# Supplementary material for: Accurate Prediction of Hydration Sites of Proteins Using Energy Model With Atom Embedding
Source: Front Mol Biosci. 2021 Sep 20;8:756075. doi: 10.3389/fmolb.2021.756075 (PMC8488165; doi:10.3389/fmolb.2021.756075)
Supplement: Supplementary file 1 [file DataSheet1.ZIP]

Archive with 431 entries (427 files):
- Data Sheet 1/
- Data Sheet 1/Our_result_pdb/
- Data Sheet 1/Our_result_pdb/OppA_dataset_output/
- Data Sheet 1/Our_result_pdb/OppA_dataset_output/1B32_watersite.pdb
- Data Sheet 1/Our_result_pdb/OppA_dataset_output/1B3F_watersite.pdb
- Data Sheet 1/Our_result_pdb/OppA_dataset_output/1B46_watersite.pdb
- Data Sheet 1/Our_result_pdb/OppA_dataset_output/1B4Z_watersite.pdb
- Data Sheet 1/Our_result_pdb/OppA_dataset_output/1B51_watersite.pdb
- Data Sheet 1/Our_result_pdb/OppA_dataset_output/1B58_watersite.pdb
- Data Sheet 1/Our_result_pdb/OppA_dataset_output/1B5I_watersite.pdb
- Data Sheet 1/Our_result_pdb/OppA_dataset_output/1B5J_watersite.pdb
- Data Sheet 1/Our_result_pdb/OppA_dataset_output/1B9J_watersite.pdb
- Data Sheet 1/Our_result_pdb/OppA_dataset_output/1JET_watersite.pdb
- Data Sheet 1/Our_result_pdb/OppA_dataset_output/1JEU_watersite.pdb
- Data Sheet 1/Our_result_pdb/OppA_dataset_output/1JEV_watersite.pdb
- Data Sheet 1/Our_result_pdb/OppA_dataset_output/1QKA_watersite.pdb
- Data Sheet 1/Our_result_pdb/OppA_dataset_output/1QKB_watersite.pdb
- Data Sheet 1/Our_result_pdb/our_dataset_output/
- Data Sheet 1/Our_result_pdb/our_dataset_output/1EGU_watersite.pdb
- Data Sheet 1/Our_result_pdb/our_dataset_output/1FCX_watersite.pdb
- Data Sheet 1/Our_result_pdb/our_dataset_output/1FG7_watersite.pdb
- Data Sheet 1/Our_result_pdb/our_dataset_output/1GOI_watersite.pdb
- Data Sheet 1/Our_result_pdb/our_dataset_output/1GPI_watersite.pdb
- Data Sheet 1/Our_result_pdb/our_dataset_output/1H2C_watersite.pdb
- Data Sheet 1/Our_result_pdb/our_dataset_output/1HD5_watersite.pdb
- Data Sheet 1/Our_result_pdb/our_dataset_output/1JBE_watersite.pdb
- Data Sheet 1/Our_result_pdb/our_dataset_output/1JOV_watersite.pdb
- Data Sheet 1/Our_result_pdb/our_dataset_output/1LC0_watersite.pdb
- Data Sheet 1/Our_result_pdb/our_dataset_output/1LYV_watersite.pdb
- Data Sheet 1/Our_result_pdb/our_dataset_output/1M44_watersite.pdb
- Data Sheet 1/Our_result_pdb/our_dataset_output/1N7N_watersite.pdb
- Data Sheet 1/Our_result_pdb/our_dataset_output/1NBU_watersite.pdb
- Data Sheet 1/Our_result_pdb/our_dataset_output/1NCW_watersite.pdb
- Data Sheet 1/Our_result_pdb/our_dataset_output/1O0M_watersite.pdb
- Data Sheet 1/Our_result_pdb/our_dataset_output/1O26_watersite.pdb
- Data Sheet 1/Our_result_pdb/our_dataset_output/1O5X_watersite.pdb
- Data Sheet 1/Our_result_pdb/our_dataset_output/1O83_watersite.pdb
- Data Sheet 1/Our_result_pdb/our_dataset_output/1O85_watersite.pdb
- Data Sheet 1/Our_result_pdb/our_dataset_output/1O8B_watersite.pdb
- Data Sheet 1/Our_result_pdb/our_dataset_output/1OFZ_watersite.pdb
- Data Sheet 1/Our_result_pdb/our_dataset_output/1OQV_watersite.pdb
- Data Sheet 1/Our_result_pdb/our_dataset_output/1P5F_watersite.pdb
- Data Sheet 1/Our_result_pdb/our_dataset_output/1QK3_watersite.pdb
- Data Sheet 1/Our_result_pdb/our_dataset_output/1S9U_watersite.pdb
- Data Sheet 1/Our_result_pdb/our_dataset_output/1SMB_watersite.pdb
- Data Sheet 1/Our_result_pdb/our_dataset_output/1TQH_watersite.pdb
- Data Sheet 1/Our_result_pdb/our_dataset_output/1U7I_watersite.pdb
- Data Sheet 1/Our_result_pdb/our_dataset_output/1VAT_watersite.pdb
- Data Sheet 1/Our_result_pdb/our_dataset_output/1VK5_watersite.pdb
- Data Sheet 1/Our_result_pdb/our_dataset_output/1WCK_watersite.pdb
- Data Sheet 1/Our_result_pdb/our_dataset_output/1WKU_watersite.pdb
- Data Sheet 1/Our_result_pdb/our_dataset_output/1X6Q_watersite.pdb
- Data Sheet 1/Our_result_pdb/our_dataset_output/1X9H_watersite.pdb
- Data Sheet 1/Our_result_pdb/our_dataset_output/1XMZ_watersite.pdb
- Data Sheet 1/Our_result_pdb/our_dataset_output/1XW3_watersite.pdb
- Data Sheet 1/Our_result_pdb/our_dataset_output/2A2K_watersite.pdb
- Data Sheet 1/Our_result_pdb/our_dataset_output/2AAL_watersite.pdb
- Data Sheet 1/Our_result_pdb/our_dataset_output/2ACF_watersite.pdb
- Data Sheet 1/Our_result_pdb/our_dataset_output/2AL5_watersite.pdb
- Data Sheet 1/Our_result_pdb/our_dataset_output/2AML_watersite.pdb
- Data Sheet 1/Our_result_pdb/our_dataset_output/2ANY_watersite.pdb
- Data Sheet 1/Our_result_pdb/our_dataset_output/2BKL_watersite.pdb
- Data Sheet 1/Our_result_pdb/our_dataset_output/2BW8_watersite.pdb
- Data Sheet 1/Our_result_pdb/our_dataset_output/2C2T_watersite.pdb
- Data Sheet 1/Our_result_pdb/our_dataset_output/2CIT_watersite.pdb
- Data Sheet 1/Our_result_pdb/our_dataset_output/2CL2_watersite.pdb
- Data Sheet 1/Our_result_pdb/our_dataset_output/2D3M_watersite.pdb
- Data Sheet 1/Our_result_pdb/our_dataset_output/2D59_watersite.pdb
- Data Sheet 1/Our_result_pdb/our_dataset_output/2DPL_watersite.pdb
- Data Sheet 1/Our_result_pdb/our_dataset_output/2E2O_watersite.pdb
- Data Sheet 1/Our_result_pdb/our_dataset_output/2E2R_watersite.pdb
- Data Sheet 1/Our_result_pdb/our_dataset_output/2E3P_watersite.pdb
- Data Sheet 1/Our_result_pdb/our_dataset_output/2EUZ_watersite.pdb
- Data Sheet 1/Our_result_pdb/our_dataset_output/2F21_watersite.pdb
- Data Sheet 1/Our_result_pdb/our_dataset_output/2F2X_watersite.pdb
- Data Sheet 1/Our_result_pdb/our_dataset_output/2FC3_watersite.pdb
- Data Sheet 1/Our_result_pdb/our_dataset_output/2FCJ_watersite.pdb
- Data Sheet 1/Our_result_pdb/our_dataset_output/2FCL_watersite.pdb
- Data Sheet 1/Our_result_pdb/our_dataset_output/2FNU_watersite.pdb
- Data Sheet 1/Our_result_pdb/our_dataset_output/2FQ3_watersite.pdb
- Data Sheet 1/Our_result_pdb/our_dataset_output/2FSR_watersite.pdb
- Data Sheet 1/Our_result_pdb/our_dataset_output/2FZ9_watersite.pdb
- Data Sheet 1/Our_result_pdb/our_dataset_output/2G13_watersite.pdb
- Data Sheet 1/Our_result_pdb/our_dataset_output/2GB4_watersite.pdb
- Data Sheet 1/Our_result_pdb/our_dataset_output/2GHA_watersite.pdb
- Data Sheet 1/Our_result_pdb/our_dataset_output/2GI9_watersite.pdb
- Data Sheet 1/Our_result_pdb/our_dataset_output/2GUD_watersite.pdb
- Data Sheet 1/Our_result_pdb/our_dataset_output/2H90_watersite.pdb
- Data Sheet 1/Our_result_pdb/our_dataset_output/2HA8_watersite.pdb
- Data Sheet 1/Our_result_pdb/our_dataset_output/2HHJ_watersite.pdb
- Data Sheet 1/Our_result_pdb/our_dataset_output/2I51_watersite.pdb
- Data Sheet 1/Our_result_pdb/our_dataset_output/2IA1_watersite.pdb
- Data Sheet 1/Our_result_pdb/our_dataset_output/2IKI_watersite.pdb
- Data Sheet 1/Our_result_pdb/our_dataset_output/2JDC_watersite.pdb
- Data Sheet 1/Our_result_pdb/our_dataset_output/2JIK_watersite.pdb
- Data Sheet 1/Our_result_pdb/our_dataset_output/2NVD_watersite.pdb
- Data Sheet 1/Our_result_pdb/our_dataset_output/2NWD_watersite.pdb
- Data Sheet 1/Our_result_pdb/our_dataset_output/2O3T_watersite.pdb
- Data Sheet 1/Our_result_pdb/our_dataset_output/2O6F_watersite.pdb
- Data Sheet 1/Our_result_pdb/our_dataset_output/2OFB_watersite.pdb
- Data Sheet 1/Our_result_pdb/our_dataset_output/2OFZ_watersite.pdb
- Data Sheet 1/Our_result_pdb/our_dataset_output/2OKM_watersite.pdb
- Data Sheet 1/Our_result_pdb/our_dataset_output/2OXC_watersite.pdb
- Data Sheet 1/Our_result_pdb/our_dataset_output/2PDI_watersite.pdb
- Data Sheet 1/Our_result_pdb/our_dataset_output/2PDY_watersite.pdb
- Data Sheet 1/Our_result_pdb/our_dataset_output/2PMK_watersite.pdb
- Data Sheet 1/Our_result_pdb/our_dataset_output/2PWO_watersite.pdb
- Data Sheet 1/Our_result_pdb/our_dataset_output/2Q8K_watersite.pdb
- Data Sheet 1/Our_result_pdb/our_dataset_output/2QXW_watersite.pdb
- Data Sheet 1/Our_result_pdb/our_dataset_output/2QZZ_watersite.pdb
- Data Sheet 1/Our_result_pdb/our_dataset_output/2R5D_watersite.pdb
- Data Sheet 1/Our_result_pdb/our_dataset_output/2RBD_watersite.pdb
- Data Sheet 1/Our_result_pdb/our_dataset_output/2RC3_watersite.pdb
- Data Sheet 1/Our_result_pdb/our_dataset_output/2RFF_watersite.pdb
- Data Sheet 1/Our_result_pdb/our_dataset_output/2RJ6_watersite.pdb
- Data Sheet 1/Our_result_pdb/our_dataset_output/2RKL_watersite.pdb
- Data Sheet 1/Our_result_pdb/our_dataset_output/2UYT_watersite.pdb
- Data Sheet 1/Our_result_pdb/our_dataset_output/2VCL_watersite.pdb
- Data Sheet 1/Our_result_pdb/our_dataset_output/2VIJ_watersite.pdb
- Data Sheet 1/Our_result_pdb/our_dataset_output/2VWR_watersite.pdb
- Data Sheet 1/Our_result_pdb/our_dataset_output/2W0R_watersite.pdb
- Data Sheet 1/Our_result_pdb/our_dataset_output/2W39_watersite.pdb
- Data Sheet 1/Our_result_pdb/our_dataset_output/2W7F_watersite.pdb
- Data Sheet 1/Our_result_pdb/our_dataset_output/2WB9_watersite.pdb
- Data Sheet 1/Our_result_pdb/our_dataset_output/2WFP_watersite.pdb
- Data Sheet 1/Our_result_pdb/our_dataset_output/2WT8_watersite.pdb
- Data Sheet 1/Our_result_pdb/our_dataset_output/2X46_watersite.pdb
- Data Sheet 1/Our_result_pdb/our_dataset_output/2X9V_watersite.pdb
- Data Sheet 1/Our_result_pdb/our_dataset_output/2XGI_watersite.pdb
- Data Sheet 1/Our_result_pdb/our_dataset_output/2XRH_watersite.pdb
- Data Sheet 1/Our_result_pdb/our_dataset_output/2Y6X_watersite.pdb
- Data Sheet 1/Our_result_pdb/our_dataset_output/2YZY_watersite.pdb
- Data Sheet 1/Our_result_pdb/our_dataset_output/2ZAB_watersite.pdb
- Data Sheet 1/Our_result_pdb/our_dataset_output/2ZMU_watersite.pdb
- Data Sheet 1/Our_result_pdb/our_dataset_output/3A0A_watersite.pdb
- Data Sheet 1/Our_result_pdb/our_dataset_output/3A0N_watersite.pdb
- Data Sheet 1/Our_result_pdb/our_dataset_output/3A0S_watersite.pdb
- Data Sheet 1/Our_result_pdb/our_dataset_output/3A0Y_watersite.pdb
- Data Sheet 1/Our_result_pdb/our_dataset_output/3A57_watersite.pdb
- Data Sheet 1/Our_result_pdb/our_dataset_output/3A6R_watersite.pdb
- Data Sheet 1/Our_result_pdb/our_dataset_output/3ABN_watersite.pdb
- Data Sheet 1/Our_result_pdb/our_dataset_output/3ACW_watersite.pdb
- Data Sheet 1/Our_result_pdb/our_dataset_output/3AK0_watersite.pdb
- Data Sheet 1/Our_result_pdb/our_dataset_output/3AKT_watersite.pdb
- Data Sheet 1/Our_result_pdb/our_dataset_output/3AP6_watersite.pdb
- Data Sheet 1/Our_result_pdb/our_dataset_output/3B0F_watersite.pdb
- Data Sheet 1/Our_result_pdb/our_dataset_output/3B0S_watersite.pdb
- Data Sheet 1/Our_result_pdb/our_dataset_output/3B27_watersite.pdb
- Data Sheet 1/Our_result_pdb/our_dataset_output/3BCJ_watersite.pdb
- Data Sheet 1/Our_result_pdb/our_dataset_output/3BEX_watersite.pdb
- Data Sheet 1/Our_result_pdb/our_dataset_output/3BKR_watersite.pdb
- Data Sheet 1/Our_result_pdb/our_dataset_output/3BU3_watersite.pdb
- Data Sheet 1/Our_result_pdb/our_dataset_output/3BUW_watersite.pdb
- Data Sheet 1/Our_result_pdb/our_dataset_output/3C36_watersite.pdb
- Data Sheet 1/Our_result_pdb/our_dataset_output/3C5A_watersite.pdb
- Data Sheet 1/Our_result_pdb/our_dataset_output/3CCD_watersite.pdb
- Data Sheet 1/Our_result_pdb/our_dataset_output/3CIM_watersite.pdb
- Data Sheet 1/Our_result_pdb/our_dataset_output/3CKM_watersite.pdb
- Data Sheet 1/Our_result_pdb/our_dataset_output/3COV_watersite.pdb
- Data Sheet 1/Our_result_pdb/our_dataset_output/3CWR_watersite.pdb
- Data Sheet 1/Our_result_pdb/our_dataset_output/3DI8_watersite.pdb
- Data Sheet 1/Our_result_pdb/our_dataset_output/3E10_watersite.pdb
- Data Sheet 1/Our_result_pdb/our_dataset_output/3E5T_watersite.pdb
- Data Sheet 1/Our_result_pdb/our_dataset_output/3EDQ_watersite.pdb
- Data Sheet 1/Our_result_pdb/our_dataset_output/3EQY_watersite.pdb
- Data Sheet 1/Our_result_pdb/our_dataset_output/3ESS_watersite.pdb
- Data Sheet 1/Our_result_pdb/our_dataset_output/3EWX_watersite.pdb
- Data Sheet 1/Our_result_pdb/our_dataset_output/3EYE_watersite.pdb
- Data Sheet 1/Our_result_pdb/our_dataset_output/3EYI_watersite.pdb
- Data Sheet 1/Our_result_pdb/our_dataset_output/3F0M_watersite.pdb
- Data Sheet 1/Our_result_pdb/our_dataset_output/3F0U_watersite.pdb
- Data Sheet 1/Our_result_pdb/our_dataset_output/3FCN_watersite.pdb
- Data Sheet 1/Our_result_pdb/our_dataset_output/3FEV_watersite.pdb
- Data Sheet 1/Our_result_pdb/our_dataset_output/3FVF_watersite.pdb
- Data Sheet 1/Our_result_pdb/our_dataset_output/3FVO_watersite.pdb
- Data Sheet 1/Our_result_pdb/our_dataset_output/3GEN_watersite.pdb
- Data Sheet 1/Our_result_pdb/our_dataset_output/3GPK_watersite.pdb
- Data Sheet 1/Our_result_pdb/our_dataset_output/3GUJ_watersite.pdb
- Data Sheet 1/Our_result_pdb/our_dataset_output/3H4X_watersite.pdb
- Data Sheet 1/Our_result_pdb/our_dataset_output/3H6C_watersite.pdb
- Data Sheet 1/Our_result_pdb/our_dataset_output/3H74_watersite.pdb
- Data Sheet 1/Our_result_pdb/our_dataset_output/3H82_watersite.pdb
- Data Sheet 1/Our_result_pdb/our_dataset_output/3HH7_watersite.pdb
- Data Sheet 1/Our_result_pdb/our_dataset_output/3HRV_watersite.pdb
- Data Sheet 1/Our_result_pdb/our_dataset_output/3HUK_watersite.pdb
- Data Sheet 1/Our_result_pdb/our_dataset_output/3HUQ_watersite.pdb
- Data Sheet 1/Our_result_pdb/our_dataset_output/3HYN_watersite.pdb
- Data Sheet 1/Our_result_pdb/our_dataset_output/3I8U_watersite.pdb
- Data Sheet 1/Our_result_pdb/our_dataset_output/3IHS_watersite.pdb
- Data Sheet 1/Our_result_pdb/our_dataset_output/3IOS_watersite.pdb
- Data Sheet 1/Our_result_pdb/our_dataset_output/3IQL_watersite.pdb
- Data Sheet 1/Our_result_pdb/our_dataset_output/3IU5_watersite.pdb
- Data Sheet 1/Our_result_pdb/our_dataset_output/3JXT_watersite.pdb
- Data Sheet 1/Our_result_pdb/our_dataset_output/3K6V_watersite.pdb
- Data Sheet 1/Our_result_pdb/our_dataset_output/3KDH_watersite.pdb
- Data Sheet 1/Our_result_pdb/our_dataset_output/3KNB_watersite.pdb
- Data Sheet 1/Our_result_pdb/our_dataset_output/3KT9_watersite.pdb
- Data Sheet 1/Our_result_pdb/our_dataset_output/3LNX_watersite.pdb
- Data Sheet 1/Our_result_pdb/our_dataset_output/3M0I_watersite.pdb
- Data Sheet 1/Our_result_pdb/our_dataset_output/3M0S_watersite.pdb
- Data Sheet 1/Our_result_pdb/our_dataset_output/3M7U_watersite.pdb
- Data Sheet 1/Our_result_pdb/our_dataset_output/3MAN_watersite.pdb
- Data Sheet 1/Our_result_pdb/our_dataset_output/3MPC_watersite.pdb
- Data Sheet 1/Our_result_pdb/our_dataset_output/3MZQ_watersite.pdb
- Data Sheet 1/Our_result_pdb/our_dataset_output/3N3G_watersite.pdb
- Data Sheet 1/Our_result_pdb/our_dataset_output/3N6Y_watersite.pdb
- Data Sheet 1/Our_result_pdb/our_dataset_output/3NC8_watersite.pdb
- Data Sheet 1/Our_result_pdb/our_dataset_output/3NOF_watersite.pdb
- Data Sheet 1/Our_result_pdb/our_dataset_output/3NUF_watersite.pdb
- Data Sheet 1/Our_result_pdb/our_dataset_output/3NYE_watersite.pdb
- Data Sheet 1/Our_result_pdb/our_dataset_output/3NZ1_watersite.pdb
- Data Sheet 1/Our_result_pdb/our_dataset_output/3O6W_watersite.pdb
- Data Sheet 1/Our_result_pdb/our_dataset_output/3O88_watersite.pdb
- Data Sheet 1/Our_result_pdb/our_dataset_output/3ODV_watersite.pdb
- Data Sheet 1/Our_result_pdb/our_dataset_output/3OL0_watersite.pdb
- Data Sheet 1/Our_result_pdb/our_dataset_output/3OMT_watersite.pdb
- Data Sheet 1/Our_result_pdb/our_dataset_output/3OT8_watersite.pdb
- Data Sheet 1/Our_result_pdb/our_dataset_output/3OU2_watersite.pdb
- Data Sheet 1/Our_result_pdb/our_dataset_output/3OYV_watersite.pdb
- Data Sheet 1/Our_result_pdb/our_dataset_output/3P0B_watersite.pdb
- Data Sheet 1/Our_result_pdb/our_dataset_output/3P2V_watersite.pdb
- Data Sheet 1/Our_result_pdb/our_dataset_output/3P67_watersite.pdb
- Data Sheet 1/Our_result_pdb/our_dataset_output/3P80_watersite.pdb
- Data Sheet 1/Our_result_pdb/our_dataset_output/3PA6_watersite.pdb
- Data Sheet 1/Our_result_pdb/our_dataset_output/3PES_watersite.pdb
- Data Sheet 1/Our_result_pdb/our_dataset_output/3PFG_watersite.pdb
- Data Sheet 1/Our_result_pdb/our_dataset_output/3PHH_watersite.pdb
- Data Sheet 1/Our_result_pdb/our_dataset_output/3PJY_watersite.pdb
- Data Sheet 1/Our_result_pdb/our_dataset_output/3POZ_watersite.pdb
- Data Sheet 1/Our_result_pdb/our_dataset_output/3PWW_watersite.pdb
- Data Sheet 1/Our_result_pdb/our_dataset_output/3Q1N_watersite.pdb
- Data Sheet 1/Our_result_pdb/our_dataset_output/3Q3A_watersite.pdb
- Data Sheet 1/Our_result_pdb/our_dataset_output/3Q64_watersite.pdb
- Data Sheet 1/Our_result_pdb/our_dataset_output/3Q67_watersite.pdb
- Data Sheet 1/Our_result_pdb/our_dataset_output/3Q7R_watersite.pdb
- Data Sheet 1/Our_result_pdb/our_dataset_output/3QB8_watersite.pdb
- Data Sheet 1/Our_result_pdb/our_dataset_output/3QFS_watersite.pdb
- Data Sheet 1/Our_result_pdb/our_dataset_output/3QFT_watersite.pdb
- Data Sheet 1/Our_result_pdb/our_dataset_output/3QNC_watersite.pdb
- Data Sheet 1/Our_result_pdb/our_dataset_output/3R6U_watersite.pdb
- Data Sheet 1/Our_result_pdb/our_dataset_output/3R8E_watersite.pdb
- Data Sheet 1/Our_result_pdb/our_dataset_output/3RKZ_watersite.pdb
- Data Sheet 1/Our_result_pdb/our_dataset_output/3S5V_watersite.pdb
- Data Sheet 1/Our_result_pdb/our_dataset_output/3SOE_watersite.pdb
- Data Sheet 1/Our_result_pdb/our_dataset_output/3SRQ_watersite.pdb
- Data Sheet 1/Our_result_pdb/our_dataset_output/3T6I_watersite.pdb
- Data Sheet 1/Our_result_pdb/our_dataset_output/3T7H_watersite.pdb
- Data Sheet 1/Our_result_pdb/our_dataset_output/3TC2_watersite.pdb
- Data Sheet 1/Our_result_pdb/our_dataset_output/3TPD_watersite.pdb
- Data Sheet 1/Our_result_pdb/our_dataset_output/3U2C_watersite.pdb
- Data Sheet 1/Our_result_pdb/our_dataset_output/3UF7_watersite.pdb
- Data Sheet 1/Our_result_pdb/our_dataset_output/3UI4_watersite.pdb
- Data Sheet 1/Our_result_pdb/our_dataset_output/3ULR_watersite.pdb
- Data Sheet 1/Our_result_pdb/our_dataset_output/3USH_watersite.pdb
- Data Sheet 1/Our_result_pdb/our_dataset_output/3UXV_watersite.pdb
- Data Sheet 1/Our_result_pdb/our_dataset_output/3UZX_watersite.pdb
- Data Sheet 1/Our_result_pdb/our_dataset_output/3V30_watersite.pdb
- Data Sheet 1/Our_result_pdb/our_dataset_output/3VE7_watersite.pdb
- Data Sheet 1/Our_result_pdb/our_dataset_output/3VQF_watersite.pdb
- Data Sheet 1/Our_result_pdb/our_dataset_output/3W01_watersite.pdb
- Data Sheet 1/Our_result_pdb/our_dataset_output/3W4O_watersite.pdb
- Data Sheet 1/Our_result_pdb/our_dataset_output/3W6Z_watersite.pdb
- Data Sheet 1/Our_result_pdb/our_dataset_output/3WKH_watersite.pdb
- Data Sheet 1/Our_result_pdb/our_dataset_output/3WL5_watersite.pdb
- Data Sheet 1/Our_result_pdb/our_dataset_output/3WP4_watersite.pdb
- Data Sheet 1/Our_result_pdb/our_dataset_output/3WP6_watersite.pdb
- Data Sheet 1/Our_result_pdb/our_dataset_output/3WUR_watersite.pdb
- Data Sheet 1/Our_result_pdb/our_dataset_output/3WUZ_watersite.pdb
- Data Sheet 1/Our_result_pdb/our_dataset_output/3WW6_watersite.pdb
- Data Sheet 1/Our_result_pdb/our_dataset_output/3WZD_watersite.pdb
- Data Sheet 1/Our_result_pdb/our_dataset_output/3ZL2_watersite.pdb
- Data Sheet 1/Our_result_pdb/our_dataset_output/3ZSJ_watersite.pdb
- Data Sheet 1/Our_result_pdb/our_dataset_output/3ZSK_watersite.pdb
- Data Sheet 1/Our_result_pdb/our_dataset_output/3ZZO_watersite.pdb
- Data Sheet 1/Our_result_pdb/our_dataset_output/4A2S_watersite.pdb
- Data Sheet 1/Our_result_pdb/our_dataset_output/4A30_watersite.pdb
- Data Sheet 1/Our_result_pdb/our_dataset_output/4AGI_watersite.pdb
- Data Sheet 1/Our_result_pdb/our_dataset_output/4AIW_watersite.pdb
- Data Sheet 1/Our_result_pdb/our_dataset_output/4ALG_watersite.pdb
- Data Sheet 1/Our_result_pdb/our_dataset_output/4AUJ_watersite.pdb
- Data Sheet 1/Our_result_pdb/our_dataset_output/4B4J_watersite.pdb
- Data Sheet 1/Our_result_pdb/our_dataset_output/4B8V_watersite.pdb
- Data Sheet 1/Our_result_pdb/our_dataset_output/4BFO_watersite.pdb
- Data Sheet 1/Our_result_pdb/our_dataset_output/4BMH_watersite.pdb
- Data Sheet 1/Our_result_pdb/our_dataset_output/4BVK_watersite.pdb
- Data Sheet 1/Our_result_pdb/our_dataset_output/4C04_watersite.pdb
- Data Sheet 1/Our_result_pdb/our_dataset_output/4CFK_watersite.pdb
- Data Sheet 1/Our_result_pdb/our_dataset_output/4CMD_watersite.pdb
- Data Sheet 1/Our_result_pdb/our_dataset_output/4CP6_watersite.pdb
- Data Sheet 1/Our_result_pdb/our_dataset_output/4D13_watersite.pdb
- Data Sheet 1/Our_result_pdb/our_dataset_output/4DE3_watersite.pdb
- Data Sheet 1/Our_result_pdb/our_dataset_output/4DRV_watersite.pdb
- Data Sheet 1/Our_result_pdb/our_dataset_output/4DYQ_watersite.pdb
- Data Sheet 1/Our_result_pdb/our_dataset_output/4E35_watersite.pdb
- Data Sheet 1/Our_result_pdb/our_dataset_output/4E97_watersite.pdb
- Data Sheet 1/Our_result_pdb/our_dataset_output/4EBY_watersite.pdb
- Data Sheet 1/Our_result_pdb/our_dataset_output/4EHD_watersite.pdb
- Data Sheet 1/Our_result_pdb/our_dataset_output/4EZG_watersite.pdb
- Data Sheet 1/Our_result_pdb/our_dataset_output/4F1U_watersite.pdb
- Data Sheet 1/Our_result_pdb/our_dataset_output/4F8X_watersite.pdb
[truncated: 131 more entries]
