# Supplementary material for: Accurate Prediction of Hydration Sites of Proteins Using Energy Model With Atom Embedding
Source: Front Mol Biosci. 2021 Sep 20;8:756075. doi: 10.3389/fmolb.2021.756075 (PMC8488165; doi:10.3389/fmolb.2021.756075)
Supplement: Supplementary file 1 [file DataSheet1.ZIP › Data Sheet 1/Our_result_pdb/OppA_dataset_output/1B3F_watersite.pdb]

HEADER                                                        XXXX


JRNL        PMID   -1
HETATM    1  O   HOH T   0       5.436  15.066  -3.649  1.00  0.16           O  
HETATM    2  O   HOH T   1      -0.949  30.539  28.478  1.00  0.17           O  
HETATM    3  O   HOH T   2       0.888  12.815  -8.321  1.00  0.17           O  
HETATM    4  O   HOH T   3      20.288  25.977  14.319  1.00  0.17           O  
HETATM    5  O   HOH T   4      19.259  19.951   6.402  1.00  0.17           O  
HETATM    6  O   HOH T   5       7.520  15.593 -10.409  1.00  0.18           O  
HETATM    7  O   HOH T   6      17.438  13.522   4.838  1.00  0.18           O  
HETATM    8  O   HOH T   7      -8.100  23.008  23.253  1.00  0.18           O  
HETATM    9  O   HOH T   8      14.330  16.839  31.046  1.00  0.18           O  
HETATM   10  O   HOH T   9      15.623  15.389  -8.463  1.00  0.19           O  
HETATM   11  O   HOH T  10       6.686  30.254  14.753  1.00  0.19           O  
HETATM   12  O   HOH T  11      -1.900   8.638  10.089  1.00  0.19           O  
HETATM   13  O   HOH T  12      23.145  23.510  -1.222  1.00  0.19           O  
HETATM   14  O   HOH T  13      -3.816  30.025  12.596  1.00  0.20           O  
HETATM   15  O   HOH T  14      -1.515  21.963  12.741  1.00  0.20           O  
HETATM   16  O   HOH T  15      13.296  23.041  10.915  1.00  0.20           O  
HETATM   17  O   HOH T  16       3.210  17.056   7.900  1.00  0.20           O  
HETATM   18  O   HOH T  17     -11.257  26.916  34.497  1.00  0.20           O  
HETATM   19  O   HOH T  18       8.707   1.514  25.809  1.00  0.21           O  
HETATM   20  O   HOH T  19      -2.185   4.803   9.949  1.00  0.21           O  
HETATM   21  O   HOH T  20       5.430   3.878  31.355  1.00  0.21           O  
HETATM   22  O   HOH T  21      34.353  14.922  -1.780  1.00  0.21           O  
HETATM   23  O   HOH T  22      31.300  11.159   8.394  1.00  0.21           O  
HETATM   24  O   HOH T  23       7.198  11.003  -8.764  1.00  0.22           O  
HETATM   25  O   HOH T  24      -1.580  28.634   2.120  1.00  0.22           O  
HETATM   26  O   HOH T  25       8.226  15.469  -3.341  1.00  0.22           O  
HETATM   27  O   HOH T  26      -0.802   6.837   0.646  1.00  0.22           O  
HETATM   28  O   HOH T  27      17.255   5.474  22.100  1.00  0.22           O  
HETATM   29  O   HOH T  28      -9.701  12.038  33.375  1.00  0.22           O  
HETATM   30  O   HOH T  29     -11.553   4.842 -12.984  1.00  0.23           O  
HETATM   31  O   HOH T  30       9.889   9.224  -5.797  1.00  0.23           O  
HETATM   32  O   HOH T  31      28.767  26.695  16.683  1.00  0.23           O  
HETATM   33  O   HOH T  32      31.880   5.411   4.071  1.00  0.23           O  
HETATM   34  O   HOH T  33       8.829  24.098   2.152  1.00  0.23           O  
HETATM   35  O   HOH T  34      -5.640  36.217  15.517  1.00  0.23           O  
HETATM   36  O   HOH T  35       4.416 -10.345  21.393  1.00  0.23           O  
HETATM   37  O   HOH T  36       2.597   1.049  25.212  1.00  0.23           O  
HETATM   38  O   HOH T  37      10.168  30.983   4.274  1.00  0.24           O  
HETATM   39  O   HOH T  38       9.623   5.939  11.080  1.00  0.24           O  
HETATM   40  O   HOH T  39      -9.535  21.249   9.180  1.00  0.24           O  
HETATM   41  O   HOH T  40      12.810  -0.578  22.431  1.00  0.24           O  
HETATM   42  O   HOH T  41       5.670  20.150  25.141  1.00  0.24           O  
HETATM   43  O   HOH T  42     -11.743  14.212 -17.044  1.00  0.24           O  
HETATM   44  O   HOH T  43      22.538  25.316  17.362  1.00  0.24           O  
HETATM   45  O   HOH T  44      13.146  24.454  27.002  1.00  0.24           O  
HETATM   46  O   HOH T  45      -5.957  14.129  13.061  1.00  0.24           O  
HETATM   47  O   HOH T  46       5.857  33.299  26.148  1.00  0.24           O  
HETATM   48  O   HOH T  47      11.019  21.257  34.818  1.00  0.24           O  
HETATM   49  O   HOH T  48      -0.349  31.103   1.812  1.00  0.25           O  
HETATM   50  O   HOH T  49     -18.216  27.282   0.123  1.00  0.25           O  
HETATM   51  O   HOH T  50     -22.088  20.840  -2.988  1.00  0.25           O  
HETATM   52  O   HOH T  51      -5.380  26.499  50.671  1.00  0.25           O  
HETATM   53  O   HOH T  52      -6.692   9.374   7.460  1.00  0.25           O  
HETATM   54  O   HOH T  53      24.874  21.772  23.469  1.00  0.25           O  
HETATM   55  O   HOH T  54      11.488  18.398   3.254  1.00  0.25           O  
HETATM   56  O   HOH T  55      27.923  15.828  20.578  1.00  0.25           O  
HETATM   57  O   HOH T  56       4.191  10.364  31.085  1.00  0.25           O  
HETATM   58  O   HOH T  57      -4.605  23.450  -7.397  1.00  0.25           O  
HETATM   59  O   HOH T  58     -12.990  14.069 -14.583  1.00  0.26           O  
HETATM   60  O   HOH T  59       3.204   5.495  30.961  1.00  0.26           O  
HETATM   61  O   HOH T  60       8.995   6.743   7.075  1.00  0.26           O  
HETATM   62  O   HOH T  61     -22.900  17.048  13.454  1.00  0.26           O  
HETATM   63  O   HOH T  62      -5.349  34.755  33.520  1.00  0.26           O  
HETATM   64  O   HOH T  63      22.602   6.480  -9.724  1.00  0.26           O  
HETATM   65  O   HOH T  64      -0.306   5.947  -6.219  1.00  0.26           O  
HETATM   66  O   HOH T  65      -0.519  34.980  32.665  1.00  0.26           O  
HETATM   67  O   HOH T  66      11.266  13.808  16.937  1.00  0.26           O  
HETATM   68  O   HOH T  67      10.682  -7.971  17.951  1.00  0.26           O  
HETATM   69  O   HOH T  68     -12.781  11.265  20.476  1.00  0.27           O  
HETATM   70  O   HOH T  69      10.499  23.405   4.178  1.00  0.27           O  
HETATM   71  O   HOH T  70       9.952  32.339  20.097  1.00  0.27           O  
HETATM   72  O   HOH T  71       8.616  12.449   5.142  1.00  0.27           O  
HETATM   73  O   HOH T  72      -4.192  19.619  16.060  1.00  0.27           O  
HETATM   74  O   HOH T  73      22.024  15.073 -11.488  1.00  0.27           O  
HETATM   75  O   HOH T  74      15.402  14.835  -5.783  1.00  0.27           O  
HETATM   76  O   HOH T  75      -4.532   6.579  16.505  1.00  0.27           O  
HETATM   77  O   HOH T  76       7.921  24.358   4.781  1.00  0.27           O  
HETATM   78  O   HOH T  77      -0.837  14.958   9.034  1.00  0.28           O  
HETATM   79  O   HOH T  78      33.982  15.969  -4.298  1.00  0.28           O  
HETATM   80  O   HOH T  79      -7.106   4.867  26.805  1.00  0.28           O  
HETATM   81  O   HOH T  80      19.593  -0.432  11.088  1.00  0.28           O  
HETATM   82  O   HOH T  81      11.690  25.603  -7.224  1.00  0.28           O  
HETATM   83  O   HOH T  82      -9.918  16.994 -12.187  1.00  0.28           O  
HETATM   84  O   HOH T  83      13.122  25.581  32.144  1.00  0.28           O  
HETATM   85  O   HOH T  84      -1.083  -0.333  35.028  1.00  0.28           O  
HETATM   86  O   HOH T  85      -8.684  27.657  42.557  1.00  0.28           O  
HETATM   87  O   HOH T  86      10.042  13.550  -2.366  1.00  0.28           O  
HETATM   88  O   HOH T  87       1.636   5.371 -12.394  1.00  0.28           O  
HETATM   89  O   HOH T  88      14.245   1.431   4.689  1.00  0.28           O  
HETATM   90  O   HOH T  89       1.084   5.145  38.967  1.00  0.29           O  
HETATM   91  O   HOH T  90       1.620  -0.496  17.070  1.00  0.29           O  
HETATM   92  O   HOH T  91      29.189  21.681   1.306  1.00  0.29           O  
HETATM   93  O   HOH T  92      -0.187   1.041  37.356  1.00  0.29           O  
HETATM   94  O   HOH T  93      -4.632  -2.970  35.184  1.00  0.29           O  
HETATM   95  O   HOH T  94     -30.615  11.945   4.127  1.00  0.29           O  
HETATM   96  O   HOH T  95      10.264  39.320  -0.438  1.00  0.29           O  
HETATM   97  O   HOH T  96      12.295   1.161  20.276  1.00  0.29           O  
HETATM   98  O   HOH T  97      -8.727  11.301 -24.389  1.00  0.29           O  
HETATM   99  O   HOH T  98     -13.268   5.070   2.532  1.00  0.29           O  
HETATM  100  O   HOH T  99      18.842  18.286  33.329  1.00  0.29           O  
HETATM  101  O   HOH T 100      -7.012   7.484  -1.997  1.00  0.29           O  
HETATM  102  O   HOH T 101      11.678   0.437   4.856  1.00  0.29           O  
HETATM  103  O   HOH T 102      13.895  22.780  29.044  1.00  0.29           O  
HETATM  104  O   HOH T 103       2.977   4.130  35.359  1.00  0.29           O  
HETATM  105  O   HOH T 104       5.595  31.641 -10.658  1.00  0.30           O  
HETATM  106  O   HOH T 105      -7.832  13.036  16.378  1.00  0.30           O  
HETATM  107  O   HOH T 106     -20.005  15.972   0.447  1.00  0.30           O  
HETATM  108  O   HOH T 107      -4.748   4.004  25.357  1.00  0.30           O  
HETATM  109  O   HOH T 108      -7.378   6.580   4.648  1.00  0.30           O  
HETATM  110  O   HOH T 109       0.952  34.048  13.207  1.00  0.30           O  
HETATM  111  O   HOH T 110     -20.954  16.768  15.233  1.00  0.30           O  
HETATM  112  O   HOH T 111     -18.652  16.011  16.651  1.00  0.30           O  
HETATM  113  O   HOH T 112      -1.478   7.369   3.366  1.00  0.30           O  
HETATM  114  O   HOH T 113      24.382  21.826  -8.099  1.00  0.30           O  
HETATM  115  O   HOH T 114       3.655  34.728  -5.067  1.00  0.30           O  
HETATM  116  O   HOH T 115      -9.917  16.189  14.777  1.00  0.31           O  
HETATM  117  O   HOH T 116      27.263  13.545  19.139  1.00  0.31           O  
HETATM  118  O   HOH T 117      12.259  23.369 -13.721  1.00  0.31           O  
HETATM  119  O   HOH T 118      -2.973  36.116  16.320  1.00  0.31           O  
HETATM  120  O   HOH T 119      -8.589  36.420   6.181  1.00  0.31           O  
HETATM  121  O   HOH T 120      14.927  14.691   4.835  1.00  0.31           O  
HETATM  122  O   HOH T 121      28.205  24.972  -3.041  1.00  0.31           O  
HETATM  123  O   HOH T 122      10.093  30.554  18.001  1.00  0.31           O  
HETATM  124  O   HOH T 123       0.131  31.959  11.497  1.00  0.31           O  
HETATM  125  O   HOH T 124     -16.515  30.499   6.803  1.00  0.31           O  
HETATM  126  O   HOH T 125       6.365   7.648   7.261  1.00  0.31           O  
HETATM  127  O   HOH T 126       1.368  21.719  19.042  1.00  0.31           O  
HETATM  128  O   HOH T 127      15.307  45.924  -1.659  1.00  0.31           O  
HETATM  129  O   HOH T 128       1.168  10.329  -0.603  1.00  0.32           O  
HETATM  130  O   HOH T 129      22.817   1.793  20.896  1.00  0.32           O  
HETATM  131  O   HOH T 130      -5.691  34.391  43.697  1.00  0.32           O  
HETATM  132  O   HOH T 131      -1.591  31.433  37.609  1.00  0.32           O  
HETATM  133  O   HOH T 132      11.606  10.205 -14.058  1.00  0.32           O  
HETATM  134  O   HOH T 133     -12.069  10.639  32.770  1.00  0.32           O  
HETATM  135  O   HOH T 134       0.650  11.658  32.542  1.00  0.32           O  
HETATM  136  O   HOH T 135      -2.825   2.128  26.093  1.00  0.32           O  
HETATM  137  O   HOH T 136      22.294   0.591   6.605  1.00  0.32           O  
HETATM  138  O   HOH T 137     -15.238  22.394  16.713  1.00  0.32           O  
HETATM  139  O   HOH T 138      23.227  -6.840  32.063  1.00  0.32           O  
HETATM  140  O   HOH T 139      10.676  15.965   4.470  1.00  0.32           O  
HETATM  141  O   HOH T 140      17.832  26.134  18.250  1.00  0.32           O  
HETATM  142  O   HOH T 141     -10.522   8.789  -2.153  1.00  0.32           O  
HETATM  143  O   HOH T 142      25.532  -3.011  11.567  1.00  0.32           O  
HETATM  144  O   HOH T 143       0.960  38.030  35.441  1.00  0.32           O  
HETATM  145  O   HOH T 144       4.499   8.145  37.227  1.00  0.32           O  
HETATM  146  O   HOH T 145       9.185  26.785  15.666  1.00  0.32           O  
HETATM  147  O   HOH T 146      -9.138  35.915  27.760  1.00  0.32           O  
HETATM  148  O   HOH T 147      13.176  13.430   2.969  1.00  0.33           O  
HETATM  149  O   HOH T 148     -20.848  17.156  17.954  1.00  0.33           O  
HETATM  150  O   HOH T 149       2.648   8.122  31.625  1.00  0.33           O  
HETATM  151  O   HOH T 150     -12.066  20.251   8.733  1.00  0.33           O  
HETATM  152  O   HOH T 151       0.823   1.656  15.678  1.00  0.33           O  
HETATM  153  O   HOH T 152       3.692   8.033   3.562  1.00  0.33           O  
HETATM  154  O   HOH T 153     -13.281   7.004 -13.552  1.00  0.33           O  
HETATM  155  O   HOH T 154      10.407  13.499   3.244  1.00  0.33           O  
HETATM  156  O   HOH T 155     -28.198  10.676   3.761  1.00  0.33           O  
HETATM  157  O   HOH T 156      28.548   2.946   6.245  1.00  0.33           O  
HETATM  158  O   HOH T 157      -2.370  19.695   4.058  1.00  0.33           O  
HETATM  159  O   HOH T 158       5.081  22.410 -14.016  1.00  0.33           O  
HETATM  160  O   HOH T 159      -0.221   1.075  29.262  1.00  0.33           O  
HETATM  161  O   HOH T 160      -2.882  24.159  11.662  1.00  0.33           O  
HETATM  162  O   HOH T 161      18.315  17.631  23.188  1.00  0.33           O  
HETATM  163  O   HOH T 162     -12.267  28.280  43.669  1.00  0.33           O  
HETATM  164  O   HOH T 163      23.907  14.714  21.113  1.00  0.33           O  
HETATM  165  O   HOH T 164     -22.323  19.199  -0.813  1.00  0.33           O  
HETATM  166  O   HOH T 165       2.970   6.153  33.555  1.00  0.33           O  
HETATM  167  O   HOH T 166       8.902  13.079   9.637  1.00  0.34           O  
HETATM  168  O   HOH T 167     -11.106  31.416  11.016  1.00  0.34           O  
HETATM  169  O   HOH T 168       4.862  -1.415  13.358  1.00  0.34           O  
HETATM  170  O   HOH T 169     -24.634  19.402   9.673  1.00  0.34           O  
HETATM  171  O   HOH T 170      -3.675  37.755  14.225  1.00  0.34           O  
HETATM  172  O   HOH T 171       2.758  14.648  32.710  1.00  0.34           O  
HETATM  173  O   HOH T 172       9.036  36.141  -5.815  1.00  0.34           O  
HETATM  174  O   HOH T 173      -5.801   6.260 -16.916  1.00  0.34           O  
HETATM  175  O   HOH T 174     -14.713  18.371  42.559  1.00  0.34           O  
HETATM  176  O   HOH T 175      15.404  -7.369  23.750  1.00  0.34           O  
HETATM  177  O   HOH T 176     -16.051  27.004  -1.615  1.00  0.34           O  
HETATM  178  O   HOH T 177     -25.520   6.741   6.421  1.00  0.34           O  
HETATM  179  O   HOH T 178       0.096  35.440   8.345  1.00  0.35           O  
HETATM  180  O   HOH T 179      -2.087  -1.785  12.631  1.00  0.35           O  
HETATM  181  O   HOH T 180      -6.677   2.149   2.443  1.00  0.35           O  
HETATM  182  O   HOH T 181     -19.291   9.181  -0.922  1.00  0.35           O  
HETATM  183  O   HOH T 182      37.269   9.598  -5.409  1.00  0.35           O  
HETATM  184  O   HOH T 183      21.287  30.085   8.624  1.00  0.35           O  
HETATM  185  O   HOH T 184       4.014  12.874  41.589  1.00  0.35           O  
HETATM  186  O   HOH T 185      10.874   7.120   8.983  1.00  0.35           O  
HETATM  187  O   HOH T 186      -3.607  17.169  54.286  1.00  0.35           O  
HETATM  188  O   HOH T 187       3.270  19.962  21.241  1.00  0.35           O  
HETATM  189  O   HOH T 188      21.974   8.091  24.290  1.00  0.35           O  
HETATM  190  O   HOH T 189     -17.101  31.098  13.734  1.00  0.35           O  
HETATM  191  O   HOH T 190      23.330  -0.887   0.279  1.00  0.35           O  
HETATM  192  O   HOH T 191     -17.804  28.533   8.183  1.00  0.35           O  
HETATM  193  O   HOH T 192      -7.181  34.248  41.286  1.00  0.35           O  
HETATM  194  O   HOH T 193      11.106  26.162  23.771  1.00  0.35           O  
HETATM  195  O   HOH T 194      -4.914  18.080   3.382  1.00  0.35           O  
HETATM  196  O   HOH T 195      -5.135  -2.761  37.960  1.00  0.35           O  
HETATM  197  O   HOH T 196      15.536   0.617   0.435  1.00  0.35           O  
HETATM  198  O   HOH T 197      23.471  12.955  -6.713  1.00  0.35           O  
HETATM  199  O   HOH T 198       4.161   4.606 -11.555  1.00  0.35           O  
HETATM  200  O   HOH T 199      -7.942  38.609  36.222  1.00  0.35           O  
HETATM  201  O   HOH T 200      10.510  15.010  -0.139  1.00  0.36           O  
HETATM  202  O   HOH T 201     -18.008  13.627  -3.302  1.00  0.36           O  
HETATM  203  O   HOH T 202     -19.015  12.017 -10.758  1.00  0.36           O  
HETATM  204  O   HOH T 203     -10.703  16.574 -15.911  1.00  0.36           O  
HETATM  205  O   HOH T 204      14.565  35.456 -10.424  1.00  0.36           O  
HETATM  206  O   HOH T 205      -2.059   8.576   7.269  1.00  0.36           O  
HETATM  207  O   HOH T 206      -7.444  23.631  11.937  1.00  0.36           O  
HETATM  208  O   HOH T 207      -8.863  23.800   9.619  1.00  0.36           O  
HETATM  209  O   HOH T 208      29.168  14.540 -10.158  1.00  0.36           O  
HETATM  210  O   HOH T 209     -15.626   6.200   7.411  1.00  0.36           O  
HETATM  211  O   HOH T 210      -6.231   0.034   7.180  1.00  0.36           O  
HETATM  212  O   HOH T 211       9.666  28.955  -8.187  1.00  0.36           O  
HETATM  213  O   HOH T 212      20.183   0.536   1.564  1.00  0.36           O  
HETATM  214  O   HOH T 213      14.491  26.118  19.762  1.00  0.36           O  
HETATM  215  O   HOH T 214       3.649  16.518   0.691  1.00  0.36           O  
HETATM  216  O   HOH T 215      -4.062  32.544  40.989  1.00  0.36           O  
HETATM  217  O   HOH T 216       5.606   5.579   8.966  1.00  0.36           O  
HETATM  218  O   HOH T 217       3.338   4.557  -4.941  1.00  0.36           O  
HETATM  219  O   HOH T 218      20.428  29.196  18.390  1.00  0.36           O  
HETATM  220  O   HOH T 219      -2.459  30.528  51.175  1.00  0.36           O  
HETATM  221  O   HOH T 220      -8.942  25.216  47.821  1.00  0.36           O  
HETATM  222  O   HOH T 221      11.968   1.254   9.500  1.00  0.36           O  
HETATM  223  O   HOH T 222      35.952  23.101  10.948  1.00  0.36           O  
HETATM  224  O   HOH T 223      20.793  24.456  -5.973  1.00  0.36           O  
HETATM  225  O   HOH T 224      -2.156  15.868   6.860  1.00  0.36           O  
HETATM  226  O   HOH T 225      27.989  16.952  -9.663  1.00  0.37           O  
HETATM  227  O   HOH T 226     -13.186  30.794  44.071  1.00  0.37           O  
HETATM  228  O   HOH T 227      12.902  28.345  23.583  1.00  0.37           O  
HETATM  229  O   HOH T 228      11.800  38.090   3.856  1.00  0.37           O  
HETATM  230  O   HOH T 229       9.664  22.842  38.938  1.00  0.37           O  
HETATM  231  O   HOH T 230       4.070  13.156  11.409  1.00  0.37           O  
HETATM  232  O   HOH T 231      -4.711   2.955 -15.189  1.00  0.37           O  
HETATM  233  O   HOH T 232       9.815  34.889  19.106  1.00  0.37           O  
HETATM  234  O   HOH T 233       3.036   9.077   1.081  1.00  0.37           O  
HETATM  235  O   HOH T 234      -9.570  30.137   9.085  1.00  0.37           O  
HETATM  236  O   HOH T 235      -7.527  31.941   3.523  1.00  0.37           O  
HETATM  237  O   HOH T 236      30.028  22.816   3.747  1.00  0.37           O  
HETATM  238  O   HOH T 237      24.582  -2.164   6.405  1.00  0.37           O  
HETATM  239  O   HOH T 238      -8.110  15.809  16.954  1.00  0.37           O  
HETATM  240  O   HOH T 239      -3.401  40.256  19.978  1.00  0.37           O  
HETATM  241  O   HOH T 240       0.510   3.127 -13.801  1.00  0.37           O  
HETATM  242  O   HOH T 241      19.900  21.712  21.881  1.00  0.38           O  
HETATM  243  O   HOH T 242      29.924  17.610  21.036  1.00  0.38           O  
HETATM  244  O   HOH T 243      -4.034  35.289  38.041  1.00  0.38           O  
HETATM  245  O   HOH T 244      15.123  15.061  37.928  1.00  0.38           O  
HETATM  246  O   HOH T 245       5.881  38.112  23.550  1.00  0.38           O  
HETATM  247  O   HOH T 246      -9.100   8.008  33.202  1.00  0.38           O  
HETATM  248  O   HOH T 247      -0.535   7.433  39.036  1.00  0.38           O  
HETATM  249  O   HOH T 248       7.345   2.097   8.675  1.00  0.38           O  
HETATM  250  O   HOH T 249      24.961  28.296   8.759  1.00  0.38           O  
HETATM  251  O   HOH T 250      24.638   4.129  -6.207  1.00  0.38           O  
HETATM  252  O   HOH T 251     -10.390   4.784   7.281  1.00  0.38           O  
HETATM  253  O   HOH T 252      -8.095  25.848  50.417  1.00  0.38           O  
HETATM  254  O   HOH T 253      22.693  23.776  -4.013  1.00  0.38           O  
HETATM  255  O   HOH T 254      -7.582  35.883  22.394  1.00  0.38           O  
HETATM  256  O   HOH T 255     -10.363  32.974  21.679  1.00  0.38           O  
HETATM  257  O   HOH T 256      12.216  29.732  -8.642  1.00  0.38           O  
HETATM  258  O   HOH T 257      -1.054   3.298  -5.786  1.00  0.38           O  
HETATM  259  O   HOH T 258       4.769  10.491 -17.171  1.00  0.38           O  
HETATM  260  O   HOH T 259      -7.209  35.405   1.662  1.00  0.38           O  
HETATM  261  O   HOH T 260     -11.818  32.246  29.282  1.00  0.39           O  
HETATM  262  O   HOH T 261       1.506  14.347  10.385  1.00  0.39           O  
HETATM  263  O   HOH T 262     -18.223  28.286   2.654  1.00  0.39           O  
HETATM  264  O   HOH T 263      -5.004   2.355   8.181  1.00  0.39           O  
HETATM  265  O   HOH T 264     -11.199  38.850  33.236  1.00  0.39           O  
HETATM  266  O   HOH T 265      -3.101  30.817   9.978  1.00  0.39           O  
HETATM  267  O   HOH T 266      28.083  -3.258  10.557  1.00  0.39           O  
HETATM  268  O   HOH T 267      33.142  18.057  -5.975  1.00  0.39           O  
HETATM  269  O   HOH T 268      21.898  25.550  -8.280  1.00  0.39           O  
HETATM  270  O   HOH T 269      -8.285  36.431  25.118  1.00  0.39           O  
HETATM  271  O   HOH T 270      13.135  22.123  36.225  1.00  0.39           O  
HETATM  272  O   HOH T 271      -9.553   9.022 -18.836  1.00  0.39           O  
HETATM  273  O   HOH T 272      11.807  20.820  10.204  1.00  0.39           O  
HETATM  274  O   HOH T 273      20.106  14.077  22.766  1.00  0.39           O  
HETATM  275  O   HOH T 274      -1.999  40.805  -2.378  1.00  0.39           O  
HETATM  276  O   HOH T 275      15.625  23.682  25.911  1.00  0.40           O  
HETATM  277  O   HOH T 276      25.729   6.766  -5.974  1.00  0.40           O  
HETATM  278  O   HOH T 277       2.331  14.966  42.204  1.00  0.40           O  
HETATM  279  O   HOH T 278      37.739  14.439   6.782  1.00  0.40           O  
HETATM  280  O   HOH T 279       8.040  19.228  21.331  1.00  0.40           O  
HETATM  281  O   HOH T 280      24.341   7.954  25.597  1.00  0.40           O  
HETATM  282  O   HOH T 281      -0.133  15.231   5.117  1.00  0.40           O  
HETATM  283  O   HOH T 282      15.494  -5.439  30.064  1.00  0.40           O  
HETATM  284  O   HOH T 283      11.931  34.182   5.569  1.00  0.40           O  
HETATM  285  O   HOH T 284      16.324  34.015  -8.859  1.00  0.40           O  
HETATM  286  O   HOH T 285      23.488  20.918  25.788  1.00  0.40           O  
HETATM  287  O   HOH T 286       2.806  34.744   7.952  1.00  0.40           O  
HETATM  288  O   HOH T 287      -0.712  36.017  30.436  1.00  0.40           O  
HETATM  289  O   HOH T 288      31.026  18.589   8.228  1.00  0.40           O  
HETATM  290  O   HOH T 289     -13.082  18.961  -4.929  1.00  0.40           O  
HETATM  291  O   HOH T 290      16.957   9.278  19.517  1.00  0.40           O  
HETATM  292  O   HOH T 291      23.071  14.440  -8.961  1.00  0.40           O  
HETATM  293  O   HOH T 292       4.665  35.036  19.615  1.00  0.41           O  
HETATM  294  O   HOH T 293     -13.709   4.507 -14.621  1.00  0.41           O  
HETATM  295  O   HOH T 294      14.414  -0.117  12.096  1.00  0.41           O  
HETATM  296  O   HOH T 295      -4.187   0.939 -17.172  1.00  0.41           O  
HETATM  297  O   HOH T 296      13.255  38.736  -3.741  1.00  0.41           O  
HETATM  298  O   HOH T 297     -13.792   9.086  -0.655  1.00  0.41           O  
HETATM  299  O   HOH T 298      29.712   1.447   3.054  1.00  0.41           O  
HETATM  300  O   HOH T 299     -22.492  20.046  -5.752  1.00  0.41           O  
HETATM  301  O   HOH T 300       1.490  34.164  10.390  1.00  0.41           O  
HETATM  302  O   HOH T 301      12.308  41.263  -3.317  1.00  0.41           O  
HETATM  303  O   HOH T 302      12.212  23.715  34.071  1.00  0.41           O  
HETATM  304  O   HOH T 303       7.556  21.507  42.285  1.00  0.41           O  
HETATM  305  O   HOH T 304     -20.194  19.325  -4.216  1.00  0.41           O  
HETATM  306  O   HOH T 305      19.444  11.759  24.290  1.00  0.41           O  
HETATM  307  O   HOH T 306       1.250  34.070  26.592  1.00  0.41           O  
HETATM  308  O   HOH T 307       7.649  30.282  -9.577  1.00  0.41           O  
HETATM  309  O   HOH T 308      -2.602  37.215  29.356  1.00  0.41           O  
HETATM  310  O   HOH T 309      12.173  -1.659  20.042  1.00  0.41           O  
HETATM  311  O   HOH T 310       0.977  28.991  45.517  1.00  0.41           O  
HETATM  312  O   HOH T 311     -14.552  19.757  -7.120  1.00  0.41           O  
HETATM  313  O   HOH T 312      -7.398   7.480 -18.550  1.00  0.41           O  
HETATM  314  O   HOH T 313      -0.400   0.476 -13.917  1.00  0.41           O  
HETATM  315  O   HOH T 314      13.698  29.382  16.177  1.00  0.41           O  
HETATM  316  O   HOH T 315     -10.493  17.413  -9.490  1.00  0.41           O  
HETATM  317  O   HOH T 316      35.676  21.812   7.176  1.00  0.41           O  
HETATM  318  O   HOH T 317      31.854  26.593  10.474  1.00  0.41           O  
HETATM  319  O   HOH T 318       0.692  33.941  30.513  1.00  0.42           O  
HETATM  320  O   HOH T 319       8.769  14.917   6.285  1.00  0.42           O  
HETATM  321  O   HOH T 320      10.404  37.294   1.586  1.00  0.42           O  
HETATM  322  O   HOH T 321      -7.262  34.050   5.430  1.00  0.42           O  
HETATM  323  O   HOH T 322     -16.960  15.412 -15.716  1.00  0.42           O  
HETATM  324  O   HOH T 323       7.376   7.885  17.430  1.00  0.42           O  
HETATM  325  O   HOH T 324     -14.764   8.903  21.761  1.00  0.42           O  
HETATM  326  O   HOH T 325       2.463  21.776 -13.831  1.00  0.42           O  
HETATM  327  O   HOH T 326      -4.529  13.704  53.207  1.00  0.42           O  
HETATM  328  O   HOH T 327      20.760  16.436  32.801  1.00  0.42           O  
HETATM  329  O   HOH T 328      -6.163  -1.134  33.791  1.00  0.42           O  
HETATM  330  O   HOH T 329       1.784  16.452   2.600  1.00  0.42           O  
HETATM  331  O   HOH T 330      10.511  35.354  26.626  1.00  0.42           O  
HETATM  332  O   HOH T 331      10.821  -3.984  20.844  1.00  0.42           O  
HETATM  333  O   HOH T 332      28.121  19.265 -11.282  1.00  0.42           O  
HETATM  334  O   HOH T 333       2.221  -0.917  23.316  1.00  0.42           O  
HETATM  335  O   HOH T 334      10.947  34.522   1.695  1.00  0.42           O  
HETATM  336  O   HOH T 335      13.787  38.203  -6.506  1.00  0.42           O  
HETATM  337  O   HOH T 336     -25.699  17.185  13.331  1.00  0.42           O  
HETATM  338  O   HOH T 337      21.104  13.860  33.889  1.00  0.42           O  
HETATM  339  O   HOH T 338      -9.633  11.596 -21.745  1.00  0.42           O  
HETATM  340  O   HOH T 339     -12.182  16.490 -13.603  1.00  0.42           O  
HETATM  341  O   HOH T 340      -7.053  16.392  14.423  1.00  0.43           O  
HETATM  342  O   HOH T 341       4.684   2.128   7.706  1.00  0.43           O  
HETATM  343  O   HOH T 342     -15.402  20.985  42.861  1.00  0.43           O  
HETATM  344  O   HOH T 343       2.365  14.045  39.572  1.00  0.43           O  
HETATM  345  O   HOH T 344      -7.434  13.003  48.119  1.00  0.43           O  
HETATM  346  O   HOH T 345      33.390  18.004   9.706  1.00  0.43           O  
HETATM  347  O   HOH T 346       4.695   6.542  -6.382  1.00  0.43           O  
HETATM  348  O   HOH T 347     -16.565   9.359  39.205  1.00  0.43           O  
HETATM  349  O   HOH T 348      -5.891  -1.661  31.157  1.00  0.43           O  
HETATM  350  O   HOH T 349      -7.976   0.159  39.549  1.00  0.43           O  
HETATM  351  O   HOH T 350      12.473  25.803 -12.541  1.00  0.43           O  
HETATM  352  O   HOH T 351      12.960  27.785  18.266  1.00  0.43           O  
HETATM  353  O   HOH T 352      27.796  29.354  -5.285  1.00  0.43           O  
HETATM  354  O   HOH T 353      -9.501   5.496  32.307  1.00  0.43           O  
HETATM  355  O   HOH T 354       1.053   7.874   2.554  1.00  0.43           O  
HETATM  356  O   HOH T 355      12.781  33.611 -11.264  1.00  0.43           O  
HETATM  357  O   HOH T 356      18.297  23.922  22.547  1.00  0.43           O  
HETATM  358  O   HOH T 357      20.266  16.164  24.545  1.00  0.43           O  
HETATM  359  O   HOH T 358       4.724  34.586   5.837  1.00  0.43           O  
HETATM  360  O   HOH T 359      -6.346  25.673  -6.775  1.00  0.43           O  
HETATM  361  O   HOH T 360      19.594  12.218  27.081  1.00  0.43           O  
HETATM  362  O   HOH T 361      24.722  14.352 -11.267  1.00  0.43           O  
HETATM  363  O   HOH T 362       3.294  32.814 -10.087  1.00  0.43           O  
HETATM  364  O   HOH T 363      25.153  32.846  -3.685  1.00  0.43           O  
HETATM  365  O   HOH T 364      -3.823  31.502  46.810  1.00  0.43           O  
HETATM  366  O   HOH T 365     -10.074   7.090  -4.272  1.00  0.43           O  
HETATM  367  O   HOH T 366      -7.908  -1.455   8.897  1.00  0.43           O  
HETATM  368  O   HOH T 367      -5.955  36.322  39.735  1.00  0.43           O  
HETATM  369  O   HOH T 368     -14.776  14.452  43.987  1.00  0.43           O  
HETATM  370  O   HOH T 369      -4.197  38.460  34.888  1.00  0.44           O  
HETATM  371  O   HOH T 370      13.190  27.092  -9.017  1.00  0.44           O  
HETATM  372  O   HOH T 371       9.966  30.121  11.526  1.00  0.44           O  
HETATM  373  O   HOH T 372       3.887  14.371   8.666  1.00  0.44           O  
HETATM  374  O   HOH T 373      37.906  12.613   4.734  1.00  0.44           O  
HETATM  375  O   HOH T 374      18.243   8.105  21.652  1.00  0.44           O  
HETATM  376  O   HOH T 375      -0.971   0.979  -7.304  1.00  0.44           O  
HETATM  377  O   HOH T 376       6.304  14.396  41.962  1.00  0.44           O  
HETATM  378  O   HOH T 377      -6.963  26.457  52.916  1.00  0.44           O  
HETATM  379  O   HOH T 378       1.924  10.726  13.559  1.00  0.44           O  
HETATM  380  O   HOH T 379      18.102   1.322  -0.489  1.00  0.44           O  
HETATM  381  O   HOH T 380      -1.892   2.589 -14.992  1.00  0.44           O  
HETATM  382  O   HOH T 381     -18.061  18.110  -5.563  1.00  0.44           O  
HETATM  383  O   HOH T 382       4.271  36.084  32.156  1.00  0.44           O  
HETATM  384  O   HOH T 383      -6.482   7.257  19.332  1.00  0.44           O  
HETATM  385  O   HOH T 384      -1.978  39.293  27.709  1.00  0.44           O  
HETATM  386  O   HOH T 385     -26.949  14.647   0.705  1.00  0.44           O  
HETATM  387  O   HOH T 386      29.917  14.038  19.707  1.00  0.44           O  
HETATM  388  O   HOH T 387      -7.442   4.283   0.862  1.00  0.44           O  
HETATM  389  O   HOH T 388       8.812   1.378  12.614  1.00  0.44           O  
HETATM  390  O   HOH T 389      -8.698  14.596  12.805  1.00  0.44           O  
HETATM  391  O   HOH T 390      18.919  -3.044  11.863  1.00  0.44           O  
HETATM  392  O   HOH T 391     -10.200  13.324  14.953  1.00  0.44           O  
HETATM  393  O   HOH T 392       5.471  36.870  -4.828  1.00  0.44           O  
HETATM  394  O   HOH T 393       2.483  26.695  46.155  1.00  0.45           O  
HETATM  395  O   HOH T 394      -9.705  26.625  52.517  1.00  0.45           O  
HETATM  396  O   HOH T 395      -3.380  19.355 -14.879  1.00  0.45           O  
HETATM  397  O   HOH T 396      23.266  -3.539  10.058  1.00  0.45           O  
HETATM  398  O   HOH T 397      27.816   6.724  -3.972  1.00  0.45           O  
HETATM  399  O   HOH T 398       4.232  33.914  -7.642  1.00  0.45           O  
HETATM  400  O   HOH T 399      -1.189  32.975  27.163  1.00  0.45           O  
HETATM  401  O   HOH T 400      23.149  23.538  24.730  1.00  0.45           O  
HETATM  402  O   HOH T 401      31.006   2.952   4.992  1.00  0.45           O  
HETATM  403  O   HOH T 402      35.493  24.116   5.636  1.00  0.45           O  
HETATM  404  O   HOH T 403      12.870  45.122  -0.413  1.00  0.45           O  
HETATM  405  O   HOH T 404      22.807  -4.425  26.188  1.00  0.45           O  
HETATM  406  O   HOH T 405       6.816   8.722  -1.527  1.00  0.45           O  
HETATM  407  O   HOH T 406      32.485  22.935   0.038  1.00  0.45           O  
HETATM  408  O   HOH T 407     -22.085  24.311   7.243  1.00  0.45           O  
HETATM  409  O   HOH T 408      -2.407  33.489  39.106  1.00  0.45           O  
HETATM  410  O   HOH T 409      -6.452   2.401 -17.209  1.00  0.45           O  
HETATM  411  O   HOH T 410       8.464  20.255  25.935  1.00  0.45           O  
HETATM  412  O   HOH T 411       7.316  -0.843  35.737  1.00  0.45           O  
HETATM  413  O   HOH T 412      22.963  -3.871  28.989  1.00  0.45           O  
HETATM  414  O   HOH T 413      -8.194  11.351 -19.336  1.00  0.45           O  
HETATM  415  O   HOH T 414      -2.444  36.403  23.332  1.00  0.45           O  
HETATM  416  O   HOH T 415       9.963  -2.490  18.690  1.00  0.45           O  
HETATM  417  O   HOH T 416      21.462  26.865  19.460  1.00  0.45           O  
HETATM  418  O   HOH T 417      14.606  31.544   5.251  1.00  0.45           O  
HETATM  419  O   HOH T 418      26.606  22.596  -3.099  1.00  0.45           O  
HETATM  420  O   HOH T 419     -18.024  15.670  -1.441  1.00  0.45           O  
HETATM  421  O   HOH T 420       2.574  12.542  30.786  1.00  0.46           O  
HETATM  422  O   HOH T 421     -11.213  31.533  51.019  1.00  0.46           O  
HETATM  423  O   HOH T 422       3.135  24.242 -14.770  1.00  0.46           O  
HETATM  424  O   HOH T 423      27.188  29.782  -2.614  1.00  0.46           O  
HETATM  425  O   HOH T 424       3.792  34.895  27.012  1.00  0.46           O  
HETATM  426  O   HOH T 425      24.265  28.756   6.087  1.00  0.46           O  
HETATM  427  O   HOH T 426      19.403  -1.068  -0.617  1.00  0.46           O  
HETATM  428  O   HOH T 427     -14.260  18.051  -9.114  1.00  0.46           O  
HETATM  429  O   HOH T 428      38.077   7.509  -3.974  1.00  0.46           O  
HETATM  430  O   HOH T 429      -1.337  30.220  46.496  1.00  0.46           O  
HETATM  431  O   HOH T 430      29.198  24.519   1.618  1.00  0.46           O  
HETATM  432  O   HOH T 431     -17.794  11.098  -8.357  1.00  0.46           O  
HETATM  433  O   HOH T 432       8.112  27.679 -10.298  1.00  0.46           O  
HETATM  434  O   HOH T 433     -12.499  30.075  41.576  1.00  0.46           O  
HETATM  435  O   HOH T 434      -2.939   1.260  28.678  1.00  0.46           O  
HETATM  436  O   HOH T 435      13.100  22.569 -16.239  1.00  0.46           O  
HETATM  437  O   HOH T 436      13.753  28.566  20.873  1.00  0.46           O  
HETATM  438  O   HOH T 437     -15.022   7.417 -11.459  1.00  0.46           O  
HETATM  439  O   HOH T 438      -6.712  36.402   4.162  1.00  0.46           O  
HETATM  440  O   HOH T 439      -7.572   1.579  30.580  1.00  0.46           O  
HETATM  441  O   HOH T 440      -9.619   4.852  28.252  1.00  0.46           O  
HETATM  442  O   HOH T 441      -6.521   9.929  45.719  1.00  0.46           O  
HETATM  443  O   HOH T 442     -10.866  32.236  18.983  1.00  0.46           O  
HETATM  444  O   HOH T 443      19.497  13.361  12.821  1.00  0.46           O  
HETATM  445  O   HOH T 444       9.545   0.411   8.683  1.00  0.46           O  
HETATM  446  O   HOH T 445      -9.005  35.267  12.751  1.00  0.46           O  
HETATM  447  O   HOH T 446      23.156  13.828 -13.585  1.00  0.46           O  
HETATM  448  O   HOH T 447      -9.324  32.262   5.510  1.00  0.46           O  
HETATM  449  O   HOH T 448      -2.559  37.782  20.881  1.00  0.46           O  
HETATM  450  O   HOH T 449      -8.747  23.045  46.304  1.00  0.46           O  
HETATM  451  O   HOH T 450       6.553  12.181  10.500  1.00  0.46           O  
HETATM  452  O   HOH T 451     -10.352  35.786  21.752  1.00  0.46           O  
HETATM  453  O   HOH T 452       7.748  20.826  23.310  1.00  0.46           O  
HETATM  454  O   HOH T 453      27.331  11.062 -12.077  1.00  0.46           O  
HETATM  455  O   HOH T 454      -2.641  37.721  45.466  1.00  0.47           O  
HETATM  456  O   HOH T 455      17.163  -0.859  12.355  1.00  0.47           O  
HETATM  457  O   HOH T 456      31.857   3.155   2.386  1.00  0.47           O  
HETATM  458  O   HOH T 457      12.024  31.556   6.389  1.00  0.47           O  
HETATM  459  O   HOH T 458       9.261  31.003  14.069  1.00  0.47           O  
HETATM  460  O   HOH T 459      22.135  21.287  23.469  1.00  0.47           O  
HETATM  461  O   HOH T 460       6.514  29.343 -11.950  1.00  0.47           O  
HETATM  462  O   HOH T 461      -8.188  33.208  51.174  1.00  0.47           O  
HETATM  463  O   HOH T 462      -0.234  27.599   4.416  1.00  0.47           O  
HETATM  464  O   HOH T 463      16.997  26.005  21.023  1.00  0.47           O  
HETATM  465  O   HOH T 464     -11.264  34.179  27.299  1.00  0.47           O  
HETATM  466  O   HOH T 465       3.142  10.319 -14.750  1.00  0.47           O  
HETATM  467  O   HOH T 466       6.504   2.252  11.322  1.00  0.47           O  
HETATM  468  O   HOH T 467       3.365  37.399  20.491  1.00  0.47           O  
HETATM  469  O   HOH T 468     -16.461  21.346  -8.331  1.00  0.47           O  
HETATM  470  O   HOH T 469      10.312  28.407  13.633  1.00  0.47           O  
HETATM  471  O   HOH T 470      -1.888  31.645  48.786  1.00  0.47           O  
HETATM  472  O   HOH T 471      20.188  26.729  17.005  1.00  0.47           O  
HETATM  473  O   HOH T 472      -4.762  31.498   7.926  1.00  0.47           O  
HETATM  474  O   HOH T 473      -5.045  27.964  -6.609  1.00  0.47           O  
HETATM  475  O   HOH T 474     -27.872  17.256   5.071  1.00  0.47           O  
HETATM  476  O   HOH T 475     -18.954  15.917  19.376  1.00  0.47           O  
HETATM  477  O   HOH T 476       1.969  12.687 -15.501  1.00  0.47           O  
HETATM  478  O   HOH T 477      15.594  36.784  -8.276  1.00  0.47           O  
HETATM  479  O   HOH T 478      38.518  21.387  13.190  1.00  0.47           O  
HETATM  480  O   HOH T 479     -14.012   4.907 -11.866  1.00  0.47           O  
HETATM  481  O   HOH T 480     -20.203  13.859  -1.453  1.00  0.47           O  
HETATM  482  O   HOH T 481     -18.691   3.098   4.561  1.00  0.47           O  
HETATM  483  O   HOH T 482     -16.250  26.734  17.080  1.00  0.47           O  
HETATM  484  O   HOH T 483      14.742  29.250  -9.467  1.00  0.47           O  
HETATM  485  O   HOH T 484      15.559  -0.342   3.097  1.00  0.48           O  
HETATM  486  O   HOH T 485     -11.728   5.322  42.221  1.00  0.48           O  
HETATM  487  O   HOH T 486      10.467  39.077  -3.213  1.00  0.48           O  
HETATM  488  O   HOH T 487      -2.292  35.297   9.824  1.00  0.48           O  
HETATM  489  O   HOH T 488     -11.440  28.255  50.974  1.00  0.48           O  
HETATM  490  O   HOH T 489      -7.963  30.809   0.981  1.00  0.48           O  
HETATM  491  O   HOH T 490      27.366  -2.707   6.401  1.00  0.48           O  
HETATM  492  O   HOH T 491      12.455  15.238  37.910  1.00  0.48           O  
HETATM  493  O   HOH T 492       4.852  35.894  22.292  1.00  0.48           O  
HETATM  494  O   HOH T 493     -16.845  28.536  12.819  1.00  0.48           O  
HETATM  495  O   HOH T 494      -5.611  37.366  37.110  1.00  0.48           O  
HETATM  496  O   HOH T 495      -8.196   2.605  28.170  1.00  0.48           O  
HETATM  497  O   HOH T 496       1.613  32.530  36.251  1.00  0.48           O  
HETATM  498  O   HOH T 497      20.534  -0.343   8.490  1.00  0.48           O  
HETATM  499  O   HOH T 498     -10.736  39.765  18.734  1.00  0.48           O  
HETATM  500  O   HOH T 499     -24.105  18.638   7.019  1.00  0.48           O  
HETATM  501  O   HOH T 500      -5.744   1.234  28.476  1.00  0.48           O  
HETATM  502  O   HOH T 501     -17.185  23.483  24.357  1.00  0.48           O  
HETATM  503  O   HOH T 502       5.273   4.751  -2.814  1.00  0.48           O  
HETATM  504  O   HOH T 503      21.966  10.883  24.358  1.00  0.48           O  
HETATM  505  O   HOH T 504       0.368  38.705  26.270  1.00  0.48           O  
HETATM  506  O   HOH T 505      16.946   2.405  -4.767  1.00  0.48           O  
HETATM  507  O   HOH T 506       3.732   1.900 -11.531  1.00  0.48           O  
HETATM  508  O   HOH T 507     -11.061  33.987  11.701  1.00  0.48           O  
HETATM  509  O   HOH T 508     -11.764   3.832   9.554  1.00  0.49           O  
HETATM  510  O   HOH T 509       2.160   7.623  38.472  1.00  0.49           O  
HETATM  511  O   HOH T 510      -1.607   0.133 -16.412  1.00  0.49           O  
HETATM  512  O   HOH T 511      19.466  25.097  20.293  1.00  0.49           O  
HETATM  513  O   HOH T 512      -0.598  13.702 -15.391  1.00  0.49           O  
HETATM  514  O   HOH T 513      33.843  16.264   7.537  1.00  0.49           O  
HETATM  515  O   HOH T 514      -3.146  23.345  14.410  1.00  0.49           O  
HETATM  516  O   HOH T 515      18.550  37.348   5.726  1.00  0.49           O  
HETATM  517  O   HOH T 516     -28.371  16.965  12.946  1.00  0.49           O  
HETATM  518  O   HOH T 517      -4.481  31.771  49.724  1.00  0.49           O  
HETATM  519  O   HOH T 518      27.458   4.587  -5.810  1.00  0.49           O  
HETATM  520  O   HOH T 519      19.233   8.137  18.879  1.00  0.49           O  
HETATM  521  O   HOH T 520      -8.664  35.806  39.527  1.00  0.49           O  
HETATM  522  O   HOH T 521      -5.376  25.354  12.557  1.00  0.49           O  
HETATM  523  O   HOH T 522     -16.228  24.249  41.353  1.00  0.49           O  
HETATM  524  O   HOH T 523      -3.344   0.173   1.395  1.00  0.49           O  
HETATM  525  O   HOH T 524      17.303  31.583  -7.638  1.00  0.49           O  
HETATM  526  O   HOH T 525     -13.076  33.840  18.517  1.00  0.49           O  
HETATM  527  O   HOH T 526     -20.300   8.037   1.391  1.00  0.49           O  
HETATM  528  O   HOH T 527      26.410   4.191  23.502  1.00  0.49           O  
HETATM  529  O   HOH T 528      -7.508  31.244   7.551  1.00  0.49           O  
HETATM  530  O   HOH T 529      -8.386  24.123  52.582  1.00  0.49           O  
HETATM  531  O   HOH T 530     -12.211   4.822   5.128  1.00  0.49           O  
HETATM  532  O   HOH T 531     -15.770  30.948  16.221  1.00  0.49           O  
HETATM  533  O   HOH T 532      21.033  -4.841  11.295  1.00  0.50           O  
HETATM  534  O   HOH T 533       7.414   8.961  -7.047  1.00  0.50           O  
HETATM  535  O   HOH T 534      -8.148   4.206   3.487  1.00  0.50           O  
HETATM  536  O   HOH T 535       9.589  32.881   6.259  1.00  0.50           O  
HETATM  537  O   HOH T 536      30.559  24.103  -1.726  1.00  0.50           O  
HETATM  538  O   HOH T 537      23.560  12.287  26.029  1.00  0.50           O  
HETATM  539  O   HOH T 538     -23.110  16.738  -2.166  1.00  0.50           O  
HETATM  540  O   HOH T 539       6.062  38.027  20.804  1.00  0.50           O  
HETATM  541  O   HOH T 540      -5.354  38.405  -1.844  1.00  0.50           O  
HETATM  542  O   HOH T 541      25.441  22.812  26.066  1.00  0.50           O  
HETATM  543  O   HOH T 542     -16.076  15.784  35.619  1.00  0.50           O  
HETATM  544  O   HOH T 543       9.035  21.315  36.674  1.00  0.50           O  
HETATM  545  O   HOH T 544      -4.681   1.565  24.099  1.00  0.50           O  
HETATM  546  O   HOH T 545      -2.723   2.081   9.715  1.00  0.50           O  
HETATM  547  O   HOH T 546     -18.536  22.620  41.288  1.00  0.50           O  
HETATM  548  O   HOH T 547      -8.855  27.379  -3.526  1.00  0.50           O  
HETATM  549  O   HOH T 548     -12.851  29.158  33.975  1.00  0.50           O  
HETATM  550  O   HOH T 549     -14.735  29.622  14.066  1.00  0.50           O  
HETATM  551  O   HOH T 550      -2.325  -2.482 -11.171  1.00  0.50           O  
HETATM  552  O   HOH T 551      24.088  26.595  -6.840  1.00  0.50           O  
HETATM  553  O   HOH T 552      11.364  37.576  -5.319  1.00  0.50           O  
HETATM  554  O   HOH T 553      22.423  30.745   6.255  1.00  0.50           O  
HETATM  555  O   HOH T 554     -14.631  23.586  43.571  1.00  0.50           O  
HETATM  556  O   HOH T 555      14.523  27.369 -11.469  1.00  0.50           O  
HETATM  557  O   HOH T 556     -11.311  35.857  29.496  1.00  0.50           O  
HETATM  558  O   HOH T 557      16.263  25.338  23.738  1.00  0.50           O  
HETATM  559  O   HOH T 558      17.197   7.433 -10.033  1.00  0.50           O  
HETATM  560  O   HOH T 559      -0.092  -0.016  -9.681  1.00  0.50           O  
HETATM  561  O   HOH T 560      25.208  30.340   4.163  1.00  0.50           O  
HETATM  562  O   HOH T 561     -17.919  18.285  -2.774  1.00  0.51           O  
HETATM  563  O   HOH T 562     -12.016  32.294  16.385  1.00  0.51           O  
HETATM  564  O   HOH T 563      -4.581  18.543  52.226  1.00  0.51           O  
HETATM  565  O   HOH T 564      11.091  28.640  16.337  1.00  0.51           O  
HETATM  566  O   HOH T 565      25.519  12.483  20.976  1.00  0.51           O  
HETATM  567  O   HOH T 566      -9.628   3.336  30.537  1.00  0.51           O  
HETATM  568  O   HOH T 567      22.456  -1.374   4.664  1.00  0.51           O  
HETATM  569  O   HOH T 568      14.639  43.226  -1.306  1.00  0.51           O  
HETATM  570  O   HOH T 569     -13.394   7.515  -7.818  1.00  0.51           O  
HETATM  571  O   HOH T 570     -22.848  16.257   7.173  1.00  0.51           O  
HETATM  572  O   HOH T 571       4.871  32.753   7.777  1.00  0.51           O  
HETATM  573  O   HOH T 572      -9.051  19.402  -8.107  1.00  0.51           O  
HETATM  574  O   HOH T 573      22.600  15.341  23.336  1.00  0.51           O  
HETATM  575  O   HOH T 574      25.089   5.742  -8.527  1.00  0.51           O  
HETATM  576  O   HOH T 575      10.642   1.240  -0.602  1.00  0.51           O  
HETATM  577  O   HOH T 576      -0.918  34.819  25.046  1.00  0.51           O  
HETATM  578  O   HOH T 577      25.823  -3.320   8.766  1.00  0.51           O  
HETATM  579  O   HOH T 578       5.929   4.163  -5.509  1.00  0.51           O  
HETATM  580  O   HOH T 579      11.390  33.031  17.801  1.00  0.51           O  
HETATM  581  O   HOH T 580     -11.111  35.814  19.077  1.00  0.51           O  
HETATM  582  O   HOH T 581      23.521  30.147  10.162  1.00  0.51           O  
HETATM  583  O   HOH T 582     -24.933   7.799   3.858  1.00  0.51           O  
HETATM  584  O   HOH T 583     -11.970  18.846  -7.508  1.00  0.51           O  
HETATM  585  O   HOH T 584     -18.158  24.530  34.892  1.00  0.51           O  
HETATM  586  O   HOH T 585      36.012  24.349   8.444  1.00  0.51           O  
HETATM  587  O   HOH T 586       4.904  34.086  38.052  1.00  0.51           O  
HETATM  588  O   HOH T 587     -20.623  12.177  22.367  1.00  0.51           O  
HETATM  589  O   HOH T 588       1.031   1.364 -11.732  1.00  0.51           O  
HETATM  590  O   HOH T 589      12.378   8.140 -12.378  1.00  0.52           O  
HETATM  591  O   HOH T 590       8.903  31.631  38.092  1.00  0.52           O  
HETATM  592  O   HOH T 591     -12.810   6.262  -4.044  1.00  0.52           O  
HETATM  593  O   HOH T 592      -6.472   5.015  -3.318  1.00  0.52           O  
HETATM  594  O   HOH T 593      10.394  39.991   2.325  1.00  0.52           O  
HETATM  595  O   HOH T 594      10.091  24.239  41.326  1.00  0.52           O  
HETATM  596  O   HOH T 595      22.706  -6.583  29.383  1.00  0.52           O  
HETATM  597  O   HOH T 596       1.680   0.112  -1.111  1.00  0.52           O  
HETATM  598  O   HOH T 597      16.705   0.464   5.566  1.00  0.52           O  
HETATM  599  O   HOH T 598      24.483  24.613  -8.752  1.00  0.52           O  
HETATM  600  O   HOH T 599     -19.469  18.314  -8.913  1.00  0.52           O  
HETATM  601  O   HOH T 600      21.278  13.603  25.203  1.00  0.52           O  
HETATM  602  O   HOH T 601      10.666  16.030 -17.155  1.00  0.52           O  
HETATM  603  O   HOH T 602     -18.294  17.567 -11.300  1.00  0.52           O  
HETATM  604  O   HOH T 603      15.456  -1.902  10.372  1.00  0.52           O  
HETATM  605  O   HOH T 604     -23.086   6.254   7.455  1.00  0.52           O  
HETATM  606  O   HOH T 605      13.165  26.069  22.048  1.00  0.52           O  
HETATM  607  O   HOH T 606      -3.833   3.367  -5.660  1.00  0.52           O  
HETATM  608  O   HOH T 607       5.392  35.820  16.945  1.00  0.52           O  
HETATM  609  O   HOH T 608      10.678  -9.258  35.070  1.00  0.52           O  
HETATM  610  O   HOH T 609       1.301  25.767 -13.252  1.00  0.52           O  
HETATM  611  O   HOH T 610      12.157  34.012  20.264  1.00  0.52           O  
HETATM  612  O   HOH T 611      -2.458  33.272  50.953  1.00  0.52           O  
HETATM  613  O   HOH T 612     -30.054  15.413   5.363  1.00  0.52           O  
HETATM  614  O   HOH T 613      13.530  24.732  24.396  1.00  0.52           O  
HETATM  615  O   HOH T 614       3.855   8.098 -16.162  1.00  0.52           O  
HETATM  616  O   HOH T 615     -14.678  14.043 -16.615  1.00  0.53           O  
HETATM  617  O   HOH T 616      30.677  28.037  12.489  1.00  0.53           O  
HETATM  618  O   HOH T 617      17.735  -0.621   1.536  1.00  0.53           O  
HETATM  619  O   HOH T 618      -6.481  37.007  34.483  1.00  0.53           O  
HETATM  620  O   HOH T 619       4.850  12.398 -15.289  1.00  0.53           O  
HETATM  621  O   HOH T 620      10.653  23.493  36.423  1.00  0.53           O  
HETATM  622  O   HOH T 621     -17.084  19.281  41.367  1.00  0.53           O  
HETATM  623  O   HOH T 622       2.566   1.927  -4.762  1.00  0.53           O  
HETATM  624  O   HOH T 623       2.590   7.738 -13.722  1.00  0.53           O  
HETATM  625  O   HOH T 624      -5.867  -2.689 -11.050  1.00  0.53           O  
HETATM  626  O   HOH T 625       9.089  20.296  10.631  1.00  0.53           O  
HETATM  627  O   HOH T 626     -12.995   6.998  22.745  1.00  0.53           O  
HETATM  628  O   HOH T 627     -16.828  18.642  -8.047  1.00  0.53           O  
HETATM  629  O   HOH T 628      12.030  42.430  -0.704  1.00  0.53           O  
HETATM  630  O   HOH T 629     -12.397  18.081 -11.378  1.00  0.53           O  
HETATM  631  O   HOH T 630     -12.901   5.662   7.754  1.00  0.53           O  
HETATM  632  O   HOH T 631      14.764  24.278 -14.909  1.00  0.53           O  
HETATM  633  O   HOH T 632      20.589  -2.693   9.669  1.00  0.53           O  
HETATM  634  O   HOH T 633      18.778   0.505  -4.234  1.00  0.53           O  
HETATM  635  O   HOH T 634      20.536  27.167  -6.432  1.00  0.53           O  
HETATM  636  O   HOH T 635      27.489  18.617 -13.853  1.00  0.54           O  
HETATM  637  O   HOH T 636      27.308  13.704 -11.911  1.00  0.54           O  
HETATM  638  O   HOH T 637     -16.259  14.882  41.740  1.00  0.54           O  
HETATM  639  O   HOH T 638      30.041   5.351  -4.999  1.00  0.54           O  
HETATM  640  O   HOH T 639      29.092  27.574  14.103  1.00  0.54           O  
HETATM  641  O   HOH T 640      11.388   5.640  -3.191  1.00  0.54           O  
HETATM  642  O   HOH T 641     -20.986  11.222  -1.555  1.00  0.54           O  
HETATM  643  O   HOH T 642      13.877  33.273   7.367  1.00  0.54           O  
HETATM  644  O   HOH T 643      24.445   0.400  22.545  1.00  0.54           O  
HETATM  645  O   HOH T 644      12.926  -0.045  -0.026  1.00  0.54           O  
HETATM  646  O   HOH T 645       7.711  18.522  23.974  1.00  0.54           O  
HETATM  647  O   HOH T 646     -14.490   3.871   6.391  1.00  0.54           O  
HETATM  648  O   HOH T 647      29.034  21.157  24.603  1.00  0.54           O  
HETATM  649  O   HOH T 648     -12.988  37.284  47.760  1.00  0.54           O  
HETATM  650  O   HOH T 649      32.437   1.704  13.777  1.00  0.54           O  
HETATM  651  O   HOH T 650      27.558  32.517  -2.404  1.00  0.54           O  
HETATM  652  O   HOH T 651      10.613   6.528  36.487  1.00  0.55           O  
HETATM  653  O   HOH T 652      12.386  33.461  26.079  1.00  0.55           O  
HETATM  654  O   HOH T 653      11.155  31.617 -10.395  1.00  0.55           O  
HETATM  655  O   HOH T 654      33.139  15.258   9.936  1.00  0.55           O  
HETATM  656  O   HOH T 655     -13.881   6.483  43.714  1.00  0.55           O  
HETATM  657  O   HOH T 656      -1.606  38.788  -4.303  1.00  0.55           O  
HETATM  658  O   HOH T 657     -15.431   9.699  -8.129  1.00  0.55           O  
HETATM  659  O   HOH T 658      16.402  14.088 -12.991  1.00  0.55           O  
HETATM  660  O   HOH T 659      25.965  10.390 -14.463  1.00  0.55           O  
HETATM  661  O   HOH T 660     -17.208   4.031   6.639  1.00  0.55           O  
HETATM  662  O   HOH T 661     -18.591   9.502  16.695  1.00  0.55           O  
HETATM  663  O   HOH T 662       9.751  13.045 -17.022  1.00  0.55           O  
HETATM  664  O   HOH T 663      -6.415   4.839  17.829  1.00  0.55           O  
HETATM  665  O   HOH T 664     -10.629   4.838  17.052  1.00  0.55           O  
HETATM  666  O   HOH T 665     -11.161  24.264  -6.467  1.00  0.55           O  
HETATM  667  O   HOH T 666      19.406  19.414 -16.116  1.00  0.55           O  
HETATM  668  O   HOH T 667     -13.745   5.650  -0.076  1.00  0.55           O  
HETATM  669  O   HOH T 668      14.477   1.328  18.706  1.00  0.55           O  
HETATM  670  O   HOH T 669      17.071  37.282   8.058  1.00  0.55           O  
HETATM  671  O   HOH T 670      29.591  26.916   8.763  1.00  0.55           O  
HETATM  672  O   HOH T 671       1.833  19.542  50.179  1.00  0.55           O  
HETATM  673  O   HOH T 672      -8.212   2.779   9.801  1.00  0.55           O  
HETATM  674  O   HOH T 673      32.321  21.681   4.985  1.00  0.56           O  
HETATM  675  O   HOH T 674      14.542  30.748  13.838  1.00  0.56           O  
HETATM  676  O   HOH T 675      17.655   8.440  35.734  1.00  0.56           O  
HETATM  677  O   HOH T 676      -8.964  18.964  25.110  1.00  0.56           O  
HETATM  678  O   HOH T 677      -9.813  18.470  49.488  1.00  0.56           O  
HETATM  679  O   HOH T 678       2.390  33.661  38.793  1.00  0.56           O  
HETATM  680  O   HOH T 679      27.353  27.713  25.207  1.00  0.56           O  
HETATM  681  O   HOH T 680      11.402   0.027  12.149  1.00  0.56           O  
HETATM  682  O   HOH T 681     -10.540   7.347  30.768  1.00  0.56           O  
HETATM  683  O   HOH T 682       8.097  16.280  40.785  1.00  0.56           O  
HETATM  684  O   HOH T 683      29.989   2.174   0.612  1.00  0.56           O  
HETATM  685  O   HOH T 684      -2.406  34.462  34.091  1.00  0.56           O  
HETATM  686  O   HOH T 685      12.937  40.631   3.386  1.00  0.56           O  
HETATM  687  O   HOH T 686     -22.074  13.791  23.459  1.00  0.56           O  
HETATM  688  O   HOH T 687      10.308  -8.406  22.504  1.00  0.56           O  
HETATM  689  O   HOH T 688      13.081  14.579 -14.661  1.00  0.56           O  
HETATM  690  O   HOH T 689      25.184  10.284  26.768  1.00  0.56           O  
HETATM  691  O   HOH T 690       5.573  35.725  24.966  1.00  0.56           O  
HETATM  692  O   HOH T 691      23.457   3.997  -9.742  1.00  0.56           O  
HETATM  693  O   HOH T 692      -7.498  21.802  -8.287  1.00  0.56           O  
HETATM  694  O   HOH T 693       7.472  34.251   5.177  1.00  0.57           O  
HETATM  695  O   HOH T 694     -11.470  37.375  46.775  1.00  0.57           O  
HETATM  696  O   HOH T 695     -13.931   9.190  -9.747  1.00  0.57           O  
HETATM  697  O   HOH T 696      29.470  -2.657   8.124  1.00  0.57           O  
HETATM  698  O   HOH T 697     -19.490   1.691   2.403  1.00  0.57           O  
HETATM  699  O   HOH T 698     -19.542   6.587  -1.914  1.00  0.57           O  
HETATM  700  O   HOH T 699      -4.708  38.091  24.228  1.00  0.57           O  
HETATM  701  O   HOH T 700      -5.499  12.113 -19.241  1.00  0.57           O  
HETATM  702  O   HOH T 701      15.423  11.424 -14.008  1.00  0.57           O  
HETATM  703  O   HOH T 702      23.396  38.874  -2.450  1.00  0.57           O  
HETATM  704  O   HOH T 703      -3.904   3.858  22.627  1.00  0.57           O  
HETATM  705  O   HOH T 704      -8.988  26.716  45.316  1.00  0.57           O  
HETATM  706  O   HOH T 705       8.248   4.760   9.077  1.00  0.57           O  
HETATM  707  O   HOH T 706       8.155  24.188  43.252  1.00  0.57           O  
HETATM  708  O   HOH T 707      29.180  27.571  25.320  1.00  0.58           O  
HETATM  709  O   HOH T 708       7.199  38.279  30.751  1.00  0.58           O  
HETATM  710  O   HOH T 709     -15.276   3.228   1.757  1.00  0.58           O  
HETATM  711  O   HOH T 710      -2.248  33.926  36.499  1.00  0.58           O  
HETATM  712  O   HOH T 711     -13.838  22.080  -8.153  1.00  0.58           O  
HETATM  713  O   HOH T 712      -4.770   8.296 -18.747  1.00  0.59           O  
HETATM  714  O   HOH T 713      24.407  -3.333   4.052  1.00  0.59           O  
HETATM  715  O   HOH T 714       0.181  31.565  44.593  1.00  0.59           O  
HETATM  716  O   HOH T 715       1.678  36.341  33.299  1.00  0.59           O  
HETATM  717  O   HOH T 716      23.398  11.296 -14.633  1.00  0.59           O  
HETATM  718  O   HOH T 717      21.809  -1.847  -1.741  1.00  0.60           O  
HETATM  719  O   HOH T 718      28.962  25.544   6.480  1.00  0.60           O  
HETATM  720  O   HOH T 719      26.278  10.056  21.926  1.00  0.60           O  
HETATM  721  O   HOH T 720     -13.096  25.771  44.658  1.00  0.61           O  
HETATM  722  O   HOH T 721      -3.341  33.929  45.176  1.00  0.61           O  
HETATM  723  O   HOH T 722      39.101  20.043  15.432  1.00  0.62           O  
HETATM  724  O   HOH T 723     -17.035   1.560   3.025  1.00  0.63           O  
TER     725      HOH T 723 
