# Supplementary material for: Accurate Prediction of Hydration Sites of Proteins Using Energy Model With Atom Embedding
Source: Front Mol Biosci. 2021 Sep 20;8:756075. doi: 10.3389/fmolb.2021.756075 (PMC8488165; doi:10.3389/fmolb.2021.756075)
Supplement: Supplementary file 1 [file DataSheet1.ZIP › Data Sheet 1/Our_result_pdb/OppA_dataset_output/1B4Z_watersite.pdb]

HEADER                                                        XXXX


JRNL        PMID   -1
HETATM    1  O   HOH T   0       5.365  14.933  -3.716  1.00  0.16           O  
HETATM    2  O   HOH T   1       7.409  15.427 -10.484  1.00  0.16           O  
HETATM    3  O   HOH T   2      23.024  23.563  -1.109  1.00  0.17           O  
HETATM    4  O   HOH T   3      14.380  16.531  30.977  1.00  0.17           O  
HETATM    5  O   HOH T   4      19.100  19.972   6.282  1.00  0.18           O  
HETATM    6  O   HOH T   5      17.388  13.503   4.726  1.00  0.18           O  
HETATM    7  O   HOH T   6      19.952  26.065  13.996  1.00  0.18           O  
HETATM    8  O   HOH T   7       0.859  12.643  -8.366  1.00  0.18           O  
HETATM    9  O   HOH T   8      -8.174  22.710  23.235  1.00  0.19           O  
HETATM   10  O   HOH T   9       5.512   3.762  30.922  1.00  0.19           O  
HETATM   11  O   HOH T  10     -22.418  20.391  -2.618  1.00  0.19           O  
HETATM   12  O   HOH T  11      15.512  15.330  -8.568  1.00  0.19           O  
HETATM   13  O   HOH T  12     -13.212  13.659 -14.486  1.00  0.19           O  
HETATM   14  O   HOH T  13       8.739   1.317  25.709  1.00  0.20           O  
HETATM   15  O   HOH T  14      -1.823   8.471   9.938  1.00  0.20           O  
HETATM   16  O   HOH T  15      -6.668   8.891   7.403  1.00  0.20           O  
HETATM   17  O   HOH T  16      11.340  13.604  16.634  1.00  0.21           O  
HETATM   18  O   HOH T  17       7.078  10.798  -8.888  1.00  0.21           O  
HETATM   19  O   HOH T  18       2.578   0.654  25.064  1.00  0.21           O  
HETATM   20  O   HOH T  19      22.070  15.134 -11.497  1.00  0.21           O  
HETATM   21  O   HOH T  20       0.068  30.883  10.834  1.00  0.21           O  
HETATM   22  O   HOH T  21      -1.766  28.361   2.026  1.00  0.21           O  
HETATM   23  O   HOH T  22      -4.689  23.095  -7.488  1.00  0.21           O  
HETATM   24  O   HOH T  23      24.518  21.752  23.235  1.00  0.22           O  
HETATM   25  O   HOH T  24      -4.253  19.327  16.123  1.00  0.22           O  
HETATM   26  O   HOH T  25      34.223  15.107  -1.788  1.00  0.22           O  
HETATM   27  O   HOH T  26      31.446  11.278   8.340  1.00  0.22           O  
HETATM   28  O   HOH T  27      17.291   5.283  21.921  1.00  0.22           O  
HETATM   29  O   HOH T  28       9.831   9.207  -5.879  1.00  0.22           O  
HETATM   30  O   HOH T  29       3.607   6.691  35.924  1.00  0.22           O  
HETATM   31  O   HOH T  30       3.116  16.866   7.837  1.00  0.22           O  
HETATM   32  O   HOH T  31      -8.685  27.249  42.564  1.00  0.22           O  
HETATM   33  O   HOH T  32      22.741   6.406  -9.810  1.00  0.22           O  
HETATM   34  O   HOH T  33       9.357   6.582   6.645  1.00  0.23           O  
HETATM   35  O   HOH T  34     -11.319  26.743  34.391  1.00  0.23           O  
HETATM   36  O   HOH T  35      13.198  23.048  10.807  1.00  0.23           O  
HETATM   37  O   HOH T  36       5.681  19.867  24.926  1.00  0.23           O  
HETATM   38  O   HOH T  37       3.128   5.275  30.710  1.00  0.23           O  
HETATM   39  O   HOH T  38      -0.531  30.826   1.783  1.00  0.23           O  
HETATM   40  O   HOH T  39      13.136  24.388  26.938  1.00  0.23           O  
HETATM   41  O   HOH T  40       8.628  23.958   2.035  1.00  0.23           O  
HETATM   42  O   HOH T  41     -12.642  11.328  20.406  1.00  0.23           O  
HETATM   43  O   HOH T  42      -5.456  34.393  33.570  1.00  0.24           O  
HETATM   44  O   HOH T  43      -2.201   4.753   9.818  1.00  0.24           O  
HETATM   45  O   HOH T  44      22.286  25.321  17.214  1.00  0.24           O  
HETATM   46  O   HOH T  45      -9.629  11.709  33.283  1.00  0.24           O  
HETATM   47  O   HOH T  46     -13.245  30.900  44.197  1.00  0.24           O  
HETATM   48  O   HOH T  47     -11.602   4.408 -13.001  1.00  0.24           O  
HETATM   49  O   HOH T  48       8.755  21.966  18.103  1.00  0.24           O  
HETATM   50  O   HOH T  49      -7.882  12.678  16.217  1.00  0.24           O  
HETATM   51  O   HOH T  50      -8.769  10.624 -24.420  1.00  0.24           O  
HETATM   52  O   HOH T  51       6.498  30.065  14.596  1.00  0.24           O  
HETATM   53  O   HOH T  52       8.136  15.363  -3.523  1.00  0.24           O  
HETATM   54  O   HOH T  53      -7.214  33.902  41.221  1.00  0.24           O  
HETATM   55  O   HOH T  54      28.890   2.972   6.092  1.00  0.24           O  
HETATM   56  O   HOH T  55      12.962  -0.879  22.167  1.00  0.25           O  
HETATM   57  O   HOH T  56      -1.248  30.210  28.467  1.00  0.25           O  
HETATM   58  O   HOH T  57     -16.052  27.000  30.023  1.00  0.25           O  
HETATM   59  O   HOH T  58     -10.223  16.527 -12.739  1.00  0.25           O  
HETATM   60  O   HOH T  59      -9.731  20.849   9.076  1.00  0.25           O  
HETATM   61  O   HOH T  60     -19.334  14.326 -11.098  1.00  0.25           O  
HETATM   62  O   HOH T  61      27.734  15.834  20.484  1.00  0.25           O  
HETATM   63  O   HOH T  62      17.566  31.237  -7.237  1.00  0.25           O  
HETATM   64  O   HOH T  63      11.363  18.324   3.134  1.00  0.26           O  
HETATM   65  O   HOH T  64      -7.308  13.770  12.746  1.00  0.26           O  
HETATM   66  O   HOH T  65      -4.124  29.570  12.841  1.00  0.26           O  
HETATM   67  O   HOH T  66      -5.821  35.905  15.522  1.00  0.26           O  
HETATM   68  O   HOH T  67       4.254  10.329  30.900  1.00  0.26           O  
HETATM   69  O   HOH T  68      10.015  30.817   4.043  1.00  0.26           O  
HETATM   70  O   HOH T  69      -5.123  26.214  50.600  1.00  0.26           O  
HETATM   71  O   HOH T  70      22.206  26.362  -4.761  1.00  0.26           O  
HETATM   72  O   HOH T  71      10.330  23.326   4.075  1.00  0.26           O  
HETATM   73  O   HOH T  72       7.716  24.183   4.695  1.00  0.26           O  
HETATM   74  O   HOH T  73      -4.431   6.392  16.330  1.00  0.26           O  
HETATM   75  O   HOH T  74      25.862  -2.100   6.236  1.00  0.26           O  
HETATM   76  O   HOH T  75      22.823   8.409  24.419  1.00  0.27           O  
HETATM   77  O   HOH T  76       1.349  21.494  18.979  1.00  0.27           O  
HETATM   78  O   HOH T  77     -18.942  15.720  16.916  1.00  0.27           O  
HETATM   79  O   HOH T  78      33.711  16.043  -4.331  1.00  0.27           O  
HETATM   80  O   HOH T  79     -30.416  16.153   8.154  1.00  0.27           O  
HETATM   81  O   HOH T  80      -1.372   8.272   6.127  1.00  0.27           O  
HETATM   82  O   HOH T  81      -0.761   6.678   0.762  1.00  0.27           O  
HETATM   83  O   HOH T  82      -1.557   7.332   3.470  1.00  0.28           O  
HETATM   84  O   HOH T  83      -1.538  21.642  12.722  1.00  0.28           O  
HETATM   85  O   HOH T  84      -9.140  22.885  44.413  1.00  0.28           O  
HETATM   86  O   HOH T  85      15.322  14.806  -5.841  1.00  0.28           O  
HETATM   87  O   HOH T  86     -13.367   6.545 -13.660  1.00  0.28           O  
HETATM   88  O   HOH T  87     -18.286  26.852   0.469  1.00  0.28           O  
HETATM   89  O   HOH T  88     -10.789  16.206 -15.487  1.00  0.28           O  
HETATM   90  O   HOH T  89      -9.099   8.592 -18.897  1.00  0.29           O  
HETATM   91  O   HOH T  90      -0.264   5.802  -6.301  1.00  0.29           O  
HETATM   92  O   HOH T  91     -10.886  29.130  17.370  1.00  0.29           O  
HETATM   93  O   HOH T  92      -2.259  24.319  12.116  1.00  0.29           O  
HETATM   94  O   HOH T  93     -15.353  22.046  16.682  1.00  0.29           O  
HETATM   95  O   HOH T  94      30.979  19.132   1.022  1.00  0.29           O  
HETATM   96  O   HOH T  95      26.891  13.496  19.100  1.00  0.29           O  
HETATM   97  O   HOH T  96     -21.172  16.424  15.123  1.00  0.30           O  
HETATM   98  O   HOH T  97      10.651  -9.203  35.089  1.00  0.30           O  
HETATM   99  O   HOH T  98     -14.652  17.855  42.409  1.00  0.30           O  
HETATM  100  O   HOH T  99       3.195   4.029  35.142  1.00  0.30           O  
HETATM  101  O   HOH T 100       9.973  13.443  -2.504  1.00  0.30           O  
HETATM  102  O   HOH T 101     -11.751  13.962 -16.831  1.00  0.30           O  
HETATM  103  O   HOH T 102       8.258  35.820  -6.125  1.00  0.30           O  
HETATM  104  O   HOH T 103      17.082   9.201  19.388  1.00  0.30           O  
HETATM  105  O   HOH T 104      -5.890  31.754   6.711  1.00  0.30           O  
HETATM  106  O   HOH T 105     -14.737  13.881  43.802  1.00  0.30           O  
HETATM  107  O   HOH T 106     -12.050  10.153  32.679  1.00  0.30           O  
HETATM  108  O   HOH T 107      10.320  13.406   3.191  1.00  0.30           O  
HETATM  109  O   HOH T 108       4.332  34.736  -0.045  1.00  0.31           O  
HETATM  110  O   HOH T 109       6.047   7.973   7.258  1.00  0.31           O  
HETATM  111  O   HOH T 110     -14.776  19.213  -7.254  1.00  0.31           O  
HETATM  112  O   HOH T 111      -7.047   7.332  -2.042  1.00  0.31           O  
HETATM  113  O   HOH T 112      18.942  18.107  33.146  1.00  0.31           O  
HETATM  114  O   HOH T 113       7.548  21.612  20.644  1.00  0.31           O  
HETATM  115  O   HOH T 114      -3.884  17.017  53.988  1.00  0.31           O  
HETATM  116  O   HOH T 115      -4.599  27.012  13.682  1.00  0.31           O  
HETATM  117  O   HOH T 116      11.509  10.003 -14.093  1.00  0.31           O  
HETATM  118  O   HOH T 117      10.397  14.947  -0.192  1.00  0.31           O  
HETATM  119  O   HOH T 118       8.588  12.388   5.108  1.00  0.31           O  
HETATM  120  O   HOH T 119       9.459  29.201  30.233  1.00  0.31           O  
HETATM  121  O   HOH T 120      14.847  14.636   4.735  1.00  0.31           O  
HETATM  122  O   HOH T 121      23.457  13.003  -6.755  1.00  0.31           O  
HETATM  123  O   HOH T 122      -1.012  14.812   8.855  1.00  0.32           O  
HETATM  124  O   HOH T 123     -10.586   8.445  -2.323  1.00  0.32           O  
HETATM  125  O   HOH T 124      -8.993  22.511  47.069  1.00  0.32           O  
HETATM  126  O   HOH T 125      21.265  30.200   8.433  1.00  0.32           O  
HETATM  127  O   HOH T 126      -1.625  42.528  47.806  1.00  0.32           O  
HETATM  128  O   HOH T 127     -16.779  29.942   7.121  1.00  0.32           O  
HETATM  129  O   HOH T 128      11.718  25.670  -7.409  1.00  0.32           O  
HETATM  130  O   HOH T 129       2.088  16.357   2.175  1.00  0.32           O  
HETATM  131  O   HOH T 130      11.194  21.122  34.849  1.00  0.32           O  
HETATM  132  O   HOH T 131     -10.021  15.668  14.756  1.00  0.33           O  
HETATM  133  O   HOH T 132      -1.477  31.216  37.490  1.00  0.33           O  
HETATM  134  O   HOH T 133      15.467  23.315  25.824  1.00  0.33           O  
HETATM  135  O   HOH T 134      -9.843  29.722   9.112  1.00  0.33           O  
HETATM  136  O   HOH T 135       0.627   2.457 -13.688  1.00  0.33           O  
HETATM  137  O   HOH T 136      29.267  21.427   1.180  1.00  0.33           O  
HETATM  138  O   HOH T 137     -16.263  26.556  -1.606  1.00  0.33           O  
HETATM  139  O   HOH T 138      12.171   0.497   5.379  1.00  0.33           O  
HETATM  140  O   HOH T 139       4.826  35.076  -2.797  1.00  0.33           O  
HETATM  141  O   HOH T 140       4.368  34.795  19.566  1.00  0.33           O  
HETATM  142  O   HOH T 141      31.869   5.639   4.096  1.00  0.33           O  
HETATM  143  O   HOH T 142     -12.650   8.447   0.623  1.00  0.33           O  
HETATM  144  O   HOH T 143       1.004  13.719  43.791  1.00  0.33           O  
HETATM  145  O   HOH T 144      20.244   0.558   1.416  1.00  0.33           O  
HETATM  146  O   HOH T 145      12.117  23.330 -13.779  1.00  0.34           O  
HETATM  147  O   HOH T 146       3.596  -0.386  20.863  1.00  0.34           O  
HETATM  148  O   HOH T 147      13.081  13.469   2.814  1.00  0.34           O  
HETATM  149  O   HOH T 148       4.623  -1.812  13.236  1.00  0.34           O  
HETATM  150  O   HOH T 149      10.695   7.060   9.074  1.00  0.34           O  
HETATM  151  O   HOH T 150     -17.856  28.007   5.564  1.00  0.34           O  
HETATM  152  O   HOH T 151       3.730   7.943   3.508  1.00  0.34           O  
HETATM  153  O   HOH T 152      -0.520  34.482  32.640  1.00  0.34           O  
HETATM  154  O   HOH T 153       0.495  37.766  -1.463  1.00  0.34           O  
HETATM  155  O   HOH T 154       1.316  33.027   9.643  1.00  0.34           O  
HETATM  156  O   HOH T 155      30.922  18.842   8.252  1.00  0.34           O  
HETATM  157  O   HOH T 156       7.535  38.882  22.711  1.00  0.34           O  
HETATM  158  O   HOH T 157      -6.522   4.859  -3.141  1.00  0.34           O  
HETATM  159  O   HOH T 158       3.884  12.225  41.311  1.00  0.34           O  
HETATM  160  O   HOH T 159      14.002  26.103  19.390  1.00  0.34           O  
HETATM  161  O   HOH T 160      -1.373  12.502  43.106  1.00  0.34           O  
HETATM  162  O   HOH T 161      13.785  22.586  28.943  1.00  0.34           O  
HETATM  163  O   HOH T 162       2.779   7.978  31.404  1.00  0.34           O  
HETATM  164  O   HOH T 163      -2.430  19.440   4.050  1.00  0.34           O  
HETATM  165  O   HOH T 164     -14.821   7.816  -1.040  1.00  0.34           O  
HETATM  166  O   HOH T 165       1.987  35.792  22.704  1.00  0.34           O  
HETATM  167  O   HOH T 166       4.082  12.948  11.321  1.00  0.34           O  
HETATM  168  O   HOH T 167       1.922  10.500  13.506  1.00  0.35           O  
HETATM  169  O   HOH T 168      20.259  23.411  23.539  1.00  0.35           O  
HETATM  170  O   HOH T 169      -0.065   0.949  29.164  1.00  0.35           O  
HETATM  171  O   HOH T 170       4.120   4.023 -11.584  1.00  0.35           O  
HETATM  172  O   HOH T 171      11.673  20.768  10.367  1.00  0.35           O  
HETATM  173  O   HOH T 172      19.426  28.781  -9.653  1.00  0.35           O  
HETATM  174  O   HOH T 173      11.072  26.079  23.655  1.00  0.35           O  
HETATM  175  O   HOH T 174      -4.137  30.640   8.424  1.00  0.35           O  
HETATM  176  O   HOH T 175      -9.587  32.337   4.826  1.00  0.35           O  
HETATM  177  O   HOH T 176      14.826  -9.431  18.741  1.00  0.35           O  
HETATM  178  O   HOH T 177      -0.280  14.999   5.099  1.00  0.35           O  
HETATM  179  O   HOH T 178      -2.461  35.053  23.681  1.00  0.35           O  
HETATM  180  O   HOH T 179     -12.832  29.058  33.889  1.00  0.35           O  
HETATM  181  O   HOH T 180       2.982   8.930   1.071  1.00  0.35           O  
HETATM  182  O   HOH T 181      -8.756  36.200   6.264  1.00  0.35           O  
HETATM  183  O   HOH T 182      14.097   1.348   1.964  1.00  0.35           O  
HETATM  184  O   HOH T 183       7.748  19.022  21.745  1.00  0.35           O  
HETATM  185  O   HOH T 184      25.691  23.234  -1.567  1.00  0.36           O  
HETATM  186  O   HOH T 185       4.223  -1.270  16.046  1.00  0.36           O  
HETATM  187  O   HOH T 186     -11.985   2.068 -14.542  1.00  0.36           O  
HETATM  188  O   HOH T 187      -6.300  -2.791 -10.780  1.00  0.36           O  
HETATM  189  O   HOH T 188      -7.541  22.964  11.746  1.00  0.36           O  
HETATM  190  O   HOH T 189       5.337  33.444  37.724  1.00  0.36           O  
HETATM  191  O   HOH T 190      10.675  15.852   4.351  1.00  0.36           O  
HETATM  192  O   HOH T 191       3.037   9.956 -14.714  1.00  0.36           O  
HETATM  193  O   HOH T 192       8.254  -7.808  34.369  1.00  0.36           O  
HETATM  194  O   HOH T 193       5.174  22.243 -14.267  1.00  0.36           O  
HETATM  195  O   HOH T 194      -9.090  23.468   9.509  1.00  0.36           O  
HETATM  196  O   HOH T 195     -20.528  16.185   0.006  1.00  0.36           O  
HETATM  197  O   HOH T 196      -0.658  13.226 -15.393  1.00  0.36           O  
HETATM  198  O   HOH T 197       1.667  -0.514  16.773  1.00  0.36           O  
HETATM  199  O   HOH T 198       6.411  32.815   6.401  1.00  0.36           O  
HETATM  200  O   HOH T 199      -4.978  16.798   3.381  1.00  0.36           O  
HETATM  201  O   HOH T 200     -12.871   6.239  21.092  1.00  0.36           O  
HETATM  202  O   HOH T 201      -1.048  -0.045  -0.036  1.00  0.36           O  
HETATM  203  O   HOH T 202      26.206   7.344  -5.531  1.00  0.36           O  
HETATM  204  O   HOH T 203      21.828  25.621  -8.614  1.00  0.37           O  
HETATM  205  O   HOH T 204      -5.269   6.895  18.758  1.00  0.37           O  
HETATM  206  O   HOH T 205      28.219  -3.210  10.784  1.00  0.37           O  
HETATM  207  O   HOH T 206       0.997  -1.550  20.318  1.00  0.37           O  
HETATM  208  O   HOH T 207      29.858   1.086   2.531  1.00  0.37           O  
HETATM  209  O   HOH T 208      -7.667  31.622   2.974  1.00  0.37           O  
HETATM  210  O   HOH T 209      -8.186  15.380  16.869  1.00  0.37           O  
HETATM  211  O   HOH T 210     -11.876  31.701  29.370  1.00  0.37           O  
HETATM  212  O   HOH T 211      20.604  24.622  -6.294  1.00  0.37           O  
HETATM  213  O   HOH T 212      -0.489   7.155  39.044  1.00  0.37           O  
HETATM  214  O   HOH T 213     -11.895   3.703   9.537  1.00  0.37           O  
HETATM  215  O   HOH T 214      23.461  -0.890   0.284  1.00  0.37           O  
HETATM  216  O   HOH T 215       8.624  -3.793  22.151  1.00  0.37           O  
HETATM  217  O   HOH T 216      -4.081  -1.398  28.937  1.00  0.37           O  
HETATM  218  O   HOH T 217     -10.459  12.818  15.075  1.00  0.37           O  
HETATM  219  O   HOH T 218       3.634  32.487   6.263  1.00  0.37           O  
HETATM  220  O   HOH T 219     -15.430   7.922  36.532  1.00  0.37           O  
HETATM  221  O   HOH T 220      33.058  18.210  -5.975  1.00  0.37           O  
HETATM  222  O   HOH T 221       1.419  -0.104  -1.353  1.00  0.37           O  
HETATM  223  O   HOH T 222      -5.973   1.803   8.637  1.00  0.37           O  
HETATM  224  O   HOH T 223     -11.699   6.246  -3.561  1.00  0.37           O  
HETATM  225  O   HOH T 224      -1.424  33.119  10.218  1.00  0.37           O  
HETATM  226  O   HOH T 225       3.204  -1.937  18.679  1.00  0.37           O  
HETATM  227  O   HOH T 226     -20.632   7.476   1.241  1.00  0.38           O  
HETATM  228  O   HOH T 227      -1.879   2.294 -14.929  1.00  0.38           O  
HETATM  229  O   HOH T 228     -11.390   4.796   7.089  1.00  0.38           O  
HETATM  230  O   HOH T 229       7.743  37.919  -4.516  1.00  0.38           O  
HETATM  231  O   HOH T 230      -8.065  11.178 -19.346  1.00  0.38           O  
HETATM  232  O   HOH T 231       2.514  34.615   7.707  1.00  0.38           O  
HETATM  233  O   HOH T 232      14.652  23.672 -15.140  1.00  0.38           O  
HETATM  234  O   HOH T 233      33.319  18.151   9.647  1.00  0.38           O  
HETATM  235  O   HOH T 234      11.347  34.304   5.277  1.00  0.38           O  
HETATM  236  O   HOH T 235      27.718  24.154  -3.185  1.00  0.38           O  
HETATM  237  O   HOH T 236       7.670  27.265 -10.276  1.00  0.38           O  
HETATM  238  O   HOH T 237       4.697   2.427   8.102  1.00  0.38           O  
HETATM  239  O   HOH T 238       1.250  14.339  10.406  1.00  0.38           O  
HETATM  240  O   HOH T 239      12.857  28.230  23.473  1.00  0.38           O  
HETATM  241  O   HOH T 240       2.425   7.311 -12.325  1.00  0.38           O  
HETATM  242  O   HOH T 241       7.603  21.174  42.094  1.00  0.38           O  
HETATM  243  O   HOH T 242      -5.674  -0.749  11.555  1.00  0.38           O  
HETATM  244  O   HOH T 243      30.927   3.050   4.164  1.00  0.38           O  
HETATM  245  O   HOH T 244      21.137  10.664  24.175  1.00  0.38           O  
HETATM  246  O   HOH T 245     -27.799  16.905   4.950  1.00  0.38           O  
HETATM  247  O   HOH T 246       1.076   7.674   2.652  1.00  0.38           O  
HETATM  248  O   HOH T 247       8.936  22.618  37.287  1.00  0.38           O  
HETATM  249  O   HOH T 248     -10.358  32.774  22.051  1.00  0.38           O  
HETATM  250  O   HOH T 249      -3.199  -3.117  40.184  1.00  0.38           O  
HETATM  251  O   HOH T 250      11.448   0.886   1.528  1.00  0.39           O  
HETATM  252  O   HOH T 251      -5.205  27.659  -6.529  1.00  0.39           O  
HETATM  253  O   HOH T 252      -2.635   0.808  28.045  1.00  0.39           O  
HETATM  254  O   HOH T 253      23.192  20.992  25.510  1.00  0.39           O  
HETATM  255  O   HOH T 254      29.447  25.813  -1.840  1.00  0.39           O  
HETATM  256  O   HOH T 255      -7.713   5.483   4.611  1.00  0.39           O  
HETATM  257  O   HOH T 256     -19.853  17.224  -2.381  1.00  0.39           O  
HETATM  258  O   HOH T 257     -17.672  27.723   8.364  1.00  0.39           O  
HETATM  259  O   HOH T 258     -10.673  34.890  27.638  1.00  0.39           O  
HETATM  260  O   HOH T 259     -13.496   8.937  21.195  1.00  0.39           O  
HETATM  261  O   HOH T 260      11.632  29.362  -8.786  1.00  0.39           O  
HETATM  262  O   HOH T 261     -10.016  37.510  28.326  1.00  0.39           O  
HETATM  263  O   HOH T 262       9.642  27.464  -8.190  1.00  0.39           O  
HETATM  264  O   HOH T 263       4.144  32.418 -10.600  1.00  0.39           O  
HETATM  265  O   HOH T 264     -11.250  27.411  43.870  1.00  0.39           O  
HETATM  266  O   HOH T 265       3.835  19.658  20.971  1.00  0.39           O  
HETATM  267  O   HOH T 266       1.235  25.667 -13.366  1.00  0.39           O  
HETATM  268  O   HOH T 267      29.810  17.723  20.940  1.00  0.39           O  
HETATM  269  O   HOH T 268      -0.649  -4.122   4.766  1.00  0.39           O  
HETATM  270  O   HOH T 269       5.589   3.434  10.610  1.00  0.39           O  
HETATM  271  O   HOH T 270      -5.761   1.409   3.221  1.00  0.39           O  
HETATM  272  O   HOH T 271      -7.935   3.786  -8.207  1.00  0.39           O  
HETATM  273  O   HOH T 272       8.342  31.578  30.963  1.00  0.39           O  
HETATM  274  O   HOH T 273     -12.209  19.767   8.780  1.00  0.39           O  
HETATM  275  O   HOH T 274     -15.581  31.718   5.475  1.00  0.39           O  
HETATM  276  O   HOH T 275      -9.337  36.153   3.569  1.00  0.39           O  
HETATM  277  O   HOH T 276      -6.769  35.948   4.443  1.00  0.39           O  
HETATM  278  O   HOH T 277     -12.738  26.493  46.158  1.00  0.40           O  
HETATM  279  O   HOH T 278      18.320   1.182  -0.756  1.00  0.40           O  
HETATM  280  O   HOH T 279      -4.696   3.860  -4.928  1.00  0.40           O  
HETATM  281  O   HOH T 280      14.212  31.559   5.790  1.00  0.40           O  
HETATM  282  O   HOH T 281      19.231  24.478  19.655  1.00  0.40           O  
HETATM  283  O   HOH T 282       9.682  33.961   1.245  1.00  0.40           O  
HETATM  284  O   HOH T 283     -13.299  18.485  -5.000  1.00  0.40           O  
HETATM  285  O   HOH T 284     -11.414  28.018  50.510  1.00  0.40           O  
HETATM  286  O   HOH T 285     -13.131  30.058  31.275  1.00  0.40           O  
HETATM  287  O   HOH T 286      20.092  29.129  18.173  1.00  0.40           O  
HETATM  288  O   HOH T 287      15.235  14.917  37.864  1.00  0.40           O  
HETATM  289  O   HOH T 288      -9.524  17.125  -8.724  1.00  0.40           O  
HETATM  290  O   HOH T 289     -17.816  25.243  34.495  1.00  0.40           O  
HETATM  291  O   HOH T 290      -3.430  38.120  28.397  1.00  0.40           O  
HETATM  292  O   HOH T 291     -26.276  18.980   8.778  1.00  0.40           O  
HETATM  293  O   HOH T 292     -16.269  26.095  17.201  1.00  0.40           O  
HETATM  294  O   HOH T 293     -13.869  28.207  44.424  1.00  0.40           O  
HETATM  295  O   HOH T 294       7.764   0.602  -1.279  1.00  0.40           O  
HETATM  296  O   HOH T 295       8.369  19.031  24.447  1.00  0.40           O  
HETATM  297  O   HOH T 296      26.906  30.019  -2.553  1.00  0.41           O  
HETATM  298  O   HOH T 297       2.714  21.222 -13.726  1.00  0.41           O  
HETATM  299  O   HOH T 298      21.903  -0.800   4.811  1.00  0.41           O  
HETATM  300  O   HOH T 299      -8.380  17.882 -11.137  1.00  0.41           O  
HETATM  301  O   HOH T 300       6.782   8.186  -1.734  1.00  0.41           O  
HETATM  302  O   HOH T 301      22.989  14.427  -8.982  1.00  0.41           O  
HETATM  303  O   HOH T 302       0.952   0.339   8.053  1.00  0.41           O  
HETATM  304  O   HOH T 303      12.216  23.432  34.057  1.00  0.41           O  
HETATM  305  O   HOH T 304      13.550  22.040  36.096  1.00  0.41           O  
HETATM  306  O   HOH T 305      -6.672  25.249  13.130  1.00  0.41           O  
HETATM  307  O   HOH T 306      17.584  -6.492  20.949  1.00  0.41           O  
HETATM  308  O   HOH T 307       9.011  32.822   5.686  1.00  0.41           O  
HETATM  309  O   HOH T 308      28.471  26.758  16.768  1.00  0.41           O  
HETATM  310  O   HOH T 309     -12.309  38.334  27.007  1.00  0.41           O  
HETATM  311  O   HOH T 310      -2.266  16.755   7.288  1.00  0.41           O  
HETATM  312  O   HOH T 311      -9.723  34.271  15.606  1.00  0.42           O  
HETATM  313  O   HOH T 312      -6.468  25.297  -6.932  1.00  0.42           O  
HETATM  314  O   HOH T 313       8.022  -2.109   7.258  1.00  0.42           O  
HETATM  315  O   HOH T 314      -7.393   4.374  -5.648  1.00  0.42           O  
HETATM  316  O   HOH T 315     -19.432   9.752  13.846  1.00  0.42           O  
HETATM  317  O   HOH T 316     -16.576   8.890  38.987  1.00  0.42           O  
HETATM  318  O   HOH T 317       3.405  14.076   8.584  1.00  0.42           O  
HETATM  319  O   HOH T 318      18.009  38.009   4.895  1.00  0.42           O  
HETATM  320  O   HOH T 319       4.727  12.109 -15.348  1.00  0.42           O  
HETATM  321  O   HOH T 320      10.582  -4.963  23.867  1.00  0.42           O  
HETATM  322  O   HOH T 321      10.824   1.709  16.374  1.00  0.42           O  
HETATM  323  O   HOH T 322      14.514   1.551   4.638  1.00  0.42           O  
HETATM  324  O   HOH T 323       7.483   7.691  17.255  1.00  0.42           O  
HETATM  325  O   HOH T 324     -26.719  14.249   0.540  1.00  0.42           O  
HETATM  326  O   HOH T 325      -8.159  36.111  25.118  1.00  0.42           O  
HETATM  327  O   HOH T 326      20.152   8.150  23.770  1.00  0.42           O  
HETATM  328  O   HOH T 327     -18.471  14.982  -1.365  1.00  0.42           O  
HETATM  329  O   HOH T 328      -0.854   3.134  -5.714  1.00  0.42           O  
HETATM  330  O   HOH T 329     -20.243  29.486   5.288  1.00  0.42           O  
HETATM  331  O   HOH T 330     -13.537  32.097  17.243  1.00  0.42           O  
HETATM  332  O   HOH T 331      29.548  13.973  19.565  1.00  0.42           O  
HETATM  333  O   HOH T 332     -10.050  26.280  46.196  1.00  0.42           O  
HETATM  334  O   HOH T 333      20.036  13.618  12.758  1.00  0.43           O  
HETATM  335  O   HOH T 334      -4.311  -0.906   2.521  1.00  0.43           O  
HETATM  336  O   HOH T 335      -7.759  25.681  50.703  1.00  0.43           O  
HETATM  337  O   HOH T 336       2.251  -2.082  25.336  1.00  0.43           O  
HETATM  338  O   HOH T 337       1.151   4.884  38.928  1.00  0.43           O  
HETATM  339  O   HOH T 338       0.588  32.175  35.856  1.00  0.43           O  
HETATM  340  O   HOH T 339     -11.419  30.249   5.262  1.00  0.43           O  
HETATM  341  O   HOH T 340     -11.224   9.790 -23.543  1.00  0.43           O  
HETATM  342  O   HOH T 341      -5.873   2.377   5.890  1.00  0.43           O  
HETATM  343  O   HOH T 342      29.477  23.044   3.533  1.00  0.43           O  
HETATM  344  O   HOH T 343      11.698  -5.389  20.061  1.00  0.43           O  
HETATM  345  O   HOH T 344     -14.056   3.875 -14.079  1.00  0.43           O  
HETATM  346  O   HOH T 345      -7.701  24.809  45.991  1.00  0.43           O  
HETATM  347  O   HOH T 346      -4.219  21.965  15.033  1.00  0.43           O  
HETATM  348  O   HOH T 347      35.556  16.328   6.897  1.00  0.43           O  
HETATM  349  O   HOH T 348     -11.061  31.549  18.636  1.00  0.43           O  
HETATM  350  O   HOH T 349      -7.047  16.131  14.429  1.00  0.43           O  
HETATM  351  O   HOH T 350      -6.194   2.465  39.855  1.00  0.43           O  
HETATM  352  O   HOH T 351      18.264   7.935  21.681  1.00  0.43           O  
HETATM  353  O   HOH T 352     -15.029  28.351  32.313  1.00  0.44           O  
HETATM  354  O   HOH T 353      12.434  32.209   3.730  1.00  0.44           O  
HETATM  355  O   HOH T 354      13.911   0.638  20.024  1.00  0.44           O  
HETATM  356  O   HOH T 355     -23.312   8.453   1.398  1.00  0.44           O  
HETATM  357  O   HOH T 356       3.115   5.989  33.310  1.00  0.44           O  
HETATM  358  O   HOH T 357      25.874  -2.558  12.158  1.00  0.44           O  
HETATM  359  O   HOH T 358       0.141  11.551  39.070  1.00  0.44           O  
HETATM  360  O   HOH T 359     -25.770  18.428   6.061  1.00  0.44           O  
HETATM  361  O   HOH T 360      12.367  25.825 -12.425  1.00  0.44           O  
HETATM  362  O   HOH T 361      22.860  23.569  24.512  1.00  0.44           O  
HETATM  363  O   HOH T 362      -7.481  -2.569  32.688  1.00  0.44           O  
HETATM  364  O   HOH T 363       1.536  -1.382   5.944  1.00  0.44           O  
HETATM  365  O   HOH T 364     -16.045  15.508  42.013  1.00  0.44           O  
HETATM  366  O   HOH T 365      12.649  22.093 -16.220  1.00  0.44           O  
HETATM  367  O   HOH T 366       2.536  33.566  37.357  1.00  0.44           O  
HETATM  368  O   HOH T 367     -16.515  18.314  35.143  1.00  0.44           O  
HETATM  369  O   HOH T 368     -16.201  28.756  10.563  1.00  0.44           O  
HETATM  370  O   HOH T 369      -0.989   0.816  -7.206  1.00  0.44           O  
HETATM  371  O   HOH T 370      11.663  18.787  36.284  1.00  0.44           O  
HETATM  372  O   HOH T 371     -13.260   5.731   0.033  1.00  0.44           O  
HETATM  373  O   HOH T 372      -4.746  13.495 -17.550  1.00  0.44           O  
HETATM  374  O   HOH T 373     -15.962  15.433  35.521  1.00  0.44           O  
HETATM  375  O   HOH T 374      22.449  30.466   5.890  1.00  0.44           O  
HETATM  376  O   HOH T 375      12.341  44.454   0.084  1.00  0.44           O  
HETATM  377  O   HOH T 376      -4.732   2.636 -15.134  1.00  0.44           O  
HETATM  378  O   HOH T 377      21.184  13.758  33.773  1.00  0.44           O  
HETATM  379  O   HOH T 378     -15.497  29.060  -1.025  1.00  0.44           O  
HETATM  380  O   HOH T 379      -0.774   1.439   9.945  1.00  0.44           O  
HETATM  381  O   HOH T 380      20.160  31.905   6.512  1.00  0.44           O  
HETATM  382  O   HOH T 381     -12.170  18.141  -7.699  1.00  0.44           O  
HETATM  383  O   HOH T 382       1.044  -0.385  27.168  1.00  0.44           O  
HETATM  384  O   HOH T 383      15.731   0.512  -0.099  1.00  0.44           O  
HETATM  385  O   HOH T 384     -17.010  29.146   1.350  1.00  0.44           O  
HETATM  386  O   HOH T 385      32.852  13.801  -7.238  1.00  0.45           O  
HETATM  387  O   HOH T 386      22.758  -4.379  26.130  1.00  0.45           O  
HETATM  388  O   HOH T 387      21.824  27.650 -10.512  1.00  0.45           O  
HETATM  389  O   HOH T 388      28.526   6.353  -4.160  1.00  0.45           O  
HETATM  390  O   HOH T 389      17.700  -0.335   1.599  1.00  0.45           O  
HETATM  391  O   HOH T 390       1.165  10.212  -0.682  1.00  0.45           O  
HETATM  392  O   HOH T 391      -7.486  35.602  22.388  1.00  0.45           O  
HETATM  393  O   HOH T 392      20.893  16.304  32.505  1.00  0.45           O  
HETATM  394  O   HOH T 393      12.509  14.846  37.835  1.00  0.45           O  
HETATM  395  O   HOH T 394      24.511   4.055  -6.367  1.00  0.45           O  
HETATM  396  O   HOH T 395      17.080  39.089   2.518  1.00  0.45           O  
HETATM  397  O   HOH T 396      18.632  10.542  22.790  1.00  0.45           O  
HETATM  398  O   HOH T 397      16.965  30.134  -9.782  1.00  0.45           O  
HETATM  399  O   HOH T 398      14.343  29.221  -9.503  1.00  0.45           O  
HETATM  400  O   HOH T 399       8.954  20.188  10.619  1.00  0.45           O  
HETATM  401  O   HOH T 400     -13.664   4.707   2.459  1.00  0.45           O  
HETATM  402  O   HOH T 401      13.941  18.464  37.679  1.00  0.45           O  
HETATM  403  O   HOH T 402      -5.843  -2.074   4.485  1.00  0.45           O  
HETATM  404  O   HOH T 403      -6.022  -4.726   3.841  1.00  0.45           O  
HETATM  405  O   HOH T 404      33.381  15.697   8.481  1.00  0.45           O  
HETATM  406  O   HOH T 405     -27.283  21.444   9.611  1.00  0.45           O  
HETATM  407  O   HOH T 406     -12.952  29.806  -0.908  1.00  0.45           O  
HETATM  408  O   HOH T 407      -9.494  11.187 -21.766  1.00  0.45           O  
HETATM  409  O   HOH T 408      -0.525  33.698  25.296  1.00  0.45           O  
HETATM  410  O   HOH T 409      -0.686   1.255  -2.422  1.00  0.45           O  
HETATM  411  O   HOH T 410      19.913  26.674  16.718  1.00  0.45           O  
HETATM  412  O   HOH T 411      -8.908  24.982  48.423  1.00  0.45           O  
HETATM  413  O   HOH T 412      17.624  26.138  18.181  1.00  0.45           O  
HETATM  414  O   HOH T 413      -7.341   0.270  32.638  1.00  0.46           O  
HETATM  415  O   HOH T 414      35.761  26.092  10.566  1.00  0.46           O  
HETATM  416  O   HOH T 415      23.531   1.976  20.850  1.00  0.46           O  
HETATM  417  O   HOH T 416     -21.147  16.925  17.845  1.00  0.46           O  
HETATM  418  O   HOH T 417      28.584  -1.602   5.905  1.00  0.46           O  
HETATM  419  O   HOH T 418      24.514   6.577  -7.640  1.00  0.46           O  
HETATM  420  O   HOH T 419      -0.221  34.826   8.285  1.00  0.46           O  
HETATM  421  O   HOH T 420       1.578  35.587  25.495  1.00  0.46           O  
HETATM  422  O   HOH T 421       0.913  22.597  52.144  1.00  0.46           O  
HETATM  423  O   HOH T 422     -17.876  13.257  -3.470  1.00  0.46           O  
HETATM  424  O   HOH T 423      -3.514  32.186  40.448  1.00  0.46           O  
HETATM  425  O   HOH T 424       9.796  38.907   3.249  1.00  0.46           O  
HETATM  426  O   HOH T 425       6.404  31.027  -9.935  1.00  0.46           O  
HETATM  427  O   HOH T 426     -19.685  25.645  32.505  1.00  0.46           O  
HETATM  428  O   HOH T 427     -23.594  18.499   7.978  1.00  0.46           O  
HETATM  429  O   HOH T 428      -4.056   0.139 -17.109  1.00  0.46           O  
HETATM  430  O   HOH T 429      -3.048  -0.082  10.613  1.00  0.46           O  
HETATM  431  O   HOH T 430       2.759  14.363  32.587  1.00  0.46           O  
HETATM  432  O   HOH T 431       1.672  36.111  33.103  1.00  0.46           O  
HETATM  433  O   HOH T 432      -0.397  27.634   4.337  1.00  0.46           O  
HETATM  434  O   HOH T 433      30.141   0.593   5.243  1.00  0.46           O  
HETATM  435  O   HOH T 434      15.975  32.599  -9.064  1.00  0.46           O  
HETATM  436  O   HOH T 435       1.651  26.346  44.643  1.00  0.46           O  
HETATM  437  O   HOH T 436       0.776  11.389  32.288  1.00  0.46           O  
HETATM  438  O   HOH T 437      29.175  -2.900   8.209  1.00  0.46           O  
HETATM  439  O   HOH T 438      -2.500   3.027  -3.311  1.00  0.46           O  
HETATM  440  O   HOH T 439       7.375   8.776  -7.067  1.00  0.46           O  
HETATM  441  O   HOH T 440     -12.424   6.508  23.703  1.00  0.47           O  
HETATM  442  O   HOH T 441       5.796   5.727   8.930  1.00  0.47           O  
HETATM  443  O   HOH T 442     -17.254  25.016  -4.958  1.00  0.47           O  
HETATM  444  O   HOH T 443      -6.373   9.514  45.621  1.00  0.47           O  
HETATM  445  O   HOH T 444     -11.497  25.952  48.605  1.00  0.47           O  
HETATM  446  O   HOH T 445      15.354  -7.270  22.551  1.00  0.47           O  
HETATM  447  O   HOH T 446      -8.985  26.758  -3.653  1.00  0.47           O  
HETATM  448  O   HOH T 447      -3.285   2.272   8.977  1.00  0.47           O  
HETATM  449  O   HOH T 448     -13.795   5.481   8.362  1.00  0.47           O  
HETATM  450  O   HOH T 449       7.401  14.901   7.243  1.00  0.47           O  
HETATM  451  O   HOH T 450      -6.353  38.079  22.358  1.00  0.47           O  
HETATM  452  O   HOH T 451      10.612  -7.780  23.403  1.00  0.47           O  
HETATM  453  O   HOH T 452     -12.914   5.207   4.917  1.00  0.47           O  
HETATM  454  O   HOH T 453     -18.986  28.070   3.051  1.00  0.47           O  
HETATM  455  O   HOH T 454      10.357   1.272  -0.911  1.00  0.47           O  
HETATM  456  O   HOH T 455     -19.379  15.660  19.635  1.00  0.47           O  
HETATM  457  O   HOH T 456      -8.865  39.214  22.643  1.00  0.47           O  
HETATM  458  O   HOH T 457     -12.990  31.821  33.364  1.00  0.47           O  
HETATM  459  O   HOH T 458     -28.461  15.669  10.086  1.00  0.47           O  
HETATM  460  O   HOH T 459       9.014  -0.286   1.025  1.00  0.47           O  
HETATM  461  O   HOH T 460      16.254   0.522  18.622  1.00  0.47           O  
HETATM  462  O   HOH T 461       7.938  32.206  37.420  1.00  0.47           O  
HETATM  463  O   HOH T 462       5.743  34.907   4.592  1.00  0.48           O  
HETATM  464  O   HOH T 463       8.541  -6.610  28.059  1.00  0.48           O  
HETATM  465  O   HOH T 464      -1.348  10.581  41.134  1.00  0.48           O  
HETATM  466  O   HOH T 465      -8.181   2.473  10.196  1.00  0.48           O  
HETATM  467  O   HOH T 466      24.866  30.420   4.220  1.00  0.48           O  
HETATM  468  O   HOH T 467      11.135  36.742   4.035  1.00  0.48           O  
HETATM  469  O   HOH T 468     -11.446   4.787  41.909  1.00  0.48           O  
HETATM  470  O   HOH T 469       8.806  13.052   9.565  1.00  0.48           O  
HETATM  471  O   HOH T 470       1.957  12.288 -15.607  1.00  0.48           O  
HETATM  472  O   HOH T 471     -20.520  19.206  -4.281  1.00  0.48           O  
HETATM  473  O   HOH T 472       8.155  34.224  30.089  1.00  0.48           O  
HETATM  474  O   HOH T 473      -5.693  34.082  43.513  1.00  0.48           O  
HETATM  475  O   HOH T 474       0.839  22.047 -15.655  1.00  0.48           O  
HETATM  476  O   HOH T 475       8.568   5.182   8.915  1.00  0.48           O  
HETATM  477  O   HOH T 476     -25.902   6.573   7.178  1.00  0.48           O  
HETATM  478  O   HOH T 477      18.115  23.761  22.077  1.00  0.48           O  
HETATM  479  O   HOH T 478     -17.487  27.211  32.480  1.00  0.48           O  
HETATM  480  O   HOH T 479      29.828  27.917  12.857  1.00  0.48           O  
HETATM  481  O   HOH T 480     -10.349  35.597  22.005  1.00  0.48           O  
HETATM  482  O   HOH T 481     -11.557  38.707  16.371  1.00  0.48           O  
HETATM  483  O   HOH T 482      20.999  26.736  19.309  1.00  0.48           O  
HETATM  484  O   HOH T 483      29.269  28.521  -2.644  1.00  0.48           O  
HETATM  485  O   HOH T 484      15.468  35.204  -8.691  1.00  0.49           O  
HETATM  486  O   HOH T 485       2.541  14.497  41.627  1.00  0.49           O  
HETATM  487  O   HOH T 486       0.734  22.992 -13.085  1.00  0.49           O  
HETATM  488  O   HOH T 487      -4.859   0.993   0.602  1.00  0.49           O  
HETATM  489  O   HOH T 488       5.568  36.345  -5.232  1.00  0.49           O  
HETATM  490  O   HOH T 489      20.086  25.726  21.878  1.00  0.49           O  
HETATM  491  O   HOH T 490     -15.281   5.865   6.052  1.00  0.49           O  
HETATM  492  O   HOH T 491       8.823  29.634  -9.295  1.00  0.49           O  
HETATM  493  O   HOH T 492     -11.315  30.856  51.000  1.00  0.49           O  
HETATM  494  O   HOH T 493     -17.198  23.005  -6.897  1.00  0.49           O  
HETATM  495  O   HOH T 494      24.217  26.680  -9.634  1.00  0.49           O  
HETATM  496  O   HOH T 495      24.702  14.470 -11.298  1.00  0.49           O  
HETATM  497  O   HOH T 496       0.563  37.765  48.996  1.00  0.49           O  
HETATM  498  O   HOH T 497      -3.541  19.163  55.530  1.00  0.49           O  
HETATM  499  O   HOH T 498      -3.215   0.756  -1.618  1.00  0.49           O  
HETATM  500  O   HOH T 499      17.004   2.407  -4.888  1.00  0.49           O  
HETATM  501  O   HOH T 500      -3.714  34.384  38.748  1.00  0.49           O  
HETATM  502  O   HOH T 501      13.176  25.941  21.891  1.00  0.49           O  
HETATM  503  O   HOH T 502      23.609  -6.734  31.381  1.00  0.49           O  
HETATM  504  O   HOH T 503       9.218  20.115  36.097  1.00  0.49           O  
HETATM  505  O   HOH T 504      -4.853  23.192  12.547  1.00  0.49           O  
HETATM  506  O   HOH T 505      -1.440  33.968  34.826  1.00  0.49           O  
HETATM  507  O   HOH T 506      -9.619   3.055   7.944  1.00  0.50           O  
HETATM  508  O   HOH T 507       7.465   2.572   8.771  1.00  0.50           O  
HETATM  509  O   HOH T 508      12.316   7.966 -12.393  1.00  0.50           O  
HETATM  510  O   HOH T 509      29.313  30.767  -1.023  1.00  0.50           O  
HETATM  511  O   HOH T 510     -10.615   4.700  16.956  1.00  0.50           O  
HETATM  512  O   HOH T 511      10.222  23.267  39.680  1.00  0.50           O  
HETATM  513  O   HOH T 512       8.854  21.055  39.616  1.00  0.50           O  
HETATM  514  O   HOH T 513      -3.112   1.588  -5.530  1.00  0.50           O  
HETATM  515  O   HOH T 514      22.469  -5.597  33.581  1.00  0.50           O  
HETATM  516  O   HOH T 515      18.529   0.363  -3.513  1.00  0.50           O  
HETATM  517  O   HOH T 516       8.138  28.784  16.264  1.00  0.50           O  
HETATM  518  O   HOH T 517       2.824  23.823 -14.779  1.00  0.50           O  
HETATM  519  O   HOH T 518       0.672  35.361  50.483  1.00  0.50           O  
HETATM  520  O   HOH T 519      -3.403  -2.970 -10.466  1.00  0.50           O  
HETATM  521  O   HOH T 520      10.565  15.954 -17.201  1.00  0.50           O  
HETATM  522  O   HOH T 521      22.812  23.684  -4.961  1.00  0.50           O  
HETATM  523  O   HOH T 522      26.501  -3.472   8.591  1.00  0.50           O  
HETATM  524  O   HOH T 523     -11.605   4.406  19.431  1.00  0.50           O  
HETATM  525  O   HOH T 524      23.196  -1.984   2.752  1.00  0.51           O  
HETATM  526  O   HOH T 525      12.286  33.089  26.688  1.00  0.51           O  
HETATM  527  O   HOH T 526       2.173   7.396  38.239  1.00  0.51           O  
HETATM  528  O   HOH T 527     -13.857   4.787 -11.512  1.00  0.51           O  
HETATM  529  O   HOH T 528      13.492  24.621  24.279  1.00  0.51           O  
HETATM  530  O   HOH T 529      14.546  27.449 -11.578  1.00  0.51           O  
HETATM  531  O   HOH T 530      -2.606  -2.271 -17.301  1.00  0.51           O  
HETATM  532  O   HOH T 531      18.089  17.561  22.643  1.00  0.51           O  
HETATM  533  O   HOH T 532      17.198   7.445 -10.119  1.00  0.51           O  
HETATM  534  O   HOH T 533      -7.183   6.707 -18.504  1.00  0.52           O  
HETATM  535  O   HOH T 534      13.723  -7.310  20.222  1.00  0.52           O  
HETATM  536  O   HOH T 535     -18.400   9.418  16.285  1.00  0.52           O  
HETATM  537  O   HOH T 536      -0.821  33.744  28.096  1.00  0.52           O  
HETATM  538  O   HOH T 537     -10.015   3.813  -6.400  1.00  0.52           O  
HETATM  539  O   HOH T 538      11.395   5.571  -3.216  1.00  0.52           O  
HETATM  540  O   HOH T 539       5.743  37.771  20.942  1.00  0.52           O  
HETATM  541  O   HOH T 540       0.876   0.751 -11.505  1.00  0.52           O  
HETATM  542  O   HOH T 541      31.658   5.677  -6.519  1.00  0.52           O  
HETATM  543  O   HOH T 542      -3.877  34.831  35.909  1.00  0.52           O  
HETATM  544  O   HOH T 543       9.638  36.615   1.638  1.00  0.52           O  
HETATM  545  O   HOH T 544     -17.295  23.374  24.292  1.00  0.52           O  
HETATM  546  O   HOH T 545      33.171  17.881   6.738  1.00  0.52           O  
HETATM  547  O   HOH T 546      10.481  34.229  28.512  1.00  0.52           O  
HETATM  548  O   HOH T 547      17.696   0.476   6.015  1.00  0.52           O  
HETATM  549  O   HOH T 548      -1.473  -0.028 -16.336  1.00  0.52           O  
HETATM  550  O   HOH T 549     -12.832  29.051  42.108  1.00  0.52           O  
HETATM  551  O   HOH T 550     -14.087  30.798  35.662  1.00  0.52           O  
HETATM  552  O   HOH T 551      29.261  24.979   1.707  1.00  0.52           O  
HETATM  553  O   HOH T 552     -16.283   7.432  32.992  1.00  0.53           O  
HETATM  554  O   HOH T 553      11.452  31.692   6.329  1.00  0.53           O  
HETATM  555  O   HOH T 554     -12.315   5.388  -6.000  1.00  0.53           O  
HETATM  556  O   HOH T 555      16.032  -6.909  18.673  1.00  0.53           O  
HETATM  557  O   HOH T 556      29.823  -1.529   3.432  1.00  0.53           O  
HETATM  558  O   HOH T 557      20.128  30.079  -7.131  1.00  0.53           O  
HETATM  559  O   HOH T 558      -7.341   0.191   5.202  1.00  0.53           O  
HETATM  560  O   HOH T 559      29.984   7.851  -5.979  1.00  0.53           O  
HETATM  561  O   HOH T 560      33.838   7.853  -2.756  1.00  0.53           O  
HETATM  562  O   HOH T 561      -5.909   5.901 -17.036  1.00  0.53           O  
HETATM  563  O   HOH T 562       3.975   5.592 -13.866  1.00  0.53           O  
HETATM  564  O   HOH T 563      31.560  26.929  10.516  1.00  0.53           O  
HETATM  565  O   HOH T 564     -18.792  26.759  30.121  1.00  0.53           O  
HETATM  566  O   HOH T 565      18.912  31.664   8.979  1.00  0.53           O  
HETATM  567  O   HOH T 566       3.110  37.091  20.449  1.00  0.53           O  
HETATM  568  O   HOH T 567      -4.872   2.353  42.231  1.00  0.53           O  
HETATM  569  O   HOH T 568       2.346  16.154  43.820  1.00  0.53           O  
HETATM  570  O   HOH T 569      -8.936  18.751  25.087  1.00  0.53           O  
HETATM  571  O   HOH T 570     -14.260   5.650  -2.557  1.00  0.53           O  
HETATM  572  O   HOH T 571     -10.697  35.138  24.827  1.00  0.53           O  
HETATM  573  O   HOH T 572      -3.847  31.130  46.857  1.00  0.53           O  
HETATM  574  O   HOH T 573     -16.462  32.701   3.067  1.00  0.53           O  
HETATM  575  O   HOH T 574     -25.114  22.719  10.574  1.00  0.53           O  
HETATM  576  O   HOH T 575      -4.118  37.718  35.955  1.00  0.53           O  
HETATM  577  O   HOH T 576     -12.260  30.975  22.931  1.00  0.54           O  
HETATM  578  O   HOH T 577     -20.179  12.940  -2.449  1.00  0.54           O  
HETATM  579  O   HOH T 578     -19.453   8.913  -0.814  1.00  0.54           O  
HETATM  580  O   HOH T 579     -21.815   5.531   8.933  1.00  0.54           O  
HETATM  581  O   HOH T 580       2.307  13.389  39.179  1.00  0.54           O  
HETATM  582  O   HOH T 581      24.337   4.220  -9.162  1.00  0.54           O  
HETATM  583  O   HOH T 582      13.859  28.434  20.914  1.00  0.54           O  
HETATM  584  O   HOH T 583     -14.078   8.624  34.086  1.00  0.54           O  
HETATM  585  O   HOH T 584     -22.027   9.644  13.854  1.00  0.54           O  
HETATM  586  O   HOH T 585       9.131  -5.258  34.407  1.00  0.54           O  
HETATM  587  O   HOH T 586      17.689   8.219  35.549  1.00  0.54           O  
HETATM  588  O   HOH T 587      -2.283  14.894  53.537  1.00  0.54           O  
HETATM  589  O   HOH T 588       3.336  33.642  -8.251  1.00  0.54           O  
HETATM  590  O   HOH T 589      26.596   4.586  23.700  1.00  0.54           O  
HETATM  591  O   HOH T 590     -29.834  13.583   8.926  1.00  0.54           O  
HETATM  592  O   HOH T 591      16.332  39.594  -0.058  1.00  0.54           O  
HETATM  593  O   HOH T 592      25.074  22.781  25.942  1.00  0.54           O  
HETATM  594  O   HOH T 593      11.241   6.494  36.276  1.00  0.54           O  
HETATM  595  O   HOH T 594      15.605  20.540  37.286  1.00  0.54           O  
HETATM  596  O   HOH T 595      19.536  -0.412  10.987  1.00  0.55           O  
HETATM  597  O   HOH T 596     -27.741  16.852   7.717  1.00  0.55           O  
HETATM  598  O   HOH T 597      -8.290  -0.835 -11.025  1.00  0.55           O  
HETATM  599  O   HOH T 598      19.259  -0.770   3.922  1.00  0.55           O  
HETATM  600  O   HOH T 599      10.657  35.170  25.974  1.00  0.55           O  
HETATM  601  O   HOH T 600      14.503  26.147 -13.969  1.00  0.55           O  
HETATM  602  O   HOH T 601     -16.536  17.703  40.389  1.00  0.55           O  
HETATM  603  O   HOH T 602      13.118  14.447 -14.665  1.00  0.55           O  
HETATM  604  O   HOH T 603      20.219  12.827  22.788  1.00  0.55           O  
HETATM  605  O   HOH T 604      22.883  -3.275  30.035  1.00  0.55           O  
HETATM  606  O   HOH T 605     -12.862  16.305 -13.730  1.00  0.55           O  
HETATM  607  O   HOH T 606     -11.465  -0.110 -16.276  1.00  0.55           O  
HETATM  608  O   HOH T 607       0.007  25.144  51.891  1.00  0.55           O  
HETATM  609  O   HOH T 608      -0.005  33.346  38.318  1.00  0.55           O  
HETATM  610  O   HOH T 609       9.793  13.032 -17.064  1.00  0.55           O  
HETATM  611  O   HOH T 610      -5.727  33.451  -3.947  1.00  0.55           O  
HETATM  612  O   HOH T 611      24.705  33.045  -4.060  1.00  0.55           O  
HETATM  613  O   HOH T 612      11.372  -3.207  21.827  1.00  0.56           O  
HETATM  614  O   HOH T 613     -20.121  17.624  21.221  1.00  0.56           O  
HETATM  615  O   HOH T 614      18.989  19.415 -16.240  1.00  0.56           O  
HETATM  616  O   HOH T 615       1.386   1.719  37.313  1.00  0.56           O  
HETATM  617  O   HOH T 616      -7.247   3.941 -18.158  1.00  0.56           O  
HETATM  618  O   HOH T 617     -10.602   8.760 -21.071  1.00  0.56           O  
HETATM  619  O   HOH T 618      -8.164   3.005  32.974  1.00  0.56           O  
HETATM  620  O   HOH T 619     -11.270  23.403  -6.654  1.00  0.56           O  
HETATM  621  O   HOH T 620     -17.107  20.358  -8.057  1.00  0.56           O  
HETATM  622  O   HOH T 621     -10.682  29.906  -2.341  1.00  0.56           O  
HETATM  623  O   HOH T 622      16.219  -2.457  31.228  1.00  0.56           O  
HETATM  624  O   HOH T 623      -9.093  35.115  39.786  1.00  0.56           O  
HETATM  625  O   HOH T 624      -7.184   4.691  26.666  1.00  0.56           O  
HETATM  626  O   HOH T 625      12.953  34.025 -11.389  1.00  0.56           O  
HETATM  627  O   HOH T 626      -9.877  19.663  -7.930  1.00  0.56           O  
HETATM  628  O   HOH T 627     -13.737   5.743  43.543  1.00  0.56           O  
HETATM  629  O   HOH T 628       2.039  25.257  49.561  1.00  0.57           O  
HETATM  630  O   HOH T 629       1.552  32.498 -11.286  1.00  0.57           O  
HETATM  631  O   HOH T 630      26.828  31.423  11.099  1.00  0.57           O  
HETATM  632  O   HOH T 631     -26.082   7.277   4.543  1.00  0.57           O  
HETATM  633  O   HOH T 632      22.849  39.100  -2.507  1.00  0.57           O  
HETATM  634  O   HOH T 633     -16.377   9.720  34.678  1.00  0.57           O  
HETATM  635  O   HOH T 634     -13.265  31.665  41.589  1.00  0.57           O  
HETATM  636  O   HOH T 635      27.577   1.555  26.736  1.00  0.57           O  
HETATM  637  O   HOH T 636      -9.912  17.807  48.878  1.00  0.57           O  
HETATM  638  O   HOH T 637       9.713  -4.032  27.977  1.00  0.57           O  
HETATM  639  O   HOH T 638       9.625  -2.643  34.180  1.00  0.57           O  
HETATM  640  O   HOH T 639       1.126  11.987  41.628  1.00  0.57           O  
HETATM  641  O   HOH T 640      -6.473  36.594  34.745  1.00  0.58           O  
HETATM  642  O   HOH T 641      34.926   6.427  -0.706  1.00  0.58           O  
HETATM  643  O   HOH T 642      12.962  30.825  24.376  1.00  0.60           O  
HETATM  644  O   HOH T 643      23.237  -2.418   6.721  1.00  0.60           O  
HETATM  645  O   HOH T 644     -21.912  14.071  -1.033  1.00  0.61           O  
TER     646      HOH T 644 
