# Supplementary material for: Accurate Prediction of Hydration Sites of Proteins Using Energy Model With Atom Embedding
Source: Front Mol Biosci. 2021 Sep 20;8:756075. doi: 10.3389/fmolb.2021.756075 (PMC8488165; doi:10.3389/fmolb.2021.756075)
Supplement: Supplementary file 1 [file DataSheet1.ZIP › Data Sheet 1/Our_result_pdb/OppA_dataset_output/1B5I_watersite.pdb]

HEADER                                                        XXXX


JRNL        PMID   -1
HETATM    1  O   HOH T   0       5.427  15.103  -3.617  1.00  0.14           O  
HETATM    2  O   HOH T   1      17.488  13.492   4.878  1.00  0.17           O  
HETATM    3  O   HOH T   2      19.220  19.932   6.421  1.00  0.17           O  
HETATM    4  O   HOH T   3      14.278  16.951  31.101  1.00  0.17           O  
HETATM    5  O   HOH T   4       7.622  15.598 -10.372  1.00  0.17           O  
HETATM    6  O   HOH T   5       1.000  12.829  -8.305  1.00  0.18           O  
HETATM    7  O   HOH T   6      -6.747   9.190   7.744  1.00  0.19           O  
HETATM    8  O   HOH T   7      -7.982  23.235  23.179  1.00  0.19           O  
HETATM    9  O   HOH T   8      23.378  23.369  -0.930  1.00  0.19           O  
HETATM   10  O   HOH T   9     -12.737  11.665  20.400  1.00  0.19           O  
HETATM   11  O   HOH T  10      15.704  15.284  -8.355  1.00  0.19           O  
HETATM   12  O   HOH T  11       8.668   1.606  25.951  1.00  0.19           O  
HETATM   13  O   HOH T  12      -1.204  -0.239  35.146  1.00  0.19           O  
HETATM   14  O   HOH T  13      20.167  26.028  13.916  1.00  0.20           O  
HETATM   15  O   HOH T  14      -1.475  28.727   2.002  1.00  0.20           O  
HETATM   16  O   HOH T  15      -1.967   8.719  10.177  1.00  0.20           O  
HETATM   17  O   HOH T  16      -0.142   6.080  -6.050  1.00  0.21           O  
HETATM   18  O   HOH T  17     -20.525  23.169   1.665  1.00  0.21           O  
HETATM   19  O   HOH T  18      -1.969  22.118  13.023  1.00  0.21           O  
HETATM   20  O   HOH T  19       3.177  17.304   7.879  1.00  0.21           O  
HETATM   21  O   HOH T  20      22.245  14.896 -11.288  1.00  0.21           O  
HETATM   22  O   HOH T  21      -2.286   5.016   9.960  1.00  0.21           O  
HETATM   23  O   HOH T  22      33.079  16.820   3.151  1.00  0.21           O  
HETATM   24  O   HOH T  23       7.249  11.003  -8.693  1.00  0.21           O  
HETATM   25  O   HOH T  24       9.803   9.306  -5.709  1.00  0.22           O  
HETATM   26  O   HOH T  25       0.972  -7.276   6.832  1.00  0.22           O  
HETATM   27  O   HOH T  26     -12.889  14.306 -14.029  1.00  0.23           O  
HETATM   28  O   HOH T  27       5.390   3.963  31.396  1.00  0.23           O  
HETATM   29  O   HOH T  28      -9.658  12.329  33.375  1.00  0.23           O  
HETATM   30  O   HOH T  29      -7.096  14.157  12.839  1.00  0.23           O  
HETATM   31  O   HOH T  30      -4.308  23.391  -7.415  1.00  0.23           O  
HETATM   32  O   HOH T  31     -20.995  16.889  15.065  1.00  0.23           O  
HETATM   33  O   HOH T  32      -3.435  30.288  12.254  1.00  0.23           O  
HETATM   34  O   HOH T  33      10.489  31.034   4.195  1.00  0.23           O  
HETATM   35  O   HOH T  34      29.874  17.566  21.061  1.00  0.23           O  
HETATM   36  O   HOH T  35       8.891   6.934   7.280  1.00  0.23           O  
HETATM   37  O   HOH T  36       6.787  30.341  14.709  1.00  0.24           O  
HETATM   38  O   HOH T  37      -8.775  28.135  42.513  1.00  0.24           O  
HETATM   39  O   HOH T  38      17.169   5.355  22.179  1.00  0.24           O  
HETATM   40  O   HOH T  39      27.762  15.772  20.609  1.00  0.24           O  
HETATM   41  O   HOH T  40      -5.417  34.987  33.329  1.00  0.24           O  
HETATM   42  O   HOH T  41      31.334  10.991   8.470  1.00  0.24           O  
HETATM   43  O   HOH T  42       1.976  10.750  13.636  1.00  0.24           O  
HETATM   44  O   HOH T  43      -8.735  27.458  -3.710  1.00  0.25           O  
HETATM   45  O   HOH T  44       4.076  10.509  31.084  1.00  0.25           O  
HETATM   46  O   HOH T  45      -0.171  31.188   1.829  1.00  0.25           O  
HETATM   47  O   HOH T  46       8.207  15.509  -3.314  1.00  0.25           O  
HETATM   48  O   HOH T  47      -2.458  39.025   9.827  1.00  0.25           O  
HETATM   49  O   HOH T  48     -10.967  26.923  34.479  1.00  0.25           O  
HETATM   50  O   HOH T  49      36.035  23.015  11.066  1.00  0.25           O  
HETATM   51  O   HOH T  50       5.686  -1.696  19.943  1.00  0.25           O  
HETATM   52  O   HOH T  51      -4.184  28.103  13.903  1.00  0.25           O  
HETATM   53  O   HOH T  52      22.399  25.284  17.327  1.00  0.25           O  
HETATM   54  O   HOH T  53     -11.726  14.417 -16.571  1.00  0.25           O  
HETATM   55  O   HOH T  54     -11.479   4.934 -12.862  1.00  0.25           O  
HETATM   56  O   HOH T  55     -11.854  32.120  29.334  1.00  0.25           O  
HETATM   57  O   HOH T  56      11.485  18.451   3.187  1.00  0.26           O  
HETATM   58  O   HOH T  57      -8.936  -1.813  41.166  1.00  0.26           O  
HETATM   59  O   HOH T  58       3.102   5.551  31.002  1.00  0.26           O  
HETATM   60  O   HOH T  59      -9.373  21.494   9.309  1.00  0.26           O  
HETATM   61  O   HOH T  60       0.157  31.973  11.413  1.00  0.26           O  
HETATM   62  O   HOH T  61       8.912  22.125  18.272  1.00  0.26           O  
HETATM   63  O   HOH T  62       0.413  39.240  -2.186  1.00  0.26           O  
HETATM   64  O   HOH T  63      -7.390   5.198  26.727  1.00  0.26           O  
HETATM   65  O   HOH T  64      24.869  21.868  23.489  1.00  0.26           O  
HETATM   66  O   HOH T  65      15.560  14.864  -5.644  1.00  0.26           O  
HETATM   67  O   HOH T  66      12.750  -0.801  22.483  1.00  0.26           O  
HETATM   68  O   HOH T  67      22.098   8.379  24.437  1.00  0.26           O  
HETATM   69  O   HOH T  68      13.981  26.147  19.550  1.00  0.26           O  
HETATM   70  O   HOH T  69      -2.395  19.855   3.976  1.00  0.26           O  
HETATM   71  O   HOH T  70     -10.605  16.720 -15.531  1.00  0.26           O  
HETATM   72  O   HOH T  71      27.415  13.467  19.182  1.00  0.27           O  
HETATM   73  O   HOH T  72      22.049   0.049   6.864  1.00  0.27           O  
HETATM   74  O   HOH T  73      36.748  10.564   0.015  1.00  0.27           O  
HETATM   75  O   HOH T  74      10.552  23.452   4.174  1.00  0.27           O  
HETATM   76  O   HOH T  75      -4.244  19.633  15.975  1.00  0.27           O  
HETATM   77  O   HOH T  76     -10.867  24.431  -6.448  1.00  0.27           O  
HETATM   78  O   HOH T  77      15.498  -7.311  24.105  1.00  0.27           O  
HETATM   79  O   HOH T  78      10.510   7.395   9.632  1.00  0.27           O  
HETATM   80  O   HOH T  79       7.661  21.685  42.255  1.00  0.27           O  
HETATM   81  O   HOH T  80      -5.225  26.828  50.685  1.00  0.27           O  
HETATM   82  O   HOH T  81     -10.522  30.238   8.887  1.00  0.27           O  
HETATM   83  O   HOH T  82      -1.704   7.607   3.715  1.00  0.27           O  
HETATM   84  O   HOH T  83      11.341  21.814  34.881  1.00  0.27           O  
HETATM   85  O   HOH T  84      11.152  13.803  16.804  1.00  0.27           O  
HETATM   86  O   HOH T  85     -29.187  17.565   8.062  1.00  0.27           O  
HETATM   87  O   HOH T  86       8.892  24.180   2.226  1.00  0.28           O  
HETATM   88  O   HOH T  87       1.571   5.392 -12.381  1.00  0.28           O  
HETATM   89  O   HOH T  88      -3.210  18.772  55.058  1.00  0.28           O  
HETATM   90  O   HOH T  89     -13.430   5.302   2.429  1.00  0.28           O  
HETATM   91  O   HOH T  90      -8.845  11.468 -24.247  1.00  0.28           O  
HETATM   92  O   HOH T  91       8.009  24.437   4.861  1.00  0.28           O  
HETATM   93  O   HOH T  92       1.484  -0.375  17.441  1.00  0.28           O  
HETATM   94  O   HOH T  93     -25.520   6.901   7.230  1.00  0.28           O  
HETATM   95  O   HOH T  94     -20.887  22.200   4.245  1.00  0.28           O  
HETATM   96  O   HOH T  95      11.383  26.119  23.571  1.00  0.28           O  
HETATM   97  O   HOH T  96      -0.818  15.082   9.076  1.00  0.29           O  
HETATM   98  O   HOH T  97       3.545  12.435  12.200  1.00  0.29           O  
HETATM   99  O   HOH T  98     -22.230  19.649  -0.978  1.00  0.29           O  
HETATM  100  O   HOH T  99      12.299   1.167  20.442  1.00  0.29           O  
HETATM  101  O   HOH T 100      -2.068  24.804  12.199  1.00  0.29           O  
HETATM  102  O   HOH T 101      -4.742  -2.626  35.156  1.00  0.29           O  
HETATM  103  O   HOH T 102      -9.286  23.469  44.342  1.00  0.29           O  
HETATM  104  O   HOH T 103      15.061  15.395  37.917  1.00  0.29           O  
HETATM  105  O   HOH T 104       6.179   8.032   7.398  1.00  0.29           O  
HETATM  106  O   HOH T 105      32.792  13.606  -7.235  1.00  0.29           O  
HETATM  107  O   HOH T 106       2.655   8.205  31.655  1.00  0.29           O  
HETATM  108  O   HOH T 107      -5.436  20.194  51.236  1.00  0.29           O  
HETATM  109  O   HOH T 108     -13.828   9.223  -0.608  1.00  0.29           O  
HETATM  110  O   HOH T 109      -3.983  32.805  40.671  1.00  0.29           O  
HETATM  111  O   HOH T 110       3.510   7.111  36.054  1.00  0.29           O  
HETATM  112  O   HOH T 111      -7.415  35.982  22.182  1.00  0.29           O  
HETATM  113  O   HOH T 112      10.295  13.525   3.346  1.00  0.29           O  
HETATM  114  O   HOH T 113       5.342   7.942  37.958  1.00  0.29           O  
HETATM  115  O   HOH T 114      17.044   9.298  19.646  1.00  0.29           O  
HETATM  116  O   HOH T 115       2.816   9.152   1.468  1.00  0.30           O  
HETATM  117  O   HOH T 116      11.939  25.752  -7.333  1.00  0.30           O  
HETATM  118  O   HOH T 117       9.915  13.423  -2.419  1.00  0.30           O  
HETATM  119  O   HOH T 118      11.980   1.143   9.306  1.00  0.30           O  
HETATM  120  O   HOH T 119       5.851  20.211  24.964  1.00  0.30           O  
HETATM  121  O   HOH T 120      20.016   0.560   1.783  1.00  0.30           O  
HETATM  122  O   HOH T 121      -8.297  36.231  27.616  1.00  0.30           O  
HETATM  123  O   HOH T 122       3.007   4.421  35.466  1.00  0.30           O  
HETATM  124  O   HOH T 123     -17.665  28.652   7.961  1.00  0.30           O  
HETATM  125  O   HOH T 124      24.760  13.200  -5.607  1.00  0.30           O  
HETATM  126  O   HOH T 125       6.616  -1.727  30.949  1.00  0.31           O  
HETATM  127  O   HOH T 126      13.192  24.540  27.106  1.00  0.31           O  
HETATM  128  O   HOH T 127     -12.166  10.889  32.775  1.00  0.31           O  
HETATM  129  O   HOH T 128     -11.448   5.606  42.391  1.00  0.31           O  
HETATM  130  O   HOH T 129      18.915  18.497  33.314  1.00  0.31           O  
HETATM  131  O   HOH T 130     -14.588  19.719  -7.109  1.00  0.31           O  
HETATM  132  O   HOH T 131      10.437  15.017  -0.209  1.00  0.31           O  
HETATM  133  O   HOH T 132      -4.020  18.298  52.506  1.00  0.31           O  
HETATM  134  O   HOH T 133      28.683   2.823   6.440  1.00  0.31           O  
HETATM  135  O   HOH T 134     -20.369   7.837   1.322  1.00  0.31           O  
HETATM  136  O   HOH T 135     -11.941  20.604   8.697  1.00  0.31           O  
HETATM  137  O   HOH T 136      31.904   5.159   4.315  1.00  0.31           O  
HETATM  138  O   HOH T 137       0.962   5.226  39.124  1.00  0.31           O  
HETATM  139  O   HOH T 138     -15.251  22.566  16.454  1.00  0.31           O  
HETATM  140  O   HOH T 139       7.909  19.351  21.637  1.00  0.31           O  
HETATM  141  O   HOH T 140      13.070  13.555   3.029  1.00  0.31           O  
HETATM  142  O   HOH T 141     -25.978  13.626   8.557  1.00  0.31           O  
HETATM  143  O   HOH T 142      -7.356  34.413  40.994  1.00  0.31           O  
HETATM  144  O   HOH T 143      21.031  -2.542  19.652  1.00  0.31           O  
HETATM  145  O   HOH T 144     -22.892   6.367   7.763  1.00  0.31           O  
HETATM  146  O   HOH T 145     -10.747  30.025  16.986  1.00  0.32           O  
HETATM  147  O   HOH T 146      -3.703  31.725  46.552  1.00  0.32           O  
HETATM  148  O   HOH T 147       1.598  21.857  19.072  1.00  0.32           O  
HETATM  149  O   HOH T 148      13.923  22.792  29.124  1.00  0.32           O  
HETATM  150  O   HOH T 149      -4.749  18.424   3.504  1.00  0.32           O  
HETATM  151  O   HOH T 150      31.077  18.991   8.848  1.00  0.32           O  
HETATM  152  O   HOH T 151      14.948  14.662   4.894  1.00  0.32           O  
HETATM  153  O   HOH T 152       7.558  21.909  20.720  1.00  0.32           O  
HETATM  154  O   HOH T 153      36.142  25.668  10.366  1.00  0.32           O  
HETATM  155  O   HOH T 154     -15.357   8.187  37.051  1.00  0.32           O  
HETATM  156  O   HOH T 155     -10.122  16.213  14.895  1.00  0.32           O  
HETATM  157  O   HOH T 156      23.343  -1.058   0.602  1.00  0.32           O  
HETATM  158  O   HOH T 157     -20.163  16.073   0.342  1.00  0.32           O  
HETATM  159  O   HOH T 158      19.381   8.160  23.906  1.00  0.32           O  
HETATM  160  O   HOH T 159      22.697   1.789  21.047  1.00  0.32           O  
HETATM  161  O   HOH T 160      -5.964  34.909  43.275  1.00  0.32           O  
HETATM  162  O   HOH T 161      -0.870   7.044   0.983  1.00  0.32           O  
HETATM  163  O   HOH T 162     -13.274   7.032 -13.423  1.00  0.32           O  
HETATM  164  O   HOH T 163      11.571  10.249 -14.113  1.00  0.33           O  
HETATM  165  O   HOH T 164       2.686  14.866  32.781  1.00  0.33           O  
HETATM  166  O   HOH T 165      -8.904  23.181  47.005  1.00  0.33           O  
HETATM  167  O   HOH T 166       2.064  -0.948   5.986  1.00  0.33           O  
HETATM  168  O   HOH T 167     -31.129  12.076   4.530  1.00  0.33           O  
HETATM  169  O   HOH T 168       5.452  34.046  37.771  1.00  0.33           O  
HETATM  170  O   HOH T 169       2.794   2.938  15.543  1.00  0.33           O  
HETATM  171  O   HOH T 170      10.013  27.767  -8.212  1.00  0.33           O  
HETATM  172  O   HOH T 171      17.766  26.580  17.965  1.00  0.33           O  
HETATM  173  O   HOH T 172      29.358  21.363   1.362  1.00  0.33           O  
HETATM  174  O   HOH T 173       3.100  10.062 -14.553  1.00  0.33           O  
HETATM  175  O   HOH T 174      13.534  23.293  11.055  1.00  0.33           O  
HETATM  176  O   HOH T 175      -8.182  38.591   0.982  1.00  0.33           O  
HETATM  177  O   HOH T 176      -2.800   2.158  26.347  1.00  0.33           O  
HETATM  178  O   HOH T 177      11.245  20.484  10.602  1.00  0.33           O  
HETATM  179  O   HOH T 178     -20.645  12.417  22.406  1.00  0.33           O  
HETATM  180  O   HOH T 179      -7.975  23.841   9.958  1.00  0.33           O  
HETATM  181  O   HOH T 180       2.093   1.328   7.403  1.00  0.34           O  
HETATM  182  O   HOH T 181     -14.323   6.279   4.818  1.00  0.34           O  
HETATM  183  O   HOH T 182      -7.610   6.424   4.728  1.00  0.34           O  
HETATM  184  O   HOH T 183      -0.736  38.114   7.825  1.00  0.34           O  
HETATM  185  O   HOH T 184       8.605  12.609   5.371  1.00  0.34           O  
HETATM  186  O   HOH T 185     -16.580  30.700   6.550  1.00  0.34           O  
HETATM  187  O   HOH T 186     -11.305   8.835  -1.635  1.00  0.34           O  
HETATM  188  O   HOH T 187     -26.402  17.992   8.111  1.00  0.35           O  
HETATM  189  O   HOH T 188       4.030  -1.162  16.484  1.00  0.35           O  
HETATM  190  O   HOH T 189      12.151  29.640  -8.592  1.00  0.35           O  
HETATM  191  O   HOH T 190     -14.726  14.724  43.804  1.00  0.35           O  
HETATM  192  O   HOH T 191      -9.205   8.149  33.298  1.00  0.35           O  
HETATM  193  O   HOH T 192     -17.572  28.642   5.167  1.00  0.35           O  
HETATM  194  O   HOH T 193     -18.105  28.434   2.452  1.00  0.35           O  
HETATM  195  O   HOH T 194      -4.445   6.633  16.486  1.00  0.35           O  
HETATM  196  O   HOH T 195      -1.500  31.697  37.499  1.00  0.35           O  
HETATM  197  O   HOH T 196      24.069  -1.932   6.701  1.00  0.35           O  
HETATM  198  O   HOH T 197      38.973  10.876   1.649  1.00  0.35           O  
HETATM  199  O   HOH T 198       1.014  34.053  13.193  1.00  0.35           O  
HETATM  200  O   HOH T 199     -19.092   9.389  -0.664  1.00  0.35           O  
HETATM  201  O   HOH T 200       7.383   7.896  17.584  1.00  0.35           O  
HETATM  202  O   HOH T 201      12.275  23.131 -13.575  1.00  0.35           O  
HETATM  203  O   HOH T 202      -3.673  37.968  14.093  1.00  0.35           O  
HETATM  204  O   HOH T 203      12.849  38.307  -3.540  1.00  0.35           O  
HETATM  205  O   HOH T 204       3.455   4.041  -4.700  1.00  0.35           O  
HETATM  206  O   HOH T 205       8.117   0.814   8.306  1.00  0.35           O  
HETATM  207  O   HOH T 206      29.087  21.342  24.784  1.00  0.36           O  
HETATM  208  O   HOH T 207       7.909  32.859  37.513  1.00  0.36           O  
HETATM  209  O   HOH T 208      -4.824   2.955 -15.252  1.00  0.36           O  
HETATM  210  O   HOH T 209      -3.250  31.174   9.458  1.00  0.36           O  
HETATM  211  O   HOH T 210      26.080   6.970  -5.302  1.00  0.36           O  
HETATM  212  O   HOH T 211      -0.469  36.793  15.274  1.00  0.36           O  
HETATM  213  O   HOH T 212       0.751  11.791  32.513  1.00  0.36           O  
HETATM  214  O   HOH T 213      -5.423  -2.662  37.842  1.00  0.36           O  
HETATM  215  O   HOH T 214     -11.945   4.168   9.690  1.00  0.36           O  
HETATM  216  O   HOH T 215       8.978  -5.005  30.712  1.00  0.36           O  
HETATM  217  O   HOH T 216      12.689  24.111  33.910  1.00  0.36           O  
HETATM  218  O   HOH T 217      -5.347   7.021  19.033  1.00  0.36           O  
HETATM  219  O   HOH T 218      25.981  22.974  -1.390  1.00  0.36           O  
HETATM  220  O   HOH T 219       3.922  13.027  41.616  1.00  0.36           O  
HETATM  221  O   HOH T 220     -18.734  16.120  16.489  1.00  0.36           O  
HETATM  222  O   HOH T 221      -1.577   8.491   6.436  1.00  0.36           O  
HETATM  223  O   HOH T 222     -10.851  35.377  26.834  1.00  0.36           O  
HETATM  224  O   HOH T 223      -2.761   1.432  29.026  1.00  0.36           O  
HETATM  225  O   HOH T 224      14.655  31.621   5.915  1.00  0.36           O  
HETATM  226  O   HOH T 225     -10.361  13.356  15.292  1.00  0.36           O  
HETATM  227  O   HOH T 226      -7.141   7.677  -1.785  1.00  0.36           O  
HETATM  228  O   HOH T 227       0.788   3.857  -4.595  1.00  0.36           O  
HETATM  229  O   HOH T 228      32.685  12.632  10.235  1.00  0.36           O  
HETATM  230  O   HOH T 229      28.177  16.273  25.129  1.00  0.37           O  
HETATM  231  O   HOH T 230       3.722   8.155   3.839  1.00  0.37           O  
HETATM  232  O   HOH T 231     -21.703  20.093   5.981  1.00  0.37           O  
HETATM  233  O   HOH T 232      -1.999  -1.985   9.335  1.00  0.37           O  
HETATM  234  O   HOH T 233      -3.044  36.223  16.219  1.00  0.37           O  
HETATM  235  O   HOH T 234      -7.080  24.497  12.518  1.00  0.37           O  
HETATM  236  O   HOH T 235      20.328  23.569  23.592  1.00  0.37           O  
HETATM  237  O   HOH T 236     -12.606  29.161  33.933  1.00  0.37           O  
HETATM  238  O   HOH T 237       9.619  13.143 -17.083  1.00  0.37           O  
HETATM  239  O   HOH T 238     -10.540   7.732  30.953  1.00  0.37           O  
HETATM  240  O   HOH T 239      17.635   9.691  22.405  1.00  0.38           O  
HETATM  241  O   HOH T 240      22.584   6.260  -9.645  1.00  0.38           O  
HETATM  242  O   HOH T 241       5.706  36.457  17.625  1.00  0.38           O  
HETATM  243  O   HOH T 242      16.650  38.931   2.157  1.00  0.38           O  
HETATM  244  O   HOH T 243       2.218  16.592   2.324  1.00  0.38           O  
HETATM  245  O   HOH T 244      -2.130   2.659 -14.910  1.00  0.38           O  
HETATM  246  O   HOH T 245      10.722   1.807  16.712  1.00  0.38           O  
HETATM  247  O   HOH T 246     -11.549   5.380   7.294  1.00  0.38           O  
HETATM  248  O   HOH T 247      27.198  25.034  -2.784  1.00  0.38           O  
HETATM  249  O   HOH T 248      -4.865  -2.214  12.623  1.00  0.38           O  
HETATM  250  O   HOH T 249     -10.241   5.316  29.700  1.00  0.38           O  
HETATM  251  O   HOH T 250      13.560  27.077  -9.134  1.00  0.38           O  
HETATM  252  O   HOH T 251      -9.976  17.014 -12.778  1.00  0.38           O  
HETATM  253  O   HOH T 252      15.440  23.448  25.936  1.00  0.38           O  
HETATM  254  O   HOH T 253      14.027   1.494   4.956  1.00  0.39           O  
HETATM  255  O   HOH T 254      30.837   2.716   4.719  1.00  0.39           O  
HETATM  256  O   HOH T 255      -1.386   8.505  41.602  1.00  0.39           O  
HETATM  257  O   HOH T 256       5.546   5.687   9.001  1.00  0.39           O  
HETATM  258  O   HOH T 257      -1.476  13.120  43.273  1.00  0.39           O  
HETATM  259  O   HOH T 258       4.662  13.289   9.939  1.00  0.39           O  
HETATM  260  O   HOH T 259     -20.020  13.876  -1.471  1.00  0.39           O  
HETATM  261  O   HOH T 260      -5.915   2.605   6.054  1.00  0.39           O  
HETATM  262  O   HOH T 261      11.953  31.767   6.449  1.00  0.39           O  
HETATM  263  O   HOH T 262     -13.890  28.277  44.686  1.00  0.39           O  
HETATM  264  O   HOH T 263      20.184  25.613  19.037  1.00  0.39           O  
HETATM  265  O   HOH T 264      22.115  21.429  23.464  1.00  0.39           O  
HETATM  266  O   HOH T 265     -13.545   9.180  21.164  1.00  0.39           O  
HETATM  267  O   HOH T 266     -11.702   4.788  19.280  1.00  0.39           O  
HETATM  268  O   HOH T 267      -8.106  15.991  17.025  1.00  0.39           O  
HETATM  269  O   HOH T 268       5.501  10.718 -17.392  1.00  0.40           O  
HETATM  270  O   HOH T 269       0.863  40.122  22.588  1.00  0.40           O  
HETATM  271  O   HOH T 270     -11.415  29.967  14.174  1.00  0.40           O  
HETATM  272  O   HOH T 271      -4.465   0.928 -17.247  1.00  0.40           O  
HETATM  273  O   HOH T 272     -31.294  16.000   7.472  1.00  0.40           O  
HETATM  274  O   HOH T 273      -3.364   2.575   9.322  1.00  0.40           O  
HETATM  275  O   HOH T 274       7.633  14.634   7.210  1.00  0.40           O  
HETATM  276  O   HOH T 275       0.900   1.419 -11.913  1.00  0.40           O  
HETATM  277  O   HOH T 276      33.453  17.941   9.883  1.00  0.40           O  
HETATM  278  O   HOH T 277      11.503   0.405   4.754  1.00  0.40           O  
HETATM  279  O   HOH T 278      19.221  24.286  21.140  1.00  0.40           O  
HETATM  280  O   HOH T 279       4.154   4.648 -11.561  1.00  0.40           O  
HETATM  281  O   HOH T 280      23.600  13.796  20.635  1.00  0.40           O  
HETATM  282  O   HOH T 281      -8.374   0.230  39.470  1.00  0.40           O  
HETATM  283  O   HOH T 282      -6.019   2.109   8.785  1.00  0.40           O  
HETATM  284  O   HOH T 283      24.465   6.504  -7.536  1.00  0.40           O  
HETATM  285  O   HOH T 284       0.789  14.398  44.063  1.00  0.40           O  
HETATM  286  O   HOH T 285     -14.649  18.690  42.480  1.00  0.40           O  
HETATM  287  O   HOH T 286      -0.583   7.631  39.127  1.00  0.40           O  
HETATM  288  O   HOH T 287       8.036  27.465 -10.282  1.00  0.40           O  
HETATM  289  O   HOH T 288     -10.198  30.719  11.685  1.00  0.40           O  
HETATM  290  O   HOH T 289      30.066  27.901  12.771  1.00  0.40           O  
HETATM  291  O   HOH T 290       8.340  29.026  16.485  1.00  0.41           O  
HETATM  292  O   HOH T 291      -4.051  22.263  14.952  1.00  0.41           O  
HETATM  293  O   HOH T 292     -12.117   6.543  23.560  1.00  0.41           O  
HETATM  294  O   HOH T 293     -26.723  20.385   9.513  1.00  0.41           O  
HETATM  295  O   HOH T 294     -20.881  17.275  17.794  1.00  0.41           O  
HETATM  296  O   HOH T 295      23.613  20.869  25.792  1.00  0.41           O  
HETATM  297  O   HOH T 296       8.845  13.096   9.621  1.00  0.41           O  
HETATM  298  O   HOH T 297      -1.535   3.645  -5.914  1.00  0.41           O  
HETATM  299  O   HOH T 298      31.847  27.608  -0.384  1.00  0.41           O  
HETATM  300  O   HOH T 299      -1.178  34.891  32.989  1.00  0.41           O  
HETATM  301  O   HOH T 300      -8.209   2.995  10.179  1.00  0.41           O  
HETATM  302  O   HOH T 301     -11.313  28.338  43.789  1.00  0.41           O  
HETATM  303  O   HOH T 302     -21.283  12.218  19.696  1.00  0.41           O  
HETATM  304  O   HOH T 303      24.876  14.176 -10.860  1.00  0.41           O  
HETATM  305  O   HOH T 304       2.823  12.892  30.925  1.00  0.41           O  
HETATM  306  O   HOH T 305      -6.595  33.867   5.674  1.00  0.41           O  
HETATM  307  O   HOH T 306       2.136  12.516 -15.498  1.00  0.41           O  
HETATM  308  O   HOH T 307       5.496   3.834  11.079  1.00  0.41           O  
HETATM  309  O   HOH T 308       6.806  13.173 -16.914  1.00  0.41           O  
HETATM  310  O   HOH T 309      12.825  32.453   3.884  1.00  0.41           O  
HETATM  311  O   HOH T 310      -7.724  30.922   8.127  1.00  0.41           O  
HETATM  312  O   HOH T 311      26.830  15.225  -9.171  1.00  0.42           O  
HETATM  313  O   HOH T 312     -13.833  18.352  -9.354  1.00  0.42           O  
HETATM  314  O   HOH T 313     -25.632  22.774  10.518  1.00  0.42           O  
HETATM  315  O   HOH T 314       8.986  23.076  37.402  1.00  0.42           O  
HETATM  316  O   HOH T 315      22.206  13.032  -6.258  1.00  0.42           O  
HETATM  317  O   HOH T 316      28.719  26.353  16.113  1.00  0.42           O  
HETATM  318  O   HOH T 317       8.645  19.550  24.329  1.00  0.42           O  
HETATM  319  O   HOH T 318     -12.845  30.748  43.985  1.00  0.42           O  
HETATM  320  O   HOH T 319       9.777  -7.018  29.010  1.00  0.42           O  
HETATM  321  O   HOH T 320     -16.962  25.501  -4.805  1.00  0.42           O  
HETATM  322  O   HOH T 321      -4.147  33.223  44.269  1.00  0.42           O  
HETATM  323  O   HOH T 322     -20.262  17.808  -1.761  1.00  0.42           O  
HETATM  324  O   HOH T 323       4.744   2.220   7.588  1.00  0.42           O  
HETATM  325  O   HOH T 324       0.981   7.838   3.059  1.00  0.42           O  
HETATM  326  O   HOH T 325      -7.266  12.894 -22.406  1.00  0.42           O  
HETATM  327  O   HOH T 326      -4.870  28.030  -6.584  1.00  0.42           O  
HETATM  328  O   HOH T 327      10.293  34.042   1.182  1.00  0.42           O  
HETATM  329  O   HOH T 328      -0.558   0.631 -14.011  1.00  0.42           O  
HETATM  330  O   HOH T 329      -6.320   4.846  17.582  1.00  0.42           O  
HETATM  331  O   HOH T 330       2.422  15.278  42.118  1.00  0.42           O  
HETATM  332  O   HOH T 331     -12.888  31.212  12.108  1.00  0.43           O  
HETATM  333  O   HOH T 332       9.724  -2.578  18.955  1.00  0.43           O  
HETATM  334  O   HOH T 333      11.317   1.037   2.020  1.00  0.43           O  
HETATM  335  O   HOH T 334      -7.922  26.345  50.618  1.00  0.43           O  
HETATM  336  O   HOH T 335      -1.970  17.239   7.695  1.00  0.43           O  
HETATM  337  O   HOH T 336     -13.025  30.717  31.493  1.00  0.43           O  
HETATM  338  O   HOH T 337      -2.457  35.721  23.553  1.00  0.43           O  
HETATM  339  O   HOH T 338      -1.235  32.638  40.085  1.00  0.43           O  
HETATM  340  O   HOH T 339     -27.877  11.899   7.541  1.00  0.43           O  
HETATM  341  O   HOH T 340      -9.254  17.600  -8.372  1.00  0.43           O  
HETATM  342  O   HOH T 341       0.534  34.043  30.600  1.00  0.43           O  
HETATM  343  O   HOH T 342      -7.843  31.354   0.210  1.00  0.43           O  
HETATM  344  O   HOH T 343      -7.262   1.562  29.915  1.00  0.43           O  
HETATM  345  O   HOH T 344      23.029  14.147  -8.712  1.00  0.43           O  
HETATM  346  O   HOH T 345      23.574  23.248  -4.947  1.00  0.43           O  
HETATM  347  O   HOH T 346      -9.805   0.835  35.254  1.00  0.43           O  
HETATM  348  O   HOH T 347     -13.016  19.030  -4.922  1.00  0.43           O  
HETATM  349  O   HOH T 348      -4.213   3.752  -5.344  1.00  0.43           O  
HETATM  350  O   HOH T 349      31.289  26.642  10.568  1.00  0.43           O  
HETATM  351  O   HOH T 350      26.972  29.910  -2.402  1.00  0.43           O  
HETATM  352  O   HOH T 351      33.762  10.184   9.487  1.00  0.43           O  
HETATM  353  O   HOH T 352      -1.458  11.240  41.264  1.00  0.43           O  
HETATM  354  O   HOH T 353     -12.785  31.620  15.991  1.00  0.43           O  
HETATM  355  O   HOH T 354       0.804  -4.947   8.283  1.00  0.43           O  
HETATM  356  O   HOH T 355     -18.800  16.121  19.216  1.00  0.44           O  
HETATM  357  O   HOH T 356      10.486  39.257  -2.724  1.00  0.44           O  
HETATM  358  O   HOH T 357      21.082  13.925  33.898  1.00  0.44           O  
HETATM  359  O   HOH T 358       0.224  12.351  39.352  1.00  0.44           O  
HETATM  360  O   HOH T 359       3.383  20.329  21.112  1.00  0.44           O  
HETATM  361  O   HOH T 360      -9.577  22.890  -8.393  1.00  0.44           O  
HETATM  362  O   HOH T 361      -2.783  -2.982  27.523  1.00  0.44           O  
HETATM  363  O   HOH T 362       0.183   3.486  14.755  1.00  0.44           O  
HETATM  364  O   HOH T 363     -17.914  13.767  -3.248  1.00  0.44           O  
HETATM  365  O   HOH T 364       1.617  -4.458  25.414  1.00  0.44           O  
HETATM  366  O   HOH T 365      30.145  17.822  23.890  1.00  0.44           O  
HETATM  367  O   HOH T 366      33.996  27.299  10.362  1.00  0.44           O  
HETATM  368  O   HOH T 367       1.420  33.677   9.678  1.00  0.44           O  
HETATM  369  O   HOH T 368      12.918  28.363  23.563  1.00  0.44           O  
HETATM  370  O   HOH T 369       6.728   8.227  -1.493  1.00  0.44           O  
HETATM  371  O   HOH T 370     -29.928  13.675   8.434  1.00  0.44           O  
HETATM  372  O   HOH T 371       1.343  15.414   7.385  1.00  0.44           O  
HETATM  373  O   HOH T 372      20.719  16.535  32.812  1.00  0.45           O  
HETATM  374  O   HOH T 373      -0.587  15.100   5.378  1.00  0.45           O  
HETATM  375  O   HOH T 374      30.013  22.889   3.660  1.00  0.45           O  
HETATM  376  O   HOH T 375      32.612  17.769   5.675  1.00  0.45           O  
HETATM  377  O   HOH T 376      28.661  22.833  -2.155  1.00  0.45           O  
HETATM  378  O   HOH T 377     -10.109  35.931  21.517  1.00  0.45           O  
HETATM  379  O   HOH T 378      12.382  15.484  37.860  1.00  0.45           O  
HETATM  380  O   HOH T 379      -8.037  11.540 -19.204  1.00  0.45           O  
HETATM  381  O   HOH T 380      13.640  24.729  24.419  1.00  0.45           O  
HETATM  382  O   HOH T 381      11.783  19.667  36.575  1.00  0.45           O  
HETATM  383  O   HOH T 382      -3.957  -3.249  40.208  1.00  0.45           O  
HETATM  384  O   HOH T 383     -12.835   6.593  21.037  1.00  0.45           O  
HETATM  385  O   HOH T 384      -7.838  13.253  16.306  1.00  0.45           O  
HETATM  386  O   HOH T 385      11.273  -3.143  22.783  1.00  0.45           O  
HETATM  387  O   HOH T 386      -6.857  23.477  -8.601  1.00  0.45           O  
HETATM  388  O   HOH T 387       8.542  -1.171  29.110  1.00  0.45           O  
HETATM  389  O   HOH T 388      -5.663   1.543   3.419  1.00  0.45           O  
HETATM  390  O   HOH T 389      11.569  15.761   4.054  1.00  0.45           O  
HETATM  391  O   HOH T 390     -16.293  26.681  17.042  1.00  0.45           O  
HETATM  392  O   HOH T 391       6.488  37.122   1.478  1.00  0.45           O  
HETATM  393  O   HOH T 392     -10.209  33.179  21.799  1.00  0.45           O  
HETATM  394  O   HOH T 393      -6.527  37.079  34.682  1.00  0.45           O  
HETATM  395  O   HOH T 394      27.196   7.196  -7.831  1.00  0.45           O  
HETATM  396  O   HOH T 395      13.978  28.554  20.978  1.00  0.46           O  
HETATM  397  O   HOH T 396      -6.416  -2.616 -11.089  1.00  0.46           O  
HETATM  398  O   HOH T 397      18.594  -3.659  20.162  1.00  0.46           O  
HETATM  399  O   HOH T 398     -20.474  14.630  20.845  1.00  0.46           O  
HETATM  400  O   HOH T 399      19.490  13.421  12.887  1.00  0.46           O  
HETATM  401  O   HOH T 400     -24.385   4.922   3.081  1.00  0.46           O  
HETATM  402  O   HOH T 401     -12.523   3.055  38.656  1.00  0.46           O  
HETATM  403  O   HOH T 402       0.294  -3.146  10.270  1.00  0.46           O  
HETATM  404  O   HOH T 403       9.170  19.526  41.311  1.00  0.46           O  
HETATM  405  O   HOH T 404     -16.013  27.606  29.948  1.00  0.46           O  
HETATM  406  O   HOH T 405      -6.406  10.313  45.920  1.00  0.46           O  
HETATM  407  O   HOH T 406      28.482  27.538  -3.040  1.00  0.46           O  
HETATM  408  O   HOH T 407       0.282   3.271 -13.846  1.00  0.46           O  
HETATM  409  O   HOH T 408     -13.825   4.524 -14.331  1.00  0.46           O  
HETATM  410  O   HOH T 409      -8.205   3.042  33.305  1.00  0.46           O  
HETATM  411  O   HOH T 410       1.591  32.654  36.036  1.00  0.46           O  
HETATM  412  O   HOH T 411      -7.240  26.747  -5.920  1.00  0.46           O  
HETATM  413  O   HOH T 412     -24.300   4.801   5.896  1.00  0.46           O  
HETATM  414  O   HOH T 413      -4.129  20.884  53.560  1.00  0.46           O  
HETATM  415  O   HOH T 414      27.722  22.865  26.728  1.00  0.46           O  
HETATM  416  O   HOH T 415     -13.729   6.487  43.735  1.00  0.46           O  
HETATM  417  O   HOH T 416      33.821  16.365   7.603  1.00  0.46           O  
HETATM  418  O   HOH T 417      25.049  23.207  25.947  1.00  0.46           O  
HETATM  419  O   HOH T 418       6.503   0.588  13.056  1.00  0.46           O  
HETATM  420  O   HOH T 419      -9.770  11.746 -21.563  1.00  0.46           O  
HETATM  421  O   HOH T 420      -8.951  38.074  -1.631  1.00  0.46           O  
HETATM  422  O   HOH T 421     -12.893   7.373  35.863  1.00  0.46           O  
HETATM  423  O   HOH T 422      29.399  15.439  22.790  1.00  0.46           O  
HETATM  424  O   HOH T 423      19.947  21.640  21.657  1.00  0.46           O  
HETATM  425  O   HOH T 424     -16.090  16.414  42.002  1.00  0.46           O  
HETATM  426  O   HOH T 425      13.721  28.576  16.591  1.00  0.46           O  
HETATM  427  O   HOH T 426     -10.000  27.051  -6.135  1.00  0.47           O  
HETATM  428  O   HOH T 427      -8.117  18.146 -10.918  1.00  0.47           O  
HETATM  429  O   HOH T 428     -26.516  18.363   5.292  1.00  0.47           O  
HETATM  430  O   HOH T 429      30.724  19.153  -6.729  1.00  0.47           O  
HETATM  431  O   HOH T 430       7.333   8.968  -6.889  1.00  0.47           O  
HETATM  432  O   HOH T 431      -7.303  16.422  14.512  1.00  0.47           O  
HETATM  433  O   HOH T 432       7.201  -6.145  32.498  1.00  0.47           O  
HETATM  434  O   HOH T 433      32.194  29.138  11.481  1.00  0.47           O  
HETATM  435  O   HOH T 434      -4.642  25.799  12.442  1.00  0.47           O  
HETATM  436  O   HOH T 435      20.128  26.601  16.552  1.00  0.47           O  
HETATM  437  O   HOH T 436      17.143  -6.656  21.847  1.00  0.47           O  
HETATM  438  O   HOH T 437      10.318  36.747   1.778  1.00  0.47           O  
HETATM  439  O   HOH T 438       2.746  34.239  38.112  1.00  0.47           O  
HETATM  440  O   HOH T 439      25.382  32.910  -3.510  1.00  0.47           O  
HETATM  441  O   HOH T 440      -8.712  25.420  -7.883  1.00  0.47           O  
HETATM  442  O   HOH T 441      -6.079   3.071  40.559  1.00  0.47           O  
HETATM  443  O   HOH T 442      14.022   1.348   2.272  1.00  0.47           O  
HETATM  444  O   HOH T 443      18.178  17.691  23.364  1.00  0.47           O  
HETATM  445  O   HOH T 444      28.344  -3.536  11.253  1.00  0.47           O  
HETATM  446  O   HOH T 445      10.969  28.293  16.211  1.00  0.47           O  
HETATM  447  O   HOH T 446      -1.708  39.511  21.782  1.00  0.47           O  
HETATM  448  O   HOH T 447       8.073  17.554  39.788  1.00  0.48           O  
HETATM  449  O   HOH T 448      11.299  -0.364  18.327  1.00  0.48           O  
HETATM  450  O   HOH T 449      13.050  22.569 -16.167  1.00  0.48           O  
HETATM  451  O   HOH T 450      -0.104  28.158   4.375  1.00  0.48           O  
HETATM  452  O   HOH T 451      -5.106  32.048   7.318  1.00  0.48           O  
HETATM  453  O   HOH T 452      -2.258  37.208  11.802  1.00  0.48           O  
HETATM  454  O   HOH T 453      33.172  15.334  10.040  1.00  0.48           O  
HETATM  455  O   HOH T 454     -18.021  25.135  34.835  1.00  0.48           O  
HETATM  456  O   HOH T 455     -20.908  11.243  -1.328  1.00  0.48           O  
HETATM  457  O   HOH T 456     -11.602  18.872 -14.180  1.00  0.48           O  
HETATM  458  O   HOH T 457       3.187  10.519  41.299  1.00  0.48           O  
HETATM  459  O   HOH T 458      -9.061  25.584  48.299  1.00  0.48           O  
HETATM  460  O   HOH T 459       3.198   6.292  33.531  1.00  0.48           O  
HETATM  461  O   HOH T 460     -13.915  30.837  35.763  1.00  0.48           O  
HETATM  462  O   HOH T 461       5.908  37.287   4.274  1.00  0.48           O  
HETATM  463  O   HOH T 462     -12.178   4.645  36.298  1.00  0.48           O  
HETATM  464  O   HOH T 463      -0.912   1.472   9.850  1.00  0.48           O  
HETATM  465  O   HOH T 464       8.857  -0.089   1.446  1.00  0.48           O  
HETATM  466  O   HOH T 465      -9.142  20.265  -7.695  1.00  0.48           O  
HETATM  467  O   HOH T 466      25.790  12.247  21.098  1.00  0.48           O  
HETATM  468  O   HOH T 467      -6.688   2.433 -17.218  1.00  0.48           O  
HETATM  469  O   HOH T 468       4.143  38.512  18.661  1.00  0.48           O  
HETATM  470  O   HOH T 469       3.067   9.244  38.956  1.00  0.48           O  
HETATM  471  O   HOH T 470       7.994   0.867  -0.965  1.00  0.48           O  
HETATM  472  O   HOH T 471      -1.928  -0.389  27.174  1.00  0.48           O  
HETATM  473  O   HOH T 472      28.451  18.891  25.884  1.00  0.48           O  
HETATM  474  O   HOH T 473     -28.343  11.484   4.877  1.00  0.48           O  
HETATM  475  O   HOH T 474       9.093   5.666  11.086  1.00  0.48           O  
HETATM  476  O   HOH T 475      30.039  31.718  -0.640  1.00  0.48           O  
HETATM  477  O   HOH T 476      -9.758   3.629   8.096  1.00  0.48           O  
HETATM  478  O   HOH T 477      -9.983  19.764 -12.070  1.00  0.48           O  
HETATM  479  O   HOH T 478      10.811  -2.269  16.408  1.00  0.48           O  
HETATM  480  O   HOH T 479      10.256  23.588  39.834  1.00  0.48           O  
HETATM  481  O   HOH T 480     -17.151  23.696  -6.857  1.00  0.48           O  
HETATM  482  O   HOH T 481      -9.627   5.424  32.453  1.00  0.49           O  
HETATM  483  O   HOH T 482     -13.090  37.013  27.265  1.00  0.49           O  
HETATM  484  O   HOH T 483      22.872  -4.368  26.174  1.00  0.49           O  
HETATM  485  O   HOH T 484      -0.463  13.641 -15.370  1.00  0.49           O  
HETATM  486  O   HOH T 485      -9.711  26.108  44.011  1.00  0.49           O  
HETATM  487  O   HOH T 486      -1.915   0.331 -16.398  1.00  0.49           O  
HETATM  488  O   HOH T 487     -11.729   4.253  21.988  1.00  0.49           O  
HETATM  489  O   HOH T 488      19.481  -0.308  11.208  1.00  0.49           O  
HETATM  490  O   HOH T 489      10.407  28.450  13.517  1.00  0.49           O  
HETATM  491  O   HOH T 490     -11.836  19.010  -7.548  1.00  0.49           O  
HETATM  492  O   HOH T 491      19.557  -0.115   8.206  1.00  0.49           O  
HETATM  493  O   HOH T 492     -18.050  15.860  -1.423  1.00  0.49           O  
HETATM  494  O   HOH T 493      -8.893   3.329  28.314  1.00  0.49           O  
HETATM  495  O   HOH T 494      -3.185  -0.683  14.314  1.00  0.49           O  
HETATM  496  O   HOH T 495       2.383   1.575  -4.907  1.00  0.49           O  
HETATM  497  O   HOH T 496      10.782  38.400  -5.454  1.00  0.49           O  
HETATM  498  O   HOH T 497      10.332  39.346   2.608  1.00  0.49           O  
HETATM  499  O   HOH T 498     -11.274  28.296  50.390  1.00  0.49           O  
HETATM  500  O   HOH T 499       8.685  19.604  11.197  1.00  0.49           O  
HETATM  501  O   HOH T 500      -6.475   4.785  -4.071  1.00  0.49           O  
HETATM  502  O   HOH T 501      17.285   7.301  -9.980  1.00  0.49           O  
HETATM  503  O   HOH T 502      25.881  -2.694  12.462  1.00  0.49           O  
HETATM  504  O   HOH T 503     -11.422   3.052  41.294  1.00  0.50           O  
HETATM  505  O   HOH T 504      27.826  32.594  -2.047  1.00  0.50           O  
HETATM  506  O   HOH T 505     -16.669   9.716  39.127  1.00  0.50           O  
HETATM  507  O   HOH T 506       7.076   3.205   8.992  1.00  0.50           O  
HETATM  508  O   HOH T 507      -9.839  18.501  49.415  1.00  0.50           O  
HETATM  509  O   HOH T 508      30.487  29.352  -2.146  1.00  0.50           O  
HETATM  510  O   HOH T 509       7.987  11.390 -18.552  1.00  0.50           O  
HETATM  511  O   HOH T 510     -12.436  33.577  31.533  1.00  0.50           O  
HETATM  512  O   HOH T 511       2.976  21.721 -13.808  1.00  0.50           O  
HETATM  513  O   HOH T 512       5.097   8.541  40.672  1.00  0.50           O  
HETATM  514  O   HOH T 513     -17.818  18.455  -2.740  1.00  0.50           O  
HETATM  515  O   HOH T 514       1.841  39.668  19.945  1.00  0.50           O  
HETATM  516  O   HOH T 515       9.100  30.533  38.264  1.00  0.50           O  
HETATM  517  O   HOH T 516      10.524  -0.174   7.295  1.00  0.50           O  
HETATM  518  O   HOH T 517     -12.413  31.971  33.851  1.00  0.50           O  
HETATM  519  O   HOH T 518     -12.233  18.324 -11.613  1.00  0.50           O  
HETATM  520  O   HOH T 519      13.746  17.939  37.711  1.00  0.50           O  
HETATM  521  O   HOH T 520      -9.345  36.090   0.380  1.00  0.50           O  
HETATM  522  O   HOH T 521      26.369   4.146  23.559  1.00  0.50           O  
HETATM  523  O   HOH T 522      30.628  23.231  -0.271  1.00  0.50           O  
HETATM  524  O   HOH T 523       5.597  22.659 -13.989  1.00  0.50           O  
HETATM  525  O   HOH T 524     -13.795   4.919 -11.554  1.00  0.50           O  
HETATM  526  O   HOH T 525      29.397  24.739   1.725  1.00  0.50           O  
HETATM  527  O   HOH T 526       0.089  -2.443  24.185  1.00  0.50           O  
HETATM  528  O   HOH T 527     -12.045   6.699  -3.303  1.00  0.50           O  
HETATM  529  O   HOH T 528      30.055  30.813  -4.535  1.00  0.50           O  
HETATM  530  O   HOH T 529       2.305  14.223  39.584  1.00  0.50           O  
HETATM  531  O   HOH T 530     -11.309  31.559  50.938  1.00  0.50           O  
HETATM  532  O   HOH T 531      10.707  15.786 -17.090  1.00  0.50           O  
HETATM  533  O   HOH T 532       5.928  37.015  20.294  1.00  0.50           O  
HETATM  534  O   HOH T 533     -12.014   8.191  33.329  1.00  0.51           O  
HETATM  535  O   HOH T 534       4.163   0.759  14.525  1.00  0.51           O  
HETATM  536  O   HOH T 535       1.714   2.997  37.498  1.00  0.51           O  
HETATM  537  O   HOH T 536     -17.155  23.559  24.292  1.00  0.51           O  
HETATM  538  O   HOH T 537      19.819  -8.375  31.059  1.00  0.51           O  
HETATM  539  O   HOH T 538       9.706  19.400  38.522  1.00  0.51           O  
HETATM  540  O   HOH T 539      -5.763   6.272 -17.126  1.00  0.51           O  
HETATM  541  O   HOH T 540       4.893  12.178 -15.092  1.00  0.51           O  
HETATM  542  O   HOH T 541      29.436   0.832   3.241  1.00  0.51           O  
HETATM  543  O   HOH T 542     -13.872   5.907   8.718  1.00  0.51           O  
HETATM  544  O   HOH T 543      11.171  -4.446  20.368  1.00  0.51           O  
HETATM  545  O   HOH T 544     -14.430  13.999 -16.288  1.00  0.51           O  
HETATM  546  O   HOH T 545      -4.371  34.237  -3.962  1.00  0.51           O  
HETATM  547  O   HOH T 546     -28.915  15.321   6.369  1.00  0.51           O  
HETATM  548  O   HOH T 547       5.021   4.082  -2.426  1.00  0.51           O  
HETATM  549  O   HOH T 548      21.321  -1.657   2.212  1.00  0.51           O  
HETATM  550  O   HOH T 549      15.574  28.268  18.678  1.00  0.51           O  
HETATM  551  O   HOH T 550      14.816  29.458  -9.441  1.00  0.51           O  
HETATM  552  O   HOH T 551      -8.932   8.894 -18.892  1.00  0.51           O  
HETATM  553  O   HOH T 552      26.422  20.816  25.570  1.00  0.51           O  
HETATM  554  O   HOH T 553      -6.288  -1.503  40.007  1.00  0.51           O  
HETATM  555  O   HOH T 554       6.676  31.568  -9.880  1.00  0.51           O  
HETATM  556  O   HOH T 555     -22.736  16.927  -0.526  1.00  0.52           O  
HETATM  557  O   HOH T 556     -12.402  25.863  44.743  1.00  0.52           O  
HETATM  558  O   HOH T 557      19.304  -3.200  17.567  1.00  0.52           O  
HETATM  559  O   HOH T 558     -10.645  28.773   0.192  1.00  0.52           O  
HETATM  560  O   HOH T 559      22.830  -0.505  19.471  1.00  0.52           O  
HETATM  561  O   HOH T 560      22.400  -1.633   4.604  1.00  0.52           O  
HETATM  562  O   HOH T 561      17.561   0.566   6.303  1.00  0.52           O  
HETATM  563  O   HOH T 562      29.917   0.458   6.060  1.00  0.52           O  
HETATM  564  O   HOH T 563      18.239  38.306   4.829  1.00  0.52           O  
HETATM  565  O   HOH T 564      32.385   1.452  15.381  1.00  0.52           O  
HETATM  566  O   HOH T 565     -17.033  18.611  40.416  1.00  0.52           O  
HETATM  567  O   HOH T 566      -8.904  19.241  25.170  1.00  0.52           O  
HETATM  568  O   HOH T 567      11.306   5.643  -2.575  1.00  0.52           O  
HETATM  569  O   HOH T 568      -5.581  12.173 -17.920  1.00  0.52           O  
HETATM  570  O   HOH T 569      11.064  24.314  36.053  1.00  0.52           O  
HETATM  571  O   HOH T 570      -9.892   7.140  -4.724  1.00  0.52           O  
HETATM  572  O   HOH T 571       7.236  35.045   5.102  1.00  0.52           O  
HETATM  573  O   HOH T 572      10.588   8.057 -12.912  1.00  0.53           O  
HETATM  574  O   HOH T 573       2.487  26.836  46.213  1.00  0.53           O  
HETATM  575  O   HOH T 574      16.988  -1.672  17.998  1.00  0.53           O  
HETATM  576  O   HOH T 575      -4.116  39.603  23.326  1.00  0.53           O  
HETATM  577  O   HOH T 576      -2.371  -2.378 -11.199  1.00  0.53           O  
HETATM  578  O   HOH T 577     -13.563   7.074  28.344  1.00  0.53           O  
HETATM  579  O   HOH T 578     -10.522   5.042  16.951  1.00  0.53           O  
HETATM  580  O   HOH T 579       4.057  33.014   6.336  1.00  0.53           O  
HETATM  581  O   HOH T 580       1.799  17.043  43.900  1.00  0.53           O  
HETATM  582  O   HOH T 581     -12.058   4.688   4.722  1.00  0.53           O  
HETATM  583  O   HOH T 582      -9.570  33.419  -0.586  1.00  0.53           O  
HETATM  584  O   HOH T 583       1.095  34.131  40.419  1.00  0.53           O  
HETATM  585  O   HOH T 584     -14.728   5.562  36.927  1.00  0.54           O  
HETATM  586  O   HOH T 585     -13.801   4.123  42.267  1.00  0.54           O  
HETATM  587  O   HOH T 586      -3.804  34.957  38.843  1.00  0.54           O  
HETATM  588  O   HOH T 587     -11.434  23.542  46.130  1.00  0.54           O  
HETATM  589  O   HOH T 588      14.791   1.304  19.349  1.00  0.54           O  
HETATM  590  O   HOH T 589       8.175  35.089   2.566  1.00  0.54           O  
HETATM  591  O   HOH T 590      -4.882   4.086  25.827  1.00  0.54           O  
HETATM  592  O   HOH T 591      -1.046   1.195  -7.085  1.00  0.54           O  
HETATM  593  O   HOH T 592      -9.800  34.934  39.697  1.00  0.54           O  
HETATM  594  O   HOH T 593     -22.205   5.634   1.417  1.00  0.54           O  
HETATM  595  O   HOH T 594     -16.149  14.446  46.202  1.00  0.54           O  
HETATM  596  O   HOH T 595       2.664   3.068 -12.919  1.00  0.54           O  
HETATM  597  O   HOH T 596      -7.519   3.200   2.298  1.00  0.54           O  
HETATM  598  O   HOH T 597       8.145  37.416  18.734  1.00  0.54           O  
HETATM  599  O   HOH T 598      17.757  24.384  23.420  1.00  0.54           O  
HETATM  600  O   HOH T 599      -6.319   2.828  27.705  1.00  0.54           O  
HETATM  601  O   HOH T 600       1.701  -4.198  -0.344  1.00  0.55           O  
HETATM  602  O   HOH T 601     -20.370   7.160  -1.385  1.00  0.55           O  
HETATM  603  O   HOH T 602      15.323  23.525 -14.938  1.00  0.55           O  
HETATM  604  O   HOH T 603     -15.768  15.960  35.572  1.00  0.55           O  
HETATM  605  O   HOH T 604      24.469   0.427  22.549  1.00  0.55           O  
HETATM  606  O   HOH T 605     -15.675  32.574   4.691  1.00  0.55           O  
HETATM  607  O   HOH T 606      -0.224  -0.238  22.553  1.00  0.55           O  
HETATM  608  O   HOH T 607       6.455  29.378 -11.435  1.00  0.55           O  
HETATM  609  O   HOH T 608      23.490  -3.240   2.430  1.00  0.55           O  
HETATM  610  O   HOH T 609       0.720  34.903  34.552  1.00  0.55           O  
HETATM  611  O   HOH T 610       9.914  30.125  11.393  1.00  0.55           O  
HETATM  612  O   HOH T 611       6.344  14.481  42.046  1.00  0.55           O  
HETATM  613  O   HOH T 612     -23.528  24.264   9.668  1.00  0.55           O  
HETATM  614  O   HOH T 613      24.160  26.767  -7.223  1.00  0.55           O  
HETATM  615  O   HOH T 614      15.436  -7.190  19.429  1.00  0.55           O  
HETATM  616  O   HOH T 615      17.607   8.481  35.784  1.00  0.55           O  
HETATM  617  O   HOH T 616      26.734  31.511  10.668  1.00  0.55           O  
HETATM  618  O   HOH T 617      -4.819   2.331  42.933  1.00  0.56           O  
HETATM  619  O   HOH T 618       0.710   9.789  40.300  1.00  0.56           O  
HETATM  620  O   HOH T 619      -4.044   3.235  17.086  1.00  0.56           O  
HETATM  621  O   HOH T 620      -0.058  34.042  37.944  1.00  0.56           O  
HETATM  622  O   HOH T 621      31.628   6.529  -3.253  1.00  0.56           O  
HETATM  623  O   HOH T 622     -14.884  28.632  32.357  1.00  0.56           O  
HETATM  624  O   HOH T 623     -12.137   2.414 -13.852  1.00  0.56           O  
HETATM  625  O   HOH T 624      10.588   6.541  36.472  1.00  0.56           O  
HETATM  626  O   HOH T 625       6.551  25.173  19.327  1.00  0.56           O  
HETATM  627  O   HOH T 626     -13.577   6.440  -0.163  1.00  0.56           O  
HETATM  628  O   HOH T 627      31.522   2.397  13.112  1.00  0.56           O  
HETATM  629  O   HOH T 628      -3.809  14.507 -17.670  1.00  0.56           O  
HETATM  630  O   HOH T 629      23.529  38.901  -2.460  1.00  0.56           O  
HETATM  631  O   HOH T 630       8.458  21.588  39.684  1.00  0.56           O  
HETATM  632  O   HOH T 631      -9.756  35.548  -2.351  1.00  0.56           O  
HETATM  633  O   HOH T 632       0.144   6.306  41.409  1.00  0.57           O  
HETATM  634  O   HOH T 633     -12.153  16.985 -21.795  1.00  0.57           O  
HETATM  635  O   HOH T 634      16.078  26.756  21.083  1.00  0.57           O  
HETATM  636  O   HOH T 635      16.786   2.268  -4.399  1.00  0.57           O  
HETATM  637  O   HOH T 636     -21.188  26.815   8.167  1.00  0.57           O  
HETATM  638  O   HOH T 637      19.261  19.348 -15.884  1.00  0.57           O  
HETATM  639  O   HOH T 638      -8.315  -0.752 -11.167  1.00  0.57           O  
HETATM  640  O   HOH T 639     -14.840   7.340 -11.287  1.00  0.57           O  
HETATM  641  O   HOH T 640      25.157  30.097   4.198  1.00  0.57           O  
HETATM  642  O   HOH T 641      -9.535   3.004  30.902  1.00  0.57           O  
HETATM  643  O   HOH T 642       8.141  32.868   6.323  1.00  0.59           O  
HETATM  644  O   HOH T 643     -13.590  26.714  46.904  1.00  0.59           O  
HETATM  645  O   HOH T 644     -22.802  14.453  19.501  1.00  0.59           O  
HETATM  646  O   HOH T 645      34.853  29.289  12.191  1.00  0.59           O  
TER     647      HOH T 645 
