# Supplementary material for: Accurate Prediction of Hydration Sites of Proteins Using Energy Model With Atom Embedding
Source: Front Mol Biosci. 2021 Sep 20;8:756075. doi: 10.3389/fmolb.2021.756075 (PMC8488165; doi:10.3389/fmolb.2021.756075)
Supplement: Supplementary file 1 [file DataSheet1.ZIP › Data Sheet 1/Our_result_pdb/OppA_dataset_output/1B5J_watersite.pdb]

HEADER                                                        XXXX


JRNL        PMID   -1
HETATM    1  O   HOH T   0       5.382  14.967  -3.832  1.00  0.16           O  
HETATM    2  O   HOH T   1       7.394  15.415 -10.524  1.00  0.16           O  
HETATM    3  O   HOH T   2      19.126  19.987   6.209  1.00  0.17           O  
HETATM    4  O   HOH T   3      23.051  23.587  -1.429  1.00  0.17           O  
HETATM    5  O   HOH T   4      14.424  16.531  30.900  1.00  0.17           O  
HETATM    6  O   HOH T   5     -22.283  20.376  -2.831  1.00  0.18           O  
HETATM    7  O   HOH T   6      19.927  26.036  13.880  1.00  0.18           O  
HETATM    8  O   HOH T   7      -6.838   9.051   7.308  1.00  0.18           O  
HETATM    9  O   HOH T   8       9.166   6.610   6.626  1.00  0.18           O  
HETATM   10  O   HOH T   9      15.510  15.332  -8.656  1.00  0.19           O  
HETATM   11  O   HOH T  10      -8.114  22.780  23.251  1.00  0.19           O  
HETATM   12  O   HOH T  11      11.306  13.635  16.607  1.00  0.19           O  
HETATM   13  O   HOH T  12       0.843  12.579  -8.386  1.00  0.19           O  
HETATM   14  O   HOH T  13      -1.728   8.499   9.907  1.00  0.19           O  
HETATM   15  O   HOH T  14       6.506  30.165  14.537  1.00  0.20           O  
HETATM   16  O   HOH T  15       3.141  16.915   7.769  1.00  0.20           O  
HETATM   17  O   HOH T  16       7.032  10.827  -8.958  1.00  0.20           O  
HETATM   18  O   HOH T  17       5.561   3.806  31.025  1.00  0.20           O  
HETATM   19  O   HOH T  18     -17.202  23.273  24.326  1.00  0.20           O  
HETATM   20  O   HOH T  19     -13.304  13.473 -14.562  1.00  0.20           O  
HETATM   21  O   HOH T  20      -1.784  28.336   1.965  1.00  0.20           O  
HETATM   22  O   HOH T  21      -9.182  22.848  44.459  1.00  0.21           O  
HETATM   23  O   HOH T  22       3.205   5.360  30.863  1.00  0.21           O  
HETATM   24  O   HOH T  23      17.392  13.527   4.539  1.00  0.21           O  
HETATM   25  O   HOH T  24     -20.779  22.553   1.965  1.00  0.21           O  
HETATM   26  O   HOH T  25       8.836   1.312  25.569  1.00  0.21           O  
HETATM   27  O   HOH T  26      31.412  11.286   8.274  1.00  0.21           O  
HETATM   28  O   HOH T  27      -1.125  30.279  28.451  1.00  0.21           O  
HETATM   29  O   HOH T  28      -9.658  11.629  33.207  1.00  0.21           O  
HETATM   30  O   HOH T  29      -3.870  29.764  12.523  1.00  0.22           O  
HETATM   31  O   HOH T  30      17.322   5.291  21.862  1.00  0.22           O  
HETATM   32  O   HOH T  31       3.226   4.088  34.996  1.00  0.22           O  
HETATM   33  O   HOH T  32      21.947  15.107 -11.751  1.00  0.22           O  
HETATM   34  O   HOH T  33      11.352  18.355   3.023  1.00  0.22           O  
HETATM   35  O   HOH T  34      22.160  25.351  17.179  1.00  0.22           O  
HETATM   36  O   HOH T  35       9.870   9.158  -5.978  1.00  0.23           O  
HETATM   37  O   HOH T  36      -0.557  30.773   1.741  1.00  0.23           O  
HETATM   38  O   HOH T  37     -12.830  10.832  20.553  1.00  0.23           O  
HETATM   39  O   HOH T  38      24.510  21.992  23.210  1.00  0.23           O  
HETATM   40  O   HOH T  39     -18.786  15.737  16.860  1.00  0.23           O  
HETATM   41  O   HOH T  40      -2.705  38.644  10.009  1.00  0.23           O  
HETATM   42  O   HOH T  41      -4.499  27.365  13.807  1.00  0.23           O  
HETATM   43  O   HOH T  42      -7.875  12.651  16.229  1.00  0.23           O  
HETATM   44  O   HOH T  43      -4.872  23.100  -7.514  1.00  0.23           O  
HETATM   45  O   HOH T  44      -0.762   6.709   0.608  1.00  0.23           O  
HETATM   46  O   HOH T  45       5.566  20.033  25.168  1.00  0.23           O  
HETATM   47  O   HOH T  46      -2.107   4.794   9.782  1.00  0.23           O  
HETATM   48  O   HOH T  47     -25.977  15.777  -1.057  1.00  0.23           O  
HETATM   49  O   HOH T  48      -5.479  34.321  33.528  1.00  0.24           O  
HETATM   50  O   HOH T  49       4.357  10.252  30.803  1.00  0.24           O  
HETATM   51  O   HOH T  50       8.623  24.024   1.977  1.00  0.24           O  
HETATM   52  O   HOH T  51      36.822  11.209  -0.545  1.00  0.24           O  
HETATM   53  O   HOH T  52      28.845   3.027   6.071  1.00  0.24           O  
HETATM   54  O   HOH T  53       8.169  15.323  -3.547  1.00  0.24           O  
HETATM   55  O   HOH T  54       3.697   6.603  36.171  1.00  0.24           O  
HETATM   56  O   HOH T  55      -9.722  20.879   9.106  1.00  0.24           O  
HETATM   57  O   HOH T  56      -5.763  35.828  15.490  1.00  0.24           O  
HETATM   58  O   HOH T  57      -1.662  37.218  18.241  1.00  0.25           O  
HETATM   59  O   HOH T  58      13.030  -0.683  22.218  1.00  0.25           O  
HETATM   60  O   HOH T  59      15.336  14.957  37.772  1.00  0.25           O  
HETATM   61  O   HOH T  60      -4.146  32.424  40.816  1.00  0.26           O  
HETATM   62  O   HOH T  61       7.607  24.269   4.663  1.00  0.26           O  
HETATM   63  O   HOH T  62       1.537  21.617  18.839  1.00  0.26           O  
HETATM   64  O   HOH T  63      -0.381   5.729  -6.385  1.00  0.26           O  
HETATM   65  O   HOH T  64      10.274  23.329   4.046  1.00  0.26           O  
HETATM   66  O   HOH T  65     -22.766  16.659  13.673  1.00  0.26           O  
HETATM   67  O   HOH T  66     -10.903  29.458  17.369  1.00  0.26           O  
HETATM   68  O   HOH T  67      -4.955  26.095  50.575  1.00  0.26           O  
HETATM   69  O   HOH T  68     -11.875  31.606  29.368  1.00  0.26           O  
HETATM   70  O   HOH T  69      22.155  26.553  -4.883  1.00  0.27           O  
HETATM   71  O   HOH T  70       6.610   7.546   7.228  1.00  0.27           O  
HETATM   72  O   HOH T  71      -0.842  14.823   8.877  1.00  0.27           O  
HETATM   73  O   HOH T  72      -7.298  13.764  12.743  1.00  0.27           O  
HETATM   74  O   HOH T  73      11.406  25.448  -7.639  1.00  0.27           O  
HETATM   75  O   HOH T  74      29.771  17.817  20.767  1.00  0.27           O  
HETATM   76  O   HOH T  75      -1.618  21.650  12.715  1.00  0.27           O  
HETATM   77  O   HOH T  76      -4.797  -2.806  38.086  1.00  0.27           O  
HETATM   78  O   HOH T  77      -2.265  24.321  12.076  1.00  0.27           O  
HETATM   79  O   HOH T  78      -8.375  27.275  42.259  1.00  0.27           O  
HETATM   80  O   HOH T  79       9.781  30.936   4.077  1.00  0.28           O  
HETATM   81  O   HOH T  80     -22.467  18.875  -0.557  1.00  0.28           O  
HETATM   82  O   HOH T  81      15.363  14.795  -5.935  1.00  0.28           O  
HETATM   83  O   HOH T  82       9.001  21.946  17.783  1.00  0.28           O  
HETATM   84  O   HOH T  83      24.705  33.063  -4.036  1.00  0.28           O  
HETATM   85  O   HOH T  84      -7.023   7.239  -2.036  1.00  0.28           O  
HETATM   86  O   HOH T  85       7.659  20.419  23.407  1.00  0.28           O  
HETATM   87  O   HOH T  86     -11.217  23.601  -6.524  1.00  0.28           O  
HETATM   88  O   HOH T  87      27.835  15.882  20.417  1.00  0.28           O  
HETATM   89  O   HOH T  88      20.233   0.455   1.654  1.00  0.28           O  
HETATM   90  O   HOH T  89      -4.352   6.332  16.313  1.00  0.29           O  
HETATM   91  O   HOH T  90      25.675  -2.109   6.117  1.00  0.29           O  
HETATM   92  O   HOH T  91     -21.564  19.486   6.227  1.00  0.29           O  
HETATM   93  O   HOH T  92      -8.973  26.711  -3.745  1.00  0.29           O  
HETATM   94  O   HOH T  93      -0.836   2.445  10.501  1.00  0.29           O  
HETATM   95  O   HOH T  94     -11.524  27.011  34.393  1.00  0.29           O  
HETATM   96  O   HOH T  95       4.628  -1.713  13.102  1.00  0.29           O  
HETATM   97  O   HOH T  96       3.637  19.692  21.166  1.00  0.30           O  
HETATM   98  O   HOH T  97       1.657   4.916 -12.455  1.00  0.30           O  
HETATM   99  O   HOH T  98       9.793  13.110  -2.685  1.00  0.30           O  
HETATM  100  O   HOH T  99      10.223  13.527   3.066  1.00  0.30           O  
HETATM  101  O   HOH T 100      -4.314  19.459  16.164  1.00  0.30           O  
HETATM  102  O   HOH T 101       5.781  34.985   1.631  1.00  0.30           O  
HETATM  103  O   HOH T 102      -3.346  -3.285  40.410  1.00  0.30           O  
HETATM  104  O   HOH T 103     -23.885  18.777  12.199  1.00  0.30           O  
HETATM  105  O   HOH T 104      11.948   1.284   9.234  1.00  0.30           O  
HETATM  106  O   HOH T 105      38.735  11.130   1.539  1.00  0.30           O  
HETATM  107  O   HOH T 106      -1.503   7.284   3.253  1.00  0.30           O  
HETATM  108  O   HOH T 107      13.160  24.392  26.915  1.00  0.30           O  
HETATM  109  O   HOH T 108     -21.346  21.707   4.539  1.00  0.30           O  
HETATM  110  O   HOH T 109      -8.748  22.442  47.036  1.00  0.31           O  
HETATM  111  O   HOH T 110       1.210   4.805  38.865  1.00  0.31           O  
HETATM  112  O   HOH T 111      18.958  18.229  33.131  1.00  0.31           O  
HETATM  113  O   HOH T 112      22.328   8.292  24.139  1.00  0.31           O  
HETATM  114  O   HOH T 113       2.498  -2.521  11.516  1.00  0.31           O  
HETATM  115  O   HOH T 114       5.509  31.074 -10.706  1.00  0.31           O  
HETATM  116  O   HOH T 115     -12.098  10.318  32.708  1.00  0.31           O  
HETATM  117  O   HOH T 116      17.098   9.149  19.368  1.00  0.31           O  
HETATM  118  O   HOH T 117      -8.156  23.112   9.625  1.00  0.31           O  
HETATM  119  O   HOH T 118      29.968  15.186 -10.561  1.00  0.31           O  
HETATM  120  O   HOH T 119       2.637  21.176 -13.920  1.00  0.31           O  
HETATM  121  O   HOH T 120     -10.042  15.751  14.866  1.00  0.32           O  
HETATM  122  O   HOH T 121     -10.272  16.500 -12.627  1.00  0.32           O  
HETATM  123  O   HOH T 122      -5.222   6.801  18.712  1.00  0.32           O  
HETATM  124  O   HOH T 123     -12.266   6.460  23.571  1.00  0.32           O  
HETATM  125  O   HOH T 124       5.546  33.496  37.556  1.00  0.32           O  
HETATM  126  O   HOH T 125      13.041  13.430   2.776  1.00  0.32           O  
HETATM  127  O   HOH T 126     -11.769  38.158  30.115  1.00  0.32           O  
HETATM  128  O   HOH T 127     -16.733  29.867   6.747  1.00  0.32           O  
HETATM  129  O   HOH T 128       9.535  27.527  -8.255  1.00  0.32           O  
HETATM  130  O   HOH T 129       2.098  16.320   2.203  1.00  0.32           O  
HETATM  131  O   HOH T 130     -15.270  19.026  -6.904  1.00  0.32           O  
HETATM  132  O   HOH T 131      -8.196  -1.837  41.326  1.00  0.32           O  
HETATM  133  O   HOH T 132       8.624  12.274   5.034  1.00  0.32           O  
HETATM  134  O   HOH T 133      10.823   7.056   8.886  1.00  0.33           O  
HETATM  135  O   HOH T 134      -2.454  19.428   3.917  1.00  0.33           O  
HETATM  136  O   HOH T 135      22.322   0.114   6.442  1.00  0.33           O  
HETATM  137  O   HOH T 136     -12.645   8.446   0.715  1.00  0.33           O  
HETATM  138  O   HOH T 137      -3.712  37.426  14.265  1.00  0.33           O  
HETATM  139  O   HOH T 138      15.484  23.346  25.704  1.00  0.33           O  
HETATM  140  O   HOH T 139     -19.165   9.895  14.249  1.00  0.33           O  
HETATM  141  O   HOH T 140     -16.384  20.762  23.375  1.00  0.33           O  
HETATM  142  O   HOH T 141      19.730  21.740  21.355  1.00  0.33           O  
HETATM  143  O   HOH T 142      31.830   5.638   4.067  1.00  0.33           O  
HETATM  144  O   HOH T 143      11.430   9.979 -14.190  1.00  0.33           O  
HETATM  145  O   HOH T 144     -16.441  28.201  10.352  1.00  0.33           O  
HETATM  146  O   HOH T 145       8.907  13.183   9.507  1.00  0.33           O  
HETATM  147  O   HOH T 146      11.467  21.162  34.828  1.00  0.33           O  
HETATM  148  O   HOH T 147      23.443   2.011  20.728  1.00  0.33           O  
HETATM  149  O   HOH T 148      16.232  39.613   0.084  1.00  0.33           O  
HETATM  150  O   HOH T 149      14.849  14.682   4.603  1.00  0.33           O  
HETATM  151  O   HOH T 150     -13.123  30.784  44.335  1.00  0.33           O  
HETATM  152  O   HOH T 151      20.253  23.520  23.437  1.00  0.33           O  
HETATM  153  O   HOH T 152      21.712  25.362  -8.507  1.00  0.34           O  
HETATM  154  O   HOH T 153      -3.183  35.841  16.491  1.00  0.34           O  
HETATM  155  O   HOH T 154      -7.367  33.999  41.237  1.00  0.34           O  
HETATM  156  O   HOH T 155       5.422   3.370  10.657  1.00  0.34           O  
HETATM  157  O   HOH T 156      26.071   7.262  -5.630  1.00  0.34           O  
HETATM  158  O   HOH T 157       4.539  34.737  19.513  1.00  0.34           O  
HETATM  159  O   HOH T 158     -11.859  13.910 -16.879  1.00  0.34           O  
HETATM  160  O   HOH T 159     -11.377  28.654  13.476  1.00  0.34           O  
HETATM  161  O   HOH T 160      -1.974   8.429   7.122  1.00  0.34           O  
HETATM  162  O   HOH T 161       1.963  10.578  13.404  1.00  0.34           O  
HETATM  163  O   HOH T 162      20.568  24.567  -6.083  1.00  0.34           O  
HETATM  164  O   HOH T 163       0.718   2.527 -13.663  1.00  0.34           O  
HETATM  165  O   HOH T 164       9.572  30.152  10.540  1.00  0.34           O  
HETATM  166  O   HOH T 165      13.202  23.160  10.662  1.00  0.34           O  
HETATM  167  O   HOH T 166       2.985   9.926 -14.776  1.00  0.34           O  
HETATM  168  O   HOH T 167     -10.873  16.167 -15.413  1.00  0.34           O  
HETATM  169  O   HOH T 168      -1.406  12.436  43.317  1.00  0.34           O  
HETATM  170  O   HOH T 169      13.955  26.135  19.353  1.00  0.34           O  
HETATM  171  O   HOH T 170      11.149  25.967  23.527  1.00  0.34           O  
HETATM  172  O   HOH T 171      29.804  14.083  19.587  1.00  0.35           O  
HETATM  173  O   HOH T 172       0.834  11.393  32.275  1.00  0.35           O  
HETATM  174  O   HOH T 173       4.257  -1.221  15.893  1.00  0.35           O  
HETATM  175  O   HOH T 174       9.632   5.618  10.788  1.00  0.35           O  
HETATM  176  O   HOH T 175       3.708   7.907   3.401  1.00  0.35           O  
HETATM  177  O   HOH T 176      10.727  15.901   4.297  1.00  0.35           O  
HETATM  178  O   HOH T 177      23.428  13.030  -6.943  1.00  0.35           O  
HETATM  179  O   HOH T 178      -4.257  -0.806  11.070  1.00  0.35           O  
HETATM  180  O   HOH T 179      -0.801  13.100 -15.414  1.00  0.35           O  
HETATM  181  O   HOH T 180       2.819   8.026  31.406  1.00  0.35           O  
HETATM  182  O   HOH T 181       2.861  14.461  32.673  1.00  0.35           O  
HETATM  183  O   HOH T 182      35.845  23.620  10.797  1.00  0.35           O  
HETATM  184  O   HOH T 183     -19.509  21.208  -6.679  1.00  0.35           O  
HETATM  185  O   HOH T 184      -7.359   6.324   4.475  1.00  0.35           O  
HETATM  186  O   HOH T 185     -20.095  17.669  21.432  1.00  0.35           O  
HETATM  187  O   HOH T 186      10.370  14.927  -0.636  1.00  0.35           O  
HETATM  188  O   HOH T 187      13.894  22.529  28.834  1.00  0.35           O  
HETATM  189  O   HOH T 188     -10.665   8.353  -2.446  1.00  0.35           O  
HETATM  190  O   HOH T 189      -7.663   0.210  39.637  1.00  0.35           O  
HETATM  191  O   HOH T 190       9.316  -3.011  22.432  1.00  0.35           O  
HETATM  192  O   HOH T 191      -5.031  16.831   3.273  1.00  0.35           O  
HETATM  193  O   HOH T 192      10.397  -8.177  26.172  1.00  0.35           O  
HETATM  194  O   HOH T 193      33.051  20.766   7.060  1.00  0.36           O  
HETATM  195  O   HOH T 194      -3.974  17.007 -16.459  1.00  0.36           O  
HETATM  196  O   HOH T 195     -19.006  14.801  -0.083  1.00  0.36           O  
HETATM  197  O   HOH T 196      -1.735  -5.812  -0.962  1.00  0.36           O  
HETATM  198  O   HOH T 197     -14.533   8.552  20.524  1.00  0.36           O  
HETATM  199  O   HOH T 198      -8.852  10.562  46.045  1.00  0.36           O  
HETATM  200  O   HOH T 199      23.324  20.787  25.390  1.00  0.36           O  
HETATM  201  O   HOH T 200      29.855   1.054   2.560  1.00  0.36           O  
HETATM  202  O   HOH T 201     -23.595  18.803   9.432  1.00  0.36           O  
HETATM  203  O   HOH T 202       4.108  13.040  11.304  1.00  0.36           O  
HETATM  204  O   HOH T 203      -4.437   0.519 -17.197  1.00  0.36           O  
HETATM  205  O   HOH T 204      -1.866  38.721  28.206  1.00  0.36           O  
HETATM  206  O   HOH T 205      -0.225  15.008   5.031  1.00  0.36           O  
HETATM  207  O   HOH T 206      -8.167  15.355  16.920  1.00  0.37           O  
HETATM  208  O   HOH T 207       7.990  32.350  37.344  1.00  0.37           O  
HETATM  209  O   HOH T 208      11.156  29.554  12.649  1.00  0.37           O  
HETATM  210  O   HOH T 209      -8.408  17.936 -11.151  1.00  0.37           O  
HETATM  211  O   HOH T 210     -10.542   4.585   7.292  1.00  0.37           O  
HETATM  212  O   HOH T 211     -12.524  29.244  32.990  1.00  0.37           O  
HETATM  213  O   HOH T 212       0.741   0.275  38.912  1.00  0.37           O  
HETATM  214  O   HOH T 213      -6.539  25.299  -7.072  1.00  0.37           O  
HETATM  215  O   HOH T 214      12.877  28.197  23.459  1.00  0.37           O  
HETATM  216  O   HOH T 215      17.781  25.850  18.203  1.00  0.37           O  
HETATM  217  O   HOH T 216       5.730   5.459   8.847  1.00  0.37           O  
HETATM  218  O   HOH T 217     -12.602   5.133   5.466  1.00  0.37           O  
HETATM  219  O   HOH T 218     -20.988  16.631  -0.143  1.00  0.37           O  
HETATM  220  O   HOH T 219     -13.898  32.019  16.695  1.00  0.37           O  
HETATM  221  O   HOH T 220       4.993  -6.512  26.946  1.00  0.38           O  
HETATM  222  O   HOH T 221      24.654  14.462 -11.597  1.00  0.38           O  
HETATM  223  O   HOH T 222      22.569   6.501  -9.916  1.00  0.38           O  
HETATM  224  O   HOH T 223      -1.552  31.180  37.756  1.00  0.38           O  
HETATM  225  O   HOH T 224      24.495   6.723  -7.871  1.00  0.38           O  
HETATM  226  O   HOH T 225      20.316  12.374  25.998  1.00  0.38           O  
HETATM  227  O   HOH T 226     -17.737  27.600   7.925  1.00  0.38           O  
HETATM  228  O   HOH T 227      -3.126  30.590   9.960  1.00  0.38           O  
HETATM  229  O   HOH T 228      35.319  23.885   5.835  1.00  0.38           O  
HETATM  230  O   HOH T 229     -14.071  39.014  33.287  1.00  0.38           O  
HETATM  231  O   HOH T 230      11.989  23.603 -13.878  1.00  0.38           O  
HETATM  232  O   HOH T 231     -10.425  12.867  15.071  1.00  0.38           O  
HETATM  233  O   HOH T 232      -1.004   3.131  -5.740  1.00  0.38           O  
HETATM  234  O   HOH T 233     -14.174  15.437  44.332  1.00  0.38           O  
HETATM  235  O   HOH T 234       7.192  -4.135  29.379  1.00  0.38           O  
HETATM  236  O   HOH T 235      -0.819  32.693  27.061  1.00  0.38           O  
HETATM  237  O   HOH T 236      20.131  29.012  18.110  1.00  0.39           O  
HETATM  238  O   HOH T 237      18.609  -0.986  11.394  1.00  0.39           O  
HETATM  239  O   HOH T 238      -7.333  23.613  12.201  1.00  0.39           O  
HETATM  240  O   HOH T 239     -10.530  32.837  21.873  1.00  0.39           O  
HETATM  241  O   HOH T 240      -4.750  13.444 -17.212  1.00  0.39           O  
HETATM  242  O   HOH T 241      11.617  29.246  -8.872  1.00  0.39           O  
HETATM  243  O   HOH T 242       9.624  33.995   1.120  1.00  0.39           O  
HETATM  244  O   HOH T 243      18.391   7.919  21.586  1.00  0.39           O  
HETATM  245  O   HOH T 244      20.905  10.640  23.915  1.00  0.39           O  
HETATM  246  O   HOH T 245       5.059  22.342 -14.249  1.00  0.39           O  
HETATM  247  O   HOH T 246      23.398  -0.837   0.138  1.00  0.39           O  
HETATM  248  O   HOH T 247     -15.263   7.899  36.419  1.00  0.39           O  
HETATM  249  O   HOH T 248      -7.355  38.134  36.505  1.00  0.39           O  
HETATM  250  O   HOH T 249      30.862   3.026   4.231  1.00  0.39           O  
HETATM  251  O   HOH T 250      -0.106   0.876  29.050  1.00  0.39           O  
HETATM  252  O   HOH T 251      -0.078  33.749  29.534  1.00  0.39           O  
HETATM  253  O   HOH T 252      23.526  13.756  20.608  1.00  0.39           O  
HETATM  254  O   HOH T 253     -20.291  12.887  -1.721  1.00  0.39           O  
HETATM  255  O   HOH T 254      27.185  13.552  19.040  1.00  0.39           O  
HETATM  256  O   HOH T 255       2.133  35.733  22.543  1.00  0.39           O  
HETATM  257  O   HOH T 256       7.716  21.159  42.141  1.00  0.39           O  
HETATM  258  O   HOH T 257     -18.307  12.730  -3.658  1.00  0.39           O  
HETATM  259  O   HOH T 258      33.325  17.966   9.626  1.00  0.39           O  
HETATM  260  O   HOH T 259      -1.824   2.253 -14.922  1.00  0.40           O  
HETATM  261  O   HOH T 260      -8.051   2.622   9.638  1.00  0.40           O  
HETATM  262  O   HOH T 261       1.052  13.621  43.711  1.00  0.40           O  
HETATM  263  O   HOH T 262       0.519  22.743 -13.352  1.00  0.40           O  
HETATM  264  O   HOH T 263     -27.060  12.528   3.313  1.00  0.40           O  
HETATM  265  O   HOH T 264      32.260   7.359  -3.012  1.00  0.40           O  
HETATM  266  O   HOH T 265      -5.282  27.669  -6.500  1.00  0.40           O  
HETATM  267  O   HOH T 266      14.370   1.509   4.474  1.00  0.40           O  
HETATM  268  O   HOH T 267       1.190  37.212   0.302  1.00  0.40           O  
HETATM  269  O   HOH T 268       4.531   3.115   8.020  1.00  0.40           O  
HETATM  270  O   HOH T 269      29.437  23.348   3.443  1.00  0.40           O  
HETATM  271  O   HOH T 270       7.729  -7.296  26.933  1.00  0.40           O  
HETATM  272  O   HOH T 271      22.703  -4.388  26.161  1.00  0.40           O  
HETATM  273  O   HOH T 272      -9.771  39.381  36.242  1.00  0.40           O  
HETATM  274  O   HOH T 273      23.195  -1.981   2.599  1.00  0.40           O  
HETATM  275  O   HOH T 274     -21.093  16.813  17.761  1.00  0.40           O  
HETATM  276  O   HOH T 275       2.115  35.727  25.385  1.00  0.40           O  
HETATM  277  O   HOH T 276      10.457  36.017   2.796  1.00  0.40           O  
HETATM  278  O   HOH T 277     -11.336  30.153   5.349  1.00  0.40           O  
HETATM  279  O   HOH T 278      -6.409  36.696  34.421  1.00  0.40           O  
HETATM  280  O   HOH T 279     -15.191  22.010  16.485  1.00  0.40           O  
HETATM  281  O   HOH T 280      24.976  21.134  -7.958  1.00  0.40           O  
HETATM  282  O   HOH T 281      -1.511  31.569  40.652  1.00  0.41           O  
HETATM  283  O   HOH T 282      -3.666  22.561  15.515  1.00  0.41           O  
HETATM  284  O   HOH T 283     -12.193  36.231  15.269  1.00  0.41           O  
HETATM  285  O   HOH T 284     -14.055  28.170  44.563  1.00  0.41           O  
HETATM  286  O   HOH T 285       8.769  -1.635  28.816  1.00  0.41           O  
HETATM  287  O   HOH T 286      -0.477   0.024 -13.884  1.00  0.41           O  
HETATM  288  O   HOH T 287      12.007  18.834  36.298  1.00  0.41           O  
HETATM  289  O   HOH T 288      -4.746   2.503 -15.275  1.00  0.41           O  
HETATM  290  O   HOH T 289      12.598  14.988  37.750  1.00  0.41           O  
HETATM  291  O   HOH T 290      -6.483   2.358 -17.476  1.00  0.41           O  
HETATM  292  O   HOH T 291       7.456   7.690  17.224  1.00  0.41           O  
HETATM  293  O   HOH T 292       9.736  -5.324  29.448  1.00  0.41           O  
HETATM  294  O   HOH T 293      15.312  23.624 -15.260  1.00  0.41           O  
HETATM  295  O   HOH T 294      -9.523  35.989   3.489  1.00  0.41           O  
HETATM  296  O   HOH T 295       7.376  -2.038  12.666  1.00  0.41           O  
HETATM  297  O   HOH T 296       1.514  14.174  10.291  1.00  0.41           O  
HETATM  298  O   HOH T 297       8.284  29.034  16.408  1.00  0.41           O  
HETATM  299  O   HOH T 298       3.026   8.975   0.896  1.00  0.41           O  
HETATM  300  O   HOH T 299      -6.240  11.527 -18.503  1.00  0.41           O  
HETATM  301  O   HOH T 300      22.156  27.213  21.174  1.00  0.41           O  
HETATM  302  O   HOH T 301     -12.195   6.145  -3.244  1.00  0.41           O  
HETATM  303  O   HOH T 302      10.873   1.732  16.301  1.00  0.41           O  
HETATM  304  O   HOH T 303      -9.636  25.508  43.953  1.00  0.41           O  
HETATM  305  O   HOH T 304      -8.830  24.837  48.373  1.00  0.41           O  
HETATM  306  O   HOH T 305      15.996  -5.798  30.040  1.00  0.41           O  
HETATM  307  O   HOH T 306     -11.455  27.607  44.005  1.00  0.41           O  
HETATM  308  O   HOH T 307     -11.216  27.607  50.627  1.00  0.41           O  
HETATM  309  O   HOH T 308      -7.005   6.436 -18.130  1.00  0.41           O  
HETATM  310  O   HOH T 309     -12.064  34.476  45.351  1.00  0.41           O  
HETATM  311  O   HOH T 310       0.969  25.479 -13.217  1.00  0.41           O  
HETATM  312  O   HOH T 311     -12.181   5.434  -5.861  1.00  0.41           O  
HETATM  313  O   HOH T 312     -15.681  30.329  11.979  1.00  0.42           O  
HETATM  314  O   HOH T 313       3.246   6.397  33.503  1.00  0.42           O  
HETATM  315  O   HOH T 314      -1.499  10.565  41.239  1.00  0.42           O  
HETATM  316  O   HOH T 315      28.534  26.874  16.732  1.00  0.42           O  
HETATM  317  O   HOH T 316      -7.382  22.056  -8.581  1.00  0.42           O  
HETATM  318  O   HOH T 317     -11.494   4.109 -12.921  1.00  0.42           O  
HETATM  319  O   HOH T 318     -25.850  12.933  -1.016  1.00  0.42           O  
HETATM  320  O   HOH T 319      14.336  31.635   5.588  1.00  0.42           O  
HETATM  321  O   HOH T 320      -0.505   7.021  39.051  1.00  0.42           O  
HETATM  322  O   HOH T 321      10.717  -2.909   7.500  1.00  0.42           O  
HETATM  323  O   HOH T 322       8.173  -1.852   7.220  1.00  0.42           O  
HETATM  324  O   HOH T 323      28.497  -1.807   5.878  1.00  0.42           O  
HETATM  325  O   HOH T 324       3.859  14.274   8.511  1.00  0.42           O  
HETATM  326  O   HOH T 325      -7.714  31.694   3.791  1.00  0.42           O  
HETATM  327  O   HOH T 326      -6.432   9.496  45.587  1.00  0.42           O  
HETATM  328  O   HOH T 327      -5.897  34.120  43.632  1.00  0.42           O  
HETATM  329  O   HOH T 328      25.905  12.363  21.186  1.00  0.42           O  
HETATM  330  O   HOH T 329       2.698  14.540  41.694  1.00  0.42           O  
HETATM  331  O   HOH T 330       6.751   8.162  -1.802  1.00  0.42           O  
HETATM  332  O   HOH T 331      19.265  23.921  19.601  1.00  0.42           O  
HETATM  333  O   HOH T 332      -7.792  24.817  45.909  1.00  0.42           O  
HETATM  334  O   HOH T 333     -10.464  35.017  16.936  1.00  0.43           O  
HETATM  335  O   HOH T 334      37.855   8.764   0.242  1.00  0.43           O  
HETATM  336  O   HOH T 335     -12.698   6.960  35.531  1.00  0.43           O  
HETATM  337  O   HOH T 336       7.801  -1.605   9.908  1.00  0.43           O  
HETATM  338  O   HOH T 337     -24.871   7.301   4.050  1.00  0.43           O  
HETATM  339  O   HOH T 338       1.116  10.185  -0.762  1.00  0.43           O  
HETATM  340  O   HOH T 339       0.008  11.779  39.152  1.00  0.43           O  
HETATM  341  O   HOH T 340      -2.204  16.684   7.164  1.00  0.43           O  
HETATM  342  O   HOH T 341     -12.591  18.340  -7.605  1.00  0.43           O  
HETATM  343  O   HOH T 342       1.109   7.734   2.408  1.00  0.43           O  
HETATM  344  O   HOH T 343     -25.145  11.847   1.503  1.00  0.43           O  
HETATM  345  O   HOH T 344      14.924  40.631   2.382  1.00  0.43           O  
HETATM  346  O   HOH T 345      -1.869  -0.072 -16.319  1.00  0.43           O  
HETATM  347  O   HOH T 346     -17.397  23.007  -6.810  1.00  0.43           O  
HETATM  348  O   HOH T 347      20.885  16.380  32.492  1.00  0.43           O  
HETATM  349  O   HOH T 348     -12.123  19.790   8.825  1.00  0.43           O  
HETATM  350  O   HOH T 349      -7.593  25.441  50.612  1.00  0.43           O  
HETATM  351  O   HOH T 350      26.803  -2.586  10.349  1.00  0.43           O  
HETATM  352  O   HOH T 351       9.704  13.033 -17.049  1.00  0.43           O  
HETATM  353  O   HOH T 352     -11.192  32.891  11.818  1.00  0.43           O  
HETATM  354  O   HOH T 353       5.705  29.254 -12.808  1.00  0.43           O  
HETATM  355  O   HOH T 354      13.959  30.483  -9.031  1.00  0.43           O  
HETATM  356  O   HOH T 355     -18.683  21.997  22.413  1.00  0.44           O  
HETATM  357  O   HOH T 356       3.317   1.111  38.295  1.00  0.44           O  
HETATM  358  O   HOH T 357      37.246  23.443  15.510  1.00  0.44           O  
HETATM  359  O   HOH T 358      -7.266   8.959 -18.918  1.00  0.44           O  
HETATM  360  O   HOH T 359       3.093  32.383 -10.463  1.00  0.44           O  
HETATM  361  O   HOH T 360       9.006  22.611  37.289  1.00  0.44           O  
HETATM  362  O   HOH T 361     -11.959  34.248  29.875  1.00  0.44           O  
HETATM  363  O   HOH T 362     -13.330  18.445  -4.908  1.00  0.44           O  
HETATM  364  O   HOH T 363     -11.483   4.190  22.142  1.00  0.44           O  
HETATM  365  O   HOH T 364      -8.070  12.167  48.117  1.00  0.44           O  
HETATM  366  O   HOH T 365      21.952  25.754  23.499  1.00  0.44           O  
HETATM  367  O   HOH T 366       7.265   3.068   8.689  1.00  0.44           O  
HETATM  368  O   HOH T 367       8.739  30.952  30.715  1.00  0.44           O  
HETATM  369  O   HOH T 368       1.222  -0.227  27.020  1.00  0.44           O  
HETATM  370  O   HOH T 369      19.818  25.705  21.739  1.00  0.44           O  
HETATM  371  O   HOH T 370       2.727  23.867 -14.683  1.00  0.44           O  
HETATM  372  O   HOH T 371     -19.436   8.904  -0.853  1.00  0.44           O  
HETATM  373  O   HOH T 372       9.714   2.876   9.953  1.00  0.44           O  
HETATM  374  O   HOH T 373      12.185  32.257   3.823  1.00  0.44           O  
HETATM  375  O   HOH T 374       1.839  -4.256  -1.136  1.00  0.44           O  
HETATM  376  O   HOH T 375      -7.106  16.153  14.460  1.00  0.44           O  
HETATM  377  O   HOH T 376      27.588  16.084  -9.434  1.00  0.44           O  
HETATM  378  O   HOH T 377      10.318  23.372  39.642  1.00  0.44           O  
HETATM  379  O   HOH T 378      28.549  -3.250   8.274  1.00  0.44           O  
HETATM  380  O   HOH T 379       9.954  28.062  14.452  1.00  0.44           O  
HETATM  381  O   HOH T 380       7.538  14.886   7.209  1.00  0.44           O  
HETATM  382  O   HOH T 381      -9.214  20.132  -7.631  1.00  0.44           O  
HETATM  383  O   HOH T 382     -18.064  18.890  -7.442  1.00  0.45           O  
HETATM  384  O   HOH T 383      -6.074   2.496  39.863  1.00  0.45           O  
HETATM  385  O   HOH T 384      15.785  32.437  -9.570  1.00  0.45           O  
HETATM  386  O   HOH T 385      23.723  26.773  -7.146  1.00  0.45           O  
HETATM  387  O   HOH T 386      16.032  -1.618  10.543  1.00  0.45           O  
HETATM  388  O   HOH T 387      -9.655  36.661  36.961  1.00  0.45           O  
HETATM  389  O   HOH T 388      -9.981   6.666  -4.621  1.00  0.45           O  
HETATM  390  O   HOH T 389     -18.549  10.064 -11.338  1.00  0.45           O  
HETATM  391  O   HOH T 390     -16.572   8.899  38.962  1.00  0.45           O  
HETATM  392  O   HOH T 391      32.748  13.773  -7.353  1.00  0.45           O  
HETATM  393  O   HOH T 392      -3.394  -4.078  43.113  1.00  0.45           O  
HETATM  394  O   HOH T 393       3.713  31.104 -12.894  1.00  0.45           O  
HETATM  395  O   HOH T 394     -21.044  17.800  -2.661  1.00  0.45           O  
HETATM  396  O   HOH T 395      18.473  10.539  22.543  1.00  0.45           O  
HETATM  397  O   HOH T 396       2.115   7.461  38.320  1.00  0.45           O  
HETATM  398  O   HOH T 397      19.473  13.338  12.654  1.00  0.45           O  
HETATM  399  O   HOH T 398      31.126  19.152   8.444  1.00  0.45           O  
HETATM  400  O   HOH T 399     -12.906   6.324  21.068  1.00  0.45           O  
HETATM  401  O   HOH T 400      -1.115   8.008  41.546  1.00  0.45           O  
HETATM  402  O   HOH T 401     -19.273  16.598  -6.294  1.00  0.45           O  
HETATM  403  O   HOH T 402     -27.978   5.160   2.762  1.00  0.45           O  
HETATM  404  O   HOH T 403      22.468  23.908  -4.166  1.00  0.45           O  
HETATM  405  O   HOH T 404      13.067  26.875  -9.474  1.00  0.45           O  
HETATM  406  O   HOH T 405      33.075  17.913   6.777  1.00  0.45           O  
HETATM  407  O   HOH T 406      16.255   0.556  18.637  1.00  0.45           O  
HETATM  408  O   HOH T 407      -7.453  35.288   1.792  1.00  0.45           O  
HETATM  409  O   HOH T 408     -11.096  11.557  48.915  1.00  0.45           O  
HETATM  410  O   HOH T 409      -2.915  -3.798  -2.490  1.00  0.45           O  
HETATM  411  O   HOH T 410       4.010  12.202  41.273  1.00  0.45           O  
HETATM  412  O   HOH T 411      23.020  14.361  -9.328  1.00  0.45           O  
HETATM  413  O   HOH T 412     -11.318  38.823  33.947  1.00  0.45           O  
HETATM  414  O   HOH T 413      29.405  -3.285  10.894  1.00  0.45           O  
HETATM  415  O   HOH T 414      23.046  -2.263   5.326  1.00  0.45           O  
HETATM  416  O   HOH T 415       1.819  26.616  44.516  1.00  0.46           O  
HETATM  417  O   HOH T 416      26.403  23.539  -7.375  1.00  0.46           O  
HETATM  418  O   HOH T 417      12.820  34.109 -11.489  1.00  0.46           O  
HETATM  419  O   HOH T 418      29.751  27.992  12.681  1.00  0.46           O  
HETATM  420  O   HOH T 419       4.168   4.110 -11.601  1.00  0.46           O  
HETATM  421  O   HOH T 420     -19.244  12.622  -8.341  1.00  0.46           O  
HETATM  422  O   HOH T 421      21.206  13.744  33.397  1.00  0.46           O  
HETATM  423  O   HOH T 422     -12.967  30.830  12.613  1.00  0.46           O  
HETATM  424  O   HOH T 423     -11.664   4.510  19.376  1.00  0.46           O  
HETATM  425  O   HOH T 424     -11.174  32.284  17.140  1.00  0.46           O  
HETATM  426  O   HOH T 425      36.828   7.352  -4.343  1.00  0.46           O  
HETATM  427  O   HOH T 426     -12.078  30.618  15.172  1.00  0.46           O  
HETATM  428  O   HOH T 427      -8.980  24.340  -8.100  1.00  0.46           O  
HETATM  429  O   HOH T 428      -3.163   2.415   9.002  1.00  0.46           O  
HETATM  430  O   HOH T 429      25.142  22.800  25.838  1.00  0.46           O  
HETATM  431  O   HOH T 430      -1.609  36.289  29.387  1.00  0.46           O  
HETATM  432  O   HOH T 431     -15.921  15.321  35.600  1.00  0.46           O  
HETATM  433  O   HOH T 432     -18.183  17.862  -2.669  1.00  0.46           O  
HETATM  434  O   HOH T 433       6.573  12.055  10.416  1.00  0.46           O  
HETATM  435  O   HOH T 434     -11.438   4.815  41.922  1.00  0.46           O  
HETATM  436  O   HOH T 435     -12.120  37.838  36.490  1.00  0.46           O  
HETATM  437  O   HOH T 436      35.553  19.548   9.827  1.00  0.46           O  
HETATM  438  O   HOH T 437     -17.215  24.947  -4.925  1.00  0.46           O  
HETATM  439  O   HOH T 438     -17.773  10.342  -8.493  1.00  0.47           O  
HETATM  440  O   HOH T 439     -13.156   7.102  -7.823  1.00  0.47           O  
HETATM  441  O   HOH T 440      21.094  -0.796   4.041  1.00  0.47           O  
HETATM  442  O   HOH T 441      15.491  35.076  -8.796  1.00  0.47           O  
HETATM  443  O   HOH T 442      10.000  31.058  17.054  1.00  0.47           O  
HETATM  444  O   HOH T 443       1.843  12.221 -15.650  1.00  0.47           O  
HETATM  445  O   HOH T 444       2.742  37.806   5.955  1.00  0.47           O  
HETATM  446  O   HOH T 445      -5.969   1.514   4.838  1.00  0.47           O  
HETATM  447  O   HOH T 446     -19.308  15.629  19.593  1.00  0.47           O  
HETATM  448  O   HOH T 447       2.889  12.547  30.767  1.00  0.47           O  
HETATM  449  O   HOH T 448      -6.446   4.809  -3.347  1.00  0.47           O  
HETATM  450  O   HOH T 449     -27.260   7.870   2.604  1.00  0.47           O  
HETATM  451  O   HOH T 450     -14.505  17.745  42.494  1.00  0.47           O  
HETATM  452  O   HOH T 451     -13.806  29.928  35.437  1.00  0.47           O  
HETATM  453  O   HOH T 452      24.303  22.709  -5.774  1.00  0.47           O  
HETATM  454  O   HOH T 453      -0.373  27.598   4.269  1.00  0.47           O  
HETATM  455  O   HOH T 454     -11.449  36.555  47.052  1.00  0.47           O  
HETATM  456  O   HOH T 455      17.551  -6.520  21.110  1.00  0.47           O  
HETATM  457  O   HOH T 456       7.393   8.794  -7.182  1.00  0.47           O  
HETATM  458  O   HOH T 457      13.808  25.747 -14.463  1.00  0.47           O  
HETATM  459  O   HOH T 458      10.852  -4.303  27.072  1.00  0.47           O  
HETATM  460  O   HOH T 459       7.610  32.063  10.911  1.00  0.48           O  
HETATM  461  O   HOH T 460      15.340  -0.803   5.729  1.00  0.48           O  
HETATM  462  O   HOH T 461     -10.395  30.251  11.564  1.00  0.48           O  
HETATM  463  O   HOH T 462     -16.214   8.025  33.706  1.00  0.48           O  
HETATM  464  O   HOH T 463      13.044  22.491 -16.259  1.00  0.48           O  
HETATM  465  O   HOH T 464      29.944   0.562   5.297  1.00  0.48           O  
HETATM  466  O   HOH T 465      -5.500  -1.417  40.379  1.00  0.48           O  
HETATM  467  O   HOH T 466      19.771  26.616  16.531  1.00  0.48           O  
HETATM  468  O   HOH T 467      17.212  39.113   2.522  1.00  0.48           O  
HETATM  469  O   HOH T 468      10.819  24.873  37.199  1.00  0.48           O  
HETATM  470  O   HOH T 469       8.929  21.064  39.656  1.00  0.48           O  
HETATM  471  O   HOH T 470      13.846  36.577 -10.582  1.00  0.48           O  
HETATM  472  O   HOH T 471     -20.415  10.080  -7.861  1.00  0.48           O  
HETATM  473  O   HOH T 472     -11.699   3.587   9.699  1.00  0.48           O  
HETATM  474  O   HOH T 473      -1.887  40.190  -5.181  1.00  0.48           O  
HETATM  475  O   HOH T 474      28.669  23.350  -1.332  1.00  0.48           O  
HETATM  476  O   HOH T 475     -17.869  30.959   1.607  1.00  0.48           O  
HETATM  477  O   HOH T 476      11.930  20.993   9.875  1.00  0.48           O  
HETATM  478  O   HOH T 477     -18.690   9.139  16.827  1.00  0.48           O  
HETATM  479  O   HOH T 478      11.811  31.547   6.585  1.00  0.48           O  
HETATM  480  O   HOH T 479     -13.225  31.752  41.737  1.00  0.48           O  
HETATM  481  O   HOH T 480       9.365  20.089  36.082  1.00  0.48           O  
HETATM  482  O   HOH T 481      -9.067  35.288  39.359  1.00  0.48           O  
HETATM  483  O   HOH T 482      22.959  -3.301  30.071  1.00  0.48           O  
HETATM  484  O   HOH T 483      -2.361  36.631  11.851  1.00  0.49           O  
HETATM  485  O   HOH T 484      20.707  14.879  24.738  1.00  0.49           O  
HETATM  486  O   HOH T 485     -11.597  38.781  16.225  1.00  0.49           O  
HETATM  487  O   HOH T 486     -18.857  11.135  -5.888  1.00  0.49           O  
HETATM  488  O   HOH T 487      10.939  27.697  37.970  1.00  0.49           O  
HETATM  489  O   HOH T 488     -17.057  17.772  -5.090  1.00  0.49           O  
HETATM  490  O   HOH T 489      13.227  25.960  21.876  1.00  0.49           O  
HETATM  491  O   HOH T 490     -18.608  21.034  24.982  1.00  0.49           O  
HETATM  492  O   HOH T 491      17.880  38.020   4.970  1.00  0.49           O  
HETATM  493  O   HOH T 492      37.607   9.307  -2.495  1.00  0.49           O  
HETATM  494  O   HOH T 493       9.249  30.764  14.374  1.00  0.49           O  
HETATM  495  O   HOH T 494      11.431  23.881  34.522  1.00  0.49           O  
HETATM  496  O   HOH T 495      10.642  15.435 -16.992  1.00  0.49           O  
HETATM  497  O   HOH T 496      17.247   7.503 -10.187  1.00  0.49           O  
HETATM  498  O   HOH T 497     -21.033   9.264 -10.497  1.00  0.49           O  
HETATM  499  O   HOH T 498     -11.224  30.507  51.176  1.00  0.49           O  
HETATM  500  O   HOH T 499      -0.263  34.216  24.827  1.00  0.50           O  
HETATM  501  O   HOH T 500      17.319  31.452  -7.582  1.00  0.50           O  
HETATM  502  O   HOH T 501      -4.956  25.034  12.397  1.00  0.50           O  
HETATM  503  O   HOH T 502       9.738  -2.936  11.368  1.00  0.50           O  
HETATM  504  O   HOH T 503       9.569  19.712   9.982  1.00  0.50           O  
HETATM  505  O   HOH T 504     -10.594   4.709  16.913  1.00  0.50           O  
HETATM  506  O   HOH T 505       0.932   0.744 -11.607  1.00  0.50           O  
HETATM  507  O   HOH T 506      -6.508  -3.319 -11.155  1.00  0.50           O  
HETATM  508  O   HOH T 507      34.937   8.156  -2.537  1.00  0.50           O  
HETATM  509  O   HOH T 508      -3.039  34.745   9.854  1.00  0.50           O  
HETATM  510  O   HOH T 509     -24.429   6.113   6.548  1.00  0.50           O  
HETATM  511  O   HOH T 510     -19.773  10.476  -3.219  1.00  0.50           O  
HETATM  512  O   HOH T 511      30.638   7.057  -5.158  1.00  0.50           O  
HETATM  513  O   HOH T 512      22.561  12.871  24.385  1.00  0.50           O  
HETATM  514  O   HOH T 513       3.785  -2.593  -2.218  1.00  0.50           O  
HETATM  515  O   HOH T 514      13.534  24.543  24.190  1.00  0.50           O  
HETATM  516  O   HOH T 515     -17.612  16.522 -11.058  1.00  0.50           O  
HETATM  517  O   HOH T 516      26.357  21.772  -4.148  1.00  0.50           O  
HETATM  518  O   HOH T 517      22.810  15.229  22.913  1.00  0.50           O  
HETATM  519  O   HOH T 518       9.192  30.104  38.268  1.00  0.50           O  
HETATM  520  O   HOH T 519      -2.734  37.540  -5.735  1.00  0.50           O  
HETATM  521  O   HOH T 520      17.929  17.336  22.481  1.00  0.50           O  
HETATM  522  O   HOH T 521     -12.396  31.729  33.979  1.00  0.50           O  
HETATM  523  O   HOH T 522      -7.997  30.601   1.369  1.00  0.50           O  
HETATM  524  O   HOH T 523      13.922  17.379  37.910  1.00  0.50           O  
HETATM  525  O   HOH T 524      -5.125   2.029   7.330  1.00  0.50           O  
HETATM  526  O   HOH T 525       0.797   9.298  40.080  1.00  0.50           O  
HETATM  527  O   HOH T 526     -21.918  18.709  19.565  1.00  0.50           O  
HETATM  528  O   HOH T 527      -2.369  33.512  38.917  1.00  0.51           O  
HETATM  529  O   HOH T 528      10.361  -0.118   7.337  1.00  0.51           O  
HETATM  530  O   HOH T 529      31.601  26.828  10.324  1.00  0.51           O  
HETATM  531  O   HOH T 530      -7.856   1.669   6.974  1.00  0.51           O  
HETATM  532  O   HOH T 531     -20.454   7.467   1.350  1.00  0.51           O  
HETATM  533  O   HOH T 532       5.654  36.134   4.159  1.00  0.51           O  
HETATM  534  O   HOH T 533      -0.282  -4.379  -2.932  1.00  0.51           O  
HETATM  535  O   HOH T 534      -2.357  14.870 -16.753  1.00  0.51           O  
HETATM  536  O   HOH T 535       2.341  13.398  39.164  1.00  0.51           O  
HETATM  537  O   HOH T 536     -13.015   5.473   8.189  1.00  0.51           O  
HETATM  538  O   HOH T 537      12.383   8.001 -12.473  1.00  0.51           O  
HETATM  539  O   HOH T 538      -9.989  25.950  -6.130  1.00  0.51           O  
HETATM  540  O   HOH T 539     -15.365   8.928  -8.151  1.00  0.51           O  
HETATM  541  O   HOH T 540      10.783  -2.111  13.789  1.00  0.51           O  
HETATM  542  O   HOH T 541       4.616   9.878 -17.199  1.00  0.52           O  
HETATM  543  O   HOH T 542      -6.842  35.952   4.354  1.00  0.52           O  
HETATM  544  O   HOH T 543      17.672   0.617   5.947  1.00  0.52           O  
HETATM  545  O   HOH T 544     -15.388  12.960 -16.323  1.00  0.52           O  
HETATM  546  O   HOH T 545      37.385  22.997  12.954  1.00  0.52           O  
HETATM  547  O   HOH T 546      22.699  23.440  24.761  1.00  0.52           O  
HETATM  548  O   HOH T 547       5.713  33.153   9.471  1.00  0.52           O  
HETATM  549  O   HOH T 548      13.934   0.647  20.003  1.00  0.52           O  
HETATM  550  O   HOH T 549     -12.933  29.043  42.185  1.00  0.52           O  
HETATM  551  O   HOH T 550       6.151  18.693  21.869  1.00  0.52           O  
HETATM  552  O   HOH T 551      12.379  25.926 -12.218  1.00  0.52           O  
HETATM  553  O   HOH T 552      27.421  20.962  -6.691  1.00  0.52           O  
HETATM  554  O   HOH T 553     -12.934  36.578  34.111  1.00  0.52           O  
HETATM  555  O   HOH T 554      -6.730   2.237   2.356  1.00  0.52           O  
HETATM  556  O   HOH T 555      14.785   0.059  -0.718  1.00  0.52           O  
HETATM  557  O   HOH T 556       7.557  27.164 -10.311  1.00  0.52           O  
HETATM  558  O   HOH T 557      -3.820   3.219  -5.649  1.00  0.52           O  
HETATM  559  O   HOH T 558       7.997  34.838   3.279  1.00  0.52           O  
HETATM  560  O   HOH T 559      -8.950  18.726  25.104  1.00  0.52           O  
HETATM  561  O   HOH T 560      11.406   5.609  -3.258  1.00  0.52           O  
HETATM  562  O   HOH T 561     -23.941  18.201   6.800  1.00  0.52           O  
HETATM  563  O   HOH T 562     -15.178   5.415   6.453  1.00  0.52           O  
HETATM  564  O   HOH T 563      29.360  31.668  -1.637  1.00  0.52           O  
HETATM  565  O   HOH T 564     -25.857  19.807  10.565  1.00  0.53           O  
HETATM  566  O   HOH T 565       2.920  26.025  46.875  1.00  0.53           O  
HETATM  567  O   HOH T 566      13.847  28.447  20.918  1.00  0.53           O  
HETATM  568  O   HOH T 567      -6.446   0.256  12.390  1.00  0.53           O  
HETATM  569  O   HOH T 568      29.892  -1.529   3.518  1.00  0.53           O  
HETATM  570  O   HOH T 569      11.434  25.841  39.818  1.00  0.53           O  
HETATM  571  O   HOH T 570       3.317  28.482 -13.926  1.00  0.53           O  
HETATM  572  O   HOH T 571      -2.249  -2.657 -11.191  1.00  0.53           O  
HETATM  573  O   HOH T 572      -3.568  19.127 -14.844  1.00  0.53           O  
HETATM  574  O   HOH T 573     -15.780  14.479  42.183  1.00  0.53           O  
HETATM  575  O   HOH T 574      24.444  24.810  -8.863  1.00  0.53           O  
HETATM  576  O   HOH T 575      14.845  -2.115   8.139  1.00  0.53           O  
HETATM  577  O   HOH T 576      -1.452   0.439  26.612  1.00  0.53           O  
HETATM  578  O   HOH T 577      24.440  -4.898  28.345  1.00  0.53           O  
HETATM  579  O   HOH T 578     -13.297   6.355 -13.434  1.00  0.53           O  
HETATM  580  O   HOH T 579      22.885  22.614  27.449  1.00  0.53           O  
HETATM  581  O   HOH T 580      11.147  34.550   4.977  1.00  0.53           O  
HETATM  582  O   HOH T 581      -4.740   2.338  42.270  1.00  0.53           O  
HETATM  583  O   HOH T 582      -5.157   4.712 -16.912  1.00  0.53           O  
HETATM  584  O   HOH T 583      11.351   6.547  36.049  1.00  0.53           O  
HETATM  585  O   HOH T 584     -16.617  18.326  35.120  1.00  0.53           O  
HETATM  586  O   HOH T 585      13.086  -0.245   7.303  1.00  0.54           O  
HETATM  587  O   HOH T 586      -0.363  38.202  26.027  1.00  0.54           O  
HETATM  588  O   HOH T 587       8.890   1.449  12.304  1.00  0.54           O  
HETATM  589  O   HOH T 588      12.028  29.791  36.445  1.00  0.54           O  
HETATM  590  O   HOH T 589     -20.581  20.469  21.086  1.00  0.54           O  
HETATM  591  O   HOH T 590     -15.386   5.671  32.560  1.00  0.54           O  
HETATM  592  O   HOH T 591      -8.278  34.741  15.195  1.00  0.54           O  
HETATM  593  O   HOH T 592      28.326  13.568  21.838  1.00  0.54           O  
HETATM  594  O   HOH T 593      -1.341   9.735  43.819  1.00  0.54           O  
HETATM  595  O   HOH T 594       2.339  25.221  49.456  1.00  0.54           O  
HETATM  596  O   HOH T 595      31.561  29.376  11.353  1.00  0.54           O  
HETATM  597  O   HOH T 596      15.050  37.642  -8.287  1.00  0.54           O  
HETATM  598  O   HOH T 597     -23.447  16.399  16.394  1.00  0.54           O  
HETATM  599  O   HOH T 598     -21.961   9.867  14.049  1.00  0.54           O  
HETATM  600  O   HOH T 599     -10.711  28.593   0.122  1.00  0.54           O  
HETATM  601  O   HOH T 600      -1.343   0.870  -7.198  1.00  0.55           O  
HETATM  602  O   HOH T 601     -11.758  20.929  -6.705  1.00  0.55           O  
HETATM  603  O   HOH T 602      17.811   8.252  35.522  1.00  0.55           O  
HETATM  604  O   HOH T 603       4.682  12.137 -15.563  1.00  0.55           O  
HETATM  605  O   HOH T 604      16.444  14.130 -13.120  1.00  0.55           O  
HETATM  606  O   HOH T 605      -5.540   4.191  17.751  1.00  0.55           O  
HETATM  607  O   HOH T 606      25.084  30.588   4.135  1.00  0.55           O  
HETATM  608  O   HOH T 607      16.980   2.400  -4.950  1.00  0.55           O  
HETATM  609  O   HOH T 608      -7.484   4.797  -0.809  1.00  0.55           O  
HETATM  610  O   HOH T 609      27.452  14.437 -11.616  1.00  0.55           O  
HETATM  611  O   HOH T 610      22.685  16.854  25.116  1.00  0.55           O  
HETATM  612  O   HOH T 611      -3.214  -1.814 -17.899  1.00  0.55           O  
HETATM  613  O   HOH T 612       2.463  16.098  43.879  1.00  0.55           O  
HETATM  614  O   HOH T 613      26.641   4.506  23.588  1.00  0.55           O  
HETATM  615  O   HOH T 614      -8.892  10.949  50.617  1.00  0.55           O  
HETATM  616  O   HOH T 615     -13.741   6.150  43.259  1.00  0.55           O  
HETATM  617  O   HOH T 616      13.144  14.403 -14.719  1.00  0.56           O  
HETATM  618  O   HOH T 617      -5.057  19.367  51.136  1.00  0.56           O  
HETATM  619  O   HOH T 618      28.288  15.391  24.202  1.00  0.56           O  
HETATM  620  O   HOH T 619     -13.065  33.359  27.480  1.00  0.56           O  
HETATM  621  O   HOH T 620      -7.128   4.706  26.692  1.00  0.56           O  
HETATM  622  O   HOH T 621       6.950  13.160 -17.133  1.00  0.56           O  
HETATM  623  O   HOH T 622     -16.143  26.957  29.978  1.00  0.56           O  
HETATM  624  O   HOH T 623      18.977  19.439 -16.264  1.00  0.56           O  
HETATM  625  O   HOH T 624       1.601   1.675  15.251  1.00  0.56           O  
HETATM  626  O   HOH T 625      -8.259  -1.035 -11.077  1.00  0.56           O  
HETATM  627  O   HOH T 626       5.178   4.029  -2.829  1.00  0.56           O  
HETATM  628  O   HOH T 627       8.932  38.741  23.392  1.00  0.56           O  
HETATM  629  O   HOH T 628     -15.292  27.570  42.117  1.00  0.56           O  
HETATM  630  O   HOH T 629      16.280   0.044  12.591  1.00  0.57           O  
HETATM  631  O   HOH T 630      25.035   0.741  22.623  1.00  0.57           O  
HETATM  632  O   HOH T 631      11.452  36.350 -12.113  1.00  0.57           O  
HETATM  633  O   HOH T 632      28.405  21.104  24.445  1.00  0.57           O  
HETATM  634  O   HOH T 633      20.426  26.450  19.151  1.00  0.57           O  
HETATM  635  O   HOH T 634      31.837   8.931  20.387  1.00  0.57           O  
HETATM  636  O   HOH T 635     -11.497  25.601  48.651  1.00  0.57           O  
HETATM  637  O   HOH T 636     -25.094  15.614  14.459  1.00  0.57           O  
HETATM  638  O   HOH T 637      29.977  17.811  23.516  1.00  0.57           O  
HETATM  639  O   HOH T 638     -10.571   2.234  20.272  1.00  0.57           O  
HETATM  640  O   HOH T 639     -14.679   7.862  -0.929  1.00  0.58           O  
HETATM  641  O   HOH T 640      15.348  42.125   0.110  1.00  0.58           O  
HETATM  642  O   HOH T 641      28.570   7.143  -6.719  1.00  0.58           O  
HETATM  643  O   HOH T 642      -7.566   3.811   5.146  1.00  0.58           O  
HETATM  644  O   HOH T 643     -12.962  34.231  42.766  1.00  0.58           O  
HETATM  645  O   HOH T 644     -16.185  10.647  34.046  1.00  0.59           O  
HETATM  646  O   HOH T 645      29.301   3.113  -4.858  1.00  0.60           O  
HETATM  647  O   HOH T 646      26.579  31.908  -5.520  1.00  0.60           O  
HETATM  648  O   HOH T 647      12.839  44.413   2.311  1.00  0.61           O  
TER     649      HOH T 647 
