# Supplementary material for: Accurate Prediction of Hydration Sites of Proteins Using Energy Model With Atom Embedding
Source: Front Mol Biosci. 2021 Sep 20;8:756075. doi: 10.3389/fmolb.2021.756075 (PMC8488165; doi:10.3389/fmolb.2021.756075)
Supplement: Supplementary file 1 [file DataSheet1.ZIP › Data Sheet 1/Our_result_pdb/OppA_dataset_output/1B9J_watersite.pdb]

HEADER                                                        XXXX


JRNL        PMID   -1
HETATM    1  O   HOH T   0       5.430  15.030  -3.759  1.00  0.15           O  
HETATM    2  O   HOH T   1       7.475  15.524 -10.492  1.00  0.17           O  
HETATM    3  O   HOH T   2      -6.928   9.144   7.319  1.00  0.17           O  
HETATM    4  O   HOH T   3      19.212  20.056   6.289  1.00  0.17           O  
HETATM    5  O   HOH T   4      23.181  23.677  -1.249  1.00  0.17           O  
HETATM    6  O   HOH T   5      17.485  13.550   4.719  1.00  0.18           O  
HETATM    7  O   HOH T   6      14.387  16.578  31.018  1.00  0.18           O  
HETATM    8  O   HOH T   7       0.925  12.640  -8.377  1.00  0.18           O  
HETATM    9  O   HOH T   8      -8.134  22.830  23.280  1.00  0.18           O  
HETATM   10  O   HOH T   9     -22.258  20.641  -2.972  1.00  0.18           O  
HETATM   11  O   HOH T  10      -1.735   8.537  10.002  1.00  0.19           O  
HETATM   12  O   HOH T  11       3.163  16.919   7.798  1.00  0.19           O  
HETATM   13  O   HOH T  12       5.558   3.785  31.068  1.00  0.19           O  
HETATM   14  O   HOH T  13      15.625  15.379  -8.549  1.00  0.19           O  
HETATM   15  O   HOH T  14       8.737   1.402  25.668  1.00  0.19           O  
HETATM   16  O   HOH T  15      20.059  26.124  14.012  1.00  0.19           O  
HETATM   17  O   HOH T  16      -9.033  26.812  -3.577  1.00  0.20           O  
HETATM   18  O   HOH T  17       6.458  30.345  14.496  1.00  0.20           O  
HETATM   19  O   HOH T  18      11.329  13.638  16.667  1.00  0.20           O  
HETATM   20  O   HOH T  19     -13.267  13.702 -14.596  1.00  0.21           O  
HETATM   21  O   HOH T  20      13.005  -0.683  22.140  1.00  0.21           O  
HETATM   22  O   HOH T  21      -2.555  38.406  10.213  1.00  0.21           O  
HETATM   23  O   HOH T  22       7.255  10.963  -8.853  1.00  0.21           O  
HETATM   24  O   HOH T  23      -4.128  19.397  16.172  1.00  0.21           O  
HETATM   25  O   HOH T  24      -4.005  29.802  12.491  1.00  0.21           O  
HETATM   26  O   HOH T  25      -8.556  27.278  42.385  1.00  0.22           O  
HETATM   27  O   HOH T  26       5.349  -3.293   1.769  1.00  0.22           O  
HETATM   28  O   HOH T  27      -1.729  28.220   2.109  1.00  0.22           O  
HETATM   29  O   HOH T  28      10.466  13.386   3.124  1.00  0.22           O  
HETATM   30  O   HOH T  29       9.082   6.712   6.947  1.00  0.22           O  
HETATM   31  O   HOH T  30      31.364  11.349   8.279  1.00  0.22           O  
HETATM   32  O   HOH T  31      29.053  21.869   1.259  1.00  0.23           O  
HETATM   33  O   HOH T  32       9.887   9.218  -5.820  1.00  0.23           O  
HETATM   34  O   HOH T  33      -7.840  12.802  16.315  1.00  0.23           O  
HETATM   35  O   HOH T  34      17.306   5.204  21.893  1.00  0.23           O  
HETATM   36  O   HOH T  35       1.624  21.401  19.006  1.00  0.23           O  
HETATM   37  O   HOH T  36      -9.687  11.754  33.256  1.00  0.23           O  
HETATM   38  O   HOH T  37     -18.830  15.767  16.792  1.00  0.23           O  
HETATM   39  O   HOH T  38       7.701  22.015  20.911  1.00  0.23           O  
HETATM   40  O   HOH T  39       4.547 -10.413  21.432  1.00  0.23           O  
HETATM   41  O   HOH T  40      -9.056  22.858  44.373  1.00  0.24           O  
HETATM   42  O   HOH T  41      24.634  21.984  23.258  1.00  0.24           O  
HETATM   43  O   HOH T  42      -4.690  23.206  -7.487  1.00  0.24           O  
HETATM   44  O   HOH T  43     -20.768  22.600   1.941  1.00  0.24           O  
HETATM   45  O   HOH T  44     -11.683  27.265  34.324  1.00  0.24           O  
HETATM   46  O   HOH T  45       5.777  19.992  24.816  1.00  0.24           O  
HETATM   47  O   HOH T  46      -0.697   6.804   0.812  1.00  0.24           O  
HETATM   48  O   HOH T  47     -19.213  14.305 -11.108  1.00  0.24           O  
HETATM   49  O   HOH T  48       8.743  24.051   2.078  1.00  0.24           O  
HETATM   50  O   HOH T  49      -9.926  20.653   8.933  1.00  0.24           O  
HETATM   51  O   HOH T  50     -12.669  11.296  20.524  1.00  0.25           O  
HETATM   52  O   HOH T  51      11.410  18.405   3.106  1.00  0.25           O  
HETATM   53  O   HOH T  52      13.415  22.771  10.858  1.00  0.25           O  
HETATM   54  O   HOH T  53      -1.029  34.450  32.798  1.00  0.25           O  
HETATM   55  O   HOH T  54       4.266  10.136  30.876  1.00  0.25           O  
HETATM   56  O   HOH T  55      10.065  30.987   4.256  1.00  0.25           O  
HETATM   57  O   HOH T  56       8.219  15.371  -3.450  1.00  0.25           O  
HETATM   58  O   HOH T  57     -25.942  13.119   8.512  1.00  0.25           O  
HETATM   59  O   HOH T  58      28.960   3.032   6.129  1.00  0.25           O  
HETATM   60  O   HOH T  59      -1.979   4.701   9.857  1.00  0.25           O  
HETATM   61  O   HOH T  60      -1.409  21.784  12.699  1.00  0.26           O  
HETATM   62  O   HOH T  61     -18.318  26.882   0.233  1.00  0.26           O  
HETATM   63  O   HOH T  62      27.893  15.971  20.548  1.00  0.26           O  
HETATM   64  O   HOH T  63      -1.015  30.266  28.266  1.00  0.26           O  
HETATM   65  O   HOH T  64      -1.546   7.495   3.536  1.00  0.26           O  
HETATM   66  O   HOH T  65     -16.770  30.065   7.122  1.00  0.26           O  
HETATM   67  O   HOH T  66      22.319   8.426  24.084  1.00  0.26           O  
HETATM   68  O   HOH T  67      -5.615  -4.565   9.114  1.00  0.26           O  
HETATM   69  O   HOH T  68      -0.646  30.696   1.759  1.00  0.26           O  
HETATM   70  O   HOH T  69     -13.347   7.051  28.207  1.00  0.26           O  
HETATM   71  O   HOH T  70       3.258   5.286  30.795  1.00  0.27           O  
HETATM   72  O   HOH T  71       3.119   4.023  35.195  1.00  0.27           O  
HETATM   73  O   HOH T  72     -11.104  24.157  -6.401  1.00  0.27           O  
HETATM   74  O   HOH T  73     -10.754  16.405 -15.589  1.00  0.27           O  
HETATM   75  O   HOH T  74     -16.087  27.068  29.945  1.00  0.27           O  
HETATM   76  O   HOH T  75       1.112  37.267   0.170  1.00  0.27           O  
HETATM   77  O   HOH T  76      -6.951   7.427  -2.024  1.00  0.27           O  
HETATM   78  O   HOH T  77     -14.058   9.005  20.917  1.00  0.27           O  
HETATM   79  O   HOH T  78     -21.079  16.440  14.963  1.00  0.27           O  
HETATM   80  O   HOH T  79       4.354  34.873  -0.090  1.00  0.27           O  
HETATM   81  O   HOH T  80      -4.376   6.432  16.310  1.00  0.27           O  
HETATM   82  O   HOH T  81      -7.336  33.982  41.178  1.00  0.27           O  
HETATM   83  O   HOH T  82      10.948   7.138   8.910  1.00  0.28           O  
HETATM   84  O   HOH T  83       7.346  32.637  37.183  1.00  0.28           O  
HETATM   85  O   HOH T  84      -7.306  13.834  12.614  1.00  0.28           O  
HETATM   86  O   HOH T  85      25.610  20.731  -8.191  1.00  0.28           O  
HETATM   87  O   HOH T  86      15.384  14.831  -5.856  1.00  0.28           O  
HETATM   88  O   HOH T  87      10.379  23.392   4.091  1.00  0.28           O  
HETATM   89  O   HOH T  88      12.022  25.197  22.593  1.00  0.28           O  
HETATM   90  O   HOH T  89      -2.450  19.442   4.047  1.00  0.28           O  
HETATM   91  O   HOH T  90       5.825  -1.914  19.739  1.00  0.28           O  
HETATM   92  O   HOH T  91      -2.332  24.397  12.167  1.00  0.29           O  
HETATM   93  O   HOH T  92      -0.072   0.824  37.295  1.00  0.29           O  
HETATM   94  O   HOH T  93       9.807   5.717  10.971  1.00  0.29           O  
HETATM   95  O   HOH T  94      15.242  14.845  37.914  1.00  0.29           O  
HETATM   96  O   HOH T  95       1.083   4.922  38.929  1.00  0.29           O  
HETATM   97  O   HOH T  96     -12.004  10.258  32.719  1.00  0.29           O  
HETATM   98  O   HOH T  97       7.800  24.340   4.724  1.00  0.29           O  
HETATM   99  O   HOH T  98      -8.530  10.865  45.981  1.00  0.29           O  
HETATM  100  O   HOH T  99       3.601   6.688  35.884  1.00  0.30           O  
HETATM  101  O   HOH T 100      18.891  18.134  33.230  1.00  0.30           O  
HETATM  102  O   HOH T 101     -11.815  31.730  29.391  1.00  0.30           O  
HETATM  103  O   HOH T 102     -20.447  21.281   4.383  1.00  0.30           O  
HETATM  104  O   HOH T 103      -5.300  26.152  50.600  1.00  0.30           O  
HETATM  105  O   HOH T 104      -0.145   5.783  -6.278  1.00  0.30           O  
HETATM  106  O   HOH T 105      12.259   1.174  20.144  1.00  0.30           O  
HETATM  107  O   HOH T 106      11.597  20.736  10.316  1.00  0.30           O  
HETATM  108  O   HOH T 107      -0.836  14.950   8.922  1.00  0.30           O  
HETATM  109  O   HOH T 108      14.940  14.711   4.743  1.00  0.30           O  
HETATM  110  O   HOH T 109      11.249  20.939  34.946  1.00  0.30           O  
HETATM  111  O   HOH T 110       2.005  -1.168   5.868  1.00  0.30           O  
HETATM  112  O   HOH T 111       6.486   7.724   7.443  1.00  0.30           O  
HETATM  113  O   HOH T 112      12.331   0.614   8.222  1.00  0.30           O  
HETATM  114  O   HOH T 113      -3.752  16.979  53.929  1.00  0.30           O  
HETATM  115  O   HOH T 114      22.410   0.053   6.586  1.00  0.30           O  
HETATM  116  O   HOH T 115     -10.479   8.533  -2.295  1.00  0.30           O  
HETATM  117  O   HOH T 116      17.115   9.247  19.396  1.00  0.30           O  
HETATM  118  O   HOH T 117      23.339  22.194  -7.716  1.00  0.31           O  
HETATM  119  O   HOH T 118      28.725  21.155  24.439  1.00  0.31           O  
HETATM  120  O   HOH T 119     -10.818  29.192  17.415  1.00  0.31           O  
HETATM  121  O   HOH T 120     -13.249   4.912   2.456  1.00  0.31           O  
HETATM  122  O   HOH T 121      -4.755  17.994   3.473  1.00  0.31           O  
HETATM  123  O   HOH T 122      11.645   9.920 -14.047  1.00  0.31           O  
HETATM  124  O   HOH T 123      23.640  13.903  20.383  1.00  0.31           O  
HETATM  125  O   HOH T 124      -1.881  37.392  18.425  1.00  0.31           O  
HETATM  126  O   HOH T 125      11.354  29.266  12.866  1.00  0.31           O  
HETATM  127  O   HOH T 126     -14.806  19.337  -7.242  1.00  0.31           O  
HETATM  128  O   HOH T 127      -1.276   8.343   6.198  1.00  0.31           O  
HETATM  129  O   HOH T 128       9.783  13.054  -2.578  1.00  0.31           O  
HETATM  130  O   HOH T 129      20.819  16.345  32.463  1.00  0.31           O  
HETATM  131  O   HOH T 130       3.189   9.985 -14.665  1.00  0.31           O  
HETATM  132  O   HOH T 131     -10.147  15.851  15.000  1.00  0.31           O  
HETATM  133  O   HOH T 132     -17.990  24.529  34.952  1.00  0.31           O  
HETATM  134  O   HOH T 133     -15.300  22.045  16.632  1.00  0.31           O  
HETATM  135  O   HOH T 134      11.656  25.617  -7.430  1.00  0.32           O  
HETATM  136  O   HOH T 135     -16.242  26.702  -1.630  1.00  0.32           O  
HETATM  137  O   HOH T 136       1.730   5.024 -12.434  1.00  0.32           O  
HETATM  138  O   HOH T 137      -9.102  23.258   9.134  1.00  0.32           O  
HETATM  139  O   HOH T 138      31.897   7.051  -3.309  1.00  0.32           O  
HETATM  140  O   HOH T 139     -22.413  18.983  -0.779  1.00  0.32           O  
HETATM  141  O   HOH T 140       3.275  34.645  -5.035  1.00  0.32           O  
HETATM  142  O   HOH T 141       2.098  10.601  13.508  1.00  0.32           O  
HETATM  143  O   HOH T 142     -23.062  18.822   8.351  1.00  0.32           O  
HETATM  144  O   HOH T 143       8.537  30.771  32.242  1.00  0.32           O  
HETATM  145  O   HOH T 144     -19.365   8.998  -0.949  1.00  0.32           O  
HETATM  146  O   HOH T 145       8.550  35.892  -6.102  1.00  0.32           O  
HETATM  147  O   HOH T 146     -13.929  30.845  44.351  1.00  0.33           O  
HETATM  148  O   HOH T 147      19.783  21.913  21.448  1.00  0.33           O  
HETATM  149  O   HOH T 148      19.549   8.056  23.678  1.00  0.33           O  
HETATM  150  O   HOH T 149      23.512  26.097  -4.474  1.00  0.33           O  
HETATM  151  O   HOH T 150      -3.625  32.557  39.880  1.00  0.33           O  
HETATM  152  O   HOH T 151       2.712   7.924  31.470  1.00  0.33           O  
HETATM  153  O   HOH T 152     -12.554   8.501   0.639  1.00  0.33           O  
HETATM  154  O   HOH T 153      -9.018  22.543  47.013  1.00  0.33           O  
HETATM  155  O   HOH T 154      -3.017  30.671  10.016  1.00  0.33           O  
HETATM  156  O   HOH T 155      31.948   5.642   4.108  1.00  0.33           O  
HETATM  157  O   HOH T 156       5.523   3.456  10.783  1.00  0.33           O  
HETATM  158  O   HOH T 157      29.579  20.240  -7.814  1.00  0.33           O  
HETATM  159  O   HOH T 158      -3.894  34.806  38.230  1.00  0.33           O  
HETATM  160  O   HOH T 159      13.905  22.567  29.038  1.00  0.33           O  
HETATM  161  O   HOH T 160      29.858  14.128  19.676  1.00  0.33           O  
HETATM  162  O   HOH T 161      22.035  15.101 -11.815  1.00  0.33           O  
HETATM  163  O   HOH T 162       3.708  -0.384  20.968  1.00  0.33           O  
HETATM  164  O   HOH T 163      17.912  25.982  18.187  1.00  0.33           O  
HETATM  165  O   HOH T 164      -7.337   6.270   4.441  1.00  0.33           O  
HETATM  166  O   HOH T 165     -11.737  14.006 -16.852  1.00  0.34           O  
HETATM  167  O   HOH T 166      -5.700  34.175  43.391  1.00  0.34           O  
HETATM  168  O   HOH T 167      -0.166  35.144   8.225  1.00  0.34           O  
HETATM  169  O   HOH T 168      12.890   0.806   5.470  1.00  0.34           O  
HETATM  170  O   HOH T 169       4.165  13.102  11.299  1.00  0.34           O  
HETATM  171  O   HOH T 170       0.115  38.659   6.058  1.00  0.34           O  
HETATM  172  O   HOH T 171       4.211  35.031  19.564  1.00  0.34           O  
HETATM  173  O   HOH T 172       3.823   7.961   3.544  1.00  0.34           O  
HETATM  174  O   HOH T 173     -20.210  15.624   0.325  1.00  0.34           O  
HETATM  175  O   HOH T 174       0.745  11.333  32.336  1.00  0.34           O  
HETATM  176  O   HOH T 175     -11.160  32.229  22.882  1.00  0.34           O  
HETATM  177  O   HOH T 176       2.933   8.992   1.179  1.00  0.34           O  
HETATM  178  O   HOH T 177      -0.431   7.230  39.036  1.00  0.34           O  
HETATM  179  O   HOH T 178      -4.758  33.706  -4.103  1.00  0.34           O  
HETATM  180  O   HOH T 179       4.377  -1.249  16.337  1.00  0.34           O  
HETATM  181  O   HOH T 180      27.610  19.560  -9.624  1.00  0.34           O  
HETATM  182  O   HOH T 181       2.773  21.273 -13.681  1.00  0.34           O  
HETATM  183  O   HOH T 182      14.551  31.632   5.256  1.00  0.34           O  
HETATM  184  O   HOH T 183      13.201  13.433   2.902  1.00  0.34           O  
HETATM  185  O   HOH T 184      21.814  25.520  -8.462  1.00  0.34           O  
HETATM  186  O   HOH T 185      20.126  23.641  23.519  1.00  0.34           O  
HETATM  187  O   HOH T 186      20.339   0.640   1.548  1.00  0.34           O  
HETATM  188  O   HOH T 187       9.554   1.149   0.007  1.00  0.34           O  
HETATM  189  O   HOH T 188       4.909  35.131  14.334  1.00  0.35           O  
HETATM  190  O   HOH T 189       4.649   3.053   8.215  1.00  0.35           O  
HETATM  191  O   HOH T 190      10.822  15.878   4.270  1.00  0.35           O  
HETATM  192  O   HOH T 191      -0.587  15.104   5.326  1.00  0.35           O  
HETATM  193  O   HOH T 192       4.248   4.202 -11.570  1.00  0.35           O  
HETATM  194  O   HOH T 193      17.644   9.472  22.158  1.00  0.35           O  
HETATM  195  O   HOH T 194      13.316  24.480  27.110  1.00  0.35           O  
HETATM  196  O   HOH T 195       7.945  19.323  21.633  1.00  0.35           O  
HETATM  197  O   HOH T 196      -1.415  31.484  37.263  1.00  0.35           O  
HETATM  198  O   HOH T 197     -14.591   7.802  -1.149  1.00  0.35           O  
HETATM  199  O   HOH T 198      10.426  14.933  -0.571  1.00  0.35           O  
HETATM  200  O   HOH T 199      17.782  31.097  -7.300  1.00  0.35           O  
HETATM  201  O   HOH T 200      -6.361  25.367  -6.970  1.00  0.35           O  
HETATM  202  O   HOH T 201      -9.805  29.818   9.147  1.00  0.35           O  
HETATM  203  O   HOH T 202      -8.071  15.568  16.893  1.00  0.35           O  
HETATM  204  O   HOH T 203       2.812  14.405  32.504  1.00  0.35           O  
HETATM  205  O   HOH T 204       9.125  30.639  37.887  1.00  0.35           O  
HETATM  206  O   HOH T 205       3.143  -1.902  18.793  1.00  0.35           O  
HETATM  207  O   HOH T 206      26.556  27.534  25.199  1.00  0.35           O  
HETATM  208  O   HOH T 207     -14.488   5.583   4.724  1.00  0.35           O  
HETATM  209  O   HOH T 208       7.141  -1.920  12.846  1.00  0.35           O  
HETATM  210  O   HOH T 209       9.643  28.960  -8.165  1.00  0.35           O  
HETATM  211  O   HOH T 210      16.013  -7.362  23.180  1.00  0.35           O  
HETATM  212  O   HOH T 211      11.442  -7.103  23.967  1.00  0.36           O  
HETATM  213  O   HOH T 212     -10.088  16.631 -12.809  1.00  0.36           O  
HETATM  214  O   HOH T 213      -4.998  -1.935  18.281  1.00  0.36           O  
HETATM  215  O   HOH T 214       5.156  22.290 -14.237  1.00  0.36           O  
HETATM  216  O   HOH T 215      10.624  -9.146  35.005  1.00  0.36           O  
HETATM  217  O   HOH T 216      -0.193   0.744   9.444  1.00  0.36           O  
HETATM  218  O   HOH T 217      22.548   6.559  -9.911  1.00  0.36           O  
HETATM  219  O   HOH T 218       1.000  -1.398  20.577  1.00  0.36           O  
HETATM  220  O   HOH T 219       8.226  -7.681  34.392  1.00  0.36           O  
HETATM  221  O   HOH T 220      -0.645  13.100 -15.407  1.00  0.36           O  
HETATM  222  O   HOH T 221      33.428  18.105   9.710  1.00  0.36           O  
HETATM  223  O   HOH T 222      31.151  18.934   8.271  1.00  0.36           O  
HETATM  224  O   HOH T 223      -4.312   0.559 -17.241  1.00  0.36           O  
HETATM  225  O   HOH T 224      12.205  30.112  -8.648  1.00  0.36           O  
HETATM  226  O   HOH T 225      -1.034  39.610  19.753  1.00  0.36           O  
HETATM  227  O   HOH T 226      29.399  23.520   3.487  1.00  0.36           O  
HETATM  228  O   HOH T 227      13.493  26.930  -9.177  1.00  0.36           O  
HETATM  229  O   HOH T 228      22.153  25.380  17.142  1.00  0.36           O  
HETATM  230  O   HOH T 229      29.905  17.854  20.924  1.00  0.37           O  
HETATM  231  O   HOH T 230      20.064  -0.155   8.141  1.00  0.37           O  
HETATM  232  O   HOH T 231      18.092   0.645   6.360  1.00  0.37           O  
HETATM  233  O   HOH T 232     -10.837  39.591  18.798  1.00  0.37           O  
HETATM  234  O   HOH T 233       4.990  34.866  -2.829  1.00  0.37           O  
HETATM  235  O   HOH T 234     -16.284  25.951  17.144  1.00  0.37           O  
HETATM  236  O   HOH T 235       2.137  33.452  37.928  1.00  0.37           O  
HETATM  237  O   HOH T 236      23.261  21.060  25.466  1.00  0.37           O  
HETATM  238  O   HOH T 237      20.270  29.217  18.240  1.00  0.37           O  
HETATM  239  O   HOH T 238       0.167   0.490  -1.034  1.00  0.37           O  
HETATM  240  O   HOH T 239      30.967   3.041   4.153  1.00  0.37           O  
HETATM  241  O   HOH T 240       8.035  32.698 -10.155  1.00  0.37           O  
HETATM  242  O   HOH T 241      -7.386   1.544  30.879  1.00  0.37           O  
HETATM  243  O   HOH T 242       4.915  33.767  37.860  1.00  0.38           O  
HETATM  244  O   HOH T 243       8.725  12.465   5.104  1.00  0.38           O  
HETATM  245  O   HOH T 244     -16.889  30.548   4.373  1.00  0.38           O  
HETATM  246  O   HOH T 245     -17.751  27.633   8.048  1.00  0.38           O  
HETATM  247  O   HOH T 246     -19.600  13.879  -5.676  1.00  0.38           O  
HETATM  248  O   HOH T 247      12.069  23.413 -13.758  1.00  0.38           O  
HETATM  249  O   HOH T 248      -1.617   1.032  15.881  1.00  0.38           O  
HETATM  250  O   HOH T 249      -8.983  24.995  48.281  1.00  0.38           O  
HETATM  251  O   HOH T 250      27.216  13.581  19.169  1.00  0.38           O  
HETATM  252  O   HOH T 251       1.925  16.428   2.463  1.00  0.38           O  
HETATM  253  O   HOH T 252       8.914  22.691  37.343  1.00  0.38           O  
HETATM  254  O   HOH T 253      -6.056   2.611   5.779  1.00  0.38           O  
HETATM  255  O   HOH T 254       4.157  33.750  -7.534  1.00  0.38           O  
HETATM  256  O   HOH T 255      -8.244   8.736 -19.032  1.00  0.38           O  
HETATM  257  O   HOH T 256     -10.755  34.891  27.626  1.00  0.38           O  
HETATM  258  O   HOH T 257     -11.686   5.797  23.337  1.00  0.38           O  
HETATM  259  O   HOH T 258      -7.477  23.372  11.429  1.00  0.38           O  
HETATM  260  O   HOH T 259     -17.844  28.104   5.305  1.00  0.38           O  
HETATM  261  O   HOH T 260      14.617  40.806   3.224  1.00  0.38           O  
HETATM  262  O   HOH T 261      -5.308   6.974  18.753  1.00  0.38           O  
HETATM  263  O   HOH T 262       7.627  -6.153  32.091  1.00  0.38           O  
HETATM  264  O   HOH T 263       4.814  12.152 -15.344  1.00  0.38           O  
HETATM  265  O   HOH T 264      15.458  23.317  25.849  1.00  0.38           O  
HETATM  266  O   HOH T 265      11.911  31.519   6.398  1.00  0.38           O  
HETATM  267  O   HOH T 266      19.249  24.127  19.789  1.00  0.38           O  
HETATM  268  O   HOH T 267      14.101   1.138   2.928  1.00  0.38           O  
HETATM  269  O   HOH T 268      13.167  14.468 -14.656  1.00  0.38           O  
HETATM  270  O   HOH T 269      15.664   0.530   5.103  1.00  0.38           O  
HETATM  271  O   HOH T 270       0.793  13.676  43.757  1.00  0.39           O  
HETATM  272  O   HOH T 271      22.751  13.923  -8.448  1.00  0.39           O  
HETATM  273  O   HOH T 272      -9.438   5.648  32.256  1.00  0.39           O  
HETATM  274  O   HOH T 273      -7.869  11.459 -19.146  1.00  0.39           O  
HETATM  275  O   HOH T 274      28.710  26.749  16.286  1.00  0.39           O  
HETATM  276  O   HOH T 275      25.704  -2.016   6.363  1.00  0.39           O  
HETATM  277  O   HOH T 276      -4.817   3.944  -4.956  1.00  0.39           O  
HETATM  278  O   HOH T 277      36.399  27.349  11.503  1.00  0.39           O  
HETATM  279  O   HOH T 278     -10.853  27.649  43.937  1.00  0.39           O  
HETATM  280  O   HOH T 279      -8.222   2.599   9.665  1.00  0.39           O  
HETATM  281  O   HOH T 280       1.126   7.652   2.821  1.00  0.39           O  
HETATM  282  O   HOH T 281      -1.985  16.768   7.116  1.00  0.39           O  
HETATM  283  O   HOH T 282       5.548  31.559 -10.611  1.00  0.39           O  
HETATM  284  O   HOH T 283     -21.866  19.504   5.958  1.00  0.39           O  
HETATM  285  O   HOH T 284       1.751  -2.902  10.682  1.00  0.39           O  
HETATM  286  O   HOH T 285       2.584  35.564  12.904  1.00  0.39           O  
HETATM  287  O   HOH T 286      24.307  25.842  25.223  1.00  0.39           O  
HETATM  288  O   HOH T 287      -4.304   3.966  -2.174  1.00  0.39           O  
HETATM  289  O   HOH T 288      -5.313  12.290 -18.277  1.00  0.39           O  
HETATM  290  O   HOH T 289      -6.646   4.968  -3.259  1.00  0.39           O  
HETATM  291  O   HOH T 290     -10.540   4.681   7.182  1.00  0.39           O  
HETATM  292  O   HOH T 291       1.458  14.322  10.443  1.00  0.39           O  
HETATM  293  O   HOH T 292     -10.245  13.057  14.994  1.00  0.39           O  
HETATM  294  O   HOH T 293     -20.238  17.361  -1.895  1.00  0.39           O  
HETATM  295  O   HOH T 294     -10.026  30.688   6.445  1.00  0.39           O  
HETATM  296  O   HOH T 295     -13.918  17.790  -9.270  1.00  0.39           O  
HETATM  297  O   HOH T 296      -6.710  11.999  47.812  1.00  0.39           O  
HETATM  298  O   HOH T 297      -5.933   1.543   3.169  1.00  0.39           O  
HETATM  299  O   HOH T 298     -18.112  13.238  -3.394  1.00  0.39           O  
HETATM  300  O   HOH T 299     -10.787   9.687  46.900  1.00  0.39           O  
HETATM  301  O   HOH T 300      35.769  25.967   7.455  1.00  0.40           O  
HETATM  302  O   HOH T 301     -13.331  32.204  24.685  1.00  0.40           O  
HETATM  303  O   HOH T 302     -12.719  29.483  33.022  1.00  0.40           O  
HETATM  304  O   HOH T 303      -4.793   2.454   8.187  1.00  0.40           O  
HETATM  305  O   HOH T 304      -3.727  14.480 -17.630  1.00  0.40           O  
HETATM  306  O   HOH T 305      -6.099   9.635  46.331  1.00  0.40           O  
HETATM  307  O   HOH T 306      -7.494   4.443  -5.898  1.00  0.40           O  
HETATM  308  O   HOH T 307     -11.422  28.057  50.583  1.00  0.40           O  
HETATM  309  O   HOH T 308       1.083  -1.425   8.430  1.00  0.40           O  
HETATM  310  O   HOH T 309      -4.214  21.929  15.019  1.00  0.40           O  
HETATM  311  O   HOH T 310       3.834  12.212  41.175  1.00  0.40           O  
HETATM  312  O   HOH T 311       4.864   8.071  37.713  1.00  0.40           O  
HETATM  313  O   HOH T 312       1.166  25.584 -13.246  1.00  0.40           O  
HETATM  314  O   HOH T 313      26.052   7.067  -5.736  1.00  0.40           O  
HETATM  315  O   HOH T 314      -5.162  27.725  -6.500  1.00  0.40           O  
HETATM  316  O   HOH T 315      23.808  23.491  -5.346  1.00  0.40           O  
HETATM  317  O   HOH T 316      28.025   6.866  -3.935  1.00  0.40           O  
HETATM  318  O   HOH T 317      11.583   0.980   1.735  1.00  0.40           O  
HETATM  319  O   HOH T 318       3.205  20.131  20.940  1.00  0.40           O  
HETATM  320  O   HOH T 319      -0.892   3.142  -5.785  1.00  0.41           O  
HETATM  321  O   HOH T 320       7.453  27.229 -10.395  1.00  0.41           O  
HETATM  322  O   HOH T 321     -12.363   5.727  -3.982  1.00  0.41           O  
HETATM  323  O   HOH T 322      -7.973  25.750  50.641  1.00  0.41           O  
HETATM  324  O   HOH T 323       3.780  16.446   0.505  1.00  0.41           O  
HETATM  325  O   HOH T 324      10.617  36.308   3.312  1.00  0.41           O  
HETATM  326  O   HOH T 325      12.213  27.695  23.706  1.00  0.41           O  
HETATM  327  O   HOH T 326      -0.510  31.507  11.179  1.00  0.41           O  
HETATM  328  O   HOH T 327     -15.274  28.349  16.314  1.00  0.41           O  
HETATM  329  O   HOH T 328      -9.060  38.305   0.065  1.00  0.41           O  
HETATM  330  O   HOH T 329      13.866  28.265  17.056  1.00  0.41           O  
HETATM  331  O   HOH T 330      32.805  13.147   9.766  1.00  0.41           O  
HETATM  332  O   HOH T 331       7.716  21.303  42.216  1.00  0.41           O  
HETATM  333  O   HOH T 332      -2.313  35.610   9.865  1.00  0.41           O  
HETATM  334  O   HOH T 333     -13.262  18.609  -5.006  1.00  0.41           O  
HETATM  335  O   HOH T 334     -17.264  25.030  -4.805  1.00  0.41           O  
HETATM  336  O   HOH T 335      12.667   7.963 -12.163  1.00  0.41           O  
HETATM  337  O   HOH T 336      30.688  25.192   5.244  1.00  0.41           O  
HETATM  338  O   HOH T 337      -6.870  36.229   4.528  1.00  0.41           O  
HETATM  339  O   HOH T 338      10.523  -0.455   6.389  1.00  0.42           O  
HETATM  340  O   HOH T 339      23.502  -0.703   0.198  1.00  0.42           O  
HETATM  341  O   HOH T 340      -2.936   1.118   9.767  1.00  0.42           O  
HETATM  342  O   HOH T 341      -1.393   2.456 -14.875  1.00  0.42           O  
HETATM  343  O   HOH T 342      -8.240  17.762 -11.064  1.00  0.42           O  
HETATM  344  O   HOH T 343      27.889  22.187  -8.787  1.00  0.42           O  
HETATM  345  O   HOH T 344      -0.447   0.050 -13.882  1.00  0.42           O  
HETATM  346  O   HOH T 345      -0.335  27.620   4.392  1.00  0.42           O  
HETATM  347  O   HOH T 346      -7.152  23.468  -8.847  1.00  0.42           O  
HETATM  348  O   HOH T 347       8.247  35.089   2.452  1.00  0.42           O  
HETATM  349  O   HOH T 348       7.497   7.707  17.346  1.00  0.42           O  
HETATM  350  O   HOH T 349      13.814  17.243  38.188  1.00  0.42           O  
HETATM  351  O   HOH T 350      -0.790  38.268  46.677  1.00  0.42           O  
HETATM  352  O   HOH T 351      -8.408   3.133  32.910  1.00  0.42           O  
HETATM  353  O   HOH T 352      10.702  34.369   1.346  1.00  0.42           O  
HETATM  354  O   HOH T 353      24.800  13.448  -5.639  1.00  0.42           O  
HETATM  355  O   HOH T 354       8.147  29.184  16.258  1.00  0.42           O  
HETATM  356  O   HOH T 355      10.558  35.165  26.773  1.00  0.42           O  
HETATM  357  O   HOH T 356     -17.130  27.619  32.445  1.00  0.42           O  
HETATM  358  O   HOH T 357      13.795  29.982  13.689  1.00  0.42           O  
HETATM  359  O   HOH T 358      12.956  34.023 -11.380  1.00  0.43           O  
HETATM  360  O   HOH T 359       5.983  29.146 -11.834  1.00  0.43           O  
HETATM  361  O   HOH T 360     -21.150  16.809  17.723  1.00  0.43           O  
HETATM  362  O   HOH T 361      12.033  18.731  36.577  1.00  0.43           O  
HETATM  363  O   HOH T 362      12.408  32.234   3.775  1.00  0.43           O  
HETATM  364  O   HOH T 363      33.821  10.618   9.188  1.00  0.43           O  
HETATM  365  O   HOH T 364      33.113  20.761   7.261  1.00  0.43           O  
HETATM  366  O   HOH T 365      11.820  -8.796  20.416  1.00  0.43           O  
HETATM  367  O   HOH T 366      13.819  -7.127  19.451  1.00  0.43           O  
HETATM  368  O   HOH T 367      -1.041   2.461  11.332  1.00  0.43           O  
HETATM  369  O   HOH T 368      17.478  -6.530  20.874  1.00  0.43           O  
HETATM  370  O   HOH T 369     -27.487  13.543   1.844  1.00  0.43           O  
HETATM  371  O   HOH T 370      13.793  26.721  28.691  1.00  0.43           O  
HETATM  372  O   HOH T 371       3.266   4.127  -4.818  1.00  0.43           O  
HETATM  373  O   HOH T 372      -8.737   8.094  33.294  1.00  0.43           O  
HETATM  374  O   HOH T 373       3.141   5.989  33.354  1.00  0.43           O  
HETATM  375  O   HOH T 374       5.805   5.518   8.967  1.00  0.43           O  
HETATM  376  O   HOH T 375      -9.856   1.078  32.016  1.00  0.43           O  
HETATM  377  O   HOH T 376     -13.014   6.530  21.128  1.00  0.43           O  
HETATM  378  O   HOH T 377      11.388  33.224  28.601  1.00  0.43           O  
HETATM  379  O   HOH T 378      -9.818  22.740  -8.417  1.00  0.43           O  
HETATM  380  O   HOH T 379      20.351  29.901  -7.025  1.00  0.43           O  
HETATM  381  O   HOH T 380       8.247  -1.636  10.278  1.00  0.43           O  
HETATM  382  O   HOH T 381      34.388  27.204   9.555  1.00  0.43           O  
HETATM  383  O   HOH T 382       6.791   8.131  -1.702  1.00  0.44           O  
HETATM  384  O   HOH T 383       3.647  14.228   8.659  1.00  0.44           O  
HETATM  385  O   HOH T 384       0.766  32.265  35.785  1.00  0.44           O  
HETATM  386  O   HOH T 385     -16.779  29.066  -0.226  1.00  0.44           O  
HETATM  387  O   HOH T 386       0.714  22.886 -13.228  1.00  0.44           O  
HETATM  388  O   HOH T 387      12.504  14.955  37.809  1.00  0.44           O  
HETATM  389  O   HOH T 388       1.038   2.361 -13.329  1.00  0.44           O  
HETATM  390  O   HOH T 389      13.541  21.988  36.199  1.00  0.44           O  
HETATM  391  O   HOH T 390      -6.222   2.632  40.015  1.00  0.44           O  
HETATM  392  O   HOH T 391       5.079  -0.841  -1.792  1.00  0.44           O  
HETATM  393  O   HOH T 392      -8.258  36.060  27.743  1.00  0.44           O  
HETATM  394  O   HOH T 393       3.704   1.332  15.392  1.00  0.44           O  
HETATM  395  O   HOH T 394      18.846  11.892  22.636  1.00  0.44           O  
HETATM  396  O   HOH T 395       2.425   1.552  -4.826  1.00  0.44           O  
HETATM  397  O   HOH T 396     -15.008  29.101  31.491  1.00  0.44           O  
HETATM  398  O   HOH T 397      -4.790   2.473 -15.266  1.00  0.44           O  
HETATM  399  O   HOH T 398      22.343  27.435  21.114  1.00  0.44           O  
HETATM  400  O   HOH T 399       7.430   3.153   8.822  1.00  0.44           O  
HETATM  401  O   HOH T 400       2.087  25.333  49.595  1.00  0.44           O  
HETATM  402  O   HOH T 401       6.467 -12.436  22.021  1.00  0.44           O  
HETATM  403  O   HOH T 402      21.130  13.785  33.688  1.00  0.44           O  
HETATM  404  O   HOH T 403      20.036  25.869  21.844  1.00  0.44           O  
HETATM  405  O   HOH T 404       7.703  38.068  -4.595  1.00  0.44           O  
HETATM  406  O   HOH T 405       2.865  23.895 -14.672  1.00  0.45           O  
HETATM  407  O   HOH T 406      32.942  13.802  -7.216  1.00  0.45           O  
HETATM  408  O   HOH T 407      21.366  24.694  -5.800  1.00  0.45           O  
HETATM  409  O   HOH T 408      -4.378   0.041   1.458  1.00  0.45           O  
HETATM  410  O   HOH T 409      15.406  26.564  18.605  1.00  0.45           O  
HETATM  411  O   HOH T 410      13.859  26.311  20.869  1.00  0.45           O  
HETATM  412  O   HOH T 411      -6.827  16.148  14.393  1.00  0.45           O  
HETATM  413  O   HOH T 412      11.290  30.502  28.970  1.00  0.45           O  
HETATM  414  O   HOH T 413      14.761  29.374  -9.324  1.00  0.45           O  
HETATM  415  O   HOH T 414      19.855  12.021  26.693  1.00  0.45           O  
HETATM  416  O   HOH T 415       9.517  22.647  18.828  1.00  0.45           O  
HETATM  417  O   HOH T 416       1.260  10.229  -0.652  1.00  0.45           O  
HETATM  418  O   HOH T 417      20.653  13.251  24.279  1.00  0.45           O  
HETATM  419  O   HOH T 418      -9.051  32.931   5.127  1.00  0.45           O  
HETATM  420  O   HOH T 419      28.303  -3.077  10.635  1.00  0.45           O  
HETATM  421  O   HOH T 420       7.396   0.550  -1.417  1.00  0.45           O  
HETATM  422  O   HOH T 421     -10.853   7.966  31.582  1.00  0.45           O  
HETATM  423  O   HOH T 422      13.523  -7.482  22.155  1.00  0.45           O  
HETATM  424  O   HOH T 423      12.214  23.485  34.236  1.00  0.45           O  
HETATM  425  O   HOH T 424       3.991  37.735  20.337  1.00  0.45           O  
HETATM  426  O   HOH T 425      22.098  13.095  -5.984  1.00  0.45           O  
HETATM  427  O   HOH T 426     -18.203  15.329  -1.483  1.00  0.45           O  
HETATM  428  O   HOH T 427      20.499  10.561  24.400  1.00  0.45           O  
HETATM  429  O   HOH T 428     -11.474   4.580 -13.025  1.00  0.45           O  
HETATM  430  O   HOH T 429     -20.177  13.556  -1.566  1.00  0.45           O  
HETATM  431  O   HOH T 430      20.430  14.686  26.627  1.00  0.45           O  
HETATM  432  O   HOH T 431     -15.546   7.845  36.913  1.00  0.45           O  
HETATM  433  O   HOH T 432       3.286  32.846 -10.058  1.00  0.45           O  
HETATM  434  O   HOH T 433       9.882  30.724  17.726  1.00  0.46           O  
HETATM  435  O   HOH T 434     -14.521  17.968  42.723  1.00  0.46           O  
HETATM  436  O   HOH T 435     -12.302  33.232  31.598  1.00  0.46           O  
HETATM  437  O   HOH T 436     -18.857  14.491  -8.344  1.00  0.46           O  
HETATM  438  O   HOH T 437      -4.933  31.306   8.043  1.00  0.46           O  
HETATM  439  O   HOH T 438      -0.855   0.781  -7.355  1.00  0.46           O  
HETATM  440  O   HOH T 439       8.304  -5.683  36.195  1.00  0.46           O  
HETATM  441  O   HOH T 440       1.658  26.667  44.573  1.00  0.46           O  
HETATM  442  O   HOH T 441      -3.438  19.120  55.533  1.00  0.46           O  
HETATM  443  O   HOH T 442       9.835  13.147 -17.006  1.00  0.46           O  
HETATM  444  O   HOH T 443      19.799  13.647  12.700  1.00  0.46           O  
HETATM  445  O   HOH T 444       8.887  20.304  10.620  1.00  0.46           O  
HETATM  446  O   HOH T 445       8.899  13.037   9.582  1.00  0.46           O  
HETATM  447  O   HOH T 446       8.457  20.163  25.792  1.00  0.46           O  
HETATM  448  O   HOH T 447      30.063   0.616   5.280  1.00  0.46           O  
HETATM  449  O   HOH T 448     -20.303  19.056  -4.173  1.00  0.46           O  
HETATM  450  O   HOH T 449      26.952  26.299  -3.590  1.00  0.46           O  
HETATM  451  O   HOH T 450       2.883  38.017   6.123  1.00  0.46           O  
HETATM  452  O   HOH T 451      -4.824  34.924  40.777  1.00  0.46           O  
HETATM  453  O   HOH T 452       3.712  38.281  17.598  1.00  0.46           O  
HETATM  454  O   HOH T 453      26.500  25.297  26.872  1.00  0.46           O  
HETATM  455  O   HOH T 454       2.688  39.281   8.703  1.00  0.46           O  
HETATM  456  O   HOH T 455       8.609  21.076  39.692  1.00  0.46           O  
HETATM  457  O   HOH T 456     -11.322  30.875  50.972  1.00  0.46           O  
HETATM  458  O   HOH T 457      -8.776  20.227  -7.738  1.00  0.46           O  
HETATM  459  O   HOH T 458      -7.389   1.114  11.865  1.00  0.46           O  
HETATM  460  O   HOH T 459      -7.671  24.824  45.911  1.00  0.46           O  
HETATM  461  O   HOH T 460       5.292  14.281  42.175  1.00  0.46           O  
HETATM  462  O   HOH T 461       2.647  12.303  30.563  1.00  0.46           O  
HETATM  463  O   HOH T 462      16.749  39.126   2.508  1.00  0.46           O  
HETATM  464  O   HOH T 463      -2.917  12.001 -16.802  1.00  0.46           O  
HETATM  465  O   HOH T 464      24.495   6.772  -7.854  1.00  0.47           O  
HETATM  466  O   HOH T 465      19.559  -0.347  10.909  1.00  0.47           O  
HETATM  467  O   HOH T 466     -13.134  31.488  41.777  1.00  0.47           O  
HETATM  468  O   HOH T 467      -7.181   4.782  26.693  1.00  0.47           O  
HETATM  469  O   HOH T 468     -18.838  26.836  30.408  1.00  0.47           O  
HETATM  470  O   HOH T 469       7.396   8.898  -7.079  1.00  0.47           O  
HETATM  471  O   HOH T 470      14.377  -0.908   7.086  1.00  0.47           O  
HETATM  472  O   HOH T 471      -2.392   0.931  -5.195  1.00  0.47           O  
HETATM  473  O   HOH T 472      15.767  14.435 -13.799  1.00  0.47           O  
HETATM  474  O   HOH T 473      27.595  22.747  26.491  1.00  0.47           O  
HETATM  475  O   HOH T 474       2.029  12.282 -15.630  1.00  0.47           O  
HETATM  476  O   HOH T 475       7.799  18.101  24.149  1.00  0.47           O  
HETATM  477  O   HOH T 476      25.936  -2.518  12.129  1.00  0.47           O  
HETATM  478  O   HOH T 477       7.486  14.961   7.196  1.00  0.47           O  
HETATM  479  O   HOH T 478      -0.110   1.503  -3.603  1.00  0.47           O  
HETATM  480  O   HOH T 479      28.929  28.131  -2.989  1.00  0.47           O  
HETATM  481  O   HOH T 480     -12.520   6.881  35.427  1.00  0.47           O  
HETATM  482  O   HOH T 481      23.519   1.985  20.873  1.00  0.47           O  
HETATM  483  O   HOH T 482      -8.958  25.276  -7.753  1.00  0.47           O  
HETATM  484  O   HOH T 483     -13.045   5.784  -0.105  1.00  0.47           O  
HETATM  485  O   HOH T 484      -8.830  36.385   6.456  1.00  0.47           O  
HETATM  486  O   HOH T 485     -21.007  11.034  -1.748  1.00  0.47           O  
HETATM  487  O   HOH T 486      15.758  31.946  -9.025  1.00  0.47           O  
HETATM  488  O   HOH T 487       9.556  32.105  35.618  1.00  0.47           O  
HETATM  489  O   HOH T 488      22.678  23.649  24.452  1.00  0.47           O  
HETATM  490  O   HOH T 489     -12.957  33.257  27.291  1.00  0.47           O  
HETATM  491  O   HOH T 490       1.179  12.136  41.446  1.00  0.47           O  
HETATM  492  O   HOH T 491     -20.707   7.560   1.080  1.00  0.48           O  
HETATM  493  O   HOH T 492       7.674  29.970  -9.805  1.00  0.48           O  
HETATM  494  O   HOH T 493     -13.902   3.324  29.316  1.00  0.48           O  
HETATM  495  O   HOH T 494     -12.071   4.620  27.672  1.00  0.48           O  
HETATM  496  O   HOH T 495     -16.476   9.144  39.225  1.00  0.48           O  
HETATM  497  O   HOH T 496      34.722   8.302  -5.829  1.00  0.48           O  
HETATM  498  O   HOH T 497      20.142  -0.997   5.473  1.00  0.48           O  
HETATM  499  O   HOH T 498      -1.849  -2.000  12.076  1.00  0.48           O  
HETATM  500  O   HOH T 499       6.125  35.779  -7.511  1.00  0.48           O  
HETATM  501  O   HOH T 500     -19.262  25.922  33.002  1.00  0.48           O  
HETATM  502  O   HOH T 501      10.235  23.234  39.729  1.00  0.48           O  
HETATM  503  O   HOH T 502      12.153  39.865   4.255  1.00  0.48           O  
HETATM  504  O   HOH T 503      27.338   7.239  -8.157  1.00  0.48           O  
HETATM  505  O   HOH T 504     -14.535  15.509  44.166  1.00  0.48           O  
HETATM  506  O   HOH T 505      -4.211  38.403  34.840  1.00  0.48           O  
HETATM  507  O   HOH T 506      -4.415  -2.184   3.175  1.00  0.48           O  
HETATM  508  O   HOH T 507      19.500  16.836  27.967  1.00  0.48           O  
HETATM  509  O   HOH T 508      -8.508  37.018   2.379  1.00  0.48           O  
HETATM  510  O   HOH T 509     -11.418   4.871  42.003  1.00  0.49           O  
HETATM  511  O   HOH T 510     -10.379  26.849  -5.958  1.00  0.49           O  
HETATM  512  O   HOH T 511      -3.824  33.239   9.754  1.00  0.49           O  
HETATM  513  O   HOH T 512      -9.945   6.884  -4.529  1.00  0.49           O  
HETATM  514  O   HOH T 513       5.608  37.812   5.882  1.00  0.49           O  
HETATM  515  O   HOH T 514      29.831  23.177  -1.040  1.00  0.49           O  
HETATM  516  O   HOH T 515      22.524  -1.543   4.173  1.00  0.49           O  
HETATM  517  O   HOH T 516      22.733  -4.401  26.133  1.00  0.49           O  
HETATM  518  O   HOH T 517     -12.933  28.855  42.667  1.00  0.49           O  
HETATM  519  O   HOH T 518      17.932  17.524  22.550  1.00  0.49           O  
HETATM  520  O   HOH T 519     -11.959  18.792  -7.526  1.00  0.49           O  
HETATM  521  O   HOH T 520      -1.627  -0.216   0.917  1.00  0.49           O  
HETATM  522  O   HOH T 521      -3.858  31.192  46.838  1.00  0.49           O  
HETATM  523  O   HOH T 522      -5.068  -0.100  11.069  1.00  0.49           O  
HETATM  524  O   HOH T 523     -14.567  31.004  26.792  1.00  0.49           O  
HETATM  525  O   HOH T 524     -11.514  18.666 -14.049  1.00  0.49           O  
HETATM  526  O   HOH T 525      -6.768  -0.977   2.583  1.00  0.49           O  
HETATM  527  O   HOH T 526     -14.747  28.231  44.655  1.00  0.49           O  
HETATM  528  O   HOH T 527       2.552  14.565  41.754  1.00  0.49           O  
HETATM  529  O   HOH T 528     -13.817  29.869  29.159  1.00  0.49           O  
HETATM  530  O   HOH T 529      33.435  15.671   8.413  1.00  0.49           O  
HETATM  531  O   HOH T 530      26.074  20.760  25.366  1.00  0.49           O  
HETATM  532  O   HOH T 531      10.650  15.819 -17.177  1.00  0.49           O  
HETATM  533  O   HOH T 532       2.254   7.368  38.243  1.00  0.49           O  
HETATM  534  O   HOH T 533     -12.743  16.234 -13.687  1.00  0.49           O  
HETATM  535  O   HOH T 534       0.566  33.678  30.764  1.00  0.49           O  
HETATM  536  O   HOH T 535      25.759  12.249  21.206  1.00  0.49           O  
HETATM  537  O   HOH T 536       2.917  26.106  46.826  1.00  0.49           O  
HETATM  538  O   HOH T 537      12.405  33.306  25.997  1.00  0.49           O  
HETATM  539  O   HOH T 538       2.457  34.195   8.288  1.00  0.49           O  
HETATM  540  O   HOH T 539      29.892  28.194  12.908  1.00  0.49           O  
HETATM  541  O   HOH T 540      12.138  12.134 -15.811  1.00  0.49           O  
HETATM  542  O   HOH T 541       4.768  32.764   7.375  1.00  0.49           O  
HETATM  543  O   HOH T 542      29.971   0.965   2.558  1.00  0.49           O  
HETATM  544  O   HOH T 543      -4.860   1.620  -0.810  1.00  0.49           O  
HETATM  545  O   HOH T 544     -13.038   6.234  25.643  1.00  0.49           O  
HETATM  546  O   HOH T 545       9.175  33.315  33.191  1.00  0.50           O  
HETATM  547  O   HOH T 546     -13.776  30.068  35.630  1.00  0.50           O  
HETATM  548  O   HOH T 547      31.748  26.881  10.421  1.00  0.50           O  
HETATM  549  O   HOH T 548     -10.414   4.472  -5.647  1.00  0.50           O  
HETATM  550  O   HOH T 549      17.029  -9.992  22.696  1.00  0.50           O  
HETATM  551  O   HOH T 550      -4.882  23.266  12.638  1.00  0.50           O  
HETATM  552  O   HOH T 551     -12.215  17.869 -11.479  1.00  0.50           O  
HETATM  553  O   HOH T 552       4.103  35.505   6.554  1.00  0.50           O  
HETATM  554  O   HOH T 553      17.279   7.478 -10.112  1.00  0.50           O  
HETATM  555  O   HOH T 554     -10.142  35.119  16.731  1.00  0.50           O  
HETATM  556  O   HOH T 555      17.875  38.130   4.899  1.00  0.50           O  
HETATM  557  O   HOH T 556      -6.635   3.906  -0.681  1.00  0.50           O  
HETATM  558  O   HOH T 557      -3.265  39.468  46.801  1.00  0.50           O  
HETATM  559  O   HOH T 558      -6.409   2.336 -17.467  1.00  0.50           O  
HETATM  560  O   HOH T 559       3.098  37.098  15.180  1.00  0.50           O  
HETATM  561  O   HOH T 560      11.643  29.308  36.893  1.00  0.50           O  
HETATM  562  O   HOH T 561       2.256  13.479  39.164  1.00  0.50           O  
HETATM  563  O   HOH T 562      -8.568   3.473  12.185  1.00  0.50           O  
HETATM  564  O   HOH T 563       1.015  37.786  13.037  1.00  0.50           O  
HETATM  565  O   HOH T 564     -12.436  31.885  34.007  1.00  0.50           O  
HETATM  566  O   HOH T 565      -5.823   6.093 -17.353  1.00  0.50           O  
HETATM  567  O   HOH T 566      20.431  27.147  -6.630  1.00  0.50           O  
HETATM  568  O   HOH T 567      14.541  12.025 -14.503  1.00  0.51           O  
HETATM  569  O   HOH T 568      28.523  -1.621   5.908  1.00  0.51           O  
HETATM  570  O   HOH T 569      -4.369  -2.067  12.910  1.00  0.51           O  
HETATM  571  O   HOH T 570     -17.272  28.471   2.502  1.00  0.51           O  
HETATM  572  O   HOH T 571      -6.358  -1.917   9.447  1.00  0.51           O  
HETATM  573  O   HOH T 572      16.383  -7.011  18.321  1.00  0.51           O  
HETATM  574  O   HOH T 573      20.515  26.564  19.147  1.00  0.51           O  
HETATM  575  O   HOH T 574      14.155  19.905  37.875  1.00  0.51           O  
HETATM  576  O   HOH T 575      -9.608  25.433  44.086  1.00  0.51           O  
HETATM  577  O   HOH T 576       1.928   2.760  37.372  1.00  0.51           O  
HETATM  578  O   HOH T 577      29.850  25.912  -1.538  1.00  0.51           O  
HETATM  579  O   HOH T 578      28.234  13.506  21.827  1.00  0.51           O  
HETATM  580  O   HOH T 579       9.769  32.579  19.655  1.00  0.51           O  
HETATM  581  O   HOH T 580       2.039  27.925  48.685  1.00  0.51           O  
HETATM  582  O   HOH T 581      10.678  32.197  31.116  1.00  0.51           O  
HETATM  583  O   HOH T 582      16.165  21.243  36.553  1.00  0.51           O  
HETATM  584  O   HOH T 583      11.453  -0.378  17.984  1.00  0.52           O  
HETATM  585  O   HOH T 584      -6.450  -0.979  31.636  1.00  0.52           O  
HETATM  586  O   HOH T 585     -17.246  23.394  24.302  1.00  0.52           O  
HETATM  587  O   HOH T 586      29.524  26.258   3.021  1.00  0.52           O  
HETATM  588  O   HOH T 587     -20.178  24.389  30.863  1.00  0.52           O  
HETATM  589  O   HOH T 588      10.516  28.279  15.255  1.00  0.52           O  
HETATM  590  O   HOH T 589     -25.212   6.378   7.234  1.00  0.52           O  
HETATM  591  O   HOH T 590       9.734  30.043  10.745  1.00  0.52           O  
HETATM  592  O   HOH T 591     -23.652  16.670   0.010  1.00  0.52           O  
HETATM  593  O   HOH T 592     -16.833  31.077   1.673  1.00  0.52           O  
HETATM  594  O   HOH T 593      -9.486  17.762  -8.678  1.00  0.52           O  
HETATM  595  O   HOH T 594       5.294  36.558  -4.916  1.00  0.52           O  
HETATM  596  O   HOH T 595      -7.343  33.366  -3.257  1.00  0.52           O  
HETATM  597  O   HOH T 596     -16.085  14.689  41.981  1.00  0.52           O  
HETATM  598  O   HOH T 597      14.563  -0.362  19.924  1.00  0.52           O  
HETATM  599  O   HOH T 598     -13.312   6.581 -13.629  1.00  0.52           O  
HETATM  600  O   HOH T 599      -2.208  -2.685 -11.100  1.00  0.52           O  
HETATM  601  O   HOH T 600     -23.050  16.257   7.282  1.00  0.52           O  
HETATM  602  O   HOH T 601      -1.783   0.082 -16.331  1.00  0.52           O  
HETATM  603  O   HOH T 602      31.602  22.657   4.746  1.00  0.52           O  
HETATM  604  O   HOH T 603     -20.028  20.931  -6.251  1.00  0.53           O  
HETATM  605  O   HOH T 604      11.441   5.626  -3.198  1.00  0.53           O  
HETATM  606  O   HOH T 605      12.959  22.675 -16.216  1.00  0.53           O  
HETATM  607  O   HOH T 606      -1.734   0.467  13.235  1.00  0.53           O  
HETATM  608  O   HOH T 607       5.735  34.197  -9.779  1.00  0.53           O  
HETATM  609  O   HOH T 608     -16.035  15.326  35.632  1.00  0.53           O  
HETATM  610  O   HOH T 609      10.126   7.972 -13.009  1.00  0.53           O  
HETATM  611  O   HOH T 610      13.608  31.532 -10.629  1.00  0.53           O  
HETATM  612  O   HOH T 611     -13.224   8.761  46.243  1.00  0.53           O  
HETATM  613  O   HOH T 612      -9.426  34.441  22.984  1.00  0.53           O  
HETATM  614  O   HOH T 613      36.982  28.005   8.876  1.00  0.53           O  
HETATM  615  O   HOH T 614     -23.493   9.596   0.718  1.00  0.53           O  
HETATM  616  O   HOH T 615      -1.618  33.470  35.185  1.00  0.53           O  
HETATM  617  O   HOH T 616     -12.019   4.227   4.874  1.00  0.53           O  
HETATM  618  O   HOH T 617      -7.596  30.874   7.758  1.00  0.53           O  
HETATM  619  O   HOH T 618      -9.804  18.108  49.261  1.00  0.53           O  
HETATM  620  O   HOH T 619     -12.889   5.663  -6.549  1.00  0.53           O  
HETATM  621  O   HOH T 620       9.762   3.121  10.100  1.00  0.53           O  
HETATM  622  O   HOH T 621     -10.432  29.085  -4.191  1.00  0.53           O  
HETATM  623  O   HOH T 622     -19.330  16.471  -6.507  1.00  0.53           O  
HETATM  624  O   HOH T 623      -6.362  36.789  34.555  1.00  0.53           O  
HETATM  625  O   HOH T 624      -6.470  -3.312 -11.211  1.00  0.53           O  
HETATM  626  O   HOH T 625       5.140   4.091  -2.694  1.00  0.54           O  
HETATM  627  O   HOH T 626     -12.147   5.948  32.895  1.00  0.54           O  
HETATM  628  O   HOH T 627      17.719   8.180  35.548  1.00  0.54           O  
HETATM  629  O   HOH T 628      11.243  -2.141  15.957  1.00  0.54           O  
HETATM  630  O   HOH T 629       9.783  -5.347  33.738  1.00  0.54           O  
HETATM  631  O   HOH T 630       0.058  -0.733  24.941  1.00  0.54           O  
HETATM  632  O   HOH T 631      -9.889  29.197  12.979  1.00  0.54           O  
HETATM  633  O   HOH T 632       9.007   1.438  12.321  1.00  0.54           O  
HETATM  634  O   HOH T 633      16.451  39.631  -0.152  1.00  0.54           O  
HETATM  635  O   HOH T 634     -11.355  34.024  25.080  1.00  0.54           O  
HETATM  636  O   HOH T 635      19.442  29.006  -9.628  1.00  0.54           O  
HETATM  637  O   HOH T 636      11.336   6.571  36.107  1.00  0.54           O  
HETATM  638  O   HOH T 637       1.841  16.277  43.568  1.00  0.54           O  
HETATM  639  O   HOH T 638      30.303   7.289  -5.565  1.00  0.54           O  
HETATM  640  O   HOH T 639       2.670  37.424  10.827  1.00  0.54           O  
HETATM  641  O   HOH T 640     -22.700   5.733   8.563  1.00  0.54           O  
HETATM  642  O   HOH T 641      -8.914  18.923  25.148  1.00  0.54           O  
HETATM  643  O   HOH T 642      25.107  30.517   4.251  1.00  0.54           O  
HETATM  644  O   HOH T 643     -10.563   4.781  16.972  1.00  0.54           O  
HETATM  645  O   HOH T 644      26.652   4.540  23.687  1.00  0.55           O  
HETATM  646  O   HOH T 645      18.776  19.397 -16.180  1.00  0.55           O  
HETATM  647  O   HOH T 646     -17.680  27.420  15.194  1.00  0.55           O  
HETATM  648  O   HOH T 647      -2.421  -1.838  -1.354  1.00  0.55           O  
HETATM  649  O   HOH T 648      26.702  31.592  10.648  1.00  0.55           O  
HETATM  650  O   HOH T 649      -8.356   8.682  47.776  1.00  0.55           O  
HETATM  651  O   HOH T 650      16.274  -0.928  31.057  1.00  0.55           O  
HETATM  652  O   HOH T 651      24.455  14.037  22.992  1.00  0.55           O  
HETATM  653  O   HOH T 652      -2.478   0.746  -2.357  1.00  0.55           O  
HETATM  654  O   HOH T 653     -12.030  36.369  46.146  1.00  0.55           O  
HETATM  655  O   HOH T 654     -20.245  26.678  16.174  1.00  0.55           O  
HETATM  656  O   HOH T 655     -14.691   6.446   8.755  1.00  0.55           O  
HETATM  657  O   HOH T 656     -15.301  27.602  42.030  1.00  0.55           O  
HETATM  658  O   HOH T 657       8.169  -3.452  32.371  1.00  0.55           O  
HETATM  659  O   HOH T 658       7.526  14.684  40.868  1.00  0.55           O  
HETATM  660  O   HOH T 659      -4.423  36.423  -4.789  1.00  0.55           O  
HETATM  661  O   HOH T 660      15.383  23.583 -15.266  1.00  0.55           O  
HETATM  662  O   HOH T 661      17.040   2.423  -4.835  1.00  0.56           O  
HETATM  663  O   HOH T 662      29.261  27.549  25.213  1.00  0.56           O  
HETATM  664  O   HOH T 663      -4.906   2.466  42.306  1.00  0.56           O  
HETATM  665  O   HOH T 664      16.976  11.360 -15.500  1.00  0.56           O  
HETATM  666  O   HOH T 665      31.419  25.941   0.907  1.00  0.56           O  
HETATM  667  O   HOH T 666      21.032  17.733  30.003  1.00  0.56           O  
HETATM  668  O   HOH T 667     -17.178  23.060  -6.793  1.00  0.56           O  
HETATM  669  O   HOH T 668      25.159  24.214  -3.186  1.00  0.56           O  
HETATM  670  O   HOH T 669      15.595  31.628  12.867  1.00  0.56           O  
HETATM  671  O   HOH T 670     -11.904   3.928   9.471  1.00  0.56           O  
HETATM  672  O   HOH T 671       6.262  26.026  19.565  1.00  0.56           O  
HETATM  673  O   HOH T 672      11.356  27.517  38.855  1.00  0.56           O  
HETATM  674  O   HOH T 673       0.902  27.501  51.056  1.00  0.56           O  
HETATM  675  O   HOH T 674      24.912  28.681  21.111  1.00  0.56           O  
HETATM  676  O   HOH T 675      14.383  30.871  16.275  1.00  0.57           O  
HETATM  677  O   HOH T 676     -13.040  33.342  43.805  1.00  0.57           O  
HETATM  678  O   HOH T 677     -19.431   6.636  -2.426  1.00  0.57           O  
HETATM  679  O   HOH T 678      34.197   8.606  -3.149  1.00  0.57           O  
HETATM  680  O   HOH T 679      31.954   8.973  20.412  1.00  0.57           O  
HETATM  681  O   HOH T 680      -9.341   4.619  28.387  1.00  0.57           O  
HETATM  682  O   HOH T 681      24.929  23.204  25.911  1.00  0.57           O  
HETATM  683  O   HOH T 682      13.800  26.918  25.914  1.00  0.58           O  
HETATM  684  O   HOH T 683      -2.587  36.629  22.667  1.00  0.58           O  
HETATM  685  O   HOH T 684       0.889  34.805  34.583  1.00  0.58           O  
HETATM  686  O   HOH T 685     -11.538  25.925  48.749  1.00  0.58           O  
HETATM  687  O   HOH T 686      13.819  33.263   7.312  1.00  0.59           O  
HETATM  688  O   HOH T 687      -8.777   6.580 -20.575  1.00  0.59           O  
HETATM  689  O   HOH T 688      10.372  33.182 -11.510  1.00  0.59           O  
HETATM  690  O   HOH T 689      17.921  29.932  19.461  1.00  0.60           O  
HETATM  691  O   HOH T 690      23.549  -2.819   1.707  1.00  0.61           O  
TER     692      HOH T 690 
