# Supplementary material for: Accurate Prediction of Hydration Sites of Proteins Using Energy Model With Atom Embedding
Source: Front Mol Biosci. 2021 Sep 20;8:756075. doi: 10.3389/fmolb.2021.756075 (PMC8488165; doi:10.3389/fmolb.2021.756075)
Supplement: Supplementary file 1 [file DataSheet1.ZIP › Data Sheet 1/Our_result_pdb/OppA_dataset_output/1B32_watersite.pdb]

HEADER                                                        XXXX


JRNL        PMID   -1
HETATM    1  O   HOH T   0       5.468  15.012  -3.643  1.00  0.15           O  
HETATM    2  O   HOH T   1       6.588  30.178  14.608  1.00  0.16           O  
HETATM    3  O   HOH T   2      23.312  23.436  -0.907  1.00  0.17           O  
HETATM    4  O   HOH T   3       7.486  15.524 -10.373  1.00  0.17           O  
HETATM    5  O   HOH T   4       0.948  12.704  -8.283  1.00  0.18           O  
HETATM    6  O   HOH T   5      20.084  25.970  14.027  1.00  0.18           O  
HETATM    7  O   HOH T   6      14.288  16.849  30.998  1.00  0.18           O  
HETATM    8  O   HOH T   7      19.217  19.918   6.345  1.00  0.18           O  
HETATM    9  O   HOH T   8       5.383   3.937  30.992  1.00  0.18           O  
HETATM   10  O   HOH T   9      17.468  13.489   4.788  1.00  0.19           O  
HETATM   11  O   HOH T  10      -1.822   8.638  10.142  1.00  0.19           O  
HETATM   12  O   HOH T  11      15.672  15.332  -8.350  1.00  0.19           O  
HETATM   13  O   HOH T  12      -4.300  27.585  13.766  1.00  0.19           O  
HETATM   14  O   HOH T  13      -4.558  23.260  -7.407  1.00  0.20           O  
HETATM   15  O   HOH T  14       3.177  17.007   7.937  1.00  0.20           O  
HETATM   16  O   HOH T  15     -13.264  13.834 -14.598  1.00  0.20           O  
HETATM   17  O   HOH T  16      -7.991  23.011  23.269  1.00  0.20           O  
HETATM   18  O   HOH T  17       7.125  10.882  -8.802  1.00  0.21           O  
HETATM   19  O   HOH T  18       8.212  15.317  -3.339  1.00  0.21           O  
HETATM   20  O   HOH T  19      31.248  11.160   8.408  1.00  0.21           O  
HETATM   21  O   HOH T  20       5.551  20.065  25.171  1.00  0.21           O  
HETATM   22  O   HOH T  21      22.107  14.982 -11.357  1.00  0.22           O  
HETATM   23  O   HOH T  22       0.344  30.985  10.806  1.00  0.22           O  
HETATM   24  O   HOH T  23      34.229  14.928  -1.717  1.00  0.22           O  
HETATM   25  O   HOH T  24     -22.069  20.753  -3.052  1.00  0.22           O  
HETATM   26  O   HOH T  25      -9.630  11.978  33.317  1.00  0.22           O  
HETATM   27  O   HOH T  26      12.861  -0.645  22.370  1.00  0.22           O  
HETATM   28  O   HOH T  27     -12.607  11.623  20.432  1.00  0.22           O  
HETATM   29  O   HOH T  28       1.462  22.599  18.286  1.00  0.22           O  
HETATM   30  O   HOH T  29      -0.702   6.868   0.881  1.00  0.23           O  
HETATM   31  O   HOH T  30      -4.236  19.488  15.993  1.00  0.23           O  
HETATM   32  O   HOH T  31      24.769  21.727  23.501  1.00  0.23           O  
HETATM   33  O   HOH T  32      -2.202   4.938   9.992  1.00  0.23           O  
HETATM   34  O   HOH T  33      -3.757  29.885  12.355  1.00  0.23           O  
HETATM   35  O   HOH T  34      22.402   6.383  -9.808  1.00  0.24           O  
HETATM   36  O   HOH T  35      -6.479   9.139   7.507  1.00  0.24           O  
HETATM   37  O   HOH T  36       9.871   9.214  -5.760  1.00  0.24           O  
HETATM   38  O   HOH T  37      -9.589  21.106   9.127  1.00  0.24           O  
HETATM   39  O   HOH T  38      -0.416  30.863   1.850  1.00  0.24           O  
HETATM   40  O   HOH T  39      25.158  32.731  -3.480  1.00  0.24           O  
HETATM   41  O   HOH T  40       4.279  10.441  30.999  1.00  0.24           O  
HETATM   42  O   HOH T  41      11.147  13.840  16.847  1.00  0.24           O  
HETATM   43  O   HOH T  42      17.762  26.234  18.002  1.00  0.24           O  
HETATM   44  O   HOH T  43       2.623   1.033  25.234  1.00  0.24           O  
HETATM   45  O   HOH T  44     -14.063   9.395  20.863  1.00  0.24           O  
HETATM   46  O   HOH T  45       3.083   4.191  35.186  1.00  0.25           O  
HETATM   47  O   HOH T  46      -6.092  14.203  13.161  1.00  0.25           O  
HETATM   48  O   HOH T  47      -0.276   5.851  -6.162  1.00  0.25           O  
HETATM   49  O   HOH T  48      -1.550  28.299   2.212  1.00  0.25           O  
HETATM   50  O   HOH T  49      17.212   5.242  21.990  1.00  0.25           O  
HETATM   51  O   HOH T  50      -5.735  36.124  15.452  1.00  0.25           O  
HETATM   52  O   HOH T  51      -7.726   5.728   4.799  1.00  0.25           O  
HETATM   53  O   HOH T  52       5.265  -3.116   1.632  1.00  0.25           O  
HETATM   54  O   HOH T  53      11.462  18.340   3.236  1.00  0.25           O  
HETATM   55  O   HOH T  54      -1.061  30.505  28.409  1.00  0.26           O  
HETATM   56  O   HOH T  55      10.045  30.917   4.234  1.00  0.26           O  
HETATM   57  O   HOH T  56       8.776  24.026   2.094  1.00  0.26           O  
HETATM   58  O   HOH T  57      -0.827  14.951   8.969  1.00  0.26           O  
HETATM   59  O   HOH T  58      10.441  23.306   4.107  1.00  0.26           O  
HETATM   60  O   HOH T  59       9.018   6.778   7.055  1.00  0.26           O  
HETATM   61  O   HOH T  60       1.443  37.421   0.542  1.00  0.26           O  
HETATM   62  O   HOH T  61       8.021  32.555  37.278  1.00  0.26           O  
HETATM   63  O   HOH T  62       9.806   6.217  10.957  1.00  0.26           O  
HETATM   64  O   HOH T  63      -8.405  27.516  42.225  1.00  0.27           O  
HETATM   65  O   HOH T  64      -8.815  11.225  46.116  1.00  0.27           O  
HETATM   66  O   HOH T  65      27.402  13.472  19.125  1.00  0.27           O  
HETATM   67  O   HOH T  66      24.789  13.250  -5.699  1.00  0.27           O  
HETATM   68  O   HOH T  67       7.841  24.268   4.759  1.00  0.27           O  
HETATM   69  O   HOH T  68      15.396  14.769  -5.695  1.00  0.27           O  
HETATM   70  O   HOH T  69       3.161   5.526  30.855  1.00  0.27           O  
HETATM   71  O   HOH T  70      -5.922  34.584  43.413  1.00  0.27           O  
HETATM   72  O   HOH T  71     -18.611  10.643 -11.447  1.00  0.27           O  
HETATM   73  O   HOH T  72      -2.118  24.541  12.060  1.00  0.28           O  
HETATM   74  O   HOH T  73      22.345  25.163  17.306  1.00  0.28           O  
HETATM   75  O   HOH T  74     -21.260  16.726  15.077  1.00  0.28           O  
HETATM   76  O   HOH T  75      33.762  15.868  -4.282  1.00  0.28           O  
HETATM   77  O   HOH T  76     -10.679  16.447 -15.496  1.00  0.28           O  
HETATM   78  O   HOH T  77       9.041  22.153  18.643  1.00  0.28           O  
HETATM   79  O   HOH T  78      13.148  24.455  26.978  1.00  0.28           O  
HETATM   80  O   HOH T  79     -11.680  14.115 -16.931  1.00  0.28           O  
HETATM   81  O   HOH T  80     -20.185   7.933   1.316  1.00  0.28           O  
HETATM   82  O   HOH T  81     -22.121  24.327   7.322  1.00  0.29           O  
HETATM   83  O   HOH T  82      38.262   7.462  -6.716  1.00  0.29           O  
HETATM   84  O   HOH T  83      13.547  23.319  11.593  1.00  0.29           O  
HETATM   85  O   HOH T  84     -18.791   8.961  -0.925  1.00  0.29           O  
HETATM   86  O   HOH T  85     -16.200  26.171  16.979  1.00  0.29           O  
HETATM   87  O   HOH T  86      -9.900  16.144  14.808  1.00  0.29           O  
HETATM   88  O   HOH T  87       7.736  20.436  23.547  1.00  0.29           O  
HETATM   89  O   HOH T  88       1.005   5.013  38.978  1.00  0.29           O  
HETATM   90  O   HOH T  89      22.114   8.180  24.276  1.00  0.29           O  
HETATM   91  O   HOH T  90       3.405   6.855  35.285  1.00  0.29           O  
HETATM   92  O   HOH T  91      -6.983   7.334  -1.994  1.00  0.29           O  
HETATM   93  O   HOH T  92       6.401   7.711   7.338  1.00  0.29           O  
HETATM   94  O   HOH T  93     -10.899  29.609  17.106  1.00  0.30           O  
HETATM   95  O   HOH T  94      32.559  18.753   0.767  1.00  0.30           O  
HETATM   96  O   HOH T  95      -5.766   4.758  26.799  1.00  0.30           O  
HETATM   97  O   HOH T  96      10.047  13.448  -2.426  1.00  0.30           O  
HETATM   98  O   HOH T  97      12.271   1.081  20.221  1.00  0.30           O  
HETATM   99  O   HOH T  98      -8.561  36.216   6.091  1.00  0.30           O  
HETATM  100  O   HOH T  99      12.292  21.192  10.281  1.00  0.30           O  
HETATM  101  O   HOH T 100      -3.075  36.024  16.272  1.00  0.30           O  
HETATM  102  O   HOH T 101      11.875  25.595  -7.340  1.00  0.30           O  
HETATM  103  O   HOH T 102      -8.700  26.987  -3.709  1.00  0.30           O  
HETATM  104  O   HOH T 103      18.879  18.282  33.257  1.00  0.30           O  
HETATM  105  O   HOH T 104       4.609   8.031  37.377  1.00  0.30           O  
HETATM  106  O   HOH T 105      12.231  22.976 -13.651  1.00  0.30           O  
HETATM  107  O   HOH T 106      -1.327  31.511  37.339  1.00  0.30           O  
HETATM  108  O   HOH T 107      10.415   8.066 -12.838  1.00  0.30           O  
HETATM  109  O   HOH T 108      17.049   9.181  19.539  1.00  0.30           O  
HETATM  110  O   HOH T 109      28.436  20.121  -8.084  1.00  0.30           O  
HETATM  111  O   HOH T 110      36.675  10.597  -0.058  1.00  0.30           O  
HETATM  112  O   HOH T 111      -7.865  13.066  16.332  1.00  0.30           O  
HETATM  113  O   HOH T 112      -3.368  19.368 -14.743  1.00  0.30           O  
HETATM  114  O   HOH T 113       8.949  13.045   9.657  1.00  0.30           O  
HETATM  115  O   HOH T 114     -14.158  39.241  30.478  1.00  0.30           O  
HETATM  116  O   HOH T 115      11.222  21.089  35.050  1.00  0.30           O  
HETATM  117  O   HOH T 116      -1.644  21.925  12.961  1.00  0.31           O  
HETATM  118  O   HOH T 117       8.787   1.420  25.831  1.00  0.31           O  
HETATM  119  O   HOH T 118      10.412  13.488   3.172  1.00  0.31           O  
HETATM  120  O   HOH T 119     -19.287  16.087  16.987  1.00  0.31           O  
HETATM  121  O   HOH T 120     -14.689  19.478  -7.037  1.00  0.31           O  
HETATM  122  O   HOH T 121      29.393  21.394   1.269  1.00  0.31           O  
HETATM  123  O   HOH T 122      20.613   0.035   1.058  1.00  0.31           O  
HETATM  124  O   HOH T 123      19.797  21.728  21.671  1.00  0.31           O  
HETATM  125  O   HOH T 124      13.878  22.682  29.011  1.00  0.31           O  
HETATM  126  O   HOH T 125      27.708  15.765  20.611  1.00  0.31           O  
HETATM  127  O   HOH T 126      14.957  14.667   4.835  1.00  0.31           O  
HETATM  128  O   HOH T 127     -11.000  26.718  34.468  1.00  0.31           O  
HETATM  129  O   HOH T 128     -12.023  10.607  32.765  1.00  0.31           O  
HETATM  130  O   HOH T 129     -10.350  29.895   8.874  1.00  0.31           O  
HETATM  131  O   HOH T 130      15.217  15.059  37.910  1.00  0.31           O  
HETATM  132  O   HOH T 131      -2.313  19.696   3.954  1.00  0.31           O  
HETATM  133  O   HOH T 132       2.783  14.552  32.652  1.00  0.31           O  
HETATM  134  O   HOH T 133     -17.646  28.408   5.199  1.00  0.31           O  
HETATM  135  O   HOH T 134      -6.006   6.652 -17.625  1.00  0.32           O  
HETATM  136  O   HOH T 135      17.234  -6.806  21.540  1.00  0.32           O  
HETATM  137  O   HOH T 136      -1.940  39.050  27.867  1.00  0.32           O  
HETATM  138  O   HOH T 137       5.648   5.561   8.967  1.00  0.32           O  
HETATM  139  O   HOH T 138      -5.062  26.550  50.633  1.00  0.32           O  
HETATM  140  O   HOH T 139     -12.482   8.754   0.789  1.00  0.32           O  
HETATM  141  O   HOH T 140      22.818   1.682  20.872  1.00  0.32           O  
HETATM  142  O   HOH T 141      -8.664  -1.942  41.052  1.00  0.32           O  
HETATM  143  O   HOH T 142      22.671  26.046  -4.601  1.00  0.32           O  
HETATM  144  O   HOH T 143       8.644  12.404   5.129  1.00  0.32           O  
HETATM  145  O   HOH T 144      10.481  15.033  -0.168  1.00  0.32           O  
HETATM  146  O   HOH T 145      -4.966  27.730  -6.646  1.00  0.32           O  
HETATM  147  O   HOH T 146      -3.994  32.573  40.711  1.00  0.32           O  
HETATM  148  O   HOH T 147      27.886   6.754  -3.817  1.00  0.32           O  
HETATM  149  O   HOH T 148      18.223  30.947  -6.786  1.00  0.32           O  
HETATM  150  O   HOH T 149      13.208  13.412   3.006  1.00  0.33           O  
HETATM  151  O   HOH T 150       0.012  -2.494  26.822  1.00  0.33           O  
HETATM  152  O   HOH T 151       0.714  11.541  32.460  1.00  0.33           O  
HETATM  153  O   HOH T 152      -8.226  36.291  27.409  1.00  0.33           O  
HETATM  154  O   HOH T 153      -2.330  30.841  10.292  1.00  0.33           O  
HETATM  155  O   HOH T 154      31.982   5.238   4.207  1.00  0.33           O  
HETATM  156  O   HOH T 155      10.664  15.925   4.480  1.00  0.33           O  
HETATM  157  O   HOH T 156       1.644   4.841 -12.587  1.00  0.33           O  
HETATM  158  O   HOH T 157       2.086  16.430   2.292  1.00  0.33           O  
HETATM  159  O   HOH T 158     -24.027  20.894  15.272  1.00  0.33           O  
HETATM  160  O   HOH T 159      -1.592   7.508   3.485  1.00  0.33           O  
HETATM  161  O   HOH T 160       4.808  34.862  -0.051  1.00  0.33           O  
HETATM  162  O   HOH T 161      23.042  14.281  -8.869  1.00  0.34           O  
HETATM  163  O   HOH T 162     -12.552  29.783  32.988  1.00  0.34           O  
HETATM  164  O   HOH T 163       2.722   9.057   1.313  1.00  0.34           O  
HETATM  165  O   HOH T 164      -8.053  15.820  17.043  1.00  0.34           O  
HETATM  166  O   HOH T 165      13.557  26.964  -9.191  1.00  0.34           O  
HETATM  167  O   HOH T 166      -4.860  18.008   3.332  1.00  0.34           O  
HETATM  168  O   HOH T 167     -17.515  14.677 -15.492  1.00  0.34           O  
HETATM  169  O   HOH T 168     -16.005  26.868  -1.817  1.00  0.34           O  
HETATM  170  O   HOH T 169     -11.777  32.053  29.271  1.00  0.34           O  
HETATM  171  O   HOH T 170      15.503  23.440  25.899  1.00  0.34           O  
HETATM  172  O   HOH T 171       5.103  35.197  -3.053  1.00  0.34           O  
HETATM  173  O   HOH T 172      -7.213  33.867   5.366  1.00  0.35           O  
HETATM  174  O   HOH T 173      -2.025   8.579   7.306  1.00  0.35           O  
HETATM  175  O   HOH T 174     -14.553   8.030  -0.886  1.00  0.35           O  
HETATM  176  O   HOH T 175     -25.981  13.617   8.475  1.00  0.35           O  
HETATM  177  O   HOH T 176     -11.082   1.149  38.059  1.00  0.35           O  
HETATM  178  O   HOH T 177      25.621  20.603  -8.047  1.00  0.35           O  
HETATM  179  O   HOH T 178     -11.524   5.048  41.958  1.00  0.35           O  
HETATM  180  O   HOH T 179      -1.489  37.329  17.991  1.00  0.35           O  
HETATM  181  O   HOH T 180      12.895  28.218  23.494  1.00  0.35           O  
HETATM  182  O   HOH T 181       0.370  33.859  29.838  1.00  0.35           O  
HETATM  183  O   HOH T 182      11.622  10.276 -14.120  1.00  0.35           O  
HETATM  184  O   HOH T 183      32.467  17.917   5.781  1.00  0.35           O  
HETATM  185  O   HOH T 184      21.026  26.075 -13.743  1.00  0.35           O  
HETATM  186  O   HOH T 185      -4.637  13.524 -17.490  1.00  0.35           O  
HETATM  187  O   HOH T 186     -10.632   8.541  -2.384  1.00  0.35           O  
HETATM  188  O   HOH T 187       3.786   7.987   3.597  1.00  0.35           O  
HETATM  189  O   HOH T 188     -10.654   4.877   7.362  1.00  0.35           O  
HETATM  190  O   HOH T 189      -8.895  23.679   9.611  1.00  0.35           O  
HETATM  191  O   HOH T 190      13.989  26.214  19.336  1.00  0.35           O  
HETATM  192  O   HOH T 191      -8.000  38.608  36.182  1.00  0.35           O  
HETATM  193  O   HOH T 192       5.545  33.729  37.554  1.00  0.36           O  
HETATM  194  O   HOH T 193      28.494   2.955   6.276  1.00  0.36           O  
HETATM  195  O   HOH T 194      -1.885  36.782  29.259  1.00  0.36           O  
HETATM  196  O   HOH T 195      -0.639  13.128 -15.316  1.00  0.36           O  
HETATM  197  O   HOH T 196      -9.488   5.659  32.246  1.00  0.36           O  
HETATM  198  O   HOH T 197     -20.168  15.764   0.383  1.00  0.36           O  
HETATM  199  O   HOH T 198      -7.460  31.919   3.412  1.00  0.36           O  
HETATM  200  O   HOH T 199      -8.768   0.256  39.379  1.00  0.36           O  
HETATM  201  O   HOH T 200     -18.215  28.174   2.533  1.00  0.36           O  
HETATM  202  O   HOH T 201       0.943   1.692  15.623  1.00  0.36           O  
HETATM  203  O   HOH T 202     -21.228  26.888   8.026  1.00  0.36           O  
HETATM  204  O   HOH T 203      -4.583   6.533  16.571  1.00  0.36           O  
HETATM  205  O   HOH T 204     -10.049  16.713 -12.678  1.00  0.36           O  
HETATM  206  O   HOH T 205       4.108  13.053  11.421  1.00  0.36           O  
HETATM  207  O   HOH T 206     -12.089  20.135   8.741  1.00  0.36           O  
HETATM  208  O   HOH T 207       0.125  38.323  26.184  1.00  0.36           O  
HETATM  209  O   HOH T 208       1.987  10.683  13.555  1.00  0.36           O  
HETATM  210  O   HOH T 209      23.195  -0.886   0.519  1.00  0.36           O  
HETATM  211  O   HOH T 210      23.303  20.889  25.755  1.00  0.37           O  
HETATM  212  O   HOH T 211      -3.678  17.167 -16.263  1.00  0.37           O  
HETATM  213  O   HOH T 212      19.413   8.179  23.727  1.00  0.37           O  
HETATM  214  O   HOH T 213       9.878  27.470  -8.126  1.00  0.37           O  
HETATM  215  O   HOH T 214       2.837   8.175  31.549  1.00  0.37           O  
HETATM  216  O   HOH T 215      11.149  26.062  23.606  1.00  0.37           O  
HETATM  217  O   HOH T 216      -3.735  37.606  14.070  1.00  0.37           O  
HETATM  218  O   HOH T 217      10.514  29.886  12.209  1.00  0.37           O  
HETATM  219  O   HOH T 218       8.474   0.657  34.798  1.00  0.37           O  
HETATM  220  O   HOH T 219      -9.187  17.046  -8.210  1.00  0.37           O  
HETATM  221  O   HOH T 220       1.190  10.261  -0.595  1.00  0.37           O  
HETATM  222  O   HOH T 221     -28.930  14.804   1.420  1.00  0.37           O  
HETATM  223  O   HOH T 222      -6.292  25.357  -6.901  1.00  0.37           O  
HETATM  224  O   HOH T 223       7.575  21.459  20.937  1.00  0.37           O  
HETATM  225  O   HOH T 224      -8.926   8.104  33.271  1.00  0.37           O  
HETATM  226  O   HOH T 225      -7.330  34.234  41.019  1.00  0.38           O  
HETATM  227  O   HOH T 226     -21.849  19.752   5.879  1.00  0.38           O  
HETATM  228  O   HOH T 227      23.359  22.064  -7.512  1.00  0.38           O  
HETATM  229  O   HOH T 228      -0.610   7.332  39.057  1.00  0.38           O  
HETATM  230  O   HOH T 229       1.532  14.268  10.382  1.00  0.38           O  
HETATM  231  O   HOH T 230      -3.936  35.328  37.805  1.00  0.38           O  
HETATM  232  O   HOH T 231      25.315  12.573 -12.587  1.00  0.38           O  
HETATM  233  O   HOH T 232      20.910  30.223  -6.844  1.00  0.38           O  
HETATM  234  O   HOH T 233      17.355   7.412 -10.031  1.00  0.38           O  
HETATM  235  O   HOH T 234       3.487   4.157  -4.858  1.00  0.38           O  
HETATM  236  O   HOH T 235      29.736  17.586  21.015  1.00  0.38           O  
HETATM  237  O   HOH T 236       4.701  35.772  22.428  1.00  0.38           O  
HETATM  238  O   HOH T 237     -11.650  38.303  29.864  1.00  0.38           O  
HETATM  239  O   HOH T 238     -15.296  22.363  16.381  1.00  0.38           O  
HETATM  240  O   HOH T 239       3.130   1.476  -4.789  1.00  0.38           O  
HETATM  241  O   HOH T 240      10.774   1.732  16.578  1.00  0.38           O  
HETATM  242  O   HOH T 241     -10.281  13.324  14.964  1.00  0.38           O  
HETATM  243  O   HOH T 242      -0.948   3.161  -5.733  1.00  0.38           O  
HETATM  244  O   HOH T 243     -25.791   6.974   6.391  1.00  0.39           O  
HETATM  245  O   HOH T 244       7.967  27.352 -10.256  1.00  0.39           O  
HETATM  246  O   HOH T 245     -14.835  29.390  -1.307  1.00  0.39           O  
HETATM  247  O   HOH T 246       3.405  34.395  -5.416  1.00  0.39           O  
HETATM  248  O   HOH T 247      -7.662  30.633   8.153  1.00  0.39           O  
HETATM  249  O   HOH T 248      -7.012  16.465  14.499  1.00  0.39           O  
HETATM  250  O   HOH T 249       7.749  21.337  42.089  1.00  0.39           O  
HETATM  251  O   HOH T 250      33.375  17.985   9.794  1.00  0.39           O  
HETATM  252  O   HOH T 251      36.306  16.104   7.126  1.00  0.39           O  
HETATM  253  O   HOH T 252      11.496  34.486   5.382  1.00  0.39           O  
HETATM  254  O   HOH T 253     -10.047   1.456  35.490  1.00  0.39           O  
HETATM  255  O   HOH T 254       4.135   4.227 -11.541  1.00  0.39           O  
HETATM  256  O   HOH T 255     -10.299  30.307  11.655  1.00  0.39           O  
HETATM  257  O   HOH T 256     -13.126   6.844  21.115  1.00  0.39           O  
HETATM  258  O   HOH T 257      38.002  14.086   6.656  1.00  0.39           O  
HETATM  259  O   HOH T 258      -0.992   0.894  -7.394  1.00  0.39           O  
HETATM  260  O   HOH T 259       0.651  38.437  -1.851  1.00  0.39           O  
HETATM  261  O   HOH T 260      15.814   0.454   0.537  1.00  0.39           O  
HETATM  262  O   HOH T 261       2.475   7.436 -12.314  1.00  0.39           O  
HETATM  263  O   HOH T 262      -0.429  26.639   4.254  1.00  0.39           O  
HETATM  264  O   HOH T 263       3.171  10.096 -14.709  1.00  0.39           O  
HETATM  265  O   HOH T 264      -7.236  12.569  48.018  1.00  0.40           O  
HETATM  266  O   HOH T 265      -0.980   2.469  10.620  1.00  0.40           O  
HETATM  267  O   HOH T 266      15.550  -7.342  23.668  1.00  0.40           O  
HETATM  268  O   HOH T 267      14.153  31.511   5.802  1.00  0.40           O  
HETATM  269  O   HOH T 268      13.854  30.399  15.416  1.00  0.40           O  
HETATM  270  O   HOH T 269     -10.869  23.990  -6.427  1.00  0.40           O  
HETATM  271  O   HOH T 270       8.358  -3.143  21.799  1.00  0.40           O  
HETATM  272  O   HOH T 271     -18.700  12.848  -9.760  1.00  0.40           O  
HETATM  273  O   HOH T 272     -11.469   3.117  39.906  1.00  0.40           O  
HETATM  274  O   HOH T 273       8.978  22.822  37.217  1.00  0.40           O  
HETATM  275  O   HOH T 274       4.780  10.436 -17.150  1.00  0.40           O  
HETATM  276  O   HOH T 275      -5.305  31.302  49.362  1.00  0.40           O  
HETATM  277  O   HOH T 276       8.406  28.981  16.352  1.00  0.40           O  
HETATM  278  O   HOH T 277     -15.663  15.522  35.656  1.00  0.40           O  
HETATM  279  O   HOH T 278       0.972   0.007  27.193  1.00  0.40           O  
HETATM  280  O   HOH T 279      -6.677  36.221   4.179  1.00  0.40           O  
HETATM  281  O   HOH T 280      -0.228   1.045  29.243  1.00  0.41           O  
HETATM  282  O   HOH T 281      12.472  15.098  37.836  1.00  0.41           O  
HETATM  283  O   HOH T 282      -3.750  31.391  46.876  1.00  0.41           O  
HETATM  284  O   HOH T 283      -5.318   2.274   7.164  1.00  0.41           O  
HETATM  285  O   HOH T 284       8.780  14.823   6.304  1.00  0.41           O  
HETATM  286  O   HOH T 285       3.633  19.893  21.108  1.00  0.41           O  
HETATM  287  O   HOH T 286     -21.271   5.648   8.839  1.00  0.41           O  
HETATM  288  O   HOH T 287      18.294  23.908  22.568  1.00  0.41           O  
HETATM  289  O   HOH T 288      31.200  18.519   8.178  1.00  0.41           O  
HETATM  290  O   HOH T 289      29.576  23.006   3.597  1.00  0.41           O  
HETATM  291  O   HOH T 290      -7.488   8.837 -18.572  1.00  0.41           O  
HETATM  292  O   HOH T 291     -11.331  38.787  33.553  1.00  0.41           O  
HETATM  293  O   HOH T 292      -8.791  25.155  47.965  1.00  0.41           O  
HETATM  294  O   HOH T 293       6.780   8.129  -1.638  1.00  0.41           O  
HETATM  295  O   HOH T 294      28.502  23.436  -0.388  1.00  0.41           O  
HETATM  296  O   HOH T 295     -20.271  17.497  -1.773  1.00  0.41           O  
HETATM  297  O   HOH T 296     -15.339   7.990  36.967  1.00  0.41           O  
HETATM  298  O   HOH T 297      -4.781   8.942 -18.756  1.00  0.41           O  
HETATM  299  O   HOH T 298      15.792  35.041  -8.544  1.00  0.41           O  
HETATM  300  O   HOH T 299       2.294  -0.990  23.382  1.00  0.41           O  
HETATM  301  O   HOH T 300       2.355  -2.922  25.363  1.00  0.41           O  
HETATM  302  O   HOH T 301      -3.956  30.971   8.153  1.00  0.41           O  
HETATM  303  O   HOH T 302       1.042   7.659   3.004  1.00  0.42           O  
HETATM  304  O   HOH T 303      24.807   4.425  -6.408  1.00  0.42           O  
HETATM  305  O   HOH T 304      11.508  29.119  37.331  1.00  0.42           O  
HETATM  306  O   HOH T 305       0.852  32.534  35.872  1.00  0.42           O  
HETATM  307  O   HOH T 306      17.796   9.742  22.199  1.00  0.42           O  
HETATM  308  O   HOH T 307      11.211  -4.954  23.387  1.00  0.42           O  
HETATM  309  O   HOH T 308      13.211  14.515 -14.521  1.00  0.42           O  
HETATM  310  O   HOH T 309     -18.391  15.429  -8.874  1.00  0.42           O  
HETATM  311  O   HOH T 310     -23.670  23.975   9.639  1.00  0.42           O  
HETATM  312  O   HOH T 311      -0.995  40.281  48.296  1.00  0.42           O  
HETATM  313  O   HOH T 312      28.625  26.778  16.823  1.00  0.42           O  
HETATM  314  O   HOH T 313      20.810  16.439  32.664  1.00  0.42           O  
HETATM  315  O   HOH T 314     -20.107  13.523  -1.482  1.00  0.42           O  
HETATM  316  O   HOH T 315     -13.100  18.728  -4.851  1.00  0.42           O  
HETATM  317  O   HOH T 316       4.160   0.725   0.017  1.00  0.42           O  
HETATM  318  O   HOH T 317      -2.188   2.224 -14.916  1.00  0.42           O  
HETATM  319  O   HOH T 318      29.904  30.380   0.070  1.00  0.42           O  
HETATM  320  O   HOH T 319      -7.620  25.643  50.388  1.00  0.42           O  
HETATM  321  O   HOH T 320      -7.527  23.660  11.932  1.00  0.42           O  
HETATM  322  O   HOH T 321      -9.838  34.782  39.742  1.00  0.43           O  
HETATM  323  O   HOH T 322      -4.078  22.182  14.927  1.00  0.43           O  
HETATM  324  O   HOH T 323      19.957  32.283  -8.453  1.00  0.43           O  
HETATM  325  O   HOH T 324     -24.738  12.234   1.096  1.00  0.43           O  
HETATM  326  O   HOH T 325      19.632   5.655 -10.071  1.00  0.43           O  
HETATM  327  O   HOH T 326      14.312  30.522  -8.826  1.00  0.43           O  
HETATM  328  O   HOH T 327     -11.123  35.114  13.475  1.00  0.43           O  
HETATM  329  O   HOH T 328      -0.517   0.230 -13.837  1.00  0.43           O  
HETATM  330  O   HOH T 329     -15.431  13.047 -16.245  1.00  0.43           O  
HETATM  331  O   HOH T 330      -7.989  36.229   1.741  1.00  0.43           O  
HETATM  332  O   HOH T 331     -18.000  13.420  -3.277  1.00  0.43           O  
HETATM  333  O   HOH T 332     -13.133   5.130   2.560  1.00  0.43           O  
HETATM  334  O   HOH T 333      -2.920   1.183  28.634  1.00  0.43           O  
HETATM  335  O   HOH T 334      -0.132  15.115   5.122  1.00  0.43           O  
HETATM  336  O   HOH T 335      22.734  -4.346  26.183  1.00  0.43           O  
HETATM  337  O   HOH T 336       2.193  13.724  39.177  1.00  0.43           O  
HETATM  338  O   HOH T 337      -7.793  36.330  44.603  1.00  0.43           O  
HETATM  339  O   HOH T 338      -0.556  36.507  15.349  1.00  0.43           O  
HETATM  340  O   HOH T 339       7.462   7.770  17.451  1.00  0.43           O  
HETATM  341  O   HOH T 340     -23.509  18.251  15.817  1.00  0.43           O  
HETATM  342  O   HOH T 341      -0.567  38.349  46.464  1.00  0.43           O  
HETATM  343  O   HOH T 342      18.168  17.579  23.279  1.00  0.43           O  
HETATM  344  O   HOH T 343      24.431  -2.194   6.410  1.00  0.43           O  
HETATM  345  O   HOH T 344      28.089  17.723  -9.535  1.00  0.43           O  
HETATM  346  O   HOH T 345      -5.781   1.092   9.628  1.00  0.44           O  
HETATM  347  O   HOH T 346      -4.977  18.768 -18.020  1.00  0.44           O  
HETATM  348  O   HOH T 347      25.499  15.189 -13.496  1.00  0.44           O  
HETATM  349  O   HOH T 348      21.186  13.848  33.788  1.00  0.44           O  
HETATM  350  O   HOH T 349      -8.234  17.251 -10.774  1.00  0.44           O  
HETATM  351  O   HOH T 350      -3.977   0.955 -16.921  1.00  0.44           O  
HETATM  352  O   HOH T 351     -19.486   9.800  13.949  1.00  0.44           O  
HETATM  353  O   HOH T 352      15.520  -0.467   3.145  1.00  0.44           O  
HETATM  354  O   HOH T 353     -21.523  17.633  17.664  1.00  0.44           O  
HETATM  355  O   HOH T 354       3.825  14.323   8.605  1.00  0.44           O  
HETATM  356  O   HOH T 355      -8.016   2.798   9.909  1.00  0.44           O  
HETATM  357  O   HOH T 356     -16.653  16.117 -13.193  1.00  0.44           O  
HETATM  358  O   HOH T 357      30.744  19.354  -6.825  1.00  0.44           O  
HETATM  359  O   HOH T 358      -1.462  -0.016 -16.393  1.00  0.44           O  
HETATM  360  O   HOH T 359     -23.269   6.461   7.258  1.00  0.44           O  
HETATM  361  O   HOH T 360      18.006  -0.523   1.905  1.00  0.44           O  
HETATM  362  O   HOH T 361      16.569  -9.359  25.114  1.00  0.44           O  
HETATM  363  O   HOH T 362      -8.399  36.297  24.679  1.00  0.44           O  
HETATM  364  O   HOH T 363      23.073  29.381  -8.330  1.00  0.44           O  
HETATM  365  O   HOH T 364      16.858  -9.426  22.323  1.00  0.45           O  
HETATM  366  O   HOH T 365      -9.951   6.879  -4.566  1.00  0.45           O  
HETATM  367  O   HOH T 366     -13.627  30.604  35.450  1.00  0.45           O  
HETATM  368  O   HOH T 367      20.182  25.834  21.895  1.00  0.45           O  
HETATM  369  O   HOH T 368     -17.541  29.197  -1.823  1.00  0.45           O  
HETATM  370  O   HOH T 369      -6.687  38.576  22.331  1.00  0.45           O  
HETATM  371  O   HOH T 370     -11.484   4.711 -12.922  1.00  0.45           O  
HETATM  372  O   HOH T 371     -12.419   5.486   5.315  1.00  0.45           O  
HETATM  373  O   HOH T 372      22.434  26.725  -9.003  1.00  0.45           O  
HETATM  374  O   HOH T 373      -6.205  25.632  13.406  1.00  0.45           O  
HETATM  375  O   HOH T 374      23.080  13.776 -13.572  1.00  0.45           O  
HETATM  376  O   HOH T 375      28.262  -3.293  10.668  1.00  0.45           O  
HETATM  377  O   HOH T 376      20.051  26.574  16.657  1.00  0.45           O  
HETATM  378  O   HOH T 377      27.399   7.244  -7.918  1.00  0.45           O  
HETATM  379  O   HOH T 378      -2.820   2.060  26.108  1.00  0.45           O  
HETATM  380  O   HOH T 379      11.860  29.304  -8.705  1.00  0.45           O  
HETATM  381  O   HOH T 380     -18.172  15.441  -1.410  1.00  0.45           O  
HETATM  382  O   HOH T 381       6.610  31.136  -9.998  1.00  0.45           O  
HETATM  383  O   HOH T 382      -2.388  34.405  34.045  1.00  0.45           O  
HETATM  384  O   HOH T 383      -2.055  16.955   7.394  1.00  0.45           O  
HETATM  385  O   HOH T 384      10.823  24.877  36.688  1.00  0.45           O  
HETATM  386  O   HOH T 385      15.350  30.806  13.059  1.00  0.45           O  
HETATM  387  O   HOH T 386      12.848  22.012 -16.200  1.00  0.45           O  
HETATM  388  O   HOH T 387       3.632  33.737  -8.148  1.00  0.45           O  
HETATM  389  O   HOH T 388       5.534  36.654  17.781  1.00  0.45           O  
HETATM  390  O   HOH T 389      -6.520   9.862  45.594  1.00  0.45           O  
HETATM  391  O   HOH T 390      -9.853  11.671  48.711  1.00  0.45           O  
HETATM  392  O   HOH T 391      18.397   1.020  -0.384  1.00  0.45           O  
HETATM  393  O   HOH T 392      12.963   7.594 -12.027  1.00  0.45           O  
HETATM  394  O   HOH T 393      -8.571  23.030  46.329  1.00  0.45           O  
HETATM  395  O   HOH T 394     -12.756  31.124  15.442  1.00  0.45           O  
HETATM  396  O   HOH T 395     -17.405  19.319  -7.550  1.00  0.45           O  
HETATM  397  O   HOH T 396      19.464  13.271  12.853  1.00  0.45           O  
HETATM  398  O   HOH T 397      15.749   7.388 -12.262  1.00  0.45           O  
HETATM  399  O   HOH T 398      34.131  26.981   9.632  1.00  0.45           O  
HETATM  400  O   HOH T 399       9.872  13.203 -16.955  1.00  0.45           O  
HETATM  401  O   HOH T 400      -4.828  36.968  21.098  1.00  0.46           O  
HETATM  402  O   HOH T 401     -16.682  29.615   0.774  1.00  0.46           O  
HETATM  403  O   HOH T 402     -12.185   6.372  -3.271  1.00  0.46           O  
HETATM  404  O   HOH T 403     -12.323  32.389  33.819  1.00  0.46           O  
HETATM  405  O   HOH T 404      24.798  25.192  -8.882  1.00  0.46           O  
HETATM  406  O   HOH T 405      12.247  12.327 -15.856  1.00  0.46           O  
HETATM  407  O   HOH T 406      -2.301  -1.376   9.100  1.00  0.46           O  
HETATM  408  O   HOH T 407      16.625  38.879   2.402  1.00  0.46           O  
HETATM  409  O   HOH T 408     -17.903  24.978  34.829  1.00  0.46           O  
HETATM  410  O   HOH T 409      -8.986  26.100  -6.409  1.00  0.46           O  
HETATM  411  O   HOH T 410      -6.436   4.921  -3.326  1.00  0.46           O  
HETATM  412  O   HOH T 411       6.105  38.119  22.940  1.00  0.46           O  
HETATM  413  O   HOH T 412      13.535  24.590  24.260  1.00  0.46           O  
HETATM  414  O   HOH T 413      -2.249  33.557  38.866  1.00  0.46           O  
HETATM  415  O   HOH T 414     -20.160  28.715   6.180  1.00  0.46           O  
HETATM  416  O   HOH T 415      29.427  25.027   1.730  1.00  0.46           O  
HETATM  417  O   HOH T 416     -16.471   9.301  39.232  1.00  0.46           O  
HETATM  418  O   HOH T 417       0.912  33.999  13.066  1.00  0.46           O  
HETATM  419  O   HOH T 418     -10.653  27.677  43.929  1.00  0.46           O  
HETATM  420  O   HOH T 419      13.907  28.148  17.162  1.00  0.47           O  
HETATM  421  O   HOH T 420       2.041  12.593 -15.394  1.00  0.47           O  
HETATM  422  O   HOH T 421      31.842   6.943  -3.270  1.00  0.47           O  
HETATM  423  O   HOH T 422      28.905  27.469  -2.919  1.00  0.47           O  
HETATM  424  O   HOH T 423     -20.551  12.741  22.386  1.00  0.47           O  
HETATM  425  O   HOH T 424     -20.184  19.229  -4.098  1.00  0.47           O  
HETATM  426  O   HOH T 425       9.948  31.168  17.131  1.00  0.47           O  
HETATM  427  O   HOH T 426       5.203   4.226  -2.646  1.00  0.47           O  
HETATM  428  O   HOH T 427      17.753  25.814  20.657  1.00  0.47           O  
HETATM  429  O   HOH T 428      -2.967  37.923  37.567  1.00  0.47           O  
HETATM  430  O   HOH T 429      -3.734  30.125  51.426  1.00  0.47           O  
HETATM  431  O   HOH T 430      -6.437   2.236 -17.212  1.00  0.47           O  
HETATM  432  O   HOH T 431      12.102  23.663  34.295  1.00  0.47           O  
HETATM  433  O   HOH T 432     -10.406  32.964  21.783  1.00  0.47           O  
HETATM  434  O   HOH T 433      26.659  15.337  -9.681  1.00  0.47           O  
HETATM  435  O   HOH T 434      12.361   7.826 -14.784  1.00  0.47           O  
HETATM  436  O   HOH T 435      18.598  26.817 -14.709  1.00  0.47           O  
HETATM  437  O   HOH T 436       7.419   8.874  -6.988  1.00  0.47           O  
HETATM  438  O   HOH T 437      -2.542  31.708  49.483  1.00  0.47           O  
HETATM  439  O   HOH T 438      -0.066  33.630  10.408  1.00  0.47           O  
HETATM  440  O   HOH T 439     -13.895  13.292 -18.523  1.00  0.47           O  
HETATM  441  O   HOH T 440      29.978  27.794  12.868  1.00  0.47           O  
HETATM  442  O   HOH T 441      25.255  22.779  26.092  1.00  0.47           O  
HETATM  443  O   HOH T 442     -13.180  31.344  44.114  1.00  0.47           O  
HETATM  444  O   HOH T 443     -11.207  31.309  50.935  1.00  0.47           O  
HETATM  445  O   HOH T 444      27.788  11.391 -12.092  1.00  0.47           O  
HETATM  446  O   HOH T 445      25.043  31.367  -8.027  1.00  0.48           O  
HETATM  447  O   HOH T 446      11.428  31.885   6.493  1.00  0.48           O  
HETATM  448  O   HOH T 447      -2.226  -2.542 -11.042  1.00  0.48           O  
HETATM  449  O   HOH T 448     -17.081  18.483  40.004  1.00  0.48           O  
HETATM  450  O   HOH T 449      -7.438   2.560  40.497  1.00  0.48           O  
HETATM  451  O   HOH T 450     -17.149  23.433  24.308  1.00  0.48           O  
HETATM  452  O   HOH T 451      -3.429   2.613   9.159  1.00  0.48           O  
HETATM  453  O   HOH T 452       8.974  21.454  39.633  1.00  0.48           O  
HETATM  454  O   HOH T 453      25.954   6.901  -5.636  1.00  0.48           O  
HETATM  455  O   HOH T 454       6.604  12.003  10.572  1.00  0.48           O  
HETATM  456  O   HOH T 455     -25.209  22.437  13.231  1.00  0.48           O  
HETATM  457  O   HOH T 456      13.968  34.968 -10.738  1.00  0.48           O  
HETATM  458  O   HOH T 457      22.355  -0.069   6.512  1.00  0.48           O  
HETATM  459  O   HOH T 458     -12.166   6.528  23.554  1.00  0.48           O  
HETATM  460  O   HOH T 459     -18.036   9.542  16.175  1.00  0.48           O  
HETATM  461  O   HOH T 460      23.909  32.755  -5.907  1.00  0.48           O  
HETATM  462  O   HOH T 461     -12.361  33.522  31.471  1.00  0.48           O  
HETATM  463  O   HOH T 462      31.489  26.783  10.557  1.00  0.48           O  
HETATM  464  O   HOH T 463       0.330  34.608  34.046  1.00  0.48           O  
HETATM  465  O   HOH T 464      -6.440  36.940  34.597  1.00  0.48           O  
HETATM  466  O   HOH T 465     -28.309   6.024   5.724  1.00  0.48           O  
HETATM  467  O   HOH T 466      -9.743  34.649  15.796  1.00  0.48           O  
HETATM  468  O   HOH T 467      -7.782  30.708   0.907  1.00  0.48           O  
HETATM  469  O   HOH T 468       2.591  12.503  30.652  1.00  0.48           O  
HETATM  470  O   HOH T 469      10.655  15.868 -17.084  1.00  0.48           O  
HETATM  471  O   HOH T 470     -11.557  18.631 -13.913  1.00  0.48           O  
HETATM  472  O   HOH T 471       9.735  20.005  10.299  1.00  0.48           O  
HETATM  473  O   HOH T 472      -5.661  37.466  37.233  1.00  0.48           O  
HETATM  474  O   HOH T 473     -13.228   6.747 -13.582  1.00  0.48           O  
HETATM  475  O   HOH T 474     -12.779  28.994  42.845  1.00  0.48           O  
HETATM  476  O   HOH T 475     -16.013  21.622  -8.275  1.00  0.49           O  
HETATM  477  O   HOH T 476     -14.711  18.422  42.453  1.00  0.49           O  
HETATM  478  O   HOH T 477       5.093  22.423 -13.989  1.00  0.49           O  
HETATM  479  O   HOH T 478      13.875  17.492  38.124  1.00  0.49           O  
HETATM  480  O   HOH T 479       7.557  37.569  19.317  1.00  0.49           O  
HETATM  481  O   HOH T 480      -4.091  32.773  44.418  1.00  0.49           O  
HETATM  482  O   HOH T 481      13.220  25.962  21.871  1.00  0.49           O  
HETATM  483  O   HOH T 482     -12.095  18.035 -11.295  1.00  0.49           O  
HETATM  484  O   HOH T 483      30.157  13.726  19.582  1.00  0.49           O  
HETATM  485  O   HOH T 484      10.161  28.172  14.421  1.00  0.49           O  
HETATM  486  O   HOH T 485      -4.016  21.092  53.463  1.00  0.49           O  
HETATM  487  O   HOH T 486      30.905  11.575  -8.036  1.00  0.49           O  
HETATM  488  O   HOH T 487       3.680   1.331  15.375  1.00  0.49           O  
HETATM  489  O   HOH T 488       1.773  26.795  44.619  1.00  0.49           O  
HETATM  490  O   HOH T 489      13.071  29.311  12.934  1.00  0.49           O  
HETATM  491  O   HOH T 490       3.329   5.541  37.635  1.00  0.49           O  
HETATM  492  O   HOH T 491      20.567   7.970 -11.380  1.00  0.49           O  
HETATM  493  O   HOH T 492      12.341  32.402   3.879  1.00  0.49           O  
HETATM  494  O   HOH T 493      -5.399   2.338  28.204  1.00  0.49           O  
HETATM  495  O   HOH T 494      22.892  23.457  24.675  1.00  0.49           O  
HETATM  496  O   HOH T 495      22.101  27.024  20.364  1.00  0.49           O  
HETATM  497  O   HOH T 496       4.938  37.721  20.426  1.00  0.49           O  
HETATM  498  O   HOH T 497     -22.687  16.425  -0.524  1.00  0.49           O  
HETATM  499  O   HOH T 498       4.642  34.994  19.755  1.00  0.49           O  
HETATM  500  O   HOH T 499      27.676  24.913  -2.580  1.00  0.49           O  
HETATM  501  O   HOH T 500     -10.728  35.278  27.353  1.00  0.49           O  
HETATM  502  O   HOH T 501      -5.467   2.422  25.378  1.00  0.49           O  
HETATM  503  O   HOH T 502     -11.441  28.191  50.440  1.00  0.49           O  
HETATM  504  O   HOH T 503      27.612  32.557  -2.136  1.00  0.49           O  
HETATM  505  O   HOH T 504      -9.739  19.435 -11.853  1.00  0.49           O  
HETATM  506  O   HOH T 505      -4.592   5.293 -15.812  1.00  0.49           O  
HETATM  507  O   HOH T 506       9.180  30.269  38.243  1.00  0.49           O  
HETATM  508  O   HOH T 507     -11.538  36.619  45.846  1.00  0.50           O  
HETATM  509  O   HOH T 508       6.431  36.447   1.586  1.00  0.50           O  
HETATM  510  O   HOH T 509      20.130  25.405  19.114  1.00  0.50           O  
HETATM  511  O   HOH T 510      -5.726   1.516   4.570  1.00  0.50           O  
HETATM  512  O   HOH T 511      12.223   9.767 -16.798  1.00  0.50           O  
HETATM  513  O   HOH T 512       9.020  29.759  -9.184  1.00  0.50           O  
HETATM  514  O   HOH T 513     -10.363   3.832  34.056  1.00  0.50           O  
HETATM  515  O   HOH T 514      -3.420  11.142 -17.919  1.00  0.50           O  
HETATM  516  O   HOH T 515       9.301  30.891  14.454  1.00  0.50           O  
HETATM  517  O   HOH T 516     -24.421   5.917   2.174  1.00  0.50           O  
HETATM  518  O   HOH T 517       9.084   0.030 -11.395  1.00  0.50           O  
HETATM  519  O   HOH T 518      30.809   2.769   4.707  1.00  0.50           O  
HETATM  520  O   HOH T 519      22.011  21.219  23.340  1.00  0.50           O  
HETATM  521  O   HOH T 520     -12.217  37.769  27.259  1.00  0.50           O  
HETATM  522  O   HOH T 521     -12.871   7.224  35.769  1.00  0.50           O  
HETATM  523  O   HOH T 522     -24.761  24.896  12.097  1.00  0.50           O  
HETATM  524  O   HOH T 523     -12.899  30.812  12.493  1.00  0.50           O  
HETATM  525  O   HOH T 524     -24.801   7.962   3.891  1.00  0.50           O  
HETATM  526  O   HOH T 525     -13.824  17.851  -9.152  1.00  0.50           O  
HETATM  527  O   HOH T 526     -21.465   9.621  -0.343  1.00  0.50           O  
HETATM  528  O   HOH T 527      31.507   2.481  13.017  1.00  0.51           O  
HETATM  529  O   HOH T 528     -10.627   4.876  17.111  1.00  0.51           O  
HETATM  530  O   HOH T 529      -6.464  -3.254 -11.269  1.00  0.51           O  
HETATM  531  O   HOH T 530       2.247   2.988  37.530  1.00  0.51           O  
HETATM  532  O   HOH T 531     -18.457  17.746  -5.592  1.00  0.51           O  
HETATM  533  O   HOH T 532     -13.690   5.510  -0.075  1.00  0.51           O  
HETATM  534  O   HOH T 533      11.993  18.858  36.559  1.00  0.51           O  
HETATM  535  O   HOH T 534       4.242  32.435 -10.584  1.00  0.51           O  
HETATM  536  O   HOH T 535      13.472  22.068  36.299  1.00  0.51           O  
HETATM  537  O   HOH T 536       6.318  37.014  -4.815  1.00  0.51           O  
HETATM  538  O   HOH T 537      26.369   4.229  23.434  1.00  0.51           O  
HETATM  539  O   HOH T 538      -4.884  33.865  -4.088  1.00  0.51           O  
HETATM  540  O   HOH T 539      25.930  -2.599  12.240  1.00  0.51           O  
HETATM  541  O   HOH T 540      -3.741   3.333  -5.631  1.00  0.51           O  
HETATM  542  O   HOH T 541       7.193  -1.974  12.918  1.00  0.51           O  
HETATM  543  O   HOH T 542       4.882  12.293 -15.245  1.00  0.51           O  
HETATM  544  O   HOH T 543      32.383   1.475  15.342  1.00  0.52           O  
HETATM  545  O   HOH T 544      20.967  10.564  24.170  1.00  0.52           O  
HETATM  546  O   HOH T 545     -21.772  22.547  -9.965  1.00  0.52           O  
HETATM  547  O   HOH T 546       0.563   0.178  -1.160  1.00  0.52           O  
HETATM  548  O   HOH T 547      -6.206  11.369 -18.456  1.00  0.52           O  
HETATM  549  O   HOH T 548     -12.080   4.874  19.457  1.00  0.52           O  
HETATM  550  O   HOH T 549      16.632   0.387   5.609  1.00  0.52           O  
HETATM  551  O   HOH T 550       9.456  -5.639  29.934  1.00  0.52           O  
HETATM  552  O   HOH T 551     -25.557   4.778  -0.002  1.00  0.52           O  
HETATM  553  O   HOH T 552      -7.216   2.473   2.525  1.00  0.52           O  
HETATM  554  O   HOH T 553      21.197  23.584 -14.931  1.00  0.52           O  
HETATM  555  O   HOH T 554      18.362   6.352 -12.364  1.00  0.52           O  
HETATM  556  O   HOH T 555      24.461  34.043  -8.309  1.00  0.53           O  
HETATM  557  O   HOH T 556      -9.746  18.509 -20.960  1.00  0.53           O  
HETATM  558  O   HOH T 557      24.457  27.001 -10.914  1.00  0.53           O  
HETATM  559  O   HOH T 558      21.244  30.069   8.625  1.00  0.53           O  
HETATM  560  O   HOH T 559      -4.729  23.542  12.400  1.00  0.53           O  
HETATM  561  O   HOH T 560      24.562   0.358  22.485  1.00  0.53           O  
HETATM  562  O   HOH T 561      22.720  -6.591  29.101  1.00  0.53           O  
HETATM  563  O   HOH T 562      15.326  -9.256  18.576  1.00  0.53           O  
HETATM  564  O   HOH T 563     -27.856  11.985   7.395  1.00  0.53           O  
HETATM  565  O   HOH T 564     -12.160   5.644  -5.820  1.00  0.53           O  
HETATM  566  O   HOH T 565       3.445  12.851  41.430  1.00  0.53           O  
HETATM  567  O   HOH T 566      -0.630  -0.992  -9.331  1.00  0.53           O  
HETATM  568  O   HOH T 567       9.776  33.559   3.468  1.00  0.53           O  
HETATM  569  O   HOH T 568      36.707  27.578   8.710  1.00  0.53           O  
HETATM  570  O   HOH T 569     -11.982   4.058   9.637  1.00  0.53           O  
HETATM  571  O   HOH T 570     -12.882   5.063  34.114  1.00  0.53           O  
HETATM  572  O   HOH T 571     -10.699  28.649   0.189  1.00  0.53           O  
HETATM  573  O   HOH T 572      27.143  26.568  -4.832  1.00  0.54           O  
HETATM  574  O   HOH T 573     -22.983   8.373   1.683  1.00  0.54           O  
HETATM  575  O   HOH T 574      -4.848   2.764 -14.993  1.00  0.54           O  
HETATM  576  O   HOH T 575     -17.868  11.106  31.558  1.00  0.54           O  
HETATM  577  O   HOH T 576      -7.526   4.922  -0.789  1.00  0.54           O  
HETATM  578  O   HOH T 577      -9.962   4.113   4.838  1.00  0.54           O  
HETATM  579  O   HOH T 578      22.984  -3.911  29.015  1.00  0.54           O  
HETATM  580  O   HOH T 579       8.782  -2.849  12.943  1.00  0.54           O  
HETATM  581  O   HOH T 580     -10.505   6.471  34.760  1.00  0.54           O  
HETATM  582  O   HOH T 581      13.861  28.482  20.938  1.00  0.54           O  
HETATM  583  O   HOH T 582      11.184  -0.540  18.160  1.00  0.54           O  
HETATM  584  O   HOH T 583      23.523  23.379  -5.058  1.00  0.54           O  
HETATM  585  O   HOH T 584      10.817  -5.536  18.177  1.00  0.54           O  
HETATM  586  O   HOH T 585      11.283   5.624  -2.616  1.00  0.54           O  
HETATM  587  O   HOH T 586      13.263  -0.051  -0.119  1.00  0.54           O  
HETATM  588  O   HOH T 587      28.529  20.936  24.886  1.00  0.54           O  
HETATM  589  O   HOH T 588      10.392  23.526  40.489  1.00  0.54           O  
HETATM  590  O   HOH T 589      27.417  16.693 -12.080  1.00  0.54           O  
HETATM  591  O   HOH T 590     -22.120   9.912  13.830  1.00  0.54           O  
HETATM  592  O   HOH T 591     -13.665  11.268 -20.488  1.00  0.54           O  
HETATM  593  O   HOH T 592      -6.540   7.232  19.208  1.00  0.54           O  
HETATM  594  O   HOH T 593     -16.392  17.981  34.891  1.00  0.54           O  
HETATM  595  O   HOH T 594      10.594   6.445  36.415  1.00  0.55           O  
HETATM  596  O   HOH T 595      20.202  28.439 -13.070  1.00  0.55           O  
HETATM  597  O   HOH T 596      22.681  -1.678   4.190  1.00  0.55           O  
HETATM  598  O   HOH T 597      19.523  -0.362  11.074  1.00  0.55           O  
HETATM  599  O   HOH T 598     -15.563  32.439   4.928  1.00  0.55           O  
HETATM  600  O   HOH T 599       5.721   2.570  -4.828  1.00  0.55           O  
HETATM  601  O   HOH T 600      -9.637   3.097  42.058  1.00  0.55           O  
HETATM  602  O   HOH T 601       0.610   1.566  12.839  1.00  0.55           O  
HETATM  603  O   HOH T 602      14.488   1.314  18.722  1.00  0.55           O  
HETATM  604  O   HOH T 603      -9.254  36.865  37.983  1.00  0.55           O  
HETATM  605  O   HOH T 604      35.317  22.450   6.490  1.00  0.55           O  
HETATM  606  O   HOH T 605      17.651   8.353  35.656  1.00  0.55           O  
HETATM  607  O   HOH T 606      25.023  30.135   4.264  1.00  0.55           O  
HETATM  608  O   HOH T 607      22.515  30.725   6.364  1.00  0.55           O  
HETATM  609  O   HOH T 608     -10.625  37.763  35.902  1.00  0.55           O  
HETATM  610  O   HOH T 609     -11.453  12.664 -19.442  1.00  0.55           O  
HETATM  611  O   HOH T 610     -10.417  20.229  32.312  1.00  0.55           O  
HETATM  612  O   HOH T 611     -15.040   5.456   5.806  1.00  0.55           O  
HETATM  613  O   HOH T 612     -22.713  20.174  17.694  1.00  0.55           O  
HETATM  614  O   HOH T 613      24.309  25.276  25.973  1.00  0.55           O  
HETATM  615  O   HOH T 614      26.710  31.504  10.666  1.00  0.55           O  
HETATM  616  O   HOH T 615      -2.252  37.194  21.996  1.00  0.55           O  
HETATM  617  O   HOH T 616      16.198  -1.078  31.079  1.00  0.56           O  
HETATM  618  O   HOH T 617     -22.034  14.580  23.533  1.00  0.56           O  
HETATM  619  O   HOH T 618      -5.117   2.479  42.269  1.00  0.56           O  
HETATM  620  O   HOH T 619      -8.869  19.002  25.104  1.00  0.56           O  
HETATM  621  O   HOH T 620      10.626  31.651  36.476  1.00  0.56           O  
HETATM  622  O   HOH T 621      16.445  14.061 -12.962  1.00  0.56           O  
HETATM  623  O   HOH T 622      14.636  23.597 -14.939  1.00  0.56           O  
HETATM  624  O   HOH T 623      -8.192  -0.843 -11.183  1.00  0.56           O  
HETATM  625  O   HOH T 624       0.001  -4.066   8.187  1.00  0.56           O  
HETATM  626  O   HOH T 625       1.915  19.507  50.151  1.00  0.56           O  
HETATM  627  O   HOH T 626     -16.205  16.291  41.447  1.00  0.56           O  
HETATM  628  O   HOH T 627      16.972   2.401  -4.756  1.00  0.56           O  
HETATM  629  O   HOH T 628      11.428  26.802  38.865  1.00  0.56           O  
HETATM  630  O   HOH T 629       8.236   4.860   9.147  1.00  0.56           O  
HETATM  631  O   HOH T 630       5.580   7.941 -17.167  1.00  0.57           O  
HETATM  632  O   HOH T 631      -7.338  27.568  -8.113  1.00  0.57           O  
HETATM  633  O   HOH T 632       2.389  21.809 -13.820  1.00  0.57           O  
HETATM  634  O   HOH T 633      -2.328  14.851 -16.587  1.00  0.57           O  
HETATM  635  O   HOH T 634      19.488  28.926 -10.569  1.00  0.57           O  
HETATM  636  O   HOH T 635      -3.178  -1.583 -17.878  1.00  0.57           O  
HETATM  637  O   HOH T 636     -18.628   6.510  -2.341  1.00  0.57           O  
HETATM  638  O   HOH T 637     -13.596   6.288  27.664  1.00  0.57           O  
HETATM  639  O   HOH T 638      18.656  18.828 -16.378  1.00  0.57           O  
HETATM  640  O   HOH T 639       4.009   5.639 -13.827  1.00  0.57           O  
HETATM  641  O   HOH T 640      26.133  24.848 -11.323  1.00  0.57           O  
HETATM  642  O   HOH T 641      -2.420  21.890 -14.596  1.00  0.57           O  
HETATM  643  O   HOH T 642       9.526   1.667  37.169  1.00  0.57           O  
HETATM  644  O   HOH T 643       2.795  33.974  37.459  1.00  0.58           O  
HETATM  645  O   HOH T 644     -14.791  29.686  14.098  1.00  0.58           O  
HETATM  646  O   HOH T 645     -10.557  21.027  -6.468  1.00  0.58           O  
HETATM  647  O   HOH T 646      13.890  32.282 -10.811  1.00  0.58           O  
HETATM  648  O   HOH T 647      18.185  33.991  -9.772  1.00  0.58           O  
HETATM  649  O   HOH T 648     -17.801  17.107 -10.807  1.00  0.58           O  
HETATM  650  O   HOH T 649      34.408  16.670  11.933  1.00  0.59           O  
HETATM  651  O   HOH T 650      24.520   6.759  -7.857  1.00  0.59           O  
HETATM  652  O   HOH T 651      21.862  34.110  -9.194  1.00  0.59           O  
HETATM  653  O   HOH T 652      -8.935  19.584  -9.101  1.00  0.59           O  
HETATM  654  O   HOH T 653      10.967   7.061   8.812  1.00  0.60           O  
HETATM  655  O   HOH T 654      27.528  14.034 -11.982  1.00  0.60           O  
HETATM  656  O   HOH T 655      25.952   2.443  -4.962  1.00  0.61           O  
TER     657      HOH T 655 
