# Supplementary material for: Accurate Prediction of Hydration Sites of Proteins Using Energy Model With Atom Embedding
Source: Front Mol Biosci. 2021 Sep 20;8:756075. doi: 10.3389/fmolb.2021.756075 (PMC8488165; doi:10.3389/fmolb.2021.756075)
Supplement: Supplementary file 1 [file DataSheet1.ZIP › Data Sheet 1/Our_result_pdb/OppA_dataset_output/1B46_watersite.pdb]

HEADER                                                        XXXX


JRNL        PMID   -1
HETATM    1  O   HOH T   0       5.226  14.925  -3.780  1.00  0.15           O  
HETATM    2  O   HOH T   1      -7.076   8.952   7.268  1.00  0.16           O  
HETATM    3  O   HOH T   2       7.290  15.374 -10.540  1.00  0.16           O  
HETATM    4  O   HOH T   3      18.990  19.970   6.121  1.00  0.17           O  
HETATM    5  O   HOH T   4       0.763  12.623  -8.408  1.00  0.17           O  
HETATM    6  O   HOH T   5      14.402  16.379  30.801  1.00  0.18           O  
HETATM    7  O   HOH T   6      19.807  26.045  13.870  1.00  0.19           O  
HETATM    8  O   HOH T   7      -8.189  22.565  23.316  1.00  0.19           O  
HETATM    9  O   HOH T   8      22.951  23.544  -1.156  1.00  0.19           O  
HETATM   10  O   HOH T   9      15.431  15.318  -8.656  1.00  0.19           O  
HETATM   11  O   HOH T  10      17.402  13.439   4.592  1.00  0.19           O  
HETATM   12  O   HOH T  11       5.641   3.634  30.975  1.00  0.20           O  
HETATM   13  O   HOH T  12       6.953  10.770  -8.916  1.00  0.20           O  
HETATM   14  O   HOH T  13       8.840   1.024  25.510  1.00  0.20           O  
HETATM   15  O   HOH T  14      -1.960   8.342   9.879  1.00  0.20           O  
HETATM   16  O   HOH T  15      -8.472  27.024  42.347  1.00  0.20           O  
HETATM   17  O   HOH T  16     -20.905  22.475   1.968  1.00  0.21           O  
HETATM   18  O   HOH T  17      -1.291  30.097  28.266  1.00  0.21           O  
HETATM   19  O   HOH T  18      24.532  21.750  23.093  1.00  0.21           O  
HETATM   20  O   HOH T  19       2.973  16.897   7.863  1.00  0.21           O  
HETATM   21  O   HOH T  20      21.836  15.048 -11.691  1.00  0.21           O  
HETATM   22  O   HOH T  21      -4.279  19.176  16.158  1.00  0.21           O  
HETATM   23  O   HOH T  22       9.745  30.861   3.940  1.00  0.21           O  
HETATM   24  O   HOH T  23      11.080  13.704  16.700  1.00  0.22           O  
HETATM   25  O   HOH T  24      -2.113  28.296   1.949  1.00  0.22           O  
HETATM   26  O   HOH T  25     -16.720  29.927   7.060  1.00  0.23           O  
HETATM   27  O   HOH T  26       9.720   9.115  -5.866  1.00  0.23           O  
HETATM   28  O   HOH T  27      29.023  21.833   0.973  1.00  0.23           O  
HETATM   29  O   HOH T  28      28.820   3.088   6.010  1.00  0.23           O  
HETATM   30  O   HOH T  29      -4.517  27.228  13.815  1.00  0.23           O  
HETATM   31  O   HOH T  30      -0.705  30.636   1.791  1.00  0.23           O  
HETATM   32  O   HOH T  31     -11.952   4.479 -13.247  1.00  0.23           O  
HETATM   33  O   HOH T  32       8.504  23.951   1.896  1.00  0.23           O  
HETATM   34  O   HOH T  33      31.261  11.273   8.120  1.00  0.23           O  
HETATM   35  O   HOH T  34     -10.949  28.990  17.320  1.00  0.24           O  
HETATM   36  O   HOH T  35      28.449  26.899  16.691  1.00  0.24           O  
HETATM   37  O   HOH T  36     -22.675  20.388  -2.624  1.00  0.24           O  
HETATM   38  O   HOH T  37       8.938  22.088  18.496  1.00  0.24           O  
HETATM   39  O   HOH T  38      27.806  15.881  20.334  1.00  0.24           O  
HETATM   40  O   HOH T  39     -12.676  11.043  20.538  1.00  0.24           O  
HETATM   41  O   HOH T  40      22.012  25.224  16.998  1.00  0.24           O  
HETATM   42  O   HOH T  41       1.203  21.351  19.153  1.00  0.24           O  
HETATM   43  O   HOH T  42      -2.203   4.740   9.645  1.00  0.24           O  
HETATM   44  O   HOH T  43      20.129  12.826  27.614  1.00  0.24           O  
HETATM   45  O   HOH T  44       9.249   6.493   6.467  1.00  0.24           O  
HETATM   46  O   HOH T  45     -11.408  26.642  34.451  1.00  0.24           O  
HETATM   47  O   HOH T  46      -4.879  23.046  -7.467  1.00  0.24           O  
HETATM   48  O   HOH T  47      36.665  11.090  -0.530  1.00  0.25           O  
HETATM   49  O   HOH T  48       3.247   5.116  30.534  1.00  0.25           O  
HETATM   50  O   HOH T  49       4.379  10.078  30.669  1.00  0.25           O  
HETATM   51  O   HOH T  50       3.793   6.577  35.648  1.00  0.25           O  
HETATM   52  O   HOH T  51      21.204  13.678  33.206  1.00  0.25           O  
HETATM   53  O   HOH T  52     -17.334  22.688  24.293  1.00  0.25           O  
HETATM   54  O   HOH T  53      -8.842  10.588  46.095  1.00  0.25           O  
HETATM   55  O   HOH T  54      -9.940  20.578   9.078  1.00  0.25           O  
HETATM   56  O   HOH T  55       5.682  19.740  24.804  1.00  0.25           O  
HETATM   57  O   HOH T  56      -4.560  -2.722  38.265  1.00  0.25           O  
HETATM   58  O   HOH T  57       7.985  15.373  -3.515  1.00  0.26           O  
HETATM   59  O   HOH T  58      25.719  -2.149   6.118  1.00  0.26           O  
HETATM   60  O   HOH T  59      -7.224   4.633  26.771  1.00  0.26           O  
HETATM   61  O   HOH T  60      -4.949  25.954  50.657  1.00  0.26           O  
HETATM   62  O   HOH T  61      -2.992  35.561  16.410  1.00  0.26           O  
HETATM   63  O   HOH T  62       7.509  24.221   4.503  1.00  0.26           O  
HETATM   64  O   HOH T  63      17.174   5.231  21.755  1.00  0.26           O  
HETATM   65  O   HOH T  64     -19.228  14.288 -10.830  1.00  0.26           O  
HETATM   66  O   HOH T  65      11.274  18.301   2.988  1.00  0.27           O  
HETATM   67  O   HOH T  66      -9.756  22.608  44.476  1.00  0.27           O  
HETATM   68  O   HOH T  67       2.749   0.674  24.936  1.00  0.27           O  
HETATM   69  O   HOH T  68      11.200  20.889  34.750  1.00  0.27           O  
HETATM   70  O   HOH T  69     -13.273  13.469  55.825  1.00  0.27           O  
HETATM   71  O   HOH T  70     -11.873   9.816  32.602  1.00  0.27           O  
HETATM   72  O   HOH T  71      -9.585  11.517  33.262  1.00  0.27           O  
HETATM   73  O   HOH T  72      24.606  33.035  -3.987  1.00  0.27           O  
HETATM   74  O   HOH T  73      27.235  13.598  18.877  1.00  0.27           O  
HETATM   75  O   HOH T  74      13.533  23.018  10.895  1.00  0.27           O  
HETATM   76  O   HOH T  75     -11.995  13.950  53.435  1.00  0.28           O  
HETATM   77  O   HOH T  76      10.297  13.350   3.058  1.00  0.28           O  
HETATM   78  O   HOH T  77      -1.779   7.354   3.473  1.00  0.28           O  
HETATM   79  O   HOH T  78      -2.597  19.291   3.984  1.00  0.28           O  
HETATM   80  O   HOH T  79       5.714  -2.031  19.373  1.00  0.28           O  
HETATM   81  O   HOH T  80      -1.415  21.513  12.754  1.00  0.28           O  
HETATM   82  O   HOH T  81      -4.679  -3.079  35.497  1.00  0.28           O  
HETATM   83  O   HOH T  82      20.234   0.538   1.525  1.00  0.28           O  
HETATM   84  O   HOH T  83      -1.974  37.076  18.455  1.00  0.28           O  
HETATM   85  O   HOH T  84     -12.060  31.879  29.046  1.00  0.28           O  
HETATM   86  O   HOH T  85       0.130  33.441  29.906  1.00  0.28           O  
HETATM   87  O   HOH T  86      -4.460   6.223  16.235  1.00  0.28           O  
HETATM   88  O   HOH T  87      10.869   6.951   8.689  1.00  0.28           O  
HETATM   89  O   HOH T  88       3.947  -8.032  22.805  1.00  0.28           O  
HETATM   90  O   HOH T  89      11.306  25.347  -7.593  1.00  0.29           O  
HETATM   91  O   HOH T  90     -10.736  28.451   0.314  1.00  0.29           O  
HETATM   92  O   HOH T  91     -10.467  16.426 -12.743  1.00  0.29           O  
HETATM   93  O   HOH T  92      11.809  22.965 -13.794  1.00  0.29           O  
HETATM   94  O   HOH T  93      -7.385  13.607  12.665  1.00  0.29           O  
HETATM   95  O   HOH T  94     -17.172  15.366  16.929  1.00  0.29           O  
HETATM   96  O   HOH T  95       1.207  10.039  -0.686  1.00  0.29           O  
HETATM   97  O   HOH T  96      -2.403  36.603  29.417  1.00  0.29           O  
HETATM   98  O   HOH T  97      15.271  14.791  -5.905  1.00  0.29           O  
HETATM   99  O   HOH T  98       6.042   7.875   7.175  1.00  0.29           O  
HETATM  100  O   HOH T  99      -7.396  33.882  41.225  1.00  0.29           O  
HETATM  101  O   HOH T 100      13.025  -0.938  21.934  1.00  0.29           O  
HETATM  102  O   HOH T 101      -0.422   5.697  -6.349  1.00  0.29           O  
HETATM  103  O   HOH T 102      12.120  29.320  12.530  1.00  0.29           O  
HETATM  104  O   HOH T 103     -22.200  23.690   7.448  1.00  0.29           O  
HETATM  105  O   HOH T 104      22.064   0.106   6.526  1.00  0.30           O  
HETATM  106  O   HOH T 105      17.107   9.193  19.324  1.00  0.30           O  
HETATM  107  O   HOH T 106     -21.483  21.637   4.522  1.00  0.30           O  
HETATM  108  O   HOH T 107       1.589   4.678 -12.478  1.00  0.30           O  
HETATM  109  O   HOH T 108       6.384  30.033  14.518  1.00  0.30           O  
HETATM  110  O   HOH T 109     -22.665  18.794  -0.509  1.00  0.30           O  
HETATM  111  O   HOH T 110      -8.591  17.017 -10.863  1.00  0.30           O  
HETATM  112  O   HOH T 111      13.923  22.811  28.426  1.00  0.30           O  
HETATM  113  O   HOH T 112      23.530  26.112  -4.635  1.00  0.30           O  
HETATM  114  O   HOH T 113       9.741  13.355  -2.682  1.00  0.30           O  
HETATM  115  O   HOH T 114      18.912  18.129  33.011  1.00  0.30           O  
HETATM  116  O   HOH T 115      -8.241  -1.992  41.241  1.00  0.30           O  
HETATM  117  O   HOH T 116      10.253  14.929  -0.443  1.00  0.30           O  
HETATM  118  O   HOH T 117      10.175  23.328   4.001  1.00  0.31           O  
HETATM  119  O   HOH T 118      20.827  16.285  32.329  1.00  0.31           O  
HETATM  120  O   HOH T 119      31.833   5.590   3.947  1.00  0.31           O  
HETATM  121  O   HOH T 120       3.259   3.961  34.902  1.00  0.31           O  
HETATM  122  O   HOH T 121      -4.747  35.776  22.109  1.00  0.31           O  
HETATM  123  O   HOH T 122      -9.216  23.185   9.281  1.00  0.31           O  
HETATM  124  O   HOH T 123      -4.076  31.992  40.787  1.00  0.31           O  
HETATM  125  O   HOH T 124       9.733   5.641  10.774  1.00  0.31           O  
HETATM  126  O   HOH T 125      23.313  12.852  -7.025  1.00  0.31           O  
HETATM  127  O   HOH T 126     -12.313  28.020  43.515  1.00  0.31           O  
HETATM  128  O   HOH T 127      -5.369  34.247  33.528  1.00  0.31           O  
HETATM  129  O   HOH T 128      -7.855  12.656  16.072  1.00  0.31           O  
HETATM  130  O   HOH T 129      17.122  31.526  -7.746  1.00  0.31           O  
HETATM  131  O   HOH T 130      -7.252   7.265  -1.984  1.00  0.31           O  
HETATM  132  O   HOH T 131      22.019   8.404  23.903  1.00  0.31           O  
HETATM  133  O   HOH T 132       4.238  34.663  19.538  1.00  0.31           O  
HETATM  134  O   HOH T 133      13.833  31.556   5.651  1.00  0.31           O  
HETATM  135  O   HOH T 134     -11.482   4.755  42.072  1.00  0.31           O  
HETATM  136  O   HOH T 135      17.870   9.758  21.954  1.00  0.31           O  
HETATM  137  O   HOH T 136      -5.742  33.934  43.427  1.00  0.31           O  
HETATM  138  O   HOH T 137      30.929  18.845   8.065  1.00  0.31           O  
HETATM  139  O   HOH T 138       2.549  21.246 -13.629  1.00  0.31           O  
HETATM  140  O   HOH T 139      14.841  14.643   4.665  1.00  0.32           O  
HETATM  141  O   HOH T 140     -15.073   7.336  36.824  1.00  0.32           O  
HETATM  142  O   HOH T 141      -0.384  -0.110  36.560  1.00  0.32           O  
HETATM  143  O   HOH T 142     -12.774   8.305   0.590  1.00  0.32           O  
HETATM  144  O   HOH T 143      11.684  24.857  22.443  1.00  0.32           O  
HETATM  145  O   HOH T 144       7.347  21.572  20.665  1.00  0.32           O  
HETATM  146  O   HOH T 145      15.248  14.862  37.613  1.00  0.32           O  
HETATM  147  O   HOH T 146       0.068   0.777  29.048  1.00  0.32           O  
HETATM  148  O   HOH T 147      23.564   2.161  20.758  1.00  0.32           O  
HETATM  149  O   HOH T 148       6.935  23.911  19.186  1.00  0.32           O  
HETATM  150  O   HOH T 149       8.993  -2.059   7.488  1.00  0.32           O  
HETATM  151  O   HOH T 150      25.747  25.841   6.249  1.00  0.32           O  
HETATM  152  O   HOH T 151     -21.207  16.319  14.853  1.00  0.33           O  
HETATM  153  O   HOH T 152      21.522  25.247  -8.447  1.00  0.33           O  
HETATM  154  O   HOH T 153      -6.672  25.124  -6.918  1.00  0.33           O  
HETATM  155  O   HOH T 154     -13.445  18.425  -4.874  1.00  0.33           O  
HETATM  156  O   HOH T 155     -10.778   8.329  -2.466  1.00  0.33           O  
HETATM  157  O   HOH T 156       1.923  16.289   2.220  1.00  0.33           O  
HETATM  158  O   HOH T 157     -15.278  18.949  -6.840  1.00  0.33           O  
HETATM  159  O   HOH T 158     -19.264  11.592 -10.435  1.00  0.33           O  
HETATM  160  O   HOH T 159      18.079  17.542  22.754  1.00  0.33           O  
HETATM  161  O   HOH T 160      -3.722  37.242  14.443  1.00  0.33           O  
HETATM  162  O   HOH T 161       4.195  12.196  41.212  1.00  0.33           O  
HETATM  163  O   HOH T 162      -0.550  14.940   5.059  1.00  0.33           O  
HETATM  164  O   HOH T 163       2.860  14.211  32.458  1.00  0.33           O  
HETATM  165  O   HOH T 164       0.859  11.162  32.234  1.00  0.33           O  
HETATM  166  O   HOH T 165      -2.499  24.098  12.182  1.00  0.33           O  
HETATM  167  O   HOH T 166       1.268   4.502  38.715  1.00  0.34           O  
HETATM  168  O   HOH T 167      38.612  11.322   1.536  1.00  0.34           O  
HETATM  169  O   HOH T 168      -0.890   6.613   0.818  1.00  0.34           O  
HETATM  170  O   HOH T 169      -9.292  34.522  12.714  1.00  0.34           O  
HETATM  171  O   HOH T 170      15.110  23.048  25.865  1.00  0.34           O  
HETATM  172  O   HOH T 171       0.527   2.451 -13.718  1.00  0.34           O  
HETATM  173  O   HOH T 172      15.650   0.342  18.601  1.00  0.34           O  
HETATM  174  O   HOH T 173      28.966  19.826  -7.852  1.00  0.34           O  
HETATM  175  O   HOH T 174       8.537  12.433   5.021  1.00  0.34           O  
HETATM  176  O   HOH T 175      -6.709   4.857  -3.155  1.00  0.34           O  
HETATM  177  O   HOH T 176     -17.798  27.929   5.440  1.00  0.34           O  
HETATM  178  O   HOH T 177       2.780   8.857   1.220  1.00  0.34           O  
HETATM  179  O   HOH T 178      17.261  26.079  18.040  1.00  0.34           O  
HETATM  180  O   HOH T 179      -3.271  -4.314  29.346  1.00  0.34           O  
HETATM  181  O   HOH T 180       3.925  12.946  11.325  1.00  0.34           O  
HETATM  182  O   HOH T 181     -20.646   7.387   1.130  1.00  0.34           O  
HETATM  183  O   HOH T 182      12.204  33.804   5.518  1.00  0.34           O  
HETATM  184  O   HOH T 183     -20.774  17.072  -1.455  1.00  0.34           O  
HETATM  185  O   HOH T 184      -4.916   3.844  -4.940  1.00  0.34           O  
HETATM  186  O   HOH T 185      16.109  39.000  -1.591  1.00  0.34           O  
HETATM  187  O   HOH T 186       2.936   7.842  31.214  1.00  0.34           O  
HETATM  188  O   HOH T 187     -14.940   7.722  -1.151  1.00  0.35           O  
HETATM  189  O   HOH T 188      -5.261   6.604  18.676  1.00  0.35           O  
HETATM  190  O   HOH T 189      -0.897  39.164  19.757  1.00  0.35           O  
HETATM  191  O   HOH T 190      11.357   9.960 -14.139  1.00  0.35           O  
HETATM  192  O   HOH T 191      -7.549   0.776  11.910  1.00  0.35           O  
HETATM  193  O   HOH T 192      -7.653  25.668  50.692  1.00  0.35           O  
HETATM  194  O   HOH T 193     -10.513  29.390   8.847  1.00  0.35           O  
HETATM  195  O   HOH T 194      -2.900  34.599   9.953  1.00  0.35           O  
HETATM  196  O   HOH T 195      -4.909  17.795   3.446  1.00  0.35           O  
HETATM  197  O   HOH T 196     -14.602  17.824  42.458  1.00  0.35           O  
HETATM  198  O   HOH T 197      29.006  27.970  13.030  1.00  0.35           O  
HETATM  199  O   HOH T 198      -1.722  30.319  10.584  1.00  0.35           O  
HETATM  200  O   HOH T 199      14.222   1.295   4.369  1.00  0.35           O  
HETATM  201  O   HOH T 200     -18.258  20.902  22.225  1.00  0.35           O  
HETATM  202  O   HOH T 201      31.024  12.085  -7.899  1.00  0.35           O  
HETATM  203  O   HOH T 202      23.460  -0.816   0.094  1.00  0.35           O  
HETATM  204  O   HOH T 203       3.641   7.838   3.553  1.00  0.35           O  
HETATM  205  O   HOH T 204      10.670  15.794   4.202  1.00  0.36           O  
HETATM  206  O   HOH T 205      25.860  -2.658  12.132  1.00  0.36           O  
HETATM  207  O   HOH T 206       2.168   7.295 -12.341  1.00  0.36           O  
HETATM  208  O   HOH T 207      -2.146  38.825  27.944  1.00  0.36           O  
HETATM  209  O   HOH T 208     -11.040  16.119  54.832  1.00  0.36           O  
HETATM  210  O   HOH T 209      19.373   8.079  23.429  1.00  0.36           O  
HETATM  211  O   HOH T 210      -4.042  17.035 -16.495  1.00  0.36           O  
HETATM  212  O   HOH T 211     -21.778  19.503  -9.582  1.00  0.36           O  
HETATM  213  O   HOH T 212       5.732   5.670   8.823  1.00  0.36           O  
HETATM  214  O   HOH T 213       4.909  33.512  37.640  1.00  0.36           O  
HETATM  215  O   HOH T 214       8.355  -7.046  29.711  1.00  0.36           O  
HETATM  216  O   HOH T 215     -18.296  21.688  41.417  1.00  0.36           O  
HETATM  217  O   HOH T 216      -7.899   0.240  39.669  1.00  0.36           O  
HETATM  218  O   HOH T 217     -11.697  28.650  13.656  1.00  0.36           O  
HETATM  219  O   HOH T 218       8.387  19.972  25.741  1.00  0.36           O  
HETATM  220  O   HOH T 219      -8.105  15.391  16.869  1.00  0.36           O  
HETATM  221  O   HOH T 220     -22.020  19.391   6.066  1.00  0.36           O  
HETATM  222  O   HOH T 221     -28.150   9.439   3.943  1.00  0.36           O  
HETATM  223  O   HOH T 222      12.136  23.409  34.048  1.00  0.36           O  
HETATM  224  O   HOH T 223     -10.521   4.703   6.618  1.00  0.37           O  
HETATM  225  O   HOH T 224       1.446  14.116  10.374  1.00  0.37           O  
HETATM  226  O   HOH T 225       1.895  10.405  13.394  1.00  0.37           O  
HETATM  227  O   HOH T 226     -13.647   8.467  20.782  1.00  0.37           O  
HETATM  228  O   HOH T 227       4.540   2.284   8.001  1.00  0.37           O  
HETATM  229  O   HOH T 228      11.086   0.895   1.651  1.00  0.37           O  
HETATM  230  O   HOH T 229     -12.684  28.816  33.197  1.00  0.37           O  
HETATM  231  O   HOH T 230     -12.819  29.656  30.501  1.00  0.37           O  
HETATM  232  O   HOH T 231      11.930  21.109   9.745  1.00  0.37           O  
HETATM  233  O   HOH T 232      28.933  26.173   8.392  1.00  0.37           O  
HETATM  234  O   HOH T 233      -6.085   2.372  39.747  1.00  0.37           O  
HETATM  235  O   HOH T 234      -1.406  -6.022  -0.723  1.00  0.37           O  
HETATM  236  O   HOH T 235      13.841  38.796  -3.406  1.00  0.37           O  
HETATM  237  O   HOH T 236      -5.767   2.291   5.863  1.00  0.37           O  
HETATM  238  O   HOH T 237      -0.228   6.984  38.934  1.00  0.37           O  
HETATM  239  O   HOH T 238     -21.127  16.515  17.629  1.00  0.37           O  
HETATM  240  O   HOH T 239     -11.256  34.060  27.444  1.00  0.37           O  
HETATM  241  O   HOH T 240      13.096   0.795  19.644  1.00  0.37           O  
HETATM  242  O   HOH T 241       0.964  22.516  52.205  1.00  0.37           O  
HETATM  243  O   HOH T 242       3.653  20.246  20.082  1.00  0.37           O  
HETATM  244  O   HOH T 243      -0.903   2.368  10.389  1.00  0.37           O  
HETATM  245  O   HOH T 244      29.845   0.620   5.353  1.00  0.37           O  
HETATM  246  O   HOH T 245      -4.947   4.843 -16.340  1.00  0.37           O  
HETATM  247  O   HOH T 246     -19.549  18.519  22.224  1.00  0.38           O  
HETATM  248  O   HOH T 247      29.729  17.809  20.795  1.00  0.38           O  
HETATM  249  O   HOH T 248     -15.492  28.961  -1.054  1.00  0.38           O  
HETATM  250  O   HOH T 249      29.161  15.598 -10.631  1.00  0.38           O  
HETATM  251  O   HOH T 250       0.046   0.310   8.813  1.00  0.38           O  
HETATM  252  O   HOH T 251      32.596  12.931   9.886  1.00  0.38           O  
HETATM  253  O   HOH T 252      -0.883   3.056  -5.643  1.00  0.38           O  
HETATM  254  O   HOH T 253      10.476  -4.980  13.041  1.00  0.38           O  
HETATM  255  O   HOH T 254     -11.827   6.055  -3.668  1.00  0.38           O  
HETATM  256  O   HOH T 255      24.258   7.618  25.096  1.00  0.38           O  
HETATM  257  O   HOH T 256       2.930  34.277  -5.350  1.00  0.38           O  
HETATM  258  O   HOH T 257     -27.221  17.242   5.435  1.00  0.38           O  
HETATM  259  O   HOH T 258     -25.898  14.392   2.898  1.00  0.38           O  
HETATM  260  O   HOH T 259       1.891  -0.338  -1.234  1.00  0.38           O  
HETATM  261  O   HOH T 260     -15.241  21.823  16.531  1.00  0.38           O  
HETATM  262  O   HOH T 261       7.749  19.017  21.589  1.00  0.38           O  
HETATM  263  O   HOH T 262       3.945  37.722  25.070  1.00  0.38           O  
HETATM  264  O   HOH T 263       0.955   7.476   2.806  1.00  0.38           O  
HETATM  265  O   HOH T 264      -4.501   0.448 -17.120  1.00  0.38           O  
HETATM  266  O   HOH T 265     -18.596  15.247  -1.047  1.00  0.38           O  
HETATM  267  O   HOH T 266      26.542   4.623  23.754  1.00  0.38           O  
HETATM  268  O   HOH T 267       7.506  27.221 -10.271  1.00  0.38           O  
HETATM  269  O   HOH T 268       8.881  22.490  37.040  1.00  0.38           O  
HETATM  270  O   HOH T 269      -8.175   2.437   9.687  1.00  0.38           O  
HETATM  271  O   HOH T 270      -6.261   2.587 -17.458  1.00  0.38           O  
HETATM  272  O   HOH T 271       0.943  25.402 -13.298  1.00  0.39           O  
HETATM  273  O   HOH T 272      -1.494   8.324   6.102  1.00  0.39           O  
HETATM  274  O   HOH T 273      26.830  19.830  -9.647  1.00  0.39           O  
HETATM  275  O   HOH T 274       9.651  31.067  17.087  1.00  0.39           O  
HETATM  276  O   HOH T 275      -7.716   5.548   4.498  1.00  0.39           O  
HETATM  277  O   HOH T 276     -20.393  13.146  -1.648  1.00  0.39           O  
HETATM  278  O   HOH T 277      -9.077   8.958  32.572  1.00  0.39           O  
HETATM  279  O   HOH T 278      -6.470   6.598 -17.793  1.00  0.39           O  
HETATM  280  O   HOH T 279      21.887  21.282  23.202  1.00  0.39           O  
HETATM  281  O   HOH T 280      -9.780  15.514  14.693  1.00  0.39           O  
HETATM  282  O   HOH T 281     -12.880   4.978   5.127  1.00  0.39           O  
HETATM  283  O   HOH T 282      -3.278  33.918  38.904  1.00  0.39           O  
HETATM  284  O   HOH T 283      -3.064   1.783  25.901  1.00  0.39           O  
HETATM  285  O   HOH T 284      -0.474  34.529  32.472  1.00  0.39           O  
HETATM  286  O   HOH T 285      18.700  39.708  -2.371  1.00  0.39           O  
HETATM  287  O   HOH T 286       5.559   3.362  10.418  1.00  0.39           O  
HETATM  288  O   HOH T 287       4.989  22.300 -14.266  1.00  0.39           O  
HETATM  289  O   HOH T 288      -8.746  24.720  48.417  1.00  0.39           O  
HETATM  290  O   HOH T 289      33.681  11.619  -8.467  1.00  0.39           O  
HETATM  291  O   HOH T 290      10.681  31.964  19.461  1.00  0.39           O  
HETATM  292  O   HOH T 291       7.414   7.563  17.118  1.00  0.39           O  
HETATM  293  O   HOH T 292      13.768  -5.747  17.806  1.00  0.39           O  
HETATM  294  O   HOH T 293      11.727  26.961  24.225  1.00  0.39           O  
HETATM  295  O   HOH T 294      -8.505  22.532  46.810  1.00  0.39           O  
HETATM  296  O   HOH T 295      -7.537   4.440  -5.688  1.00  0.39           O  
HETATM  297  O   HOH T 296      19.981  29.037  18.102  1.00  0.39           O  
HETATM  298  O   HOH T 297       9.289   1.289  -0.431  1.00  0.40           O  
HETATM  299  O   HOH T 298     -10.504  12.753  15.056  1.00  0.40           O  
HETATM  300  O   HOH T 299      11.150  -7.562  29.729  1.00  0.40           O  
HETATM  301  O   HOH T 300       0.843  13.241  43.573  1.00  0.40           O  
HETATM  302  O   HOH T 301     -13.135  30.592  44.193  1.00  0.40           O  
HETATM  303  O   HOH T 302      30.883  26.834  10.260  1.00  0.40           O  
HETATM  304  O   HOH T 303      28.413  -1.736   5.648  1.00  0.40           O  
HETATM  305  O   HOH T 304      -2.585   0.651  28.329  1.00  0.40           O  
HETATM  306  O   HOH T 305       4.339   0.612  -0.125  1.00  0.40           O  
HETATM  307  O   HOH T 306     -10.706   8.055  30.614  1.00  0.40           O  
HETATM  308  O   HOH T 307      19.742  21.602  21.446  1.00  0.40           O  
HETATM  309  O   HOH T 308      -9.699  25.257  44.051  1.00  0.40           O  
HETATM  310  O   HOH T 309       7.769  20.988  41.916  1.00  0.40           O  
HETATM  311  O   HOH T 310      -5.502  27.552  -6.623  1.00  0.40           O  
HETATM  312  O   HOH T 311       8.641  -1.850  10.119  1.00  0.40           O  
HETATM  313  O   HOH T 312       6.688   8.207  -1.740  1.00  0.40           O  
HETATM  314  O   HOH T 313       9.619  33.849   0.946  1.00  0.40           O  
HETATM  315  O   HOH T 314      -2.173  -4.455  -2.902  1.00  0.40           O  
HETATM  316  O   HOH T 315       1.939  36.041  25.978  1.00  0.40           O  
HETATM  317  O   HOH T 316      11.011   1.630  16.139  1.00  0.40           O  
HETATM  318  O   HOH T 317      12.143  25.438 -12.943  1.00  0.40           O  
HETATM  319  O   HOH T 318      23.147  -1.989   2.504  1.00  0.40           O  
HETATM  320  O   HOH T 319     -13.582   4.699   2.452  1.00  0.40           O  
HETATM  321  O   HOH T 320      10.858  -4.968  23.838  1.00  0.40           O  
HETATM  322  O   HOH T 321      29.402  23.290   3.300  1.00  0.40           O  
HETATM  323  O   HOH T 322       8.351  28.770  15.934  1.00  0.41           O  
HETATM  324  O   HOH T 323      30.863  24.792   4.919  1.00  0.41           O  
HETATM  325  O   HOH T 324     -11.297  28.329  51.004  1.00  0.41           O  
HETATM  326  O   HOH T 325       9.559  29.057  30.122  1.00  0.41           O  
HETATM  327  O   HOH T 326      22.033  23.793  -4.748  1.00  0.41           O  
HETATM  328  O   HOH T 327      18.165  23.776  22.115  1.00  0.41           O  
HETATM  329  O   HOH T 328      30.136  -3.047  10.353  1.00  0.41           O  
HETATM  330  O   HOH T 329     -14.024   6.388 -13.199  1.00  0.41           O  
HETATM  331  O   HOH T 330      -1.238  21.257  53.286  1.00  0.41           O  
HETATM  332  O   HOH T 331      22.870  14.414  -9.140  1.00  0.41           O  
HETATM  333  O   HOH T 332      -7.723  23.101  11.690  1.00  0.41           O  
HETATM  334  O   HOH T 333      24.540  14.392 -11.464  1.00  0.41           O  
HETATM  335  O   HOH T 334       7.234   1.986   8.560  1.00  0.41           O  
HETATM  336  O   HOH T 335       2.268  19.230  50.230  1.00  0.41           O  
HETATM  337  O   HOH T 336      -3.631  19.013  55.512  1.00  0.41           O  
HETATM  338  O   HOH T 337     -14.632  23.526  43.746  1.00  0.41           O  
HETATM  339  O   HOH T 338       8.783   1.389  12.203  1.00  0.41           O  
HETATM  340  O   HOH T 339     -17.791  27.598   8.189  1.00  0.41           O  
HETATM  341  O   HOH T 340      28.042  25.895  -3.519  1.00  0.41           O  
HETATM  342  O   HOH T 341      30.961  29.878  17.866  1.00  0.41           O  
HETATM  343  O   HOH T 342      20.976  26.705  19.111  1.00  0.41           O  
HETATM  344  O   HOH T 343      13.905   1.289   1.663  1.00  0.41           O  
HETATM  345  O   HOH T 344       8.371  18.801  10.976  1.00  0.41           O  
HETATM  346  O   HOH T 345      -4.268  21.699  15.087  1.00  0.41           O  
HETATM  347  O   HOH T 346     -30.069  16.627   8.134  1.00  0.41           O  
HETATM  348  O   HOH T 347      13.686  30.456  14.502  1.00  0.41           O  
HETATM  349  O   HOH T 348      -8.407  29.990   0.894  1.00  0.41           O  
HETATM  350  O   HOH T 349      26.948   7.064  25.101  1.00  0.41           O  
HETATM  351  O   HOH T 350      26.311  27.110   8.789  1.00  0.41           O  
HETATM  352  O   HOH T 351       2.613  14.421  41.688  1.00  0.41           O  
HETATM  353  O   HOH T 352      13.057  13.397   2.873  1.00  0.42           O  
HETATM  354  O   HOH T 353       8.333  31.439  30.863  1.00  0.42           O  
HETATM  355  O   HOH T 354     -24.881   5.859   6.191  1.00  0.42           O  
HETATM  356  O   HOH T 355      28.876  24.616   0.880  1.00  0.42           O  
HETATM  357  O   HOH T 356      19.633  11.636  25.266  1.00  0.42           O  
HETATM  358  O   HOH T 357     -20.233  29.155   5.010  1.00  0.42           O  
HETATM  359  O   HOH T 358      -2.038   2.206 -14.729  1.00  0.42           O  
HETATM  360  O   HOH T 359      -1.674  16.009   7.331  1.00  0.42           O  
HETATM  361  O   HOH T 360     -12.962   5.623  27.733  1.00  0.42           O  
HETATM  362  O   HOH T 361      20.206  16.151  23.603  1.00  0.42           O  
HETATM  363  O   HOH T 362      15.736  -8.877  24.265  1.00  0.42           O  
HETATM  364  O   HOH T 363      27.727   6.949  -4.279  1.00  0.42           O  
HETATM  365  O   HOH T 364     -12.681   5.398  25.072  1.00  0.42           O  
HETATM  366  O   HOH T 365     -13.329   3.673  30.915  1.00  0.42           O  
HETATM  367  O   HOH T 366      -8.388  20.980  -8.418  1.00  0.42           O  
HETATM  368  O   HOH T 367      -5.711  -1.575  31.406  1.00  0.43           O  
HETATM  369  O   HOH T 368      11.194  -4.724  21.088  1.00  0.43           O  
HETATM  370  O   HOH T 369      16.403  30.001  -9.949  1.00  0.43           O  
HETATM  371  O   HOH T 370      13.106  28.565  22.701  1.00  0.43           O  
HETATM  372  O   HOH T 371       5.072  -6.693  27.141  1.00  0.43           O  
HETATM  373  O   HOH T 372       4.046   3.940 -11.462  1.00  0.43           O  
HETATM  374  O   HOH T 373     -13.840   7.090  14.356  1.00  0.43           O  
HETATM  375  O   HOH T 374       8.885  41.339   2.392  1.00  0.43           O  
HETATM  376  O   HOH T 375      37.871   8.663  -1.207  1.00  0.43           O  
HETATM  377  O   HOH T 376       9.489   2.944   9.949  1.00  0.43           O  
HETATM  378  O   HOH T 377      12.917  26.853  -9.301  1.00  0.43           O  
HETATM  379  O   HOH T 378      -1.293  37.316   8.151  1.00  0.43           O  
HETATM  380  O   HOH T 379     -14.322   3.982 -14.489  1.00  0.43           O  
HETATM  381  O   HOH T 380      30.868   2.955   4.144  1.00  0.43           O  
HETATM  382  O   HOH T 381      18.791  12.373  21.628  1.00  0.43           O  
HETATM  383  O   HOH T 382      -8.715   3.215  12.305  1.00  0.43           O  
HETATM  384  O   HOH T 383     -11.352   5.474  30.054  1.00  0.43           O  
HETATM  385  O   HOH T 384      -6.874  15.967  14.349  1.00  0.43           O  
HETATM  386  O   HOH T 385      13.393  26.261  20.942  1.00  0.43           O  
HETATM  387  O   HOH T 386     -17.257   1.326  32.784  1.00  0.43           O  
HETATM  388  O   HOH T 387       9.951  -5.943  27.755  1.00  0.43           O  
HETATM  389  O   HOH T 388       2.720  23.807  55.541  1.00  0.43           O  
HETATM  390  O   HOH T 389      -8.135   2.351  28.078  1.00  0.43           O  
HETATM  391  O   HOH T 390     -14.295   5.703   8.529  1.00  0.44           O  
HETATM  392  O   HOH T 391       4.605   9.962 -17.225  1.00  0.44           O  
HETATM  393  O   HOH T 392     -17.481  17.827  -7.946  1.00  0.44           O  
HETATM  394  O   HOH T 393      24.595  11.909  26.700  1.00  0.44           O  
HETATM  395  O   HOH T 394      19.592  13.371  12.594  1.00  0.44           O  
HETATM  396  O   HOH T 395     -14.590  13.629  43.959  1.00  0.44           O  
HETATM  397  O   HOH T 396       1.094  19.842  52.676  1.00  0.44           O  
HETATM  398  O   HOH T 397      -0.888  32.720  27.337  1.00  0.44           O  
HETATM  399  O   HOH T 398       6.828   0.550  -1.496  1.00  0.44           O  
HETATM  400  O   HOH T 399       1.798  12.285 -15.580  1.00  0.44           O  
HETATM  401  O   HOH T 400      13.092  24.642  26.644  1.00  0.44           O  
HETATM  402  O   HOH T 401       7.262   8.769  -7.050  1.00  0.44           O  
HETATM  403  O   HOH T 402      29.904  25.636  -1.506  1.00  0.44           O  
HETATM  404  O   HOH T 403      13.459  28.345  16.461  1.00  0.44           O  
HETATM  405  O   HOH T 404       1.984  37.667  51.323  1.00  0.44           O  
HETATM  406  O   HOH T 405      28.205  29.697  17.291  1.00  0.44           O  
HETATM  407  O   HOH T 406      29.124  18.332 -10.177  1.00  0.44           O  
HETATM  408  O   HOH T 407      23.174  -2.079   5.230  1.00  0.44           O  
HETATM  409  O   HOH T 408     -13.306   4.582  13.343  1.00  0.44           O  
HETATM  410  O   HOH T 409      12.206  32.084   3.518  1.00  0.44           O  
HETATM  411  O   HOH T 410      -0.834  27.534   4.305  1.00  0.44           O  
HETATM  412  O   HOH T 411     -13.364   5.612  -0.087  1.00  0.44           O  
HETATM  413  O   HOH T 412     -11.926   4.237   8.937  1.00  0.44           O  
HETATM  414  O   HOH T 413      12.523  14.842  37.680  1.00  0.44           O  
HETATM  415  O   HOH T 414       9.731  29.932  11.316  1.00  0.44           O  
HETATM  416  O   HOH T 415       2.350  -1.327  23.017  1.00  0.44           O  
HETATM  417  O   HOH T 416      -9.831   1.078  31.901  1.00  0.44           O  
HETATM  418  O   HOH T 417     -12.870   0.401  42.246  1.00  0.44           O  
HETATM  419  O   HOH T 418     -16.102  26.817  30.065  1.00  0.44           O  
HETATM  420  O   HOH T 419     -18.099  13.626  -3.200  1.00  0.44           O  
HETATM  421  O   HOH T 420      -3.383  -0.235   0.080  1.00  0.44           O  
HETATM  422  O   HOH T 421       7.377  37.933   2.133  1.00  0.44           O  
HETATM  423  O   HOH T 422       3.144  33.650  -8.085  1.00  0.45           O  
HETATM  424  O   HOH T 423       7.286  14.852   7.256  1.00  0.45           O  
HETATM  425  O   HOH T 424     -12.998   6.686  22.717  1.00  0.45           O  
HETATM  426  O   HOH T 425      24.991  30.282   4.042  1.00  0.45           O  
HETATM  427  O   HOH T 426      22.211  -4.762  25.770  1.00  0.45           O  
HETATM  428  O   HOH T 427      29.869  14.218  19.430  1.00  0.45           O  
HETATM  429  O   HOH T 428      13.039  32.160 -11.143  1.00  0.45           O  
HETATM  430  O   HOH T 429      -2.010  31.504  38.907  1.00  0.45           O  
HETATM  431  O   HOH T 430      14.117  34.670 -11.001  1.00  0.45           O  
HETATM  432  O   HOH T 431      -2.556   0.691  -2.402  1.00  0.45           O  
HETATM  433  O   HOH T 432     -10.725   3.849  14.142  1.00  0.45           O  
HETATM  434  O   HOH T 433      25.014  22.609  25.663  1.00  0.45           O  
HETATM  435  O   HOH T 434     -16.274   8.567  39.189  1.00  0.45           O  
HETATM  436  O   HOH T 435     -12.603   6.651  35.482  1.00  0.45           O  
HETATM  437  O   HOH T 436     -10.404  25.856  50.329  1.00  0.45           O  
HETATM  438  O   HOH T 437       6.155  30.995 -10.022  1.00  0.45           O  
HETATM  439  O   HOH T 438       6.364   0.268  12.693  1.00  0.45           O  
HETATM  440  O   HOH T 439     -18.790  27.901   2.988  1.00  0.45           O  
HETATM  441  O   HOH T 440     -13.823  29.709  35.590  1.00  0.45           O  
HETATM  442  O   HOH T 441      -6.484  25.124  13.204  1.00  0.45           O  
HETATM  443  O   HOH T 442      -9.675   2.816  41.898  1.00  0.45           O  
HETATM  444  O   HOH T 443      21.143  30.239   8.193  1.00  0.45           O  
HETATM  445  O   HOH T 444     -17.251  17.748  -5.157  1.00  0.45           O  
HETATM  446  O   HOH T 445      33.676  16.348  11.650  1.00  0.45           O  
HETATM  447  O   HOH T 446      14.684  39.831  -5.854  1.00  0.45           O  
HETATM  448  O   HOH T 447       3.235   5.842  33.097  1.00  0.45           O  
HETATM  449  O   HOH T 448       3.541  14.238   8.394  1.00  0.45           O  
HETATM  450  O   HOH T 449      -7.935  11.124 -19.198  1.00  0.45           O  
HETATM  451  O   HOH T 450     -23.865  21.187  14.755  1.00  0.45           O  
HETATM  452  O   HOH T 451      10.371  36.048   2.629  1.00  0.45           O  
HETATM  453  O   HOH T 452      20.601  13.475  23.472  1.00  0.45           O  
HETATM  454  O   HOH T 453     -14.384   5.536  -2.704  1.00  0.46           O  
HETATM  455  O   HOH T 454     -14.251   4.675  36.448  1.00  0.46           O  
HETATM  456  O   HOH T 455      -3.300   2.322   8.801  1.00  0.46           O  
HETATM  457  O   HOH T 456      19.055  24.754  19.669  1.00  0.46           O  
HETATM  458  O   HOH T 457       0.944   0.785 -11.546  1.00  0.46           O  
HETATM  459  O   HOH T 458      10.907  30.860  31.696  1.00  0.46           O  
HETATM  460  O   HOH T 459     -15.477  27.508  16.881  1.00  0.46           O  
HETATM  461  O   HOH T 460      19.633  26.634  16.638  1.00  0.46           O  
HETATM  462  O   HOH T 461      10.457  31.223 -10.610  1.00  0.46           O  
HETATM  463  O   HOH T 462      33.474  27.499   9.816  1.00  0.46           O  
HETATM  464  O   HOH T 463      -3.882  31.982  10.416  1.00  0.46           O  
HETATM  465  O   HOH T 464      -9.699   3.212  30.118  1.00  0.46           O  
HETATM  466  O   HOH T 465       7.781  35.142   2.402  1.00  0.46           O  
HETATM  467  O   HOH T 466      24.328   6.677  -7.815  1.00  0.46           O  
HETATM  468  O   HOH T 467       0.571  37.724  48.906  1.00  0.46           O  
HETATM  469  O   HOH T 468     -12.143  24.155  44.815  1.00  0.46           O  
HETATM  470  O   HOH T 469       8.977  21.120  39.434  1.00  0.46           O  
HETATM  471  O   HOH T 470       7.888  -6.056  32.164  1.00  0.46           O  
HETATM  472  O   HOH T 471       8.790  13.134   9.541  1.00  0.46           O  
HETATM  473  O   HOH T 472     -11.268  37.280  17.155  1.00  0.46           O  
HETATM  474  O   HOH T 473      11.639   0.244   4.404  1.00  0.46           O  
HETATM  475  O   HOH T 474     -14.080   4.117  10.752  1.00  0.46           O  
HETATM  476  O   HOH T 475     -18.259   9.405  16.193  1.00  0.46           O  
HETATM  477  O   HOH T 476      19.641  -0.097   8.019  1.00  0.46           O  
HETATM  478  O   HOH T 477      -7.622  35.532  22.415  1.00  0.47           O  
HETATM  479  O   HOH T 478      23.508  26.946  -7.372  1.00  0.47           O  
HETATM  480  O   HOH T 479      -3.559  31.009  46.488  1.00  0.47           O  
HETATM  481  O   HOH T 480      -2.601   3.226  -3.465  1.00  0.47           O  
HETATM  482  O   HOH T 481      -4.877   2.471 -15.133  1.00  0.47           O  
HETATM  483  O   HOH T 482     -23.356   8.377   1.320  1.00  0.47           O  
HETATM  484  O   HOH T 483     -12.158   2.244 -14.664  1.00  0.47           O  
HETATM  485  O   HOH T 484      12.071  30.088  18.082  1.00  0.47           O  
HETATM  486  O   HOH T 485     -13.565  38.327  18.279  1.00  0.47           O  
HETATM  487  O   HOH T 486     -11.524  36.580  46.818  1.00  0.47           O  
HETATM  488  O   HOH T 487       3.209  35.736  37.184  1.00  0.47           O  
HETATM  489  O   HOH T 488      15.443  35.041  -8.662  1.00  0.47           O  
HETATM  490  O   HOH T 489      29.952  28.920  15.446  1.00  0.47           O  
HETATM  491  O   HOH T 490       2.916   9.905 -14.723  1.00  0.47           O  
HETATM  492  O   HOH T 491      27.509  29.994  14.550  1.00  0.47           O  
HETATM  493  O   HOH T 492       4.553  12.082 -15.483  1.00  0.47           O  
HETATM  494  O   HOH T 493     -19.284  22.024  -6.949  1.00  0.47           O  
HETATM  495  O   HOH T 494     -16.241  23.596  41.495  1.00  0.47           O  
HETATM  496  O   HOH T 495     -21.869  14.613  19.555  1.00  0.47           O  
HETATM  497  O   HOH T 496       3.437   7.256 -14.894  1.00  0.47           O  
HETATM  498  O   HOH T 497      12.920  22.588 -16.325  1.00  0.47           O  
HETATM  499  O   HOH T 498      -5.909  -3.576  29.327  1.00  0.47           O  
HETATM  500  O   HOH T 499       3.961  36.923  21.150  1.00  0.47           O  
HETATM  501  O   HOH T 500     -17.268  20.565  -8.039  1.00  0.48           O  
HETATM  502  O   HOH T 501      21.094  -0.736   3.957  1.00  0.48           O  
HETATM  503  O   HOH T 502      22.831  23.647  24.250  1.00  0.48           O  
HETATM  504  O   HOH T 503       4.013  -2.114  -0.524  1.00  0.48           O  
HETATM  505  O   HOH T 504       2.682  19.158 -15.505  1.00  0.48           O  
HETATM  506  O   HOH T 505       1.885  26.194  44.679  1.00  0.48           O  
HETATM  507  O   HOH T 506      22.434   6.444  -9.841  1.00  0.48           O  
HETATM  508  O   HOH T 507      10.683  -7.727  23.644  1.00  0.48           O  
HETATM  509  O   HOH T 508      22.785  12.011  31.676  1.00  0.48           O  
HETATM  510  O   HOH T 509       9.984  28.234  13.621  1.00  0.48           O  
HETATM  511  O   HOH T 510      29.037  -3.036   7.899  1.00  0.48           O  
HETATM  512  O   HOH T 511     -19.271  19.247  -6.504  1.00  0.48           O  
HETATM  513  O   HOH T 512      14.637  26.742  18.580  1.00  0.48           O  
HETATM  514  O   HOH T 513      11.859  18.575  36.127  1.00  0.48           O  
HETATM  515  O   HOH T 514      -6.413   9.443  45.541  1.00  0.48           O  
HETATM  516  O   HOH T 515       3.572   1.295  15.179  1.00  0.48           O  
HETATM  517  O   HOH T 516      -8.114   8.444 -18.880  1.00  0.48           O  
HETATM  518  O   HOH T 517      29.398  26.162   3.043  1.00  0.48           O  
HETATM  519  O   HOH T 518      11.521  31.683   7.150  1.00  0.48           O  
HETATM  520  O   HOH T 519     -17.061  19.132  41.810  1.00  0.48           O  
HETATM  521  O   HOH T 520      22.299  14.556  30.769  1.00  0.48           O  
HETATM  522  O   HOH T 521       8.554  29.631  -9.326  1.00  0.48           O  
HETATM  523  O   HOH T 522      -3.939  -1.587  29.265  1.00  0.48           O  
HETATM  524  O   HOH T 523      -9.368  26.777  -3.593  1.00  0.48           O  
HETATM  525  O   HOH T 524     -15.935  20.388  23.530  1.00  0.48           O  
HETATM  526  O   HOH T 525      29.728   1.021   2.595  1.00  0.49           O  
HETATM  527  O   HOH T 526     -13.840   5.649  -5.366  1.00  0.49           O  
HETATM  528  O   HOH T 527      -1.281   9.180   0.058  1.00  0.49           O  
HETATM  529  O   HOH T 528      -8.465   3.069   5.683  1.00  0.49           O  
HETATM  530  O   HOH T 529      12.247   7.922 -12.472  1.00  0.49           O  
HETATM  531  O   HOH T 530     -12.169  30.888  23.081  1.00  0.49           O  
HETATM  532  O   HOH T 531     -12.337  19.511   8.840  1.00  0.49           O  
HETATM  533  O   HOH T 532     -11.196  35.196  19.003  1.00  0.49           O  
HETATM  534  O   HOH T 533       5.688  36.453  23.301  1.00  0.49           O  
HETATM  535  O   HOH T 534      24.246  28.651   8.718  1.00  0.49           O  
HETATM  536  O   HOH T 535       2.743  12.191  30.474  1.00  0.49           O  
HETATM  537  O   HOH T 536      24.703  23.540  -5.134  1.00  0.49           O  
HETATM  538  O   HOH T 537      22.110  12.514  25.647  1.00  0.49           O  
HETATM  539  O   HOH T 538      15.428  41.028  -3.420  1.00  0.49           O  
HETATM  540  O   HOH T 539     -15.110   3.090  32.912  1.00  0.49           O  
HETATM  541  O   HOH T 540       3.208  35.549  23.496  1.00  0.49           O  
HETATM  542  O   HOH T 541      11.309  29.127  -8.946  1.00  0.49           O  
HETATM  543  O   HOH T 542     -11.443   3.410  11.538  1.00  0.49           O  
HETATM  544  O   HOH T 543      -2.312  33.981  34.285  1.00  0.49           O  
HETATM  545  O   HOH T 544      17.845  38.078   4.873  1.00  0.49           O  
HETATM  546  O   HOH T 545     -14.757  28.427  44.686  1.00  0.49           O  
HETATM  547  O   HOH T 546      -7.287  12.125  47.823  1.00  0.49           O  
HETATM  548  O   HOH T 547       6.448  -1.165   0.636  1.00  0.49           O  
HETATM  549  O   HOH T 548      -3.207  -3.191 -10.480  1.00  0.49           O  
HETATM  550  O   HOH T 549      13.795  30.415  -9.081  1.00  0.49           O  
HETATM  551  O   HOH T 550      -0.837  13.157 -15.432  1.00  0.49           O  
HETATM  552  O   HOH T 551     -12.654  31.555  33.850  1.00  0.49           O  
HETATM  553  O   HOH T 552      25.789  28.739   6.403  1.00  0.49           O  
HETATM  554  O   HOH T 553      24.187  25.209  26.017  1.00  0.49           O  
HETATM  555  O   HOH T 554      17.198   7.515 -10.237  1.00  0.49           O  
HETATM  556  O   HOH T 555       0.192  11.505  38.939  1.00  0.49           O  
HETATM  557  O   HOH T 556       9.376  27.324  -8.047  1.00  0.49           O  
HETATM  558  O   HOH T 557      19.456  -0.377  10.966  1.00  0.50           O  
HETATM  559  O   HOH T 558     -10.626   4.515  16.855  1.00  0.50           O  
HETATM  560  O   HOH T 559      10.425  15.926 -17.245  1.00  0.50           O  
HETATM  561  O   HOH T 560     -12.028   2.397  40.444  1.00  0.50           O  
HETATM  562  O   HOH T 561      13.631  28.888  20.029  1.00  0.50           O  
HETATM  563  O   HOH T 562     -23.687  22.650  12.412  1.00  0.50           O  
HETATM  564  O   HOH T 563      11.318   5.554  -3.262  1.00  0.50           O  
HETATM  565  O   HOH T 564       7.735  17.853  24.100  1.00  0.50           O  
HETATM  566  O   HOH T 565      -9.721  10.967 -21.476  1.00  0.50           O  
HETATM  567  O   HOH T 566     -15.379   6.162  12.251  1.00  0.50           O  
HETATM  568  O   HOH T 567      -5.696   2.396  26.832  1.00  0.50           O  
HETATM  569  O   HOH T 568      -5.767   1.306   3.226  1.00  0.50           O  
HETATM  570  O   HOH T 569      31.710  20.156  -7.732  1.00  0.50           O  
HETATM  571  O   HOH T 570     -10.474   3.922  24.155  1.00  0.50           O  
HETATM  572  O   HOH T 571      -9.235  34.233  15.497  1.00  0.50           O  
HETATM  573  O   HOH T 572      -2.493  23.607  52.677  1.00  0.50           O  
HETATM  574  O   HOH T 573      10.404  31.513  29.039  1.00  0.50           O  
HETATM  575  O   HOH T 574      22.790  13.322  28.264  1.00  0.50           O  
HETATM  576  O   HOH T 575       6.358  32.481  10.432  1.00  0.50           O  
HETATM  577  O   HOH T 576       9.536   0.401   8.713  1.00  0.50           O  
HETATM  578  O   HOH T 577      -0.990  11.498  42.283  1.00  0.50           O  
HETATM  579  O   HOH T 578      28.498  25.892   5.662  1.00  0.50           O  
HETATM  580  O   HOH T 579      27.427  -2.851   9.994  1.00  0.50           O  
HETATM  581  O   HOH T 580     -15.370   5.640   5.965  1.00  0.50           O  
HETATM  582  O   HOH T 581     -23.699  23.546   9.756  1.00  0.50           O  
HETATM  583  O   HOH T 582      -5.064  22.845  12.698  1.00  0.50           O  
HETATM  584  O   HOH T 583      16.304  14.071 -13.189  1.00  0.50           O  
HETATM  585  O   HOH T 584       5.334   7.295 -17.009  1.00  0.50           O  
HETATM  586  O   HOH T 585      -6.067  -3.283 -10.929  1.00  0.50           O  
HETATM  587  O   HOH T 586      -8.329   0.449  42.437  1.00  0.50           O  
HETATM  588  O   HOH T 587     -18.195  17.663  -2.549  1.00  0.51           O  
HETATM  589  O   HOH T 588     -16.206  21.364  43.051  1.00  0.51           O  
HETATM  590  O   HOH T 589      -0.133  24.986  51.944  1.00  0.51           O  
HETATM  591  O   HOH T 590      15.433  32.547  -9.734  1.00  0.51           O  
HETATM  592  O   HOH T 591      33.700  10.483   9.056  1.00  0.51           O  
HETATM  593  O   HOH T 592     -17.453  24.912  -4.672  1.00  0.51           O  
HETATM  594  O   HOH T 593      28.411  28.231  10.266  1.00  0.51           O  
HETATM  595  O   HOH T 594     -23.205  16.181  -0.247  1.00  0.51           O  
HETATM  596  O   HOH T 595     -19.153  14.918  18.864  1.00  0.51           O  
HETATM  597  O   HOH T 596      13.744  17.260  37.714  1.00  0.51           O  
HETATM  598  O   HOH T 597     -11.488  33.315  16.804  1.00  0.51           O  
HETATM  599  O   HOH T 598      -3.532  40.924  -2.355  1.00  0.51           O  
HETATM  600  O   HOH T 599       4.647  32.690   8.052  1.00  0.51           O  
HETATM  601  O   HOH T 600       5.511   7.310  37.590  1.00  0.51           O  
HETATM  602  O   HOH T 601      -5.459  18.600 -18.296  1.00  0.51           O  
HETATM  603  O   HOH T 602      -9.289  23.463  50.905  1.00  0.51           O  
HETATM  604  O   HOH T 603      13.558  21.900  35.905  1.00  0.51           O  
HETATM  605  O   HOH T 604       8.336  31.755  37.247  1.00  0.51           O  
HETATM  606  O   HOH T 605     -32.057  14.697   7.373  1.00  0.51           O  
HETATM  607  O   HOH T 606     -13.285  28.485  15.877  1.00  0.52           O  
HETATM  608  O   HOH T 607       1.114   1.954  37.442  1.00  0.52           O  
HETATM  609  O   HOH T 608      17.040  -7.219  21.069  1.00  0.52           O  
HETATM  610  O   HOH T 609     -16.040  14.573  41.887  1.00  0.52           O  
HETATM  611  O   HOH T 610     -20.312  16.150  21.238  1.00  0.52           O  
HETATM  612  O   HOH T 611     -20.802  19.833  -4.351  1.00  0.52           O  
HETATM  613  O   HOH T 612      25.393  23.467  -2.348  1.00  0.52           O  
HETATM  614  O   HOH T 613       0.072   9.336  40.624  1.00  0.52           O  
HETATM  615  O   HOH T 614      23.399  30.058   6.407  1.00  0.52           O  
HETATM  616  O   HOH T 615     -15.614   7.246  22.290  1.00  0.52           O  
HETATM  617  O   HOH T 616      -0.683  33.951  24.731  1.00  0.52           O  
HETATM  618  O   HOH T 617      20.879  39.761  -0.670  1.00  0.52           O  
HETATM  619  O   HOH T 618      29.298  30.844  -1.446  1.00  0.52           O  
HETATM  620  O   HOH T 619      24.285  24.876  -8.923  1.00  0.52           O  
HETATM  621  O   HOH T 620     -22.854   5.312   7.865  1.00  0.52           O  
HETATM  622  O   HOH T 621      17.887  33.658  -9.340  1.00  0.52           O  
HETATM  623  O   HOH T 622      28.836  30.294  -4.201  1.00  0.52           O  
HETATM  624  O   HOH T 623      -7.245  23.394  -8.943  1.00  0.52           O  
HETATM  625  O   HOH T 624      15.381  31.538  12.611  1.00  0.52           O  
HETATM  626  O   HOH T 625       3.900  32.463 -10.511  1.00  0.53           O  
HETATM  627  O   HOH T 626      17.804   0.539   5.990  1.00  0.53           O  
HETATM  628  O   HOH T 627      32.715  15.602   9.173  1.00  0.53           O  
HETATM  629  O   HOH T 628     -19.486   8.837  -0.878  1.00  0.53           O  
HETATM  630  O   HOH T 629      28.436  -3.765  12.375  1.00  0.53           O  
HETATM  631  O   HOH T 630      18.822  28.724  -9.920  1.00  0.53           O  
HETATM  632  O   HOH T 631      -1.515   0.858  -7.185  1.00  0.53           O  
HETATM  633  O   HOH T 632      -2.432  35.665  23.498  1.00  0.53           O  
HETATM  634  O   HOH T 633      11.319   6.393  35.959  1.00  0.53           O  
HETATM  635  O   HOH T 634     -19.587  26.730  16.221  1.00  0.53           O  
HETATM  636  O   HOH T 635      26.467  15.597  -9.889  1.00  0.53           O  
HETATM  637  O   HOH T 636     -16.327  16.813  40.429  1.00  0.53           O  
HETATM  638  O   HOH T 637     -11.485  22.788  -6.713  1.00  0.53           O  
HETATM  639  O   HOH T 638     -13.204   2.850  28.238  1.00  0.53           O  
HETATM  640  O   HOH T 639      22.676  23.036  26.982  1.00  0.53           O  
HETATM  641  O   HOH T 640     -12.126  34.412  30.030  1.00  0.53           O  
HETATM  642  O   HOH T 641     -21.042  12.781  21.498  1.00  0.53           O  
HETATM  643  O   HOH T 642     -14.535  28.553  28.558  1.00  0.53           O  
HETATM  644  O   HOH T 643      -7.957   3.620  -8.203  1.00  0.54           O  
HETATM  645  O   HOH T 644      26.768  31.460  11.155  1.00  0.54           O  
HETATM  646  O   HOH T 645     -16.480   8.019  33.277  1.00  0.54           O  
HETATM  647  O   HOH T 646      12.224   0.612   8.188  1.00  0.54           O  
HETATM  648  O   HOH T 647     -10.636  35.541  21.779  1.00  0.54           O  
HETATM  649  O   HOH T 648      -3.956  21.076  52.660  1.00  0.54           O  
HETATM  650  O   HOH T 649      30.743  30.944  20.320  1.00  0.54           O  
HETATM  651  O   HOH T 650      -8.137   2.485  25.288  1.00  0.54           O  
HETATM  652  O   HOH T 651      16.179  -0.032  15.916  1.00  0.54           O  
HETATM  653  O   HOH T 652       0.828  15.064   7.730  1.00  0.54           O  
HETATM  654  O   HOH T 653      -4.826  34.742  40.938  1.00  0.54           O  
HETATM  655  O   HOH T 654       5.003   4.062  -2.789  1.00  0.54           O  
HETATM  656  O   HOH T 655      10.901  24.371  36.475  1.00  0.54           O  
HETATM  657  O   HOH T 656      24.979   0.798  22.724  1.00  0.54           O  
HETATM  658  O   HOH T 657      -5.483   1.567  24.356  1.00  0.54           O  
HETATM  659  O   HOH T 658      22.605  39.073  -2.485  1.00  0.54           O  
HETATM  660  O   HOH T 659      10.301  23.336  40.443  1.00  0.54           O  
HETATM  661  O   HOH T 660      12.130  -6.893  19.666  1.00  0.54           O  
HETATM  662  O   HOH T 661      34.881  17.755  13.586  1.00  0.54           O  
HETATM  663  O   HOH T 662       2.500  13.276  39.083  1.00  0.55           O  
HETATM  664  O   HOH T 663      -7.995   3.132   2.921  1.00  0.55           O  
HETATM  665  O   HOH T 664     -25.767   9.506   2.424  1.00  0.55           O  
HETATM  666  O   HOH T 665     -15.697  14.844  35.775  1.00  0.55           O  
HETATM  667  O   HOH T 666     -19.402   9.732  13.856  1.00  0.55           O  
HETATM  668  O   HOH T 667       7.809  -7.524  26.998  1.00  0.55           O  
HETATM  669  O   HOH T 668      12.990  14.462 -14.652  1.00  0.55           O  
HETATM  670  O   HOH T 669     -12.893  29.639  -0.857  1.00  0.55           O  
HETATM  671  O   HOH T 670       1.700  36.124  33.303  1.00  0.55           O  
HETATM  672  O   HOH T 671      -0.859  -0.932  -0.819  1.00  0.55           O  
HETATM  673  O   HOH T 672      -4.988   1.660  42.137  1.00  0.55           O  
HETATM  674  O   HOH T 673       9.722  13.000 -17.014  1.00  0.55           O  
HETATM  675  O   HOH T 674      28.446  -3.933  15.194  1.00  0.55           O  
HETATM  676  O   HOH T 675      12.126  38.118   7.180  1.00  0.55           O  
HETATM  677  O   HOH T 676      25.949   9.629  25.941  1.00  0.55           O  
HETATM  678  O   HOH T 677      11.341  27.554 -11.351  1.00  0.55           O  
HETATM  679  O   HOH T 678      17.749   8.192  35.466  1.00  0.56           O  
HETATM  680  O   HOH T 679      21.275  39.866  -3.415  1.00  0.56           O  
HETATM  681  O   HOH T 680      16.242  -1.088  30.867  1.00  0.56           O  
HETATM  682  O   HOH T 681      16.931   2.379  -4.968  1.00  0.56           O  
HETATM  683  O   HOH T 682      -9.780   1.464  23.459  1.00  0.56           O  
HETATM  684  O   HOH T 683      -0.736  -2.297 -15.347  1.00  0.56           O  
HETATM  685  O   HOH T 684      31.638   7.104  -3.981  1.00  0.56           O  
HETATM  686  O   HOH T 685      -7.245  35.718   4.814  1.00  0.56           O  
HETATM  687  O   HOH T 686     -12.194  34.328  45.234  1.00  0.56           O  
HETATM  688  O   HOH T 687      14.914   8.249 -12.481  1.00  0.56           O  
HETATM  689  O   HOH T 688      15.307  23.508 -15.327  1.00  0.56           O  
HETATM  690  O   HOH T 689      26.935  33.371  -2.495  1.00  0.56           O  
HETATM  691  O   HOH T 690     -16.947  10.686  33.275  1.00  0.56           O  
HETATM  692  O   HOH T 691      15.306  11.488 -14.150  1.00  0.56           O  
HETATM  693  O   HOH T 692      10.536  38.869  -8.729  1.00  0.57           O  
HETATM  694  O   HOH T 693     -13.710   5.666  43.609  1.00  0.57           O  
HETATM  695  O   HOH T 694     -14.589  27.567  42.096  1.00  0.57           O  
HETATM  696  O   HOH T 695       1.570  11.693  41.362  1.00  0.57           O  
HETATM  697  O   HOH T 696      24.529  11.375  29.419  1.00  0.57           O  
HETATM  698  O   HOH T 697     -19.509  11.323  -3.493  1.00  0.57           O  
HETATM  699  O   HOH T 698      21.162  -9.005  27.577  1.00  0.57           O  
HETATM  700  O   HOH T 699      22.916  30.717  10.104  1.00  0.57           O  
HETATM  701  O   HOH T 700      18.803  19.352 -16.288  1.00  0.57           O  
HETATM  702  O   HOH T 701      10.832  34.690  19.212  1.00  0.57           O  
HETATM  703  O   HOH T 702     -17.196  26.596  15.257  1.00  0.57           O  
HETATM  704  O   HOH T 703       0.427  34.200  34.913  1.00  0.57           O  
HETATM  705  O   HOH T 704      26.250  30.901  -3.228  1.00  0.58           O  
HETATM  706  O   HOH T 705      -7.296  32.924  50.651  1.00  0.58           O  
HETATM  707  O   HOH T 706     -10.684  30.966  51.267  1.00  0.58           O  
HETATM  708  O   HOH T 707      -1.728   0.752  14.619  1.00  0.59           O  
HETATM  709  O   HOH T 708     -13.941  22.619  46.237  1.00  0.59           O  
HETATM  710  O   HOH T 709     -18.630  22.680  26.730  1.00  0.59           O  
HETATM  711  O   HOH T 710      22.554  16.949  24.357  1.00  0.59           O  
HETATM  712  O   HOH T 711     -19.400  26.252  13.593  1.00  0.59           O  
HETATM  713  O   HOH T 712      -1.584  24.314 -13.740  1.00  0.60           O  
HETATM  714  O   HOH T 713      33.263  28.474  18.557  1.00  0.61           O  
HETATM  715  O   HOH T 714     -24.851  18.572  14.126  1.00  0.61           O  
HETATM  716  O   HOH T 715      16.158  24.543  23.748  1.00  0.61           O  
HETATM  717  O   HOH T 716     -11.247  20.357  -8.201  1.00  0.62           O  
TER     718      HOH T 716 
