# Supplementary material for: Accurate Prediction of Hydration Sites of Proteins Using Energy Model With Atom Embedding
Source: Front Mol Biosci. 2021 Sep 20;8:756075. doi: 10.3389/fmolb.2021.756075 (PMC8488165; doi:10.3389/fmolb.2021.756075)
Supplement: Supplementary file 1 [file DataSheet1.ZIP › Data Sheet 1/Our_result_pdb/OppA_dataset_output/1B51_watersite.pdb]

HEADER                                                        XXXX


JRNL        PMID   -1
HETATM    1  O   HOH T   0       5.325  15.036  -3.679  1.00  0.16           O  
HETATM    2  O   HOH T   1       7.414  15.511 -10.389  1.00  0.17           O  
HETATM    3  O   HOH T   2      19.174  19.997   6.368  1.00  0.17           O  
HETATM    4  O   HOH T   3       6.654  30.166  14.718  1.00  0.18           O  
HETATM    5  O   HOH T   4       0.848  12.676  -8.330  1.00  0.18           O  
HETATM    6  O   HOH T   5      20.066  26.135  14.041  1.00  0.18           O  
HETATM    7  O   HOH T   6      17.480  13.552   4.808  1.00  0.19           O  
HETATM    8  O   HOH T   7      14.537  16.721  31.107  1.00  0.19           O  
HETATM    9  O   HOH T   8      15.588  15.338  -8.424  1.00  0.19           O  
HETATM   10  O   HOH T   9      23.289  23.496  -0.967  1.00  0.20           O  
HETATM   11  O   HOH T  10      -0.871  30.675  28.480  1.00  0.21           O  
HETATM   12  O   HOH T  11      -2.135   8.671  10.187  1.00  0.21           O  
HETATM   13  O   HOH T  12     -10.930  26.868  34.594  1.00  0.21           O  
HETATM   14  O   HOH T  13       9.099   6.739   6.799  1.00  0.21           O  
HETATM   15  O   HOH T  14      22.027  14.966 -11.387  1.00  0.22           O  
HETATM   16  O   HOH T  15      22.444  25.350  17.373  1.00  0.22           O  
HETATM   17  O   HOH T  16       3.662   6.914  36.120  1.00  0.22           O  
HETATM   18  O   HOH T  17      -1.589  28.639   2.061  1.00  0.22           O  
HETATM   19  O   HOH T  18       7.009  10.803  -8.867  1.00  0.22           O  
HETATM   20  O   HOH T  19      24.770  21.760  23.546  1.00  0.22           O  
HETATM   21  O   HOH T  20      -3.778  30.044  12.647  1.00  0.23           O  
HETATM   22  O   HOH T  21      31.427  11.132   8.407  1.00  0.23           O  
HETATM   23  O   HOH T  22       8.822  24.119   2.140  1.00  0.23           O  
HETATM   24  O   HOH T  23       3.166   5.515  30.876  1.00  0.23           O  
HETATM   25  O   HOH T  24       5.497   3.949  31.382  1.00  0.23           O  
HETATM   26  O   HOH T  25     -12.761  11.411  20.578  1.00  0.23           O  
HETATM   27  O   HOH T  26       8.109  15.416  -3.372  1.00  0.23           O  
HETATM   28  O   HOH T  27     -13.222  13.888 -14.564  1.00  0.23           O  
HETATM   29  O   HOH T  28     -21.144  16.738  15.246  1.00  0.23           O  
HETATM   30  O   HOH T  29       4.392  10.453  31.064  1.00  0.23           O  
HETATM   31  O   HOH T  30       3.209   4.263  35.300  1.00  0.24           O  
HETATM   32  O   HOH T  31      17.241   5.202  22.017  1.00  0.24           O  
HETATM   33  O   HOH T  32      -2.696  39.083   9.945  1.00  0.24           O  
HETATM   34  O   HOH T  33       0.000  31.835  11.444  1.00  0.24           O  
HETATM   35  O   HOH T  34      -4.303  23.184  -7.443  1.00  0.24           O  
HETATM   36  O   HOH T  35     -20.787  22.977   1.903  1.00  0.24           O  
HETATM   37  O   HOH T  36      11.391  18.415   3.197  1.00  0.24           O  
HETATM   38  O   HOH T  37      28.984   2.887   6.336  1.00  0.24           O  
HETATM   39  O   HOH T  38      -8.082  23.132  23.312  1.00  0.24           O  
HETATM   40  O   HOH T  39       3.155  17.245   7.993  1.00  0.24           O  
HETATM   41  O   HOH T  40       8.798   1.416  25.793  1.00  0.24           O  
HETATM   42  O   HOH T  41      29.196  21.685   1.456  1.00  0.24           O  
HETATM   43  O   HOH T  42      -8.882  11.076  46.347  1.00  0.25           O  
HETATM   44  O   HOH T  43      10.217  31.013   4.269  1.00  0.25           O  
HETATM   45  O   HOH T  44       4.126  13.041  11.432  1.00  0.25           O  
HETATM   46  O   HOH T  45      -4.560  27.562  13.865  1.00  0.25           O  
HETATM   47  O   HOH T  46      -2.358   4.953   9.971  1.00  0.25           O  
HETATM   48  O   HOH T  47      -1.557   8.380   6.292  1.00  0.25           O  
HETATM   49  O   HOH T  48      -9.550  12.126  33.495  1.00  0.25           O  
HETATM   50  O   HOH T  49      -9.677  21.265   9.246  1.00  0.25           O  
HETATM   51  O   HOH T  50      -4.629   6.533  16.562  1.00  0.26           O  
HETATM   52  O   HOH T  51      -4.268  19.494  16.080  1.00  0.26           O  
HETATM   53  O   HOH T  52      -1.490  22.023  12.855  1.00  0.26           O  
HETATM   54  O   HOH T  53      -5.187  34.936  33.698  1.00  0.26           O  
HETATM   55  O   HOH T  54      11.346  13.644  16.683  1.00  0.26           O  
HETATM   56  O   HOH T  55      27.995  15.808  20.616  1.00  0.26           O  
HETATM   57  O   HOH T  56       9.756   9.112  -5.771  1.00  0.26           O  
HETATM   58  O   HOH T  57       9.098  22.356  18.744  1.00  0.27           O  
HETATM   59  O   HOH T  58     -16.024  27.384  30.122  1.00  0.27           O  
HETATM   60  O   HOH T  59       8.776  36.034  -5.979  1.00  0.27           O  
HETATM   61  O   HOH T  60      -6.797  13.935  12.793  1.00  0.27           O  
HETATM   62  O   HOH T  61      -5.613  36.337  15.420  1.00  0.27           O  
HETATM   63  O   HOH T  62      32.834  17.057   2.848  1.00  0.27           O  
HETATM   64  O   HOH T  63      -0.937  14.940   9.167  1.00  0.27           O  
HETATM   65  O   HOH T  64      16.825  -7.731  28.328  1.00  0.27           O  
HETATM   66  O   HOH T  65      10.440  23.409   4.184  1.00  0.27           O  
HETATM   67  O   HOH T  66       7.886  24.313   4.774  1.00  0.27           O  
HETATM   68  O   HOH T  67      -1.119  -0.398  35.102  1.00  0.27           O  
HETATM   69  O   HOH T  68      -1.200   2.593  10.622  1.00  0.27           O  
HETATM   70  O   HOH T  69      15.337  14.736  -5.766  1.00  0.27           O  
HETATM   71  O   HOH T  70      -4.876  26.710  50.778  1.00  0.27           O  
HETATM   72  O   HOH T  71     -10.309  16.248  15.087  1.00  0.28           O  
HETATM   73  O   HOH T  72      -2.218  24.664  12.228  1.00  0.28           O  
HETATM   74  O   HOH T  73       6.590   7.675   7.571  1.00  0.28           O  
HETATM   75  O   HOH T  74      -2.508  19.704   4.110  1.00  0.28           O  
HETATM   76  O   HOH T  75      14.948  14.678   4.867  1.00  0.28           O  
HETATM   77  O   HOH T  76       5.241   4.701  -2.659  1.00  0.28           O  
HETATM   78  O   HOH T  77       8.527  -1.567  29.200  1.00  0.28           O  
HETATM   79  O   HOH T  78      -5.856  34.759  43.522  1.00  0.28           O  
HETATM   80  O   HOH T  79      -8.313  27.738  42.519  1.00  0.28           O  
HETATM   81  O   HOH T  80      -8.662   4.591  13.560  1.00  0.28           O  
HETATM   82  O   HOH T  81     -11.765  14.098 -16.909  1.00  0.29           O  
HETATM   83  O   HOH T  82      14.252  23.067  28.727  1.00  0.29           O  
HETATM   84  O   HOH T  83      -7.186   7.473  -1.920  1.00  0.29           O  
HETATM   85  O   HOH T  84      -4.662  -3.011  35.051  1.00  0.29           O  
HETATM   86  O   HOH T  85     -10.838  16.482 -15.589  1.00  0.29           O  
HETATM   87  O   HOH T  86     -10.183  16.878 -12.855  1.00  0.29           O  
HETATM   88  O   HOH T  87      22.144   8.308  24.312  1.00  0.29           O  
HETATM   89  O   HOH T  88      22.780  -4.209  26.663  1.00  0.29           O  
HETATM   90  O   HOH T  89       5.715  20.084  25.080  1.00  0.29           O  
HETATM   91  O   HOH T  90      19.028  18.199  33.304  1.00  0.29           O  
HETATM   92  O   HOH T  91      -1.011   6.852   0.958  1.00  0.29           O  
HETATM   93  O   HOH T  92     -15.806  30.663  11.273  1.00  0.29           O  
HETATM   94  O   HOH T  93     -12.263  20.346   8.924  1.00  0.29           O  
HETATM   95  O   HOH T  94      12.929  -0.615  22.451  1.00  0.29           O  
HETATM   96  O   HOH T  95      10.851   7.144   8.983  1.00  0.29           O  
HETATM   97  O   HOH T  96      -2.353  30.833  10.370  1.00  0.29           O  
HETATM   98  O   HOH T  97       0.899  11.693  32.579  1.00  0.29           O  
HETATM   99  O   HOH T  98     -11.184  24.264  -6.441  1.00  0.29           O  
HETATM  100  O   HOH T  99      13.858  29.143  13.080  1.00  0.29           O  
HETATM  101  O   HOH T 100       2.029  14.205  32.982  1.00  0.30           O  
HETATM  102  O   HOH T 101      -0.177   1.054  29.207  1.00  0.30           O  
HETATM  103  O   HOH T 102      12.270   1.147  20.259  1.00  0.30           O  
HETATM  104  O   HOH T 103       2.260  26.884  43.904  1.00  0.30           O  
HETATM  105  O   HOH T 104     -20.539  21.773   4.437  1.00  0.30           O  
HETATM  106  O   HOH T 105      14.057   1.305   4.883  1.00  0.30           O  
HETATM  107  O   HOH T 106      12.061   1.116   9.221  1.00  0.30           O  
HETATM  108  O   HOH T 107      12.365  21.336  10.287  1.00  0.30           O  
HETATM  109  O   HOH T 108      -0.317  31.090   1.908  1.00  0.30           O  
HETATM  110  O   HOH T 109      -0.414   5.891  -6.212  1.00  0.30           O  
HETATM  111  O   HOH T 110      -1.699   7.436   3.651  1.00  0.30           O  
HETATM  112  O   HOH T 111      25.150  32.798  -4.019  1.00  0.30           O  
HETATM  113  O   HOH T 112     -22.304  24.422   7.245  1.00  0.30           O  
HETATM  114  O   HOH T 113      23.447  22.017  -7.631  1.00  0.30           O  
HETATM  115  O   HOH T 114      17.647  -6.811  21.825  1.00  0.31           O  
HETATM  116  O   HOH T 115      17.092   9.217  19.542  1.00  0.31           O  
HETATM  117  O   HOH T 116       2.889   8.173  31.614  1.00  0.31           O  
HETATM  118  O   HOH T 117     -13.975   9.108  -0.451  1.00  0.31           O  
HETATM  119  O   HOH T 118      10.417  15.030  -0.118  1.00  0.31           O  
HETATM  120  O   HOH T 119       9.819  27.609  -8.239  1.00  0.31           O  
HETATM  121  O   HOH T 120      31.668   2.471  12.974  1.00  0.31           O  
HETATM  122  O   HOH T 121     -16.179  27.018  -1.909  1.00  0.31           O  
HETATM  123  O   HOH T 122     -15.436  22.444  16.619  1.00  0.31           O  
HETATM  124  O   HOH T 123       1.597   4.927 -12.321  1.00  0.31           O  
HETATM  125  O   HOH T 124      10.331  13.555   3.267  1.00  0.31           O  
HETATM  126  O   HOH T 125      11.767  25.672  -7.461  1.00  0.31           O  
HETATM  127  O   HOH T 126      13.528  23.481  11.626  1.00  0.31           O  
HETATM  128  O   HOH T 127      -7.140  34.361  41.155  1.00  0.31           O  
HETATM  129  O   HOH T 128      13.300  24.902  27.007  1.00  0.31           O  
HETATM  130  O   HOH T 129      11.364  21.039  35.029  1.00  0.31           O  
HETATM  131  O   HOH T 130       2.193  21.505  19.797  1.00  0.31           O  
HETATM  132  O   HOH T 131      13.513  27.081  -9.215  1.00  0.31           O  
HETATM  133  O   HOH T 132     -12.096  10.569  32.781  1.00  0.31           O  
HETATM  134  O   HOH T 133      17.935  26.609  17.830  1.00  0.32           O  
HETATM  135  O   HOH T 134      29.963  13.933  19.716  1.00  0.32           O  
HETATM  136  O   HOH T 135       1.563  -0.420  17.157  1.00  0.32           O  
HETATM  137  O   HOH T 136     -13.536   5.265   2.527  1.00  0.32           O  
HETATM  138  O   HOH T 137      10.008  13.554  -2.416  1.00  0.32           O  
HETATM  139  O   HOH T 138       2.319   9.716   0.059  1.00  0.32           O  
HETATM  140  O   HOH T 139       0.872   1.753  15.712  1.00  0.32           O  
HETATM  141  O   HOH T 140      -6.941   9.479   7.506  1.00  0.32           O  
HETATM  142  O   HOH T 141      32.008   5.261   4.178  1.00  0.32           O  
HETATM  143  O   HOH T 142      -0.376  -4.100   5.422  1.00  0.32           O  
HETATM  144  O   HOH T 143      17.781  -9.526  30.211  1.00  0.32           O  
HETATM  145  O   HOH T 144      17.903  31.041  -7.283  1.00  0.32           O  
HETATM  146  O   HOH T 145     -21.003  17.067  18.010  1.00  0.32           O  
HETATM  147  O   HOH T 146     -14.793  19.606  -7.027  1.00  0.32           O  
HETATM  148  O   HOH T 147      28.259  -3.292  10.745  1.00  0.33           O  
HETATM  149  O   HOH T 148      -9.274   7.500  33.028  1.00  0.33           O  
HETATM  150  O   HOH T 149       8.611  12.454   5.183  1.00  0.33           O  
HETATM  151  O   HOH T 150     -22.524  19.294  -0.799  1.00  0.33           O  
HETATM  152  O   HOH T 151      22.992  14.433  -8.846  1.00  0.33           O  
HETATM  153  O   HOH T 152      -7.080   7.238 -18.255  1.00  0.33           O  
HETATM  154  O   HOH T 153      23.570   1.998  21.188  1.00  0.33           O  
HETATM  155  O   HOH T 154      -8.083  13.160  16.337  1.00  0.33           O  
HETATM  156  O   HOH T 155     -29.374  17.543   8.196  1.00  0.33           O  
HETATM  157  O   HOH T 156      36.041  23.139  11.021  1.00  0.33           O  
HETATM  158  O   HOH T 157      -9.343  15.045  12.878  1.00  0.33           O  
HETATM  159  O   HOH T 158      15.386  15.093  38.024  1.00  0.33           O  
HETATM  160  O   HOH T 159      -3.041  36.198  16.302  1.00  0.34           O  
HETATM  161  O   HOH T 160      -3.616  37.817  14.064  1.00  0.34           O  
HETATM  162  O   HOH T 161      10.109   8.050 -12.806  1.00  0.34           O  
HETATM  163  O   HOH T 162       1.821  10.699  13.614  1.00  0.34           O  
HETATM  164  O   HOH T 163      13.125  13.469   2.990  1.00  0.34           O  
HETATM  165  O   HOH T 164      -1.393  26.938   4.146  1.00  0.34           O  
HETATM  166  O   HOH T 165      -3.777  16.952 -16.334  1.00  0.34           O  
HETATM  167  O   HOH T 166       5.282   3.513  10.846  1.00  0.34           O  
HETATM  168  O   HOH T 167     -15.167   6.995   9.021  1.00  0.34           O  
HETATM  169  O   HOH T 168      -4.845  18.233   3.549  1.00  0.34           O  
HETATM  170  O   HOH T 169      -1.959  36.937  29.315  1.00  0.34           O  
HETATM  171  O   HOH T 170     -10.602   8.786  -2.087  1.00  0.34           O  
HETATM  172  O   HOH T 171     -15.224  32.241   5.625  1.00  0.34           O  
HETATM  173  O   HOH T 172      30.943  18.644   8.344  1.00  0.34           O  
HETATM  174  O   HOH T 173      15.415  23.301  26.117  1.00  0.34           O  
HETATM  175  O   HOH T 174     -18.316  27.425   0.021  1.00  0.34           O  
HETATM  176  O   HOH T 175      19.865  21.767  21.540  1.00  0.34           O  
HETATM  177  O   HOH T 176      11.559  10.060 -14.104  1.00  0.34           O  
HETATM  178  O   HOH T 177      20.190   0.478   1.702  1.00  0.34           O  
HETATM  179  O   HOH T 178      19.426   8.153  23.779  1.00  0.34           O  
HETATM  180  O   HOH T 179     -11.708  32.411  29.468  1.00  0.34           O  
HETATM  181  O   HOH T 180      20.263  23.654  23.469  1.00  0.34           O  
HETATM  182  O   HOH T 181     -20.640   8.021   1.497  1.00  0.34           O  
HETATM  183  O   HOH T 182       2.031  16.610   2.340  1.00  0.34           O  
HETATM  184  O   HOH T 183      10.770   1.793  16.608  1.00  0.35           O  
HETATM  185  O   HOH T 184     -18.879  15.985  16.748  1.00  0.35           O  
HETATM  186  O   HOH T 185      -0.204   0.941  37.461  1.00  0.35           O  
HETATM  187  O   HOH T 186      -8.104  36.183  27.776  1.00  0.35           O  
HETATM  188  O   HOH T 187     -13.283  18.871  -4.839  1.00  0.35           O  
HETATM  189  O   HOH T 188      12.003  31.569   6.421  1.00  0.35           O  
HETATM  190  O   HOH T 189      29.523  25.423  -2.212  1.00  0.35           O  
HETATM  191  O   HOH T 190      22.495   6.381  -9.862  1.00  0.35           O  
HETATM  192  O   HOH T 191       8.171  19.211  21.347  1.00  0.35           O  
HETATM  193  O   HOH T 192      10.765  15.952   4.415  1.00  0.35           O  
HETATM  194  O   HOH T 193      -9.262  23.886   9.486  1.00  0.35           O  
HETATM  195  O   HOH T 194       0.894  34.072  12.936  1.00  0.36           O  
HETATM  196  O   HOH T 195       7.217  -3.994  29.786  1.00  0.36           O  
HETATM  197  O   HOH T 196      10.128  23.252  39.587  1.00  0.36           O  
HETATM  198  O   HOH T 197      -5.250  -2.851  37.830  1.00  0.36           O  
HETATM  199  O   HOH T 198       9.422  -5.279  28.751  1.00  0.36           O  
HETATM  200  O   HOH T 199       7.439   7.806  17.441  1.00  0.36           O  
HETATM  201  O   HOH T 200       4.148   4.299 -11.379  1.00  0.36           O  
HETATM  202  O   HOH T 201      25.644  -2.893  11.858  1.00  0.36           O  
HETATM  203  O   HOH T 202       8.820  -7.260  26.874  1.00  0.36           O  
HETATM  204  O   HOH T 203       7.195  -2.480  33.385  1.00  0.36           O  
HETATM  205  O   HOH T 204      -0.705  13.102 -15.316  1.00  0.36           O  
HETATM  206  O   HOH T 205      13.873  34.991 -10.824  1.00  0.36           O  
HETATM  207  O   HOH T 206      -8.316  17.325 -10.792  1.00  0.36           O  
HETATM  208  O   HOH T 207     -21.026  10.786  -9.938  1.00  0.36           O  
HETATM  209  O   HOH T 208      23.464  26.218  -4.587  1.00  0.36           O  
HETATM  210  O   HOH T 209      27.291  13.411  19.263  1.00  0.36           O  
HETATM  211  O   HOH T 210      -8.150  15.907  16.876  1.00  0.37           O  
HETATM  212  O   HOH T 211     -10.741   4.850  17.742  1.00  0.37           O  
HETATM  213  O   HOH T 212      33.306  18.076   9.784  1.00  0.37           O  
HETATM  214  O   HOH T 213     -11.105  38.944  33.156  1.00  0.37           O  
HETATM  215  O   HOH T 214     -20.290  16.115   0.632  1.00  0.37           O  
HETATM  216  O   HOH T 215       9.770  30.300  10.536  1.00  0.37           O  
HETATM  217  O   HOH T 216      -1.718  32.451  38.890  1.00  0.37           O  
HETATM  218  O   HOH T 217      -3.871  32.685  40.740  1.00  0.37           O  
HETATM  219  O   HOH T 218       9.499  -2.920  22.471  1.00  0.37           O  
HETATM  220  O   HOH T 219     -10.718  29.950  17.512  1.00  0.37           O  
HETATM  221  O   HOH T 220       3.321   8.006   3.579  1.00  0.37           O  
HETATM  222  O   HOH T 221       6.667  31.486  -9.921  1.00  0.37           O  
HETATM  223  O   HOH T 222      -6.177  25.293  -7.270  1.00  0.37           O  
HETATM  224  O   HOH T 223      14.116  -6.678  19.226  1.00  0.37           O  
HETATM  225  O   HOH T 224       8.371  28.888  16.421  1.00  0.37           O  
HETATM  226  O   HOH T 225      -7.674  23.433  11.838  1.00  0.37           O  
HETATM  227  O   HOH T 226      -9.822  18.315  49.474  1.00  0.37           O  
HETATM  228  O   HOH T 227      25.870  -2.345   6.558  1.00  0.37           O  
HETATM  229  O   HOH T 228       8.405  21.133  40.267  1.00  0.37           O  
HETATM  230  O   HOH T 229      -0.117   8.839  -0.725  1.00  0.37           O  
HETATM  231  O   HOH T 230      17.637   9.556  22.251  1.00  0.38           O  
HETATM  232  O   HOH T 231     -12.513  29.072  34.077  1.00  0.38           O  
HETATM  233  O   HOH T 232      -7.882  38.761  26.900  1.00  0.38           O  
HETATM  234  O   HOH T 233      10.816  -7.137  30.280  1.00  0.38           O  
HETATM  235  O   HOH T 234      -8.724  25.515  48.200  1.00  0.38           O  
HETATM  236  O   HOH T 235      23.398  12.889  -6.705  1.00  0.38           O  
HETATM  237  O   HOH T 236     -21.959  19.912   5.976  1.00  0.38           O  
HETATM  238  O   HOH T 237     -10.791   1.138  38.148  1.00  0.38           O  
HETATM  239  O   HOH T 238      26.727   4.103  23.570  1.00  0.38           O  
HETATM  240  O   HOH T 239       4.446  33.838  -7.885  1.00  0.38           O  
HETATM  241  O   HOH T 240      28.466  20.106  -8.103  1.00  0.38           O  
HETATM  242  O   HOH T 241       4.988  21.415  19.858  1.00  0.38           O  
HETATM  243  O   HOH T 242     -26.073   7.005   7.177  1.00  0.38           O  
HETATM  244  O   HOH T 243     -18.355  18.440  -5.742  1.00  0.38           O  
HETATM  245  O   HOH T 244      -1.613  39.222  27.990  1.00  0.38           O  
HETATM  246  O   HOH T 245      -4.592  41.075  27.002  1.00  0.39           O  
HETATM  247  O   HOH T 246      11.067  29.632  12.785  1.00  0.39           O  
HETATM  248  O   HOH T 247      11.934  25.178  22.651  1.00  0.39           O  
HETATM  249  O   HOH T 248     -25.830   9.855   2.703  1.00  0.39           O  
HETATM  250  O   HOH T 249      11.884  29.387  -8.720  1.00  0.39           O  
HETATM  251  O   HOH T 250      20.625  24.642  -6.428  1.00  0.39           O  
HETATM  252  O   HOH T 251      -5.449   0.845   8.334  1.00  0.39           O  
HETATM  253  O   HOH T 252       4.165  -1.155  16.362  1.00  0.39           O  
HETATM  254  O   HOH T 253      20.147  25.520  18.927  1.00  0.39           O  
HETATM  255  O   HOH T 254      -6.522   4.801  17.828  1.00  0.39           O  
HETATM  256  O   HOH T 255      22.045  25.526  -8.708  1.00  0.39           O  
HETATM  257  O   HOH T 256     -20.429  17.642  -1.732  1.00  0.39           O  
HETATM  258  O   HOH T 257      12.102  23.333 -13.702  1.00  0.39           O  
HETATM  259  O   HOH T 258     -12.231  28.809  43.571  1.00  0.39           O  
HETATM  260  O   HOH T 259      -3.842   3.337  -5.625  1.00  0.39           O  
HETATM  261  O   HOH T 260     -13.025  31.382  44.186  1.00  0.39           O  
HETATM  262  O   HOH T 261      -0.203  15.274   4.971  1.00  0.39           O  
HETATM  263  O   HOH T 262      11.165  -4.888  21.418  1.00  0.39           O  
HETATM  264  O   HOH T 263      23.627  13.741  20.715  1.00  0.39           O  
HETATM  265  O   HOH T 264      -9.084  20.159  -7.688  1.00  0.39           O  
HETATM  266  O   HOH T 265     -15.258   8.174  37.162  1.00  0.40           O  
HETATM  267  O   HOH T 266     -15.631  15.641  35.833  1.00  0.40           O  
HETATM  268  O   HOH T 267       3.008  26.775  46.511  1.00  0.40           O  
HETATM  269  O   HOH T 268      10.256  -8.535  22.306  1.00  0.40           O  
HETATM  270  O   HOH T 269      -6.270  10.150  46.129  1.00  0.40           O  
HETATM  271  O   HOH T 270      27.152   7.075  -8.090  1.00  0.40           O  
HETATM  272  O   HOH T 271       4.302  36.129  14.582  1.00  0.40           O  
HETATM  273  O   HOH T 272       8.880  33.103 -10.740  1.00  0.40           O  
HETATM  274  O   HOH T 273      -7.491  25.960  50.652  1.00  0.40           O  
HETATM  275  O   HOH T 274       7.850  20.708  23.599  1.00  0.40           O  
HETATM  276  O   HOH T 275      -6.318  -1.159  33.888  1.00  0.40           O  
HETATM  277  O   HOH T 276      22.356  23.637  -4.473  1.00  0.40           O  
HETATM  278  O   HOH T 277      26.002   6.884  -5.632  1.00  0.40           O  
HETATM  279  O   HOH T 278      29.935  17.727  21.051  1.00  0.40           O  
HETATM  280  O   HOH T 279      -4.997   2.766 -14.980  1.00  0.40           O  
HETATM  281  O   HOH T 280      13.886  30.579  15.422  1.00  0.40           O  
HETATM  282  O   HOH T 281      -0.538   7.357  39.197  1.00  0.40           O  
HETATM  283  O   HOH T 282     -11.535  38.410  30.348  1.00  0.40           O  
HETATM  284  O   HOH T 283      -4.218  22.153  15.082  1.00  0.40           O  
HETATM  285  O   HOH T 284      27.879   6.642  -3.772  1.00  0.40           O  
HETATM  286  O   HOH T 285      -6.026   2.662   6.178  1.00  0.40           O  
HETATM  287  O   HOH T 286      28.623  26.816  16.856  1.00  0.40           O  
HETATM  288  O   HOH T 287      -7.522   6.686   4.870  1.00  0.41           O  
HETATM  289  O   HOH T 288      -3.198  33.359   9.806  1.00  0.41           O  
HETATM  290  O   HOH T 289      14.594  31.667   5.283  1.00  0.41           O  
HETATM  291  O   HOH T 290      -7.001  12.091 -19.744  1.00  0.41           O  
HETATM  292  O   HOH T 291     -20.580  12.300  22.567  1.00  0.41           O  
HETATM  293  O   HOH T 292     -17.569   6.413   8.044  1.00  0.41           O  
HETATM  294  O   HOH T 293      25.121  12.635 -12.877  1.00  0.41           O  
HETATM  295  O   HOH T 294     -17.049  25.872  -4.425  1.00  0.41           O  
HETATM  296  O   HOH T 295      -7.477   2.231   9.697  1.00  0.41           O  
HETATM  297  O   HOH T 296      12.635  15.179  37.890  1.00  0.41           O  
HETATM  298  O   HOH T 297       1.380  28.882  45.617  1.00  0.41           O  
HETATM  299  O   HOH T 298      -4.007  31.120   8.195  1.00  0.41           O  
HETATM  300  O   HOH T 299      10.739  -7.128  24.720  1.00  0.41           O  
HETATM  301  O   HOH T 300      28.606  23.306  -0.689  1.00  0.41           O  
HETATM  302  O   HOH T 301     -12.023   3.976   9.830  1.00  0.41           O  
HETATM  303  O   HOH T 302      -1.994  16.012   6.925  1.00  0.41           O  
HETATM  304  O   HOH T 303       1.498  32.713  36.525  1.00  0.41           O  
HETATM  305  O   HOH T 304      11.609  -7.345  20.215  1.00  0.41           O  
HETATM  306  O   HOH T 305     -29.190  14.869   1.353  1.00  0.41           O  
HETATM  307  O   HOH T 306      10.536  34.533   1.507  1.00  0.41           O  
HETATM  308  O   HOH T 307       9.036  22.857  37.104  1.00  0.41           O  
HETATM  309  O   HOH T 308      29.056  14.558 -10.260  1.00  0.42           O  
HETATM  310  O   HOH T 309      13.913   1.313   2.125  1.00  0.42           O  
HETATM  311  O   HOH T 310     -19.322   9.101  -0.723  1.00  0.42           O  
HETATM  312  O   HOH T 311       7.258   3.404   8.949  1.00  0.42           O  
HETATM  313  O   HOH T 312       2.444   7.494 -12.413  1.00  0.42           O  
HETATM  314  O   HOH T 313      32.417   1.456  15.328  1.00  0.42           O  
HETATM  315  O   HOH T 314      -8.886  27.444  -3.554  1.00  0.42           O  
HETATM  316  O   HOH T 315      27.760  23.572  -3.340  1.00  0.42           O  
HETATM  317  O   HOH T 316      -2.301  37.025  11.740  1.00  0.42           O  
HETATM  318  O   HOH T 317      12.362  23.458  34.295  1.00  0.42           O  
HETATM  319  O   HOH T 318     -14.556  29.277  28.926  1.00  0.42           O  
HETATM  320  O   HOH T 319     -15.885  26.988  17.670  1.00  0.42           O  
HETATM  321  O   HOH T 320      11.074  31.395 -10.423  1.00  0.42           O  
HETATM  322  O   HOH T 321      -4.769  -2.261  12.848  1.00  0.42           O  
HETATM  323  O   HOH T 322       5.455   5.552   8.983  1.00  0.42           O  
HETATM  324  O   HOH T 323      36.250  25.586   9.853  1.00  0.42           O  
HETATM  325  O   HOH T 324      -0.698  33.159  27.259  1.00  0.42           O  
HETATM  326  O   HOH T 325     -10.740  35.215  27.449  1.00  0.42           O  
HETATM  327  O   HOH T 326     -11.709   5.601  42.380  1.00  0.42           O  
HETATM  328  O   HOH T 327      14.001  28.327  17.083  1.00  0.42           O  
HETATM  329  O   HOH T 328       3.523  13.949   8.890  1.00  0.42           O  
HETATM  330  O   HOH T 329      26.854  21.159  -4.387  1.00  0.43           O  
HETATM  331  O   HOH T 330      -2.057  33.627  42.694  1.00  0.43           O  
HETATM  332  O   HOH T 331      -6.561   1.287  40.393  1.00  0.43           O  
HETATM  333  O   HOH T 332      22.814  13.796 -13.680  1.00  0.43           O  
HETATM  334  O   HOH T 333      23.366  21.063  25.810  1.00  0.43           O  
HETATM  335  O   HOH T 334      -7.259  38.420  22.827  1.00  0.43           O  
HETATM  336  O   HOH T 335      -3.317  34.752  38.897  1.00  0.43           O  
HETATM  337  O   HOH T 336      13.798  26.379  20.964  1.00  0.43           O  
HETATM  338  O   HOH T 337      -5.141  27.828  -6.623  1.00  0.43           O  
HETATM  339  O   HOH T 338     -12.634  30.238  30.685  1.00  0.43           O  
HETATM  340  O   HOH T 339     -14.673  14.720  43.740  1.00  0.43           O  
HETATM  341  O   HOH T 340       4.717  12.185 -15.297  1.00  0.43           O  
HETATM  342  O   HOH T 341     -10.270   7.057  -4.284  1.00  0.43           O  
HETATM  343  O   HOH T 342     -28.169   8.404   2.545  1.00  0.43           O  
HETATM  344  O   HOH T 343       1.968  12.424 -15.514  1.00  0.43           O  
HETATM  345  O   HOH T 344      -8.189  25.800  45.439  1.00  0.43           O  
HETATM  346  O   HOH T 345     -10.506   5.294   6.842  1.00  0.43           O  
HETATM  347  O   HOH T 346       3.340   4.234  -4.727  1.00  0.43           O  
HETATM  348  O   HOH T 347     -17.182  31.033   4.146  1.00  0.43           O  
HETATM  349  O   HOH T 348      25.979  10.370 -14.278  1.00  0.43           O  
HETATM  350  O   HOH T 349      -8.835   2.605  41.320  1.00  0.43           O  
HETATM  351  O   HOH T 350     -13.618   8.848  21.386  1.00  0.43           O  
HETATM  352  O   HOH T 351       5.434  35.811  17.127  1.00  0.43           O  
HETATM  353  O   HOH T 352      -9.623   3.467   8.619  1.00  0.43           O  
HETATM  354  O   HOH T 353      17.002  39.064   2.495  1.00  0.43           O  
HETATM  355  O   HOH T 354      29.323  24.500   1.695  1.00  0.43           O  
HETATM  356  O   HOH T 355     -14.446  17.965  -9.105  1.00  0.43           O  
HETATM  357  O   HOH T 356      12.491  32.477   3.822  1.00  0.43           O  
HETATM  358  O   HOH T 357      -3.681   2.368  16.982  1.00  0.43           O  
HETATM  359  O   HOH T 358     -17.859  27.314  15.947  1.00  0.43           O  
HETATM  360  O   HOH T 359     -27.631   5.695   2.610  1.00  0.43           O  
HETATM  361  O   HOH T 360      -3.232  -3.355  40.687  1.00  0.43           O  
HETATM  362  O   HOH T 361       2.355  36.385  25.708  1.00  0.43           O  
HETATM  363  O   HOH T 362       0.767   2.340 -13.117  1.00  0.43           O  
HETATM  364  O   HOH T 363     -11.580   4.709 -12.841  1.00  0.43           O  
HETATM  365  O   HOH T 364      -8.946  37.241  37.985  1.00  0.44           O  
HETATM  366  O   HOH T 365      30.730  19.247  -6.780  1.00  0.44           O  
HETATM  367  O   HOH T 366      -9.239  17.292  -8.131  1.00  0.44           O  
HETATM  368  O   HOH T 367      11.480  33.783 -11.689  1.00  0.44           O  
HETATM  369  O   HOH T 368      -8.026  23.424  46.688  1.00  0.44           O  
HETATM  370  O   HOH T 369      33.741  16.054   7.968  1.00  0.44           O  
HETATM  371  O   HOH T 370      21.335  13.780  33.890  1.00  0.44           O  
HETATM  372  O   HOH T 371     -17.861  25.082  35.048  1.00  0.44           O  
HETATM  373  O   HOH T 372      37.423  23.395  15.642  1.00  0.44           O  
HETATM  374  O   HOH T 373      -3.535  19.259 -14.945  1.00  0.44           O  
HETATM  375  O   HOH T 374      -8.049  31.491   4.361  1.00  0.44           O  
HETATM  376  O   HOH T 375       9.195  -1.527  -0.102  1.00  0.44           O  
HETATM  377  O   HOH T 376      -6.540  37.126  34.788  1.00  0.44           O  
HETATM  378  O   HOH T 377      25.978  -3.425   9.129  1.00  0.44           O  
HETATM  379  O   HOH T 378      -0.743  38.303  36.423  1.00  0.44           O  
HETATM  380  O   HOH T 379      38.050  21.603  12.297  1.00  0.44           O  
HETATM  381  O   HOH T 380     -17.100  18.560  -8.226  1.00  0.44           O  
HETATM  382  O   HOH T 381      -5.089   2.458  42.436  1.00  0.44           O  
HETATM  383  O   HOH T 382     -20.397  26.656  17.132  1.00  0.44           O  
HETATM  384  O   HOH T 383     -14.537  18.613  42.847  1.00  0.44           O  
HETATM  385  O   HOH T 384      -0.178   1.574  -3.481  1.00  0.44           O  
HETATM  386  O   HOH T 385      -9.666  22.834  -8.363  1.00  0.44           O  
HETATM  387  O   HOH T 386      -1.728   0.783  16.005  1.00  0.44           O  
HETATM  388  O   HOH T 387     -11.056   4.513  15.021  1.00  0.44           O  
HETATM  389  O   HOH T 388      -1.263  33.224  36.242  1.00  0.44           O  
HETATM  390  O   HOH T 389     -28.562  11.549   8.715  1.00  0.45           O  
HETATM  391  O   HOH T 390       1.749  22.372  51.613  1.00  0.45           O  
HETATM  392  O   HOH T 391     -15.348   5.820   6.516  1.00  0.45           O  
HETATM  393  O   HOH T 392      -0.665  38.863  46.045  1.00  0.45           O  
HETATM  394  O   HOH T 393       2.546  -0.005  14.525  1.00  0.45           O  
HETATM  395  O   HOH T 394      -6.980   0.777  11.959  1.00  0.45           O  
HETATM  396  O   HOH T 395      -5.528   7.160  18.921  1.00  0.45           O  
HETATM  397  O   HOH T 396      -6.219   3.310 -17.346  1.00  0.45           O  
HETATM  398  O   HOH T 397      22.290  26.965  19.706  1.00  0.45           O  
HETATM  399  O   HOH T 398      -1.367  31.654  48.871  1.00  0.45           O  
HETATM  400  O   HOH T 399      -6.957  12.278  47.841  1.00  0.45           O  
HETATM  401  O   HOH T 400      -2.940   1.377  28.946  1.00  0.45           O  
HETATM  402  O   HOH T 401     -17.089  23.952  -6.452  1.00  0.45           O  
HETATM  403  O   HOH T 402      15.770  35.019  -8.662  1.00  0.45           O  
HETATM  404  O   HOH T 403      -8.135   1.891  14.263  1.00  0.45           O  
HETATM  405  O   HOH T 404      20.965  16.364  32.803  1.00  0.45           O  
HETATM  406  O   HOH T 405       9.886  29.134  30.340  1.00  0.45           O  
HETATM  407  O   HOH T 406       7.972  27.458 -10.429  1.00  0.45           O  
HETATM  408  O   HOH T 407       9.715   5.757  11.040  1.00  0.45           O  
HETATM  409  O   HOH T 408      -7.641  35.842  22.290  1.00  0.45           O  
HETATM  410  O   HOH T 409      -1.035   3.202  -5.634  1.00  0.45           O  
HETATM  411  O   HOH T 410     -13.696  30.930  35.725  1.00  0.45           O  
HETATM  412  O   HOH T 411      -6.536  -2.699 -11.003  1.00  0.45           O  
HETATM  413  O   HOH T 412      20.739  30.164  -6.911  1.00  0.45           O  
HETATM  414  O   HOH T 413      19.845  13.592  12.859  1.00  0.45           O  
HETATM  415  O   HOH T 414       2.197  19.909  50.328  1.00  0.45           O  
HETATM  416  O   HOH T 415     -11.089   3.891  12.321  1.00  0.45           O  
HETATM  417  O   HOH T 416      15.380  26.506  18.671  1.00  0.45           O  
HETATM  418  O   HOH T 417     -19.008  10.625 -11.799  1.00  0.45           O  
HETATM  419  O   HOH T 418     -12.847   6.087  -3.954  1.00  0.46           O  
HETATM  420  O   HOH T 419       9.572  -4.322  12.549  1.00  0.46           O  
HETATM  421  O   HOH T 420     -16.255   9.605  39.435  1.00  0.46           O  
HETATM  422  O   HOH T 421     -17.339  29.040   2.275  1.00  0.46           O  
HETATM  423  O   HOH T 422     -10.459  13.395  14.912  1.00  0.46           O  
HETATM  424  O   HOH T 423       6.671   8.821  -1.419  1.00  0.46           O  
HETATM  425  O   HOH T 424     -10.809   8.701  31.072  1.00  0.46           O  
HETATM  426  O   HOH T 425      13.728  32.185 -10.903  1.00  0.46           O  
HETATM  427  O   HOH T 426      -5.146  37.049  21.476  1.00  0.46           O  
HETATM  428  O   HOH T 427     -10.395   0.297  40.854  1.00  0.46           O  
HETATM  429  O   HOH T 428      13.107  22.684 -16.173  1.00  0.46           O  
HETATM  430  O   HOH T 429      27.137  20.412 -10.516  1.00  0.46           O  
HETATM  431  O   HOH T 430      -9.843  23.478  44.802  1.00  0.46           O  
HETATM  432  O   HOH T 431       2.302   1.616  -4.737  1.00  0.46           O  
HETATM  433  O   HOH T 432      26.563  27.698 -11.299  1.00  0.46           O  
HETATM  434  O   HOH T 433       5.087  22.352 -14.087  1.00  0.46           O  
HETATM  435  O   HOH T 434       6.528  34.283  -9.732  1.00  0.46           O  
HETATM  436  O   HOH T 435     -18.984  15.926  19.461  1.00  0.46           O  
HETATM  437  O   HOH T 436       2.456  14.900  42.111  1.00  0.46           O  
HETATM  438  O   HOH T 437     -12.624  16.552 -17.705  1.00  0.46           O  
HETATM  439  O   HOH T 438      -1.522  33.386  45.412  1.00  0.46           O  
HETATM  440  O   HOH T 439      12.703   7.673 -12.096  1.00  0.46           O  
HETATM  441  O   HOH T 440      -2.415   3.232  -3.228  1.00  0.46           O  
HETATM  442  O   HOH T 441     -12.218  32.629  34.071  1.00  0.46           O  
HETATM  443  O   HOH T 442       8.485  30.931  12.839  1.00  0.46           O  
HETATM  444  O   HOH T 443      22.713  23.358  27.337  1.00  0.46           O  
HETATM  445  O   HOH T 444       3.922  12.790  41.474  1.00  0.46           O  
HETATM  446  O   HOH T 445     -20.080  27.310  14.526  1.00  0.46           O  
HETATM  447  O   HOH T 446       7.388  14.982   7.310  1.00  0.46           O  
HETATM  448  O   HOH T 447      18.241  17.612  23.280  1.00  0.46           O  
HETATM  449  O   HOH T 448       0.768  34.033  10.102  1.00  0.47           O  
HETATM  450  O   HOH T 449      19.078  24.403  21.154  1.00  0.47           O  
HETATM  451  O   HOH T 450      30.005  27.916  12.846  1.00  0.47           O  
HETATM  452  O   HOH T 451      -8.041  36.588  24.965  1.00  0.47           O  
HETATM  453  O   HOH T 452     -11.313   2.795  40.073  1.00  0.47           O  
HETATM  454  O   HOH T 453       0.399  38.531  26.148  1.00  0.47           O  
HETATM  455  O   HOH T 454       0.504  28.921   4.019  1.00  0.47           O  
HETATM  456  O   HOH T 455       2.932  12.745  30.931  1.00  0.47           O  
HETATM  457  O   HOH T 456      31.410  26.797  10.595  1.00  0.47           O  
HETATM  458  O   HOH T 457     -16.055  16.431  42.006  1.00  0.47           O  
HETATM  459  O   HOH T 458       7.332   8.825  -7.059  1.00  0.47           O  
HETATM  460  O   HOH T 459      13.895  24.757  24.403  1.00  0.47           O  
HETATM  461  O   HOH T 460      -6.695  25.737  13.224  1.00  0.47           O  
HETATM  462  O   HOH T 461      27.911  17.870  -9.618  1.00  0.47           O  
HETATM  463  O   HOH T 462     -17.738  28.445  13.575  1.00  0.47           O  
HETATM  464  O   HOH T 463      -8.731  19.537 -18.715  1.00  0.47           O  
HETATM  465  O   HOH T 464       8.894  13.040   9.638  1.00  0.47           O  
HETATM  466  O   HOH T 465      -8.715   3.239   6.096  1.00  0.47           O  
HETATM  467  O   HOH T 466       9.228  -1.467  31.843  1.00  0.47           O  
HETATM  468  O   HOH T 467      -3.426  31.655  46.791  1.00  0.47           O  
HETATM  469  O   HOH T 468       6.243  29.291 -11.455  1.00  0.47           O  
HETATM  470  O   HOH T 469      -9.201   4.753  32.772  1.00  0.47           O  
HETATM  471  O   HOH T 470      24.378   6.497  -7.706  1.00  0.47           O  
HETATM  472  O   HOH T 471      -2.396  30.660  51.162  1.00  0.47           O  
HETATM  473  O   HOH T 472       6.581  23.630  19.204  1.00  0.47           O  
HETATM  474  O   HOH T 473      10.641  -2.844  -1.987  1.00  0.47           O  
HETATM  475  O   HOH T 474       3.227   6.205  33.518  1.00  0.47           O  
HETATM  476  O   HOH T 475      27.316  11.190 -12.034  1.00  0.47           O  
HETATM  477  O   HOH T 476       5.191   1.976  -2.527  1.00  0.48           O  
HETATM  478  O   HOH T 477       0.080  10.422 -15.638  1.00  0.48           O  
HETATM  479  O   HOH T 478     -10.705  28.117  50.680  1.00  0.48           O  
HETATM  480  O   HOH T 479     -23.395   8.715   1.770  1.00  0.48           O  
HETATM  481  O   HOH T 480      30.070  22.898   3.798  1.00  0.48           O  
HETATM  482  O   HOH T 481      30.847   2.730   4.211  1.00  0.48           O  
HETATM  483  O   HOH T 482       8.232  32.580  37.294  1.00  0.48           O  
HETATM  484  O   HOH T 483     -26.896  13.633   9.608  1.00  0.48           O  
HETATM  485  O   HOH T 484      -8.144   9.632 -19.176  1.00  0.48           O  
HETATM  486  O   HOH T 485      -4.681  -0.422  10.768  1.00  0.48           O  
HETATM  487  O   HOH T 486     -12.210  17.063 -20.394  1.00  0.48           O  
HETATM  488  O   HOH T 487      -5.393   2.547  19.096  1.00  0.48           O  
HETATM  489  O   HOH T 488      -3.927  32.199  49.551  1.00  0.48           O  
HETATM  490  O   HOH T 489      -6.208  37.482  37.560  1.00  0.48           O  
HETATM  491  O   HOH T 490      25.137  23.095  26.024  1.00  0.48           O  
HETATM  492  O   HOH T 491      -3.206  35.517  44.383  1.00  0.48           O  
HETATM  493  O   HOH T 492      -1.454  35.615   9.484  1.00  0.48           O  
HETATM  494  O   HOH T 493      24.117  26.737  -7.203  1.00  0.48           O  
HETATM  495  O   HOH T 494     -12.164  19.768  49.391  1.00  0.48           O  
HETATM  496  O   HOH T 495      31.864   6.922  -3.131  1.00  0.48           O  
HETATM  497  O   HOH T 496      15.948  32.218  -9.051  1.00  0.48           O  
HETATM  498  O   HOH T 497      23.174  29.166  -8.353  1.00  0.48           O  
HETATM  499  O   HOH T 498     -27.956   7.036   4.987  1.00  0.48           O  
HETATM  500  O   HOH T 499      -4.660   1.002 -17.083  1.00  0.48           O  
HETATM  501  O   HOH T 500     -11.573  31.868  22.945  1.00  0.48           O  
HETATM  502  O   HOH T 501      12.079  18.821  36.490  1.00  0.48           O  
HETATM  503  O   HOH T 502      35.433  17.143   6.221  1.00  0.48           O  
HETATM  504  O   HOH T 503      -5.354  -0.318  42.330  1.00  0.48           O  
HETATM  505  O   HOH T 504       9.371  38.917  -8.253  1.00  0.49           O  
HETATM  506  O   HOH T 505       2.419  13.851  39.320  1.00  0.49           O  
HETATM  507  O   HOH T 506     -12.105  36.380  46.150  1.00  0.49           O  
HETATM  508  O   HOH T 507       7.517  21.823  21.007  1.00  0.49           O  
HETATM  509  O   HOH T 508      11.037  -4.450  24.167  1.00  0.49           O  
HETATM  510  O   HOH T 509      15.359  -8.156  21.262  1.00  0.49           O  
HETATM  511  O   HOH T 510      -0.681  30.754  46.375  1.00  0.49           O  
HETATM  512  O   HOH T 511      11.178  -0.492  18.107  1.00  0.49           O  
HETATM  513  O   HOH T 512      13.589  22.061  36.356  1.00  0.49           O  
HETATM  514  O   HOH T 513      24.804  22.727  -5.330  1.00  0.49           O  
HETATM  515  O   HOH T 514      25.768  12.135  21.250  1.00  0.49           O  
HETATM  516  O   HOH T 515     -17.172  23.529  24.414  1.00  0.49           O  
HETATM  517  O   HOH T 516       0.961   4.901  39.151  1.00  0.49           O  
HETATM  518  O   HOH T 517       7.567  36.665  -8.468  1.00  0.49           O  
HETATM  519  O   HOH T 518      -9.454  35.262  39.816  1.00  0.49           O  
HETATM  520  O   HOH T 519      13.243  -0.223   7.076  1.00  0.49           O  
HETATM  521  O   HOH T 520       2.542  21.446 -13.919  1.00  0.49           O  
HETATM  522  O   HOH T 521      24.380  26.707 -12.717  1.00  0.49           O  
HETATM  523  O   HOH T 522     -14.320   5.351  -0.071  1.00  0.49           O  
HETATM  524  O   HOH T 523       4.220  32.714 -10.495  1.00  0.49           O  
HETATM  525  O   HOH T 524      -9.775  28.101  44.782  1.00  0.49           O  
HETATM  526  O   HOH T 525      27.745  16.376 -12.023  1.00  0.49           O  
HETATM  527  O   HOH T 526     -12.523   6.953  -1.335  1.00  0.49           O  
HETATM  528  O   HOH T 527       0.635  34.907  35.015  1.00  0.49           O  
HETATM  529  O   HOH T 528     -12.466   3.281  37.681  1.00  0.49           O  
HETATM  530  O   HOH T 529      -0.020  34.983  32.364  1.00  0.49           O  
HETATM  531  O   HOH T 530     -13.357   6.819 -13.517  1.00  0.50           O  
HETATM  532  O   HOH T 531     -21.877   9.767  -0.174  1.00  0.50           O  
HETATM  533  O   HOH T 532      -1.505   0.822  26.715  1.00  0.50           O  
HETATM  534  O   HOH T 533     -12.969   5.727   7.935  1.00  0.50           O  
HETATM  535  O   HOH T 534      32.661  17.912   6.112  1.00  0.50           O  
HETATM  536  O   HOH T 535       7.886  21.183  42.940  1.00  0.50           O  
HETATM  537  O   HOH T 536      -0.402  -0.175 -13.094  1.00  0.50           O  
HETATM  538  O   HOH T 537     -12.288  33.830  31.695  1.00  0.50           O  
HETATM  539  O   HOH T 538      14.005  17.567  38.122  1.00  0.50           O  
HETATM  540  O   HOH T 539     -18.071  22.769  41.506  1.00  0.50           O  
HETATM  541  O   HOH T 540      -4.374  -0.223  16.398  1.00  0.50           O  
HETATM  542  O   HOH T 541     -12.854   7.209  35.975  1.00  0.50           O  
HETATM  543  O   HOH T 542     -26.633  12.308  12.067  1.00  0.50           O  
HETATM  544  O   HOH T 543      17.986  38.215   4.953  1.00  0.50           O  
HETATM  545  O   HOH T 544       8.899   0.811  36.450  1.00  0.50           O  
HETATM  546  O   HOH T 545      23.074  -3.505  29.300  1.00  0.50           O  
HETATM  547  O   HOH T 546      -9.160  11.172  49.143  1.00  0.50           O  
HETATM  548  O   HOH T 547      17.172   7.337 -10.060  1.00  0.50           O  
HETATM  549  O   HOH T 548      10.570  15.967 -17.155  1.00  0.50           O  
HETATM  550  O   HOH T 549      11.833   7.330 -14.769  1.00  0.50           O  
HETATM  551  O   HOH T 550      -3.307  35.119  35.986  1.00  0.50           O  
HETATM  552  O   HOH T 551      -6.878  22.793  -8.391  1.00  0.50           O  
HETATM  553  O   HOH T 552       1.900  36.718  33.263  1.00  0.50           O  
HETATM  554  O   HOH T 553      -7.147  -0.337  15.716  1.00  0.50           O  
HETATM  555  O   HOH T 554       8.950  31.559  30.802  1.00  0.51           O  
HETATM  556  O   HOH T 555      -2.688  -1.318  14.506  1.00  0.51           O  
HETATM  557  O   HOH T 556      -9.684  21.062  49.469  1.00  0.51           O  
HETATM  558  O   HOH T 557      -8.052   2.474  18.538  1.00  0.51           O  
HETATM  559  O   HOH T 558      -7.867  30.828   1.560  1.00  0.51           O  
HETATM  560  O   HOH T 559     -12.866   5.624   5.200  1.00  0.51           O  
HETATM  561  O   HOH T 560     -23.415   6.455   7.404  1.00  0.51           O  
HETATM  562  O   HOH T 561     -18.104   9.643  16.094  1.00  0.51           O  
HETATM  563  O   HOH T 562      24.107  27.016  -9.971  1.00  0.51           O  
HETATM  564  O   HOH T 563       5.645  33.939  37.485  1.00  0.51           O  
HETATM  565  O   HOH T 564      10.586  -2.679  10.464  1.00  0.51           O  
HETATM  566  O   HOH T 565      22.790  23.531  24.578  1.00  0.51           O  
HETATM  567  O   HOH T 566      -8.600   3.858  16.205  1.00  0.51           O  
HETATM  568  O   HOH T 567      -2.276  -2.560 -11.078  1.00  0.51           O  
HETATM  569  O   HOH T 568       5.872   3.236  -4.937  1.00  0.51           O  
HETATM  570  O   HOH T 569     -11.193  30.908  51.464  1.00  0.51           O  
HETATM  571  O   HOH T 570       1.283  15.277   7.545  1.00  0.51           O  
HETATM  572  O   HOH T 571     -29.193  13.030  11.066  1.00  0.51           O  
HETATM  573  O   HOH T 572      10.409  -0.186   7.358  1.00  0.51           O  
HETATM  574  O   HOH T 573      -9.638  19.504 -11.897  1.00  0.52           O  
HETATM  575  O   HOH T 574      20.376  27.500  -6.014  1.00  0.52           O  
HETATM  576  O   HOH T 575      32.087   6.393  -5.759  1.00  0.52           O  
HETATM  577  O   HOH T 576      -3.673   7.907   8.025  1.00  0.52           O  
HETATM  578  O   HOH T 577      -1.507   1.636 -14.661  1.00  0.52           O  
HETATM  579  O   HOH T 578     -17.023  18.608  40.524  1.00  0.52           O  
HETATM  580  O   HOH T 579      -6.520   4.895  -3.271  1.00  0.52           O  
HETATM  581  O   HOH T 580      17.262  30.068  -9.888  1.00  0.52           O  
HETATM  582  O   HOH T 581     -11.309  21.533  -6.603  1.00  0.52           O  
HETATM  583  O   HOH T 582      -6.324  -1.444  39.972  1.00  0.53           O  
HETATM  584  O   HOH T 583       4.867  10.318 -17.259  1.00  0.53           O  
HETATM  585  O   HOH T 584      -1.382   0.937  -7.271  1.00  0.53           O  
HETATM  586  O   HOH T 585      23.420  -0.941   0.270  1.00  0.53           O  
HETATM  587  O   HOH T 586      28.281  13.263  21.853  1.00  0.53           O  
HETATM  588  O   HOH T 587      11.225   5.625  -2.629  1.00  0.53           O  
HETATM  589  O   HOH T 588      -3.529   2.623   9.136  1.00  0.53           O  
HETATM  590  O   HOH T 589       1.582  33.163 -11.365  1.00  0.53           O  
HETATM  591  O   HOH T 590     -10.019   3.694  43.547  1.00  0.53           O  
HETATM  592  O   HOH T 591      20.508  24.411  26.085  1.00  0.53           O  
HETATM  593  O   HOH T 592       3.495  -0.063  -1.694  1.00  0.53           O  
HETATM  594  O   HOH T 593      -4.798  33.955  -4.244  1.00  0.53           O  
HETATM  595  O   HOH T 594     -17.984  18.498  -2.952  1.00  0.53           O  
HETATM  596  O   HOH T 595      -4.109  33.054  44.468  1.00  0.53           O  
HETATM  597  O   HOH T 596     -11.954   7.878  33.454  1.00  0.53           O  
HETATM  598  O   HOH T 597      -8.783  19.199  25.212  1.00  0.53           O  
HETATM  599  O   HOH T 598      -8.047  -2.853  32.662  1.00  0.53           O  
HETATM  600  O   HOH T 599       5.493   7.902  37.983  1.00  0.54           O  
HETATM  601  O   HOH T 600     -15.623  24.243  41.779  1.00  0.54           O  
HETATM  602  O   HOH T 601      26.552  15.407  -9.675  1.00  0.54           O  
HETATM  603  O   HOH T 602      16.432  14.041 -12.984  1.00  0.54           O  
HETATM  604  O   HOH T 603      -3.207  39.768  46.866  1.00  0.54           O  
HETATM  605  O   HOH T 604     -20.139   6.296   9.050  1.00  0.54           O  
HETATM  606  O   HOH T 605     -13.481   6.934  28.426  1.00  0.54           O  
HETATM  607  O   HOH T 606      -4.925  23.975  12.002  1.00  0.54           O  
HETATM  608  O   HOH T 607       3.559  38.444  16.142  1.00  0.54           O  
HETATM  609  O   HOH T 608       9.692  -1.672  35.778  1.00  0.54           O  
HETATM  610  O   HOH T 609     -11.381  18.839 -18.516  1.00  0.54           O  
HETATM  611  O   HOH T 610     -16.328  18.696 -10.897  1.00  0.54           O  
HETATM  612  O   HOH T 611       0.022  24.230  52.721  1.00  0.54           O  
HETATM  613  O   HOH T 612     -18.645  15.374  -1.510  1.00  0.54           O  
HETATM  614  O   HOH T 613      14.673  10.539 -14.241  1.00  0.54           O  
HETATM  615  O   HOH T 614      19.557  28.777  -9.860  1.00  0.54           O  
HETATM  616  O   HOH T 615      23.439  11.294 -14.645  1.00  0.54           O  
HETATM  617  O   HOH T 616      14.464   1.264  18.708  1.00  0.54           O  
HETATM  618  O   HOH T 617     -15.064  29.433  31.677  1.00  0.54           O  
HETATM  619  O   HOH T 618      15.442  23.534 -15.072  1.00  0.54           O  
HETATM  620  O   HOH T 619       6.028  34.026  15.083  1.00  0.54           O  
HETATM  621  O   HOH T 620      17.013  39.670  -0.144  1.00  0.54           O  
HETATM  622  O   HOH T 621      13.082  14.540 -14.652  1.00  0.54           O  
HETATM  623  O   HOH T 622      25.981   1.551  22.696  1.00  0.55           O  
HETATM  624  O   HOH T 623       2.573  34.871  -9.625  1.00  0.55           O  
HETATM  625  O   HOH T 624     -10.596   5.951  34.962  1.00  0.55           O  
HETATM  626  O   HOH T 625      22.388  -0.023   6.579  1.00  0.55           O  
HETATM  627  O   HOH T 626      19.512  -0.353  11.129  1.00  0.55           O  
HETATM  628  O   HOH T 627       9.936  30.832  17.755  1.00  0.55           O  
HETATM  629  O   HOH T 628      -7.178   5.017  26.675  1.00  0.55           O  
HETATM  630  O   HOH T 629     -15.230  13.769 -16.503  1.00  0.55           O  
HETATM  631  O   HOH T 630      26.732  31.587  10.631  1.00  0.55           O  
HETATM  632  O   HOH T 631       9.729  20.489  10.900  1.00  0.55           O  
HETATM  633  O   HOH T 632     -17.889  21.199  33.829  1.00  0.56           O  
HETATM  634  O   HOH T 633     -12.431  34.196  44.488  1.00  0.56           O  
HETATM  635  O   HOH T 634     -12.213   6.514  23.510  1.00  0.56           O  
HETATM  636  O   HOH T 635      17.776   8.364  35.767  1.00  0.56           O  
HETATM  637  O   HOH T 636      10.782  -2.560  20.038  1.00  0.56           O  
HETATM  638  O   HOH T 637      16.125  -0.815  31.315  1.00  0.56           O  
HETATM  639  O   HOH T 638     -14.565  16.091 -13.622  1.00  0.56           O  
HETATM  640  O   HOH T 639       9.706  13.006 -16.998  1.00  0.56           O  
HETATM  641  O   HOH T 640      16.998  11.347 -15.445  1.00  0.56           O  
HETATM  642  O   HOH T 641     -13.835   6.515  43.791  1.00  0.56           O  
HETATM  643  O   HOH T 642      26.025   4.888  -9.069  1.00  0.56           O  
HETATM  644  O   HOH T 643     -23.539  24.226   9.698  1.00  0.56           O  
HETATM  645  O   HOH T 644      33.905   0.788  13.100  1.00  0.56           O  
HETATM  646  O   HOH T 645      24.223  29.878   5.688  1.00  0.56           O  
HETATM  647  O   HOH T 646      10.756  24.975  37.352  1.00  0.56           O  
HETATM  648  O   HOH T 647     -10.604  29.195   0.028  1.00  0.56           O  
HETATM  649  O   HOH T 648      -8.366  -0.784 -11.147  1.00  0.56           O  
HETATM  650  O   HOH T 649     -22.016  14.477  23.478  1.00  0.56           O  
HETATM  651  O   HOH T 650      16.922   2.390  -4.770  1.00  0.56           O  
HETATM  652  O   HOH T 651      -4.906  18.779 -18.014  1.00  0.56           O  
HETATM  653  O   HOH T 652     -20.509  19.179  -4.173  1.00  0.56           O  
HETATM  654  O   HOH T 653      23.484  38.902  -2.468  1.00  0.56           O  
HETATM  655  O   HOH T 654      28.413  -3.284   7.848  1.00  0.57           O  
HETATM  656  O   HOH T 655     -16.260  18.019  35.018  1.00  0.57           O  
HETATM  657  O   HOH T 656      11.268   6.567  36.419  1.00  0.57           O  
HETATM  658  O   HOH T 657      -9.804  33.854  34.673  1.00  0.57           O  
HETATM  659  O   HOH T 658      26.699  33.394  10.555  1.00  0.57           O  
HETATM  660  O   HOH T 659      21.969  -6.836  26.865  1.00  0.57           O  
HETATM  661  O   HOH T 660       1.101  36.159   8.313  1.00  0.57           O  
HETATM  662  O   HOH T 661      -9.418   7.424 -19.757  1.00  0.57           O  
HETATM  663  O   HOH T 662      -7.999   4.888 -18.850  1.00  0.57           O  
HETATM  664  O   HOH T 663       0.039  34.818  24.840  1.00  0.57           O  
HETATM  665  O   HOH T 664      12.909  31.710  12.947  1.00  0.57           O  
HETATM  666  O   HOH T 665      25.175  30.477   4.228  1.00  0.58           O  
HETATM  667  O   HOH T 666     -11.252   4.039   3.316  1.00  0.58           O  
HETATM  668  O   HOH T 667       1.422   8.061 -14.878  1.00  0.59           O  
HETATM  669  O   HOH T 668      -8.368  38.048   1.282  1.00  0.60           O  
HETATM  670  O   HOH T 669      -9.652  26.192  -5.700  1.00  0.60           O  
HETATM  671  O   HOH T 670      -7.238   2.378   2.380  1.00  0.60           O  
TER     672      HOH T 670 
