# Supplementary material for: Accurate Prediction of Hydration Sites of Proteins Using Energy Model With Atom Embedding
Source: Front Mol Biosci. 2021 Sep 20;8:756075. doi: 10.3389/fmolb.2021.756075 (PMC8488165; doi:10.3389/fmolb.2021.756075)
Supplement: Supplementary file 1 [file DataSheet1.ZIP › Data Sheet 1/Our_result_pdb/OppA_dataset_output/1B58_watersite.pdb]

HEADER                                                        XXXX


JRNL        PMID   -1
HETATM    1  O   HOH T   0      23.319  23.531  -1.384  1.00  0.17           O  
HETATM    2  O   HOH T   1       5.272  15.566  -3.712  1.00  0.18           O  
HETATM    3  O   HOH T   2      19.161  20.158   6.330  1.00  0.18           O  
HETATM    4  O   HOH T   3       0.707  13.472  -8.314  1.00  0.19           O  
HETATM    5  O   HOH T   4      -6.865   9.496   7.698  1.00  0.19           O  
HETATM    6  O   HOH T   5      14.373  16.888  31.243  1.00  0.19           O  
HETATM    7  O   HOH T   6      33.076  16.887   2.775  1.00  0.19           O  
HETATM    8  O   HOH T   7      -1.167  30.806  28.750  1.00  0.20           O  
HETATM    9  O   HOH T   8      -8.001  23.438  23.460  1.00  0.20           O  
HETATM   10  O   HOH T   9       7.649  16.076 -10.582  1.00  0.20           O  
HETATM   11  O   HOH T  10      -0.578   6.498  -6.292  1.00  0.20           O  
HETATM   12  O   HOH T  11      -2.030   9.071  10.144  1.00  0.21           O  
HETATM   13  O   HOH T  12       5.680  20.368  25.357  1.00  0.21           O  
HETATM   14  O   HOH T  13      15.552  15.628  -8.520  1.00  0.21           O  
HETATM   15  O   HOH T  14      11.120  14.239  17.042  1.00  0.21           O  
HETATM   16  O   HOH T  15      25.078  21.830  23.452  1.00  0.21           O  
HETATM   17  O   HOH T  16      17.255   5.593  22.034  1.00  0.21           O  
HETATM   18  O   HOH T  17      20.495  26.443  13.975  1.00  0.22           O  
HETATM   19  O   HOH T  18       2.448   1.006  25.189  1.00  0.22           O  
HETATM   20  O   HOH T  19       6.799  11.377  -8.967  1.00  0.22           O  
HETATM   21  O   HOH T  20       5.426   3.933  31.473  1.00  0.22           O  
HETATM   22  O   HOH T  21      13.179  23.354  10.638  1.00  0.22           O  
HETATM   23  O   HOH T  22      -4.240  19.924  16.132  1.00  0.22           O  
HETATM   24  O   HOH T  23      21.913   6.536  -9.883  1.00  0.22           O  
HETATM   25  O   HOH T  24     -20.931  23.417   1.994  1.00  0.22           O  
HETATM   26  O   HOH T  25       8.942  36.534  -6.090  1.00  0.23           O  
HETATM   27  O   HOH T  26       4.043  10.414  31.074  1.00  0.23           O  
HETATM   28  O   HOH T  27      -9.851  12.249  33.697  1.00  0.23           O  
HETATM   29  O   HOH T  28      29.134  26.910  16.798  1.00  0.23           O  
HETATM   30  O   HOH T  29      -9.405  23.581  44.590  1.00  0.23           O  
HETATM   31  O   HOH T  30       9.643   9.615  -5.855  1.00  0.23           O  
HETATM   32  O   HOH T  31     -19.260  15.943   0.077  1.00  0.24           O  
HETATM   33  O   HOH T  32      -9.632  21.365   9.289  1.00  0.24           O  
HETATM   34  O   HOH T  33       7.435  24.855   4.734  1.00  0.24           O  
HETATM   35  O   HOH T  34      -1.409  22.358  12.929  1.00  0.24           O  
HETATM   36  O   HOH T  35      12.950  -0.572  22.213  1.00  0.24           O  
HETATM   37  O   HOH T  36     -12.906  14.939 -14.730  1.00  0.24           O  
HETATM   38  O   HOH T  37      -7.329  14.361  12.768  1.00  0.25           O  
HETATM   39  O   HOH T  38       2.829  14.776  32.763  1.00  0.25           O  
HETATM   40  O   HOH T  39      22.011  15.217 -11.316  1.00  0.25           O  
HETATM   41  O   HOH T  40      -3.445  -3.240  40.967  1.00  0.25           O  
HETATM   42  O   HOH T  41       3.040  17.477   7.839  1.00  0.25           O  
HETATM   43  O   HOH T  42     -10.285  17.441 -12.760  1.00  0.25           O  
HETATM   44  O   HOH T  43       8.716   1.585  25.780  1.00  0.25           O  
HETATM   45  O   HOH T  44      10.191  31.415   4.245  1.00  0.25           O  
HETATM   46  O   HOH T  45       1.642  -2.035  18.824  1.00  0.25           O  
HETATM   47  O   HOH T  46     -11.763  14.878 -17.205  1.00  0.25           O  
HETATM   48  O   HOH T  47      31.495  11.198   8.237  1.00  0.25           O  
HETATM   49  O   HOH T  48     -11.931  31.558  23.349  1.00  0.25           O  
HETATM   50  O   HOH T  49      -7.268  34.708  41.665  1.00  0.26           O  
HETATM   51  O   HOH T  50      10.939  21.386  35.040  1.00  0.26           O  
HETATM   52  O   HOH T  51       1.802  11.134  13.502  1.00  0.26           O  
HETATM   53  O   HOH T  52     -12.804  11.589  20.745  1.00  0.26           O  
HETATM   54  O   HOH T  53       6.543  30.888  14.574  1.00  0.26           O  
HETATM   55  O   HOH T  54      13.162  24.772  27.254  1.00  0.26           O  
HETATM   56  O   HOH T  55      -0.378   1.252  29.468  1.00  0.26           O  
HETATM   57  O   HOH T  56      -2.458   5.049   9.941  1.00  0.26           O  
HETATM   58  O   HOH T  57       9.652   6.283  11.103  1.00  0.26           O  
HETATM   59  O   HOH T  58      11.402  18.768   3.153  1.00  0.26           O  
HETATM   60  O   HOH T  59     -18.393  27.234   0.315  1.00  0.26           O  
HETATM   61  O   HOH T  60      23.186   2.257  20.927  1.00  0.26           O  
HETATM   62  O   HOH T  61      25.217  30.312   3.923  1.00  0.26           O  
HETATM   63  O   HOH T  62      -4.181  28.317  14.135  1.00  0.26           O  
HETATM   64  O   HOH T  63      24.260   8.220  25.794  1.00  0.26           O  
HETATM   65  O   HOH T  64      11.302  10.222 -13.939  1.00  0.26           O  
HETATM   66  O   HOH T  65      17.186  13.765   4.650  1.00  0.26           O  
HETATM   67  O   HOH T  66      -7.383   8.047  -2.085  1.00  0.27           O  
HETATM   68  O   HOH T  67      15.253  15.319  37.945  1.00  0.27           O  
HETATM   69  O   HOH T  68      -8.339  17.935 -10.791  1.00  0.27           O  
HETATM   70  O   HOH T  69      31.629   5.632   4.105  1.00  0.27           O  
HETATM   71  O   HOH T  70      17.854  31.507  -7.304  1.00  0.27           O  
HETATM   72  O   HOH T  71      11.982  23.260 -12.763  1.00  0.28           O  
HETATM   73  O   HOH T  72       8.079  15.986  -3.449  1.00  0.28           O  
HETATM   74  O   HOH T  73      22.623  25.496  16.972  1.00  0.28           O  
HETATM   75  O   HOH T  74      12.236  26.527  -7.769  1.00  0.28           O  
HETATM   76  O   HOH T  75      19.820   0.712   1.615  1.00  0.28           O  
HETATM   77  O   HOH T  76     -19.511  15.981  15.986  1.00  0.28           O  
HETATM   78  O   HOH T  77      28.573   2.806   6.193  1.00  0.28           O  
HETATM   79  O   HOH T  78       8.714  24.636   2.225  1.00  0.28           O  
HETATM   80  O   HOH T  79       1.277  22.194  19.290  1.00  0.28           O  
HETATM   81  O   HOH T  80     -10.917  29.173   0.524  1.00  0.28           O  
HETATM   82  O   HOH T  81       3.451   7.160  36.385  1.00  0.28           O  
HETATM   83  O   HOH T  82      10.583  -3.647  27.626  1.00  0.28           O  
HETATM   84  O   HOH T  83      19.270  -0.146  11.186  1.00  0.28           O  
HETATM   85  O   HOH T  84      15.213  15.043  -5.831  1.00  0.29           O  
HETATM   86  O   HOH T  85      -1.041  31.854  37.430  1.00  0.29           O  
HETATM   87  O   HOH T  86       5.437   6.020   9.024  1.00  0.29           O  
HETATM   88  O   HOH T  87     -20.086  18.401  21.710  1.00  0.29           O  
HETATM   89  O   HOH T  88     -10.277   1.398  36.723  1.00  0.29           O  
HETATM   90  O   HOH T  89      30.687  27.792  12.090  1.00  0.29           O  
HETATM   91  O   HOH T  90      23.624  22.214  -7.526  1.00  0.29           O  
HETATM   92  O   HOH T  91      10.112  13.779   3.265  1.00  0.29           O  
HETATM   93  O   HOH T  92       3.075   2.927  15.342  1.00  0.30           O  
HETATM   94  O   HOH T  93      -5.180  -2.710  38.706  1.00  0.30           O  
HETATM   95  O   HOH T  94       1.187  12.601  32.869  1.00  0.30           O  
HETATM   96  O   HOH T  95      -8.515  27.841  42.777  1.00  0.30           O  
HETATM   97  O   HOH T  96       3.612  12.781  12.104  1.00  0.30           O  
HETATM   98  O   HOH T  97      14.682  31.832   5.883  1.00  0.30           O  
HETATM   99  O   HOH T  98      -0.841  14.003 -15.372  1.00  0.30           O  
HETATM  100  O   HOH T  99      -8.178  13.499  16.295  1.00  0.30           O  
HETATM  101  O   HOH T 100      10.727  23.738   3.774  1.00  0.30           O  
HETATM  102  O   HOH T 101      15.734  -7.267  24.258  1.00  0.30           O  
HETATM  103  O   HOH T 102       9.781  13.925  -2.467  1.00  0.30           O  
HETATM  104  O   HOH T 103      29.354  21.585   1.112  1.00  0.30           O  
HETATM  105  O   HOH T 104      -7.251  36.414  22.709  1.00  0.30           O  
HETATM  106  O   HOH T 105      -4.979   3.744 -15.350  1.00  0.30           O  
HETATM  107  O   HOH T 106     -18.088  23.629  41.576  1.00  0.30           O  
HETATM  108  O   HOH T 107       4.739  13.701   9.753  1.00  0.30           O  
HETATM  109  O   HOH T 108      11.469  21.107  10.605  1.00  0.30           O  
HETATM  110  O   HOH T 109      -0.995   6.961   1.558  1.00  0.30           O  
HETATM  111  O   HOH T 110       4.052  12.934  41.641  1.00  0.30           O  
HETATM  112  O   HOH T 111      -6.530   7.400 -17.721  1.00  0.30           O  
HETATM  113  O   HOH T 112       3.003  21.873 -13.590  1.00  0.30           O  
HETATM  114  O   HOH T 113     -10.144   9.824 -18.568  1.00  0.31           O  
HETATM  115  O   HOH T 114     -10.376  16.694  15.360  1.00  0.31           O  
HETATM  116  O   HOH T 115       0.300   3.264 -13.945  1.00  0.31           O  
HETATM  117  O   HOH T 116       7.306   8.143  17.498  1.00  0.31           O  
HETATM  118  O   HOH T 117     -15.427   8.267  37.404  1.00  0.31           O  
HETATM  119  O   HOH T 118       3.686   5.730  32.527  1.00  0.31           O  
HETATM  120  O   HOH T 119      32.649  18.472   0.662  1.00  0.31           O  
HETATM  121  O   HOH T 120       3.709   8.380   3.536  1.00  0.31           O  
HETATM  122  O   HOH T 121      14.439   1.579  18.978  1.00  0.31           O  
HETATM  123  O   HOH T 122       2.462  15.135  42.244  1.00  0.31           O  
HETATM  124  O   HOH T 123      -1.012   7.271   4.414  1.00  0.31           O  
HETATM  125  O   HOH T 124       2.763   4.612  35.114  1.00  0.32           O  
HETATM  126  O   HOH T 125      14.604  14.900   4.734  1.00  0.32           O  
HETATM  127  O   HOH T 126      -5.257   1.844   4.752  1.00  0.32           O  
HETATM  128  O   HOH T 127      22.135  30.401   8.461  1.00  0.32           O  
HETATM  129  O   HOH T 128      16.894  -7.457  28.543  1.00  0.32           O  
HETATM  130  O   HOH T 129       6.487  31.811  -9.914  1.00  0.32           O  
HETATM  131  O   HOH T 130     -12.720   9.419   0.644  1.00  0.32           O  
HETATM  132  O   HOH T 131       4.422  34.395  -7.634  1.00  0.32           O  
HETATM  133  O   HOH T 132      -6.495   2.374   2.381  1.00  0.32           O  
HETATM  134  O   HOH T 133       2.145  10.167  -0.025  1.00  0.32           O  
HETATM  135  O   HOH T 134      11.315  26.270  23.779  1.00  0.32           O  
HETATM  136  O   HOH T 135      30.983  18.556   8.090  1.00  0.32           O  
HETATM  137  O   HOH T 136      26.638  25.497   6.165  1.00  0.32           O  
HETATM  138  O   HOH T 137       1.572   5.277 -12.431  1.00  0.32           O  
HETATM  139  O   HOH T 138      26.714  30.690  -2.822  1.00  0.32           O  
HETATM  140  O   HOH T 139      -9.984  17.635 -22.872  1.00  0.32           O  
HETATM  141  O   HOH T 140       0.608  39.508  -1.727  1.00  0.32           O  
HETATM  142  O   HOH T 141      10.267  15.298  -0.111  1.00  0.33           O  
HETATM  143  O   HOH T 142       6.471  33.230  10.637  1.00  0.33           O  
HETATM  144  O   HOH T 143      17.042  -6.583  21.024  1.00  0.33           O  
HETATM  145  O   HOH T 144      -5.436  18.666   3.087  1.00  0.33           O  
HETATM  146  O   HOH T 145       9.589  -1.983   7.553  1.00  0.33           O  
HETATM  147  O   HOH T 146      -0.937  33.361  27.665  1.00  0.33           O  
HETATM  148  O   HOH T 147       9.995  30.460  10.938  1.00  0.33           O  
HETATM  149  O   HOH T 148      -4.656  35.102  34.049  1.00  0.33           O  
HETATM  150  O   HOH T 149      24.661  13.404  -5.755  1.00  0.33           O  
HETATM  151  O   HOH T 150       2.975  36.280  25.345  1.00  0.33           O  
HETATM  152  O   HOH T 151       6.009   8.192   7.242  1.00  0.33           O  
HETATM  153  O   HOH T 152       3.674   0.056  21.168  1.00  0.33           O  
HETATM  154  O   HOH T 153      15.419  23.593  26.156  1.00  0.33           O  
HETATM  155  O   HOH T 154     -10.833  29.939  17.602  1.00  0.33           O  
HETATM  156  O   HOH T 155      -0.252  31.559   2.002  1.00  0.33           O  
HETATM  157  O   HOH T 156      19.220   8.435  19.074  1.00  0.33           O  
HETATM  158  O   HOH T 157      21.045  -2.119  19.822  1.00  0.33           O  
HETATM  159  O   HOH T 158      22.704  26.819  19.286  1.00  0.33           O  
HETATM  160  O   HOH T 159       8.711   6.943   7.156  1.00  0.33           O  
HETATM  161  O   HOH T 160     -20.921   8.378   1.207  1.00  0.33           O  
HETATM  162  O   HOH T 161      17.165   7.482 -10.153  1.00  0.34           O  
HETATM  163  O   HOH T 162      11.878   1.299   9.086  1.00  0.34           O  
HETATM  164  O   HOH T 163       2.065  17.016   2.250  1.00  0.34           O  
HETATM  165  O   HOH T 164     -15.297  19.985  -6.814  1.00  0.34           O  
HETATM  166  O   HOH T 165      38.877  10.827   1.703  1.00  0.34           O  
HETATM  167  O   HOH T 166      21.980  13.247  -6.191  1.00  0.34           O  
HETATM  168  O   HOH T 167     -11.642  17.792 -20.696  1.00  0.34           O  
HETATM  169  O   HOH T 168       1.179   5.165  39.025  1.00  0.34           O  
HETATM  170  O   HOH T 169       1.615  -0.985   5.984  1.00  0.34           O  
HETATM  171  O   HOH T 170       0.244  34.183  30.061  1.00  0.34           O  
HETATM  172  O   HOH T 171      -4.816  23.698  -7.352  1.00  0.34           O  
HETATM  173  O   HOH T 172      -1.784   2.253   9.791  1.00  0.34           O  
HETATM  174  O   HOH T 173     -17.781  28.805   5.532  1.00  0.34           O  
HETATM  175  O   HOH T 174      -7.873  31.677  -0.079  1.00  0.34           O  
HETATM  176  O   HOH T 175      29.104   1.653   3.633  1.00  0.34           O  
HETATM  177  O   HOH T 176      25.681   6.820  -5.899  1.00  0.34           O  
HETATM  178  O   HOH T 177       8.414  38.534  -4.268  1.00  0.34           O  
HETATM  179  O   HOH T 178      -9.244  24.098   9.290  1.00  0.35           O  
HETATM  180  O   HOH T 179      -1.552  38.126  18.960  1.00  0.35           O  
HETATM  181  O   HOH T 180     -11.261  35.125  26.622  1.00  0.35           O  
HETATM  182  O   HOH T 181      -4.464  21.425  52.840  1.00  0.35           O  
HETATM  183  O   HOH T 182      11.046  -6.470  24.271  1.00  0.35           O  
HETATM  184  O   HOH T 183      27.776  15.733  20.446  1.00  0.35           O  
HETATM  185  O   HOH T 184     -14.957  22.456  16.818  1.00  0.35           O  
HETATM  186  O   HOH T 185      10.725   7.430   8.911  1.00  0.35           O  
HETATM  187  O   HOH T 186      -3.939   4.058  -5.755  1.00  0.35           O  
HETATM  188  O   HOH T 187      -7.711   6.605   4.753  1.00  0.35           O  
HETATM  189  O   HOH T 188       2.068   8.051 -12.344  1.00  0.35           O  
HETATM  190  O   HOH T 189      27.577   0.755  25.933  1.00  0.35           O  
HETATM  191  O   HOH T 190       1.551  32.343  36.509  1.00  0.35           O  
HETATM  192  O   HOH T 191       7.880  19.622  21.680  1.00  0.35           O  
HETATM  193  O   HOH T 192     -23.674   6.933   7.112  1.00  0.35           O  
HETATM  194  O   HOH T 193     -23.963  21.294  15.458  1.00  0.35           O  
HETATM  195  O   HOH T 194      23.477  -2.638  18.611  1.00  0.35           O  
HETATM  196  O   HOH T 195      17.727   0.813   6.632  1.00  0.36           O  
HETATM  197  O   HOH T 196      -4.241  40.646  27.759  1.00  0.36           O  
HETATM  198  O   HOH T 197      12.111   1.395  20.289  1.00  0.36           O  
HETATM  199  O   HOH T 198      -6.573  19.826 -19.829  1.00  0.36           O  
HETATM  200  O   HOH T 199      10.711  28.997  16.112  1.00  0.36           O  
HETATM  201  O   HOH T 200      19.571   9.072  23.962  1.00  0.36           O  
HETATM  202  O   HOH T 201      20.199  11.515  25.051  1.00  0.36           O  
HETATM  203  O   HOH T 202     -22.179  20.065   6.540  1.00  0.36           O  
HETATM  204  O   HOH T 203      -4.837  13.765 -17.753  1.00  0.36           O  
HETATM  205  O   HOH T 204      27.673  -2.268   6.073  1.00  0.36           O  
HETATM  206  O   HOH T 205       0.865  23.480 -13.242  1.00  0.36           O  
HETATM  207  O   HOH T 206     -13.565   8.969  21.330  1.00  0.36           O  
HETATM  208  O   HOH T 207      35.058  26.840   9.875  1.00  0.36           O  
HETATM  209  O   HOH T 208       1.975  26.878  45.278  1.00  0.36           O  
HETATM  210  O   HOH T 209      24.941  -1.995   6.601  1.00  0.36           O  
HETATM  211  O   HOH T 210       9.840  28.035  -8.142  1.00  0.36           O  
HETATM  212  O   HOH T 211     -10.679   9.338  -2.310  1.00  0.37           O  
HETATM  213  O   HOH T 212     -12.322  19.106 -22.979  1.00  0.37           O  
HETATM  214  O   HOH T 213     -10.494   5.270   7.281  1.00  0.37           O  
HETATM  215  O   HOH T 214      -3.559  20.068 -14.701  1.00  0.37           O  
HETATM  216  O   HOH T 215     -18.567  16.595  18.477  1.00  0.37           O  
HETATM  217  O   HOH T 216      10.654  16.284   4.346  1.00  0.37           O  
HETATM  218  O   HOH T 217      36.599  24.697   9.045  1.00  0.37           O  
HETATM  219  O   HOH T 218       1.644   1.478   7.381  1.00  0.37           O  
HETATM  220  O   HOH T 219      29.050  -3.476  11.270  1.00  0.37           O  
HETATM  221  O   HOH T 220      24.606  14.403 -10.801  1.00  0.37           O  
HETATM  222  O   HOH T 221       2.017  -1.702  25.528  1.00  0.37           O  
HETATM  223  O   HOH T 222      -1.709   9.040   6.463  1.00  0.37           O  
HETATM  224  O   HOH T 223      17.827  -9.856  27.626  1.00  0.37           O  
HETATM  225  O   HOH T 224     -10.687  13.983  15.041  1.00  0.37           O  
HETATM  226  O   HOH T 225       0.223  29.979  47.128  1.00  0.37           O  
HETATM  227  O   HOH T 226       9.742   8.199 -12.974  1.00  0.37           O  
HETATM  228  O   HOH T 227      -4.753   3.009  42.797  1.00  0.37           O  
HETATM  229  O   HOH T 228      23.453  26.002  -4.889  1.00  0.37           O  
HETATM  230  O   HOH T 229       6.805  -1.335  30.681  1.00  0.37           O  
HETATM  231  O   HOH T 230       3.394   3.879  -4.997  1.00  0.37           O  
HETATM  232  O   HOH T 231     -17.207  26.027  -4.069  1.00  0.37           O  
HETATM  233  O   HOH T 232     -21.950  20.362  -9.341  1.00  0.38           O  
HETATM  234  O   HOH T 233       1.699  12.995 -15.485  1.00  0.38           O  
HETATM  235  O   HOH T 234      -2.725  31.316  10.174  1.00  0.38           O  
HETATM  236  O   HOH T 235      12.758  30.735  -8.581  1.00  0.38           O  
HETATM  237  O   HOH T 236     -10.982  17.096 -15.507  1.00  0.38           O  
HETATM  238  O   HOH T 237      20.264  -8.592  31.186  1.00  0.38           O  
HETATM  239  O   HOH T 238      26.825  13.510  19.200  1.00  0.38           O  
HETATM  240  O   HOH T 239      26.077  23.292  -1.135  1.00  0.38           O  
HETATM  241  O   HOH T 240       8.591  20.459  26.034  1.00  0.38           O  
HETATM  242  O   HOH T 241      -3.213  33.359  40.096  1.00  0.38           O  
HETATM  243  O   HOH T 242      11.275  34.738   1.380  1.00  0.38           O  
HETATM  244  O   HOH T 243     -21.396  22.344   4.567  1.00  0.38           O  
HETATM  245  O   HOH T 244      18.621  24.197  22.630  1.00  0.38           O  
HETATM  246  O   HOH T 245      -9.107   8.174  33.672  1.00  0.38           O  
HETATM  247  O   HOH T 246     -18.511  28.554   2.800  1.00  0.38           O  
HETATM  248  O   HOH T 247      -8.099  16.259  17.020  1.00  0.38           O  
HETATM  249  O   HOH T 248      12.046  23.956  34.645  1.00  0.38           O  
HETATM  250  O   HOH T 249      -7.381  26.077  51.831  1.00  0.38           O  
HETATM  251  O   HOH T 250       8.446  12.652   5.149  1.00  0.38           O  
HETATM  252  O   HOH T 251      19.775  28.994  -9.597  1.00  0.38           O  
HETATM  253  O   HOH T 252     -23.574   9.506   1.305  1.00  0.39           O  
HETATM  254  O   HOH T 253     -12.176  10.759  32.934  1.00  0.39           O  
HETATM  255  O   HOH T 254     -13.376  19.498  -4.751  1.00  0.39           O  
HETATM  256  O   HOH T 255      18.497  -3.305  19.998  1.00  0.39           O  
HETATM  257  O   HOH T 256      27.719   6.637  -4.073  1.00  0.39           O  
HETATM  258  O   HOH T 257     -12.202  20.500   9.050  1.00  0.39           O  
HETATM  259  O   HOH T 258       2.145  33.880  38.755  1.00  0.39           O  
HETATM  260  O   HOH T 259     -19.506  22.739  -6.709  1.00  0.39           O  
HETATM  261  O   HOH T 260      13.141   1.207   5.195  1.00  0.39           O  
HETATM  262  O   HOH T 261      -0.328  15.555   5.102  1.00  0.39           O  
HETATM  263  O   HOH T 262     -20.768  17.989  -1.065  1.00  0.39           O  
HETATM  264  O   HOH T 263      19.548  -0.048   8.482  1.00  0.39           O  
HETATM  265  O   HOH T 264       3.818  38.677  26.471  1.00  0.39           O  
HETATM  266  O   HOH T 265      -3.540  30.551  12.766  1.00  0.39           O  
HETATM  267  O   HOH T 266      20.977  29.979  18.152  1.00  0.39           O  
HETATM  268  O   HOH T 267       9.042  23.075  37.648  1.00  0.39           O  
HETATM  269  O   HOH T 268     -13.858  18.768  -8.972  1.00  0.39           O  
HETATM  270  O   HOH T 269      26.526  -2.715  10.397  1.00  0.40           O  
HETATM  271  O   HOH T 270     -13.137  29.596  16.047  1.00  0.40           O  
HETATM  272  O   HOH T 271     -15.480   6.502   6.392  1.00  0.40           O  
HETATM  273  O   HOH T 272     -10.542  32.338  18.842  1.00  0.40           O  
HETATM  274  O   HOH T 273      29.475   6.117  22.295  1.00  0.40           O  
HETATM  275  O   HOH T 274      11.943  32.017   6.399  1.00  0.40           O  
HETATM  276  O   HOH T 275       7.750  21.397  42.262  1.00  0.40           O  
HETATM  277  O   HOH T 276     -12.489   6.426  21.127  1.00  0.40           O  
HETATM  278  O   HOH T 277      -4.334  22.552  15.224  1.00  0.40           O  
HETATM  279  O   HOH T 278       5.353  23.265 -14.007  1.00  0.40           O  
HETATM  280  O   HOH T 279      -1.430  31.693  48.509  1.00  0.40           O  
HETATM  281  O   HOH T 280     -15.873  25.257  41.921  1.00  0.40           O  
HETATM  282  O   HOH T 281      -1.691  33.941  10.194  1.00  0.40           O  
HETATM  283  O   HOH T 282     -10.613  28.219  44.588  1.00  0.40           O  
HETATM  284  O   HOH T 283     -12.078   4.495   9.437  1.00  0.40           O  
HETATM  285  O   HOH T 284      29.592  23.161   3.355  1.00  0.40           O  
HETATM  286  O   HOH T 285      11.529  32.124   9.191  1.00  0.40           O  
HETATM  287  O   HOH T 286      -0.538  27.045   4.665  1.00  0.40           O  
HETATM  288  O   HOH T 287      -4.002  36.807  18.517  1.00  0.40           O  
HETATM  289  O   HOH T 288       9.118   0.660   8.184  1.00  0.40           O  
HETATM  290  O   HOH T 289      26.624  27.415   8.380  1.00  0.40           O  
HETATM  291  O   HOH T 290       6.557   8.947  -1.706  1.00  0.40           O  
HETATM  292  O   HOH T 291      -4.242  18.666 -18.873  1.00  0.40           O  
HETATM  293  O   HOH T 292      -4.223   3.106   8.889  1.00  0.40           O  
HETATM  294  O   HOH T 293     -12.886  29.426  43.749  1.00  0.40           O  
HETATM  295  O   HOH T 294      -7.771   5.080 -18.429  1.00  0.40           O  
HETATM  296  O   HOH T 295      12.295   8.266 -12.098  1.00  0.40           O  
HETATM  297  O   HOH T 296      23.648  21.241  25.849  1.00  0.40           O  
HETATM  298  O   HOH T 297     -18.429   9.630  18.287  1.00  0.40           O  
HETATM  299  O   HOH T 298      13.110  22.016  36.558  1.00  0.40           O  
HETATM  300  O   HOH T 299      16.802   9.568  19.440  1.00  0.41           O  
HETATM  301  O   HOH T 300      -0.455  11.178 -15.711  1.00  0.41           O  
HETATM  302  O   HOH T 301      10.702   6.104  -2.260  1.00  0.41           O  
HETATM  303  O   HOH T 302      26.812   0.173  28.498  1.00  0.41           O  
HETATM  304  O   HOH T 303      -6.730   2.804 -17.263  1.00  0.41           O  
HETATM  305  O   HOH T 304      -7.420  38.942  36.845  1.00  0.41           O  
HETATM  306  O   HOH T 305       4.851  35.645  -0.041  1.00  0.41           O  
HETATM  307  O   HOH T 306      -8.221   3.241   9.852  1.00  0.41           O  
HETATM  308  O   HOH T 307     -18.709  27.296  14.474  1.00  0.41           O  
HETATM  309  O   HOH T 308       2.595   8.155  31.710  1.00  0.41           O  
HETATM  310  O   HOH T 309      -4.788   6.897  16.598  1.00  0.41           O  
HETATM  311  O   HOH T 310      12.106  -6.138  19.364  1.00  0.41           O  
HETATM  312  O   HOH T 311       1.711  -3.566   1.266  1.00  0.41           O  
HETATM  313  O   HOH T 312      22.761  26.968  21.994  1.00  0.41           O  
HETATM  314  O   HOH T 313      24.488   0.538  22.512  1.00  0.41           O  
HETATM  315  O   HOH T 314      -2.429  20.235   4.073  1.00  0.41           O  
HETATM  316  O   HOH T 315       8.707   1.792  12.624  1.00  0.41           O  
HETATM  317  O   HOH T 316      24.821  -1.653  28.502  1.00  0.41           O  
HETATM  318  O   HOH T 317      -7.374   9.785 -18.892  1.00  0.41           O  
HETATM  319  O   HOH T 318      23.525  38.950  -3.209  1.00  0.42           O  
HETATM  320  O   HOH T 319      13.722   1.466   2.406  1.00  0.42           O  
HETATM  321  O   HOH T 320      10.783  31.548 -10.398  1.00  0.42           O  
HETATM  322  O   HOH T 321     -14.718  14.456  44.525  1.00  0.42           O  
HETATM  323  O   HOH T 322      22.311   9.698  24.236  1.00  0.42           O  
HETATM  324  O   HOH T 323      29.966  17.620  20.776  1.00  0.42           O  
HETATM  325  O   HOH T 324      16.307  14.645 -13.079  1.00  0.42           O  
HETATM  326  O   HOH T 325       0.299  18.402  34.818  1.00  0.42           O  
HETATM  327  O   HOH T 326      10.218  32.632  20.078  1.00  0.42           O  
HETATM  328  O   HOH T 327      -2.257  35.848  24.090  1.00  0.42           O  
HETATM  329  O   HOH T 328      32.342  26.490  10.292  1.00  0.42           O  
HETATM  330  O   HOH T 329      29.620  13.879  19.425  1.00  0.42           O  
HETATM  331  O   HOH T 330      -0.206   8.713  -0.559  1.00  0.42           O  
HETATM  332  O   HOH T 331     -16.799   9.449  16.422  1.00  0.42           O  
HETATM  333  O   HOH T 332       2.946  10.711 -14.659  1.00  0.42           O  
HETATM  334  O   HOH T 333      -0.571  29.464   3.556  1.00  0.42           O  
HETATM  335  O   HOH T 334     -25.117   7.412   4.857  1.00  0.42           O  
HETATM  336  O   HOH T 335     -10.761  12.455 -18.154  1.00  0.42           O  
HETATM  337  O   HOH T 336      -6.896  12.374 -18.999  1.00  0.42           O  
HETATM  338  O   HOH T 337      -0.032  12.169  39.595  1.00  0.42           O  
HETATM  339  O   HOH T 338      19.548  23.829  20.083  1.00  0.42           O  
HETATM  340  O   HOH T 339      17.516  -1.816  17.980  1.00  0.42           O  
HETATM  341  O   HOH T 340       6.731  33.501  14.590  1.00  0.42           O  
HETATM  342  O   HOH T 341      12.543  15.208  37.867  1.00  0.42           O  
HETATM  343  O   HOH T 342      31.705  23.769   4.904  1.00  0.42           O  
HETATM  344  O   HOH T 343      -2.268   2.981 -15.043  1.00  0.42           O  
HETATM  345  O   HOH T 344       6.973   2.330   8.892  1.00  0.42           O  
HETATM  346  O   HOH T 345       3.273  20.375  21.549  1.00  0.43           O  
HETATM  347  O   HOH T 346      -8.750   7.512 -19.376  1.00  0.43           O  
HETATM  348  O   HOH T 347     -10.094  33.441  22.582  1.00  0.43           O  
HETATM  349  O   HOH T 348      21.884  -4.745  19.252  1.00  0.43           O  
HETATM  350  O   HOH T 349      -4.421  36.639  22.530  1.00  0.43           O  
HETATM  351  O   HOH T 350      19.359  34.235   5.884  1.00  0.43           O  
HETATM  352  O   HOH T 351      23.234  -0.416  20.206  1.00  0.43           O  
HETATM  353  O   HOH T 352      11.043  23.440  17.815  1.00  0.43           O  
HETATM  354  O   HOH T 353     -12.924   7.469  23.564  1.00  0.43           O  
HETATM  355  O   HOH T 354     -11.415   5.565  42.824  1.00  0.43           O  
HETATM  356  O   HOH T 355      27.911   3.422  25.468  1.00  0.43           O  
HETATM  357  O   HOH T 356     -20.289   8.334  -1.485  1.00  0.43           O  
HETATM  358  O   HOH T 357      29.333   8.791  22.694  1.00  0.43           O  
HETATM  359  O   HOH T 358     -17.969  21.011  42.223  1.00  0.43           O  
HETATM  360  O   HOH T 359      22.737  14.222  -8.746  1.00  0.43           O  
HETATM  361  O   HOH T 360       4.639  27.260  45.362  1.00  0.43           O  
HETATM  362  O   HOH T 361      -1.099   3.798  -5.724  1.00  0.43           O  
HETATM  363  O   HOH T 362     -20.376  10.708  -0.075  1.00  0.43           O  
HETATM  364  O   HOH T 363     -21.763  15.386  -0.972  1.00  0.43           O  
HETATM  365  O   HOH T 364      10.624   2.041  16.634  1.00  0.43           O  
HETATM  366  O   HOH T 365      10.787  39.796  -3.599  1.00  0.43           O  
HETATM  367  O   HOH T 366      15.598  35.697  -8.821  1.00  0.43           O  
HETATM  368  O   HOH T 367      -6.486  33.158   5.490  1.00  0.43           O  
HETATM  369  O   HOH T 368      -7.234  24.362  12.736  1.00  0.43           O  
HETATM  370  O   HOH T 369      22.326  21.476  23.508  1.00  0.43           O  
HETATM  371  O   HOH T 370       7.937  28.117 -10.305  1.00  0.43           O  
HETATM  372  O   HOH T 371     -17.676   7.188   7.667  1.00  0.43           O  
HETATM  373  O   HOH T 372     -12.817   5.739   5.776  1.00  0.43           O  
HETATM  374  O   HOH T 373      -1.684  16.663   7.275  1.00  0.43           O  
HETATM  375  O   HOH T 374      -6.590   2.136  40.916  1.00  0.43           O  
HETATM  376  O   HOH T 375      17.140  32.776   5.285  1.00  0.43           O  
HETATM  377  O   HOH T 376      20.395  29.991  -6.961  1.00  0.43           O  
HETATM  378  O   HOH T 377      22.986  30.417   5.696  1.00  0.43           O  
HETATM  379  O   HOH T 378      20.610  27.311  17.566  1.00  0.44           O  
HETATM  380  O   HOH T 379      11.901  19.430  36.722  1.00  0.44           O  
HETATM  381  O   HOH T 380       7.610  18.568  24.225  1.00  0.44           O  
HETATM  382  O   HOH T 381      -2.889   1.022  28.232  1.00  0.44           O  
HETATM  383  O   HOH T 382     -19.661  10.699  -2.699  1.00  0.44           O  
HETATM  384  O   HOH T 383      36.374  21.992   8.189  1.00  0.44           O  
HETATM  385  O   HOH T 384      -2.484  12.520 -17.049  1.00  0.44           O  
HETATM  386  O   HOH T 385      25.149  28.726   6.297  1.00  0.44           O  
HETATM  387  O   HOH T 386      -0.860   0.774 -14.085  1.00  0.44           O  
HETATM  388  O   HOH T 387      -6.497  -2.057  43.249  1.00  0.44           O  
HETATM  389  O   HOH T 388      25.300  32.778  -4.110  1.00  0.44           O  
HETATM  390  O   HOH T 389      21.900  -4.865  25.962  1.00  0.44           O  
HETATM  391  O   HOH T 390       7.354  15.268   7.398  1.00  0.44           O  
HETATM  392  O   HOH T 391      -8.017   4.807  -7.311  1.00  0.44           O  
HETATM  393  O   HOH T 392     -11.410   6.503  30.506  1.00  0.44           O  
HETATM  394  O   HOH T 393       9.906  -5.659  29.362  1.00  0.44           O  
HETATM  395  O   HOH T 394      28.473  -3.116   8.560  1.00  0.44           O  
HETATM  396  O   HOH T 395     -15.678  27.789  30.223  1.00  0.44           O  
HETATM  397  O   HOH T 396      10.918  -2.464  21.632  1.00  0.44           O  
HETATM  398  O   HOH T 397      -0.425  32.460  46.051  1.00  0.44           O  
HETATM  399  O   HOH T 398     -15.850  17.958  41.183  1.00  0.44           O  
HETATM  400  O   HOH T 399       0.767  32.978  43.573  1.00  0.44           O  
HETATM  401  O   HOH T 400       9.748  -7.454  26.709  1.00  0.44           O  
HETATM  402  O   HOH T 401     -14.470  10.454  34.150  1.00  0.44           O  
HETATM  403  O   HOH T 402      17.963  26.806  18.012  1.00  0.44           O  
HETATM  404  O   HOH T 403       9.243  -0.997  32.031  1.00  0.45           O  
HETATM  405  O   HOH T 404      24.464  28.954   9.005  1.00  0.45           O  
HETATM  406  O   HOH T 405      -6.922  16.714  14.478  1.00  0.45           O  
HETATM  407  O   HOH T 406      -0.468   7.533  39.237  1.00  0.45           O  
HETATM  408  O   HOH T 407       3.172   8.865  38.736  1.00  0.45           O  
HETATM  409  O   HOH T 408      -6.477  -2.391 -11.302  1.00  0.45           O  
HETATM  410  O   HOH T 409       1.131  14.630  10.225  1.00  0.45           O  
HETATM  411  O   HOH T 410     -21.312  12.736  -1.720  1.00  0.45           O  
HETATM  412  O   HOH T 411      14.728  -7.971  21.757  1.00  0.45           O  
HETATM  413  O   HOH T 412      19.578  -9.494  23.532  1.00  0.45           O  
HETATM  414  O   HOH T 413      -8.941  21.374  51.637  1.00  0.45           O  
HETATM  415  O   HOH T 414       2.797  12.778  30.712  1.00  0.45           O  
HETATM  416  O   HOH T 415       4.805  33.250   8.551  1.00  0.45           O  
HETATM  417  O   HOH T 416      -4.859  26.730  51.014  1.00  0.45           O  
HETATM  418  O   HOH T 417      13.466  26.350  22.068  1.00  0.45           O  
HETATM  419  O   HOH T 418       1.107   2.334  -4.664  1.00  0.45           O  
HETATM  420  O   HOH T 419      25.398  35.817   1.863  1.00  0.45           O  
HETATM  421  O   HOH T 420      32.917  13.688  -7.371  1.00  0.45           O  
HETATM  422  O   HOH T 421       2.304   2.648 -12.067  1.00  0.45           O  
HETATM  423  O   HOH T 422     -10.532   7.697  -4.521  1.00  0.45           O  
HETATM  424  O   HOH T 423      23.373  23.747  24.563  1.00  0.45           O  
HETATM  425  O   HOH T 424      20.118  21.937  21.896  1.00  0.45           O  
HETATM  426  O   HOH T 425       8.132  29.706  16.493  1.00  0.45           O  
HETATM  427  O   HOH T 426      20.746  27.184  -7.544  1.00  0.45           O  
HETATM  428  O   HOH T 427      -9.934   4.192  29.856  1.00  0.45           O  
HETATM  429  O   HOH T 428       0.926   0.098  27.354  1.00  0.46           O  
HETATM  430  O   HOH T 429       4.876  34.087  38.077  1.00  0.46           O  
HETATM  431  O   HOH T 430       0.579   2.009  15.662  1.00  0.46           O  
HETATM  432  O   HOH T 431      -3.305   2.352  25.939  1.00  0.46           O  
HETATM  433  O   HOH T 432       8.717  13.387   9.510  1.00  0.46           O  
HETATM  434  O   HOH T 433       3.393   7.936 -14.817  1.00  0.46           O  
HETATM  435  O   HOH T 434      21.375  33.675   4.039  1.00  0.46           O  
HETATM  436  O   HOH T 435      -4.793   0.877 -17.574  1.00  0.46           O  
HETATM  437  O   HOH T 436     -17.724  18.910  -7.970  1.00  0.46           O  
HETATM  438  O   HOH T 437      28.984  26.226   7.779  1.00  0.46           O  
HETATM  439  O   HOH T 438     -10.774  23.514  46.935  1.00  0.46           O  
HETATM  440  O   HOH T 439      -0.479  33.496  39.607  1.00  0.46           O  
HETATM  441  O   HOH T 440       3.231  26.409  47.677  1.00  0.46           O  
HETATM  442  O   HOH T 441      19.737  12.890  27.484  1.00  0.46           O  
HETATM  443  O   HOH T 442     -11.641   5.381 -12.871  1.00  0.46           O  
HETATM  444  O   HOH T 443      12.572  14.959   2.821  1.00  0.46           O  
HETATM  445  O   HOH T 444      -2.528   3.433  -3.403  1.00  0.46           O  
HETATM  446  O   HOH T 445     -11.931  32.540  29.886  1.00  0.46           O  
HETATM  447  O   HOH T 446      -9.046  33.715   1.354  1.00  0.46           O  
HETATM  448  O   HOH T 447       5.733  28.404  43.076  1.00  0.46           O  
HETATM  449  O   HOH T 448     -22.816  19.387  17.000  1.00  0.47           O  
HETATM  450  O   HOH T 449       5.551  -1.868  19.675  1.00  0.47           O  
HETATM  451  O   HOH T 450       1.201  -0.882  21.341  1.00  0.47           O  
HETATM  452  O   HOH T 451       3.028  24.406 -14.718  1.00  0.47           O  
HETATM  453  O   HOH T 452      22.641  24.911  -7.488  1.00  0.47           O  
HETATM  454  O   HOH T 453      16.232  32.966  -9.083  1.00  0.47           O  
HETATM  455  O   HOH T 454     -10.719   1.681  30.718  1.00  0.47           O  
HETATM  456  O   HOH T 455      33.084   4.550   6.210  1.00  0.47           O  
HETATM  457  O   HOH T 456     -27.249  14.094   2.926  1.00  0.47           O  
HETATM  458  O   HOH T 457       3.488   1.592  -3.433  1.00  0.47           O  
HETATM  459  O   HOH T 458       9.538   2.634  10.074  1.00  0.47           O  
HETATM  460  O   HOH T 459     -14.582  23.832  -7.519  1.00  0.47           O  
HETATM  461  O   HOH T 460     -24.301  20.399  12.844  1.00  0.47           O  
HETATM  462  O   HOH T 461       0.124  35.921   8.801  1.00  0.47           O  
HETATM  463  O   HOH T 462      28.384   2.372  28.018  1.00  0.47           O  
HETATM  464  O   HOH T 463       9.576  -3.999  23.664  1.00  0.47           O  
HETATM  465  O   HOH T 464      10.340  38.952  -6.211  1.00  0.47           O  
HETATM  466  O   HOH T 465      -1.885   0.013   1.263  1.00  0.47           O  
HETATM  467  O   HOH T 466      13.695  24.909  24.480  1.00  0.47           O  
HETATM  468  O   HOH T 467      13.544  -0.377   7.494  1.00  0.47           O  
HETATM  469  O   HOH T 468      -2.586  20.185 -17.232  1.00  0.47           O  
HETATM  470  O   HOH T 469      26.246  -0.804  24.117  1.00  0.47           O  
HETATM  471  O   HOH T 470      -3.811  17.723 -16.337  1.00  0.47           O  
HETATM  472  O   HOH T 471       8.378  -3.298  29.325  1.00  0.47           O  
HETATM  473  O   HOH T 472     -11.470  11.288 -20.575  1.00  0.47           O  
HETATM  474  O   HOH T 473     -13.075   6.790  -3.947  1.00  0.47           O  
HETATM  475  O   HOH T 474     -24.763  14.346   1.774  1.00  0.48           O  
HETATM  476  O   HOH T 475      23.640  38.391  -0.611  1.00  0.48           O  
HETATM  477  O   HOH T 476      -8.118  24.459  46.842  1.00  0.48           O  
HETATM  478  O   HOH T 477      25.295  -2.448  25.983  1.00  0.48           O  
HETATM  479  O   HOH T 478      -2.564  15.290  54.399  1.00  0.48           O  
HETATM  480  O   HOH T 479      12.920   1.408  15.278  1.00  0.48           O  
HETATM  481  O   HOH T 480     -19.506  14.693  -2.438  1.00  0.48           O  
HETATM  482  O   HOH T 481       4.699   3.920  -2.520  1.00  0.48           O  
HETATM  483  O   HOH T 482      19.535  13.821  12.705  1.00  0.48           O  
HETATM  484  O   HOH T 483      -5.515  26.085  13.937  1.00  0.48           O  
HETATM  485  O   HOH T 484      19.250  -8.280  21.066  1.00  0.48           O  
HETATM  486  O   HOH T 485      26.645  11.280  22.175  1.00  0.48           O  
HETATM  487  O   HOH T 486     -15.481  20.133  42.847  1.00  0.48           O  
HETATM  488  O   HOH T 487     -26.321   7.562   7.294  1.00  0.48           O  
HETATM  489  O   HOH T 488      21.855   0.367   6.859  1.00  0.48           O  
HETATM  490  O   HOH T 489     -12.854  29.955  34.742  1.00  0.48           O  
HETATM  491  O   HOH T 490      29.159   0.081   5.917  1.00  0.48           O  
HETATM  492  O   HOH T 491       8.923  21.505  39.838  1.00  0.48           O  
HETATM  493  O   HOH T 492     -21.171  17.278  17.749  1.00  0.48           O  
HETATM  494  O   HOH T 493      -2.146   0.643 -16.535  1.00  0.48           O  
HETATM  495  O   HOH T 494      11.137  -5.231  21.828  1.00  0.48           O  
HETATM  496  O   HOH T 495       3.882   1.534   0.295  1.00  0.48           O  
HETATM  497  O   HOH T 496       7.126   9.451  -7.042  1.00  0.48           O  
HETATM  498  O   HOH T 497      -9.053   3.177  32.327  1.00  0.48           O  
HETATM  499  O   HOH T 498     -16.705   9.511  39.674  1.00  0.48           O  
HETATM  500  O   HOH T 499      -8.995   2.957   7.161  1.00  0.48           O  
HETATM  501  O   HOH T 500       1.270  12.624  42.102  1.00  0.48           O  
HETATM  502  O   HOH T 501     -15.351  18.778 -12.984  1.00  0.49           O  
HETATM  503  O   HOH T 502      10.116  31.162  17.748  1.00  0.49           O  
HETATM  504  O   HOH T 503       5.354  37.392  24.329  1.00  0.49           O  
HETATM  505  O   HOH T 504       3.705   4.678  37.725  1.00  0.49           O  
HETATM  506  O   HOH T 505      -9.202   5.424  -4.894  1.00  0.49           O  
HETATM  507  O   HOH T 506       1.913  31.292  45.354  1.00  0.49           O  
HETATM  508  O   HOH T 507       0.877  15.683   7.654  1.00  0.49           O  
HETATM  509  O   HOH T 508      -3.813  -2.349 -11.097  1.00  0.49           O  
HETATM  510  O   HOH T 509     -16.090  15.389  42.251  1.00  0.49           O  
HETATM  511  O   HOH T 510     -17.918  19.865 -12.267  1.00  0.49           O  
HETATM  512  O   HOH T 511      31.501   6.534  -3.952  1.00  0.49           O  
HETATM  513  O   HOH T 512      -2.365  30.917  50.858  1.00  0.49           O  
HETATM  514  O   HOH T 513     -14.535   7.333  -1.544  1.00  0.49           O  
HETATM  515  O   HOH T 514      18.661  38.139   4.894  1.00  0.49           O  
HETATM  516  O   HOH T 515      24.943  10.585  24.333  1.00  0.49           O  
HETATM  517  O   HOH T 516       5.563   7.801  38.047  1.00  0.49           O  
HETATM  518  O   HOH T 517      24.258   4.567  -6.463  1.00  0.49           O  
HETATM  519  O   HOH T 518       3.268  31.925  42.967  1.00  0.49           O  
HETATM  520  O   HOH T 519      22.925  -6.696  20.936  1.00  0.49           O  
HETATM  521  O   HOH T 520      25.984  22.871  -6.066  1.00  0.49           O  
HETATM  522  O   HOH T 521      -7.292   0.967   6.376  1.00  0.49           O  
HETATM  523  O   HOH T 522      25.956  13.931  21.851  1.00  0.49           O  
HETATM  524  O   HOH T 523      10.480  29.243  13.349  1.00  0.49           O  
HETATM  525  O   HOH T 524      -4.238   0.798   2.383  1.00  0.49           O  
HETATM  526  O   HOH T 525      13.023  28.523  23.822  1.00  0.49           O  
HETATM  527  O   HOH T 526       1.162   7.946   2.921  1.00  0.49           O  
HETATM  528  O   HOH T 527     -12.162  34.089  24.350  1.00  0.49           O  
HETATM  529  O   HOH T 528      35.919  26.784   7.262  1.00  0.49           O  
HETATM  530  O   HOH T 529     -11.690   4.051  31.963  1.00  0.49           O  
HETATM  531  O   HOH T 530      -9.424  24.162  51.726  1.00  0.49           O  
HETATM  532  O   HOH T 531       0.871   8.798 -14.870  1.00  0.49           O  
HETATM  533  O   HOH T 532      24.563  -5.059  19.443  1.00  0.49           O  
HETATM  534  O   HOH T 533      31.261  27.754   8.039  1.00  0.50           O  
HETATM  535  O   HOH T 534      31.056   3.119   4.942  1.00  0.50           O  
HETATM  536  O   HOH T 535      24.085   6.769  -8.156  1.00  0.50           O  
HETATM  537  O   HOH T 536      -9.952  26.860  51.124  1.00  0.50           O  
HETATM  538  O   HOH T 537     -14.653   6.486   4.114  1.00  0.50           O  
HETATM  539  O   HOH T 538       9.831  34.123   3.759  1.00  0.50           O  
HETATM  540  O   HOH T 539      25.073  28.422  21.874  1.00  0.50           O  
HETATM  541  O   HOH T 540      15.501  -0.105   5.403  1.00  0.50           O  
HETATM  542  O   HOH T 541     -21.722  19.296  19.563  1.00  0.50           O  
HETATM  543  O   HOH T 542      -0.850   5.668  -3.626  1.00  0.50           O  
HETATM  544  O   HOH T 543      -7.049  21.966  53.530  1.00  0.50           O  
HETATM  545  O   HOH T 544     -21.792  22.897  -8.307  1.00  0.50           O  
HETATM  546  O   HOH T 545     -17.461  17.070 -12.282  1.00  0.50           O  
HETATM  547  O   HOH T 546     -14.420  32.546  24.299  1.00  0.50           O  
HETATM  548  O   HOH T 547      14.892  -0.993  17.888  1.00  0.50           O  
HETATM  549  O   HOH T 548      22.758  35.645   2.589  1.00  0.50           O  
HETATM  550  O   HOH T 549      22.388  29.177  -8.592  1.00  0.50           O  
HETATM  551  O   HOH T 550       7.403  34.184   8.234  1.00  0.50           O  
HETATM  552  O   HOH T 551     -13.820   6.425   8.248  1.00  0.50           O  
HETATM  553  O   HOH T 552       1.975  28.661  48.855  1.00  0.50           O  
HETATM  554  O   HOH T 553     -12.887   7.595  36.120  1.00  0.50           O  
HETATM  555  O   HOH T 554      20.889  31.979   6.249  1.00  0.50           O  
HETATM  556  O   HOH T 555      -9.140  27.672  -3.385  1.00  0.50           O  
HETATM  557  O   HOH T 556      -9.474  31.057   2.088  1.00  0.50           O  
HETATM  558  O   HOH T 557      10.419  26.512  -5.849  1.00  0.50           O  
HETATM  559  O   HOH T 558       2.020  26.182  50.176  1.00  0.50           O  
HETATM  560  O   HOH T 559       8.699   0.000   1.250  1.00  0.50           O  
HETATM  561  O   HOH T 560      29.307  25.331   5.098  1.00  0.50           O  
HETATM  562  O   HOH T 561      -5.507  34.360  43.877  1.00  0.50           O  
HETATM  563  O   HOH T 562       8.915  31.589  38.049  1.00  0.50           O  
HETATM  564  O   HOH T 563     -11.145  25.162  -5.981  1.00  0.51           O  
HETATM  565  O   HOH T 564      13.883  26.482  19.477  1.00  0.51           O  
HETATM  566  O   HOH T 565      -5.438   0.421  42.754  1.00  0.51           O  
HETATM  567  O   HOH T 566       3.531  -2.139  -0.446  1.00  0.51           O  
HETATM  568  O   HOH T 567      25.633  23.089  25.953  1.00  0.51           O  
HETATM  569  O   HOH T 568      31.648   8.918  21.144  1.00  0.51           O  
HETATM  570  O   HOH T 569      13.029  15.002 -14.745  1.00  0.51           O  
HETATM  571  O   HOH T 570     -15.634  29.998  -0.832  1.00  0.51           O  
HETATM  572  O   HOH T 571      16.973   0.778  18.369  1.00  0.51           O  
HETATM  573  O   HOH T 572      11.068   0.773   2.340  1.00  0.51           O  
HETATM  574  O   HOH T 573     -28.515  16.292   3.479  1.00  0.51           O  
HETATM  575  O   HOH T 574      10.664   6.507  36.449  1.00  0.51           O  
HETATM  576  O   HOH T 575      17.595  30.706  -9.919  1.00  0.51           O  
HETATM  577  O   HOH T 576       1.344  26.130 -13.388  1.00  0.51           O  
HETATM  578  O   HOH T 577      -0.228  -2.673   3.423  1.00  0.51           O  
HETATM  579  O   HOH T 578     -12.951  17.493 -13.615  1.00  0.51           O  
HETATM  580  O   HOH T 579       9.076  32.942  10.102  1.00  0.51           O  
HETATM  581  O   HOH T 580      40.083  12.183   6.155  1.00  0.51           O  
HETATM  582  O   HOH T 581      -4.867  38.187  37.571  1.00  0.51           O  
HETATM  583  O   HOH T 582      18.075   8.333  21.712  1.00  0.51           O  
HETATM  584  O   HOH T 583     -12.376   3.629 -14.809  1.00  0.51           O  
HETATM  585  O   HOH T 584     -12.953   6.555   0.582  1.00  0.51           O  
HETATM  586  O   HOH T 585      12.316   0.123  17.753  1.00  0.51           O  
HETATM  587  O   HOH T 586     -13.965  31.441  45.130  1.00  0.51           O  
HETATM  588  O   HOH T 587       4.037  29.928  44.599  1.00  0.51           O  
HETATM  589  O   HOH T 588       2.434  11.133  40.147  1.00  0.51           O  
HETATM  590  O   HOH T 589     -10.825  30.770  51.354  1.00  0.51           O  
HETATM  591  O   HOH T 590      -9.612  30.015  -1.771  1.00  0.52           O  
HETATM  592  O   HOH T 591     -16.074  27.041  17.261  1.00  0.52           O  
HETATM  593  O   HOH T 592     -21.676  16.316  22.767  1.00  0.52           O  
HETATM  594  O   HOH T 593     -12.584   6.459  33.128  1.00  0.52           O  
HETATM  595  O   HOH T 594       8.651  39.095  27.017  1.00  0.52           O  
HETATM  596  O   HOH T 595      -1.566   0.010  26.017  1.00  0.52           O  
HETATM  597  O   HOH T 596      10.602  16.204 -17.083  1.00  0.52           O  
HETATM  598  O   HOH T 597       8.118  31.986  12.542  1.00  0.52           O  
HETATM  599  O   HOH T 598      22.651  29.268  20.466  1.00  0.52           O  
HETATM  600  O   HOH T 599       8.800  31.668  31.475  1.00  0.52           O  
HETATM  601  O   HOH T 600     -10.664   6.446  35.203  1.00  0.52           O  
HETATM  602  O   HOH T 601      -4.788   4.620  -2.388  1.00  0.52           O  
HETATM  603  O   HOH T 602      -3.181  24.484  13.589  1.00  0.52           O  
HETATM  604  O   HOH T 603      13.796  17.774  38.006  1.00  0.52           O  
HETATM  605  O   HOH T 604       8.698  30.342  -8.994  1.00  0.52           O  
HETATM  606  O   HOH T 605      -8.098   2.117  29.939  1.00  0.52           O  
HETATM  607  O   HOH T 606      10.854  25.018  37.074  1.00  0.52           O  
HETATM  608  O   HOH T 607     -21.141  11.340  23.433  1.00  0.52           O  
HETATM  609  O   HOH T 608      -5.810  37.602  35.001  1.00  0.52           O  
HETATM  610  O   HOH T 609      13.770  33.360   7.999  1.00  0.52           O  
HETATM  611  O   HOH T 610     -11.235  37.213  47.009  1.00  0.53           O  
HETATM  612  O   HOH T 611     -19.686  15.805  20.901  1.00  0.53           O  
HETATM  613  O   HOH T 612     -16.056  22.849  43.287  1.00  0.53           O  
HETATM  614  O   HOH T 613      27.661  30.984  10.480  1.00  0.53           O  
HETATM  615  O   HOH T 614      -9.071  19.480  25.489  1.00  0.53           O  
HETATM  616  O   HOH T 615       8.691  33.384 -10.629  1.00  0.53           O  
HETATM  617  O   HOH T 616      -1.501  33.420  42.162  1.00  0.53           O  
HETATM  618  O   HOH T 617     -11.559   5.019  18.834  1.00  0.53           O  
HETATM  619  O   HOH T 618      -9.410  12.228 -22.088  1.00  0.53           O  
HETATM  620  O   HOH T 619     -26.096   6.605   2.399  1.00  0.53           O  
HETATM  621  O   HOH T 620      -8.875   1.287  34.380  1.00  0.53           O  
HETATM  622  O   HOH T 621     -11.202  25.668  45.247  1.00  0.53           O  
HETATM  623  O   HOH T 622      36.290  20.072  10.244  1.00  0.53           O  
HETATM  624  O   HOH T 623       5.385  -7.206  24.990  1.00  0.53           O  
HETATM  625  O   HOH T 624      -7.021   5.593  -3.399  1.00  0.53           O  
HETATM  626  O   HOH T 625      -6.427   4.932  -4.978  1.00  0.53           O  
HETATM  627  O   HOH T 626     -14.771   5.639  37.074  1.00  0.53           O  
HETATM  628  O   HOH T 627      30.240  30.770  -0.022  1.00  0.53           O  
HETATM  629  O   HOH T 628     -24.178  18.602  14.772  1.00  0.53           O  
HETATM  630  O   HOH T 629      26.202  25.617  -5.582  1.00  0.53           O  
HETATM  631  O   HOH T 630      -8.437  25.380  49.355  1.00  0.53           O  
HETATM  632  O   HOH T 631     -17.245  24.294  24.364  1.00  0.53           O  
HETATM  633  O   HOH T 632      -9.850  22.767  49.402  1.00  0.53           O  
HETATM  634  O   HOH T 633       8.927   8.070  38.284  1.00  0.53           O  
HETATM  635  O   HOH T 634      -2.325  39.838  25.722  1.00  0.53           O  
HETATM  636  O   HOH T 635     -12.437  13.893 -19.840  1.00  0.53           O  
HETATM  637  O   HOH T 636      12.870  33.179 -11.292  1.00  0.53           O  
HETATM  638  O   HOH T 637      11.197  36.439   3.560  1.00  0.53           O  
HETATM  639  O   HOH T 638     -13.137  30.844  32.037  1.00  0.53           O  
HETATM  640  O   HOH T 639      18.465  17.838  22.976  1.00  0.53           O  
HETATM  641  O   HOH T 640       6.408  34.509  -9.552  1.00  0.53           O  
HETATM  642  O   HOH T 641     -12.264   4.678  36.598  1.00  0.53           O  
HETATM  643  O   HOH T 642       2.190  13.937  39.748  1.00  0.53           O  
HETATM  644  O   HOH T 643      -4.965  39.705  25.222  1.00  0.54           O  
HETATM  645  O   HOH T 644       9.769  13.667 -17.086  1.00  0.54           O  
HETATM  646  O   HOH T 645      -0.099   0.137  -0.899  1.00  0.54           O  
HETATM  647  O   HOH T 646     -17.692  12.164  10.458  1.00  0.54           O  
HETATM  648  O   HOH T 647     -19.868  27.121  17.021  1.00  0.54           O  
HETATM  649  O   HOH T 648      29.083  28.394   9.742  1.00  0.54           O  
HETATM  650  O   HOH T 649      -7.961  34.799   3.713  1.00  0.54           O  
HETATM  651  O   HOH T 650     -13.919   7.908 -13.840  1.00  0.54           O  
HETATM  652  O   HOH T 651      29.529  24.300   0.807  1.00  0.54           O  
HETATM  653  O   HOH T 652     -12.202  22.726  -6.658  1.00  0.54           O  
HETATM  654  O   HOH T 653      28.953  27.032  14.090  1.00  0.54           O  
HETATM  655  O   HOH T 654     -21.943  13.782  23.527  1.00  0.54           O  
HETATM  656  O   HOH T 655      -7.300   5.396  26.757  1.00  0.54           O  
HETATM  657  O   HOH T 656       8.905  20.225  11.299  1.00  0.54           O  
HETATM  658  O   HOH T 657      22.029  18.472 -13.790  1.00  0.54           O  
HETATM  659  O   HOH T 658     -13.357  33.269  26.775  1.00  0.54           O  
HETATM  660  O   HOH T 659      21.282  13.928  33.915  1.00  0.54           O  
HETATM  661  O   HOH T 660      -7.612   4.519   0.911  1.00  0.54           O  
HETATM  662  O   HOH T 661     -21.162  13.641  21.871  1.00  0.55           O  
HETATM  663  O   HOH T 662      33.434   7.912  -2.527  1.00  0.55           O  
HETATM  664  O   HOH T 663      -9.258  35.556  39.789  1.00  0.55           O  
HETATM  665  O   HOH T 664       1.579   2.924  37.337  1.00  0.55           O  
HETATM  666  O   HOH T 665      -8.614  11.455  46.930  1.00  0.55           O  
HETATM  667  O   HOH T 666     -10.014   8.894  31.219  1.00  0.55           O  
HETATM  668  O   HOH T 667       0.700  35.013  26.200  1.00  0.55           O  
HETATM  669  O   HOH T 668      18.024  26.091  20.644  1.00  0.55           O  
HETATM  670  O   HOH T 669     -12.136  34.804  45.453  1.00  0.55           O  
HETATM  671  O   HOH T 670      14.789  19.959  17.482  1.00  0.55           O  
HETATM  672  O   HOH T 671     -18.687   8.610  22.944  1.00  0.56           O  
HETATM  673  O   HOH T 672      19.314   5.669  -9.924  1.00  0.56           O  
HETATM  674  O   HOH T 673      28.279  26.900  -3.816  1.00  0.56           O  
HETATM  675  O   HOH T 674      12.069   5.647  -4.251  1.00  0.56           O  
HETATM  676  O   HOH T 675       8.003   4.929   9.243  1.00  0.56           O  
HETATM  677  O   HOH T 676     -15.509  16.035  36.292  1.00  0.56           O  
HETATM  678  O   HOH T 677      15.388  -0.887  11.415  1.00  0.56           O  
HETATM  679  O   HOH T 678      34.992  16.985  12.959  1.00  0.56           O  
HETATM  680  O   HOH T 679      35.863  24.215   6.347  1.00  0.56           O  
HETATM  681  O   HOH T 680      17.613  -1.738   9.676  1.00  0.56           O  
HETATM  682  O   HOH T 681      19.560  20.003 -16.249  1.00  0.56           O  
HETATM  683  O   HOH T 682      22.794  -3.402  29.222  1.00  0.56           O  
HETATM  684  O   HOH T 683     -13.011  30.684  -0.818  1.00  0.56           O  
HETATM  685  O   HOH T 684      22.816  12.242  25.234  1.00  0.56           O  
HETATM  686  O   HOH T 685      17.824  39.056   2.481  1.00  0.56           O  
HETATM  687  O   HOH T 686     -20.225   6.364   8.754  1.00  0.56           O  
HETATM  688  O   HOH T 687      15.540  16.303 -15.358  1.00  0.56           O  
HETATM  689  O   HOH T 688      34.319   5.512   4.036  1.00  0.56           O  
HETATM  690  O   HOH T 689     -17.126  24.234  -6.341  1.00  0.56           O  
HETATM  691  O   HOH T 690       3.331   1.628  12.869  1.00  0.56           O  
HETATM  692  O   HOH T 691      20.918  39.192  -4.190  1.00  0.57           O  
HETATM  693  O   HOH T 692     -11.561   3.216  41.373  1.00  0.57           O  
HETATM  694  O   HOH T 693      27.668   4.235  22.845  1.00  0.57           O  
HETATM  695  O   HOH T 694      11.358   8.896  39.556  1.00  0.57           O  
HETATM  696  O   HOH T 695     -14.709  25.127  44.483  1.00  0.57           O  
HETATM  697  O   HOH T 696      23.387  -0.417   0.091  1.00  0.57           O  
HETATM  698  O   HOH T 697       9.278  29.414  30.161  1.00  0.57           O  
HETATM  699  O   HOH T 698      24.528  13.086 -13.168  1.00  0.57           O  
HETATM  700  O   HOH T 699      10.776  -1.705  16.250  1.00  0.57           O  
HETATM  701  O   HOH T 700      28.343  15.158  23.056  1.00  0.57           O  
HETATM  702  O   HOH T 701      25.170  26.678 -10.320  1.00  0.57           O  
HETATM  703  O   HOH T 702      -9.012  33.889  -1.531  1.00  0.58           O  
HETATM  704  O   HOH T 703       7.297  38.868  22.676  1.00  0.58           O  
HETATM  705  O   HOH T 704     -16.278  18.724 -10.361  1.00  0.58           O  
HETATM  706  O   HOH T 705      29.113   4.869  27.509  1.00  0.58           O  
HETATM  707  O   HOH T 706     -11.212  18.448  -8.046  1.00  0.58           O  
HETATM  708  O   HOH T 707     -10.500   3.439  11.343  1.00  0.58           O  
HETATM  709  O   HOH T 708      11.200  -2.063   5.198  1.00  0.58           O  
HETATM  710  O   HOH T 709       4.082   6.257  -6.261  1.00  0.58           O  
HETATM  711  O   HOH T 710      -3.910  35.996  39.062  1.00  0.58           O  
HETATM  712  O   HOH T 711      32.591  21.022   4.907  1.00  0.59           O  
HETATM  713  O   HOH T 712     -20.279  20.248  -4.113  1.00  0.59           O  
HETATM  714  O   HOH T 713      25.102  20.247  -5.982  1.00  0.59           O  
HETATM  715  O   HOH T 714      17.925  34.894  -9.927  1.00  0.59           O  
HETATM  716  O   HOH T 715      17.046  -9.060  22.498  1.00  0.59           O  
HETATM  717  O   HOH T 716      -8.064  22.000  -8.100  1.00  0.59           O  
HETATM  718  O   HOH T 717      -6.225  39.023  22.814  1.00  0.59           O  
HETATM  719  O   HOH T 718     -28.311  12.118   8.130  1.00  0.60           O  
HETATM  720  O   HOH T 719      25.933  37.154  -0.608  1.00  0.60           O  
HETATM  721  O   HOH T 720     -18.546   7.452  19.525  1.00  0.60           O  
HETATM  722  O   HOH T 721      25.010  29.085  -8.929  1.00  0.60           O  
TER     723      HOH T 721 
