# Supplementary material for: Accurate Prediction of Hydration Sites of Proteins Using Energy Model With Atom Embedding
Source: Front Mol Biosci. 2021 Sep 20;8:756075. doi: 10.3389/fmolb.2021.756075 (PMC8488165; doi:10.3389/fmolb.2021.756075)
Supplement: Supplementary file 1 [file DataSheet1.ZIP › Data Sheet 1/Our_result_pdb/OppA_dataset_output/1JET_watersite.pdb]

HEADER                                                        XXXX


JRNL        PMID   -1
HETATM    1  O   HOH T   0     -22.070  20.864  -2.909  1.00  0.16           O  
HETATM    2  O   HOH T   1      17.275  13.530   4.763  1.00  0.17           O  
HETATM    3  O   HOH T   2      22.948  23.638  -1.154  1.00  0.17           O  
HETATM    4  O   HOH T   3       7.402  15.535 -10.355  1.00  0.17           O  
HETATM    5  O   HOH T   4      -7.062   9.195   7.408  1.00  0.18           O  
HETATM    6  O   HOH T   5      14.172  16.746  30.878  1.00  0.18           O  
HETATM    7  O   HOH T   6      18.946  20.016   6.322  1.00  0.18           O  
HETATM    8  O   HOH T   7      -1.972   8.580  10.090  1.00  0.18           O  
HETATM    9  O   HOH T   8       5.284  15.068  -3.706  1.00  0.18           O  
HETATM   10  O   HOH T   9      19.788  26.130  13.970  1.00  0.18           O  
HETATM   11  O   HOH T  10       5.381   3.888  30.970  1.00  0.19           O  
HETATM   12  O   HOH T  11       6.882  10.797  -8.809  1.00  0.19           O  
HETATM   13  O   HOH T  12       8.613   1.427  25.661  1.00  0.19           O  
HETATM   14  O   HOH T  13       0.267   1.208  37.215  1.00  0.20           O  
HETATM   15  O   HOH T  14       0.850  12.715  -8.303  1.00  0.20           O  
HETATM   16  O   HOH T  15      15.425  15.365  -8.391  1.00  0.20           O  
HETATM   17  O   HOH T  16      -8.038  22.994  23.242  1.00  0.20           O  
HETATM   18  O   HOH T  17      -1.727  28.551   2.068  1.00  0.21           O  
HETATM   19  O   HOH T  18       3.054   5.397  30.786  1.00  0.21           O  
HETATM   20  O   HOH T  19       3.022  17.030   7.894  1.00  0.21           O  
HETATM   21  O   HOH T  20      -4.680  23.232  -7.402  1.00  0.21           O  
HETATM   22  O   HOH T  21      21.845  15.087 -11.533  1.00  0.21           O  
HETATM   23  O   HOH T  22     -20.708  22.861   1.855  1.00  0.21           O  
HETATM   24  O   HOH T  23      11.221  13.735  16.732  1.00  0.22           O  
HETATM   25  O   HOH T  24      -1.109  30.444  28.375  1.00  0.22           O  
HETATM   26  O   HOH T  25       9.945  31.038   4.145  1.00  0.22           O  
HETATM   27  O   HOH T  26      24.428  21.954  23.219  1.00  0.22           O  
HETATM   28  O   HOH T  27     -11.663   4.671 -12.794  1.00  0.22           O  
HETATM   29  O   HOH T  28      17.108   5.372  21.952  1.00  0.22           O  
HETATM   30  O   HOH T  29      12.865  -1.006  22.050  1.00  0.22           O  
HETATM   31  O   HOH T  30      -1.606   8.310   6.217  1.00  0.22           O  
HETATM   32  O   HOH T  31      31.073  11.217   8.267  1.00  0.22           O  
HETATM   33  O   HOH T  32      -2.064  21.926  13.079  1.00  0.23           O  
HETATM   34  O   HOH T  33      -0.987   6.676   0.829  1.00  0.23           O  
HETATM   35  O   HOH T  34     -11.871  14.511 -16.857  1.00  0.23           O  
HETATM   36  O   HOH T  35      -2.519  38.844   9.968  1.00  0.23           O  
HETATM   37  O   HOH T  36       9.170   6.615   6.644  1.00  0.23           O  
HETATM   38  O   HOH T  37      -0.491  30.989   1.878  1.00  0.23           O  
HETATM   39  O   HOH T  38      -9.610  11.966  33.293  1.00  0.23           O  
HETATM   40  O   HOH T  39       9.684   9.102  -5.721  1.00  0.24           O  
HETATM   41  O   HOH T  40       1.518  21.623  19.142  1.00  0.24           O  
HETATM   42  O   HOH T  41      -6.741  13.791  12.539  1.00  0.24           O  
HETATM   43  O   HOH T  42      -3.551  37.716  14.100  1.00  0.24           O  
HETATM   44  O   HOH T  43      -4.347  27.550  13.726  1.00  0.24           O  
HETATM   45  O   HOH T  44     -11.735  31.944  29.376  1.00  0.24           O  
HETATM   46  O   HOH T  45      27.569  15.855  20.480  1.00  0.24           O  
HETATM   47  O   HOH T  46      -7.914  13.008  16.219  1.00  0.24           O  
HETATM   48  O   HOH T  47       8.049  15.473  -3.348  1.00  0.24           O  
HETATM   49  O   HOH T  48       3.064   4.130  35.182  1.00  0.24           O  
HETATM   50  O   HOH T  49      -4.362  19.489  16.167  1.00  0.24           O  
HETATM   51  O   HOH T  50       8.617  24.066   2.067  1.00  0.25           O  
HETATM   52  O   HOH T  51       7.591  24.336   4.727  1.00  0.25           O  
HETATM   53  O   HOH T  52      -2.458   4.730   9.829  1.00  0.25           O  
HETATM   54  O   HOH T  53     -12.742  11.200  20.584  1.00  0.25           O  
HETATM   55  O   HOH T  54      11.268  18.440   3.109  1.00  0.25           O  
HETATM   56  O   HOH T  55      28.719   2.968   6.197  1.00  0.25           O  
HETATM   57  O   HOH T  56      28.288  26.819  16.327  1.00  0.25           O  
HETATM   58  O   HOH T  57       5.710  20.062  24.847  1.00  0.25           O  
HETATM   59  O   HOH T  58      -9.803  21.018   9.074  1.00  0.26           O  
HETATM   60  O   HOH T  59       8.892  22.180  18.502  1.00  0.26           O  
HETATM   61  O   HOH T  60      -4.923  34.797  33.640  1.00  0.26           O  
HETATM   62  O   HOH T  61      -1.729  35.695  16.668  1.00  0.26           O  
HETATM   63  O   HOH T  62       6.512  30.292  14.452  1.00  0.26           O  
HETATM   64  O   HOH T  63       6.405  32.979  10.420  1.00  0.26           O  
HETATM   65  O   HOH T  64       3.248  -7.200  25.308  1.00  0.27           O  
HETATM   66  O   HOH T  65      -0.471   5.821  -6.212  1.00  0.27           O  
HETATM   67  O   HOH T  66      17.952  26.550  17.582  1.00  0.27           O  
HETATM   68  O   HOH T  67      -0.178   0.612  -0.817  1.00  0.27           O  
HETATM   69  O   HOH T  68       5.923   8.037   7.353  1.00  0.27           O  
HETATM   70  O   HOH T  69      26.826  13.541  19.117  1.00  0.27           O  
HETATM   71  O   HOH T  70      10.242  23.424   4.149  1.00  0.27           O  
HETATM   72  O   HOH T  71      13.115  24.412  26.959  1.00  0.27           O  
HETATM   73  O   HOH T  72      -1.627   7.402   3.542  1.00  0.27           O  
HETATM   74  O   HOH T  73     -13.126  13.708 -14.511  1.00  0.28           O  
HETATM   75  O   HOH T  74      15.222  14.816  -5.732  1.00  0.28           O  
HETATM   76  O   HOH T  75     -18.606  15.952  16.785  1.00  0.28           O  
HETATM   77  O   HOH T  76     -20.164  15.945   0.384  1.00  0.28           O  
HETATM   78  O   HOH T  77       4.133  10.476  30.827  1.00  0.28           O  
HETATM   79  O   HOH T  78       1.082   5.117  38.910  1.00  0.28           O  
HETATM   80  O   HOH T  79      -8.461  10.973  46.022  1.00  0.28           O  
HETATM   81  O   HOH T  80     -11.895  27.714  34.330  1.00  0.28           O  
HETATM   82  O   HOH T  81      10.633   7.083   8.942  1.00  0.28           O  
HETATM   83  O   HOH T  82     -10.228  16.117  15.047  1.00  0.28           O  
HETATM   84  O   HOH T  83     -15.373  31.917   5.655  1.00  0.28           O  
HETATM   85  O   HOH T  84      -4.540  36.186  22.062  1.00  0.29           O  
HETATM   86  O   HOH T  85      17.538  31.268  -7.330  1.00  0.29           O  
HETATM   87  O   HOH T  86     -16.043  26.973  -1.813  1.00  0.29           O  
HETATM   88  O   HOH T  87      -4.380  -3.023  35.025  1.00  0.29           O  
HETATM   89  O   HOH T  88      -8.270  27.303  41.992  1.00  0.29           O  
HETATM   90  O   HOH T  89      21.505   6.751 -10.121  1.00  0.29           O  
HETATM   91  O   HOH T  90       9.743  13.416  -2.470  1.00  0.29           O  
HETATM   92  O   HOH T  91     -15.211  22.306  16.304  1.00  0.29           O  
HETATM   93  O   HOH T  92      14.723  14.629   4.790  1.00  0.29           O  
HETATM   94  O   HOH T  93      11.678  25.688  -7.394  1.00  0.29           O  
HETATM   95  O   HOH T  94     -18.654  10.693 -11.463  1.00  0.29           O  
HETATM   96  O   HOH T  95     -10.989  24.094  -6.414  1.00  0.29           O  
HETATM   97  O   HOH T  96      -1.416  31.299  37.548  1.00  0.29           O  
HETATM   98  O   HOH T  97      20.052  23.587  23.402  1.00  0.29           O  
HETATM   99  O   HOH T  98       6.528  -4.104  21.916  1.00  0.30           O  
HETATM  100  O   HOH T  99      12.157  21.276  10.198  1.00  0.30           O  
HETATM  101  O   HOH T 100      16.914   9.151  19.415  1.00  0.30           O  
HETATM  102  O   HOH T 101       7.354  21.820  20.799  1.00  0.30           O  
HETATM  103  O   HOH T 102       9.697  30.295  10.775  1.00  0.30           O  
HETATM  104  O   HOH T 103      18.826  18.224  33.108  1.00  0.30           O  
HETATM  105  O   HOH T 104      -8.528  36.427   6.247  1.00  0.30           O  
HETATM  106  O   HOH T 105      33.294  15.926  -4.445  1.00  0.30           O  
HETATM  107  O   HOH T 106       4.792  35.362  -2.720  1.00  0.30           O  
HETATM  108  O   HOH T 107      11.890   1.080   9.270  1.00  0.30           O  
HETATM  109  O   HOH T 108      -0.554   0.618   8.868  1.00  0.31           O  
HETATM  110  O   HOH T 109       7.927  32.466  37.422  1.00  0.31           O  
HETATM  111  O   HOH T 110     -13.343   6.722 -13.471  1.00  0.31           O  
HETATM  112  O   HOH T 111      21.906  -4.334  26.189  1.00  0.31           O  
HETATM  113  O   HOH T 112       5.452  31.674 -10.692  1.00  0.31           O  
HETATM  114  O   HOH T 113      -2.499  19.640   4.054  1.00  0.31           O  
HETATM  115  O   HOH T 114     -22.355  19.157  -0.773  1.00  0.31           O  
HETATM  116  O   HOH T 115     -20.371   8.046   1.253  1.00  0.31           O  
HETATM  117  O   HOH T 116     -12.455   6.800  23.573  1.00  0.31           O  
HETATM  118  O   HOH T 117     -22.723  16.762  13.566  1.00  0.31           O  
HETATM  119  O   HOH T 118      -8.885  27.038  -3.727  1.00  0.31           O  
HETATM  120  O   HOH T 119      -9.104  23.640   9.350  1.00  0.31           O  
HETATM  121  O   HOH T 120      -7.169   7.393  -2.036  1.00  0.31           O  
HETATM  122  O   HOH T 121       8.427  12.361   5.209  1.00  0.31           O  
HETATM  123  O   HOH T 122      12.931  13.479   2.900  1.00  0.31           O  
HETATM  124  O   HOH T 123     -10.553   8.710  -2.048  1.00  0.31           O  
HETATM  125  O   HOH T 124     -12.063  10.447  32.702  1.00  0.32           O  
HETATM  126  O   HOH T 125       2.844   8.093  31.397  1.00  0.32           O  
HETATM  127  O   HOH T 126      -8.800  27.378  44.687  1.00  0.32           O  
HETATM  128  O   HOH T 127      13.640  29.454  13.134  1.00  0.32           O  
HETATM  129  O   HOH T 128      -5.903   1.588   3.398  1.00  0.32           O  
HETATM  130  O   HOH T 129      -1.192  14.913   8.942  1.00  0.32           O  
HETATM  131  O   HOH T 130       4.060  12.968  11.356  1.00  0.32           O  
HETATM  132  O   HOH T 131      23.249  12.943  -6.693  1.00  0.32           O  
HETATM  133  O   HOH T 132      21.573  25.342  -8.263  1.00  0.32           O  
HETATM  134  O   HOH T 133     -17.997  26.711   0.147  1.00  0.32           O  
HETATM  135  O   HOH T 134     -14.091  29.069  28.375  1.00  0.32           O  
HETATM  136  O   HOH T 135       3.354  34.759  -5.083  1.00  0.32           O  
HETATM  137  O   HOH T 136     -15.782  27.386  29.864  1.00  0.32           O  
HETATM  138  O   HOH T 137     -10.907  29.586  17.248  1.00  0.32           O  
HETATM  139  O   HOH T 138      -7.639  23.295  11.738  1.00  0.32           O  
HETATM  140  O   HOH T 139      -4.631   6.464  16.446  1.00  0.32           O  
HETATM  141  O   HOH T 140      10.271  14.984  -0.223  1.00  0.32           O  
HETATM  142  O   HOH T 141      20.075   0.511   1.630  1.00  0.32           O  
HETATM  143  O   HOH T 142      23.031  -3.515  28.489  1.00  0.32           O  
HETATM  144  O   HOH T 143       7.831  19.180  21.463  1.00  0.32           O  
HETATM  145  O   HOH T 144      17.966  17.557  22.824  1.00  0.32           O  
HETATM  146  O   HOH T 145      12.172  30.191  -8.612  1.00  0.33           O  
HETATM  147  O   HOH T 146      -6.653   6.609 -17.816  1.00  0.33           O  
HETATM  148  O   HOH T 147      -8.143  15.745  16.918  1.00  0.33           O  
HETATM  149  O   HOH T 148       3.373   7.935   3.617  1.00  0.33           O  
HETATM  150  O   HOH T 149      16.993  -6.801  21.341  1.00  0.33           O  
HETATM  151  O   HOH T 150      10.121  13.559   3.252  1.00  0.33           O  
HETATM  152  O   HOH T 151       1.839  26.753  44.585  1.00  0.33           O  
HETATM  153  O   HOH T 152      -4.812  33.780  43.228  1.00  0.33           O  
HETATM  154  O   HOH T 153       9.700  33.998   1.071  1.00  0.33           O  
HETATM  155  O   HOH T 154      -0.616  -0.434  35.153  1.00  0.33           O  
HETATM  156  O   HOH T 155      22.093  25.366  17.293  1.00  0.34           O  
HETATM  157  O   HOH T 156      13.386  23.446  11.432  1.00  0.34           O  
HETATM  158  O   HOH T 157      13.032  14.508 -14.592  1.00  0.34           O  
HETATM  159  O   HOH T 158       4.136  33.885  -7.629  1.00  0.34           O  
HETATM  160  O   HOH T 159      -6.410  25.507  -6.870  1.00  0.34           O  
HETATM  161  O   HOH T 160      33.078  18.026   9.723  1.00  0.34           O  
HETATM  162  O   HOH T 161     -21.971   9.728  13.246  1.00  0.34           O  
HETATM  163  O   HOH T 162     -11.984   3.987   9.573  1.00  0.34           O  
HETATM  164  O   HOH T 163       3.687  -8.045  22.702  1.00  0.34           O  
HETATM  165  O   HOH T 164      11.747  27.213  24.246  1.00  0.34           O  
HETATM  166  O   HOH T 165       7.097  -3.901  29.583  1.00  0.34           O  
HETATM  167  O   HOH T 166     -17.958  13.678  -3.319  1.00  0.34           O  
HETATM  168  O   HOH T 167      28.364  21.219  24.491  1.00  0.34           O  
HETATM  169  O   HOH T 168      30.839  18.750   8.252  1.00  0.34           O  
HETATM  170  O   HOH T 169      29.118  21.524   1.167  1.00  0.34           O  
HETATM  171  O   HOH T 170      31.677   5.508   4.005  1.00  0.34           O  
HETATM  172  O   HOH T 171      11.598   0.432   5.124  1.00  0.34           O  
HETATM  173  O   HOH T 172       4.528   8.051  37.155  1.00  0.35           O  
HETATM  174  O   HOH T 173      11.148  21.050  34.848  1.00  0.35           O  
HETATM  175  O   HOH T 174       1.762   1.192   7.320  1.00  0.35           O  
HETATM  176  O   HOH T 175      10.307  39.661  -0.590  1.00  0.35           O  
HETATM  177  O   HOH T 176      13.836  22.619  28.913  1.00  0.35           O  
HETATM  178  O   HOH T 177       5.457  33.650  37.446  1.00  0.35           O  
HETATM  179  O   HOH T 178       2.627   2.333 -11.853  1.00  0.35           O  
HETATM  180  O   HOH T 179     -19.324   9.775  13.956  1.00  0.35           O  
HETATM  181  O   HOH T 180     -23.912  18.847  12.176  1.00  0.35           O  
HETATM  182  O   HOH T 181      -7.905   5.618   4.797  1.00  0.35           O  
HETATM  183  O   HOH T 182      -2.391  35.353  23.589  1.00  0.35           O  
HETATM  184  O   HOH T 183     -11.460   5.170   7.170  1.00  0.35           O  
HETATM  185  O   HOH T 184      -5.616  26.144  50.426  1.00  0.35           O  
HETATM  186  O   HOH T 185       9.067   1.303  -0.301  1.00  0.35           O  
HETATM  187  O   HOH T 186      -3.836  17.171 -16.297  1.00  0.35           O  
HETATM  188  O   HOH T 187      13.587  26.296  20.762  1.00  0.35           O  
HETATM  189  O   HOH T 188     -29.023  14.708   1.896  1.00  0.35           O  
HETATM  190  O   HOH T 189      26.304   4.278  23.502  1.00  0.36           O  
HETATM  191  O   HOH T 190       4.836  10.397 -17.366  1.00  0.36           O  
HETATM  192  O   HOH T 191       8.870  38.131  -4.265  1.00  0.36           O  
HETATM  193  O   HOH T 192      -6.497   0.043  11.676  1.00  0.36           O  
HETATM  194  O   HOH T 193       4.816  -6.420  27.416  1.00  0.36           O  
HETATM  195  O   HOH T 194      -8.900   8.008  33.140  1.00  0.36           O  
HETATM  196  O   HOH T 195      15.873  -8.805  24.539  1.00  0.36           O  
HETATM  197  O   HOH T 196      -8.337  18.128 -11.064  1.00  0.36           O  
HETATM  198  O   HOH T 197     -17.037  29.938   6.823  1.00  0.36           O  
HETATM  199  O   HOH T 198      13.424  26.955  -9.230  1.00  0.36           O  
HETATM  200  O   HOH T 199       8.445  -2.214   7.229  1.00  0.36           O  
HETATM  201  O   HOH T 200      -0.926  30.824  46.409  1.00  0.36           O  
HETATM  202  O   HOH T 201     -18.207  28.263   2.420  1.00  0.36           O  
HETATM  203  O   HOH T 202      13.862   1.257   2.044  1.00  0.36           O  
HETATM  204  O   HOH T 203      -0.954  40.121  19.618  1.00  0.36           O  
HETATM  205  O   HOH T 204      -5.095  17.051   3.320  1.00  0.36           O  
HETATM  206  O   HOH T 205      -4.127  32.529  40.741  1.00  0.36           O  
HETATM  207  O   HOH T 206      -7.194  31.489   6.470  1.00  0.36           O  
HETATM  208  O   HOH T 207       2.254  -1.004   5.877  1.00  0.36           O  
HETATM  209  O   HOH T 208      29.853  25.209  -1.547  1.00  0.36           O  
HETATM  210  O   HOH T 209       8.286  28.953  16.178  1.00  0.36           O  
HETATM  211  O   HOH T 210      -9.258  14.874  12.797  1.00  0.36           O  
HETATM  212  O   HOH T 211      11.617  29.294  36.926  1.00  0.36           O  
HETATM  213  O   HOH T 212      -6.540  34.113  41.057  1.00  0.36           O  
HETATM  214  O   HOH T 213     -26.139   7.120   6.752  1.00  0.36           O  
HETATM  215  O   HOH T 214       2.909   9.049   1.068  1.00  0.37           O  
HETATM  216  O   HOH T 215     -26.913  21.025   9.716  1.00  0.37           O  
HETATM  217  O   HOH T 216       9.254  -5.491  30.239  1.00  0.37           O  
HETATM  218  O   HOH T 217       3.488  20.296  20.663  1.00  0.37           O  
HETATM  219  O   HOH T 218     -16.998  25.862  -4.192  1.00  0.37           O  
HETATM  220  O   HOH T 219       8.967  22.768  37.217  1.00  0.37           O  
HETATM  221  O   HOH T 220     -16.853  11.386  33.042  1.00  0.37           O  
HETATM  222  O   HOH T 221     -20.776  16.624  15.185  1.00  0.37           O  
HETATM  223  O   HOH T 222       5.765  -1.880  20.341  1.00  0.37           O  
HETATM  224  O   HOH T 223      10.298  23.497  39.545  1.00  0.37           O  
HETATM  225  O   HOH T 224       1.822  10.645  13.503  1.00  0.37           O  
HETATM  226  O   HOH T 225      -6.453  33.210  50.363  1.00  0.37           O  
HETATM  227  O   HOH T 226       7.544  -0.876   0.169  1.00  0.37           O  
HETATM  228  O   HOH T 227      25.924   7.174  -5.321  1.00  0.37           O  
HETATM  229  O   HOH T 228     -10.271  16.913 -12.619  1.00  0.37           O  
HETATM  230  O   HOH T 229       1.542   4.855 -12.474  1.00  0.38           O  
HETATM  231  O   HOH T 230      11.404  10.283 -14.143  1.00  0.38           O  
HETATM  232  O   HOH T 231      27.951  24.033  -3.145  1.00  0.38           O  
HETATM  233  O   HOH T 232     -11.419  37.156  46.394  1.00  0.38           O  
HETATM  234  O   HOH T 233       2.178  36.059  22.611  1.00  0.38           O  
HETATM  235  O   HOH T 234     -20.103  13.846  -1.510  1.00  0.38           O  
HETATM  236  O   HOH T 235     -13.233  31.092  44.008  1.00  0.38           O  
HETATM  237  O   HOH T 236      15.460  23.378  25.801  1.00  0.38           O  
HETATM  238  O   HOH T 237       6.504  32.765   6.271  1.00  0.38           O  
HETATM  239  O   HOH T 238      15.764  -0.023  16.396  1.00  0.38           O  
HETATM  240  O   HOH T 239       8.452  19.448  24.182  1.00  0.38           O  
HETATM  241  O   HOH T 240       1.631  38.620   6.540  1.00  0.38           O  
HETATM  242  O   HOH T 241     -13.868   8.933  -0.635  1.00  0.38           O  
HETATM  243  O   HOH T 242      27.337  -2.864  10.311  1.00  0.38           O  
HETATM  244  O   HOH T 243      -6.351   4.883  -3.184  1.00  0.38           O  
HETATM  245  O   HOH T 244       9.906  30.665  17.565  1.00  0.38           O  
HETATM  246  O   HOH T 245      11.206   1.036   1.415  1.00  0.38           O  
HETATM  247  O   HOH T 246      21.525  10.949  24.296  1.00  0.38           O  
HETATM  248  O   HOH T 247      18.658  -3.693  19.653  1.00  0.38           O  
HETATM  249  O   HOH T 248      -0.781  32.861  27.232  1.00  0.38           O  
HETATM  250  O   HOH T 249      19.585  21.751  21.473  1.00  0.38           O  
HETATM  251  O   HOH T 250       2.945   6.152  33.376  1.00  0.38           O  
HETATM  252  O   HOH T 251      13.208  21.612  36.455  1.00  0.38           O  
HETATM  253  O   HOH T 252     -20.860  16.962  17.967  1.00  0.38           O  
HETATM  254  O   HOH T 253      10.652  15.968   4.320  1.00  0.38           O  
HETATM  255  O   HOH T 254      30.722   2.968   4.228  1.00  0.39           O  
HETATM  256  O   HOH T 255       8.620  31.617  30.897  1.00  0.39           O  
HETATM  257  O   HOH T 256      19.553   9.000  23.827  1.00  0.39           O  
HETATM  258  O   HOH T 257      22.855  14.465  -8.980  1.00  0.39           O  
HETATM  259  O   HOH T 258      23.559   4.897  -9.671  1.00  0.39           O  
HETATM  260  O   HOH T 259      14.400  31.626   5.672  1.00  0.39           O  
HETATM  261  O   HOH T 260      -9.721  30.156   9.261  1.00  0.39           O  
HETATM  262  O   HOH T 261      22.642  26.807  22.369  1.00  0.39           O  
HETATM  263  O   HOH T 262      24.440   6.554  -7.584  1.00  0.39           O  
HETATM  264  O   HOH T 263      -1.035   3.089  -5.674  1.00  0.39           O  
HETATM  265  O   HOH T 264      -0.560   7.345  39.021  1.00  0.39           O  
HETATM  266  O   HOH T 265       2.927  34.968   7.624  1.00  0.39           O  
HETATM  267  O   HOH T 266     -14.446  18.034  -8.944  1.00  0.39           O  
HETATM  268  O   HOH T 267      27.225   0.715  25.152  1.00  0.39           O  
HETATM  269  O   HOH T 268     -10.810  16.530 -15.273  1.00  0.39           O  
HETATM  270  O   HOH T 269      10.849  -1.755  18.203  1.00  0.39           O  
HETATM  271  O   HOH T 270      -3.195  34.333  38.920  1.00  0.39           O  
HETATM  272  O   HOH T 271      -4.128  22.065  14.963  1.00  0.39           O  
HETATM  273  O   HOH T 272       6.410  23.385  18.732  1.00  0.39           O  
HETATM  274  O   HOH T 273     -12.465  29.757  32.611  1.00  0.39           O  
HETATM  275  O   HOH T 274      29.547  17.762  20.854  1.00  0.39           O  
HETATM  276  O   HOH T 275      -1.199   2.341  -2.885  1.00  0.39           O  
HETATM  277  O   HOH T 276      26.968  29.674  -2.685  1.00  0.40           O  
HETATM  278  O   HOH T 277       0.462   2.566 -13.642  1.00  0.40           O  
HETATM  279  O   HOH T 278       5.962  29.273 -11.725  1.00  0.40           O  
HETATM  280  O   HOH T 279      18.090   8.020  21.717  1.00  0.40           O  
HETATM  281  O   HOH T 280       4.700  35.058  19.672  1.00  0.40           O  
HETATM  282  O   HOH T 281      14.125   1.422   4.711  1.00  0.40           O  
HETATM  283  O   HOH T 282     -13.570   8.576  21.570  1.00  0.40           O  
HETATM  284  O   HOH T 283     -13.722  31.732  27.489  1.00  0.40           O  
HETATM  285  O   HOH T 284     -16.042  15.440  35.725  1.00  0.40           O  
HETATM  286  O   HOH T 285      -2.031   2.504 -14.888  1.00  0.40           O  
HETATM  287  O   HOH T 286      -0.904   2.661  10.752  1.00  0.40           O  
HETATM  288  O   HOH T 287      11.988  34.252   5.676  1.00  0.40           O  
HETATM  289  O   HOH T 288      11.202  32.011   9.137  1.00  0.40           O  
HETATM  290  O   HOH T 289      10.763  24.927  37.163  1.00  0.40           O  
HETATM  291  O   HOH T 290       1.055  10.259  -0.592  1.00  0.40           O  
HETATM  292  O   HOH T 291      28.023  23.482  -0.479  1.00  0.40           O  
HETATM  293  O   HOH T 292     -15.301   8.029  37.017  1.00  0.41           O  
HETATM  294  O   HOH T 293       7.520  30.219  -9.663  1.00  0.41           O  
HETATM  295  O   HOH T 294      35.267  25.945   7.103  1.00  0.41           O  
HETATM  296  O   HOH T 295     -18.876  28.597   5.119  1.00  0.41           O  
HETATM  297  O   HOH T 296      -9.309  11.282 -21.573  1.00  0.41           O  
HETATM  298  O   HOH T 297       7.690  21.330  42.019  1.00  0.41           O  
HETATM  299  O   HOH T 298     -20.199  19.243  -4.147  1.00  0.41           O  
HETATM  300  O   HOH T 299      -5.119  27.874  -6.585  1.00  0.41           O  
HETATM  301  O   HOH T 300     -14.558  10.081  33.839  1.00  0.41           O  
HETATM  302  O   HOH T 301       0.801  -0.153  27.286  1.00  0.41           O  
HETATM  303  O   HOH T 302       0.459   0.623 -11.654  1.00  0.41           O  
HETATM  304  O   HOH T 303      11.750  25.064  22.533  1.00  0.41           O  
HETATM  305  O   HOH T 304      -6.152  -1.272  33.811  1.00  0.41           O  
HETATM  306  O   HOH T 305      -4.340   0.870 -17.065  1.00  0.41           O  
HETATM  307  O   HOH T 306       0.063  35.802  12.847  1.00  0.41           O  
HETATM  308  O   HOH T 307     -24.760  19.251   9.675  1.00  0.41           O  
HETATM  309  O   HOH T 308      24.399  -3.437  26.048  1.00  0.41           O  
HETATM  310  O   HOH T 309      -1.652  15.632   6.289  1.00  0.41           O  
HETATM  311  O   HOH T 310       3.490   4.113  -4.887  1.00  0.41           O  
HETATM  312  O   HOH T 311      25.588  -2.608  12.355  1.00  0.41           O  
HETATM  313  O   HOH T 312      -2.708   1.788  26.200  1.00  0.41           O  
HETATM  314  O   HOH T 313      -1.285   0.843  -7.313  1.00  0.41           O  
HETATM  315  O   HOH T 314     -13.027  29.158  42.122  1.00  0.41           O  
HETATM  316  O   HOH T 315      21.056  -2.308  19.425  1.00  0.42           O  
HETATM  317  O   HOH T 316      -3.885  -0.448  10.816  1.00  0.42           O  
HETATM  318  O   HOH T 317     -10.382  13.304  14.860  1.00  0.42           O  
HETATM  319  O   HOH T 318      -7.264  12.775  47.789  1.00  0.42           O  
HETATM  320  O   HOH T 319     -13.897  28.436  44.651  1.00  0.42           O  
HETATM  321  O   HOH T 320       2.263  13.743  39.033  1.00  0.42           O  
HETATM  322  O   HOH T 321      10.719   1.763  16.347  1.00  0.42           O  
HETATM  323  O   HOH T 322       8.499  35.996  -5.915  1.00  0.42           O  
HETATM  324  O   HOH T 323      29.482  14.063  19.551  1.00  0.42           O  
HETATM  325  O   HOH T 324      -5.324   2.436   8.022  1.00  0.42           O  
HETATM  326  O   HOH T 325     -17.816   9.691  16.182  1.00  0.42           O  
HETATM  327  O   HOH T 326      11.126  -7.478  29.919  1.00  0.42           O  
HETATM  328  O   HOH T 327      29.368  28.031  12.949  1.00  0.42           O  
HETATM  329  O   HOH T 328      13.786  28.253  17.048  1.00  0.43           O  
HETATM  330  O   HOH T 329     -13.216  18.835  -4.918  1.00  0.43           O  
HETATM  331  O   HOH T 330     -12.165   2.719 -14.613  1.00  0.43           O  
HETATM  332  O   HOH T 331      15.677  32.294  -9.125  1.00  0.43           O  
HETATM  333  O   HOH T 332      -3.842   3.279  -5.739  1.00  0.43           O  
HETATM  334  O   HOH T 333     -11.423  27.681  43.807  1.00  0.43           O  
HETATM  335  O   HOH T 334      12.909  34.254 -11.259  1.00  0.43           O  
HETATM  336  O   HOH T 335      16.269  14.532 -12.625  1.00  0.43           O  
HETATM  337  O   HOH T 336      -5.544  35.822  17.572  1.00  0.43           O  
HETATM  338  O   HOH T 337      -9.457  34.070  22.540  1.00  0.43           O  
HETATM  339  O   HOH T 338       0.952   0.646  -3.333  1.00  0.43           O  
HETATM  340  O   HOH T 339      12.047  31.430  11.816  1.00  0.43           O  
HETATM  341  O   HOH T 340      -1.519   0.775  15.959  1.00  0.43           O  
HETATM  342  O   HOH T 341      29.186  30.849  -1.304  1.00  0.43           O  
HETATM  343  O   HOH T 342     -12.820  29.308  13.538  1.00  0.44           O  
HETATM  344  O   HOH T 343      -2.186  31.817  48.673  1.00  0.44           O  
HETATM  345  O   HOH T 344       8.811  13.112   9.661  1.00  0.44           O  
HETATM  346  O   HOH T 345     -11.358   3.125  39.772  1.00  0.44           O  
HETATM  347  O   HOH T 346     -19.359   9.194  -0.951  1.00  0.44           O  
HETATM  348  O   HOH T 347       0.596  34.935  34.121  1.00  0.44           O  
HETATM  349  O   HOH T 348     -13.600  29.308  16.211  1.00  0.44           O  
HETATM  350  O   HOH T 349       3.493   7.397 -14.936  1.00  0.44           O  
HETATM  351  O   HOH T 350       9.524  29.054  -8.361  1.00  0.44           O  
HETATM  352  O   HOH T 351     -14.718  29.650  31.012  1.00  0.44           O  
HETATM  353  O   HOH T 352     -28.282   6.902   4.965  1.00  0.44           O  
HETATM  354  O   HOH T 353       2.262   7.536 -12.456  1.00  0.44           O  
HETATM  355  O   HOH T 354      -3.455  37.415  18.054  1.00  0.44           O  
HETATM  356  O   HOH T 355      32.735  18.257  -5.932  1.00  0.44           O  
HETATM  357  O   HOH T 356      35.369  23.220  11.113  1.00  0.44           O  
HETATM  358  O   HOH T 357       9.133  -3.227  22.775  1.00  0.44           O  
HETATM  359  O   HOH T 358       5.493   5.638   8.908  1.00  0.44           O  
HETATM  360  O   HOH T 359     -12.201  18.741  -7.516  1.00  0.44           O  
HETATM  361  O   HOH T 360      13.749   0.771  20.118  1.00  0.44           O  
HETATM  362  O   HOH T 361      10.411  -5.314  24.365  1.00  0.44           O  
HETATM  363  O   HOH T 362      12.128  18.937  36.500  1.00  0.44           O  
HETATM  364  O   HOH T 363      31.485  29.257  -1.392  1.00  0.44           O  
HETATM  365  O   HOH T 364       1.589  14.334  11.193  1.00  0.44           O  
HETATM  366  O   HOH T 365     -18.174  18.514  -5.696  1.00  0.44           O  
HETATM  367  O   HOH T 366       7.226  15.046   7.172  1.00  0.44           O  
HETATM  368  O   HOH T 367     -11.419  31.981  22.934  1.00  0.44           O  
HETATM  369  O   HOH T 368      11.384  27.193  38.731  1.00  0.44           O  
HETATM  370  O   HOH T 369       3.212  32.912 -10.103  1.00  0.44           O  
HETATM  371  O   HOH T 370     -10.154   6.997  -4.206  1.00  0.44           O  
HETATM  372  O   HOH T 371     -12.282  26.768  46.162  1.00  0.44           O  
HETATM  373  O   HOH T 372      12.461  32.278   3.748  1.00  0.44           O  
HETATM  374  O   HOH T 373       1.843  16.524   2.465  1.00  0.45           O  
HETATM  375  O   HOH T 374     -17.008  18.631  -8.127  1.00  0.45           O  
HETATM  376  O   HOH T 375      24.762  33.028  -3.601  1.00  0.45           O  
HETATM  377  O   HOH T 376      32.465  13.717  -7.212  1.00  0.45           O  
HETATM  378  O   HOH T 377       7.265   8.774  -6.981  1.00  0.45           O  
HETATM  379  O   HOH T 378      -5.715  37.519  24.085  1.00  0.45           O  
HETATM  380  O   HOH T 379      -2.230  24.586  12.119  1.00  0.45           O  
HETATM  381  O   HOH T 380      -8.854   6.283 -19.588  1.00  0.45           O  
HETATM  382  O   HOH T 381       4.192   4.501 -11.723  1.00  0.45           O  
HETATM  383  O   HOH T 382      15.328  26.509  18.559  1.00  0.45           O  
HETATM  384  O   HOH T 383      20.757  16.433  32.406  1.00  0.45           O  
HETATM  385  O   HOH T 384       6.667   8.755  -1.530  1.00  0.45           O  
HETATM  386  O   HOH T 385      19.434  -6.317  20.153  1.00  0.45           O  
HETATM  387  O   HOH T 386      -2.187  34.558  34.137  1.00  0.45           O  
HETATM  388  O   HOH T 387      -4.706  13.765 -17.273  1.00  0.45           O  
HETATM  389  O   HOH T 388      -4.884   2.860 -15.065  1.00  0.45           O  
HETATM  390  O   HOH T 389     -20.535  29.593   3.057  1.00  0.45           O  
HETATM  391  O   HOH T 390     -16.267   9.269  39.387  1.00  0.45           O  
HETATM  392  O   HOH T 391      21.092  13.765  33.352  1.00  0.45           O  
HETATM  393  O   HOH T 392     -19.665  20.961  -6.264  1.00  0.45           O  
HETATM  394  O   HOH T 393       0.857   7.876   2.489  1.00  0.45           O  
HETATM  395  O   HOH T 394      17.293  -2.106  17.674  1.00  0.45           O  
HETATM  396  O   HOH T 395      -3.595  31.517  46.236  1.00  0.45           O  
HETATM  397  O   HOH T 396      31.480   2.218  13.086  1.00  0.45           O  
HETATM  398  O   HOH T 397      19.435  28.682  -9.739  1.00  0.45           O  
HETATM  399  O   HOH T 398      -3.915   3.328  -2.999  1.00  0.45           O  
HETATM  400  O   HOH T 399       3.706  16.548   0.584  1.00  0.45           O  
HETATM  401  O   HOH T 400      23.609  19.695  24.631  1.00  0.45           O  
HETATM  402  O   HOH T 401       9.519   5.682  10.931  1.00  0.46           O  
HETATM  403  O   HOH T 402       1.850  12.224 -15.442  1.00  0.46           O  
HETATM  404  O   HOH T 403      -8.464  23.047  46.256  1.00  0.46           O  
HETATM  405  O   HOH T 404     -11.992  31.372  15.336  1.00  0.46           O  
HETATM  406  O   HOH T 405       3.712  33.371   5.700  1.00  0.46           O  
HETATM  407  O   HOH T 406     -10.500  30.081  11.994  1.00  0.46           O  
HETATM  408  O   HOH T 407       2.287   3.023  37.565  1.00  0.46           O  
HETATM  409  O   HOH T 408       9.751  29.265  30.211  1.00  0.46           O  
HETATM  410  O   HOH T 409       0.962  15.197   7.243  1.00  0.46           O  
HETATM  411  O   HOH T 410     -17.888  11.117  30.506  1.00  0.46           O  
HETATM  412  O   HOH T 411      21.049   4.054 -10.446  1.00  0.46           O  
HETATM  413  O   HOH T 412       3.183  14.272   8.674  1.00  0.46           O  
HETATM  414  O   HOH T 413      14.925  10.582 -14.221  1.00  0.46           O  
HETATM  415  O   HOH T 414     -12.832  37.287  27.773  1.00  0.46           O  
HETATM  416  O   HOH T 415      25.991   1.623  22.843  1.00  0.46           O  
HETATM  417  O   HOH T 416      -7.758  11.364 -19.182  1.00  0.46           O  
HETATM  418  O   HOH T 417       4.113   0.645   0.611  1.00  0.46           O  
HETATM  419  O   HOH T 418      14.879  -2.636  16.390  1.00  0.46           O  
HETATM  420  O   HOH T 419      -0.866  37.752  18.263  1.00  0.46           O  
HETATM  421  O   HOH T 420       4.768  22.136 -14.071  1.00  0.46           O  
HETATM  422  O   HOH T 421      22.415  26.212  -4.572  1.00  0.46           O  
HETATM  423  O   HOH T 422     -18.892  15.505  19.531  1.00  0.47           O  
HETATM  424  O   HOH T 423      -3.544  39.487  19.898  1.00  0.47           O  
HETATM  425  O   HOH T 424      -7.522  38.948  22.565  1.00  0.47           O  
HETATM  426  O   HOH T 425       1.309  36.010  26.666  1.00  0.47           O  
HETATM  427  O   HOH T 426      -5.844  -3.126  30.474  1.00  0.47           O  
HETATM  428  O   HOH T 427      25.066  -1.986   6.500  1.00  0.47           O  
HETATM  429  O   HOH T 428     -10.897  35.890  29.306  1.00  0.47           O  
HETATM  430  O   HOH T 429     -23.212  16.534  16.376  1.00  0.47           O  
HETATM  431  O   HOH T 430     -24.292  18.592  14.889  1.00  0.47           O  
HETATM  432  O   HOH T 431      10.502  -8.945  34.806  1.00  0.47           O  
HETATM  433  O   HOH T 432     -11.023  33.231  13.518  1.00  0.47           O  
HETATM  434  O   HOH T 433      -2.292  -2.556 -11.096  1.00  0.47           O  
HETATM  435  O   HOH T 434     -18.062  15.704  -1.392  1.00  0.47           O  
HETATM  436  O   HOH T 435      -0.370  27.625   4.333  1.00  0.47           O  
HETATM  437  O   HOH T 436      -9.083  36.815   3.559  1.00  0.47           O  
HETATM  438  O   HOH T 437      36.583  27.802   8.764  1.00  0.47           O  
HETATM  439  O   HOH T 438       2.785  14.558  32.554  1.00  0.47           O  
HETATM  440  O   HOH T 439      -0.773   0.115 -14.018  1.00  0.47           O  
HETATM  441  O   HOH T 440      -3.541  19.322 -14.758  1.00  0.47           O  
HETATM  442  O   HOH T 441     -16.969  30.239   4.000  1.00  0.47           O  
HETATM  443  O   HOH T 442      -5.831   0.563   5.986  1.00  0.47           O  
HETATM  444  O   HOH T 443      12.709  14.747  37.569  1.00  0.47           O  
HETATM  445  O   HOH T 444      14.624   8.291 -12.763  1.00  0.47           O  
HETATM  446  O   HOH T 445     -11.054  28.236  50.444  1.00  0.47           O  
HETATM  447  O   HOH T 446      25.027  -1.652  28.152  1.00  0.47           O  
HETATM  448  O   HOH T 447     -26.636  19.126  11.694  1.00  0.47           O  
HETATM  449  O   HOH T 448      -8.019   8.746 -18.835  1.00  0.47           O  
HETATM  450  O   HOH T 449      -9.730   3.311   8.091  1.00  0.48           O  
HETATM  451  O   HOH T 450     -12.739   6.070  21.047  1.00  0.48           O  
HETATM  452  O   HOH T 451       7.926  31.674  12.439  1.00  0.48           O  
HETATM  453  O   HOH T 452      25.790  -1.564  24.581  1.00  0.48           O  
HETATM  454  O   HOH T 453       0.710  11.572  32.361  1.00  0.48           O  
HETATM  455  O   HOH T 454     -17.097  23.428  24.334  1.00  0.48           O  
HETATM  456  O   HOH T 455      20.155  25.920  21.846  1.00  0.48           O  
HETATM  457  O   HOH T 456      24.512  14.344 -11.254  1.00  0.48           O  
HETATM  458  O   HOH T 457      -8.103   3.192   3.267  1.00  0.48           O  
HETATM  459  O   HOH T 458       6.597  32.954  14.419  1.00  0.48           O  
HETATM  460  O   HOH T 459      19.917  28.495  18.141  1.00  0.48           O  
HETATM  461  O   HOH T 460      10.963  29.228  13.009  1.00  0.48           O  
HETATM  462  O   HOH T 461       8.116  -1.674  34.074  1.00  0.48           O  
HETATM  463  O   HOH T 462      10.441  36.250   2.571  1.00  0.48           O  
HETATM  464  O   HOH T 463      -0.615  13.691 -15.381  1.00  0.48           O  
HETATM  465  O   HOH T 464       7.318   7.741  17.339  1.00  0.48           O  
HETATM  466  O   HOH T 465     -22.849  16.438  -0.227  1.00  0.48           O  
HETATM  467  O   HOH T 466      -3.067   1.872   9.469  1.00  0.48           O  
HETATM  468  O   HOH T 467      -1.773   0.145 -16.521  1.00  0.48           O  
HETATM  469  O   HOH T 468      31.658   7.023  -3.109  1.00  0.48           O  
HETATM  470  O   HOH T 469      15.688  34.990  -8.361  1.00  0.48           O  
HETATM  471  O   HOH T 470      -3.408  -0.722  14.701  1.00  0.48           O  
HETATM  472  O   HOH T 471     -12.837   5.324  33.476  1.00  0.48           O  
HETATM  473  O   HOH T 472      -6.772   3.107   5.635  1.00  0.48           O  
HETATM  474  O   HOH T 473      -7.824  -2.859  32.518  1.00  0.48           O  
HETATM  475  O   HOH T 474      24.170  10.033  24.395  1.00  0.48           O  
HETATM  476  O   HOH T 475      13.759  17.100  37.927  1.00  0.48           O  
HETATM  477  O   HOH T 476      10.454  15.926 -17.113  1.00  0.48           O  
HETATM  478  O   HOH T 477      22.138   8.232  24.294  1.00  0.49           O  
HETATM  479  O   HOH T 478      36.054  25.222   9.636  1.00  0.49           O  
HETATM  480  O   HOH T 479       5.224   7.727 -17.097  1.00  0.49           O  
HETATM  481  O   HOH T 480      -9.434   5.551  32.224  1.00  0.49           O  
HETATM  482  O   HOH T 481       2.103   7.554  38.222  1.00  0.49           O  
HETATM  483  O   HOH T 482      37.441  21.517  12.108  1.00  0.49           O  
HETATM  484  O   HOH T 483       5.310  -0.617  -1.522  1.00  0.49           O  
HETATM  485  O   HOH T 484      -6.617   2.260 -17.072  1.00  0.49           O  
HETATM  486  O   HOH T 485     -13.776   5.844   8.509  1.00  0.49           O  
HETATM  487  O   HOH T 486      19.264  13.808  12.291  1.00  0.49           O  
HETATM  488  O   HOH T 487       6.503  39.086  -5.072  1.00  0.49           O  
HETATM  489  O   HOH T 488     -14.546  28.161  33.355  1.00  0.49           O  
HETATM  490  O   HOH T 489      13.441  33.144   7.839  1.00  0.49           O  
HETATM  491  O   HOH T 490     -16.885   8.666  33.223  1.00  0.49           O  
HETATM  492  O   HOH T 491      34.051  27.105   9.370  1.00  0.49           O  
HETATM  493  O   HOH T 492       0.928   6.455 -14.608  1.00  0.49           O  
HETATM  494  O   HOH T 493      -7.354  36.039  22.317  1.00  0.49           O  
HETATM  495  O   HOH T 494      -4.935  -2.164  12.810  1.00  0.49           O  
HETATM  496  O   HOH T 495      16.415  26.127  21.110  1.00  0.49           O  
HETATM  497  O   HOH T 496      21.806  21.397  23.317  1.00  0.49           O  
HETATM  498  O   HOH T 497      -4.936  31.328  48.796  1.00  0.49           O  
HETATM  499  O   HOH T 498      14.680  19.586  37.680  1.00  0.49           O  
HETATM  500  O   HOH T 499      13.459  -0.722  17.834  1.00  0.49           O  
HETATM  501  O   HOH T 500     -11.364   4.979  41.905  1.00  0.49           O  
HETATM  502  O   HOH T 501      11.661  31.606   6.376  1.00  0.50           O  
HETATM  503  O   HOH T 502      29.539   0.955   2.678  1.00  0.50           O  
HETATM  504  O   HOH T 503       9.397  -3.381  19.896  1.00  0.50           O  
HETATM  505  O   HOH T 504      13.682  30.622  15.624  1.00  0.50           O  
HETATM  506  O   HOH T 505      22.061  -5.811  19.419  1.00  0.50           O  
HETATM  507  O   HOH T 506      12.628  26.808  36.317  1.00  0.50           O  
HETATM  508  O   HOH T 507      -8.026  36.409  25.130  1.00  0.50           O  
HETATM  509  O   HOH T 508      11.329  30.905  31.615  1.00  0.50           O  
HETATM  510  O   HOH T 509      19.855  29.900  -7.161  1.00  0.50           O  
HETATM  511  O   HOH T 510       8.808  21.247  39.541  1.00  0.50           O  
HETATM  512  O   HOH T 511      -7.799   4.973  -0.829  1.00  0.50           O  
HETATM  513  O   HOH T 512      -6.349  25.495  12.980  1.00  0.50           O  
HETATM  514  O   HOH T 513       9.181  30.273  38.067  1.00  0.50           O  
HETATM  515  O   HOH T 514      -0.248  34.404  25.007  1.00  0.50           O  
HETATM  516  O   HOH T 515      -9.113  26.172  -6.380  1.00  0.50           O  
HETATM  517  O   HOH T 516      11.405   0.926  18.853  1.00  0.50           O  
HETATM  518  O   HOH T 517       8.151  -7.284  34.338  1.00  0.50           O  
HETATM  519  O   HOH T 518      -6.819  35.711  43.288  1.00  0.50           O  
HETATM  520  O   HOH T 519      -1.479  32.383  40.077  1.00  0.50           O  
HETATM  521  O   HOH T 520      17.146   7.357 -10.056  1.00  0.50           O  
HETATM  522  O   HOH T 521     -10.582  35.338  24.747  1.00  0.50           O  
HETATM  523  O   HOH T 522     -14.588   7.379  33.082  1.00  0.50           O  
HETATM  524  O   HOH T 523      -6.182   9.598  45.636  1.00  0.50           O  
HETATM  525  O   HOH T 524      21.760  26.870  19.651  1.00  0.50           O  
HETATM  526  O   HOH T 525      26.878   0.495  27.890  1.00  0.50           O  
HETATM  527  O   HOH T 526      16.806   2.335  -4.845  1.00  0.51           O  
HETATM  528  O   HOH T 527      -8.197  34.227   2.945  1.00  0.51           O  
HETATM  529  O   HOH T 528      -0.593  32.835  35.543  1.00  0.51           O  
HETATM  530  O   HOH T 529       7.788  27.533 -10.280  1.00  0.51           O  
HETATM  531  O   HOH T 530       8.822  40.467  -5.673  1.00  0.51           O  
HETATM  532  O   HOH T 531       3.129   1.440  -4.869  1.00  0.51           O  
HETATM  533  O   HOH T 532       8.922  31.481  15.083  1.00  0.51           O  
HETATM  534  O   HOH T 533      -4.787   5.316 -16.131  1.00  0.51           O  
HETATM  535  O   HOH T 534       1.755  37.185   8.833  1.00  0.51           O  
HETATM  536  O   HOH T 535     -12.108  34.146  31.032  1.00  0.51           O  
HETATM  537  O   HOH T 536     -16.866  18.503  34.968  1.00  0.51           O  
HETATM  538  O   HOH T 537      23.383  -0.775   0.147  1.00  0.51           O  
HETATM  539  O   HOH T 538      19.742  -3.263  17.151  1.00  0.51           O  
HETATM  540  O   HOH T 539       4.625  32.758   8.288  1.00  0.51           O  
HETATM  541  O   HOH T 540      13.360  31.728 -10.535  1.00  0.51           O  
HETATM  542  O   HOH T 541       5.197   4.767  -2.664  1.00  0.51           O  
HETATM  543  O   HOH T 542      10.651  31.680  29.008  1.00  0.51           O  
HETATM  544  O   HOH T 543      -8.045   4.197 -18.194  1.00  0.51           O  
HETATM  545  O   HOH T 544      -2.453  37.720  36.346  1.00  0.51           O  
HETATM  546  O   HOH T 545     -11.150   1.057  38.170  1.00  0.51           O  
HETATM  547  O   HOH T 546      20.501  24.497  -5.872  1.00  0.51           O  
HETATM  548  O   HOH T 547      -5.806   3.154  -1.089  1.00  0.51           O  
HETATM  549  O   HOH T 548      -3.770  35.155  36.263  1.00  0.52           O  
HETATM  550  O   HOH T 549     -17.766  25.124  34.667  1.00  0.52           O  
HETATM  551  O   HOH T 550       8.914  32.264  34.803  1.00  0.52           O  
HETATM  552  O   HOH T 551      12.046  23.464 -13.777  1.00  0.52           O  
HETATM  553  O   HOH T 552       1.009  29.188  45.497  1.00  0.52           O  
HETATM  554  O   HOH T 553      -0.390  37.149  10.491  1.00  0.52           O  
HETATM  555  O   HOH T 554     -10.831  21.208  -6.368  1.00  0.52           O  
HETATM  556  O   HOH T 555      10.603  27.003  -9.650  1.00  0.52           O  
HETATM  557  O   HOH T 556      -0.690  -0.811  -9.564  1.00  0.52           O  
HETATM  558  O   HOH T 557      -9.940   2.592  10.745  1.00  0.52           O  
HETATM  559  O   HOH T 558     -10.473   6.280  34.679  1.00  0.52           O  
HETATM  560  O   HOH T 559     -11.375   7.411 -19.799  1.00  0.52           O  
HETATM  561  O   HOH T 560      -9.039  38.105  46.993  1.00  0.52           O  
HETATM  562  O   HOH T 561     -23.679  21.151  15.445  1.00  0.52           O  
HETATM  563  O   HOH T 562     -12.893   6.230  -3.999  1.00  0.52           O  
HETATM  564  O   HOH T 563      11.291   5.595  -3.245  1.00  0.52           O  
HETATM  565  O   HOH T 564     -11.697  35.045  44.648  1.00  0.52           O  
HETATM  566  O   HOH T 565      15.461  15.862 -14.941  1.00  0.52           O  
HETATM  567  O   HOH T 566     -11.333  30.987  50.984  1.00  0.52           O  
HETATM  568  O   HOH T 567      17.159  30.121  -9.865  1.00  0.53           O  
HETATM  569  O   HOH T 568      31.599   8.901  21.043  1.00  0.53           O  
HETATM  570  O   HOH T 569     -25.009   8.689   3.524  1.00  0.53           O  
HETATM  571  O   HOH T 570     -30.062  16.703   8.061  1.00  0.53           O  
HETATM  572  O   HOH T 571     -10.122  37.959  27.693  1.00  0.53           O  
HETATM  573  O   HOH T 572      29.964   0.647   5.448  1.00  0.53           O  
HETATM  574  O   HOH T 573      -3.861  33.849  49.580  1.00  0.53           O  
HETATM  575  O   HOH T 574       4.665  12.140 -15.263  1.00  0.53           O  
HETATM  576  O   HOH T 575     -25.063  22.804  10.521  1.00  0.53           O  
HETATM  577  O   HOH T 576      22.678   1.611  20.901  1.00  0.53           O  
HETATM  578  O   HOH T 577     -28.509   8.311   7.379  1.00  0.53           O  
HETATM  579  O   HOH T 578     -12.857   7.105  35.673  1.00  0.53           O  
HETATM  580  O   HOH T 579     -17.932  18.255  -2.811  1.00  0.53           O  
HETATM  581  O   HOH T 580     -27.136   9.449   5.273  1.00  0.53           O  
HETATM  582  O   HOH T 581     -14.224   4.151 -13.608  1.00  0.54           O  
HETATM  583  O   HOH T 582       4.727  35.066   9.760  1.00  0.54           O  
HETATM  584  O   HOH T 583       3.423  12.905  41.374  1.00  0.54           O  
HETATM  585  O   HOH T 584     -16.466  18.627 -10.732  1.00  0.54           O  
HETATM  586  O   HOH T 585     -16.886  24.024  -6.299  1.00  0.54           O  
HETATM  587  O   HOH T 586     -27.924  17.031   4.961  1.00  0.54           O  
HETATM  588  O   HOH T 587     -12.748  32.453  33.095  1.00  0.54           O  
HETATM  589  O   HOH T 588      22.607   5.392 -12.250  1.00  0.54           O  
HETATM  590  O   HOH T 589      -5.117  -3.990   4.402  1.00  0.54           O  
HETATM  591  O   HOH T 590       9.727  13.190 -16.954  1.00  0.54           O  
HETATM  592  O   HOH T 591      -4.863   1.651  42.277  1.00  0.54           O  
HETATM  593  O   HOH T 592      -9.647  25.808  46.953  1.00  0.54           O  
HETATM  594  O   HOH T 593      -5.804  -3.234 -11.205  1.00  0.54           O  
HETATM  595  O   HOH T 594      11.996   8.088 -12.552  1.00  0.54           O  
HETATM  596  O   HOH T 595      28.248   6.308  -4.054  1.00  0.54           O  
HETATM  597  O   HOH T 596       3.369  12.761 -17.680  1.00  0.55           O  
HETATM  598  O   HOH T 597      11.774  42.137  -0.616  1.00  0.55           O  
HETATM  599  O   HOH T 598      -7.225   4.912  26.661  1.00  0.55           O  
HETATM  600  O   HOH T 599      18.660  25.027  19.747  1.00  0.55           O  
HETATM  601  O   HOH T 600     -11.870  26.334  48.751  1.00  0.55           O  
HETATM  602  O   HOH T 601     -21.096  11.219  -1.675  1.00  0.55           O  
HETATM  603  O   HOH T 602      19.184  -0.667  11.274  1.00  0.55           O  
HETATM  604  O   HOH T 603     -11.314   4.285  19.367  1.00  0.55           O  
HETATM  605  O   HOH T 604       1.611  34.882  -7.263  1.00  0.55           O  
HETATM  606  O   HOH T 605      29.907  -3.206  11.208  1.00  0.55           O  
HETATM  607  O   HOH T 606     -12.949  22.595  -7.454  1.00  0.55           O  
HETATM  608  O   HOH T 607     -13.178   5.038   1.640  1.00  0.56           O  
HETATM  609  O   HOH T 608      -8.847  18.999  25.094  1.00  0.56           O  
HETATM  610  O   HOH T 609      -4.743  19.852 -18.961  1.00  0.56           O  
HETATM  611  O   HOH T 610      24.325  28.649  21.181  1.00  0.56           O  
HETATM  612  O   HOH T 611       2.165  21.813 -13.844  1.00  0.56           O  
HETATM  613  O   HOH T 612      18.875  19.435 -16.200  1.00  0.56           O  
HETATM  614  O   HOH T 613      25.883  21.037  25.302  1.00  0.56           O  
HETATM  615  O   HOH T 614      22.681  -7.242  21.751  1.00  0.56           O  
HETATM  616  O   HOH T 615     -12.953  13.857  50.917  1.00  0.56           O  
HETATM  617  O   HOH T 616      32.446   1.522  15.403  1.00  0.56           O  
HETATM  618  O   HOH T 617      27.623  29.198  14.799  1.00  0.56           O  
HETATM  619  O   HOH T 618     -15.473  31.494  16.326  1.00  0.56           O  
HETATM  620  O   HOH T 619      23.501  12.140  25.900  1.00  0.56           O  
HETATM  621  O   HOH T 620      16.248  25.123  23.789  1.00  0.56           O  
HETATM  622  O   HOH T 621       9.546  20.296  10.546  1.00  0.56           O  
HETATM  623  O   HOH T 622      17.333   0.643   6.173  1.00  0.56           O  
HETATM  624  O   HOH T 623      19.136   1.242  -5.071  1.00  0.56           O  
HETATM  625  O   HOH T 624      33.300  15.687   8.311  1.00  0.56           O  
HETATM  626  O   HOH T 625      -8.184  25.911  50.187  1.00  0.56           O  
HETATM  627  O   HOH T 626     -17.779  17.040  37.144  1.00  0.56           O  
HETATM  628  O   HOH T 627     -10.566   4.687  17.717  1.00  0.56           O  
HETATM  629  O   HOH T 628     -10.524   8.059  30.842  1.00  0.57           O  
HETATM  630  O   HOH T 629      13.537  24.798  24.390  1.00  0.57           O  
HETATM  631  O   HOH T 630     -12.550  33.810  25.948  1.00  0.57           O  
HETATM  632  O   HOH T 631     -13.833  31.680  24.773  1.00  0.57           O  
HETATM  633  O   HOH T 632      11.483  38.190   4.115  1.00  0.57           O  
HETATM  634  O   HOH T 633      15.387  13.083 -14.633  1.00  0.57           O  
HETATM  635  O   HOH T 634      10.572   6.483  36.385  1.00  0.57           O  
HETATM  636  O   HOH T 635      32.247   8.118  19.517  1.00  0.57           O  
HETATM  637  O   HOH T 636       7.498  34.356  35.697  1.00  0.57           O  
HETATM  638  O   HOH T 637      30.017  28.712  15.556  1.00  0.57           O  
HETATM  639  O   HOH T 638      13.913  36.322  -9.937  1.00  0.58           O  
HETATM  640  O   HOH T 639       9.543  38.818   1.775  1.00  0.58           O  
HETATM  641  O   HOH T 640      35.775  20.858   9.661  1.00  0.58           O  
HETATM  642  O   HOH T 641      -0.766  31.235  11.028  1.00  0.59           O  
HETATM  643  O   HOH T 642       9.009  38.088  24.964  1.00  0.59           O  
HETATM  644  O   HOH T 643     -19.473  14.505  -5.549  1.00  0.59           O  
HETATM  645  O   HOH T 644      24.262  25.057  -8.738  1.00  0.62           O  
TER     646      HOH T 644 
