# Supplementary material for: Accurate Prediction of Hydration Sites of Proteins Using Energy Model With Atom Embedding
Source: Front Mol Biosci. 2021 Sep 20;8:756075. doi: 10.3389/fmolb.2021.756075 (PMC8488165; doi:10.3389/fmolb.2021.756075)
Supplement: Supplementary file 1 [file DataSheet1.ZIP › Data Sheet 1/Our_result_pdb/OppA_dataset_output/1JEU_watersite.pdb]

HEADER                                                        XXXX


JRNL        PMID   -1
HETATM    1  O   HOH T   0      19.349  20.261   6.308  1.00  0.16           O  
HETATM    2  O   HOH T   1       7.534  15.646 -10.650  1.00  0.17           O  
HETATM    3  O   HOH T   2      14.350  16.771  31.131  1.00  0.17           O  
HETATM    4  O   HOH T   3      -6.717   8.846   7.369  1.00  0.18           O  
HETATM    5  O   HOH T   4       0.902  12.792  -8.499  1.00  0.18           O  
HETATM    6  O   HOH T   5      -8.381  22.907  23.424  1.00  0.19           O  
HETATM    7  O   HOH T   6      20.135  26.343  13.906  1.00  0.20           O  
HETATM    8  O   HOH T   7       6.308  30.330  14.704  1.00  0.20           O  
HETATM    9  O   HOH T   8       5.500  15.176  -3.836  1.00  0.20           O  
HETATM   10  O   HOH T   9      17.676  13.683   4.729  1.00  0.21           O  
HETATM   11  O   HOH T  10      -1.713   8.554   9.984  1.00  0.21           O  
HETATM   12  O   HOH T  11      15.811  15.601  -8.585  1.00  0.21           O  
HETATM   13  O   HOH T  12      11.115   7.079   8.795  1.00  0.21           O  
HETATM   14  O   HOH T  13      24.927  22.371  23.468  1.00  0.21           O  
HETATM   15  O   HOH T  14       5.660   3.573  31.157  1.00  0.21           O  
HETATM   16  O   HOH T  15     -12.848  12.229  20.771  1.00  0.21           O  
HETATM   17  O   HOH T  16      -9.829  11.755  33.591  1.00  0.22           O  
HETATM   18  O   HOH T  17     -21.012  22.752   1.850  1.00  0.22           O  
HETATM   19  O   HOH T  18       7.287  11.078  -9.062  1.00  0.22           O  
HETATM   20  O   HOH T  19      -4.101  19.453  16.288  1.00  0.22           O  
HETATM   21  O   HOH T  20      17.483   5.349  22.067  1.00  0.22           O  
HETATM   22  O   HOH T  21      11.231  13.785  16.938  1.00  0.23           O  
HETATM   23  O   HOH T  22       8.902   1.024  25.795  1.00  0.23           O  
HETATM   24  O   HOH T  23      12.930  22.144  10.545  1.00  0.23           O  
HETATM   25  O   HOH T  24       3.330  34.645  -5.394  1.00  0.23           O  
HETATM   26  O   HOH T  25      10.175  23.632   3.608  1.00  0.24           O  
HETATM   27  O   HOH T  26      10.055  31.132   4.139  1.00  0.24           O  
HETATM   28  O   HOH T  27       3.656   6.831  36.530  1.00  0.24           O  
HETATM   29  O   HOH T  28      -7.998  12.933  16.374  1.00  0.24           O  
HETATM   30  O   HOH T  29      -2.217   4.982   9.750  1.00  0.24           O  
HETATM   31  O   HOH T  30      23.194  23.901  -1.506  1.00  0.24           O  
HETATM   32  O   HOH T  31     -11.436   4.852  42.267  1.00  0.24           O  
HETATM   33  O   HOH T  32      -7.301  33.995  41.580  1.00  0.24           O  
HETATM   34  O   HOH T  33      31.706  11.515   8.267  1.00  0.24           O  
HETATM   35  O   HOH T  34     -20.730   7.802   0.966  1.00  0.24           O  
HETATM   36  O   HOH T  35      -1.435  30.455  28.871  1.00  0.25           O  
HETATM   37  O   HOH T  36      10.238   5.836  11.049  1.00  0.25           O  
HETATM   38  O   HOH T  37      -1.627  28.193   2.256  1.00  0.25           O  
HETATM   39  O   HOH T  38       4.213  10.095  31.029  1.00  0.25           O  
HETATM   40  O   HOH T  39       5.496  20.210  25.510  1.00  0.25           O  
HETATM   41  O   HOH T  40      17.919  26.660  17.978  1.00  0.25           O  
HETATM   42  O   HOH T  41      29.289   3.098   6.113  1.00  0.25           O  
HETATM   43  O   HOH T  42       6.282   8.080   7.247  1.00  0.25           O  
HETATM   44  O   HOH T  43       1.738   5.260 -12.676  1.00  0.25           O  
HETATM   45  O   HOH T  44       3.586  -8.148  23.281  1.00  0.26           O  
HETATM   46  O   HOH T  45      23.441   6.774  -9.866  1.00  0.26           O  
HETATM   47  O   HOH T  46       1.620  21.664  19.034  1.00  0.26           O  
HETATM   48  O   HOH T  47     -22.579  20.447  -2.815  1.00  0.26           O  
HETATM   49  O   HOH T  48       3.874   5.433  32.242  1.00  0.26           O  
HETATM   50  O   HOH T  49       3.249  17.175   7.754  1.00  0.26           O  
HETATM   51  O   HOH T  50      -6.281   6.085 -17.458  1.00  0.26           O  
HETATM   52  O   HOH T  51      -9.642  23.067  44.873  1.00  0.26           O  
HETATM   53  O   HOH T  52       0.029   5.795  -6.308  1.00  0.26           O  
HETATM   54  O   HOH T  53      -2.625  38.723  10.369  1.00  0.26           O  
HETATM   55  O   HOH T  54       4.269  12.975  11.351  1.00  0.26           O  
HETATM   56  O   HOH T  55       8.296  15.620  -3.541  1.00  0.26           O  
HETATM   57  O   HOH T  56     -11.858  13.987 -16.861  1.00  0.27           O  
HETATM   58  O   HOH T  57     -16.110  30.598  12.262  1.00  0.27           O  
HETATM   59  O   HOH T  58      10.071   9.434  -6.195  1.00  0.27           O  
HETATM   60  O   HOH T  59     -10.249  16.531 -12.909  1.00  0.27           O  
HETATM   61  O   HOH T  60       9.025  22.207  18.024  1.00  0.27           O  
HETATM   62  O   HOH T  61      -8.784  27.479  42.582  1.00  0.27           O  
HETATM   63  O   HOH T  62     -19.757  15.533  15.793  1.00  0.27           O  
HETATM   64  O   HOH T  63      22.688   8.505  24.460  1.00  0.27           O  
HETATM   65  O   HOH T  64      28.122  16.218  20.586  1.00  0.27           O  
HETATM   66  O   HOH T  65      22.495  25.569  17.222  1.00  0.27           O  
HETATM   67  O   HOH T  66      11.524  18.475   3.104  1.00  0.27           O  
HETATM   68  O   HOH T  67      16.662  39.945  -0.260  1.00  0.28           O  
HETATM   69  O   HOH T  68     -16.123  27.483  29.919  1.00  0.28           O  
HETATM   70  O   HOH T  69       2.581  14.487  32.992  1.00  0.28           O  
HETATM   71  O   HOH T  70      -7.081   7.340  -2.142  1.00  0.28           O  
HETATM   72  O   HOH T  71     -24.206  18.938  -1.075  1.00  0.28           O  
HETATM   73  O   HOH T  72      29.343  22.155   1.179  1.00  0.28           O  
HETATM   74  O   HOH T  73      10.544  13.585   3.121  1.00  0.28           O  
HETATM   75  O   HOH T  74      15.542  15.081  -5.855  1.00  0.28           O  
HETATM   76  O   HOH T  75      15.153  14.779   4.789  1.00  0.28           O  
HETATM   77  O   HOH T  76      11.932  25.939  -7.425  1.00  0.28           O  
HETATM   78  O   HOH T  77      -0.892  14.917   8.992  1.00  0.29           O  
HETATM   79  O   HOH T  78     -12.194  31.690  29.744  1.00  0.29           O  
HETATM   80  O   HOH T  79       9.539   6.605   6.471  1.00  0.29           O  
HETATM   81  O   HOH T  80     -13.997   9.705  20.742  1.00  0.29           O  
HETATM   82  O   HOH T  81     -12.702   8.523   0.500  1.00  0.29           O  
HETATM   83  O   HOH T  82      -0.778  26.609   4.452  1.00  0.29           O  
HETATM   84  O   HOH T  83     -16.200   6.183   7.114  1.00  0.29           O  
HETATM   85  O   HOH T  84      -9.052  22.651  47.436  1.00  0.29           O  
HETATM   86  O   HOH T  85     -13.106  13.849 -14.492  1.00  0.29           O  
HETATM   87  O   HOH T  86      22.235  15.298 -11.785  1.00  0.29           O  
HETATM   88  O   HOH T  87      -2.182  35.735  17.089  1.00  0.29           O  
HETATM   89  O   HOH T  88     -10.844  16.374 -15.726  1.00  0.30           O  
HETATM   90  O   HOH T  89     -14.121   0.953  38.873  1.00  0.30           O  
HETATM   91  O   HOH T  90      -2.509  21.373  13.078  1.00  0.30           O  
HETATM   92  O   HOH T  91     -15.270  19.338  -7.067  1.00  0.30           O  
HETATM   93  O   HOH T  92     -18.164  24.727  35.203  1.00  0.30           O  
HETATM   94  O   HOH T  93      -7.421   6.146   4.485  1.00  0.30           O  
HETATM   95  O   HOH T  94      18.871  18.278  33.376  1.00  0.30           O  
HETATM   96  O   HOH T  95      23.630  26.559  -4.462  1.00  0.30           O  
HETATM   97  O   HOH T  96      -7.509  22.827  12.092  1.00  0.30           O  
HETATM   98  O   HOH T  97       1.665  10.042  -0.776  1.00  0.30           O  
HETATM   99  O   HOH T  98      -8.678  10.726  46.406  1.00  0.30           O  
HETATM  100  O   HOH T  99      11.284  21.110  35.128  1.00  0.30           O  
HETATM  101  O   HOH T 100      -9.098  36.051  28.244  1.00  0.31           O  
HETATM  102  O   HOH T 101     -21.922  19.901   6.402  1.00  0.31           O  
HETATM  103  O   HOH T 102      13.876  22.747  29.174  1.00  0.31           O  
HETATM  104  O   HOH T 103     -10.398  19.599   8.682  1.00  0.31           O  
HETATM  105  O   HOH T 104      -0.016  39.036   6.220  1.00  0.31           O  
HETATM  106  O   HOH T 105      11.801  10.468 -14.434  1.00  0.31           O  
HETATM  107  O   HOH T 106      20.747   0.752   1.493  1.00  0.31           O  
HETATM  108  O   HOH T 107       0.964  34.236  13.373  1.00  0.31           O  
HETATM  109  O   HOH T 108       7.771  24.518   4.775  1.00  0.31           O  
HETATM  110  O   HOH T 109      15.302  14.972  37.978  1.00  0.31           O  
HETATM  111  O   HOH T 110     -21.387  21.722   4.368  1.00  0.31           O  
HETATM  112  O   HOH T 111      -8.258  15.661  17.047  1.00  0.31           O  
HETATM  113  O   HOH T 112     -19.480  14.223 -11.243  1.00  0.31           O  
HETATM  114  O   HOH T 113      -0.100  32.287  11.676  1.00  0.31           O  
HETATM  115  O   HOH T 114       1.296  12.069  32.773  1.00  0.31           O  
HETATM  116  O   HOH T 115      -0.684  30.786   1.939  1.00  0.31           O  
HETATM  117  O   HOH T 116       4.588 -10.094  21.640  1.00  0.31           O  
HETATM  118  O   HOH T 117      32.350   5.769   4.027  1.00  0.31           O  
HETATM  119  O   HOH T 118      -4.399  23.145  -7.595  1.00  0.32           O  
HETATM  120  O   HOH T 119      23.793  13.169  -6.741  1.00  0.32           O  
HETATM  121  O   HOH T 120     -15.538   7.738  37.106  1.00  0.32           O  
HETATM  122  O   HOH T 121       3.012   4.841  34.787  1.00  0.32           O  
HETATM  123  O   HOH T 122      -1.689  37.664  18.800  1.00  0.32           O  
HETATM  124  O   HOH T 123      13.074  24.432  27.072  1.00  0.32           O  
HETATM  125  O   HOH T 124      23.526  22.534  -7.819  1.00  0.32           O  
HETATM  126  O   HOH T 125      30.202  14.379  19.751  1.00  0.32           O  
HETATM  127  O   HOH T 126     -13.524  18.626  -5.023  1.00  0.32           O  
HETATM  128  O   HOH T 127      -6.581   5.002  -3.530  1.00  0.32           O  
HETATM  129  O   HOH T 128      13.941  26.313  19.472  1.00  0.32           O  
HETATM  130  O   HOH T 129      -4.541   6.571  16.398  1.00  0.32           O  
HETATM  131  O   HOH T 130      -7.611   2.330  33.304  1.00  0.32           O  
HETATM  132  O   HOH T 131      -4.560  -2.352  38.909  1.00  0.33           O  
HETATM  133  O   HOH T 132       3.197  10.185 -14.852  1.00  0.33           O  
HETATM  134  O   HOH T 133       1.590  26.480  44.874  1.00  0.33           O  
HETATM  135  O   HOH T 134      10.500  15.154  -0.393  1.00  0.33           O  
HETATM  136  O   HOH T 135     -11.356  28.310  51.217  1.00  0.33           O  
HETATM  137  O   HOH T 136     -11.310  12.042 -21.301  1.00  0.33           O  
HETATM  138  O   HOH T 137      10.997  26.186  23.702  1.00  0.33           O  
HETATM  139  O   HOH T 138     -12.272  31.251  23.177  1.00  0.33           O  
HETATM  140  O   HOH T 139      -1.480  34.704  33.417  1.00  0.33           O  
HETATM  141  O   HOH T 140       8.810  12.510   5.035  1.00  0.33           O  
HETATM  142  O   HOH T 141     -11.019  29.256  17.484  1.00  0.33           O  
HETATM  143  O   HOH T 142       5.005  33.768  38.037  1.00  0.33           O  
HETATM  144  O   HOH T 143      -4.712  32.984  41.336  1.00  0.33           O  
HETATM  145  O   HOH T 144     -12.351  27.729  34.803  1.00  0.33           O  
HETATM  146  O   HOH T 145      21.697  30.519   8.913  1.00  0.33           O  
HETATM  147  O   HOH T 146       8.869  -1.645  29.165  1.00  0.33           O  
HETATM  148  O   HOH T 147       5.350   4.012  -2.675  1.00  0.34           O  
HETATM  149  O   HOH T 148      -2.443  19.764   3.936  1.00  0.34           O  
HETATM  150  O   HOH T 149      23.230  14.839  -8.981  1.00  0.34           O  
HETATM  151  O   HOH T 150      12.628   0.447   8.237  1.00  0.34           O  
HETATM  152  O   HOH T 151      -1.916   8.460   7.197  1.00  0.34           O  
HETATM  153  O   HOH T 152      -5.635  34.130  43.764  1.00  0.34           O  
HETATM  154  O   HOH T 153      12.049  23.002 -12.864  1.00  0.34           O  
HETATM  155  O   HOH T 154       5.887  35.433   1.758  1.00  0.34           O  
HETATM  156  O   HOH T 155      -3.740  37.888  14.659  1.00  0.34           O  
HETATM  157  O   HOH T 156      -0.998   2.708  10.557  1.00  0.34           O  
HETATM  158  O   HOH T 157     -10.536   9.010 -18.487  1.00  0.34           O  
HETATM  159  O   HOH T 158     -20.488  17.005  21.804  1.00  0.34           O  
HETATM  160  O   HOH T 159      -4.800   2.762 -15.341  1.00  0.34           O  
HETATM  161  O   HOH T 160      10.158  13.628  -2.672  1.00  0.35           O  
HETATM  162  O   HOH T 161      -0.658   6.585   0.703  1.00  0.35           O  
HETATM  163  O   HOH T 162       3.936  12.264  41.558  1.00  0.35           O  
HETATM  164  O   HOH T 163       8.650  36.304  -5.968  1.00  0.35           O  
HETATM  165  O   HOH T 164      23.584   2.178  20.917  1.00  0.35           O  
HETATM  166  O   HOH T 165      33.712  18.506   9.629  1.00  0.35           O  
HETATM  167  O   HOH T 166       2.383  14.480  42.270  1.00  0.35           O  
HETATM  168  O   HOH T 167       9.508  34.103   1.079  1.00  0.35           O  
HETATM  169  O   HOH T 168       3.302   8.942   1.166  1.00  0.36           O  
HETATM  170  O   HOH T 169     -20.910  15.761   0.345  1.00  0.36           O  
HETATM  171  O   HOH T 170      14.422  31.824   5.702  1.00  0.36           O  
HETATM  172  O   HOH T 171      22.376  24.051  -4.265  1.00  0.36           O  
HETATM  173  O   HOH T 172      -8.292  17.234 -11.014  1.00  0.36           O  
HETATM  174  O   HOH T 173       3.971   7.948   3.604  1.00  0.36           O  
HETATM  175  O   HOH T 174       9.474  29.277  -8.319  1.00  0.36           O  
HETATM  176  O   HOH T 175      23.927  14.092  20.548  1.00  0.36           O  
HETATM  177  O   HOH T 176      -3.824  17.217 -16.560  1.00  0.36           O  
HETATM  178  O   HOH T 177      15.412  23.499  26.046  1.00  0.36           O  
HETATM  179  O   HOH T 178       0.590  38.041  -1.210  1.00  0.36           O  
HETATM  180  O   HOH T 179     -10.312   7.877  31.163  1.00  0.36           O  
HETATM  181  O   HOH T 180     -10.661   8.547  -2.511  1.00  0.36           O  
HETATM  182  O   HOH T 181     -14.133  29.581  29.247  1.00  0.36           O  
HETATM  183  O   HOH T 182      13.320  -0.813  22.381  1.00  0.36           O  
HETATM  184  O   HOH T 183      15.827  39.004   2.226  1.00  0.36           O  
HETATM  185  O   HOH T 184      11.677  -7.811  30.163  1.00  0.36           O  
HETATM  186  O   HOH T 185      -9.165   0.748  34.966  1.00  0.36           O  
HETATM  187  O   HOH T 186      22.000  25.778  -8.687  1.00  0.37           O  
HETATM  188  O   HOH T 187      -7.727  13.863  12.607  1.00  0.37           O  
HETATM  189  O   HOH T 188      29.317  27.663  25.443  1.00  0.37           O  
HETATM  190  O   HOH T 189       1.729  -3.424  10.712  1.00  0.37           O  
HETATM  191  O   HOH T 190      -7.746  31.928   3.231  1.00  0.37           O  
HETATM  192  O   HOH T 191      -7.456  25.844  50.915  1.00  0.37           O  
HETATM  193  O   HOH T 192      -8.166  25.073  46.283  1.00  0.37           O  
HETATM  194  O   HOH T 193      17.230   9.195  19.451  1.00  0.37           O  
HETATM  195  O   HOH T 194      37.340  11.390  -0.649  1.00  0.37           O  
HETATM  196  O   HOH T 195      17.988 -10.431  27.354  1.00  0.37           O  
HETATM  197  O   HOH T 196     -18.838  11.375 -11.260  1.00  0.37           O  
HETATM  198  O   HOH T 197       7.402  32.812  37.836  1.00  0.37           O  
HETATM  199  O   HOH T 198      -9.088  25.064  48.812  1.00  0.37           O  
HETATM  200  O   HOH T 199      -2.968  23.537  11.402  1.00  0.37           O  
HETATM  201  O   HOH T 200       8.365  20.201  26.017  1.00  0.37           O  
HETATM  202  O   HOH T 201      -0.748   1.337  -2.380  1.00  0.37           O  
HETATM  203  O   HOH T 202      26.304  27.731   8.802  1.00  0.37           O  
HETATM  204  O   HOH T 203      18.939  10.613  20.949  1.00  0.37           O  
HETATM  205  O   HOH T 204       3.966  19.373  21.173  1.00  0.37           O  
HETATM  206  O   HOH T 205       9.036  30.870  38.287  1.00  0.37           O  
HETATM  207  O   HOH T 206      27.572  13.802  19.156  1.00  0.37           O  
HETATM  208  O   HOH T 207       4.963  35.074  -0.751  1.00  0.37           O  
HETATM  209  O   HOH T 208      17.739  31.569  -7.339  1.00  0.38           O  
HETATM  210  O   HOH T 209      10.608   8.236 -13.242  1.00  0.38           O  
HETATM  211  O   HOH T 210      26.263  25.988   6.501  1.00  0.38           O  
HETATM  212  O   HOH T 211      -0.970  -0.188  -0.060  1.00  0.38           O  
HETATM  213  O   HOH T 212      -0.867   9.131  -0.227  1.00  0.38           O  
HETATM  214  O   HOH T 213      27.356  -2.547  10.394  1.00  0.38           O  
HETATM  215  O   HOH T 214      10.919  16.017   4.359  1.00  0.38           O  
HETATM  216  O   HOH T 215       2.054  16.445   2.259  1.00  0.38           O  
HETATM  217  O   HOH T 216     -21.725  17.916  -1.506  1.00  0.38           O  
HETATM  218  O   HOH T 217      11.268   1.582  16.273  1.00  0.38           O  
HETATM  219  O   HOH T 218      -6.965  36.310   4.559  1.00  0.38           O  
HETATM  220  O   HOH T 219       7.622   7.634  17.328  1.00  0.38           O  
HETATM  221  O   HOH T 220      -5.029  16.941   3.302  1.00  0.38           O  
HETATM  222  O   HOH T 221      13.008   0.839   5.543  1.00  0.38           O  
HETATM  223  O   HOH T 222       7.921  19.023  21.667  1.00  0.38           O  
HETATM  224  O   HOH T 223     -10.850  31.585  18.840  1.00  0.38           O  
HETATM  225  O   HOH T 224      20.368  23.705  23.614  1.00  0.38           O  
HETATM  226  O   HOH T 225      22.308  27.448  20.476  1.00  0.38           O  
HETATM  227  O   HOH T 226       9.834  -5.792  30.639  1.00  0.39           O  
HETATM  228  O   HOH T 227      -9.753  20.256  -7.681  1.00  0.39           O  
HETATM  229  O   HOH T 228      26.096  -1.849   6.199  1.00  0.39           O  
HETATM  230  O   HOH T 229      15.722   0.504   4.866  1.00  0.39           O  
HETATM  231  O   HOH T 230       1.383  -0.163  -1.438  1.00  0.39           O  
HETATM  232  O   HOH T 231     -19.020  11.466  -6.344  1.00  0.39           O  
HETATM  233  O   HOH T 232      29.335  -2.878   8.451  1.00  0.39           O  
HETATM  234  O   HOH T 233      12.761  28.333  23.599  1.00  0.39           O  
HETATM  235  O   HOH T 234      -0.611  11.633  39.399  1.00  0.39           O  
HETATM  236  O   HOH T 235      -0.604   7.249  39.331  1.00  0.39           O  
HETATM  237  O   HOH T 236     -12.255   6.417  -3.341  1.00  0.39           O  
HETATM  238  O   HOH T 237     -11.230  31.009  51.419  1.00  0.39           O  
HETATM  239  O   HOH T 238     -23.455   8.566   1.243  1.00  0.39           O  
HETATM  240  O   HOH T 239      31.343  19.143   8.275  1.00  0.39           O  
HETATM  241  O   HOH T 240       6.524  -2.755  21.873  1.00  0.39           O  
HETATM  242  O   HOH T 241     -17.229  27.640  32.488  1.00  0.39           O  
HETATM  243  O   HOH T 242     -10.423  33.144  22.382  1.00  0.39           O  
HETATM  244  O   HOH T 243       2.374  -1.331   6.076  1.00  0.39           O  
HETATM  245  O   HOH T 244       2.015  10.547  13.586  1.00  0.39           O  
HETATM  246  O   HOH T 245     -13.174   8.157  34.035  1.00  0.39           O  
HETATM  247  O   HOH T 246      30.106  18.137  20.960  1.00  0.39           O  
HETATM  248  O   HOH T 247      24.683  26.327  25.338  1.00  0.39           O  
HETATM  249  O   HOH T 248       4.307  -3.255   1.697  1.00  0.39           O  
HETATM  250  O   HOH T 249      20.069   7.929  23.984  1.00  0.39           O  
HETATM  251  O   HOH T 250      -7.468  36.038  22.525  1.00  0.39           O  
HETATM  252  O   HOH T 251      -8.700  11.739 -22.270  1.00  0.39           O  
HETATM  253  O   HOH T 252     -16.525   9.466  16.330  1.00  0.39           O  
HETATM  254  O   HOH T 253       0.136  33.403  26.406  1.00  0.39           O  
HETATM  255  O   HOH T 254      19.315  24.345  21.112  1.00  0.39           O  
HETATM  256  O   HOH T 255     -29.907  17.179   8.349  1.00  0.39           O  
HETATM  257  O   HOH T 256       2.351   1.227   7.568  1.00  0.39           O  
HETATM  258  O   HOH T 257      12.031  30.009  -8.876  1.00  0.39           O  
HETATM  259  O   HOH T 258      25.943  23.615  -1.233  1.00  0.39           O  
HETATM  260  O   HOH T 259       6.068   5.809   8.826  1.00  0.40           O  
HETATM  261  O   HOH T 260      -5.715  36.423  16.192  1.00  0.40           O  
HETATM  262  O   HOH T 261      23.242  21.714  25.504  1.00  0.40           O  
HETATM  263  O   HOH T 262      -4.711   3.977  -5.280  1.00  0.40           O  
HETATM  264  O   HOH T 263     -27.508  17.473   5.283  1.00  0.40           O  
HETATM  265  O   HOH T 264       9.823  13.434 -17.227  1.00  0.40           O  
HETATM  266  O   HOH T 265      20.035  21.776  21.672  1.00  0.40           O  
HETATM  267  O   HOH T 266      12.584  14.914  37.926  1.00  0.40           O  
HETATM  268  O   HOH T 267      11.733  34.541   5.348  1.00  0.40           O  
HETATM  269  O   HOH T 268     -13.993  31.833  27.714  1.00  0.40           O  
HETATM  270  O   HOH T 269       8.506  18.891  10.977  1.00  0.40           O  
HETATM  271  O   HOH T 270      11.676  31.888   6.317  1.00  0.40           O  
HETATM  272  O   HOH T 271     -11.231  16.880  48.398  1.00  0.40           O  
HETATM  273  O   HOH T 272      12.981  25.519  32.199  1.00  0.40           O  
HETATM  274  O   HOH T 273      -5.720   1.728   8.710  1.00  0.40           O  
HETATM  275  O   HOH T 274       2.710  39.149   6.642  1.00  0.40           O  
HETATM  276  O   HOH T 275      10.233  23.627  41.072  1.00  0.40           O  
HETATM  277  O   HOH T 276      -9.995  25.668  44.259  1.00  0.40           O  
HETATM  278  O   HOH T 277      20.127  39.830  -4.260  1.00  0.40           O  
HETATM  279  O   HOH T 278     -27.053  17.529   8.046  1.00  0.40           O  
HETATM  280  O   HOH T 279      -0.928   3.103  -6.283  1.00  0.40           O  
HETATM  281  O   HOH T 280       1.719  12.447 -15.566  1.00  0.40           O  
HETATM  282  O   HOH T 281      -1.732  31.179  37.943  1.00  0.40           O  
HETATM  283  O   HOH T 282      17.813  -7.701  28.056  1.00  0.40           O  
HETATM  284  O   HOH T 283       7.689  21.091  42.238  1.00  0.41           O  
HETATM  285  O   HOH T 284      29.812  23.613   3.494  1.00  0.41           O  
HETATM  286  O   HOH T 285      28.916  -1.576   5.991  1.00  0.41           O  
HETATM  287  O   HOH T 286       7.779  21.396   9.886  1.00  0.41           O  
HETATM  288  O   HOH T 287     -11.658   3.711   8.901  1.00  0.41           O  
HETATM  289  O   HOH T 288      -2.105  16.788   7.225  1.00  0.41           O  
HETATM  290  O   HOH T 289      39.228  11.479   1.436  1.00  0.41           O  
HETATM  291  O   HOH T 290      28.319   7.114  -4.054  1.00  0.41           O  
HETATM  292  O   HOH T 291     -26.010  12.134   2.285  1.00  0.41           O  
HETATM  293  O   HOH T 292     -12.818  29.622  33.078  1.00  0.41           O  
HETATM  294  O   HOH T 293      -8.808   7.984  33.518  1.00  0.41           O  
HETATM  295  O   HOH T 294      -0.543  15.085   5.255  1.00  0.41           O  
HETATM  296  O   HOH T 295      22.749  -5.471  25.287  1.00  0.41           O  
HETATM  297  O   HOH T 296       6.986  13.291 -17.120  1.00  0.41           O  
HETATM  298  O   HOH T 297      15.030   0.806  19.129  1.00  0.41           O  
HETATM  299  O   HOH T 298      -0.283   6.036   3.978  1.00  0.41           O  
HETATM  300  O   HOH T 299     -24.310  11.057   0.425  1.00  0.41           O  
HETATM  301  O   HOH T 300      10.488  20.759  10.512  1.00  0.41           O  
HETATM  302  O   HOH T 301      29.868  -3.174  11.146  1.00  0.41           O  
HETATM  303  O   HOH T 302      -8.105  38.998  36.981  1.00  0.41           O  
HETATM  304  O   HOH T 303      -7.735  11.492  51.647  1.00  0.41           O  
HETATM  305  O   HOH T 304      -4.824  26.504  51.113  1.00  0.42           O  
HETATM  306  O   HOH T 305      28.942  27.246  16.841  1.00  0.42           O  
HETATM  307  O   HOH T 306     -10.236  35.931  22.266  1.00  0.42           O  
HETATM  308  O   HOH T 307      13.836  17.338  38.200  1.00  0.42           O  
HETATM  309  O   HOH T 308     -19.272  15.618  19.661  1.00  0.42           O  
HETATM  310  O   HOH T 309       3.613  12.706  31.332  1.00  0.42           O  
HETATM  311  O   HOH T 310      -1.314  37.755   8.248  1.00  0.42           O  
HETATM  312  O   HOH T 311      14.690  29.798  -9.441  1.00  0.42           O  
HETATM  313  O   HOH T 312      11.997  18.741  36.538  1.00  0.42           O  
HETATM  314  O   HOH T 313       5.903  39.772  32.252  1.00  0.42           O  
HETATM  315  O   HOH T 314       0.281  34.115  31.203  1.00  0.42           O  
HETATM  316  O   HOH T 315       2.968  26.025  47.167  1.00  0.42           O  
HETATM  317  O   HOH T 316      24.141  29.228   9.262  1.00  0.42           O  
HETATM  318  O   HOH T 317      13.334  13.649   2.922  1.00  0.42           O  
HETATM  319  O   HOH T 318      32.732  18.401   5.731  1.00  0.42           O  
HETATM  320  O   HOH T 319      18.532  17.783  22.908  1.00  0.42           O  
HETATM  321  O   HOH T 320     -13.572   7.073  21.037  1.00  0.42           O  
HETATM  322  O   HOH T 321       7.502  30.191  -9.990  1.00  0.42           O  
HETATM  323  O   HOH T 322      12.805  34.357 -11.439  1.00  0.42           O  
HETATM  324  O   HOH T 323      23.410  26.860  22.919  1.00  0.42           O  
HETATM  325  O   HOH T 324     -21.021  16.933  17.895  1.00  0.42           O  
HETATM  326  O   HOH T 325      12.291  23.666  34.219  1.00  0.42           O  
HETATM  327  O   HOH T 326       0.453  29.043   4.027  1.00  0.42           O  
HETATM  328  O   HOH T 327      -1.135  39.943  20.088  1.00  0.42           O  
HETATM  329  O   HOH T 328       4.445   0.533   0.472  1.00  0.42           O  
HETATM  330  O   HOH T 329      12.494   0.975  20.220  1.00  0.42           O  
HETATM  331  O   HOH T 330      20.412  25.908  19.063  1.00  0.43           O  
HETATM  332  O   HOH T 331       0.317  17.990  34.861  1.00  0.43           O  
HETATM  333  O   HOH T 332       1.517   0.966  -3.971  1.00  0.43           O  
HETATM  334  O   HOH T 333     -13.802  32.270  17.100  1.00  0.43           O  
HETATM  335  O   HOH T 334       3.426  -7.307  25.851  1.00  0.43           O  
HETATM  336  O   HOH T 335      -0.983  36.743  14.966  1.00  0.43           O  
HETATM  337  O   HOH T 336      28.569  24.319  -0.327  1.00  0.43           O  
HETATM  338  O   HOH T 337      14.362  36.113 -10.183  1.00  0.43           O  
HETATM  339  O   HOH T 338       2.826  39.926   9.272  1.00  0.43           O  
HETATM  340  O   HOH T 339     -10.091   6.961  -4.721  1.00  0.43           O  
HETATM  341  O   HOH T 340     -16.559   8.777  39.623  1.00  0.43           O  
HETATM  342  O   HOH T 341       1.015   4.929  39.165  1.00  0.43           O  
HETATM  343  O   HOH T 342      -8.270  30.786   0.830  1.00  0.43           O  
HETATM  344  O   HOH T 343     -12.689  33.398  31.805  1.00  0.43           O  
HETATM  345  O   HOH T 344      13.503  24.681  24.287  1.00  0.43           O  
HETATM  346  O   HOH T 345     -12.833  32.055  34.142  1.00  0.43           O  
HETATM  347  O   HOH T 346       5.513   5.864  -8.378  1.00  0.44           O  
HETATM  348  O   HOH T 347      20.009  13.624  12.865  1.00  0.44           O  
HETATM  349  O   HOH T 348       5.885   3.607  10.634  1.00  0.44           O  
HETATM  350  O   HOH T 349      -8.819  37.830  34.540  1.00  0.44           O  
HETATM  351  O   HOH T 350      -9.448   0.620  42.452  1.00  0.44           O  
HETATM  352  O   HOH T 351     -16.906  29.410   3.330  1.00  0.44           O  
HETATM  353  O   HOH T 352      11.020  27.404  -9.608  1.00  0.44           O  
HETATM  354  O   HOH T 353     -19.755  14.180  -6.387  1.00  0.44           O  
HETATM  355  O   HOH T 354       2.694   7.918  31.635  1.00  0.44           O  
HETATM  356  O   HOH T 355     -11.481   4.255 -13.092  1.00  0.44           O  
HETATM  357  O   HOH T 356       9.101  22.541  38.807  1.00  0.44           O  
HETATM  358  O   HOH T 357       1.069  -3.773   6.849  1.00  0.44           O  
HETATM  359  O   HOH T 358      24.039  27.002  -7.194  1.00  0.44           O  
HETATM  360  O   HOH T 359      31.443   3.170   4.391  1.00  0.44           O  
HETATM  361  O   HOH T 360     -10.479  15.975  15.334  1.00  0.44           O  
HETATM  362  O   HOH T 361      29.085  26.032   6.866  1.00  0.44           O  
HETATM  363  O   HOH T 362     -19.285  28.077   3.217  1.00  0.44           O  
HETATM  364  O   HOH T 363      14.335  38.974  -5.929  1.00  0.44           O  
HETATM  365  O   HOH T 364      26.672  28.258  25.151  1.00  0.44           O  
HETATM  366  O   HOH T 365      16.178  -7.057  30.279  1.00  0.44           O  
HETATM  367  O   HOH T 366     -15.238  29.369  31.747  1.00  0.44           O  
HETATM  368  O   HOH T 367       5.697  36.404   4.217  1.00  0.44           O  
HETATM  369  O   HOH T 368     -20.444  13.722  -1.614  1.00  0.44           O  
HETATM  370  O   HOH T 369     -19.642   9.013  -1.198  1.00  0.44           O  
HETATM  371  O   HOH T 370       0.843   2.943 -13.885  1.00  0.44           O  
HETATM  372  O   HOH T 371       9.014   1.453  12.614  1.00  0.44           O  
HETATM  373  O   HOH T 372      20.474  29.588  -6.950  1.00  0.44           O  
HETATM  374  O   HOH T 373      -4.342  36.592  18.691  1.00  0.44           O  
HETATM  375  O   HOH T 374     -18.776  17.827  -5.869  1.00  0.44           O  
HETATM  376  O   HOH T 375       4.146   4.169 -11.846  1.00  0.44           O  
HETATM  377  O   HOH T 376      -5.041  36.969  21.413  1.00  0.44           O  
HETATM  378  O   HOH T 377      17.914  33.796  -9.124  1.00  0.44           O  
HETATM  379  O   HOH T 378      24.343  -3.807  26.659  1.00  0.45           O  
HETATM  380  O   HOH T 379       6.279  -1.627   0.668  1.00  0.45           O  
HETATM  381  O   HOH T 380      34.322  27.578  10.029  1.00  0.45           O  
HETATM  382  O   HOH T 381     -16.557  28.370  10.628  1.00  0.45           O  
HETATM  383  O   HOH T 382       7.946  18.017  24.313  1.00  0.45           O  
HETATM  384  O   HOH T 383      -0.803  35.155   9.127  1.00  0.45           O  
HETATM  385  O   HOH T 384      21.969  27.937 -10.484  1.00  0.45           O  
HETATM  386  O   HOH T 385      20.158  26.860  16.520  1.00  0.45           O  
HETATM  387  O   HOH T 386       5.378   1.280  -2.127  1.00  0.45           O  
HETATM  388  O   HOH T 387       3.566  13.944   8.888  1.00  0.45           O  
HETATM  389  O   HOH T 388     -13.802  29.935  35.759  1.00  0.45           O  
HETATM  390  O   HOH T 389      17.895  38.958  -8.868  1.00  0.45           O  
HETATM  391  O   HOH T 390      25.178  23.646  25.934  1.00  0.45           O  
HETATM  392  O   HOH T 391      -5.064   2.213   5.974  1.00  0.45           O  
HETATM  393  O   HOH T 392      -9.398  22.161   8.852  1.00  0.45           O  
HETATM  394  O   HOH T 393     -22.472  24.242   7.342  1.00  0.45           O  
HETATM  395  O   HOH T 394      13.012   7.914 -12.098  1.00  0.45           O  
HETATM  396  O   HOH T 395      13.799   0.425  16.657  1.00  0.45           O  
HETATM  397  O   HOH T 396      13.171  12.882 -14.745  1.00  0.45           O  
HETATM  398  O   HOH T 397       8.363  31.194  31.400  1.00  0.46           O  
HETATM  399  O   HOH T 398     -17.965   8.118  14.519  1.00  0.46           O  
HETATM  400  O   HOH T 399      -4.720   0.853 -17.325  1.00  0.46           O  
HETATM  401  O   HOH T 400     -10.025   5.246  30.004  1.00  0.46           O  
HETATM  402  O   HOH T 401       1.413   3.558  -4.983  1.00  0.46           O  
HETATM  403  O   HOH T 402      -1.484   8.436  41.681  1.00  0.46           O  
HETATM  404  O   HOH T 403      24.988   6.913  -7.625  1.00  0.46           O  
HETATM  405  O   HOH T 404      20.888  31.720   6.523  1.00  0.46           O  
HETATM  406  O   HOH T 405      20.650  24.898  -6.395  1.00  0.46           O  
HETATM  407  O   HOH T 406      18.884  40.071  -1.825  1.00  0.46           O  
HETATM  408  O   HOH T 407       8.258  27.545 -10.083  1.00  0.46           O  
HETATM  409  O   HOH T 408     -18.207  18.220  -3.108  1.00  0.46           O  
HETATM  410  O   HOH T 409       5.585   8.881 -17.793  1.00  0.46           O  
HETATM  411  O   HOH T 410      31.444  27.306  10.512  1.00  0.46           O  
HETATM  412  O   HOH T 411       8.022   6.241  -7.480  1.00  0.46           O  
HETATM  413  O   HOH T 412      17.611  40.983  -4.085  1.00  0.46           O  
HETATM  414  O   HOH T 413       7.156   3.676  -8.347  1.00  0.46           O  
HETATM  415  O   HOH T 414     -19.423  26.021  33.068  1.00  0.46           O  
HETATM  416  O   HOH T 415     -11.234  34.480  13.419  1.00  0.46           O  
HETATM  417  O   HOH T 416      26.121  12.539  21.201  1.00  0.46           O  
HETATM  418  O   HOH T 417     -12.550   3.215  38.394  1.00  0.46           O  
HETATM  419  O   HOH T 418      -2.411   3.016  -3.947  1.00  0.46           O  
HETATM  420  O   HOH T 419      12.516  32.443   3.689  1.00  0.46           O  
HETATM  421  O   HOH T 420     -13.733   5.660  43.725  1.00  0.46           O  
HETATM  422  O   HOH T 421     -18.733  15.659  -4.170  1.00  0.46           O  
HETATM  423  O   HOH T 422     -17.642  25.140  -4.744  1.00  0.46           O  
HETATM  424  O   HOH T 423      18.011  -9.972  29.994  1.00  0.46           O  
HETATM  425  O   HOH T 424      23.411  -7.275  32.373  1.00  0.46           O  
HETATM  426  O   HOH T 425     -12.490  13.855 -19.484  1.00  0.46           O  
HETATM  427  O   HOH T 426      -8.686   0.311  39.861  1.00  0.46           O  
HETATM  428  O   HOH T 427      14.606   1.446   2.476  1.00  0.46           O  
HETATM  429  O   HOH T 428      -4.054  22.105  15.408  1.00  0.46           O  
HETATM  430  O   HOH T 429     -19.534  12.600  -8.827  1.00  0.47           O  
HETATM  431  O   HOH T 430       8.962  -7.946  26.785  1.00  0.47           O  
HETATM  432  O   HOH T 431     -29.166  15.957   3.598  1.00  0.47           O  
HETATM  433  O   HOH T 432       8.927  -2.630  23.198  1.00  0.47           O  
HETATM  434  O   HOH T 433      -9.364   3.283  43.229  1.00  0.47           O  
HETATM  435  O   HOH T 434       0.723  35.189  35.017  1.00  0.47           O  
HETATM  436  O   HOH T 435      -7.367   4.636  -6.129  1.00  0.47           O  
HETATM  437  O   HOH T 436     -21.048  14.277  17.951  1.00  0.47           O  
HETATM  438  O   HOH T 437      10.245   6.674  -5.987  1.00  0.47           O  
HETATM  439  O   HOH T 438      14.604  -0.966   6.973  1.00  0.47           O  
HETATM  440  O   HOH T 439     -14.264   4.471   0.973  1.00  0.47           O  
HETATM  441  O   HOH T 440     -23.659  16.260  -0.300  1.00  0.47           O  
HETATM  442  O   HOH T 441       5.151  22.683 -14.150  1.00  0.47           O  
HETATM  443  O   HOH T 442     -22.723  16.085  13.642  1.00  0.47           O  
HETATM  444  O   HOH T 443       7.572   2.521  -3.421  1.00  0.47           O  
HETATM  445  O   HOH T 444      -7.968  22.004  -8.870  1.00  0.47           O  
HETATM  446  O   HOH T 445      17.112  36.427  -9.920  1.00  0.47           O  
HETATM  447  O   HOH T 446       7.508   9.042  -7.284  1.00  0.47           O  
HETATM  448  O   HOH T 447      15.680  32.345  -9.196  1.00  0.47           O  
HETATM  449  O   HOH T 448     -13.702  29.742  51.976  1.00  0.47           O  
HETATM  450  O   HOH T 449      29.121  27.845   8.920  1.00  0.47           O  
HETATM  451  O   HOH T 450      -7.970   8.843 -19.292  1.00  0.47           O  
HETATM  452  O   HOH T 451     -12.512   5.078  29.121  1.00  0.47           O  
HETATM  453  O   HOH T 452      10.869   1.697   9.917  1.00  0.47           O  
HETATM  454  O   HOH T 453       9.265  13.091   9.609  1.00  0.47           O  
HETATM  455  O   HOH T 454      18.447   8.000  21.757  1.00  0.47           O  
HETATM  456  O   HOH T 455     -13.717   3.301  42.292  1.00  0.47           O  
HETATM  457  O   HOH T 456      19.548  29.097  -9.655  1.00  0.47           O  
HETATM  458  O   HOH T 457       7.253  21.585  21.607  1.00  0.47           O  
HETATM  459  O   HOH T 458       1.424  15.148   7.377  1.00  0.47           O  
HETATM  460  O   HOH T 459      -3.167  36.227  23.196  1.00  0.47           O  
HETATM  461  O   HOH T 460       1.974   7.557  38.699  1.00  0.47           O  
HETATM  462  O   HOH T 461      30.371   0.688   5.168  1.00  0.47           O  
HETATM  463  O   HOH T 462      32.253   4.243  -6.420  1.00  0.47           O  
HETATM  464  O   HOH T 463      24.895  14.648 -11.282  1.00  0.47           O  
HETATM  465  O   HOH T 464       8.903   0.551   8.183  1.00  0.47           O  
HETATM  466  O   HOH T 465     -11.371  24.237  -6.389  1.00  0.48           O  
HETATM  467  O   HOH T 466      15.410  41.429  -2.358  1.00  0.48           O  
HETATM  468  O   HOH T 467     -17.173  31.426  14.744  1.00  0.48           O  
HETATM  469  O   HOH T 468      27.604  28.372   6.491  1.00  0.48           O  
HETATM  470  O   HOH T 469     -25.531   8.370   3.175  1.00  0.48           O  
HETATM  471  O   HOH T 470     -18.957  12.853  -3.903  1.00  0.48           O  
HETATM  472  O   HOH T 471     -14.611  15.100  44.740  1.00  0.48           O  
HETATM  473  O   HOH T 472      -5.746   3.384 -17.805  1.00  0.48           O  
HETATM  474  O   HOH T 473       3.958  36.717   6.301  1.00  0.48           O  
HETATM  475  O   HOH T 474     -15.140  22.038  16.746  1.00  0.48           O  
HETATM  476  O   HOH T 475      -3.704  38.969  20.021  1.00  0.48           O  
HETATM  477  O   HOH T 476     -12.923  16.263 -20.714  1.00  0.48           O  
HETATM  478  O   HOH T 477       0.804  38.003  13.312  1.00  0.48           O  
HETATM  479  O   HOH T 478      35.193   8.739  -5.489  1.00  0.48           O  
HETATM  480  O   HOH T 479     -10.488   4.822   6.572  1.00  0.48           O  
HETATM  481  O   HOH T 480      13.098  26.122  21.991  1.00  0.48           O  
HETATM  482  O   HOH T 481      24.755  23.223  -5.455  1.00  0.48           O  
HETATM  483  O   HOH T 482      30.039  28.355  12.912  1.00  0.48           O  
HETATM  484  O   HOH T 483      -1.319  11.170  41.969  1.00  0.48           O  
HETATM  485  O   HOH T 484       7.003   8.847  -1.766  1.00  0.49           O  
HETATM  486  O   HOH T 485      18.752  40.516  -6.658  1.00  0.49           O  
HETATM  487  O   HOH T 486       6.931  11.113 -18.742  1.00  0.49           O  
HETATM  488  O   HOH T 487     -18.853  26.851  30.420  1.00  0.49           O  
HETATM  489  O   HOH T 488     -11.376  37.384  47.532  1.00  0.49           O  
HETATM  490  O   HOH T 489      30.455  31.959  -4.876  1.00  0.49           O  
HETATM  491  O   HOH T 490      30.280   1.567   2.525  1.00  0.49           O  
HETATM  492  O   HOH T 491       3.890  16.556   0.469  1.00  0.49           O  
HETATM  493  O   HOH T 492      -6.526  25.303  13.120  1.00  0.49           O  
HETATM  494  O   HOH T 493       4.111  35.911  23.160  1.00  0.49           O  
HETATM  495  O   HOH T 494      35.703  21.591   8.044  1.00  0.49           O  
HETATM  496  O   HOH T 495      11.946  11.639 -16.911  1.00  0.49           O  
HETATM  497  O   HOH T 496      -7.237   4.677  26.822  1.00  0.49           O  
HETATM  498  O   HOH T 497       5.439  31.776 -10.657  1.00  0.49           O  
HETATM  499  O   HOH T 498      16.135  40.450  -7.483  1.00  0.49           O  
HETATM  500  O   HOH T 499      -4.785   3.118  -2.611  1.00  0.49           O  
HETATM  501  O   HOH T 500       6.386   2.439  -5.935  1.00  0.49           O  
HETATM  502  O   HOH T 501      -0.734  13.700 -15.552  1.00  0.49           O  
HETATM  503  O   HOH T 502      11.538  -0.661  17.906  1.00  0.49           O  
HETATM  504  O   HOH T 503     -25.590  12.477  -1.625  1.00  0.49           O  
HETATM  505  O   HOH T 504      23.043  30.257   5.556  1.00  0.49           O  
HETATM  506  O   HOH T 505      13.158  38.603  -9.749  1.00  0.49           O  
HETATM  507  O   HOH T 506      17.830  38.877   4.152  1.00  0.49           O  
HETATM  508  O   HOH T 507      -8.513   3.132  28.820  1.00  0.49           O  
HETATM  509  O   HOH T 508       2.641  21.779 -13.772  1.00  0.49           O  
HETATM  510  O   HOH T 509      10.699  16.141 -17.310  1.00  0.50           O  
HETATM  511  O   HOH T 510       6.652  33.068  14.846  1.00  0.50           O  
HETATM  512  O   HOH T 511      11.266  24.450  38.693  1.00  0.50           O  
HETATM  513  O   HOH T 512       7.371  15.027   7.218  1.00  0.50           O  
HETATM  514  O   HOH T 513     -13.782  27.122  50.913  1.00  0.50           O  
HETATM  515  O   HOH T 514      -2.346  -3.097 -11.372  1.00  0.50           O  
HETATM  516  O   HOH T 515      21.252  14.286  33.504  1.00  0.50           O  
HETATM  517  O   HOH T 516      22.733  39.737  -3.103  1.00  0.50           O  
HETATM  518  O   HOH T 517      -3.503  19.333 -15.015  1.00  0.50           O  
HETATM  519  O   HOH T 518      21.028  16.869  32.363  1.00  0.50           O  
HETATM  520  O   HOH T 519     -22.793  12.260  -1.618  1.00  0.50           O  
HETATM  521  O   HOH T 520       1.330   7.677   2.516  1.00  0.50           O  
HETATM  522  O   HOH T 521     -14.627  17.846  -9.200  1.00  0.50           O  
HETATM  523  O   HOH T 522      22.922  29.314  -8.238  1.00  0.50           O  
HETATM  524  O   HOH T 523     -13.370  10.321  33.859  1.00  0.50           O  
HETATM  525  O   HOH T 524       1.076   1.626  37.561  1.00  0.50           O  
HETATM  526  O   HOH T 525     -14.742   5.518   4.801  1.00  0.50           O  
HETATM  527  O   HOH T 526      10.905  -4.230  27.390  1.00  0.50           O  
HETATM  528  O   HOH T 527     -17.637  23.453  24.269  1.00  0.50           O  
HETATM  529  O   HOH T 528      38.023  15.000   6.752  1.00  0.50           O  
HETATM  530  O   HOH T 529       0.134   0.592   9.221  1.00  0.50           O  
HETATM  531  O   HOH T 530       8.067  34.974   3.381  1.00  0.50           O  
HETATM  532  O   HOH T 531     -13.798  32.460  25.072  1.00  0.50           O  
HETATM  533  O   HOH T 532      20.322  30.040  18.534  1.00  0.50           O  
HETATM  534  O   HOH T 533     -12.542  16.301 -18.013  1.00  0.50           O  
HETATM  535  O   HOH T 534       4.619   2.623   8.222  1.00  0.50           O  
HETATM  536  O   HOH T 535      11.316  37.054   4.175  1.00  0.51           O  
HETATM  537  O   HOH T 536      33.290  15.730   9.703  1.00  0.51           O  
HETATM  538  O   HOH T 537      -3.582  25.598  13.245  1.00  0.51           O  
HETATM  539  O   HOH T 538      34.222  16.836   7.451  1.00  0.51           O  
HETATM  540  O   HOH T 539      10.663  39.596  -9.155  1.00  0.51           O  
HETATM  541  O   HOH T 540     -11.545  26.115  49.588  1.00  0.51           O  
HETATM  542  O   HOH T 541      14.667  24.180  35.619  1.00  0.51           O  
HETATM  543  O   HOH T 542     -13.459   6.546 -13.711  1.00  0.51           O  
HETATM  544  O   HOH T 543     -10.439  31.993   2.304  1.00  0.51           O  
HETATM  545  O   HOH T 544      13.298  31.847 -10.633  1.00  0.51           O  
HETATM  546  O   HOH T 545       9.762  36.623   1.899  1.00  0.51           O  
HETATM  547  O   HOH T 546     -13.722   5.441   8.189  1.00  0.51           O  
HETATM  548  O   HOH T 547     -11.566  35.802  31.445  1.00  0.51           O  
HETATM  549  O   HOH T 548      12.265   0.025   3.037  1.00  0.51           O  
HETATM  550  O   HOH T 549      25.183  30.786   4.012  1.00  0.51           O  
HETATM  551  O   HOH T 550      24.877   7.540  25.564  1.00  0.51           O  
HETATM  552  O   HOH T 551      -7.388   3.329   5.083  1.00  0.51           O  
HETATM  553  O   HOH T 552      12.241   5.711  -4.165  1.00  0.52           O  
HETATM  554  O   HOH T 553       2.183  33.508  37.929  1.00  0.52           O  
HETATM  555  O   HOH T 554     -11.501  33.752  16.101  1.00  0.52           O  
HETATM  556  O   HOH T 555      37.902  27.750   8.687  1.00  0.52           O  
HETATM  557  O   HOH T 556      31.274  32.092  -2.146  1.00  0.52           O  
HETATM  558  O   HOH T 557     -11.416  34.893  27.505  1.00  0.52           O  
HETATM  559  O   HOH T 558       8.755   3.422  10.556  1.00  0.52           O  
HETATM  560  O   HOH T 559     -12.923   6.926  23.719  1.00  0.52           O  
HETATM  561  O   HOH T 560     -13.372  32.600  51.982  1.00  0.52           O  
HETATM  562  O   HOH T 561      18.155   0.811   6.175  1.00  0.52           O  
HETATM  563  O   HOH T 562      -9.113  18.996  25.259  1.00  0.52           O  
HETATM  564  O   HOH T 563       4.905  11.348 -16.910  1.00  0.52           O  
HETATM  565  O   HOH T 564      25.027  33.367  -4.012  1.00  0.52           O  
HETATM  566  O   HOH T 565     -12.003   4.828  31.882  1.00  0.52           O  
HETATM  567  O   HOH T 566      -5.687  -3.291 -11.236  1.00  0.52           O  
HETATM  568  O   HOH T 567       9.512  38.909   3.379  1.00  0.52           O  
HETATM  569  O   HOH T 568      12.035  29.176  37.177  1.00  0.52           O  
HETATM  570  O   HOH T 569      20.127  12.883  27.690  1.00  0.52           O  
HETATM  571  O   HOH T 570      -4.937  -0.081  10.738  1.00  0.52           O  
HETATM  572  O   HOH T 571       2.645   5.851  -5.599  1.00  0.52           O  
HETATM  573  O   HOH T 572      17.648   7.668 -10.297  1.00  0.52           O  
HETATM  574  O   HOH T 573      -9.595  18.323  50.035  1.00  0.52           O  
HETATM  575  O   HOH T 574     -20.235  24.421  30.878  1.00  0.52           O  
HETATM  576  O   HOH T 575      -0.897   0.750  -7.916  1.00  0.52           O  
HETATM  577  O   HOH T 576      15.577  21.755  36.701  1.00  0.53           O  
HETATM  578  O   HOH T 577       0.037  32.650  36.431  1.00  0.53           O  
HETATM  579  O   HOH T 578     -23.852  18.359  12.239  1.00  0.53           O  
HETATM  580  O   HOH T 579     -10.555  22.742  -8.388  1.00  0.53           O  
HETATM  581  O   HOH T 580      -7.583   3.358   2.240  1.00  0.53           O  
HETATM  582  O   HOH T 581     -17.387  17.932  -8.348  1.00  0.53           O  
HETATM  583  O   HOH T 582      32.958   6.988  -5.936  1.00  0.53           O  
HETATM  584  O   HOH T 583     -12.095  36.370  15.344  1.00  0.53           O  
HETATM  585  O   HOH T 584       2.065  25.228  49.577  1.00  0.53           O  
HETATM  586  O   HOH T 585      -8.147  36.612  25.786  1.00  0.53           O  
HETATM  587  O   HOH T 586       1.224  12.030  41.523  1.00  0.53           O  
HETATM  588  O   HOH T 587      -0.179  37.274  10.751  1.00  0.53           O  
HETATM  589  O   HOH T 588       3.936   2.247  -4.445  1.00  0.53           O  
HETATM  590  O   HOH T 589       2.419  13.714  39.613  1.00  0.53           O  
HETATM  591  O   HOH T 590     -16.165  14.602  42.360  1.00  0.53           O  
HETATM  592  O   HOH T 591     -15.233   8.205  14.089  1.00  0.53           O  
HETATM  593  O   HOH T 592      28.510  13.790  21.852  1.00  0.53           O  
HETATM  594  O   HOH T 593      15.441  11.238 -14.475  1.00  0.53           O  
HETATM  595  O   HOH T 594      -3.194   2.599   8.988  1.00  0.53           O  
HETATM  596  O   HOH T 595      11.304  27.266  38.926  1.00  0.53           O  
HETATM  597  O   HOH T 596     -11.043  28.596   0.204  1.00  0.53           O  
HETATM  598  O   HOH T 597       8.827   5.513   8.796  1.00  0.53           O  
HETATM  599  O   HOH T 598     -10.381  13.217  14.891  1.00  0.53           O  
HETATM  600  O   HOH T 599     -13.847   5.593  33.727  1.00  0.53           O  
HETATM  601  O   HOH T 600      15.361  37.810  -8.222  1.00  0.53           O  
HETATM  602  O   HOH T 601      19.184  31.729   8.754  1.00  0.53           O  
HETATM  603  O   HOH T 602      -6.245   9.570  46.177  1.00  0.54           O  
HETATM  604  O   HOH T 603     -11.280   6.918  33.641  1.00  0.54           O  
HETATM  605  O   HOH T 604      23.025  24.337  24.358  1.00  0.54           O  
HETATM  606  O   HOH T 605      -8.946  34.647  15.045  1.00  0.54           O  
HETATM  607  O   HOH T 606      -2.392  -0.081  24.436  1.00  0.54           O  
HETATM  608  O   HOH T 607      13.849  28.564  21.037  1.00  0.54           O  
HETATM  609  O   HOH T 608      17.712  24.418  23.338  1.00  0.54           O  
HETATM  610  O   HOH T 609       8.130  29.077  16.253  1.00  0.54           O  
HETATM  611  O   HOH T 610      22.762   0.528   6.567  1.00  0.54           O  
HETATM  612  O   HOH T 611      17.840   8.283  35.712  1.00  0.54           O  
HETATM  613  O   HOH T 612      15.383  40.093   4.795  1.00  0.54           O  
HETATM  614  O   HOH T 613     -19.282  19.325  22.113  1.00  0.54           O  
HETATM  615  O   HOH T 614      19.769  35.692  -9.749  1.00  0.54           O  
HETATM  616  O   HOH T 615      13.710  27.551  29.286  1.00  0.54           O  
HETATM  617  O   HOH T 616      13.828  20.073  38.014  1.00  0.54           O  
HETATM  618  O   HOH T 617      16.803  33.266   6.438  1.00  0.54           O  
HETATM  619  O   HOH T 618     -13.245   6.172  -0.794  1.00  0.54           O  
HETATM  620  O   HOH T 619      24.648  -1.830  28.603  1.00  0.54           O  
HETATM  621  O   HOH T 620     -13.726  35.848  18.728  1.00  0.54           O  
HETATM  622  O   HOH T 621     -12.947  33.293  19.553  1.00  0.54           O  
HETATM  623  O   HOH T 622      -7.359   1.415  30.694  1.00  0.55           O  
HETATM  624  O   HOH T 623      -3.777  34.489  39.123  1.00  0.55           O  
HETATM  625  O   HOH T 624      -3.922   5.084 -16.495  1.00  0.55           O  
HETATM  626  O   HOH T 625      26.074  -2.053  25.338  1.00  0.55           O  
HETATM  627  O   HOH T 626      -9.222  17.678  -8.319  1.00  0.55           O  
HETATM  628  O   HOH T 627       4.068  34.090  -8.049  1.00  0.55           O  
HETATM  629  O   HOH T 628     -16.138  15.317  35.776  1.00  0.55           O  
HETATM  630  O   HOH T 629      16.799  14.569 -13.151  1.00  0.55           O  
HETATM  631  O   HOH T 630       9.573  -1.515  31.902  1.00  0.55           O  
HETATM  632  O   HOH T 631      -8.851  37.437  48.653  1.00  0.55           O  
HETATM  633  O   HOH T 632       8.992  20.930  36.564  1.00  0.55           O  
HETATM  634  O   HOH T 633      24.621   0.358  22.499  1.00  0.55           O  
HETATM  635  O   HOH T 634       9.000  32.041  35.663  1.00  0.55           O  
HETATM  636  O   HOH T 635     -16.134  31.598  26.009  1.00  0.55           O  
HETATM  637  O   HOH T 636       0.930   0.843 -12.203  1.00  0.55           O  
HETATM  638  O   HOH T 637      -7.215   0.495  12.223  1.00  0.55           O  
HETATM  639  O   HOH T 638       6.618  24.699  19.253  1.00  0.56           O  
HETATM  640  O   HOH T 639      19.465  17.837  28.349  1.00  0.56           O  
HETATM  641  O   HOH T 640       5.748   7.354  38.157  1.00  0.56           O  
HETATM  642  O   HOH T 641      17.199   2.435  -4.859  1.00  0.56           O  
HETATM  643  O   HOH T 642     -20.970   6.529  -1.549  1.00  0.56           O  
HETATM  644  O   HOH T 643       2.387  35.907  25.407  1.00  0.56           O  
HETATM  645  O   HOH T 644       8.364   0.172  34.911  1.00  0.56           O  
HETATM  646  O   HOH T 645      10.696   6.461  36.494  1.00  0.56           O  
HETATM  647  O   HOH T 646      19.431  -0.808  11.384  1.00  0.56           O  
HETATM  648  O   HOH T 647      -4.750  13.719  53.590  1.00  0.56           O  
HETATM  649  O   HOH T 648      26.935  31.747  11.096  1.00  0.56           O  
HETATM  650  O   HOH T 649     -10.640   3.993  27.483  1.00  0.56           O  
HETATM  651  O   HOH T 650     -11.298   7.302 -20.414  1.00  0.56           O  
HETATM  652  O   HOH T 651       0.780   9.434  40.458  1.00  0.56           O  
HETATM  653  O   HOH T 652      19.423  19.602 -16.264  1.00  0.56           O  
HETATM  654  O   HOH T 653      10.897  34.035  19.456  1.00  0.57           O  
HETATM  655  O   HOH T 654      30.646  29.173  23.587  1.00  0.57           O  
HETATM  656  O   HOH T 655      20.281  16.355  24.375  1.00  0.57           O  
HETATM  657  O   HOH T 656      -9.222  26.772  -3.533  1.00  0.57           O  
HETATM  658  O   HOH T 657      27.642  -1.006  17.145  1.00  0.57           O  
HETATM  659  O   HOH T 658     -15.650   8.986  34.646  1.00  0.57           O  
HETATM  660  O   HOH T 659      12.292  25.320  36.359  1.00  0.57           O  
HETATM  661  O   HOH T 660      -4.926  23.000  13.104  1.00  0.57           O  
HETATM  662  O   HOH T 661      24.333  29.037  21.278  1.00  0.58           O  
HETATM  663  O   HOH T 662       8.519  23.410  43.200  1.00  0.58           O  
HETATM  664  O   HOH T 663      11.447  -0.088  12.080  1.00  0.58           O  
HETATM  665  O   HOH T 664     -12.985   7.009  35.931  1.00  0.58           O  
HETATM  666  O   HOH T 665     -10.853  16.310 -10.115  1.00  0.59           O  
HETATM  667  O   HOH T 666      17.801  29.326  18.805  1.00  0.60           O  
HETATM  668  O   HOH T 667     -10.622   3.156  11.394  1.00  0.60           O  
HETATM  669  O   HOH T 668     -12.102   4.011   2.484  1.00  0.60           O  
TER     670      HOH T 668 
