# Supplementary material for: Accurate Prediction of Hydration Sites of Proteins Using Energy Model With Atom Embedding
Source: Front Mol Biosci. 2021 Sep 20;8:756075. doi: 10.3389/fmolb.2021.756075 (PMC8488165; doi:10.3389/fmolb.2021.756075)
Supplement: Supplementary file 1 [file DataSheet1.ZIP › Data Sheet 1/Our_result_pdb/OppA_dataset_output/1JEV_watersite.pdb]

HEADER                                                        XXXX


JRNL        PMID   -1
HETATM    1  O   HOH T   0       5.489  15.000  -3.746  1.00  0.16           O  
HETATM    2  O   HOH T   1      -6.599   8.818   7.415  1.00  0.16           O  
HETATM    3  O   HOH T   2       7.718  15.468 -10.475  1.00  0.17           O  
HETATM    4  O   HOH T   3      19.170  19.975   6.336  1.00  0.17           O  
HETATM    5  O   HOH T   4      -1.677   8.445  10.021  1.00  0.18           O  
HETATM    6  O   HOH T   5       5.454   3.774  30.995  1.00  0.18           O  
HETATM    7  O   HOH T   6      14.124  16.576  31.067  1.00  0.18           O  
HETATM    8  O   HOH T   7      17.447  13.476   4.772  1.00  0.18           O  
HETATM    9  O   HOH T   8      23.096  23.595  -1.085  1.00  0.18           O  
HETATM   10  O   HOH T   9      20.036  26.062  14.072  1.00  0.19           O  
HETATM   11  O   HOH T  10     -13.125  13.415 -14.605  1.00  0.19           O  
HETATM   12  O   HOH T  11      -3.590  29.806  12.322  1.00  0.19           O  
HETATM   13  O   HOH T  12       5.602  19.942  25.175  1.00  0.19           O  
HETATM   14  O   HOH T  13      24.558  21.905  23.370  1.00  0.20           O  
HETATM   15  O   HOH T  14       9.243   6.648   6.881  1.00  0.20           O  
HETATM   16  O   HOH T  15      15.608  15.374  -8.417  1.00  0.20           O  
HETATM   17  O   HOH T  16       1.058  12.558  -8.445  1.00  0.20           O  
HETATM   18  O   HOH T  17       3.299  16.938   7.871  1.00  0.20           O  
HETATM   19  O   HOH T  18      -4.364  27.539  13.735  1.00  0.21           O  
HETATM   20  O   HOH T  19      -0.210   5.791  -6.249  1.00  0.21           O  
HETATM   21  O   HOH T  20       8.706   1.413  25.666  1.00  0.21           O  
HETATM   22  O   HOH T  21       9.025  13.138   9.667  1.00  0.21           O  
HETATM   23  O   HOH T  22      11.208  13.739  16.892  1.00  0.21           O  
HETATM   24  O   HOH T  23      -4.198  19.367  15.896  1.00  0.22           O  
HETATM   25  O   HOH T  24       7.208  10.975  -8.851  1.00  0.22           O  
HETATM   26  O   HOH T  25      -4.435  22.948  -7.518  1.00  0.22           O  
HETATM   27  O   HOH T  26      -5.426  19.306  51.020  1.00  0.22           O  
HETATM   28  O   HOH T  27      -1.958   4.530   9.918  1.00  0.22           O  
HETATM   29  O   HOH T  28       9.942   9.209  -5.885  1.00  0.22           O  
HETATM   30  O   HOH T  29      -9.766  17.993  49.298  1.00  0.22           O  
HETATM   31  O   HOH T  30      -1.773  28.313   1.984  1.00  0.23           O  
HETATM   32  O   HOH T  31       8.257  15.388  -3.437  1.00  0.23           O  
HETATM   33  O   HOH T  32     -20.871  22.465   1.898  1.00  0.23           O  
HETATM   34  O   HOH T  33      10.082  30.860   4.264  1.00  0.23           O  
HETATM   35  O   HOH T  34      22.796   6.554  -9.745  1.00  0.23           O  
HETATM   36  O   HOH T  35      -7.806  12.716  16.307  1.00  0.24           O  
HETATM   37  O   HOH T  36      -0.538  30.741   1.774  1.00  0.24           O  
HETATM   38  O   HOH T  37       8.411  35.785  -6.084  1.00  0.24           O  
HETATM   39  O   HOH T  38       8.754  23.981   2.055  1.00  0.24           O  
HETATM   40  O   HOH T  39      13.171  22.381  10.791  1.00  0.24           O  
HETATM   41  O   HOH T  40      -1.399  21.684  12.680  1.00  0.24           O  
HETATM   42  O   HOH T  41      27.685  15.889  20.478  1.00  0.24           O  
HETATM   43  O   HOH T  42      -9.799  20.551   8.953  1.00  0.24           O  
HETATM   44  O   HOH T  43     -18.067  24.532  34.667  1.00  0.24           O  
HETATM   45  O   HOH T  44      -8.680  27.193  42.051  1.00  0.24           O  
HETATM   46  O   HOH T  45       2.576   0.692  25.090  1.00  0.24           O  
HETATM   47  O   HOH T  46      -8.299  22.669  23.133  1.00  0.24           O  
HETATM   48  O   HOH T  47      11.407  18.312   3.163  1.00  0.24           O  
HETATM   49  O   HOH T  48      -0.303   8.913  -0.154  1.00  0.25           O  
HETATM   50  O   HOH T  49      31.297  11.333   8.291  1.00  0.25           O  
HETATM   51  O   HOH T  50      15.568  14.865  -5.730  1.00  0.25           O  
HETATM   52  O   HOH T  51       1.822   5.050 -12.451  1.00  0.25           O  
HETATM   53  O   HOH T  52      -8.851  10.629  45.963  1.00  0.25           O  
HETATM   54  O   HOH T  53      22.028  15.158 -11.527  1.00  0.25           O  
HETATM   55  O   HOH T  54       3.376   6.669  35.837  1.00  0.25           O  
HETATM   56  O   HOH T  55       1.716  -0.558  17.022  1.00  0.25           O  
HETATM   57  O   HOH T  56      -6.127  34.135  43.470  1.00  0.25           O  
HETATM   58  O   HOH T  57       4.138  10.133  30.877  1.00  0.25           O  
HETATM   59  O   HOH T  58      -1.329  30.184  28.480  1.00  0.25           O  
HETATM   60  O   HOH T  59      12.943  -0.712  22.242  1.00  0.25           O  
HETATM   61  O   HOH T  60      31.848   5.628   4.118  1.00  0.26           O  
HETATM   62  O   HOH T  61      17.241   5.195  21.915  1.00  0.26           O  
HETATM   63  O   HOH T  62      -5.450  26.002  50.465  1.00  0.26           O  
HETATM   64  O   HOH T  63      32.772  17.177   3.059  1.00  0.26           O  
HETATM   65  O   HOH T  64       7.425  21.106  42.167  1.00  0.26           O  
HETATM   66  O   HOH T  65     -22.325  16.417  13.304  1.00  0.26           O  
HETATM   67  O   HOH T  66       3.180   3.959  35.144  1.00  0.26           O  
HETATM   68  O   HOH T  67      -9.793  11.691  33.165  1.00  0.27           O  
HETATM   69  O   HOH T  68      -4.362   6.451  16.284  1.00  0.27           O  
HETATM   70  O   HOH T  69      28.937   3.126   6.259  1.00  0.27           O  
HETATM   71  O   HOH T  70       3.707  -0.301  20.860  1.00  0.27           O  
HETATM   72  O   HOH T  71       8.620  12.275   5.081  1.00  0.27           O  
HETATM   73  O   HOH T  72      -3.469   3.271  -5.737  1.00  0.27           O  
HETATM   74  O   HOH T  73      25.329  20.885  -8.020  1.00  0.27           O  
HETATM   75  O   HOH T  74      -0.731  14.867   8.860  1.00  0.27           O  
HETATM   76  O   HOH T  75      10.441  23.295   4.065  1.00  0.28           O  
HETATM   77  O   HOH T  76       3.112   5.311  30.882  1.00  0.28           O  
HETATM   78  O   HOH T  77      29.152  21.772   1.383  1.00  0.28           O  
HETATM   79  O   HOH T  78      32.798  14.018  -7.280  1.00  0.28           O  
HETATM   80  O   HOH T  79      -0.017   0.421   8.699  1.00  0.28           O  
HETATM   81  O   HOH T  80      18.700  18.170  33.271  1.00  0.28           O  
HETATM   82  O   HOH T  81      -6.867   7.216  -2.059  1.00  0.28           O  
HETATM   83  O   HOH T  82       7.850  24.235   4.724  1.00  0.28           O  
HETATM   84  O   HOH T  83     -12.802  10.825  20.450  1.00  0.28           O  
HETATM   85  O   HOH T  84     -16.947  30.943  14.213  1.00  0.28           O  
HETATM   86  O   HOH T  85       5.013  34.849   0.143  1.00  0.28           O  
HETATM   87  O   HOH T  86     -16.070  27.010  29.766  1.00  0.28           O  
HETATM   88  O   HOH T  87      -7.306  13.701  12.575  1.00  0.28           O  
HETATM   89  O   HOH T  88      -2.179  24.271  12.097  1.00  0.29           O  
HETATM   90  O   HOH T  89      25.793  -2.086   6.410  1.00  0.29           O  
HETATM   91  O   HOH T  90      11.797  25.602  -7.424  1.00  0.29           O  
HETATM   92  O   HOH T  91     -11.729  13.837 -16.893  1.00  0.29           O  
HETATM   93  O   HOH T  92      19.591  21.746  21.671  1.00  0.29           O  
HETATM   94  O   HOH T  93       6.640   7.414   7.400  1.00  0.29           O  
HETATM   95  O   HOH T  94      -5.659  34.377  33.436  1.00  0.29           O  
HETATM   96  O   HOH T  95      22.038  30.273   8.825  1.00  0.29           O  
HETATM   97  O   HOH T  96      23.414  12.967  -6.658  1.00  0.29           O  
HETATM   98  O   HOH T  97      11.609  10.148 -14.156  1.00  0.29           O  
HETATM   99  O   HOH T  98      10.751  -4.168  27.234  1.00  0.29           O  
HETATM  100  O   HOH T  99       8.165  -7.563  34.307  1.00  0.29           O  
HETATM  101  O   HOH T 100       8.368  31.077  31.074  1.00  0.29           O  
HETATM  102  O   HOH T 101     -12.285  27.520  34.317  1.00  0.29           O  
HETATM  103  O   HOH T 102     -10.086  16.520 -12.723  1.00  0.29           O  
HETATM  104  O   HOH T 103      -1.626  31.275  37.434  1.00  0.30           O  
HETATM  105  O   HOH T 104     -11.004  29.053  17.195  1.00  0.30           O  
HETATM  106  O   HOH T 105      36.604  10.886  -0.139  1.00  0.30           O  
HETATM  107  O   HOH T 106      -0.515   0.048  36.577  1.00  0.30           O  
HETATM  108  O   HOH T 107      24.263   7.827  25.408  1.00  0.30           O  
HETATM  109  O   HOH T 108       0.805  21.905  19.093  1.00  0.30           O  
HETATM  110  O   HOH T 109      14.336  38.713  -3.187  1.00  0.30           O  
HETATM  111  O   HOH T 110       3.064   2.816  15.319  1.00  0.30           O  
HETATM  112  O   HOH T 111     -11.526   4.946  41.898  1.00  0.30           O  
HETATM  113  O   HOH T 112     -10.865  31.353  18.586  1.00  0.30           O  
HETATM  114  O   HOH T 113       5.795  -1.850  19.821  1.00  0.30           O  
HETATM  115  O   HOH T 114      -1.288  11.244  40.404  1.00  0.30           O  
HETATM  116  O   HOH T 115      -3.948  17.589 -17.954  1.00  0.30           O  
HETATM  117  O   HOH T 116      28.845  -3.165  10.721  1.00  0.30           O  
HETATM  118  O   HOH T 117      -9.027   8.638 -18.937  1.00  0.30           O  
HETATM  119  O   HOH T 118      -0.755   6.863   1.707  1.00  0.31           O  
HETATM  120  O   HOH T 119      17.087   9.172  19.419  1.00  0.31           O  
HETATM  121  O   HOH T 120      10.345  13.509   3.177  1.00  0.31           O  
HETATM  122  O   HOH T 121      12.335   1.099  20.144  1.00  0.31           O  
HETATM  123  O   HOH T 122      -9.066  23.187   9.225  1.00  0.31           O  
HETATM  124  O   HOH T 123       2.819  21.264 -13.642  1.00  0.31           O  
HETATM  125  O   HOH T 124       9.955  13.252  -2.622  1.00  0.31           O  
HETATM  126  O   HOH T 125       7.809  32.229  37.774  1.00  0.31           O  
HETATM  127  O   HOH T 126       3.896  12.274  41.397  1.00  0.31           O  
HETATM  128  O   HOH T 127     -15.550  31.531   5.370  1.00  0.31           O  
HETATM  129  O   HOH T 128       0.947   5.025  38.886  1.00  0.31           O  
HETATM  130  O   HOH T 129     -15.028  21.767  16.480  1.00  0.31           O  
HETATM  131  O   HOH T 130      -7.145   6.152   4.440  1.00  0.31           O  
HETATM  132  O   HOH T 131      -6.774   7.121 -18.371  1.00  0.31           O  
HETATM  133  O   HOH T 132      11.437   5.607  -2.856  1.00  0.31           O  
HETATM  134  O   HOH T 133      14.911  14.644   4.771  1.00  0.31           O  
HETATM  135  O   HOH T 134      13.762  22.581  28.993  1.00  0.31           O  
HETATM  136  O   HOH T 135      13.111  24.371  26.902  1.00  0.31           O  
HETATM  137  O   HOH T 136      -8.861  22.544  46.350  1.00  0.32           O  
HETATM  138  O   HOH T 137      -4.976   1.246   3.141  1.00  0.32           O  
HETATM  139  O   HOH T 138       8.638  -1.626  28.934  1.00  0.32           O  
HETATM  140  O   HOH T 139      26.568  27.051   8.988  1.00  0.32           O  
HETATM  141  O   HOH T 140      -8.073  25.446  50.306  1.00  0.32           O  
HETATM  142  O   HOH T 141       3.159  -1.969  18.866  1.00  0.32           O  
HETATM  143  O   HOH T 142     -20.348   7.333   1.123  1.00  0.32           O  
HETATM  144  O   HOH T 143      -1.141   8.299   6.047  1.00  0.32           O  
HETATM  145  O   HOH T 144      14.555  31.722   5.475  1.00  0.32           O  
HETATM  146  O   HOH T 145     -12.566   6.228  23.218  1.00  0.32           O  
HETATM  147  O   HOH T 146       4.707  35.139  -2.787  1.00  0.32           O  
HETATM  148  O   HOH T 147      -7.442  33.794  41.081  1.00  0.32           O  
HETATM  149  O   HOH T 148      23.543  13.939  20.420  1.00  0.32           O  
HETATM  150  O   HOH T 149      -2.306  19.424   4.047  1.00  0.32           O  
HETATM  151  O   HOH T 150      21.034  32.143  -6.389  1.00  0.32           O  
HETATM  152  O   HOH T 151      14.427   1.413   4.679  1.00  0.32           O  
HETATM  153  O   HOH T 152      13.137  13.442   2.885  1.00  0.32           O  
HETATM  154  O   HOH T 153      11.876   0.415   4.925  1.00  0.32           O  
HETATM  155  O   HOH T 154       5.709   5.294   8.953  1.00  0.33           O  
HETATM  156  O   HOH T 155      22.178  27.312  20.685  1.00  0.33           O  
HETATM  157  O   HOH T 156      -9.868  15.744  14.944  1.00  0.33           O  
HETATM  158  O   HOH T 157       3.461  -7.223  25.603  1.00  0.33           O  
HETATM  159  O   HOH T 158     -17.832  28.035   5.415  1.00  0.33           O  
HETATM  160  O   HOH T 159     -19.118  14.356 -11.222  1.00  0.33           O  
HETATM  161  O   HOH T 160       4.350   4.212 -11.584  1.00  0.33           O  
HETATM  162  O   HOH T 161     -11.985   2.521  38.832  1.00  0.33           O  
HETATM  163  O   HOH T 162     -10.923   8.310  30.884  1.00  0.33           O  
HETATM  164  O   HOH T 163      17.784  26.742  17.771  1.00  0.33           O  
HETATM  165  O   HOH T 164      -6.323   4.871  -3.434  1.00  0.33           O  
HETATM  166  O   HOH T 165      11.902  31.475   6.295  1.00  0.33           O  
HETATM  167  O   HOH T 166      15.434  23.343  25.907  1.00  0.33           O  
HETATM  168  O   HOH T 167     -17.322  15.141  16.729  1.00  0.33           O  
HETATM  169  O   HOH T 168       2.405   9.618  -0.110  1.00  0.33           O  
HETATM  170  O   HOH T 169      13.932  26.141  19.429  1.00  0.34           O  
HETATM  171  O   HOH T 170      -9.417   6.468  32.308  1.00  0.34           O  
HETATM  172  O   HOH T 171       0.618   0.271  39.049  1.00  0.34           O  
HETATM  173  O   HOH T 172      23.333   2.003  20.810  1.00  0.34           O  
HETATM  174  O   HOH T 173      -2.333   0.725  28.718  1.00  0.34           O  
HETATM  175  O   HOH T 174      -5.290   6.760  18.748  1.00  0.34           O  
HETATM  176  O   HOH T 175     -18.373  12.568  -3.831  1.00  0.34           O  
HETATM  177  O   HOH T 176     -16.993  30.061   7.169  1.00  0.34           O  
HETATM  178  O   HOH T 177      33.983  27.250  10.014  1.00  0.34           O  
HETATM  179  O   HOH T 178      13.530  26.852  -9.235  1.00  0.34           O  
HETATM  180  O   HOH T 179      -9.091  27.182  44.770  1.00  0.34           O  
HETATM  181  O   HOH T 180      22.158  25.354  17.193  1.00  0.34           O  
HETATM  182  O   HOH T 181      31.091  19.696   1.027  1.00  0.34           O  
HETATM  183  O   HOH T 182      -0.093  31.715  11.434  1.00  0.34           O  
HETATM  184  O   HOH T 183      11.023  26.017  23.672  1.00  0.34           O  
HETATM  185  O   HOH T 184      10.978  21.145  34.779  1.00  0.34           O  
HETATM  186  O   HOH T 185       7.477  -2.121  13.005  1.00  0.34           O  
HETATM  187  O   HOH T 186      23.034  14.531  -8.959  1.00  0.34           O  
HETATM  188  O   HOH T 187      11.127  20.530  10.200  1.00  0.34           O  
HETATM  189  O   HOH T 188      32.215   7.276  -3.018  1.00  0.35           O  
HETATM  190  O   HOH T 189     -11.491   3.413   9.626  1.00  0.35           O  
HETATM  191  O   HOH T 190     -12.204  10.144  32.575  1.00  0.35           O  
HETATM  192  O   HOH T 191     -25.998  12.576   9.050  1.00  0.35           O  
HETATM  193  O   HOH T 192      17.674  31.046  -7.294  1.00  0.35           O  
HETATM  194  O   HOH T 193      26.165   7.334  -5.442  1.00  0.35           O  
HETATM  195  O   HOH T 194      20.296   0.664   1.602  1.00  0.35           O  
HETATM  196  O   HOH T 195      18.067  17.573  22.962  1.00  0.35           O  
HETATM  197  O   HOH T 196       3.275   3.109  -4.589  1.00  0.35           O  
HETATM  198  O   HOH T 197      10.699  15.891   4.413  1.00  0.35           O  
HETATM  199  O   HOH T 198      26.556  27.588  25.238  1.00  0.35           O  
HETATM  200  O   HOH T 199      22.173  26.252  -4.676  1.00  0.35           O  
HETATM  201  O   HOH T 200      29.158  26.076  -2.405  1.00  0.35           O  
HETATM  202  O   HOH T 201       9.550  28.819  -8.508  1.00  0.35           O  
HETATM  203  O   HOH T 202       5.290  33.373  37.801  1.00  0.35           O  
HETATM  204  O   HOH T 203     -23.698  18.488  11.873  1.00  0.35           O  
HETATM  205  O   HOH T 204      35.544  16.407   6.902  1.00  0.35           O  
HETATM  206  O   HOH T 205      -4.647   2.295 -15.455  1.00  0.35           O  
HETATM  207  O   HOH T 206     -12.411   8.339  -0.037  1.00  0.35           O  
HETATM  208  O   HOH T 207       2.687  14.319  32.645  1.00  0.35           O  
HETATM  209  O   HOH T 208      12.898  25.303  32.331  1.00  0.35           O  
HETATM  210  O   HOH T 209      10.459  14.901  -0.450  1.00  0.35           O  
HETATM  211  O   HOH T 210      -3.994  32.518  39.930  1.00  0.35           O  
HETATM  212  O   HOH T 211     -11.625  16.486  47.959  1.00  0.35           O  
HETATM  213  O   HOH T 212      -7.991  15.464  17.007  1.00  0.36           O  
HETATM  214  O   HOH T 213      26.921  13.574  19.119  1.00  0.36           O  
HETATM  215  O   HOH T 214      31.597   2.288  13.032  1.00  0.36           O  
HETATM  216  O   HOH T 215       7.589  18.379  23.803  1.00  0.36           O  
HETATM  217  O   HOH T 216      -8.994   3.748  32.627  1.00  0.36           O  
HETATM  218  O   HOH T 217      25.758  23.280  -1.543  1.00  0.36           O  
HETATM  219  O   HOH T 218       3.166   9.934 -14.677  1.00  0.36           O  
HETATM  220  O   HOH T 219     -12.078  31.594  29.255  1.00  0.36           O  
HETATM  221  O   HOH T 220     -10.567   8.394  -2.349  1.00  0.36           O  
HETATM  222  O   HOH T 221       0.943  -0.279  27.326  1.00  0.36           O  
HETATM  223  O   HOH T 222       0.663  11.334  32.331  1.00  0.36           O  
HETATM  224  O   HOH T 223       5.289  22.298 -14.190  1.00  0.36           O  
HETATM  225  O   HOH T 224     -14.467  28.690  28.294  1.00  0.36           O  
HETATM  226  O   HOH T 225     -15.446   7.894  36.438  1.00  0.36           O  
HETATM  227  O   HOH T 226      17.827   7.389 -10.091  1.00  0.36           O  
HETATM  228  O   HOH T 227      33.551  16.075  -4.496  1.00  0.36           O  
HETATM  229  O   HOH T 228     -26.883  17.066   8.064  1.00  0.36           O  
HETATM  230  O   HOH T 229     -13.956   6.447  -1.341  1.00  0.36           O  
HETATM  231  O   HOH T 230      -2.139  35.685   9.660  1.00  0.37           O  
HETATM  232  O   HOH T 231      -3.223  -0.372  19.492  1.00  0.37           O  
HETATM  233  O   HOH T 232     -15.759   5.891   7.181  1.00  0.37           O  
HETATM  234  O   HOH T 233      12.102  30.041  -8.713  1.00  0.37           O  
HETATM  235  O   HOH T 234      18.150 -10.095  32.467  1.00  0.37           O  
HETATM  236  O   HOH T 235      11.698  29.308  36.813  1.00  0.37           O  
HETATM  237  O   HOH T 236       2.254  10.620  13.514  1.00  0.37           O  
HETATM  238  O   HOH T 237       4.099  13.092  11.335  1.00  0.37           O  
HETATM  239  O   HOH T 238      -0.706   2.501 -14.961  1.00  0.37           O  
HETATM  240  O   HOH T 239      29.716  17.764  20.886  1.00  0.37           O  
HETATM  241  O   HOH T 240      10.544  -9.149  35.082  1.00  0.37           O  
HETATM  242  O   HOH T 241      25.387  13.066 -12.208  1.00  0.37           O  
HETATM  243  O   HOH T 242      27.799  16.797  -9.459  1.00  0.37           O  
HETATM  244  O   HOH T 243      32.255  18.138   5.664  1.00  0.37           O  
HETATM  245  O   HOH T 244     -10.666  16.194 -15.453  1.00  0.37           O  
HETATM  246  O   HOH T 245      -1.785  21.855 -13.787  1.00  0.38           O  
HETATM  247  O   HOH T 246      11.697  23.814  34.482  1.00  0.38           O  
HETATM  248  O   HOH T 247     -19.912  15.844  17.382  1.00  0.38           O  
HETATM  249  O   HOH T 248      -5.067  -1.880  18.048  1.00  0.38           O  
HETATM  250  O   HOH T 249     -26.206  17.940   5.542  1.00  0.38           O  
HETATM  251  O   HOH T 250      12.716  28.226  23.535  1.00  0.38           O  
HETATM  252  O   HOH T 251      33.634  11.662  -8.415  1.00  0.38           O  
HETATM  253  O   HOH T 252      27.720  26.923  -7.296  1.00  0.38           O  
HETATM  254  O   HOH T 253      29.927   0.667   5.646  1.00  0.38           O  
HETATM  255  O   HOH T 254      11.429  -7.470  30.000  1.00  0.38           O  
HETATM  256  O   HOH T 255      -7.307  33.612   5.607  1.00  0.38           O  
HETATM  257  O   HOH T 256      -4.669  35.875  22.159  1.00  0.38           O  
HETATM  258  O   HOH T 257      -4.617   2.266   8.204  1.00  0.38           O  
HETATM  259  O   HOH T 258      -0.647   7.294  39.040  1.00  0.38           O  
HETATM  260  O   HOH T 259      -5.012  16.591   3.229  1.00  0.38           O  
HETATM  261  O   HOH T 260      23.092  21.195  25.526  1.00  0.38           O  
HETATM  262  O   HOH T 261      24.247  28.613   8.943  1.00  0.38           O  
HETATM  263  O   HOH T 262      -9.375  17.081  -8.736  1.00  0.39           O  
HETATM  264  O   HOH T 263      -7.827   0.280  39.749  1.00  0.39           O  
HETATM  265  O   HOH T 264     -14.953  29.026  -1.138  1.00  0.39           O  
HETATM  266  O   HOH T 265      33.345  18.055   9.846  1.00  0.39           O  
HETATM  267  O   HOH T 266      -3.291  19.459 -14.726  1.00  0.39           O  
HETATM  268  O   HOH T 267      12.531  31.971   3.671  1.00  0.39           O  
HETATM  269  O   HOH T 268     -11.372   4.713   7.217  1.00  0.39           O  
HETATM  270  O   HOH T 269      19.312  23.772  19.874  1.00  0.39           O  
HETATM  271  O   HOH T 270      14.190   1.387   1.952  1.00  0.39           O  
HETATM  272  O   HOH T 271       1.430  26.674  44.535  1.00  0.39           O  
HETATM  273  O   HOH T 272       1.540  14.115  10.221  1.00  0.39           O  
HETATM  274  O   HOH T 273      32.699  13.185   9.834  1.00  0.39           O  
HETATM  275  O   HOH T 274       3.772   7.963   3.468  1.00  0.39           O  
HETATM  276  O   HOH T 275       1.895  21.743  50.773  1.00  0.39           O  
HETATM  277  O   HOH T 276      25.935  25.738   6.540  1.00  0.39           O  
HETATM  278  O   HOH T 277      29.541  23.472   3.680  1.00  0.39           O  
HETATM  279  O   HOH T 278       5.616   3.136  10.738  1.00  0.39           O  
HETATM  280  O   HOH T 279       9.983  23.161  39.621  1.00  0.39           O  
HETATM  281  O   HOH T 280     -16.096  26.488  -1.649  1.00  0.39           O  
HETATM  282  O   HOH T 281       8.165  34.928   2.507  1.00  0.40           O  
HETATM  283  O   HOH T 282      10.578  34.158   1.343  1.00  0.40           O  
HETATM  284  O   HOH T 283       8.441  14.003   7.163  1.00  0.40           O  
HETATM  285  O   HOH T 284      29.318  -2.716   8.087  1.00  0.40           O  
HETATM  286  O   HOH T 285      19.279   8.029  23.558  1.00  0.40           O  
HETATM  287  O   HOH T 286       0.655  32.118  35.968  1.00  0.40           O  
HETATM  288  O   HOH T 287     -17.819  27.667   8.071  1.00  0.40           O  
HETATM  289  O   HOH T 288     -21.132  12.034  19.578  1.00  0.40           O  
HETATM  290  O   HOH T 289      -8.139  19.314  51.055  1.00  0.40           O  
HETATM  291  O   HOH T 290       0.653  13.627  43.826  1.00  0.40           O  
HETATM  292  O   HOH T 291      -8.015   1.297  33.227  1.00  0.40           O  
HETATM  293  O   HOH T 292       7.430  30.259  -9.604  1.00  0.40           O  
HETATM  294  O   HOH T 293      23.155  -3.697  29.092  1.00  0.40           O  
HETATM  295  O   HOH T 294      26.684  25.263  -3.295  1.00  0.40           O  
HETATM  296  O   HOH T 295      20.152   5.759 -10.222  1.00  0.40           O  
HETATM  297  O   HOH T 296       2.323  -1.149   5.903  1.00  0.40           O  
HETATM  298  O   HOH T 297      -1.924   0.728  15.814  1.00  0.40           O  
HETATM  299  O   HOH T 298     -14.617  19.116  -7.298  1.00  0.40           O  
HETATM  300  O   HOH T 299      -4.408  36.419  18.677  1.00  0.40           O  
HETATM  301  O   HOH T 300      11.561  30.673  34.435  1.00  0.40           O  
HETATM  302  O   HOH T 301       0.205  25.410  51.661  1.00  0.40           O  
HETATM  303  O   HOH T 302     -18.506  16.240  -0.884  1.00  0.40           O  
HETATM  304  O   HOH T 303      -8.197  17.796 -11.149  1.00  0.40           O  
HETATM  305  O   HOH T 304     -15.898  30.409  11.659  1.00  0.40           O  
HETATM  306  O   HOH T 305       6.892  -1.715  31.006  1.00  0.40           O  
HETATM  307  O   HOH T 306      10.925   1.697  16.449  1.00  0.40           O  
HETATM  308  O   HOH T 307      -1.491  -1.897   9.239  1.00  0.41           O  
HETATM  309  O   HOH T 308     -23.604  19.344  15.658  1.00  0.41           O  
HETATM  310  O   HOH T 309      11.047  -4.382  20.182  1.00  0.41           O  
HETATM  311  O   HOH T 310      29.922  27.918  12.838  1.00  0.41           O  
HETATM  312  O   HOH T 311       9.730   5.889  10.913  1.00  0.41           O  
HETATM  313  O   HOH T 312      17.572   9.597  22.094  1.00  0.41           O  
HETATM  314  O   HOH T 313      -0.057  15.005   5.031  1.00  0.41           O  
HETATM  315  O   HOH T 314       2.083  16.364   2.421  1.00  0.41           O  
HETATM  316  O   HOH T 315       9.796  -7.999  26.045  1.00  0.41           O  
HETATM  317  O   HOH T 316      -6.986  15.998  14.407  1.00  0.41           O  
HETATM  318  O   HOH T 317     -21.032  13.851  21.511  1.00  0.41           O  
HETATM  319  O   HOH T 318       6.507  30.067  14.673  1.00  0.41           O  
HETATM  320  O   HOH T 319     -12.964  29.710  32.668  1.00  0.41           O  
HETATM  321  O   HOH T 320      -0.496   2.263  10.684  1.00  0.41           O  
HETATM  322  O   HOH T 321       0.114  33.138  26.110  1.00  0.41           O  
HETATM  323  O   HOH T 322      28.691   3.960  22.626  1.00  0.42           O  
HETATM  324  O   HOH T 323      10.533  -7.989  23.366  1.00  0.42           O  
HETATM  325  O   HOH T 324       8.726  22.483  37.303  1.00  0.42           O  
HETATM  326  O   HOH T 325      28.636  26.878  16.746  1.00  0.42           O  
HETATM  327  O   HOH T 326     -16.112  15.273  35.571  1.00  0.42           O  
HETATM  328  O   HOH T 327       8.987   4.592  -2.560  1.00  0.42           O  
HETATM  329  O   HOH T 328     -12.161   6.177  -3.383  1.00  0.42           O  
HETATM  330  O   HOH T 329      -0.773  -3.868  22.012  1.00  0.42           O  
HETATM  331  O   HOH T 330      -4.327  22.011  14.866  1.00  0.42           O  
HETATM  332  O   HOH T 331     -18.070  15.215  -3.411  1.00  0.42           O  
HETATM  333  O   HOH T 332       4.337  34.806  19.656  1.00  0.42           O  
HETATM  334  O   HOH T 333       7.816  27.608 -10.399  1.00  0.42           O  
HETATM  335  O   HOH T 334      -1.528  12.253  42.986  1.00  0.42           O  
HETATM  336  O   HOH T 335      22.217  -5.246  25.434  1.00  0.42           O  
HETATM  337  O   HOH T 336     -19.383  14.459  -5.697  1.00  0.42           O  
HETATM  338  O   HOH T 337       2.660   7.904  31.477  1.00  0.42           O  
HETATM  339  O   HOH T 338      -2.272  32.899   9.862  1.00  0.42           O  
HETATM  340  O   HOH T 339       4.750   8.084  37.670  1.00  0.42           O  
HETATM  341  O   HOH T 340      29.603  14.080  19.546  1.00  0.42           O  
HETATM  342  O   HOH T 341      37.658  14.705   6.860  1.00  0.42           O  
HETATM  343  O   HOH T 342      -4.063  22.100 -15.206  1.00  0.42           O  
HETATM  344  O   HOH T 343      35.412   9.551   7.339  1.00  0.42           O  
HETATM  345  O   HOH T 344       2.422   5.562  -5.491  1.00  0.42           O  
HETATM  346  O   HOH T 345      26.293   4.684  23.815  1.00  0.42           O  
HETATM  347  O   HOH T 346      10.536  36.140   3.284  1.00  0.42           O  
HETATM  348  O   HOH T 347      33.064  20.430   7.145  1.00  0.42           O  
HETATM  349  O   HOH T 348      24.610   6.648  -7.607  1.00  0.42           O  
HETATM  350  O   HOH T 349      21.967   8.374  24.167  1.00  0.42           O  
HETATM  351  O   HOH T 350      -9.100   4.854   5.829  1.00  0.42           O  
HETATM  352  O   HOH T 351       5.202  31.562 -10.680  1.00  0.42           O  
HETATM  353  O   HOH T 352      -7.017   1.688   9.309  1.00  0.43           O  
HETATM  354  O   HOH T 353     -21.073  17.308  -1.583  1.00  0.43           O  
HETATM  355  O   HOH T 354      -5.199  27.649  -6.543  1.00  0.43           O  
HETATM  356  O   HOH T 355       6.967   8.193  -1.801  1.00  0.43           O  
HETATM  357  O   HOH T 356      -9.636   2.246 -17.935  1.00  0.43           O  
HETATM  358  O   HOH T 357      30.992   2.984   4.398  1.00  0.43           O  
HETATM  359  O   HOH T 358      24.356  25.877  25.275  1.00  0.43           O  
HETATM  360  O   HOH T 359      10.772  -2.623   7.813  1.00  0.43           O  
HETATM  361  O   HOH T 360       2.380   1.166   7.444  1.00  0.43           O  
HETATM  362  O   HOH T 361      -2.964   1.680  26.180  1.00  0.43           O  
HETATM  363  O   HOH T 362       6.447  36.757   1.527  1.00  0.43           O  
HETATM  364  O   HOH T 363      35.642   7.908   5.106  1.00  0.43           O  
HETATM  365  O   HOH T 364      29.270  14.599 -10.179  1.00  0.43           O  
HETATM  366  O   HOH T 365      -8.226  35.970  27.641  1.00  0.43           O  
HETATM  367  O   HOH T 366      20.192  29.593  -7.337  1.00  0.43           O  
HETATM  368  O   HOH T 367       8.891  18.885  10.699  1.00  0.43           O  
HETATM  369  O   HOH T 368      20.467  26.717  -6.916  1.00  0.43           O  
HETATM  370  O   HOH T 369       2.363  14.588  41.936  1.00  0.43           O  
HETATM  371  O   HOH T 370      -8.283  36.079  24.848  1.00  0.43           O  
HETATM  372  O   HOH T 371      29.248  26.565   8.388  1.00  0.43           O  
HETATM  373  O   HOH T 372       5.086   3.905  -2.596  1.00  0.43           O  
HETATM  374  O   HOH T 373     -22.137  12.911  23.723  1.00  0.43           O  
HETATM  375  O   HOH T 374       6.080  29.313 -11.845  1.00  0.43           O  
HETATM  376  O   HOH T 375      27.526   0.485  25.949  1.00  0.43           O  
HETATM  377  O   HOH T 376      -7.589  22.854  11.619  1.00  0.43           O  
HETATM  378  O   HOH T 377      -0.734   3.032  -5.904  1.00  0.43           O  
HETATM  379  O   HOH T 378     -11.456   4.323  19.048  1.00  0.43           O  
HETATM  380  O   HOH T 379      -8.863   9.146  32.596  1.00  0.43           O  
HETATM  381  O   HOH T 380      10.848  26.989  38.045  1.00  0.43           O  
HETATM  382  O   HOH T 381      -3.825  -2.385  21.261  1.00  0.43           O  
HETATM  383  O   HOH T 382      36.143  27.454  11.737  1.00  0.43           O  
HETATM  384  O   HOH T 383     -13.108  18.451  -5.103  1.00  0.44           O  
HETATM  385  O   HOH T 384      -4.199  20.288  53.223  1.00  0.44           O  
HETATM  386  O   HOH T 385     -18.985  16.922  -7.088  1.00  0.44           O  
HETATM  387  O   HOH T 386      -2.056  16.677   7.252  1.00  0.44           O  
HETATM  388  O   HOH T 387      31.026  11.862  -7.636  1.00  0.44           O  
HETATM  389  O   HOH T 388      -0.061   0.071 -13.679  1.00  0.44           O  
HETATM  390  O   HOH T 389     -15.242  30.611  16.345  1.00  0.44           O  
HETATM  391  O   HOH T 390       3.298  34.447  -5.169  1.00  0.44           O  
HETATM  392  O   HOH T 391       1.879  25.293  49.444  1.00  0.44           O  
HETATM  393  O   HOH T 392      -0.691   0.685  -7.432  1.00  0.44           O  
HETATM  394  O   HOH T 393      15.705  31.900  -9.071  1.00  0.44           O  
HETATM  395  O   HOH T 394      -9.231  24.866  48.006  1.00  0.44           O  
HETATM  396  O   HOH T 395     -13.480  28.619  15.815  1.00  0.44           O  
HETATM  397  O   HOH T 396      11.409  -0.528  18.052  1.00  0.44           O  
HETATM  398  O   HOH T 397      -0.045  22.760  52.447  1.00  0.44           O  
HETATM  399  O   HOH T 398      37.788  12.769   4.809  1.00  0.44           O  
HETATM  400  O   HOH T 399      -4.649   0.303 -17.421  1.00  0.44           O  
HETATM  401  O   HOH T 400     -16.751   8.856  38.958  1.00  0.44           O  
HETATM  402  O   HOH T 401     -10.044  23.492  50.220  1.00  0.44           O  
HETATM  403  O   HOH T 402       0.768  20.138  52.740  1.00  0.44           O  
HETATM  404  O   HOH T 403      29.434  18.883  -9.741  1.00  0.44           O  
HETATM  405  O   HOH T 404      -9.893   6.714  -4.590  1.00  0.44           O  
HETATM  406  O   HOH T 405       2.146  12.291 -15.589  1.00  0.44           O  
HETATM  407  O   HOH T 406       2.934  23.850 -14.643  1.00  0.44           O  
HETATM  408  O   HOH T 407      20.663  16.424  32.530  1.00  0.44           O  
HETATM  409  O   HOH T 408       9.077  31.573  33.748  1.00  0.44           O  
HETATM  410  O   HOH T 409      -1.262   8.626  41.320  1.00  0.44           O  
HETATM  411  O   HOH T 410     -17.104  27.631  32.321  1.00  0.44           O  
HETATM  412  O   HOH T 411      10.498  -5.621  24.881  1.00  0.44           O  
HETATM  413  O   HOH T 412       8.581   0.754   8.879  1.00  0.45           O  
HETATM  414  O   HOH T 413      24.681  33.009  -3.939  1.00  0.45           O  
HETATM  415  O   HOH T 414      -0.338  27.651   4.321  1.00  0.45           O  
HETATM  416  O   HOH T 415     -13.017   6.166  20.537  1.00  0.45           O  
HETATM  417  O   HOH T 416      -9.986  20.776  49.623  1.00  0.45           O  
HETATM  418  O   HOH T 417       1.282   2.396 -13.193  1.00  0.45           O  
HETATM  419  O   HOH T 418      -7.716  24.921  45.795  1.00  0.45           O  
HETATM  420  O   HOH T 419       4.011  14.337   8.642  1.00  0.45           O  
HETATM  421  O   HOH T 420       1.749  36.177  33.510  1.00  0.45           O  
HETATM  422  O   HOH T 421      31.056  18.677   8.198  1.00  0.45           O  
HETATM  423  O   HOH T 422      25.656  12.315  21.276  1.00  0.45           O  
HETATM  424  O   HOH T 423      28.501   6.378  -4.193  1.00  0.45           O  
HETATM  425  O   HOH T 424     -24.586   6.881   3.702  1.00  0.45           O  
HETATM  426  O   HOH T 425      12.428  14.853  37.686  1.00  0.45           O  
HETATM  427  O   HOH T 426      16.350  14.490 -13.104  1.00  0.45           O  
HETATM  428  O   HOH T 427      -2.359   0.797  -5.281  1.00  0.45           O  
HETATM  429  O   HOH T 428     -19.220  25.861  32.536  1.00  0.45           O  
HETATM  430  O   HOH T 429       2.584  33.592  37.441  1.00  0.45           O  
HETATM  431  O   HOH T 430       4.858   6.502  -6.483  1.00  0.45           O  
HETATM  432  O   HOH T 431      36.193  25.574   9.736  1.00  0.45           O  
HETATM  433  O   HOH T 432     -18.823  17.819  -3.203  1.00  0.45           O  
HETATM  434  O   HOH T 433      27.864   3.050  25.177  1.00  0.45           O  
HETATM  435  O   HOH T 434      23.707  32.847  -6.498  1.00  0.45           O  
HETATM  436  O   HOH T 435      14.632  29.390  -9.315  1.00  0.45           O  
HETATM  437  O   HOH T 436     -20.128   6.487  -1.407  1.00  0.45           O  
HETATM  438  O   HOH T 437       0.882   0.618 -11.168  1.00  0.45           O  
HETATM  439  O   HOH T 438      -2.593  -1.291  14.050  1.00  0.45           O  
HETATM  440  O   HOH T 439       4.405   0.633  14.412  1.00  0.46           O  
HETATM  441  O   HOH T 440      19.485  13.309  12.792  1.00  0.46           O  
HETATM  442  O   HOH T 441     -13.834  29.568  35.348  1.00  0.46           O  
HETATM  443  O   HOH T 442     -18.701  14.538  -8.414  1.00  0.46           O  
HETATM  444  O   HOH T 443       4.522   2.883   8.117  1.00  0.46           O  
HETATM  445  O   HOH T 444       6.652  12.072  10.586  1.00  0.46           O  
HETATM  446  O   HOH T 445      33.371  15.608   8.567  1.00  0.46           O  
HETATM  447  O   HOH T 446      -6.266  25.079  -7.257  1.00  0.46           O  
HETATM  448  O   HOH T 447      28.505  -1.666   5.827  1.00  0.46           O  
HETATM  449  O   HOH T 448     -21.823  17.819  17.054  1.00  0.46           O  
HETATM  450  O   HOH T 449      -4.662  13.450  52.718  1.00  0.46           O  
HETATM  451  O   HOH T 450       7.180  -1.036   0.896  1.00  0.46           O  
HETATM  452  O   HOH T 451      -5.555   0.158  11.158  1.00  0.46           O  
HETATM  453  O   HOH T 452      26.540   2.160  22.825  1.00  0.46           O  
HETATM  454  O   HOH T 453     -11.753  27.593  43.855  1.00  0.46           O  
HETATM  455  O   HOH T 454      21.078  13.721  33.406  1.00  0.46           O  
HETATM  456  O   HOH T 455       0.731  22.995 -13.118  1.00  0.46           O  
HETATM  457  O   HOH T 456      23.192  22.603  -7.469  1.00  0.46           O  
HETATM  458  O   HOH T 457      -1.027   0.817  13.116  1.00  0.46           O  
HETATM  459  O   HOH T 458     -20.781  15.395   0.379  1.00  0.46           O  
HETATM  460  O   HOH T 459       2.590  26.025  46.824  1.00  0.46           O  
HETATM  461  O   HOH T 460      31.836  13.340  -9.827  1.00  0.46           O  
HETATM  462  O   HOH T 461      25.100  27.352  -8.084  1.00  0.46           O  
HETATM  463  O   HOH T 462      -8.197   4.699  -5.462  1.00  0.46           O  
HETATM  464  O   HOH T 463     -10.363  13.057  15.058  1.00  0.46           O  
HETATM  465  O   HOH T 464      -1.901  40.264  -4.689  1.00  0.46           O  
HETATM  466  O   HOH T 465      30.134   5.099  20.429  1.00  0.46           O  
HETATM  467  O   HOH T 466      22.387  26.285  23.275  1.00  0.46           O  
HETATM  468  O   HOH T 467      32.449   1.510  15.394  1.00  0.46           O  
HETATM  469  O   HOH T 468     -16.779  29.069   0.983  1.00  0.47           O  
HETATM  470  O   HOH T 469       3.865  16.420   0.467  1.00  0.47           O  
HETATM  471  O   HOH T 470      -8.622   6.383 -20.326  1.00  0.47           O  
HETATM  472  O   HOH T 471      -0.064  33.435  38.282  1.00  0.47           O  
HETATM  473  O   HOH T 472      -3.508   1.779  17.803  1.00  0.47           O  
HETATM  474  O   HOH T 473      36.913  10.312   5.224  1.00  0.47           O  
HETATM  475  O   HOH T 474      37.938  17.217   8.047  1.00  0.47           O  
HETATM  476  O   HOH T 475      -9.162   3.172   8.096  1.00  0.47           O  
HETATM  477  O   HOH T 476      33.742  10.635   9.284  1.00  0.47           O  
HETATM  478  O   HOH T 477      10.617  24.429  37.098  1.00  0.47           O  
HETATM  479  O   HOH T 478      24.572  24.738  -8.784  1.00  0.47           O  
HETATM  480  O   HOH T 479      22.720  23.752  24.426  1.00  0.47           O  
HETATM  481  O   HOH T 480     -14.332   5.480   4.757  1.00  0.47           O  
HETATM  482  O   HOH T 481     -19.438  18.577  21.972  1.00  0.47           O  
HETATM  483  O   HOH T 482     -20.483  11.433  22.208  1.00  0.47           O  
HETATM  484  O   HOH T 483      26.826   0.043  28.532  1.00  0.47           O  
HETATM  485  O   HOH T 484      32.141   6.566  -5.752  1.00  0.47           O  
HETATM  486  O   HOH T 485     -14.735  13.873  43.905  1.00  0.47           O  
HETATM  487  O   HOH T 486      28.680  28.341  10.424  1.00  0.47           O  
HETATM  488  O   HOH T 487      26.363  -2.589  11.459  1.00  0.47           O  
HETATM  489  O   HOH T 488     -10.692   2.497  41.268  1.00  0.47           O  
HETATM  490  O   HOH T 489       9.752  12.972 -17.037  1.00  0.47           O  
HETATM  491  O   HOH T 490      17.756  26.041  20.393  1.00  0.47           O  
HETATM  492  O   HOH T 491       2.571  12.281  30.588  1.00  0.47           O  
HETATM  493  O   HOH T 492      29.017   4.088  -5.634  1.00  0.47           O  
HETATM  494  O   HOH T 493       8.898   1.457  12.634  1.00  0.47           O  
HETATM  495  O   HOH T 494     -15.079   7.766  19.419  1.00  0.47           O  
HETATM  496  O   HOH T 495      -9.220  38.453  34.633  1.00  0.48           O  
HETATM  497  O   HOH T 496     -16.830  28.379  13.239  1.00  0.48           O  
HETATM  498  O   HOH T 497     -19.662   9.275  -0.750  1.00  0.48           O  
HETATM  499  O   HOH T 498      -7.283   2.417   3.379  1.00  0.48           O  
HETATM  500  O   HOH T 499      28.076  12.970 -12.015  1.00  0.48           O  
HETATM  501  O   HOH T 500      -2.280  -2.682 -11.217  1.00  0.48           O  
HETATM  502  O   HOH T 501     -22.986   6.260   1.421  1.00  0.48           O  
HETATM  503  O   HOH T 502      26.715  15.241 -11.330  1.00  0.48           O  
HETATM  504  O   HOH T 503     -16.725  17.761  -8.596  1.00  0.48           O  
HETATM  505  O   HOH T 504       5.738   0.956  38.154  1.00  0.48           O  
HETATM  506  O   HOH T 505      23.834  10.328  24.296  1.00  0.48           O  
HETATM  507  O   HOH T 506      37.288   8.891   1.596  1.00  0.48           O  
HETATM  508  O   HOH T 507      14.043  14.947 -14.621  1.00  0.48           O  
HETATM  509  O   HOH T 508       4.624  -0.014   0.732  1.00  0.48           O  
HETATM  510  O   HOH T 509       7.343   2.505  -3.352  1.00  0.48           O  
HETATM  511  O   HOH T 510      29.865   0.932   2.925  1.00  0.48           O  
HETATM  512  O   HOH T 511      -0.829  -0.075  -0.552  1.00  0.48           O  
HETATM  513  O   HOH T 512     -11.225  11.965 -19.170  1.00  0.48           O  
HETATM  514  O   HOH T 513      25.182  -2.134  27.817  1.00  0.48           O  
HETATM  515  O   HOH T 514     -27.744  10.544   9.978  1.00  0.48           O  
HETATM  516  O   HOH T 515      13.078  25.992  21.962  1.00  0.48           O  
HETATM  517  O   HOH T 516      24.483   0.323  22.559  1.00  0.48           O  
HETATM  518  O   HOH T 517      26.711  -3.395   8.822  1.00  0.48           O  
HETATM  519  O   HOH T 518     -23.214  15.714  -2.654  1.00  0.48           O  
HETATM  520  O   HOH T 519     -16.502  27.947  10.536  1.00  0.49           O  
HETATM  521  O   HOH T 520     -15.257  29.325  30.935  1.00  0.49           O  
HETATM  522  O   HOH T 521      13.470  31.490 -10.662  1.00  0.49           O  
HETATM  523  O   HOH T 522      -5.029  -3.282 -11.269  1.00  0.49           O  
HETATM  524  O   HOH T 523     -11.478  28.125  50.646  1.00  0.49           O  
HETATM  525  O   HOH T 524      -9.737   3.901 -20.069  1.00  0.49           O  
HETATM  526  O   HOH T 525     -22.750   8.952   0.826  1.00  0.49           O  
HETATM  527  O   HOH T 526      -9.696  35.824  35.310  1.00  0.49           O  
HETATM  528  O   HOH T 527      13.053  -4.654  16.541  1.00  0.49           O  
HETATM  529  O   HOH T 528     -14.100  17.903  -9.678  1.00  0.49           O  
HETATM  530  O   HOH T 529      20.069  25.788  21.764  1.00  0.49           O  
HETATM  531  O   HOH T 530      24.965  23.173  25.874  1.00  0.49           O  
HETATM  532  O   HOH T 531       3.551   2.617  37.615  1.00  0.49           O  
HETATM  533  O   HOH T 532       8.908  38.320  -7.059  1.00  0.49           O  
HETATM  534  O   HOH T 533     -19.419  10.065  -3.323  1.00  0.49           O  
HETATM  535  O   HOH T 534      -2.826  -0.587  11.374  1.00  0.49           O  
HETATM  536  O   HOH T 535      25.924  -1.685  25.099  1.00  0.49           O  
HETATM  537  O   HOH T 536      20.227  10.525  24.367  1.00  0.49           O  
HETATM  538  O   HOH T 537     -12.005  18.034  -7.813  1.00  0.49           O  
HETATM  539  O   HOH T 538       3.642  32.553   6.321  1.00  0.49           O  
HETATM  540  O   HOH T 539      23.503  -0.685   0.185  1.00  0.49           O  
HETATM  541  O   HOH T 540      17.668  37.837   5.377  1.00  0.50           O  
HETATM  542  O   HOH T 541       7.452   7.700  17.336  1.00  0.50           O  
HETATM  543  O   HOH T 542      22.473  28.182  -8.163  1.00  0.50           O  
HETATM  544  O   HOH T 543      -3.392  38.073  -4.164  1.00  0.50           O  
HETATM  545  O   HOH T 544       1.751  19.019  50.297  1.00  0.50           O  
HETATM  546  O   HOH T 545      -0.168  -2.897   3.566  1.00  0.50           O  
HETATM  547  O   HOH T 546     -10.733   4.826  16.462  1.00  0.50           O  
HETATM  548  O   HOH T 547      11.844  11.261 -16.707  1.00  0.50           O  
HETATM  549  O   HOH T 548      22.862  23.617  -4.882  1.00  0.50           O  
HETATM  550  O   HOH T 549      -5.778   2.361   5.703  1.00  0.50           O  
HETATM  551  O   HOH T 550      -7.902  11.121 -19.255  1.00  0.50           O  
HETATM  552  O   HOH T 551      -4.849   4.199  17.836  1.00  0.50           O  
HETATM  553  O   HOH T 552      13.482  24.563  24.266  1.00  0.50           O  
HETATM  554  O   HOH T 553     -17.999   7.840  -2.251  1.00  0.50           O  
HETATM  555  O   HOH T 554      -8.982  21.735  52.037  1.00  0.50           O  
HETATM  556  O   HOH T 555      -0.576  13.138 -15.404  1.00  0.50           O  
HETATM  557  O   HOH T 556       0.676   1.412  15.322  1.00  0.50           O  
HETATM  558  O   HOH T 557      36.116   6.663   2.628  1.00  0.50           O  
HETATM  559  O   HOH T 558      -6.771  -0.002   4.781  1.00  0.50           O  
HETATM  560  O   HOH T 559      16.191  39.084  -1.086  1.00  0.50           O  
HETATM  561  O   HOH T 560      -1.701  30.765  49.431  1.00  0.50           O  
HETATM  562  O   HOH T 561      -2.535  35.110  23.775  1.00  0.50           O  
HETATM  563  O   HOH T 562      11.203  -2.504  16.110  1.00  0.50           O  
HETATM  564  O   HOH T 563      19.620  12.263  27.278  1.00  0.50           O  
HETATM  565  O   HOH T 564     -13.673  13.011  51.656  1.00  0.50           O  
HETATM  566  O   HOH T 565      -1.974   2.806  -3.427  1.00  0.50           O  
HETATM  567  O   HOH T 566      12.226   0.037   7.787  1.00  0.51           O  
HETATM  568  O   HOH T 567      31.233  27.015  10.414  1.00  0.51           O  
HETATM  569  O   HOH T 568      -8.966  26.786  -3.621  1.00  0.51           O  
HETATM  570  O   HOH T 569       8.318  26.845  15.841  1.00  0.51           O  
HETATM  571  O   HOH T 570      22.018  12.046  25.763  1.00  0.51           O  
HETATM  572  O   HOH T 571     -25.056  16.441  13.258  1.00  0.51           O  
HETATM  573  O   HOH T 572      13.139  21.961  36.175  1.00  0.51           O  
HETATM  574  O   HOH T 573      14.053  46.479   1.132  1.00  0.51           O  
HETATM  575  O   HOH T 574      22.599  30.932  -8.281  1.00  0.51           O  
HETATM  576  O   HOH T 575      12.976  34.034 -11.309  1.00  0.51           O  
HETATM  577  O   HOH T 576     -11.340   4.004 -12.880  1.00  0.51           O  
HETATM  578  O   HOH T 577     -17.105  29.289  28.677  1.00  0.51           O  
HETATM  579  O   HOH T 578     -24.540   6.064   6.355  1.00  0.51           O  
HETATM  580  O   HOH T 579     -13.209   6.310 -13.164  1.00  0.51           O  
HETATM  581  O   HOH T 580       8.321  20.143  25.794  1.00  0.51           O  
HETATM  582  O   HOH T 581      20.218  26.288  18.979  1.00  0.51           O  
HETATM  583  O   HOH T 582     -13.107  29.989  43.908  1.00  0.51           O  
HETATM  584  O   HOH T 583      11.498   0.258  -0.699  1.00  0.51           O  
HETATM  585  O   HOH T 584       0.882  -3.549   6.769  1.00  0.51           O  
HETATM  586  O   HOH T 585       8.711  -3.332  21.351  1.00  0.51           O  
HETATM  587  O   HOH T 586     -12.004  34.239  29.714  1.00  0.51           O  
HETATM  588  O   HOH T 587       0.876   9.571  39.842  1.00  0.51           O  
HETATM  589  O   HOH T 588      15.316  11.268 -14.366  1.00  0.51           O  
HETATM  590  O   HOH T 589      -6.360   9.549  45.590  1.00  0.51           O  
HETATM  591  O   HOH T 590      -9.673  30.990   3.125  1.00  0.51           O  
HETATM  592  O   HOH T 591       8.314  20.938  39.599  1.00  0.51           O  
HETATM  593  O   HOH T 592       7.361   0.532  -1.446  1.00  0.51           O  
HETATM  594  O   HOH T 593      12.928  44.545  -0.330  1.00  0.51           O  
HETATM  595  O   HOH T 594       7.414   9.021  -7.090  1.00  0.51           O  
HETATM  596  O   HOH T 595      -7.194   4.476 -18.947  1.00  0.52           O  
HETATM  597  O   HOH T 596     -13.012   4.887   0.766  1.00  0.52           O  
HETATM  598  O   HOH T 597      -1.331  31.932  40.180  1.00  0.52           O  
HETATM  599  O   HOH T 598     -18.610  21.911  41.305  1.00  0.52           O  
HETATM  600  O   HOH T 599      10.948  -3.785  22.829  1.00  0.52           O  
HETATM  601  O   HOH T 600      12.418   8.097 -12.426  1.00  0.52           O  
HETATM  602  O   HOH T 601       5.705  36.297  -5.299  1.00  0.52           O  
HETATM  603  O   HOH T 602      -1.628  21.081 -16.422  1.00  0.52           O  
HETATM  604  O   HOH T 603       4.801   9.872 -17.121  1.00  0.52           O  
HETATM  605  O   HOH T 604      -4.972  -4.020   4.123  1.00  0.52           O  
HETATM  606  O   HOH T 605      -4.753  25.078  12.664  1.00  0.52           O  
HETATM  607  O   HOH T 606       2.250  13.626  39.478  1.00  0.52           O  
HETATM  608  O   HOH T 607      -9.048  18.687  25.008  1.00  0.52           O  
HETATM  609  O   HOH T 608      14.645   1.189  18.675  1.00  0.52           O  
HETATM  610  O   HOH T 609      11.384   0.870   2.077  1.00  0.52           O  
HETATM  611  O   HOH T 610      12.159  23.461 -13.736  1.00  0.52           O  
HETATM  612  O   HOH T 611      -7.426  12.073 -22.518  1.00  0.52           O  
HETATM  613  O   HOH T 612     -17.334  23.310  24.230  1.00  0.52           O  
HETATM  614  O   HOH T 613     -11.274   9.640  46.942  1.00  0.52           O  
HETATM  615  O   HOH T 614      15.131  14.950  37.859  1.00  0.52           O  
HETATM  616  O   HOH T 615      29.515  26.183   3.113  1.00  0.52           O  
HETATM  617  O   HOH T 616      -7.716  30.832   5.050  1.00  0.52           O  
HETATM  618  O   HOH T 617      34.436   5.664   4.435  1.00  0.53           O  
HETATM  619  O   HOH T 618      30.919   4.945  -3.786  1.00  0.53           O  
HETATM  620  O   HOH T 619      -2.556  34.328  33.812  1.00  0.53           O  
HETATM  621  O   HOH T 620     -23.702  16.381  15.657  1.00  0.53           O  
HETATM  622  O   HOH T 621      10.273  38.912   3.514  1.00  0.53           O  
HETATM  623  O   HOH T 622     -25.542   6.869   1.032  1.00  0.53           O  
HETATM  624  O   HOH T 623      -9.202   2.373  10.767  1.00  0.53           O  
HETATM  625  O   HOH T 624     -18.343   6.374   8.319  1.00  0.53           O  
HETATM  626  O   HOH T 625      -3.921  32.794  42.700  1.00  0.53           O  
HETATM  627  O   HOH T 626       3.370   1.658 -11.463  1.00  0.53           O  
HETATM  628  O   HOH T 627      22.379   0.005   6.497  1.00  0.53           O  
HETATM  629  O   HOH T 628     -16.131  14.653  41.850  1.00  0.53           O  
HETATM  630  O   HOH T 629      -7.168   4.726  26.283  1.00  0.53           O  
HETATM  631  O   HOH T 630      28.413  23.355  -2.386  1.00  0.53           O  
HETATM  632  O   HOH T 631     -10.759  -0.101 -17.143  1.00  0.53           O  
HETATM  633  O   HOH T 632      28.618  25.771   5.707  1.00  0.53           O  
HETATM  634  O   HOH T 633     -23.781  20.904  13.243  1.00  0.53           O  
HETATM  635  O   HOH T 634       8.322  33.551  35.450  1.00  0.54           O  
HETATM  636  O   HOH T 635      -3.899  30.036  51.104  1.00  0.54           O  
HETATM  637  O   HOH T 636     -17.014  15.863 -12.401  1.00  0.54           O  
HETATM  638  O   HOH T 637       5.976  21.140  44.572  1.00  0.54           O  
HETATM  639  O   HOH T 638      33.994   0.926  13.080  1.00  0.54           O  
HETATM  640  O   HOH T 639      12.850  12.582 -14.545  1.00  0.54           O  
HETATM  641  O   HOH T 640      10.664  16.139 -17.192  1.00  0.54           O  
HETATM  642  O   HOH T 641      13.844  28.443  20.979  1.00  0.54           O  
HETATM  643  O   HOH T 642     -23.588  11.164  -0.864  1.00  0.54           O  
HETATM  644  O   HOH T 643     -13.755   8.408  21.690  1.00  0.54           O  
HETATM  645  O   HOH T 644     -18.572  27.317  34.709  1.00  0.54           O  
HETATM  646  O   HOH T 645      -2.242  24.376  52.250  1.00  0.54           O  
HETATM  647  O   HOH T 646       9.614  -6.478  28.268  1.00  0.54           O  
HETATM  648  O   HOH T 647      12.593  -6.332  18.831  1.00  0.54           O  
HETATM  649  O   HOH T 648       2.099   7.486  38.290  1.00  0.54           O  
HETATM  650  O   HOH T 649      11.165   3.018  -3.426  1.00  0.54           O  
HETATM  651  O   HOH T 650      -7.421   4.762  -0.903  1.00  0.54           O  
HETATM  652  O   HOH T 651      17.632   8.257  35.539  1.00  0.54           O  
HETATM  653  O   HOH T 652     -16.263  23.531  41.429  1.00  0.55           O  
HETATM  654  O   HOH T 653      16.123  -2.420  31.543  1.00  0.55           O  
HETATM  655  O   HOH T 654      26.513  25.334  26.882  1.00  0.55           O  
HETATM  656  O   HOH T 655      23.656  29.933   6.564  1.00  0.55           O  
HETATM  657  O   HOH T 656     -17.691  14.486 -15.393  1.00  0.55           O  
HETATM  658  O   HOH T 657      16.097   7.219 -12.157  1.00  0.55           O  
HETATM  659  O   HOH T 658      -8.194  32.768   1.824  1.00  0.55           O  
HETATM  660  O   HOH T 659     -26.966  10.333   4.675  1.00  0.55           O  
HETATM  661  O   HOH T 660      11.982  -6.687  21.488  1.00  0.55           O  
HETATM  662  O   HOH T 661       9.012   0.260  35.568  1.00  0.55           O  
HETATM  663  O   HOH T 662     -21.855  15.520  23.345  1.00  0.55           O  
HETATM  664  O   HOH T 663       7.097  13.130 -17.025  1.00  0.55           O  
HETATM  665  O   HOH T 664      25.246  30.593   4.225  1.00  0.55           O  
HETATM  666  O   HOH T 665      17.020   2.415  -4.871  1.00  0.55           O  
HETATM  667  O   HOH T 666     -11.468  30.904  50.893  1.00  0.55           O  
HETATM  668  O   HOH T 667      21.055  34.831  13.748  1.00  0.55           O  
HETATM  669  O   HOH T 668      10.603   6.522  36.442  1.00  0.55           O  
HETATM  670  O   HOH T 669      18.707  12.008  22.642  1.00  0.56           O  
HETATM  671  O   HOH T 670       5.794  33.428   7.761  1.00  0.56           O  
HETATM  672  O   HOH T 671      -0.824   0.070 -16.272  1.00  0.56           O  
HETATM  673  O   HOH T 672      -7.483   3.338  -7.761  1.00  0.56           O  
HETATM  674  O   HOH T 673      10.064  31.564  36.380  1.00  0.56           O  
HETATM  675  O   HOH T 674      -5.652  36.549  -4.807  1.00  0.56           O  
HETATM  676  O   HOH T 675       1.121  11.934  41.633  1.00  0.56           O  
HETATM  677  O   HOH T 676      -4.815   1.514  28.348  1.00  0.56           O  
HETATM  678  O   HOH T 677     -22.593  13.735  -0.834  1.00  0.56           O  
HETATM  679  O   HOH T 678      24.364   0.071  29.442  1.00  0.56           O  
HETATM  680  O   HOH T 679      20.313  33.991  15.202  1.00  0.56           O  
HETATM  681  O   HOH T 680     -14.561  15.549 -13.708  1.00  0.56           O  
HETATM  682  O   HOH T 681      24.409  14.018  22.998  1.00  0.56           O  
HETATM  683  O   HOH T 682      29.255  27.602  25.195  1.00  0.56           O  
HETATM  684  O   HOH T 683      19.507  -0.286  11.074  1.00  0.56           O  
HETATM  685  O   HOH T 684     -20.292  16.127  21.244  1.00  0.56           O  
HETATM  686  O   HOH T 685     -16.464  17.814  34.834  1.00  0.56           O  
HETATM  687  O   HOH T 686       7.642   6.303  -7.311  1.00  0.56           O  
HETATM  688  O   HOH T 687      10.485  34.927  19.544  1.00  0.56           O  
HETATM  689  O   HOH T 688       4.958  12.096 -15.352  1.00  0.57           O  
HETATM  690  O   HOH T 689       5.848  33.837  15.163  1.00  0.57           O  
HETATM  691  O   HOH T 690      -9.700  19.656  -7.983  1.00  0.57           O  
HETATM  692  O   HOH T 691     -13.798   5.628  43.111  1.00  0.57           O  
HETATM  693  O   HOH T 692      15.290  30.755  12.981  1.00  0.57           O  
HETATM  694  O   HOH T 693       3.079   0.518  -5.503  1.00  0.57           O  
HETATM  695  O   HOH T 694      -6.483   2.291 -17.464  1.00  0.57           O  
HETATM  696  O   HOH T 695      18.730   6.340 -12.511  1.00  0.57           O  
HETATM  697  O   HOH T 696     -10.602  32.375  22.641  1.00  0.57           O  
HETATM  698  O   HOH T 697       5.793   0.819   9.022  1.00  0.58           O  
HETATM  699  O   HOH T 698      -5.611   2.240  16.148  1.00  0.58           O  
HETATM  700  O   HOH T 699     -19.388  14.145  19.498  1.00  0.58           O  
HETATM  701  O   HOH T 700       1.640  -0.261  -1.307  1.00  0.58           O  
HETATM  702  O   HOH T 701       9.582   3.041  10.253  1.00  0.59           O  
HETATM  703  O   HOH T 702     -28.136  14.547   8.916  1.00  0.59           O  
HETATM  704  O   HOH T 703      13.065  38.944  -5.735  1.00  0.59           O  
HETATM  705  O   HOH T 704      16.348  -5.138  32.296  1.00  0.59           O  
HETATM  706  O   HOH T 705      25.971  25.053 -11.289  1.00  0.59           O  
HETATM  707  O   HOH T 706       9.566   2.100  -1.542  1.00  0.61           O  
HETATM  708  O   HOH T 707      11.164  -1.378  13.649  1.00  0.62           O  
HETATM  709  O   HOH T 708      11.278  29.179  39.574  1.00  0.63           O  
TER     710      HOH T 708 
