# Supplementary material for: Accurate Prediction of Hydration Sites of Proteins Using Energy Model With Atom Embedding
Source: Front Mol Biosci. 2021 Sep 20;8:756075. doi: 10.3389/fmolb.2021.756075 (PMC8488165; doi:10.3389/fmolb.2021.756075)
Supplement: Supplementary file 1 [file DataSheet1.ZIP › Data Sheet 1/Our_result_pdb/OppA_dataset_output/1QKA_watersite.pdb]

HEADER                                                        XXXX


JRNL        PMID   -1
HETATM    1  O   HOH T   0       5.330  15.120  -3.495  1.00  0.16           O  
HETATM    2  O   HOH T   1       7.424  15.535 -10.297  1.00  0.16           O  
HETATM    3  O   HOH T   2      23.236  23.293  -1.075  1.00  0.16           O  
HETATM    4  O   HOH T   3      17.349  13.422   4.928  1.00  0.17           O  
HETATM    5  O   HOH T   4      20.199  25.969  14.122  1.00  0.18           O  
HETATM    6  O   HOH T   5      19.222  19.844   6.501  1.00  0.18           O  
HETATM    7  O   HOH T   6       9.074   6.795   6.912  1.00  0.18           O  
HETATM    8  O   HOH T   7      14.463  16.689  31.117  1.00  0.18           O  
HETATM    9  O   HOH T   8       0.841  12.858  -8.150  1.00  0.18           O  
HETATM   10  O   HOH T   9       0.547  31.159  10.926  1.00  0.19           O  
HETATM   11  O   HOH T  10      11.278  13.828  16.921  1.00  0.19           O  
HETATM   12  O   HOH T  11      15.583  15.248  -8.289  1.00  0.20           O  
HETATM   13  O   HOH T  12      -0.732  30.837  28.390  1.00  0.20           O  
HETATM   14  O   HOH T  13     -10.854  27.294  34.474  1.00  0.20           O  
HETATM   15  O   HOH T  14      22.000  14.869 -11.358  1.00  0.21           O  
HETATM   16  O   HOH T  15      24.852  21.651  23.430  1.00  0.21           O  
HETATM   17  O   HOH T  16      -2.447   4.978  10.134  1.00  0.21           O  
HETATM   18  O   HOH T  17      22.484  25.166  17.412  1.00  0.22           O  
HETATM   19  O   HOH T  18     -12.756  11.853  20.536  1.00  0.22           O  
HETATM   20  O   HOH T  19      -7.670  23.440  23.286  1.00  0.22           O  
HETATM   21  O   HOH T  20      22.086   6.345  -9.698  1.00  0.22           O  
HETATM   22  O   HOH T  21       7.011  10.903  -8.696  1.00  0.22           O  
HETATM   23  O   HOH T  22      31.236  10.883   8.448  1.00  0.22           O  
HETATM   24  O   HOH T  23      -1.550  35.977  16.760  1.00  0.22           O  
HETATM   25  O   HOH T  24       8.558  12.474   5.262  1.00  0.23           O  
HETATM   26  O   HOH T  25     -15.534  27.975  12.459  1.00  0.23           O  
HETATM   27  O   HOH T  26      22.485  26.073  -4.652  1.00  0.23           O  
HETATM   28  O   HOH T  27       5.402   4.032  31.432  1.00  0.23           O  
HETATM   29  O   HOH T  28      17.134   5.175  22.131  1.00  0.23           O  
HETATM   30  O   HOH T  29       3.110   5.573  30.917  1.00  0.23           O  
HETATM   31  O   HOH T  30       8.648   1.551  25.855  1.00  0.23           O  
HETATM   32  O   HOH T  31      -1.442  -0.086  35.067  1.00  0.23           O  
HETATM   33  O   HOH T  32      -9.613  12.184  33.528  1.00  0.23           O  
HETATM   34  O   HOH T  33      32.679  16.912   2.567  1.00  0.23           O  
HETATM   35  O   HOH T  34      28.670   2.588   6.327  1.00  0.24           O  
HETATM   36  O   HOH T  35      -3.559  37.797  13.934  1.00  0.24           O  
HETATM   37  O   HOH T  36      -7.303   9.461   8.050  1.00  0.24           O  
HETATM   38  O   HOH T  37      -4.762  35.065  33.534  1.00  0.24           O  
HETATM   39  O   HOH T  38      -8.483  11.543  46.151  1.00  0.24           O  
HETATM   40  O   HOH T  39      -9.659  21.683   9.244  1.00  0.24           O  
HETATM   41  O   HOH T  40      -2.576  38.779   9.734  1.00  0.24           O  
HETATM   42  O   HOH T  41       7.880  24.370   4.911  1.00  0.24           O  
HETATM   43  O   HOH T  42      -1.517  28.808   2.040  1.00  0.24           O  
HETATM   44  O   HOH T  43      -2.133   8.916  10.340  1.00  0.25           O  
HETATM   45  O   HOH T  44       8.839  24.133   2.270  1.00  0.25           O  
HETATM   46  O   HOH T  45      -4.354  23.335  -7.407  1.00  0.25           O  
HETATM   47  O   HOH T  46     -21.078  16.811  15.258  1.00  0.25           O  
HETATM   48  O   HOH T  47     -11.696   4.932 -12.673  1.00  0.25           O  
HETATM   49  O   HOH T  48       0.728   6.048  -5.311  1.00  0.25           O  
HETATM   50  O   HOH T  49      34.273  14.571  -1.709  1.00  0.25           O  
HETATM   51  O   HOH T  50     -11.600  32.425  29.472  1.00  0.25           O  
HETATM   52  O   HOH T  51       6.469   7.601   7.665  1.00  0.25           O  
HETATM   53  O   HOH T  52       3.141  17.291   8.051  1.00  0.25           O  
HETATM   54  O   HOH T  53      11.380  18.429   3.321  1.00  0.25           O  
HETATM   55  O   HOH T  54       8.113  15.420  -3.246  1.00  0.25           O  
HETATM   56  O   HOH T  55       4.308  10.487  31.206  1.00  0.26           O  
HETATM   57  O   HOH T  56      -2.368  20.030   4.186  1.00  0.26           O  
HETATM   58  O   HOH T  57     -23.936  18.985  -1.215  1.00  0.26           O  
HETATM   59  O   HOH T  58     -14.449  18.783  42.716  1.00  0.26           O  
HETATM   60  O   HOH T  59      29.895  17.441  20.995  1.00  0.26           O  
HETATM   61  O   HOH T  60      17.169   7.285  -9.999  1.00  0.26           O  
HETATM   62  O   HOH T  61      15.337  14.706  -5.633  1.00  0.27           O  
HETATM   63  O   HOH T  62      -5.556  34.756  43.595  1.00  0.27           O  
HETATM   64  O   HOH T  63       1.646  21.951  19.284  1.00  0.27           O  
HETATM   65  O   HOH T  64     -18.186  27.393   0.449  1.00  0.27           O  
HETATM   66  O   HOH T  65      33.878  15.516  -4.272  1.00  0.27           O  
HETATM   67  O   HOH T  66     -10.124  16.304  14.649  1.00  0.27           O  
HETATM   68  O   HOH T  67      -4.572  19.415  16.063  1.00  0.27           O  
HETATM   69  O   HOH T  68      11.741  25.476  -7.283  1.00  0.27           O  
HETATM   70  O   HOH T  69       9.583   9.380  -5.863  1.00  0.27           O  
HETATM   71  O   HOH T  70     -10.822  16.731 -15.365  1.00  0.27           O  
HETATM   72  O   HOH T  71      10.464  23.412   4.318  1.00  0.27           O  
HETATM   73  O   HOH T  72     -14.441   9.650  20.941  1.00  0.28           O  
HETATM   74  O   HOH T  73     -10.166  17.875 -21.763  1.00  0.28           O  
HETATM   75  O   HOH T  74      -0.699  13.542 -15.190  1.00  0.28           O  
HETATM   76  O   HOH T  75      -2.184  31.221  10.382  1.00  0.28           O  
HETATM   77  O   HOH T  76      14.836  14.602   4.978  1.00  0.28           O  
HETATM   78  O   HOH T  77      -3.086  32.663  40.452  1.00  0.28           O  
HETATM   79  O   HOH T  78     -10.210  17.098 -12.685  1.00  0.28           O  
HETATM   80  O   HOH T  79     -11.916  14.385 -16.486  1.00  0.28           O  
HETATM   81  O   HOH T  80      -4.108  36.471  22.072  1.00  0.29           O  
HETATM   82  O   HOH T  81     -19.828   9.998   0.037  1.00  0.29           O  
HETATM   83  O   HOH T  82      -4.394  27.633  13.799  1.00  0.29           O  
HETATM   84  O   HOH T  83      -0.134  31.148   1.906  1.00  0.29           O  
HETATM   85  O   HOH T  84      29.411  21.131   1.402  1.00  0.29           O  
HETATM   86  O   HOH T  85     -15.319  22.823  16.187  1.00  0.29           O  
HETATM   87  O   HOH T  86      -4.969  26.906 -19.419  1.00  0.29           O  
HETATM   88  O   HOH T  87       3.597   7.041  36.163  1.00  0.29           O  
HETATM   89  O   HOH T  88      22.072   8.099  24.388  1.00  0.29           O  
HETATM   90  O   HOH T  89      -0.453   1.171  37.524  1.00  0.29           O  
HETATM   91  O   HOH T  90      -7.155   7.564  -1.765  1.00  0.29           O  
HETATM   92  O   HOH T  91      12.724  -0.532  22.659  1.00  0.29           O  
HETATM   93  O   HOH T  92      -6.301   6.393 -16.894  1.00  0.29           O  
HETATM   94  O   HOH T  93      17.065   9.194  19.633  1.00  0.30           O  
HETATM   95  O   HOH T  94      -0.132   9.527   4.984  1.00  0.30           O  
HETATM   96  O   HOH T  95      32.689  13.358  -7.288  1.00  0.30           O  
HETATM   97  O   HOH T  96      -7.237  14.403  13.163  1.00  0.30           O  
HETATM   98  O   HOH T  97       2.812   8.220  31.690  1.00  0.30           O  
HETATM   99  O   HOH T  98      25.281  32.726  -3.510  1.00  0.30           O  
HETATM  100  O   HOH T  99      13.472  24.636  27.210  1.00  0.30           O  
HETATM  101  O   HOH T 100     -13.155  14.258 -13.966  1.00  0.30           O  
HETATM  102  O   HOH T 101      33.399  17.565  -6.097  1.00  0.30           O  
HETATM  103  O   HOH T 102     -11.899  10.690  32.745  1.00  0.30           O  
HETATM  104  O   HOH T 103       9.815  13.359  -2.361  1.00  0.30           O  
HETATM  105  O   HOH T 104      10.311  31.070   4.341  1.00  0.30           O  
HETATM  106  O   HOH T 105      -4.855   3.291 -14.828  1.00  0.30           O  
HETATM  107  O   HOH T 106     -14.578  19.691  -7.188  1.00  0.30           O  
HETATM  108  O   HOH T 107      -7.972   6.199   5.134  1.00  0.30           O  
HETATM  109  O   HOH T 108      26.436   4.035  23.583  1.00  0.31           O  
HETATM  110  O   HOH T 109     -12.198  20.716   8.811  1.00  0.31           O  
HETATM  111  O   HOH T 110       3.897  32.856   9.002  1.00  0.31           O  
HETATM  112  O   HOH T 111     -13.494   5.446   3.133  1.00  0.31           O  
HETATM  113  O   HOH T 112      19.088  18.358  33.348  1.00  0.31           O  
HETATM  114  O   HOH T 113       3.542   8.185   3.677  1.00  0.31           O  
HETATM  115  O   HOH T 114       3.737  20.179  21.003  1.00  0.31           O  
HETATM  116  O   HOH T 115     -20.637   7.877   1.670  1.00  0.31           O  
HETATM  117  O   HOH T 116      10.176   8.087 -12.750  1.00  0.31           O  
HETATM  118  O   HOH T 117       5.152  22.352 -13.978  1.00  0.31           O  
HETATM  119  O   HOH T 118      -6.342   7.339  19.266  1.00  0.31           O  
HETATM  120  O   HOH T 119      20.592  23.479  23.637  1.00  0.31           O  
HETATM  121  O   HOH T 120       7.383  -2.743  33.287  1.00  0.32           O  
HETATM  122  O   HOH T 121       2.299   9.800   0.161  1.00  0.32           O  
HETATM  123  O   HOH T 122      12.217  23.116 -13.587  1.00  0.32           O  
HETATM  124  O   HOH T 123       3.026   4.381  35.666  1.00  0.32           O  
HETATM  125  O   HOH T 124      -3.451  30.061  12.652  1.00  0.32           O  
HETATM  126  O   HOH T 125      -3.763  17.117 -16.210  1.00  0.32           O  
HETATM  127  O   HOH T 126       5.746  35.735  16.913  1.00  0.32           O  
HETATM  128  O   HOH T 127      13.382  22.822  11.049  1.00  0.32           O  
HETATM  129  O   HOH T 128      -1.526   7.122   4.616  1.00  0.32           O  
HETATM  130  O   HOH T 129     -10.513   4.924  17.642  1.00  0.32           O  
HETATM  131  O   HOH T 130       8.871  35.935  -5.997  1.00  0.32           O  
HETATM  132  O   HOH T 131      10.243  13.624   3.317  1.00  0.32           O  
HETATM  133  O   HOH T 132      -7.195   5.288  26.764  1.00  0.32           O  
HETATM  134  O   HOH T 133      -4.676   6.697  16.869  1.00  0.32           O  
HETATM  135  O   HOH T 134      31.792   5.088   4.242  1.00  0.32           O  
HETATM  136  O   HOH T 135      -6.744  34.493  41.125  1.00  0.32           O  
HETATM  137  O   HOH T 136      13.026  13.394   3.043  1.00  0.32           O  
HETATM  138  O   HOH T 137      -6.923  36.119  22.161  1.00  0.33           O  
HETATM  139  O   HOH T 138      -1.524   1.161   9.565  1.00  0.33           O  
HETATM  140  O   HOH T 139      -1.066   6.785   1.121  1.00  0.33           O  
HETATM  141  O   HOH T 140      10.655   7.061   9.255  1.00  0.33           O  
HETATM  142  O   HOH T 141      -0.673   7.218  39.825  1.00  0.33           O  
HETATM  143  O   HOH T 142     -18.825  16.095  16.650  1.00  0.33           O  
HETATM  144  O   HOH T 143      27.802  15.570  20.710  1.00  0.33           O  
HETATM  145  O   HOH T 144       6.869  30.084  14.945  1.00  0.33           O  
HETATM  146  O   HOH T 145      -8.342  17.610 -10.661  1.00  0.33           O  
HETATM  147  O   HOH T 146      25.493  -2.833  12.371  1.00  0.33           O  
HETATM  148  O   HOH T 147      31.789   1.676  13.848  1.00  0.33           O  
HETATM  149  O   HOH T 148       8.384  26.568  16.091  1.00  0.33           O  
HETATM  150  O   HOH T 149      -5.466  -2.465  37.898  1.00  0.33           O  
HETATM  151  O   HOH T 150      20.651  -2.326  19.846  1.00  0.33           O  
HETATM  152  O   HOH T 151      -6.781   5.256  -3.265  1.00  0.33           O  
HETATM  153  O   HOH T 152       3.958  13.097  11.747  1.00  0.33           O  
HETATM  154  O   HOH T 153       5.180   5.548   9.120  1.00  0.33           O  
HETATM  155  O   HOH T 154      -0.748  38.172   7.769  1.00  0.33           O  
HETATM  156  O   HOH T 155     -12.102  28.933  43.674  1.00  0.33           O  
HETATM  157  O   HOH T 156       1.919  10.863  13.737  1.00  0.33           O  
HETATM  158  O   HOH T 157      15.434   0.401  18.975  1.00  0.33           O  
HETATM  159  O   HOH T 158      -9.882  33.176  21.818  1.00  0.33           O  
HETATM  160  O   HOH T 159      -8.144  27.898  42.367  1.00  0.33           O  
HETATM  161  O   HOH T 160       5.505  34.083  37.624  1.00  0.34           O  
HETATM  162  O   HOH T 161      28.513  22.858  -2.598  1.00  0.34           O  
HETATM  163  O   HOH T 162       0.860  11.771  32.656  1.00  0.34           O  
HETATM  164  O   HOH T 163      12.216  25.133  22.750  1.00  0.34           O  
HETATM  165  O   HOH T 164      -9.125  24.222   9.606  1.00  0.34           O  
HETATM  166  O   HOH T 165       8.838  13.039   9.696  1.00  0.34           O  
HETATM  167  O   HOH T 166     -19.022  19.547  22.236  1.00  0.34           O  
HETATM  168  O   HOH T 167      -4.648  18.462   4.006  1.00  0.34           O  
HETATM  169  O   HOH T 168     -19.094  14.927 -11.017  1.00  0.34           O  
HETATM  170  O   HOH T 169      20.008  21.657  21.683  1.00  0.34           O  
HETATM  171  O   HOH T 170      10.353  15.014  -0.176  1.00  0.34           O  
HETATM  172  O   HOH T 171      14.125  28.261  17.162  1.00  0.34           O  
HETATM  173  O   HOH T 172     -10.389  30.502  17.349  1.00  0.34           O  
HETATM  174  O   HOH T 173       2.612  39.145   6.075  1.00  0.34           O  
HETATM  175  O   HOH T 174      -3.850  31.340   8.184  1.00  0.35           O  
HETATM  176  O   HOH T 175      -2.117  17.486   8.030  1.00  0.35           O  
HETATM  177  O   HOH T 176     -12.320  29.563  33.611  1.00  0.35           O  
HETATM  178  O   HOH T 177     -20.410  16.128   0.350  1.00  0.35           O  
HETATM  179  O   HOH T 178     -17.755  31.093  13.427  1.00  0.35           O  
HETATM  180  O   HOH T 179      -2.340   2.404 -14.687  1.00  0.35           O  
HETATM  181  O   HOH T 180      24.866  21.095  -8.129  1.00  0.35           O  
HETATM  182  O   HOH T 181      -1.312  27.171   4.197  1.00  0.35           O  
HETATM  183  O   HOH T 182      23.388  12.765  -6.596  1.00  0.35           O  
HETATM  184  O   HOH T 183      -2.011   8.537   6.825  1.00  0.35           O  
HETATM  185  O   HOH T 184      17.116  39.060  -0.870  1.00  0.35           O  
HETATM  186  O   HOH T 185      11.405  10.276 -14.037  1.00  0.35           O  
HETATM  187  O   HOH T 186      -0.075  36.712  14.509  1.00  0.35           O  
HETATM  188  O   HOH T 187     -26.226  18.321   7.882  1.00  0.35           O  
HETATM  189  O   HOH T 188      -9.390   7.488  32.897  1.00  0.35           O  
HETATM  190  O   HOH T 189      10.710   5.726  -1.994  1.00  0.35           O  
HETATM  191  O   HOH T 190     -23.793  20.241  16.127  1.00  0.35           O  
HETATM  192  O   HOH T 191       8.857   0.854   0.067  1.00  0.35           O  
HETATM  193  O   HOH T 192      19.380   8.059  23.781  1.00  0.35           O  
HETATM  194  O   HOH T 193      -0.952  13.085  43.853  1.00  0.35           O  
HETATM  195  O   HOH T 194      -4.799   4.175  -1.704  1.00  0.35           O  
HETATM  196  O   HOH T 195      -3.861  21.893  15.165  1.00  0.35           O  
HETATM  197  O   HOH T 196      20.822  24.409  -6.103  1.00  0.35           O  
HETATM  198  O   HOH T 197      19.447  39.462  -2.270  1.00  0.35           O  
HETATM  199  O   HOH T 198      15.682  23.471  25.897  1.00  0.35           O  
HETATM  200  O   HOH T 199      -5.999  25.601  -7.219  1.00  0.36           O  
HETATM  201  O   HOH T 200      -1.113  15.067   9.000  1.00  0.36           O  
HETATM  202  O   HOH T 201      -7.723  23.860  11.982  1.00  0.36           O  
HETATM  203  O   HOH T 202      19.989   0.395   1.681  1.00  0.36           O  
HETATM  204  O   HOH T 203     -16.272  30.807   6.615  1.00  0.36           O  
HETATM  205  O   HOH T 204      10.239  23.268  39.648  1.00  0.36           O  
HETATM  206  O   HOH T 205       5.892  20.200  25.223  1.00  0.36           O  
HETATM  207  O   HOH T 206      13.516  26.915  -9.013  1.00  0.36           O  
HETATM  208  O   HOH T 207     -25.735   6.968   7.184  1.00  0.36           O  
HETATM  209  O   HOH T 208      14.103  22.693  29.081  1.00  0.36           O  
HETATM  210  O   HOH T 209      34.021  26.969  10.045  1.00  0.36           O  
HETATM  211  O   HOH T 210       8.245   0.990   8.816  1.00  0.36           O  
HETATM  212  O   HOH T 211       0.944   0.297  16.527  1.00  0.36           O  
HETATM  213  O   HOH T 212      25.853  22.978  -1.973  1.00  0.36           O  
HETATM  214  O   HOH T 213      -1.570  37.024  29.057  1.00  0.36           O  
HETATM  215  O   HOH T 214     -14.547  15.021  44.061  1.00  0.36           O  
HETATM  216  O   HOH T 215       8.526  21.181  40.365  1.00  0.36           O  
HETATM  217  O   HOH T 216       3.194  14.771  32.939  1.00  0.36           O  
HETATM  218  O   HOH T 217       4.940  35.049  19.570  1.00  0.36           O  
HETATM  219  O   HOH T 218     -18.091  15.644  -1.130  1.00  0.36           O  
HETATM  220  O   HOH T 219      -1.530  15.452   6.292  1.00  0.36           O  
HETATM  221  O   HOH T 220      10.717  15.956   4.542  1.00  0.37           O  
HETATM  222  O   HOH T 221     -10.560   8.922  -1.830  1.00  0.37           O  
HETATM  223  O   HOH T 222       1.778  16.584   2.725  1.00  0.37           O  
HETATM  224  O   HOH T 223     -24.198  19.392   9.511  1.00  0.37           O  
HETATM  225  O   HOH T 224      -1.876  39.296  27.568  1.00  0.37           O  
HETATM  226  O   HOH T 225       2.652  15.209  42.283  1.00  0.37           O  
HETATM  227  O   HOH T 226       7.787  39.011  22.748  1.00  0.37           O  
HETATM  228  O   HOH T 227      -9.610   8.801 -18.478  1.00  0.37           O  
HETATM  229  O   HOH T 228      -5.675   2.342   7.282  1.00  0.37           O  
HETATM  230  O   HOH T 229      -6.680  36.136   4.191  1.00  0.37           O  
HETATM  231  O   HOH T 230     -11.738   6.762  -3.177  1.00  0.37           O  
HETATM  232  O   HOH T 231      -5.930  -0.359  11.166  1.00  0.37           O  
HETATM  233  O   HOH T 232      10.680   1.799  16.682  1.00  0.37           O  
HETATM  234  O   HOH T 233      14.701  31.528   6.022  1.00  0.37           O  
HETATM  235  O   HOH T 234      10.570  15.999 -17.045  1.00  0.37           O  
HETATM  236  O   HOH T 235      12.442  23.535  34.431  1.00  0.37           O  
HETATM  237  O   HOH T 236     -12.921  31.502  43.820  1.00  0.37           O  
HETATM  238  O   HOH T 237      20.461  29.014  18.362  1.00  0.37           O  
HETATM  239  O   HOH T 238      -3.720   3.394  -5.725  1.00  0.37           O  
HETATM  240  O   HOH T 239       2.505  36.125  22.619  1.00  0.37           O  
HETATM  241  O   HOH T 240      -1.856  22.510  13.475  1.00  0.37           O  
HETATM  242  O   HOH T 241      30.716   2.519   4.398  1.00  0.37           O  
HETATM  243  O   HOH T 242      -4.863  -2.699  35.104  1.00  0.37           O  
HETATM  244  O   HOH T 243     -12.182  31.411  12.082  1.00  0.37           O  
HETATM  245  O   HOH T 244       2.532  21.694 -13.788  1.00  0.38           O  
HETATM  246  O   HOH T 245      18.460  17.602  23.479  1.00  0.38           O  
HETATM  247  O   HOH T 246     -15.781  30.613  11.385  1.00  0.38           O  
HETATM  248  O   HOH T 247     -10.630  35.431  27.175  1.00  0.38           O  
HETATM  249  O   HOH T 248      33.456  17.832   9.992  1.00  0.38           O  
HETATM  250  O   HOH T 249      30.008  13.837  19.769  1.00  0.38           O  
HETATM  251  O   HOH T 250      -1.207  11.971  41.333  1.00  0.38           O  
HETATM  252  O   HOH T 251      -4.886  28.060  -6.526  1.00  0.38           O  
HETATM  253  O   HOH T 252      11.414  21.108  35.134  1.00  0.38           O  
HETATM  254  O   HOH T 253       7.031  32.912   6.440  1.00  0.38           O  
HETATM  255  O   HOH T 254      27.328  -3.222  10.352  1.00  0.38           O  
HETATM  256  O   HOH T 255      -2.381  25.076  12.196  1.00  0.38           O  
HETATM  257  O   HOH T 256     -16.996  23.495  24.316  1.00  0.38           O  
HETATM  258  O   HOH T 257     -11.778   5.551  42.459  1.00  0.38           O  
HETATM  259  O   HOH T 258      -4.156  40.825  26.829  1.00  0.38           O  
HETATM  260  O   HOH T 259      -2.049  35.563  23.588  1.00  0.38           O  
HETATM  261  O   HOH T 260      25.759   6.695  -5.605  1.00  0.39           O  
HETATM  262  O   HOH T 261      -8.155  22.525  -8.782  1.00  0.39           O  
HETATM  263  O   HOH T 262       1.520   5.315 -12.278  1.00  0.39           O  
HETATM  264  O   HOH T 263      -8.560  36.422   6.115  1.00  0.39           O  
HETATM  265  O   HOH T 264      -4.310   0.839   9.216  1.00  0.39           O  
HETATM  266  O   HOH T 265      23.008  14.312  -8.815  1.00  0.39           O  
HETATM  267  O   HOH T 266     -15.480   6.465   7.103  1.00  0.39           O  
HETATM  268  O   HOH T 267      -8.130  36.365  27.688  1.00  0.39           O  
HETATM  269  O   HOH T 268      37.344   8.947  -5.135  1.00  0.39           O  
HETATM  270  O   HOH T 269      -7.834  30.885   0.845  1.00  0.39           O  
HETATM  271  O   HOH T 270      22.609  -6.814  21.080  1.00  0.39           O  
HETATM  272  O   HOH T 271      -8.572   3.053  18.479  1.00  0.39           O  
HETATM  273  O   HOH T 272     -14.718   7.880  -0.762  1.00  0.39           O  
HETATM  274  O   HOH T 273       9.964  27.547  -8.161  1.00  0.39           O  
HETATM  275  O   HOH T 274      20.422  -3.474  17.260  1.00  0.39           O  
HETATM  276  O   HOH T 275      14.001  26.294  21.090  1.00  0.40           O  
HETATM  277  O   HOH T 276      -3.778  -2.937  40.160  1.00  0.40           O  
HETATM  278  O   HOH T 277     -11.620  30.710  14.811  1.00  0.40           O  
HETATM  279  O   HOH T 278       9.400   5.717  11.179  1.00  0.40           O  
HETATM  280  O   HOH T 279       6.595  35.062   2.190  1.00  0.40           O  
HETATM  281  O   HOH T 280      35.145  22.155   6.357  1.00  0.40           O  
HETATM  282  O   HOH T 281      -8.820   3.707  13.252  1.00  0.40           O  
HETATM  283  O   HOH T 282       1.318  14.378  44.506  1.00  0.40           O  
HETATM  284  O   HOH T 283      -2.329  30.738  51.065  1.00  0.40           O  
HETATM  285  O   HOH T 284       2.978  10.051 -14.479  1.00  0.40           O  
HETATM  286  O   HOH T 285      -4.520  37.738  34.029  1.00  0.40           O  
HETATM  287  O   HOH T 286      10.061  30.224  11.213  1.00  0.40           O  
HETATM  288  O   HOH T 287       3.649  16.676   0.723  1.00  0.40           O  
HETATM  289  O   HOH T 288      23.583  21.098  25.792  1.00  0.40           O  
HETATM  290  O   HOH T 289      -6.130   1.662   4.617  1.00  0.40           O  
HETATM  291  O   HOH T 290      17.839   9.745  22.313  1.00  0.40           O  
HETATM  292  O   HOH T 291     -20.207  13.954  -1.422  1.00  0.40           O  
HETATM  293  O   HOH T 292     -21.980  25.378  11.135  1.00  0.40           O  
HETATM  294  O   HOH T 293       1.816   3.508  -4.788  1.00  0.40           O  
HETATM  295  O   HOH T 294     -13.815   4.601 -14.361  1.00  0.40           O  
HETATM  296  O   HOH T 295     -28.164   9.625   3.379  1.00  0.40           O  
HETATM  297  O   HOH T 296       7.406   8.006  17.600  1.00  0.40           O  
HETATM  298  O   HOH T 297      -2.013  34.698  34.214  1.00  0.40           O  
HETATM  299  O   HOH T 298      -0.064   8.820  -0.550  1.00  0.41           O  
HETATM  300  O   HOH T 299     -16.017  36.154  17.934  1.00  0.41           O  
HETATM  301  O   HOH T 300      -3.378  19.330 -14.742  1.00  0.41           O  
HETATM  302  O   HOH T 301      -7.129   9.886 -18.650  1.00  0.41           O  
HETATM  303  O   HOH T 302       2.742  36.330  25.401  1.00  0.41           O  
HETATM  304  O   HOH T 303     -13.152   7.299  21.613  1.00  0.41           O  
HETATM  305  O   HOH T 304      -0.042  24.182  52.792  1.00  0.41           O  
HETATM  306  O   HOH T 305      -5.683  -2.851  30.140  1.00  0.41           O  
HETATM  307  O   HOH T 306       1.266  14.544  10.300  1.00  0.41           O  
HETATM  308  O   HOH T 307     -13.755   6.937 -13.035  1.00  0.41           O  
HETATM  309  O   HOH T 308       4.331  35.787  14.467  1.00  0.41           O  
HETATM  310  O   HOH T 309      -6.547  33.457   5.477  1.00  0.41           O  
HETATM  311  O   HOH T 310      -7.893   4.905  -5.774  1.00  0.41           O  
HETATM  312  O   HOH T 311     -26.792  20.451   9.451  1.00  0.41           O  
HETATM  313  O   HOH T 312      37.896  12.056   4.720  1.00  0.41           O  
HETATM  314  O   HOH T 313     -17.711  32.760  15.600  1.00  0.41           O  
HETATM  315  O   HOH T 314     -11.346  35.218  29.887  1.00  0.41           O  
HETATM  316  O   HOH T 315      -3.096  39.935  19.511  1.00  0.41           O  
HETATM  317  O   HOH T 316       0.028  35.461   8.231  1.00  0.41           O  
HETATM  318  O   HOH T 317      26.512  11.110  22.122  1.00  0.41           O  
HETATM  319  O   HOH T 318      -9.585   3.993  42.777  1.00  0.41           O  
HETATM  320  O   HOH T 319      15.218  46.309  -2.170  1.00  0.41           O  
HETATM  321  O   HOH T 320      12.000  29.355  12.984  1.00  0.41           O  
HETATM  322  O   HOH T 321      12.004  31.582   6.634  1.00  0.41           O  
HETATM  323  O   HOH T 322      28.709  26.632  16.850  1.00  0.41           O  
HETATM  324  O   HOH T 323      13.122   0.900  20.355  1.00  0.41           O  
HETATM  325  O   HOH T 324      32.623  17.239  20.576  1.00  0.42           O  
HETATM  326  O   HOH T 325       1.078   5.040  39.211  1.00  0.42           O  
HETATM  327  O   HOH T 326     -18.873  16.065  19.354  1.00  0.42           O  
HETATM  328  O   HOH T 327     -20.119  17.184  21.516  1.00  0.42           O  
HETATM  329  O   HOH T 328      -3.799  -0.264  14.549  1.00  0.42           O  
HETATM  330  O   HOH T 329      36.289  27.082  11.592  1.00  0.42           O  
HETATM  331  O   HOH T 330       3.966  13.826   9.094  1.00  0.42           O  
HETATM  332  O   HOH T 331      17.994  26.080  18.285  1.00  0.42           O  
HETATM  333  O   HOH T 332       4.052  12.870  41.650  1.00  0.42           O  
HETATM  334  O   HOH T 333       2.687  27.281  43.760  1.00  0.42           O  
HETATM  335  O   HOH T 334      12.221   0.041   7.863  1.00  0.42           O  
HETATM  336  O   HOH T 335     -20.056  29.125   9.840  1.00  0.42           O  
HETATM  337  O   HOH T 336      12.198   5.662  -4.212  1.00  0.42           O  
HETATM  338  O   HOH T 337      27.697   6.455  -3.728  1.00  0.42           O  
HETATM  339  O   HOH T 338      -9.305  17.520  -8.127  1.00  0.42           O  
HETATM  340  O   HOH T 339     -13.097   5.980   5.754  1.00  0.42           O  
HETATM  341  O   HOH T 340      -6.356   2.383 -16.830  1.00  0.42           O  
HETATM  342  O   HOH T 341      -9.714  11.657 -21.562  1.00  0.42           O  
HETATM  343  O   HOH T 342       2.672  39.991   8.643  1.00  0.42           O  
HETATM  344  O   HOH T 343       0.677  35.557  12.066  1.00  0.42           O  
HETATM  345  O   HOH T 344      11.201  31.368 -10.311  1.00  0.42           O  
HETATM  346  O   HOH T 345      -4.673   8.821   7.791  1.00  0.42           O  
HETATM  347  O   HOH T 346     -12.982  19.392  -4.913  1.00  0.42           O  
HETATM  348  O   HOH T 347      -7.204  12.891  48.178  1.00  0.42           O  
HETATM  349  O   HOH T 348       8.803  20.296  25.994  1.00  0.42           O  
HETATM  350  O   HOH T 349     -20.507  14.602  21.066  1.00  0.42           O  
HETATM  351  O   HOH T 350     -22.404  19.853  -6.109  1.00  0.43           O  
HETATM  352  O   HOH T 351       3.972   4.352 -11.334  1.00  0.43           O  
HETATM  353  O   HOH T 352       3.170  24.216 -14.569  1.00  0.43           O  
HETATM  354  O   HOH T 353      -3.852  32.325  49.427  1.00  0.43           O  
HETATM  355  O   HOH T 354       5.803  -1.587  21.190  1.00  0.43           O  
HETATM  356  O   HOH T 355      -7.327  16.839  14.634  1.00  0.43           O  
HETATM  357  O   HOH T 356      -0.499  10.722 -15.687  1.00  0.43           O  
HETATM  358  O   HOH T 357       0.205   5.852 -14.688  1.00  0.43           O  
HETATM  359  O   HOH T 358      29.852  -3.343  11.230  1.00  0.43           O  
HETATM  360  O   HOH T 359       8.805  18.756  10.821  1.00  0.43           O  
HETATM  361  O   HOH T 360       6.700   8.696  -1.421  1.00  0.43           O  
HETATM  362  O   HOH T 361       0.598  29.215   3.991  1.00  0.43           O  
HETATM  363  O   HOH T 362      11.514  41.792  25.753  1.00  0.43           O  
HETATM  364  O   HOH T 363      10.477  44.332  -0.210  1.00  0.43           O  
HETATM  365  O   HOH T 364       8.845   3.132  10.484  1.00  0.43           O  
HETATM  366  O   HOH T 365      -7.494  17.043  17.424  1.00  0.43           O  
HETATM  367  O   HOH T 366      -5.871   2.396  18.764  1.00  0.43           O  
HETATM  368  O   HOH T 367     -18.039  13.740  -3.146  1.00  0.43           O  
HETATM  369  O   HOH T 368       2.453  24.122  51.562  1.00  0.43           O  
HETATM  370  O   HOH T 369      -3.493  31.843  46.677  1.00  0.43           O  
HETATM  371  O   HOH T 370       2.194   7.592 -13.686  1.00  0.43           O  
HETATM  372  O   HOH T 371      -2.552   1.598  16.198  1.00  0.43           O  
HETATM  373  O   HOH T 372       2.764  34.931   7.637  1.00  0.43           O  
HETATM  374  O   HOH T 373       1.951   2.780  37.749  1.00  0.43           O  
HETATM  375  O   HOH T 374      -8.259   2.536  40.864  1.00  0.43           O  
HETATM  376  O   HOH T 375       6.823  31.442  -9.867  1.00  0.43           O  
HETATM  377  O   HOH T 376     -12.612   9.003   0.579  1.00  0.43           O  
HETATM  378  O   HOH T 377      27.331  25.526  -8.037  1.00  0.43           O  
HETATM  379  O   HOH T 378     -10.936   8.718  30.894  1.00  0.43           O  
HETATM  380  O   HOH T 379     -17.717  28.815   8.006  1.00  0.43           O  
HETATM  381  O   HOH T 380       7.952  27.497 -10.217  1.00  0.44           O  
HETATM  382  O   HOH T 381       1.487   0.847  39.556  1.00  0.44           O  
HETATM  383  O   HOH T 382       9.144  22.914  37.195  1.00  0.44           O  
HETATM  384  O   HOH T 383      11.560   0.338   5.031  1.00  0.44           O  
HETATM  385  O   HOH T 384     -29.017  15.056  10.083  1.00  0.44           O  
HETATM  386  O   HOH T 385     -15.842  16.456  42.176  1.00  0.44           O  
HETATM  387  O   HOH T 386       7.038  37.596   1.515  1.00  0.44           O  
HETATM  388  O   HOH T 387      20.949  16.460  32.807  1.00  0.44           O  
HETATM  389  O   HOH T 388      23.017  22.952  -7.097  1.00  0.44           O  
HETATM  390  O   HOH T 389       8.600   1.550  12.757  1.00  0.44           O  
HETATM  391  O   HOH T 390      11.914  34.175   5.525  1.00  0.44           O  
HETATM  392  O   HOH T 391       1.642  29.167  45.382  1.00  0.44           O  
HETATM  393  O   HOH T 392      23.218  23.575  24.569  1.00  0.44           O  
HETATM  394  O   HOH T 393      20.741  29.913  -6.815  1.00  0.44           O  
HETATM  395  O   HOH T 394       8.135  14.219   7.350  1.00  0.44           O  
HETATM  396  O   HOH T 395      28.540  14.645  -9.985  1.00  0.44           O  
HETATM  397  O   HOH T 396       2.361  26.162  49.670  1.00  0.44           O  
HETATM  398  O   HOH T 397     -18.818  12.501  -9.721  1.00  0.44           O  
HETATM  399  O   HOH T 398      27.044   7.055  -7.955  1.00  0.44           O  
HETATM  400  O   HOH T 399       0.115   3.171 -13.764  1.00  0.44           O  
HETATM  401  O   HOH T 400      21.964  -4.680  19.344  1.00  0.44           O  
HETATM  402  O   HOH T 401      -4.633   0.200 -17.368  1.00  0.44           O  
HETATM  403  O   HOH T 402      12.754   7.562 -12.027  1.00  0.44           O  
HETATM  404  O   HOH T 403       7.787  40.066   2.347  1.00  0.44           O  
HETATM  405  O   HOH T 404      12.672  15.255  37.915  1.00  0.44           O  
HETATM  406  O   HOH T 405     -17.983  22.054  22.109  1.00  0.44           O  
HETATM  407  O   HOH T 406      -9.711  34.918  16.201  1.00  0.44           O  
HETATM  408  O   HOH T 407      11.487  28.777  17.071  1.00  0.44           O  
HETATM  409  O   HOH T 408      20.173  26.593  16.890  1.00  0.44           O  
HETATM  410  O   HOH T 409      33.274  15.232  13.120  1.00  0.44           O  
HETATM  411  O   HOH T 410     -15.717  27.554  29.893  1.00  0.44           O  
HETATM  412  O   HOH T 411      -1.043  31.781  37.439  1.00  0.44           O  
HETATM  413  O   HOH T 412       8.688  29.198  16.914  1.00  0.44           O  
HETATM  414  O   HOH T 413      -5.590  -0.855  40.251  1.00  0.45           O  
HETATM  415  O   HOH T 414     -10.058  29.904  12.768  1.00  0.45           O  
HETATM  416  O   HOH T 415     -14.846  13.930 -16.152  1.00  0.45           O  
HETATM  417  O   HOH T 416       4.152  32.851   6.187  1.00  0.45           O  
HETATM  418  O   HOH T 417     -17.299  30.802   3.198  1.00  0.45           O  
HETATM  419  O   HOH T 418      -7.607   3.603   5.838  1.00  0.45           O  
HETATM  420  O   HOH T 419     -18.871  17.940  -2.506  1.00  0.45           O  
HETATM  421  O   HOH T 420     -17.188  16.671 -11.891  1.00  0.45           O  
HETATM  422  O   HOH T 421     -10.935   4.544  14.862  1.00  0.45           O  
HETATM  423  O   HOH T 422      11.374  41.822  22.937  1.00  0.45           O  
HETATM  424  O   HOH T 423       4.680  12.215 -15.171  1.00  0.45           O  
HETATM  425  O   HOH T 424     -23.699  17.761  14.898  1.00  0.45           O  
HETATM  426  O   HOH T 425      38.062  13.896   6.759  1.00  0.45           O  
HETATM  427  O   HOH T 426     -14.039  39.139  30.122  1.00  0.45           O  
HETATM  428  O   HOH T 427      -7.845  14.213  17.238  1.00  0.45           O  
HETATM  429  O   HOH T 428      13.750  25.299  29.935  1.00  0.45           O  
HETATM  430  O   HOH T 429      20.418  27.162  -6.209  1.00  0.45           O  
HETATM  431  O   HOH T 430       3.991   5.572 -13.740  1.00  0.45           O  
HETATM  432  O   HOH T 431       5.321  21.390  22.940  1.00  0.45           O  
HETATM  433  O   HOH T 432      -0.213  35.647  27.139  1.00  0.45           O  
HETATM  434  O   HOH T 433      21.303  13.786  33.821  1.00  0.45           O  
HETATM  435  O   HOH T 434     -14.035  30.020  13.540  1.00  0.45           O  
HETATM  436  O   HOH T 435     -12.937  31.286  31.578  1.00  0.45           O  
HETATM  437  O   HOH T 436      29.269  25.405  -2.214  1.00  0.45           O  
HETATM  438  O   HOH T 437      33.329  20.312   7.314  1.00  0.45           O  
HETATM  439  O   HOH T 438      -0.659  30.095  46.486  1.00  0.45           O  
HETATM  440  O   HOH T 439     -16.478   9.694  39.633  1.00  0.45           O  
HETATM  441  O   HOH T 440     -13.584  30.906  35.576  1.00  0.45           O  
HETATM  442  O   HOH T 441      25.649  13.671  21.183  1.00  0.45           O  
HETATM  443  O   HOH T 442      -2.943  39.197  24.981  1.00  0.45           O  
HETATM  444  O   HOH T 443      19.503  13.283  12.985  1.00  0.45           O  
HETATM  445  O   HOH T 444      24.203   6.429  -7.768  1.00  0.45           O  
HETATM  446  O   HOH T 445      -0.566  33.607  10.346  1.00  0.45           O  
HETATM  447  O   HOH T 446     -21.287  27.802   7.740  1.00  0.45           O  
HETATM  448  O   HOH T 447     -15.431   7.082   9.862  1.00  0.46           O  
HETATM  449  O   HOH T 448      26.735  26.573  -5.605  1.00  0.46           O  
HETATM  450  O   HOH T 449      -4.593  11.008  51.969  1.00  0.46           O  
HETATM  451  O   HOH T 450       2.790  12.717  30.939  1.00  0.46           O  
HETATM  452  O   HOH T 451      -6.027  24.024  -9.543  1.00  0.46           O  
HETATM  453  O   HOH T 452       9.313  40.692  24.407  1.00  0.46           O  
HETATM  454  O   HOH T 453       3.489  -0.153  16.998  1.00  0.46           O  
HETATM  455  O   HOH T 454      27.404  13.254  19.074  1.00  0.46           O  
HETATM  456  O   HOH T 455     -12.902   6.224   0.639  1.00  0.46           O  
HETATM  457  O   HOH T 456      -8.041  15.322   3.752  1.00  0.46           O  
HETATM  458  O   HOH T 457       9.577  40.898   4.241  1.00  0.46           O  
HETATM  459  O   HOH T 458      12.994   0.587   2.565  1.00  0.46           O  
HETATM  460  O   HOH T 459      -1.865  34.053  42.635  1.00  0.46           O  
HETATM  461  O   HOH T 460     -12.149  32.490  33.897  1.00  0.46           O  
HETATM  462  O   HOH T 461      33.757  16.079   7.848  1.00  0.46           O  
HETATM  463  O   HOH T 462      26.810  21.174  -3.951  1.00  0.46           O  
HETATM  464  O   HOH T 463      -0.534   8.029 -16.313  1.00  0.46           O  
HETATM  465  O   HOH T 464      15.397  26.398  18.746  1.00  0.46           O  
HETATM  466  O   HOH T 465       8.107  37.886  -4.295  1.00  0.46           O  
HETATM  467  O   HOH T 466     -10.332   5.926  30.781  1.00  0.46           O  
HETATM  468  O   HOH T 467      16.351  14.000 -12.821  1.00  0.46           O  
HETATM  469  O   HOH T 468       5.652   2.154 -10.998  1.00  0.46           O  
HETATM  470  O   HOH T 469       6.509  33.777   8.993  1.00  0.46           O  
HETATM  471  O   HOH T 470      12.927  12.535 -14.215  1.00  0.46           O  
HETATM  472  O   HOH T 471     -10.288   0.618  40.973  1.00  0.46           O  
HETATM  473  O   HOH T 472       0.934  32.823  35.830  1.00  0.46           O  
HETATM  474  O   HOH T 473     -17.624   7.773   8.220  1.00  0.46           O  
HETATM  475  O   HOH T 474      35.744   9.046  -2.879  1.00  0.46           O  
HETATM  476  O   HOH T 475      -1.642  33.545  45.379  1.00  0.46           O  
HETATM  477  O   HOH T 476     -13.839   7.083  43.842  1.00  0.46           O  
HETATM  478  O   HOH T 477      -1.343  31.747  48.682  1.00  0.46           O  
HETATM  479  O   HOH T 478       8.352  19.120  21.408  1.00  0.46           O  
HETATM  480  O   HOH T 479      -8.437   4.131  15.961  1.00  0.47           O  
HETATM  481  O   HOH T 480      -0.411  32.386  41.007  1.00  0.47           O  
HETATM  482  O   HOH T 481     -13.892  18.413  -9.557  1.00  0.47           O  
HETATM  483  O   HOH T 482      24.731  24.656  -8.497  1.00  0.47           O  
HETATM  484  O   HOH T 483      10.828   1.381   9.798  1.00  0.47           O  
HETATM  485  O   HOH T 484     -20.380  19.513  -4.177  1.00  0.47           O  
HETATM  486  O   HOH T 485       3.211   6.201  33.567  1.00  0.47           O  
HETATM  487  O   HOH T 486      -3.436  28.512  52.296  1.00  0.47           O  
HETATM  488  O   HOH T 487     -12.188   2.419 -13.808  1.00  0.47           O  
HETATM  489  O   HOH T 488      -9.186  32.253   4.962  1.00  0.47           O  
HETATM  490  O   HOH T 489      -7.705  31.473   7.153  1.00  0.47           O  
HETATM  491  O   HOH T 490      -8.286  23.578  46.737  1.00  0.47           O  
HETATM  492  O   HOH T 491     -12.202  30.416  41.433  1.00  0.47           O  
HETATM  493  O   HOH T 492      10.136  28.206  14.693  1.00  0.47           O  
HETATM  494  O   HOH T 493     -15.441  18.752 -11.770  1.00  0.47           O  
HETATM  495  O   HOH T 494      29.975  27.703  12.885  1.00  0.47           O  
HETATM  496  O   HOH T 495       7.948  21.008  23.455  1.00  0.47           O  
HETATM  497  O   HOH T 496      -9.242  13.619  14.968  1.00  0.47           O  
HETATM  498  O   HOH T 497      11.658   0.695   0.039  1.00  0.47           O  
HETATM  499  O   HOH T 498      24.624  14.073 -11.147  1.00  0.47           O  
HETATM  500  O   HOH T 499       9.555  -3.766  28.006  1.00  0.47           O  
HETATM  501  O   HOH T 500     -22.150  18.385  17.186  1.00  0.47           O  
HETATM  502  O   HOH T 501      12.407  14.436 -16.023  1.00  0.47           O  
HETATM  503  O   HOH T 502      27.530  -0.060  25.081  1.00  0.47           O  
HETATM  504  O   HOH T 503       0.812   1.200 -11.992  1.00  0.47           O  
HETATM  505  O   HOH T 504       7.053   8.810  -6.911  1.00  0.47           O  
HETATM  506  O   HOH T 505       3.026  26.948  46.391  1.00  0.47           O  
HETATM  507  O   HOH T 506      -6.583   4.946  17.877  1.00  0.47           O  
HETATM  508  O   HOH T 507      25.128  -2.440   6.518  1.00  0.48           O  
HETATM  509  O   HOH T 508       8.123  32.841  37.388  1.00  0.48           O  
HETATM  510  O   HOH T 509      -7.336   2.518   2.353  1.00  0.48           O  
HETATM  511  O   HOH T 510      10.146  29.291  30.515  1.00  0.48           O  
HETATM  512  O   HOH T 511       5.366   6.583  -7.319  1.00  0.48           O  
HETATM  513  O   HOH T 512      22.776  -4.230  26.600  1.00  0.48           O  
HETATM  514  O   HOH T 513      -4.712   8.312 -18.313  1.00  0.48           O  
HETATM  515  O   HOH T 514      33.252  15.073  10.345  1.00  0.48           O  
HETATM  516  O   HOH T 515     -13.745   4.795  10.724  1.00  0.48           O  
HETATM  517  O   HOH T 516     -11.324  28.779  50.620  1.00  0.48           O  
HETATM  518  O   HOH T 517      31.631   6.480  -3.236  1.00  0.48           O  
HETATM  519  O   HOH T 518      -2.588   3.283  -3.194  1.00  0.48           O  
HETATM  520  O   HOH T 519     -12.752  18.065 -12.061  1.00  0.48           O  
HETATM  521  O   HOH T 520      11.010  34.406   1.590  1.00  0.48           O  
HETATM  522  O   HOH T 521      12.769  45.428  -1.052  1.00  0.48           O  
HETATM  523  O   HOH T 522     -20.878  12.305  22.555  1.00  0.48           O  
HETATM  524  O   HOH T 523      31.326  26.535  10.607  1.00  0.48           O  
HETATM  525  O   HOH T 524      14.538  35.525 -10.448  1.00  0.48           O  
HETATM  526  O   HOH T 525     -22.999  16.548  -0.393  1.00  0.48           O  
HETATM  527  O   HOH T 526       0.792   7.778   3.080  1.00  0.48           O  
HETATM  528  O   HOH T 527      10.026  13.296 -16.818  1.00  0.48           O  
HETATM  529  O   HOH T 528      -2.682  12.141 -16.455  1.00  0.48           O  
HETATM  530  O   HOH T 529      -0.386  32.972  26.688  1.00  0.48           O  
HETATM  531  O   HOH T 530      18.182  30.937  -6.961  1.00  0.48           O  
HETATM  532  O   HOH T 531      -6.159  10.217  45.854  1.00  0.48           O  
HETATM  533  O   HOH T 532      -5.275  25.440  12.313  1.00  0.48           O  
HETATM  534  O   HOH T 533      31.590  11.270  -8.904  1.00  0.48           O  
HETATM  535  O   HOH T 534     -16.214  27.407  -1.714  1.00  0.48           O  
HETATM  536  O   HOH T 535      -9.309   4.654  28.462  1.00  0.48           O  
HETATM  537  O   HOH T 536      12.301  27.414  24.349  1.00  0.48           O  
HETATM  538  O   HOH T 537       7.857  21.430  43.074  1.00  0.49           O  
HETATM  539  O   HOH T 538      -7.141  33.790  50.623  1.00  0.49           O  
HETATM  540  O   HOH T 539      27.867  -4.176  12.918  1.00  0.49           O  
HETATM  541  O   HOH T 540      13.605  22.016  36.439  1.00  0.49           O  
HETATM  542  O   HOH T 541     -17.569  14.694 -15.558  1.00  0.49           O  
HETATM  543  O   HOH T 542     -11.950  18.676  -7.590  1.00  0.49           O  
HETATM  544  O   HOH T 543      13.112  33.246 -11.115  1.00  0.49           O  
HETATM  545  O   HOH T 544     -21.979  14.550  23.416  1.00  0.49           O  
HETATM  546  O   HOH T 545      -1.584   1.523  -6.538  1.00  0.49           O  
HETATM  547  O   HOH T 546     -28.132   6.967   2.545  1.00  0.49           O  
HETATM  548  O   HOH T 547      -4.143   3.811  17.128  1.00  0.49           O  
HETATM  549  O   HOH T 548      -0.937   3.809  -5.452  1.00  0.49           O  
HETATM  550  O   HOH T 549     -23.695  18.643   6.902  1.00  0.49           O  
HETATM  551  O   HOH T 550      -8.944  20.360  -7.567  1.00  0.49           O  
HETATM  552  O   HOH T 551      -4.883  13.618  52.739  1.00  0.49           O  
HETATM  553  O   HOH T 552      -7.822   4.436 -18.072  1.00  0.49           O  
HETATM  554  O   HOH T 553     -11.193  31.546  50.942  1.00  0.49           O  
HETATM  555  O   HOH T 554       5.338  -2.753  18.704  1.00  0.49           O  
HETATM  556  O   HOH T 555      11.971  29.343  -8.633  1.00  0.49           O  
HETATM  557  O   HOH T 556      -9.464  11.430 -18.864  1.00  0.49           O  
HETATM  558  O   HOH T 557      -8.096   9.844  33.730  1.00  0.49           O  
HETATM  559  O   HOH T 558      -0.828  -2.670   0.809  1.00  0.49           O  
HETATM  560  O   HOH T 559     -14.843  29.774  -1.287  1.00  0.49           O  
HETATM  561  O   HOH T 560      31.324  14.059 -12.508  1.00  0.49           O  
HETATM  562  O   HOH T 561      -2.117   0.183 -16.343  1.00  0.49           O  
HETATM  563  O   HOH T 562       5.169   4.712  -2.597  1.00  0.49           O  
HETATM  564  O   HOH T 563      10.516  39.119  -3.263  1.00  0.49           O  
HETATM  565  O   HOH T 564      -0.684  28.775  52.138  1.00  0.49           O  
HETATM  566  O   HOH T 565       0.341  32.674  43.651  1.00  0.49           O  
HETATM  567  O   HOH T 566      26.686  22.965  -7.326  1.00  0.49           O  
HETATM  568  O   HOH T 567      21.616  39.760  -0.659  1.00  0.49           O  
HETATM  569  O   HOH T 568       0.768  12.112  39.522  1.00  0.49           O  
HETATM  570  O   HOH T 569      -4.116   1.534  -1.624  1.00  0.49           O  
HETATM  571  O   HOH T 570     -20.632  27.592  12.132  1.00  0.49           O  
HETATM  572  O   HOH T 571      12.056   7.686 -14.753  1.00  0.49           O  
HETATM  573  O   HOH T 572       3.648   5.649  -5.233  1.00  0.50           O  
HETATM  574  O   HOH T 573      11.669  -1.494  20.270  1.00  0.50           O  
HETATM  575  O   HOH T 574      26.100   1.402  23.262  1.00  0.50           O  
HETATM  576  O   HOH T 575      22.903  -1.046   0.591  1.00  0.50           O  
HETATM  577  O   HOH T 576       6.373  29.316 -11.506  1.00  0.50           O  
HETATM  578  O   HOH T 577      12.851  32.090   3.962  1.00  0.50           O  
HETATM  579  O   HOH T 578      -3.139  39.126  22.216  1.00  0.50           O  
HETATM  580  O   HOH T 579     -18.709  21.839  -6.988  1.00  0.50           O  
HETATM  581  O   HOH T 580       1.835  12.370 -15.352  1.00  0.50           O  
HETATM  582  O   HOH T 581     -12.382   3.497  37.649  1.00  0.50           O  
HETATM  583  O   HOH T 582      -2.430   6.904 -17.844  1.00  0.50           O  
HETATM  584  O   HOH T 583     -17.877  25.103  34.937  1.00  0.50           O  
HETATM  585  O   HOH T 584     -22.463   9.904  13.307  1.00  0.50           O  
HETATM  586  O   HOH T 585      34.618   8.590  -5.466  1.00  0.50           O  
HETATM  587  O   HOH T 586     -22.500   9.859   0.784  1.00  0.50           O  
HETATM  588  O   HOH T 587       4.213  36.856   6.326  1.00  0.50           O  
HETATM  589  O   HOH T 588      -7.947  23.288 -11.425  1.00  0.51           O  
HETATM  590  O   HOH T 589      10.335   0.697   2.450  1.00  0.51           O  
HETATM  591  O   HOH T 590      18.228  -2.409  18.469  1.00  0.51           O  
HETATM  592  O   HOH T 591      32.387   0.719  16.167  1.00  0.51           O  
HETATM  593  O   HOH T 592      22.815  -4.115  29.337  1.00  0.51           O  
HETATM  594  O   HOH T 593      15.389  15.228  38.010  1.00  0.51           O  
HETATM  595  O   HOH T 594       7.401  -5.312  32.031  1.00  0.51           O  
HETATM  596  O   HOH T 595      26.318  28.108  -7.913  1.00  0.51           O  
HETATM  597  O   HOH T 596      29.953  30.328  -4.497  1.00  0.51           O  
HETATM  598  O   HOH T 597      29.549   0.767   2.572  1.00  0.51           O  
HETATM  599  O   HOH T 598       0.176   9.677  40.639  1.00  0.51           O  
HETATM  600  O   HOH T 599      -1.877  26.216 -17.839  1.00  0.51           O  
HETATM  601  O   HOH T 600      16.168  34.890  -8.372  1.00  0.51           O  
HETATM  602  O   HOH T 601      -8.718  27.599  -3.593  1.00  0.51           O  
HETATM  603  O   HOH T 602      23.483  38.942  -2.421  1.00  0.52           O  
HETATM  604  O   HOH T 603       7.295  39.367   4.976  1.00  0.52           O  
HETATM  605  O   HOH T 604      26.420  13.377  23.796  1.00  0.52           O  
HETATM  606  O   HOH T 605      38.096   7.890  -0.641  1.00  0.52           O  
HETATM  607  O   HOH T 606      21.419  26.705  19.432  1.00  0.52           O  
HETATM  608  O   HOH T 607      31.118  13.823  -9.667  1.00  0.52           O  
HETATM  609  O   HOH T 608       6.087  -4.159  22.212  1.00  0.52           O  
HETATM  610  O   HOH T 609       9.002  31.740  30.884  1.00  0.52           O  
HETATM  611  O   HOH T 610     -14.746  16.368 -13.088  1.00  0.52           O  
HETATM  612  O   HOH T 611       2.685  34.077  37.548  1.00  0.52           O  
HETATM  613  O   HOH T 612     -25.463   9.581   2.641  1.00  0.52           O  
HETATM  614  O   HOH T 613      12.475  25.545 -12.372  1.00  0.52           O  
HETATM  615  O   HOH T 614      13.271  38.607  -3.306  1.00  0.52           O  
HETATM  616  O   HOH T 615     -18.748  17.865  -7.479  1.00  0.52           O  
HETATM  617  O   HOH T 616      20.372  -7.395  22.645  1.00  0.52           O  
HETATM  618  O   HOH T 617     -18.750  21.202  24.440  1.00  0.52           O  
HETATM  619  O   HOH T 618      -5.550  38.676  25.687  1.00  0.52           O  
HETATM  620  O   HOH T 619     -12.090  17.732  50.242  1.00  0.52           O  
HETATM  621  O   HOH T 620     -11.617  31.589  23.083  1.00  0.52           O  
HETATM  622  O   HOH T 621      14.674  29.464  -9.245  1.00  0.52           O  
HETATM  623  O   HOH T 622      32.481  21.912   5.303  1.00  0.52           O  
HETATM  624  O   HOH T 623     -13.143   6.198   8.409  1.00  0.52           O  
HETATM  625  O   HOH T 624       0.819  26.420  51.743  1.00  0.52           O  
HETATM  626  O   HOH T 625     -13.637  16.454 -15.670  1.00  0.52           O  
HETATM  627  O   HOH T 626      30.110  22.659   3.717  1.00  0.52           O  
HETATM  628  O   HOH T 627      -2.364  -2.420 -11.168  1.00  0.52           O  
HETATM  629  O   HOH T 628       9.376  -4.579  33.852  1.00  0.53           O  
HETATM  630  O   HOH T 629     -11.642   6.345  23.710  1.00  0.53           O  
HETATM  631  O   HOH T 630      -6.485  -2.683 -11.024  1.00  0.53           O  
HETATM  632  O   HOH T 631       7.951  18.486  24.146  1.00  0.53           O  
HETATM  633  O   HOH T 632     -15.549  16.194  35.717  1.00  0.53           O  
HETATM  634  O   HOH T 633     -23.462   7.600   2.130  1.00  0.53           O  
HETATM  635  O   HOH T 634      -6.332   2.393  -0.207  1.00  0.53           O  
HETATM  636  O   HOH T 635      22.922   1.701  21.089  1.00  0.53           O  
HETATM  637  O   HOH T 636       2.339  37.375  13.509  1.00  0.53           O  
HETATM  638  O   HOH T 637      14.860  10.572 -14.184  1.00  0.53           O  
HETATM  639  O   HOH T 638     -13.787   6.276  -4.925  1.00  0.53           O  
HETATM  640  O   HOH T 639     -24.464  21.362  13.780  1.00  0.53           O  
HETATM  641  O   HOH T 640      -3.230  34.867  38.870  1.00  0.53           O  
HETATM  642  O   HOH T 641      11.170  20.061  10.341  1.00  0.53           O  
HETATM  643  O   HOH T 642     -17.880  18.504  -4.990  1.00  0.53           O  
HETATM  644  O   HOH T 643      -3.123  35.697  44.509  1.00  0.53           O  
HETATM  645  O   HOH T 644     -15.477   4.795   5.018  1.00  0.53           O  
HETATM  646  O   HOH T 645      14.831  24.983  23.570  1.00  0.53           O  
HETATM  647  O   HOH T 646      19.286  -0.680  11.342  1.00  0.53           O  
HETATM  648  O   HOH T 647      -8.552  19.356  25.099  1.00  0.54           O  
HETATM  649  O   HOH T 648      11.184  -0.760  17.667  1.00  0.54           O  
HETATM  650  O   HOH T 649     -20.155   7.377  -0.910  1.00  0.54           O  
HETATM  651  O   HOH T 650      28.510  15.178  23.536  1.00  0.54           O  
HETATM  652  O   HOH T 651     -14.724  29.292  31.958  1.00  0.54           O  
HETATM  653  O   HOH T 652       2.969  16.671  44.642  1.00  0.54           O  
HETATM  654  O   HOH T 653      -4.101  38.598  -3.166  1.00  0.54           O  
HETATM  655  O   HOH T 654      19.358   5.557  -9.948  1.00  0.54           O  
HETATM  656  O   HOH T 655      -6.447  38.117  36.318  1.00  0.54           O  
HETATM  657  O   HOH T 656     -10.591  29.223   0.033  1.00  0.54           O  
HETATM  658  O   HOH T 657       9.153  29.885  -9.082  1.00  0.55           O  
HETATM  659  O   HOH T 658      10.664   6.507  36.554  1.00  0.55           O  
HETATM  660  O   HOH T 659      -2.172   9.717 -17.862  1.00  0.55           O  
HETATM  661  O   HOH T 660      -4.917   0.424  17.036  1.00  0.55           O  
HETATM  662  O   HOH T 661     -17.849  34.368  19.102  1.00  0.55           O  
HETATM  663  O   HOH T 662      17.725   8.343  35.811  1.00  0.55           O  
HETATM  664  O   HOH T 663      10.101   6.629  -5.833  1.00  0.55           O  
HETATM  665  O   HOH T 664       1.304  12.751  42.246  1.00  0.55           O  
HETATM  666  O   HOH T 665      15.511   7.335 -12.165  1.00  0.55           O  
HETATM  667  O   HOH T 666     -11.109   3.270  40.571  1.00  0.55           O  
HETATM  668  O   HOH T 667      22.176  21.242  23.445  1.00  0.55           O  
HETATM  669  O   HOH T 668       9.291  33.548   4.975  1.00  0.55           O  
HETATM  670  O   HOH T 669      -8.124   1.722 -18.731  1.00  0.55           O  
HETATM  671  O   HOH T 670     -12.950  37.248  47.811  1.00  0.55           O  
HETATM  672  O   HOH T 671     -10.483   1.585 -17.783  1.00  0.55           O  
HETATM  673  O   HOH T 672      -0.868   0.272 -13.833  1.00  0.55           O  
HETATM  674  O   HOH T 673     -27.290   8.542   5.795  1.00  0.55           O  
HETATM  675  O   HOH T 674      23.568  38.033   0.078  1.00  0.55           O  
HETATM  676  O   HOH T 675      18.647  37.343   5.698  1.00  0.55           O  
HETATM  677  O   HOH T 676      16.840  39.162   1.972  1.00  0.55           O  
HETATM  678  O   HOH T 677      20.046  -6.250  20.251  1.00  0.56           O  
HETATM  679  O   HOH T 678      26.907  31.381  11.044  1.00  0.56           O  
HETATM  680  O   HOH T 679      19.336  19.238 -15.831  1.00  0.56           O  
HETATM  681  O   HOH T 680      35.113  17.075  13.113  1.00  0.56           O  
HETATM  682  O   HOH T 681       1.266  25.779 -13.224  1.00  0.56           O  
HETATM  683  O   HOH T 682      27.565  16.265  25.907  1.00  0.56           O  
HETATM  684  O   HOH T 683      -4.836  40.633  48.547  1.00  0.56           O  
HETATM  685  O   HOH T 684      25.953  -2.256  25.912  1.00  0.56           O  
HETATM  686  O   HOH T 685      22.040  39.568  -3.347  1.00  0.56           O  
HETATM  687  O   HOH T 686      17.250   0.668   6.245  1.00  0.56           O  
HETATM  688  O   HOH T 687      30.804   6.551  -5.748  1.00  0.56           O  
HETATM  689  O   HOH T 688      14.570  25.065  34.913  1.00  0.56           O  
HETATM  690  O   HOH T 689       0.575  18.495  34.768  1.00  0.56           O  
HETATM  691  O   HOH T 690       6.629   3.031  -8.639  1.00  0.56           O  
HETATM  692  O   HOH T 691      33.981   0.119  13.763  1.00  0.56           O  
HETATM  693  O   HOH T 692     -14.587   2.247 -15.354  1.00  0.56           O  
HETATM  694  O   HOH T 693      29.487   0.122   5.129  1.00  0.56           O  
HETATM  695  O   HOH T 694      21.820  -0.079   7.040  1.00  0.56           O  
HETATM  696  O   HOH T 695       2.404   9.741  38.926  1.00  0.56           O  
HETATM  697  O   HOH T 696      10.851  25.002  37.417  1.00  0.56           O  
HETATM  698  O   HOH T 697     -11.094  24.188  -6.577  1.00  0.56           O  
HETATM  699  O   HOH T 698      -8.399  25.621  48.580  1.00  0.56           O  
HETATM  700  O   HOH T 699      14.547  30.634  13.825  1.00  0.56           O  
HETATM  701  O   HOH T 700      -4.872   4.020  25.896  1.00  0.56           O  
HETATM  702  O   HOH T 701     -17.985   9.748  16.272  1.00  0.56           O  
HETATM  703  O   HOH T 702      30.064  30.822  -0.032  1.00  0.56           O  
HETATM  704  O   HOH T 703     -12.133   1.538 -16.255  1.00  0.57           O  
HETATM  705  O   HOH T 704      25.178  29.980   4.116  1.00  0.57           O  
HETATM  706  O   HOH T 705      20.284  16.171  25.102  1.00  0.57           O  
HETATM  707  O   HOH T 706     -11.459  37.378  46.780  1.00  0.57           O  
HETATM  708  O   HOH T 707      27.604  33.227  -1.805  1.00  0.57           O  
HETATM  709  O   HOH T 708      17.017  10.551 -15.509  1.00  0.58           O  
HETATM  710  O   HOH T 709     -10.705  32.707  19.200  1.00  0.58           O  
HETATM  711  O   HOH T 710     -16.262  18.586  40.621  1.00  0.58           O  
HETATM  712  O   HOH T 711       0.624   1.436  11.482  1.00  0.58           O  
HETATM  713  O   HOH T 712      27.540   0.810  27.540  1.00  0.58           O  
HETATM  714  O   HOH T 713      13.078  29.941  19.153  1.00  0.59           O  
HETATM  715  O   HOH T 714     -10.588   4.946  -4.789  1.00  0.60           O  
HETATM  716  O   HOH T 715     -19.284  12.985  -7.059  1.00  0.60           O  
HETATM  717  O   HOH T 716     -16.254  11.320  33.326  1.00  0.61           O  
HETATM  718  O   HOH T 717      28.425  13.093  21.831  1.00  0.61           O  
HETATM  719  O   HOH T 718     -23.222   6.551   7.591  1.00  0.61           O  
TER     720      HOH T 718 
