# Supplementary material for: Accurate Prediction of Hydration Sites of Proteins Using Energy Model With Atom Embedding
Source: Front Mol Biosci. 2021 Sep 20;8:756075. doi: 10.3389/fmolb.2021.756075 (PMC8488165; doi:10.3389/fmolb.2021.756075)
Supplement: Supplementary file 1 [file DataSheet1.ZIP › Data Sheet 1/Our_result_pdb/OppA_dataset_output/1QKB_watersite.pdb]

HEADER                                                        XXXX


JRNL        PMID   -1
HETATM    1  O   HOH T   0       5.482  15.008  -3.619  1.00  0.15           O  
HETATM    2  O   HOH T   1      -1.876   8.643  10.108  1.00  0.17           O  
HETATM    3  O   HOH T   2      20.088  25.988  13.967  1.00  0.17           O  
HETATM    4  O   HOH T   3      17.482  13.488   4.834  1.00  0.18           O  
HETATM    5  O   HOH T   4       6.711  30.334  14.544  1.00  0.18           O  
HETATM    6  O   HOH T   5       7.715  15.420 -10.340  1.00  0.18           O  
HETATM    7  O   HOH T   6      19.210  19.935   6.357  1.00  0.18           O  
HETATM    8  O   HOH T   7      14.327  16.874  30.946  1.00  0.19           O  
HETATM    9  O   HOH T   8      32.833  17.071   3.073  1.00  0.19           O  
HETATM   10  O   HOH T   9       0.895  12.753  -8.241  1.00  0.19           O  
HETATM   11  O   HOH T  10      23.330  23.430  -0.928  1.00  0.20           O  
HETATM   12  O   HOH T  11       9.242   6.786   7.008  1.00  0.20           O  
HETATM   13  O   HOH T  12      15.634  15.255  -8.368  1.00  0.20           O  
HETATM   14  O   HOH T  13      -0.998  30.577  28.236  1.00  0.20           O  
HETATM   15  O   HOH T  14       5.432   3.994  31.198  1.00  0.20           O  
HETATM   16  O   HOH T  15      -3.689  30.133  12.404  1.00  0.21           O  
HETATM   17  O   HOH T  16     -11.691  27.566  34.295  1.00  0.21           O  
HETATM   18  O   HOH T  17      -2.003  22.090  13.046  1.00  0.21           O  
HETATM   19  O   HOH T  18      -8.182  22.961  23.263  1.00  0.21           O  
HETATM   20  O   HOH T  19      22.028  14.888 -11.387  1.00  0.21           O  
HETATM   21  O   HOH T  20     -11.493   4.738 -12.899  1.00  0.22           O  
HETATM   22  O   HOH T  21     -13.219  13.820 -14.533  1.00  0.22           O  
HETATM   23  O   HOH T  22      10.082  30.917   4.191  1.00  0.22           O  
HETATM   24  O   HOH T  23       3.189  17.066   7.975  1.00  0.22           O  
HETATM   25  O   HOH T  24      38.369   7.403  -6.736  1.00  0.22           O  
HETATM   26  O   HOH T  25       7.261  10.934  -8.738  1.00  0.22           O  
HETATM   27  O   HOH T  26       8.742   1.469  25.803  1.00  0.22           O  
HETATM   28  O   HOH T  27      11.131  13.816  16.784  1.00  0.22           O  
HETATM   29  O   HOH T  28      24.640  21.827  23.290  1.00  0.22           O  
HETATM   30  O   HOH T  29       3.603   6.890  36.025  1.00  0.23           O  
HETATM   31  O   HOH T  30     -11.681  14.049 -16.846  1.00  0.23           O  
HETATM   32  O   HOH T  31      -8.736  11.199  46.057  1.00  0.23           O  
HETATM   33  O   HOH T  32       3.078   5.490  30.788  1.00  0.23           O  
HETATM   34  O   HOH T  33      -1.581  28.570   2.029  1.00  0.23           O  
HETATM   35  O   HOH T  34      31.234  11.159   8.434  1.00  0.23           O  
HETATM   36  O   HOH T  35      -0.306  30.984   1.775  1.00  0.23           O  
HETATM   37  O   HOH T  36       8.225  15.320  -3.360  1.00  0.23           O  
HETATM   38  O   HOH T  37       5.676  -1.707  19.669  1.00  0.23           O  
HETATM   39  O   HOH T  38       2.598   0.984  25.251  1.00  0.23           O  
HETATM   40  O   HOH T  39       9.050  22.174  18.093  1.00  0.23           O  
HETATM   41  O   HOH T  40      -4.234  23.120  -7.458  1.00  0.23           O  
HETATM   42  O   HOH T  41       9.857   9.124  -5.694  1.00  0.24           O  
HETATM   43  O   HOH T  42       8.869  23.963   2.095  1.00  0.24           O  
HETATM   44  O   HOH T  43      -5.428  26.368  50.567  1.00  0.24           O  
HETATM   45  O   HOH T  44      -4.288  27.712  13.659  1.00  0.24           O  
HETATM   46  O   HOH T  45     -18.845  16.006  16.819  1.00  0.24           O  
HETATM   47  O   HOH T  46      -4.218  19.585  16.013  1.00  0.24           O  
HETATM   48  O   HOH T  47      -9.484  21.194   9.230  1.00  0.24           O  
HETATM   49  O   HOH T  48     -18.118  27.271   0.048  1.00  0.24           O  
HETATM   50  O   HOH T  49      -2.297   4.634   9.963  1.00  0.24           O  
HETATM   51  O   HOH T  50      27.843  15.781  20.609  1.00  0.25           O  
HETATM   52  O   HOH T  51       1.391  37.504   0.530  1.00  0.25           O  
HETATM   53  O   HOH T  52      28.882   2.829   6.348  1.00  0.25           O  
HETATM   54  O   HOH T  53      -4.457   6.560  16.522  1.00  0.25           O  
HETATM   55  O   HOH T  54      -0.330   5.857  -6.141  1.00  0.25           O  
HETATM   56  O   HOH T  55      13.283  24.545  26.948  1.00  0.25           O  
HETATM   57  O   HOH T  56      17.215   5.288  21.990  1.00  0.25           O  
HETATM   58  O   HOH T  57      -0.882   6.718   0.834  1.00  0.25           O  
HETATM   59  O   HOH T  58      -9.677  12.045  33.315  1.00  0.25           O  
HETATM   60  O   HOH T  59     -22.044  24.320   7.119  1.00  0.25           O  
HETATM   61  O   HOH T  60     -13.865   9.545  20.874  1.00  0.25           O  
HETATM   62  O   HOH T  61     -12.677  11.836  20.373  1.00  0.26           O  
HETATM   63  O   HOH T  62     -22.786  16.856  13.570  1.00  0.26           O  
HETATM   64  O   HOH T  63       7.734  21.493  42.019  1.00  0.26           O  
HETATM   65  O   HOH T  64       4.217  10.452  30.990  1.00  0.26           O  
HETATM   66  O   HOH T  65       6.664   7.665   7.487  1.00  0.26           O  
HETATM   67  O   HOH T  66      11.432  18.357   3.215  1.00  0.26           O  
HETATM   68  O   HOH T  67      27.208  13.500  19.186  1.00  0.26           O  
HETATM   69  O   HOH T  68      34.196  14.982  -1.887  1.00  0.26           O  
HETATM   70  O   HOH T  69      10.494  23.335   4.188  1.00  0.27           O  
HETATM   71  O   HOH T  70       7.875  24.240   4.726  1.00  0.27           O  
HETATM   72  O   HOH T  71     -10.286  16.244  15.040  1.00  0.27           O  
HETATM   73  O   HOH T  72      15.380  14.729  -5.704  1.00  0.27           O  
HETATM   74  O   HOH T  73       1.510  21.774  18.950  1.00  0.27           O  
HETATM   75  O   HOH T  74      17.772  26.128  18.107  1.00  0.27           O  
HETATM   76  O   HOH T  75      -6.610  13.915  12.686  1.00  0.27           O  
HETATM   77  O   HOH T  76      -9.950  16.814 -12.157  1.00  0.27           O  
HETATM   78  O   HOH T  77     -11.133  31.550  50.859  1.00  0.28           O  
HETATM   79  O   HOH T  78       0.173  -6.265  23.972  1.00  0.28           O  
HETATM   80  O   HOH T  79       4.545  34.886   0.061  1.00  0.28           O  
HETATM   81  O   HOH T  80      -2.614  30.920   9.994  1.00  0.28           O  
HETATM   82  O   HOH T  81      22.325  25.251  17.267  1.00  0.28           O  
HETATM   83  O   HOH T  82      10.006  13.455  -2.324  1.00  0.28           O  
HETATM   84  O   HOH T  83      12.266   1.149  20.318  1.00  0.28           O  
HETATM   85  O   HOH T  84      11.177  21.443  34.696  1.00  0.28           O  
HETATM   86  O   HOH T  85      -6.483   9.167   7.521  1.00  0.28           O  
HETATM   87  O   HOH T  86      -4.590  36.264  21.972  1.00  0.28           O  
HETATM   88  O   HOH T  87       5.216  -3.053   1.683  1.00  0.28           O  
HETATM   89  O   HOH T  88      11.866  25.654  -7.369  1.00  0.29           O  
HETATM   90  O   HOH T  89       5.234  35.206  -2.613  1.00  0.29           O  
HETATM   91  O   HOH T  90      -7.082   7.330  -1.923  1.00  0.29           O  
HETATM   92  O   HOH T  91      17.644  31.381  -7.530  1.00  0.29           O  
HETATM   93  O   HOH T  92     -10.605  30.023  17.288  1.00  0.29           O  
HETATM   94  O   HOH T  93     -11.782  31.897  29.267  1.00  0.29           O  
HETATM   95  O   HOH T  94       9.885  27.511  -8.246  1.00  0.29           O  
HETATM   96  O   HOH T  95     -11.619  38.274  30.221  1.00  0.29           O  
HETATM   97  O   HOH T  96       1.448  -0.508  17.280  1.00  0.29           O  
HETATM   98  O   HOH T  97      14.939  14.674   4.835  1.00  0.29           O  
HETATM   99  O   HOH T  98      11.630  10.273 -14.145  1.00  0.30           O  
HETATM  100  O   HOH T  99      -1.578   7.389   3.495  1.00  0.30           O  
HETATM  101  O   HOH T 100      -3.900  32.625  40.628  1.00  0.30           O  
HETATM  102  O   HOH T 101      10.388  13.492   3.237  1.00  0.30           O  
HETATM  103  O   HOH T 102      -5.783   4.916  26.847  1.00  0.30           O  
HETATM  104  O   HOH T 103      -7.793   5.795   4.765  1.00  0.30           O  
HETATM  105  O   HOH T 104      17.056   9.211  19.526  1.00  0.30           O  
HETATM  106  O   HOH T 105      22.165   8.301  24.241  1.00  0.30           O  
HETATM  107  O   HOH T 106     -10.704   4.997  17.072  1.00  0.30           O  
HETATM  108  O   HOH T 107      32.540  18.654   0.787  1.00  0.30           O  
HETATM  109  O   HOH T 108      12.240  22.978 -13.668  1.00  0.30           O  
HETATM  110  O   HOH T 109     -10.463   8.692  -2.106  1.00  0.30           O  
HETATM  111  O   HOH T 110      10.135  30.566  17.682  1.00  0.30           O  
HETATM  112  O   HOH T 111      18.979  18.317  33.216  1.00  0.30           O  
HETATM  113  O   HOH T 112     -20.458  21.616   4.436  1.00  0.30           O  
HETATM  114  O   HOH T 113      24.413  21.697  -8.073  1.00  0.30           O  
HETATM  115  O   HOH T 114     -12.188  28.432  43.543  1.00  0.31           O  
HETATM  116  O   HOH T 115       0.975   4.983  38.993  1.00  0.31           O  
HETATM  117  O   HOH T 116       1.585   4.793 -12.572  1.00  0.31           O  
HETATM  118  O   HOH T 117     -13.282   6.737 -13.462  1.00  0.31           O  
HETATM  119  O   HOH T 118       1.949  10.696  13.537  1.00  0.31           O  
HETATM  120  O   HOH T 119       1.722   1.161   7.259  1.00  0.31           O  
HETATM  121  O   HOH T 120     -12.098  10.644  32.787  1.00  0.31           O  
HETATM  122  O   HOH T 121     -14.215  39.360  30.289  1.00  0.31           O  
HETATM  123  O   HOH T 122      -2.401  19.710   3.935  1.00  0.31           O  
HETATM  124  O   HOH T 123      17.262   7.429 -10.018  1.00  0.31           O  
HETATM  125  O   HOH T 124      27.845   6.688  -3.833  1.00  0.31           O  
HETATM  126  O   HOH T 125      -3.681  17.134 -16.240  1.00  0.31           O  
HETATM  127  O   HOH T 126      19.802  21.797  21.595  1.00  0.31           O  
HETATM  128  O   HOH T 127      24.726  13.263  -5.638  1.00  0.31           O  
HETATM  129  O   HOH T 128     -11.449  28.033  50.428  1.00  0.32           O  
HETATM  130  O   HOH T 129     -25.378   6.819   7.235  1.00  0.32           O  
HETATM  131  O   HOH T 130     -21.515  19.687   6.333  1.00  0.32           O  
HETATM  132  O   HOH T 131       3.063  -1.753  18.887  1.00  0.32           O  
HETATM  133  O   HOH T 132       8.762  35.954  -5.893  1.00  0.32           O  
HETATM  134  O   HOH T 133     -10.895  38.759  32.961  1.00  0.32           O  
HETATM  135  O   HOH T 134      -4.899  18.185   3.299  1.00  0.32           O  
HETATM  136  O   HOH T 135      18.300  17.644  23.035  1.00  0.32           O  
HETATM  137  O   HOH T 136     -11.898  31.240  22.838  1.00  0.32           O  
HETATM  138  O   HOH T 137     -17.232  31.029  13.589  1.00  0.32           O  
HETATM  139  O   HOH T 138     -24.300  19.165   9.354  1.00  0.32           O  
HETATM  140  O   HOH T 139     -14.673  18.469  42.436  1.00  0.32           O  
HETATM  141  O   HOH T 140      -7.901  13.119  16.235  1.00  0.32           O  
HETATM  142  O   HOH T 141       5.275  22.300 -14.133  1.00  0.33           O  
HETATM  143  O   HOH T 142       3.472   7.999   3.596  1.00  0.33           O  
HETATM  144  O   HOH T 143      29.937  22.947   3.740  1.00  0.33           O  
HETATM  145  O   HOH T 144      13.174  13.432   2.977  1.00  0.33           O  
HETATM  146  O   HOH T 145       1.861  -1.140   5.907  1.00  0.33           O  
HETATM  147  O   HOH T 146      12.318  21.242  10.230  1.00  0.33           O  
HETATM  148  O   HOH T 147     -25.924  13.220   8.062  1.00  0.33           O  
HETATM  149  O   HOH T 148       2.874   2.815  15.354  1.00  0.33           O  
HETATM  150  O   HOH T 149      -5.960  34.694  43.247  1.00  0.33           O  
HETATM  151  O   HOH T 150      31.863   5.442   4.192  1.00  0.33           O  
HETATM  152  O   HOH T 151       3.112   4.286  35.215  1.00  0.33           O  
HETATM  153  O   HOH T 152       8.650  12.531   5.202  1.00  0.33           O  
HETATM  154  O   HOH T 153      12.097   1.258   9.553  1.00  0.33           O  
HETATM  155  O   HOH T 154     -20.122  15.957   0.556  1.00  0.33           O  
HETATM  156  O   HOH T 155       0.239  38.988   5.914  1.00  0.33           O  
HETATM  157  O   HOH T 156     -15.999  26.915  -1.666  1.00  0.33           O  
HETATM  158  O   HOH T 157       0.705  11.657  32.475  1.00  0.33           O  
HETATM  159  O   HOH T 158       2.728   8.191  31.545  1.00  0.33           O  
HETATM  160  O   HOH T 159      25.098  32.855  -3.449  1.00  0.33           O  
HETATM  161  O   HOH T 160       4.172  13.084  11.382  1.00  0.33           O  
HETATM  162  O   HOH T 161       2.081  16.461   2.348  1.00  0.33           O  
HETATM  163  O   HOH T 162      10.709  15.907   4.436  1.00  0.34           O  
HETATM  164  O   HOH T 163      13.893  22.717  28.915  1.00  0.34           O  
HETATM  165  O   HOH T 164      23.044  14.299  -8.901  1.00  0.34           O  
HETATM  166  O   HOH T 165       2.742  14.705  32.635  1.00  0.34           O  
HETATM  167  O   HOH T 166     -12.577  29.887  33.119  1.00  0.34           O  
HETATM  168  O   HOH T 167     -13.718   8.956  -0.526  1.00  0.34           O  
HETATM  169  O   HOH T 168      13.559  23.340  11.516  1.00  0.34           O  
HETATM  170  O   HOH T 169       8.922  -1.983   7.486  1.00  0.34           O  
HETATM  171  O   HOH T 170      -8.172  15.836  16.810  1.00  0.34           O  
HETATM  172  O   HOH T 171       4.709  35.022  19.531  1.00  0.34           O  
HETATM  173  O   HOH T 172      -2.443  35.562  23.549  1.00  0.34           O  
HETATM  174  O   HOH T 173     -10.622  28.705   0.225  1.00  0.34           O  
HETATM  175  O   HOH T 174      10.333   8.153 -12.863  1.00  0.34           O  
HETATM  176  O   HOH T 175      -3.667  31.467  46.582  1.00  0.34           O  
HETATM  177  O   HOH T 176      -8.869  25.106  47.626  1.00  0.34           O  
HETATM  178  O   HOH T 177       5.261  21.028  23.183  1.00  0.34           O  
HETATM  179  O   HOH T 178      -7.296  34.247  40.892  1.00  0.34           O  
HETATM  180  O   HOH T 179      25.698  -2.583  12.490  1.00  0.34           O  
HETATM  181  O   HOH T 180       0.588  -2.994   2.587  1.00  0.34           O  
HETATM  182  O   HOH T 181       5.462   3.670  10.838  1.00  0.34           O  
HETATM  183  O   HOH T 182       4.066  13.006  41.672  1.00  0.34           O  
HETATM  184  O   HOH T 183     -14.741  19.507  -7.135  1.00  0.34           O  
HETATM  185  O   HOH T 184      15.550  23.411  25.789  1.00  0.34           O  
HETATM  186  O   HOH T 185     -23.911  18.994  12.141  1.00  0.34           O  
HETATM  187  O   HOH T 186      22.289  27.257  20.517  1.00  0.34           O  
HETATM  188  O   HOH T 187      22.768   1.703  20.930  1.00  0.35           O  
HETATM  189  O   HOH T 188      11.211  -3.083   8.722  1.00  0.35           O  
HETATM  190  O   HOH T 189       1.137  10.290  -0.605  1.00  0.35           O  
HETATM  191  O   HOH T 190     -13.767  32.449  50.897  1.00  0.35           O  
HETATM  192  O   HOH T 191      -9.381   7.460  33.003  1.00  0.35           O  
HETATM  193  O   HOH T 192     -12.011  20.272   8.718  1.00  0.35           O  
HETATM  194  O   HOH T 193      37.142   9.505  -5.380  1.00  0.35           O  
HETATM  195  O   HOH T 194       7.668  20.903  23.116  1.00  0.35           O  
HETATM  196  O   HOH T 195      -9.130  15.009  12.853  1.00  0.35           O  
HETATM  197  O   HOH T 196       4.860  38.678  27.200  1.00  0.35           O  
HETATM  198  O   HOH T 197      20.210   0.501   1.687  1.00  0.35           O  
HETATM  199  O   HOH T 198      23.532  26.024  -4.561  1.00  0.35           O  
HETATM  200  O   HOH T 199      17.721   9.740  22.172  1.00  0.35           O  
HETATM  201  O   HOH T 200      11.110  39.184  -2.664  1.00  0.35           O  
HETATM  202  O   HOH T 201       7.446  15.072  40.885  1.00  0.35           O  
HETATM  203  O   HOH T 202       3.771  -0.162  21.068  1.00  0.36           O  
HETATM  204  O   HOH T 203       4.755  -0.307   0.947  1.00  0.36           O  
HETATM  205  O   HOH T 204      12.883  -0.916  22.114  1.00  0.36           O  
HETATM  206  O   HOH T 205      12.449  32.327   3.800  1.00  0.36           O  
HETATM  207  O   HOH T 206      -8.899  23.779   9.737  1.00  0.36           O  
HETATM  208  O   HOH T 207      12.130  27.335  24.242  1.00  0.36           O  
HETATM  209  O   HOH T 208      10.434  15.091  -0.129  1.00  0.36           O  
HETATM  210  O   HOH T 209      29.312  21.440   1.374  1.00  0.36           O  
HETATM  211  O   HOH T 210      -9.273  39.214  35.208  1.00  0.36           O  
HETATM  212  O   HOH T 211      21.145  30.100   8.346  1.00  0.36           O  
HETATM  213  O   HOH T 212      13.906  34.898 -10.813  1.00  0.36           O  
HETATM  214  O   HOH T 213      -2.142   8.633   7.291  1.00  0.36           O  
HETATM  215  O   HOH T 214       0.811   2.299 -13.366  1.00  0.36           O  
HETATM  216  O   HOH T 215       3.091  10.063 -14.675  1.00  0.36           O  
HETATM  217  O   HOH T 216      19.361  39.533  -2.294  1.00  0.37           O  
HETATM  218  O   HOH T 217      -8.946   0.249  39.338  1.00  0.37           O  
HETATM  219  O   HOH T 218      22.064  25.352  -8.470  1.00  0.37           O  
HETATM  220  O   HOH T 219      -4.698  13.584 -17.667  1.00  0.37           O  
HETATM  221  O   HOH T 220     -10.703  16.471 -15.823  1.00  0.37           O  
HETATM  222  O   HOH T 221      28.051  -2.366   6.274  1.00  0.37           O  
HETATM  223  O   HOH T 222      -9.259   8.491 -18.620  1.00  0.37           O  
HETATM  224  O   HOH T 223      10.594  35.233  27.268  1.00  0.37           O  
HETATM  225  O   HOH T 224      10.849  25.031  37.025  1.00  0.37           O  
HETATM  226  O   HOH T 225      29.774  17.650  21.021  1.00  0.37           O  
HETATM  227  O   HOH T 226     -10.597   4.852   7.390  1.00  0.37           O  
HETATM  228  O   HOH T 227     -11.489  37.064  46.033  1.00  0.37           O  
HETATM  229  O   HOH T 228     -20.244   7.956   1.435  1.00  0.37           O  
HETATM  230  O   HOH T 229      19.443   8.265  23.686  1.00  0.37           O  
HETATM  231  O   HOH T 230       7.808  40.350   2.113  1.00  0.37           O  
HETATM  232  O   HOH T 231      23.380  21.259  25.670  1.00  0.37           O  
HETATM  233  O   HOH T 232      10.274  -5.840  31.330  1.00  0.37           O  
HETATM  234  O   HOH T 233      -1.869  32.477  38.725  1.00  0.37           O  
HETATM  235  O   HOH T 234       2.999   9.056   1.055  1.00  0.37           O  
HETATM  236  O   HOH T 235     -11.087  31.518  10.969  1.00  0.37           O  
HETATM  237  O   HOH T 236      -4.083  22.192  14.941  1.00  0.37           O  
HETATM  238  O   HOH T 237      25.845   6.899  -5.704  1.00  0.37           O  
HETATM  239  O   HOH T 238      -4.572   3.830  24.618  1.00  0.37           O  
HETATM  240  O   HOH T 239       2.813  21.211 -13.902  1.00  0.37           O  
HETATM  241  O   HOH T 240      -8.156   2.794   9.930  1.00  0.38           O  
HETATM  242  O   HOH T 241      -1.048  15.068   8.989  1.00  0.38           O  
HETATM  243  O   HOH T 242      -1.418  -5.290  -1.215  1.00  0.38           O  
HETATM  244  O   HOH T 243     -21.191  26.806   8.082  1.00  0.38           O  
HETATM  245  O   HOH T 244      -4.855   2.799 -15.050  1.00  0.38           O  
HETATM  246  O   HOH T 245      -6.350   4.901  17.867  1.00  0.38           O  
HETATM  247  O   HOH T 246     -21.931  17.920   8.503  1.00  0.38           O  
HETATM  248  O   HOH T 247      32.564  17.867   5.821  1.00  0.38           O  
HETATM  249  O   HOH T 248     -14.467  31.692  44.729  1.00  0.38           O  
HETATM  250  O   HOH T 249     -13.535  36.314  47.672  1.00  0.38           O  
HETATM  251  O   HOH T 250      -5.025   2.655  42.304  1.00  0.38           O  
HETATM  252  O   HOH T 251     -15.144  22.398  16.230  1.00  0.38           O  
HETATM  253  O   HOH T 252      24.562  33.165  -6.121  1.00  0.38           O  
HETATM  254  O   HOH T 253       1.256  14.549  10.421  1.00  0.38           O  
HETATM  255  O   HOH T 254       7.948  27.346 -10.305  1.00  0.38           O  
HETATM  256  O   HOH T 255      22.563  30.539   6.043  1.00  0.38           O  
HETATM  257  O   HOH T 256       2.568  35.867  25.005  1.00  0.38           O  
HETATM  258  O   HOH T 257      -1.063   3.195  -5.668  1.00  0.38           O  
HETATM  259  O   HOH T 258      25.325  -2.105   6.616  1.00  0.38           O  
HETATM  260  O   HOH T 259      27.547  -2.959  10.458  1.00  0.38           O  
HETATM  261  O   HOH T 260       9.013  22.914  37.199  1.00  0.39           O  
HETATM  262  O   HOH T 261      -0.179  15.221   5.113  1.00  0.39           O  
HETATM  263  O   HOH T 262      10.766   1.784  16.545  1.00  0.39           O  
HETATM  264  O   HOH T 263     -18.121  28.229   2.599  1.00  0.39           O  
HETATM  265  O   HOH T 264      -0.573   7.386  39.005  1.00  0.39           O  
HETATM  266  O   HOH T 265      -3.585  34.642  38.649  1.00  0.39           O  
HETATM  267  O   HOH T 266      -6.612   7.191  19.339  1.00  0.39           O  
HETATM  268  O   HOH T 267      10.646  35.814   2.852  1.00  0.39           O  
HETATM  269  O   HOH T 268      26.955  29.882  -2.395  1.00  0.39           O  
HETATM  270  O   HOH T 269       4.631  37.731  24.523  1.00  0.39           O  
HETATM  271  O   HOH T 270       4.085   4.146 -11.437  1.00  0.39           O  
HETATM  272  O   HOH T 271       7.085  38.692  23.458  1.00  0.39           O  
HETATM  273  O   HOH T 272     -12.831   7.291  35.740  1.00  0.39           O  
HETATM  274  O   HOH T 273     -10.549  29.423  52.625  1.00  0.40           O  
HETATM  275  O   HOH T 274      -2.116   1.096  16.448  1.00  0.40           O  
HETATM  276  O   HOH T 275      -8.034  36.446  25.074  1.00  0.40           O  
HETATM  277  O   HOH T 276      21.801  32.497  -6.078  1.00  0.40           O  
HETATM  278  O   HOH T 277      20.030  26.562  16.665  1.00  0.40           O  
HETATM  279  O   HOH T 278       7.485  -5.935  31.814  1.00  0.40           O  
HETATM  280  O   HOH T 279       4.720   3.139   8.219  1.00  0.40           O  
HETATM  281  O   HOH T 280     -16.400  28.688  10.297  1.00  0.40           O  
HETATM  282  O   HOH T 281      -2.375  24.710  12.182  1.00  0.40           O  
HETATM  283  O   HOH T 282     -23.568  19.514  16.183  1.00  0.40           O  
HETATM  284  O   HOH T 283      18.722  24.047  22.792  1.00  0.40           O  
HETATM  285  O   HOH T 284     -16.442  26.730  17.203  1.00  0.40           O  
HETATM  286  O   HOH T 285      20.612  24.534  -6.282  1.00  0.40           O  
HETATM  287  O   HOH T 286      -4.177  33.025  44.328  1.00  0.40           O  
HETATM  288  O   HOH T 287      -7.894  -3.565   4.806  1.00  0.40           O  
HETATM  289  O   HOH T 288     -19.143  14.805 -11.111  1.00  0.40           O  
HETATM  290  O   HOH T 289      29.375   0.046   6.011  1.00  0.40           O  
HETATM  291  O   HOH T 290       5.704  20.236  25.146  1.00  0.40           O  
HETATM  292  O   HOH T 291      -0.148   0.944   9.386  1.00  0.40           O  
HETATM  293  O   HOH T 292      14.343  31.559   5.679  1.00  0.40           O  
HETATM  294  O   HOH T 293      -8.527  27.788  42.303  1.00  0.40           O  
HETATM  295  O   HOH T 294       8.901   1.371  12.542  1.00  0.41           O  
HETATM  296  O   HOH T 295      22.365  23.560  -4.437  1.00  0.41           O  
HETATM  297  O   HOH T 296      -6.770  33.543   5.557  1.00  0.41           O  
HETATM  298  O   HOH T 297      24.721  30.166   4.262  1.00  0.41           O  
HETATM  299  O   HOH T 298      -9.663  30.121   9.023  1.00  0.41           O  
HETATM  300  O   HOH T 299      -6.376   2.868 -17.437  1.00  0.41           O  
HETATM  301  O   HOH T 300     -27.340   8.733   6.608  1.00  0.41           O  
HETATM  302  O   HOH T 301       8.775  13.159   9.606  1.00  0.41           O  
HETATM  303  O   HOH T 302       4.184  36.495  14.765  1.00  0.41           O  
HETATM  304  O   HOH T 303     -14.683  34.009  48.754  1.00  0.41           O  
HETATM  305  O   HOH T 304     -11.483   3.054  39.906  1.00  0.41           O  
HETATM  306  O   HOH T 305      26.013  23.005  -1.157  1.00  0.41           O  
HETATM  307  O   HOH T 306     -17.063  25.313  -4.747  1.00  0.41           O  
HETATM  308  O   HOH T 307      11.726  31.611   6.396  1.00  0.41           O  
HETATM  309  O   HOH T 308      30.988   2.868   4.475  1.00  0.41           O  
HETATM  310  O   HOH T 309      -6.671  36.119   4.287  1.00  0.41           O  
HETATM  311  O   HOH T 310       3.080  23.904 -14.629  1.00  0.41           O  
HETATM  312  O   HOH T 311      -8.632  36.704   6.080  1.00  0.42           O  
HETATM  313  O   HOH T 312     -21.099  17.099  17.756  1.00  0.42           O  
HETATM  314  O   HOH T 313      11.796  25.083  22.595  1.00  0.42           O  
HETATM  315  O   HOH T 314      12.065  -7.963  20.138  1.00  0.42           O  
HETATM  316  O   HOH T 315     -13.578   4.275 -14.604  1.00  0.42           O  
HETATM  317  O   HOH T 316      -7.409  23.667  11.988  1.00  0.42           O  
HETATM  318  O   HOH T 317     -12.059   4.857  19.367  1.00  0.42           O  
HETATM  319  O   HOH T 318      12.795   7.599 -11.883  1.00  0.42           O  
HETATM  320  O   HOH T 319     -18.577  10.503 -11.603  1.00  0.42           O  
HETATM  321  O   HOH T 320      -9.827  11.664 -21.779  1.00  0.42           O  
HETATM  322  O   HOH T 321     -13.142  18.841  -4.937  1.00  0.42           O  
HETATM  323  O   HOH T 322       2.464   7.434 -12.295  1.00  0.42           O  
HETATM  324  O   HOH T 323       8.646  31.683  30.937  1.00  0.42           O  
HETATM  325  O   HOH T 324       0.964   7.824   2.541  1.00  0.42           O  
HETATM  326  O   HOH T 325      28.621  26.806  16.801  1.00  0.42           O  
HETATM  327  O   HOH T 326      10.563   7.210   9.523  1.00  0.42           O  
HETATM  328  O   HOH T 327     -20.560  12.191  22.496  1.00  0.42           O  
HETATM  329  O   HOH T 328     -10.116   6.981  -4.227  1.00  0.43           O  
HETATM  330  O   HOH T 329       2.517  15.301  42.207  1.00  0.43           O  
HETATM  331  O   HOH T 330     -22.869   6.124   8.178  1.00  0.43           O  
HETATM  332  O   HOH T 331     -27.512   7.205   8.918  1.00  0.43           O  
HETATM  333  O   HOH T 332     -15.276   8.143  36.982  1.00  0.43           O  
HETATM  334  O   HOH T 333      29.620   0.793   3.237  1.00  0.43           O  
HETATM  335  O   HOH T 334       8.221  29.004  16.411  1.00  0.43           O  
HETATM  336  O   HOH T 335     -13.133   6.851  20.965  1.00  0.43           O  
HETATM  337  O   HOH T 336      -8.141  25.779  50.129  1.00  0.43           O  
HETATM  338  O   HOH T 337      -0.533  36.631  15.290  1.00  0.43           O  
HETATM  339  O   HOH T 338      -2.015  16.988   7.220  1.00  0.43           O  
HETATM  340  O   HOH T 339      13.692  28.356  16.876  1.00  0.43           O  
HETATM  341  O   HOH T 340       0.934  22.921 -13.116  1.00  0.43           O  
HETATM  342  O   HOH T 341      23.473  29.091  -8.347  1.00  0.43           O  
HETATM  343  O   HOH T 342       9.608  -7.023  28.881  1.00  0.43           O  
HETATM  344  O   HOH T 343      -5.751   2.691   6.095  1.00  0.43           O  
HETATM  345  O   HOH T 344       9.981  33.931   1.104  1.00  0.43           O  
HETATM  346  O   HOH T 345       4.242   0.651  14.542  1.00  0.43           O  
HETATM  347  O   HOH T 346       0.569   1.597  15.863  1.00  0.43           O  
HETATM  348  O   HOH T 347     -12.264  16.277 -13.620  1.00  0.43           O  
HETATM  349  O   HOH T 348      13.713  26.911  -9.104  1.00  0.43           O  
HETATM  350  O   HOH T 349      -4.351  31.363   7.846  1.00  0.43           O  
HETATM  351  O   HOH T 350      -1.105   2.549  11.499  1.00  0.43           O  
HETATM  352  O   HOH T 351       1.253  25.622 -13.378  1.00  0.43           O  
HETATM  353  O   HOH T 352     -16.542   9.541  39.273  1.00  0.43           O  
HETATM  354  O   HOH T 353     -18.278  15.941  -8.655  1.00  0.43           O  
HETATM  355  O   HOH T 354     -12.156   6.653  23.465  1.00  0.43           O  
HETATM  356  O   HOH T 355     -27.867  12.258   9.675  1.00  0.43           O  
HETATM  357  O   HOH T 356      33.370  17.931   9.816  1.00  0.43           O  
HETATM  358  O   HOH T 357      -5.358  -4.583   4.032  1.00  0.43           O  
HETATM  359  O   HOH T 358      -6.483  12.339 -19.536  1.00  0.43           O  
HETATM  360  O   HOH T 359      -8.928  11.129 -19.202  1.00  0.43           O  
HETATM  361  O   HOH T 360      27.505  32.527  -2.079  1.00  0.43           O  
HETATM  362  O   HOH T 361     -16.616  16.280 -13.101  1.00  0.44           O  
HETATM  363  O   HOH T 362      12.998  -7.230  22.582  1.00  0.44           O  
HETATM  364  O   HOH T 363     -11.122  34.030  11.781  1.00  0.44           O  
HETATM  365  O   HOH T 364       7.693  21.948  20.551  1.00  0.44           O  
HETATM  366  O   HOH T 365       2.318  -0.939  23.367  1.00  0.44           O  
HETATM  367  O   HOH T 366     -13.301   6.762  28.369  1.00  0.44           O  
HETATM  368  O   HOH T 367      -9.008   2.407  41.064  1.00  0.44           O  
HETATM  369  O   HOH T 368      13.784  26.293  20.972  1.00  0.44           O  
HETATM  370  O   HOH T 369      -5.002  27.689  -6.569  1.00  0.44           O  
HETATM  371  O   HOH T 370      12.156  41.316  -1.066  1.00  0.44           O  
HETATM  372  O   HOH T 371       7.888  35.170   2.527  1.00  0.44           O  
HETATM  373  O   HOH T 372      12.551  21.924 -16.202  1.00  0.44           O  
HETATM  374  O   HOH T 373       3.791  14.313   8.660  1.00  0.44           O  
HETATM  375  O   HOH T 374       8.510  20.248  25.780  1.00  0.44           O  
HETATM  376  O   HOH T 375       8.624   0.680   8.385  1.00  0.44           O  
HETATM  377  O   HOH T 376      31.169  18.484   8.198  1.00  0.44           O  
HETATM  378  O   HOH T 377       6.555  31.171 -10.057  1.00  0.44           O  
HETATM  379  O   HOH T 378      13.221  14.466 -14.535  1.00  0.44           O  
HETATM  380  O   HOH T 379      -7.164  26.344  52.687  1.00  0.44           O  
HETATM  381  O   HOH T 380      20.199  32.253  -8.300  1.00  0.44           O  
HETATM  382  O   HOH T 381      29.857  14.015  19.690  1.00  0.44           O  
HETATM  383  O   HOH T 382     -12.620   5.820  26.008  1.00  0.44           O  
HETATM  384  O   HOH T 383      -1.329   1.227  13.853  1.00  0.44           O  
HETATM  385  O   HOH T 384      33.160  20.324   7.243  1.00  0.44           O  
HETATM  386  O   HOH T 385      23.000  23.755  24.444  1.00  0.44           O  
HETATM  387  O   HOH T 386      22.990  26.167  23.013  1.00  0.44           O  
HETATM  388  O   HOH T 387      -7.232  12.636  47.963  1.00  0.44           O  
HETATM  389  O   HOH T 388      -8.809  24.127  52.202  1.00  0.44           O  
HETATM  390  O   HOH T 389       3.093   6.228  33.383  1.00  0.44           O  
HETATM  391  O   HOH T 390       7.494  14.938   7.311  1.00  0.44           O  
HETATM  392  O   HOH T 391       7.907  19.060  21.468  1.00  0.45           O  
HETATM  393  O   HOH T 392     -12.635   4.310  22.033  1.00  0.45           O  
HETATM  394  O   HOH T 393     -10.442  29.482  12.787  1.00  0.45           O  
HETATM  395  O   HOH T 394      31.231  26.796  10.547  1.00  0.45           O  
HETATM  396  O   HOH T 395     -12.357  33.491  31.402  1.00  0.45           O  
HETATM  397  O   HOH T 396      -5.536   2.570  28.296  1.00  0.45           O  
HETATM  398  O   HOH T 397     -13.130  29.836  51.743  1.00  0.45           O  
HETATM  399  O   HOH T 398      22.688  -4.342  26.124  1.00  0.45           O  
HETATM  400  O   HOH T 399     -12.352  33.579  24.127  1.00  0.45           O  
HETATM  401  O   HOH T 400      20.874  16.470  32.547  1.00  0.45           O  
HETATM  402  O   HOH T 401       7.035  38.683  20.684  1.00  0.45           O  
HETATM  403  O   HOH T 402      -6.094  25.700  13.282  1.00  0.45           O  
HETATM  404  O   HOH T 403      15.557   7.433 -12.178  1.00  0.45           O  
HETATM  405  O   HOH T 404       8.999  32.369 -10.638  1.00  0.45           O  
HETATM  406  O   HOH T 405       2.961  38.712  13.660  1.00  0.45           O  
HETATM  407  O   HOH T 406     -13.723  30.783  35.480  1.00  0.45           O  
HETATM  408  O   HOH T 407     -16.076  32.422  46.917  1.00  0.45           O  
HETATM  409  O   HOH T 408       0.389  33.650  30.349  1.00  0.45           O  
HETATM  410  O   HOH T 409     -12.002  34.750  44.585  1.00  0.45           O  
HETATM  411  O   HOH T 410       9.719   2.486  10.148  1.00  0.45           O  
HETATM  412  O   HOH T 411     -16.869  30.479   3.900  1.00  0.45           O  
HETATM  413  O   HOH T 412      13.954  30.405  -8.931  1.00  0.45           O  
HETATM  414  O   HOH T 413      35.381  21.610   6.232  1.00  0.45           O  
HETATM  415  O   HOH T 414      -0.330  27.723   4.389  1.00  0.45           O  
HETATM  416  O   HOH T 415     -11.072   4.262  24.348  1.00  0.45           O  
HETATM  417  O   HOH T 416       8.095  32.371  37.266  1.00  0.45           O  
HETATM  418  O   HOH T 417     -20.352  17.471  -1.714  1.00  0.45           O  
HETATM  419  O   HOH T 418       1.467  14.235  44.536  1.00  0.45           O  
HETATM  420  O   HOH T 419       4.841  12.212 -15.246  1.00  0.45           O  
HETATM  421  O   HOH T 420     -25.065  12.222   1.599  1.00  0.45           O  
HETATM  422  O   HOH T 421      -2.587  37.849  36.076  1.00  0.45           O  
HETATM  423  O   HOH T 422     -25.834   9.767   2.906  1.00  0.46           O  
HETATM  424  O   HOH T 423     -10.382  13.465  14.901  1.00  0.46           O  
HETATM  425  O   HOH T 424      11.746  19.406  36.359  1.00  0.46           O  
HETATM  426  O   HOH T 425      21.151  13.774  33.436  1.00  0.46           O  
HETATM  427  O   HOH T 426     -12.249  32.503  33.894  1.00  0.46           O  
HETATM  428  O   HOH T 427     -19.300  13.647  -7.240  1.00  0.46           O  
HETATM  429  O   HOH T 428      12.618  31.012  25.875  1.00  0.46           O  
HETATM  430  O   HOH T 429       5.730   5.661   8.965  1.00  0.46           O  
HETATM  431  O   HOH T 430     -16.361  28.512  13.022  1.00  0.46           O  
HETATM  432  O   HOH T 431      15.225  15.113  37.908  1.00  0.46           O  
HETATM  433  O   HOH T 432     -12.856   6.133  -3.950  1.00  0.46           O  
HETATM  434  O   HOH T 433     -15.725  27.674  29.590  1.00  0.46           O  
HETATM  435  O   HOH T 434       7.505  -0.737   0.280  1.00  0.46           O  
HETATM  436  O   HOH T 435      19.476  13.277  12.801  1.00  0.46           O  
HETATM  437  O   HOH T 436     -12.422   5.619   5.371  1.00  0.46           O  
HETATM  438  O   HOH T 437     -15.669  24.063  41.577  1.00  0.46           O  
HETATM  439  O   HOH T 438       9.820  13.139 -16.948  1.00  0.46           O  
HETATM  440  O   HOH T 439      -6.154  25.203  -7.231  1.00  0.46           O  
HETATM  441  O   HOH T 440      -3.600   0.859  18.751  1.00  0.46           O  
HETATM  442  O   HOH T 441      -2.885   1.845   9.581  1.00  0.46           O  
HETATM  443  O   HOH T 442      -6.471  -2.672 -10.994  1.00  0.46           O  
HETATM  444  O   HOH T 443      12.163  12.306 -15.861  1.00  0.46           O  
HETATM  445  O   HOH T 444      10.419  28.323  13.539  1.00  0.46           O  
HETATM  446  O   HOH T 445       6.793   8.093  -1.635  1.00  0.46           O  
HETATM  447  O   HOH T 446       4.010   5.618 -13.729  1.00  0.46           O  
HETATM  448  O   HOH T 447     -14.200  31.513  24.576  1.00  0.46           O  
HETATM  449  O   HOH T 448     -20.909  10.723 -10.225  1.00  0.46           O  
HETATM  450  O   HOH T 449     -25.046  15.312  14.492  1.00  0.46           O  
HETATM  451  O   HOH T 450      13.794  32.185 -11.093  1.00  0.46           O  
HETATM  452  O   HOH T 451       9.031  21.532  39.578  1.00  0.46           O  
HETATM  453  O   HOH T 452     -17.965  25.000  34.848  1.00  0.46           O  
HETATM  454  O   HOH T 453      10.580  -2.098  13.820  1.00  0.46           O  
HETATM  455  O   HOH T 454     -23.479  16.724  16.304  1.00  0.46           O  
HETATM  456  O   HOH T 455      -8.622   3.183  17.780  1.00  0.47           O  
HETATM  457  O   HOH T 456     -10.876  32.193  18.903  1.00  0.47           O  
HETATM  458  O   HOH T 457       9.186  19.353  41.259  1.00  0.47           O  
HETATM  459  O   HOH T 458      -9.265  36.277   3.386  1.00  0.47           O  
HETATM  460  O   HOH T 459      -6.116   6.711 -17.687  1.00  0.47           O  
HETATM  461  O   HOH T 460      22.660   6.391  -9.695  1.00  0.47           O  
HETATM  462  O   HOH T 461      -4.528   0.900 -17.130  1.00  0.47           O  
HETATM  463  O   HOH T 462      -3.297  -0.619  14.616  1.00  0.47           O  
HETATM  464  O   HOH T 463       8.116  17.469  39.641  1.00  0.47           O  
HETATM  465  O   HOH T 464      24.796  31.535  -8.287  1.00  0.47           O  
HETATM  466  O   HOH T 465      -0.678  33.257  27.463  1.00  0.47           O  
HETATM  467  O   HOH T 466     -12.351  30.059  41.378  1.00  0.47           O  
HETATM  468  O   HOH T 467      -2.755   2.168  26.054  1.00  0.47           O  
HETATM  469  O   HOH T 468      -9.134   4.030  15.116  1.00  0.47           O  
HETATM  470  O   HOH T 469      17.922  25.810  20.870  1.00  0.47           O  
HETATM  471  O   HOH T 470       9.398  29.389  29.800  1.00  0.47           O  
HETATM  472  O   HOH T 471      12.509  15.170  37.783  1.00  0.47           O  
HETATM  473  O   HOH T 472      -5.512  -2.041   4.932  1.00  0.47           O  
HETATM  474  O   HOH T 473      -6.390  38.363  22.163  1.00  0.47           O  
HETATM  475  O   HOH T 474     -14.476  28.376  41.942  1.00  0.47           O  
HETATM  476  O   HOH T 475      -9.819  26.740  52.179  1.00  0.47           O  
HETATM  477  O   HOH T 476       7.388   8.890  -6.927  1.00  0.47           O  
HETATM  478  O   HOH T 477      -3.640  33.394   9.576  1.00  0.47           O  
HETATM  479  O   HOH T 478      11.487  33.510 -11.589  1.00  0.47           O  
HETATM  480  O   HOH T 479     -10.069  35.032  23.890  1.00  0.47           O  
HETATM  481  O   HOH T 480      11.417  24.159  34.457  1.00  0.47           O  
HETATM  482  O   HOH T 481       2.020  12.440 -15.504  1.00  0.47           O  
HETATM  483  O   HOH T 482      29.940  27.800  12.919  1.00  0.48           O  
HETATM  484  O   HOH T 483      20.381  26.098  22.027  1.00  0.48           O  
HETATM  485  O   HOH T 484     -13.873  17.991  -9.175  1.00  0.48           O  
HETATM  486  O   HOH T 485      -1.359  33.020  36.052  1.00  0.48           O  
HETATM  487  O   HOH T 486       0.365  37.721  48.220  1.00  0.48           O  
HETATM  488  O   HOH T 487     -27.796  11.406   7.046  1.00  0.48           O  
HETATM  489  O   HOH T 488      -0.177  34.629  24.868  1.00  0.48           O  
HETATM  490  O   HOH T 489       7.408   7.824  17.384  1.00  0.48           O  
HETATM  491  O   HOH T 490      34.625   9.076  -6.419  1.00  0.48           O  
HETATM  492  O   HOH T 491       5.717  36.434   3.792  1.00  0.48           O  
HETATM  493  O   HOH T 492       0.620  38.554  -1.887  1.00  0.48           O  
HETATM  494  O   HOH T 493      -6.457   0.256  29.329  1.00  0.48           O  
HETATM  495  O   HOH T 494      -0.541  13.678 -15.375  1.00  0.48           O  
HETATM  496  O   HOH T 495     -11.800  32.368  16.296  1.00  0.48           O  
HETATM  497  O   HOH T 496       7.668  36.760  -8.298  1.00  0.48           O  
HETATM  498  O   HOH T 497     -11.958   3.920   9.649  1.00  0.48           O  
HETATM  499  O   HOH T 498     -17.222  23.484  24.329  1.00  0.48           O  
HETATM  500  O   HOH T 499      21.914  37.695   1.077  1.00  0.48           O  
HETATM  501  O   HOH T 500       1.405  12.772  42.121  1.00  0.48           O  
HETATM  502  O   HOH T 501       3.279  34.320  -5.568  1.00  0.48           O  
HETATM  503  O   HOH T 502      -4.991   1.373  23.325  1.00  0.48           O  
HETATM  504  O   HOH T 503      10.591  15.841 -17.053  1.00  0.48           O  
HETATM  505  O   HOH T 504      25.730   8.114  -8.171  1.00  0.48           O  
HETATM  506  O   HOH T 505      -8.760  26.909  -3.641  1.00  0.48           O  
HETATM  507  O   HOH T 506      -0.870  12.936  43.790  1.00  0.49           O  
HETATM  508  O   HOH T 507     -10.768   5.546  34.848  1.00  0.49           O  
HETATM  509  O   HOH T 508     -20.989  14.623  -1.621  1.00  0.49           O  
HETATM  510  O   HOH T 509       9.315  42.663   2.692  1.00  0.49           O  
HETATM  511  O   HOH T 510       2.728  12.711  30.819  1.00  0.49           O  
HETATM  512  O   HOH T 511      23.076  -3.512  28.664  1.00  0.49           O  
HETATM  513  O   HOH T 512       7.430   3.296   8.960  1.00  0.49           O  
HETATM  514  O   HOH T 513      -6.412   9.968  45.597  1.00  0.49           O  
HETATM  515  O   HOH T 514       5.628  35.864  16.995  1.00  0.49           O  
HETATM  516  O   HOH T 515     -13.728  31.588  27.342  1.00  0.49           O  
HETATM  517  O   HOH T 516      14.342  11.149 -14.609  1.00  0.49           O  
HETATM  518  O   HOH T 517      11.422  30.991 -10.210  1.00  0.49           O  
HETATM  519  O   HOH T 518       2.318  14.036  39.743  1.00  0.49           O  
HETATM  520  O   HOH T 519     -19.301  15.999  19.535  1.00  0.49           O  
HETATM  521  O   HOH T 520      24.226  26.660  -7.162  1.00  0.49           O  
HETATM  522  O   HOH T 521      24.719  14.282 -11.144  1.00  0.49           O  
HETATM  523  O   HOH T 522      19.336  29.753  -9.075  1.00  0.49           O  
HETATM  524  O   HOH T 523     -19.856  10.848  -7.660  1.00  0.49           O  
HETATM  525  O   HOH T 524       4.129  36.681   6.101  1.00  0.49           O  
HETATM  526  O   HOH T 525      21.152  29.936  -7.015  1.00  0.49           O  
HETATM  527  O   HOH T 526      -7.128  31.354   7.417  1.00  0.49           O  
HETATM  528  O   HOH T 527     -16.077  31.753  49.580  1.00  0.49           O  
HETATM  529  O   HOH T 528     -16.586  18.172  -8.893  1.00  0.49           O  
HETATM  530  O   HOH T 529     -18.041  22.751  41.414  1.00  0.49           O  
HETATM  531  O   HOH T 530      10.249  33.248  29.225  1.00  0.49           O  
HETATM  532  O   HOH T 531      21.971  39.631  -3.302  1.00  0.49           O  
HETATM  533  O   HOH T 532      37.844  14.337   6.785  1.00  0.49           O  
HETATM  534  O   HOH T 533      26.447   4.173  23.471  1.00  0.49           O  
HETATM  535  O   HOH T 534       9.143  -7.525  33.306  1.00  0.49           O  
HETATM  536  O   HOH T 535      11.182  -0.300  18.257  1.00  0.49           O  
HETATM  537  O   HOH T 536     -17.467  14.810 -15.397  1.00  0.50           O  
HETATM  538  O   HOH T 537       8.979  16.831  42.233  1.00  0.50           O  
HETATM  539  O   HOH T 538      16.823  38.980  -1.268  1.00  0.50           O  
HETATM  540  O   HOH T 539      11.178  -0.459   7.562  1.00  0.50           O  
HETATM  541  O   HOH T 540      -0.079   0.734  -0.821  1.00  0.50           O  
HETATM  542  O   HOH T 541     -17.885  18.340  -2.842  1.00  0.50           O  
HETATM  543  O   HOH T 542       6.604  40.994  19.293  1.00  0.50           O  
HETATM  544  O   HOH T 543      15.766  35.032  -8.694  1.00  0.50           O  
HETATM  545  O   HOH T 544     -14.657  28.963  44.630  1.00  0.50           O  
HETATM  546  O   HOH T 545     -18.209  17.520 -11.053  1.00  0.50           O  
HETATM  547  O   HOH T 546      32.445  21.639   3.308  1.00  0.50           O  
HETATM  548  O   HOH T 547       6.230  18.951  22.859  1.00  0.50           O  
HETATM  549  O   HOH T 548     -16.094  26.501  40.699  1.00  0.50           O  
HETATM  550  O   HOH T 549     -18.616  29.395  11.868  1.00  0.50           O  
HETATM  551  O   HOH T 550      -4.898   1.021  16.246  1.00  0.50           O  
HETATM  552  O   HOH T 551      -6.533   1.386  40.246  1.00  0.50           O  
HETATM  553  O   HOH T 552     -18.592  27.374  13.897  1.00  0.50           O  
HETATM  554  O   HOH T 553      -8.137   9.789  33.419  1.00  0.50           O  
HETATM  555  O   HOH T 554      11.399  30.806  28.407  1.00  0.50           O  
HETATM  556  O   HOH T 555     -12.300  18.087 -11.484  1.00  0.50           O  
HETATM  557  O   HOH T 556       1.638  26.812  44.610  1.00  0.50           O  
HETATM  558  O   HOH T 557      -8.913   3.894  12.392  1.00  0.50           O  
HETATM  559  O   HOH T 558     -28.441  16.203   3.575  1.00  0.50           O  
HETATM  560  O   HOH T 559     -24.017  18.558   6.719  1.00  0.50           O  
HETATM  561  O   HOH T 560      25.087  35.633   2.363  1.00  0.50           O  
HETATM  562  O   HOH T 561       8.944  29.801  -9.391  1.00  0.51           O  
HETATM  563  O   HOH T 562      -7.558   0.560  22.582  1.00  0.51           O  
HETATM  564  O   HOH T 563      -5.622   0.998  20.636  1.00  0.51           O  
HETATM  565  O   HOH T 564     -18.735  12.391  -9.685  1.00  0.51           O  
HETATM  566  O   HOH T 565     -16.601  18.598  40.424  1.00  0.51           O  
HETATM  567  O   HOH T 566     -25.423   7.283   1.586  1.00  0.51           O  
HETATM  568  O   HOH T 567      21.952  21.417  23.339  1.00  0.51           O  
HETATM  569  O   HOH T 568      -6.463   4.914  -3.268  1.00  0.51           O  
HETATM  570  O   HOH T 569       2.236  35.333  46.177  1.00  0.51           O  
HETATM  571  O   HOH T 570       5.555  33.844  37.419  1.00  0.51           O  
HETATM  572  O   HOH T 571      20.875  10.658  24.207  1.00  0.51           O  
HETATM  573  O   HOH T 572      -8.314   1.394  19.964  1.00  0.51           O  
HETATM  574  O   HOH T 573      20.402  27.422  -5.928  1.00  0.51           O  
HETATM  575  O   HOH T 574      -6.619   0.280   5.753  1.00  0.51           O  
HETATM  576  O   HOH T 575     -24.607  14.632   0.423  1.00  0.51           O  
HETATM  577  O   HOH T 576      13.173  -4.242  16.765  1.00  0.51           O  
HETATM  578  O   HOH T 577     -16.982  29.013  15.592  1.00  0.51           O  
HETATM  579  O   HOH T 578      20.175  31.897   6.446  1.00  0.51           O  
HETATM  580  O   HOH T 579      29.367  24.820   1.742  1.00  0.51           O  
HETATM  581  O   HOH T 580      -8.376  23.204  45.798  1.00  0.51           O  
HETATM  582  O   HOH T 581      23.229  -1.016   0.603  1.00  0.51           O  
HETATM  583  O   HOH T 582     -18.792   8.939  -0.862  1.00  0.52           O  
HETATM  584  O   HOH T 583      -3.896   3.319  -5.604  1.00  0.52           O  
HETATM  585  O   HOH T 584       2.960  39.246   6.508  1.00  0.52           O  
HETATM  586  O   HOH T 585      10.954  28.303  16.264  1.00  0.52           O  
HETATM  587  O   HOH T 586      -0.786  38.432  -4.106  1.00  0.52           O  
HETATM  588  O   HOH T 587       7.793  18.107  24.104  1.00  0.52           O  
HETATM  589  O   HOH T 588      -9.013  19.402  -8.109  1.00  0.52           O  
HETATM  590  O   HOH T 589      21.713  39.747  -0.727  1.00  0.52           O  
HETATM  591  O   HOH T 590      -0.769  38.834  46.090  1.00  0.52           O  
HETATM  592  O   HOH T 591      -4.867  33.868  -4.143  1.00  0.52           O  
HETATM  593  O   HOH T 592      -3.340  19.337 -14.744  1.00  0.52           O  
HETATM  594  O   HOH T 593     -23.830  26.375   7.446  1.00  0.52           O  
HETATM  595  O   HOH T 594      29.309  -1.817   3.932  1.00  0.52           O  
HETATM  596  O   HOH T 595      -9.868  23.573  49.677  1.00  0.52           O  
HETATM  597  O   HOH T 596      -7.807   4.718 -18.790  1.00  0.52           O  
HETATM  598  O   HOH T 597     -15.006   5.528   5.890  1.00  0.52           O  
HETATM  599  O   HOH T 598      16.663  30.024  -9.718  1.00  0.52           O  
HETATM  600  O   HOH T 599       1.661   2.541  37.661  1.00  0.52           O  
HETATM  601  O   HOH T 600      15.158  26.693  18.578  1.00  0.52           O  
HETATM  602  O   HOH T 601      35.218  17.049   6.224  1.00  0.52           O  
HETATM  603  O   HOH T 602      -1.475   1.660 -14.776  1.00  0.52           O  
HETATM  604  O   HOH T 603     -30.231  13.482   8.833  1.00  0.52           O  
HETATM  605  O   HOH T 604       1.232  15.258   7.513  1.00  0.52           O  
HETATM  606  O   HOH T 605       9.990  30.061  11.423  1.00  0.53           O  
HETATM  607  O   HOH T 606      11.470  26.918  39.002  1.00  0.53           O  
HETATM  608  O   HOH T 607       1.718  36.329  32.694  1.00  0.53           O  
HETATM  609  O   HOH T 608      -7.219   1.431  42.961  1.00  0.53           O  
HETATM  610  O   HOH T 609      11.228  -2.188  16.504  1.00  0.53           O  
HETATM  611  O   HOH T 610      -0.615  -3.133   0.310  1.00  0.53           O  
HETATM  612  O   HOH T 611      20.267  25.739  19.259  1.00  0.53           O  
HETATM  613  O   HOH T 612      12.458  33.826  25.843  1.00  0.53           O  
HETATM  614  O   HOH T 613       5.274  37.703  -7.059  1.00  0.53           O  
HETATM  615  O   HOH T 614      32.418  28.160   8.255  1.00  0.53           O  
HETATM  616  O   HOH T 615     -11.474   4.952  41.996  1.00  0.53           O  
HETATM  617  O   HOH T 616     -22.985   8.700   1.400  1.00  0.53           O  
HETATM  618  O   HOH T 617      22.370  35.697   2.722  1.00  0.53           O  
HETATM  619  O   HOH T 618     -17.978  18.568  -5.647  1.00  0.53           O  
HETATM  620  O   HOH T 619      13.198  21.778  36.488  1.00  0.53           O  
HETATM  621  O   HOH T 620      14.742   1.243  19.216  1.00  0.53           O  
HETATM  622  O   HOH T 621     -14.200  34.145  46.023  1.00  0.53           O  
HETATM  623  O   HOH T 622      16.384  13.995 -13.000  1.00  0.53           O  
HETATM  624  O   HOH T 623      31.871   6.916  -3.291  1.00  0.53           O  
HETATM  625  O   HOH T 624     -10.510  17.255  -9.496  1.00  0.53           O  
HETATM  626  O   HOH T 625      11.281   5.583  -2.592  1.00  0.53           O  
HETATM  627  O   HOH T 626      16.985  10.597 -15.472  1.00  0.54           O  
HETATM  628  O   HOH T 627     -20.274  26.994  16.154  1.00  0.54           O  
HETATM  629  O   HOH T 628       3.398   4.831  37.943  1.00  0.54           O  
HETATM  630  O   HOH T 629      16.819   0.558   5.660  1.00  0.54           O  
HETATM  631  O   HOH T 630     -13.769   4.883   0.796  1.00  0.54           O  
HETATM  632  O   HOH T 631      -8.940  19.062  25.138  1.00  0.54           O  
HETATM  633  O   HOH T 632     -25.166  17.995  14.444  1.00  0.54           O  
HETATM  634  O   HOH T 633      30.044  -3.149  11.334  1.00  0.54           O  
HETATM  635  O   HOH T 634     -11.153  24.230  -6.467  1.00  0.54           O  
HETATM  636  O   HOH T 635     -15.734  15.542  35.649  1.00  0.54           O  
HETATM  637  O   HOH T 636     -11.951   2.199 -13.761  1.00  0.54           O  
HETATM  638  O   HOH T 637      -3.921  35.502  35.931  1.00  0.54           O  
HETATM  639  O   HOH T 638      19.534  -0.370  11.126  1.00  0.54           O  
HETATM  640  O   HOH T 639       5.186   4.115  -2.583  1.00  0.54           O  
HETATM  641  O   HOH T 640      -6.603   2.182   2.223  1.00  0.54           O  
HETATM  642  O   HOH T 641     -23.727  21.752  14.692  1.00  0.54           O  
HETATM  643  O   HOH T 642      17.645   8.416  35.651  1.00  0.55           O  
HETATM  644  O   HOH T 643     -14.513   6.469  -1.680  1.00  0.55           O  
HETATM  645  O   HOH T 644     -16.108  16.211  41.958  1.00  0.55           O  
HETATM  646  O   HOH T 645      10.091  32.555  19.558  1.00  0.55           O  
HETATM  647  O   HOH T 646      22.398   0.530   6.612  1.00  0.55           O  
HETATM  648  O   HOH T 647     -22.766  16.478  -0.465  1.00  0.55           O  
HETATM  649  O   HOH T 648      13.722  24.809  24.375  1.00  0.55           O  
HETATM  650  O   HOH T 649      24.634   0.443  22.519  1.00  0.55           O  
HETATM  651  O   HOH T 650      11.455  29.131  37.303  1.00  0.55           O  
HETATM  652  O   HOH T 651      26.716  31.520  10.710  1.00  0.55           O  
HETATM  653  O   HOH T 652     -20.219  17.846  21.197  1.00  0.55           O  
HETATM  654  O   HOH T 653     -13.167   5.741   8.003  1.00  0.56           O  
HETATM  655  O   HOH T 654       9.642  20.247  10.569  1.00  0.56           O  
HETATM  656  O   HOH T 655      16.940   2.403  -4.761  1.00  0.56           O  
HETATM  657  O   HOH T 656      10.596   6.490  36.417  1.00  0.56           O  
HETATM  658  O   HOH T 657      32.075   6.325  -5.817  1.00  0.56           O  
HETATM  659  O   HOH T 658      -4.868  18.764 -17.939  1.00  0.56           O  
HETATM  660  O   HOH T 659      -9.761  34.874  39.678  1.00  0.56           O  
HETATM  661  O   HOH T 660      -1.293   0.981  -7.220  1.00  0.56           O  
HETATM  662  O   HOH T 661       9.736  38.763  -8.151  1.00  0.56           O  
HETATM  663  O   HOH T 662       3.036  16.607  44.603  1.00  0.56           O  
HETATM  664  O   HOH T 663      14.542  23.519 -15.025  1.00  0.56           O  
HETATM  665  O   HOH T 664      20.310  16.285  24.366  1.00  0.57           O  
HETATM  666  O   HOH T 665      -7.451   4.247   0.698  1.00  0.57           O  
HETATM  667  O   HOH T 666      26.266  21.277  -6.235  1.00  0.57           O  
HETATM  668  O   HOH T 667      -8.354  -0.721 -11.186  1.00  0.57           O  
HETATM  669  O   HOH T 668       1.942  19.500  49.739  1.00  0.57           O  
HETATM  670  O   HOH T 669     -13.952  29.183  28.390  1.00  0.57           O  
HETATM  671  O   HOH T 670      26.886  31.801  -6.444  1.00  0.57           O  
HETATM  672  O   HOH T 671     -10.611  21.029  -6.405  1.00  0.57           O  
HETATM  673  O   HOH T 672      13.841  18.548  37.633  1.00  0.57           O  
HETATM  674  O   HOH T 673       8.680  37.714   2.432  1.00  0.58           O  
HETATM  675  O   HOH T 674      -7.313   2.241   3.882  1.00  0.58           O  
HETATM  676  O   HOH T 675       0.972  34.131  12.958  1.00  0.59           O  
HETATM  677  O   HOH T 676      -8.967   6.473 -20.453  1.00  0.59           O  
HETATM  678  O   HOH T 677       0.737  34.113  10.404  1.00  0.59           O  
HETATM  679  O   HOH T 678      12.449  33.155  27.532  1.00  0.59           O  
HETATM  680  O   HOH T 679     -14.401  13.709 -17.040  1.00  0.60           O  
HETATM  681  O   HOH T 680      15.490  -0.242   3.204  1.00  0.60           O  
HETATM  682  O   HOH T 681       5.526   3.292 -13.706  1.00  0.60           O  
HETATM  683  O   HOH T 682      25.124  -4.127  10.392  1.00  0.60           O  
HETATM  684  O   HOH T 683     -27.480  13.039   2.619  1.00  0.60           O  
HETATM  685  O   HOH T 684     -20.960  10.679  24.696  1.00  0.61           O  
HETATM  686  O   HOH T 685      16.396   7.966 -14.751  1.00  0.61           O  
HETATM  687  O   HOH T 686       5.469  20.494  21.173  1.00  0.62           O  
HETATM  688  O   HOH T 687      -9.584  34.544  13.777  1.00  0.64           O  
TER     689      HOH T 687 
