# Supplementary material for: Accurate Prediction of Hydration Sites of Proteins Using Energy Model With Atom Embedding
Source: Front Mol Biosci. 2021 Sep 20;8:756075. doi: 10.3389/fmolb.2021.756075 (PMC8488165; doi:10.3389/fmolb.2021.756075)
Supplement: Supplementary file 1 [file DataSheet1.ZIP › Data Sheet 1/Our_result_pdb/our_dataset_output/1EGU_watersite.pdb]

HEADER                                                        XXXX


JRNL        PMID   -1
HETATM    1  O   HOH T   0      18.560 -17.000  19.397  1.00  0.17           O  
HETATM    2  O   HOH T   1      18.440  -0.511  26.324  1.00  0.17           O  
HETATM    3  O   HOH T   2      -3.993 -31.386  39.636  1.00  0.17           O  
HETATM    4  O   HOH T   3      16.407  -7.527  41.994  1.00  0.17           O  
HETATM    5  O   HOH T   4       4.173 -30.071  28.404  1.00  0.17           O  
HETATM    6  O   HOH T   5      12.419   0.125  13.982  1.00  0.18           O  
HETATM    7  O   HOH T   6       7.847 -12.055  53.231  1.00  0.18           O  
HETATM    8  O   HOH T   7      18.287 -10.409  55.207  1.00  0.18           O  
HETATM    9  O   HOH T   8       0.130 -26.134  38.491  1.00  0.19           O  
HETATM   10  O   HOH T   9      -0.198   4.767  20.812  1.00  0.19           O  
HETATM   11  O   HOH T  10     -12.472 -35.691  65.428  1.00  0.19           O  
HETATM   12  O   HOH T  11       1.413 -26.053  60.440  1.00  0.20           O  
HETATM   13  O   HOH T  12       1.671   2.102  44.952  1.00  0.20           O  
HETATM   14  O   HOH T  13     -13.561  -7.722  56.941  1.00  0.20           O  
HETATM   15  O   HOH T  14     -18.312 -24.643  43.573  1.00  0.20           O  
HETATM   16  O   HOH T  15       9.340 -22.752  44.108  1.00  0.20           O  
HETATM   17  O   HOH T  16      -1.356 -23.512  69.765  1.00  0.20           O  
HETATM   18  O   HOH T  17     -22.656 -16.370  63.518  1.00  0.20           O  
HETATM   19  O   HOH T  18     -10.314 -16.126  24.330  1.00  0.20           O  
HETATM   20  O   HOH T  19     -12.684  -6.624  67.724  1.00  0.20           O  
HETATM   21  O   HOH T  20       9.637 -12.292  60.861  1.00  0.20           O  
HETATM   22  O   HOH T  21       0.919 -13.587  37.195  1.00  0.20           O  
HETATM   23  O   HOH T  22     -12.683 -15.174  25.437  1.00  0.21           O  
HETATM   24  O   HOH T  23      -7.577 -32.332  70.817  1.00  0.21           O  
HETATM   25  O   HOH T  24      18.844   9.749  20.055  1.00  0.21           O  
HETATM   26  O   HOH T  25      13.005 -18.150  57.045  1.00  0.21           O  
HETATM   27  O   HOH T  26     -16.023 -25.580  58.047  1.00  0.21           O  
HETATM   28  O   HOH T  27      -7.130   5.205  26.926  1.00  0.21           O  
HETATM   29  O   HOH T  28      14.371  -9.985  48.705  1.00  0.21           O  
HETATM   30  O   HOH T  29       7.504  -8.418  48.120  1.00  0.22           O  
HETATM   31  O   HOH T  30       4.084 -32.518  15.248  1.00  0.22           O  
HETATM   32  O   HOH T  31       6.462 -35.540  35.775  1.00  0.22           O  
HETATM   33  O   HOH T  32     -14.194 -17.934  70.153  1.00  0.22           O  
HETATM   34  O   HOH T  33       3.267 -38.621  31.540  1.00  0.22           O  
HETATM   35  O   HOH T  34      -0.870 -53.185  55.469  1.00  0.22           O  
HETATM   36  O   HOH T  35      12.210 -11.981  60.105  1.00  0.22           O  
HETATM   37  O   HOH T  36       6.137 -51.133  43.865  1.00  0.23           O  
HETATM   38  O   HOH T  37      14.845 -24.878  22.981  1.00  0.23           O  
HETATM   39  O   HOH T  38       7.144   9.424  13.914  1.00  0.23           O  
HETATM   40  O   HOH T  39     -19.243  -8.670  58.163  1.00  0.23           O  
HETATM   41  O   HOH T  40       8.421 -27.639  11.672  1.00  0.23           O  
HETATM   42  O   HOH T  41      -0.249  -7.966  65.979  1.00  0.23           O  
HETATM   43  O   HOH T  42      -1.043 -43.183  45.784  1.00  0.23           O  
HETATM   44  O   HOH T  43      -3.105 -40.063  39.670  1.00  0.23           O  
HETATM   45  O   HOH T  44      18.934  -0.055  22.213  1.00  0.23           O  
HETATM   46  O   HOH T  45      -0.099 -37.123  47.336  1.00  0.23           O  
HETATM   47  O   HOH T  46      15.553 -34.320  54.091  1.00  0.23           O  
HETATM   48  O   HOH T  47      -2.437  -7.434  46.162  1.00  0.24           O  
HETATM   49  O   HOH T  48       2.898 -17.719  73.176  1.00  0.24           O  
HETATM   50  O   HOH T  49       9.658 -18.364  51.772  1.00  0.24           O  
HETATM   51  O   HOH T  50      -2.249  -2.478   6.544  1.00  0.24           O  
HETATM   52  O   HOH T  51      10.574   6.875  23.460  1.00  0.24           O  
HETATM   53  O   HOH T  52       0.919 -47.860  51.512  1.00  0.24           O  
HETATM   54  O   HOH T  53     -16.150 -11.635  35.347  1.00  0.24           O  
HETATM   55  O   HOH T  54      19.079  -9.769  60.184  1.00  0.24           O  
HETATM   56  O   HOH T  55     -12.016 -23.599  42.482  1.00  0.24           O  
HETATM   57  O   HOH T  56       9.384 -30.625  44.591  1.00  0.24           O  
HETATM   58  O   HOH T  57      -8.150 -14.689  12.955  1.00  0.24           O  
HETATM   59  O   HOH T  58      -7.773  -4.987  35.046  1.00  0.24           O  
HETATM   60  O   HOH T  59      16.584 -27.587  37.347  1.00  0.25           O  
HETATM   61  O   HOH T  60      -5.322 -49.374  51.780  1.00  0.25           O  
HETATM   62  O   HOH T  61      -5.133 -32.540  20.231  1.00  0.25           O  
HETATM   63  O   HOH T  62       6.527 -28.998  29.480  1.00  0.25           O  
HETATM   64  O   HOH T  63      -8.084 -11.262  45.652  1.00  0.25           O  
HETATM   65  O   HOH T  64     -11.793 -15.733  47.617  1.00  0.25           O  
HETATM   66  O   HOH T  65      -4.529  -5.777  39.344  1.00  0.25           O  
HETATM   67  O   HOH T  66       4.173  -5.432  51.868  1.00  0.25           O  
HETATM   68  O   HOH T  67       2.155   0.455  40.516  1.00  0.25           O  
HETATM   69  O   HOH T  68     -13.598  -5.452  37.926  1.00  0.25           O  
HETATM   70  O   HOH T  69     -20.618  -7.294  60.035  1.00  0.25           O  
HETATM   71  O   HOH T  70      -5.475  -5.658  69.871  1.00  0.25           O  
HETATM   72  O   HOH T  71     -19.752 -26.184  34.746  1.00  0.25           O  
HETATM   73  O   HOH T  72     -11.038 -13.194  37.021  1.00  0.25           O  
HETATM   74  O   HOH T  73     -22.777 -23.794  51.816  1.00  0.25           O  
HETATM   75  O   HOH T  74       5.260 -18.980  42.650  1.00  0.25           O  
HETATM   76  O   HOH T  75      19.267 -28.611  47.199  1.00  0.25           O  
HETATM   77  O   HOH T  76      -4.036  12.105  13.562  1.00  0.26           O  
HETATM   78  O   HOH T  77      -7.376  -7.017  12.814  1.00  0.26           O  
HETATM   79  O   HOH T  78       1.862 -23.365  59.971  1.00  0.26           O  
HETATM   80  O   HOH T  79      -7.371 -55.982  52.347  1.00  0.26           O  
HETATM   81  O   HOH T  80       1.890  -8.203   2.411  1.00  0.26           O  
HETATM   82  O   HOH T  81      13.492  -2.386  13.664  1.00  0.26           O  
HETATM   83  O   HOH T  82      -4.000 -16.526  54.339  1.00  0.26           O  
HETATM   84  O   HOH T  83      12.601 -28.769  64.268  1.00  0.26           O  
HETATM   85  O   HOH T  84      19.059 -29.195  41.850  1.00  0.26           O  
HETATM   86  O   HOH T  85      14.847 -17.621  40.210  1.00  0.26           O  
HETATM   87  O   HOH T  86     -16.782 -19.002  69.692  1.00  0.26           O  
HETATM   88  O   HOH T  87       7.954 -21.107  58.880  1.00  0.26           O  
HETATM   89  O   HOH T  88     -14.706 -35.302  63.704  1.00  0.26           O  
HETATM   90  O   HOH T  89     -11.132 -30.494  48.928  1.00  0.27           O  
HETATM   91  O   HOH T  90      -8.042 -16.222  76.170  1.00  0.27           O  
HETATM   92  O   HOH T  91       1.870 -13.844  32.965  1.00  0.27           O  
HETATM   93  O   HOH T  92      10.578 -31.162  42.111  1.00  0.27           O  
HETATM   94  O   HOH T  93      18.078 -32.330  51.180  1.00  0.27           O  
HETATM   95  O   HOH T  94      16.203  -2.111  13.059  1.00  0.27           O  
HETATM   96  O   HOH T  95     -13.222 -30.438  50.667  1.00  0.27           O  
HETATM   97  O   HOH T  96      16.827   9.873  25.025  1.00  0.27           O  
HETATM   98  O   HOH T  97     -15.293  -7.482  68.155  1.00  0.27           O  
HETATM   99  O   HOH T  98      -6.691   1.207  68.318  1.00  0.27           O  
HETATM  100  O   HOH T  99      -8.080 -12.878  19.933  1.00  0.27           O  
HETATM  101  O   HOH T 100     -20.256 -29.809  36.985  1.00  0.27           O  
HETATM  102  O   HOH T 101      18.776 -14.966  21.315  1.00  0.28           O  
HETATM  103  O   HOH T 102      19.963 -23.894  29.168  1.00  0.28           O  
HETATM  104  O   HOH T 103      24.067  -8.189  22.761  1.00  0.28           O  
HETATM  105  O   HOH T 104      20.668 -12.188  21.962  1.00  0.28           O  
HETATM  106  O   HOH T 105      -0.025 -13.944  29.441  1.00  0.28           O  
HETATM  107  O   HOH T 106      17.276 -15.123  63.178  1.00  0.28           O  
HETATM  108  O   HOH T 107     -13.753 -29.262  40.202  1.00  0.28           O  
HETATM  109  O   HOH T 108      19.298  16.242  18.262  1.00  0.28           O  
HETATM  110  O   HOH T 109      13.537 -16.158  60.985  1.00  0.28           O  
HETATM  111  O   HOH T 110      12.321   9.207  10.884  1.00  0.28           O  
HETATM  112  O   HOH T 111      -0.127 -35.685  43.380  1.00  0.28           O  
HETATM  113  O   HOH T 112     -18.581 -28.846  20.328  1.00  0.28           O  
HETATM  114  O   HOH T 113      -5.725 -12.725  21.395  1.00  0.28           O  
HETATM  115  O   HOH T 114       1.837 -15.426  72.042  1.00  0.28           O  
HETATM  116  O   HOH T 115       9.177 -26.499  27.066  1.00  0.28           O  
HETATM  117  O   HOH T 116       5.752 -11.203  51.552  1.00  0.28           O  
HETATM  118  O   HOH T 117      -0.769   0.969  62.186  1.00  0.28           O  
HETATM  119  O   HOH T 118      24.059  -1.229  22.245  1.00  0.29           O  
HETATM  120  O   HOH T 119      15.105 -15.198  44.163  1.00  0.29           O  
HETATM  121  O   HOH T 120     -13.591 -12.434  36.328  1.00  0.29           O  
HETATM  122  O   HOH T 121      -2.222  -7.235  76.515  1.00  0.29           O  
HETATM  123  O   HOH T 122      -4.368 -15.330  45.084  1.00  0.29           O  
HETATM  124  O   HOH T 123      -2.491 -48.190  47.463  1.00  0.29           O  
HETATM  125  O   HOH T 124      -8.649   9.131   9.813  1.00  0.29           O  
HETATM  126  O   HOH T 125       8.295 -24.574  46.008  1.00  0.29           O  
HETATM  127  O   HOH T 126      -0.270   6.438  24.844  1.00  0.29           O  
HETATM  128  O   HOH T 127       9.803 -20.007  30.250  1.00  0.29           O  
HETATM  129  O   HOH T 128       5.019 -35.356  38.186  1.00  0.29           O  
HETATM  130  O   HOH T 129       6.559  18.181  19.989  1.00  0.29           O  
HETATM  131  O   HOH T 130       0.691  -7.588  60.891  1.00  0.29           O  
HETATM  132  O   HOH T 131      15.289 -29.848  38.262  1.00  0.29           O  
HETATM  133  O   HOH T 132     -15.428   3.332  20.866  1.00  0.29           O  
HETATM  134  O   HOH T 133      11.066  -3.482  39.068  1.00  0.29           O  
HETATM  135  O   HOH T 134       9.905 -15.699  71.174  1.00  0.29           O  
HETATM  136  O   HOH T 135     -18.674   1.168  25.696  1.00  0.29           O  
HETATM  137  O   HOH T 136     -20.058   3.037  20.045  1.00  0.29           O  
HETATM  138  O   HOH T 137       8.873   0.993  -1.352  1.00  0.29           O  
HETATM  139  O   HOH T 138       4.711 -11.510   4.223  1.00  0.29           O  
HETATM  140  O   HOH T 139      12.297 -16.963  70.811  1.00  0.29           O  
HETATM  141  O   HOH T 140      -9.327  -8.802  11.901  1.00  0.29           O  
HETATM  142  O   HOH T 141     -11.144 -15.832  44.937  1.00  0.30           O  
HETATM  143  O   HOH T 142     -14.702  -1.109  12.386  1.00  0.30           O  
HETATM  144  O   HOH T 143       8.192 -15.230  28.189  1.00  0.30           O  
HETATM  145  O   HOH T 144     -12.286 -13.859  76.271  1.00  0.30           O  
HETATM  146  O   HOH T 145      15.446 -27.810  56.786  1.00  0.30           O  
HETATM  147  O   HOH T 146       5.115  -1.444  51.814  1.00  0.30           O  
HETATM  148  O   HOH T 147       0.583  -2.327  21.923  1.00  0.30           O  
HETATM  149  O   HOH T 148     -20.463 -20.618  38.151  1.00  0.30           O  
HETATM  150  O   HOH T 149     -15.938 -28.527  32.377  1.00  0.30           O  
HETATM  151  O   HOH T 150      -6.563 -15.314   5.968  1.00  0.30           O  
HETATM  152  O   HOH T 151      11.219  -0.323  -0.311  1.00  0.30           O  
HETATM  153  O   HOH T 152     -17.110 -20.331  23.443  1.00  0.30           O  
HETATM  154  O   HOH T 153     -19.960 -12.884  20.105  1.00  0.30           O  
HETATM  155  O   HOH T 154       9.385   3.310   6.866  1.00  0.30           O  
HETATM  156  O   HOH T 155      -3.472 -11.137  44.244  1.00  0.30           O  
HETATM  157  O   HOH T 156      15.341 -27.472  32.356  1.00  0.30           O  
HETATM  158  O   HOH T 157      10.254 -27.906  29.222  1.00  0.30           O  
HETATM  159  O   HOH T 158      -9.762 -13.893  47.794  1.00  0.30           O  
HETATM  160  O   HOH T 159      18.453  19.045  21.411  1.00  0.30           O  
HETATM  161  O   HOH T 160      -0.761  -4.064  65.269  1.00  0.30           O  
HETATM  162  O   HOH T 161      -4.376   0.950  69.863  1.00  0.30           O  
HETATM  163  O   HOH T 162     -19.421 -33.443  70.983  1.00  0.31           O  
HETATM  164  O   HOH T 163      -9.678  -2.650   8.054  1.00  0.31           O  
HETATM  165  O   HOH T 164      -2.747 -34.752  43.619  1.00  0.31           O  
HETATM  166  O   HOH T 165      15.525 -16.868  51.830  1.00  0.31           O  
HETATM  167  O   HOH T 166      14.445 -22.798  76.059  1.00  0.31           O  
HETATM  168  O   HOH T 167      -6.254  -8.983  75.967  1.00  0.31           O  
HETATM  169  O   HOH T 168      21.372  -1.164  22.332  1.00  0.31           O  
HETATM  170  O   HOH T 169      19.495  -8.796  44.618  1.00  0.31           O  
HETATM  171  O   HOH T 170     -20.567 -31.281  69.599  1.00  0.31           O  
HETATM  172  O   HOH T 171       3.092 -30.204  71.435  1.00  0.31           O  
HETATM  173  O   HOH T 172      -1.981 -18.706  46.617  1.00  0.31           O  
HETATM  174  O   HOH T 173      18.291   8.006  26.247  1.00  0.31           O  
HETATM  175  O   HOH T 174       7.478 -29.390  70.383  1.00  0.31           O  
HETATM  176  O   HOH T 175     -10.861 -14.794  50.096  1.00  0.31           O  
HETATM  177  O   HOH T 176      -4.821  -1.987   5.557  1.00  0.31           O  
HETATM  178  O   HOH T 177     -17.594  -6.591  12.181  1.00  0.31           O  
HETATM  179  O   HOH T 178     -13.875 -17.867  55.587  1.00  0.31           O  
HETATM  180  O   HOH T 179     -13.429 -35.341  70.280  1.00  0.31           O  
HETATM  181  O   HOH T 180       5.491  -6.593  22.795  1.00  0.31           O  
HETATM  182  O   HOH T 181     -17.551 -23.045  39.588  1.00  0.31           O  
HETATM  183  O   HOH T 182       4.964 -21.284  72.180  1.00  0.31           O  
HETATM  184  O   HOH T 183      27.374 -14.764  21.961  1.00  0.31           O  
HETATM  185  O   HOH T 184      11.546 -18.578   2.197  1.00  0.31           O  
HETATM  186  O   HOH T 185       4.492 -23.947  72.762  1.00  0.31           O  
HETATM  187  O   HOH T 186      13.172   7.916  30.794  1.00  0.31           O  
HETATM  188  O   HOH T 187     -20.077 -40.006  60.755  1.00  0.31           O  
HETATM  189  O   HOH T 188      26.915 -11.186  28.400  1.00  0.31           O  
HETATM  190  O   HOH T 189     -20.626 -25.674  44.816  1.00  0.31           O  
HETATM  191  O   HOH T 190      -8.128 -38.754  27.000  1.00  0.31           O  
HETATM  192  O   HOH T 191      14.531 -14.532   8.697  1.00  0.32           O  
HETATM  193  O   HOH T 192       7.025 -17.878  47.529  1.00  0.32           O  
HETATM  194  O   HOH T 193     -12.464  -6.377  74.732  1.00  0.32           O  
HETATM  195  O   HOH T 194       2.631 -54.436  58.053  1.00  0.32           O  
HETATM  196  O   HOH T 195     -16.320 -36.376  68.043  1.00  0.32           O  
HETATM  197  O   HOH T 196     -13.578 -28.747  72.750  1.00  0.32           O  
HETATM  198  O   HOH T 197       8.915   3.492  40.296  1.00  0.32           O  
HETATM  199  O   HOH T 198     -26.145 -11.597  58.583  1.00  0.32           O  
HETATM  200  O   HOH T 199      19.483 -17.231  53.396  1.00  0.32           O  
HETATM  201  O   HOH T 200     -13.009 -44.406  62.362  1.00  0.32           O  
HETATM  202  O   HOH T 201       2.879 -15.707  46.490  1.00  0.32           O  
HETATM  203  O   HOH T 202      -6.555 -34.609  72.103  1.00  0.32           O  
HETATM  204  O   HOH T 203       3.123 -17.995  48.216  1.00  0.33           O  
HETATM  205  O   HOH T 204      -6.121 -13.714   3.806  1.00  0.33           O  
HETATM  206  O   HOH T 205      -8.254  -1.544  65.965  1.00  0.33           O  
HETATM  207  O   HOH T 206       5.336 -23.446   6.738  1.00  0.33           O  
HETATM  208  O   HOH T 207      21.792  -1.879  11.133  1.00  0.33           O  
HETATM  209  O   HOH T 208       6.308 -19.674  74.030  1.00  0.33           O  
HETATM  210  O   HOH T 209       8.975 -13.628  65.645  1.00  0.33           O  
HETATM  211  O   HOH T 210       7.196 -32.323  47.529  1.00  0.33           O  
HETATM  212  O   HOH T 211       7.033 -14.272  46.878  1.00  0.33           O  
HETATM  213  O   HOH T 212      20.175 -12.997  66.553  1.00  0.33           O  
HETATM  214  O   HOH T 213       5.278  -9.060  46.596  1.00  0.33           O  
HETATM  215  O   HOH T 214       6.195  -1.643  16.924  1.00  0.33           O  
HETATM  216  O   HOH T 215      -0.262 -45.840  50.070  1.00  0.33           O  
HETATM  217  O   HOH T 216      -9.437 -42.456  48.655  1.00  0.33           O  
HETATM  218  O   HOH T 217     -24.229 -29.538  46.092  1.00  0.33           O  
HETATM  219  O   HOH T 218     -13.113 -25.903  16.269  1.00  0.33           O  
HETATM  220  O   HOH T 219      -9.058 -20.774  18.428  1.00  0.33           O  
HETATM  221  O   HOH T 220       2.346 -30.899  47.477  1.00  0.33           O  
HETATM  222  O   HOH T 221      13.603 -15.957  53.547  1.00  0.33           O  
HETATM  223  O   HOH T 222     -15.492 -27.284  16.877  1.00  0.33           O  
HETATM  224  O   HOH T 223     -11.273 -31.726  20.408  1.00  0.33           O  
HETATM  225  O   HOH T 224      16.076 -21.115  12.171  1.00  0.33           O  
HETATM  226  O   HOH T 225     -13.526  -5.585  61.456  1.00  0.33           O  
HETATM  227  O   HOH T 226     -12.703   2.674  27.538  1.00  0.33           O  
HETATM  228  O   HOH T 227      -1.170 -14.263  75.384  1.00  0.33           O  
HETATM  229  O   HOH T 228      -8.529  -3.086  54.201  1.00  0.34           O  
HETATM  230  O   HOH T 229      15.294   4.759  33.346  1.00  0.34           O  
HETATM  231  O   HOH T 230     -11.222 -41.961  50.713  1.00  0.34           O  
HETATM  232  O   HOH T 231      11.044 -13.070  31.711  1.00  0.34           O  
HETATM  233  O   HOH T 232       2.038 -27.640  49.764  1.00  0.34           O  
HETATM  234  O   HOH T 233     -15.688 -20.993  71.298  1.00  0.34           O  
HETATM  235  O   HOH T 234       5.709 -36.081  27.255  1.00  0.34           O  
HETATM  236  O   HOH T 235     -13.802 -20.175  47.673  1.00  0.34           O  
HETATM  237  O   HOH T 236      -0.110 -42.137  68.428  1.00  0.34           O  
HETATM  238  O   HOH T 237       6.781 -13.375  37.182  1.00  0.34           O  
HETATM  239  O   HOH T 238      13.859 -41.612  44.715  1.00  0.34           O  
HETATM  240  O   HOH T 239      -9.405 -15.210  20.295  1.00  0.34           O  
HETATM  241  O   HOH T 240     -15.630  -9.787  56.972  1.00  0.34           O  
HETATM  242  O   HOH T 241     -10.669 -31.715  35.521  1.00  0.34           O  
HETATM  243  O   HOH T 242      -9.665 -27.964  39.561  1.00  0.34           O  
HETATM  244  O   HOH T 243     -14.154  -6.057  49.032  1.00  0.34           O  
HETATM  245  O   HOH T 244      -0.565 -10.625  66.762  1.00  0.34           O  
HETATM  246  O   HOH T 245     -23.236   0.198  23.388  1.00  0.34           O  
HETATM  247  O   HOH T 246     -15.908 -47.174  59.662  1.00  0.34           O  
HETATM  248  O   HOH T 247     -26.018 -31.921  61.343  1.00  0.34           O  
HETATM  249  O   HOH T 248     -10.555 -18.598  18.562  1.00  0.35           O  
HETATM  250  O   HOH T 249     -16.869 -35.774  65.393  1.00  0.35           O  
HETATM  251  O   HOH T 250      13.991  12.743  29.657  1.00  0.35           O  
HETATM  252  O   HOH T 251      17.545  -3.210  47.862  1.00  0.35           O  
HETATM  253  O   HOH T 252      -6.234 -16.188  56.005  1.00  0.35           O  
HETATM  254  O   HOH T 253      -8.257  -4.353   9.620  1.00  0.35           O  
HETATM  255  O   HOH T 254      -5.987  -5.734  20.303  1.00  0.35           O  
HETATM  256  O   HOH T 255      -4.528 -14.071  55.508  1.00  0.35           O  
HETATM  257  O   HOH T 256      -5.423 -32.207  72.652  1.00  0.35           O  
HETATM  258  O   HOH T 257       6.150  -9.317   3.705  1.00  0.35           O  
HETATM  259  O   HOH T 258       8.117 -23.432   6.331  1.00  0.35           O  
HETATM  260  O   HOH T 259      -5.038 -34.834  57.080  1.00  0.35           O  
HETATM  261  O   HOH T 260      -3.860  16.266   8.568  1.00  0.35           O  
HETATM  262  O   HOH T 261      13.019 -25.159  76.596  1.00  0.35           O  
HETATM  263  O   HOH T 262     -18.552 -27.593  36.776  1.00  0.35           O  
HETATM  264  O   HOH T 263      18.826  17.653  10.552  1.00  0.35           O  
HETATM  265  O   HOH T 264       9.833 -31.191  17.618  1.00  0.35           O  
HETATM  266  O   HOH T 265      22.773  -5.927  29.490  1.00  0.35           O  
HETATM  267  O   HOH T 266     -23.640  -4.780  23.535  1.00  0.35           O  
HETATM  268  O   HOH T 267      14.131 -13.998  14.473  1.00  0.35           O  
HETATM  269  O   HOH T 268      15.366  -9.174  66.465  1.00  0.35           O  
HETATM  270  O   HOH T 269      15.401 -33.313  40.880  1.00  0.35           O  
HETATM  271  O   HOH T 270     -11.216   1.548   3.363  1.00  0.35           O  
HETATM  272  O   HOH T 271     -22.667   2.631  16.775  1.00  0.35           O  
HETATM  273  O   HOH T 272      17.341 -23.149  29.687  1.00  0.35           O  
HETATM  274  O   HOH T 273      -3.892 -34.598  72.462  1.00  0.35           O  
HETATM  275  O   HOH T 274     -15.051  -4.721  63.563  1.00  0.36           O  
HETATM  276  O   HOH T 275     -19.208 -32.286  36.210  1.00  0.36           O  
HETATM  277  O   HOH T 276       6.547 -14.252  58.192  1.00  0.36           O  
HETATM  278  O   HOH T 277      11.973  -0.149  45.727  1.00  0.36           O  
HETATM  279  O   HOH T 278      -1.586  -7.661  34.215  1.00  0.36           O  
HETATM  280  O   HOH T 279      22.000   3.116  12.433  1.00  0.36           O  
HETATM  281  O   HOH T 280     -17.692 -29.951  53.596  1.00  0.36           O  
HETATM  282  O   HOH T 281      -4.589  -5.118   9.524  1.00  0.36           O  
HETATM  283  O   HOH T 282       4.320  16.632  21.197  1.00  0.36           O  
HETATM  284  O   HOH T 283       1.258 -28.341  70.505  1.00  0.36           O  
HETATM  285  O   HOH T 284      27.541 -11.126  20.325  1.00  0.36           O  
HETATM  286  O   HOH T 285      11.096  -4.893  36.657  1.00  0.36           O  
HETATM  287  O   HOH T 286     -18.460  -0.829  13.876  1.00  0.36           O  
HETATM  288  O   HOH T 287     -18.533 -17.572  43.715  1.00  0.36           O  
HETATM  289  O   HOH T 288       8.930 -49.387  62.132  1.00  0.36           O  
HETATM  290  O   HOH T 289     -16.087 -33.582  31.056  1.00  0.36           O  
HETATM  291  O   HOH T 290      13.073  -3.157  37.165  1.00  0.36           O  
HETATM  292  O   HOH T 291      -2.774  -9.503  32.627  1.00  0.36           O  
HETATM  293  O   HOH T 292     -14.584  -4.089  27.434  1.00  0.36           O  
HETATM  294  O   HOH T 293      -9.712 -33.126  26.347  1.00  0.36           O  
HETATM  295  O   HOH T 294      -8.416  -4.838  19.419  1.00  0.36           O  
HETATM  296  O   HOH T 295      -9.593 -14.042  77.043  1.00  0.36           O  
HETATM  297  O   HOH T 296      12.445 -34.707  32.109  1.00  0.36           O  
HETATM  298  O   HOH T 297      13.572 -29.177  71.448  1.00  0.36           O  
HETATM  299  O   HOH T 298      19.643   4.859  21.721  1.00  0.36           O  
HETATM  300  O   HOH T 299     -24.712 -15.673  55.961  1.00  0.36           O  
HETATM  301  O   HOH T 300     -13.959 -21.755  41.534  1.00  0.36           O  
HETATM  302  O   HOH T 301      19.703  14.721  15.986  1.00  0.36           O  
HETATM  303  O   HOH T 302      -2.896  -6.319  62.812  1.00  0.36           O  
HETATM  304  O   HOH T 303      -8.667 -33.604  43.066  1.00  0.36           O  
HETATM  305  O   HOH T 304      10.090  -8.989   4.104  1.00  0.36           O  
HETATM  306  O   HOH T 305      10.627 -49.462  64.449  1.00  0.36           O  
HETATM  307  O   HOH T 306      12.936 -28.775  61.434  1.00  0.36           O  
HETATM  308  O   HOH T 307     -11.948  -2.267  68.952  1.00  0.36           O  
HETATM  309  O   HOH T 308      14.900  17.251  31.488  1.00  0.37           O  
HETATM  310  O   HOH T 309     -10.436  -5.405  49.303  1.00  0.37           O  
HETATM  311  O   HOH T 310      -5.668 -29.901  20.251  1.00  0.37           O  
HETATM  312  O   HOH T 311      -9.366 -29.838  73.449  1.00  0.37           O  
HETATM  313  O   HOH T 312     -13.145  -8.889  75.691  1.00  0.37           O  
HETATM  314  O   HOH T 313      18.037  -6.015  40.403  1.00  0.37           O  
HETATM  315  O   HOH T 314       4.794  -8.059  49.177  1.00  0.37           O  
HETATM  316  O   HOH T 315     -12.175  -5.321  26.883  1.00  0.37           O  
HETATM  317  O   HOH T 316      14.705 -22.202  29.741  1.00  0.37           O  
HETATM  318  O   HOH T 317      19.490 -13.954  49.991  1.00  0.37           O  
HETATM  319  O   HOH T 318     -11.964 -12.992  55.161  1.00  0.37           O  
HETATM  320  O   HOH T 319     -16.120 -40.853  55.799  1.00  0.37           O  
HETATM  321  O   HOH T 320      -4.863 -20.153  60.600  1.00  0.37           O  
HETATM  322  O   HOH T 321       7.911   5.922  32.370  1.00  0.37           O  
HETATM  323  O   HOH T 322       9.988 -36.426  38.856  1.00  0.37           O  
HETATM  324  O   HOH T 323      -6.198 -38.195  25.119  1.00  0.37           O  
HETATM  325  O   HOH T 324       8.165 -15.484  44.603  1.00  0.37           O  
HETATM  326  O   HOH T 325     -19.633  -8.660  62.184  1.00  0.37           O  
HETATM  327  O   HOH T 326     -22.795 -11.743  69.913  1.00  0.37           O  
HETATM  328  O   HOH T 327     -16.334 -10.901  47.477  1.00  0.37           O  
HETATM  329  O   HOH T 328      13.133 -29.909  31.727  1.00  0.37           O  
HETATM  330  O   HOH T 329       9.724 -49.672  59.464  1.00  0.37           O  
HETATM  331  O   HOH T 330     -15.067   3.478  28.865  1.00  0.37           O  
HETATM  332  O   HOH T 331       5.497 -15.084  60.723  1.00  0.37           O  
HETATM  333  O   HOH T 332      10.807  -8.029  34.991  1.00  0.37           O  
HETATM  334  O   HOH T 333      -5.014  -4.538  35.506  1.00  0.37           O  
HETATM  335  O   HOH T 334      11.814  -0.946  49.398  1.00  0.38           O  
HETATM  336  O   HOH T 335      -2.440  -7.443  20.746  1.00  0.38           O  
HETATM  337  O   HOH T 336     -22.889 -20.151  36.820  1.00  0.38           O  
HETATM  338  O   HOH T 337      -6.308  -4.723  11.596  1.00  0.38           O  
HETATM  339  O   HOH T 338      12.181  -4.436  55.742  1.00  0.38           O  
HETATM  340  O   HOH T 339      -1.111 -33.767  41.617  1.00  0.38           O  
HETATM  341  O   HOH T 340      -7.303  -9.312  41.453  1.00  0.38           O  
HETATM  342  O   HOH T 341       1.908  -8.723  72.539  1.00  0.38           O  
HETATM  343  O   HOH T 342      -8.227 -51.890  63.858  1.00  0.38           O  
HETATM  344  O   HOH T 343      18.043  -4.087   8.696  1.00  0.38           O  
HETATM  345  O   HOH T 344      12.643 -15.315  31.915  1.00  0.38           O  
HETATM  346  O   HOH T 345       3.546  -8.920   4.475  1.00  0.38           O  
HETATM  347  O   HOH T 346       7.438   2.250   0.822  1.00  0.38           O  
HETATM  348  O   HOH T 347     -23.323 -29.460  48.707  1.00  0.38           O  
HETATM  349  O   HOH T 348      11.425 -30.915  70.866  1.00  0.38           O  
HETATM  350  O   HOH T 349       5.890 -10.649  48.801  1.00  0.38           O  
HETATM  351  O   HOH T 350      -3.269  17.425  23.875  1.00  0.38           O  
HETATM  352  O   HOH T 351      11.971 -21.994  70.309  1.00  0.38           O  
HETATM  353  O   HOH T 352       3.361 -21.988   5.185  1.00  0.38           O  
HETATM  354  O   HOH T 353     -20.917 -21.062  23.300  1.00  0.38           O  
HETATM  355  O   HOH T 354      -8.067  -3.291  32.817  1.00  0.38           O  
HETATM  356  O   HOH T 355       8.858 -37.018  31.403  1.00  0.38           O  
HETATM  357  O   HOH T 356       2.797 -34.286  23.619  1.00  0.38           O  
HETATM  358  O   HOH T 357      19.756  -6.517  70.294  1.00  0.38           O  
HETATM  359  O   HOH T 358       3.603 -46.024  69.334  1.00  0.38           O  
HETATM  360  O   HOH T 359      19.479  -3.177  11.716  1.00  0.38           O  
HETATM  361  O   HOH T 360      20.013 -31.078  46.056  1.00  0.38           O  
HETATM  362  O   HOH T 361      25.260 -14.194  17.830  1.00  0.38           O  
HETATM  363  O   HOH T 362       3.381  -2.020  53.906  1.00  0.38           O  
HETATM  364  O   HOH T 363     -18.379  -9.482  15.997  1.00  0.38           O  
HETATM  365  O   HOH T 364      12.692  13.691  13.538  1.00  0.38           O  
HETATM  366  O   HOH T 365     -26.156 -18.705  29.006  1.00  0.38           O  
HETATM  367  O   HOH T 366      17.365 -27.042  41.382  1.00  0.38           O  
HETATM  368  O   HOH T 367       3.824 -48.707  69.025  1.00  0.38           O  
HETATM  369  O   HOH T 368     -13.976 -33.998  21.883  1.00  0.38           O  
HETATM  370  O   HOH T 369      -3.442  -5.675  33.503  1.00  0.38           O  
HETATM  371  O   HOH T 370     -10.745 -33.743  18.463  1.00  0.38           O  
HETATM  372  O   HOH T 371     -16.354 -20.265  60.280  1.00  0.38           O  
HETATM  373  O   HOH T 372       4.389 -17.121  44.531  1.00  0.38           O  
HETATM  374  O   HOH T 373       0.013 -27.774   5.493  1.00  0.38           O  
HETATM  375  O   HOH T 374     -10.070  -0.524  67.833  1.00  0.38           O  
HETATM  376  O   HOH T 375      12.860 -34.107  65.602  1.00  0.38           O  
HETATM  377  O   HOH T 376     -21.009   1.482  24.349  1.00  0.39           O  
HETATM  378  O   HOH T 377     -13.874 -35.253  24.279  1.00  0.39           O  
HETATM  379  O   HOH T 378       7.227 -53.774  43.796  1.00  0.39           O  
HETATM  380  O   HOH T 379     -10.392 -33.594  63.009  1.00  0.39           O  
HETATM  381  O   HOH T 380      -7.955 -39.831  44.003  1.00  0.39           O  
HETATM  382  O   HOH T 381      12.666 -19.595  71.459  1.00  0.39           O  
HETATM  383  O   HOH T 382     -15.839  -6.149  72.390  1.00  0.39           O  
HETATM  384  O   HOH T 383      -9.585 -55.893  58.914  1.00  0.39           O  
HETATM  385  O   HOH T 384      -1.553 -28.355  70.575  1.00  0.39           O  
HETATM  386  O   HOH T 385       0.467 -56.162  50.867  1.00  0.39           O  
HETATM  387  O   HOH T 386     -28.604 -18.933  24.276  1.00  0.39           O  
HETATM  388  O   HOH T 387      25.390  -6.781  25.438  1.00  0.39           O  
HETATM  389  O   HOH T 388       8.024 -38.534  33.509  1.00  0.39           O  
HETATM  390  O   HOH T 389     -15.538 -33.841  44.351  1.00  0.39           O  
HETATM  391  O   HOH T 390      16.609 -16.092  31.660  1.00  0.39           O  
HETATM  392  O   HOH T 391       0.053 -55.039  57.204  1.00  0.39           O  
HETATM  393  O   HOH T 392       0.253 -43.814  48.301  1.00  0.39           O  
HETATM  394  O   HOH T 393      15.227 -21.724  54.793  1.00  0.39           O  
HETATM  395  O   HOH T 394       1.835 -43.895  69.141  1.00  0.39           O  
HETATM  396  O   HOH T 395      -2.210  -9.741  30.001  1.00  0.39           O  
HETATM  397  O   HOH T 396      16.759 -13.951  42.218  1.00  0.39           O  
HETATM  398  O   HOH T 397       4.797 -30.701  10.530  1.00  0.39           O  
HETATM  399  O   HOH T 398      -9.006   0.188   2.486  1.00  0.39           O  
HETATM  400  O   HOH T 399      10.200   1.940   0.889  1.00  0.39           O  
HETATM  401  O   HOH T 400       2.196  -9.916  35.600  1.00  0.39           O  
HETATM  402  O   HOH T 401       0.904  -0.167  60.284  1.00  0.39           O  
HETATM  403  O   HOH T 402       9.293 -25.614  75.235  1.00  0.39           O  
HETATM  404  O   HOH T 403      21.051   9.562  21.736  1.00  0.39           O  
HETATM  405  O   HOH T 404      -2.703 -45.511  70.351  1.00  0.39           O  
HETATM  406  O   HOH T 405       1.316 -13.619  27.059  1.00  0.39           O  
HETATM  407  O   HOH T 406      17.650  -1.164  67.028  1.00  0.39           O  
HETATM  408  O   HOH T 407      13.096 -34.078  39.429  1.00  0.39           O  
HETATM  409  O   HOH T 408       9.743 -42.283  67.770  1.00  0.39           O  
HETATM  410  O   HOH T 409       7.654 -11.669  62.624  1.00  0.39           O  
HETATM  411  O   HOH T 410      14.963 -13.855   6.165  1.00  0.39           O  
HETATM  412  O   HOH T 411      19.279 -12.899  41.390  1.00  0.39           O  
HETATM  413  O   HOH T 412     -17.785 -38.657  55.851  1.00  0.39           O  
HETATM  414  O   HOH T 413      -1.711 -54.350  50.456  1.00  0.39           O  
HETATM  415  O   HOH T 414      -8.737  -7.483  40.180  1.00  0.39           O  
HETATM  416  O   HOH T 415      -9.509   2.780   1.459  1.00  0.39           O  
HETATM  417  O   HOH T 416     -10.076  -7.649  52.145  1.00  0.40           O  
HETATM  418  O   HOH T 417      -3.032 -37.184  34.555  1.00  0.40           O  
HETATM  419  O   HOH T 418      -3.250 -48.373  50.124  1.00  0.40           O  
HETATM  420  O   HOH T 419      -3.278 -28.380   8.911  1.00  0.40           O  
HETATM  421  O   HOH T 420     -14.885 -43.372  56.249  1.00  0.40           O  
HETATM  422  O   HOH T 421      14.462  10.832  11.309  1.00  0.40           O  
HETATM  423  O   HOH T 422      13.689 -12.861   3.863  1.00  0.40           O  
HETATM  424  O   HOH T 423     -23.662 -14.549  67.267  1.00  0.40           O  
HETATM  425  O   HOH T 424     -22.789 -27.616  27.711  1.00  0.40           O  
HETATM  426  O   HOH T 425     -21.878  -5.582  27.706  1.00  0.40           O  
HETATM  427  O   HOH T 426      14.226 -17.636  31.561  1.00  0.40           O  
HETATM  428  O   HOH T 427     -17.530   3.124  19.073  1.00  0.40           O  
HETATM  429  O   HOH T 428     -16.254  -4.821  50.530  1.00  0.40           O  
HETATM  430  O   HOH T 429      20.129 -10.320  42.298  1.00  0.40           O  
HETATM  431  O   HOH T 430      -3.564  14.464  12.177  1.00  0.40           O  
HETATM  432  O   HOH T 431      -1.606 -26.764   7.454  1.00  0.40           O  
HETATM  433  O   HOH T 432       1.594   1.594  58.323  1.00  0.40           O  
HETATM  434  O   HOH T 433       3.348 -19.433   3.609  1.00  0.40           O  
HETATM  435  O   HOH T 434       8.176  12.974  11.217  1.00  0.40           O  
HETATM  436  O   HOH T 435      16.789 -25.703  30.804  1.00  0.40           O  
HETATM  437  O   HOH T 436      14.430 -13.626  60.346  1.00  0.40           O  
HETATM  438  O   HOH T 437      19.253  -9.997  64.413  1.00  0.40           O  
HETATM  439  O   HOH T 438       2.746 -11.517  68.958  1.00  0.40           O  
HETATM  440  O   HOH T 439       5.742 -27.735  73.256  1.00  0.40           O  
HETATM  441  O   HOH T 440      -9.744 -54.064  60.850  1.00  0.40           O  
HETATM  442  O   HOH T 441      24.180 -12.184  16.182  1.00  0.40           O  
HETATM  443  O   HOH T 442      24.680  -9.678  29.050  1.00  0.40           O  
HETATM  444  O   HOH T 443      -8.737 -16.664  18.044  1.00  0.40           O  
HETATM  445  O   HOH T 444     -12.477  -1.820  52.536  1.00  0.40           O  
HETATM  446  O   HOH T 445       9.141  12.100  15.951  1.00  0.40           O  
HETATM  447  O   HOH T 446      19.916 -19.332  46.088  1.00  0.40           O  
HETATM  448  O   HOH T 447     -10.692 -10.998  53.874  1.00  0.40           O  
HETATM  449  O   HOH T 448      -7.611 -33.681  20.760  1.00  0.40           O  
HETATM  450  O   HOH T 449       8.567 -29.281  27.576  1.00  0.40           O  
HETATM  451  O   HOH T 450      -2.148   6.665  26.887  1.00  0.41           O  
HETATM  452  O   HOH T 451       9.113   8.270  32.976  1.00  0.41           O  
HETATM  453  O   HOH T 452     -10.961  10.541  10.774  1.00  0.41           O  
HETATM  454  O   HOH T 453      12.392 -29.241  41.452  1.00  0.41           O  
HETATM  455  O   HOH T 454     -13.634 -34.417  40.252  1.00  0.41           O  
HETATM  456  O   HOH T 455      -6.740 -37.335  71.456  1.00  0.41           O  
HETATM  457  O   HOH T 456     -15.256  -8.666  48.526  1.00  0.41           O  
HETATM  458  O   HOH T 457      15.241 -28.844  41.642  1.00  0.41           O  
HETATM  459  O   HOH T 458     -17.895 -31.523  45.814  1.00  0.41           O  
HETATM  460  O   HOH T 459       3.124  -5.906  21.793  1.00  0.41           O  
HETATM  461  O   HOH T 460     -17.169 -27.210  34.465  1.00  0.41           O  
HETATM  462  O   HOH T 461      -2.380 -39.615  35.727  1.00  0.41           O  
HETATM  463  O   HOH T 462      17.588 -16.299  43.397  1.00  0.41           O  
HETATM  464  O   HOH T 463      -2.623 -25.789  70.968  1.00  0.41           O  
HETATM  465  O   HOH T 464      -4.219  -4.292   6.965  1.00  0.41           O  
HETATM  466  O   HOH T 465     -15.470 -31.782  49.896  1.00  0.41           O  
HETATM  467  O   HOH T 466       7.096 -37.319  29.312  1.00  0.41           O  
HETATM  468  O   HOH T 467      12.061 -31.458  39.674  1.00  0.41           O  
HETATM  469  O   HOH T 468      -0.342  -8.304  42.269  1.00  0.41           O  
HETATM  470  O   HOH T 469     -14.582 -44.741  59.989  1.00  0.41           O  
HETATM  471  O   HOH T 470       9.777 -48.798  67.180  1.00  0.41           O  
HETATM  472  O   HOH T 471       4.140 -11.210  17.031  1.00  0.41           O  
HETATM  473  O   HOH T 472      -5.348  15.274   6.693  1.00  0.41           O  
HETATM  474  O   HOH T 473      -7.587  -1.260  49.418  1.00  0.41           O  
HETATM  475  O   HOH T 474      -2.527 -42.950  69.383  1.00  0.41           O  
HETATM  476  O   HOH T 475      14.017 -34.659  59.158  1.00  0.41           O  
HETATM  477  O   HOH T 476      17.517  10.363  27.699  1.00  0.41           O  
HETATM  478  O   HOH T 477     -10.479 -55.550  56.292  1.00  0.41           O  
HETATM  479  O   HOH T 478       8.287  -1.950  28.531  1.00  0.41           O  
HETATM  480  O   HOH T 479      -0.918 -24.536  73.881  1.00  0.41           O  
HETATM  481  O   HOH T 480      23.781 -22.130  69.523  1.00  0.41           O  
HETATM  482  O   HOH T 481      11.163 -44.766  48.366  1.00  0.41           O  
HETATM  483  O   HOH T 482      16.940  -4.086  55.203  1.00  0.41           O  
HETATM  484  O   HOH T 483     -21.010  -7.701  29.180  1.00  0.41           O  
HETATM  485  O   HOH T 484     -10.024  -7.071  73.765  1.00  0.41           O  
HETATM  486  O   HOH T 485     -22.731 -32.610  67.003  1.00  0.41           O  
HETATM  487  O   HOH T 486       5.765  11.682  11.000  1.00  0.41           O  
HETATM  488  O   HOH T 487      -7.652 -28.442  75.469  1.00  0.42           O  
HETATM  489  O   HOH T 488      17.053  -6.157   4.892  1.00  0.42           O  
HETATM  490  O   HOH T 489      -4.743 -41.700  47.350  1.00  0.42           O  
HETATM  491  O   HOH T 490      17.863  -1.675  64.303  1.00  0.42           O  
HETATM  492  O   HOH T 491      17.071 -18.278  71.494  1.00  0.42           O  
HETATM  493  O   HOH T 492      17.308 -31.928  45.816  1.00  0.42           O  
HETATM  494  O   HOH T 493      16.917  -4.312  11.347  1.00  0.42           O  
HETATM  495  O   HOH T 494      11.820   3.028   5.528  1.00  0.42           O  
HETATM  496  O   HOH T 495      18.581  17.185  15.591  1.00  0.42           O  
HETATM  497  O   HOH T 496     -15.080  -2.847  51.985  1.00  0.42           O  
HETATM  498  O   HOH T 497      20.399  -5.078   9.860  1.00  0.42           O  
HETATM  499  O   HOH T 498      16.127 -31.478  69.404  1.00  0.42           O  
HETATM  500  O   HOH T 499      13.379 -35.488  46.550  1.00  0.42           O  
HETATM  501  O   HOH T 500     -12.949  -6.547  63.947  1.00  0.42           O  
HETATM  502  O   HOH T 501      20.144 -15.255  42.807  1.00  0.42           O  
HETATM  503  O   HOH T 502     -13.428  -4.094  10.124  1.00  0.42           O  
HETATM  504  O   HOH T 503       9.303 -23.624  32.185  1.00  0.42           O  
HETATM  505  O   HOH T 504      -4.695 -44.233  48.531  1.00  0.42           O  
HETATM  506  O   HOH T 505     -13.081 -11.598  74.933  1.00  0.42           O  
HETATM  507  O   HOH T 506      -3.435 -39.877  71.547  1.00  0.42           O  
HETATM  508  O   HOH T 507      -8.877 -41.443  46.119  1.00  0.42           O  
HETATM  509  O   HOH T 508      -5.679  -4.041  22.635  1.00  0.42           O  
HETATM  510  O   HOH T 509       4.998  17.174  23.795  1.00  0.42           O  
HETATM  511  O   HOH T 510      19.676 -16.640  45.267  1.00  0.42           O  
HETATM  512  O   HOH T 511     -25.296 -19.256  58.509  1.00  0.42           O  
HETATM  513  O   HOH T 512       8.443 -34.749  47.581  1.00  0.42           O  
HETATM  514  O   HOH T 513     -25.599 -28.075  24.258  1.00  0.42           O  
HETATM  515  O   HOH T 514      20.312   2.241  21.719  1.00  0.42           O  
HETATM  516  O   HOH T 515      13.724 -12.797  32.294  1.00  0.42           O  
HETATM  517  O   HOH T 516      26.082  -9.115  26.771  1.00  0.42           O  
HETATM  518  O   HOH T 517      13.034   5.401  31.945  1.00  0.42           O  
HETATM  519  O   HOH T 518     -18.051 -36.480  57.539  1.00  0.42           O  
HETATM  520  O   HOH T 519      16.064 -26.591  34.929  1.00  0.42           O  
HETATM  521  O   HOH T 520     -18.743 -13.754  47.722  1.00  0.42           O  
HETATM  522  O   HOH T 521       5.888 -40.581  43.376  1.00  0.42           O  
HETATM  523  O   HOH T 522     -23.381 -34.196  69.299  1.00  0.43           O  
HETATM  524  O   HOH T 523      13.688 -27.904  39.502  1.00  0.43           O  
HETATM  525  O   HOH T 524      19.216  15.288  12.082  1.00  0.43           O  
HETATM  526  O   HOH T 525       7.448 -41.295  64.400  1.00  0.43           O  
HETATM  527  O   HOH T 526     -29.279 -17.571  26.600  1.00  0.43           O  
HETATM  528  O   HOH T 527      13.037 -20.015  54.975  1.00  0.43           O  
HETATM  529  O   HOH T 528      -1.606 -55.942  59.185  1.00  0.43           O  
HETATM  530  O   HOH T 529     -18.589 -19.439  49.351  1.00  0.43           O  
HETATM  531  O   HOH T 530     -21.485 -10.265  28.144  1.00  0.43           O  
HETATM  532  O   HOH T 531       8.379 -21.716  46.435  1.00  0.43           O  
HETATM  533  O   HOH T 532      18.006 -16.073  72.800  1.00  0.43           O  
HETATM  534  O   HOH T 533     -25.066 -31.006  67.225  1.00  0.43           O  
HETATM  535  O   HOH T 534     -17.176   2.880  27.244  1.00  0.43           O  
HETATM  536  O   HOH T 535      -7.791  -4.548  43.103  1.00  0.43           O  
HETATM  537  O   HOH T 536      -8.059   0.057   5.130  1.00  0.43           O  
HETATM  538  O   HOH T 537      -0.121  -6.464  74.901  1.00  0.43           O  
HETATM  539  O   HOH T 538       1.993  11.063   3.510  1.00  0.43           O  
HETATM  540  O   HOH T 539      -3.806 -44.017  45.918  1.00  0.43           O  
HETATM  541  O   HOH T 540      -2.896 -13.289  -0.008  1.00  0.43           O  
HETATM  542  O   HOH T 541      -8.518 -13.135  10.628  1.00  0.43           O  
HETATM  543  O   HOH T 542       2.535 -31.793   9.906  1.00  0.43           O  
HETATM  544  O   HOH T 543      22.297 -19.304  47.514  1.00  0.43           O  
HETATM  545  O   HOH T 544     -10.987   7.925   9.638  1.00  0.43           O  
HETATM  546  O   HOH T 545      20.613  -9.189  69.921  1.00  0.43           O  
HETATM  547  O   HOH T 546     -25.091 -16.728  59.729  1.00  0.43           O  
HETATM  548  O   HOH T 547      12.179 -29.928  18.676  1.00  0.43           O  
HETATM  549  O   HOH T 548      16.404  12.775  28.386  1.00  0.43           O  
HETATM  550  O   HOH T 549      -8.921   1.634  30.039  1.00  0.43           O  
HETATM  551  O   HOH T 550       0.809  -2.828  67.175  1.00  0.43           O  
HETATM  552  O   HOH T 551       7.177 -41.438  67.236  1.00  0.43           O  
HETATM  553  O   HOH T 552       1.534  -0.489  37.997  1.00  0.43           O  
HETATM  554  O   HOH T 553      16.230 -21.591  52.295  1.00  0.43           O  
HETATM  555  O   HOH T 554     -11.268   0.005  70.283  1.00  0.43           O  
HETATM  556  O   HOH T 555     -22.528 -32.166  48.400  1.00  0.43           O  
HETATM  557  O   HOH T 556      16.392  16.615  29.266  1.00  0.43           O  
HETATM  558  O   HOH T 557      10.328   4.979  31.761  1.00  0.43           O  
HETATM  559  O   HOH T 558     -16.948 -21.049  46.211  1.00  0.43           O  
HETATM  560  O   HOH T 559     -14.060 -11.192  55.115  1.00  0.43           O  
HETATM  561  O   HOH T 560       6.576  13.273  15.458  1.00  0.43           O  
HETATM  562  O   HOH T 561      16.161 -36.613  48.418  1.00  0.44           O  
HETATM  563  O   HOH T 562      18.627  -9.779  68.125  1.00  0.44           O  
HETATM  564  O   HOH T 563     -10.738 -32.596  38.173  1.00  0.44           O  
HETATM  565  O   HOH T 564      -0.180 -58.227  48.989  1.00  0.44           O  
HETATM  566  O   HOH T 565       3.402  -4.108  36.075  1.00  0.44           O  
HETATM  567  O   HOH T 566      -4.295 -26.143   7.482  1.00  0.44           O  
HETATM  568  O   HOH T 567      22.566  12.799  23.537  1.00  0.44           O  
HETATM  569  O   HOH T 568      20.023 -28.773  44.522  1.00  0.44           O  
HETATM  570  O   HOH T 569      15.720  -1.497  49.169  1.00  0.44           O  
HETATM  571  O   HOH T 570     -15.632  -4.627  11.752  1.00  0.44           O  
HETATM  572  O   HOH T 571      17.635 -11.213  72.981  1.00  0.44           O  
HETATM  573  O   HOH T 572     -17.234 -11.980  16.284  1.00  0.44           O  
HETATM  574  O   HOH T 573      16.197  17.099  11.437  1.00  0.44           O  
HETATM  575  O   HOH T 574       2.286 -58.274  50.314  1.00  0.44           O  
HETATM  576  O   HOH T 575      19.441  -8.991  30.768  1.00  0.44           O  
HETATM  577  O   HOH T 576      15.545  -4.834   3.087  1.00  0.44           O  
HETATM  578  O   HOH T 577     -22.722 -30.303  30.038  1.00  0.44           O  
HETATM  579  O   HOH T 578     -12.506  -5.970  40.476  1.00  0.44           O  
HETATM  580  O   HOH T 579       9.350 -17.646   0.562  1.00  0.44           O  
HETATM  581  O   HOH T 580      14.103 -26.605  15.615  1.00  0.44           O  
HETATM  582  O   HOH T 581      20.066   1.551  11.138  1.00  0.44           O  
HETATM  583  O   HOH T 582     -11.325  -4.089  38.733  1.00  0.44           O  
HETATM  584  O   HOH T 583     -18.837 -14.805  43.877  1.00  0.44           O  
HETATM  585  O   HOH T 584      17.405 -17.939  41.184  1.00  0.44           O  
HETATM  586  O   HOH T 585      19.142  -9.045  57.428  1.00  0.44           O  
HETATM  587  O   HOH T 586     -16.361 -45.088  57.854  1.00  0.44           O  
HETATM  588  O   HOH T 587      -9.779 -35.377  24.463  1.00  0.44           O  
HETATM  589  O   HOH T 588     -17.133   3.334  24.661  1.00  0.44           O  
HETATM  590  O   HOH T 589      -9.902 -33.453  22.335  1.00  0.44           O  
HETATM  591  O   HOH T 590     -12.641 -31.884  40.118  1.00  0.44           O  
HETATM  592  O   HOH T 591      -6.990  -5.450  40.561  1.00  0.44           O  
HETATM  593  O   HOH T 592     -18.660 -30.778  56.123  1.00  0.44           O  
HETATM  594  O   HOH T 593      11.576 -49.646  61.730  1.00  0.44           O  
HETATM  595  O   HOH T 594       6.411 -44.152  67.353  1.00  0.44           O  
HETATM  596  O   HOH T 595     -22.837 -12.272  26.840  1.00  0.44           O  
HETATM  597  O   HOH T 596     -13.698 -33.269  32.646  1.00  0.44           O  
HETATM  598  O   HOH T 597       6.067 -21.106   1.230  1.00  0.44           O  
HETATM  599  O   HOH T 598      13.858 -19.996   3.896  1.00  0.44           O  
HETATM  600  O   HOH T 599      11.454 -16.105   0.698  1.00  0.44           O  
HETATM  601  O   HOH T 600      26.283  -9.257  18.849  1.00  0.45           O  
HETATM  602  O   HOH T 601      17.801 -33.007  48.490  1.00  0.45           O  
HETATM  603  O   HOH T 602      15.304 -29.185  64.853  1.00  0.45           O  
HETATM  604  O   HOH T 603     -12.987   2.331  30.232  1.00  0.45           O  
HETATM  605  O   HOH T 604     -21.137   3.225  14.436  1.00  0.45           O  
HETATM  606  O   HOH T 605      23.493 -11.918  30.020  1.00  0.45           O  
HETATM  607  O   HOH T 606      17.581  17.262   8.040  1.00  0.45           O  
HETATM  608  O   HOH T 607      -1.023 -40.623  70.489  1.00  0.45           O  
HETATM  609  O   HOH T 608      -7.989 -10.420  10.113  1.00  0.45           O  
HETATM  610  O   HOH T 609      -8.961 -18.867  16.311  1.00  0.45           O  
HETATM  611  O   HOH T 610      -4.850   6.658  27.368  1.00  0.45           O  
HETATM  612  O   HOH T 611       3.427 -30.139  49.887  1.00  0.45           O  
HETATM  613  O   HOH T 612     -19.833 -31.364  47.888  1.00  0.45           O  
HETATM  614  O   HOH T 613     -26.724 -16.188  29.924  1.00  0.45           O  
HETATM  615  O   HOH T 614      18.493 -17.791  11.707  1.00  0.45           O  
HETATM  616  O   HOH T 615      -0.139 -26.505  72.094  1.00  0.45           O  
HETATM  617  O   HOH T 616       7.161 -34.751  64.348  1.00  0.45           O  
HETATM  618  O   HOH T 617      -9.878 -46.046  68.934  1.00  0.45           O  
HETATM  619  O   HOH T 618      26.412 -16.080  19.614  1.00  0.45           O  
HETATM  620  O   HOH T 619      -0.029 -58.630  51.753  1.00  0.45           O  
HETATM  621  O   HOH T 620       6.617 -12.947  28.300  1.00  0.45           O  
HETATM  622  O   HOH T 621      15.256 -20.656  72.148  1.00  0.45           O  
HETATM  623  O   HOH T 622     -23.408 -11.786  67.167  1.00  0.45           O  
HETATM  624  O   HOH T 623       0.877 -30.827  33.371  1.00  0.45           O  
HETATM  625  O   HOH T 624      13.833 -20.208  32.671  1.00  0.45           O  
HETATM  626  O   HOH T 625      26.332  -9.043  24.113  1.00  0.45           O  
HETATM  627  O   HOH T 626       0.016 -40.587  49.229  1.00  0.45           O  
HETATM  628  O   HOH T 627     -16.234 -21.162  20.908  1.00  0.45           O  
HETATM  629  O   HOH T 628      -7.662 -34.857  26.242  1.00  0.45           O  
HETATM  630  O   HOH T 629      -0.845 -38.077  22.639  1.00  0.45           O  
HETATM  631  O   HOH T 630      15.856 -15.740  71.136  1.00  0.45           O  
HETATM  632  O   HOH T 631      15.963  10.754  30.089  1.00  0.45           O  
HETATM  633  O   HOH T 632       4.692  12.276  13.572  1.00  0.45           O  
HETATM  634  O   HOH T 633      11.188  10.509  14.641  1.00  0.45           O  
HETATM  635  O   HOH T 634     -16.343 -18.921  47.901  1.00  0.45           O  
HETATM  636  O   HOH T 635     -20.546 -29.025  28.684  1.00  0.46           O  
HETATM  637  O   HOH T 636      -2.648 -54.348  57.238  1.00  0.46           O  
HETATM  638  O   HOH T 637     -14.537  -1.931  68.060  1.00  0.46           O  
HETATM  639  O   HOH T 638      -0.089  -1.385  65.126  1.00  0.46           O  
HETATM  640  O   HOH T 639      21.947 -21.048  71.352  1.00  0.46           O  
HETATM  641  O   HOH T 640      -5.733 -27.269  77.230  1.00  0.46           O  
HETATM  642  O   HOH T 641      -2.295  -4.774  75.337  1.00  0.46           O  
HETATM  643  O   HOH T 642       9.916 -37.814  41.329  1.00  0.46           O  
HETATM  644  O   HOH T 643       2.521 -15.480  74.758  1.00  0.46           O  
HETATM  645  O   HOH T 644       6.255 -12.336  31.047  1.00  0.46           O  
HETATM  646  O   HOH T 645      -6.562 -31.516  38.601  1.00  0.46           O  
HETATM  647  O   HOH T 646     -15.866  -3.370  72.948  1.00  0.46           O  
HETATM  648  O   HOH T 647     -23.522 -13.034  61.501  1.00  0.46           O  
HETATM  649  O   HOH T 648       3.944 -12.463  27.377  1.00  0.46           O  
HETATM  650  O   HOH T 649      -1.688 -19.516  77.892  1.00  0.46           O  
HETATM  651  O   HOH T 650      -6.207 -17.629  18.798  1.00  0.46           O  
HETATM  652  O   HOH T 651     -14.677 -33.180  57.880  1.00  0.46           O  
HETATM  653  O   HOH T 652     -23.271 -31.967  64.273  1.00  0.46           O  
HETATM  654  O   HOH T 653     -16.043 -29.635  38.571  1.00  0.46           O  
HETATM  655  O   HOH T 654     -23.807  -6.099  25.889  1.00  0.46           O  
HETATM  656  O   HOH T 655       7.394 -14.375  63.606  1.00  0.46           O  
HETATM  657  O   HOH T 656       4.935 -19.331  46.420  1.00  0.46           O  
HETATM  658  O   HOH T 657       1.616  -3.225  69.687  1.00  0.46           O  
HETATM  659  O   HOH T 658     -19.911 -33.342  45.937  1.00  0.46           O  
HETATM  660  O   HOH T 659     -10.161  -4.435  28.461  1.00  0.46           O  
HETATM  661  O   HOH T 660     -18.883 -35.811  67.340  1.00  0.46           O  
HETATM  662  O   HOH T 661       2.719 -12.955  71.398  1.00  0.46           O  
HETATM  663  O   HOH T 662     -21.203  -6.859  57.357  1.00  0.46           O  
HETATM  664  O   HOH T 663       7.631 -38.906  42.104  1.00  0.46           O  
HETATM  665  O   HOH T 664      -0.447 -12.237  25.301  1.00  0.46           O  
HETATM  666  O   HOH T 665     -21.143  -1.480  14.292  1.00  0.46           O  
HETATM  667  O   HOH T 666      14.114 -33.361  68.893  1.00  0.46           O  
HETATM  668  O   HOH T 667     -26.205  -1.476  21.266  1.00  0.47           O  
HETATM  669  O   HOH T 668     -21.882  -8.052  26.554  1.00  0.47           O  
HETATM  670  O   HOH T 669     -15.727 -31.290  32.547  1.00  0.47           O  
HETATM  671  O   HOH T 670     -18.182 -29.836  35.109  1.00  0.47           O  
HETATM  672  O   HOH T 671     -13.778   5.153  17.545  1.00  0.47           O  
HETATM  673  O   HOH T 672      21.563  -7.546   9.954  1.00  0.47           O  
HETATM  674  O   HOH T 673     -19.706 -12.159  73.774  1.00  0.47           O  
HETATM  675  O   HOH T 674       8.694 -13.323  30.195  1.00  0.47           O  
HETATM  676  O   HOH T 675     -18.871   1.834  13.613  1.00  0.47           O  
HETATM  677  O   HOH T 676       7.853 -29.835  13.268  1.00  0.47           O  
HETATM  678  O   HOH T 677       8.924 -29.732  74.681  1.00  0.47           O  
HETATM  679  O   HOH T 678     -21.537 -35.130  67.430  1.00  0.47           O  
HETATM  680  O   HOH T 679      20.254  14.000   9.841  1.00  0.47           O  
HETATM  681  O   HOH T 680      19.315  -3.190  66.103  1.00  0.47           O  
HETATM  682  O   HOH T 681      13.449 -37.920  45.317  1.00  0.47           O  
HETATM  683  O   HOH T 682      18.408  10.107  11.309  1.00  0.47           O  
HETATM  684  O   HOH T 683      23.580  -3.410  30.271  1.00  0.47           O  
HETATM  685  O   HOH T 684       9.824 -30.017  11.336  1.00  0.47           O  
HETATM  686  O   HOH T 685      -6.401 -38.708  41.918  1.00  0.47           O  
HETATM  687  O   HOH T 686      15.321 -33.962  56.774  1.00  0.47           O  
HETATM  688  O   HOH T 687       1.430 -11.075  33.200  1.00  0.47           O  
HETATM  689  O   HOH T 688      15.367 -10.714  33.017  1.00  0.47           O  
HETATM  690  O   HOH T 689       6.553 -12.189  65.120  1.00  0.47           O  
HETATM  691  O   HOH T 690      14.919 -13.216  72.061  1.00  0.47           O  
HETATM  692  O   HOH T 691      22.678   0.657  11.312  1.00  0.47           O  
HETATM  693  O   HOH T 692      -5.948 -40.989  24.102  1.00  0.47           O  
HETATM  694  O   HOH T 693      13.838   9.769   8.723  1.00  0.47           O  
HETATM  695  O   HOH T 694     -21.232  -5.865  24.883  1.00  0.47           O  
HETATM  696  O   HOH T 695      13.978  -9.865  69.054  1.00  0.47           O  
HETATM  697  O   HOH T 696       4.088 -30.476   7.937  1.00  0.47           O  
HETATM  698  O   HOH T 697      20.316 -22.364  37.428  1.00  0.47           O  
HETATM  699  O   HOH T 698      25.028  -4.696  28.387  1.00  0.47           O  
HETATM  700  O   HOH T 699       9.268 -44.795  51.635  1.00  0.47           O  
HETATM  701  O   HOH T 700      10.511 -27.937  75.800  1.00  0.47           O  
HETATM  702  O   HOH T 701     -20.152 -38.258  57.217  1.00  0.47           O  
HETATM  703  O   HOH T 702      21.656  10.311  24.425  1.00  0.47           O  
HETATM  704  O   HOH T 703      13.873 -32.488  31.595  1.00  0.47           O  
HETATM  705  O   HOH T 704      -4.111  -8.754  77.733  1.00  0.48           O  
HETATM  706  O   HOH T 705      -8.096   4.054  29.172  1.00  0.48           O  
HETATM  707  O   HOH T 706      -3.993 -37.435  72.239  1.00  0.48           O  
HETATM  708  O   HOH T 707       4.459 -37.861  29.087  1.00  0.48           O  
HETATM  709  O   HOH T 708      21.027  -9.495  62.363  1.00  0.48           O  
HETATM  710  O   HOH T 709      25.450 -20.259  28.073  1.00  0.48           O  
HETATM  711  O   HOH T 710       7.754 -32.920  72.240  1.00  0.48           O  
HETATM  712  O   HOH T 711      -3.390  14.665  24.398  1.00  0.48           O  
HETATM  713  O   HOH T 712      10.526 -33.006  72.511  1.00  0.48           O  
HETATM  714  O   HOH T 713     -22.549 -15.337  60.033  1.00  0.48           O  
HETATM  715  O   HOH T 714     -14.485 -21.274  22.955  1.00  0.48           O  
HETATM  716  O   HOH T 715     -19.266 -23.648  46.048  1.00  0.48           O  
HETATM  717  O   HOH T 716      -9.753  -0.774  17.538  1.00  0.48           O  
HETATM  718  O   HOH T 717     -12.707   0.197  67.915  1.00  0.48           O  
HETATM  719  O   HOH T 718     -12.205  -9.068  54.601  1.00  0.48           O  
HETATM  720  O   HOH T 719     -16.340  -4.420  70.322  1.00  0.48           O  
HETATM  721  O   HOH T 720     -10.892  -4.840   9.301  1.00  0.48           O  
HETATM  722  O   HOH T 721      14.475 -43.826  62.248  1.00  0.48           O  
HETATM  723  O   HOH T 722     -17.561 -29.117  17.727  1.00  0.48           O  
HETATM  724  O   HOH T 723      -9.335  -3.089  50.311  1.00  0.48           O  
HETATM  725  O   HOH T 724      -4.839 -37.092  36.697  1.00  0.48           O  
HETATM  726  O   HOH T 725      25.392 -18.122  21.155  1.00  0.48           O  
HETATM  727  O   HOH T 726       5.662 -20.976   4.080  1.00  0.48           O  
HETATM  728  O   HOH T 727      -7.693 -17.958  57.630  1.00  0.48           O  
HETATM  729  O   HOH T 728      19.858   7.282  20.494  1.00  0.48           O  
HETATM  730  O   HOH T 729       9.255 -46.540  49.431  1.00  0.48           O  
HETATM  731  O   HOH T 730      17.010 -14.627  51.239  1.00  0.48           O  
HETATM  732  O   HOH T 731     -28.549 -15.368  28.048  1.00  0.48           O  
HETATM  733  O   HOH T 732      -3.205 -12.717  24.539  1.00  0.48           O  
HETATM  734  O   HOH T 733     -21.775   1.806  21.750  1.00  0.48           O  
HETATM  735  O   HOH T 734     -17.213 -33.960  58.264  1.00  0.48           O  
HETATM  736  O   HOH T 735      26.530 -11.744  17.707  1.00  0.48           O  
HETATM  737  O   HOH T 736      -5.763   1.886  50.028  1.00  0.48           O  
HETATM  738  O   HOH T 737      -4.317  -6.470  22.529  1.00  0.48           O  
HETATM  739  O   HOH T 738       8.543 -36.005  27.551  1.00  0.49           O  
HETATM  740  O   HOH T 739     -15.704 -53.807  56.532  1.00  0.49           O  
HETATM  741  O   HOH T 740      15.192 -19.320  53.264  1.00  0.49           O  
HETATM  742  O   HOH T 741     -20.596 -23.346  48.505  1.00  0.49           O  
HETATM  743  O   HOH T 742      16.444   9.924   9.472  1.00  0.49           O  
HETATM  744  O   HOH T 743     -10.444 -15.357  14.578  1.00  0.49           O  
HETATM  745  O   HOH T 744     -16.101 -30.908  64.027  1.00  0.49           O  
HETATM  746  O   HOH T 745      -8.329 -32.307  36.781  1.00  0.49           O  
HETATM  747  O   HOH T 746     -11.419 -28.036  74.231  1.00  0.49           O  
HETATM  748  O   HOH T 747       4.045   6.743  41.408  1.00  0.49           O  
HETATM  749  O   HOH T 748     -24.838 -14.684  63.214  1.00  0.49           O  
HETATM  750  O   HOH T 749     -10.610  -1.784  27.630  1.00  0.49           O  
HETATM  751  O   HOH T 750     -18.156 -20.329  43.786  1.00  0.49           O  
HETATM  752  O   HOH T 751       0.922 -21.096  73.772  1.00  0.49           O  
HETATM  753  O   HOH T 752      -4.562 -12.279   2.058  1.00  0.49           O  
HETATM  754  O   HOH T 753     -11.314  -4.267  51.727  1.00  0.49           O  
HETATM  755  O   HOH T 754     -25.088 -33.749  63.274  1.00  0.49           O  
HETATM  756  O   HOH T 755       1.076  -7.231  63.623  1.00  0.49           O  
HETATM  757  O   HOH T 756      11.697   3.418  40.116  1.00  0.49           O  
HETATM  758  O   HOH T 757     -22.457 -26.024  70.952  1.00  0.49           O  
HETATM  759  O   HOH T 758      12.771 -36.782  38.977  1.00  0.49           O  
HETATM  760  O   HOH T 759      20.149  20.534  23.243  1.00  0.49           O  
HETATM  761  O   HOH T 760      -7.102 -43.228  47.489  1.00  0.49           O  
HETATM  762  O   HOH T 761      16.301 -13.592  32.882  1.00  0.49           O  
HETATM  763  O   HOH T 762     -26.564   3.165  14.902  1.00  0.49           O  
HETATM  764  O   HOH T 763      27.608 -13.664  19.353  1.00  0.49           O  
HETATM  765  O   HOH T 764      22.744   1.162  22.841  1.00  0.49           O  
HETATM  766  O   HOH T 765      15.248 -10.449  71.580  1.00  0.49           O  
HETATM  767  O   HOH T 766     -23.899   2.693  14.331  1.00  0.49           O  
HETATM  768  O   HOH T 767       6.417   8.138   6.156  1.00  0.49           O  
HETATM  769  O   HOH T 768      -7.297 -54.280  59.703  1.00  0.49           O  
HETATM  770  O   HOH T 769       5.648 -31.259  71.538  1.00  0.49           O  
HETATM  771  O   HOH T 770       4.881 -38.438  41.872  1.00  0.49           O  
HETATM  772  O   HOH T 771       4.602  -9.828  27.522  1.00  0.50           O  
HETATM  773  O   HOH T 772       0.807   8.917  47.738  1.00  0.50           O  
HETATM  774  O   HOH T 773     -18.687 -31.625  58.973  1.00  0.50           O  
HETATM  775  O   HOH T 774       0.078 -21.154   4.848  1.00  0.50           O  
HETATM  776  O   HOH T 775      -7.634 -15.140  78.713  1.00  0.50           O  
HETATM  777  O   HOH T 776     -19.737 -10.151  20.107  1.00  0.50           O  
HETATM  778  O   HOH T 777     -24.621  -2.147  23.476  1.00  0.50           O  
HETATM  779  O   HOH T 778       3.360 -37.304  16.241  1.00  0.50           O  
HETATM  780  O   HOH T 779      -9.753  12.090  12.829  1.00  0.50           O  
HETATM  781  O   HOH T 780      15.278 -35.847  39.766  1.00  0.50           O  
HETATM  782  O   HOH T 781      -7.128 -10.719  25.196  1.00  0.50           O  
HETATM  783  O   HOH T 782      -0.851  -1.669  24.251  1.00  0.50           O  
HETATM  784  O   HOH T 783      19.186  -7.660  42.252  1.00  0.50           O  
HETATM  785  O   HOH T 784      19.485 -14.588  52.573  1.00  0.50           O  
HETATM  786  O   HOH T 785      16.231 -18.932  10.464  1.00  0.50           O  
HETATM  787  O   HOH T 786       3.989 -11.112  29.910  1.00  0.50           O  
HETATM  788  O   HOH T 787       5.491 -39.148  32.907  1.00  0.50           O  
HETATM  789  O   HOH T 788     -28.744 -15.323  25.236  1.00  0.50           O  
HETATM  790  O   HOH T 789     -17.820 -38.143  66.417  1.00  0.50           O  
HETATM  791  O   HOH T 790       1.625 -12.194  30.776  1.00  0.50           O  
HETATM  792  O   HOH T 791       2.672 -11.191  73.391  1.00  0.50           O  
HETATM  793  O   HOH T 792     -24.493 -17.140  22.403  1.00  0.50           O  
HETATM  794  O   HOH T 793       7.397  -3.133  37.895  1.00  0.50           O  
HETATM  795  O   HOH T 794       0.967 -13.423  73.754  1.00  0.50           O  
HETATM  796  O   HOH T 795     -14.960 -42.699  63.287  1.00  0.50           O  
HETATM  797  O   HOH T 796       8.590  14.820   7.886  1.00  0.50           O  
HETATM  798  O   HOH T 797     -19.565 -11.437  17.695  1.00  0.50           O  
HETATM  799  O   HOH T 798     -13.516 -36.455  67.931  1.00  0.50           O  
HETATM  800  O   HOH T 799     -14.778  -4.730  67.969  1.00  0.50           O  
HETATM  801  O   HOH T 800       1.162  -4.627  73.163  1.00  0.51           O  
HETATM  802  O   HOH T 801       1.680 -18.225  -1.709  1.00  0.51           O  
HETATM  803  O   HOH T 802      -0.003 -11.617  35.448  1.00  0.51           O  
HETATM  804  O   HOH T 803       7.775 -47.566  68.922  1.00  0.51           O  
HETATM  805  O   HOH T 804      12.187  15.656  11.690  1.00  0.51           O  
HETATM  806  O   HOH T 805     -12.290 -35.369  20.124  1.00  0.51           O  
HETATM  807  O   HOH T 806      -8.460 -17.220  14.031  1.00  0.51           O  
HETATM  808  O   HOH T 807       3.600 -32.222  12.510  1.00  0.51           O  
HETATM  809  O   HOH T 808      12.138   5.782   5.559  1.00  0.51           O  
HETATM  810  O   HOH T 809      21.132  12.694  25.919  1.00  0.51           O  
HETATM  811  O   HOH T 810      11.269   9.654  31.842  1.00  0.51           O  
HETATM  812  O   HOH T 811       6.067 -14.445  32.930  1.00  0.51           O  
HETATM  813  O   HOH T 812      20.404  -9.749  11.073  1.00  0.51           O  
HETATM  814  O   HOH T 813     -12.056  10.188   8.241  1.00  0.51           O  
HETATM  815  O   HOH T 814      -8.101  -1.784  16.708  1.00  0.51           O  
HETATM  816  O   HOH T 815       6.461  -3.742  52.007  1.00  0.51           O  
HETATM  817  O   HOH T 816     -28.902 -17.905  29.327  1.00  0.51           O  
HETATM  818  O   HOH T 817     -16.156  -3.900  30.902  1.00  0.51           O  
HETATM  819  O   HOH T 818     -26.787 -17.119  57.408  1.00  0.51           O  
HETATM  820  O   HOH T 819      -6.297  -5.464  32.794  1.00  0.51           O  
HETATM  821  O   HOH T 820      -2.306  -2.591  21.932  1.00  0.51           O  
HETATM  822  O   HOH T 821     -25.699  -4.071  21.796  1.00  0.51           O  
HETATM  823  O   HOH T 822      12.432 -20.626  30.059  1.00  0.51           O  
HETATM  824  O   HOH T 823       9.537  -4.147  29.399  1.00  0.51           O  
HETATM  825  O   HOH T 824      12.467  -3.723  58.366  1.00  0.51           O  
HETATM  826  O   HOH T 825      21.862  -8.844  46.084  1.00  0.51           O  
HETATM  827  O   HOH T 826      15.097  -7.299  64.328  1.00  0.51           O  
HETATM  828  O   HOH T 827     -16.230 -23.442  42.012  1.00  0.51           O  
HETATM  829  O   HOH T 828      14.702  -4.373  56.855  1.00  0.51           O  
HETATM  830  O   HOH T 829     -11.135  -3.679  43.194  1.00  0.51           O  
HETATM  831  O   HOH T 830      -3.233  -7.258  31.018  1.00  0.51           O  
HETATM  832  O   HOH T 831      -8.080 -13.824   7.911  1.00  0.51           O  
HETATM  833  O   HOH T 832     -15.044  -7.028  74.882  1.00  0.51           O  
HETATM  834  O   HOH T 833       8.239 -51.706  58.133  1.00  0.51           O  
HETATM  835  O   HOH T 834       3.864  18.542   9.529  1.00  0.51           O  
HETATM  836  O   HOH T 835      26.031  -6.593  18.962  1.00  0.52           O  
HETATM  837  O   HOH T 836      12.297  -4.993  31.433  1.00  0.52           O  
HETATM  838  O   HOH T 837     -14.541  -4.905  42.006  1.00  0.52           O  
HETATM  839  O   HOH T 838     -16.916   4.890  15.396  1.00  0.52           O  
HETATM  840  O   HOH T 839      13.745   1.728  39.107  1.00  0.52           O  
HETATM  841  O   HOH T 840      -8.616 -30.472  40.289  1.00  0.52           O  
HETATM  842  O   HOH T 841      -2.227 -20.517  60.307  1.00  0.52           O  
HETATM  843  O   HOH T 842       7.262 -19.326  -0.686  1.00  0.52           O  
HETATM  844  O   HOH T 843      13.845  14.678  31.660  1.00  0.52           O  
HETATM  845  O   HOH T 844       0.559 -36.018  24.068  1.00  0.52           O  
HETATM  846  O   HOH T 845       0.612  -1.528  62.496  1.00  0.52           O  
HETATM  847  O   HOH T 846     -23.080 -28.312  25.115  1.00  0.52           O  
HETATM  848  O   HOH T 847      10.574 -30.612  25.965  1.00  0.52           O  
HETATM  849  O   HOH T 848      23.607 -12.506  67.832  1.00  0.52           O  
HETATM  850  O   HOH T 849      -7.130   1.038  62.669  1.00  0.52           O  
HETATM  851  O   HOH T 850      -5.616  -8.120   8.119  1.00  0.52           O  
HETATM  852  O   HOH T 851     -19.559  -3.266  12.843  1.00  0.52           O  
HETATM  853  O   HOH T 852      -6.556   2.503  70.611  1.00  0.52           O  
HETATM  854  O   HOH T 853      17.882  12.372   9.698  1.00  0.52           O  
HETATM  855  O   HOH T 854     -15.648   3.079  17.137  1.00  0.52           O  
HETATM  856  O   HOH T 855      11.259 -22.519  18.609  1.00  0.52           O  
HETATM  857  O   HOH T 856       0.735  -5.015  22.815  1.00  0.52           O  
HETATM  858  O   HOH T 857     -19.635 -21.059  47.218  1.00  0.52           O  
HETATM  859  O   HOH T 858       0.329 -38.619  25.212  1.00  0.52           O  
HETATM  860  O   HOH T 859      14.838 -28.634  59.314  1.00  0.52           O  
HETATM  861  O   HOH T 860       0.065 -45.179  70.872  1.00  0.52           O  
HETATM  862  O   HOH T 861      14.545  -4.268  54.015  1.00  0.52           O  
HETATM  863  O   HOH T 862       9.145 -30.603  72.222  1.00  0.52           O  
HETATM  864  O   HOH T 863     -11.500 -15.765  78.076  1.00  0.52           O  
HETATM  865  O   HOH T 864      22.091   4.090  20.683  1.00  0.52           O  
HETATM  866  O   HOH T 865      17.132 -13.875   7.996  1.00  0.52           O  
HETATM  867  O   HOH T 866     -25.773   2.202  12.434  1.00  0.52           O  
HETATM  868  O   HOH T 867      -8.228 -35.025  18.419  1.00  0.52           O  
HETATM  869  O   HOH T 868     -20.356 -13.126  45.566  1.00  0.52           O  
HETATM  870  O   HOH T 869       7.300 -29.950  10.548  1.00  0.53           O  
HETATM  871  O   HOH T 870      -2.320 -10.147  21.294  1.00  0.53           O  
HETATM  872  O   HOH T 871     -10.739   3.421  29.193  1.00  0.53           O  
HETATM  873  O   HOH T 872     -11.208   0.632  28.827  1.00  0.53           O  
HETATM  874  O   HOH T 873     -15.260 -24.470  16.898  1.00  0.53           O  
HETATM  875  O   HOH T 874      -6.591  10.634  25.129  1.00  0.53           O  
HETATM  876  O   HOH T 875      14.638 -20.367  74.772  1.00  0.53           O  
HETATM  877  O   HOH T 876      16.037 -40.572  46.036  1.00  0.53           O  
HETATM  878  O   HOH T 877      16.738  -2.972  31.687  1.00  0.53           O  
HETATM  879  O   HOH T 878      17.944 -27.006  32.897  1.00  0.53           O  
HETATM  880  O   HOH T 879      13.952 -23.601  78.625  1.00  0.53           O  
HETATM  881  O   HOH T 880     -10.794 -29.150  34.384  1.00  0.53           O  
HETATM  882  O   HOH T 881      -9.835  -5.024  41.074  1.00  0.53           O  
HETATM  883  O   HOH T 882       2.495 -21.646   2.311  1.00  0.53           O  
HETATM  884  O   HOH T 883       7.936 -12.257  34.849  1.00  0.53           O  
HETATM  885  O   HOH T 884      15.099  12.206   8.955  1.00  0.53           O  
HETATM  886  O   HOH T 885     -13.853 -22.001  73.128  1.00  0.53           O  
HETATM  887  O   HOH T 886      18.300  -4.114   6.115  1.00  0.53           O  
HETATM  888  O   HOH T 887      26.015  -4.064  25.813  1.00  0.53           O  
HETATM  889  O   HOH T 888      18.499 -15.289  33.437  1.00  0.53           O  
HETATM  890  O   HOH T 889      -3.475 -19.414   2.861  1.00  0.53           O  
HETATM  891  O   HOH T 890      13.646 -19.991  13.140  1.00  0.53           O  
HETATM  892  O   HOH T 891       7.132   5.580  41.281  1.00  0.53           O  
HETATM  893  O   HOH T 892     -11.223 -30.057  39.263  1.00  0.54           O  
HETATM  894  O   HOH T 893      -1.849 -35.078  13.442  1.00  0.54           O  
HETATM  895  O   HOH T 894     -21.265  -7.569  18.302  1.00  0.54           O  
HETATM  896  O   HOH T 895      -7.948 -28.354  19.742  1.00  0.54           O  
HETATM  897  O   HOH T 896     -15.718  -2.485  10.168  1.00  0.54           O  
HETATM  898  O   HOH T 897      25.912 -11.166  31.000  1.00  0.54           O  
HETATM  899  O   HOH T 898       4.048 -11.904  66.509  1.00  0.54           O  
HETATM  900  O   HOH T 899      -7.379 -23.515  46.691  1.00  0.54           O  
HETATM  901  O   HOH T 900     -12.958 -38.059  70.158  1.00  0.54           O  
HETATM  902  O   HOH T 901      14.781 -32.083  64.720  1.00  0.54           O  
HETATM  903  O   HOH T 902      24.393 -21.874  52.407  1.00  0.54           O  
HETATM  904  O   HOH T 903      -8.787 -39.065  70.405  1.00  0.54           O  
HETATM  905  O   HOH T 904      -4.936   3.247  68.387  1.00  0.54           O  
HETATM  906  O   HOH T 905      -7.498 -36.469  20.655  1.00  0.54           O  
HETATM  907  O   HOH T 906     -13.720  -2.494  74.636  1.00  0.54           O  
HETATM  908  O   HOH T 907     -17.072  -9.736  76.211  1.00  0.54           O  
HETATM  909  O   HOH T 908      -6.126 -30.746  74.922  1.00  0.54           O  
HETATM  910  O   HOH T 909      -2.284 -29.229   6.382  1.00  0.54           O  
HETATM  911  O   HOH T 910      14.306   7.413  33.260  1.00  0.54           O  
HETATM  912  O   HOH T 911       2.581 -10.583  20.440  1.00  0.54           O  
HETATM  913  O   HOH T 912      -3.341  -0.807  45.175  1.00  0.54           O  
HETATM  914  O   HOH T 913      20.462 -13.040  38.887  1.00  0.54           O  
HETATM  915  O   HOH T 914      -6.548 -11.212  77.762  1.00  0.54           O  
HETATM  916  O   HOH T 915      12.080  -5.658  34.163  1.00  0.54           O  
HETATM  917  O   HOH T 916       3.964   2.337  26.104  1.00  0.54           O  
HETATM  918  O   HOH T 917       9.025  11.420  13.309  1.00  0.54           O  
HETATM  919  O   HOH T 918      13.854   0.214  47.819  1.00  0.54           O  
HETATM  920  O   HOH T 919      21.098  -0.009   9.122  1.00  0.54           O  
HETATM  921  O   HOH T 920      26.854  -3.142  19.351  1.00  0.55           O  
HETATM  922  O   HOH T 921      18.571  12.922  26.863  1.00  0.55           O  
HETATM  923  O   HOH T 922       5.249 -12.679  34.792  1.00  0.55           O  
HETATM  924  O   HOH T 923      -6.525 -53.480  62.408  1.00  0.55           O  
HETATM  925  O   HOH T 924     -20.898 -40.777  54.525  1.00  0.55           O  
HETATM  926  O   HOH T 925      -9.782   5.607  27.688  1.00  0.55           O  
HETATM  927  O   HOH T 926      -2.401 -25.855  77.162  1.00  0.55           O  
HETATM  928  O   HOH T 927      15.898 -34.221  46.894  1.00  0.55           O  
HETATM  929  O   HOH T 928      -8.213  -0.063  51.879  1.00  0.55           O  
HETATM  930  O   HOH T 929      12.941  -0.540  37.914  1.00  0.55           O  
HETATM  931  O   HOH T 930       1.626  -3.085  37.733  1.00  0.55           O  
HETATM  932  O   HOH T 931     -25.515 -17.952  31.742  1.00  0.55           O  
HETATM  933  O   HOH T 932     -13.013   8.049  18.637  1.00  0.55           O  
HETATM  934  O   HOH T 933     -20.162 -14.717  49.921  1.00  0.55           O  
HETATM  935  O   HOH T 934      11.427   1.528  47.848  1.00  0.55           O  
HETATM  936  O   HOH T 935      -9.159 -48.600  69.637  1.00  0.55           O  
HETATM  937  O   HOH T 936     -19.517 -26.738  21.810  1.00  0.55           O  
HETATM  938  O   HOH T 937      -8.001  12.910  14.668  1.00  0.55           O  
HETATM  939  O   HOH T 938      12.379 -38.214  42.689  1.00  0.56           O  
HETATM  940  O   HOH T 939       3.334  -0.066  57.090  1.00  0.56           O  
HETATM  941  O   HOH T 940     -16.947  -5.779  42.046  1.00  0.56           O  
HETATM  942  O   HOH T 941     -22.046 -12.871  72.411  1.00  0.56           O  
HETATM  943  O   HOH T 942      -9.704  -2.895  30.668  1.00  0.56           O  
HETATM  944  O   HOH T 943      12.267 -32.370  17.210  1.00  0.56           O  
HETATM  945  O   HOH T 944      16.902 -13.755  73.891  1.00  0.56           O  
HETATM  946  O   HOH T 945      25.645 -14.914  47.780  1.00  0.56           O  
HETATM  947  O   HOH T 946      10.612 -43.785  55.084  1.00  0.56           O  
HETATM  948  O   HOH T 947       5.229  -0.041  54.228  1.00  0.56           O  
HETATM  949  O   HOH T 948      -1.609 -18.916  80.480  1.00  0.56           O  
HETATM  950  O   HOH T 949      -3.471 -24.378   5.363  1.00  0.56           O  
HETATM  951  O   HOH T 950       6.709  13.073  30.053  1.00  0.56           O  
HETATM  952  O   HOH T 951       5.703 -25.574  74.654  1.00  0.56           O  
HETATM  953  O   HOH T 952      12.198 -13.684   1.697  1.00  0.56           O  
HETATM  954  O   HOH T 953     -23.699 -10.263  54.415  1.00  0.56           O  
HETATM  955  O   HOH T 954      10.563  17.806  19.590  1.00  0.56           O  
HETATM  956  O   HOH T 955     -25.194 -13.034  65.434  1.00  0.56           O  
HETATM  957  O   HOH T 956      20.097 -11.910  61.403  1.00  0.57           O  
HETATM  958  O   HOH T 957     -19.927  -5.862  13.394  1.00  0.57           O  
HETATM  959  O   HOH T 958      18.046 -15.398  10.426  1.00  0.57           O  
HETATM  960  O   HOH T 959     -16.173  -5.649  38.884  1.00  0.57           O  
HETATM  961  O   HOH T 960       2.414  -1.545  35.562  1.00  0.57           O  
HETATM  962  O   HOH T 961      15.406 -46.067  60.781  1.00  0.57           O  
HETATM  963  O   HOH T 962     -21.158 -23.366  21.921  1.00  0.57           O  
HETATM  964  O   HOH T 963      17.739  -9.230  32.775  1.00  0.57           O  
HETATM  965  O   HOH T 964      21.814  -8.913  50.244  1.00  0.57           O  
HETATM  966  O   HOH T 965      13.209 -35.143  63.226  1.00  0.57           O  
HETATM  967  O   HOH T 966       3.081 -37.534  19.311  1.00  0.57           O  
HETATM  968  O   HOH T 967     -23.583 -16.231  51.860  1.00  0.57           O  
HETATM  969  O   HOH T 968      -9.757 -35.528  41.248  1.00  0.57           O  
HETATM  970  O   HOH T 969     -15.338 -46.109  62.270  1.00  0.57           O  
HETATM  971  O   HOH T 970      14.065 -31.860  71.212  1.00  0.57           O  
HETATM  972  O   HOH T 971     -17.811  -9.713  33.994  1.00  0.57           O  
HETATM  973  O   HOH T 972       9.967   5.993   7.219  1.00  0.58           O  
HETATM  974  O   HOH T 973      16.938 -17.852   7.963  1.00  0.58           O  
HETATM  975  O   HOH T 974      17.578  15.162   9.904  1.00  0.59           O  
HETATM  976  O   HOH T 975     -15.625 -21.425  43.759  1.00  0.59           O  
HETATM  977  O   HOH T 976     -19.590 -33.186  56.940  1.00  0.60           O  
HETATM  978  O   HOH T 977      14.431 -33.477  61.550  1.00  0.60           O  
HETATM  979  O   HOH T 978     -20.928  -4.643  68.885  1.00  0.60           O  
HETATM  980  O   HOH T 979     -25.144 -18.846  35.757  1.00  0.60           O  
HETATM  981  O   HOH T 980     -12.100  -0.857  72.780  1.00  0.60           O  
HETATM  982  O   HOH T 981      21.061   8.147  26.015  1.00  0.61           O  
HETATM  983  O   HOH T 982     -25.118 -10.583  60.906  1.00  0.61           O  
TER     984      HOH T 982 
