# Supplementary material for: Accurate Prediction of Hydration Sites of Proteins Using Energy Model With Atom Embedding
Source: Front Mol Biosci. 2021 Sep 20;8:756075. doi: 10.3389/fmolb.2021.756075 (PMC8488165; doi:10.3389/fmolb.2021.756075)
Supplement: Supplementary file 1 [file DataSheet1.ZIP › Data Sheet 1/Our_result_pdb/our_dataset_output/1FCX_watersite.pdb]

HEADER                                                        XXXX


JRNL        PMID   -1
HETATM    1  O   HOH T   0      55.204  12.756 106.823  1.00  0.19           O  
HETATM    2  O   HOH T   1      25.941  12.944  83.704  1.00  0.19           O  
HETATM    3  O   HOH T   2      35.728  21.485  88.587  1.00  0.20           O  
HETATM    4  O   HOH T   3      29.271  -3.111 109.930  1.00  0.20           O  
HETATM    5  O   HOH T   4      27.348  -0.607 101.349  1.00  0.20           O  
HETATM    6  O   HOH T   5      55.214   9.120  94.631  1.00  0.21           O  
HETATM    7  O   HOH T   6      29.514   5.333  87.376  1.00  0.22           O  
HETATM    8  O   HOH T   7      49.131   9.108  97.194  1.00  0.22           O  
HETATM    9  O   HOH T   8      49.159   2.888 103.484  1.00  0.22           O  
HETATM   10  O   HOH T   9      29.155   2.842  92.655  1.00  0.23           O  
HETATM   11  O   HOH T  10      57.989  13.243 100.147  1.00  0.23           O  
HETATM   12  O   HOH T  11      32.223   3.509  68.460  1.00  0.23           O  
HETATM   13  O   HOH T  12      40.367  17.962  66.006  1.00  0.24           O  
HETATM   14  O   HOH T  13      48.237  11.906  89.849  1.00  0.24           O  
HETATM   15  O   HOH T  14      56.733   4.658 100.392  1.00  0.25           O  
HETATM   16  O   HOH T  15      35.832  -4.750  91.924  1.00  0.25           O  
HETATM   17  O   HOH T  16      32.663   1.854  76.991  1.00  0.26           O  
HETATM   18  O   HOH T  17      49.156  -4.589  95.263  1.00  0.26           O  
HETATM   19  O   HOH T  18      35.637  -2.360 110.100  1.00  0.27           O  
HETATM   20  O   HOH T  19      36.215  27.030  75.959  1.00  0.27           O  
HETATM   21  O   HOH T  20      39.117   3.584  75.168  1.00  0.27           O  
HETATM   22  O   HOH T  21      30.811  25.193  79.520  1.00  0.28           O  
HETATM   23  O   HOH T  22      27.898  -6.607 103.947  1.00  0.28           O  
HETATM   24  O   HOH T  23      26.764  18.777  75.944  1.00  0.28           O  
HETATM   25  O   HOH T  24      43.494  -5.944 116.370  1.00  0.28           O  
HETATM   26  O   HOH T  25      50.280  26.514  81.701  1.00  0.28           O  
HETATM   27  O   HOH T  26      38.847  25.361  92.540  1.00  0.28           O  
HETATM   28  O   HOH T  27      47.044  -6.327  95.743  1.00  0.28           O  
HETATM   29  O   HOH T  28      21.520  -5.668 102.466  1.00  0.28           O  
HETATM   30  O   HOH T  29      44.418  17.065 107.992  1.00  0.28           O  
HETATM   31  O   HOH T  30      28.063  -9.637  97.920  1.00  0.29           O  
HETATM   32  O   HOH T  31      29.117  11.928  91.832  1.00  0.29           O  
HETATM   33  O   HOH T  32      25.277  27.631  82.493  1.00  0.29           O  
HETATM   34  O   HOH T  33      26.599  11.896  92.950  1.00  0.29           O  
HETATM   35  O   HOH T  34      38.111   5.165  73.112  1.00  0.29           O  
HETATM   36  O   HOH T  35      60.147   4.297 107.463  1.00  0.29           O  
HETATM   37  O   HOH T  36      31.653  24.261  74.436  1.00  0.30           O  
HETATM   38  O   HOH T  37      30.911  -5.471 102.219  1.00  0.30           O  
HETATM   39  O   HOH T  38      37.357  17.034 108.591  1.00  0.30           O  
HETATM   40  O   HOH T  39      40.596  26.600  86.542  1.00  0.30           O  
HETATM   41  O   HOH T  40      40.666  22.077 103.560  1.00  0.30           O  
HETATM   42  O   HOH T  41      28.229  10.594  72.081  1.00  0.30           O  
HETATM   43  O   HOH T  42      32.581  -7.248 103.715  1.00  0.30           O  
HETATM   44  O   HOH T  43      46.463  25.036  74.804  1.00  0.30           O  
HETATM   45  O   HOH T  44      29.505   7.408 111.279  1.00  0.30           O  
HETATM   46  O   HOH T  45      58.257   6.079 108.383  1.00  0.30           O  
HETATM   47  O   HOH T  46      48.013  -3.951 113.785  1.00  0.30           O  
HETATM   48  O   HOH T  47      29.952  17.115  65.648  1.00  0.30           O  
HETATM   49  O   HOH T  48      33.781  19.673  93.127  1.00  0.30           O  
HETATM   50  O   HOH T  49      55.046  13.971 110.391  1.00  0.30           O  
HETATM   51  O   HOH T  50      34.769  17.144 107.620  1.00  0.30           O  
HETATM   52  O   HOH T  51      36.229  30.527  85.305  1.00  0.30           O  
HETATM   53  O   HOH T  52      51.498  21.994  73.697  1.00  0.31           O  
HETATM   54  O   HOH T  53      36.798  13.131  97.660  1.00  0.31           O  
HETATM   55  O   HOH T  54      35.415 -12.122 109.731  1.00  0.31           O  
HETATM   56  O   HOH T  55      59.156   5.824 101.196  1.00  0.31           O  
HETATM   57  O   HOH T  56      30.209  10.806  95.606  1.00  0.32           O  
HETATM   58  O   HOH T  57      32.427   5.635  93.827  1.00  0.32           O  
HETATM   59  O   HOH T  58      23.714  12.040  93.147  1.00  0.32           O  
HETATM   60  O   HOH T  59      35.563 -18.340  99.995  1.00  0.32           O  
HETATM   61  O   HOH T  60      38.277  28.284  74.511  1.00  0.32           O  
HETATM   62  O   HOH T  61      20.152  21.403  80.574  1.00  0.33           O  
HETATM   63  O   HOH T  62      32.487 -12.540 102.752  1.00  0.33           O  
HETATM   64  O   HOH T  63      61.495   7.145 100.506  1.00  0.33           O  
HETATM   65  O   HOH T  64      28.389   9.017 106.649  1.00  0.33           O  
HETATM   66  O   HOH T  65      24.233  19.409  69.373  1.00  0.33           O  
HETATM   67  O   HOH T  66      32.632  16.852  65.655  1.00  0.33           O  
HETATM   68  O   HOH T  67      29.996   5.465  92.532  1.00  0.33           O  
HETATM   69  O   HOH T  68      49.395  12.096  87.284  1.00  0.33           O  
HETATM   70  O   HOH T  69      34.580  -0.195  87.493  1.00  0.33           O  
HETATM   71  O   HOH T  70      30.724   8.300  71.285  1.00  0.33           O  
HETATM   72  O   HOH T  71      31.358 -11.211  89.645  1.00  0.34           O  
HETATM   73  O   HOH T  72      19.646   0.809 106.394  1.00  0.34           O  
HETATM   74  O   HOH T  73      40.525   0.020  75.305  1.00  0.34           O  
HETATM   75  O   HOH T  74      27.556   7.214  88.112  1.00  0.34           O  
HETATM   76  O   HOH T  75      28.236  -4.550 102.056  1.00  0.34           O  
HETATM   77  O   HOH T  76      34.750 -17.213 102.372  1.00  0.34           O  
HETATM   78  O   HOH T  77      27.058   9.737  74.676  1.00  0.34           O  
HETATM   79  O   HOH T  78      39.608  16.317 110.133  1.00  0.34           O  
HETATM   80  O   HOH T  79      40.493  29.273  85.815  1.00  0.34           O  
HETATM   81  O   HOH T  80      43.829  25.863  73.815  1.00  0.35           O  
HETATM   82  O   HOH T  81      23.766  -3.958  92.221  1.00  0.35           O  
HETATM   83  O   HOH T  82      27.358   7.820  90.858  1.00  0.36           O  
HETATM   84  O   HOH T  83      43.444  32.458  96.589  1.00  0.36           O  
HETATM   85  O   HOH T  84      46.188  25.119  86.686  1.00  0.36           O  
HETATM   86  O   HOH T  85      23.170  25.302  67.002  1.00  0.36           O  
HETATM   87  O   HOH T  86      22.197   2.029 106.297  1.00  0.36           O  
HETATM   88  O   HOH T  87      30.361   1.956  78.461  1.00  0.36           O  
HETATM   89  O   HOH T  88      26.593   8.863 102.024  1.00  0.37           O  
HETATM   90  O   HOH T  89      46.168   4.517  95.571  1.00  0.37           O  
HETATM   91  O   HOH T  90      27.673  17.054  97.940  1.00  0.37           O  
HETATM   92  O   HOH T  91      50.507  20.855 107.223  1.00  0.37           O  
HETATM   93  O   HOH T  92      46.249   6.365  77.003  1.00  0.37           O  
HETATM   94  O   HOH T  93      23.538  24.216  64.589  1.00  0.37           O  
HETATM   95  O   HOH T  94      29.018   8.586  95.183  1.00  0.37           O  
HETATM   96  O   HOH T  95      20.081  19.221  86.829  1.00  0.37           O  
HETATM   97  O   HOH T  96      26.418  27.369  68.051  1.00  0.37           O  
HETATM   98  O   HOH T  97      30.901  -4.183  88.290  1.00  0.38           O  
HETATM   99  O   HOH T  98      47.072   1.022 106.232  1.00  0.38           O  
HETATM  100  O   HOH T  99      38.812  30.698  84.158  1.00  0.38           O  
HETATM  101  O   HOH T 100      37.479  -4.160 110.711  1.00  0.38           O  
HETATM  102  O   HOH T 101      28.840   5.621  90.017  1.00  0.38           O  
HETATM  103  O   HOH T 102      31.377  -8.573  88.857  1.00  0.38           O  
HETATM  104  O   HOH T 103      53.302  17.093 112.413  1.00  0.38           O  
HETATM  105  O   HOH T 104      46.830  -4.449 109.849  1.00  0.38           O  
HETATM  106  O   HOH T 105      25.212  10.589  94.922  1.00  0.39           O  
HETATM  107  O   HOH T 106      57.313  15.385 109.563  1.00  0.39           O  
HETATM  108  O   HOH T 107      18.164  -3.627 102.989  1.00  0.39           O  
HETATM  109  O   HOH T 108      39.659  27.715  80.138  1.00  0.39           O  
HETATM  110  O   HOH T 109      46.503  -4.062  94.236  1.00  0.39           O  
HETATM  111  O   HOH T 110      44.303  27.497  82.812  1.00  0.40           O  
HETATM  112  O   HOH T 111      42.199  -3.563 117.093  1.00  0.40           O  
HETATM  113  O   HOH T 112      28.253 -10.935 106.143  1.00  0.40           O  
HETATM  114  O   HOH T 113      45.908  16.683 110.369  1.00  0.40           O  
HETATM  115  O   HOH T 114      35.301  20.217  91.002  1.00  0.40           O  
HETATM  116  O   HOH T 115      51.830  21.336  71.084  1.00  0.40           O  
HETATM  117  O   HOH T 116      41.097  27.695  69.861  1.00  0.40           O  
HETATM  118  O   HOH T 117      27.573  -8.209 106.141  1.00  0.40           O  
HETATM  119  O   HOH T 118      48.963   0.249 102.596  1.00  0.40           O  
HETATM  120  O   HOH T 119      28.472  14.448  97.067  1.00  0.40           O  
HETATM  121  O   HOH T 120      40.816  14.236  72.279  1.00  0.40           O  
HETATM  122  O   HOH T 121      20.275   2.283 104.271  1.00  0.40           O  
HETATM  123  O   HOH T 122      26.060  14.862  98.449  1.00  0.40           O  
HETATM  124  O   HOH T 123      24.378   3.824 106.101  1.00  0.40           O  
HETATM  125  O   HOH T 124      40.323  16.106  63.958  1.00  0.40           O  
HETATM  126  O   HOH T 125      30.568  -0.614  81.679  1.00  0.40           O  
HETATM  127  O   HOH T 126      26.197  20.202  67.534  1.00  0.40           O  
HETATM  128  O   HOH T 127      44.711  27.221  85.538  1.00  0.40           O  
HETATM  129  O   HOH T 128      27.479  12.992 105.336  1.00  0.40           O  
HETATM  130  O   HOH T 129      26.452   6.332  70.668  1.00  0.41           O  
HETATM  131  O   HOH T 130      48.302   6.265  91.687  1.00  0.41           O  
HETATM  132  O   HOH T 131      43.096   1.885 112.899  1.00  0.41           O  
HETATM  133  O   HOH T 132      26.221   4.430 109.018  1.00  0.41           O  
HETATM  134  O   HOH T 133      27.607  11.361 112.748  1.00  0.41           O  
HETATM  135  O   HOH T 134      52.415  20.557  79.420  1.00  0.41           O  
HETATM  136  O   HOH T 135      34.804  23.105  98.713  1.00  0.41           O  
HETATM  137  O   HOH T 136      27.270   2.615  73.124  1.00  0.41           O  
HETATM  138  O   HOH T 137      27.516  22.465  66.720  1.00  0.41           O  
HETATM  139  O   HOH T 138      30.313  22.115  66.768  1.00  0.41           O  
HETATM  140  O   HOH T 139      25.863  17.100 100.064  1.00  0.41           O  
HETATM  141  O   HOH T 140      60.200   5.471  98.652  1.00  0.41           O  
HETATM  142  O   HOH T 141      29.696 -12.709  87.944  1.00  0.41           O  
HETATM  143  O   HOH T 142      57.696  10.067  93.871  1.00  0.41           O  
HETATM  144  O   HOH T 143      22.155   4.227 104.542  1.00  0.41           O  
HETATM  145  O   HOH T 144      42.792  28.989  89.840  1.00  0.41           O  
HETATM  146  O   HOH T 145      43.041  18.501  66.725  1.00  0.42           O  
HETATM  147  O   HOH T 146      25.730 -10.032 106.985  1.00  0.42           O  
HETATM  148  O   HOH T 147      34.664  20.617  78.337  1.00  0.42           O  
HETATM  149  O   HOH T 148      31.944  27.184  84.812  1.00  0.42           O  
HETATM  150  O   HOH T 149      50.883  12.163  89.419  1.00  0.42           O  
HETATM  151  O   HOH T 150      47.952   9.207  89.573  1.00  0.42           O  
HETATM  152  O   HOH T 151      29.478  27.040  83.673  1.00  0.42           O  
HETATM  153  O   HOH T 152      49.977  21.438 109.866  1.00  0.42           O  
HETATM  154  O   HOH T 153      46.929  27.846  74.660  1.00  0.42           O  
HETATM  155  O   HOH T 154      43.647   9.341 107.907  1.00  0.43           O  
HETATM  156  O   HOH T 155      65.413   7.051 108.132  1.00  0.43           O  
HETATM  157  O   HOH T 156      23.952  18.515  66.746  1.00  0.43           O  
HETATM  158  O   HOH T 157      43.593  21.477 107.497  1.00  0.43           O  
HETATM  159  O   HOH T 158      61.025   6.282 103.129  1.00  0.43           O  
HETATM  160  O   HOH T 159      41.267  22.078 106.177  1.00  0.43           O  
HETATM  161  O   HOH T 160      27.867  11.800  69.550  1.00  0.43           O  
HETATM  162  O   HOH T 161      28.289  18.129  63.742  1.00  0.43           O  
HETATM  163  O   HOH T 162      34.122  24.320  71.288  1.00  0.43           O  
HETATM  164  O   HOH T 163      36.571  -4.087  89.321  1.00  0.43           O  
HETATM  165  O   HOH T 164      26.334   8.527 104.795  1.00  0.43           O  
HETATM  166  O   HOH T 165      47.992  -2.472  92.547  1.00  0.43           O  
HETATM  167  O   HOH T 166      32.982 -16.091 100.621  1.00  0.43           O  
HETATM  168  O   HOH T 167      20.822  -2.917 102.578  1.00  0.43           O  
HETATM  169  O   HOH T 168      45.564  19.458  67.260  1.00  0.43           O  
HETATM  170  O   HOH T 169      62.388   8.628 102.709  1.00  0.43           O  
HETATM  171  O   HOH T 170      33.097  22.296  96.581  1.00  0.43           O  
HETATM  172  O   HOH T 171      42.705  28.312  87.146  1.00  0.44           O  
HETATM  173  O   HOH T 172      20.804  17.049  88.774  1.00  0.44           O  
HETATM  174  O   HOH T 173      32.347  24.606  69.201  1.00  0.44           O  
HETATM  175  O   HOH T 174      33.953  -9.779 110.138  1.00  0.44           O  
HETATM  176  O   HOH T 175      42.797  -5.368  93.052  1.00  0.44           O  
HETATM  177  O   HOH T 176      48.546  28.300  78.555  1.00  0.44           O  
HETATM  178  O   HOH T 177      54.824  -0.977 112.991  1.00  0.44           O  
HETATM  179  O   HOH T 178      25.787   2.478  80.535  1.00  0.44           O  
HETATM  180  O   HOH T 179      32.342  26.779  77.781  1.00  0.44           O  
HETATM  181  O   HOH T 180      50.223  21.839 104.506  1.00  0.44           O  
HETATM  182  O   HOH T 181      60.815   6.993 107.559  1.00  0.44           O  
HETATM  183  O   HOH T 182      26.275   8.166  95.331  1.00  0.45           O  
HETATM  184  O   HOH T 183      39.712  22.647  67.546  1.00  0.45           O  
HETATM  185  O   HOH T 184      39.308   1.418  70.614  1.00  0.45           O  
HETATM  186  O   HOH T 185      59.833  16.142 108.594  1.00  0.45           O  
HETATM  187  O   HOH T 186      39.559  27.514  72.216  1.00  0.45           O  
HETATM  188  O   HOH T 187      40.243   3.772  71.749  1.00  0.45           O  
HETATM  189  O   HOH T 188      45.469  -2.890 113.876  1.00  0.45           O  
HETATM  190  O   HOH T 189      61.324  13.834 109.220  1.00  0.45           O  
HETATM  191  O   HOH T 190      32.380   2.507 115.016  1.00  0.45           O  
HETATM  192  O   HOH T 191      30.050   0.753 115.213  1.00  0.45           O  
HETATM  193  O   HOH T 192      44.597  28.504  73.157  1.00  0.46           O  
HETATM  194  O   HOH T 193      27.441   6.799 109.434  1.00  0.46           O  
HETATM  195  O   HOH T 194      30.003  27.462  80.941  1.00  0.46           O  
HETATM  196  O   HOH T 195      41.246  -4.496  89.996  1.00  0.46           O  
HETATM  197  O   HOH T 196      27.022  27.792  84.695  1.00  0.46           O  
HETATM  198  O   HOH T 197      34.709  25.317 100.392  1.00  0.46           O  
HETATM  199  O   HOH T 198      30.031  -5.797 110.031  1.00  0.46           O  
HETATM  200  O   HOH T 199      29.936  19.861  65.150  1.00  0.46           O  
HETATM  201  O   HOH T 200      42.916  -3.845 114.427  1.00  0.46           O  
HETATM  202  O   HOH T 201      55.083  16.771 110.338  1.00  0.46           O  
HETATM  203  O   HOH T 202      25.696   0.415  73.570  1.00  0.46           O  
HETATM  204  O   HOH T 203      30.133  11.896 101.559  1.00  0.47           O  
HETATM  205  O   HOH T 204      31.365   9.831  62.991  1.00  0.47           O  
HETATM  206  O   HOH T 205      41.312  20.329 108.412  1.00  0.47           O  
HETATM  207  O   HOH T 206      41.227   6.895 122.700  1.00  0.47           O  
HETATM  208  O   HOH T 207      33.083  -9.803  87.012  1.00  0.47           O  
HETATM  209  O   HOH T 208      44.549  -0.506 112.839  1.00  0.47           O  
HETATM  210  O   HOH T 209      42.312  17.994  64.046  1.00  0.47           O  
HETATM  211  O   HOH T 210      56.672  19.863  90.638  1.00  0.47           O  
HETATM  212  O   HOH T 211      32.524  20.789  65.588  1.00  0.47           O  
HETATM  213  O   HOH T 212      29.265   1.751  74.851  1.00  0.47           O  
HETATM  214  O   HOH T 213      36.317  11.803  95.361  1.00  0.47           O  
HETATM  215  O   HOH T 214      55.580   0.001 110.500  1.00  0.47           O  
HETATM  216  O   HOH T 215      20.173  23.935  81.688  1.00  0.48           O  
HETATM  217  O   HOH T 216      32.919  22.242  67.863  1.00  0.48           O  
HETATM  218  O   HOH T 217      42.957  -1.052 108.637  1.00  0.48           O  
HETATM  219  O   HOH T 218      35.729  28.369  73.662  1.00  0.48           O  
HETATM  220  O   HOH T 219      19.691  -3.015 105.207  1.00  0.48           O  
HETATM  221  O   HOH T 220      28.995  -7.492  96.372  1.00  0.48           O  
HETATM  222  O   HOH T 221      54.471   6.540  93.812  1.00  0.48           O  
HETATM  223  O   HOH T 222      28.845  12.975  94.472  1.00  0.48           O  
HETATM  224  O   HOH T 223      42.153  27.569  72.425  1.00  0.48           O  
HETATM  225  O   HOH T 224      51.966  12.672  81.451  1.00  0.48           O  
HETATM  226  O   HOH T 225      20.150  -0.505 103.936  1.00  0.48           O  
HETATM  227  O   HOH T 226      55.132  19.151 111.851  1.00  0.48           O  
HETATM  228  O   HOH T 227      52.737  20.236  68.734  1.00  0.48           O  
HETATM  229  O   HOH T 228      24.539  -2.512 111.957  1.00  0.49           O  
HETATM  230  O   HOH T 229      37.192  -1.884 112.390  1.00  0.49           O  
HETATM  231  O   HOH T 230      46.519   9.231  72.188  1.00  0.49           O  
HETATM  232  O   HOH T 231      42.108  20.956  67.622  1.00  0.49           O  
HETATM  233  O   HOH T 232      38.390  26.812  69.798  1.00  0.49           O  
HETATM  234  O   HOH T 233      52.760  11.738  84.037  1.00  0.49           O  
HETATM  235  O   HOH T 234      24.997   4.163  78.559  1.00  0.49           O  
HETATM  236  O   HOH T 235      20.998  21.930  94.014  1.00  0.50           O  
HETATM  237  O   HOH T 236      21.909  25.178  89.814  1.00  0.50           O  
HETATM  238  O   HOH T 237      62.363   7.471 105.231  1.00  0.50           O  
HETATM  239  O   HOH T 238      32.473  23.695 100.356  1.00  0.50           O  
HETATM  240  O   HOH T 239      48.599   4.952  88.176  1.00  0.50           O  
HETATM  241  O   HOH T 240      28.155  -7.338 108.769  1.00  0.50           O  
HETATM  242  O   HOH T 241      49.133  13.594  69.549  1.00  0.50           O  
HETATM  243  O   HOH T 242      30.325  25.187  76.782  1.00  0.50           O  
HETATM  244  O   HOH T 243      36.974  26.670  99.960  1.00  0.50           O  
HETATM  245  O   HOH T 244      34.588  26.678  85.071  1.00  0.50           O  
HETATM  246  O   HOH T 245      28.451   2.254  80.450  1.00  0.50           O  
HETATM  247  O   HOH T 246      25.868  17.114  63.021  1.00  0.50           O  
HETATM  248  O   HOH T 247      28.642  25.917  68.067  1.00  0.50           O  
HETATM  249  O   HOH T 248      55.728   1.680 112.669  1.00  0.50           O  
HETATM  250  O   HOH T 249      33.134  -5.212  91.326  1.00  0.50           O  
HETATM  251  O   HOH T 250      43.709  16.275 111.827  1.00  0.50           O  
HETATM  252  O   HOH T 251      25.922 -11.324 104.551  1.00  0.51           O  
HETATM  253  O   HOH T 252      61.691   6.407  96.728  1.00  0.51           O  
HETATM  254  O   HOH T 253      19.535  18.994  90.113  1.00  0.51           O  
HETATM  255  O   HOH T 254      51.952  -0.674  93.699  1.00  0.51           O  
HETATM  256  O   HOH T 255      32.732  13.979 113.160  1.00  0.51           O  
HETATM  257  O   HOH T 256      30.790 -17.605 100.056  1.00  0.51           O  
HETATM  258  O   HOH T 257      24.303   2.544  90.707  1.00  0.51           O  
HETATM  259  O   HOH T 258      28.827 -11.997  90.437  1.00  0.51           O  
HETATM  260  O   HOH T 259      50.261   7.867  90.411  1.00  0.51           O  
HETATM  261  O   HOH T 260      44.713   7.373  74.843  1.00  0.51           O  
HETATM  262  O   HOH T 261      23.689  16.688  68.847  1.00  0.51           O  
HETATM  263  O   HOH T 262      18.533  16.323  90.671  1.00  0.51           O  
HETATM  264  O   HOH T 263      33.870  10.939  63.668  1.00  0.51           O  
HETATM  265  O   HOH T 264      43.828  19.470 109.205  1.00  0.51           O  
HETATM  266  O   HOH T 265      49.676  -0.474  92.176  1.00  0.51           O  
HETATM  267  O   HOH T 266      37.969  -6.126  90.538  1.00  0.51           O  
HETATM  268  O   HOH T 267      30.969  -6.511 112.580  1.00  0.51           O  
HETATM  269  O   HOH T 268      26.504  -8.344  96.012  1.00  0.51           O  
HETATM  270  O   HOH T 269      23.387  23.243  93.268  1.00  0.52           O  
HETATM  271  O   HOH T 270      34.965  26.802  98.071  1.00  0.52           O  
HETATM  272  O   HOH T 271      19.180  21.885  84.404  1.00  0.52           O  
HETATM  273  O   HOH T 272      48.718  22.911 107.861  1.00  0.52           O  
HETATM  274  O   HOH T 273      27.798   6.866  93.430  1.00  0.52           O  
HETATM  275  O   HOH T 274      25.858   4.947  93.089  1.00  0.52           O  
HETATM  276  O   HOH T 275      25.001   9.534  98.866  1.00  0.52           O  
HETATM  277  O   HOH T 276      25.549  13.016  68.947  1.00  0.52           O  
HETATM  278  O   HOH T 277      41.512   1.877  68.875  1.00  0.52           O  
HETATM  279  O   HOH T 278      50.192  21.454  68.900  1.00  0.52           O  
HETATM  280  O   HOH T 279      29.316  -8.235 111.126  1.00  0.52           O  
HETATM  281  O   HOH T 280      26.786  11.001 103.556  1.00  0.52           O  
HETATM  282  O   HOH T 281      32.470  28.397  80.059  1.00  0.52           O  
HETATM  283  O   HOH T 282      54.350  19.276  81.713  1.00  0.53           O  
HETATM  284  O   HOH T 283      24.683   6.688 106.104  1.00  0.53           O  
HETATM  285  O   HOH T 284      23.438  -4.227  94.857  1.00  0.53           O  
HETATM  286  O   HOH T 285      43.862   4.356  92.503  1.00  0.53           O  
HETATM  287  O   HOH T 286      26.011  19.218  64.917  1.00  0.53           O  
HETATM  288  O   HOH T 287      25.304  27.522  78.501  1.00  0.53           O  
HETATM  289  O   HOH T 288      51.847   6.603  82.485  1.00  0.53           O  
HETATM  290  O   HOH T 289      30.741  30.043  81.482  1.00  0.53           O  
HETATM  291  O   HOH T 290      33.199  29.028  73.011  1.00  0.53           O  
HETATM  292  O   HOH T 291      42.038  -0.018  84.374  1.00  0.53           O  
HETATM  293  O   HOH T 292      60.526  17.160 111.118  1.00  0.53           O  
HETATM  294  O   HOH T 293      28.328   8.090  70.170  1.00  0.53           O  
HETATM  295  O   HOH T 294      33.642  -4.226 109.559  1.00  0.54           O  
HETATM  296  O   HOH T 295      42.806  12.141  70.023  1.00  0.54           O  
HETATM  297  O   HOH T 296      19.444  -5.670 104.376  1.00  0.54           O  
HETATM  298  O   HOH T 297      37.972  10.466 114.990  1.00  0.54           O  
HETATM  299  O   HOH T 298      58.434   2.501 113.325  1.00  0.54           O  
HETATM  300  O   HOH T 299      21.506  22.977  91.413  1.00  0.54           O  
HETATM  301  O   HOH T 300      22.582  13.704  81.685  1.00  0.55           O  
HETATM  302  O   HOH T 301      49.644   7.973 111.624  1.00  0.55           O  
HETATM  303  O   HOH T 302      33.835  25.557  75.736  1.00  0.55           O  
HETATM  304  O   HOH T 303      53.055   4.675  81.250  1.00  0.55           O  
HETATM  305  O   HOH T 304      57.803  22.148  83.607  1.00  0.55           O  
HETATM  306  O   HOH T 305      23.177   2.485  97.198  1.00  0.55           O  
HETATM  307  O   HOH T 306      50.187  24.277 105.825  1.00  0.55           O  
HETATM  308  O   HOH T 307      25.234  16.358  76.919  1.00  0.55           O  
HETATM  309  O   HOH T 308      25.918  -5.572  92.396  1.00  0.56           O  
HETATM  310  O   HOH T 309      36.497  23.010 103.276  1.00  0.56           O  
HETATM  311  O   HOH T 310      58.253  23.400 106.895  1.00  0.56           O  
HETATM  312  O   HOH T 311      51.828   8.273  75.313  1.00  0.56           O  
HETATM  313  O   HOH T 312      39.174  18.910 109.398  1.00  0.56           O  
HETATM  314  O   HOH T 313      47.180   7.762  74.547  1.00  0.56           O  
HETATM  315  O   HOH T 314      29.956  25.318  70.302  1.00  0.56           O  
HETATM  316  O   HOH T 315      46.852  -0.859  88.243  1.00  0.56           O  
HETATM  317  O   HOH T 316      56.023  12.003  85.749  1.00  0.57           O  
HETATM  318  O   HOH T 317      54.366  15.289  75.243  1.00  0.57           O  
HETATM  319  O   HOH T 318      33.399  18.756  63.952  1.00  0.57           O  
HETATM  320  O   HOH T 319      44.760  18.707  64.717  1.00  0.57           O  
HETATM  321  O   HOH T 320      42.896  23.509 104.555  1.00  0.57           O  
HETATM  322  O   HOH T 321      22.860  17.775  74.389  1.00  0.57           O  
HETATM  323  O   HOH T 322      35.413  29.273  71.145  1.00  0.58           O  
HETATM  324  O   HOH T 323      42.056   0.927 115.144  1.00  0.59           O  
HETATM  325  O   HOH T 324      33.388  16.411  62.919  1.00  0.62           O  
HETATM  326  O   HOH T 325      52.922  11.256  90.530  1.00  0.63           O  
HETATM  327  O   HOH T 326      46.231  22.949  68.555  1.00  0.64           O  
HETATM  328  O   HOH T 327      30.557  21.874  97.217  1.00  0.65           O  
TER     329      HOH T 327 
