# Supplementary material for: Accurate Prediction of Hydration Sites of Proteins Using Energy Model With Atom Embedding
Source: Front Mol Biosci. 2021 Sep 20;8:756075. doi: 10.3389/fmolb.2021.756075 (PMC8488165; doi:10.3389/fmolb.2021.756075)
Supplement: Supplementary file 1 [file DataSheet1.ZIP › Data Sheet 1/Our_result_pdb/our_dataset_output/1FG7_watersite.pdb]

HEADER                                                        XXXX


JRNL        PMID   -1
HETATM    1  O   HOH T   0      44.752  50.189   0.353  1.00  0.16           O  
HETATM    2  O   HOH T   1      68.382  55.262   7.755  1.00  0.17           O  
HETATM    3  O   HOH T   2      50.979  40.191  -6.246  1.00  0.18           O  
HETATM    4  O   HOH T   3      41.331  67.173  -7.708  1.00  0.19           O  
HETATM    5  O   HOH T   4      45.259  39.848  -1.878  1.00  0.20           O  
HETATM    6  O   HOH T   5      51.542  61.431  -4.928  1.00  0.20           O  
HETATM    7  O   HOH T   6      51.198  42.362  14.932  1.00  0.20           O  
HETATM    8  O   HOH T   7      70.616  49.876   1.742  1.00  0.20           O  
HETATM    9  O   HOH T   8      61.086  32.837 -11.850  1.00  0.20           O  
HETATM   10  O   HOH T   9      34.181  31.598   0.068  1.00  0.21           O  
HETATM   11  O   HOH T  10      34.863  48.230  -6.796  1.00  0.21           O  
HETATM   12  O   HOH T  11      50.090  56.917   5.418  1.00  0.21           O  
HETATM   13  O   HOH T  12      49.956  58.610   1.166  1.00  0.22           O  
HETATM   14  O   HOH T  13      40.043  35.231  -2.371  1.00  0.22           O  
HETATM   15  O   HOH T  14      35.809  39.959   1.846  1.00  0.22           O  
HETATM   16  O   HOH T  15      49.066  29.310   7.137  1.00  0.22           O  
HETATM   17  O   HOH T  16      66.113  72.259   0.040  1.00  0.23           O  
HETATM   18  O   HOH T  17      48.927  50.649 -18.570  1.00  0.23           O  
HETATM   19  O   HOH T  18      48.773  54.546   3.415  1.00  0.23           O  
HETATM   20  O   HOH T  19      42.810  60.284   6.087  1.00  0.23           O  
HETATM   21  O   HOH T  20      36.321  28.497   8.127  1.00  0.23           O  
HETATM   22  O   HOH T  21      34.874  49.389  17.455  1.00  0.23           O  
HETATM   23  O   HOH T  22      35.065  65.482  -0.340  1.00  0.23           O  
HETATM   24  O   HOH T  23      39.728  42.776  -3.518  1.00  0.23           O  
HETATM   25  O   HOH T  24      51.216  66.150   4.720  1.00  0.23           O  
HETATM   26  O   HOH T  25      56.689  57.793  -0.772  1.00  0.23           O  
HETATM   27  O   HOH T  26      33.825  49.395  -0.839  1.00  0.23           O  
HETATM   28  O   HOH T  27      42.211  27.035   7.395  1.00  0.24           O  
HETATM   29  O   HOH T  28      36.755  51.579  -8.879  1.00  0.24           O  
HETATM   30  O   HOH T  29      32.880  67.489  -7.195  1.00  0.24           O  
HETATM   31  O   HOH T  30      77.410  66.763   3.151  1.00  0.24           O  
HETATM   32  O   HOH T  31      31.744  52.464 -27.813  1.00  0.24           O  
HETATM   33  O   HOH T  32      46.588  67.876  12.817  1.00  0.24           O  
HETATM   34  O   HOH T  33      40.622  65.595 -24.003  1.00  0.24           O  
HETATM   35  O   HOH T  34      25.847  59.396 -13.604  1.00  0.24           O  
HETATM   36  O   HOH T  35      45.631  54.708 -12.772  1.00  0.24           O  
HETATM   37  O   HOH T  36      63.437  56.899   0.861  1.00  0.25           O  
HETATM   38  O   HOH T  37      46.222  55.791 -21.690  1.00  0.25           O  
HETATM   39  O   HOH T  38      40.461  41.767  -6.003  1.00  0.25           O  
HETATM   40  O   HOH T  39      57.525  68.846  -4.431  1.00  0.25           O  
HETATM   41  O   HOH T  40      44.482  25.009   4.611  1.00  0.25           O  
HETATM   42  O   HOH T  41      55.830  53.297 -22.727  1.00  0.26           O  
HETATM   43  O   HOH T  42      45.276  61.205  -7.037  1.00  0.26           O  
HETATM   44  O   HOH T  43      34.592  65.099 -27.063  1.00  0.26           O  
HETATM   45  O   HOH T  44      47.088  60.446  18.221  1.00  0.26           O  
HETATM   46  O   HOH T  45      38.060  47.521   7.021  1.00  0.26           O  
HETATM   47  O   HOH T  46      59.778  38.565  -9.483  1.00  0.26           O  
HETATM   48  O   HOH T  47      67.942  60.350  10.556  1.00  0.27           O  
HETATM   49  O   HOH T  48      53.479  73.709  -2.304  1.00  0.27           O  
HETATM   50  O   HOH T  49      31.658  53.113  13.156  1.00  0.27           O  
HETATM   51  O   HOH T  50      50.028  52.668 -16.978  1.00  0.27           O  
HETATM   52  O   HOH T  51      67.983  67.092   4.874  1.00  0.27           O  
HETATM   53  O   HOH T  52      71.678  39.864 -18.218  1.00  0.27           O  
HETATM   54  O   HOH T  53      46.620  44.675 -17.699  1.00  0.27           O  
HETATM   55  O   HOH T  54      76.102  49.367   7.097  1.00  0.27           O  
HETATM   56  O   HOH T  55      71.196  43.773  10.363  1.00  0.27           O  
HETATM   57  O   HOH T  56      30.778  48.535  -8.081  1.00  0.27           O  
HETATM   58  O   HOH T  57      32.730  45.099  -5.508  1.00  0.27           O  
HETATM   59  O   HOH T  58      41.618  42.812  -1.557  1.00  0.28           O  
HETATM   60  O   HOH T  59      47.588  63.960 -12.409  1.00  0.28           O  
HETATM   61  O   HOH T  60      29.606  49.085 -10.571  1.00  0.28           O  
HETATM   62  O   HOH T  61      66.270  28.450  -2.016  1.00  0.28           O  
HETATM   63  O   HOH T  62      66.279  46.322  -4.056  1.00  0.28           O  
HETATM   64  O   HOH T  63      40.032  48.286   5.218  1.00  0.29           O  
HETATM   65  O   HOH T  64      59.942  72.882   3.912  1.00  0.29           O  
HETATM   66  O   HOH T  65      76.554  51.672   5.582  1.00  0.29           O  
HETATM   67  O   HOH T  66      58.749  53.229 -19.607  1.00  0.29           O  
HETATM   68  O   HOH T  67      32.586  68.334  -1.194  1.00  0.29           O  
HETATM   69  O   HOH T  68      51.715  63.515  13.605  1.00  0.29           O  
HETATM   70  O   HOH T  69      41.207  71.203 -10.132  1.00  0.29           O  
HETATM   71  O   HOH T  70      29.499  25.965   0.132  1.00  0.29           O  
HETATM   72  O   HOH T  71      45.337  55.099  11.565  1.00  0.29           O  
HETATM   73  O   HOH T  72      68.775  28.807  -8.684  1.00  0.29           O  
HETATM   74  O   HOH T  73      58.495  28.272  -1.292  1.00  0.29           O  
HETATM   75  O   HOH T  74      41.960  39.452 -18.228  1.00  0.30           O  
HETATM   76  O   HOH T  75      82.787  65.450  15.599  1.00  0.30           O  
HETATM   77  O   HOH T  76      33.860  34.184   1.104  1.00  0.30           O  
HETATM   78  O   HOH T  77      68.631  44.860  10.781  1.00  0.30           O  
HETATM   79  O   HOH T  78      36.713  45.976 -23.689  1.00  0.30           O  
HETATM   80  O   HOH T  79      28.811  66.107 -15.494  1.00  0.30           O  
HETATM   81  O   HOH T  80      42.967  27.574   9.941  1.00  0.30           O  
HETATM   82  O   HOH T  81      46.701  45.726 -11.398  1.00  0.31           O  
HETATM   83  O   HOH T  82      23.826  61.028 -14.635  1.00  0.31           O  
HETATM   84  O   HOH T  83      69.839  41.920   8.696  1.00  0.31           O  
HETATM   85  O   HOH T  84      44.906  32.080  -9.384  1.00  0.31           O  
HETATM   86  O   HOH T  85      75.047  54.501  13.388  1.00  0.31           O  
HETATM   87  O   HOH T  86      42.617  47.288   5.447  1.00  0.31           O  
HETATM   88  O   HOH T  87      67.300  54.267  14.867  1.00  0.31           O  
HETATM   89  O   HOH T  88      34.605  51.993 -27.688  1.00  0.31           O  
HETATM   90  O   HOH T  89      28.325  51.813 -13.802  1.00  0.31           O  
HETATM   91  O   HOH T  90      79.755  70.502   9.669  1.00  0.31           O  
HETATM   92  O   HOH T  91      42.113  46.303  19.369  1.00  0.31           O  
HETATM   93  O   HOH T  92      35.420  23.592   6.879  1.00  0.32           O  
HETATM   94  O   HOH T  93      47.497  57.266   0.992  1.00  0.32           O  
HETATM   95  O   HOH T  94      46.393  62.449 -10.313  1.00  0.32           O  
HETATM   96  O   HOH T  95      62.828  35.077   2.959  1.00  0.32           O  
HETATM   97  O   HOH T  96      26.156  38.855  -0.094  1.00  0.32           O  
HETATM   98  O   HOH T  97      66.086  29.714  -8.286  1.00  0.32           O  
HETATM   99  O   HOH T  98      38.068  25.663  -0.790  1.00  0.32           O  
HETATM  100  O   HOH T  99      28.087  53.146 -17.987  1.00  0.32           O  
HETATM  101  O   HOH T 100      60.875  50.234  13.880  1.00  0.32           O  
HETATM  102  O   HOH T 101      64.226  29.618  -3.305  1.00  0.32           O  
HETATM  103  O   HOH T 102      37.866  68.527  -5.847  1.00  0.32           O  
HETATM  104  O   HOH T 103      69.893  54.387  14.736  1.00  0.32           O  
HETATM  105  O   HOH T 104      65.487  35.230   2.104  1.00  0.32           O  
HETATM  106  O   HOH T 105      71.623  30.489 -18.603  1.00  0.32           O  
HETATM  107  O   HOH T 106      66.236  56.565  15.932  1.00  0.33           O  
HETATM  108  O   HOH T 107      33.271  24.371   5.296  1.00  0.33           O  
HETATM  109  O   HOH T 108      49.016  52.728 -25.712  1.00  0.33           O  
HETATM  110  O   HOH T 109      27.911  68.680 -14.546  1.00  0.33           O  
HETATM  111  O   HOH T 110      77.196  67.163  10.086  1.00  0.33           O  
HETATM  112  O   HOH T 111      58.454  35.264 -16.262  1.00  0.33           O  
HETATM  113  O   HOH T 112      83.507  34.457 -15.657  1.00  0.33           O  
HETATM  114  O   HOH T 113      30.375  54.932  -2.398  1.00  0.33           O  
HETATM  115  O   HOH T 114      77.980  53.534   9.842  1.00  0.33           O  
HETATM  116  O   HOH T 115      50.193  46.207  -9.665  1.00  0.33           O  
HETATM  117  O   HOH T 116      51.114  51.695 -24.232  1.00  0.33           O  
HETATM  118  O   HOH T 117      44.244  42.263  -2.370  1.00  0.33           O  
HETATM  119  O   HOH T 118      32.403  44.091  -3.079  1.00  0.33           O  
HETATM  120  O   HOH T 119      51.794  59.158 -24.861  1.00  0.34           O  
HETATM  121  O   HOH T 120      34.850  54.352 -30.684  1.00  0.34           O  
HETATM  122  O   HOH T 121      38.153  38.910 -17.296  1.00  0.34           O  
HETATM  123  O   HOH T 122      47.883  28.711  -5.775  1.00  0.34           O  
HETATM  124  O   HOH T 123      32.696  42.859 -10.080  1.00  0.34           O  
HETATM  125  O   HOH T 124      46.903  70.958  -4.873  1.00  0.34           O  
HETATM  126  O   HOH T 125      82.308  59.169  12.592  1.00  0.34           O  
HETATM  127  O   HOH T 126      31.598  60.207 -30.275  1.00  0.34           O  
HETATM  128  O   HOH T 127      38.126  26.372   7.939  1.00  0.34           O  
HETATM  129  O   HOH T 128      47.677  67.428 -16.761  1.00  0.34           O  
HETATM  130  O   HOH T 129      42.058  71.767 -12.698  1.00  0.34           O  
HETATM  131  O   HOH T 130      55.251  26.479   0.166  1.00  0.34           O  
HETATM  132  O   HOH T 131      34.250  57.418  12.217  1.00  0.34           O  
HETATM  133  O   HOH T 132      55.406  37.812 -10.064  1.00  0.34           O  
HETATM  134  O   HOH T 133      39.091  68.615 -22.938  1.00  0.34           O  
HETATM  135  O   HOH T 134      42.282  38.812  20.987  1.00  0.34           O  
HETATM  136  O   HOH T 135      53.042  28.344  10.228  1.00  0.35           O  
HETATM  137  O   HOH T 136      36.880  53.137 -29.074  1.00  0.35           O  
HETATM  138  O   HOH T 137      34.858  41.905 -18.986  1.00  0.35           O  
HETATM  139  O   HOH T 138      71.931  51.022  11.720  1.00  0.35           O  
HETATM  140  O   HOH T 139      52.189  55.245  22.956  1.00  0.35           O  
HETATM  141  O   HOH T 140      54.300  53.741  23.734  1.00  0.35           O  
HETATM  142  O   HOH T 141      41.038  62.643 -13.109  1.00  0.35           O  
HETATM  143  O   HOH T 142      72.797  75.576   1.459  1.00  0.35           O  
HETATM  144  O   HOH T 143      34.665  45.194 -25.420  1.00  0.35           O  
HETATM  145  O   HOH T 144      46.187  42.973  23.923  1.00  0.36           O  
HETATM  146  O   HOH T 145      52.566  59.035 -13.497  1.00  0.36           O  
HETATM  147  O   HOH T 146      34.882  39.536 -14.441  1.00  0.36           O  
HETATM  148  O   HOH T 147      66.707  29.736 -16.685  1.00  0.36           O  
HETATM  149  O   HOH T 148      54.203  42.959 -13.475  1.00  0.36           O  
HETATM  150  O   HOH T 149      41.277  38.028  18.602  1.00  0.36           O  
HETATM  151  O   HOH T 150      44.548  47.905  19.063  1.00  0.36           O  
HETATM  152  O   HOH T 151      55.095  55.460 -11.644  1.00  0.36           O  
HETATM  153  O   HOH T 152      59.822  28.227   8.151  1.00  0.36           O  
HETATM  154  O   HOH T 153      51.692  68.333   3.075  1.00  0.36           O  
HETATM  155  O   HOH T 154      40.837  50.612  13.350  1.00  0.36           O  
HETATM  156  O   HOH T 155      48.677  70.472   0.308  1.00  0.36           O  
HETATM  157  O   HOH T 156      70.090  65.231  10.541  1.00  0.36           O  
HETATM  158  O   HOH T 157      55.139  30.022  -6.832  1.00  0.36           O  
HETATM  159  O   HOH T 158      45.100  53.333  15.638  1.00  0.36           O  
HETATM  160  O   HOH T 159      43.798  46.674  24.566  1.00  0.37           O  
HETATM  161  O   HOH T 160      42.861  29.222  -5.806  1.00  0.37           O  
HETATM  162  O   HOH T 161      47.679  70.245  -2.251  1.00  0.37           O  
HETATM  163  O   HOH T 162      47.535  45.631 -15.333  1.00  0.37           O  
HETATM  164  O   HOH T 163      36.091  47.829   5.205  1.00  0.37           O  
HETATM  165  O   HOH T 164      64.103  47.145 -12.211  1.00  0.37           O  
HETATM  166  O   HOH T 165      55.967  25.641   4.798  1.00  0.37           O  
HETATM  167  O   HOH T 166      44.540  67.046  11.184  1.00  0.37           O  
HETATM  168  O   HOH T 167      59.713  62.985  -8.748  1.00  0.37           O  
HETATM  169  O   HOH T 168      30.549  58.041 -31.848  1.00  0.37           O  
HETATM  170  O   HOH T 169      79.425  53.053  13.195  1.00  0.37           O  
HETATM  171  O   HOH T 170      35.834  42.877 -16.445  1.00  0.37           O  
HETATM  172  O   HOH T 171      44.596  55.259  19.110  1.00  0.37           O  
HETATM  173  O   HOH T 172      75.384  59.269  12.459  1.00  0.37           O  
HETATM  174  O   HOH T 173      46.177  70.755   1.430  1.00  0.38           O  
HETATM  175  O   HOH T 174      39.996  45.512 -25.750  1.00  0.38           O  
HETATM  176  O   HOH T 175      39.368  64.712   4.316  1.00  0.38           O  
HETATM  177  O   HOH T 176      68.457  35.801 -17.602  1.00  0.38           O  
HETATM  178  O   HOH T 177      51.662  47.728 -16.076  1.00  0.38           O  
HETATM  179  O   HOH T 178      48.139  68.182 -12.350  1.00  0.38           O  
HETATM  180  O   HOH T 179      53.817  61.519 -14.134  1.00  0.38           O  
HETATM  181  O   HOH T 180      75.961  69.567  10.057  1.00  0.38           O  
HETATM  182  O   HOH T 181      57.292  73.024   2.967  1.00  0.38           O  
HETATM  183  O   HOH T 182      47.811  41.495  19.646  1.00  0.38           O  
HETATM  184  O   HOH T 183      60.632  46.757 -13.864  1.00  0.38           O  
HETATM  185  O   HOH T 184      48.736  42.936  25.099  1.00  0.38           O  
HETATM  186  O   HOH T 185      45.028  65.710 -26.658  1.00  0.38           O  
HETATM  187  O   HOH T 186      35.457  70.154  -5.703  1.00  0.38           O  
HETATM  188  O   HOH T 187      67.121  63.054  10.122  1.00  0.38           O  
HETATM  189  O   HOH T 188      49.237  48.061 -17.656  1.00  0.38           O  
HETATM  190  O   HOH T 189      45.919  68.934  -6.667  1.00  0.39           O  
HETATM  191  O   HOH T 190      67.467  30.378   5.874  1.00  0.39           O  
HETATM  192  O   HOH T 191      72.575  29.023 -12.166  1.00  0.39           O  
HETATM  193  O   HOH T 192      72.295  50.867   4.814  1.00  0.39           O  
HETATM  194  O   HOH T 193      45.480  61.599  13.263  1.00  0.39           O  
HETATM  195  O   HOH T 194      40.132  37.183  -9.993  1.00  0.39           O  
HETATM  196  O   HOH T 195      56.075  40.957 -13.021  1.00  0.39           O  
HETATM  197  O   HOH T 196      35.615  58.366   4.710  1.00  0.39           O  
HETATM  198  O   HOH T 197      36.658  25.852   5.562  1.00  0.39           O  
HETATM  199  O   HOH T 198      83.402  33.325 -26.075  1.00  0.39           O  
HETATM  200  O   HOH T 199      32.173  49.000  -3.096  1.00  0.39           O  
HETATM  201  O   HOH T 200      59.093  30.789 -18.789  1.00  0.39           O  
HETATM  202  O   HOH T 201      72.737  59.572  13.017  1.00  0.39           O  
HETATM  203  O   HOH T 202      76.657  34.296 -24.876  1.00  0.39           O  
HETATM  204  O   HOH T 203      51.367  46.708 -13.454  1.00  0.39           O  
HETATM  205  O   HOH T 204      38.603  31.864  -5.724  1.00  0.39           O  
HETATM  206  O   HOH T 205      64.460  69.715  10.851  1.00  0.39           O  
HETATM  207  O   HOH T 206      58.723  48.732 -14.505  1.00  0.39           O  
HETATM  208  O   HOH T 207      52.793  28.615  -6.978  1.00  0.39           O  
HETATM  209  O   HOH T 208      54.197  56.915 -26.603  1.00  0.39           O  
HETATM  210  O   HOH T 209      48.860  30.597  18.604  1.00  0.39           O  
HETATM  211  O   HOH T 210      55.064  27.180   6.991  1.00  0.39           O  
HETATM  212  O   HOH T 211      52.634  46.185  20.517  1.00  0.40           O  
HETATM  213  O   HOH T 212      53.088  24.935   0.996  1.00  0.40           O  
HETATM  214  O   HOH T 213      51.836  63.168 -27.591  1.00  0.40           O  
HETATM  215  O   HOH T 214      44.600  71.257 -13.853  1.00  0.40           O  
HETATM  216  O   HOH T 215      32.394  59.110  13.593  1.00  0.40           O  
HETATM  217  O   HOH T 216      76.996  28.784 -21.723  1.00  0.40           O  
HETATM  218  O   HOH T 217      31.485  45.940  -7.736  1.00  0.40           O  
HETATM  219  O   HOH T 218      42.088  43.681 -25.539  1.00  0.40           O  
HETATM  220  O   HOH T 219      54.820  71.993   2.517  1.00  0.40           O  
HETATM  221  O   HOH T 220      46.541  43.689  26.671  1.00  0.40           O  
HETATM  222  O   HOH T 221      70.776  44.484   7.717  1.00  0.40           O  
HETATM  223  O   HOH T 222      37.420  45.606  17.606  1.00  0.40           O  
HETATM  224  O   HOH T 223      70.567  72.388   9.115  1.00  0.40           O  
HETATM  225  O   HOH T 224      27.522  54.528 -20.332  1.00  0.40           O  
HETATM  226  O   HOH T 225      48.958  58.256  21.924  1.00  0.41           O  
HETATM  227  O   HOH T 226      47.878  70.611 -10.895  1.00  0.41           O  
HETATM  228  O   HOH T 227      24.405  57.452 -14.914  1.00  0.41           O  
HETATM  229  O   HOH T 228      36.372  39.397 -22.020  1.00  0.41           O  
HETATM  230  O   HOH T 229      50.650  39.785  -8.987  1.00  0.41           O  
HETATM  231  O   HOH T 230      62.566  68.009   9.624  1.00  0.41           O  
HETATM  232  O   HOH T 231      63.999  54.988  16.457  1.00  0.41           O  
HETATM  233  O   HOH T 232      57.685  71.856  -9.690  1.00  0.41           O  
HETATM  234  O   HOH T 233      34.065  63.638   1.502  1.00  0.41           O  
HETATM  235  O   HOH T 234      32.564  40.343 -11.440  1.00  0.41           O  
HETATM  236  O   HOH T 235      68.542  62.343  12.411  1.00  0.41           O  
HETATM  237  O   HOH T 236      60.159  42.868  -5.428  1.00  0.41           O  
HETATM  238  O   HOH T 237      50.368  26.836   7.226  1.00  0.41           O  
HETATM  239  O   HOH T 238      57.786  50.671 -20.428  1.00  0.41           O  
HETATM  240  O   HOH T 239      48.516  41.285  -9.861  1.00  0.41           O  
HETATM  241  O   HOH T 240      73.462  31.529 -20.499  1.00  0.41           O  
HETATM  242  O   HOH T 241      57.632  36.164 -13.755  1.00  0.41           O  
HETATM  243  O   HOH T 242      41.481  39.625 -20.879  1.00  0.41           O  
HETATM  244  O   HOH T 243      37.625  60.503 -32.002  1.00  0.41           O  
HETATM  245  O   HOH T 244      27.235  55.052 -29.013  1.00  0.41           O  
HETATM  246  O   HOH T 245      55.690  70.916   8.851  1.00  0.42           O  
HETATM  247  O   HOH T 246      36.845  48.616  12.455  1.00  0.42           O  
HETATM  248  O   HOH T 247      42.564  40.281  -1.475  1.00  0.42           O  
HETATM  249  O   HOH T 248      49.303  69.049 -18.455  1.00  0.42           O  
HETATM  250  O   HOH T 249      49.498  57.593  18.810  1.00  0.42           O  
HETATM  251  O   HOH T 250      26.932  50.195 -15.645  1.00  0.42           O  
HETATM  252  O   HOH T 251      72.062  28.287 -17.040  1.00  0.42           O  
HETATM  253  O   HOH T 252      79.024  51.231  11.118  1.00  0.42           O  
HETATM  254  O   HOH T 253      57.587  44.871  -2.896  1.00  0.42           O  
HETATM  255  O   HOH T 254      45.892  71.596  -7.391  1.00  0.42           O  
HETATM  256  O   HOH T 255      54.193  73.394   0.273  1.00  0.42           O  
HETATM  257  O   HOH T 256      36.101  50.081  10.244  1.00  0.42           O  
HETATM  258  O   HOH T 257      37.844  38.358  -8.504  1.00  0.42           O  
HETATM  259  O   HOH T 258      48.502  48.162 -22.451  1.00  0.42           O  
HETATM  260  O   HOH T 259      37.183  69.822  -3.567  1.00  0.42           O  
HETATM  261  O   HOH T 260      53.731  66.528 -12.433  1.00  0.42           O  
HETATM  262  O   HOH T 261      49.619  70.833  -4.106  1.00  0.42           O  
HETATM  263  O   HOH T 262      35.348  36.250 -10.639  1.00  0.42           O  
HETATM  264  O   HOH T 263      30.083  68.328 -16.378  1.00  0.42           O  
HETATM  265  O   HOH T 264      69.059  36.468  17.708  1.00  0.42           O  
HETATM  266  O   HOH T 265      27.345  52.650 -22.363  1.00  0.42           O  
HETATM  267  O   HOH T 266      80.263  53.683   8.219  1.00  0.42           O  
HETATM  268  O   HOH T 267      33.229  43.069 -15.523  1.00  0.43           O  
HETATM  269  O   HOH T 268      58.449  74.666   1.006  1.00  0.43           O  
HETATM  270  O   HOH T 269      48.594  46.918 -13.081  1.00  0.43           O  
HETATM  271  O   HOH T 270      83.721  60.903  11.050  1.00  0.43           O  
HETATM  272  O   HOH T 271      39.378  63.129 -28.501  1.00  0.43           O  
HETATM  273  O   HOH T 272      51.300  50.113 -17.389  1.00  0.43           O  
HETATM  274  O   HOH T 273      42.329  69.742  -8.171  1.00  0.43           O  
HETATM  275  O   HOH T 274      51.785  66.426 -24.570  1.00  0.43           O  
HETATM  276  O   HOH T 275      68.809  73.624   4.644  1.00  0.43           O  
HETATM  277  O   HOH T 276      66.069  57.535  -0.005  1.00  0.43           O  
HETATM  278  O   HOH T 277      44.645  39.767  22.112  1.00  0.43           O  
HETATM  279  O   HOH T 278      44.161  65.688  16.126  1.00  0.43           O  
HETATM  280  O   HOH T 279      28.690  38.494   0.799  1.00  0.43           O  
HETATM  281  O   HOH T 280      50.070  64.847 -26.130  1.00  0.43           O  
HETATM  282  O   HOH T 281      59.858  61.785 -11.339  1.00  0.43           O  
HETATM  283  O   HOH T 282      48.529  50.213 -26.920  1.00  0.43           O  
HETATM  284  O   HOH T 283      81.903  69.585  11.193  1.00  0.43           O  
HETATM  285  O   HOH T 284      31.243  65.815 -17.015  1.00  0.43           O  
HETATM  286  O   HOH T 285      25.595  53.798 -16.921  1.00  0.43           O  
HETATM  287  O   HOH T 286      64.626  62.091  13.690  1.00  0.43           O  
HETATM  288  O   HOH T 287      55.923  61.371 -15.985  1.00  0.43           O  
HETATM  289  O   HOH T 288      52.604  71.729  12.676  1.00  0.43           O  
HETATM  290  O   HOH T 289      47.962  42.987 -16.017  1.00  0.43           O  
HETATM  291  O   HOH T 290      35.727  48.786   7.819  1.00  0.43           O  
HETATM  292  O   HOH T 291      66.621  55.024  -1.067  1.00  0.43           O  
HETATM  293  O   HOH T 292      31.323  39.740   2.996  1.00  0.43           O  
HETATM  294  O   HOH T 293      78.669  36.023 -20.095  1.00  0.43           O  
HETATM  295  O   HOH T 294      43.468  60.544   8.779  1.00  0.43           O  
HETATM  296  O   HOH T 295      35.024  51.558 -30.388  1.00  0.44           O  
HETATM  297  O   HOH T 296      52.916  42.217 -11.298  1.00  0.44           O  
HETATM  298  O   HOH T 297      52.246  67.790 -10.432  1.00  0.44           O  
HETATM  299  O   HOH T 298      47.778  66.043  14.486  1.00  0.44           O  
HETATM  300  O   HOH T 299      55.302  49.343 -20.064  1.00  0.44           O  
HETATM  301  O   HOH T 300      60.629  32.029  -7.287  1.00  0.44           O  
HETATM  302  O   HOH T 301      49.482  49.784  -9.025  1.00  0.44           O  
HETATM  303  O   HOH T 302      32.409  42.628 -12.887  1.00  0.44           O  
HETATM  304  O   HOH T 303      78.441  50.667   7.471  1.00  0.44           O  
HETATM  305  O   HOH T 304      42.795  64.755 -25.523  1.00  0.44           O  
HETATM  306  O   HOH T 305      39.397  35.453 -11.996  1.00  0.44           O  
HETATM  307  O   HOH T 306      34.953  39.127 -19.555  1.00  0.44           O  
HETATM  308  O   HOH T 307      58.907  47.372  18.774  1.00  0.44           O  
HETATM  309  O   HOH T 308      39.171  39.147 -22.572  1.00  0.44           O  
HETATM  310  O   HOH T 309      61.050  45.179  -4.102  1.00  0.44           O  
HETATM  311  O   HOH T 310      65.372  75.228  -5.464  1.00  0.44           O  
HETATM  312  O   HOH T 311      70.604  37.307 -18.739  1.00  0.44           O  
HETATM  313  O   HOH T 312      73.795  56.978  12.559  1.00  0.44           O  
HETATM  314  O   HOH T 313      49.458  72.232  -1.673  1.00  0.44           O  
HETATM  315  O   HOH T 314      39.032  60.351 -28.210  1.00  0.44           O  
HETATM  316  O   HOH T 315      56.023  68.166 -12.453  1.00  0.45           O  
HETATM  317  O   HOH T 316      56.727  55.171 -16.205  1.00  0.45           O  
HETATM  318  O   HOH T 317      50.619  27.973  -5.505  1.00  0.45           O  
HETATM  319  O   HOH T 318      42.757  65.204 -28.163  1.00  0.45           O  
HETATM  320  O   HOH T 319      59.628  77.198   0.837  1.00  0.45           O  
HETATM  321  O   HOH T 320      54.166  50.991 -22.064  1.00  0.45           O  
HETATM  322  O   HOH T 321      45.186  57.913  11.227  1.00  0.45           O  
HETATM  323  O   HOH T 322      49.307  40.465  23.997  1.00  0.45           O  
HETATM  324  O   HOH T 323      46.671  66.625  16.960  1.00  0.45           O  
HETATM  325  O   HOH T 324      51.208  73.005  -3.636  1.00  0.45           O  
HETATM  326  O   HOH T 325      39.883  53.308  11.406  1.00  0.45           O  
HETATM  327  O   HOH T 326      58.319  38.076 -11.877  1.00  0.45           O  
HETATM  328  O   HOH T 327      53.832  42.274  20.871  1.00  0.45           O  
HETATM  329  O   HOH T 328      41.687  26.326  12.068  1.00  0.45           O  
HETATM  330  O   HOH T 329      43.608  72.057  -8.932  1.00  0.45           O  
HETATM  331  O   HOH T 330      74.499  70.460  12.170  1.00  0.45           O  
HETATM  332  O   HOH T 331      45.656  48.159  26.028  1.00  0.45           O  
HETATM  333  O   HOH T 332      43.258  60.631  14.716  1.00  0.45           O  
HETATM  334  O   HOH T 333      67.927  74.842  -4.651  1.00  0.45           O  
HETATM  335  O   HOH T 334      50.193  37.283  -9.914  1.00  0.45           O  
HETATM  336  O   HOH T 335      35.713  65.107 -31.075  1.00  0.45           O  
HETATM  337  O   HOH T 336      55.943  42.285 -15.458  1.00  0.45           O  
HETATM  338  O   HOH T 337      42.402  23.542   5.693  1.00  0.45           O  
HETATM  339  O   HOH T 338      32.280  47.783  -5.723  1.00  0.45           O  
HETATM  340  O   HOH T 339      61.580  74.758   5.207  1.00  0.45           O  
HETATM  341  O   HOH T 340      54.227  59.311  18.836  1.00  0.45           O  
HETATM  342  O   HOH T 341      69.905  62.401   9.973  1.00  0.46           O  
HETATM  343  O   HOH T 342      41.704  59.114  16.451  1.00  0.46           O  
HETATM  344  O   HOH T 343      43.914  33.148 -11.765  1.00  0.46           O  
HETATM  345  O   HOH T 344      42.272  44.484  23.696  1.00  0.46           O  
HETATM  346  O   HOH T 345      47.178  70.400 -13.624  1.00  0.46           O  
HETATM  347  O   HOH T 346      36.293  43.083  18.188  1.00  0.46           O  
HETATM  348  O   HOH T 347      62.638  76.714   3.395  1.00  0.46           O  
HETATM  349  O   HOH T 348      47.066  27.543  14.709  1.00  0.46           O  
HETATM  350  O   HOH T 349      60.612  52.460  15.282  1.00  0.46           O  
HETATM  351  O   HOH T 350      29.128  56.127 -33.387  1.00  0.46           O  
HETATM  352  O   HOH T 351      38.183  62.382   4.988  1.00  0.46           O  
HETATM  353  O   HOH T 352      26.656  52.722 -25.039  1.00  0.46           O  
HETATM  354  O   HOH T 353      26.311  49.127 -19.715  1.00  0.46           O  
HETATM  355  O   HOH T 354      48.636  43.946 -10.530  1.00  0.46           O  
HETATM  356  O   HOH T 355      29.641  46.525  -9.724  1.00  0.46           O  
HETATM  357  O   HOH T 356      56.400  72.337  -7.251  1.00  0.46           O  
HETATM  358  O   HOH T 357      51.791  44.094 -12.980  1.00  0.46           O  
HETATM  359  O   HOH T 358      59.312  37.952 -19.639  1.00  0.46           O  
HETATM  360  O   HOH T 359      82.719  33.848 -13.100  1.00  0.46           O  
HETATM  361  O   HOH T 360      46.410  29.770  17.416  1.00  0.46           O  
HETATM  362  O   HOH T 361      31.543  54.465   9.661  1.00  0.46           O  
HETATM  363  O   HOH T 362      54.394  72.318  10.647  1.00  0.46           O  
HETATM  364  O   HOH T 363      51.896  53.600  25.167  1.00  0.46           O  
HETATM  365  O   HOH T 364      52.628  66.637   1.030  1.00  0.46           O  
HETATM  366  O   HOH T 365      42.812  47.217 -22.946  1.00  0.46           O  
HETATM  367  O   HOH T 366      51.897  68.128 -18.413  1.00  0.46           O  
HETATM  368  O   HOH T 367      35.884  49.152  14.968  1.00  0.46           O  
HETATM  369  O   HOH T 368      41.280  61.668   7.874  1.00  0.47           O  
HETATM  370  O   HOH T 369      50.876  60.861 -26.608  1.00  0.47           O  
HETATM  371  O   HOH T 370      52.802  37.120 -10.718  1.00  0.47           O  
HETATM  372  O   HOH T 371      43.037  30.008  -9.850  1.00  0.47           O  
HETATM  373  O   HOH T 372      33.741  62.042   3.768  1.00  0.47           O  
HETATM  374  O   HOH T 373      32.106  51.558  -0.444  1.00  0.47           O  
HETATM  375  O   HOH T 374      45.852  61.396  -4.438  1.00  0.47           O  
HETATM  376  O   HOH T 375      58.167  52.415  27.239  1.00  0.47           O  
HETATM  377  O   HOH T 376      33.911  38.045 -12.194  1.00  0.47           O  
HETATM  378  O   HOH T 377      65.655  52.728  16.495  1.00  0.47           O  
HETATM  379  O   HOH T 378      56.248  65.580 -30.423  1.00  0.47           O  
HETATM  380  O   HOH T 379      66.259  74.926   2.740  1.00  0.47           O  
HETATM  381  O   HOH T 380      59.252  45.619 -16.086  1.00  0.47           O  
HETATM  382  O   HOH T 381      40.962  54.987 -32.016  1.00  0.47           O  
HETATM  383  O   HOH T 382      59.216  48.299 -11.899  1.00  0.47           O  
HETATM  384  O   HOH T 383      53.308  73.650  -5.084  1.00  0.47           O  
HETATM  385  O   HOH T 384      45.576  68.193  18.910  1.00  0.47           O  
HETATM  386  O   HOH T 385      30.515  25.826  -2.394  1.00  0.47           O  
HETATM  387  O   HOH T 386      60.069  75.576   3.084  1.00  0.47           O  
HETATM  388  O   HOH T 387      32.207  62.917 -29.996  1.00  0.47           O  
HETATM  389  O   HOH T 388      45.013  28.644  19.477  1.00  0.47           O  
HETATM  390  O   HOH T 389      61.776  31.506 -18.559  1.00  0.47           O  
HETATM  391  O   HOH T 390      40.423  25.028   7.010  1.00  0.48           O  
HETATM  392  O   HOH T 391      48.079  47.970 -10.529  1.00  0.48           O  
HETATM  393  O   HOH T 392      35.625  34.625  -8.438  1.00  0.48           O  
HETATM  394  O   HOH T 393      64.807  77.028   1.647  1.00  0.48           O  
HETATM  395  O   HOH T 394      49.674  26.550  14.236  1.00  0.48           O  
HETATM  396  O   HOH T 395      34.683  43.618  11.725  1.00  0.48           O  
HETATM  397  O   HOH T 396      29.812  52.473  -1.347  1.00  0.48           O  
HETATM  398  O   HOH T 397      44.449  58.230  13.858  1.00  0.48           O  
HETATM  399  O   HOH T 398      42.883  76.431 -21.257  1.00  0.48           O  
HETATM  400  O   HOH T 399      56.629  23.388   3.255  1.00  0.48           O  
HETATM  401  O   HOH T 400      55.686  23.958   0.785  1.00  0.48           O  
HETATM  402  O   HOH T 401      49.312  66.036  16.831  1.00  0.48           O  
HETATM  403  O   HOH T 402      27.884  54.263 -31.663  1.00  0.48           O  
HETATM  404  O   HOH T 403      47.728  47.912  20.281  1.00  0.48           O  
HETATM  405  O   HOH T 404      49.338  30.490  -7.358  1.00  0.48           O  
HETATM  406  O   HOH T 405      57.330  45.387   6.727  1.00  0.48           O  
HETATM  407  O   HOH T 406      40.512  37.357 -16.947  1.00  0.48           O  
HETATM  408  O   HOH T 407      62.967  43.819  -5.615  1.00  0.48           O  
HETATM  409  O   HOH T 408      24.961  55.102 -19.376  1.00  0.49           O  
HETATM  410  O   HOH T 409      72.914  27.570 -14.522  1.00  0.49           O  
HETATM  411  O   HOH T 410      21.408  59.913 -15.504  1.00  0.49           O  
HETATM  412  O   HOH T 411      67.087  31.502 -18.802  1.00  0.49           O  
HETATM  413  O   HOH T 412      48.218  55.956  20.509  1.00  0.49           O  
HETATM  414  O   HOH T 413      25.834  52.491 -14.422  1.00  0.49           O  
HETATM  415  O   HOH T 414      25.689  56.034 -21.863  1.00  0.49           O  
HETATM  416  O   HOH T 415      82.697  52.530   8.850  1.00  0.49           O  
HETATM  417  O   HOH T 416      53.333  39.801 -10.011  1.00  0.49           O  
HETATM  418  O   HOH T 417      52.587  65.545 -26.999  1.00  0.49           O  
HETATM  419  O   HOH T 418      28.948  53.111 -27.643  1.00  0.49           O  
HETATM  420  O   HOH T 419      72.290  55.026  13.732  1.00  0.49           O  
HETATM  421  O   HOH T 420      72.488  29.055 -20.886  1.00  0.49           O  
HETATM  422  O   HOH T 421      66.064  75.117  -0.019  1.00  0.49           O  
HETATM  423  O   HOH T 422      52.061  27.395  12.710  1.00  0.49           O  
HETATM  424  O   HOH T 423      31.975  57.304 -25.700  1.00  0.49           O  
HETATM  425  O   HOH T 424      36.205  60.848   3.947  1.00  0.49           O  
HETATM  426  O   HOH T 425      79.390  72.530   7.535  1.00  0.49           O  
HETATM  427  O   HOH T 426      71.109  56.764  15.549  1.00  0.49           O  
HETATM  428  O   HOH T 427      63.776  29.638 -18.904  1.00  0.49           O  
HETATM  429  O   HOH T 428      34.287  50.985  -3.104  1.00  0.49           O  
HETATM  430  O   HOH T 429      61.613  30.074 -12.172  1.00  0.49           O  
HETATM  431  O   HOH T 430      41.351  21.764   3.958  1.00  0.49           O  
HETATM  432  O   HOH T 431      28.783  53.437 -34.209  1.00  0.49           O  
HETATM  433  O   HOH T 432      44.599  37.460  20.458  1.00  0.49           O  
HETATM  434  O   HOH T 433      45.811  59.999  15.654  1.00  0.50           O  
HETATM  435  O   HOH T 434      61.931  48.832 -12.367  1.00  0.50           O  
HETATM  436  O   HOH T 435      44.057  58.159   7.450  1.00  0.50           O  
HETATM  437  O   HOH T 436      40.488  26.310   9.507  1.00  0.50           O  
HETATM  438  O   HOH T 437      62.325  78.022   0.885  1.00  0.50           O  
HETATM  439  O   HOH T 438      55.137  59.086 -14.630  1.00  0.50           O  
HETATM  440  O   HOH T 439      60.475  31.179  -9.837  1.00  0.50           O  
HETATM  441  O   HOH T 440      50.595  57.281  23.907  1.00  0.50           O  
HETATM  442  O   HOH T 441      45.254  48.226 -24.124  1.00  0.50           O  
HETATM  443  O   HOH T 442      34.595  45.192  17.734  1.00  0.50           O  
HETATM  444  O   HOH T 443      28.157  56.869 -30.957  1.00  0.50           O  
HETATM  445  O   HOH T 444      46.099  23.954   2.415  1.00  0.50           O  
HETATM  446  O   HOH T 445      35.239  68.236  -0.163  1.00  0.50           O  
HETATM  447  O   HOH T 446      33.535  53.051  11.019  1.00  0.50           O  
HETATM  448  O   HOH T 447      53.547  65.372  14.302  1.00  0.50           O  
HETATM  449  O   HOH T 448      72.142  71.289  11.061  1.00  0.50           O  
HETATM  450  O   HOH T 449      35.101  42.298 -13.749  1.00  0.50           O  
HETATM  451  O   HOH T 450      64.459  32.355 -18.889  1.00  0.50           O  
HETATM  452  O   HOH T 451      51.857  30.763  -8.356  1.00  0.50           O  
HETATM  453  O   HOH T 452      26.127  51.233 -18.060  1.00  0.50           O  
HETATM  454  O   HOH T 453      49.472  49.870 -29.545  1.00  0.50           O  
HETATM  455  O   HOH T 454      39.770  63.659   6.822  1.00  0.50           O  
HETATM  456  O   HOH T 455      62.188  70.712   9.762  1.00  0.51           O  
HETATM  457  O   HOH T 456      39.905  57.477 -31.149  1.00  0.51           O  
HETATM  458  O   HOH T 457      42.064  41.170 -24.378  1.00  0.51           O  
HETATM  459  O   HOH T 458      44.897  74.810 -22.071  1.00  0.51           O  
HETATM  460  O   HOH T 459      53.461  47.790  22.767  1.00  0.51           O  
HETATM  461  O   HOH T 460      54.854  74.548  -7.148  1.00  0.51           O  
HETATM  462  O   HOH T 461      54.052  67.447 -25.869  1.00  0.51           O  
HETATM  463  O   HOH T 462      39.770  47.132 -28.292  1.00  0.51           O  
HETATM  464  O   HOH T 463      39.704  46.844  20.551  1.00  0.51           O  
HETATM  465  O   HOH T 464      44.957  45.417 -23.545  1.00  0.51           O  
HETATM  466  O   HOH T 465      29.700  54.771   0.255  1.00  0.51           O  
HETATM  467  O   HOH T 466      31.760  28.290  -2.400  1.00  0.51           O  
HETATM  468  O   HOH T 467      53.988  56.681 -13.904  1.00  0.51           O  
HETATM  469  O   HOH T 468      30.647  55.102 -35.516  1.00  0.51           O  
HETATM  470  O   HOH T 469      36.165  63.517   3.325  1.00  0.51           O  
HETATM  471  O   HOH T 470      33.430  65.287 -29.464  1.00  0.51           O  
HETATM  472  O   HOH T 471      38.785  49.196  19.274  1.00  0.51           O  
HETATM  473  O   HOH T 472      46.823  62.443  16.417  1.00  0.51           O  
HETATM  474  O   HOH T 473      81.833  67.874  16.255  1.00  0.51           O  
HETATM  475  O   HOH T 474      24.187  58.328 -21.085  1.00  0.51           O  
HETATM  476  O   HOH T 475      40.598  68.256 -25.216  1.00  0.51           O  
HETATM  477  O   HOH T 476      69.924  34.191  19.049  1.00  0.51           O  
HETATM  478  O   HOH T 477      47.804  50.186  18.659  1.00  0.52           O  
HETATM  479  O   HOH T 478      24.394  54.786 -14.657  1.00  0.52           O  
HETATM  480  O   HOH T 479      33.068  59.248 -32.409  1.00  0.52           O  
HETATM  481  O   HOH T 480      56.942  49.393   5.630  1.00  0.52           O  
HETATM  482  O   HOH T 481      74.421  35.624 -23.688  1.00  0.52           O  
HETATM  483  O   HOH T 482      37.483  64.932 -27.449  1.00  0.52           O  
HETATM  484  O   HOH T 483      40.284  64.926 -26.699  1.00  0.52           O  
HETATM  485  O   HOH T 484      56.470  49.299 -22.551  1.00  0.52           O  
HETATM  486  O   HOH T 485      53.235  57.371 -20.966  1.00  0.52           O  
HETATM  487  O   HOH T 486      78.574  27.508 -23.598  1.00  0.52           O  
HETATM  488  O   HOH T 487      38.355  50.823  11.736  1.00  0.52           O  
HETATM  489  O   HOH T 488      46.159  24.971   6.996  1.00  0.52           O  
HETATM  490  O   HOH T 489      32.776  56.968   9.908  1.00  0.52           O  
HETATM  491  O   HOH T 490      67.970  49.348  13.906  1.00  0.53           O  
HETATM  492  O   HOH T 491      33.224  39.037  13.912  1.00  0.53           O  
HETATM  493  O   HOH T 492      37.863  35.760  -9.575  1.00  0.53           O  
HETATM  494  O   HOH T 493      60.123  41.417  20.439  1.00  0.53           O  
HETATM  495  O   HOH T 494      43.642  41.993  23.557  1.00  0.53           O  
HETATM  496  O   HOH T 495      39.824  47.154  17.842  1.00  0.53           O  
HETATM  497  O   HOH T 496      70.488  38.762  18.209  1.00  0.53           O  
HETATM  498  O   HOH T 497      40.556  26.008  -1.863  1.00  0.53           O  
HETATM  499  O   HOH T 498      43.009  21.653   1.718  1.00  0.53           O  
HETATM  500  O   HOH T 499      50.925  33.423  16.819  1.00  0.53           O  
HETATM  501  O   HOH T 500      77.501  27.147 -19.661  1.00  0.53           O  
HETATM  502  O   HOH T 501      41.243  72.216   6.607  1.00  0.53           O  
HETATM  503  O   HOH T 502      56.757  53.522  25.102  1.00  0.53           O  
HETATM  504  O   HOH T 503      39.455  41.776 -23.516  1.00  0.53           O  
HETATM  505  O   HOH T 504      44.832  29.843  -7.734  1.00  0.53           O  
HETATM  506  O   HOH T 505      56.711  32.261  -6.497  1.00  0.54           O  
HETATM  507  O   HOH T 506      85.756  30.691 -22.821  1.00  0.54           O  
HETATM  508  O   HOH T 507      43.659  55.356 -31.841  1.00  0.54           O  
HETATM  509  O   HOH T 508      39.720  69.161  -8.855  1.00  0.54           O  
HETATM  510  O   HOH T 509      26.989  40.051   2.250  1.00  0.54           O  
HETATM  511  O   HOH T 510      48.550  69.921 -15.948  1.00  0.54           O  
HETATM  512  O   HOH T 511      56.685  64.006 -19.408  1.00  0.54           O  
HETATM  513  O   HOH T 512      39.003  39.790  18.610  1.00  0.54           O  
HETATM  514  O   HOH T 513      34.162  56.614 -32.413  1.00  0.54           O  
HETATM  515  O   HOH T 514      32.238  34.562  -7.199  1.00  0.54           O  
HETATM  516  O   HOH T 515      29.815  60.646 -26.800  1.00  0.54           O  
HETATM  517  O   HOH T 516      36.499  58.031 -32.360  1.00  0.54           O  
HETATM  518  O   HOH T 517      32.139  44.556 -24.438  1.00  0.54           O  
HETATM  519  O   HOH T 518      46.126  72.501  -9.921  1.00  0.54           O  
HETATM  520  O   HOH T 519      64.808  45.441   1.669  1.00  0.55           O  
HETATM  521  O   HOH T 520      52.692  39.616  19.489  1.00  0.55           O  
HETATM  522  O   HOH T 521      69.130  47.529   1.340  1.00  0.55           O  
HETATM  523  O   HOH T 522      65.017  43.915  16.476  1.00  0.55           O  
HETATM  524  O   HOH T 523      37.347  44.465 -25.897  1.00  0.55           O  
HETATM  525  O   HOH T 524      30.706  53.517  -9.478  1.00  0.55           O  
HETATM  526  O   HOH T 525      57.422  26.837   8.373  1.00  0.55           O  
HETATM  527  O   HOH T 526      57.648  62.410 -17.872  1.00  0.55           O  
HETATM  528  O   HOH T 527      60.833  77.835  -1.529  1.00  0.56           O  
HETATM  529  O   HOH T 528      85.855  28.147 -21.949  1.00  0.56           O  
HETATM  530  O   HOH T 529      47.975  72.943   7.249  1.00  0.56           O  
HETATM  531  O   HOH T 530      35.426  41.496 -23.594  1.00  0.56           O  
HETATM  532  O   HOH T 531      55.159  26.551   9.802  1.00  0.56           O  
HETATM  533  O   HOH T 532      81.531  52.477  11.408  1.00  0.56           O  
HETATM  534  O   HOH T 533      54.162  39.769  21.954  1.00  0.56           O  
HETATM  535  O   HOH T 534      58.536  52.412 -22.432  1.00  0.56           O  
HETATM  536  O   HOH T 535      52.280  46.352 -18.467  1.00  0.57           O  
HETATM  537  O   HOH T 536      54.070  54.327 -26.800  1.00  0.57           O  
HETATM  538  O   HOH T 537      51.918  43.001 -15.428  1.00  0.57           O  
HETATM  539  O   HOH T 538      49.458  55.018  22.730  1.00  0.57           O  
HETATM  540  O   HOH T 539      53.492  65.878 -18.604  1.00  0.57           O  
HETATM  541  O   HOH T 540      60.945  54.458 -17.055  1.00  0.57           O  
HETATM  542  O   HOH T 541      58.320  64.800 -19.440  1.00  0.57           O  
HETATM  543  O   HOH T 542      30.651  37.998  -5.568  1.00  0.57           O  
HETATM  544  O   HOH T 543      53.440  42.892 -18.017  1.00  0.57           O  
HETATM  545  O   HOH T 544      60.015  28.527  -3.411  1.00  0.57           O  
HETATM  546  O   HOH T 545      43.759  54.447  13.625  1.00  0.57           O  
HETATM  547  O   HOH T 546      51.211  50.834 -21.624  1.00  0.57           O  
HETATM  548  O   HOH T 547      53.282  49.189  25.189  1.00  0.58           O  
HETATM  549  O   HOH T 548      35.640  40.174 -17.064  1.00  0.58           O  
HETATM  550  O   HOH T 549      66.466  50.131  16.320  1.00  0.58           O  
HETATM  551  O   HOH T 550      41.783  69.522   6.690  1.00  0.58           O  
HETATM  552  O   HOH T 551      20.002  58.305 -17.349  1.00  0.58           O  
HETATM  553  O   HOH T 552      39.128  62.656 -31.140  1.00  0.59           O  
HETATM  554  O   HOH T 553      46.719  37.829  21.962  1.00  0.59           O  
HETATM  555  O   HOH T 554      40.318  29.859  -9.440  1.00  0.59           O  
HETATM  556  O   HOH T 555      48.138  44.651  22.958  1.00  0.59           O  
HETATM  557  O   HOH T 556      34.665  45.611  13.752  1.00  0.59           O  
HETATM  558  O   HOH T 557      30.798  52.438 -35.892  1.00  0.60           O  
HETATM  559  O   HOH T 558      43.735  36.229 -16.240  1.00  0.60           O  
HETATM  560  O   HOH T 559      26.599  51.677 -27.518  1.00  0.60           O  
HETATM  561  O   HOH T 560      51.618  59.085  19.693  1.00  0.60           O  
HETATM  562  O   HOH T 561      49.672  40.639  21.284  1.00  0.61           O  
HETATM  563  O   HOH T 562      27.267  49.960 -22.075  1.00  0.61           O  
HETATM  564  O   HOH T 563      51.804  51.036  26.206  1.00  0.61           O  
TER     565      HOH T 563 
