# Supplementary material for: Accurate Prediction of Hydration Sites of Proteins Using Energy Model With Atom Embedding
Source: Front Mol Biosci. 2021 Sep 20;8:756075. doi: 10.3389/fmolb.2021.756075 (PMC8488165; doi:10.3389/fmolb.2021.756075)
Supplement: Supplementary file 1 [file DataSheet1.ZIP › Data Sheet 1/Our_result_pdb/our_dataset_output/1GOI_watersite.pdb]

HEADER                                                        XXXX


JRNL        PMID   -1
HETATM    1  O   HOH T   0      54.747  64.344  59.613  1.00  0.16           O  
HETATM    2  O   HOH T   1      45.785  49.473  50.442  1.00  0.17           O  
HETATM    3  O   HOH T   2      46.162  53.755  30.947  1.00  0.17           O  
HETATM    4  O   HOH T   3      38.756  51.193 114.161  1.00  0.17           O  
HETATM    5  O   HOH T   4      44.298  46.430 102.573  1.00  0.17           O  
HETATM    6  O   HOH T   5      42.144  54.097  56.669  1.00  0.17           O  
HETATM    7  O   HOH T   6      -0.186  46.680 110.867  1.00  0.17           O  
HETATM    8  O   HOH T   7      40.502  54.990  38.998  1.00  0.19           O  
HETATM    9  O   HOH T   8      38.863  49.038  96.724  1.00  0.19           O  
HETATM   10  O   HOH T   9      31.106  58.817 116.816  1.00  0.19           O  
HETATM   11  O   HOH T  10      -2.065  59.393 101.088  1.00  0.19           O  
HETATM   12  O   HOH T  11       8.688  39.032  95.145  1.00  0.19           O  
HETATM   13  O   HOH T  12      51.682  85.687  33.969  1.00  0.19           O  
HETATM   14  O   HOH T  13      42.508  48.820 116.314  1.00  0.19           O  
HETATM   15  O   HOH T  14      65.847  62.496  36.266  1.00  0.19           O  
HETATM   16  O   HOH T  15      47.850  60.519  55.760  1.00  0.19           O  
HETATM   17  O   HOH T  16      38.056  22.009  99.075  1.00  0.20           O  
HETATM   18  O   HOH T  17      26.860  57.274  64.443  1.00  0.20           O  
HETATM   19  O   HOH T  18      31.749  61.129  36.358  1.00  0.20           O  
HETATM   20  O   HOH T  19      40.377  52.419 130.117  1.00  0.20           O  
HETATM   21  O   HOH T  20      26.897  75.813  69.131  1.00  0.21           O  
HETATM   22  O   HOH T  21      10.776  35.115 121.851  1.00  0.21           O  
HETATM   23  O   HOH T  22      50.063  51.525  41.432  1.00  0.21           O  
HETATM   24  O   HOH T  23      42.013  23.529  93.302  1.00  0.21           O  
HETATM   25  O   HOH T  24      19.914  77.577  44.305  1.00  0.21           O  
HETATM   26  O   HOH T  25      42.003  61.826  58.402  1.00  0.21           O  
HETATM   27  O   HOH T  26      40.796  27.449  97.332  1.00  0.21           O  
HETATM   28  O   HOH T  27      33.388  42.446  98.082  1.00  0.21           O  
HETATM   29  O   HOH T  28      16.205  42.322  61.607  1.00  0.21           O  
HETATM   30  O   HOH T  29      27.979  56.333 117.389  1.00  0.21           O  
HETATM   31  O   HOH T  30      30.624  46.088 104.412  1.00  0.21           O  
HETATM   32  O   HOH T  31      40.776  88.681  77.129  1.00  0.21           O  
HETATM   33  O   HOH T  32      31.413  41.760  85.117  1.00  0.21           O  
HETATM   34  O   HOH T  33      42.232  54.568  59.424  1.00  0.21           O  
HETATM   35  O   HOH T  34      68.825  72.864  47.913  1.00  0.21           O  
HETATM   36  O   HOH T  35      68.587  59.382  54.746  1.00  0.21           O  
HETATM   37  O   HOH T  36      30.783  49.557 122.870  1.00  0.21           O  
HETATM   38  O   HOH T  37      28.332  56.639  79.521  1.00  0.22           O  
HETATM   39  O   HOH T  38      57.648  75.685  46.603  1.00  0.22           O  
HETATM   40  O   HOH T  39      27.206  33.163 118.979  1.00  0.22           O  
HETATM   41  O   HOH T  40      42.618  82.780  54.039  1.00  0.22           O  
HETATM   42  O   HOH T  41      22.152  53.045  62.833  1.00  0.22           O  
HETATM   43  O   HOH T  42      34.086  93.947  48.716  1.00  0.22           O  
HETATM   44  O   HOH T  43      44.555  88.336  21.464  1.00  0.22           O  
HETATM   45  O   HOH T  44      28.650  76.904  32.662  1.00  0.22           O  
HETATM   46  O   HOH T  45      12.300  45.731  66.974  1.00  0.22           O  
HETATM   47  O   HOH T  46      35.693  61.790  85.330  1.00  0.22           O  
HETATM   48  O   HOH T  47      15.685  44.776  90.759  1.00  0.22           O  
HETATM   49  O   HOH T  48      20.567  72.205  59.022  1.00  0.22           O  
HETATM   50  O   HOH T  49      31.047  47.789  95.301  1.00  0.22           O  
HETATM   51  O   HOH T  50      38.732  39.555  96.932  1.00  0.22           O  
HETATM   52  O   HOH T  51      20.369  32.683 132.534  1.00  0.23           O  
HETATM   53  O   HOH T  52      46.298  77.804  89.749  1.00  0.23           O  
HETATM   54  O   HOH T  53      56.428  69.530  35.551  1.00  0.23           O  
HETATM   55  O   HOH T  54      24.966  59.231  64.042  1.00  0.23           O  
HETATM   56  O   HOH T  55      12.630  49.713  89.032  1.00  0.23           O  
HETATM   57  O   HOH T  56      15.614  43.143 101.519  1.00  0.23           O  
HETATM   58  O   HOH T  57      41.720  21.434  94.975  1.00  0.23           O  
HETATM   59  O   HOH T  58      21.198  76.672  64.416  1.00  0.23           O  
HETATM   60  O   HOH T  59      25.522  63.953  67.190  1.00  0.23           O  
HETATM   61  O   HOH T  60       9.055  72.117 104.545  1.00  0.23           O  
HETATM   62  O   HOH T  61      25.175  34.022 120.779  1.00  0.23           O  
HETATM   63  O   HOH T  62      68.708  80.341  46.999  1.00  0.23           O  
HETATM   64  O   HOH T  63      40.879  85.693  66.727  1.00  0.23           O  
HETATM   65  O   HOH T  64      45.864  73.616  36.271  1.00  0.23           O  
HETATM   66  O   HOH T  65      45.566  56.763  46.827  1.00  0.24           O  
HETATM   67  O   HOH T  66      43.833  63.131  49.383  1.00  0.24           O  
HETATM   68  O   HOH T  67      26.572  65.516  90.388  1.00  0.24           O  
HETATM   69  O   HOH T  68      69.560  69.217  51.061  1.00  0.24           O  
HETATM   70  O   HOH T  69      38.260  48.652  94.005  1.00  0.24           O  
HETATM   71  O   HOH T  70      51.817  80.977  32.410  1.00  0.24           O  
HETATM   72  O   HOH T  71      19.744  30.732 106.024  1.00  0.24           O  
HETATM   73  O   HOH T  72      18.064  51.814  84.061  1.00  0.24           O  
HETATM   74  O   HOH T  73      42.780  67.620  62.295  1.00  0.24           O  
HETATM   75  O   HOH T  74      63.599  69.055  34.965  1.00  0.24           O  
HETATM   76  O   HOH T  75      28.716  19.771 103.553  1.00  0.24           O  
HETATM   77  O   HOH T  76      39.899  88.854  50.671  1.00  0.24           O  
HETATM   78  O   HOH T  77      37.333  45.647 106.673  1.00  0.24           O  
HETATM   79  O   HOH T  78      29.135  72.522  38.374  1.00  0.25           O  
HETATM   80  O   HOH T  79      32.345  62.037  73.998  1.00  0.25           O  
HETATM   81  O   HOH T  80      30.907  49.198  92.858  1.00  0.25           O  
HETATM   82  O   HOH T  81      29.161  64.988  89.260  1.00  0.25           O  
HETATM   83  O   HOH T  82      49.782  72.984  24.303  1.00  0.25           O  
HETATM   84  O   HOH T  83      67.691  58.963  46.441  1.00  0.25           O  
HETATM   85  O   HOH T  84       5.923  36.631 125.757  1.00  0.25           O  
HETATM   86  O   HOH T  85      33.538  64.607  36.224  1.00  0.25           O  
HETATM   87  O   HOH T  86      23.588  62.812  62.911  1.00  0.25           O  
HETATM   88  O   HOH T  87      56.786  79.953  55.064  1.00  0.25           O  
HETATM   89  O   HOH T  88       2.723  43.847 100.995  1.00  0.25           O  
HETATM   90  O   HOH T  89      25.846  36.287  82.661  1.00  0.25           O  
HETATM   91  O   HOH T  90      65.858  63.642  40.814  1.00  0.25           O  
HETATM   92  O   HOH T  91      26.755  25.618 115.631  1.00  0.25           O  
HETATM   93  O   HOH T  92      49.249  82.800  40.259  1.00  0.25           O  
HETATM   94  O   HOH T  93      41.158  87.732  46.824  1.00  0.25           O  
HETATM   95  O   HOH T  94       7.050  77.290 108.499  1.00  0.25           O  
HETATM   96  O   HOH T  95      22.739  23.326 108.015  1.00  0.25           O  
HETATM   97  O   HOH T  96      33.100  49.204  72.327  1.00  0.25           O  
HETATM   98  O   HOH T  97      63.118  55.760  56.945  1.00  0.25           O  
HETATM   99  O   HOH T  98      41.810  47.888  35.871  1.00  0.26           O  
HETATM  100  O   HOH T  99      54.102  64.569  66.580  1.00  0.26           O  
HETATM  101  O   HOH T 100      25.074  62.213  69.222  1.00  0.26           O  
HETATM  102  O   HOH T 101      20.153  35.200  78.346  1.00  0.26           O  
HETATM  103  O   HOH T 102      32.342  39.099  93.894  1.00  0.26           O  
HETATM  104  O   HOH T 103      43.168  92.014  36.374  1.00  0.26           O  
HETATM  105  O   HOH T 104      32.566  43.840 120.759  1.00  0.26           O  
HETATM  106  O   HOH T 105      39.952  83.198  30.434  1.00  0.26           O  
HETATM  107  O   HOH T 106      37.923  53.056  23.458  1.00  0.26           O  
HETATM  108  O   HOH T 107       9.735  46.082  70.388  1.00  0.26           O  
HETATM  109  O   HOH T 108      55.137  71.654  33.946  1.00  0.26           O  
HETATM  110  O   HOH T 109      69.492  78.884  50.848  1.00  0.26           O  
HETATM  111  O   HOH T 110      64.824  64.192  32.177  1.00  0.26           O  
HETATM  112  O   HOH T 111      34.776  37.836 103.684  1.00  0.26           O  
HETATM  113  O   HOH T 112      43.622  43.465 112.995  1.00  0.26           O  
HETATM  114  O   HOH T 113       9.382  43.192  73.577  1.00  0.26           O  
HETATM  115  O   HOH T 114       4.467  45.039 106.743  1.00  0.26           O  
HETATM  116  O   HOH T 115      40.345  79.184  28.048  1.00  0.26           O  
HETATM  117  O   HOH T 116      52.132  74.754  75.962  1.00  0.27           O  
HETATM  118  O   HOH T 117      21.641  39.474  66.779  1.00  0.27           O  
HETATM  119  O   HOH T 118      31.452  68.194  68.058  1.00  0.27           O  
HETATM  120  O   HOH T 119      40.633  48.541  87.945  1.00  0.27           O  
HETATM  121  O   HOH T 120      19.238  59.243 115.561  1.00  0.27           O  
HETATM  122  O   HOH T 121      46.221  85.565  59.895  1.00  0.27           O  
HETATM  123  O   HOH T 122      34.308  24.362 113.318  1.00  0.27           O  
HETATM  124  O   HOH T 123      49.016  80.054  80.452  1.00  0.27           O  
HETATM  125  O   HOH T 124       5.354  67.846  99.765  1.00  0.27           O  
HETATM  126  O   HOH T 125      34.127  75.888  56.241  1.00  0.27           O  
HETATM  127  O   HOH T 126      73.437  77.069  53.968  1.00  0.27           O  
HETATM  128  O   HOH T 127      38.987  22.415 107.445  1.00  0.27           O  
HETATM  129  O   HOH T 128      22.323  66.443  53.631  1.00  0.27           O  
HETATM  130  O   HOH T 129      36.013  42.057  92.801  1.00  0.27           O  
HETATM  131  O   HOH T 130      21.443  32.094 110.230  1.00  0.27           O  
HETATM  132  O   HOH T 131      12.542  82.823  51.284  1.00  0.27           O  
HETATM  133  O   HOH T 132      14.112  34.454  82.627  1.00  0.27           O  
HETATM  134  O   HOH T 133      18.100  54.553 107.671  1.00  0.27           O  
HETATM  135  O   HOH T 134      24.218  43.514  58.173  1.00  0.27           O  
HETATM  136  O   HOH T 135      25.365  77.965  39.607  1.00  0.27           O  
HETATM  137  O   HOH T 136      15.316  40.716  64.765  1.00  0.27           O  
HETATM  138  O   HOH T 137      20.121  44.439  96.080  1.00  0.27           O  
HETATM  139  O   HOH T 138      39.635  60.141  73.970  1.00  0.27           O  
HETATM  140  O   HOH T 139       8.383  76.858 121.128  1.00  0.27           O  
HETATM  141  O   HOH T 140      17.409  34.939  78.830  1.00  0.27           O  
HETATM  142  O   HOH T 141      35.536  65.931  34.983  1.00  0.27           O  
HETATM  143  O   HOH T 142      51.430  81.082  71.888  1.00  0.28           O  
HETATM  144  O   HOH T 143      23.842  44.554  98.753  1.00  0.28           O  
HETATM  145  O   HOH T 144      26.950  70.088  41.183  1.00  0.28           O  
HETATM  146  O   HOH T 145      20.753  51.426  84.117  1.00  0.28           O  
HETATM  147  O   HOH T 146       5.185  74.167 116.331  1.00  0.28           O  
HETATM  148  O   HOH T 147       6.358  44.296 108.461  1.00  0.28           O  
HETATM  149  O   HOH T 148      21.117  60.867  83.122  1.00  0.28           O  
HETATM  150  O   HOH T 149      51.977  68.891  71.208  1.00  0.28           O  
HETATM  151  O   HOH T 150      44.607  33.649 106.067  1.00  0.28           O  
HETATM  152  O   HOH T 151      30.689  37.415 123.714  1.00  0.28           O  
HETATM  153  O   HOH T 152       4.092  42.655 108.281  1.00  0.28           O  
HETATM  154  O   HOH T 153      37.092  68.014  80.999  1.00  0.28           O  
HETATM  155  O   HOH T 154      20.721  43.625 131.871  1.00  0.28           O  
HETATM  156  O   HOH T 155      17.866  58.756  84.904  1.00  0.28           O  
HETATM  157  O   HOH T 156      24.678  33.068  99.759  1.00  0.28           O  
HETATM  158  O   HOH T 157      58.199  52.164  60.759  1.00  0.28           O  
HETATM  159  O   HOH T 158      24.117  93.001  53.978  1.00  0.28           O  
HETATM  160  O   HOH T 159      24.993  65.213  63.380  1.00  0.28           O  
HETATM  161  O   HOH T 160      12.111  28.322 115.045  1.00  0.28           O  
HETATM  162  O   HOH T 161      47.559  47.097 112.274  1.00  0.28           O  
HETATM  163  O   HOH T 162      45.592  85.159  81.851  1.00  0.28           O  
HETATM  164  O   HOH T 163      -4.753  48.306 116.181  1.00  0.28           O  
HETATM  165  O   HOH T 164      47.534  79.416  23.703  1.00  0.28           O  
HETATM  166  O   HOH T 165      55.826  54.764  62.767  1.00  0.28           O  
HETATM  167  O   HOH T 166      11.985  16.843  95.528  1.00  0.28           O  
HETATM  168  O   HOH T 167      16.100  30.539  99.901  1.00  0.28           O  
HETATM  169  O   HOH T 168      12.979  38.308 126.253  1.00  0.28           O  
HETATM  170  O   HOH T 169       2.663  51.837 117.013  1.00  0.29           O  
HETATM  171  O   HOH T 170      17.549  87.936  54.589  1.00  0.29           O  
HETATM  172  O   HOH T 171      58.465  51.894  48.758  1.00  0.29           O  
HETATM  173  O   HOH T 172       4.660  76.757 113.079  1.00  0.29           O  
HETATM  174  O   HOH T 173      42.090  68.833  57.209  1.00  0.29           O  
HETATM  175  O   HOH T 174      47.891  61.888  68.570  1.00  0.29           O  
HETATM  176  O   HOH T 175      45.972  90.614  56.493  1.00  0.29           O  
HETATM  177  O   HOH T 176      -1.869  50.991 108.668  1.00  0.29           O  
HETATM  178  O   HOH T 177      55.376  60.935  40.539  1.00  0.29           O  
HETATM  179  O   HOH T 178      41.933  56.253 117.324  1.00  0.29           O  
HETATM  180  O   HOH T 179      44.416  50.323  93.083  1.00  0.29           O  
HETATM  181  O   HOH T 180      58.785  51.688  45.957  1.00  0.29           O  
HETATM  182  O   HOH T 181      51.619  71.412  70.028  1.00  0.29           O  
HETATM  183  O   HOH T 182      -8.609  44.154 102.021  1.00  0.29           O  
HETATM  184  O   HOH T 183      21.227  65.216 107.853  1.00  0.29           O  
HETATM  185  O   HOH T 184      42.766  37.570 111.684  1.00  0.29           O  
HETATM  186  O   HOH T 185      16.985  42.843  89.102  1.00  0.29           O  
HETATM  187  O   HOH T 186      32.583  94.721  46.551  1.00  0.29           O  
HETATM  188  O   HOH T 187      50.039  50.349  63.763  1.00  0.29           O  
HETATM  189  O   HOH T 188      32.414  58.459  37.149  1.00  0.29           O  
HETATM  190  O   HOH T 189      15.061  41.766  81.230  1.00  0.29           O  
HETATM  191  O   HOH T 190      24.216  63.951  89.984  1.00  0.29           O  
HETATM  192  O   HOH T 191      37.538  65.603  84.173  1.00  0.30           O  
HETATM  193  O   HOH T 192      24.484  71.268  26.898  1.00  0.30           O  
HETATM  194  O   HOH T 193      23.060  67.168  96.336  1.00  0.30           O  
HETATM  195  O   HOH T 194      63.211  56.889  40.946  1.00  0.30           O  
HETATM  196  O   HOH T 195       5.182  53.770 118.714  1.00  0.30           O  
HETATM  197  O   HOH T 196      33.622  93.608  35.097  1.00  0.30           O  
HETATM  198  O   HOH T 197      12.614  65.023  89.450  1.00  0.30           O  
HETATM  199  O   HOH T 198      21.981  66.389  56.431  1.00  0.30           O  
HETATM  200  O   HOH T 199      50.816  61.932  60.023  1.00  0.30           O  
HETATM  201  O   HOH T 200      15.318  77.470  43.765  1.00  0.30           O  
HETATM  202  O   HOH T 201       4.938  44.963 104.195  1.00  0.30           O  
HETATM  203  O   HOH T 202       1.290  73.102 119.177  1.00  0.30           O  
HETATM  204  O   HOH T 203      51.733  56.132  55.814  1.00  0.30           O  
HETATM  205  O   HOH T 204      22.741  56.589  85.740  1.00  0.30           O  
HETATM  206  O   HOH T 205      38.317  67.166  95.909  1.00  0.30           O  
HETATM  207  O   HOH T 206      52.683  60.736  49.756  1.00  0.30           O  
HETATM  208  O   HOH T 207      60.231  82.296  54.904  1.00  0.30           O  
HETATM  209  O   HOH T 208       6.404  53.442 122.958  1.00  0.30           O  
HETATM  210  O   HOH T 209      33.843  58.605 115.940  1.00  0.30           O  
HETATM  211  O   HOH T 210      22.488  74.263  31.110  1.00  0.30           O  
HETATM  212  O   HOH T 211      22.259  20.546 108.205  1.00  0.30           O  
HETATM  213  O   HOH T 212       8.140  55.374  87.638  1.00  0.30           O  
HETATM  214  O   HOH T 213      42.116  53.743 104.154  1.00  0.30           O  
HETATM  215  O   HOH T 214      61.411  64.992  64.249  1.00  0.30           O  
HETATM  216  O   HOH T 215      37.153  20.352 107.330  1.00  0.30           O  
HETATM  217  O   HOH T 216      46.453  45.679 110.004  1.00  0.30           O  
HETATM  218  O   HOH T 217      48.460  57.975  60.693  1.00  0.30           O  
HETATM  219  O   HOH T 218      35.415  61.643 110.428  1.00  0.30           O  
HETATM  220  O   HOH T 219      50.915  50.858 112.062  1.00  0.31           O  
HETATM  221  O   HOH T 220      21.599  46.792 129.248  1.00  0.31           O  
HETATM  222  O   HOH T 221       9.099  67.160  93.833  1.00  0.31           O  
HETATM  223  O   HOH T 222      33.157  74.167  46.335  1.00  0.31           O  
HETATM  224  O   HOH T 223      34.001  69.558  89.131  1.00  0.31           O  
HETATM  225  O   HOH T 224      34.259  55.890 126.487  1.00  0.31           O  
HETATM  226  O   HOH T 225      20.025  82.587  60.024  1.00  0.31           O  
HETATM  227  O   HOH T 226      18.416  78.161  33.739  1.00  0.31           O  
HETATM  228  O   HOH T 227      23.597  36.212  84.250  1.00  0.31           O  
HETATM  229  O   HOH T 228      43.669  78.467  53.142  1.00  0.31           O  
HETATM  230  O   HOH T 229      38.866  57.291  93.842  1.00  0.31           O  
HETATM  231  O   HOH T 230      47.770  78.501  28.089  1.00  0.31           O  
HETATM  232  O   HOH T 231      49.551  82.961  82.807  1.00  0.31           O  
HETATM  233  O   HOH T 232      40.179  48.891  61.409  1.00  0.31           O  
HETATM  234  O   HOH T 233      41.707  57.632  87.848  1.00  0.31           O  
HETATM  235  O   HOH T 234      30.945  27.773  89.984  1.00  0.31           O  
HETATM  236  O   HOH T 235       2.663  73.116 116.689  1.00  0.31           O  
HETATM  237  O   HOH T 236      17.060  36.622  72.903  1.00  0.31           O  
HETATM  238  O   HOH T 237      35.635  35.402 113.279  1.00  0.31           O  
HETATM  239  O   HOH T 238      18.836  44.889  85.100  1.00  0.31           O  
HETATM  240  O   HOH T 239      12.347  38.578 113.460  1.00  0.31           O  
HETATM  241  O   HOH T 240      25.089  63.307  85.386  1.00  0.31           O  
HETATM  242  O   HOH T 241      35.762  73.865  49.553  1.00  0.31           O  
HETATM  243  O   HOH T 242      50.327  56.365  59.402  1.00  0.31           O  
HETATM  244  O   HOH T 243      18.729  51.975 104.772  1.00  0.31           O  
HETATM  245  O   HOH T 244      29.928  35.022  87.396  1.00  0.31           O  
HETATM  246  O   HOH T 245       9.752  41.798 102.555  1.00  0.31           O  
HETATM  247  O   HOH T 246      41.970  62.918  66.081  1.00  0.32           O  
HETATM  248  O   HOH T 247      21.160  36.654  63.501  1.00  0.32           O  
HETATM  249  O   HOH T 248      25.347  36.142 127.540  1.00  0.32           O  
HETATM  250  O   HOH T 249      25.756  59.476  78.275  1.00  0.32           O  
HETATM  251  O   HOH T 250      31.978  64.889  98.843  1.00  0.32           O  
HETATM  252  O   HOH T 251      19.279  18.148 104.576  1.00  0.32           O  
HETATM  253  O   HOH T 252      34.014  49.299  65.141  1.00  0.32           O  
HETATM  254  O   HOH T 253      12.675  41.366  82.875  1.00  0.32           O  
HETATM  255  O   HOH T 254      14.447  50.989  73.548  1.00  0.32           O  
HETATM  256  O   HOH T 255      46.160  52.184  63.049  1.00  0.32           O  
HETATM  257  O   HOH T 256      50.147  60.494  67.762  1.00  0.32           O  
HETATM  258  O   HOH T 257       5.684  59.819 114.770  1.00  0.32           O  
HETATM  259  O   HOH T 258      17.827  18.088  97.958  1.00  0.32           O  
HETATM  260  O   HOH T 259      43.163  85.984  47.732  1.00  0.32           O  
HETATM  261  O   HOH T 260      23.362  67.310  63.204  1.00  0.32           O  
HETATM  262  O   HOH T 261      34.531  67.939  57.521  1.00  0.32           O  
HETATM  263  O   HOH T 262      47.715  46.922  56.353  1.00  0.32           O  
HETATM  264  O   HOH T 263      15.384  74.530 113.896  1.00  0.32           O  
HETATM  265  O   HOH T 264      47.670  87.861  67.576  1.00  0.32           O  
HETATM  266  O   HOH T 265      70.399  61.311  46.581  1.00  0.32           O  
HETATM  267  O   HOH T 266      44.843  78.622  64.726  1.00  0.32           O  
HETATM  268  O   HOH T 267      39.635  55.131 130.071  1.00  0.32           O  
HETATM  269  O   HOH T 268      70.271  67.953  53.451  1.00  0.32           O  
HETATM  270  O   HOH T 269      36.110  68.176  92.706  1.00  0.32           O  
HETATM  271  O   HOH T 270      13.910  73.080  38.745  1.00  0.32           O  
HETATM  272  O   HOH T 271      52.624  79.093  34.314  1.00  0.32           O  
HETATM  273  O   HOH T 272      42.233  90.207  47.265  1.00  0.32           O  
HETATM  274  O   HOH T 273      37.512  93.062  53.892  1.00  0.32           O  
HETATM  275  O   HOH T 274      42.065  73.333  25.020  1.00  0.32           O  
HETATM  276  O   HOH T 275      48.898  84.377  69.110  1.00  0.32           O  
HETATM  277  O   HOH T 276      64.629  58.367  62.158  1.00  0.32           O  
HETATM  278  O   HOH T 277      52.445  86.738  45.197  1.00  0.32           O  
HETATM  279  O   HOH T 278      65.762  73.013  39.301  1.00  0.32           O  
HETATM  280  O   HOH T 279      23.211  51.789  58.916  1.00  0.32           O  
HETATM  281  O   HOH T 280      30.593  34.794  94.494  1.00  0.32           O  
HETATM  282  O   HOH T 281      28.885  50.619  59.831  1.00  0.32           O  
HETATM  283  O   HOH T 282      28.634  62.800  41.856  1.00  0.32           O  
HETATM  284  O   HOH T 283      59.899  75.354  63.916  1.00  0.32           O  
HETATM  285  O   HOH T 284      21.773  58.307  57.481  1.00  0.33           O  
HETATM  286  O   HOH T 285      51.599  62.069  37.861  1.00  0.33           O  
HETATM  287  O   HOH T 286      40.542  55.945 103.813  1.00  0.33           O  
HETATM  288  O   HOH T 287      22.349  32.881  98.393  1.00  0.33           O  
HETATM  289  O   HOH T 288      22.239  39.070  64.147  1.00  0.33           O  
HETATM  290  O   HOH T 289      26.088  60.844 111.292  1.00  0.33           O  
HETATM  291  O   HOH T 290      44.130  34.455 103.421  1.00  0.33           O  
HETATM  292  O   HOH T 291      31.862  60.021  29.890  1.00  0.33           O  
HETATM  293  O   HOH T 292      42.814  16.504  99.383  1.00  0.33           O  
HETATM  294  O   HOH T 293      23.882  54.017  96.262  1.00  0.33           O  
HETATM  295  O   HOH T 294       3.428  27.825 124.777  1.00  0.33           O  
HETATM  296  O   HOH T 295      67.782  61.648  40.185  1.00  0.33           O  
HETATM  297  O   HOH T 296      14.414  37.217  73.906  1.00  0.33           O  
HETATM  298  O   HOH T 297      39.658  41.819  92.958  1.00  0.33           O  
HETATM  299  O   HOH T 298      51.869  63.895  35.694  1.00  0.33           O  
HETATM  300  O   HOH T 299      12.517  47.652  82.360  1.00  0.33           O  
HETATM  301  O   HOH T 300      36.038  95.286  50.083  1.00  0.33           O  
HETATM  302  O   HOH T 301      52.170  93.371  36.274  1.00  0.33           O  
HETATM  303  O   HOH T 302      11.237  43.191 100.678  1.00  0.33           O  
HETATM  304  O   HOH T 303      38.761  41.944  95.555  1.00  0.33           O  
HETATM  305  O   HOH T 304      33.969  64.123  97.071  1.00  0.33           O  
HETATM  306  O   HOH T 305      49.250  83.485  29.195  1.00  0.33           O  
HETATM  307  O   HOH T 306      46.221  37.295 104.463  1.00  0.33           O  
HETATM  308  O   HOH T 307      14.584  63.942 124.797  1.00  0.33           O  
HETATM  309  O   HOH T 308      71.188  84.200  55.337  1.00  0.33           O  
HETATM  310  O   HOH T 309      24.105  46.583  96.906  1.00  0.33           O  
HETATM  311  O   HOH T 310      21.416  72.174  32.688  1.00  0.33           O  
HETATM  312  O   HOH T 311      62.109  53.425  42.603  1.00  0.33           O  
HETATM  313  O   HOH T 312      33.956  91.094  64.646  1.00  0.33           O  
HETATM  314  O   HOH T 313      41.123  16.104 101.603  1.00  0.33           O  
HETATM  315  O   HOH T 314      43.129  41.479  89.443  1.00  0.33           O  
HETATM  316  O   HOH T 315      38.520  91.128  57.604  1.00  0.33           O  
HETATM  317  O   HOH T 316      49.156  89.652  48.480  1.00  0.33           O  
HETATM  318  O   HOH T 317      25.494  45.862  91.736  1.00  0.33           O  
HETATM  319  O   HOH T 318      39.595  70.839  69.717  1.00  0.33           O  
HETATM  320  O   HOH T 319      29.869  19.371 101.069  1.00  0.34           O  
HETATM  321  O   HOH T 320      71.406  77.278  52.117  1.00  0.34           O  
HETATM  322  O   HOH T 321      33.852  52.783  59.426  1.00  0.34           O  
HETATM  323  O   HOH T 322      24.162  84.957  37.756  1.00  0.34           O  
HETATM  324  O   HOH T 323      28.600  76.841  27.630  1.00  0.34           O  
HETATM  325  O   HOH T 324      45.677  50.727  95.435  1.00  0.34           O  
HETATM  326  O   HOH T 325      36.844  95.381  52.687  1.00  0.34           O  
HETATM  327  O   HOH T 326      16.061  52.891  98.034  1.00  0.34           O  
HETATM  328  O   HOH T 327      65.002  74.470  48.285  1.00  0.34           O  
HETATM  329  O   HOH T 328      45.418  87.683  76.432  1.00  0.34           O  
HETATM  330  O   HOH T 329      13.212  25.902  92.810  1.00  0.34           O  
HETATM  331  O   HOH T 330      57.362  83.003  39.878  1.00  0.34           O  
HETATM  332  O   HOH T 331      43.103  73.471  58.082  1.00  0.34           O  
HETATM  333  O   HOH T 332       0.231  62.701 106.036  1.00  0.34           O  
HETATM  334  O   HOH T 333      57.298  76.686  49.032  1.00  0.34           O  
HETATM  335  O   HOH T 334      15.235  52.765  77.732  1.00  0.34           O  
HETATM  336  O   HOH T 335      15.894  36.783  94.581  1.00  0.34           O  
HETATM  337  O   HOH T 336       6.416  38.916  91.006  1.00  0.34           O  
HETATM  338  O   HOH T 337      23.247  66.553  99.733  1.00  0.34           O  
HETATM  339  O   HOH T 338      66.875  63.259  33.822  1.00  0.34           O  
HETATM  340  O   HOH T 339      16.559  17.669 104.337  1.00  0.34           O  
HETATM  341  O   HOH T 340      49.341  54.228  60.717  1.00  0.34           O  
HETATM  342  O   HOH T 341      61.118  68.753  33.630  1.00  0.34           O  
HETATM  343  O   HOH T 342      45.442  73.995  65.871  1.00  0.34           O  
HETATM  344  O   HOH T 343      12.702  23.413  91.658  1.00  0.34           O  
HETATM  345  O   HOH T 344      49.867  81.707  27.024  1.00  0.34           O  
HETATM  346  O   HOH T 345      70.587  58.104  53.322  1.00  0.34           O  
HETATM  347  O   HOH T 346      37.102  51.701  52.942  1.00  0.34           O  
HETATM  348  O   HOH T 347      29.019  70.449  67.051  1.00  0.34           O  
HETATM  349  O   HOH T 348      41.267  77.528  63.842  1.00  0.34           O  
HETATM  350  O   HOH T 349      39.839  17.592 108.644  1.00  0.34           O  
HETATM  351  O   HOH T 350      29.277  25.579 119.450  1.00  0.34           O  
HETATM  352  O   HOH T 351       3.434  44.755  91.533  1.00  0.34           O  
HETATM  353  O   HOH T 352      59.068  81.826  62.121  1.00  0.34           O  
HETATM  354  O   HOH T 353      29.126  39.047 109.350  1.00  0.34           O  
HETATM  355  O   HOH T 354      50.820  75.065  35.936  1.00  0.34           O  
HETATM  356  O   HOH T 355      72.615  72.921  38.998  1.00  0.34           O  
HETATM  357  O   HOH T 356      34.824  51.678  26.870  1.00  0.34           O  
HETATM  358  O   HOH T 357      37.709  82.407  84.245  1.00  0.34           O  
HETATM  359  O   HOH T 358      29.251  63.783 110.091  1.00  0.34           O  
HETATM  360  O   HOH T 359      53.742  47.517 105.069  1.00  0.34           O  
HETATM  361  O   HOH T 360      25.817  58.007  54.331  1.00  0.34           O  
HETATM  362  O   HOH T 361      38.908  96.046  47.761  1.00  0.35           O  
HETATM  363  O   HOH T 362      23.389  51.726  73.044  1.00  0.35           O  
HETATM  364  O   HOH T 363      40.141  81.955  85.438  1.00  0.35           O  
HETATM  365  O   HOH T 364      35.782  72.088  70.519  1.00  0.35           O  
HETATM  366  O   HOH T 365      26.095  45.340 122.906  1.00  0.35           O  
HETATM  367  O   HOH T 366      52.116  59.325  66.322  1.00  0.35           O  
HETATM  368  O   HOH T 367      26.193  85.918  39.442  1.00  0.35           O  
HETATM  369  O   HOH T 368      38.744  76.964  92.571  1.00  0.35           O  
HETATM  370  O   HOH T 369      48.590  46.394  49.863  1.00  0.35           O  
HETATM  371  O   HOH T 370      32.087  22.569  92.062  1.00  0.35           O  
HETATM  372  O   HOH T 371       9.574  76.950 118.738  1.00  0.35           O  
HETATM  373  O   HOH T 372      61.229  55.044  40.648  1.00  0.35           O  
HETATM  374  O   HOH T 373      40.139  54.855  97.147  1.00  0.35           O  
HETATM  375  O   HOH T 374      18.831  85.049  59.949  1.00  0.35           O  
HETATM  376  O   HOH T 375      43.503  19.387  94.935  1.00  0.35           O  
HETATM  377  O   HOH T 376      16.078  73.656  33.579  1.00  0.35           O  
HETATM  378  O   HOH T 377      44.624  78.196  73.579  1.00  0.35           O  
HETATM  379  O   HOH T 378      25.924  51.072 125.696  1.00  0.35           O  
HETATM  380  O   HOH T 379      39.776  20.468 100.644  1.00  0.35           O  
HETATM  381  O   HOH T 380      11.837  69.241  99.698  1.00  0.35           O  
HETATM  382  O   HOH T 381      20.003  30.535 117.233  1.00  0.35           O  
HETATM  383  O   HOH T 382      20.700  60.569  50.447  1.00  0.35           O  
HETATM  384  O   HOH T 383      23.713  67.883  46.975  1.00  0.35           O  
HETATM  385  O   HOH T 384      20.461  34.629 109.568  1.00  0.35           O  
HETATM  386  O   HOH T 385       5.890  35.677 107.890  1.00  0.35           O  
HETATM  387  O   HOH T 386      57.057  84.688  32.091  1.00  0.35           O  
HETATM  388  O   HOH T 387      42.072  30.047 112.699  1.00  0.35           O  
HETATM  389  O   HOH T 388      51.977  77.560  75.500  1.00  0.35           O  
HETATM  390  O   HOH T 389      15.129  80.109  55.791  1.00  0.35           O  
HETATM  391  O   HOH T 390      53.476  89.154  42.226  1.00  0.35           O  
HETATM  392  O   HOH T 391      -3.814  52.440 101.280  1.00  0.35           O  
HETATM  393  O   HOH T 392      -6.427  48.018 114.105  1.00  0.35           O  
HETATM  394  O   HOH T 393      21.394  61.980 112.259  1.00  0.35           O  
HETATM  395  O   HOH T 394      58.384  55.739  63.236  1.00  0.35           O  
HETATM  396  O   HOH T 395      32.588  87.697  36.044  1.00  0.35           O  
HETATM  397  O   HOH T 396      31.276  64.095  96.312  1.00  0.35           O  
HETATM  398  O   HOH T 397      55.992  87.161  28.077  1.00  0.35           O  
HETATM  399  O   HOH T 398      -0.008  45.276  95.044  1.00  0.35           O  
HETATM  400  O   HOH T 399      43.901  69.864  55.458  1.00  0.35           O  
HETATM  401  O   HOH T 400       6.610  37.780 106.347  1.00  0.35           O  
HETATM  402  O   HOH T 401      37.557  15.481 121.904  1.00  0.35           O  
HETATM  403  O   HOH T 402      36.900  15.058 101.231  1.00  0.35           O  
HETATM  404  O   HOH T 403      29.379  65.824  76.806  1.00  0.35           O  
HETATM  405  O   HOH T 404      37.966  49.686  51.151  1.00  0.35           O  
HETATM  406  O   HOH T 405      37.077  69.776  69.469  1.00  0.35           O  
HETATM  407  O   HOH T 406      47.081  88.208  49.613  1.00  0.35           O  
HETATM  408  O   HOH T 407      21.196  78.401  33.560  1.00  0.35           O  
HETATM  409  O   HOH T 408      -4.039  42.184 118.112  1.00  0.36           O  
HETATM  410  O   HOH T 409      50.769  75.412  80.242  1.00  0.36           O  
HETATM  411  O   HOH T 410      50.553  66.258  45.187  1.00  0.36           O  
HETATM  412  O   HOH T 411      23.101  44.204 127.074  1.00  0.36           O  
HETATM  413  O   HOH T 412      70.081  84.714  52.628  1.00  0.36           O  
HETATM  414  O   HOH T 413      29.783  47.497  87.691  1.00  0.36           O  
HETATM  415  O   HOH T 414      20.279  35.684 125.574  1.00  0.36           O  
HETATM  416  O   HOH T 415      36.780  25.003 114.103  1.00  0.36           O  
HETATM  417  O   HOH T 416      54.668  49.788 106.276  1.00  0.36           O  
HETATM  418  O   HOH T 417      22.143  55.310  83.491  1.00  0.36           O  
HETATM  419  O   HOH T 418      12.144  40.554 103.351  1.00  0.36           O  
HETATM  420  O   HOH T 419      54.106  79.308  63.505  1.00  0.36           O  
HETATM  421  O   HOH T 420      13.023  66.336 120.073  1.00  0.36           O  
HETATM  422  O   HOH T 421      26.838  48.974  59.190  1.00  0.36           O  
HETATM  423  O   HOH T 422       7.926  73.872 116.997  1.00  0.36           O  
HETATM  424  O   HOH T 423      44.550  46.980  89.910  1.00  0.36           O  
HETATM  425  O   HOH T 424      21.518  45.960  84.814  1.00  0.36           O  
HETATM  426  O   HOH T 425       7.383  42.287  89.086  1.00  0.36           O  
HETATM  427  O   HOH T 426      32.477  36.612  92.510  1.00  0.36           O  
HETATM  428  O   HOH T 427      38.029  69.274  94.246  1.00  0.36           O  
HETATM  429  O   HOH T 428      47.291  53.159 122.334  1.00  0.36           O  
HETATM  430  O   HOH T 429      20.566  42.975 100.409  1.00  0.36           O  
HETATM  431  O   HOH T 430      41.350  58.851  71.941  1.00  0.36           O  
HETATM  432  O   HOH T 431      51.645  77.147  37.536  1.00  0.36           O  
HETATM  433  O   HOH T 432      37.121  52.833  34.863  1.00  0.36           O  
HETATM  434  O   HOH T 433      38.707  59.355  95.491  1.00  0.36           O  
HETATM  435  O   HOH T 434      39.562  91.547  55.043  1.00  0.36           O  
HETATM  436  O   HOH T 435      14.479  59.821  84.976  1.00  0.36           O  
HETATM  437  O   HOH T 436      28.942  81.739  28.407  1.00  0.36           O  
HETATM  438  O   HOH T 437      14.654  49.405  62.524  1.00  0.36           O  
HETATM  439  O   HOH T 438      49.447  90.544  30.629  1.00  0.36           O  
HETATM  440  O   HOH T 439      24.033  64.097  41.807  1.00  0.36           O  
HETATM  441  O   HOH T 440      50.266  45.933 105.129  1.00  0.36           O  
HETATM  442  O   HOH T 441      41.514  47.961  85.332  1.00  0.36           O  
HETATM  443  O   HOH T 442      30.939  62.545 111.941  1.00  0.36           O  
HETATM  444  O   HOH T 443      17.060  33.267 119.072  1.00  0.36           O  
HETATM  445  O   HOH T 444      42.331  56.771 126.562  1.00  0.36           O  
HETATM  446  O   HOH T 445      18.502  37.895 106.913  1.00  0.36           O  
HETATM  447  O   HOH T 446      23.491  42.011  89.876  1.00  0.36           O  
HETATM  448  O   HOH T 447      55.704  80.140  50.979  1.00  0.36           O  
HETATM  449  O   HOH T 448      41.772  47.997  59.307  1.00  0.36           O  
HETATM  450  O   HOH T 449      50.855  66.404  70.289  1.00  0.36           O  
HETATM  451  O   HOH T 450      20.100  61.501 116.870  1.00  0.36           O  
HETATM  452  O   HOH T 451      19.846  36.249  72.945  1.00  0.36           O  
HETATM  453  O   HOH T 452      10.600  32.008 128.695  1.00  0.36           O  
HETATM  454  O   HOH T 453      43.743  67.254  96.644  1.00  0.36           O  
HETATM  455  O   HOH T 454      18.697  80.417  59.159  1.00  0.36           O  
HETATM  456  O   HOH T 455       7.971  60.301 116.338  1.00  0.36           O  
HETATM  457  O   HOH T 456      16.593  42.310 113.454  1.00  0.36           O  
HETATM  458  O   HOH T 457      21.292  47.556  86.991  1.00  0.36           O  
HETATM  459  O   HOH T 458       5.110  73.362 110.035  1.00  0.36           O  
HETATM  460  O   HOH T 459      37.032  55.047 119.756  1.00  0.36           O  
HETATM  461  O   HOH T 460      25.391  78.717  70.364  1.00  0.37           O  
HETATM  462  O   HOH T 461      18.834  74.846  54.876  1.00  0.37           O  
HETATM  463  O   HOH T 462      42.573  81.728  84.122  1.00  0.37           O  
HETATM  464  O   HOH T 463      50.707  80.217  67.727  1.00  0.37           O  
HETATM  465  O   HOH T 464      46.826  86.116  69.607  1.00  0.37           O  
HETATM  466  O   HOH T 465      51.751  75.405  82.740  1.00  0.37           O  
HETATM  467  O   HOH T 466      17.950  65.550 110.730  1.00  0.37           O  
HETATM  468  O   HOH T 467      50.165  61.002  50.844  1.00  0.37           O  
HETATM  469  O   HOH T 468      11.100  71.540 101.041  1.00  0.37           O  
HETATM  470  O   HOH T 469      34.139  38.984 116.043  1.00  0.37           O  
HETATM  471  O   HOH T 470      55.854  63.119  38.801  1.00  0.37           O  
HETATM  472  O   HOH T 471      52.147  48.551 118.747  1.00  0.37           O  
HETATM  473  O   HOH T 472      10.238  84.003  52.374  1.00  0.37           O  
HETATM  474  O   HOH T 473      28.937  43.029 124.021  1.00  0.37           O  
HETATM  475  O   HOH T 474      40.883  55.095  85.376  1.00  0.37           O  
HETATM  476  O   HOH T 475      30.872  20.229  98.700  1.00  0.37           O  
HETATM  477  O   HOH T 476      13.251  80.162  57.788  1.00  0.37           O  
HETATM  478  O   HOH T 477      10.598  43.455  71.054  1.00  0.37           O  
HETATM  479  O   HOH T 478       9.835  26.383 122.335  1.00  0.37           O  
HETATM  480  O   HOH T 479      55.875  92.260  33.539  1.00  0.37           O  
HETATM  481  O   HOH T 480      22.569  60.486  48.429  1.00  0.37           O  
HETATM  482  O   HOH T 481       8.425  32.183 113.518  1.00  0.37           O  
HETATM  483  O   HOH T 482      29.934  59.374  37.543  1.00  0.37           O  
HETATM  484  O   HOH T 483      59.195  87.673  41.403  1.00  0.37           O  
HETATM  485  O   HOH T 484      15.149  59.209 121.313  1.00  0.37           O  
HETATM  486  O   HOH T 485      21.328  41.039 102.285  1.00  0.37           O  
HETATM  487  O   HOH T 486      18.789  76.903  62.959  1.00  0.37           O  
HETATM  488  O   HOH T 487      41.523  68.459  59.934  1.00  0.37           O  
HETATM  489  O   HOH T 488      34.139  63.944  84.647  1.00  0.37           O  
HETATM  490  O   HOH T 489      33.129  72.011  69.986  1.00  0.37           O  
HETATM  491  O   HOH T 490      41.822  46.962  56.752  1.00  0.37           O  
HETATM  492  O   HOH T 491      29.971  60.533  74.123  1.00  0.37           O  
HETATM  493  O   HOH T 492      33.091  71.630  90.765  1.00  0.37           O  
HETATM  494  O   HOH T 493      -1.778  45.570  97.211  1.00  0.37           O  
HETATM  495  O   HOH T 494      22.595  56.320  59.119  1.00  0.37           O  
HETATM  496  O   HOH T 495      -1.541  47.610 120.070  1.00  0.37           O  
HETATM  497  O   HOH T 496      11.798  19.626  96.057  1.00  0.37           O  
HETATM  498  O   HOH T 497      19.604  80.608  33.159  1.00  0.37           O  
HETATM  499  O   HOH T 498      40.880  51.590  70.551  1.00  0.37           O  
HETATM  500  O   HOH T 499      43.830  51.078  67.901  1.00  0.37           O  
HETATM  501  O   HOH T 500      34.721  20.328  96.814  1.00  0.37           O  
HETATM  502  O   HOH T 501      47.235  64.468  30.609  1.00  0.37           O  
HETATM  503  O   HOH T 502      36.686  51.868  55.635  1.00  0.37           O  
HETATM  504  O   HOH T 503      28.664  65.539  41.842  1.00  0.37           O  
HETATM  505  O   HOH T 504      45.921  46.786  40.330  1.00  0.37           O  
HETATM  506  O   HOH T 505      59.830  72.777  64.856  1.00  0.37           O  
HETATM  507  O   HOH T 506      54.593  84.176  30.794  1.00  0.37           O  
HETATM  508  O   HOH T 507       7.152  59.916  85.697  1.00  0.37           O  
HETATM  509  O   HOH T 508      36.608  64.227  86.352  1.00  0.37           O  
HETATM  510  O   HOH T 509       3.413  66.498  98.280  1.00  0.37           O  
HETATM  511  O   HOH T 510      19.315  64.850 124.021  1.00  0.37           O  
HETATM  512  O   HOH T 511      33.261  93.873  64.069  1.00  0.37           O  
HETATM  513  O   HOH T 512      38.795  98.651  48.710  1.00  0.37           O  
HETATM  514  O   HOH T 513      39.933  17.609 105.833  1.00  0.37           O  
HETATM  515  O   HOH T 514      16.344  37.774  87.910  1.00  0.37           O  
HETATM  516  O   HOH T 515      41.099  45.439  90.433  1.00  0.37           O  
HETATM  517  O   HOH T 516      37.998  62.400 104.144  1.00  0.37           O  
HETATM  518  O   HOH T 517      61.440  62.829  65.817  1.00  0.37           O  
HETATM  519  O   HOH T 518      37.608  94.038  44.751  1.00  0.38           O  
HETATM  520  O   HOH T 519      28.986  85.092  35.406  1.00  0.38           O  
HETATM  521  O   HOH T 520      43.979  85.951  83.956  1.00  0.38           O  
HETATM  522  O   HOH T 521      25.261  23.379 115.839  1.00  0.38           O  
HETATM  523  O   HOH T 522      38.425  50.776  48.624  1.00  0.38           O  
HETATM  524  O   HOH T 523      45.008  80.985  26.879  1.00  0.38           O  
HETATM  525  O   HOH T 524      69.729  62.560  57.448  1.00  0.38           O  
HETATM  526  O   HOH T 525      25.132  83.425  69.160  1.00  0.38           O  
HETATM  527  O   HOH T 526      31.724  68.695  70.770  1.00  0.38           O  
HETATM  528  O   HOH T 527      37.070  38.297  86.952  1.00  0.38           O  
HETATM  529  O   HOH T 528      35.399  66.609  75.678  1.00  0.38           O  
HETATM  530  O   HOH T 529      34.997  92.067  68.870  1.00  0.38           O  
HETATM  531  O   HOH T 530      33.275  40.091 104.290  1.00  0.38           O  
HETATM  532  O   HOH T 531       8.342  42.551 107.753  1.00  0.38           O  
HETATM  533  O   HOH T 532      41.627  76.769  52.612  1.00  0.38           O  
HETATM  534  O   HOH T 533      37.452  46.155 127.052  1.00  0.38           O  
HETATM  535  O   HOH T 534      31.566  43.121 123.120  1.00  0.38           O  
HETATM  536  O   HOH T 535      28.694  78.414  25.342  1.00  0.38           O  
HETATM  537  O   HOH T 536       3.492  60.156 116.394  1.00  0.38           O  
HETATM  538  O   HOH T 537      53.676  75.329  40.458  1.00  0.38           O  
HETATM  539  O   HOH T 538      52.490  56.624  66.620  1.00  0.38           O  
HETATM  540  O   HOH T 539      46.203  80.345  88.574  1.00  0.38           O  
HETATM  541  O   HOH T 540      31.065  82.643  29.916  1.00  0.38           O  
HETATM  542  O   HOH T 541       5.207  43.992  89.615  1.00  0.38           O  
HETATM  543  O   HOH T 542      49.053  78.312  66.616  1.00  0.38           O  
HETATM  544  O   HOH T 543      29.072  66.517 110.632  1.00  0.38           O  
HETATM  545  O   HOH T 544      25.923  58.510  46.532  1.00  0.38           O  
HETATM  546  O   HOH T 545      44.730  39.398 111.406  1.00  0.38           O  
HETATM  547  O   HOH T 546      16.060  65.668 108.709  1.00  0.38           O  
HETATM  548  O   HOH T 547      27.672  67.171  88.392  1.00  0.38           O  
HETATM  549  O   HOH T 548      33.338  86.954  31.516  1.00  0.38           O  
HETATM  550  O   HOH T 549      53.206  83.391  61.766  1.00  0.38           O  
HETATM  551  O   HOH T 550      27.203  42.390 126.141  1.00  0.38           O  
HETATM  552  O   HOH T 551      21.125  83.400  67.187  1.00  0.38           O  
HETATM  553  O   HOH T 552      40.661  61.664  60.814  1.00  0.38           O  
HETATM  554  O   HOH T 553      23.538  46.037  57.175  1.00  0.38           O  
HETATM  555  O   HOH T 554      39.627  89.200  64.039  1.00  0.38           O  
HETATM  556  O   HOH T 555      46.808  69.697  59.369  1.00  0.38           O  
HETATM  557  O   HOH T 556      58.179  85.200  41.418  1.00  0.38           O  
HETATM  558  O   HOH T 557      36.098  59.202  95.160  1.00  0.38           O  
HETATM  559  O   HOH T 558      49.691  71.494  90.704  1.00  0.39           O  
HETATM  560  O   HOH T 559      11.918  36.768 132.860  1.00  0.39           O  
HETATM  561  O   HOH T 560       9.262  60.577 128.393  1.00  0.39           O  
HETATM  562  O   HOH T 561      44.729  80.976  53.483  1.00  0.39           O  
HETATM  563  O   HOH T 562      44.999  68.918  30.887  1.00  0.39           O  
HETATM  564  O   HOH T 563      37.964  25.893  91.656  1.00  0.39           O  
HETATM  565  O   HOH T 564      42.157  91.559  54.182  1.00  0.39           O  
HETATM  566  O   HOH T 565      48.670  61.014  58.412  1.00  0.39           O  
HETATM  567  O   HOH T 566      24.978  63.351 110.845  1.00  0.39           O  
HETATM  568  O   HOH T 567      26.820  65.139 109.771  1.00  0.39           O  
HETATM  569  O   HOH T 568       8.280  58.188  87.551  1.00  0.39           O  
HETATM  570  O   HOH T 569      71.634  75.474  41.873  1.00  0.39           O  
HETATM  571  O   HOH T 570      28.686  60.972  76.493  1.00  0.39           O  
HETATM  572  O   HOH T 571      57.661  80.904  32.783  1.00  0.39           O  
HETATM  573  O   HOH T 572      55.117  80.068  42.951  1.00  0.39           O  
HETATM  574  O   HOH T 573       7.091  73.461 103.139  1.00  0.39           O  
HETATM  575  O   HOH T 574       9.868  26.858 115.655  1.00  0.39           O  
HETATM  576  O   HOH T 575      47.896  51.117  39.672  1.00  0.39           O  
HETATM  577  O   HOH T 576      25.907  88.282  37.931  1.00  0.39           O  
HETATM  578  O   HOH T 577      48.818  71.322  87.918  1.00  0.39           O  
HETATM  579  O   HOH T 578      21.357  70.476  50.228  1.00  0.39           O  
HETATM  580  O   HOH T 579      68.990  66.828  55.603  1.00  0.39           O  
HETATM  581  O   HOH T 580      71.277  72.271  46.795  1.00  0.39           O  
HETATM  582  O   HOH T 581      41.794  97.578  56.691  1.00  0.39           O  
HETATM  583  O   HOH T 582      10.177  44.975  85.985  1.00  0.39           O  
HETATM  584  O   HOH T 583       7.888  55.054  84.866  1.00  0.39           O  
HETATM  585  O   HOH T 584      31.160  85.402  30.475  1.00  0.39           O  
HETATM  586  O   HOH T 585       4.527  40.059 102.910  1.00  0.39           O  
HETATM  587  O   HOH T 586      33.311  34.134 114.144  1.00  0.39           O  
HETATM  588  O   HOH T 587      67.997  59.214  41.384  1.00  0.39           O  
HETATM  589  O   HOH T 588      46.102  80.323  51.093  1.00  0.39           O  
HETATM  590  O   HOH T 589       1.922  35.238 128.010  1.00  0.39           O  
HETATM  591  O   HOH T 590      36.762  51.143  24.908  1.00  0.39           O  
HETATM  592  O   HOH T 591      17.189  26.662 114.990  1.00  0.39           O  
HETATM  593  O   HOH T 592      29.801  94.724  46.119  1.00  0.39           O  
HETATM  594  O   HOH T 593      28.504  81.199  25.735  1.00  0.39           O  
HETATM  595  O   HOH T 594      20.930  61.702  54.154  1.00  0.39           O  
HETATM  596  O   HOH T 595      13.321  76.624  41.009  1.00  0.39           O  
HETATM  597  O   HOH T 596      49.119  75.414  33.124  1.00  0.39           O  
HETATM  598  O   HOH T 597      22.974  60.119 113.342  1.00  0.39           O  
HETATM  599  O   HOH T 598      15.751  38.250 127.116  1.00  0.39           O  
HETATM  600  O   HOH T 599      19.878  36.211  70.139  1.00  0.39           O  
HETATM  601  O   HOH T 600       7.297  74.477 108.543  1.00  0.39           O  
HETATM  602  O   HOH T 601      33.912  89.962  37.540  1.00  0.39           O  
HETATM  603  O   HOH T 602      41.579  17.777  93.708  1.00  0.39           O  
HETATM  604  O   HOH T 603      19.845  35.639  95.736  1.00  0.39           O  
HETATM  605  O   HOH T 604      23.363  44.339 131.915  1.00  0.39           O  
HETATM  606  O   HOH T 605      15.136  73.724  31.021  1.00  0.39           O  
HETATM  607  O   HOH T 606      20.128  32.585  99.983  1.00  0.39           O  
HETATM  608  O   HOH T 607      42.855  58.684  92.279  1.00  0.39           O  
HETATM  609  O   HOH T 608      21.868  40.468 120.770  1.00  0.39           O  
HETATM  610  O   HOH T 609      37.269  60.711  97.228  1.00  0.39           O  
HETATM  611  O   HOH T 610      20.210  55.074  65.027  1.00  0.39           O  
HETATM  612  O   HOH T 611      24.168  41.493  94.963  1.00  0.39           O  
HETATM  613  O   HOH T 612      50.786  45.198  48.660  1.00  0.39           O  
HETATM  614  O   HOH T 613      48.772  73.766  28.780  1.00  0.39           O  
HETATM  615  O   HOH T 614      20.284  63.515 118.866  1.00  0.39           O  
HETATM  616  O   HOH T 615      41.068  80.130  87.323  1.00  0.39           O  
HETATM  617  O   HOH T 616      36.706  56.303  33.301  1.00  0.40           O  
HETATM  618  O   HOH T 617      51.217  41.148 108.568  1.00  0.40           O  
HETATM  619  O   HOH T 618      41.000  67.550  96.353  1.00  0.40           O  
HETATM  620  O   HOH T 619      18.135  35.838 116.653  1.00  0.40           O  
HETATM  621  O   HOH T 620      69.774  81.250  49.388  1.00  0.40           O  
HETATM  622  O   HOH T 621       4.437  47.735 123.402  1.00  0.40           O  
HETATM  623  O   HOH T 622      62.690  81.749  53.957  1.00  0.40           O  
HETATM  624  O   HOH T 623      54.453  79.400  36.487  1.00  0.40           O  
HETATM  625  O   HOH T 624      12.405  45.835  84.532  1.00  0.40           O  
HETATM  626  O   HOH T 625      -2.108  50.258 120.042  1.00  0.40           O  
HETATM  627  O   HOH T 626      19.496  30.994 108.742  1.00  0.40           O  
HETATM  628  O   HOH T 627      47.082  47.845  42.817  1.00  0.40           O  
HETATM  629  O   HOH T 628      43.643  85.749  50.446  1.00  0.40           O  
HETATM  630  O   HOH T 629      10.071  40.564 128.100  1.00  0.40           O  
HETATM  631  O   HOH T 630      26.808  65.566  76.993  1.00  0.40           O  
HETATM  632  O   HOH T 631      79.543  62.089  43.676  1.00  0.40           O  
HETATM  633  O   HOH T 632      12.188  81.243  37.374  1.00  0.40           O  
HETATM  634  O   HOH T 633      72.043  66.563  43.926  1.00  0.40           O  
HETATM  635  O   HOH T 634      26.099  37.253  85.289  1.00  0.40           O  
HETATM  636  O   HOH T 635      26.003  55.793  49.549  1.00  0.40           O  
HETATM  637  O   HOH T 636      15.387  31.268 104.347  1.00  0.40           O  
HETATM  638  O   HOH T 637      37.008  18.189 120.903  1.00  0.40           O  
HETATM  639  O   HOH T 638      25.909  40.767 128.084  1.00  0.40           O  
HETATM  640  O   HOH T 639      36.470  61.387 101.949  1.00  0.40           O  
HETATM  641  O   HOH T 640      42.908  28.844 110.446  1.00  0.40           O  
HETATM  642  O   HOH T 641      32.480  60.901 115.725  1.00  0.40           O  
HETATM  643  O   HOH T 642      -2.052  61.934 104.764  1.00  0.40           O  
HETATM  644  O   HOH T 643      52.003  66.161  67.672  1.00  0.40           O  
HETATM  645  O   HOH T 644      40.277  57.717  22.922  1.00  0.40           O  
HETATM  646  O   HOH T 645      52.528  77.814  39.986  1.00  0.40           O  
HETATM  647  O   HOH T 646      40.372  47.956  80.096  1.00  0.40           O  
HETATM  648  O   HOH T 647      21.754  42.889  97.875  1.00  0.40           O  
HETATM  649  O   HOH T 648      42.404  84.473  30.677  1.00  0.40           O  
HETATM  650  O   HOH T 649      20.869  37.303  91.026  1.00  0.40           O  
HETATM  651  O   HOH T 650      12.085  74.278  40.504  1.00  0.40           O  
HETATM  652  O   HOH T 651      58.934  69.856  32.441  1.00  0.40           O  
HETATM  653  O   HOH T 652      41.658  54.843  88.055  1.00  0.40           O  
HETATM  654  O   HOH T 653      42.429  73.965  69.427  1.00  0.40           O  
HETATM  655  O   HOH T 654      -8.057  44.767 120.007  1.00  0.40           O  
HETATM  656  O   HOH T 655      47.237  52.888 107.788  1.00  0.40           O  
HETATM  657  O   HOH T 656       9.013  52.598  84.111  1.00  0.40           O  
HETATM  658  O   HOH T 657      42.440  46.023  54.220  1.00  0.40           O  
HETATM  659  O   HOH T 658      75.098  65.670  50.844  1.00  0.40           O  
HETATM  660  O   HOH T 659      16.805  29.375 119.978  1.00  0.40           O  
HETATM  661  O   HOH T 660      27.065  54.201 118.840  1.00  0.40           O  
HETATM  662  O   HOH T 661      22.673  30.858 116.420  1.00  0.40           O  
HETATM  663  O   HOH T 662      30.629  86.964  34.204  1.00  0.40           O  
HETATM  664  O   HOH T 663      14.263  23.633 101.487  1.00  0.40           O  
HETATM  665  O   HOH T 664      29.659  17.295 119.265  1.00  0.40           O  
HETATM  666  O   HOH T 665      26.548  67.503  27.530  1.00  0.40           O  
HETATM  667  O   HOH T 666      41.685  48.238  82.533  1.00  0.40           O  
HETATM  668  O   HOH T 667      14.787  71.378  32.517  1.00  0.40           O  
HETATM  669  O   HOH T 668      47.176  89.096  21.870  1.00  0.40           O  
HETATM  670  O   HOH T 669      54.910  78.103  49.363  1.00  0.40           O  
HETATM  671  O   HOH T 670      62.648  83.037  56.280  1.00  0.40           O  
HETATM  672  O   HOH T 671      34.503  33.624 116.593  1.00  0.40           O  
HETATM  673  O   HOH T 672      47.426  86.527  65.230  1.00  0.40           O  
HETATM  674  O   HOH T 673      43.934  57.534  72.328  1.00  0.41           O  
HETATM  675  O   HOH T 674      26.349  55.945  55.988  1.00  0.41           O  
HETATM  676  O   HOH T 675      48.494  82.306  42.912  1.00  0.41           O  
HETATM  677  O   HOH T 676      25.816  33.068 123.308  1.00  0.41           O  
HETATM  678  O   HOH T 677      21.736  53.857  60.157  1.00  0.41           O  
HETATM  679  O   HOH T 678      32.986  46.896 130.075  1.00  0.41           O  
HETATM  680  O   HOH T 679      22.606  59.693  55.170  1.00  0.41           O  
HETATM  681  O   HOH T 680      21.478  57.470  65.620  1.00  0.41           O  
HETATM  682  O   HOH T 681      23.316  40.551  60.599  1.00  0.41           O  
HETATM  683  O   HOH T 682      25.300  56.623  58.513  1.00  0.41           O  
HETATM  684  O   HOH T 683      22.137  74.438  44.923  1.00  0.41           O  
HETATM  685  O   HOH T 684      43.779  35.252  90.040  1.00  0.41           O  
HETATM  686  O   HOH T 685      41.171  59.081  80.914  1.00  0.41           O  
HETATM  687  O   HOH T 686      36.475  35.587  87.378  1.00  0.41           O  
HETATM  688  O   HOH T 687      21.030  34.848 114.476  1.00  0.41           O  
HETATM  689  O   HOH T 688      67.109  75.292  57.629  1.00  0.41           O  
HETATM  690  O   HOH T 689       8.188  33.722  77.513  1.00  0.41           O  
HETATM  691  O   HOH T 690      16.292  33.607  80.996  1.00  0.41           O  
HETATM  692  O   HOH T 691      43.066  79.766  28.023  1.00  0.41           O  
HETATM  693  O   HOH T 692      -5.187  43.556 115.907  1.00  0.41           O  
HETATM  694  O   HOH T 693      47.378  63.391  71.606  1.00  0.41           O  
HETATM  695  O   HOH T 694      29.550  82.452  72.271  1.00  0.41           O  
HETATM  696  O   HOH T 695      10.930  38.490  93.687  1.00  0.41           O  
HETATM  697  O   HOH T 696      16.271  37.268 108.544  1.00  0.41           O  
HETATM  698  O   HOH T 697      52.086  73.189  81.241  1.00  0.41           O  
HETATM  699  O   HOH T 698       6.418  30.538 114.542  1.00  0.41           O  
HETATM  700  O   HOH T 699      19.346  47.710  84.889  1.00  0.41           O  
HETATM  701  O   HOH T 700       5.409  55.281 121.078  1.00  0.41           O  
HETATM  702  O   HOH T 701      14.601  41.413  89.434  1.00  0.41           O  
HETATM  703  O   HOH T 702      24.506  47.024  94.140  1.00  0.41           O  
HETATM  704  O   HOH T 703      18.516  72.228  54.192  1.00  0.41           O  
HETATM  705  O   HOH T 704      21.923  39.821  94.726  1.00  0.41           O  
HETATM  706  O   HOH T 705      44.332  54.211  88.460  1.00  0.41           O  
HETATM  707  O   HOH T 706      47.002  62.961  32.896  1.00  0.41           O  
HETATM  708  O   HOH T 707      48.830  43.627  49.782  1.00  0.41           O  
HETATM  709  O   HOH T 708      18.372  69.871  53.009  1.00  0.41           O  
HETATM  710  O   HOH T 709      53.869  91.247  31.918  1.00  0.41           O  
HETATM  711  O   HOH T 710      37.238  54.897 128.642  1.00  0.41           O  
HETATM  712  O   HOH T 711      41.635  52.857  72.930  1.00  0.41           O  
HETATM  713  O   HOH T 712      60.064  53.290  58.976  1.00  0.41           O  
HETATM  714  O   HOH T 713      29.837  21.225 118.531  1.00  0.41           O  
HETATM  715  O   HOH T 714      24.942  60.103 115.154  1.00  0.41           O  
HETATM  716  O   HOH T 715      25.811  66.294  46.426  1.00  0.41           O  
HETATM  717  O   HOH T 716      56.689  82.075  63.432  1.00  0.41           O  
HETATM  718  O   HOH T 717      -5.828  43.132 105.291  1.00  0.41           O  
HETATM  719  O   HOH T 718      20.829  37.003  67.599  1.00  0.41           O  
HETATM  720  O   HOH T 719      40.901  59.089 126.501  1.00  0.41           O  
HETATM  721  O   HOH T 720      -4.742  46.204 121.754  1.00  0.42           O  
HETATM  722  O   HOH T 721      42.429  52.119  88.463  1.00  0.42           O  
HETATM  723  O   HOH T 722      35.968  47.752  63.856  1.00  0.42           O  
HETATM  724  O   HOH T 723      30.496  66.155 104.076  1.00  0.42           O  
HETATM  725  O   HOH T 724      13.742  40.536 114.784  1.00  0.42           O  
HETATM  726  O   HOH T 725      32.642  66.527  75.173  1.00  0.42           O  
HETATM  727  O   HOH T 726      44.258  52.117  72.855  1.00  0.42           O  
HETATM  728  O   HOH T 727      49.720  49.381  95.196  1.00  0.42           O  
HETATM  729  O   HOH T 728      21.612  30.478 131.324  1.00  0.42           O  
HETATM  730  O   HOH T 729      14.610  38.847  90.742  1.00  0.42           O  
HETATM  731  O   HOH T 730      -2.075  45.419 106.939  1.00  0.42           O  
HETATM  732  O   HOH T 731      37.079  22.048 113.637  1.00  0.42           O  
HETATM  733  O   HOH T 732      47.008  73.140  52.303  1.00  0.42           O  
HETATM  734  O   HOH T 733      36.282  57.811 119.993  1.00  0.42           O  
HETATM  735  O   HOH T 734      47.321  74.397  24.145  1.00  0.42           O  
HETATM  736  O   HOH T 735      26.464  81.169  69.882  1.00  0.42           O  
HETATM  737  O   HOH T 736      40.391  59.623  93.388  1.00  0.42           O  
HETATM  738  O   HOH T 737      56.705  82.393  30.622  1.00  0.42           O  
HETATM  739  O   HOH T 738      -0.317  52.169 119.402  1.00  0.42           O  
HETATM  740  O   HOH T 739      53.339  75.460  45.494  1.00  0.42           O  
HETATM  741  O   HOH T 740      13.526  41.372 101.039  1.00  0.42           O  
HETATM  742  O   HOH T 741      48.686  86.820  60.416  1.00  0.42           O  
HETATM  743  O   HOH T 742      23.657  78.528  32.624  1.00  0.42           O  
HETATM  744  O   HOH T 743      26.815  30.944  89.566  1.00  0.42           O  
HETATM  745  O   HOH T 744      10.913  43.222  81.825  1.00  0.42           O  
HETATM  746  O   HOH T 745      49.885  74.364  48.907  1.00  0.42           O  
HETATM  747  O   HOH T 746      17.643  76.085  43.773  1.00  0.42           O  
HETATM  748  O   HOH T 747      47.558  51.626 103.606  1.00  0.42           O  
HETATM  749  O   HOH T 748      25.311  51.957  69.343  1.00  0.42           O  
HETATM  750  O   HOH T 749      34.526  36.242 115.553  1.00  0.42           O  
HETATM  751  O   HOH T 750      23.224  61.083  65.039  1.00  0.42           O  
HETATM  752  O   HOH T 751      28.610  63.733  75.588  1.00  0.42           O  
HETATM  753  O   HOH T 752      19.944  92.097  59.277  1.00  0.42           O  
HETATM  754  O   HOH T 753      25.583  64.954  69.848  1.00  0.42           O  
HETATM  755  O   HOH T 754      49.428  46.941  93.807  1.00  0.42           O  
HETATM  756  O   HOH T 755      26.165  90.766  59.703  1.00  0.42           O  
HETATM  757  O   HOH T 756      -2.419  45.467 109.649  1.00  0.42           O  
HETATM  758  O   HOH T 757      51.853  53.912  66.181  1.00  0.42           O  
HETATM  759  O   HOH T 758       8.318  37.710  92.729  1.00  0.42           O  
HETATM  760  O   HOH T 759      14.839  41.180 103.394  1.00  0.42           O  
HETATM  761  O   HOH T 760      48.593  51.746  61.851  1.00  0.42           O  
HETATM  762  O   HOH T 761      23.319  53.714  78.503  1.00  0.42           O  
HETATM  763  O   HOH T 762      25.858  18.764  99.465  1.00  0.42           O  
HETATM  764  O   HOH T 763      48.497  82.632  87.125  1.00  0.42           O  
HETATM  765  O   HOH T 764       2.480  41.139 101.285  1.00  0.42           O  
HETATM  766  O   HOH T 765      31.754  38.148 119.008  1.00  0.42           O  
HETATM  767  O   HOH T 766      14.095  35.471  65.996  1.00  0.42           O  
HETATM  768  O   HOH T 767      31.942  84.437  27.981  1.00  0.43           O  
HETATM  769  O   HOH T 768       8.658  41.818 105.077  1.00  0.43           O  
HETATM  770  O   HOH T 769      -9.040  50.127  98.760  1.00  0.43           O  
HETATM  771  O   HOH T 770      69.001  68.353  57.994  1.00  0.43           O  
HETATM  772  O   HOH T 771      40.276  54.931  99.818  1.00  0.43           O  
HETATM  773  O   HOH T 772      28.946  70.193  30.576  1.00  0.43           O  
HETATM  774  O   HOH T 773      28.156  65.107  86.586  1.00  0.43           O  
HETATM  775  O   HOH T 774      25.847  56.720  78.335  1.00  0.43           O  
HETATM  776  O   HOH T 775      56.686  60.584  38.168  1.00  0.43           O  
HETATM  777  O   HOH T 776      -3.770  43.654 108.238  1.00  0.43           O  
HETATM  778  O   HOH T 777      71.125  60.604  54.301  1.00  0.43           O  
HETATM  779  O   HOH T 778      22.442  51.563  77.247  1.00  0.43           O  
HETATM  780  O   HOH T 779       8.215  37.139  89.983  1.00  0.43           O  
HETATM  781  O   HOH T 780       8.629  76.461 116.160  1.00  0.43           O  
HETATM  782  O   HOH T 781      22.674  39.367  90.463  1.00  0.43           O  
HETATM  783  O   HOH T 782      20.401  71.579 122.903  1.00  0.43           O  
HETATM  784  O   HOH T 783      50.883  77.225  60.993  1.00  0.43           O  
HETATM  785  O   HOH T 784      43.924  86.869  80.354  1.00  0.43           O  
HETATM  786  O   HOH T 785      23.548  56.794 123.142  1.00  0.43           O  
HETATM  787  O   HOH T 786      11.493  64.392 121.260  1.00  0.43           O  
HETATM  788  O   HOH T 787      -0.621  35.874 118.877  1.00  0.43           O  
HETATM  789  O   HOH T 788      23.197  62.829  83.340  1.00  0.43           O  
HETATM  790  O   HOH T 789      37.421  20.129  97.091  1.00  0.43           O  
HETATM  791  O   HOH T 790      31.139  59.772  32.530  1.00  0.43           O  
HETATM  792  O   HOH T 791      41.271  41.480  85.743  1.00  0.43           O  
HETATM  793  O   HOH T 792      16.631  65.172 123.346  1.00  0.43           O  
HETATM  794  O   HOH T 793      48.232  85.353  82.788  1.00  0.43           O  
HETATM  795  O   HOH T 794      28.681  72.616  69.003  1.00  0.43           O  
HETATM  796  O   HOH T 795      49.419  46.996  96.597  1.00  0.43           O  
HETATM  797  O   HOH T 796      57.088  81.734  42.253  1.00  0.43           O  
HETATM  798  O   HOH T 797      35.918  41.935  95.579  1.00  0.43           O  
HETATM  799  O   HOH T 798      49.907  44.282 102.900  1.00  0.43           O  
HETATM  800  O   HOH T 799      32.480  69.017  30.593  1.00  0.43           O  
HETATM  801  O   HOH T 800      46.389  76.369  65.007  1.00  0.43           O  
HETATM  802  O   HOH T 801      49.382  79.425  48.980  1.00  0.43           O  
HETATM  803  O   HOH T 802      18.879  60.778  52.528  1.00  0.43           O  
HETATM  804  O   HOH T 803      53.264  62.531  61.005  1.00  0.43           O  
HETATM  805  O   HOH T 804      31.358  39.146  85.547  1.00  0.43           O  
HETATM  806  O   HOH T 805      22.730  54.286  81.084  1.00  0.43           O  
HETATM  807  O   HOH T 806      47.174  83.293  61.307  1.00  0.43           O  
HETATM  808  O   HOH T 807      35.271  66.424  85.549  1.00  0.43           O  
HETATM  809  O   HOH T 808      70.221  59.919  56.886  1.00  0.43           O  
HETATM  810  O   HOH T 809      45.326  78.583  41.455  1.00  0.43           O  
HETATM  811  O   HOH T 810      25.491  69.741  28.992  1.00  0.43           O  
HETATM  812  O   HOH T 811      43.676  58.233  89.738  1.00  0.43           O  
HETATM  813  O   HOH T 812       6.896  40.456 106.660  1.00  0.43           O  
HETATM  814  O   HOH T 813      37.711  15.730  98.742  1.00  0.43           O  
HETATM  815  O   HOH T 814      40.702  28.473  92.237  1.00  0.43           O  
HETATM  816  O   HOH T 815      16.951  40.019  89.574  1.00  0.43           O  
HETATM  817  O   HOH T 816      31.546  54.764  57.940  1.00  0.43           O  
HETATM  818  O   HOH T 817      37.729  95.545  55.333  1.00  0.43           O  
HETATM  819  O   HOH T 818      11.381  39.590 115.861  1.00  0.43           O  
HETATM  820  O   HOH T 819      27.846  33.821 121.550  1.00  0.43           O  
HETATM  821  O   HOH T 820      49.896  79.033  46.279  1.00  0.43           O  
HETATM  822  O   HOH T 821       9.122  33.234 111.008  1.00  0.43           O  
HETATM  823  O   HOH T 822      19.129  33.873  80.663  1.00  0.43           O  
HETATM  824  O   HOH T 823      21.174  33.170  95.951  1.00  0.43           O  
HETATM  825  O   HOH T 824      35.762  51.508  31.622  1.00  0.44           O  
HETATM  826  O   HOH T 825      41.951  19.587 116.692  1.00  0.44           O  
HETATM  827  O   HOH T 826      67.727  54.168  59.444  1.00  0.44           O  
HETATM  828  O   HOH T 827      42.430  54.110 101.414  1.00  0.44           O  
HETATM  829  O   HOH T 828      35.874  51.625  48.974  1.00  0.44           O  
HETATM  830  O   HOH T 829      54.015  77.900  44.271  1.00  0.44           O  
HETATM  831  O   HOH T 830      19.236  72.882  56.748  1.00  0.44           O  
HETATM  832  O   HOH T 831      21.074  42.053  88.356  1.00  0.44           O  
HETATM  833  O   HOH T 832      59.993  53.916  61.743  1.00  0.44           O  
HETATM  834  O   HOH T 833      23.744  58.780  66.506  1.00  0.44           O  
HETATM  835  O   HOH T 834      17.953  52.124  96.301  1.00  0.44           O  
HETATM  836  O   HOH T 835      18.270  36.118 110.139  1.00  0.44           O  
HETATM  837  O   HOH T 836      56.822  52.178  50.982  1.00  0.44           O  
HETATM  838  O   HOH T 837      18.407  42.247 132.118  1.00  0.44           O  
HETATM  839  O   HOH T 838       9.342  18.957 100.005  1.00  0.44           O  
HETATM  840  O   HOH T 839      14.229  72.998 104.790  1.00  0.44           O  
HETATM  841  O   HOH T 840      14.137  59.901 123.944  1.00  0.44           O  
HETATM  842  O   HOH T 841       1.369  43.859  93.167  1.00  0.44           O  
HETATM  843  O   HOH T 842      48.801  81.130  51.031  1.00  0.44           O  
HETATM  844  O   HOH T 843      50.100  40.468 106.118  1.00  0.44           O  
HETATM  845  O   HOH T 844      16.827  66.742  94.774  1.00  0.44           O  
HETATM  846  O   HOH T 845      29.066  52.701  68.551  1.00  0.44           O  
HETATM  847  O   HOH T 846      35.624  67.245  83.003  1.00  0.44           O  
HETATM  848  O   HOH T 847      24.216  30.479  90.277  1.00  0.44           O  
HETATM  849  O   HOH T 848      15.948  75.726  29.226  1.00  0.44           O  
HETATM  850  O   HOH T 849      59.610  52.717  43.439  1.00  0.44           O  
HETATM  851  O   HOH T 850      14.898  83.770  50.115  1.00  0.44           O  
HETATM  852  O   HOH T 851       1.402  45.898  99.803  1.00  0.44           O  
HETATM  853  O   HOH T 852      27.405  33.968  87.162  1.00  0.44           O  
HETATM  854  O   HOH T 853      36.425  64.174 110.830  1.00  0.44           O  
HETATM  855  O   HOH T 854      18.761  40.316  97.120  1.00  0.44           O  
HETATM  856  O   HOH T 855      41.770  42.896  91.427  1.00  0.44           O  
HETATM  857  O   HOH T 856      32.011  64.771 106.096  1.00  0.44           O  
HETATM  858  O   HOH T 857      20.724  55.327  62.329  1.00  0.44           O  
HETATM  859  O   HOH T 858      33.925  40.352  85.048  1.00  0.44           O  
HETATM  860  O   HOH T 859      52.594  79.274  42.323  1.00  0.44           O  
HETATM  861  O   HOH T 860      61.560  68.981  63.826  1.00  0.44           O  
HETATM  862  O   HOH T 861      69.828  55.610  52.443  1.00  0.44           O  
HETATM  863  O   HOH T 862      41.655  56.786  73.674  1.00  0.44           O  
HETATM  864  O   HOH T 863      10.453  44.247  68.447  1.00  0.44           O  
HETATM  865  O   HOH T 864      -4.700  44.265 110.767  1.00  0.44           O  
HETATM  866  O   HOH T 865      53.158  75.989  61.921  1.00  0.44           O  
HETATM  867  O   HOH T 866       9.529  26.610 102.199  1.00  0.44           O  
HETATM  868  O   HOH T 867      14.570  38.945  99.725  1.00  0.44           O  
HETATM  869  O   HOH T 868       7.325  39.512  71.364  1.00  0.44           O  
HETATM  870  O   HOH T 869      27.556  79.434  27.709  1.00  0.44           O  
HETATM  871  O   HOH T 870      26.417  83.467  37.951  1.00  0.44           O  
HETATM  872  O   HOH T 871      10.690  28.535 103.772  1.00  0.44           O  
HETATM  873  O   HOH T 872      32.450  71.563  88.040  1.00  0.44           O  
HETATM  874  O   HOH T 873       8.867  34.543 131.480  1.00  0.44           O  
HETATM  875  O   HOH T 874      23.398  36.012  67.017  1.00  0.44           O  
HETATM  876  O   HOH T 875      26.674  46.335 125.470  1.00  0.44           O  
HETATM  877  O   HOH T 876      20.931  43.741  86.346  1.00  0.44           O  
HETATM  878  O   HOH T 877      44.795  74.919  56.545  1.00  0.45           O  
HETATM  879  O   HOH T 878      27.032  64.589  84.077  1.00  0.45           O  
HETATM  880  O   HOH T 879      46.709  81.716  40.669  1.00  0.45           O  
HETATM  881  O   HOH T 880      30.049  54.176 123.973  1.00  0.45           O  
HETATM  882  O   HOH T 881      27.352  48.983  69.471  1.00  0.45           O  
HETATM  883  O   HOH T 882      18.858  28.039 116.716  1.00  0.45           O  
HETATM  884  O   HOH T 883      13.458  61.824 114.090  1.00  0.45           O  
HETATM  885  O   HOH T 884      14.532  27.065 115.719  1.00  0.45           O  
HETATM  886  O   HOH T 885       7.196  36.736 131.099  1.00  0.45           O  
HETATM  887  O   HOH T 886      36.825  39.448 115.328  1.00  0.45           O  
HETATM  888  O   HOH T 887      31.185  94.225  51.092  1.00  0.45           O  
HETATM  889  O   HOH T 888      42.996  25.678 100.479  1.00  0.45           O  
HETATM  890  O   HOH T 889      25.086  59.658  44.078  1.00  0.45           O  
HETATM  891  O   HOH T 890       5.081  41.276  90.197  1.00  0.45           O  
HETATM  892  O   HOH T 891      15.794  52.864  75.069  1.00  0.45           O  
HETATM  893  O   HOH T 892      18.586  53.863  63.155  1.00  0.45           O  
HETATM  894  O   HOH T 893      13.066  37.857  65.681  1.00  0.45           O  
HETATM  895  O   HOH T 894      37.611  20.661 119.592  1.00  0.45           O  
HETATM  896  O   HOH T 895      22.106  74.244  65.287  1.00  0.45           O  
HETATM  897  O   HOH T 896      52.840  91.794  42.737  1.00  0.45           O  
HETATM  898  O   HOH T 897      45.765  73.756  58.919  1.00  0.45           O  
HETATM  899  O   HOH T 898      19.050  42.851  98.106  1.00  0.45           O  
HETATM  900  O   HOH T 899      56.596  79.200  34.756  1.00  0.45           O  
HETATM  901  O   HOH T 900      72.319  63.195  54.462  1.00  0.45           O  
HETATM  902  O   HOH T 901      58.558  80.966  35.464  1.00  0.45           O  
HETATM  903  O   HOH T 902       6.348  34.181 130.445  1.00  0.45           O  
HETATM  904  O   HOH T 903      20.630  37.521  93.821  1.00  0.45           O  
HETATM  905  O   HOH T 904      38.260  18.551 110.751  1.00  0.45           O  
HETATM  906  O   HOH T 905      39.700  99.719  43.696  1.00  0.45           O  
HETATM  907  O   HOH T 906      36.436  20.638  94.536  1.00  0.45           O  
HETATM  908  O   HOH T 907      49.404  84.376  85.163  1.00  0.45           O  
HETATM  909  O   HOH T 908       1.855  45.538  97.140  1.00  0.45           O  
HETATM  910  O   HOH T 909      73.643  73.249  47.984  1.00  0.45           O  
HETATM  911  O   HOH T 910      19.280  71.891  51.503  1.00  0.45           O  
HETATM  912  O   HOH T 911      39.842  28.316 112.965  1.00  0.45           O  
HETATM  913  O   HOH T 912      28.153  67.864  33.191  1.00  0.45           O  
HETATM  914  O   HOH T 913      11.313  30.075 101.483  1.00  0.45           O  
HETATM  915  O   HOH T 914      23.269  65.154  46.996  1.00  0.45           O  
HETATM  916  O   HOH T 915      60.817  76.820  39.593  1.00  0.45           O  
HETATM  917  O   HOH T 916      17.842  16.568 100.289  1.00  0.45           O  
HETATM  918  O   HOH T 917       9.902  37.097 131.022  1.00  0.45           O  
HETATM  919  O   HOH T 918      62.172  55.494  62.474  1.00  0.45           O  
HETATM  920  O   HOH T 919      33.077  62.588 113.642  1.00  0.45           O  
HETATM  921  O   HOH T 920      17.666  73.559  42.677  1.00  0.45           O  
HETATM  922  O   HOH T 921      53.262  93.280  33.750  1.00  0.45           O  
HETATM  923  O   HOH T 922      79.132  59.030  46.118  1.00  0.45           O  
HETATM  924  O   HOH T 923      38.207  62.322 110.162  1.00  0.45           O  
HETATM  925  O   HOH T 924      45.509  92.407  58.581  1.00  0.45           O  
HETATM  926  O   HOH T 925      33.765  47.092  62.301  1.00  0.45           O  
HETATM  927  O   HOH T 926      27.931  78.031  30.116  1.00  0.45           O  
HETATM  928  O   HOH T 927      34.677  14.350 102.698  1.00  0.45           O  
HETATM  929  O   HOH T 928      27.115  80.977  67.146  1.00  0.45           O  
HETATM  930  O   HOH T 929       8.060  42.219  71.350  1.00  0.45           O  
HETATM  931  O   HOH T 930      36.086  25.882  86.622  1.00  0.45           O  
HETATM  932  O   HOH T 931      55.302  91.137  41.579  1.00  0.45           O  
HETATM  933  O   HOH T 932      44.522  83.569  52.125  1.00  0.45           O  
HETATM  934  O   HOH T 933      43.620  50.569  70.599  1.00  0.45           O  
HETATM  935  O   HOH T 934       3.646  65.851  94.072  1.00  0.45           O  
HETATM  936  O   HOH T 935      -4.839  47.020  91.567  1.00  0.45           O  
HETATM  937  O   HOH T 936      40.241  60.961 103.605  1.00  0.45           O  
HETATM  938  O   HOH T 937      44.305  76.179  51.814  1.00  0.45           O  
HETATM  939  O   HOH T 938      26.009  65.920  42.612  1.00  0.45           O  
HETATM  940  O   HOH T 939       8.827  39.014 105.275  1.00  0.45           O  
HETATM  941  O   HOH T 940      64.851  54.662  59.077  1.00  0.45           O  
HETATM  942  O   HOH T 941      59.068  82.529  37.762  1.00  0.45           O  
HETATM  943  O   HOH T 942      29.161  40.311  84.020  1.00  0.45           O  
HETATM  944  O   HOH T 943      39.725  99.701  40.659  1.00  0.45           O  
HETATM  945  O   HOH T 944      26.256  78.333  32.216  1.00  0.45           O  
HETATM  946  O   HOH T 945      18.097  32.079 123.431  1.00  0.45           O  
HETATM  947  O   HOH T 946      70.605  64.717  56.195  1.00  0.45           O  
HETATM  948  O   HOH T 947      32.221  65.744 101.472  1.00  0.45           O  
HETATM  949  O   HOH T 948       1.023  33.903 119.872  1.00  0.46           O  
HETATM  950  O   HOH T 949      11.126  15.475  99.280  1.00  0.46           O  
HETATM  951  O   HOH T 950      16.194  20.046  93.994  1.00  0.46           O  
HETATM  952  O   HOH T 951      49.313  88.979  58.933  1.00  0.46           O  
HETATM  953  O   HOH T 952      10.598  17.765  97.803  1.00  0.46           O  
HETATM  954  O   HOH T 953       1.888  48.505 122.967  1.00  0.46           O  
HETATM  955  O   HOH T 954      34.307  21.178  92.795  1.00  0.46           O  
HETATM  956  O   HOH T 955      64.004  84.168  54.093  1.00  0.46           O  
HETATM  957  O   HOH T 956       7.905  40.803  73.798  1.00  0.46           O  
HETATM  958  O   HOH T 957      28.454  55.563  51.029  1.00  0.46           O  
HETATM  959  O   HOH T 958      -3.249  49.334  91.511  1.00  0.46           O  
HETATM  960  O   HOH T 959      41.337  93.502  56.064  1.00  0.46           O  
HETATM  961  O   HOH T 960      46.141  43.305  95.508  1.00  0.46           O  
HETATM  962  O   HOH T 961      63.266  64.653  30.026  1.00  0.46           O  
HETATM  963  O   HOH T 962      41.044  63.951  30.793  1.00  0.46           O  
HETATM  964  O   HOH T 963      68.895  77.623  47.397  1.00  0.46           O  
HETATM  965  O   HOH T 964      24.468  51.472  75.501  1.00  0.46           O  
HETATM  966  O   HOH T 965      49.634  76.909  48.050  1.00  0.46           O  
HETATM  967  O   HOH T 966      11.853  64.490 124.104  1.00  0.46           O  
HETATM  968  O   HOH T 967      14.242  18.498  95.246  1.00  0.46           O  
HETATM  969  O   HOH T 968      18.503  67.124 122.619  1.00  0.46           O  
HETATM  970  O   HOH T 969      -7.757  51.297 101.001  1.00  0.46           O  
HETATM  971  O   HOH T 970      48.923  80.671  29.392  1.00  0.46           O  
HETATM  972  O   HOH T 971      26.816  54.849 122.462  1.00  0.46           O  
HETATM  973  O   HOH T 972      17.833  69.535 100.556  1.00  0.46           O  
HETATM  974  O   HOH T 973      -3.997  43.855 120.379  1.00  0.46           O  
HETATM  975  O   HOH T 974      33.149  68.232  73.133  1.00  0.46           O  
HETATM  976  O   HOH T 975      37.229  74.607  91.598  1.00  0.46           O  
HETATM  977  O   HOH T 976      19.918  58.576  86.762  1.00  0.46           O  
HETATM  978  O   HOH T 977      15.935  37.815 105.865  1.00  0.46           O  
HETATM  979  O   HOH T 978      17.301  38.877  99.090  1.00  0.46           O  
HETATM  980  O   HOH T 979       8.289  38.899 129.630  1.00  0.46           O  
HETATM  981  O   HOH T 980      16.214  35.163  92.349  1.00  0.46           O  
HETATM  982  O   HOH T 981      18.563  36.530  98.100  1.00  0.46           O  
HETATM  983  O   HOH T 982      20.560  39.779  92.276  1.00  0.46           O  
HETATM  984  O   HOH T 983      41.285  57.203 119.802  1.00  0.46           O  
HETATM  985  O   HOH T 984      70.355  76.543  49.541  1.00  0.46           O  
HETATM  986  O   HOH T 985      19.617  66.961 109.062  1.00  0.46           O  
HETATM  987  O   HOH T 986      43.582  93.825  54.432  1.00  0.46           O  
HETATM  988  O   HOH T 987      29.877  33.989 125.001  1.00  0.46           O  
HETATM  989  O   HOH T 988      10.422  44.849 124.435  1.00  0.46           O  
HETATM  990  O   HOH T 989      23.016  41.123  92.504  1.00  0.46           O  
HETATM  991  O   HOH T 990      43.580  91.971  56.591  1.00  0.46           O  
HETATM  992  O   HOH T 991      -3.202  52.456 110.616  1.00  0.46           O  
HETATM  993  O   HOH T 992      30.664  39.530 104.926  1.00  0.46           O  
HETATM  994  O   HOH T 993      44.501  74.493  24.154  1.00  0.46           O  
HETATM  995  O   HOH T 994      54.436  50.900  63.753  1.00  0.46           O  
HETATM  996  O   HOH T 995      46.142  76.885  24.206  1.00  0.46           O  
HETATM  997  O   HOH T 996      44.603  42.095 110.756  1.00  0.46           O  
HETATM  998  O   HOH T 997      52.046  52.064  64.069  1.00  0.47           O  
HETATM  999  O   HOH T 998      13.710  35.896  76.339  1.00  0.47           O  
HETATM 1000  O   HOH T 999      22.636  28.235  90.255  1.00  0.47           O  
HETATM 1001  O   HOH T1000      15.906  52.004  82.309  1.00  0.47           O  
HETATM 1002  O   HOH T1001      -0.573  45.729  92.339  1.00  0.47           O  
HETATM 1003  O   HOH T1002      15.725  31.004 117.950  1.00  0.47           O  
HETATM 1004  O   HOH T1003       2.475  32.725 124.624  1.00  0.47           O  
HETATM 1005  O   HOH T1004       4.038  78.809 111.372  1.00  0.47           O  
HETATM 1006  O   HOH T1005      43.629  76.271  65.465  1.00  0.47           O  
HETATM 1007  O   HOH T1006      43.977  67.129  59.936  1.00  0.47           O  
HETATM 1008  O   HOH T1007      13.283  51.814  75.888  1.00  0.47           O  
HETATM 1009  O   HOH T1008      14.994  64.797  88.259  1.00  0.47           O  
HETATM 1010  O   HOH T1009      70.178  59.133  45.113  1.00  0.47           O  
HETATM 1011  O   HOH T1010      31.521  96.167  44.490  1.00  0.47           O  
HETATM 1012  O   HOH T1011      17.896  32.408 104.770  1.00  0.47           O  
HETATM 1013  O   HOH T1012       1.373  54.252 119.784  1.00  0.47           O  
HETATM 1014  O   HOH T1013      55.446  71.280  54.865  1.00  0.47           O  
HETATM 1015  O   HOH T1014      29.155  19.956  96.471  1.00  0.47           O  
HETATM 1016  O   HOH T1015      37.240  36.765 115.109  1.00  0.47           O  
HETATM 1017  O   HOH T1016      17.309  75.233 115.777  1.00  0.47           O  
HETATM 1018  O   HOH T1017      46.342  70.469  63.968  1.00  0.47           O  
HETATM 1019  O   HOH T1018      10.570  37.023  91.379  1.00  0.47           O  
HETATM 1020  O   HOH T1019      14.905  28.240 118.267  1.00  0.47           O  
HETATM 1021  O   HOH T1020      51.787  59.282  38.378  1.00  0.47           O  
HETATM 1022  O   HOH T1021      56.953  50.877  62.710  1.00  0.47           O  
HETATM 1023  O   HOH T1022      35.402  54.246  31.952  1.00  0.47           O  
HETATM 1024  O   HOH T1023      29.144  27.334 121.538  1.00  0.47           O  
HETATM 1025  O   HOH T1024      18.713  89.508  65.795  1.00  0.47           O  
HETATM 1026  O   HOH T1025      13.238  69.476  36.386  1.00  0.47           O  
HETATM 1027  O   HOH T1026      41.584  61.231 106.088  1.00  0.47           O  
HETATM 1028  O   HOH T1027      48.061  85.442  87.370  1.00  0.47           O  
HETATM 1029  O   HOH T1028      11.426  43.255  84.511  1.00  0.47           O  
HETATM 1030  O   HOH T1029      49.613  81.747  69.789  1.00  0.47           O  
HETATM 1031  O   HOH T1030      65.756  62.239  64.159  1.00  0.47           O  
HETATM 1032  O   HOH T1031      31.171  65.792  78.798  1.00  0.47           O  
HETATM 1033  O   HOH T1032      52.083  83.716  31.987  1.00  0.47           O  
HETATM 1034  O   HOH T1033      45.071  73.349  54.278  1.00  0.47           O  
HETATM 1035  O   HOH T1034      34.390  22.778  90.517  1.00  0.47           O  
HETATM 1036  O   HOH T1035      20.228  93.180  56.725  1.00  0.47           O  
HETATM 1037  O   HOH T1036      32.202  91.577  36.291  1.00  0.47           O  
HETATM 1038  O   HOH T1037      28.590  18.569  98.816  1.00  0.47           O  
HETATM 1039  O   HOH T1038      37.160  72.043  77.632  1.00  0.47           O  
HETATM 1040  O   HOH T1039      33.871  70.578  74.539  1.00  0.47           O  
HETATM 1041  O   HOH T1040      50.146  77.589  81.714  1.00  0.47           O  
HETATM 1042  O   HOH T1041      33.139  41.366  95.494  1.00  0.47           O  
HETATM 1043  O   HOH T1042      40.417  46.194  44.482  1.00  0.47           O  
HETATM 1044  O   HOH T1043      43.480  73.746  50.934  1.00  0.47           O  
HETATM 1045  O   HOH T1044      41.167  99.131  47.220  1.00  0.47           O  
HETATM 1046  O   HOH T1045       6.136  27.047 124.422  1.00  0.47           O  
HETATM 1047  O   HOH T1046      24.401  64.693  44.536  1.00  0.47           O  
HETATM 1048  O   HOH T1047      50.261  47.878  56.854  1.00  0.47           O  
HETATM 1049  O   HOH T1048      19.548  72.584  61.680  1.00  0.47           O  
HETATM 1050  O   HOH T1049      32.314  61.696  71.272  1.00  0.47           O  
HETATM 1051  O   HOH T1050      38.076  60.828  99.742  1.00  0.47           O  
HETATM 1052  O   HOH T1051      35.690  23.644  88.259  1.00  0.47           O  
HETATM 1053  O   HOH T1052      48.003  91.193  58.203  1.00  0.47           O  
HETATM 1054  O   HOH T1053      67.195  62.282  61.744  1.00  0.47           O  
HETATM 1055  O   HOH T1054      16.200  86.670  56.700  1.00  0.47           O  
HETATM 1056  O   HOH T1055       7.891  44.293  87.206  1.00  0.47           O  
HETATM 1057  O   HOH T1056       7.410  40.454 127.591  1.00  0.48           O  
HETATM 1058  O   HOH T1057      56.282  75.507  39.509  1.00  0.48           O  
HETATM 1059  O   HOH T1058      20.993  38.274 102.752  1.00  0.48           O  
HETATM 1060  O   HOH T1059      14.539  62.371 122.496  1.00  0.48           O  
HETATM 1061  O   HOH T1060      42.172  71.463  70.677  1.00  0.48           O  
HETATM 1062  O   HOH T1061      54.175  53.534  64.653  1.00  0.48           O  
HETATM 1063  O   HOH T1062      -5.968  44.095 118.465  1.00  0.48           O  
HETATM 1064  O   HOH T1063      62.624  56.093  38.477  1.00  0.48           O  
HETATM 1065  O   HOH T1064      42.202  33.762 110.926  1.00  0.48           O  
HETATM 1066  O   HOH T1065      11.890  60.405 129.326  1.00  0.48           O  
HETATM 1067  O   HOH T1066      18.004  33.640  83.161  1.00  0.48           O  
HETATM 1068  O   HOH T1067      64.763  55.607  61.720  1.00  0.48           O  
HETATM 1069  O   HOH T1068      70.110  69.429  55.722  1.00  0.48           O  
HETATM 1070  O   HOH T1069      20.400  69.048 101.431  1.00  0.48           O  
HETATM 1071  O   HOH T1070      50.372  80.708  41.624  1.00  0.48           O  
HETATM 1072  O   HOH T1071      71.044  86.732  54.153  1.00  0.48           O  
HETATM 1073  O   HOH T1072      21.030  37.849 105.812  1.00  0.48           O  
HETATM 1074  O   HOH T1073      62.485  84.640  47.154  1.00  0.48           O  
HETATM 1075  O   HOH T1074      25.194  63.774 108.100  1.00  0.48           O  
HETATM 1076  O   HOH T1075      47.215  48.744  96.359  1.00  0.48           O  
HETATM 1077  O   HOH T1076      22.229  64.913  63.962  1.00  0.48           O  
HETATM 1078  O   HOH T1077      37.162  66.361  78.873  1.00  0.48           O  
HETATM 1079  O   HOH T1078      74.334  64.687  53.370  1.00  0.48           O  
HETATM 1080  O   HOH T1079       4.203  31.773 113.411  1.00  0.48           O  
HETATM 1081  O   HOH T1080      24.424  49.542  57.909  1.00  0.48           O  
HETATM 1082  O   HOH T1081      24.010  45.319 129.503  1.00  0.48           O  
HETATM 1083  O   HOH T1082      27.634  52.877 124.301  1.00  0.48           O  
HETATM 1084  O   HOH T1083      68.028  53.555  52.435  1.00  0.48           O  
HETATM 1085  O   HOH T1084      21.567  28.298 116.575  1.00  0.48           O  
HETATM 1086  O   HOH T1085       4.692  34.053 125.568  1.00  0.48           O  
HETATM 1087  O   HOH T1086      30.785  75.676  77.119  1.00  0.48           O  
HETATM 1088  O   HOH T1087       2.461  41.998 119.943  1.00  0.48           O  
HETATM 1089  O   HOH T1088      71.472  69.899  34.838  1.00  0.48           O  
HETATM 1090  O   HOH T1089      40.481  59.246 123.822  1.00  0.48           O  
HETATM 1091  O   HOH T1090      -5.313  50.511 100.182  1.00  0.48           O  
HETATM 1092  O   HOH T1091       3.651  33.915 129.790  1.00  0.48           O  
HETATM 1093  O   HOH T1092      20.099  38.684  98.892  1.00  0.48           O  
HETATM 1094  O   HOH T1093      44.203  44.308  55.495  1.00  0.48           O  
HETATM 1095  O   HOH T1094      17.848  34.927 126.672  1.00  0.48           O  
HETATM 1096  O   HOH T1095      23.458  69.411  44.670  1.00  0.48           O  
HETATM 1097  O   HOH T1096      48.416  73.829  35.313  1.00  0.48           O  
HETATM 1098  O   HOH T1097      35.467  46.463 128.905  1.00  0.48           O  
HETATM 1099  O   HOH T1098      33.861  56.326  32.970  1.00  0.48           O  
HETATM 1100  O   HOH T1099      52.337  49.340  64.630  1.00  0.48           O  
HETATM 1101  O   HOH T1100      32.282  54.168 125.509  1.00  0.48           O  
HETATM 1102  O   HOH T1101      47.141  75.994  52.125  1.00  0.48           O  
HETATM 1103  O   HOH T1102      17.151  64.905  86.512  1.00  0.48           O  
HETATM 1104  O   HOH T1103      60.721  85.557  45.265  1.00  0.48           O  
HETATM 1105  O   HOH T1104      35.536  23.704  92.872  1.00  0.48           O  
HETATM 1106  O   HOH T1105      23.461  81.842  67.315  1.00  0.48           O  
HETATM 1107  O   HOH T1106      46.388  38.912 102.193  1.00  0.48           O  
HETATM 1108  O   HOH T1107      39.838  62.462 107.815  1.00  0.48           O  
HETATM 1109  O   HOH T1108      32.123  57.542  31.114  1.00  0.48           O  
HETATM 1110  O   HOH T1109      63.872  64.167  65.115  1.00  0.48           O  
HETATM 1111  O   HOH T1110      76.652  64.460  54.951  1.00  0.48           O  
HETATM 1112  O   HOH T1111      15.527  34.782  74.440  1.00  0.48           O  
HETATM 1113  O   HOH T1112      43.099  53.501  86.073  1.00  0.48           O  
HETATM 1114  O   HOH T1113      13.101  34.731  73.129  1.00  0.48           O  
HETATM 1115  O   HOH T1114      31.623  19.109 118.526  1.00  0.48           O  
HETATM 1116  O   HOH T1115      16.887  77.246  31.514  1.00  0.48           O  
HETATM 1117  O   HOH T1116      75.936  63.022  51.728  1.00  0.48           O  
HETATM 1118  O   HOH T1117      27.563  61.126  43.831  1.00  0.48           O  
HETATM 1119  O   HOH T1118      70.757  74.540  51.546  1.00  0.48           O  
HETATM 1120  O   HOH T1119      10.091  28.118  99.856  1.00  0.48           O  
HETATM 1121  O   HOH T1120      19.111  29.588 130.365  1.00  0.48           O  
HETATM 1122  O   HOH T1121      23.298  60.033  68.868  1.00  0.48           O  
HETATM 1123  O   HOH T1122      28.542  59.117  78.404  1.00  0.49           O  
HETATM 1124  O   HOH T1123      33.925  85.660  26.516  1.00  0.49           O  
HETATM 1125  O   HOH T1124      58.104  74.616  65.915  1.00  0.49           O  
HETATM 1126  O   HOH T1125      16.404  29.098 116.089  1.00  0.49           O  
HETATM 1127  O   HOH T1126      48.557  81.762  63.274  1.00  0.49           O  
HETATM 1128  O   HOH T1127      34.900  55.835  35.588  1.00  0.49           O  
HETATM 1129  O   HOH T1128      34.643  73.914  58.077  1.00  0.49           O  
HETATM 1130  O   HOH T1129      38.527  48.070  48.867  1.00  0.49           O  
HETATM 1131  O   HOH T1130      26.479  55.769  53.054  1.00  0.49           O  
HETATM 1132  O   HOH T1131      38.671  98.337  46.011  1.00  0.49           O  
HETATM 1133  O   HOH T1132      46.927  85.031  52.500  1.00  0.49           O  
HETATM 1134  O   HOH T1133      52.185  80.774  62.151  1.00  0.49           O  
HETATM 1135  O   HOH T1134      25.200  44.050 125.216  1.00  0.49           O  
HETATM 1136  O   HOH T1135      17.481  14.637  96.678  1.00  0.49           O  
HETATM 1137  O   HOH T1136      54.151  62.348  64.668  1.00  0.49           O  
HETATM 1138  O   HOH T1137      50.035  49.541  43.378  1.00  0.49           O  
HETATM 1139  O   HOH T1138      40.435 100.581  49.506  1.00  0.49           O  
HETATM 1140  O   HOH T1139      18.241  83.203  62.071  1.00  0.49           O  
HETATM 1141  O   HOH T1140       0.485  53.597 117.208  1.00  0.49           O  
HETATM 1142  O   HOH T1141      12.166  27.453 101.713  1.00  0.49           O  
HETATM 1143  O   HOH T1142      45.284  48.428 116.060  1.00  0.49           O  
HETATM 1144  O   HOH T1143      11.322  20.328  98.669  1.00  0.49           O  
HETATM 1145  O   HOH T1144      13.347  29.479 103.354  1.00  0.49           O  
HETATM 1146  O   HOH T1145      22.730  77.779  70.469  1.00  0.49           O  
HETATM 1147  O   HOH T1146      30.993  67.344 106.522  1.00  0.49           O  
HETATM 1148  O   HOH T1147      41.283  56.941 122.353  1.00  0.49           O  
HETATM 1149  O   HOH T1148      35.874  59.295 117.701  1.00  0.49           O  
HETATM 1150  O   HOH T1149      33.653  26.966 105.137  1.00  0.49           O  
HETATM 1151  O   HOH T1150      36.474  46.895  77.644  1.00  0.49           O  
HETATM 1152  O   HOH T1151      -2.111  48.335 109.669  1.00  0.49           O  
HETATM 1153  O   HOH T1152      72.378  64.695  40.691  1.00  0.49           O  
HETATM 1154  O   HOH T1153      54.492  59.107  38.675  1.00  0.49           O  
HETATM 1155  O   HOH T1154       6.172  33.294 114.719  1.00  0.49           O  
HETATM 1156  O   HOH T1155      39.601  59.360  98.048  1.00  0.49           O  
HETATM 1157  O   HOH T1156      51.107  50.500 120.533  1.00  0.49           O  
HETATM 1158  O   HOH T1157      18.223  34.122 114.594  1.00  0.49           O  
HETATM 1159  O   HOH T1158       2.586  76.504 111.236  1.00  0.49           O  
HETATM 1160  O   HOH T1159      48.436  45.040  47.424  1.00  0.49           O  
HETATM 1161  O   HOH T1160      19.006  33.142 117.157  1.00  0.49           O  
HETATM 1162  O   HOH T1161      46.195  30.233  93.375  1.00  0.49           O  
HETATM 1163  O   HOH T1162      51.587  92.197  30.771  1.00  0.49           O  
HETATM 1164  O   HOH T1163      51.180  58.078  68.601  1.00  0.49           O  
HETATM 1165  O   HOH T1164      55.055  78.791  53.333  1.00  0.49           O  
HETATM 1166  O   HOH T1165       3.647  68.060 106.598  1.00  0.49           O  
HETATM 1167  O   HOH T1166       8.762  49.985  84.717  1.00  0.49           O  
HETATM 1168  O   HOH T1167      58.680  85.790  34.207  1.00  0.49           O  
HETATM 1169  O   HOH T1168      22.660  44.368  88.464  1.00  0.49           O  
HETATM 1170  O   HOH T1169      24.968  68.256  98.187  1.00  0.49           O  
HETATM 1171  O   HOH T1170      32.354  35.464  89.725  1.00  0.49           O  
HETATM 1172  O   HOH T1171      28.075  27.040  90.441  1.00  0.49           O  
HETATM 1173  O   HOH T1172      11.015  47.638 124.701  1.00  0.49           O  
HETATM 1174  O   HOH T1173      52.908  78.777  71.986  1.00  0.49           O  
HETATM 1175  O   HOH T1174      14.667  14.228  96.933  1.00  0.49           O  
HETATM 1176  O   HOH T1175      18.553  86.220  47.014  1.00  0.49           O  
HETATM 1177  O   HOH T1176      17.999  46.431 134.379  1.00  0.49           O  
HETATM 1178  O   HOH T1177      16.079  36.378 124.990  1.00  0.49           O  
HETATM 1179  O   HOH T1178      50.402  82.928  67.328  1.00  0.49           O  
HETATM 1180  O   HOH T1179      43.569  54.829  73.036  1.00  0.50           O  
HETATM 1181  O   HOH T1180      18.277  34.825 123.928  1.00  0.50           O  
HETATM 1182  O   HOH T1181      48.421  46.066  91.380  1.00  0.50           O  
HETATM 1183  O   HOH T1182      48.534  90.057  19.635  1.00  0.50           O  
HETATM 1184  O   HOH T1183       0.878  44.329  90.445  1.00  0.50           O  
HETATM 1185  O   HOH T1184      21.228  63.404 109.923  1.00  0.50           O  
HETATM 1186  O   HOH T1185      46.291  35.775 106.799  1.00  0.50           O  
HETATM 1187  O   HOH T1186      33.090  69.715  33.131  1.00  0.50           O  
HETATM 1188  O   HOH T1187      18.564  34.358  93.580  1.00  0.50           O  
HETATM 1189  O   HOH T1188      26.394  29.003  91.352  1.00  0.50           O  
HETATM 1190  O   HOH T1189      49.240  55.514  56.929  1.00  0.50           O  
HETATM 1191  O   HOH T1190      19.562  58.418  82.738  1.00  0.50           O  
HETATM 1192  O   HOH T1191      16.256  40.434 101.222  1.00  0.50           O  
HETATM 1193  O   HOH T1192      11.934  42.980  66.452  1.00  0.50           O  
HETATM 1194  O   HOH T1193      16.975  81.325  57.347  1.00  0.50           O  
HETATM 1195  O   HOH T1194      11.440  72.633 108.788  1.00  0.50           O  
HETATM 1196  O   HOH T1195      55.115  49.317  49.407  1.00  0.50           O  
HETATM 1197  O   HOH T1196      47.053  67.190  30.076  1.00  0.50           O  
HETATM 1198  O   HOH T1197      44.601  39.441  88.440  1.00  0.50           O  
HETATM 1199  O   HOH T1198      21.723  55.819  77.754  1.00  0.50           O  
HETATM 1200  O   HOH T1199      35.560  53.441 126.860  1.00  0.50           O  
HETATM 1201  O   HOH T1200      34.831  34.001  85.835  1.00  0.50           O  
HETATM 1202  O   HOH T1201      13.774  38.141  93.382  1.00  0.50           O  
HETATM 1203  O   HOH T1202      24.814  20.150 107.286  1.00  0.50           O  
HETATM 1204  O   HOH T1203      34.892  16.956 119.313  1.00  0.50           O  
HETATM 1205  O   HOH T1204      11.256  33.934 132.719  1.00  0.50           O  
HETATM 1206  O   HOH T1205      32.233  56.484  35.227  1.00  0.50           O  
HETATM 1207  O   HOH T1206      22.954  23.490 117.446  1.00  0.50           O  
HETATM 1208  O   HOH T1207      57.606  89.836  40.770  1.00  0.50           O  
HETATM 1209  O   HOH T1208      43.741  64.551  88.092  1.00  0.50           O  
HETATM 1210  O   HOH T1209      32.502  66.043 108.457  1.00  0.50           O  
HETATM 1211  O   HOH T1210      55.218  62.550  34.950  1.00  0.50           O  
HETATM 1212  O   HOH T1211      10.681  48.850  85.960  1.00  0.50           O  
HETATM 1213  O   HOH T1212      41.554  80.866  30.098  1.00  0.50           O  
HETATM 1214  O   HOH T1213      56.215  89.764  28.997  1.00  0.50           O  
HETATM 1215  O   HOH T1214      46.312  67.817  95.755  1.00  0.50           O  
HETATM 1216  O   HOH T1215      43.581  74.585  67.858  1.00  0.50           O  
HETATM 1217  O   HOH T1216      54.957  93.445  35.913  1.00  0.50           O  
HETATM 1218  O   HOH T1217      59.539  83.450  35.212  1.00  0.50           O  
HETATM 1219  O   HOH T1218      15.352  47.102 126.846  1.00  0.50           O  
HETATM 1220  O   HOH T1219      49.724  76.317  50.870  1.00  0.50           O  
HETATM 1221  O   HOH T1220      33.187  45.410 127.765  1.00  0.50           O  
HETATM 1222  O   HOH T1221      45.645  65.406  28.503  1.00  0.50           O  
HETATM 1223  O   HOH T1222      33.123  37.983 122.432  1.00  0.50           O  
HETATM 1224  O   HOH T1223      35.502  17.049  99.827  1.00  0.50           O  
HETATM 1225  O   HOH T1224      39.996  74.875  51.400  1.00  0.50           O  
HETATM 1226  O   HOH T1225      65.355  52.651  52.487  1.00  0.50           O  
HETATM 1227  O   HOH T1226      25.847  34.621  84.897  1.00  0.50           O  
HETATM 1228  O   HOH T1227      29.924  83.540  32.202  1.00  0.50           O  
HETATM 1229  O   HOH T1228      40.630  26.975  89.889  1.00  0.50           O  
HETATM 1230  O   HOH T1229      21.211  18.489 106.637  1.00  0.50           O  
HETATM 1231  O   HOH T1230      49.258  64.075  69.693  1.00  0.50           O  
HETATM 1232  O   HOH T1231      48.046  48.501  40.305  1.00  0.50           O  
HETATM 1233  O   HOH T1232      53.309  63.873  33.357  1.00  0.51           O  
HETATM 1234  O   HOH T1233      43.793  67.434  28.896  1.00  0.51           O  
HETATM 1235  O   HOH T1234      24.940  42.703 130.059  1.00  0.51           O  
HETATM 1236  O   HOH T1235      53.320  76.277  48.119  1.00  0.51           O  
HETATM 1237  O   HOH T1236      19.463  34.653 112.186  1.00  0.51           O  
HETATM 1238  O   HOH T1237      70.406  68.538  32.585  1.00  0.51           O  
HETATM 1239  O   HOH T1238      17.161  79.958  32.007  1.00  0.51           O  
HETATM 1240  O   HOH T1239      33.983  63.996 109.753  1.00  0.51           O  
HETATM 1241  O   HOH T1240      77.885  61.498  45.884  1.00  0.51           O  
HETATM 1242  O   HOH T1241      24.212  66.295  67.893  1.00  0.51           O  
HETATM 1243  O   HOH T1242      24.215  38.471  65.981  1.00  0.51           O  
HETATM 1244  O   HOH T1243      24.728  92.515  43.620  1.00  0.51           O  
HETATM 1245  O   HOH T1244      25.144  26.767  90.607  1.00  0.51           O  
HETATM 1246  O   HOH T1245      72.917  73.862  45.338  1.00  0.51           O  
HETATM 1247  O   HOH T1246      41.336  45.480  48.691  1.00  0.51           O  
HETATM 1248  O   HOH T1247      -1.473  34.238 121.074  1.00  0.51           O  
HETATM 1249  O   HOH T1248      49.761  79.340  62.511  1.00  0.51           O  
HETATM 1250  O   HOH T1249      46.042  44.864 112.664  1.00  0.51           O  
HETATM 1251  O   HOH T1250      13.753  31.202 101.114  1.00  0.51           O  
HETATM 1252  O   HOH T1251      21.864  56.981  55.124  1.00  0.51           O  
HETATM 1253  O   HOH T1252      10.374  79.254  36.628  1.00  0.51           O  
HETATM 1254  O   HOH T1253      37.074  56.830 117.477  1.00  0.51           O  
HETATM 1255  O   HOH T1254      49.383  70.801  26.084  1.00  0.51           O  
HETATM 1256  O   HOH T1255       8.833  57.749  84.896  1.00  0.51           O  
HETATM 1257  O   HOH T1256      -5.756  43.674 113.173  1.00  0.51           O  
HETATM 1258  O   HOH T1257      14.583  35.669 106.949  1.00  0.51           O  
HETATM 1259  O   HOH T1258      45.284  80.711  74.480  1.00  0.51           O  
HETATM 1260  O   HOH T1259      32.783  86.928  28.778  1.00  0.51           O  
HETATM 1261  O   HOH T1260      53.972  81.946  63.919  1.00  0.51           O  
HETATM 1262  O   HOH T1261      34.615  67.503  78.231  1.00  0.51           O  
HETATM 1263  O   HOH T1262      46.991  44.332  55.990  1.00  0.51           O  
HETATM 1264  O   HOH T1263      31.524  63.416 108.494  1.00  0.51           O  
HETATM 1265  O   HOH T1264      54.994  82.745  43.778  1.00  0.51           O  
HETATM 1266  O   HOH T1265      54.392  67.346  67.127  1.00  0.51           O  
HETATM 1267  O   HOH T1266      20.227  58.924  54.041  1.00  0.51           O  
HETATM 1268  O   HOH T1267      64.730  77.045  36.128  1.00  0.51           O  
HETATM 1269  O   HOH T1268      56.787  49.764  46.164  1.00  0.51           O  
HETATM 1270  O   HOH T1269      39.661  81.868  28.105  1.00  0.51           O  
HETATM 1271  O   HOH T1270      48.484  80.994  60.646  1.00  0.51           O  
HETATM 1272  O   HOH T1271      31.617  51.877 124.004  1.00  0.51           O  
HETATM 1273  O   HOH T1272      21.442  42.792 118.519  1.00  0.51           O  
HETATM 1274  O   HOH T1273      25.983  47.287  57.283  1.00  0.51           O  
HETATM 1275  O   HOH T1274      50.804  73.011  86.907  1.00  0.51           O  
HETATM 1276  O   HOH T1275      26.838  68.615  70.605  1.00  0.51           O  
HETATM 1277  O   HOH T1276      29.757  56.107  42.612  1.00  0.51           O  
HETATM 1278  O   HOH T1277      30.896  47.570 124.899  1.00  0.51           O  
HETATM 1279  O   HOH T1278      19.732  63.789 121.516  1.00  0.51           O  
HETATM 1280  O   HOH T1279       5.674  61.888 116.512  1.00  0.52           O  
HETATM 1281  O   HOH T1280      13.187  51.465  82.502  1.00  0.52           O  
HETATM 1282  O   HOH T1281      13.608  50.709  78.531  1.00  0.52           O  
HETATM 1283  O   HOH T1282      60.677  85.618  42.473  1.00  0.52           O  
HETATM 1284  O   HOH T1283      47.229  76.005  29.142  1.00  0.52           O  
HETATM 1285  O   HOH T1284      68.448  59.493  34.067  1.00  0.52           O  
HETATM 1286  O   HOH T1285      13.594  25.831  99.915  1.00  0.52           O  
HETATM 1287  O   HOH T1286      26.807  34.791  79.338  1.00  0.52           O  
HETATM 1288  O   HOH T1287      47.799  72.029  58.260  1.00  0.52           O  
HETATM 1289  O   HOH T1288      20.335  55.859  81.447  1.00  0.52           O  
HETATM 1290  O   HOH T1289      63.219  63.349  49.036  1.00  0.52           O  
HETATM 1291  O   HOH T1290      20.954  27.721 131.229  1.00  0.52           O  
HETATM 1292  O   HOH T1291       3.795  74.222 112.407  1.00  0.52           O  
HETATM 1293  O   HOH T1292      60.604  57.318  63.875  1.00  0.52           O  
HETATM 1294  O   HOH T1293      22.673  72.858  42.081  1.00  0.52           O  
HETATM 1295  O   HOH T1294       7.660  28.345 115.482  1.00  0.52           O  
HETATM 1296  O   HOH T1295      61.688  60.806  36.335  1.00  0.52           O  
HETATM 1297  O   HOH T1296      38.920  48.386  77.816  1.00  0.52           O  
HETATM 1298  O   HOH T1297      24.174  25.807 116.740  1.00  0.52           O  
HETATM 1299  O   HOH T1298      58.973  67.972  64.175  1.00  0.52           O  
HETATM 1300  O   HOH T1299      45.582  87.213  51.837  1.00  0.52           O  
HETATM 1301  O   HOH T1300      13.829  41.340  62.410  1.00  0.52           O  
HETATM 1302  O   HOH T1301      13.116  47.779  90.865  1.00  0.52           O  
HETATM 1303  O   HOH T1302      22.419  71.082  34.836  1.00  0.52           O  
HETATM 1304  O   HOH T1303      -2.462  63.349  95.455  1.00  0.52           O  
HETATM 1305  O   HOH T1304      48.999  83.872  51.142  1.00  0.52           O  
HETATM 1306  O   HOH T1305      -3.015  45.779  99.518  1.00  0.52           O  
HETATM 1307  O   HOH T1306      23.160  60.854  76.235  1.00  0.52           O  
HETATM 1308  O   HOH T1307      45.327  72.131  56.706  1.00  0.52           O  
HETATM 1309  O   HOH T1308      48.760  88.838  62.321  1.00  0.52           O  
HETATM 1310  O   HOH T1309       5.074  63.317  87.004  1.00  0.52           O  
HETATM 1311  O   HOH T1310      41.946  90.857  64.162  1.00  0.52           O  
HETATM 1312  O   HOH T1311      22.443  69.040  98.498  1.00  0.52           O  
HETATM 1313  O   HOH T1312      31.172  89.664  34.648  1.00  0.52           O  
HETATM 1314  O   HOH T1313      51.083  81.156  47.675  1.00  0.52           O  
HETATM 1315  O   HOH T1314      15.353  71.174  37.246  1.00  0.52           O  
HETATM 1316  O   HOH T1315      50.053  86.674  81.072  1.00  0.52           O  
HETATM 1317  O   HOH T1316      24.264  44.548  80.959  1.00  0.52           O  
HETATM 1318  O   HOH T1317      42.186  21.903 100.583  1.00  0.52           O  
HETATM 1319  O   HOH T1318       9.921  39.009 102.778  1.00  0.52           O  
HETATM 1320  O   HOH T1319       8.363  80.837  42.340  1.00  0.52           O  
HETATM 1321  O   HOH T1320       6.535  57.101 119.254  1.00  0.52           O  
HETATM 1322  O   HOH T1321      21.823  25.967 118.203  1.00  0.52           O  
HETATM 1323  O   HOH T1322      26.717  18.579  96.844  1.00  0.52           O  
HETATM 1324  O   HOH T1323      34.778  60.483 114.204  1.00  0.52           O  
HETATM 1325  O   HOH T1324      72.910  62.410  42.156  1.00  0.52           O  
HETATM 1326  O   HOH T1325      -4.490  43.610  99.557  1.00  0.52           O  
HETATM 1327  O   HOH T1326      53.865  86.525  42.774  1.00  0.52           O  
HETATM 1328  O   HOH T1327      28.364  94.245  38.692  1.00  0.52           O  
HETATM 1329  O   HOH T1328      21.967  32.346  89.915  1.00  0.52           O  
HETATM 1330  O   HOH T1329      18.985  69.398 124.043  1.00  0.52           O  
HETATM 1331  O   HOH T1330      20.060  67.831  52.643  1.00  0.52           O  
HETATM 1332  O   HOH T1331      15.181  33.128  72.226  1.00  0.52           O  
HETATM 1333  O   HOH T1332      47.648  69.620  28.011  1.00  0.52           O  
HETATM 1334  O   HOH T1333      30.011  61.511  34.191  1.00  0.53           O  
HETATM 1335  O   HOH T1334      26.907  44.596  65.551  1.00  0.53           O  
HETATM 1336  O   HOH T1335      57.967  81.749  53.387  1.00  0.53           O  
HETATM 1337  O   HOH T1336       1.541  56.072 117.782  1.00  0.53           O  
HETATM 1338  O   HOH T1337      54.275  84.997  28.191  1.00  0.53           O  
HETATM 1339  O   HOH T1338      50.703  79.809  59.901  1.00  0.53           O  
HETATM 1340  O   HOH T1339      66.709  56.877  63.132  1.00  0.53           O  
HETATM 1341  O   HOH T1340      25.274  42.392  60.508  1.00  0.53           O  
HETATM 1342  O   HOH T1341      29.286  45.380 125.508  1.00  0.53           O  
HETATM 1343  O   HOH T1342      24.898  62.226 113.417  1.00  0.53           O  
HETATM 1344  O   HOH T1343      29.841  83.493  26.459  1.00  0.53           O  
HETATM 1345  O   HOH T1344      64.789  84.290  50.099  1.00  0.53           O  
HETATM 1346  O   HOH T1345      46.670  51.961  93.178  1.00  0.53           O  
HETATM 1347  O   HOH T1346      21.849  22.547  96.743  1.00  0.53           O  
HETATM 1348  O   HOH T1347      20.086  36.451 100.512  1.00  0.53           O  
HETATM 1349  O   HOH T1348      14.537  49.374  81.224  1.00  0.53           O  
HETATM 1350  O   HOH T1349      57.606  75.454  37.033  1.00  0.53           O  
HETATM 1351  O   HOH T1350      -1.782  56.820 116.596  1.00  0.53           O  
HETATM 1352  O   HOH T1351      40.085  17.094  99.216  1.00  0.53           O  
HETATM 1353  O   HOH T1352      33.279  18.180 109.575  1.00  0.53           O  
HETATM 1354  O   HOH T1353      37.590  25.464  88.921  1.00  0.53           O  
HETATM 1355  O   HOH T1354      18.715  37.982  89.392  1.00  0.53           O  
HETATM 1356  O   HOH T1355      11.202  57.992 130.524  1.00  0.53           O  
HETATM 1357  O   HOH T1356      46.446  78.593  53.280  1.00  0.53           O  
HETATM 1358  O   HOH T1357      69.714  72.219  55.855  1.00  0.53           O  
HETATM 1359  O   HOH T1358      50.242  50.974 102.938  1.00  0.53           O  
HETATM 1360  O   HOH T1359      18.624  33.220 102.198  1.00  0.53           O  
HETATM 1361  O   HOH T1360      -4.466  45.150  97.220  1.00  0.53           O  
HETATM 1362  O   HOH T1361      43.200  47.741  87.667  1.00  0.53           O  
HETATM 1363  O   HOH T1362      52.936  75.765  73.616  1.00  0.53           O  
HETATM 1364  O   HOH T1363      48.879  77.171  64.095  1.00  0.53           O  
HETATM 1365  O   HOH T1364      21.903  57.736  68.313  1.00  0.53           O  
HETATM 1366  O   HOH T1365      31.670  74.464  74.783  1.00  0.53           O  
HETATM 1367  O   HOH T1366      72.196  60.995  44.469  1.00  0.53           O  
HETATM 1368  O   HOH T1367      32.088  40.940 124.697  1.00  0.53           O  
HETATM 1369  O   HOH T1368       6.612  66.253  92.639  1.00  0.53           O  
HETATM 1370  O   HOH T1369      45.524  89.813  51.028  1.00  0.53           O  
HETATM 1371  O   HOH T1370       0.029  72.660 116.578  1.00  0.53           O  
HETATM 1372  O   HOH T1371      21.148  67.306  64.929  1.00  0.53           O  
HETATM 1373  O   HOH T1372      45.892  46.688  36.463  1.00  0.53           O  
HETATM 1374  O   HOH T1373      55.185  89.246  26.466  1.00  0.53           O  
HETATM 1375  O   HOH T1374      44.787  68.553  57.758  1.00  0.53           O  
HETATM 1376  O   HOH T1375      26.485  85.994  36.560  1.00  0.53           O  
HETATM 1377  O   HOH T1376      25.249  68.573  42.756  1.00  0.53           O  
HETATM 1378  O   HOH T1377      13.755  14.956  99.497  1.00  0.53           O  
HETATM 1379  O   HOH T1378      15.633  33.347 106.056  1.00  0.53           O  
HETATM 1380  O   HOH T1379      22.553  64.188  85.701  1.00  0.53           O  
HETATM 1381  O   HOH T1380      45.706  81.352  24.269  1.00  0.53           O  
HETATM 1382  O   HOH T1381      42.222  88.019  49.414  1.00  0.53           O  
HETATM 1383  O   HOH T1382      18.493  33.825 121.372  1.00  0.53           O  
HETATM 1384  O   HOH T1383      41.815  18.891 119.391  1.00  0.53           O  
HETATM 1385  O   HOH T1384      39.392  55.737 118.399  1.00  0.53           O  
HETATM 1386  O   HOH T1385      35.253  56.741 128.992  1.00  0.53           O  
HETATM 1387  O   HOH T1386       0.630  49.392  90.490  1.00  0.53           O  
HETATM 1388  O   HOH T1387      31.537  71.341  26.793  1.00  0.53           O  
HETATM 1389  O   HOH T1388      26.116  44.672  94.036  1.00  0.53           O  
HETATM 1390  O   HOH T1389      29.207  77.108  75.321  1.00  0.53           O  
HETATM 1391  O   HOH T1390      31.780  73.716  78.515  1.00  0.53           O  
HETATM 1392  O   HOH T1391      33.283  95.950  50.393  1.00  0.53           O  
HETATM 1393  O   HOH T1392      43.708  81.455  87.716  1.00  0.54           O  
HETATM 1394  O   HOH T1393      16.237  50.940  79.514  1.00  0.54           O  
HETATM 1395  O   HOH T1394      47.052  46.337  45.356  1.00  0.54           O  
HETATM 1396  O   HOH T1395      55.730  82.737  50.223  1.00  0.54           O  
HETATM 1397  O   HOH T1396       9.886  46.852  67.869  1.00  0.54           O  
HETATM 1398  O   HOH T1397      19.671  34.480  68.013  1.00  0.54           O  
HETATM 1399  O   HOH T1398      25.309  64.721  36.476  1.00  0.54           O  
HETATM 1400  O   HOH T1399      11.546  41.882  63.927  1.00  0.54           O  
HETATM 1401  O   HOH T1400      69.803  55.901  58.452  1.00  0.54           O  
HETATM 1402  O   HOH T1401      36.837  68.589  77.056  1.00  0.54           O  
HETATM 1403  O   HOH T1402      39.659  49.228  64.173  1.00  0.54           O  
HETATM 1404  O   HOH T1403      52.335  83.061  27.431  1.00  0.54           O  
HETATM 1405  O   HOH T1404      26.619  64.728 116.902  1.00  0.54           O  
HETATM 1406  O   HOH T1405      52.220  82.100  59.634  1.00  0.54           O  
HETATM 1407  O   HOH T1406      28.935  50.881  93.936  1.00  0.54           O  
HETATM 1408  O   HOH T1407      46.198  44.738  90.334  1.00  0.54           O  
HETATM 1409  O   HOH T1408      12.226  25.969 116.571  1.00  0.54           O  
HETATM 1410  O   HOH T1409      27.472  94.739  47.977  1.00  0.54           O  
HETATM 1411  O   HOH T1410       3.922  38.942 100.537  1.00  0.54           O  
HETATM 1412  O   HOH T1411      16.888  29.741 122.748  1.00  0.54           O  
HETATM 1413  O   HOH T1412      51.064  48.636 104.761  1.00  0.54           O  
HETATM 1414  O   HOH T1413      38.068  28.075  89.804  1.00  0.54           O  
HETATM 1415  O   HOH T1414      64.041  61.685  66.275  1.00  0.54           O  
HETATM 1416  O   HOH T1415      38.892  79.172  63.388  1.00  0.54           O  
HETATM 1417  O   HOH T1416      38.127  74.704  94.126  1.00  0.54           O  
HETATM 1418  O   HOH T1417      58.243  75.315  34.027  1.00  0.54           O  
HETATM 1419  O   HOH T1418      18.738  48.574 132.866  1.00  0.54           O  
HETATM 1420  O   HOH T1419      57.574  50.897  43.690  1.00  0.54           O  
HETATM 1421  O   HOH T1420      25.000  70.522  39.218  1.00  0.54           O  
HETATM 1422  O   HOH T1421      32.291  91.789  69.470  1.00  0.54           O  
HETATM 1423  O   HOH T1422      20.276  72.889  43.421  1.00  0.54           O  
HETATM 1424  O   HOH T1423      23.009  55.973 120.662  1.00  0.54           O  
HETATM 1425  O   HOH T1424      22.577  19.964  97.220  1.00  0.54           O  
HETATM 1426  O   HOH T1425      38.046  39.695  36.522  1.00  0.54           O  
HETATM 1427  O   HOH T1426      21.160  16.648 103.110  1.00  0.54           O  
HETATM 1428  O   HOH T1427      39.620  19.549 118.196  1.00  0.54           O  
HETATM 1429  O   HOH T1428      34.906  66.399  31.350  1.00  0.54           O  
HETATM 1430  O   HOH T1429      18.579  16.134 102.922  1.00  0.54           O  
HETATM 1431  O   HOH T1430      41.822  53.322  83.600  1.00  0.54           O  
HETATM 1432  O   HOH T1431      17.021  24.291 113.490  1.00  0.54           O  
HETATM 1433  O   HOH T1432      30.881  95.566  53.479  1.00  0.54           O  
HETATM 1434  O   HOH T1433       0.594  56.123  88.854  1.00  0.54           O  
HETATM 1435  O   HOH T1434      33.611  38.717  87.175  1.00  0.55           O  
HETATM 1436  O   HOH T1435      27.569  89.882  66.252  1.00  0.55           O  
HETATM 1437  O   HOH T1436      30.751  70.727  69.154  1.00  0.55           O  
HETATM 1438  O   HOH T1437       1.426  67.128 100.090  1.00  0.55           O  
HETATM 1439  O   HOH T1438      55.734  80.435  65.446  1.00  0.55           O  
HETATM 1440  O   HOH T1439      52.414  77.271  50.505  1.00  0.55           O  
HETATM 1441  O   HOH T1440      28.334  58.343  39.545  1.00  0.55           O  
HETATM 1442  O   HOH T1441      50.404  82.541  45.191  1.00  0.55           O  
HETATM 1443  O   HOH T1442      45.372  41.272 113.328  1.00  0.55           O  
HETATM 1444  O   HOH T1443      30.716  78.592  23.487  1.00  0.55           O  
HETATM 1445  O   HOH T1444      36.304  65.601  97.176  1.00  0.55           O  
HETATM 1446  O   HOH T1445      42.999  99.953  49.278  1.00  0.55           O  
HETATM 1447  O   HOH T1446      72.129  63.824  44.577  1.00  0.55           O  
HETATM 1448  O   HOH T1447      17.233  73.512  50.736  1.00  0.55           O  
HETATM 1449  O   HOH T1448      31.140  51.928  59.797  1.00  0.55           O  
HETATM 1450  O   HOH T1449      38.972  62.432 101.546  1.00  0.55           O  
HETATM 1451  O   HOH T1450      -1.116  59.927 111.030  1.00  0.55           O  
HETATM 1452  O   HOH T1451      21.034  62.351  64.048  1.00  0.55           O  
HETATM 1453  O   HOH T1452      17.054  36.615 114.153  1.00  0.55           O  
HETATM 1454  O   HOH T1453      12.706  87.644  38.038  1.00  0.55           O  
HETATM 1455  O   HOH T1454      15.419  59.486 126.522  1.00  0.55           O  
HETATM 1456  O   HOH T1455      21.952  60.074 123.114  1.00  0.55           O  
HETATM 1457  O   HOH T1456      28.029  87.610  34.866  1.00  0.55           O  
HETATM 1458  O   HOH T1457      36.035  50.317  34.136  1.00  0.55           O  
HETATM 1459  O   HOH T1458      72.200  66.422  46.670  1.00  0.55           O  
HETATM 1460  O   HOH T1459      46.317  97.874  40.521  1.00  0.55           O  
HETATM 1461  O   HOH T1460      -6.535  51.821  94.050  1.00  0.55           O  
HETATM 1462  O   HOH T1461      25.790  19.410 110.954  1.00  0.55           O  
HETATM 1463  O   HOH T1462      42.187  55.910  95.657  1.00  0.55           O  
HETATM 1464  O   HOH T1463      54.692  88.307  44.622  1.00  0.55           O  
HETATM 1465  O   HOH T1464       1.385  73.131 111.607  1.00  0.55           O  
HETATM 1466  O   HOH T1465      41.921  44.335  51.128  1.00  0.55           O  
HETATM 1467  O   HOH T1466      43.786  31.407 110.987  1.00  0.55           O  
HETATM 1468  O   HOH T1467      -2.228  37.781 115.850  1.00  0.55           O  
HETATM 1469  O   HOH T1468      35.803  93.119  64.022  1.00  0.55           O  
HETATM 1470  O   HOH T1469      46.641  92.418  51.110  1.00  0.56           O  
HETATM 1471  O   HOH T1470      50.204  72.629  93.268  1.00  0.56           O  
HETATM 1472  O   HOH T1471      55.874  72.907  66.414  1.00  0.56           O  
HETATM 1473  O   HOH T1472      24.301  68.957 100.623  1.00  0.56           O  
HETATM 1474  O   HOH T1473      52.758  80.115  69.618  1.00  0.56           O  
HETATM 1475  O   HOH T1474      16.170  86.788  44.618  1.00  0.56           O  
HETATM 1476  O   HOH T1475      56.040  51.574  54.300  1.00  0.56           O  
HETATM 1477  O   HOH T1476      45.362  36.418 101.969  1.00  0.56           O  
HETATM 1478  O   HOH T1477      16.198  51.209  63.907  1.00  0.56           O  
HETATM 1479  O   HOH T1478      12.138  67.265  90.776  1.00  0.56           O  
HETATM 1480  O   HOH T1479      38.043  47.062  46.185  1.00  0.56           O  
HETATM 1481  O   HOH T1480      74.498  65.093  44.204  1.00  0.56           O  
HETATM 1482  O   HOH T1481      21.320  39.747 118.172  1.00  0.56           O  
HETATM 1483  O   HOH T1482      19.808  65.802 117.504  1.00  0.56           O  
HETATM 1484  O   HOH T1483      34.809  47.703  73.789  1.00  0.56           O  
HETATM 1485  O   HOH T1484      32.406  46.972  64.811  1.00  0.56           O  
HETATM 1486  O   HOH T1485      53.828  68.014  74.413  1.00  0.56           O  
HETATM 1487  O   HOH T1486      29.762  67.252  86.538  1.00  0.56           O  
HETATM 1488  O   HOH T1487      21.983  72.203  67.152  1.00  0.56           O  
HETATM 1489  O   HOH T1488      43.740  74.520  34.830  1.00  0.56           O  
HETATM 1490  O   HOH T1489      39.688  20.986 115.848  1.00  0.56           O  
HETATM 1491  O   HOH T1490      34.021  72.887  72.894  1.00  0.56           O  
HETATM 1492  O   HOH T1491      -0.903  64.194  88.447  1.00  0.56           O  
HETATM 1493  O   HOH T1492      27.592  53.516  49.460  1.00  0.56           O  
HETATM 1494  O   HOH T1493      31.447  25.076  89.167  1.00  0.56           O  
HETATM 1495  O   HOH T1494      45.348  51.101  65.585  1.00  0.56           O  
HETATM 1496  O   HOH T1495      30.809  42.917  78.498  1.00  0.56           O  
HETATM 1497  O   HOH T1496      34.688  96.604  57.841  1.00  0.56           O  
HETATM 1498  O   HOH T1497      45.341  90.897  27.545  1.00  0.56           O  
HETATM 1499  O   HOH T1498      31.592  17.005 107.740  1.00  0.56           O  
HETATM 1500  O   HOH T1499      12.911  40.395  65.911  1.00  0.56           O  
HETATM 1501  O   HOH T1500      18.667  58.291  80.195  1.00  0.57           O  
HETATM 1502  O   HOH T1501      54.276  81.070  27.482  1.00  0.57           O  
HETATM 1503  O   HOH T1502      35.752  45.345  81.764  1.00  0.57           O  
HETATM 1504  O   HOH T1503      30.777  68.177  95.624  1.00  0.57           O  
HETATM 1505  O   HOH T1504      47.832  53.562 110.890  1.00  0.57           O  
HETATM 1506  O   HOH T1505      68.147  58.246  43.856  1.00  0.57           O  
HETATM 1507  O   HOH T1506       4.918  59.271  84.368  1.00  0.57           O  
HETATM 1508  O   HOH T1507      22.405  68.200  67.118  1.00  0.57           O  
HETATM 1509  O   HOH T1508      69.674  75.378  58.425  1.00  0.57           O  
HETATM 1510  O   HOH T1509      28.453  93.984  51.052  1.00  0.57           O  
HETATM 1511  O   HOH T1510      47.015  57.480 112.595  1.00  0.57           O  
HETATM 1512  O   HOH T1511      24.966  76.165  71.217  1.00  0.57           O  
HETATM 1513  O   HOH T1512      38.000  57.718  25.831  1.00  0.57           O  
HETATM 1514  O   HOH T1513      17.837  54.310  94.724  1.00  0.57           O  
HETATM 1515  O   HOH T1514      54.224  70.423  70.431  1.00  0.57           O  
HETATM 1516  O   HOH T1515      17.799  29.190  87.185  1.00  0.57           O  
HETATM 1517  O   HOH T1516      16.536  49.324  59.761  1.00  0.57           O  
HETATM 1518  O   HOH T1517      57.537  72.221  32.534  1.00  0.57           O  
HETATM 1519  O   HOH T1518      19.743  74.451  63.832  1.00  0.57           O  
HETATM 1520  O   HOH T1519      50.502  52.263  33.085  1.00  0.57           O  
HETATM 1521  O   HOH T1520      35.762  17.777 111.742  1.00  0.57           O  
HETATM 1522  O   HOH T1521       8.961  69.211  97.356  1.00  0.57           O  
HETATM 1523  O   HOH T1522      17.668  74.461  62.375  1.00  0.57           O  
HETATM 1524  O   HOH T1523      30.870  67.892  76.942  1.00  0.58           O  
HETATM 1525  O   HOH T1524      29.210  31.553 122.305  1.00  0.58           O  
HETATM 1526  O   HOH T1525      67.371  64.741  61.910  1.00  0.58           O  
HETATM 1527  O   HOH T1526      47.083  82.411  52.641  1.00  0.58           O  
HETATM 1528  O   HOH T1527      44.605  72.161  25.830  1.00  0.58           O  
HETATM 1529  O   HOH T1528      32.278  34.899  85.951  1.00  0.58           O  
HETATM 1530  O   HOH T1529      19.149  36.002 103.013  1.00  0.58           O  
HETATM 1531  O   HOH T1530      33.145  16.146 101.090  1.00  0.59           O  
HETATM 1532  O   HOH T1531      31.414  67.340 111.933  1.00  0.59           O  
HETATM 1533  O   HOH T1532       3.785  38.127  98.037  1.00  0.59           O  
HETATM 1534  O   HOH T1533      42.097  39.619  87.584  1.00  0.59           O  
HETATM 1535  O   HOH T1534      42.976  43.069  87.290  1.00  0.59           O  
HETATM 1536  O   HOH T1535      59.316  70.488  63.612  1.00  0.59           O  
HETATM 1537  O   HOH T1536      68.855  63.268  61.552  1.00  0.60           O  
HETATM 1538  O   HOH T1537      11.279  33.351  94.049  1.00  0.60           O  
HETATM 1539  O   HOH T1538      27.476  48.873 126.475  1.00  0.60           O  
HETATM 1540  O   HOH T1539      45.403  49.443  90.673  1.00  0.60           O  
HETATM 1541  O   HOH T1540      68.146  60.956  60.686  1.00  0.61           O  
HETATM 1542  O   HOH T1541      15.123  33.224  99.740  1.00  0.61           O  
HETATM 1543  O   HOH T1542      46.311  75.070  33.864  1.00  0.63           O  
HETATM 1544  O   HOH T1543      37.610  47.646  79.985  1.00  0.65           O  
HETATM 1545  O   HOH T1544      65.972  60.760  61.733  1.00  0.66           O  
TER    1546      HOH T1544 
