# Supplementary material for: Accurate Prediction of Hydration Sites of Proteins Using Energy Model With Atom Embedding
Source: Front Mol Biosci. 2021 Sep 20;8:756075. doi: 10.3389/fmolb.2021.756075 (PMC8488165; doi:10.3389/fmolb.2021.756075)
Supplement: Supplementary file 1 [file DataSheet1.ZIP › Data Sheet 1/Our_result_pdb/our_dataset_output/1GPI_watersite.pdb]

HEADER                                                        XXXX


JRNL        PMID   -1
HETATM    1  O   HOH T   0      40.043  26.729  31.758  1.00  0.14           O  
HETATM    2  O   HOH T   1      59.612  15.464  20.947  1.00  0.17           O  
HETATM    3  O   HOH T   2      48.915  18.362  12.318  1.00  0.17           O  
HETATM    4  O   HOH T   3      39.331  10.512 -11.520  1.00  0.18           O  
HETATM    5  O   HOH T   4      54.075  26.056  40.050  1.00  0.19           O  
HETATM    6  O   HOH T   5      35.093  32.364  32.965  1.00  0.19           O  
HETATM    7  O   HOH T   6      51.901  -0.232  15.211  1.00  0.19           O  
HETATM    8  O   HOH T   7      67.959  12.230  31.111  1.00  0.19           O  
HETATM    9  O   HOH T   8      46.593  13.099  32.108  1.00  0.20           O  
HETATM   10  O   HOH T   9      50.983   7.860  17.622  1.00  0.20           O  
HETATM   11  O   HOH T  10      66.626  25.062  23.576  1.00  0.20           O  
HETATM   12  O   HOH T  11      62.289  30.490   8.241  1.00  0.21           O  
HETATM   13  O   HOH T  12      53.270   8.691  40.483  1.00  0.21           O  
HETATM   14  O   HOH T  13      42.683  23.623  -3.493  1.00  0.22           O  
HETATM   15  O   HOH T  14      58.698  18.066   1.720  1.00  0.22           O  
HETATM   16  O   HOH T  15      51.813  23.953  50.369  1.00  0.22           O  
HETATM   17  O   HOH T  16      63.642  32.026  41.419  1.00  0.22           O  
HETATM   18  O   HOH T  17      73.085  22.798  42.423  1.00  0.22           O  
HETATM   19  O   HOH T  18      43.700  44.329   8.174  1.00  0.22           O  
HETATM   20  O   HOH T  19      47.037  27.437  18.947  1.00  0.22           O  
HETATM   21  O   HOH T  20      49.424  40.270  19.148  1.00  0.22           O  
HETATM   22  O   HOH T  21      44.320   7.214  30.437  1.00  0.23           O  
HETATM   23  O   HOH T  22      72.865  24.597  36.642  1.00  0.23           O  
HETATM   24  O   HOH T  23      65.775  24.802  31.973  1.00  0.23           O  
HETATM   25  O   HOH T  24      65.382  22.861  27.207  1.00  0.23           O  
HETATM   26  O   HOH T  25      37.882  12.919  24.020  1.00  0.23           O  
HETATM   27  O   HOH T  26      48.930  13.580   0.133  1.00  0.23           O  
HETATM   28  O   HOH T  27      36.076  28.427  28.645  1.00  0.23           O  
HETATM   29  O   HOH T  28      62.726   6.386  18.546  1.00  0.23           O  
HETATM   30  O   HOH T  29      31.362  13.629   0.956  1.00  0.24           O  
HETATM   31  O   HOH T  30      43.095   9.900  18.469  1.00  0.24           O  
HETATM   32  O   HOH T  31      58.043  28.223  49.113  1.00  0.24           O  
HETATM   33  O   HOH T  32      37.970  30.630   9.137  1.00  0.24           O  
HETATM   34  O   HOH T  33      73.504  15.854  26.800  1.00  0.24           O  
HETATM   35  O   HOH T  34      38.496  35.140  -2.954  1.00  0.24           O  
HETATM   36  O   HOH T  35      57.411   4.762  35.857  1.00  0.24           O  
HETATM   37  O   HOH T  36      41.630   9.787  35.870  1.00  0.24           O  
HETATM   38  O   HOH T  37      65.536  12.965  17.750  1.00  0.24           O  
HETATM   39  O   HOH T  38      60.660  21.643  13.682  1.00  0.24           O  
HETATM   40  O   HOH T  39      55.636  -1.911  14.456  1.00  0.25           O  
HETATM   41  O   HOH T  40      34.018  40.224  26.208  1.00  0.25           O  
HETATM   42  O   HOH T  41      57.689  37.766  26.063  1.00  0.25           O  
HETATM   43  O   HOH T  42      45.494  38.641  16.939  1.00  0.25           O  
HETATM   44  O   HOH T  43      60.172  21.794  36.820  1.00  0.25           O  
HETATM   45  O   HOH T  44      38.924  44.503  16.193  1.00  0.25           O  
HETATM   46  O   HOH T  45      54.362  34.499   4.551  1.00  0.25           O  
HETATM   47  O   HOH T  46      42.411  33.243  14.767  1.00  0.25           O  
HETATM   48  O   HOH T  47      36.902  14.886  18.078  1.00  0.25           O  
HETATM   49  O   HOH T  48      41.341  30.961  19.988  1.00  0.26           O  
HETATM   50  O   HOH T  49      57.337  49.446  20.561  1.00  0.26           O  
HETATM   51  O   HOH T  50      37.309  43.926  10.450  1.00  0.26           O  
HETATM   52  O   HOH T  51      32.549  39.474  28.478  1.00  0.26           O  
HETATM   53  O   HOH T  52      31.132  22.595  19.403  1.00  0.26           O  
HETATM   54  O   HOH T  53      45.224  25.466   4.846  1.00  0.26           O  
HETATM   55  O   HOH T  54      57.625  24.166   1.028  1.00  0.26           O  
HETATM   56  O   HOH T  55      46.297  32.689  41.083  1.00  0.26           O  
HETATM   57  O   HOH T  56      58.995  43.999  28.403  1.00  0.26           O  
HETATM   58  O   HOH T  57      32.387  16.973   6.505  1.00  0.27           O  
HETATM   59  O   HOH T  58      63.017  25.021  32.574  1.00  0.27           O  
HETATM   60  O   HOH T  59      71.577  21.020  27.219  1.00  0.27           O  
HETATM   61  O   HOH T  60      37.555  21.500  -0.543  1.00  0.27           O  
HETATM   62  O   HOH T  61      71.086  29.720  44.398  1.00  0.28           O  
HETATM   63  O   HOH T  62      59.411  18.809  53.519  1.00  0.28           O  
HETATM   64  O   HOH T  63      61.292  15.815  11.826  1.00  0.28           O  
HETATM   65  O   HOH T  64      37.964  26.888  16.025  1.00  0.28           O  
HETATM   66  O   HOH T  65      62.662  29.390  56.483  1.00  0.28           O  
HETATM   67  O   HOH T  66      31.374  38.236  30.696  1.00  0.28           O  
HETATM   68  O   HOH T  67      46.087  26.790  34.723  1.00  0.28           O  
HETATM   69  O   HOH T  68      28.372  34.127  29.781  1.00  0.28           O  
HETATM   70  O   HOH T  69      61.625   3.964  29.925  1.00  0.28           O  
HETATM   71  O   HOH T  70      36.344  36.964  16.006  1.00  0.28           O  
HETATM   72  O   HOH T  71      47.952  -1.946  21.258  1.00  0.28           O  
HETATM   73  O   HOH T  72      59.160  36.824   8.743  1.00  0.28           O  
HETATM   74  O   HOH T  73      72.096  24.451  40.518  1.00  0.29           O  
HETATM   75  O   HOH T  74      59.982   6.463   5.649  1.00  0.29           O  
HETATM   76  O   HOH T  75      34.149  35.231  15.796  1.00  0.29           O  
HETATM   77  O   HOH T  76      43.832   6.912  15.017  1.00  0.29           O  
HETATM   78  O   HOH T  77      57.290  16.563  46.101  1.00  0.29           O  
HETATM   79  O   HOH T  78      39.440  53.971  20.983  1.00  0.29           O  
HETATM   80  O   HOH T  79      46.875  24.899  41.676  1.00  0.29           O  
HETATM   81  O   HOH T  80      49.346  44.573  11.959  1.00  0.29           O  
HETATM   82  O   HOH T  81      46.832  11.392  41.625  1.00  0.29           O  
HETATM   83  O   HOH T  82      69.372  11.528  43.610  1.00  0.29           O  
HETATM   84  O   HOH T  83      40.031  26.277  14.084  1.00  0.29           O  
HETATM   85  O   HOH T  84      33.623  36.402  -3.179  1.00  0.29           O  
HETATM   86  O   HOH T  85      38.697  33.105  -0.963  1.00  0.29           O  
HETATM   87  O   HOH T  86      62.859   3.220  16.102  1.00  0.29           O  
HETATM   88  O   HOH T  87      31.208  36.226  32.625  1.00  0.29           O  
HETATM   89  O   HOH T  88      54.178   1.310  27.031  1.00  0.30           O  
HETATM   90  O   HOH T  89      47.152   0.988  19.168  1.00  0.30           O  
HETATM   91  O   HOH T  90      32.974  25.469  33.007  1.00  0.30           O  
HETATM   92  O   HOH T  91      64.001  31.515  22.575  1.00  0.30           O  
HETATM   93  O   HOH T  92      57.424  11.552  40.319  1.00  0.30           O  
HETATM   94  O   HOH T  93      51.501  38.800  18.014  1.00  0.30           O  
HETATM   95  O   HOH T  94      63.640   7.020  38.838  1.00  0.30           O  
HETATM   96  O   HOH T  95      60.867  32.263  48.208  1.00  0.30           O  
HETATM   97  O   HOH T  96      60.252  20.821  32.541  1.00  0.30           O  
HETATM   98  O   HOH T  97      69.677   7.428  32.530  1.00  0.30           O  
HETATM   99  O   HOH T  98      45.464  22.764  34.353  1.00  0.30           O  
HETATM  100  O   HOH T  99      63.152  37.148  11.171  1.00  0.30           O  
HETATM  101  O   HOH T 100      69.160  30.717  29.969  1.00  0.30           O  
HETATM  102  O   HOH T 101      46.544  29.712  20.280  1.00  0.30           O  
HETATM  103  O   HOH T 102      45.342   5.192  25.107  1.00  0.31           O  
HETATM  104  O   HOH T 103      47.756   2.551  42.670  1.00  0.31           O  
HETATM  105  O   HOH T 104      34.457  38.721  17.130  1.00  0.31           O  
HETATM  106  O   HOH T 105      66.524  22.644  35.045  1.00  0.31           O  
HETATM  107  O   HOH T 106      59.663  20.022  38.996  1.00  0.31           O  
HETATM  108  O   HOH T 107      63.353  29.655  20.820  1.00  0.31           O  
HETATM  109  O   HOH T 108      40.490  40.156  21.101  1.00  0.31           O  
HETATM  110  O   HOH T 109      56.700  29.435  -5.120  1.00  0.31           O  
HETATM  111  O   HOH T 110      40.618  25.132  11.519  1.00  0.31           O  
HETATM  112  O   HOH T 111      56.227  35.661  27.071  1.00  0.31           O  
HETATM  113  O   HOH T 112      53.567  22.636  51.993  1.00  0.31           O  
HETATM  114  O   HOH T 113      77.357  21.740  31.797  1.00  0.31           O  
HETATM  115  O   HOH T 114      36.534  23.227   3.518  1.00  0.31           O  
HETATM  116  O   HOH T 115      38.753  45.678  11.996  1.00  0.31           O  
HETATM  117  O   HOH T 116      67.053  22.282  32.265  1.00  0.31           O  
HETATM  118  O   HOH T 117      50.979   3.204  35.294  1.00  0.31           O  
HETATM  119  O   HOH T 118      37.651  18.737  -0.428  1.00  0.31           O  
HETATM  120  O   HOH T 119      43.295  10.039   7.950  1.00  0.31           O  
HETATM  121  O   HOH T 120      32.647  27.711  18.950  1.00  0.31           O  
HETATM  122  O   HOH T 121      25.719  34.752  34.937  1.00  0.31           O  
HETATM  123  O   HOH T 122      29.851  36.319  35.077  1.00  0.32           O  
HETATM  124  O   HOH T 123      38.171  28.329   0.561  1.00  0.32           O  
HETATM  125  O   HOH T 124      66.680  30.495  -1.130  1.00  0.32           O  
HETATM  126  O   HOH T 125      68.653  13.957  29.030  1.00  0.32           O  
HETATM  127  O   HOH T 126      64.546  25.201  17.907  1.00  0.32           O  
HETATM  128  O   HOH T 127      66.930  28.644   0.904  1.00  0.32           O  
HETATM  129  O   HOH T 128      33.300  13.513  33.828  1.00  0.32           O  
HETATM  130  O   HOH T 129      47.845  23.439  48.981  1.00  0.32           O  
HETATM  131  O   HOH T 130      73.505  26.319  38.883  1.00  0.32           O  
HETATM  132  O   HOH T 131      44.712  37.364   4.974  1.00  0.32           O  
HETATM  133  O   HOH T 132      49.104  34.712  43.590  1.00  0.32           O  
HETATM  134  O   HOH T 133      51.507  21.864   0.851  1.00  0.33           O  
HETATM  135  O   HOH T 134      38.128  37.763   4.701  1.00  0.33           O  
HETATM  136  O   HOH T 135      41.032   6.765   1.362  1.00  0.33           O  
HETATM  137  O   HOH T 136      58.101  19.818  51.257  1.00  0.33           O  
HETATM  138  O   HOH T 137      35.226  28.439   5.063  1.00  0.33           O  
HETATM  139  O   HOH T 138      46.145  21.264  40.524  1.00  0.33           O  
HETATM  140  O   HOH T 139      40.028  41.630  18.692  1.00  0.33           O  
HETATM  141  O   HOH T 140      55.132   3.405  33.231  1.00  0.33           O  
HETATM  142  O   HOH T 141      49.379  45.482  14.548  1.00  0.33           O  
HETATM  143  O   HOH T 142      53.351  42.318  29.125  1.00  0.33           O  
HETATM  144  O   HOH T 143      72.736  13.934  24.941  1.00  0.33           O  
HETATM  145  O   HOH T 144      65.696   2.591  41.469  1.00  0.33           O  
HETATM  146  O   HOH T 145      44.386  35.663  23.030  1.00  0.33           O  
HETATM  147  O   HOH T 146      50.227   4.111  31.689  1.00  0.34           O  
HETATM  148  O   HOH T 147      32.230  27.514  34.852  1.00  0.34           O  
HETATM  149  O   HOH T 148      31.339  11.854   5.658  1.00  0.34           O  
HETATM  150  O   HOH T 149      67.384  26.432  -0.713  1.00  0.34           O  
HETATM  151  O   HOH T 150      51.192  16.419  39.910  1.00  0.34           O  
HETATM  152  O   HOH T 151      46.047  11.845  44.285  1.00  0.34           O  
HETATM  153  O   HOH T 152      74.249  18.417  34.052  1.00  0.34           O  
HETATM  154  O   HOH T 153      49.338   2.271  28.955  1.00  0.34           O  
HETATM  155  O   HOH T 154      59.745  15.309   9.561  1.00  0.34           O  
HETATM  156  O   HOH T 155      60.006   2.571  28.168  1.00  0.35           O  
HETATM  157  O   HOH T 156      66.157  38.732  31.900  1.00  0.35           O  
HETATM  158  O   HOH T 157      51.969  -1.971  11.008  1.00  0.35           O  
HETATM  159  O   HOH T 158      69.291  30.669  25.939  1.00  0.35           O  
HETATM  160  O   HOH T 159      39.699  11.410  34.689  1.00  0.35           O  
HETATM  161  O   HOH T 160      64.432  31.383  15.610  1.00  0.35           O  
HETATM  162  O   HOH T 161      57.661  18.756  40.470  1.00  0.35           O  
HETATM  163  O   HOH T 162      38.155  28.535  39.671  1.00  0.35           O  
HETATM  164  O   HOH T 163      50.846  22.625  28.070  1.00  0.35           O  
HETATM  165  O   HOH T 164      63.336  20.046   8.042  1.00  0.35           O  
HETATM  166  O   HOH T 165      26.662  29.155  23.538  1.00  0.35           O  
HETATM  167  O   HOH T 166      43.146   7.763   0.035  1.00  0.35           O  
HETATM  168  O   HOH T 167      56.078  26.999  -0.908  1.00  0.35           O  
HETATM  169  O   HOH T 168      64.289   4.977  37.016  1.00  0.35           O  
HETATM  170  O   HOH T 169      58.093   3.566  44.094  1.00  0.35           O  
HETATM  171  O   HOH T 170      58.055  34.842  48.683  1.00  0.35           O  
HETATM  172  O   HOH T 171      51.527  29.064  39.054  1.00  0.35           O  
HETATM  173  O   HOH T 172      44.599   1.300  14.558  1.00  0.35           O  
HETATM  174  O   HOH T 173      46.810  30.619  39.332  1.00  0.35           O  
HETATM  175  O   HOH T 174      32.489  32.314  35.951  1.00  0.35           O  
HETATM  176  O   HOH T 175      43.612  33.019  42.093  1.00  0.35           O  
HETATM  177  O   HOH T 176      64.793  28.681  18.850  1.00  0.36           O  
HETATM  178  O   HOH T 177      71.300  12.822  40.350  1.00  0.36           O  
HETATM  179  O   HOH T 178      39.600  11.393  39.889  1.00  0.36           O  
HETATM  180  O   HOH T 179      46.934  37.767   3.278  1.00  0.36           O  
HETATM  181  O   HOH T 180      51.673   2.080  27.629  1.00  0.36           O  
HETATM  182  O   HOH T 181      67.585   7.752  36.849  1.00  0.36           O  
HETATM  183  O   HOH T 182      46.877  18.716  40.809  1.00  0.36           O  
HETATM  184  O   HOH T 183      71.053  22.258  19.557  1.00  0.36           O  
HETATM  185  O   HOH T 184      33.404  10.132  24.229  1.00  0.36           O  
HETATM  186  O   HOH T 185      44.543  48.578  19.403  1.00  0.36           O  
HETATM  187  O   HOH T 186      65.590  28.555  38.431  1.00  0.36           O  
HETATM  188  O   HOH T 187      30.965  14.458  21.900  1.00  0.36           O  
HETATM  189  O   HOH T 188      44.969  13.397  35.741  1.00  0.36           O  
HETATM  190  O   HOH T 189      31.496  29.786  36.414  1.00  0.36           O  
HETATM  191  O   HOH T 190      57.999  28.312  54.572  1.00  0.36           O  
HETATM  192  O   HOH T 191      70.856  10.408  41.471  1.00  0.36           O  
HETATM  193  O   HOH T 192      30.753  40.450  14.709  1.00  0.37           O  
HETATM  194  O   HOH T 193      35.222  26.429  16.407  1.00  0.37           O  
HETATM  195  O   HOH T 194      30.528  12.074  20.703  1.00  0.37           O  
HETATM  196  O   HOH T 195      42.733  18.100  21.431  1.00  0.37           O  
HETATM  197  O   HOH T 196      34.052  27.043  13.078  1.00  0.37           O  
HETATM  198  O   HOH T 197      33.097  10.720   3.825  1.00  0.37           O  
HETATM  199  O   HOH T 198      35.529  34.833   3.245  1.00  0.37           O  
HETATM  200  O   HOH T 199      62.460  21.758  34.107  1.00  0.37           O  
HETATM  201  O   HOH T 200      63.569  31.119  18.358  1.00  0.37           O  
HETATM  202  O   HOH T 201      35.671  25.629   4.834  1.00  0.37           O  
HETATM  203  O   HOH T 202      31.753  38.785  16.710  1.00  0.37           O  
HETATM  204  O   HOH T 203      29.855  32.965  20.225  1.00  0.37           O  
HETATM  205  O   HOH T 204      63.262   8.086  16.406  1.00  0.37           O  
HETATM  206  O   HOH T 205      48.736  28.613  38.882  1.00  0.38           O  
HETATM  207  O   HOH T 206      68.047   9.710  45.121  1.00  0.38           O  
HETATM  208  O   HOH T 207      64.049   9.908  14.476  1.00  0.38           O  
HETATM  209  O   HOH T 208      64.287  42.087  32.009  1.00  0.38           O  
HETATM  210  O   HOH T 209      57.542   1.270  28.004  1.00  0.38           O  
HETATM  211  O   HOH T 210      37.927   9.128  31.011  1.00  0.38           O  
HETATM  212  O   HOH T 211      38.422  43.760  18.759  1.00  0.38           O  
HETATM  213  O   HOH T 212      58.044  47.441  17.027  1.00  0.38           O  
HETATM  214  O   HOH T 213      53.381  39.779   9.789  1.00  0.38           O  
HETATM  215  O   HOH T 214      70.648   9.976  45.556  1.00  0.38           O  
HETATM  216  O   HOH T 215      52.454   1.692  24.998  1.00  0.38           O  
HETATM  217  O   HOH T 216      66.633  23.422  29.644  1.00  0.38           O  
HETATM  218  O   HOH T 217      34.669   8.900   2.420  1.00  0.38           O  
HETATM  219  O   HOH T 218      53.047  28.587  29.568  1.00  0.38           O  
HETATM  220  O   HOH T 219      55.717  37.671  33.519  1.00  0.38           O  
HETATM  221  O   HOH T 220      46.510  29.373  33.737  1.00  0.38           O  
HETATM  222  O   HOH T 221      33.596  15.394   8.520  1.00  0.38           O  
HETATM  223  O   HOH T 222      68.275  34.446  34.015  1.00  0.39           O  
HETATM  224  O   HOH T 223      51.496   6.581  13.351  1.00  0.39           O  
HETATM  225  O   HOH T 224      70.897   6.528  34.864  1.00  0.39           O  
HETATM  226  O   HOH T 225      65.776  31.050   4.603  1.00  0.39           O  
HETATM  227  O   HOH T 226      47.213  31.428  25.256  1.00  0.39           O  
HETATM  228  O   HOH T 227      48.146  28.739  25.354  1.00  0.39           O  
HETATM  229  O   HOH T 228      32.768  45.839  26.407  1.00  0.39           O  
HETATM  230  O   HOH T 229      52.606   4.048  14.328  1.00  0.39           O  
HETATM  231  O   HOH T 230      36.107  33.255  -0.021  1.00  0.39           O  
HETATM  232  O   HOH T 231      33.926  14.901  30.611  1.00  0.39           O  
HETATM  233  O   HOH T 232      47.564  32.199  21.104  1.00  0.39           O  
HETATM  234  O   HOH T 233      42.286  24.607  13.730  1.00  0.39           O  
HETATM  235  O   HOH T 234      64.288  12.192  53.514  1.00  0.39           O  
HETATM  236  O   HOH T 235      33.345  13.444   6.528  1.00  0.39           O  
HETATM  237  O   HOH T 236      57.303  16.960  -0.409  1.00  0.39           O  
HETATM  238  O   HOH T 237      25.523  30.204  25.929  1.00  0.39           O  
HETATM  239  O   HOH T 238      47.650  27.560  49.977  1.00  0.39           O  
HETATM  240  O   HOH T 239      68.974  25.139  55.129  1.00  0.39           O  
HETATM  241  O   HOH T 240      42.866  48.812  12.739  1.00  0.39           O  
HETATM  242  O   HOH T 241      44.152  22.720  39.356  1.00  0.39           O  
HETATM  243  O   HOH T 242      34.063  22.709  42.525  1.00  0.39           O  
HETATM  244  O   HOH T 243      52.206  33.472  48.318  1.00  0.40           O  
HETATM  245  O   HOH T 244      69.528  22.172  21.871  1.00  0.40           O  
HETATM  246  O   HOH T 245      53.493  40.454  31.070  1.00  0.40           O  
HETATM  247  O   HOH T 246      58.205  -0.827  14.862  1.00  0.40           O  
HETATM  248  O   HOH T 247      68.217  10.373  20.126  1.00  0.40           O  
HETATM  249  O   HOH T 248      46.454   2.125  37.953  1.00  0.40           O  
HETATM  250  O   HOH T 249      58.713  34.452   3.106  1.00  0.40           O  
HETATM  251  O   HOH T 250      55.045  37.204  42.825  1.00  0.40           O  
HETATM  252  O   HOH T 251      57.434  36.672   4.237  1.00  0.40           O  
HETATM  253  O   HOH T 252      37.366  10.252  24.519  1.00  0.40           O  
HETATM  254  O   HOH T 253      28.835  33.773  26.994  1.00  0.40           O  
HETATM  255  O   HOH T 254      50.257  21.483  30.473  1.00  0.40           O  
HETATM  256  O   HOH T 255      54.320  31.801  48.883  1.00  0.40           O  
HETATM  257  O   HOH T 256      53.661   2.138   6.275  1.00  0.40           O  
HETATM  258  O   HOH T 257      40.957   9.024  40.045  1.00  0.40           O  
HETATM  259  O   HOH T 258      27.236  22.902   6.161  1.00  0.40           O  
HETATM  260  O   HOH T 259      27.267  32.202  21.028  1.00  0.40           O  
HETATM  261  O   HOH T 260      52.447  17.892  46.909  1.00  0.40           O  
HETATM  262  O   HOH T 261      28.844  34.748  37.038  1.00  0.40           O  
HETATM  263  O   HOH T 262      50.553  27.344  37.145  1.00  0.40           O  
HETATM  264  O   HOH T 263      48.703   7.613  42.884  1.00  0.40           O  
HETATM  265  O   HOH T 264      45.945  33.837  24.443  1.00  0.40           O  
HETATM  266  O   HOH T 265      56.743  30.773  49.377  1.00  0.41           O  
HETATM  267  O   HOH T 266      30.064  23.518  21.816  1.00  0.41           O  
HETATM  268  O   HOH T 267      51.187   5.730  15.920  1.00  0.41           O  
HETATM  269  O   HOH T 268      49.076  23.755  31.602  1.00  0.41           O  
HETATM  270  O   HOH T 269      56.764   8.018  42.559  1.00  0.41           O  
HETATM  271  O   HOH T 270      66.172  29.367  16.543  1.00  0.41           O  
HETATM  272  O   HOH T 271      65.150  23.535  20.193  1.00  0.41           O  
HETATM  273  O   HOH T 272      30.534  32.660  10.303  1.00  0.41           O  
HETATM  274  O   HOH T 273      59.126  38.834  35.513  1.00  0.41           O  
HETATM  275  O   HOH T 274      68.721  26.073  26.766  1.00  0.41           O  
HETATM  276  O   HOH T 275      46.134  45.354   7.300  1.00  0.41           O  
HETATM  277  O   HOH T 276      31.577  25.163  18.559  1.00  0.41           O  
HETATM  278  O   HOH T 277      68.700  31.219  44.388  1.00  0.41           O  
HETATM  279  O   HOH T 278      61.816   6.365  -6.192  1.00  0.41           O  
HETATM  280  O   HOH T 279      42.682  33.337  19.461  1.00  0.41           O  
HETATM  281  O   HOH T 280      55.599  35.436  47.573  1.00  0.41           O  
HETATM  282  O   HOH T 281      55.923   0.629   7.089  1.00  0.41           O  
HETATM  283  O   HOH T 282      53.910  33.540  32.145  1.00  0.41           O  
HETATM  284  O   HOH T 283      39.803  42.941  21.137  1.00  0.41           O  
HETATM  285  O   HOH T 284      61.500  10.566  -0.744  1.00  0.41           O  
HETATM  286  O   HOH T 285      69.977  22.453  15.272  1.00  0.41           O  
HETATM  287  O   HOH T 286      53.640  13.523  43.811  1.00  0.41           O  
HETATM  288  O   HOH T 287      68.166  19.979  21.099  1.00  0.41           O  
HETATM  289  O   HOH T 288      54.068  32.451  34.764  1.00  0.42           O  
HETATM  290  O   HOH T 289      24.074  31.032  19.409  1.00  0.42           O  
HETATM  291  O   HOH T 290      39.347  12.976  42.100  1.00  0.42           O  
HETATM  292  O   HOH T 291      42.298  24.245  40.840  1.00  0.42           O  
HETATM  293  O   HOH T 292      35.612  10.572   0.563  1.00  0.42           O  
HETATM  294  O   HOH T 293      56.739  30.726  -2.605  1.00  0.42           O  
HETATM  295  O   HOH T 294      49.917  25.059  29.308  1.00  0.42           O  
HETATM  296  O   HOH T 295      63.575   5.044  31.516  1.00  0.42           O  
HETATM  297  O   HOH T 296      45.892   2.054  40.676  1.00  0.42           O  
HETATM  298  O   HOH T 297      25.919  33.433  32.520  1.00  0.42           O  
HETATM  299  O   HOH T 298      62.999   2.091  34.579  1.00  0.42           O  
HETATM  300  O   HOH T 299      70.209  32.364  39.707  1.00  0.42           O  
HETATM  301  O   HOH T 300      55.277  28.342  -3.037  1.00  0.42           O  
HETATM  302  O   HOH T 301      40.740  10.465   9.055  1.00  0.42           O  
HETATM  303  O   HOH T 302      40.715   6.397  25.743  1.00  0.42           O  
HETATM  304  O   HOH T 303      49.915  24.763  26.534  1.00  0.42           O  
HETATM  305  O   HOH T 304      49.413  44.042  23.429  1.00  0.42           O  
HETATM  306  O   HOH T 305      54.808  48.297  20.431  1.00  0.42           O  
HETATM  307  O   HOH T 306      57.408  39.931  33.764  1.00  0.42           O  
HETATM  308  O   HOH T 307      46.954  46.608  15.304  1.00  0.42           O  
HETATM  309  O   HOH T 308      53.396  35.324  30.252  1.00  0.42           O  
HETATM  310  O   HOH T 309      55.569   1.579   4.441  1.00  0.43           O  
HETATM  311  O   HOH T 310      44.184  31.107  19.993  1.00  0.43           O  
HETATM  312  O   HOH T 311      32.335  34.970  34.867  1.00  0.43           O  
HETATM  313  O   HOH T 312      53.697   3.603   3.873  1.00  0.43           O  
HETATM  314  O   HOH T 313      48.171  13.226  43.165  1.00  0.43           O  
HETATM  315  O   HOH T 314      62.556  -3.239  17.063  1.00  0.43           O  
HETATM  316  O   HOH T 315      54.608   2.192   8.847  1.00  0.43           O  
HETATM  317  O   HOH T 316      53.277   4.306  42.490  1.00  0.43           O  
HETATM  318  O   HOH T 317      35.522  28.985   1.280  1.00  0.43           O  
HETATM  319  O   HOH T 318      30.030  32.144  37.205  1.00  0.43           O  
HETATM  320  O   HOH T 319      28.110  27.274  25.082  1.00  0.43           O  
HETATM  321  O   HOH T 320      56.823  35.131  42.562  1.00  0.43           O  
HETATM  322  O   HOH T 321      69.178  33.374  30.043  1.00  0.43           O  
HETATM  323  O   HOH T 322      43.256   5.029  23.509  1.00  0.43           O  
HETATM  324  O   HOH T 323      47.318  24.727  33.560  1.00  0.43           O  
HETATM  325  O   HOH T 324      69.665  28.059  25.127  1.00  0.43           O  
HETATM  326  O   HOH T 325      48.426  18.404  38.587  1.00  0.43           O  
HETATM  327  O   HOH T 326      44.162  25.756  42.643  1.00  0.43           O  
HETATM  328  O   HOH T 327      27.697  43.128  21.077  1.00  0.43           O  
HETATM  329  O   HOH T 328      33.441  12.128  31.298  1.00  0.43           O  
HETATM  330  O   HOH T 329      54.690   6.526  41.445  1.00  0.43           O  
HETATM  331  O   HOH T 330      34.567  21.830   1.988  1.00  0.43           O  
HETATM  332  O   HOH T 331      45.177  -1.664  21.610  1.00  0.43           O  
HETATM  333  O   HOH T 332      66.499  31.711  45.921  1.00  0.43           O  
HETATM  334  O   HOH T 333      67.092  22.393  18.693  1.00  0.43           O  
HETATM  335  O   HOH T 334      64.686  31.621   1.981  1.00  0.43           O  
HETATM  336  O   HOH T 335      45.217   3.157  26.802  1.00  0.43           O  
HETATM  337  O   HOH T 336      32.362  47.814  24.576  1.00  0.43           O  
HETATM  338  O   HOH T 337      49.305  37.637  43.470  1.00  0.43           O  
HETATM  339  O   HOH T 338      33.375  39.515  14.616  1.00  0.43           O  
HETATM  340  O   HOH T 339      60.186  36.568   4.079  1.00  0.43           O  
HETATM  341  O   HOH T 340      57.793  19.738  -0.273  1.00  0.44           O  
HETATM  342  O   HOH T 341      57.314   2.894  37.958  1.00  0.44           O  
HETATM  343  O   HOH T 342      54.850  17.748  45.615  1.00  0.44           O  
HETATM  344  O   HOH T 343      25.961  29.704  20.817  1.00  0.44           O  
HETATM  345  O   HOH T 344      54.748  44.659  29.615  1.00  0.44           O  
HETATM  346  O   HOH T 345      31.086  33.952  22.443  1.00  0.44           O  
HETATM  347  O   HOH T 346      32.351  20.467   3.089  1.00  0.44           O  
HETATM  348  O   HOH T 347      41.902   6.837  38.593  1.00  0.44           O  
HETATM  349  O   HOH T 348      50.349  28.306  23.701  1.00  0.44           O  
HETATM  350  O   HOH T 349      63.128  33.943  48.106  1.00  0.44           O  
HETATM  351  O   HOH T 350      67.937  37.141  33.357  1.00  0.44           O  
HETATM  352  O   HOH T 351      32.052   9.416   1.706  1.00  0.44           O  
HETATM  353  O   HOH T 352      63.600  21.935  10.018  1.00  0.44           O  
HETATM  354  O   HOH T 353      58.098  22.077  33.671  1.00  0.44           O  
HETATM  355  O   HOH T 354      43.057  46.629  20.866  1.00  0.44           O  
HETATM  356  O   HOH T 355      32.372  32.595   7.159  1.00  0.44           O  
HETATM  357  O   HOH T 356      65.788   8.328  48.135  1.00  0.44           O  
HETATM  358  O   HOH T 357      69.742   8.317  40.008  1.00  0.44           O  
HETATM  359  O   HOH T 358      47.513  21.202  35.450  1.00  0.45           O  
HETATM  360  O   HOH T 359      44.090  28.549  42.151  1.00  0.45           O  
HETATM  361  O   HOH T 360      42.261  31.647  38.944  1.00  0.45           O  
HETATM  362  O   HOH T 361      53.218   1.961  12.581  1.00  0.45           O  
HETATM  363  O   HOH T 362      65.921  14.027  15.319  1.00  0.45           O  
HETATM  364  O   HOH T 363      50.976  12.983  43.397  1.00  0.45           O  
HETATM  365  O   HOH T 364      46.983  13.707  47.310  1.00  0.45           O  
HETATM  366  O   HOH T 365      56.633  18.714  53.290  1.00  0.45           O  
HETATM  367  O   HOH T 366      27.039  42.936  15.552  1.00  0.45           O  
HETATM  368  O   HOH T 367      63.489   4.321  20.316  1.00  0.45           O  
HETATM  369  O   HOH T 368      40.348  31.232  37.130  1.00  0.45           O  
HETATM  370  O   HOH T 369      62.214   1.945  13.805  1.00  0.45           O  
HETATM  371  O   HOH T 370      43.357   3.757  28.945  1.00  0.45           O  
HETATM  372  O   HOH T 371      49.194  13.966  48.955  1.00  0.45           O  
HETATM  373  O   HOH T 372      31.521  14.058  31.728  1.00  0.45           O  
HETATM  374  O   HOH T 373      64.525   6.666  -7.163  1.00  0.45           O  
HETATM  375  O   HOH T 374      57.085  34.201   5.402  1.00  0.45           O  
HETATM  376  O   HOH T 375      46.745  -2.059  23.841  1.00  0.45           O  
HETATM  377  O   HOH T 376      64.630   4.509  39.741  1.00  0.45           O  
HETATM  378  O   HOH T 377      32.971  23.528  31.036  1.00  0.45           O  
HETATM  379  O   HOH T 378      64.815  35.028  11.686  1.00  0.45           O  
HETATM  380  O   HOH T 379      63.258  31.138  48.568  1.00  0.45           O  
HETATM  381  O   HOH T 380      29.284  37.801  28.919  1.00  0.45           O  
HETATM  382  O   HOH T 381      68.915   6.022  38.568  1.00  0.45           O  
HETATM  383  O   HOH T 382      53.639  33.840   2.175  1.00  0.45           O  
HETATM  384  O   HOH T 383      62.496  42.786  14.490  1.00  0.45           O  
HETATM  385  O   HOH T 384      65.763  30.115  40.873  1.00  0.45           O  
HETATM  386  O   HOH T 385      36.775  47.844  28.029  1.00  0.45           O  
HETATM  387  O   HOH T 386      36.301  42.030  32.352  1.00  0.45           O  
HETATM  388  O   HOH T 387      60.640  32.024  54.279  1.00  0.45           O  
HETATM  389  O   HOH T 388      34.694  47.102  23.271  1.00  0.46           O  
HETATM  390  O   HOH T 389      50.636  25.504  23.945  1.00  0.46           O  
HETATM  391  O   HOH T 390      31.219  16.410   9.055  1.00  0.46           O  
HETATM  392  O   HOH T 391      39.296  45.687   9.406  1.00  0.46           O  
HETATM  393  O   HOH T 392      31.062  33.640  25.125  1.00  0.46           O  
HETATM  394  O   HOH T 393      46.665  34.733  21.845  1.00  0.46           O  
HETATM  395  O   HOH T 394      53.372  26.717  31.526  1.00  0.46           O  
HETATM  396  O   HOH T 395      29.829  36.356  22.340  1.00  0.46           O  
HETATM  397  O   HOH T 396      69.635  22.603  52.598  1.00  0.46           O  
HETATM  398  O   HOH T 397      33.109   9.165  21.659  1.00  0.46           O  
HETATM  399  O   HOH T 398      67.286  27.630  18.457  1.00  0.46           O  
HETATM  400  O   HOH T 399      44.606  30.335   1.481  1.00  0.46           O  
HETATM  401  O   HOH T 400      48.425  33.148  23.464  1.00  0.46           O  
HETATM  402  O   HOH T 401      40.133  39.603  29.993  1.00  0.46           O  
HETATM  403  O   HOH T 402      69.630   7.381  45.334  1.00  0.46           O  
HETATM  404  O   HOH T 403      65.416   5.677  18.822  1.00  0.46           O  
HETATM  405  O   HOH T 404      49.349  23.015  34.311  1.00  0.46           O  
HETATM  406  O   HOH T 405      54.652  35.178  34.207  1.00  0.46           O  
HETATM  407  O   HOH T 406      76.311  26.075  29.848  1.00  0.46           O  
HETATM  408  O   HOH T 407      70.627  12.726  27.873  1.00  0.46           O  
HETATM  409  O   HOH T 408      67.189  31.358  52.330  1.00  0.46           O  
HETATM  410  O   HOH T 409      48.902   4.354  44.552  1.00  0.46           O  
HETATM  411  O   HOH T 410      54.980  15.035  45.620  1.00  0.46           O  
HETATM  412  O   HOH T 411      47.234   5.262  15.903  1.00  0.46           O  
HETATM  413  O   HOH T 412      62.710   2.462  31.958  1.00  0.46           O  
HETATM  414  O   HOH T 413      49.140   2.191  37.182  1.00  0.46           O  
HETATM  415  O   HOH T 414      46.132  -0.680  26.073  1.00  0.47           O  
HETATM  416  O   HOH T 415      51.833  19.697  44.654  1.00  0.47           O  
HETATM  417  O   HOH T 416      52.286  26.287  26.110  1.00  0.47           O  
HETATM  418  O   HOH T 417      62.373  38.390  37.904  1.00  0.47           O  
HETATM  419  O   HOH T 418      59.272  40.394  10.939  1.00  0.47           O  
HETATM  420  O   HOH T 419      64.891   2.444  45.576  1.00  0.47           O  
HETATM  421  O   HOH T 420      33.882  39.882   5.684  1.00  0.47           O  
HETATM  422  O   HOH T 421      62.251  25.151  -7.123  1.00  0.47           O  
HETATM  423  O   HOH T 422      69.394  21.364  17.588  1.00  0.47           O  
HETATM  424  O   HOH T 423      62.304   0.564  16.230  1.00  0.47           O  
HETATM  425  O   HOH T 424      63.297  13.768  14.379  1.00  0.47           O  
HETATM  426  O   HOH T 425      30.712  21.305   0.971  1.00  0.47           O  
HETATM  427  O   HOH T 426      62.623  36.553  48.820  1.00  0.47           O  
HETATM  428  O   HOH T 427      42.110  30.560  42.258  1.00  0.47           O  
HETATM  429  O   HOH T 428      34.825  35.601   0.727  1.00  0.47           O  
HETATM  430  O   HOH T 429      52.490  14.465  41.533  1.00  0.47           O  
HETATM  431  O   HOH T 430      66.429  16.342  14.134  1.00  0.47           O  
HETATM  432  O   HOH T 431      40.578   5.580  22.981  1.00  0.47           O  
HETATM  433  O   HOH T 432      37.872  42.924   3.248  1.00  0.48           O  
HETATM  434  O   HOH T 433      71.197  30.826  41.790  1.00  0.48           O  
HETATM  435  O   HOH T 434      35.302  41.440   3.712  1.00  0.48           O  
HETATM  436  O   HOH T 435      42.042   7.879  16.890  1.00  0.48           O  
HETATM  437  O   HOH T 436      36.030  35.715  -1.725  1.00  0.48           O  
HETATM  438  O   HOH T 437      72.387  21.205  24.536  1.00  0.48           O  
HETATM  439  O   HOH T 438      69.317  33.426  22.058  1.00  0.48           O  
HETATM  440  O   HOH T 439      65.805   5.742  48.941  1.00  0.48           O  
HETATM  441  O   HOH T 440      38.462  46.417  14.492  1.00  0.48           O  
HETATM  442  O   HOH T 441      49.748  34.979  46.200  1.00  0.48           O  
HETATM  443  O   HOH T 442      47.055   1.316  27.788  1.00  0.48           O  
HETATM  444  O   HOH T 443      46.857  23.492  39.141  1.00  0.48           O  
HETATM  445  O   HOH T 444      54.801  10.916  40.620  1.00  0.48           O  
HETATM  446  O   HOH T 445      67.792  29.434  -3.478  1.00  0.48           O  
HETATM  447  O   HOH T 446      37.251  30.811  -0.079  1.00  0.48           O  
HETATM  448  O   HOH T 447      64.204   5.561  16.311  1.00  0.48           O  
HETATM  449  O   HOH T 448      32.456  22.745  33.685  1.00  0.48           O  
HETATM  450  O   HOH T 449      63.218  44.543  34.000  1.00  0.48           O  
HETATM  451  O   HOH T 450      32.844  16.769  25.871  1.00  0.48           O  
HETATM  452  O   HOH T 451      61.501  38.232   9.253  1.00  0.48           O  
HETATM  453  O   HOH T 452      28.226  23.029  17.027  1.00  0.48           O  
HETATM  454  O   HOH T 453      36.662  21.797  42.318  1.00  0.48           O  
HETATM  455  O   HOH T 454      45.291  50.126  13.082  1.00  0.48           O  
HETATM  456  O   HOH T 455      41.910   6.818  41.409  1.00  0.48           O  
HETATM  457  O   HOH T 456      64.120   1.080  47.874  1.00  0.48           O  
HETATM  458  O   HOH T 457      25.884  24.944   9.145  1.00  0.48           O  
HETATM  459  O   HOH T 458      29.808  25.890  23.338  1.00  0.48           O  
HETATM  460  O   HOH T 459      79.721  23.045  32.568  1.00  0.48           O  
HETATM  461  O   HOH T 460      66.396  21.815   9.594  1.00  0.48           O  
HETATM  462  O   HOH T 461      35.650   9.617  12.845  1.00  0.48           O  
HETATM  463  O   HOH T 462      37.370   9.672  10.644  1.00  0.49           O  
HETATM  464  O   HOH T 463      65.632  21.015   0.915  1.00  0.49           O  
HETATM  465  O   HOH T 464      28.590  24.182   8.409  1.00  0.49           O  
HETATM  466  O   HOH T 465      45.179  23.534  49.717  1.00  0.49           O  
HETATM  467  O   HOH T 466      43.822  45.497   5.717  1.00  0.49           O  
HETATM  468  O   HOH T 467      66.346  35.738  41.308  1.00  0.49           O  
HETATM  469  O   HOH T 468      67.004  12.902  20.004  1.00  0.49           O  
HETATM  470  O   HOH T 469      64.021   2.725  50.161  1.00  0.49           O  
HETATM  471  O   HOH T 470      42.615   7.362  35.942  1.00  0.49           O  
HETATM  472  O   HOH T 471      54.377  38.071  45.350  1.00  0.49           O  
HETATM  473  O   HOH T 472      62.051  -0.952  18.567  1.00  0.49           O  
HETATM  474  O   HOH T 473      63.216  40.711  16.211  1.00  0.49           O  
HETATM  475  O   HOH T 474      45.257   3.917  17.428  1.00  0.49           O  
HETATM  476  O   HOH T 475      42.262   4.694  20.979  1.00  0.49           O  
HETATM  477  O   HOH T 476      65.042   2.394  36.370  1.00  0.49           O  
HETATM  478  O   HOH T 477      65.850   8.045  45.591  1.00  0.49           O  
HETATM  479  O   HOH T 478      31.414  21.918  25.859  1.00  0.49           O  
HETATM  480  O   HOH T 479      72.508  27.417  36.412  1.00  0.49           O  
HETATM  481  O   HOH T 480      52.438   2.886  32.894  1.00  0.49           O  
HETATM  482  O   HOH T 481      53.850   0.091  10.481  1.00  0.49           O  
HETATM  483  O   HOH T 482      42.183  42.285  20.297  1.00  0.49           O  
HETATM  484  O   HOH T 483      64.090  34.353   2.143  1.00  0.49           O  
HETATM  485  O   HOH T 484      58.331  15.301  -2.458  1.00  0.49           O  
HETATM  486  O   HOH T 485      63.953  15.802  12.705  1.00  0.50           O  
HETATM  487  O   HOH T 486      30.469  26.884  28.093  1.00  0.50           O  
HETATM  488  O   HOH T 487      46.827   2.696  15.424  1.00  0.50           O  
HETATM  489  O   HOH T 488      33.516  42.289  31.919  1.00  0.50           O  
HETATM  490  O   HOH T 489      69.156  14.750  50.846  1.00  0.50           O  
HETATM  491  O   HOH T 490      37.739  40.317   3.789  1.00  0.50           O  
HETATM  492  O   HOH T 491      64.061  -0.128  35.821  1.00  0.50           O  
HETATM  493  O   HOH T 492      40.497   8.636   6.519  1.00  0.50           O  
HETATM  494  O   HOH T 493      64.790  30.973  51.043  1.00  0.50           O  
HETATM  495  O   HOH T 494      44.427  18.880  43.957  1.00  0.50           O  
HETATM  496  O   HOH T 495      51.063  26.762  33.200  1.00  0.50           O  
HETATM  497  O   HOH T 496      68.445  30.107  41.753  1.00  0.50           O  
HETATM  498  O   HOH T 497      60.755  37.571   6.585  1.00  0.50           O  
HETATM  499  O   HOH T 498      47.763  21.017  47.587  1.00  0.50           O  
HETATM  500  O   HOH T 499      50.824  43.036  25.369  1.00  0.50           O  
HETATM  501  O   HOH T 500      34.860  47.718  25.951  1.00  0.50           O  
HETATM  502  O   HOH T 501      68.999  33.142  24.721  1.00  0.50           O  
HETATM  503  O   HOH T 502      49.280   5.245   9.574  1.00  0.50           O  
HETATM  504  O   HOH T 503      66.981   4.128  25.468  1.00  0.50           O  
HETATM  505  O   HOH T 504      50.949  16.352  52.706  1.00  0.50           O  
HETATM  506  O   HOH T 505      50.354  16.203  50.067  1.00  0.50           O  
HETATM  507  O   HOH T 506      33.167  31.882   4.632  1.00  0.50           O  
HETATM  508  O   HOH T 507      40.921   4.715   3.072  1.00  0.50           O  
HETATM  509  O   HOH T 508      70.431  18.591  23.697  1.00  0.50           O  
HETATM  510  O   HOH T 509      67.438  26.987  11.787  1.00  0.50           O  
HETATM  511  O   HOH T 510      44.254   3.505  38.946  1.00  0.50           O  
HETATM  512  O   HOH T 511      58.298  21.457  -8.629  1.00  0.50           O  
HETATM  513  O   HOH T 512      44.659   3.441  36.291  1.00  0.50           O  
HETATM  514  O   HOH T 513      56.031   2.373  35.570  1.00  0.51           O  
HETATM  515  O   HOH T 514      34.466  37.130  13.870  1.00  0.51           O  
HETATM  516  O   HOH T 515      33.169  30.098   2.448  1.00  0.51           O  
HETATM  517  O   HOH T 516      40.764  47.098  13.133  1.00  0.51           O  
HETATM  518  O   HOH T 517      66.314  41.020  33.413  1.00  0.51           O  
HETATM  519  O   HOH T 518      30.192  30.123   9.271  1.00  0.51           O  
HETATM  520  O   HOH T 519      66.885  12.783  53.055  1.00  0.51           O  
HETATM  521  O   HOH T 520      41.302   7.945  14.322  1.00  0.51           O  
HETATM  522  O   HOH T 521      58.988  30.155  50.985  1.00  0.51           O  
HETATM  523  O   HOH T 522      32.664  42.067  13.552  1.00  0.51           O  
HETATM  524  O   HOH T 523      27.419  26.657  22.434  1.00  0.51           O  
HETATM  525  O   HOH T 524      55.872  35.536  31.708  1.00  0.51           O  
HETATM  526  O   HOH T 525      69.267   8.765  34.902  1.00  0.51           O  
HETATM  527  O   HOH T 526      38.105  47.571  30.500  1.00  0.51           O  
HETATM  528  O   HOH T 527      64.133   3.858  47.776  1.00  0.51           O  
HETATM  529  O   HOH T 528      60.968  -1.656  15.195  1.00  0.51           O  
HETATM  530  O   HOH T 529      53.432   8.138   1.613  1.00  0.51           O  
HETATM  531  O   HOH T 530      63.231  31.585  53.394  1.00  0.51           O  
HETATM  532  O   HOH T 531      48.646  23.194  36.980  1.00  0.51           O  
HETATM  533  O   HOH T 532      54.925   3.903  40.438  1.00  0.52           O  
HETATM  534  O   HOH T 533      47.186  26.302  39.254  1.00  0.52           O  
HETATM  535  O   HOH T 534      60.829  13.079   5.674  1.00  0.52           O  
HETATM  536  O   HOH T 535      54.164   2.764  30.757  1.00  0.52           O  
HETATM  537  O   HOH T 536      59.880   1.724   1.661  1.00  0.52           O  
HETATM  538  O   HOH T 537      48.649  -1.721  25.935  1.00  0.52           O  
HETATM  539  O   HOH T 538      49.902  14.478  41.450  1.00  0.52           O  
HETATM  540  O   HOH T 539      59.983   0.950  41.258  1.00  0.52           O  
HETATM  541  O   HOH T 540      63.231  16.154   9.882  1.00  0.52           O  
HETATM  542  O   HOH T 541      70.434   7.944  37.285  1.00  0.52           O  
HETATM  543  O   HOH T 542      60.300  20.240  -1.382  1.00  0.52           O  
HETATM  544  O   HOH T 543      72.499  20.299  41.396  1.00  0.52           O  
HETATM  545  O   HOH T 544      41.322   6.451  19.141  1.00  0.52           O  
HETATM  546  O   HOH T 545      42.647  23.617  43.560  1.00  0.52           O  
HETATM  547  O   HOH T 546      52.585  25.823  29.002  1.00  0.52           O  
HETATM  548  O   HOH T 547      44.715   1.471  29.134  1.00  0.52           O  
HETATM  549  O   HOH T 548      34.299  47.124  28.642  1.00  0.52           O  
HETATM  550  O   HOH T 549      47.147  25.013  51.092  1.00  0.52           O  
HETATM  551  O   HOH T 550      61.170   1.419  11.217  1.00  0.52           O  
HETATM  552  O   HOH T 551      47.724   6.798   3.224  1.00  0.53           O  
HETATM  553  O   HOH T 552      49.841  16.243   0.021  1.00  0.53           O  
HETATM  554  O   HOH T 553      35.283   9.712  30.377  1.00  0.53           O  
HETATM  555  O   HOH T 554      69.137  22.127  12.680  1.00  0.53           O  
HETATM  556  O   HOH T 555      69.072   4.646  45.649  1.00  0.53           O  
HETATM  557  O   HOH T 556      68.901  35.476  31.482  1.00  0.53           O  
HETATM  558  O   HOH T 557      44.663   4.562  -5.658  1.00  0.53           O  
HETATM  559  O   HOH T 558      66.166   4.843  46.341  1.00  0.53           O  
HETATM  560  O   HOH T 559      55.505  16.371  52.528  1.00  0.53           O  
HETATM  561  O   HOH T 560      59.328   5.523  -5.046  1.00  0.53           O  
HETATM  562  O   HOH T 561      38.822  41.817  31.125  1.00  0.53           O  
HETATM  563  O   HOH T 562      44.363   5.857  34.899  1.00  0.53           O  
HETATM  564  O   HOH T 563      32.467  29.252   5.091  1.00  0.53           O  
HETATM  565  O   HOH T 564      65.741  34.127  47.027  1.00  0.53           O  
HETATM  566  O   HOH T 565      46.762  35.759  19.223  1.00  0.53           O  
HETATM  567  O   HOH T 566      30.978  10.407  22.811  1.00  0.53           O  
HETATM  568  O   HOH T 567      65.195   7.395  14.480  1.00  0.53           O  
HETATM  569  O   HOH T 568      61.335  34.914   2.199  1.00  0.53           O  
HETATM  570  O   HOH T 569      59.784  46.487  27.417  1.00  0.53           O  
HETATM  571  O   HOH T 570      63.130   2.303  42.137  1.00  0.54           O  
HETATM  572  O   HOH T 571      45.484   6.066  32.644  1.00  0.54           O  
HETATM  573  O   HOH T 572      37.895  54.435  23.284  1.00  0.54           O  
HETATM  574  O   HOH T 573      52.122  20.596  41.991  1.00  0.54           O  
HETATM  575  O   HOH T 574      66.004  31.878  48.625  1.00  0.54           O  
HETATM  576  O   HOH T 575      54.812  40.358  33.349  1.00  0.54           O  
HETATM  577  O   HOH T 576      54.572  12.211  46.043  1.00  0.54           O  
HETATM  578  O   HOH T 577      39.846  10.203  42.332  1.00  0.54           O  
HETATM  579  O   HOH T 578      35.577   8.840  22.822  1.00  0.54           O  
HETATM  580  O   HOH T 579      44.378  52.751  12.373  1.00  0.54           O  
HETATM  581  O   HOH T 580      55.286   0.685  29.434  1.00  0.54           O  
HETATM  582  O   HOH T 581      41.997   4.184  -6.490  1.00  0.54           O  
HETATM  583  O   HOH T 582      39.091  26.067   1.789  1.00  0.54           O  
HETATM  584  O   HOH T 583      40.873  29.401  39.895  1.00  0.54           O  
HETATM  585  O   HOH T 584      50.038   1.694  33.133  1.00  0.54           O  
HETATM  586  O   HOH T 585      45.889  26.166   2.207  1.00  0.54           O  
HETATM  587  O   HOH T 586      64.850  36.636  39.035  1.00  0.54           O  
HETATM  588  O   HOH T 587      29.302  20.428   6.441  1.00  0.54           O  
HETATM  589  O   HOH T 588      54.530   2.715  37.877  1.00  0.54           O  
HETATM  590  O   HOH T 589      55.004  18.347  41.448  1.00  0.54           O  
HETATM  591  O   HOH T 590      34.742  35.088  33.349  1.00  0.54           O  
HETATM  592  O   HOH T 591      28.366  22.879  19.735  1.00  0.54           O  
HETATM  593  O   HOH T 592      67.311   3.891  39.521  1.00  0.54           O  
HETATM  594  O   HOH T 593      68.876  34.057  41.612  1.00  0.55           O  
HETATM  595  O   HOH T 594      56.690  35.591  39.703  1.00  0.55           O  
HETATM  596  O   HOH T 595      45.497  37.268  21.110  1.00  0.55           O  
HETATM  597  O   HOH T 596      43.709  11.286  45.746  1.00  0.55           O  
HETATM  598  O   HOH T 597      51.130  26.243  53.592  1.00  0.55           O  
HETATM  599  O   HOH T 598      56.655  21.032  -3.472  1.00  0.55           O  
HETATM  600  O   HOH T 599      30.640  16.051   2.202  1.00  0.55           O  
HETATM  601  O   HOH T 600      77.686  24.540  31.438  1.00  0.55           O  
HETATM  602  O   HOH T 601      33.777  25.444  41.997  1.00  0.55           O  
HETATM  603  O   HOH T 602      61.376  41.502  12.355  1.00  0.55           O  
HETATM  604  O   HOH T 603      65.631   2.423   4.965  1.00  0.55           O  
HETATM  605  O   HOH T 604      53.548  -0.773  12.967  1.00  0.56           O  
HETATM  606  O   HOH T 605      41.956  46.214   8.911  1.00  0.56           O  
HETATM  607  O   HOH T 606      44.511   7.155   9.766  1.00  0.56           O  
HETATM  608  O   HOH T 607      30.726  14.606  34.243  1.00  0.56           O  
HETATM  609  O   HOH T 608      53.056  23.295  40.294  1.00  0.56           O  
HETATM  610  O   HOH T 609      74.691  24.881  41.178  1.00  0.56           O  
HETATM  611  O   HOH T 610      34.018  37.080   2.863  1.00  0.56           O  
HETATM  612  O   HOH T 611      72.209  29.232  34.044  1.00  0.56           O  
HETATM  613  O   HOH T 612      30.671  15.579  24.420  1.00  0.56           O  
HETATM  614  O   HOH T 613      53.220  25.044  33.532  1.00  0.56           O  
HETATM  615  O   HOH T 614      55.766  38.551  10.369  1.00  0.56           O  
HETATM  616  O   HOH T 615      51.837  29.143  31.747  1.00  0.56           O  
HETATM  617  O   HOH T 616      71.215  29.147  29.098  1.00  0.57           O  
HETATM  618  O   HOH T 617      66.644  32.910  14.521  1.00  0.57           O  
HETATM  619  O   HOH T 618      30.823  14.625   5.678  1.00  0.57           O  
HETATM  620  O   HOH T 619      44.409  30.820  40.612  1.00  0.57           O  
HETATM  621  O   HOH T 620      51.052   8.042   3.275  1.00  0.57           O  
HETATM  622  O   HOH T 621      48.623  45.397   8.663  1.00  0.57           O  
HETATM  623  O   HOH T 622      35.559  38.701   4.138  1.00  0.57           O  
HETATM  624  O   HOH T 623      65.786  33.439  42.432  1.00  0.57           O  
HETATM  625  O   HOH T 624      67.210  27.075  55.393  1.00  0.58           O  
HETATM  626  O   HOH T 625      71.350  24.551  53.472  1.00  0.58           O  
HETATM  627  O   HOH T 626      43.469  21.217  44.511  1.00  0.58           O  
HETATM  628  O   HOH T 627      47.772   6.275  -2.543  1.00  0.59           O  
HETATM  629  O   HOH T 628      31.385  25.774  14.868  1.00  0.59           O  
HETATM  630  O   HOH T 629      28.328  40.432  16.002  1.00  0.59           O  
HETATM  631  O   HOH T 630      41.166   4.996  28.257  1.00  0.59           O  
HETATM  632  O   HOH T 631      62.369   1.605  44.565  1.00  0.59           O  
HETATM  633  O   HOH T 632      68.032  23.526  57.406  1.00  0.59           O  
HETATM  634  O   HOH T 633      55.166  21.030  53.528  1.00  0.60           O  
HETATM  635  O   HOH T 634      65.847  10.611  16.373  1.00  0.60           O  
HETATM  636  O   HOH T 635      54.843  31.644  -0.761  1.00  0.60           O  
HETATM  637  O   HOH T 636      54.314  24.874  53.551  1.00  0.61           O  
HETATM  638  O   HOH T 637      48.695  30.722  34.921  1.00  0.61           O  
TER     639      HOH T 637 
