# Supplementary material for: Accurate Prediction of Hydration Sites of Proteins Using Energy Model With Atom Embedding
Source: Front Mol Biosci. 2021 Sep 20;8:756075. doi: 10.3389/fmolb.2021.756075 (PMC8488165; doi:10.3389/fmolb.2021.756075)
Supplement: Supplementary file 1 [file DataSheet1.ZIP › Data Sheet 1/Our_result_pdb/our_dataset_output/1H2C_watersite.pdb]

HEADER                                                        XXXX


JRNL        PMID   -1
HETATM    1  O   HOH T   0      -2.366  32.864  15.782  1.00  0.15           O  
HETATM    2  O   HOH T   1       1.135  16.203  33.221  1.00  0.20           O  
HETATM    3  O   HOH T   2      -2.813  22.380  30.879  1.00  0.20           O  
HETATM    4  O   HOH T   3      -2.325  29.155  25.582  1.00  0.21           O  
HETATM    5  O   HOH T   4      10.666  39.101  29.667  1.00  0.23           O  
HETATM    6  O   HOH T   5      -1.951  23.283  38.098  1.00  0.23           O  
HETATM    7  O   HOH T   6      13.947  22.609  16.941  1.00  0.24           O  
HETATM    8  O   HOH T   7      17.149  14.631  30.603  1.00  0.24           O  
HETATM    9  O   HOH T   8       1.342  29.375  38.772  1.00  0.24           O  
HETATM   10  O   HOH T   9      -2.638  35.498  31.247  1.00  0.24           O  
HETATM   11  O   HOH T  10      10.724  25.369  43.265  1.00  0.25           O  
HETATM   12  O   HOH T  11      19.675  15.634  31.405  1.00  0.26           O  
HETATM   13  O   HOH T  12      -2.103  29.870  41.043  1.00  0.26           O  
HETATM   14  O   HOH T  13      18.590  25.015   5.692  1.00  0.26           O  
HETATM   15  O   HOH T  14     -15.052   9.819  20.966  1.00  0.26           O  
HETATM   16  O   HOH T  15      30.164  23.828  18.037  1.00  0.27           O  
HETATM   17  O   HOH T  16       7.937  20.921  38.397  1.00  0.27           O  
HETATM   18  O   HOH T  17       6.520  26.414  12.861  1.00  0.27           O  
HETATM   19  O   HOH T  18     -14.443  15.567  20.114  1.00  0.27           O  
HETATM   20  O   HOH T  19      -1.481  42.242  33.228  1.00  0.28           O  
HETATM   21  O   HOH T  20      -0.884  22.746  40.655  1.00  0.28           O  
HETATM   22  O   HOH T  21      -2.583  31.818  25.215  1.00  0.28           O  
HETATM   23  O   HOH T  22      16.898  25.207  40.736  1.00  0.28           O  
HETATM   24  O   HOH T  23      -5.671  29.477  36.219  1.00  0.28           O  
HETATM   25  O   HOH T  24      19.316  27.387   8.218  1.00  0.29           O  
HETATM   26  O   HOH T  25       7.923  19.384   6.278  1.00  0.29           O  
HETATM   27  O   HOH T  26      35.924  23.099  11.187  1.00  0.29           O  
HETATM   28  O   HOH T  27      11.117  24.258   2.305  1.00  0.29           O  
HETATM   29  O   HOH T  28       7.757  17.665  18.382  1.00  0.30           O  
HETATM   30  O   HOH T  29      20.253  22.952  36.838  1.00  0.30           O  
HETATM   31  O   HOH T  30     -13.464   9.941  18.726  1.00  0.31           O  
HETATM   32  O   HOH T  31       5.964  34.065  23.541  1.00  0.31           O  
HETATM   33  O   HOH T  32      16.989  20.034  35.805  1.00  0.31           O  
HETATM   34  O   HOH T  33      -0.322  21.355  31.370  1.00  0.32           O  
HETATM   35  O   HOH T  34      -5.785  22.184  38.843  1.00  0.32           O  
HETATM   36  O   HOH T  35      12.037  20.674  37.976  1.00  0.32           O  
HETATM   37  O   HOH T  36       1.845  17.148  35.852  1.00  0.32           O  
HETATM   38  O   HOH T  37      -0.012  21.613  23.391  1.00  0.32           O  
HETATM   39  O   HOH T  38      11.765   5.230  29.618  1.00  0.32           O  
HETATM   40  O   HOH T  39      -1.450  21.215  27.314  1.00  0.32           O  
HETATM   41  O   HOH T  40       3.057  22.081  42.126  1.00  0.33           O  
HETATM   42  O   HOH T  41      -5.493  37.021  29.236  1.00  0.33           O  
HETATM   43  O   HOH T  42     -13.598  16.406  22.738  1.00  0.33           O  
HETATM   44  O   HOH T  43      30.982  26.461  17.975  1.00  0.33           O  
HETATM   45  O   HOH T  44      20.174  19.606   9.871  1.00  0.34           O  
HETATM   46  O   HOH T  45      37.368  21.194  12.744  1.00  0.34           O  
HETATM   47  O   HOH T  46      15.548  19.760   6.449  1.00  0.34           O  
HETATM   48  O   HOH T  47      16.751  33.020  37.796  1.00  0.34           O  
HETATM   49  O   HOH T  48       3.761  37.349  32.005  1.00  0.35           O  
HETATM   50  O   HOH T  49       1.422  10.718  36.737  1.00  0.35           O  
HETATM   51  O   HOH T  50      38.865  19.569  10.795  1.00  0.35           O  
HETATM   52  O   HOH T  51      15.252  20.443   3.849  1.00  0.35           O  
HETATM   53  O   HOH T  52      15.862  39.082  24.907  1.00  0.35           O  
HETATM   54  O   HOH T  53       2.762  25.087  16.180  1.00  0.36           O  
HETATM   55  O   HOH T  54      17.962  16.191  36.403  1.00  0.36           O  
HETATM   56  O   HOH T  55      -4.589  33.512  30.923  1.00  0.36           O  
HETATM   57  O   HOH T  56      -0.157  33.213  24.916  1.00  0.36           O  
HETATM   58  O   HOH T  57      11.584  15.554  33.313  1.00  0.36           O  
HETATM   59  O   HOH T  58      19.521  36.362  20.308  1.00  0.36           O  
HETATM   60  O   HOH T  59      17.906  21.024  43.429  1.00  0.36           O  
HETATM   61  O   HOH T  60      41.086  12.483  17.751  1.00  0.37           O  
HETATM   62  O   HOH T  61     -14.441  17.680  25.146  1.00  0.37           O  
HETATM   63  O   HOH T  62      25.704  25.926   5.503  1.00  0.37           O  
HETATM   64  O   HOH T  63      22.161  36.049  21.200  1.00  0.37           O  
HETATM   65  O   HOH T  64       2.243  35.578  30.366  1.00  0.37           O  
HETATM   66  O   HOH T  65      11.102   8.384  27.673  1.00  0.37           O  
HETATM   67  O   HOH T  66      16.311  31.410   3.138  1.00  0.38           O  
HETATM   68  O   HOH T  67      -4.877  31.078  34.186  1.00  0.38           O  
HETATM   69  O   HOH T  68      -0.098  15.163  35.506  1.00  0.38           O  
HETATM   70  O   HOH T  69      11.961  22.300   0.588  1.00  0.38           O  
HETATM   71  O   HOH T  70       4.665  26.237  41.426  1.00  0.38           O  
HETATM   72  O   HOH T  71      -8.484   8.496  23.356  1.00  0.38           O  
HETATM   73  O   HOH T  72      42.554  12.233  20.068  1.00  0.38           O  
HETATM   74  O   HOH T  73       8.438  26.742  42.680  1.00  0.38           O  
HETATM   75  O   HOH T  74      14.566  39.113  22.575  1.00  0.39           O  
HETATM   76  O   HOH T  75       6.180  16.036  39.068  1.00  0.39           O  
HETATM   77  O   HOH T  76      13.524  27.441   0.889  1.00  0.39           O  
HETATM   78  O   HOH T  77      18.295  19.690   6.345  1.00  0.40           O  
HETATM   79  O   HOH T  78      18.960  18.330  34.920  1.00  0.40           O  
HETATM   80  O   HOH T  79      16.056  17.966  37.488  1.00  0.40           O  
HETATM   81  O   HOH T  80      21.600  35.680  18.560  1.00  0.40           O  
HETATM   82  O   HOH T  81      20.251  21.176   7.580  1.00  0.40           O  
HETATM   83  O   HOH T  82       5.449  19.941  38.829  1.00  0.40           O  
HETATM   84  O   HOH T  83      -4.536  11.245  18.828  1.00  0.40           O  
HETATM   85  O   HOH T  84      -0.057  13.022  37.273  1.00  0.40           O  
HETATM   86  O   HOH T  85      -0.361  27.748  40.406  1.00  0.40           O  
HETATM   87  O   HOH T  86      40.565  20.201  19.377  1.00  0.40           O  
HETATM   88  O   HOH T  87      24.318  34.238  20.994  1.00  0.40           O  
HETATM   89  O   HOH T  88      18.422  23.411  42.142  1.00  0.41           O  
HETATM   90  O   HOH T  89      25.934  32.562  19.377  1.00  0.41           O  
HETATM   91  O   HOH T  90      32.757  23.349  18.937  1.00  0.41           O  
HETATM   92  O   HOH T  91      -2.716  36.744  28.713  1.00  0.41           O  
HETATM   93  O   HOH T  92       8.437  35.843  21.356  1.00  0.41           O  
HETATM   94  O   HOH T  93      -3.432  33.400  23.168  1.00  0.41           O  
HETATM   95  O   HOH T  94      -5.634  28.139  39.877  1.00  0.41           O  
HETATM   96  O   HOH T  95       3.674  15.826  34.370  1.00  0.42           O  
HETATM   97  O   HOH T  96      15.151  25.858  -0.523  1.00  0.42           O  
HETATM   98  O   HOH T  97      -9.236  10.317  18.445  1.00  0.42           O  
HETATM   99  O   HOH T  98      14.057  32.466  38.346  1.00  0.42           O  
HETATM  100  O   HOH T  99       6.138  10.920  31.490  1.00  0.42           O  
HETATM  101  O   HOH T 100      -3.608   9.683  25.453  1.00  0.42           O  
HETATM  102  O   HOH T 101       4.403  16.754  36.904  1.00  0.42           O  
HETATM  103  O   HOH T 102       5.581  17.841   6.895  1.00  0.43           O  
HETATM  104  O   HOH T 103      10.619   5.601  27.249  1.00  0.43           O  
HETATM  105  O   HOH T 104      11.130  36.529  38.726  1.00  0.43           O  
HETATM  106  O   HOH T 105      19.505  25.066  40.090  1.00  0.44           O  
HETATM  107  O   HOH T 106       5.823  15.871   8.877  1.00  0.44           O  
HETATM  108  O   HOH T 107      -1.325  10.814  36.356  1.00  0.44           O  
HETATM  109  O   HOH T 108       9.740  17.494   5.822  1.00  0.44           O  
HETATM  110  O   HOH T 109      14.721  34.409  36.679  1.00  0.44           O  
HETATM  111  O   HOH T 110      -4.312   8.509  23.018  1.00  0.44           O  
HETATM  112  O   HOH T 111      -7.073  10.755  20.061  1.00  0.44           O  
HETATM  113  O   HOH T 112      13.625  18.514  38.829  1.00  0.44           O  
HETATM  114  O   HOH T 113      -9.136   6.209  21.811  1.00  0.44           O  
HETATM  115  O   HOH T 114      38.297  21.621  18.996  1.00  0.44           O  
HETATM  116  O   HOH T 115      11.478  23.288  44.852  1.00  0.44           O  
HETATM  117  O   HOH T 116       7.995  40.800  27.471  1.00  0.45           O  
HETATM  118  O   HOH T 117      22.296  18.754  41.187  1.00  0.45           O  
HETATM  119  O   HOH T 118      15.212  29.536   1.540  1.00  0.45           O  
HETATM  120  O   HOH T 119      -5.305  30.562  38.672  1.00  0.45           O  
HETATM  121  O   HOH T 120       6.983  27.393  40.317  1.00  0.45           O  
HETATM  122  O   HOH T 121      18.574  14.185  38.291  1.00  0.45           O  
HETATM  123  O   HOH T 122      22.289  33.329   6.130  1.00  0.46           O  
HETATM  124  O   HOH T 123      29.774  21.613  10.097  1.00  0.46           O  
HETATM  125  O   HOH T 124       0.614  30.101  41.394  1.00  0.46           O  
HETATM  126  O   HOH T 125      23.537  33.644  18.324  1.00  0.46           O  
HETATM  127  O   HOH T 126      -3.595  22.781  40.341  1.00  0.46           O  
HETATM  128  O   HOH T 127      12.202  18.333  36.479  1.00  0.46           O  
HETATM  129  O   HOH T 128       7.310  41.852  34.983  1.00  0.46           O  
HETATM  130  O   HOH T 129      19.440  27.578  38.831  1.00  0.47           O  
HETATM  131  O   HOH T 130      14.382  20.062  36.635  1.00  0.47           O  
HETATM  132  O   HOH T 131      13.115  36.533  36.834  1.00  0.47           O  
HETATM  133  O   HOH T 132      12.550  24.981   0.030  1.00  0.47           O  
HETATM  134  O   HOH T 133      16.288  16.294  23.397  1.00  0.47           O  
HETATM  135  O   HOH T 134       9.482  37.226  19.153  1.00  0.47           O  
HETATM  136  O   HOH T 135      17.537  22.519  45.704  1.00  0.47           O  
HETATM  137  O   HOH T 136      14.237  16.779  18.922  1.00  0.47           O  
HETATM  138  O   HOH T 137       3.010  30.916  40.590  1.00  0.47           O  
HETATM  139  O   HOH T 138      13.869  26.490  36.385  1.00  0.48           O  
HETATM  140  O   HOH T 139      -6.524  37.248  37.304  1.00  0.48           O  
HETATM  141  O   HOH T 140      12.860  21.744  43.019  1.00  0.48           O  
HETATM  142  O   HOH T 141       0.134  25.232   5.075  1.00  0.48           O  
HETATM  143  O   HOH T 142       7.223  36.493  23.788  1.00  0.49           O  
HETATM  144  O   HOH T 143      26.764  33.233  21.874  1.00  0.49           O  
HETATM  145  O   HOH T 144       6.706  37.380  20.070  1.00  0.49           O  
HETATM  146  O   HOH T 145      34.880  13.194   7.796  1.00  0.50           O  
HETATM  147  O   HOH T 146      -8.147   4.905  19.443  1.00  0.50           O  
HETATM  148  O   HOH T 147       8.091  17.341   8.178  1.00  0.50           O  
HETATM  149  O   HOH T 148      24.549  24.516   3.494  1.00  0.50           O  
HETATM  150  O   HOH T 149       6.563  19.702   8.691  1.00  0.50           O  
HETATM  151  O   HOH T 150      -2.357  11.927  20.341  1.00  0.51           O  
HETATM  152  O   HOH T 151       6.115  25.817  43.696  1.00  0.51           O  
HETATM  153  O   HOH T 152      26.788  21.625   6.475  1.00  0.51           O  
HETATM  154  O   HOH T 153      -0.118  36.756  31.384  1.00  0.51           O  
HETATM  155  O   HOH T 154      -6.543   9.524  17.702  1.00  0.51           O  
HETATM  156  O   HOH T 155      -0.077  35.800  25.941  1.00  0.51           O  
HETATM  157  O   HOH T 156       4.878  29.015  41.067  1.00  0.51           O  
HETATM  158  O   HOH T 157      -5.002   8.928  20.360  1.00  0.51           O  
HETATM  159  O   HOH T 158      -3.008  24.655  22.140  1.00  0.51           O  
HETATM  160  O   HOH T 159      10.649  40.152  19.682  1.00  0.51           O  
HETATM  161  O   HOH T 160       2.512  24.749  42.412  1.00  0.52           O  
HETATM  162  O   HOH T 161      27.834  31.031  20.541  1.00  0.52           O  
HETATM  163  O   HOH T 162      -0.611  25.875  22.643  1.00  0.52           O  
HETATM  164  O   HOH T 163      33.065  26.006  16.181  1.00  0.52           O  
HETATM  165  O   HOH T 164       2.522  37.163  20.898  1.00  0.52           O  
HETATM  166  O   HOH T 165      38.388  22.234  10.396  1.00  0.52           O  
HETATM  167  O   HOH T 166       4.992  17.876  40.656  1.00  0.52           O  
HETATM  168  O   HOH T 167       3.183  27.331   6.434  1.00  0.53           O  
HETATM  169  O   HOH T 168      -2.499  24.125  42.514  1.00  0.53           O  
HETATM  170  O   HOH T 169      12.210  33.334   8.000  1.00  0.53           O  
HETATM  171  O   HOH T 170      30.793  18.076  16.896  1.00  0.55           O  
HETATM  172  O   HOH T 171      37.099  21.642  16.674  1.00  0.55           O  
HETATM  173  O   HOH T 172      39.569  18.449  21.051  1.00  0.56           O  
HETATM  174  O   HOH T 173      15.365  21.791  44.139  1.00  0.56           O  
HETATM  175  O   HOH T 174      33.202  23.510  10.500  1.00  0.56           O  
HETATM  176  O   HOH T 175      12.318  17.542   4.986  1.00  0.56           O  
HETATM  177  O   HOH T 176       3.239  19.872  40.471  1.00  0.58           O  
HETATM  178  O   HOH T 177      17.769  18.527  42.295  1.00  0.59           O  
HETATM  179  O   HOH T 178      25.978  32.505  26.565  1.00  0.59           O  
HETATM  180  O   HOH T 179      34.836  24.304  17.232  1.00  0.60           O  
HETATM  181  O   HOH T 180      13.335  24.414  43.165  1.00  0.61           O  
HETATM  182  O   HOH T 181      14.596  26.264  41.478  1.00  0.61           O  
TER     183      HOH T 181 
