# Supplementary material for: Accurate Prediction of Hydration Sites of Proteins Using Energy Model With Atom Embedding
Source: Front Mol Biosci. 2021 Sep 20;8:756075. doi: 10.3389/fmolb.2021.756075 (PMC8488165; doi:10.3389/fmolb.2021.756075)
Supplement: Supplementary file 1 [file DataSheet1.ZIP › Data Sheet 1/Our_result_pdb/our_dataset_output/1HD5_watersite.pdb]

HEADER                                                        XXXX


JRNL        PMID   -1
HETATM    1  O   HOH T   0      44.110  26.421  30.020  1.00  0.15           O  
HETATM    2  O   HOH T   1      38.279  16.359  30.530  1.00  0.16           O  
HETATM    3  O   HOH T   2      42.726  35.546  22.705  1.00  0.18           O  
HETATM    4  O   HOH T   3      41.174   6.889  37.375  1.00  0.19           O  
HETATM    5  O   HOH T   4      43.432  36.292  25.220  1.00  0.19           O  
HETATM    6  O   HOH T   5      23.224  -0.320  31.608  1.00  0.19           O  
HETATM    7  O   HOH T   6      25.393   9.972  36.623  1.00  0.21           O  
HETATM    8  O   HOH T   7      16.474   3.271  39.919  1.00  0.22           O  
HETATM    9  O   HOH T   8      20.887   5.428  43.411  1.00  0.22           O  
HETATM   10  O   HOH T   9      22.725  22.929  44.437  1.00  0.22           O  
HETATM   11  O   HOH T  10      16.814   5.857  34.352  1.00  0.22           O  
HETATM   12  O   HOH T  11      28.840   3.148  34.016  1.00  0.23           O  
HETATM   13  O   HOH T  12      46.117  21.109  25.451  1.00  0.23           O  
HETATM   14  O   HOH T  13      36.323   4.725  42.434  1.00  0.23           O  
HETATM   15  O   HOH T  14      28.497  18.935  47.296  1.00  0.23           O  
HETATM   16  O   HOH T  15      47.485  31.493  33.279  1.00  0.23           O  
HETATM   17  O   HOH T  16      41.451  21.622  20.506  1.00  0.24           O  
HETATM   18  O   HOH T  17      37.343  22.103  21.999  1.00  0.24           O  
HETATM   19  O   HOH T  18      18.921   3.033  29.519  1.00  0.24           O  
HETATM   20  O   HOH T  19      38.414  22.635  48.863  1.00  0.24           O  
HETATM   21  O   HOH T  20      45.080  30.485  28.856  1.00  0.24           O  
HETATM   22  O   HOH T  21      47.314  26.456  47.929  1.00  0.24           O  
HETATM   23  O   HOH T  22      22.088  20.417  55.781  1.00  0.24           O  
HETATM   24  O   HOH T  23      26.697   8.751  23.916  1.00  0.25           O  
HETATM   25  O   HOH T  24      28.354   9.885  40.675  1.00  0.25           O  
HETATM   26  O   HOH T  25      35.080  21.289  35.407  1.00  0.25           O  
HETATM   27  O   HOH T  26      39.626  19.801  41.450  1.00  0.25           O  
HETATM   28  O   HOH T  27      47.649  30.108  21.151  1.00  0.26           O  
HETATM   29  O   HOH T  28      47.177  16.056  33.249  1.00  0.26           O  
HETATM   30  O   HOH T  29      48.440  14.589  37.139  1.00  0.26           O  
HETATM   31  O   HOH T  30      41.645  14.970  42.922  1.00  0.26           O  
HETATM   32  O   HOH T  31      21.031  23.186  42.299  1.00  0.26           O  
HETATM   33  O   HOH T  32      45.253  23.458  38.374  1.00  0.27           O  
HETATM   34  O   HOH T  33      30.232  -0.111  43.241  1.00  0.27           O  
HETATM   35  O   HOH T  34      40.626  28.249  52.963  1.00  0.27           O  
HETATM   36  O   HOH T  35      36.145  19.550  54.737  1.00  0.27           O  
HETATM   37  O   HOH T  36      39.520  35.031  39.325  1.00  0.27           O  
HETATM   38  O   HOH T  37      21.703  15.105  34.625  1.00  0.28           O  
HETATM   39  O   HOH T  38      21.291  13.083  38.539  1.00  0.28           O  
HETATM   40  O   HOH T  39      54.533  34.440  36.471  1.00  0.28           O  
HETATM   41  O   HOH T  40      45.902   9.779  27.482  1.00  0.28           O  
HETATM   42  O   HOH T  41      40.054  12.287  12.234  1.00  0.28           O  
HETATM   43  O   HOH T  42      36.179  32.978  30.176  1.00  0.28           O  
HETATM   44  O   HOH T  43      37.314  18.526  37.379  1.00  0.28           O  
HETATM   45  O   HOH T  44      46.348  17.163  16.687  1.00  0.29           O  
HETATM   46  O   HOH T  45      35.633  20.502  23.527  1.00  0.29           O  
HETATM   47  O   HOH T  46      53.123  27.092  33.990  1.00  0.29           O  
HETATM   48  O   HOH T  47      29.367  27.813  44.178  1.00  0.29           O  
HETATM   49  O   HOH T  48      22.593  12.139  43.885  1.00  0.29           O  
HETATM   50  O   HOH T  49      53.225  18.331  45.316  1.00  0.29           O  
HETATM   51  O   HOH T  50      46.306  33.146  47.297  1.00  0.30           O  
HETATM   52  O   HOH T  51      46.219  36.442  25.895  1.00  0.30           O  
HETATM   53  O   HOH T  52      43.819   1.643  28.186  1.00  0.30           O  
HETATM   54  O   HOH T  53      39.145  18.818  48.626  1.00  0.30           O  
HETATM   55  O   HOH T  54      48.564  12.091  24.797  1.00  0.30           O  
HETATM   56  O   HOH T  55      46.942  30.466  46.777  1.00  0.30           O  
HETATM   57  O   HOH T  56      37.008  26.853  24.687  1.00  0.30           O  
HETATM   58  O   HOH T  57      38.654   3.052  42.395  1.00  0.30           O  
HETATM   59  O   HOH T  58      41.164   3.879  32.535  1.00  0.31           O  
HETATM   60  O   HOH T  59      20.874  22.695  24.209  1.00  0.31           O  
HETATM   61  O   HOH T  60      38.048  31.079  33.684  1.00  0.31           O  
HETATM   62  O   HOH T  61      42.258  31.577  52.187  1.00  0.31           O  
HETATM   63  O   HOH T  62      36.861  20.924  47.063  1.00  0.31           O  
HETATM   64  O   HOH T  63      54.124  29.279  35.624  1.00  0.31           O  
HETATM   65  O   HOH T  64      25.076  16.514  18.316  1.00  0.32           O  
HETATM   66  O   HOH T  65      30.651  24.778  20.907  1.00  0.32           O  
HETATM   67  O   HOH T  66      35.552   1.564  22.572  1.00  0.32           O  
HETATM   68  O   HOH T  67      33.657   4.117  42.758  1.00  0.32           O  
HETATM   69  O   HOH T  68      38.129  15.805  54.687  1.00  0.32           O  
HETATM   70  O   HOH T  69      23.401  22.603  23.161  1.00  0.32           O  
HETATM   71  O   HOH T  70      44.944  10.612  41.166  1.00  0.32           O  
HETATM   72  O   HOH T  71      32.227  23.827  50.801  1.00  0.32           O  
HETATM   73  O   HOH T  72      45.989  22.297  42.123  1.00  0.33           O  
HETATM   74  O   HOH T  73      21.477  24.753  30.848  1.00  0.33           O  
HETATM   75  O   HOH T  74      35.784  10.636  12.684  1.00  0.33           O  
HETATM   76  O   HOH T  75      40.830  24.140  35.765  1.00  0.34           O  
HETATM   77  O   HOH T  76      42.988  21.096  53.549  1.00  0.34           O  
HETATM   78  O   HOH T  77      20.607   6.370  28.177  1.00  0.34           O  
HETATM   79  O   HOH T  78      57.543  19.037  21.370  1.00  0.34           O  
HETATM   80  O   HOH T  79      46.126  13.208  16.807  1.00  0.34           O  
HETATM   81  O   HOH T  80      34.935   7.356  15.219  1.00  0.34           O  
HETATM   82  O   HOH T  81      13.771  12.524  33.234  1.00  0.34           O  
HETATM   83  O   HOH T  82      41.456   9.082  19.035  1.00  0.34           O  
HETATM   84  O   HOH T  83      39.898  30.801  27.839  1.00  0.34           O  
HETATM   85  O   HOH T  84      17.902  11.963  40.772  1.00  0.34           O  
HETATM   86  O   HOH T  85      27.659  16.972  54.456  1.00  0.34           O  
HETATM   87  O   HOH T  86      45.335  24.972  17.014  1.00  0.34           O  
HETATM   88  O   HOH T  87      46.236  16.977  41.705  1.00  0.35           O  
HETATM   89  O   HOH T  88      20.363   7.694  30.686  1.00  0.35           O  
HETATM   90  O   HOH T  89      47.732  11.944  27.300  1.00  0.35           O  
HETATM   91  O   HOH T  90      43.049   1.791  19.990  1.00  0.35           O  
HETATM   92  O   HOH T  91      14.751  20.365  37.140  1.00  0.35           O  
HETATM   93  O   HOH T  92      41.645  32.170  20.784  1.00  0.35           O  
HETATM   94  O   HOH T  93      38.520  24.614  37.223  1.00  0.35           O  
HETATM   95  O   HOH T  94      38.032  28.427  15.684  1.00  0.36           O  
HETATM   96  O   HOH T  95      25.229  27.395  24.622  1.00  0.36           O  
HETATM   97  O   HOH T  96      35.893  27.500  27.240  1.00  0.36           O  
HETATM   98  O   HOH T  97      26.911  17.599  49.262  1.00  0.36           O  
HETATM   99  O   HOH T  98      38.334  21.428  58.915  1.00  0.36           O  
HETATM  100  O   HOH T  99      41.188  25.805  54.348  1.00  0.36           O  
HETATM  101  O   HOH T 100      25.912  17.555  15.949  1.00  0.36           O  
HETATM  102  O   HOH T 101      43.700   9.469  47.665  1.00  0.36           O  
HETATM  103  O   HOH T 102      17.978   7.329  32.215  1.00  0.36           O  
HETATM  104  O   HOH T 103      13.448  27.169  32.003  1.00  0.37           O  
HETATM  105  O   HOH T 104      35.770  25.260  37.210  1.00  0.37           O  
HETATM  106  O   HOH T 105      41.343  23.160  18.214  1.00  0.37           O  
HETATM  107  O   HOH T 106      46.223  27.967  29.105  1.00  0.37           O  
HETATM  108  O   HOH T 107      45.369  13.407  32.135  1.00  0.37           O  
HETATM  109  O   HOH T 108      42.931  -0.022  25.942  1.00  0.37           O  
HETATM  110  O   HOH T 109      32.431  27.470  30.231  1.00  0.37           O  
HETATM  111  O   HOH T 110      37.914  30.968  23.944  1.00  0.37           O  
HETATM  112  O   HOH T 111      46.041   7.161  28.384  1.00  0.37           O  
HETATM  113  O   HOH T 112      24.411   2.041  42.136  1.00  0.37           O  
HETATM  114  O   HOH T 113      33.827  14.763  10.951  1.00  0.37           O  
HETATM  115  O   HOH T 114      36.625   9.414  14.845  1.00  0.37           O  
HETATM  116  O   HOH T 115      18.389  23.441  25.323  1.00  0.37           O  
HETATM  117  O   HOH T 116      35.671  21.057  58.119  1.00  0.38           O  
HETATM  118  O   HOH T 117      17.619  25.062  34.748  1.00  0.38           O  
HETATM  119  O   HOH T 118      50.238  32.719  28.841  1.00  0.38           O  
HETATM  120  O   HOH T 119      47.528  11.467  40.653  1.00  0.38           O  
HETATM  121  O   HOH T 120      35.409  23.023  56.410  1.00  0.38           O  
HETATM  122  O   HOH T 121      32.677   1.108  37.480  1.00  0.38           O  
HETATM  123  O   HOH T 122      34.913  20.110  16.019  1.00  0.38           O  
HETATM  124  O   HOH T 123      33.172  27.774  27.544  1.00  0.38           O  
HETATM  125  O   HOH T 124      17.547  25.143  30.930  1.00  0.38           O  
HETATM  126  O   HOH T 125      23.779  10.421  38.889  1.00  0.38           O  
HETATM  127  O   HOH T 126      33.275  26.160  36.071  1.00  0.38           O  
HETATM  128  O   HOH T 127      54.941  18.204  20.866  1.00  0.38           O  
HETATM  129  O   HOH T 128      31.297  26.722  37.969  1.00  0.38           O  
HETATM  130  O   HOH T 129      42.690   9.185  41.868  1.00  0.38           O  
HETATM  131  O   HOH T 130      39.743  14.370  56.429  1.00  0.38           O  
HETATM  132  O   HOH T 131      45.246  23.499  13.221  1.00  0.38           O  
HETATM  133  O   HOH T 132      43.117  -0.623  16.725  1.00  0.38           O  
HETATM  134  O   HOH T 133      43.094   6.075  35.600  1.00  0.39           O  
HETATM  135  O   HOH T 134      29.345  11.316  53.520  1.00  0.39           O  
HETATM  136  O   HOH T 135      29.366  17.926  44.704  1.00  0.39           O  
HETATM  137  O   HOH T 136      41.782   2.939  37.697  1.00  0.39           O  
HETATM  138  O   HOH T 137      34.497  34.790  29.102  1.00  0.39           O  
HETATM  139  O   HOH T 138      43.786  33.801  52.899  1.00  0.39           O  
HETATM  140  O   HOH T 139      47.278  31.451  30.418  1.00  0.39           O  
HETATM  141  O   HOH T 140      38.578  20.456  38.847  1.00  0.39           O  
HETATM  142  O   HOH T 141      46.424  19.172  51.588  1.00  0.39           O  
HETATM  143  O   HOH T 142      45.402  35.227  45.713  1.00  0.39           O  
HETATM  144  O   HOH T 143      35.613   5.585  17.285  1.00  0.39           O  
HETATM  145  O   HOH T 144      39.855  38.865  31.034  1.00  0.39           O  
HETATM  146  O   HOH T 145      43.748  34.281  43.777  1.00  0.40           O  
HETATM  147  O   HOH T 146      46.112   8.961  22.766  1.00  0.40           O  
HETATM  148  O   HOH T 147      18.794  18.570  28.876  1.00  0.40           O  
HETATM  149  O   HOH T 148      57.454  12.522  35.114  1.00  0.40           O  
HETATM  150  O   HOH T 149      44.104   4.045  29.624  1.00  0.40           O  
HETATM  151  O   HOH T 150      19.572  18.342  23.411  1.00  0.40           O  
HETATM  152  O   HOH T 151      38.358   4.869  44.508  1.00  0.40           O  
HETATM  153  O   HOH T 152      22.546  23.671  49.375  1.00  0.41           O  
HETATM  154  O   HOH T 153      39.625  27.282  23.643  1.00  0.41           O  
HETATM  155  O   HOH T 154      24.495  18.393  52.391  1.00  0.41           O  
HETATM  156  O   HOH T 155      33.878  14.292  53.384  1.00  0.41           O  
HETATM  157  O   HOH T 156      39.296   2.164  44.850  1.00  0.41           O  
HETATM  158  O   HOH T 157      21.255   5.694  47.281  1.00  0.41           O  
HETATM  159  O   HOH T 158      39.690  36.941  41.378  1.00  0.41           O  
HETATM  160  O   HOH T 159      35.567  27.096  15.359  1.00  0.41           O  
HETATM  161  O   HOH T 160      24.215  15.318  15.915  1.00  0.41           O  
HETATM  162  O   HOH T 161      19.888  13.777  36.339  1.00  0.41           O  
HETATM  163  O   HOH T 162      27.451  18.238  51.860  1.00  0.42           O  
HETATM  164  O   HOH T 163      39.207  22.689  33.749  1.00  0.42           O  
HETATM  165  O   HOH T 164      34.058   3.804  22.052  1.00  0.42           O  
HETATM  166  O   HOH T 165      28.310  15.606  50.739  1.00  0.42           O  
HETATM  167  O   HOH T 166      29.154  17.135  11.849  1.00  0.42           O  
HETATM  168  O   HOH T 167      34.001  26.135  32.167  1.00  0.42           O  
HETATM  169  O   HOH T 168      34.407  29.407  38.518  1.00  0.42           O  
HETATM  170  O   HOH T 169      37.023  26.290  56.266  1.00  0.42           O  
HETATM  171  O   HOH T 170      22.115  19.828  53.098  1.00  0.42           O  
HETATM  172  O   HOH T 171      31.827  21.258  54.915  1.00  0.42           O  
HETATM  173  O   HOH T 172      39.841  12.900   9.668  1.00  0.42           O  
HETATM  174  O   HOH T 173      45.494  37.776  46.603  1.00  0.42           O  
HETATM  175  O   HOH T 174      20.262  11.321  29.942  1.00  0.42           O  
HETATM  176  O   HOH T 175      37.169  17.659  10.407  1.00  0.42           O  
HETATM  177  O   HOH T 176      19.592  25.714  36.556  1.00  0.42           O  
HETATM  178  O   HOH T 177      37.419  30.946  26.629  1.00  0.42           O  
HETATM  179  O   HOH T 178      39.770   1.734  31.371  1.00  0.43           O  
HETATM  180  O   HOH T 179      42.212  34.271  39.803  1.00  0.43           O  
HETATM  181  O   HOH T 180      23.681  24.257  46.798  1.00  0.43           O  
HETATM  182  O   HOH T 181      36.365  29.605  52.864  1.00  0.43           O  
HETATM  183  O   HOH T 182      24.099  17.741  49.741  1.00  0.43           O  
HETATM  184  O   HOH T 183      57.474  26.022  32.805  1.00  0.43           O  
HETATM  185  O   HOH T 184      43.986   7.558  21.543  1.00  0.43           O  
HETATM  186  O   HOH T 185      30.810   2.505  38.936  1.00  0.43           O  
HETATM  187  O   HOH T 186      46.271  10.715  25.040  1.00  0.43           O  
HETATM  188  O   HOH T 187      41.415  25.190  16.269  1.00  0.43           O  
HETATM  189  O   HOH T 188      58.351  22.796  23.178  1.00  0.43           O  
HETATM  190  O   HOH T 189      51.226  16.930  44.035  1.00  0.43           O  
HETATM  191  O   HOH T 190      41.308   0.402  36.576  1.00  0.43           O  
HETATM  192  O   HOH T 191      30.986  24.456  18.214  1.00  0.44           O  
HETATM  193  O   HOH T 192      45.817  29.889  16.994  1.00  0.44           O  
HETATM  194  O   HOH T 193      19.047   9.873  31.980  1.00  0.44           O  
HETATM  195  O   HOH T 194      47.355   9.950  30.937  1.00  0.44           O  
HETATM  196  O   HOH T 195      43.737  17.509  57.425  1.00  0.44           O  
HETATM  197  O   HOH T 196      44.553  18.858  53.613  1.00  0.44           O  
HETATM  198  O   HOH T 197      30.111  22.299  19.745  1.00  0.44           O  
HETATM  199  O   HOH T 198      47.949  31.119  15.632  1.00  0.44           O  
HETATM  200  O   HOH T 199      34.136  30.508  21.475  1.00  0.44           O  
HETATM  201  O   HOH T 200      47.755  33.990  29.195  1.00  0.44           O  
HETATM  202  O   HOH T 201      20.118  14.503  17.022  1.00  0.44           O  
HETATM  203  O   HOH T 202      20.198  22.503  55.588  1.00  0.44           O  
HETATM  204  O   HOH T 203      44.520  15.133  43.110  1.00  0.44           O  
HETATM  205  O   HOH T 204      42.418  29.647  19.882  1.00  0.44           O  
HETATM  206  O   HOH T 205      48.538  35.247  26.832  1.00  0.44           O  
HETATM  207  O   HOH T 206      32.544  18.566  11.393  1.00  0.45           O  
HETATM  208  O   HOH T 207      27.238  15.259  12.013  1.00  0.45           O  
HETATM  209  O   HOH T 208      38.132  39.731  29.290  1.00  0.45           O  
HETATM  210  O   HOH T 209      35.825  13.003  11.397  1.00  0.45           O  
HETATM  211  O   HOH T 210      47.059  33.888  31.913  1.00  0.45           O  
HETATM  212  O   HOH T 211      48.564  15.483  41.981  1.00  0.45           O  
HETATM  213  O   HOH T 212      49.221  15.129  44.612  1.00  0.45           O  
HETATM  214  O   HOH T 213      39.434  29.166  25.648  1.00  0.45           O  
HETATM  215  O   HOH T 214      45.794  21.249  53.430  1.00  0.45           O  
HETATM  216  O   HOH T 215      48.003  30.964  18.482  1.00  0.45           O  
HETATM  217  O   HOH T 216      15.471  13.012  39.957  1.00  0.45           O  
HETATM  218  O   HOH T 217      40.571   1.486  34.016  1.00  0.45           O  
HETATM  219  O   HOH T 218      17.490  14.697  16.441  1.00  0.45           O  
HETATM  220  O   HOH T 219      29.769  24.312  29.839  1.00  0.45           O  
HETATM  221  O   HOH T 220      55.273  25.244  34.082  1.00  0.45           O  
HETATM  222  O   HOH T 221      17.819  18.642  40.469  1.00  0.45           O  
HETATM  223  O   HOH T 222      61.104  16.353  35.491  1.00  0.45           O  
HETATM  224  O   HOH T 223      29.097  20.940  55.072  1.00  0.46           O  
HETATM  225  O   HOH T 224      22.458  26.178  48.205  1.00  0.46           O  
HETATM  226  O   HOH T 225      58.668  16.230  36.587  1.00  0.46           O  
HETATM  227  O   HOH T 226      35.639  29.218  33.895  1.00  0.46           O  
HETATM  228  O   HOH T 227      38.654  29.131  31.385  1.00  0.46           O  
HETATM  229  O   HOH T 228      35.295  18.528  57.235  1.00  0.46           O  
HETATM  230  O   HOH T 229      38.796  30.056  54.201  1.00  0.46           O  
HETATM  231  O   HOH T 230      49.181  17.850  13.940  1.00  0.46           O  
HETATM  232  O   HOH T 231      40.859   1.585  18.450  1.00  0.46           O  
HETATM  233  O   HOH T 232      52.237  30.193  24.924  1.00  0.46           O  
HETATM  234  O   HOH T 233      56.293  17.048  22.948  1.00  0.46           O  
HETATM  235  O   HOH T 234      41.899  13.977  11.147  1.00  0.46           O  
HETATM  236  O   HOH T 235      41.164  18.655  57.583  1.00  0.46           O  
HETATM  237  O   HOH T 236      21.292   1.959  28.363  1.00  0.47           O  
HETATM  238  O   HOH T 237      42.089  35.767  42.182  1.00  0.47           O  
HETATM  239  O   HOH T 238      11.819  19.319  38.508  1.00  0.47           O  
HETATM  240  O   HOH T 239      38.216  14.357  58.742  1.00  0.47           O  
HETATM  241  O   HOH T 240      46.127  32.666  51.834  1.00  0.47           O  
HETATM  242  O   HOH T 241      32.121  12.087  53.355  1.00  0.47           O  
HETATM  243  O   HOH T 242      47.817  19.311  15.798  1.00  0.47           O  
HETATM  244  O   HOH T 243      48.303  30.928  51.363  1.00  0.47           O  
HETATM  245  O   HOH T 244      39.098  21.954  36.445  1.00  0.47           O  
HETATM  246  O   HOH T 245      23.263  25.205  22.219  1.00  0.47           O  
HETATM  247  O   HOH T 246      33.080  22.202  15.933  1.00  0.47           O  
HETATM  248  O   HOH T 247      49.449  29.562  47.164  1.00  0.47           O  
HETATM  249  O   HOH T 248      46.999  14.542  46.139  1.00  0.47           O  
HETATM  250  O   HOH T 249      23.744   0.722  29.109  1.00  0.47           O  
HETATM  251  O   HOH T 250      48.122  13.986  39.773  1.00  0.47           O  
HETATM  252  O   HOH T 251      43.826  25.407  14.705  1.00  0.47           O  
HETATM  253  O   HOH T 252      33.053  21.997  57.500  1.00  0.48           O  
HETATM  254  O   HOH T 253      42.667   7.339  39.667  1.00  0.48           O  
HETATM  255  O   HOH T 254      25.181   4.127  43.733  1.00  0.48           O  
HETATM  256  O   HOH T 255      35.326  32.614  27.579  1.00  0.48           O  
HETATM  257  O   HOH T 256      34.840  26.884  39.264  1.00  0.48           O  
HETATM  258  O   HOH T 257      47.945  11.957  37.955  1.00  0.48           O  
HETATM  259  O   HOH T 258      45.124  16.954  11.608  1.00  0.48           O  
HETATM  260  O   HOH T 259      36.588  41.505  30.509  1.00  0.48           O  
HETATM  261  O   HOH T 260      45.596  16.601  52.376  1.00  0.48           O  
HETATM  262  O   HOH T 261      42.963  30.022  17.176  1.00  0.49           O  
HETATM  263  O   HOH T 262      42.372   2.140  30.573  1.00  0.49           O  
HETATM  264  O   HOH T 263      19.496  24.551  32.727  1.00  0.49           O  
HETATM  265  O   HOH T 264      17.880  21.032  21.487  1.00  0.49           O  
HETATM  266  O   HOH T 265      47.602  21.707  51.436  1.00  0.49           O  
HETATM  267  O   HOH T 266      42.128   0.816  39.298  1.00  0.49           O  
HETATM  268  O   HOH T 267      43.513  27.254  20.795  1.00  0.49           O  
HETATM  269  O   HOH T 268      51.835  32.291  26.668  1.00  0.49           O  
HETATM  270  O   HOH T 269      33.942  31.342  33.172  1.00  0.50           O  
HETATM  271  O   HOH T 270      45.045  29.517  20.839  1.00  0.50           O  
HETATM  272  O   HOH T 271      18.548   5.781  29.962  1.00  0.50           O  
HETATM  273  O   HOH T 272      34.011  -0.935  38.687  1.00  0.50           O  
HETATM  274  O   HOH T 273      38.555  10.296  13.094  1.00  0.50           O  
HETATM  275  O   HOH T 274      15.579  10.651  41.440  1.00  0.50           O  
HETATM  276  O   HOH T 275      26.852   8.584  47.240  1.00  0.50           O  
HETATM  277  O   HOH T 276      31.629  -0.172  27.206  1.00  0.50           O  
HETATM  278  O   HOH T 277      47.586  28.397  15.223  1.00  0.50           O  
HETATM  279  O   HOH T 278      51.451  15.999  16.742  1.00  0.50           O  
HETATM  280  O   HOH T 279      57.309  14.003  37.385  1.00  0.51           O  
HETATM  281  O   HOH T 280      23.397  26.568  16.954  1.00  0.51           O  
HETATM  282  O   HOH T 281      40.931   9.428  48.124  1.00  0.51           O  
HETATM  283  O   HOH T 282      21.950  22.232  47.054  1.00  0.51           O  
HETATM  284  O   HOH T 283      43.103  36.086  37.942  1.00  0.51           O  
HETATM  285  O   HOH T 284      46.024  11.935  29.305  1.00  0.51           O  
HETATM  286  O   HOH T 285      23.363  26.248  41.261  1.00  0.51           O  
HETATM  287  O   HOH T 286      29.274   1.749  36.328  1.00  0.51           O  
HETATM  288  O   HOH T 287      30.160  16.219  55.323  1.00  0.51           O  
HETATM  289  O   HOH T 288      46.956  15.464  50.228  1.00  0.51           O  
HETATM  290  O   HOH T 289      42.807  -0.188  34.190  1.00  0.52           O  
HETATM  291  O   HOH T 290      54.954  16.192  19.079  1.00  0.52           O  
HETATM  292  O   HOH T 291      41.485  15.915  57.951  1.00  0.52           O  
HETATM  293  O   HOH T 292      48.431  35.909  24.236  1.00  0.52           O  
HETATM  294  O   HOH T 293      36.565  13.643  53.660  1.00  0.52           O  
HETATM  295  O   HOH T 294      39.789  26.648  14.495  1.00  0.52           O  
HETATM  296  O   HOH T 295      21.729  16.459  15.975  1.00  0.52           O  
HETATM  297  O   HOH T 296      30.351  13.449  55.071  1.00  0.52           O  
HETATM  298  O   HOH T 297      19.249  16.191  14.977  1.00  0.52           O  
HETATM  299  O   HOH T 298      32.756  16.765  52.811  1.00  0.52           O  
HETATM  300  O   HOH T 299      58.997  18.318  32.536  1.00  0.52           O  
HETATM  301  O   HOH T 300      22.885   4.724  45.233  1.00  0.52           O  
HETATM  302  O   HOH T 301      24.347  28.190  31.656  1.00  0.52           O  
HETATM  303  O   HOH T 302      18.216  18.497  25.970  1.00  0.52           O  
HETATM  304  O   HOH T 303      43.040  38.481  26.829  1.00  0.52           O  
HETATM  305  O   HOH T 304      34.826  11.951  52.371  1.00  0.52           O  
HETATM  306  O   HOH T 305      25.283   6.127  45.446  1.00  0.52           O  
HETATM  307  O   HOH T 306      58.594  18.681  37.552  1.00  0.52           O  
HETATM  308  O   HOH T 307      42.419  11.651  48.685  1.00  0.52           O  
HETATM  309  O   HOH T 308      38.077  27.476  20.221  1.00  0.53           O  
HETATM  310  O   HOH T 309      43.389  34.759  18.570  1.00  0.53           O  
HETATM  311  O   HOH T 310      40.325  26.705  18.454  1.00  0.53           O  
HETATM  312  O   HOH T 311      49.958  27.266  48.606  1.00  0.53           O  
HETATM  313  O   HOH T 312      32.528   1.530  43.071  1.00  0.53           O  
HETATM  314  O   HOH T 313      35.015  19.387  10.609  1.00  0.53           O  
HETATM  315  O   HOH T 314      42.931  29.336  53.832  1.00  0.53           O  
HETATM  316  O   HOH T 315      22.884   2.162  25.090  1.00  0.53           O  
HETATM  317  O   HOH T 316      32.248   0.565  40.347  1.00  0.54           O  
HETATM  318  O   HOH T 317      54.207  28.208  24.889  1.00  0.54           O  
HETATM  319  O   HOH T 318      44.574  31.331  53.797  1.00  0.54           O  
HETATM  320  O   HOH T 319      30.787   1.685  45.288  1.00  0.54           O  
HETATM  321  O   HOH T 320      32.503  28.875  36.532  1.00  0.55           O  
HETATM  322  O   HOH T 321      36.233  30.679  31.589  1.00  0.55           O  
HETATM  323  O   HOH T 322      49.508  14.660  18.191  1.00  0.55           O  
HETATM  324  O   HOH T 323      34.942  28.391  31.069  1.00  0.55           O  
HETATM  325  O   HOH T 324      47.103  38.234  21.863  1.00  0.55           O  
HETATM  326  O   HOH T 325      38.893  16.826  57.348  1.00  0.55           O  
HETATM  327  O   HOH T 326      42.736  23.825  52.967  1.00  0.55           O  
HETATM  328  O   HOH T 327      23.365  25.954  19.580  1.00  0.56           O  
HETATM  329  O   HOH T 328      51.968  28.650  47.111  1.00  0.56           O  
HETATM  330  O   HOH T 329      48.448  38.111  39.551  1.00  0.56           O  
HETATM  331  O   HOH T 330      24.338  26.781  34.030  1.00  0.56           O  
HETATM  332  O   HOH T 331      18.720  20.918  24.184  1.00  0.56           O  
HETATM  333  O   HOH T 332      53.529  19.337  42.752  1.00  0.56           O  
HETATM  334  O   HOH T 333      15.322  19.405  39.679  1.00  0.56           O  
HETATM  335  O   HOH T 334      32.117   5.372  44.784  1.00  0.56           O  
HETATM  336  O   HOH T 335      54.125  25.372  16.906  1.00  0.56           O  
HETATM  337  O   HOH T 336      51.310  27.588  18.517  1.00  0.57           O  
HETATM  338  O   HOH T 337      46.109   8.930  33.225  1.00  0.57           O  
HETATM  339  O   HOH T 338      40.426  -0.862  25.281  1.00  0.57           O  
HETATM  340  O   HOH T 339      20.972  13.026  28.014  1.00  0.57           O  
HETATM  341  O   HOH T 340      22.884  26.951  29.756  1.00  0.57           O  
HETATM  342  O   HOH T 341      52.789  23.476  41.931  1.00  0.57           O  
HETATM  343  O   HOH T 342      38.984  27.437  54.947  1.00  0.57           O  
HETATM  344  O   HOH T 343      48.579   9.459  24.081  1.00  0.57           O  
HETATM  345  O   HOH T 344      16.980  25.187  39.671  1.00  0.58           O  
HETATM  346  O   HOH T 345      36.581  28.895  55.535  1.00  0.59           O  
HETATM  347  O   HOH T 346      31.416   4.728  19.230  1.00  0.59           O  
HETATM  348  O   HOH T 347      35.415   1.294  25.282  1.00  0.60           O  
TER     349      HOH T 347 
