# Supplementary material for: Accurate Prediction of Hydration Sites of Proteins Using Energy Model With Atom Embedding
Source: Front Mol Biosci. 2021 Sep 20;8:756075. doi: 10.3389/fmolb.2021.756075 (PMC8488165; doi:10.3389/fmolb.2021.756075)
Supplement: Supplementary file 1 [file DataSheet1.ZIP › Data Sheet 1/Our_result_pdb/our_dataset_output/1JBE_watersite.pdb]

HEADER                                                        XXXX


JRNL        PMID   -1
HETATM    1  O   HOH T   0      21.779   1.786  15.440  1.00  0.16           O  
HETATM    2  O   HOH T   1      42.806  12.527   7.384  1.00  0.18           O  
HETATM    3  O   HOH T   2      29.247   4.305  -0.848  1.00  0.21           O  
HETATM    4  O   HOH T   3      16.922   5.724   1.771  1.00  0.22           O  
HETATM    5  O   HOH T   4      23.058   0.041   7.093  1.00  0.23           O  
HETATM    6  O   HOH T   5      40.255   9.198  20.417  1.00  0.23           O  
HETATM    7  O   HOH T   6      32.751  -7.017   2.803  1.00  0.24           O  
HETATM    8  O   HOH T   7      25.953  23.250   8.106  1.00  0.24           O  
HETATM    9  O   HOH T   8      29.978   6.404  27.985  1.00  0.24           O  
HETATM   10  O   HOH T   9      38.412  -2.685   4.768  1.00  0.24           O  
HETATM   11  O   HOH T  10      21.576  10.479   2.217  1.00  0.25           O  
HETATM   12  O   HOH T  11       9.045  11.445   6.815  1.00  0.25           O  
HETATM   13  O   HOH T  12      35.841  14.029  -5.932  1.00  0.25           O  
HETATM   14  O   HOH T  13      31.246  18.575  18.425  1.00  0.26           O  
HETATM   15  O   HOH T  14      28.708  14.661  24.468  1.00  0.27           O  
HETATM   16  O   HOH T  15      22.348   6.717  -1.474  1.00  0.27           O  
HETATM   17  O   HOH T  16      40.807   6.899  26.651  1.00  0.27           O  
HETATM   18  O   HOH T  17      19.298  12.929   7.979  1.00  0.27           O  
HETATM   19  O   HOH T  18      35.544  15.483  22.279  1.00  0.28           O  
HETATM   20  O   HOH T  19      40.879   0.343  24.696  1.00  0.28           O  
HETATM   21  O   HOH T  20      45.130  20.903   6.562  1.00  0.28           O  
HETATM   22  O   HOH T  21      30.714   3.311   8.130  1.00  0.29           O  
HETATM   23  O   HOH T  22      24.876  17.834   9.610  1.00  0.29           O  
HETATM   24  O   HOH T  23      29.767  27.947  10.935  1.00  0.29           O  
HETATM   25  O   HOH T  24      48.203  13.518   3.681  1.00  0.30           O  
HETATM   26  O   HOH T  25      10.730   3.595  10.358  1.00  0.30           O  
HETATM   27  O   HOH T  26      22.412   0.506   0.325  1.00  0.30           O  
HETATM   28  O   HOH T  27      12.972  16.074  13.899  1.00  0.30           O  
HETATM   29  O   HOH T  28      29.125   1.815   6.436  1.00  0.30           O  
HETATM   30  O   HOH T  29      42.558  13.747  14.946  1.00  0.30           O  
HETATM   31  O   HOH T  30      39.084  11.690  20.312  1.00  0.30           O  
HETATM   32  O   HOH T  31      32.546  23.475   5.699  1.00  0.31           O  
HETATM   33  O   HOH T  32      26.761  23.941   5.590  1.00  0.31           O  
HETATM   34  O   HOH T  33      51.441  18.794   7.042  1.00  0.31           O  
HETATM   35  O   HOH T  34      45.528  13.502   4.786  1.00  0.31           O  
HETATM   36  O   HOH T  35      19.035   4.223   9.665  1.00  0.31           O  
HETATM   37  O   HOH T  36      34.122  15.237  -4.152  1.00  0.31           O  
HETATM   38  O   HOH T  37      33.440  15.337  -6.784  1.00  0.32           O  
HETATM   39  O   HOH T  38      47.776  17.152   5.043  1.00  0.32           O  
HETATM   40  O   HOH T  39      17.898  16.140   3.883  1.00  0.32           O  
HETATM   41  O   HOH T  40      20.449   0.759   7.482  1.00  0.32           O  
HETATM   42  O   HOH T  41      30.141  -9.702  -0.470  1.00  0.33           O  
HETATM   43  O   HOH T  42      16.687   0.510   9.881  1.00  0.33           O  
HETATM   44  O   HOH T  43      35.669   7.358  -6.058  1.00  0.33           O  
HETATM   45  O   HOH T  44      29.456  13.029  28.485  1.00  0.34           O  
HETATM   46  O   HOH T  45      28.110  21.199   2.481  1.00  0.34           O  
HETATM   47  O   HOH T  46      22.658  16.036  16.758  1.00  0.34           O  
HETATM   48  O   HOH T  47      36.736   7.160  27.277  1.00  0.35           O  
HETATM   49  O   HOH T  48      38.247  -3.226  11.211  1.00  0.35           O  
HETATM   50  O   HOH T  49      26.823   3.900  26.874  1.00  0.35           O  
HETATM   51  O   HOH T  50      35.625  -7.279  17.041  1.00  0.35           O  
HETATM   52  O   HOH T  51      38.056  -5.953  10.618  1.00  0.35           O  
HETATM   53  O   HOH T  52      36.286   8.137 -11.379  1.00  0.35           O  
HETATM   54  O   HOH T  53      40.588  19.894  -0.440  1.00  0.35           O  
HETATM   55  O   HOH T  54      32.542   9.305  -6.407  1.00  0.36           O  
HETATM   56  O   HOH T  55      30.631  16.713  24.682  1.00  0.36           O  
HETATM   57  O   HOH T  56      26.727  -2.773   7.454  1.00  0.36           O  
HETATM   58  O   HOH T  57      15.125  16.130   4.092  1.00  0.36           O  
HETATM   59  O   HOH T  58      18.594  13.960   5.446  1.00  0.37           O  
HETATM   60  O   HOH T  59      20.284  11.747  12.293  1.00  0.37           O  
HETATM   61  O   HOH T  60      48.703  11.604   5.572  1.00  0.37           O  
HETATM   62  O   HOH T  61      45.225  12.944  15.527  1.00  0.37           O  
HETATM   63  O   HOH T  62      48.830  19.369   6.317  1.00  0.37           O  
HETATM   64  O   HOH T  63      17.731   1.250   7.425  1.00  0.37           O  
HETATM   65  O   HOH T  64      43.715   6.182   4.404  1.00  0.37           O  
HETATM   66  O   HOH T  65      42.227  12.076  22.533  1.00  0.38           O  
HETATM   67  O   HOH T  66      43.008   0.782  22.866  1.00  0.38           O  
HETATM   68  O   HOH T  67      21.639  13.837  11.303  1.00  0.38           O  
HETATM   69  O   HOH T  68      23.850  -7.300   6.215  1.00  0.38           O  
HETATM   70  O   HOH T  69      42.804   0.442  11.260  1.00  0.38           O  
HETATM   71  O   HOH T  70      19.737  -0.178   0.402  1.00  0.39           O  
HETATM   72  O   HOH T  71      36.502  15.774  19.603  1.00  0.39           O  
HETATM   73  O   HOH T  72      30.130  17.990  -3.166  1.00  0.39           O  
HETATM   74  O   HOH T  73      33.837  24.840   7.669  1.00  0.39           O  
HETATM   75  O   HOH T  74      22.275  12.748   1.059  1.00  0.39           O  
HETATM   76  O   HOH T  75      46.038  14.176   0.700  1.00  0.39           O  
HETATM   77  O   HOH T  76      28.179   5.929  16.142  1.00  0.40           O  
HETATM   78  O   HOH T  77      33.044   6.647  -6.928  1.00  0.40           O  
HETATM   79  O   HOH T  78      24.643  -8.196  -1.104  1.00  0.41           O  
HETATM   80  O   HOH T  79      26.567  16.078  19.382  1.00  0.41           O  
HETATM   81  O   HOH T  80      32.850  12.982  31.629  1.00  0.41           O  
HETATM   82  O   HOH T  81      29.049  16.309  22.376  1.00  0.41           O  
HETATM   83  O   HOH T  82      22.405  12.583   3.779  1.00  0.41           O  
HETATM   84  O   HOH T  83      40.446  -1.053   3.935  1.00  0.42           O  
HETATM   85  O   HOH T  84      42.055   9.881  29.014  1.00  0.42           O  
HETATM   86  O   HOH T  85      43.182  -0.366  20.269  1.00  0.42           O  
HETATM   87  O   HOH T  86      46.973   5.878  24.282  1.00  0.42           O  
HETATM   88  O   HOH T  87      24.887  22.742   3.959  1.00  0.42           O  
HETATM   89  O   HOH T  88      33.706   9.045 -10.889  1.00  0.42           O  
HETATM   90  O   HOH T  89      13.132   2.311   0.068  1.00  0.42           O  
HETATM   91  O   HOH T  90      25.420  -4.721   8.832  1.00  0.42           O  
HETATM   92  O   HOH T  91      35.257  19.970  -4.780  1.00  0.43           O  
HETATM   93  O   HOH T  92      33.103  25.925  10.109  1.00  0.43           O  
HETATM   94  O   HOH T  93      20.715  18.830   8.800  1.00  0.43           O  
HETATM   95  O   HOH T  94      32.776  14.906  28.234  1.00  0.43           O  
HETATM   96  O   HOH T  95      23.578  -3.745   2.072  1.00  0.43           O  
HETATM   97  O   HOH T  96      22.175  16.489  11.805  1.00  0.43           O  
HETATM   98  O   HOH T  97      48.300   8.251  -1.501  1.00  0.43           O  
HETATM   99  O   HOH T  98      42.998  21.049   0.290  1.00  0.44           O  
HETATM  100  O   HOH T  99      12.919   8.533  16.974  1.00  0.44           O  
HETATM  101  O   HOH T 100      29.173  17.151  19.742  1.00  0.44           O  
HETATM  102  O   HOH T 101      33.603  20.150  23.583  1.00  0.44           O  
HETATM  103  O   HOH T 102      38.584  -5.110  13.240  1.00  0.44           O  
HETATM  104  O   HOH T 103      30.352  11.984  30.984  1.00  0.44           O  
HETATM  105  O   HOH T 104      35.859  10.849 -10.742  1.00  0.45           O  
HETATM  106  O   HOH T 105      30.989  19.454  24.142  1.00  0.45           O  
HETATM  107  O   HOH T 106      43.114  16.437  15.272  1.00  0.45           O  
HETATM  108  O   HOH T 107      30.201  16.398  17.291  1.00  0.45           O  
HETATM  109  O   HOH T 108      22.358  -1.945  -2.846  1.00  0.45           O  
HETATM  110  O   HOH T 109      27.178  -8.359  -2.345  1.00  0.45           O  
HETATM  111  O   HOH T 110      39.611  11.041  29.673  1.00  0.45           O  
HETATM  112  O   HOH T 111      45.129   5.681   6.888  1.00  0.45           O  
HETATM  113  O   HOH T 112      20.029  -6.111  10.516  1.00  0.45           O  
HETATM  114  O   HOH T 113      44.782  14.859  13.634  1.00  0.46           O  
HETATM  115  O   HOH T 114      26.409  16.226  -5.649  1.00  0.46           O  
HETATM  116  O   HOH T 115      23.463  10.474  23.491  1.00  0.46           O  
HETATM  117  O   HOH T 116      20.544  17.272  15.379  1.00  0.46           O  
HETATM  118  O   HOH T 117      45.174   4.166   3.239  1.00  0.46           O  
HETATM  119  O   HOH T 118      39.808  19.913  11.798  1.00  0.46           O  
HETATM  120  O   HOH T 119      20.227  11.869   5.410  1.00  0.46           O  
HETATM  121  O   HOH T 120      27.221  32.335   5.722  1.00  0.46           O  
HETATM  122  O   HOH T 121      22.566  18.965  10.655  1.00  0.47           O  
HETATM  123  O   HOH T 122      36.044  23.068   7.308  1.00  0.47           O  
HETATM  124  O   HOH T 123      23.080  16.849  14.326  1.00  0.47           O  
HETATM  125  O   HOH T 124      34.165  11.152  -7.622  1.00  0.47           O  
HETATM  126  O   HOH T 125      41.303  13.189  20.164  1.00  0.47           O  
HETATM  127  O   HOH T 126      37.356   9.495  28.937  1.00  0.47           O  
HETATM  128  O   HOH T 127      39.882  10.642  22.772  1.00  0.47           O  
HETATM  129  O   HOH T 128      35.971  19.112   1.949  1.00  0.48           O  
HETATM  130  O   HOH T 129      45.420  -0.296  21.946  1.00  0.48           O  
HETATM  131  O   HOH T 130      24.762   9.761  25.596  1.00  0.48           O  
HETATM  132  O   HOH T 131      41.381   0.834  27.442  1.00  0.48           O  
HETATM  133  O   HOH T 132      35.035  12.674  33.205  1.00  0.48           O  
HETATM  134  O   HOH T 133      27.470  15.947  16.781  1.00  0.48           O  
HETATM  135  O   HOH T 134      38.815  -4.065   2.295  1.00  0.48           O  
HETATM  136  O   HOH T 135      39.718  -2.886  13.690  1.00  0.48           O  
HETATM  137  O   HOH T 136      44.756   6.113  25.857  1.00  0.48           O  
HETATM  138  O   HOH T 137      37.724  13.928  21.346  1.00  0.48           O  
HETATM  139  O   HOH T 138      36.406  -6.126  21.806  1.00  0.49           O  
HETATM  140  O   HOH T 139      37.432  16.830  25.091  1.00  0.49           O  
HETATM  141  O   HOH T 140      39.056  15.519  23.311  1.00  0.49           O  
HETATM  142  O   HOH T 141      47.770   5.993  -3.006  1.00  0.49           O  
HETATM  143  O   HOH T 142      23.821  -3.177  25.254  1.00  0.49           O  
HETATM  144  O   HOH T 143      20.918   0.242  -2.104  1.00  0.49           O  
HETATM  145  O   HOH T 144      43.814  14.575  17.233  1.00  0.50           O  
HETATM  146  O   HOH T 145      28.865  19.851  19.214  1.00  0.50           O  
HETATM  147  O   HOH T 146      25.731  21.922   1.424  1.00  0.50           O  
HETATM  148  O   HOH T 147      14.685   4.652   0.451  1.00  0.50           O  
HETATM  149  O   HOH T 148      42.686  -2.380  18.327  1.00  0.50           O  
HETATM  150  O   HOH T 149      44.661   2.212   8.820  1.00  0.50           O  
HETATM  151  O   HOH T 150      25.746  15.182  -3.088  1.00  0.50           O  
HETATM  152  O   HOH T 151      21.856  -6.585   4.300  1.00  0.50           O  
HETATM  153  O   HOH T 152      41.667  -1.869  11.995  1.00  0.50           O  
HETATM  154  O   HOH T 153      13.771   1.638  -2.604  1.00  0.51           O  
HETATM  155  O   HOH T 154      36.467  17.960  21.150  1.00  0.51           O  
HETATM  156  O   HOH T 155      35.425  17.998  23.669  1.00  0.51           O  
HETATM  157  O   HOH T 156      24.021  19.668   2.097  1.00  0.51           O  
HETATM  158  O   HOH T 157      45.756   8.362  24.641  1.00  0.51           O  
HETATM  159  O   HOH T 158      37.189  21.265   5.285  1.00  0.52           O  
HETATM  160  O   HOH T 159      23.652  -8.352   3.640  1.00  0.52           O  
HETATM  161  O   HOH T 160      34.977  22.680   4.773  1.00  0.52           O  
HETATM  162  O   HOH T 161      39.204  22.568  12.208  1.00  0.52           O  
HETATM  163  O   HOH T 162      39.824   9.337  27.586  1.00  0.52           O  
HETATM  164  O   HOH T 163      34.075  17.710  -5.583  1.00  0.52           O  
HETATM  165  O   HOH T 164      31.572  21.041  21.921  1.00  0.52           O  
HETATM  166  O   HOH T 165      44.217   3.414  25.849  1.00  0.53           O  
HETATM  167  O   HOH T 166      33.126  17.976  25.263  1.00  0.53           O  
HETATM  168  O   HOH T 167      33.271  21.900  17.130  1.00  0.53           O  
HETATM  169  O   HOH T 168      39.698  20.251   4.844  1.00  0.53           O  
HETATM  170  O   HOH T 169      45.615   1.049  -1.917  1.00  0.53           O  
HETATM  171  O   HOH T 170      27.828  29.815   4.955  1.00  0.53           O  
HETATM  172  O   HOH T 171      29.013  22.498  20.178  1.00  0.53           O  
HETATM  173  O   HOH T 172      46.232   6.508   9.276  1.00  0.54           O  
HETATM  174  O   HOH T 173      28.994  23.624   3.990  1.00  0.54           O  
HETATM  175  O   HOH T 174      10.477   0.919   9.682  1.00  0.54           O  
HETATM  176  O   HOH T 175      28.549  18.114  -5.649  1.00  0.54           O  
HETATM  177  O   HOH T 176      31.678  29.284   9.434  1.00  0.54           O  
HETATM  178  O   HOH T 177      42.956  18.817  13.920  1.00  0.54           O  
HETATM  179  O   HOH T 178      40.856  -4.580  17.619  1.00  0.54           O  
HETATM  180  O   HOH T 179       8.367  13.607   8.547  1.00  0.54           O  
HETATM  181  O   HOH T 180      41.402   7.580   3.887  1.00  0.54           O  
HETATM  182  O   HOH T 181      20.535  18.826   3.729  1.00  0.54           O  
HETATM  183  O   HOH T 182      24.359  -5.873   3.468  1.00  0.54           O  
HETATM  184  O   HOH T 183      32.051   1.867   6.226  1.00  0.55           O  
HETATM  185  O   HOH T 184      41.413  -3.403   2.963  1.00  0.55           O  
HETATM  186  O   HOH T 185      10.492   5.626   8.322  1.00  0.55           O  
HETATM  187  O   HOH T 186      47.695   5.712  21.850  1.00  0.55           O  
HETATM  188  O   HOH T 187      37.276  16.177  16.892  1.00  0.56           O  
HETATM  189  O   HOH T 188      10.486   3.314   6.505  1.00  0.57           O  
HETATM  190  O   HOH T 189      24.000  17.004  -4.379  1.00  0.57           O  
HETATM  191  O   HOH T 190      41.459  14.416  24.050  1.00  0.59           O  
HETATM  192  O   HOH T 191      50.238   6.252   3.384  1.00  0.60           O  
TER     193      HOH T 191 
