# Supplementary material for: Accurate Prediction of Hydration Sites of Proteins Using Energy Model With Atom Embedding
Source: Front Mol Biosci. 2021 Sep 20;8:756075. doi: 10.3389/fmolb.2021.756075 (PMC8488165; doi:10.3389/fmolb.2021.756075)
Supplement: Supplementary file 1 [file DataSheet1.ZIP › Data Sheet 1/Our_result_pdb/our_dataset_output/1JOV_watersite.pdb]

HEADER                                                        XXXX


JRNL        PMID   -1
HETATM    1  O   HOH T   0      24.580  27.074  26.960  1.00  0.16           O  
HETATM    2  O   HOH T   1      22.123  31.831  27.248  1.00  0.17           O  
HETATM    3  O   HOH T   2      45.517  38.902  31.967  1.00  0.18           O  
HETATM    4  O   HOH T   3       6.900  18.408  12.356  1.00  0.18           O  
HETATM    5  O   HOH T   4      35.152  17.772  24.441  1.00  0.19           O  
HETATM    6  O   HOH T   5      24.418  36.496   0.237  1.00  0.20           O  
HETATM    7  O   HOH T   6      29.782  21.692  10.129  1.00  0.20           O  
HETATM    8  O   HOH T   7      24.111  35.951  26.303  1.00  0.21           O  
HETATM    9  O   HOH T   8      28.095  37.531  12.364  1.00  0.21           O  
HETATM   10  O   HOH T   9      23.921  37.276   7.826  1.00  0.21           O  
HETATM   11  O   HOH T  10      26.903  41.601  23.357  1.00  0.22           O  
HETATM   12  O   HOH T  11      13.187  26.753  42.974  1.00  0.22           O  
HETATM   13  O   HOH T  12      21.511  37.727   9.208  1.00  0.24           O  
HETATM   14  O   HOH T  13      19.613  41.193  24.607  1.00  0.24           O  
HETATM   15  O   HOH T  14      15.202  16.112   7.451  1.00  0.24           O  
HETATM   16  O   HOH T  15      42.349  20.450  35.914  1.00  0.25           O  
HETATM   17  O   HOH T  16      37.811   9.894  33.455  1.00  0.25           O  
HETATM   18  O   HOH T  17      35.759  19.030   9.322  1.00  0.26           O  
HETATM   19  O   HOH T  18      12.567  17.929   6.921  1.00  0.26           O  
HETATM   20  O   HOH T  19      15.354  26.578   1.734  1.00  0.26           O  
HETATM   21  O   HOH T  20      16.926  16.197  29.894  1.00  0.27           O  
HETATM   22  O   HOH T  21      26.257  40.426   1.657  1.00  0.27           O  
HETATM   23  O   HOH T  22      10.585  28.384   7.073  1.00  0.27           O  
HETATM   24  O   HOH T  23      35.131  29.599  17.221  1.00  0.27           O  
HETATM   25  O   HOH T  24      16.077  36.057   3.352  1.00  0.28           O  
HETATM   26  O   HOH T  25      46.068  22.294  26.707  1.00  0.28           O  
HETATM   27  O   HOH T  26       4.521  24.919  16.020  1.00  0.28           O  
HETATM   28  O   HOH T  27      21.755  13.137   3.483  1.00  0.28           O  
HETATM   29  O   HOH T  28      42.069   7.807  35.194  1.00  0.28           O  
HETATM   30  O   HOH T  29      38.799  42.107  29.349  1.00  0.28           O  
HETATM   31  O   HOH T  30      22.656  39.121   4.060  1.00  0.28           O  
HETATM   32  O   HOH T  31      30.199  34.300  10.315  1.00  0.28           O  
HETATM   33  O   HOH T  32       2.940  22.857   1.922  1.00  0.28           O  
HETATM   34  O   HOH T  33      21.925  23.571   2.191  1.00  0.29           O  
HETATM   35  O   HOH T  34      11.202  27.455  44.826  1.00  0.29           O  
HETATM   36  O   HOH T  35      14.984  33.982   1.754  1.00  0.29           O  
HETATM   37  O   HOH T  36      36.299  33.334  42.264  1.00  0.29           O  
HETATM   38  O   HOH T  37      13.106  12.164   8.131  1.00  0.29           O  
HETATM   39  O   HOH T  38      11.850  14.334  14.847  1.00  0.29           O  
HETATM   40  O   HOH T  39      22.147  33.837  38.847  1.00  0.29           O  
HETATM   41  O   HOH T  40      40.531  12.102  27.382  1.00  0.29           O  
HETATM   42  O   HOH T  41      22.094  38.647  36.622  1.00  0.30           O  
HETATM   43  O   HOH T  42       5.770  23.238  38.245  1.00  0.30           O  
HETATM   44  O   HOH T  43      29.761  14.252  26.723  1.00  0.30           O  
HETATM   45  O   HOH T  44      16.331  38.072  26.030  1.00  0.30           O  
HETATM   46  O   HOH T  45      15.810  42.468   7.123  1.00  0.30           O  
HETATM   47  O   HOH T  46       1.939  20.059   6.044  1.00  0.31           O  
HETATM   48  O   HOH T  47      35.386  27.633  11.859  1.00  0.31           O  
HETATM   49  O   HOH T  48      24.182  17.244  30.667  1.00  0.31           O  
HETATM   50  O   HOH T  49       4.962  20.479  17.296  1.00  0.31           O  
HETATM   51  O   HOH T  50       4.939  31.830  26.929  1.00  0.31           O  
HETATM   52  O   HOH T  51      28.724  33.251  -1.223  1.00  0.31           O  
HETATM   53  O   HOH T  52      37.214  13.698  19.372  1.00  0.31           O  
HETATM   54  O   HOH T  53      30.980  22.730  44.008  1.00  0.31           O  
HETATM   55  O   HOH T  54       1.614  20.491  36.946  1.00  0.31           O  
HETATM   56  O   HOH T  55       8.550  38.842  47.879  1.00  0.32           O  
HETATM   57  O   HOH T  56      40.877   6.800  32.977  1.00  0.32           O  
HETATM   58  O   HOH T  57      33.941  21.811  41.882  1.00  0.32           O  
HETATM   59  O   HOH T  58      20.201  21.773  19.859  1.00  0.32           O  
HETATM   60  O   HOH T  59      31.947  13.506  18.680  1.00  0.32           O  
HETATM   61  O   HOH T  60      10.159  28.904  14.149  1.00  0.32           O  
HETATM   62  O   HOH T  61      -1.132  24.369   5.537  1.00  0.32           O  
HETATM   63  O   HOH T  62      34.582  14.175  18.940  1.00  0.32           O  
HETATM   64  O   HOH T  63      43.557  16.574  30.200  1.00  0.32           O  
HETATM   65  O   HOH T  64      11.574  30.709  15.698  1.00  0.32           O  
HETATM   66  O   HOH T  65      16.050  32.774  16.255  1.00  0.32           O  
HETATM   67  O   HOH T  66      14.234  30.633  16.726  1.00  0.32           O  
HETATM   68  O   HOH T  67      20.409  21.129  34.176  1.00  0.32           O  
HETATM   69  O   HOH T  68      11.305  16.892  30.586  1.00  0.33           O  
HETATM   70  O   HOH T  69      17.443  22.988  -7.548  1.00  0.33           O  
HETATM   71  O   HOH T  70      37.324  19.998   7.148  1.00  0.33           O  
HETATM   72  O   HOH T  71      37.317  17.291  39.908  1.00  0.33           O  
HETATM   73  O   HOH T  72      43.051  46.241  23.164  1.00  0.33           O  
HETATM   74  O   HOH T  73      16.693  32.502  -1.351  1.00  0.33           O  
HETATM   75  O   HOH T  74      20.387  23.446  41.916  1.00  0.33           O  
HETATM   76  O   HOH T  75       4.161  19.574  21.912  1.00  0.33           O  
HETATM   77  O   HOH T  76      14.566  14.418  14.464  1.00  0.33           O  
HETATM   78  O   HOH T  77      40.162  20.192  18.008  1.00  0.33           O  
HETATM   79  O   HOH T  78      39.480  43.777  31.527  1.00  0.33           O  
HETATM   80  O   HOH T  79      44.016  32.686  39.741  1.00  0.33           O  
HETATM   81  O   HOH T  80      21.789  12.259  15.290  1.00  0.34           O  
HETATM   82  O   HOH T  81      21.462  41.055   5.584  1.00  0.34           O  
HETATM   83  O   HOH T  82      16.339  36.665  49.706  1.00  0.34           O  
HETATM   84  O   HOH T  83      16.811  38.815  11.344  1.00  0.34           O  
HETATM   85  O   HOH T  84      47.092  11.085  31.605  1.00  0.34           O  
HETATM   86  O   HOH T  85      21.641  23.899  -0.588  1.00  0.34           O  
HETATM   87  O   HOH T  86       9.785  31.199  37.664  1.00  0.34           O  
HETATM   88  O   HOH T  87       8.506  29.551  35.750  1.00  0.34           O  
HETATM   89  O   HOH T  88       4.855  15.230  12.953  1.00  0.35           O  
HETATM   90  O   HOH T  89      28.237  31.123  -3.096  1.00  0.35           O  
HETATM   91  O   HOH T  90      13.692  10.818  11.847  1.00  0.35           O  
HETATM   92  O   HOH T  91      32.551  29.302  18.372  1.00  0.35           O  
HETATM   93  O   HOH T  92      25.296  13.301  19.313  1.00  0.35           O  
HETATM   94  O   HOH T  93       9.627  41.337  30.593  1.00  0.35           O  
HETATM   95  O   HOH T  94      39.075  27.126  25.732  1.00  0.35           O  
HETATM   96  O   HOH T  95      15.953  10.965  23.753  1.00  0.35           O  
HETATM   97  O   HOH T  96      37.264  44.278  29.943  1.00  0.35           O  
HETATM   98  O   HOH T  97      44.273   9.852  27.559  1.00  0.35           O  
HETATM   99  O   HOH T  98       7.582  26.048  41.976  1.00  0.35           O  
HETATM  100  O   HOH T  99      13.855  17.918  45.380  1.00  0.35           O  
HETATM  101  O   HOH T 100      44.605  30.288  41.006  1.00  0.36           O  
HETATM  102  O   HOH T 101      10.418  13.880  23.903  1.00  0.36           O  
HETATM  103  O   HOH T 102      32.369  17.704  -0.235  1.00  0.36           O  
HETATM  104  O   HOH T 103      22.810  21.587   0.485  1.00  0.36           O  
HETATM  105  O   HOH T 104      14.460  33.436  33.491  1.00  0.36           O  
HETATM  106  O   HOH T 105      22.740  37.300  47.048  1.00  0.36           O  
HETATM  107  O   HOH T 106       9.636  34.061  12.139  1.00  0.36           O  
HETATM  108  O   HOH T 107       7.803  32.644  19.688  1.00  0.37           O  
HETATM  109  O   HOH T 108      24.560  38.422   2.250  1.00  0.37           O  
HETATM  110  O   HOH T 109      40.023  17.150  39.230  1.00  0.37           O  
HETATM  111  O   HOH T 110      17.482  36.662  15.615  1.00  0.37           O  
HETATM  112  O   HOH T 111      17.284  40.692  25.832  1.00  0.37           O  
HETATM  113  O   HOH T 112      23.586  42.981  12.007  1.00  0.37           O  
HETATM  114  O   HOH T 113       8.849  34.504  17.881  1.00  0.37           O  
HETATM  115  O   HOH T 114      37.287  26.825  22.699  1.00  0.37           O  
HETATM  116  O   HOH T 115      13.652  11.779  25.114  1.00  0.37           O  
HETATM  117  O   HOH T 116      17.501  42.447  13.913  1.00  0.37           O  
HETATM  118  O   HOH T 117      33.200  37.109  18.655  1.00  0.37           O  
HETATM  119  O   HOH T 118      21.417  26.570  -0.959  1.00  0.37           O  
HETATM  120  O   HOH T 119      15.812  43.038   9.858  1.00  0.37           O  
HETATM  121  O   HOH T 120      22.726  41.458  10.102  1.00  0.37           O  
HETATM  122  O   HOH T 121      34.902   9.944  27.701  1.00  0.38           O  
HETATM  123  O   HOH T 122      18.014  15.295  32.338  1.00  0.38           O  
HETATM  124  O   HOH T 123       9.103  29.290  44.700  1.00  0.38           O  
HETATM  125  O   HOH T 124      32.018  31.512  14.425  1.00  0.38           O  
HETATM  126  O   HOH T 125      36.530  29.154  19.537  1.00  0.38           O  
HETATM  127  O   HOH T 126      33.033  29.226  15.509  1.00  0.38           O  
HETATM  128  O   HOH T 127      14.634  34.578  10.014  1.00  0.38           O  
HETATM  129  O   HOH T 128      27.381  19.984  -1.743  1.00  0.38           O  
HETATM  130  O   HOH T 129      28.215  28.502  -2.085  1.00  0.38           O  
HETATM  131  O   HOH T 130      42.032  26.830  30.018  1.00  0.38           O  
HETATM  132  O   HOH T 131      21.231  36.182  37.629  1.00  0.38           O  
HETATM  133  O   HOH T 132      44.097  20.983  25.205  1.00  0.38           O  
HETATM  134  O   HOH T 133      40.920  40.499  20.052  1.00  0.38           O  
HETATM  135  O   HOH T 134      24.730  22.823  40.402  1.00  0.38           O  
HETATM  136  O   HOH T 135      43.035  13.912  30.638  1.00  0.38           O  
HETATM  137  O   HOH T 136      33.588  33.800  14.570  1.00  0.38           O  
HETATM  138  O   HOH T 137      11.586  30.869  39.813  1.00  0.38           O  
HETATM  139  O   HOH T 138      36.395  15.453  17.278  1.00  0.38           O  
HETATM  140  O   HOH T 139      19.073  44.714  13.374  1.00  0.39           O  
HETATM  141  O   HOH T 140       6.556  16.374   2.493  1.00  0.39           O  
HETATM  142  O   HOH T 141       8.230  24.966   4.934  1.00  0.39           O  
HETATM  143  O   HOH T 142      14.130  37.123  39.974  1.00  0.39           O  
HETATM  144  O   HOH T 143      35.831  19.628  12.037  1.00  0.39           O  
HETATM  145  O   HOH T 144      37.238  14.814  21.969  1.00  0.39           O  
HETATM  146  O   HOH T 145       8.725  30.713  15.773  1.00  0.39           O  
HETATM  147  O   HOH T 146      26.062  43.250  13.076  1.00  0.39           O  
HETATM  148  O   HOH T 147      45.561  13.045  34.697  1.00  0.39           O  
HETATM  149  O   HOH T 148      45.222   9.685  30.151  1.00  0.39           O  
HETATM  150  O   HOH T 149      30.860  10.443  24.818  1.00  0.39           O  
HETATM  151  O   HOH T 150      21.919  40.537  20.968  1.00  0.39           O  
HETATM  152  O   HOH T 151      21.861  34.841  19.839  1.00  0.39           O  
HETATM  153  O   HOH T 152      15.510  18.220  38.747  1.00  0.39           O  
HETATM  154  O   HOH T 153      12.860  15.646  32.530  1.00  0.39           O  
HETATM  155  O   HOH T 154       1.809  34.483  35.551  1.00  0.39           O  
HETATM  156  O   HOH T 155       5.895  30.557  15.434  1.00  0.39           O  
HETATM  157  O   HOH T 156      31.046   6.536  24.656  1.00  0.40           O  
HETATM  158  O   HOH T 157      33.865  12.422  16.979  1.00  0.40           O  
HETATM  159  O   HOH T 158      36.706  20.412   4.445  1.00  0.40           O  
HETATM  160  O   HOH T 159      14.579  28.319  -1.842  1.00  0.40           O  
HETATM  161  O   HOH T 160       2.462  26.746  16.301  1.00  0.40           O  
HETATM  162  O   HOH T 161      30.255   9.678  28.403  1.00  0.40           O  
HETATM  163  O   HOH T 162      44.019  40.819  38.491  1.00  0.40           O  
HETATM  164  O   HOH T 163      11.438  31.450  42.567  1.00  0.40           O  
HETATM  165  O   HOH T 164      19.507  33.448  19.629  1.00  0.40           O  
HETATM  166  O   HOH T 165      42.505  18.965  18.684  1.00  0.40           O  
HETATM  167  O   HOH T 166      13.742  41.584  22.558  1.00  0.40           O  
HETATM  168  O   HOH T 167      12.557  33.153   0.600  1.00  0.40           O  
HETATM  169  O   HOH T 168      13.571  36.577   4.587  1.00  0.41           O  
HETATM  170  O   HOH T 169      40.006  13.139  38.356  1.00  0.41           O  
HETATM  171  O   HOH T 170       4.970  26.964  42.003  1.00  0.41           O  
HETATM  172  O   HOH T 171       8.244  21.901   0.513  1.00  0.41           O  
HETATM  173  O   HOH T 172      15.277  39.149  50.319  1.00  0.41           O  
HETATM  174  O   HOH T 173       5.605  22.784   0.873  1.00  0.41           O  
HETATM  175  O   HOH T 174      23.339  10.272  16.494  1.00  0.41           O  
HETATM  176  O   HOH T 175      46.861  21.360  21.102  1.00  0.41           O  
HETATM  177  O   HOH T 176      12.446  29.065  41.657  1.00  0.41           O  
HETATM  178  O   HOH T 177      33.478  24.338   0.615  1.00  0.41           O  
HETATM  179  O   HOH T 178      46.332  24.451  28.399  1.00  0.41           O  
HETATM  180  O   HOH T 179      38.027  26.722  11.475  1.00  0.41           O  
HETATM  181  O   HOH T 180      34.298   7.289  27.869  1.00  0.41           O  
HETATM  182  O   HOH T 181      -0.340  29.096  35.385  1.00  0.41           O  
HETATM  183  O   HOH T 182      16.532  12.616   6.393  1.00  0.41           O  
HETATM  184  O   HOH T 183      32.300   6.378  22.113  1.00  0.42           O  
HETATM  185  O   HOH T 184      11.921  32.391   3.090  1.00  0.42           O  
HETATM  186  O   HOH T 185      11.602  12.598  12.596  1.00  0.42           O  
HETATM  187  O   HOH T 186       7.922  36.601   8.906  1.00  0.42           O  
HETATM  188  O   HOH T 187       4.964  29.435  19.365  1.00  0.42           O  
HETATM  189  O   HOH T 188       7.057  10.299  18.106  1.00  0.42           O  
HETATM  190  O   HOH T 189       2.963  28.604  41.039  1.00  0.42           O  
HETATM  191  O   HOH T 190      13.727   8.682  18.796  1.00  0.42           O  
HETATM  192  O   HOH T 191       2.785  26.679  39.072  1.00  0.42           O  
HETATM  193  O   HOH T 192       8.037  17.910   0.587  1.00  0.42           O  
HETATM  194  O   HOH T 193      43.092   5.831  36.714  1.00  0.42           O  
HETATM  195  O   HOH T 194      14.616  41.105   4.914  1.00  0.42           O  
HETATM  196  O   HOH T 195      37.257  26.487  19.126  1.00  0.42           O  
HETATM  197  O   HOH T 196      12.717  26.375   2.602  1.00  0.42           O  
HETATM  198  O   HOH T 197      32.232  28.325   9.501  1.00  0.42           O  
HETATM  199  O   HOH T 198      17.689  37.058  39.289  1.00  0.43           O  
HETATM  200  O   HOH T 199      31.503  11.007  17.658  1.00  0.43           O  
HETATM  201  O   HOH T 200      10.451  12.492   7.988  1.00  0.43           O  
HETATM  202  O   HOH T 201      21.063  35.819  40.369  1.00  0.43           O  
HETATM  203  O   HOH T 202       7.624  23.913   2.403  1.00  0.43           O  
HETATM  204  O   HOH T 203       4.130  28.913  16.776  1.00  0.43           O  
HETATM  205  O   HOH T 204      24.981  39.845  20.221  1.00  0.43           O  
HETATM  206  O   HOH T 205      14.381  24.128   2.240  1.00  0.43           O  
HETATM  207  O   HOH T 206      17.901  40.372  15.634  1.00  0.43           O  
HETATM  208  O   HOH T 207      19.594  15.145  30.051  1.00  0.43           O  
HETATM  209  O   HOH T 208       8.255  23.830  45.187  1.00  0.43           O  
HETATM  210  O   HOH T 209      19.441  43.567  29.518  1.00  0.43           O  
HETATM  211  O   HOH T 210      23.230  10.434  13.706  1.00  0.43           O  
HETATM  212  O   HOH T 211       7.538  25.286  37.673  1.00  0.43           O  
HETATM  213  O   HOH T 212       7.880  37.133  45.807  1.00  0.43           O  
HETATM  214  O   HOH T 213      12.202  34.804  11.407  1.00  0.43           O  
HETATM  215  O   HOH T 214      33.438  35.091  16.922  1.00  0.43           O  
HETATM  216  O   HOH T 215      24.693  43.304   9.438  1.00  0.43           O  
HETATM  217  O   HOH T 216       9.487  33.526   3.649  1.00  0.44           O  
HETATM  218  O   HOH T 217      19.411  38.137  37.433  1.00  0.44           O  
HETATM  219  O   HOH T 218      31.526  19.936  43.940  1.00  0.44           O  
HETATM  220  O   HOH T 219       7.232  31.885  36.651  1.00  0.44           O  
HETATM  221  O   HOH T 220      14.500  19.428  43.085  1.00  0.44           O  
HETATM  222  O   HOH T 221      25.273  31.666   0.612  1.00  0.44           O  
HETATM  223  O   HOH T 222      38.584  14.883  39.890  1.00  0.44           O  
HETATM  224  O   HOH T 223      24.359  44.688   6.985  1.00  0.44           O  
HETATM  225  O   HOH T 224      30.290  33.938   5.466  1.00  0.44           O  
HETATM  226  O   HOH T 225      11.537  28.672   4.292  1.00  0.44           O  
HETATM  227  O   HOH T 226      47.474  21.961  29.116  1.00  0.44           O  
HETATM  228  O   HOH T 227      42.465  19.891  23.381  1.00  0.44           O  
HETATM  229  O   HOH T 228      17.072  34.121  18.513  1.00  0.44           O  
HETATM  230  O   HOH T 229      12.265  17.750  43.089  1.00  0.44           O  
HETATM  231  O   HOH T 230      43.492  39.949  19.408  1.00  0.44           O  
HETATM  232  O   HOH T 231      21.651  38.425   6.571  1.00  0.44           O  
HETATM  233  O   HOH T 232       5.170  32.177  18.917  1.00  0.44           O  
HETATM  234  O   HOH T 233      44.607  25.884  30.123  1.00  0.44           O  
HETATM  235  O   HOH T 234      29.728  30.588  -0.924  1.00  0.45           O  
HETATM  236  O   HOH T 235      23.520  36.186  39.169  1.00  0.45           O  
HETATM  237  O   HOH T 236      11.373   9.644  19.758  1.00  0.45           O  
HETATM  238  O   HOH T 237      21.585  44.479  12.456  1.00  0.45           O  
HETATM  239  O   HOH T 238       0.749  24.103   3.338  1.00  0.45           O  
HETATM  240  O   HOH T 239       5.460  17.834  20.230  1.00  0.45           O  
HETATM  241  O   HOH T 240      16.678  38.936  48.030  1.00  0.45           O  
HETATM  242  O   HOH T 241       1.095  21.311   3.459  1.00  0.45           O  
HETATM  243  O   HOH T 242      36.832  36.794  45.329  1.00  0.45           O  
HETATM  244  O   HOH T 243      25.200  19.295  -3.372  1.00  0.45           O  
HETATM  245  O   HOH T 244       7.410  35.632  11.504  1.00  0.45           O  
HETATM  246  O   HOH T 245      45.427  13.230  31.894  1.00  0.46           O  
HETATM  247  O   HOH T 246      12.108  33.914  34.877  1.00  0.46           O  
HETATM  248  O   HOH T 247      42.264  43.697  15.061  1.00  0.46           O  
HETATM  249  O   HOH T 248      30.372  30.011   3.365  1.00  0.46           O  
HETATM  250  O   HOH T 249      21.316  34.933  22.540  1.00  0.46           O  
HETATM  251  O   HOH T 250      13.541  15.488  35.438  1.00  0.46           O  
HETATM  252  O   HOH T 251      21.960  15.341  31.599  1.00  0.46           O  
HETATM  253  O   HOH T 252       7.182  15.830  20.175  1.00  0.46           O  
HETATM  254  O   HOH T 253       9.010  12.155  11.534  1.00  0.46           O  
HETATM  255  O   HOH T 254       4.036  28.873  21.879  1.00  0.46           O  
HETATM  256  O   HOH T 255       9.101  14.282  21.508  1.00  0.46           O  
HETATM  257  O   HOH T 256       3.156  31.223  20.570  1.00  0.46           O  
HETATM  258  O   HOH T 257      24.023   3.369  19.920  1.00  0.46           O  
HETATM  259  O   HOH T 258      44.112  34.638  37.772  1.00  0.46           O  
HETATM  260  O   HOH T 259      39.586  10.395  38.081  1.00  0.46           O  
HETATM  261  O   HOH T 260      42.143  19.741  16.059  1.00  0.46           O  
HETATM  262  O   HOH T 261      15.773  16.707  36.505  1.00  0.46           O  
HETATM  263  O   HOH T 262       6.617  30.466  44.767  1.00  0.46           O  
HETATM  264  O   HOH T 263      32.456  30.460  11.142  1.00  0.46           O  
HETATM  265  O   HOH T 264       2.363  16.145  12.175  1.00  0.46           O  
HETATM  266  O   HOH T 265      13.739  17.830  40.778  1.00  0.47           O  
HETATM  267  O   HOH T 266      12.219  41.284   6.356  1.00  0.47           O  
HETATM  268  O   HOH T 267      22.605  16.588  33.949  1.00  0.47           O  
HETATM  269  O   HOH T 268       2.500  17.807  23.550  1.00  0.47           O  
HETATM  270  O   HOH T 269      11.709  11.175   5.864  1.00  0.47           O  
HETATM  271  O   HOH T 270      33.329  21.681  -0.293  1.00  0.47           O  
HETATM  272  O   HOH T 271      43.132  36.540  39.589  1.00  0.47           O  
HETATM  273  O   HOH T 272      35.984  10.125  35.608  1.00  0.47           O  
HETATM  274  O   HOH T 273      13.799  16.069  38.340  1.00  0.47           O  
HETATM  275  O   HOH T 274      21.598  18.853  34.656  1.00  0.47           O  
HETATM  276  O   HOH T 275      35.167  10.275  24.939  1.00  0.47           O  
HETATM  277  O   HOH T 276       4.222  18.011  12.988  1.00  0.48           O  
HETATM  278  O   HOH T 277      23.889  38.940  38.835  1.00  0.48           O  
HETATM  279  O   HOH T 278      24.460  15.132  32.526  1.00  0.48           O  
HETATM  280  O   HOH T 279      44.582  19.748  20.420  1.00  0.48           O  
HETATM  281  O   HOH T 280      21.494   4.263  19.597  1.00  0.48           O  
HETATM  282  O   HOH T 281      14.970  40.647  10.653  1.00  0.48           O  
HETATM  283  O   HOH T 282       8.718  43.570  29.150  1.00  0.48           O  
HETATM  284  O   HOH T 283       2.521  30.940  25.967  1.00  0.48           O  
HETATM  285  O   HOH T 284      31.380  20.005  -0.916  1.00  0.48           O  
HETATM  286  O   HOH T 285      30.763  15.568   4.156  1.00  0.48           O  
HETATM  287  O   HOH T 286      21.962  37.731  20.154  1.00  0.48           O  
HETATM  288  O   HOH T 287      44.417  17.044  17.926  1.00  0.48           O  
HETATM  289  O   HOH T 288      18.159  38.833  50.307  1.00  0.48           O  
HETATM  290  O   HOH T 289       4.754  35.491  10.714  1.00  0.48           O  
HETATM  291  O   HOH T 290      44.167  29.554  43.618  1.00  0.48           O  
HETATM  292  O   HOH T 291      47.261  38.521  38.890  1.00  0.48           O  
HETATM  293  O   HOH T 292      28.668  43.038   7.452  1.00  0.48           O  
HETATM  294  O   HOH T 293      13.545  42.077   8.700  1.00  0.48           O  
HETATM  295  O   HOH T 294       9.868  16.550  -0.919  1.00  0.48           O  
HETATM  296  O   HOH T 295       9.538  33.243  35.774  1.00  0.48           O  
HETATM  297  O   HOH T 296       3.008  21.985  13.799  1.00  0.48           O  
HETATM  298  O   HOH T 297      46.271  33.083  38.103  1.00  0.48           O  
HETATM  299  O   HOH T 298      18.781  42.897  26.797  1.00  0.49           O  
HETATM  300  O   HOH T 299      -1.669  25.797   8.050  1.00  0.49           O  
HETATM  301  O   HOH T 300       5.305  22.330  15.275  1.00  0.49           O  
HETATM  302  O   HOH T 301      39.553  26.277  20.795  1.00  0.49           O  
HETATM  303  O   HOH T 302      28.348  42.075   2.429  1.00  0.49           O  
HETATM  304  O   HOH T 303       8.670  26.469  44.529  1.00  0.49           O  
HETATM  305  O   HOH T 304      19.378  20.897  41.403  1.00  0.49           O  
HETATM  306  O   HOH T 305      37.403  22.588   5.919  1.00  0.49           O  
HETATM  307  O   HOH T 306      26.029  11.845  27.391  1.00  0.49           O  
HETATM  308  O   HOH T 307      16.759  33.733  27.658  1.00  0.49           O  
HETATM  309  O   HOH T 308      15.466  36.554  11.654  1.00  0.49           O  
HETATM  310  O   HOH T 309       6.210  34.763  18.738  1.00  0.49           O  
HETATM  311  O   HOH T 310      35.336  22.600   1.353  1.00  0.49           O  
HETATM  312  O   HOH T 311       9.166  10.361   6.597  1.00  0.50           O  
HETATM  313  O   HOH T 312      31.524  33.942  12.789  1.00  0.50           O  
HETATM  314  O   HOH T 313      13.593  32.597  14.974  1.00  0.50           O  
HETATM  315  O   HOH T 314      16.153  15.106  34.392  1.00  0.50           O  
HETATM  316  O   HOH T 315       9.909  32.383   1.115  1.00  0.50           O  
HETATM  317  O   HOH T 316      15.532  10.475  26.586  1.00  0.50           O  
HETATM  318  O   HOH T 317       2.663  36.378  13.541  1.00  0.50           O  
HETATM  319  O   HOH T 318      29.120  11.322  16.297  1.00  0.50           O  
HETATM  320  O   HOH T 319       5.476  20.673  13.176  1.00  0.50           O  
HETATM  321  O   HOH T 320       3.077  31.046  23.297  1.00  0.51           O  
HETATM  322  O   HOH T 321      22.418   6.634  20.579  1.00  0.51           O  
HETATM  323  O   HOH T 322      40.010  27.598  23.187  1.00  0.51           O  
HETATM  324  O   HOH T 323      35.950  34.803  47.127  1.00  0.51           O  
HETATM  325  O   HOH T 324      26.754  44.794   8.269  1.00  0.51           O  
HETATM  326  O   HOH T 325      11.226  34.902  37.227  1.00  0.51           O  
HETATM  327  O   HOH T 326      15.681  38.811  15.618  1.00  0.51           O  
HETATM  328  O   HOH T 327      31.675  15.624   1.543  1.00  0.51           O  
HETATM  329  O   HOH T 328      38.961  12.495  17.810  1.00  0.51           O  
HETATM  330  O   HOH T 329      37.061  45.610  27.678  1.00  0.51           O  
HETATM  331  O   HOH T 330      46.743  20.126  18.714  1.00  0.51           O  
HETATM  332  O   HOH T 331      43.993  38.212  37.481  1.00  0.51           O  
HETATM  333  O   HOH T 332       8.042  12.172  20.027  1.00  0.51           O  
HETATM  334  O   HOH T 333       8.765   9.602  20.035  1.00  0.51           O  
HETATM  335  O   HOH T 334      26.764  39.644  18.009  1.00  0.51           O  
HETATM  336  O   HOH T 335      35.903  20.202  25.562  1.00  0.51           O  
HETATM  337  O   HOH T 336      15.305  30.722  -2.737  1.00  0.51           O  
HETATM  338  O   HOH T 337      31.028   8.617  22.774  1.00  0.52           O  
HETATM  339  O   HOH T 338      42.974  12.026  28.677  1.00  0.52           O  
HETATM  340  O   HOH T 339      25.980  12.931  29.974  1.00  0.52           O  
HETATM  341  O   HOH T 340       9.845  30.691   3.282  1.00  0.52           O  
HETATM  342  O   HOH T 341      21.224  10.397   3.040  1.00  0.52           O  
HETATM  343  O   HOH T 342      10.470  33.354  39.378  1.00  0.52           O  
HETATM  344  O   HOH T 343      23.729   8.899  21.856  1.00  0.52           O  
HETATM  345  O   HOH T 344      15.681  39.698  23.826  1.00  0.52           O  
HETATM  346  O   HOH T 345      26.928  42.620   0.096  1.00  0.52           O  
HETATM  347  O   HOH T 346      33.939  39.694  18.626  1.00  0.52           O  
HETATM  348  O   HOH T 347      11.219  35.252   5.160  1.00  0.52           O  
HETATM  349  O   HOH T 348      16.387   8.324  22.760  1.00  0.52           O  
HETATM  350  O   HOH T 349      34.253  29.948  13.142  1.00  0.52           O  
HETATM  351  O   HOH T 350      33.520   7.975  24.167  1.00  0.53           O  
HETATM  352  O   HOH T 351      10.101  25.780   6.648  1.00  0.53           O  
HETATM  353  O   HOH T 352      10.230  10.141  12.717  1.00  0.53           O  
HETATM  354  O   HOH T 353       8.057  15.247  23.895  1.00  0.53           O  
HETATM  355  O   HOH T 354       6.472  13.741   8.866  1.00  0.53           O  
HETATM  356  O   HOH T 355      20.055  43.866  24.492  1.00  0.53           O  
HETATM  357  O   HOH T 356      27.695  19.738  -4.524  1.00  0.53           O  
HETATM  358  O   HOH T 357      37.340  34.205  44.746  1.00  0.53           O  
HETATM  359  O   HOH T 358      11.995  29.197  25.379  1.00  0.53           O  
HETATM  360  O   HOH T 359      29.857  20.452  -2.941  1.00  0.53           O  
HETATM  361  O   HOH T 360      16.948   8.056  20.148  1.00  0.53           O  
HETATM  362  O   HOH T 361      32.425   9.005  26.688  1.00  0.53           O  
HETATM  363  O   HOH T 362      15.133  36.473  14.365  1.00  0.53           O  
HETATM  364  O   HOH T 363       0.659  28.167  39.680  1.00  0.53           O  
HETATM  365  O   HOH T 364      16.749  44.380  12.026  1.00  0.53           O  
HETATM  366  O   HOH T 365       3.136  16.208  14.893  1.00  0.53           O  
HETATM  367  O   HOH T 366      41.801  28.195  43.255  1.00  0.53           O  
HETATM  368  O   HOH T 367      16.221  26.919  27.540  1.00  0.53           O  
HETATM  369  O   HOH T 368       7.625  39.516  31.063  1.00  0.53           O  
HETATM  370  O   HOH T 369      11.379  11.140  10.240  1.00  0.53           O  
HETATM  371  O   HOH T 370       5.616  33.231  16.392  1.00  0.53           O  
HETATM  372  O   HOH T 371      20.260  42.010  31.757  1.00  0.53           O  
HETATM  373  O   HOH T 372       4.834  35.761  15.286  1.00  0.54           O  
HETATM  374  O   HOH T 373      10.689  22.625  -0.089  1.00  0.54           O  
HETATM  375  O   HOH T 374      18.114  33.107  22.000  1.00  0.54           O  
HETATM  376  O   HOH T 375      31.380  34.710  -1.208  1.00  0.54           O  
HETATM  377  O   HOH T 376       3.154  33.659  33.396  1.00  0.54           O  
HETATM  378  O   HOH T 377       9.921  36.473  10.833  1.00  0.54           O  
HETATM  379  O   HOH T 378      41.889  39.730  23.241  1.00  0.55           O  
HETATM  380  O   HOH T 379      47.761  25.918  32.372  1.00  0.55           O  
HETATM  381  O   HOH T 380      41.265  27.495  18.635  1.00  0.55           O  
HETATM  382  O   HOH T 381       2.611  13.783  13.683  1.00  0.55           O  
HETATM  383  O   HOH T 382      39.698  38.875  21.844  1.00  0.55           O  
HETATM  384  O   HOH T 383      46.990  35.614  30.764  1.00  0.55           O  
HETATM  385  O   HOH T 384      -0.246  21.709   5.775  1.00  0.55           O  
HETATM  386  O   HOH T 385      41.728  15.339  38.130  1.00  0.55           O  
HETATM  387  O   HOH T 386       1.986  16.263  25.803  1.00  0.56           O  
HETATM  388  O   HOH T 387      17.022   8.759  25.225  1.00  0.56           O  
HETATM  389  O   HOH T 388      38.143  25.085   7.253  1.00  0.56           O  
HETATM  390  O   HOH T 389      29.290  50.474  26.569  1.00  0.56           O  
HETATM  391  O   HOH T 390      26.537  22.533  42.834  1.00  0.56           O  
HETATM  392  O   HOH T 391      28.288  11.579  29.177  1.00  0.56           O  
HETATM  393  O   HOH T 392       0.603  31.694   5.045  1.00  0.56           O  
HETATM  394  O   HOH T 393      22.730  11.779  25.730  1.00  0.56           O  
HETATM  395  O   HOH T 394      27.480  39.805  31.733  1.00  0.57           O  
HETATM  396  O   HOH T 395      41.401  19.387  38.223  1.00  0.57           O  
HETATM  397  O   HOH T 396      46.256  36.491  37.354  1.00  0.57           O  
HETATM  398  O   HOH T 397      32.437  39.853   8.750  1.00  0.57           O  
HETATM  399  O   HOH T 398      42.101  25.234  20.137  1.00  0.57           O  
HETATM  400  O   HOH T 399      32.563  33.160  10.457  1.00  0.58           O  
HETATM  401  O   HOH T 400      34.799  15.528  42.956  1.00  0.58           O  
HETATM  402  O   HOH T 401      27.675  23.498  -4.151  1.00  0.58           O  
HETATM  403  O   HOH T 402      11.505  34.895  17.642  1.00  0.59           O  
HETATM  404  O   HOH T 403      43.903  18.504  11.460  1.00  0.60           O  
HETATM  405  O   HOH T 404      13.556  36.330  18.541  1.00  0.60           O  
TER     406      HOH T 404 
