# Supplementary material for: Accurate Prediction of Hydration Sites of Proteins Using Energy Model With Atom Embedding
Source: Front Mol Biosci. 2021 Sep 20;8:756075. doi: 10.3389/fmolb.2021.756075 (PMC8488165; doi:10.3389/fmolb.2021.756075)
Supplement: Supplementary file 1 [file DataSheet1.ZIP › Data Sheet 1/Our_result_pdb/our_dataset_output/1LC0_watersite.pdb]

HEADER                                                        XXXX


JRNL        PMID   -1
HETATM    1  O   HOH T   0      14.605  34.244  66.445  1.00  0.19           O  
HETATM    2  O   HOH T   1      18.157  29.156  80.695  1.00  0.19           O  
HETATM    3  O   HOH T   2      62.516  22.100  59.203  1.00  0.19           O  
HETATM    4  O   HOH T   3      38.620  31.972  65.759  1.00  0.20           O  
HETATM    5  O   HOH T   4      49.195  14.036  64.952  1.00  0.21           O  
HETATM    6  O   HOH T   5      23.433  44.224  47.949  1.00  0.21           O  
HETATM    7  O   HOH T   6      13.390  54.239  51.088  1.00  0.21           O  
HETATM    8  O   HOH T   7      20.788  18.441  43.408  1.00  0.21           O  
HETATM    9  O   HOH T   8      41.704  28.269  67.179  1.00  0.22           O  
HETATM   10  O   HOH T   9      25.875  27.162  65.908  1.00  0.22           O  
HETATM   11  O   HOH T  10      38.683  29.396  64.584  1.00  0.22           O  
HETATM   12  O   HOH T  11      19.428  49.744  50.115  1.00  0.22           O  
HETATM   13  O   HOH T  12      45.073  14.648  38.638  1.00  0.22           O  
HETATM   14  O   HOH T  13      38.612  10.583  38.780  1.00  0.22           O  
HETATM   15  O   HOH T  14      68.470  15.312  36.734  1.00  0.22           O  
HETATM   16  O   HOH T  15      38.429  25.035  39.231  1.00  0.23           O  
HETATM   17  O   HOH T  16      51.174   8.706  54.684  1.00  0.23           O  
HETATM   18  O   HOH T  17      31.471  31.621  67.296  1.00  0.23           O  
HETATM   19  O   HOH T  18      38.386  17.181  48.260  1.00  0.23           O  
HETATM   20  O   HOH T  19      59.410  16.643  60.071  1.00  0.24           O  
HETATM   21  O   HOH T  20      43.475  40.600  37.626  1.00  0.24           O  
HETATM   22  O   HOH T  21      40.839  16.289  49.325  1.00  0.24           O  
HETATM   23  O   HOH T  22      63.748  18.770  61.266  1.00  0.24           O  
HETATM   24  O   HOH T  23      33.322  33.864  55.022  1.00  0.24           O  
HETATM   25  O   HOH T  24      44.588  17.381  64.776  1.00  0.24           O  
HETATM   26  O   HOH T  25      23.968  31.308  71.171  1.00  0.25           O  
HETATM   27  O   HOH T  26      36.179  23.770  40.435  1.00  0.25           O  
HETATM   28  O   HOH T  27      47.509  18.947  66.641  1.00  0.25           O  
HETATM   29  O   HOH T  28      12.782  20.339  68.083  1.00  0.25           O  
HETATM   30  O   HOH T  29      44.930  33.033  49.160  1.00  0.25           O  
HETATM   31  O   HOH T  30      46.778  32.859  40.998  1.00  0.25           O  
HETATM   32  O   HOH T  31      29.094  30.050  42.607  1.00  0.25           O  
HETATM   33  O   HOH T  32      64.889  20.615  59.487  1.00  0.26           O  
HETATM   34  O   HOH T  33      45.188  17.935  34.491  1.00  0.26           O  
HETATM   35  O   HOH T  34      12.340  40.852  38.857  1.00  0.26           O  
HETATM   36  O   HOH T  35      44.266   4.144  42.419  1.00  0.26           O  
HETATM   37  O   HOH T  36      26.985  44.979  59.953  1.00  0.26           O  
HETATM   38  O   HOH T  37      40.902  33.476  37.176  1.00  0.26           O  
HETATM   39  O   HOH T  38      37.459  16.481  60.270  1.00  0.26           O  
HETATM   40  O   HOH T  39      17.832  15.457  58.526  1.00  0.27           O  
HETATM   41  O   HOH T  40      51.723  27.726  44.959  1.00  0.27           O  
HETATM   42  O   HOH T  41       9.072  28.300  42.919  1.00  0.27           O  
HETATM   43  O   HOH T  42      36.447  28.931  62.843  1.00  0.27           O  
HETATM   44  O   HOH T  43      12.195  45.794  50.167  1.00  0.27           O  
HETATM   45  O   HOH T  44      17.775  39.038  41.384  1.00  0.27           O  
HETATM   46  O   HOH T  45      46.066  37.899  51.865  1.00  0.27           O  
HETATM   47  O   HOH T  46      35.341  27.157  47.788  1.00  0.28           O  
HETATM   48  O   HOH T  47      48.981  47.923  60.015  1.00  0.28           O  
HETATM   49  O   HOH T  48      32.013  15.654  47.810  1.00  0.28           O  
HETATM   50  O   HOH T  49      66.163  14.568  38.149  1.00  0.28           O  
HETATM   51  O   HOH T  50      25.648  46.791  58.402  1.00  0.28           O  
HETATM   52  O   HOH T  51      19.607  27.213  73.395  1.00  0.28           O  
HETATM   53  O   HOH T  52      34.397  15.350  46.453  1.00  0.28           O  
HETATM   54  O   HOH T  53      44.088  24.352  66.921  1.00  0.28           O  
HETATM   55  O   HOH T  54      21.770  18.579  61.935  1.00  0.28           O  
HETATM   56  O   HOH T  55      14.297  45.035  57.867  1.00  0.29           O  
HETATM   57  O   HOH T  56      18.471  28.745  77.956  1.00  0.29           O  
HETATM   58  O   HOH T  57      27.562  20.287  42.857  1.00  0.29           O  
HETATM   59  O   HOH T  58      21.739  23.089  74.711  1.00  0.29           O  
HETATM   60  O   HOH T  59      63.400   9.057  40.676  1.00  0.29           O  
HETATM   61  O   HOH T  60      38.197  21.709  36.998  1.00  0.29           O  
HETATM   62  O   HOH T  61      17.324  25.017  49.030  1.00  0.29           O  
HETATM   63  O   HOH T  62      39.030  32.451  38.966  1.00  0.29           O  
HETATM   64  O   HOH T  63      39.268  31.298  49.757  1.00  0.30           O  
HETATM   65  O   HOH T  64      14.338  19.343  52.657  1.00  0.30           O  
HETATM   66  O   HOH T  65      20.796  49.314  59.801  1.00  0.30           O  
HETATM   67  O   HOH T  66      55.690  16.001  46.450  1.00  0.30           O  
HETATM   68  O   HOH T  67      49.802   8.881  52.288  1.00  0.30           O  
HETATM   69  O   HOH T  68      19.296  43.553  66.987  1.00  0.30           O  
HETATM   70  O   HOH T  69      12.409  31.172  54.326  1.00  0.30           O  
HETATM   71  O   HOH T  70      26.820  18.339  39.170  1.00  0.30           O  
HETATM   72  O   HOH T  71      17.788  43.216  43.493  1.00  0.30           O  
HETATM   73  O   HOH T  72      26.700  25.893  57.361  1.00  0.31           O  
HETATM   74  O   HOH T  73      21.230  25.616  30.954  1.00  0.31           O  
HETATM   75  O   HOH T  74      39.087   8.150  46.260  1.00  0.31           O  
HETATM   76  O   HOH T  75      39.613  33.382  43.709  1.00  0.31           O  
HETATM   77  O   HOH T  76      63.916  10.095  43.234  1.00  0.31           O  
HETATM   78  O   HOH T  77      54.298  25.956  51.115  1.00  0.31           O  
HETATM   79  O   HOH T  78      14.958  42.762  56.423  1.00  0.31           O  
HETATM   80  O   HOH T  79      23.560  27.913  62.271  1.00  0.31           O  
HETATM   81  O   HOH T  80      33.104  28.440  46.769  1.00  0.31           O  
HETATM   82  O   HOH T  81      17.855  20.795  37.744  1.00  0.31           O  
HETATM   83  O   HOH T  82      18.799  33.789  74.406  1.00  0.32           O  
HETATM   84  O   HOH T  83      52.676  18.395  39.451  1.00  0.32           O  
HETATM   85  O   HOH T  84      20.288  43.649  69.571  1.00  0.32           O  
HETATM   86  O   HOH T  85      36.230  21.501  38.909  1.00  0.32           O  
HETATM   87  O   HOH T  86       8.006  39.627  54.564  1.00  0.32           O  
HETATM   88  O   HOH T  87      38.646  23.689  69.663  1.00  0.32           O  
HETATM   89  O   HOH T  88      10.183  35.594  51.892  1.00  0.32           O  
HETATM   90  O   HOH T  89      41.990   9.875  72.841  1.00  0.32           O  
HETATM   91  O   HOH T  90      31.474  25.045  62.413  1.00  0.32           O  
HETATM   92  O   HOH T  91      56.930  32.767  60.071  1.00  0.32           O  
HETATM   93  O   HOH T  92      49.875  35.261  49.355  1.00  0.32           O  
HETATM   94  O   HOH T  93      56.909  14.633  56.332  1.00  0.32           O  
HETATM   95  O   HOH T  94      27.411  12.912  46.899  1.00  0.32           O  
HETATM   96  O   HOH T  95      35.974  17.918  53.691  1.00  0.32           O  
HETATM   97  O   HOH T  96      29.814  25.026  60.095  1.00  0.33           O  
HETATM   98  O   HOH T  97       5.062  31.432  53.350  1.00  0.33           O  
HETATM   99  O   HOH T  98      20.263  25.857  61.599  1.00  0.33           O  
HETATM  100  O   HOH T  99      18.335  15.948  67.126  1.00  0.33           O  
HETATM  101  O   HOH T 100      16.037  40.329  64.384  1.00  0.33           O  
HETATM  102  O   HOH T 101      33.481  24.248  60.493  1.00  0.33           O  
HETATM  103  O   HOH T 102      63.933  26.120  49.491  1.00  0.33           O  
HETATM  104  O   HOH T 103      29.498  23.298  40.635  1.00  0.33           O  
HETATM  105  O   HOH T 104      41.034  34.849  47.172  1.00  0.33           O  
HETATM  106  O   HOH T 105      24.265  25.742  32.745  1.00  0.33           O  
HETATM  107  O   HOH T 106      53.361  23.738  40.248  1.00  0.33           O  
HETATM  108  O   HOH T 107      33.233  22.933  62.907  1.00  0.33           O  
HETATM  109  O   HOH T 108      63.453  18.142  66.577  1.00  0.34           O  
HETATM  110  O   HOH T 109      13.482  20.060  72.744  1.00  0.34           O  
HETATM  111  O   HOH T 110      54.290  37.363  61.388  1.00  0.34           O  
HETATM  112  O   HOH T 111       5.276  39.134  54.177  1.00  0.34           O  
HETATM  113  O   HOH T 112      35.339  30.902  49.304  1.00  0.34           O  
HETATM  114  O   HOH T 113      27.492  45.762  53.433  1.00  0.34           O  
HETATM  115  O   HOH T 114      38.577   8.536  54.064  1.00  0.34           O  
HETATM  116  O   HOH T 115      13.673  18.455  44.811  1.00  0.34           O  
HETATM  117  O   HOH T 116      28.798   8.842  51.316  1.00  0.34           O  
HETATM  118  O   HOH T 117      13.101  40.819  55.706  1.00  0.34           O  
HETATM  119  O   HOH T 118      55.595  12.551  63.546  1.00  0.34           O  
HETATM  120  O   HOH T 119      61.361  15.720  45.869  1.00  0.35           O  
HETATM  121  O   HOH T 120      38.145  29.192  69.591  1.00  0.35           O  
HETATM  122  O   HOH T 121      12.479  18.941  70.376  1.00  0.35           O  
HETATM  123  O   HOH T 122      25.032  25.563  61.670  1.00  0.35           O  
HETATM  124  O   HOH T 123      27.704  24.190  53.126  1.00  0.35           O  
HETATM  125  O   HOH T 124      19.212  36.247  73.214  1.00  0.35           O  
HETATM  126  O   HOH T 125      23.368  35.512  38.804  1.00  0.35           O  
HETATM  127  O   HOH T 126      25.215  14.733  41.615  1.00  0.35           O  
HETATM  128  O   HOH T 127      54.150   1.277  53.933  1.00  0.35           O  
HETATM  129  O   HOH T 128      36.209  17.917  62.187  1.00  0.35           O  
HETATM  130  O   HOH T 129      30.193  12.689  46.321  1.00  0.35           O  
HETATM  131  O   HOH T 130      17.189  43.932  46.147  1.00  0.35           O  
HETATM  132  O   HOH T 131      44.214  11.351  72.521  1.00  0.35           O  
HETATM  133  O   HOH T 132      13.597  18.923  75.214  1.00  0.35           O  
HETATM  134  O   HOH T 133      59.913  16.516  54.950  1.00  0.35           O  
HETATM  135  O   HOH T 134      22.764  17.150  67.939  1.00  0.35           O  
HETATM  136  O   HOH T 135      27.092  22.044  40.711  1.00  0.36           O  
HETATM  137  O   HOH T 136      36.349  24.320  71.316  1.00  0.36           O  
HETATM  138  O   HOH T 137      31.136  38.909  67.628  1.00  0.36           O  
HETATM  139  O   HOH T 138      32.213  17.658  68.762  1.00  0.36           O  
HETATM  140  O   HOH T 139      29.609   9.937  61.972  1.00  0.36           O  
HETATM  141  O   HOH T 140      65.302  24.069  48.179  1.00  0.36           O  
HETATM  142  O   HOH T 141      25.982  36.537  71.374  1.00  0.36           O  
HETATM  143  O   HOH T 142      49.837   8.215  66.567  1.00  0.36           O  
HETATM  144  O   HOH T 143      16.306  18.453  53.666  1.00  0.36           O  
HETATM  145  O   HOH T 144       9.413  28.415  50.509  1.00  0.37           O  
HETATM  146  O   HOH T 145      14.123  46.247  45.860  1.00  0.37           O  
HETATM  147  O   HOH T 146      17.677  37.923  71.664  1.00  0.37           O  
HETATM  148  O   HOH T 147      19.377  45.920  65.500  1.00  0.37           O  
HETATM  149  O   HOH T 148      61.268  10.947  43.376  1.00  0.37           O  
HETATM  150  O   HOH T 149      55.331  22.721  41.897  1.00  0.37           O  
HETATM  151  O   HOH T 150      34.142  17.108  60.475  1.00  0.37           O  
HETATM  152  O   HOH T 151      43.642  21.901  68.198  1.00  0.37           O  
HETATM  153  O   HOH T 152       5.418  39.604  38.938  1.00  0.37           O  
HETATM  154  O   HOH T 153      47.251  33.646  36.521  1.00  0.37           O  
HETATM  155  O   HOH T 154      42.169   5.486  41.436  1.00  0.37           O  
HETATM  156  O   HOH T 155      28.321  22.385  73.764  1.00  0.38           O  
HETATM  157  O   HOH T 156      32.063  33.746  52.507  1.00  0.38           O  
HETATM  158  O   HOH T 157      30.793  21.240  73.180  1.00  0.38           O  
HETATM  159  O   HOH T 158      11.041  31.175  56.753  1.00  0.38           O  
HETATM  160  O   HOH T 159      41.272  17.810  42.665  1.00  0.38           O  
HETATM  161  O   HOH T 160      32.929  29.973  44.514  1.00  0.38           O  
HETATM  162  O   HOH T 161       1.207  40.812  51.651  1.00  0.38           O  
HETATM  163  O   HOH T 162      11.724  46.152  57.739  1.00  0.38           O  
HETATM  164  O   HOH T 163      30.390  22.862  35.350  1.00  0.38           O  
HETATM  165  O   HOH T 164      51.063  41.206  55.069  1.00  0.38           O  
HETATM  166  O   HOH T 165      51.677  30.879  47.132  1.00  0.38           O  
HETATM  167  O   HOH T 166      11.257  43.461  36.524  1.00  0.38           O  
HETATM  168  O   HOH T 167      42.237  42.868  36.522  1.00  0.38           O  
HETATM  169  O   HOH T 168      50.934  16.124  67.557  1.00  0.38           O  
HETATM  170  O   HOH T 169      25.997  12.947  39.687  1.00  0.38           O  
HETATM  171  O   HOH T 170      51.889  19.966  41.530  1.00  0.38           O  
HETATM  172  O   HOH T 171      23.674  37.287  41.242  1.00  0.38           O  
HETATM  173  O   HOH T 172      37.144   9.544  36.570  1.00  0.39           O  
HETATM  174  O   HOH T 173      26.033  32.427  72.653  1.00  0.39           O  
HETATM  175  O   HOH T 174      23.535  21.162  59.196  1.00  0.39           O  
HETATM  176  O   HOH T 175      14.646  16.252  46.155  1.00  0.39           O  
HETATM  177  O   HOH T 176      22.850  26.734  28.959  1.00  0.39           O  
HETATM  178  O   HOH T 177      37.515  12.221  36.797  1.00  0.39           O  
HETATM  179  O   HOH T 178      32.405  43.006  62.211  1.00  0.39           O  
HETATM  180  O   HOH T 179      61.354  19.553  65.702  1.00  0.39           O  
HETATM  181  O   HOH T 180      37.064   9.766  72.845  1.00  0.39           O  
HETATM  182  O   HOH T 181      46.906  46.130  59.483  1.00  0.39           O  
HETATM  183  O   HOH T 182      19.108  17.639  61.635  1.00  0.39           O  
HETATM  184  O   HOH T 183      51.159  42.542  52.652  1.00  0.39           O  
HETATM  185  O   HOH T 184      12.777  21.708  70.575  1.00  0.39           O  
HETATM  186  O   HOH T 185       7.296  37.983  43.771  1.00  0.39           O  
HETATM  187  O   HOH T 186      23.850   9.247  42.295  1.00  0.39           O  
HETATM  188  O   HOH T 187      30.262  10.019  45.553  1.00  0.39           O  
HETATM  189  O   HOH T 188      30.157  30.391  72.425  1.00  0.39           O  
HETATM  190  O   HOH T 189      26.696  26.464  42.141  1.00  0.39           O  
HETATM  191  O   HOH T 190      52.548   7.268  62.515  1.00  0.39           O  
HETATM  192  O   HOH T 191      57.640  36.385  54.779  1.00  0.39           O  
HETATM  193  O   HOH T 192      33.044  37.153  66.556  1.00  0.39           O  
HETATM  194  O   HOH T 193       6.871  20.955  49.366  1.00  0.39           O  
HETATM  195  O   HOH T 194      59.588  20.811  42.964  1.00  0.39           O  
HETATM  196  O   HOH T 195      55.269  34.884  60.492  1.00  0.39           O  
HETATM  197  O   HOH T 196      23.348  20.315  63.292  1.00  0.40           O  
HETATM  198  O   HOH T 197       6.830  25.440  59.011  1.00  0.40           O  
HETATM  199  O   HOH T 198      22.869  22.290  72.335  1.00  0.40           O  
HETATM  200  O   HOH T 199      26.776  41.261  72.876  1.00  0.40           O  
HETATM  201  O   HOH T 200       2.484  27.548  46.228  1.00  0.40           O  
HETATM  202  O   HOH T 201      27.488  10.004  53.539  1.00  0.40           O  
HETATM  203  O   HOH T 202      30.099  34.171  44.557  1.00  0.40           O  
HETATM  204  O   HOH T 203      18.423  16.910  54.433  1.00  0.40           O  
HETATM  205  O   HOH T 204      24.342  34.641  41.140  1.00  0.40           O  
HETATM  206  O   HOH T 205      61.558  17.020  61.615  1.00  0.40           O  
HETATM  207  O   HOH T 206       3.168  21.702  44.377  1.00  0.40           O  
HETATM  208  O   HOH T 207      10.327  40.896  55.535  1.00  0.40           O  
HETATM  209  O   HOH T 208      46.143  34.255  46.983  1.00  0.40           O  
HETATM  210  O   HOH T 209      47.688  34.622  39.057  1.00  0.40           O  
HETATM  211  O   HOH T 210      58.228  29.986  57.506  1.00  0.40           O  
HETATM  212  O   HOH T 211      12.196  34.939  65.453  1.00  0.40           O  
HETATM  213  O   HOH T 212      50.621  27.421  36.082  1.00  0.40           O  
HETATM  214  O   HOH T 213      31.698  23.820  58.328  1.00  0.40           O  
HETATM  215  O   HOH T 214      19.455  31.381  77.630  1.00  0.41           O  
HETATM  216  O   HOH T 215      56.458  17.893  48.417  1.00  0.41           O  
HETATM  217  O   HOH T 216      10.788  26.512  41.684  1.00  0.41           O  
HETATM  218  O   HOH T 217      46.400  48.832  59.807  1.00  0.41           O  
HETATM  219  O   HOH T 218      23.950  27.447  51.962  1.00  0.41           O  
HETATM  220  O   HOH T 219      52.069   4.817  52.529  1.00  0.41           O  
HETATM  221  O   HOH T 220       6.572  34.200  47.601  1.00  0.41           O  
HETATM  222  O   HOH T 221      10.257  33.125  66.321  1.00  0.41           O  
HETATM  223  O   HOH T 222       6.927  23.424  57.123  1.00  0.41           O  
HETATM  224  O   HOH T 223      12.133  44.865  65.476  1.00  0.41           O  
HETATM  225  O   HOH T 224      18.530  15.158  45.680  1.00  0.41           O  
HETATM  226  O   HOH T 225      19.944  43.433  45.352  1.00  0.41           O  
HETATM  227  O   HOH T 226       4.138  24.439  53.001  1.00  0.41           O  
HETATM  228  O   HOH T 227      28.705  16.464  40.137  1.00  0.41           O  
HETATM  229  O   HOH T 228      44.917  37.038  49.517  1.00  0.41           O  
HETATM  230  O   HOH T 229      14.607  36.252  71.956  1.00  0.41           O  
HETATM  231  O   HOH T 230      55.877  11.158  51.850  1.00  0.41           O  
HETATM  232  O   HOH T 231      13.620  43.746  63.272  1.00  0.41           O  
HETATM  233  O   HOH T 232      29.791  17.765  61.806  1.00  0.41           O  
HETATM  234  O   HOH T 233      17.054  41.339  69.002  1.00  0.42           O  
HETATM  235  O   HOH T 234      54.479   8.157  60.856  1.00  0.42           O  
HETATM  236  O   HOH T 235      12.836  14.344  45.230  1.00  0.42           O  
HETATM  237  O   HOH T 236      29.276  14.946  47.560  1.00  0.42           O  
HETATM  238  O   HOH T 237       4.793  31.534  42.958  1.00  0.42           O  
HETATM  239  O   HOH T 238      60.485  19.520  40.492  1.00  0.42           O  
HETATM  240  O   HOH T 239       5.178  35.976  49.238  1.00  0.42           O  
HETATM  241  O   HOH T 240      34.044  31.082  46.823  1.00  0.42           O  
HETATM  242  O   HOH T 241      31.032  31.721  43.569  1.00  0.42           O  
HETATM  243  O   HOH T 242      37.156  43.576  64.884  1.00  0.42           O  
HETATM  244  O   HOH T 243      42.536   3.012  40.494  1.00  0.42           O  
HETATM  245  O   HOH T 244      55.988  24.265  44.058  1.00  0.42           O  
HETATM  246  O   HOH T 245      54.974  25.447  41.770  1.00  0.42           O  
HETATM  247  O   HOH T 246       7.962  19.564  45.609  1.00  0.42           O  
HETATM  248  O   HOH T 247      59.566  12.669  42.318  1.00  0.42           O  
HETATM  249  O   HOH T 248      60.121  17.923  63.879  1.00  0.42           O  
HETATM  250  O   HOH T 249      23.962  20.659  56.474  1.00  0.42           O  
HETATM  251  O   HOH T 250      47.141  32.103  43.572  1.00  0.42           O  
HETATM  252  O   HOH T 251      17.763  22.488  50.051  1.00  0.42           O  
HETATM  253  O   HOH T 252      36.532   9.698  40.515  1.00  0.42           O  
HETATM  254  O   HOH T 253      52.429   6.162  54.937  1.00  0.42           O  
HETATM  255  O   HOH T 254      23.693  29.010  36.714  1.00  0.42           O  
HETATM  256  O   HOH T 255      27.093  46.246  56.122  1.00  0.42           O  
HETATM  257  O   HOH T 256      29.722  15.075  60.966  1.00  0.42           O  
HETATM  258  O   HOH T 257      52.442  28.959  37.407  1.00  0.42           O  
HETATM  259  O   HOH T 258      46.127  20.616  68.316  1.00  0.42           O  
HETATM  260  O   HOH T 259      15.453  47.911  43.965  1.00  0.42           O  
HETATM  261  O   HOH T 260      53.383  41.491  56.900  1.00  0.42           O  
HETATM  262  O   HOH T 261       5.945  25.270  55.115  1.00  0.42           O  
HETATM  263  O   HOH T 262      51.651  37.207  48.985  1.00  0.42           O  
HETATM  264  O   HOH T 263      19.281  39.814  70.000  1.00  0.42           O  
HETATM  265  O   HOH T 264      30.158  14.199  39.486  1.00  0.42           O  
HETATM  266  O   HOH T 265      10.928  20.890  47.940  1.00  0.43           O  
HETATM  267  O   HOH T 266      27.351   6.740  43.165  1.00  0.43           O  
HETATM  268  O   HOH T 267      62.291  24.848  51.389  1.00  0.43           O  
HETATM  269  O   HOH T 268      31.988  14.324  50.205  1.00  0.43           O  
HETATM  270  O   HOH T 269      36.998  28.968  46.556  1.00  0.43           O  
HETATM  271  O   HOH T 270      20.501  39.082  42.141  1.00  0.43           O  
HETATM  272  O   HOH T 271      50.419  29.969  43.799  1.00  0.43           O  
HETATM  273  O   HOH T 272      58.224  33.814  53.849  1.00  0.43           O  
HETATM  274  O   HOH T 273      34.837  35.967  68.461  1.00  0.43           O  
HETATM  275  O   HOH T 274      30.494  13.215  52.253  1.00  0.43           O  
HETATM  276  O   HOH T 275      24.758  28.064  27.427  1.00  0.43           O  
HETATM  277  O   HOH T 276      14.066  16.043  43.397  1.00  0.43           O  
HETATM  278  O   HOH T 277      48.228  29.917  66.426  1.00  0.43           O  
HETATM  279  O   HOH T 278      56.885  14.457  67.342  1.00  0.43           O  
HETATM  280  O   HOH T 279      35.668  30.473  44.642  1.00  0.43           O  
HETATM  281  O   HOH T 280      44.795  15.746  36.124  1.00  0.43           O  
HETATM  282  O   HOH T 281      57.529  12.123  61.779  1.00  0.43           O  
HETATM  283  O   HOH T 282      38.173  32.413  41.504  1.00  0.44           O  
HETATM  284  O   HOH T 283      13.330  46.225  43.148  1.00  0.44           O  
HETATM  285  O   HOH T 284      32.131  41.803  48.354  1.00  0.44           O  
HETATM  286  O   HOH T 285      14.299  19.199  77.822  1.00  0.44           O  
HETATM  287  O   HOH T 286      52.530  26.324  40.851  1.00  0.44           O  
HETATM  288  O   HOH T 287      16.051  22.789  47.850  1.00  0.44           O  
HETATM  289  O   HOH T 288      39.716  33.967  49.307  1.00  0.44           O  
HETATM  290  O   HOH T 289      23.582  25.187  53.429  1.00  0.44           O  
HETATM  291  O   HOH T 290      34.559  12.709  45.685  1.00  0.44           O  
HETATM  292  O   HOH T 291      36.368  30.305  41.957  1.00  0.44           O  
HETATM  293  O   HOH T 292      44.449  39.798  44.459  1.00  0.44           O  
HETATM  294  O   HOH T 293      48.263  34.763  34.197  1.00  0.44           O  
HETATM  295  O   HOH T 294      43.016  37.862  47.679  1.00  0.44           O  
HETATM  296  O   HOH T 295      25.578  21.924  73.144  1.00  0.44           O  
HETATM  297  O   HOH T 296      25.776   8.748  44.225  1.00  0.44           O  
HETATM  298  O   HOH T 297      43.649  35.168  47.955  1.00  0.44           O  
HETATM  299  O   HOH T 298      44.975  17.704  41.903  1.00  0.44           O  
HETATM  300  O   HOH T 299      28.582  36.363  43.599  1.00  0.44           O  
HETATM  301  O   HOH T 300      47.071  14.385  72.030  1.00  0.44           O  
HETATM  302  O   HOH T 301      66.242  17.177  53.539  1.00  0.45           O  
HETATM  303  O   HOH T 302      59.900  26.134  51.369  1.00  0.45           O  
HETATM  304  O   HOH T 303      27.699  38.780  71.779  1.00  0.45           O  
HETATM  305  O   HOH T 304       7.108  30.124  42.475  1.00  0.45           O  
HETATM  306  O   HOH T 305      10.976  30.130  68.569  1.00  0.45           O  
HETATM  307  O   HOH T 306      10.401  29.875  52.771  1.00  0.45           O  
HETATM  308  O   HOH T 307      31.581  44.582  60.123  1.00  0.45           O  
HETATM  309  O   HOH T 308      37.070   8.938  44.532  1.00  0.45           O  
HETATM  310  O   HOH T 309      31.104  42.968  56.955  1.00  0.45           O  
HETATM  311  O   HOH T 310      66.545  21.823  52.149  1.00  0.45           O  
HETATM  312  O   HOH T 311      29.294  44.028  58.592  1.00  0.45           O  
HETATM  313  O   HOH T 312      15.296  48.115  52.101  1.00  0.45           O  
HETATM  314  O   HOH T 313      12.661  20.801  45.772  1.00  0.45           O  
HETATM  315  O   HOH T 314      26.092  15.779  39.291  1.00  0.45           O  
HETATM  316  O   HOH T 315       9.291  29.922  40.612  1.00  0.45           O  
HETATM  317  O   HOH T 316      48.125  34.224  44.977  1.00  0.45           O  
HETATM  318  O   HOH T 317      19.411  14.596  64.860  1.00  0.45           O  
HETATM  319  O   HOH T 318      19.583  15.112  60.598  1.00  0.46           O  
HETATM  320  O   HOH T 319       5.833  26.707  52.678  1.00  0.46           O  
HETATM  321  O   HOH T 320      28.063  23.068  38.254  1.00  0.46           O  
HETATM  322  O   HOH T 321      28.635  28.010  40.961  1.00  0.46           O  
HETATM  323  O   HOH T 322      46.897  11.633  71.465  1.00  0.46           O  
HETATM  324  O   HOH T 323      32.905  22.679  36.452  1.00  0.46           O  
HETATM  325  O   HOH T 324      67.666  16.604  55.495  1.00  0.46           O  
HETATM  326  O   HOH T 325      45.569  38.941  37.176  1.00  0.46           O  
HETATM  327  O   HOH T 326      34.681   7.364  47.033  1.00  0.46           O  
HETATM  328  O   HOH T 327      23.434  31.333  35.015  1.00  0.46           O  
HETATM  329  O   HOH T 328      17.938  53.535  46.676  1.00  0.46           O  
HETATM  330  O   HOH T 329      52.644  33.355  46.338  1.00  0.46           O  
HETATM  331  O   HOH T 330      33.250  27.586  69.055  1.00  0.46           O  
HETATM  332  O   HOH T 331      59.153  18.577  48.108  1.00  0.46           O  
HETATM  333  O   HOH T 332      24.301  19.188  60.924  1.00  0.46           O  
HETATM  334  O   HOH T 333      11.514  44.919  61.758  1.00  0.46           O  
HETATM  335  O   HOH T 334      26.611  24.461  72.822  1.00  0.46           O  
HETATM  336  O   HOH T 335      24.344  25.987  67.932  1.00  0.46           O  
HETATM  337  O   HOH T 336      14.657  39.322  31.777  1.00  0.46           O  
HETATM  338  O   HOH T 337      13.777  20.310  38.003  1.00  0.46           O  
HETATM  339  O   HOH T 338      22.676  38.185  38.822  1.00  0.46           O  
HETATM  340  O   HOH T 339      47.647  36.863  49.822  1.00  0.46           O  
HETATM  341  O   HOH T 340       9.450  24.544  59.449  1.00  0.46           O  
HETATM  342  O   HOH T 341       9.587  28.847  70.666  1.00  0.47           O  
HETATM  343  O   HOH T 342      13.545  44.858  35.906  1.00  0.47           O  
HETATM  344  O   HOH T 343      24.685  23.092  57.498  1.00  0.47           O  
HETATM  345  O   HOH T 344      52.198   3.332  54.986  1.00  0.47           O  
HETATM  346  O   HOH T 345      12.087  43.945  59.260  1.00  0.47           O  
HETATM  347  O   HOH T 346      33.889  18.248  66.732  1.00  0.47           O  
HETATM  348  O   HOH T 347      23.423  20.892  74.641  1.00  0.47           O  
HETATM  349  O   HOH T 348      37.525  31.600  68.342  1.00  0.47           O  
HETATM  350  O   HOH T 349       6.192  41.349  42.478  1.00  0.47           O  
HETATM  351  O   HOH T 350      38.125  42.168  42.178  1.00  0.47           O  
HETATM  352  O   HOH T 351      60.895  34.596  54.217  1.00  0.47           O  
HETATM  353  O   HOH T 352      15.821  45.100  43.867  1.00  0.47           O  
HETATM  354  O   HOH T 353      43.853  30.174  34.222  1.00  0.47           O  
HETATM  355  O   HOH T 354      32.208  19.112  61.184  1.00  0.47           O  
HETATM  356  O   HOH T 355       6.489  41.511  46.557  1.00  0.47           O  
HETATM  357  O   HOH T 356      33.886  22.938  39.000  1.00  0.47           O  
HETATM  358  O   HOH T 357      42.072   7.555  54.506  1.00  0.47           O  
HETATM  359  O   HOH T 358      61.321  29.208  55.527  1.00  0.47           O  
HETATM  360  O   HOH T 359      24.435  20.258  71.314  1.00  0.47           O  
HETATM  361  O   HOH T 360      15.401  38.680  73.171  1.00  0.47           O  
HETATM  362  O   HOH T 361      34.749  28.154  71.410  1.00  0.47           O  
HETATM  363  O   HOH T 362      31.912  43.016  64.857  1.00  0.47           O  
HETATM  364  O   HOH T 363      52.151  38.949  60.655  1.00  0.47           O  
HETATM  365  O   HOH T 364       4.953  28.178  47.754  1.00  0.47           O  
HETATM  366  O   HOH T 365      34.918  42.866  52.688  1.00  0.48           O  
HETATM  367  O   HOH T 366      33.990  19.105  63.313  1.00  0.48           O  
HETATM  368  O   HOH T 367       7.217  32.769  39.517  1.00  0.48           O  
HETATM  369  O   HOH T 368      20.970  15.182  67.194  1.00  0.48           O  
HETATM  370  O   HOH T 369      28.243  12.891  60.362  1.00  0.48           O  
HETATM  371  O   HOH T 370      57.225  15.100  59.166  1.00  0.48           O  
HETATM  372  O   HOH T 371      53.836  10.343  64.132  1.00  0.48           O  
HETATM  373  O   HOH T 372      30.120  39.083  70.348  1.00  0.48           O  
HETATM  374  O   HOH T 373      32.561  10.099  43.838  1.00  0.48           O  
HETATM  375  O   HOH T 374      23.273  16.923  47.934  1.00  0.48           O  
HETATM  376  O   HOH T 375       7.311  26.797  44.504  1.00  0.48           O  
HETATM  377  O   HOH T 376      56.575  15.171  48.964  1.00  0.48           O  
HETATM  378  O   HOH T 377      27.443  10.226  45.927  1.00  0.48           O  
HETATM  379  O   HOH T 378       9.248  32.368  68.827  1.00  0.48           O  
HETATM  380  O   HOH T 379      35.748  30.584  70.236  1.00  0.48           O  
HETATM  381  O   HOH T 380      19.648  40.359  39.814  1.00  0.48           O  
HETATM  382  O   HOH T 381      33.396  34.739  70.513  1.00  0.48           O  
HETATM  383  O   HOH T 382      21.600  17.723  45.917  1.00  0.48           O  
HETATM  384  O   HOH T 383      16.207  41.392  32.816  1.00  0.48           O  
HETATM  385  O   HOH T 384      29.138  20.881  36.817  1.00  0.48           O  
HETATM  386  O   HOH T 385       3.330  32.570  47.173  1.00  0.48           O  
HETATM  387  O   HOH T 386      49.291  12.713  71.685  1.00  0.48           O  
HETATM  388  O   HOH T 387      22.712  29.651  26.153  1.00  0.48           O  
HETATM  389  O   HOH T 388      24.885  18.450  69.392  1.00  0.48           O  
HETATM  390  O   HOH T 389      21.944  43.798  71.610  1.00  0.48           O  
HETATM  391  O   HOH T 390      59.320  13.889  60.543  1.00  0.48           O  
HETATM  392  O   HOH T 391      58.499  12.986  58.010  1.00  0.49           O  
HETATM  393  O   HOH T 392      20.917  15.499  47.196  1.00  0.49           O  
HETATM  394  O   HOH T 393      39.381  29.817  67.264  1.00  0.49           O  
HETATM  395  O   HOH T 394       9.990  17.707  56.596  1.00  0.49           O  
HETATM  396  O   HOH T 395      28.314  43.805  46.650  1.00  0.49           O  
HETATM  397  O   HOH T 396      33.226  40.453  46.172  1.00  0.49           O  
HETATM  398  O   HOH T 397      19.017  42.440  38.066  1.00  0.49           O  
HETATM  399  O   HOH T 398      27.332  24.107  60.712  1.00  0.49           O  
HETATM  400  O   HOH T 399      26.684  34.624  42.525  1.00  0.49           O  
HETATM  401  O   HOH T 400       5.053  33.302  49.820  1.00  0.49           O  
HETATM  402  O   HOH T 401      39.529  10.718  72.038  1.00  0.49           O  
HETATM  403  O   HOH T 402      11.953  35.403  72.248  1.00  0.49           O  
HETATM  404  O   HOH T 403      57.550  35.715  51.971  1.00  0.49           O  
HETATM  405  O   HOH T 404      53.070  17.747  68.125  1.00  0.49           O  
HETATM  406  O   HOH T 405      36.176  35.579  42.742  1.00  0.50           O  
HETATM  407  O   HOH T 406       4.825  40.103  48.148  1.00  0.50           O  
HETATM  408  O   HOH T 407      63.236  20.318  39.657  1.00  0.50           O  
HETATM  409  O   HOH T 408      11.019  17.861  63.892  1.00  0.50           O  
HETATM  410  O   HOH T 409      15.806  19.961  36.165  1.00  0.50           O  
HETATM  411  O   HOH T 410      48.238  16.523  67.451  1.00  0.50           O  
HETATM  412  O   HOH T 411      17.126  13.775  60.709  1.00  0.50           O  
HETATM  413  O   HOH T 412      17.268  38.806  32.167  1.00  0.50           O  
HETATM  414  O   HOH T 413      52.054   8.279  64.996  1.00  0.50           O  
HETATM  415  O   HOH T 414      58.503  20.141  38.557  1.00  0.50           O  
HETATM  416  O   HOH T 415      32.339   8.168  45.828  1.00  0.50           O  
HETATM  417  O   HOH T 416      26.201  47.968  54.262  1.00  0.50           O  
HETATM  418  O   HOH T 417      54.453  27.531  63.263  1.00  0.50           O  
HETATM  419  O   HOH T 418      57.581  22.275  64.965  1.00  0.50           O  
HETATM  420  O   HOH T 419      28.698  32.751  42.573  1.00  0.50           O  
HETATM  421  O   HOH T 420      17.195  36.122  33.131  1.00  0.50           O  
HETATM  422  O   HOH T 421      20.108  29.385  66.081  1.00  0.51           O  
HETATM  423  O   HOH T 422      54.920  29.883  44.580  1.00  0.51           O  
HETATM  424  O   HOH T 423      35.219  26.104  73.207  1.00  0.51           O  
HETATM  425  O   HOH T 424      15.471  37.966  34.106  1.00  0.51           O  
HETATM  426  O   HOH T 425      48.799  33.617  47.476  1.00  0.51           O  
HETATM  427  O   HOH T 426      11.877  30.359  71.272  1.00  0.51           O  
HETATM  428  O   HOH T 427      48.052  12.931  69.056  1.00  0.51           O  
HETATM  429  O   HOH T 428      34.656   9.839  45.666  1.00  0.51           O  
HETATM  430  O   HOH T 429      57.000  38.058  61.568  1.00  0.51           O  
HETATM  431  O   HOH T 430      27.680  34.406  71.513  1.00  0.51           O  
HETATM  432  O   HOH T 431      62.971  23.363  49.235  1.00  0.51           O  
HETATM  433  O   HOH T 432      53.253  39.211  49.438  1.00  0.51           O  
HETATM  434  O   HOH T 433      11.927  34.139  62.668  1.00  0.51           O  
HETATM  435  O   HOH T 434      42.238  32.758  48.440  1.00  0.51           O  
HETATM  436  O   HOH T 435      30.657  12.559  61.778  1.00  0.51           O  
HETATM  437  O   HOH T 436      59.474  13.850  55.547  1.00  0.51           O  
HETATM  438  O   HOH T 437      23.636  33.734  36.479  1.00  0.51           O  
HETATM  439  O   HOH T 438      50.250  32.399  45.312  1.00  0.51           O  
HETATM  440  O   HOH T 439      53.513  10.622  50.285  1.00  0.51           O  
HETATM  441  O   HOH T 440      43.897   0.838  51.823  1.00  0.51           O  
HETATM  442  O   HOH T 441      38.250  32.901  36.320  1.00  0.51           O  
HETATM  443  O   HOH T 442      20.726  33.392  76.368  1.00  0.52           O  
HETATM  444  O   HOH T 443      21.922  19.995  54.702  1.00  0.52           O  
HETATM  445  O   HOH T 444      59.133  27.585  56.096  1.00  0.52           O  
HETATM  446  O   HOH T 445      49.220  32.315  35.201  1.00  0.52           O  
HETATM  447  O   HOH T 446      11.831  39.540  53.564  1.00  0.52           O  
HETATM  448  O   HOH T 447      13.715  32.428  35.679  1.00  0.52           O  
HETATM  449  O   HOH T 448      14.337  41.512  68.913  1.00  0.52           O  
HETATM  450  O   HOH T 449      26.939  19.024  67.823  1.00  0.52           O  
HETATM  451  O   HOH T 450      60.655  13.233  44.837  1.00  0.52           O  
HETATM  452  O   HOH T 451      59.995  21.851  66.269  1.00  0.52           O  
HETATM  453  O   HOH T 452       4.816  41.897  44.560  1.00  0.52           O  
HETATM  454  O   HOH T 453      29.816  13.728  65.719  1.00  0.52           O  
HETATM  455  O   HOH T 454      46.172  23.250  68.338  1.00  0.52           O  
HETATM  456  O   HOH T 455       6.540  28.030  50.278  1.00  0.52           O  
HETATM  457  O   HOH T 456       6.297  38.832  41.344  1.00  0.52           O  
HETATM  458  O   HOH T 457      39.762  41.984  48.534  1.00  0.52           O  
HETATM  459  O   HOH T 458      21.848  21.324  76.805  1.00  0.52           O  
HETATM  460  O   HOH T 459       4.954  28.044  45.119  1.00  0.52           O  
HETATM  461  O   HOH T 460      21.806  40.456  37.148  1.00  0.53           O  
HETATM  462  O   HOH T 461      37.925   7.440  41.286  1.00  0.53           O  
HETATM  463  O   HOH T 462      31.448  16.917  59.905  1.00  0.53           O  
HETATM  464  O   HOH T 463      31.837  20.232  75.502  1.00  0.53           O  
HETATM  465  O   HOH T 464      19.653  15.439  56.410  1.00  0.53           O  
HETATM  466  O   HOH T 465      63.124  11.989  45.112  1.00  0.53           O  
HETATM  467  O   HOH T 466      39.102   7.032  43.730  1.00  0.53           O  
HETATM  468  O   HOH T 467      29.455  46.388  59.990  1.00  0.53           O  
HETATM  469  O   HOH T 468      24.630  30.101  73.578  1.00  0.53           O  
HETATM  470  O   HOH T 469      22.799  44.463  45.304  1.00  0.53           O  
HETATM  471  O   HOH T 470      38.254  31.096  43.860  1.00  0.53           O  
HETATM  472  O   HOH T 471      64.055   6.644  42.014  1.00  0.53           O  
HETATM  473  O   HOH T 472      33.873  21.661  74.279  1.00  0.53           O  
HETATM  474  O   HOH T 473      32.811  34.009  67.987  1.00  0.53           O  
HETATM  475  O   HOH T 474      32.620  29.143  72.972  1.00  0.54           O  
HETATM  476  O   HOH T 475      35.278  10.554  42.948  1.00  0.54           O  
HETATM  477  O   HOH T 476      34.605  42.990  64.079  1.00  0.54           O  
HETATM  478  O   HOH T 477      22.266  27.855  72.993  1.00  0.54           O  
HETATM  479  O   HOH T 478       2.683  32.621  44.377  1.00  0.54           O  
HETATM  480  O   HOH T 479      58.680  29.961  54.747  1.00  0.54           O  
HETATM  481  O   HOH T 480      52.264  29.157  34.595  1.00  0.54           O  
HETATM  482  O   HOH T 481      17.793  19.477  80.001  1.00  0.54           O  
HETATM  483  O   HOH T 482      28.313  11.672  51.497  1.00  0.54           O  
HETATM  484  O   HOH T 483      60.997  19.558  49.874  1.00  0.54           O  
HETATM  485  O   HOH T 484      56.217  33.496  62.604  1.00  0.54           O  
HETATM  486  O   HOH T 485      33.100  31.743  56.677  1.00  0.54           O  
HETATM  487  O   HOH T 486      25.227  13.695  48.585  1.00  0.54           O  
HETATM  488  O   HOH T 487      25.225  23.054  52.732  1.00  0.54           O  
HETATM  489  O   HOH T 488      42.938  43.032  33.784  1.00  0.55           O  
HETATM  490  O   HOH T 489      15.555  13.791  63.128  1.00  0.55           O  
HETATM  491  O   HOH T 490      51.840   2.451  51.010  1.00  0.55           O  
HETATM  492  O   HOH T 491      16.243  18.442  76.031  1.00  0.55           O  
HETATM  493  O   HOH T 492      64.079  17.743  53.340  1.00  0.55           O  
HETATM  494  O   HOH T 493      30.399  31.597  69.901  1.00  0.55           O  
HETATM  495  O   HOH T 494      10.363  32.341  39.493  1.00  0.55           O  
HETATM  496  O   HOH T 495      16.125  45.222  34.903  1.00  0.55           O  
HETATM  497  O   HOH T 496      55.434  40.327  50.660  1.00  0.55           O  
HETATM  498  O   HOH T 497      15.222  23.624  50.226  1.00  0.55           O  
HETATM  499  O   HOH T 498      50.297   6.389  51.062  1.00  0.55           O  
HETATM  500  O   HOH T 499      55.221  10.544  61.772  1.00  0.56           O  
HETATM  501  O   HOH T 500      38.966  44.624  63.142  1.00  0.56           O  
HETATM  502  O   HOH T 501      25.588  19.533  58.431  1.00  0.56           O  
HETATM  503  O   HOH T 502      59.004  21.926  40.515  1.00  0.56           O  
HETATM  504  O   HOH T 503      35.396  33.273  69.212  1.00  0.56           O  
HETATM  505  O   HOH T 504      52.630  31.732  37.238  1.00  0.56           O  
HETATM  506  O   HOH T 505       9.766  38.106  52.874  1.00  0.56           O  
HETATM  507  O   HOH T 506       9.651  27.665  68.113  1.00  0.56           O  
HETATM  508  O   HOH T 507      32.519  15.384  39.037  1.00  0.56           O  
HETATM  509  O   HOH T 508      12.038  23.253  72.794  1.00  0.56           O  
HETATM  510  O   HOH T 509      30.903  10.519  51.721  1.00  0.56           O  
HETATM  511  O   HOH T 510      54.167  24.988  37.915  1.00  0.56           O  
HETATM  512  O   HOH T 511      35.518  12.230  40.627  1.00  0.57           O  
HETATM  513  O   HOH T 512      18.602  51.051  46.129  1.00  0.57           O  
HETATM  514  O   HOH T 513      32.657  23.193  55.701  1.00  0.57           O  
HETATM  515  O   HOH T 514      43.669  43.049  38.854  1.00  0.57           O  
HETATM  516  O   HOH T 515      13.561  39.738  65.402  1.00  0.57           O  
HETATM  517  O   HOH T 516      19.289  20.563  54.210  1.00  0.57           O  
HETATM  518  O   HOH T 517      25.851  24.327  55.092  1.00  0.57           O  
HETATM  519  O   HOH T 518      25.480  44.748  46.122  1.00  0.57           O  
HETATM  520  O   HOH T 519      50.342  38.043  62.500  1.00  0.57           O  
HETATM  521  O   HOH T 520      43.763  40.470  47.049  1.00  0.57           O  
HETATM  522  O   HOH T 521      63.871  16.221  47.124  1.00  0.57           O  
HETATM  523  O   HOH T 522       6.671  24.284  45.318  1.00  0.57           O  
HETATM  524  O   HOH T 523      27.654  38.968  44.474  1.00  0.57           O  
HETATM  525  O   HOH T 524      31.756  29.503  70.411  1.00  0.57           O  
HETATM  526  O   HOH T 525      56.690  12.149  65.787  1.00  0.58           O  
HETATM  527  O   HOH T 526       4.817  38.125  36.605  1.00  0.58           O  
HETATM  528  O   HOH T 527      17.740  15.430  62.709  1.00  0.58           O  
HETATM  529  O   HOH T 528      14.160  40.464  71.510  1.00  0.59           O  
HETATM  530  O   HOH T 529      11.913  22.969  40.028  1.00  0.59           O  
HETATM  531  O   HOH T 530      61.553  31.981  54.518  1.00  0.60           O  
HETATM  532  O   HOH T 531      30.707  21.111  77.688  1.00  0.61           O  
HETATM  533  O   HOH T 532      22.171  15.194  64.731  1.00  0.61           O  
HETATM  534  O   HOH T 533      20.175  23.858  69.613  1.00  0.62           O  
HETATM  535  O   HOH T 534      57.613  24.279  47.851  1.00  0.62           O  
TER     536      HOH T 534 
