# Supplementary material for: Accurate Prediction of Hydration Sites of Proteins Using Energy Model With Atom Embedding
Source: Front Mol Biosci. 2021 Sep 20;8:756075. doi: 10.3389/fmolb.2021.756075 (PMC8488165; doi:10.3389/fmolb.2021.756075)
Supplement: Supplementary file 1 [file DataSheet1.ZIP › Data Sheet 1/Our_result_pdb/our_dataset_output/1LYV_watersite.pdb]

HEADER                                                        XXXX


JRNL        PMID   -1
HETATM    1  O   HOH T   0      16.709  11.143  64.970  1.00  0.16           O  
HETATM    2  O   HOH T   1      14.476  -3.256  69.143  1.00  0.18           O  
HETATM    3  O   HOH T   2       9.303  18.916  61.261  1.00  0.19           O  
HETATM    4  O   HOH T   3      23.668 -11.691  63.472  1.00  0.21           O  
HETATM    5  O   HOH T   4      34.922  -5.549  50.090  1.00  0.21           O  
HETATM    6  O   HOH T   5      37.107   0.979  48.676  1.00  0.21           O  
HETATM    7  O   HOH T   6      27.006  -3.790  69.941  1.00  0.22           O  
HETATM    8  O   HOH T   7      16.001  15.073  52.726  1.00  0.23           O  
HETATM    9  O   HOH T   8      24.584  -0.068  18.402  1.00  0.23           O  
HETATM   10  O   HOH T   9      27.312   0.455  32.022  1.00  0.23           O  
HETATM   11  O   HOH T  10      35.724  -7.075  65.519  1.00  0.23           O  
HETATM   12  O   HOH T  11      21.527   9.730  72.829  1.00  0.23           O  
HETATM   13  O   HOH T  12      32.152   1.740  60.778  1.00  0.23           O  
HETATM   14  O   HOH T  13      29.513  -7.481  54.930  1.00  0.23           O  
HETATM   15  O   HOH T  14      41.360  -1.527  60.928  1.00  0.24           O  
HETATM   16  O   HOH T  15       4.367   9.512  51.461  1.00  0.24           O  
HETATM   17  O   HOH T  16      25.860   9.815  50.117  1.00  0.24           O  
HETATM   18  O   HOH T  17      39.010  14.352  32.466  1.00  0.24           O  
HETATM   19  O   HOH T  18      27.951  -3.526  61.059  1.00  0.24           O  
HETATM   20  O   HOH T  19      31.929  -5.698  65.236  1.00  0.24           O  
HETATM   21  O   HOH T  20      16.886  -7.360  67.750  1.00  0.25           O  
HETATM   22  O   HOH T  21      25.494  15.528  57.056  1.00  0.25           O  
HETATM   23  O   HOH T  22       3.128  -0.550  45.738  1.00  0.25           O  
HETATM   24  O   HOH T  23      21.789  -6.541  45.583  1.00  0.25           O  
HETATM   25  O   HOH T  24      41.159  -6.911  54.580  1.00  0.25           O  
HETATM   26  O   HOH T  25      24.670  -2.325  33.949  1.00  0.25           O  
HETATM   27  O   HOH T  26      27.797 -13.176  59.085  1.00  0.25           O  
HETATM   28  O   HOH T  27      35.777  -4.229  57.045  1.00  0.25           O  
HETATM   29  O   HOH T  28      26.979  20.871  40.976  1.00  0.25           O  
HETATM   30  O   HOH T  29       9.757  -2.511  40.518  1.00  0.25           O  
HETATM   31  O   HOH T  30      13.268  -5.643  50.802  1.00  0.26           O  
HETATM   32  O   HOH T  31      22.490  20.035  58.661  1.00  0.26           O  
HETATM   33  O   HOH T  32      27.321   5.425  22.894  1.00  0.26           O  
HETATM   34  O   HOH T  33       9.628  13.016  61.552  1.00  0.26           O  
HETATM   35  O   HOH T  34       7.966  -4.005  57.918  1.00  0.27           O  
HETATM   36  O   HOH T  35      32.456  18.428  51.025  1.00  0.27           O  
HETATM   37  O   HOH T  36      18.703  -4.087  33.452  1.00  0.27           O  
HETATM   38  O   HOH T  37      19.227   8.117  72.351  1.00  0.27           O  
HETATM   39  O   HOH T  38      18.092 -13.761  47.303  1.00  0.27           O  
HETATM   40  O   HOH T  39      39.577  -8.348  59.671  1.00  0.27           O  
HETATM   41  O   HOH T  40      19.842 -15.239  45.685  1.00  0.27           O  
HETATM   42  O   HOH T  41      17.492  12.677  52.332  1.00  0.27           O  
HETATM   43  O   HOH T  42      17.632   8.187  77.143  1.00  0.27           O  
HETATM   44  O   HOH T  43      15.204  10.719  35.700  1.00  0.27           O  
HETATM   45  O   HOH T  44      32.435   8.620  63.407  1.00  0.27           O  
HETATM   46  O   HOH T  45      27.307  -3.358  37.306  1.00  0.27           O  
HETATM   47  O   HOH T  46      17.456 -13.512  60.339  1.00  0.27           O  
HETATM   48  O   HOH T  47      35.040  -9.917  60.234  1.00  0.28           O  
HETATM   49  O   HOH T  48      23.380  12.398  75.721  1.00  0.28           O  
HETATM   50  O   HOH T  49      17.865 -21.681  61.732  1.00  0.28           O  
HETATM   51  O   HOH T  50      37.534  -3.498  33.366  1.00  0.28           O  
HETATM   52  O   HOH T  51      19.462 -12.404  50.978  1.00  0.28           O  
HETATM   53  O   HOH T  52      20.568  24.437  65.054  1.00  0.29           O  
HETATM   54  O   HOH T  53       7.510  -4.992  70.521  1.00  0.29           O  
HETATM   55  O   HOH T  54      37.842   1.492  29.925  1.00  0.29           O  
HETATM   56  O   HOH T  55       9.732  15.283  63.166  1.00  0.29           O  
HETATM   57  O   HOH T  56      13.146  -5.956  42.711  1.00  0.29           O  
HETATM   58  O   HOH T  57       9.031   4.428  69.304  1.00  0.30           O  
HETATM   59  O   HOH T  58      28.375   9.991  28.907  1.00  0.30           O  
HETATM   60  O   HOH T  59      18.797  10.553  25.581  1.00  0.30           O  
HETATM   61  O   HOH T  60      23.522   4.180  80.875  1.00  0.30           O  
HETATM   62  O   HOH T  61      26.873   8.431  64.674  1.00  0.30           O  
HETATM   63  O   HOH T  62      13.161   3.033  74.330  1.00  0.30           O  
HETATM   64  O   HOH T  63      15.281 -12.086  62.878  1.00  0.30           O  
HETATM   65  O   HOH T  64      31.059  -2.698  35.701  1.00  0.30           O  
HETATM   66  O   HOH T  65      37.988   6.486  50.895  1.00  0.30           O  
HETATM   67  O   HOH T  66      15.419 -11.401  65.544  1.00  0.30           O  
HETATM   68  O   HOH T  67      21.236   2.616  80.443  1.00  0.30           O  
HETATM   69  O   HOH T  68       6.890  13.722  56.527  1.00  0.31           O  
HETATM   70  O   HOH T  69      35.515  17.328  57.019  1.00  0.31           O  
HETATM   71  O   HOH T  70      23.067  -9.605  50.613  1.00  0.31           O  
HETATM   72  O   HOH T  71      25.020  14.035  68.528  1.00  0.31           O  
HETATM   73  O   HOH T  72       2.320   8.424  63.373  1.00  0.31           O  
HETATM   74  O   HOH T  73      30.021 -10.494  65.802  1.00  0.31           O  
HETATM   75  O   HOH T  74      23.260  23.834  64.967  1.00  0.31           O  
HETATM   76  O   HOH T  75      41.414  -9.046  56.329  1.00  0.31           O  
HETATM   77  O   HOH T  76      35.879  -4.286  47.821  1.00  0.32           O  
HETATM   78  O   HOH T  77      28.286  23.493  36.188  1.00  0.32           O  
HETATM   79  O   HOH T  78      43.397  -1.805  57.710  1.00  0.32           O  
HETATM   80  O   HOH T  79      23.407  14.380  55.561  1.00  0.32           O  
HETATM   81  O   HOH T  80      19.357  12.863  50.254  1.00  0.32           O  
HETATM   82  O   HOH T  81      24.009 -13.107  56.791  1.00  0.32           O  
HETATM   83  O   HOH T  82      30.183  20.449  59.918  1.00  0.32           O  
HETATM   84  O   HOH T  83      13.836  23.867  58.045  1.00  0.32           O  
HETATM   85  O   HOH T  84      41.431  -5.794  37.097  1.00  0.32           O  
HETATM   86  O   HOH T  85      36.006  -4.305  64.834  1.00  0.33           O  
HETATM   87  O   HOH T  86      34.040  20.910  56.370  1.00  0.33           O  
HETATM   88  O   HOH T  87      43.005   3.714  52.021  1.00  0.33           O  
HETATM   89  O   HOH T  88       9.730 -10.406  52.022  1.00  0.33           O  
HETATM   90  O   HOH T  89      15.481 -17.286  50.964  1.00  0.33           O  
HETATM   91  O   HOH T  90      36.440 -10.016  56.422  1.00  0.33           O  
HETATM   92  O   HOH T  91      22.702  -7.316  70.805  1.00  0.33           O  
HETATM   93  O   HOH T  92      28.381  10.427  62.939  1.00  0.33           O  
HETATM   94  O   HOH T  93      28.426   6.927  66.447  1.00  0.33           O  
HETATM   95  O   HOH T  94      27.704  21.055  65.767  1.00  0.33           O  
HETATM   96  O   HOH T  95       6.504  -1.621  65.631  1.00  0.33           O  
HETATM   97  O   HOH T  96       5.686  -4.863  61.581  1.00  0.34           O  
HETATM   98  O   HOH T  97      32.282  15.458  43.189  1.00  0.34           O  
HETATM   99  O   HOH T  98      17.454  -2.496  35.375  1.00  0.34           O  
HETATM  100  O   HOH T  99      22.283  -0.715  24.688  1.00  0.34           O  
HETATM  101  O   HOH T 100      24.474  16.826  52.249  1.00  0.34           O  
HETATM  102  O   HOH T 101      30.909   7.459  65.380  1.00  0.34           O  
HETATM  103  O   HOH T 102      20.764  10.644  23.548  1.00  0.34           O  
HETATM  104  O   HOH T 103      21.225  17.107  40.676  1.00  0.34           O  
HETATM  105  O   HOH T 104      38.042  -2.542  64.119  1.00  0.34           O  
HETATM  106  O   HOH T 105       9.425  16.615  54.348  1.00  0.34           O  
HETATM  107  O   HOH T 106      21.093  -5.433  79.324  1.00  0.34           O  
HETATM  108  O   HOH T 107       3.187  10.848  64.456  1.00  0.35           O  
HETATM  109  O   HOH T 108       4.503   7.627  44.124  1.00  0.35           O  
HETATM  110  O   HOH T 109      35.542   8.228  58.988  1.00  0.35           O  
HETATM  111  O   HOH T 110      31.672  -3.403  38.412  1.00  0.35           O  
HETATM  112  O   HOH T 111      43.393   3.274  54.809  1.00  0.35           O  
HETATM  113  O   HOH T 112      26.515 -11.494  65.983  1.00  0.35           O  
HETATM  114  O   HOH T 113      18.454  17.148  41.156  1.00  0.35           O  
HETATM  115  O   HOH T 114       1.725   1.528  44.987  1.00  0.36           O  
HETATM  116  O   HOH T 115      21.719  19.490  70.382  1.00  0.36           O  
HETATM  117  O   HOH T 116       1.509  -0.803  43.432  1.00  0.36           O  
HETATM  118  O   HOH T 117      12.619  10.926  43.836  1.00  0.36           O  
HETATM  119  O   HOH T 118      23.819  -0.356  30.643  1.00  0.36           O  
HETATM  120  O   HOH T 119      24.863   8.140  79.987  1.00  0.36           O  
HETATM  121  O   HOH T 120      21.055  -6.630  76.750  1.00  0.36           O  
HETATM  122  O   HOH T 121      25.301   5.522  20.816  1.00  0.36           O  
HETATM  123  O   HOH T 122       0.612   4.313  47.315  1.00  0.36           O  
HETATM  124  O   HOH T 123       5.981   8.074  60.515  1.00  0.36           O  
HETATM  125  O   HOH T 124      28.539   7.924  23.645  1.00  0.36           O  
HETATM  126  O   HOH T 125      19.454   1.882  31.631  1.00  0.36           O  
HETATM  127  O   HOH T 126      38.282 -17.626  54.428  1.00  0.36           O  
HETATM  128  O   HOH T 127       7.097  -4.372  51.895  1.00  0.36           O  
HETATM  129  O   HOH T 128      27.656  12.578  21.005  1.00  0.36           O  
HETATM  130  O   HOH T 129      36.243  -6.572  68.281  1.00  0.36           O  
HETATM  131  O   HOH T 130      37.832   3.092  63.477  1.00  0.37           O  
HETATM  132  O   HOH T 131      26.884  -8.347  39.476  1.00  0.37           O  
HETATM  133  O   HOH T 132      20.555   2.501  20.889  1.00  0.37           O  
HETATM  134  O   HOH T 133      25.689  10.271  29.180  1.00  0.37           O  
HETATM  135  O   HOH T 134      21.795   2.152  25.061  1.00  0.37           O  
HETATM  136  O   HOH T 135      29.495  -1.794  37.906  1.00  0.38           O  
HETATM  137  O   HOH T 136      19.071 -14.858  49.647  1.00  0.38           O  
HETATM  138  O   HOH T 137       4.125   0.812  58.797  1.00  0.38           O  
HETATM  139  O   HOH T 138      14.708  12.868  68.137  1.00  0.38           O  
HETATM  140  O   HOH T 139      11.256 -14.619  49.725  1.00  0.38           O  
HETATM  141  O   HOH T 140      26.624 -13.947  56.689  1.00  0.38           O  
HETATM  142  O   HOH T 141      21.131  22.484  39.913  1.00  0.38           O  
HETATM  143  O   HOH T 142      18.533  26.024  64.163  1.00  0.39           O  
HETATM  144  O   HOH T 143      15.431 -11.435  49.246  1.00  0.39           O  
HETATM  145  O   HOH T 144      22.647   1.695  19.269  1.00  0.39           O  
HETATM  146  O   HOH T 145      27.083  -3.793  76.665  1.00  0.39           O  
HETATM  147  O   HOH T 146      22.747  17.030  29.201  1.00  0.39           O  
HETATM  148  O   HOH T 147      22.634  14.351  28.423  1.00  0.39           O  
HETATM  149  O   HOH T 148      20.971  17.095  34.814  1.00  0.39           O  
HETATM  150  O   HOH T 149      36.904  -7.979  59.531  1.00  0.39           O  
HETATM  151  O   HOH T 150      16.900  16.765  54.666  1.00  0.39           O  
HETATM  152  O   HOH T 151      28.846  24.069  60.094  1.00  0.39           O  
HETATM  153  O   HOH T 152      33.060   6.082  66.349  1.00  0.39           O  
HETATM  154  O   HOH T 153      39.922   5.767  59.889  1.00  0.39           O  
HETATM  155  O   HOH T 154      22.006  -1.905  22.147  1.00  0.39           O  
HETATM  156  O   HOH T 155      24.164  18.204  59.912  1.00  0.40           O  
HETATM  157  O   HOH T 156      27.687  11.005  65.484  1.00  0.40           O  
HETATM  158  O   HOH T 157      22.125  17.211  68.687  1.00  0.40           O  
HETATM  159  O   HOH T 158      44.993   5.484  51.644  1.00  0.40           O  
HETATM  160  O   HOH T 159       3.441   9.127  60.936  1.00  0.40           O  
HETATM  161  O   HOH T 160      14.623 -16.101  53.362  1.00  0.40           O  
HETATM  162  O   HOH T 161      33.524  23.052  58.086  1.00  0.40           O  
HETATM  163  O   HOH T 162      23.231  16.910  36.312  1.00  0.40           O  
HETATM  164  O   HOH T 163      20.878  19.706  39.722  1.00  0.40           O  
HETATM  165  O   HOH T 164       8.115  -1.848  36.251  1.00  0.40           O  
HETATM  166  O   HOH T 165      32.363  11.317  63.184  1.00  0.40           O  
HETATM  167  O   HOH T 166       9.442  -6.621  71.688  1.00  0.40           O  
HETATM  168  O   HOH T 167      18.083   0.972  78.895  1.00  0.40           O  
HETATM  169  O   HOH T 168       6.571  10.462  50.054  1.00  0.40           O  
HETATM  170  O   HOH T 169      23.578  23.002  41.157  1.00  0.40           O  
HETATM  171  O   HOH T 170      16.863   9.663  41.151  1.00  0.41           O  
HETATM  172  O   HOH T 171      38.313   3.823  60.813  1.00  0.41           O  
HETATM  173  O   HOH T 172      37.466  10.125  31.649  1.00  0.41           O  
HETATM  174  O   HOH T 173      17.376 -13.218  64.408  1.00  0.41           O  
HETATM  175  O   HOH T 174      34.780   4.014  67.089  1.00  0.41           O  
HETATM  176  O   HOH T 175       6.316   8.647  65.737  1.00  0.41           O  
HETATM  177  O   HOH T 176      13.831  23.189  55.165  1.00  0.41           O  
HETATM  178  O   HOH T 177      30.021  -6.523  70.141  1.00  0.41           O  
HETATM  179  O   HOH T 178       5.779  -4.078  64.193  1.00  0.41           O  
HETATM  180  O   HOH T 179      23.680  10.095  71.258  1.00  0.41           O  
HETATM  181  O   HOH T 180      19.339  -1.454  79.348  1.00  0.41           O  
HETATM  182  O   HOH T 181       6.682   5.635  33.421  1.00  0.41           O  
HETATM  183  O   HOH T 182      24.970  16.920  68.220  1.00  0.42           O  
HETATM  184  O   HOH T 183      29.846  12.385  29.126  1.00  0.42           O  
HETATM  185  O   HOH T 184      43.101  -3.501  36.935  1.00  0.42           O  
HETATM  186  O   HOH T 185      44.319  -3.917  43.865  1.00  0.42           O  
HETATM  187  O   HOH T 186      26.199  21.977  56.632  1.00  0.42           O  
HETATM  188  O   HOH T 187       8.367  -8.897  70.548  1.00  0.42           O  
HETATM  189  O   HOH T 188       8.625  10.560  43.442  1.00  0.42           O  
HETATM  190  O   HOH T 189      13.088  20.934  51.070  1.00  0.42           O  
HETATM  191  O   HOH T 190      42.112   9.228  55.312  1.00  0.42           O  
HETATM  192  O   HOH T 191       3.938   7.999  36.590  1.00  0.42           O  
HETATM  193  O   HOH T 192      14.399  10.505  41.850  1.00  0.42           O  
HETATM  194  O   HOH T 193      25.612  -2.253  60.636  1.00  0.42           O  
HETATM  195  O   HOH T 194      26.452  -1.626  17.115  1.00  0.42           O  
HETATM  196  O   HOH T 195      44.948   0.563  57.911  1.00  0.42           O  
HETATM  197  O   HOH T 196      41.276  -8.876  61.666  1.00  0.42           O  
HETATM  198  O   HOH T 197      28.656  24.710  68.568  1.00  0.43           O  
HETATM  199  O   HOH T 198      15.191  13.715  74.274  1.00  0.43           O  
HETATM  200  O   HOH T 199      35.772  -5.166  45.184  1.00  0.43           O  
HETATM  201  O   HOH T 200      14.978  19.847  40.558  1.00  0.43           O  
HETATM  202  O   HOH T 201      38.278   8.859  52.379  1.00  0.43           O  
HETATM  203  O   HOH T 202      41.376  -9.378  46.662  1.00  0.43           O  
HETATM  204  O   HOH T 203      34.247  15.806  54.992  1.00  0.43           O  
HETATM  205  O   HOH T 204      19.514  20.403  46.870  1.00  0.43           O  
HETATM  206  O   HOH T 205      36.380  14.212  35.669  1.00  0.43           O  
HETATM  207  O   HOH T 206      19.883   8.206  24.466  1.00  0.43           O  
HETATM  208  O   HOH T 207      28.435  -3.315  34.727  1.00  0.43           O  
HETATM  209  O   HOH T 208       7.672   0.614  37.511  1.00  0.43           O  
HETATM  210  O   HOH T 209      14.443  11.124  38.300  1.00  0.43           O  
HETATM  211  O   HOH T 210      24.886  15.390  29.709  1.00  0.43           O  
HETATM  212  O   HOH T 211      13.490 -13.217  45.006  1.00  0.43           O  
HETATM  213  O   HOH T 212      27.358 -13.805  61.781  1.00  0.43           O  
HETATM  214  O   HOH T 213      19.518  16.452  69.578  1.00  0.43           O  
HETATM  215  O   HOH T 214      24.702  12.385  78.291  1.00  0.43           O  
HETATM  216  O   HOH T 215       5.363  11.661  55.382  1.00  0.43           O  
HETATM  217  O   HOH T 216      15.755  17.188  40.549  1.00  0.44           O  
HETATM  218  O   HOH T 217      37.246   6.332  59.940  1.00  0.44           O  
HETATM  219  O   HOH T 218      21.004   0.653  22.762  1.00  0.44           O  
HETATM  220  O   HOH T 219      25.159   8.869  82.677  1.00  0.44           O  
HETATM  221  O   HOH T 220      21.397  12.521  52.129  1.00  0.44           O  
HETATM  222  O   HOH T 221       6.268  -9.574  47.892  1.00  0.44           O  
HETATM  223  O   HOH T 222      21.768  -7.996  37.279  1.00  0.44           O  
HETATM  224  O   HOH T 223      26.874  23.702  66.707  1.00  0.44           O  
HETATM  225  O   HOH T 224       1.586   5.172  65.065  1.00  0.44           O  
HETATM  226  O   HOH T 225      24.852  12.852  28.740  1.00  0.44           O  
HETATM  227  O   HOH T 226      18.486  14.610  53.913  1.00  0.44           O  
HETATM  228  O   HOH T 227      36.003  12.805  38.068  1.00  0.44           O  
HETATM  229  O   HOH T 228       8.611   8.230  36.829  1.00  0.44           O  
HETATM  230  O   HOH T 229      36.799 -15.031  63.979  1.00  0.44           O  
HETATM  231  O   HOH T 230      40.286   2.645  62.355  1.00  0.44           O  
HETATM  232  O   HOH T 231      12.560  -8.400  41.623  1.00  0.44           O  
HETATM  233  O   HOH T 232      19.882   4.596  26.712  1.00  0.44           O  
HETATM  234  O   HOH T 233      24.889  -8.774  37.443  1.00  0.44           O  
HETATM  235  O   HOH T 234      38.203   8.824  49.639  1.00  0.44           O  
HETATM  236  O   HOH T 235      10.208 -10.415  49.328  1.00  0.44           O  
HETATM  237  O   HOH T 236      45.491  -3.542  57.906  1.00  0.44           O  
HETATM  238  O   HOH T 237       5.323  12.544  49.204  1.00  0.45           O  
HETATM  239  O   HOH T 238      11.985  13.495  44.932  1.00  0.45           O  
HETATM  240  O   HOH T 239      29.032  26.089  61.967  1.00  0.45           O  
HETATM  241  O   HOH T 240      36.980  -3.888  30.673  1.00  0.45           O  
HETATM  242  O   HOH T 241      28.778 -14.541  55.159  1.00  0.45           O  
HETATM  243  O   HOH T 242      25.012  -5.528  70.948  1.00  0.45           O  
HETATM  244  O   HOH T 243      16.582  27.250  65.682  1.00  0.45           O  
HETATM  245  O   HOH T 244      25.187  20.212  58.403  1.00  0.45           O  
HETATM  246  O   HOH T 245       7.892  11.179  54.236  1.00  0.45           O  
HETATM  247  O   HOH T 246      43.009  -8.270  66.587  1.00  0.45           O  
HETATM  248  O   HOH T 247      23.384   6.542  19.124  1.00  0.45           O  
HETATM  249  O   HOH T 248      39.855   1.879  64.990  1.00  0.46           O  
HETATM  250  O   HOH T 249      30.013  12.194  64.483  1.00  0.46           O  
HETATM  251  O   HOH T 250      23.929   4.416  83.627  1.00  0.46           O  
HETATM  252  O   HOH T 251      25.614  23.333  36.538  1.00  0.46           O  
HETATM  253  O   HOH T 252      28.388  13.832  26.176  1.00  0.46           O  
HETATM  254  O   HOH T 253      28.448 -12.383  64.135  1.00  0.46           O  
HETATM  255  O   HOH T 254      39.815  -0.872  65.536  1.00  0.46           O  
HETATM  256  O   HOH T 255      25.501   3.225  79.304  1.00  0.46           O  
HETATM  257  O   HOH T 256      12.083  -4.653  38.851  1.00  0.46           O  
HETATM  258  O   HOH T 257      13.017   1.105  35.037  1.00  0.46           O  
HETATM  259  O   HOH T 258      16.107  12.126  40.322  1.00  0.46           O  
HETATM  260  O   HOH T 259      27.363  -1.821  30.285  1.00  0.46           O  
HETATM  261  O   HOH T 260      14.319 -13.367  47.623  1.00  0.46           O  
HETATM  262  O   HOH T 261      28.615  13.243  23.464  1.00  0.46           O  
HETATM  263  O   HOH T 262       6.351   7.643  35.337  1.00  0.46           O  
HETATM  264  O   HOH T 263       5.066  -4.299  69.239  1.00  0.46           O  
HETATM  265  O   HOH T 264      39.191   8.306  59.225  1.00  0.46           O  
HETATM  266  O   HOH T 265      21.441  19.051  36.933  1.00  0.46           O  
HETATM  267  O   HOH T 266      26.698  22.121  71.453  1.00  0.46           O  
HETATM  268  O   HOH T 267      30.758  -5.444  67.736  1.00  0.47           O  
HETATM  269  O   HOH T 268      28.043  17.662  43.365  1.00  0.47           O  
HETATM  270  O   HOH T 269       4.748   5.073  39.177  1.00  0.47           O  
HETATM  271  O   HOH T 270       7.507  11.004  57.028  1.00  0.47           O  
HETATM  272  O   HOH T 271      14.757  13.850  38.624  1.00  0.47           O  
HETATM  273  O   HOH T 272      19.667  16.877  54.926  1.00  0.47           O  
HETATM  274  O   HOH T 273      31.612  -4.133  69.981  1.00  0.47           O  
HETATM  275  O   HOH T 274      41.489  10.162  50.557  1.00  0.47           O  
HETATM  276  O   HOH T 275      18.992 -15.450  63.587  1.00  0.47           O  
HETATM  277  O   HOH T 276      25.830 -13.287  63.950  1.00  0.47           O  
HETATM  278  O   HOH T 277      16.273  -7.372  73.755  1.00  0.47           O  
HETATM  279  O   HOH T 278      18.348  17.894  34.753  1.00  0.47           O  
HETATM  280  O   HOH T 279      14.241  -6.809  68.348  1.00  0.47           O  
HETATM  281  O   HOH T 280      37.284 -15.770  66.609  1.00  0.48           O  
HETATM  282  O   HOH T 281      10.802  -5.049  41.305  1.00  0.48           O  
HETATM  283  O   HOH T 282       5.621  -0.654  36.115  1.00  0.48           O  
HETATM  284  O   HOH T 283      12.637 -11.483  48.709  1.00  0.48           O  
HETATM  285  O   HOH T 284      19.260  15.635  57.389  1.00  0.48           O  
HETATM  286  O   HOH T 285      26.411  19.395  71.108  1.00  0.48           O  
HETATM  287  O   HOH T 286      26.236  23.519  40.538  1.00  0.48           O  
HETATM  288  O   HOH T 287      11.606 -16.254  55.495  1.00  0.48           O  
HETATM  289  O   HOH T 288      26.574  22.492  44.385  1.00  0.48           O  
HETATM  290  O   HOH T 289       6.239   7.292  38.102  1.00  0.48           O  
HETATM  291  O   HOH T 290      31.347 -14.784  54.290  1.00  0.48           O  
HETATM  292  O   HOH T 291      26.948  -0.834  19.654  1.00  0.48           O  
HETATM  293  O   HOH T 292      26.555 -11.445  49.332  1.00  0.48           O  
HETATM  294  O   HOH T 293      23.010  12.191  72.876  1.00  0.48           O  
HETATM  295  O   HOH T 294      23.445   7.133  84.008  1.00  0.48           O  
HETATM  296  O   HOH T 295      34.227  15.523  34.532  1.00  0.48           O  
HETATM  297  O   HOH T 296      11.652 -13.641  47.111  1.00  0.48           O  
HETATM  298  O   HOH T 297      30.800  -7.874  66.475  1.00  0.48           O  
HETATM  299  O   HOH T 298      43.929   2.293  43.537  1.00  0.49           O  
HETATM  300  O   HOH T 299       8.221  10.056  40.703  1.00  0.49           O  
HETATM  301  O   HOH T 300      30.515  20.545  66.277  1.00  0.49           O  
HETATM  302  O   HOH T 301      22.738  14.761  52.864  1.00  0.49           O  
HETATM  303  O   HOH T 302      14.530 -18.858  52.889  1.00  0.49           O  
HETATM  304  O   HOH T 303       6.238 -11.430  49.969  1.00  0.49           O  
HETATM  305  O   HOH T 304      34.667   7.372  62.744  1.00  0.49           O  
HETATM  306  O   HOH T 305      25.036  -8.093  72.108  1.00  0.49           O  
HETATM  307  O   HOH T 306      27.892  10.610  22.973  1.00  0.49           O  
HETATM  308  O   HOH T 307      38.030  -2.384  28.630  1.00  0.49           O  
HETATM  309  O   HOH T 308      34.390  17.127  49.662  1.00  0.49           O  
HETATM  310  O   HOH T 309      27.623  -7.229  71.727  1.00  0.49           O  
HETATM  311  O   HOH T 310      39.668   9.718  56.804  1.00  0.49           O  
HETATM  312  O   HOH T 311      25.058  12.356  70.812  1.00  0.49           O  
HETATM  313  O   HOH T 312      35.233   5.622  64.843  1.00  0.49           O  
HETATM  314  O   HOH T 313      30.313  26.431  59.525  1.00  0.49           O  
HETATM  315  O   HOH T 314      33.811 -11.690  58.480  1.00  0.49           O  
HETATM  316  O   HOH T 315      21.011  -5.680  33.235  1.00  0.49           O  
HETATM  317  O   HOH T 316      26.693  -1.862  26.035  1.00  0.49           O  
HETATM  318  O   HOH T 317      33.056  18.228  55.877  1.00  0.49           O  
HETATM  319  O   HOH T 318      26.707  -3.506  32.458  1.00  0.49           O  
HETATM  320  O   HOH T 319      18.924  19.005  70.459  1.00  0.49           O  
HETATM  321  O   HOH T 320       3.546   8.420  65.839  1.00  0.49           O  
HETATM  322  O   HOH T 321      23.386  -7.103  75.431  1.00  0.49           O  
HETATM  323  O   HOH T 322      24.245  24.440  38.804  1.00  0.49           O  
HETATM  324  O   HOH T 323      27.733  -5.917  38.396  1.00  0.49           O  
HETATM  325  O   HOH T 324      28.437  22.034  54.925  1.00  0.49           O  
HETATM  326  O   HOH T 325      30.046  24.342  63.834  1.00  0.50           O  
HETATM  327  O   HOH T 326      18.435  14.056  47.897  1.00  0.50           O  
HETATM  328  O   HOH T 327       6.663  -7.751  57.085  1.00  0.50           O  
HETATM  329  O   HOH T 328      24.203  16.951  55.047  1.00  0.50           O  
HETATM  330  O   HOH T 329       9.153  13.521  44.438  1.00  0.50           O  
HETATM  331  O   HOH T 330      24.020  17.968  70.647  1.00  0.50           O  
HETATM  332  O   HOH T 331      24.608 -13.254  61.416  1.00  0.50           O  
HETATM  333  O   HOH T 332      29.263  -0.108  18.358  1.00  0.50           O  
HETATM  334  O   HOH T 333       0.771   1.251  40.142  1.00  0.50           O  
HETATM  335  O   HOH T 334      27.268  22.005  38.426  1.00  0.50           O  
HETATM  336  O   HOH T 335      40.424 -10.457  64.718  1.00  0.50           O  
HETATM  337  O   HOH T 336      16.678  18.684  42.663  1.00  0.50           O  
HETATM  338  O   HOH T 337      13.091  -1.294  67.778  1.00  0.50           O  
HETATM  339  O   HOH T 338      12.914  27.647  68.160  1.00  0.50           O  
HETATM  340  O   HOH T 339      32.356  -3.235  29.180  1.00  0.50           O  
HETATM  341  O   HOH T 340      27.686  -8.953  42.040  1.00  0.50           O  
HETATM  342  O   HOH T 341      29.270 -12.265  49.465  1.00  0.50           O  
HETATM  343  O   HOH T 342      40.791  -2.532  63.487  1.00  0.50           O  
HETATM  344  O   HOH T 343      42.601  -8.932  63.986  1.00  0.50           O  
HETATM  345  O   HOH T 344      43.102  -2.411  34.309  1.00  0.50           O  
HETATM  346  O   HOH T 345       6.469  -6.015  59.184  1.00  0.51           O  
HETATM  347  O   HOH T 346       9.807   3.202  32.194  1.00  0.51           O  
HETATM  348  O   HOH T 347      41.012   0.113  63.189  1.00  0.51           O  
HETATM  349  O   HOH T 348      35.842  -3.952  67.611  1.00  0.51           O  
HETATM  350  O   HOH T 349      24.341  17.387  31.555  1.00  0.51           O  
HETATM  351  O   HOH T 350       9.622 -11.116  58.678  1.00  0.51           O  
HETATM  352  O   HOH T 351      26.936  18.368  66.683  1.00  0.51           O  
HETATM  353  O   HOH T 352      31.031  11.322  53.663  1.00  0.51           O  
HETATM  354  O   HOH T 353      30.091  11.486  21.840  1.00  0.51           O  
HETATM  355  O   HOH T 354      21.973  17.365  53.477  1.00  0.51           O  
HETATM  356  O   HOH T 355      23.756  22.435  57.903  1.00  0.52           O  
HETATM  357  O   HOH T 356      41.605  -3.046  31.973  1.00  0.52           O  
HETATM  358  O   HOH T 357       8.783   7.376  34.152  1.00  0.52           O  
HETATM  359  O   HOH T 358      24.132  -3.012  31.359  1.00  0.52           O  
HETATM  360  O   HOH T 359       7.764  -5.621  55.620  1.00  0.52           O  
HETATM  361  O   HOH T 360      40.470   7.290  49.401  1.00  0.52           O  
HETATM  362  O   HOH T 361      32.249  13.917  64.051  1.00  0.52           O  
HETATM  363  O   HOH T 362      20.740 -16.408  48.038  1.00  0.52           O  
HETATM  364  O   HOH T 363      31.653 -12.952  51.097  1.00  0.52           O  
HETATM  365  O   HOH T 364      15.360  -4.876  37.287  1.00  0.52           O  
HETATM  366  O   HOH T 365      36.464   5.238  62.391  1.00  0.52           O  
HETATM  367  O   HOH T 366      27.304  26.874  64.011  1.00  0.52           O  
HETATM  368  O   HOH T 367       9.604  -3.473  37.964  1.00  0.53           O  
HETATM  369  O   HOH T 368       8.582   9.940  64.622  1.00  0.53           O  
HETATM  370  O   HOH T 369      10.968  20.902  66.626  1.00  0.53           O  
HETATM  371  O   HOH T 370       9.245   6.479  59.784  1.00  0.53           O  
HETATM  372  O   HOH T 371      13.718  12.914  36.321  1.00  0.53           O  
HETATM  373  O   HOH T 372      21.967  17.770  73.980  1.00  0.53           O  
HETATM  374  O   HOH T 373      24.953   6.231  81.896  1.00  0.53           O  
HETATM  375  O   HOH T 374      42.924   1.630  46.161  1.00  0.53           O  
HETATM  376  O   HOH T 375      20.780 -13.630  47.774  1.00  0.53           O  
HETATM  377  O   HOH T 376      25.497  -5.282  74.866  1.00  0.53           O  
HETATM  378  O   HOH T 377      23.558  -5.882  72.981  1.00  0.53           O  
HETATM  379  O   HOH T 378      39.059 -10.356  55.738  1.00  0.53           O  
HETATM  380  O   HOH T 379      29.779  21.601  63.943  1.00  0.53           O  
HETATM  381  O   HOH T 380      39.064  -2.228  31.389  1.00  0.53           O  
HETATM  382  O   HOH T 381      16.274  -4.841  34.644  1.00  0.53           O  
HETATM  383  O   HOH T 382      28.269  -0.055  72.128  1.00  0.53           O  
HETATM  384  O   HOH T 383      13.905  -6.775  39.494  1.00  0.53           O  
HETATM  385  O   HOH T 384      21.971  23.404  37.409  1.00  0.54           O  
HETATM  386  O   HOH T 385      32.698   1.498  24.269  1.00  0.54           O  
HETATM  387  O   HOH T 386      19.466  17.153  37.148  1.00  0.54           O  
HETATM  388  O   HOH T 387      18.507  12.261  27.775  1.00  0.54           O  
HETATM  389  O   HOH T 388      27.073  24.906  38.368  1.00  0.54           O  
HETATM  390  O   HOH T 389      10.589  22.847  70.447  1.00  0.54           O  
HETATM  391  O   HOH T 390      13.589 -13.041  42.235  1.00  0.54           O  
HETATM  392  O   HOH T 391      24.992  -9.296  48.774  1.00  0.54           O  
HETATM  393  O   HOH T 392      14.955  -9.335  67.390  1.00  0.54           O  
HETATM  394  O   HOH T 393      28.461  -2.755  72.114  1.00  0.54           O  
HETATM  395  O   HOH T 394      39.407  -8.874  35.401  1.00  0.54           O  
HETATM  396  O   HOH T 395      25.208  25.743  65.565  1.00  0.54           O  
HETATM  397  O   HOH T 396      15.198  -9.105  38.728  1.00  0.55           O  
HETATM  398  O   HOH T 397      21.875   3.419  85.100  1.00  0.55           O  
HETATM  399  O   HOH T 398      37.900 -16.960  57.078  1.00  0.55           O  
HETATM  400  O   HOH T 399      15.691  16.406  47.302  1.00  0.55           O  
HETATM  401  O   HOH T 400      35.503  -7.416  70.601  1.00  0.55           O  
HETATM  402  O   HOH T 401      42.905  -6.306  64.694  1.00  0.55           O  
HETATM  403  O   HOH T 402      27.430  22.502  48.549  1.00  0.55           O  
HETATM  404  O   HOH T 403      28.795  25.577  65.958  1.00  0.55           O  
HETATM  405  O   HOH T 404      23.549  -1.851  81.137  1.00  0.55           O  
HETATM  406  O   HOH T 405      17.801  -8.043  76.091  1.00  0.55           O  
HETATM  407  O   HOH T 406      36.674   9.871  28.929  1.00  0.55           O  
HETATM  408  O   HOH T 407      12.189   9.638  76.960  1.00  0.56           O  
HETATM  409  O   HOH T 408      21.521  23.659  44.441  1.00  0.56           O  
HETATM  410  O   HOH T 409      31.625 -12.094  48.468  1.00  0.56           O  
HETATM  411  O   HOH T 410      34.032  12.102  50.969  1.00  0.56           O  
HETATM  412  O   HOH T 411       5.630  -5.437  54.043  1.00  0.56           O  
HETATM  413  O   HOH T 412      34.174  -5.089  69.590  1.00  0.56           O  
HETATM  414  O   HOH T 413       0.891   9.713  68.861  1.00  0.56           O  
HETATM  415  O   HOH T 414      32.820   9.822  52.593  1.00  0.56           O  
HETATM  416  O   HOH T 415      20.252  19.462  72.732  1.00  0.56           O  
HETATM  417  O   HOH T 416      21.960  -4.717  30.827  1.00  0.56           O  
HETATM  418  O   HOH T 417      23.601 -11.582  48.770  1.00  0.57           O  
HETATM  419  O   HOH T 418       3.174   2.790  39.892  1.00  0.57           O  
HETATM  420  O   HOH T 419      30.006 -13.852  65.690  1.00  0.57           O  
HETATM  421  O   HOH T 420       1.433  -1.565  40.623  1.00  0.57           O  
HETATM  422  O   HOH T 421      31.588  19.488  63.887  1.00  0.57           O  
HETATM  423  O   HOH T 422       7.639  20.841  60.120  1.00  0.57           O  
HETATM  424  O   HOH T 423      29.847   5.877  71.311  1.00  0.57           O  
HETATM  425  O   HOH T 424      36.424  -1.643  68.909  1.00  0.57           O  
HETATM  426  O   HOH T 425      29.230  11.309  26.659  1.00  0.58           O  
HETATM  427  O   HOH T 426      39.006  -0.667  68.223  1.00  0.58           O  
HETATM  428  O   HOH T 427       4.535  -3.993  59.062  1.00  0.59           O  
HETATM  429  O   HOH T 428      10.923   5.801  34.665  1.00  0.59           O  
HETATM  430  O   HOH T 429      19.304  -7.424  78.834  1.00  0.60           O  
HETATM  431  O   HOH T 430      28.537   1.685  16.402  1.00  0.60           O  
TER     432      HOH T 430 
