# Supplementary material for: Accurate Prediction of Hydration Sites of Proteins Using Energy Model With Atom Embedding
Source: Front Mol Biosci. 2021 Sep 20;8:756075. doi: 10.3389/fmolb.2021.756075 (PMC8488165; doi:10.3389/fmolb.2021.756075)
Supplement: Supplementary file 1 [file DataSheet1.ZIP › Data Sheet 1/Our_result_pdb/our_dataset_output/1M44_watersite.pdb]

HEADER                                                        XXXX


JRNL        PMID   -1
HETATM    1  O   HOH T   0      -5.680  55.613   8.419  1.00  0.15           O  
HETATM    2  O   HOH T   1      23.534  20.170  17.949  1.00  0.15           O  
HETATM    3  O   HOH T   2     -12.107  33.616  20.479  1.00  0.17           O  
HETATM    4  O   HOH T   3       7.440  36.187   0.433  1.00  0.17           O  
HETATM    5  O   HOH T   4      20.438  34.525  20.543  1.00  0.17           O  
HETATM    6  O   HOH T   5      -8.766  48.209  17.377  1.00  0.18           O  
HETATM    7  O   HOH T   6     -17.736  11.417  25.117  1.00  0.19           O  
HETATM    8  O   HOH T   7      -1.163   6.681   4.564  1.00  0.19           O  
HETATM    9  O   HOH T   8       0.753   6.820  12.007  1.00  0.20           O  
HETATM   10  O   HOH T   9      17.249  42.268  29.026  1.00  0.21           O  
HETATM   11  O   HOH T  10       1.416  49.895  21.894  1.00  0.21           O  
HETATM   12  O   HOH T  11      -4.976  51.039  -1.630  1.00  0.22           O  
HETATM   13  O   HOH T  12      -5.840  48.559  -1.833  1.00  0.22           O  
HETATM   14  O   HOH T  13       5.964  32.040   9.396  1.00  0.23           O  
HETATM   15  O   HOH T  14       3.107  38.696   4.178  1.00  0.23           O  
HETATM   16  O   HOH T  15       6.603  18.347  25.676  1.00  0.23           O  
HETATM   17  O   HOH T  16     -16.894  32.451   7.423  1.00  0.23           O  
HETATM   18  O   HOH T  17       9.260  44.352  -1.514  1.00  0.23           O  
HETATM   19  O   HOH T  18      12.700  31.188   1.789  1.00  0.24           O  
HETATM   20  O   HOH T  19      10.373  47.087  26.658  1.00  0.24           O  
HETATM   21  O   HOH T  20      -2.402  34.785  16.122  1.00  0.24           O  
HETATM   22  O   HOH T  21       5.716  37.798   3.725  1.00  0.24           O  
HETATM   23  O   HOH T  22     -12.399  19.686  -1.490  1.00  0.24           O  
HETATM   24  O   HOH T  23      29.011  34.480  13.969  1.00  0.24           O  
HETATM   25  O   HOH T  24      15.796  49.549  13.009  1.00  0.24           O  
HETATM   26  O   HOH T  25      -6.869  54.553  16.139  1.00  0.24           O  
HETATM   27  O   HOH T  26     -12.817  41.284  17.481  1.00  0.24           O  
HETATM   28  O   HOH T  27      -4.267  27.201  20.931  1.00  0.24           O  
HETATM   29  O   HOH T  28      12.589  24.359  12.626  1.00  0.24           O  
HETATM   30  O   HOH T  29      -4.842  13.029  23.176  1.00  0.25           O  
HETATM   31  O   HOH T  30     -22.978  13.981  23.320  1.00  0.25           O  
HETATM   32  O   HOH T  31      12.906  26.354  10.722  1.00  0.25           O  
HETATM   33  O   HOH T  32      -3.321  46.480  22.306  1.00  0.25           O  
HETATM   34  O   HOH T  33     -13.455  30.436  26.803  1.00  0.25           O  
HETATM   35  O   HOH T  34     -37.132  10.013  18.725  1.00  0.25           O  
HETATM   36  O   HOH T  35       4.222   8.447  11.407  1.00  0.25           O  
HETATM   37  O   HOH T  36      26.801  19.275  10.622  1.00  0.26           O  
HETATM   38  O   HOH T  37      -0.170  19.601  34.288  1.00  0.26           O  
HETATM   39  O   HOH T  38      -5.979   8.859  31.904  1.00  0.26           O  
HETATM   40  O   HOH T  39      -8.180  59.228   4.559  1.00  0.26           O  
HETATM   41  O   HOH T  40       3.998  41.091   5.287  1.00  0.26           O  
HETATM   42  O   HOH T  41      -3.994  34.945   9.693  1.00  0.26           O  
HETATM   43  O   HOH T  42      -6.568   2.197  17.522  1.00  0.26           O  
HETATM   44  O   HOH T  43      -9.768   5.381  18.442  1.00  0.26           O  
HETATM   45  O   HOH T  44       8.323  45.996   2.176  1.00  0.27           O  
HETATM   46  O   HOH T  45      18.706  43.462  13.311  1.00  0.27           O  
HETATM   47  O   HOH T  46      20.457  19.565  14.739  1.00  0.27           O  
HETATM   48  O   HOH T  47     -29.177  19.614  21.785  1.00  0.27           O  
HETATM   49  O   HOH T  48      20.541  38.800   3.167  1.00  0.27           O  
HETATM   50  O   HOH T  49       8.098  14.039  19.552  1.00  0.27           O  
HETATM   51  O   HOH T  50      -9.651  51.818  -3.463  1.00  0.27           O  
HETATM   52  O   HOH T  51       2.628  27.693   9.375  1.00  0.28           O  
HETATM   53  O   HOH T  52      -1.681  38.652  -3.199  1.00  0.28           O  
HETATM   54  O   HOH T  53      -9.474  54.394  15.313  1.00  0.28           O  
HETATM   55  O   HOH T  54       0.926  45.391  -5.853  1.00  0.28           O  
HETATM   56  O   HOH T  55     -20.481  23.130  25.900  1.00  0.28           O  
HETATM   57  O   HOH T  56     -14.134  24.685   7.490  1.00  0.28           O  
HETATM   58  O   HOH T  57     -14.964  47.874  10.830  1.00  0.28           O  
HETATM   59  O   HOH T  58     -18.670  57.360   3.434  1.00  0.28           O  
HETATM   60  O   HOH T  59       4.457  23.596  17.317  1.00  0.28           O  
HETATM   61  O   HOH T  60     -19.219  24.122  23.739  1.00  0.28           O  
HETATM   62  O   HOH T  61     -14.251  49.877  12.780  1.00  0.28           O  
HETATM   63  O   HOH T  62     -29.552  16.925  21.189  1.00  0.28           O  
HETATM   64  O   HOH T  63      18.234  31.109   3.811  1.00  0.29           O  
HETATM   65  O   HOH T  64      -4.771  40.517  25.681  1.00  0.29           O  
HETATM   66  O   HOH T  65      -9.514  11.801  27.580  1.00  0.29           O  
HETATM   67  O   HOH T  66      -1.278  50.723   3.124  1.00  0.29           O  
HETATM   68  O   HOH T  67      -0.043   8.862   0.168  1.00  0.29           O  
HETATM   69  O   HOH T  68      13.292  37.696   4.882  1.00  0.29           O  
HETATM   70  O   HOH T  69      12.763  42.308   6.521  1.00  0.29           O  
HETATM   71  O   HOH T  70      -2.906  12.426   0.668  1.00  0.29           O  
HETATM   72  O   HOH T  71     -14.858  52.128  17.242  1.00  0.29           O  
HETATM   73  O   HOH T  72      23.140  32.307  11.796  1.00  0.30           O  
HETATM   74  O   HOH T  73      13.807  25.388  22.026  1.00  0.30           O  
HETATM   75  O   HOH T  74     -10.558  56.669  12.095  1.00  0.30           O  
HETATM   76  O   HOH T  75      -9.724  37.255  19.272  1.00  0.30           O  
HETATM   77  O   HOH T  76     -18.918  51.959   7.795  1.00  0.30           O  
HETATM   78  O   HOH T  77       0.728   5.487  17.760  1.00  0.30           O  
HETATM   79  O   HOH T  78     -18.865  35.361  20.415  1.00  0.30           O  
HETATM   80  O   HOH T  79       1.300  31.510   6.719  1.00  0.30           O  
HETATM   81  O   HOH T  80     -14.817  26.598  33.127  1.00  0.30           O  
HETATM   82  O   HOH T  81     -21.980  30.569  19.475  1.00  0.30           O  
HETATM   83  O   HOH T  82     -10.661  51.722  18.593  1.00  0.30           O  
HETATM   84  O   HOH T  83       6.181  27.581  13.073  1.00  0.30           O  
HETATM   85  O   HOH T  84     -18.508  34.727   0.836  1.00  0.30           O  
HETATM   86  O   HOH T  85     -19.441  38.798   9.856  1.00  0.30           O  
HETATM   87  O   HOH T  86       1.638  52.094   0.263  1.00  0.30           O  
HETATM   88  O   HOH T  87      -3.571  49.550  -6.196  1.00  0.30           O  
HETATM   89  O   HOH T  88      -5.759  53.247  18.275  1.00  0.30           O  
HETATM   90  O   HOH T  89       6.988  45.169  32.493  1.00  0.30           O  
HETATM   91  O   HOH T  90     -10.324  19.431   2.853  1.00  0.31           O  
HETATM   92  O   HOH T  91      -4.571  24.453  35.998  1.00  0.31           O  
HETATM   93  O   HOH T  92      16.663  32.351  25.728  1.00  0.31           O  
HETATM   94  O   HOH T  93      13.427  21.820  -3.774  1.00  0.31           O  
HETATM   95  O   HOH T  94       2.101  54.797   0.356  1.00  0.31           O  
HETATM   96  O   HOH T  95       6.794  11.365  -3.426  1.00  0.31           O  
HETATM   97  O   HOH T  96       5.522  34.567  -4.457  1.00  0.31           O  
HETATM   98  O   HOH T  97      -0.948  15.445  18.594  1.00  0.31           O  
HETATM   99  O   HOH T  98     -16.297  52.267   8.817  1.00  0.31           O  
HETATM  100  O   HOH T  99       6.247   7.135   9.970  1.00  0.31           O  
HETATM  101  O   HOH T 100      13.835  35.651  27.559  1.00  0.31           O  
HETATM  102  O   HOH T 101      16.126  44.521  13.280  1.00  0.31           O  
HETATM  103  O   HOH T 102     -21.334  24.859  20.039  1.00  0.31           O  
HETATM  104  O   HOH T 103       3.893  32.318   7.514  1.00  0.31           O  
HETATM  105  O   HOH T 104      -3.794  10.367  20.353  1.00  0.32           O  
HETATM  106  O   HOH T 105      -1.860  29.129  15.823  1.00  0.32           O  
HETATM  107  O   HOH T 106      18.591  46.004   4.092  1.00  0.32           O  
HETATM  108  O   HOH T 107     -11.199  31.262   4.859  1.00  0.32           O  
HETATM  109  O   HOH T 108       0.696  19.194  24.027  1.00  0.32           O  
HETATM  110  O   HOH T 109       2.738  26.603  21.166  1.00  0.32           O  
HETATM  111  O   HOH T 110      -0.760  50.746  23.307  1.00  0.32           O  
HETATM  112  O   HOH T 111      -0.737   9.398  30.397  1.00  0.32           O  
HETATM  113  O   HOH T 112       4.156  28.651  11.503  1.00  0.32           O  
HETATM  114  O   HOH T 113       0.992  15.205  27.603  1.00  0.32           O  
HETATM  115  O   HOH T 114     -19.614  46.657  14.287  1.00  0.32           O  
HETATM  116  O   HOH T 115     -18.923   7.426  21.988  1.00  0.32           O  
HETATM  117  O   HOH T 116      -0.653  17.050  22.818  1.00  0.33           O  
HETATM  118  O   HOH T 117      -8.995  24.480  -1.414  1.00  0.33           O  
HETATM  119  O   HOH T 118       3.597  24.307  19.889  1.00  0.33           O  
HETATM  120  O   HOH T 119       2.965   2.096  -1.970  1.00  0.33           O  
HETATM  121  O   HOH T 120      15.071  47.048  13.753  1.00  0.33           O  
HETATM  122  O   HOH T 121     -18.693  43.365   7.962  1.00  0.33           O  
HETATM  123  O   HOH T 122      -4.855  23.203  38.410  1.00  0.33           O  
HETATM  124  O   HOH T 123      17.835  38.317   3.986  1.00  0.33           O  
HETATM  125  O   HOH T 124     -15.768  43.228   2.521  1.00  0.33           O  
HETATM  126  O   HOH T 125      -5.383  27.521  14.745  1.00  0.33           O  
HETATM  127  O   HOH T 126     -12.888  20.755  34.295  1.00  0.33           O  
HETATM  128  O   HOH T 127     -16.613  30.556  -2.576  1.00  0.33           O  
HETATM  129  O   HOH T 128      -7.391  24.194  -3.659  1.00  0.33           O  
HETATM  130  O   HOH T 129      22.042  18.202  16.650  1.00  0.33           O  
HETATM  131  O   HOH T 130      -8.655  17.497   1.379  1.00  0.33           O  
HETATM  132  O   HOH T 131       1.072  18.238  -1.695  1.00  0.33           O  
HETATM  133  O   HOH T 132      -2.333  24.445  -0.906  1.00  0.33           O  
HETATM  134  O   HOH T 133     -10.922  34.544  34.890  1.00  0.33           O  
HETATM  135  O   HOH T 134      -5.063  57.235  -4.036  1.00  0.33           O  
HETATM  136  O   HOH T 135       5.288  19.423  -2.643  1.00  0.34           O  
HETATM  137  O   HOH T 136     -23.426  50.862   2.363  1.00  0.34           O  
HETATM  138  O   HOH T 137     -20.197  17.783  11.535  1.00  0.34           O  
HETATM  139  O   HOH T 138      17.686  47.979  14.253  1.00  0.34           O  
HETATM  140  O   HOH T 139     -20.745  16.251   9.297  1.00  0.34           O  
HETATM  141  O   HOH T 140      -9.750  45.692  18.247  1.00  0.34           O  
HETATM  142  O   HOH T 141      -8.755   9.461  17.948  1.00  0.34           O  
HETATM  143  O   HOH T 142      19.568  15.834   4.439  1.00  0.34           O  
HETATM  144  O   HOH T 143       6.132  48.446   7.967  1.00  0.34           O  
HETATM  145  O   HOH T 144     -12.034  28.710  -3.272  1.00  0.34           O  
HETATM  146  O   HOH T 145       2.373  20.629  34.192  1.00  0.34           O  
HETATM  147  O   HOH T 146      12.979  36.361  30.154  1.00  0.34           O  
HETATM  148  O   HOH T 147       5.529  46.207   9.289  1.00  0.34           O  
HETATM  149  O   HOH T 148       9.046  26.195   1.558  1.00  0.34           O  
HETATM  150  O   HOH T 149      -7.374  25.941   3.990  1.00  0.35           O  
HETATM  151  O   HOH T 150      -0.217   4.203  23.047  1.00  0.35           O  
HETATM  152  O   HOH T 151     -12.547  32.323  28.758  1.00  0.35           O  
HETATM  153  O   HOH T 152     -25.669  20.668  23.342  1.00  0.35           O  
HETATM  154  O   HOH T 153     -32.593  12.937  25.505  1.00  0.35           O  
HETATM  155  O   HOH T 154     -17.282  26.787   8.969  1.00  0.35           O  
HETATM  156  O   HOH T 155     -24.982  12.223  19.532  1.00  0.35           O  
HETATM  157  O   HOH T 156     -13.875  38.830  16.692  1.00  0.35           O  
HETATM  158  O   HOH T 157      23.214  26.906   3.761  1.00  0.35           O  
HETATM  159  O   HOH T 158     -23.690  10.949  15.184  1.00  0.35           O  
HETATM  160  O   HOH T 159     -17.174  31.045   9.841  1.00  0.35           O  
HETATM  161  O   HOH T 160       7.138  23.602  16.400  1.00  0.35           O  
HETATM  162  O   HOH T 161     -23.176  14.189  18.968  1.00  0.35           O  
HETATM  163  O   HOH T 162      -8.101  53.643  -1.992  1.00  0.35           O  
HETATM  164  O   HOH T 163     -21.875  21.377  24.042  1.00  0.35           O  
HETATM  165  O   HOH T 164       3.392  18.493  23.666  1.00  0.36           O  
HETATM  166  O   HOH T 165     -14.689  30.578  29.275  1.00  0.36           O  
HETATM  167  O   HOH T 166       4.212  48.076   2.870  1.00  0.36           O  
HETATM  168  O   HOH T 167      28.528  27.045   8.477  1.00  0.36           O  
HETATM  169  O   HOH T 168      -7.085  39.144  21.256  1.00  0.36           O  
HETATM  170  O   HOH T 169     -19.499  46.940   6.557  1.00  0.36           O  
HETATM  171  O   HOH T 170     -21.600  15.274  20.987  1.00  0.36           O  
HETATM  172  O   HOH T 171     -28.194   8.843  18.585  1.00  0.36           O  
HETATM  173  O   HOH T 172      18.438  33.516  27.476  1.00  0.36           O  
HETATM  174  O   HOH T 173     -16.810  42.692  18.320  1.00  0.36           O  
HETATM  175  O   HOH T 174      -9.913  17.326  38.256  1.00  0.36           O  
HETATM  176  O   HOH T 175      11.322  42.781  -0.701  1.00  0.36           O  
HETATM  177  O   HOH T 176     -13.712  46.226  12.438  1.00  0.36           O  
HETATM  178  O   HOH T 177     -11.912  21.769   2.277  1.00  0.36           O  
HETATM  179  O   HOH T 178     -17.554  29.126  18.652  1.00  0.36           O  
HETATM  180  O   HOH T 179     -17.154  25.711  17.260  1.00  0.36           O  
HETATM  181  O   HOH T 180     -20.451  13.987  18.678  1.00  0.36           O  
HETATM  182  O   HOH T 181     -11.848  37.180  17.559  1.00  0.36           O  
HETATM  183  O   HOH T 182      20.539  46.094  21.356  1.00  0.36           O  
HETATM  184  O   HOH T 183     -16.516  38.773  10.562  1.00  0.36           O  
HETATM  185  O   HOH T 184      -6.662  28.665   4.218  1.00  0.36           O  
HETATM  186  O   HOH T 185      12.844  23.627  -1.833  1.00  0.36           O  
HETATM  187  O   HOH T 186       4.655  27.723  15.276  1.00  0.36           O  
HETATM  188  O   HOH T 187     -14.658  32.523  20.807  1.00  0.36           O  
HETATM  189  O   HOH T 188       3.499  49.619   8.753  1.00  0.36           O  
HETATM  190  O   HOH T 189      13.621  23.448   0.756  1.00  0.37           O  
HETATM  191  O   HOH T 190      -3.435   8.694  30.580  1.00  0.37           O  
HETATM  192  O   HOH T 191      27.652  28.168  12.202  1.00  0.37           O  
HETATM  193  O   HOH T 192      -9.204  23.491  18.516  1.00  0.37           O  
HETATM  194  O   HOH T 193     -27.608  10.513  22.049  1.00  0.37           O  
HETATM  195  O   HOH T 194     -16.932  28.359  33.023  1.00  0.37           O  
HETATM  196  O   HOH T 195      -8.548  50.121  19.347  1.00  0.37           O  
HETATM  197  O   HOH T 196       8.974  46.425  24.313  1.00  0.37           O  
HETATM  198  O   HOH T 197       0.750  48.694   3.418  1.00  0.37           O  
HETATM  199  O   HOH T 198       3.172  26.217  29.940  1.00  0.37           O  
HETATM  200  O   HOH T 199       8.280  30.529   9.183  1.00  0.37           O  
HETATM  201  O   HOH T 200      11.027  55.788  10.733  1.00  0.37           O  
HETATM  202  O   HOH T 201      14.111  35.590   3.093  1.00  0.37           O  
HETATM  203  O   HOH T 202     -12.597  31.663   2.451  1.00  0.37           O  
HETATM  204  O   HOH T 203      -7.196  24.222  39.722  1.00  0.37           O  
HETATM  205  O   HOH T 204      25.322  30.525  20.909  1.00  0.37           O  
HETATM  206  O   HOH T 205      10.573  10.538  -0.902  1.00  0.37           O  
HETATM  207  O   HOH T 206      -4.139   0.902  16.761  1.00  0.38           O  
HETATM  208  O   HOH T 207       9.437  25.903  22.111  1.00  0.38           O  
HETATM  209  O   HOH T 208      11.274  29.916  -1.455  1.00  0.38           O  
HETATM  210  O   HOH T 209       3.277  16.117  34.046  1.00  0.38           O  
HETATM  211  O   HOH T 210     -31.670  14.759  23.693  1.00  0.38           O  
HETATM  212  O   HOH T 211     -14.535  30.353  15.081  1.00  0.38           O  
HETATM  213  O   HOH T 212      -8.191   7.398   6.643  1.00  0.38           O  
HETATM  214  O   HOH T 213      11.068  42.696  30.141  1.00  0.38           O  
HETATM  215  O   HOH T 214      -3.867   1.051  14.008  1.00  0.38           O  
HETATM  216  O   HOH T 215     -18.153  22.822   9.808  1.00  0.38           O  
HETATM  217  O   HOH T 216     -25.220  12.937  26.605  1.00  0.38           O  
HETATM  218  O   HOH T 217     -13.308  32.243  18.398  1.00  0.39           O  
HETATM  219  O   HOH T 218     -19.479  14.652  16.115  1.00  0.39           O  
HETATM  220  O   HOH T 219     -21.619  16.538  18.336  1.00  0.39           O  
HETATM  221  O   HOH T 220       6.870  44.643  24.673  1.00  0.39           O  
HETATM  222  O   HOH T 221       9.796  55.795   0.529  1.00  0.39           O  
HETATM  223  O   HOH T 222     -18.502  42.984   3.187  1.00  0.39           O  
HETATM  224  O   HOH T 223     -22.467  12.184  12.983  1.00  0.39           O  
HETATM  225  O   HOH T 224      16.840  38.819  32.344  1.00  0.39           O  
HETATM  226  O   HOH T 225      21.351  46.020  28.701  1.00  0.39           O  
HETATM  227  O   HOH T 226       0.235  12.554  28.054  1.00  0.39           O  
HETATM  228  O   HOH T 227       6.580  41.539   8.839  1.00  0.39           O  
HETATM  229  O   HOH T 228     -20.770  12.491  33.952  1.00  0.39           O  
HETATM  230  O   HOH T 229     -13.736  13.775   9.291  1.00  0.39           O  
HETATM  231  O   HOH T 230      -5.054   9.304  -1.158  1.00  0.39           O  
HETATM  232  O   HOH T 231       8.753  42.118  28.472  1.00  0.39           O  
HETATM  233  O   HOH T 232       6.543  35.737  -6.746  1.00  0.39           O  
HETATM  234  O   HOH T 233      -1.574  31.485  14.184  1.00  0.39           O  
HETATM  235  O   HOH T 234     -17.668  37.132  22.240  1.00  0.39           O  
HETATM  236  O   HOH T 235      -9.157  58.285  13.794  1.00  0.39           O  
HETATM  237  O   HOH T 236      19.628  46.206   1.601  1.00  0.40           O  
HETATM  238  O   HOH T 237       2.499   2.333  13.935  1.00  0.40           O  
HETATM  239  O   HOH T 238      -9.151  47.569  20.094  1.00  0.40           O  
HETATM  240  O   HOH T 239      18.985  36.198  27.610  1.00  0.40           O  
HETATM  241  O   HOH T 240     -19.741  36.793   2.278  1.00  0.40           O  
HETATM  242  O   HOH T 241     -22.052   5.599  26.364  1.00  0.40           O  
HETATM  243  O   HOH T 242      17.773  47.796   7.567  1.00  0.40           O  
HETATM  244  O   HOH T 243     -17.737  30.191  -0.037  1.00  0.40           O  
HETATM  245  O   HOH T 244       6.251  28.068   3.226  1.00  0.40           O  
HETATM  246  O   HOH T 245     -14.719  39.955  -2.744  1.00  0.40           O  
HETATM  247  O   HOH T 246      11.351   3.735  11.352  1.00  0.40           O  
HETATM  248  O   HOH T 247      -6.206  11.641  21.081  1.00  0.40           O  
HETATM  249  O   HOH T 248     -10.669  43.021  17.915  1.00  0.40           O  
HETATM  250  O   HOH T 249      20.295  44.164  25.488  1.00  0.40           O  
HETATM  251  O   HOH T 250     -23.977  24.982  21.080  1.00  0.40           O  
HETATM  252  O   HOH T 251      13.512  19.353  -2.230  1.00  0.40           O  
HETATM  253  O   HOH T 252       8.743   4.381  16.145  1.00  0.41           O  
HETATM  254  O   HOH T 253      11.366  20.051  -3.879  1.00  0.41           O  
HETATM  255  O   HOH T 254      -3.826  42.085  27.921  1.00  0.41           O  
HETATM  256  O   HOH T 255       7.167  46.358   4.704  1.00  0.41           O  
HETATM  257  O   HOH T 256     -12.957  16.974   6.078  1.00  0.41           O  
HETATM  258  O   HOH T 257      -3.030   4.344  23.592  1.00  0.41           O  
HETATM  259  O   HOH T 258     -21.593   7.609  28.231  1.00  0.41           O  
HETATM  260  O   HOH T 259      27.870  36.962  14.622  1.00  0.41           O  
HETATM  261  O   HOH T 260      -9.177  56.232  -5.380  1.00  0.41           O  
HETATM  262  O   HOH T 261     -29.995  16.470  25.129  1.00  0.41           O  
HETATM  263  O   HOH T 262     -13.793  26.779   5.703  1.00  0.41           O  
HETATM  264  O   HOH T 263      16.574  14.643   6.682  1.00  0.41           O  
HETATM  265  O   HOH T 264       2.485  60.147   1.781  1.00  0.41           O  
HETATM  266  O   HOH T 265     -14.962  30.715   6.391  1.00  0.41           O  
HETATM  267  O   HOH T 266     -14.336  31.536  -7.239  1.00  0.41           O  
HETATM  268  O   HOH T 267      12.626  16.983   4.200  1.00  0.41           O  
HETATM  269  O   HOH T 268       8.233   3.572   0.085  1.00  0.41           O  
HETATM  270  O   HOH T 269       3.122  20.047  -1.112  1.00  0.41           O  
HETATM  271  O   HOH T 270       7.463  39.905   3.075  1.00  0.41           O  
HETATM  272  O   HOH T 271      20.863  29.169  26.296  1.00  0.42           O  
HETATM  273  O   HOH T 272     -13.606  33.182  26.393  1.00  0.42           O  
HETATM  274  O   HOH T 273       5.401  42.953  36.706  1.00  0.42           O  
HETATM  275  O   HOH T 274     -14.074  31.653  33.015  1.00  0.42           O  
HETATM  276  O   HOH T 275     -27.299  23.012  23.517  1.00  0.42           O  
HETATM  277  O   HOH T 276      -2.253  55.069  13.053  1.00  0.42           O  
HETATM  278  O   HOH T 277     -19.871  25.940  17.929  1.00  0.42           O  
HETATM  279  O   HOH T 278      15.826  26.523  20.350  1.00  0.42           O  
HETATM  280  O   HOH T 279       0.643  14.773  -5.742  1.00  0.42           O  
HETATM  281  O   HOH T 280      -2.255  20.775  35.754  1.00  0.42           O  
HETATM  282  O   HOH T 281     -20.174  46.279  11.630  1.00  0.42           O  
HETATM  283  O   HOH T 282       3.929   6.166  -1.729  1.00  0.42           O  
HETATM  284  O   HOH T 283      16.328  33.266   3.708  1.00  0.43           O  
HETATM  285  O   HOH T 284      -7.357  45.918  21.383  1.00  0.43           O  
HETATM  286  O   HOH T 285     -11.540   6.099  28.268  1.00  0.43           O  
HETATM  287  O   HOH T 286      15.301   9.633   5.813  1.00  0.43           O  
HETATM  288  O   HOH T 287      13.805  20.522  24.327  1.00  0.43           O  
HETATM  289  O   HOH T 288       1.469   4.312  11.026  1.00  0.43           O  
HETATM  290  O   HOH T 289     -17.742  45.911  16.101  1.00  0.43           O  
HETATM  291  O   HOH T 290      -8.739   1.719  19.306  1.00  0.43           O  
HETATM  292  O   HOH T 291     -22.009   5.496  23.573  1.00  0.43           O  
HETATM  293  O   HOH T 292      -4.974  22.877  -3.800  1.00  0.43           O  
HETATM  294  O   HOH T 293     -22.152  21.239  26.684  1.00  0.43           O  
HETATM  295  O   HOH T 294      -7.408  56.009  -3.353  1.00  0.43           O  
HETATM  296  O   HOH T 295     -16.841   5.670  22.692  1.00  0.43           O  
HETATM  297  O   HOH T 296      17.999  26.681   1.954  1.00  0.43           O  
HETATM  298  O   HOH T 297     -10.724  18.294  -3.091  1.00  0.43           O  
HETATM  299  O   HOH T 298       2.727  13.206  -6.796  1.00  0.43           O  
HETATM  300  O   HOH T 299     -23.716  22.351  22.149  1.00  0.43           O  
HETATM  301  O   HOH T 300     -25.329  51.469   4.286  1.00  0.43           O  
HETATM  302  O   HOH T 301      -3.625  15.202  21.790  1.00  0.43           O  
HETATM  303  O   HOH T 302       6.162   6.293  19.895  1.00  0.43           O  
HETATM  304  O   HOH T 303       4.593  42.336  34.071  1.00  0.43           O  
HETATM  305  O   HOH T 304       9.729  49.826  25.981  1.00  0.43           O  
HETATM  306  O   HOH T 305      -1.453   6.765  30.215  1.00  0.44           O  
HETATM  307  O   HOH T 306       6.436   4.934  17.470  1.00  0.44           O  
HETATM  308  O   HOH T 307      22.671  30.621  20.144  1.00  0.44           O  
HETATM  309  O   HOH T 308     -10.025   8.968  20.436  1.00  0.44           O  
HETATM  310  O   HOH T 309      -0.811  37.589  -5.588  1.00  0.44           O  
HETATM  311  O   HOH T 310      22.594  44.298   5.524  1.00  0.44           O  
HETATM  312  O   HOH T 311     -24.354  11.651  24.353  1.00  0.44           O  
HETATM  313  O   HOH T 312      -0.105  17.317  -6.664  1.00  0.44           O  
HETATM  314  O   HOH T 313      -9.019   8.018  25.513  1.00  0.44           O  
HETATM  315  O   HOH T 314     -16.691  32.093  14.509  1.00  0.44           O  
HETATM  316  O   HOH T 315      -1.947  42.917  29.914  1.00  0.44           O  
HETATM  317  O   HOH T 316     -16.209  10.373  19.527  1.00  0.44           O  
HETATM  318  O   HOH T 317       9.705   4.791   7.003  1.00  0.44           O  
HETATM  319  O   HOH T 318     -10.568   3.233  11.454  1.00  0.44           O  
HETATM  320  O   HOH T 319     -16.666  23.347   7.449  1.00  0.44           O  
HETATM  321  O   HOH T 320      -4.136  30.060  14.529  1.00  0.44           O  
HETATM  322  O   HOH T 321      12.049  40.295   4.722  1.00  0.44           O  
HETATM  323  O   HOH T 322     -12.152   5.625  19.895  1.00  0.44           O  
HETATM  324  O   HOH T 323      -3.347  25.585  38.230  1.00  0.44           O  
HETATM  325  O   HOH T 324       3.409  44.157   7.380  1.00  0.44           O  
HETATM  326  O   HOH T 325     -25.918   9.657  19.967  1.00  0.45           O  
HETATM  327  O   HOH T 326       5.692  25.883  16.935  1.00  0.45           O  
HETATM  328  O   HOH T 327       4.927  46.378   6.484  1.00  0.45           O  
HETATM  329  O   HOH T 328     -23.337  24.843  23.667  1.00  0.45           O  
HETATM  330  O   HOH T 329     -18.768  49.317   7.816  1.00  0.45           O  
HETATM  331  O   HOH T 330     -39.816   9.616  19.489  1.00  0.45           O  
HETATM  332  O   HOH T 331     -22.764   8.090  22.603  1.00  0.45           O  
HETATM  333  O   HOH T 332      21.663  28.556  18.608  1.00  0.45           O  
HETATM  334  O   HOH T 333       8.135  43.818   3.875  1.00  0.45           O  
HETATM  335  O   HOH T 334     -12.347  29.371  13.710  1.00  0.45           O  
HETATM  336  O   HOH T 335      -3.162  57.892   0.038  1.00  0.45           O  
HETATM  337  O   HOH T 336      -3.693  12.843  18.886  1.00  0.45           O  
HETATM  338  O   HOH T 337      13.601  28.469  -1.139  1.00  0.45           O  
HETATM  339  O   HOH T 338      16.066  20.108   0.134  1.00  0.45           O  
HETATM  340  O   HOH T 339      -6.259  59.184   2.480  1.00  0.45           O  
HETATM  341  O   HOH T 340     -23.419  30.736  26.971  1.00  0.45           O  
HETATM  342  O   HOH T 341      11.435   5.375   9.111  1.00  0.45           O  
HETATM  343  O   HOH T 342     -23.476  21.050  29.040  1.00  0.45           O  
HETATM  344  O   HOH T 343      19.354  32.974  18.506  1.00  0.45           O  
HETATM  345  O   HOH T 344     -21.045  25.677  25.020  1.00  0.45           O  
HETATM  346  O   HOH T 345      -8.058  35.815  -1.084  1.00  0.45           O  
HETATM  347  O   HOH T 346      13.343  49.119   8.306  1.00  0.45           O  
HETATM  348  O   HOH T 347      -4.620   9.762  28.298  1.00  0.45           O  
HETATM  349  O   HOH T 348      -9.548   5.478  26.434  1.00  0.45           O  
HETATM  350  O   HOH T 349      12.123  35.769  -0.969  1.00  0.45           O  
HETATM  351  O   HOH T 350     -18.649  28.830  -2.378  1.00  0.45           O  
HETATM  352  O   HOH T 351      -5.635  18.077  -4.457  1.00  0.45           O  
HETATM  353  O   HOH T 352     -19.018  47.083   9.308  1.00  0.45           O  
HETATM  354  O   HOH T 353      17.115  37.909  27.988  1.00  0.45           O  
HETATM  355  O   HOH T 354      -5.120  47.211  -6.609  1.00  0.45           O  
HETATM  356  O   HOH T 355       1.025  20.951  -2.557  1.00  0.45           O  
HETATM  357  O   HOH T 356       8.265   4.572  19.510  1.00  0.45           O  
HETATM  358  O   HOH T 357      11.179  27.356  -0.083  1.00  0.46           O  
HETATM  359  O   HOH T 358      -7.772  46.530  -6.621  1.00  0.46           O  
HETATM  360  O   HOH T 359      18.403  28.118  26.085  1.00  0.46           O  
HETATM  361  O   HOH T 360     -24.479  21.864  31.453  1.00  0.46           O  
HETATM  362  O   HOH T 361      -8.238  38.878  23.709  1.00  0.46           O  
HETATM  363  O   HOH T 362     -12.163   4.091  17.648  1.00  0.46           O  
HETATM  364  O   HOH T 363      -8.738  11.451  19.952  1.00  0.46           O  
HETATM  365  O   HOH T 364      -4.856  44.465  -5.803  1.00  0.46           O  
HETATM  366  O   HOH T 365     -12.678   8.159  20.937  1.00  0.46           O  
HETATM  367  O   HOH T 366      23.027  26.513   6.650  1.00  0.46           O  
HETATM  368  O   HOH T 367      -1.357   7.079   1.876  1.00  0.46           O  
HETATM  369  O   HOH T 368     -40.494  15.948  19.870  1.00  0.46           O  
HETATM  370  O   HOH T 369     -25.296  10.639  17.413  1.00  0.46           O  
HETATM  371  O   HOH T 370     -16.356  13.087  38.920  1.00  0.46           O  
HETATM  372  O   HOH T 371     -14.748  37.088   7.683  1.00  0.46           O  
HETATM  373  O   HOH T 372     -13.981  54.382  -2.701  1.00  0.46           O  
HETATM  374  O   HOH T 373     -17.874  19.111  11.058  1.00  0.46           O  
HETATM  375  O   HOH T 374       6.584  55.699  11.063  1.00  0.46           O  
HETATM  376  O   HOH T 375     -43.384  11.478  21.306  1.00  0.46           O  
HETATM  377  O   HOH T 376     -16.120  50.267  10.664  1.00  0.46           O  
HETATM  378  O   HOH T 377      -0.765  14.545  24.083  1.00  0.46           O  
HETATM  379  O   HOH T 378      -5.275  23.989   1.816  1.00  0.46           O  
HETATM  380  O   HOH T 379      -6.577  47.667  -8.940  1.00  0.46           O  
HETATM  381  O   HOH T 380     -13.155  43.971  18.030  1.00  0.46           O  
HETATM  382  O   HOH T 381      16.935  35.880   3.011  1.00  0.46           O  
HETATM  383  O   HOH T 382      13.819  37.137   0.834  1.00  0.46           O  
HETATM  384  O   HOH T 383     -15.154  25.773  35.701  1.00  0.46           O  
HETATM  385  O   HOH T 384      -9.814  39.246  21.269  1.00  0.46           O  
HETATM  386  O   HOH T 385      13.974  40.618   2.685  1.00  0.46           O  
HETATM  387  O   HOH T 386     -12.333  14.394   6.966  1.00  0.46           O  
HETATM  388  O   HOH T 387     -23.042  51.944   8.145  1.00  0.46           O  
HETATM  389  O   HOH T 388     -12.329  32.886  -1.785  1.00  0.47           O  
HETATM  390  O   HOH T 389       3.222   2.135  11.291  1.00  0.47           O  
HETATM  391  O   HOH T 390     -18.878  19.261  34.695  1.00  0.47           O  
HETATM  392  O   HOH T 391     -12.954  35.124  28.346  1.00  0.47           O  
HETATM  393  O   HOH T 392     -21.972  24.977  30.893  1.00  0.47           O  
HETATM  394  O   HOH T 393       9.105  56.810  17.467  1.00  0.47           O  
HETATM  395  O   HOH T 394     -20.390   3.812  25.151  1.00  0.47           O  
HETATM  396  O   HOH T 395      -3.774  39.340  27.994  1.00  0.47           O  
HETATM  397  O   HOH T 396      14.665  31.013  -0.162  1.00  0.47           O  
HETATM  398  O   HOH T 397     -40.275   8.692  21.981  1.00  0.47           O  
HETATM  399  O   HOH T 398     -20.275  12.091  16.600  1.00  0.47           O  
HETATM  400  O   HOH T 399       1.909  50.356   6.561  1.00  0.47           O  
HETATM  401  O   HOH T 400      -3.550   6.134   3.140  1.00  0.47           O  
HETATM  402  O   HOH T 401       0.954  17.031  -4.148  1.00  0.47           O  
HETATM  403  O   HOH T 402       6.388   4.250   9.522  1.00  0.47           O  
HETATM  404  O   HOH T 403      24.113  39.833  22.876  1.00  0.47           O  
HETATM  405  O   HOH T 404      10.276  42.483   5.213  1.00  0.47           O  
HETATM  406  O   HOH T 405       1.730  59.206  -0.662  1.00  0.47           O  
HETATM  407  O   HOH T 406       4.638  21.805  35.257  1.00  0.47           O  
HETATM  408  O   HOH T 407     -12.125  26.417   3.491  1.00  0.47           O  
HETATM  409  O   HOH T 408     -17.397  43.114  15.730  1.00  0.47           O  
HETATM  410  O   HOH T 409     -20.412  15.254  12.739  1.00  0.47           O  
HETATM  411  O   HOH T 410      -9.809   5.364  21.221  1.00  0.47           O  
HETATM  412  O   HOH T 411      -3.478  32.263  16.086  1.00  0.47           O  
HETATM  413  O   HOH T 412      12.249  26.271  -2.509  1.00  0.47           O  
HETATM  414  O   HOH T 413      -3.178  10.401  25.947  1.00  0.47           O  
HETATM  415  O   HOH T 414      -8.754  36.712  33.503  1.00  0.47           O  
HETATM  416  O   HOH T 415      -1.401  12.528  25.855  1.00  0.47           O  
HETATM  417  O   HOH T 416       4.946   1.807   9.145  1.00  0.47           O  
HETATM  418  O   HOH T 417       1.633   3.326  16.336  1.00  0.48           O  
HETATM  419  O   HOH T 418       3.098  15.829  24.032  1.00  0.48           O  
HETATM  420  O   HOH T 419      19.701  46.154  13.405  1.00  0.48           O  
HETATM  421  O   HOH T 420      -4.955  23.399  -0.829  1.00  0.48           O  
HETATM  422  O   HOH T 421       8.232  39.240  -1.325  1.00  0.48           O  
HETATM  423  O   HOH T 422      -7.952  59.826  -1.573  1.00  0.48           O  
HETATM  424  O   HOH T 423       0.670  16.640  25.275  1.00  0.48           O  
HETATM  425  O   HOH T 424       0.475  56.926   0.380  1.00  0.48           O  
HETATM  426  O   HOH T 425       9.127  40.104  -3.855  1.00  0.48           O  
HETATM  427  O   HOH T 426       1.515   6.265  23.030  1.00  0.48           O  
HETATM  428  O   HOH T 427      -6.527  47.173  -4.112  1.00  0.48           O  
HETATM  429  O   HOH T 428     -19.030  26.578  15.410  1.00  0.48           O  
HETATM  430  O   HOH T 429      -8.657  10.106  29.676  1.00  0.48           O  
HETATM  431  O   HOH T 430       3.601   4.224   9.553  1.00  0.48           O  
HETATM  432  O   HOH T 431       4.887  28.329  17.957  1.00  0.48           O  
HETATM  433  O   HOH T 432       2.802   4.067  18.873  1.00  0.48           O  
HETATM  434  O   HOH T 433     -13.844  30.735  -2.604  1.00  0.48           O  
HETATM  435  O   HOH T 434     -19.407   4.744  22.788  1.00  0.48           O  
HETATM  436  O   HOH T 435      -9.674  16.983   3.986  1.00  0.48           O  
HETATM  437  O   HOH T 436     -10.176  26.800  -2.417  1.00  0.48           O  
HETATM  438  O   HOH T 437      11.547   3.999  14.032  1.00  0.48           O  
HETATM  439  O   HOH T 438      -6.306   1.086  15.018  1.00  0.48           O  
HETATM  440  O   HOH T 439     -37.819   8.101  20.688  1.00  0.48           O  
HETATM  441  O   HOH T 440       0.929  35.668  26.586  1.00  0.49           O  
HETATM  442  O   HOH T 441       3.838  36.448  -6.972  1.00  0.49           O  
HETATM  443  O   HOH T 442      -8.671  38.735  -4.451  1.00  0.49           O  
HETATM  444  O   HOH T 443     -29.512  16.330  27.851  1.00  0.49           O  
HETATM  445  O   HOH T 444     -16.411  14.489   9.422  1.00  0.49           O  
HETATM  446  O   HOH T 445     -15.603  50.351  15.187  1.00  0.49           O  
HETATM  447  O   HOH T 446     -11.470  28.216  -0.615  1.00  0.49           O  
HETATM  448  O   HOH T 447     -17.563  58.488   5.689  1.00  0.49           O  
HETATM  449  O   HOH T 448      16.963  13.972   9.471  1.00  0.49           O  
HETATM  450  O   HOH T 449       3.855  30.206   9.362  1.00  0.49           O  
HETATM  451  O   HOH T 450     -23.898   8.877  25.029  1.00  0.49           O  
HETATM  452  O   HOH T 451     -10.054  27.669  37.374  1.00  0.49           O  
HETATM  453  O   HOH T 452      11.454  25.005   1.388  1.00  0.49           O  
HETATM  454  O   HOH T 453       6.524  20.151  34.001  1.00  0.49           O  
HETATM  455  O   HOH T 454       8.177  32.357  -3.215  1.00  0.49           O  
HETATM  456  O   HOH T 455       2.397   1.662  20.228  1.00  0.49           O  
HETATM  457  O   HOH T 456       9.936  27.814  -2.597  1.00  0.49           O  
HETATM  458  O   HOH T 457      -2.338  23.329  37.060  1.00  0.49           O  
HETATM  459  O   HOH T 458      -4.267  22.368  -6.438  1.00  0.49           O  
HETATM  460  O   HOH T 459      -6.529  16.524   0.011  1.00  0.49           O  
HETATM  461  O   HOH T 460     -12.087  37.036  26.625  1.00  0.49           O  
HETATM  462  O   HOH T 461       9.711  25.297  -3.529  1.00  0.49           O  
HETATM  463  O   HOH T 462     -16.200  52.650  13.770  1.00  0.49           O  
HETATM  464  O   HOH T 463      -8.927  16.910  -1.525  1.00  0.49           O  
HETATM  465  O   HOH T 464     -15.641  30.913  17.577  1.00  0.49           O  
HETATM  466  O   HOH T 465       9.540  45.190   5.759  1.00  0.49           O  
HETATM  467  O   HOH T 466      20.032  47.436  23.643  1.00  0.49           O  
HETATM  468  O   HOH T 467      16.472  35.253  28.527  1.00  0.49           O  
HETATM  469  O   HOH T 468     -26.082  10.426  26.114  1.00  0.49           O  
HETATM  470  O   HOH T 469      -8.181  53.705  -4.712  1.00  0.49           O  
HETATM  471  O   HOH T 470       5.791  38.052  -8.099  1.00  0.50           O  
HETATM  472  O   HOH T 471       8.078   9.756  -1.751  1.00  0.50           O  
HETATM  473  O   HOH T 472     -13.959  14.865   4.732  1.00  0.50           O  
HETATM  474  O   HOH T 473      17.156  26.311  -0.917  1.00  0.50           O  
HETATM  475  O   HOH T 474      -8.515  47.939  -2.423  1.00  0.50           O  
HETATM  476  O   HOH T 475      -8.453  56.849  16.114  1.00  0.50           O  
HETATM  477  O   HOH T 476      19.714  31.781   1.622  1.00  0.50           O  
HETATM  478  O   HOH T 477     -22.642  49.402   9.228  1.00  0.50           O  
HETATM  479  O   HOH T 478     -16.594  54.333  17.240  1.00  0.50           O  
HETATM  480  O   HOH T 479     -19.621   7.321  29.968  1.00  0.50           O  
HETATM  481  O   HOH T 480       6.624  42.123   0.139  1.00  0.50           O  
HETATM  482  O   HOH T 481     -17.853   5.417  30.208  1.00  0.50           O  
HETATM  483  O   HOH T 482      25.694  16.785  10.906  1.00  0.50           O  
HETATM  484  O   HOH T 483       1.326   1.820  22.807  1.00  0.50           O  
HETATM  485  O   HOH T 484      15.280  38.148   3.012  1.00  0.50           O  
HETATM  486  O   HOH T 485     -18.236  44.653  10.382  1.00  0.50           O  
HETATM  487  O   HOH T 486       8.769   3.051  10.460  1.00  0.50           O  
HETATM  488  O   HOH T 487      25.449  29.499  13.373  1.00  0.50           O  
HETATM  489  O   HOH T 488      -4.871  30.729  34.809  1.00  0.51           O  
HETATM  490  O   HOH T 489     -42.015  13.718  20.583  1.00  0.51           O  
HETATM  491  O   HOH T 490       4.975   7.195  -4.107  1.00  0.51           O  
HETATM  492  O   HOH T 491      16.858  31.694   1.468  1.00  0.51           O  
HETATM  493  O   HOH T 492      16.287  28.910  -0.795  1.00  0.51           O  
HETATM  494  O   HOH T 493      -2.264  23.529  -3.561  1.00  0.51           O  
HETATM  495  O   HOH T 494      14.996  25.526  24.534  1.00  0.51           O  
HETATM  496  O   HOH T 495     -22.103  47.873   5.803  1.00  0.51           O  
HETATM  497  O   HOH T 496     -18.994  30.559  14.192  1.00  0.51           O  
HETATM  498  O   HOH T 497      19.753  42.640  27.739  1.00  0.51           O  
HETATM  499  O   HOH T 498       2.105   4.072  21.545  1.00  0.51           O  
HETATM  500  O   HOH T 499       2.015  14.611  -3.302  1.00  0.51           O  
HETATM  501  O   HOH T 500      -5.578  59.339  -0.140  1.00  0.51           O  
HETATM  502  O   HOH T 501       8.853  41.639  -1.576  1.00  0.51           O  
HETATM  503  O   HOH T 502     -17.818  28.272  35.580  1.00  0.51           O  
HETATM  504  O   HOH T 503       7.475  33.249  -5.809  1.00  0.51           O  
HETATM  505  O   HOH T 504      -2.650  49.098  22.065  1.00  0.51           O  
HETATM  506  O   HOH T 505     -14.680  30.446   3.723  1.00  0.51           O  
HETATM  507  O   HOH T 506      22.674  39.762  27.705  1.00  0.51           O  
HETATM  508  O   HOH T 507       6.054  15.457  27.492  1.00  0.51           O  
HETATM  509  O   HOH T 508     -21.610  13.916  10.783  1.00  0.51           O  
HETATM  510  O   HOH T 509     -18.127  34.591  22.970  1.00  0.51           O  
HETATM  511  O   HOH T 510       3.367  26.652   2.331  1.00  0.51           O  
HETATM  512  O   HOH T 511       2.851  47.995   5.351  1.00  0.51           O  
HETATM  513  O   HOH T 512     -22.003   7.869  30.912  1.00  0.51           O  
HETATM  514  O   HOH T 513      14.279  21.081   2.110  1.00  0.52           O  
HETATM  515  O   HOH T 514      -2.474  10.020  -0.535  1.00  0.52           O  
HETATM  516  O   HOH T 515      -0.070   4.650  31.171  1.00  0.52           O  
HETATM  517  O   HOH T 516      14.595  37.280  32.185  1.00  0.52           O  
HETATM  518  O   HOH T 517     -14.932  15.387   7.281  1.00  0.52           O  
HETATM  519  O   HOH T 518     -15.303  44.630  16.644  1.00  0.52           O  
HETATM  520  O   HOH T 519      -3.140  20.899  -4.409  1.00  0.52           O  
HETATM  521  O   HOH T 520       2.745  19.117  -3.715  1.00  0.52           O  
HETATM  522  O   HOH T 521      -7.353  25.001  42.515  1.00  0.52           O  
HETATM  523  O   HOH T 522     -18.043  13.638  12.907  1.00  0.52           O  
HETATM  524  O   HOH T 523     -27.495  16.942  26.063  1.00  0.52           O  
HETATM  525  O   HOH T 524     -29.769   8.990  22.932  1.00  0.52           O  
HETATM  526  O   HOH T 525      26.617  28.810   9.652  1.00  0.52           O  
HETATM  527  O   HOH T 526     -16.522  43.824  -0.183  1.00  0.53           O  
HETATM  528  O   HOH T 527     -13.730  33.946  34.494  1.00  0.53           O  
HETATM  529  O   HOH T 528     -17.616   4.110  24.935  1.00  0.53           O  
HETATM  530  O   HOH T 529       1.855   6.477  20.207  1.00  0.53           O  
HETATM  531  O   HOH T 530       4.652  50.154   6.251  1.00  0.53           O  
HETATM  532  O   HOH T 531       3.002  50.409   3.958  1.00  0.53           O  
HETATM  533  O   HOH T 532      14.571  18.255   2.759  1.00  0.53           O  
HETATM  534  O   HOH T 533     -40.376  13.771  22.832  1.00  0.53           O  
HETATM  535  O   HOH T 534       3.692   9.371  -5.148  1.00  0.53           O  
HETATM  536  O   HOH T 535     -12.156  38.152  20.147  1.00  0.53           O  
HETATM  537  O   HOH T 536      -5.875  38.094  26.834  1.00  0.53           O  
HETATM  538  O   HOH T 537     -15.927  42.297  -2.462  1.00  0.53           O  
HETATM  539  O   HOH T 538      11.685  38.188  -2.070  1.00  0.53           O  
HETATM  540  O   HOH T 539      -3.392  10.684  23.136  1.00  0.53           O  
HETATM  541  O   HOH T 540      -5.710  43.097  26.222  1.00  0.53           O  
HETATM  542  O   HOH T 541     -31.698  10.340  25.276  1.00  0.53           O  
HETATM  543  O   HOH T 542       9.650   2.295  12.991  1.00  0.53           O  
HETATM  544  O   HOH T 543       0.811   0.827  15.412  1.00  0.54           O  
HETATM  545  O   HOH T 544       9.767  25.994   9.679  1.00  0.54           O  
HETATM  546  O   HOH T 545      -9.596  27.056   2.878  1.00  0.54           O  
HETATM  547  O   HOH T 546     -24.336  18.447  29.337  1.00  0.54           O  
HETATM  548  O   HOH T 547      19.412  29.137   2.299  1.00  0.54           O  
HETATM  549  O   HOH T 548       8.984  58.247   8.168  1.00  0.54           O  
HETATM  550  O   HOH T 549      12.332  18.758  26.730  1.00  0.54           O  
HETATM  551  O   HOH T 550     -10.547  38.775  25.168  1.00  0.54           O  
HETATM  552  O   HOH T 551     -16.876  45.431  18.747  1.00  0.54           O  
HETATM  553  O   HOH T 552     -11.350  18.686  35.682  1.00  0.54           O  
HETATM  554  O   HOH T 553      12.361  26.740  24.236  1.00  0.54           O  
HETATM  555  O   HOH T 554       0.054  23.542  -2.030  1.00  0.54           O  
HETATM  556  O   HOH T 555       8.679   5.706   9.351  1.00  0.55           O  
HETATM  557  O   HOH T 556      -4.030  61.591   0.022  1.00  0.55           O  
HETATM  558  O   HOH T 557     -12.919  30.467  -5.202  1.00  0.55           O  
HETATM  559  O   HOH T 558      10.511  57.637   8.928  1.00  0.55           O  
HETATM  560  O   HOH T 559       9.028  28.936  24.241  1.00  0.55           O  
HETATM  561  O   HOH T 560      -3.283  38.813  -5.471  1.00  0.55           O  
HETATM  562  O   HOH T 561       7.435  26.625  -2.416  1.00  0.55           O  
HETATM  563  O   HOH T 562      -1.833  -0.012  15.394  1.00  0.55           O  
HETATM  564  O   HOH T 563      10.604  26.294  14.735  1.00  0.55           O  
HETATM  565  O   HOH T 564       5.652  13.479  29.090  1.00  0.55           O  
HETATM  566  O   HOH T 565     -13.770  27.743  38.758  1.00  0.55           O  
HETATM  567  O   HOH T 566      12.160  51.294  20.424  1.00  0.55           O  
HETATM  568  O   HOH T 567     -13.588   2.354  12.279  1.00  0.55           O  
HETATM  569  O   HOH T 568      12.226  34.001  29.076  1.00  0.55           O  
HETATM  570  O   HOH T 569       5.483  12.934  26.147  1.00  0.56           O  
HETATM  571  O   HOH T 570     -21.185  50.338   7.064  1.00  0.56           O  
HETATM  572  O   HOH T 571      -9.311  24.862  37.994  1.00  0.56           O  
HETATM  573  O   HOH T 572      -0.871  32.448  -1.764  1.00  0.56           O  
HETATM  574  O   HOH T 573     -11.420   0.737  11.576  1.00  0.56           O  
HETATM  575  O   HOH T 574     -17.144  55.027  14.647  1.00  0.56           O  
HETATM  576  O   HOH T 575     -13.848  36.463  30.696  1.00  0.56           O  
HETATM  577  O   HOH T 576      -8.149  35.631  -3.976  1.00  0.56           O  
HETATM  578  O   HOH T 577       6.552  23.569  35.732  1.00  0.56           O  
HETATM  579  O   HOH T 578     -10.676  59.325  11.670  1.00  0.56           O  
HETATM  580  O   HOH T 579       6.645  41.825   4.921  1.00  0.56           O  
HETATM  581  O   HOH T 580     -16.018  27.751  37.530  1.00  0.57           O  
HETATM  582  O   HOH T 581       4.800  40.516  -7.389  1.00  0.57           O  
HETATM  583  O   HOH T 582      -3.095  51.804  22.142  1.00  0.57           O  
HETATM  584  O   HOH T 583      -9.047   7.548  28.251  1.00  0.57           O  
HETATM  585  O   HOH T 584      -6.010  59.808  -3.706  1.00  0.57           O  
HETATM  586  O   HOH T 585      -9.488   7.505  22.820  1.00  0.58           O  
HETATM  587  O   HOH T 586     -16.930  29.959  30.798  1.00  0.58           O  
HETATM  588  O   HOH T 587       4.803  14.105  33.116  1.00  0.58           O  
HETATM  589  O   HOH T 588     -11.412   1.698  18.819  1.00  0.60           O  
HETATM  590  O   HOH T 589     -15.722  12.041  10.412  1.00  0.61           O  
HETATM  591  O   HOH T 590      -5.806  46.836  23.416  1.00  0.63           O  
HETATM  592  O   HOH T 591      -8.184  52.762  19.540  1.00  0.63           O  
TER     593      HOH T 591 
