# Supplementary material for: Accurate Prediction of Hydration Sites of Proteins Using Energy Model With Atom Embedding
Source: Front Mol Biosci. 2021 Sep 20;8:756075. doi: 10.3389/fmolb.2021.756075 (PMC8488165; doi:10.3389/fmolb.2021.756075)
Supplement: Supplementary file 1 [file DataSheet1.ZIP › Data Sheet 1/Our_result_pdb/our_dataset_output/1N7N_watersite.pdb]

HEADER                                                        XXXX


JRNL        PMID   -1
HETATM    1  O   HOH T   0       4.195 -30.178  28.430  1.00  0.16           O  
HETATM    2  O   HOH T   1      18.549 -16.948  19.184  1.00  0.17           O  
HETATM    3  O   HOH T   2       7.916 -11.761  53.190  1.00  0.17           O  
HETATM    4  O   HOH T   3       1.728   2.398  44.781  1.00  0.17           O  
HETATM    5  O   HOH T   4       0.165 -26.071  38.488  1.00  0.18           O  
HETATM    6  O   HOH T   5      15.586 -27.333  56.865  1.00  0.18           O  
HETATM    7  O   HOH T   6       6.557  12.534  24.965  1.00  0.19           O  
HETATM    8  O   HOH T   7       9.587 -30.214  44.735  1.00  0.19           O  
HETATM    9  O   HOH T   8      18.656  -0.549  25.910  1.00  0.19           O  
HETATM   10  O   HOH T   9     -12.330 -35.601  65.676  1.00  0.19           O  
HETATM   11  O   HOH T  10       1.559 -25.755  60.479  1.00  0.19           O  
HETATM   12  O   HOH T  11      12.727   0.327  13.773  1.00  0.19           O  
HETATM   13  O   HOH T  12       9.719 -11.923  60.720  1.00  0.20           O  
HETATM   14  O   HOH T  13       9.404 -22.665  44.146  1.00  0.20           O  
HETATM   15  O   HOH T  14     -12.588  -6.181  67.801  1.00  0.20           O  
HETATM   16  O   HOH T  15      -3.937 -31.076  39.884  1.00  0.20           O  
HETATM   17  O   HOH T  16      18.466 -10.040  55.205  1.00  0.20           O  
HETATM   18  O   HOH T  17     -13.767 -17.721  55.640  1.00  0.20           O  
HETATM   19  O   HOH T  18      -2.349  -7.190  45.948  1.00  0.20           O  
HETATM   20  O   HOH T  19     -10.231 -16.012  24.300  1.00  0.21           O  
HETATM   21  O   HOH T  20      -7.471  -9.086  41.306  1.00  0.21           O  
HETATM   22  O   HOH T  21      -2.237  -2.712   6.202  1.00  0.21           O  
HETATM   23  O   HOH T  22       0.058   4.663  20.789  1.00  0.21           O  
HETATM   24  O   HOH T  23      12.383 -11.576  60.022  1.00  0.21           O  
HETATM   25  O   HOH T  24     -16.004 -25.354  58.111  1.00  0.21           O  
HETATM   26  O   HOH T  25       9.801 -18.061  51.803  1.00  0.21           O  
HETATM   27  O   HOH T  26      15.960  22.423  12.090  1.00  0.22           O  
HETATM   28  O   HOH T  27     -14.061 -17.405  70.265  1.00  0.22           O  
HETATM   29  O   HOH T  28      15.019 -25.052  23.006  1.00  0.22           O  
HETATM   30  O   HOH T  29      -5.360  -5.091  70.096  1.00  0.22           O  
HETATM   31  O   HOH T  30      -4.504  -5.503  39.312  1.00  0.22           O  
HETATM   32  O   HOH T  31     -12.870 -30.461  50.889  1.00  0.22           O  
HETATM   33  O   HOH T  32       1.813 -14.682  71.934  1.00  0.22           O  
HETATM   34  O   HOH T  33       7.195   9.392  13.102  1.00  0.23           O  
HETATM   35  O   HOH T  34      15.165 -14.662  44.310  1.00  0.23           O  
HETATM   36  O   HOH T  35      -8.104 -11.082  45.452  1.00  0.23           O  
HETATM   37  O   HOH T  36      14.554  -9.599  48.620  1.00  0.23           O  
HETATM   38  O   HOH T  37     -13.475  -7.345  56.924  1.00  0.23           O  
HETATM   39  O   HOH T  38      13.059 -17.843  56.993  1.00  0.23           O  
HETATM   40  O   HOH T  39       9.232 -26.417  26.974  1.00  0.23           O  
HETATM   41  O   HOH T  40       9.140  -9.000   3.395  1.00  0.23           O  
HETATM   42  O   HOH T  41      12.381  11.312  30.070  1.00  0.23           O  
HETATM   43  O   HOH T  42      15.544  -4.912   2.370  1.00  0.23           O  
HETATM   44  O   HOH T  43      13.110 -16.080  60.595  1.00  0.24           O  
HETATM   45  O   HOH T  44     -15.246  -7.134  68.046  1.00  0.24           O  
HETATM   46  O   HOH T  45       8.071 -20.644  58.823  1.00  0.24           O  
HETATM   47  O   HOH T  46       6.021 -50.772  43.964  1.00  0.24           O  
HETATM   48  O   HOH T  47      18.522   8.087  25.000  1.00  0.24           O  
HETATM   49  O   HOH T  48      18.038 -22.532  55.946  1.00  0.24           O  
HETATM   50  O   HOH T  49      10.502   7.042  22.908  1.00  0.24           O  
HETATM   51  O   HOH T  50       7.593  -8.134  47.886  1.00  0.24           O  
HETATM   52  O   HOH T  51     -18.220 -24.604  43.592  1.00  0.24           O  
HETATM   53  O   HOH T  52      16.248  -1.874  12.843  1.00  0.24           O  
HETATM   54  O   HOH T  53       0.808  -7.249  60.775  1.00  0.24           O  
HETATM   55  O   HOH T  54      -1.195 -23.024  69.696  1.00  0.24           O  
HETATM   56  O   HOH T  55     -11.059 -13.059  36.981  1.00  0.24           O  
HETATM   57  O   HOH T  56      10.631   0.242  -0.216  1.00  0.24           O  
HETATM   58  O   HOH T  57     -16.310 -10.547  47.630  1.00  0.24           O  
HETATM   59  O   HOH T  58      -2.425  -5.597  61.759  1.00  0.25           O  
HETATM   60  O   HOH T  59      -5.840 -13.007  21.073  1.00  0.25           O  
HETATM   61  O   HOH T  60       8.365 -15.252  44.184  1.00  0.25           O  
HETATM   62  O   HOH T  61       4.042 -32.470  15.489  1.00  0.25           O  
HETATM   63  O   HOH T  62     -14.019 -21.561  42.871  1.00  0.25           O  
HETATM   64  O   HOH T  63     -17.526 -22.790  39.744  1.00  0.25           O  
HETATM   65  O   HOH T  64       5.855 -10.757  51.592  1.00  0.25           O  
HETATM   66  O   HOH T  65       9.333   3.273   6.719  1.00  0.25           O  
HETATM   67  O   HOH T  66       4.252 -11.274  17.099  1.00  0.25           O  
HETATM   68  O   HOH T  67       5.719   0.086  -4.086  1.00  0.25           O  
HETATM   69  O   HOH T  68      13.496  -2.203  13.057  1.00  0.25           O  
HETATM   70  O   HOH T  69      24.042  -8.125  22.346  1.00  0.25           O  
HETATM   71  O   HOH T  70       2.116 -23.100  59.950  1.00  0.25           O  
HETATM   72  O   HOH T  71     -28.646 -19.089  24.301  1.00  0.25           O  
HETATM   73  O   HOH T  72      20.878 -12.217  21.751  1.00  0.26           O  
HETATM   74  O   HOH T  73      12.782 -15.625  31.538  1.00  0.26           O  
HETATM   75  O   HOH T  74      -7.504 -32.072  70.830  1.00  0.26           O  
HETATM   76  O   HOH T  75     -15.270  -8.730  55.484  1.00  0.26           O  
HETATM   77  O   HOH T  76     -11.939 -23.500  42.515  1.00  0.26           O  
HETATM   78  O   HOH T  77     -10.813 -14.541  50.136  1.00  0.26           O  
HETATM   79  O   HOH T  78     -25.376 -24.399  64.625  1.00  0.26           O  
HETATM   80  O   HOH T  79     -22.859 -22.661  60.007  1.00  0.26           O  
HETATM   81  O   HOH T  80       0.014 -37.000  47.351  1.00  0.26           O  
HETATM   82  O   HOH T  81     -12.637 -16.794  47.028  1.00  0.26           O  
HETATM   83  O   HOH T  82      15.774 -33.902  54.303  1.00  0.26           O  
HETATM   84  O   HOH T  83      18.890 -15.027  21.134  1.00  0.26           O  
HETATM   85  O   HOH T  84     -13.335  -5.612  60.897  1.00  0.26           O  
HETATM   86  O   HOH T  85       4.060 -35.074  27.355  1.00  0.26           O  
HETATM   87  O   HOH T  86       0.620   8.956   5.081  1.00  0.26           O  
HETATM   88  O   HOH T  87      -7.359  -6.961  12.924  1.00  0.27           O  
HETATM   89  O   HOH T  88       4.841 -11.699   3.986  1.00  0.27           O  
HETATM   90  O   HOH T  89     -22.381 -16.060  63.479  1.00  0.27           O  
HETATM   91  O   HOH T  90       9.502 -14.451  26.922  1.00  0.27           O  
HETATM   92  O   HOH T  91       6.246  -1.526  16.628  1.00  0.27           O  
HETATM   93  O   HOH T  92      12.779   7.354  21.523  1.00  0.27           O  
HETATM   94  O   HOH T  93      11.189  -3.331  38.873  1.00  0.27           O  
HETATM   95  O   HOH T  94      14.905 -17.537  40.023  1.00  0.27           O  
HETATM   96  O   HOH T  95      -6.195  10.606  25.097  1.00  0.27           O  
HETATM   97  O   HOH T  96     -16.126 -11.535  35.234  1.00  0.27           O  
HETATM   98  O   HOH T  97       8.406 -24.419  46.108  1.00  0.27           O  
HETATM   99  O   HOH T  98     -12.636 -44.120  62.682  1.00  0.27           O  
HETATM  100  O   HOH T  99     -13.785  -5.294  37.842  1.00  0.27           O  
HETATM  101  O   HOH T 100       5.489 -18.715  42.657  1.00  0.27           O  
HETATM  102  O   HOH T 101      -4.776 -32.421  20.265  1.00  0.27           O  
HETATM  103  O   HOH T 102     -12.714  -6.510  63.514  1.00  0.27           O  
HETATM  104  O   HOH T 103      24.289  -1.196  21.812  1.00  0.27           O  
HETATM  105  O   HOH T 104     -22.762 -23.398  54.408  1.00  0.27           O  
HETATM  106  O   HOH T 105       5.204  -1.276  51.672  1.00  0.28           O  
HETATM  107  O   HOH T 106      -9.269 -14.545  13.947  1.00  0.28           O  
HETATM  108  O   HOH T 107      -3.601  13.518  19.396  1.00  0.28           O  
HETATM  109  O   HOH T 108      10.156 -20.019  30.049  1.00  0.28           O  
HETATM  110  O   HOH T 109      15.170  16.223  20.993  1.00  0.28           O  
HETATM  111  O   HOH T 110       6.414 -29.202  29.753  1.00  0.28           O  
HETATM  112  O   HOH T 111      24.385   7.362  12.425  1.00  0.28           O  
HETATM  113  O   HOH T 112       0.223  14.690  16.222  1.00  0.28           O  
HETATM  114  O   HOH T 113      -6.562  16.286  15.158  1.00  0.28           O  
HETATM  115  O   HOH T 114       5.439 -23.446   6.457  1.00  0.28           O  
HETATM  116  O   HOH T 115       8.191 -24.024   6.076  1.00  0.28           O  
HETATM  117  O   HOH T 116      17.340 -14.569  63.351  1.00  0.28           O  
HETATM  118  O   HOH T 117       2.568 -34.660  71.771  1.00  0.28           O  
HETATM  119  O   HOH T 118       2.610 -54.294  58.019  1.00  0.29           O  
HETATM  120  O   HOH T 119      14.623 -30.473  38.720  1.00  0.29           O  
HETATM  121  O   HOH T 120     -27.214 -29.675  25.722  1.00  0.29           O  
HETATM  122  O   HOH T 121      -1.139   4.197  -0.666  1.00  0.29           O  
HETATM  123  O   HOH T 122     -13.644 -12.308  36.301  1.00  0.29           O  
HETATM  124  O   HOH T 123       9.710  23.976  11.296  1.00  0.29           O  
HETATM  125  O   HOH T 124     -24.416 -17.155  22.372  1.00  0.29           O  
HETATM  126  O   HOH T 125       9.077 -49.242  62.361  1.00  0.29           O  
HETATM  127  O   HOH T 126      18.145  -3.527   8.744  1.00  0.29           O  
HETATM  128  O   HOH T 127      12.304 -34.934  31.579  1.00  0.29           O  
HETATM  129  O   HOH T 128       5.369  -6.359  22.565  1.00  0.29           O  
HETATM  130  O   HOH T 129      -4.282 -15.097  45.167  1.00  0.29           O  
HETATM  131  O   HOH T 130       7.176  12.038   9.812  1.00  0.30           O  
HETATM  132  O   HOH T 131       7.513 -28.865  70.464  1.00  0.30           O  
HETATM  133  O   HOH T 132      21.739  -0.866  22.363  1.00  0.30           O  
HETATM  134  O   HOH T 133     -14.828  -1.160  12.319  1.00  0.30           O  
HETATM  135  O   HOH T 134     -15.421 -34.247  80.122  1.00  0.30           O  
HETATM  136  O   HOH T 135     -10.915 -30.308  49.012  1.00  0.30           O  
HETATM  137  O   HOH T 136      -3.872 -16.305  54.322  1.00  0.30           O  
HETATM  138  O   HOH T 137      -8.997   9.051   9.807  1.00  0.30           O  
HETATM  139  O   HOH T 138     -20.480 -25.388  44.876  1.00  0.30           O  
HETATM  140  O   HOH T 139     -22.697 -23.596  51.613  1.00  0.30           O  
HETATM  141  O   HOH T 140       3.298 -11.410  19.704  1.00  0.30           O  
HETATM  142  O   HOH T 141       7.068 -13.225  37.157  1.00  0.30           O  
HETATM  143  O   HOH T 142      -1.468 -36.542  44.930  1.00  0.30           O  
HETATM  144  O   HOH T 143     -15.160  -2.507  51.879  1.00  0.30           O  
HETATM  145  O   HOH T 144      -0.740 -52.946  55.531  1.00  0.30           O  
HETATM  146  O   HOH T 145       2.920 -16.975  73.163  1.00  0.30           O  
HETATM  147  O   HOH T 146      23.774 -17.617  60.047  1.00  0.30           O  
HETATM  148  O   HOH T 147     -15.569 -19.847  70.641  1.00  0.30           O  
HETATM  149  O   HOH T 148      -6.811   5.041  26.881  1.00  0.30           O  
HETATM  150  O   HOH T 149      -6.668 -15.311   6.057  1.00  0.31           O  
HETATM  151  O   HOH T 150      -8.260 -12.857  19.674  1.00  0.31           O  
HETATM  152  O   HOH T 151      15.407  -8.700  66.575  1.00  0.31           O  
HETATM  153  O   HOH T 152      10.177 -27.918  29.222  1.00  0.31           O  
HETATM  154  O   HOH T 153     -14.640  -4.133  27.331  1.00  0.31           O  
HETATM  155  O   HOH T 154      -6.217 -13.839   3.716  1.00  0.31           O  
HETATM  156  O   HOH T 155      17.304  -5.757   4.319  1.00  0.31           O  
HETATM  157  O   HOH T 156      22.889   9.250   9.491  1.00  0.31           O  
HETATM  158  O   HOH T 157      -7.269 -13.871  77.623  1.00  0.31           O  
HETATM  159  O   HOH T 158      13.709 -20.197  55.465  1.00  0.31           O  
HETATM  160  O   HOH T 159      -7.246 -39.942  45.414  1.00  0.31           O  
HETATM  161  O   HOH T 160      23.261   0.398  11.357  1.00  0.31           O  
HETATM  162  O   HOH T 161      22.489 -20.578  64.641  1.00  0.31           O  
HETATM  163  O   HOH T 162      12.059  -3.938  55.888  1.00  0.31           O  
HETATM  164  O   HOH T 163      12.401 -28.451  64.086  1.00  0.31           O  
HETATM  165  O   HOH T 164      13.444  14.263  21.728  1.00  0.31           O  
HETATM  166  O   HOH T 165       7.009 -14.616  46.517  1.00  0.31           O  
HETATM  167  O   HOH T 166     -19.719 -25.494  33.911  1.00  0.31           O  
HETATM  168  O   HOH T 167      25.690  -6.676  25.224  1.00  0.32           O  
HETATM  169  O   HOH T 168      -1.783   6.740  26.646  1.00  0.32           O  
HETATM  170  O   HOH T 169       3.718  -9.074   4.367  1.00  0.32           O  
HETATM  171  O   HOH T 170      11.405 -30.744  70.677  1.00  0.32           O  
HETATM  172  O   HOH T 171       2.937 -15.511  46.466  1.00  0.32           O  
HETATM  173  O   HOH T 172      -7.961 -15.998  76.072  1.00  0.32           O  
HETATM  174  O   HOH T 173     -17.290 -18.495  68.999  1.00  0.32           O  
HETATM  175  O   HOH T 174      15.707 -21.884  54.577  1.00  0.32           O  
HETATM  176  O   HOH T 175      13.732 -15.589  53.418  1.00  0.32           O  
HETATM  177  O   HOH T 176     -17.572 -29.876  53.498  1.00  0.32           O  
HETATM  178  O   HOH T 177      12.413   9.061  10.264  1.00  0.32           O  
HETATM  179  O   HOH T 178     -26.864 -24.154  69.453  1.00  0.32           O  
HETATM  180  O   HOH T 179       7.189 -17.452  47.343  1.00  0.32           O  
HETATM  181  O   HOH T 180      21.997  -7.226  70.677  1.00  0.32           O  
HETATM  182  O   HOH T 181      19.915 -13.493  49.780  1.00  0.32           O  
HETATM  183  O   HOH T 182     -17.530  -6.509  11.925  1.00  0.32           O  
HETATM  184  O   HOH T 183     -10.743 -16.231  45.163  1.00  0.32           O  
HETATM  185  O   HOH T 184       3.236 -17.771  48.234  1.00  0.32           O  
HETATM  186  O   HOH T 185      -9.245 -29.571  73.216  1.00  0.32           O  
HETATM  187  O   HOH T 186     -23.838 -19.504  50.333  1.00  0.32           O  
HETATM  188  O   HOH T 187      -4.735 -19.742  60.626  1.00  0.32           O  
HETATM  189  O   HOH T 188       8.420 -12.270  67.963  1.00  0.32           O  
HETATM  190  O   HOH T 189       6.512 -19.397  74.323  1.00  0.32           O  
HETATM  191  O   HOH T 190      25.877 -20.355  27.625  1.00  0.32           O  
HETATM  192  O   HOH T 191      -2.785 -25.784  71.041  1.00  0.32           O  
HETATM  193  O   HOH T 192      -1.063 -33.596  41.767  1.00  0.32           O  
HETATM  194  O   HOH T 193       2.106 -27.462  49.971  1.00  0.32           O  
HETATM  195  O   HOH T 194      -8.273 -53.660  57.386  1.00  0.32           O  
HETATM  196  O   HOH T 195     -18.558 -17.403  43.751  1.00  0.32           O  
HETATM  197  O   HOH T 196      16.136 -20.066  40.423  1.00  0.32           O  
HETATM  198  O   HOH T 197      19.764 -16.882  53.406  1.00  0.32           O  
HETATM  199  O   HOH T 198       9.219 -13.198  65.436  1.00  0.32           O  
HETATM  200  O   HOH T 199     -14.367 -36.778  80.047  1.00  0.32           O  
HETATM  201  O   HOH T 200       8.343 -51.834  57.719  1.00  0.32           O  
HETATM  202  O   HOH T 201      -9.192 -34.050  23.605  1.00  0.32           O  
HETATM  203  O   HOH T 202      16.584   8.141  22.996  1.00  0.32           O  
HETATM  204  O   HOH T 203     -28.145 -16.546  54.717  1.00  0.32           O  
HETATM  205  O   HOH T 204      15.052   6.005  22.042  1.00  0.33           O  
HETATM  206  O   HOH T 205       5.974 -39.820  43.645  1.00  0.33           O  
HETATM  207  O   HOH T 206      10.704 -15.533  71.191  1.00  0.33           O  
HETATM  208  O   HOH T 207     -15.393 -30.938  50.026  1.00  0.33           O  
HETATM  209  O   HOH T 208      12.734  20.186  11.310  1.00  0.33           O  
HETATM  210  O   HOH T 209      -4.323 -13.863  55.467  1.00  0.33           O  
HETATM  211  O   HOH T 210      -9.789 -13.772  47.768  1.00  0.33           O  
HETATM  212  O   HOH T 211      -4.642  -5.036   9.395  1.00  0.33           O  
HETATM  213  O   HOH T 212       2.553  -1.796  55.240  1.00  0.33           O  
HETATM  214  O   HOH T 213      -5.667 -29.748  20.183  1.00  0.33           O  
HETATM  215  O   HOH T 214       7.455  -4.756  -1.936  1.00  0.33           O  
HETATM  216  O   HOH T 215      13.270 -28.400  61.434  1.00  0.33           O  
HETATM  217  O   HOH T 216     -12.119 -34.137  26.359  1.00  0.33           O  
HETATM  218  O   HOH T 217       9.367 -25.224  75.290  1.00  0.33           O  
HETATM  219  O   HOH T 218     -11.333 -10.184  54.155  1.00  0.33           O  
HETATM  220  O   HOH T 219     -20.429 -29.242  30.243  1.00  0.33           O  
HETATM  221  O   HOH T 220      22.907  -5.590  29.441  1.00  0.33           O  
HETATM  222  O   HOH T 221       2.229 -20.074   6.127  1.00  0.33           O  
HETATM  223  O   HOH T 222      -6.012  -5.789  20.195  1.00  0.33           O  
HETATM  224  O   HOH T 223      -3.038 -10.703  43.983  1.00  0.33           O  
HETATM  225  O   HOH T 224      -6.378  -4.834  11.483  1.00  0.33           O  
HETATM  226  O   HOH T 225      13.911  -4.110  53.918  1.00  0.33           O  
HETATM  227  O   HOH T 226      -4.792  -4.438  34.894  1.00  0.33           O  
HETATM  228  O   HOH T 227      18.968 -21.633  71.993  1.00  0.33           O  
HETATM  229  O   HOH T 228       7.280 -32.148  47.708  1.00  0.33           O  
HETATM  230  O   HOH T 229       1.380 -13.778  26.945  1.00  0.33           O  
HETATM  231  O   HOH T 230      23.719  -3.070  30.230  1.00  0.34           O  
HETATM  232  O   HOH T 231     -12.847  -5.464  40.516  1.00  0.34           O  
HETATM  233  O   HOH T 232     -15.232 -48.257  61.468  1.00  0.34           O  
HETATM  234  O   HOH T 233      -3.191 -52.725  54.376  1.00  0.34           O  
HETATM  235  O   HOH T 234      16.752  -4.040  11.194  1.00  0.34           O  
HETATM  236  O   HOH T 235      -7.961  -6.361  41.751  1.00  0.34           O  
HETATM  237  O   HOH T 236     -16.325 -28.466  32.379  1.00  0.34           O  
HETATM  238  O   HOH T 237     -19.417 -33.317  71.050  1.00  0.34           O  
HETATM  239  O   HOH T 238     -21.548 -21.978  37.537  1.00  0.34           O  
HETATM  240  O   HOH T 239      21.714 -17.802  73.470  1.00  0.34           O  
HETATM  241  O   HOH T 240       2.511 -11.993  63.558  1.00  0.34           O  
HETATM  242  O   HOH T 241       1.693 -42.976  69.364  1.00  0.34           O  
HETATM  243  O   HOH T 242     -10.620  11.793  12.218  1.00  0.34           O  
HETATM  244  O   HOH T 243       2.742 -29.818  71.472  1.00  0.34           O  
HETATM  245  O   HOH T 244     -25.797 -25.267  67.111  1.00  0.34           O  
HETATM  246  O   HOH T 245      -0.743 -36.182  40.762  1.00  0.34           O  
HETATM  247  O   HOH T 246       7.234 -32.930  20.945  1.00  0.35           O  
HETATM  248  O   HOH T 247     -21.968 -21.019  55.554  1.00  0.35           O  
HETATM  249  O   HOH T 248     -12.284 -14.723  25.693  1.00  0.35           O  
HETATM  250  O   HOH T 249      11.271 -19.158   1.932  1.00  0.35           O  
HETATM  251  O   HOH T 250     -11.738 -12.737  55.106  1.00  0.35           O  
HETATM  252  O   HOH T 251      13.465 -28.955  71.287  1.00  0.35           O  
HETATM  253  O   HOH T 252      -5.535   2.491  49.342  1.00  0.35           O  
HETATM  254  O   HOH T 253     -18.418 -31.947  27.414  1.00  0.35           O  
HETATM  255  O   HOH T 254      -2.954 -34.432  43.669  1.00  0.35           O  
HETATM  256  O   HOH T 255     -13.998  -5.762  49.046  1.00  0.35           O  
HETATM  257  O   HOH T 256      -8.867 -10.588  18.095  1.00  0.35           O  
HETATM  258  O   HOH T 257      -6.106 -15.918  55.953  1.00  0.35           O  
HETATM  259  O   HOH T 258      15.614 -16.439  51.457  1.00  0.35           O  
HETATM  260  O   HOH T 259       8.742 -34.527  47.423  1.00  0.35           O  
HETATM  261  O   HOH T 260      14.215 -21.742  29.422  1.00  0.35           O  
HETATM  262  O   HOH T 261      20.491 -22.361  37.137  1.00  0.35           O  
HETATM  263  O   HOH T 262     -16.279 -20.084  60.344  1.00  0.35           O  
HETATM  264  O   HOH T 263     -25.294 -18.915  57.753  1.00  0.35           O  
HETATM  265  O   HOH T 264     -28.551 -16.124  26.965  1.00  0.35           O  
HETATM  266  O   HOH T 265      16.169 -30.072  66.002  1.00  0.35           O  
HETATM  267  O   HOH T 266       3.131 -19.696   3.526  1.00  0.36           O  
HETATM  268  O   HOH T 267     -24.168  -3.767  23.109  1.00  0.36           O  
HETATM  269  O   HOH T 268     -16.260  -3.738  30.884  1.00  0.36           O  
HETATM  270  O   HOH T 269      -3.552  -2.406  42.202  1.00  0.36           O  
HETATM  271  O   HOH T 270      19.723 -16.428  45.188  1.00  0.36           O  
HETATM  272  O   HOH T 271     -15.733   2.856  17.341  1.00  0.36           O  
HETATM  273  O   HOH T 272      13.594  22.744  10.602  1.00  0.36           O  
HETATM  274  O   HOH T 273      -1.531 -28.184  70.495  1.00  0.36           O  
HETATM  275  O   HOH T 274      -1.957 -18.649  46.610  1.00  0.36           O  
HETATM  276  O   HOH T 275       3.250 -45.253  69.807  1.00  0.36           O  
HETATM  277  O   HOH T 276       3.923 -47.961  69.527  1.00  0.36           O  
HETATM  278  O   HOH T 277      -0.710 -24.190  73.960  1.00  0.36           O  
HETATM  279  O   HOH T 278       5.067  16.092  16.897  1.00  0.36           O  
HETATM  280  O   HOH T 279       9.830  19.161  24.902  1.00  0.36           O  
HETATM  281  O   HOH T 280     -21.035 -37.355  58.209  1.00  0.36           O  
HETATM  282  O   HOH T 281     -16.493 -35.834  68.060  1.00  0.36           O  
HETATM  283  O   HOH T 282       8.281  12.781  14.763  1.00  0.36           O  
HETATM  284  O   HOH T 283      12.848 -44.438  40.300  1.00  0.36           O  
HETATM  285  O   HOH T 284       2.524   3.494   2.537  1.00  0.36           O  
HETATM  286  O   HOH T 285      15.907   5.676  32.613  1.00  0.36           O  
HETATM  287  O   HOH T 286       0.965 -13.472  37.172  1.00  0.36           O  
HETATM  288  O   HOH T 287      15.908 -15.292  71.135  1.00  0.36           O  
HETATM  289  O   HOH T 288      -0.050   6.475  24.465  1.00  0.36           O  
HETATM  290  O   HOH T 289      -2.726 -13.164   0.415  1.00  0.36           O  
HETATM  291  O   HOH T 290       4.933  -7.744  49.112  1.00  0.36           O  
HETATM  292  O   HOH T 291       2.319 -30.765  47.545  1.00  0.36           O  
HETATM  293  O   HOH T 292      -3.869 -19.717   9.909  1.00  0.36           O  
HETATM  294  O   HOH T 293       9.399 -18.087   0.163  1.00  0.36           O  
HETATM  295  O   HOH T 294       0.023 -44.470  49.179  1.00  0.37           O  
HETATM  296  O   HOH T 295     -15.517   3.413  20.915  1.00  0.37           O  
HETATM  297  O   HOH T 296      -5.311  -8.327   7.884  1.00  0.37           O  
HETATM  298  O   HOH T 297      21.845  12.109  16.212  1.00  0.37           O  
HETATM  299  O   HOH T 298      -8.540  -4.390  35.061  1.00  0.37           O  
HETATM  300  O   HOH T 299      -4.026  15.809   8.206  1.00  0.37           O  
HETATM  301  O   HOH T 300      -8.909  -2.623   7.784  1.00  0.37           O  
HETATM  302  O   HOH T 301     -14.840 -43.273  56.620  1.00  0.37           O  
HETATM  303  O   HOH T 302     -16.285 -46.637  59.444  1.00  0.37           O  
HETATM  304  O   HOH T 303      -6.766   0.410  64.023  1.00  0.37           O  
HETATM  305  O   HOH T 304      17.544 -36.447  45.972  1.00  0.37           O  
HETATM  306  O   HOH T 305     -16.361 -33.164  63.810  1.00  0.37           O  
HETATM  307  O   HOH T 306     -18.906 -35.126  69.157  1.00  0.37           O  
HETATM  308  O   HOH T 307     -13.839 -10.994  55.036  1.00  0.37           O  
HETATM  309  O   HOH T 308     -17.665 -31.580  51.406  1.00  0.37           O  
HETATM  310  O   HOH T 309      19.352   9.923  19.832  1.00  0.37           O  
HETATM  311  O   HOH T 310      10.668 -49.276  64.679  1.00  0.37           O  
HETATM  312  O   HOH T 311      -8.814  -2.314  54.204  1.00  0.37           O  
HETATM  313  O   HOH T 312      19.428  -3.248  11.293  1.00  0.37           O  
HETATM  314  O   HOH T 313      -5.711 -11.317  43.999  1.00  0.37           O  
HETATM  315  O   HOH T 314       5.374  -8.857  46.542  1.00  0.37           O  
HETATM  316  O   HOH T 315      10.555 -30.912  40.418  1.00  0.37           O  
HETATM  317  O   HOH T 316      17.835 -15.308  52.576  1.00  0.37           O  
HETATM  318  O   HOH T 317     -16.951 -35.397  65.382  1.00  0.37           O  
HETATM  319  O   HOH T 318      -8.437  -4.853  19.429  1.00  0.37           O  
HETATM  320  O   HOH T 319       8.747  -4.314  27.975  1.00  0.37           O  
HETATM  321  O   HOH T 320       2.214  -9.804  35.531  1.00  0.37           O  
HETATM  322  O   HOH T 321     -15.451 -33.380  32.859  1.00  0.38           O  
HETATM  323  O   HOH T 322       6.038 -29.200  12.572  1.00  0.38           O  
HETATM  324  O   HOH T 323     -23.483 -22.010  70.519  1.00  0.38           O  
HETATM  325  O   HOH T 324      -3.034  -8.077  21.140  1.00  0.38           O  
HETATM  326  O   HOH T 325      -6.432 -34.221  72.270  1.00  0.38           O  
HETATM  327  O   HOH T 326      13.890 -41.795  44.842  1.00  0.38           O  
HETATM  328  O   HOH T 327     -13.673 -34.950  78.078  1.00  0.38           O  
HETATM  329  O   HOH T 328      -2.085  -9.699  29.996  1.00  0.38           O  
HETATM  330  O   HOH T 329      -9.966  -7.408  52.132  1.00  0.38           O  
HETATM  331  O   HOH T 330      -1.166 -13.900  75.477  1.00  0.38           O  
HETATM  332  O   HOH T 331       8.122 -40.807  63.834  1.00  0.38           O  
HETATM  333  O   HOH T 332       6.603 -53.696  62.264  1.00  0.38           O  
HETATM  334  O   HOH T 333     -26.296   4.766  19.868  1.00  0.38           O  
HETATM  335  O   HOH T 334     -10.415 -39.871  72.296  1.00  0.38           O  
HETATM  336  O   HOH T 335     -14.313 -28.730  36.657  1.00  0.38           O  
HETATM  337  O   HOH T 336      -5.662  13.102  17.567  1.00  0.38           O  
HETATM  338  O   HOH T 337     -11.945 -44.732  65.353  1.00  0.38           O  
HETATM  339  O   HOH T 338      17.024 -17.800  71.374  1.00  0.38           O  
HETATM  340  O   HOH T 339      12.662 -17.719  70.969  1.00  0.38           O  
HETATM  341  O   HOH T 340      -7.607 -17.650  57.606  1.00  0.38           O  
HETATM  342  O   HOH T 341     -10.445  -5.135  49.244  1.00  0.38           O  
HETATM  343  O   HOH T 342       0.998  -2.406  21.894  1.00  0.38           O  
HETATM  344  O   HOH T 343      16.323 -21.704  12.424  1.00  0.38           O  
HETATM  345  O   HOH T 344      12.713  17.809  18.297  1.00  0.38           O  
HETATM  346  O   HOH T 345     -10.124 -29.814  16.561  1.00  0.38           O  
HETATM  347  O   HOH T 346      -9.894 -45.569  69.056  1.00  0.38           O  
HETATM  348  O   HOH T 347       3.176  -6.951  20.858  1.00  0.38           O  
HETATM  349  O   HOH T 348     -20.449  -7.357  59.257  1.00  0.38           O  
HETATM  350  O   HOH T 349      -6.355 -31.483  38.559  1.00  0.38           O  
HETATM  351  O   HOH T 350      -8.145  -1.152  65.887  1.00  0.38           O  
HETATM  352  O   HOH T 351      15.397 -19.835  72.168  1.00  0.38           O  
HETATM  353  O   HOH T 352       9.901 -48.636  67.321  1.00  0.38           O  
HETATM  354  O   HOH T 353       8.186   1.660  -0.214  1.00  0.38           O  
HETATM  355  O   HOH T 354       3.155   7.757   4.635  1.00  0.39           O  
HETATM  356  O   HOH T 355      13.945 -37.649  45.475  1.00  0.39           O  
HETATM  357  O   HOH T 356     -12.051  -5.084  26.863  1.00  0.39           O  
HETATM  358  O   HOH T 357       4.486 -53.516  45.936  1.00  0.39           O  
HETATM  359  O   HOH T 358      19.549  12.924  11.480  1.00  0.39           O  
HETATM  360  O   HOH T 359     -12.922 -12.189  74.944  1.00  0.39           O  
HETATM  361  O   HOH T 360       5.867   8.074   5.600  1.00  0.39           O  
HETATM  362  O   HOH T 361      -5.584  -4.020  22.609  1.00  0.39           O  
HETATM  363  O   HOH T 362      17.109  -1.768  31.038  1.00  0.39           O  
HETATM  364  O   HOH T 363       2.891  15.104  15.634  1.00  0.39           O  
HETATM  365  O   HOH T 364     -19.827  -8.647  61.559  1.00  0.39           O  
HETATM  366  O   HOH T 365      22.696 -18.396  66.312  1.00  0.39           O  
HETATM  367  O   HOH T 366       6.614 -13.921  58.115  1.00  0.39           O  
HETATM  368  O   HOH T 367     -12.653  -1.470  52.344  1.00  0.39           O  
HETATM  369  O   HOH T 368       3.446 -22.198   4.930  1.00  0.39           O  
HETATM  370  O   HOH T 369      -7.095  14.353  20.964  1.00  0.39           O  
HETATM  371  O   HOH T 370      18.954  -9.761  68.089  1.00  0.39           O  
HETATM  372  O   HOH T 371      -8.052  -3.182  32.566  1.00  0.39           O  
HETATM  373  O   HOH T 372     -23.973 -24.410  69.195  1.00  0.39           O  
HETATM  374  O   HOH T 373       9.744 -41.830  67.775  1.00  0.39           O  
HETATM  375  O   HOH T 374      19.308  -0.452  21.360  1.00  0.39           O  
HETATM  376  O   HOH T 375     -21.085  -5.726  24.818  1.00  0.39           O  
HETATM  377  O   HOH T 376       2.571  -8.842  73.005  1.00  0.39           O  
HETATM  378  O   HOH T 377       7.470 -33.340  64.476  1.00  0.39           O  
HETATM  379  O   HOH T 378      -4.871 -34.646  57.271  1.00  0.39           O  
HETATM  380  O   HOH T 379       3.360  13.623  29.242  1.00  0.39           O  
HETATM  381  O   HOH T 380     -16.051 -27.412  34.947  1.00  0.39           O  
HETATM  382  O   HOH T 381      21.737  11.094  11.350  1.00  0.39           O  
HETATM  383  O   HOH T 382       8.792 -29.140  74.743  1.00  0.39           O  
HETATM  384  O   HOH T 383       0.981  -4.252  74.129  1.00  0.39           O  
HETATM  385  O   HOH T 384     -20.048 -12.921  20.193  1.00  0.39           O  
HETATM  386  O   HOH T 385      -8.057  11.410   8.957  1.00  0.39           O  
HETATM  387  O   HOH T 386     -28.810 -18.236  28.751  1.00  0.39           O  
HETATM  388  O   HOH T 387      -0.481 -10.373  66.413  1.00  0.39           O  
HETATM  389  O   HOH T 388      27.416 -11.049  27.654  1.00  0.39           O  
HETATM  390  O   HOH T 389      -3.386   4.104  62.947  1.00  0.39           O  
HETATM  391  O   HOH T 390      20.022 -19.200  46.055  1.00  0.39           O  
HETATM  392  O   HOH T 391      13.825 -32.554  31.631  1.00  0.40           O  
HETATM  393  O   HOH T 392       7.831 -54.569  50.307  1.00  0.40           O  
HETATM  394  O   HOH T 393       2.518  -3.318  72.119  1.00  0.40           O  
HETATM  395  O   HOH T 394     -11.595 -14.190  76.290  1.00  0.40           O  
HETATM  396  O   HOH T 395     -10.642  -7.341  74.286  1.00  0.40           O  
HETATM  397  O   HOH T 396       4.716 -30.615  10.291  1.00  0.40           O  
HETATM  398  O   HOH T 397      18.578  -3.954   5.959  1.00  0.40           O  
HETATM  399  O   HOH T 398     -21.889 -19.589  38.803  1.00  0.40           O  
HETATM  400  O   HOH T 399     -22.465 -15.917  60.256  1.00  0.40           O  
HETATM  401  O   HOH T 400       3.968 -30.792   7.568  1.00  0.40           O  
HETATM  402  O   HOH T 401      14.512 -29.199  41.220  1.00  0.40           O  
HETATM  403  O   HOH T 402       8.895   3.422  39.541  1.00  0.40           O  
HETATM  404  O   HOH T 403      23.258 -22.323  62.661  1.00  0.40           O  
HETATM  405  O   HOH T 404      -4.504   6.529  27.196  1.00  0.40           O  
HETATM  406  O   HOH T 405      -0.477 -36.281  25.578  1.00  0.40           O  
HETATM  407  O   HOH T 406      21.848 -12.408  41.734  1.00  0.40           O  
HETATM  408  O   HOH T 407      10.532 -32.071  42.854  1.00  0.40           O  
HETATM  409  O   HOH T 408      11.513 -41.985  40.312  1.00  0.40           O  
HETATM  410  O   HOH T 409      16.314 -13.773  50.832  1.00  0.40           O  
HETATM  411  O   HOH T 410       9.101 -30.147  72.206  1.00  0.40           O  
HETATM  412  O   HOH T 411       0.050 -21.216   4.708  1.00  0.40           O  
HETATM  413  O   HOH T 412       5.490 -14.677  60.676  1.00  0.40           O  
HETATM  414  O   HOH T 413      -9.380 -34.050  74.830  1.00  0.40           O  
HETATM  415  O   HOH T 414      18.925 -30.785  56.154  1.00  0.40           O  
HETATM  416  O   HOH T 415       4.712  11.726  11.137  1.00  0.40           O  
HETATM  417  O   HOH T 416     -18.524 -19.393  49.386  1.00  0.40           O  
HETATM  418  O   HOH T 417      -3.090  -5.536  33.235  1.00  0.40           O  
HETATM  419  O   HOH T 418     -26.595 -18.523  60.193  1.00  0.40           O  
HETATM  420  O   HOH T 419      -8.387 -38.795  70.638  1.00  0.40           O  
HETATM  421  O   HOH T 420      -2.742  -9.537  32.726  1.00  0.40           O  
HETATM  422  O   HOH T 421      -2.057 -20.188  60.366  1.00  0.40           O  
HETATM  423  O   HOH T 422      20.625  -8.964  72.360  1.00  0.40           O  
HETATM  424  O   HOH T 423       7.515 -13.709  28.692  1.00  0.40           O  
HETATM  425  O   HOH T 424     -16.490   5.061  15.978  1.00  0.40           O  
HETATM  426  O   HOH T 425     -12.923 -37.202  43.568  1.00  0.40           O  
HETATM  427  O   HOH T 426     -13.944   5.747   6.296  1.00  0.40           O  
HETATM  428  O   HOH T 427       5.781 -35.129  63.099  1.00  0.40           O  
HETATM  429  O   HOH T 428     -16.946 -35.358  20.914  1.00  0.40           O  
HETATM  430  O   HOH T 429      -6.517 -11.120  77.815  1.00  0.40           O  
HETATM  431  O   HOH T 430       9.426 -23.580  32.224  1.00  0.40           O  
HETATM  432  O   HOH T 431       4.888 -55.774  57.433  1.00  0.40           O  
HETATM  433  O   HOH T 432      16.262 -36.116  48.406  1.00  0.41           O  
HETATM  434  O   HOH T 433      -7.613  14.222  13.724  1.00  0.41           O  
HETATM  435  O   HOH T 434       0.888 -11.452  21.092  1.00  0.41           O  
HETATM  436  O   HOH T 435     -14.502  -4.507  63.234  1.00  0.41           O  
HETATM  437  O   HOH T 436      -3.248 -19.476   2.408  1.00  0.41           O  
HETATM  438  O   HOH T 437     -16.068  -6.327   9.530  1.00  0.41           O  
HETATM  439  O   HOH T 438      -5.092   1.963  62.508  1.00  0.41           O  
HETATM  440  O   HOH T 439      -9.868  -3.561  27.763  1.00  0.41           O  
HETATM  441  O   HOH T 440      26.645  -8.709  21.729  1.00  0.41           O  
HETATM  442  O   HOH T 441      -0.305  -8.142  42.047  1.00  0.41           O  
HETATM  443  O   HOH T 442      22.428 -18.835  47.363  1.00  0.41           O  
HETATM  444  O   HOH T 443      -0.424   9.847   2.738  1.00  0.41           O  
HETATM  445  O   HOH T 444     -15.176  -4.863  42.093  1.00  0.41           O  
HETATM  446  O   HOH T 445     -14.577 -35.167  63.994  1.00  0.41           O  
HETATM  447  O   HOH T 446      13.270 -29.826  31.855  1.00  0.41           O  
HETATM  448  O   HOH T 447      -8.251 -13.973   7.991  1.00  0.41           O  
HETATM  449  O   HOH T 448      12.307 -27.532  41.012  1.00  0.41           O  
HETATM  450  O   HOH T 449      12.879  22.986  19.326  1.00  0.41           O  
HETATM  451  O   HOH T 450       4.363   2.031   0.883  1.00  0.41           O  
HETATM  452  O   HOH T 451       6.601 -36.469  22.703  1.00  0.41           O  
HETATM  453  O   HOH T 452      19.699  13.820  15.528  1.00  0.41           O  
HETATM  454  O   HOH T 453      -9.013 -21.037  18.250  1.00  0.41           O  
HETATM  455  O   HOH T 454      22.794  -3.514   9.236  1.00  0.41           O  
HETATM  456  O   HOH T 455       4.701 -23.541  72.900  1.00  0.41           O  
HETATM  457  O   HOH T 456      23.126 -28.208  55.550  1.00  0.41           O  
HETATM  458  O   HOH T 457      -2.285 -43.010  69.709  1.00  0.41           O  
HETATM  459  O   HOH T 458      18.487 -31.603  65.150  1.00  0.41           O  
HETATM  460  O   HOH T 459      11.880 -49.423  62.224  1.00  0.41           O  
HETATM  461  O   HOH T 460     -19.429 -12.880  49.516  1.00  0.41           O  
HETATM  462  O   HOH T 461       8.357  13.714  23.149  1.00  0.41           O  
HETATM  463  O   HOH T 462     -22.035   0.169  21.857  1.00  0.41           O  
HETATM  464  O   HOH T 463     -22.570 -32.169  48.263  1.00  0.41           O  
HETATM  465  O   HOH T 464     -17.790   2.394  11.486  1.00  0.41           O  
HETATM  466  O   HOH T 465       6.021 -10.340  48.824  1.00  0.41           O  
HETATM  467  O   HOH T 466     -11.361   7.184   2.194  1.00  0.41           O  
HETATM  468  O   HOH T 467       7.495 -26.757  28.942  1.00  0.41           O  
HETATM  469  O   HOH T 468       3.872  -5.541   2.115  1.00  0.42           O  
HETATM  470  O   HOH T 469     -14.301  -5.834  65.736  1.00  0.42           O  
HETATM  471  O   HOH T 470     -12.350 -35.194  30.048  1.00  0.42           O  
HETATM  472  O   HOH T 471      22.860   9.461  13.290  1.00  0.42           O  
HETATM  473  O   HOH T 472       4.447 -37.456  28.874  1.00  0.42           O  
HETATM  474  O   HOH T 473       0.162 -54.602  51.208  1.00  0.42           O  
HETATM  475  O   HOH T 474     -13.711  -3.674  29.961  1.00  0.42           O  
HETATM  476  O   HOH T 475      14.470   5.522  24.664  1.00  0.42           O  
HETATM  477  O   HOH T 476       2.095 -13.815  32.681  1.00  0.42           O  
HETATM  478  O   HOH T 477      17.874  -9.042  71.676  1.00  0.42           O  
HETATM  479  O   HOH T 478       4.954 -38.810  26.509  1.00  0.42           O  
HETATM  480  O   HOH T 479     -11.414  -3.956  38.602  1.00  0.42           O  
HETATM  481  O   HOH T 480       5.181 -20.998  72.070  1.00  0.42           O  
HETATM  482  O   HOH T 481      14.529  17.143  28.706  1.00  0.42           O  
HETATM  483  O   HOH T 482       5.375 -33.995  22.712  1.00  0.42           O  
HETATM  484  O   HOH T 483      -8.526  11.682  13.937  1.00  0.42           O  
HETATM  485  O   HOH T 484     -13.555  -3.886  58.714  1.00  0.42           O  
HETATM  486  O   HOH T 485     -10.841   7.609  24.354  1.00  0.42           O  
HETATM  487  O   HOH T 486      -6.070   8.879  27.349  1.00  0.42           O  
HETATM  488  O   HOH T 487     -15.755 -33.333  44.647  1.00  0.42           O  
HETATM  489  O   HOH T 488      -7.176 -10.613  25.092  1.00  0.42           O  
HETATM  490  O   HOH T 489       7.538 -14.041  63.558  1.00  0.42           O  
HETATM  491  O   HOH T 490      -8.589 -33.470  41.438  1.00  0.42           O  
HETATM  492  O   HOH T 491     -28.567 -16.267  24.156  1.00  0.42           O  
HETATM  493  O   HOH T 492      25.112 -18.149  71.186  1.00  0.42           O  
HETATM  494  O   HOH T 493       6.306  -9.312   3.433  1.00  0.42           O  
HETATM  495  O   HOH T 494     -12.942  -8.245  75.592  1.00  0.42           O  
HETATM  496  O   HOH T 495       8.557  11.592  12.199  1.00  0.42           O  
HETATM  497  O   HOH T 496      -7.158  -9.792   8.908  1.00  0.43           O  
HETATM  498  O   HOH T 497       2.540 -12.897  69.704  1.00  0.43           O  
HETATM  499  O   HOH T 498       0.863 -44.882  71.115  1.00  0.43           O  
HETATM  500  O   HOH T 499       2.153   0.636  40.338  1.00  0.43           O  
HETATM  501  O   HOH T 500      -2.127   4.937  60.611  1.00  0.43           O  
HETATM  502  O   HOH T 501      23.647   1.150  22.998  1.00  0.43           O  
HETATM  503  O   HOH T 502      14.446 -17.845  31.398  1.00  0.43           O  
HETATM  504  O   HOH T 503     -21.044 -15.159  50.003  1.00  0.43           O  
HETATM  505  O   HOH T 504     -12.190 -33.078  41.821  1.00  0.43           O  
HETATM  506  O   HOH T 505     -18.983 -14.667  43.813  1.00  0.43           O  
HETATM  507  O   HOH T 506      -4.719 -41.733  70.103  1.00  0.43           O  
HETATM  508  O   HOH T 507     -29.331 -18.004  59.687  1.00  0.43           O  
HETATM  509  O   HOH T 508      -0.612  -7.969  19.826  1.00  0.43           O  
HETATM  510  O   HOH T 509      23.096 -19.449  62.178  1.00  0.43           O  
HETATM  511  O   HOH T 510      -2.850  17.468  27.067  1.00  0.43           O  
HETATM  512  O   HOH T 511     -23.975 -29.831  48.487  1.00  0.43           O  
HETATM  513  O   HOH T 512     -12.163  -1.409  30.339  1.00  0.43           O  
HETATM  514  O   HOH T 513       8.353  -1.600  28.409  1.00  0.43           O  
HETATM  515  O   HOH T 514      20.149  -7.326  68.659  1.00  0.43           O  
HETATM  516  O   HOH T 515       0.362 -35.407  43.232  1.00  0.43           O  
HETATM  517  O   HOH T 516      -3.288 -11.408   2.500  1.00  0.43           O  
HETATM  518  O   HOH T 517      12.383   8.704  29.954  1.00  0.43           O  
HETATM  519  O   HOH T 518      19.333  11.649  17.607  1.00  0.43           O  
HETATM  520  O   HOH T 519      -9.938 -13.337  11.603  1.00  0.43           O  
HETATM  521  O   HOH T 520     -24.406 -23.654  57.944  1.00  0.43           O  
HETATM  522  O   HOH T 521     -22.826 -17.130  49.278  1.00  0.43           O  
HETATM  523  O   HOH T 522      -7.946  -2.196  17.019  1.00  0.43           O  
HETATM  524  O   HOH T 523      24.469  -6.858  27.623  1.00  0.43           O  
HETATM  525  O   HOH T 524      14.307 -13.554  60.372  1.00  0.43           O  
HETATM  526  O   HOH T 525      -2.281 -55.429  50.019  1.00  0.43           O  
HETATM  527  O   HOH T 526      19.742  -3.422  65.845  1.00  0.43           O  
HETATM  528  O   HOH T 527      15.697  14.674  28.371  1.00  0.43           O  
HETATM  529  O   HOH T 528      11.320  -9.044   1.712  1.00  0.43           O  
HETATM  530  O   HOH T 529     -20.320 -30.968  69.877  1.00  0.43           O  
HETATM  531  O   HOH T 530      -2.582 -39.932  23.617  1.00  0.43           O  
HETATM  532  O   HOH T 531      -4.259   9.930  29.275  1.00  0.43           O  
HETATM  533  O   HOH T 532     -29.972 -18.588  62.319  1.00  0.44           O  
HETATM  534  O   HOH T 533      -5.921 -32.662  41.086  1.00  0.44           O  
HETATM  535  O   HOH T 534      15.634 -39.854  45.778  1.00  0.44           O  
HETATM  536  O   HOH T 535      30.674 -16.597  25.268  1.00  0.44           O  
HETATM  537  O   HOH T 536      10.603 -35.035  29.181  1.00  0.44           O  
HETATM  538  O   HOH T 537     -20.583 -13.094  45.446  1.00  0.44           O  
HETATM  539  O   HOH T 538     -18.360 -12.290  36.423  1.00  0.44           O  
HETATM  540  O   HOH T 539      -0.198   3.271  59.354  1.00  0.44           O  
HETATM  541  O   HOH T 540     -19.560 -21.089  39.106  1.00  0.44           O  
HETATM  542  O   HOH T 541     -14.199   5.479   8.987  1.00  0.44           O  
HETATM  543  O   HOH T 542      12.123  -0.809  48.691  1.00  0.44           O  
HETATM  544  O   HOH T 543      12.527   4.970  22.930  1.00  0.44           O  
HETATM  545  O   HOH T 544      -2.571 -45.899  70.400  1.00  0.44           O  
HETATM  546  O   HOH T 545     -16.843  -6.211  43.995  1.00  0.44           O  
HETATM  547  O   HOH T 546     -12.403 -35.178  68.456  1.00  0.44           O  
HETATM  548  O   HOH T 547      12.925 -33.557  29.233  1.00  0.44           O  
HETATM  549  O   HOH T 548       4.649   6.841   2.479  1.00  0.44           O  
HETATM  550  O   HOH T 549      -3.287 -53.522  51.732  1.00  0.44           O  
HETATM  551  O   HOH T 550     -29.976   2.068  17.813  1.00  0.44           O  
HETATM  552  O   HOH T 551      17.391 -29.210  57.790  1.00  0.44           O  
HETATM  553  O   HOH T 552      15.848 -40.659  43.218  1.00  0.44           O  
HETATM  554  O   HOH T 553      15.902 -19.445  10.988  1.00  0.44           O  
HETATM  555  O   HOH T 554       0.069  -7.696  65.787  1.00  0.44           O  
HETATM  556  O   HOH T 555     -16.372  -8.108  46.094  1.00  0.44           O  
HETATM  557  O   HOH T 556     -18.501  -9.549  16.036  1.00  0.44           O  
HETATM  558  O   HOH T 557      -7.647   2.335  51.154  1.00  0.44           O  
HETATM  559  O   HOH T 558      12.841  11.508  11.416  1.00  0.44           O  
HETATM  560  O   HOH T 559       4.450 -16.854  44.544  1.00  0.44           O  
HETATM  561  O   HOH T 560       6.554 -43.738  67.571  1.00  0.44           O  
HETATM  562  O   HOH T 561      11.188  -4.719  36.440  1.00  0.44           O  
HETATM  563  O   HOH T 562     -12.409 -38.700  70.668  1.00  0.44           O  
HETATM  564  O   HOH T 563      12.921 -30.144  25.712  1.00  0.44           O  
HETATM  565  O   HOH T 564      -8.344  15.443  23.055  1.00  0.44           O  
HETATM  566  O   HOH T 565     -17.008  -9.065  76.125  1.00  0.44           O  
HETATM  567  O   HOH T 566       6.436   8.906   3.004  1.00  0.44           O  
HETATM  568  O   HOH T 567      -1.455   2.596  61.640  1.00  0.44           O  
HETATM  569  O   HOH T 568      -6.944 -34.082  30.887  1.00  0.44           O  
HETATM  570  O   HOH T 569     -12.112 -48.695  48.538  1.00  0.44           O  
HETATM  571  O   HOH T 570     -13.806 -42.894  66.412  1.00  0.44           O  
HETATM  572  O   HOH T 571     -15.483 -43.920  59.273  1.00  0.45           O  
HETATM  573  O   HOH T 572      -6.691 -36.990  71.924  1.00  0.45           O  
HETATM  574  O   HOH T 573      15.314 -20.522  31.938  1.00  0.45           O  
HETATM  575  O   HOH T 574     -18.838 -16.766  48.956  1.00  0.45           O  
HETATM  576  O   HOH T 575       5.845 -55.039  59.969  1.00  0.45           O  
HETATM  577  O   HOH T 576       2.823 -37.467  20.270  1.00  0.45           O  
HETATM  578  O   HOH T 577     -17.058  -0.181  10.868  1.00  0.45           O  
HETATM  579  O   HOH T 578     -25.683 -17.790  55.200  1.00  0.45           O  
HETATM  580  O   HOH T 579      -0.085  -9.808  33.933  1.00  0.45           O  
HETATM  581  O   HOH T 580      15.202  -9.759  71.522  1.00  0.45           O  
HETATM  582  O   HOH T 581      21.995 -20.685  54.136  1.00  0.45           O  
HETATM  583  O   HOH T 582       6.676 -53.418  44.292  1.00  0.45           O  
HETATM  584  O   HOH T 583      -0.000  11.292  28.173  1.00  0.45           O  
HETATM  585  O   HOH T 584      12.971 -34.038  65.635  1.00  0.45           O  
HETATM  586  O   HOH T 585      -7.535  -3.808  42.920  1.00  0.45           O  
HETATM  587  O   HOH T 586      -9.082 -55.067  59.663  1.00  0.45           O  
HETATM  588  O   HOH T 587      -5.090 -34.846  27.472  1.00  0.45           O  
HETATM  589  O   HOH T 588     -14.620 -45.560  61.355  1.00  0.45           O  
HETATM  590  O   HOH T 589     -27.306   2.927  18.011  1.00  0.45           O  
HETATM  591  O   HOH T 590       0.033 -11.448  -5.552  1.00  0.45           O  
HETATM  592  O   HOH T 591     -11.327   1.522   3.361  1.00  0.45           O  
HETATM  593  O   HOH T 592     -23.370 -15.814  51.645  1.00  0.45           O  
HETATM  594  O   HOH T 593       1.071   4.947   0.725  1.00  0.45           O  
HETATM  595  O   HOH T 594     -16.412  -5.739  38.741  1.00  0.45           O  
HETATM  596  O   HOH T 595      -4.081   1.529  70.230  1.00  0.45           O  
HETATM  597  O   HOH T 596     -12.221 -14.442  10.439  1.00  0.45           O  
HETATM  598  O   HOH T 597       2.613 -46.943  71.808  1.00  0.45           O  
HETATM  599  O   HOH T 598       1.159 -20.491  73.631  1.00  0.45           O  
HETATM  600  O   HOH T 599       5.041 -19.074  46.386  1.00  0.45           O  
HETATM  601  O   HOH T 600       3.569 -29.922  49.860  1.00  0.45           O  
HETATM  602  O   HOH T 601      11.509   6.180  30.945  1.00  0.45           O  
HETATM  603  O   HOH T 602      22.181 -18.385  55.750  1.00  0.45           O  
HETATM  604  O   HOH T 603     -23.483 -21.041  57.850  1.00  0.45           O  
HETATM  605  O   HOH T 604       5.564 -30.163   5.419  1.00  0.45           O  
HETATM  606  O   HOH T 605      11.643 -20.207  69.723  1.00  0.45           O  
HETATM  607  O   HOH T 606      -3.375 -12.338  24.615  1.00  0.45           O  
HETATM  608  O   HOH T 607       8.060  20.925  10.249  1.00  0.45           O  
HETATM  609  O   HOH T 608      16.492  -8.858  69.200  1.00  0.45           O  
HETATM  610  O   HOH T 609     -14.758 -42.486  63.707  1.00  0.45           O  
HETATM  611  O   HOH T 610     -18.702  -0.592  58.323  1.00  0.46           O  
HETATM  612  O   HOH T 611      12.070  24.104  12.964  1.00  0.46           O  
HETATM  613  O   HOH T 612      17.285 -16.264  40.682  1.00  0.46           O  
HETATM  614  O   HOH T 613      -3.974 -37.315  72.341  1.00  0.46           O  
HETATM  615  O   HOH T 614     -23.036 -10.854  67.086  1.00  0.46           O  
HETATM  616  O   HOH T 615      13.151  -2.905  37.026  1.00  0.46           O  
HETATM  617  O   HOH T 616     -17.128   1.814   8.852  1.00  0.46           O  
HETATM  618  O   HOH T 617     -28.130   0.541  19.126  1.00  0.46           O  
HETATM  619  O   HOH T 618       6.501 -30.234   8.096  1.00  0.46           O  
HETATM  620  O   HOH T 619      13.567 -28.005  38.844  1.00  0.46           O  
HETATM  621  O   HOH T 620     -10.315 -55.571  57.190  1.00  0.46           O  
HETATM  622  O   HOH T 621      15.336 -14.988   8.537  1.00  0.46           O  
HETATM  623  O   HOH T 622      11.279 -22.537  18.720  1.00  0.46           O  
HETATM  624  O   HOH T 623     -20.021  -7.251  40.350  1.00  0.46           O  
HETATM  625  O   HOH T 624     -10.194 -33.347  63.241  1.00  0.46           O  
HETATM  626  O   HOH T 625       3.414 -10.567  68.045  1.00  0.46           O  
HETATM  627  O   HOH T 626       0.553  -4.995  65.594  1.00  0.46           O  
HETATM  628  O   HOH T 627      18.639  16.245  16.991  1.00  0.46           O  
HETATM  629  O   HOH T 628      -6.558  -4.200   7.482  1.00  0.46           O  
HETATM  630  O   HOH T 629       5.427   4.723   0.892  1.00  0.46           O  
HETATM  631  O   HOH T 630      18.587  -4.888  63.841  1.00  0.46           O  
HETATM  632  O   HOH T 631      10.702  -8.020  34.887  1.00  0.46           O  
HETATM  633  O   HOH T 632       4.145  -9.232   1.521  1.00  0.46           O  
HETATM  634  O   HOH T 633     -16.144  -4.525  50.380  1.00  0.46           O  
HETATM  635  O   HOH T 634      16.911 -11.281  73.112  1.00  0.46           O  
HETATM  636  O   HOH T 635       1.666  -2.929  69.643  1.00  0.46           O  
HETATM  637  O   HOH T 636     -26.111 -18.862  28.989  1.00  0.46           O  
HETATM  638  O   HOH T 637     -16.311 -21.013  44.484  1.00  0.46           O  
HETATM  639  O   HOH T 638       2.900  -7.504  75.370  1.00  0.46           O  
HETATM  640  O   HOH T 639       0.674   9.068  47.221  1.00  0.46           O  
HETATM  641  O   HOH T 640     -11.280 -48.760  53.608  1.00  0.46           O  
HETATM  642  O   HOH T 641     -18.886 -40.912  61.796  1.00  0.46           O  
HETATM  643  O   HOH T 642     -14.128 -29.132  33.950  1.00  0.46           O  
HETATM  644  O   HOH T 643     -10.606 -33.999  19.540  1.00  0.46           O  
HETATM  645  O   HOH T 644     -17.204 -12.070  16.341  1.00  0.46           O  
HETATM  646  O   HOH T 645       1.189 -27.739  70.379  1.00  0.46           O  
HETATM  647  O   HOH T 646      11.424 -13.661  30.091  1.00  0.46           O  
HETATM  648  O   HOH T 647       8.884  -4.880  -4.248  1.00  0.46           O  
HETATM  649  O   HOH T 648     -22.565 -28.309  71.858  1.00  0.46           O  
HETATM  650  O   HOH T 649     -14.850   5.807  11.597  1.00  0.46           O  
HETATM  651  O   HOH T 650      24.476 -20.032  53.045  1.00  0.46           O  
HETATM  652  O   HOH T 651      11.889   0.175  45.552  1.00  0.46           O  
HETATM  653  O   HOH T 652      -0.089 -40.933  69.701  1.00  0.46           O  
HETATM  654  O   HOH T 653       8.022 -39.031  31.904  1.00  0.46           O  
HETATM  655  O   HOH T 654      11.491   2.825   4.994  1.00  0.46           O  
HETATM  656  O   HOH T 655       4.456 -42.957  69.089  1.00  0.46           O  
HETATM  657  O   HOH T 656      19.714  10.656  25.152  1.00  0.46           O  
HETATM  658  O   HOH T 657       2.914  -6.010  72.981  1.00  0.47           O  
HETATM  659  O   HOH T 658      -8.284  -4.450   9.622  1.00  0.47           O  
HETATM  660  O   HOH T 659      16.986 -17.130  11.985  1.00  0.47           O  
HETATM  661  O   HOH T 660      18.946 -20.071  37.362  1.00  0.47           O  
HETATM  662  O   HOH T 661       6.092  11.858  13.539  1.00  0.47           O  
HETATM  663  O   HOH T 662     -16.506   4.292  10.029  1.00  0.47           O  
HETATM  664  O   HOH T 663     -19.492 -11.436  17.884  1.00  0.47           O  
HETATM  665  O   HOH T 664      -9.044 -34.414  38.864  1.00  0.47           O  
HETATM  666  O   HOH T 665      -1.558 -37.120  15.382  1.00  0.47           O  
HETATM  667  O   HOH T 666     -22.762 -11.488  69.776  1.00  0.47           O  
HETATM  668  O   HOH T 667      16.304  -3.132  52.777  1.00  0.47           O  
HETATM  669  O   HOH T 668      13.853   7.400  31.886  1.00  0.47           O  
HETATM  670  O   HOH T 669     -12.414  -2.418  27.772  1.00  0.47           O  
HETATM  671  O   HOH T 670      21.583 -28.553  53.197  1.00  0.47           O  
HETATM  672  O   HOH T 671      22.345   7.059  14.280  1.00  0.47           O  
HETATM  673  O   HOH T 672     -14.493 -10.260  76.441  1.00  0.47           O  
HETATM  674  O   HOH T 673       0.705 -30.631  32.162  1.00  0.47           O  
HETATM  675  O   HOH T 674      13.691  16.200  11.167  1.00  0.47           O  
HETATM  676  O   HOH T 675       8.160 -53.496  59.981  1.00  0.47           O  
HETATM  677  O   HOH T 676     -13.564 -31.383  32.410  1.00  0.47           O  
HETATM  678  O   HOH T 677      -3.255 -39.783  71.578  1.00  0.47           O  
HETATM  679  O   HOH T 678     -20.060 -10.382  45.718  1.00  0.47           O  
HETATM  680  O   HOH T 679      -3.626   4.597  46.734  1.00  0.47           O  
HETATM  681  O   HOH T 680       2.153  -9.852  65.473  1.00  0.47           O  
HETATM  682  O   HOH T 681      14.770 -48.485  45.706  1.00  0.47           O  
HETATM  683  O   HOH T 682      -3.656 -10.286  22.807  1.00  0.47           O  
HETATM  684  O   HOH T 683       2.800 -32.479  11.257  1.00  0.47           O  
HETATM  685  O   HOH T 684      13.931 -20.354   3.905  1.00  0.47           O  
HETATM  686  O   HOH T 685      16.837 -20.846  34.516  1.00  0.47           O  
HETATM  687  O   HOH T 686     -13.316 -28.425  72.860  1.00  0.47           O  
HETATM  688  O   HOH T 687       2.149  -7.617   2.470  1.00  0.47           O  
HETATM  689  O   HOH T 688      18.739 -12.012  38.006  1.00  0.47           O  
HETATM  690  O   HOH T 689     -10.107 -43.574  67.144  1.00  0.47           O  
HETATM  691  O   HOH T 690      -5.386  15.295  10.591  1.00  0.47           O  
HETATM  692  O   HOH T 691     -15.459  -5.982  73.239  1.00  0.47           O  
HETATM  693  O   HOH T 692     -10.465 -40.324  69.562  1.00  0.47           O  
HETATM  694  O   HOH T 693      -1.543   9.932  30.059  1.00  0.47           O  
HETATM  695  O   HOH T 694      -8.286 -34.077  20.970  1.00  0.47           O  
HETATM  696  O   HOH T 695     -31.295 -24.220  25.873  1.00  0.47           O  
HETATM  697  O   HOH T 696     -15.195  -8.267  48.668  1.00  0.47           O  
HETATM  698  O   HOH T 697      20.163 -13.523  39.793  1.00  0.47           O  
HETATM  699  O   HOH T 698      -6.838  -5.495  33.231  1.00  0.47           O  
HETATM  700  O   HOH T 699     -17.021  -0.856   8.128  1.00  0.47           O  
HETATM  701  O   HOH T 700     -24.871 -28.586  25.996  1.00  0.47           O  
HETATM  702  O   HOH T 701     -18.610 -27.010  35.927  1.00  0.47           O  
HETATM  703  O   HOH T 702      21.030 -29.185  57.107  1.00  0.48           O  
HETATM  704  O   HOH T 703      17.806  -9.365  38.326  1.00  0.48           O  
HETATM  705  O   HOH T 704     -16.304 -18.161  48.342  1.00  0.48           O  
HETATM  706  O   HOH T 705      16.558  12.413  27.378  1.00  0.48           O  
HETATM  707  O   HOH T 706      17.609  -3.234   3.378  1.00  0.48           O  
HETATM  708  O   HOH T 707     -10.993  -4.211   9.242  1.00  0.48           O  
HETATM  709  O   HOH T 708      -2.210 -35.118  13.471  1.00  0.48           O  
HETATM  710  O   HOH T 709      26.322  -4.056  25.644  1.00  0.48           O  
HETATM  711  O   HOH T 710      -9.565 -18.598  79.310  1.00  0.48           O  
HETATM  712  O   HOH T 711      -6.667 -12.397  61.146  1.00  0.48           O  
HETATM  713  O   HOH T 712       7.580 -55.805  52.773  1.00  0.48           O  
HETATM  714  O   HOH T 713     -26.563 -15.270  22.400  1.00  0.48           O  
HETATM  715  O   HOH T 714       0.123 -13.931  29.455  1.00  0.48           O  
HETATM  716  O   HOH T 715      -9.130  -0.038   2.775  1.00  0.48           O  
HETATM  717  O   HOH T 716     -16.266 -33.787  27.899  1.00  0.48           O  
HETATM  718  O   HOH T 717     -15.646  -4.646  11.752  1.00  0.48           O  
HETATM  719  O   HOH T 718     -12.643   2.738  27.453  1.00  0.48           O  
HETATM  720  O   HOH T 719     -13.825  -4.474   9.670  1.00  0.48           O  
HETATM  721  O   HOH T 720     -17.698 -19.934  46.713  1.00  0.48           O  
HETATM  722  O   HOH T 721      10.630 -29.973  27.184  1.00  0.48           O  
HETATM  723  O   HOH T 722     -16.033   1.079   6.348  1.00  0.48           O  
HETATM  724  O   HOH T 723     -20.134 -22.644  54.274  1.00  0.48           O  
HETATM  725  O   HOH T 724      -5.715  11.587  27.674  1.00  0.48           O  
HETATM  726  O   HOH T 725      19.792  -8.745  30.271  1.00  0.48           O  
HETATM  727  O   HOH T 726      -8.230 -33.854  18.206  1.00  0.48           O  
HETATM  728  O   HOH T 727      19.443 -19.862  34.587  1.00  0.48           O  
HETATM  729  O   HOH T 728     -12.181 -49.360  51.074  1.00  0.48           O  
HETATM  730  O   HOH T 729      -8.293 -16.123  78.868  1.00  0.48           O  
HETATM  731  O   HOH T 730       3.329 -12.162  34.807  1.00  0.48           O  
HETATM  732  O   HOH T 731      -5.741 -26.851  77.168  1.00  0.48           O  
HETATM  733  O   HOH T 732      13.012 -46.724  47.026  1.00  0.48           O  
HETATM  734  O   HOH T 733      21.438  12.895  13.554  1.00  0.48           O  
HETATM  735  O   HOH T 734     -13.323 -33.963  19.763  1.00  0.48           O  
HETATM  736  O   HOH T 735      11.653  11.203   8.926  1.00  0.48           O  
HETATM  737  O   HOH T 736     -26.208 -27.865  71.763  1.00  0.48           O  
HETATM  738  O   HOH T 737      -1.567  -6.595  76.279  1.00  0.48           O  
HETATM  739  O   HOH T 738      18.132 -18.578  41.918  1.00  0.48           O  
HETATM  740  O   HOH T 739      -1.705 -38.941  46.318  1.00  0.48           O  
HETATM  741  O   HOH T 740      21.480  -7.496   9.632  1.00  0.48           O  
HETATM  742  O   HOH T 741      -9.733  -2.721  30.456  1.00  0.48           O  
HETATM  743  O   HOH T 742      18.711 -14.340  41.943  1.00  0.48           O  
HETATM  744  O   HOH T 743      -1.412 -10.188  21.259  1.00  0.48           O  
HETATM  745  O   HOH T 744     -26.260  -2.553  21.253  1.00  0.48           O  
HETATM  746  O   HOH T 745     -15.864  -2.542  10.074  1.00  0.48           O  
HETATM  747  O   HOH T 746      -6.556   1.644  68.065  1.00  0.48           O  
HETATM  748  O   HOH T 747     -22.596 -21.002  42.910  1.00  0.49           O  
HETATM  749  O   HOH T 748     -16.440 -42.230  61.441  1.00  0.49           O  
HETATM  750  O   HOH T 749     -23.046 -13.557  67.436  1.00  0.49           O  
HETATM  751  O   HOH T 750     -24.296 -14.798  58.504  1.00  0.49           O  
HETATM  752  O   HOH T 751     -16.505 -22.782  42.379  1.00  0.49           O  
HETATM  753  O   HOH T 752      18.089 -20.273  32.137  1.00  0.49           O  
HETATM  754  O   HOH T 753       1.796   1.602  58.200  1.00  0.49           O  
HETATM  755  O   HOH T 754      -9.650 -42.922  69.886  1.00  0.49           O  
HETATM  756  O   HOH T 755      20.491  -5.018   9.544  1.00  0.49           O  
HETATM  757  O   HOH T 756      -8.284  -0.046  52.554  1.00  0.49           O  
HETATM  758  O   HOH T 757      23.752 -21.465  69.957  1.00  0.49           O  
HETATM  759  O   HOH T 758      17.843 -26.749  41.354  1.00  0.49           O  
HETATM  760  O   HOH T 759      19.957  -2.704  63.182  1.00  0.49           O  
HETATM  761  O   HOH T 760     -13.839 -34.621  43.286  1.00  0.49           O  
HETATM  762  O   HOH T 761      33.926 -12.875  28.248  1.00  0.49           O  
HETATM  763  O   HOH T 762       0.685  -8.963  -4.845  1.00  0.49           O  
HETATM  764  O   HOH T 763     -28.604 -27.390  24.950  1.00  0.49           O  
HETATM  765  O   HOH T 764      16.038 -29.921  71.458  1.00  0.49           O  
HETATM  766  O   HOH T 765       7.293 -35.138  43.908  1.00  0.49           O  
HETATM  767  O   HOH T 766       9.113  13.695   6.327  1.00  0.49           O  
HETATM  768  O   HOH T 767       3.996   7.094  41.277  1.00  0.49           O  
HETATM  769  O   HOH T 768      12.982 -30.924  28.324  1.00  0.49           O  
HETATM  770  O   HOH T 769      15.399 -33.641  57.006  1.00  0.49           O  
HETATM  771  O   HOH T 770      -8.244 -51.428  63.952  1.00  0.49           O  
HETATM  772  O   HOH T 771       8.962 -44.685  50.133  1.00  0.49           O  
HETATM  773  O   HOH T 772      14.740  -3.969  56.617  1.00  0.49           O  
HETATM  774  O   HOH T 773      10.020 -31.083  16.998  1.00  0.49           O  
HETATM  775  O   HOH T 774       7.921  14.466   8.647  1.00  0.49           O  
HETATM  776  O   HOH T 775     -10.223 -18.640  18.396  1.00  0.49           O  
HETATM  777  O   HOH T 776       6.503  -3.638  52.742  1.00  0.49           O  
HETATM  778  O   HOH T 777      20.276  -9.738  10.510  1.00  0.50           O  
HETATM  779  O   HOH T 778      -0.913  -1.929  23.827  1.00  0.50           O  
HETATM  780  O   HOH T 779      -1.495  -7.478  34.014  1.00  0.50           O  
HETATM  781  O   HOH T 780      17.444 -16.225  43.494  1.00  0.50           O  
HETATM  782  O   HOH T 781      21.325  -1.387  10.372  1.00  0.50           O  
HETATM  783  O   HOH T 782       8.058  16.621  22.393  1.00  0.50           O  
HETATM  784  O   HOH T 783       3.774 -19.491  73.775  1.00  0.50           O  
HETATM  785  O   HOH T 784      -7.769 -56.462  57.614  1.00  0.50           O  
HETATM  786  O   HOH T 785      -1.489 -54.749  53.519  1.00  0.50           O  
HETATM  787  O   HOH T 786      21.127 -20.478  73.261  1.00  0.50           O  
HETATM  788  O   HOH T 787       6.603 -29.138  73.123  1.00  0.50           O  
HETATM  789  O   HOH T 788       8.217 -29.086  27.730  1.00  0.50           O  
HETATM  790  O   HOH T 789       4.883  -6.342  51.546  1.00  0.50           O  
HETATM  791  O   HOH T 790     -24.184 -39.713  61.056  1.00  0.50           O  
HETATM  792  O   HOH T 791      -3.889  13.256   9.299  1.00  0.50           O  
HETATM  793  O   HOH T 792      -1.584 -18.807  77.976  1.00  0.50           O  
HETATM  794  O   HOH T 793     -20.678  -7.833  42.866  1.00  0.50           O  
HETATM  795  O   HOH T 794       7.453 -31.658  13.570  1.00  0.50           O  
HETATM  796  O   HOH T 795      16.209 -18.431   8.426  1.00  0.50           O  
HETATM  797  O   HOH T 796     -11.473   0.240  28.216  1.00  0.50           O  
HETATM  798  O   HOH T 797      23.799 -18.866  68.848  1.00  0.50           O  
HETATM  799  O   HOH T 798       0.041 -54.823  57.324  1.00  0.50           O  
HETATM  800  O   HOH T 799       7.405  -2.985  37.670  1.00  0.50           O  
HETATM  801  O   HOH T 800     -15.747 -38.705  54.983  1.00  0.50           O  
HETATM  802  O   HOH T 801      -5.922  -0.239  49.130  1.00  0.50           O  
HETATM  803  O   HOH T 802      13.641 -51.018  46.030  1.00  0.50           O  
HETATM  804  O   HOH T 803      16.488  10.386  29.043  1.00  0.50           O  
HETATM  805  O   HOH T 804      -1.773  15.068  28.051  1.00  0.50           O  
HETATM  806  O   HOH T 805     -16.513 -41.088  56.229  1.00  0.50           O  
HETATM  807  O   HOH T 806      -4.857  -7.816  77.045  1.00  0.50           O  
HETATM  808  O   HOH T 807      -9.597 -32.583  16.041  1.00  0.50           O  
HETATM  809  O   HOH T 808      -2.738   7.564  29.121  1.00  0.50           O  
HETATM  810  O   HOH T 809      25.135  -4.279  28.212  1.00  0.50           O  
HETATM  811  O   HOH T 810     -17.454 -41.896  63.958  1.00  0.50           O  
HETATM  812  O   HOH T 811     -15.274 -22.850  16.995  1.00  0.50           O  
HETATM  813  O   HOH T 812     -13.999   5.154  17.365  1.00  0.50           O  
HETATM  814  O   HOH T 813      11.851 -41.557  43.047  1.00  0.50           O  
HETATM  815  O   HOH T 814      16.679 -34.156  70.374  1.00  0.51           O  
HETATM  816  O   HOH T 815       7.148 -26.917  74.892  1.00  0.51           O  
HETATM  817  O   HOH T 816       2.049 -18.538  -1.806  1.00  0.51           O  
HETATM  818  O   HOH T 817      15.279  -6.936  64.472  1.00  0.51           O  
HETATM  819  O   HOH T 818     -20.298  -1.537  13.534  1.00  0.51           O  
HETATM  820  O   HOH T 819      -3.007  -2.724  22.128  1.00  0.51           O  
HETATM  821  O   HOH T 820      19.397 -32.328  53.911  1.00  0.51           O  
HETATM  822  O   HOH T 821     -13.281 -16.275  12.233  1.00  0.51           O  
HETATM  823  O   HOH T 822       9.795   7.992  32.434  1.00  0.51           O  
HETATM  824  O   HOH T 823     -17.953 -17.143  46.399  1.00  0.51           O  
HETATM  825  O   HOH T 824       2.521  12.580  14.580  1.00  0.51           O  
HETATM  826  O   HOH T 825     -25.038  -0.065  21.877  1.00  0.51           O  
HETATM  827  O   HOH T 826       2.393 -49.569  71.202  1.00  0.51           O  
HETATM  828  O   HOH T 827       3.163 -29.296   3.941  1.00  0.51           O  
HETATM  829  O   HOH T 828       8.150 -47.083  69.067  1.00  0.51           O  
HETATM  830  O   HOH T 829       8.475 -13.706  70.530  1.00  0.51           O  
HETATM  831  O   HOH T 830      24.357 -20.174  55.798  1.00  0.51           O  
HETATM  832  O   HOH T 831       9.755 -12.165  28.360  1.00  0.51           O  
HETATM  833  O   HOH T 832       0.855  13.989  27.794  1.00  0.51           O  
HETATM  834  O   HOH T 833      -6.578 -22.744  12.025  1.00  0.51           O  
HETATM  835  O   HOH T 834     -12.191 -42.402  68.731  1.00  0.51           O  
HETATM  836  O   HOH T 835       7.664 -11.433  62.509  1.00  0.51           O  
HETATM  837  O   HOH T 836       8.906 -53.617  55.773  1.00  0.51           O  
HETATM  838  O   HOH T 837     -11.251  -3.839  51.678  1.00  0.51           O  
HETATM  839  O   HOH T 838       1.880 -21.908   2.546  1.00  0.51           O  
HETATM  840  O   HOH T 839      -2.304  15.419  25.318  1.00  0.51           O  
HETATM  841  O   HOH T 840      -8.312 -13.129   5.355  1.00  0.51           O  
HETATM  842  O   HOH T 841      14.905 -14.516   5.871  1.00  0.51           O  
HETATM  843  O   HOH T 842     -24.217 -26.039  71.586  1.00  0.51           O  
HETATM  844  O   HOH T 843     -20.699 -19.800  41.307  1.00  0.51           O  
HETATM  845  O   HOH T 844     -10.553 -12.785   8.958  1.00  0.51           O  
HETATM  846  O   HOH T 845       2.979 -10.513  70.810  1.00  0.51           O  
HETATM  847  O   HOH T 846     -22.887 -12.625  26.775  1.00  0.51           O  
HETATM  848  O   HOH T 847      -6.910 -36.446  26.240  1.00  0.51           O  
HETATM  849  O   HOH T 848     -17.382  -9.871  33.406  1.00  0.51           O  
HETATM  850  O   HOH T 849       4.680 -31.555  13.045  1.00  0.51           O  
HETATM  851  O   HOH T 850     -11.243 -41.732  50.844  1.00  0.51           O  
HETATM  852  O   HOH T 851      -8.938 -11.277   7.408  1.00  0.51           O  
HETATM  853  O   HOH T 852       2.321  10.318   3.607  1.00  0.51           O  
HETATM  854  O   HOH T 853       4.743 -13.654  63.790  1.00  0.51           O  
HETATM  855  O   HOH T 854      -3.878  -4.840   6.784  1.00  0.51           O  
HETATM  856  O   HOH T 855      -1.915 -21.923   2.879  1.00  0.51           O  
HETATM  857  O   HOH T 856      -9.754 -20.772  77.596  1.00  0.51           O  
HETATM  858  O   HOH T 857      13.952 -31.679  71.052  1.00  0.51           O  
HETATM  859  O   HOH T 858       8.871 -20.131  44.820  1.00  0.52           O  
HETATM  860  O   HOH T 859     -14.516 -25.608  16.913  1.00  0.52           O  
HETATM  861  O   HOH T 860      25.978  -8.968  26.761  1.00  0.52           O  
HETATM  862  O   HOH T 861     -17.808 -18.911  22.517  1.00  0.52           O  
HETATM  863  O   HOH T 862       4.738 -52.920  64.167  1.00  0.52           O  
HETATM  864  O   HOH T 863       7.308 -41.290  66.445  1.00  0.52           O  
HETATM  865  O   HOH T 864       7.257  -2.218  54.967  1.00  0.52           O  
HETATM  866  O   HOH T 865      -1.991   8.223  47.792  1.00  0.52           O  
HETATM  867  O   HOH T 866      -6.370 -20.204  10.994  1.00  0.52           O  
HETATM  868  O   HOH T 867       7.781   6.411  31.921  1.00  0.52           O  
HETATM  869  O   HOH T 868      14.884 -25.391  15.611  1.00  0.52           O  
HETATM  870  O   HOH T 869      20.420 -14.384  52.396  1.00  0.52           O  
HETATM  871  O   HOH T 870       6.761 -53.883  57.617  1.00  0.52           O  
HETATM  872  O   HOH T 871      13.886 -34.241  59.243  1.00  0.52           O  
HETATM  873  O   HOH T 872     -14.773 -33.045  57.895  1.00  0.52           O  
HETATM  874  O   HOH T 873     -27.318   1.546  22.883  1.00  0.52           O  
HETATM  875  O   HOH T 874      12.803  -3.374  58.458  1.00  0.52           O  
HETATM  876  O   HOH T 875       8.809 -52.021  62.300  1.00  0.52           O  
HETATM  877  O   HOH T 876     -16.158 -53.437  56.684  1.00  0.52           O  
HETATM  878  O   HOH T 877     -22.270 -24.284  71.534  1.00  0.52           O  
HETATM  879  O   HOH T 878     -12.969  -5.694  74.600  1.00  0.52           O  
HETATM  880  O   HOH T 879      -8.987  -4.873  39.650  1.00  0.52           O  
HETATM  881  O   HOH T 880      27.716 -10.654  20.146  1.00  0.52           O  
HETATM  882  O   HOH T 881      14.608 -43.638  62.407  1.00  0.52           O  
HETATM  883  O   HOH T 882      12.784  -4.730  31.006  1.00  0.52           O  
HETATM  884  O   HOH T 883     -13.561   7.429  18.886  1.00  0.52           O  
HETATM  885  O   HOH T 884       1.526  -2.318  37.333  1.00  0.52           O  
HETATM  886  O   HOH T 885      20.309  12.881  26.746  1.00  0.52           O  
HETATM  887  O   HOH T 886      13.969  12.728   9.133  1.00  0.52           O  
HETATM  888  O   HOH T 887       4.957  11.128   4.130  1.00  0.52           O  
HETATM  889  O   HOH T 888     -19.776 -11.740  73.627  1.00  0.52           O  
HETATM  890  O   HOH T 889      -8.041 -29.290  18.544  1.00  0.52           O  
HETATM  891  O   HOH T 890       4.961  -0.738  54.425  1.00  0.52           O  
HETATM  892  O   HOH T 891      -9.195   6.315  26.245  1.00  0.52           O  
HETATM  893  O   HOH T 892      -3.410  -0.875  44.629  1.00  0.52           O  
HETATM  894  O   HOH T 893       0.812 -23.707  71.694  1.00  0.52           O  
HETATM  895  O   HOH T 894      -2.342 -22.844  24.550  1.00  0.52           O  
HETATM  896  O   HOH T 895     -20.970  -0.915  56.642  1.00  0.52           O  
HETATM  897  O   HOH T 896       4.359 -36.248  73.250  1.00  0.52           O  
HETATM  898  O   HOH T 897      -1.637 -26.795   7.307  1.00  0.52           O  
HETATM  899  O   HOH T 898     -26.097 -20.961  70.581  1.00  0.52           O  
HETATM  900  O   HOH T 899       0.296 -28.978  72.580  1.00  0.52           O  
HETATM  901  O   HOH T 900     -27.082 -17.913  22.449  1.00  0.52           O  
HETATM  902  O   HOH T 901       9.662  16.333  24.911  1.00  0.52           O  
HETATM  903  O   HOH T 902      19.244  -4.025  50.993  1.00  0.53           O  
HETATM  904  O   HOH T 903       6.817 -55.372  55.433  1.00  0.53           O  
HETATM  905  O   HOH T 904     -19.762 -13.660  75.552  1.00  0.53           O  
HETATM  906  O   HOH T 905     -27.220 -32.202  26.874  1.00  0.53           O  
HETATM  907  O   HOH T 906     -17.852 -29.126  17.774  1.00  0.53           O  
HETATM  908  O   HOH T 907      -7.373 -31.699  19.786  1.00  0.53           O  
HETATM  909  O   HOH T 908       8.127 -38.594  34.637  1.00  0.53           O  
HETATM  910  O   HOH T 909      -3.242 -23.524   4.746  1.00  0.53           O  
HETATM  911  O   HOH T 910      13.912 -20.174  12.900  1.00  0.53           O  
HETATM  912  O   HOH T 911       3.744   1.588  25.383  1.00  0.53           O  
HETATM  913  O   HOH T 912     -21.742  -1.723  54.331  1.00  0.53           O  
HETATM  914  O   HOH T 913      -4.658  -2.606  39.669  1.00  0.53           O  
HETATM  915  O   HOH T 914      -0.050  -2.302  64.943  1.00  0.53           O  
HETATM  916  O   HOH T 915     -10.540  -8.765  76.797  1.00  0.53           O  
HETATM  917  O   HOH T 916     -10.705 -11.542  76.483  1.00  0.53           O  
HETATM  918  O   HOH T 917     -13.012  -3.018  61.344  1.00  0.53           O  
HETATM  919  O   HOH T 918      26.820 -16.102  19.269  1.00  0.53           O  
HETATM  920  O   HOH T 919      -9.643  -6.663   8.763  1.00  0.53           O  
HETATM  921  O   HOH T 920      -4.239  -9.847  78.810  1.00  0.53           O  
HETATM  922  O   HOH T 921       9.759   5.997   6.514  1.00  0.53           O  
HETATM  923  O   HOH T 922      -2.365 -56.731  60.796  1.00  0.53           O  
HETATM  924  O   HOH T 923      22.601   8.848   6.748  1.00  0.53           O  
HETATM  925  O   HOH T 924      16.265   8.423  32.682  1.00  0.53           O  
HETATM  926  O   HOH T 925      25.949 -12.543  29.497  1.00  0.53           O  
HETATM  927  O   HOH T 926       4.836  -3.085  55.986  1.00  0.53           O  
HETATM  928  O   HOH T 927       8.081  -8.900  -3.216  1.00  0.53           O  
HETATM  929  O   HOH T 928       1.920  -5.080  22.557  1.00  0.53           O  
HETATM  930  O   HOH T 929      25.903  -7.291  19.394  1.00  0.53           O  
HETATM  931  O   HOH T 930     -26.908 -16.306  29.369  1.00  0.53           O  
HETATM  932  O   HOH T 931       7.929 -17.913  43.714  1.00  0.53           O  
HETATM  933  O   HOH T 932      -0.782 -52.819  64.743  1.00  0.53           O  
HETATM  934  O   HOH T 933     -17.830 -24.742  72.429  1.00  0.53           O  
HETATM  935  O   HOH T 934      19.422  -8.109  44.530  1.00  0.53           O  
HETATM  936  O   HOH T 935      -0.150 -12.154  25.266  1.00  0.53           O  
HETATM  937  O   HOH T 936      -1.647  -4.052  75.150  1.00  0.53           O  
HETATM  938  O   HOH T 937      14.731  -1.286  48.259  1.00  0.53           O  
HETATM  939  O   HOH T 938     -25.205 -16.199  60.773  1.00  0.54           O  
HETATM  940  O   HOH T 939      10.475  -4.311  29.988  1.00  0.54           O  
HETATM  941  O   HOH T 940      18.851   2.384  32.593  1.00  0.54           O  
HETATM  942  O   HOH T 941       6.188  13.106  28.733  1.00  0.54           O  
HETATM  943  O   HOH T 942     -15.487  -8.884   8.897  1.00  0.54           O  
HETATM  944  O   HOH T 943     -12.239  -6.306   8.050  1.00  0.54           O  
HETATM  945  O   HOH T 944      -3.093  -7.253  30.915  1.00  0.54           O  
HETATM  946  O   HOH T 945      11.191 -42.978  54.855  1.00  0.54           O  
HETATM  947  O   HOH T 946      27.466  -3.195  19.333  1.00  0.54           O  
HETATM  948  O   HOH T 947      16.917   3.519  34.062  1.00  0.54           O  
HETATM  949  O   HOH T 948     -26.313   2.127  20.515  1.00  0.54           O  
HETATM  950  O   HOH T 949      -5.694 -50.954  52.248  1.00  0.54           O  
HETATM  951  O   HOH T 950      20.182 -15.466  73.709  1.00  0.54           O  
HETATM  952  O   HOH T 951      19.489 -18.022  11.768  1.00  0.54           O  
HETATM  953  O   HOH T 952      14.719 -32.061  64.853  1.00  0.54           O  
HETATM  954  O   HOH T 953      -9.034  -3.206  37.483  1.00  0.54           O  
HETATM  955  O   HOH T 954      -5.655  -3.814  37.441  1.00  0.54           O  
HETATM  956  O   HOH T 955      17.059  -7.796  41.236  1.00  0.54           O  
HETATM  957  O   HOH T 956      13.680 -16.299  73.789  1.00  0.54           O  
HETATM  958  O   HOH T 957      -8.523 -31.480  74.935  1.00  0.54           O  
HETATM  959  O   HOH T 958      23.525  -0.905   8.884  1.00  0.54           O  
HETATM  960  O   HOH T 959      21.161   8.524  24.250  1.00  0.54           O  
HETATM  961  O   HOH T 960     -18.988 -10.912  75.352  1.00  0.54           O  
HETATM  962  O   HOH T 961     -19.439   1.084  25.363  1.00  0.54           O  
HETATM  963  O   HOH T 962      12.248  -8.204  -0.749  1.00  0.54           O  
HETATM  964  O   HOH T 963     -14.692   7.120  15.446  1.00  0.54           O  
HETATM  965  O   HOH T 964      -0.234 -26.237  72.145  1.00  0.54           O  
HETATM  966  O   HOH T 965      14.692  12.367  29.500  1.00  0.54           O  
HETATM  967  O   HOH T 966      21.180 -13.062  74.949  1.00  0.54           O  
HETATM  968  O   HOH T 967     -26.168  -1.817  23.839  1.00  0.54           O  
HETATM  969  O   HOH T 968     -16.160  -0.770  59.199  1.00  0.54           O  
HETATM  970  O   HOH T 969      -0.703   4.874  63.012  1.00  0.54           O  
HETATM  971  O   HOH T 970      15.245  -2.250   2.243  1.00  0.54           O  
HETATM  972  O   HOH T 971      -9.733   1.679  29.905  1.00  0.54           O  
HETATM  973  O   HOH T 972     -18.689  -8.200  44.662  1.00  0.54           O  
HETATM  974  O   HOH T 973      -6.433 -17.820  18.665  1.00  0.55           O  
HETATM  975  O   HOH T 974     -20.966 -21.096  22.661  1.00  0.55           O  
HETATM  976  O   HOH T 975     -13.103  -3.111  75.201  1.00  0.55           O  
HETATM  977  O   HOH T 976     -18.452 -12.211  46.971  1.00  0.55           O  
HETATM  978  O   HOH T 977     -17.820  -8.100  38.880  1.00  0.55           O  
HETATM  979  O   HOH T 978     -10.459 -53.523  61.510  1.00  0.55           O  
HETATM  980  O   HOH T 979       3.045 -38.877  17.956  1.00  0.55           O  
HETATM  981  O   HOH T 980      14.587   9.928  30.901  1.00  0.55           O  
HETATM  982  O   HOH T 981       2.425 -12.230  -4.911  1.00  0.55           O  
HETATM  983  O   HOH T 982      19.458  -0.605  31.573  1.00  0.55           O  
HETATM  984  O   HOH T 983      -5.795  -1.800  24.630  1.00  0.55           O  
HETATM  985  O   HOH T 984      -6.603 -29.339  75.774  1.00  0.55           O  
HETATM  986  O   HOH T 985       2.468  -5.805  62.428  1.00  0.55           O  
HETATM  987  O   HOH T 986     -21.152  -7.635  18.100  1.00  0.55           O  
HETATM  988  O   HOH T 987      -6.684   4.850  50.237  1.00  0.55           O  
HETATM  989  O   HOH T 988     -18.872 -28.591  21.067  1.00  0.55           O  
HETATM  990  O   HOH T 989      13.155 -16.737  76.413  1.00  0.55           O  
HETATM  991  O   HOH T 990      -4.240   4.956  49.431  1.00  0.55           O  
HETATM  992  O   HOH T 991       0.528  -7.052  74.006  1.00  0.55           O  
HETATM  993  O   HOH T 992       7.522 -35.557  20.266  1.00  0.55           O  
HETATM  994  O   HOH T 993      -2.349 -25.170  77.787  1.00  0.56           O  
HETATM  995  O   HOH T 994     -10.576 -15.987  12.083  1.00  0.56           O  
HETATM  996  O   HOH T 995     -16.200   0.810  58.320  1.00  0.56           O  
HETATM  997  O   HOH T 996      -7.449  -3.272   3.246  1.00  0.56           O  
HETATM  998  O   HOH T 997       5.569 -37.323  20.309  1.00  0.56           O  
HETATM  999  O   HOH T 998     -17.665  -6.050  41.245  1.00  0.56           O  
HETATM 1000  O   HOH T 999      -9.690 -31.534  18.580  1.00  0.56           O  
HETATM 1001  O   HOH T1000      20.964  -7.452  45.230  1.00  0.56           O  
HETATM 1002  O   HOH T1001      -4.789  -7.167   5.607  1.00  0.56           O  
HETATM 1003  O   HOH T1002      15.572 -29.928  28.504  1.00  0.56           O  
HETATM 1004  O   HOH T1003     -12.759 -38.007  46.345  1.00  0.56           O  
HETATM 1005  O   HOH T1004       5.663 -12.181  27.434  1.00  0.56           O  
HETATM 1006  O   HOH T1005     -23.490 -22.409  73.255  1.00  0.56           O  
HETATM 1007  O   HOH T1006      23.515 -12.986  15.364  1.00  0.56           O  
HETATM 1008  O   HOH T1007      10.583  13.705   8.688  1.00  0.56           O  
HETATM 1009  O   HOH T1008       7.158   5.561  40.577  1.00  0.56           O  
HETATM 1010  O   HOH T1009      22.088   2.363  25.048  1.00  0.56           O  
HETATM 1011  O   HOH T1010      -9.131  -2.925  50.223  1.00  0.57           O  
HETATM 1012  O   HOH T1011      21.806  -8.766  50.142  1.00  0.57           O  
HETATM 1013  O   HOH T1012       7.336 -19.553  -1.000  1.00  0.57           O  
HETATM 1014  O   HOH T1013      21.068  -9.715  54.196  1.00  0.57           O  
HETATM 1015  O   HOH T1014       5.980 -12.829  34.681  1.00  0.57           O  
HETATM 1016  O   HOH T1015      -5.685 -51.885  70.481  1.00  0.57           O  
HETATM 1017  O   HOH T1016      -0.065 -23.527   1.432  1.00  0.57           O  
HETATM 1018  O   HOH T1017      -0.084  -6.223  63.190  1.00  0.57           O  
HETATM 1019  O   HOH T1018       7.026 -37.348  25.310  1.00  0.57           O  
HETATM 1020  O   HOH T1019       8.325  -9.890  69.574  1.00  0.57           O  
HETATM 1021  O   HOH T1020      25.920  -1.715  29.200  1.00  0.57           O  
HETATM 1022  O   HOH T1021      10.439 -49.302  60.018  1.00  0.57           O  
HETATM 1023  O   HOH T1022      16.867 -16.323  31.656  1.00  0.57           O  
HETATM 1024  O   HOH T1023      12.927 -38.065  42.819  1.00  0.58           O  
HETATM 1025  O   HOH T1024     -19.615 -10.475  38.055  1.00  0.58           O  
HETATM 1026  O   HOH T1025       9.935  -7.318  -4.089  1.00  0.59           O  
HETATM 1027  O   HOH T1026      11.258  15.495  12.200  1.00  0.59           O  
HETATM 1028  O   HOH T1027      20.860 -16.656  33.951  1.00  0.59           O  
HETATM 1029  O   HOH T1028      15.407 -30.078  61.306  1.00  0.59           O  
HETATM 1030  O   HOH T1029      -7.253 -42.167  71.300  1.00  0.59           O  
HETATM 1031  O   HOH T1030      19.219  15.714  11.149  1.00  0.60           O  
HETATM 1032  O   HOH T1031     -19.671 -35.101  65.391  1.00  0.61           O  
TER    1033      HOH T1031 
