# Supplementary material for: Accurate Prediction of Hydration Sites of Proteins Using Energy Model With Atom Embedding
Source: Front Mol Biosci. 2021 Sep 20;8:756075. doi: 10.3389/fmolb.2021.756075 (PMC8488165; doi:10.3389/fmolb.2021.756075)
Supplement: Supplementary file 1 [file DataSheet1.ZIP › Data Sheet 1/Our_result_pdb/our_dataset_output/1NBU_watersite.pdb]

HEADER                                                        XXXX


JRNL        PMID   -1
HETATM    1  O   HOH T   0      -7.226  -2.278   0.227  1.00  0.16           O  
HETATM    2  O   HOH T   1       6.826  25.235  19.273  1.00  0.16           O  
HETATM    3  O   HOH T   2       1.809   7.241  -5.275  1.00  0.16           O  
HETATM    4  O   HOH T   3      27.245  -4.507  29.202  1.00  0.16           O  
HETATM    5  O   HOH T   4       5.277   4.185  -0.193  1.00  0.17           O  
HETATM    6  O   HOH T   5      19.211  -0.077  35.555  1.00  0.17           O  
HETATM    7  O   HOH T   6       8.109 -19.014  20.657  1.00  0.17           O  
HETATM    8  O   HOH T   7       8.813 -25.856  21.958  1.00  0.17           O  
HETATM    9  O   HOH T   8      18.760  18.009  17.995  1.00  0.17           O  
HETATM   10  O   HOH T   9      23.146   1.536  41.095  1.00  0.17           O  
HETATM   11  O   HOH T  10      13.654 -18.602  11.001  1.00  0.18           O  
HETATM   12  O   HOH T  11       7.820  18.444  20.576  1.00  0.18           O  
HETATM   13  O   HOH T  12      -9.525  -8.765   1.392  1.00  0.18           O  
HETATM   14  O   HOH T  13       4.648  11.064  27.372  1.00  0.19           O  
HETATM   15  O   HOH T  14      -3.260  -0.184   5.512  1.00  0.19           O  
HETATM   16  O   HOH T  15      21.447   8.367  42.873  1.00  0.19           O  
HETATM   17  O   HOH T  16       0.734  25.473  15.180  1.00  0.19           O  
HETATM   18  O   HOH T  17      42.206 -12.994  23.736  1.00  0.19           O  
HETATM   19  O   HOH T  18      14.792  33.698  27.013  1.00  0.20           O  
HETATM   20  O   HOH T  19       5.374  -3.921 -12.273  1.00  0.20           O  
HETATM   21  O   HOH T  20      11.790 -24.510   8.366  1.00  0.20           O  
HETATM   22  O   HOH T  21       0.525 -11.346  21.831  1.00  0.21           O  
HETATM   23  O   HOH T  22      -4.398   3.100  15.467  1.00  0.21           O  
HETATM   24  O   HOH T  23      20.670  24.352  20.171  1.00  0.21           O  
HETATM   25  O   HOH T  24       6.193 -16.195  45.599  1.00  0.21           O  
HETATM   26  O   HOH T  25      10.788 -26.221  28.887  1.00  0.21           O  
HETATM   27  O   HOH T  26       9.092  -3.599  33.447  1.00  0.21           O  
HETATM   28  O   HOH T  27      19.388 -11.499  21.817  1.00  0.21           O  
HETATM   29  O   HOH T  28      -5.639  24.661  19.423  1.00  0.22           O  
HETATM   30  O   HOH T  29      30.747  -7.697  33.991  1.00  0.22           O  
HETATM   31  O   HOH T  30       9.872 -23.491   1.722  1.00  0.23           O  
HETATM   32  O   HOH T  31       8.104  -7.884   6.626  1.00  0.23           O  
HETATM   33  O   HOH T  32      14.655  -1.266   1.066  1.00  0.23           O  
HETATM   34  O   HOH T  33      11.778 -28.200  17.810  1.00  0.23           O  
HETATM   35  O   HOH T  34       4.134   9.435  12.340  1.00  0.23           O  
HETATM   36  O   HOH T  35       3.565 -22.974  41.218  1.00  0.23           O  
HETATM   37  O   HOH T  36     -22.556   5.697  19.010  1.00  0.23           O  
HETATM   38  O   HOH T  37      22.700 -16.697  24.419  1.00  0.23           O  
HETATM   39  O   HOH T  38      15.279   9.089  27.448  1.00  0.24           O  
HETATM   40  O   HOH T  39       4.611  13.759  -5.684  1.00  0.24           O  
HETATM   41  O   HOH T  40      35.056  17.155  34.028  1.00  0.24           O  
HETATM   42  O   HOH T  41      34.264  23.070   4.766  1.00  0.24           O  
HETATM   43  O   HOH T  42      33.034 -13.582  32.254  1.00  0.24           O  
HETATM   44  O   HOH T  43      12.880  25.798  -4.658  1.00  0.24           O  
HETATM   45  O   HOH T  44       3.121   8.844 -11.451  1.00  0.24           O  
HETATM   46  O   HOH T  45      26.553  23.788  23.474  1.00  0.24           O  
HETATM   47  O   HOH T  46      28.802   0.562  19.717  1.00  0.24           O  
HETATM   48  O   HOH T  47      36.442 -19.865   1.719  1.00  0.24           O  
HETATM   49  O   HOH T  48       7.268   4.186  -8.534  1.00  0.24           O  
HETATM   50  O   HOH T  49      24.480  23.356  14.531  1.00  0.25           O  
HETATM   51  O   HOH T  50      47.236   1.165  16.498  1.00  0.25           O  
HETATM   52  O   HOH T  51      40.490 -18.909  20.610  1.00  0.25           O  
HETATM   53  O   HOH T  52      22.394 -11.999  11.274  1.00  0.25           O  
HETATM   54  O   HOH T  53      36.667  17.920   8.892  1.00  0.25           O  
HETATM   55  O   HOH T  54      19.239 -20.000  46.349  1.00  0.25           O  
HETATM   56  O   HOH T  55      16.865  -3.031  51.018  1.00  0.25           O  
HETATM   57  O   HOH T  56      23.862 -10.617  37.279  1.00  0.25           O  
HETATM   58  O   HOH T  57       3.146  23.799  24.933  1.00  0.25           O  
HETATM   59  O   HOH T  58      16.978  -0.918  43.760  1.00  0.25           O  
HETATM   60  O   HOH T  59      18.757 -24.300   7.225  1.00  0.25           O  
HETATM   61  O   HOH T  60     -14.541  23.172  39.364  1.00  0.25           O  
HETATM   62  O   HOH T  61       2.272 -24.363  23.678  1.00  0.25           O  
HETATM   63  O   HOH T  62       9.653   5.569  27.189  1.00  0.25           O  
HETATM   64  O   HOH T  63       5.664  -2.884  51.261  1.00  0.26           O  
HETATM   65  O   HOH T  64       8.011 -30.773   5.180  1.00  0.26           O  
HETATM   66  O   HOH T  65      35.817  -4.618  29.945  1.00  0.26           O  
HETATM   67  O   HOH T  66      14.896  -9.924  26.673  1.00  0.26           O  
HETATM   68  O   HOH T  67       4.882 -18.756   2.402  1.00  0.26           O  
HETATM   69  O   HOH T  68      18.187  24.298  11.846  1.00  0.26           O  
HETATM   70  O   HOH T  69       2.412  24.310  37.125  1.00  0.26           O  
HETATM   71  O   HOH T  70      -3.458   6.004  -4.902  1.00  0.26           O  
HETATM   72  O   HOH T  71      23.670 -23.695  19.264  1.00  0.26           O  
HETATM   73  O   HOH T  72      -0.712  -5.665  -4.551  1.00  0.26           O  
HETATM   74  O   HOH T  73      22.062  23.334   1.100  1.00  0.26           O  
HETATM   75  O   HOH T  74      21.592   7.286  24.573  1.00  0.26           O  
HETATM   76  O   HOH T  75      25.514  11.575  28.297  1.00  0.26           O  
HETATM   77  O   HOH T  76       0.051 -13.543   7.200  1.00  0.26           O  
HETATM   78  O   HOH T  77      16.375  22.736  27.234  1.00  0.26           O  
HETATM   79  O   HOH T  78       7.308 -11.916  22.627  1.00  0.26           O  
HETATM   80  O   HOH T  79      16.185 -14.803  30.823  1.00  0.26           O  
HETATM   81  O   HOH T  80      -3.521  24.665   9.982  1.00  0.26           O  
HETATM   82  O   HOH T  81     -11.746   1.088   4.873  1.00  0.26           O  
HETATM   83  O   HOH T  82     -13.107  -9.270   4.518  1.00  0.26           O  
HETATM   84  O   HOH T  83      29.472 -27.275  26.455  1.00  0.26           O  
HETATM   85  O   HOH T  84      -3.637  25.147  17.586  1.00  0.26           O  
HETATM   86  O   HOH T  85      33.229 -26.729  24.051  1.00  0.27           O  
HETATM   87  O   HOH T  86      -7.264  13.459   5.608  1.00  0.27           O  
HETATM   88  O   HOH T  87       5.024 -25.343  33.540  1.00  0.27           O  
HETATM   89  O   HOH T  88     -11.568   8.066  -7.362  1.00  0.27           O  
HETATM   90  O   HOH T  89      16.656 -22.098  29.041  1.00  0.27           O  
HETATM   91  O   HOH T  90      27.728 -18.587  -2.950  1.00  0.27           O  
HETATM   92  O   HOH T  91       5.896 -15.332   8.844  1.00  0.27           O  
HETATM   93  O   HOH T  92     -20.912  13.404  21.163  1.00  0.27           O  
HETATM   94  O   HOH T  93      18.624   2.547 -15.690  1.00  0.27           O  
HETATM   95  O   HOH T  94      46.480  -3.051  21.387  1.00  0.27           O  
HETATM   96  O   HOH T  95      21.170  -7.256  17.026  1.00  0.27           O  
HETATM   97  O   HOH T  96      24.387  28.291  19.423  1.00  0.27           O  
HETATM   98  O   HOH T  97     -21.993   2.353  13.605  1.00  0.27           O  
HETATM   99  O   HOH T  98     -26.569   3.077   5.703  1.00  0.27           O  
HETATM  100  O   HOH T  99       3.977  15.328   3.258  1.00  0.27           O  
HETATM  101  O   HOH T 100      47.348   0.123  19.105  1.00  0.28           O  
HETATM  102  O   HOH T 101      28.185  -0.113  40.615  1.00  0.28           O  
HETATM  103  O   HOH T 102      34.772  19.650  -0.716  1.00  0.28           O  
HETATM  104  O   HOH T 103      -6.875  21.086  38.098  1.00  0.28           O  
HETATM  105  O   HOH T 104     -21.142 -23.914  29.705  1.00  0.28           O  
HETATM  106  O   HOH T 105      10.250  11.032   9.452  1.00  0.28           O  
HETATM  107  O   HOH T 106      26.321   0.274  -8.656  1.00  0.28           O  
HETATM  108  O   HOH T 107      22.570  11.724  36.768  1.00  0.28           O  
HETATM  109  O   HOH T 108     -19.378  -8.191   9.540  1.00  0.28           O  
HETATM  110  O   HOH T 109     -21.826  -8.962  21.851  1.00  0.28           O  
HETATM  111  O   HOH T 110     -12.671  19.346   1.432  1.00  0.28           O  
HETATM  112  O   HOH T 111      28.945  -6.454  38.912  1.00  0.28           O  
HETATM  113  O   HOH T 112      -6.810  22.853  34.507  1.00  0.28           O  
HETATM  114  O   HOH T 113      44.944 -12.212  11.209  1.00  0.28           O  
HETATM  115  O   HOH T 114      24.159  -1.716 -15.217  1.00  0.28           O  
HETATM  116  O   HOH T 115       3.246  19.210   9.374  1.00  0.28           O  
HETATM  117  O   HOH T 116     -22.856  -5.276  13.572  1.00  0.28           O  
HETATM  118  O   HOH T 117      30.639 -23.573   0.607  1.00  0.28           O  
HETATM  119  O   HOH T 118      15.290 -18.792  17.879  1.00  0.28           O  
HETATM  120  O   HOH T 119       4.283  -0.826  -7.190  1.00  0.28           O  
HETATM  121  O   HOH T 120      -8.384 -26.291   8.445  1.00  0.28           O  
HETATM  122  O   HOH T 121       9.023  23.286  27.303  1.00  0.28           O  
HETATM  123  O   HOH T 122      11.224  25.313  11.615  1.00  0.28           O  
HETATM  124  O   HOH T 123       5.580 -22.616  11.022  1.00  0.28           O  
HETATM  125  O   HOH T 124      35.997 -16.576  28.979  1.00  0.28           O  
HETATM  126  O   HOH T 125       7.013  19.404  39.923  1.00  0.28           O  
HETATM  127  O   HOH T 126      13.267  17.765  14.329  1.00  0.28           O  
HETATM  128  O   HOH T 127      21.087  11.672   9.665  1.00  0.28           O  
HETATM  129  O   HOH T 128      11.157 -25.085  38.223  1.00  0.29           O  
HETATM  130  O   HOH T 129      -9.643 -23.506  30.176  1.00  0.29           O  
HETATM  131  O   HOH T 130      14.969  22.453  40.702  1.00  0.29           O  
HETATM  132  O   HOH T 131      17.115   9.014  45.501  1.00  0.29           O  
HETATM  133  O   HOH T 132      25.031   1.402  30.324  1.00  0.29           O  
HETATM  134  O   HOH T 133      -2.387   8.541  48.544  1.00  0.29           O  
HETATM  135  O   HOH T 134      35.465 -14.357  27.587  1.00  0.29           O  
HETATM  136  O   HOH T 135      29.712  34.959  27.498  1.00  0.29           O  
HETATM  137  O   HOH T 136      12.096  21.372  45.192  1.00  0.29           O  
HETATM  138  O   HOH T 137       6.903  21.189  -4.844  1.00  0.29           O  
HETATM  139  O   HOH T 138       7.493   3.898 -16.156  1.00  0.29           O  
HETATM  140  O   HOH T 139       7.393 -25.752  32.131  1.00  0.29           O  
HETATM  141  O   HOH T 140      29.812   4.790  36.463  1.00  0.29           O  
HETATM  142  O   HOH T 141       0.129  -6.106  49.655  1.00  0.29           O  
HETATM  143  O   HOH T 142      33.844 -20.957  33.983  1.00  0.29           O  
HETATM  144  O   HOH T 143       8.991 -27.468  11.983  1.00  0.29           O  
HETATM  145  O   HOH T 144      16.741 -20.263  45.304  1.00  0.29           O  
HETATM  146  O   HOH T 145     -15.100  12.315  10.161  1.00  0.30           O  
HETATM  147  O   HOH T 146      16.916  18.050  37.112  1.00  0.30           O  
HETATM  148  O   HOH T 147       8.763  34.578  25.980  1.00  0.30           O  
HETATM  149  O   HOH T 148      -9.343  19.607  47.861  1.00  0.30           O  
HETATM  150  O   HOH T 149       3.254 -23.845  10.427  1.00  0.30           O  
HETATM  151  O   HOH T 150       0.326  14.421   9.794  1.00  0.30           O  
HETATM  152  O   HOH T 151       3.772  22.258  38.303  1.00  0.30           O  
HETATM  153  O   HOH T 152       3.546  -9.262  11.477  1.00  0.30           O  
HETATM  154  O   HOH T 153      12.570  25.831  27.062  1.00  0.30           O  
HETATM  155  O   HOH T 154      32.962   8.102  31.604  1.00  0.30           O  
HETATM  156  O   HOH T 155      -1.002 -25.761  35.636  1.00  0.30           O  
HETATM  157  O   HOH T 156      15.124 -33.748  13.725  1.00  0.30           O  
HETATM  158  O   HOH T 157      17.432 -25.544  20.443  1.00  0.30           O  
HETATM  159  O   HOH T 158      25.048  21.847  27.447  1.00  0.30           O  
HETATM  160  O   HOH T 159       7.334  10.380 -17.181  1.00  0.30           O  
HETATM  161  O   HOH T 160      39.831   9.696  25.414  1.00  0.30           O  
HETATM  162  O   HOH T 161     -11.358 -22.916  32.325  1.00  0.30           O  
HETATM  163  O   HOH T 162      34.559  30.292  20.720  1.00  0.30           O  
HETATM  164  O   HOH T 163      23.399   7.066  17.220  1.00  0.30           O  
HETATM  165  O   HOH T 164      48.053  -3.703  19.192  1.00  0.30           O  
HETATM  166  O   HOH T 165      27.896  -7.444  46.302  1.00  0.30           O  
HETATM  167  O   HOH T 166       9.468  -6.491  26.703  1.00  0.30           O  
HETATM  168  O   HOH T 167      29.203 -32.394  -0.031  1.00  0.30           O  
HETATM  169  O   HOH T 168       8.144  16.502   5.627  1.00  0.30           O  
HETATM  170  O   HOH T 169       6.743  26.386  36.729  1.00  0.30           O  
HETATM  171  O   HOH T 170      11.475 -21.590  15.871  1.00  0.31           O  
HETATM  172  O   HOH T 171      23.131 -15.628  29.644  1.00  0.31           O  
HETATM  173  O   HOH T 172       6.000 -12.021   1.510  1.00  0.31           O  
HETATM  174  O   HOH T 173     -11.365   5.412  -6.789  1.00  0.31           O  
HETATM  175  O   HOH T 174       4.353 -16.530   3.999  1.00  0.31           O  
HETATM  176  O   HOH T 175      14.662   8.536  46.690  1.00  0.31           O  
HETATM  177  O   HOH T 176      15.151  27.092  12.635  1.00  0.31           O  
HETATM  178  O   HOH T 177       8.255  26.258  32.659  1.00  0.31           O  
HETATM  179  O   HOH T 178     -20.500 -23.671  27.055  1.00  0.31           O  
HETATM  180  O   HOH T 179      -8.451  30.051  34.843  1.00  0.31           O  
HETATM  181  O   HOH T 180      26.686 -22.264  24.568  1.00  0.31           O  
HETATM  182  O   HOH T 181      -4.906  -0.351  -4.541  1.00  0.31           O  
HETATM  183  O   HOH T 182      13.803  34.023  24.449  1.00  0.31           O  
HETATM  184  O   HOH T 183      14.059  -5.010   7.331  1.00  0.31           O  
HETATM  185  O   HOH T 184      10.417   7.775  49.864  1.00  0.31           O  
HETATM  186  O   HOH T 185       3.056  20.410  -8.533  1.00  0.31           O  
HETATM  187  O   HOH T 186      15.549   6.900   8.893  1.00  0.31           O  
HETATM  188  O   HOH T 187      15.316 -23.887  19.752  1.00  0.31           O  
HETATM  189  O   HOH T 188      -0.708 -11.566   3.134  1.00  0.31           O  
HETATM  190  O   HOH T 189     -18.320  19.723  20.989  1.00  0.31           O  
HETATM  191  O   HOH T 190      13.690  26.101  10.420  1.00  0.31           O  
HETATM  192  O   HOH T 191      12.359  15.323  47.235  1.00  0.31           O  
HETATM  193  O   HOH T 192      -4.990 -26.031  14.577  1.00  0.31           O  
HETATM  194  O   HOH T 193     -24.359   9.383   2.486  1.00  0.31           O  
HETATM  195  O   HOH T 194      -9.468 -10.533  49.557  1.00  0.31           O  
HETATM  196  O   HOH T 195       7.169  13.172 -14.250  1.00  0.32           O  
HETATM  197  O   HOH T 196       2.270  -9.301  22.671  1.00  0.32           O  
HETATM  198  O   HOH T 197      -3.175 -12.056   1.769  1.00  0.32           O  
HETATM  199  O   HOH T 198     -15.047  -9.043   6.397  1.00  0.32           O  
HETATM  200  O   HOH T 199      17.327 -19.564  28.289  1.00  0.32           O  
HETATM  201  O   HOH T 200      31.985  28.424  29.443  1.00  0.32           O  
HETATM  202  O   HOH T 201      18.203 -15.803  27.511  1.00  0.32           O  
HETATM  203  O   HOH T 202      22.274   6.816  31.604  1.00  0.32           O  
HETATM  204  O   HOH T 203      22.707   4.758  18.588  1.00  0.32           O  
HETATM  205  O   HOH T 204     -10.885 -19.596  15.267  1.00  0.32           O  
HETATM  206  O   HOH T 205      -0.574  -1.603  12.061  1.00  0.32           O  
HETATM  207  O   HOH T 206      34.008  33.011   8.532  1.00  0.32           O  
HETATM  208  O   HOH T 207     -21.529 -18.232  26.500  1.00  0.32           O  
HETATM  209  O   HOH T 208      18.576 -18.676 -12.443  1.00  0.32           O  
HETATM  210  O   HOH T 209      -2.665  12.038  -9.584  1.00  0.32           O  
HETATM  211  O   HOH T 210      29.344 -14.693  -9.071  1.00  0.32           O  
HETATM  212  O   HOH T 211      15.752  24.634  -0.200  1.00  0.32           O  
HETATM  213  O   HOH T 212     -23.690  10.178   8.801  1.00  0.32           O  
HETATM  214  O   HOH T 213       0.609  10.107   3.855  1.00  0.32           O  
HETATM  215  O   HOH T 214      16.008 -33.195  21.168  1.00  0.32           O  
HETATM  216  O   HOH T 215      -7.221  -9.726  45.136  1.00  0.32           O  
HETATM  217  O   HOH T 216      16.679 -19.959  21.713  1.00  0.32           O  
HETATM  218  O   HOH T 217      30.125  -7.034 -12.209  1.00  0.32           O  
HETATM  219  O   HOH T 218      -8.119  -6.137  -7.728  1.00  0.32           O  
HETATM  220  O   HOH T 219      -2.202   8.880   0.351  1.00  0.32           O  
HETATM  221  O   HOH T 220      45.864 -22.044   8.718  1.00  0.32           O  
HETATM  222  O   HOH T 221     -10.573 -22.201  28.005  1.00  0.32           O  
HETATM  223  O   HOH T 222     -10.392  18.723  40.076  1.00  0.32           O  
HETATM  224  O   HOH T 223      -0.604   3.030   0.875  1.00  0.32           O  
HETATM  225  O   HOH T 224      22.249  30.436  26.083  1.00  0.32           O  
HETATM  226  O   HOH T 225       9.800  25.912  26.973  1.00  0.32           O  
HETATM  227  O   HOH T 226       9.104  20.973  -9.665  1.00  0.32           O  
HETATM  228  O   HOH T 227      18.235 -21.826  39.770  1.00  0.32           O  
HETATM  229  O   HOH T 228       3.205  -2.078  52.203  1.00  0.32           O  
HETATM  230  O   HOH T 229      -3.144   8.087 -13.577  1.00  0.32           O  
HETATM  231  O   HOH T 230       5.521 -18.799  12.608  1.00  0.32           O  
HETATM  232  O   HOH T 231      12.802   4.928  53.430  1.00  0.33           O  
HETATM  233  O   HOH T 232       2.640  21.881   9.838  1.00  0.33           O  
HETATM  234  O   HOH T 233      -4.930   9.334 -15.362  1.00  0.33           O  
HETATM  235  O   HOH T 234     -16.557 -15.461   8.952  1.00  0.33           O  
HETATM  236  O   HOH T 235       2.369 -33.417  23.041  1.00  0.33           O  
HETATM  237  O   HOH T 236      20.341  -6.345  33.085  1.00  0.33           O  
HETATM  238  O   HOH T 237     -17.656  11.171   9.862  1.00  0.33           O  
HETATM  239  O   HOH T 238       9.622 -15.585  43.004  1.00  0.33           O  
HETATM  240  O   HOH T 239       2.655 -27.883   9.213  1.00  0.33           O  
HETATM  241  O   HOH T 240       0.585  -9.506  27.187  1.00  0.33           O  
HETATM  242  O   HOH T 241      14.884  20.464  -8.839  1.00  0.33           O  
HETATM  243  O   HOH T 242      -6.955  18.365  47.353  1.00  0.33           O  
HETATM  244  O   HOH T 243       1.675 -24.445  15.949  1.00  0.33           O  
HETATM  245  O   HOH T 244      35.471 -28.974  -8.427  1.00  0.33           O  
HETATM  246  O   HOH T 245       1.824   8.181  19.200  1.00  0.33           O  
HETATM  247  O   HOH T 246     -16.936  16.054  28.992  1.00  0.33           O  
HETATM  248  O   HOH T 247      -1.635 -23.733  10.422  1.00  0.33           O  
HETATM  249  O   HOH T 248      22.634  16.093  29.017  1.00  0.33           O  
HETATM  250  O   HOH T 249       1.218  31.083  33.927  1.00  0.33           O  
HETATM  251  O   HOH T 250       1.549  -9.015  33.235  1.00  0.33           O  
HETATM  252  O   HOH T 251      -7.566  24.593  11.776  1.00  0.33           O  
HETATM  253  O   HOH T 252      19.070 -26.944  18.733  1.00  0.33           O  
HETATM  254  O   HOH T 253     -21.922  -7.887  13.796  1.00  0.33           O  
HETATM  255  O   HOH T 254      -4.216  10.517   0.208  1.00  0.33           O  
HETATM  256  O   HOH T 255      -4.977  21.527  36.077  1.00  0.33           O  
HETATM  257  O   HOH T 256      35.013 -19.133  35.694  1.00  0.33           O  
HETATM  258  O   HOH T 257      21.789   8.584   1.546  1.00  0.33           O  
HETATM  259  O   HOH T 258       1.594  16.879   9.140  1.00  0.33           O  
HETATM  260  O   HOH T 259      42.832  10.756  22.658  1.00  0.33           O  
HETATM  261  O   HOH T 260      22.058  -8.074  34.464  1.00  0.34           O  
HETATM  262  O   HOH T 261      37.801  23.141  -4.100  1.00  0.34           O  
HETATM  263  O   HOH T 262       6.350 -23.271  41.207  1.00  0.34           O  
HETATM  264  O   HOH T 263      -6.899  20.878   4.906  1.00  0.34           O  
HETATM  265  O   HOH T 264      -1.088   6.280 -17.185  1.00  0.34           O  
HETATM  266  O   HOH T 265      11.118 -12.146  21.061  1.00  0.34           O  
HETATM  267  O   HOH T 266      27.436   3.407  35.982  1.00  0.34           O  
HETATM  268  O   HOH T 267      26.079  -4.772  50.252  1.00  0.34           O  
HETATM  269  O   HOH T 268      20.466  11.253  30.729  1.00  0.34           O  
HETATM  270  O   HOH T 269     -13.063 -21.814  29.158  1.00  0.34           O  
HETATM  271  O   HOH T 270      43.305  -8.570  41.875  1.00  0.34           O  
HETATM  272  O   HOH T 271      17.035  12.939  32.056  1.00  0.34           O  
HETATM  273  O   HOH T 272      24.304  18.262  28.963  1.00  0.34           O  
HETATM  274  O   HOH T 273      25.562 -16.644  30.831  1.00  0.34           O  
HETATM  275  O   HOH T 274     -19.858 -14.751  29.118  1.00  0.34           O  
HETATM  276  O   HOH T 275       8.967 -25.113  13.233  1.00  0.34           O  
HETATM  277  O   HOH T 276      -9.364  22.151  35.516  1.00  0.34           O  
HETATM  278  O   HOH T 277      17.222  -4.889  52.946  1.00  0.34           O  
HETATM  279  O   HOH T 278      36.196 -21.693  35.341  1.00  0.34           O  
HETATM  280  O   HOH T 279       6.202 -22.318   2.192  1.00  0.34           O  
HETATM  281  O   HOH T 280     -10.214 -23.804  19.578  1.00  0.34           O  
HETATM  282  O   HOH T 281       8.623  -1.838  31.192  1.00  0.34           O  
HETATM  283  O   HOH T 282      39.093  28.834  22.658  1.00  0.34           O  
HETATM  284  O   HOH T 283      -2.364 -19.896  38.031  1.00  0.34           O  
HETATM  285  O   HOH T 284      -2.394   1.579  16.802  1.00  0.34           O  
HETATM  286  O   HOH T 285      23.594  -5.743  34.630  1.00  0.34           O  
HETATM  287  O   HOH T 286       9.617 -25.694  19.350  1.00  0.35           O  
HETATM  288  O   HOH T 287     -16.283  -6.349  -2.616  1.00  0.35           O  
HETATM  289  O   HOH T 288      25.334  25.901   2.292  1.00  0.35           O  
HETATM  290  O   HOH T 289      15.927  13.652  46.536  1.00  0.35           O  
HETATM  291  O   HOH T 290       6.203 -30.485   3.177  1.00  0.35           O  
HETATM  292  O   HOH T 291      15.231  24.466  21.620  1.00  0.35           O  
HETATM  293  O   HOH T 292      22.305 -16.318 -13.165  1.00  0.35           O  
HETATM  294  O   HOH T 293      -7.508 -16.417  41.446  1.00  0.35           O  
HETATM  295  O   HOH T 294      31.355 -25.007  11.400  1.00  0.35           O  
HETATM  296  O   HOH T 295      12.456  -5.837 -14.632  1.00  0.35           O  
HETATM  297  O   HOH T 296      32.160 -22.789  15.730  1.00  0.35           O  
HETATM  298  O   HOH T 297      20.063  15.554  29.997  1.00  0.35           O  
HETATM  299  O   HOH T 298      21.233  -7.466   0.302  1.00  0.35           O  
HETATM  300  O   HOH T 299       2.185  -6.190  17.015  1.00  0.35           O  
HETATM  301  O   HOH T 300      17.670  18.720  -9.917  1.00  0.35           O  
HETATM  302  O   HOH T 301      19.423 -12.973  46.351  1.00  0.35           O  
HETATM  303  O   HOH T 302       9.718  19.202  12.134  1.00  0.35           O  
HETATM  304  O   HOH T 303      -5.530 -23.607  36.760  1.00  0.35           O  
HETATM  305  O   HOH T 304      11.147  24.260  28.765  1.00  0.35           O  
HETATM  306  O   HOH T 305      19.596 -33.401   6.375  1.00  0.35           O  
HETATM  307  O   HOH T 306      15.388 -21.072  19.539  1.00  0.35           O  
HETATM  308  O   HOH T 307       4.980  23.974  -7.179  1.00  0.35           O  
HETATM  309  O   HOH T 308      12.893  20.731  40.309  1.00  0.35           O  
HETATM  310  O   HOH T 309      36.604  30.127   5.855  1.00  0.35           O  
HETATM  311  O   HOH T 310      17.090  17.596  26.434  1.00  0.35           O  
HETATM  312  O   HOH T 311     -19.469  -3.303  16.345  1.00  0.35           O  
HETATM  313  O   HOH T 312       8.478  20.941   3.141  1.00  0.35           O  
HETATM  314  O   HOH T 313     -12.066  -0.226  -2.341  1.00  0.35           O  
HETATM  315  O   HOH T 314      -0.917  -3.832  -2.432  1.00  0.35           O  
HETATM  316  O   HOH T 315      31.531  30.564  16.346  1.00  0.35           O  
HETATM  317  O   HOH T 316      26.016   3.035  32.375  1.00  0.35           O  
HETATM  318  O   HOH T 317      39.171  31.016  21.037  1.00  0.35           O  
HETATM  319  O   HOH T 318       8.125  32.454  32.817  1.00  0.36           O  
HETATM  320  O   HOH T 319      -6.769 -11.310  -0.723  1.00  0.36           O  
HETATM  321  O   HOH T 320     -17.461  13.672   1.964  1.00  0.36           O  
HETATM  322  O   HOH T 321     -24.950   2.410  21.758  1.00  0.36           O  
HETATM  323  O   HOH T 322      34.396  25.100   2.737  1.00  0.36           O  
HETATM  324  O   HOH T 323       1.272  -9.697   2.307  1.00  0.36           O  
HETATM  325  O   HOH T 324       3.303  16.218   0.662  1.00  0.36           O  
HETATM  326  O   HOH T 325      -8.151 -16.139  38.796  1.00  0.36           O  
HETATM  327  O   HOH T 326      22.819 -28.246  -6.653  1.00  0.36           O  
HETATM  328  O   HOH T 327      11.147  27.696  17.993  1.00  0.36           O  
HETATM  329  O   HOH T 328      -7.688   7.890  -0.060  1.00  0.36           O  
HETATM  330  O   HOH T 329      44.237  -9.720  12.377  1.00  0.36           O  
HETATM  331  O   HOH T 330      -0.898   7.643   3.832  1.00  0.36           O  
HETATM  332  O   HOH T 331      20.142  11.093  16.699  1.00  0.36           O  
HETATM  333  O   HOH T 332      13.291  14.617  17.367  1.00  0.36           O  
HETATM  334  O   HOH T 333      18.767 -34.276   8.864  1.00  0.36           O  
HETATM  335  O   HOH T 334      -5.820  -1.212  18.804  1.00  0.36           O  
HETATM  336  O   HOH T 335      35.964 -22.700  13.871  1.00  0.36           O  
HETATM  337  O   HOH T 336      13.070 -29.978  -1.866  1.00  0.36           O  
HETATM  338  O   HOH T 337      20.531 -10.355  40.947  1.00  0.36           O  
HETATM  339  O   HOH T 338       7.635 -29.115  -2.797  1.00  0.36           O  
HETATM  340  O   HOH T 339      25.144 -12.459  38.864  1.00  0.36           O  
HETATM  341  O   HOH T 340      36.918  22.170   3.837  1.00  0.36           O  
HETATM  342  O   HOH T 341      -6.155  25.943  16.963  1.00  0.36           O  
HETATM  343  O   HOH T 342      48.988   5.156  14.503  1.00  0.36           O  
HETATM  344  O   HOH T 343      -6.990  20.633  48.981  1.00  0.36           O  
HETATM  345  O   HOH T 344      17.309 -17.157  29.826  1.00  0.36           O  
HETATM  346  O   HOH T 345       5.514  -4.831  49.334  1.00  0.36           O  
HETATM  347  O   HOH T 346      24.393 -32.125   5.420  1.00  0.36           O  
HETATM  348  O   HOH T 347      17.445  14.371 -12.941  1.00  0.36           O  
HETATM  349  O   HOH T 348      21.763  -6.447  43.379  1.00  0.36           O  
HETATM  350  O   HOH T 349       5.187 -17.808  10.027  1.00  0.36           O  
HETATM  351  O   HOH T 350     -19.701 -19.536   7.948  1.00  0.36           O  
HETATM  352  O   HOH T 351     -13.030 -28.283  22.673  1.00  0.36           O  
HETATM  353  O   HOH T 352     -12.620  18.001   6.144  1.00  0.36           O  
HETATM  354  O   HOH T 353      17.245  34.200   1.198  1.00  0.36           O  
HETATM  355  O   HOH T 354      -2.017 -14.640   5.995  1.00  0.37           O  
HETATM  356  O   HOH T 355      24.267  -4.123  22.397  1.00  0.37           O  
HETATM  357  O   HOH T 356      12.693  32.038  26.110  1.00  0.37           O  
HETATM  358  O   HOH T 357      23.859  -6.941  17.873  1.00  0.37           O  
HETATM  359  O   HOH T 358      21.760  12.428  28.581  1.00  0.37           O  
HETATM  360  O   HOH T 359       3.235   6.446  35.009  1.00  0.37           O  
HETATM  361  O   HOH T 360       7.639  -8.668  26.672  1.00  0.37           O  
HETATM  362  O   HOH T 361      26.783 -32.457   6.652  1.00  0.37           O  
HETATM  363  O   HOH T 362      44.112 -14.778  11.476  1.00  0.37           O  
HETATM  364  O   HOH T 363      24.297  -3.263  34.852  1.00  0.37           O  
HETATM  365  O   HOH T 364      24.282   6.365 -12.668  1.00  0.37           O  
HETATM  366  O   HOH T 365      43.879 -10.845  32.762  1.00  0.37           O  
HETATM  367  O   HOH T 366      14.082  12.955  15.271  1.00  0.37           O  
HETATM  368  O   HOH T 367      17.887  24.428  28.786  1.00  0.37           O  
HETATM  369  O   HOH T 368      -0.309  -5.046  16.200  1.00  0.37           O  
HETATM  370  O   HOH T 369       8.926 -26.199  37.123  1.00  0.37           O  
HETATM  371  O   HOH T 370       7.252  15.482 -15.824  1.00  0.37           O  
HETATM  372  O   HOH T 371       0.170   1.775  -1.517  1.00  0.37           O  
HETATM  373  O   HOH T 372      29.053 -21.637  29.086  1.00  0.37           O  
HETATM  374  O   HOH T 373      14.350 -32.430  23.179  1.00  0.37           O  
HETATM  375  O   HOH T 374      20.261 -14.489  40.796  1.00  0.37           O  
HETATM  376  O   HOH T 375      -4.933  -3.711  19.699  1.00  0.37           O  
HETATM  377  O   HOH T 376      20.173  22.711  -0.992  1.00  0.37           O  
HETATM  378  O   HOH T 377       4.039  18.789  42.927  1.00  0.37           O  
HETATM  379  O   HOH T 378      27.393 -27.217  20.723  1.00  0.37           O  
HETATM  380  O   HOH T 379      42.949 -19.658  14.726  1.00  0.37           O  
HETATM  381  O   HOH T 380     -27.636   1.943   8.072  1.00  0.37           O  
HETATM  382  O   HOH T 381      16.653  26.765  21.948  1.00  0.37           O  
HETATM  383  O   HOH T 382     -21.821   4.955  14.544  1.00  0.37           O  
HETATM  384  O   HOH T 383     -25.409   6.890   3.185  1.00  0.37           O  
HETATM  385  O   HOH T 384      34.232  12.936   1.820  1.00  0.37           O  
HETATM  386  O   HOH T 385      11.868  -9.658  49.472  1.00  0.37           O  
HETATM  387  O   HOH T 386       4.810 -14.224   2.596  1.00  0.37           O  
HETATM  388  O   HOH T 387      45.019  -6.707  14.961  1.00  0.37           O  
HETATM  389  O   HOH T 388       0.462 -10.357  24.517  1.00  0.37           O  
HETATM  390  O   HOH T 389      -0.510 -28.732  13.373  1.00  0.37           O  
HETATM  391  O   HOH T 390      12.365  33.582  28.428  1.00  0.37           O  
HETATM  392  O   HOH T 391      -8.934 -18.470  35.633  1.00  0.37           O  
HETATM  393  O   HOH T 392       5.603   0.592  34.030  1.00  0.37           O  
HETATM  394  O   HOH T 393      -7.171  -2.481  20.888  1.00  0.37           O  
HETATM  395  O   HOH T 394     -23.858   3.314  15.493  1.00  0.37           O  
HETATM  396  O   HOH T 395      42.983 -25.311  12.812  1.00  0.37           O  
HETATM  397  O   HOH T 396     -19.720  -5.669  23.917  1.00  0.37           O  
HETATM  398  O   HOH T 397      -8.282  13.765  35.829  1.00  0.37           O  
HETATM  399  O   HOH T 398      24.984   8.344  39.998  1.00  0.37           O  
HETATM  400  O   HOH T 399       2.388   6.034  17.574  1.00  0.37           O  
HETATM  401  O   HOH T 400      17.906  26.947  12.616  1.00  0.37           O  
HETATM  402  O   HOH T 401       1.669  -7.338   3.927  1.00  0.37           O  
HETATM  403  O   HOH T 402       2.938  -2.479   1.274  1.00  0.38           O  
HETATM  404  O   HOH T 403      -6.426   8.503  22.856  1.00  0.38           O  
HETATM  405  O   HOH T 404       9.657   4.224  29.718  1.00  0.38           O  
HETATM  406  O   HOH T 405      17.255  29.593  28.612  1.00  0.38           O  
HETATM  407  O   HOH T 406      24.691   5.566  32.337  1.00  0.38           O  
HETATM  408  O   HOH T 407      29.045 -14.211  34.722  1.00  0.38           O  
HETATM  409  O   HOH T 408      -6.363   8.053  38.675  1.00  0.38           O  
HETATM  410  O   HOH T 409      -8.922  25.433  14.127  1.00  0.38           O  
HETATM  411  O   HOH T 410       1.743   4.596   8.800  1.00  0.38           O  
HETATM  412  O   HOH T 411       8.286  21.504  41.322  1.00  0.38           O  
HETATM  413  O   HOH T 412     -13.310  14.911  12.224  1.00  0.38           O  
HETATM  414  O   HOH T 413      36.123  29.504  14.371  1.00  0.38           O  
HETATM  415  O   HOH T 414      31.697  13.985  31.023  1.00  0.38           O  
HETATM  416  O   HOH T 415      33.294 -23.390  -0.328  1.00  0.38           O  
HETATM  417  O   HOH T 416      -3.218 -29.279  13.971  1.00  0.38           O  
HETATM  418  O   HOH T 417      34.437  21.771   1.065  1.00  0.38           O  
HETATM  419  O   HOH T 418      -8.870 -28.459  20.052  1.00  0.38           O  
HETATM  420  O   HOH T 419     -10.971  18.918   8.180  1.00  0.38           O  
HETATM  421  O   HOH T 420       1.785 -11.831   5.640  1.00  0.38           O  
HETATM  422  O   HOH T 421       8.220 -20.971  13.807  1.00  0.38           O  
HETATM  423  O   HOH T 422      17.817 -27.568  16.164  1.00  0.38           O  
HETATM  424  O   HOH T 423     -16.173  12.237  -0.896  1.00  0.38           O  
HETATM  425  O   HOH T 424      -5.282  33.283  32.586  1.00  0.38           O  
HETATM  426  O   HOH T 425      42.887 -21.151   3.895  1.00  0.38           O  
HETATM  427  O   HOH T 426     -19.409 -11.983  29.060  1.00  0.38           O  
HETATM  428  O   HOH T 427     -18.515   9.088   8.171  1.00  0.38           O  
HETATM  429  O   HOH T 428      -7.250  10.652   2.280  1.00  0.38           O  
HETATM  430  O   HOH T 429       8.960  19.560  -7.338  1.00  0.38           O  
HETATM  431  O   HOH T 430     -12.977  19.782   4.127  1.00  0.38           O  
HETATM  432  O   HOH T 431      -2.290   4.855  -2.660  1.00  0.38           O  
HETATM  433  O   HOH T 432      26.763  13.548  29.857  1.00  0.38           O  
HETATM  434  O   HOH T 433      12.740  14.210  20.184  1.00  0.38           O  
HETATM  435  O   HOH T 434      -2.743  -2.509  51.867  1.00  0.38           O  
HETATM  436  O   HOH T 435      14.261 -22.702  42.655  1.00  0.38           O  
HETATM  437  O   HOH T 436      14.436  -7.354  57.367  1.00  0.38           O  
HETATM  438  O   HOH T 437      19.672  12.731  33.029  1.00  0.38           O  
HETATM  439  O   HOH T 438       6.114 -23.933  -6.440  1.00  0.38           O  
HETATM  440  O   HOH T 439      10.064  22.636   1.626  1.00  0.38           O  
HETATM  441  O   HOH T 440       8.256 -11.304  16.988  1.00  0.38           O  
HETATM  442  O   HOH T 441      -3.181   4.960  45.634  1.00  0.38           O  
HETATM  443  O   HOH T 442       9.564  27.243  -1.888  1.00  0.38           O  
HETATM  444  O   HOH T 443      -0.593 -20.306  45.298  1.00  0.38           O  
HETATM  445  O   HOH T 444       6.429 -17.234  14.820  1.00  0.38           O  
HETATM  446  O   HOH T 445     -17.789 -18.854  13.554  1.00  0.38           O  
HETATM  447  O   HOH T 446       5.724  21.818  40.228  1.00  0.38           O  
HETATM  448  O   HOH T 447      18.556  26.163  30.787  1.00  0.38           O  
HETATM  449  O   HOH T 448     -17.008  15.591  14.914  1.00  0.38           O  
HETATM  450  O   HOH T 449     -20.982   9.723   9.315  1.00  0.38           O  
HETATM  451  O   HOH T 450      24.025 -18.319  26.308  1.00  0.38           O  
HETATM  452  O   HOH T 451      -9.551 -28.560   7.789  1.00  0.38           O  
HETATM  453  O   HOH T 452      22.670  22.092  -3.896  1.00  0.38           O  
HETATM  454  O   HOH T 453      39.943  20.184  13.022  1.00  0.39           O  
HETATM  455  O   HOH T 454      28.976 -18.900  33.156  1.00  0.39           O  
HETATM  456  O   HOH T 455     -24.252   4.741  13.124  1.00  0.39           O  
HETATM  457  O   HOH T 456      40.749   9.750   5.692  1.00  0.39           O  
HETATM  458  O   HOH T 457      -2.980 -21.334  11.237  1.00  0.39           O  
HETATM  459  O   HOH T 458       3.772  30.527  34.876  1.00  0.39           O  
HETATM  460  O   HOH T 459      38.599  -8.885  44.319  1.00  0.39           O  
HETATM  461  O   HOH T 460      -0.578  -7.280  33.693  1.00  0.39           O  
HETATM  462  O   HOH T 461      -3.578 -31.865  13.362  1.00  0.39           O  
HETATM  463  O   HOH T 462      49.274   2.621  15.489  1.00  0.39           O  
HETATM  464  O   HOH T 463     -22.796   7.085   2.255  1.00  0.39           O  
HETATM  465  O   HOH T 464       2.383  -5.421  50.973  1.00  0.39           O  
HETATM  466  O   HOH T 465      -0.749   2.774  -3.936  1.00  0.39           O  
HETATM  467  O   HOH T 466      19.433  12.674 -13.940  1.00  0.39           O  
HETATM  468  O   HOH T 467       4.137 -16.003   6.737  1.00  0.39           O  
HETATM  469  O   HOH T 468      46.040 -10.737  19.969  1.00  0.39           O  
HETATM  470  O   HOH T 469      11.460  -3.333 -15.283  1.00  0.39           O  
HETATM  471  O   HOH T 470       0.751  -3.545  -0.190  1.00  0.39           O  
HETATM  472  O   HOH T 471      39.197 -25.356  22.344  1.00  0.39           O  
HETATM  473  O   HOH T 472      -4.199 -14.950   4.343  1.00  0.39           O  
HETATM  474  O   HOH T 473      -4.804 -20.998  40.562  1.00  0.39           O  
HETATM  475  O   HOH T 474      -3.093 -17.109   5.781  1.00  0.39           O  
HETATM  476  O   HOH T 475      38.901 -23.071  18.953  1.00  0.39           O  
HETATM  477  O   HOH T 476       1.961  -2.749  12.529  1.00  0.39           O  
HETATM  478  O   HOH T 477     -10.532 -33.638  21.772  1.00  0.39           O  
HETATM  479  O   HOH T 478      21.935  11.304  34.020  1.00  0.39           O  
HETATM  480  O   HOH T 479      13.351  26.083  -0.046  1.00  0.39           O  
HETATM  481  O   HOH T 480      11.683  12.299  21.906  1.00  0.39           O  
HETATM  482  O   HOH T 481      -4.328 -14.668  51.038  1.00  0.39           O  
HETATM  483  O   HOH T 482      11.117  19.813 -11.201  1.00  0.39           O  
HETATM  484  O   HOH T 483      17.117 -32.654  15.311  1.00  0.39           O  
HETATM  485  O   HOH T 484     -13.201  24.856  32.901  1.00  0.39           O  
HETATM  486  O   HOH T 485      16.172 -11.278 -12.946  1.00  0.39           O  
HETATM  487  O   HOH T 486      28.328  11.254 -11.469  1.00  0.39           O  
HETATM  488  O   HOH T 487      -9.609 -10.457  43.920  1.00  0.39           O  
HETATM  489  O   HOH T 488       0.002  -2.582  -7.534  1.00  0.39           O  
HETATM  490  O   HOH T 489      10.970  23.458  13.761  1.00  0.39           O  
HETATM  491  O   HOH T 490       0.134  -0.698  -0.183  1.00  0.39           O  
HETATM  492  O   HOH T 491      27.855  14.033 -11.295  1.00  0.39           O  
HETATM  493  O   HOH T 492      11.888   4.253  28.024  1.00  0.39           O  
HETATM  494  O   HOH T 493      23.616  32.426  17.242  1.00  0.39           O  
HETATM  495  O   HOH T 494      29.203 -13.764 -13.387  1.00  0.39           O  
HETATM  496  O   HOH T 495       1.203  26.244  10.105  1.00  0.39           O  
HETATM  497  O   HOH T 496      10.951  22.350  41.547  1.00  0.40           O  
HETATM  498  O   HOH T 497       7.283 -26.491  34.831  1.00  0.40           O  
HETATM  499  O   HOH T 498      -2.353 -13.825  55.039  1.00  0.40           O  
HETATM  500  O   HOH T 499     -16.942 -20.343   7.895  1.00  0.40           O  
HETATM  501  O   HOH T 500     -16.510 -13.588   4.365  1.00  0.40           O  
HETATM  502  O   HOH T 501      25.044 -11.815  41.541  1.00  0.40           O  
HETATM  503  O   HOH T 502     -11.931  21.543   8.333  1.00  0.40           O  
HETATM  504  O   HOH T 503     -12.254   9.970   1.954  1.00  0.40           O  
HETATM  505  O   HOH T 504      13.266  16.999  23.899  1.00  0.40           O  
HETATM  506  O   HOH T 505      16.525  26.063  10.385  1.00  0.40           O  
HETATM  507  O   HOH T 506      31.400 -22.599   3.076  1.00  0.40           O  
HETATM  508  O   HOH T 507      37.604  12.039  29.817  1.00  0.40           O  
HETATM  509  O   HOH T 508      12.419  -9.961  25.421  1.00  0.40           O  
HETATM  510  O   HOH T 509      18.770  21.240  -9.891  1.00  0.40           O  
HETATM  511  O   HOH T 510      40.578  14.465   7.400  1.00  0.40           O  
HETATM  512  O   HOH T 511      40.505 -26.156   9.636  1.00  0.40           O  
HETATM  513  O   HOH T 512       5.416  -6.705 -12.535  1.00  0.40           O  
HETATM  514  O   HOH T 513      43.753   3.056  28.583  1.00  0.40           O  
HETATM  515  O   HOH T 514      21.872 -27.839  -4.089  1.00  0.40           O  
HETATM  516  O   HOH T 515      -8.667 -14.331  50.418  1.00  0.40           O  
HETATM  517  O   HOH T 516      21.199   2.995 -16.624  1.00  0.40           O  
HETATM  518  O   HOH T 517     -27.393   8.694  15.321  1.00  0.40           O  
HETATM  519  O   HOH T 518      -9.607   9.592   1.171  1.00  0.40           O  
HETATM  520  O   HOH T 519      32.114  28.575  18.350  1.00  0.40           O  
HETATM  521  O   HOH T 520      32.498 -14.508  -2.035  1.00  0.40           O  
HETATM  522  O   HOH T 521       2.373  15.829 -13.844  1.00  0.40           O  
HETATM  523  O   HOH T 522      17.975  24.407  -1.840  1.00  0.40           O  
HETATM  524  O   HOH T 523       4.775  -8.369  -6.220  1.00  0.40           O  
HETATM  525  O   HOH T 524      14.000  23.373   6.124  1.00  0.40           O  
HETATM  526  O   HOH T 525      15.440  26.703   1.630  1.00  0.40           O  
HETATM  527  O   HOH T 526      -5.536  -8.871  -1.028  1.00  0.40           O  
HETATM  528  O   HOH T 527       7.850  -5.411 -15.176  1.00  0.40           O  
HETATM  529  O   HOH T 528       3.460  31.335  32.273  1.00  0.40           O  
HETATM  530  O   HOH T 529      22.413 -16.141  41.625  1.00  0.40           O  
HETATM  531  O   HOH T 530      13.172  21.231  20.309  1.00  0.40           O  
HETATM  532  O   HOH T 531      -5.711 -19.757  33.876  1.00  0.40           O  
HETATM  533  O   HOH T 532      30.291   5.817  44.170  1.00  0.41           O  
HETATM  534  O   HOH T 533      21.268 -10.614  29.998  1.00  0.41           O  
HETATM  535  O   HOH T 534      18.868 -16.756  39.548  1.00  0.41           O  
HETATM  536  O   HOH T 535      48.217  -0.774  21.636  1.00  0.41           O  
HETATM  537  O   HOH T 536       5.557   0.469 -17.762  1.00  0.41           O  
HETATM  538  O   HOH T 537      35.090   9.355  32.944  1.00  0.41           O  
HETATM  539  O   HOH T 538      12.569 -15.119  16.582  1.00  0.41           O  
HETATM  540  O   HOH T 539     -14.527  21.815  12.726  1.00  0.41           O  
HETATM  541  O   HOH T 540      17.649  24.625  20.083  1.00  0.41           O  
HETATM  542  O   HOH T 541     -19.209 -16.965  27.511  1.00  0.41           O  
HETATM  543  O   HOH T 542      14.840  18.837  25.173  1.00  0.41           O  
HETATM  544  O   HOH T 543       4.156  -6.996  10.013  1.00  0.41           O  
HETATM  545  O   HOH T 544       3.449  -7.979  58.324  1.00  0.41           O  
HETATM  546  O   HOH T 545       2.475  11.964   4.754  1.00  0.41           O  
HETATM  547  O   HOH T 546      24.610 -32.492  11.044  1.00  0.41           O  
HETATM  548  O   HOH T 547       0.802  -5.195  -6.928  1.00  0.41           O  
HETATM  549  O   HOH T 548      -6.102  31.670  34.841  1.00  0.41           O  
HETATM  550  O   HOH T 549      13.966  28.256  20.116  1.00  0.41           O  
HETATM  551  O   HOH T 550      -3.878 -18.952  42.167  1.00  0.41           O  
HETATM  552  O   HOH T 551      16.703   0.486   1.696  1.00  0.41           O  
HETATM  553  O   HOH T 552       2.157 -28.551  14.297  1.00  0.41           O  
HETATM  554  O   HOH T 553      -9.122 -14.493  35.268  1.00  0.41           O  
HETATM  555  O   HOH T 554     -10.706  13.860  34.117  1.00  0.41           O  
HETATM  556  O   HOH T 555     -14.657  10.684   3.162  1.00  0.41           O  
HETATM  557  O   HOH T 556      -0.010 -33.613  21.609  1.00  0.41           O  
HETATM  558  O   HOH T 557      -9.302 -11.647  39.528  1.00  0.41           O  
HETATM  559  O   HOH T 558       6.110  30.993  31.570  1.00  0.41           O  
HETATM  560  O   HOH T 559     -11.610  10.013  -0.775  1.00  0.41           O  
HETATM  561  O   HOH T 560       6.827  -6.051  27.223  1.00  0.41           O  
HETATM  562  O   HOH T 561      15.228   6.239   6.220  1.00  0.41           O  
HETATM  563  O   HOH T 562       6.727 -13.325  15.608  1.00  0.41           O  
HETATM  564  O   HOH T 563     -20.640  -3.105   0.814  1.00  0.41           O  
HETATM  565  O   HOH T 564       0.971  30.932  31.165  1.00  0.41           O  
HETATM  566  O   HOH T 565      17.058   7.088  27.040  1.00  0.41           O  
HETATM  567  O   HOH T 566      35.663  23.841  -2.549  1.00  0.41           O  
HETATM  568  O   HOH T 567     -18.577  16.397  26.790  1.00  0.41           O  
HETATM  569  O   HOH T 568      34.685  32.590  12.458  1.00  0.41           O  
HETATM  570  O   HOH T 569      13.238  -7.391   8.667  1.00  0.41           O  
HETATM  571  O   HOH T 570      -5.635 -17.153   4.942  1.00  0.41           O  
HETATM  572  O   HOH T 571      29.055  13.523  31.443  1.00  0.41           O  
HETATM  573  O   HOH T 572      19.233 -26.697  13.703  1.00  0.41           O  
HETATM  574  O   HOH T 573      17.007  33.260  15.443  1.00  0.41           O  
HETATM  575  O   HOH T 574      36.696  13.656  32.026  1.00  0.41           O  
HETATM  576  O   HOH T 575      -0.304   4.124 -15.589  1.00  0.41           O  
HETATM  577  O   HOH T 576      24.408 -32.580   8.214  1.00  0.41           O  
HETATM  578  O   HOH T 577     -19.398  12.052  32.753  1.00  0.41           O  
HETATM  579  O   HOH T 578      -1.187  -3.085  18.007  1.00  0.41           O  
HETATM  580  O   HOH T 579      -0.567 -24.499  38.056  1.00  0.42           O  
HETATM  581  O   HOH T 580      21.667  -5.205  21.964  1.00  0.42           O  
HETATM  582  O   HOH T 581      21.725  25.068  -0.975  1.00  0.42           O  
HETATM  583  O   HOH T 582      15.532  -7.290   7.097  1.00  0.42           O  
HETATM  584  O   HOH T 583      33.229  15.390  33.149  1.00  0.42           O  
HETATM  585  O   HOH T 584      26.845  -5.502  37.420  1.00  0.42           O  
HETATM  586  O   HOH T 585      38.408  16.069   7.785  1.00  0.42           O  
HETATM  587  O   HOH T 586      29.014   6.987  37.671  1.00  0.42           O  
HETATM  588  O   HOH T 587      21.832  -0.571 -16.276  1.00  0.42           O  
HETATM  589  O   HOH T 588      49.476  -9.338  30.957  1.00  0.42           O  
HETATM  590  O   HOH T 589       9.827 -14.808  16.178  1.00  0.42           O  
HETATM  591  O   HOH T 590      17.021 -32.896   5.404  1.00  0.42           O  
HETATM  592  O   HOH T 591      28.353   5.672  46.159  1.00  0.42           O  
HETATM  593  O   HOH T 592       6.257  -2.362   3.520  1.00  0.42           O  
HETATM  594  O   HOH T 593     -14.809 -19.357  17.597  1.00  0.42           O  
HETATM  595  O   HOH T 594      16.367 -15.166  17.122  1.00  0.42           O  
HETATM  596  O   HOH T 595      21.280 -18.114  40.026  1.00  0.42           O  
HETATM  597  O   HOH T 596     -12.075 -24.356  28.984  1.00  0.42           O  
HETATM  598  O   HOH T 597       2.456   9.635  26.552  1.00  0.42           O  
HETATM  599  O   HOH T 598      15.597 -39.481   4.672  1.00  0.42           O  
HETATM  600  O   HOH T 599      43.365   5.089  26.763  1.00  0.42           O  
HETATM  601  O   HOH T 600       2.408 -27.082  16.684  1.00  0.42           O  
HETATM  602  O   HOH T 601      17.120  26.978  -0.747  1.00  0.42           O  
HETATM  603  O   HOH T 602      11.146   6.196   9.846  1.00  0.42           O  
HETATM  604  O   HOH T 603      19.345   8.700  23.810  1.00  0.42           O  
HETATM  605  O   HOH T 604       2.464  -5.280   1.122  1.00  0.42           O  
HETATM  606  O   HOH T 605       5.345  21.237  -7.090  1.00  0.42           O  
HETATM  607  O   HOH T 606     -10.295   7.578  -0.679  1.00  0.42           O  
HETATM  608  O   HOH T 607      15.238  12.835 -12.709  1.00  0.42           O  
HETATM  609  O   HOH T 608      20.736  18.223  40.189  1.00  0.42           O  
HETATM  610  O   HOH T 609      43.166 -12.512  30.725  1.00  0.42           O  
HETATM  611  O   HOH T 610       2.881   0.547 -17.315  1.00  0.42           O  
HETATM  612  O   HOH T 611      34.049 -30.379  -6.595  1.00  0.42           O  
HETATM  613  O   HOH T 612      43.033 -14.658  21.616  1.00  0.42           O  
HETATM  614  O   HOH T 613      10.888   6.735  52.424  1.00  0.42           O  
HETATM  615  O   HOH T 614     -14.826 -11.478   4.909  1.00  0.42           O  
HETATM  616  O   HOH T 615      -3.331   3.182  -4.725  1.00  0.42           O  
HETATM  617  O   HOH T 616      14.561  20.213  22.533  1.00  0.42           O  
HETATM  618  O   HOH T 617      27.769 -25.232  26.460  1.00  0.42           O  
HETATM  619  O   HOH T 618      13.724  20.617 -11.441  1.00  0.42           O  
HETATM  620  O   HOH T 619      -0.783  -3.597  20.677  1.00  0.42           O  
HETATM  621  O   HOH T 620     -10.659  19.923   5.627  1.00  0.42           O  
HETATM  622  O   HOH T 621       7.428   2.468  30.055  1.00  0.42           O  
HETATM  623  O   HOH T 622      -4.047  12.529  -1.413  1.00  0.42           O  
HETATM  624  O   HOH T 623      17.329 -35.143  11.097  1.00  0.42           O  
HETATM  625  O   HOH T 624     -13.742 -14.090   4.354  1.00  0.42           O  
HETATM  626  O   HOH T 625      23.455  -2.136 -17.892  1.00  0.42           O  
HETATM  627  O   HOH T 626      15.334  29.943  30.642  1.00  0.42           O  
HETATM  628  O   HOH T 627      12.453  21.061  16.381  1.00  0.42           O  
HETATM  629  O   HOH T 628     -19.073  17.328  31.826  1.00  0.42           O  
HETATM  630  O   HOH T 629     -23.768  15.523  22.987  1.00  0.42           O  
HETATM  631  O   HOH T 630      25.474   1.944 -17.794  1.00  0.42           O  
HETATM  632  O   HOH T 631      32.374  23.612   1.551  1.00  0.42           O  
HETATM  633  O   HOH T 632      41.653 -23.369  19.364  1.00  0.42           O  
HETATM  634  O   HOH T 633      11.840  20.074  13.720  1.00  0.43           O  
HETATM  635  O   HOH T 634     -13.259  22.873  35.026  1.00  0.43           O  
HETATM  636  O   HOH T 635       2.707  15.554  -2.843  1.00  0.43           O  
HETATM  637  O   HOH T 636      21.090 -18.674 -13.625  1.00  0.43           O  
HETATM  638  O   HOH T 637      26.467 -20.711  29.011  1.00  0.43           O  
HETATM  639  O   HOH T 638      19.034   5.161  27.293  1.00  0.43           O  
HETATM  640  O   HOH T 639      -3.620 -22.461  38.414  1.00  0.43           O  
HETATM  641  O   HOH T 640       4.134 -31.801  31.540  1.00  0.43           O  
HETATM  642  O   HOH T 641      20.503  -8.984  21.343  1.00  0.43           O  
HETATM  643  O   HOH T 642       4.120   0.243   5.049  1.00  0.43           O  
HETATM  644  O   HOH T 643     -22.623  -6.835  11.324  1.00  0.43           O  
HETATM  645  O   HOH T 644      -5.525 -16.978  43.243  1.00  0.43           O  
HETATM  646  O   HOH T 645      29.154  -5.600  35.775  1.00  0.43           O  
HETATM  647  O   HOH T 646      36.147  -1.640  42.004  1.00  0.43           O  
HETATM  648  O   HOH T 647      16.937  -2.943  28.375  1.00  0.43           O  
HETATM  649  O   HOH T 648     -11.943 -31.393  35.407  1.00  0.43           O  
HETATM  650  O   HOH T 649      -6.561  15.748   4.210  1.00  0.43           O  
HETATM  651  O   HOH T 650      22.479  -8.584  41.863  1.00  0.43           O  
HETATM  652  O   HOH T 651       0.108  14.650  -3.390  1.00  0.43           O  
HETATM  653  O   HOH T 652     -24.791  13.213  21.950  1.00  0.43           O  
HETATM  654  O   HOH T 653      41.699 -24.410  21.906  1.00  0.43           O  
HETATM  655  O   HOH T 654      22.279 -16.318  27.152  1.00  0.43           O  
HETATM  656  O   HOH T 655      20.593  -9.049  32.283  1.00  0.43           O  
HETATM  657  O   HOH T 656      16.204  21.235  24.790  1.00  0.43           O  
HETATM  658  O   HOH T 657       0.453  25.701  38.252  1.00  0.43           O  
HETATM  659  O   HOH T 658     -13.322  22.473  18.652  1.00  0.43           O  
HETATM  660  O   HOH T 659       6.624  -0.574   5.588  1.00  0.43           O  
HETATM  661  O   HOH T 660       4.474  -1.842 -16.699  1.00  0.43           O  
HETATM  662  O   HOH T 661      28.761 -16.089  32.814  1.00  0.43           O  
HETATM  663  O   HOH T 662      24.924  -0.227  39.766  1.00  0.43           O  
HETATM  664  O   HOH T 663      -7.256  14.833   0.406  1.00  0.43           O  
HETATM  665  O   HOH T 664      23.482   9.307  32.280  1.00  0.43           O  
HETATM  666  O   HOH T 665     -19.328  -5.021  26.603  1.00  0.43           O  
HETATM  667  O   HOH T 666      19.455  -3.253  29.582  1.00  0.43           O  
HETATM  668  O   HOH T 667      -6.341  23.637  37.334  1.00  0.43           O  
HETATM  669  O   HOH T 668      15.298 -10.523  18.893  1.00  0.43           O  
HETATM  670  O   HOH T 669       3.402 -16.185  51.966  1.00  0.43           O  
HETATM  671  O   HOH T 670      45.807   3.604  26.803  1.00  0.43           O  
HETATM  672  O   HOH T 671      -5.616  -0.369  -1.022  1.00  0.43           O  
HETATM  673  O   HOH T 672     -10.107   7.245  -5.166  1.00  0.43           O  
HETATM  674  O   HOH T 673      -2.060  -6.507  51.447  1.00  0.43           O  
HETATM  675  O   HOH T 674      -8.827 -25.882  21.072  1.00  0.43           O  
HETATM  676  O   HOH T 675       9.601 -10.281  22.482  1.00  0.43           O  
HETATM  677  O   HOH T 676      25.503   0.585  33.929  1.00  0.43           O  
HETATM  678  O   HOH T 677      22.981   1.449  26.778  1.00  0.43           O  
HETATM  679  O   HOH T 678     -13.747  16.945  10.311  1.00  0.43           O  
HETATM  680  O   HOH T 679      11.175 -25.030  11.483  1.00  0.43           O  
HETATM  681  O   HOH T 680      41.320  -7.293  40.289  1.00  0.43           O  
HETATM  682  O   HOH T 681      -7.519 -24.422  38.489  1.00  0.43           O  
HETATM  683  O   HOH T 682      10.555  -8.160   8.067  1.00  0.43           O  
HETATM  684  O   HOH T 683      30.700  -8.865  12.909  1.00  0.43           O  
HETATM  685  O   HOH T 684      29.103  -5.639 -14.415  1.00  0.43           O  
HETATM  686  O   HOH T 685     -26.472   5.861   5.507  1.00  0.43           O  
HETATM  687  O   HOH T 686      16.328 -37.369   3.147  1.00  0.43           O  
HETATM  688  O   HOH T 687      22.722  -7.317  49.561  1.00  0.43           O  
HETATM  689  O   HOH T 688       6.402 -21.363  45.664  1.00  0.43           O  
HETATM  690  O   HOH T 689      13.513  15.064  13.509  1.00  0.43           O  
HETATM  691  O   HOH T 690      17.691 -34.965  13.825  1.00  0.43           O  
HETATM  692  O   HOH T 691      24.062 -28.400  13.102  1.00  0.43           O  
HETATM  693  O   HOH T 692      45.028 -13.526  17.093  1.00  0.44           O  
HETATM  694  O   HOH T 693      -0.920  31.406  22.126  1.00  0.44           O  
HETATM  695  O   HOH T 694      37.601  -6.571  45.567  1.00  0.44           O  
HETATM  696  O   HOH T 695     -12.820 -32.288  37.920  1.00  0.44           O  
HETATM  697  O   HOH T 696       0.833  -4.815  18.818  1.00  0.44           O  
HETATM  698  O   HOH T 697       1.726  -0.659  33.450  1.00  0.44           O  
HETATM  699  O   HOH T 698       7.902  17.053  12.029  1.00  0.44           O  
HETATM  700  O   HOH T 699       2.674  -3.084  -7.388  1.00  0.44           O  
HETATM  701  O   HOH T 700       1.506 -32.329  30.774  1.00  0.44           O  
HETATM  702  O   HOH T 701      17.402  -5.094  30.108  1.00  0.44           O  
HETATM  703  O   HOH T 702     -21.221  15.972  22.272  1.00  0.44           O  
HETATM  704  O   HOH T 703       8.101 -16.248  38.890  1.00  0.44           O  
HETATM  705  O   HOH T 704      41.261 -13.854  32.250  1.00  0.44           O  
HETATM  706  O   HOH T 705     -14.281  21.523   9.960  1.00  0.44           O  
HETATM  707  O   HOH T 706      16.429 -25.905  30.232  1.00  0.44           O  
HETATM  708  O   HOH T 707     -19.038  -1.019  22.639  1.00  0.44           O  
HETATM  709  O   HOH T 708      -4.003  10.620  49.657  1.00  0.44           O  
HETATM  710  O   HOH T 709      -3.192 -25.025  37.165  1.00  0.44           O  
HETATM  711  O   HOH T 710      34.067 -25.204  11.630  1.00  0.44           O  
HETATM  712  O   HOH T 711     -16.100  22.290  17.982  1.00  0.44           O  
HETATM  713  O   HOH T 712      -7.616   9.827  43.516  1.00  0.44           O  
HETATM  714  O   HOH T 713      23.008   7.920 -10.813  1.00  0.44           O  
HETATM  715  O   HOH T 714      24.148  10.737  38.774  1.00  0.44           O  
HETATM  716  O   HOH T 715     -23.392  10.529  22.384  1.00  0.44           O  
HETATM  717  O   HOH T 716      22.837   9.753  10.500  1.00  0.44           O  
HETATM  718  O   HOH T 717       6.034 -10.190  12.298  1.00  0.44           O  
HETATM  719  O   HOH T 718      13.128   6.088   7.909  1.00  0.44           O  
HETATM  720  O   HOH T 719       2.976  21.930  40.888  1.00  0.44           O  
HETATM  721  O   HOH T 720      29.689 -15.608  -6.431  1.00  0.44           O  
HETATM  722  O   HOH T 721      25.184  15.855  30.122  1.00  0.44           O  
HETATM  723  O   HOH T 722      30.895 -12.957  -6.116  1.00  0.44           O  
HETATM  724  O   HOH T 723      18.555   0.687 -18.525  1.00  0.44           O  
HETATM  725  O   HOH T 724       2.253  -8.222  29.052  1.00  0.44           O  
HETATM  726  O   HOH T 725      32.418 -12.089  -8.221  1.00  0.44           O  
HETATM  727  O   HOH T 726       4.447 -22.818   0.107  1.00  0.44           O  
HETATM  728  O   HOH T 727      20.002 -26.157  16.284  1.00  0.44           O  
HETATM  729  O   HOH T 728       9.189  -3.818 -16.982  1.00  0.44           O  
HETATM  730  O   HOH T 729     -17.671   3.872  -1.081  1.00  0.44           O  
HETATM  731  O   HOH T 730      -4.647 -13.095  -0.381  1.00  0.44           O  
HETATM  732  O   HOH T 731       9.504  25.167  19.411  1.00  0.44           O  
HETATM  733  O   HOH T 732     -15.702  26.526  13.766  1.00  0.44           O  
HETATM  734  O   HOH T 733      -7.325  -9.816  -2.910  1.00  0.44           O  
HETATM  735  O   HOH T 734      17.756 -19.079  -9.900  1.00  0.44           O  
HETATM  736  O   HOH T 735       0.817 -22.550  44.708  1.00  0.44           O  
HETATM  737  O   HOH T 736      30.320 -26.727   9.587  1.00  0.44           O  
HETATM  738  O   HOH T 737      24.604  11.530  33.355  1.00  0.44           O  
HETATM  739  O   HOH T 738      22.724   5.708 -19.524  1.00  0.44           O  
HETATM  740  O   HOH T 739      42.629 -17.223  21.152  1.00  0.44           O  
HETATM  741  O   HOH T 740      22.740  30.019  18.219  1.00  0.44           O  
HETATM  742  O   HOH T 741      -5.833 -15.577   0.021  1.00  0.45           O  
HETATM  743  O   HOH T 742      12.103  11.424 -18.335  1.00  0.45           O  
HETATM  744  O   HOH T 743      21.041   8.433  16.482  1.00  0.45           O  
HETATM  745  O   HOH T 744      14.168  27.452  30.597  1.00  0.45           O  
HETATM  746  O   HOH T 745       4.321 -12.832   4.991  1.00  0.45           O  
HETATM  747  O   HOH T 746      31.377 -15.334  33.593  1.00  0.45           O  
HETATM  748  O   HOH T 747      19.341   0.617  29.535  1.00  0.45           O  
HETATM  749  O   HOH T 748      -9.709  -9.622  41.288  1.00  0.45           O  
HETATM  750  O   HOH T 749       2.763  -7.040 -11.672  1.00  0.45           O  
HETATM  751  O   HOH T 750      29.666  34.853  18.988  1.00  0.45           O  
HETATM  752  O   HOH T 751       1.965  26.244  12.847  1.00  0.45           O  
HETATM  753  O   HOH T 752      27.828 -20.873  31.467  1.00  0.45           O  
HETATM  754  O   HOH T 753      29.166  -2.679  40.185  1.00  0.45           O  
HETATM  755  O   HOH T 754      36.537  22.271  16.135  1.00  0.45           O  
HETATM  756  O   HOH T 755     -17.402   2.276  23.064  1.00  0.45           O  
HETATM  757  O   HOH T 756       1.774  -0.659  -8.498  1.00  0.45           O  
HETATM  758  O   HOH T 757       4.697  23.777   9.458  1.00  0.45           O  
HETATM  759  O   HOH T 758       2.120  24.212   8.481  1.00  0.45           O  
HETATM  760  O   HOH T 759      15.576  26.393  -4.825  1.00  0.45           O  
HETATM  761  O   HOH T 760      25.217 -20.875  26.500  1.00  0.45           O  
HETATM  762  O   HOH T 761     -16.810   7.214   0.599  1.00  0.45           O  
HETATM  763  O   HOH T 762      30.033  16.140  30.826  1.00  0.45           O  
HETATM  764  O   HOH T 763       4.122  -6.626  27.533  1.00  0.45           O  
HETATM  765  O   HOH T 764      23.786   9.240  44.043  1.00  0.45           O  
HETATM  766  O   HOH T 765     -15.652  15.013  10.719  1.00  0.45           O  
HETATM  767  O   HOH T 766       9.087  26.236  35.338  1.00  0.45           O  
HETATM  768  O   HOH T 767     -18.684 -13.976  11.832  1.00  0.45           O  
HETATM  769  O   HOH T 768      18.567   8.925  21.143  1.00  0.45           O  
HETATM  770  O   HOH T 769       4.832   3.193  33.072  1.00  0.45           O  
HETATM  771  O   HOH T 770     -18.211  -4.133   0.265  1.00  0.45           O  
HETATM  772  O   HOH T 771      12.900 -11.803  52.269  1.00  0.45           O  
HETATM  773  O   HOH T 772     -10.434   9.040  -3.068  1.00  0.45           O  
HETATM  774  O   HOH T 773       7.302  18.596   4.001  1.00  0.45           O  
HETATM  775  O   HOH T 774       4.253 -25.388  -3.499  1.00  0.45           O  
HETATM  776  O   HOH T 775      49.125  -0.084  14.813  1.00  0.45           O  
HETATM  777  O   HOH T 776      54.239   7.303  20.459  1.00  0.45           O  
HETATM  778  O   HOH T 777      31.672 -19.197  33.840  1.00  0.45           O  
HETATM  779  O   HOH T 778     -11.322  23.344  37.231  1.00  0.45           O  
HETATM  780  O   HOH T 779     -13.626 -30.896  23.508  1.00  0.45           O  
HETATM  781  O   HOH T 780       3.081   1.538  34.418  1.00  0.45           O  
HETATM  782  O   HOH T 781     -13.744  27.574  32.594  1.00  0.45           O  
HETATM  783  O   HOH T 782      19.366 -20.458  26.627  1.00  0.45           O  
HETATM  784  O   HOH T 783      -5.126   0.972  17.148  1.00  0.45           O  
HETATM  785  O   HOH T 784      -5.861  31.026  37.533  1.00  0.45           O  
HETATM  786  O   HOH T 785      13.019  -4.139 -20.131  1.00  0.45           O  
HETATM  787  O   HOH T 786       6.981  -9.430  18.600  1.00  0.45           O  
HETATM  788  O   HOH T 787      44.995 -17.655  19.840  1.00  0.45           O  
HETATM  789  O   HOH T 788      -6.407   9.863  50.928  1.00  0.45           O  
HETATM  790  O   HOH T 789      19.962 -17.734  26.570  1.00  0.45           O  
HETATM  791  O   HOH T 790     -11.763 -21.263  13.365  1.00  0.45           O  
HETATM  792  O   HOH T 791       1.955   3.231 -16.798  1.00  0.45           O  
HETATM  793  O   HOH T 792      44.220 -22.903  13.609  1.00  0.45           O  
HETATM  794  O   HOH T 793       4.555   9.377  15.133  1.00  0.45           O  
HETATM  795  O   HOH T 794      19.384  -6.515  20.932  1.00  0.45           O  
HETATM  796  O   HOH T 795      41.708  12.321   6.300  1.00  0.45           O  
HETATM  797  O   HOH T 796      -0.413   5.435   5.420  1.00  0.45           O  
HETATM  798  O   HOH T 797      -3.049   1.946   0.757  1.00  0.46           O  
HETATM  799  O   HOH T 798      14.673  12.524 -21.174  1.00  0.46           O  
HETATM  800  O   HOH T 799     -20.442  18.709  22.516  1.00  0.46           O  
HETATM  801  O   HOH T 800       6.852  19.482   1.439  1.00  0.46           O  
HETATM  802  O   HOH T 801      42.952 -24.861  10.117  1.00  0.46           O  
HETATM  803  O   HOH T 802       0.722   5.433  34.826  1.00  0.46           O  
HETATM  804  O   HOH T 803      18.649 -31.058  -0.368  1.00  0.46           O  
HETATM  805  O   HOH T 804      -3.394   0.914 -12.165  1.00  0.46           O  
HETATM  806  O   HOH T 805      39.218  21.642  15.307  1.00  0.46           O  
HETATM  807  O   HOH T 806      41.752  -7.668  37.524  1.00  0.46           O  
HETATM  808  O   HOH T 807     -11.562  21.071  39.083  1.00  0.46           O  
HETATM  809  O   HOH T 808      34.203  31.701   6.189  1.00  0.46           O  
HETATM  810  O   HOH T 809      18.619  -8.194  25.688  1.00  0.46           O  
HETATM  811  O   HOH T 810     -18.501  -6.942   0.659  1.00  0.46           O  
HETATM  812  O   HOH T 811       4.251  16.595   9.488  1.00  0.46           O  
HETATM  813  O   HOH T 812       0.021 -27.956   8.371  1.00  0.46           O  
HETATM  814  O   HOH T 813      48.717 -13.432  25.889  1.00  0.46           O  
HETATM  815  O   HOH T 814      -9.270 -13.771  37.884  1.00  0.46           O  
HETATM  816  O   HOH T 815     -14.458  16.193  30.302  1.00  0.46           O  
HETATM  817  O   HOH T 816      -6.577 -29.534  17.000  1.00  0.46           O  
HETATM  818  O   HOH T 817       0.580  -6.950  52.221  1.00  0.46           O  
HETATM  819  O   HOH T 818      -0.149  15.866  -5.893  1.00  0.46           O  
HETATM  820  O   HOH T 819      43.931 -13.652  33.103  1.00  0.46           O  
HETATM  821  O   HOH T 820      10.244  28.103  33.669  1.00  0.46           O  
HETATM  822  O   HOH T 821       2.311 -34.479  20.516  1.00  0.46           O  
HETATM  823  O   HOH T 822      12.025  25.105  17.928  1.00  0.46           O  
HETATM  824  O   HOH T 823       3.952  -4.522  13.424  1.00  0.46           O  
HETATM  825  O   HOH T 824       7.734  28.889  32.666  1.00  0.46           O  
HETATM  826  O   HOH T 825       3.325 -21.161  -1.785  1.00  0.46           O  
HETATM  827  O   HOH T 826      50.415 -14.965  29.072  1.00  0.46           O  
HETATM  828  O   HOH T 827     -23.657  11.676   6.374  1.00  0.46           O  
HETATM  829  O   HOH T 828      22.091 -15.645 -16.889  1.00  0.46           O  
HETATM  830  O   HOH T 829      12.305  -7.246 -12.257  1.00  0.46           O  
HETATM  831  O   HOH T 830     -21.062  -9.074  11.551  1.00  0.46           O  
HETATM  832  O   HOH T 831      32.510 -24.745  13.857  1.00  0.46           O  
HETATM  833  O   HOH T 832       0.769  17.184  -8.255  1.00  0.46           O  
HETATM  834  O   HOH T 833      36.543  23.604   1.577  1.00  0.46           O  
HETATM  835  O   HOH T 834      23.230 -16.188  33.368  1.00  0.46           O  
HETATM  836  O   HOH T 835       4.293   2.868 -18.067  1.00  0.46           O  
HETATM  837  O   HOH T 836      -7.973 -17.200   0.657  1.00  0.46           O  
HETATM  838  O   HOH T 837      -0.964 -16.098  55.879  1.00  0.46           O  
HETATM  839  O   HOH T 838      -9.092 -14.223  40.588  1.00  0.46           O  
HETATM  840  O   HOH T 839      -6.536  -7.031  20.561  1.00  0.46           O  
HETATM  841  O   HOH T 840      11.587  23.491  20.162  1.00  0.46           O  
HETATM  842  O   HOH T 841      -8.217  27.377  15.961  1.00  0.46           O  
HETATM  843  O   HOH T 842       7.884  -2.927 -19.216  1.00  0.46           O  
HETATM  844  O   HOH T 843      26.042 -16.224  33.624  1.00  0.46           O  
HETATM  845  O   HOH T 844       3.659  -4.317 -16.216  1.00  0.46           O  
HETATM  846  O   HOH T 845       7.632 -16.407  47.939  1.00  0.46           O  
HETATM  847  O   HOH T 846       6.349   7.528  16.108  1.00  0.46           O  
HETATM  848  O   HOH T 847      33.000 -21.766  31.428  1.00  0.46           O  
HETATM  849  O   HOH T 848       7.847  -0.128 -19.104  1.00  0.46           O  
HETATM  850  O   HOH T 849      -9.318 -10.073  -0.992  1.00  0.46           O  
HETATM  851  O   HOH T 850     -11.288 -26.189  22.053  1.00  0.46           O  
HETATM  852  O   HOH T 851      53.503   6.226  17.974  1.00  0.46           O  
HETATM  853  O   HOH T 852       2.689  -6.734  12.404  1.00  0.46           O  
HETATM  854  O   HOH T 853      -4.373   1.576  -2.644  1.00  0.46           O  
HETATM  855  O   HOH T 854      15.304 -37.528   6.703  1.00  0.46           O  
HETATM  856  O   HOH T 855       8.236 -25.747   1.380  1.00  0.46           O  
HETATM  857  O   HOH T 856     -26.165   8.948   8.119  1.00  0.46           O  
HETATM  858  O   HOH T 857      16.571 -34.890  18.945  1.00  0.46           O  
HETATM  859  O   HOH T 858      17.717 -11.276  47.728  1.00  0.47           O  
HETATM  860  O   HOH T 859     -18.854   8.984   1.291  1.00  0.47           O  
HETATM  861  O   HOH T 860       3.239 -20.398   0.859  1.00  0.47           O  
HETATM  862  O   HOH T 861      21.131 -16.088  31.518  1.00  0.47           O  
HETATM  863  O   HOH T 862       7.358  11.913 -19.474  1.00  0.47           O  
HETATM  864  O   HOH T 863      13.450  -9.647  58.705  1.00  0.47           O  
HETATM  865  O   HOH T 864      45.421  -0.534  21.096  1.00  0.47           O  
HETATM  866  O   HOH T 865     -20.958  -6.229  21.452  1.00  0.47           O  
HETATM  867  O   HOH T 866      47.911 -11.338  30.212  1.00  0.47           O  
HETATM  868  O   HOH T 867      38.729  -2.972  41.393  1.00  0.47           O  
HETATM  869  O   HOH T 868       4.999  -8.570  22.710  1.00  0.47           O  
HETATM  870  O   HOH T 869      -9.882  15.926  14.666  1.00  0.47           O  
HETATM  871  O   HOH T 870      -1.406  16.979  -0.049  1.00  0.47           O  
HETATM  872  O   HOH T 871      46.138 -15.389  18.837  1.00  0.47           O  
HETATM  873  O   HOH T 872     -11.753 -29.795  37.717  1.00  0.47           O  
HETATM  874  O   HOH T 873       8.338 -13.708  47.888  1.00  0.47           O  
HETATM  875  O   HOH T 874      32.337  -7.870  -7.954  1.00  0.47           O  
HETATM  876  O   HOH T 875      16.828  -6.221  26.384  1.00  0.47           O  
HETATM  877  O   HOH T 876      27.553  31.040  20.201  1.00  0.47           O  
HETATM  878  O   HOH T 877      20.978   7.689  21.765  1.00  0.47           O  
HETATM  879  O   HOH T 878      40.566   7.146  26.195  1.00  0.47           O  
HETATM  880  O   HOH T 879      16.854  13.010  49.042  1.00  0.47           O  
HETATM  881  O   HOH T 880      20.005   3.363  25.414  1.00  0.47           O  
HETATM  882  O   HOH T 881      34.795 -22.071   1.427  1.00  0.47           O  
HETATM  883  O   HOH T 882      21.752  -0.252  28.558  1.00  0.47           O  
HETATM  884  O   HOH T 883      39.130  21.540  10.694  1.00  0.47           O  
HETATM  885  O   HOH T 884      16.742   5.104  28.941  1.00  0.47           O  
HETATM  886  O   HOH T 885      19.104  15.900  27.394  1.00  0.47           O  
HETATM  887  O   HOH T 886      -3.775 -14.760   1.662  1.00  0.47           O  
HETATM  888  O   HOH T 887      12.664  29.811  30.242  1.00  0.47           O  
HETATM  889  O   HOH T 888      21.501 -13.460  30.671  1.00  0.47           O  
HETATM  890  O   HOH T 889      -6.569 -19.140  41.803  1.00  0.47           O  
HETATM  891  O   HOH T 890      15.142 -10.538  16.185  1.00  0.47           O  
HETATM  892  O   HOH T 891      22.089   6.126 -22.189  1.00  0.47           O  
HETATM  893  O   HOH T 892      27.485  30.814  10.493  1.00  0.47           O  
HETATM  894  O   HOH T 893      17.697  -2.253  53.589  1.00  0.47           O  
HETATM  895  O   HOH T 894     -16.588 -17.762  10.511  1.00  0.47           O  
HETATM  896  O   HOH T 895      26.618  -2.396  39.565  1.00  0.47           O  
HETATM  897  O   HOH T 896       7.885 -32.683   3.136  1.00  0.47           O  
HETATM  898  O   HOH T 897      14.116 -20.446  44.400  1.00  0.47           O  
HETATM  899  O   HOH T 898      49.549  -2.368  13.169  1.00  0.47           O  
HETATM  900  O   HOH T 899      21.876  28.702   3.906  1.00  0.47           O  
HETATM  901  O   HOH T 900       2.902  -4.323 -11.052  1.00  0.47           O  
HETATM  902  O   HOH T 901       3.438   3.175  10.429  1.00  0.47           O  
HETATM  903  O   HOH T 902      10.544 -28.355  15.326  1.00  0.47           O  
HETATM  904  O   HOH T 903      -0.055   5.432  -4.286  1.00  0.47           O  
HETATM  905  O   HOH T 904     -18.810   3.205   2.353  1.00  0.47           O  
HETATM  906  O   HOH T 905      37.315  10.930  32.354  1.00  0.47           O  
HETATM  907  O   HOH T 906       1.746 -24.381  42.834  1.00  0.47           O  
HETATM  908  O   HOH T 907       2.352  14.586   5.428  1.00  0.47           O  
HETATM  909  O   HOH T 908      -6.428  33.485  29.988  1.00  0.47           O  
HETATM  910  O   HOH T 909     -12.353 -31.639  21.110  1.00  0.47           O  
HETATM  911  O   HOH T 910      49.688 -12.427  28.369  1.00  0.47           O  
HETATM  912  O   HOH T 911      -3.211  15.156  -0.958  1.00  0.48           O  
HETATM  913  O   HOH T 912      35.261  12.018  33.852  1.00  0.48           O  
HETATM  914  O   HOH T 913       3.235  -4.494  10.785  1.00  0.48           O  
HETATM  915  O   HOH T 914      43.147 -19.739  20.092  1.00  0.48           O  
HETATM  916  O   HOH T 915       7.235  -1.529  33.516  1.00  0.48           O  
HETATM  917  O   HOH T 916       8.425   8.965   9.159  1.00  0.48           O  
HETATM  918  O   HOH T 917      -8.396 -14.706  -0.476  1.00  0.48           O  
HETATM  919  O   HOH T 918      19.387  -5.476  25.499  1.00  0.48           O  
HETATM  920  O   HOH T 919      34.864  29.252  18.137  1.00  0.48           O  
HETATM  921  O   HOH T 920      33.992  12.816  -7.121  1.00  0.48           O  
HETATM  922  O   HOH T 921      20.157  23.968  30.312  1.00  0.48           O  
HETATM  923  O   HOH T 922      -7.554   7.405  42.369  1.00  0.48           O  
HETATM  924  O   HOH T 923       4.973  17.807   2.448  1.00  0.48           O  
HETATM  925  O   HOH T 924      17.253 -18.636  24.135  1.00  0.48           O  
HETATM  926  O   HOH T 925      20.935   0.754  25.058  1.00  0.48           O  
HETATM  927  O   HOH T 926      34.212  30.910  15.946  1.00  0.48           O  
HETATM  928  O   HOH T 927     -21.219 -15.169  17.101  1.00  0.48           O  
HETATM  929  O   HOH T 928      23.901  -9.447  48.248  1.00  0.48           O  
HETATM  930  O   HOH T 929      23.423  -5.060  51.101  1.00  0.48           O  
HETATM  931  O   HOH T 930      30.651 -27.498  23.942  1.00  0.48           O  
HETATM  932  O   HOH T 931      11.507 -26.055  14.071  1.00  0.48           O  
HETATM  933  O   HOH T 932      -7.919   9.449  40.617  1.00  0.48           O  
HETATM  934  O   HOH T 933       6.456   7.023   8.892  1.00  0.48           O  
HETATM  935  O   HOH T 934      -6.385  17.118   1.698  1.00  0.48           O  
HETATM  936  O   HOH T 935      -0.891   5.486   1.876  1.00  0.48           O  
HETATM  937  O   HOH T 936     -10.337 -15.560  14.170  1.00  0.48           O  
HETATM  938  O   HOH T 937     -19.718  -3.661  21.943  1.00  0.48           O  
HETATM  939  O   HOH T 938     -18.139   6.538  -1.731  1.00  0.48           O  
HETATM  940  O   HOH T 939       6.658 -32.825  31.009  1.00  0.48           O  
HETATM  941  O   HOH T 940       0.146 -24.817  40.614  1.00  0.48           O  
HETATM  942  O   HOH T 941      42.220 -19.490  22.701  1.00  0.48           O  
HETATM  943  O   HOH T 942       5.762  16.834   7.163  1.00  0.48           O  
HETATM  944  O   HOH T 943      27.798  16.059  29.247  1.00  0.48           O  
HETATM  945  O   HOH T 944       1.649   6.028 -17.246  1.00  0.48           O  
HETATM  946  O   HOH T 945       9.247 -10.606  19.616  1.00  0.48           O  
HETATM  947  O   HOH T 946      -1.400  26.006   9.031  1.00  0.48           O  
HETATM  948  O   HOH T 947      14.653 -13.322  16.154  1.00  0.48           O  
HETATM  949  O   HOH T 948      26.494  -1.828  34.875  1.00  0.48           O  
HETATM  950  O   HOH T 949       5.763  21.765   7.891  1.00  0.48           O  
HETATM  951  O   HOH T 950      16.309  10.997  46.969  1.00  0.48           O  
HETATM  952  O   HOH T 951      19.206   8.982  18.411  1.00  0.48           O  
HETATM  953  O   HOH T 952      12.862 -10.472 -10.603  1.00  0.48           O  
HETATM  954  O   HOH T 953      23.076   3.136 -18.594  1.00  0.48           O  
HETATM  955  O   HOH T 954      13.066  -4.205 -17.287  1.00  0.49           O  
HETATM  956  O   HOH T 955      12.189 -23.787  17.343  1.00  0.49           O  
HETATM  957  O   HOH T 956      13.011  24.068  41.922  1.00  0.49           O  
HETATM  958  O   HOH T 957       0.845 -23.977  11.962  1.00  0.49           O  
HETATM  959  O   HOH T 958      13.859 -11.952  20.755  1.00  0.49           O  
HETATM  960  O   HOH T 959      39.390  26.690  20.996  1.00  0.49           O  
HETATM  961  O   HOH T 960      28.280  26.009  -7.090  1.00  0.49           O  
HETATM  962  O   HOH T 961      32.311 -10.268  -6.219  1.00  0.49           O  
HETATM  963  O   HOH T 962      39.454  11.619  27.427  1.00  0.49           O  
HETATM  964  O   HOH T 963      38.922  14.600  30.698  1.00  0.49           O  
HETATM  965  O   HOH T 964       9.676   7.984  11.486  1.00  0.49           O  
HETATM  966  O   HOH T 965       5.644  32.434  29.183  1.00  0.49           O  
HETATM  967  O   HOH T 966      19.649 -10.434  49.559  1.00  0.49           O  
HETATM  968  O   HOH T 967      32.791   4.863  43.835  1.00  0.49           O  
HETATM  969  O   HOH T 968      14.506 -36.437  17.919  1.00  0.49           O  
HETATM  970  O   HOH T 969      -3.576   1.728  19.292  1.00  0.49           O  
HETATM  971  O   HOH T 970      46.591  18.736  23.812  1.00  0.49           O  
HETATM  972  O   HOH T 971      -0.873  22.830  46.249  1.00  0.49           O  
HETATM  973  O   HOH T 972      24.867 -20.877  -7.431  1.00  0.49           O  
HETATM  974  O   HOH T 973      20.967  -4.324  27.500  1.00  0.49           O  
HETATM  975  O   HOH T 974      23.461  13.140  47.028  1.00  0.49           O  
HETATM  976  O   HOH T 975      31.663  -5.987 -15.379  1.00  0.49           O  
HETATM  977  O   HOH T 976      19.599  33.557  22.030  1.00  0.49           O  
HETATM  978  O   HOH T 977      -3.778  32.427  36.506  1.00  0.49           O  
HETATM  979  O   HOH T 978      26.884 -32.532   9.456  1.00  0.49           O  
HETATM  980  O   HOH T 979      28.523  -5.357  47.869  1.00  0.49           O  
HETATM  981  O   HOH T 980       0.653  16.464   1.749  1.00  0.49           O  
HETATM  982  O   HOH T 981     -12.194  14.621  31.624  1.00  0.49           O  
HETATM  983  O   HOH T 982      11.284   6.415  55.156  1.00  0.49           O  
HETATM  984  O   HOH T 983      -9.775 -26.319  18.482  1.00  0.49           O  
HETATM  985  O   HOH T 984      -1.834   0.064  45.715  1.00  0.49           O  
HETATM  986  O   HOH T 985      34.512  24.393  -0.012  1.00  0.49           O  
HETATM  987  O   HOH T 986      36.525  32.359   7.523  1.00  0.49           O  
HETATM  988  O   HOH T 987       3.987 -21.167   3.443  1.00  0.49           O  
HETATM  989  O   HOH T 988     -19.815  -5.311   2.317  1.00  0.49           O  
HETATM  990  O   HOH T 989       4.207   8.107  17.661  1.00  0.49           O  
HETATM  991  O   HOH T 990      24.963   6.904   1.516  1.00  0.49           O  
HETATM  992  O   HOH T 991      16.298 -20.719  42.692  1.00  0.49           O  
HETATM  993  O   HOH T 992      18.675  19.578 -12.241  1.00  0.49           O  
HETATM  994  O   HOH T 993      26.640  24.358 -10.483  1.00  0.49           O  
HETATM  995  O   HOH T 994      14.255 -35.186  20.397  1.00  0.49           O  
HETATM  996  O   HOH T 995       8.141  -9.197   9.026  1.00  0.49           O  
HETATM  997  O   HOH T 996      14.486  12.980 -18.496  1.00  0.49           O  
HETATM  998  O   HOH T 997      19.182  -0.088 -15.985  1.00  0.49           O  
HETATM  999  O   HOH T 998      30.602 -14.776  -4.012  1.00  0.49           O  
HETATM 1000  O   HOH T 999      47.069 -12.964  28.100  1.00  0.49           O  
HETATM 1001  O   HOH T1000     -26.570   8.025  12.770  1.00  0.49           O  
HETATM 1002  O   HOH T1001      16.523 -24.486  27.768  1.00  0.49           O  
HETATM 1003  O   HOH T1002       7.685 -22.554  43.573  1.00  0.49           O  
HETATM 1004  O   HOH T1003       4.900   5.552  10.609  1.00  0.49           O  
HETATM 1005  O   HOH T1004      -2.700  32.007  18.434  1.00  0.50           O  
HETATM 1006  O   HOH T1005     -27.599   7.983  10.254  1.00  0.50           O  
HETATM 1007  O   HOH T1006       6.313  -4.014 -17.157  1.00  0.50           O  
HETATM 1008  O   HOH T1007       2.430 -25.907  13.757  1.00  0.50           O  
HETATM 1009  O   HOH T1008     -24.441   0.766  16.250  1.00  0.50           O  
HETATM 1010  O   HOH T1009      -1.756 -14.018   3.325  1.00  0.50           O  
HETATM 1011  O   HOH T1010      23.600  -5.975   0.279  1.00  0.50           O  
HETATM 1012  O   HOH T1011      16.242 -32.555  -1.034  1.00  0.50           O  
HETATM 1013  O   HOH T1012     -13.579  25.317  12.579  1.00  0.50           O  
HETATM 1014  O   HOH T1013     -26.138   2.482  19.221  1.00  0.50           O  
HETATM 1015  O   HOH T1014       9.806  21.607  46.678  1.00  0.50           O  
HETATM 1016  O   HOH T1015      12.313 -13.541  18.973  1.00  0.50           O  
HETATM 1017  O   HOH T1016      33.872 -13.690   1.589  1.00  0.50           O  
HETATM 1018  O   HOH T1017     -20.269  16.950  24.680  1.00  0.50           O  
HETATM 1019  O   HOH T1018       2.030  18.253  -3.117  1.00  0.50           O  
HETATM 1020  O   HOH T1019      23.043 -13.565  40.612  1.00  0.50           O  
HETATM 1021  O   HOH T1020       8.903 -22.612  16.005  1.00  0.50           O  
HETATM 1022  O   HOH T1021      -6.503 -12.983  51.624  1.00  0.50           O  
HETATM 1023  O   HOH T1022       4.973  -5.500  52.047  1.00  0.50           O  
HETATM 1024  O   HOH T1023       5.713  11.425  20.321  1.00  0.50           O  
HETATM 1025  O   HOH T1024      33.167 -25.895   1.189  1.00  0.50           O  
HETATM 1026  O   HOH T1025       0.654   1.827  33.151  1.00  0.50           O  
HETATM 1027  O   HOH T1026       5.098  14.539   5.702  1.00  0.50           O  
HETATM 1028  O   HOH T1027      17.132  -0.133  28.034  1.00  0.50           O  
HETATM 1029  O   HOH T1028      16.737 -11.866  20.896  1.00  0.50           O  
HETATM 1030  O   HOH T1029      15.498 -36.425  12.806  1.00  0.50           O  
HETATM 1031  O   HOH T1030      22.581   6.090   0.568  1.00  0.50           O  
HETATM 1032  O   HOH T1031      20.145  10.099 -14.963  1.00  0.50           O  
HETATM 1033  O   HOH T1032      21.115  13.602  35.304  1.00  0.50           O  
HETATM 1034  O   HOH T1033       5.576  -7.445  25.202  1.00  0.50           O  
HETATM 1035  O   HOH T1034       6.390   8.052  13.413  1.00  0.50           O  
HETATM 1036  O   HOH T1035      18.525   6.448  22.470  1.00  0.50           O  
HETATM 1037  O   HOH T1036      35.735  23.364  26.967  1.00  0.50           O  
HETATM 1038  O   HOH T1037      30.188 -30.992  -2.246  1.00  0.50           O  
HETATM 1039  O   HOH T1038     -12.875  18.596  38.834  1.00  0.50           O  
HETATM 1040  O   HOH T1039      42.322 -13.645   4.207  1.00  0.50           O  
HETATM 1041  O   HOH T1040      26.025  10.692  35.577  1.00  0.50           O  
HETATM 1042  O   HOH T1041      37.241 -24.688  20.523  1.00  0.50           O  
HETATM 1043  O   HOH T1042      -3.267  24.815   7.251  1.00  0.50           O  
HETATM 1044  O   HOH T1043      17.677 -33.348   1.193  1.00  0.50           O  
HETATM 1045  O   HOH T1044      21.141   6.996  18.875  1.00  0.51           O  
HETATM 1046  O   HOH T1045     -17.744  23.104  14.886  1.00  0.51           O  
HETATM 1047  O   HOH T1046      25.846 -29.062  19.290  1.00  0.51           O  
HETATM 1048  O   HOH T1047      -2.461 -27.786  36.798  1.00  0.51           O  
HETATM 1049  O   HOH T1048      26.388 -18.754  32.437  1.00  0.51           O  
HETATM 1050  O   HOH T1049     -13.016  22.461  14.937  1.00  0.51           O  
HETATM 1051  O   HOH T1050      13.071  28.275  28.116  1.00  0.51           O  
HETATM 1052  O   HOH T1051      26.977 -21.883  -5.908  1.00  0.51           O  
HETATM 1053  O   HOH T1052      -4.797  22.215   3.864  1.00  0.51           O  
HETATM 1054  O   HOH T1053      25.070  -1.917  37.315  1.00  0.51           O  
HETATM 1055  O   HOH T1054      10.282 -10.968  52.697  1.00  0.51           O  
HETATM 1056  O   HOH T1055       0.113 -26.693  15.184  1.00  0.51           O  
HETATM 1057  O   HOH T1056      42.462  -0.681  12.734  1.00  0.51           O  
HETATM 1058  O   HOH T1057      16.287 -33.936   7.844  1.00  0.51           O  
HETATM 1059  O   HOH T1058      12.156 -32.405  24.910  1.00  0.51           O  
HETATM 1060  O   HOH T1059     -10.957 -13.911  33.436  1.00  0.51           O  
HETATM 1061  O   HOH T1060      -2.187   0.261  -1.449  1.00  0.51           O  
HETATM 1062  O   HOH T1061      20.159  -7.142  23.471  1.00  0.51           O  
HETATM 1063  O   HOH T1062      47.211 -12.848  18.637  1.00  0.51           O  
HETATM 1064  O   HOH T1063      34.486   4.669  19.897  1.00  0.51           O  
HETATM 1065  O   HOH T1064      -0.842 -32.301  19.396  1.00  0.51           O  
HETATM 1066  O   HOH T1065      21.868 -25.760  -5.869  1.00  0.51           O  
HETATM 1067  O   HOH T1066       8.952   6.498   8.111  1.00  0.51           O  
HETATM 1068  O   HOH T1067       1.598  -6.266  59.418  1.00  0.51           O  
HETATM 1069  O   HOH T1068      22.958  -6.252  15.251  1.00  0.51           O  
HETATM 1070  O   HOH T1069      -6.582  -5.238  -9.847  1.00  0.51           O  
HETATM 1071  O   HOH T1070      23.451  34.547  20.560  1.00  0.51           O  
HETATM 1072  O   HOH T1071      44.842 -12.997  22.800  1.00  0.51           O  
HETATM 1073  O   HOH T1072      -7.379  17.040  43.794  1.00  0.51           O  
HETATM 1074  O   HOH T1073       8.834  13.844  48.005  1.00  0.51           O  
HETATM 1075  O   HOH T1074       3.597 -32.254  28.889  1.00  0.51           O  
HETATM 1076  O   HOH T1075      -1.467   2.903  46.334  1.00  0.51           O  
HETATM 1077  O   HOH T1076      -3.406 -30.322  37.107  1.00  0.51           O  
HETATM 1078  O   HOH T1077       9.627  21.472  43.819  1.00  0.51           O  
HETATM 1079  O   HOH T1078     -28.010   4.208   9.665  1.00  0.51           O  
HETATM 1080  O   HOH T1079      21.395 -11.121  46.078  1.00  0.51           O  
HETATM 1081  O   HOH T1080      10.801   4.776   7.405  1.00  0.51           O  
HETATM 1082  O   HOH T1081      48.507   3.926  27.517  1.00  0.51           O  
HETATM 1083  O   HOH T1082       3.117  14.711  49.547  1.00  0.51           O  
HETATM 1084  O   HOH T1083       3.343  -5.281 -13.672  1.00  0.51           O  
HETATM 1085  O   HOH T1084      -5.302   7.524 -11.926  1.00  0.51           O  
HETATM 1086  O   HOH T1085      33.191 -17.109  34.869  1.00  0.51           O  
HETATM 1087  O   HOH T1086      11.402   9.612  21.740  1.00  0.51           O  
HETATM 1088  O   HOH T1087      44.734 -13.248  19.923  1.00  0.51           O  
HETATM 1089  O   HOH T1088       1.792  17.911  -5.822  1.00  0.51           O  
HETATM 1090  O   HOH T1089      15.404 -31.321   7.186  1.00  0.51           O  
HETATM 1091  O   HOH T1090      22.265 -33.461   6.800  1.00  0.51           O  
HETATM 1092  O   HOH T1091      10.328 -13.906  13.603  1.00  0.52           O  
HETATM 1093  O   HOH T1092      49.642  -5.709  16.176  1.00  0.52           O  
HETATM 1094  O   HOH T1093      31.119   8.663  -1.901  1.00  0.52           O  
HETATM 1095  O   HOH T1094       7.314  -9.436  24.022  1.00  0.52           O  
HETATM 1096  O   HOH T1095     -22.605  10.946   3.807  1.00  0.52           O  
HETATM 1097  O   HOH T1096     -27.559   6.477   8.000  1.00  0.52           O  
HETATM 1098  O   HOH T1097       7.371   4.526  28.257  1.00  0.52           O  
HETATM 1099  O   HOH T1098      18.328  17.008 -13.253  1.00  0.52           O  
HETATM 1100  O   HOH T1099      17.949  18.596   7.243  1.00  0.52           O  
HETATM 1101  O   HOH T1100      12.471 -11.271  56.540  1.00  0.52           O  
HETATM 1102  O   HOH T1101      40.117  18.784  20.392  1.00  0.52           O  
HETATM 1103  O   HOH T1102      26.577   2.864  -9.894  1.00  0.52           O  
HETATM 1104  O   HOH T1103      16.481  26.874  29.059  1.00  0.52           O  
HETATM 1105  O   HOH T1104      16.099 -35.050  16.129  1.00  0.52           O  
HETATM 1106  O   HOH T1105      24.995  -4.909  16.200  1.00  0.52           O  
HETATM 1107  O   HOH T1106      30.043 -17.512  -4.214  1.00  0.52           O  
HETATM 1108  O   HOH T1107      19.376 -19.490  38.772  1.00  0.52           O  
HETATM 1109  O   HOH T1108     -15.580  21.504  15.317  1.00  0.52           O  
HETATM 1110  O   HOH T1109       4.205   9.040  20.340  1.00  0.52           O  
HETATM 1111  O   HOH T1110       7.274  -9.460  21.296  1.00  0.52           O  
HETATM 1112  O   HOH T1111       2.784  24.359  11.207  1.00  0.52           O  
HETATM 1113  O   HOH T1112      21.312 -12.516  42.534  1.00  0.52           O  
HETATM 1114  O   HOH T1113       1.340  -5.980  -9.529  1.00  0.52           O  
HETATM 1115  O   HOH T1114     -13.017 -33.562  22.966  1.00  0.52           O  
HETATM 1116  O   HOH T1115      49.549   9.862  22.085  1.00  0.52           O  
HETATM 1117  O   HOH T1116       0.905  15.773  -0.884  1.00  0.52           O  
HETATM 1118  O   HOH T1117      19.614  26.606  -1.874  1.00  0.52           O  
HETATM 1119  O   HOH T1118     -20.716 -13.158  31.337  1.00  0.52           O  
HETATM 1120  O   HOH T1119      14.656 -10.908  24.139  1.00  0.52           O  
HETATM 1121  O   HOH T1120      -4.095   6.387  47.805  1.00  0.52           O  
HETATM 1122  O   HOH T1121     -24.226  14.575  14.965  1.00  0.52           O  
HETATM 1123  O   HOH T1122      40.360  -4.704  39.810  1.00  0.52           O  
HETATM 1124  O   HOH T1123      24.586  29.400  25.007  1.00  0.52           O  
HETATM 1125  O   HOH T1124      -0.094  10.458  25.796  1.00  0.52           O  
HETATM 1126  O   HOH T1125      18.532   2.339  27.581  1.00  0.52           O  
HETATM 1127  O   HOH T1126      21.924  38.637  16.771  1.00  0.52           O  
HETATM 1128  O   HOH T1127      47.744  -6.626  14.370  1.00  0.52           O  
HETATM 1129  O   HOH T1128      -4.937 -31.274  18.357  1.00  0.52           O  
HETATM 1130  O   HOH T1129      18.043   2.690   0.761  1.00  0.52           O  
HETATM 1131  O   HOH T1130      16.200 -38.880   8.910  1.00  0.52           O  
HETATM 1132  O   HOH T1131       6.458   0.051  31.337  1.00  0.52           O  
HETATM 1133  O   HOH T1132       8.108 -25.910  43.729  1.00  0.52           O  
HETATM 1134  O   HOH T1133     -20.822  20.376  20.239  1.00  0.52           O  
HETATM 1135  O   HOH T1134     -21.249  15.816  27.050  1.00  0.53           O  
HETATM 1136  O   HOH T1135      33.459  34.869  13.667  1.00  0.53           O  
HETATM 1137  O   HOH T1136      49.594  -8.248  15.373  1.00  0.53           O  
HETATM 1138  O   HOH T1137      25.494  -0.598 -18.988  1.00  0.53           O  
HETATM 1139  O   HOH T1138     -18.650 -19.197  29.074  1.00  0.53           O  
HETATM 1140  O   HOH T1139      33.229   0.742  32.400  1.00  0.53           O  
HETATM 1141  O   HOH T1140      42.148  -4.936  36.485  1.00  0.53           O  
HETATM 1142  O   HOH T1141       0.768 -32.766  28.318  1.00  0.53           O  
HETATM 1143  O   HOH T1142      31.403   6.975  14.371  1.00  0.53           O  
HETATM 1144  O   HOH T1143      27.491  27.414   1.738  1.00  0.53           O  
HETATM 1145  O   HOH T1144      21.059 -30.094  -5.572  1.00  0.53           O  
HETATM 1146  O   HOH T1145      -1.447   2.442  34.914  1.00  0.53           O  
HETATM 1147  O   HOH T1146      51.149  -9.087  33.129  1.00  0.53           O  
HETATM 1148  O   HOH T1147      36.466  13.765   3.238  1.00  0.53           O  
HETATM 1149  O   HOH T1148      23.601 -18.416  42.811  1.00  0.53           O  
HETATM 1150  O   HOH T1149     -14.460   0.722  -3.622  1.00  0.53           O  
HETATM 1151  O   HOH T1150      19.026  -9.498  45.945  1.00  0.53           O  
HETATM 1152  O   HOH T1151      26.393  29.474  18.109  1.00  0.53           O  
HETATM 1153  O   HOH T1152      43.403  -7.081  12.850  1.00  0.53           O  
HETATM 1154  O   HOH T1153      24.182  34.806  16.252  1.00  0.53           O  
HETATM 1155  O   HOH T1154     -15.382   5.662  26.779  1.00  0.53           O  
HETATM 1156  O   HOH T1155     -17.141  13.696   8.853  1.00  0.53           O  
HETATM 1157  O   HOH T1156      42.981  -3.257  12.116  1.00  0.53           O  
HETATM 1158  O   HOH T1157     -14.651 -22.240  33.465  1.00  0.53           O  
HETATM 1159  O   HOH T1158      25.580   9.659  11.192  1.00  0.53           O  
HETATM 1160  O   HOH T1159     -24.808   4.656  20.255  1.00  0.53           O  
HETATM 1161  O   HOH T1160      -8.152  -8.244  43.034  1.00  0.53           O  
HETATM 1162  O   HOH T1161       8.405  10.500  11.455  1.00  0.53           O  
HETATM 1163  O   HOH T1162     -10.590 -16.630  34.344  1.00  0.53           O  
HETATM 1164  O   HOH T1163      45.268  15.606  17.652  1.00  0.53           O  
HETATM 1165  O   HOH T1164      36.808  10.067  34.988  1.00  0.53           O  
HETATM 1166  O   HOH T1165     -13.546  -8.218  28.561  1.00  0.53           O  
HETATM 1167  O   HOH T1166       4.988 -22.755  43.639  1.00  0.53           O  
HETATM 1168  O   HOH T1167       7.967  34.049  18.630  1.00  0.53           O  
HETATM 1169  O   HOH T1168      14.654  -1.585  28.322  1.00  0.53           O  
HETATM 1170  O   HOH T1169      40.506  21.047  17.711  1.00  0.53           O  
HETATM 1171  O   HOH T1170      33.883 -29.140 -10.780  1.00  0.53           O  
HETATM 1172  O   HOH T1171      -4.688   8.019  49.897  1.00  0.53           O  
HETATM 1173  O   HOH T1172      -3.123   1.621  37.215  1.00  0.53           O  
HETATM 1174  O   HOH T1173      36.739  -9.558   4.926  1.00  0.53           O  
HETATM 1175  O   HOH T1174      -8.009  -5.659  23.471  1.00  0.53           O  
HETATM 1176  O   HOH T1175     -18.537  -9.205   7.100  1.00  0.53           O  
HETATM 1177  O   HOH T1176     -20.308 -22.697  17.860  1.00  0.53           O  
HETATM 1178  O   HOH T1177     -21.918  -7.298  23.870  1.00  0.54           O  
HETATM 1179  O   HOH T1178      -5.080  -6.152  39.931  1.00  0.54           O  
HETATM 1180  O   HOH T1179      23.947  24.373  27.787  1.00  0.54           O  
HETATM 1181  O   HOH T1180      39.827   3.685   8.880  1.00  0.54           O  
HETATM 1182  O   HOH T1181     -19.590  -2.966  24.602  1.00  0.54           O  
HETATM 1183  O   HOH T1182      -1.765  17.800   2.475  1.00  0.54           O  
HETATM 1184  O   HOH T1183     -20.557   5.376   2.059  1.00  0.54           O  
HETATM 1185  O   HOH T1184      42.974 -20.336  17.332  1.00  0.54           O  
HETATM 1186  O   HOH T1185      -5.785   4.709  44.540  1.00  0.54           O  
HETATM 1187  O   HOH T1186      12.804 -22.879  13.837  1.00  0.54           O  
HETATM 1188  O   HOH T1187      -8.259  -4.986  20.438  1.00  0.54           O  
HETATM 1189  O   HOH T1188      14.495  10.283  15.429  1.00  0.54           O  
HETATM 1190  O   HOH T1189      12.986   8.788  49.706  1.00  0.54           O  
HETATM 1191  O   HOH T1190      26.697   9.965  38.304  1.00  0.54           O  
HETATM 1192  O   HOH T1191       7.476  22.068   0.821  1.00  0.54           O  
HETATM 1193  O   HOH T1192      45.325 -24.315  11.575  1.00  0.54           O  
HETATM 1194  O   HOH T1193      49.644  -1.427  19.324  1.00  0.54           O  
HETATM 1195  O   HOH T1194     -12.852 -22.751  19.426  1.00  0.54           O  
HETATM 1196  O   HOH T1195     -12.795 -15.875  -2.623  1.00  0.54           O  
HETATM 1197  O   HOH T1196      40.355  12.252  29.994  1.00  0.54           O  
HETATM 1198  O   HOH T1197      27.205 -22.731  27.295  1.00  0.54           O  
HETATM 1199  O   HOH T1198      18.844 -23.000  27.546  1.00  0.54           O  
HETATM 1200  O   HOH T1199      40.356   3.436  33.973  1.00  0.54           O  
HETATM 1201  O   HOH T1200      14.487  22.090  18.088  1.00  0.54           O  
HETATM 1202  O   HOH T1201      31.462  -7.290  10.521  1.00  0.54           O  
HETATM 1203  O   HOH T1202     -21.923 -11.484  12.052  1.00  0.54           O  
HETATM 1204  O   HOH T1203     -11.401  26.592  13.508  1.00  0.54           O  
HETATM 1205  O   HOH T1204       6.401  19.509   6.551  1.00  0.54           O  
HETATM 1206  O   HOH T1205      24.359 -16.351 -11.351  1.00  0.54           O  
HETATM 1207  O   HOH T1206      16.417 -26.290  33.061  1.00  0.54           O  
HETATM 1208  O   HOH T1207      -1.566  -8.092  28.253  1.00  0.54           O  
HETATM 1209  O   HOH T1208      17.066 -37.906  11.200  1.00  0.54           O  
HETATM 1210  O   HOH T1209     -17.846 -17.699   8.000  1.00  0.54           O  
HETATM 1211  O   HOH T1210      21.022  -9.688  10.485  1.00  0.54           O  
HETATM 1212  O   HOH T1211     -21.960 -21.130  13.037  1.00  0.54           O  
HETATM 1213  O   HOH T1212      40.798  23.975   6.334  1.00  0.54           O  
HETATM 1214  O   HOH T1213     -18.488  22.112  19.642  1.00  0.54           O  
HETATM 1215  O   HOH T1214      12.560  13.833  24.153  1.00  0.54           O  
HETATM 1216  O   HOH T1215      24.241  19.248 -10.890  1.00  0.54           O  
HETATM 1217  O   HOH T1216      10.536 -25.947  16.732  1.00  0.54           O  
HETATM 1218  O   HOH T1217      38.893  19.493  23.419  1.00  0.54           O  
HETATM 1219  O   HOH T1218      43.052  -8.743  18.856  1.00  0.55           O  
HETATM 1220  O   HOH T1219      -7.144   6.851  24.941  1.00  0.55           O  
HETATM 1221  O   HOH T1220      12.074  26.156  20.502  1.00  0.55           O  
HETATM 1222  O   HOH T1221      -9.648  -7.793  49.649  1.00  0.55           O  
HETATM 1223  O   HOH T1222      26.746  -0.733  18.310  1.00  0.55           O  
HETATM 1224  O   HOH T1223      -5.313  19.662   2.677  1.00  0.55           O  
HETATM 1225  O   HOH T1224      44.722  -9.878   9.678  1.00  0.55           O  
HETATM 1226  O   HOH T1225     -12.054  17.233  30.704  1.00  0.55           O  
HETATM 1227  O   HOH T1226      24.289  37.363  16.098  1.00  0.55           O  
HETATM 1228  O   HOH T1227      29.952  16.051 -11.441  1.00  0.55           O  
HETATM 1229  O   HOH T1228      -2.686  -1.326  37.884  1.00  0.55           O  
HETATM 1230  O   HOH T1229      43.640 -22.250  10.912  1.00  0.55           O  
HETATM 1231  O   HOH T1230     -18.898  14.584  32.117  1.00  0.55           O  
HETATM 1232  O   HOH T1231      15.338  25.970  19.358  1.00  0.55           O  
HETATM 1233  O   HOH T1232      -1.541  -3.154  44.543  1.00  0.55           O  
HETATM 1234  O   HOH T1233      12.347  11.580 -15.519  1.00  0.55           O  
HETATM 1235  O   HOH T1234     -10.485  15.391  36.413  1.00  0.55           O  
HETATM 1236  O   HOH T1235       9.924 -34.129   9.637  1.00  0.55           O  
HETATM 1237  O   HOH T1236      12.854 -29.218  29.276  1.00  0.55           O  
HETATM 1238  O   HOH T1237      23.717 -18.676 -12.910  1.00  0.55           O  
HETATM 1239  O   HOH T1238      -3.372  31.592  21.062  1.00  0.55           O  
HETATM 1240  O   HOH T1239      -3.605   7.531 -17.118  1.00  0.55           O  
HETATM 1241  O   HOH T1240      44.613  -3.028  33.082  1.00  0.55           O  
HETATM 1242  O   HOH T1241      19.384  16.864  38.121  1.00  0.55           O  
HETATM 1243  O   HOH T1242       2.417 -18.765  51.871  1.00  0.55           O  
HETATM 1244  O   HOH T1243      25.181   8.882 -12.043  1.00  0.55           O  
HETATM 1245  O   HOH T1244      25.065  25.998  -8.958  1.00  0.55           O  
HETATM 1246  O   HOH T1245      -4.026  33.258  29.979  1.00  0.56           O  
HETATM 1247  O   HOH T1246      32.403  31.738  13.908  1.00  0.56           O  
HETATM 1248  O   HOH T1247      23.452  -4.902  19.822  1.00  0.56           O  
HETATM 1249  O   HOH T1248      28.337  -1.632  -9.024  1.00  0.56           O  
HETATM 1250  O   HOH T1249     -21.188 -21.972  15.458  1.00  0.56           O  
HETATM 1251  O   HOH T1250      17.069 -19.164  37.377  1.00  0.56           O  
HETATM 1252  O   HOH T1251      -6.454  27.447  38.851  1.00  0.56           O  
HETATM 1253  O   HOH T1252      34.078 -15.707  -0.076  1.00  0.56           O  
HETATM 1254  O   HOH T1253      24.413  25.038  -1.671  1.00  0.56           O  
HETATM 1255  O   HOH T1254      10.298  -4.380 -19.404  1.00  0.56           O  
HETATM 1256  O   HOH T1255      45.466 -16.319   9.780  1.00  0.56           O  
HETATM 1257  O   HOH T1256      43.115  10.588   4.762  1.00  0.56           O  
HETATM 1258  O   HOH T1257      14.541   3.635  28.032  1.00  0.56           O  
HETATM 1259  O   HOH T1258      50.241   6.502  21.849  1.00  0.56           O  
HETATM 1260  O   HOH T1259     -10.607  -5.902  -6.526  1.00  0.56           O  
HETATM 1261  O   HOH T1260     -26.746  -4.050  16.141  1.00  0.56           O  
HETATM 1262  O   HOH T1261      50.461  -1.730  16.694  1.00  0.56           O  
HETATM 1263  O   HOH T1262       7.493  -9.753  14.654  1.00  0.56           O  
HETATM 1264  O   HOH T1263      30.795 -32.415   2.329  1.00  0.56           O  
HETATM 1265  O   HOH T1264      41.907   7.200   5.664  1.00  0.56           O  
HETATM 1266  O   HOH T1265      -8.484  20.410  28.662  1.00  0.56           O  
HETATM 1267  O   HOH T1266      31.686 -13.842 -10.067  1.00  0.56           O  
HETATM 1268  O   HOH T1267      30.829  19.589 -12.110  1.00  0.56           O  
HETATM 1269  O   HOH T1268      43.877 -22.750  17.804  1.00  0.56           O  
HETATM 1270  O   HOH T1269      21.207  -9.000  47.808  1.00  0.56           O  
HETATM 1271  O   HOH T1270     -25.762   4.879  22.764  1.00  0.56           O  
HETATM 1272  O   HOH T1271      42.230 -16.066   2.510  1.00  0.56           O  
HETATM 1273  O   HOH T1272     -20.196   9.879   4.954  1.00  0.57           O  
HETATM 1274  O   HOH T1273     -14.671  -6.281  -4.883  1.00  0.57           O  
HETATM 1275  O   HOH T1274     -14.598   9.733  33.294  1.00  0.57           O  
HETATM 1276  O   HOH T1275      29.176   8.123  45.345  1.00  0.57           O  
HETATM 1277  O   HOH T1276      31.448  -7.925   3.083  1.00  0.57           O  
HETATM 1278  O   HOH T1277      23.658  33.631  13.710  1.00  0.57           O  
HETATM 1279  O   HOH T1278      -7.170   8.172  48.760  1.00  0.57           O  
HETATM 1280  O   HOH T1279       0.800   3.271  47.723  1.00  0.57           O  
HETATM 1281  O   HOH T1280      31.775   7.832   3.764  1.00  0.57           O  
HETATM 1282  O   HOH T1281     -21.208  -2.673  18.825  1.00  0.57           O  
HETATM 1283  O   HOH T1282       5.239 -14.623  -4.830  1.00  0.57           O  
HETATM 1284  O   HOH T1283     -24.934   8.315  10.504  1.00  0.57           O  
HETATM 1285  O   HOH T1284      24.081 -14.142 -15.382  1.00  0.57           O  
HETATM 1286  O   HOH T1285      -0.787   1.617  52.454  1.00  0.57           O  
HETATM 1287  O   HOH T1286       4.878 -25.801   2.691  1.00  0.57           O  
HETATM 1288  O   HOH T1287      51.048  -7.319  19.385  1.00  0.58           O  
HETATM 1289  O   HOH T1288      -3.254  -3.957  21.790  1.00  0.58           O  
HETATM 1290  O   HOH T1289     -19.728  16.196  29.362  1.00  0.58           O  
HETATM 1291  O   HOH T1290     -14.742  26.121  34.711  1.00  0.58           O  
HETATM 1292  O   HOH T1291     -18.875 -16.783  12.140  1.00  0.58           O  
HETATM 1293  O   HOH T1292      24.386  11.091  48.683  1.00  0.58           O  
HETATM 1294  O   HOH T1293     -26.793  -6.441  14.682  1.00  0.58           O  
HETATM 1295  O   HOH T1294     -19.448 -21.016  13.810  1.00  0.58           O  
HETATM 1296  O   HOH T1295      28.375 -16.845 -10.541  1.00  0.59           O  
HETATM 1297  O   HOH T1296       1.735 -16.120  55.251  1.00  0.59           O  
HETATM 1298  O   HOH T1297      -2.558 -34.224  18.551  1.00  0.59           O  
HETATM 1299  O   HOH T1298      -0.802  -5.227  22.872  1.00  0.59           O  
HETATM 1300  O   HOH T1299      26.084   9.645  42.196  1.00  0.59           O  
HETATM 1301  O   HOH T1300       6.436  23.438  -3.276  1.00  0.59           O  
HETATM 1302  O   HOH T1301      48.861   4.866  11.888  1.00  0.59           O  
HETATM 1303  O   HOH T1302       0.064  -2.782  14.509  1.00  0.59           O  
HETATM 1304  O   HOH T1303      -0.695  -8.812  31.531  1.00  0.60           O  
HETATM 1305  O   HOH T1304      23.448  27.623   1.680  1.00  0.60           O  
HETATM 1306  O   HOH T1305      15.494 -23.544  -9.826  1.00  0.60           O  
HETATM 1307  O   HOH T1306      29.453  32.617  11.046  1.00  0.60           O  
HETATM 1308  O   HOH T1307      19.455  -5.600  18.474  1.00  0.60           O  
HETATM 1309  O   HOH T1308      24.949 -26.121  20.154  1.00  0.60           O  
HETATM 1310  O   HOH T1309      46.248  -8.153  32.503  1.00  0.61           O  
HETATM 1311  O   HOH T1310       9.016 -15.910  45.570  1.00  0.61           O  
HETATM 1312  O   HOH T1311      10.507  13.744 -17.814  1.00  0.62           O  
HETATM 1313  O   HOH T1312       1.545   3.200  30.863  1.00  0.64           O  
TER    1314      HOH T1312 
