# Supplementary material for: Accurate Prediction of Hydration Sites of Proteins Using Energy Model With Atom Embedding
Source: Front Mol Biosci. 2021 Sep 20;8:756075. doi: 10.3389/fmolb.2021.756075 (PMC8488165; doi:10.3389/fmolb.2021.756075)
Supplement: Supplementary file 1 [file DataSheet1.ZIP › Data Sheet 1/Our_result_pdb/our_dataset_output/1NCW_watersite.pdb]

HEADER                                                        XXXX


JRNL        PMID   -1
HETATM    1  O   HOH T   0      71.572  22.287  26.827  1.00  0.17           O  
HETATM    2  O   HOH T   1      57.666  21.510  35.532  1.00  0.17           O  
HETATM    3  O   HOH T   2      67.814  32.469  27.342  1.00  0.18           O  
HETATM    4  O   HOH T   3      58.946  23.411  53.107  1.00  0.18           O  
HETATM    5  O   HOH T   4      64.186  34.890  33.520  1.00  0.18           O  
HETATM    6  O   HOH T   5      54.482  46.832  10.969  1.00  0.19           O  
HETATM    7  O   HOH T   6      69.242  36.855 -12.415  1.00  0.19           O  
HETATM    8  O   HOH T   7      65.812  31.841  40.465  1.00  0.19           O  
HETATM    9  O   HOH T   8      63.443  38.761 -16.202  1.00  0.19           O  
HETATM   10  O   HOH T   9      53.055  48.718  23.472  1.00  0.20           O  
HETATM   11  O   HOH T  10      49.085  55.684  28.930  1.00  0.20           O  
HETATM   12  O   HOH T  11      68.961  48.266 -13.599  1.00  0.20           O  
HETATM   13  O   HOH T  12      71.708  38.464 -19.170  1.00  0.20           O  
HETATM   14  O   HOH T  13      58.578  47.119  16.171  1.00  0.20           O  
HETATM   15  O   HOH T  14      58.422  22.157  28.292  1.00  0.20           O  
HETATM   16  O   HOH T  15      66.077  24.266  47.239  1.00  0.20           O  
HETATM   17  O   HOH T  16      54.407  32.764   0.122  1.00  0.20           O  
HETATM   18  O   HOH T  17      41.266  23.644  43.611  1.00  0.21           O  
HETATM   19  O   HOH T  18      73.361  47.853   0.700  1.00  0.21           O  
HETATM   20  O   HOH T  19      63.098  23.139  13.112  1.00  0.21           O  
HETATM   21  O   HOH T  20      58.972  56.492  17.394  1.00  0.21           O  
HETATM   22  O   HOH T  21      82.172  43.622 -12.825  1.00  0.21           O  
HETATM   23  O   HOH T  22      45.405  40.124  21.990  1.00  0.22           O  
HETATM   24  O   HOH T  23      74.467  27.043  36.423  1.00  0.22           O  
HETATM   25  O   HOH T  24      64.548  31.021  -3.768  1.00  0.22           O  
HETATM   26  O   HOH T  25      61.233  12.260  29.503  1.00  0.22           O  
HETATM   27  O   HOH T  26      70.097  39.582 -22.838  1.00  0.23           O  
HETATM   28  O   HOH T  27      65.792  16.927  32.325  1.00  0.23           O  
HETATM   29  O   HOH T  28      59.484  38.788 -24.184  1.00  0.23           O  
HETATM   30  O   HOH T  29      55.105  23.410  29.913  1.00  0.23           O  
HETATM   31  O   HOH T  30      69.929  32.049  -5.993  1.00  0.23           O  
HETATM   32  O   HOH T  31      59.450  26.375  18.364  1.00  0.23           O  
HETATM   33  O   HOH T  32      75.612  22.301  31.374  1.00  0.23           O  
HETATM   34  O   HOH T  33      83.578  43.359  -2.778  1.00  0.24           O  
HETATM   35  O   HOH T  34      71.245  41.531   2.487  1.00  0.24           O  
HETATM   36  O   HOH T  35      61.662  31.219 -16.972  1.00  0.24           O  
HETATM   37  O   HOH T  36      56.800  55.940  31.730  1.00  0.24           O  
HETATM   38  O   HOH T  37      56.041  58.199  13.186  1.00  0.24           O  
HETATM   39  O   HOH T  38      65.961  38.715  42.186  1.00  0.24           O  
HETATM   40  O   HOH T  39      75.995  35.932 -15.038  1.00  0.25           O  
HETATM   41  O   HOH T  40      56.138  30.578 -12.698  1.00  0.25           O  
HETATM   42  O   HOH T  41      58.730  55.735 -10.533  1.00  0.25           O  
HETATM   43  O   HOH T  42      75.166  58.840 -13.922  1.00  0.25           O  
HETATM   44  O   HOH T  43      53.265  27.286  22.232  1.00  0.25           O  
HETATM   45  O   HOH T  44      67.790  12.584  29.003  1.00  0.25           O  
HETATM   46  O   HOH T  45      83.904  41.498 -12.429  1.00  0.25           O  
HETATM   47  O   HOH T  46      70.540  23.811  46.454  1.00  0.25           O  
HETATM   48  O   HOH T  47      42.791  43.128  36.610  1.00  0.25           O  
HETATM   49  O   HOH T  48      63.179  59.281  12.253  1.00  0.25           O  
HETATM   50  O   HOH T  49      75.517  31.165   6.343  1.00  0.25           O  
HETATM   51  O   HOH T  50      80.172  33.185   6.101  1.00  0.26           O  
HETATM   52  O   HOH T  51      69.722  31.358  34.055  1.00  0.26           O  
HETATM   53  O   HOH T  52      43.476  34.921  35.544  1.00  0.26           O  
HETATM   54  O   HOH T  53      61.626  47.074 -12.845  1.00  0.26           O  
HETATM   55  O   HOH T  54      68.311  28.329   5.092  1.00  0.26           O  
HETATM   56  O   HOH T  55      71.603  35.643 -12.055  1.00  0.26           O  
HETATM   57  O   HOH T  56      65.427  47.763  -7.092  1.00  0.26           O  
HETATM   58  O   HOH T  57      70.448  30.353 -17.706  1.00  0.26           O  
HETATM   59  O   HOH T  58      56.371  56.766   4.668  1.00  0.27           O  
HETATM   60  O   HOH T  59      65.217  50.173  20.004  1.00  0.27           O  
HETATM   61  O   HOH T  60      69.977  25.248  13.819  1.00  0.27           O  
HETATM   62  O   HOH T  61      36.887  48.274  27.296  1.00  0.27           O  
HETATM   63  O   HOH T  62      61.704  47.712  14.501  1.00  0.27           O  
HETATM   64  O   HOH T  63      58.022  43.936 -12.066  1.00  0.28           O  
HETATM   65  O   HOH T  64      63.074   9.450  13.051  1.00  0.28           O  
HETATM   66  O   HOH T  65      70.949  38.057   9.135  1.00  0.28           O  
HETATM   67  O   HOH T  66      65.480  10.071  23.981  1.00  0.28           O  
HETATM   68  O   HOH T  67      67.985  34.715 -11.184  1.00  0.28           O  
HETATM   69  O   HOH T  68      70.505  45.196  11.503  1.00  0.28           O  
HETATM   70  O   HOH T  69      62.683  55.941  10.623  1.00  0.28           O  
HETATM   71  O   HOH T  70      61.640  36.211  19.527  1.00  0.28           O  
HETATM   72  O   HOH T  71      73.569  48.158   8.950  1.00  0.28           O  
HETATM   73  O   HOH T  72      65.228  16.974  41.530  1.00  0.28           O  
HETATM   74  O   HOH T  73      48.656  45.379  33.068  1.00  0.29           O  
HETATM   75  O   HOH T  74      63.429  53.001  -1.427  1.00  0.29           O  
HETATM   76  O   HOH T  75      59.048  13.531  15.264  1.00  0.29           O  
HETATM   77  O   HOH T  76      56.043  17.964   9.685  1.00  0.29           O  
HETATM   78  O   HOH T  77      62.318  24.350 -16.922  1.00  0.29           O  
HETATM   79  O   HOH T  78      55.734  33.130  42.468  1.00  0.29           O  
HETATM   80  O   HOH T  79      59.031  41.343  42.440  1.00  0.29           O  
HETATM   81  O   HOH T  80      35.907  41.590  33.871  1.00  0.29           O  
HETATM   82  O   HOH T  81      75.776  23.879  10.521  1.00  0.29           O  
HETATM   83  O   HOH T  82      55.757  22.650  47.383  1.00  0.29           O  
HETATM   84  O   HOH T  83      48.775  41.567  42.523  1.00  0.29           O  
HETATM   85  O   HOH T  84      67.662  32.341 -12.434  1.00  0.29           O  
HETATM   86  O   HOH T  85      75.146  29.211  -9.089  1.00  0.30           O  
HETATM   87  O   HOH T  86      58.389  29.091  30.810  1.00  0.30           O  
HETATM   88  O   HOH T  87      39.712  31.665  39.725  1.00  0.30           O  
HETATM   89  O   HOH T  88      60.873  15.508  41.333  1.00  0.30           O  
HETATM   90  O   HOH T  89      64.060  15.438  37.655  1.00  0.30           O  
HETATM   91  O   HOH T  90      71.122  14.568  38.061  1.00  0.30           O  
HETATM   92  O   HOH T  91      73.112  28.642  29.794  1.00  0.30           O  
HETATM   93  O   HOH T  92      53.293  44.999  19.839  1.00  0.30           O  
HETATM   94  O   HOH T  93      60.816  39.534 -21.831  1.00  0.30           O  
HETATM   95  O   HOH T  94      53.220  12.773  23.297  1.00  0.30           O  
HETATM   96  O   HOH T  95      65.912  39.299  39.496  1.00  0.30           O  
HETATM   97  O   HOH T  96      75.675  21.210  10.842  1.00  0.30           O  
HETATM   98  O   HOH T  97      59.969  11.295  27.306  1.00  0.30           O  
HETATM   99  O   HOH T  98      66.352  33.977  32.066  1.00  0.30           O  
HETATM  100  O   HOH T  99      72.558  39.817 -23.861  1.00  0.30           O  
HETATM  101  O   HOH T 100      53.529  16.590  17.987  1.00  0.30           O  
HETATM  102  O   HOH T 101      54.237  25.013  23.462  1.00  0.30           O  
HETATM  103  O   HOH T 102      56.381  46.794  39.247  1.00  0.30           O  
HETATM  104  O   HOH T 103      60.319  28.038   1.177  1.00  0.30           O  
HETATM  105  O   HOH T 104      39.683  34.303  39.351  1.00  0.30           O  
HETATM  106  O   HOH T 105      77.748  23.035  16.119  1.00  0.30           O  
HETATM  107  O   HOH T 106      63.986  44.008 -11.509  1.00  0.30           O  
HETATM  108  O   HOH T 107      62.096  31.874   4.284  1.00  0.31           O  
HETATM  109  O   HOH T 108      78.074  59.129 -11.207  1.00  0.31           O  
HETATM  110  O   HOH T 109      57.994  46.337  41.547  1.00  0.31           O  
HETATM  111  O   HOH T 110      31.851  38.083  29.302  1.00  0.31           O  
HETATM  112  O   HOH T 111      60.939  59.953  23.811  1.00  0.31           O  
HETATM  113  O   HOH T 112      55.729  21.188  21.581  1.00  0.31           O  
HETATM  114  O   HOH T 113      57.566  30.053   2.428  1.00  0.31           O  
HETATM  115  O   HOH T 114      65.842  58.728  12.807  1.00  0.31           O  
HETATM  116  O   HOH T 115      75.897  21.126  -4.778  1.00  0.31           O  
HETATM  117  O   HOH T 116      53.410  19.514  21.604  1.00  0.31           O  
HETATM  118  O   HOH T 117      64.489  10.258  33.276  1.00  0.31           O  
HETATM  119  O   HOH T 118      51.984  44.784  -9.503  1.00  0.31           O  
HETATM  120  O   HOH T 119      51.002  36.481  -9.532  1.00  0.31           O  
HETATM  121  O   HOH T 120      70.764  42.580 -16.914  1.00  0.31           O  
HETATM  122  O   HOH T 121      60.470  43.550 -13.141  1.00  0.31           O  
HETATM  123  O   HOH T 122      67.051  29.494 -15.658  1.00  0.31           O  
HETATM  124  O   HOH T 123      50.170  42.779  -8.669  1.00  0.31           O  
HETATM  125  O   HOH T 124      65.679  32.384   8.797  1.00  0.32           O  
HETATM  126  O   HOH T 125      48.840  14.307  42.246  1.00  0.32           O  
HETATM  127  O   HOH T 126      53.018  51.676  17.913  1.00  0.32           O  
HETATM  128  O   HOH T 127      48.190  24.833  23.820  1.00  0.32           O  
HETATM  129  O   HOH T 128      68.650  27.309   2.569  1.00  0.32           O  
HETATM  130  O   HOH T 129      67.662  44.912  28.487  1.00  0.32           O  
HETATM  131  O   HOH T 130      78.759  35.060   4.669  1.00  0.32           O  
HETATM  132  O   HOH T 131      51.955  54.615   2.410  1.00  0.32           O  
HETATM  133  O   HOH T 132      66.903  44.523  21.434  1.00  0.32           O  
HETATM  134  O   HOH T 133      67.257  48.613  21.075  1.00  0.32           O  
HETATM  135  O   HOH T 134      56.923  38.883 -21.497  1.00  0.32           O  
HETATM  136  O   HOH T 135      53.330  41.193  40.402  1.00  0.32           O  
HETATM  137  O   HOH T 136      78.859  20.014  20.243  1.00  0.32           O  
HETATM  138  O   HOH T 137      63.544  47.817  35.931  1.00  0.32           O  
HETATM  139  O   HOH T 138      72.718  31.320   6.387  1.00  0.32           O  
HETATM  140  O   HOH T 139      47.434  48.869   9.708  1.00  0.32           O  
HETATM  141  O   HOH T 140      71.148  31.269  31.785  1.00  0.33           O  
HETATM  142  O   HOH T 141      74.565  43.447   6.855  1.00  0.33           O  
HETATM  143  O   HOH T 142      73.703  22.864  -4.666  1.00  0.33           O  
HETATM  144  O   HOH T 143      50.151  18.118  33.481  1.00  0.33           O  
HETATM  145  O   HOH T 144      58.114  35.280   3.172  1.00  0.33           O  
HETATM  146  O   HOH T 145      73.497  35.736 -13.960  1.00  0.33           O  
HETATM  147  O   HOH T 146      58.415  39.589   5.921  1.00  0.33           O  
HETATM  148  O   HOH T 147      76.448  48.374 -19.600  1.00  0.33           O  
HETATM  149  O   HOH T 148      81.647  55.809 -16.891  1.00  0.33           O  
HETATM  150  O   HOH T 149      49.782  40.336  -9.856  1.00  0.33           O  
HETATM  151  O   HOH T 150      80.532  41.724  -0.968  1.00  0.33           O  
HETATM  152  O   HOH T 151      80.776  13.775   1.938  1.00  0.33           O  
HETATM  153  O   HOH T 152      59.528  23.669  19.081  1.00  0.33           O  
HETATM  154  O   HOH T 153      54.501  26.174  -3.130  1.00  0.33           O  
HETATM  155  O   HOH T 154      65.169  38.172 -18.234  1.00  0.33           O  
HETATM  156  O   HOH T 155      62.208  55.045   2.867  1.00  0.33           O  
HETATM  157  O   HOH T 156      72.246  16.823  40.556  1.00  0.33           O  
HETATM  158  O   HOH T 157      58.784  26.395  30.569  1.00  0.34           O  
HETATM  159  O   HOH T 158      69.130  48.479  -0.479  1.00  0.34           O  
HETATM  160  O   HOH T 159      71.447  14.623  33.954  1.00  0.34           O  
HETATM  161  O   HOH T 160      53.567  42.743  37.926  1.00  0.34           O  
HETATM  162  O   HOH T 161      44.260  47.578  28.536  1.00  0.34           O  
HETATM  163  O   HOH T 162      63.876  32.481  45.518  1.00  0.34           O  
HETATM  164  O   HOH T 163      61.783  43.794 -15.458  1.00  0.34           O  
HETATM  165  O   HOH T 164      66.319  42.664 -10.972  1.00  0.34           O  
HETATM  166  O   HOH T 165      48.519  44.495  17.498  1.00  0.34           O  
HETATM  167  O   HOH T 166      84.324  28.452  -3.971  1.00  0.34           O  
HETATM  168  O   HOH T 167      38.614  26.646  31.647  1.00  0.34           O  
HETATM  169  O   HOH T 168      52.048  40.109   3.080  1.00  0.34           O  
HETATM  170  O   HOH T 169      42.428  18.260  31.900  1.00  0.34           O  
HETATM  171  O   HOH T 170      76.315  27.540  26.330  1.00  0.34           O  
HETATM  172  O   HOH T 171      57.601  55.799   2.452  1.00  0.34           O  
HETATM  173  O   HOH T 172      55.253  42.125  15.785  1.00  0.34           O  
HETATM  174  O   HOH T 173      80.336  62.324  -9.655  1.00  0.34           O  
HETATM  175  O   HOH T 174      52.529  51.396  23.955  1.00  0.34           O  
HETATM  176  O   HOH T 175      50.760  31.613  47.075  1.00  0.35           O  
HETATM  177  O   HOH T 176      51.943  49.651  16.277  1.00  0.35           O  
HETATM  178  O   HOH T 177      75.053  46.915 -21.641  1.00  0.35           O  
HETATM  179  O   HOH T 178      68.122  32.568  47.330  1.00  0.35           O  
HETATM  180  O   HOH T 179      51.994  15.410  29.121  1.00  0.35           O  
HETATM  181  O   HOH T 180      55.058  56.293  14.787  1.00  0.35           O  
HETATM  182  O   HOH T 181      63.381  46.673  16.433  1.00  0.35           O  
HETATM  183  O   HOH T 182      72.191  25.929  12.098  1.00  0.35           O  
HETATM  184  O   HOH T 183      75.443  14.963  22.346  1.00  0.35           O  
HETATM  185  O   HOH T 184      75.772  28.141  28.981  1.00  0.35           O  
HETATM  186  O   HOH T 185      59.473  41.623   8.990  1.00  0.35           O  
HETATM  187  O   HOH T 186      59.681   7.140  18.406  1.00  0.35           O  
HETATM  188  O   HOH T 187      73.578  18.361  33.164  1.00  0.35           O  
HETATM  189  O   HOH T 188      62.369  33.342   6.568  1.00  0.35           O  
HETATM  190  O   HOH T 189      51.074  31.687 -10.526  1.00  0.35           O  
HETATM  191  O   HOH T 190      61.190  18.889  16.474  1.00  0.35           O  
HETATM  192  O   HOH T 191      65.397  53.182  15.904  1.00  0.36           O  
HETATM  193  O   HOH T 192      33.774  42.724  34.931  1.00  0.36           O  
HETATM  194  O   HOH T 193      61.519  30.860  45.481  1.00  0.36           O  
HETATM  195  O   HOH T 194      69.680  52.679  12.912  1.00  0.36           O  
HETATM  196  O   HOH T 195      54.232  44.965 -11.376  1.00  0.36           O  
HETATM  197  O   HOH T 196      89.126  30.960  -5.011  1.00  0.36           O  
HETATM  198  O   HOH T 197      48.809  18.896  31.209  1.00  0.36           O  
HETATM  199  O   HOH T 198      68.699  45.161  25.948  1.00  0.36           O  
HETATM  200  O   HOH T 199      67.938  44.411  11.439  1.00  0.36           O  
HETATM  201  O   HOH T 200      59.992  32.793  46.433  1.00  0.36           O  
HETATM  202  O   HOH T 201      79.843  50.127   3.849  1.00  0.36           O  
HETATM  203  O   HOH T 202      64.113  54.033   1.110  1.00  0.37           O  
HETATM  204  O   HOH T 203      67.444  36.344  31.076  1.00  0.37           O  
HETATM  205  O   HOH T 204      60.243  61.281  17.860  1.00  0.37           O  
HETATM  206  O   HOH T 205      64.004  51.811  32.474  1.00  0.37           O  
HETATM  207  O   HOH T 206      51.137  24.614  42.275  1.00  0.37           O  
HETATM  208  O   HOH T 207      50.555  53.720  30.311  1.00  0.37           O  
HETATM  209  O   HOH T 208      77.557  24.495   8.592  1.00  0.37           O  
HETATM  210  O   HOH T 209      67.883  30.199  -5.826  1.00  0.37           O  
HETATM  211  O   HOH T 210      57.891  34.128  17.636  1.00  0.37           O  
HETATM  212  O   HOH T 211      64.302  44.734  14.638  1.00  0.37           O  
HETATM  213  O   HOH T 212      53.487  29.181  20.176  1.00  0.37           O  
HETATM  214  O   HOH T 213      65.860  28.495  16.146  1.00  0.37           O  
HETATM  215  O   HOH T 214      38.183  25.014  29.429  1.00  0.37           O  
HETATM  216  O   HOH T 215      49.149  30.392  20.794  1.00  0.37           O  
HETATM  217  O   HOH T 216      79.359  24.288  20.841  1.00  0.37           O  
HETATM  218  O   HOH T 217      49.418  33.318  18.581  1.00  0.37           O  
HETATM  219  O   HOH T 218      64.677  14.361   8.842  1.00  0.37           O  
HETATM  220  O   HOH T 219      46.731  48.549   3.097  1.00  0.38           O  
HETATM  221  O   HOH T 220      65.491  24.545  -8.243  1.00  0.38           O  
HETATM  222  O   HOH T 221      50.160  43.056  -0.274  1.00  0.38           O  
HETATM  223  O   HOH T 222      64.000  54.493  32.372  1.00  0.38           O  
HETATM  224  O   HOH T 223      71.054  49.336   1.397  1.00  0.38           O  
HETATM  225  O   HOH T 224      45.260  22.333  30.119  1.00  0.38           O  
HETATM  226  O   HOH T 225      50.535  53.657  27.590  1.00  0.38           O  
HETATM  227  O   HOH T 226      83.545  18.281   2.788  1.00  0.38           O  
HETATM  228  O   HOH T 227      46.511  23.222  27.762  1.00  0.38           O  
HETATM  229  O   HOH T 228      81.609  38.699   2.283  1.00  0.38           O  
HETATM  230  O   HOH T 229      57.519  36.776  17.093  1.00  0.38           O  
HETATM  231  O   HOH T 230      54.479  49.428  15.093  1.00  0.38           O  
HETATM  232  O   HOH T 231      63.957  48.900  38.371  1.00  0.38           O  
HETATM  233  O   HOH T 232      50.848  21.736  46.379  1.00  0.38           O  
HETATM  234  O   HOH T 233      68.544  44.426  -7.284  1.00  0.38           O  
HETATM  235  O   HOH T 234      65.631  56.855  -2.950  1.00  0.38           O  
HETATM  236  O   HOH T 235      64.018  25.782   9.635  1.00  0.38           O  
HETATM  237  O   HOH T 236      65.951  58.362  15.556  1.00  0.38           O  
HETATM  238  O   HOH T 237      77.156  43.087   5.750  1.00  0.38           O  
HETATM  239  O   HOH T 238      58.683  11.107  16.626  1.00  0.38           O  
HETATM  240  O   HOH T 239      63.456  31.387  16.127  1.00  0.38           O  
HETATM  241  O   HOH T 240      81.694  45.016   2.763  1.00  0.38           O  
HETATM  242  O   HOH T 241      53.993  12.105  20.729  1.00  0.38           O  
HETATM  243  O   HOH T 242      68.002  33.879  29.761  1.00  0.38           O  
HETATM  244  O   HOH T 243      63.478  15.141  40.369  1.00  0.38           O  
HETATM  245  O   HOH T 244      33.867  38.015  34.774  1.00  0.38           O  
HETATM  246  O   HOH T 245      77.567  48.684   4.217  1.00  0.38           O  
HETATM  247  O   HOH T 246      33.439  42.790  28.415  1.00  0.39           O  
HETATM  248  O   HOH T 247      70.228  10.666  22.821  1.00  0.39           O  
HETATM  249  O   HOH T 248      48.207  46.619  28.559  1.00  0.39           O  
HETATM  250  O   HOH T 249      56.279  45.803  15.861  1.00  0.39           O  
HETATM  251  O   HOH T 250      80.100  16.312   1.717  1.00  0.39           O  
HETATM  252  O   HOH T 251      64.698  32.447  13.827  1.00  0.39           O  
HETATM  253  O   HOH T 252      55.700  10.125  19.626  1.00  0.39           O  
HETATM  254  O   HOH T 253      51.088  13.651  24.998  1.00  0.39           O  
HETATM  255  O   HOH T 254      72.300  35.647  25.399  1.00  0.39           O  
HETATM  256  O   HOH T 255      71.694  23.881  48.978  1.00  0.39           O  
HETATM  257  O   HOH T 256      44.782  42.422  38.296  1.00  0.39           O  
HETATM  258  O   HOH T 257      64.361  46.238  33.759  1.00  0.39           O  
HETATM  259  O   HOH T 258      68.703  30.432  -9.541  1.00  0.39           O  
HETATM  260  O   HOH T 259      65.932  38.839  34.791  1.00  0.39           O  
HETATM  261  O   HOH T 260      75.343  26.474  -8.397  1.00  0.39           O  
HETATM  262  O   HOH T 261      69.706  25.178  -5.325  1.00  0.39           O  
HETATM  263  O   HOH T 262      72.337  52.703  11.746  1.00  0.39           O  
HETATM  264  O   HOH T 263      87.219  23.278  -2.740  1.00  0.39           O  
HETATM  265  O   HOH T 264      81.816  59.579  -7.319  1.00  0.39           O  
HETATM  266  O   HOH T 265      38.810  35.083  24.112  1.00  0.40           O  
HETATM  267  O   HOH T 266      54.162  14.174  18.775  1.00  0.40           O  
HETATM  268  O   HOH T 267      55.147  47.214  13.728  1.00  0.40           O  
HETATM  269  O   HOH T 268      78.660  16.117   6.639  1.00  0.40           O  
HETATM  270  O   HOH T 269      87.426  23.367  -0.005  1.00  0.40           O  
HETATM  271  O   HOH T 270      60.762  60.920  26.385  1.00  0.40           O  
HETATM  272  O   HOH T 271      48.692  28.180  22.464  1.00  0.40           O  
HETATM  273  O   HOH T 272      70.493  35.690  10.687  1.00  0.40           O  
HETATM  274  O   HOH T 273      57.457  57.569  15.526  1.00  0.40           O  
HETATM  275  O   HOH T 274      81.742  28.889  -4.643  1.00  0.40           O  
HETATM  276  O   HOH T 275      63.776  29.791   3.569  1.00  0.40           O  
HETATM  277  O   HOH T 276      57.426  24.696  28.962  1.00  0.40           O  
HETATM  278  O   HOH T 277      82.669  30.963 -11.756  1.00  0.40           O  
HETATM  279  O   HOH T 278      61.371  25.085   5.005  1.00  0.40           O  
HETATM  280  O   HOH T 279      83.274  59.883 -18.830  1.00  0.40           O  
HETATM  281  O   HOH T 280      59.149  45.574 -21.252  1.00  0.40           O  
HETATM  282  O   HOH T 281      60.803  24.379  -0.091  1.00  0.40           O  
HETATM  283  O   HOH T 282      77.844  32.328   7.276  1.00  0.40           O  
HETATM  284  O   HOH T 283      44.167  40.572  40.160  1.00  0.40           O  
HETATM  285  O   HOH T 284      58.510  60.192  24.962  1.00  0.40           O  
HETATM  286  O   HOH T 285      73.876  34.723  23.456  1.00  0.40           O  
HETATM  287  O   HOH T 286      66.921  45.577  23.874  1.00  0.40           O  
HETATM  288  O   HOH T 287      78.664  18.623  17.784  1.00  0.40           O  
HETATM  289  O   HOH T 288      71.720  22.765  -2.839  1.00  0.40           O  
HETATM  290  O   HOH T 289      59.028  52.726  37.315  1.00  0.40           O  
HETATM  291  O   HOH T 290      86.649  30.043  -4.238  1.00  0.40           O  
HETATM  292  O   HOH T 291      70.462  53.459   4.839  1.00  0.40           O  
HETATM  293  O   HOH T 292      69.641  31.699  17.589  1.00  0.41           O  
HETATM  294  O   HOH T 293      43.787  21.855  33.974  1.00  0.41           O  
HETATM  295  O   HOH T 294      71.849  49.056  12.649  1.00  0.41           O  
HETATM  296  O   HOH T 295      68.652  49.157   6.120  1.00  0.41           O  
HETATM  297  O   HOH T 296      66.075  44.163 -13.268  1.00  0.41           O  
HETATM  298  O   HOH T 297      65.482  50.806  17.289  1.00  0.41           O  
HETATM  299  O   HOH T 298      55.060  36.800   5.896  1.00  0.41           O  
HETATM  300  O   HOH T 299      70.931  28.510  11.719  1.00  0.41           O  
HETATM  301  O   HOH T 300      72.708  25.741  -8.896  1.00  0.41           O  
HETATM  302  O   HOH T 301      91.082  27.430  -8.289  1.00  0.41           O  
HETATM  303  O   HOH T 302      71.958  30.824  42.450  1.00  0.41           O  
HETATM  304  O   HOH T 303      53.291  54.334  13.854  1.00  0.41           O  
HETATM  305  O   HOH T 304      80.222  41.128   1.757  1.00  0.41           O  
HETATM  306  O   HOH T 305      68.502  26.526 -13.255  1.00  0.41           O  
HETATM  307  O   HOH T 306      50.872  42.730  38.591  1.00  0.41           O  
HETATM  308  O   HOH T 307      58.809  27.030  44.577  1.00  0.41           O  
HETATM  309  O   HOH T 308      65.222  43.639  33.141  1.00  0.41           O  
HETATM  310  O   HOH T 309      77.013  55.505  -4.585  1.00  0.41           O  
HETATM  311  O   HOH T 310      42.821  21.330  44.417  1.00  0.41           O  
HETATM  312  O   HOH T 311      70.623  12.066  33.620  1.00  0.41           O  
HETATM  313  O   HOH T 312      57.557   8.859  17.894  1.00  0.41           O  
HETATM  314  O   HOH T 313      68.869  43.739  23.369  1.00  0.41           O  
HETATM  315  O   HOH T 314      71.035  31.565 -10.682  1.00  0.41           O  
HETATM  316  O   HOH T 315      77.058  15.105  20.130  1.00  0.42           O  
HETATM  317  O   HOH T 316      91.003  27.489  -3.822  1.00  0.42           O  
HETATM  318  O   HOH T 317      56.139  25.872  26.807  1.00  0.42           O  
HETATM  319  O   HOH T 318      58.854  54.199   0.669  1.00  0.42           O  
HETATM  320  O   HOH T 319      58.915  57.763  32.316  1.00  0.42           O  
HETATM  321  O   HOH T 320      73.055  12.947  32.441  1.00  0.42           O  
HETATM  322  O   HOH T 321      87.594  25.684  -1.567  1.00  0.42           O  
HETATM  323  O   HOH T 322      67.706  41.353  38.850  1.00  0.42           O  
HETATM  324  O   HOH T 323      41.687  18.280  29.249  1.00  0.42           O  
HETATM  325  O   HOH T 324      78.550  20.889  -4.241  1.00  0.42           O  
HETATM  326  O   HOH T 325      55.865  52.675  39.684  1.00  0.42           O  
HETATM  327  O   HOH T 326      65.570  22.288 -11.847  1.00  0.42           O  
HETATM  328  O   HOH T 327      72.056  31.521 -20.790  1.00  0.42           O  
HETATM  329  O   HOH T 328      57.620  37.085   5.203  1.00  0.42           O  
HETATM  330  O   HOH T 329      71.213  46.721  13.777  1.00  0.42           O  
HETATM  331  O   HOH T 330      69.673   6.492  20.433  1.00  0.42           O  
HETATM  332  O   HOH T 331      69.529  16.501  22.971  1.00  0.42           O  
HETATM  333  O   HOH T 332      57.077  27.508  28.786  1.00  0.42           O  
HETATM  334  O   HOH T 333      72.273  30.495  10.227  1.00  0.42           O  
HETATM  335  O   HOH T 334      61.502  53.449   0.600  1.00  0.42           O  
HETATM  336  O   HOH T 335      60.248  22.155  41.949  1.00  0.42           O  
HETATM  337  O   HOH T 336      49.143  44.791  38.391  1.00  0.42           O  
HETATM  338  O   HOH T 337      50.122  27.406   0.109  1.00  0.42           O  
HETATM  339  O   HOH T 338      79.299  17.011  15.518  1.00  0.42           O  
HETATM  340  O   HOH T 339      43.190  20.952  31.461  1.00  0.43           O  
HETATM  341  O   HOH T 340      49.257  51.620  29.130  1.00  0.43           O  
HETATM  342  O   HOH T 341      48.440  24.113  42.028  1.00  0.43           O  
HETATM  343  O   HOH T 342      48.699  23.394  26.168  1.00  0.43           O  
HETATM  344  O   HOH T 343      62.989  23.296 -11.869  1.00  0.43           O  
HETATM  345  O   HOH T 344      81.085  20.184   5.726  1.00  0.43           O  
HETATM  346  O   HOH T 345      65.960  26.266  -4.808  1.00  0.43           O  
HETATM  347  O   HOH T 346      54.637  50.284  39.941  1.00  0.43           O  
HETATM  348  O   HOH T 347      47.594  19.582  27.378  1.00  0.43           O  
HETATM  349  O   HOH T 348      72.936  42.185 -18.542  1.00  0.43           O  
HETATM  350  O   HOH T 349      49.962  34.100 -10.413  1.00  0.43           O  
HETATM  351  O   HOH T 350      61.605  33.293  17.080  1.00  0.43           O  
HETATM  352  O   HOH T 351      84.246  26.917  -9.170  1.00  0.43           O  
HETATM  353  O   HOH T 352      52.427  39.637  16.646  1.00  0.43           O  
HETATM  354  O   HOH T 353      50.974  28.210  20.823  1.00  0.43           O  
HETATM  355  O   HOH T 354      64.889  50.107  30.390  1.00  0.43           O  
HETATM  356  O   HOH T 355      32.300  40.307  34.929  1.00  0.43           O  
HETATM  357  O   HOH T 356      56.028  24.816   1.147  1.00  0.43           O  
HETATM  358  O   HOH T 357      76.875  18.833  -3.579  1.00  0.43           O  
HETATM  359  O   HOH T 358      66.452  43.806  30.748  1.00  0.43           O  
HETATM  360  O   HOH T 359      62.230  18.041   2.635  1.00  0.43           O  
HETATM  361  O   HOH T 360      65.271  27.043  -2.254  1.00  0.43           O  
HETATM  362  O   HOH T 361      90.333  29.994  -7.324  1.00  0.43           O  
HETATM  363  O   HOH T 362      62.832  27.631   2.323  1.00  0.43           O  
HETATM  364  O   HOH T 363      51.359  28.839  47.293  1.00  0.44           O  
HETATM  365  O   HOH T 364      62.391  61.686  16.174  1.00  0.44           O  
HETATM  366  O   HOH T 365      47.672  32.453  -5.770  1.00  0.44           O  
HETATM  367  O   HOH T 366      71.224  11.417  31.093  1.00  0.44           O  
HETATM  368  O   HOH T 367      56.749  23.592  16.223  1.00  0.44           O  
HETATM  369  O   HOH T 368      72.291  33.952  27.625  1.00  0.44           O  
HETATM  370  O   HOH T 369      60.615  54.329  -4.854  1.00  0.44           O  
HETATM  371  O   HOH T 370      66.444  32.862  42.888  1.00  0.44           O  
HETATM  372  O   HOH T 371      77.792  16.083  17.675  1.00  0.44           O  
HETATM  373  O   HOH T 372      72.516  46.804  11.190  1.00  0.44           O  
HETATM  374  O   HOH T 373      56.709  33.785   1.268  1.00  0.44           O  
HETATM  375  O   HOH T 374      72.269  32.964  25.050  1.00  0.44           O  
HETATM  376  O   HOH T 375      37.377  30.685  23.504  1.00  0.44           O  
HETATM  377  O   HOH T 376      73.145  54.836   9.968  1.00  0.44           O  
HETATM  378  O   HOH T 377      60.851  20.200   7.002  1.00  0.44           O  
HETATM  379  O   HOH T 378      69.749  47.822 -16.311  1.00  0.44           O  
HETATM  380  O   HOH T 379      52.521  42.386  16.346  1.00  0.44           O  
HETATM  381  O   HOH T 380      64.210  12.979  38.763  1.00  0.44           O  
HETATM  382  O   HOH T 381      64.965  28.248   8.902  1.00  0.44           O  
HETATM  383  O   HOH T 382      65.920  28.879   6.394  1.00  0.44           O  
HETATM  384  O   HOH T 383      40.478  25.017  21.897  1.00  0.44           O  
HETATM  385  O   HOH T 384      75.386  50.220   8.950  1.00  0.44           O  
HETATM  386  O   HOH T 385      55.613  55.341  40.321  1.00  0.44           O  
HETATM  387  O   HOH T 386      72.080  29.071 -21.992  1.00  0.44           O  
HETATM  388  O   HOH T 387      60.610  55.376  -7.337  1.00  0.44           O  
HETATM  389  O   HOH T 388      68.240  43.562  37.149  1.00  0.44           O  
HETATM  390  O   HOH T 389      37.413  34.631  32.150  1.00  0.44           O  
HETATM  391  O   HOH T 390      52.387  47.835  14.163  1.00  0.44           O  
HETATM  392  O   HOH T 391      60.470  63.676  29.148  1.00  0.44           O  
HETATM  393  O   HOH T 392      55.040  29.973  17.133  1.00  0.44           O  
HETATM  394  O   HOH T 393      49.405  46.757   5.989  1.00  0.44           O  
HETATM  395  O   HOH T 394      68.236   6.344  22.723  1.00  0.44           O  
HETATM  396  O   HOH T 395      62.931  24.797  -9.441  1.00  0.44           O  
HETATM  397  O   HOH T 396      60.772  13.739  43.608  1.00  0.44           O  
HETATM  398  O   HOH T 397      61.946  61.535  13.296  1.00  0.44           O  
HETATM  399  O   HOH T 398      48.886  15.260  25.765  1.00  0.45           O  
HETATM  400  O   HOH T 399      82.709  39.417 -13.811  1.00  0.45           O  
HETATM  401  O   HOH T 400      61.314   9.449  25.741  1.00  0.45           O  
HETATM  402  O   HOH T 401      84.340  17.111   5.118  1.00  0.45           O  
HETATM  403  O   HOH T 402      49.352  37.988 -11.271  1.00  0.45           O  
HETATM  404  O   HOH T 403      63.270  16.945   4.834  1.00  0.45           O  
HETATM  405  O   HOH T 404      64.297  60.402  14.512  1.00  0.45           O  
HETATM  406  O   HOH T 405      68.944  32.376  14.952  1.00  0.45           O  
HETATM  407  O   HOH T 406      86.497  28.066  -2.318  1.00  0.45           O  
HETATM  408  O   HOH T 407      68.909  27.523  15.222  1.00  0.45           O  
HETATM  409  O   HOH T 408      62.384  17.869   7.317  1.00  0.45           O  
HETATM  410  O   HOH T 409      60.447   8.925  13.892  1.00  0.45           O  
HETATM  411  O   HOH T 410      67.204  36.137  20.222  1.00  0.45           O  
HETATM  412  O   HOH T 411      49.138  38.137  -8.408  1.00  0.45           O  
HETATM  413  O   HOH T 412      76.107  12.883  14.538  1.00  0.45           O  
HETATM  414  O   HOH T 413      49.276  33.775 -13.044  1.00  0.45           O  
HETATM  415  O   HOH T 414      45.268  18.828  25.973  1.00  0.45           O  
HETATM  416  O   HOH T 415      79.851  38.661   4.490  1.00  0.45           O  
HETATM  417  O   HOH T 416      49.561  51.873  36.396  1.00  0.45           O  
HETATM  418  O   HOH T 417      74.486  30.890   8.736  1.00  0.45           O  
HETATM  419  O   HOH T 418      73.119  32.359  22.472  1.00  0.45           O  
HETATM  420  O   HOH T 419      65.605  56.464  19.411  1.00  0.45           O  
HETATM  421  O   HOH T 420      66.668  46.168  14.793  1.00  0.45           O  
HETATM  422  O   HOH T 421      64.064  32.473  11.047  1.00  0.45           O  
HETATM  423  O   HOH T 422      53.224  51.834  15.125  1.00  0.45           O  
HETATM  424  O   HOH T 423      78.353  51.881 -10.055  1.00  0.45           O  
HETATM  425  O   HOH T 424      79.360  15.773  -4.257  1.00  0.45           O  
HETATM  426  O   HOH T 425      88.954  29.206  -2.873  1.00  0.45           O  
HETATM  427  O   HOH T 426      68.106   8.962  23.660  1.00  0.45           O  
HETATM  428  O   HOH T 427      79.807  47.244   3.205  1.00  0.45           O  
HETATM  429  O   HOH T 428      67.808  46.254  30.935  1.00  0.45           O  
HETATM  430  O   HOH T 429      66.332  28.891  -3.978  1.00  0.45           O  
HETATM  431  O   HOH T 430      73.171  28.353  21.515  1.00  0.45           O  
HETATM  432  O   HOH T 431      63.776  30.071  46.886  1.00  0.45           O  
HETATM  433  O   HOH T 432      66.290  25.954   1.823  1.00  0.45           O  
HETATM  434  O   HOH T 433      69.036  45.076  13.873  1.00  0.46           O  
HETATM  435  O   HOH T 434      49.233  53.547   9.780  1.00  0.46           O  
HETATM  436  O   HOH T 435      57.174  31.353  44.000  1.00  0.46           O  
HETATM  437  O   HOH T 436      78.797  40.765   5.943  1.00  0.46           O  
HETATM  438  O   HOH T 437      50.095  41.333   1.781  1.00  0.46           O  
HETATM  439  O   HOH T 438      73.789  28.339  27.059  1.00  0.46           O  
HETATM  440  O   HOH T 439      44.394  48.497  31.186  1.00  0.46           O  
HETATM  441  O   HOH T 440      68.867  28.100 -11.027  1.00  0.46           O  
HETATM  442  O   HOH T 441      63.642  40.619  10.053  1.00  0.46           O  
HETATM  443  O   HOH T 442      41.920  23.206  46.191  1.00  0.46           O  
HETATM  444  O   HOH T 443      66.620  36.236  33.802  1.00  0.46           O  
HETATM  445  O   HOH T 444      86.933  33.288   0.258  1.00  0.46           O  
HETATM  446  O   HOH T 445      52.816  57.088   3.342  1.00  0.46           O  
HETATM  447  O   HOH T 446      60.220  28.564  46.216  1.00  0.46           O  
HETATM  448  O   HOH T 447      61.837  24.901  11.393  1.00  0.46           O  
HETATM  449  O   HOH T 448      47.871  25.768  21.243  1.00  0.46           O  
HETATM  450  O   HOH T 449      55.334  31.703   2.495  1.00  0.46           O  
HETATM  451  O   HOH T 450      75.471  30.108  25.691  1.00  0.46           O  
HETATM  452  O   HOH T 451      50.133  38.509   2.039  1.00  0.46           O  
HETATM  453  O   HOH T 452      62.032  25.043   2.335  1.00  0.46           O  
HETATM  454  O   HOH T 453      58.514  21.834  21.068  1.00  0.46           O  
HETATM  455  O   HOH T 454      36.984  33.343  22.871  1.00  0.46           O  
HETATM  456  O   HOH T 455      74.603  38.891 -22.264  1.00  0.46           O  
HETATM  457  O   HOH T 456      67.399  45.327  39.127  1.00  0.46           O  
HETATM  458  O   HOH T 457      71.982  40.527   8.645  1.00  0.46           O  
HETATM  459  O   HOH T 458      65.811  30.930  17.661  1.00  0.46           O  
HETATM  460  O   HOH T 459      39.652  45.504  29.866  1.00  0.46           O  
HETATM  461  O   HOH T 460      71.371  59.446  -7.717  1.00  0.46           O  
HETATM  462  O   HOH T 461      50.098  34.159 -15.475  1.00  0.46           O  
HETATM  463  O   HOH T 462      59.137  45.964 -13.693  1.00  0.46           O  
HETATM  464  O   HOH T 463      67.638  25.941  -7.024  1.00  0.46           O  
HETATM  465  O   HOH T 464      79.439  18.029   4.906  1.00  0.46           O  
HETATM  466  O   HOH T 465      80.092  31.158 -12.555  1.00  0.47           O  
HETATM  467  O   HOH T 466      52.456  18.204  19.522  1.00  0.47           O  
HETATM  468  O   HOH T 467      85.146  42.233  -0.764  1.00  0.47           O  
HETATM  469  O   HOH T 468      73.149  18.332  42.703  1.00  0.47           O  
HETATM  470  O   HOH T 469      73.844  24.977  -6.515  1.00  0.47           O  
HETATM  471  O   HOH T 470      52.014  26.067   1.532  1.00  0.47           O  
HETATM  472  O   HOH T 471      51.093  52.566  13.577  1.00  0.47           O  
HETATM  473  O   HOH T 472      79.330  44.516   4.325  1.00  0.47           O  
HETATM  474  O   HOH T 473      59.081  61.405  29.972  1.00  0.47           O  
HETATM  475  O   HOH T 474      66.707  48.528  18.344  1.00  0.47           O  
HETATM  476  O   HOH T 475      80.112  18.323   7.590  1.00  0.47           O  
HETATM  477  O   HOH T 476      59.892  22.143   8.836  1.00  0.47           O  
HETATM  478  O   HOH T 477      78.719  46.741   5.728  1.00  0.47           O  
HETATM  479  O   HOH T 478      59.810  32.886   5.590  1.00  0.47           O  
HETATM  480  O   HOH T 479      59.928  60.776  15.085  1.00  0.47           O  
HETATM  481  O   HOH T 480      80.551  19.462  16.087  1.00  0.47           O  
HETATM  482  O   HOH T 481      51.081  43.649  18.414  1.00  0.47           O  
HETATM  483  O   HOH T 482      70.729  26.853 -20.904  1.00  0.47           O  
HETATM  484  O   HOH T 483      47.086  16.967  27.070  1.00  0.47           O  
HETATM  485  O   HOH T 484      83.479  57.419 -20.164  1.00  0.48           O  
HETATM  486  O   HOH T 485      61.742  53.250  36.552  1.00  0.48           O  
HETATM  487  O   HOH T 486      74.817  52.599  10.379  1.00  0.48           O  
HETATM  488  O   HOH T 487      70.150  25.036  -8.041  1.00  0.48           O  
HETATM  489  O   HOH T 488      61.766  61.700  30.643  1.00  0.48           O  
HETATM  490  O   HOH T 489      62.326  25.096   7.685  1.00  0.48           O  
HETATM  491  O   HOH T 490      72.150  25.168  -4.244  1.00  0.48           O  
HETATM  492  O   HOH T 491      68.408  51.823   5.592  1.00  0.48           O  
HETATM  493  O   HOH T 492      37.123  37.228  24.355  1.00  0.48           O  
HETATM  494  O   HOH T 493      69.834   7.098  16.834  1.00  0.48           O  
HETATM  495  O   HOH T 494      32.204  40.361  28.008  1.00  0.48           O  
HETATM  496  O   HOH T 495      48.469  51.133  11.039  1.00  0.48           O  
HETATM  497  O   HOH T 496      65.700  42.885  11.446  1.00  0.48           O  
HETATM  498  O   HOH T 497      35.394  36.918  26.529  1.00  0.48           O  
HETATM  499  O   HOH T 498      60.869  18.328   4.968  1.00  0.48           O  
HETATM  500  O   HOH T 499      57.550  25.704 -10.550  1.00  0.48           O  
HETATM  501  O   HOH T 500      78.833  17.208  20.043  1.00  0.48           O  
HETATM  502  O   HOH T 501      36.215  34.727  25.119  1.00  0.48           O  
HETATM  503  O   HOH T 502      57.228  54.630  38.204  1.00  0.48           O  
HETATM  504  O   HOH T 503      55.623  57.845   7.035  1.00  0.48           O  
HETATM  505  O   HOH T 504      38.100  32.671  25.358  1.00  0.48           O  
HETATM  506  O   HOH T 505      81.249  36.427   4.058  1.00  0.48           O  
HETATM  507  O   HOH T 506      77.830  60.898  -9.064  1.00  0.48           O  
HETATM  508  O   HOH T 507      60.245  63.099  11.584  1.00  0.48           O  
HETATM  509  O   HOH T 508      75.605  21.106  39.622  1.00  0.48           O  
HETATM  510  O   HOH T 509      53.137  52.509  40.299  1.00  0.48           O  
HETATM  511  O   HOH T 510      64.294  23.965  45.086  1.00  0.49           O  
HETATM  512  O   HOH T 511      66.145  10.774  35.643  1.00  0.49           O  
HETATM  513  O   HOH T 512      54.017  57.092   9.110  1.00  0.49           O  
HETATM  514  O   HOH T 513      67.369  39.064  37.223  1.00  0.49           O  
HETATM  515  O   HOH T 514      73.638  29.897  23.658  1.00  0.49           O  
HETATM  516  O   HOH T 515      35.008  37.471  37.163  1.00  0.49           O  
HETATM  517  O   HOH T 516      55.874  33.131  16.112  1.00  0.49           O  
HETATM  518  O   HOH T 517      66.298  32.202  20.108  1.00  0.49           O  
HETATM  519  O   HOH T 518      68.429  27.612  -4.876  1.00  0.49           O  
HETATM  520  O   HOH T 519      48.903  23.151  21.698  1.00  0.49           O  
HETATM  521  O   HOH T 520      43.755  33.169  21.514  1.00  0.49           O  
HETATM  522  O   HOH T 521      71.976   8.133  11.110  1.00  0.49           O  
HETATM  523  O   HOH T 522      47.278  31.573  18.972  1.00  0.49           O  
HETATM  524  O   HOH T 523      80.241  36.542 -15.311  1.00  0.49           O  
HETATM  525  O   HOH T 524      33.544  36.129  28.396  1.00  0.49           O  
HETATM  526  O   HOH T 525      69.810  24.256 -14.508  1.00  0.49           O  
HETATM  527  O   HOH T 526      68.058  55.895  -1.925  1.00  0.49           O  
HETATM  528  O   HOH T 527      60.039  60.152  32.217  1.00  0.49           O  
HETATM  529  O   HOH T 528      67.808  46.329  19.580  1.00  0.49           O  
HETATM  530  O   HOH T 529      54.385  24.380  -1.010  1.00  0.49           O  
HETATM  531  O   HOH T 530      63.124   8.615  23.800  1.00  0.49           O  
HETATM  532  O   HOH T 531      48.527  39.488  16.798  1.00  0.49           O  
HETATM  533  O   HOH T 532      85.155  31.494   1.296  1.00  0.49           O  
HETATM  534  O   HOH T 533      66.182  34.243  10.875  1.00  0.50           O  
HETATM  535  O   HOH T 534      58.466  23.484   0.998  1.00  0.50           O  
HETATM  536  O   HOH T 535      55.799  28.287 -11.063  1.00  0.50           O  
HETATM  537  O   HOH T 536      70.724  29.482 -15.117  1.00  0.50           O  
HETATM  538  O   HOH T 537      66.570  30.152  47.081  1.00  0.50           O  
HETATM  539  O   HOH T 538      51.650  55.632   9.450  1.00  0.50           O  
HETATM  540  O   HOH T 539      75.321  12.984  20.191  1.00  0.50           O  
HETATM  541  O   HOH T 540      67.546  54.355  25.637  1.00  0.50           O  
HETATM  542  O   HOH T 541      80.209  24.374  23.518  1.00  0.50           O  
HETATM  543  O   HOH T 542      45.404  47.030   5.012  1.00  0.50           O  
HETATM  544  O   HOH T 543      64.056  25.308 -18.827  1.00  0.50           O  
HETATM  545  O   HOH T 544      51.469  28.688   2.205  1.00  0.50           O  
HETATM  546  O   HOH T 545      51.457  30.040  -6.798  1.00  0.50           O  
HETATM  547  O   HOH T 546      46.130  46.600  26.703  1.00  0.50           O  
HETATM  548  O   HOH T 547      55.015  58.629   3.181  1.00  0.50           O  
HETATM  549  O   HOH T 548      72.745  15.481   2.420  1.00  0.50           O  
HETATM  550  O   HOH T 549      67.323  53.411  -2.855  1.00  0.50           O  
HETATM  551  O   HOH T 550      84.719  38.856 -12.020  1.00  0.50           O  
HETATM  552  O   HOH T 551      65.671  54.675  -1.063  1.00  0.50           O  
HETATM  553  O   HOH T 552      90.291  49.913   2.397  1.00  0.50           O  
HETATM  554  O   HOH T 553      54.322  44.410  17.126  1.00  0.50           O  
HETATM  555  O   HOH T 554      80.175  59.520  -9.459  1.00  0.50           O  
HETATM  556  O   HOH T 555      48.074  47.110  31.183  1.00  0.50           O  
HETATM  557  O   HOH T 556      83.466  56.692 -14.821  1.00  0.50           O  
HETATM  558  O   HOH T 557      52.823  13.791  27.026  1.00  0.50           O  
HETATM  559  O   HOH T 558      78.601  25.655  15.877  1.00  0.50           O  
HETATM  560  O   HOH T 559      41.310  28.822  20.033  1.00  0.50           O  
HETATM  561  O   HOH T 560      60.747  47.710 -15.369  1.00  0.50           O  
HETATM  562  O   HOH T 561      61.686  37.883  17.251  1.00  0.51           O  
HETATM  563  O   HOH T 562      66.014  55.834  16.806  1.00  0.51           O  
HETATM  564  O   HOH T 563      86.023  49.118  -2.661  1.00  0.51           O  
HETATM  565  O   HOH T 564      42.379  26.206  43.162  1.00  0.51           O  
HETATM  566  O   HOH T 565      67.086  46.078  36.482  1.00  0.51           O  
HETATM  567  O   HOH T 566      36.321  24.981  31.495  1.00  0.51           O  
HETATM  568  O   HOH T 567      50.815  45.970  16.772  1.00  0.51           O  
HETATM  569  O   HOH T 568      68.250  50.349  16.986  1.00  0.51           O  
HETATM  570  O   HOH T 569      53.637  31.175 -10.214  1.00  0.51           O  
HETATM  571  O   HOH T 570      47.254  42.958  39.217  1.00  0.51           O  
HETATM  572  O   HOH T 571      70.532   7.880  22.751  1.00  0.51           O  
HETATM  573  O   HOH T 572      53.147  45.394  12.977  1.00  0.51           O  
HETATM  574  O   HOH T 573      57.133  55.824  34.586  1.00  0.51           O  
HETATM  575  O   HOH T 574      82.655  28.563 -10.487  1.00  0.51           O  
HETATM  576  O   HOH T 575      65.664  10.374  12.785  1.00  0.51           O  
HETATM  577  O   HOH T 576      75.427  11.373  17.847  1.00  0.51           O  
HETATM  578  O   HOH T 577      80.208  32.386   8.718  1.00  0.51           O  
HETATM  579  O   HOH T 578      84.326  58.765 -16.511  1.00  0.51           O  
HETATM  580  O   HOH T 579      70.534  41.334  23.433  1.00  0.51           O  
HETATM  581  O   HOH T 580      56.795  38.194   7.675  1.00  0.51           O  
HETATM  582  O   HOH T 581      50.280  13.244  44.421  1.00  0.51           O  
HETATM  583  O   HOH T 582      45.118  20.845  27.831  1.00  0.51           O  
HETATM  584  O   HOH T 583      32.866  38.092  26.702  1.00  0.51           O  
HETATM  585  O   HOH T 584      32.320  38.582  37.040  1.00  0.51           O  
HETATM  586  O   HOH T 585      63.900  42.345  13.424  1.00  0.51           O  
HETATM  587  O   HOH T 586      64.920  44.816  42.240  1.00  0.52           O  
HETATM  588  O   HOH T 587      60.060  35.640  17.334  1.00  0.52           O  
HETATM  589  O   HOH T 588      44.978  50.829  36.581  1.00  0.52           O  
HETATM  590  O   HOH T 589      65.498  46.757 -14.087  1.00  0.52           O  
HETATM  591  O   HOH T 590      46.989  47.429   7.270  1.00  0.52           O  
HETATM  592  O   HOH T 591      60.806   7.172  24.359  1.00  0.52           O  
HETATM  593  O   HOH T 592      65.383  46.069  29.612  1.00  0.52           O  
HETATM  594  O   HOH T 593      69.034  32.946  43.955  1.00  0.52           O  
HETATM  595  O   HOH T 594      49.432  38.107 -14.061  1.00  0.52           O  
HETATM  596  O   HOH T 595      57.691  32.575   3.691  1.00  0.52           O  
HETATM  597  O   HOH T 596      53.457  47.080   1.886  1.00  0.52           O  
HETATM  598  O   HOH T 597      76.077  26.730  42.938  1.00  0.52           O  
HETATM  599  O   HOH T 598      76.161  37.079 -23.513  1.00  0.52           O  
HETATM  600  O   HOH T 599      72.129  14.081   7.857  1.00  0.52           O  
HETATM  601  O   HOH T 600      52.756  44.834  39.553  1.00  0.52           O  
HETATM  602  O   HOH T 601      81.871  43.165   0.862  1.00  0.52           O  
HETATM  603  O   HOH T 602      69.480   6.976  25.121  1.00  0.52           O  
HETATM  604  O   HOH T 603      49.287  37.524  -5.593  1.00  0.53           O  
HETATM  605  O   HOH T 604      89.748  44.608  -7.941  1.00  0.53           O  
HETATM  606  O   HOH T 605      85.852  31.603 -10.803  1.00  0.53           O  
HETATM  607  O   HOH T 606      68.687  38.600  42.869  1.00  0.53           O  
HETATM  608  O   HOH T 607      49.875  23.941  47.889  1.00  0.53           O  
HETATM  609  O   HOH T 608      73.997  38.700 -17.595  1.00  0.53           O  
HETATM  610  O   HOH T 609      70.010  33.506  35.720  1.00  0.53           O  
HETATM  611  O   HOH T 610      58.226   6.846  16.054  1.00  0.53           O  
HETATM  612  O   HOH T 611      79.538  26.765  19.974  1.00  0.53           O  
HETATM  613  O   HOH T 612      52.550  11.307  25.682  1.00  0.53           O  
HETATM  614  O   HOH T 613      72.271  55.172   5.498  1.00  0.53           O  
HETATM  615  O   HOH T 614      64.961  46.515  39.156  1.00  0.53           O  
HETATM  616  O   HOH T 615      57.472  21.909  18.448  1.00  0.53           O  
HETATM  617  O   HOH T 616      49.280  15.856  28.447  1.00  0.53           O  
HETATM  618  O   HOH T 617      56.741  46.215 -12.134  1.00  0.53           O  
HETATM  619  O   HOH T 618      79.376  21.375  17.815  1.00  0.53           O  
HETATM  620  O   HOH T 619      68.959  41.055  36.348  1.00  0.53           O  
HETATM  621  O   HOH T 620      64.627  34.613   7.665  1.00  0.53           O  
HETATM  622  O   HOH T 621      80.204  22.002  15.312  1.00  0.53           O  
HETATM  623  O   HOH T 622      63.027  11.978   9.466  1.00  0.53           O  
HETATM  624  O   HOH T 623      53.571  54.260  17.906  1.00  0.53           O  
HETATM  625  O   HOH T 624      59.680  30.679   4.015  1.00  0.54           O  
HETATM  626  O   HOH T 625      71.543  31.609  15.477  1.00  0.54           O  
HETATM  627  O   HOH T 626      55.222  37.249  15.788  1.00  0.54           O  
HETATM  628  O   HOH T 627      63.956  53.368  34.852  1.00  0.54           O  
HETATM  629  O   HOH T 628      74.470  32.506  26.636  1.00  0.54           O  
HETATM  630  O   HOH T 629      88.919  48.466  -5.668  1.00  0.54           O  
HETATM  631  O   HOH T 630      69.668  38.037  11.571  1.00  0.54           O  
HETATM  632  O   HOH T 631      54.279  25.908   3.066  1.00  0.54           O  
HETATM  633  O   HOH T 632      67.232  23.319  -9.992  1.00  0.54           O  
HETATM  634  O   HOH T 633      81.545  38.793 -16.148  1.00  0.54           O  
HETATM  635  O   HOH T 634      68.627  29.954 -13.339  1.00  0.54           O  
HETATM  636  O   HOH T 635      66.509  59.026 -10.251  1.00  0.54           O  
HETATM  637  O   HOH T 636      52.821  44.582 -13.763  1.00  0.54           O  
HETATM  638  O   HOH T 637      64.008  59.059  -3.268  1.00  0.54           O  
HETATM  639  O   HOH T 638      35.346  30.738  33.424  1.00  0.54           O  
HETATM  640  O   HOH T 639      67.941  30.087  15.979  1.00  0.54           O  
HETATM  641  O   HOH T 640      75.237  20.239  42.258  1.00  0.54           O  
HETATM  642  O   HOH T 641      82.750  27.396   2.680  1.00  0.54           O  
HETATM  643  O   HOH T 642      46.627  48.784  29.542  1.00  0.55           O  
HETATM  644  O   HOH T 643      48.239  16.417  23.301  1.00  0.55           O  
HETATM  645  O   HOH T 644      73.408  50.321  10.759  1.00  0.55           O  
HETATM  646  O   HOH T 645      68.081  35.711  12.239  1.00  0.55           O  
HETATM  647  O   HOH T 646      58.791  42.020  46.342  1.00  0.55           O  
HETATM  648  O   HOH T 647      66.201  51.074   4.025  1.00  0.55           O  
HETATM  649  O   HOH T 648      50.043  30.294  49.390  1.00  0.55           O  
HETATM  650  O   HOH T 649      66.858  43.228  40.874  1.00  0.55           O  
HETATM  651  O   HOH T 650      68.019   6.293  13.646  1.00  0.55           O  
HETATM  652  O   HOH T 651      88.290  47.790  -3.240  1.00  0.55           O  
HETATM  653  O   HOH T 652      65.695  49.380 -15.350  1.00  0.55           O  
HETATM  654  O   HOH T 653      49.466  45.312  -8.177  1.00  0.55           O  
HETATM  655  O   HOH T 654      78.342  51.815  -2.243  1.00  0.55           O  
HETATM  656  O   HOH T 655      80.886  26.357  -4.888  1.00  0.55           O  
HETATM  657  O   HOH T 656      69.954  29.932  14.021  1.00  0.55           O  
HETATM  658  O   HOH T 657      61.068  22.838   6.592  1.00  0.55           O  
HETATM  659  O   HOH T 658      48.621  30.029  -7.249  1.00  0.55           O  
HETATM  660  O   HOH T 659      42.001  31.056  18.712  1.00  0.55           O  
HETATM  661  O   HOH T 660      76.919  27.498 -10.506  1.00  0.55           O  
HETATM  662  O   HOH T 661      81.980  48.500   4.067  1.00  0.56           O  
HETATM  663  O   HOH T 662      70.474  25.953 -10.574  1.00  0.56           O  
HETATM  664  O   HOH T 663      70.769  33.271  29.891  1.00  0.56           O  
HETATM  665  O   HOH T 664      71.069  50.985   3.703  1.00  0.56           O  
HETATM  666  O   HOH T 665      58.274  12.921  43.739  1.00  0.56           O  
HETATM  667  O   HOH T 666      58.921  27.395  -5.773  1.00  0.56           O  
HETATM  668  O   HOH T 667      54.890  18.555  19.344  1.00  0.56           O  
HETATM  669  O   HOH T 668      75.351  28.229  43.703  1.00  0.56           O  
HETATM  670  O   HOH T 669      68.294  52.576  15.471  1.00  0.56           O  
HETATM  671  O   HOH T 670      47.796  53.425  21.060  1.00  0.56           O  
HETATM  672  O   HOH T 671      89.919  26.273 -10.605  1.00  0.56           O  
HETATM  673  O   HOH T 672      69.792  12.064  38.415  1.00  0.56           O  
HETATM  674  O   HOH T 673      37.238  32.991  39.147  1.00  0.56           O  
HETATM  675  O   HOH T 674      42.822  25.116  20.222  1.00  0.56           O  
HETATM  676  O   HOH T 675      50.914  45.381  14.064  1.00  0.57           O  
HETATM  677  O   HOH T 676      77.181  27.552  35.937  1.00  0.57           O  
HETATM  678  O   HOH T 677      64.008  53.620 -14.458  1.00  0.57           O  
HETATM  679  O   HOH T 678      71.358  10.401   7.911  1.00  0.57           O  
HETATM  680  O   HOH T 679      38.875  24.309  24.180  1.00  0.57           O  
HETATM  681  O   HOH T 680      55.981  20.298  12.155  1.00  0.57           O  
HETATM  682  O   HOH T 681      52.375  26.397  -1.230  1.00  0.57           O  
HETATM  683  O   HOH T 682      72.980  29.869 -13.737  1.00  0.57           O  
HETATM  684  O   HOH T 683      58.822  46.593 -18.669  1.00  0.57           O  
HETATM  685  O   HOH T 684      79.723  18.474  -3.271  1.00  0.57           O  
HETATM  686  O   HOH T 685      60.738  53.690  39.107  1.00  0.58           O  
HETATM  687  O   HOH T 686      47.907  42.103  16.295  1.00  0.58           O  
HETATM  688  O   HOH T 687      73.776  35.529 -16.584  1.00  0.59           O  
HETATM  689  O   HOH T 688      80.197  33.987 -14.844  1.00  0.59           O  
HETATM  690  O   HOH T 689      54.951  46.077 -22.446  1.00  0.59           O  
HETATM  691  O   HOH T 690      84.525  39.738   0.127  1.00  0.59           O  
HETATM  692  O   HOH T 691      66.601  47.688  33.029  1.00  0.60           O  
TER     693      HOH T 691 
