# Supplementary material for: Accurate Prediction of Hydration Sites of Proteins Using Energy Model With Atom Embedding
Source: Front Mol Biosci. 2021 Sep 20;8:756075. doi: 10.3389/fmolb.2021.756075 (PMC8488165; doi:10.3389/fmolb.2021.756075)
Supplement: Supplementary file 1 [file DataSheet1.ZIP › Data Sheet 1/Our_result_pdb/our_dataset_output/1O0M_watersite.pdb]

HEADER                                                        XXXX


JRNL        PMID   -1
HETATM    1  O   HOH T   0      47.848  -1.110  34.124  1.00  0.18           O  
HETATM    2  O   HOH T   1      15.757   8.497 -10.368  1.00  0.20           O  
HETATM    3  O   HOH T   2      20.316   5.519   7.781  1.00  0.21           O  
HETATM    4  O   HOH T   3      31.338  -7.401  10.314  1.00  0.22           O  
HETATM    5  O   HOH T   4      21.150  -5.526   9.898  1.00  0.22           O  
HETATM    6  O   HOH T   5      17.844   0.444  19.372  1.00  0.22           O  
HETATM    7  O   HOH T   6      27.250  -8.619  22.270  1.00  0.22           O  
HETATM    8  O   HOH T   7       1.619  -6.778  17.535  1.00  0.23           O  
HETATM    9  O   HOH T   8      33.519   5.460  14.340  1.00  0.23           O  
HETATM   10  O   HOH T   9      16.323 -17.581   5.636  1.00  0.23           O  
HETATM   11  O   HOH T  10      32.330   7.360  11.296  1.00  0.23           O  
HETATM   12  O   HOH T  11      18.574   3.498   0.756  1.00  0.24           O  
HETATM   13  O   HOH T  12      38.805  -0.060  39.252  1.00  0.24           O  
HETATM   14  O   HOH T  13      25.418  18.830   8.377  1.00  0.24           O  
HETATM   15  O   HOH T  14      37.662   0.972  15.251  1.00  0.24           O  
HETATM   16  O   HOH T  15      31.357   7.376   8.693  1.00  0.24           O  
HETATM   17  O   HOH T  16      36.093   6.811   6.308  1.00  0.25           O  
HETATM   18  O   HOH T  17      45.485   4.429  42.180  1.00  0.25           O  
HETATM   19  O   HOH T  18      19.800  10.213  -1.116  1.00  0.26           O  
HETATM   20  O   HOH T  19      15.531 -13.424  13.253  1.00  0.26           O  
HETATM   21  O   HOH T  20      33.824   9.831  39.462  1.00  0.26           O  
HETATM   22  O   HOH T  21      39.139  -6.217  37.309  1.00  0.26           O  
HETATM   23  O   HOH T  22       6.093   2.266  19.863  1.00  0.27           O  
HETATM   24  O   HOH T  23      -4.018  -2.690  -2.930  1.00  0.27           O  
HETATM   25  O   HOH T  24      18.309   3.983  18.050  1.00  0.27           O  
HETATM   26  O   HOH T  25      31.711 -26.270  24.898  1.00  0.27           O  
HETATM   27  O   HOH T  26      11.234   7.076  18.312  1.00  0.28           O  
HETATM   28  O   HOH T  27      31.334  11.018  38.898  1.00  0.28           O  
HETATM   29  O   HOH T  28       0.905  -7.698   4.977  1.00  0.28           O  
HETATM   30  O   HOH T  29      20.130  -2.191  -8.513  1.00  0.28           O  
HETATM   31  O   HOH T  30      34.103  -8.381  22.351  1.00  0.28           O  
HETATM   32  O   HOH T  31      12.945 -14.362  12.988  1.00  0.29           O  
HETATM   33  O   HOH T  32      21.511 -11.271  12.859  1.00  0.29           O  
HETATM   34  O   HOH T  33      31.106  -3.565   0.868  1.00  0.29           O  
HETATM   35  O   HOH T  34      17.447  -6.536  19.208  1.00  0.29           O  
HETATM   36  O   HOH T  35      26.436   3.658  41.293  1.00  0.29           O  
HETATM   37  O   HOH T  36      -4.755   5.283  17.083  1.00  0.29           O  
HETATM   38  O   HOH T  37      30.231  12.748  -8.523  1.00  0.29           O  
HETATM   39  O   HOH T  38      32.368  -9.510  39.700  1.00  0.30           O  
HETATM   40  O   HOH T  39      21.711  -6.375  29.094  1.00  0.30           O  
HETATM   41  O   HOH T  40      22.789   1.762   7.595  1.00  0.30           O  
HETATM   42  O   HOH T  41      33.924  -5.754  23.344  1.00  0.30           O  
HETATM   43  O   HOH T  42      18.656 -11.159   1.551  1.00  0.30           O  
HETATM   44  O   HOH T  43       6.834   8.426  21.770  1.00  0.30           O  
HETATM   45  O   HOH T  44      18.929   1.494   9.530  1.00  0.30           O  
HETATM   46  O   HOH T  45      25.467  21.139   9.860  1.00  0.30           O  
HETATM   47  O   HOH T  46      43.270  -5.793  32.140  1.00  0.30           O  
HETATM   48  O   HOH T  47      23.038   8.851   0.859  1.00  0.30           O  
HETATM   49  O   HOH T  48      28.573   3.704  44.872  1.00  0.30           O  
HETATM   50  O   HOH T  49      49.624   7.309  30.825  1.00  0.30           O  
HETATM   51  O   HOH T  50       8.252  11.279  15.252  1.00  0.31           O  
HETATM   52  O   HOH T  51      13.629   0.527  21.033  1.00  0.31           O  
HETATM   53  O   HOH T  52      22.284  -5.901   5.035  1.00  0.31           O  
HETATM   54  O   HOH T  53      12.234   6.282   2.449  1.00  0.31           O  
HETATM   55  O   HOH T  54      25.050   4.732   6.268  1.00  0.31           O  
HETATM   56  O   HOH T  55      17.412  -4.679  14.531  1.00  0.31           O  
HETATM   57  O   HOH T  56      14.074 -14.013   6.237  1.00  0.31           O  
HETATM   58  O   HOH T  57       0.814  10.490  16.770  1.00  0.31           O  
HETATM   59  O   HOH T  58       0.633  -4.727  11.020  1.00  0.31           O  
HETATM   60  O   HOH T  59      31.715  -5.111   3.086  1.00  0.31           O  
HETATM   61  O   HOH T  60      34.772   9.722  32.691  1.00  0.31           O  
HETATM   62  O   HOH T  61      21.018  -5.811 -13.766  1.00  0.31           O  
HETATM   63  O   HOH T  62      22.659  -5.888  31.761  1.00  0.31           O  
HETATM   64  O   HOH T  63      17.794  -0.837  31.066  1.00  0.32           O  
HETATM   65  O   HOH T  64      21.251   9.682  34.771  1.00  0.32           O  
HETATM   66  O   HOH T  65      13.515   8.734   2.164  1.00  0.32           O  
HETATM   67  O   HOH T  66       8.071  18.136  14.773  1.00  0.32           O  
HETATM   68  O   HOH T  67      19.299  12.952  31.871  1.00  0.32           O  
HETATM   69  O   HOH T  68      21.424  -9.907  15.316  1.00  0.32           O  
HETATM   70  O   HOH T  69      34.971  -5.764  14.261  1.00  0.32           O  
HETATM   71  O   HOH T  70      19.124  12.343  -6.744  1.00  0.32           O  
HETATM   72  O   HOH T  71      16.379   0.255  26.647  1.00  0.33           O  
HETATM   73  O   HOH T  72      21.146   8.742  31.211  1.00  0.33           O  
HETATM   74  O   HOH T  73      23.167   9.184  41.091  1.00  0.33           O  
HETATM   75  O   HOH T  74      40.045  -0.433  41.682  1.00  0.33           O  
HETATM   76  O   HOH T  75      35.553  -8.488  20.007  1.00  0.33           O  
HETATM   77  O   HOH T  76       9.169  15.623  -8.212  1.00  0.33           O  
HETATM   78  O   HOH T  77      22.339   8.055  -3.882  1.00  0.33           O  
HETATM   79  O   HOH T  78      23.511  -4.301   9.347  1.00  0.33           O  
HETATM   80  O   HOH T  79      22.490   8.682  14.616  1.00  0.33           O  
HETATM   81  O   HOH T  80      34.774   5.869  39.584  1.00  0.33           O  
HETATM   82  O   HOH T  81       4.354  -3.976  18.000  1.00  0.33           O  
HETATM   83  O   HOH T  82       4.608 -12.145  21.083  1.00  0.34           O  
HETATM   84  O   HOH T  83      20.724  -0.948   5.638  1.00  0.34           O  
HETATM   85  O   HOH T  84      36.108  -3.097   6.408  1.00  0.34           O  
HETATM   86  O   HOH T  85      19.767   9.024  -3.596  1.00  0.34           O  
HETATM   87  O   HOH T  86      44.802  -9.054  38.870  1.00  0.34           O  
HETATM   88  O   HOH T  87      30.839   1.774   7.071  1.00  0.34           O  
HETATM   89  O   HOH T  88      41.577   4.844  10.600  1.00  0.34           O  
HETATM   90  O   HOH T  89      10.583  12.275  21.970  1.00  0.34           O  
HETATM   91  O   HOH T  90       1.574  -5.548   3.268  1.00  0.34           O  
HETATM   92  O   HOH T  91      -1.365  10.323  18.648  1.00  0.34           O  
HETATM   93  O   HOH T  92       5.240  10.575  11.265  1.00  0.34           O  
HETATM   94  O   HOH T  93      20.819  -3.719   6.023  1.00  0.34           O  
HETATM   95  O   HOH T  94      12.221  -3.198 -15.812  1.00  0.34           O  
HETATM   96  O   HOH T  95       8.420  14.557 -10.555  1.00  0.34           O  
HETATM   97  O   HOH T  96      40.596   1.281  26.743  1.00  0.34           O  
HETATM   98  O   HOH T  97      40.424  -2.283  39.732  1.00  0.34           O  
HETATM   99  O   HOH T  98       9.574 -15.124  -4.933  1.00  0.35           O  
HETATM  100  O   HOH T  99      27.618 -14.273  16.270  1.00  0.35           O  
HETATM  101  O   HOH T 100       0.317  -2.952  20.288  1.00  0.35           O  
HETATM  102  O   HOH T 101      41.110  -7.224  32.602  1.00  0.35           O  
HETATM  103  O   HOH T 102      43.046  12.514  36.628  1.00  0.35           O  
HETATM  104  O   HOH T 103      19.453   8.872  26.022  1.00  0.35           O  
HETATM  105  O   HOH T 104      15.745  12.702   4.654  1.00  0.35           O  
HETATM  106  O   HOH T 105       1.819   6.517   7.823  1.00  0.35           O  
HETATM  107  O   HOH T 106      35.683  -3.366  13.088  1.00  0.35           O  
HETATM  108  O   HOH T 107      20.746  -6.165  33.990  1.00  0.35           O  
HETATM  109  O   HOH T 108       5.778   3.447  22.407  1.00  0.35           O  
HETATM  110  O   HOH T 109      20.116  -5.639  14.784  1.00  0.35           O  
HETATM  111  O   HOH T 110       8.656 -10.331   9.268  1.00  0.35           O  
HETATM  112  O   HOH T 111      24.658  -9.506  22.589  1.00  0.35           O  
HETATM  113  O   HOH T 112      37.322   2.502  19.888  1.00  0.35           O  
HETATM  114  O   HOH T 113      31.331   9.743  10.002  1.00  0.35           O  
HETATM  115  O   HOH T 114      44.471  11.741  38.974  1.00  0.36           O  
HETATM  116  O   HOH T 115      16.125  -8.317  -5.107  1.00  0.36           O  
HETATM  117  O   HOH T 116       9.695 -13.875   0.719  1.00  0.36           O  
HETATM  118  O   HOH T 117      31.456  -9.577  35.767  1.00  0.36           O  
HETATM  119  O   HOH T 118      36.948 -11.926  14.119  1.00  0.36           O  
HETATM  120  O   HOH T 119      17.781   2.390  38.284  1.00  0.36           O  
HETATM  121  O   HOH T 120      -6.182   6.305  18.957  1.00  0.36           O  
HETATM  122  O   HOH T 121       8.119 -13.643  -6.788  1.00  0.36           O  
HETATM  123  O   HOH T 122      23.998  -6.183   2.059  1.00  0.36           O  
HETATM  124  O   HOH T 123      23.499   9.348   3.581  1.00  0.36           O  
HETATM  125  O   HOH T 124       8.005   4.959  21.499  1.00  0.37           O  
HETATM  126  O   HOH T 125       0.804  -9.121  16.195  1.00  0.37           O  
HETATM  127  O   HOH T 126      13.676   7.265  19.655  1.00  0.37           O  
HETATM  128  O   HOH T 127      17.318 -16.993   8.177  1.00  0.37           O  
HETATM  129  O   HOH T 128      15.414  -2.311 -14.699  1.00  0.37           O  
HETATM  130  O   HOH T 129      14.637  -1.949  19.665  1.00  0.37           O  
HETATM  131  O   HOH T 130      36.140 -13.323  25.239  1.00  0.37           O  
HETATM  132  O   HOH T 131      22.859  -4.730  -4.987  1.00  0.37           O  
HETATM  133  O   HOH T 132      47.147   6.209  35.266  1.00  0.37           O  
HETATM  134  O   HOH T 133      29.085 -15.978  14.671  1.00  0.37           O  
HETATM  135  O   HOH T 134      -6.081  -0.816  19.978  1.00  0.37           O  
HETATM  136  O   HOH T 135      49.661  -7.763  32.440  1.00  0.37           O  
HETATM  137  O   HOH T 136      26.089  14.243  30.698  1.00  0.37           O  
HETATM  138  O   HOH T 137      21.085   2.436   0.360  1.00  0.38           O  
HETATM  139  O   HOH T 138      41.120   8.940  41.940  1.00  0.38           O  
HETATM  140  O   HOH T 139      32.313 -20.327  20.283  1.00  0.38           O  
HETATM  141  O   HOH T 140       8.026   2.104  21.823  1.00  0.38           O  
HETATM  142  O   HOH T 141      -0.115   8.891  14.624  1.00  0.38           O  
HETATM  143  O   HOH T 142      32.530  13.054  35.526  1.00  0.38           O  
HETATM  144  O   HOH T 143       6.619 -13.948   7.175  1.00  0.38           O  
HETATM  145  O   HOH T 144       2.083   2.585  -4.156  1.00  0.38           O  
HETATM  146  O   HOH T 145      40.343  12.166  36.434  1.00  0.38           O  
HETATM  147  O   HOH T 146      13.894  12.946  -3.627  1.00  0.38           O  
HETATM  148  O   HOH T 147      17.988   4.793  31.207  1.00  0.38           O  
HETATM  149  O   HOH T 148      37.707   0.144   4.714  1.00  0.38           O  
HETATM  150  O   HOH T 149      14.239 -13.962   3.538  1.00  0.39           O  
HETATM  151  O   HOH T 150      34.352   7.548  15.929  1.00  0.39           O  
HETATM  152  O   HOH T 151      35.700 -17.645  22.301  1.00  0.39           O  
HETATM  153  O   HOH T 152      25.440  -4.192   7.391  1.00  0.39           O  
HETATM  154  O   HOH T 153      39.290  -7.662  30.548  1.00  0.39           O  
HETATM  155  O   HOH T 154       3.168 -14.461   1.467  1.00  0.39           O  
HETATM  156  O   HOH T 155      29.511 -12.392  17.009  1.00  0.39           O  
HETATM  157  O   HOH T 156      18.997 -13.519  10.349  1.00  0.39           O  
HETATM  158  O   HOH T 157      23.244  10.625  -5.080  1.00  0.39           O  
HETATM  159  O   HOH T 158      24.882   7.912  42.858  1.00  0.39           O  
HETATM  160  O   HOH T 159      33.521   9.617  14.460  1.00  0.39           O  
HETATM  161  O   HOH T 160      11.082 -14.863  -2.604  1.00  0.39           O  
HETATM  162  O   HOH T 161       5.683 -11.267  15.052  1.00  0.39           O  
HETATM  163  O   HOH T 162       1.161  11.115  14.080  1.00  0.39           O  
HETATM  164  O   HOH T 163      17.179  10.322  20.860  1.00  0.39           O  
HETATM  165  O   HOH T 164      -1.323  -2.200  -0.272  1.00  0.39           O  
HETATM  166  O   HOH T 165      33.053 -15.361  19.418  1.00  0.40           O  
HETATM  167  O   HOH T 166      29.370 -13.496  32.549  1.00  0.40           O  
HETATM  168  O   HOH T 167       4.979 -12.915  17.144  1.00  0.40           O  
HETATM  169  O   HOH T 168      33.804 -17.940  20.275  1.00  0.40           O  
HETATM  170  O   HOH T 169      30.552 -13.845  19.211  1.00  0.40           O  
HETATM  171  O   HOH T 170      12.293 -16.187   9.065  1.00  0.40           O  
HETATM  172  O   HOH T 171       8.261 -11.728   7.187  1.00  0.40           O  
HETATM  173  O   HOH T 172      16.178   1.893  21.046  1.00  0.40           O  
HETATM  174  O   HOH T 173      36.300 -12.276  22.746  1.00  0.40           O  
HETATM  175  O   HOH T 174      14.862  13.293   7.154  1.00  0.40           O  
HETATM  176  O   HOH T 175      42.188   6.886  29.808  1.00  0.40           O  
HETATM  177  O   HOH T 176      38.701   8.098  40.824  1.00  0.41           O  
HETATM  178  O   HOH T 177      36.409  -3.879  15.702  1.00  0.41           O  
HETATM  179  O   HOH T 178      37.414  -9.361  15.177  1.00  0.41           O  
HETATM  180  O   HOH T 179      35.741  -8.834  17.310  1.00  0.41           O  
HETATM  181  O   HOH T 180      22.505  -3.140  -7.286  1.00  0.41           O  
HETATM  182  O   HOH T 181      -0.186  -5.148  18.821  1.00  0.41           O  
HETATM  183  O   HOH T 182      21.809  -7.366  16.181  1.00  0.41           O  
HETATM  184  O   HOH T 183      50.196  10.756  38.144  1.00  0.41           O  
HETATM  185  O   HOH T 184      26.121   6.881   7.466  1.00  0.41           O  
HETATM  186  O   HOH T 185      24.597  -7.018  35.016  1.00  0.41           O  
HETATM  187  O   HOH T 186       4.820   7.587  -5.206  1.00  0.41           O  
HETATM  188  O   HOH T 187      20.301  10.273  14.676  1.00  0.41           O  
HETATM  189  O   HOH T 188      20.495  -9.613  -5.162  1.00  0.42           O  
HETATM  190  O   HOH T 189      36.196  -1.277  14.775  1.00  0.42           O  
HETATM  191  O   HOH T 190      38.021  -6.392   6.273  1.00  0.42           O  
HETATM  192  O   HOH T 191      35.689 -12.936  38.069  1.00  0.42           O  
HETATM  193  O   HOH T 192      11.990  -5.947 -15.686  1.00  0.42           O  
HETATM  194  O   HOH T 193       3.500  -1.381   6.993  1.00  0.42           O  
HETATM  195  O   HOH T 194      36.123 -14.980  21.962  1.00  0.42           O  
HETATM  196  O   HOH T 195      27.293 -15.745   8.055  1.00  0.42           O  
HETATM  197  O   HOH T 196      18.747  10.952  18.706  1.00  0.42           O  
HETATM  198  O   HOH T 197      17.597   5.697  28.485  1.00  0.42           O  
HETATM  199  O   HOH T 198      17.457 -11.428   7.336  1.00  0.42           O  
HETATM  200  O   HOH T 199       6.248  15.955  20.282  1.00  0.42           O  
HETATM  201  O   HOH T 200      33.378   9.982  19.329  1.00  0.42           O  
HETATM  202  O   HOH T 201      17.443   5.196  23.427  1.00  0.42           O  
HETATM  203  O   HOH T 202      33.173   9.656  46.164  1.00  0.42           O  
HETATM  204  O   HOH T 203      23.050   6.728   2.660  1.00  0.42           O  
HETATM  205  O   HOH T 204      38.890 -11.506  16.190  1.00  0.43           O  
HETATM  206  O   HOH T 205      45.528   5.879  31.200  1.00  0.43           O  
HETATM  207  O   HOH T 206      15.263 -10.850  -4.334  1.00  0.43           O  
HETATM  208  O   HOH T 207      24.406   5.186  42.524  1.00  0.43           O  
HETATM  209  O   HOH T 208      43.721   8.158  41.159  1.00  0.43           O  
HETATM  210  O   HOH T 209       7.877   9.845  10.740  1.00  0.43           O  
HETATM  211  O   HOH T 210       8.750  10.221  21.902  1.00  0.43           O  
HETATM  212  O   HOH T 211      23.017 -12.927  25.609  1.00  0.43           O  
HETATM  213  O   HOH T 212      42.925  10.540  32.386  1.00  0.43           O  
HETATM  214  O   HOH T 213      14.736 -17.594   9.230  1.00  0.43           O  
HETATM  215  O   HOH T 214      -6.277  -1.774  16.399  1.00  0.43           O  
HETATM  216  O   HOH T 215      21.027  15.069  31.319  1.00  0.43           O  
HETATM  217  O   HOH T 216      14.663   9.920  19.720  1.00  0.44           O  
HETATM  218  O   HOH T 217      17.487  12.140  22.884  1.00  0.44           O  
HETATM  219  O   HOH T 218      12.375 -13.955   1.422  1.00  0.44           O  
HETATM  220  O   HOH T 219      20.290  14.690  -5.781  1.00  0.44           O  
HETATM  221  O   HOH T 220      21.422  11.211  32.449  1.00  0.44           O  
HETATM  222  O   HOH T 221      -0.741   8.920  25.493  1.00  0.44           O  
HETATM  223  O   HOH T 222      24.660   6.627   0.473  1.00  0.44           O  
HETATM  224  O   HOH T 223      25.113   1.365  40.600  1.00  0.44           O  
HETATM  225  O   HOH T 224      17.718  12.981  20.257  1.00  0.44           O  
HETATM  226  O   HOH T 225       6.612 -14.120  21.104  1.00  0.44           O  
HETATM  227  O   HOH T 226      23.487  -0.480   5.977  1.00  0.44           O  
HETATM  228  O   HOH T 227      30.012  10.436  29.526  1.00  0.44           O  
HETATM  229  O   HOH T 228       9.599 -16.688   9.753  1.00  0.44           O  
HETATM  230  O   HOH T 229       4.119 -16.393  18.737  1.00  0.44           O  
HETATM  231  O   HOH T 230      -1.931  -0.734  23.567  1.00  0.44           O  
HETATM  232  O   HOH T 231       2.215  -6.629  21.649  1.00  0.44           O  
HETATM  233  O   HOH T 232      48.926 -10.215  33.597  1.00  0.44           O  
HETATM  234  O   HOH T 233      39.296  -5.815  28.424  1.00  0.44           O  
HETATM  235  O   HOH T 234       9.993  14.680  20.784  1.00  0.44           O  
HETATM  236  O   HOH T 235      19.296   0.168 -12.283  1.00  0.44           O  
HETATM  237  O   HOH T 236      43.879   6.405  43.351  1.00  0.44           O  
HETATM  238  O   HOH T 237      14.741  10.851  -9.207  1.00  0.44           O  
HETATM  239  O   HOH T 238      20.723  -3.358 -15.086  1.00  0.44           O  
HETATM  240  O   HOH T 239      -2.833   8.127  14.544  1.00  0.44           O  
HETATM  241  O   HOH T 240       8.720  17.304  12.112  1.00  0.44           O  
HETATM  242  O   HOH T 241      -0.879   1.675  24.537  1.00  0.45           O  
HETATM  243  O   HOH T 242      20.862  -0.002 -10.035  1.00  0.45           O  
HETATM  244  O   HOH T 243      46.539  -7.527  43.479  1.00  0.45           O  
HETATM  245  O   HOH T 244      -3.520  -0.662  21.272  1.00  0.45           O  
HETATM  246  O   HOH T 245      25.513  -4.771  36.401  1.00  0.45           O  
HETATM  247  O   HOH T 246      11.391 -14.564   6.882  1.00  0.45           O  
HETATM  248  O   HOH T 247      23.163   3.135  39.610  1.00  0.45           O  
HETATM  249  O   HOH T 248      17.838 -10.502  -5.213  1.00  0.45           O  
HETATM  250  O   HOH T 249      47.672   6.091  42.914  1.00  0.45           O  
HETATM  251  O   HOH T 250      28.843 -11.647  29.281  1.00  0.45           O  
HETATM  252  O   HOH T 251      39.474   0.471  19.575  1.00  0.45           O  
HETATM  253  O   HOH T 252       8.721  17.107  19.988  1.00  0.45           O  
HETATM  254  O   HOH T 253       7.003   9.877  13.362  1.00  0.45           O  
HETATM  255  O   HOH T 254      17.902   1.978  31.232  1.00  0.45           O  
HETATM  256  O   HOH T 255       4.691 -14.657  -0.766  1.00  0.45           O  
HETATM  257  O   HOH T 256      16.968  -0.285 -13.721  1.00  0.45           O  
HETATM  258  O   HOH T 257      32.361  11.242  28.312  1.00  0.45           O  
HETATM  259  O   HOH T 258      23.124  -4.807  34.574  1.00  0.45           O  
HETATM  260  O   HOH T 259      26.032  13.738  33.401  1.00  0.45           O  
HETATM  261  O   HOH T 260      47.950   5.943  32.584  1.00  0.45           O  
HETATM  262  O   HOH T 261      20.184  19.732   0.115  1.00  0.46           O  
HETATM  263  O   HOH T 262      30.054   0.730   4.573  1.00  0.46           O  
HETATM  264  O   HOH T 263       7.156  12.302  11.913  1.00  0.46           O  
HETATM  265  O   HOH T 264      15.570   2.103  32.753  1.00  0.46           O  
HETATM  266  O   HOH T 265      30.759 -11.460  33.927  1.00  0.46           O  
HETATM  267  O   HOH T 266      38.721   2.122  17.529  1.00  0.46           O  
HETATM  268  O   HOH T 267      21.968  -1.724 -13.148  1.00  0.46           O  
HETATM  269  O   HOH T 268      15.527   4.080  27.556  1.00  0.46           O  
HETATM  270  O   HOH T 269      44.732  -7.747  41.352  1.00  0.46           O  
HETATM  271  O   HOH T 270      33.430  14.857  37.609  1.00  0.46           O  
HETATM  272  O   HOH T 271      36.106 -14.245  15.762  1.00  0.46           O  
HETATM  273  O   HOH T 272      31.417  10.649  25.748  1.00  0.46           O  
HETATM  274  O   HOH T 273      28.379   4.367   4.001  1.00  0.46           O  
HETATM  275  O   HOH T 274      42.967   3.782  43.097  1.00  0.46           O  
HETATM  276  O   HOH T 275      15.224  -4.745  19.242  1.00  0.46           O  
HETATM  277  O   HOH T 276      33.497  12.136  37.896  1.00  0.46           O  
HETATM  278  O   HOH T 277      34.306 -27.227  27.902  1.00  0.46           O  
HETATM  279  O   HOH T 278      21.081  17.408   9.735  1.00  0.46           O  
HETATM  280  O   HOH T 279      15.460   3.843  37.844  1.00  0.46           O  
HETATM  281  O   HOH T 280      -1.598   6.396  24.929  1.00  0.46           O  
HETATM  282  O   HOH T 281       3.196 -10.225  15.527  1.00  0.46           O  
HETATM  283  O   HOH T 282      23.987   8.182  -1.690  1.00  0.46           O  
HETATM  284  O   HOH T 283      45.949   7.694  33.265  1.00  0.46           O  
HETATM  285  O   HOH T 284      -1.799   3.865  26.051  1.00  0.46           O  
HETATM  286  O   HOH T 285      22.458  16.389  27.993  1.00  0.46           O  
HETATM  287  O   HOH T 286      17.897   6.575  25.730  1.00  0.46           O  
HETATM  288  O   HOH T 287      -1.374   4.097  23.308  1.00  0.46           O  
HETATM  289  O   HOH T 288      40.332  11.524  41.201  1.00  0.46           O  
HETATM  290  O   HOH T 289      11.429 -16.341  11.794  1.00  0.46           O  
HETATM  291  O   HOH T 290      30.056   4.214   6.165  1.00  0.47           O  
HETATM  292  O   HOH T 291      -3.048   1.650  22.746  1.00  0.47           O  
HETATM  293  O   HOH T 292      33.612 -19.474  22.592  1.00  0.47           O  
HETATM  294  O   HOH T 293      38.852  -4.391  25.958  1.00  0.47           O  
HETATM  295  O   HOH T 294      33.287 -24.631  23.166  1.00  0.47           O  
HETATM  296  O   HOH T 295      42.590  -4.170  39.605  1.00  0.47           O  
HETATM  297  O   HOH T 296      23.242 -11.806  23.133  1.00  0.47           O  
HETATM  298  O   HOH T 297      39.881  -9.813  32.288  1.00  0.47           O  
HETATM  299  O   HOH T 298      25.119  13.719  26.842  1.00  0.47           O  
HETATM  300  O   HOH T 299       2.409 -12.359   3.031  1.00  0.47           O  
HETATM  301  O   HOH T 300      16.432  13.230  -2.488  1.00  0.47           O  
HETATM  302  O   HOH T 301       5.048  -9.983  22.759  1.00  0.47           O  
HETATM  303  O   HOH T 302      47.262 -10.070  35.774  1.00  0.47           O  
HETATM  304  O   HOH T 303       2.486 -11.595  12.170  1.00  0.47           O  
HETATM  305  O   HOH T 304      39.942   3.190  19.862  1.00  0.47           O  
HETATM  306  O   HOH T 305      16.335  -5.862  16.833  1.00  0.47           O  
HETATM  307  O   HOH T 306      15.911 -12.189   5.176  1.00  0.47           O  
HETATM  308  O   HOH T 307      -3.878   4.863  24.425  1.00  0.47           O  
HETATM  309  O   HOH T 308      33.142  16.966  35.771  1.00  0.47           O  
HETATM  310  O   HOH T 309      -8.863  -2.720  16.592  1.00  0.47           O  
HETATM  311  O   HOH T 310      25.895   3.612  44.076  1.00  0.48           O  
HETATM  312  O   HOH T 311      15.644  -0.764  29.211  1.00  0.48           O  
HETATM  313  O   HOH T 312      22.714  14.541  25.882  1.00  0.48           O  
HETATM  314  O   HOH T 313       3.405   4.919  -0.713  1.00  0.48           O  
HETATM  315  O   HOH T 314      17.474   2.473  23.446  1.00  0.48           O  
HETATM  316  O   HOH T 315      18.712 -11.393   4.845  1.00  0.48           O  
HETATM  317  O   HOH T 316      22.676  19.107   8.213  1.00  0.48           O  
HETATM  318  O   HOH T 317      31.252   9.416  12.801  1.00  0.48           O  
HETATM  319  O   HOH T 318      33.505 -22.168  21.936  1.00  0.48           O  
HETATM  320  O   HOH T 319      18.364 -13.142  13.007  1.00  0.48           O  
HETATM  321  O   HOH T 320       2.533 -11.291  22.585  1.00  0.48           O  
HETATM  322  O   HOH T 321      16.635   7.876  23.539  1.00  0.48           O  
HETATM  323  O   HOH T 322      17.323   2.495 -14.016  1.00  0.48           O  
HETATM  324  O   HOH T 323      30.745 -13.535  29.902  1.00  0.48           O  
HETATM  325  O   HOH T 324      -2.388   8.168  17.537  1.00  0.48           O  
HETATM  326  O   HOH T 325      15.242  12.210  21.229  1.00  0.48           O  
HETATM  327  O   HOH T 326      22.692  11.295   5.449  1.00  0.49           O  
HETATM  328  O   HOH T 327       7.425  17.702   9.578  1.00  0.49           O  
HETATM  329  O   HOH T 328      48.912  -6.667  44.530  1.00  0.49           O  
HETATM  330  O   HOH T 329      13.633  20.142  -0.758  1.00  0.49           O  
HETATM  331  O   HOH T 330      25.177  -6.816  22.576  1.00  0.49           O  
HETATM  332  O   HOH T 331      38.984  12.201  38.870  1.00  0.49           O  
HETATM  333  O   HOH T 332      18.093  -2.349 -15.332  1.00  0.49           O  
HETATM  334  O   HOH T 333       3.120  -1.534 -13.348  1.00  0.49           O  
HETATM  335  O   HOH T 334      40.105  -5.722  12.937  1.00  0.49           O  
HETATM  336  O   HOH T 335      38.673  -8.083  39.137  1.00  0.49           O  
HETATM  337  O   HOH T 336       2.143  -1.464   4.595  1.00  0.49           O  
HETATM  338  O   HOH T 337      21.903  12.587  -6.537  1.00  0.49           O  
HETATM  339  O   HOH T 338       9.450   7.423  21.780  1.00  0.49           O  
HETATM  340  O   HOH T 339      34.225 -25.298  25.838  1.00  0.49           O  
HETATM  341  O   HOH T 340      31.319  11.343  14.721  1.00  0.49           O  
HETATM  342  O   HOH T 341       1.174   3.515  -0.730  1.00  0.50           O  
HETATM  343  O   HOH T 342      23.419  12.830  33.548  1.00  0.50           O  
HETATM  344  O   HOH T 343      16.282   1.884  28.941  1.00  0.50           O  
HETATM  345  O   HOH T 344      42.944   9.602  29.709  1.00  0.50           O  
HETATM  346  O   HOH T 345      43.943   8.115  31.548  1.00  0.50           O  
HETATM  347  O   HOH T 346       2.326  -4.780  19.583  1.00  0.50           O  
HETATM  348  O   HOH T 347      10.484  -8.550  18.869  1.00  0.50           O  
HETATM  349  O   HOH T 348      47.031  -7.677  39.765  1.00  0.50           O  
HETATM  350  O   HOH T 349       1.413 -12.482   9.802  1.00  0.50           O  
HETATM  351  O   HOH T 350      20.154   8.202   8.726  1.00  0.50           O  
HETATM  352  O   HOH T 351       8.907 -15.494   7.360  1.00  0.50           O  
HETATM  353  O   HOH T 352      41.731  12.568  38.987  1.00  0.50           O  
HETATM  354  O   HOH T 353      40.753  -6.264  39.519  1.00  0.51           O  
HETATM  355  O   HOH T 354      21.202 -12.503   4.317  1.00  0.51           O  
HETATM  356  O   HOH T 355      21.361  -4.641  -9.307  1.00  0.51           O  
HETATM  357  O   HOH T 356      44.686  -6.327  38.931  1.00  0.51           O  
HETATM  358  O   HOH T 357      27.212 -17.035  16.598  1.00  0.51           O  
HETATM  359  O   HOH T 358      -4.712  -0.274  23.824  1.00  0.51           O  
HETATM  360  O   HOH T 359      22.576 -10.242  -0.859  1.00  0.51           O  
HETATM  361  O   HOH T 360      40.464  10.541  34.018  1.00  0.51           O  
HETATM  362  O   HOH T 361      22.787   5.077   4.790  1.00  0.51           O  
HETATM  363  O   HOH T 362      42.946  10.802  40.975  1.00  0.51           O  
HETATM  364  O   HOH T 363      36.102  -6.557  21.861  1.00  0.51           O  
HETATM  365  O   HOH T 364      21.559 -11.489   6.888  1.00  0.52           O  
HETATM  366  O   HOH T 365      -0.122  -1.976  -6.738  1.00  0.52           O  
HETATM  367  O   HOH T 366      -6.437   5.561  23.498  1.00  0.52           O  
HETATM  368  O   HOH T 367      27.399   1.704   4.076  1.00  0.52           O  
HETATM  369  O   HOH T 368      28.261  14.556  32.262  1.00  0.52           O  
HETATM  370  O   HOH T 369      41.596   1.351  43.112  1.00  0.52           O  
HETATM  371  O   HOH T 370      23.568  -3.322   5.589  1.00  0.52           O  
HETATM  372  O   HOH T 371      45.916   8.250  42.904  1.00  0.52           O  
HETATM  373  O   HOH T 372      -3.229  10.822  14.670  1.00  0.52           O  
HETATM  374  O   HOH T 373      39.672  -1.527   5.726  1.00  0.52           O  
HETATM  375  O   HOH T 374      35.831   8.302  40.699  1.00  0.52           O  
HETATM  376  O   HOH T 375      28.801   7.445   7.761  1.00  0.52           O  
HETATM  377  O   HOH T 376      38.387  -4.017   4.880  1.00  0.52           O  
HETATM  378  O   HOH T 377      25.244  -4.059   3.397  1.00  0.53           O  
HETATM  379  O   HOH T 378      17.531  -1.007  14.514  1.00  0.53           O  
HETATM  380  O   HOH T 379      41.333  -5.769  30.157  1.00  0.53           O  
HETATM  381  O   HOH T 380      42.340   3.075  35.977  1.00  0.53           O  
HETATM  382  O   HOH T 381      34.001  -4.139  42.331  1.00  0.53           O  
HETATM  383  O   HOH T 382       6.492 -14.717  18.435  1.00  0.53           O  
HETATM  384  O   HOH T 383      35.653 -22.616  29.165  1.00  0.53           O  
HETATM  385  O   HOH T 384      18.304  11.344  16.143  1.00  0.53           O  
HETATM  386  O   HOH T 385      -0.084   1.915  -2.536  1.00  0.53           O  
HETATM  387  O   HOH T 386      -0.760  -0.674  -2.525  1.00  0.53           O  
HETATM  388  O   HOH T 387       0.948  -8.923  22.546  1.00  0.53           O  
HETATM  389  O   HOH T 388      24.570   7.207   5.060  1.00  0.53           O  
HETATM  390  O   HOH T 389      23.610  15.468  30.363  1.00  0.53           O  
HETATM  391  O   HOH T 390      43.328  -0.002  11.265  1.00  0.53           O  
HETATM  392  O   HOH T 391      15.258   4.824  32.168  1.00  0.53           O  
HETATM  393  O   HOH T 392      15.404   2.482  25.285  1.00  0.53           O  
HETATM  394  O   HOH T 393      20.750  -0.084   8.282  1.00  0.53           O  
HETATM  395  O   HOH T 394      34.883  12.195  31.567  1.00  0.54           O  
HETATM  396  O   HOH T 395      37.245 -13.045  20.321  1.00  0.54           O  
HETATM  397  O   HOH T 396      13.449 -12.425  14.858  1.00  0.54           O  
HETATM  398  O   HOH T 397      16.653  -3.185  30.272  1.00  0.54           O  
HETATM  399  O   HOH T 398      -7.163  -0.991  22.642  1.00  0.54           O  
HETATM  400  O   HOH T 399       3.855 -15.431   4.020  1.00  0.54           O  
HETATM  401  O   HOH T 400      14.544  -4.893 -15.600  1.00  0.54           O  
HETATM  402  O   HOH T 401       8.112  -9.793 -12.918  1.00  0.54           O  
HETATM  403  O   HOH T 402       3.156 -12.341  -1.719  1.00  0.54           O  
HETATM  404  O   HOH T 403      16.248  10.485  13.104  1.00  0.55           O  
HETATM  405  O   HOH T 404       8.007   8.389   6.203  1.00  0.55           O  
HETATM  406  O   HOH T 405      21.119 -13.933  12.082  1.00  0.55           O  
HETATM  407  O   HOH T 406      27.681   1.164  41.791  1.00  0.55           O  
HETATM  408  O   HOH T 407      12.169  11.548  14.378  1.00  0.55           O  
HETATM  409  O   HOH T 408      29.154  14.623  18.576  1.00  0.55           O  
HETATM  410  O   HOH T 409      29.414   2.322   2.404  1.00  0.55           O  
HETATM  411  O   HOH T 410      30.486  -8.244  37.976  1.00  0.55           O  
HETATM  412  O   HOH T 411      23.081  -5.828  -7.492  1.00  0.56           O  
HETATM  413  O   HOH T 412      -1.618  12.333  21.850  1.00  0.56           O  
HETATM  414  O   HOH T 413      11.344   9.614  21.894  1.00  0.56           O  
HETATM  415  O   HOH T 414      13.718  -5.684  17.185  1.00  0.56           O  
HETATM  416  O   HOH T 415      36.442 -12.285  33.090  1.00  0.56           O  
HETATM  417  O   HOH T 416       4.925  17.183  16.207  1.00  0.56           O  
HETATM  418  O   HOH T 417      12.274   3.259 -17.815  1.00  0.57           O  
HETATM  419  O   HOH T 418      49.260  -8.035  35.227  1.00  0.58           O  
HETATM  420  O   HOH T 419      11.957  10.315  12.202  1.00  0.58           O  
HETATM  421  O   HOH T 420      17.891 -13.706  -1.432  1.00  0.58           O  
HETATM  422  O   HOH T 421      -4.002  10.480  17.190  1.00  0.58           O  
HETATM  423  O   HOH T 422      15.616 -10.923  -1.650  1.00  0.59           O  
HETATM  424  O   HOH T 423      35.753  -6.121  16.828  1.00  0.59           O  
HETATM  425  O   HOH T 424      47.361   1.621  33.995  1.00  0.59           O  
HETATM  426  O   HOH T 425      50.493   9.740  40.597  1.00  0.59           O  
HETATM  427  O   HOH T 426      16.218   3.325 -16.384  1.00  0.59           O  
TER     428      HOH T 426 
