# Supplementary material for: Accurate Prediction of Hydration Sites of Proteins Using Energy Model With Atom Embedding
Source: Front Mol Biosci. 2021 Sep 20;8:756075. doi: 10.3389/fmolb.2021.756075 (PMC8488165; doi:10.3389/fmolb.2021.756075)
Supplement: Supplementary file 1 [file DataSheet1.ZIP › Data Sheet 1/Our_result_pdb/our_dataset_output/1O5X_watersite.pdb]

HEADER                                                        XXXX


JRNL        PMID   -1
HETATM    1  O   HOH T   0      34.983  -8.486  11.821  1.00  0.17           O  
HETATM    2  O   HOH T   1      20.644   6.027  14.878  1.00  0.17           O  
HETATM    3  O   HOH T   2     -16.098  26.014  21.311  1.00  0.17           O  
HETATM    4  O   HOH T   3      -5.035   9.185  36.365  1.00  0.18           O  
HETATM    5  O   HOH T   4       9.582  12.413  13.835  1.00  0.18           O  
HETATM    6  O   HOH T   5      28.021 -36.437  26.917  1.00  0.20           O  
HETATM    7  O   HOH T   6      14.664   3.319  14.610  1.00  0.20           O  
HETATM    8  O   HOH T   7      19.799  -7.988   5.952  1.00  0.20           O  
HETATM    9  O   HOH T   8       6.787  20.985  23.628  1.00  0.20           O  
HETATM   10  O   HOH T   9      22.308   6.544  32.121  1.00  0.21           O  
HETATM   11  O   HOH T  10      15.762  -4.609  36.289  1.00  0.21           O  
HETATM   12  O   HOH T  11      26.592 -21.565  29.848  1.00  0.21           O  
HETATM   13  O   HOH T  12      10.958 -15.366  21.438  1.00  0.21           O  
HETATM   14  O   HOH T  13       6.525  -5.990  29.344  1.00  0.21           O  
HETATM   15  O   HOH T  14     -16.945  18.361  24.335  1.00  0.21           O  
HETATM   16  O   HOH T  15      19.785  -2.553  15.654  1.00  0.21           O  
HETATM   17  O   HOH T  16       5.009   1.345  25.540  1.00  0.22           O  
HETATM   18  O   HOH T  17      21.004 -14.163  20.202  1.00  0.22           O  
HETATM   19  O   HOH T  18      20.121  -7.294  30.897  1.00  0.22           O  
HETATM   20  O   HOH T  19      23.577   3.629  29.610  1.00  0.23           O  
HETATM   21  O   HOH T  20      17.233  11.387  26.992  1.00  0.23           O  
HETATM   22  O   HOH T  21      -1.103  30.682  27.957  1.00  0.23           O  
HETATM   23  O   HOH T  22       4.433  19.501  23.378  1.00  0.23           O  
HETATM   24  O   HOH T  23      32.893   1.211  18.655  1.00  0.23           O  
HETATM   25  O   HOH T  24      -2.631  -6.321  34.096  1.00  0.24           O  
HETATM   26  O   HOH T  25      19.877   3.830  31.837  1.00  0.24           O  
HETATM   27  O   HOH T  26      10.220  -8.316  26.457  1.00  0.24           O  
HETATM   28  O   HOH T  27     -13.088  29.212  21.095  1.00  0.24           O  
HETATM   29  O   HOH T  28      16.085   7.830  16.877  1.00  0.24           O  
HETATM   30  O   HOH T  29      18.563   2.520  33.817  1.00  0.24           O  
HETATM   31  O   HOH T  30      -5.363   2.432  21.538  1.00  0.24           O  
HETATM   32  O   HOH T  31      -1.292  28.567  34.567  1.00  0.25           O  
HETATM   33  O   HOH T  32      -9.211  28.603  22.826  1.00  0.25           O  
HETATM   34  O   HOH T  33      21.822   0.578  34.638  1.00  0.25           O  
HETATM   35  O   HOH T  34      21.573 -15.409  17.760  1.00  0.25           O  
HETATM   36  O   HOH T  35      20.997 -23.186  -0.582  1.00  0.25           O  
HETATM   37  O   HOH T  36       1.376  30.286  29.288  1.00  0.25           O  
HETATM   38  O   HOH T  37       7.534  -5.619  22.947  1.00  0.26           O  
HETATM   39  O   HOH T  38      43.726 -16.558  24.392  1.00  0.26           O  
HETATM   40  O   HOH T  39       4.516   2.327  22.972  1.00  0.26           O  
HETATM   41  O   HOH T  40      27.806  -5.513  -2.470  1.00  0.26           O  
HETATM   42  O   HOH T  41     -11.615  27.435  19.482  1.00  0.26           O  
HETATM   43  O   HOH T  42     -18.498   4.970  39.220  1.00  0.27           O  
HETATM   44  O   HOH T  43      24.281   9.797  25.151  1.00  0.27           O  
HETATM   45  O   HOH T  44      -4.907   0.894  36.850  1.00  0.27           O  
HETATM   46  O   HOH T  45     -15.928   3.868  17.669  1.00  0.27           O  
HETATM   47  O   HOH T  46     -16.907  -0.809  34.888  1.00  0.27           O  
HETATM   48  O   HOH T  47      -1.506  23.085  17.869  1.00  0.27           O  
HETATM   49  O   HOH T  48       8.705  27.747  43.090  1.00  0.27           O  
HETATM   50  O   HOH T  49      21.387 -28.576  -1.803  1.00  0.27           O  
HETATM   51  O   HOH T  50      15.787  -0.688  41.931  1.00  0.27           O  
HETATM   52  O   HOH T  51      41.568 -15.097  18.688  1.00  0.27           O  
HETATM   53  O   HOH T  52      43.045 -15.195  26.714  1.00  0.27           O  
HETATM   54  O   HOH T  53      -3.124   7.854  17.735  1.00  0.27           O  
HETATM   55  O   HOH T  54     -21.779  21.599  21.297  1.00  0.28           O  
HETATM   56  O   HOH T  55      35.804 -26.540   9.143  1.00  0.28           O  
HETATM   57  O   HOH T  56      43.703 -13.292  18.430  1.00  0.28           O  
HETATM   58  O   HOH T  57       2.622  17.076  20.063  1.00  0.28           O  
HETATM   59  O   HOH T  58      28.110   4.884   7.439  1.00  0.28           O  
HETATM   60  O   HOH T  59       8.159 -11.419  32.725  1.00  0.28           O  
HETATM   61  O   HOH T  60      18.730  -4.954  16.833  1.00  0.28           O  
HETATM   62  O   HOH T  61      15.076 -26.201  17.049  1.00  0.28           O  
HETATM   63  O   HOH T  62      20.168 -25.624   2.844  1.00  0.28           O  
HETATM   64  O   HOH T  63      17.136 -31.827  12.902  1.00  0.28           O  
HETATM   65  O   HOH T  64     -11.539  -0.277  33.596  1.00  0.28           O  
HETATM   66  O   HOH T  65      21.405  12.971  15.086  1.00  0.28           O  
HETATM   67  O   HOH T  66      -3.303  17.931  43.721  1.00  0.28           O  
HETATM   68  O   HOH T  67       6.496  29.490  47.812  1.00  0.28           O  
HETATM   69  O   HOH T  68      21.762 -12.001  35.149  1.00  0.29           O  
HETATM   70  O   HOH T  69      16.952 -19.568  20.394  1.00  0.29           O  
HETATM   71  O   HOH T  70      17.336  12.383  13.053  1.00  0.29           O  
HETATM   72  O   HOH T  71      19.740 -21.430  -2.273  1.00  0.29           O  
HETATM   73  O   HOH T  72      12.859 -23.833  -4.121  1.00  0.29           O  
HETATM   74  O   HOH T  73      21.837 -26.607  34.875  1.00  0.29           O  
HETATM   75  O   HOH T  74      25.072   7.129  31.728  1.00  0.29           O  
HETATM   76  O   HOH T  75      21.826   2.072  31.127  1.00  0.29           O  
HETATM   77  O   HOH T  76       6.662  13.907  40.531  1.00  0.29           O  
HETATM   78  O   HOH T  77     -25.093   4.810  29.281  1.00  0.29           O  
HETATM   79  O   HOH T  78      20.802 -24.304  16.573  1.00  0.29           O  
HETATM   80  O   HOH T  79      17.211  -7.329  41.724  1.00  0.29           O  
HETATM   81  O   HOH T  80     -12.895  24.568  30.226  1.00  0.29           O  
HETATM   82  O   HOH T  81      40.083  -6.031  33.229  1.00  0.29           O  
HETATM   83  O   HOH T  82      10.229  25.352  27.486  1.00  0.30           O  
HETATM   84  O   HOH T  83      41.996 -18.089  32.428  1.00  0.30           O  
HETATM   85  O   HOH T  84      -7.288  -4.182  22.068  1.00  0.30           O  
HETATM   86  O   HOH T  85       6.576  23.250  22.101  1.00  0.30           O  
HETATM   87  O   HOH T  86      -0.591  20.373  18.452  1.00  0.30           O  
HETATM   88  O   HOH T  87      10.377  -6.837  38.967  1.00  0.30           O  
HETATM   89  O   HOH T  88     -17.664  11.189  24.089  1.00  0.30           O  
HETATM   90  O   HOH T  89      23.318  18.250  37.290  1.00  0.30           O  
HETATM   91  O   HOH T  90      36.470  -1.283  28.995  1.00  0.30           O  
HETATM   92  O   HOH T  91      33.017 -29.153   8.609  1.00  0.30           O  
HETATM   93  O   HOH T  92      29.302   3.032   5.738  1.00  0.30           O  
HETATM   94  O   HOH T  93      10.688  21.334  45.978  1.00  0.30           O  
HETATM   95  O   HOH T  94      10.554  -2.422  24.982  1.00  0.31           O  
HETATM   96  O   HOH T  95      20.845  17.500  38.358  1.00  0.31           O  
HETATM   97  O   HOH T  96      16.306   2.245  19.100  1.00  0.31           O  
HETATM   98  O   HOH T  97       1.695  15.684   9.756  1.00  0.31           O  
HETATM   99  O   HOH T  98     -20.688   4.797  37.511  1.00  0.31           O  
HETATM  100  O   HOH T  99      20.149  22.627  41.041  1.00  0.31           O  
HETATM  101  O   HOH T 100       8.001  -2.413  14.715  1.00  0.31           O  
HETATM  102  O   HOH T 101      14.698   4.824  24.747  1.00  0.31           O  
HETATM  103  O   HOH T 102       8.422  28.270  25.120  1.00  0.31           O  
HETATM  104  O   HOH T 103       5.011  -8.930  17.495  1.00  0.31           O  
HETATM  105  O   HOH T 104      15.354  13.884  46.752  1.00  0.31           O  
HETATM  106  O   HOH T 105      19.063 -26.492  16.983  1.00  0.31           O  
HETATM  107  O   HOH T 106      -2.265   2.163  16.476  1.00  0.31           O  
HETATM  108  O   HOH T 107     -17.936   6.818  19.428  1.00  0.31           O  
HETATM  109  O   HOH T 108     -13.668  17.039  15.346  1.00  0.31           O  
HETATM  110  O   HOH T 109       4.978   2.367  39.465  1.00  0.31           O  
HETATM  111  O   HOH T 110      17.222  25.957  27.521  1.00  0.31           O  
HETATM  112  O   HOH T 111      35.350 -24.748  27.852  1.00  0.31           O  
HETATM  113  O   HOH T 112      -2.605  19.374  41.363  1.00  0.31           O  
HETATM  114  O   HOH T 113      18.398 -12.524  11.542  1.00  0.31           O  
HETATM  115  O   HOH T 114      25.907  -4.907  -0.650  1.00  0.31           O  
HETATM  116  O   HOH T 115      33.062  -0.829   8.815  1.00  0.31           O  
HETATM  117  O   HOH T 116      -1.222   8.130  19.802  1.00  0.32           O  
HETATM  118  O   HOH T 117       7.689  -1.202  18.678  1.00  0.32           O  
HETATM  119  O   HOH T 118      32.906   3.314  11.707  1.00  0.32           O  
HETATM  120  O   HOH T 119       4.928  29.974  31.083  1.00  0.32           O  
HETATM  121  O   HOH T 120       3.879  22.596  43.899  1.00  0.32           O  
HETATM  122  O   HOH T 121      36.150 -25.864  25.418  1.00  0.32           O  
HETATM  123  O   HOH T 122      -8.187  21.304  34.589  1.00  0.32           O  
HETATM  124  O   HOH T 123      42.163 -16.389  22.153  1.00  0.32           O  
HETATM  125  O   HOH T 124      28.082   2.989  31.435  1.00  0.32           O  
HETATM  126  O   HOH T 125      13.575  -9.028  35.542  1.00  0.32           O  
HETATM  127  O   HOH T 126      18.083  27.191  37.060  1.00  0.32           O  
HETATM  128  O   HOH T 127      34.008   1.244  10.323  1.00  0.32           O  
HETATM  129  O   HOH T 128      -9.549  -4.701  23.685  1.00  0.32           O  
HETATM  130  O   HOH T 129      20.063  23.198  30.039  1.00  0.32           O  
HETATM  131  O   HOH T 130      -8.085  12.051  40.798  1.00  0.32           O  
HETATM  132  O   HOH T 131     -11.781   0.124  38.924  1.00  0.32           O  
HETATM  133  O   HOH T 132      20.969   5.598   7.046  1.00  0.32           O  
HETATM  134  O   HOH T 133      21.119  21.160  28.584  1.00  0.33           O  
HETATM  135  O   HOH T 134      -4.806  -4.631  34.219  1.00  0.33           O  
HETATM  136  O   HOH T 135      16.052 -15.236  26.518  1.00  0.33           O  
HETATM  137  O   HOH T 136      11.894   1.180  22.784  1.00  0.33           O  
HETATM  138  O   HOH T 137      11.123 -29.160  12.459  1.00  0.33           O  
HETATM  139  O   HOH T 138      -3.494  27.364  20.241  1.00  0.33           O  
HETATM  140  O   HOH T 139     -14.493  -1.630  28.218  1.00  0.33           O  
HETATM  141  O   HOH T 140      13.967  21.989  22.444  1.00  0.33           O  
HETATM  142  O   HOH T 141     -18.189   7.604  22.088  1.00  0.33           O  
HETATM  143  O   HOH T 142      38.855  -8.803  12.125  1.00  0.33           O  
HETATM  144  O   HOH T 143      -2.565  13.777  10.520  1.00  0.33           O  
HETATM  145  O   HOH T 144       1.385  23.668  43.819  1.00  0.34           O  
HETATM  146  O   HOH T 145      12.909  -6.473  42.244  1.00  0.34           O  
HETATM  147  O   HOH T 146       8.271  -0.286  11.359  1.00  0.34           O  
HETATM  148  O   HOH T 147      32.381 -27.607  23.972  1.00  0.34           O  
HETATM  149  O   HOH T 148      16.278  10.584  11.224  1.00  0.34           O  
HETATM  150  O   HOH T 149      25.772 -24.069  28.775  1.00  0.34           O  
HETATM  151  O   HOH T 150      18.777  20.554  27.321  1.00  0.34           O  
HETATM  152  O   HOH T 151     -16.060  21.875  27.033  1.00  0.34           O  
HETATM  153  O   HOH T 152      36.619  -7.777  25.208  1.00  0.34           O  
HETATM  154  O   HOH T 153      13.936   1.831   6.655  1.00  0.34           O  
HETATM  155  O   HOH T 154      -5.730  25.532  12.068  1.00  0.34           O  
HETATM  156  O   HOH T 155      -3.112  25.658  50.229  1.00  0.34           O  
HETATM  157  O   HOH T 156      36.515 -19.618  -8.318  1.00  0.34           O  
HETATM  158  O   HOH T 157      11.417 -15.827  18.700  1.00  0.34           O  
HETATM  159  O   HOH T 158      -5.814  24.935  35.831  1.00  0.34           O  
HETATM  160  O   HOH T 159       0.773  21.994  12.865  1.00  0.34           O  
HETATM  161  O   HOH T 160      25.914  21.284  33.944  1.00  0.35           O  
HETATM  162  O   HOH T 161     -15.154  -2.981  35.507  1.00  0.35           O  
HETATM  163  O   HOH T 162      -7.817  30.230  24.493  1.00  0.35           O  
HETATM  164  O   HOH T 163      -3.232  26.747  11.723  1.00  0.35           O  
HETATM  165  O   HOH T 164       1.859  13.717  23.352  1.00  0.35           O  
HETATM  166  O   HOH T 165      20.292  -3.234  24.847  1.00  0.35           O  
HETATM  167  O   HOH T 166      14.134  -8.527   7.517  1.00  0.35           O  
HETATM  168  O   HOH T 167       8.272  32.014  30.257  1.00  0.35           O  
HETATM  169  O   HOH T 168      15.033  -1.446  21.023  1.00  0.35           O  
HETATM  170  O   HOH T 169      32.905   3.384  33.302  1.00  0.35           O  
HETATM  171  O   HOH T 170      18.781 -29.231   7.407  1.00  0.35           O  
HETATM  172  O   HOH T 171      17.015 -13.515   9.319  1.00  0.35           O  
HETATM  173  O   HOH T 172     -13.430   2.947  41.797  1.00  0.35           O  
HETATM  174  O   HOH T 173      25.019 -15.549  38.855  1.00  0.35           O  
HETATM  175  O   HOH T 174      33.288   4.970   4.753  1.00  0.35           O  
HETATM  176  O   HOH T 175      -1.051  23.018  20.689  1.00  0.35           O  
HETATM  177  O   HOH T 176      43.522  -7.237  19.439  1.00  0.35           O  
HETATM  178  O   HOH T 177      21.031  20.029  40.797  1.00  0.35           O  
HETATM  179  O   HOH T 178      12.963   5.577  27.524  1.00  0.35           O  
HETATM  180  O   HOH T 179       3.000 -10.962  25.938  1.00  0.35           O  
HETATM  181  O   HOH T 180      15.082 -12.170  34.043  1.00  0.35           O  
HETATM  182  O   HOH T 181      10.791  -2.071  14.128  1.00  0.36           O  
HETATM  183  O   HOH T 182      11.199 -16.235  25.338  1.00  0.36           O  
HETATM  184  O   HOH T 183      17.117  -3.146  25.496  1.00  0.36           O  
HETATM  185  O   HOH T 184      -0.131  -8.430  39.201  1.00  0.36           O  
HETATM  186  O   HOH T 185      -5.413  12.698  41.046  1.00  0.36           O  
HETATM  187  O   HOH T 186     -15.428  17.139  33.928  1.00  0.36           O  
HETATM  188  O   HOH T 187     -13.080  -1.666  13.218  1.00  0.36           O  
HETATM  189  O   HOH T 188      -4.765  23.051  22.160  1.00  0.36           O  
HETATM  190  O   HOH T 189      -8.005  19.272  39.060  1.00  0.36           O  
HETATM  191  O   HOH T 190     -13.842  15.008  13.554  1.00  0.36           O  
HETATM  192  O   HOH T 191       6.986  -8.044  32.242  1.00  0.36           O  
HETATM  193  O   HOH T 192      20.544  10.747  43.530  1.00  0.36           O  
HETATM  194  O   HOH T 193      32.613  -0.391   1.486  1.00  0.36           O  
HETATM  195  O   HOH T 194       2.747  35.090  24.296  1.00  0.36           O  
HETATM  196  O   HOH T 195      17.303  17.150  48.616  1.00  0.37           O  
HETATM  197  O   HOH T 196       0.744   8.001  14.433  1.00  0.37           O  
HETATM  198  O   HOH T 197      12.391 -10.003  38.100  1.00  0.37           O  
HETATM  199  O   HOH T 198      -1.385  -2.050  38.595  1.00  0.37           O  
HETATM  200  O   HOH T 199      18.132  19.855  48.922  1.00  0.37           O  
HETATM  201  O   HOH T 200     -12.506  28.188  26.478  1.00  0.37           O  
HETATM  202  O   HOH T 201      28.591 -14.998  41.303  1.00  0.37           O  
HETATM  203  O   HOH T 202      24.669 -19.755  36.687  1.00  0.37           O  
HETATM  204  O   HOH T 203      33.742 -31.182  20.803  1.00  0.37           O  
HETATM  205  O   HOH T 204      15.529  26.628  36.499  1.00  0.37           O  
HETATM  206  O   HOH T 205       4.362  10.872  40.310  1.00  0.37           O  
HETATM  207  O   HOH T 206      -6.980  -8.873  28.796  1.00  0.37           O  
HETATM  208  O   HOH T 207      33.120  -1.889  25.360  1.00  0.37           O  
HETATM  209  O   HOH T 208      14.438 -18.513  20.438  1.00  0.37           O  
HETATM  210  O   HOH T 209      12.791  29.022  26.371  1.00  0.37           O  
HETATM  211  O   HOH T 210      22.000  16.464  40.646  1.00  0.37           O  
HETATM  212  O   HOH T 211     -20.726  24.979  27.564  1.00  0.37           O  
HETATM  213  O   HOH T 212      33.407   0.159  37.405  1.00  0.37           O  
HETATM  214  O   HOH T 213      16.840 -10.242  41.625  1.00  0.37           O  
HETATM  215  O   HOH T 214      -4.882  27.640  35.667  1.00  0.37           O  
HETATM  216  O   HOH T 215     -23.364   3.460  33.213  1.00  0.37           O  
HETATM  217  O   HOH T 216       9.875   3.249  10.143  1.00  0.37           O  
HETATM  218  O   HOH T 217      23.126 -29.882   2.770  1.00  0.37           O  
HETATM  219  O   HOH T 218      -5.015  -2.594  40.495  1.00  0.37           O  
HETATM  220  O   HOH T 219      38.452  -7.040  23.225  1.00  0.37           O  
HETATM  221  O   HOH T 220      29.057  -7.546  40.458  1.00  0.38           O  
HETATM  222  O   HOH T 221      15.857   0.876  24.861  1.00  0.38           O  
HETATM  223  O   HOH T 222      22.811  12.749  21.364  1.00  0.38           O  
HETATM  224  O   HOH T 223      20.914  14.732  21.287  1.00  0.38           O  
HETATM  225  O   HOH T 224      15.543  14.500  13.659  1.00  0.38           O  
HETATM  226  O   HOH T 225     -14.902  -0.854  15.266  1.00  0.38           O  
HETATM  227  O   HOH T 226       2.214   3.058  10.982  1.00  0.38           O  
HETATM  228  O   HOH T 227      16.526  11.452  45.906  1.00  0.38           O  
HETATM  229  O   HOH T 228      38.118 -21.549  13.917  1.00  0.38           O  
HETATM  230  O   HOH T 229      -6.085  10.518  39.635  1.00  0.38           O  
HETATM  231  O   HOH T 230      -7.484  -8.408  19.203  1.00  0.38           O  
HETATM  232  O   HOH T 231     -14.306   2.353  46.570  1.00  0.38           O  
HETATM  233  O   HOH T 232       0.881  13.706  14.025  1.00  0.38           O  
HETATM  234  O   HOH T 233      18.152  23.277  27.912  1.00  0.38           O  
HETATM  235  O   HOH T 234      10.502  29.281  44.529  1.00  0.38           O  
HETATM  236  O   HOH T 235       9.870   8.146  40.012  1.00  0.39           O  
HETATM  237  O   HOH T 236      13.711 -30.279   2.231  1.00  0.39           O  
HETATM  238  O   HOH T 237      19.812 -32.594  12.600  1.00  0.39           O  
HETATM  239  O   HOH T 238     -17.429  18.530  21.695  1.00  0.39           O  
HETATM  240  O   HOH T 239      19.043 -33.927  17.268  1.00  0.39           O  
HETATM  241  O   HOH T 240     -13.191  25.306  14.153  1.00  0.39           O  
HETATM  242  O   HOH T 241       7.405   1.074  39.661  1.00  0.39           O  
HETATM  243  O   HOH T 242      21.861 -26.885  16.644  1.00  0.39           O  
HETATM  244  O   HOH T 243      29.199 -34.270  25.535  1.00  0.39           O  
HETATM  245  O   HOH T 244      15.505 -24.747  19.373  1.00  0.39           O  
HETATM  246  O   HOH T 245       8.948  20.111  47.844  1.00  0.39           O  
HETATM  247  O   HOH T 246      30.962  -0.118  25.542  1.00  0.39           O  
HETATM  248  O   HOH T 247      40.195 -20.966  10.699  1.00  0.39           O  
HETATM  249  O   HOH T 248     -20.448   3.176  22.430  1.00  0.40           O  
HETATM  250  O   HOH T 249      -5.457 -10.446  22.682  1.00  0.40           O  
HETATM  251  O   HOH T 250       0.235  -7.494  19.859  1.00  0.40           O  
HETATM  252  O   HOH T 251       8.528 -16.208  26.117  1.00  0.40           O  
HETATM  253  O   HOH T 252       7.633  -7.093  38.661  1.00  0.40           O  
HETATM  254  O   HOH T 253     -15.937  19.665  32.954  1.00  0.40           O  
HETATM  255  O   HOH T 254      -3.320  25.369  22.135  1.00  0.40           O  
HETATM  256  O   HOH T 255      32.685   2.491  35.963  1.00  0.40           O  
HETATM  257  O   HOH T 256      -2.042  26.557  38.252  1.00  0.40           O  
HETATM  258  O   HOH T 257      22.278 -14.807  35.747  1.00  0.40           O  
HETATM  259  O   HOH T 258      43.795 -15.449  20.129  1.00  0.40           O  
HETATM  260  O   HOH T 259      19.394 -14.763  26.465  1.00  0.40           O  
HETATM  261  O   HOH T 260      14.986  27.748  27.926  1.00  0.40           O  
HETATM  262  O   HOH T 261      16.776   2.713  38.378  1.00  0.40           O  
HETATM  263  O   HOH T 262      14.683  -4.454  42.861  1.00  0.40           O  
HETATM  264  O   HOH T 263      31.457  -5.199  -5.243  1.00  0.40           O  
HETATM  265  O   HOH T 264      42.265  -6.556  31.592  1.00  0.40           O  
HETATM  266  O   HOH T 265      -1.680   7.124  15.434  1.00  0.40           O  
HETATM  267  O   HOH T 266     -10.468  29.692  20.710  1.00  0.40           O  
HETATM  268  O   HOH T 267      22.943  -5.161  42.107  1.00  0.40           O  
HETATM  269  O   HOH T 268      -5.225   0.696  44.621  1.00  0.40           O  
HETATM  270  O   HOH T 269      12.042  15.602  19.837  1.00  0.40           O  
HETATM  271  O   HOH T 270     -17.320  -5.734  21.803  1.00  0.40           O  
HETATM  272  O   HOH T 271       8.147  27.378  48.230  1.00  0.40           O  
HETATM  273  O   HOH T 272      12.356  18.270  17.332  1.00  0.40           O  
HETATM  274  O   HOH T 273      24.313 -26.069   5.653  1.00  0.40           O  
HETATM  275  O   HOH T 274      17.019   0.505  21.203  1.00  0.40           O  
HETATM  276  O   HOH T 275      10.629 -19.191   0.442  1.00  0.40           O  
HETATM  277  O   HOH T 276      -4.869  -8.948  25.008  1.00  0.41           O  
HETATM  278  O   HOH T 277       9.431  10.349  44.381  1.00  0.41           O  
HETATM  279  O   HOH T 278       0.144  28.264  38.437  1.00  0.41           O  
HETATM  280  O   HOH T 279      22.856 -25.017   3.566  1.00  0.41           O  
HETATM  281  O   HOH T 280      11.743   2.525  26.809  1.00  0.41           O  
HETATM  282  O   HOH T 281     -23.382   2.977  27.924  1.00  0.41           O  
HETATM  283  O   HOH T 282       3.166  -9.539  28.240  1.00  0.41           O  
HETATM  284  O   HOH T 283      31.769   3.452  19.822  1.00  0.41           O  
HETATM  285  O   HOH T 284      38.275 -19.218  12.050  1.00  0.41           O  
HETATM  286  O   HOH T 285      26.827  19.597  31.902  1.00  0.41           O  
HETATM  287  O   HOH T 286      28.019  22.050  29.319  1.00  0.41           O  
HETATM  288  O   HOH T 287      16.096   1.809  42.949  1.00  0.41           O  
HETATM  289  O   HOH T 288      18.046 -32.410  21.690  1.00  0.41           O  
HETATM  290  O   HOH T 289      21.759  12.199  45.594  1.00  0.41           O  
HETATM  291  O   HOH T 290      13.826  -4.163   2.971  1.00  0.41           O  
HETATM  292  O   HOH T 291      22.736 -14.263  38.368  1.00  0.41           O  
HETATM  293  O   HOH T 292      11.743   0.053  17.818  1.00  0.41           O  
HETATM  294  O   HOH T 293      19.915 -13.732  -3.454  1.00  0.41           O  
HETATM  295  O   HOH T 294      26.019 -27.550  27.714  1.00  0.41           O  
HETATM  296  O   HOH T 295      11.787   0.138  25.408  1.00  0.41           O  
HETATM  297  O   HOH T 296      36.066   4.462   4.075  1.00  0.41           O  
HETATM  298  O   HOH T 297      -7.245  -5.145  35.144  1.00  0.41           O  
HETATM  299  O   HOH T 298      19.166 -12.983  35.153  1.00  0.42           O  
HETATM  300  O   HOH T 299     -16.794  -3.021  24.503  1.00  0.42           O  
HETATM  301  O   HOH T 300      -0.005  22.838  15.447  1.00  0.42           O  
HETATM  302  O   HOH T 301     -13.699   3.244  13.609  1.00  0.42           O  
HETATM  303  O   HOH T 302      13.272 -26.476  19.261  1.00  0.42           O  
HETATM  304  O   HOH T 303      31.668 -22.185  -3.067  1.00  0.42           O  
HETATM  305  O   HOH T 304      21.811   8.119  13.500  1.00  0.42           O  
HETATM  306  O   HOH T 305      18.929  17.770  26.769  1.00  0.42           O  
HETATM  307  O   HOH T 306      21.909  10.541  12.117  1.00  0.42           O  
HETATM  308  O   HOH T 307      26.067 -22.004  35.524  1.00  0.42           O  
HETATM  309  O   HOH T 308       4.181  29.756  33.973  1.00  0.42           O  
HETATM  310  O   HOH T 309       5.091   5.058  23.582  1.00  0.42           O  
HETATM  311  O   HOH T 310      24.199 -29.394  26.482  1.00  0.42           O  
HETATM  312  O   HOH T 311       2.478  -9.688  23.549  1.00  0.42           O  
HETATM  313  O   HOH T 312       2.998  24.112  46.110  1.00  0.42           O  
HETATM  314  O   HOH T 313       5.626  -3.701  13.900  1.00  0.42           O  
HETATM  315  O   HOH T 314      12.462  -0.351   5.755  1.00  0.42           O  
HETATM  316  O   HOH T 315      13.790  17.810  19.634  1.00  0.42           O  
HETATM  317  O   HOH T 316      12.106 -30.067   9.906  1.00  0.42           O  
HETATM  318  O   HOH T 317      39.865 -24.731  28.012  1.00  0.42           O  
HETATM  319  O   HOH T 318     -22.121  18.326  25.318  1.00  0.42           O  
HETATM  320  O   HOH T 319      13.469 -19.519  14.333  1.00  0.42           O  
HETATM  321  O   HOH T 320      31.066 -26.351  31.427  1.00  0.42           O  
HETATM  322  O   HOH T 321      10.878  10.146  42.154  1.00  0.42           O  
HETATM  323  O   HOH T 322      41.038 -22.511  29.306  1.00  0.42           O  
HETATM  324  O   HOH T 323     -20.189   8.172  20.207  1.00  0.42           O  
HETATM  325  O   HOH T 324      35.656 -20.745  -2.932  1.00  0.42           O  
HETATM  326  O   HOH T 325      34.524  -5.090  38.343  1.00  0.42           O  
HETATM  327  O   HOH T 326     -21.740   6.058  21.141  1.00  0.42           O  
HETATM  328  O   HOH T 327     -18.491  -0.939  32.523  1.00  0.42           O  
HETATM  329  O   HOH T 328     -15.600  23.918  30.532  1.00  0.43           O  
HETATM  330  O   HOH T 329      18.943 -31.857  19.103  1.00  0.43           O  
HETATM  331  O   HOH T 330       9.269  16.813  19.397  1.00  0.43           O  
HETATM  332  O   HOH T 331      12.101 -21.139  11.044  1.00  0.43           O  
HETATM  333  O   HOH T 332      19.844  -7.499  -1.121  1.00  0.43           O  
HETATM  334  O   HOH T 333      -8.025  29.124  28.561  1.00  0.43           O  
HETATM  335  O   HOH T 334     -14.551  15.632  36.048  1.00  0.43           O  
HETATM  336  O   HOH T 335      42.703 -10.414  32.380  1.00  0.43           O  
HETATM  337  O   HOH T 336     -12.722  -2.267  26.366  1.00  0.43           O  
HETATM  338  O   HOH T 337      19.447 -16.932  16.906  1.00  0.43           O  
HETATM  339  O   HOH T 338      -3.456  -5.422  36.540  1.00  0.43           O  
HETATM  340  O   HOH T 339      14.442 -32.379  13.519  1.00  0.43           O  
HETATM  341  O   HOH T 340      12.248 -18.486  18.799  1.00  0.43           O  
HETATM  342  O   HOH T 341      -9.133  -9.671  30.310  1.00  0.43           O  
HETATM  343  O   HOH T 342      16.642  -1.361  23.338  1.00  0.43           O  
HETATM  344  O   HOH T 343      41.785  -8.954  -1.630  1.00  0.43           O  
HETATM  345  O   HOH T 344      19.855  16.164  42.450  1.00  0.43           O  
HETATM  346  O   HOH T 345       5.014  22.632  17.694  1.00  0.43           O  
HETATM  347  O   HOH T 346       7.813  22.686  48.032  1.00  0.43           O  
HETATM  348  O   HOH T 347      28.700  -4.521  -4.924  1.00  0.43           O  
HETATM  349  O   HOH T 348      12.004   5.396  41.537  1.00  0.43           O  
HETATM  350  O   HOH T 349       4.629  13.827  42.378  1.00  0.43           O  
HETATM  351  O   HOH T 350      18.043  11.111  42.566  1.00  0.43           O  
HETATM  352  O   HOH T 351      41.321 -17.408  13.835  1.00  0.43           O  
HETATM  353  O   HOH T 352      -0.049  14.502  11.550  1.00  0.43           O  
HETATM  354  O   HOH T 353     -17.039  12.117  15.557  1.00  0.43           O  
HETATM  355  O   HOH T 354      13.844   4.973  39.542  1.00  0.43           O  
HETATM  356  O   HOH T 355      18.524   4.891  38.407  1.00  0.43           O  
HETATM  357  O   HOH T 356       7.349   9.792  42.511  1.00  0.44           O  
HETATM  358  O   HOH T 357      26.751  -6.489  -4.856  1.00  0.44           O  
HETATM  359  O   HOH T 358      -0.404  -1.163  41.008  1.00  0.44           O  
HETATM  360  O   HOH T 359     -12.871  22.896  15.488  1.00  0.44           O  
HETATM  361  O   HOH T 360      19.124  -0.628  22.561  1.00  0.44           O  
HETATM  362  O   HOH T 361      -8.154  -3.259  19.447  1.00  0.44           O  
HETATM  363  O   HOH T 362      12.882  14.583  14.489  1.00  0.44           O  
HETATM  364  O   HOH T 363      22.455 -20.818  24.653  1.00  0.44           O  
HETATM  365  O   HOH T 364      -9.690  -5.011  20.950  1.00  0.44           O  
HETATM  366  O   HOH T 365      -8.675  -1.235  42.047  1.00  0.44           O  
HETATM  367  O   HOH T 366      29.230  17.984  31.714  1.00  0.44           O  
HETATM  368  O   HOH T 367     -14.027  -4.247  27.252  1.00  0.44           O  
HETATM  369  O   HOH T 368       7.700  36.719  29.614  1.00  0.44           O  
HETATM  370  O   HOH T 369      -9.646  26.773  35.537  1.00  0.44           O  
HETATM  371  O   HOH T 370      23.557  14.050  44.543  1.00  0.44           O  
HETATM  372  O   HOH T 371      -8.903  21.198  37.267  1.00  0.44           O  
HETATM  373  O   HOH T 372      22.200 -25.117   0.908  1.00  0.44           O  
HETATM  374  O   HOH T 373      24.804 -24.362   1.709  1.00  0.44           O  
HETATM  375  O   HOH T 374      33.991 -22.431  -1.726  1.00  0.44           O  
HETATM  376  O   HOH T 375      25.233   7.317  34.450  1.00  0.44           O  
HETATM  377  O   HOH T 376     -15.934  21.154  30.761  1.00  0.44           O  
HETATM  378  O   HOH T 377      -2.466   0.223  39.745  1.00  0.44           O  
HETATM  379  O   HOH T 378      -6.791 -10.836  20.264  1.00  0.44           O  
HETATM  380  O   HOH T 379     -12.017  -0.735  20.398  1.00  0.44           O  
HETATM  381  O   HOH T 380       9.738  -1.653  16.796  1.00  0.44           O  
HETATM  382  O   HOH T 381      -4.290  12.223   8.030  1.00  0.44           O  
HETATM  383  O   HOH T 382     -14.228  22.952  13.147  1.00  0.44           O  
HETATM  384  O   HOH T 383      34.781 -19.186   1.629  1.00  0.45           O  
HETATM  385  O   HOH T 384      16.348  -8.819  43.957  1.00  0.45           O  
HETATM  386  O   HOH T 385      -5.031  -3.487  16.918  1.00  0.45           O  
HETATM  387  O   HOH T 386      23.464 -10.006  43.818  1.00  0.45           O  
HETATM  388  O   HOH T 387     -16.936  14.960  34.717  1.00  0.45           O  
HETATM  389  O   HOH T 388      -4.010  -1.463  38.132  1.00  0.45           O  
HETATM  390  O   HOH T 389      36.465 -17.136  -9.607  1.00  0.45           O  
HETATM  391  O   HOH T 390      13.538  -1.697  13.249  1.00  0.45           O  
HETATM  392  O   HOH T 391      13.947   7.106  23.431  1.00  0.45           O  
HETATM  393  O   HOH T 392      21.936 -34.094  13.744  1.00  0.45           O  
HETATM  394  O   HOH T 393       0.754  32.732  28.257  1.00  0.45           O  
HETATM  395  O   HOH T 394      11.322  16.123  22.754  1.00  0.45           O  
HETATM  396  O   HOH T 395      14.499   0.065  16.418  1.00  0.45           O  
HETATM  397  O   HOH T 396      19.059 -34.466  20.045  1.00  0.45           O  
HETATM  398  O   HOH T 397       6.313  -9.954  34.161  1.00  0.45           O  
HETATM  399  O   HOH T 398      -0.976  31.260  34.703  1.00  0.45           O  
HETATM  400  O   HOH T 399      13.455   2.306  24.647  1.00  0.45           O  
HETATM  401  O   HOH T 400      17.261   1.195  40.539  1.00  0.45           O  
HETATM  402  O   HOH T 401      10.279 -17.188   2.329  1.00  0.45           O  
HETATM  403  O   HOH T 402      -9.246  -5.982  33.345  1.00  0.45           O  
HETATM  404  O   HOH T 403      20.996 -22.684  25.931  1.00  0.45           O  
HETATM  405  O   HOH T 404      16.300  26.943  23.306  1.00  0.45           O  
HETATM  406  O   HOH T 405      22.909  11.828  43.069  1.00  0.45           O  
HETATM  407  O   HOH T 406      14.309 -23.161  21.406  1.00  0.45           O  
HETATM  408  O   HOH T 407      31.147 -28.598   6.613  1.00  0.46           O  
HETATM  409  O   HOH T 408      15.515 -23.387  -4.269  1.00  0.46           O  
HETATM  410  O   HOH T 409      10.168  30.101  26.276  1.00  0.46           O  
HETATM  411  O   HOH T 410      40.532 -17.844  34.837  1.00  0.46           O  
HETATM  412  O   HOH T 411      -2.649  20.489  43.807  1.00  0.46           O  
HETATM  413  O   HOH T 412     -17.186  14.493  30.147  1.00  0.46           O  
HETATM  414  O   HOH T 413       7.063 -15.357  22.003  1.00  0.46           O  
HETATM  415  O   HOH T 414       5.554  -5.008  16.297  1.00  0.46           O  
HETATM  416  O   HOH T 415      12.394 -17.059   0.565  1.00  0.46           O  
HETATM  417  O   HOH T 416      24.912   5.783  36.618  1.00  0.46           O  
HETATM  418  O   HOH T 417      -1.872  25.299  19.682  1.00  0.46           O  
HETATM  419  O   HOH T 418       7.961  -2.494  21.173  1.00  0.46           O  
HETATM  420  O   HOH T 419     -19.705  -1.254  35.019  1.00  0.46           O  
HETATM  421  O   HOH T 420       3.006  20.944  14.322  1.00  0.46           O  
HETATM  422  O   HOH T 421       2.680  14.483  12.035  1.00  0.46           O  
HETATM  423  O   HOH T 422      18.283 -27.753   2.691  1.00  0.46           O  
HETATM  424  O   HOH T 423       8.924  32.223  27.491  1.00  0.46           O  
HETATM  425  O   HOH T 424      15.718   3.454  40.831  1.00  0.46           O  
HETATM  426  O   HOH T 425      40.519  -7.201  -3.374  1.00  0.46           O  
HETATM  427  O   HOH T 426      25.943 -24.746  31.466  1.00  0.46           O  
HETATM  428  O   HOH T 427      44.122 -17.826  26.698  1.00  0.46           O  
HETATM  429  O   HOH T 428     -21.498   9.875  22.011  1.00  0.46           O  
HETATM  430  O   HOH T 429      24.422 -25.999  16.242  1.00  0.46           O  
HETATM  431  O   HOH T 430      10.749  12.363  11.275  1.00  0.46           O  
HETATM  432  O   HOH T 431      27.762   5.072   4.753  1.00  0.46           O  
HETATM  433  O   HOH T 432      35.324   1.408  15.516  1.00  0.46           O  
HETATM  434  O   HOH T 433      16.232 -29.338   1.609  1.00  0.46           O  
HETATM  435  O   HOH T 434      10.186  -2.262  19.571  1.00  0.46           O  
HETATM  436  O   HOH T 435      19.434   2.228  39.068  1.00  0.46           O  
HETATM  437  O   HOH T 436     -14.585  17.395  12.658  1.00  0.47           O  
HETATM  438  O   HOH T 437      20.476 -24.807  36.429  1.00  0.47           O  
HETATM  439  O   HOH T 438     -21.170  13.987  29.301  1.00  0.47           O  
HETATM  440  O   HOH T 439      40.682 -10.574  11.355  1.00  0.47           O  
HETATM  441  O   HOH T 440      -8.825 -10.718  18.420  1.00  0.47           O  
HETATM  442  O   HOH T 441      44.735 -19.087  29.133  1.00  0.47           O  
HETATM  443  O   HOH T 442      32.966   1.480  13.738  1.00  0.47           O  
HETATM  444  O   HOH T 443      24.764  20.504  36.407  1.00  0.47           O  
HETATM  445  O   HOH T 444      16.509 -30.093  21.971  1.00  0.47           O  
HETATM  446  O   HOH T 445       8.465  -2.373   9.593  1.00  0.47           O  
HETATM  447  O   HOH T 446      37.756  -5.443  25.487  1.00  0.47           O  
HETATM  448  O   HOH T 447      23.613  14.600  14.446  1.00  0.47           O  
HETATM  449  O   HOH T 448      35.403 -28.507   7.195  1.00  0.47           O  
HETATM  450  O   HOH T 449      -4.840  26.137  38.108  1.00  0.47           O  
HETATM  451  O   HOH T 450      19.528  17.878  50.293  1.00  0.47           O  
HETATM  452  O   HOH T 451      15.454   8.770  34.845  1.00  0.47           O  
HETATM  453  O   HOH T 452       7.288  34.079  28.599  1.00  0.47           O  
HETATM  454  O   HOH T 453      22.173 -22.495  -3.930  1.00  0.47           O  
HETATM  455  O   HOH T 454       5.270 -14.754  24.077  1.00  0.47           O  
HETATM  456  O   HOH T 455      20.965 -10.656  32.763  1.00  0.47           O  
HETATM  457  O   HOH T 456      20.917  -2.466  -0.152  1.00  0.47           O  
HETATM  458  O   HOH T 457      41.587 -17.009  16.592  1.00  0.47           O  
HETATM  459  O   HOH T 458      23.698 -17.104  36.470  1.00  0.47           O  
HETATM  460  O   HOH T 459      17.401  -4.880  43.222  1.00  0.47           O  
HETATM  461  O   HOH T 460      16.694 -12.344  36.288  1.00  0.47           O  
HETATM  462  O   HOH T 461     -15.387   2.001  15.584  1.00  0.47           O  
HETATM  463  O   HOH T 462      -5.439  16.008  49.859  1.00  0.47           O  
HETATM  464  O   HOH T 463      37.322 -27.526  11.233  1.00  0.47           O  
HETATM  465  O   HOH T 464       1.569  -9.916  20.873  1.00  0.47           O  
HETATM  466  O   HOH T 465      20.234  18.840  43.206  1.00  0.48           O  
HETATM  467  O   HOH T 466      16.289 -32.284  15.543  1.00  0.48           O  
HETATM  468  O   HOH T 467      12.007 -31.712  12.265  1.00  0.48           O  
HETATM  469  O   HOH T 468      21.027   0.486  37.418  1.00  0.48           O  
HETATM  470  O   HOH T 469       9.228 -16.465  23.394  1.00  0.48           O  
HETATM  471  O   HOH T 470      20.249  -1.421  35.581  1.00  0.48           O  
HETATM  472  O   HOH T 471      21.386  15.747  44.701  1.00  0.48           O  
HETATM  473  O   HOH T 472       9.594   4.052  41.826  1.00  0.48           O  
HETATM  474  O   HOH T 473      -9.975  28.607  30.563  1.00  0.48           O  
HETATM  475  O   HOH T 474      -6.700  26.913  14.231  1.00  0.48           O  
HETATM  476  O   HOH T 475       0.897  33.876  25.890  1.00  0.48           O  
HETATM  477  O   HOH T 476     -22.725  11.681  29.568  1.00  0.48           O  
HETATM  478  O   HOH T 477     -19.175  12.917  30.957  1.00  0.48           O  
HETATM  479  O   HOH T 478       0.642  -8.255  28.277  1.00  0.48           O  
HETATM  480  O   HOH T 479      39.885  -9.780  -4.078  1.00  0.48           O  
HETATM  481  O   HOH T 480      14.426  20.503  20.173  1.00  0.48           O  
HETATM  482  O   HOH T 481     -12.257  20.117  19.139  1.00  0.48           O  
HETATM  483  O   HOH T 482      15.790  -7.270  25.209  1.00  0.48           O  
HETATM  484  O   HOH T 483     -19.319   2.564  38.316  1.00  0.48           O  
HETATM  485  O   HOH T 484      12.728  -1.485  22.360  1.00  0.48           O  
HETATM  486  O   HOH T 485      29.352  -7.013  -5.843  1.00  0.48           O  
HETATM  487  O   HOH T 486      20.761   8.300  10.934  1.00  0.48           O  
HETATM  488  O   HOH T 487      -4.843  -0.818  15.741  1.00  0.48           O  
HETATM  489  O   HOH T 488     -10.573  28.217  33.317  1.00  0.48           O  
HETATM  490  O   HOH T 489      -5.655   8.024  14.600  1.00  0.48           O  
HETATM  491  O   HOH T 490     -19.859   1.785  24.889  1.00  0.48           O  
HETATM  492  O   HOH T 491       5.515  32.289  29.781  1.00  0.48           O  
HETATM  493  O   HOH T 492     -12.165  -0.759  36.285  1.00  0.48           O  
HETATM  494  O   HOH T 493     -22.585  16.156  30.249  1.00  0.48           O  
HETATM  495  O   HOH T 494       8.251  12.679  45.064  1.00  0.48           O  
HETATM  496  O   HOH T 495      -5.781  20.551  40.125  1.00  0.49           O  
HETATM  497  O   HOH T 496      -9.004   1.527  42.283  1.00  0.49           O  
HETATM  498  O   HOH T 497      10.594  -8.374   8.962  1.00  0.49           O  
HETATM  499  O   HOH T 498      16.420 -22.217  19.715  1.00  0.49           O  
HETATM  500  O   HOH T 499      38.616 -18.692   6.240  1.00  0.49           O  
HETATM  501  O   HOH T 500      12.857 -13.758  12.096  1.00  0.49           O  
HETATM  502  O   HOH T 501      30.791  22.225  29.882  1.00  0.49           O  
HETATM  503  O   HOH T 502      10.637   1.020  11.441  1.00  0.49           O  
HETATM  504  O   HOH T 503       9.638 -21.652   8.254  1.00  0.49           O  
HETATM  505  O   HOH T 504      12.123  -8.495  40.453  1.00  0.49           O  
HETATM  506  O   HOH T 505      11.727 -31.712   1.078  1.00  0.49           O  
HETATM  507  O   HOH T 506      35.263  -5.523  16.830  1.00  0.49           O  
HETATM  508  O   HOH T 507      -9.873  28.513  25.458  1.00  0.49           O  
HETATM  509  O   HOH T 508       9.005 -27.594  13.129  1.00  0.49           O  
HETATM  510  O   HOH T 509      40.547 -20.173  13.462  1.00  0.49           O  
HETATM  511  O   HOH T 510      21.897  14.330  42.298  1.00  0.49           O  
HETATM  512  O   HOH T 511      39.593  -3.365   6.611  1.00  0.49           O  
HETATM  513  O   HOH T 512       6.810  12.103  13.600  1.00  0.49           O  
HETATM  514  O   HOH T 513      13.158  -7.317   4.069  1.00  0.49           O  
HETATM  515  O   HOH T 514      42.801 -10.596   5.708  1.00  0.49           O  
HETATM  516  O   HOH T 515      13.004 -20.884  20.279  1.00  0.49           O  
HETATM  517  O   HOH T 516      15.571  10.366  43.484  1.00  0.49           O  
HETATM  518  O   HOH T 517       2.422  23.456  16.832  1.00  0.49           O  
HETATM  519  O   HOH T 518      30.787  12.244  21.120  1.00  0.49           O  
HETATM  520  O   HOH T 519       1.790  -7.432  40.851  1.00  0.49           O  
HETATM  521  O   HOH T 520      16.073 -18.048  22.636  1.00  0.49           O  
HETATM  522  O   HOH T 521      36.448 -24.376  33.176  1.00  0.49           O  
HETATM  523  O   HOH T 522      -4.853   3.297  16.620  1.00  0.49           O  
HETATM  524  O   HOH T 523      14.742 -15.517   6.459  1.00  0.49           O  
HETATM  525  O   HOH T 524      16.943 -14.097  34.148  1.00  0.49           O  
HETATM  526  O   HOH T 525      -0.502  14.356   8.789  1.00  0.49           O  
HETATM  527  O   HOH T 526     -21.083   1.625  27.353  1.00  0.50           O  
HETATM  528  O   HOH T 527     -15.244  17.655   9.880  1.00  0.50           O  
HETATM  529  O   HOH T 528      14.419 -26.126  -4.397  1.00  0.50           O  
HETATM  530  O   HOH T 529       8.941   6.574  17.661  1.00  0.50           O  
HETATM  531  O   HOH T 530      25.263 -29.821  28.994  1.00  0.50           O  
HETATM  532  O   HOH T 531       0.001   1.664  13.710  1.00  0.50           O  
HETATM  533  O   HOH T 532      37.861 -28.428   8.591  1.00  0.50           O  
HETATM  534  O   HOH T 533      31.857  21.649  27.461  1.00  0.50           O  
HETATM  535  O   HOH T 534     -24.422   5.953  33.761  1.00  0.50           O  
HETATM  536  O   HOH T 535     -15.822  -3.242  21.968  1.00  0.50           O  
HETATM  537  O   HOH T 536     -13.707  10.545  41.235  1.00  0.50           O  
HETATM  538  O   HOH T 537      -8.149  17.107  49.967  1.00  0.50           O  
HETATM  539  O   HOH T 538      25.727 -24.192  34.099  1.00  0.50           O  
HETATM  540  O   HOH T 539      17.418  -7.096   0.352  1.00  0.50           O  
HETATM  541  O   HOH T 540       5.850  11.825  43.853  1.00  0.50           O  
HETATM  542  O   HOH T 541      24.244  22.991  35.322  1.00  0.50           O  
HETATM  543  O   HOH T 542     -14.154  -0.631  34.383  1.00  0.50           O  
HETATM  544  O   HOH T 543      17.785  15.266  26.923  1.00  0.50           O  
HETATM  545  O   HOH T 544     -12.282  15.031  39.864  1.00  0.50           O  
HETATM  546  O   HOH T 545      -9.562  -0.823  19.009  1.00  0.50           O  
HETATM  547  O   HOH T 546      28.332 -26.180  31.803  1.00  0.50           O  
HETATM  548  O   HOH T 547       8.770   0.956  42.086  1.00  0.51           O  
HETATM  549  O   HOH T 548      38.974 -24.794  31.982  1.00  0.51           O  
HETATM  550  O   HOH T 549      10.425  19.902  14.578  1.00  0.51           O  
HETATM  551  O   HOH T 550       7.006  20.554  49.730  1.00  0.51           O  
HETATM  552  O   HOH T 551      17.005 -14.451  -6.618  1.00  0.51           O  
HETATM  553  O   HOH T 552      13.058  16.150  46.196  1.00  0.51           O  
HETATM  554  O   HOH T 553       3.272  19.130  18.395  1.00  0.51           O  
HETATM  555  O   HOH T 554      29.255  20.852  31.670  1.00  0.51           O  
HETATM  556  O   HOH T 555      38.375   0.224  17.814  1.00  0.51           O  
HETATM  557  O   HOH T 556     -24.299   7.313  30.090  1.00  0.51           O  
HETATM  558  O   HOH T 557     -20.167  12.082  22.721  1.00  0.51           O  
HETATM  559  O   HOH T 558      39.855 -20.334   8.012  1.00  0.51           O  
HETATM  560  O   HOH T 559     -13.130  18.923  11.025  1.00  0.51           O  
HETATM  561  O   HOH T 560       2.413  30.416  31.902  1.00  0.51           O  
HETATM  562  O   HOH T 561       2.933  22.161  11.174  1.00  0.51           O  
HETATM  563  O   HOH T 562      18.653   2.945  36.487  1.00  0.51           O  
HETATM  564  O   HOH T 563     -10.699  13.030  41.112  1.00  0.51           O  
HETATM  565  O   HOH T 564      14.383  -2.615  15.643  1.00  0.51           O  
HETATM  566  O   HOH T 565      39.279   1.062   6.517  1.00  0.51           O  
HETATM  567  O   HOH T 566      42.182  -7.924  33.913  1.00  0.51           O  
HETATM  568  O   HOH T 567      34.108 -18.390  -8.844  1.00  0.51           O  
HETATM  569  O   HOH T 568     -16.709  -3.977  19.593  1.00  0.51           O  
HETATM  570  O   HOH T 569      11.065  28.443  24.245  1.00  0.51           O  
HETATM  571  O   HOH T 570     -14.572  18.625   7.319  1.00  0.51           O  
HETATM  572  O   HOH T 571       5.400  -5.892  40.599  1.00  0.51           O  
HETATM  573  O   HOH T 572      -2.761   4.559  15.178  1.00  0.51           O  
HETATM  574  O   HOH T 573      14.606  -8.649  41.834  1.00  0.51           O  
HETATM  575  O   HOH T 574      33.866 -33.983  21.002  1.00  0.51           O  
HETATM  576  O   HOH T 575     -15.417  -1.454  20.082  1.00  0.51           O  
HETATM  577  O   HOH T 576      35.592 -29.295   9.809  1.00  0.51           O  
HETATM  578  O   HOH T 577      14.820  18.263  49.234  1.00  0.52           O  
HETATM  579  O   HOH T 578       9.728  17.689  16.542  1.00  0.52           O  
HETATM  580  O   HOH T 579     -22.687  13.663  31.614  1.00  0.52           O  
HETATM  581  O   HOH T 580     -18.197   3.802  24.064  1.00  0.52           O  
HETATM  582  O   HOH T 581      -6.014  -6.080  37.397  1.00  0.52           O  
HETATM  583  O   HOH T 582      26.956  -2.549  29.848  1.00  0.52           O  
HETATM  584  O   HOH T 583      22.665  14.611  17.004  1.00  0.52           O  
HETATM  585  O   HOH T 584       1.547  20.743  16.722  1.00  0.52           O  
HETATM  586  O   HOH T 585      -7.711  24.414  13.799  1.00  0.52           O  
HETATM  587  O   HOH T 586       4.659   9.446  42.742  1.00  0.52           O  
HETATM  588  O   HOH T 587      20.456  18.125  45.878  1.00  0.52           O  
HETATM  589  O   HOH T 588      21.160 -29.480   0.836  1.00  0.52           O  
HETATM  590  O   HOH T 589     -21.211  14.561  21.721  1.00  0.52           O  
HETATM  591  O   HOH T 590      15.394 -10.174   5.596  1.00  0.52           O  
HETATM  592  O   HOH T 591       3.328  -3.673  15.535  1.00  0.52           O  
HETATM  593  O   HOH T 592      17.176  27.734  34.555  1.00  0.52           O  
HETATM  594  O   HOH T 593      34.833 -29.163  15.174  1.00  0.52           O  
HETATM  595  O   HOH T 594       0.599   9.914  39.116  1.00  0.52           O  
HETATM  596  O   HOH T 595     -15.839  24.521  27.779  1.00  0.52           O  
HETATM  597  O   HOH T 596     -19.063  19.990  23.462  1.00  0.52           O  
HETATM  598  O   HOH T 597      44.149 -17.118  30.967  1.00  0.52           O  
HETATM  599  O   HOH T 598     -11.530  20.955  36.422  1.00  0.52           O  
HETATM  600  O   HOH T 599       0.932  32.407  33.065  1.00  0.52           O  
HETATM  601  O   HOH T 600       5.634  25.164  20.352  1.00  0.52           O  
HETATM  602  O   HOH T 601      17.178 -34.814  15.326  1.00  0.52           O  
HETATM  603  O   HOH T 602      10.369 -18.021   4.995  1.00  0.53           O  
HETATM  604  O   HOH T 603       8.622 -30.779  16.727  1.00  0.53           O  
HETATM  605  O   HOH T 604      17.570 -30.391   3.801  1.00  0.53           O  
HETATM  606  O   HOH T 605      43.213 -12.937   1.558  1.00  0.53           O  
HETATM  607  O   HOH T 606      44.005 -11.516  -0.390  1.00  0.53           O  
HETATM  608  O   HOH T 607      -8.052  21.995  39.707  1.00  0.53           O  
HETATM  609  O   HOH T 608     -10.890  21.459  13.942  1.00  0.53           O  
HETATM  610  O   HOH T 609      10.617  -1.778  11.305  1.00  0.53           O  
HETATM  611  O   HOH T 610      16.950  28.178  25.743  1.00  0.53           O  
HETATM  612  O   HOH T 611      -8.112  -1.816  16.916  1.00  0.53           O  
HETATM  613  O   HOH T 612     -13.033   5.371  40.520  1.00  0.53           O  
HETATM  614  O   HOH T 613     -14.582   0.765  13.066  1.00  0.53           O  
HETATM  615  O   HOH T 614      11.122   5.988  38.821  1.00  0.53           O  
HETATM  616  O   HOH T 615       5.582 -10.152  36.832  1.00  0.53           O  
HETATM  617  O   HOH T 616      16.283 -29.244   6.024  1.00  0.53           O  
HETATM  618  O   HOH T 617       3.150   4.903   9.345  1.00  0.53           O  
HETATM  619  O   HOH T 618      -0.801  27.585  20.938  1.00  0.53           O  
HETATM  620  O   HOH T 619      -3.512  30.142  34.961  1.00  0.53           O  
HETATM  621  O   HOH T 620     -11.829  26.746  31.547  1.00  0.53           O  
HETATM  622  O   HOH T 621       7.063   3.067  41.460  1.00  0.53           O  
HETATM  623  O   HOH T 622      21.986 -23.693  23.572  1.00  0.53           O  
HETATM  624  O   HOH T 623      18.504 -16.888  23.583  1.00  0.53           O  
HETATM  625  O   HOH T 624      22.168   7.359   8.774  1.00  0.53           O  
HETATM  626  O   HOH T 625      28.671  15.292  31.625  1.00  0.53           O  
HETATM  627  O   HOH T 626       1.452  12.048  11.897  1.00  0.53           O  
HETATM  628  O   HOH T 627      12.201  10.608   9.785  1.00  0.53           O  
HETATM  629  O   HOH T 628      21.643 -33.791  11.094  1.00  0.53           O  
HETATM  630  O   HOH T 629      23.548 -35.474  11.887  1.00  0.53           O  
HETATM  631  O   HOH T 630      35.802 -20.970  -0.194  1.00  0.54           O  
HETATM  632  O   HOH T 631       8.093  28.577  45.716  1.00  0.54           O  
HETATM  633  O   HOH T 632       4.159  25.230  17.978  1.00  0.54           O  
HETATM  634  O   HOH T 633     -22.297   7.467  34.700  1.00  0.54           O  
HETATM  635  O   HOH T 634      40.560 -27.990   8.906  1.00  0.54           O  
HETATM  636  O   HOH T 635      -3.237  24.486  39.788  1.00  0.54           O  
HETATM  637  O   HOH T 636      17.836  28.338  28.394  1.00  0.54           O  
HETATM  638  O   HOH T 637      25.355  12.528  13.548  1.00  0.54           O  
HETATM  639  O   HOH T 638     -20.906  16.714  23.430  1.00  0.54           O  
HETATM  640  O   HOH T 639       0.793  17.724  51.041  1.00  0.54           O  
HETATM  641  O   HOH T 640      23.491   1.575  38.069  1.00  0.54           O  
HETATM  642  O   HOH T 641       2.994 -13.126  24.219  1.00  0.54           O  
HETATM  643  O   HOH T 642      -0.814  -6.318  17.609  1.00  0.54           O  
HETATM  644  O   HOH T 643      -7.286  26.981  36.956  1.00  0.54           O  
HETATM  645  O   HOH T 644      -5.731  23.346  40.451  1.00  0.55           O  
HETATM  646  O   HOH T 645      -7.230  31.316  26.947  1.00  0.55           O  
HETATM  647  O   HOH T 646      40.473  -4.839  35.776  1.00  0.55           O  
HETATM  648  O   HOH T 647      18.862  -2.594   1.991  1.00  0.55           O  
HETATM  649  O   HOH T 648      20.207  16.991  22.548  1.00  0.55           O  
HETATM  650  O   HOH T 649      25.248  -3.956  41.775  1.00  0.55           O  
HETATM  651  O   HOH T 650     -11.369  -3.247  37.324  1.00  0.55           O  
HETATM  652  O   HOH T 651      29.920   9.269  28.268  1.00  0.55           O  
HETATM  653  O   HOH T 652     -13.200  19.458  13.872  1.00  0.55           O  
HETATM  654  O   HOH T 653     -20.365  16.197  25.940  1.00  0.55           O  
HETATM  655  O   HOH T 654       2.448  29.122  39.641  1.00  0.56           O  
HETATM  656  O   HOH T 655      -2.367  20.155   6.238  1.00  0.56           O  
HETATM  657  O   HOH T 656      17.705 -25.188  21.192  1.00  0.56           O  
HETATM  658  O   HOH T 657       9.611 -30.004   8.853  1.00  0.56           O  
HETATM  659  O   HOH T 658     -16.766  16.313   7.867  1.00  0.56           O  
HETATM  660  O   HOH T 659      41.526 -22.075  17.091  1.00  0.56           O  
HETATM  661  O   HOH T 660      17.070 -13.003  -4.064  1.00  0.56           O  
HETATM  662  O   HOH T 661     -21.939   5.752  32.570  1.00  0.56           O  
HETATM  663  O   HOH T 662      27.430   8.058  33.225  1.00  0.56           O  
HETATM  664  O   HOH T 663      31.008   9.901  10.377  1.00  0.56           O  
HETATM  665  O   HOH T 664     -18.577  21.223  25.864  1.00  0.56           O  
HETATM  666  O   HOH T 665       9.679  23.623  18.703  1.00  0.56           O  
HETATM  667  O   HOH T 666      45.398 -12.178  30.822  1.00  0.56           O  
HETATM  668  O   HOH T 667     -18.347  23.429  27.515  1.00  0.56           O  
HETATM  669  O   HOH T 668       3.144 -10.453  18.653  1.00  0.57           O  
HETATM  670  O   HOH T 669     -17.086  12.278  33.920  1.00  0.57           O  
HETATM  671  O   HOH T 670       2.216  -5.797  44.107  1.00  0.57           O  
HETATM  672  O   HOH T 671      12.014  -2.205   3.885  1.00  0.57           O  
HETATM  673  O   HOH T 672       4.896  -4.859  43.074  1.00  0.57           O  
HETATM  674  O   HOH T 673      20.105  12.806  12.615  1.00  0.58           O  
HETATM  675  O   HOH T 674     -20.324  13.872  33.179  1.00  0.59           O  
HETATM  676  O   HOH T 675      34.798  -7.376  -4.988  1.00  0.59           O  
HETATM  677  O   HOH T 676      29.091  11.885  27.447  1.00  0.59           O  
HETATM  678  O   HOH T 677      33.847  -3.657  -4.837  1.00  0.59           O  
HETATM  679  O   HOH T 678      29.766  13.741  23.296  1.00  0.59           O  
HETATM  680  O   HOH T 679       6.262 -12.973  31.668  1.00  0.60           O  
HETATM  681  O   HOH T 680      16.844  -6.487  45.335  1.00  0.60           O  
HETATM  682  O   HOH T 681      13.664 -11.660  36.386  1.00  0.60           O  
HETATM  683  O   HOH T 682      30.616   6.410  37.193  1.00  0.61           O  
HETATM  684  O   HOH T 683      28.350 -30.730  18.604  1.00  0.62           O  
TER     685      HOH T 683 
