# Supplementary material for: Accurate Prediction of Hydration Sites of Proteins Using Energy Model With Atom Embedding
Source: Front Mol Biosci. 2021 Sep 20;8:756075. doi: 10.3389/fmolb.2021.756075 (PMC8488165; doi:10.3389/fmolb.2021.756075)
Supplement: Supplementary file 1 [file DataSheet1.ZIP › Data Sheet 1/Our_result_pdb/our_dataset_output/1O8B_watersite.pdb]

HEADER                                                        XXXX


JRNL        PMID   -1
HETATM    1  O   HOH T   0      -0.906  -5.656   4.643  1.00  0.06           O  
HETATM    2  O   HOH T   1      21.350  20.714  21.376  1.00  0.06           O  
HETATM    3  O   HOH T   2      23.017  20.718  20.348  1.00  0.07           O  
HETATM    4  O   HOH T   3       0.037  -4.626  -0.281  1.00  0.09           O  
HETATM    5  O   HOH T   4      21.324  22.726  19.176  1.00  0.10           O  
HETATM    6  O   HOH T   5      -1.684  -3.408   1.702  1.00  0.11           O  
HETATM    7  O   HOH T   6      21.925  21.074  17.221  1.00  0.11           O  
HETATM    8  O   HOH T   7       0.693  -3.536   2.856  1.00  0.11           O  
HETATM    9  O   HOH T   8      20.123  20.008  18.361  1.00  0.11           O  
HETATM   10  O   HOH T   9      -1.059  -7.075  -0.586  1.00  0.11           O  
HETATM   11  O   HOH T  10      -2.230  -4.960   3.155  1.00  0.11           O  
HETATM   12  O   HOH T  11      21.742  17.945  17.216  1.00  0.12           O  
HETATM   13  O   HOH T  12      22.511  23.306  21.110  1.00  0.12           O  
HETATM   14  O   HOH T  13      22.190  18.348  19.345  1.00  0.12           O  
HETATM   15  O   HOH T  14       1.162  -6.994   3.630  1.00  0.13           O  
HETATM   16  O   HOH T  15      -1.602  -7.278   2.406  1.00  0.14           O  
HETATM   17  O   HOH T  16      23.905  19.741  17.577  1.00  0.14           O  
HETATM   18  O   HOH T  17      -7.155  -8.864  -1.345  1.00  0.15           O  
HETATM   19  O   HOH T  18      -4.579  -7.244   3.297  1.00  0.15           O  
HETATM   20  O   HOH T  19      21.062  18.100  21.623  1.00  0.16           O  
HETATM   21  O   HOH T  20       2.494  -4.807   4.377  1.00  0.17           O  
HETATM   22  O   HOH T  21       7.187  10.458  21.441  1.00  0.17           O  
HETATM   23  O   HOH T  22       8.086  -5.336  15.998  1.00  0.17           O  
HETATM   24  O   HOH T  23       8.277  -0.913   6.951  1.00  0.18           O  
HETATM   25  O   HOH T  24     -18.860  12.598   5.422  1.00  0.18           O  
HETATM   26  O   HOH T  25      13.319   8.697  -3.330  1.00  0.19           O  
HETATM   27  O   HOH T  26       2.932  -5.761   1.647  1.00  0.20           O  
HETATM   28  O   HOH T  27      -3.991  -6.524   0.721  1.00  0.20           O  
HETATM   29  O   HOH T  28      -5.253  -6.955  -1.647  1.00  0.20           O  
HETATM   30  O   HOH T  29       2.163  -4.100  -0.713  1.00  0.20           O  
HETATM   31  O   HOH T  30      -1.866  -6.113   1.040  1.00  0.21           O  
HETATM   32  O   HOH T  31       3.466   7.991   7.793  1.00  0.21           O  
HETATM   33  O   HOH T  32      19.687   7.439  27.852  1.00  0.21           O  
HETATM   34  O   HOH T  33       0.762  -6.686   1.691  1.00  0.21           O  
HETATM   35  O   HOH T  34       9.419  16.508  21.220  1.00  0.21           O  
HETATM   36  O   HOH T  35      22.874  23.856  18.457  1.00  0.21           O  
HETATM   37  O   HOH T  36      -1.597  -7.879   6.349  1.00  0.21           O  
HETATM   38  O   HOH T  37      31.973  12.063   6.790  1.00  0.22           O  
HETATM   39  O   HOH T  38       2.166   8.002   0.248  1.00  0.22           O  
HETATM   40  O   HOH T  39      11.658   8.963  -6.744  1.00  0.22           O  
HETATM   41  O   HOH T  40      -6.666   3.879  24.432  1.00  0.23           O  
HETATM   42  O   HOH T  41      -1.389 -10.871  22.638  1.00  0.23           O  
HETATM   43  O   HOH T  42      23.652  22.106  23.503  1.00  0.23           O  
HETATM   44  O   HOH T  43       9.490  15.156  13.550  1.00  0.23           O  
HETATM   45  O   HOH T  44     -14.974 -10.357  13.052  1.00  0.23           O  
HETATM   46  O   HOH T  45      18.872  11.593  14.382  1.00  0.23           O  
HETATM   47  O   HOH T  46      31.133  23.859  32.372  1.00  0.24           O  
HETATM   48  O   HOH T  47       3.272  27.915  14.478  1.00  0.24           O  
HETATM   49  O   HOH T  48      24.381  22.080  15.931  1.00  0.24           O  
HETATM   50  O   HOH T  49       7.554  11.032  -0.066  1.00  0.25           O  
HETATM   51  O   HOH T  50      -2.595  -7.864   3.843  1.00  0.25           O  
HETATM   52  O   HOH T  51      29.306   5.374   8.060  1.00  0.25           O  
HETATM   53  O   HOH T  52       6.555  30.082   6.332  1.00  0.25           O  
HETATM   54  O   HOH T  53     -11.756   8.468  15.182  1.00  0.25           O  
HETATM   55  O   HOH T  54     -16.573   4.724   4.363  1.00  0.26           O  
HETATM   56  O   HOH T  55      -9.600  -6.746  21.745  1.00  0.26           O  
HETATM   57  O   HOH T  56       9.309  -1.202   4.337  1.00  0.26           O  
HETATM   58  O   HOH T  57       1.249  -6.823  17.036  1.00  0.26           O  
HETATM   59  O   HOH T  58      11.557  11.556  16.261  1.00  0.26           O  
HETATM   60  O   HOH T  59      14.061  15.629  35.419  1.00  0.27           O  
HETATM   61  O   HOH T  60       9.036  35.375  29.934  1.00  0.27           O  
HETATM   62  O   HOH T  61     -12.642  -1.515   9.872  1.00  0.27           O  
HETATM   63  O   HOH T  62      -0.187   7.472   1.566  1.00  0.27           O  
HETATM   64  O   HOH T  63      25.376  35.355  30.561  1.00  0.27           O  
HETATM   65  O   HOH T  64       0.115  13.024   7.959  1.00  0.27           O  
HETATM   66  O   HOH T  65      11.269  -6.331   1.441  1.00  0.27           O  
HETATM   67  O   HOH T  66      12.645  -1.189  -6.843  1.00  0.27           O  
HETATM   68  O   HOH T  67      19.318  22.078  19.881  1.00  0.27           O  
HETATM   69  O   HOH T  68      19.279  22.445  17.435  1.00  0.27           O  
HETATM   70  O   HOH T  69     -16.437   9.051  -0.614  1.00  0.28           O  
HETATM   71  O   HOH T  70     -25.688   3.398   6.834  1.00  0.28           O  
HETATM   72  O   HOH T  71      12.082  25.731  -3.172  1.00  0.28           O  
HETATM   73  O   HOH T  72      22.767  25.927  22.799  1.00  0.28           O  
HETATM   74  O   HOH T  73      16.464  32.507  11.278  1.00  0.28           O  
HETATM   75  O   HOH T  74      16.091   3.090  11.061  1.00  0.28           O  
HETATM   76  O   HOH T  75      10.478   9.734  14.421  1.00  0.28           O  
HETATM   77  O   HOH T  76      -1.281   9.286   3.290  1.00  0.28           O  
HETATM   78  O   HOH T  77       3.723  32.972   1.022  1.00  0.28           O  
HETATM   79  O   HOH T  78      16.184  -6.570  16.985  1.00  0.29           O  
HETATM   80  O   HOH T  79      12.629  11.568  38.364  1.00  0.29           O  
HETATM   81  O   HOH T  80       7.459  19.569  18.069  1.00  0.29           O  
HETATM   82  O   HOH T  81       4.544  13.015 -12.717  1.00  0.29           O  
HETATM   83  O   HOH T  82      -2.792  -2.437   3.877  1.00  0.29           O  
HETATM   84  O   HOH T  83      23.566  19.537   4.297  1.00  0.29           O  
HETATM   85  O   HOH T  84      16.046  30.819  35.831  1.00  0.29           O  
HETATM   86  O   HOH T  85      24.831  17.937  -0.945  1.00  0.29           O  
HETATM   87  O   HOH T  86      24.820  11.646  12.737  1.00  0.29           O  
HETATM   88  O   HOH T  87      22.922  28.541  15.638  1.00  0.30           O  
HETATM   89  O   HOH T  88       9.436  18.800  19.757  1.00  0.30           O  
HETATM   90  O   HOH T  89      -4.955 -11.728  -1.539  1.00  0.30           O  
HETATM   91  O   HOH T  90       3.597   3.634 -14.007  1.00  0.30           O  
HETATM   92  O   HOH T  91       7.807   8.520   6.990  1.00  0.30           O  
HETATM   93  O   HOH T  92      24.002  22.452  18.488  1.00  0.31           O  
HETATM   94  O   HOH T  93     -10.022   9.675  13.380  1.00  0.31           O  
HETATM   95  O   HOH T  94     -17.662  -1.962   7.595  1.00  0.31           O  
HETATM   96  O   HOH T  95      17.725   8.120  17.718  1.00  0.31           O  
HETATM   97  O   HOH T  96     -12.975   0.783  13.283  1.00  0.31           O  
HETATM   98  O   HOH T  97      23.307   8.857  39.139  1.00  0.31           O  
HETATM   99  O   HOH T  98       6.996  -5.255  -5.808  1.00  0.31           O  
HETATM  100  O   HOH T  99      -8.271  -3.258  15.598  1.00  0.31           O  
HETATM  101  O   HOH T 100      -6.534   7.953  27.358  1.00  0.32           O  
HETATM  102  O   HOH T 101      24.630  36.080  15.573  1.00  0.32           O  
HETATM  103  O   HOH T 102       9.938   6.853  28.268  1.00  0.32           O  
HETATM  104  O   HOH T 103       4.005  17.683  13.492  1.00  0.32           O  
HETATM  105  O   HOH T 104      10.732   3.305  25.008  1.00  0.32           O  
HETATM  106  O   HOH T 105      18.436   7.836  25.301  1.00  0.32           O  
HETATM  107  O   HOH T 106      -0.656  -8.812   2.473  1.00  0.32           O  
HETATM  108  O   HOH T 107     -16.026  -6.151   2.847  1.00  0.32           O  
HETATM  109  O   HOH T 108      27.028  11.586  20.304  1.00  0.32           O  
HETATM  110  O   HOH T 109      14.075   1.798  -3.948  1.00  0.33           O  
HETATM  111  O   HOH T 110      14.073  32.462   7.896  1.00  0.33           O  
HETATM  112  O   HOH T 111       8.026  33.152   4.390  1.00  0.33           O  
HETATM  113  O   HOH T 112      18.467  29.536  36.361  1.00  0.33           O  
HETATM  114  O   HOH T 113      14.910  -0.806 -18.567  1.00  0.33           O  
HETATM  115  O   HOH T 114     -13.644  -8.652   5.830  1.00  0.33           O  
HETATM  116  O   HOH T 115      -5.726   1.382  25.286  1.00  0.33           O  
HETATM  117  O   HOH T 116      16.186  37.369  13.709  1.00  0.33           O  
HETATM  118  O   HOH T 117     -20.961 -13.909  -0.203  1.00  0.34           O  
HETATM  119  O   HOH T 118      24.086   6.288  24.996  1.00  0.34           O  
HETATM  120  O   HOH T 119     -17.256  -5.824   0.416  1.00  0.34           O  
HETATM  121  O   HOH T 120     -15.357 -10.892   5.432  1.00  0.34           O  
HETATM  122  O   HOH T 121     -16.042 -10.863   1.402  1.00  0.34           O  
HETATM  123  O   HOH T 122      21.822   6.530  19.627  1.00  0.34           O  
HETATM  124  O   HOH T 123      16.080   2.904  14.742  1.00  0.34           O  
HETATM  125  O   HOH T 124     -12.082  -5.086   8.366  1.00  0.34           O  
HETATM  126  O   HOH T 125     -17.115  -1.584 -12.586  1.00  0.34           O  
HETATM  127  O   HOH T 126      -9.208   6.288  18.547  1.00  0.34           O  
HETATM  128  O   HOH T 127      -8.976  -6.595   6.725  1.00  0.34           O  
HETATM  129  O   HOH T 128      17.242   5.348  25.455  1.00  0.34           O  
HETATM  130  O   HOH T 129       4.168   9.376  25.321  1.00  0.35           O  
HETATM  131  O   HOH T 130      -5.387  16.986  11.422  1.00  0.35           O  
HETATM  132  O   HOH T 131       8.927   7.197  35.142  1.00  0.35           O  
HETATM  133  O   HOH T 132      15.101  35.717  11.907  1.00  0.35           O  
HETATM  134  O   HOH T 133      17.752  34.691  34.814  1.00  0.35           O  
HETATM  135  O   HOH T 134      -8.397   0.772  21.537  1.00  0.35           O  
HETATM  136  O   HOH T 135       6.365  33.055  23.824  1.00  0.35           O  
HETATM  137  O   HOH T 136      10.469  38.440   4.662  1.00  0.36           O  
HETATM  138  O   HOH T 137       6.828  16.229  -4.170  1.00  0.36           O  
HETATM  139  O   HOH T 138      13.374 -10.315  15.436  1.00  0.36           O  
HETATM  140  O   HOH T 139     -14.145 -11.271  -2.903  1.00  0.36           O  
HETATM  141  O   HOH T 140      19.107  10.463  16.957  1.00  0.36           O  
HETATM  142  O   HOH T 141     -12.215  -0.867  15.444  1.00  0.36           O  
HETATM  143  O   HOH T 142      -9.598  15.687   8.406  1.00  0.36           O  
HETATM  144  O   HOH T 143      10.526  35.106  32.185  1.00  0.36           O  
HETATM  145  O   HOH T 144       5.610  10.023  27.630  1.00  0.36           O  
HETATM  146  O   HOH T 145       6.760  26.181  23.645  1.00  0.36           O  
HETATM  147  O   HOH T 146      23.764  25.923  16.300  1.00  0.36           O  
HETATM  148  O   HOH T 147       2.337  12.353  -3.198  1.00  0.36           O  
HETATM  149  O   HOH T 148       5.331  26.041  28.995  1.00  0.36           O  
HETATM  150  O   HOH T 149      18.779  28.617   5.517  1.00  0.36           O  
HETATM  151  O   HOH T 150      20.406   1.963  33.064  1.00  0.37           O  
HETATM  152  O   HOH T 151     -18.782 -12.743  -1.305  1.00  0.37           O  
HETATM  153  O   HOH T 152     -19.090   2.292  14.902  1.00  0.37           O  
HETATM  154  O   HOH T 153      12.665  16.078  37.833  1.00  0.37           O  
HETATM  155  O   HOH T 154       7.328   6.522   5.126  1.00  0.37           O  
HETATM  156  O   HOH T 155      26.788  25.874  22.194  1.00  0.37           O  
HETATM  157  O   HOH T 156     -18.651  10.452  17.243  1.00  0.37           O  
HETATM  158  O   HOH T 157      20.304  36.736  18.445  1.00  0.37           O  
HETATM  159  O   HOH T 158      12.403  35.841  34.074  1.00  0.37           O  
HETATM  160  O   HOH T 159      27.644  37.126  30.888  1.00  0.37           O  
HETATM  161  O   HOH T 160      15.247  17.016  37.539  1.00  0.37           O  
HETATM  162  O   HOH T 161       7.674  12.315  -6.460  1.00  0.37           O  
HETATM  163  O   HOH T 162      31.168  35.816  27.707  1.00  0.37           O  
HETATM  164  O   HOH T 163      26.604  18.475   2.576  1.00  0.37           O  
HETATM  165  O   HOH T 164      -9.355  -5.169  19.468  1.00  0.37           O  
HETATM  166  O   HOH T 165       7.221  11.733  -2.714  1.00  0.38           O  
HETATM  167  O   HOH T 166       6.796  11.027   7.875  1.00  0.38           O  
HETATM  168  O   HOH T 167      29.309  39.500  31.035  1.00  0.38           O  
HETATM  169  O   HOH T 168       6.119  11.895  10.575  1.00  0.38           O  
HETATM  170  O   HOH T 169       0.964 -11.051  25.940  1.00  0.38           O  
HETATM  171  O   HOH T 170     -14.927  -5.224   8.274  1.00  0.38           O  
HETATM  172  O   HOH T 171       5.487  12.079  29.517  1.00  0.38           O  
HETATM  173  O   HOH T 172     -15.491  15.835  11.558  1.00  0.38           O  
HETATM  174  O   HOH T 173      37.742  32.979  21.256  1.00  0.38           O  
HETATM  175  O   HOH T 174      14.062  34.645  19.573  1.00  0.38           O  
HETATM  176  O   HOH T 175      15.562  -3.476  15.960  1.00  0.38           O  
HETATM  177  O   HOH T 176     -16.976   9.777  19.535  1.00  0.38           O  
HETATM  178  O   HOH T 177      -6.065   0.317  30.189  1.00  0.38           O  
HETATM  179  O   HOH T 178     -13.759 -11.311  -0.206  1.00  0.38           O  
HETATM  180  O   HOH T 179       7.408  17.040  19.278  1.00  0.38           O  
HETATM  181  O   HOH T 180      -6.744  -7.519   5.402  1.00  0.38           O  
HETATM  182  O   HOH T 181      28.410  17.010   5.650  1.00  0.38           O  
HETATM  183  O   HOH T 182       6.564  28.465  28.410  1.00  0.38           O  
HETATM  184  O   HOH T 183     -15.468   5.628  -3.176  1.00  0.38           O  
HETATM  185  O   HOH T 184      24.321  28.303  22.700  1.00  0.38           O  
HETATM  186  O   HOH T 185       8.224  13.849  -4.154  1.00  0.39           O  
HETATM  187  O   HOH T 186     -16.155  -0.560   9.477  1.00  0.39           O  
HETATM  188  O   HOH T 187       2.871  -9.734  18.643  1.00  0.39           O  
HETATM  189  O   HOH T 188      14.336  -4.883  18.036  1.00  0.39           O  
HETATM  190  O   HOH T 189       1.148   9.821   2.126  1.00  0.39           O  
HETATM  191  O   HOH T 190     -12.995  15.213  12.817  1.00  0.39           O  
HETATM  192  O   HOH T 191       5.509  28.906  -0.773  1.00  0.39           O  
HETATM  193  O   HOH T 192      21.620  10.603  14.975  1.00  0.39           O  
HETATM  194  O   HOH T 193     -12.648  -7.665  15.015  1.00  0.39           O  
HETATM  195  O   HOH T 194     -21.110   1.936  13.048  1.00  0.39           O  
HETATM  196  O   HOH T 195      11.677   0.219  -3.808  1.00  0.39           O  
HETATM  197  O   HOH T 196     -11.361  -5.503   5.674  1.00  0.39           O  
HETATM  198  O   HOH T 197      -3.165   9.969 -17.549  1.00  0.39           O  
HETATM  199  O   HOH T 198       7.757  -0.078 -17.456  1.00  0.39           O  
HETATM  200  O   HOH T 199      -7.431  -7.073  20.196  1.00  0.39           O  
HETATM  201  O   HOH T 200       0.577  12.207   5.293  1.00  0.39           O  
HETATM  202  O   HOH T 201       4.947  24.132  22.796  1.00  0.40           O  
HETATM  203  O   HOH T 202      -8.579  10.029  22.244  1.00  0.40           O  
HETATM  204  O   HOH T 203      11.368   0.660   4.137  1.00  0.40           O  
HETATM  205  O   HOH T 204       3.027  -8.303   2.373  1.00  0.40           O  
HETATM  206  O   HOH T 205      15.591  27.226   5.847  1.00  0.40           O  
HETATM  207  O   HOH T 206      20.338   5.460  40.608  1.00  0.40           O  
HETATM  208  O   HOH T 207       6.851  16.984  26.242  1.00  0.40           O  
HETATM  209  O   HOH T 208       6.181  10.771  23.994  1.00  0.40           O  
HETATM  210  O   HOH T 209      12.698  -2.208  -9.372  1.00  0.40           O  
HETATM  211  O   HOH T 210      -8.157  10.444  -6.411  1.00  0.40           O  
HETATM  212  O   HOH T 211     -14.591   8.184  -2.498  1.00  0.40           O  
HETATM  213  O   HOH T 212     -17.260  -8.340   1.620  1.00  0.40           O  
HETATM  214  O   HOH T 213       0.102  -8.493   4.380  1.00  0.40           O  
HETATM  215  O   HOH T 214      20.870  15.693  13.910  1.00  0.40           O  
HETATM  216  O   HOH T 215       1.312  10.380  -4.806  1.00  0.41           O  
HETATM  217  O   HOH T 216       0.723  -5.571  -5.876  1.00  0.41           O  
HETATM  218  O   HOH T 217     -11.135   8.908  22.652  1.00  0.41           O  
HETATM  219  O   HOH T 218       3.167 -10.449  -4.736  1.00  0.41           O  
HETATM  220  O   HOH T 219      14.047   4.894  10.587  1.00  0.41           O  
HETATM  221  O   HOH T 220      12.946  36.512  21.130  1.00  0.41           O  
HETATM  222  O   HOH T 221       9.833  35.024  23.894  1.00  0.41           O  
HETATM  223  O   HOH T 222       1.447  -8.204  -4.773  1.00  0.41           O  
HETATM  224  O   HOH T 223      17.243  30.792   5.149  1.00  0.41           O  
HETATM  225  O   HOH T 224      15.387   1.742 -19.460  1.00  0.41           O  
HETATM  226  O   HOH T 225      14.787  -9.670   1.843  1.00  0.42           O  
HETATM  227  O   HOH T 226     -14.785  -1.462  16.279  1.00  0.42           O  
HETATM  228  O   HOH T 227      25.396   4.480  33.831  1.00  0.42           O  
HETATM  229  O   HOH T 228     -16.177   4.815 -10.478  1.00  0.42           O  
HETATM  230  O   HOH T 229      14.349  -2.191 -16.149  1.00  0.42           O  
HETATM  231  O   HOH T 230      25.857  27.973  20.732  1.00  0.42           O  
HETATM  232  O   HOH T 231      11.248  13.928  39.002  1.00  0.42           O  
HETATM  233  O   HOH T 232       9.859  -3.166   6.345  1.00  0.42           O  
HETATM  234  O   HOH T 233      10.497  37.644  18.060  1.00  0.42           O  
HETATM  235  O   HOH T 234       7.737  -8.957   1.701  1.00  0.42           O  
HETATM  236  O   HOH T 235      -4.060  -8.610   5.626  1.00  0.42           O  
HETATM  237  O   HOH T 236      17.108   0.346  15.123  1.00  0.42           O  
HETATM  238  O   HOH T 237      -7.524  17.026   9.693  1.00  0.42           O  
HETATM  239  O   HOH T 238       6.148  25.646  20.874  1.00  0.42           O  
HETATM  240  O   HOH T 239       7.940  30.015   0.092  1.00  0.42           O  
HETATM  241  O   HOH T 240      33.399  28.546  29.400  1.00  0.42           O  
HETATM  242  O   HOH T 241      -6.864   0.065  14.259  1.00  0.42           O  
HETATM  243  O   HOH T 242     -24.433   2.159   9.035  1.00  0.42           O  
HETATM  244  O   HOH T 243     -23.045   2.666   6.640  1.00  0.42           O  
HETATM  245  O   HOH T 244     -17.084   1.036 -12.913  1.00  0.42           O  
HETATM  246  O   HOH T 245      -6.981 -10.982  -3.249  1.00  0.42           O  
HETATM  247  O   HOH T 246      14.217  -9.724  12.866  1.00  0.42           O  
HETATM  248  O   HOH T 247      22.350   9.172  19.492  1.00  0.42           O  
HETATM  249  O   HOH T 248      25.158  12.272  18.416  1.00  0.42           O  
HETATM  250  O   HOH T 249      -6.036  11.092  -1.226  1.00  0.42           O  
HETATM  251  O   HOH T 250      11.402  -7.045  -5.945  1.00  0.43           O  
HETATM  252  O   HOH T 251      18.442  31.989  35.127  1.00  0.43           O  
HETATM  253  O   HOH T 252      31.003  14.382  39.540  1.00  0.43           O  
HETATM  254  O   HOH T 253     -20.158  -1.197   8.576  1.00  0.43           O  
HETATM  255  O   HOH T 254       4.657 -11.471  15.434  1.00  0.43           O  
HETATM  256  O   HOH T 255      16.047   4.017  -3.635  1.00  0.43           O  
HETATM  257  O   HOH T 256       6.933  12.922  14.351  1.00  0.43           O  
HETATM  258  O   HOH T 257     -15.182   3.360  19.533  1.00  0.43           O  
HETATM  259  O   HOH T 258       5.338  34.550  21.921  1.00  0.43           O  
HETATM  260  O   HOH T 259      14.095  34.170  22.209  1.00  0.43           O  
HETATM  261  O   HOH T 260      11.373  36.819  30.119  1.00  0.43           O  
HETATM  262  O   HOH T 261      12.404  -8.467   2.785  1.00  0.43           O  
HETATM  263  O   HOH T 262      26.115  49.541  30.250  1.00  0.43           O  
HETATM  264  O   HOH T 263     -15.540   3.163 -12.742  1.00  0.43           O  
HETATM  265  O   HOH T 264      24.354  14.335  12.300  1.00  0.43           O  
HETATM  266  O   HOH T 265       6.100  28.049   8.253  1.00  0.43           O  
HETATM  267  O   HOH T 266      20.546  29.760  38.081  1.00  0.43           O  
HETATM  268  O   HOH T 267     -13.673   5.735  19.510  1.00  0.43           O  
HETATM  269  O   HOH T 268      35.743  29.223  28.189  1.00  0.43           O  
HETATM  270  O   HOH T 269     -14.983  -3.007   9.868  1.00  0.43           O  
HETATM  271  O   HOH T 270       4.835  17.307  16.114  1.00  0.43           O  
HETATM  272  O   HOH T 271     -14.653  -0.790  11.666  1.00  0.43           O  
HETATM  273  O   HOH T 272      19.257   1.236  35.394  1.00  0.43           O  
HETATM  274  O   HOH T 273      12.036  10.987  35.688  1.00  0.43           O  
HETATM  275  O   HOH T 274      -0.201  26.710  12.567  1.00  0.43           O  
HETATM  276  O   HOH T 275       8.847  14.885 -10.443  1.00  0.44           O  
HETATM  277  O   HOH T 276      16.177  36.812  33.800  1.00  0.44           O  
HETATM  278  O   HOH T 277       1.675  -9.961   2.764  1.00  0.44           O  
HETATM  279  O   HOH T 278     -14.815   6.079   6.190  1.00  0.44           O  
HETATM  280  O   HOH T 279     -12.021  11.159  14.662  1.00  0.44           O  
HETATM  281  O   HOH T 280     -13.513  -7.516   8.304  1.00  0.44           O  
HETATM  282  O   HOH T 281     -15.331   1.450 -15.069  1.00  0.44           O  
HETATM  283  O   HOH T 282      23.644   9.626  42.970  1.00  0.44           O  
HETATM  284  O   HOH T 283     -16.506  -4.107   6.231  1.00  0.44           O  
HETATM  285  O   HOH T 284      26.935  19.420  -0.022  1.00  0.44           O  
HETATM  286  O   HOH T 285      26.822  34.679  14.603  1.00  0.44           O  
HETATM  287  O   HOH T 286       4.951  12.019  21.794  1.00  0.44           O  
HETATM  288  O   HOH T 287       4.432  13.032  24.228  1.00  0.44           O  
HETATM  289  O   HOH T 288      38.834  31.720  25.064  1.00  0.44           O  
HETATM  290  O   HOH T 289     -21.929   0.963   8.524  1.00  0.44           O  
HETATM  291  O   HOH T 290     -18.247 -10.193  -0.222  1.00  0.44           O  
HETATM  292  O   HOH T 291     -14.820  -2.828 -13.939  1.00  0.44           O  
HETATM  293  O   HOH T 292      23.032  30.575  13.698  1.00  0.44           O  
HETATM  294  O   HOH T 293      15.021  34.376   9.545  1.00  0.44           O  
HETATM  295  O   HOH T 294      -9.689 -10.536   4.048  1.00  0.44           O  
HETATM  296  O   HOH T 295      19.920  37.868  20.964  1.00  0.44           O  
HETATM  297  O   HOH T 296     -13.846   3.796 -14.865  1.00  0.44           O  
HETATM  298  O   HOH T 297      30.229  37.123  29.913  1.00  0.44           O  
HETATM  299  O   HOH T 298       4.898  11.916  -9.978  1.00  0.44           O  
HETATM  300  O   HOH T 299      -0.602 -10.906   1.437  1.00  0.45           O  
HETATM  301  O   HOH T 300      19.137   6.243  19.278  1.00  0.45           O  
HETATM  302  O   HOH T 301       2.565 -12.602  24.226  1.00  0.45           O  
HETATM  303  O   HOH T 302      23.376   4.103  26.686  1.00  0.45           O  
HETATM  304  O   HOH T 303      21.145  12.964  13.618  1.00  0.45           O  
HETATM  305  O   HOH T 304       5.590  -8.659   3.318  1.00  0.45           O  
HETATM  306  O   HOH T 305      14.456  40.281  12.355  1.00  0.45           O  
HETATM  307  O   HOH T 306       6.247  29.456  -3.447  1.00  0.45           O  
HETATM  308  O   HOH T 307      -0.441  -6.184  -3.452  1.00  0.45           O  
HETATM  309  O   HOH T 308      19.742   8.340   0.536  1.00  0.45           O  
HETATM  310  O   HOH T 309      15.320   3.249  25.265  1.00  0.45           O  
HETATM  311  O   HOH T 310      12.346  -3.817   2.074  1.00  0.45           O  
HETATM  312  O   HOH T 311      22.217   6.578  27.010  1.00  0.45           O  
HETATM  313  O   HOH T 312      -9.301  13.113   1.199  1.00  0.45           O  
HETATM  314  O   HOH T 313     -10.410   2.429  20.984  1.00  0.45           O  
HETATM  315  O   HOH T 314     -11.383  16.509   4.280  1.00  0.45           O  
HETATM  316  O   HOH T 315       3.658  32.924  23.491  1.00  0.45           O  
HETATM  317  O   HOH T 316       9.690  12.441  14.401  1.00  0.45           O  
HETATM  318  O   HOH T 317     -18.979   0.138  13.142  1.00  0.46           O  
HETATM  319  O   HOH T 318       2.489  -4.847  23.486  1.00  0.46           O  
HETATM  320  O   HOH T 319      27.467  11.099  -0.272  1.00  0.46           O  
HETATM  321  O   HOH T 320     -15.036   0.421   1.608  1.00  0.46           O  
HETATM  322  O   HOH T 321     -13.576  -0.812 -15.487  1.00  0.46           O  
HETATM  323  O   HOH T 322       8.271   3.412  29.582  1.00  0.46           O  
HETATM  324  O   HOH T 323       4.008   2.368  26.946  1.00  0.46           O  
HETATM  325  O   HOH T 324      -0.548  12.517  18.622  1.00  0.46           O  
HETATM  326  O   HOH T 325      26.857  17.563  25.262  1.00  0.46           O  
HETATM  327  O   HOH T 326     -11.154  14.609   6.282  1.00  0.46           O  
HETATM  328  O   HOH T 327       5.924  -4.179   0.618  1.00  0.46           O  
HETATM  329  O   HOH T 328      13.875  37.548  32.512  1.00  0.46           O  
HETATM  330  O   HOH T 329      25.503  45.777  28.432  1.00  0.46           O  
HETATM  331  O   HOH T 330      22.827   6.638  40.589  1.00  0.46           O  
HETATM  332  O   HOH T 331      20.189  35.608  35.827  1.00  0.46           O  
HETATM  333  O   HOH T 332       4.780  35.245  24.556  1.00  0.46           O  
HETATM  334  O   HOH T 333      -1.772  12.597  -8.846  1.00  0.47           O  
HETATM  335  O   HOH T 334       5.534  25.242  -4.617  1.00  0.47           O  
HETATM  336  O   HOH T 335       7.945  30.406   3.945  1.00  0.47           O  
HETATM  337  O   HOH T 336       7.257  15.440  15.395  1.00  0.47           O  
HETATM  338  O   HOH T 337      22.452   1.906  28.087  1.00  0.47           O  
HETATM  339  O   HOH T 338      26.873  13.497  13.087  1.00  0.47           O  
HETATM  340  O   HOH T 339       4.257 -10.446   1.597  1.00  0.47           O  
HETATM  341  O   HOH T 340      -1.455  -7.377  17.057  1.00  0.47           O  
HETATM  342  O   HOH T 341       8.127  25.928  -4.075  1.00  0.47           O  
HETATM  343  O   HOH T 342      10.668  37.244  25.333  1.00  0.47           O  
HETATM  344  O   HOH T 343      26.169  15.853  44.797  1.00  0.47           O  
HETATM  345  O   HOH T 344       9.628  37.276  27.951  1.00  0.47           O  
HETATM  346  O   HOH T 345      -4.900  15.070   0.755  1.00  0.47           O  
HETATM  347  O   HOH T 346       5.495  37.191  22.667  1.00  0.47           O  
HETATM  348  O   HOH T 347     -20.203   0.581  10.721  1.00  0.47           O  
HETATM  349  O   HOH T 348      -7.675  15.376   0.833  1.00  0.47           O  
HETATM  350  O   HOH T 349     -10.435   8.615  17.611  1.00  0.47           O  
HETATM  351  O   HOH T 350       3.036  10.153   6.014  1.00  0.47           O  
HETATM  352  O   HOH T 351      -9.192   9.315  -4.158  1.00  0.47           O  
HETATM  353  O   HOH T 352     -10.021  15.535   2.185  1.00  0.47           O  
HETATM  354  O   HOH T 353     -12.201  -3.166 -14.680  1.00  0.47           O  
HETATM  355  O   HOH T 354     -19.401   4.104   4.139  1.00  0.47           O  
HETATM  356  O   HOH T 355     -15.109   7.940  18.409  1.00  0.47           O  
HETATM  357  O   HOH T 356      13.191  -2.486 -13.655  1.00  0.47           O  
HETATM  358  O   HOH T 357       4.826  13.075  -2.461  1.00  0.47           O  
HETATM  359  O   HOH T 358       2.828   9.916  27.678  1.00  0.48           O  
HETATM  360  O   HOH T 359       6.827  -6.368   2.264  1.00  0.48           O  
HETATM  361  O   HOH T 360      26.304   9.003  43.801  1.00  0.48           O  
HETATM  362  O   HOH T 361      21.213  30.916  15.792  1.00  0.48           O  
HETATM  363  O   HOH T 362       4.250  -8.208  -5.679  1.00  0.48           O  
HETATM  364  O   HOH T 363       6.569  27.603  30.921  1.00  0.48           O  
HETATM  365  O   HOH T 364      11.901  38.344   6.930  1.00  0.48           O  
HETATM  366  O   HOH T 365      26.692  48.206  27.884  1.00  0.48           O  
HETATM  367  O   HOH T 366       4.244  19.572  30.623  1.00  0.48           O  
HETATM  368  O   HOH T 367      10.637  37.386  22.524  1.00  0.48           O  
HETATM  369  O   HOH T 368      14.017  -5.346  -3.808  1.00  0.48           O  
HETATM  370  O   HOH T 369       4.795  15.587  24.977  1.00  0.48           O  
HETATM  371  O   HOH T 370     -10.790  -8.264   5.470  1.00  0.48           O  
HETATM  372  O   HOH T 371     -13.010  16.680  10.483  1.00  0.48           O  
HETATM  373  O   HOH T 372      27.333  44.083  29.818  1.00  0.48           O  
HETATM  374  O   HOH T 373      21.374   2.386  30.498  1.00  0.48           O  
HETATM  375  O   HOH T 374      29.988  16.819   7.895  1.00  0.48           O  
HETATM  376  O   HOH T 375      31.532   4.019  23.025  1.00  0.48           O  
HETATM  377  O   HOH T 376      13.225  38.875   4.640  1.00  0.49           O  
HETATM  378  O   HOH T 377      24.086  31.055  16.279  1.00  0.49           O  
HETATM  379  O   HOH T 378       9.040   0.739  29.237  1.00  0.49           O  
HETATM  380  O   HOH T 379       7.664  14.984  -6.635  1.00  0.49           O  
HETATM  381  O   HOH T 380      10.099  12.161  37.277  1.00  0.49           O  
HETATM  382  O   HOH T 381     -14.941  -6.420  15.934  1.00  0.49           O  
HETATM  383  O   HOH T 382       9.749  -4.086   1.658  1.00  0.49           O  
HETATM  384  O   HOH T 383      22.864  35.708  35.550  1.00  0.49           O  
HETATM  385  O   HOH T 384       8.083  28.280   2.278  1.00  0.49           O  
HETATM  386  O   HOH T 385     -17.604   2.493   2.932  1.00  0.49           O  
HETATM  387  O   HOH T 386      25.355   9.564  40.623  1.00  0.49           O  
HETATM  388  O   HOH T 387      27.516  28.216  18.513  1.00  0.49           O  
HETATM  389  O   HOH T 388      13.751  -8.683  -5.425  1.00  0.49           O  
HETATM  390  O   HOH T 389       4.041  18.397   2.706  1.00  0.49           O  
HETATM  391  O   HOH T 390      -7.692   6.374  25.315  1.00  0.49           O  
HETATM  392  O   HOH T 391     -18.073   0.044 -10.507  1.00  0.49           O  
HETATM  393  O   HOH T 392       0.595  28.674  14.699  1.00  0.49           O  
HETATM  394  O   HOH T 393      -4.657 -14.474  -1.731  1.00  0.49           O  
HETATM  395  O   HOH T 394      19.172  30.139  -1.204  1.00  0.49           O  
HETATM  396  O   HOH T 395     -20.882 -11.129  -0.359  1.00  0.49           O  
HETATM  397  O   HOH T 396      23.999   3.190  31.667  1.00  0.50           O  
HETATM  398  O   HOH T 397      22.068  17.957  -2.046  1.00  0.50           O  
HETATM  399  O   HOH T 398       3.541  25.286  20.523  1.00  0.50           O  
HETATM  400  O   HOH T 399     -14.654  -8.891 -14.510  1.00  0.50           O  
HETATM  401  O   HOH T 400      12.508  13.588  36.630  1.00  0.50           O  
HETATM  402  O   HOH T 401     -10.739  16.873  12.281  1.00  0.50           O  
HETATM  403  O   HOH T 402     -12.996 -11.252   6.672  1.00  0.50           O  
HETATM  404  O   HOH T 403      27.491  25.750  19.697  1.00  0.50           O  
HETATM  405  O   HOH T 404       5.378   5.332 -15.362  1.00  0.50           O  
HETATM  406  O   HOH T 405      -5.866   1.972  27.995  1.00  0.50           O  
HETATM  407  O   HOH T 406      -8.430  -5.756  16.922  1.00  0.50           O  
HETATM  408  O   HOH T 407      28.447   6.559  25.325  1.00  0.50           O  
HETATM  409  O   HOH T 408     -10.430   8.822  -6.555  1.00  0.50           O  
HETATM  410  O   HOH T 409      13.179  -3.607  20.268  1.00  0.50           O  
HETATM  411  O   HOH T 410      11.764  33.141  23.123  1.00  0.50           O  
HETATM  412  O   HOH T 411      19.450   4.745  17.012  1.00  0.50           O  
HETATM  413  O   HOH T 412       5.435   3.019  29.359  1.00  0.50           O  
HETATM  414  O   HOH T 413       4.114  -2.502  23.401  1.00  0.50           O  
HETATM  415  O   HOH T 414     -13.772   8.458   7.313  1.00  0.50           O  
HETATM  416  O   HOH T 415      17.170   3.446  17.190  1.00  0.50           O  
HETATM  417  O   HOH T 416      12.290  41.781  13.121  1.00  0.50           O  
HETATM  418  O   HOH T 417       6.161  26.903  -2.577  1.00  0.50           O  
HETATM  419  O   HOH T 418      -6.232   5.806   5.594  1.00  0.50           O  
HETATM  420  O   HOH T 419       9.425   2.104  31.641  1.00  0.50           O  
HETATM  421  O   HOH T 420     -10.569 -12.271   1.819  1.00  0.51           O  
HETATM  422  O   HOH T 421      -0.131  11.627  -6.833  1.00  0.51           O  
HETATM  423  O   HOH T 422       1.616  23.449  20.319  1.00  0.51           O  
HETATM  424  O   HOH T 423      -8.339   8.105  -0.105  1.00  0.51           O  
HETATM  425  O   HOH T 424       2.679  32.282  20.973  1.00  0.51           O  
HETATM  426  O   HOH T 425      15.165  38.073  17.847  1.00  0.51           O  
HETATM  427  O   HOH T 426       8.682  -7.444  -5.513  1.00  0.51           O  
HETATM  428  O   HOH T 427      13.754  -2.512 -20.290  1.00  0.51           O  
HETATM  429  O   HOH T 428      11.352   9.267 -13.843  1.00  0.51           O  
HETATM  430  O   HOH T 429       6.276  24.007  25.327  1.00  0.51           O  
HETATM  431  O   HOH T 430      27.643  33.382  16.905  1.00  0.51           O  
HETATM  432  O   HOH T 431      11.452  -1.524  21.042  1.00  0.51           O  
HETATM  433  O   HOH T 432      -1.735  -4.913  12.000  1.00  0.51           O  
HETATM  434  O   HOH T 433     -10.818  -0.874 -14.703  1.00  0.51           O  
HETATM  435  O   HOH T 434      -8.312  10.127  18.682  1.00  0.51           O  
HETATM  436  O   HOH T 435       2.409  11.558  25.433  1.00  0.51           O  
HETATM  437  O   HOH T 436      14.875 -10.540  -3.676  1.00  0.51           O  
HETATM  438  O   HOH T 437      13.083   0.717  23.769  1.00  0.51           O  
HETATM  439  O   HOH T 438     -14.745  10.597  17.828  1.00  0.51           O  
HETATM  440  O   HOH T 439      -6.594  12.876   0.812  1.00  0.51           O  
HETATM  441  O   HOH T 440     -16.184   5.409  18.048  1.00  0.51           O  
HETATM  442  O   HOH T 441      -9.789   9.945  -1.602  1.00  0.51           O  
HETATM  443  O   HOH T 442       1.598  15.577  11.803  1.00  0.51           O  
HETATM  444  O   HOH T 443       4.045  16.316  -4.157  1.00  0.52           O  
HETATM  445  O   HOH T 444      31.833   6.682  24.110  1.00  0.52           O  
HETATM  446  O   HOH T 445      26.498  30.875  17.469  1.00  0.52           O  
HETATM  447  O   HOH T 446       6.999  13.441  -8.941  1.00  0.52           O  
HETATM  448  O   HOH T 447       0.058 -13.729   1.789  1.00  0.52           O  
HETATM  449  O   HOH T 448       4.719  26.089  -0.487  1.00  0.52           O  
HETATM  450  O   HOH T 449      16.433  -0.791  29.094  1.00  0.52           O  
HETATM  451  O   HOH T 450       8.249  35.925  25.987  1.00  0.52           O  
HETATM  452  O   HOH T 451      14.647  25.091  -4.004  1.00  0.52           O  
HETATM  453  O   HOH T 452      25.374  30.330  35.826  1.00  0.52           O  
HETATM  454  O   HOH T 453      31.051   4.925  20.369  1.00  0.52           O  
HETATM  455  O   HOH T 454      21.905  27.504  38.709  1.00  0.52           O  
HETATM  456  O   HOH T 455       6.025  26.636  26.334  1.00  0.52           O  
HETATM  457  O   HOH T 456       4.691 -10.489  -2.398  1.00  0.52           O  
HETATM  458  O   HOH T 457       5.057  25.911   2.316  1.00  0.52           O  
HETATM  459  O   HOH T 458       5.484  14.747  29.205  1.00  0.52           O  
HETATM  460  O   HOH T 459     -15.394  -5.645 -14.821  1.00  0.53           O  
HETATM  461  O   HOH T 460       4.826  16.274  18.655  1.00  0.53           O  
HETATM  462  O   HOH T 461      21.223  22.224   9.266  1.00  0.53           O  
HETATM  463  O   HOH T 462     -10.684  10.756   0.851  1.00  0.53           O  
HETATM  464  O   HOH T 463     -17.783   5.687  -1.689  1.00  0.53           O  
HETATM  465  O   HOH T 464      -8.048  17.891  12.251  1.00  0.53           O  
HETATM  466  O   HOH T 465       1.493  12.507   2.724  1.00  0.53           O  
HETATM  467  O   HOH T 466       9.754   9.603  36.156  1.00  0.53           O  
HETATM  468  O   HOH T 467       2.241  -7.325  -7.349  1.00  0.53           O  
HETATM  469  O   HOH T 468      13.815  -3.425  -5.731  1.00  0.53           O  
HETATM  470  O   HOH T 469      18.515  37.354  15.313  1.00  0.53           O  
HETATM  471  O   HOH T 470      29.466   4.163  27.618  1.00  0.53           O  
HETATM  472  O   HOH T 471      20.747  39.079  30.639  1.00  0.53           O  
HETATM  473  O   HOH T 472      17.896   0.800  17.774  1.00  0.53           O  
HETATM  474  O   HOH T 473      10.618  29.914  -0.701  1.00  0.53           O  
HETATM  475  O   HOH T 474      -0.932   6.527  27.895  1.00  0.54           O  
HETATM  476  O   HOH T 475       0.381 -12.971  22.537  1.00  0.54           O  
HETATM  477  O   HOH T 476     -12.895   1.663 -16.298  1.00  0.54           O  
HETATM  478  O   HOH T 477      31.568  18.656  37.915  1.00  0.54           O  
HETATM  479  O   HOH T 478      30.768  31.714  32.407  1.00  0.54           O  
HETATM  480  O   HOH T 479      25.485   7.163  39.584  1.00  0.54           O  
HETATM  481  O   HOH T 480      25.072  43.023  23.458  1.00  0.54           O  
HETATM  482  O   HOH T 481       5.444  18.604  28.169  1.00  0.54           O  
HETATM  483  O   HOH T 482      26.069  18.579  18.634  1.00  0.54           O  
HETATM  484  O   HOH T 483      17.968  35.698  12.138  1.00  0.55           O  
HETATM  485  O   HOH T 484     -17.910   2.716  -9.617  1.00  0.55           O  
HETATM  486  O   HOH T 485       9.764  19.572  -6.623  1.00  0.55           O  
HETATM  487  O   HOH T 486      23.669  22.261   4.191  1.00  0.55           O  
HETATM  488  O   HOH T 487      -6.058 -10.127   4.870  1.00  0.55           O  
HETATM  489  O   HOH T 488      -6.489   9.785  -4.121  1.00  0.55           O  
HETATM  490  O   HOH T 489      -5.073 -12.990  -4.005  1.00  0.55           O  
HETATM  491  O   HOH T 490      17.889  38.175  17.969  1.00  0.55           O  
HETATM  492  O   HOH T 491      -1.552  29.083  13.039  1.00  0.55           O  
HETATM  493  O   HOH T 492      36.705  31.502  23.221  1.00  0.55           O  
HETATM  494  O   HOH T 493      -4.861  15.576  13.734  1.00  0.55           O  
HETATM  495  O   HOH T 494     -14.489  12.195  15.483  1.00  0.55           O  
HETATM  496  O   HOH T 495      13.901   0.053 -21.094  1.00  0.55           O  
HETATM  497  O   HOH T 496      32.510  32.460  18.590  1.00  0.55           O  
HETATM  498  O   HOH T 497      31.506  24.223  25.119  1.00  0.55           O  
HETATM  499  O   HOH T 498     -15.484  -2.487  13.805  1.00  0.56           O  
HETATM  500  O   HOH T 499      17.827   4.019  40.641  1.00  0.56           O  
HETATM  501  O   HOH T 500      18.518  38.155  25.122  1.00  0.56           O  
HETATM  502  O   HOH T 501     -17.604  -0.934  18.604  1.00  0.56           O  
HETATM  503  O   HOH T 502      -9.940   8.482  20.261  1.00  0.56           O  
HETATM  504  O   HOH T 503      -2.735 -13.731   1.867  1.00  0.56           O  
HETATM  505  O   HOH T 504      29.141   6.307  35.922  1.00  0.56           O  
HETATM  506  O   HOH T 505       3.973  13.644  -4.949  1.00  0.56           O  
HETATM  507  O   HOH T 506      12.446  35.784  23.752  1.00  0.56           O  
HETATM  508  O   HOH T 507      27.440  17.943  -2.405  1.00  0.56           O  
HETATM  509  O   HOH T 508      11.651  29.695  35.072  1.00  0.56           O  
HETATM  510  O   HOH T 509       6.243  14.659 -11.314  1.00  0.56           O  
HETATM  511  O   HOH T 510      16.269  38.918  20.175  1.00  0.56           O  
HETATM  512  O   HOH T 511      29.185  34.736  30.831  1.00  0.56           O  
HETATM  513  O   HOH T 512       9.651   7.280 -14.189  1.00  0.57           O  
HETATM  514  O   HOH T 513      24.963  26.690  39.045  1.00  0.57           O  
HETATM  515  O   HOH T 514     -14.521   7.335  -4.987  1.00  0.57           O  
HETATM  516  O   HOH T 515      13.861   1.577   3.696  1.00  0.57           O  
HETATM  517  O   HOH T 516     -19.318   0.603  17.082  1.00  0.57           O  
HETATM  518  O   HOH T 517       2.461 -12.317   1.551  1.00  0.57           O  
HETATM  519  O   HOH T 518      -0.755  -8.140  10.580  1.00  0.57           O  
HETATM  520  O   HOH T 519      -5.011 -13.591   0.679  1.00  0.57           O  
HETATM  521  O   HOH T 520      35.938   9.581  34.943  1.00  0.57           O  
HETATM  522  O   HOH T 521      23.605  37.895  19.655  1.00  0.57           O  
HETATM  523  O   HOH T 522      24.118  16.702  18.064  1.00  0.57           O  
HETATM  524  O   HOH T 523      25.906  24.255  14.690  1.00  0.57           O  
HETATM  525  O   HOH T 524      14.561  -0.886  -4.791  1.00  0.57           O  
HETATM  526  O   HOH T 525      23.947  29.278   4.728  1.00  0.58           O  
HETATM  527  O   HOH T 526      29.554   3.108  19.047  1.00  0.58           O  
HETATM  528  O   HOH T 527     -12.594  -2.489  17.679  1.00  0.58           O  
HETATM  529  O   HOH T 528       3.260  13.683  30.078  1.00  0.58           O  
HETATM  530  O   HOH T 529      -6.417   5.672  29.050  1.00  0.58           O  
HETATM  531  O   HOH T 530     -21.538   2.228   3.177  1.00  0.58           O  
HETATM  532  O   HOH T 531      12.939  40.558  18.625  1.00  0.58           O  
HETATM  533  O   HOH T 532      15.474  34.814   3.970  1.00  0.58           O  
HETATM  534  O   HOH T 533      14.646  37.602   6.703  1.00  0.59           O  
HETATM  535  O   HOH T 534      21.282   2.402  25.786  1.00  0.60           O  
HETATM  536  O   HOH T 535      -3.927  12.424  -2.383  1.00  0.61           O  
HETATM  537  O   HOH T 536       3.693  23.611  -1.019  1.00  0.62           O  
HETATM  538  O   HOH T 537      13.756  34.779  36.399  1.00  0.63           O  
HETATM  539  O   HOH T 538      25.336  24.166  17.667  1.00  0.78           O  
TER     540      HOH T 538 
