# Supplementary material for: Accurate Prediction of Hydration Sites of Proteins Using Energy Model With Atom Embedding
Source: Front Mol Biosci. 2021 Sep 20;8:756075. doi: 10.3389/fmolb.2021.756075 (PMC8488165; doi:10.3389/fmolb.2021.756075)
Supplement: Supplementary file 1 [file DataSheet1.ZIP › Data Sheet 1/Our_result_pdb/our_dataset_output/1O26_watersite.pdb]

HEADER                                                        XXXX


JRNL        PMID   -1
HETATM    1  O   HOH T   0      23.305  69.097 128.692  1.00  0.19           O  
HETATM    2  O   HOH T   1      52.956  37.013 104.200  1.00  0.19           O  
HETATM    3  O   HOH T   2      36.317  25.553 118.117  1.00  0.20           O  
HETATM    4  O   HOH T   3      31.810  46.700 125.160  1.00  0.20           O  
HETATM    5  O   HOH T   4      28.946  54.404 134.243  1.00  0.20           O  
HETATM    6  O   HOH T   5      40.732  61.781 112.531  1.00  0.20           O  
HETATM    7  O   HOH T   6      18.306  52.794 125.206  1.00  0.20           O  
HETATM    8  O   HOH T   7      46.369  61.452 137.973  1.00  0.21           O  
HETATM    9  O   HOH T   8      33.126  52.756 113.307  1.00  0.21           O  
HETATM   10  O   HOH T   9      30.069  58.481  90.180  1.00  0.22           O  
HETATM   11  O   HOH T  10      29.779  35.160  95.292  1.00  0.22           O  
HETATM   12  O   HOH T  11      37.974  37.561 121.359  1.00  0.22           O  
HETATM   13  O   HOH T  12      41.265  20.023 110.081  1.00  0.22           O  
HETATM   14  O   HOH T  13      26.159  37.883  86.357  1.00  0.22           O  
HETATM   15  O   HOH T  14      41.187  53.560 134.566  1.00  0.22           O  
HETATM   16  O   HOH T  15      41.099  16.141 112.568  1.00  0.22           O  
HETATM   17  O   HOH T  16      52.594  25.911 129.078  1.00  0.22           O  
HETATM   18  O   HOH T  17      41.883  33.093  96.363  1.00  0.22           O  
HETATM   19  O   HOH T  18      27.664  46.291 144.377  1.00  0.22           O  
HETATM   20  O   HOH T  19       6.274  53.960 107.018  1.00  0.23           O  
HETATM   21  O   HOH T  20      17.013  52.049 131.427  1.00  0.23           O  
HETATM   22  O   HOH T  21      53.213  62.124 143.038  1.00  0.23           O  
HETATM   23  O   HOH T  22      30.938  35.988 116.212  1.00  0.23           O  
HETATM   24  O   HOH T  23      41.954  66.582 134.238  1.00  0.23           O  
HETATM   25  O   HOH T  24      44.077  43.899 108.412  1.00  0.23           O  
HETATM   26  O   HOH T  25      53.029  22.221  89.767  1.00  0.24           O  
HETATM   27  O   HOH T  26      25.146  45.905 143.299  1.00  0.24           O  
HETATM   28  O   HOH T  27      31.194  49.139 103.607  1.00  0.24           O  
HETATM   29  O   HOH T  28      31.713  43.083  84.877  1.00  0.24           O  
HETATM   30  O   HOH T  29      18.354  39.145 102.668  1.00  0.24           O  
HETATM   31  O   HOH T  30      44.510  65.954 133.321  1.00  0.24           O  
HETATM   32  O   HOH T  31      46.896  40.118 143.543  1.00  0.24           O  
HETATM   33  O   HOH T  32      39.922  31.751 112.695  1.00  0.24           O  
HETATM   34  O   HOH T  33      19.642  66.240 118.439  1.00  0.24           O  
HETATM   35  O   HOH T  34      23.574  52.388 142.282  1.00  0.24           O  
HETATM   36  O   HOH T  35      45.355  44.336  79.267  1.00  0.24           O  
HETATM   37  O   HOH T  36      48.329  36.173  99.476  1.00  0.24           O  
HETATM   38  O   HOH T  37      23.664  76.829 127.822  1.00  0.25           O  
HETATM   39  O   HOH T  38       6.461  64.862 114.737  1.00  0.25           O  
HETATM   40  O   HOH T  39      27.048  38.492 110.874  1.00  0.25           O  
HETATM   41  O   HOH T  40      52.241  47.286 128.638  1.00  0.25           O  
HETATM   42  O   HOH T  41      29.976  31.638 127.933  1.00  0.25           O  
HETATM   43  O   HOH T  42      61.102  46.844 109.456  1.00  0.25           O  
HETATM   44  O   HOH T  43      44.567  60.911  95.133  1.00  0.25           O  
HETATM   45  O   HOH T  44      42.070  55.084 118.462  1.00  0.25           O  
HETATM   46  O   HOH T  45      27.571  51.733 118.103  1.00  0.25           O  
HETATM   47  O   HOH T  46      23.137  55.129 129.201  1.00  0.25           O  
HETATM   48  O   HOH T  47      11.741  33.561  83.856  1.00  0.25           O  
HETATM   49  O   HOH T  48      18.294  50.521 107.844  1.00  0.25           O  
HETATM   50  O   HOH T  49      58.886  59.055 110.738  1.00  0.25           O  
HETATM   51  O   HOH T  50      48.916  47.667 112.703  1.00  0.25           O  
HETATM   52  O   HOH T  51      27.122  48.765 113.441  1.00  0.25           O  
HETATM   53  O   HOH T  52      42.905  42.128 123.135  1.00  0.25           O  
HETATM   54  O   HOH T  53      28.525  40.223 125.744  1.00  0.25           O  
HETATM   55  O   HOH T  54      33.223  46.487  87.438  1.00  0.26           O  
HETATM   56  O   HOH T  55      34.765  56.984 101.857  1.00  0.26           O  
HETATM   57  O   HOH T  56      59.314  50.640 100.313  1.00  0.26           O  
HETATM   58  O   HOH T  57      45.712  24.302  93.821  1.00  0.26           O  
HETATM   59  O   HOH T  58      23.111  35.685  99.282  1.00  0.26           O  
HETATM   60  O   HOH T  59      23.562  50.764 112.391  1.00  0.26           O  
HETATM   61  O   HOH T  60      47.190  49.122 132.581  1.00  0.26           O  
HETATM   62  O   HOH T  61      42.453  20.614  98.041  1.00  0.26           O  
HETATM   63  O   HOH T  62      51.345  27.408  94.741  1.00  0.27           O  
HETATM   64  O   HOH T  63      10.287  38.543 109.906  1.00  0.27           O  
HETATM   65  O   HOH T  64      51.406  57.181 137.761  1.00  0.27           O  
HETATM   66  O   HOH T  65      39.652  14.421  92.882  1.00  0.27           O  
HETATM   67  O   HOH T  66      52.546  34.378 116.812  1.00  0.27           O  
HETATM   68  O   HOH T  67      29.085  61.123 153.893  1.00  0.27           O  
HETATM   69  O   HOH T  68      39.865  20.402  96.876  1.00  0.27           O  
HETATM   70  O   HOH T  69      53.336  16.757 122.180  1.00  0.27           O  
HETATM   71  O   HOH T  70      12.751  66.500 145.571  1.00  0.27           O  
HETATM   72  O   HOH T  71      42.021  21.944 127.999  1.00  0.27           O  
HETATM   73  O   HOH T  72      25.095  35.586 136.744  1.00  0.27           O  
HETATM   74  O   HOH T  73       2.764  35.595 123.406  1.00  0.27           O  
HETATM   75  O   HOH T  74      33.012  41.928 104.513  1.00  0.27           O  
HETATM   76  O   HOH T  75      46.931  62.245 104.929  1.00  0.28           O  
HETATM   77  O   HOH T  76       5.793  34.627 106.697  1.00  0.28           O  
HETATM   78  O   HOH T  77      39.724  34.001 110.981  1.00  0.28           O  
HETATM   79  O   HOH T  78      18.861  37.161  86.702  1.00  0.28           O  
HETATM   80  O   HOH T  79      45.396  68.795 149.210  1.00  0.28           O  
HETATM   81  O   HOH T  80      38.938  36.507 107.748  1.00  0.28           O  
HETATM   82  O   HOH T  81      20.369  21.869  99.601  1.00  0.28           O  
HETATM   83  O   HOH T  82      54.192  19.497 112.366  1.00  0.28           O  
HETATM   84  O   HOH T  83      49.073  52.756 151.137  1.00  0.28           O  
HETATM   85  O   HOH T  84      33.340  40.405  88.816  1.00  0.28           O  
HETATM   86  O   HOH T  85      28.746  29.368 128.928  1.00  0.28           O  
HETATM   87  O   HOH T  86      55.448  51.270 151.149  1.00  0.28           O  
HETATM   88  O   HOH T  87      57.666  59.418 145.553  1.00  0.28           O  
HETATM   89  O   HOH T  88      29.496  42.755 125.046  1.00  0.28           O  
HETATM   90  O   HOH T  89      22.769  68.151 123.315  1.00  0.28           O  
HETATM   91  O   HOH T  90      41.128  52.915 119.932  1.00  0.28           O  
HETATM   92  O   HOH T  91      35.255  22.290 123.789  1.00  0.28           O  
HETATM   93  O   HOH T  92      31.369  46.437 104.404  1.00  0.28           O  
HETATM   94  O   HOH T  93      54.248  38.953 118.796  1.00  0.28           O  
HETATM   95  O   HOH T  94      53.585  31.201 101.139  1.00  0.29           O  
HETATM   96  O   HOH T  95      20.192  45.860 143.719  1.00  0.29           O  
HETATM   97  O   HOH T  96      25.724  16.590 100.158  1.00  0.29           O  
HETATM   98  O   HOH T  97      42.056  58.619  88.678  1.00  0.29           O  
HETATM   99  O   HOH T  98      22.705  22.877 124.131  1.00  0.29           O  
HETATM  100  O   HOH T  99      29.324  43.803  85.734  1.00  0.29           O  
HETATM  101  O   HOH T 100      10.253  37.969 113.947  1.00  0.29           O  
HETATM  102  O   HOH T 101      37.471  69.755 155.354  1.00  0.29           O  
HETATM  103  O   HOH T 102      31.069  27.420 135.260  1.00  0.29           O  
HETATM  104  O   HOH T 103      50.945  18.096  81.942  1.00  0.29           O  
HETATM  105  O   HOH T 104      53.095  59.060 138.926  1.00  0.29           O  
HETATM  106  O   HOH T 105      17.825  32.763  94.504  1.00  0.29           O  
HETATM  107  O   HOH T 106      67.809  60.034 144.505  1.00  0.29           O  
HETATM  108  O   HOH T 107      49.417  66.449 133.295  1.00  0.29           O  
HETATM  109  O   HOH T 108      52.893  25.276  93.698  1.00  0.30           O  
HETATM  110  O   HOH T 109      20.060  36.568  89.125  1.00  0.30           O  
HETATM  111  O   HOH T 110      19.022  23.067 104.666  1.00  0.30           O  
HETATM  112  O   HOH T 111      36.345  73.439 136.831  1.00  0.30           O  
HETATM  113  O   HOH T 112      28.815  16.246  89.992  1.00  0.30           O  
HETATM  114  O   HOH T 113      60.048  58.229 144.972  1.00  0.30           O  
HETATM  115  O   HOH T 114      57.502  63.206 156.094  1.00  0.30           O  
HETATM  116  O   HOH T 115      54.184  49.591 116.126  1.00  0.30           O  
HETATM  117  O   HOH T 116      33.297  74.813 116.003  1.00  0.30           O  
HETATM  118  O   HOH T 117      68.520  26.169  83.775  1.00  0.30           O  
HETATM  119  O   HOH T 118       9.543  33.055 122.438  1.00  0.30           O  
HETATM  120  O   HOH T 119      24.756  44.903  84.214  1.00  0.30           O  
HETATM  121  O   HOH T 120      29.169  66.886 104.518  1.00  0.30           O  
HETATM  122  O   HOH T 121      18.659  59.915 153.556  1.00  0.30           O  
HETATM  123  O   HOH T 122      17.737  31.953  90.496  1.00  0.30           O  
HETATM  124  O   HOH T 123      11.680  60.577 148.875  1.00  0.30           O  
HETATM  125  O   HOH T 124      58.037  23.952  88.321  1.00  0.31           O  
HETATM  126  O   HOH T 125      34.711  44.387 118.432  1.00  0.31           O  
HETATM  127  O   HOH T 126      10.362  59.825 102.962  1.00  0.31           O  
HETATM  128  O   HOH T 127      54.973  16.886  82.926  1.00  0.31           O  
HETATM  129  O   HOH T 128      65.327  60.574 143.214  1.00  0.31           O  
HETATM  130  O   HOH T 129      20.098  25.806 125.372  1.00  0.31           O  
HETATM  131  O   HOH T 130      36.091  46.572 117.283  1.00  0.31           O  
HETATM  132  O   HOH T 131      40.252  68.685 118.812  1.00  0.31           O  
HETATM  133  O   HOH T 132      34.962  59.770 145.754  1.00  0.31           O  
HETATM  134  O   HOH T 133      59.781  34.844 117.669  1.00  0.31           O  
HETATM  135  O   HOH T 134      35.823  41.379 112.943  1.00  0.31           O  
HETATM  136  O   HOH T 135      36.793  33.571 117.514  1.00  0.31           O  
HETATM  137  O   HOH T 136      11.617  31.587 123.785  1.00  0.31           O  
HETATM  138  O   HOH T 137      29.245  64.998 151.047  1.00  0.31           O  
HETATM  139  O   HOH T 138      39.048  69.892 116.616  1.00  0.31           O  
HETATM  140  O   HOH T 139      37.999  20.128 101.113  1.00  0.31           O  
HETATM  141  O   HOH T 140      35.184  43.757 111.712  1.00  0.31           O  
HETATM  142  O   HOH T 141      21.383  31.725  74.253  1.00  0.31           O  
HETATM  143  O   HOH T 142      18.672  54.597 138.605  1.00  0.31           O  
HETATM  144  O   HOH T 143      43.478  63.121 116.539  1.00  0.31           O  
HETATM  145  O   HOH T 144      12.536  39.676 104.956  1.00  0.31           O  
HETATM  146  O   HOH T 145      23.424  65.757 100.781  1.00  0.31           O  
HETATM  147  O   HOH T 146      16.057  64.755 115.858  1.00  0.31           O  
HETATM  148  O   HOH T 147      54.180  24.023 122.558  1.00  0.31           O  
HETATM  149  O   HOH T 148       8.304  57.283 109.637  1.00  0.31           O  
HETATM  150  O   HOH T 149      29.427  64.341 105.553  1.00  0.31           O  
HETATM  151  O   HOH T 150      20.240  50.874 105.925  1.00  0.32           O  
HETATM  152  O   HOH T 151      41.096  21.139  79.253  1.00  0.32           O  
HETATM  153  O   HOH T 152      10.750  51.607 108.370  1.00  0.32           O  
HETATM  154  O   HOH T 153      16.801  27.440 134.023  1.00  0.32           O  
HETATM  155  O   HOH T 154      43.408  45.784 106.507  1.00  0.32           O  
HETATM  156  O   HOH T 155      59.521  19.230  78.510  1.00  0.32           O  
HETATM  157  O   HOH T 156      12.963  50.145 107.544  1.00  0.32           O  
HETATM  158  O   HOH T 157      44.584  14.341 109.242  1.00  0.32           O  
HETATM  159  O   HOH T 158      35.994  68.501 153.421  1.00  0.32           O  
HETATM  160  O   HOH T 159       7.898  31.398 131.663  1.00  0.32           O  
HETATM  161  O   HOH T 160      24.413  42.175 131.576  1.00  0.32           O  
HETATM  162  O   HOH T 161      34.768  39.941 103.695  1.00  0.32           O  
HETATM  163  O   HOH T 162      33.442  17.618 117.186  1.00  0.32           O  
HETATM  164  O   HOH T 163      24.444  74.902 111.870  1.00  0.32           O  
HETATM  165  O   HOH T 164      31.395  73.552 128.006  1.00  0.32           O  
HETATM  166  O   HOH T 165      43.760  39.829 118.226  1.00  0.32           O  
HETATM  167  O   HOH T 166      33.642  34.741 121.391  1.00  0.32           O  
HETATM  168  O   HOH T 167      45.313  16.818  80.047  1.00  0.32           O  
HETATM  169  O   HOH T 168      44.084  66.790 123.078  1.00  0.32           O  
HETATM  170  O   HOH T 169      49.355  57.156 126.494  1.00  0.32           O  
HETATM  171  O   HOH T 170      52.261  48.176  92.569  1.00  0.32           O  
HETATM  172  O   HOH T 171      14.279  32.651  77.938  1.00  0.32           O  
HETATM  173  O   HOH T 172      27.460  45.308  84.450  1.00  0.32           O  
HETATM  174  O   HOH T 173      20.408  41.485 111.833  1.00  0.32           O  
HETATM  175  O   HOH T 174      59.415  53.373  99.898  1.00  0.32           O  
HETATM  176  O   HOH T 175      19.959  44.593 107.571  1.00  0.32           O  
HETATM  177  O   HOH T 176      50.733  40.771  85.647  1.00  0.32           O  
HETATM  178  O   HOH T 177      40.241  49.682 109.452  1.00  0.32           O  
HETATM  179  O   HOH T 178      17.619  63.024 139.094  1.00  0.32           O  
HETATM  180  O   HOH T 179      16.321  18.265  89.069  1.00  0.32           O  
HETATM  181  O   HOH T 180      67.533  43.313  97.902  1.00  0.32           O  
HETATM  182  O   HOH T 181      55.305  66.803 150.003  1.00  0.32           O  
HETATM  183  O   HOH T 182      36.465  53.236 108.787  1.00  0.32           O  
HETATM  184  O   HOH T 183      29.590  24.900 127.493  1.00  0.33           O  
HETATM  185  O   HOH T 184      41.334  24.142 126.407  1.00  0.33           O  
HETATM  186  O   HOH T 185      27.953  49.608  83.960  1.00  0.33           O  
HETATM  187  O   HOH T 186      42.219  68.744 155.247  1.00  0.33           O  
HETATM  188  O   HOH T 187      19.990  41.983  87.509  1.00  0.33           O  
HETATM  189  O   HOH T 188      16.631  23.878  93.424  1.00  0.33           O  
HETATM  190  O   HOH T 189      21.648  45.363 122.543  1.00  0.33           O  
HETATM  191  O   HOH T 190      39.396  27.637  99.195  1.00  0.33           O  
HETATM  192  O   HOH T 191      52.850  52.694 141.195  1.00  0.33           O  
HETATM  193  O   HOH T 192      49.986  21.556 108.733  1.00  0.33           O  
HETATM  194  O   HOH T 193      49.610  41.415 120.506  1.00  0.33           O  
HETATM  195  O   HOH T 194      66.122  48.466 103.447  1.00  0.33           O  
HETATM  196  O   HOH T 195      51.425  44.669  88.587  1.00  0.33           O  
HETATM  197  O   HOH T 196       3.486  38.863 106.177  1.00  0.33           O  
HETATM  198  O   HOH T 197      34.326  75.924 129.977  1.00  0.33           O  
HETATM  199  O   HOH T 198      47.592  35.980 108.340  1.00  0.33           O  
HETATM  200  O   HOH T 199      50.593  70.575 123.078  1.00  0.33           O  
HETATM  201  O   HOH T 200      57.039  55.828 159.013  1.00  0.33           O  
HETATM  202  O   HOH T 201      14.184  33.306  82.534  1.00  0.33           O  
HETATM  203  O   HOH T 202      61.566  38.920 118.713  1.00  0.33           O  
HETATM  204  O   HOH T 203      43.850  32.528 144.809  1.00  0.33           O  
HETATM  205  O   HOH T 204      53.542  64.880 107.814  1.00  0.33           O  
HETATM  206  O   HOH T 205      20.209  34.082 141.156  1.00  0.33           O  
HETATM  207  O   HOH T 206      27.738  35.897 111.293  1.00  0.33           O  
HETATM  208  O   HOH T 207      52.280  35.845 106.623  1.00  0.33           O  
HETATM  209  O   HOH T 208      44.539  46.015 113.097  1.00  0.33           O  
HETATM  210  O   HOH T 209      56.131  24.685  90.319  1.00  0.34           O  
HETATM  211  O   HOH T 210       7.352  26.127  88.516  1.00  0.34           O  
HETATM  212  O   HOH T 211      42.331  61.925  99.003  1.00  0.34           O  
HETATM  213  O   HOH T 212      57.661  34.253  88.715  1.00  0.34           O  
HETATM  214  O   HOH T 213      27.599  47.664  97.315  1.00  0.34           O  
HETATM  215  O   HOH T 214      19.786  42.572 133.148  1.00  0.34           O  
HETATM  216  O   HOH T 215      40.167  44.809  78.283  1.00  0.34           O  
HETATM  217  O   HOH T 216      23.015  17.586  87.938  1.00  0.34           O  
HETATM  218  O   HOH T 217      28.363  17.607  80.195  1.00  0.34           O  
HETATM  219  O   HOH T 218      11.340  43.048 119.435  1.00  0.34           O  
HETATM  220  O   HOH T 219      41.395  40.582 124.741  1.00  0.34           O  
HETATM  221  O   HOH T 220      34.439  33.607 118.966  1.00  0.34           O  
HETATM  222  O   HOH T 221      47.732  37.293 140.196  1.00  0.34           O  
HETATM  223  O   HOH T 222      36.338  50.640 107.731  1.00  0.34           O  
HETATM  224  O   HOH T 223      16.284  51.868 120.846  1.00  0.34           O  
HETATM  225  O   HOH T 224       7.200  37.395 102.788  1.00  0.34           O  
HETATM  226  O   HOH T 225      50.460  32.801  74.560  1.00  0.34           O  
HETATM  227  O   HOH T 226      48.465  64.063 103.656  1.00  0.34           O  
HETATM  228  O   HOH T 227      60.712  24.476  89.072  1.00  0.34           O  
HETATM  229  O   HOH T 228      47.700  45.053 116.759  1.00  0.34           O  
HETATM  230  O   HOH T 229      59.823  27.550 107.694  1.00  0.34           O  
HETATM  231  O   HOH T 230      54.101  31.229  91.710  1.00  0.34           O  
HETATM  232  O   HOH T 231      27.350  33.325 130.907  1.00  0.34           O  
HETATM  233  O   HOH T 232      18.942  42.412 142.107  1.00  0.34           O  
HETATM  234  O   HOH T 233      16.209  49.674 112.496  1.00  0.34           O  
HETATM  235  O   HOH T 234      37.080  54.276 111.269  1.00  0.34           O  
HETATM  236  O   HOH T 235       8.863  31.507 118.115  1.00  0.34           O  
HETATM  237  O   HOH T 236       7.886  62.679 115.592  1.00  0.34           O  
HETATM  238  O   HOH T 237      29.243  53.820 117.665  1.00  0.34           O  
HETATM  239  O   HOH T 238      17.807  29.359 141.681  1.00  0.35           O  
HETATM  240  O   HOH T 239      22.312  45.540  87.321  1.00  0.35           O  
HETATM  241  O   HOH T 240      15.516  46.458 131.205  1.00  0.35           O  
HETATM  242  O   HOH T 241      50.977  66.633 150.569  1.00  0.35           O  
HETATM  243  O   HOH T 242      36.512  50.731 125.351  1.00  0.35           O  
HETATM  244  O   HOH T 243      55.371  58.841 142.625  1.00  0.35           O  
HETATM  245  O   HOH T 244      23.896  25.256 123.350  1.00  0.35           O  
HETATM  246  O   HOH T 245      58.105  43.936 127.363  1.00  0.35           O  
HETATM  247  O   HOH T 246      37.000  53.827 114.038  1.00  0.35           O  
HETATM  248  O   HOH T 247      11.753  67.440 141.950  1.00  0.35           O  
HETATM  249  O   HOH T 248      54.883  29.477  93.798  1.00  0.35           O  
HETATM  250  O   HOH T 249      20.901  22.486  92.421  1.00  0.35           O  
HETATM  251  O   HOH T 250      61.774  47.656 115.912  1.00  0.35           O  
HETATM  252  O   HOH T 251      13.923  27.684  90.975  1.00  0.35           O  
HETATM  253  O   HOH T 252      32.711  16.611 108.114  1.00  0.35           O  
HETATM  254  O   HOH T 253      23.137  44.429 116.504  1.00  0.35           O  
HETATM  255  O   HOH T 254      47.355  40.378 115.134  1.00  0.35           O  
HETATM  256  O   HOH T 255      37.267  23.452 116.628  1.00  0.35           O  
HETATM  257  O   HOH T 256      21.916  39.849 115.895  1.00  0.35           O  
HETATM  258  O   HOH T 257      52.003  23.437  99.574  1.00  0.35           O  
HETATM  259  O   HOH T 258      33.405  76.275 112.694  1.00  0.35           O  
HETATM  260  O   HOH T 259      65.071  49.095 110.952  1.00  0.35           O  
HETATM  261  O   HOH T 260      39.484  39.883  79.367  1.00  0.35           O  
HETATM  262  O   HOH T 261      54.339  27.477  72.871  1.00  0.35           O  
HETATM  263  O   HOH T 262      52.975  63.094 140.442  1.00  0.35           O  
HETATM  264  O   HOH T 263      58.177  28.386  83.384  1.00  0.35           O  
HETATM  265  O   HOH T 264      17.401  40.028 105.085  1.00  0.35           O  
HETATM  266  O   HOH T 265      44.877  22.073 125.263  1.00  0.36           O  
HETATM  267  O   HOH T 266      22.519  20.146  92.425  1.00  0.36           O  
HETATM  268  O   HOH T 267      35.323  75.755 108.355  1.00  0.36           O  
HETATM  269  O   HOH T 268       3.636  42.908 123.804  1.00  0.36           O  
HETATM  270  O   HOH T 269      49.962  43.902 121.595  1.00  0.36           O  
HETATM  271  O   HOH T 270      50.697  32.706 115.796  1.00  0.36           O  
HETATM  272  O   HOH T 271      49.840  53.276  86.578  1.00  0.36           O  
HETATM  273  O   HOH T 272      31.615  36.591 121.799  1.00  0.36           O  
HETATM  274  O   HOH T 273      33.019  65.186 154.887  1.00  0.36           O  
HETATM  275  O   HOH T 274      55.580  45.580 114.794  1.00  0.36           O  
HETATM  276  O   HOH T 275      29.707  48.496 137.212  1.00  0.36           O  
HETATM  277  O   HOH T 276      33.930  14.591  84.289  1.00  0.36           O  
HETATM  278  O   HOH T 277      51.221  62.631 157.275  1.00  0.36           O  
HETATM  279  O   HOH T 278      60.634  48.641 118.270  1.00  0.36           O  
HETATM  280  O   HOH T 279      34.172  69.107 151.411  1.00  0.36           O  
HETATM  281  O   HOH T 280      58.290  38.596  96.401  1.00  0.36           O  
HETATM  282  O   HOH T 281      27.534  16.002 102.139  1.00  0.36           O  
HETATM  283  O   HOH T 282      65.886  26.616  84.551  1.00  0.36           O  
HETATM  284  O   HOH T 283      32.884  13.431  90.081  1.00  0.36           O  
HETATM  285  O   HOH T 284      27.878  30.642 131.281  1.00  0.36           O  
HETATM  286  O   HOH T 285      59.645  34.066 115.086  1.00  0.36           O  
HETATM  287  O   HOH T 286      55.986  51.697 155.609  1.00  0.36           O  
HETATM  288  O   HOH T 287      55.098  24.996 129.818  1.00  0.36           O  
HETATM  289  O   HOH T 288      32.508  58.682  88.842  1.00  0.36           O  
HETATM  290  O   HOH T 289      19.146  42.987 130.534  1.00  0.36           O  
HETATM  291  O   HOH T 290      38.522  22.685  96.016  1.00  0.36           O  
HETATM  292  O   HOH T 291      63.005  30.386  84.651  1.00  0.37           O  
HETATM  293  O   HOH T 292      14.912  59.234 130.298  1.00  0.37           O  
HETATM  294  O   HOH T 293      37.808  17.080  84.465  1.00  0.37           O  
HETATM  295  O   HOH T 294      50.982  46.307  84.912  1.00  0.37           O  
HETATM  296  O   HOH T 295      57.493  56.126 151.281  1.00  0.37           O  
HETATM  297  O   HOH T 296      56.024  34.881 109.070  1.00  0.37           O  
HETATM  298  O   HOH T 297      43.721  27.645 108.014  1.00  0.37           O  
HETATM  299  O   HOH T 298      58.213  32.142 131.185  1.00  0.37           O  
HETATM  300  O   HOH T 299      33.875  48.214 126.401  1.00  0.37           O  
HETATM  301  O   HOH T 300      16.733  41.320 119.958  1.00  0.37           O  
HETATM  302  O   HOH T 301      54.415  15.371  85.221  1.00  0.37           O  
HETATM  303  O   HOH T 302      11.161  53.863 116.231  1.00  0.37           O  
HETATM  304  O   HOH T 303      33.058  71.483 150.464  1.00  0.37           O  
HETATM  305  O   HOH T 304      18.671  65.527 116.004  1.00  0.37           O  
HETATM  306  O   HOH T 305      36.503  37.144 105.241  1.00  0.37           O  
HETATM  307  O   HOH T 306      41.901  63.464 114.386  1.00  0.37           O  
HETATM  308  O   HOH T 307      43.444  21.334 130.319  1.00  0.37           O  
HETATM  309  O   HOH T 308      48.839  58.202 123.990  1.00  0.37           O  
HETATM  310  O   HOH T 309      58.951  26.284  80.030  1.00  0.37           O  
HETATM  311  O   HOH T 310      51.251  46.631 111.816  1.00  0.37           O  
HETATM  312  O   HOH T 311      20.521  72.488 120.974  1.00  0.37           O  
HETATM  313  O   HOH T 312      49.460  37.424 111.852  1.00  0.37           O  
HETATM  314  O   HOH T 313      60.971  24.601  81.126  1.00  0.37           O  
HETATM  315  O   HOH T 314      46.666  70.642 118.972  1.00  0.37           O  
HETATM  316  O   HOH T 315      20.283  46.280 120.325  1.00  0.37           O  
HETATM  317  O   HOH T 316      33.816  74.044 106.777  1.00  0.37           O  
HETATM  318  O   HOH T 317      52.716  51.757 116.809  1.00  0.37           O  
HETATM  319  O   HOH T 318      17.077  43.794 102.258  1.00  0.37           O  
HETATM  320  O   HOH T 319      53.458  50.746 126.976  1.00  0.37           O  
HETATM  321  O   HOH T 320      46.297  21.635 133.100  1.00  0.37           O  
HETATM  322  O   HOH T 321       9.376  65.137 149.319  1.00  0.37           O  
HETATM  323  O   HOH T 322      66.674  45.567 102.899  1.00  0.37           O  
HETATM  324  O   HOH T 323      33.889  48.595  85.707  1.00  0.37           O  
HETATM  325  O   HOH T 324      40.187  50.795 122.940  1.00  0.37           O  
HETATM  326  O   HOH T 325      59.586  23.984  78.721  1.00  0.37           O  
HETATM  327  O   HOH T 326      22.758  44.972 144.352  1.00  0.38           O  
HETATM  328  O   HOH T 327      33.989  34.385  75.066  1.00  0.38           O  
HETATM  329  O   HOH T 328      44.704  28.403 136.878  1.00  0.38           O  
HETATM  330  O   HOH T 329      22.103  69.110 135.531  1.00  0.38           O  
HETATM  331  O   HOH T 330      51.474  20.909 106.380  1.00  0.38           O  
HETATM  332  O   HOH T 331      14.673  22.055  96.476  1.00  0.38           O  
HETATM  333  O   HOH T 332      55.153  49.826 124.974  1.00  0.38           O  
HETATM  334  O   HOH T 333      60.650  43.041 108.595  1.00  0.38           O  
HETATM  335  O   HOH T 334      28.036  40.560  79.225  1.00  0.38           O  
HETATM  336  O   HOH T 335      18.544  51.186 112.845  1.00  0.38           O  
HETATM  337  O   HOH T 336      12.442  26.907  81.174  1.00  0.38           O  
HETATM  338  O   HOH T 337      18.005  65.470  89.951  1.00  0.38           O  
HETATM  339  O   HOH T 338      22.920  44.668 124.909  1.00  0.38           O  
HETATM  340  O   HOH T 339      10.629  26.803 136.747  1.00  0.38           O  
HETATM  341  O   HOH T 340      59.077  18.927  83.255  1.00  0.38           O  
HETATM  342  O   HOH T 341      14.860  24.202 101.442  1.00  0.38           O  
HETATM  343  O   HOH T 342      40.663  28.209  96.785  1.00  0.38           O  
HETATM  344  O   HOH T 343      60.031  60.791 145.929  1.00  0.38           O  
HETATM  345  O   HOH T 344      51.353  55.159 126.812  1.00  0.38           O  
HETATM  346  O   HOH T 345      25.306  23.498 124.890  1.00  0.38           O  
HETATM  347  O   HOH T 346      56.071  54.017 157.186  1.00  0.38           O  
HETATM  348  O   HOH T 347       8.566  54.887 108.119  1.00  0.38           O  
HETATM  349  O   HOH T 348      47.780  68.486 133.971  1.00  0.38           O  
HETATM  350  O   HOH T 349       5.539  26.658  90.613  1.00  0.38           O  
HETATM  351  O   HOH T 350      57.165  36.008  96.273  1.00  0.38           O  
HETATM  352  O   HOH T 351      62.848  35.104 128.816  1.00  0.38           O  
HETATM  353  O   HOH T 352      45.831  34.380 144.647  1.00  0.38           O  
HETATM  354  O   HOH T 353      30.658  16.734  81.460  1.00  0.38           O  
HETATM  355  O   HOH T 354       6.528  33.623 131.123  1.00  0.38           O  
HETATM  356  O   HOH T 355      21.059  42.817 109.480  1.00  0.38           O  
HETATM  357  O   HOH T 356      31.213  52.005  90.723  1.00  0.38           O  
HETATM  358  O   HOH T 357      56.543  57.636 153.416  1.00  0.38           O  
HETATM  359  O   HOH T 358      38.091  71.586 122.103  1.00  0.38           O  
HETATM  360  O   HOH T 359      25.006  49.152 152.276  1.00  0.38           O  
HETATM  361  O   HOH T 360      46.098  58.454 123.625  1.00  0.39           O  
HETATM  362  O   HOH T 361      35.838  72.925 122.945  1.00  0.39           O  
HETATM  363  O   HOH T 362      37.330  47.191 114.825  1.00  0.39           O  
HETATM  364  O   HOH T 363      21.631  46.785 126.349  1.00  0.39           O  
HETATM  365  O   HOH T 364      55.455  25.679  92.809  1.00  0.39           O  
HETATM  366  O   HOH T 365      23.870  21.157  76.926  1.00  0.39           O  
HETATM  367  O   HOH T 366      57.379  19.329  87.423  1.00  0.39           O  
HETATM  368  O   HOH T 367      22.928  47.447 123.897  1.00  0.39           O  
HETATM  369  O   HOH T 368      36.958  23.108 119.364  1.00  0.39           O  
HETATM  370  O   HOH T 369      64.791  59.329 120.090  1.00  0.39           O  
HETATM  371  O   HOH T 370      44.526  38.152 146.707  1.00  0.39           O  
HETATM  372  O   HOH T 371      30.744  29.805 136.716  1.00  0.39           O  
HETATM  373  O   HOH T 372      52.228  46.747  90.151  1.00  0.39           O  
HETATM  374  O   HOH T 373      35.770  28.194 137.976  1.00  0.39           O  
HETATM  375  O   HOH T 374      49.572  39.702  83.242  1.00  0.39           O  
HETATM  376  O   HOH T 375      20.265  44.386  88.883  1.00  0.39           O  
HETATM  377  O   HOH T 376      52.857  17.854 110.572  1.00  0.39           O  
HETATM  378  O   HOH T 377      29.801  47.671 143.417  1.00  0.39           O  
HETATM  379  O   HOH T 378      39.711  18.376 111.683  1.00  0.39           O  
HETATM  380  O   HOH T 379      26.640  41.191 115.100  1.00  0.39           O  
HETATM  381  O   HOH T 380      50.195  20.946  77.798  1.00  0.39           O  
HETATM  382  O   HOH T 381      47.525  18.349 101.049  1.00  0.39           O  
HETATM  383  O   HOH T 382      55.301  58.026 140.031  1.00  0.39           O  
HETATM  384  O   HOH T 383      18.817  35.604  81.823  1.00  0.39           O  
HETATM  385  O   HOH T 384      38.195  63.565 104.664  1.00  0.39           O  
HETATM  386  O   HOH T 385      51.650  38.348  84.758  1.00  0.39           O  
HETATM  387  O   HOH T 386      57.466  57.766 157.026  1.00  0.39           O  
HETATM  388  O   HOH T 387      33.471  41.619  86.244  1.00  0.39           O  
HETATM  389  O   HOH T 388      40.441  59.506 131.822  1.00  0.39           O  
HETATM  390  O   HOH T 389      20.740  49.302 118.280  1.00  0.39           O  
HETATM  391  O   HOH T 390      23.455  14.536 111.653  1.00  0.39           O  
HETATM  392  O   HOH T 391      19.466  38.713  90.833  1.00  0.39           O  
HETATM  393  O   HOH T 392      51.468  51.200  87.271  1.00  0.39           O  
HETATM  394  O   HOH T 393      16.186  56.596 145.695  1.00  0.39           O  
HETATM  395  O   HOH T 394      16.902  35.782  74.521  1.00  0.39           O  
HETATM  396  O   HOH T 395      56.696  20.972  75.729  1.00  0.39           O  
HETATM  397  O   HOH T 396      33.438  63.800 152.535  1.00  0.39           O  
HETATM  398  O   HOH T 397      16.181  46.911 108.568  1.00  0.39           O  
HETATM  399  O   HOH T 398      31.502  17.125 115.162  1.00  0.39           O  
HETATM  400  O   HOH T 399      31.512  65.775 152.575  1.00  0.39           O  
HETATM  401  O   HOH T 400      52.418  24.536 107.838  1.00  0.40           O  
HETATM  402  O   HOH T 401      53.377  60.920 134.073  1.00  0.40           O  
HETATM  403  O   HOH T 402      30.918  43.842 142.188  1.00  0.40           O  
HETATM  404  O   HOH T 403       8.104  52.649 102.923  1.00  0.40           O  
HETATM  405  O   HOH T 404      12.221  54.139 123.705  1.00  0.40           O  
HETATM  406  O   HOH T 405      22.629  67.793 142.297  1.00  0.40           O  
HETATM  407  O   HOH T 406      56.438  61.283 157.961  1.00  0.40           O  
HETATM  408  O   HOH T 407      54.298  63.083 101.134  1.00  0.40           O  
HETATM  409  O   HOH T 408      60.278  26.885  82.333  1.00  0.40           O  
HETATM  410  O   HOH T 409      41.068  37.578 109.238  1.00  0.40           O  
HETATM  411  O   HOH T 410      64.599  58.567 124.648  1.00  0.40           O  
HETATM  412  O   HOH T 411      47.110  18.537  98.329  1.00  0.40           O  
HETATM  413  O   HOH T 412       7.505  38.289 105.398  1.00  0.40           O  
HETATM  414  O   HOH T 413      40.920  38.783 146.705  1.00  0.40           O  
HETATM  415  O   HOH T 414      14.323  52.538 131.418  1.00  0.40           O  
HETATM  416  O   HOH T 415      21.931  51.778 110.384  1.00  0.40           O  
HETATM  417  O   HOH T 416      27.563  13.382 103.054  1.00  0.40           O  
HETATM  418  O   HOH T 417      66.323  33.313  86.449  1.00  0.40           O  
HETATM  419  O   HOH T 418      61.266  57.639 110.816  1.00  0.40           O  
HETATM  420  O   HOH T 419      21.842  75.151 110.928  1.00  0.40           O  
HETATM  421  O   HOH T 420      28.974  51.066 138.047  1.00  0.40           O  
HETATM  422  O   HOH T 421      31.691  65.660 104.750  1.00  0.40           O  
HETATM  423  O   HOH T 422      25.410  16.228  82.794  1.00  0.40           O  
HETATM  424  O   HOH T 423      20.062  47.116 124.121  1.00  0.40           O  
HETATM  425  O   HOH T 424      15.982  34.681  84.414  1.00  0.40           O  
HETATM  426  O   HOH T 425      17.249  60.018 136.800  1.00  0.40           O  
HETATM  427  O   HOH T 426      23.310  45.834 111.532  1.00  0.40           O  
HETATM  428  O   HOH T 427      34.977  75.019 134.998  1.00  0.40           O  
HETATM  429  O   HOH T 428      30.006  32.341 137.680  1.00  0.40           O  
HETATM  430  O   HOH T 429      23.817  69.609 133.401  1.00  0.40           O  
HETATM  431  O   HOH T 430      65.151  50.986 104.627  1.00  0.40           O  
HETATM  432  O   HOH T 431      39.355  53.759 112.859  1.00  0.40           O  
HETATM  433  O   HOH T 432      47.994  45.576 120.451  1.00  0.40           O  
HETATM  434  O   HOH T 433      19.392  19.391 103.678  1.00  0.40           O  
HETATM  435  O   HOH T 434      13.323  31.235 141.575  1.00  0.40           O  
HETATM  436  O   HOH T 435      21.231  49.773 115.573  1.00  0.40           O  
HETATM  437  O   HOH T 436      41.255  58.695 134.359  1.00  0.40           O  
HETATM  438  O   HOH T 437      16.776  49.377 141.016  1.00  0.40           O  
HETATM  439  O   HOH T 438      15.270  48.427 125.340  1.00  0.40           O  
HETATM  440  O   HOH T 439      17.920  59.172 132.991  1.00  0.40           O  
HETATM  441  O   HOH T 440      15.156  69.031 134.268  1.00  0.40           O  
HETATM  442  O   HOH T 441      35.011  72.544 128.808  1.00  0.40           O  
HETATM  443  O   HOH T 442      24.823  45.862 149.995  1.00  0.40           O  
HETATM  444  O   HOH T 443       2.807  37.487 121.405  1.00  0.40           O  
HETATM  445  O   HOH T 444       8.466  29.887  90.643  1.00  0.40           O  
HETATM  446  O   HOH T 445      36.452  40.544 115.592  1.00  0.41           O  
HETATM  447  O   HOH T 446      30.367  52.932  86.491  1.00  0.41           O  
HETATM  448  O   HOH T 447      13.410  25.358  79.070  1.00  0.41           O  
HETATM  449  O   HOH T 448      26.134  73.108 128.434  1.00  0.41           O  
HETATM  450  O   HOH T 449      16.975  55.689  93.083  1.00  0.41           O  
HETATM  451  O   HOH T 450       6.854  32.297 123.260  1.00  0.41           O  
HETATM  452  O   HOH T 451      34.058  51.985 108.261  1.00  0.41           O  
HETATM  453  O   HOH T 452      47.700  39.922  79.587  1.00  0.41           O  
HETATM  454  O   HOH T 453      61.187  60.083 123.004  1.00  0.41           O  
HETATM  455  O   HOH T 454      47.258  72.169 146.598  1.00  0.41           O  
HETATM  456  O   HOH T 455      15.798  61.715 135.049  1.00  0.41           O  
HETATM  457  O   HOH T 456      42.971  15.250 102.196  1.00  0.41           O  
HETATM  458  O   HOH T 457      19.531  21.806 102.267  1.00  0.41           O  
HETATM  459  O   HOH T 458      36.549  17.737  78.320  1.00  0.41           O  
HETATM  460  O   HOH T 459      57.538  34.050 129.257  1.00  0.41           O  
HETATM  461  O   HOH T 460      46.330  39.399 117.414  1.00  0.41           O  
HETATM  462  O   HOH T 461      34.669  34.255 116.196  1.00  0.41           O  
HETATM  463  O   HOH T 462      36.574  43.140  77.033  1.00  0.41           O  
HETATM  464  O   HOH T 463      29.522  46.076 123.659  1.00  0.41           O  
HETATM  465  O   HOH T 464      41.258  68.916 129.814  1.00  0.41           O  
HETATM  466  O   HOH T 465      14.487  44.660 108.375  1.00  0.41           O  
HETATM  467  O   HOH T 466      27.823  63.385 152.863  1.00  0.41           O  
HETATM  468  O   HOH T 467      56.685  64.943 148.422  1.00  0.41           O  
HETATM  469  O   HOH T 468      26.872  12.070 109.410  1.00  0.41           O  
HETATM  470  O   HOH T 469      54.673  14.541 123.179  1.00  0.41           O  
HETATM  471  O   HOH T 470      41.818  58.864 137.009  1.00  0.41           O  
HETATM  472  O   HOH T 471      33.513  36.915 116.690  1.00  0.41           O  
HETATM  473  O   HOH T 472      39.069  42.263  77.940  1.00  0.41           O  
HETATM  474  O   HOH T 473      40.401  19.303 107.587  1.00  0.41           O  
HETATM  475  O   HOH T 474      19.787  46.959 130.574  1.00  0.41           O  
HETATM  476  O   HOH T 475      34.311  43.748  84.531  1.00  0.41           O  
HETATM  477  O   HOH T 476      26.041  64.666 103.070  1.00  0.41           O  
HETATM  478  O   HOH T 477      43.931  70.687 150.656  1.00  0.41           O  
HETATM  479  O   HOH T 478       8.999  42.212 118.334  1.00  0.41           O  
HETATM  480  O   HOH T 479      31.654  53.887  88.772  1.00  0.41           O  
HETATM  481  O   HOH T 480      28.850  16.778 114.284  1.00  0.41           O  
HETATM  482  O   HOH T 481      26.824  47.035 151.527  1.00  0.41           O  
HETATM  483  O   HOH T 482      15.895  16.449  86.970  1.00  0.41           O  
HETATM  484  O   HOH T 483      18.857  72.814 116.294  1.00  0.41           O  
HETATM  485  O   HOH T 484      21.319  70.407 124.235  1.00  0.41           O  
HETATM  486  O   HOH T 485      49.197  37.644  79.095  1.00  0.41           O  
HETATM  487  O   HOH T 486      40.092  68.894 110.610  1.00  0.41           O  
HETATM  488  O   HOH T 487      53.075  45.789 126.331  1.00  0.41           O  
HETATM  489  O   HOH T 488      36.368  20.994  95.574  1.00  0.41           O  
HETATM  490  O   HOH T 489      30.886  14.832  88.715  1.00  0.41           O  
HETATM  491  O   HOH T 490      53.048  31.289 103.932  1.00  0.42           O  
HETATM  492  O   HOH T 491       0.275  32.725 107.209  1.00  0.42           O  
HETATM  493  O   HOH T 492      35.309  48.619 124.159  1.00  0.42           O  
HETATM  494  O   HOH T 493      35.524  76.270 110.959  1.00  0.42           O  
HETATM  495  O   HOH T 494      54.018  64.674 142.500  1.00  0.42           O  
HETATM  496  O   HOH T 495      24.000  41.839 115.800  1.00  0.42           O  
HETATM  497  O   HOH T 496      30.152  36.306  89.658  1.00  0.42           O  
HETATM  498  O   HOH T 497      35.068  45.953 110.026  1.00  0.42           O  
HETATM  499  O   HOH T 498      38.993  49.561  80.733  1.00  0.42           O  
HETATM  500  O   HOH T 499      12.850  57.834  82.669  1.00  0.42           O  
HETATM  501  O   HOH T 500       4.639  54.849 102.080  1.00  0.42           O  
HETATM  502  O   HOH T 501      34.665  18.661 111.883  1.00  0.42           O  
HETATM  503  O   HOH T 502      10.733  66.557 151.309  1.00  0.42           O  
HETATM  504  O   HOH T 503      59.696  31.291 127.176  1.00  0.42           O  
HETATM  505  O   HOH T 504      56.831  53.642 150.251  1.00  0.42           O  
HETATM  506  O   HOH T 505      54.731  19.066  88.276  1.00  0.42           O  
HETATM  507  O   HOH T 506      14.267  46.944 128.777  1.00  0.42           O  
HETATM  508  O   HOH T 507      57.450  29.864  94.829  1.00  0.42           O  
HETATM  509  O   HOH T 508      53.409  25.165 103.086  1.00  0.42           O  
HETATM  510  O   HOH T 509      25.288  69.024 104.579  1.00  0.42           O  
HETATM  511  O   HOH T 510      63.000  56.803 103.172  1.00  0.42           O  
HETATM  512  O   HOH T 511      24.559  48.210 112.338  1.00  0.42           O  
HETATM  513  O   HOH T 512      21.684  21.233  94.928  1.00  0.42           O  
HETATM  514  O   HOH T 513      52.168  49.360  89.147  1.00  0.42           O  
HETATM  515  O   HOH T 514      40.752  65.946 151.495  1.00  0.42           O  
HETATM  516  O   HOH T 515      16.952  20.999  97.700  1.00  0.42           O  
HETATM  517  O   HOH T 516      57.473  18.611  76.867  1.00  0.42           O  
HETATM  518  O   HOH T 517      17.198  44.503 107.739  1.00  0.42           O  
HETATM  519  O   HOH T 518      51.691  47.208  87.460  1.00  0.42           O  
HETATM  520  O   HOH T 519      52.538  56.624 135.431  1.00  0.42           O  
HETATM  521  O   HOH T 520      10.671  66.600 147.367  1.00  0.42           O  
HETATM  522  O   HOH T 521      52.257  21.327  92.292  1.00  0.42           O  
HETATM  523  O   HOH T 522       5.312  41.219 120.134  1.00  0.42           O  
HETATM  524  O   HOH T 523      41.054  70.193 132.300  1.00  0.42           O  
HETATM  525  O   HOH T 524      35.422  67.136 106.768  1.00  0.42           O  
HETATM  526  O   HOH T 525      23.052  69.943 105.965  1.00  0.42           O  
HETATM  527  O   HOH T 526       2.783  31.547 106.577  1.00  0.42           O  
HETATM  528  O   HOH T 527      35.934  28.208  84.342  1.00  0.42           O  
HETATM  529  O   HOH T 528      39.573  67.934 155.944  1.00  0.42           O  
HETATM  530  O   HOH T 529      16.902  61.961 153.910  1.00  0.42           O  
HETATM  531  O   HOH T 530      17.685  28.178  72.352  1.00  0.42           O  
HETATM  532  O   HOH T 531      39.246  23.681 114.761  1.00  0.42           O  
HETATM  533  O   HOH T 532       4.922  62.081 148.307  1.00  0.42           O  
HETATM  534  O   HOH T 533      56.098  33.147  92.187  1.00  0.42           O  
HETATM  535  O   HOH T 534      56.000  16.392 121.472  1.00  0.43           O  
HETATM  536  O   HOH T 535      50.626  43.075 111.753  1.00  0.43           O  
HETATM  537  O   HOH T 536      17.900  46.746 132.602  1.00  0.43           O  
HETATM  538  O   HOH T 537      53.715  38.310 106.438  1.00  0.43           O  
HETATM  539  O   HOH T 538      24.831  70.439 135.807  1.00  0.43           O  
HETATM  540  O   HOH T 539      60.528  46.018 111.962  1.00  0.43           O  
HETATM  541  O   HOH T 540      52.728  36.819 115.682  1.00  0.43           O  
HETATM  542  O   HOH T 541      12.726  50.557 120.009  1.00  0.43           O  
HETATM  543  O   HOH T 542      19.753  40.736 144.167  1.00  0.43           O  
HETATM  544  O   HOH T 543      51.724  28.189  72.538  1.00  0.43           O  
HETATM  545  O   HOH T 544      17.019  66.952 133.743  1.00  0.43           O  
HETATM  546  O   HOH T 545      36.615  49.256 116.540  1.00  0.43           O  
HETATM  547  O   HOH T 546      16.414  61.506 103.070  1.00  0.43           O  
HETATM  548  O   HOH T 547      16.358  64.452 134.916  1.00  0.43           O  
HETATM  549  O   HOH T 548      15.299  28.421 101.127  1.00  0.43           O  
HETATM  550  O   HOH T 549      52.171  50.238 137.835  1.00  0.43           O  
HETATM  551  O   HOH T 550       5.676  37.167 116.657  1.00  0.43           O  
HETATM  552  O   HOH T 551      52.897  48.688 123.569  1.00  0.43           O  
HETATM  553  O   HOH T 552      58.709  22.552  76.583  1.00  0.43           O  
HETATM  554  O   HOH T 553       9.676  36.963  99.782  1.00  0.43           O  
HETATM  555  O   HOH T 554      34.130  17.544 114.425  1.00  0.43           O  
HETATM  556  O   HOH T 555      60.174  56.141 143.218  1.00  0.43           O  
HETATM  557  O   HOH T 556      57.731  16.672  82.646  1.00  0.43           O  
HETATM  558  O   HOH T 557       4.433  28.111 105.128  1.00  0.43           O  
HETATM  559  O   HOH T 558      17.394  52.262 137.551  1.00  0.43           O  
HETATM  560  O   HOH T 559      26.841  13.645 105.769  1.00  0.43           O  
HETATM  561  O   HOH T 560      12.536  68.623 150.772  1.00  0.43           O  
HETATM  562  O   HOH T 561      42.107  64.149 111.744  1.00  0.43           O  
HETATM  563  O   HOH T 562      32.115  42.445  77.593  1.00  0.43           O  
HETATM  564  O   HOH T 563      48.043  35.129 111.016  1.00  0.43           O  
HETATM  565  O   HOH T 564      28.435  39.763 143.603  1.00  0.43           O  
HETATM  566  O   HOH T 565      28.404  53.283 139.639  1.00  0.43           O  
HETATM  567  O   HOH T 566      20.087  23.056 125.007  1.00  0.43           O  
HETATM  568  O   HOH T 567      38.300  49.145  84.398  1.00  0.43           O  
HETATM  569  O   HOH T 568       6.410  54.380 104.239  1.00  0.43           O  
HETATM  570  O   HOH T 569      11.989  51.982 114.442  1.00  0.43           O  
HETATM  571  O   HOH T 570      62.129  55.888 122.954  1.00  0.43           O  
HETATM  572  O   HOH T 571      53.756  34.069  94.831  1.00  0.43           O  
HETATM  573  O   HOH T 572      44.323  18.636  98.774  1.00  0.43           O  
HETATM  574  O   HOH T 573      55.974  25.545  71.618  1.00  0.43           O  
HETATM  575  O   HOH T 574      21.775  23.288  85.926  1.00  0.43           O  
HETATM  576  O   HOH T 575       8.391  52.193 107.030  1.00  0.43           O  
HETATM  577  O   HOH T 576      58.230  20.740  85.186  1.00  0.43           O  
HETATM  578  O   HOH T 577      46.210  20.891 130.330  1.00  0.43           O  
HETATM  579  O   HOH T 578      48.184  39.804 111.399  1.00  0.43           O  
HETATM  580  O   HOH T 579      43.480  16.279  99.739  1.00  0.43           O  
HETATM  581  O   HOH T 580      19.472  68.315 134.523  1.00  0.43           O  
HETATM  582  O   HOH T 581      33.720  75.295 132.608  1.00  0.43           O  
HETATM  583  O   HOH T 582      41.515  28.027  94.177  1.00  0.44           O  
HETATM  584  O   HOH T 583      33.034  28.234 137.164  1.00  0.44           O  
HETATM  585  O   HOH T 584      44.948  69.614 115.020  1.00  0.44           O  
HETATM  586  O   HOH T 585      14.267  25.287  98.889  1.00  0.44           O  
HETATM  587  O   HOH T 586      53.379  33.319 105.919  1.00  0.44           O  
HETATM  588  O   HOH T 587      53.733  46.022 112.721  1.00  0.44           O  
HETATM  589  O   HOH T 588       9.051  30.468 123.333  1.00  0.44           O  
HETATM  590  O   HOH T 589      17.751  33.312  73.572  1.00  0.44           O  
HETATM  591  O   HOH T 590      56.622  17.960 119.182  1.00  0.44           O  
HETATM  592  O   HOH T 591      59.100  21.511  87.619  1.00  0.44           O  
HETATM  593  O   HOH T 592       9.397  38.858 107.282  1.00  0.44           O  
HETATM  594  O   HOH T 593      11.309  66.393 153.945  1.00  0.44           O  
HETATM  595  O   HOH T 594      54.431  39.768 108.550  1.00  0.44           O  
HETATM  596  O   HOH T 595      16.317  35.296  89.768  1.00  0.44           O  
HETATM  597  O   HOH T 596      37.854  17.579 102.000  1.00  0.44           O  
HETATM  598  O   HOH T 597      31.146  18.767 120.142  1.00  0.44           O  
HETATM  599  O   HOH T 598      14.621  66.574 135.302  1.00  0.44           O  
HETATM  600  O   HOH T 599      53.492  23.442 128.237  1.00  0.44           O  
HETATM  601  O   HOH T 600      40.515  67.493 132.071  1.00  0.44           O  
HETATM  602  O   HOH T 601       7.382  43.020 120.459  1.00  0.44           O  
HETATM  603  O   HOH T 602      28.548  18.620 119.216  1.00  0.44           O  
HETATM  604  O   HOH T 603      37.489  69.192 109.485  1.00  0.44           O  
HETATM  605  O   HOH T 604      43.292  65.776 152.533  1.00  0.44           O  
HETATM  606  O   HOH T 605      55.190  29.129 100.272  1.00  0.44           O  
HETATM  607  O   HOH T 606      39.856  41.898 152.012  1.00  0.44           O  
HETATM  608  O   HOH T 607      58.542  55.233 156.903  1.00  0.44           O  
HETATM  609  O   HOH T 608      51.227  30.923  72.572  1.00  0.44           O  
HETATM  610  O   HOH T 609      19.112  68.191 116.620  1.00  0.44           O  
HETATM  611  O   HOH T 610      30.835  56.538  88.323  1.00  0.44           O  
HETATM  612  O   HOH T 611      17.357  50.203 125.778  1.00  0.44           O  
HETATM  613  O   HOH T 612      44.701  16.998  82.666  1.00  0.44           O  
HETATM  614  O   HOH T 613      33.993  46.099  79.197  1.00  0.44           O  
HETATM  615  O   HOH T 614      18.559  42.300 108.531  1.00  0.44           O  
HETATM  616  O   HOH T 615      18.635  54.237 135.893  1.00  0.44           O  
HETATM  617  O   HOH T 616      52.151  38.014 120.271  1.00  0.44           O  
HETATM  618  O   HOH T 617      34.161  42.162 120.100  1.00  0.44           O  
HETATM  619  O   HOH T 618      35.517  63.865 102.214  1.00  0.44           O  
HETATM  620  O   HOH T 619      26.004  64.792 100.222  1.00  0.44           O  
HETATM  621  O   HOH T 620      32.620  23.243 124.172  1.00  0.44           O  
HETATM  622  O   HOH T 621      45.374  41.506  79.121  1.00  0.44           O  
HETATM  623  O   HOH T 622      56.916  38.669 119.313  1.00  0.44           O  
HETATM  624  O   HOH T 623      24.074  62.468 137.715  1.00  0.44           O  
HETATM  625  O   HOH T 624       6.354  58.046 124.681  1.00  0.44           O  
HETATM  626  O   HOH T 625      41.283  63.304 101.193  1.00  0.44           O  
HETATM  627  O   HOH T 626      28.301  30.966 135.933  1.00  0.44           O  
HETATM  628  O   HOH T 627      12.133  69.913 148.288  1.00  0.44           O  
HETATM  629  O   HOH T 628      47.082  46.074 114.262  1.00  0.44           O  
HETATM  630  O   HOH T 629      18.723  41.838 103.420  1.00  0.44           O  
HETATM  631  O   HOH T 630       7.911  65.157 117.128  1.00  0.44           O  
HETATM  632  O   HOH T 631      49.410  68.866 150.666  1.00  0.44           O  
HETATM  633  O   HOH T 632      58.201  64.007 120.890  1.00  0.44           O  
HETATM  634  O   HOH T 633      14.265  24.429  94.997  1.00  0.44           O  
HETATM  635  O   HOH T 634      14.356  46.666 106.502  1.00  0.44           O  
HETATM  636  O   HOH T 635       8.429  57.474 106.900  1.00  0.45           O  
HETATM  637  O   HOH T 636      36.033  20.576 119.156  1.00  0.45           O  
HETATM  638  O   HOH T 637       9.498  38.810 101.974  1.00  0.45           O  
HETATM  639  O   HOH T 638      15.660  49.620 108.191  1.00  0.45           O  
HETATM  640  O   HOH T 639      30.114  15.843  78.899  1.00  0.45           O  
HETATM  641  O   HOH T 640      23.131  69.085 125.924  1.00  0.45           O  
HETATM  642  O   HOH T 641      34.758  16.725 109.942  1.00  0.45           O  
HETATM  643  O   HOH T 642      31.260  38.055  91.389  1.00  0.45           O  
HETATM  644  O   HOH T 643      15.118  61.856  88.394  1.00  0.45           O  
HETATM  645  O   HOH T 644      65.088  62.309 149.281  1.00  0.45           O  
HETATM  646  O   HOH T 645      46.869  37.482 110.670  1.00  0.45           O  
HETATM  647  O   HOH T 646      60.330  27.295  93.211  1.00  0.45           O  
HETATM  648  O   HOH T 647      54.314  31.136  88.109  1.00  0.45           O  
HETATM  649  O   HOH T 648      51.925  48.454 126.224  1.00  0.45           O  
HETATM  650  O   HOH T 649      59.150  57.985 152.498  1.00  0.45           O  
HETATM  651  O   HOH T 650      54.998  26.520 101.217  1.00  0.45           O  
HETATM  652  O   HOH T 651      25.860  37.663 138.300  1.00  0.45           O  
HETATM  653  O   HOH T 652      34.868  75.148 124.241  1.00  0.45           O  
HETATM  654  O   HOH T 653      28.785  42.186 142.029  1.00  0.45           O  
HETATM  655  O   HOH T 654      47.409  38.055 119.581  1.00  0.45           O  
HETATM  656  O   HOH T 655       4.248  40.501 122.576  1.00  0.45           O  
HETATM  657  O   HOH T 656      53.122  66.613 155.344  1.00  0.45           O  
HETATM  658  O   HOH T 657      10.965  21.277 136.983  1.00  0.45           O  
HETATM  659  O   HOH T 658      12.901  21.896 134.965  1.00  0.45           O  
HETATM  660  O   HOH T 659      31.630  27.661  75.450  1.00  0.45           O  
HETATM  661  O   HOH T 660      24.722  56.511  83.670  1.00  0.45           O  
HETATM  662  O   HOH T 661      59.819  33.276 112.439  1.00  0.45           O  
HETATM  663  O   HOH T 662      21.256  51.668 113.354  1.00  0.45           O  
HETATM  664  O   HOH T 663      25.835  29.042  70.440  1.00  0.45           O  
HETATM  665  O   HOH T 664      16.175  15.368  84.416  1.00  0.45           O  
HETATM  666  O   HOH T 665      50.534  64.237 101.801  1.00  0.45           O  
HETATM  667  O   HOH T 666       7.974  31.352 120.863  1.00  0.45           O  
HETATM  668  O   HOH T 667      13.128  44.064 101.792  1.00  0.45           O  
HETATM  669  O   HOH T 668      11.522  53.991 121.086  1.00  0.45           O  
HETATM  670  O   HOH T 669      16.972  49.199 121.243  1.00  0.45           O  
HETATM  671  O   HOH T 670      39.240  66.624 134.387  1.00  0.45           O  
HETATM  672  O   HOH T 671      26.912  67.326 103.180  1.00  0.45           O  
HETATM  673  O   HOH T 672      15.891  34.390  76.677  1.00  0.45           O  
HETATM  674  O   HOH T 673      35.357  46.147  85.661  1.00  0.45           O  
HETATM  675  O   HOH T 674      36.735  52.478 153.992  1.00  0.45           O  
HETATM  676  O   HOH T 675      16.994  22.890 102.753  1.00  0.45           O  
HETATM  677  O   HOH T 676      26.797  40.253 145.819  1.00  0.45           O  
HETATM  678  O   HOH T 677      30.558  21.508 123.219  1.00  0.45           O  
HETATM  679  O   HOH T 678      18.431  48.092 119.225  1.00  0.45           O  
HETATM  680  O   HOH T 679      34.212  37.337 122.257  1.00  0.45           O  
HETATM  681  O   HOH T 680      22.558  47.240 119.021  1.00  0.45           O  
HETATM  682  O   HOH T 681      50.941  29.759 104.794  1.00  0.46           O  
HETATM  683  O   HOH T 682      51.124  65.798 106.782  1.00  0.46           O  
HETATM  684  O   HOH T 683      46.062  51.841 143.453  1.00  0.46           O  
HETATM  685  O   HOH T 684      41.458  65.115 106.667  1.00  0.46           O  
HETATM  686  O   HOH T 685       8.216  32.423 129.156  1.00  0.46           O  
HETATM  687  O   HOH T 686      17.942  15.992  88.860  1.00  0.46           O  
HETATM  688  O   HOH T 687      25.760  12.894 111.797  1.00  0.46           O  
HETATM  689  O   HOH T 688      23.388  70.448 103.217  1.00  0.46           O  
HETATM  690  O   HOH T 689      10.644  25.769 129.111  1.00  0.46           O  
HETATM  691  O   HOH T 690      10.270  21.247 134.284  1.00  0.46           O  
HETATM  692  O   HOH T 691      66.631  45.337  96.326  1.00  0.46           O  
HETATM  693  O   HOH T 692       7.378  33.191 133.737  1.00  0.46           O  
HETATM  694  O   HOH T 693       8.461  39.608 115.150  1.00  0.46           O  
HETATM  695  O   HOH T 694      14.510  25.468  92.488  1.00  0.46           O  
HETATM  696  O   HOH T 695      33.099  20.519 123.926  1.00  0.46           O  
HETATM  697  O   HOH T 696      54.179  23.419  91.973  1.00  0.46           O  
HETATM  698  O   HOH T 697      22.668  73.841 145.749  1.00  0.46           O  
HETATM  699  O   HOH T 698      57.741  53.606 154.894  1.00  0.46           O  
HETATM  700  O   HOH T 699      34.689  70.181 155.260  1.00  0.46           O  
HETATM  701  O   HOH T 700      64.779  32.420  84.186  1.00  0.46           O  
HETATM  702  O   HOH T 701      17.622  51.023 123.176  1.00  0.46           O  
HETATM  703  O   HOH T 702      60.265  35.499 109.154  1.00  0.46           O  
HETATM  704  O   HOH T 703      13.428  72.368 148.143  1.00  0.46           O  
HETATM  705  O   HOH T 704      26.132  42.967 145.963  1.00  0.46           O  
HETATM  706  O   HOH T 705      46.517  37.464 142.754  1.00  0.46           O  
HETATM  707  O   HOH T 706      24.297  57.424 154.909  1.00  0.46           O  
HETATM  708  O   HOH T 707      26.551  13.966  83.766  1.00  0.46           O  
HETATM  709  O   HOH T 708      24.317  13.166 109.361  1.00  0.46           O  
HETATM  710  O   HOH T 709      23.707  28.160  90.842  1.00  0.46           O  
HETATM  711  O   HOH T 710      27.507  14.523 113.314  1.00  0.46           O  
HETATM  712  O   HOH T 711      54.608  45.386 123.904  1.00  0.46           O  
HETATM  713  O   HOH T 712      62.457  59.758 106.834  1.00  0.46           O  
HETATM  714  O   HOH T 713      42.864  71.120 130.417  1.00  0.46           O  
HETATM  715  O   HOH T 714      40.294  55.795 157.373  1.00  0.46           O  
HETATM  716  O   HOH T 715      55.394  17.051 124.050  1.00  0.46           O  
HETATM  717  O   HOH T 716      55.530  27.982  70.504  1.00  0.46           O  
HETATM  718  O   HOH T 717      22.451  40.769 144.479  1.00  0.46           O  
HETATM  719  O   HOH T 718       2.188  62.502 148.186  1.00  0.46           O  
HETATM  720  O   HOH T 719      55.825  17.083  86.828  1.00  0.46           O  
HETATM  721  O   HOH T 720      59.556  17.718  80.829  1.00  0.46           O  
HETATM  722  O   HOH T 721      42.150  60.927  96.406  1.00  0.46           O  
HETATM  723  O   HOH T 722      36.678  49.372  82.192  1.00  0.46           O  
HETATM  724  O   HOH T 723      11.190  51.855 118.167  1.00  0.46           O  
HETATM  725  O   HOH T 724      45.419  30.865 147.237  1.00  0.46           O  
HETATM  726  O   HOH T 725      58.132  48.546 116.931  1.00  0.46           O  
HETATM  727  O   HOH T 726      39.626  16.080 110.158  1.00  0.46           O  
HETATM  728  O   HOH T 727      61.643  28.870 111.119  1.00  0.46           O  
HETATM  729  O   HOH T 728      11.195  29.989  90.771  1.00  0.46           O  
HETATM  730  O   HOH T 729      24.503  68.124 102.067  1.00  0.46           O  
HETATM  731  O   HOH T 730       7.076  62.819 112.914  1.00  0.46           O  
HETATM  732  O   HOH T 731      42.928  22.967  78.019  1.00  0.46           O  
HETATM  733  O   HOH T 732      52.570  59.269 136.225  1.00  0.47           O  
HETATM  734  O   HOH T 733      51.818  24.709  97.176  1.00  0.47           O  
HETATM  735  O   HOH T 734      41.928  65.545 109.338  1.00  0.47           O  
HETATM  736  O   HOH T 735      47.826  46.750 147.384  1.00  0.47           O  
HETATM  737  O   HOH T 736       8.016  62.344 141.878  1.00  0.47           O  
HETATM  738  O   HOH T 737      35.898  46.370 112.624  1.00  0.47           O  
HETATM  739  O   HOH T 738      13.185  64.924 122.719  1.00  0.47           O  
HETATM  740  O   HOH T 739      22.581  14.974  87.121  1.00  0.47           O  
HETATM  741  O   HOH T 740      27.299  35.386 138.627  1.00  0.47           O  
HETATM  742  O   HOH T 741      56.398  27.336  94.806  1.00  0.47           O  
HETATM  743  O   HOH T 742      14.909  44.279 103.838  1.00  0.47           O  
HETATM  744  O   HOH T 743       8.640  52.300 100.203  1.00  0.47           O  
HETATM  745  O   HOH T 744      14.434  33.212  97.065  1.00  0.47           O  
HETATM  746  O   HOH T 745      53.430  52.896 131.900  1.00  0.47           O  
HETATM  747  O   HOH T 746      27.761  72.496 137.864  1.00  0.47           O  
HETATM  748  O   HOH T 747      44.267  62.629  97.197  1.00  0.47           O  
HETATM  749  O   HOH T 748      38.356  73.375 130.829  1.00  0.47           O  
HETATM  750  O   HOH T 749      63.300  49.268 117.516  1.00  0.47           O  
HETATM  751  O   HOH T 750      54.294  55.790 126.547  1.00  0.47           O  
HETATM  752  O   HOH T 751      60.766  50.234  92.755  1.00  0.47           O  
HETATM  753  O   HOH T 752      37.621  66.208 105.420  1.00  0.47           O  
HETATM  754  O   HOH T 753      61.265  60.410 110.720  1.00  0.47           O  
HETATM  755  O   HOH T 754      40.053  70.928 120.392  1.00  0.47           O  
HETATM  756  O   HOH T 755      31.409  23.286 128.891  1.00  0.47           O  
HETATM  757  O   HOH T 756      58.324  34.014 110.245  1.00  0.47           O  
HETATM  758  O   HOH T 757      16.411  35.887  86.907  1.00  0.47           O  
HETATM  759  O   HOH T 758      42.866  72.199 138.626  1.00  0.47           O  
HETATM  760  O   HOH T 759      18.134  40.503 122.170  1.00  0.47           O  
HETATM  761  O   HOH T 760      61.886  56.272 145.351  1.00  0.47           O  
HETATM  762  O   HOH T 761      44.685  20.917 127.896  1.00  0.47           O  
HETATM  763  O   HOH T 762      19.480  29.709  73.629  1.00  0.47           O  
HETATM  764  O   HOH T 763      29.814  40.748  76.971  1.00  0.47           O  
HETATM  765  O   HOH T 764      13.694  52.472 121.905  1.00  0.47           O  
HETATM  766  O   HOH T 765      17.763  19.458 120.900  1.00  0.47           O  
HETATM  767  O   HOH T 766      18.324  39.860  96.157  1.00  0.47           O  
HETATM  768  O   HOH T 767      12.918  36.455 134.520  1.00  0.47           O  
HETATM  769  O   HOH T 768      39.058  70.188 146.008  1.00  0.47           O  
HETATM  770  O   HOH T 769      48.906  38.610 142.342  1.00  0.47           O  
HETATM  771  O   HOH T 770      33.001  70.533 144.297  1.00  0.47           O  
HETATM  772  O   HOH T 771      35.868  38.739 113.641  1.00  0.47           O  
HETATM  773  O   HOH T 772      17.745  70.269 115.440  1.00  0.47           O  
HETATM  774  O   HOH T 773      47.927  33.690  88.466  1.00  0.47           O  
HETATM  775  O   HOH T 774      32.250  24.523 126.666  1.00  0.47           O  
HETATM  776  O   HOH T 775      11.151  60.234 125.478  1.00  0.47           O  
HETATM  777  O   HOH T 776      25.040  47.906 115.145  1.00  0.47           O  
HETATM  778  O   HOH T 777      53.180  19.494  90.448  1.00  0.47           O  
HETATM  779  O   HOH T 778      18.337  47.747 142.662  1.00  0.47           O  
HETATM  780  O   HOH T 779      16.521  54.571 140.983  1.00  0.47           O  
HETATM  781  O   HOH T 780      53.597  22.794 106.086  1.00  0.47           O  
HETATM  782  O   HOH T 781      41.450  69.621 112.793  1.00  0.47           O  
HETATM  783  O   HOH T 782      63.750  49.054  94.181  1.00  0.47           O  
HETATM  784  O   HOH T 783      60.519  32.637  90.727  1.00  0.47           O  
HETATM  785  O   HOH T 784      56.984  35.552  93.409  1.00  0.47           O  
HETATM  786  O   HOH T 785      52.205  40.691  83.313  1.00  0.47           O  
HETATM  787  O   HOH T 786      59.993  26.726 110.305  1.00  0.48           O  
HETATM  788  O   HOH T 787      16.155  48.878 127.961  1.00  0.48           O  
HETATM  789  O   HOH T 788      50.106  19.631  93.173  1.00  0.48           O  
HETATM  790  O   HOH T 789      30.986  17.966  90.474  1.00  0.48           O  
HETATM  791  O   HOH T 790      45.417  35.518 147.235  1.00  0.48           O  
HETATM  792  O   HOH T 791      18.754  70.557 117.995  1.00  0.48           O  
HETATM  793  O   HOH T 792      45.092  68.562 133.946  1.00  0.48           O  
HETATM  794  O   HOH T 793       3.455  30.735 101.803  1.00  0.48           O  
HETATM  795  O   HOH T 794      21.190  38.392 143.627  1.00  0.48           O  
HETATM  796  O   HOH T 795      62.981  38.635 100.213  1.00  0.48           O  
HETATM  797  O   HOH T 796      35.553  38.650 117.361  1.00  0.48           O  
HETATM  798  O   HOH T 797      33.477  56.019  88.648  1.00  0.48           O  
HETATM  799  O   HOH T 798      57.429  51.365 153.251  1.00  0.48           O  
HETATM  800  O   HOH T 799      60.260  35.020  89.352  1.00  0.48           O  
HETATM  801  O   HOH T 800      25.934  76.186 126.492  1.00  0.48           O  
HETATM  802  O   HOH T 801      63.287  67.828 118.292  1.00  0.48           O  
HETATM  803  O   HOH T 802      51.903  72.855 122.307  1.00  0.48           O  
HETATM  804  O   HOH T 803      20.799  21.123 123.234  1.00  0.48           O  
HETATM  805  O   HOH T 804      24.117  48.528 149.631  1.00  0.48           O  
HETATM  806  O   HOH T 805      37.441  73.876 126.502  1.00  0.48           O  
HETATM  807  O   HOH T 806      43.203  71.245 116.529  1.00  0.48           O  
HETATM  808  O   HOH T 807      17.228  41.913 132.181  1.00  0.48           O  
HETATM  809  O   HOH T 808      31.746  14.334 109.366  1.00  0.48           O  
HETATM  810  O   HOH T 809      42.964  67.812 114.311  1.00  0.48           O  
HETATM  811  O   HOH T 810      30.115  48.487 140.803  1.00  0.48           O  
HETATM  812  O   HOH T 811      61.845  32.990 127.210  1.00  0.48           O  
HETATM  813  O   HOH T 812      57.313  34.888 116.296  1.00  0.48           O  
HETATM  814  O   HOH T 813      42.053  40.399 151.363  1.00  0.48           O  
HETATM  815  O   HOH T 814      34.865  52.480 110.955  1.00  0.48           O  
HETATM  816  O   HOH T 815      17.354  30.419 144.183  1.00  0.48           O  
HETATM  817  O   HOH T 816      35.664  38.089 120.029  1.00  0.48           O  
HETATM  818  O   HOH T 817      20.827  66.068  89.119  1.00  0.48           O  
HETATM  819  O   HOH T 818      18.403  27.263 139.982  1.00  0.48           O  
HETATM  820  O   HOH T 819      25.089  72.476 137.667  1.00  0.48           O  
HETATM  821  O   HOH T 820       9.601  60.658 140.431  1.00  0.48           O  
HETATM  822  O   HOH T 821      54.318  60.640 140.831  1.00  0.48           O  
HETATM  823  O   HOH T 822      49.522  45.062 113.304  1.00  0.48           O  
HETATM  824  O   HOH T 823      54.530  27.532 103.793  1.00  0.48           O  
HETATM  825  O   HOH T 824      34.058  18.697  79.032  1.00  0.48           O  
HETATM  826  O   HOH T 825      41.237  13.937  78.705  1.00  0.48           O  
HETATM  827  O   HOH T 826      16.083  51.890 139.964  1.00  0.48           O  
HETATM  828  O   HOH T 827      35.766  17.004 100.193  1.00  0.48           O  
HETATM  829  O   HOH T 828      22.497  43.721  85.232  1.00  0.48           O  
HETATM  830  O   HOH T 829      17.409  30.989  71.974  1.00  0.48           O  
HETATM  831  O   HOH T 830      52.578  67.340 108.576  1.00  0.48           O  
HETATM  832  O   HOH T 831      59.426  52.567 149.721  1.00  0.48           O  
HETATM  833  O   HOH T 832      43.530  16.666  94.262  1.00  0.48           O  
HETATM  834  O   HOH T 833      21.887  52.276 107.703  1.00  0.48           O  
HETATM  835  O   HOH T 834      18.445  73.094 119.080  1.00  0.48           O  
HETATM  836  O   HOH T 835      40.252  62.726  97.391  1.00  0.48           O  
HETATM  837  O   HOH T 836      28.917  28.071 131.326  1.00  0.48           O  
HETATM  838  O   HOH T 837      23.090  42.860 129.249  1.00  0.48           O  
HETATM  839  O   HOH T 838      63.501  48.201 108.951  1.00  0.48           O  
HETATM  840  O   HOH T 839      28.712  47.188  82.856  1.00  0.48           O  
HETATM  841  O   HOH T 840      30.890  41.336 143.628  1.00  0.49           O  
HETATM  842  O   HOH T 841      52.803  57.227 128.296  1.00  0.49           O  
HETATM  843  O   HOH T 842      45.351  16.642 101.859  1.00  0.49           O  
HETATM  844  O   HOH T 843      21.062  44.696 129.722  1.00  0.49           O  
HETATM  845  O   HOH T 844      51.297  47.038 119.942  1.00  0.49           O  
HETATM  846  O   HOH T 845      48.939  42.372  78.885  1.00  0.49           O  
HETATM  847  O   HOH T 846      41.931  67.029 111.757  1.00  0.49           O  
HETATM  848  O   HOH T 847      63.712  49.110 114.717  1.00  0.49           O  
HETATM  849  O   HOH T 848       9.574  44.682 120.725  1.00  0.49           O  
HETATM  850  O   HOH T 849      51.445  64.671 132.956  1.00  0.49           O  
HETATM  851  O   HOH T 850      46.451  70.180 132.147  1.00  0.49           O  
HETATM  852  O   HOH T 851      34.162  24.034 128.955  1.00  0.49           O  
HETATM  853  O   HOH T 852      42.880  63.047  94.834  1.00  0.49           O  
HETATM  854  O   HOH T 853      36.184  26.910  79.939  1.00  0.49           O  
HETATM  855  O   HOH T 854      25.328  11.741 107.165  1.00  0.49           O  
HETATM  856  O   HOH T 855      27.025  43.842 143.449  1.00  0.49           O  
HETATM  857  O   HOH T 856      27.647  75.538 135.270  1.00  0.49           O  
HETATM  858  O   HOH T 857      30.782  53.835 154.259  1.00  0.49           O  
HETATM  859  O   HOH T 858      42.284  31.920 108.738  1.00  0.49           O  
HETATM  860  O   HOH T 859      44.198  64.091 154.628  1.00  0.49           O  
HETATM  861  O   HOH T 860      15.779  25.709 109.405  1.00  0.49           O  
HETATM  862  O   HOH T 861      41.021  35.133  76.908  1.00  0.49           O  
HETATM  863  O   HOH T 862      16.582  57.293 131.547  1.00  0.49           O  
HETATM  864  O   HOH T 863       9.813  39.770 104.641  1.00  0.49           O  
HETATM  865  O   HOH T 864      34.779  71.159 139.213  1.00  0.49           O  
HETATM  866  O   HOH T 865      48.140  22.673 131.358  1.00  0.49           O  
HETATM  867  O   HOH T 866      64.580  50.246 101.978  1.00  0.49           O  
HETATM  868  O   HOH T 867      62.380  27.927  83.543  1.00  0.49           O  
HETATM  869  O   HOH T 868      40.945  71.179 115.046  1.00  0.49           O  
HETATM  870  O   HOH T 869      20.514  73.119 112.198  1.00  0.49           O  
HETATM  871  O   HOH T 870       9.692  50.727 113.303  1.00  0.49           O  
HETATM  872  O   HOH T 871      52.595  44.157 122.477  1.00  0.49           O  
HETATM  873  O   HOH T 872      18.515  40.217 133.868  1.00  0.49           O  
HETATM  874  O   HOH T 873      33.004  74.014 151.748  1.00  0.49           O  
HETATM  875  O   HOH T 874      10.880  61.367 151.449  1.00  0.49           O  
HETATM  876  O   HOH T 875      27.940  23.953 125.475  1.00  0.49           O  
HETATM  877  O   HOH T 876      56.763  35.859 111.654  1.00  0.49           O  
HETATM  878  O   HOH T 877      30.658  63.178 152.785  1.00  0.49           O  
HETATM  879  O   HOH T 878      13.789  58.260 142.857  1.00  0.49           O  
HETATM  880  O   HOH T 879      35.643  47.145  81.029  1.00  0.49           O  
HETATM  881  O   HOH T 880      53.395  65.700 105.156  1.00  0.49           O  
HETATM  882  O   HOH T 881      53.276  47.061 115.289  1.00  0.49           O  
HETATM  883  O   HOH T 882      63.954  59.174 104.584  1.00  0.50           O  
HETATM  884  O   HOH T 883      38.144  46.411  77.320  1.00  0.50           O  
HETATM  885  O   HOH T 884      28.887  45.829 101.437  1.00  0.50           O  
HETATM  886  O   HOH T 885       5.522  37.361 107.168  1.00  0.50           O  
HETATM  887  O   HOH T 886      24.233  46.971  85.834  1.00  0.50           O  
HETATM  888  O   HOH T 887      24.320  14.341 106.876  1.00  0.50           O  
HETATM  889  O   HOH T 888      63.505  26.877  85.880  1.00  0.50           O  
HETATM  890  O   HOH T 889      29.074  19.612 121.716  1.00  0.50           O  
HETATM  891  O   HOH T 890      19.511  50.336 110.317  1.00  0.50           O  
HETATM  892  O   HOH T 891      20.933  72.413 118.293  1.00  0.50           O  
HETATM  893  O   HOH T 892      53.417  46.615 121.685  1.00  0.50           O  
HETATM  894  O   HOH T 893      19.911  39.231  88.203  1.00  0.50           O  
HETATM  895  O   HOH T 894      21.859  32.382  69.011  1.00  0.50           O  
HETATM  896  O   HOH T 895      13.404  26.495 101.244  1.00  0.50           O  
HETATM  897  O   HOH T 896      47.833  58.281  89.089  1.00  0.50           O  
HETATM  898  O   HOH T 897      51.364  19.130  79.453  1.00  0.50           O  
HETATM  899  O   HOH T 898      13.597  41.926 103.653  1.00  0.50           O  
HETATM  900  O   HOH T 899      34.638  44.007  87.295  1.00  0.50           O  
HETATM  901  O   HOH T 900      51.133  64.275 104.459  1.00  0.50           O  
HETATM  902  O   HOH T 901      30.809  40.421  89.994  1.00  0.50           O  
HETATM  903  O   HOH T 902      42.412  25.627  77.520  1.00  0.50           O  
HETATM  904  O   HOH T 903      27.881  17.776 116.671  1.00  0.50           O  
HETATM  905  O   HOH T 904      33.449  42.028 117.436  1.00  0.50           O  
HETATM  906  O   HOH T 905      59.328  37.257 118.820  1.00  0.50           O  
HETATM  907  O   HOH T 906      69.206  50.496 112.764  1.00  0.50           O  
HETATM  908  O   HOH T 907      15.268  50.205 130.287  1.00  0.50           O  
HETATM  909  O   HOH T 908      49.418  10.539 118.947  1.00  0.50           O  
HETATM  910  O   HOH T 909      58.624  16.618  78.405  1.00  0.50           O  
HETATM  911  O   HOH T 910      43.136  24.513  69.177  1.00  0.50           O  
HETATM  912  O   HOH T 911      28.549  12.992 111.322  1.00  0.50           O  
HETATM  913  O   HOH T 912      17.581  24.724 134.044  1.00  0.50           O  
HETATM  914  O   HOH T 913      31.852  55.072  97.569  1.00  0.50           O  
HETATM  915  O   HOH T 914      41.323  14.722  90.809  1.00  0.50           O  
HETATM  916  O   HOH T 915      11.431  50.958 111.022  1.00  0.50           O  
HETATM  917  O   HOH T 916      14.086  69.135 141.668  1.00  0.50           O  
HETATM  918  O   HOH T 917      34.851  47.814 150.964  1.00  0.50           O  
HETATM  919  O   HOH T 918      54.428  21.855 110.881  1.00  0.50           O  
HETATM  920  O   HOH T 919      33.633  26.452 135.199  1.00  0.50           O  
HETATM  921  O   HOH T 920      38.105  40.095 150.779  1.00  0.50           O  
HETATM  922  O   HOH T 921      50.846  33.797 135.375  1.00  0.50           O  
HETATM  923  O   HOH T 922      17.542  48.227 123.768  1.00  0.50           O  
HETATM  924  O   HOH T 923       4.471  32.863 108.381  1.00  0.50           O  
HETATM  925  O   HOH T 924      54.143  46.314  92.009  1.00  0.50           O  
HETATM  926  O   HOH T 925      42.826  38.798 148.930  1.00  0.50           O  
HETATM  927  O   HOH T 926      58.463  34.371  91.382  1.00  0.50           O  
HETATM  928  O   HOH T 927      24.277  37.045  77.453  1.00  0.50           O  
HETATM  929  O   HOH T 928      65.553  55.764 119.582  1.00  0.50           O  
HETATM  930  O   HOH T 929      58.303  17.049 113.398  1.00  0.50           O  
HETATM  931  O   HOH T 930      47.828  26.419  75.034  1.00  0.50           O  
HETATM  932  O   HOH T 931      58.823  32.523 133.747  1.00  0.51           O  
HETATM  933  O   HOH T 932      42.603  65.603 115.935  1.00  0.51           O  
HETATM  934  O   HOH T 933       2.392  29.831 104.310  1.00  0.51           O  
HETATM  935  O   HOH T 934      46.366  64.933 156.260  1.00  0.51           O  
HETATM  936  O   HOH T 935      26.763  43.916 127.697  1.00  0.51           O  
HETATM  937  O   HOH T 936      28.165  15.780  82.359  1.00  0.51           O  
HETATM  938  O   HOH T 937      51.839  27.114 104.552  1.00  0.51           O  
HETATM  939  O   HOH T 938      52.688  18.682  93.093  1.00  0.51           O  
HETATM  940  O   HOH T 939      48.602  66.447 156.294  1.00  0.51           O  
HETATM  941  O   HOH T 940      38.351  21.121 117.704  1.00  0.51           O  
HETATM  942  O   HOH T 941      14.494  61.773  95.715  1.00  0.51           O  
HETATM  943  O   HOH T 942      58.817  42.744 121.162  1.00  0.51           O  
HETATM  944  O   HOH T 943      43.071  17.009  97.017  1.00  0.51           O  
HETATM  945  O   HOH T 944      55.191  49.874 144.404  1.00  0.51           O  
HETATM  946  O   HOH T 945      11.080  26.752  78.766  1.00  0.51           O  
HETATM  947  O   HOH T 946      39.858  20.420 119.939  1.00  0.51           O  
HETATM  948  O   HOH T 947      28.029  32.319 133.501  1.00  0.51           O  
HETATM  949  O   HOH T 948       7.688  37.005 114.305  1.00  0.51           O  
HETATM  950  O   HOH T 949      36.899  46.884  83.400  1.00  0.51           O  
HETATM  951  O   HOH T 950      -0.155  29.997 102.974  1.00  0.51           O  
HETATM  952  O   HOH T 951      55.240  58.249 127.115  1.00  0.51           O  
HETATM  953  O   HOH T 952      63.227  58.367 122.209  1.00  0.51           O  
HETATM  954  O   HOH T 953      51.044  35.261 109.094  1.00  0.51           O  
HETATM  955  O   HOH T 954      16.749  34.744  96.068  1.00  0.51           O  
HETATM  956  O   HOH T 955      57.780  26.615 106.066  1.00  0.51           O  
HETATM  957  O   HOH T 956      16.973  67.466 114.989  1.00  0.51           O  
HETATM  958  O   HOH T 957      56.999  15.226 115.171  1.00  0.51           O  
HETATM  959  O   HOH T 958      23.160  45.375 128.098  1.00  0.51           O  
HETATM  960  O   HOH T 959      55.915  37.619 109.625  1.00  0.51           O  
HETATM  961  O   HOH T 960      16.922  21.452  94.958  1.00  0.51           O  
HETATM  962  O   HOH T 961      32.191  40.499  92.401  1.00  0.51           O  
HETATM  963  O   HOH T 962      58.299  45.694 129.301  1.00  0.51           O  
HETATM  964  O   HOH T 963      62.614  47.193 113.261  1.00  0.51           O  
HETATM  965  O   HOH T 964      33.931  18.896 119.843  1.00  0.52           O  
HETATM  966  O   HOH T 965      51.954  40.611 119.236  1.00  0.52           O  
HETATM  967  O   HOH T 966      23.365  46.619 147.805  1.00  0.52           O  
HETATM  968  O   HOH T 967      50.542  32.557  81.934  1.00  0.52           O  
HETATM  969  O   HOH T 968      24.301  72.261 133.752  1.00  0.52           O  
HETATM  970  O   HOH T 969      45.480  65.932 111.060  1.00  0.52           O  
HETATM  971  O   HOH T 970      38.934  58.054 158.707  1.00  0.52           O  
HETATM  972  O   HOH T 971      41.605  68.969 116.539  1.00  0.52           O  
HETATM  973  O   HOH T 972      64.420  60.864 113.509  1.00  0.52           O  
HETATM  974  O   HOH T 973      54.937  32.947 133.513  1.00  0.52           O  
HETATM  975  O   HOH T 974      45.531  67.343 113.439  1.00  0.52           O  
HETATM  976  O   HOH T 975      43.652  54.268 122.430  1.00  0.52           O  
HETATM  977  O   HOH T 976      56.053  37.989  79.578  1.00  0.52           O  
HETATM  978  O   HOH T 977      54.972  50.148 153.611  1.00  0.52           O  
HETATM  979  O   HOH T 978      23.868  74.234 126.854  1.00  0.52           O  
HETATM  980  O   HOH T 979      44.574  71.391 140.895  1.00  0.52           O  
HETATM  981  O   HOH T 980      21.291  31.462 141.182  1.00  0.52           O  
HETATM  982  O   HOH T 981      34.085  44.308  77.102  1.00  0.52           O  
HETATM  983  O   HOH T 982      52.661  53.215 128.278  1.00  0.52           O  
HETATM  984  O   HOH T 983      54.867  27.675 129.383  1.00  0.52           O  
HETATM  985  O   HOH T 984      43.030  13.025 111.029  1.00  0.52           O  
HETATM  986  O   HOH T 985      20.457  17.747  98.019  1.00  0.52           O  
HETATM  987  O   HOH T 986      47.283  65.561 158.799  1.00  0.52           O  
HETATM  988  O   HOH T 987      35.710  16.227 112.514  1.00  0.52           O  
HETATM  989  O   HOH T 988      58.270  33.131 100.388  1.00  0.52           O  
HETATM  990  O   HOH T 989      10.521  39.001  98.024  1.00  0.52           O  
HETATM  991  O   HOH T 990      11.334  31.981  88.870  1.00  0.52           O  
HETATM  992  O   HOH T 991      51.805  38.520 117.595  1.00  0.52           O  
HETATM  993  O   HOH T 992      15.454  22.851  99.061  1.00  0.52           O  
HETATM  994  O   HOH T 993      54.959  23.347 108.480  1.00  0.52           O  
HETATM  995  O   HOH T 994      54.438  58.325 134.373  1.00  0.52           O  
HETATM  996  O   HOH T 995      16.601  49.714 138.317  1.00  0.52           O  
HETATM  997  O   HOH T 996      67.579  46.839 105.183  1.00  0.52           O  
HETATM  998  O   HOH T 997      56.070  35.540  90.650  1.00  0.52           O  
HETATM  999  O   HOH T 998      12.011  71.415 150.487  1.00  0.52           O  
HETATM 1000  O   HOH T 999      13.102  34.157  80.017  1.00  0.53           O  
HETATM 1001  O   HOH T1000      62.676  63.446 149.114  1.00  0.53           O  
HETATM 1002  O   HOH T1001      25.900  18.233 118.596  1.00  0.53           O  
HETATM 1003  O   HOH T1002      35.586  73.670 131.371  1.00  0.53           O  
HETATM 1004  O   HOH T1003      21.102  43.116 143.519  1.00  0.53           O  
HETATM 1005  O   HOH T1004      53.076  11.265 118.556  1.00  0.53           O  
HETATM 1006  O   HOH T1005      12.656  70.350 153.037  1.00  0.53           O  
HETATM 1007  O   HOH T1006      58.116  45.982 115.866  1.00  0.53           O  
HETATM 1008  O   HOH T1007      13.634  68.093 154.219  1.00  0.53           O  
HETATM 1009  O   HOH T1008      27.109  33.407  72.727  1.00  0.53           O  
HETATM 1010  O   HOH T1009      10.383  57.791 100.956  1.00  0.53           O  
HETATM 1011  O   HOH T1010      41.122  57.952  86.173  1.00  0.53           O  
HETATM 1012  O   HOH T1011      16.772  32.910 145.229  1.00  0.53           O  
HETATM 1013  O   HOH T1012      54.479  31.150  98.460  1.00  0.53           O  
HETATM 1014  O   HOH T1013      34.664  32.508  73.189  1.00  0.53           O  
HETATM 1015  O   HOH T1014      43.921  33.167 147.607  1.00  0.53           O  
HETATM 1016  O   HOH T1015      56.838  32.547  98.113  1.00  0.53           O  
HETATM 1017  O   HOH T1016      55.209  47.820 136.881  1.00  0.53           O  
HETATM 1018  O   HOH T1017       6.140  29.101  91.746  1.00  0.53           O  
HETATM 1019  O   HOH T1018      17.796  35.525  71.911  1.00  0.53           O  
HETATM 1020  O   HOH T1019      51.823  37.979 113.431  1.00  0.53           O  
HETATM 1021  O   HOH T1020      32.612  35.708 119.010  1.00  0.53           O  
HETATM 1022  O   HOH T1021      10.486  40.558 113.422  1.00  0.53           O  
HETATM 1023  O   HOH T1022      50.321  40.049  78.521  1.00  0.53           O  
HETATM 1024  O   HOH T1023      59.943  36.463  96.064  1.00  0.53           O  
HETATM 1025  O   HOH T1024      55.221  68.272 147.453  1.00  0.53           O  
HETATM 1026  O   HOH T1025      17.405  48.429 130.444  1.00  0.53           O  
HETATM 1027  O   HOH T1026      30.889  43.783 144.865  1.00  0.53           O  
HETATM 1028  O   HOH T1027      11.890  69.774 143.506  1.00  0.53           O  
HETATM 1029  O   HOH T1028      54.439  33.761  97.474  1.00  0.53           O  
HETATM 1030  O   HOH T1029      36.692  74.728 128.962  1.00  0.53           O  
HETATM 1031  O   HOH T1030      53.653  25.594  98.961  1.00  0.53           O  
HETATM 1032  O   HOH T1031      17.585  69.583 132.973  1.00  0.53           O  
HETATM 1033  O   HOH T1032      47.121  70.607 129.566  1.00  0.53           O  
HETATM 1034  O   HOH T1033      18.532  41.095  89.692  1.00  0.53           O  
HETATM 1035  O   HOH T1034      30.943  66.725 102.318  1.00  0.53           O  
HETATM 1036  O   HOH T1035      36.209  26.346 135.953  1.00  0.53           O  
HETATM 1037  O   HOH T1036      58.151  25.604  93.452  1.00  0.53           O  
HETATM 1038  O   HOH T1037      15.499  57.822 136.887  1.00  0.53           O  
HETATM 1039  O   HOH T1038      37.876  15.609  79.514  1.00  0.53           O  
HETATM 1040  O   HOH T1039      53.437  50.269 135.373  1.00  0.53           O  
HETATM 1041  O   HOH T1040      49.525  40.507 144.175  1.00  0.53           O  
HETATM 1042  O   HOH T1041      63.359  50.946  92.264  1.00  0.53           O  
HETATM 1043  O   HOH T1042      56.669  18.368 111.763  1.00  0.53           O  
HETATM 1044  O   HOH T1043      43.925  14.701  78.802  1.00  0.54           O  
HETATM 1045  O   HOH T1044      35.459  73.920 117.307  1.00  0.54           O  
HETATM 1046  O   HOH T1045      13.773  45.454  97.161  1.00  0.54           O  
HETATM 1047  O   HOH T1046      56.489  38.591 107.049  1.00  0.54           O  
HETATM 1048  O   HOH T1047      55.827  44.823 126.220  1.00  0.54           O  
HETATM 1049  O   HOH T1048      55.867  73.355 113.502  1.00  0.54           O  
HETATM 1050  O   HOH T1049      52.657  42.171  81.050  1.00  0.54           O  
HETATM 1051  O   HOH T1050      56.649  25.058 123.097  1.00  0.54           O  
HETATM 1052  O   HOH T1051      11.872  27.644 111.007  1.00  0.54           O  
HETATM 1053  O   HOH T1052      14.424  60.940 128.127  1.00  0.54           O  
HETATM 1054  O   HOH T1053      53.971  25.679 105.814  1.00  0.54           O  
HETATM 1055  O   HOH T1054      38.417  16.040 112.633  1.00  0.54           O  
HETATM 1056  O   HOH T1055      23.743  71.807 128.229  1.00  0.54           O  
HETATM 1057  O   HOH T1056      59.321  34.149 127.086  1.00  0.54           O  
HETATM 1058  O   HOH T1057      52.778  63.500  98.929  1.00  0.54           O  
HETATM 1059  O   HOH T1058      55.791  64.030 122.339  1.00  0.54           O  
HETATM 1060  O   HOH T1059      34.811  59.739 101.076  1.00  0.54           O  
HETATM 1061  O   HOH T1060      51.562  19.339 108.654  1.00  0.54           O  
HETATM 1062  O   HOH T1061      53.089  65.051 102.584  1.00  0.54           O  
HETATM 1063  O   HOH T1062      53.031  62.666 132.005  1.00  0.54           O  
HETATM 1064  O   HOH T1063      47.624  19.888 124.917  1.00  0.54           O  
HETATM 1065  O   HOH T1064       5.572  35.538 113.338  1.00  0.54           O  
HETATM 1066  O   HOH T1065      16.116  64.313  88.324  1.00  0.54           O  
HETATM 1067  O   HOH T1066      60.858  32.990 135.438  1.00  0.54           O  
HETATM 1068  O   HOH T1067      66.671  58.286 142.586  1.00  0.54           O  
HETATM 1069  O   HOH T1068      54.963  55.300 139.101  1.00  0.54           O  
HETATM 1070  O   HOH T1069      47.977  44.802  80.036  1.00  0.54           O  
HETATM 1071  O   HOH T1070      44.713  49.329 136.861  1.00  0.54           O  
HETATM 1072  O   HOH T1071      23.460  45.245  95.661  1.00  0.54           O  
HETATM 1073  O   HOH T1072      17.711  21.762 100.283  1.00  0.54           O  
HETATM 1074  O   HOH T1073      54.494  48.128 127.116  1.00  0.54           O  
HETATM 1075  O   HOH T1074       8.933  30.799 139.287  1.00  0.55           O  
HETATM 1076  O   HOH T1075      16.208  41.070 102.791  1.00  0.55           O  
HETATM 1077  O   HOH T1076      14.285  37.523 136.690  1.00  0.55           O  
HETATM 1078  O   HOH T1077      64.060  29.804 112.422  1.00  0.55           O  
HETATM 1079  O   HOH T1078      35.699  78.912 119.523  1.00  0.55           O  
HETATM 1080  O   HOH T1079      48.619  72.818 119.982  1.00  0.55           O  
HETATM 1081  O   HOH T1080       5.701  29.114 101.925  1.00  0.55           O  
HETATM 1082  O   HOH T1081      26.663  20.886  76.889  1.00  0.55           O  
HETATM 1083  O   HOH T1082      53.438  65.697 139.942  1.00  0.55           O  
HETATM 1084  O   HOH T1083      49.410  20.368 100.305  1.00  0.55           O  
HETATM 1085  O   HOH T1084      34.946  37.932 107.486  1.00  0.55           O  
HETATM 1086  O   HOH T1085      60.608  34.190 100.527  1.00  0.55           O  
HETATM 1087  O   HOH T1086      12.059  71.422 145.937  1.00  0.55           O  
HETATM 1088  O   HOH T1087      55.860  44.611 136.932  1.00  0.55           O  
HETATM 1089  O   HOH T1088      42.275  70.452 127.860  1.00  0.55           O  
HETATM 1090  O   HOH T1089      55.006  50.818 140.803  1.00  0.55           O  
HETATM 1091  O   HOH T1090      46.514  36.591  94.925  1.00  0.55           O  
HETATM 1092  O   HOH T1091      24.357  65.638  98.150  1.00  0.55           O  
HETATM 1093  O   HOH T1092      10.481  50.288  99.598  1.00  0.55           O  
HETATM 1094  O   HOH T1093      52.527  13.808  86.625  1.00  0.55           O  
HETATM 1095  O   HOH T1094      31.436  46.568  82.855  1.00  0.55           O  
HETATM 1096  O   HOH T1095      46.127  52.377 157.353  1.00  0.55           O  
HETATM 1097  O   HOH T1096      18.677  17.640 119.046  1.00  0.55           O  
HETATM 1098  O   HOH T1097      12.956  37.941  97.876  1.00  0.55           O  
HETATM 1099  O   HOH T1098      31.664  60.652  90.606  1.00  0.55           O  
HETATM 1100  O   HOH T1099      29.197  73.238 151.493  1.00  0.55           O  
HETATM 1101  O   HOH T1100      11.324  69.839 140.885  1.00  0.55           O  
HETATM 1102  O   HOH T1101      18.413  32.076 142.228  1.00  0.55           O  
HETATM 1103  O   HOH T1102      60.077  29.994  93.900  1.00  0.55           O  
HETATM 1104  O   HOH T1103      15.658  39.470 135.347  1.00  0.55           O  
HETATM 1105  O   HOH T1104      13.095  31.587  99.479  1.00  0.56           O  
HETATM 1106  O   HOH T1105      13.691  34.896  90.847  1.00  0.56           O  
HETATM 1107  O   HOH T1106      47.782  72.946 117.519  1.00  0.56           O  
HETATM 1108  O   HOH T1107      43.880  14.435  90.176  1.00  0.56           O  
HETATM 1109  O   HOH T1108       7.220  65.597 119.823  1.00  0.56           O  
HETATM 1110  O   HOH T1109      54.872  67.184 106.861  1.00  0.56           O  
HETATM 1111  O   HOH T1110      55.130  30.007 107.622  1.00  0.56           O  
HETATM 1112  O   HOH T1111      60.834  45.390 130.399  1.00  0.56           O  
HETATM 1113  O   HOH T1112      52.689  58.371  92.483  1.00  0.56           O  
HETATM 1114  O   HOH T1113      35.575  20.980  99.852  1.00  0.56           O  
HETATM 1115  O   HOH T1114       9.698  54.285  98.569  1.00  0.56           O  
HETATM 1116  O   HOH T1115      12.701  42.764 107.459  1.00  0.56           O  
HETATM 1117  O   HOH T1116       9.793  56.605 126.457  1.00  0.56           O  
HETATM 1118  O   HOH T1117      36.262  38.659 147.609  1.00  0.56           O  
HETATM 1119  O   HOH T1118      13.542  63.060 109.324  1.00  0.56           O  
HETATM 1120  O   HOH T1119      18.617  55.045  90.715  1.00  0.56           O  
HETATM 1121  O   HOH T1120      38.908  73.980 137.608  1.00  0.56           O  
HETATM 1122  O   HOH T1121      11.401  27.566  92.204  1.00  0.56           O  
HETATM 1123  O   HOH T1122      52.764  52.750 143.999  1.00  0.56           O  
HETATM 1124  O   HOH T1123      60.050  32.847 129.401  1.00  0.56           O  
HETATM 1125  O   HOH T1124      35.693  58.304 157.108  1.00  0.56           O  
HETATM 1126  O   HOH T1125      51.826  74.002 119.709  1.00  0.56           O  
HETATM 1127  O   HOH T1126      33.627  71.684 153.215  1.00  0.56           O  
HETATM 1128  O   HOH T1127      61.483  39.870 131.270  1.00  0.56           O  
HETATM 1129  O   HOH T1128      35.623  50.962 156.333  1.00  0.56           O  
HETATM 1130  O   HOH T1129      64.161  71.395 119.969  1.00  0.56           O  
HETATM 1131  O   HOH T1130      30.858  25.249  76.981  1.00  0.56           O  
HETATM 1132  O   HOH T1131      51.881  29.498  96.526  1.00  0.56           O  
HETATM 1133  O   HOH T1132      27.416  32.927 137.694  1.00  0.56           O  
HETATM 1134  O   HOH T1133      32.143  12.936  87.398  1.00  0.56           O  
HETATM 1135  O   HOH T1134      25.100  31.787  97.057  1.00  0.56           O  
HETATM 1136  O   HOH T1135      25.939  56.739 157.196  1.00  0.56           O  
HETATM 1137  O   HOH T1136      22.845  75.998 147.498  1.00  0.57           O  
HETATM 1138  O   HOH T1137      44.586  69.695 123.278  1.00  0.57           O  
HETATM 1139  O   HOH T1138      38.109  64.798 102.100  1.00  0.57           O  
HETATM 1140  O   HOH T1139      11.941  63.246 124.703  1.00  0.57           O  
HETATM 1141  O   HOH T1140      45.834  71.621 116.639  1.00  0.57           O  
HETATM 1142  O   HOH T1141      32.618  58.665 157.252  1.00  0.57           O  
HETATM 1143  O   HOH T1142      46.160  12.134 110.087  1.00  0.57           O  
HETATM 1144  O   HOH T1143      52.727  21.838 108.638  1.00  0.57           O  
HETATM 1145  O   HOH T1144      54.329  37.362 111.904  1.00  0.57           O  
HETATM 1146  O   HOH T1145      21.597  42.044 114.278  1.00  0.57           O  
HETATM 1147  O   HOH T1146      16.803  33.996  92.210  1.00  0.58           O  
HETATM 1148  O   HOH T1147      24.455  32.708  72.716  1.00  0.58           O  
HETATM 1149  O   HOH T1148      28.620  42.190 144.996  1.00  0.58           O  
HETATM 1150  O   HOH T1149      64.122  51.748 118.343  1.00  0.58           O  
HETATM 1151  O   HOH T1150      12.071  49.395 117.477  1.00  0.58           O  
HETATM 1152  O   HOH T1151      44.647  14.386  93.059  1.00  0.58           O  
HETATM 1153  O   HOH T1152      41.489  14.507  94.867  1.00  0.59           O  
HETATM 1154  O   HOH T1153      60.021  60.635 152.456  1.00  0.59           O  
HETATM 1155  O   HOH T1154      42.310  25.927 140.498  1.00  0.60           O  
HETATM 1156  O   HOH T1155      38.205  17.824 108.475  1.00  0.60           O  
HETATM 1157  O   HOH T1156      61.508  35.505  98.072  1.00  0.60           O  
HETATM 1158  O   HOH T1157      39.754  16.108  99.035  1.00  0.60           O  
HETATM 1159  O   HOH T1158      13.503  32.281  92.407  1.00  0.60           O  
HETATM 1160  O   HOH T1159      23.674  58.404  85.289  1.00  0.60           O  
HETATM 1161  O   HOH T1160      13.741  55.175 131.198  1.00  0.61           O  
HETATM 1162  O   HOH T1161      48.816  52.756 148.234  1.00  0.61           O  
TER    1163      HOH T1161 
