# Supplementary material for: Accurate Prediction of Hydration Sites of Proteins Using Energy Model With Atom Embedding
Source: Front Mol Biosci. 2021 Sep 20;8:756075. doi: 10.3389/fmolb.2021.756075 (PMC8488165; doi:10.3389/fmolb.2021.756075)
Supplement: Supplementary file 1 [file DataSheet1.ZIP › Data Sheet 1/Our_result_pdb/our_dataset_output/1O83_watersite.pdb]

HEADER                                                        XXXX


JRNL        PMID   -1
HETATM    1  O   HOH T   0      17.865  17.761  27.923  1.00  0.20           O  
HETATM    2  O   HOH T   1      20.236  25.267   7.631  1.00  0.20           O  
HETATM    3  O   HOH T   2      26.024  15.012  29.546  1.00  0.21           O  
HETATM    4  O   HOH T   3      31.518   7.168  10.031  1.00  0.21           O  
HETATM    5  O   HOH T   4      17.411  20.372 -28.040  1.00  0.22           O  
HETATM    6  O   HOH T   5      26.761  27.295  15.332  1.00  0.22           O  
HETATM    7  O   HOH T   6      41.786   4.767  29.566  1.00  0.24           O  
HETATM    8  O   HOH T   7      24.652  34.369 -15.027  1.00  0.25           O  
HETATM    9  O   HOH T   8      51.456  17.167   0.621  1.00  0.25           O  
HETATM   10  O   HOH T   9      25.841  55.710 -20.313  1.00  0.25           O  
HETATM   11  O   HOH T  10      25.409  22.622  -7.772  1.00  0.26           O  
HETATM   12  O   HOH T  11      11.937  26.080  10.545  1.00  0.26           O  
HETATM   13  O   HOH T  12      29.700  20.992  20.131  1.00  0.26           O  
HETATM   14  O   HOH T  13      17.454  28.997   1.096  1.00  0.26           O  
HETATM   15  O   HOH T  14       6.482  44.577 -30.843  1.00  0.26           O  
HETATM   16  O   HOH T  15      31.140   2.263  20.093  1.00  0.27           O  
HETATM   17  O   HOH T  16      19.403  26.318  10.074  1.00  0.27           O  
HETATM   18  O   HOH T  17      19.606  27.503   1.948  1.00  0.27           O  
HETATM   19  O   HOH T  18      18.192  35.600  -4.607  1.00  0.27           O  
HETATM   20  O   HOH T  19      25.748  39.588 -14.658  1.00  0.27           O  
HETATM   21  O   HOH T  20      10.154  48.823 -30.555  1.00  0.27           O  
HETATM   22  O   HOH T  21      30.093  21.118  17.327  1.00  0.27           O  
HETATM   23  O   HOH T  22      21.740  31.789 -20.692  1.00  0.27           O  
HETATM   24  O   HOH T  23      20.279  53.402 -12.390  1.00  0.27           O  
HETATM   25  O   HOH T  24       7.736  43.195 -32.800  1.00  0.27           O  
HETATM   26  O   HOH T  25      21.917  32.209 -18.005  1.00  0.27           O  
HETATM   27  O   HOH T  26      32.439  17.711   3.801  1.00  0.27           O  
HETATM   28  O   HOH T  27      50.624  19.122  11.146  1.00  0.27           O  
HETATM   29  O   HOH T  28      26.040  21.121 -10.174  1.00  0.28           O  
HETATM   30  O   HOH T  29       9.771  29.951   3.576  1.00  0.28           O  
HETATM   31  O   HOH T  30      23.494  31.624  -0.787  1.00  0.29           O  
HETATM   32  O   HOH T  31      22.136  55.166 -13.585  1.00  0.29           O  
HETATM   33  O   HOH T  32      24.766  32.023  16.841  1.00  0.29           O  
HETATM   34  O   HOH T  33       3.517  18.936  -8.940  1.00  0.29           O  
HETATM   35  O   HOH T  34      19.184  26.765   5.680  1.00  0.30           O  
HETATM   36  O   HOH T  35      23.861  34.181 -17.786  1.00  0.30           O  
HETATM   37  O   HOH T  36      26.611  16.743  19.841  1.00  0.30           O  
HETATM   38  O   HOH T  37      12.529  48.144 -31.834  1.00  0.30           O  
HETATM   39  O   HOH T  38      14.450  21.611   0.974  1.00  0.30           O  
HETATM   40  O   HOH T  39      26.893  10.619  25.024  1.00  0.30           O  
HETATM   41  O   HOH T  40      39.918   6.795  28.929  1.00  0.31           O  
HETATM   42  O   HOH T  41      27.675   8.024  20.039  1.00  0.31           O  
HETATM   43  O   HOH T  42      24.469  13.483  19.792  1.00  0.31           O  
HETATM   44  O   HOH T  43      36.291   2.463  14.351  1.00  0.32           O  
HETATM   45  O   HOH T  44      28.743  14.105  29.352  1.00  0.32           O  
HETATM   46  O   HOH T  45      18.053  20.129 -25.388  1.00  0.32           O  
HETATM   47  O   HOH T  46      35.201  16.164   7.207  1.00  0.32           O  
HETATM   48  O   HOH T  47      26.433  24.389  20.836  1.00  0.32           O  
HETATM   49  O   HOH T  48       1.132  42.211 -22.654  1.00  0.32           O  
HETATM   50  O   HOH T  49      54.143  14.189  10.481  1.00  0.32           O  
HETATM   51  O   HOH T  50       3.184  39.752 -15.643  1.00  0.32           O  
HETATM   52  O   HOH T  51      21.325  30.340 -28.890  1.00  0.32           O  
HETATM   53  O   HOH T  52      10.972  36.787 -37.147  1.00  0.32           O  
HETATM   54  O   HOH T  53      25.312  27.588 -21.485  1.00  0.32           O  
HETATM   55  O   HOH T  54      47.800   1.562  10.611  1.00  0.33           O  
HETATM   56  O   HOH T  55      17.572  18.504  25.294  1.00  0.33           O  
HETATM   57  O   HOH T  56      32.148  22.987  17.286  1.00  0.33           O  
HETATM   58  O   HOH T  57      11.312  29.507 -25.653  1.00  0.33           O  
HETATM   59  O   HOH T  58      46.171  12.072  28.529  1.00  0.33           O  
HETATM   60  O   HOH T  59       3.950  16.953  -4.706  1.00  0.34           O  
HETATM   61  O   HOH T  60       8.240  30.895 -20.590  1.00  0.34           O  
HETATM   62  O   HOH T  61      29.151   0.631  21.192  1.00  0.34           O  
HETATM   63  O   HOH T  62      39.813  13.313  35.274  1.00  0.34           O  
HETATM   64  O   HOH T  63      27.638  19.547  26.449  1.00  0.34           O  
HETATM   65  O   HOH T  64      41.373  17.079  31.665  1.00  0.34           O  
HETATM   66  O   HOH T  65      17.177  28.025   7.104  1.00  0.34           O  
HETATM   67  O   HOH T  66      24.989  10.752  19.894  1.00  0.35           O  
HETATM   68  O   HOH T  67      28.070  17.908  -8.865  1.00  0.35           O  
HETATM   69  O   HOH T  68      19.554  32.227 -27.616  1.00  0.35           O  
HETATM   70  O   HOH T  69      15.158   4.180   8.828  1.00  0.35           O  
HETATM   71  O   HOH T  70      26.722  10.270  -4.199  1.00  0.35           O  
HETATM   72  O   HOH T  71      12.197  17.013   3.799  1.00  0.35           O  
HETATM   73  O   HOH T  72       9.584  23.118 -22.720  1.00  0.35           O  
HETATM   74  O   HOH T  73      13.919  15.243  -2.807  1.00  0.35           O  
HETATM   75  O   HOH T  74      16.642  37.341  -6.090  1.00  0.35           O  
HETATM   76  O   HOH T  75      21.611  14.191  24.705  1.00  0.35           O  
HETATM   77  O   HOH T  76      29.807  12.249  31.093  1.00  0.36           O  
HETATM   78  O   HOH T  77      53.438  21.598   3.811  1.00  0.36           O  
HETATM   79  O   HOH T  78      24.281  33.559  14.583  1.00  0.36           O  
HETATM   80  O   HOH T  79      26.502   9.530  17.949  1.00  0.36           O  
HETATM   81  O   HOH T  80      39.265   9.387  28.162  1.00  0.36           O  
HETATM   82  O   HOH T  81      33.067   2.969  11.661  1.00  0.36           O  
HETATM   83  O   HOH T  82      26.588   9.734  22.264  1.00  0.36           O  
HETATM   84  O   HOH T  83      39.835  -0.000  22.700  1.00  0.36           O  
HETATM   85  O   HOH T  84      33.814  12.571  28.604  1.00  0.36           O  
HETATM   86  O   HOH T  85      25.940  53.483 -18.812  1.00  0.36           O  
HETATM   87  O   HOH T  86      36.300  13.637  28.082  1.00  0.36           O  
HETATM   88  O   HOH T  87      11.687  53.229  -7.514  1.00  0.36           O  
HETATM   89  O   HOH T  88      34.094  -0.720  15.368  1.00  0.36           O  
HETATM   90  O   HOH T  89      47.379   9.765  27.533  1.00  0.37           O  
HETATM   91  O   HOH T  90      12.964  36.403  -3.940  1.00  0.37           O  
HETATM   92  O   HOH T  91      25.603  18.138  25.146  1.00  0.37           O  
HETATM   93  O   HOH T  92      25.053  36.339 -13.126  1.00  0.37           O  
HETATM   94  O   HOH T  93      52.210  10.163  25.027  1.00  0.37           O  
HETATM   95  O   HOH T  94      16.603  20.336  -0.269  1.00  0.37           O  
HETATM   96  O   HOH T  95      24.775  16.744  27.536  1.00  0.37           O  
HETATM   97  O   HOH T  96      28.703  34.247 -18.655  1.00  0.37           O  
HETATM   98  O   HOH T  97       4.157  31.149 -16.482  1.00  0.38           O  
HETATM   99  O   HOH T  98      15.100  29.027 -21.714  1.00  0.38           O  
HETATM  100  O   HOH T  99      24.378  11.807  -4.257  1.00  0.38           O  
HETATM  101  O   HOH T 100      10.437  27.659   5.027  1.00  0.38           O  
HETATM  102  O   HOH T 101      26.638  17.665  22.393  1.00  0.38           O  
HETATM  103  O   HOH T 102      17.313  29.187 -20.091  1.00  0.38           O  
HETATM  104  O   HOH T 103      19.772  17.919  -1.447  1.00  0.38           O  
HETATM  105  O   HOH T 104      29.143  22.564  -0.217  1.00  0.38           O  
HETATM  106  O   HOH T 105      28.734  11.945  -6.621  1.00  0.38           O  
HETATM  107  O   HOH T 106      50.575  23.315  11.943  1.00  0.38           O  
HETATM  108  O   HOH T 107      51.946  15.090   8.911  1.00  0.39           O  
HETATM  109  O   HOH T 108      29.900  36.507 -18.057  1.00  0.39           O  
HETATM  110  O   HOH T 109      23.628  29.728 -21.076  1.00  0.39           O  
HETATM  111  O   HOH T 110      16.337  43.519  -8.454  1.00  0.39           O  
HETATM  112  O   HOH T 111      15.464   3.772  11.510  1.00  0.39           O  
HETATM  113  O   HOH T 112      13.208  22.638   3.234  1.00  0.39           O  
HETATM  114  O   HOH T 113      25.005  41.947 -13.504  1.00  0.40           O  
HETATM  115  O   HOH T 114      50.413   8.780  23.356  1.00  0.40           O  
HETATM  116  O   HOH T 115      14.411  38.811 -35.536  1.00  0.40           O  
HETATM  117  O   HOH T 116      29.178  19.768  -0.955  1.00  0.40           O  
HETATM  118  O   HOH T 117      14.410  31.221   7.304  1.00  0.40           O  
HETATM  119  O   HOH T 118      17.205  17.466  -0.389  1.00  0.40           O  
HETATM  120  O   HOH T 119       7.795  35.019 -11.010  1.00  0.40           O  
HETATM  121  O   HOH T 120       5.620  31.559 -14.147  1.00  0.40           O  
HETATM  122  O   HOH T 121      13.269  37.168 -32.027  1.00  0.40           O  
HETATM  123  O   HOH T 122      30.706   3.212  12.983  1.00  0.40           O  
HETATM  124  O   HOH T 123      21.382  17.265  22.065  1.00  0.40           O  
HETATM  125  O   HOH T 124      29.454  12.705  26.927  1.00  0.40           O  
HETATM  126  O   HOH T 125      18.660  25.257  26.221  1.00  0.40           O  
HETATM  127  O   HOH T 126       5.117  40.605 -13.865  1.00  0.40           O  
HETATM  128  O   HOH T 127      13.782  36.556 -37.102  1.00  0.40           O  
HETATM  129  O   HOH T 128      20.110  17.794  26.396  1.00  0.41           O  
HETATM  130  O   HOH T 129       7.220  29.472 -14.518  1.00  0.41           O  
HETATM  131  O   HOH T 130      21.076  16.079  -3.212  1.00  0.41           O  
HETATM  132  O   HOH T 131      17.738  29.006 -22.778  1.00  0.41           O  
HETATM  133  O   HOH T 132      33.375   7.096   7.987  1.00  0.41           O  
HETATM  134  O   HOH T 133      40.537  15.375  33.630  1.00  0.41           O  
HETATM  135  O   HOH T 134       0.180  38.004 -16.145  1.00  0.41           O  
HETATM  136  O   HOH T 135      27.919  20.480  -5.565  1.00  0.41           O  
HETATM  137  O   HOH T 136      24.205  16.794 -16.962  1.00  0.41           O  
HETATM  138  O   HOH T 137      -1.761  40.000 -16.248  1.00  0.42           O  
HETATM  139  O   HOH T 138      38.832  10.965  30.143  1.00  0.42           O  
HETATM  140  O   HOH T 139      35.385   3.657  10.379  1.00  0.42           O  
HETATM  141  O   HOH T 140      18.889  15.285  -1.375  1.00  0.42           O  
HETATM  142  O   HOH T 141      21.977  10.446  -5.124  1.00  0.42           O  
HETATM  143  O   HOH T 142      18.415  10.288  -3.330  1.00  0.42           O  
HETATM  144  O   HOH T 143      33.954  15.755   4.869  1.00  0.42           O  
HETATM  145  O   HOH T 144      27.242  34.914 -14.014  1.00  0.42           O  
HETATM  146  O   HOH T 145      21.617  14.520  21.968  1.00  0.42           O  
HETATM  147  O   HOH T 146      37.294   3.753  12.256  1.00  0.42           O  
HETATM  148  O   HOH T 147      30.705   6.633   7.411  1.00  0.42           O  
HETATM  149  O   HOH T 148      32.881  13.878   3.065  1.00  0.42           O  
HETATM  150  O   HOH T 149      29.763  14.328  -7.231  1.00  0.42           O  
HETATM  151  O   HOH T 150       2.539  33.346 -15.972  1.00  0.42           O  
HETATM  152  O   HOH T 151      25.047  35.884  -7.859  1.00  0.42           O  
HETATM  153  O   HOH T 152      49.630   9.371  25.924  1.00  0.42           O  
HETATM  154  O   HOH T 153      23.613  18.331 -19.276  1.00  0.43           O  
HETATM  155  O   HOH T 154      10.633  53.655 -12.330  1.00  0.43           O  
HETATM  156  O   HOH T 155      26.134  33.896 -19.323  1.00  0.43           O  
HETATM  157  O   HOH T 156      11.237  35.419  -5.667  1.00  0.43           O  
HETATM  158  O   HOH T 157      18.913  11.174  -8.200  1.00  0.43           O  
HETATM  159  O   HOH T 158      24.047  19.458 -25.995  1.00  0.43           O  
HETATM  160  O   HOH T 159       3.181  18.800 -12.013  1.00  0.43           O  
HETATM  161  O   HOH T 160      10.644  40.616  -6.019  1.00  0.43           O  
HETATM  162  O   HOH T 161       0.678  35.321 -15.907  1.00  0.43           O  
HETATM  163  O   HOH T 162      31.886  25.439  18.671  1.00  0.43           O  
HETATM  164  O   HOH T 163      13.203  54.003 -13.299  1.00  0.43           O  
HETATM  165  O   HOH T 164      32.551  11.240   4.010  1.00  0.43           O  
HETATM  166  O   HOH T 165      22.398  51.769 -11.480  1.00  0.43           O  
HETATM  167  O   HOH T 166      25.991   9.034   7.179  1.00  0.43           O  
HETATM  168  O   HOH T 167       4.057  33.864 -13.636  1.00  0.43           O  
HETATM  169  O   HOH T 168      13.752   5.650  12.952  1.00  0.44           O  
HETATM  170  O   HOH T 169      11.363  21.278 -21.160  1.00  0.44           O  
HETATM  171  O   HOH T 170      49.039  21.366  10.543  1.00  0.44           O  
HETATM  172  O   HOH T 171      15.684  27.455 -23.939  1.00  0.44           O  
HETATM  173  O   HOH T 172      18.447  12.439 -10.691  1.00  0.44           O  
HETATM  174  O   HOH T 173      33.181   5.007   9.710  1.00  0.44           O  
HETATM  175  O   HOH T 174      41.236   8.034   6.043  1.00  0.44           O  
HETATM  176  O   HOH T 175      29.183  34.784 -15.997  1.00  0.44           O  
HETATM  177  O   HOH T 176      23.565  29.367   0.948  1.00  0.44           O  
HETATM  178  O   HOH T 177      48.690  17.580   0.366  1.00  0.44           O  
HETATM  179  O   HOH T 178       4.880  29.142 -13.020  1.00  0.44           O  
HETATM  180  O   HOH T 179       9.418  50.868  -9.493  1.00  0.44           O  
HETATM  181  O   HOH T 180       2.649  16.313  -8.871  1.00  0.44           O  
HETATM  182  O   HOH T 181      40.292   2.126   9.172  1.00  0.44           O  
HETATM  183  O   HOH T 182      37.249  24.684  13.592  1.00  0.44           O  
HETATM  184  O   HOH T 183       8.443  26.476   6.507  1.00  0.44           O  
HETATM  185  O   HOH T 184      30.758  12.887  -4.868  1.00  0.44           O  
HETATM  186  O   HOH T 185      45.184   2.398  10.598  1.00  0.44           O  
HETATM  187  O   HOH T 186      10.041  44.033 -37.402  1.00  0.44           O  
HETATM  188  O   HOH T 187      24.533   9.402  -5.694  1.00  0.44           O  
HETATM  189  O   HOH T 188      21.656  11.403  -8.823  1.00  0.44           O  
HETATM  190  O   HOH T 189      25.876   2.301  16.981  1.00  0.44           O  
HETATM  191  O   HOH T 190      16.438  33.911  -1.712  1.00  0.44           O  
HETATM  192  O   HOH T 191      26.362  14.720  21.700  1.00  0.45           O  
HETATM  193  O   HOH T 192      18.281   7.792  22.342  1.00  0.45           O  
HETATM  194  O   HOH T 193       3.764  31.547 -12.134  1.00  0.45           O  
HETATM  195  O   HOH T 194      38.807   1.503  11.374  1.00  0.45           O  
HETATM  196  O   HOH T 195      19.762  18.441  23.739  1.00  0.45           O  
HETATM  197  O   HOH T 196      32.436  13.191  30.896  1.00  0.45           O  
HETATM  198  O   HOH T 197      12.908  36.585 -29.350  1.00  0.45           O  
HETATM  199  O   HOH T 198      -1.963  36.313 -16.137  1.00  0.45           O  
HETATM  200  O   HOH T 199      17.804  57.588 -18.839  1.00  0.45           O  
HETATM  201  O   HOH T 200      11.495  45.241 -11.135  1.00  0.45           O  
HETATM  202  O   HOH T 201      37.979  12.990  31.695  1.00  0.45           O  
HETATM  203  O   HOH T 202      14.489  38.778 -28.573  1.00  0.45           O  
HETATM  204  O   HOH T 203      25.146  36.910 -10.408  1.00  0.45           O  
HETATM  205  O   HOH T 204      26.419  19.944  -7.693  1.00  0.45           O  
HETATM  206  O   HOH T 205      40.132  19.442  11.225  1.00  0.45           O  
HETATM  207  O   HOH T 206      16.923  23.652 -23.742  1.00  0.45           O  
HETATM  208  O   HOH T 207      38.288  11.379  33.981  1.00  0.45           O  
HETATM  209  O   HOH T 208       9.835  53.664  -9.609  1.00  0.46           O  
HETATM  210  O   HOH T 209      26.594  30.029  16.153  1.00  0.46           O  
HETATM  211  O   HOH T 210      39.715   4.610   8.229  1.00  0.46           O  
HETATM  212  O   HOH T 211      29.602  37.478 -15.478  1.00  0.46           O  
HETATM  213  O   HOH T 212      23.050  37.557  -8.980  1.00  0.46           O  
HETATM  214  O   HOH T 213      34.771  14.567  30.225  1.00  0.46           O  
HETATM  215  O   HOH T 214      37.387   9.464   5.006  1.00  0.46           O  
HETATM  216  O   HOH T 215       9.344  40.876 -32.209  1.00  0.46           O  
HETATM  217  O   HOH T 216       2.814  48.449 -13.649  1.00  0.46           O  
HETATM  218  O   HOH T 217      27.796  28.467 -15.681  1.00  0.46           O  
HETATM  219  O   HOH T 218      28.561   3.058  16.830  1.00  0.46           O  
HETATM  220  O   HOH T 219      23.228  17.665 -21.970  1.00  0.46           O  
HETATM  221  O   HOH T 220      19.417  39.262  -9.378  1.00  0.46           O  
HETATM  222  O   HOH T 221      37.692  12.212  36.578  1.00  0.46           O  
HETATM  223  O   HOH T 222      23.669  17.122 -24.659  1.00  0.46           O  
HETATM  224  O   HOH T 223      42.150  10.560   9.828  1.00  0.46           O  
HETATM  225  O   HOH T 224      32.431  28.062  17.874  1.00  0.47           O  
HETATM  226  O   HOH T 225      32.353  20.618  26.971  1.00  0.47           O  
HETATM  227  O   HOH T 226      32.683  14.394  -7.321  1.00  0.47           O  
HETATM  228  O   HOH T 227      23.566  54.387 -11.276  1.00  0.47           O  
HETATM  229  O   HOH T 228      27.519  37.709 -13.590  1.00  0.47           O  
HETATM  230  O   HOH T 229      20.993  38.328  -3.950  1.00  0.47           O  
HETATM  231  O   HOH T 230      45.324  21.009  26.038  1.00  0.47           O  
HETATM  232  O   HOH T 231      17.766  22.563  25.950  1.00  0.47           O  
HETATM  233  O   HOH T 232       2.984  42.260 -14.583  1.00  0.47           O  
HETATM  234  O   HOH T 233      22.454  19.327  23.538  1.00  0.48           O  
HETATM  235  O   HOH T 234       9.683  31.952   1.726  1.00  0.48           O  
HETATM  236  O   HOH T 235      25.581   5.719  15.463  1.00  0.48           O  
HETATM  237  O   HOH T 236       7.273  34.255  -8.078  1.00  0.48           O  
HETATM  238  O   HOH T 237      46.076   0.890  12.643  1.00  0.48           O  
HETATM  239  O   HOH T 238      32.354  15.207  -4.712  1.00  0.48           O  
HETATM  240  O   HOH T 239      36.920  15.498  31.700  1.00  0.48           O  
HETATM  241  O   HOH T 240      47.710  13.679   2.470  1.00  0.48           O  
HETATM  242  O   HOH T 241      47.922  23.430  12.858  1.00  0.48           O  
HETATM  243  O   HOH T 242      21.004   9.042  15.539  1.00  0.48           O  
HETATM  244  O   HOH T 243       9.757  19.493  11.268  1.00  0.48           O  
HETATM  245  O   HOH T 244      36.142  -0.195  13.559  1.00  0.49           O  
HETATM  246  O   HOH T 245      22.486  31.712   1.762  1.00  0.49           O  
HETATM  247  O   HOH T 246      14.779  29.381   9.311  1.00  0.49           O  
HETATM  248  O   HOH T 247       5.572  17.021 -13.744  1.00  0.49           O  
HETATM  249  O   HOH T 248      21.937  26.893   8.939  1.00  0.49           O  
HETATM  250  O   HOH T 249       5.748  22.565  -3.118  1.00  0.49           O  
HETATM  251  O   HOH T 250      13.666   3.279   6.752  1.00  0.49           O  
HETATM  252  O   HOH T 251      42.094   5.662   7.160  1.00  0.49           O  
HETATM  253  O   HOH T 252      36.337  18.282   8.520  1.00  0.49           O  
HETATM  254  O   HOH T 253      55.270  12.160   8.944  1.00  0.49           O  
HETATM  255  O   HOH T 254      15.032  38.175  -3.955  1.00  0.49           O  
HETATM  256  O   HOH T 255      19.804  29.474 -26.806  1.00  0.49           O  
HETATM  257  O   HOH T 256       5.796  29.021  -3.208  1.00  0.49           O  
HETATM  258  O   HOH T 257       8.167  24.176   7.972  1.00  0.50           O  
HETATM  259  O   HOH T 258       8.997  43.706  -6.496  1.00  0.50           O  
HETATM  260  O   HOH T 259      18.387   6.578   2.493  1.00  0.50           O  
HETATM  261  O   HOH T 260      -0.220  36.304 -18.390  1.00  0.50           O  
HETATM  262  O   HOH T 261      28.336  39.827 -15.309  1.00  0.50           O  
HETATM  263  O   HOH T 262      32.200  24.184  13.726  1.00  0.50           O  
HETATM  264  O   HOH T 263      31.223  15.919   1.975  1.00  0.50           O  
HETATM  265  O   HOH T 264      18.186  42.995 -32.763  1.00  0.50           O  
HETATM  266  O   HOH T 265      24.318  31.817 -19.456  1.00  0.51           O  
HETATM  267  O   HOH T 266       2.774  15.253  -6.423  1.00  0.51           O  
HETATM  268  O   HOH T 267      29.071  23.606  21.196  1.00  0.51           O  
HETATM  269  O   HOH T 268      51.074  12.117  12.076  1.00  0.51           O  
HETATM  270  O   HOH T 269      24.404  28.269   8.865  1.00  0.51           O  
HETATM  271  O   HOH T 270      48.617  14.775   0.334  1.00  0.51           O  
HETATM  272  O   HOH T 271      47.901  15.284  24.401  1.00  0.51           O  
HETATM  273  O   HOH T 272      12.200  28.671   9.479  1.00  0.51           O  
HETATM  274  O   HOH T 273      28.887  22.984 -16.180  1.00  0.51           O  
HETATM  275  O   HOH T 274      22.124  54.225  -8.868  1.00  0.51           O  
HETATM  276  O   HOH T 275      10.535  42.963 -39.854  1.00  0.51           O  
HETATM  277  O   HOH T 276       2.308  17.897  -6.678  1.00  0.51           O  
HETATM  278  O   HOH T 277      10.135  20.495   8.740  1.00  0.51           O  
HETATM  279  O   HOH T 278      16.360  39.966  -5.507  1.00  0.51           O  
HETATM  280  O   HOH T 279      12.464  49.049 -29.241  1.00  0.52           O  
HETATM  281  O   HOH T 280       9.607  26.125   9.039  1.00  0.52           O  
HETATM  282  O   HOH T 281      36.042   5.507  37.226  1.00  0.52           O  
HETATM  283  O   HOH T 282       2.067  42.279 -25.235  1.00  0.52           O  
HETATM  284  O   HOH T 283      15.390  49.468  -8.566  1.00  0.52           O  
HETATM  285  O   HOH T 284      35.020  22.647   8.194  1.00  0.52           O  
HETATM  286  O   HOH T 285      24.651  48.538 -21.169  1.00  0.52           O  
HETATM  287  O   HOH T 286      39.761   5.657   5.694  1.00  0.52           O  
HETATM  288  O   HOH T 287      25.868  29.294 -19.454  1.00  0.52           O  
HETATM  289  O   HOH T 288      21.016  55.636 -11.094  1.00  0.52           O  
HETATM  290  O   HOH T 289      33.280  24.482   7.081  1.00  0.52           O  
HETATM  291  O   HOH T 290      13.838  21.919  21.871  1.00  0.52           O  
HETATM  292  O   HOH T 291      18.772  37.305  -2.483  1.00  0.52           O  
HETATM  293  O   HOH T 292      39.843  -0.015  15.281  1.00  0.52           O  
HETATM  294  O   HOH T 293      29.885  26.994  17.817  1.00  0.52           O  
HETATM  295  O   HOH T 294      10.726  52.769 -28.434  1.00  0.53           O  
HETATM  296  O   HOH T 295      38.777  17.276  32.670  1.00  0.53           O  
HETATM  297  O   HOH T 296      25.136  47.780 -14.571  1.00  0.53           O  
HETATM  298  O   HOH T 297      47.739   8.283   8.159  1.00  0.53           O  
HETATM  299  O   HOH T 298      10.016  27.897  11.116  1.00  0.53           O  
HETATM  300  O   HOH T 299      46.028  23.416  20.203  1.00  0.53           O  
HETATM  301  O   HOH T 300       8.991  53.626 -20.995  1.00  0.53           O  
HETATM  302  O   HOH T 301      12.862   4.767   4.613  1.00  0.53           O  
HETATM  303  O   HOH T 302      16.345  37.033 -35.998  1.00  0.53           O  
HETATM  304  O   HOH T 303      11.396  20.199   3.308  1.00  0.53           O  
HETATM  305  O   HOH T 304      35.193  20.189   3.063  1.00  0.53           O  
HETATM  306  O   HOH T 305      11.174  13.335  13.657  1.00  0.54           O  
HETATM  307  O   HOH T 306      20.018   9.296  -0.884  1.00  0.54           O  
HETATM  308  O   HOH T 307      26.634  27.640  -4.054  1.00  0.54           O  
HETATM  309  O   HOH T 308      27.501  23.343  -9.668  1.00  0.54           O  
HETATM  310  O   HOH T 309      25.161  26.383   3.955  1.00  0.54           O  
HETATM  311  O   HOH T 310      39.494  24.320  12.065  1.00  0.54           O  
HETATM  312  O   HOH T 311      25.898  11.567  -6.646  1.00  0.54           O  
HETATM  313  O   HOH T 312      27.458  28.115  18.033  1.00  0.54           O  
HETATM  314  O   HOH T 313      49.886  11.494  24.040  1.00  0.54           O  
HETATM  315  O   HOH T 314      12.217  13.879 -13.246  1.00  0.55           O  
HETATM  316  O   HOH T 315      54.561  16.143  14.335  1.00  0.55           O  
HETATM  317  O   HOH T 316      27.715  25.261  18.574  1.00  0.55           O  
HETATM  318  O   HOH T 317       8.232  29.111   5.709  1.00  0.55           O  
HETATM  319  O   HOH T 318      22.051  47.726 -27.609  1.00  0.55           O  
HETATM  320  O   HOH T 319      12.369  11.035  -7.088  1.00  0.55           O  
HETATM  321  O   HOH T 320       6.986  17.762 -16.094  1.00  0.55           O  
HETATM  322  O   HOH T 321       9.497  54.192 -15.621  1.00  0.55           O  
HETATM  323  O   HOH T 322      10.612  37.976  -4.756  1.00  0.56           O  
HETATM  324  O   HOH T 323      11.411   4.082   5.627  1.00  0.56           O  
HETATM  325  O   HOH T 324      13.815   7.610  14.868  1.00  0.56           O  
HETATM  326  O   HOH T 325       3.942  26.136  -8.412  1.00  0.56           O  
HETATM  327  O   HOH T 326      18.651  39.185  -6.739  1.00  0.56           O  
HETATM  328  O   HOH T 327      37.804   3.122   9.473  1.00  0.56           O  
HETATM  329  O   HOH T 328      29.921  23.429  18.751  1.00  0.56           O  
HETATM  330  O   HOH T 329      21.140  27.922   4.214  1.00  0.56           O  
HETATM  331  O   HOH T 330      10.360   5.950   4.014  1.00  0.56           O  
HETATM  332  O   HOH T 331      21.334  39.134  -7.424  1.00  0.56           O  
HETATM  333  O   HOH T 332      30.067   9.720   3.969  1.00  0.56           O  
HETATM  334  O   HOH T 333      27.396  29.347  13.687  1.00  0.56           O  
HETATM  335  O   HOH T 334      46.065  19.118  27.546  1.00  0.57           O  
HETATM  336  O   HOH T 335      15.581  42.197  -6.150  1.00  0.57           O  
HETATM  337  O   HOH T 336      24.559   5.594   2.267  1.00  0.57           O  
HETATM  338  O   HOH T 337      28.879   3.435  21.083  1.00  0.57           O  
HETATM  339  O   HOH T 338      19.362   9.714  -5.861  1.00  0.57           O  
HETATM  340  O   HOH T 339      41.427  26.868  17.912  1.00  0.57           O  
HETATM  341  O   HOH T 340       7.305  10.622 -11.187  1.00  0.57           O  
HETATM  342  O   HOH T 341      16.963  40.842  -8.155  1.00  0.57           O  
HETATM  343  O   HOH T 342      22.997  29.855   3.726  1.00  0.57           O  
TER     344      HOH T 342 
