# Supplementary material for: Accurate Prediction of Hydration Sites of Proteins Using Energy Model With Atom Embedding
Source: Front Mol Biosci. 2021 Sep 20;8:756075. doi: 10.3389/fmolb.2021.756075 (PMC8488165; doi:10.3389/fmolb.2021.756075)
Supplement: Supplementary file 1 [file DataSheet1.ZIP › Data Sheet 1/Our_result_pdb/our_dataset_output/1O85_watersite.pdb]

HEADER                                                        XXXX


JRNL        PMID   -1
HETATM    1  O   HOH T   0      -4.236   0.819  -1.787  1.00  0.15           O  
HETATM    2  O   HOH T   1     -14.679  -4.079   2.647  1.00  0.20           O  
HETATM    3  O   HOH T   2     -13.116  -0.576   5.364  1.00  0.21           O  
HETATM    4  O   HOH T   3      12.563  14.488   8.124  1.00  0.21           O  
HETATM    5  O   HOH T   4       2.872  14.450  -5.531  1.00  0.22           O  
HETATM    6  O   HOH T   5      15.517   8.025  16.753  1.00  0.22           O  
HETATM    7  O   HOH T   6      -8.487   0.104  19.981  1.00  0.23           O  
HETATM    8  O   HOH T   7     -23.115   5.056   9.648  1.00  0.23           O  
HETATM    9  O   HOH T   8      -0.967  -8.666  16.135  1.00  0.23           O  
HETATM   10  O   HOH T   9       0.898  -4.910  17.790  1.00  0.24           O  
HETATM   11  O   HOH T  10      -6.934  -9.806  22.127  1.00  0.24           O  
HETATM   12  O   HOH T  11      13.690  -5.545   8.292  1.00  0.24           O  
HETATM   13  O   HOH T  12     -24.716   6.908   8.386  1.00  0.25           O  
HETATM   14  O   HOH T  13      -9.846  -8.767   6.467  1.00  0.25           O  
HETATM   15  O   HOH T  14      -4.358  10.083  12.348  1.00  0.25           O  
HETATM   16  O   HOH T  15      -0.945 -11.388  19.702  1.00  0.26           O  
HETATM   17  O   HOH T  16      -5.026  11.121 -17.077  1.00  0.26           O  
HETATM   18  O   HOH T  17       7.149  16.182  -0.114  1.00  0.27           O  
HETATM   19  O   HOH T  18      -0.074   9.423  11.374  1.00  0.27           O  
HETATM   20  O   HOH T  19     -17.317  18.913  10.742  1.00  0.28           O  
HETATM   21  O   HOH T  20      -6.551   8.776  13.247  1.00  0.28           O  
HETATM   22  O   HOH T  21     -15.289  -1.615   3.918  1.00  0.28           O  
HETATM   23  O   HOH T  22      -1.168  14.630   6.657  1.00  0.28           O  
HETATM   24  O   HOH T  23       5.101   9.256  -2.220  1.00  0.28           O  
HETATM   25  O   HOH T  24      -9.313  -8.169  22.514  1.00  0.28           O  
HETATM   26  O   HOH T  25       5.641  -4.537  -2.774  1.00  0.28           O  
HETATM   27  O   HOH T  26       9.259  10.311  -3.221  1.00  0.29           O  
HETATM   28  O   HOH T  27      -2.899   7.134  -9.866  1.00  0.29           O  
HETATM   29  O   HOH T  28      -9.481   4.847  -5.985  1.00  0.29           O  
HETATM   30  O   HOH T  29       4.288  10.888  -5.923  1.00  0.29           O  
HETATM   31  O   HOH T  30      18.154  -2.284  11.457  1.00  0.29           O  
HETATM   32  O   HOH T  31      -9.841  -5.459  22.036  1.00  0.30           O  
HETATM   33  O   HOH T  32      14.654  -5.623  10.896  1.00  0.30           O  
HETATM   34  O   HOH T  33      -9.244   6.476  -1.094  1.00  0.30           O  
HETATM   35  O   HOH T  34       0.854  11.896  12.165  1.00  0.30           O  
HETATM   36  O   HOH T  35       2.520  -2.239  -8.791  1.00  0.31           O  
HETATM   37  O   HOH T  36       7.480  -8.059   9.717  1.00  0.31           O  
HETATM   38  O   HOH T  37      -1.877   4.705  -6.012  1.00  0.32           O  
HETATM   39  O   HOH T  38      -2.151   0.609 -12.665  1.00  0.32           O  
HETATM   40  O   HOH T  39      -7.103 -14.581   3.813  1.00  0.33           O  
HETATM   41  O   HOH T  40       2.993  12.055  -3.925  1.00  0.33           O  
HETATM   42  O   HOH T  41     -10.747   0.906  15.696  1.00  0.33           O  
HETATM   43  O   HOH T  42      11.973  20.610  15.017  1.00  0.33           O  
HETATM   44  O   HOH T  43     -12.974   0.115  10.451  1.00  0.34           O  
HETATM   45  O   HOH T  44       5.477  -1.671 -12.702  1.00  0.34           O  
HETATM   46  O   HOH T  45       5.533  -2.874  -4.976  1.00  0.34           O  
HETATM   47  O   HOH T  46      -5.098  12.871   8.387  1.00  0.34           O  
HETATM   48  O   HOH T  47      -3.442 -16.844  13.420  1.00  0.34           O  
HETATM   49  O   HOH T  48       3.673  -8.547 -13.356  1.00  0.35           O  
HETATM   50  O   HOH T  49      10.400  -0.484  20.309  1.00  0.35           O  
HETATM   51  O   HOH T  50      -6.420 -10.258  11.981  1.00  0.35           O  
HETATM   52  O   HOH T  51       7.811  -9.075  -2.959  1.00  0.35           O  
HETATM   53  O   HOH T  52      -6.876  13.617  10.273  1.00  0.36           O  
HETATM   54  O   HOH T  53      16.376  -3.778  15.327  1.00  0.36           O  
HETATM   55  O   HOH T  54       2.612 -10.693   4.443  1.00  0.36           O  
HETATM   56  O   HOH T  55       9.181   5.865  -3.307  1.00  0.36           O  
HETATM   57  O   HOH T  56       6.688   7.798  -6.022  1.00  0.37           O  
HETATM   58  O   HOH T  57       5.558   3.899  22.224  1.00  0.37           O  
HETATM   59  O   HOH T  58       4.147  -9.436   6.416  1.00  0.37           O  
HETATM   60  O   HOH T  59      -9.159 -19.751   0.925  1.00  0.37           O  
HETATM   61  O   HOH T  60      -6.758   0.391  -2.729  1.00  0.37           O  
HETATM   62  O   HOH T  61       2.315  -2.807  18.982  1.00  0.37           O  
HETATM   63  O   HOH T  62      -4.122 -11.603  12.773  1.00  0.37           O  
HETATM   64  O   HOH T  63     -16.693  11.347   8.467  1.00  0.37           O  
HETATM   65  O   HOH T  64       7.199  -4.884 -10.943  1.00  0.37           O  
HETATM   66  O   HOH T  65       1.497 -14.179  -4.882  1.00  0.38           O  
HETATM   67  O   HOH T  66      -4.299  -0.475 -11.434  1.00  0.38           O  
HETATM   68  O   HOH T  67     -16.039  -2.079   1.275  1.00  0.38           O  
HETATM   69  O   HOH T  68      -3.083 -16.094  -5.069  1.00  0.38           O  
HETATM   70  O   HOH T  69      -4.002  -3.042  23.125  1.00  0.38           O  
HETATM   71  O   HOH T  70     -14.012  -0.837   8.031  1.00  0.39           O  
HETATM   72  O   HOH T  71     -15.535 -13.945   3.862  1.00  0.39           O  
HETATM   73  O   HOH T  72      -4.804 -11.354   9.961  1.00  0.39           O  
HETATM   74  O   HOH T  73       3.118 -15.399  -0.713  1.00  0.39           O  
HETATM   75  O   HOH T  74       1.450   3.004 -13.551  1.00  0.39           O  
HETATM   76  O   HOH T  75       4.697  -4.072 -11.580  1.00  0.40           O  
HETATM   77  O   HOH T  76      -3.622  14.756 -17.172  1.00  0.40           O  
HETATM   78  O   HOH T  77      -8.503   5.947  -3.743  1.00  0.40           O  
HETATM   79  O   HOH T  78       4.232  -3.664  -7.294  1.00  0.40           O  
HETATM   80  O   HOH T  79      -1.166  12.995   8.878  1.00  0.40           O  
HETATM   81  O   HOH T  80     -14.721   5.930  13.850  1.00  0.40           O  
HETATM   82  O   HOH T  81     -12.246 -10.539  -0.768  1.00  0.40           O  
HETATM   83  O   HOH T  82      -2.669   2.970  21.865  1.00  0.40           O  
HETATM   84  O   HOH T  83      -4.490  -3.564  -7.365  1.00  0.40           O  
HETATM   85  O   HOH T  84       7.495  -6.458  -2.013  1.00  0.41           O  
HETATM   86  O   HOH T  85      -2.283  -3.246  21.028  1.00  0.41           O  
HETATM   87  O   HOH T  86      -3.894  -5.445  21.695  1.00  0.41           O  
HETATM   88  O   HOH T  87       8.959  -6.839   3.030  1.00  0.41           O  
HETATM   89  O   HOH T  88       3.318  -1.500 -14.560  1.00  0.41           O  
HETATM   90  O   HOH T  89      -4.468   9.377  -9.218  1.00  0.41           O  
HETATM   91  O   HOH T  90       0.708  -1.674 -15.439  1.00  0.41           O  
HETATM   92  O   HOH T  91      13.379  12.316   9.607  1.00  0.41           O  
HETATM   93  O   HOH T  92       0.288  -6.300  -7.646  1.00  0.41           O  
HETATM   94  O   HOH T  93       4.284  -7.461  16.200  1.00  0.41           O  
HETATM   95  O   HOH T  94       2.469   4.497  26.356  1.00  0.42           O  
HETATM   96  O   HOH T  95     -14.824  10.354  10.596  1.00  0.42           O  
HETATM   97  O   HOH T  96     -12.540 -15.802   7.248  1.00  0.42           O  
HETATM   98  O   HOH T  97     -10.694   7.524  -3.202  1.00  0.42           O  
HETATM   99  O   HOH T  98      -2.412  10.206  21.813  1.00  0.42           O  
HETATM  100  O   HOH T  99      -8.030  13.018  12.777  1.00  0.42           O  
HETATM  101  O   HOH T 100      -9.291   9.876  -3.433  1.00  0.42           O  
HETATM  102  O   HOH T 101      -7.544  -5.865  25.589  1.00  0.42           O  
HETATM  103  O   HOH T 102     -10.700   3.507  16.087  1.00  0.42           O  
HETATM  104  O   HOH T 103      -1.004  13.119  13.889  1.00  0.42           O  
HETATM  105  O   HOH T 104      13.676  18.640  15.860  1.00  0.42           O  
HETATM  106  O   HOH T 105       4.851   4.425  24.917  1.00  0.42           O  
HETATM  107  O   HOH T 106      -4.223 -19.649  -5.747  1.00  0.42           O  
HETATM  108  O   HOH T 107      -4.402  -0.236 -14.290  1.00  0.42           O  
HETATM  109  O   HOH T 108     -13.871  14.824   9.901  1.00  0.43           O  
HETATM  110  O   HOH T 109      10.917   8.037  -2.854  1.00  0.43           O  
HETATM  111  O   HOH T 110      14.453   8.968  19.255  1.00  0.43           O  
HETATM  112  O   HOH T 111     -11.105   5.836  14.833  1.00  0.43           O  
HETATM  113  O   HOH T 112       8.375  -6.752  -9.197  1.00  0.43           O  
HETATM  114  O   HOH T 113      -7.315 -12.860  16.182  1.00  0.43           O  
HETATM  115  O   HOH T 114     -15.486  -0.864  10.412  1.00  0.43           O  
HETATM  116  O   HOH T 115      -1.091   0.855  22.638  1.00  0.43           O  
HETATM  117  O   HOH T 116      -4.775  -9.050  -3.649  1.00  0.43           O  
HETATM  118  O   HOH T 117      18.690  -3.166  14.026  1.00  0.43           O  
HETATM  119  O   HOH T 118      -4.952  -9.082  24.126  1.00  0.43           O  
HETATM  120  O   HOH T 119      -0.599  16.640   4.860  1.00  0.43           O  
HETATM  121  O   HOH T 120       3.133 -12.649  10.754  1.00  0.44           O  
HETATM  122  O   HOH T 121      -9.609  -9.804  -0.920  1.00  0.44           O  
HETATM  123  O   HOH T 122      -1.521   3.095  24.327  1.00  0.44           O  
HETATM  124  O   HOH T 123       6.402  -6.495   1.865  1.00  0.44           O  
HETATM  125  O   HOH T 124       5.967  17.247   8.646  1.00  0.44           O  
HETATM  126  O   HOH T 125      -3.615  12.674 -15.260  1.00  0.44           O  
HETATM  127  O   HOH T 126     -16.181   4.077   8.077  1.00  0.44           O  
HETATM  128  O   HOH T 127      -0.033  -8.955  18.753  1.00  0.44           O  
HETATM  129  O   HOH T 128      10.354  -7.270  -7.290  1.00  0.44           O  
HETATM  130  O   HOH T 129       0.234  -3.967  20.322  1.00  0.44           O  
HETATM  131  O   HOH T 130      18.491  11.675  11.318  1.00  0.44           O  
HETATM  132  O   HOH T 131      -3.877  18.007   8.334  1.00  0.45           O  
HETATM  133  O   HOH T 132     -11.690 -16.425  -2.436  1.00  0.45           O  
HETATM  134  O   HOH T 133      -8.315  10.614  14.044  1.00  0.45           O  
HETATM  135  O   HOH T 134      -2.484  12.441 -12.788  1.00  0.45           O  
HETATM  136  O   HOH T 135      -1.913  -1.589 -14.454  1.00  0.45           O  
HETATM  137  O   HOH T 136     -16.401   3.899   0.209  1.00  0.45           O  
HETATM  138  O   HOH T 137       4.934  12.154  20.524  1.00  0.45           O  
HETATM  139  O   HOH T 138      -2.327  -9.095  20.386  1.00  0.45           O  
HETATM  140  O   HOH T 139      14.221  19.612  18.450  1.00  0.45           O  
HETATM  141  O   HOH T 140      -9.063   5.736  16.598  1.00  0.45           O  
HETATM  142  O   HOH T 141      -0.825   0.788 -15.247  1.00  0.46           O  
HETATM  143  O   HOH T 142     -10.759  -6.559  16.125  1.00  0.46           O  
HETATM  144  O   HOH T 143       6.961  17.053  -2.718  1.00  0.46           O  
HETATM  145  O   HOH T 144      -1.432  17.310   7.357  1.00  0.46           O  
HETATM  146  O   HOH T 145       6.264  -7.581   7.411  1.00  0.46           O  
HETATM  147  O   HOH T 146       8.142  -0.834  21.896  1.00  0.46           O  
HETATM  148  O   HOH T 147       7.212   2.372 -10.857  1.00  0.46           O  
HETATM  149  O   HOH T 148      -4.606  20.370  -1.559  1.00  0.46           O  
HETATM  150  O   HOH T 149     -14.222 -16.109  -3.562  1.00  0.46           O  
HETATM  151  O   HOH T 150      -1.598 -18.547  10.146  1.00  0.46           O  
HETATM  152  O   HOH T 151      -3.319 -16.358  10.523  1.00  0.46           O  
HETATM  153  O   HOH T 152     -22.003   1.562   2.535  1.00  0.46           O  
HETATM  154  O   HOH T 153      -9.668  -0.807  17.525  1.00  0.46           O  
HETATM  155  O   HOH T 154       1.996   0.834 -15.260  1.00  0.47           O  
HETATM  156  O   HOH T 155      -3.343  11.590  14.346  1.00  0.47           O  
HETATM  157  O   HOH T 156     -15.360 -10.550   6.674  1.00  0.47           O  
HETATM  158  O   HOH T 157      -3.278  15.809   2.216  1.00  0.47           O  
HETATM  159  O   HOH T 158       1.208  13.779  10.149  1.00  0.47           O  
HETATM  160  O   HOH T 159       1.071 -15.778  -2.631  1.00  0.47           O  
HETATM  161  O   HOH T 160     -12.869  10.344  -4.191  1.00  0.47           O  
HETATM  162  O   HOH T 161       0.022 -15.389   2.385  1.00  0.47           O  
HETATM  163  O   HOH T 162       5.429  -5.025  16.316  1.00  0.47           O  
HETATM  164  O   HOH T 163       6.916 -15.016  -6.181  1.00  0.47           O  
HETATM  165  O   HOH T 164      12.187  -4.660   2.612  1.00  0.47           O  
HETATM  166  O   HOH T 165       8.222  -3.028  -5.328  1.00  0.47           O  
HETATM  167  O   HOH T 166       8.206  -3.074  -7.978  1.00  0.47           O  
HETATM  168  O   HOH T 167      -0.253   4.946  26.053  1.00  0.47           O  
HETATM  169  O   HOH T 168      14.548  14.052  11.195  1.00  0.48           O  
HETATM  170  O   HOH T 169      -5.209  15.673   9.092  1.00  0.48           O  
HETATM  171  O   HOH T 170      -9.037   4.121 -16.565  1.00  0.48           O  
HETATM  172  O   HOH T 171      -7.289  -4.086  -8.080  1.00  0.48           O  
HETATM  173  O   HOH T 172      -5.340 -17.458  -4.333  1.00  0.48           O  
HETATM  174  O   HOH T 173     -13.798 -12.545   5.520  1.00  0.48           O  
HETATM  175  O   HOH T 174       3.021  -4.743  -9.603  1.00  0.48           O  
HETATM  176  O   HOH T 175      -6.543  18.189   8.847  1.00  0.49           O  
HETATM  177  O   HOH T 176      -5.699  -2.280 -12.959  1.00  0.49           O  
HETATM  178  O   HOH T 177       8.329  -8.274  -5.633  1.00  0.49           O  
HETATM  179  O   HOH T 178       8.932  11.040  17.732  1.00  0.49           O  
HETATM  180  O   HOH T 179      15.892  11.820  10.355  1.00  0.49           O  
HETATM  181  O   HOH T 180       9.045   8.197  -4.775  1.00  0.49           O  
HETATM  182  O   HOH T 181       8.096   1.614  23.184  1.00  0.49           O  
HETATM  183  O   HOH T 182       9.034   0.304 -11.309  1.00  0.49           O  
HETATM  184  O   HOH T 183     -23.265   8.845   6.958  1.00  0.49           O  
HETATM  185  O   HOH T 184      10.701   1.636  22.019  1.00  0.49           O  
HETATM  186  O   HOH T 185      18.426  -3.026  19.114  1.00  0.49           O  
HETATM  187  O   HOH T 186      17.896  -4.403   9.846  1.00  0.50           O  
HETATM  188  O   HOH T 187      -3.258  -0.686  21.818  1.00  0.50           O  
HETATM  189  O   HOH T 188      -6.617 -19.517  -0.214  1.00  0.50           O  
HETATM  190  O   HOH T 189       3.909   6.707  23.652  1.00  0.50           O  
HETATM  191  O   HOH T 190       8.330  -5.583  -6.626  1.00  0.50           O  
HETATM  192  O   HOH T 191      -7.540  -8.395  24.456  1.00  0.50           O  
HETATM  193  O   HOH T 192      10.556  -8.896  -2.702  1.00  0.50           O  
HETATM  194  O   HOH T 193       6.758   7.299  -3.377  1.00  0.50           O  
HETATM  195  O   HOH T 194      -4.140 -18.669   9.017  1.00  0.50           O  
HETATM  196  O   HOH T 195      -9.802   4.176  18.651  1.00  0.50           O  
HETATM  197  O   HOH T 196      12.236  -0.686  22.406  1.00  0.50           O  
HETATM  198  O   HOH T 197      -6.778  16.473  -9.741  1.00  0.50           O  
HETATM  199  O   HOH T 198      -3.651  18.319  -3.112  1.00  0.50           O  
HETATM  200  O   HOH T 199     -11.755  -7.260  13.605  1.00  0.50           O  
HETATM  201  O   HOH T 200     -14.594 -12.822   8.156  1.00  0.50           O  
HETATM  202  O   HOH T 201     -15.049  18.572   9.201  1.00  0.50           O  
HETATM  203  O   HOH T 202      16.718  -4.374  12.501  1.00  0.51           O  
HETATM  204  O   HOH T 203     -21.142   1.387   5.296  1.00  0.51           O  
HETATM  205  O   HOH T 204     -14.654   8.183  12.382  1.00  0.51           O  
HETATM  206  O   HOH T 205      -8.261 -17.367   0.067  1.00  0.51           O  
HETATM  207  O   HOH T 206     -12.959   7.881  14.561  1.00  0.51           O  
HETATM  208  O   HOH T 207      -5.748  -6.452  23.506  1.00  0.51           O  
HETATM  209  O   HOH T 208     -15.994  16.417  10.762  1.00  0.51           O  
HETATM  210  O   HOH T 209      -7.367  16.399  10.826  1.00  0.52           O  
HETATM  211  O   HOH T 210      -0.469   8.238 -10.588  1.00  0.52           O  
HETATM  212  O   HOH T 211      -1.905  11.355  12.042  1.00  0.52           O  
HETATM  213  O   HOH T 212      11.166   3.995  -4.031  1.00  0.52           O  
HETATM  214  O   HOH T 213      -0.108  11.499  -9.787  1.00  0.52           O  
HETATM  215  O   HOH T 214      -8.279   8.135  15.314  1.00  0.52           O  
HETATM  216  O   HOH T 215      17.414   9.679   9.723  1.00  0.52           O  
HETATM  217  O   HOH T 216      -7.359 -18.029  -2.471  1.00  0.52           O  
HETATM  218  O   HOH T 217     -17.960   4.567   6.167  1.00  0.52           O  
HETATM  219  O   HOH T 218     -16.412  13.815   9.754  1.00  0.52           O  
HETATM  220  O   HOH T 219      -4.108 -13.731  10.939  1.00  0.52           O  
HETATM  221  O   HOH T 220     -17.275  -3.517   3.260  1.00  0.52           O  
HETATM  222  O   HOH T 221       0.818  -6.596  20.031  1.00  0.52           O  
HETATM  223  O   HOH T 222     -12.819  -0.794 -13.749  1.00  0.53           O  
HETATM  224  O   HOH T 223       9.201 -10.397  12.119  1.00  0.53           O  
HETATM  225  O   HOH T 224      -9.319 -11.409   6.287  1.00  0.53           O  
HETATM  226  O   HOH T 225     -18.254  -0.852   0.145  1.00  0.53           O  
HETATM  227  O   HOH T 226      18.027  -5.820  14.497  1.00  0.54           O  
HETATM  228  O   HOH T 227      -0.066  -1.743  22.028  1.00  0.54           O  
HETATM  229  O   HOH T 228       2.601  -9.841  18.652  1.00  0.54           O  
HETATM  230  O   HOH T 229      -4.549   8.572 -17.846  1.00  0.54           O  
HETATM  231  O   HOH T 230     -16.144  -3.357  10.456  1.00  0.54           O  
HETATM  232  O   HOH T 231      -9.367  15.430  12.409  1.00  0.55           O  
HETATM  233  O   HOH T 232      -9.740  -2.546 -14.621  1.00  0.56           O  
HETATM  234  O   HOH T 233       4.118 -13.769   7.261  1.00  0.56           O  
HETATM  235  O   HOH T 234     -11.577   6.198  -7.210  1.00  0.56           O  
HETATM  236  O   HOH T 235       5.038   9.050  -7.739  1.00  0.56           O  
HETATM  237  O   HOH T 236      16.893 -10.456   7.329  1.00  0.57           O  
HETATM  238  O   HOH T 237     -12.117 -14.534   9.710  1.00  0.57           O  
HETATM  239  O   HOH T 238      -8.151 -17.985   9.959  1.00  0.57           O  
HETATM  240  O   HOH T 239      10.627   6.494 -10.599  1.00  0.57           O  
HETATM  241  O   HOH T 240      -1.624  -4.072  -8.108  1.00  0.57           O  
HETATM  242  O   HOH T 241       0.768 -16.208   0.056  1.00  0.57           O  
HETATM  243  O   HOH T 242      17.942   8.249  23.358  1.00  0.57           O  
HETATM  244  O   HOH T 243      -1.489 -15.402  -1.476  1.00  0.59           O  
HETATM  245  O   HOH T 244       4.811  -2.804  17.977  1.00  0.62           O  
TER     246      HOH T 244 
