# Supplementary material for: Accurate Prediction of Hydration Sites of Proteins Using Energy Model With Atom Embedding
Source: Front Mol Biosci. 2021 Sep 20;8:756075. doi: 10.3389/fmolb.2021.756075 (PMC8488165; doi:10.3389/fmolb.2021.756075)
Supplement: Supplementary file 1 [file DataSheet1.ZIP › Data Sheet 1/Our_result_pdb/our_dataset_output/1OFZ_watersite.pdb]

HEADER                                                        XXXX


JRNL        PMID   -1
HETATM    1  O   HOH T   0      49.121  27.890  35.759  1.00  0.15           O  
HETATM    2  O   HOH T   1      25.395  33.440  77.087  1.00  0.15           O  
HETATM    3  O   HOH T   2      18.238  19.556  74.272  1.00  0.15           O  
HETATM    4  O   HOH T   3      54.029  37.568  47.207  1.00  0.15           O  
HETATM    5  O   HOH T   4      26.026  26.584  60.941  1.00  0.16           O  
HETATM    6  O   HOH T   5      43.389  24.231  50.993  1.00  0.17           O  
HETATM    7  O   HOH T   6      38.014  32.205  69.706  1.00  0.17           O  
HETATM    8  O   HOH T   7      50.757  38.887  77.336  1.00  0.17           O  
HETATM    9  O   HOH T   8      48.921  17.199  79.636  1.00  0.17           O  
HETATM   10  O   HOH T   9      48.293  42.641  61.547  1.00  0.18           O  
HETATM   11  O   HOH T  10      40.030  54.341  60.819  1.00  0.19           O  
HETATM   12  O   HOH T  11      42.017  33.522  50.714  1.00  0.19           O  
HETATM   13  O   HOH T  12      45.493  36.588  62.670  1.00  0.19           O  
HETATM   14  O   HOH T  13      41.700  39.402  55.112  1.00  0.19           O  
HETATM   15  O   HOH T  14      32.594  27.609  67.845  1.00  0.19           O  
HETATM   16  O   HOH T  15      36.601  39.562  65.012  1.00  0.20           O  
HETATM   17  O   HOH T  16      34.117  45.497  32.528  1.00  0.20           O  
HETATM   18  O   HOH T  17      38.973  62.350  52.832  1.00  0.20           O  
HETATM   19  O   HOH T  18      41.222  34.059  72.915  1.00  0.20           O  
HETATM   20  O   HOH T  19      58.328  35.776  48.720  1.00  0.20           O  
HETATM   21  O   HOH T  20      47.187  37.835  78.513  1.00  0.20           O  
HETATM   22  O   HOH T  21      28.289  38.423  92.665  1.00  0.20           O  
HETATM   23  O   HOH T  22      33.963   1.538  77.751  1.00  0.20           O  
HETATM   24  O   HOH T  23      54.133  43.328  51.823  1.00  0.20           O  
HETATM   25  O   HOH T  24      26.330  30.941  70.334  1.00  0.21           O  
HETATM   26  O   HOH T  25      42.329  52.959  57.953  1.00  0.21           O  
HETATM   27  O   HOH T  26      30.566  38.342  78.627  1.00  0.21           O  
HETATM   28  O   HOH T  27      56.736  33.664  34.894  1.00  0.21           O  
HETATM   29  O   HOH T  28      41.904  44.160  55.949  1.00  0.22           O  
HETATM   30  O   HOH T  29      46.992  25.899  66.306  1.00  0.22           O  
HETATM   31  O   HOH T  30       9.653  28.711  83.566  1.00  0.22           O  
HETATM   32  O   HOH T  31      49.332  32.415  49.425  1.00  0.22           O  
HETATM   33  O   HOH T  32      37.765  30.218  29.226  1.00  0.22           O  
HETATM   34  O   HOH T  33      34.431  38.331  63.940  1.00  0.22           O  
HETATM   35  O   HOH T  34      17.048  28.617  94.529  1.00  0.22           O  
HETATM   36  O   HOH T  35      17.895  33.525  78.692  1.00  0.22           O  
HETATM   37  O   HOH T  36      21.039  46.421  45.252  1.00  0.23           O  
HETATM   38  O   HOH T  37      40.061  20.376  84.439  1.00  0.23           O  
HETATM   39  O   HOH T  38      44.532  30.149  59.696  1.00  0.23           O  
HETATM   40  O   HOH T  39      62.365  24.998  82.072  1.00  0.23           O  
HETATM   41  O   HOH T  40      24.774  36.463  90.970  1.00  0.23           O  
HETATM   42  O   HOH T  41      49.165  13.335  86.482  1.00  0.23           O  
HETATM   43  O   HOH T  42      35.588  33.115  61.275  1.00  0.23           O  
HETATM   44  O   HOH T  43      59.824  34.138  43.616  1.00  0.23           O  
HETATM   45  O   HOH T  44      21.667  35.171  65.436  1.00  0.23           O  
HETATM   46  O   HOH T  45      15.052  52.021  43.437  1.00  0.24           O  
HETATM   47  O   HOH T  46      53.271  20.380  71.366  1.00  0.24           O  
HETATM   48  O   HOH T  47      38.575  18.227  83.751  1.00  0.24           O  
HETATM   49  O   HOH T  48      45.420  38.256  74.926  1.00  0.24           O  
HETATM   50  O   HOH T  49      34.158  17.280  85.080  1.00  0.24           O  
HETATM   51  O   HOH T  50      28.742  50.420  42.703  1.00  0.24           O  
HETATM   52  O   HOH T  51      38.426   5.141  78.811  1.00  0.24           O  
HETATM   53  O   HOH T  52      53.684  23.663  77.413  1.00  0.24           O  
HETATM   54  O   HOH T  53      55.430  33.122  78.170  1.00  0.24           O  
HETATM   55  O   HOH T  54      23.579  47.111  44.087  1.00  0.24           O  
HETATM   56  O   HOH T  55      42.458  33.654  99.600  1.00  0.24           O  
HETATM   57  O   HOH T  56      48.016  42.367  57.471  1.00  0.25           O  
HETATM   58  O   HOH T  57      47.508  29.426  26.375  1.00  0.25           O  
HETATM   59  O   HOH T  58      26.094  48.814  55.900  1.00  0.25           O  
HETATM   60  O   HOH T  59      42.262  49.255  59.319  1.00  0.25           O  
HETATM   61  O   HOH T  60      28.752  35.940  26.675  1.00  0.25           O  
HETATM   62  O   HOH T  61      42.418  22.374  52.748  1.00  0.25           O  
HETATM   63  O   HOH T  62      25.496  37.185  51.509  1.00  0.25           O  
HETATM   64  O   HOH T  63      46.067  36.192  76.683  1.00  0.25           O  
HETATM   65  O   HOH T  64      28.044  40.374  30.677  1.00  0.25           O  
HETATM   66  O   HOH T  65      46.568  18.917  63.939  1.00  0.25           O  
HETATM   67  O   HOH T  66      21.647  37.230  76.653  1.00  0.25           O  
HETATM   68  O   HOH T  67      36.622  38.556  72.985  1.00  0.26           O  
HETATM   69  O   HOH T  68      53.226  33.934  87.375  1.00  0.26           O  
HETATM   70  O   HOH T  69      24.630  50.266  36.284  1.00  0.26           O  
HETATM   71  O   HOH T  70      30.887  42.135  95.260  1.00  0.26           O  
HETATM   72  O   HOH T  71      36.557  34.402 104.487  1.00  0.26           O  
HETATM   73  O   HOH T  72      35.134  40.610  94.504  1.00  0.26           O  
HETATM   74  O   HOH T  73      40.213  43.649  95.337  1.00  0.26           O  
HETATM   75  O   HOH T  74      38.056  47.026  37.140  1.00  0.26           O  
HETATM   76  O   HOH T  75      16.972  12.090  79.816  1.00  0.26           O  
HETATM   77  O   HOH T  76      35.604  -1.482  85.741  1.00  0.26           O  
HETATM   78  O   HOH T  77      38.455  66.863  47.309  1.00  0.26           O  
HETATM   79  O   HOH T  78      65.424  52.786  36.917  1.00  0.26           O  
HETATM   80  O   HOH T  79      24.178  29.388  71.211  1.00  0.26           O  
HETATM   81  O   HOH T  80      46.303  44.901  72.071  1.00  0.26           O  
HETATM   82  O   HOH T  81      33.652  33.452  59.234  1.00  0.27           O  
HETATM   83  O   HOH T  82      32.326  35.094  61.106  1.00  0.27           O  
HETATM   84  O   HOH T  83      64.889  44.463  48.606  1.00  0.27           O  
HETATM   85  O   HOH T  84      50.597  28.295  73.357  1.00  0.27           O  
HETATM   86  O   HOH T  85      23.415  36.584  98.794  1.00  0.27           O  
HETATM   87  O   HOH T  86      42.160  27.632  35.568  1.00  0.27           O  
HETATM   88  O   HOH T  87      56.234  30.405  28.132  1.00  0.27           O  
HETATM   89  O   HOH T  88      41.389  44.588  43.080  1.00  0.27           O  
HETATM   90  O   HOH T  89      47.447  36.381  57.280  1.00  0.28           O  
HETATM   91  O   HOH T  90      58.411  58.289  46.981  1.00  0.28           O  
HETATM   92  O   HOH T  91      42.068  13.951  88.247  1.00  0.28           O  
HETATM   93  O   HOH T  92      36.813  47.315  28.037  1.00  0.28           O  
HETATM   94  O   HOH T  93      32.052  25.173  82.493  1.00  0.28           O  
HETATM   95  O   HOH T  94      48.147  21.813  34.935  1.00  0.28           O  
HETATM   96  O   HOH T  95      44.313  46.889  34.567  1.00  0.28           O  
HETATM   97  O   HOH T  96      36.571  24.253  40.260  1.00  0.28           O  
HETATM   98  O   HOH T  97      50.147  31.466  47.012  1.00  0.28           O  
HETATM   99  O   HOH T  98      60.875  50.771  55.399  1.00  0.28           O  
HETATM  100  O   HOH T  99      53.509  53.462  56.027  1.00  0.28           O  
HETATM  101  O   HOH T 100      51.518  35.389  25.858  1.00  0.28           O  
HETATM  102  O   HOH T 101      52.801  13.290  72.534  1.00  0.28           O  
HETATM  103  O   HOH T 102      30.629  30.139  78.530  1.00  0.28           O  
HETATM  104  O   HOH T 103      35.348  29.071  74.842  1.00  0.28           O  
HETATM  105  O   HOH T 104      49.509  40.878  25.601  1.00  0.28           O  
HETATM  106  O   HOH T 105      38.354  42.985  81.652  1.00  0.29           O  
HETATM  107  O   HOH T 106      42.093  44.375  89.140  1.00  0.29           O  
HETATM  108  O   HOH T 107      33.985  25.908  77.407  1.00  0.29           O  
HETATM  109  O   HOH T 108      45.622  44.729  55.241  1.00  0.29           O  
HETATM  110  O   HOH T 109      31.796  47.003  85.234  1.00  0.29           O  
HETATM  111  O   HOH T 110      50.477  21.539  33.323  1.00  0.29           O  
HETATM  112  O   HOH T 111      49.658  15.079  88.623  1.00  0.29           O  
HETATM  113  O   HOH T 112      28.358  53.143  50.691  1.00  0.29           O  
HETATM  114  O   HOH T 113      37.226  15.342  59.104  1.00  0.29           O  
HETATM  115  O   HOH T 114      49.330  50.012  57.967  1.00  0.29           O  
HETATM  116  O   HOH T 115      36.915  38.227 100.009  1.00  0.29           O  
HETATM  117  O   HOH T 116      43.793  18.166  59.236  1.00  0.29           O  
HETATM  118  O   HOH T 117      38.802  36.230  74.975  1.00  0.29           O  
HETATM  119  O   HOH T 118      28.852  54.493  35.526  1.00  0.29           O  
HETATM  120  O   HOH T 119      37.096  17.788  43.587  1.00  0.29           O  
HETATM  121  O   HOH T 120      37.098  24.412  79.897  1.00  0.29           O  
HETATM  122  O   HOH T 121      38.354  11.846  83.781  1.00  0.29           O  
HETATM  123  O   HOH T 122      25.272  46.879  51.366  1.00  0.29           O  
HETATM  124  O   HOH T 123      48.899  66.167  33.358  1.00  0.29           O  
HETATM  125  O   HOH T 124      39.692  41.918  79.222  1.00  0.29           O  
HETATM  126  O   HOH T 125      31.844  48.751  54.680  1.00  0.29           O  
HETATM  127  O   HOH T 126      42.030  29.196  60.291  1.00  0.29           O  
HETATM  128  O   HOH T 127      47.703  60.047  49.211  1.00  0.29           O  
HETATM  129  O   HOH T 128      45.798  34.182  61.476  1.00  0.29           O  
HETATM  130  O   HOH T 129      51.000  14.232  74.547  1.00  0.29           O  
HETATM  131  O   HOH T 130      31.660  -1.720  83.698  1.00  0.29           O  
HETATM  132  O   HOH T 131      52.530  50.990  56.924  1.00  0.29           O  
HETATM  133  O   HOH T 132      68.578  53.961  42.418  1.00  0.29           O  
HETATM  134  O   HOH T 133      30.452  49.817  58.329  1.00  0.30           O  
HETATM  135  O   HOH T 134      44.754  32.833  59.271  1.00  0.30           O  
HETATM  136  O   HOH T 135      51.818  38.846  71.360  1.00  0.30           O  
HETATM  137  O   HOH T 136      43.659  51.447  67.200  1.00  0.30           O  
HETATM  138  O   HOH T 137      48.126  66.536  38.402  1.00  0.30           O  
HETATM  139  O   HOH T 138      43.741  41.295  44.929  1.00  0.30           O  
HETATM  140  O   HOH T 139      62.545  41.843  34.399  1.00  0.30           O  
HETATM  141  O   HOH T 140      45.497  55.810  33.304  1.00  0.30           O  
HETATM  142  O   HOH T 141      38.915  48.841  38.846  1.00  0.30           O  
HETATM  143  O   HOH T 142      51.897  38.031  84.168  1.00  0.30           O  
HETATM  144  O   HOH T 143      17.573  14.780  86.710  1.00  0.30           O  
HETATM  145  O   HOH T 144      32.962  36.704  98.423  1.00  0.30           O  
HETATM  146  O   HOH T 145      15.888  48.365  41.813  1.00  0.30           O  
HETATM  147  O   HOH T 146      38.085  22.660  88.275  1.00  0.30           O  
HETATM  148  O   HOH T 147      42.654  37.225  99.009  1.00  0.30           O  
HETATM  149  O   HOH T 148      33.959  56.593  57.857  1.00  0.30           O  
HETATM  150  O   HOH T 149      39.044  43.390  84.441  1.00  0.31           O  
HETATM  151  O   HOH T 150      54.188  59.780  55.170  1.00  0.31           O  
HETATM  152  O   HOH T 151      48.056  41.570  49.808  1.00  0.31           O  
HETATM  153  O   HOH T 152      39.408   5.140  76.262  1.00  0.31           O  
HETATM  154  O   HOH T 153      44.663  48.906  66.487  1.00  0.31           O  
HETATM  155  O   HOH T 154      26.896  29.153  44.094  1.00  0.31           O  
HETATM  156  O   HOH T 155      33.081  36.448  68.052  1.00  0.31           O  
HETATM  157  O   HOH T 156      42.359  42.594  41.425  1.00  0.31           O  
HETATM  158  O   HOH T 157      48.020  53.025  62.002  1.00  0.31           O  
HETATM  159  O   HOH T 158      40.748  49.720  56.980  1.00  0.31           O  
HETATM  160  O   HOH T 159      52.200  17.927  94.949  1.00  0.31           O  
HETATM  161  O   HOH T 160      63.234  39.210  33.741  1.00  0.31           O  
HETATM  162  O   HOH T 161      39.899  30.646  60.768  1.00  0.31           O  
HETATM  163  O   HOH T 162      33.286  35.730  63.670  1.00  0.31           O  
HETATM  164  O   HOH T 163      63.279  34.163  54.158  1.00  0.31           O  
HETATM  165  O   HOH T 164      26.070   8.529  67.643  1.00  0.31           O  
HETATM  166  O   HOH T 165      37.887  40.366  93.979  1.00  0.31           O  
HETATM  167  O   HOH T 166      43.645  40.923  48.930  1.00  0.32           O  
HETATM  168  O   HOH T 167       7.573  30.350  71.224  1.00  0.32           O  
HETATM  169  O   HOH T 168      46.225  43.720  40.712  1.00  0.32           O  
HETATM  170  O   HOH T 169      33.158  58.718  38.551  1.00  0.32           O  
HETATM  171  O   HOH T 170      22.625  15.292  72.024  1.00  0.32           O  
HETATM  172  O   HOH T 171      37.745  22.661 105.795  1.00  0.32           O  
HETATM  173  O   HOH T 172      32.974  20.200  87.560  1.00  0.32           O  
HETATM  174  O   HOH T 173      50.520  64.523  51.137  1.00  0.32           O  
HETATM  175  O   HOH T 174      46.109  40.401  93.971  1.00  0.32           O  
HETATM  176  O   HOH T 175      58.019  18.721  83.214  1.00  0.32           O  
HETATM  177  O   HOH T 176      48.764  39.053  88.194  1.00  0.32           O  
HETATM  178  O   HOH T 177      57.805  56.820  32.749  1.00  0.32           O  
HETATM  179  O   HOH T 178      25.267  44.744  79.147  1.00  0.32           O  
HETATM  180  O   HOH T 179      22.570  40.741  87.363  1.00  0.32           O  
HETATM  181  O   HOH T 180      48.633  13.055  73.612  1.00  0.32           O  
HETATM  182  O   HOH T 181      29.610  29.158 100.894  1.00  0.32           O  
HETATM  183  O   HOH T 182      27.590  44.777  77.840  1.00  0.32           O  
HETATM  184  O   HOH T 183      57.667  62.356  42.147  1.00  0.32           O  
HETATM  185  O   HOH T 184      31.339  -4.418  84.208  1.00  0.32           O  
HETATM  186  O   HOH T 185      13.338  18.042  80.740  1.00  0.33           O  
HETATM  187  O   HOH T 186      67.672  39.068  46.808  1.00  0.33           O  
HETATM  188  O   HOH T 187      29.119  40.484  55.639  1.00  0.33           O  
HETATM  189  O   HOH T 188      28.832  40.379  94.606  1.00  0.33           O  
HETATM  190  O   HOH T 189      55.811  36.304  27.474  1.00  0.33           O  
HETATM  191  O   HOH T 190      44.057  44.512 100.085  1.00  0.33           O  
HETATM  192  O   HOH T 191      65.376  38.447  43.593  1.00  0.33           O  
HETATM  193  O   HOH T 192      44.094  56.011  64.109  1.00  0.33           O  
HETATM  194  O   HOH T 193      46.510  38.249  46.100  1.00  0.33           O  
HETATM  195  O   HOH T 194      27.263  46.755  33.131  1.00  0.33           O  
HETATM  196  O   HOH T 195      62.564  34.309  43.203  1.00  0.33           O  
HETATM  197  O   HOH T 196      55.116  55.993  54.209  1.00  0.33           O  
HETATM  198  O   HOH T 197      14.647  13.776  79.757  1.00  0.33           O  
HETATM  199  O   HOH T 198      25.206  35.642  33.978  1.00  0.33           O  
HETATM  200  O   HOH T 199      65.538  39.459  41.018  1.00  0.33           O  
HETATM  201  O   HOH T 200      39.156  58.631  34.419  1.00  0.33           O  
HETATM  202  O   HOH T 201      16.811  47.178  80.447  1.00  0.33           O  
HETATM  203  O   HOH T 202      49.852  19.702  90.008  1.00  0.33           O  
HETATM  204  O   HOH T 203      57.769  16.565  75.825  1.00  0.33           O  
HETATM  205  O   HOH T 204      37.986  40.447  98.767  1.00  0.33           O  
HETATM  206  O   HOH T 205      45.659  34.143  54.760  1.00  0.33           O  
HETATM  207  O   HOH T 206      19.675  11.119  79.751  1.00  0.34           O  
HETATM  208  O   HOH T 207      58.985  36.078  77.357  1.00  0.34           O  
HETATM  209  O   HOH T 208      32.607  30.575  24.210  1.00  0.34           O  
HETATM  210  O   HOH T 209      51.499  65.426  41.417  1.00  0.34           O  
HETATM  211  O   HOH T 210      27.044  38.608  56.001  1.00  0.34           O  
HETATM  212  O   HOH T 211      12.198  13.568  71.957  1.00  0.34           O  
HETATM  213  O   HOH T 212      49.065  21.971  29.381  1.00  0.34           O  
HETATM  214  O   HOH T 213      49.980  23.699  83.588  1.00  0.34           O  
HETATM  215  O   HOH T 214      26.632  10.777  92.779  1.00  0.34           O  
HETATM  216  O   HOH T 215      56.616  58.267  49.193  1.00  0.34           O  
HETATM  217  O   HOH T 216      34.090  47.771  77.769  1.00  0.34           O  
HETATM  218  O   HOH T 217      37.371  22.515  95.200  1.00  0.34           O  
HETATM  219  O   HOH T 218      44.974  41.266  96.326  1.00  0.34           O  
HETATM  220  O   HOH T 219      22.511  34.943  75.284  1.00  0.34           O  
HETATM  221  O   HOH T 220      46.322  41.952  91.736  1.00  0.34           O  
HETATM  222  O   HOH T 221      31.805  32.987  67.755  1.00  0.34           O  
HETATM  223  O   HOH T 222      16.814  38.148  84.013  1.00  0.34           O  
HETATM  224  O   HOH T 223      19.424  19.521  95.126  1.00  0.34           O  
HETATM  225  O   HOH T 224      25.980  37.110  58.730  1.00  0.34           O  
HETATM  226  O   HOH T 225      37.778   3.304  85.975  1.00  0.34           O  
HETATM  227  O   HOH T 226      28.249  35.688  21.224  1.00  0.34           O  
HETATM  228  O   HOH T 227      53.499  26.797  53.523  1.00  0.34           O  
HETATM  229  O   HOH T 228      24.009  45.054  86.225  1.00  0.34           O  
HETATM  230  O   HOH T 229      56.001  34.517  48.050  1.00  0.34           O  
HETATM  231  O   HOH T 230      24.222   7.906  69.707  1.00  0.34           O  
HETATM  232  O   HOH T 231      36.127  47.023  63.080  1.00  0.34           O  
HETATM  233  O   HOH T 232      16.625  41.629  83.444  1.00  0.34           O  
HETATM  234  O   HOH T 233      34.318   4.771  93.222  1.00  0.34           O  
HETATM  235  O   HOH T 234      47.884  23.799  63.090  1.00  0.34           O  
HETATM  236  O   HOH T 235      28.262  50.461  56.678  1.00  0.34           O  
HETATM  237  O   HOH T 236      60.060  42.197  56.042  1.00  0.34           O  
HETATM  238  O   HOH T 237      53.025  22.286  42.394  1.00  0.34           O  
HETATM  239  O   HOH T 238      53.835  49.210  65.072  1.00  0.35           O  
HETATM  240  O   HOH T 239      59.969  31.221  88.286  1.00  0.35           O  
HETATM  241  O   HOH T 240      50.029  56.649  31.170  1.00  0.35           O  
HETATM  242  O   HOH T 241      37.391  31.276  60.285  1.00  0.35           O  
HETATM  243  O   HOH T 242      16.654  36.776  72.103  1.00  0.35           O  
HETATM  244  O   HOH T 243      36.712  45.527  90.014  1.00  0.35           O  
HETATM  245  O   HOH T 244      25.741   5.943  78.994  1.00  0.35           O  
HETATM  246  O   HOH T 245      26.054  27.062  58.120  1.00  0.35           O  
HETATM  247  O   HOH T 246      22.226  26.817  99.130  1.00  0.35           O  
HETATM  248  O   HOH T 247      30.215  11.311  67.792  1.00  0.35           O  
HETATM  249  O   HOH T 248      48.503  42.377  47.198  1.00  0.35           O  
HETATM  250  O   HOH T 249      37.572  44.866  63.487  1.00  0.35           O  
HETATM  251  O   HOH T 250      48.784  13.388  92.496  1.00  0.35           O  
HETATM  252  O   HOH T 251      40.470  45.293  34.760  1.00  0.35           O  
HETATM  253  O   HOH T 252      34.004  59.860  43.833  1.00  0.35           O  
HETATM  254  O   HOH T 253      47.276  43.832  65.692  1.00  0.35           O  
HETATM  255  O   HOH T 254      42.129  17.925  98.371  1.00  0.35           O  
HETATM  256  O   HOH T 255      49.277  42.013  70.503  1.00  0.35           O  
HETATM  257  O   HOH T 256      49.364   9.874  81.296  1.00  0.35           O  
HETATM  258  O   HOH T 257      59.375  56.971  53.395  1.00  0.35           O  
HETATM  259  O   HOH T 258      64.822  43.582  38.765  1.00  0.35           O  
HETATM  260  O   HOH T 259      14.824  28.644  89.247  1.00  0.35           O  
HETATM  261  O   HOH T 260      54.981  27.276  33.149  1.00  0.35           O  
HETATM  262  O   HOH T 261      71.147  46.874  54.045  1.00  0.35           O  
HETATM  263  O   HOH T 262      51.286  28.159  28.081  1.00  0.35           O  
HETATM  264  O   HOH T 263      44.002  47.421  43.004  1.00  0.35           O  
HETATM  265  O   HOH T 264      12.677  19.922  87.003  1.00  0.35           O  
HETATM  266  O   HOH T 265      44.173  50.681  33.319  1.00  0.35           O  
HETATM  267  O   HOH T 266      48.407  24.699  28.838  1.00  0.35           O  
HETATM  268  O   HOH T 267      36.588  21.615  92.811  1.00  0.35           O  
HETATM  269  O   HOH T 268       8.997  25.785  70.759  1.00  0.35           O  
HETATM  270  O   HOH T 269      36.602  65.803  45.592  1.00  0.35           O  
HETATM  271  O   HOH T 270      31.839  34.978  65.930  1.00  0.35           O  
HETATM  272  O   HOH T 271      24.153  31.444  51.676  1.00  0.35           O  
HETATM  273  O   HOH T 272      24.173  44.682  42.739  1.00  0.35           O  
HETATM  274  O   HOH T 273      44.438  18.361 101.383  1.00  0.36           O  
HETATM  275  O   HOH T 274      38.714  55.199  35.805  1.00  0.36           O  
HETATM  276  O   HOH T 275      62.607  56.387  46.006  1.00  0.36           O  
HETATM  277  O   HOH T 276      39.426  28.822  24.657  1.00  0.36           O  
HETATM  278  O   HOH T 277      56.596  40.393  54.451  1.00  0.36           O  
HETATM  279  O   HOH T 278      30.528  28.020  75.490  1.00  0.36           O  
HETATM  280  O   HOH T 279      34.922   7.070  68.646  1.00  0.36           O  
HETATM  281  O   HOH T 280      17.057  24.846  91.659  1.00  0.36           O  
HETATM  282  O   HOH T 281      40.590  44.702  69.610  1.00  0.36           O  
HETATM  283  O   HOH T 282      37.093   6.144  70.144  1.00  0.36           O  
HETATM  284  O   HOH T 283      42.910  20.256  99.876  1.00  0.36           O  
HETATM  285  O   HOH T 284      35.652  10.519  88.553  1.00  0.36           O  
HETATM  286  O   HOH T 285      25.226  19.493  67.512  1.00  0.36           O  
HETATM  287  O   HOH T 286      28.042  33.010  70.693  1.00  0.36           O  
HETATM  288  O   HOH T 287      13.123  21.239  77.446  1.00  0.36           O  
HETATM  289  O   HOH T 288      49.761  41.225  86.836  1.00  0.36           O  
HETATM  290  O   HOH T 289      17.550  18.453  93.385  1.00  0.36           O  
HETATM  291  O   HOH T 290      36.601  63.036  43.011  1.00  0.36           O  
HETATM  292  O   HOH T 291      21.165  36.418  97.225  1.00  0.36           O  
HETATM  293  O   HOH T 292      22.617  20.468  97.224  1.00  0.36           O  
HETATM  294  O   HOH T 293      43.010  25.231  32.613  1.00  0.36           O  
HETATM  295  O   HOH T 294      53.713  29.356  28.998  1.00  0.36           O  
HETATM  296  O   HOH T 295      57.542  42.974  55.079  1.00  0.36           O  
HETATM  297  O   HOH T 296      19.371  28.511  59.937  1.00  0.36           O  
HETATM  298  O   HOH T 297      46.461  46.334  42.214  1.00  0.36           O  
HETATM  299  O   HOH T 298      37.749  18.000  59.748  1.00  0.36           O  
HETATM  300  O   HOH T 299      53.596  22.635  69.722  1.00  0.36           O  
HETATM  301  O   HOH T 300      45.988  67.676  39.644  1.00  0.36           O  
HETATM  302  O   HOH T 301      54.645  66.481  53.284  1.00  0.36           O  
HETATM  303  O   HOH T 302      42.475  51.514  37.949  1.00  0.36           O  
HETATM  304  O   HOH T 303      51.355  65.993  34.803  1.00  0.36           O  
HETATM  305  O   HOH T 304      60.490  50.526  29.167  1.00  0.36           O  
HETATM  306  O   HOH T 305      47.918  18.998  56.082  1.00  0.36           O  
HETATM  307  O   HOH T 306      54.297  22.593  79.984  1.00  0.36           O  
HETATM  308  O   HOH T 307      15.267  33.773  85.886  1.00  0.36           O  
HETATM  309  O   HOH T 308      10.793  27.096  81.580  1.00  0.37           O  
HETATM  310  O   HOH T 309      13.115  24.234  74.319  1.00  0.37           O  
HETATM  311  O   HOH T 310      43.521  45.216  44.601  1.00  0.37           O  
HETATM  312  O   HOH T 311      38.884   5.447  72.006  1.00  0.37           O  
HETATM  313  O   HOH T 312      12.653  21.961  70.411  1.00  0.37           O  
HETATM  314  O   HOH T 313      27.249  21.212  99.132  1.00  0.37           O  
HETATM  315  O   HOH T 314      47.394  37.260  67.806  1.00  0.37           O  
HETATM  316  O   HOH T 315      38.049  42.023  24.243  1.00  0.37           O  
HETATM  317  O   HOH T 316      14.554  26.071  75.979  1.00  0.37           O  
HETATM  318  O   HOH T 317      32.730  23.082  80.628  1.00  0.37           O  
HETATM  319  O   HOH T 318      33.533  14.912  91.652  1.00  0.37           O  
HETATM  320  O   HOH T 319      26.690  37.251  25.356  1.00  0.37           O  
HETATM  321  O   HOH T 320      35.008  17.980  96.143  1.00  0.37           O  
HETATM  322  O   HOH T 321      16.893  21.718  97.650  1.00  0.37           O  
HETATM  323  O   HOH T 322      24.986   7.950  75.613  1.00  0.37           O  
HETATM  324  O   HOH T 323      39.258  23.994  40.594  1.00  0.37           O  
HETATM  325  O   HOH T 324      49.511  20.159  60.658  1.00  0.37           O  
HETATM  326  O   HOH T 325      17.579  30.666  90.740  1.00  0.37           O  
HETATM  327  O   HOH T 326      37.355  42.289  92.094  1.00  0.37           O  
HETATM  328  O   HOH T 327      36.873  26.286  81.882  1.00  0.37           O  
HETATM  329  O   HOH T 328      42.897  23.034  99.107  1.00  0.37           O  
HETATM  330  O   HOH T 329      29.884   4.216  79.427  1.00  0.37           O  
HETATM  331  O   HOH T 330      56.611  22.316  81.682  1.00  0.37           O  
HETATM  332  O   HOH T 331      16.152  20.908  88.799  1.00  0.37           O  
HETATM  333  O   HOH T 332      65.055  45.020  33.454  1.00  0.37           O  
HETATM  334  O   HOH T 333      27.821  30.602  35.801  1.00  0.37           O  
HETATM  335  O   HOH T 334      34.088  26.806  83.983  1.00  0.37           O  
HETATM  336  O   HOH T 335      31.990  37.853  73.874  1.00  0.37           O  
HETATM  337  O   HOH T 336      18.347  27.785  64.329  1.00  0.37           O  
HETATM  338  O   HOH T 337      43.084  45.973  68.928  1.00  0.37           O  
HETATM  339  O   HOH T 338      45.439  61.683  56.956  1.00  0.37           O  
HETATM  340  O   HOH T 339      16.211  22.484  92.992  1.00  0.37           O  
HETATM  341  O   HOH T 340      30.764   7.461  97.981  1.00  0.37           O  
HETATM  342  O   HOH T 341      44.445  32.959  97.727  1.00  0.37           O  
HETATM  343  O   HOH T 342      29.313  28.324  49.627  1.00  0.37           O  
HETATM  344  O   HOH T 343      63.754  35.446  38.873  1.00  0.37           O  
HETATM  345  O   HOH T 344      25.766  20.744  62.461  1.00  0.38           O  
HETATM  346  O   HOH T 345      38.333  11.491  67.454  1.00  0.38           O  
HETATM  347  O   HOH T 346      56.365  20.883  84.112  1.00  0.38           O  
HETATM  348  O   HOH T 347      42.069  27.074  42.323  1.00  0.38           O  
HETATM  349  O   HOH T 348      42.581  11.318  87.797  1.00  0.38           O  
HETATM  350  O   HOH T 349      55.761  25.981  37.025  1.00  0.38           O  
HETATM  351  O   HOH T 350      41.451  19.268 104.075  1.00  0.38           O  
HETATM  352  O   HOH T 351      50.192  28.863  25.771  1.00  0.38           O  
HETATM  353  O   HOH T 352      58.938  58.929  40.947  1.00  0.38           O  
HETATM  354  O   HOH T 353      38.787  43.891  87.250  1.00  0.38           O  
HETATM  355  O   HOH T 354      22.757  36.507  55.105  1.00  0.38           O  
HETATM  356  O   HOH T 355      25.094  38.718  98.190  1.00  0.38           O  
HETATM  357  O   HOH T 356      44.819  36.380  90.601  1.00  0.38           O  
HETATM  358  O   HOH T 357      39.968   1.283  78.065  1.00  0.38           O  
HETATM  359  O   HOH T 358      29.962  37.890  75.874  1.00  0.38           O  
HETATM  360  O   HOH T 359      44.909  49.295  35.697  1.00  0.38           O  
HETATM  361  O   HOH T 360      58.602  58.171  51.043  1.00  0.38           O  
HETATM  362  O   HOH T 361      54.140  64.618  57.270  1.00  0.38           O  
HETATM  363  O   HOH T 362      33.166  17.773  94.098  1.00  0.38           O  
HETATM  364  O   HOH T 363      18.360  54.760  42.255  1.00  0.38           O  
HETATM  365  O   HOH T 364      15.974  34.978  80.091  1.00  0.38           O  
HETATM  366  O   HOH T 365      26.797  36.655  40.523  1.00  0.38           O  
HETATM  367  O   HOH T 366      62.179  41.604  54.464  1.00  0.38           O  
HETATM  368  O   HOH T 367      44.682  53.320  34.078  1.00  0.38           O  
HETATM  369  O   HOH T 368      49.569  21.959  78.430  1.00  0.38           O  
HETATM  370  O   HOH T 369       8.754  28.098  72.189  1.00  0.38           O  
HETATM  371  O   HOH T 370      62.380  55.657  37.664  1.00  0.38           O  
HETATM  372  O   HOH T 371      29.409  34.070  23.087  1.00  0.38           O  
HETATM  373  O   HOH T 372      50.082  41.077  51.652  1.00  0.38           O  
HETATM  374  O   HOH T 373      23.102  49.915  31.652  1.00  0.38           O  
HETATM  375  O   HOH T 374      12.633  38.352  78.876  1.00  0.38           O  
HETATM  376  O   HOH T 375      42.137  48.709  22.600  1.00  0.38           O  
HETATM  377  O   HOH T 376      45.566  44.933  67.679  1.00  0.38           O  
HETATM  378  O   HOH T 377      23.801  32.482  54.258  1.00  0.38           O  
HETATM  379  O   HOH T 378      24.998  37.961  54.147  1.00  0.38           O  
HETATM  380  O   HOH T 379      35.220  22.421  79.501  1.00  0.38           O  
HETATM  381  O   HOH T 380      57.755  32.695  27.427  1.00  0.39           O  
HETATM  382  O   HOH T 381      67.347  45.213  52.543  1.00  0.39           O  
HETATM  383  O   HOH T 382      32.521   6.614  67.295  1.00  0.39           O  
HETATM  384  O   HOH T 383      49.555  34.235  51.475  1.00  0.39           O  
HETATM  385  O   HOH T 384      60.730  34.999  33.964  1.00  0.39           O  
HETATM  386  O   HOH T 385      22.800  32.248  41.992  1.00  0.39           O  
HETATM  387  O   HOH T 386      27.135  40.012  96.766  1.00  0.39           O  
HETATM  388  O   HOH T 387      57.512  63.003  51.705  1.00  0.39           O  
HETATM  389  O   HOH T 388      56.945  29.201  32.744  1.00  0.39           O  
HETATM  390  O   HOH T 389      46.437  62.568  40.937  1.00  0.39           O  
HETATM  391  O   HOH T 390      37.747  12.354  62.472  1.00  0.39           O  
HETATM  392  O   HOH T 391      29.943  48.995  86.015  1.00  0.39           O  
HETATM  393  O   HOH T 392      34.339  27.948 101.545  1.00  0.39           O  
HETATM  394  O   HOH T 393      37.979  41.918  71.185  1.00  0.39           O  
HETATM  395  O   HOH T 394      53.545  22.007  87.503  1.00  0.39           O  
HETATM  396  O   HOH T 395      34.693  24.873  34.001  1.00  0.39           O  
HETATM  397  O   HOH T 396      29.766  20.321  99.718  1.00  0.39           O  
HETATM  398  O   HOH T 397      40.227  47.239  28.882  1.00  0.39           O  
HETATM  399  O   HOH T 398      51.856  16.054  84.675  1.00  0.39           O  
HETATM  400  O   HOH T 399      53.335  52.240  26.770  1.00  0.39           O  
HETATM  401  O   HOH T 400      56.813  57.857  53.170  1.00  0.39           O  
HETATM  402  O   HOH T 401      63.558  51.157  55.140  1.00  0.39           O  
HETATM  403  O   HOH T 402      28.323  21.083  61.432  1.00  0.39           O  
HETATM  404  O   HOH T 403      53.780  35.295  82.650  1.00  0.39           O  
HETATM  405  O   HOH T 404      23.410  38.675  50.417  1.00  0.39           O  
HETATM  406  O   HOH T 405      42.625  17.668  49.440  1.00  0.39           O  
HETATM  407  O   HOH T 406      41.983   8.291  61.398  1.00  0.39           O  
HETATM  408  O   HOH T 407      19.404   8.803  81.199  1.00  0.39           O  
HETATM  409  O   HOH T 408      35.689  23.308  87.143  1.00  0.39           O  
HETATM  410  O   HOH T 409      54.845  61.930  56.888  1.00  0.39           O  
HETATM  411  O   HOH T 410      29.184  42.634  78.278  1.00  0.39           O  
HETATM  412  O   HOH T 411      30.926  50.877  47.095  1.00  0.39           O  
HETATM  413  O   HOH T 412      52.523  19.250  68.998  1.00  0.39           O  
HETATM  414  O   HOH T 413      35.410  53.662  33.873  1.00  0.39           O  
HETATM  415  O   HOH T 414      27.577  18.608 100.027  1.00  0.39           O  
HETATM  416  O   HOH T 415      52.460  20.233  89.280  1.00  0.39           O  
HETATM  417  O   HOH T 416      32.217  33.148  76.238  1.00  0.39           O  
HETATM  418  O   HOH T 417      56.624  31.017  76.906  1.00  0.40           O  
HETATM  419  O   HOH T 418      32.853  25.741  79.912  1.00  0.40           O  
HETATM  420  O   HOH T 419      40.469  53.389  36.887  1.00  0.40           O  
HETATM  421  O   HOH T 420      36.793  48.458  34.012  1.00  0.40           O  
HETATM  422  O   HOH T 421      25.904  16.219  96.417  1.00  0.40           O  
HETATM  423  O   HOH T 422      38.935   4.783  90.741  1.00  0.40           O  
HETATM  424  O   HOH T 423      35.317  34.054 102.080  1.00  0.40           O  
HETATM  425  O   HOH T 424      44.744  43.839  97.354  1.00  0.40           O  
HETATM  426  O   HOH T 425      36.534  23.062  32.958  1.00  0.40           O  
HETATM  427  O   HOH T 426      44.366  49.398  38.388  1.00  0.40           O  
HETATM  428  O   HOH T 427      26.865  44.032  88.814  1.00  0.40           O  
HETATM  429  O   HOH T 428      41.847   6.376  76.398  1.00  0.40           O  
HETATM  430  O   HOH T 429      37.849  56.450  33.489  1.00  0.40           O  
HETATM  431  O   HOH T 430      35.651  10.506  67.131  1.00  0.40           O  
HETATM  432  O   HOH T 431      21.970  18.435  95.261  1.00  0.40           O  
HETATM  433  O   HOH T 432      52.134  22.743  94.265  1.00  0.40           O  
HETATM  434  O   HOH T 433      31.769  35.823  75.847  1.00  0.40           O  
HETATM  435  O   HOH T 434      49.695  36.545  69.149  1.00  0.40           O  
HETATM  436  O   HOH T 435      40.490  46.951  73.796  1.00  0.40           O  
HETATM  437  O   HOH T 436      33.344  47.702  83.132  1.00  0.40           O  
HETATM  438  O   HOH T 437      65.648  34.545  52.702  1.00  0.40           O  
HETATM  439  O   HOH T 438      64.804  41.833  55.309  1.00  0.40           O  
HETATM  440  O   HOH T 439      21.753  36.525  49.902  1.00  0.40           O  
HETATM  441  O   HOH T 440      24.895  19.495  64.773  1.00  0.40           O  
HETATM  442  O   HOH T 441      50.454  22.418  47.372  1.00  0.40           O  
HETATM  443  O   HOH T 442      64.213  44.726  36.202  1.00  0.40           O  
HETATM  444  O   HOH T 443      28.126  55.019  48.663  1.00  0.40           O  
HETATM  445  O   HOH T 444      55.985  21.595  90.781  1.00  0.40           O  
HETATM  446  O   HOH T 445      31.915  25.027  68.276  1.00  0.40           O  
HETATM  447  O   HOH T 446      28.792   2.940  89.127  1.00  0.40           O  
HETATM  448  O   HOH T 447      12.789  22.641  79.797  1.00  0.40           O  
HETATM  449  O   HOH T 448      38.845  27.685  29.415  1.00  0.40           O  
HETATM  450  O   HOH T 449      44.551  20.246  29.960  1.00  0.40           O  
HETATM  451  O   HOH T 450      51.881  21.724  67.856  1.00  0.40           O  
HETATM  452  O   HOH T 451      20.281  35.222  48.041  1.00  0.40           O  
HETATM  453  O   HOH T 452       9.263  13.719  80.224  1.00  0.40           O  
HETATM  454  O   HOH T 453      23.831  47.066  79.639  1.00  0.40           O  
HETATM  455  O   HOH T 454      46.471  33.795  57.391  1.00  0.40           O  
HETATM  456  O   HOH T 455      38.872  41.342  96.363  1.00  0.40           O  
HETATM  457  O   HOH T 456      55.181  51.494  60.752  1.00  0.40           O  
HETATM  458  O   HOH T 457      45.164  46.886  37.253  1.00  0.40           O  
HETATM  459  O   HOH T 458      30.088  31.691  24.420  1.00  0.40           O  
HETATM  460  O   HOH T 459      11.786  30.595  83.256  1.00  0.40           O  
HETATM  461  O   HOH T 460      22.122  54.833  48.601  1.00  0.40           O  
HETATM  462  O   HOH T 461      31.472   5.059  96.736  1.00  0.40           O  
HETATM  463  O   HOH T 462      28.211  28.258  41.784  1.00  0.40           O  
HETATM  464  O   HOH T 463      35.121  41.974  21.890  1.00  0.40           O  
HETATM  465  O   HOH T 464      64.182  54.953  47.785  1.00  0.40           O  
HETATM  466  O   HOH T 465      30.694   3.832  87.257  1.00  0.40           O  
HETATM  467  O   HOH T 466      22.016  40.388  52.047  1.00  0.40           O  
HETATM  468  O   HOH T 467      35.631  48.831  21.194  1.00  0.40           O  
HETATM  469  O   HOH T 468      26.370  50.427  30.259  1.00  0.41           O  
HETATM  470  O   HOH T 469      41.239  60.058  56.682  1.00  0.41           O  
HETATM  471  O   HOH T 470      51.056  64.615  32.445  1.00  0.41           O  
HETATM  472  O   HOH T 471      50.468  26.593  58.242  1.00  0.41           O  
HETATM  473  O   HOH T 472      39.641  49.087  21.405  1.00  0.41           O  
HETATM  474  O   HOH T 473      35.944  25.567  31.710  1.00  0.41           O  
HETATM  475  O   HOH T 474      51.719  14.297  86.866  1.00  0.41           O  
HETATM  476  O   HOH T 475      47.779  17.747  86.938  1.00  0.41           O  
HETATM  477  O   HOH T 476      33.222  30.644  26.916  1.00  0.41           O  
HETATM  478  O   HOH T 477      35.505  48.793  26.138  1.00  0.41           O  
HETATM  479  O   HOH T 478      33.844  55.470  45.408  1.00  0.41           O  
HETATM  480  O   HOH T 479      15.426  23.882  96.599  1.00  0.41           O  
HETATM  481  O   HOH T 480      39.648  20.755  87.151  1.00  0.41           O  
HETATM  482  O   HOH T 481      67.556  40.101  42.902  1.00  0.41           O  
HETATM  483  O   HOH T 482      17.742  46.313  42.223  1.00  0.41           O  
HETATM  484  O   HOH T 483      52.051  42.305  78.169  1.00  0.41           O  
HETATM  485  O   HOH T 484      21.730  40.613  49.236  1.00  0.41           O  
HETATM  486  O   HOH T 485      10.714  32.351  85.057  1.00  0.41           O  
HETATM  487  O   HOH T 486      33.611  13.204  89.536  1.00  0.41           O  
HETATM  488  O   HOH T 487      38.926  48.730  65.354  1.00  0.41           O  
HETATM  489  O   HOH T 488      43.679  43.785  39.361  1.00  0.41           O  
HETATM  490  O   HOH T 489      22.387  42.915  51.039  1.00  0.41           O  
HETATM  491  O   HOH T 490      51.129  33.408  92.118  1.00  0.41           O  
HETATM  492  O   HOH T 491      50.262  19.041  80.995  1.00  0.41           O  
HETATM  493  O   HOH T 492      42.845  35.032  97.291  1.00  0.41           O  
HETATM  494  O   HOH T 493      60.478  57.028  33.810  1.00  0.41           O  
HETATM  495  O   HOH T 494      38.018  26.917 104.509  1.00  0.41           O  
HETATM  496  O   HOH T 495      64.531  45.223  46.080  1.00  0.41           O  
HETATM  497  O   HOH T 496      19.814  51.802  53.682  1.00  0.41           O  
HETATM  498  O   HOH T 497      25.116  10.363  65.779  1.00  0.41           O  
HETATM  499  O   HOH T 498      35.437  26.638  79.583  1.00  0.41           O  
HETATM  500  O   HOH T 499      46.770  28.499  28.923  1.00  0.41           O  
HETATM  501  O   HOH T 500      49.368  59.166  30.437  1.00  0.41           O  
HETATM  502  O   HOH T 501      23.170  40.524  35.681  1.00  0.41           O  
HETATM  503  O   HOH T 502      48.249  16.827  64.715  1.00  0.42           O  
HETATM  504  O   HOH T 503      54.389  49.860  25.910  1.00  0.42           O  
HETATM  505  O   HOH T 504      40.710  27.244  37.918  1.00  0.42           O  
HETATM  506  O   HOH T 505      39.771  48.583  18.677  1.00  0.42           O  
HETATM  507  O   HOH T 506      37.067  64.148  53.747  1.00  0.42           O  
HETATM  508  O   HOH T 507      60.376  57.130  55.977  1.00  0.42           O  
HETATM  509  O   HOH T 508      34.698  37.094  73.968  1.00  0.42           O  
HETATM  510  O   HOH T 509      47.304  57.347  30.644  1.00  0.42           O  
HETATM  511  O   HOH T 510      35.029  19.928  91.168  1.00  0.42           O  
HETATM  512  O   HOH T 511      43.531  60.542  53.307  1.00  0.42           O  
HETATM  513  O   HOH T 512      40.972  32.803  48.252  1.00  0.42           O  
HETATM  514  O   HOH T 513      44.380  43.982  87.576  1.00  0.42           O  
HETATM  515  O   HOH T 514      57.347  30.980  34.890  1.00  0.42           O  
HETATM  516  O   HOH T 515      48.354  20.943  63.047  1.00  0.42           O  
HETATM  517  O   HOH T 516      44.661  43.540  46.422  1.00  0.42           O  
HETATM  518  O   HOH T 517      35.971  50.051  68.202  1.00  0.42           O  
HETATM  519  O   HOH T 518      56.592  34.165  52.820  1.00  0.42           O  
HETATM  520  O   HOH T 519      25.153  44.816  40.213  1.00  0.42           O  
HETATM  521  O   HOH T 520      24.022  48.915  33.997  1.00  0.42           O  
HETATM  522  O   HOH T 521      25.936  53.696  52.001  1.00  0.42           O  
HETATM  523  O   HOH T 522      17.130  15.465  89.323  1.00  0.42           O  
HETATM  524  O   HOH T 523      45.086  52.566  31.443  1.00  0.42           O  
HETATM  525  O   HOH T 524      64.701  49.339  56.763  1.00  0.42           O  
HETATM  526  O   HOH T 525      12.978  24.149  87.199  1.00  0.42           O  
HETATM  527  O   HOH T 526      50.961  40.384  54.241  1.00  0.42           O  
HETATM  528  O   HOH T 527      64.396  55.401  39.565  1.00  0.42           O  
HETATM  529  O   HOH T 528      58.116  62.774  54.362  1.00  0.42           O  
HETATM  530  O   HOH T 529      22.018  15.887  91.637  1.00  0.42           O  
HETATM  531  O   HOH T 530      32.415  54.422  37.480  1.00  0.42           O  
HETATM  532  O   HOH T 531      17.012  31.082  95.667  1.00  0.42           O  
HETATM  533  O   HOH T 532      56.179  66.324  56.926  1.00  0.42           O  
HETATM  534  O   HOH T 533      60.330  61.185  54.450  1.00  0.42           O  
HETATM  535  O   HOH T 534      31.352  49.096  81.626  1.00  0.42           O  
HETATM  536  O   HOH T 535      31.319  56.096  57.441  1.00  0.42           O  
HETATM  537  O   HOH T 536      37.210  43.603  66.694  1.00  0.42           O  
HETATM  538  O   HOH T 537      43.742   6.423  74.326  1.00  0.42           O  
HETATM  539  O   HOH T 538      13.130  15.349  70.119  1.00  0.42           O  
HETATM  540  O   HOH T 539      66.642  53.794  39.120  1.00  0.42           O  
HETATM  541  O   HOH T 540      23.468  45.701  77.247  1.00  0.42           O  
HETATM  542  O   HOH T 541      30.038   7.734  87.327  1.00  0.42           O  
HETATM  543  O   HOH T 542      18.474  32.842  92.151  1.00  0.42           O  
HETATM  544  O   HOH T 543      19.495  16.305  90.614  1.00  0.43           O  
HETATM  545  O   HOH T 544      15.339  37.305  78.455  1.00  0.43           O  
HETATM  546  O   HOH T 545      25.954  28.222  53.575  1.00  0.43           O  
HETATM  547  O   HOH T 546      52.252  61.194  56.439  1.00  0.43           O  
HETATM  548  O   HOH T 547      37.472  61.754  55.134  1.00  0.43           O  
HETATM  549  O   HOH T 548      22.068  30.205  50.311  1.00  0.43           O  
HETATM  550  O   HOH T 549      58.240  14.074  74.661  1.00  0.43           O  
HETATM  551  O   HOH T 550      29.049   7.171  84.821  1.00  0.43           O  
HETATM  552  O   HOH T 551      27.064  56.202  34.645  1.00  0.43           O  
HETATM  553  O   HOH T 552      32.211  48.783  87.436  1.00  0.43           O  
HETATM  554  O   HOH T 553      43.075  49.047  31.363  1.00  0.43           O  
HETATM  555  O   HOH T 554      43.839   7.777  71.843  1.00  0.43           O  
HETATM  556  O   HOH T 555      16.580  33.260  90.223  1.00  0.43           O  
HETATM  557  O   HOH T 556      11.292  16.550  84.934  1.00  0.43           O  
HETATM  558  O   HOH T 557      28.924  10.703  94.417  1.00  0.43           O  
HETATM  559  O   HOH T 558      56.571  18.820  74.731  1.00  0.43           O  
HETATM  560  O   HOH T 559      55.947  20.689  86.885  1.00  0.43           O  
HETATM  561  O   HOH T 560      29.273   5.549  88.233  1.00  0.43           O  
HETATM  562  O   HOH T 561      63.173  36.416  34.153  1.00  0.43           O  
HETATM  563  O   HOH T 562      57.828  64.010  38.956  1.00  0.43           O  
HETATM  564  O   HOH T 563      38.886   4.751  87.967  1.00  0.43           O  
HETATM  565  O   HOH T 564      45.751  38.879  21.124  1.00  0.43           O  
HETATM  566  O   HOH T 565      34.441  51.374  32.498  1.00  0.43           O  
HETATM  567  O   HOH T 566      64.655  42.001  36.336  1.00  0.43           O  
HETATM  568  O   HOH T 567      17.429  42.963  85.683  1.00  0.43           O  
HETATM  569  O   HOH T 568      41.451  25.597  40.095  1.00  0.43           O  
HETATM  570  O   HOH T 569      16.145  36.451  86.034  1.00  0.43           O  
HETATM  571  O   HOH T 570      32.570  32.129  78.753  1.00  0.43           O  
HETATM  572  O   HOH T 571      34.704  45.888  75.659  1.00  0.43           O  
HETATM  573  O   HOH T 572      26.498  39.732  32.895  1.00  0.43           O  
HETATM  574  O   HOH T 573      48.085  39.172  65.021  1.00  0.43           O  
HETATM  575  O   HOH T 574      23.568  38.396  72.424  1.00  0.43           O  
HETATM  576  O   HOH T 575      61.337  57.823  36.337  1.00  0.43           O  
HETATM  577  O   HOH T 576      46.110  13.585  61.574  1.00  0.43           O  
HETATM  578  O   HOH T 577      20.793  30.962  59.892  1.00  0.43           O  
HETATM  579  O   HOH T 578      31.251  60.778  44.196  1.00  0.43           O  
HETATM  580  O   HOH T 579      35.689  44.439  92.352  1.00  0.43           O  
HETATM  581  O   HOH T 580      48.807  34.180  20.713  1.00  0.43           O  
HETATM  582  O   HOH T 581      16.306  12.935  88.343  1.00  0.43           O  
HETATM  583  O   HOH T 582      51.867  36.057  70.799  1.00  0.43           O  
HETATM  584  O   HOH T 583      46.436  56.778  63.044  1.00  0.44           O  
HETATM  585  O   HOH T 584      57.440  51.923  59.137  1.00  0.44           O  
HETATM  586  O   HOH T 585      46.249  40.600  23.302  1.00  0.44           O  
HETATM  587  O   HOH T 586      32.943  45.530  61.461  1.00  0.44           O  
HETATM  588  O   HOH T 587      46.948  43.882  43.456  1.00  0.44           O  
HETATM  589  O   HOH T 588      64.470  38.088  38.732  1.00  0.44           O  
HETATM  590  O   HOH T 589      29.047  50.931  30.190  1.00  0.44           O  
HETATM  591  O   HOH T 590      49.315  25.421  64.882  1.00  0.44           O  
HETATM  592  O   HOH T 591      36.516   6.556  93.246  1.00  0.44           O  
HETATM  593  O   HOH T 592      34.048  39.601  72.913  1.00  0.44           O  
HETATM  594  O   HOH T 593      28.022  56.915  46.549  1.00  0.44           O  
HETATM  595  O   HOH T 594      34.102  18.926  40.789  1.00  0.44           O  
HETATM  596  O   HOH T 595      45.599  46.522  69.928  1.00  0.44           O  
HETATM  597  O   HOH T 596      28.527   6.673  78.851  1.00  0.44           O  
HETATM  598  O   HOH T 597      51.176  24.387  59.753  1.00  0.44           O  
HETATM  599  O   HOH T 598      35.768  26.052 102.979  1.00  0.44           O  
HETATM  600  O   HOH T 599      65.850  46.074  37.928  1.00  0.44           O  
HETATM  601  O   HOH T 600      33.408  11.140  65.517  1.00  0.44           O  
HETATM  602  O   HOH T 601      35.101  11.302  63.350  1.00  0.44           O  
HETATM  603  O   HOH T 602      62.506  54.147  44.276  1.00  0.44           O  
HETATM  604  O   HOH T 603      28.092  32.952  41.037  1.00  0.44           O  
HETATM  605  O   HOH T 604      49.252  21.255  53.177  1.00  0.44           O  
HETATM  606  O   HOH T 605      27.605  10.801  66.947  1.00  0.44           O  
HETATM  607  O   HOH T 606      23.009   3.681  77.176  1.00  0.44           O  
HETATM  608  O   HOH T 607      37.693  51.063  66.348  1.00  0.44           O  
HETATM  609  O   HOH T 608      38.197  24.132  38.005  1.00  0.44           O  
HETATM  610  O   HOH T 609      34.104  69.564  49.361  1.00  0.44           O  
HETATM  611  O   HOH T 610      51.107  67.329  32.297  1.00  0.44           O  
HETATM  612  O   HOH T 611      15.459  30.046  72.945  1.00  0.44           O  
HETATM  613  O   HOH T 612      26.114  42.224  33.893  1.00  0.44           O  
HETATM  614  O   HOH T 613      50.133  40.716  56.825  1.00  0.44           O  
HETATM  615  O   HOH T 614      50.235  25.082  62.276  1.00  0.44           O  
HETATM  616  O   HOH T 615      26.513  44.725  34.927  1.00  0.44           O  
HETATM  617  O   HOH T 616      23.187  42.164  41.837  1.00  0.44           O  
HETATM  618  O   HOH T 617      23.350  36.403  63.712  1.00  0.44           O  
HETATM  619  O   HOH T 618      28.405  39.659  62.488  1.00  0.44           O  
HETATM  620  O   HOH T 619      35.007  62.400  54.264  1.00  0.44           O  
HETATM  621  O   HOH T 620      19.830  45.510  40.565  1.00  0.44           O  
HETATM  622  O   HOH T 621      21.629  45.766  42.634  1.00  0.44           O  
HETATM  623  O   HOH T 622      27.330  40.736  57.812  1.00  0.44           O  
HETATM  624  O   HOH T 623      27.204   5.673  86.340  1.00  0.44           O  
HETATM  625  O   HOH T 624      29.775  63.015  45.105  1.00  0.44           O  
HETATM  626  O   HOH T 625      46.215  18.957  58.263  1.00  0.44           O  
HETATM  627  O   HOH T 626      36.389  65.428  48.370  1.00  0.44           O  
HETATM  628  O   HOH T 627      49.049  19.850  50.918  1.00  0.44           O  
HETATM  629  O   HOH T 628      31.617   9.190  66.493  1.00  0.44           O  
HETATM  630  O   HOH T 629      16.899  20.657  95.039  1.00  0.44           O  
HETATM  631  O   HOH T 630      54.517  21.941  93.116  1.00  0.44           O  
HETATM  632  O   HOH T 631      61.874  36.207  31.700  1.00  0.44           O  
HETATM  633  O   HOH T 632      43.171  22.772  34.012  1.00  0.44           O  
HETATM  634  O   HOH T 633      53.639  22.284  37.554  1.00  0.44           O  
HETATM  635  O   HOH T 634      49.298  36.672  86.846  1.00  0.44           O  
HETATM  636  O   HOH T 635      66.782  33.962  50.316  1.00  0.44           O  
HETATM  637  O   HOH T 636      43.913  44.215  79.599  1.00  0.45           O  
HETATM  638  O   HOH T 637      39.460   7.651  70.329  1.00  0.45           O  
HETATM  639  O   HOH T 638      57.038  65.111  53.360  1.00  0.45           O  
HETATM  640  O   HOH T 639      32.877  60.000  51.962  1.00  0.45           O  
HETATM  641  O   HOH T 640      35.828  52.766  67.595  1.00  0.45           O  
HETATM  642  O   HOH T 641      18.218  33.788  69.427  1.00  0.45           O  
HETATM  643  O   HOH T 642      37.112  50.532  64.253  1.00  0.45           O  
HETATM  644  O   HOH T 643      48.935  18.511  58.510  1.00  0.45           O  
HETATM  645  O   HOH T 644      50.061  33.930  94.618  1.00  0.45           O  
HETATM  646  O   HOH T 645      50.207  31.426  95.747  1.00  0.45           O  
HETATM  647  O   HOH T 646      42.794  49.650  28.572  1.00  0.45           O  
HETATM  648  O   HOH T 647      42.815  21.337  31.689  1.00  0.45           O  
HETATM  649  O   HOH T 648      12.527  16.016  82.448  1.00  0.45           O  
HETATM  650  O   HOH T 649      34.902  50.811  65.808  1.00  0.45           O  
HETATM  651  O   HOH T 650      17.002  12.717  77.057  1.00  0.45           O  
HETATM  652  O   HOH T 651      38.602  13.127  58.210  1.00  0.45           O  
HETATM  653  O   HOH T 652      47.393  61.622  63.394  1.00  0.45           O  
HETATM  654  O   HOH T 653      24.806  42.896  36.211  1.00  0.45           O  
HETATM  655  O   HOH T 654      52.031  34.749  89.834  1.00  0.45           O  
HETATM  656  O   HOH T 655      11.439  22.535  72.818  1.00  0.45           O  
HETATM  657  O   HOH T 656      50.130  35.626  53.856  1.00  0.45           O  
HETATM  658  O   HOH T 657      40.564  56.668  33.030  1.00  0.45           O  
HETATM  659  O   HOH T 658      33.330  22.585  85.888  1.00  0.45           O  
HETATM  660  O   HOH T 659      15.348  10.527  74.489  1.00  0.45           O  
HETATM  661  O   HOH T 660      38.852  45.567  82.726  1.00  0.45           O  
HETATM  662  O   HOH T 661      23.200  15.974  95.687  1.00  0.45           O  
HETATM  663  O   HOH T 662      24.738  36.079  36.572  1.00  0.45           O  
HETATM  664  O   HOH T 663      63.471  44.228  31.317  1.00  0.45           O  
HETATM  665  O   HOH T 664      40.489  46.998  40.470  1.00  0.45           O  
HETATM  666  O   HOH T 665      65.927  46.756  35.257  1.00  0.45           O  
HETATM  667  O   HOH T 666      50.526  19.747  40.599  1.00  0.45           O  
HETATM  668  O   HOH T 667      49.064   7.419  82.725  1.00  0.46           O  
HETATM  669  O   HOH T 668      52.426  44.693  79.512  1.00  0.46           O  
HETATM  670  O   HOH T 669      24.469  53.798  49.700  1.00  0.46           O  
HETATM  671  O   HOH T 670      34.255  41.826  18.409  1.00  0.46           O  
HETATM  672  O   HOH T 671      60.023  28.987  49.385  1.00  0.46           O  
HETATM  673  O   HOH T 672      29.998  56.697  44.660  1.00  0.46           O  
HETATM  674  O   HOH T 673      40.457  12.687  68.894  1.00  0.46           O  
HETATM  675  O   HOH T 674      22.764  36.125  67.727  1.00  0.46           O  
HETATM  676  O   HOH T 675      32.530  57.503  44.249  1.00  0.46           O  
HETATM  677  O   HOH T 676      28.142  48.356  30.967  1.00  0.46           O  
HETATM  678  O   HOH T 677      56.070  28.540  35.344  1.00  0.46           O  
HETATM  679  O   HOH T 678      34.016  21.639  41.382  1.00  0.46           O  
HETATM  680  O   HOH T 679      33.093  62.700  39.497  1.00  0.46           O  
HETATM  681  O   HOH T 680      41.321   8.855  63.970  1.00  0.46           O  
HETATM  682  O   HOH T 681      46.968  42.815  21.775  1.00  0.46           O  
HETATM  683  O   HOH T 682      44.539   8.532  86.590  1.00  0.46           O  
HETATM  684  O   HOH T 683      20.121  29.774  57.508  1.00  0.46           O  
HETATM  685  O   HOH T 684      23.273   6.467  77.510  1.00  0.46           O  
HETATM  686  O   HOH T 685      55.738  20.295  72.628  1.00  0.46           O  
HETATM  687  O   HOH T 686      45.450  30.274  22.844  1.00  0.46           O  
HETATM  688  O   HOH T 687      50.655  61.604  29.881  1.00  0.46           O  
HETATM  689  O   HOH T 688      21.248  52.176  48.734  1.00  0.46           O  
HETATM  690  O   HOH T 689      26.866  35.139  23.572  1.00  0.46           O  
HETATM  691  O   HOH T 690      60.018  59.296  38.311  1.00  0.46           O  
HETATM  692  O   HOH T 691      41.640  48.896  38.663  1.00  0.46           O  
HETATM  693  O   HOH T 692      34.386  17.019  42.949  1.00  0.46           O  
HETATM  694  O   HOH T 693      37.312   0.674  85.966  1.00  0.46           O  
HETATM  695  O   HOH T 694      46.396  54.173  64.109  1.00  0.46           O  
HETATM  696  O   HOH T 695      47.999  15.524  62.271  1.00  0.46           O  
HETATM  697  O   HOH T 696      41.076  44.593  72.475  1.00  0.46           O  
HETATM  698  O   HOH T 697      17.961  45.675  85.388  1.00  0.46           O  
HETATM  699  O   HOH T 698      37.706  24.332 103.691  1.00  0.46           O  
HETATM  700  O   HOH T 699      65.389  32.278  54.368  1.00  0.46           O  
HETATM  701  O   HOH T 700      37.859  49.553  16.972  1.00  0.46           O  
HETATM  702  O   HOH T 701      24.374  56.648  35.002  1.00  0.46           O  
HETATM  703  O   HOH T 702      56.130  57.900  55.904  1.00  0.46           O  
HETATM  704  O   HOH T 703      35.962  18.853  83.580  1.00  0.46           O  
HETATM  705  O   HOH T 704      56.229  27.275  48.690  1.00  0.46           O  
HETATM  706  O   HOH T 705      38.322  22.096  82.918  1.00  0.46           O  
HETATM  707  O   HOH T 706      40.986  23.363  32.342  1.00  0.46           O  
HETATM  708  O   HOH T 707      16.628  34.042  71.619  1.00  0.46           O  
HETATM  709  O   HOH T 708      58.343  56.941  60.293  1.00  0.46           O  
HETATM  710  O   HOH T 709      22.592  42.795  85.567  1.00  0.46           O  
HETATM  711  O   HOH T 710      23.680  49.255  54.594  1.00  0.46           O  
HETATM  712  O   HOH T 711      43.680  45.866  71.840  1.00  0.46           O  
HETATM  713  O   HOH T 712      58.890  59.191  33.591  1.00  0.46           O  
HETATM  714  O   HOH T 713      34.603  21.766  89.176  1.00  0.46           O  
HETATM  715  O   HOH T 714      44.339  38.482  23.559  1.00  0.46           O  
HETATM  716  O   HOH T 715      37.938  46.018  73.719  1.00  0.46           O  
HETATM  717  O   HOH T 716      38.109  49.232  26.555  1.00  0.46           O  
HETATM  718  O   HOH T 717      44.840  42.288  42.615  1.00  0.46           O  
HETATM  719  O   HOH T 718      29.562  52.600  43.815  1.00  0.46           O  
HETATM  720  O   HOH T 719      44.141  14.510  59.707  1.00  0.46           O  
HETATM  721  O   HOH T 720      57.742  40.876  56.898  1.00  0.47           O  
HETATM  722  O   HOH T 721      15.741  26.619  95.899  1.00  0.47           O  
HETATM  723  O   HOH T 722      25.112  14.269  94.684  1.00  0.47           O  
HETATM  724  O   HOH T 723      31.650  48.878  78.804  1.00  0.47           O  
HETATM  725  O   HOH T 724      14.504  12.964  75.674  1.00  0.47           O  
HETATM  726  O   HOH T 725      43.665  29.566  96.457  1.00  0.47           O  
HETATM  727  O   HOH T 726      37.271  10.796  64.875  1.00  0.47           O  
HETATM  728  O   HOH T 727      47.061  37.846  94.828  1.00  0.47           O  
HETATM  729  O   HOH T 728      41.509   6.363  71.416  1.00  0.47           O  
HETATM  730  O   HOH T 729      15.366  34.978  88.327  1.00  0.47           O  
HETATM  731  O   HOH T 730      39.024  22.106  33.885  1.00  0.47           O  
HETATM  732  O   HOH T 731      10.061  23.279  70.502  1.00  0.47           O  
HETATM  733  O   HOH T 732      46.356  43.356  48.601  1.00  0.47           O  
HETATM  734  O   HOH T 733      50.280  22.864  63.965  1.00  0.47           O  
HETATM  735  O   HOH T 734      53.669  42.348  80.510  1.00  0.47           O  
HETATM  736  O   HOH T 735      62.679  43.104  56.656  1.00  0.47           O  
HETATM  737  O   HOH T 736      64.261  34.293  41.209  1.00  0.47           O  
HETATM  738  O   HOH T 737       7.817  11.388  79.816  1.00  0.47           O  
HETATM  739  O   HOH T 738      23.536  28.946  52.439  1.00  0.47           O  
HETATM  740  O   HOH T 739      17.687  35.782  89.548  1.00  0.47           O  
HETATM  741  O   HOH T 740       9.270   9.442  80.978  1.00  0.47           O  
HETATM  742  O   HOH T 741      45.749  64.908  42.361  1.00  0.47           O  
HETATM  743  O   HOH T 742      43.012  62.153  51.022  1.00  0.47           O  
HETATM  744  O   HOH T 743      57.410  32.553  73.373  1.00  0.47           O  
HETATM  745  O   HOH T 744      52.657  38.255  53.606  1.00  0.47           O  
HETATM  746  O   HOH T 745      55.010  53.082  58.412  1.00  0.47           O  
HETATM  747  O   HOH T 746      27.157  42.433  98.051  1.00  0.47           O  
HETATM  748  O   HOH T 747      28.925  41.108  60.040  1.00  0.47           O  
HETATM  749  O   HOH T 748      20.830  42.835  87.776  1.00  0.47           O  
HETATM  750  O   HOH T 749      39.415  44.815  89.774  1.00  0.47           O  
HETATM  751  O   HOH T 750      31.527  61.528  41.503  1.00  0.47           O  
HETATM  752  O   HOH T 751      41.297  46.779  83.321  1.00  0.47           O  
HETATM  753  O   HOH T 752      59.288  32.919  35.186  1.00  0.47           O  
HETATM  754  O   HOH T 753      41.274  22.434  55.102  1.00  0.47           O  
HETATM  755  O   HOH T 754      53.343  35.923  85.332  1.00  0.47           O  
HETATM  756  O   HOH T 755      47.865  43.120  86.897  1.00  0.47           O  
HETATM  757  O   HOH T 756      58.682  36.350  72.949  1.00  0.47           O  
HETATM  758  O   HOH T 757      37.818  59.324  56.398  1.00  0.47           O  
HETATM  759  O   HOH T 758      39.903   3.186  80.133  1.00  0.47           O  
HETATM  760  O   HOH T 759      57.649  60.643  50.345  1.00  0.47           O  
HETATM  761  O   HOH T 760      27.030   6.295  76.510  1.00  0.47           O  
HETATM  762  O   HOH T 761      36.655  51.178  34.090  1.00  0.47           O  
HETATM  763  O   HOH T 762      58.338  28.176  47.300  1.00  0.48           O  
HETATM  764  O   HOH T 763      48.940  44.537  63.488  1.00  0.48           O  
HETATM  765  O   HOH T 764      33.374  47.615  80.477  1.00  0.48           O  
HETATM  766  O   HOH T 765      20.267  17.774  93.005  1.00  0.48           O  
HETATM  767  O   HOH T 766      24.016  18.123  97.120  1.00  0.48           O  
HETATM  768  O   HOH T 767      46.026  27.055  26.694  1.00  0.48           O  
HETATM  769  O   HOH T 768      10.625  20.201  77.152  1.00  0.48           O  
HETATM  770  O   HOH T 769      56.893  60.574  47.745  1.00  0.48           O  
HETATM  771  O   HOH T 770      47.597  35.054  94.413  1.00  0.48           O  
HETATM  772  O   HOH T 771      15.181  26.953  91.542  1.00  0.48           O  
HETATM  773  O   HOH T 772      23.610  37.857  34.694  1.00  0.48           O  
HETATM  774  O   HOH T 773      21.492  33.994  54.800  1.00  0.48           O  
HETATM  775  O   HOH T 774      14.282  22.927  89.401  1.00  0.48           O  
HETATM  776  O   HOH T 775      32.642  53.037  46.269  1.00  0.48           O  
HETATM  777  O   HOH T 776      23.278  38.327  37.391  1.00  0.48           O  
HETATM  778  O   HOH T 777      58.152  56.688  57.557  1.00  0.48           O  
HETATM  779  O   HOH T 778      17.225  26.360  62.219  1.00  0.48           O  
HETATM  780  O   HOH T 779      30.600  57.828  38.779  1.00  0.48           O  
HETATM  781  O   HOH T 780      31.190   2.282  77.672  1.00  0.48           O  
HETATM  782  O   HOH T 781      41.527  38.868  64.337  1.00  0.48           O  
HETATM  783  O   HOH T 782      58.326  61.309  39.497  1.00  0.48           O  
HETATM  784  O   HOH T 783      49.430  23.187  80.926  1.00  0.48           O  
HETATM  785  O   HOH T 784      32.799   6.626  94.779  1.00  0.48           O  
HETATM  786  O   HOH T 785      17.462  48.419  44.015  1.00  0.48           O  
HETATM  787  O   HOH T 786      26.724   4.708  88.908  1.00  0.48           O  
HETATM  788  O   HOH T 787      50.501  21.197  82.719  1.00  0.48           O  
HETATM  789  O   HOH T 788      36.476  68.092  48.901  1.00  0.48           O  
HETATM  790  O   HOH T 789      39.068  15.476  86.023  1.00  0.48           O  
HETATM  791  O   HOH T 790      51.400  20.475  95.766  1.00  0.48           O  
HETATM  792  O   HOH T 791      57.741  34.814  75.122  1.00  0.48           O  
HETATM  793  O   HOH T 792      25.361  48.184  31.628  1.00  0.48           O  
HETATM  794  O   HOH T 793      42.991  61.458  58.231  1.00  0.48           O  
HETATM  795  O   HOH T 794      23.084   8.569  73.771  1.00  0.48           O  
HETATM  796  O   HOH T 795      40.819  48.836  26.793  1.00  0.48           O  
HETATM  797  O   HOH T 796      33.406  -3.041  85.352  1.00  0.48           O  
HETATM  798  O   HOH T 797      10.360  27.244  77.661  1.00  0.48           O  
HETATM  799  O   HOH T 798      36.723  12.919  60.086  1.00  0.48           O  
HETATM  800  O   HOH T 799      19.273  25.745  60.399  1.00  0.48           O  
HETATM  801  O   HOH T 800      26.749  35.031  38.241  1.00  0.48           O  
HETATM  802  O   HOH T 801      27.390  12.975  94.202  1.00  0.48           O  
HETATM  803  O   HOH T 802      39.293  47.225  16.287  1.00  0.48           O  
HETATM  804  O   HOH T 803      38.095  49.726  36.168  1.00  0.48           O  
HETATM  805  O   HOH T 804      37.529   2.516  78.910  1.00  0.48           O  
HETATM  806  O   HOH T 805      56.912  38.588  81.241  1.00  0.48           O  
HETATM  807  O   HOH T 806      21.753  50.127  52.662  1.00  0.48           O  
HETATM  808  O   HOH T 807      27.631  55.270  40.399  1.00  0.48           O  
HETATM  809  O   HOH T 808      66.442  50.244  37.028  1.00  0.48           O  
HETATM  810  O   HOH T 809      42.013  46.025  80.709  1.00  0.48           O  
HETATM  811  O   HOH T 810      34.285  20.062  85.256  1.00  0.48           O  
HETATM  812  O   HOH T 811      34.856  30.848  77.926  1.00  0.48           O  
HETATM  813  O   HOH T 812      51.039  35.324  21.810  1.00  0.49           O  
HETATM  814  O   HOH T 813      49.327  19.879  47.462  1.00  0.49           O  
HETATM  815  O   HOH T 814      49.840  44.657  66.099  1.00  0.49           O  
HETATM  816  O   HOH T 815      35.959  21.163  81.920  1.00  0.49           O  
HETATM  817  O   HOH T 816      27.333  57.630  49.126  1.00  0.49           O  
HETATM  818  O   HOH T 817      60.998  57.846  47.759  1.00  0.49           O  
HETATM  819  O   HOH T 818      49.730  61.909  61.869  1.00  0.49           O  
HETATM  820  O   HOH T 819      16.391  39.941  78.346  1.00  0.49           O  
HETATM  821  O   HOH T 820      56.320  30.381  71.843  1.00  0.49           O  
HETATM  822  O   HOH T 821      22.760  36.352  47.326  1.00  0.49           O  
HETATM  823  O   HOH T 822      55.695  47.604  25.199  1.00  0.49           O  
HETATM  824  O   HOH T 823      38.788  60.118  68.206  1.00  0.49           O  
HETATM  825  O   HOH T 824      53.417  40.753  52.873  1.00  0.49           O  
HETATM  826  O   HOH T 825      51.344  23.652  87.567  1.00  0.49           O  
HETATM  827  O   HOH T 826      43.608  15.783  89.632  1.00  0.49           O  
HETATM  828  O   HOH T 827      45.459  61.665  49.788  1.00  0.49           O  
HETATM  829  O   HOH T 828      12.221  17.243  87.499  1.00  0.49           O  
HETATM  830  O   HOH T 829      46.053  24.347  27.526  1.00  0.49           O  
HETATM  831  O   HOH T 830      13.906  34.196  81.930  1.00  0.49           O  
HETATM  832  O   HOH T 831      40.073  46.108  92.144  1.00  0.49           O  
HETATM  833  O   HOH T 832      34.755  49.325  63.380  1.00  0.49           O  
HETATM  834  O   HOH T 833      24.125  29.834  41.961  1.00  0.49           O  
HETATM  835  O   HOH T 834      28.170  55.043  52.771  1.00  0.49           O  
HETATM  836  O   HOH T 835      25.709  58.319  47.001  1.00  0.49           O  
HETATM  837  O   HOH T 836      33.294  30.723  75.538  1.00  0.49           O  
HETATM  838  O   HOH T 837      46.953   6.456  85.063  1.00  0.49           O  
HETATM  839  O   HOH T 838      48.623  13.770  66.357  1.00  0.49           O  
HETATM  840  O   HOH T 839      57.458  28.652  29.997  1.00  0.49           O  
HETATM  841  O   HOH T 840      30.324  11.824  96.594  1.00  0.49           O  
HETATM  842  O   HOH T 841      58.945  30.414  28.402  1.00  0.49           O  
HETATM  843  O   HOH T 842      41.205  61.524  54.292  1.00  0.49           O  
HETATM  844  O   HOH T 843      29.321  55.043  42.604  1.00  0.49           O  
HETATM  845  O   HOH T 844      40.533  10.098  66.317  1.00  0.49           O  
HETATM  846  O   HOH T 845      68.591  52.266  40.169  1.00  0.49           O  
HETATM  847  O   HOH T 846      16.027  20.025  91.515  1.00  0.49           O  
HETATM  848  O   HOH T 847      26.721  39.437  60.223  1.00  0.49           O  
HETATM  849  O   HOH T 848      14.504  24.642  78.445  1.00  0.50           O  
HETATM  850  O   HOH T 849      45.825  44.075  89.945  1.00  0.50           O  
HETATM  851  O   HOH T 850      27.584  33.291  36.244  1.00  0.50           O  
HETATM  852  O   HOH T 851      38.234  44.481  93.505  1.00  0.50           O  
HETATM  853  O   HOH T 852      20.261  26.692 101.142  1.00  0.50           O  
HETATM  854  O   HOH T 853      24.431   6.906  81.319  1.00  0.50           O  
HETATM  855  O   HOH T 854      25.335  33.074  41.120  1.00  0.50           O  
HETATM  856  O   HOH T 855      50.955  11.628  73.621  1.00  0.50           O  
HETATM  857  O   HOH T 856      23.398  38.074  59.366  1.00  0.50           O  
HETATM  858  O   HOH T 857      12.511  29.209  81.003  1.00  0.50           O  
HETATM  859  O   HOH T 858      36.876   3.843  92.446  1.00  0.50           O  
HETATM  860  O   HOH T 859      21.523  37.419  57.483  1.00  0.50           O  
HETATM  861  O   HOH T 860      51.939  36.367  87.657  1.00  0.50           O  
HETATM  862  O   HOH T 861      51.235  53.788  25.779  1.00  0.50           O  
HETATM  863  O   HOH T 862      43.906   8.184  76.511  1.00  0.50           O  
HETATM  864  O   HOH T 863      19.491  12.864  71.911  1.00  0.50           O  
HETATM  865  O   HOH T 864      21.759  31.304  55.719  1.00  0.50           O  
HETATM  866  O   HOH T 865      24.160  29.833  55.094  1.00  0.50           O  
HETATM  867  O   HOH T 866      41.038  62.799  56.714  1.00  0.50           O  
HETATM  868  O   HOH T 867      38.421  46.583  88.028  1.00  0.50           O  
HETATM  869  O   HOH T 868      57.671  22.089  88.562  1.00  0.50           O  
HETATM  870  O   HOH T 869      28.957   3.963  84.988  1.00  0.50           O  
HETATM  871  O   HOH T 870      65.664  54.170  49.990  1.00  0.50           O  
HETATM  872  O   HOH T 871      23.884  34.939  31.727  1.00  0.50           O  
HETATM  873  O   HOH T 872      33.866  34.860 104.310  1.00  0.50           O  
HETATM  874  O   HOH T 873      19.115  20.100  97.890  1.00  0.50           O  
HETATM  875  O   HOH T 874      52.162  26.837  56.008  1.00  0.50           O  
HETATM  876  O   HOH T 875      29.209   5.512  82.708  1.00  0.50           O  
HETATM  877  O   HOH T 876      43.858  46.446  84.435  1.00  0.50           O  
HETATM  878  O   HOH T 877      18.885  45.593  81.097  1.00  0.50           O  
HETATM  879  O   HOH T 878      12.910  11.526  73.723  1.00  0.50           O  
HETATM  880  O   HOH T 879      56.824  27.510  43.700  1.00  0.50           O  
HETATM  881  O   HOH T 880      11.948  14.527  80.148  1.00  0.50           O  
HETATM  882  O   HOH T 881      39.620  47.129  31.496  1.00  0.50           O  
HETATM  883  O   HOH T 882      49.804  19.998  36.517  1.00  0.50           O  
HETATM  884  O   HOH T 883      50.574  17.826  43.626  1.00  0.50           O  
HETATM  885  O   HOH T 884      49.967  33.877  71.089  1.00  0.50           O  
HETATM  886  O   HOH T 885      29.828  56.855  34.814  1.00  0.50           O  
HETATM  887  O   HOH T 886      57.530  64.025  44.518  1.00  0.50           O  
HETATM  888  O   HOH T 887      46.352  37.055  97.475  1.00  0.51           O  
HETATM  889  O   HOH T 888      47.147  12.055  75.694  1.00  0.51           O  
HETATM  890  O   HOH T 889      47.645  31.707  20.264  1.00  0.51           O  
HETATM  891  O   HOH T 890      27.857  41.330  76.032  1.00  0.51           O  
HETATM  892  O   HOH T 891      21.892  28.501  55.925  1.00  0.51           O  
HETATM  893  O   HOH T 892      42.097  49.108  19.930  1.00  0.51           O  
HETATM  894  O   HOH T 893      47.690  39.238  98.522  1.00  0.51           O  
HETATM  895  O   HOH T 894      47.823  15.067  90.688  1.00  0.51           O  
HETATM  896  O   HOH T 895      23.443  43.193  88.255  1.00  0.51           O  
HETATM  897  O   HOH T 896      57.990  23.375  91.038  1.00  0.51           O  
HETATM  898  O   HOH T 897      24.249  39.594  39.685  1.00  0.51           O  
HETATM  899  O   HOH T 898      44.628  10.062  89.011  1.00  0.51           O  
HETATM  900  O   HOH T 899      35.393  63.550  40.599  1.00  0.51           O  
HETATM  901  O   HOH T 900      50.336  38.775  58.668  1.00  0.51           O  
HETATM  902  O   HOH T 901      67.132  50.170  55.484  1.00  0.51           O  
HETATM  903  O   HOH T 902      43.108  20.355  54.356  1.00  0.51           O  
HETATM  904  O   HOH T 903      39.637   9.520  62.013  1.00  0.51           O  
HETATM  905  O   HOH T 904      28.368  23.641  60.872  1.00  0.51           O  
HETATM  906  O   HOH T 905      14.913  26.549  80.308  1.00  0.51           O  
HETATM  907  O   HOH T 906      28.671  28.159  34.911  1.00  0.51           O  
HETATM  908  O   HOH T 907      36.000  20.222  42.539  1.00  0.51           O  
HETATM  909  O   HOH T 908      19.529  48.235  80.258  1.00  0.51           O  
HETATM  910  O   HOH T 909      30.212  53.518  47.468  1.00  0.51           O  
HETATM  911  O   HOH T 910      52.299  20.229  93.228  1.00  0.51           O  
HETATM  912  O   HOH T 911      27.734  26.928  47.701  1.00  0.51           O  
HETATM  913  O   HOH T 912      36.461  48.136  89.327  1.00  0.51           O  
HETATM  914  O   HOH T 913      39.579   0.048  87.416  1.00  0.51           O  
HETATM  915  O   HOH T 914      19.601  43.287  73.809  1.00  0.52           O  
HETATM  916  O   HOH T 915      49.841  41.475  59.469  1.00  0.52           O  
HETATM  917  O   HOH T 916      16.266  18.149  89.527  1.00  0.52           O  
HETATM  918  O   HOH T 917      38.080  13.025  86.233  1.00  0.52           O  
HETATM  919  O   HOH T 918      14.404  32.774  79.486  1.00  0.52           O  
HETATM  920  O   HOH T 919      20.438  53.836  46.515  1.00  0.52           O  
HETATM  921  O   HOH T 920      18.188  43.965  83.202  1.00  0.52           O  
HETATM  922  O   HOH T 921      48.757  55.332  63.250  1.00  0.52           O  
HETATM  923  O   HOH T 922      40.010  12.051  87.827  1.00  0.52           O  
HETATM  924  O   HOH T 923      37.900  39.301  24.890  1.00  0.52           O  
HETATM  925  O   HOH T 924      35.071  19.722  93.954  1.00  0.52           O  
HETATM  926  O   HOH T 925      55.151  34.589  80.478  1.00  0.52           O  
HETATM  927  O   HOH T 926      32.354  37.638  65.577  1.00  0.52           O  
HETATM  928  O   HOH T 927      59.673  21.028  36.714  1.00  0.52           O  
HETATM  929  O   HOH T 928      40.289  61.380  59.000  1.00  0.52           O  
HETATM  930  O   HOH T 929      36.504  16.414  86.291  1.00  0.52           O  
HETATM  931  O   HOH T 930      50.685  23.750  66.551  1.00  0.52           O  
HETATM  932  O   HOH T 931      34.922  36.312 100.374  1.00  0.52           O  
HETATM  933  O   HOH T 932      55.009  27.212  30.311  1.00  0.52           O  
HETATM  934  O   HOH T 933      50.588  52.538  60.817  1.00  0.52           O  
HETATM  935  O   HOH T 934      48.744  27.155  27.444  1.00  0.52           O  
HETATM  936  O   HOH T 935      32.617  38.910 100.195  1.00  0.52           O  
HETATM  937  O   HOH T 936      48.377  34.486  55.542  1.00  0.52           O  
HETATM  938  O   HOH T 937      29.850  52.517  57.560  1.00  0.52           O  
HETATM  939  O   HOH T 938      28.763  30.876  39.325  1.00  0.52           O  
HETATM  940  O   HOH T 939      22.679  47.755  84.225  1.00  0.52           O  
HETATM  941  O   HOH T 940      46.217  39.156  91.544  1.00  0.52           O  
HETATM  942  O   HOH T 941      33.104  59.376  62.105  1.00  0.52           O  
HETATM  943  O   HOH T 942      57.150  54.666  59.210  1.00  0.52           O  
HETATM  944  O   HOH T 943      22.940  20.407  62.875  1.00  0.52           O  
HETATM  945  O   HOH T 944      26.376  38.858  27.553  1.00  0.52           O  
HETATM  946  O   HOH T 945      52.593  61.502  31.869  1.00  0.53           O  
HETATM  947  O   HOH T 946      43.789  33.384  77.850  1.00  0.53           O  
HETATM  948  O   HOH T 947      11.213  33.227  82.393  1.00  0.53           O  
HETATM  949  O   HOH T 948      20.457  54.506  43.909  1.00  0.53           O  
HETATM  950  O   HOH T 949      57.372  22.445  75.641  1.00  0.53           O  
HETATM  951  O   HOH T 950      43.082  10.353  65.260  1.00  0.53           O  
HETATM  952  O   HOH T 951      26.636   4.924  94.784  1.00  0.53           O  
HETATM  953  O   HOH T 952      32.373  28.250 103.429  1.00  0.53           O  
HETATM  954  O   HOH T 953      35.712  50.165  18.678  1.00  0.53           O  
HETATM  955  O   HOH T 954      44.594  26.041  99.570  1.00  0.53           O  
HETATM  956  O   HOH T 955      38.549  24.776  47.861  1.00  0.53           O  
HETATM  957  O   HOH T 956      42.707  45.991  86.947  1.00  0.53           O  
HETATM  958  O   HOH T 957      54.368  38.978  70.297  1.00  0.53           O  
HETATM  959  O   HOH T 958      28.980  59.221  45.113  1.00  0.53           O  
HETATM  960  O   HOH T 959      20.062  46.177  83.638  1.00  0.53           O  
HETATM  961  O   HOH T 960      56.238  23.165  36.911  1.00  0.53           O  
HETATM  962  O   HOH T 961      66.292  39.728  54.187  1.00  0.53           O  
HETATM  963  O   HOH T 962      47.918  18.766  53.248  1.00  0.53           O  
HETATM  964  O   HOH T 963      21.914  37.185  61.546  1.00  0.53           O  
HETATM  965  O   HOH T 964      50.395  33.116  67.470  1.00  0.53           O  
HETATM  966  O   HOH T 965      36.162  29.778 102.416  1.00  0.53           O  
HETATM  967  O   HOH T 966      37.195  47.132  76.054  1.00  0.53           O  
HETATM  968  O   HOH T 967      29.263  49.630  83.503  1.00  0.53           O  
HETATM  969  O   HOH T 968      54.973  54.281  27.453  1.00  0.53           O  
HETATM  970  O   HOH T 969      31.630  58.314  36.328  1.00  0.53           O  
HETATM  971  O   HOH T 970      56.186  24.628  76.865  1.00  0.53           O  
HETATM  972  O   HOH T 971      46.576  14.441  64.397  1.00  0.53           O  
HETATM  973  O   HOH T 972      26.350  44.354  32.177  1.00  0.53           O  
HETATM  974  O   HOH T 973      56.730  38.694  26.501  1.00  0.53           O  
HETATM  975  O   HOH T 974      34.723  49.978  88.202  1.00  0.53           O  
HETATM  976  O   HOH T 975      26.852  30.632  41.583  1.00  0.53           O  
HETATM  977  O   HOH T 976      29.946  38.854  64.795  1.00  0.53           O  
HETATM  978  O   HOH T 977      51.915  20.292  38.284  1.00  0.53           O  
HETATM  979  O   HOH T 978      41.945  47.065  33.079  1.00  0.53           O  
HETATM  980  O   HOH T 979      23.346   8.768  67.198  1.00  0.53           O  
HETATM  981  O   HOH T 980      20.011  43.837  85.325  1.00  0.53           O  
HETATM  982  O   HOH T 981      19.791  25.006 103.318  1.00  0.53           O  
HETATM  983  O   HOH T 982      29.779   7.172  66.755  1.00  0.53           O  
HETATM  984  O   HOH T 983      43.975   8.737  63.226  1.00  0.53           O  
HETATM  985  O   HOH T 984      39.808  44.563  80.250  1.00  0.53           O  
HETATM  986  O   HOH T 985      59.798  41.340  29.699  1.00  0.53           O  
HETATM  987  O   HOH T 986      31.292  54.134  59.446  1.00  0.54           O  
HETATM  988  O   HOH T 987      33.366  17.733  91.263  1.00  0.54           O  
HETATM  989  O   HOH T 988      49.501  37.286  97.968  1.00  0.54           O  
HETATM  990  O   HOH T 989      47.564  30.351  95.871  1.00  0.54           O  
HETATM  991  O   HOH T 990      60.630  33.854  31.451  1.00  0.54           O  
HETATM  992  O   HOH T 991      28.189  15.944 100.551  1.00  0.54           O  
HETATM  993  O   HOH T 992      38.944  64.159  42.329  1.00  0.54           O  
HETATM  994  O   HOH T 993      29.773  19.639  59.662  1.00  0.54           O  
HETATM  995  O   HOH T 994      15.149  29.259  96.462  1.00  0.54           O  
HETATM  996  O   HOH T 995      27.496   7.802  82.534  1.00  0.54           O  
HETATM  997  O   HOH T 996      46.422  62.586  61.036  1.00  0.54           O  
HETATM  998  O   HOH T 997      33.008  44.838  91.705  1.00  0.54           O  
HETATM  999  O   HOH T 998      68.847  47.550  52.663  1.00  0.54           O  
HETATM 1000  O   HOH T 999      48.443  20.153  38.888  1.00  0.54           O  
HETATM 1001  O   HOH T1000      58.721  32.439  75.907  1.00  0.54           O  
HETATM 1002  O   HOH T1001      59.183  10.574  76.340  1.00  0.54           O  
HETATM 1003  O   HOH T1002      20.110   6.925  83.210  1.00  0.54           O  
HETATM 1004  O   HOH T1003      23.613  52.136  51.835  1.00  0.54           O  
HETATM 1005  O   HOH T1004      26.592  32.548 102.227  1.00  0.54           O  
HETATM 1006  O   HOH T1005      40.941   5.285  73.972  1.00  0.54           O  
HETATM 1007  O   HOH T1006      52.147  20.938  44.622  1.00  0.54           O  
HETATM 1008  O   HOH T1007      22.328  38.905  97.980  1.00  0.54           O  
HETATM 1009  O   HOH T1008      25.888  47.003  77.736  1.00  0.54           O  
HETATM 1010  O   HOH T1009      46.212  64.893  39.586  1.00  0.55           O  
HETATM 1011  O   HOH T1010      35.330  24.852  37.955  1.00  0.55           O  
HETATM 1012  O   HOH T1011      52.659  20.227  80.180  1.00  0.55           O  
HETATM 1013  O   HOH T1012      15.294  17.082  69.583  1.00  0.55           O  
HETATM 1014  O   HOH T1013      28.925   4.164  96.084  1.00  0.55           O  
HETATM 1015  O   HOH T1014      34.015  15.491  95.527  1.00  0.55           O  
HETATM 1016  O   HOH T1015      27.548  27.457  55.817  1.00  0.55           O  
HETATM 1017  O   HOH T1016      36.765  48.013  78.554  1.00  0.55           O  
HETATM 1018  O   HOH T1017      28.265   1.713  94.763  1.00  0.55           O  
HETATM 1019  O   HOH T1018      23.480  38.102  43.678  1.00  0.55           O  
HETATM 1020  O   HOH T1019      28.986  55.092  56.672  1.00  0.55           O  
HETATM 1021  O   HOH T1020      64.963  35.655  43.525  1.00  0.55           O  
HETATM 1022  O   HOH T1021      59.331  27.577  93.357  1.00  0.55           O  
HETATM 1023  O   HOH T1022      54.335  22.688  34.962  1.00  0.55           O  
HETATM 1024  O   HOH T1023      40.494   6.573  89.299  1.00  0.55           O  
HETATM 1025  O   HOH T1024      13.037  30.799  72.044  1.00  0.55           O  
HETATM 1026  O   HOH T1025      24.110   5.567  71.219  1.00  0.55           O  
HETATM 1027  O   HOH T1026      51.065  38.856  86.695  1.00  0.55           O  
HETATM 1028  O   HOH T1027      16.928  43.919  76.872  1.00  0.55           O  
HETATM 1029  O   HOH T1028      50.399  17.733  46.310  1.00  0.55           O  
HETATM 1030  O   HOH T1029      36.438  46.063  65.748  1.00  0.56           O  
HETATM 1031  O   HOH T1030      31.673  25.736  56.724  1.00  0.56           O  
HETATM 1032  O   HOH T1031      14.670  25.100  98.853  1.00  0.56           O  
HETATM 1033  O   HOH T1032      64.995  50.356  27.764  1.00  0.56           O  
HETATM 1034  O   HOH T1033      56.042  10.420  78.578  1.00  0.56           O  
HETATM 1035  O   HOH T1034      14.151  25.771  89.241  1.00  0.56           O  
HETATM 1036  O   HOH T1035      42.917  18.521  56.583  1.00  0.56           O  
HETATM 1037  O   HOH T1036      26.849  42.954  22.567  1.00  0.56           O  
HETATM 1038  O   HOH T1037      17.063  20.044  65.562  1.00  0.56           O  
HETATM 1039  O   HOH T1038      35.533  60.612  61.584  1.00  0.56           O  
HETATM 1040  O   HOH T1039      35.595  47.799  31.593  1.00  0.56           O  
HETATM 1041  O   HOH T1040      24.913  42.191  39.586  1.00  0.56           O  
HETATM 1042  O   HOH T1041      54.369  33.298  89.895  1.00  0.56           O  
HETATM 1043  O   HOH T1042      26.446  40.311  22.608  1.00  0.56           O  
HETATM 1044  O   HOH T1043      29.995  56.547  54.509  1.00  0.56           O  
HETATM 1045  O   HOH T1044      45.408  55.246  30.501  1.00  0.56           O  
HETATM 1046  O   HOH T1045      30.682  28.359  40.447  1.00  0.57           O  
HETATM 1047  O   HOH T1046      36.654  24.213  54.849  1.00  0.57           O  
HETATM 1048  O   HOH T1047      41.249  49.576  54.124  1.00  0.57           O  
HETATM 1049  O   HOH T1048      30.721  43.769  61.535  1.00  0.57           O  
HETATM 1050  O   HOH T1049      33.971  16.182  89.198  1.00  0.57           O  
HETATM 1051  O   HOH T1050      21.649  29.891  42.806  1.00  0.57           O  
HETATM 1052  O   HOH T1051      47.671  50.326  64.899  1.00  0.57           O  
HETATM 1053  O   HOH T1052      13.821  35.523  84.313  1.00  0.58           O  
HETATM 1054  O   HOH T1053      39.273  46.508  71.326  1.00  0.58           O  
HETATM 1055  O   HOH T1054      30.186  59.090  41.221  1.00  0.58           O  
HETATM 1056  O   HOH T1055      47.209  16.967  60.010  1.00  0.58           O  
HETATM 1057  O   HOH T1056      35.945  13.249  88.300  1.00  0.58           O  
HETATM 1058  O   HOH T1057      58.421  12.228  78.678  1.00  0.58           O  
HETATM 1059  O   HOH T1058      51.722  21.665  59.964  1.00  0.59           O  
HETATM 1060  O   HOH T1059      43.709  24.916  28.528  1.00  0.59           O  
HETATM 1061  O   HOH T1060      56.782  33.622  87.491  1.00  0.59           O  
HETATM 1062  O   HOH T1061      51.746  67.179  47.702  1.00  0.59           O  
HETATM 1063  O   HOH T1062      63.541  47.148  58.151  1.00  0.59           O  
HETATM 1064  O   HOH T1063      50.135  38.158  66.990  1.00  0.59           O  
HETATM 1065  O   HOH T1064      59.451  60.678  43.142  1.00  0.60           O  
TER    1066      HOH T1064 
