# Supplementary material for: Accurate Prediction of Hydration Sites of Proteins Using Energy Model With Atom Embedding
Source: Front Mol Biosci. 2021 Sep 20;8:756075. doi: 10.3389/fmolb.2021.756075 (PMC8488165; doi:10.3389/fmolb.2021.756075)
Supplement: Supplementary file 1 [file DataSheet1.ZIP › Data Sheet 1/Our_result_pdb/our_dataset_output/1OQV_watersite.pdb]

HEADER                                                        XXXX


JRNL        PMID   -1
HETATM    1  O   HOH T   0      56.167 108.719  38.097  1.00  0.15           O  
HETATM    2  O   HOH T   1      59.156  16.114   8.338  1.00  0.16           O  
HETATM    3  O   HOH T   2     -19.993  61.311  43.867  1.00  0.16           O  
HETATM    4  O   HOH T   3     -36.353  64.097  35.823  1.00  0.19           O  
HETATM    5  O   HOH T   4      51.099  26.065  -6.610  1.00  0.19           O  
HETATM    6  O   HOH T   5      47.850  15.733   6.135  1.00  0.19           O  
HETATM    7  O   HOH T   6     -19.564  81.504  40.195  1.00  0.20           O  
HETATM    8  O   HOH T   7      70.894  13.443  -1.421  1.00  0.20           O  
HETATM    9  O   HOH T   8     -28.076  71.236  28.941  1.00  0.20           O  
HETATM   10  O   HOH T   9      46.402 129.773  46.513  1.00  0.21           O  
HETATM   11  O   HOH T  10      38.763  23.355  11.959  1.00  0.21           O  
HETATM   12  O   HOH T  11      67.976  20.904  -9.437  1.00  0.22           O  
HETATM   13  O   HOH T  12      55.722 126.559  23.159  1.00  0.22           O  
HETATM   14  O   HOH T  13      44.814 109.465  35.868  1.00  0.22           O  
HETATM   15  O   HOH T  14      52.790 108.705  12.400  1.00  0.22           O  
HETATM   16  O   HOH T  15      36.910 106.568  28.080  1.00  0.23           O  
HETATM   17  O   HOH T  16      49.297 119.543  23.155  1.00  0.23           O  
HETATM   18  O   HOH T  17      33.849 119.556  30.163  1.00  0.23           O  
HETATM   19  O   HOH T  18      41.791  29.280   5.122  1.00  0.23           O  
HETATM   20  O   HOH T  19     -11.244  66.667  25.844  1.00  0.23           O  
HETATM   21  O   HOH T  20      74.230   5.095 -12.800  1.00  0.23           O  
HETATM   22  O   HOH T  21      70.552 109.392  26.899  1.00  0.24           O  
HETATM   23  O   HOH T  22      41.370 111.589  20.774  1.00  0.24           O  
HETATM   24  O   HOH T  23     -14.808  79.837  24.467  1.00  0.24           O  
HETATM   25  O   HOH T  24      54.600  33.061 -13.599  1.00  0.24           O  
HETATM   26  O   HOH T  25      52.080 135.984  38.374  1.00  0.24           O  
HETATM   27  O   HOH T  26      62.502 126.532  29.833  1.00  0.24           O  
HETATM   28  O   HOH T  27      39.077  26.026  12.662  1.00  0.24           O  
HETATM   29  O   HOH T  28      42.846  18.926   0.163  1.00  0.24           O  
HETATM   30  O   HOH T  29     -37.553  74.780  46.021  1.00  0.25           O  
HETATM   31  O   HOH T  30     -36.537  73.027  47.938  1.00  0.25           O  
HETATM   32  O   HOH T  31      55.853  15.716 -17.410  1.00  0.25           O  
HETATM   33  O   HOH T  32      -9.679  64.266  32.068  1.00  0.25           O  
HETATM   34  O   HOH T  33      52.682 100.843  31.616  1.00  0.25           O  
HETATM   35  O   HOH T  34      41.079 122.182  42.223  1.00  0.25           O  
HETATM   36  O   HOH T  35      -1.078  52.498  31.713  1.00  0.25           O  
HETATM   37  O   HOH T  36     -40.474  67.936  33.343  1.00  0.26           O  
HETATM   38  O   HOH T  37      56.953  33.750  -6.771  1.00  0.26           O  
HETATM   39  O   HOH T  38      60.851 121.687  13.626  1.00  0.26           O  
HETATM   40  O   HOH T  39      48.748 130.468  24.253  1.00  0.26           O  
HETATM   41  O   HOH T  40     -31.472  66.117  53.316  1.00  0.26           O  
HETATM   42  O   HOH T  41      55.395  99.362  41.376  1.00  0.26           O  
HETATM   43  O   HOH T  42      57.446  37.136   3.006  1.00  0.27           O  
HETATM   44  O   HOH T  43     -10.950  45.408  28.377  1.00  0.27           O  
HETATM   45  O   HOH T  44      62.416  26.177 -14.971  1.00  0.27           O  
HETATM   46  O   HOH T  45     -23.403  60.805  54.020  1.00  0.27           O  
HETATM   47  O   HOH T  46      45.629 115.982  26.083  1.00  0.27           O  
HETATM   48  O   HOH T  47     -39.732  70.132  42.298  1.00  0.27           O  
HETATM   49  O   HOH T  48      47.260 113.283  19.900  1.00  0.27           O  
HETATM   50  O   HOH T  49      42.232 105.051  28.889  1.00  0.27           O  
HETATM   51  O   HOH T  50      51.389  99.318  27.037  1.00  0.27           O  
HETATM   52  O   HOH T  51      56.090 131.158  36.769  1.00  0.27           O  
HETATM   53  O   HOH T  52      50.919  23.775 -15.734  1.00  0.27           O  
HETATM   54  O   HOH T  53     -39.379  57.550  34.925  1.00  0.27           O  
HETATM   55  O   HOH T  54      60.037 119.159  14.543  1.00  0.28           O  
HETATM   56  O   HOH T  55      60.338  35.846  -4.140  1.00  0.28           O  
HETATM   57  O   HOH T  56      63.158   9.765  -5.375  1.00  0.28           O  
HETATM   58  O   HOH T  57     -26.838  64.757  19.398  1.00  0.28           O  
HETATM   59  O   HOH T  58      57.637 104.814  43.993  1.00  0.28           O  
HETATM   60  O   HOH T  59      53.959   8.539   1.210  1.00  0.28           O  
HETATM   61  O   HOH T  60      49.591  19.692  -9.802  1.00  0.28           O  
HETATM   62  O   HOH T  61      42.770  28.995   7.687  1.00  0.28           O  
HETATM   63  O   HOH T  62      54.184  41.916  -5.233  1.00  0.28           O  
HETATM   64  O   HOH T  63     -27.674  86.878  35.970  1.00  0.28           O  
HETATM   65  O   HOH T  64      50.317 111.717  11.266  1.00  0.28           O  
HETATM   66  O   HOH T  65     -33.077  64.327  46.281  1.00  0.28           O  
HETATM   67  O   HOH T  66      46.155  19.935  10.483  1.00  0.28           O  
HETATM   68  O   HOH T  67      -9.145  51.014  34.644  1.00  0.28           O  
HETATM   69  O   HOH T  68      63.092  98.731  30.906  1.00  0.28           O  
HETATM   70  O   HOH T  69     -42.160  70.464  37.993  1.00  0.29           O  
HETATM   71  O   HOH T  70      57.777  40.220  -3.888  1.00  0.29           O  
HETATM   72  O   HOH T  71      52.408 135.634  45.277  1.00  0.29           O  
HETATM   73  O   HOH T  72      66.456  94.654  22.483  1.00  0.29           O  
HETATM   74  O   HOH T  73      54.640   8.077   3.916  1.00  0.29           O  
HETATM   75  O   HOH T  74     -36.650  74.088  43.461  1.00  0.29           O  
HETATM   76  O   HOH T  75      49.259  25.161  -4.878  1.00  0.29           O  
HETATM   77  O   HOH T  76     -33.988  77.259  32.509  1.00  0.29           O  
HETATM   78  O   HOH T  77      64.251  15.965   7.160  1.00  0.29           O  
HETATM   79  O   HOH T  78     -26.094  72.355  16.951  1.00  0.29           O  
HETATM   80  O   HOH T  79     -15.452  79.676  35.494  1.00  0.30           O  
HETATM   81  O   HOH T  80      50.250 102.025  31.054  1.00  0.30           O  
HETATM   82  O   HOH T  81     -44.733  74.526  34.848  1.00  0.30           O  
HETATM   83  O   HOH T  82     -16.962  75.962  18.990  1.00  0.30           O  
HETATM   84  O   HOH T  83      47.532  22.196  -3.553  1.00  0.30           O  
HETATM   85  O   HOH T  84      35.614  23.741  -5.501  1.00  0.30           O  
HETATM   86  O   HOH T  85     -24.784  69.064  55.801  1.00  0.30           O  
HETATM   87  O   HOH T  86      -3.015  51.018  30.352  1.00  0.30           O  
HETATM   88  O   HOH T  87     -32.350  67.280  31.571  1.00  0.30           O  
HETATM   89  O   HOH T  88      59.720 102.115  24.305  1.00  0.30           O  
HETATM   90  O   HOH T  89      59.070  38.068  -5.124  1.00  0.30           O  
HETATM   91  O   HOH T  90      51.051  10.901  -0.202  1.00  0.30           O  
HETATM   92  O   HOH T  91     -17.994  49.767  40.740  1.00  0.30           O  
HETATM   93  O   HOH T  92      47.129 104.399  23.538  1.00  0.30           O  
HETATM   94  O   HOH T  93     -25.313  53.877  36.464  1.00  0.30           O  
HETATM   95  O   HOH T  94     -31.616  60.726  41.987  1.00  0.30           O  
HETATM   96  O   HOH T  95      46.054 121.438  21.902  1.00  0.30           O  
HETATM   97  O   HOH T  96     -10.740  66.562  33.053  1.00  0.31           O  
HETATM   98  O   HOH T  97      47.145  36.492  16.537  1.00  0.31           O  
HETATM   99  O   HOH T  98      64.678  24.482 -14.954  1.00  0.31           O  
HETATM  100  O   HOH T  99      39.854 114.114  16.212  1.00  0.31           O  
HETATM  101  O   HOH T 100      42.543  15.496   0.949  1.00  0.31           O  
HETATM  102  O   HOH T 101     -20.136  61.842  17.497  1.00  0.31           O  
HETATM  103  O   HOH T 102     -24.169  51.304  43.626  1.00  0.31           O  
HETATM  104  O   HOH T 103      47.541  12.461 -15.004  1.00  0.31           O  
HETATM  105  O   HOH T 104      37.463  27.366   2.563  1.00  0.31           O  
HETATM  106  O   HOH T 105     -29.861  70.304  30.857  1.00  0.31           O  
HETATM  107  O   HOH T 106     -39.015  54.527  36.828  1.00  0.31           O  
HETATM  108  O   HOH T 107      52.352  19.585 -16.100  1.00  0.31           O  
HETATM  109  O   HOH T 108      51.003  99.302  37.790  1.00  0.31           O  
HETATM  110  O   HOH T 109      51.036 101.561  33.707  1.00  0.31           O  
HETATM  111  O   HOH T 110      55.544 126.020  51.046  1.00  0.31           O  
HETATM  112  O   HOH T 111      54.993   6.163   8.383  1.00  0.31           O  
HETATM  113  O   HOH T 112      38.901 111.276  25.055  1.00  0.31           O  
HETATM  114  O   HOH T 113      44.237 126.122  26.822  1.00  0.32           O  
HETATM  115  O   HOH T 114      44.073 114.972  47.400  1.00  0.32           O  
HETATM  116  O   HOH T 115     -38.203  64.913  34.026  1.00  0.32           O  
HETATM  117  O   HOH T 116      36.894 117.398  27.481  1.00  0.32           O  
HETATM  118  O   HOH T 117     -21.285  82.646  38.362  1.00  0.32           O  
HETATM  119  O   HOH T 118      63.265 100.223  35.014  1.00  0.32           O  
HETATM  120  O   HOH T 119     -15.977  55.060  29.829  1.00  0.32           O  
HETATM  121  O   HOH T 120      72.902   2.703 -13.067  1.00  0.32           O  
HETATM  122  O   HOH T 121      77.656   8.479   0.096  1.00  0.32           O  
HETATM  123  O   HOH T 122      30.235 123.993  30.061  1.00  0.32           O  
HETATM  124  O   HOH T 123     -26.049  63.610  17.017  1.00  0.32           O  
HETATM  125  O   HOH T 124     -11.105  77.692  22.883  1.00  0.32           O  
HETATM  126  O   HOH T 125     -29.646  82.018  29.785  1.00  0.32           O  
HETATM  127  O   HOH T 126     -29.721  64.874  25.722  1.00  0.32           O  
HETATM  128  O   HOH T 127     -28.763  68.731  55.773  1.00  0.32           O  
HETATM  129  O   HOH T 128      47.727  27.999  -7.961  1.00  0.32           O  
HETATM  130  O   HOH T 129     -22.666  53.026  37.318  1.00  0.32           O  
HETATM  131  O   HOH T 130      60.842   4.361   5.179  1.00  0.32           O  
HETATM  132  O   HOH T 131      60.407 128.974  27.917  1.00  0.33           O  
HETATM  133  O   HOH T 132      39.094 118.508  23.784  1.00  0.33           O  
HETATM  134  O   HOH T 133     -11.782  42.788  29.042  1.00  0.33           O  
HETATM  135  O   HOH T 134     -29.282  80.986  22.580  1.00  0.33           O  
HETATM  136  O   HOH T 135     -21.496  53.323  21.216  1.00  0.33           O  
HETATM  137  O   HOH T 136      58.415 128.904  34.606  1.00  0.33           O  
HETATM  138  O   HOH T 137      50.734  35.772 -12.885  1.00  0.33           O  
HETATM  139  O   HOH T 138      40.218 124.011  40.155  1.00  0.33           O  
HETATM  140  O   HOH T 139     -25.134  78.289  57.769  1.00  0.33           O  
HETATM  141  O   HOH T 140     -47.235  78.839  38.224  1.00  0.33           O  
HETATM  142  O   HOH T 141     -14.759  56.642  44.545  1.00  0.33           O  
HETATM  143  O   HOH T 142      67.365 117.567  24.052  1.00  0.33           O  
HETATM  144  O   HOH T 143     -34.271  72.145  49.319  1.00  0.33           O  
HETATM  145  O   HOH T 144      55.353  33.723  16.206  1.00  0.34           O  
HETATM  146  O   HOH T 145      47.398 118.848  24.786  1.00  0.34           O  
HETATM  147  O   HOH T 146     -12.174  53.804  40.915  1.00  0.34           O  
HETATM  148  O   HOH T 147     -43.465  78.074  43.349  1.00  0.34           O  
HETATM  149  O   HOH T 148     -23.503  78.565  51.800  1.00  0.34           O  
HETATM  150  O   HOH T 149      49.669 112.809  13.705  1.00  0.34           O  
HETATM  151  O   HOH T 150      59.362  36.570   4.939  1.00  0.34           O  
HETATM  152  O   HOH T 151      67.097 110.892  26.256  1.00  0.34           O  
HETATM  153  O   HOH T 152     -18.603  66.997  47.344  1.00  0.34           O  
HETATM  154  O   HOH T 153     -10.336  48.101  24.479  1.00  0.34           O  
HETATM  155  O   HOH T 154      44.154 121.110  19.863  1.00  0.34           O  
HETATM  156  O   HOH T 155      58.532  16.756 -17.907  1.00  0.34           O  
HETATM  157  O   HOH T 156     -20.280  81.513  29.727  1.00  0.34           O  
HETATM  158  O   HOH T 157      67.975  16.642  -3.076  1.00  0.35           O  
HETATM  159  O   HOH T 158      57.375  33.191 -13.781  1.00  0.35           O  
HETATM  160  O   HOH T 159      59.682  24.962  16.195  1.00  0.35           O  
HETATM  161  O   HOH T 160      57.114 130.243  32.591  1.00  0.35           O  
HETATM  162  O   HOH T 161      56.739  97.067  34.954  1.00  0.35           O  
HETATM  163  O   HOH T 162     -10.533  77.278  20.157  1.00  0.35           O  
HETATM  164  O   HOH T 163      45.389 120.029  49.001  1.00  0.35           O  
HETATM  165  O   HOH T 164      63.201  22.054 -14.925  1.00  0.35           O  
HETATM  166  O   HOH T 165      65.444  17.348  -2.199  1.00  0.35           O  
HETATM  167  O   HOH T 166      66.812   8.272   5.346  1.00  0.35           O  
HETATM  168  O   HOH T 167      40.541  23.982  13.963  1.00  0.35           O  
HETATM  169  O   HOH T 168      52.908 116.866   8.663  1.00  0.35           O  
HETATM  170  O   HOH T 169      52.157  13.191  -1.334  1.00  0.35           O  
HETATM  171  O   HOH T 170      -9.477  70.845  29.905  1.00  0.35           O  
HETATM  172  O   HOH T 171      47.765  21.160 -17.710  1.00  0.35           O  
HETATM  173  O   HOH T 172      54.165 101.574  42.767  1.00  0.35           O  
HETATM  174  O   HOH T 173      52.592  27.365  14.515  1.00  0.35           O  
HETATM  175  O   HOH T 174      68.204  24.260  -1.383  1.00  0.36           O  
HETATM  176  O   HOH T 175      58.326  31.797  18.063  1.00  0.36           O  
HETATM  177  O   HOH T 176      53.196  18.488 -18.499  1.00  0.36           O  
HETATM  178  O   HOH T 177      66.792   8.320  10.496  1.00  0.36           O  
HETATM  179  O   HOH T 178      61.978  97.897  38.335  1.00  0.36           O  
HETATM  180  O   HOH T 179      62.513  29.949 -16.309  1.00  0.36           O  
HETATM  181  O   HOH T 180      35.054 113.586  33.972  1.00  0.36           O  
HETATM  182  O   HOH T 181     -43.150  68.670  33.193  1.00  0.36           O  
HETATM  183  O   HOH T 182     -14.014  71.940  41.157  1.00  0.36           O  
HETATM  184  O   HOH T 183     -23.891  51.287  32.656  1.00  0.36           O  
HETATM  185  O   HOH T 184      43.520 113.346  40.399  1.00  0.36           O  
HETATM  186  O   HOH T 185      45.413 127.450  47.743  1.00  0.36           O  
HETATM  187  O   HOH T 186      62.967  97.485  35.734  1.00  0.36           O  
HETATM  188  O   HOH T 187     -20.971  79.420  51.562  1.00  0.36           O  
HETATM  189  O   HOH T 188      60.897 103.414  38.900  1.00  0.36           O  
HETATM  190  O   HOH T 189      69.300   7.728 -15.934  1.00  0.37           O  
HETATM  191  O   HOH T 190     -26.754  81.881  50.389  1.00  0.37           O  
HETATM  192  O   HOH T 191      57.400 106.939  11.825  1.00  0.37           O  
HETATM  193  O   HOH T 192      -9.398  53.313  20.150  1.00  0.37           O  
HETATM  194  O   HOH T 193      43.739 107.601  37.556  1.00  0.37           O  
HETATM  195  O   HOH T 194      52.614  99.554  41.636  1.00  0.37           O  
HETATM  196  O   HOH T 195     -26.904  57.839  34.758  1.00  0.37           O  
HETATM  197  O   HOH T 196      64.395  11.146   8.722  1.00  0.37           O  
HETATM  198  O   HOH T 197      70.730  94.821  18.771  1.00  0.37           O  
HETATM  199  O   HOH T 198      69.240   1.358  -5.901  1.00  0.37           O  
HETATM  200  O   HOH T 199      66.954  25.512 -13.687  1.00  0.37           O  
HETATM  201  O   HOH T 200      77.726   4.756   0.700  1.00  0.37           O  
HETATM  202  O   HOH T 201     -31.516  72.945  27.771  1.00  0.37           O  
HETATM  203  O   HOH T 202      39.486 113.216  26.971  1.00  0.37           O  
HETATM  204  O   HOH T 203      43.067 115.878  25.215  1.00  0.37           O  
HETATM  205  O   HOH T 204     -22.430  51.777  47.307  1.00  0.37           O  
HETATM  206  O   HOH T 205      36.520  19.301   1.708  1.00  0.37           O  
HETATM  207  O   HOH T 206      65.930   8.911   7.948  1.00  0.37           O  
HETATM  208  O   HOH T 207      73.648   1.624   1.701  1.00  0.37           O  
HETATM  209  O   HOH T 208     -13.291  50.801  44.113  1.00  0.38           O  
HETATM  210  O   HOH T 209      37.049  29.334   8.969  1.00  0.38           O  
HETATM  211  O   HOH T 210     -25.621  80.313  52.294  1.00  0.38           O  
HETATM  212  O   HOH T 211      64.874 100.405  32.483  1.00  0.38           O  
HETATM  213  O   HOH T 212     -40.567  72.011  31.129  1.00  0.38           O  
HETATM  214  O   HOH T 213      52.544 128.336  46.590  1.00  0.38           O  
HETATM  215  O   HOH T 214      45.093 113.683  49.611  1.00  0.38           O  
HETATM  216  O   HOH T 215     -21.166  53.898  48.660  1.00  0.38           O  
HETATM  217  O   HOH T 216      43.659 108.662  49.234  1.00  0.38           O  
HETATM  218  O   HOH T 217      68.430  21.617  -2.447  1.00  0.38           O  
HETATM  219  O   HOH T 218      56.985 132.784  31.615  1.00  0.38           O  
HETATM  220  O   HOH T 219      49.128 100.941  26.682  1.00  0.38           O  
HETATM  221  O   HOH T 220      40.905 129.233  32.151  1.00  0.38           O  
HETATM  222  O   HOH T 221      34.189 120.733  26.024  1.00  0.38           O  
HETATM  223  O   HOH T 222      49.617  36.892  -6.088  1.00  0.38           O  
HETATM  224  O   HOH T 223     -21.215  83.565  40.991  1.00  0.38           O  
HETATM  225  O   HOH T 224      45.337 124.723  48.659  1.00  0.38           O  
HETATM  226  O   HOH T 225      42.127 115.801  38.130  1.00  0.38           O  
HETATM  227  O   HOH T 226     -21.238  81.857  50.472  1.00  0.38           O  
HETATM  228  O   HOH T 227      49.595  34.928  -7.987  1.00  0.38           O  
HETATM  229  O   HOH T 228      51.952  36.737  14.873  1.00  0.39           O  
HETATM  230  O   HOH T 229      71.637  97.189  17.755  1.00  0.39           O  
HETATM  231  O   HOH T 230     -46.134  75.597  36.961  1.00  0.39           O  
HETATM  232  O   HOH T 231      58.430  35.620  15.447  1.00  0.39           O  
HETATM  233  O   HOH T 232      37.961 120.698  25.034  1.00  0.39           O  
HETATM  234  O   HOH T 233     -21.861  73.080  19.170  1.00  0.39           O  
HETATM  235  O   HOH T 234     -11.908  42.343  26.217  1.00  0.39           O  
HETATM  236  O   HOH T 235     -45.249  79.218  40.014  1.00  0.39           O  
HETATM  237  O   HOH T 236      54.433 126.288  10.356  1.00  0.39           O  
HETATM  238  O   HOH T 237      35.685 120.704  31.892  1.00  0.39           O  
HETATM  239  O   HOH T 238     -41.511  70.030  29.377  1.00  0.39           O  
HETATM  240  O   HOH T 239      54.572 137.005  33.842  1.00  0.39           O  
HETATM  241  O   HOH T 240      48.126  32.027  20.848  1.00  0.39           O  
HETATM  242  O   HOH T 241      44.953  31.750  -3.293  1.00  0.39           O  
HETATM  243  O   HOH T 242     -14.515  76.840  17.822  1.00  0.39           O  
HETATM  244  O   HOH T 243      41.133  17.666   2.033  1.00  0.39           O  
HETATM  245  O   HOH T 244      45.428 118.808  22.755  1.00  0.39           O  
HETATM  246  O   HOH T 245      48.630  10.265  -1.441  1.00  0.39           O  
HETATM  247  O   HOH T 246     -32.592  74.792  32.236  1.00  0.39           O  
HETATM  248  O   HOH T 247      47.821  29.278  20.786  1.00  0.39           O  
HETATM  249  O   HOH T 248      66.683  27.428  -7.482  1.00  0.39           O  
HETATM  250  O   HOH T 249      58.200 114.241  41.537  1.00  0.39           O  
HETATM  251  O   HOH T 250     -12.188  80.137  23.561  1.00  0.40           O  
HETATM  252  O   HOH T 251      -8.213  47.629  22.707  1.00  0.40           O  
HETATM  253  O   HOH T 252     -39.221  69.162  48.695  1.00  0.40           O  
HETATM  254  O   HOH T 253      64.502 110.825  27.373  1.00  0.40           O  
HETATM  255  O   HOH T 254      59.394   6.648  11.857  1.00  0.40           O  
HETATM  256  O   HOH T 255      40.431  27.688   7.023  1.00  0.40           O  
HETATM  257  O   HOH T 256      40.782  19.725  -1.620  1.00  0.40           O  
HETATM  258  O   HOH T 257     -15.534  81.206  26.719  1.00  0.40           O  
HETATM  259  O   HOH T 258      55.804 109.215  11.759  1.00  0.40           O  
HETATM  260  O   HOH T 259      53.187 106.076  36.906  1.00  0.40           O  
HETATM  261  O   HOH T 260     -28.343  57.414  32.476  1.00  0.40           O  
HETATM  262  O   HOH T 261      56.887   6.212  10.650  1.00  0.40           O  
HETATM  263  O   HOH T 262      50.818 120.312  44.495  1.00  0.40           O  
HETATM  264  O   HOH T 263      46.708  14.684 -16.491  1.00  0.40           O  
HETATM  265  O   HOH T 264      37.038 114.630  27.206  1.00  0.40           O  
HETATM  266  O   HOH T 265      60.234 103.792  43.705  1.00  0.40           O  
HETATM  267  O   HOH T 266     -39.110  63.325  42.070  1.00  0.40           O  
HETATM  268  O   HOH T 267     -22.658  54.512  19.065  1.00  0.40           O  
HETATM  269  O   HOH T 268      51.177  99.147  34.955  1.00  0.40           O  
HETATM  270  O   HOH T 269      32.593 124.384  31.553  1.00  0.40           O  
HETATM  271  O   HOH T 270     -13.546  49.668  35.313  1.00  0.40           O  
HETATM  272  O   HOH T 271      68.383  14.613  -1.323  1.00  0.40           O  
HETATM  273  O   HOH T 272     -45.137  71.950  35.773  1.00  0.40           O  
HETATM  274  O   HOH T 273      43.438  12.762  13.952  1.00  0.40           O  
HETATM  275  O   HOH T 274     -27.436  55.704  36.422  1.00  0.40           O  
HETATM  276  O   HOH T 275      -3.082  53.321  35.262  1.00  0.40           O  
HETATM  277  O   HOH T 276      75.340   9.758   1.066  1.00  0.40           O  
HETATM  278  O   HOH T 277     -22.774  58.323  42.630  1.00  0.40           O  
HETATM  279  O   HOH T 278      52.567  34.669  20.991  1.00  0.40           O  
HETATM  280  O   HOH T 279     -11.644  79.625  20.919  1.00  0.41           O  
HETATM  281  O   HOH T 280      -6.146  47.947  35.644  1.00  0.41           O  
HETATM  282  O   HOH T 281      46.077 125.332  51.216  1.00  0.41           O  
HETATM  283  O   HOH T 282      50.090  36.311 -10.306  1.00  0.41           O  
HETATM  284  O   HOH T 283      52.989 126.199  51.800  1.00  0.41           O  
HETATM  285  O   HOH T 284      46.807  13.954   7.871  1.00  0.41           O  
HETATM  286  O   HOH T 285     -35.051  75.938  27.620  1.00  0.41           O  
HETATM  287  O   HOH T 286      55.795 120.759  49.019  1.00  0.41           O  
HETATM  288  O   HOH T 287     -29.963  80.248  27.513  1.00  0.41           O  
HETATM  289  O   HOH T 288     -35.325  64.582  31.308  1.00  0.41           O  
HETATM  290  O   HOH T 289      65.927  97.324  29.036  1.00  0.41           O  
HETATM  291  O   HOH T 290      42.182 110.461  46.388  1.00  0.41           O  
HETATM  292  O   HOH T 291     -14.414  48.545  42.899  1.00  0.41           O  
HETATM  293  O   HOH T 292      57.964   9.929  14.479  1.00  0.41           O  
HETATM  294  O   HOH T 293      66.778   5.516   5.901  1.00  0.41           O  
HETATM  295  O   HOH T 294      -6.536  50.321  34.270  1.00  0.41           O  
HETATM  296  O   HOH T 295     -32.352  79.144  53.040  1.00  0.41           O  
HETATM  297  O   HOH T 296      53.440 102.141  14.660  1.00  0.41           O  
HETATM  298  O   HOH T 297      36.995  26.098   5.138  1.00  0.41           O  
HETATM  299  O   HOH T 298      68.115   8.012   2.884  1.00  0.41           O  
HETATM  300  O   HOH T 299      44.499  32.624   9.150  1.00  0.41           O  
HETATM  301  O   HOH T 300     -43.634  69.464  35.816  1.00  0.41           O  
HETATM  302  O   HOH T 301      77.567   9.615   2.723  1.00  0.41           O  
HETATM  303  O   HOH T 302     -23.566  86.698  37.787  1.00  0.41           O  
HETATM  304  O   HOH T 303     -32.267  55.569  35.227  1.00  0.41           O  
HETATM  305  O   HOH T 304      56.915 114.142  11.314  1.00  0.41           O  
HETATM  306  O   HOH T 305      44.620   9.841 -12.105  1.00  0.42           O  
HETATM  307  O   HOH T 306     -19.640  52.026  47.229  1.00  0.42           O  
HETATM  308  O   HOH T 307      51.052 135.058  30.036  1.00  0.42           O  
HETATM  309  O   HOH T 308      44.331 106.141  39.839  1.00  0.42           O  
HETATM  310  O   HOH T 309     -22.716  78.615  56.732  1.00  0.42           O  
HETATM  311  O   HOH T 310      -7.770  68.748  34.183  1.00  0.42           O  
HETATM  312  O   HOH T 311      57.291 102.274  17.118  1.00  0.42           O  
HETATM  313  O   HOH T 312     -31.678  69.239  23.159  1.00  0.42           O  
HETATM  314  O   HOH T 313      66.143 125.534  17.464  1.00  0.42           O  
HETATM  315  O   HOH T 314      47.927 102.716  38.852  1.00  0.42           O  
HETATM  316  O   HOH T 315      68.714  23.806 -12.297  1.00  0.42           O  
HETATM  317  O   HOH T 316     -17.818  82.011  33.798  1.00  0.42           O  
HETATM  318  O   HOH T 317      55.796   5.573   3.425  1.00  0.42           O  
HETATM  319  O   HOH T 318      48.252 103.899  31.547  1.00  0.42           O  
HETATM  320  O   HOH T 319      66.572 115.943  28.179  1.00  0.42           O  
HETATM  321  O   HOH T 320      44.370  17.760   9.791  1.00  0.42           O  
HETATM  322  O   HOH T 321      43.348 107.029  42.337  1.00  0.42           O  
HETATM  323  O   HOH T 322     -35.970  59.582  40.965  1.00  0.42           O  
HETATM  324  O   HOH T 323     -42.804  77.973  39.617  1.00  0.42           O  
HETATM  325  O   HOH T 324      44.380  21.647   8.896  1.00  0.42           O  
HETATM  326  O   HOH T 325     -25.342  88.343  36.418  1.00  0.42           O  
HETATM  327  O   HOH T 326     -18.990  67.382  14.388  1.00  0.42           O  
HETATM  328  O   HOH T 327      49.288 117.294  49.640  1.00  0.42           O  
HETATM  329  O   HOH T 328     -35.440  62.328  26.874  1.00  0.42           O  
HETATM  330  O   HOH T 329      68.077   1.596  -1.686  1.00  0.42           O  
HETATM  331  O   HOH T 330      55.624   7.297  -0.646  1.00  0.42           O  
HETATM  332  O   HOH T 331      72.078  98.474  29.208  1.00  0.42           O  
HETATM  333  O   HOH T 332      69.146 100.712  21.330  1.00  0.43           O  
HETATM  334  O   HOH T 333      74.129 101.006  32.598  1.00  0.43           O  
HETATM  335  O   HOH T 334      39.629 106.128  28.748  1.00  0.43           O  
HETATM  336  O   HOH T 335     -17.841  61.717  15.888  1.00  0.43           O  
HETATM  337  O   HOH T 336      56.438  13.117   7.188  1.00  0.43           O  
HETATM  338  O   HOH T 337      58.283  11.023 -18.617  1.00  0.43           O  
HETATM  339  O   HOH T 338     -14.709  55.601  21.162  1.00  0.43           O  
HETATM  340  O   HOH T 339      68.366 115.922  26.035  1.00  0.43           O  
HETATM  341  O   HOH T 340     -22.105  90.352  42.426  1.00  0.43           O  
HETATM  342  O   HOH T 341     -17.213  73.201  54.876  1.00  0.43           O  
HETATM  343  O   HOH T 342      41.436 112.316  24.944  1.00  0.43           O  
HETATM  344  O   HOH T 343      42.075 108.875  35.828  1.00  0.43           O  
HETATM  345  O   HOH T 344      70.430  12.246   1.063  1.00  0.43           O  
HETATM  346  O   HOH T 345      61.264  37.068  -1.760  1.00  0.43           O  
HETATM  347  O   HOH T 346      59.288  21.637  17.645  1.00  0.43           O  
HETATM  348  O   HOH T 347      34.105 120.373  34.075  1.00  0.43           O  
HETATM  349  O   HOH T 348      60.079  27.401 -16.150  1.00  0.43           O  
HETATM  350  O   HOH T 349      45.350  12.287 -13.223  1.00  0.43           O  
HETATM  351  O   HOH T 350      58.377  37.821   7.341  1.00  0.43           O  
HETATM  352  O   HOH T 351     -24.205  71.530  18.878  1.00  0.43           O  
HETATM  353  O   HOH T 352      44.394 106.251  50.386  1.00  0.43           O  
HETATM  354  O   HOH T 353     -18.589  57.471  49.527  1.00  0.43           O  
HETATM  355  O   HOH T 354     -33.361  74.526  29.410  1.00  0.43           O  
HETATM  356  O   HOH T 355      41.565 110.403  49.102  1.00  0.43           O  
HETATM  357  O   HOH T 356      41.783  15.409   3.627  1.00  0.43           O  
HETATM  358  O   HOH T 357      58.768 117.576  12.620  1.00  0.43           O  
HETATM  359  O   HOH T 358     -32.291  71.857  58.102  1.00  0.43           O  
HETATM  360  O   HOH T 359      56.942 127.200  45.895  1.00  0.44           O  
HETATM  361  O   HOH T 360      42.172 106.873  44.940  1.00  0.44           O  
HETATM  362  O   HOH T 361      46.538  33.286  17.875  1.00  0.44           O  
HETATM  363  O   HOH T 362      67.050   1.553  -4.231  1.00  0.44           O  
HETATM  364  O   HOH T 363      49.068 106.664  28.015  1.00  0.44           O  
HETATM  365  O   HOH T 364      61.839  22.263 -17.306  1.00  0.44           O  
HETATM  366  O   HOH T 365      53.372 119.322  48.999  1.00  0.44           O  
HETATM  367  O   HOH T 366      69.534  30.166  -8.229  1.00  0.44           O  
HETATM  368  O   HOH T 367     -31.790  70.313  28.944  1.00  0.44           O  
HETATM  369  O   HOH T 368      56.057  43.380   9.314  1.00  0.44           O  
HETATM  370  O   HOH T 369      40.631 120.303  25.409  1.00  0.44           O  
HETATM  371  O   HOH T 370      71.887 111.794  26.990  1.00  0.44           O  
HETATM  372  O   HOH T 371     -25.037  87.140  30.400  1.00  0.44           O  
HETATM  373  O   HOH T 372      61.725 100.636  38.679  1.00  0.44           O  
HETATM  374  O   HOH T 373     -12.814  65.462  40.717  1.00  0.44           O  
HETATM  375  O   HOH T 374      44.585 127.132  22.014  1.00  0.44           O  
HETATM  376  O   HOH T 375      61.379  20.500  16.282  1.00  0.44           O  
HETATM  377  O   HOH T 376     -29.387  65.997  55.206  1.00  0.44           O  
HETATM  378  O   HOH T 377     -39.039  88.364  40.364  1.00  0.44           O  
HETATM  379  O   HOH T 378     -36.122  56.783  40.997  1.00  0.44           O  
HETATM  380  O   HOH T 379      45.311 105.160  42.229  1.00  0.44           O  
HETATM  381  O   HOH T 380     -23.532  49.530  41.476  1.00  0.44           O  
HETATM  382  O   HOH T 381      55.461 129.672  39.138  1.00  0.44           O  
HETATM  383  O   HOH T 382      47.256 102.158  36.244  1.00  0.44           O  
HETATM  384  O   HOH T 383      -8.678  51.999  37.214  1.00  0.44           O  
HETATM  385  O   HOH T 384      40.906  17.103  -0.667  1.00  0.44           O  
HETATM  386  O   HOH T 385      42.772 109.294  43.914  1.00  0.44           O  
HETATM  387  O   HOH T 386      44.287  12.784   7.876  1.00  0.44           O  
HETATM  388  O   HOH T 387      57.717 124.676  44.958  1.00  0.44           O  
HETATM  389  O   HOH T 388      53.339  35.543  16.779  1.00  0.44           O  
HETATM  390  O   HOH T 389     -41.465  73.014  38.701  1.00  0.44           O  
HETATM  391  O   HOH T 390      59.413 131.483  31.692  1.00  0.44           O  
HETATM  392  O   HOH T 391     -35.187  60.217  23.647  1.00  0.44           O  
HETATM  393  O   HOH T 392      66.254   6.311   8.564  1.00  0.44           O  
HETATM  394  O   HOH T 393     -38.425  60.667  41.527  1.00  0.45           O  
HETATM  395  O   HOH T 394      42.374 106.232  52.133  1.00  0.45           O  
HETATM  396  O   HOH T 395      42.918 104.577  43.561  1.00  0.45           O  
HETATM  397  O   HOH T 396     -15.442  45.923  26.797  1.00  0.45           O  
HETATM  398  O   HOH T 397      34.845 130.329  36.335  1.00  0.45           O  
HETATM  399  O   HOH T 398     -26.827  72.331  50.007  1.00  0.45           O  
HETATM  400  O   HOH T 399      54.398 134.775  37.381  1.00  0.45           O  
HETATM  401  O   HOH T 400      56.571   9.749 -16.698  1.00  0.45           O  
HETATM  402  O   HOH T 401      56.405   7.816   1.907  1.00  0.45           O  
HETATM  403  O   HOH T 402     -28.459  54.180  23.612  1.00  0.45           O  
HETATM  404  O   HOH T 403      44.649  25.011  15.467  1.00  0.45           O  
HETATM  405  O   HOH T 404      63.482  15.253 -16.031  1.00  0.45           O  
HETATM  406  O   HOH T 405     -26.805  80.442  57.301  1.00  0.45           O  
HETATM  407  O   HOH T 406      51.665  38.097 -11.605  1.00  0.45           O  
HETATM  408  O   HOH T 407      42.298  38.223   3.807  1.00  0.45           O  
HETATM  409  O   HOH T 408      63.237 126.571  18.833  1.00  0.45           O  
HETATM  410  O   HOH T 409      47.985  99.689  24.436  1.00  0.45           O  
HETATM  411  O   HOH T 410      50.182  10.643  -6.409  1.00  0.45           O  
HETATM  412  O   HOH T 411      46.695  30.756  18.748  1.00  0.45           O  
HETATM  413  O   HOH T 412     -26.719  87.903  32.608  1.00  0.45           O  
HETATM  414  O   HOH T 413     -36.674  63.355  29.164  1.00  0.45           O  
HETATM  415  O   HOH T 414     -12.112  63.078  35.920  1.00  0.45           O  
HETATM  416  O   HOH T 415      56.225  41.917   5.090  1.00  0.45           O  
HETATM  417  O   HOH T 416      45.156 121.756  17.317  1.00  0.45           O  
HETATM  418  O   HOH T 417     -10.484  69.305  33.934  1.00  0.45           O  
HETATM  419  O   HOH T 418      46.797 102.856  42.264  1.00  0.45           O  
HETATM  420  O   HOH T 419      46.788  28.023  18.605  1.00  0.45           O  
HETATM  421  O   HOH T 420     -12.198  59.634  37.131  1.00  0.45           O  
HETATM  422  O   HOH T 421     -41.323  67.913  47.221  1.00  0.45           O  
HETATM  423  O   HOH T 422     -17.172  70.377  19.967  1.00  0.46           O  
HETATM  424  O   HOH T 423      43.596 117.094  45.937  1.00  0.46           O  
HETATM  425  O   HOH T 424     -37.520  66.429  44.443  1.00  0.46           O  
HETATM  426  O   HOH T 425     -34.779  66.786  43.815  1.00  0.46           O  
HETATM  427  O   HOH T 426      33.118 121.673  31.812  1.00  0.46           O  
HETATM  428  O   HOH T 427      52.390 136.165  27.381  1.00  0.46           O  
HETATM  429  O   HOH T 428      70.461   2.751  -1.101  1.00  0.46           O  
HETATM  430  O   HOH T 429      73.069   1.967  -0.960  1.00  0.46           O  
HETATM  431  O   HOH T 430      43.427 103.726  15.418  1.00  0.46           O  
HETATM  432  O   HOH T 431     -16.943  59.148  51.052  1.00  0.46           O  
HETATM  433  O   HOH T 432      57.510   8.100 -14.580  1.00  0.46           O  
HETATM  434  O   HOH T 433      45.323  17.769  18.044  1.00  0.46           O  
HETATM  435  O   HOH T 434      40.708 117.750  21.718  1.00  0.46           O  
HETATM  436  O   HOH T 435      56.733 124.833  11.806  1.00  0.46           O  
HETATM  437  O   HOH T 436      59.301 123.220  43.252  1.00  0.46           O  
HETATM  438  O   HOH T 437      69.789  18.729  -3.507  1.00  0.46           O  
HETATM  439  O   HOH T 438     -19.451  71.760  55.019  1.00  0.46           O  
HETATM  440  O   HOH T 439      44.948 130.080  13.191  1.00  0.46           O  
HETATM  441  O   HOH T 440     -13.435  62.926  33.433  1.00  0.46           O  
HETATM  442  O   HOH T 441      61.131 108.206  37.231  1.00  0.46           O  
HETATM  443  O   HOH T 442      -9.351  56.797  37.507  1.00  0.46           O  
HETATM  444  O   HOH T 443      41.446  12.749   4.340  1.00  0.46           O  
HETATM  445  O   HOH T 444     -31.123  70.177  20.566  1.00  0.46           O  
HETATM  446  O   HOH T 445      55.085 115.628   9.700  1.00  0.46           O  
HETATM  447  O   HOH T 446      52.702  36.840  19.168  1.00  0.46           O  
HETATM  448  O   HOH T 447      54.478  24.304  20.733  1.00  0.46           O  
HETATM  449  O   HOH T 448     -10.817  53.372  38.376  1.00  0.46           O  
HETATM  450  O   HOH T 449     -18.825  69.638  17.678  1.00  0.46           O  
HETATM  451  O   HOH T 450      54.207  99.016  43.881  1.00  0.46           O  
HETATM  452  O   HOH T 451      72.472  92.640  18.863  1.00  0.46           O  
HETATM  453  O   HOH T 452      67.356  26.614  -2.548  1.00  0.46           O  
HETATM  454  O   HOH T 453      43.893  11.804   5.353  1.00  0.46           O  
HETATM  455  O   HOH T 454      -3.247  51.467  33.145  1.00  0.46           O  
HETATM  456  O   HOH T 455      56.556 104.474  46.557  1.00  0.46           O  
HETATM  457  O   HOH T 456      58.874 103.199  45.982  1.00  0.46           O  
HETATM  458  O   HOH T 457      39.617 109.288  34.371  1.00  0.47           O  
HETATM  459  O   HOH T 458     -15.368  44.601  40.670  1.00  0.47           O  
HETATM  460  O   HOH T 459      51.169  41.506   0.092  1.00  0.47           O  
HETATM  461  O   HOH T 460      53.034  37.165 -13.748  1.00  0.47           O  
HETATM  462  O   HOH T 461      50.701   8.829 -12.027  1.00  0.47           O  
HETATM  463  O   HOH T 462      51.138   8.937   5.665  1.00  0.47           O  
HETATM  464  O   HOH T 463      51.697 119.597  46.917  1.00  0.47           O  
HETATM  465  O   HOH T 464      -6.118  68.572  24.458  1.00  0.47           O  
HETATM  466  O   HOH T 465      60.886  24.881  18.752  1.00  0.47           O  
HETATM  467  O   HOH T 466      47.054 102.219  25.255  1.00  0.47           O  
HETATM  468  O   HOH T 467     -17.040  47.691  42.287  1.00  0.47           O  
HETATM  469  O   HOH T 468      34.952  21.337   0.796  1.00  0.47           O  
HETATM  470  O   HOH T 469      52.562  42.769  -3.090  1.00  0.47           O  
HETATM  471  O   HOH T 470      -7.920  62.605  36.578  1.00  0.47           O  
HETATM  472  O   HOH T 471      64.518  94.578  18.641  1.00  0.47           O  
HETATM  473  O   HOH T 472      -8.210  54.412  38.406  1.00  0.47           O  
HETATM  474  O   HOH T 473     -39.544  85.789  38.669  1.00  0.47           O  
HETATM  475  O   HOH T 474     -24.014  82.024  50.780  1.00  0.47           O  
HETATM  476  O   HOH T 475     -37.172  87.063  38.593  1.00  0.47           O  
HETATM  477  O   HOH T 476      45.952  29.142  -6.516  1.00  0.47           O  
HETATM  478  O   HOH T 477      41.862 118.196  24.202  1.00  0.47           O  
HETATM  479  O   HOH T 478      57.885  32.859  15.535  1.00  0.47           O  
HETATM  480  O   HOH T 479     -10.553  60.194  33.983  1.00  0.47           O  
HETATM  481  O   HOH T 480      66.433  90.716  18.742  1.00  0.47           O  
HETATM  482  O   HOH T 481      37.894  28.571   6.337  1.00  0.47           O  
HETATM  483  O   HOH T 482     -12.832  53.552  43.823  1.00  0.47           O  
HETATM  484  O   HOH T 483      51.306  10.916  -4.023  1.00  0.47           O  
HETATM  485  O   HOH T 484      45.919 127.963  14.700  1.00  0.47           O  
HETATM  486  O   HOH T 485      36.991 112.604  35.697  1.00  0.47           O  
HETATM  487  O   HOH T 486      -9.070  62.543  34.097  1.00  0.47           O  
HETATM  488  O   HOH T 487      53.825  38.422  -9.840  1.00  0.47           O  
HETATM  489  O   HOH T 488      -8.531  48.387  34.450  1.00  0.47           O  
HETATM  490  O   HOH T 489     -12.356  51.895  36.568  1.00  0.47           O  
HETATM  491  O   HOH T 490      68.127 109.364  28.306  1.00  0.47           O  
HETATM  492  O   HOH T 491     -18.643  59.589  17.507  1.00  0.47           O  
HETATM  493  O   HOH T 492      64.794 123.829  12.279  1.00  0.48           O  
HETATM  494  O   HOH T 493     -33.382  77.949  28.275  1.00  0.48           O  
HETATM  495  O   HOH T 494      52.388 116.908  50.036  1.00  0.48           O  
HETATM  496  O   HOH T 495     -21.094  56.311  17.614  1.00  0.48           O  
HETATM  497  O   HOH T 496     -16.931  81.649  24.391  1.00  0.48           O  
HETATM  498  O   HOH T 497      70.075  25.203  -5.039  1.00  0.48           O  
HETATM  499  O   HOH T 498     -37.851  72.340  31.403  1.00  0.48           O  
HETATM  500  O   HOH T 499     -44.638  78.087  33.400  1.00  0.48           O  
HETATM  501  O   HOH T 500      48.110  26.529  20.533  1.00  0.48           O  
HETATM  502  O   HOH T 501      66.216 106.376  30.145  1.00  0.48           O  
HETATM  503  O   HOH T 502      54.146 135.031  24.872  1.00  0.48           O  
HETATM  504  O   HOH T 503      46.963 102.171  17.788  1.00  0.48           O  
HETATM  505  O   HOH T 504      68.168  29.366  -6.026  1.00  0.48           O  
HETATM  506  O   HOH T 505      55.730 127.211  12.735  1.00  0.48           O  
HETATM  507  O   HOH T 506      -9.998  65.412  39.814  1.00  0.48           O  
HETATM  508  O   HOH T 507      70.389  22.595  -4.197  1.00  0.48           O  
HETATM  509  O   HOH T 508      67.103  24.722 -16.386  1.00  0.48           O  
HETATM  510  O   HOH T 509      66.869  93.303  17.686  1.00  0.48           O  
HETATM  511  O   HOH T 510     -22.621  88.330  35.800  1.00  0.48           O  
HETATM  512  O   HOH T 511      45.045 101.103  41.082  1.00  0.48           O  
HETATM  513  O   HOH T 512     -23.283  52.566  34.935  1.00  0.48           O  
HETATM  514  O   HOH T 513     -17.275  83.296  36.206  1.00  0.48           O  
HETATM  515  O   HOH T 514      56.451 138.615  34.952  1.00  0.48           O  
HETATM  516  O   HOH T 515      43.834  16.997  -8.141  1.00  0.48           O  
HETATM  517  O   HOH T 516      37.709 109.452  32.278  1.00  0.48           O  
HETATM  518  O   HOH T 517      68.106  28.277  -9.740  1.00  0.48           O  
HETATM  519  O   HOH T 518      66.526 125.410  14.690  1.00  0.48           O  
HETATM  520  O   HOH T 519      48.399 100.220  37.936  1.00  0.48           O  
HETATM  521  O   HOH T 520     -28.473  82.626  27.495  1.00  0.48           O  
HETATM  522  O   HOH T 521      60.145  29.688  17.716  1.00  0.48           O  
HETATM  523  O   HOH T 522      48.747 103.188  34.188  1.00  0.48           O  
HETATM  524  O   HOH T 523      61.928 105.730  37.781  1.00  0.48           O  
HETATM  525  O   HOH T 524      69.718   3.859   4.144  1.00  0.48           O  
HETATM  526  O   HOH T 525      46.107  33.384  -7.783  1.00  0.49           O  
HETATM  527  O   HOH T 526     -18.909  53.894  20.291  1.00  0.49           O  
HETATM  528  O   HOH T 527     -10.818  47.188  21.990  1.00  0.49           O  
HETATM  529  O   HOH T 528      53.241   7.068   6.188  1.00  0.49           O  
HETATM  530  O   HOH T 529      63.854 106.178  31.522  1.00  0.49           O  
HETATM  531  O   HOH T 530      57.526 102.585  12.670  1.00  0.49           O  
HETATM  532  O   HOH T 531     -41.301  72.315  41.441  1.00  0.49           O  
HETATM  533  O   HOH T 532      44.370 123.080  23.434  1.00  0.49           O  
HETATM  534  O   HOH T 533      59.096  33.812 -15.912  1.00  0.49           O  
HETATM  535  O   HOH T 534     -39.692  62.238  39.644  1.00  0.49           O  
HETATM  536  O   HOH T 535     -10.334  63.221  38.016  1.00  0.49           O  
HETATM  537  O   HOH T 536      54.836   6.336  12.328  1.00  0.49           O  
HETATM  538  O   HOH T 537      45.705 104.141  32.575  1.00  0.49           O  
HETATM  539  O   HOH T 538      57.718 116.581  10.244  1.00  0.49           O  
HETATM  540  O   HOH T 539     -38.048  64.668  31.294  1.00  0.49           O  
HETATM  541  O   HOH T 540     -13.057  81.692  25.644  1.00  0.49           O  
HETATM  542  O   HOH T 541      40.619  13.675   1.834  1.00  0.49           O  
HETATM  543  O   HOH T 542      70.678  29.242 -10.472  1.00  0.49           O  
HETATM  544  O   HOH T 543      53.900  97.122  41.891  1.00  0.49           O  
HETATM  545  O   HOH T 544      71.525  23.439 -12.222  1.00  0.49           O  
HETATM  546  O   HOH T 545      56.883  39.680   2.318  1.00  0.49           O  
HETATM  547  O   HOH T 546     -19.372  84.471  37.414  1.00  0.49           O  
HETATM  548  O   HOH T 547      43.742 104.563  34.548  1.00  0.49           O  
HETATM  549  O   HOH T 548     -19.690  66.419  16.992  1.00  0.49           O  
HETATM  550  O   HOH T 549      57.128   7.588  13.149  1.00  0.49           O  
HETATM  551  O   HOH T 550     -35.900  70.498  30.516  1.00  0.49           O  
HETATM  552  O   HOH T 551     -38.492  58.981  37.155  1.00  0.49           O  
HETATM  553  O   HOH T 552     -41.730  63.065  41.285  1.00  0.49           O  
HETATM  554  O   HOH T 553      56.667 118.855  47.170  1.00  0.49           O  
HETATM  555  O   HOH T 554      45.510 128.422  19.481  1.00  0.49           O  
HETATM  556  O   HOH T 555      63.600  34.732   0.024  1.00  0.49           O  
HETATM  557  O   HOH T 556      41.831 104.339  46.111  1.00  0.49           O  
HETATM  558  O   HOH T 557      67.886  26.848  -5.143  1.00  0.49           O  
HETATM  559  O   HOH T 558     -41.983  69.806  40.642  1.00  0.49           O  
HETATM  560  O   HOH T 559     -35.816  74.876  25.185  1.00  0.49           O  
HETATM  561  O   HOH T 560     -18.494  54.194  22.964  1.00  0.49           O  
HETATM  562  O   HOH T 561      45.421 103.574  39.886  1.00  0.50           O  
HETATM  563  O   HOH T 562     -40.506  68.747  44.614  1.00  0.50           O  
HETATM  564  O   HOH T 563      61.144  27.111 -18.665  1.00  0.50           O  
HETATM  565  O   HOH T 564      63.117  -2.200   2.524  1.00  0.50           O  
HETATM  566  O   HOH T 565      52.338  38.621  13.004  1.00  0.50           O  
HETATM  567  O   HOH T 566     -28.472  55.811  29.282  1.00  0.50           O  
HETATM  568  O   HOH T 567     -44.377  63.447  41.944  1.00  0.50           O  
HETATM  569  O   HOH T 568     -16.029  60.445  17.559  1.00  0.50           O  
HETATM  570  O   HOH T 569      65.165  13.521   8.002  1.00  0.50           O  
HETATM  571  O   HOH T 570      45.589  30.844  21.224  1.00  0.50           O  
HETATM  572  O   HOH T 571      66.692   6.401  12.412  1.00  0.50           O  
HETATM  573  O   HOH T 572      53.080  34.929   7.678  1.00  0.50           O  
HETATM  574  O   HOH T 573     -12.525  50.208  41.589  1.00  0.50           O  
HETATM  575  O   HOH T 574     -31.042  67.512  56.851  1.00  0.50           O  
HETATM  576  O   HOH T 575      66.526  98.305  31.542  1.00  0.50           O  
HETATM  577  O   HOH T 576      35.614 121.854  23.825  1.00  0.50           O  
HETATM  578  O   HOH T 577      46.706  29.593  -3.152  1.00  0.50           O  
HETATM  579  O   HOH T 578     -41.618  64.011  38.727  1.00  0.51           O  
HETATM  580  O   HOH T 579      68.309  29.013  -3.344  1.00  0.51           O  
HETATM  581  O   HOH T 580      51.708   8.209   8.240  1.00  0.51           O  
HETATM  582  O   HOH T 581      72.658   8.502  -8.327  1.00  0.51           O  
HETATM  583  O   HOH T 582     -22.575  54.398  51.992  1.00  0.51           O  
HETATM  584  O   HOH T 583      67.172  92.738  20.477  1.00  0.51           O  
HETATM  585  O   HOH T 584      77.219   6.358  -1.550  1.00  0.51           O  
HETATM  586  O   HOH T 585      42.296  32.413  -2.631  1.00  0.51           O  
HETATM  587  O   HOH T 586     -20.306  55.511  50.799  1.00  0.51           O  
HETATM  588  O   HOH T 587     -33.964  71.891  28.966  1.00  0.51           O  
HETATM  589  O   HOH T 588     -10.151  55.576  39.923  1.00  0.51           O  
HETATM  590  O   HOH T 589     -24.934  53.934  17.608  1.00  0.51           O  
HETATM  591  O   HOH T 590     -44.743  75.669  32.336  1.00  0.51           O  
HETATM  592  O   HOH T 591     -15.090  58.451  49.067  1.00  0.51           O  
HETATM  593  O   HOH T 592     -45.342  78.123  36.204  1.00  0.51           O  
HETATM  594  O   HOH T 593      -8.790  68.810  31.648  1.00  0.51           O  
HETATM  595  O   HOH T 594     -14.130  56.831  47.170  1.00  0.51           O  
HETATM  596  O   HOH T 595      49.919  21.107 -15.883  1.00  0.51           O  
HETATM  597  O   HOH T 596      48.842  98.143  26.587  1.00  0.51           O  
HETATM  598  O   HOH T 597     -38.781  72.819  44.504  1.00  0.51           O  
HETATM  599  O   HOH T 598      47.063  35.565  19.276  1.00  0.51           O  
HETATM  600  O   HOH T 599      59.137  40.542  -6.299  1.00  0.51           O  
HETATM  601  O   HOH T 600      65.540 108.816  29.041  1.00  0.51           O  
HETATM  602  O   HOH T 601      59.583 128.307  25.378  1.00  0.52           O  
HETATM  603  O   HOH T 602      62.457 122.245  11.382  1.00  0.52           O  
HETATM  604  O   HOH T 603      36.340  23.105  -0.650  1.00  0.52           O  
HETATM  605  O   HOH T 604     -20.246  84.138  30.474  1.00  0.52           O  
HETATM  606  O   HOH T 605      56.860 129.697  44.631  1.00  0.52           O  
HETATM  607  O   HOH T 606      65.099 123.835  24.329  1.00  0.52           O  
HETATM  608  O   HOH T 607      64.255  97.966  33.390  1.00  0.52           O  
HETATM  609  O   HOH T 608     -43.052  71.392  27.660  1.00  0.52           O  
HETATM  610  O   HOH T 609      33.071 128.422  37.365  1.00  0.52           O  
HETATM  611  O   HOH T 610      55.917  36.452  16.179  1.00  0.52           O  
HETATM  612  O   HOH T 611      66.428  14.572   5.894  1.00  0.52           O  
HETATM  613  O   HOH T 612     -38.094  65.742  28.791  1.00  0.52           O  
HETATM  614  O   HOH T 613     -12.061  53.516  46.472  1.00  0.52           O  
HETATM  615  O   HOH T 614     -14.544  74.643  41.400  1.00  0.52           O  
HETATM  616  O   HOH T 615      56.628  42.757  -4.043  1.00  0.52           O  
HETATM  617  O   HOH T 616      65.631  92.705  15.288  1.00  0.52           O  
HETATM  618  O   HOH T 617      34.136  17.930   2.262  1.00  0.52           O  
HETATM  619  O   HOH T 618      50.376  10.817  13.569  1.00  0.52           O  
HETATM  620  O   HOH T 619      71.973  -1.287 -11.523  1.00  0.52           O  
HETATM  621  O   HOH T 620      46.024  10.394   4.202  1.00  0.52           O  
HETATM  622  O   HOH T 621      44.223  16.022  -5.669  1.00  0.52           O  
HETATM  623  O   HOH T 622     -12.681  73.882  39.781  1.00  0.52           O  
HETATM  624  O   HOH T 623     -15.049  61.245  42.980  1.00  0.52           O  
HETATM  625  O   HOH T 624      67.110 118.264  26.714  1.00  0.52           O  
HETATM  626  O   HOH T 625     -14.491  70.393  19.921  1.00  0.52           O  
HETATM  627  O   HOH T 626      47.688 114.806  49.677  1.00  0.53           O  
HETATM  628  O   HOH T 627      -9.290  67.586  27.606  1.00  0.53           O  
HETATM  629  O   HOH T 628      54.132   8.909 -17.367  1.00  0.53           O  
HETATM  630  O   HOH T 629     -19.010  82.891  42.651  1.00  0.53           O  
HETATM  631  O   HOH T 630      64.891  34.485 -11.186  1.00  0.53           O  
HETATM  632  O   HOH T 631     -21.566  85.802  36.262  1.00  0.53           O  
HETATM  633  O   HOH T 632      61.633 104.451  41.475  1.00  0.53           O  
HETATM  634  O   HOH T 633      44.602 132.745  29.101  1.00  0.53           O  
HETATM  635  O   HOH T 634      -8.749  68.936  20.287  1.00  0.53           O  
HETATM  636  O   HOH T 635      42.904 104.587  12.885  1.00  0.53           O  
HETATM  637  O   HOH T 636     -33.928  84.082  34.852  1.00  0.53           O  
HETATM  638  O   HOH T 637      38.028 123.972  34.456  1.00  0.53           O  
HETATM  639  O   HOH T 638      61.237 130.452  30.024  1.00  0.53           O  
HETATM  640  O   HOH T 639      65.370   0.908 -10.971  1.00  0.53           O  
HETATM  641  O   HOH T 640      43.774 115.013  15.868  1.00  0.53           O  
HETATM  642  O   HOH T 641      68.957   9.788   4.814  1.00  0.53           O  
HETATM  643  O   HOH T 642      70.591  25.927 -12.157  1.00  0.53           O  
HETATM  644  O   HOH T 643      66.707  14.493   0.994  1.00  0.53           O  
HETATM  645  O   HOH T 644      64.286  21.005 -17.264  1.00  0.53           O  
HETATM  646  O   HOH T 645      60.607  21.839  11.686  1.00  0.53           O  
HETATM  647  O   HOH T 646     -29.911  55.746  33.973  1.00  0.53           O  
HETATM  648  O   HOH T 647      50.932   8.900  -2.168  1.00  0.53           O  
HETATM  649  O   HOH T 648     -21.829  78.661  54.090  1.00  0.53           O  
HETATM  650  O   HOH T 649     -19.331  51.792  21.967  1.00  0.53           O  
HETATM  651  O   HOH T 650      61.626  96.344  40.520  1.00  0.53           O  
HETATM  652  O   HOH T 651      69.156 114.837  28.487  1.00  0.54           O  
HETATM  653  O   HOH T 652      71.223  97.067  27.003  1.00  0.54           O  
HETATM  654  O   HOH T 653      53.736 134.450  40.046  1.00  0.54           O  
HETATM  655  O   HOH T 654      60.790  36.591  14.589  1.00  0.54           O  
HETATM  656  O   HOH T 655      61.596  34.876 -16.902  1.00  0.54           O  
HETATM  657  O   HOH T 656      60.627 122.282  41.176  1.00  0.54           O  
HETATM  658  O   HOH T 657      57.526  94.900  36.496  1.00  0.54           O  
HETATM  659  O   HOH T 658      58.306   4.639   4.097  1.00  0.54           O  
HETATM  660  O   HOH T 659      62.303   2.472   6.582  1.00  0.54           O  
HETATM  661  O   HOH T 660     -16.191  47.012  29.282  1.00  0.54           O  
HETATM  662  O   HOH T 661     -12.306  78.527  18.445  1.00  0.54           O  
HETATM  663  O   HOH T 662      54.655  41.892   7.348  1.00  0.54           O  
HETATM  664  O   HOH T 663      72.015  23.364  -0.767  1.00  0.54           O  
HETATM  665  O   HOH T 664     -22.485  84.333  50.314  1.00  0.54           O  
HETATM  666  O   HOH T 665      56.125 133.705  35.632  1.00  0.54           O  
HETATM  667  O   HOH T 666      55.120 134.682  32.184  1.00  0.54           O  
HETATM  668  O   HOH T 667      62.210 127.544  32.403  1.00  0.54           O  
HETATM  669  O   HOH T 668     -34.990  55.635  35.024  1.00  0.54           O  
HETATM  670  O   HOH T 669      47.907 128.866  16.335  1.00  0.54           O  
HETATM  671  O   HOH T 670      56.078  37.181   8.994  1.00  0.54           O  
HETATM  672  O   HOH T 671      45.116  38.970  -0.968  1.00  0.55           O  
HETATM  673  O   HOH T 672     -36.689  77.876  33.117  1.00  0.55           O  
HETATM  674  O   HOH T 673      44.422 117.483  48.555  1.00  0.55           O  
HETATM  675  O   HOH T 674     -16.135  53.439  20.455  1.00  0.55           O  
HETATM  676  O   HOH T 675      59.935  22.493  14.981  1.00  0.55           O  
HETATM  677  O   HOH T 676      -9.641  59.161  36.325  1.00  0.55           O  
HETATM  678  O   HOH T 677     -33.262  56.554  40.740  1.00  0.55           O  
HETATM  679  O   HOH T 678     -25.081  51.145  46.950  1.00  0.55           O  
HETATM  680  O   HOH T 679      59.961 121.492  38.120  1.00  0.55           O  
HETATM  681  O   HOH T 680      63.187 118.409  35.700  1.00  0.55           O  
HETATM  682  O   HOH T 681     -33.920  73.515  26.717  1.00  0.55           O  
HETATM  683  O   HOH T 682      60.651 115.033  40.489  1.00  0.55           O  
HETATM  684  O   HOH T 683     -31.589  66.475  23.587  1.00  0.55           O  
HETATM  685  O   HOH T 684     -32.387  55.907  31.603  1.00  0.55           O  
HETATM  686  O   HOH T 685      64.028  29.219 -18.625  1.00  0.55           O  
HETATM  687  O   HOH T 686      65.046  26.945   5.221  1.00  0.56           O  
HETATM  688  O   HOH T 687      68.197  12.411   5.165  1.00  0.56           O  
HETATM  689  O   HOH T 688      63.003  91.704  21.810  1.00  0.56           O  
HETATM  690  O   HOH T 689     -25.976  52.539  34.024  1.00  0.56           O  
HETATM  691  O   HOH T 690      62.269  34.950 -19.493  1.00  0.56           O  
HETATM  692  O   HOH T 691      -6.527  68.015  36.410  1.00  0.56           O  
HETATM  693  O   HOH T 692      61.957  13.096 -16.437  1.00  0.56           O  
HETATM  694  O   HOH T 693     -16.243  68.058  46.181  1.00  0.56           O  
HETATM  695  O   HOH T 694      68.955 103.761  19.410  1.00  0.56           O  
HETATM  696  O   HOH T 695     -29.291  88.674  37.245  1.00  0.56           O  
HETATM  697  O   HOH T 696      42.870 128.054  20.202  1.00  0.56           O  
HETATM  698  O   HOH T 697      60.164   7.942 -12.991  1.00  0.56           O  
HETATM  699  O   HOH T 698      58.242 114.238  44.538  1.00  0.56           O  
HETATM  700  O   HOH T 699     -30.846  77.528  20.479  1.00  0.56           O  
HETATM  701  O   HOH T 700     -39.618  74.436  32.156  1.00  0.56           O  
HETATM  702  O   HOH T 701      51.968  15.881  -2.102  1.00  0.56           O  
HETATM  703  O   HOH T 702     -21.838  50.003  39.422  1.00  0.56           O  
HETATM  704  O   HOH T 703      45.405  28.316  -9.092  1.00  0.56           O  
HETATM  705  O   HOH T 704      65.832   4.490  10.541  1.00  0.57           O  
HETATM  706  O   HOH T 705     -17.972  45.085  34.139  1.00  0.57           O  
HETATM  707  O   HOH T 706     -30.115  54.962  27.551  1.00  0.57           O  
HETATM  708  O   HOH T 707     -37.143  84.309  38.839  1.00  0.57           O  
HETATM  709  O   HOH T 708      44.509 103.620  17.952  1.00  0.57           O  
HETATM  710  O   HOH T 709      40.406  30.740  -3.254  1.00  0.57           O  
HETATM  711  O   HOH T 710     -12.191  68.066  41.566  1.00  0.57           O  
HETATM  712  O   HOH T 711      46.709 131.036  25.981  1.00  0.57           O  
HETATM  713  O   HOH T 712      39.724  21.005  -3.961  1.00  0.57           O  
HETATM  714  O   HOH T 713     -43.049  66.281  38.874  1.00  0.57           O  
HETATM  715  O   HOH T 714      67.385  19.184  -2.451  1.00  0.57           O  
HETATM  716  O   HOH T 715     -25.823  81.100  54.893  1.00  0.57           O  
HETATM  717  O   HOH T 716      47.774  10.624  -4.103  1.00  0.57           O  
HETATM  718  O   HOH T 717     -11.273  72.286  31.566  1.00  0.57           O  
HETATM  719  O   HOH T 718      55.995 101.176  14.638  1.00  0.57           O  
HETATM  720  O   HOH T 719      62.902  98.088  42.099  1.00  0.58           O  
HETATM  721  O   HOH T 720     -15.869  80.186  38.148  1.00  0.58           O  
HETATM  722  O   HOH T 721      60.950  31.748  12.264  1.00  0.58           O  
HETATM  723  O   HOH T 722      45.245 123.501  26.630  1.00  0.58           O  
HETATM  724  O   HOH T 723      58.935 130.496  36.961  1.00  0.58           O  
HETATM  725  O   HOH T 724      63.274 102.347  15.180  1.00  0.58           O  
HETATM  726  O   HOH T 725     -30.678  81.847  56.064  1.00  0.58           O  
HETATM  727  O   HOH T 726      59.724 122.274  11.145  1.00  0.59           O  
HETATM  728  O   HOH T 727      42.818 120.803  48.605  1.00  0.60           O  
HETATM  729  O   HOH T 728      61.492 117.385  12.988  1.00  0.60           O  
HETATM  730  O   HOH T 729      60.807  16.314  16.174  1.00  0.61           O  
HETATM  731  O   HOH T 730      62.614  34.809  13.639  1.00  0.61           O  
HETATM  732  O   HOH T 731      59.181 126.714  16.367  1.00  0.61           O  
TER     733      HOH T 731 
