# Supplementary material for: Accurate Prediction of Hydration Sites of Proteins Using Energy Model With Atom Embedding
Source: Front Mol Biosci. 2021 Sep 20;8:756075. doi: 10.3389/fmolb.2021.756075 (PMC8488165; doi:10.3389/fmolb.2021.756075)
Supplement: Supplementary file 1 [file DataSheet1.ZIP › Data Sheet 1/Our_result_pdb/our_dataset_output/1P5F_watersite.pdb]

HEADER                                                        XXXX


JRNL        PMID   -1
HETATM    1  O   HOH T   0      42.294  24.014  23.708  1.00  0.15           O  
HETATM    2  O   HOH T   1      13.704  20.933  42.886  1.00  0.16           O  
HETATM    3  O   HOH T   2      33.021  32.591  22.268  1.00  0.17           O  
HETATM    4  O   HOH T   3      20.224  22.492  15.358  1.00  0.20           O  
HETATM    5  O   HOH T   4      11.081  40.507  30.101  1.00  0.20           O  
HETATM    6  O   HOH T   5      25.613  21.230  31.819  1.00  0.22           O  
HETATM    7  O   HOH T   6      27.237  21.069  43.338  1.00  0.23           O  
HETATM    8  O   HOH T   7      22.150  20.443  15.293  1.00  0.23           O  
HETATM    9  O   HOH T   8      15.156  43.509  17.540  1.00  0.24           O  
HETATM   10  O   HOH T   9      23.304  20.272  30.700  1.00  0.24           O  
HETATM   11  O   HOH T  10      44.742  32.488  24.348  1.00  0.25           O  
HETATM   12  O   HOH T  11      21.912  30.535  14.151  1.00  0.26           O  
HETATM   13  O   HOH T  12      21.810  13.368  32.120  1.00  0.26           O  
HETATM   14  O   HOH T  13      12.838  24.688  20.453  1.00  0.26           O  
HETATM   15  O   HOH T  14      16.503  13.598  31.353  1.00  0.27           O  
HETATM   16  O   HOH T  15      24.509  38.400  33.963  1.00  0.27           O  
HETATM   17  O   HOH T  16      33.662  18.818  30.164  1.00  0.27           O  
HETATM   18  O   HOH T  17      17.943  11.461  24.898  1.00  0.27           O  
HETATM   19  O   HOH T  18      28.155  19.971  38.509  1.00  0.28           O  
HETATM   20  O   HOH T  19      10.507  13.245  24.436  1.00  0.28           O  
HETATM   21  O   HOH T  20      20.714  11.426  24.371  1.00  0.29           O  
HETATM   22  O   HOH T  21      21.484  43.136  38.107  1.00  0.30           O  
HETATM   23  O   HOH T  22      49.483  31.134  31.995  1.00  0.30           O  
HETATM   24  O   HOH T  23      16.983  48.066  34.853  1.00  0.30           O  
HETATM   25  O   HOH T  24       9.747  15.390  31.715  1.00  0.31           O  
HETATM   26  O   HOH T  25      35.366  18.303  28.123  1.00  0.31           O  
HETATM   27  O   HOH T  26      23.910  17.588  43.946  1.00  0.31           O  
HETATM   28  O   HOH T  27      39.959  37.213  15.027  1.00  0.32           O  
HETATM   29  O   HOH T  28      36.943  14.248  23.357  1.00  0.32           O  
HETATM   30  O   HOH T  29      15.325  20.747  45.155  1.00  0.32           O  
HETATM   31  O   HOH T  30      19.258  13.359  36.782  1.00  0.32           O  
HETATM   32  O   HOH T  31      13.521  24.545  12.368  1.00  0.33           O  
HETATM   33  O   HOH T  32      10.465  14.994  29.047  1.00  0.33           O  
HETATM   34  O   HOH T  33      20.889  19.735  48.597  1.00  0.33           O  
HETATM   35  O   HOH T  34      41.593  26.871  35.173  1.00  0.34           O  
HETATM   36  O   HOH T  35       9.612  39.330  23.271  1.00  0.34           O  
HETATM   37  O   HOH T  36      19.570  13.051  33.906  1.00  0.34           O  
HETATM   38  O   HOH T  37      19.327  14.324  31.301  1.00  0.34           O  
HETATM   39  O   HOH T  38      29.994  22.879  39.146  1.00  0.34           O  
HETATM   40  O   HOH T  39      10.180  42.073  23.327  1.00  0.35           O  
HETATM   41  O   HOH T  40       3.942  34.087  15.026  1.00  0.35           O  
HETATM   42  O   HOH T  41      16.058  10.799  31.606  1.00  0.35           O  
HETATM   43  O   HOH T  42      10.138  46.567  27.734  1.00  0.35           O  
HETATM   44  O   HOH T  43      16.218  45.779  33.586  1.00  0.35           O  
HETATM   45  O   HOH T  44      33.106  25.363  36.593  1.00  0.36           O  
HETATM   46  O   HOH T  45      40.460  24.146  34.205  1.00  0.36           O  
HETATM   47  O   HOH T  46       6.819  18.779  26.780  1.00  0.36           O  
HETATM   48  O   HOH T  47      36.844  22.779  15.415  1.00  0.36           O  
HETATM   49  O   HOH T  48      25.084  11.921  44.554  1.00  0.36           O  
HETATM   50  O   HOH T  49      23.005  27.590  29.379  1.00  0.36           O  
HETATM   51  O   HOH T  50      21.526  17.876  14.789  1.00  0.36           O  
HETATM   52  O   HOH T  51       9.079  43.183  19.708  1.00  0.36           O  
HETATM   53  O   HOH T  52      46.612  37.029  25.853  1.00  0.37           O  
HETATM   54  O   HOH T  53      34.547  24.654  38.959  1.00  0.37           O  
HETATM   55  O   HOH T  54      31.358  40.807  27.515  1.00  0.38           O  
HETATM   56  O   HOH T  55       7.926  40.846  20.653  1.00  0.38           O  
HETATM   57  O   HOH T  56      17.049  26.999  12.123  1.00  0.38           O  
HETATM   58  O   HOH T  57      18.020  17.865  13.838  1.00  0.38           O  
HETATM   59  O   HOH T  58      42.342  17.860  18.678  1.00  0.38           O  
HETATM   60  O   HOH T  59       7.491  34.766  29.053  1.00  0.38           O  
HETATM   61  O   HOH T  60      19.515  19.803  15.162  1.00  0.39           O  
HETATM   62  O   HOH T  61       8.529  32.177  23.808  1.00  0.39           O  
HETATM   63  O   HOH T  62       7.563  22.928  29.988  1.00  0.39           O  
HETATM   64  O   HOH T  63      19.526   9.426  25.913  1.00  0.39           O  
HETATM   65  O   HOH T  64      17.225  48.188  37.521  1.00  0.39           O  
HETATM   66  O   HOH T  65      40.622  16.568  20.322  1.00  0.39           O  
HETATM   67  O   HOH T  66      45.419  27.941  30.766  1.00  0.40           O  
HETATM   68  O   HOH T  67      35.502  24.258  36.374  1.00  0.40           O  
HETATM   69  O   HOH T  68      20.278  27.307  29.567  1.00  0.40           O  
HETATM   70  O   HOH T  69      13.558  18.573  44.341  1.00  0.40           O  
HETATM   71  O   HOH T  70      26.329  18.400  43.268  1.00  0.40           O  
HETATM   72  O   HOH T  71      28.322  10.967  30.648  1.00  0.40           O  
HETATM   73  O   HOH T  72      35.964  15.608  27.924  1.00  0.40           O  
HETATM   74  O   HOH T  73      13.786  15.393  11.284  1.00  0.41           O  
HETATM   75  O   HOH T  74       7.132  27.283  22.483  1.00  0.41           O  
HETATM   76  O   HOH T  75      24.923  10.096  23.774  1.00  0.41           O  
HETATM   77  O   HOH T  76      31.744  13.634  40.809  1.00  0.41           O  
HETATM   78  O   HOH T  77      30.959  23.995  41.745  1.00  0.42           O  
HETATM   79  O   HOH T  78       8.990  13.854  26.836  1.00  0.42           O  
HETATM   80  O   HOH T  79       9.352  40.813  18.281  1.00  0.42           O  
HETATM   81  O   HOH T  80      19.254  28.543  11.927  1.00  0.42           O  
HETATM   82  O   HOH T  81      26.205   8.875  41.537  1.00  0.42           O  
HETATM   83  O   HOH T  82       7.808  46.654  29.191  1.00  0.43           O  
HETATM   84  O   HOH T  83       5.383  29.123  21.287  1.00  0.43           O  
HETATM   85  O   HOH T  84      35.553  22.375  34.416  1.00  0.43           O  
HETATM   86  O   HOH T  85      21.569  17.690  52.019  1.00  0.43           O  
HETATM   87  O   HOH T  86      37.310  20.216  14.368  1.00  0.43           O  
HETATM   88  O   HOH T  87      12.171  34.936  13.376  1.00  0.43           O  
HETATM   89  O   HOH T  88      23.441  36.423  35.707  1.00  0.43           O  
HETATM   90  O   HOH T  89      16.788  45.453  16.361  1.00  0.44           O  
HETATM   91  O   HOH T  90      11.746  21.128  19.421  1.00  0.44           O  
HETATM   92  O   HOH T  91       7.865  46.780  26.350  1.00  0.44           O  
HETATM   93  O   HOH T  92      10.535  13.816  17.866  1.00  0.44           O  
HETATM   94  O   HOH T  93      38.323  22.652  34.791  1.00  0.44           O  
HETATM   95  O   HOH T  94      24.841  11.327  41.807  1.00  0.44           O  
HETATM   96  O   HOH T  95      14.947  26.661  13.815  1.00  0.45           O  
HETATM   97  O   HOH T  96      16.918  12.322  33.781  1.00  0.45           O  
HETATM   98  O   HOH T  97      30.892  20.220  11.974  1.00  0.45           O  
HETATM   99  O   HOH T  98       7.786  15.485  24.860  1.00  0.45           O  
HETATM  100  O   HOH T  99      33.196  42.278  29.880  1.00  0.45           O  
HETATM  101  O   HOH T 100      32.209  26.431  41.900  1.00  0.45           O  
HETATM  102  O   HOH T 101      13.142  28.739  13.652  1.00  0.45           O  
HETATM  103  O   HOH T 102      29.454  28.324  22.535  1.00  0.45           O  
HETATM  104  O   HOH T 103      19.555  31.052  12.744  1.00  0.45           O  
HETATM  105  O   HOH T 104      32.718  39.291  21.237  1.00  0.45           O  
HETATM  106  O   HOH T 105      47.259  29.361  36.604  1.00  0.46           O  
HETATM  107  O   HOH T 106       7.168  20.333  29.211  1.00  0.46           O  
HETATM  108  O   HOH T 107      31.693  12.527  23.182  1.00  0.46           O  
HETATM  109  O   HOH T 108      11.146  38.872  17.726  1.00  0.46           O  
HETATM  110  O   HOH T 109      21.348  14.935  52.397  1.00  0.46           O  
HETATM  111  O   HOH T 110      26.839  11.415  28.462  1.00  0.46           O  
HETATM  112  O   HOH T 111      10.426  17.087  12.636  1.00  0.46           O  
HETATM  113  O   HOH T 112       9.541  11.272  33.883  1.00  0.46           O  
HETATM  114  O   HOH T 113       5.195  46.070  26.874  1.00  0.46           O  
HETATM  115  O   HOH T 114       8.364  35.867  16.096  1.00  0.46           O  
HETATM  116  O   HOH T 115      28.522  27.347  15.618  1.00  0.47           O  
HETATM  117  O   HOH T 116       8.779  12.793  31.717  1.00  0.47           O  
HETATM  118  O   HOH T 117      37.031  25.069  13.784  1.00  0.47           O  
HETATM  119  O   HOH T 118      37.796  35.653  14.613  1.00  0.47           O  
HETATM  120  O   HOH T 119      24.436  20.385   8.996  1.00  0.47           O  
HETATM  121  O   HOH T 120      10.922  29.396  12.228  1.00  0.48           O  
HETATM  122  O   HOH T 121      21.984  17.329  49.325  1.00  0.48           O  
HETATM  123  O   HOH T 122      28.740  11.169  17.590  1.00  0.48           O  
HETATM  124  O   HOH T 123      40.666  17.526  22.927  1.00  0.48           O  
HETATM  125  O   HOH T 124      31.779  31.474  13.552  1.00  0.48           O  
HETATM  126  O   HOH T 125      19.476  44.468  15.895  1.00  0.48           O  
HETATM  127  O   HOH T 126      27.299   8.578  24.250  1.00  0.48           O  
HETATM  128  O   HOH T 127      33.617  19.871  14.695  1.00  0.49           O  
HETATM  129  O   HOH T 128      37.252  14.325  30.027  1.00  0.49           O  
HETATM  130  O   HOH T 129       5.736  36.178  15.277  1.00  0.49           O  
HETATM  131  O   HOH T 130      12.860  40.373  15.996  1.00  0.49           O  
HETATM  132  O   HOH T 131      44.336  34.994  25.102  1.00  0.49           O  
HETATM  133  O   HOH T 132      38.885  16.064  24.382  1.00  0.49           O  
HETATM  134  O   HOH T 133      12.892  18.021  11.716  1.00  0.49           O  
HETATM  135  O   HOH T 134      24.438  15.274  42.429  1.00  0.49           O  
HETATM  136  O   HOH T 135      38.817  20.876  12.313  1.00  0.49           O  
HETATM  137  O   HOH T 136      24.319  40.720  26.701  1.00  0.49           O  
HETATM  138  O   HOH T 137      22.081  10.240  26.603  1.00  0.49           O  
HETATM  139  O   HOH T 138       9.959  38.962  20.342  1.00  0.50           O  
HETATM  140  O   HOH T 139      15.299  11.188  37.301  1.00  0.50           O  
HETATM  141  O   HOH T 140      17.398  15.335  13.077  1.00  0.50           O  
HETATM  142  O   HOH T 141      33.372  19.394  32.877  1.00  0.50           O  
HETATM  143  O   HOH T 142      12.058  26.863  11.786  1.00  0.50           O  
HETATM  144  O   HOH T 143      21.399  40.267  38.127  1.00  0.50           O  
HETATM  145  O   HOH T 144      31.319  28.180   3.434  1.00  0.50           O  
HETATM  146  O   HOH T 145      41.620  29.155  37.272  1.00  0.50           O  
HETATM  147  O   HOH T 146      34.799  37.138  39.072  1.00  0.50           O  
HETATM  148  O   HOH T 147      14.578  27.973  11.296  1.00  0.51           O  
HETATM  149  O   HOH T 148      14.439  19.255   9.766  1.00  0.51           O  
HETATM  150  O   HOH T 149      11.331  14.530  12.122  1.00  0.51           O  
HETATM  151  O   HOH T 150      17.052  12.842  38.443  1.00  0.51           O  
HETATM  152  O   HOH T 151      30.673  28.497  40.585  1.00  0.51           O  
HETATM  153  O   HOH T 152      41.329  25.083  37.328  1.00  0.52           O  
HETATM  154  O   HOH T 153      16.349  47.831  28.307  1.00  0.52           O  
HETATM  155  O   HOH T 154      34.215  13.582  23.346  1.00  0.52           O  
HETATM  156  O   HOH T 155      24.528  38.860  20.263  1.00  0.52           O  
HETATM  157  O   HOH T 156      15.345  30.680  11.327  1.00  0.52           O  
HETATM  158  O   HOH T 157      48.722  30.256  34.372  1.00  0.52           O  
HETATM  159  O   HOH T 158      19.723  45.613  23.338  1.00  0.52           O  
HETATM  160  O   HOH T 159      29.526  27.174  12.091  1.00  0.52           O  
HETATM  161  O   HOH T 160       7.727  18.113  24.167  1.00  0.53           O  
HETATM  162  O   HOH T 161      21.718  29.780  11.471  1.00  0.53           O  
HETATM  163  O   HOH T 162      30.612  24.881  37.460  1.00  0.53           O  
HETATM  164  O   HOH T 163      29.444  24.404   6.291  1.00  0.53           O  
HETATM  165  O   HOH T 164      17.174  11.208  17.557  1.00  0.53           O  
HETATM  166  O   HOH T 165      42.172  19.281  29.987  1.00  0.53           O  
HETATM  167  O   HOH T 166      11.437  46.926  35.430  1.00  0.53           O  
HETATM  168  O   HOH T 167      13.930  36.770  14.513  1.00  0.53           O  
HETATM  169  O   HOH T 168      31.606  39.743  18.661  1.00  0.53           O  
HETATM  170  O   HOH T 169      43.075  17.096  21.319  1.00  0.53           O  
HETATM  171  O   HOH T 170      12.919  31.350  12.587  1.00  0.54           O  
HETATM  172  O   HOH T 171       6.992  15.918  27.433  1.00  0.54           O  
HETATM  173  O   HOH T 172       9.297  14.087  34.079  1.00  0.54           O  
HETATM  174  O   HOH T 173      16.102   8.151  32.440  1.00  0.54           O  
HETATM  175  O   HOH T 174      36.548  22.458  12.810  1.00  0.54           O  
HETATM  176  O   HOH T 175      13.084  48.707  34.135  1.00  0.54           O  
HETATM  177  O   HOH T 176      38.441  15.970  21.759  1.00  0.54           O  
HETATM  178  O   HOH T 177      13.123   8.498  28.393  1.00  0.55           O  
HETATM  179  O   HOH T 178      37.500  14.495  26.000  1.00  0.55           O  
HETATM  180  O   HOH T 179      35.630  39.827  20.962  1.00  0.55           O  
HETATM  181  O   HOH T 180      33.286  39.876  24.045  1.00  0.55           O  
HETATM  182  O   HOH T 181      31.206  27.890  44.023  1.00  0.55           O  
HETATM  183  O   HOH T 182      15.687  17.213  12.465  1.00  0.55           O  
HETATM  184  O   HOH T 183      12.610  21.137  10.456  1.00  0.56           O  
HETATM  185  O   HOH T 184      48.005  28.777  31.265  1.00  0.56           O  
HETATM  186  O   HOH T 185      29.016  40.885  29.156  1.00  0.56           O  
HETATM  187  O   HOH T 186       7.615  30.006  22.626  1.00  0.56           O  
HETATM  188  O   HOH T 187      15.517   7.991  34.973  1.00  0.56           O  
HETATM  189  O   HOH T 188      40.428  34.758  34.084  1.00  0.56           O  
HETATM  190  O   HOH T 189      27.676   9.017  16.171  1.00  0.56           O  
HETATM  191  O   HOH T 190      44.187  20.966  30.949  1.00  0.57           O  
HETATM  192  O   HOH T 191      29.279  25.837  39.627  1.00  0.57           O  
HETATM  193  O   HOH T 192      21.377  42.131  24.276  1.00  0.57           O  
HETATM  194  O   HOH T 193      42.239  26.747  39.142  1.00  0.57           O  
TER     195      HOH T 193 
