# Supplementary material for: Accurate Prediction of Hydration Sites of Proteins Using Energy Model With Atom Embedding
Source: Front Mol Biosci. 2021 Sep 20;8:756075. doi: 10.3389/fmolb.2021.756075 (PMC8488165; doi:10.3389/fmolb.2021.756075)
Supplement: Supplementary file 1 [file DataSheet1.ZIP › Data Sheet 1/Our_result_pdb/our_dataset_output/1QK3_watersite.pdb]

HEADER                                                        XXXX


JRNL        PMID   -1
HETATM    1  O   HOH T   0      57.780  88.444  84.630  1.00  0.15           O  
HETATM    2  O   HOH T   1      66.894  67.468 106.649  1.00  0.15           O  
HETATM    3  O   HOH T   2      84.539 111.456 103.580  1.00  0.16           O  
HETATM    4  O   HOH T   3      77.339  83.508  84.175  1.00  0.16           O  
HETATM    5  O   HOH T   4     100.028  86.564 111.719  1.00  0.17           O  
HETATM    6  O   HOH T   5      85.603  82.167  74.505  1.00  0.17           O  
HETATM    7  O   HOH T   6      88.674  96.688 127.473  1.00  0.17           O  
HETATM    8  O   HOH T   7      91.936  78.791  79.023  1.00  0.17           O  
HETATM    9  O   HOH T   8      76.780  86.683  88.227  1.00  0.18           O  
HETATM   10  O   HOH T   9      64.430  54.325 102.499  1.00  0.18           O  
HETATM   11  O   HOH T  10      83.254  73.750 126.638  1.00  0.18           O  
HETATM   12  O   HOH T  11      58.310  59.079  99.454  1.00  0.18           O  
HETATM   13  O   HOH T  12      84.586  87.501 138.802  1.00  0.18           O  
HETATM   14  O   HOH T  13      75.678  79.055  81.688  1.00  0.18           O  
HETATM   15  O   HOH T  14      66.198  83.947 119.904  1.00  0.19           O  
HETATM   16  O   HOH T  15      73.041  63.487 103.530  1.00  0.19           O  
HETATM   17  O   HOH T  16      66.191  81.209 115.777  1.00  0.19           O  
HETATM   18  O   HOH T  17      76.332 111.886 102.080  1.00  0.19           O  
HETATM   19  O   HOH T  18      69.608  89.116  88.991  1.00  0.19           O  
HETATM   20  O   HOH T  19      51.167  86.343  88.059  1.00  0.19           O  
HETATM   21  O   HOH T  20      91.079  83.455 100.589  1.00  0.19           O  
HETATM   22  O   HOH T  21      81.561  97.507 125.064  1.00  0.20           O  
HETATM   23  O   HOH T  22      92.391  71.064 115.091  1.00  0.20           O  
HETATM   24  O   HOH T  23      75.569  79.590 132.464  1.00  0.20           O  
HETATM   25  O   HOH T  24      83.752  67.885  92.672  1.00  0.20           O  
HETATM   26  O   HOH T  25      91.822 119.191 116.599  1.00  0.20           O  
HETATM   27  O   HOH T  26      50.320  96.348 102.860  1.00  0.20           O  
HETATM   28  O   HOH T  27      72.709 101.322 131.078  1.00  0.20           O  
HETATM   29  O   HOH T  28      99.025  66.252 105.409  1.00  0.20           O  
HETATM   30  O   HOH T  29      56.508  66.327  84.710  1.00  0.20           O  
HETATM   31  O   HOH T  30      85.493 100.880 110.119  1.00  0.20           O  
HETATM   32  O   HOH T  31      73.881  67.370 106.839  1.00  0.20           O  
HETATM   33  O   HOH T  32      67.340  81.200 132.502  1.00  0.21           O  
HETATM   34  O   HOH T  33      51.521  91.477 108.419  1.00  0.21           O  
HETATM   35  O   HOH T  34      82.174  98.840 127.499  1.00  0.21           O  
HETATM   36  O   HOH T  35      90.822  89.622 103.822  1.00  0.21           O  
HETATM   37  O   HOH T  36      69.109 113.233 103.709  1.00  0.21           O  
HETATM   38  O   HOH T  37      69.667 101.284 127.983  1.00  0.21           O  
HETATM   39  O   HOH T  38      97.328  80.427  88.517  1.00  0.21           O  
HETATM   40  O   HOH T  39      83.804  86.227  88.238  1.00  0.22           O  
HETATM   41  O   HOH T  40      82.536  73.136 112.670  1.00  0.22           O  
HETATM   42  O   HOH T  41      93.348  63.768  85.633  1.00  0.22           O  
HETATM   43  O   HOH T  42      96.465  73.634 106.649  1.00  0.22           O  
HETATM   44  O   HOH T  43      74.333  60.958  98.923  1.00  0.22           O  
HETATM   45  O   HOH T  44      86.913  98.320  96.604  1.00  0.22           O  
HETATM   46  O   HOH T  45      84.347  95.371 133.782  1.00  0.22           O  
HETATM   47  O   HOH T  46      98.926  79.236 103.789  1.00  0.22           O  
HETATM   48  O   HOH T  47      73.776  87.548 114.210  1.00  0.22           O  
HETATM   49  O   HOH T  48      51.682  83.998 100.612  1.00  0.22           O  
HETATM   50  O   HOH T  49      99.807  66.506 102.755  1.00  0.22           O  
HETATM   51  O   HOH T  50      98.669  79.700 112.786  1.00  0.22           O  
HETATM   52  O   HOH T  51     103.343  58.324  94.915  1.00  0.22           O  
HETATM   53  O   HOH T  52      60.982 116.468 117.725  1.00  0.22           O  
HETATM   54  O   HOH T  53      92.424  99.381  91.774  1.00  0.22           O  
HETATM   55  O   HOH T  54      84.764  93.504 117.837  1.00  0.23           O  
HETATM   56  O   HOH T  55      79.966 106.901 131.364  1.00  0.23           O  
HETATM   57  O   HOH T  56      85.171  62.586 114.225  1.00  0.23           O  
HETATM   58  O   HOH T  57      92.564  97.922  99.383  1.00  0.23           O  
HETATM   59  O   HOH T  58      81.625 111.523 121.134  1.00  0.23           O  
HETATM   60  O   HOH T  59      93.104  54.251 109.923  1.00  0.23           O  
HETATM   61  O   HOH T  60      81.108 104.342 134.614  1.00  0.23           O  
HETATM   62  O   HOH T  61      77.475  98.218 118.024  1.00  0.23           O  
HETATM   63  O   HOH T  62      54.164  50.736  86.594  1.00  0.23           O  
HETATM   64  O   HOH T  63      61.957  87.737  79.500  1.00  0.23           O  
HETATM   65  O   HOH T  64      58.946  96.148  85.854  1.00  0.24           O  
HETATM   66  O   HOH T  65      60.476  83.324 110.833  1.00  0.24           O  
HETATM   67  O   HOH T  66      66.090  73.908  88.368  1.00  0.24           O  
HETATM   68  O   HOH T  67      76.602  80.908  83.477  1.00  0.24           O  
HETATM   69  O   HOH T  68      67.379 118.223 110.557  1.00  0.24           O  
HETATM   70  O   HOH T  69      58.597  95.491  92.962  1.00  0.24           O  
HETATM   71  O   HOH T  70      81.597  91.313  85.529  1.00  0.24           O  
HETATM   72  O   HOH T  71     101.340  77.193 101.278  1.00  0.24           O  
HETATM   73  O   HOH T  72      83.682 101.207 127.827  1.00  0.24           O  
HETATM   74  O   HOH T  73      73.769  76.544 138.716  1.00  0.24           O  
HETATM   75  O   HOH T  74      55.013  92.757  97.993  1.00  0.24           O  
HETATM   76  O   HOH T  75      95.417  81.146  73.530  1.00  0.24           O  
HETATM   77  O   HOH T  76      70.167  99.992 111.513  1.00  0.24           O  
HETATM   78  O   HOH T  77      64.961 104.776 124.312  1.00  0.24           O  
HETATM   79  O   HOH T  78      80.600  98.804  98.800  1.00  0.24           O  
HETATM   80  O   HOH T  79      76.879  92.474  97.792  1.00  0.24           O  
HETATM   81  O   HOH T  80      47.450  74.708  78.926  1.00  0.24           O  
HETATM   82  O   HOH T  81      81.957 105.419 116.834  1.00  0.24           O  
HETATM   83  O   HOH T  82      76.767 107.255 129.258  1.00  0.24           O  
HETATM   84  O   HOH T  83     100.067  80.579 118.848  1.00  0.25           O  
HETATM   85  O   HOH T  84      93.653  71.451 118.941  1.00  0.25           O  
HETATM   86  O   HOH T  85      81.995  89.473 120.854  1.00  0.25           O  
HETATM   87  O   HOH T  86     102.374  64.766  91.541  1.00  0.25           O  
HETATM   88  O   HOH T  87      83.531 112.518 116.647  1.00  0.25           O  
HETATM   89  O   HOH T  88      83.859  96.134 117.501  1.00  0.25           O  
HETATM   90  O   HOH T  89      98.112 100.882 102.524  1.00  0.25           O  
HETATM   91  O   HOH T  90      37.983  62.128  98.527  1.00  0.25           O  
HETATM   92  O   HOH T  91      59.528 114.728 109.887  1.00  0.25           O  
HETATM   93  O   HOH T  92      83.516  74.310 123.820  1.00  0.25           O  
HETATM   94  O   HOH T  93      62.629  90.406 115.266  1.00  0.25           O  
HETATM   95  O   HOH T  94      84.867  49.494 111.246  1.00  0.25           O  
HETATM   96  O   HOH T  95      52.852  92.949 101.682  1.00  0.25           O  
HETATM   97  O   HOH T  96      50.432  83.640  88.226  1.00  0.25           O  
HETATM   98  O   HOH T  97      73.334  71.410  97.130  1.00  0.25           O  
HETATM   99  O   HOH T  98      85.501  98.839 105.060  1.00  0.25           O  
HETATM  100  O   HOH T  99      70.472 103.338 120.063  1.00  0.25           O  
HETATM  101  O   HOH T 100      66.457  88.357 122.427  1.00  0.25           O  
HETATM  102  O   HOH T 101      76.808  76.724  92.015  1.00  0.25           O  
HETATM  103  O   HOH T 102      86.443  87.293  84.269  1.00  0.26           O  
HETATM  104  O   HOH T 103      53.375  61.792  94.169  1.00  0.26           O  
HETATM  105  O   HOH T 104      81.620  61.450  83.098  1.00  0.26           O  
HETATM  106  O   HOH T 105      51.704  98.759 103.019  1.00  0.26           O  
HETATM  107  O   HOH T 106      49.143 105.042 105.366  1.00  0.26           O  
HETATM  108  O   HOH T 107      63.756  89.796  69.259  1.00  0.26           O  
HETATM  109  O   HOH T 108      70.665  95.044 126.967  1.00  0.26           O  
HETATM  110  O   HOH T 109      84.266  68.368  87.983  1.00  0.26           O  
HETATM  111  O   HOH T 110      98.010  73.034  83.319  1.00  0.26           O  
HETATM  112  O   HOH T 111      92.438  62.334 108.115  1.00  0.26           O  
HETATM  113  O   HOH T 112      80.440  89.688 113.127  1.00  0.26           O  
HETATM  114  O   HOH T 113      48.820  53.361 107.029  1.00  0.26           O  
HETATM  115  O   HOH T 114      95.984  98.872 106.064  1.00  0.26           O  
HETATM  116  O   HOH T 115     101.308  81.016 116.396  1.00  0.26           O  
HETATM  117  O   HOH T 116      86.474  75.956 126.014  1.00  0.26           O  
HETATM  118  O   HOH T 117     101.978  69.273  94.220  1.00  0.26           O  
HETATM  119  O   HOH T 118      91.576  63.820  87.536  1.00  0.26           O  
HETATM  120  O   HOH T 119      64.128 107.187 118.179  1.00  0.26           O  
HETATM  121  O   HOH T 120      94.467  97.305 118.741  1.00  0.26           O  
HETATM  122  O   HOH T 121      75.426  84.623 142.670  1.00  0.26           O  
HETATM  123  O   HOH T 122      86.256 118.746 113.629  1.00  0.27           O  
HETATM  124  O   HOH T 123      54.057  56.268  98.163  1.00  0.27           O  
HETATM  125  O   HOH T 124      51.883  90.474 115.327  1.00  0.27           O  
HETATM  126  O   HOH T 125      84.609  80.840 132.686  1.00  0.27           O  
HETATM  127  O   HOH T 126      56.396 106.589 101.376  1.00  0.27           O  
HETATM  128  O   HOH T 127      71.263 106.004 120.784  1.00  0.27           O  
HETATM  129  O   HOH T 128      57.475  99.140  93.641  1.00  0.27           O  
HETATM  130  O   HOH T 129      99.244  90.401 102.495  1.00  0.27           O  
HETATM  131  O   HOH T 130      80.254  90.523 122.732  1.00  0.27           O  
HETATM  132  O   HOH T 131      56.688  45.242  89.937  1.00  0.27           O  
HETATM  133  O   HOH T 132      84.700 103.133  96.223  1.00  0.27           O  
HETATM  134  O   HOH T 133      58.187  64.251 112.180  1.00  0.27           O  
HETATM  135  O   HOH T 134      46.607  79.644  83.696  1.00  0.27           O  
HETATM  136  O   HOH T 135      77.784  93.318 108.791  1.00  0.27           O  
HETATM  137  O   HOH T 136      52.906  70.005  90.762  1.00  0.27           O  
HETATM  138  O   HOH T 137      76.375  71.404  78.880  1.00  0.27           O  
HETATM  139  O   HOH T 138      85.995 111.523  99.466  1.00  0.27           O  
HETATM  140  O   HOH T 139     102.205  82.766 125.359  1.00  0.27           O  
HETATM  141  O   HOH T 140      76.980  96.627  81.775  1.00  0.27           O  
HETATM  142  O   HOH T 141      96.227  66.489  76.600  1.00  0.28           O  
HETATM  143  O   HOH T 142      78.727  96.498 133.104  1.00  0.28           O  
HETATM  144  O   HOH T 143      66.535  71.371  89.669  1.00  0.28           O  
HETATM  145  O   HOH T 144      63.483  54.266 106.353  1.00  0.28           O  
HETATM  146  O   HOH T 145      85.338  65.880  88.742  1.00  0.28           O  
HETATM  147  O   HOH T 146      98.499  64.541  91.191  1.00  0.28           O  
HETATM  148  O   HOH T 147      85.872 104.250  98.499  1.00  0.28           O  
HETATM  149  O   HOH T 148      66.587  45.528  93.908  1.00  0.28           O  
HETATM  150  O   HOH T 149      48.896 104.694 102.605  1.00  0.28           O  
HETATM  151  O   HOH T 150      50.267  68.258  85.504  1.00  0.28           O  
HETATM  152  O   HOH T 151      65.199  45.390  90.199  1.00  0.28           O  
HETATM  153  O   HOH T 152      52.982  68.317 101.568  1.00  0.28           O  
HETATM  154  O   HOH T 153      82.327  98.533  91.299  1.00  0.28           O  
HETATM  155  O   HOH T 154      79.302  56.275 107.227  1.00  0.28           O  
HETATM  156  O   HOH T 155      53.595  99.167 119.909  1.00  0.28           O  
HETATM  157  O   HOH T 156      89.470  87.504 102.613  1.00  0.28           O  
HETATM  158  O   HOH T 157      65.993  77.261 132.181  1.00  0.28           O  
HETATM  159  O   HOH T 158      90.898  53.536 111.334  1.00  0.28           O  
HETATM  160  O   HOH T 159      55.929 111.455 109.135  1.00  0.28           O  
HETATM  161  O   HOH T 160      69.459  68.362  85.187  1.00  0.28           O  
HETATM  162  O   HOH T 161      63.378  77.317  78.299  1.00  0.28           O  
HETATM  163  O   HOH T 162      71.922 101.836 112.693  1.00  0.28           O  
HETATM  164  O   HOH T 163      94.404  84.684 128.993  1.00  0.28           O  
HETATM  165  O   HOH T 164      93.380  98.725  86.797  1.00  0.28           O  
HETATM  166  O   HOH T 165      64.697  94.817  83.258  1.00  0.29           O  
HETATM  167  O   HOH T 166      48.049  74.998  90.841  1.00  0.29           O  
HETATM  168  O   HOH T 167      97.584  76.838  90.725  1.00  0.29           O  
HETATM  169  O   HOH T 168      85.800 100.568 118.225  1.00  0.29           O  
HETATM  170  O   HOH T 169     103.338  74.351 122.864  1.00  0.29           O  
HETATM  171  O   HOH T 170      90.339 100.325 115.262  1.00  0.29           O  
HETATM  172  O   HOH T 171      84.793  99.626 107.703  1.00  0.29           O  
HETATM  173  O   HOH T 172      64.648  68.942  86.923  1.00  0.29           O  
HETATM  174  O   HOH T 173      55.037  86.367 119.303  1.00  0.29           O  
HETATM  175  O   HOH T 174      88.654  93.261 110.388  1.00  0.29           O  
HETATM  176  O   HOH T 175      83.519  88.209  80.572  1.00  0.29           O  
HETATM  177  O   HOH T 176      55.495  50.018  93.523  1.00  0.29           O  
HETATM  178  O   HOH T 177      84.449  63.216  93.786  1.00  0.29           O  
HETATM  179  O   HOH T 178      52.411  82.229 111.625  1.00  0.29           O  
HETATM  180  O   HOH T 179      72.559 101.788  91.552  1.00  0.29           O  
HETATM  181  O   HOH T 180      79.547  89.532  82.885  1.00  0.29           O  
HETATM  182  O   HOH T 181      69.523  91.576 117.954  1.00  0.29           O  
HETATM  183  O   HOH T 182      74.308 116.817 102.078  1.00  0.29           O  
HETATM  184  O   HOH T 183      66.337  91.018 140.667  1.00  0.29           O  
HETATM  185  O   HOH T 184      70.461  77.053 119.414  1.00  0.29           O  
HETATM  186  O   HOH T 185      95.454  86.473  90.566  1.00  0.29           O  
HETATM  187  O   HOH T 186     102.673  80.220 124.531  1.00  0.29           O  
HETATM  188  O   HOH T 187      48.599 115.706 109.299  1.00  0.29           O  
HETATM  189  O   HOH T 188      85.065  94.687 102.315  1.00  0.29           O  
HETATM  190  O   HOH T 189      78.893  77.588 149.020  1.00  0.29           O  
HETATM  191  O   HOH T 190      61.650  70.154 109.901  1.00  0.29           O  
HETATM  192  O   HOH T 191      89.765 103.899  91.196  1.00  0.29           O  
HETATM  193  O   HOH T 192      67.010 100.242  78.895  1.00  0.30           O  
HETATM  194  O   HOH T 193      75.450  64.958  95.157  1.00  0.30           O  
HETATM  195  O   HOH T 194      73.678  59.113  90.874  1.00  0.30           O  
HETATM  196  O   HOH T 195      72.376  72.458  85.924  1.00  0.30           O  
HETATM  197  O   HOH T 196      44.315  74.410  85.808  1.00  0.30           O  
HETATM  198  O   HOH T 197      50.942  62.385  95.449  1.00  0.30           O  
HETATM  199  O   HOH T 198      68.691 107.177  95.891  1.00  0.30           O  
HETATM  200  O   HOH T 199      65.052 106.047  98.402  1.00  0.30           O  
HETATM  201  O   HOH T 200      67.339  91.488 110.885  1.00  0.30           O  
HETATM  202  O   HOH T 201      72.072  77.521 140.631  1.00  0.30           O  
HETATM  203  O   HOH T 202      67.454  59.879 105.623  1.00  0.30           O  
HETATM  204  O   HOH T 203      74.864  95.819 138.858  1.00  0.30           O  
HETATM  205  O   HOH T 204      63.793 111.868 128.023  1.00  0.30           O  
HETATM  206  O   HOH T 205      64.933  87.599 136.893  1.00  0.30           O  
HETATM  207  O   HOH T 206      83.066  85.528  80.347  1.00  0.30           O  
HETATM  208  O   HOH T 207      96.431  80.827 134.939  1.00  0.30           O  
HETATM  209  O   HOH T 208      47.687  90.557  99.494  1.00  0.30           O  
HETATM  210  O   HOH T 209      91.695  58.189  85.144  1.00  0.30           O  
HETATM  211  O   HOH T 210      58.555  77.911 119.642  1.00  0.30           O  
HETATM  212  O   HOH T 211      40.179  72.813  84.225  1.00  0.30           O  
HETATM  213  O   HOH T 212      94.760  56.029 117.734  1.00  0.30           O  
HETATM  214  O   HOH T 213      95.988  77.197  76.189  1.00  0.30           O  
HETATM  215  O   HOH T 214      53.935  76.114 103.407  1.00  0.30           O  
HETATM  216  O   HOH T 215      64.705  91.939 116.217  1.00  0.30           O  
HETATM  217  O   HOH T 216      52.613  70.818  97.879  1.00  0.30           O  
HETATM  218  O   HOH T 217      55.074 106.136  98.998  1.00  0.30           O  
HETATM  219  O   HOH T 218      91.515  88.393  79.935  1.00  0.30           O  
HETATM  220  O   HOH T 219      51.468  72.070  85.758  1.00  0.30           O  
HETATM  221  O   HOH T 220      89.232  92.575 137.307  1.00  0.30           O  
HETATM  222  O   HOH T 221      57.514 105.976 122.920  1.00  0.30           O  
HETATM  223  O   HOH T 222      51.206  65.002  99.600  1.00  0.30           O  
HETATM  224  O   HOH T 223      75.285  90.330  96.663  1.00  0.30           O  
HETATM  225  O   HOH T 224      71.007  82.638 111.575  1.00  0.30           O  
HETATM  226  O   HOH T 225      64.489 102.068 132.179  1.00  0.31           O  
HETATM  227  O   HOH T 226      88.046  58.145 107.244  1.00  0.31           O  
HETATM  228  O   HOH T 227      48.103  77.239  95.579  1.00  0.31           O  
HETATM  229  O   HOH T 228      81.416  84.223  78.511  1.00  0.31           O  
HETATM  230  O   HOH T 229      69.798  77.546  78.667  1.00  0.31           O  
HETATM  231  O   HOH T 230      68.537  96.755 118.003  1.00  0.31           O  
HETATM  232  O   HOH T 231      59.678  67.132 121.351  1.00  0.31           O  
HETATM  233  O   HOH T 232      97.988  66.453  78.712  1.00  0.31           O  
HETATM  234  O   HOH T 233      69.867  89.803  91.621  1.00  0.31           O  
HETATM  235  O   HOH T 234      65.861  56.611 113.053  1.00  0.31           O  
HETATM  236  O   HOH T 235      74.327  69.966 115.362  1.00  0.31           O  
HETATM  237  O   HOH T 236      65.395  74.485  84.605  1.00  0.31           O  
HETATM  238  O   HOH T 237      64.102  63.854 107.786  1.00  0.31           O  
HETATM  239  O   HOH T 238      62.548  52.419 103.143  1.00  0.31           O  
HETATM  240  O   HOH T 239      74.754  77.827 109.781  1.00  0.31           O  
HETATM  241  O   HOH T 240      73.610  62.895 100.812  1.00  0.31           O  
HETATM  242  O   HOH T 241      52.615  62.443 105.233  1.00  0.31           O  
HETATM  243  O   HOH T 242      95.853  90.791  92.302  1.00  0.31           O  
HETATM  244  O   HOH T 243      86.511  56.410  97.068  1.00  0.31           O  
HETATM  245  O   HOH T 244      94.333  48.556 110.734  1.00  0.31           O  
HETATM  246  O   HOH T 245      78.582 117.895  99.357  1.00  0.31           O  
HETATM  247  O   HOH T 246      80.715  64.288  97.925  1.00  0.31           O  
HETATM  248  O   HOH T 247      99.163  78.600  84.391  1.00  0.31           O  
HETATM  249  O   HOH T 248      46.666  65.036  90.549  1.00  0.31           O  
HETATM  250  O   HOH T 249      81.671  79.457 134.336  1.00  0.31           O  
HETATM  251  O   HOH T 250      86.025  59.810  92.926  1.00  0.31           O  
HETATM  252  O   HOH T 251      88.007  98.900 129.102  1.00  0.31           O  
HETATM  253  O   HOH T 252      77.968  79.010 137.124  1.00  0.31           O  
HETATM  254  O   HOH T 253      69.829  56.996  84.930  1.00  0.31           O  
HETATM  255  O   HOH T 254      92.506  93.143  94.204  1.00  0.31           O  
HETATM  256  O   HOH T 255      53.729  73.025  99.119  1.00  0.31           O  
HETATM  257  O   HOH T 256      81.661  57.710 107.598  1.00  0.31           O  
HETATM  258  O   HOH T 257      76.067  88.790  86.528  1.00  0.31           O  
HETATM  259  O   HOH T 258      62.459 110.223  93.313  1.00  0.31           O  
HETATM  260  O   HOH T 259      65.006  67.050 114.765  1.00  0.31           O  
HETATM  261  O   HOH T 260      85.730 104.256 111.934  1.00  0.31           O  
HETATM  262  O   HOH T 261      66.547  97.598 122.486  1.00  0.31           O  
HETATM  263  O   HOH T 262      68.295 111.393  97.456  1.00  0.32           O  
HETATM  264  O   HOH T 263      85.189 104.783 101.227  1.00  0.32           O  
HETATM  265  O   HOH T 264      79.459  72.873 133.879  1.00  0.32           O  
HETATM  266  O   HOH T 265      51.360  50.944  98.152  1.00  0.32           O  
HETATM  267  O   HOH T 266      86.872  94.513 113.403  1.00  0.32           O  
HETATM  268  O   HOH T 267      63.842  85.063 106.519  1.00  0.32           O  
HETATM  269  O   HOH T 268      44.676  64.870  92.604  1.00  0.32           O  
HETATM  270  O   HOH T 269     102.307  74.008  96.621  1.00  0.32           O  
HETATM  271  O   HOH T 270      79.035 117.090 119.063  1.00  0.32           O  
HETATM  272  O   HOH T 271      59.065  91.372  74.351  1.00  0.32           O  
HETATM  273  O   HOH T 272      84.051  79.851 105.436  1.00  0.32           O  
HETATM  274  O   HOH T 273      93.168  85.528 131.317  1.00  0.32           O  
HETATM  275  O   HOH T 274      47.736  95.756 117.375  1.00  0.32           O  
HETATM  276  O   HOH T 275      91.122  88.254 135.153  1.00  0.32           O  
HETATM  277  O   HOH T 276      87.175 105.010 130.644  1.00  0.32           O  
HETATM  278  O   HOH T 277      77.800  70.903 125.736  1.00  0.32           O  
HETATM  279  O   HOH T 278      73.230  56.265 110.938  1.00  0.32           O  
HETATM  280  O   HOH T 279      81.788 110.654 130.708  1.00  0.32           O  
HETATM  281  O   HOH T 280     110.607  92.425 115.131  1.00  0.32           O  
HETATM  282  O   HOH T 281      72.719  69.406  95.290  1.00  0.32           O  
HETATM  283  O   HOH T 282      53.140 104.555 113.197  1.00  0.32           O  
HETATM  284  O   HOH T 283      79.990  68.823  75.208  1.00  0.32           O  
HETATM  285  O   HOH T 284     102.233  90.854 119.126  1.00  0.32           O  
HETATM  286  O   HOH T 285      76.192  67.870 112.164  1.00  0.32           O  
HETATM  287  O   HOH T 286     104.397  75.686 120.690  1.00  0.32           O  
HETATM  288  O   HOH T 287      71.397  66.286 113.516  1.00  0.32           O  
HETATM  289  O   HOH T 288      42.457  74.331  83.806  1.00  0.32           O  
HETATM  290  O   HOH T 289      98.477  92.855 126.434  1.00  0.32           O  
HETATM  291  O   HOH T 290      66.331  73.876 123.967  1.00  0.32           O  
HETATM  292  O   HOH T 291      49.231  81.163  99.192  1.00  0.32           O  
HETATM  293  O   HOH T 292      57.317  89.815 126.580  1.00  0.32           O  
HETATM  294  O   HOH T 293     100.782  75.913 103.699  1.00  0.32           O  
HETATM  295  O   HOH T 294      82.252  97.953  86.504  1.00  0.32           O  
HETATM  296  O   HOH T 295      70.392  67.542 118.483  1.00  0.32           O  
HETATM  297  O   HOH T 296      47.668  72.333  85.584  1.00  0.32           O  
HETATM  298  O   HOH T 297     105.406 101.576 108.365  1.00  0.33           O  
HETATM  299  O   HOH T 298      80.115  57.463  97.132  1.00  0.33           O  
HETATM  300  O   HOH T 299      94.829  80.920  70.710  1.00  0.33           O  
HETATM  301  O   HOH T 300      99.537  96.100 121.874  1.00  0.33           O  
HETATM  302  O   HOH T 301      72.985  76.987 107.774  1.00  0.33           O  
HETATM  303  O   HOH T 302     100.390  66.592  91.138  1.00  0.33           O  
HETATM  304  O   HOH T 303      64.770  77.675  71.321  1.00  0.33           O  
HETATM  305  O   HOH T 304      64.423  72.926 131.778  1.00  0.33           O  
HETATM  306  O   HOH T 305      92.997  90.929  83.456  1.00  0.33           O  
HETATM  307  O   HOH T 306      86.416  85.577 106.969  1.00  0.33           O  
HETATM  308  O   HOH T 307      99.283  74.960  81.858  1.00  0.33           O  
HETATM  309  O   HOH T 308      61.713  77.690 113.648  1.00  0.33           O  
HETATM  310  O   HOH T 309      65.569  62.027 109.763  1.00  0.33           O  
HETATM  311  O   HOH T 310      68.831  92.838  94.600  1.00  0.33           O  
HETATM  312  O   HOH T 311      79.659  67.577 108.149  1.00  0.33           O  
HETATM  313  O   HOH T 312      57.397 103.784  96.804  1.00  0.33           O  
HETATM  314  O   HOH T 313      77.444  91.858 111.148  1.00  0.33           O  
HETATM  315  O   HOH T 314     100.605  97.867 126.204  1.00  0.33           O  
HETATM  316  O   HOH T 315      74.291  87.878  88.400  1.00  0.33           O  
HETATM  317  O   HOH T 316      79.378 105.472  90.171  1.00  0.33           O  
HETATM  318  O   HOH T 317     102.987  86.223 102.298  1.00  0.33           O  
HETATM  319  O   HOH T 318      84.249  78.612 134.371  1.00  0.33           O  
HETATM  320  O   HOH T 319      74.639  94.048  97.167  1.00  0.33           O  
HETATM  321  O   HOH T 320      84.879 114.007 102.511  1.00  0.33           O  
HETATM  322  O   HOH T 321      92.308  91.422  97.573  1.00  0.33           O  
HETATM  323  O   HOH T 322      99.363  60.616 106.311  1.00  0.33           O  
HETATM  324  O   HOH T 323      99.757  77.441 111.637  1.00  0.33           O  
HETATM  325  O   HOH T 324      96.814  75.300  80.715  1.00  0.33           O  
HETATM  326  O   HOH T 325      70.700  76.477  93.184  1.00  0.33           O  
HETATM  327  O   HOH T 326      77.479  65.657  93.311  1.00  0.33           O  
HETATM  328  O   HOH T 327      39.621  64.172  99.414  1.00  0.33           O  
HETATM  329  O   HOH T 328      64.799  82.290 113.653  1.00  0.33           O  
HETATM  330  O   HOH T 329      92.208  93.231  82.266  1.00  0.34           O  
HETATM  331  O   HOH T 330      75.332 114.942 128.698  1.00  0.34           O  
HETATM  332  O   HOH T 331      66.882 112.503 102.355  1.00  0.34           O  
HETATM  333  O   HOH T 332      45.156  80.513  85.922  1.00  0.34           O  
HETATM  334  O   HOH T 333      58.666  90.024  82.426  1.00  0.34           O  
HETATM  335  O   HOH T 334      48.555 107.521 106.659  1.00  0.34           O  
HETATM  336  O   HOH T 335      92.036  90.811  80.920  1.00  0.34           O  
HETATM  337  O   HOH T 336      72.157  95.531 139.621  1.00  0.34           O  
HETATM  338  O   HOH T 337      60.170  89.939  80.095  1.00  0.34           O  
HETATM  339  O   HOH T 338      52.560  75.973 107.160  1.00  0.34           O  
HETATM  340  O   HOH T 339      73.686  57.435 113.361  1.00  0.34           O  
HETATM  341  O   HOH T 340      61.134 115.222 102.813  1.00  0.34           O  
HETATM  342  O   HOH T 341      87.955  93.555 120.094  1.00  0.34           O  
HETATM  343  O   HOH T 342      55.812 114.616 103.617  1.00  0.34           O  
HETATM  344  O   HOH T 343      95.554 106.169 130.365  1.00  0.34           O  
HETATM  345  O   HOH T 344      57.943 112.721 103.597  1.00  0.34           O  
HETATM  346  O   HOH T 345      52.729  57.496  86.782  1.00  0.34           O  
HETATM  347  O   HOH T 346      94.561  89.739  97.746  1.00  0.34           O  
HETATM  348  O   HOH T 347      84.298  69.592  90.424  1.00  0.34           O  
HETATM  349  O   HOH T 348      73.972  68.412  92.858  1.00  0.34           O  
HETATM  350  O   HOH T 349      62.338  95.206  74.748  1.00  0.34           O  
HETATM  351  O   HOH T 350     102.827  90.305 111.727  1.00  0.34           O  
HETATM  352  O   HOH T 351      57.513  54.744 107.314  1.00  0.34           O  
HETATM  353  O   HOH T 352      71.084  88.940 145.133  1.00  0.34           O  
HETATM  354  O   HOH T 353      73.374 105.834  93.134  1.00  0.34           O  
HETATM  355  O   HOH T 354      82.255  95.025 108.049  1.00  0.34           O  
HETATM  356  O   HOH T 355      68.796  86.612  67.131  1.00  0.34           O  
HETATM  357  O   HOH T 356      87.648  94.604 101.255  1.00  0.34           O  
HETATM  358  O   HOH T 357      58.908  73.077 114.369  1.00  0.34           O  
HETATM  359  O   HOH T 358      88.958  51.596  67.708  1.00  0.34           O  
HETATM  360  O   HOH T 359      92.998  60.783  74.294  1.00  0.34           O  
HETATM  361  O   HOH T 360      92.492 100.396  98.202  1.00  0.34           O  
HETATM  362  O   HOH T 361      70.150  70.073 129.011  1.00  0.34           O  
HETATM  363  O   HOH T 362      87.321  97.071 112.421  1.00  0.34           O  
HETATM  364  O   HOH T 363      61.042  79.833 112.214  1.00  0.34           O  
HETATM  365  O   HOH T 364      68.139 114.642  99.882  1.00  0.34           O  
HETATM  366  O   HOH T 365      65.223  96.296 139.056  1.00  0.34           O  
HETATM  367  O   HOH T 366     100.275  70.203  76.221  1.00  0.34           O  
HETATM  368  O   HOH T 367      80.662  89.059 143.837  1.00  0.34           O  
HETATM  369  O   HOH T 368      71.918 116.146 122.639  1.00  0.34           O  
HETATM  370  O   HOH T 369      66.279  54.956 110.801  1.00  0.34           O  
HETATM  371  O   HOH T 370      85.460  82.364 101.298  1.00  0.34           O  
HETATM  372  O   HOH T 371      75.961  94.066 115.564  1.00  0.34           O  
HETATM  373  O   HOH T 372      80.105  79.929 148.214  1.00  0.34           O  
HETATM  374  O   HOH T 373      77.130  72.519  76.505  1.00  0.34           O  
HETATM  375  O   HOH T 374      64.044  75.103 118.784  1.00  0.35           O  
HETATM  376  O   HOH T 375      86.680  82.904  72.164  1.00  0.35           O  
HETATM  377  O   HOH T 376      44.361  64.922  95.421  1.00  0.35           O  
HETATM  378  O   HOH T 377      87.244 115.271 110.073  1.00  0.35           O  
HETATM  379  O   HOH T 378      70.008  74.949 123.766  1.00  0.35           O  
HETATM  380  O   HOH T 379      77.318  92.590  79.821  1.00  0.35           O  
HETATM  381  O   HOH T 380      85.791  93.150 127.711  1.00  0.35           O  
HETATM  382  O   HOH T 381      88.145 125.768 110.145  1.00  0.35           O  
HETATM  383  O   HOH T 382     100.046  94.049 110.811  1.00  0.35           O  
HETATM  384  O   HOH T 383      55.258  84.674 121.441  1.00  0.35           O  
HETATM  385  O   HOH T 384     101.826  91.294 101.909  1.00  0.35           O  
HETATM  386  O   HOH T 385      65.929  96.093  85.482  1.00  0.35           O  
HETATM  387  O   HOH T 386      52.694  80.910 121.897  1.00  0.35           O  
HETATM  388  O   HOH T 387     103.545  70.184 109.154  1.00  0.35           O  
HETATM  389  O   HOH T 388      79.004  91.324  84.877  1.00  0.35           O  
HETATM  390  O   HOH T 389      74.490  90.654  87.769  1.00  0.35           O  
HETATM  391  O   HOH T 390      55.666  49.105 103.436  1.00  0.35           O  
HETATM  392  O   HOH T 391      77.904 117.685 123.396  1.00  0.35           O  
HETATM  393  O   HOH T 392      83.449 103.042 116.596  1.00  0.35           O  
HETATM  394  O   HOH T 393      66.455  94.814 129.378  1.00  0.35           O  
HETATM  395  O   HOH T 394      75.801 111.635 119.071  1.00  0.35           O  
HETATM  396  O   HOH T 395      75.162  67.899  90.333  1.00  0.35           O  
HETATM  397  O   HOH T 396      59.645  45.884  97.012  1.00  0.35           O  
HETATM  398  O   HOH T 397      84.477  82.537 140.493  1.00  0.35           O  
HETATM  399  O   HOH T 398      69.587  82.800  67.264  1.00  0.35           O  
HETATM  400  O   HOH T 399      70.170  85.015  68.891  1.00  0.35           O  
HETATM  401  O   HOH T 400      70.352  95.984  88.094  1.00  0.35           O  
HETATM  402  O   HOH T 401      83.544 121.832 106.971  1.00  0.35           O  
HETATM  403  O   HOH T 402      50.028  81.398 112.494  1.00  0.35           O  
HETATM  404  O   HOH T 403      47.163  84.380  96.490  1.00  0.35           O  
HETATM  405  O   HOH T 404      62.110  95.901  77.333  1.00  0.35           O  
HETATM  406  O   HOH T 405      95.539  72.300 116.962  1.00  0.35           O  
HETATM  407  O   HOH T 406      68.972  94.230 116.994  1.00  0.35           O  
HETATM  408  O   HOH T 407      68.709  85.681 116.943  1.00  0.35           O  
HETATM  409  O   HOH T 408      38.145  69.284  83.845  1.00  0.35           O  
HETATM  410  O   HOH T 409      96.286 101.066 128.069  1.00  0.35           O  
HETATM  411  O   HOH T 410      93.608  75.560  68.901  1.00  0.35           O  
HETATM  412  O   HOH T 411      80.449  93.452 109.419  1.00  0.35           O  
HETATM  413  O   HOH T 412      54.606 109.405 122.356  1.00  0.35           O  
HETATM  414  O   HOH T 413      85.408  41.722 102.690  1.00  0.35           O  
HETATM  415  O   HOH T 414      52.114  76.778 101.632  1.00  0.35           O  
HETATM  416  O   HOH T 415      56.787  77.410 110.611  1.00  0.36           O  
HETATM  417  O   HOH T 416      80.519  76.925 109.468  1.00  0.36           O  
HETATM  418  O   HOH T 417      74.584  61.330 111.675  1.00  0.36           O  
HETATM  419  O   HOH T 418      66.596  79.393 125.631  1.00  0.36           O  
HETATM  420  O   HOH T 419      59.245  78.636 122.294  1.00  0.36           O  
HETATM  421  O   HOH T 420      81.492  65.761  88.502  1.00  0.36           O  
HETATM  422  O   HOH T 421      52.684  57.751  96.417  1.00  0.36           O  
HETATM  423  O   HOH T 422      77.887  54.904 112.008  1.00  0.36           O  
HETATM  424  O   HOH T 423      51.375  80.089 110.263  1.00  0.36           O  
HETATM  425  O   HOH T 424      77.412  93.930  82.233  1.00  0.36           O  
HETATM  426  O   HOH T 425      66.472  76.089 134.588  1.00  0.36           O  
HETATM  427  O   HOH T 426      84.170 106.686 115.553  1.00  0.36           O  
HETATM  428  O   HOH T 427      63.537  71.151 111.741  1.00  0.36           O  
HETATM  429  O   HOH T 428      75.542  92.005  81.963  1.00  0.36           O  
HETATM  430  O   HOH T 429      72.474  68.184 126.358  1.00  0.36           O  
HETATM  431  O   HOH T 430      94.543  87.524 134.431  1.00  0.36           O  
HETATM  432  O   HOH T 431      72.954  89.847 119.673  1.00  0.36           O  
HETATM  433  O   HOH T 432      83.958  91.843 123.312  1.00  0.36           O  
HETATM  434  O   HOH T 433      80.258  59.185  82.123  1.00  0.36           O  
HETATM  435  O   HOH T 434      67.214 105.123  96.839  1.00  0.36           O  
HETATM  436  O   HOH T 435      66.294  90.055 124.664  1.00  0.36           O  
HETATM  437  O   HOH T 436      57.619  97.874 119.279  1.00  0.36           O  
HETATM  438  O   HOH T 437      84.916 109.416  93.171  1.00  0.36           O  
HETATM  439  O   HOH T 438      77.487  75.205  89.849  1.00  0.36           O  
HETATM  440  O   HOH T 439      69.804  68.336  82.355  1.00  0.36           O  
HETATM  441  O   HOH T 440      81.161 109.034  93.801  1.00  0.36           O  
HETATM  442  O   HOH T 441     103.854  70.593  95.753  1.00  0.36           O  
HETATM  443  O   HOH T 442      82.816 111.103  92.985  1.00  0.36           O  
HETATM  444  O   HOH T 443      74.159  80.381 110.663  1.00  0.36           O  
HETATM  445  O   HOH T 444      68.805  70.566 117.327  1.00  0.36           O  
HETATM  446  O   HOH T 445      79.406  46.174 105.228  1.00  0.36           O  
HETATM  447  O   HOH T 446      71.104  78.857  83.373  1.00  0.36           O  
HETATM  448  O   HOH T 447      88.499  96.869  98.306  1.00  0.36           O  
HETATM  449  O   HOH T 448      97.022  82.055  96.159  1.00  0.36           O  
HETATM  450  O   HOH T 449      85.216  89.229  82.576  1.00  0.36           O  
HETATM  451  O   HOH T 450     101.850  89.329 109.312  1.00  0.36           O  
HETATM  452  O   HOH T 451      96.114  98.701 120.514  1.00  0.36           O  
HETATM  453  O   HOH T 452      52.643 110.036 102.864  1.00  0.36           O  
HETATM  454  O   HOH T 453      57.710 107.774 107.537  1.00  0.36           O  
HETATM  455  O   HOH T 454      71.156  92.186 111.124  1.00  0.36           O  
HETATM  456  O   HOH T 455      60.402  57.534 111.489  1.00  0.36           O  
HETATM  457  O   HOH T 456      82.580 109.261 122.504  1.00  0.36           O  
HETATM  458  O   HOH T 457      79.939 120.059 100.433  1.00  0.36           O  
HETATM  459  O   HOH T 458      81.080 101.233 128.572  1.00  0.36           O  
HETATM  460  O   HOH T 459      49.538  56.709  90.991  1.00  0.36           O  
HETATM  461  O   HOH T 460      99.975  63.094  84.745  1.00  0.36           O  
HETATM  462  O   HOH T 461      94.465 101.173  87.437  1.00  0.36           O  
HETATM  463  O   HOH T 462      70.936  89.028  77.145  1.00  0.36           O  
HETATM  464  O   HOH T 463      97.253 100.391  96.341  1.00  0.36           O  
HETATM  465  O   HOH T 464      82.294  96.502 112.558  1.00  0.37           O  
HETATM  466  O   HOH T 465      60.866 116.102 100.131  1.00  0.37           O  
HETATM  467  O   HOH T 466      69.110 112.229 129.438  1.00  0.37           O  
HETATM  468  O   HOH T 467      98.839  82.452  87.190  1.00  0.37           O  
HETATM  469  O   HOH T 468     100.680 101.683 103.015  1.00  0.37           O  
HETATM  470  O   HOH T 469      78.203  69.709  71.850  1.00  0.37           O  
HETATM  471  O   HOH T 470      90.235 102.996 129.797  1.00  0.37           O  
HETATM  472  O   HOH T 471      68.037  61.150 115.842  1.00  0.37           O  
HETATM  473  O   HOH T 472      72.754  75.574  91.547  1.00  0.37           O  
HETATM  474  O   HOH T 473      55.707  97.080  94.567  1.00  0.37           O  
HETATM  475  O   HOH T 474      67.296  96.319 115.410  1.00  0.37           O  
HETATM  476  O   HOH T 475      74.486  63.992 120.796  1.00  0.37           O  
HETATM  477  O   HOH T 476      53.615  64.944 104.619  1.00  0.37           O  
HETATM  478  O   HOH T 477      80.933 117.314  97.923  1.00  0.37           O  
HETATM  479  O   HOH T 478      97.297  87.101 128.676  1.00  0.37           O  
HETATM  480  O   HOH T 479      49.436  71.907  87.682  1.00  0.37           O  
HETATM  481  O   HOH T 480      68.009  86.927  98.514  1.00  0.37           O  
HETATM  482  O   HOH T 481      63.382 109.626 112.325  1.00  0.37           O  
HETATM  483  O   HOH T 482      73.846  73.238 103.598  1.00  0.37           O  
HETATM  484  O   HOH T 483      57.484 106.214 115.729  1.00  0.37           O  
HETATM  485  O   HOH T 484      85.653 102.496 124.137  1.00  0.37           O  
HETATM  486  O   HOH T 485      57.944  77.968 127.181  1.00  0.37           O  
HETATM  487  O   HOH T 486      82.541  97.343 134.515  1.00  0.37           O  
HETATM  488  O   HOH T 487      89.912  95.540 120.289  1.00  0.37           O  
HETATM  489  O   HOH T 488      50.922  69.944  88.821  1.00  0.37           O  
HETATM  490  O   HOH T 489      62.379 102.475 127.795  1.00  0.37           O  
HETATM  491  O   HOH T 490      61.674  97.463 117.410  1.00  0.37           O  
HETATM  492  O   HOH T 491      87.355  49.324  71.378  1.00  0.37           O  
HETATM  493  O   HOH T 492      80.652  66.659 115.996  1.00  0.37           O  
HETATM  494  O   HOH T 493      68.870  98.202  79.199  1.00  0.37           O  
HETATM  495  O   HOH T 494     106.354  92.483 112.482  1.00  0.37           O  
HETATM  496  O   HOH T 495      92.455  57.553 117.287  1.00  0.37           O  
HETATM  497  O   HOH T 496      73.498  82.664 142.504  1.00  0.37           O  
HETATM  498  O   HOH T 497     104.463  78.582  89.745  1.00  0.37           O  
HETATM  499  O   HOH T 498      53.584  70.662 100.341  1.00  0.37           O  
HETATM  500  O   HOH T 499     105.249 100.529 105.802  1.00  0.37           O  
HETATM  501  O   HOH T 500      65.873  77.822  68.721  1.00  0.37           O  
HETATM  502  O   HOH T 501      62.419  72.853  77.894  1.00  0.37           O  
HETATM  503  O   HOH T 502      48.191  65.469 105.115  1.00  0.37           O  
HETATM  504  O   HOH T 503      97.288  79.068  94.029  1.00  0.37           O  
HETATM  505  O   HOH T 504      86.555  85.784 137.824  1.00  0.38           O  
HETATM  506  O   HOH T 505      53.816  79.241 109.069  1.00  0.38           O  
HETATM  507  O   HOH T 506      92.354  47.029 111.991  1.00  0.38           O  
HETATM  508  O   HOH T 507      89.777  63.182 117.177  1.00  0.38           O  
HETATM  509  O   HOH T 508      93.262  55.741 102.701  1.00  0.38           O  
HETATM  510  O   HOH T 509      46.235  77.112  79.445  1.00  0.38           O  
HETATM  511  O   HOH T 510      96.703  84.058  82.617  1.00  0.38           O  
HETATM  512  O   HOH T 511      81.592  59.447  72.837  1.00  0.38           O  
HETATM  513  O   HOH T 512      68.739  88.091  78.549  1.00  0.38           O  
HETATM  514  O   HOH T 513      68.693  98.551 133.276  1.00  0.38           O  
HETATM  515  O   HOH T 514      96.390 101.065 104.597  1.00  0.38           O  
HETATM  516  O   HOH T 515      99.605  88.588 100.349  1.00  0.38           O  
HETATM  517  O   HOH T 516      85.750  63.435 116.795  1.00  0.38           O  
HETATM  518  O   HOH T 517      80.156  66.226 101.526  1.00  0.38           O  
HETATM  519  O   HOH T 518      80.275 107.071 124.554  1.00  0.38           O  
HETATM  520  O   HOH T 519      65.255 103.466  97.481  1.00  0.38           O  
HETATM  521  O   HOH T 520      64.776  90.920 118.769  1.00  0.38           O  
HETATM  522  O   HOH T 521      76.079  98.255 139.621  1.00  0.38           O  
HETATM  523  O   HOH T 522      65.516  66.547 117.496  1.00  0.38           O  
HETATM  524  O   HOH T 523      98.997  96.325  97.887  1.00  0.38           O  
HETATM  525  O   HOH T 524      74.165  66.272 113.049  1.00  0.38           O  
HETATM  526  O   HOH T 525      86.965 110.364 127.672  1.00  0.38           O  
HETATM  527  O   HOH T 526      88.927  84.229 137.297  1.00  0.38           O  
HETATM  528  O   HOH T 527      98.700  97.882 119.928  1.00  0.38           O  
HETATM  529  O   HOH T 528      63.116  65.418 122.030  1.00  0.38           O  
HETATM  530  O   HOH T 529      95.619  56.777 101.959  1.00  0.38           O  
HETATM  531  O   HOH T 530      84.600 100.661 115.754  1.00  0.38           O  
HETATM  532  O   HOH T 531     103.740  77.782 110.220  1.00  0.38           O  
HETATM  533  O   HOH T 532      65.806  98.915 138.569  1.00  0.38           O  
HETATM  534  O   HOH T 533      60.044  80.707 104.836  1.00  0.38           O  
HETATM  535  O   HOH T 534      90.902 104.562 132.030  1.00  0.38           O  
HETATM  536  O   HOH T 535      91.025  79.959 135.564  1.00  0.38           O  
HETATM  537  O   HOH T 536      84.986  73.604 121.576  1.00  0.38           O  
HETATM  538  O   HOH T 537      81.483  60.204  76.827  1.00  0.38           O  
HETATM  539  O   HOH T 538      68.464  93.744 127.875  1.00  0.38           O  
HETATM  540  O   HOH T 539      78.809  62.277  98.444  1.00  0.38           O  
HETATM  541  O   HOH T 540      85.708  60.717 116.153  1.00  0.38           O  
HETATM  542  O   HOH T 541      85.164  99.078  89.012  1.00  0.38           O  
HETATM  543  O   HOH T 542      49.388  76.647 101.923  1.00  0.38           O  
HETATM  544  O   HOH T 543      81.245 103.122  96.782  1.00  0.38           O  
HETATM  545  O   HOH T 544      63.674  64.501 105.087  1.00  0.38           O  
HETATM  546  O   HOH T 545      39.975  67.502  84.894  1.00  0.39           O  
HETATM  547  O   HOH T 546      86.146  75.237 123.493  1.00  0.39           O  
HETATM  548  O   HOH T 547      68.192 120.023 105.831  1.00  0.39           O  
HETATM  549  O   HOH T 548      76.352  68.278 106.416  1.00  0.39           O  
HETATM  550  O   HOH T 549      89.725 107.062  95.523  1.00  0.39           O  
HETATM  551  O   HOH T 550      52.602 104.391 119.251  1.00  0.39           O  
HETATM  552  O   HOH T 551      94.801  87.313 137.159  1.00  0.39           O  
HETATM  553  O   HOH T 552      40.806  61.366  94.720  1.00  0.39           O  
HETATM  554  O   HOH T 553      82.346  62.768  70.667  1.00  0.39           O  
HETATM  555  O   HOH T 554      90.357 123.282 113.771  1.00  0.39           O  
HETATM  556  O   HOH T 555      99.761  65.159  80.345  1.00  0.39           O  
HETATM  557  O   HOH T 556      71.112  88.223  93.546  1.00  0.39           O  
HETATM  558  O   HOH T 557      99.304  64.228  87.222  1.00  0.39           O  
HETATM  559  O   HOH T 558      68.412  94.844 134.947  1.00  0.39           O  
HETATM  560  O   HOH T 559      48.428  82.013 108.021  1.00  0.39           O  
HETATM  561  O   HOH T 560      87.471 115.708 118.887  1.00  0.39           O  
HETATM  562  O   HOH T 561      67.230  88.426 132.042  1.00  0.39           O  
HETATM  563  O   HOH T 562      79.987 121.161 122.194  1.00  0.39           O  
HETATM  564  O   HOH T 563      65.102  87.325 107.458  1.00  0.39           O  
HETATM  565  O   HOH T 564     106.404  69.526  95.765  1.00  0.39           O  
HETATM  566  O   HOH T 565      84.064  90.523  84.793  1.00  0.39           O  
HETATM  567  O   HOH T 566     101.165  73.102 107.805  1.00  0.39           O  
HETATM  568  O   HOH T 567      64.637  68.986 116.731  1.00  0.39           O  
HETATM  569  O   HOH T 568      85.666  71.420 119.992  1.00  0.39           O  
HETATM  570  O   HOH T 569      71.028  55.477  92.068  1.00  0.39           O  
HETATM  571  O   HOH T 570      98.619 102.717 104.564  1.00  0.39           O  
HETATM  572  O   HOH T 571      89.164  70.450 129.585  1.00  0.39           O  
HETATM  573  O   HOH T 572      82.745  68.239 131.403  1.00  0.39           O  
HETATM  574  O   HOH T 573     103.597 102.618 106.482  1.00  0.39           O  
HETATM  575  O   HOH T 574      49.067  78.626  99.983  1.00  0.39           O  
HETATM  576  O   HOH T 575      49.275  69.868  83.413  1.00  0.39           O  
HETATM  577  O   HOH T 576      95.913  76.366 112.628  1.00  0.39           O  
HETATM  578  O   HOH T 577      70.873 110.835  97.046  1.00  0.39           O  
HETATM  579  O   HOH T 578      82.510  72.833 106.660  1.00  0.39           O  
HETATM  580  O   HOH T 579      67.775 108.773  91.218  1.00  0.39           O  
HETATM  581  O   HOH T 580      96.084  86.683  93.273  1.00  0.39           O  
HETATM  582  O   HOH T 581      62.423 120.815 112.262  1.00  0.39           O  
HETATM  583  O   HOH T 582      83.914  78.034 107.569  1.00  0.39           O  
HETATM  584  O   HOH T 583      48.404  67.819  81.762  1.00  0.39           O  
HETATM  585  O   HOH T 584      46.264  58.224 106.779  1.00  0.39           O  
HETATM  586  O   HOH T 585      99.938  62.898  81.965  1.00  0.39           O  
HETATM  587  O   HOH T 586     106.205  61.760  89.730  1.00  0.39           O  
HETATM  588  O   HOH T 587     106.032  67.731 102.928  1.00  0.39           O  
HETATM  589  O   HOH T 588      71.754  95.465  77.894  1.00  0.40           O  
HETATM  590  O   HOH T 589      84.919  92.430 105.127  1.00  0.40           O  
HETATM  591  O   HOH T 590      39.000  60.325  96.615  1.00  0.40           O  
HETATM  592  O   HOH T 591      76.972 117.519 120.885  1.00  0.40           O  
HETATM  593  O   HOH T 592      86.746  92.427 102.997  1.00  0.40           O  
HETATM  594  O   HOH T 593      64.056  93.869 143.600  1.00  0.40           O  
HETATM  595  O   HOH T 594      67.770  79.256  67.233  1.00  0.40           O  
HETATM  596  O   HOH T 595     111.387  70.475 100.234  1.00  0.40           O  
HETATM  597  O   HOH T 596      67.190  57.463 117.545  1.00  0.40           O  
HETATM  598  O   HOH T 597      54.305  82.773 122.929  1.00  0.40           O  
HETATM  599  O   HOH T 598      49.770 109.517 109.883  1.00  0.40           O  
HETATM  600  O   HOH T 599      82.298  72.785 103.975  1.00  0.40           O  
HETATM  601  O   HOH T 600      69.637  64.978 111.828  1.00  0.40           O  
HETATM  602  O   HOH T 601      41.028  92.477 117.296  1.00  0.40           O  
HETATM  603  O   HOH T 602      86.942  77.911 146.790  1.00  0.40           O  
HETATM  604  O   HOH T 603     114.112  91.801 112.570  1.00  0.40           O  
HETATM  605  O   HOH T 604      55.217 109.945 105.515  1.00  0.40           O  
HETATM  606  O   HOH T 605      69.670  82.187  86.184  1.00  0.40           O  
HETATM  607  O   HOH T 606      56.816  77.644 123.091  1.00  0.40           O  
HETATM  608  O   HOH T 607      65.657  43.003  93.231  1.00  0.40           O  
HETATM  609  O   HOH T 608      90.152  97.314 100.434  1.00  0.40           O  
HETATM  610  O   HOH T 609      39.473  91.789 115.005  1.00  0.40           O  
HETATM  611  O   HOH T 610      68.822  93.591  73.483  1.00  0.40           O  
HETATM  612  O   HOH T 611      51.592 108.980 111.814  1.00  0.40           O  
HETATM  613  O   HOH T 612      64.803 101.914  95.250  1.00  0.40           O  
HETATM  614  O   HOH T 613      57.439  96.834  81.691  1.00  0.40           O  
HETATM  615  O   HOH T 614      77.865  67.749  73.639  1.00  0.40           O  
HETATM  616  O   HOH T 615      80.084  61.539  71.620  1.00  0.40           O  
HETATM  617  O   HOH T 616      64.372 118.051 105.334  1.00  0.40           O  
HETATM  618  O   HOH T 617     111.161  68.383 101.957  1.00  0.40           O  
HETATM  619  O   HOH T 618      45.347  77.814  81.865  1.00  0.40           O  
HETATM  620  O   HOH T 619      98.418  77.651  70.663  1.00  0.40           O  
HETATM  621  O   HOH T 620      49.531  65.881  80.138  1.00  0.40           O  
HETATM  622  O   HOH T 621      72.154  58.370  85.947  1.00  0.40           O  
HETATM  623  O   HOH T 622      59.740  53.061 106.995  1.00  0.40           O  
HETATM  624  O   HOH T 623      99.499  80.777  96.568  1.00  0.40           O  
HETATM  625  O   HOH T 624      93.055  98.119 123.092  1.00  0.40           O  
HETATM  626  O   HOH T 625      93.150  53.460 105.300  1.00  0.40           O  
HETATM  627  O   HOH T 626      82.699 113.232 129.981  1.00  0.40           O  
HETATM  628  O   HOH T 627      61.019 117.912 102.186  1.00  0.40           O  
HETATM  629  O   HOH T 628      79.478  72.712  96.500  1.00  0.40           O  
HETATM  630  O   HOH T 629      80.313 101.557  98.917  1.00  0.40           O  
HETATM  631  O   HOH T 630      60.702 118.762 113.009  1.00  0.40           O  
HETATM  632  O   HOH T 631      62.208 117.485 109.452  1.00  0.40           O  
HETATM  633  O   HOH T 632      99.103  60.782  83.552  1.00  0.40           O  
HETATM  634  O   HOH T 633      96.011  81.847  84.003  1.00  0.40           O  
HETATM  635  O   HOH T 634      51.745  82.458 124.018  1.00  0.40           O  
HETATM  636  O   HOH T 635      70.026  80.938  90.899  1.00  0.40           O  
HETATM  637  O   HOH T 636     101.831  86.023 131.060  1.00  0.40           O  
HETATM  638  O   HOH T 637      64.382  96.747 126.355  1.00  0.41           O  
HETATM  639  O   HOH T 638      68.885  54.876  86.382  1.00  0.41           O  
HETATM  640  O   HOH T 639      68.739  78.542 123.949  1.00  0.41           O  
HETATM  641  O   HOH T 640      96.379  87.463  76.776  1.00  0.41           O  
HETATM  642  O   HOH T 641      64.316  72.179  79.928  1.00  0.41           O  
HETATM  643  O   HOH T 642      74.346 116.798 126.878  1.00  0.41           O  
HETATM  644  O   HOH T 643      65.829  67.621  89.089  1.00  0.41           O  
HETATM  645  O   HOH T 644      96.295  69.515 107.165  1.00  0.41           O  
HETATM  646  O   HOH T 645      83.408  58.928  88.261  1.00  0.41           O  
HETATM  647  O   HOH T 646      74.753  80.195  85.396  1.00  0.41           O  
HETATM  648  O   HOH T 647      64.172  88.930 134.498  1.00  0.41           O  
HETATM  649  O   HOH T 648      98.843  90.676 124.819  1.00  0.41           O  
HETATM  650  O   HOH T 649      64.059 109.251 119.947  1.00  0.41           O  
HETATM  651  O   HOH T 650      70.477  82.690  88.803  1.00  0.41           O  
HETATM  652  O   HOH T 651      89.157 117.559 105.337  1.00  0.41           O  
HETATM  653  O   HOH T 652      88.462 117.558 114.778  1.00  0.41           O  
HETATM  654  O   HOH T 653      65.505 100.070  93.267  1.00  0.41           O  
HETATM  655  O   HOH T 654      94.031  72.840  69.611  1.00  0.41           O  
HETATM  656  O   HOH T 655      49.592  65.086  83.901  1.00  0.41           O  
HETATM  657  O   HOH T 656      45.929  75.642  95.880  1.00  0.41           O  
HETATM  658  O   HOH T 657      64.848 100.460 115.713  1.00  0.41           O  
HETATM  659  O   HOH T 658      69.222  69.621 119.962  1.00  0.41           O  
HETATM  660  O   HOH T 659      83.505 125.647 111.785  1.00  0.41           O  
HETATM  661  O   HOH T 660      86.416 113.123 128.184  1.00  0.41           O  
HETATM  662  O   HOH T 661      61.752 111.981  97.002  1.00  0.41           O  
HETATM  663  O   HOH T 662      91.747  70.916 120.992  1.00  0.41           O  
HETATM  664  O   HOH T 663      76.024 106.046 136.492  1.00  0.41           O  
HETATM  665  O   HOH T 664      64.181  50.657  81.727  1.00  0.41           O  
HETATM  666  O   HOH T 665      72.121  79.534  85.789  1.00  0.41           O  
HETATM  667  O   HOH T 666      96.826  69.803  89.541  1.00  0.41           O  
HETATM  668  O   HOH T 667      50.313  89.684 113.226  1.00  0.41           O  
HETATM  669  O   HOH T 668      68.160  62.587 113.500  1.00  0.41           O  
HETATM  670  O   HOH T 669      59.213 101.293  93.187  1.00  0.41           O  
HETATM  671  O   HOH T 670      72.426  91.914  88.988  1.00  0.41           O  
HETATM  672  O   HOH T 671      71.254  94.963 142.163  1.00  0.41           O  
HETATM  673  O   HOH T 672      89.212  70.114 122.082  1.00  0.41           O  
HETATM  674  O   HOH T 673     102.314  93.288 117.940  1.00  0.41           O  
HETATM  675  O   HOH T 674      58.282 118.466 111.653  1.00  0.41           O  
HETATM  676  O   HOH T 675     101.203  85.966  92.339  1.00  0.41           O  
HETATM  677  O   HOH T 676      99.788  75.196 113.249  1.00  0.41           O  
HETATM  678  O   HOH T 677      78.794  99.144 133.662  1.00  0.41           O  
HETATM  679  O   HOH T 678      83.684  98.143  84.182  1.00  0.41           O  
HETATM  680  O   HOH T 679      83.346  54.251  81.164  1.00  0.41           O  
HETATM  681  O   HOH T 680      46.271  76.501  92.094  1.00  0.41           O  
HETATM  682  O   HOH T 681      77.996  60.986  96.169  1.00  0.42           O  
HETATM  683  O   HOH T 682      67.197  60.151 108.416  1.00  0.42           O  
HETATM  684  O   HOH T 683      65.558 102.669 114.189  1.00  0.42           O  
HETATM  685  O   HOH T 684      75.206  60.854  96.317  1.00  0.42           O  
HETATM  686  O   HOH T 685      61.884 100.269 117.803  1.00  0.42           O  
HETATM  687  O   HOH T 686      87.530 105.618  91.419  1.00  0.42           O  
HETATM  688  O   HOH T 687      69.699  81.923 141.436  1.00  0.42           O  
HETATM  689  O   HOH T 688      51.325 111.715 111.060  1.00  0.42           O  
HETATM  690  O   HOH T 689      56.716  96.402  84.234  1.00  0.42           O  
HETATM  691  O   HOH T 690      49.617  62.382  83.512  1.00  0.42           O  
HETATM  692  O   HOH T 691     100.314  59.254  85.464  1.00  0.42           O  
HETATM  693  O   HOH T 692      55.949 116.432 101.455  1.00  0.42           O  
HETATM  694  O   HOH T 693     103.210 101.385 104.081  1.00  0.42           O  
HETATM  695  O   HOH T 694      86.160  98.912 114.225  1.00  0.42           O  
HETATM  696  O   HOH T 695      65.576  83.644  65.535  1.00  0.42           O  
HETATM  697  O   HOH T 696      76.472  92.921  77.138  1.00  0.42           O  
HETATM  698  O   HOH T 697      59.155  70.522 113.307  1.00  0.42           O  
HETATM  699  O   HOH T 698      84.721  85.867  85.766  1.00  0.42           O  
HETATM  700  O   HOH T 699      64.970  75.991  81.419  1.00  0.42           O  
HETATM  701  O   HOH T 700      89.719  89.058  90.049  1.00  0.42           O  
HETATM  702  O   HOH T 701      65.936 119.956 104.421  1.00  0.42           O  
HETATM  703  O   HOH T 702      78.676  70.133 133.247  1.00  0.42           O  
HETATM  704  O   HOH T 703      85.083  60.960  95.326  1.00  0.42           O  
HETATM  705  O   HOH T 704      51.124  67.947 105.935  1.00  0.42           O  
HETATM  706  O   HOH T 705     103.299  74.832 103.943  1.00  0.42           O  
HETATM  707  O   HOH T 706      59.033  48.143 101.246  1.00  0.42           O  
HETATM  708  O   HOH T 707      87.559 116.582 112.374  1.00  0.42           O  
HETATM  709  O   HOH T 708      83.674  60.564  71.571  1.00  0.42           O  
HETATM  710  O   HOH T 709      75.293  94.047 140.979  1.00  0.42           O  
HETATM  711  O   HOH T 710      75.894  74.190  78.469  1.00  0.42           O  
HETATM  712  O   HOH T 711      92.935  85.320 140.114  1.00  0.42           O  
HETATM  713  O   HOH T 712      92.510  49.051 114.069  1.00  0.42           O  
HETATM  714  O   HOH T 713      98.938  68.014  89.349  1.00  0.42           O  
HETATM  715  O   HOH T 714      87.640 102.581 117.689  1.00  0.42           O  
HETATM  716  O   HOH T 715      50.753  71.952  79.738  1.00  0.42           O  
HETATM  717  O   HOH T 716      66.787  92.190 108.178  1.00  0.42           O  
HETATM  718  O   HOH T 717      70.968  71.603 134.665  1.00  0.42           O  
HETATM  719  O   HOH T 718      81.663  73.253 137.258  1.00  0.42           O  
HETATM  720  O   HOH T 719      70.270  50.277  90.803  1.00  0.42           O  
HETATM  721  O   HOH T 720      74.502  65.307 102.081  1.00  0.42           O  
HETATM  722  O   HOH T 721      53.016  84.915 124.407  1.00  0.42           O  
HETATM  723  O   HOH T 722      47.985 101.904  98.197  1.00  0.42           O  
HETATM  724  O   HOH T 723     101.376  78.397 104.745  1.00  0.42           O  
HETATM  725  O   HOH T 724     103.818  80.960  92.363  1.00  0.42           O  
HETATM  726  O   HOH T 725      94.489  91.936  95.874  1.00  0.42           O  
HETATM  727  O   HOH T 726      63.676  86.902  64.962  1.00  0.42           O  
HETATM  728  O   HOH T 727      84.896  43.111 108.696  1.00  0.42           O  
HETATM  729  O   HOH T 728      75.584  74.882  87.934  1.00  0.42           O  
HETATM  730  O   HOH T 729      65.793  81.949 126.550  1.00  0.43           O  
HETATM  731  O   HOH T 730      84.373  96.165 104.690  1.00  0.43           O  
HETATM  732  O   HOH T 731      44.955  71.817  85.136  1.00  0.43           O  
HETATM  733  O   HOH T 732      79.196  78.594 107.628  1.00  0.43           O  
HETATM  734  O   HOH T 733      53.954  55.952 114.218  1.00  0.43           O  
HETATM  735  O   HOH T 734      88.958  99.897 121.780  1.00  0.43           O  
HETATM  736  O   HOH T 735      63.216  56.785 114.221  1.00  0.43           O  
HETATM  737  O   HOH T 736      49.591  58.653 103.154  1.00  0.43           O  
HETATM  738  O   HOH T 737     104.480  86.710 130.701  1.00  0.43           O  
HETATM  739  O   HOH T 738      94.275  58.473  73.367  1.00  0.43           O  
HETATM  740  O   HOH T 739      66.031  77.844 123.551  1.00  0.43           O  
HETATM  741  O   HOH T 740      56.008  96.157  91.995  1.00  0.43           O  
HETATM  742  O   HOH T 741      53.058  46.185  87.376  1.00  0.43           O  
HETATM  743  O   HOH T 742      70.664  56.757  87.576  1.00  0.43           O  
HETATM  744  O   HOH T 743      66.509  54.758  84.859  1.00  0.43           O  
HETATM  745  O   HOH T 744     106.097  77.119  76.691  1.00  0.43           O  
HETATM  746  O   HOH T 745      62.395 116.089 121.348  1.00  0.43           O  
HETATM  747  O   HOH T 746      68.777 113.587 127.071  1.00  0.43           O  
HETATM  748  O   HOH T 747      65.177  60.129 121.434  1.00  0.43           O  
HETATM  749  O   HOH T 748      48.738  68.169  79.009  1.00  0.43           O  
HETATM  750  O   HOH T 749      72.262  86.381 112.095  1.00  0.43           O  
HETATM  751  O   HOH T 750      85.132  94.639 115.556  1.00  0.43           O  
HETATM  752  O   HOH T 751      73.589 108.607  92.956  1.00  0.43           O  
HETATM  753  O   HOH T 752      79.096  60.682  75.339  1.00  0.43           O  
HETATM  754  O   HOH T 753      93.055  88.598  77.610  1.00  0.43           O  
HETATM  755  O   HOH T 754      97.212  84.570 141.242  1.00  0.43           O  
HETATM  756  O   HOH T 755      41.420  68.661 107.763  1.00  0.43           O  
HETATM  757  O   HOH T 756      76.866  83.476  93.933  1.00  0.43           O  
HETATM  758  O   HOH T 757      73.111  80.039 141.413  1.00  0.43           O  
HETATM  759  O   HOH T 758      40.559  70.197  85.110  1.00  0.43           O  
HETATM  760  O   HOH T 759      75.244  73.602 105.968  1.00  0.43           O  
HETATM  761  O   HOH T 760     101.738  82.372  95.926  1.00  0.43           O  
HETATM  762  O   HOH T 761      95.277 100.518  98.232  1.00  0.43           O  
HETATM  763  O   HOH T 762      57.800 103.538  94.144  1.00  0.43           O  
HETATM  764  O   HOH T 763      73.908  55.061 105.942  1.00  0.43           O  
HETATM  765  O   HOH T 764      76.831 121.700 108.178  1.00  0.43           O  
HETATM  766  O   HOH T 765      53.209  56.049 111.530  1.00  0.43           O  
HETATM  767  O   HOH T 766      64.517 102.033 124.376  1.00  0.43           O  
HETATM  768  O   HOH T 767      86.561 107.583 116.581  1.00  0.43           O  
HETATM  769  O   HOH T 768      44.216  83.955  89.776  1.00  0.43           O  
HETATM  770  O   HOH T 769      94.855  69.995 115.610  1.00  0.43           O  
HETATM  771  O   HOH T 770      76.467  76.977  78.333  1.00  0.43           O  
HETATM  772  O   HOH T 771      67.258  99.036  81.365  1.00  0.43           O  
HETATM  773  O   HOH T 772      67.374  94.993 122.201  1.00  0.43           O  
HETATM  774  O   HOH T 773      61.630  69.389 112.598  1.00  0.43           O  
HETATM  775  O   HOH T 774      95.059  85.616  87.857  1.00  0.43           O  
HETATM  776  O   HOH T 775      99.884  76.826 108.964  1.00  0.43           O  
HETATM  777  O   HOH T 776     104.256  78.550 127.795  1.00  0.43           O  
HETATM  778  O   HOH T 777      61.123  62.621 118.624  1.00  0.43           O  
HETATM  779  O   HOH T 778      67.009  91.017 122.213  1.00  0.43           O  
HETATM  780  O   HOH T 779      81.772  59.370  86.175  1.00  0.43           O  
HETATM  781  O   HOH T 780      86.891 104.432 122.493  1.00  0.43           O  
HETATM  782  O   HOH T 781      76.099  68.778  78.122  1.00  0.43           O  
HETATM  783  O   HOH T 782      59.179 105.441 120.888  1.00  0.43           O  
HETATM  784  O   HOH T 783      69.488  89.150  97.640  1.00  0.43           O  
HETATM  785  O   HOH T 784      93.781  79.681 135.233  1.00  0.43           O  
HETATM  786  O   HOH T 785      74.608  72.311  87.750  1.00  0.43           O  
HETATM  787  O   HOH T 786      98.691  85.118  95.491  1.00  0.43           O  
HETATM  788  O   HOH T 787      95.367 103.595 129.095  1.00  0.43           O  
HETATM  789  O   HOH T 788     102.540  87.610 111.577  1.00  0.43           O  
HETATM  790  O   HOH T 789      97.279  87.491  99.482  1.00  0.43           O  
HETATM  791  O   HOH T 790      89.344  50.309  65.133  1.00  0.44           O  
HETATM  792  O   HOH T 791      66.717  96.577  88.020  1.00  0.44           O  
HETATM  793  O   HOH T 792      81.226  63.952 100.661  1.00  0.44           O  
HETATM  794  O   HOH T 793      83.339  56.606  82.501  1.00  0.44           O  
HETATM  795  O   HOH T 794      61.637  74.608 117.496  1.00  0.44           O  
HETATM  796  O   HOH T 795      72.972  59.080 111.182  1.00  0.44           O  
HETATM  797  O   HOH T 796      99.779  92.986  88.737  1.00  0.44           O  
HETATM  798  O   HOH T 797      84.502 114.699  97.596  1.00  0.44           O  
HETATM  799  O   HOH T 798      52.630  78.521  78.530  1.00  0.44           O  
HETATM  800  O   HOH T 799      75.774  64.394  99.727  1.00  0.44           O  
HETATM  801  O   HOH T 800      85.981  61.711  72.107  1.00  0.44           O  
HETATM  802  O   HOH T 801      82.480  61.577  94.604  1.00  0.44           O  
HETATM  803  O   HOH T 802      93.115  58.158  90.691  1.00  0.44           O  
HETATM  804  O   HOH T 803      64.512  93.154 130.373  1.00  0.44           O  
HETATM  805  O   HOH T 804      80.109 107.799  91.541  1.00  0.44           O  
HETATM  806  O   HOH T 805      62.505  73.355 113.165  1.00  0.44           O  
HETATM  807  O   HOH T 806      60.602  79.746 118.763  1.00  0.44           O  
HETATM  808  O   HOH T 807      94.605  56.156  91.793  1.00  0.44           O  
HETATM  809  O   HOH T 808      98.017  98.766  92.389  1.00  0.44           O  
HETATM  810  O   HOH T 809      89.427  49.410  69.481  1.00  0.44           O  
HETATM  811  O   HOH T 810      97.454  80.345  85.778  1.00  0.44           O  
HETATM  812  O   HOH T 811      71.303 103.683  89.977  1.00  0.44           O  
HETATM  813  O   HOH T 812      57.869 108.464 117.189  1.00  0.44           O  
HETATM  814  O   HOH T 813      54.074 100.336 122.415  1.00  0.44           O  
HETATM  815  O   HOH T 814      66.986 122.458 104.925  1.00  0.44           O  
HETATM  816  O   HOH T 815      51.731  77.438 109.409  1.00  0.44           O  
HETATM  817  O   HOH T 816      83.795  98.083 115.541  1.00  0.44           O  
HETATM  818  O   HOH T 817      93.189  76.194 108.540  1.00  0.44           O  
HETATM  819  O   HOH T 818      58.354  66.372  79.074  1.00  0.44           O  
HETATM  820  O   HOH T 819      94.662  94.102  81.254  1.00  0.44           O  
HETATM  821  O   HOH T 820      54.690  47.178  89.497  1.00  0.44           O  
HETATM  822  O   HOH T 821      88.333 123.371 111.645  1.00  0.44           O  
HETATM  823  O   HOH T 822      48.474  69.305  87.436  1.00  0.44           O  
HETATM  824  O   HOH T 823      66.879  97.602 140.784  1.00  0.44           O  
HETATM  825  O   HOH T 824      67.909  92.556 142.381  1.00  0.44           O  
HETATM  826  O   HOH T 825      76.049  70.436  89.341  1.00  0.44           O  
HETATM  827  O   HOH T 826      47.817 109.487 104.761  1.00  0.44           O  
HETATM  828  O   HOH T 827      56.205  99.622 120.820  1.00  0.44           O  
HETATM  829  O   HOH T 828      95.769  98.653 126.609  1.00  0.44           O  
HETATM  830  O   HOH T 829      65.980  60.803 114.030  1.00  0.44           O  
HETATM  831  O   HOH T 830      84.077  64.903  71.201  1.00  0.44           O  
HETATM  832  O   HOH T 831      77.528  63.136  92.147  1.00  0.44           O  
HETATM  833  O   HOH T 832      72.120  77.719 105.238  1.00  0.44           O  
HETATM  834  O   HOH T 833      61.824  82.253 108.610  1.00  0.44           O  
HETATM  835  O   HOH T 834      83.233 104.648  98.210  1.00  0.44           O  
HETATM  836  O   HOH T 835      50.181  90.041  98.436  1.00  0.44           O  
HETATM  837  O   HOH T 836      47.906  56.000 106.775  1.00  0.44           O  
HETATM  838  O   HOH T 837      66.911  89.366 119.892  1.00  0.44           O  
HETATM  839  O   HOH T 838      69.567 108.602  93.430  1.00  0.44           O  
HETATM  840  O   HOH T 839     103.133  87.309 133.121  1.00  0.44           O  
HETATM  841  O   HOH T 840      71.809 104.724 139.985  1.00  0.44           O  
HETATM  842  O   HOH T 841      67.141  48.608  97.300  1.00  0.44           O  
HETATM  843  O   HOH T 842      93.675 105.023 132.011  1.00  0.44           O  
HETATM  844  O   HOH T 843      65.049 108.544  90.548  1.00  0.44           O  
HETATM  845  O   HOH T 844      64.230 106.817 113.844  1.00  0.44           O  
HETATM  846  O   HOH T 845      64.441 111.030  91.506  1.00  0.44           O  
HETATM  847  O   HOH T 846      71.686  91.319  75.731  1.00  0.44           O  
HETATM  848  O   HOH T 847      98.852  72.095 106.774  1.00  0.44           O  
HETATM  849  O   HOH T 848      49.431  98.864 113.361  1.00  0.44           O  
HETATM  850  O   HOH T 849      67.557  92.347 125.718  1.00  0.45           O  
HETATM  851  O   HOH T 850      55.201  51.809 104.057  1.00  0.45           O  
HETATM  852  O   HOH T 851      78.993  64.811  89.242  1.00  0.45           O  
HETATM  853  O   HOH T 852      82.632  58.942  83.596  1.00  0.45           O  
HETATM  854  O   HOH T 853      74.359  55.952 108.473  1.00  0.45           O  
HETATM  855  O   HOH T 854      80.485  58.252  75.149  1.00  0.45           O  
HETATM  856  O   HOH T 855      65.647  69.692  79.407  1.00  0.45           O  
HETATM  857  O   HOH T 856      65.212  65.871 120.220  1.00  0.45           O  
HETATM  858  O   HOH T 857      94.606  72.804 126.372  1.00  0.45           O  
HETATM  859  O   HOH T 858      76.508  61.237  93.880  1.00  0.45           O  
HETATM  860  O   HOH T 859      86.601  50.132  73.885  1.00  0.45           O  
HETATM  861  O   HOH T 860      46.732  72.856 102.382  1.00  0.45           O  
HETATM  862  O   HOH T 861      83.953  43.955 106.255  1.00  0.45           O  
HETATM  863  O   HOH T 862     110.651  93.943 112.670  1.00  0.45           O  
HETATM  864  O   HOH T 863      85.420  85.865 104.427  1.00  0.45           O  
HETATM  865  O   HOH T 864      54.223  87.984  91.108  1.00  0.45           O  
HETATM  866  O   HOH T 865      84.155  91.131 102.886  1.00  0.45           O  
HETATM  867  O   HOH T 866      96.342  79.142  71.934  1.00  0.45           O  
HETATM  868  O   HOH T 867      85.938  83.312 105.339  1.00  0.45           O  
HETATM  869  O   HOH T 868      45.129  49.721  97.040  1.00  0.45           O  
HETATM  870  O   HOH T 869      90.950  83.552 139.293  1.00  0.45           O  
HETATM  871  O   HOH T 870      60.395  56.275 113.940  1.00  0.45           O  
HETATM  872  O   HOH T 871      60.538 102.061  88.466  1.00  0.45           O  
HETATM  873  O   HOH T 872      88.900  68.861 127.001  1.00  0.45           O  
HETATM  874  O   HOH T 873      60.178  68.402 114.695  1.00  0.45           O  
HETATM  875  O   HOH T 874      52.521  65.577 102.056  1.00  0.45           O  
HETATM  876  O   HOH T 875      85.299  81.437 142.904  1.00  0.45           O  
HETATM  877  O   HOH T 876      42.902  63.080  93.893  1.00  0.45           O  
HETATM  878  O   HOH T 877      62.924  84.156  65.244  1.00  0.45           O  
HETATM  879  O   HOH T 878      56.074  76.143 126.389  1.00  0.45           O  
HETATM  880  O   HOH T 879      42.334  72.333  85.858  1.00  0.45           O  
HETATM  881  O   HOH T 880     105.042  78.972 125.188  1.00  0.45           O  
HETATM  882  O   HOH T 881      81.477 113.003 127.592  1.00  0.45           O  
HETATM  883  O   HOH T 882      75.276 118.580 122.823  1.00  0.45           O  
HETATM  884  O   HOH T 883      67.057  86.570 119.165  1.00  0.45           O  
HETATM  885  O   HOH T 884      82.810 100.387  99.428  1.00  0.45           O  
HETATM  886  O   HOH T 885      85.721  82.983  69.554  1.00  0.45           O  
HETATM  887  O   HOH T 886      71.244  97.228  80.121  1.00  0.45           O  
HETATM  888  O   HOH T 887      61.751  94.122 122.203  1.00  0.45           O  
HETATM  889  O   HOH T 888      66.989  83.493 117.184  1.00  0.45           O  
HETATM  890  O   HOH T 889      62.092 103.650  91.938  1.00  0.45           O  
HETATM  891  O   HOH T 890      76.577  65.303  90.642  1.00  0.45           O  
HETATM  892  O   HOH T 891      77.589  67.654 133.199  1.00  0.45           O  
HETATM  893  O   HOH T 892      64.253  98.117 123.924  1.00  0.45           O  
HETATM  894  O   HOH T 893     104.554  80.976  88.355  1.00  0.45           O  
HETATM  895  O   HOH T 894      78.246  67.486  77.028  1.00  0.45           O  
HETATM  896  O   HOH T 895      90.502  86.572 137.350  1.00  0.45           O  
HETATM  897  O   HOH T 896      84.849  82.196  67.080  1.00  0.45           O  
HETATM  898  O   HOH T 897      65.090  97.530  80.348  1.00  0.45           O  
HETATM  899  O   HOH T 898      72.031  61.551 110.467  1.00  0.45           O  
HETATM  900  O   HOH T 899      79.232  58.928  77.582  1.00  0.45           O  
HETATM  901  O   HOH T 900     102.835  93.079 120.617  1.00  0.45           O  
HETATM  902  O   HOH T 901      85.288 107.495  91.294  1.00  0.45           O  
HETATM  903  O   HOH T 902      50.039  56.663 105.095  1.00  0.45           O  
HETATM  904  O   HOH T 903      77.846  63.478  94.896  1.00  0.45           O  
HETATM  905  O   HOH T 904      61.119 101.289  91.086  1.00  0.45           O  
HETATM  906  O   HOH T 905      71.436  53.478 105.373  1.00  0.46           O  
HETATM  907  O   HOH T 906     103.088  82.701  90.050  1.00  0.46           O  
HETATM  908  O   HOH T 907      94.365  78.186  70.073  1.00  0.46           O  
HETATM  909  O   HOH T 908     107.430  67.688 105.293  1.00  0.46           O  
HETATM  910  O   HOH T 909      65.391  95.571 124.040  1.00  0.46           O  
HETATM  911  O   HOH T 910      87.409  97.101 135.234  1.00  0.46           O  
HETATM  912  O   HOH T 911      76.112 118.240 125.373  1.00  0.46           O  
HETATM  913  O   HOH T 912      89.934 100.321 130.590  1.00  0.46           O  
HETATM  914  O   HOH T 913      79.349  91.606  74.532  1.00  0.46           O  
HETATM  915  O   HOH T 914     103.283  79.352 106.576  1.00  0.46           O  
HETATM  916  O   HOH T 915      54.242  74.424  77.369  1.00  0.46           O  
HETATM  917  O   HOH T 916      71.164 113.764 128.595  1.00  0.46           O  
HETATM  918  O   HOH T 917      88.246  72.283 120.577  1.00  0.46           O  
HETATM  919  O   HOH T 918      49.095  70.635  77.931  1.00  0.46           O  
HETATM  920  O   HOH T 919      63.984  95.790 117.448  1.00  0.46           O  
HETATM  921  O   HOH T 920      98.635  65.140  76.270  1.00  0.46           O  
HETATM  922  O   HOH T 921      49.354  83.548  97.900  1.00  0.46           O  
HETATM  923  O   HOH T 922      54.990  82.812  78.381  1.00  0.46           O  
HETATM  924  O   HOH T 923     102.910  85.921 128.492  1.00  0.46           O  
HETATM  925  O   HOH T 924      93.847  82.186 128.311  1.00  0.46           O  
HETATM  926  O   HOH T 925     104.575  74.315  95.070  1.00  0.46           O  
HETATM  927  O   HOH T 926      85.802  49.792 113.833  1.00  0.46           O  
HETATM  928  O   HOH T 927      48.974  61.546  96.880  1.00  0.46           O  
HETATM  929  O   HOH T 928      42.793  61.496  91.573  1.00  0.46           O  
HETATM  930  O   HOH T 929      72.468  76.860  89.124  1.00  0.46           O  
HETATM  931  O   HOH T 930      98.854  96.535 124.537  1.00  0.46           O  
HETATM  932  O   HOH T 931      94.235  51.117 113.249  1.00  0.46           O  
HETATM  933  O   HOH T 932      90.753  76.154 133.025  1.00  0.46           O  
HETATM  934  O   HOH T 933      94.304  55.654 106.234  1.00  0.46           O  
HETATM  935  O   HOH T 934      77.300 119.883 100.944  1.00  0.46           O  
HETATM  936  O   HOH T 935      67.898  81.295 104.194  1.00  0.46           O  
HETATM  937  O   HOH T 936      84.472 104.235 114.314  1.00  0.46           O  
HETATM  938  O   HOH T 937      90.487 116.691 116.455  1.00  0.46           O  
HETATM  939  O   HOH T 938     105.483  79.436 111.399  1.00  0.46           O  
HETATM  940  O   HOH T 939      71.211  60.435 112.912  1.00  0.46           O  
HETATM  941  O   HOH T 940      64.607  89.204 131.810  1.00  0.46           O  
HETATM  942  O   HOH T 941      75.320  75.608 108.086  1.00  0.46           O  
HETATM  943  O   HOH T 942      83.216  97.004  88.868  1.00  0.46           O  
HETATM  944  O   HOH T 943      86.632  86.679  74.358  1.00  0.46           O  
HETATM  945  O   HOH T 944      69.966 101.423  90.609  1.00  0.46           O  
HETATM  946  O   HOH T 945      82.282 102.967 100.209  1.00  0.46           O  
HETATM  947  O   HOH T 946      87.790 115.180 105.124  1.00  0.46           O  
HETATM  948  O   HOH T 947      91.605  77.292 135.377  1.00  0.46           O  
HETATM  949  O   HOH T 948      61.481 111.539 126.499  1.00  0.46           O  
HETATM  950  O   HOH T 949      60.294 111.812 124.022  1.00  0.46           O  
HETATM  951  O   HOH T 950      86.867  84.013 102.946  1.00  0.46           O  
HETATM  952  O   HOH T 951      70.076  67.278 121.279  1.00  0.46           O  
HETATM  953  O   HOH T 952      53.550  91.772  93.289  1.00  0.46           O  
HETATM  954  O   HOH T 953     104.755  64.024  90.462  1.00  0.46           O  
HETATM  955  O   HOH T 954     101.243  83.657  88.233  1.00  0.46           O  
HETATM  956  O   HOH T 955      66.613  96.507 119.988  1.00  0.46           O  
HETATM  957  O   HOH T 956      81.882 115.146  96.433  1.00  0.46           O  
HETATM  958  O   HOH T 957      68.731  58.317 103.778  1.00  0.46           O  
HETATM  959  O   HOH T 958      76.872  91.448  86.497  1.00  0.46           O  
HETATM  960  O   HOH T 959      83.464  59.121  93.922  1.00  0.46           O  
HETATM  961  O   HOH T 960      73.066  57.159  92.607  1.00  0.46           O  
HETATM  962  O   HOH T 961      64.934 112.637 125.614  1.00  0.46           O  
HETATM  963  O   HOH T 962     103.991  84.375 104.131  1.00  0.46           O  
HETATM  964  O   HOH T 963      92.116  51.725 115.007  1.00  0.46           O  
HETATM  965  O   HOH T 964      74.076  89.908 112.995  1.00  0.46           O  
HETATM  966  O   HOH T 965      73.464  88.992 146.608  1.00  0.46           O  
HETATM  967  O   HOH T 966      69.590  89.830 111.425  1.00  0.46           O  
HETATM  968  O   HOH T 967      47.549  70.801 104.139  1.00  0.46           O  
HETATM  969  O   HOH T 968      91.425  51.142 112.558  1.00  0.46           O  
HETATM  970  O   HOH T 969      49.164  60.975 104.606  1.00  0.47           O  
HETATM  971  O   HOH T 970      82.587  75.799 106.482  1.00  0.47           O  
HETATM  972  O   HOH T 971      90.159  73.966 131.603  1.00  0.47           O  
HETATM  973  O   HOH T 972      84.301  39.421 101.835  1.00  0.47           O  
HETATM  974  O   HOH T 973     103.852  78.871  97.402  1.00  0.47           O  
HETATM  975  O   HOH T 974      65.033  95.709 141.692  1.00  0.47           O  
HETATM  976  O   HOH T 975      78.433  70.117  77.320  1.00  0.47           O  
HETATM  977  O   HOH T 976     103.188  74.654 106.694  1.00  0.47           O  
HETATM  978  O   HOH T 977      89.123  84.894 101.862  1.00  0.47           O  
HETATM  979  O   HOH T 978      76.031  95.918 117.567  1.00  0.47           O  
HETATM  980  O   HOH T 979      64.006 100.388 122.271  1.00  0.47           O  
HETATM  981  O   HOH T 980      85.927 101.178  87.415  1.00  0.47           O  
HETATM  982  O   HOH T 981      50.842  64.081  81.658  1.00  0.47           O  
HETATM  983  O   HOH T 982      46.155  69.619  95.745  1.00  0.47           O  
HETATM  984  O   HOH T 983      69.475  61.595 109.427  1.00  0.47           O  
HETATM  985  O   HOH T 984      62.758 107.125  91.287  1.00  0.47           O  
HETATM  986  O   HOH T 985      76.213 122.359 101.470  1.00  0.47           O  
HETATM  987  O   HOH T 986      70.407  77.043 122.115  1.00  0.47           O  
HETATM  988  O   HOH T 987      87.201 105.623 102.908  1.00  0.47           O  
HETATM  989  O   HOH T 988      53.410  93.039  95.742  1.00  0.47           O  
HETATM  990  O   HOH T 989      63.297  63.992 119.628  1.00  0.47           O  
HETATM  991  O   HOH T 990      50.714  85.801  98.569  1.00  0.47           O  
HETATM  992  O   HOH T 991      63.535  74.770  79.415  1.00  0.47           O  
HETATM  993  O   HOH T 992     100.735  75.978  70.788  1.00  0.47           O  
HETATM  994  O   HOH T 993      93.788  57.241  86.736  1.00  0.47           O  
HETATM  995  O   HOH T 994      94.924 102.905  89.574  1.00  0.47           O  
HETATM  996  O   HOH T 995      63.746  97.872 115.544  1.00  0.47           O  
HETATM  997  O   HOH T 996      79.631 119.640 118.355  1.00  0.47           O  
HETATM  998  O   HOH T 997      62.400  82.157 112.451  1.00  0.47           O  
HETATM  999  O   HOH T 998     111.808  94.972 114.973  1.00  0.47           O  
HETATM 1000  O   HOH T 999      77.951  55.507 109.407  1.00  0.47           O  
HETATM 1001  O   HOH T1000     101.462  84.899  94.885  1.00  0.47           O  
HETATM 1002  O   HOH T1001      88.281  71.928 131.779  1.00  0.47           O  
HETATM 1003  O   HOH T1002      87.531 123.290 109.010  1.00  0.47           O  
HETATM 1004  O   HOH T1003      45.168  89.364 116.842  1.00  0.47           O  
HETATM 1005  O   HOH T1004      75.748 108.857 136.752  1.00  0.47           O  
HETATM 1006  O   HOH T1005      60.755  50.403  80.453  1.00  0.47           O  
HETATM 1007  O   HOH T1006      63.810  52.145  79.388  1.00  0.47           O  
HETATM 1008  O   HOH T1007      75.808  70.780 105.464  1.00  0.47           O  
HETATM 1009  O   HOH T1008      61.882 117.174 104.716  1.00  0.47           O  
HETATM 1010  O   HOH T1009      87.535  61.780 117.990  1.00  0.47           O  
HETATM 1011  O   HOH T1010      64.015  48.643  86.623  1.00  0.47           O  
HETATM 1012  O   HOH T1011      95.610  51.015  80.182  1.00  0.47           O  
HETATM 1013  O   HOH T1012      61.643  78.558 116.287  1.00  0.47           O  
HETATM 1014  O   HOH T1013      74.802  76.511  81.490  1.00  0.47           O  
HETATM 1015  O   HOH T1014     107.500  62.420 104.680  1.00  0.47           O  
HETATM 1016  O   HOH T1015      66.460  98.770  86.534  1.00  0.47           O  
HETATM 1017  O   HOH T1016      58.492  53.359 109.490  1.00  0.47           O  
HETATM 1018  O   HOH T1017      81.334  70.373 132.035  1.00  0.47           O  
HETATM 1019  O   HOH T1018      69.970  76.419  83.137  1.00  0.47           O  
HETATM 1020  O   HOH T1019      90.146  97.435 135.320  1.00  0.47           O  
HETATM 1021  O   HOH T1020      64.298  91.457 121.428  1.00  0.47           O  
HETATM 1022  O   HOH T1021      64.749  61.644 119.185  1.00  0.47           O  
HETATM 1023  O   HOH T1022      63.864  94.008 139.771  1.00  0.47           O  
HETATM 1024  O   HOH T1023      77.986  67.124 102.743  1.00  0.47           O  
HETATM 1025  O   HOH T1024      65.475  81.720 102.870  1.00  0.47           O  
HETATM 1026  O   HOH T1025      83.382  66.478  68.921  1.00  0.47           O  
HETATM 1027  O   HOH T1026      46.748  79.905  99.091  1.00  0.47           O  
HETATM 1028  O   HOH T1027      72.702  75.648 103.503  1.00  0.47           O  
HETATM 1029  O   HOH T1028      74.346  66.702 120.112  1.00  0.47           O  
HETATM 1030  O   HOH T1029      67.728  76.064 125.060  1.00  0.47           O  
HETATM 1031  O   HOH T1030     101.325  61.072  87.457  1.00  0.47           O  
HETATM 1032  O   HOH T1031      65.441  84.846 104.191  1.00  0.47           O  
HETATM 1033  O   HOH T1032      65.327  84.184 101.354  1.00  0.48           O  
HETATM 1034  O   HOH T1033      72.655  68.281 121.660  1.00  0.48           O  
HETATM 1035  O   HOH T1034     104.613  77.804  74.647  1.00  0.48           O  
HETATM 1036  O   HOH T1035      78.733 121.673 106.185  1.00  0.48           O  
HETATM 1037  O   HOH T1036      74.820  67.619  95.405  1.00  0.48           O  
HETATM 1038  O   HOH T1037      92.403  63.852 116.633  1.00  0.48           O  
HETATM 1039  O   HOH T1038      65.514  56.036 115.732  1.00  0.48           O  
HETATM 1040  O   HOH T1039      56.712  90.122  75.632  1.00  0.48           O  
HETATM 1041  O   HOH T1040      53.391 106.551 115.041  1.00  0.48           O  
HETATM 1042  O   HOH T1041     101.544  78.167  98.745  1.00  0.48           O  
HETATM 1043  O   HOH T1042      83.415  52.562  79.039  1.00  0.48           O  
HETATM 1044  O   HOH T1043      63.406  99.878  83.384  1.00  0.48           O  
HETATM 1045  O   HOH T1044     111.614  67.865  99.242  1.00  0.48           O  
HETATM 1046  O   HOH T1045      54.905  47.508  94.686  1.00  0.48           O  
HETATM 1047  O   HOH T1046      87.543 101.324 120.147  1.00  0.48           O  
HETATM 1048  O   HOH T1047      57.989  88.938  97.515  1.00  0.48           O  
HETATM 1049  O   HOH T1048      75.843  75.954  94.682  1.00  0.48           O  
HETATM 1050  O   HOH T1049      58.143 111.019 105.858  1.00  0.48           O  
HETATM 1051  O   HOH T1050      59.998  60.681  81.779  1.00  0.48           O  
HETATM 1052  O   HOH T1051      94.948  65.757  70.245  1.00  0.48           O  
HETATM 1053  O   HOH T1052      72.115  68.867 116.665  1.00  0.48           O  
HETATM 1054  O   HOH T1053      66.162  94.128 116.793  1.00  0.48           O  
HETATM 1055  O   HOH T1054      68.640  84.071 142.835  1.00  0.48           O  
HETATM 1056  O   HOH T1055      44.412  78.346  84.380  1.00  0.48           O  
HETATM 1057  O   HOH T1056      81.830  87.878  82.810  1.00  0.48           O  
HETATM 1058  O   HOH T1057      99.473  76.420 133.426  1.00  0.48           O  
HETATM 1059  O   HOH T1058      56.102  76.790 120.661  1.00  0.48           O  
HETATM 1060  O   HOH T1059      69.717  86.914 114.616  1.00  0.48           O  
HETATM 1061  O   HOH T1060      50.955 112.250 103.143  1.00  0.48           O  
HETATM 1062  O   HOH T1061      80.017 105.957 136.679  1.00  0.48           O  
HETATM 1063  O   HOH T1062      46.905  82.726  98.775  1.00  0.48           O  
HETATM 1064  O   HOH T1063      64.708  90.619 129.386  1.00  0.48           O  
HETATM 1065  O   HOH T1064      82.656  88.129 113.794  1.00  0.48           O  
HETATM 1066  O   HOH T1065      88.625 117.712 110.092  1.00  0.48           O  
HETATM 1067  O   HOH T1066      84.902 110.721 110.245  1.00  0.48           O  
HETATM 1068  O   HOH T1067      86.562 106.036 114.166  1.00  0.48           O  
HETATM 1069  O   HOH T1068      51.123  93.165  89.923  1.00  0.48           O  
HETATM 1070  O   HOH T1069      51.886  50.165  85.110  1.00  0.48           O  
HETATM 1071  O   HOH T1070      55.797  46.894  92.066  1.00  0.48           O  
HETATM 1072  O   HOH T1071      39.050  94.167 116.306  1.00  0.48           O  
HETATM 1073  O   HOH T1072      60.903  77.021 118.408  1.00  0.48           O  
HETATM 1074  O   HOH T1073      68.808  90.419 108.806  1.00  0.48           O  
HETATM 1075  O   HOH T1074      39.398  94.095 118.994  1.00  0.48           O  
HETATM 1076  O   HOH T1075      71.427 107.196  91.632  1.00  0.48           O  
HETATM 1077  O   HOH T1076      93.853  75.475 126.230  1.00  0.48           O  
HETATM 1078  O   HOH T1077     103.749  82.777  97.916  1.00  0.48           O  
HETATM 1079  O   HOH T1078      52.784 107.391  97.985  1.00  0.48           O  
HETATM 1080  O   HOH T1079      73.027 106.285 133.818  1.00  0.48           O  
HETATM 1081  O   HOH T1080      57.976  65.774 119.589  1.00  0.48           O  
HETATM 1082  O   HOH T1081      82.676 120.568 104.576  1.00  0.48           O  
HETATM 1083  O   HOH T1082      80.111  90.435 103.641  1.00  0.48           O  
HETATM 1084  O   HOH T1083      63.477 112.319  94.785  1.00  0.48           O  
HETATM 1085  O   HOH T1084      74.024  78.550  87.508  1.00  0.48           O  
HETATM 1086  O   HOH T1085      65.814 105.380 117.049  1.00  0.48           O  
HETATM 1087  O   HOH T1086      98.839  87.085  93.403  1.00  0.48           O  
HETATM 1088  O   HOH T1087      70.488  92.629 143.446  1.00  0.48           O  
HETATM 1089  O   HOH T1088      57.332 106.059  95.308  1.00  0.48           O  
HETATM 1090  O   HOH T1089      92.385  96.801 120.634  1.00  0.48           O  
HETATM 1091  O   HOH T1090      62.857  80.191 114.356  1.00  0.48           O  
HETATM 1092  O   HOH T1091      95.784  80.118  91.820  1.00  0.48           O  
HETATM 1093  O   HOH T1092      79.116  53.508 107.934  1.00  0.48           O  
HETATM 1094  O   HOH T1093      46.564  63.363 105.754  1.00  0.48           O  
HETATM 1095  O   HOH T1094      88.190 116.347 107.670  1.00  0.48           O  
HETATM 1096  O   HOH T1095      54.291  76.456 109.424  1.00  0.49           O  
HETATM 1097  O   HOH T1096      74.498  76.316 105.519  1.00  0.49           O  
HETATM 1098  O   HOH T1097     101.883  77.053 107.112  1.00  0.49           O  
HETATM 1099  O   HOH T1098      68.063  86.320  95.794  1.00  0.49           O  
HETATM 1100  O   HOH T1099      70.369 117.298  96.706  1.00  0.49           O  
HETATM 1101  O   HOH T1100      51.290  74.647  79.377  1.00  0.49           O  
HETATM 1102  O   HOH T1101      63.834  97.305  84.177  1.00  0.49           O  
HETATM 1103  O   HOH T1102      70.844 106.312  94.274  1.00  0.49           O  
HETATM 1104  O   HOH T1103     102.023  60.063 105.708  1.00  0.49           O  
HETATM 1105  O   HOH T1104      66.257  94.683 126.563  1.00  0.49           O  
HETATM 1106  O   HOH T1105      68.490  94.540 119.758  1.00  0.49           O  
HETATM 1107  O   HOH T1106      72.137 115.963 125.450  1.00  0.49           O  
HETATM 1108  O   HOH T1107      85.860  79.396 144.739  1.00  0.49           O  
HETATM 1109  O   HOH T1108      52.503  91.585  97.884  1.00  0.49           O  
HETATM 1110  O   HOH T1109      85.157  85.256 140.212  1.00  0.49           O  
HETATM 1111  O   HOH T1110      50.340  90.743 110.663  1.00  0.49           O  
HETATM 1112  O   HOH T1111     106.853  94.238 110.143  1.00  0.49           O  
HETATM 1113  O   HOH T1112      98.188  97.773  95.721  1.00  0.49           O  
HETATM 1114  O   HOH T1113     102.202  88.606 101.199  1.00  0.49           O  
HETATM 1115  O   HOH T1114      67.517  68.797  87.205  1.00  0.49           O  
HETATM 1116  O   HOH T1115      88.372  71.179 134.489  1.00  0.49           O  
HETATM 1117  O   HOH T1116     102.167  83.391 117.473  1.00  0.49           O  
HETATM 1118  O   HOH T1117      52.188  62.978 101.191  1.00  0.49           O  
HETATM 1119  O   HOH T1118      57.772 105.995 118.490  1.00  0.49           O  
HETATM 1120  O   HOH T1119      64.792  88.556  67.034  1.00  0.49           O  
HETATM 1121  O   HOH T1120      91.375  90.688  78.372  1.00  0.49           O  
HETATM 1122  O   HOH T1121     104.720  79.556  76.903  1.00  0.49           O  
HETATM 1123  O   HOH T1122      95.221  80.766  94.472  1.00  0.49           O  
HETATM 1124  O   HOH T1123      63.672  54.310 110.225  1.00  0.49           O  
HETATM 1125  O   HOH T1124      58.289  47.709  98.714  1.00  0.49           O  
HETATM 1126  O   HOH T1125      98.826  82.638  79.757  1.00  0.49           O  
HETATM 1127  O   HOH T1126      65.564  91.506 143.382  1.00  0.49           O  
HETATM 1128  O   HOH T1127     112.512  93.317 110.798  1.00  0.49           O  
HETATM 1129  O   HOH T1128      48.256  96.972 114.941  1.00  0.49           O  
HETATM 1130  O   HOH T1129      44.879  71.068  77.483  1.00  0.49           O  
HETATM 1131  O   HOH T1130      77.545 115.013 130.416  1.00  0.49           O  
HETATM 1132  O   HOH T1131      81.707 106.987  89.543  1.00  0.49           O  
HETATM 1133  O   HOH T1132      81.141 125.329 110.361  1.00  0.49           O  
HETATM 1134  O   HOH T1133      95.220  59.353 113.974  1.00  0.49           O  
HETATM 1135  O   HOH T1134      80.171  97.339  90.023  1.00  0.49           O  
HETATM 1136  O   HOH T1135      75.233  99.398 116.885  1.00  0.49           O  
HETATM 1137  O   HOH T1136      80.514 118.664 120.907  1.00  0.49           O  
HETATM 1138  O   HOH T1137      81.974  89.680 101.878  1.00  0.49           O  
HETATM 1139  O   HOH T1138      92.151 100.436 117.582  1.00  0.49           O  
HETATM 1140  O   HOH T1139      72.139  86.567 145.890  1.00  0.49           O  
HETATM 1141  O   HOH T1140      67.957  68.210  80.156  1.00  0.49           O  
HETATM 1142  O   HOH T1141      48.603  70.362  80.704  1.00  0.49           O  
HETATM 1143  O   HOH T1142      71.890 108.792  95.267  1.00  0.49           O  
HETATM 1144  O   HOH T1143      69.092  75.603  80.639  1.00  0.49           O  
HETATM 1145  O   HOH T1144      90.374  81.903 137.311  1.00  0.49           O  
HETATM 1146  O   HOH T1145      56.096 108.518 103.326  1.00  0.49           O  
HETATM 1147  O   HOH T1146      98.843  74.568 107.739  1.00  0.49           O  
HETATM 1148  O   HOH T1147     100.669  78.755 132.560  1.00  0.49           O  
HETATM 1149  O   HOH T1148      66.713  96.930 134.308  1.00  0.49           O  
HETATM 1150  O   HOH T1149      99.632  87.488  90.716  1.00  0.49           O  
HETATM 1151  O   HOH T1150      85.973  59.606  89.147  1.00  0.49           O  
HETATM 1152  O   HOH T1151     102.637  83.584  92.502  1.00  0.49           O  
HETATM 1153  O   HOH T1152     103.822  72.887 108.733  1.00  0.49           O  
HETATM 1154  O   HOH T1153      92.711 106.483  92.991  1.00  0.49           O  
HETATM 1155  O   HOH T1154      70.516  77.214  85.649  1.00  0.49           O  
HETATM 1156  O   HOH T1155      52.709 109.180 114.310  1.00  0.49           O  
HETATM 1157  O   HOH T1156      66.750  58.476 115.079  1.00  0.49           O  
HETATM 1158  O   HOH T1157      63.773 115.006  93.910  1.00  0.49           O  
HETATM 1159  O   HOH T1158      56.709  83.351  76.174  1.00  0.50           O  
HETATM 1160  O   HOH T1159      65.460  54.110 108.247  1.00  0.50           O  
HETATM 1161  O   HOH T1160      82.763  82.632 101.925  1.00  0.50           O  
HETATM 1162  O   HOH T1161      64.602 114.888 122.329  1.00  0.50           O  
HETATM 1163  O   HOH T1162      76.931  78.470 143.351  1.00  0.50           O  
HETATM 1164  O   HOH T1163      49.513  96.848 105.428  1.00  0.50           O  
HETATM 1165  O   HOH T1164      86.015  97.330 132.833  1.00  0.50           O  
HETATM 1166  O   HOH T1165      62.367 107.619 104.720  1.00  0.50           O  
HETATM 1167  O   HOH T1166      92.573 103.039  88.154  1.00  0.50           O  
HETATM 1168  O   HOH T1167      83.242 101.035  88.162  1.00  0.50           O  
HETATM 1169  O   HOH T1168      84.648  98.236 110.100  1.00  0.50           O  
HETATM 1170  O   HOH T1169      64.042  69.530 114.031  1.00  0.50           O  
HETATM 1171  O   HOH T1170      76.015  66.405 108.390  1.00  0.50           O  
HETATM 1172  O   HOH T1171      54.143  58.651 111.776  1.00  0.50           O  
HETATM 1173  O   HOH T1172      82.652  72.124 140.931  1.00  0.50           O  
HETATM 1174  O   HOH T1173      89.532  91.522  97.299  1.00  0.50           O  
HETATM 1175  O   HOH T1174      48.448  68.308 105.016  1.00  0.50           O  
HETATM 1176  O   HOH T1175     103.142  76.278  97.831  1.00  0.50           O  
HETATM 1177  O   HOH T1176      72.864  74.522  87.692  1.00  0.50           O  
HETATM 1178  O   HOH T1177      50.688 110.888 113.572  1.00  0.50           O  
HETATM 1179  O   HOH T1178      88.656  85.996  72.804  1.00  0.50           O  
HETATM 1180  O   HOH T1179      71.376  67.162 123.802  1.00  0.50           O  
HETATM 1181  O   HOH T1180      77.965  75.180  96.347  1.00  0.50           O  
HETATM 1182  O   HOH T1181      80.072  90.864 110.575  1.00  0.50           O  
HETATM 1183  O   HOH T1182      86.917  84.547  84.731  1.00  0.50           O  
HETATM 1184  O   HOH T1183      89.251  55.644 115.222  1.00  0.50           O  
HETATM 1185  O   HOH T1184      65.738  89.543 106.039  1.00  0.50           O  
HETATM 1186  O   HOH T1185      78.542  67.753 110.817  1.00  0.50           O  
HETATM 1187  O   HOH T1186      97.204  88.469  91.549  1.00  0.50           O  
HETATM 1188  O   HOH T1187      58.070  68.025 117.962  1.00  0.50           O  
HETATM 1189  O   HOH T1188      82.751 108.730  91.512  1.00  0.50           O  
HETATM 1190  O   HOH T1189      98.231  81.721  82.296  1.00  0.50           O  
HETATM 1191  O   HOH T1190      97.516  87.395 137.896  1.00  0.50           O  
HETATM 1192  O   HOH T1191     106.225  78.484  85.047  1.00  0.50           O  
HETATM 1193  O   HOH T1192      86.092 114.289 100.087  1.00  0.50           O  
HETATM 1194  O   HOH T1193     103.914  60.846  88.430  1.00  0.50           O  
HETATM 1195  O   HOH T1194      86.871  49.795  68.642  1.00  0.50           O  
HETATM 1196  O   HOH T1195      94.736  85.225 142.104  1.00  0.50           O  
HETATM 1197  O   HOH T1196      50.172 106.238  98.121  1.00  0.50           O  
HETATM 1198  O   HOH T1197     105.161  58.382  88.033  1.00  0.50           O  
HETATM 1199  O   HOH T1198      88.663 108.628  93.544  1.00  0.50           O  
HETATM 1200  O   HOH T1199      53.484 112.117 104.554  1.00  0.50           O  
HETATM 1201  O   HOH T1200      88.433 105.223 124.755  1.00  0.50           O  
HETATM 1202  O   HOH T1201     102.423  63.030  89.237  1.00  0.50           O  
HETATM 1203  O   HOH T1202      86.827  86.702 102.201  1.00  0.50           O  
HETATM 1204  O   HOH T1203      71.875  72.753  83.239  1.00  0.50           O  
HETATM 1205  O   HOH T1204     103.054  70.354  91.849  1.00  0.50           O  
HETATM 1206  O   HOH T1205      80.050  77.694  70.332  1.00  0.50           O  
HETATM 1207  O   HOH T1206      47.944 107.546 109.338  1.00  0.50           O  
HETATM 1208  O   HOH T1207      85.864 113.751 117.558  1.00  0.50           O  
HETATM 1209  O   HOH T1208      84.902  96.498 113.597  1.00  0.50           O  
HETATM 1210  O   HOH T1209      46.094  91.482 101.482  1.00  0.50           O  
HETATM 1211  O   HOH T1210      61.000 100.377 128.839  1.00  0.51           O  
HETATM 1212  O   HOH T1211      53.014 106.743 117.766  1.00  0.51           O  
HETATM 1213  O   HOH T1212      73.957  94.089  76.648  1.00  0.51           O  
HETATM 1214  O   HOH T1213      91.459  63.386 119.186  1.00  0.51           O  
HETATM 1215  O   HOH T1214      76.179 107.828 134.225  1.00  0.51           O  
HETATM 1216  O   HOH T1215      64.882 100.224  80.930  1.00  0.51           O  
HETATM 1217  O   HOH T1216      54.848  94.381  93.815  1.00  0.51           O  
HETATM 1218  O   HOH T1217      44.301  65.751  99.623  1.00  0.51           O  
HETATM 1219  O   HOH T1218      72.884  69.847 128.671  1.00  0.51           O  
HETATM 1220  O   HOH T1219      53.090 101.713 118.908  1.00  0.51           O  
HETATM 1221  O   HOH T1220      79.314  46.077 107.914  1.00  0.51           O  
HETATM 1222  O   HOH T1221      97.903  98.259 122.579  1.00  0.51           O  
HETATM 1223  O   HOH T1222      98.572  85.097  80.940  1.00  0.51           O  
HETATM 1224  O   HOH T1223      87.482  84.907  70.527  1.00  0.51           O  
HETATM 1225  O   HOH T1224      59.969  96.434 122.329  1.00  0.51           O  
HETATM 1226  O   HOH T1225      81.631  74.406 108.779  1.00  0.51           O  
HETATM 1227  O   HOH T1226      78.349 125.187 114.187  1.00  0.51           O  
HETATM 1228  O   HOH T1227      98.470  85.980  77.527  1.00  0.51           O  
HETATM 1229  O   HOH T1228      91.469 106.036  90.563  1.00  0.51           O  
HETATM 1230  O   HOH T1229      66.267  86.462  65.771  1.00  0.51           O  
HETATM 1231  O   HOH T1230      68.819  98.300  88.088  1.00  0.51           O  
HETATM 1232  O   HOH T1231     102.466  88.393 129.578  1.00  0.51           O  
HETATM 1233  O   HOH T1232      78.610  64.770  99.661  1.00  0.51           O  
HETATM 1234  O   HOH T1233      47.619  90.768 110.135  1.00  0.51           O  
HETATM 1235  O   HOH T1234      76.842  66.274  78.990  1.00  0.51           O  
HETATM 1236  O   HOH T1235      73.924  58.952  88.080  1.00  0.51           O  
HETATM 1237  O   HOH T1236     104.166  76.455 124.610  1.00  0.51           O  
HETATM 1238  O   HOH T1237      77.756  51.893 101.268  1.00  0.51           O  
HETATM 1239  O   HOH T1238      64.123  82.562 105.200  1.00  0.51           O  
HETATM 1240  O   HOH T1239      98.070  72.030 117.983  1.00  0.51           O  
HETATM 1241  O   HOH T1240      61.187 118.443 107.155  1.00  0.51           O  
HETATM 1242  O   HOH T1241     106.101  71.177 108.673  1.00  0.51           O  
HETATM 1243  O   HOH T1242      67.250  63.796 111.098  1.00  0.51           O  
HETATM 1244  O   HOH T1243      50.071 109.526 103.042  1.00  0.51           O  
HETATM 1245  O   HOH T1244      71.241  76.047  76.961  1.00  0.51           O  
HETATM 1246  O   HOH T1245      78.408  48.298 106.578  1.00  0.51           O  
HETATM 1247  O   HOH T1246      61.416  96.443  83.131  1.00  0.51           O  
HETATM 1248  O   HOH T1247      72.008  68.094  84.112  1.00  0.51           O  
HETATM 1249  O   HOH T1248      81.770  97.319  76.932  1.00  0.51           O  
HETATM 1250  O   HOH T1249      78.093  76.148 108.272  1.00  0.51           O  
HETATM 1251  O   HOH T1250      88.309 104.240 133.135  1.00  0.51           O  
HETATM 1252  O   HOH T1251      84.217  96.877 107.556  1.00  0.51           O  
HETATM 1253  O   HOH T1252      46.977  71.991  79.008  1.00  0.51           O  
HETATM 1254  O   HOH T1253      63.155 101.422  93.043  1.00  0.51           O  
HETATM 1255  O   HOH T1254     103.790  82.542 129.389  1.00  0.51           O  
HETATM 1256  O   HOH T1255      97.221  79.114 136.979  1.00  0.52           O  
HETATM 1257  O   HOH T1256      86.882 115.857 102.522  1.00  0.52           O  
HETATM 1258  O   HOH T1257      67.300  56.819  83.235  1.00  0.52           O  
HETATM 1259  O   HOH T1258     105.484  98.006 104.592  1.00  0.52           O  
HETATM 1260  O   HOH T1259      80.369  67.863 132.913  1.00  0.52           O  
HETATM 1261  O   HOH T1260      78.026  63.335  71.906  1.00  0.52           O  
HETATM 1262  O   HOH T1261      63.605  87.991 129.643  1.00  0.52           O  
HETATM 1263  O   HOH T1262      62.532 117.427 123.930  1.00  0.52           O  
HETATM 1264  O   HOH T1263      66.265  65.518 104.857  1.00  0.52           O  
HETATM 1265  O   HOH T1264      67.330  76.489  77.084  1.00  0.52           O  
HETATM 1266  O   HOH T1265      80.804  70.511 109.473  1.00  0.52           O  
HETATM 1267  O   HOH T1266      74.156 111.186  93.794  1.00  0.52           O  
HETATM 1268  O   HOH T1267      96.311  71.953 114.243  1.00  0.52           O  
HETATM 1269  O   HOH T1268     104.522  67.620  87.498  1.00  0.52           O  
HETATM 1270  O   HOH T1269      81.762 121.144 102.009  1.00  0.52           O  
HETATM 1271  O   HOH T1270      83.361  82.450 104.599  1.00  0.52           O  
HETATM 1272  O   HOH T1271      70.461  79.285 141.784  1.00  0.52           O  
HETATM 1273  O   HOH T1272      66.865  94.898 108.580  1.00  0.52           O  
HETATM 1274  O   HOH T1273      79.433  61.636  88.391  1.00  0.52           O  
HETATM 1275  O   HOH T1274      84.864  68.050 120.790  1.00  0.52           O  
HETATM 1276  O   HOH T1275      71.442  88.769 113.290  1.00  0.52           O  
HETATM 1277  O   HOH T1276      93.239 100.685  84.960  1.00  0.52           O  
HETATM 1278  O   HOH T1277     103.715  74.559  87.514  1.00  0.52           O  
HETATM 1279  O   HOH T1278      69.557  77.833 106.289  1.00  0.52           O  
HETATM 1280  O   HOH T1279      59.773 110.502 117.527  1.00  0.52           O  
HETATM 1281  O   HOH T1280      68.834  88.849  94.978  1.00  0.52           O  
HETATM 1282  O   HOH T1281      60.694 100.180  84.123  1.00  0.52           O  
HETATM 1283  O   HOH T1282     102.923  70.117  75.142  1.00  0.52           O  
HETATM 1284  O   HOH T1283      63.531  75.082  76.706  1.00  0.52           O  
HETATM 1285  O   HOH T1284      48.905 107.170 103.890  1.00  0.52           O  
HETATM 1286  O   HOH T1285      68.166  84.439  65.474  1.00  0.52           O  
HETATM 1287  O   HOH T1286      77.342  60.976  77.449  1.00  0.52           O  
HETATM 1288  O   HOH T1287      72.358  61.288 115.561  1.00  0.52           O  
HETATM 1289  O   HOH T1288      79.319  60.640  85.848  1.00  0.52           O  
HETATM 1290  O   HOH T1289      98.160 100.488 120.961  1.00  0.52           O  
HETATM 1291  O   HOH T1290     102.955  52.253  75.997  1.00  0.52           O  
HETATM 1292  O   HOH T1291      85.002  97.490  86.658  1.00  0.52           O  
HETATM 1293  O   HOH T1292      72.637  63.843 113.947  1.00  0.52           O  
HETATM 1294  O   HOH T1293      73.663  91.606 146.623  1.00  0.52           O  
HETATM 1295  O   HOH T1294      80.850  56.577  81.254  1.00  0.52           O  
HETATM 1296  O   HOH T1295      97.243  74.583 114.153  1.00  0.52           O  
HETATM 1297  O   HOH T1296      71.951 122.560 112.653  1.00  0.52           O  
HETATM 1298  O   HOH T1297      51.750  59.899 104.594  1.00  0.52           O  
HETATM 1299  O   HOH T1298      73.186  57.943  96.988  1.00  0.52           O  
HETATM 1300  O   HOH T1299      93.721  55.668  68.761  1.00  0.52           O  
HETATM 1301  O   HOH T1300      74.363  75.604  84.172  1.00  0.52           O  
HETATM 1302  O   HOH T1301      43.743  67.207 107.332  1.00  0.52           O  
HETATM 1303  O   HOH T1302      59.151 120.012 108.117  1.00  0.53           O  
HETATM 1304  O   HOH T1303      83.985  73.598 102.055  1.00  0.53           O  
HETATM 1305  O   HOH T1304      90.721 103.918 123.921  1.00  0.53           O  
HETATM 1306  O   HOH T1305      61.257 114.470  97.927  1.00  0.53           O  
HETATM 1307  O   HOH T1306      67.701  81.658  65.531  1.00  0.53           O  
HETATM 1308  O   HOH T1307      85.685  58.212  95.234  1.00  0.53           O  
HETATM 1309  O   HOH T1308      47.847  87.995 113.492  1.00  0.53           O  
HETATM 1310  O   HOH T1309      47.095  55.352  90.817  1.00  0.53           O  
HETATM 1311  O   HOH T1310      55.048 107.035  96.428  1.00  0.53           O  
HETATM 1312  O   HOH T1311     107.104  68.131  98.064  1.00  0.53           O  
HETATM 1313  O   HOH T1312      63.062  70.268  78.507  1.00  0.53           O  
HETATM 1314  O   HOH T1313      71.550  57.368  90.218  1.00  0.53           O  
HETATM 1315  O   HOH T1314      45.429  72.159  94.319  1.00  0.53           O  
HETATM 1316  O   HOH T1315      81.954  71.767 134.728  1.00  0.53           O  
HETATM 1317  O   HOH T1316      49.714  62.419 102.261  1.00  0.53           O  
HETATM 1318  O   HOH T1317      83.365  50.896 113.046  1.00  0.53           O  
HETATM 1319  O   HOH T1318      46.235  80.941 106.762  1.00  0.53           O  
HETATM 1320  O   HOH T1319      92.351  88.470 137.712  1.00  0.53           O  
HETATM 1321  O   HOH T1320     101.872  80.756  98.066  1.00  0.53           O  
HETATM 1322  O   HOH T1321     102.091  84.260  85.791  1.00  0.53           O  
HETATM 1323  O   HOH T1322      50.786  85.888  95.637  1.00  0.53           O  
HETATM 1324  O   HOH T1323      88.628  97.385 137.721  1.00  0.53           O  
HETATM 1325  O   HOH T1324      95.594  86.043 139.510  1.00  0.53           O  
HETATM 1326  O   HOH T1325      45.898  78.078  97.130  1.00  0.53           O  
HETATM 1327  O   HOH T1326      66.402 101.172  89.947  1.00  0.53           O  
HETATM 1328  O   HOH T1327      57.351 121.055 110.908  1.00  0.53           O  
HETATM 1329  O   HOH T1328      50.943  65.576 104.382  1.00  0.53           O  
HETATM 1330  O   HOH T1329      72.266  65.551 121.571  1.00  0.53           O  
HETATM 1331  O   HOH T1330      79.029 120.708 102.989  1.00  0.53           O  
HETATM 1332  O   HOH T1331      63.981  94.668 128.122  1.00  0.53           O  
HETATM 1333  O   HOH T1332      69.749  85.090 112.478  1.00  0.53           O  
HETATM 1334  O   HOH T1333      65.573  47.153  88.246  1.00  0.53           O  
HETATM 1335  O   HOH T1334      58.257  76.359 112.752  1.00  0.53           O  
HETATM 1336  O   HOH T1335      84.297 100.528  95.524  1.00  0.53           O  
HETATM 1337  O   HOH T1336      87.590 105.056 116.544  1.00  0.53           O  
HETATM 1338  O   HOH T1337     105.346  76.682  96.322  1.00  0.53           O  
HETATM 1339  O   HOH T1338      82.443  55.945  96.141  1.00  0.53           O  
HETATM 1340  O   HOH T1339      93.220  69.708 123.046  1.00  0.53           O  
HETATM 1341  O   HOH T1340      82.456  68.928 134.138  1.00  0.53           O  
HETATM 1342  O   HOH T1341      74.564  85.792 144.974  1.00  0.53           O  
HETATM 1343  O   HOH T1342      69.491  81.653 101.988  1.00  0.53           O  
HETATM 1344  O   HOH T1343      89.093 119.011 107.727  1.00  0.53           O  
HETATM 1345  O   HOH T1344      46.621  78.737 104.938  1.00  0.53           O  
HETATM 1346  O   HOH T1345      80.413 106.897 134.134  1.00  0.53           O  
HETATM 1347  O   HOH T1346      68.945 111.120  90.579  1.00  0.53           O  
HETATM 1348  O   HOH T1347      84.138  89.204 111.913  1.00  0.53           O  
HETATM 1349  O   HOH T1348      45.455  98.706  98.172  1.00  0.53           O  
HETATM 1350  O   HOH T1349      45.106  94.205 122.283  1.00  0.53           O  
HETATM 1351  O   HOH T1350      80.983  76.835  73.746  1.00  0.53           O  
HETATM 1352  O   HOH T1351      81.647  85.786  98.104  1.00  0.54           O  
HETATM 1353  O   HOH T1352      44.851 111.401 107.670  1.00  0.54           O  
HETATM 1354  O   HOH T1353      96.399  63.192  70.381  1.00  0.54           O  
HETATM 1355  O   HOH T1354      59.781  90.691 127.407  1.00  0.54           O  
HETATM 1356  O   HOH T1355     105.522  76.104  88.944  1.00  0.54           O  
HETATM 1357  O   HOH T1356      60.154  78.245  75.286  1.00  0.54           O  
HETATM 1358  O   HOH T1357      86.727  65.531  70.331  1.00  0.54           O  
HETATM 1359  O   HOH T1358      67.975  85.219 100.681  1.00  0.54           O  
HETATM 1360  O   HOH T1359      86.105 107.699 128.423  1.00  0.54           O  
HETATM 1361  O   HOH T1360      85.728  84.640 109.508  1.00  0.54           O  
HETATM 1362  O   HOH T1361      89.713  58.664  83.213  1.00  0.54           O  
HETATM 1363  O   HOH T1362      44.859  63.058  90.437  1.00  0.54           O  
HETATM 1364  O   HOH T1363      88.956 108.744  97.688  1.00  0.54           O  
HETATM 1365  O   HOH T1364      47.704  74.901  93.765  1.00  0.54           O  
HETATM 1366  O   HOH T1365      47.054  87.127 116.239  1.00  0.54           O  
HETATM 1367  O   HOH T1366      73.724  56.578 115.969  1.00  0.54           O  
HETATM 1368  O   HOH T1367      58.159  79.325 124.797  1.00  0.54           O  
HETATM 1369  O   HOH T1368      94.113  53.922 119.364  1.00  0.54           O  
HETATM 1370  O   HOH T1369      90.134 115.129 118.813  1.00  0.54           O  
HETATM 1371  O   HOH T1370      91.809 101.929 131.815  1.00  0.54           O  
HETATM 1372  O   HOH T1371      81.609  78.674 106.163  1.00  0.54           O  
HETATM 1373  O   HOH T1372      89.768  94.663  99.398  1.00  0.54           O  
HETATM 1374  O   HOH T1373      89.016  95.067 136.178  1.00  0.54           O  
HETATM 1375  O   HOH T1374      53.500  76.259  79.388  1.00  0.54           O  
HETATM 1376  O   HOH T1375      46.928  83.713 106.300  1.00  0.54           O  
HETATM 1377  O   HOH T1376      44.453  51.898  95.530  1.00  0.54           O  
HETATM 1378  O   HOH T1377     107.082  64.817  95.669  1.00  0.54           O  
HETATM 1379  O   HOH T1378      83.308 111.800 123.334  1.00  0.54           O  
HETATM 1380  O   HOH T1379      44.824  67.707 109.867  1.00  0.54           O  
HETATM 1381  O   HOH T1380      65.634 115.034 124.829  1.00  0.55           O  
HETATM 1382  O   HOH T1381      75.930  86.010  94.040  1.00  0.55           O  
HETATM 1383  O   HOH T1382      89.889 106.224  92.825  1.00  0.55           O  
HETATM 1384  O   HOH T1383      40.248  62.809  97.061  1.00  0.55           O  
HETATM 1385  O   HOH T1384      53.575  98.633  93.959  1.00  0.55           O  
HETATM 1386  O   HOH T1385      71.905  66.219 137.290  1.00  0.55           O  
HETATM 1387  O   HOH T1386      53.629 114.997 101.792  1.00  0.55           O  
HETATM 1388  O   HOH T1387     105.260  90.736 110.391  1.00  0.55           O  
HETATM 1389  O   HOH T1388      67.288  75.709  82.845  1.00  0.55           O  
HETATM 1390  O   HOH T1389      44.261  81.788  88.249  1.00  0.55           O  
HETATM 1391  O   HOH T1390      70.179  78.216  89.891  1.00  0.55           O  
HETATM 1392  O   HOH T1391      42.120  71.280  77.760  1.00  0.55           O  
HETATM 1393  O   HOH T1392      77.693  70.535  95.607  1.00  0.55           O  
HETATM 1394  O   HOH T1393      44.451  88.283  89.194  1.00  0.55           O  
HETATM 1395  O   HOH T1394      70.450  52.524 101.269  1.00  0.55           O  
HETATM 1396  O   HOH T1395      83.378 100.385  82.623  1.00  0.55           O  
HETATM 1397  O   HOH T1396      63.091  85.514 131.077  1.00  0.55           O  
HETATM 1398  O   HOH T1397      57.751  65.435 122.282  1.00  0.55           O  
HETATM 1399  O   HOH T1398      70.797  70.759  81.704  1.00  0.55           O  
HETATM 1400  O   HOH T1399      68.875 118.624 117.651  1.00  0.55           O  
HETATM 1401  O   HOH T1400      46.690  87.187 123.325  1.00  0.55           O  
HETATM 1402  O   HOH T1401     104.403  77.821  87.040  1.00  0.55           O  
HETATM 1403  O   HOH T1402      58.869  88.117 125.056  1.00  0.55           O  
HETATM 1404  O   HOH T1403     103.139  78.092 131.720  1.00  0.55           O  
HETATM 1405  O   HOH T1404     104.509  84.961 117.581  1.00  0.55           O  
HETATM 1406  O   HOH T1405      66.658  64.886 107.526  1.00  0.55           O  
HETATM 1407  O   HOH T1406      86.835  48.499 101.899  1.00  0.55           O  
HETATM 1408  O   HOH T1407      76.970  54.257 102.869  1.00  0.55           O  
HETATM 1409  O   HOH T1408      89.854  55.066  80.385  1.00  0.55           O  
HETATM 1410  O   HOH T1409      52.773  54.156 109.541  1.00  0.55           O  
HETATM 1411  O   HOH T1410      90.646  66.308 121.580  1.00  0.55           O  
HETATM 1412  O   HOH T1411      75.161  55.162 112.608  1.00  0.55           O  
HETATM 1413  O   HOH T1412      66.457  80.212 134.681  1.00  0.55           O  
HETATM 1414  O   HOH T1413      87.087  57.507 115.218  1.00  0.55           O  
HETATM 1415  O   HOH T1414     104.529  72.808  91.552  1.00  0.55           O  
HETATM 1416  O   HOH T1415      59.415 117.497 109.167  1.00  0.55           O  
HETATM 1417  O   HOH T1416     102.165  74.387 114.233  1.00  0.55           O  
HETATM 1418  O   HOH T1417      88.393  73.614  61.594  1.00  0.56           O  
HETATM 1419  O   HOH T1418      54.230  77.133  76.760  1.00  0.56           O  
HETATM 1420  O   HOH T1419      93.133  60.082 117.527  1.00  0.56           O  
HETATM 1421  O   HOH T1420      74.579  71.121  99.704  1.00  0.56           O  
HETATM 1422  O   HOH T1421      72.858  93.866 144.150  1.00  0.56           O  
HETATM 1423  O   HOH T1422      68.828  83.087  92.421  1.00  0.56           O  
HETATM 1424  O   HOH T1423      52.881  49.227  93.947  1.00  0.56           O  
HETATM 1425  O   HOH T1424      73.002  53.481 107.773  1.00  0.56           O  
HETATM 1426  O   HOH T1425      98.830  67.894  76.502  1.00  0.56           O  
HETATM 1427  O   HOH T1426      59.082  97.851  83.603  1.00  0.56           O  
HETATM 1428  O   HOH T1427      79.897  83.663  96.520  1.00  0.56           O  
HETATM 1429  O   HOH T1428      76.275  95.614  76.773  1.00  0.56           O  
HETATM 1430  O   HOH T1429      89.970  74.494 135.250  1.00  0.56           O  
HETATM 1431  O   HOH T1430      58.538 117.448 100.976  1.00  0.56           O  
HETATM 1432  O   HOH T1431      69.699  73.161  81.646  1.00  0.56           O  
HETATM 1433  O   HOH T1432     106.109  72.272  96.193  1.00  0.56           O  
HETATM 1434  O   HOH T1433      64.786  89.935 138.523  1.00  0.56           O  
HETATM 1435  O   HOH T1434      72.158 112.587  95.416  1.00  0.56           O  
HETATM 1436  O   HOH T1435      45.856  97.140 106.455  1.00  0.56           O  
HETATM 1437  O   HOH T1436      76.741  73.773 115.110  1.00  0.56           O  
HETATM 1438  O   HOH T1437     102.054  79.367  79.291  1.00  0.56           O  
HETATM 1439  O   HOH T1438      89.122 109.463 107.703  1.00  0.56           O  
HETATM 1440  O   HOH T1439      66.485  75.227 120.170  1.00  0.56           O  
HETATM 1441  O   HOH T1440      81.920  92.343  74.446  1.00  0.56           O  
HETATM 1442  O   HOH T1441      96.995  49.430 101.674  1.00  0.56           O  
HETATM 1443  O   HOH T1442      47.191  63.764  83.242  1.00  0.56           O  
HETATM 1444  O   HOH T1443      50.236  52.530  91.493  1.00  0.57           O  
HETATM 1445  O   HOH T1444      70.492 106.165  89.136  1.00  0.57           O  
HETATM 1446  O   HOH T1445      55.126  73.708 111.784  1.00  0.57           O  
HETATM 1447  O   HOH T1446      68.209  43.785  92.460  1.00  0.57           O  
HETATM 1448  O   HOH T1447      63.819  77.462 121.951  1.00  0.57           O  
HETATM 1449  O   HOH T1448      65.654  82.668 109.163  1.00  0.57           O  
HETATM 1450  O   HOH T1449      56.665  71.383 114.274  1.00  0.57           O  
HETATM 1451  O   HOH T1450      96.972  54.974  90.861  1.00  0.57           O  
HETATM 1452  O   HOH T1451      82.667  90.627 144.983  1.00  0.57           O  
HETATM 1453  O   HOH T1452      55.558  93.085 100.697  1.00  0.57           O  
HETATM 1454  O   HOH T1453      67.627  83.638 102.866  1.00  0.57           O  
HETATM 1455  O   HOH T1454      74.008  67.283 128.670  1.00  0.57           O  
HETATM 1456  O   HOH T1455      68.183  46.896  95.648  1.00  0.57           O  
HETATM 1457  O   HOH T1456      51.986  76.093  77.038  1.00  0.57           O  
HETATM 1458  O   HOH T1457     104.750  80.021 108.723  1.00  0.57           O  
HETATM 1459  O   HOH T1458      97.236 101.272  93.822  1.00  0.57           O  
HETATM 1460  O   HOH T1459      67.314  76.395  70.529  1.00  0.57           O  
HETATM 1461  O   HOH T1460      84.159 103.028  86.499  1.00  0.58           O  
HETATM 1462  O   HOH T1461      73.694  90.635 109.332  1.00  0.58           O  
HETATM 1463  O   HOH T1462      76.199  89.849 109.948  1.00  0.58           O  
HETATM 1464  O   HOH T1463      87.415  99.696 131.578  1.00  0.58           O  
HETATM 1465  O   HOH T1464      90.293  99.893 136.726  1.00  0.58           O  
HETATM 1466  O   HOH T1465      51.888  50.104  91.468  1.00  0.58           O  
HETATM 1467  O   HOH T1466      54.234  86.912  95.319  1.00  0.58           O  
HETATM 1468  O   HOH T1467      48.642 103.971  99.918  1.00  0.58           O  
HETATM 1469  O   HOH T1468      69.062  93.203 109.387  1.00  0.58           O  
HETATM 1470  O   HOH T1469      73.164  76.241  94.213  1.00  0.59           O  
HETATM 1471  O   HOH T1470      48.598  70.502 106.748  1.00  0.59           O  
HETATM 1472  O   HOH T1471      94.785  77.372 129.590  1.00  0.59           O  
HETATM 1473  O   HOH T1472      45.472  53.374  98.600  1.00  0.59           O  
HETATM 1474  O   HOH T1473      86.728  42.843 100.514  1.00  0.59           O  
HETATM 1475  O   HOH T1474      73.050  74.513  78.518  1.00  0.60           O  
HETATM 1476  O   HOH T1475      58.171 110.041 102.800  1.00  0.60           O  
HETATM 1477  O   HOH T1476      81.716 102.241  86.008  1.00  0.60           O  
HETATM 1478  O   HOH T1477      64.967 117.366 109.128  1.00  0.61           O  
HETATM 1479  O   HOH T1478      55.016  86.618 125.532  1.00  0.61           O  
HETATM 1480  O   HOH T1479      43.529  70.535  95.543  1.00  0.63           O  
HETATM 1481  O   HOH T1480      59.883 100.248  86.621  1.00  0.65           O  
TER    1482      HOH T1480 
