# Supplementary material for: Accurate Prediction of Hydration Sites of Proteins Using Energy Model With Atom Embedding
Source: Front Mol Biosci. 2021 Sep 20;8:756075. doi: 10.3389/fmolb.2021.756075 (PMC8488165; doi:10.3389/fmolb.2021.756075)
Supplement: Supplementary file 1 [file DataSheet1.ZIP › Data Sheet 1/Our_result_pdb/our_dataset_output/1S9U_watersite.pdb]

HEADER                                                        XXXX


JRNL        PMID   -1
HETATM    1  O   HOH T   0      31.785  -7.376   2.224  1.00  0.17           O  
HETATM    2  O   HOH T   1      29.958 -12.472  -7.510  1.00  0.18           O  
HETATM    3  O   HOH T   2      16.107  12.374 -10.872  1.00  0.18           O  
HETATM    4  O   HOH T   3      33.154  12.585  -3.355  1.00  0.19           O  
HETATM    5  O   HOH T   4      -4.990  15.078  -3.872  1.00  0.20           O  
HETATM    6  O   HOH T   5      14.413  16.222   6.315  1.00  0.21           O  
HETATM    7  O   HOH T   6      34.386   2.925  17.636  1.00  0.21           O  
HETATM    8  O   HOH T   7      31.640   6.521  -0.985  1.00  0.22           O  
HETATM    9  O   HOH T   8      26.833   5.906 -15.182  1.00  0.22           O  
HETATM   10  O   HOH T   9       8.094  12.157  18.232  1.00  0.22           O  
HETATM   11  O   HOH T  10      25.750  -0.590  36.921  1.00  0.23           O  
HETATM   12  O   HOH T  11       9.531   6.175   4.797  1.00  0.23           O  
HETATM   13  O   HOH T  12      30.074  -5.187  -5.676  1.00  0.23           O  
HETATM   14  O   HOH T  13      29.675   5.833  -2.663  1.00  0.23           O  
HETATM   15  O   HOH T  14      13.719   0.352   3.869  1.00  0.24           O  
HETATM   16  O   HOH T  15      19.258  -3.566  -6.749  1.00  0.24           O  
HETATM   17  O   HOH T  16      13.258  16.908   3.827  1.00  0.24           O  
HETATM   18  O   HOH T  17      15.979  18.794  -1.102  1.00  0.24           O  
HETATM   19  O   HOH T  18      11.153   4.737   8.884  1.00  0.24           O  
HETATM   20  O   HOH T  19      18.899   6.429  -6.955  1.00  0.24           O  
HETATM   21  O   HOH T  20      23.273  15.989 -10.566  1.00  0.25           O  
HETATM   22  O   HOH T  21       2.080  14.565  -5.652  1.00  0.25           O  
HETATM   23  O   HOH T  22      42.008   7.851   1.152  1.00  0.25           O  
HETATM   24  O   HOH T  23      27.411   6.818  19.123  1.00  0.25           O  
HETATM   25  O   HOH T  24      15.164   1.106   8.011  1.00  0.25           O  
HETATM   26  O   HOH T  25      33.208  -9.243   6.213  1.00  0.26           O  
HETATM   27  O   HOH T  26      33.896   2.420 -15.457  1.00  0.26           O  
HETATM   28  O   HOH T  27      12.121  17.533   7.299  1.00  0.26           O  
HETATM   29  O   HOH T  28      31.230   8.435 -10.552  1.00  0.26           O  
HETATM   30  O   HOH T  29      24.269   1.172  14.851  1.00  0.26           O  
HETATM   31  O   HOH T  30      22.324  17.770  -0.908  1.00  0.27           O  
HETATM   32  O   HOH T  31      29.590   3.156 -20.216  1.00  0.27           O  
HETATM   33  O   HOH T  32      32.223  -5.773 -10.128  1.00  0.28           O  
HETATM   34  O   HOH T  33      33.195   7.700  -8.645  1.00  0.28           O  
HETATM   35  O   HOH T  34      10.541   4.624  16.771  1.00  0.28           O  
HETATM   36  O   HOH T  35      25.740   3.701  20.354  1.00  0.28           O  
HETATM   37  O   HOH T  36      29.292 -13.014   4.075  1.00  0.28           O  
HETATM   38  O   HOH T  37      14.613   3.906   7.862  1.00  0.29           O  
HETATM   39  O   HOH T  38      18.898  26.305   9.608  1.00  0.29           O  
HETATM   40  O   HOH T  39      24.776 -13.042  15.821  1.00  0.29           O  
HETATM   41  O   HOH T  40      24.160  13.541  -5.761  1.00  0.29           O  
HETATM   42  O   HOH T  41      21.460  25.375   9.832  1.00  0.29           O  
HETATM   43  O   HOH T  42      21.318   8.643 -14.031  1.00  0.29           O  
HETATM   44  O   HOH T  43       7.855   4.965  15.801  1.00  0.30           O  
HETATM   45  O   HOH T  44      26.047   1.751  24.079  1.00  0.30           O  
HETATM   46  O   HOH T  45       0.783  10.357  -1.910  1.00  0.30           O  
HETATM   47  O   HOH T  46      20.346   7.672  -5.067  1.00  0.30           O  
HETATM   48  O   HOH T  47      10.449  15.347   7.677  1.00  0.31           O  
HETATM   49  O   HOH T  48      34.998  15.807   3.209  1.00  0.31           O  
HETATM   50  O   HOH T  49      12.268  -0.687  13.628  1.00  0.31           O  
HETATM   51  O   HOH T  50       5.579   6.255  14.610  1.00  0.32           O  
HETATM   52  O   HOH T  51      22.793 -15.726   6.990  1.00  0.32           O  
HETATM   53  O   HOH T  52      25.885   3.288 -15.634  1.00  0.32           O  
HETATM   54  O   HOH T  53      38.101  13.028  -2.356  1.00  0.32           O  
HETATM   55  O   HOH T  54      27.331 -11.425  -9.865  1.00  0.32           O  
HETATM   56  O   HOH T  55      16.756  13.551  -8.477  1.00  0.32           O  
HETATM   57  O   HOH T  56      14.018  10.677 -10.291  1.00  0.33           O  
HETATM   58  O   HOH T  57      23.793  18.289   2.311  1.00  0.33           O  
HETATM   59  O   HOH T  58      34.404  -7.795  -4.719  1.00  0.33           O  
HETATM   60  O   HOH T  59       6.661   7.301   7.109  1.00  0.33           O  
HETATM   61  O   HOH T  60      11.072  -1.786  19.436  1.00  0.33           O  
HETATM   62  O   HOH T  61      30.047 -11.820  29.087  1.00  0.34           O  
HETATM   63  O   HOH T  62      19.522   6.810 -13.226  1.00  0.34           O  
HETATM   64  O   HOH T  63      42.701  -6.413   0.002  1.00  0.34           O  
HETATM   65  O   HOH T  64      23.582   7.037 -17.355  1.00  0.34           O  
HETATM   66  O   HOH T  65      10.229  28.010   6.558  1.00  0.34           O  
HETATM   67  O   HOH T  66      26.069  13.505  -2.202  1.00  0.34           O  
HETATM   68  O   HOH T  67      34.661   9.952  -8.649  1.00  0.34           O  
HETATM   69  O   HOH T  68      32.430 -10.311  29.483  1.00  0.35           O  
HETATM   70  O   HOH T  69      23.447  15.004  -8.026  1.00  0.35           O  
HETATM   71  O   HOH T  70      20.272 -14.382   6.710  1.00  0.35           O  
HETATM   72  O   HOH T  71      23.649  -1.457  13.903  1.00  0.35           O  
HETATM   73  O   HOH T  72      -4.085  20.064   0.615  1.00  0.35           O  
HETATM   74  O   HOH T  73      14.266  22.773  -6.506  1.00  0.35           O  
HETATM   75  O   HOH T  74      27.738  -6.839  29.419  1.00  0.35           O  
HETATM   76  O   HOH T  75      34.218  -1.010  -9.780  1.00  0.36           O  
HETATM   77  O   HOH T  76      30.232  15.331   7.884  1.00  0.36           O  
HETATM   78  O   HOH T  77      31.749  17.644   7.378  1.00  0.36           O  
HETATM   79  O   HOH T  78      14.049  20.330  -7.723  1.00  0.36           O  
HETATM   80  O   HOH T  79      30.288   9.379  26.115  1.00  0.36           O  
HETATM   81  O   HOH T  80      24.061  24.274   1.723  1.00  0.37           O  
HETATM   82  O   HOH T  81       7.032   2.823  17.467  1.00  0.37           O  
HETATM   83  O   HOH T  82       7.338   8.269  23.052  1.00  0.37           O  
HETATM   84  O   HOH T  83      33.580  -9.115  -7.082  1.00  0.37           O  
HETATM   85  O   HOH T  84      25.538   5.752  22.284  1.00  0.37           O  
HETATM   86  O   HOH T  85      29.772  19.467   8.200  1.00  0.38           O  
HETATM   87  O   HOH T  86      30.475  17.327   9.827  1.00  0.38           O  
HETATM   88  O   HOH T  87      23.950   4.228 -17.357  1.00  0.38           O  
HETATM   89  O   HOH T  88      29.414 -11.060  14.178  1.00  0.38           O  
HETATM   90  O   HOH T  89      34.422 -10.559  -4.929  1.00  0.38           O  
HETATM   91  O   HOH T  90      31.668  -2.990  -9.907  1.00  0.38           O  
HETATM   92  O   HOH T  91      29.619  -8.909  26.094  1.00  0.38           O  
HETATM   93  O   HOH T  92       8.113  23.437  -1.823  1.00  0.39           O  
HETATM   94  O   HOH T  93      24.702 -10.784  -9.404  1.00  0.39           O  
HETATM   95  O   HOH T  94      32.006  13.679   6.280  1.00  0.39           O  
HETATM   96  O   HOH T  95      11.466  28.087  15.479  1.00  0.39           O  
HETATM   97  O   HOH T  96      11.864  14.408  -7.823  1.00  0.39           O  
HETATM   98  O   HOH T  97      23.566 -18.023   8.418  1.00  0.39           O  
HETATM   99  O   HOH T  98       4.263   5.403  19.881  1.00  0.39           O  
HETATM  100  O   HOH T  99      19.140  21.992  21.272  1.00  0.39           O  
HETATM  101  O   HOH T 100      26.659  -6.524 -14.514  1.00  0.39           O  
HETATM  102  O   HOH T 101       9.817  -0.978  17.117  1.00  0.39           O  
HETATM  103  O   HOH T 102       2.252   8.156  -2.706  1.00  0.40           O  
HETATM  104  O   HOH T 103      18.983  27.721   0.613  1.00  0.40           O  
HETATM  105  O   HOH T 104      32.530  16.875   2.489  1.00  0.40           O  
HETATM  106  O   HOH T 105      23.532   1.597  17.546  1.00  0.40           O  
HETATM  107  O   HOH T 106      25.646   1.141  21.473  1.00  0.40           O  
HETATM  108  O   HOH T 107      23.596  21.806   2.993  1.00  0.40           O  
HETATM  109  O   HOH T 108       5.362   7.072  11.957  1.00  0.40           O  
HETATM  110  O   HOH T 109      31.229  -8.123  28.144  1.00  0.40           O  
HETATM  111  O   HOH T 110      24.886  -4.468  24.333  1.00  0.41           O  
HETATM  112  O   HOH T 111      23.548  18.173  24.850  1.00  0.41           O  
HETATM  113  O   HOH T 112       4.040   8.316  15.526  1.00  0.41           O  
HETATM  114  O   HOH T 113      30.604  18.763   2.176  1.00  0.41           O  
HETATM  115  O   HOH T 114      30.028  -6.285  16.290  1.00  0.41           O  
HETATM  116  O   HOH T 115      43.481   7.171   3.304  1.00  0.41           O  
HETATM  117  O   HOH T 116      25.218  22.767  16.920  1.00  0.41           O  
HETATM  118  O   HOH T 117      20.814 -16.245   4.835  1.00  0.41           O  
HETATM  119  O   HOH T 118       6.267  11.657  16.305  1.00  0.41           O  
HETATM  120  O   HOH T 119      28.187   7.543  26.426  1.00  0.41           O  
HETATM  121  O   HOH T 120      35.494  13.753  -2.310  1.00  0.41           O  
HETATM  122  O   HOH T 121      21.833  25.140   7.027  1.00  0.42           O  
HETATM  123  O   HOH T 122       2.608   6.297   2.415  1.00  0.42           O  
HETATM  124  O   HOH T 123      37.611 -11.234   2.769  1.00  0.42           O  
HETATM  125  O   HOH T 124      28.991 -10.422  11.560  1.00  0.42           O  
HETATM  126  O   HOH T 125       2.415  11.942  -6.300  1.00  0.42           O  
HETATM  127  O   HOH T 126      17.139  17.245 -10.257  1.00  0.42           O  
HETATM  128  O   HOH T 127      -4.135  21.069   3.298  1.00  0.42           O  
HETATM  129  O   HOH T 128      23.633 -14.800  14.071  1.00  0.42           O  
HETATM  130  O   HOH T 129      43.346  -5.638   4.639  1.00  0.42           O  
HETATM  131  O   HOH T 130      19.457   6.326  21.640  1.00  0.42           O  
HETATM  132  O   HOH T 131      29.178  15.025  10.563  1.00  0.42           O  
HETATM  133  O   HOH T 132       4.816   6.733   9.136  1.00  0.42           O  
HETATM  134  O   HOH T 133      22.812  20.304  23.437  1.00  0.42           O  
HETATM  135  O   HOH T 134      22.075  14.675  25.357  1.00  0.42           O  
HETATM  136  O   HOH T 135       9.617   7.162  -6.490  1.00  0.42           O  
HETATM  137  O   HOH T 136      14.387  13.475  21.366  1.00  0.42           O  
HETATM  138  O   HOH T 137      28.383  14.809  -2.562  1.00  0.43           O  
HETATM  139  O   HOH T 138      28.074  19.428   2.998  1.00  0.43           O  
HETATM  140  O   HOH T 139      -5.690  22.133   1.488  1.00  0.43           O  
HETATM  141  O   HOH T 140      23.294  18.006  -3.536  1.00  0.43           O  
HETATM  142  O   HOH T 141      45.492  -6.708   6.017  1.00  0.43           O  
HETATM  143  O   HOH T 142      21.797   7.232  22.821  1.00  0.43           O  
HETATM  144  O   HOH T 143       4.596   6.960  -1.576  1.00  0.43           O  
HETATM  145  O   HOH T 144      27.219 -10.030  15.553  1.00  0.43           O  
HETATM  146  O   HOH T 145      15.048  -2.465  24.652  1.00  0.43           O  
HETATM  147  O   HOH T 146      34.061  -2.560  15.950  1.00  0.43           O  
HETATM  148  O   HOH T 147      17.019   5.548  22.416  1.00  0.43           O  
HETATM  149  O   HOH T 148      -0.044  10.513  -6.476  1.00  0.43           O  
HETATM  150  O   HOH T 149      -5.068  18.771  -1.726  1.00  0.43           O  
HETATM  151  O   HOH T 150      21.207   3.057  18.155  1.00  0.43           O  
HETATM  152  O   HOH T 151      21.884   5.642  20.466  1.00  0.43           O  
HETATM  153  O   HOH T 152       4.581  13.784  -6.385  1.00  0.44           O  
HETATM  154  O   HOH T 153      17.580  -4.388  12.282  1.00  0.44           O  
HETATM  155  O   HOH T 154      25.531  16.516  -9.089  1.00  0.44           O  
HETATM  156  O   HOH T 155      14.530  15.195  -8.044  1.00  0.44           O  
HETATM  157  O   HOH T 156      29.814   8.057  19.819  1.00  0.44           O  
HETATM  158  O   HOH T 157      22.679  -0.802  26.683  1.00  0.44           O  
HETATM  159  O   HOH T 158      13.836   2.425  10.050  1.00  0.44           O  
HETATM  160  O   HOH T 159      40.845   8.045   3.737  1.00  0.44           O  
HETATM  161  O   HOH T 160      20.863  19.428  -8.395  1.00  0.45           O  
HETATM  162  O   HOH T 161      13.546  13.719 -14.486  1.00  0.45           O  
HETATM  163  O   HOH T 162      33.434  -4.717 -16.388  1.00  0.45           O  
HETATM  164  O   HOH T 163      28.500   8.912  24.082  1.00  0.45           O  
HETATM  165  O   HOH T 164      20.986  21.405  -6.424  1.00  0.45           O  
HETATM  166  O   HOH T 165      34.768  -3.306 -18.403  1.00  0.45           O  
HETATM  167  O   HOH T 166      21.784  18.781  -5.838  1.00  0.45           O  
HETATM  168  O   HOH T 167      29.828  -9.105  16.096  1.00  0.45           O  
HETATM  169  O   HOH T 168      34.681 -13.187  -5.696  1.00  0.45           O  
HETATM  170  O   HOH T 169      21.003   0.620  16.744  1.00  0.45           O  
HETATM  171  O   HOH T 170      25.067  19.993   7.363  1.00  0.45           O  
HETATM  172  O   HOH T 171      24.535  22.093   5.605  1.00  0.45           O  
HETATM  173  O   HOH T 172      14.993  17.913  -8.599  1.00  0.45           O  
HETATM  174  O   HOH T 173       3.872  10.694  16.939  1.00  0.46           O  
HETATM  175  O   HOH T 174      32.333  -4.561 -18.914  1.00  0.46           O  
HETATM  176  O   HOH T 175      -1.542   8.813  -1.718  1.00  0.46           O  
HETATM  177  O   HOH T 176      20.970  17.153  24.564  1.00  0.46           O  
HETATM  178  O   HOH T 177      14.174  15.588 -12.601  1.00  0.46           O  
HETATM  179  O   HOH T 178       8.925   5.633   7.515  1.00  0.46           O  
HETATM  180  O   HOH T 179      17.034  16.236  -7.636  1.00  0.46           O  
HETATM  181  O   HOH T 180      33.535  -9.141   3.449  1.00  0.46           O  
HETATM  182  O   HOH T 181      29.231  20.143   5.530  1.00  0.46           O  
HETATM  183  O   HOH T 182      21.274  24.453   2.127  1.00  0.46           O  
HETATM  184  O   HOH T 183       4.060   8.104   6.748  1.00  0.46           O  
HETATM  185  O   HOH T 184      12.202  -1.341  21.803  1.00  0.46           O  
HETATM  186  O   HOH T 185      21.475   5.329 -16.947  1.00  0.46           O  
HETATM  187  O   HOH T 186      25.534  15.869  -6.405  1.00  0.46           O  
HETATM  188  O   HOH T 187       6.529  22.501  -3.870  1.00  0.46           O  
HETATM  189  O   HOH T 188      19.360   8.726  22.954  1.00  0.46           O  
HETATM  190  O   HOH T 189       4.406   5.316   0.602  1.00  0.46           O  
HETATM  191  O   HOH T 190      12.990   0.378   6.556  1.00  0.46           O  
HETATM  192  O   HOH T 191      18.635  -5.537  14.469  1.00  0.46           O  
HETATM  193  O   HOH T 192      13.569  13.051 -11.738  1.00  0.47           O  
HETATM  194  O   HOH T 193      24.936  -2.206  25.934  1.00  0.47           O  
HETATM  195  O   HOH T 194      38.733   9.217   5.248  1.00  0.47           O  
HETATM  196  O   HOH T 195      12.011  -1.581   4.797  1.00  0.47           O  
HETATM  197  O   HOH T 196      20.871  -7.268  14.727  1.00  0.47           O  
HETATM  198  O   HOH T 197      24.314  13.760  26.647  1.00  0.47           O  
HETATM  199  O   HOH T 198      17.480  36.508  12.341  1.00  0.47           O  
HETATM  200  O   HOH T 199      24.995   7.543  20.248  1.00  0.47           O  
HETATM  201  O   HOH T 200      16.040   7.058 -15.453  1.00  0.47           O  
HETATM  202  O   HOH T 201      26.565  20.253   5.065  1.00  0.47           O  
HETATM  203  O   HOH T 202      17.216  22.705  -6.691  1.00  0.47           O  
HETATM  204  O   HOH T 203      13.617  -3.035  -1.368  1.00  0.47           O  
HETATM  205  O   HOH T 204      23.967  19.549   4.755  1.00  0.48           O  
HETATM  206  O   HOH T 205       7.910  23.752   5.835  1.00  0.48           O  
HETATM  207  O   HOH T 206       9.738  -0.032  14.520  1.00  0.48           O  
HETATM  208  O   HOH T 207       2.266   7.011  -0.194  1.00  0.48           O  
HETATM  209  O   HOH T 208       2.919   8.335   4.183  1.00  0.48           O  
HETATM  210  O   HOH T 209      -6.268  17.561  -3.964  1.00  0.48           O  
HETATM  211  O   HOH T 210      14.639  -0.169  22.975  1.00  0.48           O  
HETATM  212  O   HOH T 211      35.414  12.374  -4.890  1.00  0.48           O  
HETATM  213  O   HOH T 212      15.374   9.711 -17.309  1.00  0.48           O  
HETATM  214  O   HOH T 213      23.651  -0.634  34.927  1.00  0.48           O  
HETATM  215  O   HOH T 214      31.910  -4.675  -7.613  1.00  0.48           O  
HETATM  216  O   HOH T 215      26.149  22.764  14.408  1.00  0.48           O  
HETATM  217  O   HOH T 216      12.134  14.902  21.928  1.00  0.49           O  
HETATM  218  O   HOH T 217      32.621 -11.441   4.657  1.00  0.49           O  
HETATM  219  O   HOH T 218      19.651  24.023   8.185  1.00  0.49           O  
HETATM  220  O   HOH T 219      29.208   9.973  21.699  1.00  0.49           O  
HETATM  221  O   HOH T 220      24.635  15.466  -3.783  1.00  0.49           O  
HETATM  222  O   HOH T 221      26.570  -9.870  34.217  1.00  0.49           O  
HETATM  223  O   HOH T 222      30.143  11.137  24.028  1.00  0.49           O  
HETATM  224  O   HOH T 223       9.548  13.788  -9.080  1.00  0.49           O  
HETATM  225  O   HOH T 224       9.331  17.837   7.374  1.00  0.49           O  
HETATM  226  O   HOH T 225      29.926  10.858 -10.494  1.00  0.49           O  
HETATM  227  O   HOH T 226      10.760  -2.552  14.995  1.00  0.49           O  
HETATM  228  O   HOH T 227       2.693   5.823   7.526  1.00  0.50           O  
HETATM  229  O   HOH T 228      44.479  -3.069   5.132  1.00  0.50           O  
HETATM  230  O   HOH T 229      25.066  -0.718  23.477  1.00  0.50           O  
HETATM  231  O   HOH T 230      28.601  -8.478  13.622  1.00  0.50           O  
HETATM  232  O   HOH T 231       1.239   7.931   6.368  1.00  0.50           O  
HETATM  233  O   HOH T 232      28.377 -11.203  27.011  1.00  0.50           O  
HETATM  234  O   HOH T 233      35.018 -11.466   3.298  1.00  0.50           O  
HETATM  235  O   HOH T 234      33.282  16.955   5.137  1.00  0.50           O  
HETATM  236  O   HOH T 235      26.785  13.967  -4.815  1.00  0.50           O  
HETATM  237  O   HOH T 236      32.619  11.273   7.990  1.00  0.50           O  
HETATM  238  O   HOH T 237      26.285   7.356  24.347  1.00  0.50           O  
HETATM  239  O   HOH T 238       9.099   2.471  15.623  1.00  0.50           O  
HETATM  240  O   HOH T 239      24.104  16.410  26.886  1.00  0.51           O  
HETATM  241  O   HOH T 240      16.322  17.166 -12.930  1.00  0.51           O  
HETATM  242  O   HOH T 241      30.713 -15.409   3.947  1.00  0.51           O  
HETATM  243  O   HOH T 242      -0.113   8.903  -4.134  1.00  0.51           O  
HETATM  244  O   HOH T 243      12.865  25.245  -6.422  1.00  0.51           O  
HETATM  245  O   HOH T 244      10.349  24.231  -6.315  1.00  0.52           O  
HETATM  246  O   HOH T 245      17.839  -3.354  -9.018  1.00  0.52           O  
HETATM  247  O   HOH T 246      38.217   1.708  -3.286  1.00  0.52           O  
HETATM  248  O   HOH T 247      34.679  -6.003 -18.529  1.00  0.52           O  
HETATM  249  O   HOH T 248      22.402  25.388  -0.160  1.00  0.52           O  
HETATM  250  O   HOH T 249      39.734 -10.568  -1.009  1.00  0.52           O  
HETATM  251  O   HOH T 250      44.556  -9.024   4.928  1.00  0.52           O  
HETATM  252  O   HOH T 251       7.091   7.203  -7.428  1.00  0.52           O  
HETATM  253  O   HOH T 252      20.054  -9.706   5.622  1.00  0.52           O  
HETATM  254  O   HOH T 253       7.136   4.932   5.649  1.00  0.52           O  
HETATM  255  O   HOH T 254       4.910  11.241  -7.405  1.00  0.52           O  
HETATM  256  O   HOH T 255      40.312 -10.861   2.483  1.00  0.52           O  
HETATM  257  O   HOH T 256      40.549   7.245  -5.652  1.00  0.52           O  
HETATM  258  O   HOH T 257      13.787  28.455  13.923  1.00  0.52           O  
HETATM  259  O   HOH T 258      30.824  12.574  -6.673  1.00  0.52           O  
HETATM  260  O   HOH T 259      20.392  -2.391  26.733  1.00  0.53           O  
HETATM  261  O   HOH T 260      24.902  16.954  -1.524  1.00  0.53           O  
HETATM  262  O   HOH T 261      20.550  -4.238  32.460  1.00  0.53           O  
HETATM  263  O   HOH T 262      24.116 -11.242  34.094  1.00  0.53           O  
HETATM  264  O   HOH T 263      21.883  17.232   7.293  1.00  0.53           O  
HETATM  265  O   HOH T 264      31.679  11.286  21.837  1.00  0.53           O  
HETATM  266  O   HOH T 265      34.091  12.139  18.647  1.00  0.53           O  
HETATM  267  O   HOH T 266      42.382  -9.242   3.300  1.00  0.53           O  
HETATM  268  O   HOH T 267      10.553  16.126  -9.597  1.00  0.53           O  
HETATM  269  O   HOH T 268      27.557  -7.467  15.997  1.00  0.53           O  
HETATM  270  O   HOH T 269      34.595  14.503   5.610  1.00  0.54           O  
HETATM  271  O   HOH T 270      12.139  23.439  -8.289  1.00  0.54           O  
HETATM  272  O   HOH T 271      10.603  22.566  12.076  1.00  0.54           O  
HETATM  273  O   HOH T 272      33.242  13.755  -5.832  1.00  0.54           O  
HETATM  274  O   HOH T 273      29.472  14.108  -4.981  1.00  0.54           O  
HETATM  275  O   HOH T 274       8.153   1.343   0.220  1.00  0.54           O  
HETATM  276  O   HOH T 275      22.507  -3.188  25.173  1.00  0.54           O  
HETATM  277  O   HOH T 276      25.349   4.674 -19.788  1.00  0.54           O  
HETATM  278  O   HOH T 277      27.301  20.507   8.946  1.00  0.54           O  
HETATM  279  O   HOH T 278      10.125  25.122  -0.680  1.00  0.54           O  
HETATM  280  O   HOH T 279      17.976 -15.321   8.000  1.00  0.54           O  
HETATM  281  O   HOH T 280      20.934  22.055  23.272  1.00  0.55           O  
HETATM  282  O   HOH T 281       3.200  13.629  11.984  1.00  0.55           O  
HETATM  283  O   HOH T 282      20.424  29.247  15.385  1.00  0.55           O  
HETATM  284  O   HOH T 283      20.182  15.534 -16.977  1.00  0.55           O  
HETATM  285  O   HOH T 284      34.018  -3.149  -8.140  1.00  0.55           O  
HETATM  286  O   HOH T 285      16.110   5.599 -13.077  1.00  0.55           O  
HETATM  287  O   HOH T 286      24.705  -2.911  35.947  1.00  0.55           O  
HETATM  288  O   HOH T 287      12.102   4.838  -9.742  1.00  0.56           O  
HETATM  289  O   HOH T 288      28.894  -9.250  28.755  1.00  0.56           O  
HETATM  290  O   HOH T 289      35.826   7.487 -12.637  1.00  0.56           O  
HETATM  291  O   HOH T 290      13.269  21.691  18.727  1.00  0.56           O  
HETATM  292  O   HOH T 291      26.710   3.308  30.742  1.00  0.56           O  
HETATM  293  O   HOH T 292      41.509  -8.992   0.675  1.00  0.56           O  
HETATM  294  O   HOH T 293      22.782 -12.232  17.373  1.00  0.57           O  
HETATM  295  O   HOH T 294      21.850 -13.000  -4.924  1.00  0.57           O  
HETATM  296  O   HOH T 295      27.696  -1.752 -17.710  1.00  0.57           O  
HETATM  297  O   HOH T 296      24.210  -1.021  17.822  1.00  0.57           O  
HETATM  298  O   HOH T 297      22.489  -5.916  -9.068  1.00  0.57           O  
HETATM  299  O   HOH T 298      25.026  -3.083  21.868  1.00  0.57           O  
HETATM  300  O   HOH T 299      34.878  -2.340 -12.186  1.00  0.58           O  
HETATM  301  O   HOH T 300      32.255  10.774 -11.943  1.00  0.58           O  
HETATM  302  O   HOH T 301      33.918   8.898 -11.094  1.00  0.59           O  
HETATM  303  O   HOH T 302      16.942  -1.618  22.993  1.00  0.59           O  
HETATM  304  O   HOH T 303      21.271  17.966 -10.755  1.00  0.61           O  
TER     305      HOH T 303 
