# Supplementary material for: Accurate Prediction of Hydration Sites of Proteins Using Energy Model With Atom Embedding
Source: Front Mol Biosci. 2021 Sep 20;8:756075. doi: 10.3389/fmolb.2021.756075 (PMC8488165; doi:10.3389/fmolb.2021.756075)
Supplement: Supplementary file 1 [file DataSheet1.ZIP › Data Sheet 1/Our_result_pdb/our_dataset_output/1SMB_watersite.pdb]

HEADER                                                        XXXX


JRNL        PMID   -1
HETATM    1  O   HOH T   0      -5.827  44.093  12.218  1.00  0.19           O  
HETATM    2  O   HOH T   1     -13.332  47.649  23.440  1.00  0.19           O  
HETATM    3  O   HOH T   2     -11.062  61.825  24.760  1.00  0.19           O  
HETATM    4  O   HOH T   3      -5.669  50.527  15.743  1.00  0.20           O  
HETATM    5  O   HOH T   4       4.444  42.874  36.161  1.00  0.20           O  
HETATM    6  O   HOH T   5       1.537  40.335  26.206  1.00  0.21           O  
HETATM    7  O   HOH T   6      -8.367  43.927  35.291  1.00  0.21           O  
HETATM    8  O   HOH T   7     -14.345  45.418  39.112  1.00  0.22           O  
HETATM    9  O   HOH T   8      -8.704  41.785  13.768  1.00  0.22           O  
HETATM   10  O   HOH T   9      -2.535  39.051  10.734  1.00  0.24           O  
HETATM   11  O   HOH T  10       9.497  71.973  27.768  1.00  0.25           O  
HETATM   12  O   HOH T  11      -4.005  46.904  25.429  1.00  0.25           O  
HETATM   13  O   HOH T  12       2.873  57.272  17.755  1.00  0.26           O  
HETATM   14  O   HOH T  13       7.591  68.954  33.907  1.00  0.26           O  
HETATM   15  O   HOH T  14      -5.826  65.847  26.310  1.00  0.26           O  
HETATM   16  O   HOH T  15     -11.502  41.723  13.523  1.00  0.26           O  
HETATM   17  O   HOH T  16      11.817  49.976  31.761  1.00  0.27           O  
HETATM   18  O   HOH T  17      -9.772  44.604  31.801  1.00  0.27           O  
HETATM   19  O   HOH T  18      -5.774  64.134  35.982  1.00  0.27           O  
HETATM   20  O   HOH T  19       1.224  71.395  33.713  1.00  0.27           O  
HETATM   21  O   HOH T  20      16.790  65.739  29.948  1.00  0.27           O  
HETATM   22  O   HOH T  21     -13.512  46.544  16.327  1.00  0.27           O  
HETATM   23  O   HOH T  22     -12.543  45.043   8.474  1.00  0.27           O  
HETATM   24  O   HOH T  23      14.668  42.743  19.411  1.00  0.28           O  
HETATM   25  O   HOH T  24      13.639  51.775  23.417  1.00  0.28           O  
HETATM   26  O   HOH T  25      -1.797  70.605  25.281  1.00  0.28           O  
HETATM   27  O   HOH T  26      12.492  43.187  25.895  1.00  0.29           O  
HETATM   28  O   HOH T  27      15.454  61.088  33.408  1.00  0.29           O  
HETATM   29  O   HOH T  28     -16.777  42.941  27.708  1.00  0.29           O  
HETATM   30  O   HOH T  29      -7.661  62.339  17.890  1.00  0.30           O  
HETATM   31  O   HOH T  30      11.611  49.453  29.052  1.00  0.30           O  
HETATM   32  O   HOH T  31     -14.190  38.155  16.299  1.00  0.30           O  
HETATM   33  O   HOH T  32     -16.488  45.163  17.684  1.00  0.30           O  
HETATM   34  O   HOH T  33       2.317  59.765  19.049  1.00  0.30           O  
HETATM   35  O   HOH T  34      -0.755  35.626  30.394  1.00  0.30           O  
HETATM   36  O   HOH T  35       3.431  44.180  41.172  1.00  0.30           O  
HETATM   37  O   HOH T  36       3.772  47.131  21.981  1.00  0.31           O  
HETATM   38  O   HOH T  37     -12.257  68.466  10.820  1.00  0.31           O  
HETATM   39  O   HOH T  38     -19.233  43.630  26.629  1.00  0.32           O  
HETATM   40  O   HOH T  39      -0.025  42.431  20.423  1.00  0.32           O  
HETATM   41  O   HOH T  40     -11.531  50.454  11.876  1.00  0.32           O  
HETATM   42  O   HOH T  41     -11.142  43.768  35.658  1.00  0.32           O  
HETATM   43  O   HOH T  42       5.951  50.316  41.636  1.00  0.33           O  
HETATM   44  O   HOH T  43      -1.407  33.013  30.554  1.00  0.33           O  
HETATM   45  O   HOH T  44      14.732  76.379  28.613  1.00  0.33           O  
HETATM   46  O   HOH T  45      11.724  61.480  18.915  1.00  0.33           O  
HETATM   47  O   HOH T  46      -0.965  69.829  32.742  1.00  0.33           O  
HETATM   48  O   HOH T  47       4.779  74.245  28.421  1.00  0.33           O  
HETATM   49  O   HOH T  48      11.298  63.216  36.397  1.00  0.33           O  
HETATM   50  O   HOH T  49       8.325  42.089  29.524  1.00  0.33           O  
HETATM   51  O   HOH T  50      15.236  63.931  33.175  1.00  0.33           O  
HETATM   52  O   HOH T  51      11.637  59.248  17.164  1.00  0.34           O  
HETATM   53  O   HOH T  52       4.455  56.025  19.776  1.00  0.34           O  
HETATM   54  O   HOH T  53       8.699  45.463  40.931  1.00  0.34           O  
HETATM   55  O   HOH T  54     -13.144  39.554  29.577  1.00  0.34           O  
HETATM   56  O   HOH T  55      -6.467  38.283  29.084  1.00  0.34           O  
HETATM   57  O   HOH T  56     -10.289  35.952  38.856  1.00  0.34           O  
HETATM   58  O   HOH T  57      14.719  45.349  18.461  1.00  0.34           O  
HETATM   59  O   HOH T  58       2.451  71.796  36.138  1.00  0.34           O  
HETATM   60  O   HOH T  59      -6.920  37.257  31.616  1.00  0.34           O  
HETATM   61  O   HOH T  60     -17.759  48.369  38.229  1.00  0.35           O  
HETATM   62  O   HOH T  61      -3.389  67.179  26.460  1.00  0.35           O  
HETATM   63  O   HOH T  62     -10.396  64.558  24.526  1.00  0.36           O  
HETATM   64  O   HOH T  63      13.366  49.629  21.681  1.00  0.36           O  
HETATM   65  O   HOH T  64     -16.162  46.763  15.358  1.00  0.36           O  
HETATM   66  O   HOH T  65     -10.419  52.865  11.096  1.00  0.36           O  
HETATM   67  O   HOH T  66     -11.377  54.967   9.606  1.00  0.37           O  
HETATM   68  O   HOH T  67      12.776  68.239  35.164  1.00  0.37           O  
HETATM   69  O   HOH T  68       6.811  45.420  42.959  1.00  0.37           O  
HETATM   70  O   HOH T  69     -11.149  40.568  10.991  1.00  0.37           O  
HETATM   71  O   HOH T  70      13.456  62.517  34.665  1.00  0.37           O  
HETATM   72  O   HOH T  71     -13.959  47.900  40.235  1.00  0.37           O  
HETATM   73  O   HOH T  72      -4.195  33.402  10.047  1.00  0.38           O  
HETATM   74  O   HOH T  73      -6.204  55.715  11.874  1.00  0.38           O  
HETATM   75  O   HOH T  74      -8.014  41.393  36.448  1.00  0.38           O  
HETATM   76  O   HOH T  75      -6.074  40.428   9.832  1.00  0.38           O  
HETATM   77  O   HOH T  76      18.547  65.425  25.026  1.00  0.38           O  
HETATM   78  O   HOH T  77     -15.460  56.650  14.730  1.00  0.38           O  
HETATM   79  O   HOH T  78      -7.369  34.884  12.791  1.00  0.38           O  
HETATM   80  O   HOH T  79      -7.074  59.418  15.121  1.00  0.38           O  
HETATM   81  O   HOH T  80      -0.878  54.863  42.859  1.00  0.39           O  
HETATM   82  O   HOH T  81       2.871  67.100  20.540  1.00  0.39           O  
HETATM   83  O   HOH T  82       2.335  41.001  20.990  1.00  0.39           O  
HETATM   84  O   HOH T  83       4.027  38.958  26.626  1.00  0.39           O  
HETATM   85  O   HOH T  84       3.546  51.757  41.926  1.00  0.40           O  
HETATM   86  O   HOH T  85       1.917  35.269  30.978  1.00  0.40           O  
HETATM   87  O   HOH T  86      -9.109  37.444   4.094  1.00  0.40           O  
HETATM   88  O   HOH T  87       2.095  64.591  19.583  1.00  0.40           O  
HETATM   89  O   HOH T  88      -3.876  72.482  31.746  1.00  0.40           O  
HETATM   90  O   HOH T  89      -8.899  60.815  35.689  1.00  0.40           O  
HETATM   91  O   HOH T  90       1.463  49.238  17.435  1.00  0.40           O  
HETATM   92  O   HOH T  91      -7.591  42.162  11.289  1.00  0.40           O  
HETATM   93  O   HOH T  92     -12.230  43.788  38.192  1.00  0.40           O  
HETATM   94  O   HOH T  93     -13.631  41.395  11.701  1.00  0.40           O  
HETATM   95  O   HOH T  94       2.222  43.166  18.970  1.00  0.40           O  
HETATM   96  O   HOH T  95       2.182  75.110  27.730  1.00  0.40           O  
HETATM   97  O   HOH T  96       5.649  59.176  37.526  1.00  0.41           O  
HETATM   98  O   HOH T  97     -11.877  65.787  11.413  1.00  0.41           O  
HETATM   99  O   HOH T  98      -2.683  49.222   9.366  1.00  0.41           O  
HETATM  100  O   HOH T  99       1.706  39.681  23.429  1.00  0.41           O  
HETATM  101  O   HOH T 100       5.808  61.319  44.039  1.00  0.41           O  
HETATM  102  O   HOH T 101      -6.236  48.437  27.957  1.00  0.41           O  
HETATM  103  O   HOH T 102      19.710  64.095  18.762  1.00  0.41           O  
HETATM  104  O   HOH T 103     -13.829  51.004  37.310  1.00  0.41           O  
HETATM  105  O   HOH T 104       0.388  66.789  19.482  1.00  0.42           O  
HETATM  106  O   HOH T 105      12.488  45.121  33.855  1.00  0.42           O  
HETATM  107  O   HOH T 106      -8.030  41.761  42.781  1.00  0.42           O  
HETATM  108  O   HOH T 107      -1.706  47.101  24.294  1.00  0.42           O  
HETATM  109  O   HOH T 108      -6.694  39.612  22.775  1.00  0.43           O  
HETATM  110  O   HOH T 109      10.654  47.599  30.968  1.00  0.43           O  
HETATM  111  O   HOH T 110       3.891  45.190  20.078  1.00  0.43           O  
HETATM  112  O   HOH T 111      13.648  47.377  20.051  1.00  0.43           O  
HETATM  113  O   HOH T 112       4.764  37.038  28.535  1.00  0.43           O  
HETATM  114  O   HOH T 113      -1.705  54.624  45.397  1.00  0.43           O  
HETATM  115  O   HOH T 114       2.587  35.360  28.265  1.00  0.43           O  
HETATM  116  O   HOH T 115       7.432  47.863  41.776  1.00  0.43           O  
HETATM  117  O   HOH T 116     -14.765  57.208  12.092  1.00  0.43           O  
HETATM  118  O   HOH T 117       7.996  43.011  42.224  1.00  0.43           O  
HETATM  119  O   HOH T 118      -1.052  52.260  43.897  1.00  0.43           O  
HETATM  120  O   HOH T 119      -4.870  38.086  25.451  1.00  0.44           O  
HETATM  121  O   HOH T 120      -6.423  39.551  43.295  1.00  0.44           O  
HETATM  122  O   HOH T 121     -13.224  60.587  11.384  1.00  0.44           O  
HETATM  123  O   HOH T 122      -2.926  71.293  34.119  1.00  0.44           O  
HETATM  124  O   HOH T 123       0.393  68.987  24.667  1.00  0.44           O  
HETATM  125  O   HOH T 124      -9.211  38.801  29.338  1.00  0.44           O  
HETATM  126  O   HOH T 125       6.424  40.631  30.844  1.00  0.44           O  
HETATM  127  O   HOH T 126      15.406  57.585  23.508  1.00  0.44           O  
HETATM  128  O   HOH T 127     -12.154  49.343  38.801  1.00  0.44           O  
HETATM  129  O   HOH T 128     -20.619  50.105  24.601  1.00  0.44           O  
HETATM  130  O   HOH T 129      20.326  63.788  26.271  1.00  0.44           O  
HETATM  131  O   HOH T 130      -8.919  37.896  21.901  1.00  0.44           O  
HETATM  132  O   HOH T 131      -6.769  52.909   7.388  1.00  0.45           O  
HETATM  133  O   HOH T 132      -9.068  56.337   9.786  1.00  0.45           O  
HETATM  134  O   HOH T 133      -0.003  52.473  16.360  1.00  0.45           O  
HETATM  135  O   HOH T 134       0.852  50.639  47.741  1.00  0.45           O  
HETATM  136  O   HOH T 135      -0.580  50.816  18.584  1.00  0.45           O  
HETATM  137  O   HOH T 136      -8.278  37.832  42.204  1.00  0.45           O  
HETATM  138  O   HOH T 137     -11.474  51.997  38.440  1.00  0.45           O  
HETATM  139  O   HOH T 138      10.101  40.696  31.213  1.00  0.45           O  
HETATM  140  O   HOH T 139      -3.137  39.485  23.685  1.00  0.45           O  
HETATM  141  O   HOH T 140     -18.517  40.947  26.848  1.00  0.45           O  
HETATM  142  O   HOH T 141      12.765  65.634  36.289  1.00  0.46           O  
HETATM  143  O   HOH T 142      18.749  65.592  27.818  1.00  0.46           O  
HETATM  144  O   HOH T 143      -0.883  47.345  21.872  1.00  0.46           O  
HETATM  145  O   HOH T 144      -4.250  73.800  34.163  1.00  0.46           O  
HETATM  146  O   HOH T 145      -9.324  60.894  16.088  1.00  0.46           O  
HETATM  147  O   HOH T 146      -9.716  36.144  16.279  1.00  0.46           O  
HETATM  148  O   HOH T 147      -5.225  40.768  24.989  1.00  0.46           O  
HETATM  149  O   HOH T 148      -3.622  57.807  10.366  1.00  0.46           O  
HETATM  150  O   HOH T 149       3.180  54.367  17.978  1.00  0.46           O  
HETATM  151  O   HOH T 150       2.721  55.094  21.759  1.00  0.47           O  
HETATM  152  O   HOH T 151      -4.797  37.380  22.729  1.00  0.47           O  
HETATM  153  O   HOH T 152     -16.559  50.495  36.931  1.00  0.47           O  
HETATM  154  O   HOH T 153     -11.956  42.925   9.955  1.00  0.47           O  
HETATM  155  O   HOH T 154      19.377  64.560  30.158  1.00  0.47           O  
HETATM  156  O   HOH T 155       5.324  43.054  42.900  1.00  0.47           O  
HETATM  157  O   HOH T 156       6.232  59.682  26.377  1.00  0.47           O  
HETATM  158  O   HOH T 157      -8.986  53.743   8.867  1.00  0.47           O  
HETATM  159  O   HOH T 158     -11.456  66.629   8.829  1.00  0.47           O  
HETATM  160  O   HOH T 159      -3.254  63.993  37.277  1.00  0.47           O  
HETATM  161  O   HOH T 160       4.112  36.230  26.003  1.00  0.47           O  
HETATM  162  O   HOH T 161      17.375  42.345  19.817  1.00  0.47           O  
HETATM  163  O   HOH T 162      -6.528  55.066   9.170  1.00  0.47           O  
HETATM  164  O   HOH T 163      14.831  66.253  34.726  1.00  0.48           O  
HETATM  165  O   HOH T 164      -9.572  52.928  28.165  1.00  0.48           O  
HETATM  166  O   HOH T 165     -12.877  54.851  36.690  1.00  0.48           O  
HETATM  167  O   HOH T 166     -16.163  40.488  22.648  1.00  0.48           O  
HETATM  168  O   HOH T 167     -16.130  46.386  37.231  1.00  0.48           O  
HETATM  169  O   HOH T 168      13.857  44.883  21.066  1.00  0.48           O  
HETATM  170  O   HOH T 169      -2.841  49.852   6.614  1.00  0.48           O  
HETATM  171  O   HOH T 170     -12.362  65.174  22.736  1.00  0.49           O  
HETATM  172  O   HOH T 171     -14.772  36.412  18.353  1.00  0.49           O  
HETATM  173  O   HOH T 172      16.537  72.299  26.067  1.00  0.49           O  
HETATM  174  O   HOH T 173     -12.193  36.340  17.378  1.00  0.49           O  
HETATM  175  O   HOH T 174       5.262  64.042  45.576  1.00  0.49           O  
HETATM  176  O   HOH T 175      -1.451  60.893  46.061  1.00  0.50           O  
HETATM  177  O   HOH T 176      -7.409  50.239   7.271  1.00  0.50           O  
HETATM  178  O   HOH T 177     -10.222  47.570  38.313  1.00  0.50           O  
HETATM  179  O   HOH T 178      -3.460  67.004  21.934  1.00  0.50           O  
HETATM  180  O   HOH T 179     -20.496  47.731  22.852  1.00  0.50           O  
HETATM  181  O   HOH T 180      -0.071  46.121  11.540  1.00  0.51           O  
HETATM  182  O   HOH T 181      13.735  46.776  35.640  1.00  0.51           O  
HETATM  183  O   HOH T 182      13.357  39.770  24.967  1.00  0.51           O  
HETATM  184  O   HOH T 183      -5.094  49.151   8.213  1.00  0.51           O  
HETATM  185  O   HOH T 184       6.319  47.133  31.757  1.00  0.51           O  
HETATM  186  O   HOH T 185      14.523  44.578  27.553  1.00  0.51           O  
HETATM  187  O   HOH T 186       2.551  71.723  38.953  1.00  0.52           O  
HETATM  188  O   HOH T 187      12.681  43.435  30.414  1.00  0.52           O  
HETATM  189  O   HOH T 188      -9.805  44.384   8.769  1.00  0.52           O  
HETATM  190  O   HOH T 189       1.008  52.934  42.096  1.00  0.52           O  
HETATM  191  O   HOH T 190      13.006  46.080  31.271  1.00  0.53           O  
HETATM  192  O   HOH T 191     -17.747  53.530  12.999  1.00  0.53           O  
HETATM  193  O   HOH T 192      -5.243  39.790  40.780  1.00  0.53           O  
HETATM  194  O   HOH T 193     -17.839  55.472  32.460  1.00  0.53           O  
HETATM  195  O   HOH T 194      12.298  47.794  33.369  1.00  0.53           O  
HETATM  196  O   HOH T 195     -16.125  59.149  13.713  1.00  0.54           O  
HETATM  197  O   HOH T 196     -10.722  41.492  37.431  1.00  0.54           O  
HETATM  198  O   HOH T 197      -7.295  60.084  41.407  1.00  0.54           O  
HETATM  199  O   HOH T 198       0.093  64.031  39.903  1.00  0.54           O  
HETATM  200  O   HOH T 199      15.756  54.944  33.316  1.00  0.55           O  
HETATM  201  O   HOH T 200     -14.602  56.839  38.017  1.00  0.55           O  
HETATM  202  O   HOH T 201       9.805  60.952  37.365  1.00  0.55           O  
HETATM  203  O   HOH T 202      10.128  42.859  35.847  1.00  0.55           O  
HETATM  204  O   HOH T 203     -15.851  53.591  35.029  1.00  0.56           O  
HETATM  205  O   HOH T 204      13.752  42.006  28.252  1.00  0.56           O  
HETATM  206  O   HOH T 205     -10.039  37.094  19.206  1.00  0.56           O  
HETATM  207  O   HOH T 206      14.482  46.945  29.198  1.00  0.56           O  
HETATM  208  O   HOH T 207     -21.149  54.286  25.896  1.00  0.56           O  
HETATM  209  O   HOH T 208     -16.972  57.531  22.668  1.00  0.57           O  
HETATM  210  O   HOH T 209       5.635  56.754  38.930  1.00  0.57           O  
HETATM  211  O   HOH T 210     -15.535  59.976  12.123  1.00  0.57           O  
HETATM  212  O   HOH T 211      -8.788  33.196   7.169  1.00  0.57           O  
HETATM  213  O   HOH T 212       0.099  38.178  24.979  1.00  0.59           O  
TER     214      HOH T 212 
