# Supplementary material for: Accurate Prediction of Hydration Sites of Proteins Using Energy Model With Atom Embedding
Source: Front Mol Biosci. 2021 Sep 20;8:756075. doi: 10.3389/fmolb.2021.756075 (PMC8488165; doi:10.3389/fmolb.2021.756075)
Supplement: Supplementary file 1 [file DataSheet1.ZIP › Data Sheet 1/Our_result_pdb/our_dataset_output/1TQH_watersite.pdb]

HEADER                                                        XXXX


JRNL        PMID   -1
HETATM    1  O   HOH T   0      23.314   4.715  17.691  1.00  0.18           O  
HETATM    2  O   HOH T   1      29.686  33.157  13.420  1.00  0.18           O  
HETATM    3  O   HOH T   2      35.715  38.099  11.238  1.00  0.19           O  
HETATM    4  O   HOH T   3      38.455  26.847  -1.063  1.00  0.20           O  
HETATM    5  O   HOH T   4      45.648  28.296  38.603  1.00  0.22           O  
HETATM    6  O   HOH T   5      27.477  25.009  17.869  1.00  0.22           O  
HETATM    7  O   HOH T   6      19.932   2.652  17.171  1.00  0.22           O  
HETATM    8  O   HOH T   7      44.227  12.449   6.512  1.00  0.22           O  
HETATM    9  O   HOH T   8      41.109  14.901   0.112  1.00  0.23           O  
HETATM   10  O   HOH T   9      44.336  27.025  40.729  1.00  0.24           O  
HETATM   11  O   HOH T  10      33.461  18.249  22.141  1.00  0.24           O  
HETATM   12  O   HOH T  11      26.303  25.686  20.280  1.00  0.24           O  
HETATM   13  O   HOH T  12      23.858  43.145  16.171  1.00  0.24           O  
HETATM   14  O   HOH T  13      44.551  30.807  27.165  1.00  0.25           O  
HETATM   15  O   HOH T  14      27.450  37.343  49.931  1.00  0.26           O  
HETATM   16  O   HOH T  15      45.449  36.064  27.208  1.00  0.26           O  
HETATM   17  O   HOH T  16      42.687  37.662   8.389  1.00  0.27           O  
HETATM   18  O   HOH T  17      36.175   6.208  10.693  1.00  0.27           O  
HETATM   19  O   HOH T  18      51.214  39.005   7.362  1.00  0.28           O  
HETATM   20  O   HOH T  19      44.844  39.937  11.296  1.00  0.28           O  
HETATM   21  O   HOH T  20      34.365  28.257  40.325  1.00  0.28           O  
HETATM   22  O   HOH T  21      46.974  32.889  24.297  1.00  0.28           O  
HETATM   23  O   HOH T  22      37.059  41.551   6.400  1.00  0.28           O  
HETATM   24  O   HOH T  23      56.302  20.161  19.418  1.00  0.29           O  
HETATM   25  O   HOH T  24      35.306  11.982  -0.066  1.00  0.29           O  
HETATM   26  O   HOH T  25      35.748   7.410   8.163  1.00  0.29           O  
HETATM   27  O   HOH T  26      43.938  31.633  21.870  1.00  0.29           O  
HETATM   28  O   HOH T  27      40.026  29.285  44.036  1.00  0.29           O  
HETATM   29  O   HOH T  28      34.896  34.750  20.321  1.00  0.29           O  
HETATM   30  O   HOH T  29      31.343  21.577  -6.046  1.00  0.30           O  
HETATM   31  O   HOH T  30      43.472  37.525  32.707  1.00  0.30           O  
HETATM   32  O   HOH T  31      55.937  23.071  13.870  1.00  0.30           O  
HETATM   33  O   HOH T  32      24.755   7.225  24.412  1.00  0.30           O  
HETATM   34  O   HOH T  33      52.808  11.077   2.175  1.00  0.30           O  
HETATM   35  O   HOH T  34      36.876  24.167  33.824  1.00  0.30           O  
HETATM   36  O   HOH T  35      50.355  22.723  39.617  1.00  0.30           O  
HETATM   37  O   HOH T  36      26.204  20.311  25.126  1.00  0.31           O  
HETATM   38  O   HOH T  37      29.864  18.773  33.595  1.00  0.31           O  
HETATM   39  O   HOH T  38      29.943  16.512  32.069  1.00  0.31           O  
HETATM   40  O   HOH T  39      31.793  34.168   4.981  1.00  0.31           O  
HETATM   41  O   HOH T  40      21.442   7.833   6.736  1.00  0.31           O  
HETATM   42  O   HOH T  41      30.686  41.948  46.658  1.00  0.31           O  
HETATM   43  O   HOH T  42      23.983  33.481  10.719  1.00  0.31           O  
HETATM   44  O   HOH T  43      50.230  10.272   5.440  1.00  0.31           O  
HETATM   45  O   HOH T  44      20.334  15.751   4.411  1.00  0.32           O  
HETATM   46  O   HOH T  45      53.880  19.411   7.476  1.00  0.32           O  
HETATM   47  O   HOH T  46      44.631  15.297  34.815  1.00  0.32           O  
HETATM   48  O   HOH T  47      22.595  13.378  24.010  1.00  0.32           O  
HETATM   49  O   HOH T  48      48.517   9.954   7.543  1.00  0.32           O  
HETATM   50  O   HOH T  49      42.227  37.143  37.226  1.00  0.33           O  
HETATM   51  O   HOH T  50      35.634  10.853  25.573  1.00  0.33           O  
HETATM   52  O   HOH T  51      27.675   1.857   9.885  1.00  0.33           O  
HETATM   53  O   HOH T  52      30.834  42.862   4.307  1.00  0.33           O  
HETATM   54  O   HOH T  53      53.816  21.348  30.162  1.00  0.34           O  
HETATM   55  O   HOH T  54      36.576  10.741   2.181  1.00  0.34           O  
HETATM   56  O   HOH T  55      21.114  13.935   2.387  1.00  0.34           O  
HETATM   57  O   HOH T  56      18.164   8.802  19.950  1.00  0.34           O  
HETATM   58  O   HOH T  57      32.856  34.757  18.534  1.00  0.34           O  
HETATM   59  O   HOH T  58      28.164  -1.978  17.908  1.00  0.34           O  
HETATM   60  O   HOH T  59      27.328  19.286  -1.291  1.00  0.34           O  
HETATM   61  O   HOH T  60      33.906  20.851  -1.997  1.00  0.34           O  
HETATM   62  O   HOH T  61      18.417  17.759   3.995  1.00  0.35           O  
HETATM   63  O   HOH T  62      40.962  27.991  11.124  1.00  0.35           O  
HETATM   64  O   HOH T  63      34.000   6.599   1.722  1.00  0.35           O  
HETATM   65  O   HOH T  64      21.646  39.072  15.305  1.00  0.35           O  
HETATM   66  O   HOH T  65      56.916  16.982  14.930  1.00  0.35           O  
HETATM   67  O   HOH T  66      41.616   9.698   3.765  1.00  0.35           O  
HETATM   68  O   HOH T  67      43.221  24.497  41.346  1.00  0.35           O  
HETATM   69  O   HOH T  68      35.987  29.732  27.177  1.00  0.35           O  
HETATM   70  O   HOH T  69      53.024  23.349   8.536  1.00  0.35           O  
HETATM   71  O   HOH T  70      43.305  39.355   6.154  1.00  0.36           O  
HETATM   72  O   HOH T  71      47.826  22.852  38.588  1.00  0.36           O  
HETATM   73  O   HOH T  72      29.162   5.705   9.713  1.00  0.36           O  
HETATM   74  O   HOH T  73      44.704  27.214  43.569  1.00  0.36           O  
HETATM   75  O   HOH T  74      41.358  37.618  34.610  1.00  0.36           O  
HETATM   76  O   HOH T  75      26.131   7.424   3.304  1.00  0.36           O  
HETATM   77  O   HOH T  76      39.659  33.344  28.414  1.00  0.36           O  
HETATM   78  O   HOH T  77      37.555  24.345  31.093  1.00  0.36           O  
HETATM   79  O   HOH T  78      27.724  16.970  33.672  1.00  0.36           O  
HETATM   80  O   HOH T  79      35.963  32.081  28.694  1.00  0.36           O  
HETATM   81  O   HOH T  80      53.320  20.511   3.520  1.00  0.36           O  
HETATM   82  O   HOH T  81      23.129  19.183  32.948  1.00  0.36           O  
HETATM   83  O   HOH T  82      47.714  33.351   1.619  1.00  0.37           O  
HETATM   84  O   HOH T  83      33.848  28.385  28.275  1.00  0.37           O  
HETATM   85  O   HOH T  84      34.622  40.517  12.220  1.00  0.37           O  
HETATM   86  O   HOH T  85      26.541  12.888  -1.619  1.00  0.37           O  
HETATM   87  O   HOH T  86      49.472  30.498  39.130  1.00  0.37           O  
HETATM   88  O   HOH T  87      42.701  30.158  25.148  1.00  0.37           O  
HETATM   89  O   HOH T  88      53.302  26.858  34.833  1.00  0.37           O  
HETATM   90  O   HOH T  89      31.748   0.564  13.407  1.00  0.37           O  
HETATM   91  O   HOH T  90      49.582  16.958  29.282  1.00  0.37           O  
HETATM   92  O   HOH T  91      41.298   9.673   6.557  1.00  0.37           O  
HETATM   93  O   HOH T  92      28.251  10.242  27.449  1.00  0.38           O  
HETATM   94  O   HOH T  93      17.992  18.399  15.603  1.00  0.38           O  
HETATM   95  O   HOH T  94      56.721  22.686  11.154  1.00  0.38           O  
HETATM   96  O   HOH T  95      16.665   8.336  17.608  1.00  0.38           O  
HETATM   97  O   HOH T  96      38.875  10.351   3.709  1.00  0.38           O  
HETATM   98  O   HOH T  97      22.098  38.165   9.906  1.00  0.38           O  
HETATM   99  O   HOH T  98      51.375  30.184  41.131  1.00  0.38           O  
HETATM  100  O   HOH T  99      50.468  32.681  40.243  1.00  0.38           O  
HETATM  101  O   HOH T 100      34.079  18.101  -2.068  1.00  0.38           O  
HETATM  102  O   HOH T 101      54.231  12.901  16.154  1.00  0.38           O  
HETATM  103  O   HOH T 102      32.327  17.970  32.533  1.00  0.39           O  
HETATM  104  O   HOH T 103      21.964  15.724  25.298  1.00  0.39           O  
HETATM  105  O   HOH T 104      47.991   5.713  13.801  1.00  0.39           O  
HETATM  106  O   HOH T 105      40.064  29.677  25.804  1.00  0.39           O  
HETATM  107  O   HOH T 106      24.601  37.911  11.070  1.00  0.39           O  
HETATM  108  O   HOH T 107      46.281  36.840   9.001  1.00  0.39           O  
HETATM  109  O   HOH T 108      36.100   4.681   8.273  1.00  0.39           O  
HETATM  110  O   HOH T 109      27.351  26.376  15.517  1.00  0.39           O  
HETATM  111  O   HOH T 110      44.898  22.690  -4.459  1.00  0.39           O  
HETATM  112  O   HOH T 111      47.722  29.149  20.216  1.00  0.39           O  
HETATM  113  O   HOH T 112      35.459  17.122  32.246  1.00  0.40           O  
HETATM  114  O   HOH T 113      44.482  14.435  -8.012  1.00  0.40           O  
HETATM  115  O   HOH T 114      27.522  36.837   6.769  1.00  0.40           O  
HETATM  116  O   HOH T 115      28.292   6.410   4.738  1.00  0.40           O  
HETATM  117  O   HOH T 116      33.026  25.898  31.758  1.00  0.41           O  
HETATM  118  O   HOH T 117      43.387   9.145   8.255  1.00  0.41           O  
HETATM  119  O   HOH T 118      54.786  26.756   7.797  1.00  0.41           O  
HETATM  120  O   HOH T 119      56.370  24.599  25.089  1.00  0.41           O  
HETATM  121  O   HOH T 120      46.364  10.805   5.808  1.00  0.41           O  
HETATM  122  O   HOH T 121      24.964  17.473  34.131  1.00  0.41           O  
HETATM  123  O   HOH T 122      24.113  16.600  26.712  1.00  0.41           O  
HETATM  124  O   HOH T 123      45.539  35.356  24.519  1.00  0.41           O  
HETATM  125  O   HOH T 124      48.279  39.517  20.279  1.00  0.41           O  
HETATM  126  O   HOH T 125      34.489  15.466  -1.746  1.00  0.41           O  
HETATM  127  O   HOH T 126      48.500  39.393   7.242  1.00  0.42           O  
HETATM  128  O   HOH T 127      24.128  40.400  15.658  1.00  0.42           O  
HETATM  129  O   HOH T 128      47.183  16.078  34.034  1.00  0.42           O  
HETATM  130  O   HOH T 129      46.196  39.572   8.837  1.00  0.42           O  
HETATM  131  O   HOH T 130      34.863  24.351  30.379  1.00  0.42           O  
HETATM  132  O   HOH T 131      26.753  39.625  48.475  1.00  0.42           O  
HETATM  133  O   HOH T 132      41.480  41.389   6.400  1.00  0.42           O  
HETATM  134  O   HOH T 133      43.905  38.342  35.322  1.00  0.42           O  
HETATM  135  O   HOH T 134      49.767  32.438   3.248  1.00  0.42           O  
HETATM  136  O   HOH T 135      30.752  25.131  39.802  1.00  0.42           O  
HETATM  137  O   HOH T 136      40.947  37.788  23.070  1.00  0.42           O  
HETATM  138  O   HOH T 137      29.256  34.702   6.027  1.00  0.42           O  
HETATM  139  O   HOH T 138      55.263  15.318   9.438  1.00  0.43           O  
HETATM  140  O   HOH T 139      35.846  27.637  -0.388  1.00  0.43           O  
HETATM  141  O   HOH T 140      22.286  13.836   4.802  1.00  0.43           O  
HETATM  142  O   HOH T 141      57.076  18.592  17.149  1.00  0.43           O  
HETATM  143  O   HOH T 142      20.538   2.746  19.865  1.00  0.43           O  
HETATM  144  O   HOH T 143      37.138  16.119  34.247  1.00  0.43           O  
HETATM  145  O   HOH T 144      36.964  39.178  16.996  1.00  0.43           O  
HETATM  146  O   HOH T 145      56.534  14.528  16.211  1.00  0.43           O  
HETATM  147  O   HOH T 146      25.600  12.793  28.391  1.00  0.43           O  
HETATM  148  O   HOH T 147      17.201  12.294  15.929  1.00  0.43           O  
HETATM  149  O   HOH T 148      26.762  21.776  -2.405  1.00  0.43           O  
HETATM  150  O   HOH T 149      19.974  14.197  24.175  1.00  0.44           O  
HETATM  151  O   HOH T 150      21.293  34.218  11.175  1.00  0.44           O  
HETATM  152  O   HOH T 151      30.568  17.660  -5.669  1.00  0.44           O  
HETATM  153  O   HOH T 152      23.593  13.840  26.680  1.00  0.44           O  
HETATM  154  O   HOH T 153      23.611   9.643  25.205  1.00  0.44           O  
HETATM  155  O   HOH T 154      45.751  13.395  -5.796  1.00  0.44           O  
HETATM  156  O   HOH T 155      43.342  44.512  10.462  1.00  0.44           O  
HETATM  157  O   HOH T 156      37.028   7.257   5.659  1.00  0.44           O  
HETATM  158  O   HOH T 157      22.667   1.883   5.543  1.00  0.45           O  
HETATM  159  O   HOH T 158      28.835  41.775  44.678  1.00  0.45           O  
HETATM  160  O   HOH T 159      46.862  19.610  -0.758  1.00  0.45           O  
HETATM  161  O   HOH T 160      30.644  -1.555  16.328  1.00  0.45           O  
HETATM  162  O   HOH T 161      37.239   9.898  27.731  1.00  0.45           O  
HETATM  163  O   HOH T 162      42.863  21.521  -5.775  1.00  0.45           O  
HETATM  164  O   HOH T 163      58.185  25.275  17.852  1.00  0.45           O  
HETATM  165  O   HOH T 164      43.008  36.066  23.520  1.00  0.45           O  
HETATM  166  O   HOH T 165      46.650  28.213  22.696  1.00  0.45           O  
HETATM  167  O   HOH T 166      20.006   1.705  22.503  1.00  0.45           O  
HETATM  168  O   HOH T 167      31.573   1.630  23.792  1.00  0.45           O  
HETATM  169  O   HOH T 168      55.222  11.810   3.261  1.00  0.45           O  
HETATM  170  O   HOH T 169      24.080  23.794   2.519  1.00  0.46           O  
HETATM  171  O   HOH T 170      33.618  31.077  27.685  1.00  0.46           O  
HETATM  172  O   HOH T 171      25.091  19.219  27.568  1.00  0.46           O  
HETATM  173  O   HOH T 172      27.421  11.321  24.992  1.00  0.46           O  
HETATM  174  O   HOH T 173      25.803  37.800   8.691  1.00  0.46           O  
HETATM  175  O   HOH T 174      33.271  12.863  27.503  1.00  0.46           O  
HETATM  176  O   HOH T 175      45.650   4.410  14.738  1.00  0.46           O  
HETATM  177  O   HOH T 176      29.366  37.192   1.755  1.00  0.46           O  
HETATM  178  O   HOH T 177      38.333  31.160  27.499  1.00  0.46           O  
HETATM  179  O   HOH T 178      44.880  29.210  20.964  1.00  0.46           O  
HETATM  180  O   HOH T 179      21.391  26.928  11.341  1.00  0.46           O  
HETATM  181  O   HOH T 180      39.652   8.053   4.959  1.00  0.46           O  
HETATM  182  O   HOH T 181      50.378   8.954  12.836  1.00  0.46           O  
HETATM  183  O   HOH T 182      18.502  14.429  21.872  1.00  0.47           O  
HETATM  184  O   HOH T 183      55.583  22.677  31.878  1.00  0.47           O  
HETATM  185  O   HOH T 184      28.009  41.818  47.322  1.00  0.47           O  
HETATM  186  O   HOH T 185      14.580  10.426  12.488  1.00  0.47           O  
HETATM  187  O   HOH T 186      27.949  39.425   5.631  1.00  0.47           O  
HETATM  188  O   HOH T 187      14.992  17.900   9.641  1.00  0.47           O  
HETATM  189  O   HOH T 188      30.671  -2.035  13.587  1.00  0.47           O  
HETATM  190  O   HOH T 189      43.809   9.808   5.522  1.00  0.47           O  
HETATM  191  O   HOH T 190      22.575  18.290  28.317  1.00  0.47           O  
HETATM  192  O   HOH T 191      22.522   4.789   1.012  1.00  0.47           O  
HETATM  193  O   HOH T 192      41.992  27.277  43.981  1.00  0.47           O  
HETATM  194  O   HOH T 193      29.803  29.029  35.679  1.00  0.47           O  
HETATM  195  O   HOH T 194      30.858  24.298   1.847  1.00  0.47           O  
HETATM  196  O   HOH T 195      24.066  19.747  30.260  1.00  0.47           O  
HETATM  197  O   HOH T 196      54.630  21.527   5.806  1.00  0.48           O  
HETATM  198  O   HOH T 197      34.798   5.259  23.842  1.00  0.48           O  
HETATM  199  O   HOH T 198      32.917  26.102  41.499  1.00  0.48           O  
HETATM  200  O   HOH T 199      51.068  28.643  35.420  1.00  0.48           O  
HETATM  201  O   HOH T 200      30.723  33.770  19.784  1.00  0.48           O  
HETATM  202  O   HOH T 201      57.309  15.933  11.092  1.00  0.48           O  
HETATM  203  O   HOH T 202      27.286  11.264  29.890  1.00  0.48           O  
HETATM  204  O   HOH T 203      35.268  41.605   4.162  1.00  0.48           O  
HETATM  205  O   HOH T 204      23.265  37.803   7.424  1.00  0.48           O  
HETATM  206  O   HOH T 205      41.947  14.075  -6.862  1.00  0.48           O  
HETATM  207  O   HOH T 206      16.149  10.804  20.234  1.00  0.48           O  
HETATM  208  O   HOH T 207      34.373  28.151  43.056  1.00  0.48           O  
HETATM  209  O   HOH T 208      26.356   9.017  25.795  1.00  0.48           O  
HETATM  210  O   HOH T 209      31.683  12.736  -3.665  1.00  0.48           O  
HETATM  211  O   HOH T 210      41.996  30.267  27.799  1.00  0.48           O  
HETATM  212  O   HOH T 211      35.979   8.317   1.021  1.00  0.48           O  
HETATM  213  O   HOH T 212      39.407  43.136   6.295  1.00  0.49           O  
HETATM  214  O   HOH T 213      40.936  35.600  27.638  1.00  0.49           O  
HETATM  215  O   HOH T 214      55.359  24.571   9.500  1.00  0.49           O  
HETATM  216  O   HOH T 215      30.626  10.428  -4.095  1.00  0.49           O  
HETATM  217  O   HOH T 216      31.614  21.871  -3.239  1.00  0.49           O  
HETATM  218  O   HOH T 217      49.050  20.340  38.753  1.00  0.49           O  
HETATM  219  O   HOH T 218      18.580   3.806  21.550  1.00  0.49           O  
HETATM  220  O   HOH T 219      21.453  27.361   8.660  1.00  0.49           O  
HETATM  221  O   HOH T 220      55.100  24.122   6.827  1.00  0.49           O  
HETATM  222  O   HOH T 221      46.792  22.575  -6.507  1.00  0.49           O  
HETATM  223  O   HOH T 222      42.204  24.330  43.899  1.00  0.49           O  
HETATM  224  O   HOH T 223      15.931  17.217   7.066  1.00  0.49           O  
HETATM  225  O   HOH T 224      19.063  12.827  19.582  1.00  0.49           O  
HETATM  226  O   HOH T 225      35.656  14.469  32.358  1.00  0.50           O  
HETATM  227  O   HOH T 226      42.126  39.971  22.176  1.00  0.50           O  
HETATM  228  O   HOH T 227      30.054  19.929  -4.224  1.00  0.50           O  
HETATM  229  O   HOH T 228      48.311  16.139  31.650  1.00  0.50           O  
HETATM  230  O   HOH T 229      29.990  -2.451  20.199  1.00  0.50           O  
HETATM  231  O   HOH T 230      42.987  41.940  11.305  1.00  0.50           O  
HETATM  232  O   HOH T 231      16.454  13.068  18.515  1.00  0.50           O  
HETATM  233  O   HOH T 232      35.637  39.665  14.701  1.00  0.50           O  
HETATM  234  O   HOH T 233      50.129  39.031  27.674  1.00  0.50           O  
HETATM  235  O   HOH T 234      42.077  22.053  42.171  1.00  0.50           O  
HETATM  236  O   HOH T 235      43.115  35.025  26.006  1.00  0.51           O  
HETATM  237  O   HOH T 236      27.612   4.037   8.166  1.00  0.51           O  
HETATM  238  O   HOH T 237      41.378  38.730  42.750  1.00  0.51           O  
HETATM  239  O   HOH T 238      57.048  20.936  15.509  1.00  0.51           O  
HETATM  240  O   HOH T 239      29.624  -4.101  15.178  1.00  0.51           O  
HETATM  241  O   HOH T 240      50.845  19.747   0.583  1.00  0.51           O  
HETATM  242  O   HOH T 241      34.055  13.873  29.993  1.00  0.51           O  
HETATM  243  O   HOH T 242      24.768  25.490  22.633  1.00  0.51           O  
HETATM  244  O   HOH T 243      34.985   2.382   7.163  1.00  0.51           O  
HETATM  245  O   HOH T 244      44.501  43.640  12.814  1.00  0.51           O  
HETATM  246  O   HOH T 245      45.229  29.093  25.011  1.00  0.51           O  
HETATM  247  O   HOH T 246      58.319  21.051  17.815  1.00  0.51           O  
HETATM  248  O   HOH T 247      40.584  35.615  24.860  1.00  0.52           O  
HETATM  249  O   HOH T 248      56.607  19.480   8.243  1.00  0.52           O  
HETATM  250  O   HOH T 249      36.467   6.569   3.080  1.00  0.52           O  
HETATM  251  O   HOH T 250      19.205  19.382   1.846  1.00  0.52           O  
HETATM  252  O   HOH T 251      44.501  22.789  43.179  1.00  0.52           O  
HETATM  253  O   HOH T 252      35.026   1.458   9.707  1.00  0.52           O  
HETATM  254  O   HOH T 253      55.796  33.020  29.879  1.00  0.52           O  
HETATM  255  O   HOH T 254      46.501   4.271  12.000  1.00  0.52           O  
HETATM  256  O   HOH T 255      52.724   8.667   0.826  1.00  0.53           O  
HETATM  257  O   HOH T 256      21.001  24.333  15.491  1.00  0.53           O  
HETATM  258  O   HOH T 257      56.783  20.362   2.661  1.00  0.53           O  
HETATM  259  O   HOH T 258      34.539  24.004  33.103  1.00  0.53           O  
HETATM  260  O   HOH T 259      43.956  20.150  -3.692  1.00  0.53           O  
HETATM  261  O   HOH T 260      45.251  33.368  26.440  1.00  0.53           O  
HETATM  262  O   HOH T 261      23.888  33.865  15.365  1.00  0.53           O  
HETATM  263  O   HOH T 262      41.514  18.270  38.165  1.00  0.53           O  
HETATM  264  O   HOH T 263      19.857  31.873  14.051  1.00  0.53           O  
HETATM  265  O   HOH T 264      50.166  34.969  33.320  1.00  0.54           O  
HETATM  266  O   HOH T 265      33.239  10.277  24.415  1.00  0.54           O  
HETATM  267  O   HOH T 266      35.952   7.034  -1.443  1.00  0.54           O  
HETATM  268  O   HOH T 267      25.310  10.545  -1.570  1.00  0.54           O  
HETATM  269  O   HOH T 268      41.886  39.791  36.411  1.00  0.54           O  
HETATM  270  O   HOH T 269      34.371  12.929  -2.651  1.00  0.54           O  
HETATM  271  O   HOH T 270      58.902  23.512  25.068  1.00  0.54           O  
HETATM  272  O   HOH T 271      24.795   7.096  -1.153  1.00  0.55           O  
HETATM  273  O   HOH T 272      37.286  12.947  30.847  1.00  0.55           O  
HETATM  274  O   HOH T 273      17.791  10.739  18.033  1.00  0.55           O  
HETATM  275  O   HOH T 274      51.903  18.155  24.124  1.00  0.55           O  
HETATM  276  O   HOH T 275      34.961  42.434   8.049  1.00  0.55           O  
HETATM  277  O   HOH T 276      29.015  12.261  -2.614  1.00  0.55           O  
HETATM  278  O   HOH T 277      48.778  21.597  34.302  1.00  0.55           O  
HETATM  279  O   HOH T 278      25.765  -1.467  16.250  1.00  0.55           O  
HETATM  280  O   HOH T 279      42.071  33.955  48.697  1.00  0.56           O  
HETATM  281  O   HOH T 280      27.304   8.028  -0.003  1.00  0.56           O  
HETATM  282  O   HOH T 281      56.963  25.134  12.440  1.00  0.56           O  
HETATM  283  O   HOH T 282      47.710  11.344  25.263  1.00  0.56           O  
HETATM  284  O   HOH T 283      51.121  32.361  42.889  1.00  0.56           O  
HETATM  285  O   HOH T 284      47.185  35.697  45.337  1.00  0.56           O  
HETATM  286  O   HOH T 285      33.675  23.535   2.126  1.00  0.56           O  
HETATM  287  O   HOH T 286      32.048  27.425  26.595  1.00  0.56           O  
HETATM  288  O   HOH T 287      21.680  18.609  30.827  1.00  0.57           O  
HETATM  289  O   HOH T 288      26.844  34.969   4.766  1.00  0.57           O  
HETATM  290  O   HOH T 289      48.132  41.530  22.110  1.00  0.57           O  
HETATM  291  O   HOH T 290      60.046  33.208  24.474  1.00  0.57           O  
HETATM  292  O   HOH T 291      28.370  42.163   5.465  1.00  0.57           O  
HETATM  293  O   HOH T 292      43.569  16.187  37.215  1.00  0.57           O  
HETATM  294  O   HOH T 293      55.006  25.146  36.358  1.00  0.57           O  
HETATM  295  O   HOH T 294      54.815  25.032  33.172  1.00  0.58           O  
HETATM  296  O   HOH T 295      46.281  18.739  -3.142  1.00  0.58           O  
HETATM  297  O   HOH T 296      23.122  36.666  15.422  1.00  0.59           O  
HETATM  298  O   HOH T 297      50.011  19.823  36.253  1.00  0.61           O  
HETATM  299  O   HOH T 298      28.962   3.966   5.798  1.00  0.62           O  
TER     300      HOH T 298 
