# Supplementary material for: Accurate Prediction of Hydration Sites of Proteins Using Energy Model With Atom Embedding
Source: Front Mol Biosci. 2021 Sep 20;8:756075. doi: 10.3389/fmolb.2021.756075 (PMC8488165; doi:10.3389/fmolb.2021.756075)
Supplement: Supplementary file 1 [file DataSheet1.ZIP › Data Sheet 1/Our_result_pdb/our_dataset_output/1U7I_watersite.pdb]

HEADER                                                        XXXX


JRNL        PMID   -1
HETATM    1  O   HOH T   0      28.626   7.045  33.011  1.00  0.17           O  
HETATM    2  O   HOH T   1      20.603  15.590  27.114  1.00  0.19           O  
HETATM    3  O   HOH T   2      12.017  40.822  34.598  1.00  0.19           O  
HETATM    4  O   HOH T   3      19.615  32.431  27.611  1.00  0.19           O  
HETATM    5  O   HOH T   4      32.885  35.116  44.656  1.00  0.20           O  
HETATM    6  O   HOH T   5       8.483  12.051  44.850  1.00  0.21           O  
HETATM    7  O   HOH T   6      14.034  22.650  47.090  1.00  0.22           O  
HETATM    8  O   HOH T   7      24.869  24.381  30.324  1.00  0.22           O  
HETATM    9  O   HOH T   8      16.415  45.885  25.532  1.00  0.22           O  
HETATM   10  O   HOH T   9      27.468  24.560  46.623  1.00  0.22           O  
HETATM   11  O   HOH T  10      10.781  11.457  43.699  1.00  0.22           O  
HETATM   12  O   HOH T  11      20.025   9.185  42.990  1.00  0.23           O  
HETATM   13  O   HOH T  12      17.112  36.997  17.975  1.00  0.23           O  
HETATM   14  O   HOH T  13      22.239  24.019  29.699  1.00  0.23           O  
HETATM   15  O   HOH T  14      15.668  23.647  30.717  1.00  0.24           O  
HETATM   16  O   HOH T  15      -1.979  11.729  38.353  1.00  0.24           O  
HETATM   17  O   HOH T  16      30.973   8.048  32.176  1.00  0.24           O  
HETATM   18  O   HOH T  17      34.853  40.589  36.624  1.00  0.24           O  
HETATM   19  O   HOH T  18      22.146   4.755  29.954  1.00  0.24           O  
HETATM   20  O   HOH T  19      45.500  28.512  40.584  1.00  0.24           O  
HETATM   21  O   HOH T  20      36.398  20.507  30.761  1.00  0.24           O  
HETATM   22  O   HOH T  21      23.316  55.178  29.316  1.00  0.25           O  
HETATM   23  O   HOH T  22      18.266  24.010  29.913  1.00  0.25           O  
HETATM   24  O   HOH T  23       6.214   7.173  36.540  1.00  0.25           O  
HETATM   25  O   HOH T  24      20.144  26.309  48.053  1.00  0.26           O  
HETATM   26  O   HOH T  25      42.488  25.180  30.018  1.00  0.26           O  
HETATM   27  O   HOH T  26       9.657  39.733  33.813  1.00  0.26           O  
HETATM   28  O   HOH T  27       2.619  29.374  46.174  1.00  0.26           O  
HETATM   29  O   HOH T  28       4.316  27.544  32.299  1.00  0.26           O  
HETATM   30  O   HOH T  29      43.045  29.917  34.419  1.00  0.26           O  
HETATM   31  O   HOH T  30      21.099  22.487  21.802  1.00  0.27           O  
HETATM   32  O   HOH T  31      17.778  32.979  54.210  1.00  0.27           O  
HETATM   33  O   HOH T  32      14.539  33.341  28.193  1.00  0.27           O  
HETATM   34  O   HOH T  33       9.548  23.329  51.972  1.00  0.27           O  
HETATM   35  O   HOH T  34      21.396  37.997  43.411  1.00  0.28           O  
HETATM   36  O   HOH T  35      25.808  14.815  27.290  1.00  0.28           O  
HETATM   37  O   HOH T  36      30.536  35.886  43.556  1.00  0.28           O  
HETATM   38  O   HOH T  37      37.168  23.231  22.451  1.00  0.28           O  
HETATM   39  O   HOH T  38      24.990   9.356  50.662  1.00  0.28           O  
HETATM   40  O   HOH T  39      21.662  41.133  33.556  1.00  0.28           O  
HETATM   41  O   HOH T  40      19.046  25.835  22.029  1.00  0.28           O  
HETATM   42  O   HOH T  41      37.382  24.601  43.872  1.00  0.28           O  
HETATM   43  O   HOH T  42      21.110  50.557  34.670  1.00  0.28           O  
HETATM   44  O   HOH T  43       9.596  37.058  47.708  1.00  0.29           O  
HETATM   45  O   HOH T  44      16.800  58.377  31.148  1.00  0.29           O  
HETATM   46  O   HOH T  45      35.674  35.475  57.947  1.00  0.29           O  
HETATM   47  O   HOH T  46       5.524   2.513  38.140  1.00  0.29           O  
HETATM   48  O   HOH T  47       4.040  19.582  53.103  1.00  0.29           O  
HETATM   49  O   HOH T  48      17.744  51.344  31.030  1.00  0.29           O  
HETATM   50  O   HOH T  49      41.439  16.888  42.763  1.00  0.29           O  
HETATM   51  O   HOH T  50      22.945  30.757  32.454  1.00  0.29           O  
HETATM   52  O   HOH T  51      16.768  -0.828  34.461  1.00  0.30           O  
HETATM   53  O   HOH T  52      15.387  -3.058  28.811  1.00  0.30           O  
HETATM   54  O   HOH T  53      -0.014   6.354  32.608  1.00  0.30           O  
HETATM   55  O   HOH T  54      14.941  36.675  19.877  1.00  0.30           O  
HETATM   56  O   HOH T  55      15.200  51.571  29.770  1.00  0.31           O  
HETATM   57  O   HOH T  56       4.404  22.798  45.287  1.00  0.31           O  
HETATM   58  O   HOH T  57       2.004  20.181  25.231  1.00  0.31           O  
HETATM   59  O   HOH T  58      21.412  20.832  47.732  1.00  0.31           O  
HETATM   60  O   HOH T  59      17.794  43.488  31.007  1.00  0.31           O  
HETATM   61  O   HOH T  60      21.071  42.157  45.403  1.00  0.31           O  
HETATM   62  O   HOH T  61      22.047  -7.771  28.495  1.00  0.31           O  
HETATM   63  O   HOH T  62      28.832   4.803  34.565  1.00  0.32           O  
HETATM   64  O   HOH T  63      20.500  31.253  49.471  1.00  0.32           O  
HETATM   65  O   HOH T  64      38.086  35.643  56.485  1.00  0.32           O  
HETATM   66  O   HOH T  65      13.865  23.081  28.416  1.00  0.32           O  
HETATM   67  O   HOH T  66      30.555  45.417  33.947  1.00  0.32           O  
HETATM   68  O   HOH T  67      22.815  40.890  28.095  1.00  0.32           O  
HETATM   69  O   HOH T  68      20.404  42.813  30.338  1.00  0.32           O  
HETATM   70  O   HOH T  69      34.301  22.724  47.945  1.00  0.32           O  
HETATM   71  O   HOH T  70      22.401  20.749  19.930  1.00  0.33           O  
HETATM   72  O   HOH T  71      34.508  21.579  54.368  1.00  0.33           O  
HETATM   73  O   HOH T  72      15.211  48.261  43.012  1.00  0.33           O  
HETATM   74  O   HOH T  73      24.393  -0.104  40.749  1.00  0.33           O  
HETATM   75  O   HOH T  74      23.523   5.480  27.640  1.00  0.33           O  
HETATM   76  O   HOH T  75      -3.303  20.385  43.976  1.00  0.33           O  
HETATM   77  O   HOH T  76      15.210  12.359  19.844  1.00  0.33           O  
HETATM   78  O   HOH T  77      23.310  16.150  27.071  1.00  0.33           O  
HETATM   79  O   HOH T  78      32.406  10.381  46.267  1.00  0.33           O  
HETATM   80  O   HOH T  79      27.115  22.674  25.002  1.00  0.33           O  
HETATM   81  O   HOH T  80      -0.220  24.968  27.207  1.00  0.33           O  
HETATM   82  O   HOH T  81      11.253  38.329  49.535  1.00  0.33           O  
HETATM   83  O   HOH T  82      26.470  25.051  28.050  1.00  0.33           O  
HETATM   84  O   HOH T  83       5.761  31.599  47.516  1.00  0.34           O  
HETATM   85  O   HOH T  84      11.120  40.520  26.474  1.00  0.34           O  
HETATM   86  O   HOH T  85      37.443  33.865  50.525  1.00  0.34           O  
HETATM   87  O   HOH T  86      20.163  24.192  27.869  1.00  0.34           O  
HETATM   88  O   HOH T  87      36.641  38.671  26.801  1.00  0.34           O  
HETATM   89  O   HOH T  88      44.505  33.682  45.680  1.00  0.34           O  
HETATM   90  O   HOH T  89      38.706  19.207  31.644  1.00  0.34           O  
HETATM   91  O   HOH T  90       6.152  24.801  49.341  1.00  0.34           O  
HETATM   92  O   HOH T  91      26.884  36.467  35.707  1.00  0.34           O  
HETATM   93  O   HOH T  92      25.518  35.966  33.387  1.00  0.34           O  
HETATM   94  O   HOH T  93      19.254   6.540  32.798  1.00  0.34           O  
HETATM   95  O   HOH T  94       1.060   9.613  46.216  1.00  0.35           O  
HETATM   96  O   HOH T  95       1.249  10.990  48.661  1.00  0.35           O  
HETATM   97  O   HOH T  96      -4.144  24.790  46.788  1.00  0.35           O  
HETATM   98  O   HOH T  97      30.322  24.390  46.680  1.00  0.35           O  
HETATM   99  O   HOH T  98      39.318  31.266  30.928  1.00  0.35           O  
HETATM  100  O   HOH T  99       2.237   9.734  29.987  1.00  0.35           O  
HETATM  101  O   HOH T 100      15.524  43.419  26.632  1.00  0.36           O  
HETATM  102  O   HOH T 101      40.763  19.599  33.415  1.00  0.36           O  
HETATM  103  O   HOH T 102      16.957  31.925  27.651  1.00  0.36           O  
HETATM  104  O   HOH T 103      32.260  24.324  48.810  1.00  0.36           O  
HETATM  105  O   HOH T 104      42.911  35.861  37.993  1.00  0.36           O  
HETATM  106  O   HOH T 105      40.664  41.369  32.156  1.00  0.36           O  
HETATM  107  O   HOH T 106      34.833  18.148  24.665  1.00  0.36           O  
HETATM  108  O   HOH T 107      24.332  -6.248  29.256  1.00  0.36           O  
HETATM  109  O   HOH T 108      29.388   7.152  46.483  1.00  0.36           O  
HETATM  110  O   HOH T 109      28.247  43.650  40.383  1.00  0.36           O  
HETATM  111  O   HOH T 110      11.691  46.562  32.125  1.00  0.36           O  
HETATM  112  O   HOH T 111      35.351  37.452  46.929  1.00  0.37           O  
HETATM  113  O   HOH T 112      -2.472  24.107  38.045  1.00  0.37           O  
HETATM  114  O   HOH T 113      23.488  49.028  34.700  1.00  0.37           O  
HETATM  115  O   HOH T 114      23.802  33.652  17.182  1.00  0.37           O  
HETATM  116  O   HOH T 115      16.466  42.464  28.932  1.00  0.37           O  
HETATM  117  O   HOH T 116      25.558  43.917  40.674  1.00  0.37           O  
HETATM  118  O   HOH T 117      20.174  -1.056  38.073  1.00  0.37           O  
HETATM  119  O   HOH T 118      20.705  40.705  43.175  1.00  0.37           O  
HETATM  120  O   HOH T 119      13.193  25.917  25.690  1.00  0.37           O  
HETATM  121  O   HOH T 120       9.134  16.219  50.995  1.00  0.38           O  
HETATM  122  O   HOH T 121      40.554  27.859  27.012  1.00  0.38           O  
HETATM  123  O   HOH T 122       3.948  10.427  48.653  1.00  0.38           O  
HETATM  124  O   HOH T 123      24.972   4.194  45.665  1.00  0.38           O  
HETATM  125  O   HOH T 124      17.726  17.101  32.250  1.00  0.38           O  
HETATM  126  O   HOH T 125       2.260  19.635  55.231  1.00  0.38           O  
HETATM  127  O   HOH T 126       7.370  31.676  51.321  1.00  0.38           O  
HETATM  128  O   HOH T 127      32.440   8.108  29.903  1.00  0.38           O  
HETATM  129  O   HOH T 128       6.448  18.571  53.978  1.00  0.38           O  
HETATM  130  O   HOH T 129      12.787  40.249  48.177  1.00  0.38           O  
HETATM  131  O   HOH T 130      26.754  44.942  38.397  1.00  0.38           O  
HETATM  132  O   HOH T 131      24.106  13.867  17.117  1.00  0.39           O  
HETATM  133  O   HOH T 132       8.864  40.601  28.179  1.00  0.39           O  
HETATM  134  O   HOH T 133      10.028  16.315  48.338  1.00  0.39           O  
HETATM  135  O   HOH T 134      24.981  38.318  36.581  1.00  0.39           O  
HETATM  136  O   HOH T 135      18.224  29.421  16.824  1.00  0.39           O  
HETATM  137  O   HOH T 136      33.239  24.130  54.035  1.00  0.39           O  
HETATM  138  O   HOH T 137      23.911  40.575  35.306  1.00  0.40           O  
HETATM  139  O   HOH T 138       5.533   8.167  48.363  1.00  0.40           O  
HETATM  140  O   HOH T 139      30.898   8.856  47.891  1.00  0.40           O  
HETATM  141  O   HOH T 140      28.799  25.131  48.972  1.00  0.40           O  
HETATM  142  O   HOH T 141      15.297  44.717  23.137  1.00  0.40           O  
HETATM  143  O   HOH T 142      26.517  30.090  43.739  1.00  0.40           O  
HETATM  144  O   HOH T 143      11.805  43.045  36.089  1.00  0.40           O  
HETATM  145  O   HOH T 144      35.701  16.158  46.996  1.00  0.40           O  
HETATM  146  O   HOH T 145       3.544   8.591  46.536  1.00  0.40           O  
HETATM  147  O   HOH T 146      12.654  43.773  23.415  1.00  0.40           O  
HETATM  148  O   HOH T 147      10.663  44.818  34.148  1.00  0.40           O  
HETATM  149  O   HOH T 148      45.379  28.993  33.116  1.00  0.40           O  
HETATM  150  O   HOH T 149      23.499  12.246  21.083  1.00  0.40           O  
HETATM  151  O   HOH T 150      15.139  12.375  43.331  1.00  0.40           O  
HETATM  152  O   HOH T 151      25.939   1.612  42.122  1.00  0.40           O  
HETATM  153  O   HOH T 152      40.446  17.980  24.182  1.00  0.41           O  
HETATM  154  O   HOH T 153      15.911  34.975  53.542  1.00  0.41           O  
HETATM  155  O   HOH T 154      22.697  16.156  21.088  1.00  0.41           O  
HETATM  156  O   HOH T 155      30.597   2.797  35.284  1.00  0.41           O  
HETATM  157  O   HOH T 156      12.911  22.010  49.571  1.00  0.41           O  
HETATM  158  O   HOH T 157       1.285  24.774  51.432  1.00  0.41           O  
HETATM  159  O   HOH T 158      24.499  44.374  31.722  1.00  0.41           O  
HETATM  160  O   HOH T 159       1.235  22.468  26.764  1.00  0.41           O  
HETATM  161  O   HOH T 160      10.458  18.688  51.011  1.00  0.41           O  
HETATM  162  O   HOH T 161       1.289  25.968  24.994  1.00  0.41           O  
HETATM  163  O   HOH T 162      21.487  48.635  39.103  1.00  0.42           O  
HETATM  164  O   HOH T 163       1.093   2.662  39.456  1.00  0.42           O  
HETATM  165  O   HOH T 164      13.203  31.516  26.790  1.00  0.42           O  
HETATM  166  O   HOH T 165      31.869  23.604  51.579  1.00  0.42           O  
HETATM  167  O   HOH T 166      26.426  43.296  36.148  1.00  0.42           O  
HETATM  168  O   HOH T 167      20.956   6.601  42.442  1.00  0.42           O  
HETATM  169  O   HOH T 168      41.676  30.059  31.904  1.00  0.42           O  
HETATM  170  O   HOH T 169      26.805   6.275  46.126  1.00  0.42           O  
HETATM  171  O   HOH T 170      26.512  42.188  38.715  1.00  0.42           O  
HETATM  172  O   HOH T 171      26.805  17.017  25.828  1.00  0.42           O  
HETATM  173  O   HOH T 172      38.901  36.536  47.762  1.00  0.42           O  
HETATM  174  O   HOH T 173      17.419  27.470  20.247  1.00  0.43           O  
HETATM  175  O   HOH T 174      17.519  31.286  52.156  1.00  0.43           O  
HETATM  176  O   HOH T 175      17.045   5.614  34.119  1.00  0.43           O  
HETATM  177  O   HOH T 176      14.821  17.113  43.672  1.00  0.43           O  
HETATM  178  O   HOH T 177      36.331  35.710  48.778  1.00  0.43           O  
HETATM  179  O   HOH T 178      34.826  25.454  48.531  1.00  0.43           O  
HETATM  180  O   HOH T 179      41.055  37.338  29.275  1.00  0.43           O  
HETATM  181  O   HOH T 180      26.119  25.130  24.139  1.00  0.43           O  
HETATM  182  O   HOH T 181       4.794  32.178  50.025  1.00  0.43           O  
HETATM  183  O   HOH T 182      26.409   7.230  49.941  1.00  0.43           O  
HETATM  184  O   HOH T 183      32.786  27.687  54.922  1.00  0.43           O  
HETATM  185  O   HOH T 184      40.448  29.134  29.520  1.00  0.43           O  
HETATM  186  O   HOH T 185      46.986  30.730  41.281  1.00  0.43           O  
HETATM  187  O   HOH T 186       8.499  20.353  54.537  1.00  0.44           O  
HETATM  188  O   HOH T 187      23.538  49.423  37.431  1.00  0.44           O  
HETATM  189  O   HOH T 188       3.315   9.574  27.437  1.00  0.44           O  
HETATM  190  O   HOH T 189      24.419  43.108  34.167  1.00  0.44           O  
HETATM  191  O   HOH T 190      27.429  38.125  37.908  1.00  0.44           O  
HETATM  192  O   HOH T 191      16.449  29.776  18.814  1.00  0.44           O  
HETATM  193  O   HOH T 192      22.376  30.247  47.631  1.00  0.44           O  
HETATM  194  O   HOH T 193      13.058  19.464  50.507  1.00  0.44           O  
HETATM  195  O   HOH T 194      37.748  38.609  46.273  1.00  0.45           O  
HETATM  196  O   HOH T 195      21.661  23.478  50.109  1.00  0.45           O  
HETATM  197  O   HOH T 196      -5.154   8.459  37.853  1.00  0.45           O  
HETATM  198  O   HOH T 197       2.186  22.604  24.047  1.00  0.45           O  
HETATM  199  O   HOH T 198      42.189  18.612  26.208  1.00  0.45           O  
HETATM  200  O   HOH T 199      25.026   5.630  48.076  1.00  0.45           O  
HETATM  201  O   HOH T 200      12.808  42.755  26.075  1.00  0.45           O  
HETATM  202  O   HOH T 201      44.748  19.009  41.904  1.00  0.45           O  
HETATM  203  O   HOH T 202      37.238  41.348  46.076  1.00  0.45           O  
HETATM  204  O   HOH T 203       9.559  42.301  34.533  1.00  0.45           O  
HETATM  205  O   HOH T 204      18.339  11.190  43.821  1.00  0.45           O  
HETATM  206  O   HOH T 205      32.366   7.047  40.506  1.00  0.45           O  
HETATM  207  O   HOH T 206      25.450  38.061  31.479  1.00  0.46           O  
HETATM  208  O   HOH T 207      12.208  23.765  52.704  1.00  0.46           O  
HETATM  209  O   HOH T 208       2.002   5.634  30.806  1.00  0.46           O  
HETATM  210  O   HOH T 209      22.618  19.107  49.494  1.00  0.46           O  
HETATM  211  O   HOH T 210      46.410  33.230  41.690  1.00  0.46           O  
HETATM  212  O   HOH T 211      18.564  29.430  50.529  1.00  0.46           O  
HETATM  213  O   HOH T 212      17.871  55.099  37.231  1.00  0.46           O  
HETATM  214  O   HOH T 213      14.370  56.973  30.912  1.00  0.46           O  
HETATM  215  O   HOH T 214      -1.639  22.690  31.322  1.00  0.46           O  
HETATM  216  O   HOH T 215      -1.958  17.781  35.450  1.00  0.46           O  
HETATM  217  O   HOH T 216      33.962  17.733  52.949  1.00  0.46           O  
HETATM  218  O   HOH T 217      24.311  16.537  24.515  1.00  0.46           O  
HETATM  219  O   HOH T 218       4.438  35.748  36.460  1.00  0.46           O  
HETATM  220  O   HOH T 219      37.464  12.808  41.426  1.00  0.46           O  
HETATM  221  O   HOH T 220      14.767  -2.191  33.144  1.00  0.46           O  
HETATM  222  O   HOH T 221      43.508  23.431  36.655  1.00  0.46           O  
HETATM  223  O   HOH T 222      32.636  16.311  51.121  1.00  0.46           O  
HETATM  224  O   HOH T 223      27.731   9.708  50.142  1.00  0.47           O  
HETATM  225  O   HOH T 224      22.003  27.307  19.120  1.00  0.47           O  
HETATM  226  O   HOH T 225      42.857  35.773  46.269  1.00  0.47           O  
HETATM  227  O   HOH T 226      23.594   7.036  49.927  1.00  0.47           O  
HETATM  228  O   HOH T 227      27.532  37.805  33.331  1.00  0.47           O  
HETATM  229  O   HOH T 228       9.587  23.363  47.906  1.00  0.47           O  
HETATM  230  O   HOH T 229      24.375  25.409  21.957  1.00  0.47           O  
HETATM  231  O   HOH T 230      37.919  40.621  28.345  1.00  0.47           O  
HETATM  232  O   HOH T 231      26.059  34.935  43.658  1.00  0.47           O  
HETATM  233  O   HOH T 232      21.662  25.169  20.967  1.00  0.47           O  
HETATM  234  O   HOH T 233      23.200  35.931  44.241  1.00  0.47           O  
HETATM  235  O   HOH T 234      19.378   5.392  30.342  1.00  0.47           O  
HETATM  236  O   HOH T 235      22.955  42.325  43.250  1.00  0.47           O  
HETATM  237  O   HOH T 236      47.141  29.846  38.772  1.00  0.48           O  
HETATM  238  O   HOH T 237      38.477  42.177  30.645  1.00  0.48           O  
HETATM  239  O   HOH T 238      23.600  23.112  20.712  1.00  0.48           O  
HETATM  240  O   HOH T 239      42.045  34.932  30.151  1.00  0.48           O  
HETATM  241  O   HOH T 240      -6.458  11.971  38.740  1.00  0.48           O  
HETATM  242  O   HOH T 241      24.036  35.582  46.893  1.00  0.48           O  
HETATM  243  O   HOH T 242      22.468  21.044  51.355  1.00  0.48           O  
HETATM  244  O   HOH T 243      36.490  43.208  44.039  1.00  0.48           O  
HETATM  245  O   HOH T 244      27.869   1.585  29.814  1.00  0.48           O  
HETATM  246  O   HOH T 245      15.285  32.814  25.538  1.00  0.48           O  
HETATM  247  O   HOH T 246       1.466  16.614  31.620  1.00  0.48           O  
HETATM  248  O   HOH T 247      -1.516  12.998  30.865  1.00  0.48           O  
HETATM  249  O   HOH T 248      24.206  32.489  19.627  1.00  0.49           O  
HETATM  250  O   HOH T 249      39.722  40.458  46.925  1.00  0.49           O  
HETATM  251  O   HOH T 250      24.630  36.250  17.073  1.00  0.49           O  
HETATM  252  O   HOH T 251      42.644  27.873  30.433  1.00  0.49           O  
HETATM  253  O   HOH T 252       3.140  25.998  53.299  1.00  0.49           O  
HETATM  254  O   HOH T 253      38.407  37.905  28.767  1.00  0.49           O  
HETATM  255  O   HOH T 254      33.257   6.550  32.051  1.00  0.49           O  
HETATM  256  O   HOH T 255      13.723  37.944  22.261  1.00  0.49           O  
HETATM  257  O   HOH T 256      24.643  37.937  45.475  1.00  0.49           O  
HETATM  258  O   HOH T 257      -4.159  10.475  39.509  1.00  0.49           O  
HETATM  259  O   HOH T 258      21.023  28.568  49.445  1.00  0.49           O  
HETATM  260  O   HOH T 259      11.441  49.229  31.062  1.00  0.49           O  
HETATM  261  O   HOH T 260      29.056   8.888  25.208  1.00  0.49           O  
HETATM  262  O   HOH T 261      25.556  22.980  22.699  1.00  0.49           O  
HETATM  263  O   HOH T 262      23.497   0.897  43.082  1.00  0.49           O  
HETATM  264  O   HOH T 263      23.509  38.452  29.457  1.00  0.49           O  
HETATM  265  O   HOH T 264      41.703  25.206  27.291  1.00  0.50           O  
HETATM  266  O   HOH T 265       5.385  30.767  26.361  1.00  0.50           O  
HETATM  267  O   HOH T 266      42.039  26.645  45.039  1.00  0.50           O  
HETATM  268  O   HOH T 267      13.727  45.182  25.415  1.00  0.50           O  
HETATM  269  O   HOH T 268      21.980  24.387  47.415  1.00  0.50           O  
HETATM  270  O   HOH T 269      19.853  25.136  51.460  1.00  0.50           O  
HETATM  271  O   HOH T 270      39.996  39.868  29.939  1.00  0.50           O  
HETATM  272  O   HOH T 271      34.227   5.915  38.858  1.00  0.50           O  
HETATM  273  O   HOH T 272       8.934  17.870  53.198  1.00  0.50           O  
HETATM  274  O   HOH T 273      36.458  12.126  34.802  1.00  0.50           O  
HETATM  275  O   HOH T 274      40.810  18.637  39.215  1.00  0.50           O  
HETATM  276  O   HOH T 275      43.347  20.305  33.190  1.00  0.50           O  
HETATM  277  O   HOH T 276      30.169   3.236  32.598  1.00  0.50           O  
HETATM  278  O   HOH T 277      19.529  26.075  19.333  1.00  0.50           O  
HETATM  279  O   HOH T 278      -0.148   4.364  44.407  1.00  0.50           O  
HETATM  280  O   HOH T 279      23.459  51.655  35.760  1.00  0.50           O  
HETATM  281  O   HOH T 280      24.615  -8.917  28.954  1.00  0.50           O  
HETATM  282  O   HOH T 281      17.637  11.441  46.476  1.00  0.50           O  
HETATM  283  O   HOH T 282      26.303  14.576  24.580  1.00  0.50           O  
HETATM  284  O   HOH T 283      37.517  31.860  55.163  1.00  0.50           O  
HETATM  285  O   HOH T 284      -2.514   5.217  32.308  1.00  0.50           O  
HETATM  286  O   HOH T 285       8.923   4.900  42.988  1.00  0.51           O  
HETATM  287  O   HOH T 286       0.550  26.971  52.958  1.00  0.51           O  
HETATM  288  O   HOH T 287      37.976  28.372  23.828  1.00  0.51           O  
HETATM  289  O   HOH T 288      21.915  13.141  18.854  1.00  0.51           O  
HETATM  290  O   HOH T 289      44.765  21.915  34.792  1.00  0.51           O  
HETATM  291  O   HOH T 290      43.091  22.727  26.955  1.00  0.51           O  
HETATM  292  O   HOH T 291      25.069  53.558  30.649  1.00  0.51           O  
HETATM  293  O   HOH T 292      46.145  27.426  38.061  1.00  0.51           O  
HETATM  294  O   HOH T 293      31.057   7.236  26.400  1.00  0.51           O  
HETATM  295  O   HOH T 294       5.738  10.657  26.813  1.00  0.51           O  
HETATM  296  O   HOH T 295      -1.582   5.748  34.837  1.00  0.51           O  
HETATM  297  O   HOH T 296      36.706  31.859  52.443  1.00  0.51           O  
HETATM  298  O   HOH T 297      22.364  15.731  18.442  1.00  0.51           O  
HETATM  299  O   HOH T 298      32.210  46.274  31.996  1.00  0.51           O  
HETATM  300  O   HOH T 299       8.048  41.301  30.763  1.00  0.51           O  
HETATM  301  O   HOH T 300      21.248  51.048  37.439  1.00  0.51           O  
HETATM  302  O   HOH T 301       0.897   3.739  32.354  1.00  0.51           O  
HETATM  303  O   HOH T 302       9.133  30.447  52.985  1.00  0.51           O  
HETATM  304  O   HOH T 303      33.981  33.697  56.540  1.00  0.51           O  
HETATM  305  O   HOH T 304       3.945  34.902  43.050  1.00  0.52           O  
HETATM  306  O   HOH T 305      16.614   7.408  36.294  1.00  0.52           O  
HETATM  307  O   HOH T 306      15.705  18.797  50.686  1.00  0.52           O  
HETATM  308  O   HOH T 307       4.134  24.347  51.299  1.00  0.52           O  
HETATM  309  O   HOH T 308      12.260  39.053  24.363  1.00  0.52           O  
HETATM  310  O   HOH T 309      26.573  40.483  36.462  1.00  0.52           O  
HETATM  311  O   HOH T 310      13.078  10.688  42.707  1.00  0.52           O  
HETATM  312  O   HOH T 311      11.354  21.246  51.773  1.00  0.52           O  
HETATM  313  O   HOH T 312      19.466  50.421  39.416  1.00  0.52           O  
HETATM  314  O   HOH T 313      22.665  -7.516  35.839  1.00  0.52           O  
HETATM  315  O   HOH T 314      42.967  42.359  33.234  1.00  0.52           O  
HETATM  316  O   HOH T 315      29.860   0.686  31.394  1.00  0.52           O  
HETATM  317  O   HOH T 316      40.021  34.780  49.707  1.00  0.52           O  
HETATM  318  O   HOH T 317      22.378  -1.727  39.752  1.00  0.53           O  
HETATM  319  O   HOH T 318      15.398  58.422  28.772  1.00  0.53           O  
HETATM  320  O   HOH T 319      34.290  37.405  26.666  1.00  0.53           O  
HETATM  321  O   HOH T 320      42.108  43.414  30.934  1.00  0.53           O  
HETATM  322  O   HOH T 321      31.838   7.899  45.361  1.00  0.53           O  
HETATM  323  O   HOH T 322      42.234  39.104  40.718  1.00  0.53           O  
HETATM  324  O   HOH T 323      15.830   3.492  32.678  1.00  0.53           O  
HETATM  325  O   HOH T 324       2.680  17.571  24.345  1.00  0.53           O  
HETATM  326  O   HOH T 325      -0.243  10.894  29.716  1.00  0.53           O  
HETATM  327  O   HOH T 326      13.574  23.120  25.677  1.00  0.53           O  
HETATM  328  O   HOH T 327       3.332  25.096  23.374  1.00  0.54           O  
HETATM  329  O   HOH T 328      20.194  27.463  16.930  1.00  0.54           O  
HETATM  330  O   HOH T 329      45.359  31.319  34.726  1.00  0.54           O  
HETATM  331  O   HOH T 330      41.602  35.784  51.694  1.00  0.54           O  
HETATM  332  O   HOH T 331      45.320  28.738  35.708  1.00  0.54           O  
HETATM  333  O   HOH T 332       7.958  38.658  29.996  1.00  0.54           O  
HETATM  334  O   HOH T 333      28.253  -1.789  28.567  1.00  0.54           O  
HETATM  335  O   HOH T 334       3.198  30.056  25.014  1.00  0.54           O  
HETATM  336  O   HOH T 335      10.218  47.580  34.128  1.00  0.55           O  
HETATM  337  O   HOH T 336      40.554  16.960  37.189  1.00  0.55           O  
HETATM  338  O   HOH T 337      31.087  31.140  47.914  1.00  0.55           O  
HETATM  339  O   HOH T 338      20.246  17.850  48.753  1.00  0.55           O  
HETATM  340  O   HOH T 339      32.302  43.956  30.625  1.00  0.56           O  
HETATM  341  O   HOH T 340      22.550  25.228  52.077  1.00  0.56           O  
HETATM  342  O   HOH T 341      12.961  26.438  52.999  1.00  0.56           O  
HETATM  343  O   HOH T 342      30.723  43.782  31.599  1.00  0.56           O  
HETATM  344  O   HOH T 343       6.463  34.069  48.597  1.00  0.56           O  
HETATM  345  O   HOH T 344       3.943  33.628  34.575  1.00  0.56           O  
HETATM  346  O   HOH T 345       4.911  38.853  37.361  1.00  0.56           O  
HETATM  347  O   HOH T 346      12.814  27.434  23.454  1.00  0.56           O  
HETATM  348  O   HOH T 347      32.325   9.596  27.566  1.00  0.57           O  
HETATM  349  O   HOH T 348      21.108   8.061  50.286  1.00  0.57           O  
HETATM  350  O   HOH T 349      22.797  40.005  44.926  1.00  0.57           O  
HETATM  351  O   HOH T 350      32.319   4.174  30.977  1.00  0.57           O  
HETATM  352  O   HOH T 351      25.877  36.678  29.154  1.00  0.58           O  
HETATM  353  O   HOH T 352      44.334  20.221  26.576  1.00  0.58           O  
HETATM  354  O   HOH T 353      10.165  39.728  47.392  1.00  0.59           O  
HETATM  355  O   HOH T 354      25.766  28.213  50.575  1.00  0.61           O  
HETATM  356  O   HOH T 355      24.443  42.097  30.143  1.00  0.62           O  
TER     357      HOH T 355 
