# Supplementary material for: Accurate Prediction of Hydration Sites of Proteins Using Energy Model With Atom Embedding
Source: Front Mol Biosci. 2021 Sep 20;8:756075. doi: 10.3389/fmolb.2021.756075 (PMC8488165; doi:10.3389/fmolb.2021.756075)
Supplement: Supplementary file 1 [file DataSheet1.ZIP › Data Sheet 1/Our_result_pdb/our_dataset_output/1VAT_watersite.pdb]

HEADER                                                        XXXX


JRNL        PMID   -1
HETATM    1  O   HOH T   0      -9.506  12.891   8.419  1.00  0.19           O  
HETATM    2  O   HOH T   1       1.130  16.309  19.608  1.00  0.20           O  
HETATM    3  O   HOH T   2     -11.782  17.897   5.049  1.00  0.22           O  
HETATM    4  O   HOH T   3      13.577  14.383  26.664  1.00  0.22           O  
HETATM    5  O   HOH T   4       8.923  21.897  19.048  1.00  0.22           O  
HETATM    6  O   HOH T   5      -3.940  21.446  32.432  1.00  0.23           O  
HETATM    7  O   HOH T   6      -5.832  10.224  13.313  1.00  0.23           O  
HETATM    8  O   HOH T   7     -21.158  24.848   5.345  1.00  0.24           O  
HETATM    9  O   HOH T   8      16.700  21.982  32.547  1.00  0.25           O  
HETATM   10  O   HOH T   9      -4.055   7.942  19.648  1.00  0.25           O  
HETATM   11  O   HOH T  10       3.294  21.193  25.455  1.00  0.25           O  
HETATM   12  O   HOH T  11      13.994  24.494  27.080  1.00  0.25           O  
HETATM   13  O   HOH T  12      -6.014  17.142   2.961  1.00  0.26           O  
HETATM   14  O   HOH T  13      -3.512  38.295  24.104  1.00  0.26           O  
HETATM   15  O   HOH T  14      15.925  17.787  18.272  1.00  0.26           O  
HETATM   16  O   HOH T  15     -11.097  22.904  -2.041  1.00  0.26           O  
HETATM   17  O   HOH T  16      10.453   5.149  28.140  1.00  0.28           O  
HETATM   18  O   HOH T  17     -15.259  19.811  16.848  1.00  0.28           O  
HETATM   19  O   HOH T  18      -8.735  15.406  27.601  1.00  0.28           O  
HETATM   20  O   HOH T  19     -14.783  23.523  25.158  1.00  0.29           O  
HETATM   21  O   HOH T  20      12.724  10.997  22.705  1.00  0.30           O  
HETATM   22  O   HOH T  21      -5.675  19.753   2.007  1.00  0.30           O  
HETATM   23  O   HOH T  22     -12.014  27.928  11.964  1.00  0.30           O  
HETATM   24  O   HOH T  23      -1.679   6.906  20.511  1.00  0.30           O  
HETATM   25  O   HOH T  24      -5.854  34.895   4.726  1.00  0.31           O  
HETATM   26  O   HOH T  25     -14.372  27.307   2.659  1.00  0.31           O  
HETATM   27  O   HOH T  26     -10.556  31.171  23.766  1.00  0.31           O  
HETATM   28  O   HOH T  27       1.630   9.734   5.785  1.00  0.31           O  
HETATM   29  O   HOH T  28     -18.520  11.721  16.423  1.00  0.31           O  
HETATM   30  O   HOH T  29      -9.736  34.030  10.629  1.00  0.31           O  
HETATM   31  O   HOH T  30      -2.902  19.614   1.972  1.00  0.32           O  
HETATM   32  O   HOH T  31     -15.439  23.354  11.273  1.00  0.32           O  
HETATM   33  O   HOH T  32     -11.096  30.503  12.311  1.00  0.32           O  
HETATM   34  O   HOH T  33      -1.207  32.434  10.525  1.00  0.32           O  
HETATM   35  O   HOH T  34      -3.408  33.383  31.279  1.00  0.33           O  
HETATM   36  O   HOH T  35      10.653  12.563  35.260  1.00  0.33           O  
HETATM   37  O   HOH T  36       9.013  12.793  30.287  1.00  0.33           O  
HETATM   38  O   HOH T  37      -9.795  26.129  -5.232  1.00  0.33           O  
HETATM   39  O   HOH T  38       4.289  32.749  10.016  1.00  0.34           O  
HETATM   40  O   HOH T  39      -6.660  21.203  32.262  1.00  0.34           O  
HETATM   41  O   HOH T  40      -2.820  26.823  28.663  1.00  0.34           O  
HETATM   42  O   HOH T  41     -14.059  26.690  13.235  1.00  0.34           O  
HETATM   43  O   HOH T  42      14.194  25.119  24.395  1.00  0.35           O  
HETATM   44  O   HOH T  43      -7.246  36.647  14.371  1.00  0.35           O  
HETATM   45  O   HOH T  44      -6.429  37.680  19.111  1.00  0.35           O  
HETATM   46  O   HOH T  45      -1.734  10.757  19.117  1.00  0.35           O  
HETATM   47  O   HOH T  46      -9.049  12.619  21.131  1.00  0.36           O  
HETATM   48  O   HOH T  47      -4.710  12.070  28.470  1.00  0.36           O  
HETATM   49  O   HOH T  48       1.784  23.412  24.524  1.00  0.36           O  
HETATM   50  O   HOH T  49       0.455  13.593  16.962  1.00  0.36           O  
HETATM   51  O   HOH T  50     -13.956  25.085   4.268  1.00  0.37           O  
HETATM   52  O   HOH T  51       7.869  27.705   8.475  1.00  0.37           O  
HETATM   53  O   HOH T  52      -3.742  12.044  25.909  1.00  0.37           O  
HETATM   54  O   HOH T  53       6.107  11.767  41.579  1.00  0.37           O  
HETATM   55  O   HOH T  54     -20.003  20.428  -2.904  1.00  0.38           O  
HETATM   56  O   HOH T  55     -15.252  21.771  20.784  1.00  0.38           O  
HETATM   57  O   HOH T  56       7.420  24.479  11.364  1.00  0.38           O  
HETATM   58  O   HOH T  57     -21.780  23.626   2.957  1.00  0.38           O  
HETATM   59  O   HOH T  58       7.833  32.132  23.639  1.00  0.38           O  
HETATM   60  O   HOH T  59       9.731  12.778  12.309  1.00  0.38           O  
HETATM   61  O   HOH T  60       5.374  25.500  21.284  1.00  0.38           O  
HETATM   62  O   HOH T  61     -19.708  25.637   3.227  1.00  0.39           O  
HETATM   63  O   HOH T  62     -18.118  18.730  -2.020  1.00  0.39           O  
HETATM   64  O   HOH T  63       2.523  23.210  27.186  1.00  0.39           O  
HETATM   65  O   HOH T  64      -4.189  41.185  14.432  1.00  0.39           O  
HETATM   66  O   HOH T  65       4.277  12.339  36.654  1.00  0.39           O  
HETATM   67  O   HOH T  66      -5.166   8.934  10.866  1.00  0.39           O  
HETATM   68  O   HOH T  67      11.605  18.557  33.696  1.00  0.40           O  
HETATM   69  O   HOH T  68      -1.332  27.500  31.012  1.00  0.40           O  
HETATM   70  O   HOH T  69      10.955  12.870  40.206  1.00  0.40           O  
HETATM   71  O   HOH T  70      -5.670  13.347  30.734  1.00  0.40           O  
HETATM   72  O   HOH T  71     -13.938  27.550   5.545  1.00  0.40           O  
HETATM   73  O   HOH T  72      -7.604  10.359  11.099  1.00  0.40           O  
HETATM   74  O   HOH T  73     -21.099  26.231  16.105  1.00  0.40           O  
HETATM   75  O   HOH T  74      11.226  11.421  32.562  1.00  0.40           O  
HETATM   76  O   HOH T  75     -17.836  24.074  16.939  1.00  0.40           O  
HETATM   77  O   HOH T  76     -10.555  10.537   7.252  1.00  0.41           O  
HETATM   78  O   HOH T  77       0.718  31.905   7.169  1.00  0.41           O  
HETATM   79  O   HOH T  78     -16.497  10.171  15.517  1.00  0.41           O  
HETATM   80  O   HOH T  79      -2.046  11.929   4.690  1.00  0.41           O  
HETATM   81  O   HOH T  80     -12.490  19.921   0.093  1.00  0.41           O  
HETATM   82  O   HOH T  81       6.835  27.643   4.815  1.00  0.41           O  
HETATM   83  O   HOH T  82      16.760  23.097  21.567  1.00  0.41           O  
HETATM   84  O   HOH T  83      -9.993  36.777  14.789  1.00  0.41           O  
HETATM   85  O   HOH T  84      -4.581  32.390  33.559  1.00  0.41           O  
HETATM   86  O   HOH T  85     -17.250  26.897  21.996  1.00  0.41           O  
HETATM   87  O   HOH T  86      -2.177  38.264  26.517  1.00  0.42           O  
HETATM   88  O   HOH T  87     -15.558  19.345  21.987  1.00  0.42           O  
HETATM   89  O   HOH T  88     -12.230  29.085  -0.212  1.00  0.42           O  
HETATM   90  O   HOH T  89       5.750  24.704   9.232  1.00  0.43           O  
HETATM   91  O   HOH T  90      -0.768  13.777   3.200  1.00  0.43           O  
HETATM   92  O   HOH T  91     -15.095  29.650   4.138  1.00  0.43           O  
HETATM   93  O   HOH T  92     -11.631  19.854  31.254  1.00  0.43           O  
HETATM   94  O   HOH T  93      -4.065  33.768   6.572  1.00  0.43           O  
HETATM   95  O   HOH T  94       2.076  13.906  36.593  1.00  0.43           O  
HETATM   96  O   HOH T  95       5.850  32.113   7.859  1.00  0.43           O  
HETATM   97  O   HOH T  96      18.590  25.061  20.842  1.00  0.43           O  
HETATM   98  O   HOH T  97      -7.586  15.270  30.108  1.00  0.43           O  
HETATM   99  O   HOH T  98      -5.970  42.978  13.292  1.00  0.43           O  
HETATM  100  O   HOH T  99     -11.530  29.965  26.961  1.00  0.43           O  
HETATM  101  O   HOH T 100      18.788  20.226  31.925  1.00  0.44           O  
HETATM  102  O   HOH T 101      -0.145   4.722  14.507  1.00  0.44           O  
HETATM  103  O   HOH T 102      -4.035  24.422  35.560  1.00  0.44           O  
HETATM  104  O   HOH T 103       9.185  19.509  34.743  1.00  0.44           O  
HETATM  105  O   HOH T 104       6.520  11.921  35.086  1.00  0.44           O  
HETATM  106  O   HOH T 105      -8.123  36.404   3.970  1.00  0.44           O  
HETATM  107  O   HOH T 106       2.685  25.073  29.145  1.00  0.44           O  
HETATM  108  O   HOH T 107       7.222  12.798  32.469  1.00  0.44           O  
HETATM  109  O   HOH T 108       5.432  22.171  23.966  1.00  0.44           O  
HETATM  110  O   HOH T 109       4.555  22.934  21.517  1.00  0.45           O  
HETATM  111  O   HOH T 110      -3.562  28.579  35.440  1.00  0.45           O  
HETATM  112  O   HOH T 111      -1.474  33.779  28.312  1.00  0.45           O  
HETATM  113  O   HOH T 112      17.393  27.366  19.902  1.00  0.45           O  
HETATM  114  O   HOH T 113       7.765  23.060  16.744  1.00  0.45           O  
HETATM  115  O   HOH T 114       7.479  25.467  18.241  1.00  0.45           O  
HETATM  116  O   HOH T 115       8.577  24.969   8.935  1.00  0.45           O  
HETATM  117  O   HOH T 116     -20.591  18.844  -0.708  1.00  0.45           O  
HETATM  118  O   HOH T 117      -8.599   6.301  18.936  1.00  0.45           O  
HETATM  119  O   HOH T 118       5.256  26.119  29.375  1.00  0.45           O  
HETATM  120  O   HOH T 119       6.237  29.440   6.794  1.00  0.45           O  
HETATM  121  O   HOH T 120       8.779  30.170  25.247  1.00  0.45           O  
HETATM  122  O   HOH T 121     -18.080  22.494  14.643  1.00  0.46           O  
HETATM  123  O   HOH T 122       8.129   2.474  24.821  1.00  0.46           O  
HETATM  124  O   HOH T 123      20.413  16.386  18.604  1.00  0.46           O  
HETATM  125  O   HOH T 124      10.199  22.050  28.755  1.00  0.46           O  
HETATM  126  O   HOH T 125       0.098  25.261  30.074  1.00  0.46           O  
HETATM  127  O   HOH T 126       9.481  12.994  37.800  1.00  0.46           O  
HETATM  128  O   HOH T 127      -5.040  10.591  30.679  1.00  0.46           O  
HETATM  129  O   HOH T 128      -8.895  19.503  31.535  1.00  0.46           O  
HETATM  130  O   HOH T 129       0.761  11.470   3.846  1.00  0.47           O  
HETATM  131  O   HOH T 130     -11.173  11.368  22.526  1.00  0.47           O  
HETATM  132  O   HOH T 131      -6.630  24.323  34.703  1.00  0.47           O  
HETATM  133  O   HOH T 132      -8.486  28.778  32.496  1.00  0.47           O  
HETATM  134  O   HOH T 133       9.233  29.569  27.870  1.00  0.47           O  
HETATM  135  O   HOH T 134      -1.940  36.548  28.656  1.00  0.47           O  
HETATM  136  O   HOH T 135       8.118  27.680  26.085  1.00  0.48           O  
HETATM  137  O   HOH T 136     -16.325  25.176   9.401  1.00  0.48           O  
HETATM  138  O   HOH T 137     -10.324  25.575  -2.506  1.00  0.48           O  
HETATM  139  O   HOH T 138       5.716  26.591   7.069  1.00  0.48           O  
HETATM  140  O   HOH T 139       6.182  23.801  26.128  1.00  0.48           O  
HETATM  141  O   HOH T 140     -17.728  19.966  15.470  1.00  0.48           O  
HETATM  142  O   HOH T 141     -11.407  13.950  21.638  1.00  0.48           O  
HETATM  143  O   HOH T 142       7.076  23.580  20.354  1.00  0.48           O  
HETATM  144  O   HOH T 143      -2.696  19.505  -0.832  1.00  0.48           O  
HETATM  145  O   HOH T 144       7.440  27.776  28.810  1.00  0.48           O  
HETATM  146  O   HOH T 145      12.267  26.404  26.107  1.00  0.49           O  
HETATM  147  O   HOH T 146     -14.499  29.139  11.997  1.00  0.49           O  
HETATM  148  O   HOH T 147      -3.979   6.379  21.930  1.00  0.49           O  
HETATM  149  O   HOH T 148     -11.486  24.057  33.004  1.00  0.49           O  
HETATM  150  O   HOH T 149      -8.590  10.859  13.548  1.00  0.49           O  
HETATM  151  O   HOH T 150      18.910  15.501  31.322  1.00  0.49           O  
HETATM  152  O   HOH T 151     -13.124  31.530  24.945  1.00  0.49           O  
HETATM  153  O   HOH T 152     -16.461  24.623  23.345  1.00  0.49           O  
HETATM  154  O   HOH T 153       9.773   5.569  31.649  1.00  0.49           O  
HETATM  155  O   HOH T 154      -7.868  26.661  34.201  1.00  0.49           O  
HETATM  156  O   HOH T 155       0.053  30.662   4.761  1.00  0.49           O  
HETATM  157  O   HOH T 156      -6.251  40.239  12.940  1.00  0.50           O  
HETATM  158  O   HOH T 157      -7.333  13.121  28.530  1.00  0.50           O  
HETATM  159  O   HOH T 158      -2.347  30.838  34.203  1.00  0.50           O  
HETATM  160  O   HOH T 159      15.267  19.747  16.527  1.00  0.50           O  
HETATM  161  O   HOH T 160     -13.467  11.449  17.584  1.00  0.50           O  
HETATM  162  O   HOH T 161      -0.516  34.117   8.488  1.00  0.50           O  
HETATM  163  O   HOH T 162     -14.108  31.848   2.780  1.00  0.50           O  
HETATM  164  O   HOH T 163       6.265   3.153  22.993  1.00  0.50           O  
HETATM  165  O   HOH T 164      -4.322  17.633   0.777  1.00  0.50           O  
HETATM  166  O   HOH T 165     -16.112  11.921  17.826  1.00  0.50           O  
HETATM  167  O   HOH T 166     -16.431  25.822  12.084  1.00  0.50           O  
HETATM  168  O   HOH T 167       3.547  10.528   3.981  1.00  0.50           O  
HETATM  169  O   HOH T 168      -6.142   6.144  20.262  1.00  0.51           O  
HETATM  170  O   HOH T 169      20.278  28.403  24.276  1.00  0.51           O  
HETATM  171  O   HOH T 170     -15.794  27.817   9.887  1.00  0.51           O  
HETATM  172  O   HOH T 171      -2.038  21.012  34.432  1.00  0.51           O  
HETATM  173  O   HOH T 172       8.104  22.902  24.431  1.00  0.51           O  
HETATM  174  O   HOH T 173     -15.642  34.221   0.407  1.00  0.51           O  
HETATM  175  O   HOH T 174     -16.331  21.810  23.337  1.00  0.52           O  
HETATM  176  O   HOH T 175      19.260  16.244  28.628  1.00  0.52           O  
HETATM  177  O   HOH T 176      -9.011  17.548  29.391  1.00  0.52           O  
HETATM  178  O   HOH T 177      -5.593  26.669  35.846  1.00  0.52           O  
HETATM  179  O   HOH T 178      -0.941   9.453   4.942  1.00  0.52           O  
HETATM  180  O   HOH T 179       8.239  13.055  40.270  1.00  0.52           O  
HETATM  181  O   HOH T 180      -3.416  13.538   2.845  1.00  0.52           O  
HETATM  182  O   HOH T 181      16.787  15.212  29.560  1.00  0.53           O  
HETATM  183  O   HOH T 182     -12.968  12.124  20.259  1.00  0.53           O  
HETATM  184  O   HOH T 183       4.868  11.236  39.148  1.00  0.53           O  
HETATM  185  O   HOH T 184      -9.138  38.446   5.688  1.00  0.54           O  
HETATM  186  O   HOH T 185       8.104  15.282  38.557  1.00  0.54           O  
HETATM  187  O   HOH T 186      -1.430  28.243  33.725  1.00  0.54           O  
HETATM  188  O   HOH T 187      -8.883  35.924  12.318  1.00  0.54           O  
HETATM  189  O   HOH T 188       0.851  28.432   3.265  1.00  0.54           O  
HETATM  190  O   HOH T 189       7.955  18.753  37.167  1.00  0.54           O  
HETATM  191  O   HOH T 190      11.342  24.468  28.002  1.00  0.54           O  
HETATM  192  O   HOH T 191      -7.163  17.861   0.550  1.00  0.54           O  
HETATM  193  O   HOH T 192      19.424  11.421  25.926  1.00  0.55           O  
HETATM  194  O   HOH T 193      -4.081   8.018  29.954  1.00  0.56           O  
HETATM  195  O   HOH T 194       8.648   8.637  15.275  1.00  0.56           O  
HETATM  196  O   HOH T 195      19.434  22.654  21.872  1.00  0.56           O  
HETATM  197  O   HOH T 196      20.423  17.022  25.134  1.00  0.56           O  
HETATM  198  O   HOH T 197       7.501  25.544  24.510  1.00  0.57           O  
HETATM  199  O   HOH T 198      -0.953  34.911  30.744  1.00  0.57           O  
HETATM  200  O   HOH T 199      12.903  23.484  16.154  1.00  0.57           O  
HETATM  201  O   HOH T 200     -15.753  26.519   7.164  1.00  0.58           O  
HETATM  202  O   HOH T 201     -11.362  17.771  -1.388  1.00  0.58           O  
HETATM  203  O   HOH T 202      10.616  22.656  14.647  1.00  0.59           O  
HETATM  204  O   HOH T 203      18.822  11.447  28.551  1.00  0.61           O  
HETATM  205  O   HOH T 204      14.007  14.007  18.770  1.00  0.62           O  
HETATM  206  O   HOH T 205     -15.401  16.301   6.625  1.00  0.64           O  
TER     207      HOH T 205 
