# Supplementary material for: Accurate Prediction of Hydration Sites of Proteins Using Energy Model With Atom Embedding
Source: Front Mol Biosci. 2021 Sep 20;8:756075. doi: 10.3389/fmolb.2021.756075 (PMC8488165; doi:10.3389/fmolb.2021.756075)
Supplement: Supplementary file 1 [file DataSheet1.ZIP › Data Sheet 1/Our_result_pdb/our_dataset_output/1VK5_watersite.pdb]

HEADER                                                        XXXX


JRNL        PMID   -1
HETATM    1  O   HOH T   0      32.534  30.827  -8.587  1.00  0.15           O  
HETATM    2  O   HOH T   1      24.176  41.424 -19.464  1.00  0.19           O  
HETATM    3  O   HOH T   2      34.433  24.540 -12.635  1.00  0.19           O  
HETATM    4  O   HOH T   3      37.930  29.850 -11.898  1.00  0.22           O  
HETATM    5  O   HOH T   4      16.122  28.410  -7.083  1.00  0.23           O  
HETATM    6  O   HOH T   5      34.920  18.234  -9.724  1.00  0.24           O  
HETATM    7  O   HOH T   6      23.299  18.722   4.449  1.00  0.24           O  
HETATM    8  O   HOH T   7      16.771  36.633 -15.337  1.00  0.24           O  
HETATM    9  O   HOH T   8      21.956  17.594 -12.173  1.00  0.24           O  
HETATM   10  O   HOH T   9      18.350  40.916  20.033  1.00  0.26           O  
HETATM   11  O   HOH T  10      30.640  38.631   1.771  1.00  0.26           O  
HETATM   12  O   HOH T  11      39.942  43.568 -11.845  1.00  0.26           O  
HETATM   13  O   HOH T  12      20.953  12.252   6.112  1.00  0.27           O  
HETATM   14  O   HOH T  13      42.770  35.727  -8.295  1.00  0.27           O  
HETATM   15  O   HOH T  14      31.497  30.223   0.487  1.00  0.27           O  
HETATM   16  O   HOH T  15      19.347  19.210   1.445  1.00  0.27           O  
HETATM   17  O   HOH T  16      29.020  42.226  -4.622  1.00  0.28           O  
HETATM   18  O   HOH T  17      26.592  13.864  12.486  1.00  0.28           O  
HETATM   19  O   HOH T  18      16.809  36.985  -9.716  1.00  0.29           O  
HETATM   20  O   HOH T  19      31.869  23.488 -13.138  1.00  0.29           O  
HETATM   21  O   HOH T  20      38.781  30.974  -4.887  1.00  0.29           O  
HETATM   22  O   HOH T  21      25.366  38.056  -3.058  1.00  0.30           O  
HETATM   23  O   HOH T  22      46.274  33.145 -11.360  1.00  0.30           O  
HETATM   24  O   HOH T  23      21.421  45.651 -12.348  1.00  0.30           O  
HETATM   25  O   HOH T  24      22.288  26.004 -13.859  1.00  0.31           O  
HETATM   26  O   HOH T  25      27.730  40.782   6.454  1.00  0.31           O  
HETATM   27  O   HOH T  26      24.642  16.098   0.910  1.00  0.31           O  
HETATM   28  O   HOH T  27      24.363  41.968  -4.678  1.00  0.31           O  
HETATM   29  O   HOH T  28      28.889  27.791  14.750  1.00  0.31           O  
HETATM   30  O   HOH T  29      21.111  41.170   0.360  1.00  0.31           O  
HETATM   31  O   HOH T  30      14.863  27.750 -15.802  1.00  0.32           O  
HETATM   32  O   HOH T  31      31.591  40.611  -0.018  1.00  0.33           O  
HETATM   33  O   HOH T  32      16.280  24.183  10.668  1.00  0.33           O  
HETATM   34  O   HOH T  33      20.063  19.556 -12.843  1.00  0.33           O  
HETATM   35  O   HOH T  34      30.971  21.135   7.316  1.00  0.33           O  
HETATM   36  O   HOH T  35      25.774  31.867  19.486  1.00  0.33           O  
HETATM   37  O   HOH T  36      28.600  30.868  11.309  1.00  0.34           O  
HETATM   38  O   HOH T  37      22.134  33.989 -15.453  1.00  0.35           O  
HETATM   39  O   HOH T  38      19.018  31.023 -17.391  1.00  0.35           O  
HETATM   40  O   HOH T  39      22.701  45.383 -21.367  1.00  0.35           O  
HETATM   41  O   HOH T  40      35.131  23.124 -16.385  1.00  0.35           O  
HETATM   42  O   HOH T  41      15.881  26.069   8.708  1.00  0.35           O  
HETATM   43  O   HOH T  42      22.235  24.584 -16.267  1.00  0.35           O  
HETATM   44  O   HOH T  43      24.980  14.533  -7.123  1.00  0.35           O  
HETATM   45  O   HOH T  44      29.963  29.882  24.888  1.00  0.36           O  
HETATM   46  O   HOH T  45      32.683  32.751   0.726  1.00  0.36           O  
HETATM   47  O   HOH T  46      30.291  37.083  18.467  1.00  0.36           O  
HETATM   48  O   HOH T  47      26.814  42.886   4.823  1.00  0.36           O  
HETATM   49  O   HOH T  48      34.112  25.028  13.683  1.00  0.37           O  
HETATM   50  O   HOH T  49      18.684  38.497 -16.339  1.00  0.37           O  
HETATM   51  O   HOH T  50      43.932  20.170   2.317  1.00  0.37           O  
HETATM   52  O   HOH T  51      27.423   8.486  -0.986  1.00  0.37           O  
HETATM   53  O   HOH T  52      36.244  33.913   0.049  1.00  0.37           O  
HETATM   54  O   HOH T  53      40.664  34.153  -7.319  1.00  0.37           O  
HETATM   55  O   HOH T  54      16.738  29.381 -17.056  1.00  0.38           O  
HETATM   56  O   HOH T  55      29.456  37.129  21.126  1.00  0.38           O  
HETATM   57  O   HOH T  56      19.992  22.427 -13.010  1.00  0.38           O  
HETATM   58  O   HOH T  57      42.823  20.666  -0.097  1.00  0.38           O  
HETATM   59  O   HOH T  58      38.886  31.535 -10.011  1.00  0.39           O  
HETATM   60  O   HOH T  59      33.306  27.205  12.124  1.00  0.39           O  
HETATM   61  O   HOH T  60      32.341  21.104 -11.710  1.00  0.39           O  
HETATM   62  O   HOH T  61      33.005  18.582 -11.483  1.00  0.39           O  
HETATM   63  O   HOH T  62      30.963  41.401  -2.698  1.00  0.39           O  
HETATM   64  O   HOH T  63      19.723  25.140 -12.821  1.00  0.39           O  
HETATM   65  O   HOH T  64      19.735  38.497  23.405  1.00  0.39           O  
HETATM   66  O   HOH T  65      41.008  23.604   9.027  1.00  0.39           O  
HETATM   67  O   HOH T  66      29.655  21.521  -5.133  1.00  0.40           O  
HETATM   68  O   HOH T  67      26.460   6.414  -2.441  1.00  0.40           O  
HETATM   69  O   HOH T  68      35.227  31.668   1.139  1.00  0.40           O  
HETATM   70  O   HOH T  69      18.344  13.079  -3.868  1.00  0.40           O  
HETATM   71  O   HOH T  70      42.153  24.461   6.645  1.00  0.41           O  
HETATM   72  O   HOH T  71      27.731  30.510  18.018  1.00  0.41           O  
HETATM   73  O   HOH T  72      28.013  15.892  -8.032  1.00  0.41           O  
HETATM   74  O   HOH T  73      24.501  18.488 -11.291  1.00  0.41           O  
HETATM   75  O   HOH T  74      39.810  31.503  -7.403  1.00  0.41           O  
HETATM   76  O   HOH T  75      21.714   9.401   2.340  1.00  0.42           O  
HETATM   77  O   HOH T  76      28.490  27.483  24.485  1.00  0.42           O  
HETATM   78  O   HOH T  77      23.609  29.756  23.230  1.00  0.42           O  
HETATM   79  O   HOH T  78      19.126  11.999  -1.356  1.00  0.42           O  
HETATM   80  O   HOH T  79      21.820  46.701  -4.902  1.00  0.42           O  
HETATM   81  O   HOH T  80      26.680  40.625  -3.984  1.00  0.42           O  
HETATM   82  O   HOH T  81      21.379  38.941   1.769  1.00  0.43           O  
HETATM   83  O   HOH T  82      28.373  36.217  23.467  1.00  0.43           O  
HETATM   84  O   HOH T  83      17.127  15.228   7.209  1.00  0.43           O  
HETATM   85  O   HOH T  84      26.239  16.822  -9.944  1.00  0.43           O  
HETATM   86  O   HOH T  85      37.801  44.646 -22.434  1.00  0.43           O  
HETATM   87  O   HOH T  86      23.228  22.220 -17.280  1.00  0.43           O  
HETATM   88  O   HOH T  87      20.404  36.676  -9.380  1.00  0.43           O  
HETATM   89  O   HOH T  88      28.388  17.868 -11.294  1.00  0.44           O  
HETATM   90  O   HOH T  89      28.952  34.423  21.471  1.00  0.44           O  
HETATM   91  O   HOH T  90      19.127  16.454   1.310  1.00  0.44           O  
HETATM   92  O   HOH T  91      27.539  34.996 -24.596  1.00  0.44           O  
HETATM   93  O   HOH T  92      31.343  35.313  20.275  1.00  0.44           O  
HETATM   94  O   HOH T  93      38.101  20.306 -15.592  1.00  0.44           O  
HETATM   95  O   HOH T  94      18.257  40.690  22.714  1.00  0.44           O  
HETATM   96  O   HOH T  95      17.027  26.656 -17.072  1.00  0.44           O  
HETATM   97  O   HOH T  96      38.929  21.916   8.312  1.00  0.44           O  
HETATM   98  O   HOH T  97      20.967  26.642 -17.788  1.00  0.44           O  
HETATM   99  O   HOH T  98      34.231  28.299   9.754  1.00  0.44           O  
HETATM  100  O   HOH T  99      20.144  11.030  -3.732  1.00  0.44           O  
HETATM  101  O   HOH T 100      19.932  45.008 -21.827  1.00  0.45           O  
HETATM  102  O   HOH T 101      23.544  30.885  20.803  1.00  0.45           O  
HETATM  103  O   HOH T 102      33.471  28.371   0.076  1.00  0.45           O  
HETATM  104  O   HOH T 103      20.158  36.295 -17.434  1.00  0.45           O  
HETATM  105  O   HOH T 104      17.787  14.559   2.888  1.00  0.45           O  
HETATM  106  O   HOH T 105      19.416  13.715   0.871  1.00  0.45           O  
HETATM  107  O   HOH T 106      40.438  21.507 -14.795  1.00  0.45           O  
HETATM  108  O   HOH T 107      23.220   9.883  -1.629  1.00  0.45           O  
HETATM  109  O   HOH T 108      41.824  21.880   2.281  1.00  0.45           O  
HETATM  110  O   HOH T 109      27.316   8.632  -3.778  1.00  0.45           O  
HETATM  111  O   HOH T 110      25.417  33.097  17.018  1.00  0.45           O  
HETATM  112  O   HOH T 111      30.234  41.357   2.356  1.00  0.45           O  
HETATM  113  O   HOH T 112      29.857  44.956  -5.185  1.00  0.45           O  
HETATM  114  O   HOH T 113      29.984  33.095  15.355  1.00  0.45           O  
HETATM  115  O   HOH T 114      20.974  35.662 -22.616  1.00  0.46           O  
HETATM  116  O   HOH T 115      41.411  44.670  -6.560  1.00  0.46           O  
HETATM  117  O   HOH T 116      21.217  17.634   2.857  1.00  0.46           O  
HETATM  118  O   HOH T 117      44.442  31.517  -7.975  1.00  0.46           O  
HETATM  119  O   HOH T 118      23.854  10.971  -4.081  1.00  0.46           O  
HETATM  120  O   HOH T 119      18.819  28.390 -18.458  1.00  0.46           O  
HETATM  121  O   HOH T 120      23.072  31.443  25.297  1.00  0.46           O  
HETATM  122  O   HOH T 121      21.851  34.095 -20.522  1.00  0.46           O  
HETATM  123  O   HOH T 122      45.185  30.639 -11.959  1.00  0.47           O  
HETATM  124  O   HOH T 123      25.114  13.394  -4.587  1.00  0.47           O  
HETATM  125  O   HOH T 124      29.175  28.320  26.995  1.00  0.47           O  
HETATM  126  O   HOH T 125      21.588   9.640   5.128  1.00  0.47           O  
HETATM  127  O   HOH T 126      22.801  45.686 -14.672  1.00  0.47           O  
HETATM  128  O   HOH T 127      26.063  34.862  27.069  1.00  0.47           O  
HETATM  129  O   HOH T 128      43.511  32.844 -11.520  1.00  0.47           O  
HETATM  130  O   HOH T 129      19.008  14.227   5.400  1.00  0.47           O  
HETATM  131  O   HOH T 130      25.239  23.640  20.035  1.00  0.47           O  
HETATM  132  O   HOH T 131      28.330  43.456   7.065  1.00  0.47           O  
HETATM  133  O   HOH T 132      26.454  10.966  -4.955  1.00  0.47           O  
HETATM  134  O   HOH T 133      38.003  13.164 -17.624  1.00  0.48           O  
HETATM  135  O   HOH T 134      33.055  25.754   9.703  1.00  0.48           O  
HETATM  136  O   HOH T 135      43.265  33.594  -6.620  1.00  0.48           O  
HETATM  137  O   HOH T 136      40.493  21.663 -11.988  1.00  0.48           O  
HETATM  138  O   HOH T 137      40.371  44.598  -9.247  1.00  0.48           O  
HETATM  139  O   HOH T 138      20.996  10.355  -0.054  1.00  0.48           O  
HETATM  140  O   HOH T 139      29.987  49.484  -9.657  1.00  0.48           O  
HETATM  141  O   HOH T 140      20.522  14.938   3.126  1.00  0.48           O  
HETATM  142  O   HOH T 141      33.171  19.487 -13.929  1.00  0.48           O  
HETATM  143  O   HOH T 142      34.530  33.964   2.407  1.00  0.48           O  
HETATM  144  O   HOH T 143      39.023  32.429  -2.478  1.00  0.48           O  
HETATM  145  O   HOH T 144      24.158  43.070 -21.752  1.00  0.48           O  
HETATM  146  O   HOH T 145      29.360  33.092  12.632  1.00  0.49           O  
HETATM  147  O   HOH T 146      41.435  23.600 -16.297  1.00  0.49           O  
HETATM  148  O   HOH T 147      30.897  17.580 -10.225  1.00  0.49           O  
HETATM  149  O   HOH T 148      34.154  22.589  14.923  1.00  0.49           O  
HETATM  150  O   HOH T 149      28.072  34.081  16.988  1.00  0.49           O  
HETATM  151  O   HOH T 150      28.758  14.293  -5.897  1.00  0.49           O  
HETATM  152  O   HOH T 151      33.015  18.788  15.565  1.00  0.50           O  
HETATM  153  O   HOH T 152      21.139  32.822  17.061  1.00  0.50           O  
HETATM  154  O   HOH T 153      35.877  27.906  -2.527  1.00  0.50           O  
HETATM  155  O   HOH T 154      33.138  50.566 -16.921  1.00  0.50           O  
HETATM  156  O   HOH T 155      35.324  20.473 -15.537  1.00  0.50           O  
HETATM  157  O   HOH T 156      19.086  46.889 -11.611  1.00  0.51           O  
HETATM  158  O   HOH T 157      24.457  11.252  -8.879  1.00  0.51           O  
HETATM  159  O   HOH T 158      21.744  43.932 -23.469  1.00  0.51           O  
HETATM  160  O   HOH T 159      21.788  20.030  -5.709  1.00  0.51           O  
HETATM  161  O   HOH T 160      17.010  17.021  -5.655  1.00  0.51           O  
HETATM  162  O   HOH T 161      22.429   7.956   0.121  1.00  0.52           O  
HETATM  163  O   HOH T 162      18.718  27.198   5.813  1.00  0.52           O  
HETATM  164  O   HOH T 163      24.232  40.494  -2.407  1.00  0.52           O  
HETATM  165  O   HOH T 164      31.576  28.334  14.033  1.00  0.52           O  
HETATM  166  O   HOH T 165      32.728  40.392   2.547  1.00  0.52           O  
HETATM  167  O   HOH T 166      25.976  37.873  26.844  1.00  0.52           O  
HETATM  168  O   HOH T 167      31.701  31.595  16.944  1.00  0.52           O  
HETATM  169  O   HOH T 168      18.571  12.839   7.695  1.00  0.53           O  
HETATM  170  O   HOH T 169      31.769  30.730 -20.481  1.00  0.53           O  
HETATM  171  O   HOH T 170      35.053  26.499   7.877  1.00  0.53           O  
HETATM  172  O   HOH T 171      16.206  26.807  11.464  1.00  0.53           O  
HETATM  173  O   HOH T 172      41.257  33.938  -1.836  1.00  0.53           O  
HETATM  174  O   HOH T 173      30.222  29.539  17.843  1.00  0.53           O  
HETATM  175  O   HOH T 174      24.482   9.770  -6.520  1.00  0.54           O  
HETATM  176  O   HOH T 175      30.749  33.971  17.880  1.00  0.54           O  
HETATM  177  O   HOH T 176      22.572  34.807 -17.984  1.00  0.54           O  
HETATM  178  O   HOH T 177      24.981  22.497 -19.411  1.00  0.54           O  
HETATM  179  O   HOH T 178      34.049  22.068 -13.848  1.00  0.55           O  
HETATM  180  O   HOH T 179      16.040  15.363  -7.262  1.00  0.55           O  
HETATM  181  O   HOH T 180      17.598  22.378  -2.664  1.00  0.55           O  
HETATM  182  O   HOH T 181      42.135  36.304  -2.947  1.00  0.56           O  
HETATM  183  O   HOH T 182      29.408  25.115 -17.276  1.00  0.56           O  
HETATM  184  O   HOH T 183      31.613  33.479  23.780  1.00  0.56           O  
HETATM  185  O   HOH T 184      25.857  29.936 -21.289  1.00  0.56           O  
HETATM  186  O   HOH T 185      36.869  37.376 -23.578  1.00  0.56           O  
HETATM  187  O   HOH T 186      38.612  32.151 -24.581  1.00  0.57           O  
HETATM  188  O   HOH T 187      35.732  23.538 -20.239  1.00  0.57           O  
HETATM  189  O   HOH T 188      24.947  34.074 -24.132  1.00  0.58           O  
HETATM  190  O   HOH T 189      35.650  20.200   9.293  1.00  0.58           O  
HETATM  191  O   HOH T 190      28.199  19.898 -13.087  1.00  0.62           O  
TER     192      HOH T 190 
