# Supplementary material for: Accurate Prediction of Hydration Sites of Proteins Using Energy Model With Atom Embedding
Source: Front Mol Biosci. 2021 Sep 20;8:756075. doi: 10.3389/fmolb.2021.756075 (PMC8488165; doi:10.3389/fmolb.2021.756075)
Supplement: Supplementary file 1 [file DataSheet1.ZIP › Data Sheet 1/Our_result_pdb/our_dataset_output/1WCK_watersite.pdb]

HEADER                                                        XXXX


JRNL        PMID   -1
HETATM    1  O   HOH T   0      -4.629  61.884  19.657  1.00  0.18           O  
HETATM    2  O   HOH T   1      -7.535  67.921   4.411  1.00  0.20           O  
HETATM    3  O   HOH T   2       3.031  74.398  33.013  1.00  0.22           O  
HETATM    4  O   HOH T   3       5.819  71.555  39.023  1.00  0.23           O  
HETATM    5  O   HOH T   4       3.684  75.162  26.012  1.00  0.23           O  
HETATM    6  O   HOH T   5      -4.443  80.653  39.920  1.00  0.25           O  
HETATM    7  O   HOH T   6       0.680  57.305  18.192  1.00  0.25           O  
HETATM    8  O   HOH T   7      -0.005  68.308  40.876  1.00  0.26           O  
HETATM    9  O   HOH T   8       0.005  79.177  12.965  1.00  0.26           O  
HETATM   10  O   HOH T   9     -13.228  75.720  27.299  1.00  0.26           O  
HETATM   11  O   HOH T  10      -7.826  76.257  20.453  1.00  0.27           O  
HETATM   12  O   HOH T  11     -12.237  71.230  34.783  1.00  0.27           O  
HETATM   13  O   HOH T  12       2.306  64.654  39.708  1.00  0.27           O  
HETATM   14  O   HOH T  13      -6.554  75.266  31.638  1.00  0.28           O  
HETATM   15  O   HOH T  14       7.851  61.221  14.088  1.00  0.28           O  
HETATM   16  O   HOH T  15     -12.749  74.602  32.377  1.00  0.28           O  
HETATM   17  O   HOH T  16      -4.048  63.322  35.854  1.00  0.28           O  
HETATM   18  O   HOH T  17     -10.787  77.057  22.892  1.00  0.28           O  
HETATM   19  O   HOH T  18       0.382  56.609  36.498  1.00  0.29           O  
HETATM   20  O   HOH T  19     -10.319  75.848  19.354  1.00  0.29           O  
HETATM   21  O   HOH T  20     -15.427  75.331  14.659  1.00  0.30           O  
HETATM   22  O   HOH T  21      13.717  69.647   6.441  1.00  0.30           O  
HETATM   23  O   HOH T  22     -17.285  66.274  14.324  1.00  0.30           O  
HETATM   24  O   HOH T  23       0.163  55.083  22.659  1.00  0.30           O  
HETATM   25  O   HOH T  24     -18.501  69.758  20.194  1.00  0.30           O  
HETATM   26  O   HOH T  25       0.006  79.181  35.238  1.00  0.30           O  
HETATM   27  O   HOH T  26       1.769  73.886  30.604  1.00  0.31           O  
HETATM   28  O   HOH T  27     -10.535  76.063  31.556  1.00  0.31           O  
HETATM   29  O   HOH T  28       2.081  77.232  16.025  1.00  0.32           O  
HETATM   30  O   HOH T  29      -9.042  62.316   2.987  1.00  0.32           O  
HETATM   31  O   HOH T  30      -5.603  67.608  -0.338  1.00  0.32           O  
HETATM   32  O   HOH T  31      10.533  66.442   9.583  1.00  0.32           O  
HETATM   33  O   HOH T  32     -12.148  61.022  32.304  1.00  0.32           O  
HETATM   34  O   HOH T  33       8.873  59.414   0.016  1.00  0.33           O  
HETATM   35  O   HOH T  34      -5.405  63.285  -0.394  1.00  0.33           O  
HETATM   36  O   HOH T  35       5.953  64.188  30.904  1.00  0.33           O  
HETATM   37  O   HOH T  36       9.451  72.255  37.488  1.00  0.33           O  
HETATM   38  O   HOH T  37     -12.186  64.021   8.752  1.00  0.33           O  
HETATM   39  O   HOH T  38     -12.914  66.396  27.558  1.00  0.33           O  
HETATM   40  O   HOH T  39     -14.336  65.037  29.578  1.00  0.34           O  
HETATM   41  O   HOH T  40       0.726  54.819   9.049  1.00  0.34           O  
HETATM   42  O   HOH T  41       1.319  85.217  -1.213  1.00  0.34           O  
HETATM   43  O   HOH T  42      10.622  66.630  22.683  1.00  0.34           O  
HETATM   44  O   HOH T  43       8.349  72.395  39.998  1.00  0.35           O  
HETATM   45  O   HOH T  44      -6.458  62.014   4.316  1.00  0.35           O  
HETATM   46  O   HOH T  45       3.300  54.870   6.068  1.00  0.35           O  
HETATM   47  O   HOH T  46       4.802  62.343  35.557  1.00  0.35           O  
HETATM   48  O   HOH T  47     -10.104  72.071  36.247  1.00  0.36           O  
HETATM   49  O   HOH T  48     -13.940  71.328   2.527  1.00  0.36           O  
HETATM   50  O   HOH T  49      10.406  62.614   7.661  1.00  0.36           O  
HETATM   51  O   HOH T  50       1.001  58.111  15.564  1.00  0.36           O  
HETATM   52  O   HOH T  51      -5.711  70.742  -2.509  1.00  0.36           O  
HETATM   53  O   HOH T  52       6.902  71.993  29.049  1.00  0.36           O  
HETATM   54  O   HOH T  53     -14.370  64.701  35.621  1.00  0.37           O  
HETATM   55  O   HOH T  54       9.893  67.557  12.148  1.00  0.37           O  
HETATM   56  O   HOH T  55       1.937  65.838  -2.129  1.00  0.37           O  
HETATM   57  O   HOH T  56      -2.135  53.964  30.591  1.00  0.37           O  
HETATM   58  O   HOH T  57       2.238  85.168  -3.929  1.00  0.38           O  
HETATM   59  O   HOH T  58      -0.680  56.562  34.012  1.00  0.38           O  
HETATM   60  O   HOH T  59     -13.343  69.016  28.128  1.00  0.38           O  
HETATM   61  O   HOH T  60       6.012  65.386  27.115  1.00  0.38           O  
HETATM   62  O   HOH T  61       1.029  53.338   6.764  1.00  0.38           O  
HETATM   63  O   HOH T  62      -7.861  72.141  -1.433  1.00  0.38           O  
HETATM   64  O   HOH T  63      -2.599  61.359  -2.260  1.00  0.38           O  
HETATM   65  O   HOH T  64       1.254  57.168  39.123  1.00  0.38           O  
HETATM   66  O   HOH T  65     -16.861  62.240  17.790  1.00  0.38           O  
HETATM   67  O   HOH T  66       5.796  59.485   6.887  1.00  0.39           O  
HETATM   68  O   HOH T  67     -12.920  56.941   9.537  1.00  0.39           O  
HETATM   69  O   HOH T  68      -4.685  73.005  -3.704  1.00  0.39           O  
HETATM   70  O   HOH T  69      12.992  65.974  21.104  1.00  0.39           O  
HETATM   71  O   HOH T  70      -9.559  70.061  38.322  1.00  0.39           O  
HETATM   72  O   HOH T  71     -12.753  61.436   7.956  1.00  0.40           O  
HETATM   73  O   HOH T  72      -2.380  53.737  27.720  1.00  0.40           O  
HETATM   74  O   HOH T  73      12.009  67.653   7.482  1.00  0.40           O  
HETATM   75  O   HOH T  74       9.815  66.482  30.880  1.00  0.40           O  
HETATM   76  O   HOH T  75      -9.160  67.342  37.759  1.00  0.40           O  
HETATM   77  O   HOH T  76      -7.952  76.752  23.055  1.00  0.41           O  
HETATM   78  O   HOH T  77      -7.163  61.533   0.913  1.00  0.41           O  
HETATM   79  O   HOH T  78     -10.540  65.159  36.661  1.00  0.41           O  
HETATM   80  O   HOH T  79      -7.474  62.223  -1.775  1.00  0.41           O  
HETATM   81  O   HOH T  80     -11.965  73.916  35.060  1.00  0.41           O  
HETATM   82  O   HOH T  81       7.784  62.487  32.187  1.00  0.42           O  
HETATM   83  O   HOH T  82      -0.279  52.651  29.091  1.00  0.42           O  
HETATM   84  O   HOH T  83       0.836  59.829  39.767  1.00  0.42           O  
HETATM   85  O   HOH T  84     -18.757  65.306  29.060  1.00  0.42           O  
HETATM   86  O   HOH T  85      -1.509  54.961  20.443  1.00  0.43           O  
HETATM   87  O   HOH T  86     -14.179  62.593  16.630  1.00  0.43           O  
HETATM   88  O   HOH T  87     -15.506  67.272  36.404  1.00  0.43           O  
HETATM   89  O   HOH T  88       8.139  61.003   7.254  1.00  0.43           O  
HETATM   90  O   HOH T  89       7.657  63.021  12.066  1.00  0.43           O  
HETATM   91  O   HOH T  90       2.662  87.383  -2.376  1.00  0.43           O  
HETATM   92  O   HOH T  91     -18.729  65.915  16.724  1.00  0.43           O  
HETATM   93  O   HOH T  92       2.518  61.899  39.906  1.00  0.43           O  
HETATM   94  O   HOH T  93      -0.821  58.616  37.886  1.00  0.43           O  
HETATM   95  O   HOH T  94       0.006  65.563  40.870  1.00  0.43           O  
HETATM   96  O   HOH T  95      -7.559  73.958  23.399  1.00  0.44           O  
HETATM   97  O   HOH T  96     -14.120  57.732  17.634  1.00  0.44           O  
HETATM   98  O   HOH T  97      -0.004  79.160  -2.996  1.00  0.44           O  
HETATM   99  O   HOH T  98      -8.373  59.931   4.350  1.00  0.44           O  
HETATM  100  O   HOH T  99     -13.778  75.574  29.961  1.00  0.44           O  
HETATM  101  O   HOH T 100     -12.048  60.013  34.923  1.00  0.44           O  
HETATM  102  O   HOH T 101       3.338  73.621  28.325  1.00  0.44           O  
HETATM  103  O   HOH T 102     -15.298  64.359  14.821  1.00  0.45           O  
HETATM  104  O   HOH T 103     -11.250  63.970   3.889  1.00  0.45           O  
HETATM  105  O   HOH T 104     -14.788  69.812   4.631  1.00  0.45           O  
HETATM  106  O   HOH T 105      -6.728  64.784  40.332  1.00  0.45           O  
HETATM  107  O   HOH T 106       8.012  65.242  32.406  1.00  0.45           O  
HETATM  108  O   HOH T 107      15.446  65.944  19.642  1.00  0.45           O  
HETATM  109  O   HOH T 108       4.236  58.110  27.073  1.00  0.45           O  
HETATM  110  O   HOH T 109     -13.861  60.644  11.805  1.00  0.45           O  
HETATM  111  O   HOH T 110      -5.139  77.957  39.582  1.00  0.45           O  
HETATM  112  O   HOH T 111     -16.459  60.476  30.153  1.00  0.45           O  
HETATM  113  O   HOH T 112     -12.488  68.951   3.116  1.00  0.45           O  
HETATM  114  O   HOH T 113      -2.465  54.316  22.954  1.00  0.46           O  
HETATM  115  O   HOH T 114      13.007  68.220  22.648  1.00  0.46           O  
HETATM  116  O   HOH T 115     -17.340  74.872  12.769  1.00  0.46           O  
HETATM  117  O   HOH T 116     -17.799  62.662  29.015  1.00  0.46           O  
HETATM  118  O   HOH T 117       7.514  59.249  12.208  1.00  0.46           O  
HETATM  119  O   HOH T 118     -12.189  71.170   0.303  1.00  0.46           O  
HETATM  120  O   HOH T 119     -14.984  77.563  28.356  1.00  0.46           O  
HETATM  121  O   HOH T 120     -13.705  60.213  30.097  1.00  0.46           O  
HETATM  122  O   HOH T 121     -13.652  62.250  34.315  1.00  0.46           O  
HETATM  123  O   HOH T 122       4.042  54.999  20.229  1.00  0.46           O  
HETATM  124  O   HOH T 123      -3.894  54.210  25.354  1.00  0.46           O  
HETATM  125  O   HOH T 124       8.085  62.046  -0.529  1.00  0.46           O  
HETATM  126  O   HOH T 125     -12.804  63.560   6.164  1.00  0.46           O  
HETATM  127  O   HOH T 126       7.369  61.714  34.849  1.00  0.47           O  
HETATM  128  O   HOH T 127     -20.281  70.297  18.145  1.00  0.47           O  
HETATM  129  O   HOH T 128     -14.994  62.397  28.861  1.00  0.47           O  
HETATM  130  O   HOH T 129      -4.911  60.806  35.085  1.00  0.47           O  
HETATM  131  O   HOH T 130       4.069  63.254  38.050  1.00  0.47           O  
HETATM  132  O   HOH T 131       6.999  62.173   9.523  1.00  0.47           O  
HETATM  133  O   HOH T 132      -4.249  60.549  40.098  1.00  0.47           O  
HETATM  134  O   HOH T 133     -12.938  63.713   1.664  1.00  0.47           O  
HETATM  135  O   HOH T 134       1.267  55.509  20.269  1.00  0.48           O  
HETATM  136  O   HOH T 135     -12.447  68.283   0.404  1.00  0.48           O  
HETATM  137  O   HOH T 136      -7.508  67.025  -2.262  1.00  0.48           O  
HETATM  138  O   HOH T 137       4.217  75.093  30.611  1.00  0.48           O  
HETATM  139  O   HOH T 138      12.039  59.399   4.876  1.00  0.48           O  
HETATM  140  O   HOH T 139      -2.103  72.220  -4.697  1.00  0.48           O  
HETATM  141  O   HOH T 140       5.983  63.885  33.735  1.00  0.48           O  
HETATM  142  O   HOH T 141     -16.393  64.585  27.773  1.00  0.48           O  
HETATM  143  O   HOH T 142     -11.573  58.944   7.985  1.00  0.48           O  
HETATM  144  O   HOH T 143     -19.543  67.659  18.776  1.00  0.49           O  
HETATM  145  O   HOH T 144     -10.748  68.085  39.895  1.00  0.49           O  
HETATM  146  O   HOH T 145       8.023  64.068   1.631  1.00  0.49           O  
HETATM  147  O   HOH T 146      12.680  61.614   6.467  1.00  0.49           O  
HETATM  148  O   HOH T 147      -2.562  59.694  36.037  1.00  0.49           O  
HETATM  149  O   HOH T 148       5.957  67.597  34.822  1.00  0.50           O  
HETATM  150  O   HOH T 149     -14.689  58.238  12.908  1.00  0.50           O  
HETATM  151  O   HOH T 150     -14.896  60.459  32.508  1.00  0.50           O  
HETATM  152  O   HOH T 151       6.324  58.992  29.063  1.00  0.50           O  
HETATM  153  O   HOH T 152      -9.315  65.701  40.085  1.00  0.50           O  
HETATM  154  O   HOH T 153      -8.477  58.965  24.110  1.00  0.50           O  
HETATM  155  O   HOH T 154       6.722  62.383  37.486  1.00  0.50           O  
HETATM  156  O   HOH T 155      -2.459  58.303  40.229  1.00  0.50           O  
HETATM  157  O   HOH T 156       0.632  89.218  -1.600  1.00  0.50           O  
HETATM  158  O   HOH T 157     -14.379  60.593  14.495  1.00  0.51           O  
HETATM  159  O   HOH T 158     -10.667  58.733  32.865  1.00  0.51           O  
HETATM  160  O   HOH T 159     -13.749  65.854   0.166  1.00  0.51           O  
HETATM  161  O   HOH T 160      10.684  59.824   7.209  1.00  0.51           O  
HETATM  162  O   HOH T 161     -15.499  60.113  17.065  1.00  0.51           O  
HETATM  163  O   HOH T 162     -14.491  67.209   3.976  1.00  0.51           O  
HETATM  164  O   HOH T 163      -7.115  54.802  15.417  1.00  0.51           O  
HETATM  165  O   HOH T 164      -9.148  58.555   6.626  1.00  0.52           O  
HETATM  166  O   HOH T 165     -17.824  67.979  12.157  1.00  0.52           O  
HETATM  167  O   HOH T 166     -20.467  68.127  16.272  1.00  0.52           O  
HETATM  168  O   HOH T 167       7.342  59.377   9.359  1.00  0.52           O  
HETATM  169  O   HOH T 168       9.497  64.759  21.098  1.00  0.52           O  
HETATM  170  O   HOH T 169      10.471  57.442   5.644  1.00  0.53           O  
HETATM  171  O   HOH T 170     -15.481  58.203  15.311  1.00  0.53           O  
HETATM  172  O   HOH T 171      -7.881  64.979  37.793  1.00  0.53           O  
HETATM  173  O   HOH T 172       9.154  63.958   9.838  1.00  0.53           O  
HETATM  174  O   HOH T 173      -8.238  69.632  -2.626  1.00  0.54           O  
HETATM  175  O   HOH T 174      -6.289  74.444  -1.726  1.00  0.54           O  
HETATM  176  O   HOH T 175      -9.404  66.203  24.915  1.00  0.54           O  
HETATM  177  O   HOH T 176     -14.029  64.601   3.980  1.00  0.54           O  
HETATM  178  O   HOH T 177      -5.299  63.891  38.136  1.00  0.55           O  
HETATM  179  O   HOH T 178     -18.813  63.967  18.663  1.00  0.55           O  
HETATM  180  O   HOH T 179     -13.816  59.469   9.320  1.00  0.55           O  
HETATM  181  O   HOH T 180      -4.456  63.342  40.759  1.00  0.55           O  
HETATM  182  O   HOH T 181       1.612  77.066  39.434  1.00  0.55           O  
HETATM  183  O   HOH T 182       5.659  53.315  18.774  1.00  0.56           O  
HETATM  184  O   HOH T 183       7.253  56.695   9.699  1.00  0.56           O  
HETATM  185  O   HOH T 184     -21.019  70.465  33.236  1.00  0.57           O  
HETATM  186  O   HOH T 185     -17.048  72.921  25.165  1.00  0.57           O  
HETATM  187  O   HOH T 186      -0.780  52.646   8.854  1.00  0.57           O  
HETATM  188  O   HOH T 187     -19.602  71.759  33.031  1.00  0.57           O  
HETATM  189  O   HOH T 188       5.733  54.291   7.266  1.00  0.57           O  
HETATM  190  O   HOH T 189      -1.070  73.631  11.977  1.00  0.57           O  
HETATM  191  O   HOH T 190      -6.379  58.032   3.820  1.00  0.58           O  
HETATM  192  O   HOH T 191     -12.237  66.311   2.550  1.00  0.58           O  
HETATM  193  O   HOH T 192       1.719  80.187  12.105  1.00  0.58           O  
HETATM  194  O   HOH T 193       1.427  79.625  14.824  1.00  0.69           O  
TER     195      HOH T 193 
