# Supplementary material for: Accurate Prediction of Hydration Sites of Proteins Using Energy Model With Atom Embedding
Source: Front Mol Biosci. 2021 Sep 20;8:756075. doi: 10.3389/fmolb.2021.756075 (PMC8488165; doi:10.3389/fmolb.2021.756075)
Supplement: Supplementary file 1 [file DataSheet1.ZIP › Data Sheet 1/Our_result_pdb/our_dataset_output/1WKU_watersite.pdb]

HEADER                                                        XXXX


JRNL        PMID   -1
HETATM    1  O   HOH T   0      23.425  59.399  29.622  1.00  0.14           O  
HETATM    2  O   HOH T   1      43.060   4.803  57.083  1.00  0.15           O  
HETATM    3  O   HOH T   2      25.000  57.469  34.704  1.00  0.18           O  
HETATM    4  O   HOH T   3      23.983  58.772  17.708  1.00  0.18           O  
HETATM    5  O   HOH T   4      43.535   4.644  69.116  1.00  0.19           O  
HETATM    6  O   HOH T   5      20.293  25.142  47.729  1.00  0.19           O  
HETATM    7  O   HOH T   6      42.115  32.936  42.930  1.00  0.20           O  
HETATM    8  O   HOH T   7       1.188  39.053  39.898  1.00  0.20           O  
HETATM    9  O   HOH T   8       6.774  42.824  25.866  1.00  0.20           O  
HETATM   10  O   HOH T   9      44.176   4.321  71.845  1.00  0.21           O  
HETATM   11  O   HOH T  10      17.681  61.767  10.540  1.00  0.22           O  
HETATM   12  O   HOH T  11      51.618  13.892  73.632  1.00  0.22           O  
HETATM   13  O   HOH T  12      37.795  55.053  22.701  1.00  0.22           O  
HETATM   14  O   HOH T  13      -6.092  58.174  12.639  1.00  0.22           O  
HETATM   15  O   HOH T  14      30.122  -5.009  60.907  1.00  0.22           O  
HETATM   16  O   HOH T  15      41.121   3.687  51.450  1.00  0.22           O  
HETATM   17  O   HOH T  16      17.935  35.737  36.782  1.00  0.23           O  
HETATM   18  O   HOH T  17      15.524  40.354  43.020  1.00  0.23           O  
HETATM   19  O   HOH T  18      24.560  58.885  14.945  1.00  0.23           O  
HETATM   20  O   HOH T  19      -2.695  56.455   6.853  1.00  0.23           O  
HETATM   21  O   HOH T  20      34.469  24.292  44.903  1.00  0.24           O  
HETATM   22  O   HOH T  21      20.144  34.835  35.548  1.00  0.24           O  
HETATM   23  O   HOH T  22      37.166   1.179  76.088  1.00  0.24           O  
HETATM   24  O   HOH T  23      43.665  20.917  52.276  1.00  0.24           O  
HETATM   25  O   HOH T  24      19.010   9.380  65.024  1.00  0.24           O  
HETATM   26  O   HOH T  25      32.106  49.438  13.449  1.00  0.24           O  
HETATM   27  O   HOH T  26      19.122  37.645  38.313  1.00  0.24           O  
HETATM   28  O   HOH T  27      37.096  28.627  51.403  1.00  0.24           O  
HETATM   29  O   HOH T  28      38.001 -10.952  60.198  1.00  0.25           O  
HETATM   30  O   HOH T  29      38.100  26.842  49.646  1.00  0.25           O  
HETATM   31  O   HOH T  30       4.646  51.239  26.694  1.00  0.25           O  
HETATM   32  O   HOH T  31      46.315  13.787  62.812  1.00  0.25           O  
HETATM   33  O   HOH T  32      40.455  17.865  71.416  1.00  0.25           O  
HETATM   34  O   HOH T  33      36.605  26.748  62.708  1.00  0.25           O  
HETATM   35  O   HOH T  34      12.040  39.432  25.041  1.00  0.25           O  
HETATM   36  O   HOH T  35       8.867  63.144  23.235  1.00  0.25           O  
HETATM   37  O   HOH T  36      30.142  70.746  20.728  1.00  0.26           O  
HETATM   38  O   HOH T  37      27.551  64.011  33.081  1.00  0.26           O  
HETATM   39  O   HOH T  38      16.384  48.855  13.502  1.00  0.26           O  
HETATM   40  O   HOH T  39      28.460   0.540  63.492  1.00  0.26           O  
HETATM   41  O   HOH T  40      25.267  70.833  28.305  1.00  0.26           O  
HETATM   42  O   HOH T  41      44.601   6.859  52.231  1.00  0.26           O  
HETATM   43  O   HOH T  42      22.000  59.223  11.835  1.00  0.26           O  
HETATM   44  O   HOH T  43      55.816   4.035  68.584  1.00  0.26           O  
HETATM   45  O   HOH T  44      45.087   7.917  59.195  1.00  0.26           O  
HETATM   46  O   HOH T  45      28.106  48.023  25.591  1.00  0.27           O  
HETATM   47  O   HOH T  46      30.085  55.170  27.092  1.00  0.27           O  
HETATM   48  O   HOH T  47      12.748  35.182  47.414  1.00  0.27           O  
HETATM   49  O   HOH T  48      25.731  56.006  27.677  1.00  0.27           O  
HETATM   50  O   HOH T  49      37.590  27.150  44.195  1.00  0.27           O  
HETATM   51  O   HOH T  50      42.178  28.793  61.321  1.00  0.28           O  
HETATM   52  O   HOH T  51      37.428   8.951  41.718  1.00  0.28           O  
HETATM   53  O   HOH T  52      23.815  12.234  60.533  1.00  0.28           O  
HETATM   54  O   HOH T  53      24.537  43.560  35.376  1.00  0.28           O  
HETATM   55  O   HOH T  54      23.584  11.586  56.226  1.00  0.28           O  
HETATM   56  O   HOH T  55      27.364  69.570  24.834  1.00  0.28           O  
HETATM   57  O   HOH T  56      28.720  71.121  23.062  1.00  0.28           O  
HETATM   58  O   HOH T  57      17.071  40.099  25.007  1.00  0.29           O  
HETATM   59  O   HOH T  58      21.619  20.123  39.685  1.00  0.29           O  
HETATM   60  O   HOH T  59      41.424   3.995  74.892  1.00  0.29           O  
HETATM   61  O   HOH T  60      44.280  15.305  53.579  1.00  0.29           O  
HETATM   62  O   HOH T  61      57.323   3.955  70.875  1.00  0.29           O  
HETATM   63  O   HOH T  62      21.394  13.773  67.480  1.00  0.29           O  
HETATM   64  O   HOH T  63      48.323  13.852  76.663  1.00  0.29           O  
HETATM   65  O   HOH T  64      34.839  56.603  25.614  1.00  0.29           O  
HETATM   66  O   HOH T  65      31.634  29.711  40.902  1.00  0.29           O  
HETATM   67  O   HOH T  66      30.655  -1.552  54.834  1.00  0.30           O  
HETATM   68  O   HOH T  67       4.078  51.817  30.976  1.00  0.30           O  
HETATM   69  O   HOH T  68      31.834  66.205  10.064  1.00  0.30           O  
HETATM   70  O   HOH T  69      51.749  -3.383  76.158  1.00  0.30           O  
HETATM   71  O   HOH T  70       2.178  35.107  28.950  1.00  0.30           O  
HETATM   72  O   HOH T  71      54.080  20.193  76.331  1.00  0.30           O  
HETATM   73  O   HOH T  72      52.267   5.038  74.433  1.00  0.30           O  
HETATM   74  O   HOH T  73      26.563   2.673  57.182  1.00  0.30           O  
HETATM   75  O   HOH T  74      32.291   9.724  58.034  1.00  0.30           O  
HETATM   76  O   HOH T  75      33.953   2.630  42.133  1.00  0.30           O  
HETATM   77  O   HOH T  76      22.798  32.249  29.651  1.00  0.30           O  
HETATM   78  O   HOH T  77      26.748  50.074  24.252  1.00  0.30           O  
HETATM   79  O   HOH T  78      26.479  30.819  35.194  1.00  0.30           O  
HETATM   80  O   HOH T  79      36.409  24.045  62.907  1.00  0.30           O  
HETATM   81  O   HOH T  80      27.954  43.395  14.248  1.00  0.31           O  
HETATM   82  O   HOH T  81      21.158  28.288  59.127  1.00  0.31           O  
HETATM   83  O   HOH T  82      31.039  72.500  22.683  1.00  0.31           O  
HETATM   84  O   HOH T  83       9.575  65.431  21.795  1.00  0.31           O  
HETATM   85  O   HOH T  84      25.740  34.087  63.238  1.00  0.31           O  
HETATM   86  O   HOH T  85      21.217  65.161   4.598  1.00  0.31           O  
HETATM   87  O   HOH T  86      44.902  15.430  61.079  1.00  0.31           O  
HETATM   88  O   HOH T  87      37.676  59.382  16.064  1.00  0.31           O  
HETATM   89  O   HOH T  88      19.264  19.036  62.131  1.00  0.31           O  
HETATM   90  O   HOH T  89      36.232  59.661  18.270  1.00  0.31           O  
HETATM   91  O   HOH T  90      22.518  11.372  75.915  1.00  0.32           O  
HETATM   92  O   HOH T  91      13.062  59.040  30.609  1.00  0.32           O  
HETATM   93  O   HOH T  92      21.364   0.738  70.549  1.00  0.32           O  
HETATM   94  O   HOH T  93      39.069  17.906  76.937  1.00  0.32           O  
HETATM   95  O   HOH T  94      41.977  20.981  69.099  1.00  0.32           O  
HETATM   96  O   HOH T  95      25.477  39.823  42.399  1.00  0.32           O  
HETATM   97  O   HOH T  96      27.339  37.396  61.430  1.00  0.32           O  
HETATM   98  O   HOH T  97      43.786   2.724  74.083  1.00  0.32           O  
HETATM   99  O   HOH T  98      28.749  49.307  10.313  1.00  0.32           O  
HETATM  100  O   HOH T  99      32.584   4.793  56.085  1.00  0.32           O  
HETATM  101  O   HOH T 100      18.951  20.885  40.114  1.00  0.32           O  
HETATM  102  O   HOH T 101      17.498  20.963  45.278  1.00  0.32           O  
HETATM  103  O   HOH T 102       8.033  32.804  58.452  1.00  0.32           O  
HETATM  104  O   HOH T 103      48.027  11.923  78.456  1.00  0.32           O  
HETATM  105  O   HOH T 104       8.974  51.878  31.775  1.00  0.32           O  
HETATM  106  O   HOH T 105      27.808  68.462  13.579  1.00  0.32           O  
HETATM  107  O   HOH T 106      27.564  26.908  62.354  1.00  0.33           O  
HETATM  108  O   HOH T 107      48.148  25.295  60.610  1.00  0.33           O  
HETATM  109  O   HOH T 108      22.684  31.517  45.239  1.00  0.33           O  
HETATM  110  O   HOH T 109      28.697  -9.852  54.936  1.00  0.33           O  
HETATM  111  O   HOH T 110      33.344  66.299  17.290  1.00  0.33           O  
HETATM  112  O   HOH T 111      44.182  30.079  62.403  1.00  0.33           O  
HETATM  113  O   HOH T 112      39.753 -15.133  63.252  1.00  0.33           O  
HETATM  114  O   HOH T 113      45.990   6.647  74.534  1.00  0.33           O  
HETATM  115  O   HOH T 114       4.002  32.411  56.083  1.00  0.33           O  
HETATM  116  O   HOH T 115      21.113  54.000   6.467  1.00  0.33           O  
HETATM  117  O   HOH T 116      18.381  23.447  39.089  1.00  0.33           O  
HETATM  118  O   HOH T 117       7.970  51.039   9.211  1.00  0.34           O  
HETATM  119  O   HOH T 118      21.261  53.644  35.833  1.00  0.34           O  
HETATM  120  O   HOH T 119      35.248 -10.800  60.834  1.00  0.34           O  
HETATM  121  O   HOH T 120       1.496  37.405  48.407  1.00  0.34           O  
HETATM  122  O   HOH T 121      26.109  32.330  59.444  1.00  0.34           O  
HETATM  123  O   HOH T 122      38.748   9.440  82.429  1.00  0.34           O  
HETATM  124  O   HOH T 123      -0.238  39.768  48.406  1.00  0.34           O  
HETATM  125  O   HOH T 124      19.309   7.569  62.863  1.00  0.34           O  
HETATM  126  O   HOH T 125      32.571  53.893  14.125  1.00  0.34           O  
HETATM  127  O   HOH T 126      12.815  54.110  29.127  1.00  0.34           O  
HETATM  128  O   HOH T 127      14.837  65.456  31.406  1.00  0.34           O  
HETATM  129  O   HOH T 128      -0.053  43.602  47.556  1.00  0.34           O  
HETATM  130  O   HOH T 129       9.652  43.654  46.084  1.00  0.34           O  
HETATM  131  O   HOH T 130       7.134  44.447  49.132  1.00  0.34           O  
HETATM  132  O   HOH T 131      35.981   5.816  52.968  1.00  0.35           O  
HETATM  133  O   HOH T 132      26.316  24.327  31.642  1.00  0.35           O  
HETATM  134  O   HOH T 133      43.617   6.573  67.226  1.00  0.35           O  
HETATM  135  O   HOH T 134      37.775  -6.261  53.537  1.00  0.35           O  
HETATM  136  O   HOH T 135      23.851  32.109  32.308  1.00  0.35           O  
HETATM  137  O   HOH T 136      48.870  21.241  48.695  1.00  0.35           O  
HETATM  138  O   HOH T 137      11.836  49.913  48.177  1.00  0.35           O  
HETATM  139  O   HOH T 138      16.063  25.774  36.424  1.00  0.35           O  
HETATM  140  O   HOH T 139      47.507  15.962  61.610  1.00  0.35           O  
HETATM  141  O   HOH T 140      24.757  74.461  36.707  1.00  0.35           O  
HETATM  142  O   HOH T 141      12.176  64.968  31.814  1.00  0.35           O  
HETATM  143  O   HOH T 142       0.074  61.889  16.123  1.00  0.35           O  
HETATM  144  O   HOH T 143      37.516  33.139  45.058  1.00  0.35           O  
HETATM  145  O   HOH T 144       1.171  28.926  44.128  1.00  0.35           O  
HETATM  146  O   HOH T 145      15.235  50.063   9.796  1.00  0.35           O  
HETATM  147  O   HOH T 146      21.724  20.119  62.615  1.00  0.35           O  
HETATM  148  O   HOH T 147      34.413  -0.767  54.467  1.00  0.35           O  
HETATM  149  O   HOH T 148      14.033  25.043  34.506  1.00  0.35           O  
HETATM  150  O   HOH T 149      24.356  60.373  12.586  1.00  0.35           O  
HETATM  151  O   HOH T 150      -1.836  41.438  37.308  1.00  0.35           O  
HETATM  152  O   HOH T 151       3.179  58.219  22.768  1.00  0.35           O  
HETATM  153  O   HOH T 152      17.152  14.569  44.596  1.00  0.35           O  
HETATM  154  O   HOH T 153      15.292  25.830  49.366  1.00  0.35           O  
HETATM  155  O   HOH T 154      48.482  -6.936  62.837  1.00  0.35           O  
HETATM  156  O   HOH T 155      20.245   3.920  65.562  1.00  0.35           O  
HETATM  157  O   HOH T 156      -1.041  46.090  48.492  1.00  0.35           O  
HETATM  158  O   HOH T 157       6.904  61.433  29.523  1.00  0.36           O  
HETATM  159  O   HOH T 158      43.211  14.319  51.045  1.00  0.36           O  
HETATM  160  O   HOH T 159       6.013  37.930  23.456  1.00  0.36           O  
HETATM  161  O   HOH T 160      -0.346  43.670  40.571  1.00  0.36           O  
HETATM  162  O   HOH T 161      13.991  44.637  10.956  1.00  0.36           O  
HETATM  163  O   HOH T 162      28.591  11.834  55.124  1.00  0.36           O  
HETATM  164  O   HOH T 163      21.080  23.438  64.200  1.00  0.36           O  
HETATM  165  O   HOH T 164       6.696  29.393  54.751  1.00  0.36           O  
HETATM  166  O   HOH T 165      23.329  43.476  15.733  1.00  0.36           O  
HETATM  167  O   HOH T 166      22.766  29.808  22.859  1.00  0.36           O  
HETATM  168  O   HOH T 167      50.418   8.144  59.926  1.00  0.36           O  
HETATM  169  O   HOH T 168      25.769  44.025  18.418  1.00  0.36           O  
HETATM  170  O   HOH T 169       6.904  49.863  45.292  1.00  0.36           O  
HETATM  171  O   HOH T 170      28.639  39.646  24.298  1.00  0.36           O  
HETATM  172  O   HOH T 171       2.605  62.604  16.314  1.00  0.36           O  
HETATM  173  O   HOH T 172      41.869   9.620  77.976  1.00  0.36           O  
HETATM  174  O   HOH T 173      -1.689  43.126  42.950  1.00  0.36           O  
HETATM  175  O   HOH T 174      21.200  30.474  28.344  1.00  0.36           O  
HETATM  176  O   HOH T 175      25.129  -6.035  55.683  1.00  0.36           O  
HETATM  177  O   HOH T 176      21.946  70.605   9.094  1.00  0.37           O  
HETATM  178  O   HOH T 177      28.880  -3.954  63.225  1.00  0.37           O  
HETATM  179  O   HOH T 178      19.751  27.912  47.314  1.00  0.37           O  
HETATM  180  O   HOH T 179       1.948  51.265  13.833  1.00  0.37           O  
HETATM  181  O   HOH T 180       9.880  35.575  61.025  1.00  0.37           O  
HETATM  182  O   HOH T 181      44.806  20.620  72.600  1.00  0.37           O  
HETATM  183  O   HOH T 182      23.526  18.093  40.167  1.00  0.37           O  
HETATM  184  O   HOH T 183       4.090  36.892  51.873  1.00  0.37           O  
HETATM  185  O   HOH T 184      45.232   2.592  76.351  1.00  0.37           O  
HETATM  186  O   HOH T 185      46.534  18.309  50.353  1.00  0.37           O  
HETATM  187  O   HOH T 186      33.997  30.374  39.497  1.00  0.37           O  
HETATM  188  O   HOH T 187      49.404  23.124  46.753  1.00  0.37           O  
HETATM  189  O   HOH T 188      21.716  62.953   5.984  1.00  0.37           O  
HETATM  190  O   HOH T 189      19.244   8.905  70.392  1.00  0.37           O  
HETATM  191  O   HOH T 190       2.033  49.411  19.740  1.00  0.37           O  
HETATM  192  O   HOH T 191      28.361  -1.808  64.984  1.00  0.37           O  
HETATM  193  O   HOH T 192      15.938  17.077  47.904  1.00  0.37           O  
HETATM  194  O   HOH T 193      23.480  32.414  63.433  1.00  0.37           O  
HETATM  195  O   HOH T 194      31.582   7.376  56.600  1.00  0.37           O  
HETATM  196  O   HOH T 195      27.622   9.652  56.464  1.00  0.37           O  
HETATM  197  O   HOH T 196      -4.889  54.672   6.930  1.00  0.37           O  
HETATM  198  O   HOH T 197      25.277  54.777  34.343  1.00  0.37           O  
HETATM  199  O   HOH T 198      50.220   4.555  58.089  1.00  0.37           O  
HETATM  200  O   HOH T 199      46.200 -11.759  67.968  1.00  0.37           O  
HETATM  201  O   HOH T 200      34.926  68.702  17.141  1.00  0.37           O  
HETATM  202  O   HOH T 201      17.886  13.731  40.705  1.00  0.37           O  
HETATM  203  O   HOH T 202      -1.207  53.341  19.102  1.00  0.37           O  
HETATM  204  O   HOH T 203      20.492  30.508  41.765  1.00  0.37           O  
HETATM  205  O   HOH T 204      32.937  -9.206  68.007  1.00  0.37           O  
HETATM  206  O   HOH T 205      18.156  14.525  36.121  1.00  0.37           O  
HETATM  207  O   HOH T 206      28.514  51.412   8.698  1.00  0.38           O  
HETATM  208  O   HOH T 207       6.253  32.130  54.430  1.00  0.38           O  
HETATM  209  O   HOH T 208      32.294  -6.626  59.895  1.00  0.38           O  
HETATM  210  O   HOH T 209      25.574  48.699  26.333  1.00  0.38           O  
HETATM  211  O   HOH T 210      53.571  -1.506  77.130  1.00  0.38           O  
HETATM  212  O   HOH T 211      12.055  56.402  30.534  1.00  0.38           O  
HETATM  213  O   HOH T 212      30.921  55.979  13.473  1.00  0.38           O  
HETATM  214  O   HOH T 213      46.443  25.832  43.727  1.00  0.38           O  
HETATM  215  O   HOH T 214      27.425  62.358   8.904  1.00  0.38           O  
HETATM  216  O   HOH T 215      18.320  23.559  48.954  1.00  0.38           O  
HETATM  217  O   HOH T 216       4.021  39.714  24.005  1.00  0.38           O  
HETATM  218  O   HOH T 217      15.850  23.518  58.343  1.00  0.38           O  
HETATM  219  O   HOH T 218       0.192  50.396  34.854  1.00  0.38           O  
HETATM  220  O   HOH T 219      26.143  33.720  32.469  1.00  0.38           O  
HETATM  221  O   HOH T 220      28.395  35.130  33.349  1.00  0.38           O  
HETATM  222  O   HOH T 221      50.326  14.055  57.437  1.00  0.38           O  
HETATM  223  O   HOH T 222      33.225  34.071  61.017  1.00  0.38           O  
HETATM  224  O   HOH T 223      31.915  -8.064  62.182  1.00  0.38           O  
HETATM  225  O   HOH T 224      23.600  23.520  63.574  1.00  0.38           O  
HETATM  226  O   HOH T 225      32.689  56.158  27.291  1.00  0.38           O  
HETATM  227  O   HOH T 226      38.688 -10.323  57.555  1.00  0.38           O  
HETATM  228  O   HOH T 227      34.253  64.867  10.175  1.00  0.38           O  
HETATM  229  O   HOH T 228      50.652   7.128  73.417  1.00  0.38           O  
HETATM  230  O   HOH T 229      47.256  -5.480  60.889  1.00  0.38           O  
HETATM  231  O   HOH T 230      47.336   0.350  53.310  1.00  0.38           O  
HETATM  232  O   HOH T 231      43.301  14.855  65.883  1.00  0.38           O  
HETATM  233  O   HOH T 232      32.987   4.714  43.736  1.00  0.38           O  
HETATM  234  O   HOH T 233      31.933  67.527  21.772  1.00  0.38           O  
HETATM  235  O   HOH T 234      25.798  20.184  61.950  1.00  0.39           O  
HETATM  236  O   HOH T 235      34.831   0.295  77.237  1.00  0.39           O  
HETATM  237  O   HOH T 236      13.982  22.487  56.509  1.00  0.39           O  
HETATM  238  O   HOH T 237      30.760   3.142  54.828  1.00  0.39           O  
HETATM  239  O   HOH T 238      33.921   6.513  48.578  1.00  0.39           O  
HETATM  240  O   HOH T 239      34.963   6.214  44.901  1.00  0.39           O  
HETATM  241  O   HOH T 240       8.524  52.036  44.818  1.00  0.39           O  
HETATM  242  O   HOH T 241      43.894  15.961  48.925  1.00  0.39           O  
HETATM  243  O   HOH T 242      25.262  48.889  33.480  1.00  0.39           O  
HETATM  244  O   HOH T 243      24.927  74.332  34.015  1.00  0.39           O  
HETATM  245  O   HOH T 244       8.521  62.060   5.889  1.00  0.39           O  
HETATM  246  O   HOH T 245      23.756  50.244  36.295  1.00  0.39           O  
HETATM  247  O   HOH T 246      34.208  12.397  76.583  1.00  0.39           O  
HETATM  248  O   HOH T 247       9.873  47.906  11.321  1.00  0.39           O  
HETATM  249  O   HOH T 248      32.762  65.577  19.942  1.00  0.39           O  
HETATM  250  O   HOH T 249      -2.734  45.870  42.859  1.00  0.39           O  
HETATM  251  O   HOH T 250      47.666  -5.617  72.553  1.00  0.39           O  
HETATM  252  O   HOH T 251      34.139   6.846  51.284  1.00  0.39           O  
HETATM  253  O   HOH T 252       3.210  52.827  28.571  1.00  0.39           O  
HETATM  254  O   HOH T 253       3.472  51.184  42.805  1.00  0.40           O  
HETATM  255  O   HOH T 254      32.284  70.701  12.911  1.00  0.40           O  
HETATM  256  O   HOH T 255       0.180  44.125  25.518  1.00  0.40           O  
HETATM  257  O   HOH T 256      11.922  24.813  44.857  1.00  0.40           O  
HETATM  258  O   HOH T 257      26.068  41.262  17.971  1.00  0.40           O  
HETATM  259  O   HOH T 258      33.432  68.199  19.426  1.00  0.40           O  
HETATM  260  O   HOH T 259      32.990  -2.554  55.950  1.00  0.40           O  
HETATM  261  O   HOH T 260       7.218  28.115  38.115  1.00  0.40           O  
HETATM  262  O   HOH T 261      24.090  -1.265  61.752  1.00  0.40           O  
HETATM  263  O   HOH T 262      26.149  22.387  63.644  1.00  0.40           O  
HETATM  264  O   HOH T 263       1.809  33.065  45.019  1.00  0.40           O  
HETATM  265  O   HOH T 264      27.536  -9.148  57.373  1.00  0.40           O  
HETATM  266  O   HOH T 265       3.233  52.850  44.847  1.00  0.40           O  
HETATM  267  O   HOH T 266      38.145  -0.030  79.592  1.00  0.40           O  
HETATM  268  O   HOH T 267      18.683  71.179   6.901  1.00  0.40           O  
HETATM  269  O   HOH T 268      23.752  48.860  21.267  1.00  0.40           O  
HETATM  270  O   HOH T 269      25.919  11.116  54.768  1.00  0.40           O  
HETATM  271  O   HOH T 270      38.706  12.095  83.364  1.00  0.40           O  
HETATM  272  O   HOH T 271      14.189  63.232  32.811  1.00  0.40           O  
HETATM  273  O   HOH T 272      47.842  24.524  63.202  1.00  0.40           O  
HETATM  274  O   HOH T 273      26.384  14.605  79.357  1.00  0.41           O  
HETATM  275  O   HOH T 274       7.022  54.984  40.481  1.00  0.41           O  
HETATM  276  O   HOH T 275      18.575  37.912  43.802  1.00  0.41           O  
HETATM  277  O   HOH T 276      22.661   4.910  64.607  1.00  0.41           O  
HETATM  278  O   HOH T 277       7.047  28.205  44.506  1.00  0.41           O  
HETATM  279  O   HOH T 278       6.387  31.138  56.980  1.00  0.41           O  
HETATM  280  O   HOH T 279      17.127  64.882   7.096  1.00  0.41           O  
HETATM  281  O   HOH T 280      18.580  28.866  42.990  1.00  0.41           O  
HETATM  282  O   HOH T 281      10.182  37.589  25.879  1.00  0.41           O  
HETATM  283  O   HOH T 282      10.957  35.456  49.508  1.00  0.41           O  
HETATM  284  O   HOH T 283       1.096  59.656  21.632  1.00  0.41           O  
HETATM  285  O   HOH T 284      10.025  51.626  10.980  1.00  0.41           O  
HETATM  286  O   HOH T 285      45.889  31.134  60.655  1.00  0.42           O  
HETATM  287  O   HOH T 286      30.390   9.851  55.958  1.00  0.42           O  
HETATM  288  O   HOH T 287      44.431  24.461  45.198  1.00  0.42           O  
HETATM  289  O   HOH T 288      34.140  39.788  50.969  1.00  0.42           O  
HETATM  290  O   HOH T 289       2.869  32.414  28.441  1.00  0.42           O  
HETATM  291  O   HOH T 290      10.828  53.924  31.125  1.00  0.42           O  
HETATM  292  O   HOH T 291       5.680  53.670  27.499  1.00  0.42           O  
HETATM  293  O   HOH T 292      24.474  25.722  65.124  1.00  0.42           O  
HETATM  294  O   HOH T 293      21.920  35.563  43.088  1.00  0.42           O  
HETATM  295  O   HOH T 294      17.732  20.338  35.643  1.00  0.42           O  
HETATM  296  O   HOH T 295      33.466  51.790  12.825  1.00  0.42           O  
HETATM  297  O   HOH T 296      28.933  40.931  53.774  1.00  0.42           O  
HETATM  298  O   HOH T 297      51.836  -7.471  72.908  1.00  0.42           O  
HETATM  299  O   HOH T 298       6.379  52.689  32.338  1.00  0.42           O  
HETATM  300  O   HOH T 299      30.668  57.229  28.754  1.00  0.42           O  
HETATM  301  O   HOH T 300      22.647  10.475  58.649  1.00  0.42           O  
HETATM  302  O   HOH T 301      35.556  61.109  24.373  1.00  0.42           O  
HETATM  303  O   HOH T 302      25.216   3.983  59.084  1.00  0.42           O  
HETATM  304  O   HOH T 303      26.010  43.031  15.992  1.00  0.42           O  
HETATM  305  O   HOH T 304      37.664  34.903  39.852  1.00  0.42           O  
HETATM  306  O   HOH T 305      15.219  66.629   6.292  1.00  0.42           O  
HETATM  307  O   HOH T 306      53.078  -2.577  68.758  1.00  0.42           O  
HETATM  308  O   HOH T 307      25.801  36.020  43.769  1.00  0.42           O  
HETATM  309  O   HOH T 308       9.453  28.665  54.479  1.00  0.42           O  
HETATM  310  O   HOH T 309      23.999  13.193  72.711  1.00  0.43           O  
HETATM  311  O   HOH T 310      24.038  75.399  20.251  1.00  0.43           O  
HETATM  312  O   HOH T 311      18.624  31.709  43.415  1.00  0.43           O  
HETATM  313  O   HOH T 312       6.498  46.597  47.462  1.00  0.43           O  
HETATM  314  O   HOH T 313      28.500  36.619  53.419  1.00  0.43           O  
HETATM  315  O   HOH T 314      34.164  39.333  39.611  1.00  0.43           O  
HETATM  316  O   HOH T 315       8.050  28.311  35.434  1.00  0.43           O  
HETATM  317  O   HOH T 316      17.370  12.228  46.113  1.00  0.43           O  
HETATM  318  O   HOH T 317      49.628   8.819  75.275  1.00  0.43           O  
HETATM  319  O   HOH T 318      53.295  22.513  60.699  1.00  0.43           O  
HETATM  320  O   HOH T 319       3.179  30.688  44.527  1.00  0.43           O  
HETATM  321  O   HOH T 320      40.489  -1.197  80.391  1.00  0.43           O  
HETATM  322  O   HOH T 321      29.305   0.752  54.984  1.00  0.43           O  
HETATM  323  O   HOH T 322      44.617  20.298  69.838  1.00  0.43           O  
HETATM  324  O   HOH T 323      51.139  -5.717  74.818  1.00  0.43           O  
HETATM  325  O   HOH T 324      23.979  50.079  40.275  1.00  0.43           O  
HETATM  326  O   HOH T 325      20.922  31.518  21.858  1.00  0.43           O  
HETATM  327  O   HOH T 326      12.478  56.038  37.173  1.00  0.43           O  
HETATM  328  O   HOH T 327      18.576   9.838  67.812  1.00  0.43           O  
HETATM  329  O   HOH T 328      23.784  20.635  41.387  1.00  0.43           O  
HETATM  330  O   HOH T 329      11.597  37.689  50.862  1.00  0.43           O  
HETATM  331  O   HOH T 330      15.464  10.486  73.753  1.00  0.43           O  
HETATM  332  O   HOH T 331      35.631   2.762  77.924  1.00  0.43           O  
HETATM  333  O   HOH T 332      28.170  43.881  36.699  1.00  0.43           O  
HETATM  334  O   HOH T 333      17.014  68.927   6.592  1.00  0.43           O  
HETATM  335  O   HOH T 334       5.810  33.155  51.956  1.00  0.43           O  
HETATM  336  O   HOH T 335      41.482  -2.284  45.774  1.00  0.43           O  
HETATM  337  O   HOH T 336      33.311  -5.898  57.445  1.00  0.43           O  
HETATM  338  O   HOH T 337      14.764  60.807  34.144  1.00  0.43           O  
HETATM  339  O   HOH T 338      51.034  19.479  68.028  1.00  0.43           O  
HETATM  340  O   HOH T 339      14.749   7.745  74.053  1.00  0.44           O  
HETATM  341  O   HOH T 340      49.745  18.668  65.613  1.00  0.44           O  
HETATM  342  O   HOH T 341      -1.290  54.212  40.336  1.00  0.44           O  
HETATM  343  O   HOH T 342      16.921  21.719  50.536  1.00  0.44           O  
HETATM  344  O   HOH T 343      31.088  69.761  23.169  1.00  0.44           O  
HETATM  345  O   HOH T 344       4.299  49.788  14.672  1.00  0.44           O  
HETATM  346  O   HOH T 345      42.675   5.661  77.897  1.00  0.44           O  
HETATM  347  O   HOH T 346      -0.716  41.036  39.828  1.00  0.44           O  
HETATM  348  O   HOH T 347      37.501  38.892  38.120  1.00  0.44           O  
HETATM  349  O   HOH T 348      39.228  36.743  41.156  1.00  0.44           O  
HETATM  350  O   HOH T 349      20.329  54.800  39.041  1.00  0.44           O  
HETATM  351  O   HOH T 350      24.732  48.503  38.254  1.00  0.44           O  
HETATM  352  O   HOH T 351      17.963  18.964  47.244  1.00  0.44           O  
HETATM  353  O   HOH T 352      36.274  58.965  25.882  1.00  0.44           O  
HETATM  354  O   HOH T 353      29.446  -5.751  53.948  1.00  0.44           O  
HETATM  355  O   HOH T 354       8.184  25.134  41.037  1.00  0.44           O  
HETATM  356  O   HOH T 355      57.895   2.921  76.651  1.00  0.44           O  
HETATM  357  O   HOH T 356      18.600  22.921  36.387  1.00  0.44           O  
HETATM  358  O   HOH T 357      35.002  39.177  37.030  1.00  0.44           O  
HETATM  359  O   HOH T 358      12.485  51.998   6.455  1.00  0.44           O  
HETATM  360  O   HOH T 359       8.458  26.438  55.821  1.00  0.44           O  
HETATM  361  O   HOH T 360      29.891  11.503  76.904  1.00  0.44           O  
HETATM  362  O   HOH T 361      28.376  41.741  16.493  1.00  0.44           O  
HETATM  363  O   HOH T 362      14.509  29.304  24.872  1.00  0.45           O  
HETATM  364  O   HOH T 363      23.934  52.972  35.843  1.00  0.45           O  
HETATM  365  O   HOH T 364      31.957   0.726  53.889  1.00  0.45           O  
HETATM  366  O   HOH T 365      24.779  33.060  34.795  1.00  0.45           O  
HETATM  367  O   HOH T 366      19.466  11.914  66.263  1.00  0.45           O  
HETATM  368  O   HOH T 367      18.419  26.045  59.573  1.00  0.45           O  
HETATM  369  O   HOH T 368      11.096  58.298  32.393  1.00  0.45           O  
HETATM  370  O   HOH T 369      48.654   8.993  58.027  1.00  0.45           O  
HETATM  371  O   HOH T 370      12.788   4.781  77.091  1.00  0.45           O  
HETATM  372  O   HOH T 371      22.078  56.116   8.085  1.00  0.45           O  
HETATM  373  O   HOH T 372      48.171  -9.065  53.470  1.00  0.45           O  
HETATM  374  O   HOH T 373      18.544  64.141   9.354  1.00  0.45           O  
HETATM  375  O   HOH T 374       8.773  37.407  23.461  1.00  0.45           O  
HETATM  376  O   HOH T 375       2.343  33.236  30.979  1.00  0.45           O  
HETATM  377  O   HOH T 376      16.836  69.314  36.620  1.00  0.45           O  
HETATM  378  O   HOH T 377      -2.943  47.765  47.271  1.00  0.45           O  
HETATM  379  O   HOH T 378      17.898  37.332  25.497  1.00  0.45           O  
HETATM  380  O   HOH T 379      30.350  59.863  28.624  1.00  0.45           O  
HETATM  381  O   HOH T 380      26.210  48.942  35.997  1.00  0.45           O  
HETATM  382  O   HOH T 381      18.689  69.695  34.563  1.00  0.45           O  
HETATM  383  O   HOH T 382      18.602  34.099  44.983  1.00  0.45           O  
HETATM  384  O   HOH T 383      -0.880  44.142  51.991  1.00  0.45           O  
HETATM  385  O   HOH T 384       9.114  33.100  60.777  1.00  0.45           O  
HETATM  386  O   HOH T 385      38.060  59.877  23.969  1.00  0.45           O  
HETATM  387  O   HOH T 386      36.586  29.150  39.654  1.00  0.45           O  
HETATM  388  O   HOH T 387      44.690 -11.672  63.025  1.00  0.45           O  
HETATM  389  O   HOH T 388       3.926  62.781  18.698  1.00  0.45           O  
HETATM  390  O   HOH T 389      30.921  23.454  62.909  1.00  0.45           O  
HETATM  391  O   HOH T 390      16.444  19.006  43.602  1.00  0.45           O  
HETATM  392  O   HOH T 391      54.333  17.598  75.172  1.00  0.45           O  
HETATM  393  O   HOH T 392       2.005  35.648  53.290  1.00  0.45           O  
HETATM  394  O   HOH T 393      34.503  27.982  38.344  1.00  0.45           O  
HETATM  395  O   HOH T 394      20.470  57.205  42.029  1.00  0.45           O  
HETATM  396  O   HOH T 395      25.102  -9.269  58.766  1.00  0.46           O  
HETATM  397  O   HOH T 396      21.685  29.495  54.139  1.00  0.46           O  
HETATM  398  O   HOH T 397       4.743  65.527  24.382  1.00  0.46           O  
HETATM  399  O   HOH T 398      -0.439  41.714  53.235  1.00  0.46           O  
HETATM  400  O   HOH T 399      36.345  35.721  44.444  1.00  0.46           O  
HETATM  401  O   HOH T 400      35.691  32.917  61.422  1.00  0.46           O  
HETATM  402  O   HOH T 401      36.482  13.197  84.316  1.00  0.46           O  
HETATM  403  O   HOH T 402      15.258  21.265  35.005  1.00  0.46           O  
HETATM  404  O   HOH T 403      17.016  17.061  45.384  1.00  0.46           O  
HETATM  405  O   HOH T 404      40.293 -10.668  55.286  1.00  0.46           O  
HETATM  406  O   HOH T 405      46.340  26.019  65.131  1.00  0.46           O  
HETATM  407  O   HOH T 406      -7.189  55.255   8.512  1.00  0.46           O  
HETATM  408  O   HOH T 407       9.485  56.267  31.625  1.00  0.46           O  
HETATM  409  O   HOH T 408       3.385  35.544  49.540  1.00  0.46           O  
HETATM  410  O   HOH T 409      17.761   9.725  72.566  1.00  0.46           O  
HETATM  411  O   HOH T 410      32.942  27.813  36.150  1.00  0.46           O  
HETATM  412  O   HOH T 411       7.432  53.764  42.899  1.00  0.46           O  
HETATM  413  O   HOH T 412      56.702   2.299  65.483  1.00  0.46           O  
HETATM  414  O   HOH T 413      52.630  -0.287  62.058  1.00  0.46           O  
HETATM  415  O   HOH T 414      16.179  19.812  52.429  1.00  0.46           O  
HETATM  416  O   HOH T 415      29.412  46.138  37.497  1.00  0.46           O  
HETATM  417  O   HOH T 416      27.247  70.728  12.066  1.00  0.46           O  
HETATM  418  O   HOH T 417      32.858  64.206  24.472  1.00  0.46           O  
HETATM  419  O   HOH T 418      29.447  67.507   9.812  1.00  0.47           O  
HETATM  420  O   HOH T 419      33.927  14.912  75.269  1.00  0.47           O  
HETATM  421  O   HOH T 420      20.822  44.654  16.375  1.00  0.47           O  
HETATM  422  O   HOH T 421       8.020  54.149  30.574  1.00  0.47           O  
HETATM  423  O   HOH T 422      45.528  15.845  51.187  1.00  0.47           O  
HETATM  424  O   HOH T 423      18.597  72.786   9.077  1.00  0.47           O  
HETATM  425  O   HOH T 424       7.119  30.720  35.060  1.00  0.47           O  
HETATM  426  O   HOH T 425      51.991  17.463  66.475  1.00  0.47           O  
HETATM  427  O   HOH T 426      16.581  19.091  49.695  1.00  0.47           O  
HETATM  428  O   HOH T 427      17.850  29.247  45.759  1.00  0.47           O  
HETATM  429  O   HOH T 428      34.292   0.754  52.294  1.00  0.47           O  
HETATM  430  O   HOH T 429      29.950  28.086  63.315  1.00  0.47           O  
HETATM  431  O   HOH T 430      38.165  -1.356  77.155  1.00  0.47           O  
HETATM  432  O   HOH T 431      31.615  68.753  11.185  1.00  0.47           O  
HETATM  433  O   HOH T 432       3.414  37.821  54.233  1.00  0.47           O  
HETATM  434  O   HOH T 433      40.123  34.152  41.289  1.00  0.47           O  
HETATM  435  O   HOH T 434      12.133  57.549  34.820  1.00  0.47           O  
HETATM  436  O   HOH T 435      27.519  48.063  38.220  1.00  0.47           O  
HETATM  437  O   HOH T 436      24.354  55.625  36.757  1.00  0.47           O  
HETATM  438  O   HOH T 437      12.061  44.657  46.946  1.00  0.47           O  
HETATM  439  O   HOH T 438      44.738 -16.798  56.942  1.00  0.47           O  
HETATM  440  O   HOH T 439      27.025  37.900  22.911  1.00  0.47           O  
HETATM  441  O   HOH T 440      25.923  34.683  53.238  1.00  0.47           O  
HETATM  442  O   HOH T 441      13.603  35.857  49.973  1.00  0.47           O  
HETATM  443  O   HOH T 442       5.146  53.113  41.540  1.00  0.47           O  
HETATM  444  O   HOH T 443      -3.564  47.985  44.547  1.00  0.47           O  
HETATM  445  O   HOH T 444      20.424  12.857  41.485  1.00  0.47           O  
HETATM  446  O   HOH T 445      11.354  47.050  48.390  1.00  0.47           O  
HETATM  447  O   HOH T 446       7.510  38.159  25.848  1.00  0.47           O  
HETATM  448  O   HOH T 447       7.095  65.378  22.823  1.00  0.47           O  
HETATM  449  O   HOH T 448      44.837  19.165  53.935  1.00  0.47           O  
HETATM  450  O   HOH T 449       9.631  63.941  31.347  1.00  0.47           O  
HETATM  451  O   HOH T 450      27.610  12.875  77.821  1.00  0.47           O  
HETATM  452  O   HOH T 451      10.404  68.731  25.208  1.00  0.47           O  
HETATM  453  O   HOH T 452      27.576   8.782  49.492  1.00  0.47           O  
HETATM  454  O   HOH T 453      21.209  57.509  39.358  1.00  0.47           O  
HETATM  455  O   HOH T 454      39.514  19.747  69.639  1.00  0.47           O  
HETATM  456  O   HOH T 455      33.322  31.578  62.233  1.00  0.47           O  
HETATM  457  O   HOH T 456      57.824  11.652  71.390  1.00  0.48           O  
HETATM  458  O   HOH T 457      29.758  -6.581  63.152  1.00  0.48           O  
HETATM  459  O   HOH T 458      44.545   9.632  52.574  1.00  0.48           O  
HETATM  460  O   HOH T 459      18.464  31.579  49.426  1.00  0.48           O  
HETATM  461  O   HOH T 460      33.012  -9.760  65.262  1.00  0.48           O  
HETATM  462  O   HOH T 461      25.056   9.899  59.689  1.00  0.48           O  
HETATM  463  O   HOH T 462      10.099  66.608  31.056  1.00  0.48           O  
HETATM  464  O   HOH T 463      35.095  71.007  15.414  1.00  0.48           O  
HETATM  465  O   HOH T 464      17.476  26.944  53.424  1.00  0.48           O  
HETATM  466  O   HOH T 465      24.188   1.753  57.581  1.00  0.48           O  
HETATM  467  O   HOH T 466      25.137  -8.812  55.998  1.00  0.48           O  
HETATM  468  O   HOH T 467      25.846  60.531  10.257  1.00  0.48           O  
HETATM  469  O   HOH T 468      47.624  -8.160  60.492  1.00  0.48           O  
HETATM  470  O   HOH T 469      19.502  12.897  52.556  1.00  0.48           O  
HETATM  471  O   HOH T 470      14.206  20.869  54.200  1.00  0.48           O  
HETATM  472  O   HOH T 471      19.226  12.813  44.026  1.00  0.48           O  
HETATM  473  O   HOH T 472      24.037  30.893  36.377  1.00  0.48           O  
HETATM  474  O   HOH T 473      58.163  14.353  70.587  1.00  0.48           O  
HETATM  475  O   HOH T 474      37.748  36.335  46.875  1.00  0.48           O  
HETATM  476  O   HOH T 475      26.010  -0.819  63.866  1.00  0.48           O  
HETATM  477  O   HOH T 476      46.764  25.350  58.301  1.00  0.48           O  
HETATM  478  O   HOH T 477      25.786  45.315  33.744  1.00  0.48           O  
HETATM  479  O   HOH T 478      33.061 -10.525  62.541  1.00  0.48           O  
HETATM  480  O   HOH T 479       3.624  61.762   4.550  1.00  0.48           O  
HETATM  481  O   HOH T 480      20.832  47.960  46.141  1.00  0.48           O  
HETATM  482  O   HOH T 481      14.415  56.158  34.035  1.00  0.48           O  
HETATM  483  O   HOH T 482      15.835  16.407  42.908  1.00  0.48           O  
HETATM  484  O   HOH T 483      17.463  22.761  64.008  1.00  0.48           O  
HETATM  485  O   HOH T 484      24.141   2.519  66.877  1.00  0.49           O  
HETATM  486  O   HOH T 485      18.528  65.542   4.795  1.00  0.49           O  
HETATM  487  O   HOH T 486      25.569  25.630  29.423  1.00  0.49           O  
HETATM  488  O   HOH T 487      15.605  43.423  12.969  1.00  0.49           O  
HETATM  489  O   HOH T 488      31.937  -7.374  66.307  1.00  0.49           O  
HETATM  490  O   HOH T 489      25.974  19.375  40.485  1.00  0.49           O  
HETATM  491  O   HOH T 490      50.216  16.261  59.167  1.00  0.49           O  
HETATM  492  O   HOH T 491       7.461  47.162  10.047  1.00  0.49           O  
HETATM  493  O   HOH T 492       5.803  49.400   9.979  1.00  0.49           O  
HETATM  494  O   HOH T 493      57.580   3.282  63.088  1.00  0.49           O  
HETATM  495  O   HOH T 494      22.175  15.161  69.836  1.00  0.49           O  
HETATM  496  O   HOH T 495      15.340  18.655  56.768  1.00  0.49           O  
HETATM  497  O   HOH T 496      14.417  57.739  36.424  1.00  0.49           O  
HETATM  498  O   HOH T 497      16.022  25.047  60.581  1.00  0.49           O  
HETATM  499  O   HOH T 498      16.051  15.773  40.190  1.00  0.49           O  
HETATM  500  O   HOH T 499      -0.321  37.081  28.454  1.00  0.49           O  
HETATM  501  O   HOH T 500      16.112  58.409  33.579  1.00  0.49           O  
HETATM  502  O   HOH T 501      34.597   6.401  42.190  1.00  0.49           O  
HETATM  503  O   HOH T 502      21.768   6.262  62.399  1.00  0.49           O  
HETATM  504  O   HOH T 503      44.421 -11.636  65.828  1.00  0.50           O  
HETATM  505  O   HOH T 504      16.223   9.953  45.229  1.00  0.50           O  
HETATM  506  O   HOH T 505       8.569  75.089  26.718  1.00  0.50           O  
HETATM  507  O   HOH T 506      23.513  31.640  20.931  1.00  0.50           O  
HETATM  508  O   HOH T 507      26.452  27.127  31.556  1.00  0.50           O  
HETATM  509  O   HOH T 508      23.136   3.726  62.321  1.00  0.50           O  
HETATM  510  O   HOH T 509      50.130  11.339  57.510  1.00  0.50           O  
HETATM  511  O   HOH T 510      37.147  -2.594  79.533  1.00  0.50           O  
HETATM  512  O   HOH T 511      38.212  28.473  41.807  1.00  0.50           O  
HETATM  513  O   HOH T 512      29.856  43.643  38.742  1.00  0.50           O  
HETATM  514  O   HOH T 513      13.789  63.047  35.492  1.00  0.50           O  
HETATM  515  O   HOH T 514      23.160  34.396  45.325  1.00  0.50           O  
HETATM  516  O   HOH T 515      42.077  -7.923  76.777  1.00  0.50           O  
HETATM  517  O   HOH T 516      25.622  24.959  62.730  1.00  0.50           O  
HETATM  518  O   HOH T 517      25.933   9.370  52.773  1.00  0.50           O  
HETATM  519  O   HOH T 518      22.751  53.885  38.150  1.00  0.50           O  
HETATM  520  O   HOH T 519      28.300  44.456  29.927  1.00  0.50           O  
HETATM  521  O   HOH T 520      19.640  21.008  64.124  1.00  0.50           O  
HETATM  522  O   HOH T 521      29.924  47.708  39.645  1.00  0.50           O  
HETATM  523  O   HOH T 522       2.543  43.022  24.948  1.00  0.50           O  
HETATM  524  O   HOH T 523      27.518  71.424  26.817  1.00  0.50           O  
HETATM  525  O   HOH T 524      10.919  49.842  12.916  1.00  0.50           O  
HETATM  526  O   HOH T 525       6.248  48.240  49.687  1.00  0.50           O  
HETATM  527  O   HOH T 526      56.793   2.899  79.279  1.00  0.50           O  
HETATM  528  O   HOH T 527      -1.383  36.743  34.750  1.00  0.51           O  
HETATM  529  O   HOH T 528       8.848  67.554  23.366  1.00  0.51           O  
HETATM  530  O   HOH T 529      13.552  30.289  54.655  1.00  0.51           O  
HETATM  531  O   HOH T 530      49.430  -3.558  74.598  1.00  0.51           O  
HETATM  532  O   HOH T 531      23.356  -1.057  64.523  1.00  0.51           O  
HETATM  533  O   HOH T 532      25.385  75.025  16.851  1.00  0.51           O  
HETATM  534  O   HOH T 533      34.095  67.694  10.264  1.00  0.51           O  
HETATM  535  O   HOH T 534       9.512  51.246  47.342  1.00  0.51           O  
HETATM  536  O   HOH T 535      25.967  16.795  39.982  1.00  0.51           O  
HETATM  537  O   HOH T 536       0.868  52.434  43.310  1.00  0.51           O  
HETATM  538  O   HOH T 537      26.538   8.922  47.018  1.00  0.51           O  
HETATM  539  O   HOH T 538      30.472  39.637  46.447  1.00  0.51           O  
HETATM  540  O   HOH T 539      17.854  26.214  48.360  1.00  0.51           O  
HETATM  541  O   HOH T 540      28.607  21.749  41.492  1.00  0.51           O  
HETATM  542  O   HOH T 541      24.566  55.227  19.709  1.00  0.51           O  
HETATM  543  O   HOH T 542      26.847  38.927  19.349  1.00  0.51           O  
HETATM  544  O   HOH T 543       6.665  67.358  24.846  1.00  0.51           O  
HETATM  545  O   HOH T 544       9.877  44.620  48.573  1.00  0.51           O  
HETATM  546  O   HOH T 545       9.300  39.902  24.531  1.00  0.51           O  
HETATM  547  O   HOH T 546       1.440  61.530  18.564  1.00  0.51           O  
HETATM  548  O   HOH T 547      21.767  30.885  60.022  1.00  0.51           O  
HETATM  549  O   HOH T 548      17.509  21.272  42.522  1.00  0.51           O  
HETATM  550  O   HOH T 549      55.861  -0.818  78.443  1.00  0.51           O  
HETATM  551  O   HOH T 550      26.664  34.752  60.757  1.00  0.51           O  
HETATM  552  O   HOH T 551      28.933  -3.133  53.394  1.00  0.51           O  
HETATM  553  O   HOH T 552      24.094   1.175  63.211  1.00  0.51           O  
HETATM  554  O   HOH T 553      24.307  33.321  61.076  1.00  0.51           O  
HETATM  555  O   HOH T 554      55.002   2.562  62.342  1.00  0.52           O  
HETATM  556  O   HOH T 555       0.513  35.462  44.554  1.00  0.52           O  
HETATM  557  O   HOH T 556      23.957   5.854  60.764  1.00  0.52           O  
HETATM  558  O   HOH T 557      37.229  18.420  74.875  1.00  0.52           O  
HETATM  559  O   HOH T 558      33.895   2.211  50.031  1.00  0.52           O  
HETATM  560  O   HOH T 559      17.550  29.177  48.581  1.00  0.52           O  
HETATM  561  O   HOH T 560      37.076  23.766  65.565  1.00  0.52           O  
HETATM  562  O   HOH T 561      24.924   9.290  50.233  1.00  0.52           O  
HETATM  563  O   HOH T 562      33.750  13.564  79.031  1.00  0.52           O  
HETATM  564  O   HOH T 563      17.839  25.157  62.577  1.00  0.52           O  
HETATM  565  O   HOH T 564       0.030  51.129  20.931  1.00  0.52           O  
HETATM  566  O   HOH T 565      -2.789  40.732  41.636  1.00  0.52           O  
HETATM  567  O   HOH T 566      -3.163  46.865  40.235  1.00  0.52           O  
HETATM  568  O   HOH T 567      28.278  24.295  63.397  1.00  0.52           O  
HETATM  569  O   HOH T 568      46.673  16.119  48.692  1.00  0.52           O  
HETATM  570  O   HOH T 569      23.926  28.537  31.508  1.00  0.52           O  
HETATM  571  O   HOH T 570      42.179  -2.342  82.255  1.00  0.52           O  
HETATM  572  O   HOH T 571      15.858  68.003  31.818  1.00  0.52           O  
HETATM  573  O   HOH T 572      47.244  20.163  57.430  1.00  0.52           O  
HETATM  574  O   HOH T 573      25.129  -0.282  80.866  1.00  0.52           O  
HETATM  575  O   HOH T 574      26.213  42.303  43.160  1.00  0.53           O  
HETATM  576  O   HOH T 575      17.462  25.322  51.035  1.00  0.53           O  
HETATM  577  O   HOH T 576      18.695  41.222  44.683  1.00  0.53           O  
HETATM  578  O   HOH T 577      29.049   7.434  55.655  1.00  0.53           O  
HETATM  579  O   HOH T 578       5.177  54.151  30.190  1.00  0.53           O  
HETATM  580  O   HOH T 579      52.269   0.024  79.022  1.00  0.53           O  
HETATM  581  O   HOH T 580       6.650  40.477  24.476  1.00  0.53           O  
HETATM  582  O   HOH T 581      39.050  57.407  23.031  1.00  0.53           O  
HETATM  583  O   HOH T 582       4.220  47.151  13.839  1.00  0.53           O  
HETATM  584  O   HOH T 583      18.207  39.583  22.502  1.00  0.53           O  
HETATM  585  O   HOH T 584      32.486   4.102  48.630  1.00  0.53           O  
HETATM  586  O   HOH T 585      25.415  32.411  30.110  1.00  0.53           O  
HETATM  587  O   HOH T 586      28.423  37.923  33.171  1.00  0.53           O  
HETATM  588  O   HOH T 587       0.286  55.963  25.137  1.00  0.53           O  
HETATM  589  O   HOH T 588      24.890  16.942  75.204  1.00  0.53           O  
HETATM  590  O   HOH T 589      14.930  20.848  58.418  1.00  0.53           O  
HETATM  591  O   HOH T 590      14.612  63.912   7.218  1.00  0.53           O  
HETATM  592  O   HOH T 591      19.806  64.642   6.977  1.00  0.53           O  
HETATM  593  O   HOH T 592       3.346  61.072  20.704  1.00  0.53           O  
HETATM  594  O   HOH T 593      30.071  73.719  11.477  1.00  0.53           O  
HETATM  595  O   HOH T 594      48.353  24.127  43.025  1.00  0.53           O  
HETATM  596  O   HOH T 595      40.816   7.293  78.687  1.00  0.53           O  
HETATM  597  O   HOH T 596      30.067  -4.065  75.308  1.00  0.53           O  
HETATM  598  O   HOH T 597      28.398  26.586  64.962  1.00  0.53           O  
HETATM  599  O   HOH T 598      47.108  20.905  50.888  1.00  0.53           O  
HETATM  600  O   HOH T 599      40.281  16.875  41.359  1.00  0.54           O  
HETATM  601  O   HOH T 600      20.990  72.730   7.527  1.00  0.54           O  
HETATM  602  O   HOH T 601       7.980  48.934  47.756  1.00  0.54           O  
HETATM  603  O   HOH T 602      20.200  72.556   4.912  1.00  0.54           O  
HETATM  604  O   HOH T 603      27.460  -7.399  55.137  1.00  0.54           O  
HETATM  605  O   HOH T 604      22.043  -3.306  61.883  1.00  0.54           O  
HETATM  606  O   HOH T 605      29.515  47.148  27.713  1.00  0.54           O  
HETATM  607  O   HOH T 606      31.809  28.810  38.378  1.00  0.54           O  
HETATM  608  O   HOH T 607      34.130  32.445  32.947  1.00  0.54           O  
HETATM  609  O   HOH T 608      26.457  57.715   9.911  1.00  0.54           O  
HETATM  610  O   HOH T 609      14.619  39.449  23.943  1.00  0.55           O  
HETATM  611  O   HOH T 610      14.135  48.525  11.780  1.00  0.55           O  
HETATM  612  O   HOH T 611      21.006  33.201  44.027  1.00  0.55           O  
HETATM  613  O   HOH T 612      17.452  70.167  32.062  1.00  0.55           O  
HETATM  614  O   HOH T 613      11.366  58.254  44.575  1.00  0.55           O  
HETATM  615  O   HOH T 614      13.732  72.876  29.145  1.00  0.55           O  
HETATM  616  O   HOH T 615      32.359  41.250  47.756  1.00  0.55           O  
HETATM  617  O   HOH T 616      42.871   0.135  80.278  1.00  0.55           O  
HETATM  618  O   HOH T 617      15.859  60.725  39.136  1.00  0.55           O  
HETATM  619  O   HOH T 618      35.580  -9.865  68.039  1.00  0.55           O  
HETATM  620  O   HOH T 619      30.845  15.123  39.446  1.00  0.55           O  
HETATM  621  O   HOH T 620      10.494  67.260  11.302  1.00  0.55           O  
HETATM  622  O   HOH T 621      23.476  37.224  44.571  1.00  0.55           O  
HETATM  623  O   HOH T 622      34.418   7.922  53.833  1.00  0.55           O  
HETATM  624  O   HOH T 623      23.115   2.393  59.966  1.00  0.55           O  
HETATM  625  O   HOH T 624       2.445  33.959  33.612  1.00  0.55           O  
HETATM  626  O   HOH T 625      41.278   7.245  65.710  1.00  0.55           O  
HETATM  627  O   HOH T 626       3.568  54.911  42.958  1.00  0.55           O  
HETATM  628  O   HOH T 627      25.861  51.866  32.430  1.00  0.56           O  
HETATM  629  O   HOH T 628       6.956  30.706  29.204  1.00  0.56           O  
HETATM  630  O   HOH T 629      26.761  63.918  35.703  1.00  0.56           O  
HETATM  631  O   HOH T 630      30.743   9.812  39.569  1.00  0.56           O  
HETATM  632  O   HOH T 631       6.171  59.817  27.475  1.00  0.56           O  
HETATM  633  O   HOH T 632      24.451  52.630  41.293  1.00  0.56           O  
HETATM  634  O   HOH T 633      24.556  15.485  71.352  1.00  0.56           O  
HETATM  635  O   HOH T 634      14.370  21.766  51.587  1.00  0.56           O  
HETATM  636  O   HOH T 635      57.608  14.007  64.199  1.00  0.56           O  
HETATM  637  O   HOH T 636      26.985  59.789   7.958  1.00  0.56           O  
HETATM  638  O   HOH T 637      34.698  28.587  62.241  1.00  0.56           O  
HETATM  639  O   HOH T 638      34.206  39.137  53.622  1.00  0.56           O  
HETATM  640  O   HOH T 639      29.837  62.343  33.242  1.00  0.56           O  
HETATM  641  O   HOH T 640      36.641  38.063  53.553  1.00  0.56           O  
HETATM  642  O   HOH T 641      17.046  41.231  46.983  1.00  0.57           O  
HETATM  643  O   HOH T 642      28.056   3.209  55.131  1.00  0.57           O  
HETATM  644  O   HOH T 643       1.552  52.629  34.089  1.00  0.57           O  
HETATM  645  O   HOH T 644      24.328  34.031  65.516  1.00  0.57           O  
HETATM  646  O   HOH T 645      28.313  69.981   9.584  1.00  0.57           O  
HETATM  647  O   HOH T 646      29.978  71.035  11.492  1.00  0.57           O  
HETATM  648  O   HOH T 647      43.878  29.998  64.967  1.00  0.57           O  
HETATM  649  O   HOH T 648      49.257  -9.942  74.132  1.00  0.57           O  
HETATM  650  O   HOH T 649      -0.121  49.278  23.331  1.00  0.57           O  
HETATM  651  O   HOH T 650      47.032   0.002  50.711  1.00  0.58           O  
HETATM  652  O   HOH T 651      27.509  -8.131  63.059  1.00  0.59           O  
HETATM  653  O   HOH T 652      22.453  13.042  58.202  1.00  0.59           O  
HETATM  654  O   HOH T 653      51.184  17.941  57.316  1.00  0.59           O  
HETATM  655  O   HOH T 654      22.708   0.534  68.092  1.00  0.60           O  
HETATM  656  O   HOH T 655       8.808  61.492  31.678  1.00  0.60           O  
HETATM  657  O   HOH T 656      14.557  69.121  28.619  1.00  0.60           O  
HETATM  658  O   HOH T 657      15.357  46.230  12.799  1.00  0.60           O  
HETATM  659  O   HOH T 658      30.779   7.261  40.527  1.00  0.61           O  
HETATM  660  O   HOH T 659      20.249  -0.263  72.751  1.00  0.61           O  
HETATM  661  O   HOH T 660      46.713  -7.052  74.668  1.00  0.62           O  
HETATM  662  O   HOH T 661      58.466  -0.748  68.831  1.00  0.63           O  
HETATM  663  O   HOH T 662      34.161  -4.909  55.050  1.00  0.64           O  
TER     664      HOH T 662 
