# Supplementary material for: Accurate Prediction of Hydration Sites of Proteins Using Energy Model With Atom Embedding
Source: Front Mol Biosci. 2021 Sep 20;8:756075. doi: 10.3389/fmolb.2021.756075 (PMC8488165; doi:10.3389/fmolb.2021.756075)
Supplement: Supplementary file 1 [file DataSheet1.ZIP › Data Sheet 1/Our_result_pdb/our_dataset_output/1X6Q_watersite.pdb]

HEADER                                                        XXXX


JRNL        PMID   -1
HETATM    1  O   HOH T   0       0.186  11.092  44.394  1.00  0.16           O  
HETATM    2  O   HOH T   1       1.504  18.215  64.753  1.00  0.16           O  
HETATM    3  O   HOH T   2      17.771  11.337  45.766  1.00  0.17           O  
HETATM    4  O   HOH T   3       7.295   5.273  54.414  1.00  0.20           O  
HETATM    5  O   HOH T   4       9.178  19.924  55.917  1.00  0.23           O  
HETATM    6  O   HOH T   5      20.189   4.885  25.997  1.00  0.23           O  
HETATM    7  O   HOH T   6      -4.604   9.942  49.653  1.00  0.24           O  
HETATM    8  O   HOH T   7       3.400   6.783  37.546  1.00  0.24           O  
HETATM    9  O   HOH T   8      17.619   5.543  32.554  1.00  0.24           O  
HETATM   10  O   HOH T   9       2.372   4.466  54.909  1.00  0.25           O  
HETATM   11  O   HOH T  10      19.364   4.560  36.704  1.00  0.25           O  
HETATM   12  O   HOH T  11       1.546  21.122  43.851  1.00  0.25           O  
HETATM   13  O   HOH T  12      22.692  -6.684  32.141  1.00  0.25           O  
HETATM   14  O   HOH T  13       0.518  -5.050  31.305  1.00  0.26           O  
HETATM   15  O   HOH T  14      -0.102  -2.492  25.523  1.00  0.26           O  
HETATM   16  O   HOH T  15      -9.925  14.514  39.932  1.00  0.27           O  
HETATM   17  O   HOH T  16       1.513  -4.366  24.259  1.00  0.27           O  
HETATM   18  O   HOH T  17      13.898   0.523  20.669  1.00  0.27           O  
HETATM   19  O   HOH T  18      17.275  -4.461  37.195  1.00  0.27           O  
HETATM   20  O   HOH T  19       8.371  11.488  58.266  1.00  0.27           O  
HETATM   21  O   HOH T  20      16.967   6.559  30.060  1.00  0.28           O  
HETATM   22  O   HOH T  21       3.026  19.453  62.953  1.00  0.28           O  
HETATM   23  O   HOH T  22       2.575  18.550  44.364  1.00  0.29           O  
HETATM   24  O   HOH T  23      10.130   7.243  58.509  1.00  0.29           O  
HETATM   25  O   HOH T  24      22.016   2.051  47.741  1.00  0.30           O  
HETATM   26  O   HOH T  25      -2.196  16.285  55.559  1.00  0.30           O  
HETATM   27  O   HOH T  26      11.402  12.430  38.859  1.00  0.30           O  
HETATM   28  O   HOH T  27      13.031  10.113  28.117  1.00  0.31           O  
HETATM   29  O   HOH T  28      21.950   1.212  35.281  1.00  0.31           O  
HETATM   30  O   HOH T  29      16.935   9.055  57.836  1.00  0.31           O  
HETATM   31  O   HOH T  30      21.710   6.657  43.774  1.00  0.31           O  
HETATM   32  O   HOH T  31      -1.810  21.674  50.335  1.00  0.31           O  
HETATM   33  O   HOH T  32      16.991  14.365  59.051  1.00  0.32           O  
HETATM   34  O   HOH T  33       6.661   1.573  50.956  1.00  0.32           O  
HETATM   35  O   HOH T  34      13.236  14.578  39.210  1.00  0.32           O  
HETATM   36  O   HOH T  35      -4.606  24.054  46.428  1.00  0.32           O  
HETATM   37  O   HOH T  36       1.616   4.946  30.908  1.00  0.32           O  
HETATM   38  O   HOH T  37      12.432  12.441  29.582  1.00  0.33           O  
HETATM   39  O   HOH T  38      -2.884   4.637  41.187  1.00  0.33           O  
HETATM   40  O   HOH T  39       6.701  13.579  66.099  1.00  0.33           O  
HETATM   41  O   HOH T  40      12.963  -6.367  20.576  1.00  0.33           O  
HETATM   42  O   HOH T  41      14.031  20.619  61.352  1.00  0.33           O  
HETATM   43  O   HOH T  42      27.052  -1.967  40.993  1.00  0.33           O  
HETATM   44  O   HOH T  43      22.941   5.432  45.894  1.00  0.33           O  
HETATM   45  O   HOH T  44      -5.650   6.501  44.823  1.00  0.33           O  
HETATM   46  O   HOH T  45      11.428  -4.047  20.611  1.00  0.33           O  
HETATM   47  O   HOH T  46      -2.005  17.286  58.224  1.00  0.33           O  
HETATM   48  O   HOH T  47      18.799  11.347  33.902  1.00  0.34           O  
HETATM   49  O   HOH T  48      -0.201  -3.172  33.217  1.00  0.34           O  
HETATM   50  O   HOH T  49       0.864   1.232  26.929  1.00  0.34           O  
HETATM   51  O   HOH T  50      10.438  15.038  39.026  1.00  0.34           O  
HETATM   52  O   HOH T  51       0.320  -8.148  24.420  1.00  0.34           O  
HETATM   53  O   HOH T  52      13.992  13.069  60.388  1.00  0.34           O  
HETATM   54  O   HOH T  53       7.612  -3.001  45.566  1.00  0.35           O  
HETATM   55  O   HOH T  54      15.194  22.675  52.003  1.00  0.35           O  
HETATM   56  O   HOH T  55       8.810  24.470  46.568  1.00  0.35           O  
HETATM   57  O   HOH T  56       4.424   3.209  25.261  1.00  0.36           O  
HETATM   58  O   HOH T  57       0.969  15.023  36.999  1.00  0.36           O  
HETATM   59  O   HOH T  58      21.246  21.222  58.542  1.00  0.36           O  
HETATM   60  O   HOH T  59       3.469  -4.968  34.253  1.00  0.36           O  
HETATM   61  O   HOH T  60       0.150  17.456  43.373  1.00  0.36           O  
HETATM   62  O   HOH T  61      -6.313   4.408  46.680  1.00  0.36           O  
HETATM   63  O   HOH T  62      10.851  -1.275  46.496  1.00  0.36           O  
HETATM   64  O   HOH T  63       8.554  -8.594  36.967  1.00  0.36           O  
HETATM   65  O   HOH T  64      10.502 -10.483  36.953  1.00  0.37           O  
HETATM   66  O   HOH T  65      -3.757  26.029  48.229  1.00  0.37           O  
HETATM   67  O   HOH T  66       3.186   7.299  29.951  1.00  0.37           O  
HETATM   68  O   HOH T  67      12.000   3.801  55.739  1.00  0.37           O  
HETATM   69  O   HOH T  68      18.727  -8.839  34.189  1.00  0.38           O  
HETATM   70  O   HOH T  69      -1.888   7.288  33.940  1.00  0.38           O  
HETATM   71  O   HOH T  70       6.639  12.854  32.598  1.00  0.38           O  
HETATM   72  O   HOH T  71       8.199  13.746  34.773  1.00  0.38           O  
HETATM   73  O   HOH T  72      19.241  -4.098  35.134  1.00  0.38           O  
HETATM   74  O   HOH T  73      12.769  23.078  50.834  1.00  0.38           O  
HETATM   75  O   HOH T  74      14.296  15.624  47.239  1.00  0.38           O  
HETATM   76  O   HOH T  75       6.662  11.582  35.010  1.00  0.39           O  
HETATM   77  O   HOH T  76       8.912  23.769  56.109  1.00  0.39           O  
HETATM   78  O   HOH T  77       8.091   3.275  52.618  1.00  0.39           O  
HETATM   79  O   HOH T  78      18.876  20.662  57.252  1.00  0.39           O  
HETATM   80  O   HOH T  79       0.011   6.408  46.353  1.00  0.40           O  
HETATM   81  O   HOH T  80       5.540   8.715  37.298  1.00  0.40           O  
HETATM   82  O   HOH T  81       2.214   1.607  52.467  1.00  0.40           O  
HETATM   83  O   HOH T  82      28.494  -1.025  43.157  1.00  0.40           O  
HETATM   84  O   HOH T  83       3.014   2.645  21.219  1.00  0.40           O  
HETATM   85  O   HOH T  84       4.304   4.887  58.446  1.00  0.40           O  
HETATM   86  O   HOH T  85       4.959  -9.164  27.213  1.00  0.40           O  
HETATM   87  O   HOH T  86       0.183  20.132  68.517  1.00  0.41           O  
HETATM   88  O   HOH T  87      15.127  -7.092  38.993  1.00  0.41           O  
HETATM   89  O   HOH T  88       3.068   9.440  38.138  1.00  0.41           O  
HETATM   90  O   HOH T  89       4.032   4.392  61.250  1.00  0.41           O  
HETATM   91  O   HOH T  90       5.006   4.320  55.754  1.00  0.42           O  
HETATM   92  O   HOH T  91      17.818  18.707  51.040  1.00  0.42           O  
HETATM   93  O   HOH T  92      -4.456  14.974  56.750  1.00  0.42           O  
HETATM   94  O   HOH T  93       3.114  -1.611  38.757  1.00  0.42           O  
HETATM   95  O   HOH T  94      -6.095  22.000  65.267  1.00  0.43           O  
HETATM   96  O   HOH T  95      10.977  -1.652  21.206  1.00  0.43           O  
HETATM   97  O   HOH T  96      -1.771   1.189  27.855  1.00  0.43           O  
HETATM   98  O   HOH T  97       2.481  13.084  35.594  1.00  0.43           O  
HETATM   99  O   HOH T  98      -6.521   8.654  46.228  1.00  0.43           O  
HETATM  100  O   HOH T  99      20.233  -2.402  40.317  1.00  0.44           O  
HETATM  101  O   HOH T 100       9.357   3.553  55.078  1.00  0.44           O  
HETATM  102  O   HOH T 101      11.535 -10.782  34.321  1.00  0.44           O  
HETATM  103  O   HOH T 102       5.900   6.674  26.034  1.00  0.44           O  
HETATM  104  O   HOH T 103     -10.644  14.098  42.527  1.00  0.44           O  
HETATM  105  O   HOH T 104      11.162   0.894  20.142  1.00  0.44           O  
HETATM  106  O   HOH T 105      -0.057  28.191  55.739  1.00  0.44           O  
HETATM  107  O   HOH T 106      19.504  15.327  59.973  1.00  0.44           O  
HETATM  108  O   HOH T 107      15.225   6.562  28.099  1.00  0.44           O  
HETATM  109  O   HOH T 108      12.665  -5.858  41.190  1.00  0.44           O  
HETATM  110  O   HOH T 109      -0.417   6.746  31.658  1.00  0.44           O  
HETATM  111  O   HOH T 110      16.357  16.145  62.598  1.00  0.45           O  
HETATM  112  O   HOH T 111       0.683   5.059  48.718  1.00  0.45           O  
HETATM  113  O   HOH T 112      14.794  -5.472  42.888  1.00  0.45           O  
HETATM  114  O   HOH T 113      21.159  -8.636  33.143  1.00  0.45           O  
HETATM  115  O   HOH T 114       2.559  -8.808  23.031  1.00  0.45           O  
HETATM  116  O   HOH T 115      24.795  12.737  50.691  1.00  0.45           O  
HETATM  117  O   HOH T 116       3.786   2.096  54.698  1.00  0.45           O  
HETATM  118  O   HOH T 117      -8.453  14.361  44.170  1.00  0.46           O  
HETATM  119  O   HOH T 118      26.632   9.014  44.428  1.00  0.46           O  
HETATM  120  O   HOH T 119      -3.404   8.048  51.370  1.00  0.46           O  
HETATM  121  O   HOH T 120      -2.759  -2.118  25.421  1.00  0.46           O  
HETATM  122  O   HOH T 121      17.488  11.745  58.100  1.00  0.46           O  
HETATM  123  O   HOH T 122      19.598  -6.247  33.226  1.00  0.46           O  
HETATM  124  O   HOH T 123      21.170  -2.539  42.990  1.00  0.47           O  
HETATM  125  O   HOH T 124      11.499   9.327  62.078  1.00  0.47           O  
HETATM  126  O   HOH T 125      -3.753   7.453  48.657  1.00  0.47           O  
HETATM  127  O   HOH T 126       9.683   7.326  61.270  1.00  0.47           O  
HETATM  128  O   HOH T 127       9.708  13.117  29.137  1.00  0.47           O  
HETATM  129  O   HOH T 128       1.159  -6.434  22.401  1.00  0.47           O  
HETATM  130  O   HOH T 129      12.157  21.820  63.041  1.00  0.47           O  
HETATM  131  O   HOH T 130      -6.112   9.000  43.511  1.00  0.48           O  
HETATM  132  O   HOH T 131       8.281   8.983  59.501  1.00  0.48           O  
HETATM  133  O   HOH T 132       1.962  -3.949  37.784  1.00  0.48           O  
HETATM  134  O   HOH T 133      13.694  22.738  54.432  1.00  0.48           O  
HETATM  135  O   HOH T 134       5.523   8.425  67.168  1.00  0.48           O  
HETATM  136  O   HOH T 135      -2.820  18.519  53.929  1.00  0.48           O  
HETATM  137  O   HOH T 136      25.320   7.275  37.910  1.00  0.48           O  
HETATM  138  O   HOH T 137       0.118  22.715  68.677  1.00  0.48           O  
HETATM  139  O   HOH T 138       3.408  14.199  38.064  1.00  0.48           O  
HETATM  140  O   HOH T 139       9.768  15.582  66.417  1.00  0.48           O  
HETATM  141  O   HOH T 140       0.064  22.576  45.769  1.00  0.49           O  
HETATM  142  O   HOH T 141      24.152   7.727  44.791  1.00  0.49           O  
HETATM  143  O   HOH T 142      -8.313   7.564  44.465  1.00  0.49           O  
HETATM  144  O   HOH T 143      14.602  16.157  64.789  1.00  0.49           O  
HETATM  145  O   HOH T 144      23.740  12.197  48.176  1.00  0.49           O  
HETATM  146  O   HOH T 145      21.314  11.817  32.893  1.00  0.50           O  
HETATM  147  O   HOH T 146      12.837  -7.268  43.624  1.00  0.50           O  
HETATM  148  O   HOH T 147      13.097  20.332  65.230  1.00  0.50           O  
HETATM  149  O   HOH T 148       4.448   5.675  23.848  1.00  0.50           O  
HETATM  150  O   HOH T 149      25.228  10.843  46.221  1.00  0.50           O  
HETATM  151  O   HOH T 150       4.810  -9.581  24.487  1.00  0.50           O  
HETATM  152  O   HOH T 151      11.276  12.010  27.161  1.00  0.50           O  
HETATM  153  O   HOH T 152       8.181  -3.699  35.911  1.00  0.50           O  
HETATM  154  O   HOH T 153       8.459 -10.440  39.084  1.00  0.50           O  
HETATM  155  O   HOH T 154      16.723  11.491  35.829  1.00  0.50           O  
HETATM  156  O   HOH T 155      -2.999  23.396  48.567  1.00  0.50           O  
HETATM  157  O   HOH T 156      -1.961   4.349  46.102  1.00  0.51           O  
HETATM  158  O   HOH T 157       4.811   0.757  52.768  1.00  0.51           O  
HETATM  159  O   HOH T 158       1.453  21.787  62.926  1.00  0.51           O  
HETATM  160  O   HOH T 159      10.251   4.950  60.008  1.00  0.51           O  
HETATM  161  O   HOH T 160       8.026   6.512  24.190  1.00  0.51           O  
HETATM  162  O   HOH T 161       5.127  16.282  37.206  1.00  0.51           O  
HETATM  163  O   HOH T 162       7.961  -6.934  22.830  1.00  0.52           O  
HETATM  164  O   HOH T 163      13.089   2.627  19.089  1.00  0.52           O  
HETATM  165  O   HOH T 164      18.564  13.891  56.826  1.00  0.52           O  
HETATM  166  O   HOH T 165      18.805  -6.645  36.059  1.00  0.52           O  
HETATM  167  O   HOH T 166      12.761  -9.218  36.271  1.00  0.52           O  
HETATM  168  O   HOH T 167       4.387  11.163  36.430  1.00  0.52           O  
HETATM  169  O   HOH T 168      -8.090  13.316  41.696  1.00  0.52           O  
HETATM  170  O   HOH T 169      23.016   0.909  32.769  1.00  0.53           O  
HETATM  171  O   HOH T 170      -2.509  26.896  55.926  1.00  0.53           O  
HETATM  172  O   HOH T 171      10.182   3.328  57.729  1.00  0.53           O  
HETATM  173  O   HOH T 172      10.403  10.737  59.937  1.00  0.54           O  
HETATM  174  O   HOH T 173       8.883  -2.522  48.075  1.00  0.54           O  
HETATM  175  O   HOH T 174      14.641  -9.622  38.281  1.00  0.54           O  
HETATM  176  O   HOH T 175      11.246  22.705  48.559  1.00  0.54           O  
HETATM  177  O   HOH T 176       4.202  11.918  33.699  1.00  0.54           O  
HETATM  178  O   HOH T 177      -3.971  23.426  64.051  1.00  0.55           O  
HETATM  179  O   HOH T 178      23.413  10.377  50.210  1.00  0.55           O  
HETATM  180  O   HOH T 179       1.663  23.456  60.251  1.00  0.55           O  
HETATM  181  O   HOH T 180      -3.956   4.798  47.942  1.00  0.55           O  
HETATM  182  O   HOH T 181      11.306  25.082  55.185  1.00  0.55           O  
HETATM  183  O   HOH T 182      -1.760  22.940  61.642  1.00  0.56           O  
HETATM  184  O   HOH T 183       1.518  -2.902  17.044  1.00  0.56           O  
HETATM  185  O   HOH T 184      15.087  -1.657  58.957  1.00  0.56           O  
HETATM  186  O   HOH T 185      15.621  14.353  37.532  1.00  0.56           O  
HETATM  187  O   HOH T 186       6.844  25.416  55.908  1.00  0.57           O  
HETATM  188  O   HOH T 187      10.786  -9.141  25.848  1.00  0.57           O  
HETATM  189  O   HOH T 188       6.546   8.166  28.350  1.00  0.57           O  
HETATM  190  O   HOH T 189      -9.920  12.061  47.092  1.00  0.58           O  
HETATM  191  O   HOH T 190      -4.876  17.140  58.229  1.00  0.58           O  
HETATM  192  O   HOH T 191      14.484  -8.009  41.611  1.00  0.59           O  
HETATM  193  O   HOH T 192      26.867   7.482  34.661  1.00  0.61           O  
TER     194      HOH T 192 
