# Supplementary material for: Accurate Prediction of Hydration Sites of Proteins Using Energy Model With Atom Embedding
Source: Front Mol Biosci. 2021 Sep 20;8:756075. doi: 10.3389/fmolb.2021.756075 (PMC8488165; doi:10.3389/fmolb.2021.756075)
Supplement: Supplementary file 1 [file DataSheet1.ZIP › Data Sheet 1/Our_result_pdb/our_dataset_output/1X9H_watersite.pdb]

HEADER                                                        XXXX


JRNL        PMID   -1
HETATM    1  O   HOH T   0      14.286  20.740  64.101  1.00  0.15           O  
HETATM    2  O   HOH T   1      39.570  26.705  31.089  1.00  0.17           O  
HETATM    3  O   HOH T   2      24.910   2.502  28.578  1.00  0.17           O  
HETATM    4  O   HOH T   3      33.931 -10.699  36.850  1.00  0.17           O  
HETATM    5  O   HOH T   4      47.376   8.903  37.237  1.00  0.18           O  
HETATM    6  O   HOH T   5      16.041  19.545  35.556  1.00  0.18           O  
HETATM    7  O   HOH T   6      16.157  35.247  31.216  1.00  0.18           O  
HETATM    8  O   HOH T   7      45.266  29.975  29.466  1.00  0.18           O  
HETATM    9  O   HOH T   8      19.463  -0.488  25.766  1.00  0.19           O  
HETATM   10  O   HOH T   9      29.645  39.052  39.351  1.00  0.20           O  
HETATM   11  O   HOH T  10      37.285   5.751  31.340  1.00  0.20           O  
HETATM   12  O   HOH T  11      56.224  -6.427  35.923  1.00  0.20           O  
HETATM   13  O   HOH T  12      33.651   8.687  36.298  1.00  0.20           O  
HETATM   14  O   HOH T  13      14.486  14.811  26.075  1.00  0.21           O  
HETATM   15  O   HOH T  14      43.204 -10.937  26.690  1.00  0.21           O  
HETATM   16  O   HOH T  15      33.841  17.550  51.730  1.00  0.21           O  
HETATM   17  O   HOH T  16      16.554   0.963  19.550  1.00  0.21           O  
HETATM   18  O   HOH T  17      44.678   1.127  31.655  1.00  0.21           O  
HETATM   19  O   HOH T  18      50.093  14.423  28.828  1.00  0.21           O  
HETATM   20  O   HOH T  19      12.289  19.100  65.022  1.00  0.22           O  
HETATM   21  O   HOH T  20      30.270  16.946  40.081  1.00  0.22           O  
HETATM   22  O   HOH T  21      42.376  33.247  19.758  1.00  0.22           O  
HETATM   23  O   HOH T  22      23.963   8.167  38.937  1.00  0.22           O  
HETATM   24  O   HOH T  23      18.104   9.811  43.039  1.00  0.22           O  
HETATM   25  O   HOH T  24      26.798  23.391  31.463  1.00  0.22           O  
HETATM   26  O   HOH T  25      31.116  -7.759  28.004  1.00  0.22           O  
HETATM   27  O   HOH T  26      38.861  11.051  55.855  1.00  0.23           O  
HETATM   28  O   HOH T  27      28.412  21.420   4.460  1.00  0.23           O  
HETATM   29  O   HOH T  28      14.028  16.251  51.026  1.00  0.23           O  
HETATM   30  O   HOH T  29      32.772  11.368  40.167  1.00  0.23           O  
HETATM   31  O   HOH T  30      32.195   6.391  35.641  1.00  0.23           O  
HETATM   32  O   HOH T  31      31.410  22.192  36.515  1.00  0.23           O  
HETATM   33  O   HOH T  32      19.443  27.899  31.190  1.00  0.24           O  
HETATM   34  O   HOH T  33      40.492  18.594  17.932  1.00  0.24           O  
HETATM   35  O   HOH T  34      52.684  22.726  24.889  1.00  0.24           O  
HETATM   36  O   HOH T  35      27.701   9.141  50.564  1.00  0.24           O  
HETATM   37  O   HOH T  36      25.853  11.953  16.675  1.00  0.24           O  
HETATM   38  O   HOH T  37      14.075   8.271  43.606  1.00  0.24           O  
HETATM   39  O   HOH T  38      41.287  29.979  41.153  1.00  0.24           O  
HETATM   40  O   HOH T  39      21.207  41.623  28.955  1.00  0.24           O  
HETATM   41  O   HOH T  40      33.595  37.252  30.574  1.00  0.25           O  
HETATM   42  O   HOH T  41      44.170  17.749  45.513  1.00  0.25           O  
HETATM   43  O   HOH T  42      33.445  21.872  44.665  1.00  0.25           O  
HETATM   44  O   HOH T  43      33.333  39.999  30.995  1.00  0.25           O  
HETATM   45  O   HOH T  44       8.563  16.708  18.766  1.00  0.26           O  
HETATM   46  O   HOH T  45      49.559  22.678  34.661  1.00  0.26           O  
HETATM   47  O   HOH T  46      21.618  25.018  25.926  1.00  0.26           O  
HETATM   48  O   HOH T  47       6.975  16.129  24.883  1.00  0.26           O  
HETATM   49  O   HOH T  48      49.819  -5.377  47.082  1.00  0.26           O  
HETATM   50  O   HOH T  49      23.575  25.905  58.558  1.00  0.26           O  
HETATM   51  O   HOH T  50      31.609  22.654   8.355  1.00  0.26           O  
HETATM   52  O   HOH T  51      56.093   1.954  48.210  1.00  0.26           O  
HETATM   53  O   HOH T  52      29.622  -6.125  22.785  1.00  0.26           O  
HETATM   54  O   HOH T  53      34.830  39.016  14.626  1.00  0.26           O  
HETATM   55  O   HOH T  54      21.074  21.856  27.576  1.00  0.26           O  
HETATM   56  O   HOH T  55      42.979   4.511  26.832  1.00  0.26           O  
HETATM   57  O   HOH T  56      47.822 -14.127  53.850  1.00  0.26           O  
HETATM   58  O   HOH T  57      39.691  18.243  55.730  1.00  0.26           O  
HETATM   59  O   HOH T  58      57.158  13.306  23.047  1.00  0.27           O  
HETATM   60  O   HOH T  59      18.514 -11.106  32.846  1.00  0.27           O  
HETATM   61  O   HOH T  60      27.849   6.370  50.911  1.00  0.27           O  
HETATM   62  O   HOH T  61      29.942  19.957  36.654  1.00  0.27           O  
HETATM   63  O   HOH T  62       8.089  10.143  62.701  1.00  0.27           O  
HETATM   64  O   HOH T  63      32.086 -12.418  30.348  1.00  0.27           O  
HETATM   65  O   HOH T  64      36.613  -3.942   9.441  1.00  0.27           O  
HETATM   66  O   HOH T  65      13.530  13.553  30.771  1.00  0.27           O  
HETATM   67  O   HOH T  66      25.971  10.658  44.733  1.00  0.27           O  
HETATM   68  O   HOH T  67      36.107  13.971  21.870  1.00  0.27           O  
HETATM   69  O   HOH T  68      36.387   0.041  58.331  1.00  0.28           O  
HETATM   70  O   HOH T  69      24.165  13.931   9.581  1.00  0.28           O  
HETATM   71  O   HOH T  70      11.326   6.532  34.863  1.00  0.28           O  
HETATM   72  O   HOH T  71       1.740  12.154  29.022  1.00  0.28           O  
HETATM   73  O   HOH T  72      22.158  42.298  26.369  1.00  0.28           O  
HETATM   74  O   HOH T  73      37.355  13.596  14.323  1.00  0.28           O  
HETATM   75  O   HOH T  74      14.343   6.053  30.864  1.00  0.28           O  
HETATM   76  O   HOH T  75      26.045  38.937  46.034  1.00  0.28           O  
HETATM   77  O   HOH T  76      54.053  16.737  34.196  1.00  0.28           O  
HETATM   78  O   HOH T  77      34.391  36.696  27.891  1.00  0.29           O  
HETATM   79  O   HOH T  78      58.356  -9.491  24.676  1.00  0.29           O  
HETATM   80  O   HOH T  79      34.280  18.596  17.815  1.00  0.29           O  
HETATM   81  O   HOH T  80      51.845  22.005  38.606  1.00  0.29           O  
HETATM   82  O   HOH T  81      17.111  17.881  59.218  1.00  0.29           O  
HETATM   83  O   HOH T  82      15.157  -0.902  27.100  1.00  0.29           O  
HETATM   84  O   HOH T  83      42.218   7.358  59.445  1.00  0.29           O  
HETATM   85  O   HOH T  84      16.635   7.728  42.291  1.00  0.29           O  
HETATM   86  O   HOH T  85      28.849  -6.988  45.223  1.00  0.29           O  
HETATM   87  O   HOH T  86      45.721  19.980  45.219  1.00  0.29           O  
HETATM   88  O   HOH T  87      51.259  -7.139  42.177  1.00  0.30           O  
HETATM   89  O   HOH T  88      19.380  27.616  55.930  1.00  0.30           O  
HETATM   90  O   HOH T  89      20.695  35.185  49.637  1.00  0.30           O  
HETATM   91  O   HOH T  90      16.545  -0.994  37.413  1.00  0.30           O  
HETATM   92  O   HOH T  91      28.281  13.747  28.093  1.00  0.30           O  
HETATM   93  O   HOH T  92      41.047 -15.953  29.242  1.00  0.30           O  
HETATM   94  O   HOH T  93      56.905  -7.108  25.116  1.00  0.30           O  
HETATM   95  O   HOH T  94       9.015  31.634  45.388  1.00  0.30           O  
HETATM   96  O   HOH T  95      35.948 -11.605  43.905  1.00  0.30           O  
HETATM   97  O   HOH T  96      51.007 -10.355  35.559  1.00  0.30           O  
HETATM   98  O   HOH T  97      25.237  12.910  37.233  1.00  0.30           O  
HETATM   99  O   HOH T  98       6.642  14.924  35.583  1.00  0.30           O  
HETATM  100  O   HOH T  99      12.313  29.454  57.715  1.00  0.30           O  
HETATM  101  O   HOH T 100      32.565  41.230  33.286  1.00  0.31           O  
HETATM  102  O   HOH T 101      38.314  12.516  21.519  1.00  0.31           O  
HETATM  103  O   HOH T 102      56.766   0.283  32.922  1.00  0.31           O  
HETATM  104  O   HOH T 103      17.641  42.414  37.275  1.00  0.31           O  
HETATM  105  O   HOH T 104      57.253   3.373  37.458  1.00  0.31           O  
HETATM  106  O   HOH T 105      51.104  16.594  52.133  1.00  0.31           O  
HETATM  107  O   HOH T 106      48.093 -11.154  43.010  1.00  0.31           O  
HETATM  108  O   HOH T 107      19.505  19.232  58.322  1.00  0.31           O  
HETATM  109  O   HOH T 108       7.077  27.168  32.946  1.00  0.31           O  
HETATM  110  O   HOH T 109      22.979  11.474   8.840  1.00  0.31           O  
HETATM  111  O   HOH T 110      35.690  35.671  25.537  1.00  0.31           O  
HETATM  112  O   HOH T 111      29.071   4.970  43.986  1.00  0.31           O  
HETATM  113  O   HOH T 112      41.533  -4.386  58.247  1.00  0.31           O  
HETATM  114  O   HOH T 113      23.724  30.765  26.900  1.00  0.31           O  
HETATM  115  O   HOH T 114      38.887  19.243  40.655  1.00  0.31           O  
HETATM  116  O   HOH T 115      33.235   9.639  53.643  1.00  0.31           O  
HETATM  117  O   HOH T 116      29.612  14.503  20.128  1.00  0.31           O  
HETATM  118  O   HOH T 117      56.166   5.290  50.406  1.00  0.32           O  
HETATM  119  O   HOH T 118      41.944  35.331  24.787  1.00  0.32           O  
HETATM  120  O   HOH T 119      40.955  -1.071  26.307  1.00  0.32           O  
HETATM  121  O   HOH T 120       8.885  36.443  32.259  1.00  0.32           O  
HETATM  122  O   HOH T 121      25.671  18.495  28.649  1.00  0.32           O  
HETATM  123  O   HOH T 122      32.663  15.568  23.957  1.00  0.32           O  
HETATM  124  O   HOH T 123      40.641   8.345  32.238  1.00  0.32           O  
HETATM  125  O   HOH T 124      11.779  27.159  59.395  1.00  0.32           O  
HETATM  126  O   HOH T 125      22.123  24.322  28.556  1.00  0.32           O  
HETATM  127  O   HOH T 126      34.547  16.640  28.170  1.00  0.32           O  
HETATM  128  O   HOH T 127      25.254   5.779  13.045  1.00  0.32           O  
HETATM  129  O   HOH T 128      14.485  -0.575  29.826  1.00  0.32           O  
HETATM  130  O   HOH T 129      41.382  25.109  15.356  1.00  0.32           O  
HETATM  131  O   HOH T 130      30.630  -6.869  25.361  1.00  0.32           O  
HETATM  132  O   HOH T 131      46.280  -5.766  52.756  1.00  0.32           O  
HETATM  133  O   HOH T 132      25.392  16.676  26.579  1.00  0.32           O  
HETATM  134  O   HOH T 133      29.535   6.330  58.559  1.00  0.33           O  
HETATM  135  O   HOH T 134      23.572  20.719  31.440  1.00  0.33           O  
HETATM  136  O   HOH T 135       9.138  28.563  28.590  1.00  0.33           O  
HETATM  137  O   HOH T 136      36.387 -13.894  42.346  1.00  0.33           O  
HETATM  138  O   HOH T 137      12.285   7.313  32.284  1.00  0.33           O  
HETATM  139  O   HOH T 138      55.088  -6.620  30.964  1.00  0.33           O  
HETATM  140  O   HOH T 139      30.682  10.433  41.604  1.00  0.33           O  
HETATM  141  O   HOH T 140      23.521  11.755  13.801  1.00  0.33           O  
HETATM  142  O   HOH T 141      36.545  38.388  17.923  1.00  0.33           O  
HETATM  143  O   HOH T 142      44.528  13.330  39.671  1.00  0.33           O  
HETATM  144  O   HOH T 143      43.915   7.871  28.479  1.00  0.33           O  
HETATM  145  O   HOH T 144      41.897  36.811  15.415  1.00  0.33           O  
HETATM  146  O   HOH T 145       6.794  16.250  30.299  1.00  0.33           O  
HETATM  147  O   HOH T 146      26.080   5.187  47.861  1.00  0.33           O  
HETATM  148  O   HOH T 147      33.389  20.193  51.868  1.00  0.33           O  
HETATM  149  O   HOH T 148      36.072  16.589  45.883  1.00  0.34           O  
HETATM  150  O   HOH T 149      52.724  -1.751  19.589  1.00  0.34           O  
HETATM  151  O   HOH T 150      38.655  -7.525  54.947  1.00  0.34           O  
HETATM  152  O   HOH T 151       8.049  -4.307  22.072  1.00  0.34           O  
HETATM  153  O   HOH T 152       8.100  19.485  19.397  1.00  0.34           O  
HETATM  154  O   HOH T 153      51.571  16.083  33.336  1.00  0.34           O  
HETATM  155  O   HOH T 154      18.576  14.838  37.771  1.00  0.34           O  
HETATM  156  O   HOH T 155      30.452  23.356  53.428  1.00  0.34           O  
HETATM  157  O   HOH T 156      45.412  -4.895  59.104  1.00  0.34           O  
HETATM  158  O   HOH T 157      28.345  16.675  21.047  1.00  0.34           O  
HETATM  159  O   HOH T 158      30.537   3.258  52.362  1.00  0.34           O  
HETATM  160  O   HOH T 159      45.767  21.387  54.886  1.00  0.34           O  
HETATM  161  O   HOH T 160      49.139  15.626  58.035  1.00  0.34           O  
HETATM  162  O   HOH T 161      44.768 -14.062  22.933  1.00  0.34           O  
HETATM  163  O   HOH T 162      12.956  32.928  53.309  1.00  0.34           O  
HETATM  164  O   HOH T 163      49.250  14.456  60.532  1.00  0.34           O  
HETATM  165  O   HOH T 164       7.364  28.514  30.570  1.00  0.34           O  
HETATM  166  O   HOH T 165      38.573  15.250  28.709  1.00  0.34           O  
HETATM  167  O   HOH T 166      31.447  14.781  18.120  1.00  0.34           O  
HETATM  168  O   HOH T 167      22.067  27.631  56.849  1.00  0.34           O  
HETATM  169  O   HOH T 168      42.163   4.830  29.583  1.00  0.34           O  
HETATM  170  O   HOH T 169      45.105  36.562  37.561  1.00  0.35           O  
HETATM  171  O   HOH T 170      39.296  25.229   7.771  1.00  0.35           O  
HETATM  172  O   HOH T 171      19.083   7.305  43.647  1.00  0.35           O  
HETATM  173  O   HOH T 172      37.279  14.574  38.034  1.00  0.35           O  
HETATM  174  O   HOH T 173      35.729  37.056  12.810  1.00  0.35           O  
HETATM  175  O   HOH T 174      33.507  29.404  51.192  1.00  0.35           O  
HETATM  176  O   HOH T 175      33.633  19.835  42.759  1.00  0.35           O  
HETATM  177  O   HOH T 176       1.971  14.030  33.048  1.00  0.35           O  
HETATM  178  O   HOH T 177       5.870  25.338  45.865  1.00  0.35           O  
HETATM  179  O   HOH T 178      47.103   9.879  65.123  1.00  0.35           O  
HETATM  180  O   HOH T 179      14.202  18.078  63.172  1.00  0.35           O  
HETATM  181  O   HOH T 180      28.958  -7.359  47.945  1.00  0.35           O  
HETATM  182  O   HOH T 181       5.734  13.004  38.842  1.00  0.35           O  
HETATM  183  O   HOH T 182      16.029   1.117  16.739  1.00  0.35           O  
HETATM  184  O   HOH T 183      16.086  45.153  22.843  1.00  0.35           O  
HETATM  185  O   HOH T 184      47.863  19.198  46.939  1.00  0.35           O  
HETATM  186  O   HOH T 185      10.800  18.286  31.567  1.00  0.36           O  
HETATM  187  O   HOH T 186      38.218  24.672  49.213  1.00  0.36           O  
HETATM  188  O   HOH T 187      40.836  -6.772  59.570  1.00  0.36           O  
HETATM  189  O   HOH T 188      53.744   5.594  48.965  1.00  0.36           O  
HETATM  190  O   HOH T 189      12.500  24.407  22.712  1.00  0.36           O  
HETATM  191  O   HOH T 190      54.531   7.049  24.072  1.00  0.36           O  
HETATM  192  O   HOH T 191      46.987   4.149   5.460  1.00  0.36           O  
HETATM  193  O   HOH T 192      58.893  15.069  57.456  1.00  0.36           O  
HETATM  194  O   HOH T 193      42.687  10.100  59.480  1.00  0.36           O  
HETATM  195  O   HOH T 194      50.772 -16.952  50.913  1.00  0.36           O  
HETATM  196  O   HOH T 195      39.936   6.262  58.455  1.00  0.36           O  
HETATM  197  O   HOH T 196      24.385  46.802  31.845  1.00  0.36           O  
HETATM  198  O   HOH T 197      29.070  15.373  38.154  1.00  0.36           O  
HETATM  199  O   HOH T 198      53.631  18.590  65.202  1.00  0.36           O  
HETATM  200  O   HOH T 199      38.132  33.427  46.467  1.00  0.36           O  
HETATM  201  O   HOH T 200      37.618  19.207  43.095  1.00  0.36           O  
HETATM  202  O   HOH T 201      16.216   1.536  38.598  1.00  0.36           O  
HETATM  203  O   HOH T 202      39.608   5.887  29.803  1.00  0.36           O  
HETATM  204  O   HOH T 203      35.662  15.459  19.580  1.00  0.36           O  
HETATM  205  O   HOH T 204      41.268 -17.870  13.261  1.00  0.36           O  
HETATM  206  O   HOH T 205      63.613  18.376  25.590  1.00  0.36           O  
HETATM  207  O   HOH T 206      21.239   3.069  11.993  1.00  0.36           O  
HETATM  208  O   HOH T 207      53.154  -3.394  47.139  1.00  0.36           O  
HETATM  209  O   HOH T 208      54.222  -6.277  25.450  1.00  0.36           O  
HETATM  210  O   HOH T 209      30.800  17.417  37.380  1.00  0.36           O  
HETATM  211  O   HOH T 210      44.195 -14.589  48.843  1.00  0.36           O  
HETATM  212  O   HOH T 211      56.265  -4.597  26.301  1.00  0.36           O  
HETATM  213  O   HOH T 212       8.072  21.545  46.481  1.00  0.36           O  
HETATM  214  O   HOH T 213      44.437  -9.729  48.957  1.00  0.36           O  
HETATM  215  O   HOH T 214      26.643  45.208  21.452  1.00  0.36           O  
HETATM  216  O   HOH T 215      32.523  34.251  50.611  1.00  0.36           O  
HETATM  217  O   HOH T 216      26.382  37.478  48.371  1.00  0.36           O  
HETATM  218  O   HOH T 217      14.433  14.811  53.278  1.00  0.36           O  
HETATM  219  O   HOH T 218      46.736  37.548  33.467  1.00  0.36           O  
HETATM  220  O   HOH T 219      24.633  23.485  29.596  1.00  0.37           O  
HETATM  221  O   HOH T 220      21.584  -1.752  37.853  1.00  0.37           O  
HETATM  222  O   HOH T 221      41.130  29.974  43.905  1.00  0.37           O  
HETATM  223  O   HOH T 222      21.089  40.915  45.385  1.00  0.37           O  
HETATM  224  O   HOH T 223      33.034  34.059  47.930  1.00  0.37           O  
HETATM  225  O   HOH T 224      38.923  10.753  29.183  1.00  0.37           O  
HETATM  226  O   HOH T 225      48.147 -12.608  40.703  1.00  0.37           O  
HETATM  227  O   HOH T 226       4.288  11.447  27.709  1.00  0.37           O  
HETATM  228  O   HOH T 227      17.696  32.302  14.018  1.00  0.37           O  
HETATM  229  O   HOH T 228      14.093  38.804  43.373  1.00  0.37           O  
HETATM  230  O   HOH T 229      43.009  20.198  46.278  1.00  0.37           O  
HETATM  231  O   HOH T 230      30.557  44.784  21.144  1.00  0.37           O  
HETATM  232  O   HOH T 231      45.591  -1.114  61.397  1.00  0.37           O  
HETATM  233  O   HOH T 232      46.633  26.562  42.247  1.00  0.37           O  
HETATM  234  O   HOH T 233      35.605  21.840  49.664  1.00  0.37           O  
HETATM  235  O   HOH T 234      23.054  -4.963  38.231  1.00  0.37           O  
HETATM  236  O   HOH T 235      29.502  28.041  55.371  1.00  0.37           O  
HETATM  237  O   HOH T 236       8.353   7.578  57.854  1.00  0.37           O  
HETATM  238  O   HOH T 237      17.132  -2.074  25.487  1.00  0.37           O  
HETATM  239  O   HOH T 238       6.239  25.122  34.864  1.00  0.37           O  
HETATM  240  O   HOH T 239      56.962   1.607  35.301  1.00  0.37           O  
HETATM  241  O   HOH T 240       4.852  16.500  42.941  1.00  0.37           O  
HETATM  242  O   HOH T 241      42.210 -10.266  17.893  1.00  0.38           O  
HETATM  243  O   HOH T 242      53.797   6.353  56.704  1.00  0.38           O  
HETATM  244  O   HOH T 243      43.262  23.347  16.154  1.00  0.38           O  
HETATM  245  O   HOH T 244      35.582 -11.235  23.764  1.00  0.38           O  
HETATM  246  O   HOH T 245      20.318  44.205  35.751  1.00  0.38           O  
HETATM  247  O   HOH T 246      39.048  -9.336  14.076  1.00  0.38           O  
HETATM  248  O   HOH T 247      45.130 -15.672  20.676  1.00  0.38           O  
HETATM  249  O   HOH T 248      54.344  12.740  56.370  1.00  0.38           O  
HETATM  250  O   HOH T 249      51.611  26.279  29.508  1.00  0.38           O  
HETATM  251  O   HOH T 250      20.365   4.952  58.707  1.00  0.38           O  
HETATM  252  O   HOH T 251      39.270  39.094  14.246  1.00  0.38           O  
HETATM  253  O   HOH T 252       7.521  17.248  52.553  1.00  0.38           O  
HETATM  254  O   HOH T 253      26.537  -5.550  44.708  1.00  0.38           O  
HETATM  255  O   HOH T 254      58.314   5.803  37.058  1.00  0.38           O  
HETATM  256  O   HOH T 255      27.692  43.285  42.187  1.00  0.38           O  
HETATM  257  O   HOH T 256      18.666   7.513  55.336  1.00  0.38           O  
HETATM  258  O   HOH T 257       5.398  21.729  47.556  1.00  0.38           O  
HETATM  259  O   HOH T 258      33.755  16.129  44.506  1.00  0.38           O  
HETATM  260  O   HOH T 259      25.108  23.605  59.202  1.00  0.38           O  
HETATM  261  O   HOH T 260       7.809   4.599  25.932  1.00  0.38           O  
HETATM  262  O   HOH T 261       9.655  26.241  57.916  1.00  0.38           O  
HETATM  263  O   HOH T 262       0.481  16.319  61.323  1.00  0.38           O  
HETATM  264  O   HOH T 263      14.265  23.472  14.759  1.00  0.38           O  
HETATM  265  O   HOH T 264      36.386  15.134  40.600  1.00  0.38           O  
HETATM  266  O   HOH T 265      11.408  32.708  46.274  1.00  0.38           O  
HETATM  267  O   HOH T 266      25.099   6.157  50.247  1.00  0.38           O  
HETATM  268  O   HOH T 267      52.190  -5.689  48.282  1.00  0.38           O  
HETATM  269  O   HOH T 268       0.640  23.851  33.621  1.00  0.38           O  
HETATM  270  O   HOH T 269      12.771  38.764  27.568  1.00  0.38           O  
HETATM  271  O   HOH T 270      33.895  -9.197  24.540  1.00  0.38           O  
HETATM  272  O   HOH T 271      23.323   0.632  56.142  1.00  0.38           O  
HETATM  273  O   HOH T 272      51.607  21.042  35.987  1.00  0.39           O  
HETATM  274  O   HOH T 273      52.738   7.208  13.895  1.00  0.39           O  
HETATM  275  O   HOH T 274      48.271 -12.190  51.870  1.00  0.39           O  
HETATM  276  O   HOH T 275      31.298  -1.609  53.962  1.00  0.39           O  
HETATM  277  O   HOH T 276      50.550  16.210  30.838  1.00  0.39           O  
HETATM  278  O   HOH T 277       7.123  23.889  47.893  1.00  0.39           O  
HETATM  279  O   HOH T 278      55.838   7.346  58.197  1.00  0.39           O  
HETATM  280  O   HOH T 279      30.069  15.689  24.961  1.00  0.39           O  
HETATM  281  O   HOH T 280      29.462  23.005   6.644  1.00  0.39           O  
HETATM  282  O   HOH T 281      52.869  -0.530  51.251  1.00  0.39           O  
HETATM  283  O   HOH T 282      48.910   1.971  63.795  1.00  0.39           O  
HETATM  284  O   HOH T 283      41.548  -9.229  15.390  1.00  0.39           O  
HETATM  285  O   HOH T 284      33.598  14.555  26.482  1.00  0.39           O  
HETATM  286  O   HOH T 285      21.974   4.115  56.706  1.00  0.39           O  
HETATM  287  O   HOH T 286      22.697   2.200  42.232  1.00  0.39           O  
HETATM  288  O   HOH T 287      44.583  20.104  57.068  1.00  0.39           O  
HETATM  289  O   HOH T 288      13.570  13.003  27.964  1.00  0.39           O  
HETATM  290  O   HOH T 289      36.309 -14.514  17.918  1.00  0.39           O  
HETATM  291  O   HOH T 290      17.568  -0.964  17.793  1.00  0.39           O  
HETATM  292  O   HOH T 291      18.718  -4.370  34.132  1.00  0.39           O  
HETATM  293  O   HOH T 292      35.190  12.800  37.413  1.00  0.39           O  
HETATM  294  O   HOH T 293      56.751   5.937  60.449  1.00  0.39           O  
HETATM  295  O   HOH T 294      41.138  17.317  57.869  1.00  0.39           O  
HETATM  296  O   HOH T 295      26.969  16.025  28.796  1.00  0.39           O  
HETATM  297  O   HOH T 296      54.222  20.206  62.843  1.00  0.39           O  
HETATM  298  O   HOH T 297      49.423  12.325  17.642  1.00  0.39           O  
HETATM  299  O   HOH T 298      31.087  27.433  53.322  1.00  0.39           O  
HETATM  300  O   HOH T 299      47.224  20.372  57.063  1.00  0.39           O  
HETATM  301  O   HOH T 300      40.009 -14.884  19.164  1.00  0.39           O  
HETATM  302  O   HOH T 301      57.649  10.701  51.538  1.00  0.39           O  
HETATM  303  O   HOH T 302      14.651  39.822  37.531  1.00  0.39           O  
HETATM  304  O   HOH T 303      52.139  30.054  24.456  1.00  0.39           O  
HETATM  305  O   HOH T 304      17.020  18.591  15.407  1.00  0.39           O  
HETATM  306  O   HOH T 305      48.762  18.344  57.921  1.00  0.39           O  
HETATM  307  O   HOH T 306      39.795  -1.299  56.547  1.00  0.40           O  
HETATM  308  O   HOH T 307      53.033   1.587  65.498  1.00  0.40           O  
HETATM  309  O   HOH T 308      26.283  12.507  42.783  1.00  0.40           O  
HETATM  310  O   HOH T 309      41.951   6.076  38.926  1.00  0.40           O  
HETATM  311  O   HOH T 310      47.563  -5.269  56.263  1.00  0.40           O  
HETATM  312  O   HOH T 311       5.864   7.765  59.038  1.00  0.40           O  
HETATM  313  O   HOH T 312      32.094  12.118  17.252  1.00  0.40           O  
HETATM  314  O   HOH T 313      29.650   5.670  36.351  1.00  0.40           O  
HETATM  315  O   HOH T 314      29.328  -0.331  52.636  1.00  0.40           O  
HETATM  316  O   HOH T 315      32.896  11.110  37.446  1.00  0.40           O  
HETATM  317  O   HOH T 316      23.827  37.943  47.417  1.00  0.40           O  
HETATM  318  O   HOH T 317      43.179  19.308  15.628  1.00  0.40           O  
HETATM  319  O   HOH T 318      27.603  -8.002  22.958  1.00  0.40           O  
HETATM  320  O   HOH T 319      40.181  25.303  11.322  1.00  0.40           O  
HETATM  321  O   HOH T 320      13.096  31.279  55.619  1.00  0.40           O  
HETATM  322  O   HOH T 321      10.706  22.833  21.498  1.00  0.40           O  
HETATM  323  O   HOH T 322      52.252   5.114  24.959  1.00  0.40           O  
HETATM  324  O   HOH T 323      21.843  -7.280  37.083  1.00  0.40           O  
HETATM  325  O   HOH T 324      39.443  22.636  39.162  1.00  0.40           O  
HETATM  326  O   HOH T 325      16.039  41.488  18.783  1.00  0.40           O  
HETATM  327  O   HOH T 326      27.531  16.893  53.521  1.00  0.40           O  
HETATM  328  O   HOH T 327      12.864  13.353  54.992  1.00  0.40           O  
HETATM  329  O   HOH T 328      49.756 -12.604  49.658  1.00  0.40           O  
HETATM  330  O   HOH T 329      54.100  16.376  63.603  1.00  0.40           O  
HETATM  331  O   HOH T 330      54.677  -5.882  28.225  1.00  0.40           O  
HETATM  332  O   HOH T 331      22.866  33.918  55.713  1.00  0.40           O  
HETATM  333  O   HOH T 332      55.416   0.759  30.578  1.00  0.40           O  
HETATM  334  O   HOH T 333      60.878  14.393  41.327  1.00  0.40           O  
HETATM  335  O   HOH T 334      44.735  32.367  31.028  1.00  0.40           O  
HETATM  336  O   HOH T 335       2.509  11.725  34.493  1.00  0.40           O  
HETATM  337  O   HOH T 336      20.574  30.016  56.483  1.00  0.40           O  
HETATM  338  O   HOH T 337      55.996  -3.216  18.817  1.00  0.40           O  
HETATM  339  O   HOH T 338      22.642  31.544   4.847  1.00  0.40           O  
HETATM  340  O   HOH T 339       6.591   7.933  22.295  1.00  0.41           O  
HETATM  341  O   HOH T 340      25.927  -6.564  21.318  1.00  0.41           O  
HETATM  342  O   HOH T 341       3.184   9.664  54.000  1.00  0.41           O  
HETATM  343  O   HOH T 342      58.804  10.368  25.285  1.00  0.41           O  
HETATM  344  O   HOH T 343      38.393  22.546  55.524  1.00  0.41           O  
HETATM  345  O   HOH T 344      42.072 -14.898  44.640  1.00  0.41           O  
HETATM  346  O   HOH T 345      39.742  25.807  44.472  1.00  0.41           O  
HETATM  347  O   HOH T 346      49.801  -0.892  59.551  1.00  0.41           O  
HETATM  348  O   HOH T 347      37.369  10.961  31.393  1.00  0.41           O  
HETATM  349  O   HOH T 348      20.659  17.066  62.119  1.00  0.41           O  
HETATM  350  O   HOH T 349      36.609  -5.755  55.563  1.00  0.41           O  
HETATM  351  O   HOH T 350      53.629  -6.579  41.078  1.00  0.41           O  
HETATM  352  O   HOH T 351       9.660  21.815  19.132  1.00  0.41           O  
HETATM  353  O   HOH T 352      44.772  21.320  14.999  1.00  0.41           O  
HETATM  354  O   HOH T 353      52.175   3.820   3.664  1.00  0.41           O  
HETATM  355  O   HOH T 354      14.423   3.217  39.781  1.00  0.41           O  
HETATM  356  O   HOH T 355      23.598   5.835  37.176  1.00  0.41           O  
HETATM  357  O   HOH T 356      32.306  17.617  41.954  1.00  0.41           O  
HETATM  358  O   HOH T 357      31.513  22.423  55.896  1.00  0.41           O  
HETATM  359  O   HOH T 358      13.799   5.488  53.469  1.00  0.41           O  
HETATM  360  O   HOH T 359      17.296  16.389  10.891  1.00  0.41           O  
HETATM  361  O   HOH T 360      30.206   9.383   8.689  1.00  0.41           O  
HETATM  362  O   HOH T 361      43.942  17.871  58.501  1.00  0.41           O  
HETATM  363  O   HOH T 362      19.164   3.454  56.831  1.00  0.42           O  
HETATM  364  O   HOH T 363      56.121  -0.788  47.848  1.00  0.42           O  
HETATM  365  O   HOH T 364      56.403 -12.708  25.895  1.00  0.42           O  
HETATM  366  O   HOH T 365      11.011  29.796  60.191  1.00  0.42           O  
HETATM  367  O   HOH T 366      56.100  -4.526  38.035  1.00  0.42           O  
HETATM  368  O   HOH T 367      44.094  26.386  43.172  1.00  0.42           O  
HETATM  369  O   HOH T 368      49.283   5.773   5.933  1.00  0.42           O  
HETATM  370  O   HOH T 369      31.506  11.677  54.432  1.00  0.42           O  
HETATM  371  O   HOH T 370      55.853   8.635  22.149  1.00  0.42           O  
HETATM  372  O   HOH T 371       2.945  19.096  58.754  1.00  0.42           O  
HETATM  373  O   HOH T 372      53.602  -6.627  43.794  1.00  0.42           O  
HETATM  374  O   HOH T 373      19.122  38.914  48.437  1.00  0.42           O  
HETATM  375  O   HOH T 374      39.380  12.854  27.497  1.00  0.42           O  
HETATM  376  O   HOH T 375       9.911  11.764  64.130  1.00  0.42           O  
HETATM  377  O   HOH T 376      41.947  33.891  41.113  1.00  0.42           O  
HETATM  378  O   HOH T 377      35.601  32.981  47.748  1.00  0.42           O  
HETATM  379  O   HOH T 378      34.851 -14.559  38.878  1.00  0.42           O  
HETATM  380  O   HOH T 379      27.887  44.496  39.729  1.00  0.42           O  
HETATM  381  O   HOH T 380      21.180  22.109  38.197  1.00  0.42           O  
HETATM  382  O   HOH T 381      45.676  33.521  24.317  1.00  0.42           O  
HETATM  383  O   HOH T 382      39.380  28.056  16.610  1.00  0.42           O  
HETATM  384  O   HOH T 383      55.068  24.649  31.083  1.00  0.42           O  
HETATM  385  O   HOH T 384      12.549   7.743  14.685  1.00  0.42           O  
HETATM  386  O   HOH T 385      25.990  35.408  51.933  1.00  0.42           O  
HETATM  387  O   HOH T 386      33.852 -13.571  16.739  1.00  0.42           O  
HETATM  388  O   HOH T 387      33.669 -13.471  36.604  1.00  0.42           O  
HETATM  389  O   HOH T 388      14.594  40.590  41.343  1.00  0.42           O  
HETATM  390  O   HOH T 389      12.603  -1.673  26.197  1.00  0.43           O  
HETATM  391  O   HOH T 390      49.359  19.479  16.049  1.00  0.43           O  
HETATM  392  O   HOH T 391      26.155  12.792  39.928  1.00  0.43           O  
HETATM  393  O   HOH T 392      29.223  14.811  54.385  1.00  0.43           O  
HETATM  394  O   HOH T 393      43.083  35.848  39.411  1.00  0.43           O  
HETATM  395  O   HOH T 394      36.163  37.960  29.648  1.00  0.43           O  
HETATM  396  O   HOH T 395      33.770  31.967  49.791  1.00  0.43           O  
HETATM  397  O   HOH T 396      54.480   3.086  50.306  1.00  0.43           O  
HETATM  398  O   HOH T 397      25.065   8.306  60.588  1.00  0.43           O  
HETATM  399  O   HOH T 398      40.292  21.756  48.188  1.00  0.43           O  
HETATM  400  O   HOH T 399      51.535   2.871  63.538  1.00  0.43           O  
HETATM  401  O   HOH T 400      49.121 -14.779  51.394  1.00  0.43           O  
HETATM  402  O   HOH T 401      58.479  -2.643  20.088  1.00  0.43           O  
HETATM  403  O   HOH T 402      34.352  22.163  55.831  1.00  0.43           O  
HETATM  404  O   HOH T 403      28.192  40.642  46.354  1.00  0.43           O  
HETATM  405  O   HOH T 404      15.114  43.421  36.623  1.00  0.43           O  
HETATM  406  O   HOH T 405      21.418  18.693   9.068  1.00  0.43           O  
HETATM  407  O   HOH T 406      13.600  15.431  62.449  1.00  0.43           O  
HETATM  408  O   HOH T 407      46.876  10.413  55.004  1.00  0.43           O  
HETATM  409  O   HOH T 408      58.402  21.043  32.857  1.00  0.43           O  
HETATM  410  O   HOH T 409      42.381  30.899  15.783  1.00  0.43           O  
HETATM  411  O   HOH T 410      12.153  32.361  19.232  1.00  0.43           O  
HETATM  412  O   HOH T 411      46.948  29.135  41.261  1.00  0.43           O  
HETATM  413  O   HOH T 412      22.488   3.229  39.729  1.00  0.43           O  
HETATM  414  O   HOH T 413      51.433  23.767  36.453  1.00  0.43           O  
HETATM  415  O   HOH T 414      19.392  -2.665  23.939  1.00  0.43           O  
HETATM  416  O   HOH T 415      50.836  30.080  21.995  1.00  0.44           O  
HETATM  417  O   HOH T 416       4.882   8.056  24.508  1.00  0.44           O  
HETATM  418  O   HOH T 417      59.069   7.407  60.906  1.00  0.44           O  
HETATM  419  O   HOH T 418      25.229  50.086  41.568  1.00  0.44           O  
HETATM  420  O   HOH T 419      28.586  19.454   2.303  1.00  0.44           O  
HETATM  421  O   HOH T 420      24.286  12.172  33.134  1.00  0.44           O  
HETATM  422  O   HOH T 421      20.617   9.366  54.876  1.00  0.44           O  
HETATM  423  O   HOH T 422      19.522  42.653  46.593  1.00  0.44           O  
HETATM  424  O   HOH T 423      61.605  12.505  43.210  1.00  0.44           O  
HETATM  425  O   HOH T 424      24.060  43.900  27.715  1.00  0.44           O  
HETATM  426  O   HOH T 425      10.449  39.179  29.058  1.00  0.44           O  
HETATM  427  O   HOH T 426      45.097  34.150  28.900  1.00  0.44           O  
HETATM  428  O   HOH T 427      37.878  17.040  39.181  1.00  0.44           O  
HETATM  429  O   HOH T 428      26.695  15.261  36.605  1.00  0.44           O  
HETATM  430  O   HOH T 429      27.374   9.840  60.980  1.00  0.44           O  
HETATM  431  O   HOH T 430       7.152  12.339  36.470  1.00  0.44           O  
HETATM  432  O   HOH T 431      22.310  15.642  55.161  1.00  0.44           O  
HETATM  433  O   HOH T 432      18.020  -0.087  15.199  1.00  0.44           O  
HETATM  434  O   HOH T 433      28.849  46.333  22.572  1.00  0.44           O  
HETATM  435  O   HOH T 434       7.713  12.696  40.707  1.00  0.44           O  
HETATM  436  O   HOH T 435      33.287  36.743  11.433  1.00  0.44           O  
HETATM  437  O   HOH T 436      56.601   9.070  64.988  1.00  0.44           O  
HETATM  438  O   HOH T 437      39.625 -19.473  27.939  1.00  0.44           O  
HETATM  439  O   HOH T 438      16.115  -3.955  33.352  1.00  0.44           O  
HETATM  440  O   HOH T 439      39.760 -16.913  26.905  1.00  0.44           O  
HETATM  441  O   HOH T 440      18.589  46.120  29.961  1.00  0.44           O  
HETATM  442  O   HOH T 441      46.040  13.681  16.020  1.00  0.44           O  
HETATM  443  O   HOH T 442      29.537   8.062  60.788  1.00  0.45           O  
HETATM  444  O   HOH T 443      23.682  40.470  46.212  1.00  0.45           O  
HETATM  445  O   HOH T 444      38.069 -13.236  44.484  1.00  0.45           O  
HETATM  446  O   HOH T 445      55.267   3.591  60.751  1.00  0.45           O  
HETATM  447  O   HOH T 446      19.688  -6.613  35.454  1.00  0.45           O  
HETATM  448  O   HOH T 447      12.038   5.584  57.640  1.00  0.45           O  
HETATM  449  O   HOH T 448      38.527  27.815  13.959  1.00  0.45           O  
HETATM  450  O   HOH T 449      25.936   4.970  52.514  1.00  0.45           O  
HETATM  451  O   HOH T 450      12.712   7.128  55.334  1.00  0.45           O  
HETATM  452  O   HOH T 451      46.532  -0.076  67.941  1.00  0.45           O  
HETATM  453  O   HOH T 452      47.936  -3.684  58.617  1.00  0.45           O  
HETATM  454  O   HOH T 453      21.073   6.797  54.139  1.00  0.45           O  
HETATM  455  O   HOH T 454      45.712  11.129  63.078  1.00  0.45           O  
HETATM  456  O   HOH T 455      27.916  14.315  30.801  1.00  0.45           O  
HETATM  457  O   HOH T 456      34.445 -13.790  23.207  1.00  0.45           O  
HETATM  458  O   HOH T 457      36.975  39.565  12.939  1.00  0.45           O  
HETATM  459  O   HOH T 458      30.668  35.602  11.387  1.00  0.45           O  
HETATM  460  O   HOH T 459      34.556 -18.218  27.518  1.00  0.45           O  
HETATM  461  O   HOH T 460      25.368  10.528  38.495  1.00  0.45           O  
HETATM  462  O   HOH T 461      31.349 -10.615  28.466  1.00  0.45           O  
HETATM  463  O   HOH T 462      36.397  26.321  14.761  1.00  0.45           O  
HETATM  464  O   HOH T 463      56.780  10.451  62.637  1.00  0.45           O  
HETATM  465  O   HOH T 464      38.046  26.705  51.077  1.00  0.45           O  
HETATM  466  O   HOH T 465      46.142  35.033  33.849  1.00  0.45           O  
HETATM  467  O   HOH T 466      56.399  14.473  56.538  1.00  0.46           O  
HETATM  468  O   HOH T 467      52.013  -5.282  45.490  1.00  0.46           O  
HETATM  469  O   HOH T 468       3.022  22.756  46.925  1.00  0.46           O  
HETATM  470  O   HOH T 469      39.662  23.163  44.111  1.00  0.46           O  
HETATM  471  O   HOH T 470      46.657  -3.646  61.178  1.00  0.46           O  
HETATM  472  O   HOH T 471      18.835  -2.644  37.731  1.00  0.46           O  
HETATM  473  O   HOH T 472       6.636  15.569  22.146  1.00  0.46           O  
HETATM  474  O   HOH T 473      12.652   6.848  20.403  1.00  0.46           O  
HETATM  475  O   HOH T 474      42.863  22.690  47.732  1.00  0.46           O  
HETATM  476  O   HOH T 475       1.662  11.603  31.778  1.00  0.46           O  
HETATM  477  O   HOH T 476      59.761   4.283  43.654  1.00  0.46           O  
HETATM  478  O   HOH T 477      17.335   2.581  14.674  1.00  0.46           O  
HETATM  479  O   HOH T 478      39.903  14.847  57.085  1.00  0.46           O  
HETATM  480  O   HOH T 479      28.471  -7.194  20.457  1.00  0.46           O  
HETATM  481  O   HOH T 480      41.997  27.406  44.533  1.00  0.46           O  
HETATM  482  O   HOH T 481      14.584  -2.940  31.245  1.00  0.46           O  
HETATM  483  O   HOH T 482      54.170  -2.027  49.329  1.00  0.46           O  
HETATM  484  O   HOH T 483      29.986  -6.039  42.963  1.00  0.46           O  
HETATM  485  O   HOH T 484      52.311   7.369  16.694  1.00  0.46           O  
HETATM  486  O   HOH T 485      26.953  47.218  30.920  1.00  0.46           O  
HETATM  487  O   HOH T 486      18.585  27.338  58.544  1.00  0.46           O  
HETATM  488  O   HOH T 487      39.766  32.381  44.300  1.00  0.46           O  
HETATM  489  O   HOH T 488      40.749 -12.614  44.031  1.00  0.46           O  
HETATM  490  O   HOH T 489      32.958  22.123  53.525  1.00  0.46           O  
HETATM  491  O   HOH T 490      28.249  41.794  50.068  1.00  0.46           O  
HETATM  492  O   HOH T 491      34.790   2.334  58.839  1.00  0.46           O  
HETATM  493  O   HOH T 492      16.145  16.084  63.094  1.00  0.46           O  
HETATM  494  O   HOH T 493      44.836  37.316  26.369  1.00  0.46           O  
HETATM  495  O   HOH T 494      58.472  -5.292  36.840  1.00  0.46           O  
HETATM  496  O   HOH T 495      57.186  -1.314  30.737  1.00  0.46           O  
HETATM  497  O   HOH T 496      17.963  41.452  48.425  1.00  0.46           O  
HETATM  498  O   HOH T 497      56.950   7.619  62.685  1.00  0.46           O  
HETATM  499  O   HOH T 498      30.921   1.229  54.351  1.00  0.46           O  
HETATM  500  O   HOH T 499      44.128 -15.860  24.935  1.00  0.47           O  
HETATM  501  O   HOH T 500      38.381  17.029  57.824  1.00  0.47           O  
HETATM  502  O   HOH T 501      36.069  30.486  50.462  1.00  0.47           O  
HETATM  503  O   HOH T 502       2.856  12.561  20.568  1.00  0.47           O  
HETATM  504  O   HOH T 503      41.563  -1.526  58.729  1.00  0.47           O  
HETATM  505  O   HOH T 504      50.277 -11.389  44.710  1.00  0.47           O  
HETATM  506  O   HOH T 505      40.928   1.102  63.191  1.00  0.47           O  
HETATM  507  O   HOH T 506       7.086  20.964  29.799  1.00  0.47           O  
HETATM  508  O   HOH T 507       4.370   8.738  51.677  1.00  0.47           O  
HETATM  509  O   HOH T 508      26.164  13.453  34.644  1.00  0.47           O  
HETATM  510  O   HOH T 509      31.550  13.987  48.357  1.00  0.47           O  
HETATM  511  O   HOH T 510       3.065  23.547  40.481  1.00  0.47           O  
HETATM  512  O   HOH T 511      46.976  35.099  39.088  1.00  0.47           O  
HETATM  513  O   HOH T 512      58.195  17.142  21.752  1.00  0.47           O  
HETATM  514  O   HOH T 513      43.456  31.614  40.900  1.00  0.47           O  
HETATM  515  O   HOH T 514       2.891  22.903  34.906  1.00  0.47           O  
HETATM  516  O   HOH T 515      45.511   0.609  65.426  1.00  0.47           O  
HETATM  517  O   HOH T 516      20.842  11.987  55.138  1.00  0.47           O  
HETATM  518  O   HOH T 517      47.930 -13.717  38.110  1.00  0.47           O  
HETATM  519  O   HOH T 518      31.068  13.192  41.324  1.00  0.47           O  
HETATM  520  O   HOH T 519      44.344 -12.187  50.342  1.00  0.47           O  
HETATM  521  O   HOH T 520      40.420  16.340  10.173  1.00  0.47           O  
HETATM  522  O   HOH T 521      42.740 -11.721  15.591  1.00  0.47           O  
HETATM  523  O   HOH T 522      44.736  34.954  17.105  1.00  0.47           O  
HETATM  524  O   HOH T 523      15.166   5.026  51.245  1.00  0.47           O  
HETATM  525  O   HOH T 524      30.492  13.735  29.802  1.00  0.47           O  
HETATM  526  O   HOH T 525      33.199  13.123  35.557  1.00  0.48           O  
HETATM  527  O   HOH T 526      46.217  -8.478  52.113  1.00  0.48           O  
HETATM  528  O   HOH T 527      40.420  -3.914  55.747  1.00  0.48           O  
HETATM  529  O   HOH T 528      14.383  24.002  12.040  1.00  0.48           O  
HETATM  530  O   HOH T 529      57.604  12.733  58.369  1.00  0.48           O  
HETATM  531  O   HOH T 530      57.341  -2.288  39.192  1.00  0.48           O  
HETATM  532  O   HOH T 531      56.846  16.981  57.490  1.00  0.48           O  
HETATM  533  O   HOH T 532       9.126  33.026  47.804  1.00  0.48           O  
HETATM  534  O   HOH T 533       8.407  26.858  49.639  1.00  0.48           O  
HETATM  535  O   HOH T 534      50.211  -9.701  46.939  1.00  0.48           O  
HETATM  536  O   HOH T 535       5.812  18.825  30.910  1.00  0.48           O  
HETATM  537  O   HOH T 536       6.588  14.692  19.552  1.00  0.48           O  
HETATM  538  O   HOH T 537      32.347  33.733  45.207  1.00  0.48           O  
HETATM  539  O   HOH T 538      49.793   0.792   6.837  1.00  0.48           O  
HETATM  540  O   HOH T 539      22.571  37.248  49.808  1.00  0.48           O  
HETATM  541  O   HOH T 540      32.976 -11.861  24.636  1.00  0.48           O  
HETATM  542  O   HOH T 541      27.207  44.988  37.159  1.00  0.48           O  
HETATM  543  O   HOH T 542      10.283  33.873  17.783  1.00  0.48           O  
HETATM  544  O   HOH T 543      47.233  -0.062  63.359  1.00  0.48           O  
HETATM  545  O   HOH T 544      37.044 -15.554  40.281  1.00  0.48           O  
HETATM  546  O   HOH T 545      37.954  32.052  48.900  1.00  0.48           O  
HETATM  547  O   HOH T 546      28.522  12.155  41.244  1.00  0.48           O  
HETATM  548  O   HOH T 547      33.074  14.552  31.023  1.00  0.48           O  
HETATM  549  O   HOH T 548      55.330   0.299  50.278  1.00  0.48           O  
HETATM  550  O   HOH T 549      41.547 -15.147  48.597  1.00  0.48           O  
HETATM  551  O   HOH T 550      33.390  -4.961  40.473  1.00  0.48           O  
HETATM  552  O   HOH T 551      59.991  20.112  28.352  1.00  0.49           O  
HETATM  553  O   HOH T 552      13.716  13.284  58.645  1.00  0.49           O  
HETATM  554  O   HOH T 553      32.017 -10.221  22.809  1.00  0.49           O  
HETATM  555  O   HOH T 554      16.955  -1.719  20.358  1.00  0.49           O  
HETATM  556  O   HOH T 555      53.539  23.032  34.942  1.00  0.49           O  
HETATM  557  O   HOH T 556       2.833  16.344  59.860  1.00  0.49           O  
HETATM  558  O   HOH T 557      41.317  36.499  41.455  1.00  0.49           O  
HETATM  559  O   HOH T 558      29.069   7.264  42.264  1.00  0.49           O  
HETATM  560  O   HOH T 559      28.141  -2.338  49.388  1.00  0.49           O  
HETATM  561  O   HOH T 560       6.356  17.475  20.114  1.00  0.49           O  
HETATM  562  O   HOH T 561      38.813  -0.963  59.186  1.00  0.49           O  
HETATM  563  O   HOH T 562      50.011  -5.258  57.454  1.00  0.49           O  
HETATM  564  O   HOH T 563      44.313 -18.028  33.691  1.00  0.49           O  
HETATM  565  O   HOH T 564      28.542   1.703  55.828  1.00  0.49           O  
HETATM  566  O   HOH T 565       3.927   8.640  21.934  1.00  0.49           O  
HETATM  567  O   HOH T 566      56.612   8.423  55.741  1.00  0.49           O  
HETATM  568  O   HOH T 567       7.169  30.638  28.916  1.00  0.49           O  
HETATM  569  O   HOH T 568       0.226  19.267  57.886  1.00  0.49           O  
HETATM  570  O   HOH T 569      16.647  -4.838  25.725  1.00  0.49           O  
HETATM  571  O   HOH T 570      38.593  32.223  13.764  1.00  0.49           O  
HETATM  572  O   HOH T 571      29.338  33.053  42.208  1.00  0.49           O  
HETATM  573  O   HOH T 572      53.519  25.272  33.280  1.00  0.49           O  
HETATM  574  O   HOH T 573      46.160  10.888  13.007  1.00  0.50           O  
HETATM  575  O   HOH T 574       9.765  30.582  47.638  1.00  0.50           O  
HETATM  576  O   HOH T 575      11.304  20.419  26.162  1.00  0.50           O  
HETATM  577  O   HOH T 576      11.235  22.445  24.206  1.00  0.50           O  
HETATM  578  O   HOH T 577      37.414  13.081  29.606  1.00  0.50           O  
HETATM  579  O   HOH T 578      22.702  18.844  64.858  1.00  0.50           O  
HETATM  580  O   HOH T 579      56.734   0.638  25.890  1.00  0.50           O  
HETATM  581  O   HOH T 580      17.550  43.790  18.501  1.00  0.50           O  
HETATM  582  O   HOH T 581      13.837  12.674  62.291  1.00  0.50           O  
HETATM  583  O   HOH T 582      20.463  44.048  25.176  1.00  0.50           O  
HETATM  584  O   HOH T 583      64.082  20.165  27.740  1.00  0.50           O  
HETATM  585  O   HOH T 584      19.262  43.701  28.745  1.00  0.50           O  
HETATM  586  O   HOH T 585      49.793   5.198   3.290  1.00  0.50           O  
HETATM  587  O   HOH T 586      41.777 -11.598  51.117  1.00  0.50           O  
HETATM  588  O   HOH T 587      29.175  41.218  41.196  1.00  0.50           O  
HETATM  589  O   HOH T 588      56.672  15.005  20.956  1.00  0.50           O  
HETATM  590  O   HOH T 589      52.606   2.890  60.989  1.00  0.50           O  
HETATM  591  O   HOH T 590      20.815   1.834  55.402  1.00  0.50           O  
HETATM  592  O   HOH T 591      54.344  10.050  55.794  1.00  0.50           O  
HETATM  593  O   HOH T 592      61.052  13.698  31.040  1.00  0.50           O  
HETATM  594  O   HOH T 593      28.826  -8.483  26.549  1.00  0.50           O  
HETATM  595  O   HOH T 594      34.004  -4.834   9.456  1.00  0.50           O  
HETATM  596  O   HOH T 595      48.923  30.739  32.295  1.00  0.50           O  
HETATM  597  O   HOH T 596      19.497  -8.575  33.499  1.00  0.50           O  
HETATM  598  O   HOH T 597       3.188  25.075  36.585  1.00  0.50           O  
HETATM  599  O   HOH T 598      43.797  -9.721  51.653  1.00  0.50           O  
HETATM  600  O   HOH T 599      37.330 -17.882  27.988  1.00  0.50           O  
HETATM  601  O   HOH T 600       4.008  11.785  30.444  1.00  0.50           O  
HETATM  602  O   HOH T 601      30.809  14.435  27.150  1.00  0.51           O  
HETATM  603  O   HOH T 602      10.252  33.730  44.022  1.00  0.51           O  
HETATM  604  O   HOH T 603      22.790  50.251  40.354  1.00  0.51           O  
HETATM  605  O   HOH T 604      41.022  24.361  49.200  1.00  0.51           O  
HETATM  606  O   HOH T 605      16.876  -3.230  35.875  1.00  0.51           O  
HETATM  607  O   HOH T 606      39.943  16.928  33.978  1.00  0.51           O  
HETATM  608  O   HOH T 607      41.235  27.658  14.508  1.00  0.51           O  
HETATM  609  O   HOH T 608      49.286  -4.297  61.251  1.00  0.51           O  
HETATM  610  O   HOH T 609      21.245   8.802  52.187  1.00  0.51           O  
HETATM  611  O   HOH T 610      11.521   1.804  16.480  1.00  0.51           O  
HETATM  612  O   HOH T 611      39.802  24.501  54.180  1.00  0.51           O  
HETATM  613  O   HOH T 612       5.340  13.843  53.977  1.00  0.51           O  
HETATM  614  O   HOH T 613      11.460  37.412  24.450  1.00  0.51           O  
HETATM  615  O   HOH T 614      36.016  -8.366  54.712  1.00  0.51           O  
HETATM  616  O   HOH T 615      18.550  45.435  34.030  1.00  0.51           O  
HETATM  617  O   HOH T 616      50.762  -0.009   9.147  1.00  0.51           O  
HETATM  618  O   HOH T 617       5.409  22.708  33.797  1.00  0.51           O  
HETATM  619  O   HOH T 618      45.251  -4.067  10.954  1.00  0.51           O  
HETATM  620  O   HOH T 619      43.733 -19.058  31.199  1.00  0.51           O  
HETATM  621  O   HOH T 620      38.112  16.872  41.919  1.00  0.51           O  
HETATM  622  O   HOH T 621      41.621 -21.204  32.658  1.00  0.51           O  
HETATM  623  O   HOH T 622       9.584   6.954  32.743  1.00  0.51           O  
HETATM  624  O   HOH T 623      35.535 -10.123  46.356  1.00  0.51           O  
HETATM  625  O   HOH T 624      17.193   6.574  57.410  1.00  0.51           O  
HETATM  626  O   HOH T 625      23.308   4.827  11.682  1.00  0.51           O  
HETATM  627  O   HOH T 626       3.268  24.927  45.356  1.00  0.52           O  
HETATM  628  O   HOH T 627      26.526  46.407  33.532  1.00  0.52           O  
HETATM  629  O   HOH T 628      20.298  29.999   4.855  1.00  0.52           O  
HETATM  630  O   HOH T 629      30.258   4.443  12.717  1.00  0.52           O  
HETATM  631  O   HOH T 630      28.121  49.445  29.802  1.00  0.52           O  
HETATM  632  O   HOH T 631       6.963  34.272  34.948  1.00  0.52           O  
HETATM  633  O   HOH T 632      30.689  41.256  45.279  1.00  0.52           O  
HETATM  634  O   HOH T 633      32.285  -8.109  11.840  1.00  0.52           O  
HETATM  635  O   HOH T 634      14.813   5.037  57.285  1.00  0.52           O  
HETATM  636  O   HOH T 635      58.605  -3.480  31.349  1.00  0.52           O  
HETATM  637  O   HOH T 636      50.845  -3.428  59.205  1.00  0.52           O  
HETATM  638  O   HOH T 637      57.563   4.296  34.868  1.00  0.52           O  
HETATM  639  O   HOH T 638      24.319  -6.124  43.342  1.00  0.52           O  
HETATM  640  O   HOH T 639      30.913  30.015  54.219  1.00  0.52           O  
HETATM  641  O   HOH T 640       2.688  10.715  56.531  1.00  0.52           O  
HETATM  642  O   HOH T 641       6.322   5.834  24.094  1.00  0.52           O  
HETATM  643  O   HOH T 642      21.974  24.104   7.065  1.00  0.52           O  
HETATM  644  O   HOH T 643      42.175  24.622  44.159  1.00  0.52           O  
HETATM  645  O   HOH T 644      38.750  30.097  50.602  1.00  0.52           O  
HETATM  646  O   HOH T 645      57.448  24.082  29.965  1.00  0.52           O  
HETATM  647  O   HOH T 646      23.130  30.227  57.042  1.00  0.52           O  
HETATM  648  O   HOH T 647      21.316  50.434  32.618  1.00  0.52           O  
HETATM  649  O   HOH T 648      46.435 -16.056  38.074  1.00  0.52           O  
HETATM  650  O   HOH T 649      15.395  42.061  39.044  1.00  0.52           O  
HETATM  651  O   HOH T 650      56.875   8.790  34.088  1.00  0.53           O  
HETATM  652  O   HOH T 651      26.939   3.844  13.506  1.00  0.53           O  
HETATM  653  O   HOH T 652      27.823  -5.078  46.994  1.00  0.53           O  
HETATM  654  O   HOH T 653      25.970  20.261   5.090  1.00  0.53           O  
HETATM  655  O   HOH T 654      26.338  39.775  49.967  1.00  0.53           O  
HETATM  656  O   HOH T 655       4.568  13.237  36.307  1.00  0.53           O  
HETATM  657  O   HOH T 656      33.744  23.019  37.747  1.00  0.53           O  
HETATM  658  O   HOH T 657      16.845  44.774  28.143  1.00  0.53           O  
HETATM  659  O   HOH T 658      53.386   6.547  11.234  1.00  0.53           O  
HETATM  660  O   HOH T 659      51.240  16.009  54.784  1.00  0.53           O  
HETATM  661  O   HOH T 660      62.044  15.273  32.960  1.00  0.53           O  
HETATM  662  O   HOH T 661      21.853  -0.796  40.462  1.00  0.53           O  
HETATM  663  O   HOH T 662      49.614  -8.956  43.595  1.00  0.53           O  
HETATM  664  O   HOH T 663      57.454   9.830  20.207  1.00  0.53           O  
HETATM  665  O   HOH T 664      27.525  43.728  14.571  1.00  0.53           O  
HETATM  666  O   HOH T 665      34.113  -6.963  56.061  1.00  0.53           O  
HETATM  667  O   HOH T 666      55.887  -3.551  47.799  1.00  0.53           O  
HETATM  668  O   HOH T 667      41.264  34.718  43.689  1.00  0.53           O  
HETATM  669  O   HOH T 668      34.041  15.570  41.837  1.00  0.53           O  
HETATM  670  O   HOH T 669      21.655  18.657  60.103  1.00  0.53           O  
HETATM  671  O   HOH T 670       5.524   9.620  60.990  1.00  0.54           O  
HETATM  672  O   HOH T 671      53.590  30.000  22.061  1.00  0.54           O  
HETATM  673  O   HOH T 672      13.448  -5.527  31.174  1.00  0.54           O  
HETATM  674  O   HOH T 673      53.912  20.448  37.555  1.00  0.54           O  
HETATM  675  O   HOH T 674       6.614  24.582  32.161  1.00  0.54           O  
HETATM  676  O   HOH T 675       8.870  21.161  25.158  1.00  0.54           O  
HETATM  677  O   HOH T 676      11.294   3.200  59.096  1.00  0.54           O  
HETATM  678  O   HOH T 677      17.034  15.504  57.839  1.00  0.54           O  
HETATM  679  O   HOH T 678      46.258  16.411  13.976  1.00  0.54           O  
HETATM  680  O   HOH T 679      24.179  -3.065  16.335  1.00  0.54           O  
HETATM  681  O   HOH T 680      45.394  28.302  15.407  1.00  0.54           O  
HETATM  682  O   HOH T 681       6.939  30.867  37.392  1.00  0.54           O  
HETATM  683  O   HOH T 682       4.428  17.985  54.957  1.00  0.54           O  
HETATM  684  O   HOH T 683      44.674 -17.067  36.199  1.00  0.54           O  
HETATM  685  O   HOH T 684      17.041  31.662   8.139  1.00  0.54           O  
HETATM  686  O   HOH T 685      42.857  -0.040  64.935  1.00  0.54           O  
HETATM  687  O   HOH T 686      28.394  35.645  55.862  1.00  0.54           O  
HETATM  688  O   HOH T 687      29.999  -8.838  21.932  1.00  0.54           O  
HETATM  689  O   HOH T 688      27.342   7.778  59.148  1.00  0.54           O  
HETATM  690  O   HOH T 689      35.880  14.608  31.511  1.00  0.54           O  
HETATM  691  O   HOH T 690      35.461  -2.292  57.125  1.00  0.54           O  
HETATM  692  O   HOH T 691       4.701  10.523  49.583  1.00  0.54           O  
HETATM  693  O   HOH T 692       8.592  29.868  23.661  1.00  0.55           O  
HETATM  694  O   HOH T 693      52.022  20.118  16.893  1.00  0.55           O  
HETATM  695  O   HOH T 694      22.593   1.620  53.590  1.00  0.55           O  
HETATM  696  O   HOH T 695      50.403  21.895  15.373  1.00  0.55           O  
HETATM  697  O   HOH T 696      10.510  -0.103  25.148  1.00  0.55           O  
HETATM  698  O   HOH T 697      37.880  -3.462  56.608  1.00  0.55           O  
HETATM  699  O   HOH T 698      39.932  30.059  14.688  1.00  0.55           O  
HETATM  700  O   HOH T 699      16.072  45.375  34.969  1.00  0.55           O  
HETATM  701  O   HOH T 700      22.353  35.462  11.478  1.00  0.55           O  
HETATM  702  O   HOH T 701      63.619  18.565  30.054  1.00  0.55           O  
HETATM  703  O   HOH T 702      28.938  17.886  35.355  1.00  0.55           O  
HETATM  704  O   HOH T 703       7.671  28.678  47.793  1.00  0.55           O  
HETATM  705  O   HOH T 704      17.918  -3.798  21.952  1.00  0.55           O  
HETATM  706  O   HOH T 705      52.648  21.845  17.005  1.00  0.55           O  
HETATM  707  O   HOH T 706      47.036  30.863  21.003  1.00  0.55           O  
HETATM  708  O   HOH T 707      10.174  10.325  48.590  1.00  0.55           O  
HETATM  709  O   HOH T 708      21.961  -3.330  41.222  1.00  0.55           O  
HETATM  710  O   HOH T 709      52.390  16.939  17.119  1.00  0.55           O  
HETATM  711  O   HOH T 710      29.147  23.481  55.869  1.00  0.55           O  
HETATM  712  O   HOH T 711       0.813  24.176  46.213  1.00  0.55           O  
HETATM  713  O   HOH T 712      31.554  15.360  55.869  1.00  0.55           O  
HETATM  714  O   HOH T 713      54.228  -0.066  17.821  1.00  0.55           O  
HETATM  715  O   HOH T 714      47.141  10.780  10.489  1.00  0.55           O  
HETATM  716  O   HOH T 715      12.205  -4.321  22.719  1.00  0.56           O  
HETATM  717  O   HOH T 716      41.036 -14.423  41.956  1.00  0.56           O  
HETATM  718  O   HOH T 717       9.731   4.481  27.854  1.00  0.56           O  
HETATM  719  O   HOH T 718      38.857 -16.635  12.797  1.00  0.56           O  
HETATM  720  O   HOH T 719      20.359  -5.007  37.556  1.00  0.56           O  
HETATM  721  O   HOH T 720      31.643  40.498  40.481  1.00  0.56           O  
HETATM  722  O   HOH T 721      18.783  44.705  22.776  1.00  0.56           O  
HETATM  723  O   HOH T 722      20.263  32.416   6.134  1.00  0.56           O  
HETATM  724  O   HOH T 723      33.996  35.617   9.095  1.00  0.56           O  
HETATM  725  O   HOH T 724      23.149  42.213  44.091  1.00  0.56           O  
HETATM  726  O   HOH T 725      30.021  25.107   4.868  1.00  0.56           O  
HETATM  727  O   HOH T 726      15.348  36.646  29.027  1.00  0.56           O  
HETATM  728  O   HOH T 727      11.338   7.265  43.703  1.00  0.56           O  
HETATM  729  O   HOH T 728      44.661  10.092  61.114  1.00  0.56           O  
HETATM  730  O   HOH T 729      19.043  18.943  60.877  1.00  0.56           O  
HETATM  731  O   HOH T 730      28.994  10.721  55.152  1.00  0.57           O  
HETATM  732  O   HOH T 731      20.189   2.384  40.593  1.00  0.57           O  
HETATM  733  O   HOH T 732      16.139  30.835  12.137  1.00  0.57           O  
HETATM  734  O   HOH T 733      39.529  39.858  34.817  1.00  0.57           O  
HETATM  735  O   HOH T 734       9.440   6.312  37.075  1.00  0.57           O  
HETATM  736  O   HOH T 735      46.163  31.719  40.525  1.00  0.57           O  
HETATM  737  O   HOH T 736      19.169  34.807  14.247  1.00  0.57           O  
HETATM  738  O   HOH T 737      37.345  36.594  10.595  1.00  0.57           O  
HETATM  739  O   HOH T 738      16.190   4.135  53.521  1.00  0.57           O  
HETATM  740  O   HOH T 739      40.369  10.610  58.266  1.00  0.57           O  
HETATM  741  O   HOH T 740      34.944  -4.071   7.136  1.00  0.57           O  
HETATM  742  O   HOH T 741      47.584  18.756  13.858  1.00  0.57           O  
HETATM  743  O   HOH T 742      46.916  32.185  29.227  1.00  0.57           O  
HETATM  744  O   HOH T 743      23.567  23.466  61.525  1.00  0.57           O  
HETATM  745  O   HOH T 744      11.866   3.761  39.052  1.00  0.57           O  
HETATM  746  O   HOH T 745       7.987  35.020  29.887  1.00  0.57           O  
HETATM  747  O   HOH T 746      40.760  24.077  46.522  1.00  0.58           O  
HETATM  748  O   HOH T 747      14.639  44.506  40.435  1.00  0.58           O  
HETATM  749  O   HOH T 748      51.055 -12.368  47.175  1.00  0.58           O  
HETATM  750  O   HOH T 749       5.965   9.812  43.175  1.00  0.58           O  
HETATM  751  O   HOH T 750      47.755  -0.903   6.433  1.00  0.59           O  
HETATM  752  O   HOH T 751      10.187   0.691  21.047  1.00  0.60           O  
HETATM  753  O   HOH T 752      60.168   8.626  39.660  1.00  0.60           O  
HETATM  754  O   HOH T 753       8.923  37.229  28.220  1.00  0.60           O  
HETATM  755  O   HOH T 754       8.090  37.999  30.220  1.00  0.64           O  
HETATM  756  O   HOH T 755      59.345  14.630  21.642  1.00  0.65           O  
TER     757      HOH T 755 
