# Supplementary material for: Accurate Prediction of Hydration Sites of Proteins Using Energy Model With Atom Embedding
Source: Front Mol Biosci. 2021 Sep 20;8:756075. doi: 10.3389/fmolb.2021.756075 (PMC8488165; doi:10.3389/fmolb.2021.756075)
Supplement: Supplementary file 1 [file DataSheet1.ZIP › Data Sheet 1/Our_result_pdb/our_dataset_output/1XMZ_watersite.pdb]

HEADER                                                        XXXX


JRNL        PMID   -1
HETATM    1  O   HOH T   0      42.872  21.533  61.921  1.00  0.15           O  
HETATM    2  O   HOH T   1      46.669  46.407  66.514  1.00  0.15           O  
HETATM    3  O   HOH T   2      36.300  35.600  51.657  1.00  0.15           O  
HETATM    4  O   HOH T   3      51.756   4.815  67.407  1.00  0.16           O  
HETATM    5  O   HOH T   4      56.806  53.345  59.419  1.00  0.16           O  
HETATM    6  O   HOH T   5      49.572  15.141  69.457  1.00  0.16           O  
HETATM    7  O   HOH T   6      55.586  32.148  74.947  1.00  0.17           O  
HETATM    8  O   HOH T   7      51.791  14.656  53.203  1.00  0.17           O  
HETATM    9  O   HOH T   8      40.624  52.599  58.608  1.00  0.18           O  
HETATM   10  O   HOH T   9      35.508  37.398  53.581  1.00  0.18           O  
HETATM   11  O   HOH T  10      55.024  57.458  65.064  1.00  0.20           O  
HETATM   12  O   HOH T  11      49.330  57.769  59.033  1.00  0.20           O  
HETATM   13  O   HOH T  12      49.502  26.568  62.540  1.00  0.20           O  
HETATM   14  O   HOH T  13      54.973  39.408  76.243  1.00  0.20           O  
HETATM   15  O   HOH T  14      39.155  19.825  46.347  1.00  0.21           O  
HETATM   16  O   HOH T  15      53.608  30.348  75.409  1.00  0.21           O  
HETATM   17  O   HOH T  16      42.756  63.253  56.912  1.00  0.21           O  
HETATM   18  O   HOH T  17      46.057  22.487  83.497  1.00  0.21           O  
HETATM   19  O   HOH T  18      63.330  47.263  56.052  1.00  0.21           O  
HETATM   20  O   HOH T  19      46.815  26.171  51.185  1.00  0.21           O  
HETATM   21  O   HOH T  20      57.794  42.043  65.038  1.00  0.21           O  
HETATM   22  O   HOH T  21      50.393  45.344  80.056  1.00  0.21           O  
HETATM   23  O   HOH T  22      44.512  -5.130  37.893  1.00  0.21           O  
HETATM   24  O   HOH T  23      47.317  41.354  59.936  1.00  0.21           O  
HETATM   25  O   HOH T  24      61.084  47.753  73.183  1.00  0.22           O  
HETATM   26  O   HOH T  25      39.123  34.103  61.947  1.00  0.22           O  
HETATM   27  O   HOH T  26      56.492  20.857  47.496  1.00  0.22           O  
HETATM   28  O   HOH T  27      31.543  35.621  54.581  1.00  0.22           O  
HETATM   29  O   HOH T  28      34.946   4.764  61.881  1.00  0.23           O  
HETATM   30  O   HOH T  29      50.932  10.155  60.644  1.00  0.23           O  
HETATM   31  O   HOH T  30      47.547   4.706  65.146  1.00  0.23           O  
HETATM   32  O   HOH T  31      54.188  55.508  70.919  1.00  0.23           O  
HETATM   33  O   HOH T  32      38.959  25.268  59.315  1.00  0.23           O  
HETATM   34  O   HOH T  33      61.276  47.181  50.451  1.00  0.24           O  
HETATM   35  O   HOH T  34      51.560  32.062  79.071  1.00  0.24           O  
HETATM   36  O   HOH T  35      56.332  36.453  62.496  1.00  0.24           O  
HETATM   37  O   HOH T  36      39.726  50.280  75.517  1.00  0.24           O  
HETATM   38  O   HOH T  37      45.882  33.761  70.372  1.00  0.24           O  
HETATM   39  O   HOH T  38      62.377  23.322  71.750  1.00  0.24           O  
HETATM   40  O   HOH T  39      30.366  41.451  50.086  1.00  0.24           O  
HETATM   41  O   HOH T  40      54.702  15.835  71.894  1.00  0.24           O  
HETATM   42  O   HOH T  41      51.894  51.279  78.209  1.00  0.25           O  
HETATM   43  O   HOH T  42      57.599  38.391  64.002  1.00  0.25           O  
HETATM   44  O   HOH T  43      32.320  16.624  54.358  1.00  0.25           O  
HETATM   45  O   HOH T  44      48.809  31.562  53.420  1.00  0.25           O  
HETATM   46  O   HOH T  45      47.754  56.159  80.074  1.00  0.25           O  
HETATM   47  O   HOH T  46      50.596  48.146  79.852  1.00  0.25           O  
HETATM   48  O   HOH T  47      43.835  17.521  72.132  1.00  0.25           O  
HETATM   49  O   HOH T  48      51.583  25.583  66.472  1.00  0.25           O  
HETATM   50  O   HOH T  49      32.757   5.905  54.849  1.00  0.25           O  
HETATM   51  O   HOH T  50      42.521  32.441  77.033  1.00  0.25           O  
HETATM   52  O   HOH T  51      53.842  62.671  66.332  1.00  0.25           O  
HETATM   53  O   HOH T  52      40.482  44.553  45.582  1.00  0.26           O  
HETATM   54  O   HOH T  53      38.861   2.289  55.264  1.00  0.26           O  
HETATM   55  O   HOH T  54      49.413  11.720  77.800  1.00  0.26           O  
HETATM   56  O   HOH T  55      43.854  42.229  57.147  1.00  0.26           O  
HETATM   57  O   HOH T  56      33.598  10.049  54.917  1.00  0.26           O  
HETATM   58  O   HOH T  57      47.546  29.665  51.852  1.00  0.26           O  
HETATM   59  O   HOH T  58      51.691  57.883  77.025  1.00  0.26           O  
HETATM   60  O   HOH T  59      51.946  17.339  53.846  1.00  0.26           O  
HETATM   61  O   HOH T  60      36.758  44.440  47.029  1.00  0.26           O  
HETATM   62  O   HOH T  61      46.995  62.884  61.880  1.00  0.26           O  
HETATM   63  O   HOH T  62      28.895   5.207  76.694  1.00  0.26           O  
HETATM   64  O   HOH T  63      43.825  47.644  40.838  1.00  0.26           O  
HETATM   65  O   HOH T  64      53.414  16.906  42.732  1.00  0.27           O  
HETATM   66  O   HOH T  65      37.233  29.639  57.662  1.00  0.27           O  
HETATM   67  O   HOH T  66      60.143  23.119  75.198  1.00  0.27           O  
HETATM   68  O   HOH T  67      22.492   8.557  58.251  1.00  0.27           O  
HETATM   69  O   HOH T  68      37.189  50.041  60.868  1.00  0.28           O  
HETATM   70  O   HOH T  69      43.645  -5.578  40.465  1.00  0.28           O  
HETATM   71  O   HOH T  70      26.630  52.742  57.930  1.00  0.28           O  
HETATM   72  O   HOH T  71      67.958  57.518  50.828  1.00  0.28           O  
HETATM   73  O   HOH T  72      46.584  11.537  81.106  1.00  0.28           O  
HETATM   74  O   HOH T  73      46.633  17.833  72.193  1.00  0.28           O  
HETATM   75  O   HOH T  74      33.304  65.318  74.488  1.00  0.28           O  
HETATM   76  O   HOH T  75      51.468   1.556  53.495  1.00  0.29           O  
HETATM   77  O   HOH T  76      72.410  22.902  60.962  1.00  0.29           O  
HETATM   78  O   HOH T  77      68.032  20.105  69.404  1.00  0.29           O  
HETATM   79  O   HOH T  78      62.938  40.674  63.173  1.00  0.29           O  
HETATM   80  O   HOH T  79      52.418  22.732  66.269  1.00  0.29           O  
HETATM   81  O   HOH T  80      56.892  16.636  84.115  1.00  0.29           O  
HETATM   82  O   HOH T  81      29.195  15.321  55.909  1.00  0.29           O  
HETATM   83  O   HOH T  82      36.430  56.519  55.297  1.00  0.29           O  
HETATM   84  O   HOH T  83      53.793  37.473  62.142  1.00  0.29           O  
HETATM   85  O   HOH T  84      46.075  10.316  53.988  1.00  0.29           O  
HETATM   86  O   HOH T  85      40.323  13.762  54.998  1.00  0.29           O  
HETATM   87  O   HOH T  86      57.841  57.470  79.228  1.00  0.29           O  
HETATM   88  O   HOH T  87      56.138  50.648  59.337  1.00  0.29           O  
HETATM   89  O   HOH T  88      46.704  19.916  83.948  1.00  0.30           O  
HETATM   90  O   HOH T  89      32.216  63.159  77.873  1.00  0.30           O  
HETATM   91  O   HOH T  90      35.434  41.725  65.204  1.00  0.30           O  
HETATM   92  O   HOH T  91      64.872  47.856  61.670  1.00  0.30           O  
HETATM   93  O   HOH T  92      52.164  11.221  73.775  1.00  0.30           O  
HETATM   94  O   HOH T  93      17.614   6.743  71.808  1.00  0.30           O  
HETATM   95  O   HOH T  94      38.818  52.451  53.069  1.00  0.30           O  
HETATM   96  O   HOH T  95      64.618  17.734  40.754  1.00  0.30           O  
HETATM   97  O   HOH T  96      55.440  68.395  60.759  1.00  0.30           O  
HETATM   98  O   HOH T  97      41.247  62.744  81.716  1.00  0.30           O  
HETATM   99  O   HOH T  98      31.962  25.331  59.558  1.00  0.30           O  
HETATM  100  O   HOH T  99      58.431  37.077  35.065  1.00  0.30           O  
HETATM  101  O   HOH T 100      34.384  26.190  66.029  1.00  0.30           O  
HETATM  102  O   HOH T 101      37.466  48.901  70.767  1.00  0.31           O  
HETATM  103  O   HOH T 102      39.245   4.365  53.409  1.00  0.31           O  
HETATM  104  O   HOH T 103      46.036  36.651  79.764  1.00  0.31           O  
HETATM  105  O   HOH T 104      44.213  45.163  56.270  1.00  0.31           O  
HETATM  106  O   HOH T 105      32.361   2.482  73.678  1.00  0.31           O  
HETATM  107  O   HOH T 106      48.468  30.364  55.864  1.00  0.31           O  
HETATM  108  O   HOH T 107      63.786  59.833  64.876  1.00  0.31           O  
HETATM  109  O   HOH T 108      43.562  56.023  81.980  1.00  0.31           O  
HETATM  110  O   HOH T 109      56.295  65.164  67.840  1.00  0.31           O  
HETATM  111  O   HOH T 110      53.143  35.906  38.832  1.00  0.31           O  
HETATM  112  O   HOH T 111      39.601  66.158  78.021  1.00  0.31           O  
HETATM  113  O   HOH T 112      31.828  12.395  47.948  1.00  0.31           O  
HETATM  114  O   HOH T 113      38.127  54.249  51.110  1.00  0.31           O  
HETATM  115  O   HOH T 114      50.702  24.120  61.673  1.00  0.31           O  
HETATM  116  O   HOH T 115      32.475   3.589  61.231  1.00  0.32           O  
HETATM  117  O   HOH T 116      38.093  50.648  49.564  1.00  0.32           O  
HETATM  118  O   HOH T 117      57.383  28.273  81.295  1.00  0.32           O  
HETATM  119  O   HOH T 118      50.529  37.162  74.481  1.00  0.32           O  
HETATM  120  O   HOH T 119      56.393  62.438  67.482  1.00  0.32           O  
HETATM  121  O   HOH T 120      30.156  57.702  54.996  1.00  0.32           O  
HETATM  122  O   HOH T 121      58.895  38.544  37.473  1.00  0.32           O  
HETATM  123  O   HOH T 122      34.996  17.467  68.512  1.00  0.32           O  
HETATM  124  O   HOH T 123      48.458  43.839  58.958  1.00  0.32           O  
HETATM  125  O   HOH T 124      44.514  35.197  75.085  1.00  0.32           O  
HETATM  126  O   HOH T 125      56.912  14.554  73.004  1.00  0.32           O  
HETATM  127  O   HOH T 126      53.277   1.508  61.407  1.00  0.32           O  
HETATM  128  O   HOH T 127      42.230  63.628  84.285  1.00  0.32           O  
HETATM  129  O   HOH T 128      59.447  41.333  81.156  1.00  0.32           O  
HETATM  130  O   HOH T 129      58.612  19.486  44.196  1.00  0.33           O  
HETATM  131  O   HOH T 130      47.481  54.016  81.869  1.00  0.33           O  
HETATM  132  O   HOH T 131      53.847  21.102  89.489  1.00  0.33           O  
HETATM  133  O   HOH T 132      62.062   9.974  43.754  1.00  0.33           O  
HETATM  134  O   HOH T 133      44.672  -2.573  37.007  1.00  0.33           O  
HETATM  135  O   HOH T 134      53.007  23.993  63.592  1.00  0.33           O  
HETATM  136  O   HOH T 135      66.732  65.012  59.891  1.00  0.33           O  
HETATM  137  O   HOH T 136      35.262  49.019  68.926  1.00  0.33           O  
HETATM  138  O   HOH T 137      65.492  37.365  63.210  1.00  0.33           O  
HETATM  139  O   HOH T 138      38.936  54.254  42.052  1.00  0.33           O  
HETATM  140  O   HOH T 139      46.903  43.941  56.256  1.00  0.33           O  
HETATM  141  O   HOH T 140      40.136  63.577  47.633  1.00  0.33           O  
HETATM  142  O   HOH T 141      38.658  50.441  72.896  1.00  0.33           O  
HETATM  143  O   HOH T 142      45.803   9.972  75.653  1.00  0.33           O  
HETATM  144  O   HOH T 143      40.543  64.519  86.503  1.00  0.34           O  
HETATM  145  O   HOH T 144      64.619  56.908  72.650  1.00  0.34           O  
HETATM  146  O   HOH T 145      27.094   5.217  64.547  1.00  0.34           O  
HETATM  147  O   HOH T 146      60.841  67.686  54.984  1.00  0.34           O  
HETATM  148  O   HOH T 147      62.409  44.558  70.492  1.00  0.34           O  
HETATM  149  O   HOH T 148      37.672  53.242  48.551  1.00  0.34           O  
HETATM  150  O   HOH T 149      43.058  57.822  78.169  1.00  0.34           O  
HETATM  151  O   HOH T 150      51.290  39.743  38.166  1.00  0.34           O  
HETATM  152  O   HOH T 151      38.285  18.850  66.539  1.00  0.34           O  
HETATM  153  O   HOH T 152      38.932  54.053  56.990  1.00  0.34           O  
HETATM  154  O   HOH T 153      48.714  -8.792  51.406  1.00  0.34           O  
HETATM  155  O   HOH T 154      48.448  35.912  38.061  1.00  0.34           O  
HETATM  156  O   HOH T 155      51.334  67.632  63.855  1.00  0.34           O  
HETATM  157  O   HOH T 156      63.387  61.944  54.212  1.00  0.34           O  
HETATM  158  O   HOH T 157      52.779  44.949  37.691  1.00  0.34           O  
HETATM  159  O   HOH T 158      68.008  51.798  59.432  1.00  0.34           O  
HETATM  160  O   HOH T 159      38.670  34.673  44.323  1.00  0.34           O  
HETATM  161  O   HOH T 160      36.096  48.502  46.749  1.00  0.35           O  
HETATM  162  O   HOH T 161      62.565  41.749  60.597  1.00  0.35           O  
HETATM  163  O   HOH T 162      39.011  61.257  72.825  1.00  0.35           O  
HETATM  164  O   HOH T 163      44.898  63.225  74.349  1.00  0.35           O  
HETATM  165  O   HOH T 164      38.811  33.768  64.681  1.00  0.35           O  
HETATM  166  O   HOH T 165      63.208  35.294  69.982  1.00  0.35           O  
HETATM  167  O   HOH T 166      37.807  37.206  43.452  1.00  0.35           O  
HETATM  168  O   HOH T 167      67.326  56.439  72.217  1.00  0.35           O  
HETATM  169  O   HOH T 168      36.199  51.643  68.284  1.00  0.35           O  
HETATM  170  O   HOH T 169      52.276  65.651  71.914  1.00  0.35           O  
HETATM  171  O   HOH T 170      39.855  -5.897  41.590  1.00  0.35           O  
HETATM  172  O   HOH T 171      28.178  43.019  49.420  1.00  0.35           O  
HETATM  173  O   HOH T 172      46.802  12.344  78.619  1.00  0.35           O  
HETATM  174  O   HOH T 173      36.860  18.985  70.113  1.00  0.35           O  
HETATM  175  O   HOH T 174      71.271  27.571  62.806  1.00  0.35           O  
HETATM  176  O   HOH T 175      51.381  -2.588  52.609  1.00  0.35           O  
HETATM  177  O   HOH T 176      49.023  41.810  81.809  1.00  0.35           O  
HETATM  178  O   HOH T 177      26.189  48.569  46.112  1.00  0.35           O  
HETATM  179  O   HOH T 178      50.940  13.812  71.494  1.00  0.35           O  
HETATM  180  O   HOH T 179      62.677   8.712  46.247  1.00  0.36           O  
HETATM  181  O   HOH T 180      55.005  17.022  80.135  1.00  0.36           O  
HETATM  182  O   HOH T 181      50.264  -2.626  56.367  1.00  0.36           O  
HETATM  183  O   HOH T 182      31.615  50.679  50.989  1.00  0.36           O  
HETATM  184  O   HOH T 183      31.844  15.826  51.701  1.00  0.36           O  
HETATM  185  O   HOH T 184      41.142  38.762  40.060  1.00  0.36           O  
HETATM  186  O   HOH T 185      40.534  63.708  79.144  1.00  0.36           O  
HETATM  187  O   HOH T 186      67.157  20.916  71.819  1.00  0.36           O  
HETATM  188  O   HOH T 187      58.931  49.496  46.392  1.00  0.36           O  
HETATM  189  O   HOH T 188      42.136  42.704  44.306  1.00  0.36           O  
HETATM  190  O   HOH T 189      37.911  31.780  63.016  1.00  0.36           O  
HETATM  191  O   HOH T 190      27.297  16.654  54.296  1.00  0.36           O  
HETATM  192  O   HOH T 191      36.826  54.323  53.660  1.00  0.36           O  
HETATM  193  O   HOH T 192      59.766  37.334  72.368  1.00  0.36           O  
HETATM  194  O   HOH T 193      66.273  53.689  80.669  1.00  0.37           O  
HETATM  195  O   HOH T 194      46.776  21.721  86.070  1.00  0.37           O  
HETATM  196  O   HOH T 195      54.251  63.544  71.841  1.00  0.37           O  
HETATM  197  O   HOH T 196      31.303  31.356  59.289  1.00  0.37           O  
HETATM  198  O   HOH T 197      52.861  66.522  65.843  1.00  0.37           O  
HETATM  199  O   HOH T 198      63.959  29.893  79.513  1.00  0.37           O  
HETATM  200  O   HOH T 199      69.243  31.474  67.792  1.00  0.37           O  
HETATM  201  O   HOH T 200      65.137  58.519  66.895  1.00  0.37           O  
HETATM  202  O   HOH T 201      70.436  54.975  56.933  1.00  0.37           O  
HETATM  203  O   HOH T 202      56.686  12.956  40.108  1.00  0.37           O  
HETATM  204  O   HOH T 203      59.984  21.602  78.648  1.00  0.37           O  
HETATM  205  O   HOH T 204      23.171  13.670  66.161  1.00  0.37           O  
HETATM  206  O   HOH T 205      66.674  60.534  57.053  1.00  0.37           O  
HETATM  207  O   HOH T 206      38.518  52.751  39.782  1.00  0.37           O  
HETATM  208  O   HOH T 207      27.269  50.759  49.196  1.00  0.37           O  
HETATM  209  O   HOH T 208      55.536 -10.465  51.934  1.00  0.37           O  
HETATM  210  O   HOH T 209      65.597  25.677  71.585  1.00  0.37           O  
HETATM  211  O   HOH T 210      56.741  56.549  40.702  1.00  0.38           O  
HETATM  212  O   HOH T 211      50.331  45.752  38.653  1.00  0.38           O  
HETATM  213  O   HOH T 212      50.158  20.639  87.694  1.00  0.38           O  
HETATM  214  O   HOH T 213      35.623  33.012  45.482  1.00  0.38           O  
HETATM  215  O   HOH T 214      65.553  28.039  73.238  1.00  0.38           O  
HETATM  216  O   HOH T 215      45.661 -10.419  52.712  1.00  0.38           O  
HETATM  217  O   HOH T 216      32.330  31.725  56.720  1.00  0.38           O  
HETATM  218  O   HOH T 217      53.038  69.532  71.522  1.00  0.38           O  
HETATM  219  O   HOH T 218      28.394  50.178  46.701  1.00  0.38           O  
HETATM  220  O   HOH T 219      38.382  22.287  45.084  1.00  0.38           O  
HETATM  221  O   HOH T 220      28.098  34.808  50.990  1.00  0.38           O  
HETATM  222  O   HOH T 221      51.030   0.257  62.396  1.00  0.38           O  
HETATM  223  O   HOH T 222      39.598  39.248  42.408  1.00  0.38           O  
HETATM  224  O   HOH T 223      67.501  47.283  62.149  1.00  0.38           O  
HETATM  225  O   HOH T 224      50.623  10.396  79.924  1.00  0.38           O  
HETATM  226  O   HOH T 225      49.541  23.793  65.677  1.00  0.38           O  
HETATM  227  O   HOH T 226      39.138  10.276  42.888  1.00  0.38           O  
HETATM  228  O   HOH T 227      53.041   3.868  42.071  1.00  0.38           O  
HETATM  229  O   HOH T 228      53.193  39.541  80.085  1.00  0.38           O  
HETATM  230  O   HOH T 229      28.902  50.437  51.166  1.00  0.38           O  
HETATM  231  O   HOH T 230      51.986  71.734  65.362  1.00  0.39           O  
HETATM  232  O   HOH T 231      65.719  45.264  61.398  1.00  0.39           O  
HETATM  233  O   HOH T 232      69.530  54.142  59.443  1.00  0.39           O  
HETATM  234  O   HOH T 233      46.647  52.230  64.224  1.00  0.39           O  
HETATM  235  O   HOH T 234      49.252  42.886  79.193  1.00  0.39           O  
HETATM  236  O   HOH T 235      67.225  35.187  63.399  1.00  0.39           O  
HETATM  237  O   HOH T 236      21.678  45.464  56.927  1.00  0.39           O  
HETATM  238  O   HOH T 237      34.500  46.175  46.634  1.00  0.39           O  
HETATM  239  O   HOH T 238      72.722  25.309  62.277  1.00  0.39           O  
HETATM  240  O   HOH T 239      71.066  52.865  49.233  1.00  0.39           O  
HETATM  241  O   HOH T 240      38.604  29.465  60.025  1.00  0.39           O  
HETATM  242  O   HOH T 241      37.050  24.642  45.712  1.00  0.39           O  
HETATM  243  O   HOH T 242      54.771   3.052  64.606  1.00  0.39           O  
HETATM  244  O   HOH T 243      64.722  62.283  64.070  1.00  0.39           O  
HETATM  245  O   HOH T 244      67.969  58.834  66.753  1.00  0.39           O  
HETATM  246  O   HOH T 245      73.177  29.162  64.022  1.00  0.39           O  
HETATM  247  O   HOH T 246      37.408  16.330  67.496  1.00  0.39           O  
HETATM  248  O   HOH T 247      33.548  15.192  43.044  1.00  0.39           O  
HETATM  249  O   HOH T 248      45.071  55.945  79.128  1.00  0.39           O  
HETATM  250  O   HOH T 249      22.593  49.709  53.794  1.00  0.39           O  
HETATM  251  O   HOH T 250      43.196   9.742  42.679  1.00  0.39           O  
HETATM  252  O   HOH T 251      43.778  18.219  67.958  1.00  0.39           O  
HETATM  253  O   HOH T 252      43.020  28.427  71.944  1.00  0.40           O  
HETATM  254  O   HOH T 253      36.258   5.710  49.944  1.00  0.40           O  
HETATM  255  O   HOH T 254      46.720  25.090  82.924  1.00  0.40           O  
HETATM  256  O   HOH T 255      68.053  67.184  61.029  1.00  0.40           O  
HETATM  257  O   HOH T 256      57.820  17.173  73.537  1.00  0.40           O  
HETATM  258  O   HOH T 257      52.485  46.688  81.306  1.00  0.40           O  
HETATM  259  O   HOH T 258      61.083  43.247  75.712  1.00  0.40           O  
HETATM  260  O   HOH T 259      63.146  46.655  71.924  1.00  0.40           O  
HETATM  261  O   HOH T 260      36.640  39.402  64.201  1.00  0.40           O  
HETATM  262  O   HOH T 261      46.147  36.361  39.551  1.00  0.40           O  
HETATM  263  O   HOH T 262      25.178   3.226  64.835  1.00  0.40           O  
HETATM  264  O   HOH T 263      58.314  69.125  54.446  1.00  0.40           O  
HETATM  265  O   HOH T 264      41.002  41.354  40.980  1.00  0.40           O  
HETATM  266  O   HOH T 265      54.942  35.534  53.020  1.00  0.40           O  
HETATM  267  O   HOH T 266      61.585  37.467  70.407  1.00  0.40           O  
HETATM  268  O   HOH T 267      54.952  19.934  56.136  1.00  0.40           O  
HETATM  269  O   HOH T 268      73.593  25.168  59.684  1.00  0.40           O  
HETATM  270  O   HOH T 269      61.135  66.352  52.517  1.00  0.40           O  
HETATM  271  O   HOH T 270      44.452  11.594  77.404  1.00  0.40           O  
HETATM  272  O   HOH T 271      61.559  42.007  70.794  1.00  0.40           O  
HETATM  273  O   HOH T 272      23.680   6.027  57.445  1.00  0.40           O  
HETATM  274  O   HOH T 273      31.254  21.844  48.800  1.00  0.40           O  
HETATM  275  O   HOH T 274      61.952  41.895  65.641  1.00  0.40           O  
HETATM  276  O   HOH T 275      39.370  29.145  52.621  1.00  0.40           O  
HETATM  277  O   HOH T 276      64.900  45.609  75.799  1.00  0.40           O  
HETATM  278  O   HOH T 277      49.623  27.327  46.824  1.00  0.41           O  
HETATM  279  O   HOH T 278      71.995  31.806  67.520  1.00  0.41           O  
HETATM  280  O   HOH T 279      55.083  38.791  71.753  1.00  0.41           O  
HETATM  281  O   HOH T 280      26.613  42.214  51.595  1.00  0.41           O  
HETATM  282  O   HOH T 281      50.196  52.816  60.351  1.00  0.41           O  
HETATM  283  O   HOH T 282      12.847   8.215  67.823  1.00  0.41           O  
HETATM  284  O   HOH T 283      51.543  38.806  77.951  1.00  0.41           O  
HETATM  285  O   HOH T 284      61.522  19.916  50.817  1.00  0.41           O  
HETATM  286  O   HOH T 285      60.975  54.021  79.221  1.00  0.41           O  
HETATM  287  O   HOH T 286      49.114  63.089  81.022  1.00  0.41           O  
HETATM  288  O   HOH T 287      62.058  39.894  69.163  1.00  0.41           O  
HETATM  289  O   HOH T 288      29.718  42.636  61.444  1.00  0.41           O  
HETATM  290  O   HOH T 289      42.213  22.200  42.715  1.00  0.41           O  
HETATM  291  O   HOH T 290      34.648  30.296  57.257  1.00  0.41           O  
HETATM  292  O   HOH T 291      30.160   1.601  67.151  1.00  0.41           O  
HETATM  293  O   HOH T 292      54.450  48.086  55.969  1.00  0.41           O  
HETATM  294  O   HOH T 293      44.472  43.871  59.367  1.00  0.41           O  
HETATM  295  O   HOH T 294      62.422  63.921  52.611  1.00  0.41           O  
HETATM  296  O   HOH T 295      41.915  65.487  48.426  1.00  0.41           O  
HETATM  297  O   HOH T 296      35.688  54.752  49.622  1.00  0.41           O  
HETATM  298  O   HOH T 297      52.537  27.465  84.848  1.00  0.41           O  
HETATM  299  O   HOH T 298      72.191  31.567  64.812  1.00  0.41           O  
HETATM  300  O   HOH T 299      58.382  34.214  42.005  1.00  0.42           O  
HETATM  301  O   HOH T 300      41.353  25.789  46.704  1.00  0.42           O  
HETATM  302  O   HOH T 301      63.233  33.294  73.900  1.00  0.42           O  
HETATM  303  O   HOH T 302      35.712   5.722  66.743  1.00  0.42           O  
HETATM  304  O   HOH T 303      60.431   4.644  51.841  1.00  0.42           O  
HETATM  305  O   HOH T 304      42.000  29.926  46.779  1.00  0.42           O  
HETATM  306  O   HOH T 305      62.826  55.989  79.519  1.00  0.42           O  
HETATM  307  O   HOH T 306      68.120  49.204  60.265  1.00  0.42           O  
HETATM  308  O   HOH T 307      56.498  61.989  71.561  1.00  0.42           O  
HETATM  309  O   HOH T 308      65.585  36.038  68.900  1.00  0.42           O  
HETATM  310  O   HOH T 309      41.826  27.680  76.889  1.00  0.42           O  
HETATM  311  O   HOH T 310      50.210  33.188  42.089  1.00  0.42           O  
HETATM  312  O   HOH T 311      29.483  38.927  50.916  1.00  0.42           O  
HETATM  313  O   HOH T 312      54.503  26.907  51.536  1.00  0.42           O  
HETATM  314  O   HOH T 313      55.935  75.672  64.820  1.00  0.42           O  
HETATM  315  O   HOH T 314      50.154  14.942  59.736  1.00  0.42           O  
HETATM  316  O   HOH T 315      52.428  34.100  40.841  1.00  0.42           O  
HETATM  317  O   HOH T 316      61.101  33.770  68.931  1.00  0.42           O  
HETATM  318  O   HOH T 317      26.212   6.088  56.240  1.00  0.42           O  
HETATM  319  O   HOH T 318      24.074  45.374  47.902  1.00  0.42           O  
HETATM  320  O   HOH T 319      41.440  11.712  42.643  1.00  0.42           O  
HETATM  321  O   HOH T 320      68.934  52.770  45.101  1.00  0.42           O  
HETATM  322  O   HOH T 321      31.016  13.676  50.156  1.00  0.42           O  
HETATM  323  O   HOH T 322      51.737  61.712  77.774  1.00  0.42           O  
HETATM  324  O   HOH T 323      38.321  26.654  53.406  1.00  0.42           O  
HETATM  325  O   HOH T 324      32.557  29.288  52.384  1.00  0.42           O  
HETATM  326  O   HOH T 325      52.215  36.998  79.995  1.00  0.43           O  
HETATM  327  O   HOH T 326      54.446  17.254  82.775  1.00  0.43           O  
HETATM  328  O   HOH T 327      52.316  39.219  75.253  1.00  0.43           O  
HETATM  329  O   HOH T 328      57.630  55.089  80.555  1.00  0.43           O  
HETATM  330  O   HOH T 329      53.542  64.928  68.004  1.00  0.43           O  
HETATM  331  O   HOH T 330      62.865  44.459  66.567  1.00  0.43           O  
HETATM  332  O   HOH T 331      33.581   5.551  50.832  1.00  0.43           O  
HETATM  333  O   HOH T 332      52.752  34.296  79.982  1.00  0.43           O  
HETATM  334  O   HOH T 333      48.623  27.287  80.722  1.00  0.43           O  
HETATM  335  O   HOH T 334      52.525  71.228  61.518  1.00  0.43           O  
HETATM  336  O   HOH T 335      40.863  49.699  64.576  1.00  0.43           O  
HETATM  337  O   HOH T 336      57.516  30.810  82.499  1.00  0.43           O  
HETATM  338  O   HOH T 337      54.059  15.087  40.717  1.00  0.43           O  
HETATM  339  O   HOH T 338      49.447  42.982  38.546  1.00  0.43           O  
HETATM  340  O   HOH T 339      62.343  23.092  79.228  1.00  0.43           O  
HETATM  341  O   HOH T 340      43.878  39.395  72.727  1.00  0.43           O  
HETATM  342  O   HOH T 341      50.084  30.545  43.550  1.00  0.43           O  
HETATM  343  O   HOH T 342      63.435  32.894  76.734  1.00  0.43           O  
HETATM  344  O   HOH T 343      64.627  42.776  62.118  1.00  0.43           O  
HETATM  345  O   HOH T 344      40.367  65.896  50.798  1.00  0.43           O  
HETATM  346  O   HOH T 345      36.823  66.795  73.733  1.00  0.43           O  
HETATM  347  O   HOH T 346      39.284  56.965  42.710  1.00  0.43           O  
HETATM  348  O   HOH T 347      55.215  32.241  83.168  1.00  0.43           O  
HETATM  349  O   HOH T 348      39.923  31.495  47.815  1.00  0.43           O  
HETATM  350  O   HOH T 349      49.144  -1.544  54.051  1.00  0.43           O  
HETATM  351  O   HOH T 350      65.833  57.780  70.321  1.00  0.43           O  
HETATM  352  O   HOH T 351      39.268  68.066  73.812  1.00  0.43           O  
HETATM  353  O   HOH T 352      39.330  49.986  51.972  1.00  0.43           O  
HETATM  354  O   HOH T 353      43.511  35.415  70.546  1.00  0.43           O  
HETATM  355  O   HOH T 354      60.795   7.445  59.568  1.00  0.43           O  
HETATM  356  O   HOH T 355      38.003  27.748  50.795  1.00  0.43           O  
HETATM  357  O   HOH T 356      53.414  -8.773  51.684  1.00  0.44           O  
HETATM  358  O   HOH T 357      57.725  32.234  56.541  1.00  0.44           O  
HETATM  359  O   HOH T 358      44.270  33.889  72.670  1.00  0.44           O  
HETATM  360  O   HOH T 359      62.525  16.615  75.264  1.00  0.44           O  
HETATM  361  O   HOH T 360      55.200  30.037  81.446  1.00  0.44           O  
HETATM  362  O   HOH T 361      36.296  26.950  46.968  1.00  0.44           O  
HETATM  363  O   HOH T 362      50.619  33.903  63.207  1.00  0.44           O  
HETATM  364  O   HOH T 363      70.233  33.188  65.849  1.00  0.44           O  
HETATM  365  O   HOH T 364      66.908  46.984  77.571  1.00  0.44           O  
HETATM  366  O   HOH T 365      66.305  26.833  75.562  1.00  0.44           O  
HETATM  367  O   HOH T 366      42.153  23.617  45.178  1.00  0.44           O  
HETATM  368  O   HOH T 367      55.960  38.763  37.634  1.00  0.44           O  
HETATM  369  O   HOH T 368      54.982  54.538  80.397  1.00  0.44           O  
HETATM  370  O   HOH T 369      69.003  61.059  65.515  1.00  0.44           O  
HETATM  371  O   HOH T 370      51.704  22.646  88.473  1.00  0.44           O  
HETATM  372  O   HOH T 371      59.825  20.385  76.194  1.00  0.44           O  
HETATM  373  O   HOH T 372      61.629  12.843  74.137  1.00  0.44           O  
HETATM  374  O   HOH T 373      38.410  27.799  55.966  1.00  0.44           O  
HETATM  375  O   HOH T 374      30.227  27.667  55.149  1.00  0.44           O  
HETATM  376  O   HOH T 375      35.979  35.016  43.521  1.00  0.44           O  
HETATM  377  O   HOH T 376      27.892  41.982  63.376  1.00  0.44           O  
HETATM  378  O   HOH T 377      47.934  29.475  85.511  1.00  0.44           O  
HETATM  379  O   HOH T 378      63.451  38.314  61.600  1.00  0.44           O  
HETATM  380  O   HOH T 379      49.635  36.930  77.173  1.00  0.44           O  
HETATM  381  O   HOH T 380      25.351  51.220  56.067  1.00  0.44           O  
HETATM  382  O   HOH T 381      29.772   7.899  54.901  1.00  0.44           O  
HETATM  383  O   HOH T 382      46.096   2.633  74.589  1.00  0.44           O  
HETATM  384  O   HOH T 383      54.300  51.981  79.458  1.00  0.44           O  
HETATM  385  O   HOH T 384      50.102   3.761  65.494  1.00  0.45           O  
HETATM  386  O   HOH T 385      60.971  40.410  75.880  1.00  0.45           O  
HETATM  387  O   HOH T 386      62.362  45.493  74.453  1.00  0.45           O  
HETATM  388  O   HOH T 387      46.301  63.359  80.863  1.00  0.45           O  
HETATM  389  O   HOH T 388      47.174  40.223  80.537  1.00  0.45           O  
HETATM  390  O   HOH T 389      51.976  42.293  37.507  1.00  0.45           O  
HETATM  391  O   HOH T 390      67.916  29.148  72.065  1.00  0.45           O  
HETATM  392  O   HOH T 391      48.999  22.862  89.036  1.00  0.45           O  
HETATM  393  O   HOH T 392      58.993  60.672  72.011  1.00  0.45           O  
HETATM  394  O   HOH T 393      21.046  42.867  56.212  1.00  0.45           O  
HETATM  395  O   HOH T 394      18.334  43.274  56.686  1.00  0.45           O  
HETATM  396  O   HOH T 395      37.355  66.198  90.879  1.00  0.45           O  
HETATM  397  O   HOH T 396      42.704  56.074  39.308  1.00  0.45           O  
HETATM  398  O   HOH T 397      40.859  21.271  44.739  1.00  0.45           O  
HETATM  399  O   HOH T 398      53.576  40.044  36.736  1.00  0.45           O  
HETATM  400  O   HOH T 399      68.863  31.250  70.549  1.00  0.45           O  
HETATM  401  O   HOH T 400      37.976  35.870  72.706  1.00  0.45           O  
HETATM  402  O   HOH T 401      62.446  15.221  72.943  1.00  0.45           O  
HETATM  403  O   HOH T 402      48.207  35.177  78.911  1.00  0.45           O  
HETATM  404  O   HOH T 403      46.352  -7.772  52.788  1.00  0.46           O  
HETATM  405  O   HOH T 404      53.289   0.700  64.008  1.00  0.46           O  
HETATM  406  O   HOH T 405      67.921  66.890  58.192  1.00  0.46           O  
HETATM  407  O   HOH T 406      22.591  47.766  55.820  1.00  0.46           O  
HETATM  408  O   HOH T 407      50.955  37.064  37.719  1.00  0.46           O  
HETATM  409  O   HOH T 408      31.079  32.959  54.651  1.00  0.46           O  
HETATM  410  O   HOH T 409      39.523  38.182  72.431  1.00  0.46           O  
HETATM  411  O   HOH T 410      58.578  56.766  47.725  1.00  0.46           O  
HETATM  412  O   HOH T 411      26.479  37.190  54.294  1.00  0.46           O  
HETATM  413  O   HOH T 412      26.109   5.312  58.887  1.00  0.46           O  
HETATM  414  O   HOH T 413      35.249   3.351  50.574  1.00  0.46           O  
HETATM  415  O   HOH T 414      74.036  30.240  66.434  1.00  0.46           O  
HETATM  416  O   HOH T 415      46.175  35.964  77.132  1.00  0.46           O  
HETATM  417  O   HOH T 416      65.673  13.919  74.276  1.00  0.46           O  
HETATM  418  O   HOH T 417      35.836  20.873  39.872  1.00  0.46           O  
HETATM  419  O   HOH T 418      58.648  41.278  51.079  1.00  0.46           O  
HETATM  420  O   HOH T 419      62.379  34.895  41.209  1.00  0.46           O  
HETATM  421  O   HOH T 420      39.788  -7.343  44.051  1.00  0.46           O  
HETATM  422  O   HOH T 421      47.141  29.586  80.575  1.00  0.46           O  
HETATM  423  O   HOH T 422      49.848  55.513  60.722  1.00  0.46           O  
HETATM  424  O   HOH T 423      64.011  30.359  75.818  1.00  0.46           O  
HETATM  425  O   HOH T 424      30.034  51.035  48.710  1.00  0.46           O  
HETATM  426  O   HOH T 425      61.673  41.720  73.525  1.00  0.46           O  
HETATM  427  O   HOH T 426      44.916  15.769  62.441  1.00  0.46           O  
HETATM  428  O   HOH T 427      60.937  48.513  48.127  1.00  0.46           O  
HETATM  429  O   HOH T 428      43.916  63.566  82.161  1.00  0.47           O  
HETATM  430  O   HOH T 429      31.151  30.290  54.532  1.00  0.47           O  
HETATM  431  O   HOH T 430      57.654   1.213  49.980  1.00  0.47           O  
HETATM  432  O   HOH T 431      51.639  -0.776  54.806  1.00  0.47           O  
HETATM  433  O   HOH T 432      52.514  73.446  63.245  1.00  0.47           O  
HETATM  434  O   HOH T 433      37.946   3.829  51.095  1.00  0.47           O  
HETATM  435  O   HOH T 434      65.561  55.525  78.746  1.00  0.47           O  
HETATM  436  O   HOH T 435      60.582  39.064  42.184  1.00  0.47           O  
HETATM  437  O   HOH T 436      72.234  30.927  62.087  1.00  0.47           O  
HETATM  438  O   HOH T 437      69.632  51.313  47.389  1.00  0.47           O  
HETATM  439  O   HOH T 438      55.787  40.452  73.880  1.00  0.47           O  
HETATM  440  O   HOH T 439      40.893  30.268  76.711  1.00  0.47           O  
HETATM  441  O   HOH T 440      40.328  10.504  40.406  1.00  0.47           O  
HETATM  442  O   HOH T 441      46.943  34.013  58.767  1.00  0.47           O  
HETATM  443  O   HOH T 442      56.573  -1.356  49.285  1.00  0.47           O  
HETATM  444  O   HOH T 443      38.220  66.086  86.466  1.00  0.47           O  
HETATM  445  O   HOH T 444      63.496  11.211  53.465  1.00  0.47           O  
HETATM  446  O   HOH T 445      64.723  22.153  74.741  1.00  0.47           O  
HETATM  447  O   HOH T 446      59.766  41.400  57.458  1.00  0.47           O  
HETATM  448  O   HOH T 447      54.367  67.304  72.669  1.00  0.47           O  
HETATM  449  O   HOH T 448      69.338  54.100  47.493  1.00  0.47           O  
HETATM  450  O   HOH T 449      44.579  60.846  44.689  1.00  0.47           O  
HETATM  451  O   HOH T 450      29.782  16.346  53.387  1.00  0.47           O  
HETATM  452  O   HOH T 451      65.116  18.609  53.571  1.00  0.47           O  
HETATM  453  O   HOH T 452      31.189   3.832  55.912  1.00  0.47           O  
HETATM  454  O   HOH T 453      64.339  57.904  75.187  1.00  0.47           O  
HETATM  455  O   HOH T 454      29.040  36.557  55.089  1.00  0.47           O  
HETATM  456  O   HOH T 455      55.041  34.599  40.385  1.00  0.48           O  
HETATM  457  O   HOH T 456      37.942  22.506  42.249  1.00  0.48           O  
HETATM  458  O   HOH T 457      57.082  75.480  62.312  1.00  0.48           O  
HETATM  459  O   HOH T 458      59.449  17.285  83.433  1.00  0.48           O  
HETATM  460  O   HOH T 459      64.567  44.189  68.731  1.00  0.48           O  
HETATM  461  O   HOH T 460      62.320  11.296  40.529  1.00  0.48           O  
HETATM  462  O   HOH T 461      61.988  51.273  79.293  1.00  0.48           O  
HETATM  463  O   HOH T 462      30.796  10.364  55.688  1.00  0.48           O  
HETATM  464  O   HOH T 463      38.955  50.210  39.033  1.00  0.48           O  
HETATM  465  O   HOH T 464      43.459  32.314  46.879  1.00  0.48           O  
HETATM  466  O   HOH T 465      57.381  38.224  73.325  1.00  0.48           O  
HETATM  467  O   HOH T 466      32.698  14.350  40.496  1.00  0.48           O  
HETATM  468  O   HOH T 467      64.158  23.218  77.248  1.00  0.48           O  
HETATM  469  O   HOH T 468      38.406   1.680  52.667  1.00  0.48           O  
HETATM  470  O   HOH T 469      63.807  53.334  79.272  1.00  0.48           O  
HETATM  471  O   HOH T 470      45.031  40.437  74.998  1.00  0.48           O  
HETATM  472  O   HOH T 471      24.998  39.517  54.308  1.00  0.48           O  
HETATM  473  O   HOH T 472      32.294  10.394  51.672  1.00  0.48           O  
HETATM  474  O   HOH T 473      67.120  67.995  55.658  1.00  0.48           O  
HETATM  475  O   HOH T 474      60.403  12.719  76.607  1.00  0.48           O  
HETATM  476  O   HOH T 475      33.846  30.506  60.075  1.00  0.48           O  
HETATM  477  O   HOH T 476      50.752  29.259  85.915  1.00  0.48           O  
HETATM  478  O   HOH T 477      44.351  36.686  72.806  1.00  0.48           O  
HETATM  479  O   HOH T 478      31.783  61.894  91.848  1.00  0.48           O  
HETATM  480  O   HOH T 479      51.731  30.133  73.445  1.00  0.49           O  
HETATM  481  O   HOH T 480      56.586  52.356  81.058  1.00  0.49           O  
HETATM  482  O   HOH T 481      18.512  46.908  52.663  1.00  0.49           O  
HETATM  483  O   HOH T 482      36.310  51.148  47.496  1.00  0.49           O  
HETATM  484  O   HOH T 483      67.413  37.308  65.187  1.00  0.49           O  
HETATM  485  O   HOH T 484      20.107  46.755  54.991  1.00  0.49           O  
HETATM  486  O   HOH T 485      46.361  23.287  88.276  1.00  0.49           O  
HETATM  487  O   HOH T 486      49.532  12.312  59.202  1.00  0.49           O  
HETATM  488  O   HOH T 487      37.128  37.634  55.741  1.00  0.49           O  
HETATM  489  O   HOH T 488      48.366  53.639  62.362  1.00  0.49           O  
HETATM  490  O   HOH T 489      39.524  37.828  67.845  1.00  0.49           O  
HETATM  491  O   HOH T 490      53.074  57.886  79.395  1.00  0.49           O  
HETATM  492  O   HOH T 491      60.236  45.857  39.043  1.00  0.49           O  
HETATM  493  O   HOH T 492      59.246  52.782  81.050  1.00  0.49           O  
HETATM  494  O   HOH T 493      37.990  67.435  76.173  1.00  0.49           O  
HETATM  495  O   HOH T 494      60.182  56.605  80.346  1.00  0.49           O  
HETATM  496  O   HOH T 495      48.870  62.146  83.675  1.00  0.49           O  
HETATM  497  O   HOH T 496      60.581  70.358  55.583  1.00  0.49           O  
HETATM  498  O   HOH T 497      24.482  41.202  50.092  1.00  0.49           O  
HETATM  499  O   HOH T 498      40.320  57.417  40.056  1.00  0.49           O  
HETATM  500  O   HOH T 499      22.224  47.066  53.195  1.00  0.49           O  
HETATM  501  O   HOH T 500      38.261  32.135  45.555  1.00  0.49           O  
HETATM  502  O   HOH T 501      42.110  37.687  71.447  1.00  0.49           O  
HETATM  503  O   HOH T 502      65.108  28.405  77.471  1.00  0.49           O  
HETATM  504  O   HOH T 503      33.275  65.755  77.316  1.00  0.49           O  
HETATM  505  O   HOH T 504      35.576  15.500  55.390  1.00  0.49           O  
HETATM  506  O   HOH T 505      44.399  30.029  45.478  1.00  0.49           O  
HETATM  507  O   HOH T 506      51.279  59.472  80.831  1.00  0.49           O  
HETATM  508  O   HOH T 507      46.133  62.588  83.600  1.00  0.49           O  
HETATM  509  O   HOH T 508      46.648  55.035  64.097  1.00  0.49           O  
HETATM  510  O   HOH T 509      29.810  58.262  52.366  1.00  0.49           O  
HETATM  511  O   HOH T 510      48.195  13.993  85.464  1.00  0.50           O  
HETATM  512  O   HOH T 511      49.072  24.890  73.160  1.00  0.50           O  
HETATM  513  O   HOH T 512      68.045  15.376  74.656  1.00  0.50           O  
HETATM  514  O   HOH T 513      52.982  23.479  84.491  1.00  0.50           O  
HETATM  515  O   HOH T 514      45.519  64.959  62.957  1.00  0.50           O  
HETATM  516  O   HOH T 515      57.167  36.213  37.228  1.00  0.50           O  
HETATM  517  O   HOH T 516      47.157  60.331  85.050  1.00  0.50           O  
HETATM  518  O   HOH T 517      63.255  37.606  68.282  1.00  0.50           O  
HETATM  519  O   HOH T 518      52.159  69.094  66.124  1.00  0.50           O  
HETATM  520  O   HOH T 519      48.487   1.625  62.384  1.00  0.50           O  
HETATM  521  O   HOH T 520      19.228  42.347  54.209  1.00  0.50           O  
HETATM  522  O   HOH T 521      46.341   5.283  75.397  1.00  0.50           O  
HETATM  523  O   HOH T 522      54.314  67.794  75.382  1.00  0.50           O  
HETATM  524  O   HOH T 523      51.030  29.759  46.188  1.00  0.50           O  
HETATM  525  O   HOH T 524      50.983  -8.561  52.823  1.00  0.50           O  
HETATM  526  O   HOH T 525      47.047  24.001  90.732  1.00  0.50           O  
HETATM  527  O   HOH T 526      38.770  -4.135  48.770  1.00  0.50           O  
HETATM  528  O   HOH T 527      50.750  34.454  38.647  1.00  0.50           O  
HETATM  529  O   HOH T 528      53.178  31.882  81.301  1.00  0.50           O  
HETATM  530  O   HOH T 529      63.985  24.302  69.736  1.00  0.51           O  
HETATM  531  O   HOH T 530      59.531  68.632  51.921  1.00  0.51           O  
HETATM  532  O   HOH T 531      59.548  34.847  44.398  1.00  0.51           O  
HETATM  533  O   HOH T 532      66.258  60.722  65.768  1.00  0.51           O  
HETATM  534  O   HOH T 533      59.617  39.848  73.525  1.00  0.51           O  
HETATM  535  O   HOH T 534      46.826   2.203  66.174  1.00  0.51           O  
HETATM  536  O   HOH T 535      60.155  17.708  76.173  1.00  0.51           O  
HETATM  537  O   HOH T 536      45.216  64.657  76.850  1.00  0.51           O  
HETATM  538  O   HOH T 537      29.241  34.436  53.428  1.00  0.51           O  
HETATM  539  O   HOH T 538      52.584  -3.380  55.014  1.00  0.51           O  
HETATM  540  O   HOH T 539      53.247  40.539  72.763  1.00  0.51           O  
HETATM  541  O   HOH T 540      64.749   9.461  44.540  1.00  0.51           O  
HETATM  542  O   HOH T 541      54.272  33.662  51.058  1.00  0.51           O  
HETATM  543  O   HOH T 542      63.140   7.311  43.865  1.00  0.51           O  
HETATM  544  O   HOH T 543      25.936   3.939  62.352  1.00  0.51           O  
HETATM  545  O   HOH T 544      61.634  34.804  76.936  1.00  0.52           O  
HETATM  546  O   HOH T 545      65.690   5.499  66.437  1.00  0.52           O  
HETATM  547  O   HOH T 546      57.165  40.690  82.675  1.00  0.52           O  
HETATM  548  O   HOH T 547      31.372   0.189  63.479  1.00  0.52           O  
HETATM  549  O   HOH T 548      64.190  25.189  79.186  1.00  0.52           O  
HETATM  550  O   HOH T 549      40.356  54.640  39.639  1.00  0.52           O  
HETATM  551  O   HOH T 550      67.948  54.919  50.018  1.00  0.52           O  
HETATM  552  O   HOH T 551      62.599  45.010  77.199  1.00  0.52           O  
HETATM  553  O   HOH T 552      49.391  64.793  78.906  1.00  0.52           O  
HETATM  554  O   HOH T 553      59.954  34.775  39.848  1.00  0.52           O  
HETATM  555  O   HOH T 554      62.436  21.041  73.357  1.00  0.52           O  
HETATM  556  O   HOH T 555      29.185  37.894  57.341  1.00  0.52           O  
HETATM  557  O   HOH T 556      57.146   6.334  47.138  1.00  0.52           O  
HETATM  558  O   HOH T 557      35.148  28.603  64.802  1.00  0.52           O  
HETATM  559  O   HOH T 558      23.209  40.204  52.331  1.00  0.53           O  
HETATM  560  O   HOH T 559      64.841  21.087  64.814  1.00  0.53           O  
HETATM  561  O   HOH T 560      71.333  50.215  49.262  1.00  0.53           O  
HETATM  562  O   HOH T 561      52.708  38.208  82.485  1.00  0.53           O  
HETATM  563  O   HOH T 562      53.645  73.577  60.686  1.00  0.53           O  
HETATM  564  O   HOH T 563      61.068  18.583  73.611  1.00  0.53           O  
HETATM  565  O   HOH T 564      52.746  53.475  70.034  1.00  0.53           O  
HETATM  566  O   HOH T 565      28.800  34.979  48.327  1.00  0.53           O  
HETATM  567  O   HOH T 566      14.945   6.615  68.721  1.00  0.53           O  
HETATM  568  O   HOH T 567      23.800  52.996  57.559  1.00  0.53           O  
HETATM  569  O   HOH T 568      61.553  38.057  74.399  1.00  0.53           O  
HETATM  570  O   HOH T 569      40.651  68.042  76.206  1.00  0.53           O  
HETATM  571  O   HOH T 570      73.666  22.639  58.531  1.00  0.53           O  
HETATM  572  O   HOH T 571      59.084  34.125  47.005  1.00  0.53           O  
HETATM  573  O   HOH T 572      52.003  56.940  81.733  1.00  0.53           O  
HETATM  574  O   HOH T 573      30.556  27.048  57.934  1.00  0.54           O  
HETATM  575  O   HOH T 574      60.193  36.310  42.139  1.00  0.54           O  
HETATM  576  O   HOH T 575      35.549  66.326  76.109  1.00  0.54           O  
HETATM  577  O   HOH T 576      26.672  51.947  51.685  1.00  0.54           O  
HETATM  578  O   HOH T 577      42.953  36.562  39.630  1.00  0.54           O  
HETATM  579  O   HOH T 578      66.398  24.130  75.924  1.00  0.54           O  
HETATM  580  O   HOH T 579      34.644  12.376  41.042  1.00  0.54           O  
HETATM  581  O   HOH T 580      66.393  57.587  76.936  1.00  0.54           O  
HETATM  582  O   HOH T 581      69.552  35.648  64.814  1.00  0.54           O  
HETATM  583  O   HOH T 582      68.185  56.938  74.776  1.00  0.54           O  
HETATM  584  O   HOH T 583      57.672  63.501  69.575  1.00  0.54           O  
HETATM  585  O   HOH T 584      31.616   1.591  71.132  1.00  0.54           O  
HETATM  586  O   HOH T 585      33.154  14.526  37.990  1.00  0.54           O  
HETATM  587  O   HOH T 586      52.567  19.260  41.434  1.00  0.54           O  
HETATM  588  O   HOH T 587      65.502   8.157  46.919  1.00  0.54           O  
HETATM  589  O   HOH T 588      62.001  58.497  54.889  1.00  0.55           O  
HETATM  590  O   HOH T 589      62.427   4.953  45.348  1.00  0.55           O  
HETATM  591  O   HOH T 590      67.603  32.517  54.354  1.00  0.55           O  
HETATM  592  O   HOH T 591      32.438  38.101  42.922  1.00  0.55           O  
HETATM  593  O   HOH T 592      52.455   2.592  65.846  1.00  0.55           O  
HETATM  594  O   HOH T 593      63.741  18.915  43.094  1.00  0.55           O  
HETATM  595  O   HOH T 594      27.233  37.400  51.630  1.00  0.55           O  
HETATM  596  O   HOH T 595      54.527  14.474  81.175  1.00  0.55           O  
HETATM  597  O   HOH T 596      59.783  50.052  80.371  1.00  0.55           O  
HETATM  598  O   HOH T 597      21.678  41.242  50.191  1.00  0.55           O  
HETATM  599  O   HOH T 598      28.281  48.654  44.402  1.00  0.55           O  
HETATM  600  O   HOH T 599      47.729  13.886  60.623  1.00  0.55           O  
HETATM  601  O   HOH T 600      29.874  12.091  52.044  1.00  0.55           O  
HETATM  602  O   HOH T 601      46.288  64.179  85.920  1.00  0.55           O  
HETATM  603  O   HOH T 602      51.830  68.001  73.602  1.00  0.55           O  
HETATM  604  O   HOH T 603      59.178  -0.236  52.467  1.00  0.55           O  
HETATM  605  O   HOH T 604      51.667  67.900  76.282  1.00  0.55           O  
HETATM  606  O   HOH T 605      49.469  66.590  56.755  1.00  0.56           O  
HETATM  607  O   HOH T 606      40.556  -6.456  47.808  1.00  0.56           O  
HETATM  608  O   HOH T 607      25.273   8.160  57.921  1.00  0.56           O  
HETATM  609  O   HOH T 608      37.174   3.983  64.877  1.00  0.56           O  
HETATM  610  O   HOH T 609      68.947  53.491  80.209  1.00  0.56           O  
HETATM  611  O   HOH T 610      50.938  29.004  83.228  1.00  0.56           O  
HETATM  612  O   HOH T 611      51.873  26.195  47.543  1.00  0.56           O  
HETATM  613  O   HOH T 612      42.952  63.908  77.870  1.00  0.56           O  
HETATM  614  O   HOH T 613      47.791  42.162  36.455  1.00  0.56           O  
HETATM  615  O   HOH T 614      30.725  22.732  46.250  1.00  0.56           O  
HETATM  616  O   HOH T 615      65.513  27.562  80.135  1.00  0.56           O  
HETATM  617  O   HOH T 616      48.062  46.723  44.487  1.00  0.56           O  
HETATM  618  O   HOH T 617      62.650   7.180  61.560  1.00  0.56           O  
HETATM  619  O   HOH T 618      60.928  40.504  49.497  1.00  0.56           O  
HETATM  620  O   HOH T 619      38.846  29.097  48.551  1.00  0.56           O  
HETATM  621  O   HOH T 620      58.296  54.291  40.278  1.00  0.56           O  
HETATM  622  O   HOH T 621      42.952   9.735  39.783  1.00  0.56           O  
HETATM  623  O   HOH T 622      55.903  33.972  55.120  1.00  0.56           O  
HETATM  624  O   HOH T 623      65.675  38.138  67.182  1.00  0.57           O  
HETATM  625  O   HOH T 624      40.511  43.823  42.172  1.00  0.57           O  
HETATM  626  O   HOH T 625      69.102  17.929  73.923  1.00  0.57           O  
HETATM  627  O   HOH T 626      44.545  64.181  58.657  1.00  0.57           O  
HETATM  628  O   HOH T 627      51.865  53.614  35.492  1.00  0.57           O  
HETATM  629  O   HOH T 628      36.397  20.366  37.152  1.00  0.57           O  
HETATM  630  O   HOH T 629      32.169   8.177  53.341  1.00  0.57           O  
HETATM  631  O   HOH T 630      68.222  55.799  77.864  1.00  0.57           O  
HETATM  632  O   HOH T 631      38.809  26.750  46.071  1.00  0.57           O  
HETATM  633  O   HOH T 632      37.684  62.407  68.846  1.00  0.57           O  
HETATM  634  O   HOH T 633      23.069  42.921  48.454  1.00  0.57           O  
HETATM  635  O   HOH T 634      69.860  50.894  61.322  1.00  0.58           O  
HETATM  636  O   HOH T 635      37.950  50.190  45.465  1.00  0.59           O  
HETATM  637  O   HOH T 636      50.306  57.343  79.502  1.00  0.59           O  
HETATM  638  O   HOH T 637      48.734  39.802  35.348  1.00  0.60           O  
HETATM  639  O   HOH T 638      28.947   0.430  64.859  1.00  0.60           O  
HETATM  640  O   HOH T 639      30.679   8.791  50.197  1.00  0.60           O  
HETATM  641  O   HOH T 640      37.447  31.555  65.812  1.00  0.60           O  
HETATM  642  O   HOH T 641      49.220  33.047  80.449  1.00  0.60           O  
TER     643      HOH T 641 
