# Supplementary material for: Accurate Prediction of Hydration Sites of Proteins Using Energy Model With Atom Embedding
Source: Front Mol Biosci. 2021 Sep 20;8:756075. doi: 10.3389/fmolb.2021.756075 (PMC8488165; doi:10.3389/fmolb.2021.756075)
Supplement: Supplementary file 1 [file DataSheet1.ZIP › Data Sheet 1/Our_result_pdb/our_dataset_output/1XW3_watersite.pdb]

HEADER                                                        XXXX


JRNL        PMID   -1
HETATM    1  O   HOH T   0      77.578 -26.439 -26.462  1.00  0.16           O  
HETATM    2  O   HOH T   1      75.546 -37.741 -13.593  1.00  0.20           O  
HETATM    3  O   HOH T   2      73.771 -46.936 -20.323  1.00  0.22           O  
HETATM    4  O   HOH T   3      80.043 -43.700 -22.604  1.00  0.22           O  
HETATM    5  O   HOH T   4      88.363 -44.105 -21.971  1.00  0.24           O  
HETATM    6  O   HOH T   5      69.875 -38.626 -33.160  1.00  0.24           O  
HETATM    7  O   HOH T   6      67.830 -27.029 -30.589  1.00  0.26           O  
HETATM    8  O   HOH T   7      90.966 -41.175 -16.104  1.00  0.26           O  
HETATM    9  O   HOH T   8      90.149 -33.906 -16.244  1.00  0.26           O  
HETATM   10  O   HOH T   9      70.763 -31.544 -30.680  1.00  0.26           O  
HETATM   11  O   HOH T  10      72.161 -51.308 -15.489  1.00  0.27           O  
HETATM   12  O   HOH T  11      92.255 -44.411 -10.674  1.00  0.27           O  
HETATM   13  O   HOH T  12      67.590 -42.700 -11.981  1.00  0.27           O  
HETATM   14  O   HOH T  13      76.078 -52.194 -25.287  1.00  0.27           O  
HETATM   15  O   HOH T  14      83.601 -63.595 -26.704  1.00  0.28           O  
HETATM   16  O   HOH T  15      91.079 -44.369 -22.034  1.00  0.28           O  
HETATM   17  O   HOH T  16      83.934 -20.596 -45.487  1.00  0.28           O  
HETATM   18  O   HOH T  17      66.661 -33.724 -11.261  1.00  0.28           O  
HETATM   19  O   HOH T  18      83.369 -54.598 -15.551  1.00  0.28           O  
HETATM   20  O   HOH T  19      59.937 -44.789 -24.964  1.00  0.29           O  
HETATM   21  O   HOH T  20      73.611 -37.578 -11.535  1.00  0.29           O  
HETATM   22  O   HOH T  21      86.296 -48.948 -10.360  1.00  0.29           O  
HETATM   23  O   HOH T  22      95.281 -58.467 -24.770  1.00  0.30           O  
HETATM   24  O   HOH T  23      72.964 -23.632 -15.682  1.00  0.30           O  
HETATM   25  O   HOH T  24      69.211 -23.093 -28.958  1.00  0.30           O  
HETATM   26  O   HOH T  25      80.755 -47.911 -27.823  1.00  0.31           O  
HETATM   27  O   HOH T  26      78.664 -28.752 -41.322  1.00  0.31           O  
HETATM   28  O   HOH T  27      71.136 -29.544 -21.280  1.00  0.32           O  
HETATM   29  O   HOH T  28      76.364 -43.675 -11.201  1.00  0.32           O  
HETATM   30  O   HOH T  29      75.943 -34.717 -32.673  1.00  0.32           O  
HETATM   31  O   HOH T  30      59.736 -40.748 -27.012  1.00  0.32           O  
HETATM   32  O   HOH T  31      84.361 -43.022  -9.280  1.00  0.32           O  
HETATM   33  O   HOH T  32      79.879 -51.596 -19.430  1.00  0.32           O  
HETATM   34  O   HOH T  33      59.871 -37.852 -21.072  1.00  0.33           O  
HETATM   35  O   HOH T  34      94.142 -45.304 -17.959  1.00  0.33           O  
HETATM   36  O   HOH T  35      65.710 -30.241 -25.173  1.00  0.33           O  
HETATM   37  O   HOH T  36      79.763 -50.054 -26.282  1.00  0.33           O  
HETATM   38  O   HOH T  37      92.116 -44.405 -14.649  1.00  0.33           O  
HETATM   39  O   HOH T  38      80.445 -43.751 -25.360  1.00  0.33           O  
HETATM   40  O   HOH T  39      65.948 -47.670 -29.016  1.00  0.33           O  
HETATM   41  O   HOH T  40      72.005 -40.085 -34.200  1.00  0.34           O  
HETATM   42  O   HOH T  41      78.969 -18.900 -34.201  1.00  0.34           O  
HETATM   43  O   HOH T  42      75.921 -43.601 -27.616  1.00  0.34           O  
HETATM   44  O   HOH T  43      89.296 -34.555 -13.736  1.00  0.34           O  
HETATM   45  O   HOH T  44      60.594 -36.711 -14.377  1.00  0.34           O  
HETATM   46  O   HOH T  45      75.746 -37.310  -9.725  1.00  0.34           O  
HETATM   47  O   HOH T  46      82.621 -43.824 -26.971  1.00  0.35           O  
HETATM   48  O   HOH T  47      71.909 -33.957 -31.652  1.00  0.36           O  
HETATM   49  O   HOH T  48      95.574 -55.687 -25.417  1.00  0.36           O  
HETATM   50  O   HOH T  49      85.851 -26.032 -36.405  1.00  0.36           O  
HETATM   51  O   HOH T  50      77.026 -41.462 -23.532  1.00  0.36           O  
HETATM   52  O   HOH T  51      93.271 -42.862 -22.706  1.00  0.37           O  
HETATM   53  O   HOH T  52      57.467 -39.265 -20.802  1.00  0.37           O  
HETATM   54  O   HOH T  53      94.550 -50.405 -11.926  1.00  0.37           O  
HETATM   55  O   HOH T  54      96.432 -46.875 -17.403  1.00  0.37           O  
HETATM   56  O   HOH T  55      98.890 -48.026 -17.543  1.00  0.37           O  
HETATM   57  O   HOH T  56      89.250 -31.667 -25.065  1.00  0.37           O  
HETATM   58  O   HOH T  57      98.069 -49.747 -27.770  1.00  0.37           O  
HETATM   59  O   HOH T  58      93.538 -42.695 -27.826  1.00  0.37           O  
HETATM   60  O   HOH T  59      84.896 -42.790 -27.932  1.00  0.38           O  
HETATM   61  O   HOH T  60      75.124 -30.035 -10.446  1.00  0.38           O  
HETATM   62  O   HOH T  61      82.768 -25.524 -34.188  1.00  0.38           O  
HETATM   63  O   HOH T  62      83.592 -48.926 -10.138  1.00  0.39           O  
HETATM   64  O   HOH T  63      61.262 -35.598 -20.400  1.00  0.39           O  
HETATM   65  O   HOH T  64      75.657 -35.679 -11.876  1.00  0.39           O  
HETATM   66  O   HOH T  65      93.352 -60.220 -23.683  1.00  0.39           O  
HETATM   67  O   HOH T  66      70.683 -53.000 -17.074  1.00  0.39           O  
HETATM   68  O   HOH T  67      66.216 -30.444  -5.306  1.00  0.39           O  
HETATM   69  O   HOH T  68      77.420 -19.803 -44.760  1.00  0.39           O  
HETATM   70  O   HOH T  69      93.968 -47.870 -30.113  1.00  0.39           O  
HETATM   71  O   HOH T  70      74.303 -23.526 -43.289  1.00  0.40           O  
HETATM   72  O   HOH T  71      80.295 -52.624 -16.947  1.00  0.40           O  
HETATM   73  O   HOH T  72      95.282 -54.379 -11.775  1.00  0.40           O  
HETATM   74  O   HOH T  73      81.832 -30.002 -23.112  1.00  0.40           O  
HETATM   75  O   HOH T  74      76.046 -33.182 -10.682  1.00  0.41           O  
HETATM   76  O   HOH T  75      74.783 -51.073 -15.758  1.00  0.41           O  
HETATM   77  O   HOH T  76     100.305 -44.724 -23.160  1.00  0.41           O  
HETATM   78  O   HOH T  77      87.790 -46.307  -7.105  1.00  0.41           O  
HETATM   79  O   HOH T  78      85.047 -30.412 -39.416  1.00  0.41           O  
HETATM   80  O   HOH T  79      81.901 -56.635 -16.818  1.00  0.41           O  
HETATM   81  O   HOH T  80      72.307 -46.963 -26.957  1.00  0.41           O  
HETATM   82  O   HOH T  81      59.288 -38.905 -18.709  1.00  0.42           O  
HETATM   83  O   HOH T  82      89.275 -48.601  -6.481  1.00  0.42           O  
HETATM   84  O   HOH T  83      81.705 -30.947 -30.720  1.00  0.42           O  
HETATM   85  O   HOH T  84      75.305 -50.967 -18.461  1.00  0.42           O  
HETATM   86  O   HOH T  85      68.111 -29.340 -22.089  1.00  0.42           O  
HETATM   87  O   HOH T  86      92.156 -41.445  -6.081  1.00  0.42           O  
HETATM   88  O   HOH T  87      77.983 -42.711 -25.871  1.00  0.43           O  
HETATM   89  O   HOH T  88      63.054 -33.317 -24.208  1.00  0.43           O  
HETATM   90  O   HOH T  89      90.869 -61.640 -24.237  1.00  0.43           O  
HETATM   91  O   HOH T  90      67.657 -48.743 -25.653  1.00  0.43           O  
HETATM   92  O   HOH T  91      78.558 -34.296 -31.827  1.00  0.43           O  
HETATM   93  O   HOH T  92      64.825 -33.048  -9.237  1.00  0.43           O  
HETATM   94  O   HOH T  93      92.653 -62.800 -22.533  1.00  0.43           O  
HETATM   95  O   HOH T  94      56.649 -41.408 -19.164  1.00  0.43           O  
HETATM   96  O   HOH T  95      85.084 -53.102  -9.783  1.00  0.44           O  
HETATM   97  O   HOH T  96      80.735 -33.452 -30.394  1.00  0.44           O  
HETATM   98  O   HOH T  97      80.609 -52.070 -28.028  1.00  0.44           O  
HETATM   99  O   HOH T  98      91.350 -40.332  -8.564  1.00  0.44           O  
HETATM  100  O   HOH T  99      73.797 -46.299 -29.223  1.00  0.44           O  
HETATM  101  O   HOH T 100      68.820 -43.172 -14.434  1.00  0.44           O  
HETATM  102  O   HOH T 101      92.991 -48.913 -27.787  1.00  0.45           O  
HETATM  103  O   HOH T 102      83.510 -19.460 -47.993  1.00  0.45           O  
HETATM  104  O   HOH T 103      69.837 -50.350 -26.241  1.00  0.45           O  
HETATM  105  O   HOH T 104      64.818 -46.351 -24.015  1.00  0.45           O  
HETATM  106  O   HOH T 105      74.251 -24.987 -32.053  1.00  0.45           O  
HETATM  107  O   HOH T 106      89.264 -44.694  -5.511  1.00  0.45           O  
HETATM  108  O   HOH T 107      88.207 -32.390 -15.052  1.00  0.45           O  
HETATM  109  O   HOH T 108      74.806 -25.089 -14.243  1.00  0.45           O  
HETATM  110  O   HOH T 109      74.232 -48.090 -22.726  1.00  0.45           O  
HETATM  111  O   HOH T 110      92.371 -53.480 -26.761  1.00  0.45           O  
HETATM  112  O   HOH T 111      83.375 -29.006 -29.759  1.00  0.46           O  
HETATM  113  O   HOH T 112      75.442 -50.020 -21.158  1.00  0.46           O  
HETATM  114  O   HOH T 113      93.545 -41.784 -25.272  1.00  0.46           O  
HETATM  115  O   HOH T 114      74.055 -23.608 -18.131  1.00  0.46           O  
HETATM  116  O   HOH T 115      95.571 -40.203 -25.950  1.00  0.46           O  
HETATM  117  O   HOH T 116      93.424 -49.400  -9.541  1.00  0.46           O  
HETATM  118  O   HOH T 117      92.977 -42.923 -16.907  1.00  0.46           O  
HETATM  119  O   HOH T 118      78.024 -51.134 -17.599  1.00  0.46           O  
HETATM  120  O   HOH T 119      75.994 -49.496 -25.972  1.00  0.46           O  
HETATM  121  O   HOH T 120      64.980 -30.670  -7.735  1.00  0.46           O  
HETATM  122  O   HOH T 121      97.019 -52.937 -13.331  1.00  0.46           O  
HETATM  123  O   HOH T 122      92.016 -48.746  -7.124  1.00  0.47           O  
HETATM  124  O   HOH T 123      76.367 -30.026 -41.682  1.00  0.47           O  
HETATM  125  O   HOH T 124      76.457 -46.333 -28.341  1.00  0.47           O  
HETATM  126  O   HOH T 125      80.580 -54.781 -15.224  1.00  0.47           O  
HETATM  127  O   HOH T 126      73.755 -41.973 -33.245  1.00  0.48           O  
HETATM  128  O   HOH T 127      91.923 -44.231  -6.261  1.00  0.48           O  
HETATM  129  O   HOH T 128      94.755 -45.298 -30.469  1.00  0.48           O  
HETATM  130  O   HOH T 129      99.785 -50.057 -15.864  1.00  0.48           O  
HETATM  131  O   HOH T 130      93.984 -54.122  -6.593  1.00  0.48           O  
HETATM  132  O   HOH T 131      63.476 -38.213 -12.154  1.00  0.49           O  
HETATM  133  O   HOH T 132      68.557 -25.682 -28.292  1.00  0.49           O  
HETATM  134  O   HOH T 133      86.674 -40.558 -28.254  1.00  0.49           O  
HETATM  135  O   HOH T 134      54.987 -40.443 -21.197  1.00  0.49           O  
HETATM  136  O   HOH T 135      81.483 -27.919 -34.716  1.00  0.49           O  
HETATM  137  O   HOH T 136      99.488 -55.155 -20.335  1.00  0.49           O  
HETATM  138  O   HOH T 137      89.850 -30.980 -22.517  1.00  0.49           O  
HETATM  139  O   HOH T 138      89.493 -58.906 -17.102  1.00  0.49           O  
HETATM  140  O   HOH T 139      65.651 -48.969 -23.747  1.00  0.49           O  
HETATM  141  O   HOH T 140      59.026 -41.343 -17.542  1.00  0.49           O  
HETATM  142  O   HOH T 141      87.096 -29.900 -37.649  1.00  0.50           O  
HETATM  143  O   HOH T 142      59.174 -38.184 -27.867  1.00  0.50           O  
HETATM  144  O   HOH T 143      90.572 -46.413  -7.331  1.00  0.50           O  
HETATM  145  O   HOH T 144      62.027 -32.448  -9.230  1.00  0.50           O  
HETATM  146  O   HOH T 145      77.150 -32.298 -33.086  1.00  0.50           O  
HETATM  147  O   HOH T 146      68.424 -48.895 -29.695  1.00  0.50           O  
HETATM  148  O   HOH T 147      69.654 -47.791 -27.396  1.00  0.50           O  
HETATM  149  O   HOH T 148      66.884 -47.700 -17.823  1.00  0.50           O  
HETATM  150  O   HOH T 149      72.413 -28.137 -23.214  1.00  0.50           O  
HETATM  151  O   HOH T 150      69.473 -52.413 -24.422  1.00  0.50           O  
HETATM  152  O   HOH T 151      61.943 -35.990 -12.099  1.00  0.50           O  
HETATM  153  O   HOH T 152      89.853 -10.207 -50.877  1.00  0.51           O  
HETATM  154  O   HOH T 153      60.671 -38.421 -12.134  1.00  0.51           O  
HETATM  155  O   HOH T 154      71.901 -39.321 -31.486  1.00  0.51           O  
HETATM  156  O   HOH T 155      68.370 -53.233 -15.563  1.00  0.51           O  
HETATM  157  O   HOH T 156      81.847 -46.842  -9.570  1.00  0.52           O  
HETATM  158  O   HOH T 157      77.975 -48.739 -27.904  1.00  0.52           O  
HETATM  159  O   HOH T 158      74.544 -43.712 -30.018  1.00  0.52           O  
HETATM  160  O   HOH T 159      92.960 -61.637 -26.182  1.00  0.52           O  
HETATM  161  O   HOH T 160      75.374 -27.500 -11.416  1.00  0.52           O  
HETATM  162  O   HOH T 161      83.550 -42.145  -6.629  1.00  0.53           O  
HETATM  163  O   HOH T 162      58.343 -42.982 -26.496  1.00  0.53           O  
HETATM  164  O   HOH T 163      75.625 -21.771 -44.871  1.00  0.53           O  
HETATM  165  O   HOH T 164      86.532 -34.496 -14.442  1.00  0.53           O  
HETATM  166  O   HOH T 165      85.820 -12.888 -48.581  1.00  0.53           O  
HETATM  167  O   HOH T 166      67.316 -50.110 -19.379  1.00  0.53           O  
HETATM  168  O   HOH T 167      87.753 -30.683 -27.083  1.00  0.54           O  
HETATM  169  O   HOH T 168      97.446 -40.989 -27.849  1.00  0.54           O  
HETATM  170  O   HOH T 169      95.456 -49.676 -28.616  1.00  0.54           O  
HETATM  171  O   HOH T 170      92.724 -42.733  -8.529  1.00  0.54           O  
HETATM  172  O   HOH T 171      79.337 -42.126 -29.308  1.00  0.54           O  
HETATM  173  O   HOH T 172      77.860 -29.962 -10.533  1.00  0.54           O  
HETATM  174  O   HOH T 173      74.583 -28.059 -40.901  1.00  0.54           O  
HETATM  175  O   HOH T 174      92.027 -34.744 -14.522  1.00  0.54           O  
HETATM  176  O   HOH T 175      78.459 -44.406 -28.306  1.00  0.54           O  
HETATM  177  O   HOH T 176      68.910 -55.014 -17.714  1.00  0.54           O  
HETATM  178  O   HOH T 177      94.741 -57.506 -27.319  1.00  0.55           O  
HETATM  179  O   HOH T 178      73.769 -39.371 -29.515  1.00  0.55           O  
HETATM  180  O   HOH T 179      62.302 -33.275 -21.648  1.00  0.55           O  
HETATM  181  O   HOH T 180      85.054 -21.828 -48.601  1.00  0.55           O  
HETATM  182  O   HOH T 181      64.009 -23.444 -15.482  1.00  0.56           O  
HETATM  183  O   HOH T 182      94.710 -52.534 -28.290  1.00  0.56           O  
HETATM  184  O   HOH T 183      98.006 -60.642 -15.369  1.00  0.56           O  
HETATM  185  O   HOH T 184      85.857 -52.624  -7.222  1.00  0.56           O  
HETATM  186  O   HOH T 185      97.328 -50.408 -14.495  1.00  0.57           O  
HETATM  187  O   HOH T 186      78.482 -58.177 -29.504  1.00  0.57           O  
HETATM  188  O   HOH T 187      61.603 -40.551 -16.250  1.00  0.57           O  
HETATM  189  O   HOH T 188      85.148 -46.671  -9.606  1.00  0.57           O  
HETATM  190  O   HOH T 189      93.815 -51.737  -7.985  1.00  0.57           O  
HETATM  191  O   HOH T 190      81.861 -59.330 -19.380  1.00  0.57           O  
HETATM  192  O   HOH T 191      95.838 -42.779 -29.275  1.00  0.58           O  
HETATM  193  O   HOH T 192      56.435 -39.529 -23.414  1.00  0.59           O  
HETATM  194  O   HOH T 193      93.896 -63.961 -24.815  1.00  0.59           O  
TER     195      HOH T 193 
