# Supplementary material for: Accurate Prediction of Hydration Sites of Proteins Using Energy Model With Atom Embedding
Source: Front Mol Biosci. 2021 Sep 20;8:756075. doi: 10.3389/fmolb.2021.756075 (PMC8488165; doi:10.3389/fmolb.2021.756075)
Supplement: Supplementary file 1 [file DataSheet1.ZIP › Data Sheet 1/Our_result_pdb/our_dataset_output/2A2K_watersite.pdb]

HEADER                                                        XXXX


JRNL        PMID   -1
HETATM    1  O   HOH T   0      28.786  28.293  22.076  1.00  0.14           O  
HETATM    2  O   HOH T   1      23.144  13.699  13.382  1.00  0.15           O  
HETATM    3  O   HOH T   2       8.210  18.253  39.448  1.00  0.16           O  
HETATM    4  O   HOH T   3      26.860  15.461  14.359  1.00  0.18           O  
HETATM    5  O   HOH T   4      15.303   5.246  34.809  1.00  0.18           O  
HETATM    6  O   HOH T   5      16.315  24.566  34.457  1.00  0.18           O  
HETATM    7  O   HOH T   6      28.432   2.185  10.981  1.00  0.20           O  
HETATM    8  O   HOH T   7      33.659  16.847  44.982  1.00  0.21           O  
HETATM    9  O   HOH T   8      27.862  12.819  29.784  1.00  0.21           O  
HETATM   10  O   HOH T   9      26.110  14.770  21.821  1.00  0.21           O  
HETATM   11  O   HOH T  10      10.259  14.345  20.588  1.00  0.21           O  
HETATM   12  O   HOH T  11      10.702   1.058  40.707  1.00  0.22           O  
HETATM   13  O   HOH T  12      18.287  10.191  37.216  1.00  0.22           O  
HETATM   14  O   HOH T  13       5.198  17.686  26.169  1.00  0.23           O  
HETATM   15  O   HOH T  14      12.296  12.885  29.704  1.00  0.23           O  
HETATM   16  O   HOH T  15      18.309  25.997  17.619  1.00  0.23           O  
HETATM   17  O   HOH T  16      20.080  28.252  23.851  1.00  0.24           O  
HETATM   18  O   HOH T  17      14.386  23.808  29.630  1.00  0.25           O  
HETATM   19  O   HOH T  18      26.110   1.409  21.217  1.00  0.25           O  
HETATM   20  O   HOH T  19      11.851   1.912  24.436  1.00  0.25           O  
HETATM   21  O   HOH T  20      19.582   4.761  19.673  1.00  0.26           O  
HETATM   22  O   HOH T  21      16.732  -1.564  17.977  1.00  0.26           O  
HETATM   23  O   HOH T  22      12.345  10.777  35.098  1.00  0.26           O  
HETATM   24  O   HOH T  23      16.992   4.361  20.916  1.00  0.26           O  
HETATM   25  O   HOH T  24      36.802  29.097  23.301  1.00  0.26           O  
HETATM   26  O   HOH T  25       7.942  11.132  37.248  1.00  0.27           O  
HETATM   27  O   HOH T  26      21.559   4.123   3.946  1.00  0.27           O  
HETATM   28  O   HOH T  27       2.024  17.519  35.929  1.00  0.27           O  
HETATM   29  O   HOH T  28      18.909  11.412  41.277  1.00  0.28           O  
HETATM   30  O   HOH T  29      21.174  -2.509  37.835  1.00  0.28           O  
HETATM   31  O   HOH T  30      12.684  17.190  20.152  1.00  0.28           O  
HETATM   32  O   HOH T  31      28.474  -0.096  27.413  1.00  0.28           O  
HETATM   33  O   HOH T  32      17.830  11.315  12.670  1.00  0.29           O  
HETATM   34  O   HOH T  33      33.119  15.246  24.272  1.00  0.29           O  
HETATM   35  O   HOH T  34      22.193   5.770  39.787  1.00  0.29           O  
HETATM   36  O   HOH T  35       9.074  10.190  48.893  1.00  0.29           O  
HETATM   37  O   HOH T  36      22.977   8.531   5.179  1.00  0.29           O  
HETATM   38  O   HOH T  37      34.132  23.676  20.794  1.00  0.30           O  
HETATM   39  O   HOH T  38      28.145   2.567  22.638  1.00  0.30           O  
HETATM   40  O   HOH T  39      27.158   7.049   1.048  1.00  0.30           O  
HETATM   41  O   HOH T  40      13.717  23.501  40.591  1.00  0.30           O  
HETATM   42  O   HOH T  41      15.114  -1.310  44.644  1.00  0.30           O  
HETATM   43  O   HOH T  42      28.446   4.401  41.298  1.00  0.30           O  
HETATM   44  O   HOH T  43      19.456  -3.855  40.949  1.00  0.31           O  
HETATM   45  O   HOH T  44      27.725   0.990  40.935  1.00  0.31           O  
HETATM   46  O   HOH T  45      31.230   8.135  23.535  1.00  0.32           O  
HETATM   47  O   HOH T  46      17.537  27.397  24.615  1.00  0.32           O  
HETATM   48  O   HOH T  47      32.305  16.214  42.695  1.00  0.32           O  
HETATM   49  O   HOH T  48      18.704  21.062  21.512  1.00  0.32           O  
HETATM   50  O   HOH T  49      30.846   6.391   3.858  1.00  0.32           O  
HETATM   51  O   HOH T  50      15.343   5.498  44.149  1.00  0.32           O  
HETATM   52  O   HOH T  51      27.798  -7.070   6.415  1.00  0.32           O  
HETATM   53  O   HOH T  52       9.459  20.666  39.027  1.00  0.32           O  
HETATM   54  O   HOH T  53      30.186   4.407  11.265  1.00  0.32           O  
HETATM   55  O   HOH T  54      11.709  16.575  17.599  1.00  0.33           O  
HETATM   56  O   HOH T  55      21.109  22.756  12.681  1.00  0.33           O  
HETATM   57  O   HOH T  56      12.979  -0.048   9.958  1.00  0.33           O  
HETATM   58  O   HOH T  57       9.395  -5.570  44.508  1.00  0.33           O  
HETATM   59  O   HOH T  58       8.678  -4.097  42.276  1.00  0.33           O  
HETATM   60  O   HOH T  59      14.548  -7.493  19.642  1.00  0.34           O  
HETATM   61  O   HOH T  60      22.348  15.457   5.054  1.00  0.34           O  
HETATM   62  O   HOH T  61       4.015  17.456  34.005  1.00  0.34           O  
HETATM   63  O   HOH T  62       3.893  19.598  42.368  1.00  0.34           O  
HETATM   64  O   HOH T  63      35.109  21.754  18.992  1.00  0.35           O  
HETATM   65  O   HOH T  64      20.805  -3.901  21.790  1.00  0.35           O  
HETATM   66  O   HOH T  65      15.727  10.424  43.995  1.00  0.35           O  
HETATM   67  O   HOH T  66      24.256  15.100   2.955  1.00  0.35           O  
HETATM   68  O   HOH T  67      28.446   0.213  12.993  1.00  0.35           O  
HETATM   69  O   HOH T  68      17.032  -0.484  14.299  1.00  0.35           O  
HETATM   70  O   HOH T  69      23.477  30.716  25.982  1.00  0.35           O  
HETATM   71  O   HOH T  70       3.120   6.370  38.718  1.00  0.35           O  
HETATM   72  O   HOH T  71      10.541   0.816  26.674  1.00  0.35           O  
HETATM   73  O   HOH T  72      30.533  12.107  30.438  1.00  0.35           O  
HETATM   74  O   HOH T  73       2.918  12.094  23.182  1.00  0.36           O  
HETATM   75  O   HOH T  74      10.954  26.211  30.645  1.00  0.36           O  
HETATM   76  O   HOH T  75      19.167  13.056   9.036  1.00  0.36           O  
HETATM   77  O   HOH T  76      20.795   6.551  42.072  1.00  0.36           O  
HETATM   78  O   HOH T  77      29.589   2.557  33.373  1.00  0.37           O  
HETATM   79  O   HOH T  78       4.601  15.143  31.186  1.00  0.37           O  
HETATM   80  O   HOH T  79      25.031  21.948  36.869  1.00  0.37           O  
HETATM   81  O   HOH T  80      32.326   8.504   3.137  1.00  0.37           O  
HETATM   82  O   HOH T  81       7.207  12.387  34.850  1.00  0.37           O  
HETATM   83  O   HOH T  82      21.061   6.755   4.150  1.00  0.38           O  
HETATM   84  O   HOH T  83      14.489  20.294  14.700  1.00  0.38           O  
HETATM   85  O   HOH T  84      32.639  12.698  25.201  1.00  0.38           O  
HETATM   86  O   HOH T  85      34.217  12.228  39.552  1.00  0.38           O  
HETATM   87  O   HOH T  86      26.780  -1.028   4.840  1.00  0.38           O  
HETATM   88  O   HOH T  87       6.478  19.496  41.293  1.00  0.38           O  
HETATM   89  O   HOH T  88      27.788   0.399  34.417  1.00  0.38           O  
HETATM   90  O   HOH T  89      29.649   9.748  31.627  1.00  0.38           O  
HETATM   91  O   HOH T  90      13.542  -2.615  23.548  1.00  0.38           O  
HETATM   92  O   HOH T  91      16.988  12.658  42.810  1.00  0.38           O  
HETATM   93  O   HOH T  92      30.984   4.167   2.128  1.00  0.38           O  
HETATM   94  O   HOH T  93       7.106   9.007  31.217  1.00  0.39           O  
HETATM   95  O   HOH T  94       4.367  19.777  27.823  1.00  0.39           O  
HETATM   96  O   HOH T  95      29.683  -1.023  29.744  1.00  0.39           O  
HETATM   97  O   HOH T  96      20.330  10.989  43.665  1.00  0.39           O  
HETATM   98  O   HOH T  97      21.690  14.115   2.753  1.00  0.39           O  
HETATM   99  O   HOH T  98      11.457   7.851  31.444  1.00  0.39           O  
HETATM  100  O   HOH T  99      10.293  -0.622  10.618  1.00  0.39           O  
HETATM  101  O   HOH T 100      13.586  18.362  16.555  1.00  0.39           O  
HETATM  102  O   HOH T 101      12.926  -7.885   9.675  1.00  0.40           O  
HETATM  103  O   HOH T 102      18.021  -2.366  42.674  1.00  0.40           O  
HETATM  104  O   HOH T 103      26.010  -3.536   5.680  1.00  0.40           O  
HETATM  105  O   HOH T 104      29.821   4.126  21.265  1.00  0.40           O  
HETATM  106  O   HOH T 105       1.434   3.371  41.273  1.00  0.40           O  
HETATM  107  O   HOH T 106      16.616  26.991  35.732  1.00  0.40           O  
HETATM  108  O   HOH T 107      22.861   4.700  42.246  1.00  0.40           O  
HETATM  109  O   HOH T 108      18.981   1.015  20.170  1.00  0.40           O  
HETATM  110  O   HOH T 109       7.319  25.043  25.853  1.00  0.40           O  
HETATM  111  O   HOH T 110       5.480   7.292  37.635  1.00  0.41           O  
HETATM  112  O   HOH T 111      30.492  -1.975   6.783  1.00  0.41           O  
HETATM  113  O   HOH T 112      34.451  10.225  41.369  1.00  0.41           O  
HETATM  114  O   HOH T 113      29.573   2.632  36.262  1.00  0.41           O  
HETATM  115  O   HOH T 114      28.971  12.874  35.063  1.00  0.41           O  
HETATM  116  O   HOH T 115      16.368   1.535  20.335  1.00  0.42           O  
HETATM  117  O   HOH T 116       8.503  12.315  32.444  1.00  0.42           O  
HETATM  118  O   HOH T 117      14.532  -0.032  17.104  1.00  0.42           O  
HETATM  119  O   HOH T 118      18.639  12.826  44.949  1.00  0.42           O  
HETATM  120  O   HOH T 119      17.972  26.502  14.927  1.00  0.42           O  
HETATM  121  O   HOH T 120       6.169  24.805  28.442  1.00  0.42           O  
HETATM  122  O   HOH T 121      32.303   6.259  11.399  1.00  0.42           O  
HETATM  123  O   HOH T 122      23.532  -4.953  28.366  1.00  0.43           O  
HETATM  124  O   HOH T 123      10.190  -1.566  40.133  1.00  0.43           O  
HETATM  125  O   HOH T 124      32.563   8.949  10.944  1.00  0.43           O  
HETATM  126  O   HOH T 125      12.873  -0.005  22.716  1.00  0.43           O  
HETATM  127  O   HOH T 126      26.024  25.911  41.318  1.00  0.43           O  
HETATM  128  O   HOH T 127      16.120   2.453  22.810  1.00  0.43           O  
HETATM  129  O   HOH T 128       3.054   3.573  39.011  1.00  0.43           O  
HETATM  130  O   HOH T 129      16.104  24.470  39.751  1.00  0.43           O  
HETATM  131  O   HOH T 130      21.049   9.244   3.235  1.00  0.44           O  
HETATM  132  O   HOH T 131      11.731  19.220  18.353  1.00  0.44           O  
HETATM  133  O   HOH T 132       6.179  -5.000  41.521  1.00  0.44           O  
HETATM  134  O   HOH T 133      10.702  27.880  28.459  1.00  0.44           O  
HETATM  135  O   HOH T 134      15.525  24.780  37.097  1.00  0.44           O  
HETATM  136  O   HOH T 135      19.403  28.263  16.573  1.00  0.44           O  
HETATM  137  O   HOH T 136      10.401  24.519  36.679  1.00  0.44           O  
HETATM  138  O   HOH T 137      12.888  24.427  38.049  1.00  0.44           O  
HETATM  139  O   HOH T 138      19.482   2.481  17.906  1.00  0.45           O  
HETATM  140  O   HOH T 139       3.062  10.535  25.566  1.00  0.45           O  
HETATM  141  O   HOH T 140      32.822   7.392   5.598  1.00  0.45           O  
HETATM  142  O   HOH T 141      26.862  26.619  15.161  1.00  0.45           O  
HETATM  143  O   HOH T 142      28.237   2.442  19.777  1.00  0.45           O  
HETATM  144  O   HOH T 143      22.879  29.698  14.649  1.00  0.45           O  
HETATM  145  O   HOH T 144      15.903  27.642  29.400  1.00  0.45           O  
HETATM  146  O   HOH T 145      19.120   4.782  43.464  1.00  0.45           O  
HETATM  147  O   HOH T 146      20.870  -5.058  38.830  1.00  0.46           O  
HETATM  148  O   HOH T 147       9.807   9.901  35.770  1.00  0.46           O  
HETATM  149  O   HOH T 148      29.484   2.584  39.206  1.00  0.46           O  
HETATM  150  O   HOH T 149      12.242  -0.852  18.453  1.00  0.46           O  
HETATM  151  O   HOH T 150      36.287  27.214  19.925  1.00  0.46           O  
HETATM  152  O   HOH T 151      28.731   5.477   2.844  1.00  0.46           O  
HETATM  153  O   HOH T 152      32.231  10.034  25.236  1.00  0.46           O  
HETATM  154  O   HOH T 153      22.748  29.435  28.167  1.00  0.46           O  
HETATM  155  O   HOH T 154      29.726  16.293  42.098  1.00  0.46           O  
HETATM  156  O   HOH T 155      29.512  -0.969  32.577  1.00  0.46           O  
HETATM  157  O   HOH T 156      28.554  26.522  40.379  1.00  0.46           O  
HETATM  158  O   HOH T 157      12.082  10.599  31.262  1.00  0.47           O  
HETATM  159  O   HOH T 158       4.385   9.699  23.203  1.00  0.47           O  
HETATM  160  O   HOH T 159      19.053  15.855   8.793  1.00  0.47           O  
HETATM  161  O   HOH T 160      20.159  16.487   6.288  1.00  0.47           O  
HETATM  162  O   HOH T 161      30.668   5.436  23.460  1.00  0.47           O  
HETATM  163  O   HOH T 162      30.176   2.386  13.109  1.00  0.47           O  
HETATM  164  O   HOH T 163      10.618  18.511  46.090  1.00  0.47           O  
HETATM  165  O   HOH T 164       8.639  22.530  37.163  1.00  0.47           O  
HETATM  166  O   HOH T 165      36.400  26.840  24.856  1.00  0.47           O  
HETATM  167  O   HOH T 166      31.982   4.533  13.431  1.00  0.47           O  
HETATM  168  O   HOH T 167      21.033  11.477   1.721  1.00  0.48           O  
HETATM  169  O   HOH T 168      29.128   7.031  40.896  1.00  0.48           O  
HETATM  170  O   HOH T 169      28.428  27.847  37.863  1.00  0.48           O  
HETATM  171  O   HOH T 170      11.752  -6.845  16.020  1.00  0.48           O  
HETATM  172  O   HOH T 171      22.104  -3.187  40.423  1.00  0.48           O  
HETATM  173  O   HOH T 172       8.562  26.172  29.130  1.00  0.48           O  
HETATM  174  O   HOH T 173      12.660  -2.175  20.897  1.00  0.48           O  
HETATM  175  O   HOH T 174      28.679  12.221  32.383  1.00  0.48           O  
HETATM  176  O   HOH T 175       8.727  27.316  26.602  1.00  0.49           O  
HETATM  177  O   HOH T 176      30.851   1.127  31.124  1.00  0.49           O  
HETATM  178  O   HOH T 177      30.528   0.400  34.835  1.00  0.49           O  
HETATM  179  O   HOH T 178      10.889  -5.805  42.188  1.00  0.49           O  
HETATM  180  O   HOH T 179      36.087  21.908  16.353  1.00  0.49           O  
HETATM  181  O   HOH T 180      27.275  20.960   9.751  1.00  0.49           O  
HETATM  182  O   HOH T 181      20.260  11.180  46.389  1.00  0.49           O  
HETATM  183  O   HOH T 182      29.433  10.302  34.284  1.00  0.49           O  
HETATM  184  O   HOH T 183      25.371  -5.744  37.246  1.00  0.49           O  
HETATM  185  O   HOH T 184      18.946  18.619   9.585  1.00  0.49           O  
HETATM  186  O   HOH T 185       4.515  25.910  30.447  1.00  0.50           O  
HETATM  187  O   HOH T 186      11.924  -7.306  18.826  1.00  0.50           O  
HETATM  188  O   HOH T 187      30.750  16.735  10.600  1.00  0.50           O  
HETATM  189  O   HOH T 188      28.462  -3.895   7.058  1.00  0.50           O  
HETATM  190  O   HOH T 189       6.433  16.955  29.896  1.00  0.50           O  
HETATM  191  O   HOH T 190      11.204  -5.115  39.500  1.00  0.50           O  
HETATM  192  O   HOH T 191      12.993  21.110  16.822  1.00  0.50           O  
HETATM  193  O   HOH T 192      11.186   5.806  18.658  1.00  0.50           O  
HETATM  194  O   HOH T 193      18.890  24.142  13.698  1.00  0.50           O  
HETATM  195  O   HOH T 194       9.467   2.607  30.054  1.00  0.51           O  
HETATM  196  O   HOH T 195      10.476  -5.108  17.925  1.00  0.51           O  
HETATM  197  O   HOH T 196       4.305  11.328  20.954  1.00  0.51           O  
HETATM  198  O   HOH T 197       4.643  22.451  28.353  1.00  0.51           O  
HETATM  199  O   HOH T 198      11.997  -4.859  20.256  1.00  0.51           O  
HETATM  200  O   HOH T 199      22.614  31.060  17.106  1.00  0.51           O  
HETATM  201  O   HOH T 200       4.851  10.983  34.713  1.00  0.51           O  
HETATM  202  O   HOH T 201       4.163   7.927  25.201  1.00  0.51           O  
HETATM  203  O   HOH T 202      11.979  -0.879  25.214  1.00  0.51           O  
HETATM  204  O   HOH T 203      11.302  -2.223  16.188  1.00  0.51           O  
HETATM  205  O   HOH T 204      12.800  -3.583  25.913  1.00  0.51           O  
HETATM  206  O   HOH T 205      23.446  -4.157  38.188  1.00  0.52           O  
HETATM  207  O   HOH T 206      13.440  27.483  28.104  1.00  0.52           O  
HETATM  208  O   HOH T 207      16.295  26.977  38.588  1.00  0.52           O  
HETATM  209  O   HOH T 208       7.065  24.868  31.086  1.00  0.52           O  
HETATM  210  O   HOH T 209      18.364   2.050  14.089  1.00  0.52           O  
HETATM  211  O   HOH T 210      11.347  -7.260  37.375  1.00  0.52           O  
HETATM  212  O   HOH T 211      15.699  28.146  26.645  1.00  0.52           O  
HETATM  213  O   HOH T 212      34.068  11.216  23.360  1.00  0.52           O  
HETATM  214  O   HOH T 213      15.339   1.042  10.885  1.00  0.52           O  
HETATM  215  O   HOH T 214       9.598   9.735  32.231  1.00  0.53           O  
HETATM  216  O   HOH T 215      19.380  -4.881  25.142  1.00  0.53           O  
HETATM  217  O   HOH T 216      30.912   0.914  28.271  1.00  0.53           O  
HETATM  218  O   HOH T 217      26.667   2.689  42.706  1.00  0.53           O  
HETATM  219  O   HOH T 218      14.925  -2.238  47.297  1.00  0.54           O  
HETATM  220  O   HOH T 219      14.761  -0.726  19.653  1.00  0.54           O  
HETATM  221  O   HOH T 220       8.891   7.102  31.589  1.00  0.54           O  
HETATM  222  O   HOH T 221       9.661  -2.462  33.320  1.00  0.54           O  
HETATM  223  O   HOH T 222      25.007  19.621   8.674  1.00  0.54           O  
HETATM  224  O   HOH T 223      17.809   2.251  43.099  1.00  0.55           O  
HETATM  225  O   HOH T 224      29.159   5.136   0.107  1.00  0.55           O  
HETATM  226  O   HOH T 225      30.029   0.783   6.499  1.00  0.55           O  
HETATM  227  O   HOH T 226      30.091  15.479   8.008  1.00  0.55           O  
HETATM  228  O   HOH T 227      11.330  22.068  37.729  1.00  0.55           O  
HETATM  229  O   HOH T 228      21.723   5.691  44.542  1.00  0.55           O  
HETATM  230  O   HOH T 229      10.684  16.437  48.036  1.00  0.55           O  
HETATM  231  O   HOH T 230      11.315  22.070  40.605  1.00  0.55           O  
HETATM  232  O   HOH T 231      33.263   5.734   7.941  1.00  0.56           O  
HETATM  233  O   HOH T 232      20.988  -5.682  27.407  1.00  0.56           O  
HETATM  234  O   HOH T 233      17.811  -5.743  28.319  1.00  0.56           O  
HETATM  235  O   HOH T 234       7.843   4.041  34.794  1.00  0.56           O  
HETATM  236  O   HOH T 235      17.099  26.733  32.902  1.00  0.56           O  
HETATM  237  O   HOH T 236       8.627   0.091  28.374  1.00  0.56           O  
HETATM  238  O   HOH T 237      30.938   6.881   1.381  1.00  0.56           O  
HETATM  239  O   HOH T 238      12.758  -4.910  30.664  1.00  0.57           O  
HETATM  240  O   HOH T 239      35.097  13.002  16.315  1.00  0.57           O  
HETATM  241  O   HOH T 240      27.635  17.870   7.748  1.00  0.57           O  
HETATM  242  O   HOH T 241      22.708  11.944  47.182  1.00  0.57           O  
TER     243      HOH T 241 
