# Supplementary material for: Accurate Prediction of Hydration Sites of Proteins Using Energy Model With Atom Embedding
Source: Front Mol Biosci. 2021 Sep 20;8:756075. doi: 10.3389/fmolb.2021.756075 (PMC8488165; doi:10.3389/fmolb.2021.756075)
Supplement: Supplementary file 1 [file DataSheet1.ZIP › Data Sheet 1/Our_result_pdb/our_dataset_output/2AAL_watersite.pdb]

HEADER                                                        XXXX


JRNL        PMID   -1
HETATM    1  O   HOH T   0     -29.824  29.242 185.672  1.00  0.14           O  
HETATM    2  O   HOH T   1      13.884   6.886   1.909  1.00  0.15           O  
HETATM    3  O   HOH T   2     -15.270  -5.490  -0.889  1.00  0.15           O  
HETATM    4  O   HOH T   3     -11.292  25.675   3.620  1.00  0.15           O  
HETATM    5  O   HOH T   4      -0.409  40.977 186.218  1.00  0.15           O  
HETATM    6  O   HOH T   5     -25.918  30.926 194.393  1.00  0.15           O  
HETATM    7  O   HOH T   6     -25.168  60.306 180.791  1.00  0.16           O  
HETATM    8  O   HOH T   7     -12.575  29.947  -6.958  1.00  0.16           O  
HETATM    9  O   HOH T   8     -13.813  20.377  11.288  1.00  0.16           O  
HETATM   10  O   HOH T   9      17.500   8.067  -8.798  1.00  0.16           O  
HETATM   11  O   HOH T  10      -3.473  46.256 193.713  1.00  0.16           O  
HETATM   12  O   HOH T  11     -10.980  -6.331   7.681  1.00  0.16           O  
HETATM   13  O   HOH T  12      11.229   9.597  10.719  1.00  0.17           O  
HETATM   14  O   HOH T  13     -22.825  53.547 168.901  1.00  0.17           O  
HETATM   15  O   HOH T  14      -3.882  40.344 172.889  1.00  0.17           O  
HETATM   16  O   HOH T  15     -18.342  52.258 166.051  1.00  0.18           O  
HETATM   17  O   HOH T  16     -27.996  57.775 189.523  1.00  0.18           O  
HETATM   18  O   HOH T  17      -9.308  30.733  -0.945  1.00  0.18           O  
HETATM   19  O   HOH T  18     -22.541  63.755 175.056  1.00  0.19           O  
HETATM   20  O   HOH T  19      16.904   3.646  -3.695  1.00  0.19           O  
HETATM   21  O   HOH T  20     -21.618  42.756 193.976  1.00  0.19           O  
HETATM   22  O   HOH T  21     -24.971  30.148 172.775  1.00  0.19           O  
HETATM   23  O   HOH T  22     -19.971  -5.344  -6.272  1.00  0.19           O  
HETATM   24  O   HOH T  23      -5.687  10.836  11.491  1.00  0.19           O  
HETATM   25  O   HOH T  24       2.653  36.234 181.971  1.00  0.19           O  
HETATM   26  O   HOH T  25     -34.044  27.903 180.330  1.00  0.19           O  
HETATM   27  O   HOH T  26     -11.074  11.582  18.097  1.00  0.19           O  
HETATM   28  O   HOH T  27      -6.754   5.196  10.959  1.00  0.20           O  
HETATM   29  O   HOH T  28       0.262  -4.811  -0.359  1.00  0.20           O  
HETATM   30  O   HOH T  29     -31.475  40.522 157.447  1.00  0.20           O  
HETATM   31  O   HOH T  30       9.774   9.783 -10.931  1.00  0.20           O  
HETATM   32  O   HOH T  31       3.969  -1.675 -15.445  1.00  0.21           O  
HETATM   33  O   HOH T  32      -9.842  22.725  -9.783  1.00  0.21           O  
HETATM   34  O   HOH T  33     -14.074  29.617 186.757  1.00  0.21           O  
HETATM   35  O   HOH T  34       3.525  38.929 175.741  1.00  0.21           O  
HETATM   36  O   HOH T  35      -2.275  32.502 174.028  1.00  0.21           O  
HETATM   37  O   HOH T  36      -8.323  54.114 183.163  1.00  0.21           O  
HETATM   38  O   HOH T  37      11.741   2.112 -11.970  1.00  0.21           O  
HETATM   39  O   HOH T  38     -30.327  24.942 175.509  1.00  0.21           O  
HETATM   40  O   HOH T  39     -12.919  37.935 195.748  1.00  0.21           O  
HETATM   41  O   HOH T  40     -11.600  -0.273 -13.103  1.00  0.21           O  
HETATM   42  O   HOH T  41      -1.465  17.045  12.793  1.00  0.21           O  
HETATM   43  O   HOH T  42     -15.719  44.365 194.235  1.00  0.22           O  
HETATM   44  O   HOH T  43     -24.051  63.829 187.210  1.00  0.22           O  
HETATM   45  O   HOH T  44     -16.874  -6.567 -12.292  1.00  0.22           O  
HETATM   46  O   HOH T  45     -26.639   3.091  -3.341  1.00  0.22           O  
HETATM   47  O   HOH T  46     -18.704  11.931   1.030  1.00  0.22           O  
HETATM   48  O   HOH T  47     -32.533  68.995 183.142  1.00  0.23           O  
HETATM   49  O   HOH T  48     -14.745  38.121 177.545  1.00  0.23           O  
HETATM   50  O   HOH T  49     -38.472  55.778 189.113  1.00  0.23           O  
HETATM   51  O   HOH T  50      14.996   3.597   8.525  1.00  0.23           O  
HETATM   52  O   HOH T  51     -21.775  24.814  -4.494  1.00  0.23           O  
HETATM   53  O   HOH T  52     -11.590  43.688 158.148  1.00  0.23           O  
HETATM   54  O   HOH T  53     -38.284  63.873 191.876  1.00  0.23           O  
HETATM   55  O   HOH T  54      -3.561  52.430 187.842  1.00  0.23           O  
HETATM   56  O   HOH T  55     -25.717   4.290  -9.970  1.00  0.23           O  
HETATM   57  O   HOH T  56     -34.030  36.533 161.982  1.00  0.23           O  
HETATM   58  O   HOH T  57       1.713  41.559 195.104  1.00  0.23           O  
HETATM   59  O   HOH T  58       3.978  49.778 177.264  1.00  0.23           O  
HETATM   60  O   HOH T  59     -32.744  46.709 181.957  1.00  0.23           O  
HETATM   61  O   HOH T  60      -5.293  26.259 166.292  1.00  0.24           O  
HETATM   62  O   HOH T  61     -33.013  30.753 192.378  1.00  0.24           O  
HETATM   63  O   HOH T  62     -19.918  26.972   7.775  1.00  0.24           O  
HETATM   64  O   HOH T  63     -25.476  61.298 169.332  1.00  0.24           O  
HETATM   65  O   HOH T  64     -32.197  40.110 201.126  1.00  0.24           O  
HETATM   66  O   HOH T  65      -4.157  28.381  -9.325  1.00  0.24           O  
HETATM   67  O   HOH T  66     -19.111  27.267 190.968  1.00  0.24           O  
HETATM   68  O   HOH T  67     -33.339  52.836 184.755  1.00  0.25           O  
HETATM   69  O   HOH T  68      -7.786  35.358 166.456  1.00  0.25           O  
HETATM   70  O   HOH T  69      -2.436  33.745   4.207  1.00  0.25           O  
HETATM   71  O   HOH T  70     -24.173  17.933  10.667  1.00  0.25           O  
HETATM   72  O   HOH T  71      -6.678   1.276 -18.108  1.00  0.25           O  
HETATM   73  O   HOH T  72     -16.805  50.542 163.188  1.00  0.25           O  
HETATM   74  O   HOH T  73     -16.943  58.718 168.391  1.00  0.25           O  
HETATM   75  O   HOH T  74     -12.457   6.176 -19.101  1.00  0.25           O  
HETATM   76  O   HOH T  75     -33.339  16.828 176.779  1.00  0.25           O  
HETATM   77  O   HOH T  76      -9.133   9.398  -6.483  1.00  0.25           O  
HETATM   78  O   HOH T  77     -15.954  67.934 179.721  1.00  0.25           O  
HETATM   79  O   HOH T  78     -32.480  32.375 171.356  1.00  0.25           O  
HETATM   80  O   HOH T  79      -8.698  37.549  -5.029  1.00  0.26           O  
HETATM   81  O   HOH T  80     -26.637  -1.647  -1.178  1.00  0.26           O  
HETATM   82  O   HOH T  81     -32.545  28.734 194.254  1.00  0.26           O  
HETATM   83  O   HOH T  82     -12.890   4.198 -16.146  1.00  0.26           O  
HETATM   84  O   HOH T  83     -13.578  43.789 199.067  1.00  0.26           O  
HETATM   85  O   HOH T  84      -3.230   6.645 -23.463  1.00  0.26           O  
HETATM   86  O   HOH T  85       2.091   0.524  10.132  1.00  0.26           O  
HETATM   87  O   HOH T  86       1.370  31.740   1.234  1.00  0.26           O  
HETATM   88  O   HOH T  87     -32.350  42.784 169.383  1.00  0.26           O  
HETATM   89  O   HOH T  88     -12.181 -16.406   0.878  1.00  0.26           O  
HETATM   90  O   HOH T  89      17.755  18.102  -4.141  1.00  0.26           O  
HETATM   91  O   HOH T  90       7.295   6.885 -14.920  1.00  0.26           O  
HETATM   92  O   HOH T  91     -18.445  -6.202   5.970  1.00  0.27           O  
HETATM   93  O   HOH T  92     -24.362  19.331 194.675  1.00  0.27           O  
HETATM   94  O   HOH T  93     -33.544  57.486 193.705  1.00  0.27           O  
HETATM   95  O   HOH T  94     -22.349  19.523 180.423  1.00  0.27           O  
HETATM   96  O   HOH T  95     -21.273  39.821 167.044  1.00  0.27           O  
HETATM   97  O   HOH T  96      -4.199  21.782 -16.624  1.00  0.27           O  
HETATM   98  O   HOH T  97       8.691  -1.852 -20.925  1.00  0.27           O  
HETATM   99  O   HOH T  98       0.102  39.746 193.631  1.00  0.27           O  
HETATM  100  O   HOH T  99     -20.139  47.902 193.154  1.00  0.27           O  
HETATM  101  O   HOH T 100      -9.016  60.748 166.899  1.00  0.27           O  
HETATM  102  O   HOH T 101      12.837  13.854  16.015  1.00  0.27           O  
HETATM  103  O   HOH T 102     -12.237  27.473  12.161  1.00  0.27           O  
HETATM  104  O   HOH T 103       6.358  15.920 -20.100  1.00  0.27           O  
HETATM  105  O   HOH T 104      -5.513  22.544 -13.416  1.00  0.27           O  
HETATM  106  O   HOH T 105       4.235  16.262  16.322  1.00  0.27           O  
HETATM  107  O   HOH T 106     -26.272  64.542 188.584  1.00  0.28           O  
HETATM  108  O   HOH T 107     -25.063   7.482 -14.623  1.00  0.28           O  
HETATM  109  O   HOH T 108      12.319  -5.522  -8.856  1.00  0.28           O  
HETATM  110  O   HOH T 109      -6.460  36.420 169.567  1.00  0.28           O  
HETATM  111  O   HOH T 110     -28.187  70.896 178.835  1.00  0.28           O  
HETATM  112  O   HOH T 111     -11.672  41.777 180.916  1.00  0.28           O  
HETATM  113  O   HOH T 112     -15.476  34.576   0.051  1.00  0.28           O  
HETATM  114  O   HOH T 113     -28.111  43.029 163.584  1.00  0.28           O  
HETATM  115  O   HOH T 114       6.070  53.770 182.357  1.00  0.28           O  
HETATM  116  O   HOH T 115      -9.830  50.804 197.731  1.00  0.28           O  
HETATM  117  O   HOH T 116      -9.722  16.686  16.856  1.00  0.28           O  
HETATM  118  O   HOH T 117     -13.098  -2.506  15.521  1.00  0.28           O  
HETATM  119  O   HOH T 118      -2.354  52.007 197.537  1.00  0.28           O  
HETATM  120  O   HOH T 119      16.196  -4.876  -0.115  1.00  0.28           O  
HETATM  121  O   HOH T 120     -11.251  63.354 171.374  1.00  0.28           O  
HETATM  122  O   HOH T 121       5.710  20.072   3.034  1.00  0.29           O  
HETATM  123  O   HOH T 122       7.548  45.562 188.670  1.00  0.29           O  
HETATM  124  O   HOH T 123     -33.829  49.137 163.344  1.00  0.29           O  
HETATM  125  O   HOH T 124       7.402  54.339 197.188  1.00  0.29           O  
HETATM  126  O   HOH T 125      -0.925  63.984 191.155  1.00  0.29           O  
HETATM  127  O   HOH T 126     -26.091  33.480 168.421  1.00  0.29           O  
HETATM  128  O   HOH T 127       4.351  35.343 188.209  1.00  0.29           O  
HETATM  129  O   HOH T 128       0.037  52.881 198.451  1.00  0.29           O  
HETATM  130  O   HOH T 129      -8.127 -12.688  -9.469  1.00  0.29           O  
HETATM  131  O   HOH T 130     -25.401   4.155  10.802  1.00  0.29           O  
HETATM  132  O   HOH T 131     -23.042  27.691 200.021  1.00  0.29           O  
HETATM  133  O   HOH T 132      -9.810  34.281   2.989  1.00  0.29           O  
HETATM  134  O   HOH T 133     -31.802  40.779 167.500  1.00  0.29           O  
HETATM  135  O   HOH T 134      17.019   0.191 -19.832  1.00  0.29           O  
HETATM  136  O   HOH T 135       1.701  13.915 -19.453  1.00  0.29           O  
HETATM  137  O   HOH T 136      12.140  16.853  -6.401  1.00  0.29           O  
HETATM  138  O   HOH T 137     -22.593  70.453 183.406  1.00  0.29           O  
HETATM  139  O   HOH T 138     -13.786  -9.502  14.904  1.00  0.29           O  
HETATM  140  O   HOH T 139       0.802  25.915 -19.210  1.00  0.29           O  
HETATM  141  O   HOH T 140     -26.550   8.588  -4.401  1.00  0.29           O  
HETATM  142  O   HOH T 141     -19.888 -13.754   4.618  1.00  0.29           O  
HETATM  143  O   HOH T 142      -5.718  29.279  15.691  1.00  0.29           O  
HETATM  144  O   HOH T 143       6.218   6.690  15.976  1.00  0.29           O  
HETATM  145  O   HOH T 144     -15.739  46.823 176.085  1.00  0.30           O  
HETATM  146  O   HOH T 145      -9.861  27.623 171.514  1.00  0.30           O  
HETATM  147  O   HOH T 146     -38.449  61.790 185.986  1.00  0.30           O  
HETATM  148  O   HOH T 147     -40.015  42.287 192.988  1.00  0.30           O  
HETATM  149  O   HOH T 148      -1.205  41.079 201.005  1.00  0.30           O  
HETATM  150  O   HOH T 149     -28.344  -1.172  -5.253  1.00  0.30           O  
HETATM  151  O   HOH T 150     -30.096  13.701   4.708  1.00  0.30           O  
HETATM  152  O   HOH T 151       2.724  -2.929 -13.220  1.00  0.30           O  
HETATM  153  O   HOH T 152     -25.536  34.537 165.266  1.00  0.30           O  
HETATM  154  O   HOH T 153      -4.086  47.791 174.460  1.00  0.30           O  
HETATM  155  O   HOH T 154     -23.495  11.415 -16.975  1.00  0.30           O  
HETATM  156  O   HOH T 155     -10.579  -2.468  14.387  1.00  0.30           O  
HETATM  157  O   HOH T 156     -15.996  54.394 192.457  1.00  0.30           O  
HETATM  158  O   HOH T 157      -8.316   4.505  -3.513  1.00  0.30           O  
HETATM  159  O   HOH T 158     -40.804  32.519 183.406  1.00  0.30           O  
HETATM  160  O   HOH T 159       0.007  32.887   5.370  1.00  0.30           O  
HETATM  161  O   HOH T 160      -8.919  32.918   5.228  1.00  0.30           O  
HETATM  162  O   HOH T 161     -45.243  31.990 184.322  1.00  0.30           O  
HETATM  163  O   HOH T 162     -23.659  22.771 201.421  1.00  0.30           O  
HETATM  164  O   HOH T 163     -32.461  50.388 171.652  1.00  0.30           O  
HETATM  165  O   HOH T 164      -6.525  15.442  -1.898  1.00  0.31           O  
HETATM  166  O   HOH T 165     -21.115  28.763 167.427  1.00  0.31           O  
HETATM  167  O   HOH T 166     -19.207  22.672 196.714  1.00  0.31           O  
HETATM  168  O   HOH T 167       5.910   6.669 -18.031  1.00  0.31           O  
HETATM  169  O   HOH T 168     -44.676  49.933 188.732  1.00  0.31           O  
HETATM  170  O   HOH T 169     -19.448  16.924   5.825  1.00  0.31           O  
HETATM  171  O   HOH T 170     -20.333  48.979 178.805  1.00  0.31           O  
HETATM  172  O   HOH T 171     -21.091   2.242 -13.811  1.00  0.31           O  
HETATM  173  O   HOH T 172      -5.486  14.152  17.058  1.00  0.31           O  
HETATM  174  O   HOH T 173     -23.956  29.386  -4.397  1.00  0.31           O  
HETATM  175  O   HOH T 174     -12.105  71.014 183.738  1.00  0.31           O  
HETATM  176  O   HOH T 175      14.522  19.550  12.248  1.00  0.31           O  
HETATM  177  O   HOH T 176     -39.307  36.050 174.046  1.00  0.31           O  
HETATM  178  O   HOH T 177     -42.097  37.148 181.881  1.00  0.31           O  
HETATM  179  O   HOH T 178     -12.624  61.738 164.998  1.00  0.31           O  
HETATM  180  O   HOH T 179     -31.810  48.491 197.032  1.00  0.31           O  
HETATM  181  O   HOH T 180     -22.399  27.743   6.748  1.00  0.31           O  
HETATM  182  O   HOH T 181      19.997  20.536   1.485  1.00  0.32           O  
HETATM  183  O   HOH T 182       5.762  47.630 189.439  1.00  0.32           O  
HETATM  184  O   HOH T 183     -37.407  33.832 167.597  1.00  0.32           O  
HETATM  185  O   HOH T 184     -24.312  48.369 164.433  1.00  0.32           O  
HETATM  186  O   HOH T 185       5.969  52.722 191.793  1.00  0.32           O  
HETATM  187  O   HOH T 186     -29.326  68.753 177.309  1.00  0.32           O  
HETATM  188  O   HOH T 187       6.751  -3.943 -21.102  1.00  0.32           O  
HETATM  189  O   HOH T 188       0.139  56.174 192.617  1.00  0.32           O  
HETATM  190  O   HOH T 189     -22.225  38.185 180.175  1.00  0.32           O  
HETATM  191  O   HOH T 190      20.045  12.629   6.613  1.00  0.32           O  
HETATM  192  O   HOH T 191     -19.547  18.792  -7.265  1.00  0.32           O  
HETATM  193  O   HOH T 192       0.185  37.366  -4.835  1.00  0.32           O  
HETATM  194  O   HOH T 193      -4.110  13.515 -14.480  1.00  0.32           O  
HETATM  195  O   HOH T 194     -10.497  25.451  17.936  1.00  0.32           O  
HETATM  196  O   HOH T 195      -1.813   8.817  -1.014  1.00  0.32           O  
HETATM  197  O   HOH T 196      -3.612  -6.765 -10.609  1.00  0.32           O  
HETATM  198  O   HOH T 197      -0.983   7.920 -13.945  1.00  0.32           O  
HETATM  199  O   HOH T 198     -25.201  55.865 196.369  1.00  0.32           O  
HETATM  200  O   HOH T 199     -20.557  24.962 177.946  1.00  0.32           O  
HETATM  201  O   HOH T 200      -7.107  -3.526  14.987  1.00  0.32           O  
HETATM  202  O   HOH T 201       1.567  31.976  -5.427  1.00  0.32           O  
HETATM  203  O   HOH T 202     -28.403  21.615 176.857  1.00  0.32           O  
HETATM  204  O   HOH T 203     -30.488  68.808 189.453  1.00  0.33           O  
HETATM  205  O   HOH T 204     -22.372  21.662 199.218  1.00  0.33           O  
HETATM  206  O   HOH T 205     -12.274  39.953 199.668  1.00  0.33           O  
HETATM  207  O   HOH T 206      -8.424   3.430  12.254  1.00  0.33           O  
HETATM  208  O   HOH T 207      -9.487  21.498 192.981  1.00  0.33           O  
HETATM  209  O   HOH T 208     -23.023  -7.059  -0.690  1.00  0.33           O  
HETATM  210  O   HOH T 209      -2.283  14.952 -13.139  1.00  0.33           O  
HETATM  211  O   HOH T 210     -17.777  24.424 177.953  1.00  0.33           O  
HETATM  212  O   HOH T 211     -29.202  66.303 175.732  1.00  0.33           O  
HETATM  213  O   HOH T 212       2.248  20.697 -13.971  1.00  0.33           O  
HETATM  214  O   HOH T 213     -29.934  15.720   6.585  1.00  0.33           O  
HETATM  215  O   HOH T 214      17.732  16.091  16.871  1.00  0.33           O  
HETATM  216  O   HOH T 215     -25.009  22.744   9.009  1.00  0.33           O  
HETATM  217  O   HOH T 216      -9.770  25.883 176.821  1.00  0.33           O  
HETATM  218  O   HOH T 217     -16.419  33.111 163.596  1.00  0.33           O  
HETATM  219  O   HOH T 218      -4.418  65.724 190.035  1.00  0.33           O  
HETATM  220  O   HOH T 219     -20.724  42.581 167.010  1.00  0.33           O  
HETATM  221  O   HOH T 220      -2.471  -3.594 -14.034  1.00  0.33           O  
HETATM  222  O   HOH T 221     -16.492  36.331 168.705  1.00  0.33           O  
HETATM  223  O   HOH T 222      -2.210  14.697  -5.471  1.00  0.33           O  
HETATM  224  O   HOH T 223     -28.254  37.218 200.409  1.00  0.33           O  
HETATM  225  O   HOH T 224     -24.893  45.507 197.493  1.00  0.33           O  
HETATM  226  O   HOH T 225      -2.206  50.875 174.694  1.00  0.33           O  
HETATM  227  O   HOH T 226     -24.352  66.630 170.132  1.00  0.33           O  
HETATM  228  O   HOH T 227     -24.382  25.222  15.047  1.00  0.33           O  
HETATM  229  O   HOH T 228     -25.759  37.082 199.191  1.00  0.33           O  
HETATM  230  O   HOH T 229       8.120  -8.708  10.107  1.00  0.33           O  
HETATM  231  O   HOH T 230      -6.791  60.554 162.305  1.00  0.33           O  
HETATM  232  O   HOH T 231     -39.592  55.266 185.163  1.00  0.33           O  
HETATM  233  O   HOH T 232      -6.214  12.574  13.472  1.00  0.33           O  
HETATM  234  O   HOH T 233     -13.954  71.448 173.534  1.00  0.33           O  
HETATM  235  O   HOH T 234      -3.752  24.329 173.079  1.00  0.33           O  
HETATM  236  O   HOH T 235     -10.682  50.122 166.652  1.00  0.33           O  
HETATM  237  O   HOH T 236     -15.159  11.690 -15.605  1.00  0.34           O  
HETATM  238  O   HOH T 237     -10.338   1.795  13.398  1.00  0.34           O  
HETATM  239  O   HOH T 238     -12.285  30.437 168.280  1.00  0.34           O  
HETATM  240  O   HOH T 239     -33.886  30.124 170.193  1.00  0.34           O  
HETATM  241  O   HOH T 240       7.067  -0.272  17.982  1.00  0.34           O  
HETATM  242  O   HOH T 241      -2.050  66.527 191.274  1.00  0.34           O  
HETATM  243  O   HOH T 242     -25.868  40.536 159.944  1.00  0.34           O  
HETATM  244  O   HOH T 243       4.296  14.705 -18.761  1.00  0.34           O  
HETATM  245  O   HOH T 244     -32.424  66.906 181.334  1.00  0.34           O  
HETATM  246  O   HOH T 245     -28.466   5.053  -3.157  1.00  0.34           O  
HETATM  247  O   HOH T 246      -8.766  62.843 170.275  1.00  0.34           O  
HETATM  248  O   HOH T 247     -10.129  64.595 173.655  1.00  0.34           O  
HETATM  249  O   HOH T 248     -22.989  41.429 176.379  1.00  0.34           O  
HETATM  250  O   HOH T 249     -14.401  -9.815 -11.974  1.00  0.34           O  
HETATM  251  O   HOH T 250     -23.702   9.317 -21.361  1.00  0.34           O  
HETATM  252  O   HOH T 251     -21.831   0.061 -15.348  1.00  0.34           O  
HETATM  253  O   HOH T 252       5.720  -7.504 -18.121  1.00  0.34           O  
HETATM  254  O   HOH T 253       5.766  29.865  -0.714  1.00  0.34           O  
HETATM  255  O   HOH T 254     -28.545  68.386 179.960  1.00  0.34           O  
HETATM  256  O   HOH T 255     -19.487  19.544  16.007  1.00  0.34           O  
HETATM  257  O   HOH T 256     -30.090  48.454 161.262  1.00  0.34           O  
HETATM  258  O   HOH T 257      17.945  -1.822 -18.098  1.00  0.34           O  
HETATM  259  O   HOH T 258      18.710   9.871   9.401  1.00  0.34           O  
HETATM  260  O   HOH T 259       1.616 -13.164  -5.624  1.00  0.34           O  
HETATM  261  O   HOH T 260     -29.264  14.245  -2.225  1.00  0.34           O  
HETATM  262  O   HOH T 261     -20.146  27.003 169.482  1.00  0.34           O  
HETATM  263  O   HOH T 262     -30.901  52.621 171.830  1.00  0.35           O  
HETATM  264  O   HOH T 263     -25.891  24.360   0.716  1.00  0.35           O  
HETATM  265  O   HOH T 264      -4.555  23.849  20.475  1.00  0.35           O  
HETATM  266  O   HOH T 265     -23.350   0.273 -17.897  1.00  0.35           O  
HETATM  267  O   HOH T 266      -0.646   6.018  -6.377  1.00  0.35           O  
HETATM  268  O   HOH T 267     -42.271  33.865 179.101  1.00  0.35           O  
HETATM  269  O   HOH T 268     -29.407  40.472 198.300  1.00  0.35           O  
HETATM  270  O   HOH T 269     -23.399  57.836 197.202  1.00  0.35           O  
HETATM  271  O   HOH T 270       9.888  48.207 196.257  1.00  0.35           O  
HETATM  272  O   HOH T 271     -32.767   1.004   1.867  1.00  0.35           O  
HETATM  273  O   HOH T 272       7.441  51.738 193.976  1.00  0.35           O  
HETATM  274  O   HOH T 273     -34.834  26.500 190.276  1.00  0.35           O  
HETATM  275  O   HOH T 274     -30.230  -4.533 -10.385  1.00  0.35           O  
HETATM  276  O   HOH T 275     -13.554  49.874 199.483  1.00  0.35           O  
HETATM  277  O   HOH T 276      -2.358  62.624 189.056  1.00  0.35           O  
HETATM  278  O   HOH T 277      -5.459  -4.627 -10.672  1.00  0.35           O  
HETATM  279  O   HOH T 278     -12.140  22.577 184.446  1.00  0.35           O  
HETATM  280  O   HOH T 279     -11.481  27.013 174.704  1.00  0.35           O  
HETATM  281  O   HOH T 280      -6.220  -7.310 -10.211  1.00  0.35           O  
HETATM  282  O   HOH T 281      -4.859   8.295  14.929  1.00  0.35           O  
HETATM  283  O   HOH T 282       8.094  18.105  10.612  1.00  0.35           O  
HETATM  284  O   HOH T 283      -3.302   7.092 -15.333  1.00  0.36           O  
HETATM  285  O   HOH T 284     -39.938  41.554 177.419  1.00  0.36           O  
HETATM  286  O   HOH T 285       1.673  29.153 187.746  1.00  0.36           O  
HETATM  287  O   HOH T 286     -40.355  36.935 179.731  1.00  0.36           O  
HETATM  288  O   HOH T 287     -12.155  -0.136 -15.742  1.00  0.36           O  
HETATM  289  O   HOH T 288      14.423  -4.866 -12.188  1.00  0.36           O  
HETATM  290  O   HOH T 289     -32.377  42.058 161.810  1.00  0.36           O  
HETATM  291  O   HOH T 290     -19.559  13.679   9.168  1.00  0.36           O  
HETATM  292  O   HOH T 291     -36.652  53.739 188.915  1.00  0.36           O  
HETATM  293  O   HOH T 292     -32.572  48.483 194.313  1.00  0.36           O  
HETATM  294  O   HOH T 293      -5.597  47.923 201.319  1.00  0.36           O  
HETATM  295  O   HOH T 294     -21.331  16.928 186.446  1.00  0.36           O  
HETATM  296  O   HOH T 295     -38.119  20.163 177.929  1.00  0.36           O  
HETATM  297  O   HOH T 296     -30.358  40.964 203.066  1.00  0.36           O  
HETATM  298  O   HOH T 297     -18.792  17.614  -9.610  1.00  0.36           O  
HETATM  299  O   HOH T 298     -17.032  -0.489  17.348  1.00  0.36           O  
HETATM  300  O   HOH T 299      -3.723  54.343 189.860  1.00  0.36           O  
HETATM  301  O   HOH T 300     -18.062  76.965 177.779  1.00  0.36           O  
HETATM  302  O   HOH T 301     -34.942  21.129 181.675  1.00  0.36           O  
HETATM  303  O   HOH T 302      -2.989  16.674  16.972  1.00  0.36           O  
HETATM  304  O   HOH T 303      -1.082  -7.136   7.301  1.00  0.36           O  
HETATM  305  O   HOH T 304       3.835  -7.083  10.390  1.00  0.36           O  
HETATM  306  O   HOH T 305       5.805  -9.957 -19.659  1.00  0.36           O  
HETATM  307  O   HOH T 306     -32.491  39.381 203.887  1.00  0.36           O  
HETATM  308  O   HOH T 307      10.979  19.316  -6.507  1.00  0.36           O  
HETATM  309  O   HOH T 308      -0.138  13.664 -14.571  1.00  0.37           O  
HETATM  310  O   HOH T 309       8.176  35.668 185.426  1.00  0.37           O  
HETATM  311  O   HOH T 310      21.280  22.346   4.818  1.00  0.37           O  
HETATM  312  O   HOH T 311      21.059   8.466   9.845  1.00  0.37           O  
HETATM  313  O   HOH T 312     -25.299  24.425  11.186  1.00  0.37           O  
HETATM  314  O   HOH T 313     -11.141  30.679 197.800  1.00  0.37           O  
HETATM  315  O   HOH T 314     -13.660  28.768 166.596  1.00  0.37           O  
HETATM  316  O   HOH T 315       3.492  30.859 -10.513  1.00  0.37           O  
HETATM  317  O   HOH T 316     -14.409   5.676  10.409  1.00  0.37           O  
HETATM  318  O   HOH T 317      10.651  17.121   6.750  1.00  0.37           O  
HETATM  319  O   HOH T 318       3.861  17.310 -19.600  1.00  0.37           O  
HETATM  320  O   HOH T 319      -6.612 -11.777  -7.406  1.00  0.37           O  
HETATM  321  O   HOH T 320     -41.958  49.640 188.698  1.00  0.37           O  
HETATM  322  O   HOH T 321      -6.344  54.463 190.937  1.00  0.37           O  
HETATM  323  O   HOH T 322     -19.535  -1.177  18.165  1.00  0.37           O  
HETATM  324  O   HOH T 323     -13.446  38.417  -3.012  1.00  0.37           O  
HETATM  325  O   HOH T 324      -4.362  21.078  20.588  1.00  0.37           O  
HETATM  326  O   HOH T 325     -15.541 -16.228   7.812  1.00  0.37           O  
HETATM  327  O   HOH T 326     -44.356  35.561 178.357  1.00  0.37           O  
HETATM  328  O   HOH T 327       3.006   0.583 -16.731  1.00  0.37           O  
HETATM  329  O   HOH T 328     -13.875  44.058 196.254  1.00  0.37           O  
HETATM  330  O   HOH T 329     -34.757  39.109 161.240  1.00  0.37           O  
HETATM  331  O   HOH T 330       4.771  53.983 198.294  1.00  0.37           O  
HETATM  332  O   HOH T 331     -24.729  67.056 182.205  1.00  0.37           O  
HETATM  333  O   HOH T 332     -10.720  -1.123 -17.854  1.00  0.37           O  
HETATM  334  O   HOH T 333      -6.517   2.695  14.133  1.00  0.37           O  
HETATM  335  O   HOH T 334     -18.473  60.491 166.896  1.00  0.37           O  
HETATM  336  O   HOH T 335     -15.548  44.749 167.028  1.00  0.37           O  
HETATM  337  O   HOH T 336     -34.969  32.572 170.457  1.00  0.37           O  
HETATM  338  O   HOH T 337      -1.478  48.243 175.392  1.00  0.37           O  
HETATM  339  O   HOH T 338      21.256  12.005  -5.696  1.00  0.37           O  
HETATM  340  O   HOH T 339     -11.021  18.643  18.318  1.00  0.37           O  
HETATM  341  O   HOH T 340     -17.615  -3.259  18.008  1.00  0.37           O  
HETATM  342  O   HOH T 341     -32.903   2.726   4.001  1.00  0.37           O  
HETATM  343  O   HOH T 342     -23.247  52.926 162.075  1.00  0.37           O  
HETATM  344  O   HOH T 343      -7.264  26.746 -19.508  1.00  0.37           O  
HETATM  345  O   HOH T 344     -39.589  47.066 176.868  1.00  0.37           O  
HETATM  346  O   HOH T 345     -29.657  50.062 171.577  1.00  0.38           O  
HETATM  347  O   HOH T 346      -4.488  -8.516   2.750  1.00  0.38           O  
HETATM  348  O   HOH T 347      13.442  -2.625 -17.950  1.00  0.38           O  
HETATM  349  O   HOH T 348       5.146  42.919 175.908  1.00  0.38           O  
HETATM  350  O   HOH T 349      -9.988  72.222 187.941  1.00  0.38           O  
HETATM  351  O   HOH T 350     -21.150  -8.144   1.086  1.00  0.38           O  
HETATM  352  O   HOH T 351       0.252  31.777 172.978  1.00  0.38           O  
HETATM  353  O   HOH T 352     -20.234  42.492 159.324  1.00  0.38           O  
HETATM  354  O   HOH T 353     -20.777  50.490 193.846  1.00  0.38           O  
HETATM  355  O   HOH T 354      -9.877  70.879 185.434  1.00  0.38           O  
HETATM  356  O   HOH T 355      -9.698  52.770 166.922  1.00  0.38           O  
HETATM  357  O   HOH T 356     -25.164  -7.096 -12.029  1.00  0.38           O  
HETATM  358  O   HOH T 357     -13.638   3.216  14.604  1.00  0.38           O  
HETATM  359  O   HOH T 358     -16.942  18.821  -7.890  1.00  0.38           O  
HETATM  360  O   HOH T 359       2.823 -10.725  -5.281  1.00  0.38           O  
HETATM  361  O   HOH T 360     -17.868  70.522 168.601  1.00  0.38           O  
HETATM  362  O   HOH T 361      -6.725  21.779 193.462  1.00  0.38           O  
HETATM  363  O   HOH T 362      -0.821  23.120 -16.994  1.00  0.38           O  
HETATM  364  O   HOH T 363     -15.908  34.049  -2.581  1.00  0.38           O  
HETATM  365  O   HOH T 364       9.280 -11.508   6.037  1.00  0.38           O  
HETATM  366  O   HOH T 365     -30.126  48.702 166.575  1.00  0.38           O  
HETATM  367  O   HOH T 366     -16.601  29.622 194.735  1.00  0.38           O  
HETATM  368  O   HOH T 367     -23.513  41.626 195.620  1.00  0.38           O  
HETATM  369  O   HOH T 368     -11.519  37.805  -4.993  1.00  0.38           O  
HETATM  370  O   HOH T 369       1.076  42.301 197.744  1.00  0.38           O  
HETATM  371  O   HOH T 370       4.343  37.529 189.828  1.00  0.38           O  
HETATM  372  O   HOH T 371     -22.739  68.313 176.779  1.00  0.38           O  
HETATM  373  O   HOH T 372     -33.894  50.049 189.443  1.00  0.38           O  
HETATM  374  O   HOH T 373     -14.786  40.605 168.075  1.00  0.38           O  
HETATM  375  O   HOH T 374     -18.819 -13.071   7.132  1.00  0.38           O  
HETATM  376  O   HOH T 375     -43.135  40.801 181.957  1.00  0.38           O  
HETATM  377  O   HOH T 376      -2.236  54.083 199.433  1.00  0.38           O  
HETATM  378  O   HOH T 377     -39.186  58.287 188.319  1.00  0.38           O  
HETATM  379  O   HOH T 378     -22.710  11.289 -19.684  1.00  0.38           O  
HETATM  380  O   HOH T 379     -11.564  72.866 185.818  1.00  0.38           O  
HETATM  381  O   HOH T 380       2.818  55.548 192.545  1.00  0.38           O  
HETATM  382  O   HOH T 381       2.954  32.521  -2.993  1.00  0.38           O  
HETATM  383  O   HOH T 382       3.067  20.421 -16.454  1.00  0.39           O  
HETATM  384  O   HOH T 383     -20.886 -12.583  -6.466  1.00  0.39           O  
HETATM  385  O   HOH T 384     -26.761  63.771 195.255  1.00  0.39           O  
HETATM  386  O   HOH T 385      -4.729  45.721 202.674  1.00  0.39           O  
HETATM  387  O   HOH T 386       2.505   8.438  -2.855  1.00  0.39           O  
HETATM  388  O   HOH T 387       4.996  12.149  16.466  1.00  0.39           O  
HETATM  389  O   HOH T 388     -12.527  49.561 164.655  1.00  0.39           O  
HETATM  390  O   HOH T 389      -5.225  12.989  -2.417  1.00  0.39           O  
HETATM  391  O   HOH T 390      -7.064   6.921  -3.439  1.00  0.39           O  
HETATM  392  O   HOH T 391      -3.379  49.653 172.509  1.00  0.39           O  
HETATM  393  O   HOH T 392     -13.313  51.415 162.879  1.00  0.39           O  
HETATM  394  O   HOH T 393      19.175  11.444  -7.413  1.00  0.39           O  
HETATM  395  O   HOH T 394     -12.608  24.058  19.024  1.00  0.39           O  
HETATM  396  O   HOH T 395     -21.027  25.110 175.178  1.00  0.39           O  
HETATM  397  O   HOH T 396      -4.727   6.041 -21.186  1.00  0.39           O  
HETATM  398  O   HOH T 397     -35.114  57.223 172.528  1.00  0.39           O  
HETATM  399  O   HOH T 398     -36.316  65.133 177.231  1.00  0.39           O  
HETATM  400  O   HOH T 399     -16.989  54.742 159.158  1.00  0.39           O  
HETATM  401  O   HOH T 400     -45.315  34.301 173.377  1.00  0.39           O  
HETATM  402  O   HOH T 401     -16.865  -3.287   0.027  1.00  0.39           O  
HETATM  403  O   HOH T 402     -41.144  38.749 171.872  1.00  0.39           O  
HETATM  404  O   HOH T 403      -6.692  28.163 164.783  1.00  0.39           O  
HETATM  405  O   HOH T 404     -15.645  60.731 167.159  1.00  0.39           O  
HETATM  406  O   HOH T 405     -42.996  43.057 188.792  1.00  0.39           O  
HETATM  407  O   HOH T 406     -10.406  59.821 192.853  1.00  0.39           O  
HETATM  408  O   HOH T 407       9.745 -10.135   8.413  1.00  0.39           O  
HETATM  409  O   HOH T 408     -13.004 -18.964  -0.067  1.00  0.39           O  
HETATM  410  O   HOH T 409       8.711  46.474 197.976  1.00  0.39           O  
HETATM  411  O   HOH T 410     -27.432  12.690   9.620  1.00  0.39           O  
HETATM  412  O   HOH T 411      17.582   6.785 -11.244  1.00  0.39           O  
HETATM  413  O   HOH T 412     -11.052  64.225 192.038  1.00  0.39           O  
HETATM  414  O   HOH T 413     -30.590  62.995 196.513  1.00  0.39           O  
HETATM  415  O   HOH T 414      -6.260   9.781 -15.022  1.00  0.39           O  
HETATM  416  O   HOH T 415     -23.587  65.621 165.929  1.00  0.39           O  
HETATM  417  O   HOH T 416     -10.742  31.721   6.921  1.00  0.39           O  
HETATM  418  O   HOH T 417     -13.540  43.112 167.888  1.00  0.39           O  
HETATM  419  O   HOH T 418     -13.613  69.640 171.355  1.00  0.39           O  
HETATM  420  O   HOH T 419     -17.335  41.469 172.526  1.00  0.40           O  
HETATM  421  O   HOH T 420     -40.445  49.641 176.469  1.00  0.40           O  
HETATM  422  O   HOH T 421      10.317   9.456 -13.582  1.00  0.40           O  
HETATM  423  O   HOH T 422     -32.516  -8.445  -9.783  1.00  0.40           O  
HETATM  424  O   HOH T 423     -19.620  74.799 177.017  1.00  0.40           O  
HETATM  425  O   HOH T 424     -38.911  60.122 190.454  1.00  0.40           O  
HETATM  426  O   HOH T 425     -20.328 -12.236  -3.700  1.00  0.40           O  
HETATM  427  O   HOH T 426      -8.649  25.701   4.345  1.00  0.40           O  
HETATM  428  O   HOH T 427     -19.708  63.596 199.214  1.00  0.40           O  
HETATM  429  O   HOH T 428      -6.429  42.817 166.806  1.00  0.40           O  
HETATM  430  O   HOH T 429       9.484  16.739  -7.232  1.00  0.40           O  
HETATM  431  O   HOH T 430      -7.666 -17.911   1.868  1.00  0.40           O  
HETATM  432  O   HOH T 431     -16.818  25.945 172.081  1.00  0.40           O  
HETATM  433  O   HOH T 432     -27.624  41.672 166.003  1.00  0.40           O  
HETATM  434  O   HOH T 433      -0.681  38.276 204.608  1.00  0.40           O  
HETATM  435  O   HOH T 434     -13.795 -14.200   1.616  1.00  0.40           O  
HETATM  436  O   HOH T 435      -7.036  24.158 166.814  1.00  0.40           O  
HETATM  437  O   HOH T 436      14.165   7.348  18.036  1.00  0.40           O  
HETATM  438  O   HOH T 437      -4.931  30.850 -10.339  1.00  0.40           O  
HETATM  439  O   HOH T 438     -14.146  12.888  15.371  1.00  0.40           O  
HETATM  440  O   HOH T 439      -1.790  38.954  -3.614  1.00  0.40           O  
HETATM  441  O   HOH T 440     -15.933  43.873 169.580  1.00  0.40           O  
HETATM  442  O   HOH T 441     -11.695  11.576  20.784  1.00  0.40           O  
HETATM  443  O   HOH T 442     -24.198  48.734 161.694  1.00  0.40           O  
HETATM  444  O   HOH T 443     -27.998  -3.156  -3.255  1.00  0.40           O  
HETATM  445  O   HOH T 444     -26.023  26.925 169.189  1.00  0.40           O  
HETATM  446  O   HOH T 445     -28.491   1.173   0.763  1.00  0.40           O  
HETATM  447  O   HOH T 446     -13.250 -17.457  -2.473  1.00  0.40           O  
HETATM  448  O   HOH T 447      14.092   1.713 -13.376  1.00  0.40           O  
HETATM  449  O   HOH T 448     -27.651  12.149  -2.074  1.00  0.40           O  
HETATM  450  O   HOH T 449      -3.846  10.563 -10.499  1.00  0.40           O  
HETATM  451  O   HOH T 450       1.189  40.369 199.733  1.00  0.40           O  
HETATM  452  O   HOH T 451      -2.438  55.428 191.972  1.00  0.40           O  
HETATM  453  O   HOH T 452      -4.326  53.950 197.590  1.00  0.40           O  
HETATM  454  O   HOH T 453     -30.525   0.117 -11.994  1.00  0.40           O  
HETATM  455  O   HOH T 454     -16.366  70.377 180.947  1.00  0.40           O  
HETATM  456  O   HOH T 455      -3.303   6.113  -7.077  1.00  0.40           O  
HETATM  457  O   HOH T 456     -14.978  18.633  18.749  1.00  0.40           O  
HETATM  458  O   HOH T 457     -10.398  34.481 165.724  1.00  0.40           O  
HETATM  459  O   HOH T 458      -8.263  18.649  18.293  1.00  0.40           O  
HETATM  460  O   HOH T 459       3.494   7.695 -21.082  1.00  0.40           O  
HETATM  461  O   HOH T 460      -8.817  53.605 169.413  1.00  0.40           O  
HETATM  462  O   HOH T 461      -4.607   7.045  10.848  1.00  0.40           O  
HETATM  463  O   HOH T 462     -14.082  28.296 -11.631  1.00  0.41           O  
HETATM  464  O   HOH T 463     -10.565  32.304 167.367  1.00  0.41           O  
HETATM  465  O   HOH T 464     -41.156  43.014 179.430  1.00  0.41           O  
HETATM  466  O   HOH T 465     -20.874  69.800 175.525  1.00  0.41           O  
HETATM  467  O   HOH T 466     -41.619  35.145 183.763  1.00  0.41           O  
HETATM  468  O   HOH T 467     -26.506  26.804   4.981  1.00  0.41           O  
HETATM  469  O   HOH T 468     -26.325   7.639 -12.081  1.00  0.41           O  
HETATM  470  O   HOH T 469     -29.972  58.095 197.421  1.00  0.41           O  
HETATM  471  O   HOH T 470       0.621   7.182   3.904  1.00  0.41           O  
HETATM  472  O   HOH T 471     -17.897  55.190 196.683  1.00  0.41           O  
HETATM  473  O   HOH T 472     -40.927  37.254 175.833  1.00  0.41           O  
HETATM  474  O   HOH T 473     -26.873  63.332 197.947  1.00  0.41           O  
HETATM  475  O   HOH T 474      -1.795  56.660 200.494  1.00  0.41           O  
HETATM  476  O   HOH T 475      -0.869  12.523  -5.868  1.00  0.41           O  
HETATM  477  O   HOH T 476      -7.199  21.801 188.117  1.00  0.41           O  
HETATM  478  O   HOH T 477     -20.197  29.521   6.610  1.00  0.41           O  
HETATM  479  O   HOH T 478     -20.902  53.733 165.529  1.00  0.41           O  
HETATM  480  O   HOH T 479     -18.802  11.217 -14.718  1.00  0.41           O  
HETATM  481  O   HOH T 480     -25.248  18.270 177.103  1.00  0.41           O  
HETATM  482  O   HOH T 481     -21.007  -8.624  -1.733  1.00  0.41           O  
HETATM  483  O   HOH T 482      -5.517  -9.912  -9.206  1.00  0.41           O  
HETATM  484  O   HOH T 483     -14.877  12.967 -17.977  1.00  0.41           O  
HETATM  485  O   HOH T 484       3.289  27.020  14.648  1.00  0.41           O  
HETATM  486  O   HOH T 485       0.814  34.375   7.504  1.00  0.41           O  
HETATM  487  O   HOH T 486       2.596   6.055 -18.962  1.00  0.41           O  
HETATM  488  O   HOH T 487      -9.593  23.796 -12.248  1.00  0.41           O  
HETATM  489  O   HOH T 488     -17.951  56.927 160.580  1.00  0.41           O  
HETATM  490  O   HOH T 489     -30.098   0.994  -9.369  1.00  0.41           O  
HETATM  491  O   HOH T 490      21.008   5.876   4.923  1.00  0.41           O  
HETATM  492  O   HOH T 491      15.991  22.773   7.068  1.00  0.41           O  
HETATM  493  O   HOH T 492     -28.927   7.174  -4.856  1.00  0.41           O  
HETATM  494  O   HOH T 493      -9.480  67.580 176.312  1.00  0.41           O  
HETATM  495  O   HOH T 494       4.756  -2.392 -22.352  1.00  0.41           O  
HETATM  496  O   HOH T 495     -11.116 -18.221   7.730  1.00  0.41           O  
HETATM  497  O   HOH T 496     -28.214   3.241  -1.044  1.00  0.41           O  
HETATM  498  O   HOH T 497     -37.366  64.076 174.879  1.00  0.41           O  
HETATM  499  O   HOH T 498      -8.907 -18.190   6.051  1.00  0.41           O  
HETATM  500  O   HOH T 499     -27.919  36.592 163.507  1.00  0.41           O  
HETATM  501  O   HOH T 500       5.220   3.369 -19.429  1.00  0.41           O  
HETATM  502  O   HOH T 501      18.402  18.874   9.843  1.00  0.41           O  
HETATM  503  O   HOH T 502     -29.680  51.529 166.846  1.00  0.41           O  
HETATM  504  O   HOH T 503     -20.598  28.698 200.590  1.00  0.41           O  
HETATM  505  O   HOH T 504      19.241   0.489 -18.314  1.00  0.41           O  
HETATM  506  O   HOH T 505     -33.268  42.977 166.860  1.00  0.41           O  
HETATM  507  O   HOH T 506     -13.709  35.706  -1.866  1.00  0.41           O  
HETATM  508  O   HOH T 507     -14.036  26.272 165.357  1.00  0.42           O  
HETATM  509  O   HOH T 508       9.564  20.220  -8.575  1.00  0.42           O  
HETATM  510  O   HOH T 509       1.719   3.032 -17.004  1.00  0.42           O  
HETATM  511  O   HOH T 510     -16.222  25.164 175.781  1.00  0.42           O  
HETATM  512  O   HOH T 511     -36.316  45.683 192.898  1.00  0.42           O  
HETATM  513  O   HOH T 512     -21.513  27.684  -7.308  1.00  0.42           O  
HETATM  514  O   HOH T 513     -11.373  32.377   4.249  1.00  0.42           O  
HETATM  515  O   HOH T 514     -21.559  43.637 175.577  1.00  0.42           O  
HETATM  516  O   HOH T 515      17.655  17.623  14.618  1.00  0.42           O  
HETATM  517  O   HOH T 516     -19.617  54.097 158.748  1.00  0.42           O  
HETATM  518  O   HOH T 517     -25.238  20.477  10.585  1.00  0.42           O  
HETATM  519  O   HOH T 518     -10.946  25.265 172.575  1.00  0.42           O  
HETATM  520  O   HOH T 519     -28.407  16.845  -2.304  1.00  0.42           O  
HETATM  521  O   HOH T 520     -28.665   5.925   7.377  1.00  0.42           O  
HETATM  522  O   HOH T 521      -9.792  26.338 163.628  1.00  0.42           O  
HETATM  523  O   HOH T 522      12.933  -2.600 -15.207  1.00  0.42           O  
HETATM  524  O   HOH T 523     -27.577  28.900 168.215  1.00  0.42           O  
HETATM  525  O   HOH T 524      -0.112  45.215 201.802  1.00  0.42           O  
HETATM  526  O   HOH T 525     -18.435  24.875 174.077  1.00  0.42           O  
HETATM  527  O   HOH T 526     -24.475  21.698 171.058  1.00  0.42           O  
HETATM  528  O   HOH T 527     -22.495  40.635 186.733  1.00  0.42           O  
HETATM  529  O   HOH T 528      18.032  -5.785 -15.318  1.00  0.42           O  
HETATM  530  O   HOH T 529      -9.474   7.617 -23.443  1.00  0.42           O  
HETATM  531  O   HOH T 530     -18.206  31.444   7.299  1.00  0.42           O  
HETATM  532  O   HOH T 531       6.575  52.014 180.316  1.00  0.42           O  
HETATM  533  O   HOH T 532      -7.414  16.768  20.185  1.00  0.42           O  
HETATM  534  O   HOH T 533       0.084  39.704 169.508  1.00  0.42           O  
HETATM  535  O   HOH T 534     -26.375  18.867   6.417  1.00  0.42           O  
HETATM  536  O   HOH T 535     -31.356  31.671 185.724  1.00  0.42           O  
HETATM  537  O   HOH T 536     -24.405  63.800 199.056  1.00  0.42           O  
HETATM  538  O   HOH T 537     -24.158  26.557   9.903  1.00  0.42           O  
HETATM  539  O   HOH T 538      -3.810  42.059 166.646  1.00  0.42           O  
HETATM  540  O   HOH T 539     -15.667 -16.106  10.506  1.00  0.42           O  
HETATM  541  O   HOH T 540      17.782  20.933   8.112  1.00  0.42           O  
HETATM  542  O   HOH T 541      -3.850  24.991 195.810  1.00  0.42           O  
HETATM  543  O   HOH T 542     -42.688  50.305 177.828  1.00  0.42           O  
HETATM  544  O   HOH T 543      10.133  -5.460 -14.601  1.00  0.42           O  
HETATM  545  O   HOH T 544     -17.520 -15.556  -0.291  1.00  0.42           O  
HETATM  546  O   HOH T 545      -6.600   1.007 -20.978  1.00  0.42           O  
HETATM  547  O   HOH T 546     -33.223  45.273 168.480  1.00  0.42           O  
HETATM  548  O   HOH T 547     -10.521  46.959 162.158  1.00  0.42           O  
HETATM  549  O   HOH T 548     -23.057  40.678 203.509  1.00  0.42           O  
HETATM  550  O   HOH T 549     -13.163 -16.764   9.039  1.00  0.43           O  
HETATM  551  O   HOH T 550     -20.539  31.105   8.831  1.00  0.43           O  
HETATM  552  O   HOH T 551     -17.244  49.373 160.687  1.00  0.43           O  
HETATM  553  O   HOH T 552     -17.898  21.001  -6.541  1.00  0.43           O  
HETATM  554  O   HOH T 553      18.680  -4.416   0.962  1.00  0.43           O  
HETATM  555  O   HOH T 554      14.604  12.319  17.577  1.00  0.43           O  
HETATM  556  O   HOH T 555      -6.409   7.166  12.912  1.00  0.43           O  
HETATM  557  O   HOH T 556      17.190  -6.806   1.586  1.00  0.43           O  
HETATM  558  O   HOH T 557     -23.541  53.262 164.725  1.00  0.43           O  
HETATM  559  O   HOH T 558     -29.498  39.512 200.892  1.00  0.43           O  
HETATM  560  O   HOH T 559     -34.069  26.711 192.979  1.00  0.43           O  
HETATM  561  O   HOH T 560     -34.636  22.019 187.898  1.00  0.43           O  
HETATM  562  O   HOH T 561     -35.518  59.264 193.903  1.00  0.43           O  
HETATM  563  O   HOH T 562     -14.730  21.898 179.004  1.00  0.43           O  
HETATM  564  O   HOH T 563     -43.567  53.266 186.807  1.00  0.43           O  
HETATM  565  O   HOH T 564     -16.602  43.300 162.313  1.00  0.43           O  
HETATM  566  O   HOH T 565     -14.504  44.506 176.399  1.00  0.43           O  
HETATM  567  O   HOH T 566     -33.090  21.453 190.112  1.00  0.43           O  
HETATM  568  O   HOH T 567       3.648  24.059 -12.195  1.00  0.43           O  
HETATM  569  O   HOH T 568     -27.294   1.519   8.207  1.00  0.43           O  
HETATM  570  O   HOH T 569     -29.662  20.348   3.194  1.00  0.43           O  
HETATM  571  O   HOH T 570     -16.989  50.357 197.677  1.00  0.43           O  
HETATM  572  O   HOH T 571     -17.872  38.449 167.825  1.00  0.43           O  
HETATM  573  O   HOH T 572      14.475  -9.813  -8.515  1.00  0.43           O  
HETATM  574  O   HOH T 573     -11.045  -0.522 -20.428  1.00  0.43           O  
HETATM  575  O   HOH T 574     -15.123  62.818 164.199  1.00  0.43           O  
HETATM  576  O   HOH T 575      18.672  10.282  -9.893  1.00  0.43           O  
HETATM  577  O   HOH T 576     -44.554  52.604 189.359  1.00  0.43           O  
HETATM  578  O   HOH T 577     -19.675   9.872  -0.824  1.00  0.43           O  
HETATM  579  O   HOH T 578     -21.990  -9.219 -10.797  1.00  0.43           O  
HETATM  580  O   HOH T 579      -0.873   8.995  -3.695  1.00  0.43           O  
HETATM  581  O   HOH T 580      -1.687  -5.673 -12.319  1.00  0.43           O  
HETATM  582  O   HOH T 581      18.715  -3.285   3.474  1.00  0.43           O  
HETATM  583  O   HOH T 582     -30.931  51.189 169.392  1.00  0.43           O  
HETATM  584  O   HOH T 583      15.238  14.838  16.746  1.00  0.43           O  
HETATM  585  O   HOH T 584       3.235  54.875 195.240  1.00  0.43           O  
HETATM  586  O   HOH T 585     -26.609  72.048 172.220  1.00  0.43           O  
HETATM  587  O   HOH T 586      -0.562  38.346 200.341  1.00  0.43           O  
HETATM  588  O   HOH T 587     -38.424  61.364 192.902  1.00  0.44           O  
HETATM  589  O   HOH T 588      -0.246  28.464  14.007  1.00  0.44           O  
HETATM  590  O   HOH T 589     -15.038   8.609 -19.543  1.00  0.44           O  
HETATM  591  O   HOH T 590     -11.962  26.552  20.056  1.00  0.44           O  
HETATM  592  O   HOH T 591       2.024  33.834  -0.583  1.00  0.44           O  
HETATM  593  O   HOH T 592     -24.768  28.806   5.794  1.00  0.44           O  
HETATM  594  O   HOH T 593     -20.368  16.440 192.209  1.00  0.44           O  
HETATM  595  O   HOH T 594     -21.372  52.910 195.358  1.00  0.44           O  
HETATM  596  O   HOH T 595     -19.410  25.160 171.526  1.00  0.44           O  
HETATM  597  O   HOH T 596     -32.397  -1.914 -11.683  1.00  0.44           O  
HETATM  598  O   HOH T 597     -14.479  65.589 190.564  1.00  0.44           O  
HETATM  599  O   HOH T 598     -39.516  21.507 179.873  1.00  0.44           O  
HETATM  600  O   HOH T 599      17.286  19.097  12.383  1.00  0.44           O  
HETATM  601  O   HOH T 600     -31.944   3.658   1.496  1.00  0.44           O  
HETATM  602  O   HOH T 601     -32.956  67.780 185.590  1.00  0.44           O  
HETATM  603  O   HOH T 602     -11.199  53.340 160.109  1.00  0.44           O  
HETATM  604  O   HOH T 603     -11.189  31.075  -9.075  1.00  0.44           O  
HETATM  605  O   HOH T 604      -2.964  58.286 178.714  1.00  0.44           O  
HETATM  606  O   HOH T 605     -25.493  29.531 170.110  1.00  0.44           O  
HETATM  607  O   HOH T 606     -26.685  23.354 170.857  1.00  0.44           O  
HETATM  608  O   HOH T 607     -19.221  11.920 -12.139  1.00  0.44           O  
HETATM  609  O   HOH T 608      -4.198  23.535 -18.764  1.00  0.44           O  
HETATM  610  O   HOH T 609      -2.421  39.865 165.899  1.00  0.44           O  
HETATM  611  O   HOH T 610     -35.288  57.199 195.875  1.00  0.44           O  
HETATM  612  O   HOH T 611      -3.188  48.744 200.280  1.00  0.44           O  
HETATM  613  O   HOH T 612     -11.441 -18.580   4.920  1.00  0.44           O  
HETATM  614  O   HOH T 613      17.188  -5.053 -12.574  1.00  0.44           O  
HETATM  615  O   HOH T 614      -1.420  10.552 -14.762  1.00  0.44           O  
HETATM  616  O   HOH T 615      -3.522  60.897 178.923  1.00  0.44           O  
HETATM  617  O   HOH T 616     -19.846   7.330  13.598  1.00  0.44           O  
HETATM  618  O   HOH T 617     -11.284  21.903 182.011  1.00  0.44           O  
HETATM  619  O   HOH T 618     -19.680  22.607 178.905  1.00  0.44           O  
HETATM  620  O   HOH T 619     -40.894  55.682 195.998  1.00  0.44           O  
HETATM  621  O   HOH T 620     -19.149  20.479 195.025  1.00  0.44           O  
HETATM  622  O   HOH T 621     -23.818  26.647  -3.938  1.00  0.44           O  
HETATM  623  O   HOH T 622     -11.273  24.249  21.454  1.00  0.44           O  
HETATM  624  O   HOH T 623      -1.578  33.176  -9.537  1.00  0.44           O  
HETATM  625  O   HOH T 624      -7.087  56.550 192.574  1.00  0.44           O  
HETATM  626  O   HOH T 625     -14.215  63.149 166.878  1.00  0.44           O  
HETATM  627  O   HOH T 626     -10.390 -17.948   2.365  1.00  0.44           O  
HETATM  628  O   HOH T 627     -42.327  47.660 176.634  1.00  0.44           O  
HETATM  629  O   HOH T 628     -23.467  27.754 166.240  1.00  0.44           O  
HETATM  630  O   HOH T 629       4.108  29.244  13.276  1.00  0.44           O  
HETATM  631  O   HOH T 630      19.025  -4.893   5.680  1.00  0.44           O  
HETATM  632  O   HOH T 631      -0.852  47.905 201.688  1.00  0.44           O  
HETATM  633  O   HOH T 632      16.356  20.715  10.447  1.00  0.44           O  
HETATM  634  O   HOH T 633       6.652   0.856 -22.120  1.00  0.44           O  
HETATM  635  O   HOH T 634     -24.890  66.836 179.467  1.00  0.44           O  
HETATM  636  O   HOH T 635       4.951  37.729 187.101  1.00  0.44           O  
HETATM  637  O   HOH T 636     -28.293  61.591 168.886  1.00  0.45           O  
HETATM  638  O   HOH T 637      -0.059  40.847 167.036  1.00  0.45           O  
HETATM  639  O   HOH T 638     -37.825  38.054 167.688  1.00  0.45           O  
HETATM  640  O   HOH T 639     -25.266  40.592 197.469  1.00  0.45           O  
HETATM  641  O   HOH T 640      -5.495  26.801 -21.785  1.00  0.45           O  
HETATM  642  O   HOH T 641      -7.595  33.980 -10.589  1.00  0.45           O  
HETATM  643  O   HOH T 642      -4.016 -15.550   3.163  1.00  0.45           O  
HETATM  644  O   HOH T 643     -13.938  10.387 -17.729  1.00  0.45           O  
HETATM  645  O   HOH T 644     -29.023  43.271 192.833  1.00  0.45           O  
HETATM  646  O   HOH T 645      13.486   4.207 -12.495  1.00  0.45           O  
HETATM  647  O   HOH T 646     -39.296  34.622 165.719  1.00  0.45           O  
HETATM  648  O   HOH T 647     -31.105  49.217 163.894  1.00  0.45           O  
HETATM  649  O   HOH T 648     -11.687  45.189 160.375  1.00  0.45           O  
HETATM  650  O   HOH T 649     -13.014  31.448   8.381  1.00  0.45           O  
HETATM  651  O   HOH T 650     -33.329  19.613 177.554  1.00  0.45           O  
HETATM  652  O   HOH T 651      -9.670  21.785 185.455  1.00  0.45           O  
HETATM  653  O   HOH T 652       7.184  14.123 -15.936  1.00  0.45           O  
HETATM  654  O   HOH T 653      15.442  -0.729 -17.743  1.00  0.45           O  
HETATM  655  O   HOH T 654     -20.268  44.294 178.030  1.00  0.45           O  
HETATM  656  O   HOH T 655      -5.211  11.803  -6.225  1.00  0.45           O  
HETATM  657  O   HOH T 656     -22.682  18.723 177.883  1.00  0.45           O  
HETATM  658  O   HOH T 657     -25.067  12.635 -18.889  1.00  0.45           O  
HETATM  659  O   HOH T 658      20.289   1.691 -13.977  1.00  0.45           O  
HETATM  660  O   HOH T 659     -20.852  22.621 176.372  1.00  0.45           O  
HETATM  661  O   HOH T 660     -17.351  16.897 -11.746  1.00  0.45           O  
HETATM  662  O   HOH T 661       0.391  20.839 -16.024  1.00  0.45           O  
HETATM  663  O   HOH T 662      17.841  22.421   1.275  1.00  0.45           O  
HETATM  664  O   HOH T 663     -15.084  43.085 178.800  1.00  0.45           O  
HETATM  665  O   HOH T 664     -23.998  61.802 167.035  1.00  0.45           O  
HETATM  666  O   HOH T 665       8.152  19.393 -10.717  1.00  0.45           O  
HETATM  667  O   HOH T 666      -2.320  44.576 203.349  1.00  0.45           O  
HETATM  668  O   HOH T 667     -11.551  23.760 177.157  1.00  0.45           O  
HETATM  669  O   HOH T 668      -7.877  66.801 184.186  1.00  0.45           O  
HETATM  670  O   HOH T 669     -11.413   7.013 -21.548  1.00  0.45           O  
HETATM  671  O   HOH T 670       1.287  49.241 200.819  1.00  0.45           O  
HETATM  672  O   HOH T 671     -35.010  21.557 178.848  1.00  0.45           O  
HETATM  673  O   HOH T 672      -2.263 -16.151   0.993  1.00  0.45           O  
HETATM  674  O   HOH T 673       3.587  31.561  -0.434  1.00  0.45           O  
HETATM  675  O   HOH T 674       4.119  14.170  18.243  1.00  0.45           O  
HETATM  676  O   HOH T 675       4.432   0.154 -23.613  1.00  0.45           O  
HETATM  677  O   HOH T 676     -26.215   5.567 -16.392  1.00  0.45           O  
HETATM  678  O   HOH T 677     -31.598  24.163 173.289  1.00  0.45           O  
HETATM  679  O   HOH T 678     -11.465  25.884 169.990  1.00  0.45           O  
HETATM  680  O   HOH T 679      12.296  29.140  -7.427  1.00  0.45           O  
HETATM  681  O   HOH T 680      -5.697  28.398 -17.730  1.00  0.45           O  
HETATM  682  O   HOH T 681      -1.400  28.417 195.428  1.00  0.45           O  
HETATM  683  O   HOH T 682      -8.500  -0.345 -19.364  1.00  0.45           O  
HETATM  684  O   HOH T 683     -25.173  71.164 174.381  1.00  0.45           O  
HETATM  685  O   HOH T 684     -18.018  38.951 171.475  1.00  0.45           O  
HETATM  686  O   HOH T 685      10.317 -12.826   8.193  1.00  0.46           O  
HETATM  687  O   HOH T 686     -34.229  46.326 194.688  1.00  0.46           O  
HETATM  688  O   HOH T 687     -17.505  41.078 175.315  1.00  0.46           O  
HETATM  689  O   HOH T 688      -9.515   9.011  14.559  1.00  0.46           O  
HETATM  690  O   HOH T 689      -0.239  38.033   4.100  1.00  0.46           O  
HETATM  691  O   HOH T 690     -15.579 -18.757  -3.440  1.00  0.46           O  
HETATM  692  O   HOH T 691     -26.509  29.331 201.966  1.00  0.46           O  
HETATM  693  O   HOH T 692     -18.965  70.739 179.788  1.00  0.46           O  
HETATM  694  O   HOH T 693       4.926  40.682 174.228  1.00  0.46           O  
HETATM  695  O   HOH T 694     -23.901  16.312 191.102  1.00  0.46           O  
HETATM  696  O   HOH T 695       1.569  26.652 192.936  1.00  0.46           O  
HETATM  697  O   HOH T 696     -15.191  41.364 170.767  1.00  0.46           O  
HETATM  698  O   HOH T 697     -15.735  40.700 177.406  1.00  0.46           O  
HETATM  699  O   HOH T 698     -13.085  17.870 189.497  1.00  0.46           O  
HETATM  700  O   HOH T 699      -5.028  49.566 170.391  1.00  0.46           O  
HETATM  701  O   HOH T 700     -25.185   1.473   9.966  1.00  0.46           O  
HETATM  702  O   HOH T 701     -14.255  23.216 176.451  1.00  0.46           O  
HETATM  703  O   HOH T 702     -17.707  -8.516   7.279  1.00  0.46           O  
HETATM  704  O   HOH T 703     -19.352  74.070 174.391  1.00  0.46           O  
HETATM  705  O   HOH T 704      -8.828  55.159 180.748  1.00  0.46           O  
HETATM  706  O   HOH T 705       4.424  22.523  14.337  1.00  0.46           O  
HETATM  707  O   HOH T 706     -19.331  43.204 161.804  1.00  0.46           O  
HETATM  708  O   HOH T 707     -43.803  54.355 184.257  1.00  0.46           O  
HETATM  709  O   HOH T 708     -39.811  37.363 166.139  1.00  0.46           O  
HETATM  710  O   HOH T 709      -6.834  28.972  -9.972  1.00  0.46           O  
HETATM  711  O   HOH T 710     -10.287  30.473  18.452  1.00  0.46           O  
HETATM  712  O   HOH T 711     -39.848  26.577 181.572  1.00  0.46           O  
HETATM  713  O   HOH T 712      21.720  11.011  12.869  1.00  0.46           O  
HETATM  714  O   HOH T 713     -13.096  72.281 170.921  1.00  0.46           O  
HETATM  715  O   HOH T 714     -13.119  26.389  17.511  1.00  0.46           O  
HETATM  716  O   HOH T 715      -2.515  35.798  -9.365  1.00  0.46           O  
HETATM  717  O   HOH T 716     -26.670  -4.930 -12.313  1.00  0.46           O  
HETATM  718  O   HOH T 717     -32.689  -5.764 -10.652  1.00  0.46           O  
HETATM  719  O   HOH T 718     -21.107  20.677 196.970  1.00  0.46           O  
HETATM  720  O   HOH T 719     -29.857  -2.782   1.834  1.00  0.46           O  
HETATM  721  O   HOH T 720     -28.460  66.849 173.039  1.00  0.46           O  
HETATM  722  O   HOH T 721     -26.746   4.901 -12.499  1.00  0.46           O  
HETATM  723  O   HOH T 722      -8.640 -12.616 -12.137  1.00  0.46           O  
HETATM  724  O   HOH T 723      20.442  12.180  17.302  1.00  0.46           O  
HETATM  725  O   HOH T 724     -19.703  39.663 169.387  1.00  0.46           O  
HETATM  726  O   HOH T 725     -24.192  34.483 202.507  1.00  0.46           O  
HETATM  727  O   HOH T 726       2.046  -5.769  12.077  1.00  0.46           O  
HETATM  728  O   HOH T 727      -6.274  24.347 198.519  1.00  0.46           O  
HETATM  729  O   HOH T 728     -35.895  20.840 190.109  1.00  0.46           O  
HETATM  730  O   HOH T 729      13.020   5.666 -17.023  1.00  0.46           O  
HETATM  731  O   HOH T 730      11.277  17.978  -8.859  1.00  0.46           O  
HETATM  732  O   HOH T 731       7.073  42.735 177.800  1.00  0.46           O  
HETATM  733  O   HOH T 732     -13.280   9.095 -21.687  1.00  0.46           O  
HETATM  734  O   HOH T 733      -8.036  29.407  17.247  1.00  0.46           O  
HETATM  735  O   HOH T 734     -40.168  39.548 167.829  1.00  0.46           O  
HETATM  736  O   HOH T 735      17.867   3.058 -13.799  1.00  0.46           O  
HETATM  737  O   HOH T 736      -9.939  26.891  10.843  1.00  0.46           O  
HETATM  738  O   HOH T 737     -44.494  33.276 186.709  1.00  0.46           O  
HETATM  739  O   HOH T 738     -13.659  37.582  -6.710  1.00  0.46           O  
HETATM  740  O   HOH T 739       3.206  21.030  16.293  1.00  0.46           O  
HETATM  741  O   HOH T 740     -21.484  30.797 202.220  1.00  0.46           O  
HETATM  742  O   HOH T 741     -29.145  58.861 199.965  1.00  0.46           O  
HETATM  743  O   HOH T 742     -26.062  58.168 197.623  1.00  0.46           O  
HETATM  744  O   HOH T 743      -4.586  26.270 -19.291  1.00  0.46           O  
HETATM  745  O   HOH T 744      -0.228  25.071 170.495  1.00  0.46           O  
HETATM  746  O   HOH T 745     -43.816  27.285 170.748  1.00  0.46           O  
HETATM  747  O   HOH T 746       0.111  26.074 195.383  1.00  0.46           O  
HETATM  748  O   HOH T 747     -26.742  50.231 164.734  1.00  0.46           O  
HETATM  749  O   HOH T 748     -28.966   9.812  -5.176  1.00  0.46           O  
HETATM  750  O   HOH T 749     -21.315  69.709 181.034  1.00  0.46           O  
HETATM  751  O   HOH T 750       6.404  14.528  16.695  1.00  0.47           O  
HETATM  752  O   HOH T 751       3.085   8.840  18.726  1.00  0.47           O  
HETATM  753  O   HOH T 752     -16.952  26.768 -12.881  1.00  0.47           O  
HETATM  754  O   HOH T 753      -4.933  16.140  19.000  1.00  0.47           O  
HETATM  755  O   HOH T 754     -36.117  51.572 193.079  1.00  0.47           O  
HETATM  756  O   HOH T 755     -14.818  39.982 162.232  1.00  0.47           O  
HETATM  757  O   HOH T 756     -24.591  25.629  -1.495  1.00  0.47           O  
HETATM  758  O   HOH T 757     -31.693  -2.452   5.658  1.00  0.47           O  
HETATM  759  O   HOH T 758      16.887   5.153   9.887  1.00  0.47           O  
HETATM  760  O   HOH T 759     -22.454  63.334 165.299  1.00  0.47           O  
HETATM  761  O   HOH T 760     -29.987  28.304 169.462  1.00  0.47           O  
HETATM  762  O   HOH T 761      -9.594  24.789 165.835  1.00  0.47           O  
HETATM  763  O   HOH T 762       1.986  -4.571  -2.490  1.00  0.47           O  
HETATM  764  O   HOH T 763      -4.650  56.684 191.166  1.00  0.47           O  
HETATM  765  O   HOH T 764     -24.377  28.439  -1.857  1.00  0.47           O  
HETATM  766  O   HOH T 765       4.846  23.424  -9.772  1.00  0.47           O  
HETATM  767  O   HOH T 766      15.050  24.339  -1.022  1.00  0.47           O  
HETATM  768  O   HOH T 767     -25.025  -1.977 -18.551  1.00  0.47           O  
HETATM  769  O   HOH T 768     -44.213  49.505 175.706  1.00  0.47           O  
HETATM  770  O   HOH T 769       5.638  30.057  11.180  1.00  0.47           O  
HETATM  771  O   HOH T 770     -21.158  61.387 166.643  1.00  0.47           O  
HETATM  772  O   HOH T 771      16.631  -8.897  -9.962  1.00  0.47           O  
HETATM  773  O   HOH T 772      -3.891   9.817  -7.799  1.00  0.47           O  
HETATM  774  O   HOH T 773     -37.877  47.785 191.998  1.00  0.47           O  
HETATM  775  O   HOH T 774     -32.236  39.881 160.104  1.00  0.47           O  
HETATM  776  O   HOH T 775      -3.172  60.880 191.192  1.00  0.47           O  
HETATM  777  O   HOH T 776     -23.738  69.289 169.615  1.00  0.47           O  
HETATM  778  O   HOH T 777     -39.526  50.413 189.749  1.00  0.47           O  
HETATM  779  O   HOH T 778     -19.410  35.040 202.097  1.00  0.47           O  
HETATM  780  O   HOH T 779     -17.853  45.259 160.762  1.00  0.47           O  
HETATM  781  O   HOH T 780      14.597  -7.245   0.713  1.00  0.47           O  
HETATM  782  O   HOH T 781      -0.167  57.278 202.724  1.00  0.47           O  
HETATM  783  O   HOH T 782       6.469  12.736  18.796  1.00  0.47           O  
HETATM  784  O   HOH T 783     -40.641  33.401 171.327  1.00  0.47           O  
HETATM  785  O   HOH T 784     -22.634  18.080 192.748  1.00  0.47           O  
HETATM  786  O   HOH T 785     -13.865  30.034  -9.412  1.00  0.47           O  
HETATM  787  O   HOH T 786     -21.314  70.265 178.240  1.00  0.47           O  
HETATM  788  O   HOH T 787      -3.585  64.928 178.757  1.00  0.47           O  
HETATM  789  O   HOH T 788      13.047   9.965  17.835  1.00  0.47           O  
HETATM  790  O   HOH T 789      12.329  -8.274  -9.253  1.00  0.47           O  
HETATM  791  O   HOH T 790     -12.268  29.674  10.364  1.00  0.47           O  
HETATM  792  O   HOH T 791      -6.586 -16.896  -4.363  1.00  0.47           O  
HETATM  793  O   HOH T 792       5.129  49.057 174.827  1.00  0.47           O  
HETATM  794  O   HOH T 793     -42.971  40.933 179.136  1.00  0.47           O  
HETATM  795  O   HOH T 794      -6.406  66.732 181.824  1.00  0.47           O  
HETATM  796  O   HOH T 795     -15.617 -11.686 -10.449  1.00  0.47           O  
HETATM  797  O   HOH T 796     -39.371  53.092 188.867  1.00  0.47           O  
HETATM  798  O   HOH T 797      21.867  10.388  15.622  1.00  0.48           O  
HETATM  799  O   HOH T 798     -37.852  60.069 195.249  1.00  0.48           O  
HETATM  800  O   HOH T 799     -41.432  26.231 169.873  1.00  0.48           O  
HETATM  801  O   HOH T 800     -24.084  26.556  12.540  1.00  0.48           O  
HETATM  802  O   HOH T 801     -13.120  47.423 161.227  1.00  0.48           O  
HETATM  803  O   HOH T 802     -22.636  55.117 196.765  1.00  0.48           O  
HETATM  804  O   HOH T 803     -30.176  -0.095   2.616  1.00  0.48           O  
HETATM  805  O   HOH T 804     -38.719  28.254 166.959  1.00  0.48           O  
HETATM  806  O   HOH T 805      -1.036  -7.042  14.230  1.00  0.48           O  
HETATM  807  O   HOH T 806     -30.680  67.444 187.081  1.00  0.48           O  
HETATM  808  O   HOH T 807     -19.655  57.280 196.186  1.00  0.48           O  
HETATM  809  O   HOH T 808     -26.661  60.536 166.837  1.00  0.48           O  
HETATM  810  O   HOH T 809      18.099   9.223 -12.460  1.00  0.48           O  
HETATM  811  O   HOH T 810     -26.296  21.656   6.843  1.00  0.48           O  
HETATM  812  O   HOH T 811      -8.895  25.124 170.680  1.00  0.48           O  
HETATM  813  O   HOH T 812      -9.903  48.737 164.224  1.00  0.48           O  
HETATM  814  O   HOH T 813     -22.459  23.360 167.560  1.00  0.48           O  
HETATM  815  O   HOH T 814     -20.251  24.283 169.006  1.00  0.48           O  
HETATM  816  O   HOH T 815     -18.897  34.692  14.383  1.00  0.48           O  
HETATM  817  O   HOH T 816      -7.116  -5.902 -12.461  1.00  0.48           O  
HETATM  818  O   HOH T 817     -22.399  60.516 181.581  1.00  0.48           O  
HETATM  819  O   HOH T 818      -2.114  26.522 184.767  1.00  0.48           O  
HETATM  820  O   HOH T 819     -28.131  41.465 161.208  1.00  0.48           O  
HETATM  821  O   HOH T 820       2.509   5.129 -21.543  1.00  0.48           O  
HETATM  822  O   HOH T 821     -27.829   6.125 -10.267  1.00  0.48           O  
HETATM  823  O   HOH T 822     -16.250  23.083  19.762  1.00  0.48           O  
HETATM  824  O   HOH T 823      -1.568  11.194 -12.039  1.00  0.48           O  
HETATM  825  O   HOH T 824      -2.325  37.960   5.901  1.00  0.48           O  
HETATM  826  O   HOH T 825     -36.408  63.404 182.481  1.00  0.48           O  
HETATM  827  O   HOH T 826      -0.938  24.344 173.032  1.00  0.48           O  
HETATM  828  O   HOH T 827     -31.021  47.008 168.607  1.00  0.48           O  
HETATM  829  O   HOH T 828     -39.086  59.196 185.734  1.00  0.48           O  
HETATM  830  O   HOH T 829     -25.059  22.782 168.525  1.00  0.48           O  
HETATM  831  O   HOH T 830      -2.434  40.483 168.509  1.00  0.48           O  
HETATM  832  O   HOH T 831     -25.490   9.692 -16.144  1.00  0.48           O  
HETATM  833  O   HOH T 832      18.091  18.271  -6.953  1.00  0.48           O  
HETATM  834  O   HOH T 833     -29.385  63.405 198.973  1.00  0.48           O  
HETATM  835  O   HOH T 834     -43.088  30.091 172.999  1.00  0.48           O  
HETATM  836  O   HOH T 835       9.239  51.157 180.620  1.00  0.48           O  
HETATM  837  O   HOH T 836     -12.541  24.352 174.635  1.00  0.48           O  
HETATM  838  O   HOH T 837      17.628  -1.171 -13.413  1.00  0.48           O  
HETATM  839  O   HOH T 838     -16.253   5.907 -23.691  1.00  0.48           O  
HETATM  840  O   HOH T 839     -18.690 -15.948  -2.775  1.00  0.49           O  
HETATM  841  O   HOH T 840     -26.916   9.445  -1.775  1.00  0.49           O  
HETATM  842  O   HOH T 841     -18.836  69.577 182.291  1.00  0.49           O  
HETATM  843  O   HOH T 842     -42.178  42.295 191.330  1.00  0.49           O  
HETATM  844  O   HOH T 843      20.360  17.051  10.476  1.00  0.49           O  
HETATM  845  O   HOH T 844      -0.432  35.118   0.174  1.00  0.49           O  
HETATM  846  O   HOH T 845      19.208   4.242   6.225  1.00  0.49           O  
HETATM  847  O   HOH T 846     -31.912  44.371 160.347  1.00  0.49           O  
HETATM  848  O   HOH T 847     -29.274   6.191  10.040  1.00  0.49           O  
HETATM  849  O   HOH T 848      -8.812  48.928 161.522  1.00  0.49           O  
HETATM  850  O   HOH T 849      16.304  11.295 -12.953  1.00  0.49           O  
HETATM  851  O   HOH T 850     -41.642  44.514 193.027  1.00  0.49           O  
HETATM  852  O   HOH T 851      16.228   4.688 -12.453  1.00  0.49           O  
HETATM  853  O   HOH T 852     -26.031  -4.205  -0.172  1.00  0.49           O  
HETATM  854  O   HOH T 853       5.815  34.662 184.797  1.00  0.49           O  
HETATM  855  O   HOH T 854     -18.057  45.953 177.429  1.00  0.49           O  
HETATM  856  O   HOH T 855       5.667   8.052  18.423  1.00  0.49           O  
HETATM  857  O   HOH T 856     -27.085  40.601 163.641  1.00  0.49           O  
HETATM  858  O   HOH T 857     -24.426  25.357 167.480  1.00  0.49           O  
HETATM  859  O   HOH T 858     -18.366  33.173  16.674  1.00  0.49           O  
HETATM  860  O   HOH T 859     -25.930  38.171 164.402  1.00  0.49           O  
HETATM  861  O   HOH T 860     -28.800  10.373  10.544  1.00  0.49           O  
HETATM  862  O   HOH T 861     -36.883  58.850 197.572  1.00  0.49           O  
HETATM  863  O   HOH T 862     -34.814  63.761 173.942  1.00  0.49           O  
HETATM  864  O   HOH T 863     -28.675  -3.394  -0.580  1.00  0.49           O  
HETATM  865  O   HOH T 864      -9.074 -19.948   0.906  1.00  0.49           O  
HETATM  866  O   HOH T 865     -21.836  20.080 175.606  1.00  0.49           O  
HETATM  867  O   HOH T 866      -6.142  23.274 195.878  1.00  0.49           O  
HETATM  868  O   HOH T 867     -30.227  20.278  -0.806  1.00  0.49           O  
HETATM  869  O   HOH T 868     -15.333  75.761 170.929  1.00  0.49           O  
HETATM  870  O   HOH T 869      -4.825   7.200  -5.026  1.00  0.49           O  
HETATM  871  O   HOH T 870      21.123  12.861  14.768  1.00  0.49           O  
HETATM  872  O   HOH T 871      -0.030  48.316 204.380  1.00  0.49           O  
HETATM  873  O   HOH T 872     -22.402  17.396 183.795  1.00  0.49           O  
HETATM  874  O   HOH T 873      -7.217   7.310 -21.839  1.00  0.49           O  
HETATM  875  O   HOH T 874      -7.269  25.492 164.492  1.00  0.49           O  
HETATM  876  O   HOH T 875     -10.285  33.435 -10.278  1.00  0.49           O  
HETATM  877  O   HOH T 876     -19.809  32.573 200.833  1.00  0.49           O  
HETATM  878  O   HOH T 877      -5.389  62.795 178.339  1.00  0.49           O  
HETATM  879  O   HOH T 878     -20.247  15.308 189.768  1.00  0.49           O  
HETATM  880  O   HOH T 879     -20.544  70.189 168.169  1.00  0.49           O  
HETATM  881  O   HOH T 880     -15.775  47.046 160.601  1.00  0.49           O  
HETATM  882  O   HOH T 881     -21.621   7.590  11.522  1.00  0.49           O  
HETATM  883  O   HOH T 882       2.228  28.944 -17.649  1.00  0.49           O  
HETATM  884  O   HOH T 883     -26.755  58.320 165.219  1.00  0.49           O  
HETATM  885  O   HOH T 884     -18.372  42.886 170.283  1.00  0.49           O  
HETATM  886  O   HOH T 885     -11.027  50.524 200.156  1.00  0.49           O  
HETATM  887  O   HOH T 886     -37.921  52.342 191.043  1.00  0.49           O  
HETATM  888  O   HOH T 887      19.376  19.054  -1.963  1.00  0.49           O  
HETATM  889  O   HOH T 888     -23.065  50.929 160.255  1.00  0.49           O  
HETATM  890  O   HOH T 889     -29.312   3.175   7.220  1.00  0.49           O  
HETATM  891  O   HOH T 890      -9.839  39.739 162.693  1.00  0.49           O  
HETATM  892  O   HOH T 891      -5.009  12.512 -12.061  1.00  0.49           O  
HETATM  893  O   HOH T 892     -21.959  64.494 197.791  1.00  0.49           O  
HETATM  894  O   HOH T 893     -25.649  -0.601 -14.744  1.00  0.49           O  
HETATM  895  O   HOH T 894     -37.542  31.983 169.698  1.00  0.49           O  
HETATM  896  O   HOH T 895     -11.063  19.467 -15.721  1.00  0.49           O  
HETATM  897  O   HOH T 896      -9.293  36.769   4.036  1.00  0.49           O  
HETATM  898  O   HOH T 897     -23.013  -4.225  10.579  1.00  0.49           O  
HETATM  899  O   HOH T 898     -11.543  29.571 185.432  1.00  0.50           O  
HETATM  900  O   HOH T 899      -0.625  -5.240  12.258  1.00  0.50           O  
HETATM  901  O   HOH T 900     -34.193  24.003 189.611  1.00  0.50           O  
HETATM  902  O   HOH T 901      16.412  14.738 -13.285  1.00  0.50           O  
HETATM  903  O   HOH T 902     -39.377  30.599 165.558  1.00  0.50           O  
HETATM  904  O   HOH T 903     -26.534  14.764  -2.592  1.00  0.50           O  
HETATM  905  O   HOH T 904     -11.448   4.180  15.977  1.00  0.50           O  
HETATM  906  O   HOH T 905      -7.526  15.371  15.663  1.00  0.50           O  
HETATM  907  O   HOH T 906     -21.546  33.514 202.894  1.00  0.50           O  
HETATM  908  O   HOH T 907     -18.421 -13.322  -5.362  1.00  0.50           O  
HETATM  909  O   HOH T 908       7.326 -13.763  -4.039  1.00  0.50           O  
HETATM  910  O   HOH T 909     -25.203  26.931 201.633  1.00  0.50           O  
HETATM  911  O   HOH T 910       3.262  44.497 169.434  1.00  0.50           O  
HETATM  912  O   HOH T 911     -20.270  20.877  18.430  1.00  0.50           O  
HETATM  913  O   HOH T 912      -8.474  31.331  -9.968  1.00  0.50           O  
HETATM  914  O   HOH T 913      12.223  -6.346 -12.902  1.00  0.50           O  
HETATM  915  O   HOH T 914      -5.837  14.185 -19.799  1.00  0.50           O  
HETATM  916  O   HOH T 915     -27.757  26.888 202.518  1.00  0.50           O  
HETATM  917  O   HOH T 916      15.471   9.820  18.563  1.00  0.50           O  
HETATM  918  O   HOH T 917     -21.577  24.954  -7.210  1.00  0.50           O  
HETATM  919  O   HOH T 918      -4.363  55.851 199.631  1.00  0.50           O  
HETATM  920  O   HOH T 919     -26.519  63.266 167.594  1.00  0.50           O  
HETATM  921  O   HOH T 920       4.294  54.558 190.545  1.00  0.50           O  
HETATM  922  O   HOH T 921     -26.523  35.121 201.013  1.00  0.50           O  
HETATM  923  O   HOH T 922     -16.540  20.851  18.404  1.00  0.50           O  
HETATM  924  O   HOH T 923     -35.753  49.476 191.330  1.00  0.50           O  
HETATM  925  O   HOH T 924     -28.282  23.371   5.784  1.00  0.50           O  
HETATM  926  O   HOH T 925     -15.941   8.315 -22.227  1.00  0.50           O  
HETATM  927  O   HOH T 926      -8.681 -19.270  -1.737  1.00  0.50           O  
HETATM  928  O   HOH T 927      -1.570  -8.364 -11.493  1.00  0.50           O  
HETATM  929  O   HOH T 928     -38.422  39.881 165.760  1.00  0.50           O  
HETATM  930  O   HOH T 929     -42.704  31.604 185.290  1.00  0.50           O  
HETATM  931  O   HOH T 930     -25.001  26.663   7.365  1.00  0.50           O  
HETATM  932  O   HOH T 931     -26.980  39.609 199.594  1.00  0.50           O  
HETATM  933  O   HOH T 932      -2.573   8.270 -17.737  1.00  0.50           O  
HETATM  934  O   HOH T 933     -19.788  66.313 199.822  1.00  0.50           O  
HETATM  935  O   HOH T 934     -19.959  19.053 192.743  1.00  0.50           O  
HETATM  936  O   HOH T 935     -11.371  -4.765  15.647  1.00  0.50           O  
HETATM  937  O   HOH T 936     -38.064  66.614 175.515  1.00  0.50           O  
HETATM  938  O   HOH T 937     -25.239  40.109 201.873  1.00  0.50           O  
HETATM  939  O   HOH T 938     -24.202  47.807 196.218  1.00  0.50           O  
HETATM  940  O   HOH T 939     -32.136  47.005 162.691  1.00  0.50           O  
HETATM  941  O   HOH T 940      -5.045  25.563  22.620  1.00  0.50           O  
HETATM  942  O   HOH T 941      -4.397  10.105 -16.991  1.00  0.50           O  
HETATM  943  O   HOH T 942     -23.588 -11.598 -10.556  1.00  0.50           O  
HETATM  944  O   HOH T 943      -1.945  40.289   4.416  1.00  0.50           O  
HETATM  945  O   HOH T 944     -14.450  38.110 169.367  1.00  0.50           O  
HETATM  946  O   HOH T 945      16.510   7.210 -13.662  1.00  0.50           O  
HETATM  947  O   HOH T 946     -34.063  51.692 187.198  1.00  0.50           O  
HETATM  948  O   HOH T 947      -9.004  -0.109 -22.115  1.00  0.50           O  
HETATM  949  O   HOH T 948     -31.620  43.211 156.796  1.00  0.51           O  
HETATM  950  O   HOH T 949     -39.917  39.449 192.994  1.00  0.51           O  
HETATM  951  O   HOH T 950     -26.536  68.768 178.171  1.00  0.51           O  
HETATM  952  O   HOH T 951      -2.447  40.213 203.419  1.00  0.51           O  
HETATM  953  O   HOH T 952     -41.390  45.090 177.513  1.00  0.51           O  
HETATM  954  O   HOH T 953     -25.008  69.215 183.931  1.00  0.51           O  
HETATM  955  O   HOH T 954      -9.800   6.271  15.338  1.00  0.51           O  
HETATM  956  O   HOH T 955     -26.020  66.707 184.664  1.00  0.51           O  
HETATM  957  O   HOH T 956      -6.270   9.291  -6.227  1.00  0.51           O  
HETATM  958  O   HOH T 957     -43.373  37.733 176.989  1.00  0.51           O  
HETATM  959  O   HOH T 958     -31.766  50.754 195.389  1.00  0.51           O  
HETATM  960  O   HOH T 959      -3.868  30.820 197.714  1.00  0.51           O  
HETATM  961  O   HOH T 960     -29.369  22.681 174.397  1.00  0.51           O  
HETATM  962  O   HOH T 961       1.425  28.428 194.981  1.00  0.51           O  
HETATM  963  O   HOH T 962     -17.455 -14.592   9.004  1.00  0.51           O  
HETATM  964  O   HOH T 963     -42.091  36.570 173.383  1.00  0.51           O  
HETATM  965  O   HOH T 964     -15.542  -8.234 -13.932  1.00  0.51           O  
HETATM  966  O   HOH T 965     -30.204  25.873 202.014  1.00  0.51           O  
HETATM  967  O   HOH T 966     -15.570 -14.665  -9.088  1.00  0.51           O  
HETATM  968  O   HOH T 967      10.791  -8.074 -11.421  1.00  0.51           O  
HETATM  969  O   HOH T 968     -29.292  30.090 202.027  1.00  0.51           O  
HETATM  970  O   HOH T 969      20.246  14.903  16.506  1.00  0.51           O  
HETATM  971  O   HOH T 970     -40.337  30.646 185.461  1.00  0.51           O  
HETATM  972  O   HOH T 971     -21.743  26.831 202.350  1.00  0.51           O  
HETATM  973  O   HOH T 972     -41.212  54.449 183.127  1.00  0.51           O  
HETATM  974  O   HOH T 973       6.467  50.778 177.854  1.00  0.51           O  
HETATM  975  O   HOH T 974     -24.843  45.940 200.284  1.00  0.51           O  
HETATM  976  O   HOH T 975       2.409  36.816  -3.183  1.00  0.51           O  
HETATM  977  O   HOH T 976      -8.795   9.823 -21.790  1.00  0.51           O  
HETATM  978  O   HOH T 977       0.273  50.306 175.790  1.00  0.51           O  
HETATM  979  O   HOH T 978     -29.270  -2.123   4.453  1.00  0.51           O  
HETATM  980  O   HOH T 979      -0.395  35.618 199.241  1.00  0.51           O  
HETATM  981  O   HOH T 980     -33.342  44.971 180.014  1.00  0.51           O  
HETATM  982  O   HOH T 981     -20.306 -13.771  -8.858  1.00  0.51           O  
HETATM  983  O   HOH T 982     -30.080  68.149 182.196  1.00  0.52           O  
HETATM  984  O   HOH T 983     -17.660 -12.928  -9.049  1.00  0.52           O  
HETATM  985  O   HOH T 984       7.971  -8.540  -5.551  1.00  0.52           O  
HETATM  986  O   HOH T 985     -11.811  32.983 163.629  1.00  0.52           O  
HETATM  987  O   HOH T 986      -0.514  61.296 190.534  1.00  0.52           O  
HETATM  988  O   HOH T 987      -3.481   8.912  -3.304  1.00  0.52           O  
HETATM  989  O   HOH T 988     -19.142   0.199 -14.037  1.00  0.52           O  
HETATM  990  O   HOH T 989      -4.084  10.595  -1.357  1.00  0.52           O  
HETATM  991  O   HOH T 990     -39.109  38.290 170.071  1.00  0.52           O  
HETATM  992  O   HOH T 991     -17.634  27.616 193.290  1.00  0.52           O  
HETATM  993  O   HOH T 992     -38.090  34.035 195.376  1.00  0.52           O  
HETATM  994  O   HOH T 993     -43.927  34.109 175.885  1.00  0.52           O  
HETATM  995  O   HOH T 994      -4.849  39.582 204.865  1.00  0.52           O  
HETATM  996  O   HOH T 995       3.991  40.633 193.674  1.00  0.52           O  
HETATM  997  O   HOH T 996     -27.727   4.072   9.255  1.00  0.52           O  
HETATM  998  O   HOH T 997       5.729  -4.730 -18.708  1.00  0.52           O  
HETATM  999  O   HOH T 998     -20.334  68.938 199.140  1.00  0.52           O  
HETATM 1000  O   HOH T 999     -40.146  36.128 171.334  1.00  0.52           O  
HETATM 1001  O   HOH T1000     -25.443  13.908  -4.882  1.00  0.52           O  
HETATM 1002  O   HOH T1001     -40.496  47.104 192.703  1.00  0.52           O  
HETATM 1003  O   HOH T1002     -24.557  50.957 163.475  1.00  0.52           O  
HETATM 1004  O   HOH T1003     -18.632  41.507 165.352  1.00  0.52           O  
HETATM 1005  O   HOH T1004     -27.349  66.486 186.995  1.00  0.52           O  
HETATM 1006  O   HOH T1005     -23.586  38.019 204.259  1.00  0.52           O  
HETATM 1007  O   HOH T1006     -16.328  33.922 200.124  1.00  0.52           O  
HETATM 1008  O   HOH T1007     -24.329  19.134 174.640  1.00  0.52           O  
HETATM 1009  O   HOH T1008     -17.220  18.532  17.164  1.00  0.52           O  
HETATM 1010  O   HOH T1009     -11.989  32.278 199.980  1.00  0.52           O  
HETATM 1011  O   HOH T1010      -0.796  35.637   5.596  1.00  0.52           O  
HETATM 1012  O   HOH T1011       4.095  32.374  11.343  1.00  0.52           O  
HETATM 1013  O   HOH T1012     -16.676 -18.096  -0.927  1.00  0.52           O  
HETATM 1014  O   HOH T1013     -29.334  13.202   7.689  1.00  0.52           O  
HETATM 1015  O   HOH T1014      -8.158  13.756 -21.237  1.00  0.52           O  
HETATM 1016  O   HOH T1015     -21.664  26.005 167.339  1.00  0.52           O  
HETATM 1017  O   HOH T1016     -31.471  29.760 171.208  1.00  0.52           O  
HETATM 1018  O   HOH T1017      20.905  -6.865   5.389  1.00  0.52           O  
HETATM 1019  O   HOH T1018      -1.486  24.200 -19.521  1.00  0.52           O  
HETATM 1020  O   HOH T1019     -34.801  23.527 171.747  1.00  0.52           O  
HETATM 1021  O   HOH T1020       4.700  33.769  -8.953  1.00  0.52           O  
HETATM 1022  O   HOH T1021      -4.744   9.156 -12.757  1.00  0.53           O  
HETATM 1023  O   HOH T1022     -26.048  -5.451   6.432  1.00  0.53           O  
HETATM 1024  O   HOH T1023     -31.073  23.363 201.066  1.00  0.53           O  
HETATM 1025  O   HOH T1024      19.497  -7.677 -13.952  1.00  0.53           O  
HETATM 1026  O   HOH T1025       0.776  -7.270 -12.477  1.00  0.53           O  
HETATM 1027  O   HOH T1026     -28.654  21.977 201.509  1.00  0.53           O  
HETATM 1028  O   HOH T1027     -12.445  26.366  14.759  1.00  0.53           O  
HETATM 1029  O   HOH T1028      20.200   4.246 -12.907  1.00  0.53           O  
HETATM 1030  O   HOH T1029       7.228  56.613 185.506  1.00  0.53           O  
HETATM 1031  O   HOH T1030     -19.560  18.231  18.563  1.00  0.53           O  
HETATM 1032  O   HOH T1031      -2.968  58.327 175.965  1.00  0.53           O  
HETATM 1033  O   HOH T1032      11.311  -6.439   9.775  1.00  0.53           O  
HETATM 1034  O   HOH T1033     -20.668  40.324 179.753  1.00  0.53           O  
HETATM 1035  O   HOH T1034      -1.289  33.282 166.039  1.00  0.53           O  
HETATM 1036  O   HOH T1035      -7.280  49.429 163.690  1.00  0.53           O  
HETATM 1037  O   HOH T1036      12.706   4.295   2.234  1.00  0.53           O  
HETATM 1038  O   HOH T1037      -8.425  23.667 194.268  1.00  0.53           O  
HETATM 1039  O   HOH T1038     -22.710  15.341 188.809  1.00  0.53           O  
HETATM 1040  O   HOH T1039       2.962  32.702   3.344  1.00  0.53           O  
HETATM 1041  O   HOH T1040     -18.600  17.810 186.044  1.00  0.53           O  
HETATM 1042  O   HOH T1041      -7.923  30.152  19.922  1.00  0.53           O  
HETATM 1043  O   HOH T1042     -42.307  48.833 191.409  1.00  0.53           O  
HETATM 1044  O   HOH T1043     -44.720  36.589 174.746  1.00  0.53           O  
HETATM 1045  O   HOH T1044     -18.734  43.663 175.812  1.00  0.53           O  
HETATM 1046  O   HOH T1045     -15.556  -8.023  16.376  1.00  0.53           O  
HETATM 1047  O   HOH T1046     -24.448  37.211 201.644  1.00  0.53           O  
HETATM 1048  O   HOH T1047     -17.129  17.060  19.445  1.00  0.53           O  
HETATM 1049  O   HOH T1048      -4.857  64.007 192.151  1.00  0.53           O  
HETATM 1050  O   HOH T1049     -21.752  19.892 194.517  1.00  0.53           O  
HETATM 1051  O   HOH T1050     -30.806  21.869 198.604  1.00  0.53           O  
HETATM 1052  O   HOH T1051     -30.043  18.495   6.688  1.00  0.53           O  
HETATM 1053  O   HOH T1052     -12.355  30.474 -11.554  1.00  0.53           O  
HETATM 1054  O   HOH T1053     -13.765   6.574 -22.844  1.00  0.53           O  
HETATM 1055  O   HOH T1054     -28.393  21.088 199.055  1.00  0.53           O  
HETATM 1056  O   HOH T1055     -15.322  38.097 164.212  1.00  0.53           O  
HETATM 1057  O   HOH T1056     -22.080  16.203   9.835  1.00  0.54           O  
HETATM 1058  O   HOH T1057     -27.471  25.841   2.510  1.00  0.54           O  
HETATM 1059  O   HOH T1058      -5.676  10.633  -3.747  1.00  0.54           O  
HETATM 1060  O   HOH T1059      -0.707  27.544 186.974  1.00  0.54           O  
HETATM 1061  O   HOH T1060       4.895  39.693 191.257  1.00  0.54           O  
HETATM 1062  O   HOH T1061     -13.983   4.302  17.154  1.00  0.54           O  
HETATM 1063  O   HOH T1062      -0.478  34.419 173.139  1.00  0.54           O  
HETATM 1064  O   HOH T1063      -7.118  32.371  21.517  1.00  0.54           O  
HETATM 1065  O   HOH T1064     -28.354  18.187   4.519  1.00  0.54           O  
HETATM 1066  O   HOH T1065     -27.481  -6.932 -10.566  1.00  0.54           O  
HETATM 1067  O   HOH T1066      -5.682  30.368  18.231  1.00  0.54           O  
HETATM 1068  O   HOH T1067     -41.088  39.064 177.972  1.00  0.54           O  
HETATM 1069  O   HOH T1068       3.510 -14.860  -6.597  1.00  0.54           O  
HETATM 1070  O   HOH T1069      -8.261  31.601 165.980  1.00  0.54           O  
HETATM 1071  O   HOH T1070       1.562  30.322  13.198  1.00  0.54           O  
HETATM 1072  O   HOH T1071       6.540  31.556 173.133  1.00  0.54           O  
HETATM 1073  O   HOH T1072     -31.658  21.719   7.239  1.00  0.54           O  
HETATM 1074  O   HOH T1073     -34.959  57.518 169.825  1.00  0.54           O  
HETATM 1075  O   HOH T1074     -17.210  10.123  14.747  1.00  0.54           O  
HETATM 1076  O   HOH T1075       3.997  55.366 181.291  1.00  0.54           O  
HETATM 1077  O   HOH T1076      -9.742  43.147 160.166  1.00  0.54           O  
HETATM 1078  O   HOH T1077      -8.108  -3.004  17.522  1.00  0.54           O  
HETATM 1079  O   HOH T1078     -27.178  38.754 161.798  1.00  0.54           O  
HETATM 1080  O   HOH T1079     -10.143  63.162 167.812  1.00  0.54           O  
HETATM 1081  O   HOH T1080      -9.927  64.750 176.441  1.00  0.54           O  
HETATM 1082  O   HOH T1081      18.660  13.937  18.506  1.00  0.54           O  
HETATM 1083  O   HOH T1082      -6.529 -16.505   3.943  1.00  0.54           O  
HETATM 1084  O   HOH T1083     -12.176  22.569 179.602  1.00  0.54           O  
HETATM 1085  O   HOH T1084      -6.435 -11.347 -11.284  1.00  0.54           O  
HETATM 1086  O   HOH T1085       5.833  53.734 195.125  1.00  0.54           O  
HETATM 1087  O   HOH T1086      -8.918  37.109 162.745  1.00  0.54           O  
HETATM 1088  O   HOH T1087     -29.873  60.816 198.154  1.00  0.54           O  
HETATM 1089  O   HOH T1088       0.978   9.548  17.098  1.00  0.54           O  
HETATM 1090  O   HOH T1089      -0.100  27.247 189.487  1.00  0.54           O  
HETATM 1091  O   HOH T1090      -1.786  38.599 187.171  1.00  0.55           O  
HETATM 1092  O   HOH T1091     -40.407  57.469 183.883  1.00  0.55           O  
HETATM 1093  O   HOH T1092     -20.417   5.159  15.227  1.00  0.55           O  
HETATM 1094  O   HOH T1093     -30.709  67.694 191.917  1.00  0.55           O  
HETATM 1095  O   HOH T1094       1.278  -8.184  13.257  1.00  0.55           O  
HETATM 1096  O   HOH T1095     -20.037  -9.266   3.472  1.00  0.55           O  
HETATM 1097  O   HOH T1096     -42.055  59.116 182.202  1.00  0.55           O  
HETATM 1098  O   HOH T1097       7.949  46.725 191.010  1.00  0.55           O  
HETATM 1099  O   HOH T1098      -7.367  23.419 169.382  1.00  0.55           O  
HETATM 1100  O   HOH T1099      -4.021 -15.648  -4.898  1.00  0.55           O  
HETATM 1101  O   HOH T1100     -42.172  59.160 179.736  1.00  0.55           O  
HETATM 1102  O   HOH T1101     -33.055  63.146 195.222  1.00  0.55           O  
HETATM 1103  O   HOH T1102       3.078 -10.543  -8.002  1.00  0.55           O  
HETATM 1104  O   HOH T1103     -36.313  22.456 173.791  1.00  0.55           O  
HETATM 1105  O   HOH T1104     -14.626   0.886 -22.680  1.00  0.55           O  
HETATM 1106  O   HOH T1105     -24.329  21.747  15.402  1.00  0.55           O  
HETATM 1107  O   HOH T1106      -4.690  36.412  -7.702  1.00  0.55           O  
HETATM 1108  O   HOH T1107     -12.459 -13.038  14.357  1.00  0.55           O  
HETATM 1109  O   HOH T1108     -14.539  32.554 198.617  1.00  0.55           O  
HETATM 1110  O   HOH T1109     -24.259  64.420 194.540  1.00  0.55           O  
HETATM 1111  O   HOH T1110     -11.712  59.182 195.275  1.00  0.55           O  
HETATM 1112  O   HOH T1111     -20.450 -11.784   2.605  1.00  0.55           O  
HETATM 1113  O   HOH T1112     -15.419  13.885 -20.511  1.00  0.55           O  
HETATM 1114  O   HOH T1113      19.816  16.442  -8.076  1.00  0.55           O  
HETATM 1115  O   HOH T1114      17.922  24.240   5.788  1.00  0.55           O  
HETATM 1116  O   HOH T1115     -39.374  60.938 183.524  1.00  0.55           O  
HETATM 1117  O   HOH T1116       0.006  32.435 -12.093  1.00  0.55           O  
HETATM 1118  O   HOH T1117     -12.488  26.431 167.653  1.00  0.55           O  
HETATM 1119  O   HOH T1118     -27.527  20.406  -0.940  1.00  0.55           O  
HETATM 1120  O   HOH T1119      -4.739  40.475   3.941  1.00  0.55           O  
HETATM 1121  O   HOH T1120     -16.965 -17.724  -5.796  1.00  0.56           O  
HETATM 1122  O   HOH T1121      21.610   4.874 -11.177  1.00  0.56           O  
HETATM 1123  O   HOH T1122     -22.427  67.090 199.072  1.00  0.56           O  
HETATM 1124  O   HOH T1123     -26.604  65.898 168.545  1.00  0.56           O  
HETATM 1125  O   HOH T1124     -10.525  55.069 196.825  1.00  0.56           O  
HETATM 1126  O   HOH T1125       2.527  28.415 173.829  1.00  0.56           O  
HETATM 1127  O   HOH T1126      -7.226  28.395 -15.453  1.00  0.56           O  
HETATM 1128  O   HOH T1127     -21.118  72.027 173.943  1.00  0.56           O  
HETATM 1129  O   HOH T1128     -13.940  68.794 181.317  1.00  0.56           O  
HETATM 1130  O   HOH T1129     -23.840   1.664 -14.034  1.00  0.56           O  
HETATM 1131  O   HOH T1130       6.671  25.597  -7.046  1.00  0.56           O  
HETATM 1132  O   HOH T1131     -20.187  66.930 192.075  1.00  0.56           O  
HETATM 1133  O   HOH T1132      -0.627  26.160  18.808  1.00  0.56           O  
HETATM 1134  O   HOH T1133     -26.952  26.655  -0.205  1.00  0.56           O  
HETATM 1135  O   HOH T1134       4.223  18.768  15.248  1.00  0.56           O  
HETATM 1136  O   HOH T1135      -7.457  42.240 203.520  1.00  0.56           O  
HETATM 1137  O   HOH T1136     -26.815   8.998  12.157  1.00  0.56           O  
HETATM 1138  O   HOH T1137      -4.775  60.735 176.465  1.00  0.56           O  
HETATM 1139  O   HOH T1138     -41.416  28.202 171.871  1.00  0.56           O  
HETATM 1140  O   HOH T1139     -26.639  18.608   9.055  1.00  0.56           O  
HETATM 1141  O   HOH T1140     -15.282  55.960 157.121  1.00  0.56           O  
HETATM 1142  O   HOH T1141       4.190  22.068   1.561  1.00  0.56           O  
HETATM 1143  O   HOH T1142     -15.227  16.150 185.587  1.00  0.56           O  
HETATM 1144  O   HOH T1143      20.426   8.184  16.167  1.00  0.57           O  
HETATM 1145  O   HOH T1144      -5.717  33.010 202.564  1.00  0.57           O  
HETATM 1146  O   HOH T1145     -42.037  53.521 188.817  1.00  0.57           O  
HETATM 1147  O   HOH T1146     -19.118  -0.020 -22.377  1.00  0.57           O  
HETATM 1148  O   HOH T1147     -34.883  28.191 195.272  1.00  0.57           O  
HETATM 1149  O   HOH T1148       8.230   8.859  18.797  1.00  0.57           O  
HETATM 1150  O   HOH T1149     -21.927  68.932 196.869  1.00  0.57           O  
HETATM 1151  O   HOH T1150     -25.584  42.051 199.921  1.00  0.57           O  
HETATM 1152  O   HOH T1151       4.104  40.405 171.587  1.00  0.57           O  
HETATM 1153  O   HOH T1152     -29.484  23.333 171.614  1.00  0.57           O  
HETATM 1154  O   HOH T1153     -26.629  18.643 196.002  1.00  0.57           O  
HETATM 1155  O   HOH T1154     -12.129  20.298  20.319  1.00  0.57           O  
HETATM 1156  O   HOH T1155       7.292 -11.375  -2.456  1.00  0.57           O  
HETATM 1157  O   HOH T1156     -35.509  61.547 195.344  1.00  0.57           O  
HETATM 1158  O   HOH T1157     -20.052  20.798 180.930  1.00  0.57           O  
HETATM 1159  O   HOH T1158      15.216  -1.761 -13.879  1.00  0.57           O  
HETATM 1160  O   HOH T1159       3.146  -9.656 -14.355  1.00  0.57           O  
HETATM 1161  O   HOH T1160     -29.175  65.076 195.267  1.00  0.57           O  
HETATM 1162  O   HOH T1161     -30.238  -1.751  -9.925  1.00  0.58           O  
HETATM 1163  O   HOH T1162      -7.271  60.942 169.064  1.00  0.58           O  
HETATM 1164  O   HOH T1163     -21.728  20.854 201.743  1.00  0.58           O  
HETATM 1165  O   HOH T1164       5.115  10.565  19.687  1.00  0.58           O  
HETATM 1166  O   HOH T1165     -27.887  24.112 202.746  1.00  0.58           O  
HETATM 1167  O   HOH T1166     -31.011  34.136 159.768  1.00  0.58           O  
HETATM 1168  O   HOH T1167     -13.053  15.291 -20.305  1.00  0.58           O  
HETATM 1169  O   HOH T1168       7.293 -10.767  11.654  1.00  0.59           O  
HETATM 1170  O   HOH T1169       1.005  23.333 -20.288  1.00  0.59           O  
HETATM 1171  O   HOH T1170      21.900   7.381  12.266  1.00  0.59           O  
HETATM 1172  O   HOH T1171       8.766  43.529 195.168  1.00  0.59           O  
HETATM 1173  O   HOH T1172     -22.513  24.307 203.443  1.00  0.59           O  
HETATM 1174  O   HOH T1173      21.809  18.855  -3.228  1.00  0.59           O  
HETATM 1175  O   HOH T1174      -0.611  27.451 -21.234  1.00  0.60           O  
HETATM 1176  O   HOH T1175     -12.223  41.263 162.638  1.00  0.60           O  
HETATM 1177  O   HOH T1176     -35.581  44.617 170.015  1.00  0.60           O  
HETATM 1178  O   HOH T1177     -42.179  55.834 193.603  1.00  0.61           O  
HETATM 1179  O   HOH T1178     -13.228  67.412 188.975  1.00  0.61           O  
HETATM 1180  O   HOH T1179      -0.935  37.374 170.705  1.00  0.62           O  
HETATM 1181  O   HOH T1180       2.471   3.347 -19.545  1.00  0.66           O  
TER    1182      HOH T1180 
