# Supplementary material for: Accurate Prediction of Hydration Sites of Proteins Using Energy Model With Atom Embedding
Source: Front Mol Biosci. 2021 Sep 20;8:756075. doi: 10.3389/fmolb.2021.756075 (PMC8488165; doi:10.3389/fmolb.2021.756075)
Supplement: Supplementary file 1 [file DataSheet1.ZIP › Data Sheet 1/Our_result_pdb/our_dataset_output/2ACF_watersite.pdb]

HEADER                                                        XXXX


JRNL        PMID   -1
HETATM    1  O   HOH T   0       4.956  11.719  30.796  1.00  0.17           O  
HETATM    2  O   HOH T   1      23.648  12.359  25.410  1.00  0.17           O  
HETATM    3  O   HOH T   2      41.315  48.196  -8.648  1.00  0.17           O  
HETATM    4  O   HOH T   3      62.002  30.436  37.826  1.00  0.17           O  
HETATM    5  O   HOH T   4      23.084   1.114  26.760  1.00  0.18           O  
HETATM    6  O   HOH T   5      34.654   8.841   8.495  1.00  0.18           O  
HETATM    7  O   HOH T   6      36.307  17.244   1.716  1.00  0.18           O  
HETATM    8  O   HOH T   7      52.768  30.035  47.796  1.00  0.19           O  
HETATM    9  O   HOH T   8      15.907   0.097  16.127  1.00  0.19           O  
HETATM   10  O   HOH T   9      51.809  13.791   0.591  1.00  0.19           O  
HETATM   11  O   HOH T  10      24.935  55.648  -1.049  1.00  0.20           O  
HETATM   12  O   HOH T  11      15.192  12.348  15.263  1.00  0.20           O  
HETATM   13  O   HOH T  12      31.685   6.000  13.927  1.00  0.20           O  
HETATM   14  O   HOH T  13      33.600   8.035  14.065  1.00  0.21           O  
HETATM   15  O   HOH T  14      59.001  28.858  18.805  1.00  0.21           O  
HETATM   16  O   HOH T  15      37.379  -1.599  11.640  1.00  0.21           O  
HETATM   17  O   HOH T  16      45.822  40.406   1.436  1.00  0.21           O  
HETATM   18  O   HOH T  17      57.318  17.516  34.888  1.00  0.21           O  
HETATM   19  O   HOH T  18      44.512  57.516   1.176  1.00  0.21           O  
HETATM   20  O   HOH T  19      18.502   0.929   1.082  1.00  0.22           O  
HETATM   21  O   HOH T  20      43.687  44.562 -13.674  1.00  0.22           O  
HETATM   22  O   HOH T  21      52.120  36.918  42.229  1.00  0.22           O  
HETATM   23  O   HOH T  22      47.478  47.127 -22.147  1.00  0.22           O  
HETATM   24  O   HOH T  23      41.796  56.126  -5.053  1.00  0.22           O  
HETATM   25  O   HOH T  24      16.551  20.947  25.774  1.00  0.22           O  
HETATM   26  O   HOH T  25      26.156  17.904  25.241  1.00  0.22           O  
HETATM   27  O   HOH T  26      37.376  46.608 -20.512  1.00  0.22           O  
HETATM   28  O   HOH T  27      40.497  24.673   8.641  1.00  0.22           O  
HETATM   29  O   HOH T  28      41.653  27.850  43.198  1.00  0.22           O  
HETATM   30  O   HOH T  29      20.843  13.688  44.438  1.00  0.23           O  
HETATM   31  O   HOH T  30      38.893  40.721 -17.058  1.00  0.23           O  
HETATM   32  O   HOH T  31      43.187  31.061  32.629  1.00  0.23           O  
HETATM   33  O   HOH T  32      37.205  11.443  40.729  1.00  0.23           O  
HETATM   34  O   HOH T  33      29.640  11.208   5.630  1.00  0.23           O  
HETATM   35  O   HOH T  34       3.007  18.143  15.158  1.00  0.23           O  
HETATM   36  O   HOH T  35      25.103 -10.606   5.649  1.00  0.23           O  
HETATM   37  O   HOH T  36      29.412   0.404  -0.744  1.00  0.23           O  
HETATM   38  O   HOH T  37      76.392  23.009  18.777  1.00  0.23           O  
HETATM   39  O   HOH T  38      28.916   8.488  22.545  1.00  0.24           O  
HETATM   40  O   HOH T  39      28.759  -1.813  29.682  1.00  0.24           O  
HETATM   41  O   HOH T  40      40.997  19.461  14.149  1.00  0.24           O  
HETATM   42  O   HOH T  41      56.506  36.046  49.802  1.00  0.24           O  
HETATM   43  O   HOH T  42      48.828  31.226   1.816  1.00  0.24           O  
HETATM   44  O   HOH T  43      67.930  27.604  25.919  1.00  0.24           O  
HETATM   45  O   HOH T  44       1.626  24.175  33.576  1.00  0.24           O  
HETATM   46  O   HOH T  45      -1.552  25.536  23.068  1.00  0.24           O  
HETATM   47  O   HOH T  46      39.921   6.088  -7.779  1.00  0.24           O  
HETATM   48  O   HOH T  47      43.169  24.858  28.102  1.00  0.25           O  
HETATM   49  O   HOH T  48      42.279  46.904 -13.890  1.00  0.25           O  
HETATM   50  O   HOH T  49       3.335  14.540  20.230  1.00  0.25           O  
HETATM   51  O   HOH T  50      38.689  64.874   6.194  1.00  0.25           O  
HETATM   52  O   HOH T  51      11.816  -0.444  29.634  1.00  0.25           O  
HETATM   53  O   HOH T  52       3.168  27.704  28.608  1.00  0.25           O  
HETATM   54  O   HOH T  53      38.954  26.808  36.315  1.00  0.25           O  
HETATM   55  O   HOH T  54       6.656  -0.910  32.407  1.00  0.25           O  
HETATM   56  O   HOH T  55      15.081   0.802  26.707  1.00  0.25           O  
HETATM   57  O   HOH T  56      10.276  18.883   9.798  1.00  0.26           O  
HETATM   58  O   HOH T  57      33.189  -5.044  10.824  1.00  0.26           O  
HETATM   59  O   HOH T  58      38.528  -0.673  -7.426  1.00  0.26           O  
HETATM   60  O   HOH T  59      37.388  31.561   1.735  1.00  0.26           O  
HETATM   61  O   HOH T  60      68.875  24.499  42.098  1.00  0.26           O  
HETATM   62  O   HOH T  61      42.933  27.128  24.597  1.00  0.26           O  
HETATM   63  O   HOH T  62      70.097  23.495   2.269  1.00  0.26           O  
HETATM   64  O   HOH T  63      72.156  19.527  34.350  1.00  0.26           O  
HETATM   65  O   HOH T  64      37.675  19.623  44.692  1.00  0.26           O  
HETATM   66  O   HOH T  65      38.880  56.700  12.150  1.00  0.26           O  
HETATM   67  O   HOH T  66      55.235  21.668  37.476  1.00  0.26           O  
HETATM   68  O   HOH T  67      60.963  28.471  39.510  1.00  0.26           O  
HETATM   69  O   HOH T  68      65.178  24.508  38.528  1.00  0.26           O  
HETATM   70  O   HOH T  69      39.608  18.711  29.776  1.00  0.27           O  
HETATM   71  O   HOH T  70      26.122  47.709   6.191  1.00  0.27           O  
HETATM   72  O   HOH T  71      30.494  20.502  -8.197  1.00  0.27           O  
HETATM   73  O   HOH T  72      26.177   8.757  21.699  1.00  0.27           O  
HETATM   74  O   HOH T  73      33.097  58.390  15.079  1.00  0.27           O  
HETATM   75  O   HOH T  74      36.608  16.919  40.167  1.00  0.27           O  
HETATM   76  O   HOH T  75      12.741  27.573  38.048  1.00  0.27           O  
HETATM   77  O   HOH T  76      44.543  13.608  21.590  1.00  0.27           O  
HETATM   78  O   HOH T  77      50.139  43.043  32.943  1.00  0.27           O  
HETATM   79  O   HOH T  78       5.251   2.478  36.122  1.00  0.27           O  
HETATM   80  O   HOH T  79      26.972 -16.530   6.642  1.00  0.27           O  
HETATM   81  O   HOH T  80      18.514   0.604  -5.685  1.00  0.27           O  
HETATM   82  O   HOH T  81      59.229  35.873  50.258  1.00  0.27           O  
HETATM   83  O   HOH T  82      71.730  25.102   0.664  1.00  0.27           O  
HETATM   84  O   HOH T  83      45.816  52.970  -6.742  1.00  0.27           O  
HETATM   85  O   HOH T  84      49.687   4.950  -5.872  1.00  0.27           O  
HETATM   86  O   HOH T  85      34.990  -8.675   0.594  1.00  0.27           O  
HETATM   87  O   HOH T  86      29.333   6.393  20.884  1.00  0.27           O  
HETATM   88  O   HOH T  87      64.741  33.821  41.690  1.00  0.27           O  
HETATM   89  O   HOH T  88      50.143  37.077 -10.608  1.00  0.27           O  
HETATM   90  O   HOH T  89      29.822  14.936  37.174  1.00  0.27           O  
HETATM   91  O   HOH T  90      37.830  14.702 -12.827  1.00  0.27           O  
HETATM   92  O   HOH T  91      42.681  59.596 -11.847  1.00  0.28           O  
HETATM   93  O   HOH T  92      55.737  40.357  30.490  1.00  0.28           O  
HETATM   94  O   HOH T  93      33.268 -13.609   5.899  1.00  0.28           O  
HETATM   95  O   HOH T  94      40.566  50.270  18.458  1.00  0.28           O  
HETATM   96  O   HOH T  95      46.634   9.547 -10.662  1.00  0.28           O  
HETATM   97  O   HOH T  96      67.167  44.124  32.735  1.00  0.28           O  
HETATM   98  O   HOH T  97      54.914  15.022  16.404  1.00  0.28           O  
HETATM   99  O   HOH T  98      54.674  24.999  22.624  1.00  0.28           O  
HETATM  100  O   HOH T  99      13.454   6.749  19.592  1.00  0.28           O  
HETATM  101  O   HOH T 100      40.607  43.314  18.385  1.00  0.28           O  
HETATM  102  O   HOH T 101      24.031  59.774 -12.478  1.00  0.28           O  
HETATM  103  O   HOH T 102      47.548  13.619  33.430  1.00  0.28           O  
HETATM  104  O   HOH T 103      19.045  25.127  28.450  1.00  0.28           O  
HETATM  105  O   HOH T 104      50.207  22.759  46.688  1.00  0.28           O  
HETATM  106  O   HOH T 105      33.101  22.740  40.637  1.00  0.28           O  
HETATM  107  O   HOH T 106      -2.577  18.618  22.730  1.00  0.28           O  
HETATM  108  O   HOH T 107      42.281  25.448  -7.464  1.00  0.28           O  
HETATM  109  O   HOH T 108      41.230  32.758 -13.012  1.00  0.28           O  
HETATM  110  O   HOH T 109      50.051  23.228   6.131  1.00  0.28           O  
HETATM  111  O   HOH T 110      42.860   2.317  -6.501  1.00  0.28           O  
HETATM  112  O   HOH T 111      30.251  24.375  45.980  1.00  0.28           O  
HETATM  113  O   HOH T 112      36.033  47.774   7.955  1.00  0.28           O  
HETATM  114  O   HOH T 113      35.500  24.119  40.797  1.00  0.28           O  
HETATM  115  O   HOH T 114      42.923  14.977  35.833  1.00  0.28           O  
HETATM  116  O   HOH T 115      43.315  53.132  -8.132  1.00  0.29           O  
HETATM  117  O   HOH T 116      51.870  22.421  -2.036  1.00  0.29           O  
HETATM  118  O   HOH T 117      40.362   0.828  14.019  1.00  0.29           O  
HETATM  119  O   HOH T 118      28.449   5.292   7.521  1.00  0.29           O  
HETATM  120  O   HOH T 119      52.880  20.732  -0.293  1.00  0.29           O  
HETATM  121  O   HOH T 120      39.671  53.416 -20.982  1.00  0.29           O  
HETATM  122  O   HOH T 121      34.721  11.604   8.202  1.00  0.29           O  
HETATM  123  O   HOH T 122      47.471  44.608  -7.367  1.00  0.29           O  
HETATM  124  O   HOH T 123      26.537  -1.938  14.164  1.00  0.29           O  
HETATM  125  O   HOH T 124      38.296  43.187  19.786  1.00  0.29           O  
HETATM  126  O   HOH T 125      39.702  -1.450  -5.026  1.00  0.29           O  
HETATM  127  O   HOH T 126      61.775  18.238  35.737  1.00  0.29           O  
HETATM  128  O   HOH T 127      74.559  36.381  35.746  1.00  0.29           O  
HETATM  129  O   HOH T 128      51.239  15.321  24.544  1.00  0.29           O  
HETATM  130  O   HOH T 129      31.458   8.109  21.190  1.00  0.29           O  
HETATM  131  O   HOH T 130      -8.717  26.111  13.426  1.00  0.29           O  
HETATM  132  O   HOH T 131      68.061  31.275  56.000  1.00  0.29           O  
HETATM  133  O   HOH T 132      22.381  14.389  23.897  1.00  0.29           O  
HETATM  134  O   HOH T 133      47.270  37.832  37.878  1.00  0.30           O  
HETATM  135  O   HOH T 134      35.783  37.603  -8.286  1.00  0.30           O  
HETATM  136  O   HOH T 135      37.202  10.028 -22.069  1.00  0.30           O  
HETATM  137  O   HOH T 136      36.848  14.522  21.023  1.00  0.30           O  
HETATM  138  O   HOH T 137       8.796   4.764  25.555  1.00  0.30           O  
HETATM  139  O   HOH T 138      54.180   9.869  40.592  1.00  0.30           O  
HETATM  140  O   HOH T 139      52.927  30.325  50.524  1.00  0.30           O  
HETATM  141  O   HOH T 140      36.410  11.329  30.552  1.00  0.30           O  
HETATM  142  O   HOH T 141      25.135  -6.893  13.273  1.00  0.30           O  
HETATM  143  O   HOH T 142      54.531  12.426  27.051  1.00  0.30           O  
HETATM  144  O   HOH T 143       9.326  28.980  29.795  1.00  0.30           O  
HETATM  145  O   HOH T 144      31.406   2.824  32.121  1.00  0.30           O  
HETATM  146  O   HOH T 145      30.538   1.516  24.371  1.00  0.30           O  
HETATM  147  O   HOH T 146      54.249  29.293  20.812  1.00  0.30           O  
HETATM  148  O   HOH T 147      43.148  56.933  -1.219  1.00  0.30           O  
HETATM  149  O   HOH T 148      47.518  12.159  31.023  1.00  0.30           O  
HETATM  150  O   HOH T 149      37.874  20.402  31.388  1.00  0.30           O  
HETATM  151  O   HOH T 150       5.252  24.997  16.063  1.00  0.30           O  
HETATM  152  O   HOH T 151      43.183  33.385  25.977  1.00  0.31           O  
HETATM  153  O   HOH T 152      35.070  20.663  50.443  1.00  0.31           O  
HETATM  154  O   HOH T 153      57.317  22.829  38.958  1.00  0.31           O  
HETATM  155  O   HOH T 154      66.334  28.007  47.699  1.00  0.31           O  
HETATM  156  O   HOH T 155      33.232   6.100  20.269  1.00  0.31           O  
HETATM  157  O   HOH T 156      22.621  -4.844   9.729  1.00  0.31           O  
HETATM  158  O   HOH T 157      14.185   4.579  -3.686  1.00  0.31           O  
HETATM  159  O   HOH T 158      36.393  59.117 -15.392  1.00  0.31           O  
HETATM  160  O   HOH T 159      47.973  27.155  51.799  1.00  0.31           O  
HETATM  161  O   HOH T 160      47.340  38.978  -0.176  1.00  0.31           O  
HETATM  162  O   HOH T 161      58.051  25.501   1.733  1.00  0.31           O  
HETATM  163  O   HOH T 162      77.246  16.363  26.993  1.00  0.31           O  
HETATM  164  O   HOH T 163       5.019  17.724  35.494  1.00  0.31           O  
HETATM  165  O   HOH T 164      33.882  22.864  29.266  1.00  0.31           O  
HETATM  166  O   HOH T 165      27.730  -0.592   0.988  1.00  0.31           O  
HETATM  167  O   HOH T 166      10.866   0.970  22.795  1.00  0.31           O  
HETATM  168  O   HOH T 167      36.145   2.171  17.927  1.00  0.31           O  
HETATM  169  O   HOH T 168      16.542  17.468  40.619  1.00  0.31           O  
HETATM  170  O   HOH T 169      12.659  22.533  48.307  1.00  0.31           O  
HETATM  171  O   HOH T 170      59.691  26.016  39.150  1.00  0.31           O  
HETATM  172  O   HOH T 171      16.725  -9.117   5.248  1.00  0.31           O  
HETATM  173  O   HOH T 172      74.455  31.192  32.302  1.00  0.32           O  
HETATM  174  O   HOH T 173      30.376  13.956  26.898  1.00  0.32           O  
HETATM  175  O   HOH T 174      45.759  11.920  13.962  1.00  0.32           O  
HETATM  176  O   HOH T 175      16.131  32.526  22.618  1.00  0.32           O  
HETATM  177  O   HOH T 176      24.924  20.133  20.909  1.00  0.32           O  
HETATM  178  O   HOH T 177      23.070  77.977  -2.646  1.00  0.32           O  
HETATM  179  O   HOH T 178      38.670   7.710  20.607  1.00  0.32           O  
HETATM  180  O   HOH T 179      31.730   5.639  16.686  1.00  0.32           O  
HETATM  181  O   HOH T 180      27.782  56.955   5.712  1.00  0.32           O  
HETATM  182  O   HOH T 181      14.067   1.117  22.258  1.00  0.32           O  
HETATM  183  O   HOH T 182      30.358  13.894   5.535  1.00  0.32           O  
HETATM  184  O   HOH T 183      16.072  13.325  42.513  1.00  0.32           O  
HETATM  185  O   HOH T 184      48.096  43.098  39.949  1.00  0.32           O  
HETATM  186  O   HOH T 185       7.998  31.941  40.660  1.00  0.32           O  
HETATM  187  O   HOH T 186      28.222  50.762 -15.212  1.00  0.32           O  
HETATM  188  O   HOH T 187      69.287  32.254  21.119  1.00  0.32           O  
HETATM  189  O   HOH T 188      36.562  -5.242   3.446  1.00  0.32           O  
HETATM  190  O   HOH T 189      34.910  16.620   4.116  1.00  0.32           O  
HETATM  191  O   HOH T 190      23.563  24.431  27.344  1.00  0.32           O  
HETATM  192  O   HOH T 191      24.791  -0.673   7.798  1.00  0.32           O  
HETATM  193  O   HOH T 192      25.739 -12.891   7.088  1.00  0.32           O  
HETATM  194  O   HOH T 193      21.800   7.257  13.000  1.00  0.33           O  
HETATM  195  O   HOH T 194      20.943  18.253  24.886  1.00  0.33           O  
HETATM  196  O   HOH T 195      42.032  -0.188   3.687  1.00  0.33           O  
HETATM  197  O   HOH T 196      68.541  28.531  35.903  1.00  0.33           O  
HETATM  198  O   HOH T 197      44.954  46.758 -20.964  1.00  0.33           O  
HETATM  199  O   HOH T 198      24.205  47.405  -5.458  1.00  0.33           O  
HETATM  200  O   HOH T 199      46.140  44.258 -14.994  1.00  0.33           O  
HETATM  201  O   HOH T 200      42.996  44.835 -20.101  1.00  0.33           O  
HETATM  202  O   HOH T 201      18.976  -0.493   3.476  1.00  0.33           O  
HETATM  203  O   HOH T 202      54.746  31.891  20.077  1.00  0.33           O  
HETATM  204  O   HOH T 203      31.775  55.673  12.201  1.00  0.33           O  
HETATM  205  O   HOH T 204      49.842  12.750  10.628  1.00  0.33           O  
HETATM  206  O   HOH T 205      30.727  18.482  20.821  1.00  0.33           O  
HETATM  207  O   HOH T 206      29.117 -16.929   8.189  1.00  0.33           O  
HETATM  208  O   HOH T 207      30.361  26.591  -2.544  1.00  0.33           O  
HETATM  209  O   HOH T 208      47.465  31.838  22.384  1.00  0.33           O  
HETATM  210  O   HOH T 209      33.176  13.847   8.811  1.00  0.33           O  
HETATM  211  O   HOH T 210      44.069  31.411  25.519  1.00  0.33           O  
HETATM  212  O   HOH T 211      16.590  10.671  43.205  1.00  0.33           O  
HETATM  213  O   HOH T 212      46.699  55.579  -7.431  1.00  0.33           O  
HETATM  214  O   HOH T 213      28.078  10.532  21.025  1.00  0.33           O  
HETATM  215  O   HOH T 214      23.220  -2.119   9.503  1.00  0.33           O  
HETATM  216  O   HOH T 215      25.275  44.531   1.556  1.00  0.33           O  
HETATM  217  O   HOH T 216      28.430   9.499   9.915  1.00  0.33           O  
HETATM  218  O   HOH T 217      34.397  40.475 -13.281  1.00  0.33           O  
HETATM  219  O   HOH T 218      51.658  43.207  30.602  1.00  0.33           O  
HETATM  220  O   HOH T 219      51.948  20.873  13.341  1.00  0.34           O  
HETATM  221  O   HOH T 220       8.907  11.218  40.636  1.00  0.34           O  
HETATM  222  O   HOH T 221      61.343  36.689  26.788  1.00  0.34           O  
HETATM  223  O   HOH T 222      41.415  24.182  48.335  1.00  0.34           O  
HETATM  224  O   HOH T 223      31.237  28.733  -0.828  1.00  0.34           O  
HETATM  225  O   HOH T 224      39.055   1.618 -18.726  1.00  0.34           O  
HETATM  226  O   HOH T 225      33.202  10.119 -20.418  1.00  0.34           O  
HETATM  227  O   HOH T 226       6.173  24.193  13.651  1.00  0.34           O  
HETATM  228  O   HOH T 227      57.061  37.123  -1.810  1.00  0.34           O  
HETATM  229  O   HOH T 228      16.701  13.655  13.353  1.00  0.34           O  
HETATM  230  O   HOH T 229      58.296  11.073  24.807  1.00  0.34           O  
HETATM  231  O   HOH T 230      39.078  23.630  -7.396  1.00  0.34           O  
HETATM  232  O   HOH T 231      36.857  53.431 -20.423  1.00  0.34           O  
HETATM  233  O   HOH T 232      27.899  13.154  20.537  1.00  0.34           O  
HETATM  234  O   HOH T 233      18.653  19.782  24.393  1.00  0.34           O  
HETATM  235  O   HOH T 234      26.824  11.822   9.637  1.00  0.34           O  
HETATM  236  O   HOH T 235      28.959  -1.903  20.693  1.00  0.34           O  
HETATM  237  O   HOH T 236      20.539   1.227  -7.495  1.00  0.34           O  
HETATM  238  O   HOH T 237      29.190  15.135  50.133  1.00  0.34           O  
HETATM  239  O   HOH T 238      46.926  44.819 -20.567  1.00  0.34           O  
HETATM  240  O   HOH T 239      26.637  18.440  22.518  1.00  0.34           O  
HETATM  241  O   HOH T 240       8.011  13.330  15.665  1.00  0.34           O  
HETATM  242  O   HOH T 241      28.945   5.495  16.496  1.00  0.35           O  
HETATM  243  O   HOH T 242       9.730  22.715  42.777  1.00  0.35           O  
HETATM  244  O   HOH T 243      22.022  26.734  43.626  1.00  0.35           O  
HETATM  245  O   HOH T 244       5.926  21.945  36.897  1.00  0.35           O  
HETATM  246  O   HOH T 245      42.102  53.428  -5.686  1.00  0.35           O  
HETATM  247  O   HOH T 246       5.746  28.288  38.670  1.00  0.35           O  
HETATM  248  O   HOH T 247      36.549  18.597  42.333  1.00  0.35           O  
HETATM  249  O   HOH T 248      67.763  34.317  54.294  1.00  0.35           O  
HETATM  250  O   HOH T 249      39.479  34.851  -1.543  1.00  0.35           O  
HETATM  251  O   HOH T 250      51.658   5.759   5.551  1.00  0.35           O  
HETATM  252  O   HOH T 251      30.872  54.688 -20.784  1.00  0.35           O  
HETATM  253  O   HOH T 252      13.178   3.663  14.145  1.00  0.35           O  
HETATM  254  O   HOH T 253      58.540  36.864  27.468  1.00  0.35           O  
HETATM  255  O   HOH T 254       9.569  19.251  41.935  1.00  0.35           O  
HETATM  256  O   HOH T 255      19.202  22.379  28.256  1.00  0.35           O  
HETATM  257  O   HOH T 256      70.159  28.477  27.003  1.00  0.35           O  
HETATM  258  O   HOH T 257      56.834  21.007  43.455  1.00  0.35           O  
HETATM  259  O   HOH T 258      21.594  26.149  28.273  1.00  0.36           O  
HETATM  260  O   HOH T 259       6.784  11.125  38.804  1.00  0.36           O  
HETATM  261  O   HOH T 260      12.024  17.466  46.295  1.00  0.36           O  
HETATM  262  O   HOH T 261      20.130   4.890   3.925  1.00  0.36           O  
HETATM  263  O   HOH T 262      37.882  35.434  -6.081  1.00  0.36           O  
HETATM  264  O   HOH T 263      29.726  47.090 -14.214  1.00  0.36           O  
HETATM  265  O   HOH T 264      17.048  -4.551   8.291  1.00  0.36           O  
HETATM  266  O   HOH T 265      28.763  25.221  -0.770  1.00  0.36           O  
HETATM  267  O   HOH T 266      41.890   4.048 -17.871  1.00  0.36           O  
HETATM  268  O   HOH T 267      18.107 -11.149  11.407  1.00  0.36           O  
HETATM  269  O   HOH T 268      33.585  -0.915  35.877  1.00  0.36           O  
HETATM  270  O   HOH T 269      19.817  -6.450  -3.031  1.00  0.36           O  
HETATM  271  O   HOH T 270      18.724  23.764  24.836  1.00  0.36           O  
HETATM  272  O   HOH T 271      44.296  -0.106  -5.957  1.00  0.36           O  
HETATM  273  O   HOH T 272      30.495  51.891 -14.062  1.00  0.36           O  
HETATM  274  O   HOH T 273      69.748  33.166  14.710  1.00  0.36           O  
HETATM  275  O   HOH T 274      46.105   0.675  -9.888  1.00  0.36           O  
HETATM  276  O   HOH T 275      27.925  20.531  45.598  1.00  0.36           O  
HETATM  277  O   HOH T 276      36.940   6.142  19.176  1.00  0.36           O  
HETATM  278  O   HOH T 277      32.466  21.521  44.084  1.00  0.36           O  
HETATM  279  O   HOH T 278      66.420  26.432  18.329  1.00  0.36           O  
HETATM  280  O   HOH T 279      32.973  40.702  -2.767  1.00  0.36           O  
HETATM  281  O   HOH T 280      18.777  10.352   6.470  1.00  0.36           O  
HETATM  282  O   HOH T 281      40.997  32.778  -0.567  1.00  0.36           O  
HETATM  283  O   HOH T 282      27.272   3.680 -24.661  1.00  0.36           O  
HETATM  284  O   HOH T 283      24.127  26.340  29.258  1.00  0.36           O  
HETATM  285  O   HOH T 284      54.911  12.273  19.328  1.00  0.36           O  
HETATM  286  O   HOH T 285      58.858  31.328  20.087  1.00  0.36           O  
HETATM  287  O   HOH T 286      51.368  32.439  -8.180  1.00  0.36           O  
HETATM  288  O   HOH T 287      71.473  25.173  41.592  1.00  0.36           O  
HETATM  289  O   HOH T 288      39.608  -1.757   3.797  1.00  0.37           O  
HETATM  290  O   HOH T 289      65.398  23.832  18.567  1.00  0.37           O  
HETATM  291  O   HOH T 290      78.507  33.922  31.429  1.00  0.37           O  
HETATM  292  O   HOH T 291      71.820  42.440  32.656  1.00  0.37           O  
HETATM  293  O   HOH T 292      -0.173  12.769  32.955  1.00  0.37           O  
HETATM  294  O   HOH T 293      52.765  11.047   3.052  1.00  0.37           O  
HETATM  295  O   HOH T 294      46.474  39.973  44.423  1.00  0.37           O  
HETATM  296  O   HOH T 295      26.783  54.996 -12.942  1.00  0.37           O  
HETATM  297  O   HOH T 296      56.994  18.764  38.477  1.00  0.37           O  
HETATM  298  O   HOH T 297      -5.204  19.683  22.686  1.00  0.37           O  
HETATM  299  O   HOH T 298      19.267   6.617  13.896  1.00  0.37           O  
HETATM  300  O   HOH T 299      31.924  13.948  36.029  1.00  0.37           O  
HETATM  301  O   HOH T 300      30.777  -0.938  -9.092  1.00  0.37           O  
HETATM  302  O   HOH T 301      25.874  21.863  44.650  1.00  0.37           O  
HETATM  303  O   HOH T 302      40.469  26.600  24.364  1.00  0.37           O  
HETATM  304  O   HOH T 303      23.487  17.825  14.418  1.00  0.37           O  
HETATM  305  O   HOH T 304      45.065  17.387  25.828  1.00  0.37           O  
HETATM  306  O   HOH T 305      24.547   2.735  34.933  1.00  0.37           O  
HETATM  307  O   HOH T 306      43.502  19.960  50.969  1.00  0.37           O  
HETATM  308  O   HOH T 307      19.550  18.048  16.258  1.00  0.37           O  
HETATM  309  O   HOH T 308      21.154   6.356  38.335  1.00  0.37           O  
HETATM  310  O   HOH T 309      42.656  43.303 -17.880  1.00  0.37           O  
HETATM  311  O   HOH T 310      37.985   8.849  23.007  1.00  0.37           O  
HETATM  312  O   HOH T 311      48.379  12.371  13.076  1.00  0.37           O  
HETATM  313  O   HOH T 312       0.676  18.014  10.781  1.00  0.37           O  
HETATM  314  O   HOH T 313      26.787  26.912  40.490  1.00  0.37           O  
HETATM  315  O   HOH T 314      51.722  13.839  22.056  1.00  0.37           O  
HETATM  316  O   HOH T 315      25.658  45.216   5.160  1.00  0.37           O  
HETATM  317  O   HOH T 316      47.151  50.117  14.901  1.00  0.37           O  
HETATM  318  O   HOH T 317      47.836  19.542  20.178  1.00  0.37           O  
HETATM  319  O   HOH T 318      34.774  28.114  34.559  1.00  0.37           O  
HETATM  320  O   HOH T 319      37.252  37.988 -10.738  1.00  0.37           O  
HETATM  321  O   HOH T 320      34.449  20.539  11.511  1.00  0.38           O  
HETATM  322  O   HOH T 321      41.397  51.017  -8.537  1.00  0.38           O  
HETATM  323  O   HOH T 322      16.758  11.844  -7.276  1.00  0.38           O  
HETATM  324  O   HOH T 323      20.245   5.639  35.845  1.00  0.38           O  
HETATM  325  O   HOH T 324      43.491  11.127 -14.475  1.00  0.38           O  
HETATM  326  O   HOH T 325      55.933  21.895   6.255  1.00  0.38           O  
HETATM  327  O   HOH T 326      40.626  -1.831  14.742  1.00  0.38           O  
HETATM  328  O   HOH T 327      20.477  11.075  43.564  1.00  0.38           O  
HETATM  329  O   HOH T 328      21.645  50.324   2.422  1.00  0.38           O  
HETATM  330  O   HOH T 329      57.234  43.879  -4.340  1.00  0.38           O  
HETATM  331  O   HOH T 330      25.260   2.430  19.166  1.00  0.38           O  
HETATM  332  O   HOH T 331       6.547  25.696  37.519  1.00  0.38           O  
HETATM  333  O   HOH T 332      14.827  14.983  44.445  1.00  0.38           O  
HETATM  334  O   HOH T 333      71.811  13.606  22.687  1.00  0.38           O  
HETATM  335  O   HOH T 334      36.461  16.967  24.182  1.00  0.38           O  
HETATM  336  O   HOH T 335      76.829  13.688  26.769  1.00  0.38           O  
HETATM  337  O   HOH T 336      23.239   1.733  -7.430  1.00  0.38           O  
HETATM  338  O   HOH T 337      39.068  -2.156   9.522  1.00  0.38           O  
HETATM  339  O   HOH T 338      38.923  11.364  23.569  1.00  0.38           O  
HETATM  340  O   HOH T 339      40.872  38.844 -16.396  1.00  0.38           O  
HETATM  341  O   HOH T 340      30.283  10.867   8.322  1.00  0.38           O  
HETATM  342  O   HOH T 341      28.809  -4.213  22.344  1.00  0.38           O  
HETATM  343  O   HOH T 342      37.849  42.615 -18.784  1.00  0.38           O  
HETATM  344  O   HOH T 343      26.359  -4.838  14.688  1.00  0.38           O  
HETATM  345  O   HOH T 344      68.232  35.727  44.788  1.00  0.38           O  
HETATM  346  O   HOH T 345      77.209  31.582  39.498  1.00  0.38           O  
HETATM  347  O   HOH T 346      55.933  17.129  40.479  1.00  0.38           O  
HETATM  348  O   HOH T 347      18.508 -13.901  11.433  1.00  0.38           O  
HETATM  349  O   HOH T 348      10.313   2.678  32.664  1.00  0.38           O  
HETATM  350  O   HOH T 349      60.404  15.456  19.779  1.00  0.38           O  
HETATM  351  O   HOH T 350       3.719   3.515  33.982  1.00  0.38           O  
HETATM  352  O   HOH T 351      32.986  53.715  13.929  1.00  0.38           O  
HETATM  353  O   HOH T 352      12.122  28.307  51.830  1.00  0.39           O  
HETATM  354  O   HOH T 353      41.216  -1.755   1.492  1.00  0.39           O  
HETATM  355  O   HOH T 354      80.273  31.616  27.677  1.00  0.39           O  
HETATM  356  O   HOH T 355      21.094   5.045   7.385  1.00  0.39           O  
HETATM  357  O   HOH T 356      24.356  25.607  39.876  1.00  0.39           O  
HETATM  358  O   HOH T 357      50.653  46.732  -9.850  1.00  0.39           O  
HETATM  359  O   HOH T 358      61.452  25.045  -4.890  1.00  0.39           O  
HETATM  360  O   HOH T 359       6.455  19.603  12.901  1.00  0.39           O  
HETATM  361  O   HOH T 360      45.511  15.527  33.199  1.00  0.39           O  
HETATM  362  O   HOH T 361      52.570  19.581   4.095  1.00  0.39           O  
HETATM  363  O   HOH T 362      34.701   2.397 -17.760  1.00  0.39           O  
HETATM  364  O   HOH T 363      -1.763  23.383  16.569  1.00  0.39           O  
HETATM  365  O   HOH T 364      25.293  51.997   5.953  1.00  0.39           O  
HETATM  366  O   HOH T 365      33.865  22.414  54.471  1.00  0.39           O  
HETATM  367  O   HOH T 366      16.616   0.918  23.020  1.00  0.39           O  
HETATM  368  O   HOH T 367      50.418  22.652  -8.060  1.00  0.39           O  
HETATM  369  O   HOH T 368      24.767  64.186   5.370  1.00  0.39           O  
HETATM  370  O   HOH T 369      33.932  19.504  42.865  1.00  0.39           O  
HETATM  371  O   HOH T 370      53.997  19.411   1.734  1.00  0.39           O  
HETATM  372  O   HOH T 371       7.317  27.067  30.058  1.00  0.39           O  
HETATM  373  O   HOH T 372      44.871  48.942  13.973  1.00  0.39           O  
HETATM  374  O   HOH T 373      57.806  24.769  47.610  1.00  0.39           O  
HETATM  375  O   HOH T 374      50.447  30.001  49.320  1.00  0.39           O  
HETATM  376  O   HOH T 375      36.232  41.462 -16.866  1.00  0.39           O  
HETATM  377  O   HOH T 376      59.387  36.294  24.848  1.00  0.39           O  
HETATM  378  O   HOH T 377      17.149  -1.980   9.343  1.00  0.39           O  
HETATM  379  O   HOH T 378      69.175  41.534  38.080  1.00  0.39           O  
HETATM  380  O   HOH T 379      33.899  15.909  23.319  1.00  0.39           O  
HETATM  381  O   HOH T 380      33.295  -9.889  13.157  1.00  0.39           O  
HETATM  382  O   HOH T 381      78.959  26.763  32.942  1.00  0.39           O  
HETATM  383  O   HOH T 382      38.709  45.227 -18.605  1.00  0.39           O  
HETATM  384  O   HOH T 383      31.446  54.435  16.145  1.00  0.39           O  
HETATM  385  O   HOH T 384      50.892  18.408   6.042  1.00  0.39           O  
HETATM  386  O   HOH T 385      40.765  57.241  -2.659  1.00  0.39           O  
HETATM  387  O   HOH T 386      32.042 -12.306   9.999  1.00  0.40           O  
HETATM  388  O   HOH T 387      39.344  25.151  49.783  1.00  0.40           O  
HETATM  389  O   HOH T 388      15.381  12.578  -0.420  1.00  0.40           O  
HETATM  390  O   HOH T 389      32.760  44.321   7.380  1.00  0.40           O  
HETATM  391  O   HOH T 390      34.320  13.668   6.402  1.00  0.40           O  
HETATM  392  O   HOH T 391      40.522  16.076  30.420  1.00  0.40           O  
HETATM  393  O   HOH T 392      42.562  37.237  26.926  1.00  0.40           O  
HETATM  394  O   HOH T 393      41.212   2.652 -20.174  1.00  0.40           O  
HETATM  395  O   HOH T 394       7.442   3.687  27.846  1.00  0.40           O  
HETATM  396  O   HOH T 395      28.378  57.455   8.306  1.00  0.40           O  
HETATM  397  O   HOH T 396      60.642  40.477  49.420  1.00  0.40           O  
HETATM  398  O   HOH T 397      43.660  22.762  51.118  1.00  0.40           O  
HETATM  399  O   HOH T 398      59.229  26.810  -5.192  1.00  0.40           O  
HETATM  400  O   HOH T 399      -3.375  20.212  20.708  1.00  0.40           O  
HETATM  401  O   HOH T 400      64.525  15.921  19.845  1.00  0.40           O  
HETATM  402  O   HOH T 401      29.779  13.821 -16.038  1.00  0.40           O  
HETATM  403  O   HOH T 402      12.175   0.626  20.355  1.00  0.40           O  
HETATM  404  O   HOH T 403      29.620   3.632  20.583  1.00  0.40           O  
HETATM  405  O   HOH T 404      46.225  17.287  20.324  1.00  0.40           O  
HETATM  406  O   HOH T 405      44.166  55.176  -6.296  1.00  0.40           O  
HETATM  407  O   HOH T 406      17.150  30.909  27.606  1.00  0.40           O  
HETATM  408  O   HOH T 407      43.875  39.548  45.570  1.00  0.40           O  
HETATM  409  O   HOH T 408      29.982  21.551  -4.376  1.00  0.40           O  
HETATM  410  O   HOH T 409      44.118  22.931  26.405  1.00  0.40           O  
HETATM  411  O   HOH T 410      20.485  10.545   1.808  1.00  0.40           O  
HETATM  412  O   HOH T 411      50.272  23.667  10.511  1.00  0.40           O  
HETATM  413  O   HOH T 412      38.352  13.900  40.769  1.00  0.40           O  
HETATM  414  O   HOH T 413      17.540   5.760   3.329  1.00  0.41           O  
HETATM  415  O   HOH T 414      38.848  64.746   8.987  1.00  0.41           O  
HETATM  416  O   HOH T 415      45.391  43.776  11.576  1.00  0.41           O  
HETATM  417  O   HOH T 416      35.178  20.987  44.825  1.00  0.41           O  
HETATM  418  O   HOH T 417      13.090  -0.333  15.897  1.00  0.41           O  
HETATM  419  O   HOH T 418      20.993   1.334  28.656  1.00  0.41           O  
HETATM  420  O   HOH T 419      36.488   0.610 -18.728  1.00  0.41           O  
HETATM  421  O   HOH T 420      43.961  14.209  24.378  1.00  0.41           O  
HETATM  422  O   HOH T 421      23.065   5.861  36.319  1.00  0.41           O  
HETATM  423  O   HOH T 422      22.462  17.042  22.993  1.00  0.41           O  
HETATM  424  O   HOH T 423      25.943  10.090   7.469  1.00  0.41           O  
HETATM  425  O   HOH T 424      33.076  15.366  43.700  1.00  0.41           O  
HETATM  426  O   HOH T 425      75.706  15.131  28.899  1.00  0.41           O  
HETATM  427  O   HOH T 426       4.411  27.003  36.417  1.00  0.41           O  
HETATM  428  O   HOH T 427      28.111  14.979  15.362  1.00  0.41           O  
HETATM  429  O   HOH T 428      32.803  -4.067  16.467  1.00  0.41           O  
HETATM  430  O   HOH T 429      20.984   7.050   9.185  1.00  0.41           O  
HETATM  431  O   HOH T 430      73.641  17.543  35.678  1.00  0.41           O  
HETATM  432  O   HOH T 431      40.648  27.497  -8.523  1.00  0.41           O  
HETATM  433  O   HOH T 432      -2.412  20.628  38.638  1.00  0.41           O  
HETATM  434  O   HOH T 433      31.809  17.779  43.725  1.00  0.41           O  
HETATM  435  O   HOH T 434      53.292  26.789  10.168  1.00  0.41           O  
HETATM  436  O   HOH T 435      42.469  60.627  -9.224  1.00  0.41           O  
HETATM  437  O   HOH T 436      71.480  27.528  40.114  1.00  0.41           O  
HETATM  438  O   HOH T 437      -7.454  23.711  12.922  1.00  0.41           O  
HETATM  439  O   HOH T 438       7.566  23.468  38.735  1.00  0.41           O  
HETATM  440  O   HOH T 439      11.695  19.599  16.645  1.00  0.41           O  
HETATM  441  O   HOH T 440      58.513  21.867  41.315  1.00  0.41           O  
HETATM  442  O   HOH T 441      50.517  30.929 -10.362  1.00  0.41           O  
HETATM  443  O   HOH T 442      43.186  39.883  12.235  1.00  0.41           O  
HETATM  444  O   HOH T 443      52.601  53.485  -3.313  1.00  0.41           O  
HETATM  445  O   HOH T 444      46.253  19.991  50.689  1.00  0.41           O  
HETATM  446  O   HOH T 445      32.894 -12.220  14.777  1.00  0.41           O  
HETATM  447  O   HOH T 446      24.311  19.379  23.560  1.00  0.41           O  
HETATM  448  O   HOH T 447      16.124  10.494   1.295  1.00  0.41           O  
HETATM  449  O   HOH T 448      36.724  13.886 -15.309  1.00  0.41           O  
HETATM  450  O   HOH T 449      47.071  13.915 -11.436  1.00  0.41           O  
HETATM  451  O   HOH T 450      34.195  -7.301  12.327  1.00  0.41           O  
HETATM  452  O   HOH T 451      32.500  -0.746  33.339  1.00  0.41           O  
HETATM  453  O   HOH T 452      49.215  17.180  11.542  1.00  0.41           O  
HETATM  454  O   HOH T 453      36.651  17.267  26.914  1.00  0.41           O  
HETATM  455  O   HOH T 454      37.390  27.573  34.207  1.00  0.41           O  
HETATM  456  O   HOH T 455      53.719  32.845  -2.232  1.00  0.41           O  
HETATM  457  O   HOH T 456      28.695   0.839  30.247  1.00  0.42           O  
HETATM  458  O   HOH T 457      31.809  51.175  13.838  1.00  0.42           O  
HETATM  459  O   HOH T 458      -1.338  17.364   8.892  1.00  0.42           O  
HETATM  460  O   HOH T 459      43.148   8.890 -19.376  1.00  0.42           O  
HETATM  461  O   HOH T 460      42.667  13.152 -16.454  1.00  0.42           O  
HETATM  462  O   HOH T 461      55.515  15.296  -2.488  1.00  0.42           O  
HETATM  463  O   HOH T 462      28.991  55.565 -14.540  1.00  0.42           O  
HETATM  464  O   HOH T 463      42.769  11.652 -18.897  1.00  0.42           O  
HETATM  465  O   HOH T 464      -6.047  20.736  20.213  1.00  0.42           O  
HETATM  466  O   HOH T 465      11.562  22.122  46.100  1.00  0.42           O  
HETATM  467  O   HOH T 466      57.479  48.946   5.106  1.00  0.42           O  
HETATM  468  O   HOH T 467      42.998  38.124  10.128  1.00  0.42           O  
HETATM  469  O   HOH T 468      48.563  26.770 -10.066  1.00  0.42           O  
HETATM  470  O   HOH T 469       6.151  21.210  39.595  1.00  0.42           O  
HETATM  471  O   HOH T 470      48.215  22.269  20.376  1.00  0.42           O  
HETATM  472  O   HOH T 471      45.821  56.420  -0.982  1.00  0.42           O  
HETATM  473  O   HOH T 472      18.307   1.751  29.683  1.00  0.42           O  
HETATM  474  O   HOH T 473      -4.841  23.791  11.999  1.00  0.42           O  
HETATM  475  O   HOH T 474      26.722  14.134  46.857  1.00  0.42           O  
HETATM  476  O   HOH T 475      48.643   7.894  -9.553  1.00  0.42           O  
HETATM  477  O   HOH T 476      21.426  59.792 -11.523  1.00  0.42           O  
HETATM  478  O   HOH T 477      28.927  17.833  49.739  1.00  0.42           O  
HETATM  479  O   HOH T 478      29.742  56.898  10.639  1.00  0.42           O  
HETATM  480  O   HOH T 479      67.876  34.619  21.530  1.00  0.42           O  
HETATM  481  O   HOH T 480      10.044  20.502  44.426  1.00  0.42           O  
HETATM  482  O   HOH T 481      32.648  -6.059  14.436  1.00  0.42           O  
HETATM  483  O   HOH T 482      47.827  10.602  15.273  1.00  0.42           O  
HETATM  484  O   HOH T 483      70.937  23.307  19.452  1.00  0.43           O  
HETATM  485  O   HOH T 484      23.545  21.898  22.573  1.00  0.43           O  
HETATM  486  O   HOH T 485      51.720  11.403  23.468  1.00  0.43           O  
HETATM  487  O   HOH T 486      43.076  40.630  34.076  1.00  0.43           O  
HETATM  488  O   HOH T 487      16.186  -3.182   4.405  1.00  0.43           O  
HETATM  489  O   HOH T 488       0.685  14.783  13.527  1.00  0.43           O  
HETATM  490  O   HOH T 489      50.054  39.004  24.888  1.00  0.43           O  
HETATM  491  O   HOH T 490       8.770   7.225  20.106  1.00  0.43           O  
HETATM  492  O   HOH T 491      54.254  22.801   8.212  1.00  0.43           O  
HETATM  493  O   HOH T 492      42.570   6.703 -17.711  1.00  0.43           O  
HETATM  494  O   HOH T 493      25.778   1.516 -23.520  1.00  0.43           O  
HETATM  495  O   HOH T 494      32.542  28.480  36.036  1.00  0.43           O  
HETATM  496  O   HOH T 495      42.251  27.692 -10.653  1.00  0.43           O  
HETATM  497  O   HOH T 496      67.717  43.641  39.256  1.00  0.43           O  
HETATM  498  O   HOH T 497      64.783  15.307  22.634  1.00  0.43           O  
HETATM  499  O   HOH T 498      33.720  39.121  -0.625  1.00  0.43           O  
HETATM  500  O   HOH T 499       6.898   4.931  30.388  1.00  0.43           O  
HETATM  501  O   HOH T 500      44.629  40.261   9.843  1.00  0.43           O  
HETATM  502  O   HOH T 501       4.957  29.846  25.809  1.00  0.43           O  
HETATM  503  O   HOH T 502       4.547   9.012  35.636  1.00  0.43           O  
HETATM  504  O   HOH T 503      52.445  39.201  23.562  1.00  0.43           O  
HETATM  505  O   HOH T 504       4.491  24.217  36.385  1.00  0.43           O  
HETATM  506  O   HOH T 505      33.484  24.772  55.981  1.00  0.43           O  
HETATM  507  O   HOH T 506      38.645  47.523 -22.728  1.00  0.43           O  
HETATM  508  O   HOH T 507       8.987  30.437  32.236  1.00  0.43           O  
HETATM  509  O   HOH T 508      67.331  14.307  25.664  1.00  0.43           O  
HETATM  510  O   HOH T 509      41.605  22.662  -7.922  1.00  0.43           O  
HETATM  511  O   HOH T 510      16.441 -10.997   3.151  1.00  0.43           O  
HETATM  512  O   HOH T 511      -1.854  28.269  17.730  1.00  0.43           O  
HETATM  513  O   HOH T 512      -7.059  14.947  20.182  1.00  0.43           O  
HETATM  514  O   HOH T 513      29.718   1.788 -19.368  1.00  0.43           O  
HETATM  515  O   HOH T 514      27.396   1.808 -21.136  1.00  0.43           O  
HETATM  516  O   HOH T 515      35.162  16.869  50.271  1.00  0.43           O  
HETATM  517  O   HOH T 516      40.978  13.172  36.232  1.00  0.43           O  
HETATM  518  O   HOH T 517      47.928  53.699  17.721  1.00  0.43           O  
HETATM  519  O   HOH T 518      19.565  -0.732  29.715  1.00  0.44           O  
HETATM  520  O   HOH T 519      57.140  19.491  41.153  1.00  0.44           O  
HETATM  521  O   HOH T 520      72.130  39.573  42.317  1.00  0.44           O  
HETATM  522  O   HOH T 521      63.152  39.975  30.873  1.00  0.44           O  
HETATM  523  O   HOH T 522      67.982  36.676  23.417  1.00  0.44           O  
HETATM  524  O   HOH T 523      36.437  22.881  51.367  1.00  0.44           O  
HETATM  525  O   HOH T 524      18.767   2.108  10.424  1.00  0.44           O  
HETATM  526  O   HOH T 525      33.047   9.303 -16.301  1.00  0.44           O  
HETATM  527  O   HOH T 526      18.264  12.581  44.391  1.00  0.44           O  
HETATM  528  O   HOH T 527      13.841   9.091  13.524  1.00  0.44           O  
HETATM  529  O   HOH T 528      34.348  -6.490   2.219  1.00  0.44           O  
HETATM  530  O   HOH T 529      34.528  24.384  -8.490  1.00  0.44           O  
HETATM  531  O   HOH T 530      11.119   9.128  12.811  1.00  0.44           O  
HETATM  532  O   HOH T 531      75.631  33.744  35.009  1.00  0.44           O  
HETATM  533  O   HOH T 532      33.703  55.857  15.700  1.00  0.44           O  
HETATM  534  O   HOH T 533      66.229  32.046  53.955  1.00  0.44           O  
HETATM  535  O   HOH T 534      65.294  16.036  25.246  1.00  0.44           O  
HETATM  536  O   HOH T 535      41.353  11.400  41.609  1.00  0.44           O  
HETATM  537  O   HOH T 536      -3.286  15.128  30.028  1.00  0.44           O  
HETATM  538  O   HOH T 537      76.758  32.446  32.897  1.00  0.44           O  
HETATM  539  O   HOH T 538      23.544  50.581   4.362  1.00  0.44           O  
HETATM  540  O   HOH T 539      59.651  49.462   3.537  1.00  0.44           O  
HETATM  541  O   HOH T 540       5.986   7.618  30.783  1.00  0.44           O  
HETATM  542  O   HOH T 541      43.641   2.453 -16.359  1.00  0.44           O  
HETATM  543  O   HOH T 542      11.013  30.947  30.637  1.00  0.44           O  
HETATM  544  O   HOH T 543      27.557   7.929   7.680  1.00  0.44           O  
HETATM  545  O   HOH T 544      30.257 -11.553  15.165  1.00  0.44           O  
HETATM  546  O   HOH T 545      41.402  40.855 -18.212  1.00  0.44           O  
HETATM  547  O   HOH T 546      15.135   9.881  -1.249  1.00  0.44           O  
HETATM  548  O   HOH T 547      54.471   8.086  -1.917  1.00  0.44           O  
HETATM  549  O   HOH T 548      32.332  14.927 -19.152  1.00  0.44           O  
HETATM  550  O   HOH T 549      59.771  24.059   0.059  1.00  0.44           O  
HETATM  551  O   HOH T 550       5.460  13.565  38.876  1.00  0.44           O  
HETATM  552  O   HOH T 551      -0.534  22.213  31.609  1.00  0.44           O  
HETATM  553  O   HOH T 552      18.266   7.985  -6.045  1.00  0.44           O  
HETATM  554  O   HOH T 553      32.334  17.046   3.044  1.00  0.44           O  
HETATM  555  O   HOH T 554      16.691  10.051  -5.179  1.00  0.44           O  
HETATM  556  O   HOH T 555      50.575   9.590  -8.650  1.00  0.44           O  
HETATM  557  O   HOH T 556      37.169  64.440 -10.474  1.00  0.44           O  
HETATM  558  O   HOH T 557      55.686  21.854  41.083  1.00  0.44           O  
HETATM  559  O   HOH T 558      60.809  16.926  37.996  1.00  0.44           O  
HETATM  560  O   HOH T 559      37.503  45.863 -26.642  1.00  0.44           O  
HETATM  561  O   HOH T 560      15.130   4.409  12.280  1.00  0.45           O  
HETATM  562  O   HOH T 561      53.884  13.589   2.429  1.00  0.45           O  
HETATM  563  O   HOH T 562      68.330  41.351  40.644  1.00  0.45           O  
HETATM  564  O   HOH T 563      23.532 -12.843   5.520  1.00  0.45           O  
HETATM  565  O   HOH T 564      44.845  12.893 -12.770  1.00  0.45           O  
HETATM  566  O   HOH T 565      14.957  32.345  19.979  1.00  0.45           O  
HETATM  567  O   HOH T 566       6.884  14.657  13.443  1.00  0.45           O  
HETATM  568  O   HOH T 567      41.601   1.323 -17.784  1.00  0.45           O  
HETATM  569  O   HOH T 568      59.188  18.670  36.685  1.00  0.45           O  
HETATM  570  O   HOH T 569      64.923  21.043   2.815  1.00  0.45           O  
HETATM  571  O   HOH T 570      43.886   3.325 -13.700  1.00  0.45           O  
HETATM  572  O   HOH T 571      56.943  22.125  46.087  1.00  0.45           O  
HETATM  573  O   HOH T 572      16.440  -5.728   3.237  1.00  0.45           O  
HETATM  574  O   HOH T 573      38.369  41.973  17.340  1.00  0.45           O  
HETATM  575  O   HOH T 574      35.746  19.275  28.783  1.00  0.45           O  
HETATM  576  O   HOH T 575      45.130  46.864 -13.983  1.00  0.45           O  
HETATM  577  O   HOH T 576      60.535  17.990  21.022  1.00  0.45           O  
HETATM  578  O   HOH T 577      41.463   9.684 -21.526  1.00  0.45           O  
HETATM  579  O   HOH T 578      53.981  42.146  31.750  1.00  0.45           O  
HETATM  580  O   HOH T 579      50.557  37.760  -7.869  1.00  0.45           O  
HETATM  581  O   HOH T 580      20.969  22.791  49.376  1.00  0.45           O  
HETATM  582  O   HOH T 581      45.763  19.566  21.892  1.00  0.45           O  
HETATM  583  O   HOH T 582      -3.166  21.865  13.149  1.00  0.45           O  
HETATM  584  O   HOH T 583       7.305  22.044  12.334  1.00  0.45           O  
HETATM  585  O   HOH T 584       4.409   5.749  29.434  1.00  0.45           O  
HETATM  586  O   HOH T 585      46.313  48.315  11.684  1.00  0.45           O  
HETATM  587  O   HOH T 586      40.890  -1.508   7.507  1.00  0.45           O  
HETATM  588  O   HOH T 587       9.081  28.752  16.858  1.00  0.45           O  
HETATM  589  O   HOH T 588      33.314  17.748  21.293  1.00  0.45           O  
HETATM  590  O   HOH T 589      52.669   8.089  -4.118  1.00  0.45           O  
HETATM  591  O   HOH T 590      51.050   9.416  -5.990  1.00  0.45           O  
HETATM  592  O   HOH T 591      20.982   7.990   2.583  1.00  0.45           O  
HETATM  593  O   HOH T 592      38.931  -4.336   4.568  1.00  0.45           O  
HETATM  594  O   HOH T 593      45.106  30.721  22.992  1.00  0.45           O  
HETATM  595  O   HOH T 594      -1.063  28.057  22.245  1.00  0.45           O  
HETATM  596  O   HOH T 595      29.063   8.765 -15.356  1.00  0.45           O  
HETATM  597  O   HOH T 596      38.940  35.295   3.479  1.00  0.45           O  
HETATM  598  O   HOH T 597      64.079  24.860   6.790  1.00  0.45           O  
HETATM  599  O   HOH T 598      76.726  33.360  37.473  1.00  0.45           O  
HETATM  600  O   HOH T 599      53.049  28.165  -2.386  1.00  0.46           O  
HETATM  601  O   HOH T 600      20.715   1.234  34.452  1.00  0.46           O  
HETATM  602  O   HOH T 601      24.898   3.336 -21.671  1.00  0.46           O  
HETATM  603  O   HOH T 602      74.001  23.341  34.285  1.00  0.46           O  
HETATM  604  O   HOH T 603      60.578  21.509  -0.524  1.00  0.46           O  
HETATM  605  O   HOH T 604      35.717 -12.814   6.757  1.00  0.46           O  
HETATM  606  O   HOH T 605       5.437  19.327  37.688  1.00  0.46           O  
HETATM  607  O   HOH T 606      60.086  23.292  39.441  1.00  0.46           O  
HETATM  608  O   HOH T 607      35.588  11.566 -20.283  1.00  0.46           O  
HETATM  609  O   HOH T 608      54.788  34.204  50.900  1.00  0.46           O  
HETATM  610  O   HOH T 609      41.416  31.429  26.020  1.00  0.46           O  
HETATM  611  O   HOH T 610      39.572   2.933  17.622  1.00  0.46           O  
HETATM  612  O   HOH T 611      45.336  39.775  37.686  1.00  0.46           O  
HETATM  613  O   HOH T 612      45.156  12.948  32.182  1.00  0.46           O  
HETATM  614  O   HOH T 613      48.214  56.348  17.811  1.00  0.46           O  
HETATM  615  O   HOH T 614      37.824  52.731 -22.915  1.00  0.46           O  
HETATM  616  O   HOH T 615       6.883   3.687  17.592  1.00  0.46           O  
HETATM  617  O   HOH T 616      20.873  23.992  26.617  1.00  0.46           O  
HETATM  618  O   HOH T 617      62.991  41.780  49.217  1.00  0.46           O  
HETATM  619  O   HOH T 618      42.841  13.115  38.072  1.00  0.46           O  
HETATM  620  O   HOH T 619      49.505  48.482   9.819  1.00  0.46           O  
HETATM  621  O   HOH T 620       7.794  25.717  45.844  1.00  0.46           O  
HETATM  622  O   HOH T 621      30.681  48.736  13.801  1.00  0.46           O  
HETATM  623  O   HOH T 622       7.592   2.209  19.866  1.00  0.46           O  
HETATM  624  O   HOH T 623       2.227  11.726  33.874  1.00  0.46           O  
HETATM  625  O   HOH T 624      23.865  -1.053  13.473  1.00  0.46           O  
HETATM  626  O   HOH T 625      33.909  11.357 -17.974  1.00  0.46           O  
HETATM  627  O   HOH T 626      46.859  61.474   6.466  1.00  0.46           O  
HETATM  628  O   HOH T 627      59.432  48.558   0.900  1.00  0.46           O  
HETATM  629  O   HOH T 628      36.050  64.028   6.588  1.00  0.46           O  
HETATM  630  O   HOH T 629      33.974  38.860  -6.519  1.00  0.46           O  
HETATM  631  O   HOH T 630      38.783  -3.369  13.310  1.00  0.46           O  
HETATM  632  O   HOH T 631      53.650  18.181   6.241  1.00  0.46           O  
HETATM  633  O   HOH T 632       0.857  17.531  13.505  1.00  0.46           O  
HETATM  634  O   HOH T 633      56.093  10.238  20.798  1.00  0.46           O  
HETATM  635  O   HOH T 634      62.994  19.319   3.926  1.00  0.46           O  
HETATM  636  O   HOH T 635      49.662  14.692  12.437  1.00  0.46           O  
HETATM  637  O   HOH T 636      44.085  35.777  25.114  1.00  0.46           O  
HETATM  638  O   HOH T 637      58.897  24.210  -4.187  1.00  0.46           O  
HETATM  639  O   HOH T 638      41.510  52.193  20.226  1.00  0.47           O  
HETATM  640  O   HOH T 639      43.106   3.093  -9.234  1.00  0.47           O  
HETATM  641  O   HOH T 640      71.959  22.821  -0.868  1.00  0.47           O  
HETATM  642  O   HOH T 641      27.931  11.746  47.408  1.00  0.47           O  
HETATM  643  O   HOH T 642      14.405  16.201  46.986  1.00  0.47           O  
HETATM  644  O   HOH T 643      64.593  20.801   5.615  1.00  0.47           O  
HETATM  645  O   HOH T 644       5.287  32.572  25.556  1.00  0.47           O  
HETATM  646  O   HOH T 645       4.607  16.104  14.298  1.00  0.47           O  
HETATM  647  O   HOH T 646      31.014  41.825   6.796  1.00  0.47           O  
HETATM  648  O   HOH T 647      19.156   3.090  35.630  1.00  0.47           O  
HETATM  649  O   HOH T 648      35.844  16.938  21.548  1.00  0.47           O  
HETATM  650  O   HOH T 649      38.829  30.051  -6.459  1.00  0.47           O  
HETATM  651  O   HOH T 650      17.883  25.405  22.817  1.00  0.47           O  
HETATM  652  O   HOH T 651      37.357  28.609  48.991  1.00  0.47           O  
HETATM  653  O   HOH T 652      32.968  18.128   5.500  1.00  0.47           O  
HETATM  654  O   HOH T 653      34.897  -4.774  13.116  1.00  0.47           O  
HETATM  655  O   HOH T 654      37.566   9.720  28.522  1.00  0.47           O  
HETATM  656  O   HOH T 655      23.386  -5.992  -1.195  1.00  0.47           O  
HETATM  657  O   HOH T 656      43.338   5.136 -15.712  1.00  0.47           O  
HETATM  658  O   HOH T 657      30.853  22.732  -6.678  1.00  0.47           O  
HETATM  659  O   HOH T 658      50.694  11.483  20.912  1.00  0.47           O  
HETATM  660  O   HOH T 659      50.275  20.355  15.525  1.00  0.47           O  
HETATM  661  O   HOH T 660      74.927  25.702  36.443  1.00  0.47           O  
HETATM  662  O   HOH T 661      58.501  47.126  -5.711  1.00  0.47           O  
HETATM  663  O   HOH T 662      32.493 -14.678   8.338  1.00  0.47           O  
HETATM  664  O   HOH T 663      25.142  76.130  -3.190  1.00  0.47           O  
HETATM  665  O   HOH T 664      21.765  19.763  22.666  1.00  0.47           O  
HETATM  666  O   HOH T 665      26.791  43.194   3.547  1.00  0.47           O  
HETATM  667  O   HOH T 666      36.591  -4.318   7.844  1.00  0.47           O  
HETATM  668  O   HOH T 667      35.558  38.455  -2.766  1.00  0.47           O  
HETATM  669  O   HOH T 668      65.616  39.744  29.081  1.00  0.47           O  
HETATM  670  O   HOH T 669      17.788  -0.285  11.437  1.00  0.47           O  
HETATM  671  O   HOH T 670       5.758  28.580  28.228  1.00  0.47           O  
HETATM  672  O   HOH T 671      62.493  16.055  34.198  1.00  0.47           O  
HETATM  673  O   HOH T 672       9.654   8.895  42.032  1.00  0.47           O  
HETATM  674  O   HOH T 673      56.465  29.976  19.185  1.00  0.47           O  
HETATM  675  O   HOH T 674      35.109   4.056  19.753  1.00  0.47           O  
HETATM  676  O   HOH T 675      65.902  44.932  49.579  1.00  0.47           O  
HETATM  677  O   HOH T 676      41.793  44.982  12.081  1.00  0.47           O  
HETATM  678  O   HOH T 677      38.867  20.434  15.529  1.00  0.47           O  
HETATM  679  O   HOH T 678      47.193  56.625   1.341  1.00  0.47           O  
HETATM  680  O   HOH T 679      12.058   6.553  17.213  1.00  0.47           O  
HETATM  681  O   HOH T 680       1.656  16.570  38.581  1.00  0.47           O  
HETATM  682  O   HOH T 681      24.975  21.238  -1.192  1.00  0.47           O  
HETATM  683  O   HOH T 682       5.343  12.406  12.909  1.00  0.47           O  
HETATM  684  O   HOH T 683      32.424   3.364  20.089  1.00  0.47           O  
HETATM  685  O   HOH T 684      32.084  24.389  53.705  1.00  0.47           O  
HETATM  686  O   HOH T 685      57.359  25.037  -0.925  1.00  0.47           O  
HETATM  687  O   HOH T 686      39.184  53.585  19.587  1.00  0.47           O  
HETATM  688  O   HOH T 687       6.436  29.413  16.904  1.00  0.47           O  
HETATM  689  O   HOH T 688      34.843  21.865  -9.973  1.00  0.47           O  
HETATM  690  O   HOH T 689      41.406  34.448   2.655  1.00  0.47           O  
HETATM  691  O   HOH T 690      45.022   5.846 -13.647  1.00  0.47           O  
HETATM  692  O   HOH T 691      57.147  20.171  35.965  1.00  0.47           O  
HETATM  693  O   HOH T 692      39.782  40.866  19.359  1.00  0.47           O  
HETATM  694  O   HOH T 693      32.632  15.376   5.157  1.00  0.48           O  
HETATM  695  O   HOH T 694      31.652  12.739 -17.784  1.00  0.48           O  
HETATM  696  O   HOH T 695      29.408  14.246  47.359  1.00  0.48           O  
HETATM  697  O   HOH T 696      15.626  12.435  45.135  1.00  0.48           O  
HETATM  698  O   HOH T 697      32.341   0.498  30.977  1.00  0.48           O  
HETATM  699  O   HOH T 698      43.654  -3.466  -0.999  1.00  0.48           O  
HETATM  700  O   HOH T 699      33.879  70.637   5.733  1.00  0.48           O  
HETATM  701  O   HOH T 700      47.879  16.311  13.751  1.00  0.48           O  
HETATM  702  O   HOH T 701      42.728  16.159  26.809  1.00  0.48           O  
HETATM  703  O   HOH T 702      53.501  10.567  25.349  1.00  0.48           O  
HETATM  704  O   HOH T 703      52.785  51.985   3.132  1.00  0.48           O  
HETATM  705  O   HOH T 704      32.485  13.382  45.594  1.00  0.48           O  
HETATM  706  O   HOH T 705      22.762  24.646  42.042  1.00  0.48           O  
HETATM  707  O   HOH T 706      29.957  16.332   7.863  1.00  0.48           O  
HETATM  708  O   HOH T 707      28.923  59.552  10.034  1.00  0.48           O  
HETATM  709  O   HOH T 708      39.007  16.375  28.253  1.00  0.48           O  
HETATM  710  O   HOH T 709      53.666  21.592  -3.952  1.00  0.48           O  
HETATM  711  O   HOH T 710      54.466  13.946  -0.276  1.00  0.48           O  
HETATM  712  O   HOH T 711      27.389  18.256  44.707  1.00  0.48           O  
HETATM  713  O   HOH T 712      30.760  -0.291  28.844  1.00  0.48           O  
HETATM  714  O   HOH T 713      42.225  26.734   9.211  1.00  0.48           O  
HETATM  715  O   HOH T 714       3.196  14.783  39.746  1.00  0.48           O  
HETATM  716  O   HOH T 715      45.573  38.364  40.054  1.00  0.48           O  
HETATM  717  O   HOH T 716      55.703  26.896   8.967  1.00  0.48           O  
HETATM  718  O   HOH T 717      40.455  14.671  20.464  1.00  0.48           O  
HETATM  719  O   HOH T 718      21.710  11.340   9.712  1.00  0.48           O  
HETATM  720  O   HOH T 719      41.444  43.742  14.511  1.00  0.48           O  
HETATM  721  O   HOH T 720      23.623   7.858   9.839  1.00  0.48           O  
HETATM  722  O   HOH T 721      -9.296  14.276  21.669  1.00  0.48           O  
HETATM  723  O   HOH T 722      49.601   9.687  22.735  1.00  0.48           O  
HETATM  724  O   HOH T 723      58.512  10.757  21.998  1.00  0.48           O  
HETATM  725  O   HOH T 724      63.028  40.018  28.183  1.00  0.48           O  
HETATM  726  O   HOH T 725      13.073   8.406  -2.523  1.00  0.48           O  
HETATM  727  O   HOH T 726      42.841  14.239  33.049  1.00  0.48           O  
HETATM  728  O   HOH T 727      15.459  11.226  12.713  1.00  0.48           O  
HETATM  729  O   HOH T 728      31.302 -11.638  12.600  1.00  0.48           O  
HETATM  730  O   HOH T 729      49.285  39.952  27.367  1.00  0.48           O  
HETATM  731  O   HOH T 730      52.115  22.696  -5.983  1.00  0.49           O  
HETATM  732  O   HOH T 731      30.576  62.598  -7.079  1.00  0.49           O  
HETATM  733  O   HOH T 732      20.900 -10.560  11.253  1.00  0.49           O  
HETATM  734  O   HOH T 733      39.313  -3.831   7.312  1.00  0.49           O  
HETATM  735  O   HOH T 734      56.093  25.498  49.670  1.00  0.49           O  
HETATM  736  O   HOH T 735      30.949   1.540  21.725  1.00  0.49           O  
HETATM  737  O   HOH T 736      42.149  14.359  28.850  1.00  0.49           O  
HETATM  738  O   HOH T 737      31.426  -3.163  -7.514  1.00  0.49           O  
HETATM  739  O   HOH T 738      47.743  13.684  46.983  1.00  0.49           O  
HETATM  740  O   HOH T 739      31.492   8.132  15.723  1.00  0.49           O  
HETATM  741  O   HOH T 740      37.789  29.328  30.725  1.00  0.49           O  
HETATM  742  O   HOH T 741      40.027  32.191   1.899  1.00  0.49           O  
HETATM  743  O   HOH T 742      10.017  23.354  47.927  1.00  0.49           O  
HETATM  744  O   HOH T 743       4.937   4.783  26.917  1.00  0.49           O  
HETATM  745  O   HOH T 744      50.224  23.300  -4.044  1.00  0.49           O  
HETATM  746  O   HOH T 745      35.603  72.081   4.183  1.00  0.49           O  
HETATM  747  O   HOH T 746      -1.618  16.339  14.026  1.00  0.49           O  
HETATM  748  O   HOH T 747      55.845  11.343  35.845  1.00  0.49           O  
HETATM  749  O   HOH T 748      34.693  -0.041  18.547  1.00  0.49           O  
HETATM  750  O   HOH T 749      32.642  49.271  15.705  1.00  0.49           O  
HETATM  751  O   HOH T 750      62.228  20.998  -2.651  1.00  0.49           O  
HETATM  752  O   HOH T 751       1.732   3.461  35.931  1.00  0.49           O  
HETATM  753  O   HOH T 752      61.699  37.734  24.134  1.00  0.49           O  
HETATM  754  O   HOH T 753      36.718  35.693  -1.753  1.00  0.49           O  
HETATM  755  O   HOH T 754      17.281  21.942  23.286  1.00  0.49           O  
HETATM  756  O   HOH T 755      28.533  27.352  31.561  1.00  0.49           O  
HETATM  757  O   HOH T 756      46.679  21.515  52.972  1.00  0.49           O  
HETATM  758  O   HOH T 757      44.974  63.657   6.730  1.00  0.49           O  
HETATM  759  O   HOH T 758      62.434  16.083  21.606  1.00  0.49           O  
HETATM  760  O   HOH T 759      32.173   0.619  19.358  1.00  0.49           O  
HETATM  761  O   HOH T 760      29.174  24.099  -3.320  1.00  0.49           O  
HETATM  762  O   HOH T 761      29.024  17.539  37.615  1.00  0.49           O  
HETATM  763  O   HOH T 762      20.230  31.574  38.080  1.00  0.49           O  
HETATM  764  O   HOH T 763      42.106  -2.801  -5.064  1.00  0.49           O  
HETATM  765  O   HOH T 764      72.037  19.284  37.122  1.00  0.49           O  
HETATM  766  O   HOH T 765      50.901  28.190 -10.105  1.00  0.49           O  
HETATM  767  O   HOH T 766      55.327  27.516  51.022  1.00  0.50           O  
HETATM  768  O   HOH T 767      38.753  59.551 -16.577  1.00  0.50           O  
HETATM  769  O   HOH T 768      53.173  10.243  43.152  1.00  0.50           O  
HETATM  770  O   HOH T 769      31.392   6.912 -12.052  1.00  0.50           O  
HETATM  771  O   HOH T 770      28.359  21.589  -6.711  1.00  0.50           O  
HETATM  772  O   HOH T 771      39.697  27.825  50.249  1.00  0.50           O  
HETATM  773  O   HOH T 772      63.154  16.129  36.845  1.00  0.50           O  
HETATM  774  O   HOH T 773      12.352  19.973  47.426  1.00  0.50           O  
HETATM  775  O   HOH T 774      23.626  53.529  -2.276  1.00  0.50           O  
HETATM  776  O   HOH T 775      33.255  21.712   2.090  1.00  0.50           O  
HETATM  777  O   HOH T 776      58.420  22.626  -1.956  1.00  0.50           O  
HETATM  778  O   HOH T 777      49.196  11.397  33.139  1.00  0.50           O  
HETATM  779  O   HOH T 778      54.615  17.664   3.740  1.00  0.50           O  
HETATM  780  O   HOH T 779      56.016  10.942  32.416  1.00  0.50           O  
HETATM  781  O   HOH T 780       4.712  28.391  30.832  1.00  0.50           O  
HETATM  782  O   HOH T 781      47.922  28.886  49.650  1.00  0.50           O  
HETATM  783  O   HOH T 782      30.505  13.586   8.276  1.00  0.50           O  
HETATM  784  O   HOH T 783      24.431  10.570   9.798  1.00  0.50           O  
HETATM  785  O   HOH T 784      43.973  44.535  13.757  1.00  0.50           O  
HETATM  786  O   HOH T 785      73.607  21.262  35.989  1.00  0.50           O  
HETATM  787  O   HOH T 786      52.889  24.161  10.057  1.00  0.50           O  
HETATM  788  O   HOH T 787      24.145  -1.909  -6.820  1.00  0.50           O  
HETATM  789  O   HOH T 788      23.442  53.348   7.453  1.00  0.50           O  
HETATM  790  O   HOH T 789      22.819  29.166  43.111  1.00  0.50           O  
HETATM  791  O   HOH T 790      61.621  25.564  49.367  1.00  0.50           O  
HETATM  792  O   HOH T 791      17.835  31.993  30.714  1.00  0.50           O  
HETATM  793  O   HOH T 792       9.527   8.604  15.063  1.00  0.50           O  
HETATM  794  O   HOH T 793      51.954  23.587  12.671  1.00  0.50           O  
HETATM  795  O   HOH T 794      44.169  20.118  26.292  1.00  0.50           O  
HETATM  796  O   HOH T 795      19.594   9.548   9.052  1.00  0.50           O  
HETATM  797  O   HOH T 796      52.888  26.950  34.219  1.00  0.50           O  
HETATM  798  O   HOH T 797      36.523  33.909   3.128  1.00  0.50           O  
HETATM  799  O   HOH T 798      55.241  34.313 -12.007  1.00  0.50           O  
HETATM  800  O   HOH T 799      22.666  56.086  -2.553  1.00  0.50           O  
HETATM  801  O   HOH T 800      12.097   6.284  -4.089  1.00  0.50           O  
HETATM  802  O   HOH T 801      46.365  66.382  -0.020  1.00  0.50           O  
HETATM  803  O   HOH T 802      41.922  24.889  51.056  1.00  0.50           O  
HETATM  804  O   HOH T 803      41.481  38.860  28.963  1.00  0.50           O  
HETATM  805  O   HOH T 804      77.337  24.282  36.268  1.00  0.50           O  
HETATM  806  O   HOH T 805      66.611  15.228  31.712  1.00  0.50           O  
HETATM  807  O   HOH T 806      29.732  23.638  48.688  1.00  0.50           O  
HETATM  808  O   HOH T 807      35.332  16.041  42.396  1.00  0.50           O  
HETATM  809  O   HOH T 808      12.995  17.687  48.865  1.00  0.50           O  
HETATM  810  O   HOH T 809      46.916  24.261  21.745  1.00  0.50           O  
HETATM  811  O   HOH T 810      33.627  54.124  17.864  1.00  0.50           O  
HETATM  812  O   HOH T 811      27.389   4.564 -21.938  1.00  0.50           O  
HETATM  813  O   HOH T 812      51.333  35.238  -8.702  1.00  0.50           O  
HETATM  814  O   HOH T 813      45.493  68.882  -2.468  1.00  0.50           O  
HETATM  815  O   HOH T 814      26.049  56.084   7.581  1.00  0.50           O  
HETATM  816  O   HOH T 815      -1.629  18.464  12.266  1.00  0.50           O  
HETATM  817  O   HOH T 816      50.842  19.255  11.346  1.00  0.51           O  
HETATM  818  O   HOH T 817       8.147   6.230  17.648  1.00  0.51           O  
HETATM  819  O   HOH T 818      -5.900  21.398  13.000  1.00  0.51           O  
HETATM  820  O   HOH T 819      41.329  61.608 -12.904  1.00  0.51           O  
HETATM  821  O   HOH T 820      39.886  29.222 -10.587  1.00  0.51           O  
HETATM  822  O   HOH T 821      69.656  14.575  24.238  1.00  0.51           O  
HETATM  823  O   HOH T 822      34.129  47.045  18.095  1.00  0.51           O  
HETATM  824  O   HOH T 823      23.801  46.148   3.260  1.00  0.51           O  
HETATM  825  O   HOH T 824      19.335  -8.468   4.257  1.00  0.51           O  
HETATM  826  O   HOH T 825      35.638  25.090  27.463  1.00  0.51           O  
HETATM  827  O   HOH T 826      67.262  24.934  25.582  1.00  0.51           O  
HETATM  828  O   HOH T 827      40.164  -1.326  12.053  1.00  0.51           O  
HETATM  829  O   HOH T 828      47.513  25.111  50.197  1.00  0.51           O  
HETATM  830  O   HOH T 829      35.456  34.839   0.712  1.00  0.51           O  
HETATM  831  O   HOH T 830      23.913  77.502  -5.214  1.00  0.51           O  
HETATM  832  O   HOH T 831      -6.771  19.904  10.774  1.00  0.51           O  
HETATM  833  O   HOH T 832      45.622  16.199 -11.204  1.00  0.51           O  
HETATM  834  O   HOH T 833      29.254  51.066  12.841  1.00  0.51           O  
HETATM  835  O   HOH T 834      36.634  -6.367   0.836  1.00  0.51           O  
HETATM  836  O   HOH T 835      20.134   2.533  12.818  1.00  0.51           O  
HETATM  837  O   HOH T 836      32.290  46.846  14.509  1.00  0.51           O  
HETATM  838  O   HOH T 837      41.918  10.945  35.115  1.00  0.51           O  
HETATM  839  O   HOH T 838      15.537   7.709  -6.113  1.00  0.51           O  
HETATM  840  O   HOH T 839      -0.808  12.929  14.781  1.00  0.51           O  
HETATM  841  O   HOH T 840      78.465  34.068  34.240  1.00  0.51           O  
HETATM  842  O   HOH T 841      54.592  19.612  -2.289  1.00  0.51           O  
HETATM  843  O   HOH T 842      44.634   8.605 -13.951  1.00  0.51           O  
HETATM  844  O   HOH T 843       8.523  18.097  44.201  1.00  0.52           O  
HETATM  845  O   HOH T 844      36.092  32.531  -0.609  1.00  0.52           O  
HETATM  846  O   HOH T 845      44.712  25.174  50.415  1.00  0.52           O  
HETATM  847  O   HOH T 846       3.527  11.517  14.660  1.00  0.52           O  
HETATM  848  O   HOH T 847      46.318  -3.362  -0.752  1.00  0.52           O  
HETATM  849  O   HOH T 848      48.532  23.184  48.715  1.00  0.52           O  
HETATM  850  O   HOH T 849      55.984  45.971  -5.697  1.00  0.52           O  
HETATM  851  O   HOH T 850      39.008  18.713  26.917  1.00  0.52           O  
HETATM  852  O   HOH T 851      61.859  25.779   8.275  1.00  0.52           O  
HETATM  853  O   HOH T 852      40.449  34.819 -14.679  1.00  0.52           O  
HETATM  854  O   HOH T 853      28.876  22.934   0.826  1.00  0.52           O  
HETATM  855  O   HOH T 854      19.556  21.568  51.392  1.00  0.52           O  
HETATM  856  O   HOH T 855      37.415  40.475  24.487  1.00  0.52           O  
HETATM  857  O   HOH T 856      21.052  58.367   2.277  1.00  0.52           O  
HETATM  858  O   HOH T 857      43.685  18.166  20.501  1.00  0.52           O  
HETATM  859  O   HOH T 858       0.579  26.521  34.786  1.00  0.52           O  
HETATM  860  O   HOH T 859       2.794  10.939  36.513  1.00  0.52           O  
HETATM  861  O   HOH T 860      48.323  19.768  17.508  1.00  0.52           O  
HETATM  862  O   HOH T 861      21.657  11.578  46.092  1.00  0.52           O  
HETATM  863  O   HOH T 862      45.717  41.130  12.128  1.00  0.52           O  
HETATM  864  O   HOH T 863       9.475   3.786  18.461  1.00  0.52           O  
HETATM  865  O   HOH T 864      25.696  19.673  46.465  1.00  0.52           O  
HETATM  866  O   HOH T 865      48.614  46.955  12.956  1.00  0.52           O  
HETATM  867  O   HOH T 866      50.528   7.096  -7.546  1.00  0.52           O  
HETATM  868  O   HOH T 867      17.055  27.393  46.946  1.00  0.52           O  
HETATM  869  O   HOH T 868      19.536  11.749   4.175  1.00  0.52           O  
HETATM  870  O   HOH T 869      33.924  16.160 -17.208  1.00  0.52           O  
HETATM  871  O   HOH T 870      -5.633  16.114  22.154  1.00  0.52           O  
HETATM  872  O   HOH T 871       6.254  11.141  15.233  1.00  0.52           O  
HETATM  873  O   HOH T 872      18.646  20.922  17.808  1.00  0.52           O  
HETATM  874  O   HOH T 873      17.142  -8.354   2.597  1.00  0.52           O  
HETATM  875  O   HOH T 874      56.109  39.419   8.269  1.00  0.52           O  
HETATM  876  O   HOH T 875      56.053  47.342   6.691  1.00  0.52           O  
HETATM  877  O   HOH T 876      67.223  17.865  38.069  1.00  0.52           O  
HETATM  878  O   HOH T 877      37.462  70.641   5.579  1.00  0.52           O  
HETATM  879  O   HOH T 878       5.218  13.656  15.432  1.00  0.52           O  
HETATM  880  O   HOH T 879      21.637  47.600   2.522  1.00  0.52           O  
HETATM  881  O   HOH T 880      59.001  19.360  13.820  1.00  0.53           O  
HETATM  882  O   HOH T 881      21.912   3.326  35.838  1.00  0.53           O  
HETATM  883  O   HOH T 882       1.961  12.564  24.932  1.00  0.53           O  
HETATM  884  O   HOH T 883      56.534  14.494  18.607  1.00  0.53           O  
HETATM  885  O   HOH T 884      61.038  23.565  -2.478  1.00  0.53           O  
HETATM  886  O   HOH T 885      56.523   9.584  23.427  1.00  0.53           O  
HETATM  887  O   HOH T 886      75.529  22.652  37.398  1.00  0.53           O  
HETATM  888  O   HOH T 887      30.200  21.573  45.487  1.00  0.53           O  
HETATM  889  O   HOH T 888      32.941  42.486 -14.325  1.00  0.53           O  
HETATM  890  O   HOH T 889      53.262  20.935   6.483  1.00  0.53           O  
HETATM  891  O   HOH T 890      51.197  47.757  11.885  1.00  0.53           O  
HETATM  892  O   HOH T 891      34.769  21.282   8.795  1.00  0.53           O  
HETATM  893  O   HOH T 892      32.159   2.931 -18.642  1.00  0.53           O  
HETATM  894  O   HOH T 893       5.861  18.662  40.422  1.00  0.53           O  
HETATM  895  O   HOH T 894      44.044  33.776   2.621  1.00  0.53           O  
HETATM  896  O   HOH T 895      44.618  16.220  22.364  1.00  0.53           O  
HETATM  897  O   HOH T 896      35.770   8.037 -18.506  1.00  0.53           O  
HETATM  898  O   HOH T 897      23.029 -15.409   4.743  1.00  0.53           O  
HETATM  899  O   HOH T 898      60.625  12.822  20.057  1.00  0.53           O  
HETATM  900  O   HOH T 899      36.088  -3.659  31.822  1.00  0.53           O  
HETATM  901  O   HOH T 900      21.381   8.985  11.010  1.00  0.53           O  
HETATM  902  O   HOH T 901      37.812  32.645  -6.610  1.00  0.53           O  
HETATM  903  O   HOH T 902      26.646  25.990  43.906  1.00  0.53           O  
HETATM  904  O   HOH T 903      45.475  -1.430  -8.187  1.00  0.53           O  
HETATM  905  O   HOH T 904      40.606  -2.514  -7.418  1.00  0.53           O  
HETATM  906  O   HOH T 905      50.998  41.422  23.581  1.00  0.53           O  
HETATM  907  O   HOH T 906       4.232   5.048  36.103  1.00  0.53           O  
HETATM  908  O   HOH T 907       8.100  31.705  37.882  1.00  0.53           O  
HETATM  909  O   HOH T 908      28.378  25.023  25.107  1.00  0.53           O  
HETATM  910  O   HOH T 909      19.555  12.182   8.275  1.00  0.53           O  
HETATM  911  O   HOH T 910      44.636  -2.205  -4.026  1.00  0.53           O  
HETATM  912  O   HOH T 911      36.934  40.576   8.573  1.00  0.53           O  
HETATM  913  O   HOH T 912      66.493  32.427  20.671  1.00  0.53           O  
HETATM  914  O   HOH T 913      48.898  14.457  -6.506  1.00  0.53           O  
HETATM  915  O   HOH T 914      47.553  19.494 -10.667  1.00  0.53           O  
HETATM  916  O   HOH T 915      20.318  13.800  11.923  1.00  0.53           O  
HETATM  917  O   HOH T 916      54.189  10.457  37.905  1.00  0.53           O  
HETATM  918  O   HOH T 917      45.608  33.444  46.403  1.00  0.53           O  
HETATM  919  O   HOH T 918       9.882   5.842  15.353  1.00  0.53           O  
HETATM  920  O   HOH T 919      65.680  20.138  -1.954  1.00  0.53           O  
HETATM  921  O   HOH T 920      48.926   5.140  -8.517  1.00  0.53           O  
HETATM  922  O   HOH T 921      -9.499  15.037  19.016  1.00  0.54           O  
HETATM  923  O   HOH T 922      18.678  31.629  21.908  1.00  0.54           O  
HETATM  924  O   HOH T 923      38.934  72.105  -4.132  1.00  0.54           O  
HETATM  925  O   HOH T 924      38.310   9.624  25.651  1.00  0.54           O  
HETATM  926  O   HOH T 925      26.826  52.340 -13.445  1.00  0.54           O  
HETATM  927  O   HOH T 926      55.992  22.871  48.563  1.00  0.54           O  
HETATM  928  O   HOH T 927      19.387   7.292   0.259  1.00  0.54           O  
HETATM  929  O   HOH T 928      37.794   3.601  19.556  1.00  0.54           O  
HETATM  930  O   HOH T 929      51.517  22.404   8.295  1.00  0.54           O  
HETATM  931  O   HOH T 930      43.720   0.576  -8.403  1.00  0.54           O  
HETATM  932  O   HOH T 931      43.862  -0.859 -10.504  1.00  0.54           O  
HETATM  933  O   HOH T 932      40.317  36.482  28.275  1.00  0.54           O  
HETATM  934  O   HOH T 933      34.746  -5.017  -2.327  1.00  0.54           O  
HETATM  935  O   HOH T 934      29.754  11.095 -16.801  1.00  0.54           O  
HETATM  936  O   HOH T 935      37.278  26.638  50.941  1.00  0.54           O  
HETATM  937  O   HOH T 936      41.297  41.134  13.917  1.00  0.54           O  
HETATM  938  O   HOH T 937      34.885  65.600   8.808  1.00  0.54           O  
HETATM  939  O   HOH T 938      44.666  33.424  23.861  1.00  0.54           O  
HETATM  940  O   HOH T 939      45.697  58.517 -13.830  1.00  0.54           O  
HETATM  941  O   HOH T 940      41.401  29.235  24.229  1.00  0.54           O  
HETATM  942  O   HOH T 941      16.765  30.077  36.228  1.00  0.54           O  
HETATM  943  O   HOH T 942      16.231   0.142  30.920  1.00  0.54           O  
HETATM  944  O   HOH T 943      28.089  48.255 -16.119  1.00  0.54           O  
HETATM  945  O   HOH T 944      54.364  48.838   8.313  1.00  0.54           O  
HETATM  946  O   HOH T 945      24.256  67.188  -0.026  1.00  0.54           O  
HETATM  947  O   HOH T 946      17.384   4.643  13.893  1.00  0.54           O  
HETATM  948  O   HOH T 947      47.081  29.021 -11.193  1.00  0.54           O  
HETATM  949  O   HOH T 948      29.594  56.504 -19.471  1.00  0.54           O  
HETATM  950  O   HOH T 949      41.179  34.498  29.907  1.00  0.54           O  
HETATM  951  O   HOH T 950      12.668  11.463  12.601  1.00  0.54           O  
HETATM  952  O   HOH T 951      54.972  45.298   8.273  1.00  0.54           O  
HETATM  953  O   HOH T 952      30.073  28.578  37.411  1.00  0.54           O  
HETATM  954  O   HOH T 953      24.393  42.850  -0.295  1.00  0.54           O  
HETATM  955  O   HOH T 954      13.075  12.251  46.286  1.00  0.54           O  
HETATM  956  O   HOH T 955      57.725  38.001  51.279  1.00  0.55           O  
HETATM  957  O   HOH T 956      30.847  19.739  13.855  1.00  0.55           O  
HETATM  958  O   HOH T 957      47.151  29.329  21.609  1.00  0.55           O  
HETATM  959  O   HOH T 958       7.774   8.790  39.964  1.00  0.55           O  
HETATM  960  O   HOH T 959      49.179  10.511 -10.827  1.00  0.55           O  
HETATM  961  O   HOH T 960      39.011  34.695 -12.684  1.00  0.55           O  
HETATM  962  O   HOH T 961      77.005  42.871  24.312  1.00  0.55           O  
HETATM  963  O   HOH T 962      13.825  28.446  40.442  1.00  0.55           O  
HETATM  964  O   HOH T 963      43.566  10.288  37.318  1.00  0.55           O  
HETATM  965  O   HOH T 964      16.447   3.644  35.395  1.00  0.55           O  
HETATM  966  O   HOH T 965      38.398  44.107 -21.052  1.00  0.55           O  
HETATM  967  O   HOH T 966      33.476  -6.707  17.133  1.00  0.55           O  
HETATM  968  O   HOH T 967      28.204  21.897  50.144  1.00  0.55           O  
HETATM  969  O   HOH T 968       3.088  12.134  38.982  1.00  0.55           O  
HETATM  970  O   HOH T 969      33.996  11.185  45.140  1.00  0.55           O  
HETATM  971  O   HOH T 970      49.400  35.650   6.472  1.00  0.55           O  
HETATM  972  O   HOH T 971      24.594  26.934  42.366  1.00  0.55           O  
HETATM  973  O   HOH T 972      47.424  34.094  44.494  1.00  0.55           O  
HETATM  974  O   HOH T 973      46.219  22.751 -11.223  1.00  0.55           O  
HETATM  975  O   HOH T 974      38.052  25.909   8.896  1.00  0.55           O  
HETATM  976  O   HOH T 975      19.462  16.322  12.051  1.00  0.55           O  
HETATM  977  O   HOH T 976      50.922   1.593   0.077  1.00  0.55           O  
HETATM  978  O   HOH T 977      28.235  18.645  47.334  1.00  0.55           O  
HETATM  979  O   HOH T 978      34.303  -1.427  31.104  1.00  0.55           O  
HETATM  980  O   HOH T 979       7.926  17.111  41.574  1.00  0.55           O  
HETATM  981  O   HOH T 980      34.095  31.626  -2.403  1.00  0.55           O  
HETATM  982  O   HOH T 981      38.711  41.307  14.692  1.00  0.56           O  
HETATM  983  O   HOH T 982      16.202  32.362  25.373  1.00  0.56           O  
HETATM  984  O   HOH T 983      30.656  65.427  -7.278  1.00  0.56           O  
HETATM  985  O   HOH T 984      29.199  24.245  21.868  1.00  0.56           O  
HETATM  986  O   HOH T 985      37.149  66.523   7.494  1.00  0.56           O  
HETATM  987  O   HOH T 986      57.755  12.043  19.496  1.00  0.56           O  
HETATM  988  O   HOH T 987      52.456  54.875  -8.011  1.00  0.56           O  
HETATM  989  O   HOH T 988      28.507  10.068  45.310  1.00  0.56           O  
HETATM  990  O   HOH T 989      40.613  13.222  22.816  1.00  0.56           O  
HETATM  991  O   HOH T 990      77.523  43.590  25.896  1.00  0.56           O  
HETATM  992  O   HOH T 991      32.477  22.453  -8.701  1.00  0.56           O  
HETATM  993  O   HOH T 992      29.375  65.248  -1.903  1.00  0.56           O  
HETATM  994  O   HOH T 993      68.034  18.586  41.362  1.00  0.56           O  
HETATM  995  O   HOH T 994      49.255  18.739  13.768  1.00  0.56           O  
HETATM  996  O   HOH T 995      42.431  24.900  25.387  1.00  0.56           O  
HETATM  997  O   HOH T 996      31.818  57.748 -18.486  1.00  0.56           O  
HETATM  998  O   HOH T 997      47.171  11.433 -12.756  1.00  0.56           O  
HETATM  999  O   HOH T 998      43.474  38.169  36.544  1.00  0.56           O  
HETATM 1000  O   HOH T 999      29.120  52.532  10.509  1.00  0.56           O  
HETATM 1001  O   HOH T1000      40.378   8.979  31.535  1.00  0.56           O  
HETATM 1002  O   HOH T1001      52.046  12.951  25.784  1.00  0.56           O  
HETATM 1003  O   HOH T1002      53.466   9.019   4.961  1.00  0.56           O  
HETATM 1004  O   HOH T1003      20.340  27.544  22.333  1.00  0.56           O  
HETATM 1005  O   HOH T1004      35.235  31.004  43.018  1.00  0.56           O  
HETATM 1006  O   HOH T1005      47.804  30.157   8.037  1.00  0.56           O  
HETATM 1007  O   HOH T1006      56.716  10.612  41.354  1.00  0.56           O  
HETATM 1008  O   HOH T1007      21.190  19.389  14.636  1.00  0.56           O  
HETATM 1009  O   HOH T1008      54.933  37.912  51.177  1.00  0.56           O  
HETATM 1010  O   HOH T1009      55.904  16.183   0.042  1.00  0.57           O  
HETATM 1011  O   HOH T1010      54.203  53.452  -0.906  1.00  0.57           O  
HETATM 1012  O   HOH T1011      42.982   3.207  33.196  1.00  0.57           O  
HETATM 1013  O   HOH T1012      19.448  -3.287   8.790  1.00  0.57           O  
HETATM 1014  O   HOH T1013      41.127  14.715  25.040  1.00  0.57           O  
HETATM 1015  O   HOH T1014      -1.318  23.882  21.016  1.00  0.57           O  
HETATM 1016  O   HOH T1015      43.927  46.861  12.223  1.00  0.57           O  
HETATM 1017  O   HOH T1016      -0.060  11.307  30.727  1.00  0.57           O  
HETATM 1018  O   HOH T1017      35.289  36.459  -5.715  1.00  0.57           O  
HETATM 1019  O   HOH T1018      47.809  37.244   8.059  1.00  0.57           O  
HETATM 1020  O   HOH T1019      38.879  75.313   2.517  1.00  0.57           O  
HETATM 1021  O   HOH T1020      38.828  25.126  25.959  1.00  0.57           O  
HETATM 1022  O   HOH T1021       4.914   8.091  38.075  1.00  0.57           O  
HETATM 1023  O   HOH T1022       9.001   8.988  17.861  1.00  0.57           O  
HETATM 1024  O   HOH T1023      53.719  35.359  -9.793  1.00  0.58           O  
HETATM 1025  O   HOH T1024      27.374  22.140  -4.147  1.00  0.58           O  
HETATM 1026  O   HOH T1025      29.960  29.151   1.592  1.00  0.58           O  
HETATM 1027  O   HOH T1026      55.886  12.365  16.909  1.00  0.58           O  
HETATM 1028  O   HOH T1027      22.879  23.532  24.731  1.00  0.58           O  
HETATM 1029  O   HOH T1028      35.546  -4.829  17.058  1.00  0.59           O  
HETATM 1030  O   HOH T1029      23.450  55.936   8.182  1.00  0.59           O  
HETATM 1031  O   HOH T1030      31.507  30.982  -2.310  1.00  0.59           O  
HETATM 1032  O   HOH T1031      14.635   1.293  33.147  1.00  0.59           O  
HETATM 1033  O   HOH T1032      35.076  52.735 -22.700  1.00  0.59           O  
HETATM 1034  O   HOH T1033      32.909  51.668  18.870  1.00  0.59           O  
HETATM 1035  O   HOH T1034      13.062   3.270  -7.433  1.00  0.59           O  
HETATM 1036  O   HOH T1035       2.395  10.507  31.389  1.00  0.59           O  
HETATM 1037  O   HOH T1036      60.755  46.882   3.892  1.00  0.60           O  
HETATM 1038  O   HOH T1037      42.934  -3.995   1.645  1.00  0.60           O  
HETATM 1039  O   HOH T1038      55.017  26.104  -1.802  1.00  0.60           O  
HETATM 1040  O   HOH T1039      63.284  18.681  -1.450  1.00  0.60           O  
HETATM 1041  O   HOH T1040      38.711  18.753  24.037  1.00  0.60           O  
HETATM 1042  O   HOH T1041      27.891  22.948  46.340  1.00  0.63           O  
HETATM 1043  O   HOH T1042      19.303  54.025   3.934  1.00  0.64           O  
HETATM 1044  O   HOH T1043      44.141  29.208  25.011  1.00  0.65           O  
TER    1045      HOH T1043 
