# Supplementary material for: Accurate Prediction of Hydration Sites of Proteins Using Energy Model With Atom Embedding
Source: Front Mol Biosci. 2021 Sep 20;8:756075. doi: 10.3389/fmolb.2021.756075 (PMC8488165; doi:10.3389/fmolb.2021.756075)
Supplement: Supplementary file 1 [file DataSheet1.ZIP › Data Sheet 1/Our_result_pdb/our_dataset_output/2AL5_watersite.pdb]

HEADER                                                        XXXX


JRNL        PMID   -1
HETATM    1  O   HOH T   0      15.920  56.972  28.725  1.00  0.17           O  
HETATM    2  O   HOH T   1      15.957  99.420  25.174  1.00  0.18           O  
HETATM    3  O   HOH T   2      13.453  56.817  27.398  1.00  0.18           O  
HETATM    4  O   HOH T   3      13.479  99.552  26.560  1.00  0.19           O  
HETATM    5  O   HOH T   4      19.820  68.295  48.373  1.00  0.19           O  
HETATM    6  O   HOH T   5     -10.118  69.347  41.689  1.00  0.19           O  
HETATM    7  O   HOH T   6      38.891  99.398  27.915  1.00  0.19           O  
HETATM    8  O   HOH T   7      30.592  70.018  44.245  1.00  0.20           O  
HETATM    9  O   HOH T   8      30.620  86.399   9.734  1.00  0.20           O  
HETATM   10  O   HOH T   9      38.827  57.076  26.021  1.00  0.20           O  
HETATM   11  O   HOH T  10      12.806  88.172  19.621  1.00  0.22           O  
HETATM   12  O   HOH T  11      41.449 105.305  21.956  1.00  0.22           O  
HETATM   13  O   HOH T  12      -0.361  76.744  33.936  1.00  0.22           O  
HETATM   14  O   HOH T  13      12.787  68.294  34.399  1.00  0.22           O  
HETATM   15  O   HOH T  14      28.251  66.701  44.008  1.00  0.22           O  
HETATM   16  O   HOH T  15      38.039  87.039  12.270  1.00  0.22           O  
HETATM   17  O   HOH T  16      17.684  64.521  20.467  1.00  0.22           O  
HETATM   18  O   HOH T  17      29.678 107.073  41.139  1.00  0.23           O  
HETATM   19  O   HOH T  18       0.480  87.473  17.194  1.00  0.23           O  
HETATM   20  O   HOH T  19       0.711  65.794  28.512  1.00  0.23           O  
HETATM   21  O   HOH T  20      28.369  89.706   9.888  1.00  0.23           O  
HETATM   22  O   HOH T  21      -3.559  57.404  31.980  1.00  0.23           O  
HETATM   23  O   HOH T  22      38.471  53.577  27.603  1.00  0.23           O  
HETATM   24  O   HOH T  23      26.355 107.364  34.778  1.00  0.23           O  
HETATM   25  O   HOH T  24       0.315  92.091  27.836  1.00  0.23           O  
HETATM   26  O   HOH T  25      33.106  67.165  22.892  1.00  0.24           O  
HETATM   27  O   HOH T  26      -3.544  98.957  22.050  1.00  0.24           O  
HETATM   28  O   HOH T  27       1.495  83.979  22.308  1.00  0.24           O  
HETATM   29  O   HOH T  28      26.644  73.541  24.144  1.00  0.24           O  
HETATM   30  O   HOH T  29       0.581  69.100  36.911  1.00  0.24           O  
HETATM   31  O   HOH T  30      19.975  65.301  15.420  1.00  0.24           O  
HETATM   32  O   HOH T  31      24.101  56.650  36.213  1.00  0.24           O  
HETATM   33  O   HOH T  32      10.713  96.887  32.728  1.00  0.24           O  
HETATM   34  O   HOH T  33      38.489 102.750  26.366  1.00  0.25           O  
HETATM   35  O   HOH T  34      26.650  82.887  29.798  1.00  0.25           O  
HETATM   36  O   HOH T  35      39.646  64.203  35.759  1.00  0.25           O  
HETATM   37  O   HOH T  36      21.873  97.612  12.180  1.00  0.25           O  
HETATM   38  O   HOH T  37      21.388  81.802  38.150  1.00  0.25           O  
HETATM   39  O   HOH T  38      25.818  95.325  17.675  1.00  0.25           O  
HETATM   40  O   HOH T  39      34.824  86.619  18.860  1.00  0.25           O  
HETATM   41  O   HOH T  40       9.614  73.718  49.302  1.00  0.25           O  
HETATM   42  O   HOH T  41      -8.290  68.752  45.286  1.00  0.25           O  
HETATM   43  O   HOH T  42      25.212  82.843  41.970  1.00  0.25           O  
HETATM   44  O   HOH T  43      17.077  99.027  31.621  1.00  0.26           O  
HETATM   45  O   HOH T  44      17.075  57.404  22.368  1.00  0.26           O  
HETATM   46  O   HOH T  45      32.139 108.887  34.371  1.00  0.26           O  
HETATM   47  O   HOH T  46      29.690  49.327  12.863  1.00  0.26           O  
HETATM   48  O   HOH T  47      21.817  80.714  17.637  1.00  0.26           O  
HETATM   49  O   HOH T  48      21.573  91.461  29.191  1.00  0.26           O  
HETATM   50  O   HOH T  49       5.517  63.832  19.766  1.00  0.26           O  
HETATM   51  O   HOH T  50      25.259  73.556  12.027  1.00  0.26           O  
HETATM   52  O   HOH T  51      32.209  67.018  40.626  1.00  0.26           O  
HETATM   53  O   HOH T  52      34.472 107.790  18.643  1.00  0.27           O  
HETATM   54  O   HOH T  53      41.413  51.061  32.032  1.00  0.27           O  
HETATM   55  O   HOH T  54      34.471 112.717  35.293  1.00  0.27           O  
HETATM   56  O   HOH T  55      33.112  89.290  31.234  1.00  0.27           O  
HETATM   57  O   HOH T  56       0.603  90.608  25.454  1.00  0.27           O  
HETATM   58  O   HOH T  57      21.578  64.923  24.794  1.00  0.27           O  
HETATM   59  O   HOH T  58      25.667  60.803  36.563  1.00  0.27           O  
HETATM   60  O   HOH T  59      21.437  74.604  15.860  1.00  0.27           O  
HETATM   61  O   HOH T  60      26.449  49.076  19.197  1.00  0.27           O  
HETATM   62  O   HOH T  61      19.992  88.121   5.555  1.00  0.27           O  
HETATM   63  O   HOH T  62      24.774  59.716  26.164  1.00  0.27           O  
HETATM   64  O   HOH T  63      21.124  88.869  42.725  1.00  0.27           O  
HETATM   65  O   HOH T  64      24.877  96.693  27.789  1.00  0.27           O  
HETATM   66  O   HOH T  65      10.709  59.879  21.597  1.00  0.27           O  
HETATM   67  O   HOH T  66      23.970  50.466  34.302  1.00  0.27           O  
HETATM   68  O   HOH T  67      24.681  69.944  16.049  1.00  0.27           O  
HETATM   69  O   HOH T  68      34.888  69.720  34.988  1.00  0.27           O  
HETATM   70  O   HOH T  69      38.151  93.608  18.144  1.00  0.28           O  
HETATM   71  O   HOH T  70      24.508  86.401  37.899  1.00  0.28           O  
HETATM   72  O   HOH T  71       0.628  97.817  29.354  1.00  0.28           O  
HETATM   73  O   HOH T  72      21.743  75.598  36.364  1.00  0.28           O  
HETATM   74  O   HOH T  73      22.165  57.888  32.747  1.00  0.28           O  
HETATM   75  O   HOH T  74      11.625  89.759   0.583  1.00  0.28           O  
HETATM   76  O   HOH T  75      13.788  94.883  -3.407  1.00  0.28           O  
HETATM   77  O   HOH T  76      -1.196  92.837  25.704  1.00  0.29           O  
HETATM   78  O   HOH T  77       8.053  54.849  34.750  1.00  0.29           O  
HETATM   79  O   HOH T  78       6.353  75.024  13.672  1.00  0.29           O  
HETATM   80  O   HOH T  79      21.181  67.319  11.510  1.00  0.29           O  
HETATM   81  O   HOH T  80       6.533  72.694  32.455  1.00  0.29           O  
HETATM   82  O   HOH T  81      16.254  83.962  30.647  1.00  0.29           O  
HETATM   83  O   HOH T  82      15.784  80.072  30.533  1.00  0.29           O  
HETATM   84  O   HOH T  83      29.726  57.558  37.315  1.00  0.29           O  
HETATM   85  O   HOH T  84      13.734  61.489  57.409  1.00  0.29           O  
HETATM   86  O   HOH T  85      25.857  50.183  10.172  1.00  0.29           O  
HETATM   87  O   HOH T  86      25.871 106.224  43.840  1.00  0.29           O  
HETATM   88  O   HOH T  87       0.168  84.872   6.516  1.00  0.30           O  
HETATM   89  O   HOH T  88      31.660  89.145  46.118  1.00  0.30           O  
HETATM   90  O   HOH T  89       6.549  83.778  21.498  1.00  0.30           O  
HETATM   91  O   HOH T  90       8.045 101.514  19.305  1.00  0.30           O  
HETATM   92  O   HOH T  91      33.048  90.323  10.129  1.00  0.30           O  
HETATM   93  O   HOH T  92      25.426 107.735  19.273  1.00  0.30           O  
HETATM   94  O   HOH T  93      32.838  48.701  18.518  1.00  0.30           O  
HETATM   95  O   HOH T  94      -3.424  62.394  37.169  1.00  0.30           O  
HETATM   96  O   HOH T  95      32.352  47.704  21.126  1.00  0.30           O  
HETATM   97  O   HOH T  96      13.450  63.711  22.653  1.00  0.30           O  
HETATM   98  O   HOH T  97      12.969  66.052  19.143  1.00  0.30           O  
HETATM   99  O   HOH T  98      34.642  63.582  32.700  1.00  0.30           O  
HETATM  100  O   HOH T  99      22.080  98.517  21.033  1.00  0.31           O  
HETATM  101  O   HOH T 100       1.529  76.817  11.561  1.00  0.31           O  
HETATM  102  O   HOH T 101       0.211  71.498  47.182  1.00  0.31           O  
HETATM  103  O   HOH T 102      20.085  91.039  38.655  1.00  0.31           O  
HETATM  104  O   HOH T 103      -0.049  77.087  39.726  1.00  0.31           O  
HETATM  105  O   HOH T 104      -0.972  89.928  17.270  1.00  0.31           O  
HETATM  106  O   HOH T 105      14.419  54.980  53.462  1.00  0.31           O  
HETATM  107  O   HOH T 106       8.835  78.726  25.717  1.00  0.31           O  
HETATM  108  O   HOH T 107       9.664  61.189  48.641  1.00  0.31           O  
HETATM  109  O   HOH T 108       0.637  58.547  24.638  1.00  0.31           O  
HETATM  110  O   HOH T 109      18.762 100.379  17.053  1.00  0.31           O  
HETATM  111  O   HOH T 110       4.766  55.583  30.820  1.00  0.31           O  
HETATM  112  O   HOH T 111      20.869  58.922  24.949  1.00  0.31           O  
HETATM  113  O   HOH T 112      14.479 101.497   0.321  1.00  0.31           O  
HETATM  114  O   HOH T 113      -0.860  84.608   9.025  1.00  0.31           O  
HETATM  115  O   HOH T 114      28.290  95.669  47.175  1.00  0.31           O  
HETATM  116  O   HOH T 115      34.668  67.337  15.155  1.00  0.31           O  
HETATM  117  O   HOH T 116      37.666  62.338  36.117  1.00  0.31           O  
HETATM  118  O   HOH T 117      34.499  55.674  13.750  1.00  0.31           O  
HETATM  119  O   HOH T 118      23.803  76.359  32.630  1.00  0.31           O  
HETATM  120  O   HOH T 119      35.452  92.787  21.968  1.00  0.31           O  
HETATM  121  O   HOH T 120      13.083  67.948  48.600  1.00  0.31           O  
HETATM  122  O   HOH T 121      22.409  59.912  11.512  1.00  0.32           O  
HETATM  123  O   HOH T 122       6.855  55.724  32.450  1.00  0.32           O  
HETATM  124  O   HOH T 123       8.813  77.687  28.290  1.00  0.32           O  
HETATM  125  O   HOH T 124      20.175  68.924   9.606  1.00  0.32           O  
HETATM  126  O   HOH T 125       8.550  92.602   1.324  1.00  0.32           O  
HETATM  127  O   HOH T 126      -8.342  87.925   8.759  1.00  0.32           O  
HETATM  128  O   HOH T 127      18.657  66.850  50.443  1.00  0.32           O  
HETATM  129  O   HOH T 128      23.069  65.096   4.837  1.00  0.32           O  
HETATM  130  O   HOH T 129       1.529  72.429  31.667  1.00  0.32           O  
HETATM  131  O   HOH T 130       5.113  74.925  21.137  1.00  0.32           O  
HETATM  132  O   HOH T 131      16.183  93.345  43.131  1.00  0.32           O  
HETATM  133  O   HOH T 132      20.865  97.472  29.024  1.00  0.32           O  
HETATM  134  O   HOH T 133      15.650  85.557  32.718  1.00  0.32           O  
HETATM  135  O   HOH T 134      30.731  54.853  37.201  1.00  0.32           O  
HETATM  136  O   HOH T 135       8.548  63.782  52.594  1.00  0.32           O  
HETATM  137  O   HOH T 136      32.210  89.345  13.434  1.00  0.32           O  
HETATM  138  O   HOH T 137      34.184  67.657  20.352  1.00  0.32           O  
HETATM  139  O   HOH T 138      20.625  87.234  35.136  1.00  0.32           O  
HETATM  140  O   HOH T 139      11.818  95.277  30.913  1.00  0.32           O  
HETATM  141  O   HOH T 140      35.611 105.335  18.195  1.00  0.32           O  
HETATM  142  O   HOH T 141       5.042  81.660  32.144  1.00  0.33           O  
HETATM  143  O   HOH T 142      35.590  51.067  35.781  1.00  0.33           O  
HETATM  144  O   HOH T 143      22.382  96.491  42.486  1.00  0.33           O  
HETATM  145  O   HOH T 144      16.027  65.983  50.775  1.00  0.33           O  
HETATM  146  O   HOH T 145      18.782  55.870  37.340  1.00  0.33           O  
HETATM  147  O   HOH T 146      34.710  48.932  25.970  1.00  0.33           O  
HETATM  148  O   HOH T 147       6.844  72.934  49.752  1.00  0.33           O  
HETATM  149  O   HOH T 148      44.125  62.645  26.077  1.00  0.33           O  
HETATM  150  O   HOH T 149      27.287  97.661  16.959  1.00  0.33           O  
HETATM  151  O   HOH T 150      15.589  71.030  21.149  1.00  0.33           O  
HETATM  152  O   HOH T 151      24.960  84.123  39.479  1.00  0.33           O  
HETATM  153  O   HOH T 152       0.149  99.068  31.840  1.00  0.33           O  
HETATM  154  O   HOH T 153      24.495  58.692  37.959  1.00  0.33           O  
HETATM  155  O   HOH T 154      35.013  43.911  23.723  1.00  0.33           O  
HETATM  156  O   HOH T 155      35.393  52.797  16.474  1.00  0.33           O  
HETATM  157  O   HOH T 156      25.059  72.295  14.609  1.00  0.33           O  
HETATM  158  O   HOH T 157      18.498  89.430   3.624  1.00  0.33           O  
HETATM  159  O   HOH T 158      34.753  50.244  13.067  1.00  0.33           O  
HETATM  160  O   HOH T 159      28.779  87.646   8.029  1.00  0.33           O  
HETATM  161  O   HOH T 160      13.367  92.967  30.969  1.00  0.33           O  
HETATM  162  O   HOH T 161      13.586  89.596  12.237  1.00  0.33           O  
HETATM  163  O   HOH T 162      13.809  95.192  36.524  1.00  0.34           O  
HETATM  164  O   HOH T 163      16.681  97.525  42.420  1.00  0.34           O  
HETATM  165  O   HOH T 164       6.658  87.458   3.584  1.00  0.34           O  
HETATM  166  O   HOH T 165      25.729  77.850  36.329  1.00  0.34           O  
HETATM  167  O   HOH T 166      12.607  66.137  16.402  1.00  0.34           O  
HETATM  168  O   HOH T 167      18.412  77.218  20.514  1.00  0.34           O  
HETATM  169  O   HOH T 168      27.124  85.644  38.611  1.00  0.34           O  
HETATM  170  O   HOH T 169      30.767 101.613  16.768  1.00  0.34           O  
HETATM  171  O   HOH T 170      23.584  74.902  25.648  1.00  0.34           O  
HETATM  172  O   HOH T 171      23.630 105.868  20.026  1.00  0.34           O  
HETATM  173  O   HOH T 172       3.710  84.001  31.782  1.00  0.34           O  
HETATM  174  O   HOH T 173      25.864  94.687  48.028  1.00  0.34           O  
HETATM  175  O   HOH T 174      22.105  57.352  44.180  1.00  0.34           O  
HETATM  176  O   HOH T 175      17.110  69.109  22.165  1.00  0.34           O  
HETATM  177  O   HOH T 176      19.053  66.646  13.159  1.00  0.34           O  
HETATM  178  O   HOH T 177      23.851  57.597  46.196  1.00  0.34           O  
HETATM  179  O   HOH T 178       8.784  95.688  34.338  1.00  0.35           O  
HETATM  180  O   HOH T 179      22.521  48.876  18.053  1.00  0.35           O  
HETATM  181  O   HOH T 180      -0.413  79.471  19.740  1.00  0.35           O  
HETATM  182  O   HOH T 181      28.343 112.540  28.345  1.00  0.35           O  
HETATM  183  O   HOH T 182       9.685  95.257   5.331  1.00  0.35           O  
HETATM  184  O   HOH T 183      11.881 100.924  -0.177  1.00  0.35           O  
HETATM  185  O   HOH T 184      29.597  96.037  12.255  1.00  0.35           O  
HETATM  186  O   HOH T 185      28.745  68.718  45.914  1.00  0.35           O  
HETATM  187  O   HOH T 186      13.373  87.971   6.420  1.00  0.35           O  
HETATM  188  O   HOH T 187      35.608 106.723  38.205  1.00  0.35           O  
HETATM  189  O   HOH T 188       0.155  57.321  22.085  1.00  0.35           O  
HETATM  190  O   HOH T 189      20.115  49.041  27.951  1.00  0.35           O  
HETATM  191  O   HOH T 190      11.843  55.403  54.240  1.00  0.35           O  
HETATM  192  O   HOH T 191      23.586  81.529  28.326  1.00  0.35           O  
HETATM  193  O   HOH T 192      18.467 100.484  24.580  1.00  0.35           O  
HETATM  194  O   HOH T 193       0.378  64.168  26.131  1.00  0.35           O  
HETATM  195  O   HOH T 194       0.356  77.981  16.914  1.00  0.35           O  
HETATM  196  O   HOH T 195      22.079  99.005   9.805  1.00  0.35           O  
HETATM  197  O   HOH T 196       6.526  81.180  20.661  1.00  0.35           O  
HETATM  198  O   HOH T 197       4.223  84.397  29.095  1.00  0.35           O  
HETATM  199  O   HOH T 198       4.562  66.934  50.908  1.00  0.35           O  
HETATM  200  O   HOH T 199      18.064  56.428  32.220  1.00  0.35           O  
HETATM  201  O   HOH T 200      34.046  92.332   5.655  1.00  0.35           O  
HETATM  202  O   HOH T 201       4.792 101.348  23.266  1.00  0.36           O  
HETATM  203  O   HOH T 202       7.658  99.653  35.832  1.00  0.36           O  
HETATM  204  O   HOH T 203      39.887  69.082  21.877  1.00  0.36           O  
HETATM  205  O   HOH T 204      37.989 113.859  20.861  1.00  0.36           O  
HETATM  206  O   HOH T 205      35.514  69.745  18.888  1.00  0.36           O  
HETATM  207  O   HOH T 206      32.442  56.501  12.092  1.00  0.36           O  
HETATM  208  O   HOH T 207      33.918  67.835  17.693  1.00  0.36           O  
HETATM  209  O   HOH T 208      -4.393  56.565  27.614  1.00  0.36           O  
HETATM  210  O   HOH T 209      22.575  73.269  18.601  1.00  0.36           O  
HETATM  211  O   HOH T 210      21.375  53.660  53.658  1.00  0.36           O  
HETATM  212  O   HOH T 211      23.252 100.848   4.194  1.00  0.36           O  
HETATM  213  O   HOH T 212      51.281  95.066  33.443  1.00  0.36           O  
HETATM  214  O   HOH T 213      23.880  99.009   7.723  1.00  0.36           O  
HETATM  215  O   HOH T 214       6.507  75.307  33.226  1.00  0.36           O  
HETATM  216  O   HOH T 215      22.256  83.424  35.289  1.00  0.36           O  
HETATM  217  O   HOH T 216       0.542  75.286  16.216  1.00  0.36           O  
HETATM  218  O   HOH T 217      39.732 109.912  21.206  1.00  0.36           O  
HETATM  219  O   HOH T 218      34.026  48.587  23.202  1.00  0.36           O  
HETATM  220  O   HOH T 219      26.068  54.334  52.092  1.00  0.36           O  
HETATM  221  O   HOH T 220      14.889  64.231  20.245  1.00  0.36           O  
HETATM  222  O   HOH T 221      33.426 101.902  16.696  1.00  0.36           O  
HETATM  223  O   HOH T 222       0.395  78.417  37.264  1.00  0.36           O  
HETATM  224  O   HOH T 223       4.775  89.420   3.042  1.00  0.36           O  
HETATM  225  O   HOH T 224      34.901 103.022  38.929  1.00  0.36           O  
HETATM  226  O   HOH T 225      18.527  89.097  43.711  1.00  0.37           O  
HETATM  227  O   HOH T 226       8.335  97.615  14.454  1.00  0.37           O  
HETATM  228  O   HOH T 227      -1.248  63.727  28.303  1.00  0.37           O  
HETATM  229  O   HOH T 228      27.432  78.435  15.831  1.00  0.37           O  
HETATM  230  O   HOH T 229      31.857 105.320  14.577  1.00  0.37           O  
HETATM  231  O   HOH T 230      18.443  55.969  29.403  1.00  0.37           O  
HETATM  232  O   HOH T 231       6.608  68.776  50.477  1.00  0.37           O  
HETATM  233  O   HOH T 232       8.611  55.678  42.328  1.00  0.37           O  
HETATM  234  O   HOH T 233       1.582  79.419  12.101  1.00  0.37           O  
HETATM  235  O   HOH T 234      39.832  87.055  32.498  1.00  0.37           O  
HETATM  236  O   HOH T 235      47.183  51.814  22.606  1.00  0.37           O  
HETATM  237  O   HOH T 236       3.801  61.704  20.046  1.00  0.37           O  
HETATM  238  O   HOH T 237      -2.603  78.286  16.889  1.00  0.37           O  
HETATM  239  O   HOH T 238      39.563  69.731  27.086  1.00  0.37           O  
HETATM  240  O   HOH T 239     -13.184  89.696   5.979  1.00  0.37           O  
HETATM  241  O   HOH T 240       6.763 100.538  21.603  1.00  0.37           O  
HETATM  242  O   HOH T 241      21.797  85.654  37.177  1.00  0.37           O  
HETATM  243  O   HOH T 242      39.788  69.044  35.464  1.00  0.37           O  
HETATM  244  O   HOH T 243      32.420  99.979  41.933  1.00  0.37           O  
HETATM  245  O   HOH T 244      -3.991  85.423  17.789  1.00  0.37           O  
HETATM  246  O   HOH T 245       8.638 105.109  23.389  1.00  0.37           O  
HETATM  247  O   HOH T 246      43.646  99.747  26.361  1.00  0.37           O  
HETATM  248  O   HOH T 247       6.116  71.185  51.767  1.00  0.37           O  
HETATM  249  O   HOH T 248      37.924 106.698  33.042  1.00  0.37           O  
HETATM  250  O   HOH T 249       4.237  72.029  24.899  1.00  0.37           O  
HETATM  251  O   HOH T 250      -2.008  64.788  34.119  1.00  0.38           O  
HETATM  252  O   HOH T 251      -9.950  85.747   7.824  1.00  0.38           O  
HETATM  253  O   HOH T 252      33.357 118.656  37.346  1.00  0.38           O  
HETATM  254  O   HOH T 253       8.581  73.550  12.837  1.00  0.38           O  
HETATM  255  O   HOH T 254      30.075 110.808  40.030  1.00  0.38           O  
HETATM  256  O   HOH T 255      25.760 111.298  34.918  1.00  0.38           O  
HETATM  257  O   HOH T 256      44.143  93.152  26.345  1.00  0.38           O  
HETATM  258  O   HOH T 257      28.510  97.150  14.550  1.00  0.38           O  
HETATM  259  O   HOH T 258       5.820  59.383  39.684  1.00  0.38           O  
HETATM  260  O   HOH T 259      34.463  59.855  43.036  1.00  0.38           O  
HETATM  261  O   HOH T 260      10.563 101.977  11.459  1.00  0.38           O  
HETATM  262  O   HOH T 261      40.157  66.681  36.847  1.00  0.38           O  
HETATM  263  O   HOH T 262      11.376  66.589  53.495  1.00  0.38           O  
HETATM  264  O   HOH T 263      24.904 109.177  36.395  1.00  0.38           O  
HETATM  265  O   HOH T 264      14.187  60.393  24.160  1.00  0.38           O  
HETATM  266  O   HOH T 265       4.180 100.777  20.585  1.00  0.38           O  
HETATM  267  O   HOH T 266      40.481 112.503  20.393  1.00  0.38           O  
HETATM  268  O   HOH T 267      23.580  48.057  24.555  1.00  0.38           O  
HETATM  269  O   HOH T 268      33.935 107.390  36.058  1.00  0.39           O  
HETATM  270  O   HOH T 269      20.923  49.418  16.042  1.00  0.39           O  
HETATM  271  O   HOH T 270      18.625  53.213  30.024  1.00  0.39           O  
HETATM  272  O   HOH T 271      32.188 110.814  38.134  1.00  0.39           O  
HETATM  273  O   HOH T 272      34.723 107.360  28.188  1.00  0.39           O  
HETATM  274  O   HOH T 273      35.641  49.998  15.752  1.00  0.39           O  
HETATM  275  O   HOH T 274      25.115  95.045   2.782  1.00  0.39           O  
HETATM  276  O   HOH T 275      34.007  88.629  35.925  1.00  0.39           O  
HETATM  277  O   HOH T 276      27.746  83.556  25.917  1.00  0.39           O  
HETATM  278  O   HOH T 277      23.039  54.453  37.604  1.00  0.39           O  
HETATM  279  O   HOH T 278      -1.488  63.415  31.805  1.00  0.39           O  
HETATM  280  O   HOH T 279      -4.191  58.140  39.734  1.00  0.39           O  
HETATM  281  O   HOH T 280      34.513 100.752  40.265  1.00  0.39           O  
HETATM  282  O   HOH T 281      20.174  68.791  19.467  1.00  0.39           O  
HETATM  283  O   HOH T 282       4.020  72.627  22.192  1.00  0.39           O  
HETATM  284  O   HOH T 283      -0.539  65.041  36.359  1.00  0.39           O  
HETATM  285  O   HOH T 284      10.499  56.339  44.292  1.00  0.39           O  
HETATM  286  O   HOH T 285      47.849  54.495  22.571  1.00  0.39           O  
HETATM  287  O   HOH T 286      10.391 100.017   9.637  1.00  0.39           O  
HETATM  288  O   HOH T 287      24.870  47.311  17.551  1.00  0.39           O  
HETATM  289  O   HOH T 288      11.234  85.631   3.134  1.00  0.39           O  
HETATM  290  O   HOH T 289      -1.529  70.846  37.512  1.00  0.39           O  
HETATM  291  O   HOH T 290      42.651  68.943  22.482  1.00  0.39           O  
HETATM  292  O   HOH T 291      14.204 104.569  -3.161  1.00  0.39           O  
HETATM  293  O   HOH T 292       3.732  98.719  13.876  1.00  0.39           O  
HETATM  294  O   HOH T 293      39.939  86.668  29.911  1.00  0.40           O  
HETATM  295  O   HOH T 294      22.313  48.123  22.130  1.00  0.40           O  
HETATM  296  O   HOH T 295      22.477  44.081  31.714  1.00  0.40           O  
HETATM  297  O   HOH T 296      16.172 104.254  -5.068  1.00  0.40           O  
HETATM  298  O   HOH T 297      25.399  81.770  21.752  1.00  0.40           O  
HETATM  299  O   HOH T 298      20.213  87.173  44.748  1.00  0.40           O  
HETATM  300  O   HOH T 299      14.169  51.823  57.060  1.00  0.40           O  
HETATM  301  O   HOH T 300      24.491  97.441  16.740  1.00  0.40           O  
HETATM  302  O   HOH T 301      25.039  98.933   5.259  1.00  0.40           O  
HETATM  303  O   HOH T 302      31.789  47.921  14.261  1.00  0.40           O  
HETATM  304  O   HOH T 303      19.198  88.958  36.875  1.00  0.40           O  
HETATM  305  O   HOH T 304      10.402  58.266  46.249  1.00  0.40           O  
HETATM  306  O   HOH T 305      27.737  72.792  28.051  1.00  0.40           O  
HETATM  307  O   HOH T 306      44.450  55.444  25.097  1.00  0.40           O  
HETATM  308  O   HOH T 307       0.293  58.602  40.659  1.00  0.40           O  
HETATM  309  O   HOH T 308      36.862  49.513  18.229  1.00  0.40           O  
HETATM  310  O   HOH T 309      18.491  66.733  21.926  1.00  0.40           O  
HETATM  311  O   HOH T 310       8.375  58.830  39.510  1.00  0.40           O  
HETATM  312  O   HOH T 311      44.807  88.172  22.002  1.00  0.40           O  
HETATM  313  O   HOH T 312      10.858  71.675  50.412  1.00  0.40           O  
HETATM  314  O   HOH T 313      31.521  82.404  30.805  1.00  0.40           O  
HETATM  315  O   HOH T 314      20.099  60.462  10.239  1.00  0.40           O  
HETATM  316  O   HOH T 315       5.775  96.889  14.372  1.00  0.40           O  
HETATM  317  O   HOH T 316      24.980  96.104   5.256  1.00  0.40           O  
HETATM  318  O   HOH T 317      20.114  96.006  43.747  1.00  0.40           O  
HETATM  319  O   HOH T 318      16.060  90.457   3.193  1.00  0.40           O  
HETATM  320  O   HOH T 319      35.671  86.611  35.195  1.00  0.40           O  
HETATM  321  O   HOH T 320      19.220  56.900  11.305  1.00  0.40           O  
HETATM  322  O   HOH T 321      21.460 100.443  16.898  1.00  0.40           O  
HETATM  323  O   HOH T 322      -0.161 101.869  31.366  1.00  0.40           O  
HETATM  324  O   HOH T 323      32.203  68.417  15.578  1.00  0.41           O  
HETATM  325  O   HOH T 324      18.487  70.822  20.548  1.00  0.41           O  
HETATM  326  O   HOH T 325     -11.345  87.529   6.207  1.00  0.41           O  
HETATM  327  O   HOH T 326      13.707  59.317  59.189  1.00  0.41           O  
HETATM  328  O   HOH T 327      -2.017  66.422  29.237  1.00  0.41           O  
HETATM  329  O   HOH T 328      22.526  49.166  26.870  1.00  0.41           O  
HETATM  330  O   HOH T 329      41.022  50.448  34.610  1.00  0.41           O  
HETATM  331  O   HOH T 330      20.192  71.342   8.569  1.00  0.41           O  
HETATM  332  O   HOH T 331      21.018  49.314  13.277  1.00  0.41           O  
HETATM  333  O   HOH T 332      18.204 102.138  19.136  1.00  0.41           O  
HETATM  334  O   HOH T 333       6.597  84.652   3.998  1.00  0.41           O  
HETATM  335  O   HOH T 334      40.621  87.260  15.781  1.00  0.41           O  
HETATM  336  O   HOH T 335      20.613  84.964  33.597  1.00  0.41           O  
HETATM  337  O   HOH T 336      39.583  46.389  32.853  1.00  0.41           O  
HETATM  338  O   HOH T 337      42.913  63.970  24.005  1.00  0.41           O  
HETATM  339  O   HOH T 338      21.551  77.885  35.126  1.00  0.41           O  
HETATM  340  O   HOH T 339      -1.757  78.304  35.720  1.00  0.41           O  
HETATM  341  O   HOH T 340       4.288  55.651  33.558  1.00  0.41           O  
HETATM  342  O   HOH T 341       9.820  82.547   4.617  1.00  0.41           O  
HETATM  343  O   HOH T 342      34.907  52.989  13.670  1.00  0.41           O  
HETATM  344  O   HOH T 343      -0.590 105.442  31.786  1.00  0.41           O  
HETATM  345  O   HOH T 344       4.950 100.625  36.157  1.00  0.41           O  
HETATM  346  O   HOH T 345      25.345  58.164  48.485  1.00  0.41           O  
HETATM  347  O   HOH T 346      24.047  78.959  17.899  1.00  0.41           O  
HETATM  348  O   HOH T 347       7.848  62.394  50.300  1.00  0.41           O  
HETATM  349  O   HOH T 348      25.127  78.095  22.713  1.00  0.41           O  
HETATM  350  O   HOH T 349       5.718  92.661  34.272  1.00  0.41           O  
HETATM  351  O   HOH T 350      30.218  45.615  13.977  1.00  0.41           O  
HETATM  352  O   HOH T 351      -4.885  69.215  30.803  1.00  0.42           O  
HETATM  353  O   HOH T 352      35.068  48.425  30.015  1.00  0.42           O  
HETATM  354  O   HOH T 353       0.079  90.706  31.610  1.00  0.42           O  
HETATM  355  O   HOH T 354      16.009  76.030  20.747  1.00  0.42           O  
HETATM  356  O   HOH T 355      11.717  61.767  23.614  1.00  0.42           O  
HETATM  357  O   HOH T 356      22.246 107.330  26.712  1.00  0.42           O  
HETATM  358  O   HOH T 357      21.904  62.317  55.935  1.00  0.42           O  
HETATM  359  O   HOH T 358      34.103 116.061  37.930  1.00  0.42           O  
HETATM  360  O   HOH T 359      -1.063  91.716  10.766  1.00  0.42           O  
HETATM  361  O   HOH T 360      -3.164  65.598  31.672  1.00  0.42           O  
HETATM  362  O   HOH T 361      18.400  55.216  34.715  1.00  0.42           O  
HETATM  363  O   HOH T 362      25.069  78.350  31.448  1.00  0.42           O  
HETATM  364  O   HOH T 363      24.152 116.107  36.752  1.00  0.42           O  
HETATM  365  O   HOH T 364      -3.365  93.991  17.013  1.00  0.42           O  
HETATM  366  O   HOH T 365      10.447  98.116   7.720  1.00  0.42           O  
HETATM  367  O   HOH T 366      21.448 102.712   0.156  1.00  0.42           O  
HETATM  368  O   HOH T 367      24.966  61.526  51.738  1.00  0.42           O  
HETATM  369  O   HOH T 368      18.642 103.235  24.136  1.00  0.42           O  
HETATM  370  O   HOH T 369      14.538  99.857  32.336  1.00  0.42           O  
HETATM  371  O   HOH T 370       8.848  93.916  -1.258  1.00  0.42           O  
HETATM  372  O   HOH T 371      33.276  66.378  43.112  1.00  0.42           O  
HETATM  373  O   HOH T 372       6.405  74.409  26.896  1.00  0.42           O  
HETATM  374  O   HOH T 373      16.941  53.281  22.619  1.00  0.42           O  
HETATM  375  O   HOH T 374      16.317  81.916  32.528  1.00  0.42           O  
HETATM  376  O   HOH T 375      34.080 104.524  16.044  1.00  0.42           O  
HETATM  377  O   HOH T 376      22.461  80.548  35.000  1.00  0.42           O  
HETATM  378  O   HOH T 377      11.143 104.666  24.353  1.00  0.42           O  
HETATM  379  O   HOH T 378      21.405  88.857  39.939  1.00  0.42           O  
HETATM  380  O   HOH T 379      29.897  81.619  19.523  1.00  0.43           O  
HETATM  381  O   HOH T 380      23.271 102.013  44.737  1.00  0.43           O  
HETATM  382  O   HOH T 381      28.341  46.000  25.303  1.00  0.43           O  
HETATM  383  O   HOH T 382      -2.541  89.776  24.204  1.00  0.43           O  
HETATM  384  O   HOH T 383      46.793  53.265  20.338  1.00  0.43           O  
HETATM  385  O   HOH T 384      31.861  72.084  18.516  1.00  0.43           O  
HETATM  386  O   HOH T 385      32.049  58.528  38.534  1.00  0.43           O  
HETATM  387  O   HOH T 386      23.288  54.362   9.232  1.00  0.43           O  
HETATM  388  O   HOH T 387      41.427  48.362  32.784  1.00  0.43           O  
HETATM  389  O   HOH T 388      -3.286  56.765  34.662  1.00  0.43           O  
HETATM  390  O   HOH T 389      24.396  60.725  47.867  1.00  0.43           O  
HETATM  391  O   HOH T 390      12.708  56.740  58.570  1.00  0.43           O  
HETATM  392  O   HOH T 391      23.381  47.760  33.448  1.00  0.43           O  
HETATM  393  O   HOH T 392      34.696  67.100   8.989  1.00  0.43           O  
HETATM  394  O   HOH T 393      21.866  58.679  41.857  1.00  0.43           O  
HETATM  395  O   HOH T 394      15.334  65.890  16.016  1.00  0.43           O  
HETATM  396  O   HOH T 395      10.274  88.155   2.493  1.00  0.43           O  
HETATM  397  O   HOH T 396      27.303  58.961  37.931  1.00  0.43           O  
HETATM  398  O   HOH T 397      42.608  67.314  38.138  1.00  0.43           O  
HETATM  399  O   HOH T 398      43.963  92.774  30.864  1.00  0.43           O  
HETATM  400  O   HOH T 399      22.484 107.839  36.112  1.00  0.43           O  
HETATM  401  O   HOH T 400      36.385 107.218  30.514  1.00  0.43           O  
HETATM  402  O   HOH T 401      25.471 105.194  18.021  1.00  0.43           O  
HETATM  403  O   HOH T 402      23.490 108.226  29.112  1.00  0.43           O  
HETATM  404  O   HOH T 403      43.932 102.806  32.427  1.00  0.43           O  
HETATM  405  O   HOH T 404      27.391  70.926  15.597  1.00  0.43           O  
HETATM  406  O   HOH T 405      26.730 108.079  26.419  1.00  0.43           O  
HETATM  407  O   HOH T 406      27.447  47.947   9.623  1.00  0.43           O  
HETATM  408  O   HOH T 407      10.643  52.649  19.211  1.00  0.43           O  
HETATM  409  O   HOH T 408       6.421  81.906  27.094  1.00  0.43           O  
HETATM  410  O   HOH T 409      23.485  67.601   5.831  1.00  0.43           O  
HETATM  411  O   HOH T 410      22.633  45.655  23.358  1.00  0.43           O  
HETATM  412  O   HOH T 411      16.938  79.663  33.934  1.00  0.44           O  
HETATM  413  O   HOH T 412      -2.298  78.127  38.275  1.00  0.44           O  
HETATM  414  O   HOH T 413      36.556  99.924  44.704  1.00  0.44           O  
HETATM  415  O   HOH T 414      34.638  96.626  10.640  1.00  0.44           O  
HETATM  416  O   HOH T 415       5.575  99.737  12.054  1.00  0.44           O  
HETATM  417  O   HOH T 416      33.880  84.236  20.007  1.00  0.44           O  
HETATM  418  O   HOH T 417      10.034  56.843  52.817  1.00  0.44           O  
HETATM  419  O   HOH T 418      26.102  74.509  26.729  1.00  0.44           O  
HETATM  420  O   HOH T 419      12.838  99.575  -4.859  1.00  0.44           O  
HETATM  421  O   HOH T 420      23.546  62.692   6.226  1.00  0.44           O  
HETATM  422  O   HOH T 421      16.161  51.681  33.226  1.00  0.44           O  
HETATM  423  O   HOH T 422      26.438  55.263  40.508  1.00  0.44           O  
HETATM  424  O   HOH T 423      -0.140  93.791  14.901  1.00  0.44           O  
HETATM  425  O   HOH T 424       8.095  59.022  47.451  1.00  0.44           O  
HETATM  426  O   HOH T 425      11.366  62.857  56.530  1.00  0.44           O  
HETATM  427  O   HOH T 426      32.241  45.627  15.937  1.00  0.44           O  
HETATM  428  O   HOH T 427      -3.334  99.682  19.457  1.00  0.44           O  
HETATM  429  O   HOH T 428      27.559  77.313  45.591  1.00  0.44           O  
HETATM  430  O   HOH T 429      27.459 108.463  44.346  1.00  0.44           O  
HETATM  431  O   HOH T 430      42.325  87.347  31.447  1.00  0.44           O  
HETATM  432  O   HOH T 431      10.521  68.178  51.426  1.00  0.44           O  
HETATM  433  O   HOH T 432      23.061  98.963  18.591  1.00  0.44           O  
HETATM  434  O   HOH T 433      31.972  83.720  34.882  1.00  0.44           O  
HETATM  435  O   HOH T 434      31.861  70.429   7.121  1.00  0.44           O  
HETATM  436  O   HOH T 435      13.919  61.446  17.440  1.00  0.44           O  
HETATM  437  O   HOH T 436      23.012  91.301  49.090  1.00  0.44           O  
HETATM  438  O   HOH T 437      27.661  81.554  41.274  1.00  0.44           O  
HETATM  439  O   HOH T 438       8.806  62.441  55.204  1.00  0.44           O  
HETATM  440  O   HOH T 439      28.408  57.071  39.687  1.00  0.44           O  
HETATM  441  O   HOH T 440      25.266 113.497  36.564  1.00  0.44           O  
HETATM  442  O   HOH T 441      -1.545  85.594  16.389  1.00  0.44           O  
HETATM  443  O   HOH T 442      29.676  99.008  16.253  1.00  0.44           O  
HETATM  444  O   HOH T 443      15.161  68.576  50.391  1.00  0.44           O  
HETATM  445  O   HOH T 444      13.870  89.053   2.214  1.00  0.44           O  
HETATM  446  O   HOH T 445      -1.012  63.127  38.279  1.00  0.45           O  
HETATM  447  O   HOH T 446      27.365  72.083  13.077  1.00  0.45           O  
HETATM  448  O   HOH T 447      24.350  69.291   7.890  1.00  0.45           O  
HETATM  449  O   HOH T 448      44.619 101.934  34.853  1.00  0.45           O  
HETATM  450  O   HOH T 449      27.620  77.946  38.234  1.00  0.45           O  
HETATM  451  O   HOH T 450      19.576  51.276  14.498  1.00  0.45           O  
HETATM  452  O   HOH T 451      -1.608  93.858  12.511  1.00  0.45           O  
HETATM  453  O   HOH T 452      43.317  91.469  28.405  1.00  0.45           O  
HETATM  454  O   HOH T 453      23.249  44.466  20.826  1.00  0.45           O  
HETATM  455  O   HOH T 454      31.737 108.581  39.850  1.00  0.45           O  
HETATM  456  O   HOH T 455      -3.095  90.815  21.802  1.00  0.45           O  
HETATM  457  O   HOH T 456      13.743  66.542  41.628  1.00  0.45           O  
HETATM  458  O   HOH T 457      48.650  94.495  32.664  1.00  0.45           O  
HETATM  459  O   HOH T 458      11.425  93.517  -2.585  1.00  0.45           O  
HETATM  460  O   HOH T 459      18.385  48.539  30.065  1.00  0.45           O  
HETATM  461  O   HOH T 460      13.949  54.185  58.541  1.00  0.45           O  
HETATM  462  O   HOH T 461      -2.220  87.590  18.077  1.00  0.45           O  
HETATM  463  O   HOH T 462      33.942  47.760  16.136  1.00  0.45           O  
HETATM  464  O   HOH T 463      -3.265  81.665  13.088  1.00  0.45           O  
HETATM  465  O   HOH T 464      27.661  79.056   8.500  1.00  0.45           O  
HETATM  466  O   HOH T 465      24.260 108.596  25.249  1.00  0.45           O  
HETATM  467  O   HOH T 466      -2.507  65.386  48.795  1.00  0.45           O  
HETATM  468  O   HOH T 467      33.118  49.332  37.660  1.00  0.45           O  
HETATM  469  O   HOH T 468      27.184  96.676  11.086  1.00  0.45           O  
HETATM  470  O   HOH T 469      32.277  43.813  13.842  1.00  0.45           O  
HETATM  471  O   HOH T 470      32.619  90.705   7.395  1.00  0.45           O  
HETATM  472  O   HOH T 471      31.618  69.297  18.114  1.00  0.45           O  
HETATM  473  O   HOH T 472      -2.469  86.421  10.302  1.00  0.45           O  
HETATM  474  O   HOH T 473       6.461  91.637   3.032  1.00  0.45           O  
HETATM  475  O   HOH T 474      19.814  92.676  -6.859  1.00  0.45           O  
HETATM  476  O   HOH T 475      23.442  93.723  47.778  1.00  0.45           O  
HETATM  477  O   HOH T 476      38.377  86.614  34.823  1.00  0.45           O  
HETATM  478  O   HOH T 477      23.854  54.235  50.696  1.00  0.45           O  
HETATM  479  O   HOH T 478      12.954 100.433  37.464  1.00  0.45           O  
HETATM  480  O   HOH T 479      10.688  53.965  23.671  1.00  0.45           O  
HETATM  481  O   HOH T 480      -8.985  70.788  31.944  1.00  0.45           O  
HETATM  482  O   HOH T 481      27.296  84.308  41.028  1.00  0.45           O  
HETATM  483  O   HOH T 482      -2.481  79.311  14.376  1.00  0.45           O  
HETATM  484  O   HOH T 483      27.552  82.335  32.329  1.00  0.45           O  
HETATM  485  O   HOH T 484      13.793  97.001  -5.215  1.00  0.45           O  
HETATM  486  O   HOH T 485      16.199  87.778   3.225  1.00  0.45           O  
HETATM  487  O   HOH T 486      25.203  97.101  23.865  1.00  0.46           O  
HETATM  488  O   HOH T 487      23.765  97.999  14.165  1.00  0.46           O  
HETATM  489  O   HOH T 488      23.788  48.274  29.157  1.00  0.46           O  
HETATM  490  O   HOH T 489      21.806  70.512  16.225  1.00  0.46           O  
HETATM  491  O   HOH T 490      25.569  74.503  32.064  1.00  0.46           O  
HETATM  492  O   HOH T 491      28.681 106.034  43.588  1.00  0.46           O  
HETATM  493  O   HOH T 492      -1.931  91.552  19.396  1.00  0.46           O  
HETATM  494  O   HOH T 493       7.011 103.018  22.698  1.00  0.46           O  
HETATM  495  O   HOH T 494      -0.851  60.927  39.782  1.00  0.46           O  
HETATM  496  O   HOH T 495      12.076 102.839  13.627  1.00  0.46           O  
HETATM  497  O   HOH T 496       7.431  96.593   3.921  1.00  0.46           O  
HETATM  498  O   HOH T 497      36.518  45.161  25.705  1.00  0.46           O  
HETATM  499  O   HOH T 498       8.318  53.928  24.895  1.00  0.46           O  
HETATM  500  O   HOH T 499      22.318  76.019  19.049  1.00  0.46           O  
HETATM  501  O   HOH T 500       9.757  99.519   0.890  1.00  0.46           O  
HETATM  502  O   HOH T 501       8.354 102.411  29.170  1.00  0.46           O  
HETATM  503  O   HOH T 502      32.529  68.851   9.447  1.00  0.46           O  
HETATM  504  O   HOH T 503      26.400  98.397  13.172  1.00  0.46           O  
HETATM  505  O   HOH T 504      -2.570  92.542  14.711  1.00  0.46           O  
HETATM  506  O   HOH T 505      11.402  95.845  35.206  1.00  0.46           O  
HETATM  507  O   HOH T 506      41.709  70.024  20.075  1.00  0.46           O  
HETATM  508  O   HOH T 507      36.876 107.156  35.777  1.00  0.46           O  
HETATM  509  O   HOH T 508      -9.712  70.851  44.061  1.00  0.46           O  
HETATM  510  O   HOH T 509      17.555  90.057  38.835  1.00  0.46           O  
HETATM  511  O   HOH T 510      17.808  69.451  49.890  1.00  0.46           O  
HETATM  512  O   HOH T 511      11.300  57.451  20.461  1.00  0.46           O  
HETATM  513  O   HOH T 512       8.951  86.083   9.967  1.00  0.46           O  
HETATM  514  O   HOH T 513      -7.358  68.495  31.851  1.00  0.46           O  
HETATM  515  O   HOH T 514      33.775 107.812  30.801  1.00  0.46           O  
HETATM  516  O   HOH T 515      24.046  61.291  54.447  1.00  0.46           O  
HETATM  517  O   HOH T 516      27.666  74.837  12.914  1.00  0.46           O  
HETATM  518  O   HOH T 517      20.249  98.624  18.705  1.00  0.46           O  
HETATM  519  O   HOH T 518      36.337  47.593  20.161  1.00  0.46           O  
HETATM  520  O   HOH T 519       5.593 103.376  24.980  1.00  0.46           O  
HETATM  521  O   HOH T 520      -4.071  65.463  26.005  1.00  0.46           O  
HETATM  522  O   HOH T 521      28.648  50.367  10.399  1.00  0.46           O  
HETATM  523  O   HOH T 522       6.485  72.956   8.810  1.00  0.46           O  
HETATM  524  O   HOH T 523      34.667  88.932  38.731  1.00  0.46           O  
HETATM  525  O   HOH T 524      -1.030  80.349  12.208  1.00  0.46           O  
HETATM  526  O   HOH T 525      30.190  82.488  33.255  1.00  0.46           O  
HETATM  527  O   HOH T 526      13.880  67.930  14.857  1.00  0.47           O  
HETATM  528  O   HOH T 527      34.242  68.100  11.518  1.00  0.47           O  
HETATM  529  O   HOH T 528      21.447  67.426  14.219  1.00  0.47           O  
HETATM  530  O   HOH T 529      33.774  58.543  40.697  1.00  0.47           O  
HETATM  531  O   HOH T 530      33.024  42.958  16.370  1.00  0.47           O  
HETATM  532  O   HOH T 531      12.699  69.753  50.691  1.00  0.47           O  
HETATM  533  O   HOH T 532      26.053  55.672  49.593  1.00  0.47           O  
HETATM  534  O   HOH T 533      27.664  84.501  23.359  1.00  0.47           O  
HETATM  535  O   HOH T 534      34.660 101.250  43.064  1.00  0.47           O  
HETATM  536  O   HOH T 535       7.851  93.914   3.654  1.00  0.47           O  
HETATM  537  O   HOH T 536      14.281  95.576  29.899  1.00  0.47           O  
HETATM  538  O   HOH T 537      16.286  49.295  31.722  1.00  0.47           O  
HETATM  539  O   HOH T 538       8.917  70.335  44.031  1.00  0.47           O  
HETATM  540  O   HOH T 539      39.674  69.783  24.445  1.00  0.47           O  
HETATM  541  O   HOH T 540      -7.133  85.724   7.976  1.00  0.47           O  
HETATM  542  O   HOH T 541      42.006 103.198  40.415  1.00  0.47           O  
HETATM  543  O   HOH T 542       6.298  72.221  13.685  1.00  0.47           O  
HETATM  544  O   HOH T 543      30.787  88.915  11.031  1.00  0.47           O  
HETATM  545  O   HOH T 544      21.669  69.278   7.246  1.00  0.47           O  
HETATM  546  O   HOH T 545      40.127  91.640  18.019  1.00  0.47           O  
HETATM  547  O   HOH T 546      19.036  89.635  41.019  1.00  0.47           O  
HETATM  548  O   HOH T 547     -11.666  84.938   5.775  1.00  0.47           O  
HETATM  549  O   HOH T 548      42.125  53.294  13.706  1.00  0.47           O  
HETATM  550  O   HOH T 549      -2.874 101.910  27.344  1.00  0.47           O  
HETATM  551  O   HOH T 550      34.763  46.165  21.934  1.00  0.47           O  
HETATM  552  O   HOH T 551      31.525  79.497  18.755  1.00  0.47           O  
HETATM  553  O   HOH T 552      37.288 109.370  33.964  1.00  0.47           O  
HETATM  554  O   HOH T 553      18.047  94.425  44.710  1.00  0.47           O  
HETATM  555  O   HOH T 554      10.595 103.684  34.863  1.00  0.47           O  
HETATM  556  O   HOH T 555      -4.077  71.033  36.409  1.00  0.47           O  
HETATM  557  O   HOH T 556      28.175  83.209  34.970  1.00  0.48           O  
HETATM  558  O   HOH T 557      -2.505  90.768   4.850  1.00  0.48           O  
HETATM  559  O   HOH T 558      18.465  50.934  28.785  1.00  0.48           O  
HETATM  560  O   HOH T 559      36.618  71.854  42.067  1.00  0.48           O  
HETATM  561  O   HOH T 560      21.742  78.669  19.482  1.00  0.48           O  
HETATM  562  O   HOH T 561      22.370  46.801  31.058  1.00  0.48           O  
HETATM  563  O   HOH T 562      22.598  70.448   9.646  1.00  0.48           O  
HETATM  564  O   HOH T 563      13.806  50.072  32.600  1.00  0.48           O  
HETATM  565  O   HOH T 564      41.432 107.912  21.108  1.00  0.48           O  
HETATM  566  O   HOH T 565      30.736  67.482  42.983  1.00  0.48           O  
HETATM  567  O   HOH T 566      33.505  68.334   6.900  1.00  0.48           O  
HETATM  568  O   HOH T 567      33.942 110.110  36.088  1.00  0.48           O  
HETATM  569  O   HOH T 568      -4.033  97.446  13.823  1.00  0.48           O  
HETATM  570  O   HOH T 569      24.684  58.996  30.102  1.00  0.48           O  
HETATM  571  O   HOH T 570      -3.330  67.830  27.354  1.00  0.48           O  
HETATM  572  O   HOH T 571       3.994  73.699  14.296  1.00  0.48           O  
HETATM  573  O   HOH T 572      39.034  69.782  19.289  1.00  0.48           O  
HETATM  574  O   HOH T 573       5.833  98.772   7.471  1.00  0.48           O  
HETATM  575  O   HOH T 574      37.195  70.470  28.340  1.00  0.48           O  
HETATM  576  O   HOH T 575      28.909  79.395  18.075  1.00  0.48           O  
HETATM  577  O   HOH T 576      -6.218  70.895  32.576  1.00  0.48           O  
HETATM  578  O   HOH T 577      34.856 105.394  40.518  1.00  0.48           O  
HETATM  579  O   HOH T 578      -2.947  68.265  32.369  1.00  0.48           O  
HETATM  580  O   HOH T 579      21.391  98.296  44.510  1.00  0.48           O  
HETATM  581  O   HOH T 580      13.670  54.325  55.949  1.00  0.48           O  
HETATM  582  O   HOH T 581      13.730  55.836  19.506  1.00  0.48           O  
HETATM  583  O   HOH T 582      17.794  91.672  44.544  1.00  0.48           O  
HETATM  584  O   HOH T 583      23.768  56.801  10.140  1.00  0.48           O  
HETATM  585  O   HOH T 584      32.661  81.716  19.907  1.00  0.49           O  
HETATM  586  O   HOH T 585      25.905  57.995  40.206  1.00  0.49           O  
HETATM  587  O   HOH T 586      23.795  99.587  43.826  1.00  0.49           O  
HETATM  588  O   HOH T 587      19.895  57.612  34.116  1.00  0.49           O  
HETATM  589  O   HOH T 588       8.719  70.256  51.578  1.00  0.49           O  
HETATM  590  O   HOH T 589       5.068  68.852  52.790  1.00  0.49           O  
HETATM  591  O   HOH T 590      12.716  90.400  35.326  1.00  0.49           O  
HETATM  592  O   HOH T 591      38.953  69.136  29.772  1.00  0.49           O  
HETATM  593  O   HOH T 592      16.159  76.227  23.408  1.00  0.49           O  
HETATM  594  O   HOH T 593      10.463  53.717  41.392  1.00  0.49           O  
HETATM  595  O   HOH T 594      22.148  93.527  -5.716  1.00  0.49           O  
HETATM  596  O   HOH T 595      31.866 115.190  39.310  1.00  0.49           O  
HETATM  597  O   HOH T 596       8.563  85.929   2.406  1.00  0.49           O  
HETATM  598  O   HOH T 597      21.273  58.036   9.645  1.00  0.49           O  
HETATM  599  O   HOH T 598      -0.091  93.234  30.233  1.00  0.49           O  
HETATM  600  O   HOH T 599      44.635  99.532  16.832  1.00  0.49           O  
HETATM  601  O   HOH T 600      10.962  93.337  11.822  1.00  0.49           O  
HETATM  602  O   HOH T 601      21.369  56.474  36.370  1.00  0.49           O  
HETATM  603  O   HOH T 602      39.031  46.650  35.589  1.00  0.49           O  
HETATM  604  O   HOH T 603      26.142  81.810  27.296  1.00  0.49           O  
HETATM  605  O   HOH T 604      27.594  71.913  30.617  1.00  0.49           O  
HETATM  606  O   HOH T 605      30.764  73.873  20.222  1.00  0.49           O  
HETATM  607  O   HOH T 606      46.864  56.511  24.374  1.00  0.49           O  
HETATM  608  O   HOH T 607      45.432  90.483  31.426  1.00  0.49           O  
HETATM  609  O   HOH T 608      30.159  70.275  15.903  1.00  0.49           O  
HETATM  610  O   HOH T 609      42.137  87.414  28.555  1.00  0.49           O  
HETATM  611  O   HOH T 610      -1.684  92.377   8.106  1.00  0.49           O  
HETATM  612  O   HOH T 611      16.262  82.080  28.681  1.00  0.50           O  
HETATM  613  O   HOH T 612      -7.477  69.155  38.148  1.00  0.50           O  
HETATM  614  O   HOH T 613      45.370  54.361  27.501  1.00  0.50           O  
HETATM  615  O   HOH T 614      26.583  77.766  18.324  1.00  0.50           O  
HETATM  616  O   HOH T 615       8.086  97.390   6.464  1.00  0.50           O  
HETATM  617  O   HOH T 616      39.732  86.787  27.199  1.00  0.50           O  
HETATM  618  O   HOH T 617       8.993  93.791  -4.005  1.00  0.50           O  
HETATM  619  O   HOH T 618      18.745  48.662  32.743  1.00  0.50           O  
HETATM  620  O   HOH T 619      -1.878  64.323  46.182  1.00  0.50           O  
HETATM  621  O   HOH T 620      34.128 110.466  24.780  1.00  0.50           O  
HETATM  622  O   HOH T 621       8.866  62.576  57.868  1.00  0.50           O  
HETATM  623  O   HOH T 622      31.582  73.881  23.524  1.00  0.50           O  
HETATM  624  O   HOH T 623       6.417 100.485   9.561  1.00  0.50           O  
HETATM  625  O   HOH T 624       7.814  59.626  50.048  1.00  0.50           O  
HETATM  626  O   HOH T 625      41.301 107.748  38.862  1.00  0.50           O  
HETATM  627  O   HOH T 626      38.944 108.393  37.417  1.00  0.50           O  
HETATM  628  O   HOH T 627      23.613  55.975  48.483  1.00  0.50           O  
HETATM  629  O   HOH T 628       6.302  73.570  11.350  1.00  0.50           O  
HETATM  630  O   HOH T 629      20.214  63.174  58.054  1.00  0.50           O  
HETATM  631  O   HOH T 630      -0.109 104.909  35.530  1.00  0.50           O  
HETATM  632  O   HOH T 631      13.671 100.443  34.857  1.00  0.50           O  
HETATM  633  O   HOH T 632      -0.044  81.739  22.646  1.00  0.50           O  
HETATM  634  O   HOH T 633      26.102 112.264  38.910  1.00  0.50           O  
HETATM  635  O   HOH T 634      -0.038  75.215  31.634  1.00  0.51           O  
HETATM  636  O   HOH T 635      -3.876  59.623  37.362  1.00  0.51           O  
HETATM  637  O   HOH T 636      25.593  79.397  20.276  1.00  0.51           O  
HETATM  638  O   HOH T 637      -1.627  71.326  44.522  1.00  0.51           O  
HETATM  639  O   HOH T 638      13.614  86.898   3.897  1.00  0.51           O  
HETATM  640  O   HOH T 639       1.346  97.075  33.502  1.00  0.51           O  
HETATM  641  O   HOH T 640      43.720  89.105  29.926  1.00  0.51           O  
HETATM  642  O   HOH T 641      45.469  92.516  34.937  1.00  0.51           O  
HETATM  643  O   HOH T 642      13.153  61.068  21.579  1.00  0.51           O  
HETATM  644  O   HOH T 643      25.035  53.220  39.183  1.00  0.51           O  
HETATM  645  O   HOH T 644      16.444  64.187  17.967  1.00  0.51           O  
HETATM  646  O   HOH T 645      34.246  88.921  44.830  1.00  0.51           O  
HETATM  647  O   HOH T 646       9.851  98.291  34.923  1.00  0.51           O  
HETATM  648  O   HOH T 647       2.305  70.588  22.029  1.00  0.51           O  
HETATM  649  O   HOH T 648      27.638 111.806  41.173  1.00  0.51           O  
HETATM  650  O   HOH T 649      27.483  50.026   7.896  1.00  0.51           O  
HETATM  651  O   HOH T 650       0.992  98.753  13.717  1.00  0.51           O  
HETATM  652  O   HOH T 651      44.698  56.809  37.395  1.00  0.51           O  
HETATM  653  O   HOH T 652      19.215  67.409  17.134  1.00  0.51           O  
HETATM  654  O   HOH T 653      37.421  70.475  17.016  1.00  0.51           O  
HETATM  655  O   HOH T 654      27.525 106.363  46.124  1.00  0.51           O  
HETATM  656  O   HOH T 655       1.394  77.777  41.946  1.00  0.51           O  
HETATM  657  O   HOH T 656      39.890  87.478  18.442  1.00  0.51           O  
HETATM  658  O   HOH T 657      46.097  51.820  26.691  1.00  0.51           O  
HETATM  659  O   HOH T 658      17.656  92.004  33.433  1.00  0.51           O  
HETATM  660  O   HOH T 659      36.435 109.640  18.320  1.00  0.52           O  
HETATM  661  O   HOH T 660      16.133  72.709  23.332  1.00  0.52           O  
HETATM  662  O   HOH T 661       5.437 100.945  38.999  1.00  0.52           O  
HETATM  663  O   HOH T 662      28.171  45.112  12.266  1.00  0.52           O  
HETATM  664  O   HOH T 663       5.521 101.869  18.402  1.00  0.52           O  
HETATM  665  O   HOH T 664       5.542  54.410  35.722  1.00  0.52           O  
HETATM  666  O   HOH T 665      20.837 109.013  29.727  1.00  0.52           O  
HETATM  667  O   HOH T 666      20.654  71.258  18.660  1.00  0.52           O  
HETATM  668  O   HOH T 667      25.936  44.557  13.872  1.00  0.52           O  
HETATM  669  O   HOH T 668      13.450 102.018  -2.203  1.00  0.52           O  
HETATM  670  O   HOH T 669       0.564  81.174  37.776  1.00  0.52           O  
HETATM  671  O   HOH T 670      29.095  72.217  17.594  1.00  0.52           O  
HETATM  672  O   HOH T 671      24.009  48.016  20.035  1.00  0.52           O  
HETATM  673  O   HOH T 672      41.111 105.861  19.283  1.00  0.52           O  
HETATM  674  O   HOH T 673      14.723  81.667  46.243  1.00  0.52           O  
HETATM  675  O   HOH T 674      18.592 103.752  21.431  1.00  0.52           O  
HETATM  676  O   HOH T 675       8.031  56.935  17.913  1.00  0.52           O  
HETATM  677  O   HOH T 676      25.163 102.174   2.631  1.00  0.52           O  
HETATM  678  O   HOH T 677      36.348  47.308  27.572  1.00  0.52           O  
HETATM  679  O   HOH T 678      18.737  51.152  34.086  1.00  0.52           O  
HETATM  680  O   HOH T 679      12.554  59.071  17.832  1.00  0.52           O  
HETATM  681  O   HOH T 680       7.617  56.115  39.663  1.00  0.52           O  
HETATM  682  O   HOH T 681      35.963  71.908  48.709  1.00  0.52           O  
HETATM  683  O   HOH T 682      16.235  56.269  38.363  1.00  0.52           O  
HETATM  684  O   HOH T 683      -1.735  58.551  38.791  1.00  0.52           O  
HETATM  685  O   HOH T 684       9.543 103.965  12.882  1.00  0.52           O  
HETATM  686  O   HOH T 685      16.316 100.096  15.645  1.00  0.52           O  
HETATM  687  O   HOH T 686       6.416  98.959   4.815  1.00  0.52           O  
HETATM  688  O   HOH T 687      16.754  58.266  11.752  1.00  0.53           O  
HETATM  689  O   HOH T 688       1.394  58.873  19.980  1.00  0.53           O  
HETATM  690  O   HOH T 689      14.601  75.001   7.143  1.00  0.53           O  
HETATM  691  O   HOH T 690      -6.059  73.167  31.256  1.00  0.53           O  
HETATM  692  O   HOH T 691       9.857 105.280  26.746  1.00  0.53           O  
HETATM  693  O   HOH T 692      43.122  67.966  25.057  1.00  0.53           O  
HETATM  694  O   HOH T 693      30.928  60.032  40.649  1.00  0.53           O  
HETATM  695  O   HOH T 694      24.235  78.551  34.220  1.00  0.53           O  
HETATM  696  O   HOH T 695       2.038  60.652  21.840  1.00  0.53           O  
HETATM  697  O   HOH T 696      10.960  63.114  42.128  1.00  0.53           O  
HETATM  698  O   HOH T 697      11.402 105.394  14.192  1.00  0.53           O  
HETATM  699  O   HOH T 698      36.538  84.455  12.132  1.00  0.53           O  
HETATM  700  O   HOH T 699      32.360  49.244  11.962  1.00  0.53           O  
HETATM  701  O   HOH T 700      -1.204  99.854  29.595  1.00  0.53           O  
HETATM  702  O   HOH T 701      38.822  87.984  23.729  1.00  0.53           O  
HETATM  703  O   HOH T 702      14.507  54.376  23.294  1.00  0.53           O  
HETATM  704  O   HOH T 703      43.509  50.110  33.453  1.00  0.53           O  
HETATM  705  O   HOH T 704      43.773  91.621  36.762  1.00  0.53           O  
HETATM  706  O   HOH T 705      31.000 101.488  43.847  1.00  0.53           O  
HETATM  707  O   HOH T 706      34.220  74.521  48.603  1.00  0.53           O  
HETATM  708  O   HOH T 707       7.040  82.020   4.545  1.00  0.53           O  
HETATM  709  O   HOH T 708      -3.536 101.342  29.962  1.00  0.53           O  
HETATM  710  O   HOH T 709       4.162  98.961   9.748  1.00  0.53           O  
HETATM  711  O   HOH T 710      31.049  54.876  10.272  1.00  0.54           O  
HETATM  712  O   HOH T 711       7.240 105.434  25.862  1.00  0.54           O  
HETATM  713  O   HOH T 712       2.628  57.459  40.495  1.00  0.54           O  
HETATM  714  O   HOH T 713      26.543  78.837  25.032  1.00  0.54           O  
HETATM  715  O   HOH T 714      30.858  78.542  16.291  1.00  0.54           O  
HETATM  716  O   HOH T 715      18.634  99.631  42.430  1.00  0.54           O  
HETATM  717  O   HOH T 716      -4.979  69.951  38.881  1.00  0.54           O  
HETATM  718  O   HOH T 717      20.944 106.961  38.064  1.00  0.54           O  
HETATM  719  O   HOH T 718      41.183  59.976  13.827  1.00  0.54           O  
HETATM  720  O   HOH T 719      46.395  92.850  32.394  1.00  0.54           O  
HETATM  721  O   HOH T 720      32.411  90.314   4.667  1.00  0.54           O  
HETATM  722  O   HOH T 721      32.710  81.596  33.175  1.00  0.54           O  
HETATM  723  O   HOH T 722      13.599  54.378  25.972  1.00  0.54           O  
HETATM  724  O   HOH T 723       1.649  74.436  12.943  1.00  0.54           O  
HETATM  725  O   HOH T 724       7.628 100.289  13.869  1.00  0.54           O  
HETATM  726  O   HOH T 725      33.733  87.940  47.286  1.00  0.54           O  
HETATM  727  O   HOH T 726      13.595 101.995  27.944  1.00  0.54           O  
HETATM  728  O   HOH T 727      11.570  54.755  20.998  1.00  0.54           O  
HETATM  729  O   HOH T 728       0.467  80.267   9.819  1.00  0.54           O  
HETATM  730  O   HOH T 729       1.321  68.960  20.023  1.00  0.54           O  
HETATM  731  O   HOH T 730      33.160  72.171  29.993  1.00  0.54           O  
HETATM  732  O   HOH T 731      39.855  85.613  13.779  1.00  0.55           O  
HETATM  733  O   HOH T 732      25.893  76.222  24.642  1.00  0.55           O  
HETATM  734  O   HOH T 733      28.378  85.831   6.066  1.00  0.55           O  
HETATM  735  O   HOH T 734      28.344  70.507  47.896  1.00  0.55           O  
HETATM  736  O   HOH T 735      33.173  84.156  24.145  1.00  0.55           O  
HETATM  737  O   HOH T 736      -2.523  95.306  14.737  1.00  0.55           O  
HETATM  738  O   HOH T 737      32.259  96.964  12.683  1.00  0.55           O  
HETATM  739  O   HOH T 738      -1.519  75.966  17.814  1.00  0.55           O  
HETATM  740  O   HOH T 739      -3.850  96.761  16.782  1.00  0.55           O  
HETATM  741  O   HOH T 740      26.053  81.805  34.677  1.00  0.55           O  
HETATM  742  O   HOH T 741      28.129  73.289  20.058  1.00  0.55           O  
HETATM  743  O   HOH T 742      16.034  55.236  20.992  1.00  0.55           O  
HETATM  744  O   HOH T 743      11.515  51.597  39.949  1.00  0.55           O  
HETATM  745  O   HOH T 744      33.943  72.138  34.024  1.00  0.55           O  
HETATM  746  O   HOH T 745      28.342  92.419   9.746  1.00  0.55           O  
HETATM  747  O   HOH T 746      -1.814  97.928  15.272  1.00  0.55           O  
HETATM  748  O   HOH T 747      21.158  63.149   4.892  1.00  0.55           O  
HETATM  749  O   HOH T 748      -4.161  85.172  15.180  1.00  0.55           O  
HETATM  750  O   HOH T 749      28.310  76.111  10.486  1.00  0.55           O  
HETATM  751  O   HOH T 750      41.287 109.484  36.562  1.00  0.55           O  
HETATM  752  O   HOH T 751      -1.689  82.830  11.098  1.00  0.55           O  
HETATM  753  O   HOH T 752      36.539  85.751  28.038  1.00  0.56           O  
HETATM  754  O   HOH T 753      -1.413  88.944  10.841  1.00  0.56           O  
HETATM  755  O   HOH T 754       6.243  81.227  40.509  1.00  0.56           O  
HETATM  756  O   HOH T 755      11.337  51.984  21.812  1.00  0.56           O  
HETATM  757  O   HOH T 756      27.802 117.165  39.774  1.00  0.56           O  
HETATM  758  O   HOH T 757      28.335  80.160  43.673  1.00  0.56           O  
HETATM  759  O   HOH T 758      28.181  63.900  44.091  1.00  0.56           O  
HETATM  760  O   HOH T 759      -0.231  76.348  13.706  1.00  0.56           O  
HETATM  761  O   HOH T 760      18.310  53.573  32.682  1.00  0.56           O  
HETATM  762  O   HOH T 761      -1.399 103.341  33.398  1.00  0.56           O  
HETATM  763  O   HOH T 762      35.678  89.868  46.962  1.00  0.56           O  
HETATM  764  O   HOH T 763      14.205 102.306  -4.891  1.00  0.56           O  
HETATM  765  O   HOH T 764       9.769 106.103  14.561  1.00  0.56           O  
HETATM  766  O   HOH T 765      42.315 110.285  20.233  1.00  0.56           O  
HETATM  767  O   HOH T 766       5.668  77.753   4.075  1.00  0.56           O  
HETATM  768  O   HOH T 767      41.309  96.419  39.701  1.00  0.56           O  
HETATM  769  O   HOH T 768      -0.331  74.048  47.872  1.00  0.56           O  
HETATM  770  O   HOH T 769      -2.272 103.588  36.767  1.00  0.56           O  
HETATM  771  O   HOH T 770      46.155 104.469  26.776  1.00  0.56           O  
HETATM  772  O   HOH T 771      25.865  47.829  27.596  1.00  0.56           O  
HETATM  773  O   HOH T 772      14.584  95.607  43.123  1.00  0.56           O  
HETATM  774  O   HOH T 773       6.555  83.516  44.579  1.00  0.56           O  
HETATM  775  O   HOH T 774      10.848  63.899  54.027  1.00  0.56           O  
HETATM  776  O   HOH T 775      24.214  56.662  59.867  1.00  0.57           O  
HETATM  777  O   HOH T 776      12.808  97.931  36.124  1.00  0.57           O  
HETATM  778  O   HOH T 777      -0.654  82.429  25.265  1.00  0.57           O  
HETATM  779  O   HOH T 778      42.388  89.718  21.707  1.00  0.57           O  
HETATM  780  O   HOH T 779      36.556  73.862  46.965  1.00  0.57           O  
HETATM  781  O   HOH T 780      30.796  77.833  37.760  1.00  0.57           O  
HETATM  782  O   HOH T 781      28.582  75.986  15.376  1.00  0.57           O  
HETATM  783  O   HOH T 782      47.934  51.487  18.497  1.00  0.57           O  
HETATM  784  O   HOH T 783      37.250  71.960  19.392  1.00  0.57           O  
HETATM  785  O   HOH T 784      20.328  78.415  21.888  1.00  0.57           O  
HETATM  786  O   HOH T 785      13.828  55.565  46.077  1.00  0.57           O  
HETATM  787  O   HOH T 786      36.678  69.347  47.801  1.00  0.57           O  
HETATM  788  O   HOH T 787      37.203  46.732  29.927  1.00  0.57           O  
HETATM  789  O   HOH T 788      10.910  92.478  -0.126  1.00  0.57           O  
HETATM  790  O   HOH T 789      28.230 109.852  28.109  1.00  0.57           O  
HETATM  791  O   HOH T 790       5.563  78.524  49.615  1.00  0.57           O  
HETATM  792  O   HOH T 791      40.555  71.367  45.494  1.00  0.57           O  
HETATM  793  O   HOH T 792      36.498  70.024  31.019  1.00  0.58           O  
HETATM  794  O   HOH T 793      13.872 100.787   8.122  1.00  0.58           O  
HETATM  795  O   HOH T 794       7.938  75.338  50.592  1.00  0.58           O  
HETATM  796  O   HOH T 795      43.684  54.209  22.670  1.00  0.58           O  
HETATM  797  O   HOH T 796      14.122 101.976  30.642  1.00  0.58           O  
HETATM  798  O   HOH T 797      28.515  80.480  38.759  1.00  0.58           O  
HETATM  799  O   HOH T 798      37.236 102.155  43.326  1.00  0.58           O  
HETATM  800  O   HOH T 799      36.720  69.013  14.554  1.00  0.58           O  
HETATM  801  O   HOH T 800      21.107 107.772  33.994  1.00  0.58           O  
HETATM  802  O   HOH T 801      26.550  77.642  29.171  1.00  0.58           O  
HETATM  803  O   HOH T 802      24.110  52.845  53.388  1.00  0.59           O  
HETATM  804  O   HOH T 803      39.089 109.483  18.484  1.00  0.59           O  
HETATM  805  O   HOH T 804       4.057  73.641   9.834  1.00  0.59           O  
HETATM  806  O   HOH T 805      13.162  56.445  16.935  1.00  0.60           O  
HETATM  807  O   HOH T 806      10.686 102.360  30.267  1.00  0.60           O  
HETATM  808  O   HOH T 807      12.081 102.960  37.138  1.00  0.60           O  
HETATM  809  O   HOH T 808      22.601  47.055  13.655  1.00  0.61           O  
HETATM  810  O   HOH T 809      -0.160  53.628  26.957  1.00  0.61           O  
HETATM  811  O   HOH T 810      25.564  97.284   8.994  1.00  0.61           O  
HETATM  812  O   HOH T 811      -1.392  66.949  42.882  1.00  0.62           O  
TER     813      HOH T 811 
