# Supplementary material for: Accurate Prediction of Hydration Sites of Proteins Using Energy Model With Atom Embedding
Source: Front Mol Biosci. 2021 Sep 20;8:756075. doi: 10.3389/fmolb.2021.756075 (PMC8488165; doi:10.3389/fmolb.2021.756075)
Supplement: Supplementary file 1 [file DataSheet1.ZIP › Data Sheet 1/Our_result_pdb/our_dataset_output/2AML_watersite.pdb]

HEADER                                                        XXXX


JRNL        PMID   -1
HETATM    1  O   HOH T   0      58.936  73.395  21.905  1.00  0.15           O  
HETATM    2  O   HOH T   1      48.748  32.713   7.646  1.00  0.15           O  
HETATM    3  O   HOH T   2      49.330  63.790  27.376  1.00  0.16           O  
HETATM    4  O   HOH T   3      39.163  40.902  18.456  1.00  0.16           O  
HETATM    5  O   HOH T   4      42.852  51.637  27.231  1.00  0.17           O  
HETATM    6  O   HOH T   5      44.841  70.245  13.820  1.00  0.17           O  
HETATM    7  O   HOH T   6      41.671  59.284   4.807  1.00  0.18           O  
HETATM    8  O   HOH T   7      43.653  64.551   8.884  1.00  0.18           O  
HETATM    9  O   HOH T   8      58.221  75.185  33.257  1.00  0.18           O  
HETATM   10  O   HOH T   9      35.886  49.483   2.542  1.00  0.18           O  
HETATM   11  O   HOH T  10      44.419  51.628  -8.040  1.00  0.18           O  
HETATM   12  O   HOH T  11      35.851  59.062  31.387  1.00  0.18           O  
HETATM   13  O   HOH T  12      41.922  62.814  30.281  1.00  0.19           O  
HETATM   14  O   HOH T  13      53.469  70.248  44.045  1.00  0.19           O  
HETATM   15  O   HOH T  14      42.657  45.505   3.792  1.00  0.19           O  
HETATM   16  O   HOH T  15      37.576  51.947  22.635  1.00  0.19           O  
HETATM   17  O   HOH T  16      51.274  31.041  29.636  1.00  0.19           O  
HETATM   18  O   HOH T  17      64.017  32.465   7.566  1.00  0.19           O  
HETATM   19  O   HOH T  18      36.943  50.894   4.749  1.00  0.20           O  
HETATM   20  O   HOH T  19      56.300  74.824   3.951  1.00  0.20           O  
HETATM   21  O   HOH T  20      58.499  16.206   9.135  1.00  0.20           O  
HETATM   22  O   HOH T  21      52.618  21.062  13.657  1.00  0.20           O  
HETATM   23  O   HOH T  22      68.203  46.127   1.718  1.00  0.20           O  
HETATM   24  O   HOH T  23      70.545  43.092  -0.200  1.00  0.20           O  
HETATM   25  O   HOH T  24      50.238  29.093  31.285  1.00  0.20           O  
HETATM   26  O   HOH T  25      54.534  68.033  23.354  1.00  0.20           O  
HETATM   27  O   HOH T  26      31.747  55.398   2.601  1.00  0.20           O  
HETATM   28  O   HOH T  27      30.638  57.965   8.515  1.00  0.20           O  
HETATM   29  O   HOH T  28      46.618  39.423   6.865  1.00  0.21           O  
HETATM   30  O   HOH T  29      32.654  57.417  25.773  1.00  0.21           O  
HETATM   31  O   HOH T  30      41.803  61.172  28.001  1.00  0.21           O  
HETATM   32  O   HOH T  31      44.858  31.492  -3.178  1.00  0.21           O  
HETATM   33  O   HOH T  32      61.233  74.423  14.368  1.00  0.21           O  
HETATM   34  O   HOH T  33      62.337  56.713  -4.547  1.00  0.21           O  
HETATM   35  O   HOH T  34      45.315  55.758  32.650  1.00  0.21           O  
HETATM   36  O   HOH T  35      41.556  46.656  23.089  1.00  0.21           O  
HETATM   37  O   HOH T  36      66.716  19.046   8.349  1.00  0.22           O  
HETATM   38  O   HOH T  37      36.563  36.438 -13.516  1.00  0.22           O  
HETATM   39  O   HOH T  38      27.338  75.232  11.979  1.00  0.22           O  
HETATM   40  O   HOH T  39      47.610  25.690   0.435  1.00  0.22           O  
HETATM   41  O   HOH T  40      58.262  47.456  21.866  1.00  0.22           O  
HETATM   42  O   HOH T  41      49.683  31.522  25.826  1.00  0.23           O  
HETATM   43  O   HOH T  42      42.298  40.287  24.335  1.00  0.23           O  
HETATM   44  O   HOH T  43      23.027  43.829  24.240  1.00  0.23           O  
HETATM   45  O   HOH T  44      51.130  56.840  38.779  1.00  0.23           O  
HETATM   46  O   HOH T  45      17.667  58.247  18.681  1.00  0.23           O  
HETATM   47  O   HOH T  46      39.874  76.090  29.800  1.00  0.23           O  
HETATM   48  O   HOH T  47      54.990  28.406  26.233  1.00  0.23           O  
HETATM   49  O   HOH T  48      72.543  52.928  23.639  1.00  0.23           O  
HETATM   50  O   HOH T  49      64.199  45.425  31.731  1.00  0.23           O  
HETATM   51  O   HOH T  50      53.934  12.683  13.820  1.00  0.23           O  
HETATM   52  O   HOH T  51      72.689  67.663  18.465  1.00  0.23           O  
HETATM   53  O   HOH T  52      56.929  74.919  -0.250  1.00  0.23           O  
HETATM   54  O   HOH T  53      48.138  81.907  22.285  1.00  0.24           O  
HETATM   55  O   HOH T  54      27.902  37.923  32.248  1.00  0.24           O  
HETATM   56  O   HOH T  55      66.791  43.490  -7.405  1.00  0.24           O  
HETATM   57  O   HOH T  56      74.001  56.054  31.327  1.00  0.24           O  
HETATM   58  O   HOH T  57      57.063  45.888  19.962  1.00  0.24           O  
HETATM   59  O   HOH T  58      40.138  66.450  48.508  1.00  0.24           O  
HETATM   60  O   HOH T  59      42.873  57.125  38.959  1.00  0.24           O  
HETATM   61  O   HOH T  60      25.842  33.404  20.035  1.00  0.24           O  
HETATM   62  O   HOH T  61      38.139  60.939  10.436  1.00  0.24           O  
HETATM   63  O   HOH T  62      60.760  32.976  14.447  1.00  0.24           O  
HETATM   64  O   HOH T  63      27.408  37.849   4.035  1.00  0.24           O  
HETATM   65  O   HOH T  64      34.703  69.218  51.802  1.00  0.24           O  
HETATM   66  O   HOH T  65      49.727  15.872  18.676  1.00  0.25           O  
HETATM   67  O   HOH T  66      51.768  78.828  19.309  1.00  0.25           O  
HETATM   68  O   HOH T  67      47.018  57.933  38.753  1.00  0.25           O  
HETATM   69  O   HOH T  68      48.641  81.121  29.792  1.00  0.25           O  
HETATM   70  O   HOH T  69      63.961  72.116  37.365  1.00  0.25           O  
HETATM   71  O   HOH T  70      46.848  72.300  19.868  1.00  0.25           O  
HETATM   72  O   HOH T  71      44.605  54.192  -1.430  1.00  0.25           O  
HETATM   73  O   HOH T  72      53.296  24.476  24.236  1.00  0.25           O  
HETATM   74  O   HOH T  73      60.989  49.974  21.693  1.00  0.25           O  
HETATM   75  O   HOH T  74      43.052  62.122   7.679  1.00  0.25           O  
HETATM   76  O   HOH T  75      58.166  26.454  17.322  1.00  0.25           O  
HETATM   77  O   HOH T  76      38.704  38.320  12.219  1.00  0.26           O  
HETATM   78  O   HOH T  77      58.447  58.668   8.302  1.00  0.26           O  
HETATM   79  O   HOH T  78      28.819  80.492  42.047  1.00  0.26           O  
HETATM   80  O   HOH T  79      22.413  73.327  24.347  1.00  0.26           O  
HETATM   81  O   HOH T  80      45.202  31.311  -5.967  1.00  0.26           O  
HETATM   82  O   HOH T  81      48.971  55.047  32.444  1.00  0.26           O  
HETATM   83  O   HOH T  82      47.714  63.275  12.527  1.00  0.26           O  
HETATM   84  O   HOH T  83      46.867  79.398  38.899  1.00  0.26           O  
HETATM   85  O   HOH T  84      25.055  74.255  29.155  1.00  0.27           O  
HETATM   86  O   HOH T  85      15.982  46.968  14.154  1.00  0.27           O  
HETATM   87  O   HOH T  86      47.417  32.144  24.222  1.00  0.27           O  
HETATM   88  O   HOH T  87      41.088  54.922  -0.898  1.00  0.27           O  
HETATM   89  O   HOH T  88      56.538  39.757  23.845  1.00  0.27           O  
HETATM   90  O   HOH T  89      47.853  37.880  23.267  1.00  0.27           O  
HETATM   91  O   HOH T  90      46.407  70.063   7.526  1.00  0.27           O  
HETATM   92  O   HOH T  91      52.771  69.691   6.950  1.00  0.27           O  
HETATM   93  O   HOH T  92      35.618  72.201   3.134  1.00  0.27           O  
HETATM   94  O   HOH T  93      62.430  35.257   0.740  1.00  0.27           O  
HETATM   95  O   HOH T  94      42.791  28.432  -2.854  1.00  0.27           O  
HETATM   96  O   HOH T  95      44.610  29.740  17.828  1.00  0.27           O  
HETATM   97  O   HOH T  96      27.325  68.066  30.988  1.00  0.27           O  
HETATM   98  O   HOH T  97      18.110  47.275 -10.985  1.00  0.27           O  
HETATM   99  O   HOH T  98      35.715  29.009  10.114  1.00  0.28           O  
HETATM  100  O   HOH T  99      25.406  60.957  24.390  1.00  0.28           O  
HETATM  101  O   HOH T 100      63.434  56.536  11.431  1.00  0.28           O  
HETATM  102  O   HOH T 101      59.392  64.686   4.539  1.00  0.28           O  
HETATM  103  O   HOH T 102      39.198  43.129  29.040  1.00  0.28           O  
HETATM  104  O   HOH T 103      47.259  45.049  17.790  1.00  0.28           O  
HETATM  105  O   HOH T 104      24.556  33.139  -0.961  1.00  0.28           O  
HETATM  106  O   HOH T 105      52.269  30.103  14.494  1.00  0.28           O  
HETATM  107  O   HOH T 106      50.513  63.153  12.683  1.00  0.28           O  
HETATM  108  O   HOH T 107      62.102  69.131  -1.132  1.00  0.28           O  
HETATM  109  O   HOH T 108      70.467  49.094   4.078  1.00  0.28           O  
HETATM  110  O   HOH T 109      42.541  44.093  22.857  1.00  0.28           O  
HETATM  111  O   HOH T 110      48.313  41.834  31.453  1.00  0.28           O  
HETATM  112  O   HOH T 111      59.053  70.968   8.381  1.00  0.28           O  
HETATM  113  O   HOH T 112      19.922  63.172  19.167  1.00  0.29           O  
HETATM  114  O   HOH T 113      53.224  75.121  15.686  1.00  0.29           O  
HETATM  115  O   HOH T 114      42.199  68.331  45.597  1.00  0.29           O  
HETATM  116  O   HOH T 115      58.343  34.086  29.134  1.00  0.29           O  
HETATM  117  O   HOH T 116      48.657  67.372  41.746  1.00  0.29           O  
HETATM  118  O   HOH T 117      75.607  65.761  14.254  1.00  0.29           O  
HETATM  119  O   HOH T 118      17.873  63.539  27.259  1.00  0.29           O  
HETATM  120  O   HOH T 119      23.482  71.441  22.571  1.00  0.29           O  
HETATM  121  O   HOH T 120      45.859  68.875   4.218  1.00  0.29           O  
HETATM  122  O   HOH T 121      54.617  75.313   6.089  1.00  0.29           O  
HETATM  123  O   HOH T 122      35.481  82.402  14.979  1.00  0.29           O  
HETATM  124  O   HOH T 123      39.608  63.479  37.439  1.00  0.29           O  
HETATM  125  O   HOH T 124      70.054  47.534   7.930  1.00  0.29           O  
HETATM  126  O   HOH T 125      39.790  59.701  12.358  1.00  0.29           O  
HETATM  127  O   HOH T 126      56.123  48.280  14.055  1.00  0.29           O  
HETATM  128  O   HOH T 127      52.372  27.706  13.068  1.00  0.29           O  
HETATM  129  O   HOH T 128      55.228  32.964  16.836  1.00  0.29           O  
HETATM  130  O   HOH T 129      28.262  54.151  15.348  1.00  0.29           O  
HETATM  131  O   HOH T 130      50.763  31.572  32.333  1.00  0.29           O  
HETATM  132  O   HOH T 131      33.162  78.985   2.551  1.00  0.29           O  
HETATM  133  O   HOH T 132      64.514  35.659  -1.098  1.00  0.29           O  
HETATM  134  O   HOH T 133      15.276  43.772  -6.662  1.00  0.30           O  
HETATM  135  O   HOH T 134      51.216  14.586  16.717  1.00  0.30           O  
HETATM  136  O   HOH T 135      44.556  44.974 -14.948  1.00  0.30           O  
HETATM  137  O   HOH T 136      26.684  62.195  26.494  1.00  0.30           O  
HETATM  138  O   HOH T 137       8.715  54.175   8.042  1.00  0.30           O  
HETATM  139  O   HOH T 138      23.418  60.106  11.611  1.00  0.30           O  
HETATM  140  O   HOH T 139      72.123  66.641  12.675  1.00  0.30           O  
HETATM  141  O   HOH T 140      19.661  72.254  11.637  1.00  0.30           O  
HETATM  142  O   HOH T 141      62.076  45.629  15.990  1.00  0.30           O  
HETATM  143  O   HOH T 142      50.631  27.555  20.955  1.00  0.30           O  
HETATM  144  O   HOH T 143      54.927  79.653  15.327  1.00  0.30           O  
HETATM  145  O   HOH T 144      27.504  31.404  10.262  1.00  0.30           O  
HETATM  146  O   HOH T 145      35.753  61.591  -1.134  1.00  0.30           O  
HETATM  147  O   HOH T 146      32.301  66.113   2.830  1.00  0.30           O  
HETATM  148  O   HOH T 147      33.189  27.708  13.142  1.00  0.30           O  
HETATM  149  O   HOH T 148      41.505  41.600  28.440  1.00  0.30           O  
HETATM  150  O   HOH T 149      29.849  71.468  47.172  1.00  0.30           O  
HETATM  151  O   HOH T 150      58.374  56.574   6.342  1.00  0.30           O  
HETATM  152  O   HOH T 151      43.818  58.810  25.805  1.00  0.30           O  
HETATM  153  O   HOH T 152      58.119  82.561  21.015  1.00  0.30           O  
HETATM  154  O   HOH T 153      55.853  45.263  36.537  1.00  0.30           O  
HETATM  155  O   HOH T 154      60.538  39.339  18.199  1.00  0.31           O  
HETATM  156  O   HOH T 155      34.454  66.059   0.940  1.00  0.31           O  
HETATM  157  O   HOH T 156      53.117  19.577  11.466  1.00  0.31           O  
HETATM  158  O   HOH T 157      51.099  27.144  25.940  1.00  0.31           O  
HETATM  159  O   HOH T 158      38.103  84.944  18.775  1.00  0.31           O  
HETATM  160  O   HOH T 159      58.378  71.342  41.651  1.00  0.31           O  
HETATM  161  O   HOH T 160      49.628  66.430  -0.912  1.00  0.31           O  
HETATM  162  O   HOH T 161      41.833  74.587   4.309  1.00  0.31           O  
HETATM  163  O   HOH T 162      48.236  37.875  13.118  1.00  0.31           O  
HETATM  164  O   HOH T 163      31.111  57.012   4.797  1.00  0.31           O  
HETATM  165  O   HOH T 164      52.055  67.355  15.242  1.00  0.31           O  
HETATM  166  O   HOH T 165      25.862  77.416  37.128  1.00  0.31           O  
HETATM  167  O   HOH T 166      53.310  76.279  -3.413  1.00  0.31           O  
HETATM  168  O   HOH T 167      29.749  64.125  37.139  1.00  0.31           O  
HETATM  169  O   HOH T 168      16.630  37.934   7.825  1.00  0.31           O  
HETATM  170  O   HOH T 169      44.847  45.935  18.718  1.00  0.31           O  
HETATM  171  O   HOH T 170      32.152  47.211  26.325  1.00  0.31           O  
HETATM  172  O   HOH T 171      24.633  58.910  22.680  1.00  0.31           O  
HETATM  173  O   HOH T 172      32.990  42.514  31.050  1.00  0.31           O  
HETATM  174  O   HOH T 173      44.535  28.353  15.399  1.00  0.31           O  
HETATM  175  O   HOH T 174      48.728  81.633  12.822  1.00  0.31           O  
HETATM  176  O   HOH T 175      11.928  35.223   2.984  1.00  0.31           O  
HETATM  177  O   HOH T 176      54.245  72.755  14.711  1.00  0.31           O  
HETATM  178  O   HOH T 177      26.016  67.903  28.477  1.00  0.31           O  
HETATM  179  O   HOH T 178      30.361  62.388  19.216  1.00  0.31           O  
HETATM  180  O   HOH T 179      38.580  85.097  16.086  1.00  0.31           O  
HETATM  181  O   HOH T 180      40.497  55.889  38.112  1.00  0.31           O  
HETATM  182  O   HOH T 181      34.137  35.951 -12.053  1.00  0.32           O  
HETATM  183  O   HOH T 182      64.394  72.408   4.485  1.00  0.32           O  
HETATM  184  O   HOH T 183      61.631  50.034  46.624  1.00  0.32           O  
HETATM  185  O   HOH T 184      29.942  63.093  12.938  1.00  0.32           O  
HETATM  186  O   HOH T 185      52.990  67.575  44.570  1.00  0.32           O  
HETATM  187  O   HOH T 186      52.195  34.369 -14.130  1.00  0.32           O  
HETATM  188  O   HOH T 187      17.021  37.675   1.728  1.00  0.32           O  
HETATM  189  O   HOH T 188      21.654  41.740  23.018  1.00  0.32           O  
HETATM  190  O   HOH T 189      38.260  42.569  31.596  1.00  0.32           O  
HETATM  191  O   HOH T 190      61.123  47.026  34.271  1.00  0.32           O  
HETATM  192  O   HOH T 191      37.595  54.187  -6.993  1.00  0.32           O  
HETATM  193  O   HOH T 192      25.964  55.707  28.204  1.00  0.32           O  
HETATM  194  O   HOH T 193      50.470  56.251  18.621  1.00  0.32           O  
HETATM  195  O   HOH T 194      68.106  68.813  12.484  1.00  0.32           O  
HETATM  196  O   HOH T 195      22.707  67.827  24.119  1.00  0.32           O  
HETATM  197  O   HOH T 196      68.037  39.654  -1.612  1.00  0.32           O  
HETATM  198  O   HOH T 197      14.992  51.770   1.328  1.00  0.32           O  
HETATM  199  O   HOH T 198      58.069  56.415  14.540  1.00  0.32           O  
HETATM  200  O   HOH T 199      20.161  55.287  15.926  1.00  0.32           O  
HETATM  201  O   HOH T 200      39.950  52.375   6.305  1.00  0.32           O  
HETATM  202  O   HOH T 201      12.635  52.530  -3.796  1.00  0.32           O  
HETATM  203  O   HOH T 202      48.953  71.223  18.319  1.00  0.32           O  
HETATM  204  O   HOH T 203      72.313  43.508  -2.353  1.00  0.32           O  
HETATM  205  O   HOH T 204      44.617  24.729   9.239  1.00  0.32           O  
HETATM  206  O   HOH T 205      54.899  31.317   7.894  1.00  0.32           O  
HETATM  207  O   HOH T 206      36.834  58.975  19.286  1.00  0.32           O  
HETATM  208  O   HOH T 207      40.854  30.424  12.197  1.00  0.32           O  
HETATM  209  O   HOH T 208      24.164  31.850  16.354  1.00  0.32           O  
HETATM  210  O   HOH T 209      45.635  84.248  20.125  1.00  0.32           O  
HETATM  211  O   HOH T 210      54.443  30.630  10.579  1.00  0.32           O  
HETATM  212  O   HOH T 211      33.363  58.658  23.430  1.00  0.33           O  
HETATM  213  O   HOH T 212      49.479  36.699  18.651  1.00  0.33           O  
HETATM  214  O   HOH T 213      38.566  56.068   9.255  1.00  0.33           O  
HETATM  215  O   HOH T 214      44.277  31.501  21.954  1.00  0.33           O  
HETATM  216  O   HOH T 215      42.440  67.289  -0.733  1.00  0.33           O  
HETATM  217  O   HOH T 216      45.107  72.891   0.910  1.00  0.33           O  
HETATM  218  O   HOH T 217      64.492  63.172   9.035  1.00  0.33           O  
HETATM  219  O   HOH T 218      59.926  82.816  11.491  1.00  0.33           O  
HETATM  220  O   HOH T 219      30.841  60.417  21.044  1.00  0.33           O  
HETATM  221  O   HOH T 220      32.545  33.081  27.331  1.00  0.33           O  
HETATM  222  O   HOH T 221      40.148  55.066   7.211  1.00  0.33           O  
HETATM  223  O   HOH T 222      36.137  54.294  14.985  1.00  0.33           O  
HETATM  224  O   HOH T 223      62.355  42.812  16.274  1.00  0.33           O  
HETATM  225  O   HOH T 224      11.906  50.125  -4.930  1.00  0.33           O  
HETATM  226  O   HOH T 225      57.413  75.920   6.259  1.00  0.33           O  
HETATM  227  O   HOH T 226      62.511  76.689  15.300  1.00  0.33           O  
HETATM  228  O   HOH T 227      37.806  63.647  35.339  1.00  0.33           O  
HETATM  229  O   HOH T 228      65.650  61.704   3.926  1.00  0.33           O  
HETATM  230  O   HOH T 229      54.016  78.305  40.169  1.00  0.33           O  
HETATM  231  O   HOH T 230      36.564  43.438 -10.218  1.00  0.33           O  
HETATM  232  O   HOH T 231      34.491  67.382   7.487  1.00  0.34           O  
HETATM  233  O   HOH T 232      63.974  55.279  -6.432  1.00  0.34           O  
HETATM  234  O   HOH T 233      34.870  47.066  -9.349  1.00  0.34           O  
HETATM  235  O   HOH T 234      22.631  50.427 -10.652  1.00  0.34           O  
HETATM  236  O   HOH T 235      46.392  40.645  15.087  1.00  0.34           O  
HETATM  237  O   HOH T 236      61.882  47.533  42.004  1.00  0.34           O  
HETATM  238  O   HOH T 237      33.214  85.339  30.577  1.00  0.34           O  
HETATM  239  O   HOH T 238      64.352  58.384  38.714  1.00  0.34           O  
HETATM  240  O   HOH T 239      26.389  38.775  30.013  1.00  0.34           O  
HETATM  241  O   HOH T 240      29.548  26.569  -0.958  1.00  0.34           O  
HETATM  242  O   HOH T 241      51.968  76.816   8.734  1.00  0.34           O  
HETATM  243  O   HOH T 242      38.929  58.991  21.135  1.00  0.34           O  
HETATM  244  O   HOH T 243      41.391  38.522  13.071  1.00  0.34           O  
HETATM  245  O   HOH T 244      28.012  81.229  29.392  1.00  0.34           O  
HETATM  246  O   HOH T 245      72.417  46.039  -3.353  1.00  0.34           O  
HETATM  247  O   HOH T 246      50.059  76.174  41.295  1.00  0.34           O  
HETATM  248  O   HOH T 247      52.362  34.364  20.976  1.00  0.34           O  
HETATM  249  O   HOH T 248      23.826  64.427   9.575  1.00  0.34           O  
HETATM  250  O   HOH T 249      35.407  84.217  19.505  1.00  0.34           O  
HETATM  251  O   HOH T 250      16.182  46.862  -8.902  1.00  0.34           O  
HETATM  252  O   HOH T 251      10.064  52.101  -4.912  1.00  0.34           O  
HETATM  253  O   HOH T 252      56.243  54.339  -6.529  1.00  0.34           O  
HETATM  254  O   HOH T 253      22.871  57.476  12.243  1.00  0.34           O  
HETATM  255  O   HOH T 254      42.294  48.961  24.278  1.00  0.34           O  
HETATM  256  O   HOH T 255      50.991  28.513  23.439  1.00  0.34           O  
HETATM  257  O   HOH T 256      48.607  21.870  10.906  1.00  0.34           O  
HETATM  258  O   HOH T 257      31.192  26.846  -3.315  1.00  0.34           O  
HETATM  259  O   HOH T 258      39.789  83.020  23.816  1.00  0.34           O  
HETATM  260  O   HOH T 259      39.714  82.018  29.468  1.00  0.34           O  
HETATM  261  O   HOH T 260      24.066  76.214  30.817  1.00  0.34           O  
HETATM  262  O   HOH T 261      24.076  77.658  13.562  1.00  0.34           O  
HETATM  263  O   HOH T 262      65.265  71.514  20.987  1.00  0.34           O  
HETATM  264  O   HOH T 263      44.354  38.710   0.874  1.00  0.34           O  
HETATM  265  O   HOH T 264      56.065  84.319  21.631  1.00  0.35           O  
HETATM  266  O   HOH T 265      58.185  23.800   9.253  1.00  0.35           O  
HETATM  267  O   HOH T 266      10.503  52.625  14.234  1.00  0.35           O  
HETATM  268  O   HOH T 267      21.958  70.697  11.448  1.00  0.35           O  
HETATM  269  O   HOH T 268      54.084  69.131  29.628  1.00  0.35           O  
HETATM  270  O   HOH T 269      42.935  64.425  -6.123  1.00  0.35           O  
HETATM  271  O   HOH T 270      14.032  43.838  24.719  1.00  0.35           O  
HETATM  272  O   HOH T 271      25.254  49.447 -10.782  1.00  0.35           O  
HETATM  273  O   HOH T 272      40.266  50.047 -10.438  1.00  0.35           O  
HETATM  274  O   HOH T 273      39.897  30.050  29.914  1.00  0.35           O  
HETATM  275  O   HOH T 274      70.528  66.551  31.712  1.00  0.35           O  
HETATM  276  O   HOH T 275      66.066  42.945  10.229  1.00  0.35           O  
HETATM  277  O   HOH T 276      33.480  25.800  15.136  1.00  0.35           O  
HETATM  278  O   HOH T 277      20.200  54.915   1.666  1.00  0.35           O  
HETATM  279  O   HOH T 278      49.089  89.676  37.346  1.00  0.35           O  
HETATM  280  O   HOH T 279      43.910  47.044  16.523  1.00  0.35           O  
HETATM  281  O   HOH T 280      58.369  51.919  40.487  1.00  0.35           O  
HETATM  282  O   HOH T 281      40.362  56.033  23.397  1.00  0.35           O  
HETATM  283  O   HOH T 282      38.530  28.981  19.323  1.00  0.35           O  
HETATM  284  O   HOH T 283      54.110  27.851  10.853  1.00  0.35           O  
HETATM  285  O   HOH T 284      66.322  46.060  33.264  1.00  0.35           O  
HETATM  286  O   HOH T 285      47.222  87.223  29.254  1.00  0.35           O  
HETATM  287  O   HOH T 286      18.180  52.594  13.089  1.00  0.35           O  
HETATM  288  O   HOH T 287      17.163  45.695  16.382  1.00  0.35           O  
HETATM  289  O   HOH T 288      52.613  33.976  16.987  1.00  0.35           O  
HETATM  290  O   HOH T 289      43.060  69.107  48.151  1.00  0.35           O  
HETATM  291  O   HOH T 290      21.361  42.475  25.950  1.00  0.35           O  
HETATM  292  O   HOH T 291      29.735  83.841  15.560  1.00  0.35           O  
HETATM  293  O   HOH T 292      37.655  59.867  -2.370  1.00  0.36           O  
HETATM  294  O   HOH T 293      12.379  52.188  10.678  1.00  0.36           O  
HETATM  295  O   HOH T 294      18.351  47.904  15.259  1.00  0.36           O  
HETATM  296  O   HOH T 295      31.759  84.926  28.251  1.00  0.36           O  
HETATM  297  O   HOH T 296      32.295  57.684  18.494  1.00  0.36           O  
HETATM  298  O   HOH T 297      26.015  80.183  36.528  1.00  0.36           O  
HETATM  299  O   HOH T 298      30.804  56.567  10.904  1.00  0.36           O  
HETATM  300  O   HOH T 299      59.847  72.169  43.792  1.00  0.36           O  
HETATM  301  O   HOH T 300      39.727  41.229 -17.330  1.00  0.36           O  
HETATM  302  O   HOH T 301      62.041  55.323  42.414  1.00  0.36           O  
HETATM  303  O   HOH T 302      16.149  49.056  23.086  1.00  0.36           O  
HETATM  304  O   HOH T 303      29.273  47.889  -8.695  1.00  0.36           O  
HETATM  305  O   HOH T 304      51.133  49.178 -16.582  1.00  0.36           O  
HETATM  306  O   HOH T 305      51.976  12.569  18.447  1.00  0.36           O  
HETATM  307  O   HOH T 306      25.117  63.009   7.511  1.00  0.36           O  
HETATM  308  O   HOH T 307      41.156  75.109  44.655  1.00  0.36           O  
HETATM  309  O   HOH T 308      59.336  50.010  37.066  1.00  0.36           O  
HETATM  310  O   HOH T 309      31.886  80.252  10.609  1.00  0.36           O  
HETATM  311  O   HOH T 310      29.470  33.058   3.317  1.00  0.36           O  
HETATM  312  O   HOH T 311      40.564  39.728  10.646  1.00  0.36           O  
HETATM  313  O   HOH T 312      38.870  84.228  27.815  1.00  0.36           O  
HETATM  314  O   HOH T 313      66.213  22.498  14.624  1.00  0.36           O  
HETATM  315  O   HOH T 314      20.746  44.416 -14.035  1.00  0.36           O  
HETATM  316  O   HOH T 315      17.135  43.857   8.798  1.00  0.36           O  
HETATM  317  O   HOH T 316      20.313  59.836  26.683  1.00  0.36           O  
HETATM  318  O   HOH T 317      51.057  53.825  17.485  1.00  0.36           O  
HETATM  319  O   HOH T 318      34.801  74.096  48.017  1.00  0.36           O  
HETATM  320  O   HOH T 319      71.812  39.904  -5.010  1.00  0.36           O  
HETATM  321  O   HOH T 320      32.283  59.370  35.878  1.00  0.36           O  
HETATM  322  O   HOH T 321      20.432  51.573   8.044  1.00  0.36           O  
HETATM  323  O   HOH T 322      31.841  87.508  34.223  1.00  0.36           O  
HETATM  324  O   HOH T 323      21.100  42.876  32.190  1.00  0.36           O  
HETATM  325  O   HOH T 324      49.029  44.742  15.660  1.00  0.36           O  
HETATM  326  O   HOH T 325      31.188  49.863  -4.733  1.00  0.37           O  
HETATM  327  O   HOH T 326      24.254  67.135   9.029  1.00  0.37           O  
HETATM  328  O   HOH T 327      22.691  64.008  21.069  1.00  0.37           O  
HETATM  329  O   HOH T 328      36.708  72.088  48.344  1.00  0.37           O  
HETATM  330  O   HOH T 329      37.946  30.851 -10.953  1.00  0.37           O  
HETATM  331  O   HOH T 330      21.540  40.276  27.482  1.00  0.37           O  
HETATM  332  O   HOH T 331      49.979  68.701  13.989  1.00  0.37           O  
HETATM  333  O   HOH T 332      23.342  71.414  17.663  1.00  0.37           O  
HETATM  334  O   HOH T 333      18.828  36.417   0.179  1.00  0.37           O  
HETATM  335  O   HOH T 334      54.431  60.522  14.512  1.00  0.37           O  
HETATM  336  O   HOH T 335      54.706  47.733 -12.985  1.00  0.37           O  
HETATM  337  O   HOH T 336      50.718  33.532  23.060  1.00  0.37           O  
HETATM  338  O   HOH T 337      53.770  60.407  -7.496  1.00  0.37           O  
HETATM  339  O   HOH T 338      55.227  69.108  16.965  1.00  0.37           O  
HETATM  340  O   HOH T 339      25.479  56.907  18.119  1.00  0.37           O  
HETATM  341  O   HOH T 340      47.957  47.840  13.141  1.00  0.37           O  
HETATM  342  O   HOH T 341      60.508  49.789  34.623  1.00  0.37           O  
HETATM  343  O   HOH T 342      30.977  85.967  32.178  1.00  0.37           O  
HETATM  344  O   HOH T 343      26.779  72.782  39.897  1.00  0.37           O  
HETATM  345  O   HOH T 344       8.510  50.717  13.921  1.00  0.37           O  
HETATM  346  O   HOH T 345      33.103  51.899  30.597  1.00  0.37           O  
HETATM  347  O   HOH T 346      21.155  37.483  -8.911  1.00  0.37           O  
HETATM  348  O   HOH T 347      51.896  55.173  13.918  1.00  0.37           O  
HETATM  349  O   HOH T 348      49.144  60.845  16.726  1.00  0.37           O  
HETATM  350  O   HOH T 349      54.418  38.840  34.096  1.00  0.37           O  
HETATM  351  O   HOH T 350      35.032  57.097  18.238  1.00  0.37           O  
HETATM  352  O   HOH T 351      17.735  65.618  29.128  1.00  0.37           O  
HETATM  353  O   HOH T 352      53.231  75.497  10.824  1.00  0.37           O  
HETATM  354  O   HOH T 353      34.716  24.340  17.160  1.00  0.37           O  
HETATM  355  O   HOH T 354      44.457  40.086  17.006  1.00  0.37           O  
HETATM  356  O   HOH T 355      25.658  66.522   6.648  1.00  0.37           O  
HETATM  357  O   HOH T 356      16.829  43.521  18.083  1.00  0.37           O  
HETATM  358  O   HOH T 357      48.454  70.202  20.898  1.00  0.37           O  
HETATM  359  O   HOH T 358      31.146  57.559  -2.516  1.00  0.38           O  
HETATM  360  O   HOH T 359      65.604  69.848   4.730  1.00  0.38           O  
HETATM  361  O   HOH T 360      76.004  54.559  24.976  1.00  0.38           O  
HETATM  362  O   HOH T 361      57.338  71.996   6.371  1.00  0.38           O  
HETATM  363  O   HOH T 362      22.350  77.745  23.420  1.00  0.38           O  
HETATM  364  O   HOH T 363      64.718  52.334  45.590  1.00  0.38           O  
HETATM  365  O   HOH T 364      32.496  33.442  30.090  1.00  0.38           O  
HETATM  366  O   HOH T 365      27.347  64.220   6.221  1.00  0.38           O  
HETATM  367  O   HOH T 366      60.822  28.467  18.546  1.00  0.38           O  
HETATM  368  O   HOH T 367      38.961  81.872  35.623  1.00  0.38           O  
HETATM  369  O   HOH T 368      26.794  75.293  38.762  1.00  0.38           O  
HETATM  370  O   HOH T 369      56.283  22.728   6.121  1.00  0.38           O  
HETATM  371  O   HOH T 370      42.566  56.367  25.012  1.00  0.38           O  
HETATM  372  O   HOH T 371      47.708  38.042  20.422  1.00  0.38           O  
HETATM  373  O   HOH T 372      53.782  77.998  12.068  1.00  0.38           O  
HETATM  374  O   HOH T 373      33.866  42.223 -16.802  1.00  0.38           O  
HETATM  375  O   HOH T 374      71.540  42.038   8.392  1.00  0.38           O  
HETATM  376  O   HOH T 375      37.397  37.164  21.321  1.00  0.38           O  
HETATM  377  O   HOH T 376      65.426  43.384  33.194  1.00  0.38           O  
HETATM  378  O   HOH T 377      32.310  51.887  -8.249  1.00  0.38           O  
HETATM  379  O   HOH T 378      34.136  58.025  29.505  1.00  0.38           O  
HETATM  380  O   HOH T 379      52.716  69.585   9.740  1.00  0.38           O  
HETATM  381  O   HOH T 380      59.687  34.661  -4.817  1.00  0.38           O  
HETATM  382  O   HOH T 381      37.931  43.422 -12.834  1.00  0.38           O  
HETATM  383  O   HOH T 382      21.800  34.191  -5.270  1.00  0.38           O  
HETATM  384  O   HOH T 383      59.288  77.915   7.361  1.00  0.38           O  
HETATM  385  O   HOH T 384      23.098  51.668  23.713  1.00  0.39           O  
HETATM  386  O   HOH T 385      30.883  78.786  42.807  1.00  0.39           O  
HETATM  387  O   HOH T 386      55.394  66.982  -4.862  1.00  0.39           O  
HETATM  388  O   HOH T 387      32.480  28.139  24.407  1.00  0.39           O  
HETATM  389  O   HOH T 388      33.291  58.292  32.175  1.00  0.39           O  
HETATM  390  O   HOH T 389      53.640  80.638  27.213  1.00  0.39           O  
HETATM  391  O   HOH T 390      19.337  50.260  21.091  1.00  0.39           O  
HETATM  392  O   HOH T 391      27.479  56.955   1.731  1.00  0.39           O  
HETATM  393  O   HOH T 392      46.313  29.364  -4.582  1.00  0.39           O  
HETATM  394  O   HOH T 393      17.328  42.591  23.487  1.00  0.39           O  
HETATM  395  O   HOH T 394      43.297  30.266 -12.357  1.00  0.39           O  
HETATM  396  O   HOH T 395      45.597  51.842 -13.027  1.00  0.39           O  
HETATM  397  O   HOH T 396      57.311  57.996  10.835  1.00  0.39           O  
HETATM  398  O   HOH T 397      45.976  51.000  40.202  1.00  0.39           O  
HETATM  399  O   HOH T 398      61.838  70.804  10.928  1.00  0.39           O  
HETATM  400  O   HOH T 399      53.979  72.958  11.891  1.00  0.39           O  
HETATM  401  O   HOH T 400      63.997  34.780  -3.713  1.00  0.39           O  
HETATM  402  O   HOH T 401      65.196  70.320  13.542  1.00  0.39           O  
HETATM  403  O   HOH T 402      70.552  72.681  17.670  1.00  0.39           O  
HETATM  404  O   HOH T 403      49.677  30.894  23.056  1.00  0.39           O  
HETATM  405  O   HOH T 404      47.792  46.705 -17.111  1.00  0.39           O  
HETATM  406  O   HOH T 405      48.263  83.390  24.538  1.00  0.39           O  
HETATM  407  O   HOH T 406      68.891  46.615  32.795  1.00  0.39           O  
HETATM  408  O   HOH T 407      56.636  32.012  14.545  1.00  0.39           O  
HETATM  409  O   HOH T 408      27.053  32.854   4.985  1.00  0.39           O  
HETATM  410  O   HOH T 409      27.780  39.358 -15.206  1.00  0.39           O  
HETATM  411  O   HOH T 410      55.982  55.820 -10.483  1.00  0.39           O  
HETATM  412  O   HOH T 411      51.729  60.007  17.016  1.00  0.39           O  
HETATM  413  O   HOH T 412      55.691  47.055  17.834  1.00  0.39           O  
HETATM  414  O   HOH T 413      44.987  64.580  41.931  1.00  0.39           O  
HETATM  415  O   HOH T 414      55.919  35.549 -10.627  1.00  0.39           O  
HETATM  416  O   HOH T 415      26.467  30.081  25.062  1.00  0.39           O  
HETATM  417  O   HOH T 416      44.770  31.826  13.978  1.00  0.39           O  
HETATM  418  O   HOH T 417      23.304  68.103   6.606  1.00  0.39           O  
HETATM  419  O   HOH T 418      40.638  61.370  41.966  1.00  0.39           O  
HETATM  420  O   HOH T 419      55.427  44.938 -10.852  1.00  0.39           O  
HETATM  421  O   HOH T 420      60.076  80.615   9.765  1.00  0.39           O  
HETATM  422  O   HOH T 421      14.831  42.782  22.180  1.00  0.39           O  
HETATM  423  O   HOH T 422      59.987  24.357  11.366  1.00  0.39           O  
HETATM  424  O   HOH T 423      33.989  44.394 -18.574  1.00  0.39           O  
HETATM  425  O   HOH T 424      47.663  82.557  10.403  1.00  0.39           O  
HETATM  426  O   HOH T 425      22.360  69.214   9.037  1.00  0.40           O  
HETATM  427  O   HOH T 426       8.371  54.122  10.828  1.00  0.40           O  
HETATM  428  O   HOH T 427      53.702  45.080 -13.123  1.00  0.40           O  
HETATM  429  O   HOH T 428      52.514  62.497  14.439  1.00  0.40           O  
HETATM  430  O   HOH T 429      64.044  50.762  47.758  1.00  0.40           O  
HETATM  431  O   HOH T 430      76.389  63.328  21.989  1.00  0.40           O  
HETATM  432  O   HOH T 431      22.327  76.884  15.461  1.00  0.40           O  
HETATM  433  O   HOH T 432      51.192  70.267  12.019  1.00  0.40           O  
HETATM  434  O   HOH T 433      20.906  52.304  22.137  1.00  0.40           O  
HETATM  435  O   HOH T 434      32.216  85.436  35.985  1.00  0.40           O  
HETATM  436  O   HOH T 435      51.217  46.285  15.010  1.00  0.40           O  
HETATM  437  O   HOH T 436      22.219  62.482  29.064  1.00  0.40           O  
HETATM  438  O   HOH T 437      48.503  51.529  11.561  1.00  0.40           O  
HETATM  439  O   HOH T 438      60.735  28.852   8.959  1.00  0.40           O  
HETATM  440  O   HOH T 439      33.811  87.666  36.173  1.00  0.40           O  
HETATM  441  O   HOH T 440      65.973  43.588  -9.959  1.00  0.40           O  
HETATM  442  O   HOH T 441      21.761  68.608  26.543  1.00  0.40           O  
HETATM  443  O   HOH T 442      20.817  50.062  23.517  1.00  0.40           O  
HETATM  444  O   HOH T 443      38.437  38.432 -13.868  1.00  0.40           O  
HETATM  445  O   HOH T 444      40.812  78.598  29.015  1.00  0.40           O  
HETATM  446  O   HOH T 445      33.004  56.243  12.527  1.00  0.40           O  
HETATM  447  O   HOH T 446      60.027  56.525  45.658  1.00  0.40           O  
HETATM  448  O   HOH T 447      41.375  69.151   1.006  1.00  0.40           O  
HETATM  449  O   HOH T 448      63.927  58.084  -6.074  1.00  0.40           O  
HETATM  450  O   HOH T 449      38.872  44.429  35.869  1.00  0.40           O  
HETATM  451  O   HOH T 450      13.793  45.327  14.950  1.00  0.40           O  
HETATM  452  O   HOH T 451      64.819  75.293  17.675  1.00  0.40           O  
HETATM  453  O   HOH T 452      43.610  40.566 -15.363  1.00  0.40           O  
HETATM  454  O   HOH T 453      65.401  59.539  10.660  1.00  0.40           O  
HETATM  455  O   HOH T 454      51.419  82.244  27.527  1.00  0.40           O  
HETATM  456  O   HOH T 455      31.511  31.659   4.813  1.00  0.40           O  
HETATM  457  O   HOH T 456      23.730  39.455  30.360  1.00  0.40           O  
HETATM  458  O   HOH T 457      46.569  36.564  14.894  1.00  0.40           O  
HETATM  459  O   HOH T 458      36.924  58.399  16.647  1.00  0.40           O  
HETATM  460  O   HOH T 459      26.749  60.996  17.699  1.00  0.40           O  
HETATM  461  O   HOH T 460      35.673  71.639  50.885  1.00  0.40           O  
HETATM  462  O   HOH T 461      49.273  85.373  29.428  1.00  0.40           O  
HETATM  463  O   HOH T 462      36.480  46.634 -15.853  1.00  0.40           O  
HETATM  464  O   HOH T 463      33.452  58.258  -3.835  1.00  0.40           O  
HETATM  465  O   HOH T 464      28.251  53.030  21.690  1.00  0.40           O  
HETATM  466  O   HOH T 465      62.294  17.608  11.666  1.00  0.40           O  
HETATM  467  O   HOH T 466      69.000  71.946   8.397  1.00  0.41           O  
HETATM  468  O   HOH T 467      20.814  46.778 -15.543  1.00  0.41           O  
HETATM  469  O   HOH T 468      12.875  37.388   6.166  1.00  0.41           O  
HETATM  470  O   HOH T 469      70.833  39.394   8.973  1.00  0.41           O  
HETATM  471  O   HOH T 470      74.296  55.905  35.432  1.00  0.41           O  
HETATM  472  O   HOH T 471      65.317  76.515  15.128  1.00  0.41           O  
HETATM  473  O   HOH T 472      16.898  59.117  16.206  1.00  0.41           O  
HETATM  474  O   HOH T 473      35.332  35.192 -15.774  1.00  0.41           O  
HETATM  475  O   HOH T 474      54.201  54.941  -8.545  1.00  0.41           O  
HETATM  476  O   HOH T 475      53.030  31.233  16.816  1.00  0.41           O  
HETATM  477  O   HOH T 476      18.637  62.941  14.629  1.00  0.41           O  
HETATM  478  O   HOH T 477      21.850  53.340  -4.385  1.00  0.41           O  
HETATM  479  O   HOH T 478      34.507  85.458  28.148  1.00  0.41           O  
HETATM  480  O   HOH T 479      45.578  38.216  18.676  1.00  0.41           O  
HETATM  481  O   HOH T 480      51.448  48.663  16.277  1.00  0.41           O  
HETATM  482  O   HOH T 481      33.365  84.734  17.619  1.00  0.41           O  
HETATM  483  O   HOH T 482      33.125  47.620   9.029  1.00  0.41           O  
HETATM  484  O   HOH T 483      35.472  57.100  36.619  1.00  0.41           O  
HETATM  485  O   HOH T 484      46.867  23.330   9.546  1.00  0.41           O  
HETATM  486  O   HOH T 485      24.544  31.516  13.650  1.00  0.41           O  
HETATM  487  O   HOH T 486      38.141  27.872  13.653  1.00  0.41           O  
HETATM  488  O   HOH T 487      44.227  52.467 -10.687  1.00  0.41           O  
HETATM  489  O   HOH T 488      21.858  66.681  17.043  1.00  0.41           O  
HETATM  490  O   HOH T 489      43.982  25.911  22.551  1.00  0.41           O  
HETATM  491  O   HOH T 490      44.413  77.067  43.185  1.00  0.41           O  
HETATM  492  O   HOH T 491      72.179  46.481  -6.084  1.00  0.41           O  
HETATM  493  O   HOH T 492      32.233  63.265   3.727  1.00  0.41           O  
HETATM  494  O   HOH T 493      19.237  49.527  25.733  1.00  0.41           O  
HETATM  495  O   HOH T 494      21.815  51.495  -6.600  1.00  0.41           O  
HETATM  496  O   HOH T 495      33.276  82.001   5.582  1.00  0.42           O  
HETATM  497  O   HOH T 496      37.047  53.772  12.316  1.00  0.42           O  
HETATM  498  O   HOH T 497      47.826  30.610  -6.746  1.00  0.42           O  
HETATM  499  O   HOH T 498      50.208  20.642  16.986  1.00  0.42           O  
HETATM  500  O   HOH T 499      48.580  86.696  31.725  1.00  0.42           O  
HETATM  501  O   HOH T 500      62.036  24.073  15.100  1.00  0.42           O  
HETATM  502  O   HOH T 501      47.828  55.103  11.587  1.00  0.42           O  
HETATM  503  O   HOH T 502      34.983  52.555  33.995  1.00  0.42           O  
HETATM  504  O   HOH T 503      55.140  81.177  30.568  1.00  0.42           O  
HETATM  505  O   HOH T 504      49.604  22.870  18.495  1.00  0.42           O  
HETATM  506  O   HOH T 505      31.251  59.707  33.380  1.00  0.42           O  
HETATM  507  O   HOH T 506      29.052  53.517  19.005  1.00  0.42           O  
HETATM  508  O   HOH T 507      53.152  58.315  13.605  1.00  0.42           O  
HETATM  509  O   HOH T 508      20.468  62.554  26.833  1.00  0.42           O  
HETATM  510  O   HOH T 509      47.288  89.186  35.181  1.00  0.42           O  
HETATM  511  O   HOH T 510      41.986  31.447  30.791  1.00  0.42           O  
HETATM  512  O   HOH T 511      39.202  52.510  20.418  1.00  0.42           O  
HETATM  513  O   HOH T 512      15.967  46.224   8.375  1.00  0.42           O  
HETATM  514  O   HOH T 513      39.541  32.753  30.443  1.00  0.42           O  
HETATM  515  O   HOH T 514      76.827  56.832  13.668  1.00  0.42           O  
HETATM  516  O   HOH T 515      44.006  57.872  41.391  1.00  0.42           O  
HETATM  517  O   HOH T 516      54.010  51.418  13.758  1.00  0.42           O  
HETATM  518  O   HOH T 517      34.656  29.648   2.997  1.00  0.42           O  
HETATM  519  O   HOH T 518      33.965  43.838  33.342  1.00  0.42           O  
HETATM  520  O   HOH T 519      68.184  40.031   8.934  1.00  0.42           O  
HETATM  521  O   HOH T 520      50.018  25.330  19.552  1.00  0.42           O  
HETATM  522  O   HOH T 521      43.131  78.864  27.594  1.00  0.42           O  
HETATM  523  O   HOH T 522      21.748  73.888  40.387  1.00  0.42           O  
HETATM  524  O   HOH T 523      20.815  59.339  12.401  1.00  0.42           O  
HETATM  525  O   HOH T 524      60.020  44.665  35.450  1.00  0.42           O  
HETATM  526  O   HOH T 525      65.874  60.541  39.800  1.00  0.42           O  
HETATM  527  O   HOH T 526      67.496  71.177   6.240  1.00  0.42           O  
HETATM  528  O   HOH T 527      59.941  21.816   5.205  1.00  0.42           O  
HETATM  529  O   HOH T 528      59.378  53.963   5.714  1.00  0.42           O  
HETATM  530  O   HOH T 529      32.761  37.673 -13.884  1.00  0.42           O  
HETATM  531  O   HOH T 530      36.749  71.039  26.673  1.00  0.42           O  
HETATM  532  O   HOH T 531      55.547  74.793  -2.609  1.00  0.43           O  
HETATM  533  O   HOH T 532      27.529  53.509  29.131  1.00  0.43           O  
HETATM  534  O   HOH T 533      36.305  28.791 -10.141  1.00  0.43           O  
HETATM  535  O   HOH T 534      19.852  37.463  -6.487  1.00  0.43           O  
HETATM  536  O   HOH T 535      51.501  16.674   7.458  1.00  0.43           O  
HETATM  537  O   HOH T 536      62.340  80.052  32.558  1.00  0.43           O  
HETATM  538  O   HOH T 537      53.180  20.337   4.324  1.00  0.43           O  
HETATM  539  O   HOH T 538      69.657  48.239  30.838  1.00  0.43           O  
HETATM  540  O   HOH T 539      41.677  44.596  35.791  1.00  0.43           O  
HETATM  541  O   HOH T 540      24.986  77.127  16.126  1.00  0.43           O  
HETATM  542  O   HOH T 541      74.600  50.347  18.397  1.00  0.43           O  
HETATM  543  O   HOH T 542      39.574  65.447  -7.237  1.00  0.43           O  
HETATM  544  O   HOH T 543      54.615  34.843 -12.942  1.00  0.43           O  
HETATM  545  O   HOH T 544      33.757  26.736  -4.561  1.00  0.43           O  
HETATM  546  O   HOH T 545      16.106  51.074   3.782  1.00  0.43           O  
HETATM  547  O   HOH T 546      36.315  57.866  39.140  1.00  0.43           O  
HETATM  548  O   HOH T 547      22.515  36.497  -6.707  1.00  0.43           O  
HETATM  549  O   HOH T 548      49.553  58.168  16.902  1.00  0.43           O  
HETATM  550  O   HOH T 549      42.795  81.719  26.957  1.00  0.43           O  
HETATM  551  O   HOH T 550      52.064  17.600   9.935  1.00  0.43           O  
HETATM  552  O   HOH T 551      63.806  74.067  15.291  1.00  0.43           O  
HETATM  553  O   HOH T 552      50.123  82.236  18.514  1.00  0.43           O  
HETATM  554  O   HOH T 553      72.283  68.707  10.948  1.00  0.43           O  
HETATM  555  O   HOH T 554      30.964  73.496  48.684  1.00  0.43           O  
HETATM  556  O   HOH T 555      37.813  42.733 -18.704  1.00  0.43           O  
HETATM  557  O   HOH T 556      56.543  52.186  49.418  1.00  0.43           O  
HETATM  558  O   HOH T 557      43.394  28.052  20.918  1.00  0.43           O  
HETATM  559  O   HOH T 558      64.118  35.590  33.134  1.00  0.43           O  
HETATM  560  O   HOH T 559      71.825  60.864  14.589  1.00  0.43           O  
HETATM  561  O   HOH T 560      23.319  67.381  14.736  1.00  0.43           O  
HETATM  562  O   HOH T 561      33.603  58.875   0.473  1.00  0.43           O  
HETATM  563  O   HOH T 562      32.699  86.874  26.557  1.00  0.43           O  
HETATM  564  O   HOH T 563      64.853  60.729  42.307  1.00  0.43           O  
HETATM  565  O   HOH T 564      55.102  70.562  10.805  1.00  0.44           O  
HETATM  566  O   HOH T 565      51.163  21.702   5.820  1.00  0.44           O  
HETATM  567  O   HOH T 566      66.831  45.353   9.172  1.00  0.44           O  
HETATM  568  O   HOH T 567      61.098  60.143  43.815  1.00  0.44           O  
HETATM  569  O   HOH T 568      39.032  66.033  42.585  1.00  0.44           O  
HETATM  570  O   HOH T 569      29.909  80.115  39.506  1.00  0.44           O  
HETATM  571  O   HOH T 570      37.424  28.399  21.909  1.00  0.44           O  
HETATM  572  O   HOH T 571      67.854  42.823   8.168  1.00  0.44           O  
HETATM  573  O   HOH T 572      31.049  44.634 -11.681  1.00  0.44           O  
HETATM  574  O   HOH T 573      54.478  71.304   8.263  1.00  0.44           O  
HETATM  575  O   HOH T 574      50.497  24.706  24.577  1.00  0.44           O  
HETATM  576  O   HOH T 575      35.669  26.418  13.539  1.00  0.44           O  
HETATM  577  O   HOH T 576      28.224  59.077  16.265  1.00  0.44           O  
HETATM  578  O   HOH T 577      22.966  73.694  30.839  1.00  0.44           O  
HETATM  579  O   HOH T 578      23.864  27.091  -3.996  1.00  0.44           O  
HETATM  580  O   HOH T 579      26.829  54.565  17.686  1.00  0.44           O  
HETATM  581  O   HOH T 580      39.168  41.087 -13.595  1.00  0.44           O  
HETATM  582  O   HOH T 581      38.723  78.644   2.127  1.00  0.44           O  
HETATM  583  O   HOH T 582      59.082  54.396  -6.710  1.00  0.44           O  
HETATM  584  O   HOH T 583      44.041  74.549  11.226  1.00  0.44           O  
HETATM  585  O   HOH T 584      67.258  70.877  40.521  1.00  0.44           O  
HETATM  586  O   HOH T 585      31.630  83.405  13.580  1.00  0.44           O  
HETATM  587  O   HOH T 586      56.131  46.133  39.169  1.00  0.44           O  
HETATM  588  O   HOH T 587      52.130  25.054   1.627  1.00  0.44           O  
HETATM  589  O   HOH T 588      21.801  73.028  15.976  1.00  0.44           O  
HETATM  590  O   HOH T 589      39.229  66.163  24.511  1.00  0.44           O  
HETATM  591  O   HOH T 590      55.593  43.015 -12.897  1.00  0.44           O  
HETATM  592  O   HOH T 591      36.264  55.004  33.143  1.00  0.44           O  
HETATM  593  O   HOH T 592      15.094  52.367  10.447  1.00  0.44           O  
HETATM  594  O   HOH T 593      75.075  66.894  19.639  1.00  0.44           O  
HETATM  595  O   HOH T 594      44.634  33.994  30.198  1.00  0.44           O  
HETATM  596  O   HOH T 595      40.363  76.722   3.315  1.00  0.44           O  
HETATM  597  O   HOH T 596      43.016  76.470   2.627  1.00  0.44           O  
HETATM  598  O   HOH T 597      29.073  82.913  18.145  1.00  0.44           O  
HETATM  599  O   HOH T 598      71.914  49.924  18.367  1.00  0.44           O  
HETATM  600  O   HOH T 599      54.565  29.435  13.060  1.00  0.44           O  
HETATM  601  O   HOH T 600      49.303  25.338  22.105  1.00  0.44           O  
HETATM  602  O   HOH T 601      45.258  85.968  36.251  1.00  0.44           O  
HETATM  603  O   HOH T 602      47.527  57.486  10.503  1.00  0.44           O  
HETATM  604  O   HOH T 603      39.475  35.417  31.261  1.00  0.44           O  
HETATM  605  O   HOH T 604      38.202  75.352  25.262  1.00  0.44           O  
HETATM  606  O   HOH T 605      18.000  38.963  -0.554  1.00  0.44           O  
HETATM  607  O   HOH T 606      63.701  56.583  40.760  1.00  0.45           O  
HETATM  608  O   HOH T 607      31.807  54.314  22.914  1.00  0.45           O  
HETATM  609  O   HOH T 608      53.288  79.925  10.231  1.00  0.45           O  
HETATM  610  O   HOH T 609      71.905  56.834  17.429  1.00  0.45           O  
HETATM  611  O   HOH T 610      50.015  53.615  12.580  1.00  0.45           O  
HETATM  612  O   HOH T 611      59.988  46.672  43.849  1.00  0.45           O  
HETATM  613  O   HOH T 612      23.050  76.438  18.063  1.00  0.45           O  
HETATM  614  O   HOH T 613      32.516  28.144  -9.326  1.00  0.45           O  
HETATM  615  O   HOH T 614      27.660  48.747 -14.605  1.00  0.45           O  
HETATM  616  O   HOH T 615      32.233  49.425  31.735  1.00  0.45           O  
HETATM  617  O   HOH T 616      66.400  64.363   4.328  1.00  0.45           O  
HETATM  618  O   HOH T 617      53.756  47.236  15.775  1.00  0.45           O  
HETATM  619  O   HOH T 618      33.928  58.945  38.089  1.00  0.45           O  
HETATM  620  O   HOH T 619      62.263  48.032  44.744  1.00  0.45           O  
HETATM  621  O   HOH T 620      18.138  55.275  13.959  1.00  0.45           O  
HETATM  622  O   HOH T 621      62.414  37.433  17.565  1.00  0.45           O  
HETATM  623  O   HOH T 622      67.995  68.643   5.483  1.00  0.45           O  
HETATM  624  O   HOH T 623      69.631  68.448  10.238  1.00  0.45           O  
HETATM  625  O   HOH T 624      21.457  41.071  30.116  1.00  0.45           O  
HETATM  626  O   HOH T 625      40.000  80.225   6.495  1.00  0.45           O  
HETATM  627  O   HOH T 626      35.750  60.589  39.475  1.00  0.45           O  
HETATM  628  O   HOH T 627      51.362  31.705  20.915  1.00  0.45           O  
HETATM  629  O   HOH T 628      54.261  80.335  38.264  1.00  0.45           O  
HETATM  630  O   HOH T 629      40.421  52.433  -7.233  1.00  0.45           O  
HETATM  631  O   HOH T 630      30.966  50.702  -2.279  1.00  0.45           O  
HETATM  632  O   HOH T 631      32.298  80.997   7.919  1.00  0.45           O  
HETATM  633  O   HOH T 632      65.928  67.049   4.720  1.00  0.45           O  
HETATM  634  O   HOH T 633      51.887  73.769  -3.092  1.00  0.45           O  
HETATM  635  O   HOH T 634      30.565  62.720  15.602  1.00  0.45           O  
HETATM  636  O   HOH T 635      10.540  37.116  11.543  1.00  0.45           O  
HETATM  637  O   HOH T 636      42.679  80.119  30.560  1.00  0.45           O  
HETATM  638  O   HOH T 637      43.417  34.029  14.913  1.00  0.45           O  
HETATM  639  O   HOH T 638      52.002  52.181  15.506  1.00  0.45           O  
HETATM  640  O   HOH T 639      69.587  49.775   6.604  1.00  0.45           O  
HETATM  641  O   HOH T 640      19.880  63.957  29.142  1.00  0.45           O  
HETATM  642  O   HOH T 641      37.299  39.956  31.836  1.00  0.45           O  
HETATM  643  O   HOH T 642      24.026  30.226  23.778  1.00  0.45           O  
HETATM  644  O   HOH T 643      26.782  30.271  12.757  1.00  0.45           O  
HETATM  645  O   HOH T 644      20.101  73.753  22.780  1.00  0.45           O  
HETATM  646  O   HOH T 645      65.996  72.522  35.496  1.00  0.45           O  
HETATM  647  O   HOH T 646      41.875  34.230  30.556  1.00  0.45           O  
HETATM  648  O   HOH T 647      55.923  58.556  13.247  1.00  0.45           O  
HETATM  649  O   HOH T 648      33.953  38.407  29.557  1.00  0.45           O  
HETATM  650  O   HOH T 649      16.706  50.610  25.307  1.00  0.45           O  
HETATM  651  O   HOH T 650      28.235  63.702  34.799  1.00  0.45           O  
HETATM  652  O   HOH T 651      27.934  78.992  38.063  1.00  0.45           O  
HETATM  653  O   HOH T 652      62.595  33.769  -1.510  1.00  0.45           O  
HETATM  654  O   HOH T 653      54.924  24.645   1.411  1.00  0.45           O  
HETATM  655  O   HOH T 654      30.546  55.813  19.652  1.00  0.45           O  
HETATM  656  O   HOH T 655      67.531  47.813  -6.312  1.00  0.45           O  
HETATM  657  O   HOH T 656      59.721  25.159  14.087  1.00  0.45           O  
HETATM  658  O   HOH T 657      64.630  68.755  -2.195  1.00  0.46           O  
HETATM  659  O   HOH T 658      45.089  32.013  19.386  1.00  0.46           O  
HETATM  660  O   HOH T 659      63.479  29.085  17.859  1.00  0.46           O  
HETATM  661  O   HOH T 660      67.175  76.276  11.121  1.00  0.46           O  
HETATM  662  O   HOH T 661      35.832  26.433  20.794  1.00  0.46           O  
HETATM  663  O   HOH T 662      22.202  69.048  18.472  1.00  0.46           O  
HETATM  664  O   HOH T 663      20.997  70.468  16.467  1.00  0.46           O  
HETATM  665  O   HOH T 664      27.541  61.009  28.835  1.00  0.46           O  
HETATM  666  O   HOH T 665      28.759  24.644  14.170  1.00  0.46           O  
HETATM  667  O   HOH T 666      30.487  78.902  37.029  1.00  0.46           O  
HETATM  668  O   HOH T 667      62.673  40.052  16.564  1.00  0.46           O  
HETATM  669  O   HOH T 668      56.399  82.195  23.242  1.00  0.46           O  
HETATM  670  O   HOH T 669      32.113  31.734  18.888  1.00  0.46           O  
HETATM  671  O   HOH T 670      32.330  61.523  13.866  1.00  0.46           O  
HETATM  672  O   HOH T 671      14.552  44.540  -9.291  1.00  0.46           O  
HETATM  673  O   HOH T 672      38.029  56.638  22.302  1.00  0.46           O  
HETATM  674  O   HOH T 673      32.886  32.217  32.512  1.00  0.46           O  
HETATM  675  O   HOH T 674      32.484  79.697  38.843  1.00  0.46           O  
HETATM  676  O   HOH T 675      32.353  25.458  -8.717  1.00  0.46           O  
HETATM  677  O   HOH T 676      66.241  73.614   6.150  1.00  0.46           O  
HETATM  678  O   HOH T 677      42.008  24.180   8.823  1.00  0.46           O  
HETATM  679  O   HOH T 678      44.720  54.273  -8.792  1.00  0.46           O  
HETATM  680  O   HOH T 679      22.552  73.809  21.520  1.00  0.46           O  
HETATM  681  O   HOH T 680      44.609  84.299  30.104  1.00  0.46           O  
HETATM  682  O   HOH T 681      60.860  26.130  16.687  1.00  0.46           O  
HETATM  683  O   HOH T 682      24.632  78.267  19.517  1.00  0.46           O  
HETATM  684  O   HOH T 683      17.060  53.495  -2.568  1.00  0.46           O  
HETATM  685  O   HOH T 684      58.439  55.217  -9.370  1.00  0.46           O  
HETATM  686  O   HOH T 685      52.209  80.315  15.156  1.00  0.46           O  
HETATM  687  O   HOH T 686      24.724  58.452  25.431  1.00  0.46           O  
HETATM  688  O   HOH T 687      73.933  64.551  12.649  1.00  0.46           O  
HETATM  689  O   HOH T 688      39.403  38.229  31.404  1.00  0.46           O  
HETATM  690  O   HOH T 689      37.298  52.929  40.843  1.00  0.46           O  
HETATM  691  O   HOH T 690      38.803  66.610  -4.917  1.00  0.46           O  
HETATM  692  O   HOH T 691      21.883  32.294  17.853  1.00  0.46           O  
HETATM  693  O   HOH T 692      38.308  75.996   1.599  1.00  0.46           O  
HETATM  694  O   HOH T 693      31.258  34.166   5.944  1.00  0.46           O  
HETATM  695  O   HOH T 694      46.399  85.845  18.054  1.00  0.46           O  
HETATM  696  O   HOH T 695      60.908  40.527  35.062  1.00  0.46           O  
HETATM  697  O   HOH T 696      30.683  59.966  15.314  1.00  0.46           O  
HETATM  698  O   HOH T 697      60.752  82.491  21.855  1.00  0.47           O  
HETATM  699  O   HOH T 698      25.256  81.826  29.345  1.00  0.47           O  
HETATM  700  O   HOH T 699      65.634  37.974  -7.356  1.00  0.47           O  
HETATM  701  O   HOH T 700      32.010  47.320  -9.039  1.00  0.47           O  
HETATM  702  O   HOH T 701      39.645  71.310   1.301  1.00  0.47           O  
HETATM  703  O   HOH T 702      43.831  44.668  40.421  1.00  0.47           O  
HETATM  704  O   HOH T 703      54.845  23.970   4.172  1.00  0.47           O  
HETATM  705  O   HOH T 704      23.438  56.157   9.858  1.00  0.47           O  
HETATM  706  O   HOH T 705      57.391  30.487   6.963  1.00  0.47           O  
HETATM  707  O   HOH T 706      27.755  27.747  12.219  1.00  0.47           O  
HETATM  708  O   HOH T 707      45.256  78.723  41.016  1.00  0.47           O  
HETATM  709  O   HOH T 708      71.548  65.595  25.325  1.00  0.47           O  
HETATM  710  O   HOH T 709      64.203  74.097  34.147  1.00  0.47           O  
HETATM  711  O   HOH T 710      23.576  31.680   1.194  1.00  0.47           O  
HETATM  712  O   HOH T 711      41.776  36.988  31.007  1.00  0.47           O  
HETATM  713  O   HOH T 712      30.170  81.342  12.459  1.00  0.47           O  
HETATM  714  O   HOH T 713      50.493  51.762 -17.673  1.00  0.47           O  
HETATM  715  O   HOH T 714      23.509  61.707   9.358  1.00  0.47           O  
HETATM  716  O   HOH T 715      29.089  35.613   4.679  1.00  0.47           O  
HETATM  717  O   HOH T 716      66.085  63.094   6.639  1.00  0.47           O  
HETATM  718  O   HOH T 717      41.919  59.465  -8.530  1.00  0.47           O  
HETATM  719  O   HOH T 718      54.838  33.329  -9.155  1.00  0.47           O  
HETATM  720  O   HOH T 719      47.491  61.508  14.597  1.00  0.47           O  
HETATM  721  O   HOH T 720      42.007  71.342   2.538  1.00  0.47           O  
HETATM  722  O   HOH T 721      36.481  36.855  13.062  1.00  0.47           O  
HETATM  723  O   HOH T 722      29.897  57.026  17.258  1.00  0.47           O  
HETATM  724  O   HOH T 723      46.529  24.910  21.813  1.00  0.47           O  
HETATM  725  O   HOH T 724      30.668  85.079  17.791  1.00  0.47           O  
HETATM  726  O   HOH T 725      56.967  25.412   3.245  1.00  0.47           O  
HETATM  727  O   HOH T 726      63.366  79.393  10.158  1.00  0.47           O  
HETATM  728  O   HOH T 727      52.070  53.444 -10.966  1.00  0.47           O  
HETATM  729  O   HOH T 728      27.100  63.676  37.336  1.00  0.47           O  
HETATM  730  O   HOH T 729      44.640  70.471   2.251  1.00  0.47           O  
HETATM  731  O   HOH T 730      27.181  42.198 -12.836  1.00  0.47           O  
HETATM  732  O   HOH T 731      68.519  34.749   5.585  1.00  0.47           O  
HETATM  733  O   HOH T 732      46.201  33.796  15.352  1.00  0.47           O  
HETATM  734  O   HOH T 733      28.941  43.610   7.804  1.00  0.47           O  
HETATM  735  O   HOH T 734      60.583  62.833  44.319  1.00  0.47           O  
HETATM  736  O   HOH T 735      64.936  72.302  39.939  1.00  0.47           O  
HETATM  737  O   HOH T 736      56.615  56.591   8.528  1.00  0.47           O  
HETATM  738  O   HOH T 737      67.902  74.414   8.141  1.00  0.47           O  
HETATM  739  O   HOH T 738      52.635  82.583  13.678  1.00  0.47           O  
HETATM  740  O   HOH T 739      63.935  72.703  17.689  1.00  0.47           O  
HETATM  741  O   HOH T 740      34.247  64.002  -1.053  1.00  0.47           O  
HETATM  742  O   HOH T 741      19.376  40.169  -7.149  1.00  0.47           O  
HETATM  743  O   HOH T 742      13.699  41.939  -9.778  1.00  0.47           O  
HETATM  744  O   HOH T 743      40.482  28.996  14.589  1.00  0.47           O  
HETATM  745  O   HOH T 744      62.827  59.005  41.873  1.00  0.47           O  
HETATM  746  O   HOH T 745      27.557  61.069  31.555  1.00  0.48           O  
HETATM  747  O   HOH T 746      37.480  44.438  27.259  1.00  0.48           O  
HETATM  748  O   HOH T 747      31.716  60.917  11.381  1.00  0.48           O  
HETATM  749  O   HOH T 748      45.275  28.475 -12.632  1.00  0.48           O  
HETATM  750  O   HOH T 749      53.506  32.528  19.137  1.00  0.48           O  
HETATM  751  O   HOH T 750      60.126  61.020  46.347  1.00  0.48           O  
HETATM  752  O   HOH T 751      27.391  55.953  30.462  1.00  0.48           O  
HETATM  753  O   HOH T 752      44.604  88.237  34.875  1.00  0.48           O  
HETATM  754  O   HOH T 753      67.885  72.088  20.343  1.00  0.48           O  
HETATM  755  O   HOH T 754      41.868  48.603 -12.102  1.00  0.48           O  
HETATM  756  O   HOH T 755      50.985  82.664  15.917  1.00  0.48           O  
HETATM  757  O   HOH T 756      36.472  43.837  34.624  1.00  0.48           O  
HETATM  758  O   HOH T 757      47.564  51.770  20.334  1.00  0.48           O  
HETATM  759  O   HOH T 758      55.813  50.888  39.674  1.00  0.48           O  
HETATM  760  O   HOH T 759      24.910  59.410  19.093  1.00  0.48           O  
HETATM  761  O   HOH T 760      64.768  36.351  23.238  1.00  0.48           O  
HETATM  762  O   HOH T 761      67.244  50.948  42.160  1.00  0.48           O  
HETATM  763  O   HOH T 762      47.176  44.653 -15.371  1.00  0.48           O  
HETATM  764  O   HOH T 763      24.437  54.823   0.003  1.00  0.48           O  
HETATM  765  O   HOH T 764      12.828  37.841   3.443  1.00  0.48           O  
HETATM  766  O   HOH T 765      33.089  61.613  -0.171  1.00  0.48           O  
HETATM  767  O   HOH T 766      53.465  85.225  21.876  1.00  0.48           O  
HETATM  768  O   HOH T 767      33.323  72.879  50.025  1.00  0.48           O  
HETATM  769  O   HOH T 768      42.673  73.902   1.658  1.00  0.48           O  
HETATM  770  O   HOH T 769      39.514  24.038   9.643  1.00  0.48           O  
HETATM  771  O   HOH T 770      64.941  37.682  20.794  1.00  0.48           O  
HETATM  772  O   HOH T 771      41.430  66.544  43.872  1.00  0.48           O  
HETATM  773  O   HOH T 772      20.337  35.807  22.696  1.00  0.48           O  
HETATM  774  O   HOH T 773      22.349  73.797  18.662  1.00  0.48           O  
HETATM  775  O   HOH T 774      66.620  38.222  27.443  1.00  0.48           O  
HETATM  776  O   HOH T 775      39.802  63.818  41.032  1.00  0.48           O  
HETATM  777  O   HOH T 776      17.994  55.960   3.038  1.00  0.48           O  
HETATM  778  O   HOH T 777      34.016  24.829  22.052  1.00  0.48           O  
HETATM  779  O   HOH T 778      32.813  74.697  29.320  1.00  0.48           O  
HETATM  780  O   HOH T 779      59.219  47.078  41.244  1.00  0.48           O  
HETATM  781  O   HOH T 780      44.562  32.318  16.767  1.00  0.48           O  
HETATM  782  O   HOH T 781      41.755  44.865  38.606  1.00  0.48           O  
HETATM  783  O   HOH T 782      55.138  27.299   2.311  1.00  0.48           O  
HETATM  784  O   HOH T 783      62.416  82.011  10.549  1.00  0.49           O  
HETATM  785  O   HOH T 784      42.378  42.208 -17.156  1.00  0.49           O  
HETATM  786  O   HOH T 785      56.303  53.370  -9.178  1.00  0.49           O  
HETATM  787  O   HOH T 786      27.578  73.607  43.794  1.00  0.49           O  
HETATM  788  O   HOH T 787      18.450  38.200  -8.810  1.00  0.49           O  
HETATM  789  O   HOH T 788      41.015  83.710  26.107  1.00  0.49           O  
HETATM  790  O   HOH T 789      46.496  66.449  43.277  1.00  0.49           O  
HETATM  791  O   HOH T 790      23.703  82.312  24.926  1.00  0.49           O  
HETATM  792  O   HOH T 791      36.918  71.343   0.856  1.00  0.49           O  
HETATM  793  O   HOH T 792      41.916  44.369 -15.426  1.00  0.49           O  
HETATM  794  O   HOH T 793      66.470  44.796  -5.795  1.00  0.49           O  
HETATM  795  O   HOH T 794      30.019  80.908  44.508  1.00  0.49           O  
HETATM  796  O   HOH T 795      52.824  77.720  14.772  1.00  0.49           O  
HETATM  797  O   HOH T 796      34.895  26.770  -8.880  1.00  0.49           O  
HETATM  798  O   HOH T 797      34.971  45.350 -11.468  1.00  0.49           O  
HETATM  799  O   HOH T 798      51.319  18.909   5.786  1.00  0.49           O  
HETATM  800  O   HOH T 799      38.331  61.290  38.702  1.00  0.49           O  
HETATM  801  O   HOH T 800      19.187  41.933  21.755  1.00  0.49           O  
HETATM  802  O   HOH T 801      23.694  56.101  26.693  1.00  0.49           O  
HETATM  803  O   HOH T 802      66.737  26.563  14.469  1.00  0.49           O  
HETATM  804  O   HOH T 803      34.561  49.746  33.299  1.00  0.49           O  
HETATM  805  O   HOH T 804      20.260  76.055  24.310  1.00  0.49           O  
HETATM  806  O   HOH T 805      25.349  49.873 -13.472  1.00  0.49           O  
HETATM  807  O   HOH T 806      25.430  59.071  16.394  1.00  0.49           O  
HETATM  808  O   HOH T 807      50.698  83.069  30.023  1.00  0.49           O  
HETATM  809  O   HOH T 808      51.672  43.619  15.013  1.00  0.49           O  
HETATM  810  O   HOH T 809      21.519  70.394  24.306  1.00  0.49           O  
HETATM  811  O   HOH T 810      58.338  45.875  37.448  1.00  0.49           O  
HETATM  812  O   HOH T 811      42.082  59.903  18.762  1.00  0.49           O  
HETATM  813  O   HOH T 812      45.213  74.594  19.544  1.00  0.49           O  
HETATM  814  O   HOH T 813      24.172  52.595  -5.614  1.00  0.49           O  
HETATM  815  O   HOH T 814      48.308  34.272  19.441  1.00  0.49           O  
HETATM  816  O   HOH T 815      65.949  62.965  41.275  1.00  0.50           O  
HETATM  817  O   HOH T 816      36.363  53.588  38.312  1.00  0.50           O  
HETATM  818  O   HOH T 817      30.481  33.508  32.005  1.00  0.50           O  
HETATM  819  O   HOH T 818      27.479  56.737  -1.005  1.00  0.50           O  
HETATM  820  O   HOH T 819      42.009  81.454  14.625  1.00  0.50           O  
HETATM  821  O   HOH T 820      25.165  38.143  32.393  1.00  0.50           O  
HETATM  822  O   HOH T 821      38.883  68.352  -2.823  1.00  0.50           O  
HETATM  823  O   HOH T 822      65.514  65.644  41.334  1.00  0.50           O  
HETATM  824  O   HOH T 823      45.063  46.939  39.206  1.00  0.50           O  
HETATM  825  O   HOH T 824      41.099  63.208  -7.849  1.00  0.50           O  
HETATM  826  O   HOH T 825      70.175  48.369  -5.932  1.00  0.50           O  
HETATM  827  O   HOH T 826      44.665  75.504   0.618  1.00  0.50           O  
HETATM  828  O   HOH T 827      36.871  57.612  10.834  1.00  0.50           O  
HETATM  829  O   HOH T 828      47.914  77.712  40.738  1.00  0.50           O  
HETATM  830  O   HOH T 829      72.938  53.601   2.690  1.00  0.50           O  
HETATM  831  O   HOH T 830      34.386  88.422  33.543  1.00  0.50           O  
HETATM  832  O   HOH T 831      21.186  65.694  19.504  1.00  0.50           O  
HETATM  833  O   HOH T 832      71.657  66.843  29.276  1.00  0.50           O  
HETATM  834  O   HOH T 833      62.284  33.614  34.007  1.00  0.50           O  
HETATM  835  O   HOH T 834      21.715  69.504  13.956  1.00  0.50           O  
HETATM  836  O   HOH T 835      72.787  71.254  18.633  1.00  0.50           O  
HETATM  837  O   HOH T 836      54.244  68.816  14.360  1.00  0.50           O  
HETATM  838  O   HOH T 837      56.930  69.545  14.177  1.00  0.50           O  
HETATM  839  O   HOH T 838      45.562  25.690  -1.560  1.00  0.50           O  
HETATM  840  O   HOH T 839      35.576  51.711  36.618  1.00  0.50           O  
HETATM  841  O   HOH T 840      68.834  39.904  -8.280  1.00  0.50           O  
HETATM  842  O   HOH T 841      68.076  32.421  10.538  1.00  0.50           O  
HETATM  843  O   HOH T 842      17.735  55.338   5.714  1.00  0.50           O  
HETATM  844  O   HOH T 843      16.138  54.208  12.268  1.00  0.50           O  
HETATM  845  O   HOH T 844      25.597  53.219  -3.127  1.00  0.50           O  
HETATM  846  O   HOH T 845      54.423  82.224   7.324  1.00  0.50           O  
HETATM  847  O   HOH T 846      43.714  38.911 -13.255  1.00  0.50           O  
HETATM  848  O   HOH T 847      42.861  29.955  13.907  1.00  0.50           O  
HETATM  849  O   HOH T 848      25.911  76.465   9.871  1.00  0.50           O  
HETATM  850  O   HOH T 849      50.452  38.185 -12.614  1.00  0.50           O  
HETATM  851  O   HOH T 850      37.705  55.826  37.767  1.00  0.50           O  
HETATM  852  O   HOH T 851      66.657  71.423  37.873  1.00  0.50           O  
HETATM  853  O   HOH T 852      35.603  25.759  -6.438  1.00  0.50           O  
HETATM  854  O   HOH T 853      64.148  41.125  10.995  1.00  0.50           O  
HETATM  855  O   HOH T 854      29.981  57.679   2.447  1.00  0.50           O  
HETATM  856  O   HOH T 855      68.572  63.941  12.671  1.00  0.50           O  
HETATM  857  O   HOH T 856      56.877  48.436  40.616  1.00  0.51           O  
HETATM  858  O   HOH T 857      69.753  68.116   7.516  1.00  0.51           O  
HETATM  859  O   HOH T 858      45.187  22.756  20.557  1.00  0.51           O  
HETATM  860  O   HOH T 859      40.280  80.380  37.576  1.00  0.51           O  
HETATM  861  O   HOH T 860      30.357  62.236  33.676  1.00  0.51           O  
HETATM  862  O   HOH T 861      57.363  47.527  43.190  1.00  0.51           O  
HETATM  863  O   HOH T 862      51.852  73.770  13.651  1.00  0.51           O  
HETATM  864  O   HOH T 863      60.790  39.740 -11.290  1.00  0.51           O  
HETATM  865  O   HOH T 864      45.454  59.815  14.381  1.00  0.51           O  
HETATM  866  O   HOH T 865      22.711  56.009   1.725  1.00  0.51           O  
HETATM  867  O   HOH T 866      33.290  55.846  30.855  1.00  0.51           O  
HETATM  868  O   HOH T 867      54.375  32.351 -11.495  1.00  0.51           O  
HETATM  869  O   HOH T 868      52.389  32.050  -9.453  1.00  0.51           O  
HETATM  870  O   HOH T 869      56.443  45.653 -13.395  1.00  0.51           O  
HETATM  871  O   HOH T 870      18.496  44.965 -12.481  1.00  0.51           O  
HETATM  872  O   HOH T 871      20.094  54.747  -1.069  1.00  0.51           O  
HETATM  873  O   HOH T 872      46.161  26.717  -4.078  1.00  0.51           O  
HETATM  874  O   HOH T 873      44.427  34.540  18.514  1.00  0.51           O  
HETATM  875  O   HOH T 874      34.963  27.220  23.371  1.00  0.51           O  
HETATM  876  O   HOH T 875      14.445  58.426  15.371  1.00  0.51           O  
HETATM  877  O   HOH T 876      59.399  49.364  39.717  1.00  0.51           O  
HETATM  878  O   HOH T 877      45.246  47.587 -17.594  1.00  0.51           O  
HETATM  879  O   HOH T 878      72.902  51.927  16.611  1.00  0.51           O  
HETATM  880  O   HOH T 879      36.536  85.304  39.678  1.00  0.51           O  
HETATM  881  O   HOH T 880      38.940  58.738  14.776  1.00  0.51           O  
HETATM  882  O   HOH T 881      43.740  75.330  45.360  1.00  0.51           O  
HETATM  883  O   HOH T 882      47.762  19.504  12.030  1.00  0.51           O  
HETATM  884  O   HOH T 883      23.096  53.171  -1.807  1.00  0.51           O  
HETATM  885  O   HOH T 884      47.112  87.427  15.950  1.00  0.52           O  
HETATM  886  O   HOH T 885      48.021  35.111  16.802  1.00  0.52           O  
HETATM  887  O   HOH T 886      42.842  25.901  -1.676  1.00  0.52           O  
HETATM  888  O   HOH T 887      49.188  18.025  16.979  1.00  0.52           O  
HETATM  889  O   HOH T 888      33.202  83.501   8.870  1.00  0.52           O  
HETATM  890  O   HOH T 889      26.781  77.107  13.966  1.00  0.52           O  
HETATM  891  O   HOH T 890      17.185  43.735  20.876  1.00  0.52           O  
HETATM  892  O   HOH T 891      42.997  37.746  -1.417  1.00  0.52           O  
HETATM  893  O   HOH T 892      71.398  55.855   3.122  1.00  0.52           O  
HETATM  894  O   HOH T 893      49.252  55.957  13.780  1.00  0.52           O  
HETATM  895  O   HOH T 894      36.916  72.983  24.640  1.00  0.52           O  
HETATM  896  O   HOH T 895      74.574  70.240  10.345  1.00  0.52           O  
HETATM  897  O   HOH T 896      35.711  56.044  12.799  1.00  0.52           O  
HETATM  898  O   HOH T 897      33.191  41.139  33.369  1.00  0.52           O  
HETATM  899  O   HOH T 898      11.876  39.815   5.177  1.00  0.52           O  
HETATM  900  O   HOH T 899      32.430  81.639   3.092  1.00  0.52           O  
HETATM  901  O   HOH T 900      42.917  46.810 -16.382  1.00  0.52           O  
HETATM  902  O   HOH T 901      71.108  70.261   8.806  1.00  0.52           O  
HETATM  903  O   HOH T 902      38.963  57.401  39.767  1.00  0.52           O  
HETATM  904  O   HOH T 903      43.580  51.056 -14.770  1.00  0.52           O  
HETATM  905  O   HOH T 904      70.134  68.853  30.282  1.00  0.52           O  
HETATM  906  O   HOH T 905      46.373  82.509  28.937  1.00  0.52           O  
HETATM  907  O   HOH T 906      74.877  57.652  33.424  1.00  0.52           O  
HETATM  908  O   HOH T 907      65.021  47.141  18.694  1.00  0.52           O  
HETATM  909  O   HOH T 908      37.730  29.767  28.438  1.00  0.52           O  
HETATM  910  O   HOH T 909      69.860  38.786  -3.369  1.00  0.52           O  
HETATM  911  O   HOH T 910      45.316  24.230  24.257  1.00  0.52           O  
HETATM  912  O   HOH T 911      14.573  42.750  14.857  1.00  0.52           O  
HETATM  913  O   HOH T 912      50.370  25.980  -0.305  1.00  0.52           O  
HETATM  914  O   HOH T 913      35.302  58.856  -1.822  1.00  0.52           O  
HETATM  915  O   HOH T 914      41.157  27.931  -5.808  1.00  0.52           O  
HETATM  916  O   HOH T 915      46.185  23.652   1.600  1.00  0.52           O  
HETATM  917  O   HOH T 916      40.161  46.400 -16.206  1.00  0.52           O  
HETATM  918  O   HOH T 917      71.465  60.947  37.423  1.00  0.52           O  
HETATM  919  O   HOH T 918       9.945  46.916  11.560  1.00  0.53           O  
HETATM  920  O   HOH T 919      39.402  45.917  38.138  1.00  0.53           O  
HETATM  921  O   HOH T 920      68.130  43.969  33.191  1.00  0.53           O  
HETATM  922  O   HOH T 921      66.093  56.152  12.118  1.00  0.53           O  
HETATM  923  O   HOH T 922      28.305  35.155  31.876  1.00  0.53           O  
HETATM  924  O   HOH T 923      33.938  83.048  12.196  1.00  0.53           O  
HETATM  925  O   HOH T 924      15.405  39.994   6.459  1.00  0.53           O  
HETATM  926  O   HOH T 925      51.221  71.529  -4.648  1.00  0.53           O  
HETATM  927  O   HOH T 926      30.451  66.441  42.794  1.00  0.53           O  
HETATM  928  O   HOH T 927      45.657  47.739  14.620  1.00  0.53           O  
HETATM  929  O   HOH T 928      35.480  56.808  -5.039  1.00  0.53           O  
HETATM  930  O   HOH T 929      70.555  40.312  -0.817  1.00  0.53           O  
HETATM  931  O   HOH T 930      28.361  73.633  47.846  1.00  0.53           O  
HETATM  932  O   HOH T 931      42.028  84.183  38.888  1.00  0.53           O  
HETATM  933  O   HOH T 932      61.413  58.599  46.162  1.00  0.53           O  
HETATM  934  O   HOH T 933      45.997  20.884  10.494  1.00  0.53           O  
HETATM  935  O   HOH T 934      14.537  54.437  -3.307  1.00  0.53           O  
HETATM  936  O   HOH T 935      46.883  86.619  34.077  1.00  0.53           O  
HETATM  937  O   HOH T 936      30.145  26.868  11.250  1.00  0.53           O  
HETATM  938  O   HOH T 937      64.098  66.009  43.824  1.00  0.53           O  
HETATM  939  O   HOH T 938      44.607  38.488  14.765  1.00  0.53           O  
HETATM  940  O   HOH T 939      69.721  77.816  20.281  1.00  0.53           O  
HETATM  941  O   HOH T 940      41.173  59.843  16.203  1.00  0.53           O  
HETATM  942  O   HOH T 941      61.685  42.721  36.542  1.00  0.53           O  
HETATM  943  O   HOH T 942      64.649  24.752  14.590  1.00  0.53           O  
HETATM  944  O   HOH T 943      34.965  66.467  46.184  1.00  0.53           O  
HETATM  945  O   HOH T 944      39.862  28.215   4.311  1.00  0.53           O  
HETATM  946  O   HOH T 945      37.429  74.697  48.692  1.00  0.53           O  
HETATM  947  O   HOH T 946      54.237  39.666  36.818  1.00  0.53           O  
HETATM  948  O   HOH T 947      49.532  67.596  28.648  1.00  0.53           O  
HETATM  949  O   HOH T 948      38.263  44.556 -15.347  1.00  0.53           O  
HETATM  950  O   HOH T 949      61.803  33.072  -4.031  1.00  0.54           O  
HETATM  951  O   HOH T 950      15.030  41.258  24.451  1.00  0.54           O  
HETATM  952  O   HOH T 951      35.617  42.108  32.375  1.00  0.54           O  
HETATM  953  O   HOH T 952      40.469  25.019  -5.759  1.00  0.54           O  
HETATM  954  O   HOH T 953      50.350  89.130  39.858  1.00  0.54           O  
HETATM  955  O   HOH T 954      22.449  70.375   5.304  1.00  0.54           O  
HETATM  956  O   HOH T 955      31.394  57.076   0.256  1.00  0.54           O  
HETATM  957  O   HOH T 956      63.222  29.765   7.662  1.00  0.54           O  
HETATM  958  O   HOH T 957      52.598  82.552   9.644  1.00  0.54           O  
HETATM  959  O   HOH T 958      21.896  77.711  30.783  1.00  0.54           O  
HETATM  960  O   HOH T 959      42.473  35.682 -13.503  1.00  0.54           O  
HETATM  961  O   HOH T 960      10.901  54.273   9.693  1.00  0.54           O  
HETATM  962  O   HOH T 961      49.421  11.338  16.058  1.00  0.54           O  
HETATM  963  O   HOH T 962      30.751  85.069  25.654  1.00  0.54           O  
HETATM  964  O   HOH T 963      41.372  78.571  39.271  1.00  0.54           O  
HETATM  965  O   HOH T 964      53.801  70.336  32.132  1.00  0.54           O  
HETATM  966  O   HOH T 965      21.022  76.112  21.660  1.00  0.54           O  
HETATM  967  O   HOH T 966      50.595  35.700  16.243  1.00  0.54           O  
HETATM  968  O   HOH T 967      56.670  52.210  42.753  1.00  0.54           O  
HETATM  969  O   HOH T 968      22.563  40.635  32.586  1.00  0.54           O  
HETATM  970  O   HOH T 969      73.838  54.131  33.319  1.00  0.54           O  
HETATM  971  O   HOH T 970      17.643  41.329  19.520  1.00  0.54           O  
HETATM  972  O   HOH T 971      28.849  30.732   4.821  1.00  0.54           O  
HETATM  973  O   HOH T 972      56.536  48.629  20.007  1.00  0.54           O  
HETATM  974  O   HOH T 973      64.840  78.429  29.146  1.00  0.54           O  
HETATM  975  O   HOH T 974      48.587  84.509  19.264  1.00  0.54           O  
HETATM  976  O   HOH T 975      32.879  63.929   1.277  1.00  0.54           O  
HETATM  977  O   HOH T 976      68.370  34.805  11.583  1.00  0.54           O  
HETATM  978  O   HOH T 977      15.372  51.849  -3.911  1.00  0.54           O  
HETATM  979  O   HOH T 978      66.543  41.520  -8.079  1.00  0.54           O  
HETATM  980  O   HOH T 979      42.443  82.672  29.389  1.00  0.55           O  
HETATM  981  O   HOH T 980      37.004  27.241 -12.293  1.00  0.55           O  
HETATM  982  O   HOH T 981      22.723  43.809  34.130  1.00  0.55           O  
HETATM  983  O   HOH T 982      69.808  54.116   9.056  1.00  0.55           O  
HETATM  984  O   HOH T 983      43.579  49.522 -16.943  1.00  0.55           O  
HETATM  985  O   HOH T 984      50.034  42.175  38.041  1.00  0.55           O  
HETATM  986  O   HOH T 985      65.677  27.576  16.913  1.00  0.55           O  
HETATM  987  O   HOH T 986      19.263  69.497  27.558  1.00  0.55           O  
HETATM  988  O   HOH T 987      66.438  41.339  30.018  1.00  0.55           O  
HETATM  989  O   HOH T 988      34.261  78.169  44.452  1.00  0.55           O  
HETATM  990  O   HOH T 989      25.915  77.767   4.858  1.00  0.55           O  
HETATM  991  O   HOH T 990      59.990  50.366 -15.476  1.00  0.55           O  
HETATM  992  O   HOH T 991      66.260  69.513  -0.094  1.00  0.55           O  
HETATM  993  O   HOH T 992      64.712  82.661  12.112  1.00  0.55           O  
HETATM  994  O   HOH T 993      33.206  44.489 -13.575  1.00  0.55           O  
HETATM  995  O   HOH T 994      36.054  43.897 -16.814  1.00  0.55           O  
HETATM  996  O   HOH T 995      25.300  55.639   2.528  1.00  0.55           O  
HETATM  997  O   HOH T 996      68.212  67.272  38.198  1.00  0.55           O  
HETATM  998  O   HOH T 997      17.651  38.064  -4.900  1.00  0.55           O  
HETATM  999  O   HOH T 998      47.576  13.075  14.853  1.00  0.55           O  
HETATM 1000  O   HOH T 999      36.286  49.350  35.612  1.00  0.55           O  
HETATM 1001  O   HOH T1000      36.467  77.844   0.735  1.00  0.55           O  
HETATM 1002  O   HOH T1001      45.173  56.692  -9.841  1.00  0.55           O  
HETATM 1003  O   HOH T1002      43.949  49.833  17.032  1.00  0.55           O  
HETATM 1004  O   HOH T1003      40.406  27.285   0.881  1.00  0.55           O  
HETATM 1005  O   HOH T1004      61.638  45.354 -14.640  1.00  0.56           O  
HETATM 1006  O   HOH T1005      65.468  50.097  44.141  1.00  0.56           O  
HETATM 1007  O   HOH T1006      30.577  83.394  23.367  1.00  0.56           O  
HETATM 1008  O   HOH T1007      46.703  84.191  26.668  1.00  0.56           O  
HETATM 1009  O   HOH T1008      27.545  58.337  31.677  1.00  0.56           O  
HETATM 1010  O   HOH T1009      31.404  54.124  30.868  1.00  0.56           O  
HETATM 1011  O   HOH T1010      20.084  32.455   7.477  1.00  0.56           O  
HETATM 1012  O   HOH T1011      31.489  52.759  -5.668  1.00  0.56           O  
HETATM 1013  O   HOH T1012      18.477  52.827   6.574  1.00  0.56           O  
HETATM 1014  O   HOH T1013      62.271  42.100 -13.002  1.00  0.56           O  
HETATM 1015  O   HOH T1014      70.752  55.200  40.733  1.00  0.56           O  
HETATM 1016  O   HOH T1015      36.383  85.017  14.335  1.00  0.56           O  
HETATM 1017  O   HOH T1016      71.281  64.125  12.102  1.00  0.56           O  
HETATM 1018  O   HOH T1017      49.656  49.457 -18.851  1.00  0.56           O  
HETATM 1019  O   HOH T1018      41.083  41.902   2.711  1.00  0.56           O  
HETATM 1020  O   HOH T1019      41.813  48.907 -14.882  1.00  0.56           O  
HETATM 1021  O   HOH T1020      59.949  82.679  24.426  1.00  0.56           O  
HETATM 1022  O   HOH T1021      29.948  31.424   6.983  1.00  0.57           O  
HETATM 1023  O   HOH T1022      17.669  37.070  -2.400  1.00  0.57           O  
HETATM 1024  O   HOH T1023      26.539  58.326  29.140  1.00  0.57           O  
HETATM 1025  O   HOH T1024      65.788  40.651  32.582  1.00  0.57           O  
HETATM 1026  O   HOH T1025      54.450  66.244  -7.504  1.00  0.57           O  
HETATM 1027  O   HOH T1026      37.194  69.148  -0.789  1.00  0.57           O  
HETATM 1028  O   HOH T1027      49.440  86.623  40.345  1.00  0.57           O  
HETATM 1029  O   HOH T1028      41.174  85.256  36.477  1.00  0.57           O  
HETATM 1030  O   HOH T1029      17.542  50.334   6.035  1.00  0.57           O  
HETATM 1031  O   HOH T1030      32.202  63.121  38.030  1.00  0.57           O  
HETATM 1032  O   HOH T1031      36.049  84.378  16.928  1.00  0.57           O  
HETATM 1033  O   HOH T1032      37.965  81.152   2.887  1.00  0.57           O  
HETATM 1034  O   HOH T1033      42.116  65.777  -8.315  1.00  0.57           O  
HETATM 1035  O   HOH T1034      23.852  29.367  15.382  1.00  0.57           O  
HETATM 1036  O   HOH T1035      23.377  53.411  25.834  1.00  0.57           O  
HETATM 1037  O   HOH T1036      59.770  43.661  38.288  1.00  0.57           O  
HETATM 1038  O   HOH T1037      14.996  39.485  -9.502  1.00  0.57           O  
HETATM 1039  O   HOH T1038      29.889  50.509  -9.110  1.00  0.57           O  
HETATM 1040  O   HOH T1039      68.982  44.709  -7.165  1.00  0.58           O  
HETATM 1041  O   HOH T1040      12.210  46.510  16.795  1.00  0.58           O  
HETATM 1042  O   HOH T1041      34.168  47.032 -14.435  1.00  0.58           O  
HETATM 1043  O   HOH T1042      66.550  33.267   4.078  1.00  0.58           O  
HETATM 1044  O   HOH T1043      41.674  38.967  32.978  1.00  0.58           O  
HETATM 1045  O   HOH T1044      49.489  17.922  10.607  1.00  0.58           O  
HETATM 1046  O   HOH T1045      40.821  57.641  19.634  1.00  0.58           O  
HETATM 1047  O   HOH T1046      37.341  53.437  -9.712  1.00  0.58           O  
HETATM 1048  O   HOH T1047      39.620  52.626 -11.230  1.00  0.58           O  
HETATM 1049  O   HOH T1048      42.390  25.924  -4.374  1.00  0.58           O  
HETATM 1050  O   HOH T1049      24.169  60.471  29.119  1.00  0.58           O  
HETATM 1051  O   HOH T1050      33.629  49.556  -9.154  1.00  0.59           O  
HETATM 1052  O   HOH T1051      65.931  59.220  -3.408  1.00  0.59           O  
HETATM 1053  O   HOH T1052      66.307  56.765  -6.563  1.00  0.59           O  
HETATM 1054  O   HOH T1053      70.515  48.305  16.884  1.00  0.59           O  
HETATM 1055  O   HOH T1054      45.379  21.063  16.945  1.00  0.59           O  
HETATM 1056  O   HOH T1055      14.030  52.053  15.520  1.00  0.59           O  
HETATM 1057  O   HOH T1056      34.026  81.767  39.708  1.00  0.60           O  
HETATM 1058  O   HOH T1057      47.917  55.991  17.562  1.00  0.60           O  
HETATM 1059  O   HOH T1058      24.489  28.775   3.121  1.00  0.61           O  
HETATM 1060  O   HOH T1059      67.500  65.288  10.396  1.00  0.61           O  
HETATM 1061  O   HOH T1060      19.234  53.635  -4.276  1.00  0.62           O  
HETATM 1062  O   HOH T1061      43.023  67.342  -3.461  1.00  0.62           O  
HETATM 1063  O   HOH T1062      74.206  69.386  20.130  1.00  0.64           O  
TER    1064      HOH T1062 
