# Supplementary material for: Accurate Prediction of Hydration Sites of Proteins Using Energy Model With Atom Embedding
Source: Front Mol Biosci. 2021 Sep 20;8:756075. doi: 10.3389/fmolb.2021.756075 (PMC8488165; doi:10.3389/fmolb.2021.756075)
Supplement: Supplementary file 1 [file DataSheet1.ZIP › Data Sheet 1/Our_result_pdb/our_dataset_output/2ANY_watersite.pdb]

HEADER                                                        XXXX


JRNL        PMID   -1
HETATM    1  O   HOH T   0      42.115  36.994  10.876  1.00  0.17           O  
HETATM    2  O   HOH T   1      34.120  51.459  -2.074  1.00  0.18           O  
HETATM    3  O   HOH T   2      45.763  34.511   7.767  1.00  0.18           O  
HETATM    4  O   HOH T   3      38.950  45.399  21.582  1.00  0.19           O  
HETATM    5  O   HOH T   4      46.420  44.516   2.155  1.00  0.20           O  
HETATM    6  O   HOH T   5      61.751  32.493  14.098  1.00  0.20           O  
HETATM    7  O   HOH T   6      52.903  39.698  -2.238  1.00  0.21           O  
HETATM    8  O   HOH T   7      49.721  49.531  18.187  1.00  0.21           O  
HETATM    9  O   HOH T   8      33.288  36.322  11.877  1.00  0.21           O  
HETATM   10  O   HOH T   9      35.488  29.334  25.194  1.00  0.21           O  
HETATM   11  O   HOH T  10      28.116  54.034  20.865  1.00  0.21           O  
HETATM   12  O   HOH T  11      39.601  27.480   0.288  1.00  0.22           O  
HETATM   13  O   HOH T  12      43.942  25.020  21.907  1.00  0.22           O  
HETATM   14  O   HOH T  13      41.433  33.828   3.186  1.00  0.23           O  
HETATM   15  O   HOH T  14      51.374  41.251   4.815  1.00  0.23           O  
HETATM   16  O   HOH T  15      36.284  50.457   5.583  1.00  0.23           O  
HETATM   17  O   HOH T  16      58.324  40.548   8.925  1.00  0.23           O  
HETATM   18  O   HOH T  17      30.060  39.667  20.820  1.00  0.23           O  
HETATM   19  O   HOH T  18      35.435  42.018   0.548  1.00  0.23           O  
HETATM   20  O   HOH T  19      38.057  53.777  15.683  1.00  0.23           O  
HETATM   21  O   HOH T  20      57.584  40.807  28.843  1.00  0.24           O  
HETATM   22  O   HOH T  21      42.597  28.400  27.209  1.00  0.24           O  
HETATM   23  O   HOH T  22      37.308  34.957   0.628  1.00  0.24           O  
HETATM   24  O   HOH T  23      49.885  47.750  31.808  1.00  0.24           O  
HETATM   25  O   HOH T  24      39.926  33.573  23.898  1.00  0.24           O  
HETATM   26  O   HOH T  25      28.074  16.946  25.293  1.00  0.24           O  
HETATM   27  O   HOH T  26      37.184  26.790  15.639  1.00  0.24           O  
HETATM   28  O   HOH T  27      30.262  28.837  11.266  1.00  0.24           O  
HETATM   29  O   HOH T  28      56.090  20.537   4.142  1.00  0.24           O  
HETATM   30  O   HOH T  29      51.969  25.055  16.651  1.00  0.25           O  
HETATM   31  O   HOH T  30      56.178  52.780  17.689  1.00  0.25           O  
HETATM   32  O   HOH T  31      33.216  42.273   2.257  1.00  0.25           O  
HETATM   33  O   HOH T  32      28.532  35.046   9.260  1.00  0.25           O  
HETATM   34  O   HOH T  33      58.036  40.139   4.831  1.00  0.25           O  
HETATM   35  O   HOH T  34      25.849  24.258  26.986  1.00  0.26           O  
HETATM   36  O   HOH T  35      48.450  51.609  19.358  1.00  0.26           O  
HETATM   37  O   HOH T  36      52.482  43.835   7.163  1.00  0.26           O  
HETATM   38  O   HOH T  37      51.706  19.397  20.583  1.00  0.26           O  
HETATM   39  O   HOH T  38      22.274  37.423   7.034  1.00  0.26           O  
HETATM   40  O   HOH T  39      23.222  21.669  27.870  1.00  0.26           O  
HETATM   41  O   HOH T  40      49.818  25.909  23.268  1.00  0.26           O  
HETATM   42  O   HOH T  41      44.455  36.342   9.455  1.00  0.26           O  
HETATM   43  O   HOH T  42      39.669  35.883  25.503  1.00  0.26           O  
HETATM   44  O   HOH T  43      56.670  27.537  18.608  1.00  0.27           O  
HETATM   45  O   HOH T  44      29.680  32.900   0.598  1.00  0.27           O  
HETATM   46  O   HOH T  45      21.936  34.879  18.367  1.00  0.27           O  
HETATM   47  O   HOH T  46      61.801  47.066   8.225  1.00  0.27           O  
HETATM   48  O   HOH T  47      43.321  43.844   8.424  1.00  0.27           O  
HETATM   49  O   HOH T  48      54.021  48.809  26.938  1.00  0.27           O  
HETATM   50  O   HOH T  49      47.715  53.720  29.974  1.00  0.27           O  
HETATM   51  O   HOH T  50      36.379  48.176  26.173  1.00  0.27           O  
HETATM   52  O   HOH T  51      43.893  54.686  11.347  1.00  0.28           O  
HETATM   53  O   HOH T  52      26.630  25.004  13.643  1.00  0.28           O  
HETATM   54  O   HOH T  53      43.090  28.302  12.269  1.00  0.28           O  
HETATM   55  O   HOH T  54      62.837  40.794  13.056  1.00  0.28           O  
HETATM   56  O   HOH T  55      69.692  36.276  -4.768  1.00  0.28           O  
HETATM   57  O   HOH T  56      45.444  24.420   2.468  1.00  0.28           O  
HETATM   58  O   HOH T  57      32.499  41.844  23.448  1.00  0.28           O  
HETATM   59  O   HOH T  58      42.152  28.717  29.991  1.00  0.28           O  
HETATM   60  O   HOH T  59      26.012  38.707   4.073  1.00  0.28           O  
HETATM   61  O   HOH T  60      34.659  32.124  -0.003  1.00  0.28           O  
HETATM   62  O   HOH T  61      26.535  33.353  11.244  1.00  0.29           O  
HETATM   63  O   HOH T  62      19.561  36.565   3.659  1.00  0.29           O  
HETATM   64  O   HOH T  63      63.979  32.587  15.691  1.00  0.29           O  
HETATM   65  O   HOH T  64      66.365  22.320  11.986  1.00  0.29           O  
HETATM   66  O   HOH T  65      31.558  30.735  12.915  1.00  0.29           O  
HETATM   67  O   HOH T  66      45.904  24.910  17.617  1.00  0.29           O  
HETATM   68  O   HOH T  67      52.409  22.534  11.199  1.00  0.29           O  
HETATM   69  O   HOH T  68      42.536  53.698  21.348  1.00  0.29           O  
HETATM   70  O   HOH T  69      59.859  32.567  24.342  1.00  0.29           O  
HETATM   71  O   HOH T  70      32.583  55.251   0.452  1.00  0.29           O  
HETATM   72  O   HOH T  71      38.080  50.477  19.676  1.00  0.29           O  
HETATM   73  O   HOH T  72      23.064  24.304  26.959  1.00  0.30           O  
HETATM   74  O   HOH T  73      29.454  32.465  -2.192  1.00  0.30           O  
HETATM   75  O   HOH T  74      28.912  32.520  10.432  1.00  0.30           O  
HETATM   76  O   HOH T  75      60.078  37.205  -4.078  1.00  0.30           O  
HETATM   77  O   HOH T  76      65.853  42.643   3.422  1.00  0.30           O  
HETATM   78  O   HOH T  77      50.311  43.747   5.542  1.00  0.30           O  
HETATM   79  O   HOH T  78      39.347  34.723  27.993  1.00  0.30           O  
HETATM   80  O   HOH T  79      45.295  20.097  26.755  1.00  0.31           O  
HETATM   81  O   HOH T  80      43.174  34.275  -2.602  1.00  0.31           O  
HETATM   82  O   HOH T  81      30.019  54.700  22.667  1.00  0.31           O  
HETATM   83  O   HOH T  82      47.170  28.348  32.127  1.00  0.31           O  
HETATM   84  O   HOH T  83      50.715  51.843  -0.332  1.00  0.31           O  
HETATM   85  O   HOH T  84      44.780  42.668  30.814  1.00  0.31           O  
HETATM   86  O   HOH T  85      49.574  29.664  29.394  1.00  0.31           O  
HETATM   87  O   HOH T  86      48.967  19.779  21.079  1.00  0.31           O  
HETATM   88  O   HOH T  87      58.914  44.075  26.903  1.00  0.32           O  
HETATM   89  O   HOH T  88      48.615  51.485   9.900  1.00  0.32           O  
HETATM   90  O   HOH T  89      61.846  25.108  22.175  1.00  0.32           O  
HETATM   91  O   HOH T  90      57.077  25.682  16.668  1.00  0.32           O  
HETATM   92  O   HOH T  91      45.369  49.463  29.877  1.00  0.32           O  
HETATM   93  O   HOH T  92      64.828  38.106   6.467  1.00  0.33           O  
HETATM   94  O   HOH T  93      38.283  39.433  -5.341  1.00  0.33           O  
HETATM   95  O   HOH T  94      47.012  53.040  27.434  1.00  0.33           O  
HETATM   96  O   HOH T  95      55.022  31.793  26.678  1.00  0.33           O  
HETATM   97  O   HOH T  96      64.663  38.855  12.278  1.00  0.33           O  
HETATM   98  O   HOH T  97      64.044  31.135   9.319  1.00  0.33           O  
HETATM   99  O   HOH T  98      41.147  42.585   9.491  1.00  0.33           O  
HETATM  100  O   HOH T  99      55.780  45.604   0.484  1.00  0.33           O  
HETATM  101  O   HOH T 100      66.305  46.493  12.762  1.00  0.33           O  
HETATM  102  O   HOH T 101      33.319  40.260   0.303  1.00  0.33           O  
HETATM  103  O   HOH T 102      51.139  46.269   2.157  1.00  0.33           O  
HETATM  104  O   HOH T 103      67.122  33.054  -4.783  1.00  0.34           O  
HETATM  105  O   HOH T 104      32.824  42.129  26.236  1.00  0.34           O  
HETATM  106  O   HOH T 105      25.829  44.374   7.772  1.00  0.34           O  
HETATM  107  O   HOH T 106      22.523  39.278   9.220  1.00  0.34           O  
HETATM  108  O   HOH T 107      46.125  56.339  21.260  1.00  0.34           O  
HETATM  109  O   HOH T 108      50.783  24.817  28.560  1.00  0.34           O  
HETATM  110  O   HOH T 109      22.962  33.995  15.927  1.00  0.35           O  
HETATM  111  O   HOH T 110      26.563  52.926  11.187  1.00  0.35           O  
HETATM  112  O   HOH T 111      55.585  30.233   1.748  1.00  0.35           O  
HETATM  113  O   HOH T 112      24.170  53.705  10.121  1.00  0.35           O  
HETATM  114  O   HOH T 113      26.827  26.059  37.651  1.00  0.35           O  
HETATM  115  O   HOH T 114      50.045  52.898  11.885  1.00  0.35           O  
HETATM  116  O   HOH T 115      58.975  29.082  22.646  1.00  0.36           O  
HETATM  117  O   HOH T 116      59.451  39.403  -2.498  1.00  0.36           O  
HETATM  118  O   HOH T 117      54.916  25.985   0.045  1.00  0.36           O  
HETATM  119  O   HOH T 118      25.342  46.020   9.921  1.00  0.36           O  
HETATM  120  O   HOH T 119      57.330  43.936  -3.677  1.00  0.36           O  
HETATM  121  O   HOH T 120      46.267  39.994  15.572  1.00  0.36           O  
HETATM  122  O   HOH T 121      25.494  53.380  20.340  1.00  0.36           O  
HETATM  123  O   HOH T 122      65.201  37.353   9.120  1.00  0.36           O  
HETATM  124  O   HOH T 123      65.878  34.704  21.195  1.00  0.36           O  
HETATM  125  O   HOH T 124      23.450  43.005   7.375  1.00  0.36           O  
HETATM  126  O   HOH T 125      51.565  28.309   2.559  1.00  0.36           O  
HETATM  127  O   HOH T 126      24.993  31.352   3.627  1.00  0.37           O  
HETATM  128  O   HOH T 127      29.579  46.567  20.457  1.00  0.37           O  
HETATM  129  O   HOH T 128      30.528  34.851  -1.263  1.00  0.37           O  
HETATM  130  O   HOH T 129      36.761  27.795  27.065  1.00  0.37           O  
HETATM  131  O   HOH T 130      57.745  48.732   2.547  1.00  0.38           O  
HETATM  132  O   HOH T 131      57.872  54.919  16.471  1.00  0.38           O  
HETATM  133  O   HOH T 132      43.552  22.469   3.034  1.00  0.38           O  
HETATM  134  O   HOH T 133      48.647  45.827   3.052  1.00  0.38           O  
HETATM  135  O   HOH T 134      30.898  35.697  10.617  1.00  0.38           O  
HETATM  136  O   HOH T 135      43.460  31.605  -3.488  1.00  0.38           O  
HETATM  137  O   HOH T 136      50.699  27.025  25.628  1.00  0.38           O  
HETATM  138  O   HOH T 137      59.231  38.608  29.010  1.00  0.38           O  
HETATM  139  O   HOH T 138      39.781  19.166  31.732  1.00  0.38           O  
HETATM  140  O   HOH T 139      23.502  49.305  13.313  1.00  0.38           O  
HETATM  141  O   HOH T 140      51.304  26.586  30.611  1.00  0.38           O  
HETATM  142  O   HOH T 141      31.326  48.346  23.726  1.00  0.38           O  
HETATM  143  O   HOH T 142      52.065  31.135  29.310  1.00  0.38           O  
HETATM  144  O   HOH T 143      45.244  22.598  18.853  1.00  0.38           O  
HETATM  145  O   HOH T 144      51.849  49.320  -5.044  1.00  0.38           O  
HETATM  146  O   HOH T 145      24.657  29.100  32.262  1.00  0.38           O  
HETATM  147  O   HOH T 146      30.359  55.779  26.752  1.00  0.38           O  
HETATM  148  O   HOH T 147      49.124  51.815   4.036  1.00  0.38           O  
HETATM  149  O   HOH T 148      47.500  49.187  31.809  1.00  0.38           O  
HETATM  150  O   HOH T 149      47.672  56.116  18.987  1.00  0.39           O  
HETATM  151  O   HOH T 150      42.294  29.891  32.606  1.00  0.39           O  
HETATM  152  O   HOH T 151      35.056  42.994  -7.036  1.00  0.39           O  
HETATM  153  O   HOH T 152      51.484  40.666  -6.008  1.00  0.39           O  
HETATM  154  O   HOH T 153      20.958  28.331  19.257  1.00  0.39           O  
HETATM  155  O   HOH T 154      45.639  26.693  -2.073  1.00  0.39           O  
HETATM  156  O   HOH T 155      41.286  25.119  -5.827  1.00  0.39           O  
HETATM  157  O   HOH T 156      59.823  44.384  29.477  1.00  0.39           O  
HETATM  158  O   HOH T 157      43.043  45.299  30.254  1.00  0.39           O  
HETATM  159  O   HOH T 158      21.892  34.579  25.456  1.00  0.39           O  
HETATM  160  O   HOH T 159      56.384  29.531  23.418  1.00  0.39           O  
HETATM  161  O   HOH T 160      41.258  57.440   7.336  1.00  0.39           O  
HETATM  162  O   HOH T 161      65.599  31.646  13.635  1.00  0.39           O  
HETATM  163  O   HOH T 162      65.102  36.389   2.567  1.00  0.39           O  
HETATM  164  O   HOH T 163      37.363  59.043  17.554  1.00  0.39           O  
HETATM  165  O   HOH T 164      48.618  25.812  27.222  1.00  0.40           O  
HETATM  166  O   HOH T 165      46.466  20.581  20.285  1.00  0.40           O  
HETATM  167  O   HOH T 166      51.710  18.904  16.542  1.00  0.40           O  
HETATM  168  O   HOH T 167      44.596  54.226  14.029  1.00  0.40           O  
HETATM  169  O   HOH T 168      60.378  41.478   7.250  1.00  0.40           O  
HETATM  170  O   HOH T 169      35.341  50.258   8.065  1.00  0.40           O  
HETATM  171  O   HOH T 170      37.443  49.216  22.149  1.00  0.40           O  
HETATM  172  O   HOH T 171      53.433  20.818   4.886  1.00  0.40           O  
HETATM  173  O   HOH T 172      36.624  34.247  14.320  1.00  0.40           O  
HETATM  174  O   HOH T 173      55.088  27.193  23.763  1.00  0.40           O  
HETATM  175  O   HOH T 174      35.034  57.792  17.208  1.00  0.40           O  
HETATM  176  O   HOH T 175      39.870  27.657  16.184  1.00  0.40           O  
HETATM  177  O   HOH T 176      25.496  26.062  35.041  1.00  0.40           O  
HETATM  178  O   HOH T 177      47.264  52.280  12.084  1.00  0.40           O  
HETATM  179  O   HOH T 178      44.502  51.026   5.777  1.00  0.40           O  
HETATM  180  O   HOH T 179      43.697  57.364  10.511  1.00  0.40           O  
HETATM  181  O   HOH T 180      62.934  21.063   1.479  1.00  0.40           O  
HETATM  182  O   HOH T 181      52.942  30.634   2.224  1.00  0.41           O  
HETATM  183  O   HOH T 182      23.948  27.882  15.681  1.00  0.41           O  
HETATM  184  O   HOH T 183      64.326  26.956   9.013  1.00  0.41           O  
HETATM  185  O   HOH T 184      62.164  50.102   5.522  1.00  0.41           O  
HETATM  186  O   HOH T 185      39.996  42.991  -5.369  1.00  0.41           O  
HETATM  187  O   HOH T 186      35.454  52.840   6.926  1.00  0.41           O  
HETATM  188  O   HOH T 187      55.871  22.017  14.809  1.00  0.41           O  
HETATM  189  O   HOH T 188      63.354  31.575  12.019  1.00  0.42           O  
HETATM  190  O   HOH T 189      22.693  31.770  26.010  1.00  0.42           O  
HETATM  191  O   HOH T 190      68.918  33.138  -2.634  1.00  0.42           O  
HETATM  192  O   HOH T 191      22.320  29.430  27.849  1.00  0.42           O  
HETATM  193  O   HOH T 192      22.889  36.066  14.133  1.00  0.42           O  
HETATM  194  O   HOH T 193      37.626  54.167  18.384  1.00  0.42           O  
HETATM  195  O   HOH T 194      32.312  31.912  31.218  1.00  0.42           O  
HETATM  196  O   HOH T 195      28.984  47.356  17.795  1.00  0.42           O  
HETATM  197  O   HOH T 196      62.165  16.875   4.047  1.00  0.42           O  
HETATM  198  O   HOH T 197      51.452  35.831  29.990  1.00  0.42           O  
HETATM  199  O   HOH T 198      54.334  26.150  17.728  1.00  0.42           O  
HETATM  200  O   HOH T 199      41.331  46.326  -2.334  1.00  0.42           O  
HETATM  201  O   HOH T 200      49.004  50.945  -2.348  1.00  0.42           O  
HETATM  202  O   HOH T 201      47.542  52.652  34.087  1.00  0.42           O  
HETATM  203  O   HOH T 202      66.537  23.060   9.340  1.00  0.42           O  
HETATM  204  O   HOH T 203      55.384  51.141  27.728  1.00  0.42           O  
HETATM  205  O   HOH T 204      34.245  30.078  30.624  1.00  0.42           O  
HETATM  206  O   HOH T 205      36.675  52.673  20.690  1.00  0.42           O  
HETATM  207  O   HOH T 206      43.556  36.442  32.884  1.00  0.42           O  
HETATM  208  O   HOH T 207      25.244  47.633  14.654  1.00  0.42           O  
HETATM  209  O   HOH T 208      41.112  55.315  23.212  1.00  0.43           O  
HETATM  210  O   HOH T 209      52.622  25.908   1.586  1.00  0.43           O  
HETATM  211  O   HOH T 210      49.728  17.524  17.950  1.00  0.43           O  
HETATM  212  O   HOH T 211      25.617  50.823  19.201  1.00  0.43           O  
HETATM  213  O   HOH T 212      54.067  20.217  15.969  1.00  0.43           O  
HETATM  214  O   HOH T 213      20.201  26.423  11.692  1.00  0.43           O  
HETATM  215  O   HOH T 214      25.132  34.764  13.073  1.00  0.43           O  
HETATM  216  O   HOH T 215      25.378  30.093   5.977  1.00  0.43           O  
HETATM  217  O   HOH T 216      29.285  46.215   1.393  1.00  0.43           O  
HETATM  218  O   HOH T 217      62.528  33.366  23.948  1.00  0.43           O  
HETATM  219  O   HOH T 218      26.513  30.972  29.207  1.00  0.43           O  
HETATM  220  O   HOH T 219      17.091  31.591  12.833  1.00  0.43           O  
HETATM  221  O   HOH T 220      17.832  29.223  13.829  1.00  0.43           O  
HETATM  222  O   HOH T 221      32.328  27.838   4.940  1.00  0.43           O  
HETATM  223  O   HOH T 222      48.422  47.660  34.069  1.00  0.43           O  
HETATM  224  O   HOH T 223      43.863  28.844  -2.597  1.00  0.44           O  
HETATM  225  O   HOH T 224      29.945  49.791   9.028  1.00  0.44           O  
HETATM  226  O   HOH T 225      60.719  47.772   5.797  1.00  0.44           O  
HETATM  227  O   HOH T 226      28.537  51.286  24.962  1.00  0.44           O  
HETATM  228  O   HOH T 227      35.908  25.869  13.209  1.00  0.44           O  
HETATM  229  O   HOH T 228      43.615  24.806  19.163  1.00  0.44           O  
HETATM  230  O   HOH T 229      54.144  33.144  28.960  1.00  0.44           O  
HETATM  231  O   HOH T 230      43.637  43.519  33.281  1.00  0.44           O  
HETATM  232  O   HOH T 231      35.880  38.260  -6.142  1.00  0.44           O  
HETATM  233  O   HOH T 232      49.077  29.992  -1.646  1.00  0.44           O  
HETATM  234  O   HOH T 233      33.395  54.029  -1.881  1.00  0.44           O  
HETATM  235  O   HOH T 234      32.224  38.686  -1.515  1.00  0.44           O  
HETATM  236  O   HOH T 235      19.733  38.970   5.064  1.00  0.44           O  
HETATM  237  O   HOH T 236      44.868  54.210  19.921  1.00  0.44           O  
HETATM  238  O   HOH T 237      63.462  47.754  25.799  1.00  0.44           O  
HETATM  239  O   HOH T 238      25.078  45.804  12.658  1.00  0.44           O  
HETATM  240  O   HOH T 239      36.206  28.176  29.834  1.00  0.44           O  
HETATM  241  O   HOH T 240      64.847  40.045   9.757  1.00  0.44           O  
HETATM  242  O   HOH T 241      62.492  28.945   9.738  1.00  0.44           O  
HETATM  243  O   HOH T 242      47.764  37.326  -8.990  1.00  0.45           O  
HETATM  244  O   HOH T 243      24.267  51.715  12.179  1.00  0.45           O  
HETATM  245  O   HOH T 244      53.754  33.509  -8.522  1.00  0.45           O  
HETATM  246  O   HOH T 245      64.123  33.124  22.017  1.00  0.45           O  
HETATM  247  O   HOH T 246      42.003  44.520  -4.376  1.00  0.45           O  
HETATM  248  O   HOH T 247      33.289  34.085  32.588  1.00  0.45           O  
HETATM  249  O   HOH T 248      49.033  19.243  15.882  1.00  0.45           O  
HETATM  250  O   HOH T 249      47.698  27.735  -0.729  1.00  0.45           O  
HETATM  251  O   HOH T 250      39.728  41.753  31.102  1.00  0.45           O  
HETATM  252  O   HOH T 251      68.019  30.665  14.647  1.00  0.45           O  
HETATM  253  O   HOH T 252      38.330  33.826  21.681  1.00  0.45           O  
HETATM  254  O   HOH T 253      23.510  33.958  27.581  1.00  0.45           O  
HETATM  255  O   HOH T 254      65.648  27.575  11.335  1.00  0.45           O  
HETATM  256  O   HOH T 255      32.940  30.094  33.143  1.00  0.45           O  
HETATM  257  O   HOH T 256      55.764  28.063  21.121  1.00  0.45           O  
HETATM  258  O   HOH T 257      37.697  24.201   8.119  1.00  0.45           O  
HETATM  259  O   HOH T 258      20.904  26.488  16.062  1.00  0.46           O  
HETATM  260  O   HOH T 259      34.343  24.071  14.571  1.00  0.46           O  
HETATM  261  O   HOH T 260      38.477  21.032  27.877  1.00  0.46           O  
HETATM  262  O   HOH T 261      35.877  64.350  13.819  1.00  0.46           O  
HETATM  263  O   HOH T 262      61.850  35.771 -10.608  1.00  0.46           O  
HETATM  264  O   HOH T 263      25.769  41.193  25.368  1.00  0.46           O  
HETATM  265  O   HOH T 264      54.778  37.930  -1.089  1.00  0.46           O  
HETATM  266  O   HOH T 265      60.258  36.491  -8.456  1.00  0.46           O  
HETATM  267  O   HOH T 266      38.108  36.117  -3.327  1.00  0.46           O  
HETATM  268  O   HOH T 267      50.037  35.695  -8.895  1.00  0.46           O  
HETATM  269  O   HOH T 268      23.370  47.491  11.161  1.00  0.46           O  
HETATM  270  O   HOH T 269      60.716  24.834   3.217  1.00  0.46           O  
HETATM  271  O   HOH T 270      20.392  28.142  13.885  1.00  0.46           O  
HETATM  272  O   HOH T 271      46.250  26.728   9.757  1.00  0.46           O  
HETATM  273  O   HOH T 272      60.577  54.068   7.295  1.00  0.46           O  
HETATM  274  O   HOH T 273      26.097  50.014  25.468  1.00  0.46           O  
HETATM  275  O   HOH T 274      66.562  37.349   4.655  1.00  0.46           O  
HETATM  276  O   HOH T 275      23.550  41.466  18.452  1.00  0.46           O  
HETATM  277  O   HOH T 276      26.793  46.199  20.943  1.00  0.46           O  
HETATM  278  O   HOH T 277      54.405  23.869  16.128  1.00  0.47           O  
HETATM  279  O   HOH T 278      30.496  43.982  20.028  1.00  0.47           O  
HETATM  280  O   HOH T 279      59.488  53.873   3.550  1.00  0.47           O  
HETATM  281  O   HOH T 280      35.072  29.923  27.983  1.00  0.47           O  
HETATM  282  O   HOH T 281      61.017  27.547  23.086  1.00  0.47           O  
HETATM  283  O   HOH T 282      57.563  31.161  25.368  1.00  0.47           O  
HETATM  284  O   HOH T 283      24.660  54.543  17.906  1.00  0.47           O  
HETATM  285  O   HOH T 284      47.183  25.814  33.334  1.00  0.47           O  
HETATM  286  O   HOH T 285      33.892  60.374   8.733  1.00  0.47           O  
HETATM  287  O   HOH T 286      64.284  40.736   7.088  1.00  0.47           O  
HETATM  288  O   HOH T 287      35.655  34.397  -1.486  1.00  0.47           O  
HETATM  289  O   HOH T 288      44.836  56.703  12.869  1.00  0.47           O  
HETATM  290  O   HOH T 289      46.435  17.599  30.083  1.00  0.47           O  
HETATM  291  O   HOH T 290      43.623  51.385   3.146  1.00  0.47           O  
HETATM  292  O   HOH T 291      55.055  35.899  -7.903  1.00  0.47           O  
HETATM  293  O   HOH T 292      56.651  33.922  27.702  1.00  0.47           O  
HETATM  294  O   HOH T 293      38.846  35.829  -7.284  1.00  0.47           O  
HETATM  295  O   HOH T 294      28.242  42.377  24.238  1.00  0.47           O  
HETATM  296  O   HOH T 295      32.185  44.282  22.175  1.00  0.48           O  
HETATM  297  O   HOH T 296      62.743  23.064   3.257  1.00  0.48           O  
HETATM  298  O   HOH T 297      57.595  25.954  -0.041  1.00  0.48           O  
HETATM  299  O   HOH T 298      57.273  34.468  -6.846  1.00  0.48           O  
HETATM  300  O   HOH T 299      57.479  30.080  -0.197  1.00  0.48           O  
HETATM  301  O   HOH T 300      33.154  36.613  31.496  1.00  0.48           O  
HETATM  302  O   HOH T 301      54.164  35.438  30.663  1.00  0.48           O  
HETATM  303  O   HOH T 302      57.694  36.273  28.952  1.00  0.48           O  
HETATM  304  O   HOH T 303      18.536  28.083  20.780  1.00  0.48           O  
HETATM  305  O   HOH T 304      70.586  28.133  13.033  1.00  0.48           O  
HETATM  306  O   HOH T 305      57.538  43.155  30.300  1.00  0.48           O  
HETATM  307  O   HOH T 306      37.288  42.150  -5.741  1.00  0.48           O  
HETATM  308  O   HOH T 307      31.991  41.433  -1.869  1.00  0.48           O  
HETATM  309  O   HOH T 308      47.634  40.487  -5.994  1.00  0.48           O  
HETATM  310  O   HOH T 309      35.858  61.478  10.452  1.00  0.48           O  
HETATM  311  O   HOH T 310      40.836  29.466  19.686  1.00  0.48           O  
HETATM  312  O   HOH T 311      59.664  40.493  26.962  1.00  0.48           O  
HETATM  313  O   HOH T 312      66.314  39.862   3.409  1.00  0.48           O  
HETATM  314  O   HOH T 313      24.377  48.258   8.627  1.00  0.48           O  
HETATM  315  O   HOH T 314      51.146  54.363  13.928  1.00  0.48           O  
HETATM  316  O   HOH T 315      37.454  56.370  16.527  1.00  0.49           O  
HETATM  317  O   HOH T 316      24.452  27.498   7.215  1.00  0.49           O  
HETATM  318  O   HOH T 317      40.384  53.143  29.094  1.00  0.49           O  
HETATM  319  O   HOH T 318      49.854  26.992   4.174  1.00  0.49           O  
HETATM  320  O   HOH T 319      68.277  27.867  14.446  1.00  0.49           O  
HETATM  321  O   HOH T 320      52.303  35.435  -7.189  1.00  0.49           O  
HETATM  322  O   HOH T 321      53.637  55.462  13.915  1.00  0.49           O  
HETATM  323  O   HOH T 322      42.294  17.954  29.205  1.00  0.49           O  
HETATM  324  O   HOH T 323      44.537  56.568  15.561  1.00  0.49           O  
HETATM  325  O   HOH T 324      52.539  54.208  11.589  1.00  0.49           O  
HETATM  326  O   HOH T 325      51.220  52.255  -3.112  1.00  0.49           O  
HETATM  327  O   HOH T 326      40.163  21.943  31.948  1.00  0.49           O  
HETATM  328  O   HOH T 327      52.129  27.177  28.009  1.00  0.50           O  
HETATM  329  O   HOH T 328      54.061  20.089   2.303  1.00  0.50           O  
HETATM  330  O   HOH T 329      39.536  18.664  28.996  1.00  0.50           O  
HETATM  331  O   HOH T 330      20.679  42.978   7.102  1.00  0.50           O  
HETATM  332  O   HOH T 331      35.644  47.668  23.578  1.00  0.50           O  
HETATM  333  O   HOH T 332      34.937  31.916  32.494  1.00  0.50           O  
HETATM  334  O   HOH T 333      46.727  25.213   0.082  1.00  0.50           O  
HETATM  335  O   HOH T 334      21.920  45.267   8.009  1.00  0.50           O  
HETATM  336  O   HOH T 335      33.080  29.798  -0.172  1.00  0.51           O  
HETATM  337  O   HOH T 336      57.418  55.499   4.170  1.00  0.51           O  
HETATM  338  O   HOH T 337      22.296  31.419   3.809  1.00  0.51           O  
HETATM  339  O   HOH T 338      48.871  43.148   2.337  1.00  0.51           O  
HETATM  340  O   HOH T 339      44.627  19.573  29.402  1.00  0.51           O  
HETATM  341  O   HOH T 340      39.430  20.309  25.356  1.00  0.51           O  
HETATM  342  O   HOH T 341      63.498  19.251   3.559  1.00  0.51           O  
HETATM  343  O   HOH T 342      50.110  28.404   0.296  1.00  0.51           O  
HETATM  344  O   HOH T 343      45.484  38.893  -9.120  1.00  0.51           O  
HETATM  345  O   HOH T 344      67.844  31.616  12.060  1.00  0.51           O  
HETATM  346  O   HOH T 345      21.742  40.869  22.709  1.00  0.51           O  
HETATM  347  O   HOH T 346      36.514  46.643  21.719  1.00  0.51           O  
HETATM  348  O   HOH T 347      64.585  32.863  19.487  1.00  0.51           O  
HETATM  349  O   HOH T 348      54.533  18.285   4.377  1.00  0.51           O  
HETATM  350  O   HOH T 349      38.953  34.096  -5.061  1.00  0.51           O  
HETATM  351  O   HOH T 350      42.316  59.266   8.981  1.00  0.52           O  
HETATM  352  O   HOH T 351      40.493  27.871  32.039  1.00  0.52           O  
HETATM  353  O   HOH T 352      34.024  41.967  11.582  1.00  0.52           O  
HETATM  354  O   HOH T 353      36.572  24.954  10.629  1.00  0.52           O  
HETATM  355  O   HOH T 354      30.344  44.486  -0.583  1.00  0.52           O  
HETATM  356  O   HOH T 355      53.631  29.384  27.669  1.00  0.52           O  
HETATM  357  O   HOH T 356      45.274  29.763  11.609  1.00  0.52           O  
HETATM  358  O   HOH T 357      56.664  43.554  -0.944  1.00  0.52           O  
HETATM  359  O   HOH T 358      64.864  34.849  23.751  1.00  0.52           O  
HETATM  360  O   HOH T 359      69.865  33.441  -5.284  1.00  0.52           O  
HETATM  361  O   HOH T 360      45.040  50.411  32.591  1.00  0.52           O  
HETATM  362  O   HOH T 361      37.947  26.869  31.638  1.00  0.53           O  
HETATM  363  O   HOH T 362      25.789  31.592  31.669  1.00  0.53           O  
HETATM  364  O   HOH T 363      69.683  31.248  -7.147  1.00  0.53           O  
HETATM  365  O   HOH T 364      48.264  54.216  10.249  1.00  0.53           O  
HETATM  366  O   HOH T 365      33.097  34.320  -2.358  1.00  0.53           O  
HETATM  367  O   HOH T 366      25.131  25.063  31.696  1.00  0.53           O  
HETATM  368  O   HOH T 367      24.392  28.823  35.047  1.00  0.53           O  
HETATM  369  O   HOH T 368      42.296  34.891  19.323  1.00  0.53           O  
HETATM  370  O   HOH T 369      42.228  20.308  30.806  1.00  0.53           O  
HETATM  371  O   HOH T 370      47.806  47.002  -7.812  1.00  0.53           O  
HETATM  372  O   HOH T 371      57.696  44.852   3.908  1.00  0.54           O  
HETATM  373  O   HOH T 372      64.523  24.348   7.969  1.00  0.54           O  
HETATM  374  O   HOH T 373      47.712  34.847  -7.606  1.00  0.54           O  
HETATM  375  O   HOH T 374      41.632  48.609  -3.941  1.00  0.54           O  
HETATM  376  O   HOH T 375      42.349  57.830  22.927  1.00  0.54           O  
HETATM  377  O   HOH T 376      61.746  52.833   4.903  1.00  0.54           O  
HETATM  378  O   HOH T 377      31.567  32.404  33.927  1.00  0.54           O  
HETATM  379  O   HOH T 378      31.011  44.026   2.030  1.00  0.54           O  
HETATM  380  O   HOH T 379      64.073  51.775   6.401  1.00  0.54           O  
HETATM  381  O   HOH T 380      28.048  44.850  18.912  1.00  0.54           O  
HETATM  382  O   HOH T 381      46.254  51.991   3.992  1.00  0.54           O  
HETATM  383  O   HOH T 382      44.928  52.395  25.688  1.00  0.54           O  
HETATM  384  O   HOH T 383      53.796  28.346   0.867  1.00  0.54           O  
HETATM  385  O   HOH T 384      34.025  59.090   6.355  1.00  0.54           O  
HETATM  386  O   HOH T 385      33.712  48.357  25.284  1.00  0.55           O  
HETATM  387  O   HOH T 386      28.546  19.564  21.038  1.00  0.55           O  
HETATM  388  O   HOH T 387      50.895  30.011  33.918  1.00  0.55           O  
HETATM  389  O   HOH T 388      32.898  23.359   2.435  1.00  0.55           O  
HETATM  390  O   HOH T 389      44.572  28.531  33.217  1.00  0.55           O  
HETATM  391  O   HOH T 390      35.353  28.463  -1.160  1.00  0.55           O  
HETATM  392  O   HOH T 391      47.762  25.964   7.310  1.00  0.55           O  
HETATM  393  O   HOH T 392      41.323  21.066   3.970  1.00  0.56           O  
HETATM  394  O   HOH T 393      40.759  22.543  -5.449  1.00  0.56           O  
HETATM  395  O   HOH T 394      52.250  36.405  32.481  1.00  0.56           O  
HETATM  396  O   HOH T 395      58.512  42.763   5.519  1.00  0.56           O  
HETATM  397  O   HOH T 396      41.348  43.682  31.622  1.00  0.56           O  
HETATM  398  O   HOH T 397      20.155  36.430  14.564  1.00  0.56           O  
HETATM  399  O   HOH T 398      44.423  55.241   8.789  1.00  0.56           O  
HETATM  400  O   HOH T 399      41.511  55.017   4.371  1.00  0.56           O  
HETATM  401  O   HOH T 400      42.075  26.765  14.558  1.00  0.56           O  
HETATM  402  O   HOH T 401      58.378  55.850   6.754  1.00  0.56           O  
HETATM  403  O   HOH T 402      19.313  40.541  21.893  1.00  0.57           O  
HETATM  404  O   HOH T 403      26.678  30.054  36.538  1.00  0.57           O  
HETATM  405  O   HOH T 404      48.490  20.210  18.399  1.00  0.57           O  
HETATM  406  O   HOH T 405      37.515  54.293  28.732  1.00  0.57           O  
HETATM  407  O   HOH T 406      24.113  27.193  37.267  1.00  0.57           O  
HETATM  408  O   HOH T 407      63.175  52.618  29.922  1.00  0.57           O  
HETATM  409  O   HOH T 408      34.094  30.068  12.117  1.00  0.57           O  
HETATM  410  O   HOH T 409      34.039  43.238  28.477  1.00  0.57           O  
HETATM  411  O   HOH T 410      69.315  33.849  12.183  1.00  0.57           O  
HETATM  412  O   HOH T 411      42.004  55.861  28.267  1.00  0.57           O  
HETATM  413  O   HOH T 412      59.939  15.407   3.301  1.00  0.57           O  
HETATM  414  O   HOH T 413      65.624  29.964  18.637  1.00  0.58           O  
HETATM  415  O   HOH T 414      62.473  41.393   9.298  1.00  0.58           O  
HETATM  416  O   HOH T 415      21.919  32.051  28.632  1.00  0.59           O  
HETATM  417  O   HOH T 416      20.786  34.505  28.026  1.00  0.59           O  
HETATM  418  O   HOH T 417      62.397  43.426  29.247  1.00  0.60           O  
HETATM  419  O   HOH T 418      66.617  31.710   9.610  1.00  0.60           O  
HETATM  420  O   HOH T 419      67.384  38.278  13.052  1.00  0.61           O  
HETATM  421  O   HOH T 420      31.559  59.207   9.743  1.00  0.62           O  
TER     422      HOH T 420 
