# Supplementary material for: Accurate Prediction of Hydration Sites of Proteins Using Energy Model With Atom Embedding
Source: Front Mol Biosci. 2021 Sep 20;8:756075. doi: 10.3389/fmolb.2021.756075 (PMC8488165; doi:10.3389/fmolb.2021.756075)
Supplement: Supplementary file 1 [file DataSheet1.ZIP › Data Sheet 1/Our_result_pdb/our_dataset_output/2BKL_watersite.pdb]

HEADER                                                        XXXX


JRNL        PMID   -1
HETATM    1  O   HOH T   0     -35.420  -9.407  -1.369  1.00  0.15           O  
HETATM    2  O   HOH T   1     -36.289 -11.652  73.320  1.00  0.16           O  
HETATM    3  O   HOH T   2     -58.498   2.801   1.839  1.00  0.17           O  
HETATM    4  O   HOH T   3     -12.280  -3.431  66.171  1.00  0.17           O  
HETATM    5  O   HOH T   4     -68.744  -5.454  21.314  1.00  0.17           O  
HETATM    6  O   HOH T   5     -26.610 -18.724  33.331  1.00  0.18           O  
HETATM    7  O   HOH T   6     -54.032  20.852  -5.327  1.00  0.18           O  
HETATM    8  O   HOH T   7     -15.208  16.247  66.228  1.00  0.18           O  
HETATM    9  O   HOH T   8     -43.205  10.783  56.811  1.00  0.18           O  
HETATM   10  O   HOH T   9     -61.933 -13.788   1.536  1.00  0.18           O  
HETATM   11  O   HOH T  10     -68.718 -19.587  19.938  1.00  0.18           O  
HETATM   12  O   HOH T  11     -26.480  16.902   6.014  1.00  0.19           O  
HETATM   13  O   HOH T  12      -5.809 -11.981  31.287  1.00  0.19           O  
HETATM   14  O   HOH T  13     -28.187  -3.291  37.247  1.00  0.19           O  
HETATM   15  O   HOH T  14     -32.194  -8.970  14.701  1.00  0.19           O  
HETATM   16  O   HOH T  15     -42.122 -11.795   5.953  1.00  0.19           O  
HETATM   17  O   HOH T  16     -45.346  -0.596  38.153  1.00  0.19           O  
HETATM   18  O   HOH T  17     -33.255 -14.829  57.733  1.00  0.19           O  
HETATM   19  O   HOH T  18     -10.267 -18.910  72.269  1.00  0.19           O  
HETATM   20  O   HOH T  19     -46.642   9.092  25.125  1.00  0.19           O  
HETATM   21  O   HOH T  20     -21.221  12.827  58.402  1.00  0.19           O  
HETATM   22  O   HOH T  21     -16.082  10.385  -0.049  1.00  0.20           O  
HETATM   23  O   HOH T  22      -4.282 -31.594  57.379  1.00  0.20           O  
HETATM   24  O   HOH T  23     -17.473 -34.034  45.856  1.00  0.20           O  
HETATM   25  O   HOH T  24     -31.600 -20.766  47.981  1.00  0.20           O  
HETATM   26  O   HOH T  25     -23.126  11.217  -9.429  1.00  0.20           O  
HETATM   27  O   HOH T  26     -27.431  -1.285  64.016  1.00  0.20           O  
HETATM   28  O   HOH T  27     -38.100  -1.495  54.548  1.00  0.20           O  
HETATM   29  O   HOH T  28     -62.306 -11.971  30.882  1.00  0.20           O  
HETATM   30  O   HOH T  29     -34.938   5.478  53.547  1.00  0.20           O  
HETATM   31  O   HOH T  30     -39.773 -16.737  58.159  1.00  0.20           O  
HETATM   32  O   HOH T  31     -38.574 -16.863  20.993  1.00  0.20           O  
HETATM   33  O   HOH T  32     -27.250   4.918  -9.823  1.00  0.20           O  
HETATM   34  O   HOH T  33     -38.528  -6.476  14.378  1.00  0.20           O  
HETATM   35  O   HOH T  34      -2.838 -18.989  50.954  1.00  0.20           O  
HETATM   36  O   HOH T  35      -8.338 -20.418  70.970  1.00  0.21           O  
HETATM   37  O   HOH T  36     -47.742   1.872  71.783  1.00  0.21           O  
HETATM   38  O   HOH T  37     -11.122 -38.128  65.707  1.00  0.21           O  
HETATM   39  O   HOH T  38     -40.502  -8.486  25.273  1.00  0.21           O  
HETATM   40  O   HOH T  39     -61.830  11.605  18.171  1.00  0.21           O  
HETATM   41  O   HOH T  40      -9.895  14.938  57.146  1.00  0.21           O  
HETATM   42  O   HOH T  41     -19.246   1.944  63.120  1.00  0.21           O  
HETATM   43  O   HOH T  42     -57.744  -4.762 -17.734  1.00  0.21           O  
HETATM   44  O   HOH T  43     -58.277   0.364  41.370  1.00  0.21           O  
HETATM   45  O   HOH T  44     -43.098 -12.987  68.411  1.00  0.21           O  
HETATM   46  O   HOH T  45     -10.139   5.590  46.111  1.00  0.21           O  
HETATM   47  O   HOH T  46     -13.353  -3.340  87.164  1.00  0.21           O  
HETATM   48  O   HOH T  47     -40.624 -12.150  19.714  1.00  0.21           O  
HETATM   49  O   HOH T  48     -40.781   6.435  17.906  1.00  0.21           O  
HETATM   50  O   HOH T  49     -23.983  -4.808  41.812  1.00  0.21           O  
HETATM   51  O   HOH T  50     -33.331 -21.754  55.227  1.00  0.21           O  
HETATM   52  O   HOH T  51     -35.174  13.789  11.069  1.00  0.21           O  
HETATM   53  O   HOH T  52     -45.310   5.426  82.547  1.00  0.21           O  
HETATM   54  O   HOH T  53     -27.168 -16.638  46.066  1.00  0.21           O  
HETATM   55  O   HOH T  54      -8.310  -1.364  47.396  1.00  0.22           O  
HETATM   56  O   HOH T  55     -34.477 -26.778  55.178  1.00  0.22           O  
HETATM   57  O   HOH T  56      -9.696 -25.318  75.967  1.00  0.22           O  
HETATM   58  O   HOH T  57     -56.526 -18.534  32.694  1.00  0.22           O  
HETATM   59  O   HOH T  58     -63.063   8.791  36.451  1.00  0.22           O  
HETATM   60  O   HOH T  59     -22.035  -8.284  32.998  1.00  0.22           O  
HETATM   61  O   HOH T  60     -62.663 -29.286  14.470  1.00  0.22           O  
HETATM   62  O   HOH T  61     -51.177   8.438   3.234  1.00  0.22           O  
HETATM   63  O   HOH T  62     -28.642  -9.362   3.937  1.00  0.22           O  
HETATM   64  O   HOH T  63      -9.891   2.721  64.894  1.00  0.22           O  
HETATM   65  O   HOH T  64     -30.223 -10.557  70.636  1.00  0.22           O  
HETATM   66  O   HOH T  65     -30.024  18.096  77.140  1.00  0.22           O  
HETATM   67  O   HOH T  66     -46.621  11.491  73.226  1.00  0.22           O  
HETATM   68  O   HOH T  67     -41.188  -6.988   0.626  1.00  0.22           O  
HETATM   69  O   HOH T  68     -63.835 -14.636   3.362  1.00  0.22           O  
HETATM   70  O   HOH T  69     -61.362   3.382 -12.288  1.00  0.22           O  
HETATM   71  O   HOH T  70     -57.846  21.147  24.159  1.00  0.22           O  
HETATM   72  O   HOH T  71     -41.909 -20.241  47.859  1.00  0.22           O  
HETATM   73  O   HOH T  72     -14.893 -17.648  43.942  1.00  0.22           O  
HETATM   74  O   HOH T  73     -60.351   9.230   0.693  1.00  0.22           O  
HETATM   75  O   HOH T  74     -27.195  -4.250  82.806  1.00  0.22           O  
HETATM   76  O   HOH T  75     -16.125  14.429   1.178  1.00  0.22           O  
HETATM   77  O   HOH T  76     -46.978  15.610 -17.905  1.00  0.23           O  
HETATM   78  O   HOH T  77     -57.728   4.231 -13.733  1.00  0.23           O  
HETATM   79  O   HOH T  78     -31.175 -15.917  18.707  1.00  0.23           O  
HETATM   80  O   HOH T  79     -39.686  12.339  77.429  1.00  0.23           O  
HETATM   81  O   HOH T  80     -30.102  -3.023   9.654  1.00  0.23           O  
HETATM   82  O   HOH T  81     -48.166  20.056   3.259  1.00  0.23           O  
HETATM   83  O   HOH T  82     -38.465 -17.396  10.434  1.00  0.23           O  
HETATM   84  O   HOH T  83     -68.732  -1.526   5.023  1.00  0.23           O  
HETATM   85  O   HOH T  84     -59.756  18.645  17.127  1.00  0.23           O  
HETATM   86  O   HOH T  85     -22.788   2.771  -4.467  1.00  0.23           O  
HETATM   87  O   HOH T  86     -22.365  16.677  79.805  1.00  0.23           O  
HETATM   88  O   HOH T  87     -32.574   6.632  12.408  1.00  0.23           O  
HETATM   89  O   HOH T  88     -54.512 -29.303  18.612  1.00  0.23           O  
HETATM   90  O   HOH T  89     -23.637  -0.728  -8.809  1.00  0.23           O  
HETATM   91  O   HOH T  90     -37.583  -9.625  40.667  1.00  0.24           O  
HETATM   92  O   HOH T  91     -15.675  15.704  55.948  1.00  0.24           O  
HETATM   93  O   HOH T  92     -50.156 -24.717   6.265  1.00  0.24           O  
HETATM   94  O   HOH T  93     -29.905  -8.543  33.747  1.00  0.24           O  
HETATM   95  O   HOH T  94     -34.342 -23.447  65.448  1.00  0.24           O  
HETATM   96  O   HOH T  95     -50.825  23.107  -9.396  1.00  0.24           O  
HETATM   97  O   HOH T  96     -43.166   4.268   3.361  1.00  0.24           O  
HETATM   98  O   HOH T  97     -41.189  -9.277  60.765  1.00  0.24           O  
HETATM   99  O   HOH T  98     -43.901  -5.155 -13.090  1.00  0.24           O  
HETATM  100  O   HOH T  99     -41.541 -24.546  56.884  1.00  0.24           O  
HETATM  101  O   HOH T 100     -81.030   4.725  12.797  1.00  0.24           O  
HETATM  102  O   HOH T 101     -54.539  -7.792  79.860  1.00  0.24           O  
HETATM  103  O   HOH T 102     -26.061 -21.952  64.226  1.00  0.24           O  
HETATM  104  O   HOH T 103     -55.226  -2.534  55.058  1.00  0.24           O  
HETATM  105  O   HOH T 104     -44.736  -3.489  25.756  1.00  0.24           O  
HETATM  106  O   HOH T 105     -13.506 -20.999  60.451  1.00  0.24           O  
HETATM  107  O   HOH T 106     -44.737  -4.552  54.128  1.00  0.24           O  
HETATM  108  O   HOH T 107     -31.489  -2.606  12.035  1.00  0.24           O  
HETATM  109  O   HOH T 108     -36.566  -2.917  28.628  1.00  0.24           O  
HETATM  110  O   HOH T 109     -15.889 -26.654  46.420  1.00  0.24           O  
HETATM  111  O   HOH T 110     -30.741   0.104  -6.510  1.00  0.24           O  
HETATM  112  O   HOH T 111     -11.053  -9.977  75.236  1.00  0.24           O  
HETATM  113  O   HOH T 112     -63.131 -20.942   0.227  1.00  0.24           O  
HETATM  114  O   HOH T 113     -62.216  17.892  17.946  1.00  0.24           O  
HETATM  115  O   HOH T 114     -25.516  -7.332  17.013  1.00  0.24           O  
HETATM  116  O   HOH T 115     -49.486   6.370  69.938  1.00  0.24           O  
HETATM  117  O   HOH T 116     -55.233  -7.893  28.687  1.00  0.24           O  
HETATM  118  O   HOH T 117      -5.239   3.524  54.397  1.00  0.24           O  
HETATM  119  O   HOH T 118     -24.014  -6.850  68.338  1.00  0.24           O  
HETATM  120  O   HOH T 119     -19.454  -9.865  63.376  1.00  0.24           O  
HETATM  121  O   HOH T 120     -27.511   2.910  47.440  1.00  0.25           O  
HETATM  122  O   HOH T 121     -46.872 -23.354  30.288  1.00  0.25           O  
HETATM  123  O   HOH T 122     -54.247   7.567  64.807  1.00  0.25           O  
HETATM  124  O   HOH T 123     -29.930  -4.325  49.925  1.00  0.25           O  
HETATM  125  O   HOH T 124     -74.295   2.957   2.305  1.00  0.25           O  
HETATM  126  O   HOH T 125     -28.421 -31.123  37.210  1.00  0.25           O  
HETATM  127  O   HOH T 126     -38.567  23.236  11.030  1.00  0.25           O  
HETATM  128  O   HOH T 127     -13.892 -28.285  54.092  1.00  0.25           O  
HETATM  129  O   HOH T 128     -47.311  -1.723   1.416  1.00  0.25           O  
HETATM  130  O   HOH T 129     -20.875   7.366  -7.273  1.00  0.25           O  
HETATM  131  O   HOH T 130     -24.393  -6.731  19.530  1.00  0.25           O  
HETATM  132  O   HOH T 131     -47.235   0.713  -1.326  1.00  0.25           O  
HETATM  133  O   HOH T 132     -34.445  -9.591  44.384  1.00  0.25           O  
HETATM  134  O   HOH T 133     -53.294  17.480  20.249  1.00  0.25           O  
HETATM  135  O   HOH T 134     -45.146 -13.774  39.339  1.00  0.25           O  
HETATM  136  O   HOH T 135     -62.194 -11.339  18.674  1.00  0.25           O  
HETATM  137  O   HOH T 136     -60.471   4.130   0.358  1.00  0.25           O  
HETATM  138  O   HOH T 137     -29.263 -19.686  -1.235  1.00  0.25           O  
HETATM  139  O   HOH T 138     -23.015 -29.772  71.598  1.00  0.25           O  
HETATM  140  O   HOH T 139     -31.121  -0.611  43.255  1.00  0.25           O  
HETATM  141  O   HOH T 140     -11.445  -5.886  65.111  1.00  0.25           O  
HETATM  142  O   HOH T 141     -35.927 -15.884   3.982  1.00  0.25           O  
HETATM  143  O   HOH T 142     -53.920  19.869 -20.270  1.00  0.25           O  
HETATM  144  O   HOH T 143     -45.145 -28.171  25.749  1.00  0.26           O  
HETATM  145  O   HOH T 144     -10.199  -1.788  67.139  1.00  0.26           O  
HETATM  146  O   HOH T 145      -9.720 -26.736  53.914  1.00  0.26           O  
HETATM  147  O   HOH T 146     -53.542  16.715  12.696  1.00  0.26           O  
HETATM  148  O   HOH T 147     -38.241  -8.417  78.384  1.00  0.26           O  
HETATM  149  O   HOH T 148     -33.252 -16.588   3.897  1.00  0.26           O  
HETATM  150  O   HOH T 149     -34.705   6.595  47.013  1.00  0.26           O  
HETATM  151  O   HOH T 150     -43.827  15.695  10.857  1.00  0.26           O  
HETATM  152  O   HOH T 151     -51.252   2.029 -17.384  1.00  0.26           O  
HETATM  153  O   HOH T 152     -34.072 -16.603  45.283  1.00  0.26           O  
HETATM  154  O   HOH T 153     -42.124  12.185  29.174  1.00  0.26           O  
HETATM  155  O   HOH T 154     -30.736 -22.156  54.552  1.00  0.26           O  
HETATM  156  O   HOH T 155     -14.896   2.979   5.508  1.00  0.26           O  
HETATM  157  O   HOH T 156     -55.525  21.313  53.101  1.00  0.26           O  
HETATM  158  O   HOH T 157     -39.843  -2.280  59.149  1.00  0.26           O  
HETATM  159  O   HOH T 158     -25.347   0.961  37.929  1.00  0.26           O  
HETATM  160  O   HOH T 159     -13.701 -20.372  30.332  1.00  0.26           O  
HETATM  161  O   HOH T 160     -37.896   2.460  17.875  1.00  0.26           O  
HETATM  162  O   HOH T 161     -12.821   8.304  49.181  1.00  0.26           O  
HETATM  163  O   HOH T 162     -63.809 -20.200  24.789  1.00  0.26           O  
HETATM  164  O   HOH T 163     -40.515 -16.381   3.930  1.00  0.26           O  
HETATM  165  O   HOH T 164     -41.988  13.822  78.219  1.00  0.26           O  
HETATM  166  O   HOH T 165     -52.315  16.570  22.701  1.00  0.26           O  
HETATM  167  O   HOH T 166     -60.144  -8.347  -6.307  1.00  0.26           O  
HETATM  168  O   HOH T 167     -18.712   8.111  83.720  1.00  0.26           O  
HETATM  169  O   HOH T 168     -67.878  -2.755  30.943  1.00  0.26           O  
HETATM  170  O   HOH T 169     -21.534  -2.403  44.115  1.00  0.27           O  
HETATM  171  O   HOH T 170     -33.126  -8.361  -7.234  1.00  0.27           O  
HETATM  172  O   HOH T 171     -14.350 -28.878  45.794  1.00  0.27           O  
HETATM  173  O   HOH T 172     -52.849  -7.481  69.009  1.00  0.27           O  
HETATM  174  O   HOH T 173     -23.610   5.001  82.382  1.00  0.27           O  
HETATM  175  O   HOH T 174     -26.561  -0.282  49.408  1.00  0.27           O  
HETATM  176  O   HOH T 175     -45.257  -9.765  20.532  1.00  0.27           O  
HETATM  177  O   HOH T 176     -29.951 -17.163  67.484  1.00  0.27           O  
HETATM  178  O   HOH T 177     -81.179  -0.588  17.981  1.00  0.27           O  
HETATM  179  O   HOH T 178     -42.024 -24.264  25.948  1.00  0.27           O  
HETATM  180  O   HOH T 179     -16.382 -24.090  45.273  1.00  0.27           O  
HETATM  181  O   HOH T 180     -64.359 -14.339  34.964  1.00  0.27           O  
HETATM  182  O   HOH T 181     -17.549 -25.271  56.593  1.00  0.27           O  
HETATM  183  O   HOH T 182      -5.900  -4.638  65.683  1.00  0.27           O  
HETATM  184  O   HOH T 183     -54.285   6.164  52.678  1.00  0.27           O  
HETATM  185  O   HOH T 184     -26.868  12.744 -15.213  1.00  0.27           O  
HETATM  186  O   HOH T 185     -20.895 -10.419  31.765  1.00  0.27           O  
HETATM  187  O   HOH T 186     -40.308  13.364  15.687  1.00  0.27           O  
HETATM  188  O   HOH T 187     -45.306  -1.194  24.172  1.00  0.27           O  
HETATM  189  O   HOH T 188     -49.293   7.342  72.544  1.00  0.27           O  
HETATM  190  O   HOH T 189     -34.326 -12.253  -7.534  1.00  0.27           O  
HETATM  191  O   HOH T 190     -35.155  -7.901  30.730  1.00  0.27           O  
HETATM  192  O   HOH T 191     -29.253  -2.660  43.077  1.00  0.27           O  
HETATM  193  O   HOH T 192     -63.985  -2.769  25.184  1.00  0.27           O  
HETATM  194  O   HOH T 193     -29.759 -13.535  49.253  1.00  0.27           O  
HETATM  195  O   HOH T 194     -10.178 -28.264  51.642  1.00  0.27           O  
HETATM  196  O   HOH T 195     -40.918  10.664  23.658  1.00  0.27           O  
HETATM  197  O   HOH T 196     -36.393 -19.566  70.671  1.00  0.27           O  
HETATM  198  O   HOH T 197      -7.358  -1.728  49.921  1.00  0.27           O  
HETATM  199  O   HOH T 198     -23.657  -3.286  69.753  1.00  0.27           O  
HETATM  200  O   HOH T 199     -41.250 -21.313  35.510  1.00  0.27           O  
HETATM  201  O   HOH T 200     -64.570  14.252  10.116  1.00  0.27           O  
HETATM  202  O   HOH T 201     -48.738  10.587  22.550  1.00  0.27           O  
HETATM  203  O   HOH T 202     -15.302  20.927  69.637  1.00  0.27           O  
HETATM  204  O   HOH T 203     -43.036 -25.141  15.789  1.00  0.27           O  
HETATM  205  O   HOH T 204     -55.087  12.281   4.124  1.00  0.27           O  
HETATM  206  O   HOH T 205      -8.203   4.732  63.942  1.00  0.28           O  
HETATM  207  O   HOH T 206     -39.752   2.533  33.313  1.00  0.28           O  
HETATM  208  O   HOH T 207     -39.809  -9.836  58.457  1.00  0.28           O  
HETATM  209  O   HOH T 208     -22.228  -5.664  70.141  1.00  0.28           O  
HETATM  210  O   HOH T 209     -32.451 -19.859  62.608  1.00  0.28           O  
HETATM  211  O   HOH T 210     -35.573 -16.695  42.847  1.00  0.28           O  
HETATM  212  O   HOH T 211     -15.673  13.585  12.033  1.00  0.28           O  
HETATM  213  O   HOH T 212     -17.767  -7.208  82.668  1.00  0.28           O  
HETATM  214  O   HOH T 213     -42.653  14.165  17.191  1.00  0.28           O  
HETATM  215  O   HOH T 214     -32.650 -11.448  32.377  1.00  0.28           O  
HETATM  216  O   HOH T 215     -67.860  -0.042  30.461  1.00  0.28           O  
HETATM  217  O   HOH T 216     -76.382  -3.715   5.327  1.00  0.28           O  
HETATM  218  O   HOH T 217     -31.846 -13.373  36.460  1.00  0.28           O  
HETATM  219  O   HOH T 218     -61.302  -9.946  37.593  1.00  0.28           O  
HETATM  220  O   HOH T 219     -42.271   6.429  76.332  1.00  0.28           O  
HETATM  221  O   HOH T 220     -48.938 -16.407   3.443  1.00  0.28           O  
HETATM  222  O   HOH T 221     -39.840 -12.833  11.403  1.00  0.28           O  
HETATM  223  O   HOH T 222     -53.277  23.650 -10.453  1.00  0.28           O  
HETATM  224  O   HOH T 223     -56.774 -11.572  28.318  1.00  0.28           O  
HETATM  225  O   HOH T 224      -8.989   6.583  77.876  1.00  0.28           O  
HETATM  226  O   HOH T 225     -53.082  10.321   4.108  1.00  0.28           O  
HETATM  227  O   HOH T 226     -53.994 -18.878  33.718  1.00  0.28           O  
HETATM  228  O   HOH T 227     -60.200 -19.977  33.314  1.00  0.28           O  
HETATM  229  O   HOH T 228     -44.607 -11.151  12.188  1.00  0.28           O  
HETATM  230  O   HOH T 229     -65.751   8.555  37.108  1.00  0.28           O  
HETATM  231  O   HOH T 230     -39.818  -0.259  41.698  1.00  0.28           O  
HETATM  232  O   HOH T 231     -33.005 -12.376  -1.202  1.00  0.28           O  
HETATM  233  O   HOH T 232     -22.698   7.299  59.080  1.00  0.28           O  
HETATM  234  O   HOH T 233     -31.348  -0.186  15.353  1.00  0.28           O  
HETATM  235  O   HOH T 234     -46.337 -15.003  10.660  1.00  0.28           O  
HETATM  236  O   HOH T 235     -59.270  -3.169  11.685  1.00  0.28           O  
HETATM  237  O   HOH T 236     -19.493 -15.168  46.934  1.00  0.28           O  
HETATM  238  O   HOH T 237     -36.739 -31.408  50.288  1.00  0.28           O  
HETATM  239  O   HOH T 238      -9.908 -29.479  41.110  1.00  0.28           O  
HETATM  240  O   HOH T 239     -40.149  11.685   7.861  1.00  0.28           O  
HETATM  241  O   HOH T 240     -14.450   6.314  59.931  1.00  0.28           O  
HETATM  242  O   HOH T 241     -14.870  -0.580  72.107  1.00  0.28           O  
HETATM  243  O   HOH T 242     -24.564 -18.415  71.822  1.00  0.29           O  
HETATM  244  O   HOH T 243     -70.225   1.802  35.880  1.00  0.29           O  
HETATM  245  O   HOH T 244     -64.056   0.307  21.440  1.00  0.29           O  
HETATM  246  O   HOH T 245     -57.324  -3.107  27.603  1.00  0.29           O  
HETATM  247  O   HOH T 246     -17.233  20.451  71.619  1.00  0.29           O  
HETATM  248  O   HOH T 247     -21.727  -3.282   2.344  1.00  0.29           O  
HETATM  249  O   HOH T 248     -31.522  -2.384  18.696  1.00  0.29           O  
HETATM  250  O   HOH T 249     -79.109   7.753  16.292  1.00  0.29           O  
HETATM  251  O   HOH T 250     -48.920   9.184  34.623  1.00  0.29           O  
HETATM  252  O   HOH T 251     -53.579   3.187 -16.567  1.00  0.29           O  
HETATM  253  O   HOH T 252     -43.326  31.987   5.469  1.00  0.29           O  
HETATM  254  O   HOH T 253     -56.685  12.115  37.951  1.00  0.29           O  
HETATM  255  O   HOH T 254     -63.333  -7.044  -4.231  1.00  0.29           O  
HETATM  256  O   HOH T 255      -0.038  -6.852  65.508  1.00  0.29           O  
HETATM  257  O   HOH T 256     -41.951 -19.121  40.692  1.00  0.29           O  
HETATM  258  O   HOH T 257     -37.795  -3.814  26.420  1.00  0.29           O  
HETATM  259  O   HOH T 258     -29.795   4.074  57.465  1.00  0.29           O  
HETATM  260  O   HOH T 259     -36.427  16.270  18.431  1.00  0.29           O  
HETATM  261  O   HOH T 260     -50.124   9.799  60.838  1.00  0.29           O  
HETATM  262  O   HOH T 261     -47.534 -14.244   2.273  1.00  0.29           O  
HETATM  263  O   HOH T 262     -18.290  -5.161   1.618  1.00  0.29           O  
HETATM  264  O   HOH T 263     -55.676   6.715  57.329  1.00  0.29           O  
HETATM  265  O   HOH T 264     -65.564  14.719  18.924  1.00  0.29           O  
HETATM  266  O   HOH T 265     -18.255 -34.888  48.470  1.00  0.29           O  
HETATM  267  O   HOH T 266     -39.809 -12.268  51.913  1.00  0.29           O  
HETATM  268  O   HOH T 267     -37.433  -3.274  56.613  1.00  0.29           O  
HETATM  269  O   HOH T 268     -39.929  -8.791  54.339  1.00  0.29           O  
HETATM  270  O   HOH T 269     -61.506  -6.576  42.044  1.00  0.29           O  
HETATM  271  O   HOH T 270     -49.365   9.120  24.879  1.00  0.29           O  
HETATM  272  O   HOH T 271     -18.841 -41.399  60.495  1.00  0.29           O  
HETATM  273  O   HOH T 272     -57.017  -5.727  28.538  1.00  0.29           O  
HETATM  274  O   HOH T 273     -32.594  20.487  49.729  1.00  0.29           O  
HETATM  275  O   HOH T 274     -77.149  -4.826   2.944  1.00  0.29           O  
HETATM  276  O   HOH T 275     -28.149 -38.930  58.300  1.00  0.29           O  
HETATM  277  O   HOH T 276     -17.434   1.095  61.328  1.00  0.29           O  
HETATM  278  O   HOH T 277     -48.882  -1.479  -0.843  1.00  0.29           O  
HETATM  279  O   HOH T 278     -33.238   4.338  11.245  1.00  0.29           O  
HETATM  280  O   HOH T 279     -46.980 -12.671  56.276  1.00  0.29           O  
HETATM  281  O   HOH T 280     -39.316 -17.906  37.949  1.00  0.29           O  
HETATM  282  O   HOH T 281     -53.081   7.328  45.892  1.00  0.29           O  
HETATM  283  O   HOH T 282     -55.751   3.079  -4.653  1.00  0.29           O  
HETATM  284  O   HOH T 283     -62.061   0.060  64.491  1.00  0.29           O  
HETATM  285  O   HOH T 284     -54.289 -15.603   9.088  1.00  0.29           O  
HETATM  286  O   HOH T 285     -44.180  -7.427  13.964  1.00  0.29           O  
HETATM  287  O   HOH T 286     -43.370   0.803  53.833  1.00  0.29           O  
HETATM  288  O   HOH T 287     -28.818 -39.638  55.793  1.00  0.29           O  
HETATM  289  O   HOH T 288     -41.525  -0.119  52.032  1.00  0.29           O  
HETATM  290  O   HOH T 289     -19.778  14.021   2.795  1.00  0.29           O  
HETATM  291  O   HOH T 290     -30.309 -15.051  28.555  1.00  0.29           O  
HETATM  292  O   HOH T 291     -30.244  -9.674  26.346  1.00  0.29           O  
HETATM  293  O   HOH T 292      -9.290 -33.587  52.604  1.00  0.29           O  
HETATM  294  O   HOH T 293      -8.022 -23.955  41.796  1.00  0.29           O  
HETATM  295  O   HOH T 294      -9.547 -30.631  50.493  1.00  0.29           O  
HETATM  296  O   HOH T 295     -56.235   6.115  54.659  1.00  0.29           O  
HETATM  297  O   HOH T 296       1.333  -7.539  58.479  1.00  0.30           O  
HETATM  298  O   HOH T 297     -55.142  -6.470  49.924  1.00  0.30           O  
HETATM  299  O   HOH T 298     -47.575  18.681  27.147  1.00  0.30           O  
HETATM  300  O   HOH T 299     -41.085  12.122  67.392  1.00  0.30           O  
HETATM  301  O   HOH T 300     -36.998 -17.842  52.982  1.00  0.30           O  
HETATM  302  O   HOH T 301     -47.033 -20.511  59.792  1.00  0.30           O  
HETATM  303  O   HOH T 302     -34.696   4.937  23.982  1.00  0.30           O  
HETATM  304  O   HOH T 303     -75.460   5.383  -0.099  1.00  0.30           O  
HETATM  305  O   HOH T 304     -11.154   9.358   1.432  1.00  0.30           O  
HETATM  306  O   HOH T 305     -24.963 -13.641  21.123  1.00  0.30           O  
HETATM  307  O   HOH T 306     -12.963  -3.152  45.242  1.00  0.30           O  
HETATM  308  O   HOH T 307     -23.466 -20.980  71.495  1.00  0.30           O  
HETATM  309  O   HOH T 308     -65.322   3.529   2.310  1.00  0.30           O  
HETATM  310  O   HOH T 309      -8.715  -0.165  75.462  1.00  0.30           O  
HETATM  311  O   HOH T 310     -47.007  -7.818  47.728  1.00  0.30           O  
HETATM  312  O   HOH T 311     -14.012   6.715  51.087  1.00  0.30           O  
HETATM  313  O   HOH T 312      -6.640  -4.785  30.084  1.00  0.30           O  
HETATM  314  O   HOH T 313     -31.659  -7.343  50.802  1.00  0.30           O  
HETATM  315  O   HOH T 314     -38.625 -11.665  17.927  1.00  0.30           O  
HETATM  316  O   HOH T 315       4.855 -13.030  66.621  1.00  0.30           O  
HETATM  317  O   HOH T 316     -70.015 -14.585   6.165  1.00  0.30           O  
HETATM  318  O   HOH T 317     -56.571  14.128  15.994  1.00  0.30           O  
HETATM  319  O   HOH T 318     -32.969 -23.987  31.824  1.00  0.30           O  
HETATM  320  O   HOH T 319     -36.352 -10.897  42.726  1.00  0.30           O  
HETATM  321  O   HOH T 320      -8.078 -23.508  77.564  1.00  0.30           O  
HETATM  322  O   HOH T 321     -35.008  -8.037  20.212  1.00  0.30           O  
HETATM  323  O   HOH T 322     -73.005   2.355  28.471  1.00  0.30           O  
HETATM  324  O   HOH T 323     -29.497  22.654  53.116  1.00  0.30           O  
HETATM  325  O   HOH T 324     -38.913  12.359  22.665  1.00  0.30           O  
HETATM  326  O   HOH T 325     -29.957 -29.060  70.298  1.00  0.30           O  
HETATM  327  O   HOH T 326     -44.624  15.666  26.598  1.00  0.30           O  
HETATM  328  O   HOH T 327     -16.614  -6.996  80.085  1.00  0.30           O  
HETATM  329  O   HOH T 328     -45.386  -3.966  12.217  1.00  0.30           O  
HETATM  330  O   HOH T 329     -18.631  19.077  58.172  1.00  0.30           O  
HETATM  331  O   HOH T 330     -38.675  -0.821  57.097  1.00  0.30           O  
HETATM  332  O   HOH T 331     -25.078 -20.994  51.476  1.00  0.30           O  
HETATM  333  O   HOH T 332     -23.171   4.005  62.066  1.00  0.30           O  
HETATM  334  O   HOH T 333      -8.951 -18.658  52.660  1.00  0.31           O  
HETATM  335  O   HOH T 334     -30.905   4.154   8.618  1.00  0.31           O  
HETATM  336  O   HOH T 335     -27.572 -18.605  61.452  1.00  0.31           O  
HETATM  337  O   HOH T 336     -38.880  30.540   4.907  1.00  0.31           O  
HETATM  338  O   HOH T 337     -26.952 -15.154  58.168  1.00  0.31           O  
HETATM  339  O   HOH T 338     -30.456 -15.660  76.987  1.00  0.31           O  
HETATM  340  O   HOH T 339     -65.610 -27.475   5.592  1.00  0.31           O  
HETATM  341  O   HOH T 340     -20.551 -36.306  48.834  1.00  0.31           O  
HETATM  342  O   HOH T 341     -42.597  -2.209  47.361  1.00  0.31           O  
HETATM  343  O   HOH T 342     -12.235  -5.414  29.840  1.00  0.31           O  
HETATM  344  O   HOH T 343     -54.334 -32.536  11.795  1.00  0.31           O  
HETATM  345  O   HOH T 344     -39.313  17.515 -15.783  1.00  0.31           O  
HETATM  346  O   HOH T 345     -43.632  10.371  16.959  1.00  0.31           O  
HETATM  347  O   HOH T 346     -14.663  -0.162  55.764  1.00  0.31           O  
HETATM  348  O   HOH T 347     -40.575   8.360  33.384  1.00  0.31           O  
HETATM  349  O   HOH T 348     -10.293  -5.244  58.154  1.00  0.31           O  
HETATM  350  O   HOH T 349     -59.272   1.448  23.541  1.00  0.31           O  
HETATM  351  O   HOH T 350     -42.195   7.379   7.385  1.00  0.31           O  
HETATM  352  O   HOH T 351     -59.187 -34.399  16.078  1.00  0.31           O  
HETATM  353  O   HOH T 352     -43.073 -11.145  19.790  1.00  0.31           O  
HETATM  354  O   HOH T 353     -17.253 -44.561  51.351  1.00  0.31           O  
HETATM  355  O   HOH T 354     -51.941  -2.577   6.931  1.00  0.31           O  
HETATM  356  O   HOH T 355     -10.498  14.192  46.102  1.00  0.31           O  
HETATM  357  O   HOH T 356     -10.223 -16.220  56.026  1.00  0.31           O  
HETATM  358  O   HOH T 357     -27.021  -3.302  16.073  1.00  0.31           O  
HETATM  359  O   HOH T 358     -61.752   1.019  -3.965  1.00  0.31           O  
HETATM  360  O   HOH T 359     -23.448  -5.788  44.275  1.00  0.31           O  
HETATM  361  O   HOH T 360     -45.167 -10.876  18.002  1.00  0.31           O  
HETATM  362  O   HOH T 361     -74.796  10.733  17.137  1.00  0.31           O  
HETATM  363  O   HOH T 362     -46.244  15.124  82.603  1.00  0.31           O  
HETATM  364  O   HOH T 363     -37.530  -9.950  46.840  1.00  0.31           O  
HETATM  365  O   HOH T 364     -39.733  -0.653  74.555  1.00  0.31           O  
HETATM  366  O   HOH T 365     -47.121 -22.671  53.347  1.00  0.31           O  
HETATM  367  O   HOH T 366     -17.696   2.230  41.457  1.00  0.31           O  
HETATM  368  O   HOH T 367     -59.756   0.982   3.525  1.00  0.31           O  
HETATM  369  O   HOH T 368     -52.641  15.715  15.158  1.00  0.31           O  
HETATM  370  O   HOH T 369     -32.206  22.987  52.824  1.00  0.31           O  
HETATM  371  O   HOH T 370     -30.653  -1.745  -8.568  1.00  0.31           O  
HETATM  372  O   HOH T 371     -27.156  23.722  51.907  1.00  0.31           O  
HETATM  373  O   HOH T 372     -66.200  -0.582  38.271  1.00  0.31           O  
HETATM  374  O   HOH T 373     -61.764 -34.867  23.027  1.00  0.31           O  
HETATM  375  O   HOH T 374     -51.295  22.523 -12.121  1.00  0.31           O  
HETATM  376  O   HOH T 375     -58.841 -12.246  26.530  1.00  0.31           O  
HETATM  377  O   HOH T 376     -58.742  -7.190  -2.327  1.00  0.31           O  
HETATM  378  O   HOH T 377     -68.793  11.160  38.316  1.00  0.31           O  
HETATM  379  O   HOH T 378     -52.767  -0.254  24.238  1.00  0.31           O  
HETATM  380  O   HOH T 379     -35.528  -9.302  78.507  1.00  0.31           O  
HETATM  381  O   HOH T 380     -14.688 -42.531  57.493  1.00  0.31           O  
HETATM  382  O   HOH T 381     -10.193 -28.348  43.678  1.00  0.31           O  
HETATM  383  O   HOH T 382     -65.537  -6.909  33.397  1.00  0.31           O  
HETATM  384  O   HOH T 383     -51.481  18.621 -23.972  1.00  0.32           O  
HETATM  385  O   HOH T 384     -16.718  20.707   5.030  1.00  0.32           O  
HETATM  386  O   HOH T 385     -17.569 -11.442  30.398  1.00  0.32           O  
HETATM  387  O   HOH T 386     -31.766 -35.759  53.265  1.00  0.32           O  
HETATM  388  O   HOH T 387     -28.914  14.414  -4.008  1.00  0.32           O  
HETATM  389  O   HOH T 388     -50.299   9.019  47.804  1.00  0.32           O  
HETATM  390  O   HOH T 389     -65.422  -0.911  23.627  1.00  0.32           O  
HETATM  391  O   HOH T 390     -39.058  -1.709  -0.168  1.00  0.32           O  
HETATM  392  O   HOH T 391     -51.719   6.445  68.343  1.00  0.32           O  
HETATM  393  O   HOH T 392     -66.754 -19.933  27.685  1.00  0.32           O  
HETATM  394  O   HOH T 393      -9.713 -21.912  54.952  1.00  0.32           O  
HETATM  395  O   HOH T 394     -21.002   7.278  -4.569  1.00  0.32           O  
HETATM  396  O   HOH T 395     -35.424 -26.677  34.204  1.00  0.32           O  
HETATM  397  O   HOH T 396     -17.423   5.641  83.994  1.00  0.32           O  
HETATM  398  O   HOH T 397     -65.068  -1.720   0.046  1.00  0.32           O  
HETATM  399  O   HOH T 398      -5.731 -20.057  71.818  1.00  0.32           O  
HETATM  400  O   HOH T 399     -75.231  10.058  14.374  1.00  0.32           O  
HETATM  401  O   HOH T 400     -27.779 -16.677  31.794  1.00  0.32           O  
HETATM  402  O   HOH T 401     -21.209 -30.604  33.288  1.00  0.32           O  
HETATM  403  O   HOH T 402     -55.930  -4.963  53.885  1.00  0.32           O  
HETATM  404  O   HOH T 403     -32.005  -5.264  69.532  1.00  0.32           O  
HETATM  405  O   HOH T 404     -52.404   2.459   5.680  1.00  0.32           O  
HETATM  406  O   HOH T 405     -42.814   8.217  35.031  1.00  0.32           O  
HETATM  407  O   HOH T 406     -53.491  -7.221 -12.085  1.00  0.32           O  
HETATM  408  O   HOH T 407     -14.314 -22.567  44.223  1.00  0.32           O  
HETATM  409  O   HOH T 408     -33.776 -14.312  -3.245  1.00  0.32           O  
HETATM  410  O   HOH T 409     -44.633  -0.364  47.344  1.00  0.32           O  
HETATM  411  O   HOH T 410     -14.640   0.740  -0.891  1.00  0.32           O  
HETATM  412  O   HOH T 411     -38.135 -12.419  48.025  1.00  0.32           O  
HETATM  413  O   HOH T 412     -31.922   6.429   9.831  1.00  0.32           O  
HETATM  414  O   HOH T 413     -19.464 -20.461  47.317  1.00  0.32           O  
HETATM  415  O   HOH T 414     -62.536 -27.710  25.056  1.00  0.32           O  
HETATM  416  O   HOH T 415     -68.120 -26.209   5.445  1.00  0.32           O  
HETATM  417  O   HOH T 416     -40.232  -6.410  42.359  1.00  0.32           O  
HETATM  418  O   HOH T 417     -16.910 -14.659  69.807  1.00  0.32           O  
HETATM  419  O   HOH T 418     -74.049 -15.470  16.146  1.00  0.32           O  
HETATM  420  O   HOH T 419     -16.147   4.019  54.047  1.00  0.32           O  
HETATM  421  O   HOH T 420     -40.658  32.094   6.360  1.00  0.32           O  
HETATM  422  O   HOH T 421     -39.396 -16.323  53.510  1.00  0.32           O  
HETATM  423  O   HOH T 422     -12.268  -5.976  86.732  1.00  0.32           O  
HETATM  424  O   HOH T 423     -58.236  14.046  36.473  1.00  0.32           O  
HETATM  425  O   HOH T 424     -20.169  18.667  86.351  1.00  0.32           O  
HETATM  426  O   HOH T 425     -26.541  12.977  16.179  1.00  0.32           O  
HETATM  427  O   HOH T 426     -47.215  13.362  20.298  1.00  0.32           O  
HETATM  428  O   HOH T 427     -36.390 -17.141   6.501  1.00  0.32           O  
HETATM  429  O   HOH T 428     -76.275  -1.764  22.696  1.00  0.32           O  
HETATM  430  O   HOH T 429     -15.418  18.768   6.712  1.00  0.32           O  
HETATM  431  O   HOH T 430     -16.975   0.211  39.642  1.00  0.33           O  
HETATM  432  O   HOH T 431     -74.126   0.589   9.631  1.00  0.33           O  
HETATM  433  O   HOH T 432     -51.216 -32.319  30.756  1.00  0.33           O  
HETATM  434  O   HOH T 433     -52.830 -13.702   3.489  1.00  0.33           O  
HETATM  435  O   HOH T 434     -19.884   4.267  48.054  1.00  0.33           O  
HETATM  436  O   HOH T 435     -46.832   0.512  77.050  1.00  0.33           O  
HETATM  437  O   HOH T 436     -15.264 -12.968  29.842  1.00  0.33           O  
HETATM  438  O   HOH T 437     -39.999 -21.216  13.378  1.00  0.33           O  
HETATM  439  O   HOH T 438     -71.348 -20.997   7.210  1.00  0.33           O  
HETATM  440  O   HOH T 439     -56.239  11.311  11.318  1.00  0.33           O  
HETATM  441  O   HOH T 440      -6.510   8.138  52.485  1.00  0.33           O  
HETATM  442  O   HOH T 441      -7.496 -39.399  48.267  1.00  0.33           O  
HETATM  443  O   HOH T 442     -17.946  20.196  68.985  1.00  0.33           O  
HETATM  444  O   HOH T 443     -66.311 -27.522  21.354  1.00  0.33           O  
HETATM  445  O   HOH T 444     -46.184  15.690  76.160  1.00  0.33           O  
HETATM  446  O   HOH T 445     -66.844  10.716  22.295  1.00  0.33           O  
HETATM  447  O   HOH T 446     -12.144  11.908  45.933  1.00  0.33           O  
HETATM  448  O   HOH T 447     -59.851  -7.319  67.736  1.00  0.33           O  
HETATM  449  O   HOH T 448     -22.661 -28.858  74.081  1.00  0.33           O  
HETATM  450  O   HOH T 449      -8.943  -2.596  33.130  1.00  0.33           O  
HETATM  451  O   HOH T 450     -61.472   2.728  65.307  1.00  0.33           O  
HETATM  452  O   HOH T 451     -17.359 -45.324  44.515  1.00  0.33           O  
HETATM  453  O   HOH T 452     -57.306  10.578  21.164  1.00  0.33           O  
HETATM  454  O   HOH T 453     -39.766  -5.403  39.841  1.00  0.33           O  
HETATM  455  O   HOH T 454     -46.894  13.807  17.609  1.00  0.33           O  
HETATM  456  O   HOH T 455     -36.618 -22.496  16.486  1.00  0.33           O  
HETATM  457  O   HOH T 456     -61.829 -14.874  23.650  1.00  0.33           O  
HETATM  458  O   HOH T 457     -79.405  -9.845  16.027  1.00  0.33           O  
HETATM  459  O   HOH T 458     -52.922  12.367  69.155  1.00  0.33           O  
HETATM  460  O   HOH T 459     -36.583  -3.118  18.023  1.00  0.33           O  
HETATM  461  O   HOH T 460     -66.957 -31.478  16.425  1.00  0.33           O  
HETATM  462  O   HOH T 461     -72.088 -12.894  23.587  1.00  0.33           O  
HETATM  463  O   HOH T 462     -27.105 -15.316  21.425  1.00  0.33           O  
HETATM  464  O   HOH T 463     -19.498   8.545  -2.726  1.00  0.33           O  
HETATM  465  O   HOH T 464     -27.131   8.724  12.605  1.00  0.33           O  
HETATM  466  O   HOH T 465     -38.998  22.223 -10.785  1.00  0.33           O  
HETATM  467  O   HOH T 466     -31.893 -18.282  30.032  1.00  0.33           O  
HETATM  468  O   HOH T 467     -62.878   9.878  -0.203  1.00  0.33           O  
HETATM  469  O   HOH T 468     -17.756 -16.073  76.549  1.00  0.33           O  
HETATM  470  O   HOH T 469     -13.710  -8.466  73.032  1.00  0.33           O  
HETATM  471  O   HOH T 470     -23.217  23.965   6.526  1.00  0.33           O  
HETATM  472  O   HOH T 471     -13.752 -39.151  50.835  1.00  0.33           O  
HETATM  473  O   HOH T 472     -12.205 -12.555  45.927  1.00  0.33           O  
HETATM  474  O   HOH T 473     -59.456  17.345  23.980  1.00  0.33           O  
HETATM  475  O   HOH T 474     -78.331 -11.440  14.079  1.00  0.33           O  
HETATM  476  O   HOH T 475     -53.583   8.382  37.984  1.00  0.33           O  
HETATM  477  O   HOH T 476     -16.619   4.017  43.360  1.00  0.33           O  
HETATM  478  O   HOH T 477     -21.170 -12.737  23.618  1.00  0.33           O  
HETATM  479  O   HOH T 478      -7.846 -39.772  69.059  1.00  0.34           O  
HETATM  480  O   HOH T 479      -1.619 -19.298  68.171  1.00  0.34           O  
HETATM  481  O   HOH T 480      -2.510  -9.466  64.794  1.00  0.34           O  
HETATM  482  O   HOH T 481     -70.627   4.441   1.962  1.00  0.34           O  
HETATM  483  O   HOH T 482     -52.819 -31.411  18.702  1.00  0.34           O  
HETATM  484  O   HOH T 483     -59.692 -15.556  21.888  1.00  0.34           O  
HETATM  485  O   HOH T 484     -75.560   2.968  18.177  1.00  0.34           O  
HETATM  486  O   HOH T 485      -9.073   5.089  75.421  1.00  0.34           O  
HETATM  487  O   HOH T 486     -48.704  -6.499   8.156  1.00  0.34           O  
HETATM  488  O   HOH T 487     -29.890  24.224  71.125  1.00  0.34           O  
HETATM  489  O   HOH T 488       7.282  -7.476  55.914  1.00  0.34           O  
HETATM  490  O   HOH T 489     -63.412  12.474  -4.648  1.00  0.34           O  
HETATM  491  O   HOH T 490     -25.897  25.086   2.992  1.00  0.34           O  
HETATM  492  O   HOH T 491      -7.278  -7.020  28.450  1.00  0.34           O  
HETATM  493  O   HOH T 492     -11.554 -46.537  61.445  1.00  0.34           O  
HETATM  494  O   HOH T 493      -7.010  -4.761  75.926  1.00  0.34           O  
HETATM  495  O   HOH T 494     -32.488  -6.681  19.436  1.00  0.34           O  
HETATM  496  O   HOH T 495      -6.897 -14.761  48.492  1.00  0.34           O  
HETATM  497  O   HOH T 496     -65.433  10.505   0.606  1.00  0.34           O  
HETATM  498  O   HOH T 497     -16.236 -18.615  62.161  1.00  0.34           O  
HETATM  499  O   HOH T 498     -30.670 -15.664  11.478  1.00  0.34           O  
HETATM  500  O   HOH T 499     -14.356  12.075   7.247  1.00  0.34           O  
HETATM  501  O   HOH T 500     -26.370   1.427  35.423  1.00  0.34           O  
HETATM  502  O   HOH T 501     -21.650   3.609  83.585  1.00  0.34           O  
HETATM  503  O   HOH T 502     -21.224   0.587  -1.810  1.00  0.34           O  
HETATM  504  O   HOH T 503     -25.763   6.419  53.045  1.00  0.34           O  
HETATM  505  O   HOH T 504     -33.232  -4.110  30.518  1.00  0.34           O  
HETATM  506  O   HOH T 505     -68.289 -13.068   4.276  1.00  0.34           O  
HETATM  507  O   HOH T 506     -12.412 -10.686  47.943  1.00  0.34           O  
HETATM  508  O   HOH T 507     -19.041   6.412  22.382  1.00  0.34           O  
HETATM  509  O   HOH T 508     -62.963  -6.297  19.286  1.00  0.34           O  
HETATM  510  O   HOH T 509     -46.228  -1.509  45.335  1.00  0.34           O  
HETATM  511  O   HOH T 510     -37.217 -29.223  40.342  1.00  0.34           O  
HETATM  512  O   HOH T 511     -37.708   6.348  81.491  1.00  0.34           O  
HETATM  513  O   HOH T 512     -33.140  -5.956  -8.789  1.00  0.34           O  
HETATM  514  O   HOH T 513     -50.415 -24.447   3.429  1.00  0.34           O  
HETATM  515  O   HOH T 514     -39.254  -7.254 -11.491  1.00  0.34           O  
HETATM  516  O   HOH T 515     -56.530  21.207  14.784  1.00  0.34           O  
HETATM  517  O   HOH T 516     -13.798  -5.899  59.932  1.00  0.34           O  
HETATM  518  O   HOH T 517     -26.508   4.646  15.134  1.00  0.34           O  
HETATM  519  O   HOH T 518     -55.415  -0.722  24.855  1.00  0.34           O  
HETATM  520  O   HOH T 519     -43.816   1.692  38.983  1.00  0.34           O  
HETATM  521  O   HOH T 520     -35.906  -8.892  -6.790  1.00  0.34           O  
HETATM  522  O   HOH T 521     -48.959  12.572 -21.730  1.00  0.35           O  
HETATM  523  O   HOH T 522      -3.803   4.419  47.678  1.00  0.35           O  
HETATM  524  O   HOH T 523     -19.276   4.922  55.425  1.00  0.35           O  
HETATM  525  O   HOH T 524     -63.664   1.870   4.032  1.00  0.35           O  
HETATM  526  O   HOH T 525     -60.543  -7.462  13.773  1.00  0.35           O  
HETATM  527  O   HOH T 526     -41.985 -17.038   6.225  1.00  0.35           O  
HETATM  528  O   HOH T 527     -19.423  -6.569  43.774  1.00  0.35           O  
HETATM  529  O   HOH T 528      -4.084 -19.761  69.452  1.00  0.35           O  
HETATM  530  O   HOH T 529     -32.760  -5.405  32.952  1.00  0.35           O  
HETATM  531  O   HOH T 530     -30.919 -15.641  -6.713  1.00  0.35           O  
HETATM  532  O   HOH T 531      -9.983 -36.015  45.817  1.00  0.35           O  
HETATM  533  O   HOH T 532     -69.237   5.741  25.654  1.00  0.35           O  
HETATM  534  O   HOH T 533     -34.834  17.252  16.280  1.00  0.35           O  
HETATM  535  O   HOH T 534     -71.257  11.399  11.274  1.00  0.35           O  
HETATM  536  O   HOH T 535     -17.288 -15.990  64.785  1.00  0.35           O  
HETATM  537  O   HOH T 536     -46.111 -21.640  33.574  1.00  0.35           O  
HETATM  538  O   HOH T 537     -72.349   2.704  10.273  1.00  0.35           O  
HETATM  539  O   HOH T 538     -37.381 -12.034  80.103  1.00  0.35           O  
HETATM  540  O   HOH T 539     -16.652 -10.046  63.635  1.00  0.35           O  
HETATM  541  O   HOH T 540     -35.138  19.656  67.837  1.00  0.35           O  
HETATM  542  O   HOH T 541     -17.176   0.163  56.758  1.00  0.35           O  
HETATM  543  O   HOH T 542     -36.586   2.982  24.760  1.00  0.35           O  
HETATM  544  O   HOH T 543     -18.770  -4.198  62.728  1.00  0.35           O  
HETATM  545  O   HOH T 544     -31.056 -19.497  15.380  1.00  0.35           O  
HETATM  546  O   HOH T 545     -28.175 -21.575  53.879  1.00  0.35           O  
HETATM  547  O   HOH T 546     -49.360 -17.108  41.444  1.00  0.35           O  
HETATM  548  O   HOH T 547     -18.348   8.431  20.733  1.00  0.35           O  
HETATM  549  O   HOH T 548     -33.383   3.764  21.685  1.00  0.35           O  
HETATM  550  O   HOH T 549      -6.830 -37.402  50.103  1.00  0.35           O  
HETATM  551  O   HOH T 550      -2.536 -21.936  68.300  1.00  0.35           O  
HETATM  552  O   HOH T 551     -52.974  -7.090   4.691  1.00  0.35           O  
HETATM  553  O   HOH T 552     -55.375  -3.364  25.623  1.00  0.35           O  
HETATM  554  O   HOH T 553     -32.377 -37.553  45.377  1.00  0.35           O  
HETATM  555  O   HOH T 554     -44.101 -18.427  48.079  1.00  0.35           O  
HETATM  556  O   HOH T 555     -24.604 -11.464  13.095  1.00  0.35           O  
HETATM  557  O   HOH T 556     -33.617 -14.266  54.981  1.00  0.35           O  
HETATM  558  O   HOH T 557     -64.622 -15.614  37.440  1.00  0.35           O  
HETATM  559  O   HOH T 558     -32.583  17.903  70.327  1.00  0.35           O  
HETATM  560  O   HOH T 559     -38.118  -5.706  78.818  1.00  0.35           O  
HETATM  561  O   HOH T 560     -18.217  -6.476  92.105  1.00  0.35           O  
HETATM  562  O   HOH T 561     -40.415 -14.647  80.069  1.00  0.35           O  
HETATM  563  O   HOH T 562      -9.624  -0.182  41.015  1.00  0.35           O  
HETATM  564  O   HOH T 563     -53.335  24.190   4.624  1.00  0.35           O  
HETATM  565  O   HOH T 564     -36.245  30.763   5.282  1.00  0.35           O  
HETATM  566  O   HOH T 565     -73.485   8.808   3.819  1.00  0.35           O  
HETATM  567  O   HOH T 566     -21.147 -24.105  74.278  1.00  0.35           O  
HETATM  568  O   HOH T 567     -72.962   7.506  33.826  1.00  0.35           O  
HETATM  569  O   HOH T 568     -41.740  10.397 -13.465  1.00  0.35           O  
HETATM  570  O   HOH T 569     -47.093  13.923 -20.128  1.00  0.35           O  
HETATM  571  O   HOH T 570     -58.719   2.835  21.164  1.00  0.35           O  
HETATM  572  O   HOH T 571      -8.750 -36.784  66.321  1.00  0.35           O  
HETATM  573  O   HOH T 572      -0.782 -30.954  68.802  1.00  0.35           O  
HETATM  574  O   HOH T 573     -42.767   2.966  77.332  1.00  0.35           O  
HETATM  575  O   HOH T 574       1.663 -26.849  59.509  1.00  0.35           O  
HETATM  576  O   HOH T 575     -13.235   5.772  14.406  1.00  0.35           O  
HETATM  577  O   HOH T 576     -19.510 -39.007  61.869  1.00  0.35           O  
HETATM  578  O   HOH T 577     -53.331  -5.642  78.775  1.00  0.36           O  
HETATM  579  O   HOH T 578     -64.739 -19.676  -1.798  1.00  0.36           O  
HETATM  580  O   HOH T 579     -30.445  -0.504  54.999  1.00  0.36           O  
HETATM  581  O   HOH T 580     -60.551 -20.956  -1.035  1.00  0.36           O  
HETATM  582  O   HOH T 581     -52.064  -1.967  45.943  1.00  0.36           O  
HETATM  583  O   HOH T 582     -50.238   8.227  36.707  1.00  0.36           O  
HETATM  584  O   HOH T 583     -75.139  -3.138   1.870  1.00  0.36           O  
HETATM  585  O   HOH T 584     -55.162 -16.634  19.844  1.00  0.36           O  
HETATM  586  O   HOH T 585     -24.609  23.974  67.538  1.00  0.36           O  
HETATM  587  O   HOH T 586      -7.656   4.483  45.593  1.00  0.36           O  
HETATM  588  O   HOH T 587     -50.187   0.427  43.242  1.00  0.36           O  
HETATM  589  O   HOH T 588     -30.269 -32.842  63.003  1.00  0.36           O  
HETATM  590  O   HOH T 589     -29.899  26.390  72.834  1.00  0.36           O  
HETATM  591  O   HOH T 590     -69.543 -12.680  29.504  1.00  0.36           O  
HETATM  592  O   HOH T 591     -25.132   0.077  15.447  1.00  0.36           O  
HETATM  593  O   HOH T 592     -28.239  -8.233  25.145  1.00  0.36           O  
HETATM  594  O   HOH T 593     -55.074 -12.372   2.299  1.00  0.36           O  
HETATM  595  O   HOH T 594      -9.179   0.879  66.809  1.00  0.36           O  
HETATM  596  O   HOH T 595     -46.741   3.289  47.617  1.00  0.36           O  
HETATM  597  O   HOH T 596     -19.497 -35.670  68.072  1.00  0.36           O  
HETATM  598  O   HOH T 597       1.312 -18.429  46.594  1.00  0.36           O  
HETATM  599  O   HOH T 598     -30.655  13.752  49.992  1.00  0.36           O  
HETATM  600  O   HOH T 599     -48.424  25.263 -13.708  1.00  0.36           O  
HETATM  601  O   HOH T 600     -51.448 -20.370   1.722  1.00  0.36           O  
HETATM  602  O   HOH T 601     -68.925  -0.998   2.290  1.00  0.36           O  
HETATM  603  O   HOH T 602     -11.544 -10.991  77.844  1.00  0.36           O  
HETATM  604  O   HOH T 603     -43.953 -24.670  27.921  1.00  0.36           O  
HETATM  605  O   HOH T 604     -14.244  10.655  44.662  1.00  0.36           O  
HETATM  606  O   HOH T 605     -28.038 -14.508  47.487  1.00  0.36           O  
HETATM  607  O   HOH T 606     -70.936   0.559   3.316  1.00  0.36           O  
HETATM  608  O   HOH T 607       1.084   2.086  60.336  1.00  0.36           O  
HETATM  609  O   HOH T 608     -12.004 -12.292  58.609  1.00  0.36           O  
HETATM  610  O   HOH T 609     -51.795  -4.640  45.399  1.00  0.36           O  
HETATM  611  O   HOH T 610     -17.907  -7.727  62.725  1.00  0.36           O  
HETATM  612  O   HOH T 611     -10.548   7.887  -0.751  1.00  0.36           O  
HETATM  613  O   HOH T 612     -34.440  -6.917  50.725  1.00  0.36           O  
HETATM  614  O   HOH T 613     -23.401  25.529   4.194  1.00  0.36           O  
HETATM  615  O   HOH T 614     -72.821  -3.209  25.314  1.00  0.36           O  
HETATM  616  O   HOH T 615      -7.331 -32.127  50.985  1.00  0.36           O  
HETATM  617  O   HOH T 616     -61.024   7.910  -9.899  1.00  0.36           O  
HETATM  618  O   HOH T 617     -17.004 -14.419  46.065  1.00  0.36           O  
HETATM  619  O   HOH T 618      -1.538 -28.379  69.820  1.00  0.36           O  
HETATM  620  O   HOH T 619     -31.630 -13.104  -7.763  1.00  0.36           O  
HETATM  621  O   HOH T 620     -17.037 -18.700  64.852  1.00  0.36           O  
HETATM  622  O   HOH T 621     -59.522 -15.909  13.781  1.00  0.36           O  
HETATM  623  O   HOH T 622     -17.387  20.549  84.384  1.00  0.36           O  
HETATM  624  O   HOH T 623      -4.650  -1.401  39.264  1.00  0.36           O  
HETATM  625  O   HOH T 624     -14.498 -13.921   1.793  1.00  0.37           O  
HETATM  626  O   HOH T 625       0.455 -17.958  66.876  1.00  0.37           O  
HETATM  627  O   HOH T 626     -55.817  -0.394   1.563  1.00  0.37           O  
HETATM  628  O   HOH T 627     -10.378  16.240  72.364  1.00  0.37           O  
HETATM  629  O   HOH T 628     -27.759 -37.853  50.162  1.00  0.37           O  
HETATM  630  O   HOH T 629     -47.348  -9.287  22.124  1.00  0.37           O  
HETATM  631  O   HOH T 630     -81.716  -4.895  12.129  1.00  0.37           O  
HETATM  632  O   HOH T 631     -52.800  14.666  10.947  1.00  0.37           O  
HETATM  633  O   HOH T 632     -16.368 -42.335  59.619  1.00  0.37           O  
HETATM  634  O   HOH T 633     -50.817 -31.243  28.141  1.00  0.37           O  
HETATM  635  O   HOH T 634     -74.043  -5.602  26.153  1.00  0.37           O  
HETATM  636  O   HOH T 635     -63.230  15.990  -0.184  1.00  0.37           O  
HETATM  637  O   HOH T 636     -63.830  -7.218  -8.832  1.00  0.37           O  
HETATM  638  O   HOH T 637     -59.642  10.188  17.451  1.00  0.37           O  
HETATM  639  O   HOH T 638       2.192 -14.265  57.491  1.00  0.37           O  
HETATM  640  O   HOH T 639     -24.442 -29.149  76.113  1.00  0.37           O  
HETATM  641  O   HOH T 640     -55.072  -9.515   2.444  1.00  0.37           O  
HETATM  642  O   HOH T 641     -46.209   7.603  81.098  1.00  0.37           O  
HETATM  643  O   HOH T 642     -62.960 -14.496  21.197  1.00  0.37           O  
HETATM  644  O   HOH T 643       1.283  -9.008  44.333  1.00  0.37           O  
HETATM  645  O   HOH T 644     -67.272 -17.217  27.984  1.00  0.37           O  
HETATM  646  O   HOH T 645     -40.618   7.632  11.460  1.00  0.37           O  
HETATM  647  O   HOH T 646     -22.685 -40.092  64.984  1.00  0.37           O  
HETATM  648  O   HOH T 647     -35.371 -24.282  35.569  1.00  0.37           O  
HETATM  649  O   HOH T 648     -61.054 -36.267  16.725  1.00  0.37           O  
HETATM  650  O   HOH T 649     -37.943  -5.396  16.915  1.00  0.37           O  
HETATM  651  O   HOH T 650     -58.138  16.587 -12.158  1.00  0.37           O  
HETATM  652  O   HOH T 651     -58.464 -10.462  13.475  1.00  0.37           O  
HETATM  653  O   HOH T 652     -43.666   5.592   5.792  1.00  0.37           O  
HETATM  654  O   HOH T 653     -41.424  -7.732  52.374  1.00  0.37           O  
HETATM  655  O   HOH T 654     -11.483 -17.003  58.411  1.00  0.37           O  
HETATM  656  O   HOH T 655     -63.910  -0.606  -3.620  1.00  0.37           O  
HETATM  657  O   HOH T 656     -17.851   1.258  11.606  1.00  0.37           O  
HETATM  658  O   HOH T 657     -46.471 -10.890  54.125  1.00  0.37           O  
HETATM  659  O   HOH T 658     -33.721  11.320  26.034  1.00  0.37           O  
HETATM  660  O   HOH T 659      -3.885  -3.894  38.380  1.00  0.37           O  
HETATM  661  O   HOH T 660     -50.656  14.172   9.309  1.00  0.37           O  
HETATM  662  O   HOH T 661     -36.495 -19.550  27.405  1.00  0.37           O  
HETATM  663  O   HOH T 662     -53.489  14.810  25.624  1.00  0.37           O  
HETATM  664  O   HOH T 663     -12.152 -24.584  77.223  1.00  0.37           O  
HETATM  665  O   HOH T 664       0.607  -7.477  36.044  1.00  0.37           O  
HETATM  666  O   HOH T 665     -48.446   2.021 -17.240  1.00  0.37           O  
HETATM  667  O   HOH T 666     -25.700   7.094  55.762  1.00  0.37           O  
HETATM  668  O   HOH T 667     -15.873  11.207  -4.162  1.00  0.37           O  
HETATM  669  O   HOH T 668     -57.430  -0.674  50.177  1.00  0.37           O  
HETATM  670  O   HOH T 669     -38.500  17.928  14.424  1.00  0.37           O  
HETATM  671  O   HOH T 670     -70.026 -17.154   5.012  1.00  0.37           O  
HETATM  672  O   HOH T 671     -77.195   9.725  16.261  1.00  0.37           O  
HETATM  673  O   HOH T 672     -34.652  -1.796  30.292  1.00  0.37           O  
HETATM  674  O   HOH T 673     -63.172  23.088   9.380  1.00  0.37           O  
HETATM  675  O   HOH T 674     -77.267   4.454   9.864  1.00  0.37           O  
HETATM  676  O   HOH T 675     -17.277   4.071  48.772  1.00  0.37           O  
HETATM  677  O   HOH T 676     -51.990   4.872   4.470  1.00  0.37           O  
HETATM  678  O   HOH T 677     -40.594   2.878  18.413  1.00  0.37           O  
HETATM  679  O   HOH T 678     -53.392  -5.979  58.298  1.00  0.37           O  
HETATM  680  O   HOH T 679     -59.068  21.979  15.519  1.00  0.37           O  
HETATM  681  O   HOH T 680     -36.190 -15.242  36.946  1.00  0.37           O  
HETATM  682  O   HOH T 681     -40.301  -1.494  77.058  1.00  0.37           O  
HETATM  683  O   HOH T 682     -37.336 -21.902  13.902  1.00  0.37           O  
HETATM  684  O   HOH T 683     -35.310   9.279  27.107  1.00  0.38           O  
HETATM  685  O   HOH T 684     -70.564 -11.895   5.596  1.00  0.38           O  
HETATM  686  O   HOH T 685     -29.310 -33.765  37.614  1.00  0.38           O  
HETATM  687  O   HOH T 686       5.708 -23.443  68.018  1.00  0.38           O  
HETATM  688  O   HOH T 687     -14.228 -41.160  49.048  1.00  0.38           O  
HETATM  689  O   HOH T 688     -33.816  20.479  -7.484  1.00  0.38           O  
HETATM  690  O   HOH T 689     -39.344 -22.157  15.870  1.00  0.38           O  
HETATM  691  O   HOH T 690     -70.079   7.726  37.663  1.00  0.38           O  
HETATM  692  O   HOH T 691     -51.376  18.951 -19.724  1.00  0.38           O  
HETATM  693  O   HOH T 692     -33.185   3.234  41.212  1.00  0.38           O  
HETATM  694  O   HOH T 693     -37.857 -16.404  33.491  1.00  0.38           O  
HETATM  695  O   HOH T 694     -55.301 -14.267  18.545  1.00  0.38           O  
HETATM  696  O   HOH T 695      -1.273 -18.092  34.013  1.00  0.38           O  
HETATM  697  O   HOH T 696     -51.791  12.487 -21.825  1.00  0.38           O  
HETATM  698  O   HOH T 697     -40.008   9.119  80.304  1.00  0.38           O  
HETATM  699  O   HOH T 698     -23.630 -35.190  69.124  1.00  0.38           O  
HETATM  700  O   HOH T 699     -47.988   5.565  81.640  1.00  0.38           O  
HETATM  701  O   HOH T 700     -35.097 -12.852  52.868  1.00  0.38           O  
HETATM  702  O   HOH T 701     -20.618 -26.088  76.069  1.00  0.38           O  
HETATM  703  O   HOH T 702     -13.882  12.916   9.934  1.00  0.38           O  
HETATM  704  O   HOH T 703     -17.565 -27.925  33.048  1.00  0.38           O  
HETATM  705  O   HOH T 704     -44.926  -8.659  79.459  1.00  0.38           O  
HETATM  706  O   HOH T 705     -33.800 -20.367  71.349  1.00  0.38           O  
HETATM  707  O   HOH T 706     -60.426   3.890   9.837  1.00  0.38           O  
HETATM  708  O   HOH T 707     -62.781  12.254  -7.345  1.00  0.38           O  
HETATM  709  O   HOH T 708     -17.655 -22.532  47.217  1.00  0.38           O  
HETATM  710  O   HOH T 709     -28.297 -19.038  55.103  1.00  0.38           O  
HETATM  711  O   HOH T 710     -31.169 -20.369  70.524  1.00  0.38           O  
HETATM  712  O   HOH T 711      -8.689  17.966  65.426  1.00  0.38           O  
HETATM  713  O   HOH T 712     -58.883 -13.161  29.142  1.00  0.38           O  
HETATM  714  O   HOH T 713     -11.496 -28.744  37.490  1.00  0.38           O  
HETATM  715  O   HOH T 714     -24.481 -24.004  29.388  1.00  0.38           O  
HETATM  716  O   HOH T 715     -33.969 -38.182  50.211  1.00  0.38           O  
HETATM  717  O   HOH T 716     -43.831 -10.613  54.864  1.00  0.38           O  
HETATM  718  O   HOH T 717     -11.220  -4.702  49.983  1.00  0.38           O  
HETATM  719  O   HOH T 718      -7.426  -9.488  80.134  1.00  0.38           O  
HETATM  720  O   HOH T 719     -38.046 -27.804  49.364  1.00  0.38           O  
HETATM  721  O   HOH T 720     -69.989  -5.090  33.089  1.00  0.38           O  
HETATM  722  O   HOH T 721     -42.574  -1.911  50.175  1.00  0.38           O  
HETATM  723  O   HOH T 722     -41.613  -6.415 -12.397  1.00  0.38           O  
HETATM  724  O   HOH T 723     -45.970  17.317  53.482  1.00  0.38           O  
HETATM  725  O   HOH T 724     -53.742  10.850  62.080  1.00  0.38           O  
HETATM  726  O   HOH T 725     -15.607  16.162   8.006  1.00  0.38           O  
HETATM  727  O   HOH T 726     -41.205   4.884   8.603  1.00  0.38           O  
HETATM  728  O   HOH T 727     -60.669  14.950  23.463  1.00  0.38           O  
HETATM  729  O   HOH T 728     -11.315  14.610  74.473  1.00  0.38           O  
HETATM  730  O   HOH T 729     -22.636  16.037  82.414  1.00  0.38           O  
HETATM  731  O   HOH T 730     -35.347 -26.055  65.413  1.00  0.38           O  
HETATM  732  O   HOH T 731     -50.288  10.205 -21.986  1.00  0.38           O  
HETATM  733  O   HOH T 732     -30.909  20.283  70.481  1.00  0.38           O  
HETATM  734  O   HOH T 733     -76.854  10.158  18.945  1.00  0.38           O  
HETATM  735  O   HOH T 734     -46.655 -15.874  38.392  1.00  0.38           O  
HETATM  736  O   HOH T 735     -18.669 -13.148  67.105  1.00  0.38           O  
HETATM  737  O   HOH T 736     -43.437   3.318  41.243  1.00  0.38           O  
HETATM  738  O   HOH T 737     -50.109 -28.190   8.695  1.00  0.38           O  
HETATM  739  O   HOH T 738     -35.230 -32.610  40.583  1.00  0.38           O  
HETATM  740  O   HOH T 739     -52.711 -10.973   2.746  1.00  0.38           O  
HETATM  741  O   HOH T 740       6.386  -8.844  58.113  1.00  0.38           O  
HETATM  742  O   HOH T 741     -66.558 -29.988  12.082  1.00  0.38           O  
HETATM  743  O   HOH T 742     -16.287  22.309  47.847  1.00  0.38           O  
HETATM  744  O   HOH T 743     -56.554   6.311 -15.143  1.00  0.38           O  
HETATM  745  O   HOH T 744     -33.799 -24.300  56.156  1.00  0.39           O  
HETATM  746  O   HOH T 745     -64.971 -28.148  13.354  1.00  0.39           O  
HETATM  747  O   HOH T 746       4.306  -2.593  49.126  1.00  0.39           O  
HETATM  748  O   HOH T 747     -42.027  18.916  63.178  1.00  0.39           O  
HETATM  749  O   HOH T 748     -33.250  17.667  -7.988  1.00  0.39           O  
HETATM  750  O   HOH T 749     -32.449 -17.940  -7.262  1.00  0.39           O  
HETATM  751  O   HOH T 750     -45.089  -3.778  23.118  1.00  0.39           O  
HETATM  752  O   HOH T 751     -66.585  12.986  32.047  1.00  0.39           O  
HETATM  753  O   HOH T 752     -25.482 -19.903  62.575  1.00  0.39           O  
HETATM  754  O   HOH T 753      -7.280 -16.501  46.477  1.00  0.39           O  
HETATM  755  O   HOH T 754     -57.645 -12.829  70.309  1.00  0.39           O  
HETATM  756  O   HOH T 755     -44.397  -1.650  64.665  1.00  0.39           O  
HETATM  757  O   HOH T 756     -54.726  -2.662   6.655  1.00  0.39           O  
HETATM  758  O   HOH T 757     -59.778   0.360   6.271  1.00  0.39           O  
HETATM  759  O   HOH T 758     -37.066  11.727  11.517  1.00  0.39           O  
HETATM  760  O   HOH T 759     -54.049  10.062  68.150  1.00  0.39           O  
HETATM  761  O   HOH T 760     -28.496   8.376  20.260  1.00  0.39           O  
HETATM  762  O   HOH T 761     -40.892  32.441   1.612  1.00  0.39           O  
HETATM  763  O   HOH T 762     -32.631   8.300  47.809  1.00  0.39           O  
HETATM  764  O   HOH T 763     -44.014  15.455   8.115  1.00  0.39           O  
HETATM  765  O   HOH T 764     -53.372  16.118  17.798  1.00  0.39           O  
HETATM  766  O   HOH T 765     -24.816   9.218 -16.464  1.00  0.39           O  
HETATM  767  O   HOH T 766     -34.912  22.212  11.864  1.00  0.39           O  
HETATM  768  O   HOH T 767     -35.475  10.818  29.401  1.00  0.39           O  
HETATM  769  O   HOH T 768     -34.850  22.716  -8.804  1.00  0.39           O  
HETATM  770  O   HOH T 769     -18.537   2.259  44.138  1.00  0.39           O  
HETATM  771  O   HOH T 770     -36.976 -29.811  47.945  1.00  0.39           O  
HETATM  772  O   HOH T 771     -18.709 -41.858  65.174  1.00  0.39           O  
HETATM  773  O   HOH T 772     -47.634  -8.963  79.021  1.00  0.39           O  
HETATM  774  O   HOH T 773     -67.352 -13.898  30.636  1.00  0.39           O  
HETATM  775  O   HOH T 774     -33.710 -22.613  34.064  1.00  0.39           O  
HETATM  776  O   HOH T 775     -11.826 -20.844  56.552  1.00  0.39           O  
HETATM  777  O   HOH T 776     -66.380 -14.287   2.326  1.00  0.39           O  
HETATM  778  O   HOH T 777     -36.757 -35.306  47.148  1.00  0.39           O  
HETATM  779  O   HOH T 778     -48.679 -16.655  56.482  1.00  0.39           O  
HETATM  780  O   HOH T 779     -36.479   0.107  34.867  1.00  0.39           O  
HETATM  781  O   HOH T 780     -55.391  12.156  17.609  1.00  0.39           O  
HETATM  782  O   HOH T 781     -51.443 -13.076  20.036  1.00  0.39           O  
HETATM  783  O   HOH T 782     -23.153  -6.336  13.906  1.00  0.39           O  
HETATM  784  O   HOH T 783     -19.462  12.991  85.581  1.00  0.39           O  
HETATM  785  O   HOH T 784     -42.874 -26.829  56.091  1.00  0.39           O  
HETATM  786  O   HOH T 785     -26.404  -9.579  -7.684  1.00  0.39           O  
HETATM  787  O   HOH T 786     -66.716  11.697   4.641  1.00  0.39           O  
HETATM  788  O   HOH T 787     -28.844 -30.960  68.312  1.00  0.39           O  
HETATM  789  O   HOH T 788     -22.442  22.218  67.030  1.00  0.39           O  
HETATM  790  O   HOH T 789     -18.523  -0.343  64.539  1.00  0.39           O  
HETATM  791  O   HOH T 790     -48.691 -11.143   8.090  1.00  0.39           O  
HETATM  792  O   HOH T 791      -4.205 -20.263  41.308  1.00  0.39           O  
HETATM  793  O   HOH T 792     -67.857  10.944   6.962  1.00  0.39           O  
HETATM  794  O   HOH T 793     -37.250  -6.548  35.451  1.00  0.39           O  
HETATM  795  O   HOH T 794      -8.039 -26.515  43.097  1.00  0.39           O  
HETATM  796  O   HOH T 795     -28.087   2.444  31.454  1.00  0.39           O  
HETATM  797  O   HOH T 796     -72.434  -9.962   6.307  1.00  0.39           O  
HETATM  798  O   HOH T 797     -62.170  -9.805  40.183  1.00  0.39           O  
HETATM  799  O   HOH T 798     -20.811  22.692  64.859  1.00  0.39           O  
HETATM  800  O   HOH T 799     -51.854  16.814  58.413  1.00  0.39           O  
HETATM  801  O   HOH T 800     -68.049 -13.896  -2.484  1.00  0.39           O  
HETATM  802  O   HOH T 801     -63.545   9.770  -4.181  1.00  0.39           O  
HETATM  803  O   HOH T 802     -57.790  -4.665  -2.605  1.00  0.39           O  
HETATM  804  O   HOH T 803     -60.000  14.849  34.347  1.00  0.39           O  
HETATM  805  O   HOH T 804      -8.852   7.817  75.473  1.00  0.39           O  
HETATM  806  O   HOH T 805     -73.661   7.569   8.891  1.00  0.39           O  
HETATM  807  O   HOH T 806     -41.453   4.976  11.266  1.00  0.39           O  
HETATM  808  O   HOH T 807      -9.739 -17.698  50.100  1.00  0.39           O  
HETATM  809  O   HOH T 808     -44.875  -2.687  48.915  1.00  0.39           O  
HETATM  810  O   HOH T 809     -33.377   3.315  53.884  1.00  0.39           O  
HETATM  811  O   HOH T 810     -26.163 -35.623  43.582  1.00  0.39           O  
HETATM  812  O   HOH T 811     -14.287  18.734  50.314  1.00  0.39           O  
HETATM  813  O   HOH T 812     -20.594  24.350  73.122  1.00  0.39           O  
HETATM  814  O   HOH T 813      -9.944 -34.015  43.984  1.00  0.39           O  
HETATM  815  O   HOH T 814     -47.314   5.656  43.018  1.00  0.39           O  
HETATM  816  O   HOH T 815     -36.098  30.939   0.646  1.00  0.39           O  
HETATM  817  O   HOH T 816     -59.519 -35.121  18.729  1.00  0.39           O  
HETATM  818  O   HOH T 817     -63.686  19.963  10.968  1.00  0.40           O  
HETATM  819  O   HOH T 818       2.606 -11.546  58.122  1.00  0.40           O  
HETATM  820  O   HOH T 819      -2.436 -32.357  59.344  1.00  0.40           O  
HETATM  821  O   HOH T 820     -12.975 -14.760  59.206  1.00  0.40           O  
HETATM  822  O   HOH T 821     -25.018 -19.137  57.649  1.00  0.40           O  
HETATM  823  O   HOH T 822     -54.359 -13.147  10.414  1.00  0.40           O  
HETATM  824  O   HOH T 823     -47.413  -3.198  76.076  1.00  0.40           O  
HETATM  825  O   HOH T 824     -17.355 -23.087  49.948  1.00  0.40           O  
HETATM  826  O   HOH T 825     -46.755 -34.399  30.092  1.00  0.40           O  
HETATM  827  O   HOH T 826     -42.606  16.179  29.200  1.00  0.40           O  
HETATM  828  O   HOH T 827     -63.503 -17.448  25.834  1.00  0.40           O  
HETATM  829  O   HOH T 828     -34.969 -11.067  37.411  1.00  0.40           O  
HETATM  830  O   HOH T 829     -26.566   2.413   3.277  1.00  0.40           O  
HETATM  831  O   HOH T 830     -72.413   9.951   9.419  1.00  0.40           O  
HETATM  832  O   HOH T 831     -25.081   2.454  14.050  1.00  0.40           O  
HETATM  833  O   HOH T 832     -24.162  -8.868  13.916  1.00  0.40           O  
HETATM  834  O   HOH T 833      -5.076 -10.783  80.770  1.00  0.40           O  
HETATM  835  O   HOH T 834     -56.967  23.860  15.687  1.00  0.40           O  
HETATM  836  O   HOH T 835     -74.090   4.795   4.346  1.00  0.40           O  
HETATM  837  O   HOH T 836      -5.019 -14.435  77.130  1.00  0.40           O  
HETATM  838  O   HOH T 837     -57.345  21.053 -16.079  1.00  0.40           O  
HETATM  839  O   HOH T 838     -54.911 -11.370   8.417  1.00  0.40           O  
HETATM  840  O   HOH T 839     -45.110  -9.431  15.639  1.00  0.40           O  
HETATM  841  O   HOH T 840     -70.572 -21.122  18.632  1.00  0.40           O  
HETATM  842  O   HOH T 841     -40.732   9.899  35.574  1.00  0.40           O  
HETATM  843  O   HOH T 842     -26.639 -39.554  60.380  1.00  0.40           O  
HETATM  844  O   HOH T 843     -26.735 -19.370  52.953  1.00  0.40           O  
HETATM  845  O   HOH T 844     -43.964  17.812  64.692  1.00  0.40           O  
HETATM  846  O   HOH T 845       3.148  -1.952  62.535  1.00  0.40           O  
HETATM  847  O   HOH T 846     -71.282  -6.584   1.218  1.00  0.40           O  
HETATM  848  O   HOH T 847     -45.248  -7.151 -19.746  1.00  0.40           O  
HETATM  849  O   HOH T 848     -26.255 -39.299  48.389  1.00  0.40           O  
HETATM  850  O   HOH T 849     -53.923 -28.341  11.497  1.00  0.40           O  
HETATM  851  O   HOH T 850     -19.165 -23.664  76.197  1.00  0.40           O  
HETATM  852  O   HOH T 851      -6.871  -8.945  77.612  1.00  0.40           O  
HETATM  853  O   HOH T 852     -41.803  -0.096 -14.082  1.00  0.40           O  
HETATM  854  O   HOH T 853     -55.178  23.666  -7.432  1.00  0.40           O  
HETATM  855  O   HOH T 854     -41.403  11.433  79.556  1.00  0.40           O  
HETATM  856  O   HOH T 855     -30.923 -19.421  21.878  1.00  0.40           O  
HETATM  857  O   HOH T 856     -54.567  -8.864   7.448  1.00  0.40           O  
HETATM  858  O   HOH T 857     -41.609 -17.703  46.870  1.00  0.40           O  
HETATM  859  O   HOH T 858     -27.623   3.036  17.080  1.00  0.40           O  
HETATM  860  O   HOH T 859     -57.092  -2.489   8.033  1.00  0.40           O  
HETATM  861  O   HOH T 860     -54.755 -18.705  36.364  1.00  0.40           O  
HETATM  862  O   HOH T 861     -28.423 -16.201  13.046  1.00  0.40           O  
HETATM  863  O   HOH T 862     -50.109  15.899  16.097  1.00  0.40           O  
HETATM  864  O   HOH T 863     -36.468  -8.135  33.241  1.00  0.40           O  
HETATM  865  O   HOH T 864     -24.965   3.490  57.794  1.00  0.40           O  
HETATM  866  O   HOH T 865     -33.693 -11.691  72.171  1.00  0.40           O  
HETATM  867  O   HOH T 866     -55.418  25.290  -9.734  1.00  0.40           O  
HETATM  868  O   HOH T 867     -72.438   8.479  36.402  1.00  0.40           O  
HETATM  869  O   HOH T 868     -13.130 -46.132  63.738  1.00  0.40           O  
HETATM  870  O   HOH T 869     -25.078 -41.072  64.215  1.00  0.40           O  
HETATM  871  O   HOH T 870     -25.633 -13.653  14.397  1.00  0.40           O  
HETATM  872  O   HOH T 871     -12.982  22.241  68.985  1.00  0.40           O  
HETATM  873  O   HOH T 872      -2.475 -23.280  70.593  1.00  0.40           O  
HETATM  874  O   HOH T 873     -27.704   2.176 -10.159  1.00  0.40           O  
HETATM  875  O   HOH T 874     -18.950 -37.919  66.481  1.00  0.40           O  
HETATM  876  O   HOH T 875      -6.378  -3.020  71.492  1.00  0.40           O  
HETATM  877  O   HOH T 876     -29.452  12.035 -14.175  1.00  0.40           O  
HETATM  878  O   HOH T 877     -43.312  20.789  55.002  1.00  0.40           O  
HETATM  879  O   HOH T 878     -47.883  -9.815  15.449  1.00  0.40           O  
HETATM  880  O   HOH T 879     -36.299  27.008  -5.776  1.00  0.40           O  
HETATM  881  O   HOH T 880     -50.867   2.475 -20.162  1.00  0.40           O  
HETATM  882  O   HOH T 881     -58.262  12.884  12.262  1.00  0.40           O  
HETATM  883  O   HOH T 882     -42.025   3.874  38.906  1.00  0.40           O  
HETATM  884  O   HOH T 883     -61.199  15.841  31.944  1.00  0.40           O  
HETATM  885  O   HOH T 884     -15.669 -14.650  77.772  1.00  0.40           O  
HETATM  886  O   HOH T 885     -16.535   5.758  50.878  1.00  0.41           O  
HETATM  887  O   HOH T 886     -30.776  20.333  -4.866  1.00  0.41           O  
HETATM  888  O   HOH T 887     -23.484  -3.062  -7.257  1.00  0.41           O  
HETATM  889  O   HOH T 888     -57.769  -4.789  60.702  1.00  0.41           O  
HETATM  890  O   HOH T 889     -62.446 -26.775  27.671  1.00  0.41           O  
HETATM  891  O   HOH T 890      -2.694 -30.703  70.809  1.00  0.41           O  
HETATM  892  O   HOH T 891      -1.778 -32.534  56.679  1.00  0.41           O  
HETATM  893  O   HOH T 892     -37.882  -9.675  35.038  1.00  0.41           O  
HETATM  894  O   HOH T 893     -62.280   1.858  -7.972  1.00  0.41           O  
HETATM  895  O   HOH T 894     -27.141   4.240  52.129  1.00  0.41           O  
HETATM  896  O   HOH T 895     -20.252 -33.423  71.385  1.00  0.41           O  
HETATM  897  O   HOH T 896     -57.067  10.176  18.488  1.00  0.41           O  
HETATM  898  O   HOH T 897     -26.044 -22.610  27.420  1.00  0.41           O  
HETATM  899  O   HOH T 898     -15.397 -16.861  70.414  1.00  0.41           O  
HETATM  900  O   HOH T 899     -47.868  -7.174 -20.321  1.00  0.41           O  
HETATM  901  O   HOH T 900     -53.189 -13.464   7.941  1.00  0.41           O  
HETATM  902  O   HOH T 901     -12.887 -11.033  73.366  1.00  0.41           O  
HETATM  903  O   HOH T 902     -50.332  -4.213   8.434  1.00  0.41           O  
HETATM  904  O   HOH T 903     -56.010   3.806 -15.846  1.00  0.41           O  
HETATM  905  O   HOH T 904     -72.001   5.312   9.225  1.00  0.41           O  
HETATM  906  O   HOH T 905     -49.035  24.014 -11.327  1.00  0.41           O  
HETATM  907  O   HOH T 906     -27.436   8.180  17.795  1.00  0.41           O  
HETATM  908  O   HOH T 907     -11.510  -8.874  62.821  1.00  0.41           O  
HETATM  909  O   HOH T 908     -44.333 -17.186  42.872  1.00  0.41           O  
HETATM  910  O   HOH T 909     -51.189   8.729  39.255  1.00  0.41           O  
HETATM  911  O   HOH T 910     -51.041  25.218 -12.803  1.00  0.41           O  
HETATM  912  O   HOH T 911     -57.557  26.478 -11.122  1.00  0.41           O  
HETATM  913  O   HOH T 912      -8.224 -21.256  52.642  1.00  0.41           O  
HETATM  914  O   HOH T 913     -39.115   9.914  12.168  1.00  0.41           O  
HETATM  915  O   HOH T 914     -15.134 -29.188  33.738  1.00  0.41           O  
HETATM  916  O   HOH T 915     -37.218 -30.993  45.411  1.00  0.41           O  
HETATM  917  O   HOH T 916     -31.660  27.200  65.698  1.00  0.41           O  
HETATM  918  O   HOH T 917     -35.888 -20.586  73.157  1.00  0.41           O  
HETATM  919  O   HOH T 918     -19.257 -16.184  69.950  1.00  0.41           O  
HETATM  920  O   HOH T 919     -64.604  15.146   4.874  1.00  0.41           O  
HETATM  921  O   HOH T 920     -25.823 -26.761  76.509  1.00  0.41           O  
HETATM  922  O   HOH T 921     -52.060 -11.188  42.433  1.00  0.41           O  
HETATM  923  O   HOH T 922     -15.462 -24.952  50.545  1.00  0.41           O  
HETATM  924  O   HOH T 923     -37.673  -5.982 -13.468  1.00  0.41           O  
HETATM  925  O   HOH T 924     -56.914 -16.141  73.651  1.00  0.41           O  
HETATM  926  O   HOH T 925     -29.350   2.899  49.424  1.00  0.41           O  
HETATM  927  O   HOH T 926     -47.710 -17.931  60.599  1.00  0.41           O  
HETATM  928  O   HOH T 927     -19.523 -39.361  68.921  1.00  0.41           O  
HETATM  929  O   HOH T 928     -15.170   4.672  20.466  1.00  0.41           O  
HETATM  930  O   HOH T 929     -25.058  16.721  -2.200  1.00  0.41           O  
HETATM  931  O   HOH T 930     -61.077  -7.346  70.309  1.00  0.41           O  
HETATM  932  O   HOH T 931     -34.204  13.102  28.212  1.00  0.41           O  
HETATM  933  O   HOH T 932     -64.195  -2.364  -5.786  1.00  0.41           O  
HETATM  934  O   HOH T 933     -34.970 -23.473  40.479  1.00  0.41           O  
HETATM  935  O   HOH T 934     -39.046  36.339   4.936  1.00  0.41           O  
HETATM  936  O   HOH T 935     -34.052  -2.133  21.976  1.00  0.41           O  
HETATM  937  O   HOH T 936     -16.251  12.102  43.377  1.00  0.41           O  
HETATM  938  O   HOH T 937     -18.537  20.284  51.056  1.00  0.41           O  
HETATM  939  O   HOH T 938     -18.454  21.980  46.019  1.00  0.41           O  
HETATM  940  O   HOH T 939      -9.719 -37.330  72.751  1.00  0.41           O  
HETATM  941  O   HOH T 940      -1.587 -25.832  70.782  1.00  0.41           O  
HETATM  942  O   HOH T 941     -37.041  17.107  23.880  1.00  0.41           O  
HETATM  943  O   HOH T 942     -62.827  15.400  18.836  1.00  0.41           O  
HETATM  944  O   HOH T 943     -58.901   2.072   8.497  1.00  0.41           O  
HETATM  945  O   HOH T 944     -70.075 -21.142  15.878  1.00  0.41           O  
HETATM  946  O   HOH T 945     -23.763  13.082  17.155  1.00  0.41           O  
HETATM  947  O   HOH T 946       2.550  -4.121  67.740  1.00  0.41           O  
HETATM  948  O   HOH T 947     -16.230  19.729   2.473  1.00  0.41           O  
HETATM  949  O   HOH T 948     -34.386 -16.552  35.488  1.00  0.41           O  
HETATM  950  O   HOH T 949     -54.918 -31.140  20.643  1.00  0.41           O  
HETATM  951  O   HOH T 950     -20.871   4.567  -5.187  1.00  0.41           O  
HETATM  952  O   HOH T 951     -55.632 -16.403  76.038  1.00  0.41           O  
HETATM  953  O   HOH T 952     -32.084  -6.350  81.874  1.00  0.41           O  
HETATM  954  O   HOH T 953     -83.132  -4.784  14.434  1.00  0.41           O  
HETATM  955  O   HOH T 954     -13.905  11.456  39.593  1.00  0.41           O  
HETATM  956  O   HOH T 955     -27.519 -17.891  57.503  1.00  0.41           O  
HETATM  957  O   HOH T 956     -38.720 -16.047  36.090  1.00  0.41           O  
HETATM  958  O   HOH T 957     -14.538 -15.812  45.881  1.00  0.41           O  
HETATM  959  O   HOH T 958     -21.366  -4.866  42.592  1.00  0.42           O  
HETATM  960  O   HOH T 959      -4.076  -4.003  35.608  1.00  0.42           O  
HETATM  961  O   HOH T 960     -39.497   8.014  82.818  1.00  0.42           O  
HETATM  962  O   HOH T 961     -42.002  -1.901  21.845  1.00  0.42           O  
HETATM  963  O   HOH T 962     -71.672   5.843  24.308  1.00  0.42           O  
HETATM  964  O   HOH T 963     -13.314 -44.955  57.271  1.00  0.42           O  
HETATM  965  O   HOH T 964     -41.115   3.981  79.271  1.00  0.42           O  
HETATM  966  O   HOH T 965     -53.541  19.479  53.613  1.00  0.42           O  
HETATM  967  O   HOH T 966     -26.229 -12.454  58.830  1.00  0.42           O  
HETATM  968  O   HOH T 967     -45.159 -25.461  55.244  1.00  0.42           O  
HETATM  969  O   HOH T 968     -56.127  -9.487  26.608  1.00  0.42           O  
HETATM  970  O   HOH T 969     -56.690  -9.757  65.298  1.00  0.42           O  
HETATM  971  O   HOH T 970     -34.574  17.043  68.717  1.00  0.42           O  
HETATM  972  O   HOH T 971     -27.284  10.095 -15.882  1.00  0.42           O  
HETATM  973  O   HOH T 972     -56.415 -33.711  31.722  1.00  0.42           O  
HETATM  974  O   HOH T 973     -51.244   7.151   5.778  1.00  0.42           O  
HETATM  975  O   HOH T 974     -23.264 -17.789  69.495  1.00  0.42           O  
HETATM  976  O   HOH T 975     -27.693   0.072  88.517  1.00  0.42           O  
HETATM  977  O   HOH T 976     -51.699   0.182   7.065  1.00  0.42           O  
HETATM  978  O   HOH T 977     -12.353  -0.886  49.577  1.00  0.42           O  
HETATM  979  O   HOH T 978     -29.663  -5.409  82.776  1.00  0.42           O  
HETATM  980  O   HOH T 979     -72.207 -17.096  29.027  1.00  0.42           O  
HETATM  981  O   HOH T 980     -71.792   0.897  30.546  1.00  0.42           O  
HETATM  982  O   HOH T 981     -21.018  14.899  84.345  1.00  0.42           O  
HETATM  983  O   HOH T 982     -36.867  20.997  -9.737  1.00  0.42           O  
HETATM  984  O   HOH T 983     -31.689  12.982 -13.018  1.00  0.42           O  
HETATM  985  O   HOH T 984     -38.788  15.040  23.435  1.00  0.42           O  
HETATM  986  O   HOH T 985     -26.775 -16.356  48.862  1.00  0.42           O  
HETATM  987  O   HOH T 986     -12.148 -35.851  72.660  1.00  0.42           O  
HETATM  988  O   HOH T 987     -31.218 -34.192  60.749  1.00  0.42           O  
HETATM  989  O   HOH T 988     -41.733 -10.472  52.965  1.00  0.42           O  
HETATM  990  O   HOH T 989     -36.670 -12.221  35.599  1.00  0.42           O  
HETATM  991  O   HOH T 990     -75.158  -8.473  20.302  1.00  0.42           O  
HETATM  992  O   HOH T 991     -25.211  20.331  -3.801  1.00  0.42           O  
HETATM  993  O   HOH T 992     -49.562  -1.185  70.245  1.00  0.42           O  
HETATM  994  O   HOH T 993     -17.103  -3.435  46.304  1.00  0.42           O  
HETATM  995  O   HOH T 994     -54.348  23.638  16.710  1.00  0.42           O  
HETATM  996  O   HOH T 995     -23.569  21.161  -5.762  1.00  0.42           O  
HETATM  997  O   HOH T 996     -41.441   0.410  10.291  1.00  0.42           O  
HETATM  998  O   HOH T 997     -53.880  -9.690   4.941  1.00  0.42           O  
HETATM  999  O   HOH T 998     -28.222 -19.596  22.710  1.00  0.42           O  
HETATM 1000  O   HOH T 999     -42.927  17.834  31.461  1.00  0.42           O  
HETATM 1001  O   HOH T1000       2.913   0.711  61.837  1.00  0.42           O  
HETATM 1002  O   HOH T1001       4.716  -2.455  51.862  1.00  0.42           O  
HETATM 1003  O   HOH T1002     -64.052 -31.119   7.918  1.00  0.42           O  
HETATM 1004  O   HOH T1003     -38.545 -20.417  72.085  1.00  0.42           O  
HETATM 1005  O   HOH T1004     -47.862   7.266  23.340  1.00  0.42           O  
HETATM 1006  O   HOH T1005     -57.342  -6.960 -14.294  1.00  0.42           O  
HETATM 1007  O   HOH T1006     -83.966  -2.190  15.284  1.00  0.42           O  
HETATM 1008  O   HOH T1007     -11.000 -12.297  -1.658  1.00  0.42           O  
HETATM 1009  O   HOH T1008     -63.337  -0.749  -7.741  1.00  0.42           O  
HETATM 1010  O   HOH T1009     -41.592 -15.195  59.248  1.00  0.42           O  
HETATM 1011  O   HOH T1010      -5.566   5.656  52.637  1.00  0.42           O  
HETATM 1012  O   HOH T1011     -11.235  -7.451  49.999  1.00  0.42           O  
HETATM 1013  O   HOH T1012     -51.660   8.319  43.738  1.00  0.42           O  
HETATM 1014  O   HOH T1013     -15.510 -26.404  33.808  1.00  0.42           O  
HETATM 1015  O   HOH T1014     -42.040 -23.894  32.531  1.00  0.42           O  
HETATM 1016  O   HOH T1015     -52.881  -7.430 -14.822  1.00  0.42           O  
HETATM 1017  O   HOH T1016     -62.244  -5.901  59.116  1.00  0.42           O  
HETATM 1018  O   HOH T1017      -4.075 -32.964  71.020  1.00  0.42           O  
HETATM 1019  O   HOH T1018     -47.773  21.963  -3.725  1.00  0.42           O  
HETATM 1020  O   HOH T1019     -46.222  -8.085  54.466  1.00  0.42           O  
HETATM 1021  O   HOH T1020     -24.973  -8.055  88.977  1.00  0.42           O  
HETATM 1022  O   HOH T1021     -42.668  13.471  14.428  1.00  0.42           O  
HETATM 1023  O   HOH T1022     -30.790 -31.706  66.487  1.00  0.42           O  
HETATM 1024  O   HOH T1023     -10.737 -14.725  27.131  1.00  0.42           O  
HETATM 1025  O   HOH T1024     -51.075 -10.946  21.789  1.00  0.42           O  
HETATM 1026  O   HOH T1025     -13.391  10.834   0.642  1.00  0.42           O  
HETATM 1027  O   HOH T1026     -54.133 -16.145  39.905  1.00  0.42           O  
HETATM 1028  O   HOH T1027     -48.769  16.096  68.873  1.00  0.42           O  
HETATM 1029  O   HOH T1028     -42.949   3.307   7.192  1.00  0.42           O  
HETATM 1030  O   HOH T1029     -22.533  -7.823  21.274  1.00  0.42           O  
HETATM 1031  O   HOH T1030     -17.368  18.260  85.975  1.00  0.42           O  
HETATM 1032  O   HOH T1031     -28.211  -0.167  30.784  1.00  0.42           O  
HETATM 1033  O   HOH T1032     -64.869  17.648  11.687  1.00  0.42           O  
HETATM 1034  O   HOH T1033     -31.987 -18.862  -0.946  1.00  0.42           O  
HETATM 1035  O   HOH T1034     -64.269 -18.649  32.828  1.00  0.42           O  
HETATM 1036  O   HOH T1035     -61.849   7.962  -5.089  1.00  0.42           O  
HETATM 1037  O   HOH T1036     -67.856 -16.282   1.510  1.00  0.42           O  
HETATM 1038  O   HOH T1037     -50.163 -31.797  19.552  1.00  0.42           O  
HETATM 1039  O   HOH T1038     -38.714   1.503  35.640  1.00  0.42           O  
HETATM 1040  O   HOH T1039     -46.563  -5.285   9.824  1.00  0.42           O  
HETATM 1041  O   HOH T1040     -15.378 -20.115  44.926  1.00  0.42           O  
HETATM 1042  O   HOH T1041      -8.719 -39.433  66.392  1.00  0.42           O  
HETATM 1043  O   HOH T1042      -4.078   0.941  46.077  1.00  0.42           O  
HETATM 1044  O   HOH T1043     -13.883 -45.764  59.939  1.00  0.43           O  
HETATM 1045  O   HOH T1044     -36.361 -17.158  29.128  1.00  0.43           O  
HETATM 1046  O   HOH T1045     -20.918  -1.745  14.604  1.00  0.43           O  
HETATM 1047  O   HOH T1046     -15.976 -41.697  46.976  1.00  0.43           O  
HETATM 1048  O   HOH T1047     -46.383  -2.499  10.019  1.00  0.43           O  
HETATM 1049  O   HOH T1048     -33.207  31.393   0.539  1.00  0.43           O  
HETATM 1050  O   HOH T1049       7.303 -21.749  58.300  1.00  0.43           O  
HETATM 1051  O   HOH T1050     -36.688 -32.422  43.020  1.00  0.43           O  
HETATM 1052  O   HOH T1051     -22.572  -0.231  16.246  1.00  0.43           O  
HETATM 1053  O   HOH T1052     -59.685  -9.141  15.807  1.00  0.43           O  
HETATM 1054  O   HOH T1053     -47.911  13.664  68.101  1.00  0.43           O  
HETATM 1055  O   HOH T1054     -35.772  18.858  -8.318  1.00  0.43           O  
HETATM 1056  O   HOH T1055     -28.549 -16.723  19.482  1.00  0.43           O  
HETATM 1057  O   HOH T1056     -11.591 -37.426  74.766  1.00  0.43           O  
HETATM 1058  O   HOH T1057     -32.479 -37.494  48.019  1.00  0.43           O  
HETATM 1059  O   HOH T1058     -13.149 -19.206  58.366  1.00  0.43           O  
HETATM 1060  O   HOH T1059     -35.378 -17.001  26.630  1.00  0.43           O  
HETATM 1061  O   HOH T1060     -55.107   9.078  10.406  1.00  0.43           O  
HETATM 1062  O   HOH T1061     -56.217  -6.593 -11.906  1.00  0.43           O  
HETATM 1063  O   HOH T1062     -47.810 -15.667  58.895  1.00  0.43           O  
HETATM 1064  O   HOH T1063     -47.270   1.871   6.648  1.00  0.43           O  
HETATM 1065  O   HOH T1064     -73.616   5.660   6.949  1.00  0.43           O  
HETATM 1066  O   HOH T1065      -6.573   7.368  68.823  1.00  0.43           O  
HETATM 1067  O   HOH T1066     -44.709   1.478  78.587  1.00  0.43           O  
HETATM 1068  O   HOH T1067     -74.715  -7.502   3.052  1.00  0.43           O  
HETATM 1069  O   HOH T1068     -66.930 -10.357  -4.397  1.00  0.43           O  
HETATM 1070  O   HOH T1069     -16.937 -14.534  22.937  1.00  0.43           O  
HETATM 1071  O   HOH T1070     -50.209  26.209   0.987  1.00  0.43           O  
HETATM 1072  O   HOH T1071     -47.873  21.303  26.688  1.00  0.43           O  
HETATM 1073  O   HOH T1072     -53.930  26.158  -5.135  1.00  0.43           O  
HETATM 1074  O   HOH T1073     -39.805 -23.530  42.825  1.00  0.43           O  
HETATM 1075  O   HOH T1074     -59.051   4.083  18.598  1.00  0.43           O  
HETATM 1076  O   HOH T1075     -43.062 -25.883  58.707  1.00  0.43           O  
HETATM 1077  O   HOH T1076     -53.793   4.807  68.145  1.00  0.43           O  
HETATM 1078  O   HOH T1077     -49.480  -5.835  67.727  1.00  0.43           O  
HETATM 1079  O   HOH T1078      -1.725 -18.912  30.124  1.00  0.43           O  
HETATM 1080  O   HOH T1079     -43.466   9.658  47.764  1.00  0.43           O  
HETATM 1081  O   HOH T1080     -30.172 -11.366  33.365  1.00  0.43           O  
HETATM 1082  O   HOH T1081     -18.633 -40.385  43.615  1.00  0.43           O  
HETATM 1083  O   HOH T1082     -21.694   3.344  -1.873  1.00  0.43           O  
HETATM 1084  O   HOH T1083     -62.540  15.640  34.393  1.00  0.43           O  
HETATM 1085  O   HOH T1084     -45.055   7.780   6.696  1.00  0.43           O  
HETATM 1086  O   HOH T1085     -77.707   1.888  10.851  1.00  0.43           O  
HETATM 1087  O   HOH T1086     -18.021 -35.663  43.771  1.00  0.43           O  
HETATM 1088  O   HOH T1087     -46.951  13.229   3.147  1.00  0.43           O  
HETATM 1089  O   HOH T1088     -19.333 -12.616  25.544  1.00  0.43           O  
HETATM 1090  O   HOH T1089     -52.701  14.608  60.100  1.00  0.43           O  
HETATM 1091  O   HOH T1090     -19.405 -14.924  24.016  1.00  0.43           O  
HETATM 1092  O   HOH T1091      -7.289 -41.329  64.896  1.00  0.43           O  
HETATM 1093  O   HOH T1092     -16.184  10.699  41.052  1.00  0.43           O  
HETATM 1094  O   HOH T1093     -66.340 -17.839  -3.192  1.00  0.43           O  
HETATM 1095  O   HOH T1094     -25.184 -34.100  71.211  1.00  0.43           O  
HETATM 1096  O   HOH T1095     -41.943   1.072  56.121  1.00  0.43           O  
HETATM 1097  O   HOH T1096     -62.695  -3.319  60.069  1.00  0.43           O  
HETATM 1098  O   HOH T1097     -20.163 -11.172  46.347  1.00  0.43           O  
HETATM 1099  O   HOH T1098     -74.018   5.906  11.034  1.00  0.43           O  
HETATM 1100  O   HOH T1099     -19.799  21.294  67.099  1.00  0.43           O  
HETATM 1101  O   HOH T1100     -49.043 -14.690  11.155  1.00  0.43           O  
HETATM 1102  O   HOH T1101     -57.453 -31.571  21.716  1.00  0.43           O  
HETATM 1103  O   HOH T1102     -49.395   1.059   8.280  1.00  0.43           O  
HETATM 1104  O   HOH T1103     -22.333  -4.092  15.284  1.00  0.43           O  
HETATM 1105  O   HOH T1104     -50.989 -15.346  13.115  1.00  0.43           O  
HETATM 1106  O   HOH T1105     -20.093 -11.211  29.212  1.00  0.43           O  
HETATM 1107  O   HOH T1106     -65.672 -15.284  29.178  1.00  0.43           O  
HETATM 1108  O   HOH T1107     -24.281   3.133  84.371  1.00  0.43           O  
HETATM 1109  O   HOH T1108     -35.539  15.471  50.237  1.00  0.43           O  
HETATM 1110  O   HOH T1109     -45.786 -29.923  23.542  1.00  0.43           O  
HETATM 1111  O   HOH T1110     -22.535   0.144  44.712  1.00  0.43           O  
HETATM 1112  O   HOH T1111     -58.456  -9.825  25.116  1.00  0.44           O  
HETATM 1113  O   HOH T1112     -21.307  15.204  -5.501  1.00  0.44           O  
HETATM 1114  O   HOH T1113     -61.867  -4.768  70.058  1.00  0.44           O  
HETATM 1115  O   HOH T1114     -63.282  -8.993  19.596  1.00  0.44           O  
HETATM 1116  O   HOH T1115     -64.597  -4.732  58.518  1.00  0.44           O  
HETATM 1117  O   HOH T1116     -18.286  18.899   0.970  1.00  0.44           O  
HETATM 1118  O   HOH T1117     -72.039 -22.950   9.314  1.00  0.44           O  
HETATM 1119  O   HOH T1118     -44.084  -6.971  52.877  1.00  0.44           O  
HETATM 1120  O   HOH T1119     -58.941 -13.183  13.286  1.00  0.44           O  
HETATM 1121  O   HOH T1120     -13.848 -45.349  54.582  1.00  0.44           O  
HETATM 1122  O   HOH T1121     -40.003 -12.084  80.832  1.00  0.44           O  
HETATM 1123  O   HOH T1122     -45.812 -26.771  28.198  1.00  0.44           O  
HETATM 1124  O   HOH T1123     -22.753  -5.996  31.797  1.00  0.44           O  
HETATM 1125  O   HOH T1124     -57.448  -4.109  58.018  1.00  0.44           O  
HETATM 1126  O   HOH T1125     -17.963 -15.849  67.475  1.00  0.44           O  
HETATM 1127  O   HOH T1126     -14.430 -12.150  -6.323  1.00  0.44           O  
HETATM 1128  O   HOH T1127     -71.094 -23.402  17.053  1.00  0.44           O  
HETATM 1129  O   HOH T1128     -58.616 -20.744  -2.900  1.00  0.44           O  
HETATM 1130  O   HOH T1129     -11.183 -22.534  49.702  1.00  0.44           O  
HETATM 1131  O   HOH T1130     -42.751   4.703  18.687  1.00  0.44           O  
HETATM 1132  O   HOH T1131     -34.490  -4.211  38.784  1.00  0.44           O  
HETATM 1133  O   HOH T1132     -47.149  19.754  53.145  1.00  0.44           O  
HETATM 1134  O   HOH T1133     -10.295  -4.617  31.701  1.00  0.44           O  
HETATM 1135  O   HOH T1134      -0.720 -17.916  36.852  1.00  0.44           O  
HETATM 1136  O   HOH T1135       5.995 -20.970  69.353  1.00  0.44           O  
HETATM 1137  O   HOH T1136     -62.020 -18.165  34.340  1.00  0.44           O  
HETATM 1138  O   HOH T1137     -32.918 -32.534  62.239  1.00  0.44           O  
HETATM 1139  O   HOH T1138     -73.820  10.452  11.929  1.00  0.44           O  
HETATM 1140  O   HOH T1139     -33.187  13.610 -10.841  1.00  0.44           O  
HETATM 1141  O   HOH T1140     -14.725  -8.149  28.896  1.00  0.44           O  
HETATM 1142  O   HOH T1141     -65.039 -30.801  14.303  1.00  0.44           O  
HETATM 1143  O   HOH T1142     -12.741   9.331  46.621  1.00  0.44           O  
HETATM 1144  O   HOH T1143     -37.160  17.966  68.807  1.00  0.44           O  
HETATM 1145  O   HOH T1144     -45.858  16.621  66.390  1.00  0.44           O  
HETATM 1146  O   HOH T1145     -56.486  -9.759  80.143  1.00  0.44           O  
HETATM 1147  O   HOH T1146     -30.279  -8.063  13.207  1.00  0.44           O  
HETATM 1148  O   HOH T1147     -58.048   4.856   8.957  1.00  0.44           O  
HETATM 1149  O   HOH T1148     -25.774  11.484  18.333  1.00  0.44           O  
HETATM 1150  O   HOH T1149     -32.188  22.785  70.842  1.00  0.44           O  
HETATM 1151  O   HOH T1150     -37.958  -8.786  -0.275  1.00  0.44           O  
HETATM 1152  O   HOH T1151     -54.580 -16.069  37.152  1.00  0.44           O  
HETATM 1153  O   HOH T1152     -67.189 -29.232  14.718  1.00  0.44           O  
HETATM 1154  O   HOH T1153     -43.753  10.912  14.250  1.00  0.44           O  
HETATM 1155  O   HOH T1154     -61.268   2.998  62.517  1.00  0.44           O  
HETATM 1156  O   HOH T1155     -23.353 -22.107  27.614  1.00  0.44           O  
HETATM 1157  O   HOH T1156     -76.271  -6.578   0.901  1.00  0.44           O  
HETATM 1158  O   HOH T1157     -21.623  -9.082  45.527  1.00  0.44           O  
HETATM 1159  O   HOH T1158       1.528  -1.582  64.840  1.00  0.44           O  
HETATM 1160  O   HOH T1159     -68.543 -16.215  -3.825  1.00  0.44           O  
HETATM 1161  O   HOH T1160     -14.688 -13.946  61.279  1.00  0.44           O  
HETATM 1162  O   HOH T1161     -15.240 -26.103  55.232  1.00  0.44           O  
HETATM 1163  O   HOH T1162      -7.462 -39.143  58.765  1.00  0.44           O  
HETATM 1164  O   HOH T1163     -29.445  -8.602  49.921  1.00  0.44           O  
HETATM 1165  O   HOH T1164     -44.499  15.170  78.424  1.00  0.44           O  
HETATM 1166  O   HOH T1165      -7.317   2.803  65.786  1.00  0.44           O  
HETATM 1167  O   HOH T1166     -26.751   3.298  37.433  1.00  0.44           O  
HETATM 1168  O   HOH T1167     -42.135  34.382   5.934  1.00  0.44           O  
HETATM 1169  O   HOH T1168     -56.216  -0.997  68.936  1.00  0.44           O  
HETATM 1170  O   HOH T1169     -15.459  -7.863  46.900  1.00  0.44           O  
HETATM 1171  O   HOH T1170     -16.474 -15.858  62.110  1.00  0.44           O  
HETATM 1172  O   HOH T1171     -75.300  -1.816   8.630  1.00  0.44           O  
HETATM 1173  O   HOH T1172     -40.468 -24.568  16.686  1.00  0.44           O  
HETATM 1174  O   HOH T1173     -26.236 -40.648  66.702  1.00  0.44           O  
HETATM 1175  O   HOH T1174     -57.943  -3.683  46.289  1.00  0.44           O  
HETATM 1176  O   HOH T1175     -29.140  -4.773 -10.560  1.00  0.44           O  
HETATM 1177  O   HOH T1176     -37.929 -33.646  45.238  1.00  0.44           O  
HETATM 1178  O   HOH T1177     -21.351  17.186  64.302  1.00  0.44           O  
HETATM 1179  O   HOH T1178     -63.193  15.255  36.960  1.00  0.44           O  
HETATM 1180  O   HOH T1179     -24.560  23.459  52.735  1.00  0.44           O  
HETATM 1181  O   HOH T1180     -59.906  23.614   2.559  1.00  0.44           O  
HETATM 1182  O   HOH T1181     -16.797   3.351  46.083  1.00  0.44           O  
HETATM 1183  O   HOH T1182      -5.582 -22.647  42.254  1.00  0.44           O  
HETATM 1184  O   HOH T1183     -20.002   2.300  -3.716  1.00  0.45           O  
HETATM 1185  O   HOH T1184     -54.254  -5.637  46.120  1.00  0.45           O  
HETATM 1186  O   HOH T1185     -64.052  17.955   9.041  1.00  0.45           O  
HETATM 1187  O   HOH T1186     -44.323 -29.019  28.262  1.00  0.45           O  
HETATM 1188  O   HOH T1187     -48.457  15.281  13.949  1.00  0.45           O  
HETATM 1189  O   HOH T1188     -18.957  -1.138  12.691  1.00  0.45           O  
HETATM 1190  O   HOH T1189     -15.292  -5.854  67.794  1.00  0.45           O  
HETATM 1191  O   HOH T1190     -56.135 -34.023  10.029  1.00  0.45           O  
HETATM 1192  O   HOH T1191     -56.677  22.995   4.209  1.00  0.45           O  
HETATM 1193  O   HOH T1192     -14.472  -0.226  47.899  1.00  0.45           O  
HETATM 1194  O   HOH T1193     -47.136  11.210  18.617  1.00  0.45           O  
HETATM 1195  O   HOH T1194     -78.484   3.930  12.385  1.00  0.45           O  
HETATM 1196  O   HOH T1195     -45.432  19.405  66.328  1.00  0.45           O  
HETATM 1197  O   HOH T1196     -58.277  -3.264  43.547  1.00  0.45           O  
HETATM 1198  O   HOH T1197     -45.694   8.876  18.100  1.00  0.45           O  
HETATM 1199  O   HOH T1198     -33.647 -18.913  -4.908  1.00  0.45           O  
HETATM 1200  O   HOH T1199     -66.442 -30.012  22.222  1.00  0.45           O  
HETATM 1201  O   HOH T1200     -47.248  15.590  78.863  1.00  0.45           O  
HETATM 1202  O   HOH T1201     -21.349 -37.779  45.130  1.00  0.45           O  
HETATM 1203  O   HOH T1202       0.778  -4.146  65.663  1.00  0.45           O  
HETATM 1204  O   HOH T1203     -32.456   1.466  55.909  1.00  0.45           O  
HETATM 1205  O   HOH T1204     -14.152 -23.486  78.932  1.00  0.45           O  
HETATM 1206  O   HOH T1205     -44.439  18.167  29.225  1.00  0.45           O  
HETATM 1207  O   HOH T1206     -72.638   2.268  25.817  1.00  0.45           O  
HETATM 1208  O   HOH T1207     -66.606 -10.803  -7.189  1.00  0.45           O  
HETATM 1209  O   HOH T1208     -11.934 -13.187   0.854  1.00  0.45           O  
HETATM 1210  O   HOH T1209     -50.998  10.674  35.491  1.00  0.45           O  
HETATM 1211  O   HOH T1210     -55.715  -7.318  55.317  1.00  0.45           O  
HETATM 1212  O   HOH T1211     -24.338  -2.446  16.389  1.00  0.45           O  
HETATM 1213  O   HOH T1212     -11.236  21.626  52.380  1.00  0.45           O  
HETATM 1214  O   HOH T1213     -48.488  -5.838  46.538  1.00  0.45           O  
HETATM 1215  O   HOH T1214     -49.516 -11.988  10.619  1.00  0.45           O  
HETATM 1216  O   HOH T1215     -24.999  -5.038  15.471  1.00  0.45           O  
HETATM 1217  O   HOH T1216     -17.274 -46.147  47.230  1.00  0.45           O  
HETATM 1218  O   HOH T1217     -29.347 -37.028  56.696  1.00  0.45           O  
HETATM 1219  O   HOH T1218     -12.622  14.602  56.720  1.00  0.45           O  
HETATM 1220  O   HOH T1219     -46.919 -29.917  20.959  1.00  0.45           O  
HETATM 1221  O   HOH T1220       7.885 -19.472  64.796  1.00  0.45           O  
HETATM 1222  O   HOH T1221     -49.287 -33.502  29.081  1.00  0.45           O  
HETATM 1223  O   HOH T1222     -16.809  13.124  -5.849  1.00  0.45           O  
HETATM 1224  O   HOH T1223     -52.310  -5.937  25.690  1.00  0.45           O  
HETATM 1225  O   HOH T1224     -24.470 -16.126  53.449  1.00  0.45           O  
HETATM 1226  O   HOH T1225     -41.360   1.721  40.495  1.00  0.45           O  
HETATM 1227  O   HOH T1226     -25.080 -15.343  56.051  1.00  0.45           O  
HETATM 1228  O   HOH T1227      -9.995  -2.423  49.256  1.00  0.45           O  
HETATM 1229  O   HOH T1228     -44.865  12.954   5.011  1.00  0.45           O  
HETATM 1230  O   HOH T1229     -14.862 -43.227  65.911  1.00  0.45           O  
HETATM 1231  O   HOH T1230     -43.978  12.641  79.680  1.00  0.45           O  
HETATM 1232  O   HOH T1231     -18.168  -1.567  62.012  1.00  0.45           O  
HETATM 1233  O   HOH T1232     -26.204  18.864  14.940  1.00  0.45           O  
HETATM 1234  O   HOH T1233     -35.754  13.372  30.452  1.00  0.45           O  
HETATM 1235  O   HOH T1234     -13.283  14.573   7.703  1.00  0.45           O  
HETATM 1236  O   HOH T1235     -56.385 -10.048  11.554  1.00  0.45           O  
HETATM 1237  O   HOH T1236     -47.067   4.064 -16.109  1.00  0.45           O  
HETATM 1238  O   HOH T1237     -43.547 -22.714  34.453  1.00  0.45           O  
HETATM 1239  O   HOH T1238     -59.738  14.404 -12.119  1.00  0.45           O  
HETATM 1240  O   HOH T1239      -8.192 -41.936  67.470  1.00  0.45           O  
HETATM 1241  O   HOH T1240     -47.464  13.400  80.815  1.00  0.45           O  
HETATM 1242  O   HOH T1241       2.658 -20.993  46.947  1.00  0.45           O  
HETATM 1243  O   HOH T1242     -33.848  24.321  10.339  1.00  0.45           O  
HETATM 1244  O   HOH T1243     -33.520 -15.995  32.908  1.00  0.45           O  
HETATM 1245  O   HOH T1244     -52.923  15.244  56.394  1.00  0.45           O  
HETATM 1246  O   HOH T1245     -52.682   3.283  74.546  1.00  0.45           O  
HETATM 1247  O   HOH T1246     -34.146 -13.712  82.691  1.00  0.45           O  
HETATM 1248  O   HOH T1247     -62.171  -4.187  23.656  1.00  0.45           O  
HETATM 1249  O   HOH T1248     -11.716  19.159  51.208  1.00  0.45           O  
HETATM 1250  O   HOH T1249     -72.659 -17.993   4.835  1.00  0.45           O  
HETATM 1251  O   HOH T1250     -32.740  -8.315 -10.030  1.00  0.45           O  
HETATM 1252  O   HOH T1251     -68.196   7.073  27.913  1.00  0.45           O  
HETATM 1253  O   HOH T1252      -0.970 -10.229  43.272  1.00  0.45           O  
HETATM 1254  O   HOH T1253     -36.447  13.250  73.786  1.00  0.45           O  
HETATM 1255  O   HOH T1254     -69.811 -16.104  28.161  1.00  0.45           O  
HETATM 1256  O   HOH T1255     -39.352  -2.956  41.116  1.00  0.45           O  
HETATM 1257  O   HOH T1256     -62.214  -6.453  -6.702  1.00  0.45           O  
HETATM 1258  O   HOH T1257     -64.132 -29.976  25.249  1.00  0.45           O  
HETATM 1259  O   HOH T1258     -11.896  -8.146  -1.026  1.00  0.45           O  
HETATM 1260  O   HOH T1259     -47.786 -16.448  47.772  1.00  0.45           O  
HETATM 1261  O   HOH T1260     -46.911 -12.594  11.298  1.00  0.45           O  
HETATM 1262  O   HOH T1261     -80.038   0.686   9.766  1.00  0.45           O  
HETATM 1263  O   HOH T1262     -29.092   0.979  81.895  1.00  0.45           O  
HETATM 1264  O   HOH T1263     -15.832 -24.365  47.985  1.00  0.46           O  
HETATM 1265  O   HOH T1264       2.204  -8.376  66.335  1.00  0.46           O  
HETATM 1266  O   HOH T1265     -21.623 -22.597  52.122  1.00  0.46           O  
HETATM 1267  O   HOH T1266     -29.749 -16.167   8.912  1.00  0.46           O  
HETATM 1268  O   HOH T1267     -55.030 -35.525  30.108  1.00  0.46           O  
HETATM 1269  O   HOH T1268     -45.846  -5.247  14.623  1.00  0.46           O  
HETATM 1270  O   HOH T1269     -28.937 -11.195  50.416  1.00  0.46           O  
HETATM 1271  O   HOH T1270     -51.143  15.898  70.335  1.00  0.46           O  
HETATM 1272  O   HOH T1271     -30.197 -22.080  -2.489  1.00  0.46           O  
HETATM 1273  O   HOH T1272      -0.623 -17.673  44.723  1.00  0.46           O  
HETATM 1274  O   HOH T1273     -12.245 -18.150  55.993  1.00  0.46           O  
HETATM 1275  O   HOH T1274     -48.517  12.715   8.275  1.00  0.46           O  
HETATM 1276  O   HOH T1275     -45.790  -5.725  21.262  1.00  0.46           O  
HETATM 1277  O   HOH T1276     -70.510 -23.652   7.176  1.00  0.46           O  
HETATM 1278  O   HOH T1277     -72.170  10.562   5.452  1.00  0.46           O  
HETATM 1279  O   HOH T1278     -16.344  -2.345  55.889  1.00  0.46           O  
HETATM 1280  O   HOH T1279     -34.720 -16.324   1.554  1.00  0.46           O  
HETATM 1281  O   HOH T1280     -34.701  24.822  -6.903  1.00  0.46           O  
HETATM 1282  O   HOH T1281     -68.082   3.246   1.805  1.00  0.46           O  
HETATM 1283  O   HOH T1282     -48.953 -23.897  55.036  1.00  0.46           O  
HETATM 1284  O   HOH T1283     -64.829  10.406   3.310  1.00  0.46           O  
HETATM 1285  O   HOH T1284     -30.564  23.302  62.907  1.00  0.46           O  
HETATM 1286  O   HOH T1285     -51.990  -9.397 -13.036  1.00  0.46           O  
HETATM 1287  O   HOH T1286     -17.062 -43.929  64.249  1.00  0.46           O  
HETATM 1288  O   HOH T1287     -60.679  23.479  -5.389  1.00  0.46           O  
HETATM 1289  O   HOH T1288       5.859 -22.623  60.459  1.00  0.46           O  
HETATM 1290  O   HOH T1289     -15.967   9.064  -2.445  1.00  0.46           O  
HETATM 1291  O   HOH T1290     -36.854  -3.425  37.430  1.00  0.46           O  
HETATM 1292  O   HOH T1291     -54.186  -9.863  81.577  1.00  0.46           O  
HETATM 1293  O   HOH T1292     -50.033  -9.805 -11.137  1.00  0.46           O  
HETATM 1294  O   HOH T1293     -14.648  -2.419  49.555  1.00  0.46           O  
HETATM 1295  O   HOH T1294     -45.909  28.142   3.295  1.00  0.46           O  
HETATM 1296  O   HOH T1295     -25.822   0.130 -10.493  1.00  0.46           O  
HETATM 1297  O   HOH T1296     -26.653  25.843  67.972  1.00  0.46           O  
HETATM 1298  O   HOH T1297     -23.828 -35.922  47.048  1.00  0.46           O  
HETATM 1299  O   HOH T1298     -16.844  -9.633  -8.275  1.00  0.46           O  
HETATM 1300  O   HOH T1299     -19.221  15.821  -1.074  1.00  0.46           O  
HETATM 1301  O   HOH T1300     -36.025  29.378   9.224  1.00  0.46           O  
HETATM 1302  O   HOH T1301     -21.777 -20.325  29.016  1.00  0.46           O  
HETATM 1303  O   HOH T1302     -69.217  13.708  33.040  1.00  0.46           O  
HETATM 1304  O   HOH T1303     -33.941  -9.594  81.004  1.00  0.46           O  
HETATM 1305  O   HOH T1304     -47.034  14.762   5.035  1.00  0.46           O  
HETATM 1306  O   HOH T1305     -30.486   1.014  21.935  1.00  0.46           O  
HETATM 1307  O   HOH T1306     -13.061 -25.051  61.746  1.00  0.46           O  
HETATM 1308  O   HOH T1307     -17.182 -42.587  44.608  1.00  0.46           O  
HETATM 1309  O   HOH T1308     -44.542 -18.167  40.424  1.00  0.46           O  
HETATM 1310  O   HOH T1309     -19.829  -0.123  44.732  1.00  0.46           O  
HETATM 1311  O   HOH T1310     -35.589 -11.468  82.073  1.00  0.46           O  
HETATM 1312  O   HOH T1311     -57.801  -2.167  25.038  1.00  0.46           O  
HETATM 1313  O   HOH T1312     -79.611  -4.120  10.597  1.00  0.46           O  
HETATM 1314  O   HOH T1313     -70.500   8.161  25.282  1.00  0.46           O  
HETATM 1315  O   HOH T1314     -25.852 -17.324  51.283  1.00  0.46           O  
HETATM 1316  O   HOH T1315     -54.197 -13.174  -3.199  1.00  0.46           O  
HETATM 1317  O   HOH T1316     -38.227  32.693   1.039  1.00  0.46           O  
HETATM 1318  O   HOH T1317     -69.428 -13.752  -4.879  1.00  0.46           O  
HETATM 1319  O   HOH T1318     -28.284   7.943  15.191  1.00  0.46           O  
HETATM 1320  O   HOH T1319     -67.773   8.670  39.004  1.00  0.46           O  
HETATM 1321  O   HOH T1320     -19.722  -2.311  46.338  1.00  0.46           O  
HETATM 1322  O   HOH T1321     -25.120  -0.362  88.936  1.00  0.46           O  
HETATM 1323  O   HOH T1322      -5.035   2.602  64.156  1.00  0.46           O  
HETATM 1324  O   HOH T1323     -38.689 -15.361  18.545  1.00  0.46           O  
HETATM 1325  O   HOH T1324     -46.276  15.142   9.901  1.00  0.46           O  
HETATM 1326  O   HOH T1325     -14.692  21.131  63.999  1.00  0.46           O  
HETATM 1327  O   HOH T1326     -32.455 -10.633  -8.734  1.00  0.46           O  
HETATM 1328  O   HOH T1327       3.551 -10.349  60.609  1.00  0.46           O  
HETATM 1329  O   HOH T1328     -28.152  10.477  77.654  1.00  0.46           O  
HETATM 1330  O   HOH T1329     -48.196  21.826  24.032  1.00  0.46           O  
HETATM 1331  O   HOH T1330     -38.312  17.749  66.270  1.00  0.46           O  
HETATM 1332  O   HOH T1331     -67.698  -1.355  -0.141  1.00  0.46           O  
HETATM 1333  O   HOH T1332     -54.546  -7.331  26.019  1.00  0.46           O  
HETATM 1334  O   HOH T1333     -35.973 -26.682  40.349  1.00  0.46           O  
HETATM 1335  O   HOH T1334     -10.630 -12.910  48.146  1.00  0.46           O  
HETATM 1336  O   HOH T1335     -21.882  25.049  75.627  1.00  0.46           O  
HETATM 1337  O   HOH T1336     -48.516 -10.963  12.976  1.00  0.46           O  
HETATM 1338  O   HOH T1337     -19.941  10.480  87.005  1.00  0.46           O  
HETATM 1339  O   HOH T1338     -36.289 -24.905  38.148  1.00  0.46           O  
HETATM 1340  O   HOH T1339     -59.020  -1.714  48.028  1.00  0.46           O  
HETATM 1341  O   HOH T1340     -11.703   9.364  61.376  1.00  0.46           O  
HETATM 1342  O   HOH T1341     -54.299   7.332  67.492  1.00  0.46           O  
HETATM 1343  O   HOH T1342     -28.961 -17.800  15.204  1.00  0.46           O  
HETATM 1344  O   HOH T1343     -29.998   3.773  18.278  1.00  0.46           O  
HETATM 1345  O   HOH T1344      -8.792   0.762  38.416  1.00  0.46           O  
HETATM 1346  O   HOH T1345     -32.268  -7.601  34.556  1.00  0.46           O  
HETATM 1347  O   HOH T1346     -55.768  -3.964  44.505  1.00  0.46           O  
HETATM 1348  O   HOH T1347     -28.999  27.458  65.488  1.00  0.47           O  
HETATM 1349  O   HOH T1348     -24.462   3.955  52.770  1.00  0.47           O  
HETATM 1350  O   HOH T1349     -21.896  26.351   6.440  1.00  0.47           O  
HETATM 1351  O   HOH T1350     -41.426 -23.331  14.391  1.00  0.47           O  
HETATM 1352  O   HOH T1351      -8.987 -27.913  38.934  1.00  0.47           O  
HETATM 1353  O   HOH T1352     -17.204 -14.318   2.617  1.00  0.47           O  
HETATM 1354  O   HOH T1353     -52.348  12.020  10.299  1.00  0.47           O  
HETATM 1355  O   HOH T1354     -54.254 -16.751  73.692  1.00  0.47           O  
HETATM 1356  O   HOH T1355     -81.614  -0.511  15.231  1.00  0.47           O  
HETATM 1357  O   HOH T1356     -15.896 -12.080   3.180  1.00  0.47           O  
HETATM 1358  O   HOH T1357     -50.476  -1.440   8.935  1.00  0.47           O  
HETATM 1359  O   HOH T1358     -55.491   9.953 -13.436  1.00  0.47           O  
HETATM 1360  O   HOH T1359     -75.392   1.004  20.151  1.00  0.47           O  
HETATM 1361  O   HOH T1360     -23.373 -35.859  44.309  1.00  0.47           O  
HETATM 1362  O   HOH T1361     -53.852  20.452  51.025  1.00  0.47           O  
HETATM 1363  O   HOH T1362     -47.870   0.780  44.920  1.00  0.47           O  
HETATM 1364  O   HOH T1363     -25.016 -20.076  26.566  1.00  0.47           O  
HETATM 1365  O   HOH T1364      -7.724  -1.005  36.492  1.00  0.47           O  
HETATM 1366  O   HOH T1365     -29.085  -7.883  84.015  1.00  0.47           O  
HETATM 1367  O   HOH T1366     -33.482  20.363  71.407  1.00  0.47           O  
HETATM 1368  O   HOH T1367     -33.799  -9.086  32.693  1.00  0.47           O  
HETATM 1369  O   HOH T1368     -21.889   2.971  49.375  1.00  0.47           O  
HETATM 1370  O   HOH T1369     -53.516 -20.147  -0.231  1.00  0.47           O  
HETATM 1371  O   HOH T1370     -80.304  -0.871  11.957  1.00  0.47           O  
HETATM 1372  O   HOH T1371     -72.066   8.469   1.442  1.00  0.47           O  
HETATM 1373  O   HOH T1372      -9.349  -0.710  70.851  1.00  0.47           O  
HETATM 1374  O   HOH T1373     -47.275   3.423  44.797  1.00  0.47           O  
HETATM 1375  O   HOH T1374      -6.737   0.337  45.931  1.00  0.47           O  
HETATM 1376  O   HOH T1375     -48.857  -1.723  44.411  1.00  0.47           O  
HETATM 1377  O   HOH T1376     -52.227  -5.342   6.729  1.00  0.47           O  
HETATM 1378  O   HOH T1377       4.182 -10.379  66.347  1.00  0.47           O  
HETATM 1379  O   HOH T1378     -33.381  14.321 -14.765  1.00  0.47           O  
HETATM 1380  O   HOH T1379     -40.254  13.678  12.926  1.00  0.47           O  
HETATM 1381  O   HOH T1380     -49.571 -12.018  15.365  1.00  0.47           O  
HETATM 1382  O   HOH T1381     -25.706 -22.977   0.302  1.00  0.47           O  
HETATM 1383  O   HOH T1382     -27.601 -22.868  -3.174  1.00  0.47           O  
HETATM 1384  O   HOH T1383     -44.495  -3.248 -20.189  1.00  0.47           O  
HETATM 1385  O   HOH T1384     -74.504  -1.551  11.316  1.00  0.47           O  
HETATM 1386  O   HOH T1385     -31.523  -6.117 -11.206  1.00  0.47           O  
HETATM 1387  O   HOH T1386     -57.598 -20.923  33.485  1.00  0.47           O  
HETATM 1388  O   HOH T1387     -30.718 -22.350  68.833  1.00  0.47           O  
HETATM 1389  O   HOH T1388     -25.082  24.625  71.063  1.00  0.47           O  
HETATM 1390  O   HOH T1389     -29.840 -37.214  51.825  1.00  0.47           O  
HETATM 1391  O   HOH T1390     -19.160  16.015  -3.852  1.00  0.47           O  
HETATM 1392  O   HOH T1391     -66.447   3.086  -0.334  1.00  0.47           O  
HETATM 1393  O   HOH T1392     -25.138   1.787  48.172  1.00  0.47           O  
HETATM 1394  O   HOH T1393     -11.571  -1.367  33.080  1.00  0.47           O  
HETATM 1395  O   HOH T1394     -20.370 -40.300  66.525  1.00  0.47           O  
HETATM 1396  O   HOH T1395     -37.352  18.618  62.333  1.00  0.47           O  
HETATM 1397  O   HOH T1396     -61.704  -4.659  21.064  1.00  0.47           O  
HETATM 1398  O   HOH T1397      -3.032  13.821  55.590  1.00  0.47           O  
HETATM 1399  O   HOH T1398     -74.774   7.936  12.615  1.00  0.47           O  
HETATM 1400  O   HOH T1399     -36.439  14.839  32.575  1.00  0.47           O  
HETATM 1401  O   HOH T1400     -71.111   6.317  -0.042  1.00  0.47           O  
HETATM 1402  O   HOH T1401     -22.028  18.861  -5.858  1.00  0.47           O  
HETATM 1403  O   HOH T1402      -4.442 -17.153  76.965  1.00  0.47           O  
HETATM 1404  O   HOH T1403     -45.984 -15.436  46.073  1.00  0.47           O  
HETATM 1405  O   HOH T1404     -17.990  -7.254  -8.106  1.00  0.47           O  
HETATM 1406  O   HOH T1405     -14.185  19.765   4.325  1.00  0.47           O  
HETATM 1407  O   HOH T1406     -32.283  -0.437  53.042  1.00  0.47           O  
HETATM 1408  O   HOH T1407     -52.036 -23.086   1.509  1.00  0.47           O  
HETATM 1409  O   HOH T1408     -35.942  16.412  21.321  1.00  0.47           O  
HETATM 1410  O   HOH T1409     -12.143   1.681  53.468  1.00  0.47           O  
HETATM 1411  O   HOH T1410     -55.808 -17.991  38.831  1.00  0.47           O  
HETATM 1412  O   HOH T1411     -25.825 -17.258  59.641  1.00  0.47           O  
HETATM 1413  O   HOH T1412     -25.818 -20.059  23.963  1.00  0.47           O  
HETATM 1414  O   HOH T1413     -42.933  23.497  16.913  1.00  0.47           O  
HETATM 1415  O   HOH T1414     -43.139 -28.583  58.193  1.00  0.47           O  
HETATM 1416  O   HOH T1415     -33.228 -25.911  40.542  1.00  0.47           O  
HETATM 1417  O   HOH T1416     -44.241   9.065 -18.123  1.00  0.47           O  
HETATM 1418  O   HOH T1417     -64.933 -12.858  30.732  1.00  0.47           O  
HETATM 1419  O   HOH T1418     -28.205 -22.099  -0.560  1.00  0.47           O  
HETATM 1420  O   HOH T1419     -52.574  -9.144 -10.331  1.00  0.47           O  
HETATM 1421  O   HOH T1420     -31.401 -15.602  31.084  1.00  0.47           O  
HETATM 1422  O   HOH T1421     -57.561  11.492  16.094  1.00  0.47           O  
HETATM 1423  O   HOH T1422     -24.956 -14.622  60.024  1.00  0.47           O  
HETATM 1424  O   HOH T1423     -16.539 -17.876  46.154  1.00  0.47           O  
HETATM 1425  O   HOH T1424     -67.930   9.718  -0.186  1.00  0.47           O  
HETATM 1426  O   HOH T1425     -29.780   1.258  17.022  1.00  0.47           O  
HETATM 1427  O   HOH T1426     -19.390  -5.007  46.077  1.00  0.47           O  
HETATM 1428  O   HOH T1427     -33.226 -11.126  83.309  1.00  0.47           O  
HETATM 1429  O   HOH T1428     -18.387  16.094   1.637  1.00  0.47           O  
HETATM 1430  O   HOH T1429     -16.406 -15.610  -1.590  1.00  0.47           O  
HETATM 1431  O   HOH T1430     -28.918  25.207  63.889  1.00  0.47           O  
HETATM 1432  O   HOH T1431     -25.467  15.311  17.163  1.00  0.47           O  
HETATM 1433  O   HOH T1432     -29.784   8.974  13.198  1.00  0.47           O  
HETATM 1434  O   HOH T1433       0.231 -15.613  43.131  1.00  0.47           O  
HETATM 1435  O   HOH T1434     -17.795 -40.641  71.448  1.00  0.47           O  
HETATM 1436  O   HOH T1435     -46.036  -4.877  77.810  1.00  0.47           O  
HETATM 1437  O   HOH T1436       6.742 -21.928  65.789  1.00  0.47           O  
HETATM 1438  O   HOH T1437     -21.504 -10.126  22.585  1.00  0.47           O  
HETATM 1439  O   HOH T1438     -29.904  -0.265  19.443  1.00  0.47           O  
HETATM 1440  O   HOH T1439     -61.296   0.356  21.932  1.00  0.47           O  
HETATM 1441  O   HOH T1440     -19.448   4.011  86.856  1.00  0.47           O  
HETATM 1442  O   HOH T1441     -18.994  -9.231  44.639  1.00  0.48           O  
HETATM 1443  O   HOH T1442     -10.137  -1.501  35.437  1.00  0.48           O  
HETATM 1444  O   HOH T1443     -15.487   2.195  48.295  1.00  0.48           O  
HETATM 1445  O   HOH T1444     -45.335   8.895  15.341  1.00  0.48           O  
HETATM 1446  O   HOH T1445      -8.024 -33.666  73.359  1.00  0.48           O  
HETATM 1447  O   HOH T1446     -34.630  32.580   2.392  1.00  0.48           O  
HETATM 1448  O   HOH T1447     -56.659  23.674  28.919  1.00  0.48           O  
HETATM 1449  O   HOH T1448     -57.739  -7.444  49.321  1.00  0.48           O  
HETATM 1450  O   HOH T1449     -39.724  12.145  10.626  1.00  0.48           O  
HETATM 1451  O   HOH T1450     -72.008   9.723  23.555  1.00  0.48           O  
HETATM 1452  O   HOH T1451     -46.214  -6.571  12.276  1.00  0.48           O  
HETATM 1453  O   HOH T1452     -66.062  10.800  38.686  1.00  0.48           O  
HETATM 1454  O   HOH T1453     -63.781  20.591   8.229  1.00  0.48           O  
HETATM 1455  O   HOH T1454     -41.302   4.757  36.362  1.00  0.48           O  
HETATM 1456  O   HOH T1455      -3.361 -31.545  61.816  1.00  0.48           O  
HETATM 1457  O   HOH T1456       1.898  -2.111  57.797  1.00  0.48           O  
HETATM 1458  O   HOH T1457     -68.822 -30.103  17.989  1.00  0.48           O  
HETATM 1459  O   HOH T1458     -59.678  19.606  25.393  1.00  0.48           O  
HETATM 1460  O   HOH T1459      -5.177 -32.979  49.293  1.00  0.48           O  
HETATM 1461  O   HOH T1460      -3.130   2.499  66.239  1.00  0.48           O  
HETATM 1462  O   HOH T1461       3.371 -21.970  53.417  1.00  0.48           O  
HETATM 1463  O   HOH T1462     -43.964  26.847  -9.082  1.00  0.48           O  
HETATM 1464  O   HOH T1463      -5.560 -13.381  79.687  1.00  0.48           O  
HETATM 1465  O   HOH T1464     -51.153   5.459  73.505  1.00  0.48           O  
HETATM 1466  O   HOH T1465     -34.182   8.879  83.331  1.00  0.48           O  
HETATM 1467  O   HOH T1466     -33.342 -16.210  -5.314  1.00  0.48           O  
HETATM 1468  O   HOH T1467     -64.887  15.675   7.602  1.00  0.48           O  
HETATM 1469  O   HOH T1468     -10.668  17.220  58.499  1.00  0.48           O  
HETATM 1470  O   HOH T1469     -13.847 -12.591  77.959  1.00  0.48           O  
HETATM 1471  O   HOH T1470     -38.973 -14.177  74.242  1.00  0.48           O  
HETATM 1472  O   HOH T1471     -35.824  -0.897  37.384  1.00  0.48           O  
HETATM 1473  O   HOH T1472     -35.703   6.566  83.290  1.00  0.48           O  
HETATM 1474  O   HOH T1473     -35.021   3.255  39.137  1.00  0.48           O  
HETATM 1475  O   HOH T1474     -55.270  -8.897  59.888  1.00  0.48           O  
HETATM 1476  O   HOH T1475     -14.402   8.954  77.758  1.00  0.48           O  
HETATM 1477  O   HOH T1476     -25.153  20.322  -1.017  1.00  0.48           O  
HETATM 1478  O   HOH T1477      -3.229  -4.227  66.472  1.00  0.48           O  
HETATM 1479  O   HOH T1478     -61.465 -29.990   7.254  1.00  0.48           O  
HETATM 1480  O   HOH T1479     -29.642   1.530  56.576  1.00  0.48           O  
HETATM 1481  O   HOH T1480     -48.703   0.754 -19.765  1.00  0.48           O  
HETATM 1482  O   HOH T1481     -33.940 -23.927  29.153  1.00  0.48           O  
HETATM 1483  O   HOH T1482     -15.238 -45.192  62.432  1.00  0.48           O  
HETATM 1484  O   HOH T1483     -14.602 -44.793  51.972  1.00  0.48           O  
HETATM 1485  O   HOH T1484       2.634   0.281  59.065  1.00  0.48           O  
HETATM 1486  O   HOH T1485     -22.875   4.500  59.358  1.00  0.48           O  
HETATM 1487  O   HOH T1486     -18.092 -16.020   0.679  1.00  0.48           O  
HETATM 1488  O   HOH T1487     -70.260  -1.365  31.049  1.00  0.48           O  
HETATM 1489  O   HOH T1488     -30.181 -20.224  19.319  1.00  0.48           O  
HETATM 1490  O   HOH T1489     -15.071  -5.563  86.810  1.00  0.48           O  
HETATM 1491  O   HOH T1490     -51.859 -30.488  14.760  1.00  0.48           O  
HETATM 1492  O   HOH T1491       9.124  -8.806  57.468  1.00  0.48           O  
HETATM 1493  O   HOH T1492     -24.027 -39.575  46.899  1.00  0.48           O  
HETATM 1494  O   HOH T1493     -17.995  -7.263  46.081  1.00  0.48           O  
HETATM 1495  O   HOH T1494     -26.249 -35.019  40.803  1.00  0.48           O  
HETATM 1496  O   HOH T1495     -23.445  25.780   8.672  1.00  0.48           O  
HETATM 1497  O   HOH T1496     -54.009  11.297  37.668  1.00  0.48           O  
HETATM 1498  O   HOH T1497     -29.921 -34.841  58.380  1.00  0.48           O  
HETATM 1499  O   HOH T1498     -24.072   2.056  50.757  1.00  0.48           O  
HETATM 1500  O   HOH T1499     -46.715  -3.779  47.091  1.00  0.48           O  
HETATM 1501  O   HOH T1500     -53.622 -32.662  14.526  1.00  0.48           O  
HETATM 1502  O   HOH T1501     -38.068  31.830   7.174  1.00  0.48           O  
HETATM 1503  O   HOH T1502     -55.805  -0.920  62.245  1.00  0.48           O  
HETATM 1504  O   HOH T1503     -56.529  -5.567  47.735  1.00  0.48           O  
HETATM 1505  O   HOH T1504     -19.522  -8.042  31.738  1.00  0.48           O  
HETATM 1506  O   HOH T1505     -34.094 -23.169  37.762  1.00  0.48           O  
HETATM 1507  O   HOH T1506     -11.487 -24.906  50.918  1.00  0.48           O  
HETATM 1508  O   HOH T1507     -27.007 -33.078  38.740  1.00  0.48           O  
HETATM 1509  O   HOH T1508     -41.298 -25.564  28.252  1.00  0.48           O  
HETATM 1510  O   HOH T1509     -33.899 -16.280  30.205  1.00  0.48           O  
HETATM 1511  O   HOH T1510       7.143 -19.472  67.238  1.00  0.48           O  
HETATM 1512  O   HOH T1511     -50.139 -29.097  11.286  1.00  0.48           O  
HETATM 1513  O   HOH T1512     -30.073 -18.124  17.617  1.00  0.48           O  
HETATM 1514  O   HOH T1513     -58.856  -5.579  12.925  1.00  0.48           O  
HETATM 1515  O   HOH T1514     -53.017  17.688 -21.798  1.00  0.48           O  
HETATM 1516  O   HOH T1515     -60.240  16.003  29.270  1.00  0.48           O  
HETATM 1517  O   HOH T1516     -20.662  17.157  -7.432  1.00  0.48           O  
HETATM 1518  O   HOH T1517     -17.032 -38.209  42.753  1.00  0.48           O  
HETATM 1519  O   HOH T1518     -71.370  10.109  38.358  1.00  0.48           O  
HETATM 1520  O   HOH T1519      -0.847 -14.305  45.318  1.00  0.48           O  
HETATM 1521  O   HOH T1520     -27.514  25.365  61.428  1.00  0.48           O  
HETATM 1522  O   HOH T1521     -68.192 -24.038   3.713  1.00  0.48           O  
HETATM 1523  O   HOH T1522     -37.321 -32.603  47.764  1.00  0.48           O  
HETATM 1524  O   HOH T1523     -81.496  -6.992  13.915  1.00  0.48           O  
HETATM 1525  O   HOH T1524     -18.480   4.967  52.734  1.00  0.48           O  
HETATM 1526  O   HOH T1525     -50.266   1.475  70.572  1.00  0.48           O  
HETATM 1527  O   HOH T1526     -51.722 -13.786  15.246  1.00  0.48           O  
HETATM 1528  O   HOH T1527     -31.897 -36.287  50.388  1.00  0.49           O  
HETATM 1529  O   HOH T1528     -54.268   9.747  55.081  1.00  0.49           O  
HETATM 1530  O   HOH T1529     -31.330   4.567  39.634  1.00  0.49           O  
HETATM 1531  O   HOH T1530     -23.350   6.022  54.231  1.00  0.49           O  
HETATM 1532  O   HOH T1531     -21.121  -8.857  25.114  1.00  0.49           O  
HETATM 1533  O   HOH T1532     -18.445  -6.391  85.246  1.00  0.49           O  
HETATM 1534  O   HOH T1533     -19.477  22.175  71.673  1.00  0.49           O  
HETATM 1535  O   HOH T1534     -17.348  -8.695  29.915  1.00  0.49           O  
HETATM 1536  O   HOH T1535     -31.326 -18.072  10.290  1.00  0.49           O  
HETATM 1537  O   HOH T1536     -38.988 -15.589  77.872  1.00  0.49           O  
HETATM 1538  O   HOH T1537     -11.598 -46.740  58.640  1.00  0.49           O  
HETATM 1539  O   HOH T1538     -63.276  10.602  16.128  1.00  0.49           O  
HETATM 1540  O   HOH T1539     -46.344 -15.384  55.752  1.00  0.49           O  
HETATM 1541  O   HOH T1540     -82.249  -2.409  13.196  1.00  0.49           O  
HETATM 1542  O   HOH T1541     -21.845  21.399   9.666  1.00  0.49           O  
HETATM 1543  O   HOH T1542      -9.106  -3.168  72.194  1.00  0.49           O  
HETATM 1544  O   HOH T1543     -67.524 -16.397  -1.208  1.00  0.49           O  
HETATM 1545  O   HOH T1544     -56.015 -11.815  -5.133  1.00  0.49           O  
HETATM 1546  O   HOH T1545     -42.112 -26.163  18.217  1.00  0.49           O  
HETATM 1547  O   HOH T1546     -13.662 -26.331  52.009  1.00  0.49           O  
HETATM 1548  O   HOH T1547     -56.673   1.035   9.637  1.00  0.49           O  
HETATM 1549  O   HOH T1548     -26.136 -17.677  22.648  1.00  0.49           O  
HETATM 1550  O   HOH T1549     -31.562 -31.800  31.505  1.00  0.49           O  
HETATM 1551  O   HOH T1550     -59.738  -6.678  59.899  1.00  0.49           O  
HETATM 1552  O   HOH T1551     -40.368   7.206  35.907  1.00  0.49           O  
HETATM 1553  O   HOH T1552     -10.665   2.122  39.861  1.00  0.49           O  
HETATM 1554  O   HOH T1553      -7.069   8.386  71.271  1.00  0.49           O  
HETATM 1555  O   HOH T1554     -50.896  14.685  62.155  1.00  0.49           O  
HETATM 1556  O   HOH T1555     -36.915  23.517  13.165  1.00  0.49           O  
HETATM 1557  O   HOH T1556     -32.427 -38.174  52.476  1.00  0.49           O  
HETATM 1558  O   HOH T1557     -71.721   0.654  37.946  1.00  0.49           O  
HETATM 1559  O   HOH T1558     -35.837 -17.279  31.880  1.00  0.49           O  
HETATM 1560  O   HOH T1559     -72.376  11.265  36.098  1.00  0.49           O  
HETATM 1561  O   HOH T1560     -54.941  -1.007   8.908  1.00  0.49           O  
HETATM 1562  O   HOH T1561     -30.312 -37.917  54.348  1.00  0.49           O  
HETATM 1563  O   HOH T1562     -61.797  -8.244  44.360  1.00  0.49           O  
HETATM 1564  O   HOH T1563     -53.821   7.022  55.285  1.00  0.49           O  
HETATM 1565  O   HOH T1564     -44.876 -23.798  32.248  1.00  0.49           O  
HETATM 1566  O   HOH T1565     -32.444 -11.412  38.354  1.00  0.49           O  
HETATM 1567  O   HOH T1566     -17.814 -22.541  56.751  1.00  0.49           O  
HETATM 1568  O   HOH T1567     -24.286   2.184  60.182  1.00  0.49           O  
HETATM 1569  O   HOH T1568     -35.621  13.827 -16.209  1.00  0.49           O  
HETATM 1570  O   HOH T1569       2.539 -14.158  43.991  1.00  0.49           O  
HETATM 1571  O   HOH T1570     -42.230 -23.552  29.868  1.00  0.49           O  
HETATM 1572  O   HOH T1571     -38.776 -18.078   7.746  1.00  0.49           O  
HETATM 1573  O   HOH T1572     -47.008  10.432   3.230  1.00  0.49           O  
HETATM 1574  O   HOH T1573     -25.623 -13.536  54.059  1.00  0.49           O  
HETATM 1575  O   HOH T1574     -45.601  13.886  66.699  1.00  0.49           O  
HETATM 1576  O   HOH T1575     -18.368 -22.648  66.103  1.00  0.49           O  
HETATM 1577  O   HOH T1576     -66.644  16.782  17.311  1.00  0.49           O  
HETATM 1578  O   HOH T1577     -52.022   3.296  71.882  1.00  0.49           O  
HETATM 1579  O   HOH T1578     -73.249   3.822  32.421  1.00  0.49           O  
HETATM 1580  O   HOH T1579     -43.556  -0.747  11.519  1.00  0.49           O  
HETATM 1581  O   HOH T1580     -65.036  -6.716  -6.476  1.00  0.49           O  
HETATM 1582  O   HOH T1581     -52.895 -28.697   8.909  1.00  0.49           O  
HETATM 1583  O   HOH T1582     -60.042 -38.771  16.971  1.00  0.49           O  
HETATM 1584  O   HOH T1583     -16.778  22.505  63.019  1.00  0.49           O  
HETATM 1585  O   HOH T1584     -49.441   4.036  71.572  1.00  0.49           O  
HETATM 1586  O   HOH T1585     -69.094   4.459  -0.423  1.00  0.49           O  
HETATM 1587  O   HOH T1586     -45.506  17.684  77.894  1.00  0.49           O  
HETATM 1588  O   HOH T1587       5.186 -11.793  64.115  1.00  0.49           O  
HETATM 1589  O   HOH T1588     -22.631   1.625  47.043  1.00  0.49           O  
HETATM 1590  O   HOH T1589     -10.455  -9.539   4.487  1.00  0.49           O  
HETATM 1591  O   HOH T1590     -51.888 -26.654   7.306  1.00  0.49           O  
HETATM 1592  O   HOH T1591     -13.470  21.202  61.540  1.00  0.49           O  
HETATM 1593  O   HOH T1592     -48.647  -1.427  77.825  1.00  0.49           O  
HETATM 1594  O   HOH T1593     -71.808  -3.997   0.064  1.00  0.49           O  
HETATM 1595  O   HOH T1594     -62.256   7.031  -7.641  1.00  0.49           O  
HETATM 1596  O   HOH T1595     -36.111  -2.233  39.916  1.00  0.49           O  
HETATM 1597  O   HOH T1596      -5.491 -32.590  73.196  1.00  0.49           O  
HETATM 1598  O   HOH T1597     -49.756 -12.049 -15.157  1.00  0.49           O  
HETATM 1599  O   HOH T1598      -9.821  -6.248  28.627  1.00  0.49           O  
HETATM 1600  O   HOH T1599     -38.342 -33.134  51.645  1.00  0.49           O  
HETATM 1601  O   HOH T1600     -37.964  13.855  76.139  1.00  0.49           O  
HETATM 1602  O   HOH T1601     -45.074  30.835  12.361  1.00  0.49           O  
HETATM 1603  O   HOH T1602     -42.943  17.905  26.829  1.00  0.49           O  
HETATM 1604  O   HOH T1603     -17.198  13.199  18.856  1.00  0.49           O  
HETATM 1605  O   HOH T1604     -46.956  -4.030  19.455  1.00  0.49           O  
HETATM 1606  O   HOH T1605     -50.070 -13.928   3.275  1.00  0.49           O  
HETATM 1607  O   HOH T1606     -19.071 -44.497  66.031  1.00  0.50           O  
HETATM 1608  O   HOH T1607     -36.327  19.485  15.296  1.00  0.50           O  
HETATM 1609  O   HOH T1608     -25.736  -1.783  53.753  1.00  0.50           O  
HETATM 1610  O   HOH T1609     -64.164  12.643  43.742  1.00  0.50           O  
HETATM 1611  O   HOH T1610     -46.731 -16.592  41.109  1.00  0.50           O  
HETATM 1612  O   HOH T1611     -59.055  -1.969  57.606  1.00  0.50           O  
HETATM 1613  O   HOH T1612     -42.900  18.099  54.912  1.00  0.50           O  
HETATM 1614  O   HOH T1613     -17.276  17.999  55.850  1.00  0.50           O  
HETATM 1615  O   HOH T1614     -18.839  22.101  48.827  1.00  0.50           O  
HETATM 1616  O   HOH T1615     -58.830  -3.125  50.334  1.00  0.50           O  
HETATM 1617  O   HOH T1616     -47.273 -15.800  51.764  1.00  0.50           O  
HETATM 1618  O   HOH T1617     -39.526  21.301  50.993  1.00  0.50           O  
HETATM 1619  O   HOH T1618     -13.143  17.344   7.408  1.00  0.50           O  
HETATM 1620  O   HOH T1619     -39.441  -9.348  80.716  1.00  0.50           O  
HETATM 1621  O   HOH T1620     -21.034 -41.261  42.476  1.00  0.50           O  
HETATM 1622  O   HOH T1621     -43.738  13.931  82.151  1.00  0.50           O  
HETATM 1623  O   HOH T1622      -9.714 -30.586  38.584  1.00  0.50           O  
HETATM 1624  O   HOH T1623     -42.851   2.854   9.931  1.00  0.50           O  
HETATM 1625  O   HOH T1624     -24.270 -15.383  79.380  1.00  0.50           O  
HETATM 1626  O   HOH T1625     -38.055 -30.006  42.959  1.00  0.50           O  
HETATM 1627  O   HOH T1626     -12.099  -2.735  30.665  1.00  0.50           O  
HETATM 1628  O   HOH T1627     -20.743  23.236  47.091  1.00  0.50           O  
HETATM 1629  O   HOH T1628     -42.002  15.503  48.523  1.00  0.50           O  
HETATM 1630  O   HOH T1629     -21.149 -35.775  70.323  1.00  0.50           O  
HETATM 1631  O   HOH T1630     -25.035  -6.969  22.251  1.00  0.50           O  
HETATM 1632  O   HOH T1631     -43.543 -20.963  76.958  1.00  0.50           O  
HETATM 1633  O   HOH T1632     -16.908   4.801  22.551  1.00  0.50           O  
HETATM 1634  O   HOH T1633     -44.382 -11.136  52.232  1.00  0.50           O  
HETATM 1635  O   HOH T1634     -51.378  12.225  61.084  1.00  0.50           O  
HETATM 1636  O   HOH T1635     -77.773   0.710   8.320  1.00  0.50           O  
HETATM 1637  O   HOH T1636     -17.947   2.385  55.448  1.00  0.50           O  
HETATM 1638  O   HOH T1637     -33.454 -17.144  -2.714  1.00  0.50           O  
HETATM 1639  O   HOH T1638     -73.257  -2.891  28.158  1.00  0.50           O  
HETATM 1640  O   HOH T1639     -30.659  22.285  50.587  1.00  0.50           O  
HETATM 1641  O   HOH T1640     -35.707 -24.084  31.316  1.00  0.50           O  
HETATM 1642  O   HOH T1641     -20.755 -35.444  43.670  1.00  0.50           O  
HETATM 1643  O   HOH T1642     -73.747  -5.540   1.211  1.00  0.50           O  
HETATM 1644  O   HOH T1643     -13.559 -12.872  75.231  1.00  0.50           O  
HETATM 1645  O   HOH T1644     -37.980 -33.202  54.395  1.00  0.50           O  
HETATM 1646  O   HOH T1645     -44.751   6.595  19.424  1.00  0.50           O  
HETATM 1647  O   HOH T1646     -57.557  -8.096  63.423  1.00  0.50           O  
HETATM 1648  O   HOH T1647     -30.545 -18.050  12.998  1.00  0.50           O  
HETATM 1649  O   HOH T1648     -48.477  11.911  34.995  1.00  0.50           O  
HETATM 1650  O   HOH T1649     -57.310 -23.661  33.189  1.00  0.50           O  
HETATM 1651  O   HOH T1650       3.136  -4.614  46.661  1.00  0.50           O  
HETATM 1652  O   HOH T1651     -28.896  -1.233  15.919  1.00  0.50           O  
HETATM 1653  O   HOH T1652     -52.694   9.445   9.398  1.00  0.50           O  
HETATM 1654  O   HOH T1653     -40.849  34.615   3.496  1.00  0.50           O  
HETATM 1655  O   HOH T1654     -46.285  18.123  75.152  1.00  0.50           O  
HETATM 1656  O   HOH T1655     -35.497  14.055 -13.013  1.00  0.50           O  
HETATM 1657  O   HOH T1656     -28.228  24.930  54.275  1.00  0.50           O  
HETATM 1658  O   HOH T1657     -63.275   9.498  -6.999  1.00  0.50           O  
HETATM 1659  O   HOH T1658     -54.251  13.038  55.031  1.00  0.50           O  
HETATM 1660  O   HOH T1659     -69.682 -22.145   5.031  1.00  0.50           O  
HETATM 1661  O   HOH T1660     -66.358 -31.481  24.584  1.00  0.50           O  
HETATM 1662  O   HOH T1661     -30.593  14.521 -14.967  1.00  0.50           O  
HETATM 1663  O   HOH T1662     -82.221   1.436  19.418  1.00  0.50           O  
HETATM 1664  O   HOH T1663     -32.003   2.023  51.861  1.00  0.50           O  
HETATM 1665  O   HOH T1664     -28.087   3.512  35.029  1.00  0.50           O  
HETATM 1666  O   HOH T1665     -27.946  26.917   2.849  1.00  0.50           O  
HETATM 1667  O   HOH T1666     -72.903   4.320   0.365  1.00  0.50           O  
HETATM 1668  O   HOH T1667     -23.560  17.568 -12.833  1.00  0.50           O  
HETATM 1669  O   HOH T1668     -52.619  -8.465  59.143  1.00  0.50           O  
HETATM 1670  O   HOH T1669     -32.931   0.190  22.852  1.00  0.50           O  
HETATM 1671  O   HOH T1670     -27.995  -6.282  49.510  1.00  0.50           O  
HETATM 1672  O   HOH T1671     -33.212  -9.033  36.822  1.00  0.50           O  
HETATM 1673  O   HOH T1672     -16.510 -44.589  54.056  1.00  0.50           O  
HETATM 1674  O   HOH T1673     -51.378 -16.281  39.858  1.00  0.50           O  
HETATM 1675  O   HOH T1674     -60.616  -9.132  18.526  1.00  0.50           O  
HETATM 1676  O   HOH T1675     -22.842 -14.630  22.551  1.00  0.50           O  
HETATM 1677  O   HOH T1676     -47.714 -14.111  -5.829  1.00  0.50           O  
HETATM 1678  O   HOH T1677     -62.868  -1.652  22.938  1.00  0.50           O  
HETATM 1679  O   HOH T1678     -36.345 -18.488   8.992  1.00  0.50           O  
HETATM 1680  O   HOH T1679     -10.461 -23.207  78.926  1.00  0.50           O  
HETATM 1681  O   HOH T1680     -39.832 -25.945  25.857  1.00  0.50           O  
HETATM 1682  O   HOH T1681     -37.871  -6.929  41.164  1.00  0.50           O  
HETATM 1683  O   HOH T1682     -34.027 -18.823  10.581  1.00  0.50           O  
HETATM 1684  O   HOH T1683     -60.926  -5.806  44.726  1.00  0.50           O  
HETATM 1685  O   HOH T1684     -25.708 -17.986  55.272  1.00  0.50           O  
HETATM 1686  O   HOH T1685     -16.365  -6.347  60.838  1.00  0.50           O  
HETATM 1687  O   HOH T1686     -56.153  -6.893 -16.814  1.00  0.50           O  
HETATM 1688  O   HOH T1687      -7.209  -4.932  73.164  1.00  0.50           O  
HETATM 1689  O   HOH T1688     -34.775  -6.678  17.859  1.00  0.50           O  
HETATM 1690  O   HOH T1689     -36.194  -7.314  44.359  1.00  0.50           O  
HETATM 1691  O   HOH T1690     -17.690  20.174  80.255  1.00  0.51           O  
HETATM 1692  O   HOH T1691     -55.176  27.525  -3.249  1.00  0.51           O  
HETATM 1693  O   HOH T1692     -59.246  -0.681  43.780  1.00  0.51           O  
HETATM 1694  O   HOH T1693     -50.104  30.006   7.971  1.00  0.51           O  
HETATM 1695  O   HOH T1694      -9.062 -18.366  47.505  1.00  0.51           O  
HETATM 1696  O   HOH T1695     -34.993  -5.144  36.259  1.00  0.51           O  
HETATM 1697  O   HOH T1696     -39.521 -14.882  51.136  1.00  0.51           O  
HETATM 1698  O   HOH T1697     -32.075  -5.055  84.209  1.00  0.51           O  
HETATM 1699  O   HOH T1698     -72.180 -15.364  22.648  1.00  0.51           O  
HETATM 1700  O   HOH T1699     -50.563  13.845  68.710  1.00  0.51           O  
HETATM 1701  O   HOH T1700     -32.593  -4.097  20.603  1.00  0.51           O  
HETATM 1702  O   HOH T1701     -47.159  13.144  14.868  1.00  0.51           O  
HETATM 1703  O   HOH T1702     -26.773 -34.744  36.567  1.00  0.51           O  
HETATM 1704  O   HOH T1703     -44.975   1.844   8.299  1.00  0.51           O  
HETATM 1705  O   HOH T1704     -24.335 -24.400  76.328  1.00  0.51           O  
HETATM 1706  O   HOH T1705       1.975 -27.868  56.821  1.00  0.51           O  
HETATM 1707  O   HOH T1706     -42.898 -22.706  37.171  1.00  0.51           O  
HETATM 1708  O   HOH T1707       7.780 -17.766  51.644  1.00  0.51           O  
HETATM 1709  O   HOH T1708      -1.839 -20.569  70.656  1.00  0.51           O  
HETATM 1710  O   HOH T1709     -22.947 -32.509  71.317  1.00  0.51           O  
HETATM 1711  O   HOH T1710     -25.292 -15.140  23.465  1.00  0.51           O  
HETATM 1712  O   HOH T1711     -31.851 -30.740  64.073  1.00  0.51           O  
HETATM 1713  O   HOH T1712     -49.239  -9.749 -13.756  1.00  0.51           O  
HETATM 1714  O   HOH T1713     -23.781  -9.942  -6.964  1.00  0.51           O  
HETATM 1715  O   HOH T1714     -61.280 -10.234  21.082  1.00  0.51           O  
HETATM 1716  O   HOH T1715     -30.709   3.560  20.935  1.00  0.51           O  
HETATM 1717  O   HOH T1716     -60.705 -12.874  22.044  1.00  0.51           O  
HETATM 1718  O   HOH T1717     -20.396  -2.103  63.399  1.00  0.51           O  
HETATM 1719  O   HOH T1718      -7.396 -26.181  40.376  1.00  0.51           O  
HETATM 1720  O   HOH T1719     -11.082   4.021  37.897  1.00  0.51           O  
HETATM 1721  O   HOH T1720     -48.938  -6.601  79.666  1.00  0.51           O  
HETATM 1722  O   HOH T1721     -13.832  15.983   0.670  1.00  0.51           O  
HETATM 1723  O   HOH T1722     -36.646   7.093 -17.965  1.00  0.51           O  
HETATM 1724  O   HOH T1723      -7.385 -21.464  34.577  1.00  0.51           O  
HETATM 1725  O   HOH T1724     -46.919   0.077   8.926  1.00  0.51           O  
HETATM 1726  O   HOH T1725     -59.344  -9.152  72.869  1.00  0.51           O  
HETATM 1727  O   HOH T1726     -17.407   6.691  -2.587  1.00  0.51           O  
HETATM 1728  O   HOH T1727     -20.417   4.811  50.784  1.00  0.51           O  
HETATM 1729  O   HOH T1728     -13.803  18.626   1.744  1.00  0.51           O  
HETATM 1730  O   HOH T1729     -46.724  -4.732 -19.849  1.00  0.51           O  
HETATM 1731  O   HOH T1730     -27.350   0.393  33.264  1.00  0.51           O  
HETATM 1732  O   HOH T1731       4.835 -12.050  41.200  1.00  0.51           O  
HETATM 1733  O   HOH T1732       5.049 -20.233  59.062  1.00  0.51           O  
HETATM 1734  O   HOH T1733     -50.242   8.200  22.393  1.00  0.51           O  
HETATM 1735  O   HOH T1734      -0.773 -20.252  32.371  1.00  0.51           O  
HETATM 1736  O   HOH T1735     -13.944 -10.690  29.279  1.00  0.51           O  
HETATM 1737  O   HOH T1736      -6.546  15.455  71.756  1.00  0.51           O  
HETATM 1738  O   HOH T1737     -29.791   0.745  -9.131  1.00  0.51           O  
HETATM 1739  O   HOH T1738     -13.673 -31.553  34.035  1.00  0.51           O  
HETATM 1740  O   HOH T1739     -58.095 -12.368  21.172  1.00  0.51           O  
HETATM 1741  O   HOH T1740     -34.526 -12.792  42.158  1.00  0.51           O  
HETATM 1742  O   HOH T1741       1.931  -8.879  38.056  1.00  0.51           O  
HETATM 1743  O   HOH T1742     -60.241   6.722  -0.694  1.00  0.51           O  
HETATM 1744  O   HOH T1743     -22.669   3.366  36.406  1.00  0.51           O  
HETATM 1745  O   HOH T1744     -14.317 -14.728  -7.330  1.00  0.51           O  
HETATM 1746  O   HOH T1745     -41.588 -13.995  -3.328  1.00  0.51           O  
HETATM 1747  O   HOH T1746     -21.866 -45.360  45.343  1.00  0.51           O  
HETATM 1748  O   HOH T1747     -77.125  -9.018  14.521  1.00  0.51           O  
HETATM 1749  O   HOH T1748     -19.225 -33.566  39.804  1.00  0.51           O  
HETATM 1750  O   HOH T1749     -62.394 -32.400   6.102  1.00  0.51           O  
HETATM 1751  O   HOH T1750     -36.607 -24.066  66.934  1.00  0.51           O  
HETATM 1752  O   HOH T1751     -61.884   2.584  59.918  1.00  0.51           O  
HETATM 1753  O   HOH T1752     -13.770  20.251  67.254  1.00  0.51           O  
HETATM 1754  O   HOH T1753     -70.025  11.377   8.746  1.00  0.51           O  
HETATM 1755  O   HOH T1754     -35.474  31.672   7.827  1.00  0.51           O  
HETATM 1756  O   HOH T1755     -34.618 -14.596  -0.609  1.00  0.51           O  
HETATM 1757  O   HOH T1756     -26.748  22.133  -2.410  1.00  0.51           O  
HETATM 1758  O   HOH T1757     -19.265 -17.764  46.985  1.00  0.51           O  
HETATM 1759  O   HOH T1758     -72.705 -21.078  17.002  1.00  0.51           O  
HETATM 1760  O   HOH T1759     -68.616 -33.822  17.159  1.00  0.51           O  
HETATM 1761  O   HOH T1760     -12.941 -13.362  28.377  1.00  0.51           O  
HETATM 1762  O   HOH T1761     -66.267  -1.437  -2.473  1.00  0.52           O  
HETATM 1763  O   HOH T1762     -23.639  -8.572  86.608  1.00  0.52           O  
HETATM 1764  O   HOH T1763     -55.294  -4.911  56.591  1.00  0.52           O  
HETATM 1765  O   HOH T1764     -10.650 -22.698  52.462  1.00  0.52           O  
HETATM 1766  O   HOH T1765     -20.962   7.398  20.678  1.00  0.52           O  
HETATM 1767  O   HOH T1766     -55.829   9.676  38.800  1.00  0.52           O  
HETATM 1768  O   HOH T1767     -65.105  22.791   7.223  1.00  0.52           O  
HETATM 1769  O   HOH T1768     -72.809 -10.315  23.263  1.00  0.52           O  
HETATM 1770  O   HOH T1769     -43.865 -17.079  45.568  1.00  0.52           O  
HETATM 1771  O   HOH T1770     -28.381 -22.928  71.786  1.00  0.52           O  
HETATM 1772  O   HOH T1771     -20.770  -5.909   2.503  1.00  0.52           O  
HETATM 1773  O   HOH T1772     -66.230   0.944  40.631  1.00  0.52           O  
HETATM 1774  O   HOH T1773     -57.416   7.470  38.830  1.00  0.52           O  
HETATM 1775  O   HOH T1774     -47.239  14.107  51.725  1.00  0.52           O  
HETATM 1776  O   HOH T1775     -59.088  -5.685  42.456  1.00  0.52           O  
HETATM 1777  O   HOH T1776     -33.304   7.365  -0.763  1.00  0.52           O  
HETATM 1778  O   HOH T1777     -42.832  20.272  65.539  1.00  0.52           O  
HETATM 1779  O   HOH T1778     -50.256  -8.868   8.187  1.00  0.52           O  
HETATM 1780  O   HOH T1779     -26.634 -21.261  37.709  1.00  0.52           O  
HETATM 1781  O   HOH T1780     -25.886   0.437  52.051  1.00  0.52           O  
HETATM 1782  O   HOH T1781     -77.767  -2.851   7.506  1.00  0.52           O  
HETATM 1783  O   HOH T1782     -47.203  -5.366  16.985  1.00  0.52           O  
HETATM 1784  O   HOH T1783     -23.505   5.758  56.986  1.00  0.52           O  
HETATM 1785  O   HOH T1784     -79.243 -11.232   6.581  1.00  0.52           O  
HETATM 1786  O   HOH T1785     -52.327   0.663  44.982  1.00  0.52           O  
HETATM 1787  O   HOH T1786     -33.866 -12.159  34.962  1.00  0.52           O  
HETATM 1788  O   HOH T1787     -51.912  -9.754  67.815  1.00  0.52           O  
HETATM 1789  O   HOH T1788     -69.533  11.316   4.678  1.00  0.52           O  
HETATM 1790  O   HOH T1789     -54.204 -30.248  13.417  1.00  0.52           O  
HETATM 1791  O   HOH T1790     -21.714  -2.738  -9.191  1.00  0.52           O  
HETATM 1792  O   HOH T1791     -11.890 -24.885  53.696  1.00  0.52           O  
HETATM 1793  O   HOH T1792     -71.942  -3.160  32.222  1.00  0.52           O  
HETATM 1794  O   HOH T1793     -18.441  15.735  -7.978  1.00  0.52           O  
HETATM 1795  O   HOH T1794     -60.665  -9.003  23.547  1.00  0.52           O  
HETATM 1796  O   HOH T1795     -71.397  -1.492   1.296  1.00  0.52           O  
HETATM 1797  O   HOH T1796     -24.426  -2.936  89.411  1.00  0.52           O  
HETATM 1798  O   HOH T1797     -71.010  11.284  21.669  1.00  0.52           O  
HETATM 1799  O   HOH T1798     -33.144  23.179  50.183  1.00  0.52           O  
HETATM 1800  O   HOH T1799     -11.830 -10.502   0.151  1.00  0.52           O  
HETATM 1801  O   HOH T1800     -69.627  -6.575  -1.123  1.00  0.52           O  
HETATM 1802  O   HOH T1801     -29.103   5.679  20.067  1.00  0.52           O  
HETATM 1803  O   HOH T1802      -9.097   8.129  45.498  1.00  0.52           O  
HETATM 1804  O   HOH T1803     -74.295   9.481  19.564  1.00  0.52           O  
HETATM 1805  O   HOH T1804     -21.575  17.262  -3.664  1.00  0.52           O  
HETATM 1806  O   HOH T1805       7.287  -4.842  52.586  1.00  0.52           O  
HETATM 1807  O   HOH T1806     -33.404   8.274  45.180  1.00  0.52           O  
HETATM 1808  O   HOH T1807     -13.579  13.379   1.611  1.00  0.52           O  
HETATM 1809  O   HOH T1808     -18.590 -18.599  71.149  1.00  0.53           O  
HETATM 1810  O   HOH T1809     -15.559 -45.850  49.501  1.00  0.53           O  
HETATM 1811  O   HOH T1810     -33.139  28.703   0.059  1.00  0.53           O  
HETATM 1812  O   HOH T1811     -57.400 -14.991  20.407  1.00  0.53           O  
HETATM 1813  O   HOH T1812     -14.613  18.282  55.687  1.00  0.53           O  
HETATM 1814  O   HOH T1813     -80.155  -9.666   8.735  1.00  0.53           O  
HETATM 1815  O   HOH T1814     -46.353  -9.139  13.209  1.00  0.53           O  
HETATM 1816  O   HOH T1815     -38.760  27.627  -4.421  1.00  0.53           O  
HETATM 1817  O   HOH T1816     -44.417  -0.898   8.816  1.00  0.53           O  
HETATM 1818  O   HOH T1817     -28.937   4.585  22.832  1.00  0.53           O  
HETATM 1819  O   HOH T1818     -39.536   3.143  81.189  1.00  0.53           O  
HETATM 1820  O   HOH T1819     -45.507  19.368  55.342  1.00  0.53           O  
HETATM 1821  O   HOH T1820      -2.298 -34.117  61.528  1.00  0.53           O  
HETATM 1822  O   HOH T1821     -68.953 -12.344  -7.216  1.00  0.53           O  
HETATM 1823  O   HOH T1822     -10.445  17.301  49.591  1.00  0.53           O  
HETATM 1824  O   HOH T1823     -19.359 -12.304  64.668  1.00  0.53           O  
HETATM 1825  O   HOH T1824     -23.716  15.658  -4.219  1.00  0.53           O  
HETATM 1826  O   HOH T1825     -44.523 -32.554  30.035  1.00  0.53           O  
HETATM 1827  O   HOH T1826     -31.593  -8.976  82.773  1.00  0.53           O  
HETATM 1828  O   HOH T1827     -79.688  -9.095  13.404  1.00  0.53           O  
HETATM 1829  O   HOH T1828     -61.736 -15.689  37.379  1.00  0.53           O  
HETATM 1830  O   HOH T1829     -73.687  -3.237  13.624  1.00  0.53           O  
HETATM 1831  O   HOH T1830     -11.293 -44.502  55.326  1.00  0.53           O  
HETATM 1832  O   HOH T1831     -77.787   0.094  21.275  1.00  0.53           O  
HETATM 1833  O   HOH T1832     -38.213 -26.943  38.928  1.00  0.53           O  
HETATM 1834  O   HOH T1833     -78.643  -1.624   9.793  1.00  0.53           O  
HETATM 1835  O   HOH T1834     -25.223  22.538  -7.241  1.00  0.53           O  
HETATM 1836  O   HOH T1835     -74.715 -15.471  18.812  1.00  0.53           O  
HETATM 1837  O   HOH T1836     -63.423 -26.759   3.899  1.00  0.53           O  
HETATM 1838  O   HOH T1837     -72.931   9.209  26.098  1.00  0.53           O  
HETATM 1839  O   HOH T1838     -61.428  20.530  18.403  1.00  0.53           O  
HETATM 1840  O   HOH T1839     -27.285   6.571  21.995  1.00  0.53           O  
HETATM 1841  O   HOH T1840     -37.129   4.040  66.447  1.00  0.53           O  
HETATM 1842  O   HOH T1841      -4.826   6.223  59.120  1.00  0.53           O  
HETATM 1843  O   HOH T1842     -48.693 -14.348  54.896  1.00  0.53           O  
HETATM 1844  O   HOH T1843     -17.789  -9.779  47.170  1.00  0.53           O  
HETATM 1845  O   HOH T1844     -51.030 -26.787   4.666  1.00  0.53           O  
HETATM 1846  O   HOH T1845     -13.781  -2.622  56.567  1.00  0.53           O  
HETATM 1847  O   HOH T1846     -35.642 -21.752  29.903  1.00  0.53           O  
HETATM 1848  O   HOH T1847     -55.207   8.955  45.308  1.00  0.53           O  
HETATM 1849  O   HOH T1848     -38.968  -0.723 -13.867  1.00  0.53           O  
HETATM 1850  O   HOH T1849     -18.174  22.825  65.468  1.00  0.53           O  
HETATM 1851  O   HOH T1850     -27.447  24.333  12.091  1.00  0.53           O  
HETATM 1852  O   HOH T1851     -40.544   9.689   9.744  1.00  0.53           O  
HETATM 1853  O   HOH T1852     -23.331 -22.701  -1.083  1.00  0.53           O  
HETATM 1854  O   HOH T1853     -38.631   1.542  43.473  1.00  0.53           O  
HETATM 1855  O   HOH T1854     -12.376 -29.120  34.636  1.00  0.53           O  
HETATM 1856  O   HOH T1855     -59.350   6.542  63.354  1.00  0.53           O  
HETATM 1857  O   HOH T1856     -53.393  12.161  66.445  1.00  0.53           O  
HETATM 1858  O   HOH T1857      -7.560  16.938  52.899  1.00  0.53           O  
HETATM 1859  O   HOH T1858     -30.149 -27.471  72.703  1.00  0.53           O  
HETATM 1860  O   HOH T1859     -26.942  -2.151  90.076  1.00  0.53           O  
HETATM 1861  O   HOH T1860      -3.050 -35.125  56.860  1.00  0.53           O  
HETATM 1862  O   HOH T1861     -64.501 -17.135  35.057  1.00  0.53           O  
HETATM 1863  O   HOH T1862     -48.641  14.635  11.359  1.00  0.53           O  
HETATM 1864  O   HOH T1863     -19.463  18.274  14.627  1.00  0.53           O  
HETATM 1865  O   HOH T1864     -66.707  -8.602  -2.389  1.00  0.54           O  
HETATM 1866  O   HOH T1865      -9.162 -42.124  70.018  1.00  0.54           O  
HETATM 1867  O   HOH T1866      -3.658  -7.020  67.343  1.00  0.54           O  
HETATM 1868  O   HOH T1867     -39.847  19.415  61.499  1.00  0.54           O  
HETATM 1869  O   HOH T1868     -23.476  19.614  46.498  1.00  0.54           O  
HETATM 1870  O   HOH T1869     -22.053 -43.748  42.976  1.00  0.54           O  
HETATM 1871  O   HOH T1870     -57.302  -4.915  10.744  1.00  0.54           O  
HETATM 1872  O   HOH T1871     -27.594  -1.607  18.370  1.00  0.54           O  
HETATM 1873  O   HOH T1872     -74.561 -16.934  27.475  1.00  0.54           O  
HETATM 1874  O   HOH T1873     -65.744 -21.117  29.959  1.00  0.54           O  
HETATM 1875  O   HOH T1874      -4.796 -29.163  73.840  1.00  0.54           O  
HETATM 1876  O   HOH T1875      -5.052 -40.335  51.493  1.00  0.54           O  
HETATM 1877  O   HOH T1876     -48.664  -4.027  78.507  1.00  0.54           O  
HETATM 1878  O   HOH T1877      -7.568  -0.965  73.012  1.00  0.54           O  
HETATM 1879  O   HOH T1878     -19.590 -35.726  46.178  1.00  0.54           O  
HETATM 1880  O   HOH T1879     -47.563  -6.587  19.326  1.00  0.54           O  
HETATM 1881  O   HOH T1880     -71.266   1.458  33.294  1.00  0.54           O  
HETATM 1882  O   HOH T1881     -57.321 -15.199  71.293  1.00  0.54           O  
HETATM 1883  O   HOH T1882     -30.400  26.572   1.778  1.00  0.54           O  
HETATM 1884  O   HOH T1883     -11.306 -39.918  75.108  1.00  0.54           O  
HETATM 1885  O   HOH T1884     -43.659  12.803   7.416  1.00  0.54           O  
HETATM 1886  O   HOH T1885      -8.910 -21.060  78.570  1.00  0.54           O  
HETATM 1887  O   HOH T1886     -26.989  -0.973  61.292  1.00  0.54           O  
HETATM 1888  O   HOH T1887     -21.625 -19.847  52.464  1.00  0.54           O  
HETATM 1889  O   HOH T1888     -31.260   3.240  23.613  1.00  0.54           O  
HETATM 1890  O   HOH T1889     -49.549  -3.274  46.603  1.00  0.54           O  
HETATM 1891  O   HOH T1890      -1.603  -1.411  44.709  1.00  0.54           O  
HETATM 1892  O   HOH T1891     -44.763  12.779  16.081  1.00  0.54           O  
HETATM 1893  O   HOH T1892     -61.605  -5.587  16.934  1.00  0.54           O  
HETATM 1894  O   HOH T1893     -12.135  -7.382  58.310  1.00  0.54           O  
HETATM 1895  O   HOH T1894     -79.066  -3.308  20.594  1.00  0.54           O  
HETATM 1896  O   HOH T1895       6.495  -9.698  50.241  1.00  0.54           O  
HETATM 1897  O   HOH T1896     -37.160  -3.227 -14.062  1.00  0.54           O  
HETATM 1898  O   HOH T1897     -15.141 -10.570  47.140  1.00  0.54           O  
HETATM 1899  O   HOH T1898     -50.806  -5.692  77.821  1.00  0.54           O  
HETATM 1900  O   HOH T1899     -61.191  11.928   0.701  1.00  0.54           O  
HETATM 1901  O   HOH T1900     -41.319  19.334  21.907  1.00  0.54           O  
HETATM 1902  O   HOH T1901     -62.006 -27.955  30.161  1.00  0.54           O  
HETATM 1903  O   HOH T1902     -45.612   6.318  22.087  1.00  0.54           O  
HETATM 1904  O   HOH T1903     -10.532 -11.267   2.372  1.00  0.54           O  
HETATM 1905  O   HOH T1904     -29.340  29.049   7.994  1.00  0.54           O  
HETATM 1906  O   HOH T1905     -44.374  13.862  64.256  1.00  0.54           O  
HETATM 1907  O   HOH T1906     -73.782  -0.247  28.951  1.00  0.54           O  
HETATM 1908  O   HOH T1907      -8.846 -29.177  36.460  1.00  0.54           O  
HETATM 1909  O   HOH T1908     -37.503  -7.320  80.902  1.00  0.54           O  
HETATM 1910  O   HOH T1909     -48.609 -31.900  21.810  1.00  0.54           O  
HETATM 1911  O   HOH T1910     -62.463  14.655  21.369  1.00  0.54           O  
HETATM 1912  O   HOH T1911     -59.183  -7.148  25.100  1.00  0.54           O  
HETATM 1913  O   HOH T1912     -13.089  -8.933   4.991  1.00  0.54           O  
HETATM 1914  O   HOH T1913     -29.976   4.028  51.848  1.00  0.54           O  
HETATM 1915  O   HOH T1914     -55.697 -32.914  29.133  1.00  0.54           O  
HETATM 1916  O   HOH T1915     -25.329  -3.269  51.633  1.00  0.54           O  
HETATM 1917  O   HOH T1916     -27.265 -11.729  52.573  1.00  0.54           O  
HETATM 1918  O   HOH T1917     -59.494 -11.664  71.887  1.00  0.54           O  
HETATM 1919  O   HOH T1918      -9.974 -17.183  81.405  1.00  0.54           O  
HETATM 1920  O   HOH T1919     -42.153  -3.208  80.204  1.00  0.54           O  
HETATM 1921  O   HOH T1920     -25.259   5.667  84.416  1.00  0.55           O  
HETATM 1922  O   HOH T1921     -32.358 -33.382  64.847  1.00  0.55           O  
HETATM 1923  O   HOH T1922      -8.982   1.682  69.515  1.00  0.55           O  
HETATM 1924  O   HOH T1923       6.478  -8.713  65.493  1.00  0.55           O  
HETATM 1925  O   HOH T1924     -22.607  -2.406  61.645  1.00  0.55           O  
HETATM 1926  O   HOH T1925     -38.227 -13.792  53.519  1.00  0.55           O  
HETATM 1927  O   HOH T1926     -16.265  13.785  -3.208  1.00  0.55           O  
HETATM 1928  O   HOH T1927     -45.535  -4.754  35.105  1.00  0.55           O  
HETATM 1929  O   HOH T1928     -58.376  24.508 -13.085  1.00  0.55           O  
HETATM 1930  O   HOH T1929     -42.630  -9.063 -12.787  1.00  0.55           O  
HETATM 1931  O   HOH T1930     -37.209 -22.398  41.945  1.00  0.55           O  
HETATM 1932  O   HOH T1931     -71.267 -13.796  27.568  1.00  0.55           O  
HETATM 1933  O   HOH T1932     -30.745   3.488  54.902  1.00  0.55           O  
HETATM 1934  O   HOH T1933     -36.353  15.823  70.450  1.00  0.55           O  
HETATM 1935  O   HOH T1934     -57.642 -17.090  40.649  1.00  0.55           O  
HETATM 1936  O   HOH T1935     -46.710  -0.005 -18.038  1.00  0.55           O  
HETATM 1937  O   HOH T1936      -9.751  -9.752  -1.594  1.00  0.55           O  
HETATM 1938  O   HOH T1937     -57.331  -6.407  40.570  1.00  0.55           O  
HETATM 1939  O   HOH T1938     -27.563  10.417  16.411  1.00  0.55           O  
HETATM 1940  O   HOH T1939     -74.733   7.584   1.585  1.00  0.55           O  
HETATM 1941  O   HOH T1940     -69.687 -17.785   0.039  1.00  0.55           O  
HETATM 1942  O   HOH T1941     -49.778   9.651  45.135  1.00  0.55           O  
HETATM 1943  O   HOH T1942     -32.514 -20.657  -3.057  1.00  0.55           O  
HETATM 1944  O   HOH T1943     -33.228  -4.420  17.884  1.00  0.55           O  
HETATM 1945  O   HOH T1944     -37.406   2.565  59.537  1.00  0.55           O  
HETATM 1946  O   HOH T1945     -51.589 -14.938  26.523  1.00  0.55           O  
HETATM 1947  O   HOH T1946     -37.131   2.378  33.427  1.00  0.55           O  
HETATM 1948  O   HOH T1947     -52.892 -12.947  17.653  1.00  0.55           O  
HETATM 1949  O   HOH T1948     -50.052 -22.989  57.410  1.00  0.55           O  
HETATM 1950  O   HOH T1949     -33.961  -3.240  83.337  1.00  0.55           O  
HETATM 1951  O   HOH T1950     -33.023  21.162  68.828  1.00  0.55           O  
HETATM 1952  O   HOH T1951     -35.766   4.208  36.526  1.00  0.55           O  
HETATM 1953  O   HOH T1952      -1.438 -33.190  70.403  1.00  0.55           O  
HETATM 1954  O   HOH T1953     -34.925 -20.293  33.697  1.00  0.55           O  
HETATM 1955  O   HOH T1954      -9.467 -15.608  48.175  1.00  0.55           O  
HETATM 1956  O   HOH T1955     -26.842   7.210 -16.156  1.00  0.55           O  
HETATM 1957  O   HOH T1956     -76.327   0.904  23.523  1.00  0.55           O  
HETATM 1958  O   HOH T1957     -41.190 -20.587  75.584  1.00  0.55           O  
HETATM 1959  O   HOH T1958     -45.380  20.276  27.579  1.00  0.55           O  
HETATM 1960  O   HOH T1959     -77.819 -14.658   5.595  1.00  0.55           O  
HETATM 1961  O   HOH T1960     -42.120   9.780 -16.247  1.00  0.55           O  
HETATM 1962  O   HOH T1961     -42.133 -14.451   5.222  1.00  0.55           O  
HETATM 1963  O   HOH T1962     -38.853  16.220  72.072  1.00  0.55           O  
HETATM 1964  O   HOH T1963     -37.233 -23.761  18.631  1.00  0.55           O  
HETATM 1965  O   HOH T1964     -60.754   7.295  42.138  1.00  0.55           O  
HETATM 1966  O   HOH T1965     -69.169 -25.747   7.903  1.00  0.55           O  
HETATM 1967  O   HOH T1966     -62.949  13.481  -0.837  1.00  0.56           O  
HETATM 1968  O   HOH T1967     -47.918  26.733   2.330  1.00  0.56           O  
HETATM 1969  O   HOH T1968     -31.708   4.984 -15.266  1.00  0.56           O  
HETATM 1970  O   HOH T1969     -16.044  10.598 -12.886  1.00  0.56           O  
HETATM 1971  O   HOH T1970     -34.276  12.995  49.956  1.00  0.56           O  
HETATM 1972  O   HOH T1971     -12.466  -3.224  47.998  1.00  0.56           O  
HETATM 1973  O   HOH T1972     -48.859 -34.359  26.590  1.00  0.56           O  
HETATM 1974  O   HOH T1973     -53.172 -32.352  29.022  1.00  0.56           O  
HETATM 1975  O   HOH T1974      -0.537 -28.452  53.364  1.00  0.56           O  
HETATM 1976  O   HOH T1975     -43.749 -13.674  46.113  1.00  0.56           O  
HETATM 1977  O   HOH T1976     -69.587  10.802  22.675  1.00  0.56           O  
HETATM 1978  O   HOH T1977     -16.257 -15.411  -8.890  1.00  0.56           O  
HETATM 1979  O   HOH T1978     -38.247  -7.447  47.731  1.00  0.56           O  
HETATM 1980  O   HOH T1979     -28.297   5.758  17.201  1.00  0.56           O  
HETATM 1981  O   HOH T1980     -36.448  28.407  -8.086  1.00  0.56           O  
HETATM 1982  O   HOH T1981     -10.584  23.102  70.433  1.00  0.56           O  
HETATM 1983  O   HOH T1982     -14.722  -4.967  46.469  1.00  0.56           O  
HETATM 1984  O   HOH T1983     -10.623 -27.793  33.023  1.00  0.56           O  
HETATM 1985  O   HOH T1984     -45.378  23.690  18.567  1.00  0.56           O  
HETATM 1986  O   HOH T1985     -59.302  22.844  22.743  1.00  0.56           O  
HETATM 1987  O   HOH T1986     -26.639  11.538  44.544  1.00  0.56           O  
HETATM 1988  O   HOH T1987     -15.326 -33.961  40.915  1.00  0.56           O  
HETATM 1989  O   HOH T1988     -44.576 -34.893  31.543  1.00  0.56           O  
HETATM 1990  O   HOH T1989     -21.919  -6.545  26.668  1.00  0.56           O  
HETATM 1991  O   HOH T1990     -71.227 -17.875   2.566  1.00  0.56           O  
HETATM 1992  O   HOH T1991     -31.707 -23.377  27.368  1.00  0.56           O  
HETATM 1993  O   HOH T1992     -48.520   4.155   5.627  1.00  0.56           O  
HETATM 1994  O   HOH T1993     -31.603   2.087  81.881  1.00  0.56           O  
HETATM 1995  O   HOH T1994     -29.895   4.700  31.612  1.00  0.56           O  
HETATM 1996  O   HOH T1995     -51.884  27.835  -4.322  1.00  0.56           O  
HETATM 1997  O   HOH T1996      -3.491 -23.816  44.541  1.00  0.56           O  
HETATM 1998  O   HOH T1997     -45.136  12.239  58.109  1.00  0.56           O  
HETATM 1999  O   HOH T1998     -25.821  -7.202  24.880  1.00  0.56           O  
HETATM 2000  O   HOH T1999     -10.801 -13.501  56.354  1.00  0.56           O  
HETATM 2001  O   HOH T2000     -64.838 -27.666  26.612  1.00  0.56           O  
HETATM 2002  O   HOH T2001     -26.801 -27.634  27.514  1.00  0.56           O  
HETATM 2003  O   HOH T2002      -3.973   5.579  45.234  1.00  0.56           O  
HETATM 2004  O   HOH T2003     -45.064 -28.202  31.854  1.00  0.56           O  
HETATM 2005  O   HOH T2004     -23.520  -5.966  25.975  1.00  0.56           O  
HETATM 2006  O   HOH T2005     -45.430  21.775  53.655  1.00  0.56           O  
HETATM 2007  O   HOH T2006     -17.889  13.656 -13.002  1.00  0.56           O  
HETATM 2008  O   HOH T2007      -2.402  15.452  64.883  1.00  0.56           O  
HETATM 2009  O   HOH T2008     -15.375  -4.930  56.077  1.00  0.56           O  
HETATM 2010  O   HOH T2009     -30.037   8.901  83.503  1.00  0.56           O  
HETATM 2011  O   HOH T2010     -25.622  18.089   0.091  1.00  0.56           O  
HETATM 2012  O   HOH T2011     -48.444  16.200   0.702  1.00  0.57           O  
HETATM 2013  O   HOH T2012     -31.730  -3.722  -9.928  1.00  0.57           O  
HETATM 2014  O   HOH T2013     -36.447 -31.589  60.749  1.00  0.57           O  
HETATM 2015  O   HOH T2014     -55.717  26.273  -7.177  1.00  0.57           O  
HETATM 2016  O   HOH T2015     -49.344  23.563  27.572  1.00  0.57           O  
HETATM 2017  O   HOH T2016     -74.624   7.348  31.632  1.00  0.57           O  
HETATM 2018  O   HOH T2017     -34.048 -17.895   7.912  1.00  0.57           O  
HETATM 2019  O   HOH T2018     -44.333  -8.088  47.102  1.00  0.57           O  
HETATM 2020  O   HOH T2019     -16.790  15.379  10.332  1.00  0.57           O  
HETATM 2021  O   HOH T2020     -52.501  15.555  34.001  1.00  0.57           O  
HETATM 2022  O   HOH T2021       8.179 -21.942  67.999  1.00  0.57           O  
HETATM 2023  O   HOH T2022     -53.351   1.095  73.015  1.00  0.57           O  
HETATM 2024  O   HOH T2023     -56.656 -25.950   2.443  1.00  0.57           O  
HETATM 2025  O   HOH T2024     -47.972  27.515  -4.910  1.00  0.57           O  
HETATM 2026  O   HOH T2025     -42.965  -5.616 -20.296  1.00  0.57           O  
HETATM 2027  O   HOH T2026     -23.468  -8.779  23.650  1.00  0.57           O  
HETATM 2028  O   HOH T2027     -28.290  21.743  -5.683  1.00  0.57           O  
HETATM 2029  O   HOH T2028     -16.974 -30.039  76.071  1.00  0.57           O  
HETATM 2030  O   HOH T2029     -20.958  20.276  57.523  1.00  0.57           O  
HETATM 2031  O   HOH T2030     -70.615  10.800   2.097  1.00  0.57           O  
HETATM 2032  O   HOH T2031     -51.175  28.630  14.504  1.00  0.57           O  
HETATM 2033  O   HOH T2032      -4.896  -0.842  72.221  1.00  0.57           O  
HETATM 2034  O   HOH T2033     -60.831 -27.051   3.708  1.00  0.57           O  
HETATM 2035  O   HOH T2034     -39.497  17.630  22.686  1.00  0.57           O  
HETATM 2036  O   HOH T2035     -31.665  16.348  -9.950  1.00  0.57           O  
HETATM 2037  O   HOH T2036     -57.367  -7.510  61.070  1.00  0.57           O  
HETATM 2038  O   HOH T2037     -62.986 -28.401   5.910  1.00  0.57           O  
HETATM 2039  O   HOH T2038     -18.452  25.203  78.539  1.00  0.57           O  
HETATM 2040  O   HOH T2039     -46.214  13.992   7.280  1.00  0.57           O  
HETATM 2041  O   HOH T2040     -29.268  -7.299  59.017  1.00  0.58           O  
HETATM 2042  O   HOH T2041     -22.850  20.372  55.851  1.00  0.58           O  
HETATM 2043  O   HOH T2042     -49.495 -21.041  59.004  1.00  0.58           O  
HETATM 2044  O   HOH T2043     -28.269   1.786  52.697  1.00  0.58           O  
HETATM 2045  O   HOH T2044     -43.447 -28.674  17.954  1.00  0.58           O  
HETATM 2046  O   HOH T2045     -16.261 -22.389  54.380  1.00  0.58           O  
HETATM 2047  O   HOH T2046     -27.495  23.888  69.815  1.00  0.58           O  
HETATM 2048  O   HOH T2047     -38.079 -20.219  74.613  1.00  0.58           O  
HETATM 2049  O   HOH T2048      -3.483  10.304  50.041  1.00  0.58           O  
HETATM 2050  O   HOH T2049     -48.607 -17.715  49.990  1.00  0.58           O  
HETATM 2051  O   HOH T2050     -56.071  -6.341  58.935  1.00  0.58           O  
HETATM 2052  O   HOH T2051     -12.947  -5.059  57.378  1.00  0.58           O  
HETATM 2053  O   HOH T2052     -52.651  18.006  51.484  1.00  0.58           O  
HETATM 2054  O   HOH T2053     -58.085  -0.690  11.341  1.00  0.59           O  
HETATM 2055  O   HOH T2054     -23.597  24.412   1.627  1.00  0.59           O  
HETATM 2056  O   HOH T2055     -62.430  -6.660  68.100  1.00  0.59           O  
HETATM 2057  O   HOH T2056     -23.242 -26.820  75.717  1.00  0.59           O  
HETATM 2058  O   HOH T2057     -21.890 -17.105  52.805  1.00  0.59           O  
HETATM 2059  O   HOH T2058     -17.081 -12.033  24.274  1.00  0.59           O  
HETATM 2060  O   HOH T2059     -27.338 -11.414  55.199  1.00  0.59           O  
HETATM 2061  O   HOH T2060     -42.943 -21.450  39.659  1.00  0.59           O  
HETATM 2062  O   HOH T2061     -25.749   0.772  31.609  1.00  0.59           O  
HETATM 2063  O   HOH T2062     -50.161  14.358  64.783  1.00  0.59           O  
HETATM 2064  O   HOH T2063      -5.972 -19.739  29.670  1.00  0.59           O  
HETATM 2065  O   HOH T2064     -31.630 -17.250  27.610  1.00  0.60           O  
HETATM 2066  O   HOH T2065     -58.392 -12.334  67.912  1.00  0.60           O  
HETATM 2067  O   HOH T2066     -16.201  -2.431  51.835  1.00  0.60           O  
HETATM 2068  O   HOH T2067     -58.068 -10.075  -5.943  1.00  0.60           O  
HETATM 2069  O   HOH T2068      -5.579   7.452  54.911  1.00  0.60           O  
HETATM 2070  O   HOH T2069     -50.357 -19.617  41.201  1.00  0.61           O  
HETATM 2071  O   HOH T2070     -31.803 -17.975  77.381  1.00  0.62           O  
HETATM 2072  O   HOH T2071     -12.982  16.184  44.475  1.00  0.62           O  
HETATM 2073  O   HOH T2072     -35.892 -15.376  53.693  1.00  0.63           O  
HETATM 2074  O   HOH T2073     -39.008 -20.420  37.091  1.00  0.63           O  
HETATM 2075  O   HOH T2074     -29.368 -42.983  57.445  1.00  0.63           O  
HETATM 2076  O   HOH T2075     -12.838 -20.859  48.498  1.00  0.67           O  
TER    2077      HOH T2075 
