# Supplementary material for: Accurate Prediction of Hydration Sites of Proteins Using Energy Model With Atom Embedding
Source: Front Mol Biosci. 2021 Sep 20;8:756075. doi: 10.3389/fmolb.2021.756075 (PMC8488165; doi:10.3389/fmolb.2021.756075)
Supplement: Supplementary file 1 [file DataSheet1.ZIP › Data Sheet 1/Our_result_pdb/our_dataset_output/2BW8_watersite.pdb]

HEADER                                                        XXXX


JRNL        PMID   -1
HETATM    1  O   HOH T   0       0.988  16.355  13.903  1.00  0.15           O  
HETATM    2  O   HOH T   1      28.036  -3.159  -5.247  1.00  0.19           O  
HETATM    3  O   HOH T   2      53.891  13.313  -4.015  1.00  0.19           O  
HETATM    4  O   HOH T   3      43.811   2.819  -9.799  1.00  0.20           O  
HETATM    5  O   HOH T   4      49.631   5.093   5.040  1.00  0.21           O  
HETATM    6  O   HOH T   5      63.342  -7.719 -12.899  1.00  0.21           O  
HETATM    7  O   HOH T   6      47.569   9.962  10.567  1.00  0.22           O  
HETATM    8  O   HOH T   7      27.584   2.164  21.160  1.00  0.22           O  
HETATM    9  O   HOH T   8       5.811   5.604   8.464  1.00  0.22           O  
HETATM   10  O   HOH T   9      -6.225  19.345  27.490  1.00  0.22           O  
HETATM   11  O   HOH T  10       9.598  20.292  30.294  1.00  0.22           O  
HETATM   12  O   HOH T  11      42.335   4.389 -18.314  1.00  0.23           O  
HETATM   13  O   HOH T  12       5.852  24.181  33.905  1.00  0.23           O  
HETATM   14  O   HOH T  13      37.976 -11.938  -9.906  1.00  0.23           O  
HETATM   15  O   HOH T  14      17.637  -4.488  28.387  1.00  0.23           O  
HETATM   16  O   HOH T  15      11.437   9.091  23.225  1.00  0.24           O  
HETATM   17  O   HOH T  16      12.570  13.805  30.691  1.00  0.24           O  
HETATM   18  O   HOH T  17      48.278 -17.164  -5.565  1.00  0.24           O  
HETATM   19  O   HOH T  18      37.570   9.218  -4.675  1.00  0.24           O  
HETATM   20  O   HOH T  19      40.420  15.058  -7.842  1.00  0.25           O  
HETATM   21  O   HOH T  20      59.359 -18.945 -10.840  1.00  0.25           O  
HETATM   22  O   HOH T  21      42.474  17.398   0.568  1.00  0.25           O  
HETATM   23  O   HOH T  22      31.098   4.673  15.038  1.00  0.25           O  
HETATM   24  O   HOH T  23       7.846   8.300   1.524  1.00  0.25           O  
HETATM   25  O   HOH T  24      22.503  -5.990  14.034  1.00  0.25           O  
HETATM   26  O   HOH T  25      -8.205   7.960  17.436  1.00  0.26           O  
HETATM   27  O   HOH T  26      60.721  11.638 -17.871  1.00  0.26           O  
HETATM   28  O   HOH T  27      14.776  -4.716  34.532  1.00  0.26           O  
HETATM   29  O   HOH T  28      -3.009  -6.052  20.256  1.00  0.26           O  
HETATM   30  O   HOH T  29      19.739   2.626  29.083  1.00  0.26           O  
HETATM   31  O   HOH T  30      52.604  13.864   8.068  1.00  0.26           O  
HETATM   32  O   HOH T  31       8.155   5.196   9.993  1.00  0.26           O  
HETATM   33  O   HOH T  32      50.839 -16.985   3.489  1.00  0.27           O  
HETATM   34  O   HOH T  33      53.511  15.670  -8.447  1.00  0.27           O  
HETATM   35  O   HOH T  34      14.898  -1.474  28.618  1.00  0.27           O  
HETATM   36  O   HOH T  35      16.787  17.266  16.658  1.00  0.27           O  
HETATM   37  O   HOH T  36      25.084   9.051  13.766  1.00  0.27           O  
HETATM   38  O   HOH T  37      49.270  15.719   6.719  1.00  0.27           O  
HETATM   39  O   HOH T  38      64.713   2.203 -15.795  1.00  0.27           O  
HETATM   40  O   HOH T  39      23.431   0.370   4.297  1.00  0.27           O  
HETATM   41  O   HOH T  40      17.407  13.260  16.124  1.00  0.28           O  
HETATM   42  O   HOH T  41      36.180  10.858 -18.459  1.00  0.28           O  
HETATM   43  O   HOH T  42      19.241  -0.144  29.039  1.00  0.28           O  
HETATM   44  O   HOH T  43       3.783  19.653  38.139  1.00  0.28           O  
HETATM   45  O   HOH T  44      47.275   4.013   3.883  1.00  0.28           O  
HETATM   46  O   HOH T  45      36.571 -16.988   6.327  1.00  0.28           O  
HETATM   47  O   HOH T  46      28.947   6.222   1.194  1.00  0.28           O  
HETATM   48  O   HOH T  47      52.330   5.784  13.463  1.00  0.29           O  
HETATM   49  O   HOH T  48      -4.322  -9.385  34.770  1.00  0.29           O  
HETATM   50  O   HOH T  49       6.603  18.174  29.990  1.00  0.29           O  
HETATM   51  O   HOH T  50      65.077  -5.589 -12.275  1.00  0.29           O  
HETATM   52  O   HOH T  51      48.303  14.965  -2.296  1.00  0.29           O  
HETATM   53  O   HOH T  52      -4.220   6.531   5.621  1.00  0.29           O  
HETATM   54  O   HOH T  53      -9.342  -2.250   8.313  1.00  0.29           O  
HETATM   55  O   HOH T  54      31.140  -4.708   4.311  1.00  0.29           O  
HETATM   56  O   HOH T  55       2.663  12.783   2.436  1.00  0.29           O  
HETATM   57  O   HOH T  56      18.880  18.888  16.188  1.00  0.29           O  
HETATM   58  O   HOH T  57       2.381  13.223  -4.092  1.00  0.29           O  
HETATM   59  O   HOH T  58       4.013 -10.599  37.258  1.00  0.30           O  
HETATM   60  O   HOH T  59      -5.522  13.067  15.179  1.00  0.30           O  
HETATM   61  O   HOH T  60      -3.895  -3.709  16.259  1.00  0.30           O  
HETATM   62  O   HOH T  61      56.785  15.281 -14.905  1.00  0.30           O  
HETATM   63  O   HOH T  62      30.564   5.942  -1.055  1.00  0.30           O  
HETATM   64  O   HOH T  63       4.090  21.267   3.304  1.00  0.30           O  
HETATM   65  O   HOH T  64      49.677  12.700 -15.512  1.00  0.30           O  
HETATM   66  O   HOH T  65      58.674 -16.352 -15.812  1.00  0.30           O  
HETATM   67  O   HOH T  66      33.094  -8.230   4.148  1.00  0.30           O  
HETATM   68  O   HOH T  67      22.743  16.435  13.989  1.00  0.30           O  
HETATM   69  O   HOH T  68      22.522  -5.731  11.301  1.00  0.30           O  
HETATM   70  O   HOH T  69      54.305  11.764 -24.897  1.00  0.30           O  
HETATM   71  O   HOH T  70      53.016 -11.532   5.854  1.00  0.30           O  
HETATM   72  O   HOH T  71      63.339   4.563  -4.432  1.00  0.30           O  
HETATM   73  O   HOH T  72      63.217  -2.593   5.542  1.00  0.30           O  
HETATM   74  O   HOH T  73       6.277  10.530  38.102  1.00  0.30           O  
HETATM   75  O   HOH T  74      40.543  -9.138 -11.277  1.00  0.30           O  
HETATM   76  O   HOH T  75      18.602   8.293   0.535  1.00  0.30           O  
HETATM   77  O   HOH T  76       3.905   3.635   4.956  1.00  0.31           O  
HETATM   78  O   HOH T  77       0.293 -11.618  23.480  1.00  0.31           O  
HETATM   79  O   HOH T  78       6.529  17.383  11.724  1.00  0.31           O  
HETATM   80  O   HOH T  79       0.671   8.710  38.787  1.00  0.31           O  
HETATM   81  O   HOH T  80      47.962   9.147 -19.455  1.00  0.31           O  
HETATM   82  O   HOH T  81      40.778 -10.604 -19.614  1.00  0.31           O  
HETATM   83  O   HOH T  82      60.319  10.901 -10.483  1.00  0.31           O  
HETATM   84  O   HOH T  83      52.639 -20.209 -14.640  1.00  0.31           O  
HETATM   85  O   HOH T  84      37.098  15.303  -1.046  1.00  0.31           O  
HETATM   86  O   HOH T  85       8.614  -2.282   7.955  1.00  0.31           O  
HETATM   87  O   HOH T  86      36.267  -7.956 -11.852  1.00  0.31           O  
HETATM   88  O   HOH T  87       2.343  -6.540  41.492  1.00  0.31           O  
HETATM   89  O   HOH T  88      10.968 -10.776  19.650  1.00  0.31           O  
HETATM   90  O   HOH T  89       4.780  15.190  39.357  1.00  0.32           O  
HETATM   91  O   HOH T  90      11.587  10.662   0.073  1.00  0.32           O  
HETATM   92  O   HOH T  91       7.190 -11.356  15.286  1.00  0.32           O  
HETATM   93  O   HOH T  92      29.605   6.622  23.352  1.00  0.32           O  
HETATM   94  O   HOH T  93      38.420  11.423  -6.086  1.00  0.32           O  
HETATM   95  O   HOH T  94      -4.823   4.412   8.986  1.00  0.32           O  
HETATM   96  O   HOH T  95      43.758 -10.856 -23.639  1.00  0.32           O  
HETATM   97  O   HOH T  96      59.473  -1.500 -25.976  1.00  0.32           O  
HETATM   98  O   HOH T  97      -8.237  -3.592  26.514  1.00  0.32           O  
HETATM   99  O   HOH T  98      -4.277 -13.927  41.355  1.00  0.32           O  
HETATM  100  O   HOH T  99      14.047  17.897   2.061  1.00  0.32           O  
HETATM  101  O   HOH T 100      42.453   5.619   9.783  1.00  0.32           O  
HETATM  102  O   HOH T 101      60.417 -10.903 -17.936  1.00  0.32           O  
HETATM  103  O   HOH T 102      19.198 -14.309  19.385  1.00  0.32           O  
HETATM  104  O   HOH T 103      24.183  -2.483  12.529  1.00  0.32           O  
HETATM  105  O   HOH T 104      32.237  12.532   3.375  1.00  0.32           O  
HETATM  106  O   HOH T 105       3.072   4.341   0.543  1.00  0.32           O  
HETATM  107  O   HOH T 106      35.577  -5.372 -12.899  1.00  0.32           O  
HETATM  108  O   HOH T 107      -7.743  -1.753  10.631  1.00  0.32           O  
HETATM  109  O   HOH T 108      13.415   0.674  27.706  1.00  0.32           O  
HETATM  110  O   HOH T 109      38.657 -16.057   4.940  1.00  0.32           O  
HETATM  111  O   HOH T 110      25.899  -1.199  10.688  1.00  0.33           O  
HETATM  112  O   HOH T 111      57.115  14.240 -17.509  1.00  0.33           O  
HETATM  113  O   HOH T 112       6.020 -14.792  26.935  1.00  0.33           O  
HETATM  114  O   HOH T 113       7.396 -11.371  26.575  1.00  0.33           O  
HETATM  115  O   HOH T 114      62.324 -16.251 -12.184  1.00  0.33           O  
HETATM  116  O   HOH T 115      -8.341   6.016  32.702  1.00  0.33           O  
HETATM  117  O   HOH T 116       5.882 -12.642  36.595  1.00  0.33           O  
HETATM  118  O   HOH T 117      41.142 -14.517 -15.379  1.00  0.33           O  
HETATM  119  O   HOH T 118      33.236  -6.805   6.504  1.00  0.33           O  
HETATM  120  O   HOH T 119      46.854   7.567 -22.523  1.00  0.33           O  
HETATM  121  O   HOH T 120      11.219  17.919  33.069  1.00  0.33           O  
HETATM  122  O   HOH T 121      59.299  -3.394 -23.904  1.00  0.34           O  
HETATM  123  O   HOH T 122      -6.501  -2.569  19.583  1.00  0.34           O  
HETATM  124  O   HOH T 123      59.215  -6.401   0.911  1.00  0.34           O  
HETATM  125  O   HOH T 124      52.873  13.848 -23.637  1.00  0.34           O  
HETATM  126  O   HOH T 125      26.734  -4.122  23.396  1.00  0.34           O  
HETATM  127  O   HOH T 126       8.954  18.497  34.729  1.00  0.34           O  
HETATM  128  O   HOH T 127      -7.441  -7.735  31.432  1.00  0.34           O  
HETATM  129  O   HOH T 128      18.087 -14.042  16.833  1.00  0.34           O  
HETATM  130  O   HOH T 129      42.870   7.231 -21.793  1.00  0.34           O  
HETATM  131  O   HOH T 130      27.209  13.704  -9.655  1.00  0.34           O  
HETATM  132  O   HOH T 131      35.645 -10.538   8.735  1.00  0.34           O  
HETATM  133  O   HOH T 132       7.450  -7.203  40.755  1.00  0.34           O  
HETATM  134  O   HOH T 133      56.545   8.161   3.202  1.00  0.34           O  
HETATM  135  O   HOH T 134      30.181  -1.350   8.237  1.00  0.34           O  
HETATM  136  O   HOH T 135      35.796  14.775  -5.677  1.00  0.34           O  
HETATM  137  O   HOH T 136       9.227  20.412  15.349  1.00  0.34           O  
HETATM  138  O   HOH T 137      -1.560   9.513   9.098  1.00  0.34           O  
HETATM  139  O   HOH T 138     -10.841  25.206  28.947  1.00  0.34           O  
HETATM  140  O   HOH T 139      31.911 -13.690   3.079  1.00  0.34           O  
HETATM  141  O   HOH T 140      26.239 -11.711  13.842  1.00  0.34           O  
HETATM  142  O   HOH T 141       0.866  20.463  17.072  1.00  0.34           O  
HETATM  143  O   HOH T 142      39.336  -3.540 -11.744  1.00  0.34           O  
HETATM  144  O   HOH T 143      55.132 -16.145  -3.119  1.00  0.35           O  
HETATM  145  O   HOH T 144      57.642 -18.974 -15.797  1.00  0.35           O  
HETATM  146  O   HOH T 145      -4.602  -7.532   8.678  1.00  0.35           O  
HETATM  147  O   HOH T 146     -11.745   6.504  26.281  1.00  0.35           O  
HETATM  148  O   HOH T 147      50.769 -20.444  -7.948  1.00  0.35           O  
HETATM  149  O   HOH T 148      30.279 -12.944   9.067  1.00  0.35           O  
HETATM  150  O   HOH T 149      -2.330  21.634  23.030  1.00  0.35           O  
HETATM  151  O   HOH T 150      59.966  13.144 -21.075  1.00  0.35           O  
HETATM  152  O   HOH T 151       2.766 -10.354  13.676  1.00  0.35           O  
HETATM  153  O   HOH T 152      40.450 -15.603  -2.571  1.00  0.35           O  
HETATM  154  O   HOH T 153      58.214 -20.881  -5.062  1.00  0.35           O  
HETATM  155  O   HOH T 154       2.931   7.241   7.342  1.00  0.35           O  
HETATM  156  O   HOH T 155      12.911   4.611   3.839  1.00  0.35           O  
HETATM  157  O   HOH T 156      44.693 -12.621 -21.703  1.00  0.35           O  
HETATM  158  O   HOH T 157      55.727  15.981 -10.305  1.00  0.36           O  
HETATM  159  O   HOH T 158      67.685  -4.313   4.996  1.00  0.36           O  
HETATM  160  O   HOH T 159       4.252  -7.160   9.446  1.00  0.36           O  
HETATM  161  O   HOH T 160      -1.994  19.187  34.753  1.00  0.36           O  
HETATM  162  O   HOH T 161      66.066   5.019  -4.064  1.00  0.36           O  
HETATM  163  O   HOH T 162       0.256  25.306  26.965  1.00  0.36           O  
HETATM  164  O   HOH T 163      55.680  13.717 -23.512  1.00  0.36           O  
HETATM  165  O   HOH T 164      -1.441  -5.390  11.565  1.00  0.36           O  
HETATM  166  O   HOH T 165      38.877   4.825 -10.511  1.00  0.36           O  
HETATM  167  O   HOH T 166       3.318   1.852   1.460  1.00  0.36           O  
HETATM  168  O   HOH T 167      55.910  18.561  -1.574  1.00  0.36           O  
HETATM  169  O   HOH T 168       4.929 -14.509  17.830  1.00  0.36           O  
HETATM  170  O   HOH T 169      15.507  -4.242  37.095  1.00  0.36           O  
HETATM  171  O   HOH T 170      23.595 -10.887  17.204  1.00  0.36           O  
HETATM  172  O   HOH T 171       4.976  12.411  39.622  1.00  0.36           O  
HETATM  173  O   HOH T 172      56.170   8.048 -24.383  1.00  0.36           O  
HETATM  174  O   HOH T 173       8.783  10.307  -0.353  1.00  0.36           O  
HETATM  175  O   HOH T 174      62.346   1.499 -14.655  1.00  0.36           O  
HETATM  176  O   HOH T 175      -8.714  -5.525  28.341  1.00  0.36           O  
HETATM  177  O   HOH T 176      53.591  17.824 -21.049  1.00  0.37           O  
HETATM  178  O   HOH T 177      60.997   9.888  -3.942  1.00  0.37           O  
HETATM  179  O   HOH T 178      -0.440  -6.214  19.201  1.00  0.37           O  
HETATM  180  O   HOH T 179      54.383  19.001 -14.480  1.00  0.37           O  
HETATM  181  O   HOH T 180       0.192 -15.007  26.801  1.00  0.37           O  
HETATM  182  O   HOH T 181      64.034  -9.637  -8.097  1.00  0.37           O  
HETATM  183  O   HOH T 182       5.722  19.904  11.116  1.00  0.37           O  
HETATM  184  O   HOH T 183      55.898 -10.171   2.799  1.00  0.37           O  
HETATM  185  O   HOH T 184      41.416 -16.354  -5.121  1.00  0.37           O  
HETATM  186  O   HOH T 185      40.171 -14.832 -17.919  1.00  0.37           O  
HETATM  187  O   HOH T 186      -6.327 -11.974  41.576  1.00  0.37           O  
HETATM  188  O   HOH T 187      25.926  16.369  18.361  1.00  0.37           O  
HETATM  189  O   HOH T 188      28.268  -5.287   1.744  1.00  0.37           O  
HETATM  190  O   HOH T 189      55.746 -11.773 -23.491  1.00  0.37           O  
HETATM  191  O   HOH T 190      38.476  11.322 -16.811  1.00  0.37           O  
HETATM  192  O   HOH T 191      33.975  14.798  -3.488  1.00  0.37           O  
HETATM  193  O   HOH T 192      14.348 -12.221  18.545  1.00  0.37           O  
HETATM  194  O   HOH T 193      51.170  19.683  -0.362  1.00  0.37           O  
HETATM  195  O   HOH T 194       7.758  -6.109   7.726  1.00  0.37           O  
HETATM  196  O   HOH T 195     -10.065   9.804  29.141  1.00  0.37           O  
HETATM  197  O   HOH T 196      63.461   9.535  -2.533  1.00  0.37           O  
HETATM  198  O   HOH T 197      29.200  -9.100   2.183  1.00  0.37           O  
HETATM  199  O   HOH T 198      48.580  -0.836 -24.339  1.00  0.37           O  
HETATM  200  O   HOH T 199       2.011   8.241   0.949  1.00  0.37           O  
HETATM  201  O   HOH T 200      14.270   9.349  23.052  1.00  0.38           O  
HETATM  202  O   HOH T 201      36.666  18.507  -4.091  1.00  0.38           O  
HETATM  203  O   HOH T 202      14.054  17.078  16.421  1.00  0.38           O  
HETATM  204  O   HOH T 203       1.157   3.146   5.060  1.00  0.38           O  
HETATM  205  O   HOH T 204      55.710 -20.322  -4.117  1.00  0.38           O  
HETATM  206  O   HOH T 205       0.245  19.610   5.812  1.00  0.38           O  
HETATM  207  O   HOH T 206      29.882   9.052  15.121  1.00  0.38           O  
HETATM  208  O   HOH T 207       2.451 -13.285  18.314  1.00  0.38           O  
HETATM  209  O   HOH T 208      10.570   4.818   2.246  1.00  0.38           O  
HETATM  210  O   HOH T 209      43.013 -12.812   3.936  1.00  0.38           O  
HETATM  211  O   HOH T 210      59.243 -10.526  -0.768  1.00  0.38           O  
HETATM  212  O   HOH T 211      20.746  -8.236  26.173  1.00  0.38           O  
HETATM  213  O   HOH T 212      22.820  18.746  15.583  1.00  0.38           O  
HETATM  214  O   HOH T 213      29.564   0.951   9.646  1.00  0.38           O  
HETATM  215  O   HOH T 214      42.009  -9.384 -25.242  1.00  0.38           O  
HETATM  216  O   HOH T 215      42.273  -1.250  -8.924  1.00  0.38           O  
HETATM  217  O   HOH T 216      27.568  -1.713 -10.397  1.00  0.38           O  
HETATM  218  O   HOH T 217      24.969  -6.491  15.202  1.00  0.38           O  
HETATM  219  O   HOH T 218      53.544  20.247   2.815  1.00  0.38           O  
HETATM  220  O   HOH T 219      15.858  10.006  25.335  1.00  0.38           O  
HETATM  221  O   HOH T 220      -2.500  21.859  25.874  1.00  0.38           O  
HETATM  222  O   HOH T 221      -0.991  13.356   4.184  1.00  0.38           O  
HETATM  223  O   HOH T 222      57.597 -17.058  -2.420  1.00  0.38           O  
HETATM  224  O   HOH T 223      31.879   1.689  11.081  1.00  0.38           O  
HETATM  225  O   HOH T 224      55.996  -3.533 -26.297  1.00  0.39           O  
HETATM  226  O   HOH T 225      13.081   6.804  26.052  1.00  0.39           O  
HETATM  227  O   HOH T 226      33.254   5.403 -12.918  1.00  0.39           O  
HETATM  228  O   HOH T 227      15.264 -10.575  22.973  1.00  0.39           O  
HETATM  229  O   HOH T 228      37.344   6.611 -12.041  1.00  0.39           O  
HETATM  230  O   HOH T 229      32.400   2.426  16.011  1.00  0.39           O  
HETATM  231  O   HOH T 230      41.102   3.379  -9.702  1.00  0.39           O  
HETATM  232  O   HOH T 231      35.816 -10.650 -11.087  1.00  0.39           O  
HETATM  233  O   HOH T 232      39.569   2.462 -11.824  1.00  0.39           O  
HETATM  234  O   HOH T 233      39.405   7.060 -18.320  1.00  0.39           O  
HETATM  235  O   HOH T 234      31.702   9.882  17.089  1.00  0.39           O  
HETATM  236  O   HOH T 235      -0.232  22.453  21.289  1.00  0.39           O  
HETATM  237  O   HOH T 236       4.233 -16.242  25.574  1.00  0.39           O  
HETATM  238  O   HOH T 237      -0.251  13.105   6.901  1.00  0.39           O  
HETATM  239  O   HOH T 238      16.369   8.045  29.381  1.00  0.39           O  
HETATM  240  O   HOH T 239      46.663  -3.323 -24.829  1.00  0.39           O  
HETATM  241  O   HOH T 240      28.227 -11.087  -4.077  1.00  0.39           O  
HETATM  242  O   HOH T 241      53.046  10.054  11.247  1.00  0.39           O  
HETATM  243  O   HOH T 242      64.336   7.213  -3.955  1.00  0.39           O  
HETATM  244  O   HOH T 243      31.500  -8.991   6.369  1.00  0.39           O  
HETATM  245  O   HOH T 244      13.072   3.250  42.135  1.00  0.39           O  
HETATM  246  O   HOH T 245     -14.743  11.881  21.007  1.00  0.40           O  
HETATM  247  O   HOH T 246      48.404 -23.938 -10.752  1.00  0.40           O  
HETATM  248  O   HOH T 247      60.045 -16.672  -1.117  1.00  0.40           O  
HETATM  249  O   HOH T 248      -8.981  24.827  26.939  1.00  0.40           O  
HETATM  250  O   HOH T 249      22.621   0.672  -8.027  1.00  0.40           O  
HETATM  251  O   HOH T 250      -0.294  -8.054  15.630  1.00  0.40           O  
HETATM  252  O   HOH T 251      28.976  -1.795   5.780  1.00  0.40           O  
HETATM  253  O   HOH T 252      44.377  22.546 -22.976  1.00  0.40           O  
HETATM  254  O   HOH T 253      56.521  -9.921  -1.067  1.00  0.40           O  
HETATM  255  O   HOH T 254      31.386  -2.472 -11.422  1.00  0.40           O  
HETATM  256  O   HOH T 255      31.699   7.217  16.119  1.00  0.40           O  
HETATM  257  O   HOH T 256      18.035  12.920  -0.780  1.00  0.40           O  
HETATM  258  O   HOH T 257      31.681   0.873  20.156  1.00  0.40           O  
HETATM  259  O   HOH T 258      47.089  11.341  14.681  1.00  0.40           O  
HETATM  260  O   HOH T 259      43.590  17.132   3.197  1.00  0.40           O  
HETATM  261  O   HOH T 260      30.956  12.174  18.537  1.00  0.40           O  
HETATM  262  O   HOH T 261       0.120  -0.430  40.836  1.00  0.40           O  
HETATM  263  O   HOH T 262       7.249  23.636  22.597  1.00  0.40           O  
HETATM  264  O   HOH T 263      54.111  -4.406   9.038  1.00  0.40           O  
HETATM  265  O   HOH T 264      62.291  20.626  -8.159  1.00  0.40           O  
HETATM  266  O   HOH T 265      64.159 -14.355 -11.218  1.00  0.40           O  
HETATM  267  O   HOH T 266      12.496  -8.176  25.212  1.00  0.40           O  
HETATM  268  O   HOH T 267      23.030  13.796   7.951  1.00  0.40           O  
HETATM  269  O   HOH T 268      39.524 -12.131 -17.779  1.00  0.40           O  
HETATM  270  O   HOH T 269      27.745   5.629  25.249  1.00  0.41           O  
HETATM  271  O   HOH T 270      -7.595  -0.833  30.063  1.00  0.41           O  
HETATM  272  O   HOH T 271      55.442   6.407 -26.617  1.00  0.41           O  
HETATM  273  O   HOH T 272      -3.895  -5.924  10.714  1.00  0.41           O  
HETATM  274  O   HOH T 273      -5.318  15.990   8.816  1.00  0.41           O  
HETATM  275  O   HOH T 274       6.758  17.867  36.391  1.00  0.41           O  
HETATM  276  O   HOH T 275      50.819 -21.382  -3.906  1.00  0.41           O  
HETATM  277  O   HOH T 276      13.039 -10.568  16.687  1.00  0.41           O  
HETATM  278  O   HOH T 277      66.573  10.961  -7.851  1.00  0.41           O  
HETATM  279  O   HOH T 278      57.806  14.782 -20.276  1.00  0.41           O  
HETATM  280  O   HOH T 279      -3.138  21.191  17.089  1.00  0.41           O  
HETATM  281  O   HOH T 280      53.803   7.341   7.639  1.00  0.41           O  
HETATM  282  O   HOH T 281      21.017  15.214   6.887  1.00  0.41           O  
HETATM  283  O   HOH T 282      38.980   7.494  -9.855  1.00  0.41           O  
HETATM  284  O   HOH T 283       5.376  22.506  11.831  1.00  0.41           O  
HETATM  285  O   HOH T 284      23.741   5.005  26.662  1.00  0.41           O  
HETATM  286  O   HOH T 285      10.704  -1.153  39.920  1.00  0.41           O  
HETATM  287  O   HOH T 286      55.217 -17.872   2.064  1.00  0.41           O  
HETATM  288  O   HOH T 287      34.558  17.058  -5.040  1.00  0.41           O  
HETATM  289  O   HOH T 288     -13.159  13.055  31.644  1.00  0.41           O  
HETATM  290  O   HOH T 289      44.965  11.259  12.871  1.00  0.41           O  
HETATM  291  O   HOH T 290       2.699  -6.527   7.275  1.00  0.41           O  
HETATM  292  O   HOH T 291       8.070 -13.770  25.328  1.00  0.41           O  
HETATM  293  O   HOH T 292      21.286   4.678  27.939  1.00  0.41           O  
HETATM  294  O   HOH T 293       0.916  23.471  12.684  1.00  0.41           O  
HETATM  295  O   HOH T 294       5.866  15.035   3.216  1.00  0.41           O  
HETATM  296  O   HOH T 295      63.670  19.414  -6.039  1.00  0.42           O  
HETATM  297  O   HOH T 296      43.897  18.758 -23.633  1.00  0.42           O  
HETATM  298  O   HOH T 297      41.959  -6.585 -11.199  1.00  0.42           O  
HETATM  299  O   HOH T 298       0.759  -6.563   5.434  1.00  0.42           O  
HETATM  300  O   HOH T 299      53.314 -16.001   2.734  1.00  0.42           O  
HETATM  301  O   HOH T 300     -10.575   4.604  22.837  1.00  0.42           O  
HETATM  302  O   HOH T 301      19.239  10.461  -1.083  1.00  0.42           O  
HETATM  303  O   HOH T 302      11.471  17.256   5.733  1.00  0.42           O  
HETATM  304  O   HOH T 303      11.669   1.250  40.830  1.00  0.42           O  
HETATM  305  O   HOH T 304     -12.116  10.747  30.710  1.00  0.42           O  
HETATM  306  O   HOH T 305      61.766  13.243  -9.884  1.00  0.42           O  
HETATM  307  O   HOH T 306      47.714 -18.981  -3.489  1.00  0.42           O  
HETATM  308  O   HOH T 307       7.696  17.892  32.435  1.00  0.42           O  
HETATM  309  O   HOH T 308      52.223 -22.080  -6.278  1.00  0.42           O  
HETATM  310  O   HOH T 309      21.478 -10.957  19.128  1.00  0.42           O  
HETATM  311  O   HOH T 310      34.876  12.163  10.618  1.00  0.42           O  
HETATM  312  O   HOH T 311      45.971   9.932 -21.193  1.00  0.42           O  
HETATM  313  O   HOH T 312      61.031   0.661 -26.839  1.00  0.42           O  
HETATM  314  O   HOH T 313      43.184 -14.072  -5.749  1.00  0.42           O  
HETATM  315  O   HOH T 314      42.643 -14.466 -21.150  1.00  0.42           O  
HETATM  316  O   HOH T 315      42.012 -11.804 -21.758  1.00  0.42           O  
HETATM  317  O   HOH T 316      14.567   8.727  27.436  1.00  0.42           O  
HETATM  318  O   HOH T 317      52.984 -18.713   3.536  1.00  0.42           O  
HETATM  319  O   HOH T 318      21.755  -4.103   6.723  1.00  0.42           O  
HETATM  320  O   HOH T 319       8.752   9.784  -4.764  1.00  0.42           O  
HETATM  321  O   HOH T 320      25.287 -12.663   8.634  1.00  0.42           O  
HETATM  322  O   HOH T 321      42.164  -0.772 -11.708  1.00  0.42           O  
HETATM  323  O   HOH T 322      15.919   3.941  27.348  1.00  0.42           O  
HETATM  324  O   HOH T 323      44.638 -14.777   3.073  1.00  0.42           O  
HETATM  325  O   HOH T 324      20.502 -12.895  17.446  1.00  0.42           O  
HETATM  326  O   HOH T 325      -2.521  11.419   7.319  1.00  0.42           O  
HETATM  327  O   HOH T 326      10.705 -11.979  17.029  1.00  0.42           O  
HETATM  328  O   HOH T 327      55.257 -12.383   4.425  1.00  0.42           O  
HETATM  329  O   HOH T 328      -8.518   3.647  34.239  1.00  0.42           O  
HETATM  330  O   HOH T 329      34.484 -16.139   4.758  1.00  0.42           O  
HETATM  331  O   HOH T 330      44.639 -14.253   0.286  1.00  0.43           O  
HETATM  332  O   HOH T 331      63.452  -2.482 -17.976  1.00  0.43           O  
HETATM  333  O   HOH T 332      53.493   4.542 -27.379  1.00  0.43           O  
HETATM  334  O   HOH T 333     -11.565  14.943  18.340  1.00  0.43           O  
HETATM  335  O   HOH T 334      33.861  -3.092 -12.582  1.00  0.43           O  
HETATM  336  O   HOH T 335      29.114  10.821  17.013  1.00  0.43           O  
HETATM  337  O   HOH T 336      14.310 -10.482  25.481  1.00  0.43           O  
HETATM  338  O   HOH T 337      -8.737   6.613  13.933  1.00  0.43           O  
HETATM  339  O   HOH T 338      54.257 -22.211 -11.092  1.00  0.43           O  
HETATM  340  O   HOH T 339      63.768  -5.234 -18.525  1.00  0.43           O  
HETATM  341  O   HOH T 340      -6.767  15.480  14.485  1.00  0.43           O  
HETATM  342  O   HOH T 341      13.810   5.495  -3.437  1.00  0.43           O  
HETATM  343  O   HOH T 342       0.588  -2.587  39.090  1.00  0.43           O  
HETATM  344  O   HOH T 343      51.262 -20.255 -17.110  1.00  0.43           O  
HETATM  345  O   HOH T 344      19.155  -8.057  29.308  1.00  0.43           O  
HETATM  346  O   HOH T 345      33.322   2.554  18.601  1.00  0.43           O  
HETATM  347  O   HOH T 346      24.369  -7.500  12.605  1.00  0.43           O  
HETATM  348  O   HOH T 347      20.811  15.482   4.167  1.00  0.44           O  
HETATM  349  O   HOH T 348      25.870  -9.025  14.492  1.00  0.44           O  
HETATM  350  O   HOH T 349      -2.631  16.123   9.414  1.00  0.44           O  
HETATM  351  O   HOH T 350       3.539  22.550  24.442  1.00  0.44           O  
HETATM  352  O   HOH T 351      -0.421  17.641  10.320  1.00  0.44           O  
HETATM  353  O   HOH T 352      53.528 -22.020  -3.847  1.00  0.44           O  
HETATM  354  O   HOH T 353      -6.598  -8.923  25.155  1.00  0.44           O  
HETATM  355  O   HOH T 354       9.878 -11.346  14.411  1.00  0.44           O  
HETATM  356  O   HOH T 355      34.891  -7.834   8.436  1.00  0.44           O  
HETATM  357  O   HOH T 356       5.879   3.972   0.202  1.00  0.44           O  
HETATM  358  O   HOH T 357      61.138  13.867  -7.173  1.00  0.44           O  
HETATM  359  O   HOH T 358       1.571   8.944   5.594  1.00  0.44           O  
HETATM  360  O   HOH T 359      63.923 -10.277 -13.645  1.00  0.44           O  
HETATM  361  O   HOH T 360      13.501  18.705  20.941  1.00  0.44           O  
HETATM  362  O   HOH T 361      64.183  11.439  -6.793  1.00  0.44           O  
HETATM  363  O   HOH T 362       1.661 -15.660  24.601  1.00  0.44           O  
HETATM  364  O   HOH T 363       7.678  21.882  10.436  1.00  0.44           O  
HETATM  365  O   HOH T 364      50.784 -25.502 -10.544  1.00  0.44           O  
HETATM  366  O   HOH T 365     -13.989   9.329  20.187  1.00  0.44           O  
HETATM  367  O   HOH T 366      62.377 -10.587 -15.966  1.00  0.44           O  
HETATM  368  O   HOH T 367      43.612   1.819 -26.287  1.00  0.44           O  
HETATM  369  O   HOH T 368      49.907   0.085 -26.446  1.00  0.44           O  
HETATM  370  O   HOH T 369      15.706 -15.144  21.583  1.00  0.44           O  
HETATM  371  O   HOH T 370      40.927  -7.602 -13.520  1.00  0.44           O  
HETATM  372  O   HOH T 371      37.787  -4.140 -13.930  1.00  0.44           O  
HETATM  373  O   HOH T 372      65.392  -5.933   5.259  1.00  0.44           O  
HETATM  374  O   HOH T 373      25.788   0.046   5.820  1.00  0.44           O  
HETATM  375  O   HOH T 374      40.450  13.587 -10.291  1.00  0.44           O  
HETATM  376  O   HOH T 375       3.917  16.191   1.517  1.00  0.44           O  
HETATM  377  O   HOH T 376      21.946 -13.696  19.685  1.00  0.44           O  
HETATM  378  O   HOH T 377      24.448  -3.935   7.313  1.00  0.44           O  
HETATM  379  O   HOH T 378     -14.068   7.144  25.058  1.00  0.44           O  
HETATM  380  O   HOH T 379      29.760 -11.085   7.032  1.00  0.44           O  
HETATM  381  O   HOH T 380      14.472   0.768  30.256  1.00  0.44           O  
HETATM  382  O   HOH T 381      25.087  -0.088  -7.417  1.00  0.44           O  
HETATM  383  O   HOH T 382      10.552  24.801  12.179  1.00  0.44           O  
HETATM  384  O   HOH T 383      14.523 -12.669  21.289  1.00  0.44           O  
HETATM  385  O   HOH T 384      41.349  11.146  -9.635  1.00  0.44           O  
HETATM  386  O   HOH T 385      44.431 -20.812 -23.369  1.00  0.44           O  
HETATM  387  O   HOH T 386      25.316  13.985   6.516  1.00  0.45           O  
HETATM  388  O   HOH T 387       2.624   7.303  40.217  1.00  0.45           O  
HETATM  389  O   HOH T 388      13.295  26.791  25.258  1.00  0.45           O  
HETATM  390  O   HOH T 389      40.460  -4.836 -13.934  1.00  0.45           O  
HETATM  391  O   HOH T 390      40.552   0.670  -9.962  1.00  0.45           O  
HETATM  392  O   HOH T 391      60.647 -17.274 -14.176  1.00  0.45           O  
HETATM  393  O   HOH T 392       1.074  24.061   9.913  1.00  0.45           O  
HETATM  394  O   HOH T 393      -2.650  -5.711  17.608  1.00  0.45           O  
HETATM  395  O   HOH T 394      44.046  20.274 -21.275  1.00  0.45           O  
HETATM  396  O   HOH T 395      -0.759   4.034  25.586  1.00  0.45           O  
HETATM  397  O   HOH T 396       2.503  21.185   5.614  1.00  0.45           O  
HETATM  398  O   HOH T 397       1.377  16.951   2.160  1.00  0.45           O  
HETATM  399  O   HOH T 398      59.701  22.522  -5.779  1.00  0.45           O  
HETATM  400  O   HOH T 399      33.023   4.896  17.029  1.00  0.45           O  
HETATM  401  O   HOH T 400      49.249 -19.756  -5.620  1.00  0.45           O  
HETATM  402  O   HOH T 401      63.374  -0.041 -16.787  1.00  0.45           O  
HETATM  403  O   HOH T 402      29.432  13.084  -8.136  1.00  0.45           O  
HETATM  404  O   HOH T 403      -8.995  -8.061  29.203  1.00  0.45           O  
HETATM  405  O   HOH T 404      16.333  13.434  18.628  1.00  0.45           O  
HETATM  406  O   HOH T 405      43.731   6.525 -26.720  1.00  0.45           O  
HETATM  407  O   HOH T 406       5.490  -9.068  40.543  1.00  0.46           O  
HETATM  408  O   HOH T 407      -5.551 -11.541  24.962  1.00  0.46           O  
HETATM  409  O   HOH T 408      19.935  -5.982  27.702  1.00  0.46           O  
HETATM  410  O   HOH T 409       1.388  22.723  15.406  1.00  0.46           O  
HETATM  411  O   HOH T 410      54.279  -2.569 -24.405  1.00  0.46           O  
HETATM  412  O   HOH T 411      42.117  -3.724 -11.996  1.00  0.46           O  
HETATM  413  O   HOH T 412      19.248  -5.511  30.386  1.00  0.46           O  
HETATM  414  O   HOH T 413      39.065   9.875  -8.260  1.00  0.46           O  
HETATM  415  O   HOH T 414      56.415  -5.664   7.911  1.00  0.46           O  
HETATM  416  O   HOH T 415      15.263  16.504  21.181  1.00  0.46           O  
HETATM  417  O   HOH T 416     -13.894  13.756  19.133  1.00  0.46           O  
HETATM  418  O   HOH T 417       7.841   5.466   1.690  1.00  0.46           O  
HETATM  419  O   HOH T 418      45.290  19.241   2.718  1.00  0.46           O  
HETATM  420  O   HOH T 419       6.746 -16.111  24.567  1.00  0.46           O  
HETATM  421  O   HOH T 420      31.541  -0.879  10.487  1.00  0.46           O  
HETATM  422  O   HOH T 421      20.701  -1.554   6.464  1.00  0.46           O  
HETATM  423  O   HOH T 422      -5.326  15.270  16.884  1.00  0.46           O  
HETATM  424  O   HOH T 423       3.991  15.364  -4.943  1.00  0.46           O  
HETATM  425  O   HOH T 424      55.913  15.779  -1.433  1.00  0.46           O  
HETATM  426  O   HOH T 425      45.941   7.199 -25.181  1.00  0.46           O  
HETATM  427  O   HOH T 426      17.499   4.047  29.674  1.00  0.46           O  
HETATM  428  O   HOH T 427      54.345  16.030 -22.851  1.00  0.46           O  
HETATM  429  O   HOH T 428      13.166  15.991  32.380  1.00  0.46           O  
HETATM  430  O   HOH T 429       8.876 -13.609  15.474  1.00  0.47           O  
HETATM  431  O   HOH T 430      -8.870   7.909  30.767  1.00  0.47           O  
HETATM  432  O   HOH T 431     -12.563  13.022  11.209  1.00  0.47           O  
HETATM  433  O   HOH T 432      53.468  -9.433   7.701  1.00  0.47           O  
HETATM  434  O   HOH T 433      50.231   2.654 -27.167  1.00  0.47           O  
HETATM  435  O   HOH T 434      59.982  11.583  -5.920  1.00  0.47           O  
HETATM  436  O   HOH T 435      27.843 -11.538   8.942  1.00  0.47           O  
HETATM  437  O   HOH T 436      -9.589   9.127  13.079  1.00  0.47           O  
HETATM  438  O   HOH T 437      -9.678  16.071  37.372  1.00  0.47           O  
HETATM  439  O   HOH T 438      25.846  -2.543  -6.650  1.00  0.47           O  
HETATM  440  O   HOH T 439      24.564  17.868  12.376  1.00  0.47           O  
HETATM  441  O   HOH T 440      -8.211 -11.169  25.611  1.00  0.47           O  
HETATM  442  O   HOH T 441      43.725  19.838   0.446  1.00  0.47           O  
HETATM  443  O   HOH T 442      36.845  10.407 -25.000  1.00  0.47           O  
HETATM  444  O   HOH T 443      55.198 -13.176 -21.173  1.00  0.47           O  
HETATM  445  O   HOH T 444       3.187  17.404  39.691  1.00  0.47           O  
HETATM  446  O   HOH T 445      63.292 -12.774 -14.543  1.00  0.47           O  
HETATM  447  O   HOH T 446      28.342  12.984  18.466  1.00  0.47           O  
HETATM  448  O   HOH T 447      14.187 -10.346  28.082  1.00  0.47           O  
HETATM  449  O   HOH T 448      63.953 -12.859  -5.823  1.00  0.47           O  
HETATM  450  O   HOH T 449      44.627   6.423  11.315  1.00  0.47           O  
HETATM  451  O   HOH T 450      29.258 -14.436  -1.636  1.00  0.47           O  
HETATM  452  O   HOH T 451      30.715  10.471   8.126  1.00  0.47           O  
HETATM  453  O   HOH T 452      -0.808  22.757  17.113  1.00  0.47           O  
HETATM  454  O   HOH T 453       1.625  21.259  19.615  1.00  0.47           O  
HETATM  455  O   HOH T 454      12.933   3.625   1.296  1.00  0.47           O  
HETATM  456  O   HOH T 455      20.833  11.205   1.088  1.00  0.47           O  
HETATM  457  O   HOH T 456      -0.454  15.538   5.794  1.00  0.47           O  
HETATM  458  O   HOH T 457       0.275   7.825   7.834  1.00  0.47           O  
HETATM  459  O   HOH T 458      63.849  -8.291 -15.552  1.00  0.47           O  
HETATM  460  O   HOH T 459      -9.991  18.540  31.787  1.00  0.47           O  
HETATM  461  O   HOH T 460      30.660 -11.297   2.939  1.00  0.47           O  
HETATM  462  O   HOH T 461       2.256  -8.717  10.602  1.00  0.47           O  
HETATM  463  O   HOH T 462      38.866   7.469 -21.022  1.00  0.47           O  
HETATM  464  O   HOH T 463      -8.358   4.088  21.256  1.00  0.47           O  
HETATM  465  O   HOH T 464      14.714   3.542  29.674  1.00  0.47           O  
HETATM  466  O   HOH T 465      23.149  -1.651  -6.454  1.00  0.48           O  
HETATM  467  O   HOH T 466       5.347  22.749  14.587  1.00  0.48           O  
HETATM  468  O   HOH T 467       4.929 -13.076  15.349  1.00  0.48           O  
HETATM  469  O   HOH T 468      -3.333 -13.130  24.063  1.00  0.48           O  
HETATM  470  O   HOH T 469      31.922 -16.324   3.737  1.00  0.48           O  
HETATM  471  O   HOH T 470       0.269 -10.579  14.860  1.00  0.48           O  
HETATM  472  O   HOH T 471      53.893  19.626   0.074  1.00  0.48           O  
HETATM  473  O   HOH T 472      25.153  -1.308   8.061  1.00  0.48           O  
HETATM  474  O   HOH T 473       5.260  -6.455   3.134  1.00  0.48           O  
HETATM  475  O   HOH T 474      22.793  13.732   5.181  1.00  0.48           O  
HETATM  476  O   HOH T 475      -5.252  17.676  15.410  1.00  0.48           O  
HETATM  477  O   HOH T 476      65.632  -4.813  -9.631  1.00  0.48           O  
HETATM  478  O   HOH T 477      56.075  -2.266 -10.389  1.00  0.48           O  
HETATM  479  O   HOH T 478       1.561  -3.935  41.296  1.00  0.48           O  
HETATM  480  O   HOH T 479      -9.298  22.742  28.709  1.00  0.48           O  
HETATM  481  O   HOH T 480      20.826   1.038  31.070  1.00  0.48           O  
HETATM  482  O   HOH T 481      23.243   0.823  -5.368  1.00  0.48           O  
HETATM  483  O   HOH T 482       8.250  -2.439  39.821  1.00  0.48           O  
HETATM  484  O   HOH T 483      55.238  16.629 -13.038  1.00  0.48           O  
HETATM  485  O   HOH T 484      26.039   6.380  27.382  1.00  0.48           O  
HETATM  486  O   HOH T 485      10.868  13.986  39.134  1.00  0.48           O  
HETATM  487  O   HOH T 486      31.709   0.149  22.786  1.00  0.48           O  
HETATM  488  O   HOH T 487      42.633  -7.367 -27.140  1.00  0.48           O  
HETATM  489  O   HOH T 488      39.172   8.818 -25.144  1.00  0.48           O  
HETATM  490  O   HOH T 489      16.087  -2.367  35.205  1.00  0.48           O  
HETATM  491  O   HOH T 490      -1.003  15.738   3.100  1.00  0.48           O  
HETATM  492  O   HOH T 491      41.497 -16.165   0.004  1.00  0.48           O  
HETATM  493  O   HOH T 492       2.526  22.568  21.858  1.00  0.48           O  
HETATM  494  O   HOH T 493       8.647   8.228  39.308  1.00  0.49           O  
HETATM  495  O   HOH T 494      14.725   5.634  24.212  1.00  0.49           O  
HETATM  496  O   HOH T 495       0.904   5.252   6.998  1.00  0.49           O  
HETATM  497  O   HOH T 496       0.010  27.929  26.162  1.00  0.49           O  
HETATM  498  O   HOH T 497      55.957   4.131 -28.270  1.00  0.49           O  
HETATM  499  O   HOH T 498      -4.051   7.271  38.686  1.00  0.49           O  
HETATM  500  O   HOH T 499      62.495 -15.341 -14.913  1.00  0.49           O  
HETATM  501  O   HOH T 500      -8.079  21.220  26.616  1.00  0.49           O  
HETATM  502  O   HOH T 501      62.646  -5.382   5.518  1.00  0.49           O  
HETATM  503  O   HOH T 502       8.562  24.830  20.439  1.00  0.49           O  
HETATM  504  O   HOH T 503       6.856  25.862  32.048  1.00  0.49           O  
HETATM  505  O   HOH T 504      65.020  11.571 -15.050  1.00  0.49           O  
HETATM  506  O   HOH T 505      50.151  14.785 -22.807  1.00  0.49           O  
HETATM  507  O   HOH T 506      13.617  12.221  -1.101  1.00  0.49           O  
HETATM  508  O   HOH T 507      26.866  -2.455  15.677  1.00  0.49           O  
HETATM  509  O   HOH T 508      49.731   5.501  12.463  1.00  0.49           O  
HETATM  510  O   HOH T 509       1.511  10.540  40.687  1.00  0.49           O  
HETATM  511  O   HOH T 510      57.743  17.130  -8.861  1.00  0.49           O  
HETATM  512  O   HOH T 511      46.813  15.846   5.480  1.00  0.49           O  
HETATM  513  O   HOH T 512      61.711  11.210  -8.019  1.00  0.49           O  
HETATM  514  O   HOH T 513      15.602   7.476  -3.084  1.00  0.49           O  
HETATM  515  O   HOH T 514       0.639  -8.559  12.959  1.00  0.49           O  
HETATM  516  O   HOH T 515      24.311   1.137  -0.197  1.00  0.49           O  
HETATM  517  O   HOH T 516      26.895  -0.851  29.995  1.00  0.49           O  
HETATM  518  O   HOH T 517      60.769  -8.036  -0.761  1.00  0.49           O  
HETATM  519  O   HOH T 518      -8.751  -7.177  24.764  1.00  0.49           O  
HETATM  520  O   HOH T 519      20.649  15.186   1.464  1.00  0.49           O  
HETATM  521  O   HOH T 520      -5.053  -4.810  18.646  1.00  0.49           O  
HETATM  522  O   HOH T 521      36.904  10.347  11.523  1.00  0.49           O  
HETATM  523  O   HOH T 522      41.818 -14.978   2.560  1.00  0.49           O  
HETATM  524  O   HOH T 523      35.066 -18.764   4.772  1.00  0.49           O  
HETATM  525  O   HOH T 524     -10.440  18.232  24.935  1.00  0.49           O  
HETATM  526  O   HOH T 525       9.150  13.117  23.672  1.00  0.49           O  
HETATM  527  O   HOH T 526      29.222  -6.819   3.919  1.00  0.49           O  
HETATM  528  O   HOH T 527      -3.095  23.586  15.833  1.00  0.49           O  
HETATM  529  O   HOH T 528      15.803   5.871  30.830  1.00  0.49           O  
HETATM  530  O   HOH T 529      38.271  11.211 -14.052  1.00  0.50           O  
HETATM  531  O   HOH T 530      40.246 -13.281 -20.239  1.00  0.50           O  
HETATM  532  O   HOH T 531      32.944  -9.748   8.662  1.00  0.50           O  
HETATM  533  O   HOH T 532      12.333  16.192  18.285  1.00  0.50           O  
HETATM  534  O   HOH T 533      64.399 -11.974  -9.713  1.00  0.50           O  
HETATM  535  O   HOH T 534       5.042  -6.736  42.004  1.00  0.50           O  
HETATM  536  O   HOH T 535      62.438  13.860 -17.710  1.00  0.50           O  
HETATM  537  O   HOH T 536       9.077 -13.538  30.547  1.00  0.50           O  
HETATM  538  O   HOH T 537      50.389 -19.535   2.665  1.00  0.50           O  
HETATM  539  O   HOH T 538      69.006  10.711  -8.890  1.00  0.50           O  
HETATM  540  O   HOH T 539      11.423   3.946  44.249  1.00  0.50           O  
HETATM  541  O   HOH T 540      -9.136  -2.925  29.092  1.00  0.50           O  
HETATM  542  O   HOH T 541      23.720  -9.320  19.430  1.00  0.50           O  
HETATM  543  O   HOH T 542       5.801  17.843  38.933  1.00  0.50           O  
HETATM  544  O   HOH T 543      60.613  18.174  -0.286  1.00  0.50           O  
HETATM  545  O   HOH T 544      32.802  -1.605  20.951  1.00  0.50           O  
HETATM  546  O   HOH T 545      12.776   9.833  20.860  1.00  0.50           O  
HETATM  547  O   HOH T 546      27.511   1.918  27.943  1.00  0.50           O  
HETATM  548  O   HOH T 547      51.762   3.737  11.639  1.00  0.51           O  
HETATM  549  O   HOH T 548       1.750  14.660   0.415  1.00  0.51           O  
HETATM  550  O   HOH T 549      17.057  -3.925  30.995  1.00  0.51           O  
HETATM  551  O   HOH T 550      27.426   0.858 -11.520  1.00  0.51           O  
HETATM  552  O   HOH T 551      39.542   4.300 -18.520  1.00  0.51           O  
HETATM  553  O   HOH T 552       1.875  10.170   3.072  1.00  0.51           O  
HETATM  554  O   HOH T 553      17.205   9.673  -2.815  1.00  0.51           O  
HETATM  555  O   HOH T 554       7.810  22.694  15.669  1.00  0.51           O  
HETATM  556  O   HOH T 555      35.824   4.817 -13.658  1.00  0.51           O  
HETATM  557  O   HOH T 556      14.731   5.096  40.928  1.00  0.51           O  
HETATM  558  O   HOH T 557      12.109   3.566  -4.261  1.00  0.51           O  
HETATM  559  O   HOH T 558      28.317  -9.716 -12.153  1.00  0.51           O  
HETATM  560  O   HOH T 559      38.515  14.152  -5.971  1.00  0.51           O  
HETATM  561  O   HOH T 560      41.866 -17.048 -18.380  1.00  0.51           O  
HETATM  562  O   HOH T 561      59.234  14.430 -15.652  1.00  0.51           O  
HETATM  563  O   HOH T 562      -0.646 -14.108  24.239  1.00  0.51           O  
HETATM  564  O   HOH T 563      40.953   5.824 -20.280  1.00  0.51           O  
HETATM  565  O   HOH T 564      53.437 -13.085 -23.409  1.00  0.51           O  
HETATM  566  O   HOH T 565      47.253 -13.773 -21.346  1.00  0.51           O  
HETATM  567  O   HOH T 566      48.535  -2.353 -26.630  1.00  0.51           O  
HETATM  568  O   HOH T 567      17.865 -11.954  28.939  1.00  0.51           O  
HETATM  569  O   HOH T 568      62.368  19.208  -3.580  1.00  0.51           O  
HETATM  570  O   HOH T 569      34.803  -7.824 -14.184  1.00  0.51           O  
HETATM  571  O   HOH T 570     -11.494   7.344  13.945  1.00  0.51           O  
HETATM  572  O   HOH T 571      53.832  19.382   5.367  1.00  0.51           O  
HETATM  573  O   HOH T 572       4.124   9.701  39.784  1.00  0.51           O  
HETATM  574  O   HOH T 573      35.290  -3.567 -14.945  1.00  0.52           O  
HETATM  575  O   HOH T 574      29.831   4.054  24.251  1.00  0.52           O  
HETATM  576  O   HOH T 575      28.396  10.513  -3.196  1.00  0.52           O  
HETATM  577  O   HOH T 576      -8.971  13.977  15.513  1.00  0.52           O  
HETATM  578  O   HOH T 577       0.718  16.242  39.045  1.00  0.52           O  
HETATM  579  O   HOH T 578      27.373  -7.589   0.606  1.00  0.52           O  
HETATM  580  O   HOH T 579      14.719  15.468  30.080  1.00  0.52           O  
HETATM  581  O   HOH T 580      29.212  -1.073 -12.522  1.00  0.52           O  
HETATM  582  O   HOH T 581      35.144   7.390 -13.611  1.00  0.52           O  
HETATM  583  O   HOH T 582      60.989  20.124  -5.775  1.00  0.52           O  
HETATM  584  O   HOH T 583      16.225  12.825  25.200  1.00  0.52           O  
HETATM  585  O   HOH T 584      30.322 -12.499  11.781  1.00  0.52           O  
HETATM  586  O   HOH T 585      15.378  -0.255  36.718  1.00  0.52           O  
HETATM  587  O   HOH T 586      11.266  17.781   2.357  1.00  0.52           O  
HETATM  588  O   HOH T 587      23.390  -1.778   6.006  1.00  0.52           O  
HETATM  589  O   HOH T 588      40.602 -14.011   4.810  1.00  0.52           O  
HETATM  590  O   HOH T 589      60.046  16.430  -7.457  1.00  0.52           O  
HETATM  591  O   HOH T 590       7.997 -12.636  12.939  1.00  0.52           O  
HETATM  592  O   HOH T 591      66.364  -3.235 -11.536  1.00  0.52           O  
HETATM  593  O   HOH T 592      62.385  -6.109  -2.428  1.00  0.52           O  
HETATM  594  O   HOH T 593      13.834  -6.054  38.396  1.00  0.52           O  
HETATM  595  O   HOH T 594      29.887   1.394  24.481  1.00  0.52           O  
HETATM  596  O   HOH T 595      65.336  -3.466   3.900  1.00  0.52           O  
HETATM  597  O   HOH T 596      38.894 -17.219   0.272  1.00  0.52           O  
HETATM  598  O   HOH T 597       2.646  -1.224  41.698  1.00  0.53           O  
HETATM  599  O   HOH T 598      28.233  -4.288   4.419  1.00  0.53           O  
HETATM  600  O   HOH T 599      64.751  -7.213  -6.514  1.00  0.53           O  
HETATM  601  O   HOH T 600      32.635   3.361  21.119  1.00  0.53           O  
HETATM  602  O   HOH T 601      18.441   6.567  30.531  1.00  0.53           O  
HETATM  603  O   HOH T 602      57.908  -9.022   1.212  1.00  0.53           O  
HETATM  604  O   HOH T 603      28.206  -5.657 -11.326  1.00  0.53           O  
HETATM  605  O   HOH T 604      59.403 -19.708 -13.619  1.00  0.53           O  
HETATM  606  O   HOH T 605      34.950 -10.611 -13.744  1.00  0.53           O  
HETATM  607  O   HOH T 606      40.585   8.417 -22.922  1.00  0.53           O  
HETATM  608  O   HOH T 607      39.718  -5.720  10.675  1.00  0.53           O  
HETATM  609  O   HOH T 608      55.215  -9.779   5.500  1.00  0.53           O  
HETATM  610  O   HOH T 609      55.907  18.798 -16.826  1.00  0.53           O  
HETATM  611  O   HOH T 610       2.430 -12.057  15.933  1.00  0.53           O  
HETATM  612  O   HOH T 611      -0.589  24.496  14.889  1.00  0.53           O  
HETATM  613  O   HOH T 612      -6.627  -3.267  16.824  1.00  0.53           O  
HETATM  614  O   HOH T 613      26.081  -3.606   9.462  1.00  0.53           O  
HETATM  615  O   HOH T 614      43.839 -16.338 -22.731  1.00  0.53           O  
HETATM  616  O   HOH T 615      25.054  -8.476  17.102  1.00  0.53           O  
HETATM  617  O   HOH T 616      52.620  17.712   7.387  1.00  0.53           O  
HETATM  618  O   HOH T 617      27.916  12.850  15.619  1.00  0.53           O  
HETATM  619  O   HOH T 618      28.385 -13.671   0.839  1.00  0.53           O  
HETATM  620  O   HOH T 619      46.270  -0.807 -25.976  1.00  0.53           O  
HETATM  621  O   HOH T 620     -12.842   4.980  24.279  1.00  0.53           O  
HETATM  622  O   HOH T 621       3.299  -7.428   4.793  1.00  0.53           O  
HETATM  623  O   HOH T 622       6.615 -10.630  38.517  1.00  0.54           O  
HETATM  624  O   HOH T 623       0.473  -2.346  10.381  1.00  0.54           O  
HETATM  625  O   HOH T 624      -2.798   9.110   5.609  1.00  0.54           O  
HETATM  626  O   HOH T 625      39.689  -2.689  11.251  1.00  0.54           O  
HETATM  627  O   HOH T 626      64.234   9.763 -21.813  1.00  0.54           O  
HETATM  628  O   HOH T 627      54.450  -7.225   9.295  1.00  0.54           O  
HETATM  629  O   HOH T 628      52.701  17.321 -16.049  1.00  0.54           O  
HETATM  630  O   HOH T 629      -8.950  15.521  17.845  1.00  0.54           O  
HETATM  631  O   HOH T 630      49.263 -20.522  -1.710  1.00  0.54           O  
HETATM  632  O   HOH T 631      56.784  10.597 -25.331  1.00  0.54           O  
HETATM  633  O   HOH T 632      12.963   5.867  43.057  1.00  0.54           O  
HETATM  634  O   HOH T 633      32.166  12.170   9.820  1.00  0.54           O  
HETATM  635  O   HOH T 634      52.409 -21.333   2.720  1.00  0.54           O  
HETATM  636  O   HOH T 635      14.518   6.091  28.342  1.00  0.54           O  
HETATM  637  O   HOH T 636      15.108   2.649   2.862  1.00  0.54           O  
HETATM  638  O   HOH T 637      20.233 -10.511  28.468  1.00  0.54           O  
HETATM  639  O   HOH T 638      45.443  11.370 -23.490  1.00  0.55           O  
HETATM  640  O   HOH T 639      31.500  -0.161  16.298  1.00  0.55           O  
HETATM  641  O   HOH T 640      14.865  15.548   3.233  1.00  0.55           O  
HETATM  642  O   HOH T 641      55.059  -5.816 -27.299  1.00  0.55           O  
HETATM  643  O   HOH T 642      20.154  -1.645  31.455  1.00  0.55           O  
HETATM  644  O   HOH T 643      44.525   4.060 -27.502  1.00  0.55           O  
HETATM  645  O   HOH T 644      59.759  14.213 -18.414  1.00  0.55           O  
HETATM  646  O   HOH T 645       8.113   2.334  -0.011  1.00  0.55           O  
HETATM  647  O   HOH T 646      45.601   6.380 -11.703  1.00  0.55           O  
HETATM  648  O   HOH T 647      38.079   9.554 -22.674  1.00  0.55           O  
HETATM  649  O   HOH T 648      69.282   1.569 -10.626  1.00  0.55           O  
HETATM  650  O   HOH T 649      12.699   3.892  -1.497  1.00  0.55           O  
HETATM  651  O   HOH T 650       9.766  23.030  30.867  1.00  0.55           O  
HETATM  652  O   HOH T 651      -8.076   8.787  33.204  1.00  0.55           O  
HETATM  653  O   HOH T 652      61.281 -13.143 -16.366  1.00  0.55           O  
HETATM  654  O   HOH T 653      67.306   3.065 -18.708  1.00  0.55           O  
HETATM  655  O   HOH T 654      25.947 -11.473  -0.790  1.00  0.55           O  
HETATM  656  O   HOH T 655      40.532   4.118  11.409  1.00  0.55           O  
HETATM  657  O   HOH T 656      27.652   6.081   6.610  1.00  0.55           O  
HETATM  658  O   HOH T 657      26.746  11.242  13.699  1.00  0.55           O  
HETATM  659  O   HOH T 658      -4.656  21.270  24.363  1.00  0.55           O  
HETATM  660  O   HOH T 659      40.434  -7.178 -25.130  1.00  0.55           O  
HETATM  661  O   HOH T 660      60.243  17.317  -2.973  1.00  0.55           O  
HETATM  662  O   HOH T 661     -12.863  15.439  30.108  1.00  0.55           O  
HETATM  663  O   HOH T 662      16.005  12.268  -2.588  1.00  0.55           O  
HETATM  664  O   HOH T 663      21.823  12.562  25.322  1.00  0.55           O  
HETATM  665  O   HOH T 664      30.246   2.432  22.018  1.00  0.55           O  
HETATM  666  O   HOH T 665      -8.857  -1.628  16.261  1.00  0.56           O  
HETATM  667  O   HOH T 666       3.596  24.198  13.078  1.00  0.56           O  
HETATM  668  O   HOH T 667      44.440  -9.071 -28.397  1.00  0.56           O  
HETATM  669  O   HOH T 668     -10.502  18.654  37.280  1.00  0.56           O  
HETATM  670  O   HOH T 669       8.317 -13.670  27.982  1.00  0.56           O  
HETATM  671  O   HOH T 670      -9.712 -10.058  27.507  1.00  0.56           O  
HETATM  672  O   HOH T 671      65.475  -0.929  -8.106  1.00  0.56           O  
HETATM  673  O   HOH T 672      62.624  13.562 -20.427  1.00  0.56           O  
HETATM  674  O   HOH T 673      68.007   0.925  -3.245  1.00  0.56           O  
HETATM  675  O   HOH T 674       8.901  13.178  -1.017  1.00  0.56           O  
HETATM  676  O   HOH T 675      30.874   8.665  24.681  1.00  0.56           O  
HETATM  677  O   HOH T 676      55.709  18.577   3.311  1.00  0.56           O  
HETATM  678  O   HOH T 677      -5.673  20.314  16.199  1.00  0.56           O  
HETATM  679  O   HOH T 678      38.566 -12.925 -12.427  1.00  0.56           O  
HETATM  680  O   HOH T 679      11.373  -3.266   2.402  1.00  0.56           O  
HETATM  681  O   HOH T 680     -17.801  13.679  24.319  1.00  0.56           O  
HETATM  682  O   HOH T 681      64.043 -19.448 -11.278  1.00  0.56           O  
HETATM  683  O   HOH T 682      64.719 -16.972 -10.607  1.00  0.57           O  
HETATM  684  O   HOH T 683      46.925 -20.286  -8.954  1.00  0.57           O  
HETATM  685  O   HOH T 684      63.188  -8.926 -23.536  1.00  0.57           O  
HETATM  686  O   HOH T 685       7.040  17.764  -0.670  1.00  0.57           O  
HETATM  687  O   HOH T 686      44.536   8.805 -23.357  1.00  0.57           O  
HETATM  688  O   HOH T 687      55.307   3.688   8.274  1.00  0.57           O  
HETATM  689  O   HOH T 688      55.082  17.214   0.784  1.00  0.57           O  
HETATM  690  O   HOH T 689      38.618  11.417 -10.492  1.00  0.58           O  
HETATM  691  O   HOH T 690      29.091 -13.612  -4.073  1.00  0.58           O  
HETATM  692  O   HOH T 691      58.257  -3.271 -27.602  1.00  0.58           O  
HETATM  693  O   HOH T 692      20.273  -6.297   8.027  1.00  0.58           O  
HETATM  694  O   HOH T 693      28.237   4.720  27.739  1.00  0.59           O  
HETATM  695  O   HOH T 694      66.452   0.726  -0.833  1.00  0.59           O  
HETATM  696  O   HOH T 695      53.501   7.262 -28.350  1.00  0.59           O  
HETATM  697  O   HOH T 696      27.706 -11.375   2.381  1.00  0.60           O  
HETATM  698  O   HOH T 697      57.784 -15.733   0.035  1.00  0.61           O  
TER     699      HOH T 697 
