# Supplementary material for: Accurate Prediction of Hydration Sites of Proteins Using Energy Model With Atom Embedding
Source: Front Mol Biosci. 2021 Sep 20;8:756075. doi: 10.3389/fmolb.2021.756075 (PMC8488165; doi:10.3389/fmolb.2021.756075)
Supplement: Supplementary file 1 [file DataSheet1.ZIP › Data Sheet 1/Our_result_pdb/our_dataset_output/2C2T_watersite.pdb]

HEADER                                                        XXXX


JRNL        PMID   -1
HETATM    1  O   HOH T   0       2.542  24.161 -18.307  1.00  0.17           O  
HETATM    2  O   HOH T   1      23.950  50.049   8.316  1.00  0.19           O  
HETATM    3  O   HOH T   2      20.006  35.881  30.287  1.00  0.19           O  
HETATM    4  O   HOH T   3      29.004  40.631  15.505  1.00  0.19           O  
HETATM    5  O   HOH T   4      -3.286  25.691 -15.873  1.00  0.19           O  
HETATM    6  O   HOH T   5      24.537  58.559  23.716  1.00  0.20           O  
HETATM    7  O   HOH T   6      22.517  44.556   5.696  1.00  0.20           O  
HETATM    8  O   HOH T   7      32.499  45.936  37.188  1.00  0.20           O  
HETATM    9  O   HOH T   8       3.060  38.330 -13.530  1.00  0.20           O  
HETATM   10  O   HOH T   9      20.315  52.422  40.069  1.00  0.20           O  
HETATM   11  O   HOH T  10     -12.188  19.479 -16.126  1.00  0.21           O  
HETATM   12  O   HOH T  11      37.129  34.778  10.063  1.00  0.21           O  
HETATM   13  O   HOH T  12     -12.950  26.162  -1.303  1.00  0.22           O  
HETATM   14  O   HOH T  13       5.197  31.701  -8.348  1.00  0.22           O  
HETATM   15  O   HOH T  14      28.611  46.099   7.734  1.00  0.22           O  
HETATM   16  O   HOH T  15     -12.135  17.969 -18.501  1.00  0.22           O  
HETATM   17  O   HOH T  16       9.194  12.269  -2.372  1.00  0.23           O  
HETATM   18  O   HOH T  17      18.024  35.126  -7.177  1.00  0.23           O  
HETATM   19  O   HOH T  18      -5.684  25.001 -23.294  1.00  0.23           O  
HETATM   20  O   HOH T  19      14.723  46.960   7.621  1.00  0.23           O  
HETATM   21  O   HOH T  20       6.998  34.047  14.518  1.00  0.24           O  
HETATM   22  O   HOH T  21      21.269  27.317   5.663  1.00  0.24           O  
HETATM   23  O   HOH T  22      -2.111  36.209  12.156  1.00  0.24           O  
HETATM   24  O   HOH T  23      -0.670  23.187  28.753  1.00  0.24           O  
HETATM   25  O   HOH T  24      16.225  35.010  -5.088  1.00  0.24           O  
HETATM   26  O   HOH T  25      17.998  69.716  23.586  1.00  0.25           O  
HETATM   27  O   HOH T  26      -7.112  35.884   0.650  1.00  0.25           O  
HETATM   28  O   HOH T  27       9.445  23.821   7.072  1.00  0.25           O  
HETATM   29  O   HOH T  28       0.556  31.636  -4.891  1.00  0.25           O  
HETATM   30  O   HOH T  29       8.469  16.790   8.153  1.00  0.25           O  
HETATM   31  O   HOH T  30     -13.916  19.235  13.292  1.00  0.25           O  
HETATM   32  O   HOH T  31      23.458  28.479 -10.012  1.00  0.26           O  
HETATM   33  O   HOH T  32       7.539  56.526  20.500  1.00  0.26           O  
HETATM   34  O   HOH T  33      18.686  36.176  40.733  1.00  0.26           O  
HETATM   35  O   HOH T  34      13.786  36.940 -19.555  1.00  0.26           O  
HETATM   36  O   HOH T  35      10.830  39.795 -13.676  1.00  0.26           O  
HETATM   37  O   HOH T  36      17.529  48.755   5.390  1.00  0.26           O  
HETATM   38  O   HOH T  37       7.326  40.187   9.189  1.00  0.26           O  
HETATM   39  O   HOH T  38       0.300  30.828 -16.460  1.00  0.26           O  
HETATM   40  O   HOH T  39      38.252  38.723  13.209  1.00  0.26           O  
HETATM   41  O   HOH T  40      36.094  42.723  10.878  1.00  0.26           O  
HETATM   42  O   HOH T  41       4.806  53.396  22.684  1.00  0.26           O  
HETATM   43  O   HOH T  42       0.007  48.645  24.002  1.00  0.26           O  
HETATM   44  O   HOH T  43      -7.799  23.391  15.688  1.00  0.27           O  
HETATM   45  O   HOH T  44      27.931  33.873   7.117  1.00  0.27           O  
HETATM   46  O   HOH T  45      20.102  45.473  12.327  1.00  0.27           O  
HETATM   47  O   HOH T  46      13.762  10.402  -7.196  1.00  0.27           O  
HETATM   48  O   HOH T  47      29.737  44.430  19.325  1.00  0.27           O  
HETATM   49  O   HOH T  48      34.354  35.644  19.921  1.00  0.27           O  
HETATM   50  O   HOH T  49      21.120  24.814  -4.488  1.00  0.27           O  
HETATM   51  O   HOH T  50       8.127  49.688  24.248  1.00  0.27           O  
HETATM   52  O   HOH T  51      14.098  23.882   3.364  1.00  0.27           O  
HETATM   53  O   HOH T  52       2.209  16.990 -15.715  1.00  0.27           O  
HETATM   54  O   HOH T  53      -2.648  11.537  15.151  1.00  0.27           O  
HETATM   55  O   HOH T  54       2.989  33.507  16.989  1.00  0.28           O  
HETATM   56  O   HOH T  55       1.107  22.346 -11.323  1.00  0.28           O  
HETATM   57  O   HOH T  56       9.711  37.615  -3.938  1.00  0.28           O  
HETATM   58  O   HOH T  57       7.278  33.989   7.982  1.00  0.28           O  
HETATM   59  O   HOH T  58      15.172  48.114  40.814  1.00  0.28           O  
HETATM   60  O   HOH T  59      13.014  22.346 -10.149  1.00  0.28           O  
HETATM   61  O   HOH T  60      11.900  24.410 -11.535  1.00  0.28           O  
HETATM   62  O   HOH T  61      19.237  33.737  12.921  1.00  0.28           O  
HETATM   63  O   HOH T  62      12.467  32.096   3.622  1.00  0.28           O  
HETATM   64  O   HOH T  63     -14.935  19.800  -7.322  1.00  0.29           O  
HETATM   65  O   HOH T  64      34.074  38.053  18.701  1.00  0.29           O  
HETATM   66  O   HOH T  65       5.023  27.657 -24.781  1.00  0.29           O  
HETATM   67  O   HOH T  66      18.939  28.117   4.425  1.00  0.29           O  
HETATM   68  O   HOH T  67      38.615  36.373  11.794  1.00  0.29           O  
HETATM   69  O   HOH T  68      34.019  38.345  26.803  1.00  0.29           O  
HETATM   70  O   HOH T  69      -5.556  10.347   5.690  1.00  0.29           O  
HETATM   71  O   HOH T  70      13.830  30.345 -18.482  1.00  0.29           O  
HETATM   72  O   HOH T  71     -15.125  19.944  -9.962  1.00  0.30           O  
HETATM   73  O   HOH T  72      15.869  53.319  16.742  1.00  0.30           O  
HETATM   74  O   HOH T  73     -18.425  24.186   4.166  1.00  0.30           O  
HETATM   75  O   HOH T  74     -23.369  18.707  -2.092  1.00  0.30           O  
HETATM   76  O   HOH T  75      21.352  34.599  11.516  1.00  0.30           O  
HETATM   77  O   HOH T  76      14.312  32.465 -20.490  1.00  0.30           O  
HETATM   78  O   HOH T  77       3.505  33.972  -8.053  1.00  0.30           O  
HETATM   79  O   HOH T  78      22.295  44.396  15.213  1.00  0.30           O  
HETATM   80  O   HOH T  79       1.895  24.621  -8.603  1.00  0.30           O  
HETATM   81  O   HOH T  80     -12.812  14.555   6.375  1.00  0.30           O  
HETATM   82  O   HOH T  81      26.033  32.747   4.310  1.00  0.30           O  
HETATM   83  O   HOH T  82      -8.991  37.236   4.124  1.00  0.30           O  
HETATM   84  O   HOH T  83      -9.502  31.478 -11.948  1.00  0.30           O  
HETATM   85  O   HOH T  84     -15.589  26.663  -5.696  1.00  0.31           O  
HETATM   86  O   HOH T  85       2.505  34.526  -4.853  1.00  0.31           O  
HETATM   87  O   HOH T  86      35.718  31.629  28.654  1.00  0.31           O  
HETATM   88  O   HOH T  87      13.172  16.275  -6.729  1.00  0.31           O  
HETATM   89  O   HOH T  88      22.524  63.992  11.735  1.00  0.31           O  
HETATM   90  O   HOH T  89       4.150  44.939  14.037  1.00  0.31           O  
HETATM   91  O   HOH T  90       1.466  31.767  29.987  1.00  0.31           O  
HETATM   92  O   HOH T  91      -3.599  31.510 -14.115  1.00  0.31           O  
HETATM   93  O   HOH T  92       1.353  30.285  27.701  1.00  0.31           O  
HETATM   94  O   HOH T  93      -1.579  19.247 -17.902  1.00  0.31           O  
HETATM   95  O   HOH T  94      21.915  23.892  23.036  1.00  0.31           O  
HETATM   96  O   HOH T  95       7.725  62.162  38.107  1.00  0.31           O  
HETATM   97  O   HOH T  96      17.985  68.125  28.550  1.00  0.31           O  
HETATM   98  O   HOH T  97      10.447  35.521  13.126  1.00  0.31           O  
HETATM   99  O   HOH T  98      22.844  25.205  18.263  1.00  0.31           O  
HETATM  100  O   HOH T  99       8.937  21.754  11.499  1.00  0.31           O  
HETATM  101  O   HOH T 100      -3.222  18.746  17.257  1.00  0.31           O  
HETATM  102  O   HOH T 101      28.331  32.478  26.909  1.00  0.31           O  
HETATM  103  O   HOH T 102      23.505  31.691   4.470  1.00  0.31           O  
HETATM  104  O   HOH T 103      -4.125  10.543 -14.383  1.00  0.31           O  
HETATM  105  O   HOH T 104      -4.948  10.824   3.046  1.00  0.31           O  
HETATM  106  O   HOH T 105      38.779  33.129   4.847  1.00  0.32           O  
HETATM  107  O   HOH T 106       5.602  22.686 -20.467  1.00  0.32           O  
HETATM  108  O   HOH T 107       4.575  17.548  14.592  1.00  0.32           O  
HETATM  109  O   HOH T 108      18.585  54.481  11.625  1.00  0.32           O  
HETATM  110  O   HOH T 109     -15.915  10.701  11.939  1.00  0.32           O  
HETATM  111  O   HOH T 110       2.353  45.324  18.714  1.00  0.32           O  
HETATM  112  O   HOH T 111       8.511  52.091  25.775  1.00  0.32           O  
HETATM  113  O   HOH T 112      29.775  49.808  10.501  1.00  0.32           O  
HETATM  114  O   HOH T 113      14.228  54.420  22.737  1.00  0.32           O  
HETATM  115  O   HOH T 114       5.342  33.797   0.971  1.00  0.32           O  
HETATM  116  O   HOH T 115       8.415  22.904  16.390  1.00  0.32           O  
HETATM  117  O   HOH T 116      -9.740  22.419  -7.355  1.00  0.33           O  
HETATM  118  O   HOH T 117      13.853  40.346  -3.790  1.00  0.33           O  
HETATM  119  O   HOH T 118      -7.475  19.177  -9.431  1.00  0.33           O  
HETATM  120  O   HOH T 119      30.744  44.302   3.978  1.00  0.33           O  
HETATM  121  O   HOH T 120       3.919  39.389 -17.319  1.00  0.33           O  
HETATM  122  O   HOH T 121       0.313  33.211  16.413  1.00  0.33           O  
HETATM  123  O   HOH T 122      18.090  65.932  35.877  1.00  0.33           O  
HETATM  124  O   HOH T 123       8.429   1.596  -7.470  1.00  0.33           O  
HETATM  125  O   HOH T 124      -7.132  16.223  -0.759  1.00  0.33           O  
HETATM  126  O   HOH T 125      12.890  32.883 -18.181  1.00  0.33           O  
HETATM  127  O   HOH T 126     -13.223  28.043  -9.834  1.00  0.33           O  
HETATM  128  O   HOH T 127      26.320  44.504  44.900  1.00  0.33           O  
HETATM  129  O   HOH T 128      26.471  42.850  -0.896  1.00  0.33           O  
HETATM  130  O   HOH T 129       2.976  52.812  18.714  1.00  0.33           O  
HETATM  131  O   HOH T 130      30.875  53.407  15.339  1.00  0.33           O  
HETATM  132  O   HOH T 131      14.819  62.853  28.668  1.00  0.33           O  
HETATM  133  O   HOH T 132      18.923  31.368 -13.890  1.00  0.33           O  
HETATM  134  O   HOH T 133      33.371  32.484  22.273  1.00  0.33           O  
HETATM  135  O   HOH T 134      36.104  49.845  33.815  1.00  0.33           O  
HETATM  136  O   HOH T 135      10.412  62.901  38.660  1.00  0.33           O  
HETATM  137  O   HOH T 136       3.461  19.990  20.496  1.00  0.34           O  
HETATM  138  O   HOH T 137      -8.101   8.113  -3.854  1.00  0.34           O  
HETATM  139  O   HOH T 138     -17.738  23.722 -11.282  1.00  0.34           O  
HETATM  140  O   HOH T 139       8.312   7.876 -11.732  1.00  0.34           O  
HETATM  141  O   HOH T 140      20.101  34.511  37.702  1.00  0.34           O  
HETATM  142  O   HOH T 141      -7.180  31.902  17.692  1.00  0.34           O  
HETATM  143  O   HOH T 142      30.923  42.515  16.045  1.00  0.34           O  
HETATM  144  O   HOH T 143      10.001  44.482  34.610  1.00  0.34           O  
HETATM  145  O   HOH T 144       4.694   4.310 -17.030  1.00  0.34           O  
HETATM  146  O   HOH T 145       1.679  38.468 -15.964  1.00  0.34           O  
HETATM  147  O   HOH T 146       4.349  11.061 -18.278  1.00  0.34           O  
HETATM  148  O   HOH T 147      36.406  37.492  34.101  1.00  0.34           O  
HETATM  149  O   HOH T 148      30.028  26.345  26.245  1.00  0.34           O  
HETATM  150  O   HOH T 149       2.607  15.301 -22.078  1.00  0.34           O  
HETATM  151  O   HOH T 150      -7.030  34.431  -8.373  1.00  0.34           O  
HETATM  152  O   HOH T 151       9.939  43.078   4.992  1.00  0.35           O  
HETATM  153  O   HOH T 152      -5.117  25.977  24.649  1.00  0.35           O  
HETATM  154  O   HOH T 153      -7.144  15.962  15.602  1.00  0.35           O  
HETATM  155  O   HOH T 154       3.035   9.033 -16.875  1.00  0.35           O  
HETATM  156  O   HOH T 155      14.955  54.962  14.637  1.00  0.35           O  
HETATM  157  O   HOH T 156      39.185  34.319  15.993  1.00  0.35           O  
HETATM  158  O   HOH T 157      20.502  29.594  -3.005  1.00  0.35           O  
HETATM  159  O   HOH T 158      34.848  47.183  36.707  1.00  0.35           O  
HETATM  160  O   HOH T 159      15.410  61.193  30.883  1.00  0.35           O  
HETATM  161  O   HOH T 160      -8.049  16.527  -8.987  1.00  0.35           O  
HETATM  162  O   HOH T 161      34.279  32.189   4.586  1.00  0.35           O  
HETATM  163  O   HOH T 162      10.536  37.762   9.244  1.00  0.35           O  
HETATM  164  O   HOH T 163      27.337  51.201  10.488  1.00  0.35           O  
HETATM  165  O   HOH T 164     -16.516  16.314   4.227  1.00  0.35           O  
HETATM  166  O   HOH T 165      22.676  50.735  44.736  1.00  0.35           O  
HETATM  167  O   HOH T 166     -19.769  24.289  -5.046  1.00  0.35           O  
HETATM  168  O   HOH T 167     -11.114  31.972   4.564  1.00  0.35           O  
HETATM  169  O   HOH T 168       0.746  27.964 -25.654  1.00  0.35           O  
HETATM  170  O   HOH T 169      14.024  43.393   5.515  1.00  0.35           O  
HETATM  171  O   HOH T 170      18.580  67.090  33.379  1.00  0.36           O  
HETATM  172  O   HOH T 171      -4.228  24.068  22.840  1.00  0.36           O  
HETATM  173  O   HOH T 172      10.578  36.351 -23.865  1.00  0.36           O  
HETATM  174  O   HOH T 173       3.052   6.587  -8.776  1.00  0.36           O  
HETATM  175  O   HOH T 174      29.870  55.867  29.664  1.00  0.36           O  
HETATM  176  O   HOH T 175      33.141  42.376  24.943  1.00  0.36           O  
HETATM  177  O   HOH T 176      -3.751   9.518   0.963  1.00  0.36           O  
HETATM  178  O   HOH T 177      25.990  46.773  -1.428  1.00  0.36           O  
HETATM  179  O   HOH T 178      -4.095  37.447  10.284  1.00  0.36           O  
HETATM  180  O   HOH T 179      29.958  50.259  21.296  1.00  0.36           O  
HETATM  181  O   HOH T 180      16.269  39.546   5.334  1.00  0.36           O  
HETATM  182  O   HOH T 181      11.354  13.905   0.124  1.00  0.36           O  
HETATM  183  O   HOH T 182      25.198  57.244  38.184  1.00  0.36           O  
HETATM  184  O   HOH T 183     -22.623  17.378  16.810  1.00  0.36           O  
HETATM  185  O   HOH T 184      19.211  54.977   4.314  1.00  0.36           O  
HETATM  186  O   HOH T 185       2.940  38.680   9.261  1.00  0.36           O  
HETATM  187  O   HOH T 186      19.911  73.644  20.344  1.00  0.36           O  
HETATM  188  O   HOH T 187      23.646  32.448  -4.581  1.00  0.36           O  
HETATM  189  O   HOH T 188      19.208  43.088   5.276  1.00  0.36           O  
HETATM  190  O   HOH T 189      30.011  33.650   5.081  1.00  0.36           O  
HETATM  191  O   HOH T 190     -15.898  27.651 -10.611  1.00  0.37           O  
HETATM  192  O   HOH T 191      -6.748   6.028  -4.974  1.00  0.37           O  
HETATM  193  O   HOH T 192       1.467  39.356  11.613  1.00  0.37           O  
HETATM  194  O   HOH T 193      20.260  41.433   3.164  1.00  0.37           O  
HETATM  195  O   HOH T 194       5.586  37.526  -3.071  1.00  0.37           O  
HETATM  196  O   HOH T 195       2.664  41.427  13.044  1.00  0.37           O  
HETATM  197  O   HOH T 196      -7.006   4.832  -7.284  1.00  0.37           O  
HETATM  198  O   HOH T 197      34.214  39.605  20.993  1.00  0.37           O  
HETATM  199  O   HOH T 198      18.588  34.077   3.429  1.00  0.37           O  
HETATM  200  O   HOH T 199      20.124  31.385  26.172  1.00  0.37           O  
HETATM  201  O   HOH T 200       7.351  37.271  -5.105  1.00  0.37           O  
HETATM  202  O   HOH T 201      13.141  13.911  -8.314  1.00  0.37           O  
HETATM  203  O   HOH T 202      19.839  47.465  46.208  1.00  0.37           O  
HETATM  204  O   HOH T 203      23.398  54.392  40.756  1.00  0.37           O  
HETATM  205  O   HOH T 204       9.112  38.254  19.687  1.00  0.37           O  
HETATM  206  O   HOH T 205      -2.374  29.993 -16.138  1.00  0.37           O  
HETATM  207  O   HOH T 206     -16.911  12.219   9.869  1.00  0.37           O  
HETATM  208  O   HOH T 207      14.512  57.670  13.935  1.00  0.37           O  
HETATM  209  O   HOH T 208      -6.523  17.814  -7.137  1.00  0.37           O  
HETATM  210  O   HOH T 209     -10.037  31.164  -6.697  1.00  0.37           O  
HETATM  211  O   HOH T 210      25.506  60.772  13.048  1.00  0.38           O  
HETATM  212  O   HOH T 211      -5.670  39.127   8.704  1.00  0.38           O  
HETATM  213  O   HOH T 212       1.670  21.806  21.496  1.00  0.38           O  
HETATM  214  O   HOH T 213      13.001  52.626  39.634  1.00  0.38           O  
HETATM  215  O   HOH T 214      -5.131  29.210 -13.612  1.00  0.38           O  
HETATM  216  O   HOH T 215      25.117  25.270  19.908  1.00  0.38           O  
HETATM  217  O   HOH T 216      -1.190  43.540   4.285  1.00  0.38           O  
HETATM  218  O   HOH T 217       4.022   5.211  -4.000  1.00  0.38           O  
HETATM  219  O   HOH T 218      10.919  18.089   8.710  1.00  0.38           O  
HETATM  220  O   HOH T 219      14.636  37.658   6.539  1.00  0.38           O  
HETATM  221  O   HOH T 220      12.571  38.045 -23.486  1.00  0.38           O  
HETATM  222  O   HOH T 221      21.795  38.743  46.898  1.00  0.38           O  
HETATM  223  O   HOH T 222      30.156  55.281  21.887  1.00  0.38           O  
HETATM  224  O   HOH T 223      22.874  61.768  13.483  1.00  0.38           O  
HETATM  225  O   HOH T 224       3.297  19.495 -20.049  1.00  0.38           O  
HETATM  226  O   HOH T 225       9.119  13.406   1.821  1.00  0.38           O  
HETATM  227  O   HOH T 226      11.702  11.669  -1.370  1.00  0.38           O  
HETATM  228  O   HOH T 227      12.115  30.791  21.120  1.00  0.38           O  
HETATM  229  O   HOH T 228      -1.188  10.329   0.946  1.00  0.38           O  
HETATM  230  O   HOH T 229      -7.454  32.508  14.960  1.00  0.38           O  
HETATM  231  O   HOH T 230      32.249  43.119  19.581  1.00  0.38           O  
HETATM  232  O   HOH T 231      -5.640   6.475  -0.763  1.00  0.38           O  
HETATM  233  O   HOH T 232      13.741  26.898 -22.033  1.00  0.38           O  
HETATM  234  O   HOH T 233      17.398  43.785   3.393  1.00  0.38           O  
HETATM  235  O   HOH T 234     -22.114  19.986   3.079  1.00  0.39           O  
HETATM  236  O   HOH T 235     -21.189  15.989  -0.518  1.00  0.39           O  
HETATM  237  O   HOH T 236      18.592  25.391 -17.019  1.00  0.39           O  
HETATM  238  O   HOH T 237      31.835  52.579  40.157  1.00  0.39           O  
HETATM  239  O   HOH T 238      26.828  59.293  17.130  1.00  0.39           O  
HETATM  240  O   HOH T 239      20.229  25.928  17.901  1.00  0.39           O  
HETATM  241  O   HOH T 240       9.933  24.392  14.695  1.00  0.39           O  
HETATM  242  O   HOH T 241      20.552  55.975  17.353  1.00  0.39           O  
HETATM  243  O   HOH T 242      23.980  31.780  29.004  1.00  0.39           O  
HETATM  244  O   HOH T 243      19.258  35.133  32.905  1.00  0.39           O  
HETATM  245  O   HOH T 244      -9.218  24.023  -9.583  1.00  0.39           O  
HETATM  246  O   HOH T 245      -0.346  12.992  15.281  1.00  0.39           O  
HETATM  247  O   HOH T 246      -0.896  15.511  19.240  1.00  0.39           O  
HETATM  248  O   HOH T 247      -0.595  39.509  13.610  1.00  0.39           O  
HETATM  249  O   HOH T 248     -19.527  23.411  11.213  1.00  0.39           O  
HETATM  250  O   HOH T 249     -14.422  17.793  -5.609  1.00  0.39           O  
HETATM  251  O   HOH T 250      12.934  19.987 -13.899  1.00  0.39           O  
HETATM  252  O   HOH T 251      22.219  74.772  21.283  1.00  0.39           O  
HETATM  253  O   HOH T 252      36.727  34.294  24.245  1.00  0.39           O  
HETATM  254  O   HOH T 253       0.155  38.019  -7.379  1.00  0.39           O  
HETATM  255  O   HOH T 254      18.469  50.541   3.308  1.00  0.39           O  
HETATM  256  O   HOH T 255      18.590  71.814  21.794  1.00  0.39           O  
HETATM  257  O   HOH T 256      21.817  68.497  29.317  1.00  0.39           O  
HETATM  258  O   HOH T 257     -11.202  31.410 -14.133  1.00  0.39           O  
HETATM  259  O   HOH T 258       0.976  19.204 -16.789  1.00  0.39           O  
HETATM  260  O   HOH T 259      -5.350  23.257  25.291  1.00  0.39           O  
HETATM  261  O   HOH T 260      10.194  33.719  21.660  1.00  0.39           O  
HETATM  262  O   HOH T 261       1.004  30.472 -26.943  1.00  0.40           O  
HETATM  263  O   HOH T 262     -14.870  28.284  -1.637  1.00  0.40           O  
HETATM  264  O   HOH T 263      28.013  45.413  42.876  1.00  0.40           O  
HETATM  265  O   HOH T 264       2.344  46.006  15.942  1.00  0.40           O  
HETATM  266  O   HOH T 265      15.548  30.440  19.437  1.00  0.40           O  
HETATM  267  O   HOH T 266      29.879  39.953  25.025  1.00  0.40           O  
HETATM  268  O   HOH T 267      27.592  31.343  -1.518  1.00  0.40           O  
HETATM  269  O   HOH T 268       5.116  56.018  21.749  1.00  0.40           O  
HETATM  270  O   HOH T 269       3.761  16.191 -17.838  1.00  0.40           O  
HETATM  271  O   HOH T 270      -2.933  18.793 -22.162  1.00  0.40           O  
HETATM  272  O   HOH T 271      32.816  32.104   6.937  1.00  0.40           O  
HETATM  273  O   HOH T 272      12.090  36.777   7.179  1.00  0.40           O  
HETATM  274  O   HOH T 273      36.725  35.909  30.136  1.00  0.40           O  
HETATM  275  O   HOH T 274     -19.328  25.998  -0.973  1.00  0.40           O  
HETATM  276  O   HOH T 275       8.250  33.736  19.681  1.00  0.40           O  
HETATM  277  O   HOH T 276      10.356  31.810   6.511  1.00  0.40           O  
HETATM  278  O   HOH T 277      13.120  33.411  44.706  1.00  0.40           O  
HETATM  279  O   HOH T 278      14.743  36.730  -3.635  1.00  0.40           O  
HETATM  280  O   HOH T 279      28.824  42.973   0.716  1.00  0.40           O  
HETATM  281  O   HOH T 280       8.748  44.604  30.727  1.00  0.40           O  
HETATM  282  O   HOH T 281      22.349  56.907  41.498  1.00  0.40           O  
HETATM  283  O   HOH T 282      31.584  57.892  28.640  1.00  0.40           O  
HETATM  284  O   HOH T 283      30.721  28.600  11.223  1.00  0.40           O  
HETATM  285  O   HOH T 284       2.714   5.014  -6.548  1.00  0.40           O  
HETATM  286  O   HOH T 285     -16.752  26.294  -1.618  1.00  0.40           O  
HETATM  287  O   HOH T 286       0.153  51.326  20.782  1.00  0.40           O  
HETATM  288  O   HOH T 287      22.721  36.301  46.254  1.00  0.40           O  
HETATM  289  O   HOH T 288      16.845  45.094  -0.566  1.00  0.41           O  
HETATM  290  O   HOH T 289      11.876  16.249  -9.121  1.00  0.41           O  
HETATM  291  O   HOH T 290      26.829  60.303  23.484  1.00  0.41           O  
HETATM  292  O   HOH T 291      -5.820  25.906 -17.121  1.00  0.41           O  
HETATM  293  O   HOH T 292      13.779  59.064  29.829  1.00  0.41           O  
HETATM  294  O   HOH T 293      11.785  22.065 -15.286  1.00  0.41           O  
HETATM  295  O   HOH T 294      32.664  55.367  29.357  1.00  0.41           O  
HETATM  296  O   HOH T 295       0.356  33.293 -17.815  1.00  0.41           O  
HETATM  297  O   HOH T 296      19.660  44.735  42.165  1.00  0.41           O  
HETATM  298  O   HOH T 297      24.650  54.177   4.891  1.00  0.41           O  
HETATM  299  O   HOH T 298      21.974  54.678   4.359  1.00  0.41           O  
HETATM  300  O   HOH T 299      33.215  42.098  17.205  1.00  0.41           O  
HETATM  301  O   HOH T 300      32.056  51.638  22.352  1.00  0.41           O  
HETATM  302  O   HOH T 301      17.456  28.585  20.208  1.00  0.41           O  
HETATM  303  O   HOH T 302      -5.597  29.408 -21.126  1.00  0.41           O  
HETATM  304  O   HOH T 303      24.240  68.072  16.209  1.00  0.41           O  
HETATM  305  O   HOH T 304     -22.503  16.179  -2.955  1.00  0.42           O  
HETATM  306  O   HOH T 305      24.495  24.759  23.634  1.00  0.42           O  
HETATM  307  O   HOH T 306      -9.834  19.096 -19.671  1.00  0.42           O  
HETATM  308  O   HOH T 307      27.002  53.743  48.358  1.00  0.42           O  
HETATM  309  O   HOH T 308       7.582  35.975   6.226  1.00  0.42           O  
HETATM  310  O   HOH T 309      -8.611  34.900  15.295  1.00  0.42           O  
HETATM  311  O   HOH T 310      34.353  32.924  19.672  1.00  0.42           O  
HETATM  312  O   HOH T 311      -8.377  38.611   8.861  1.00  0.42           O  
HETATM  313  O   HOH T 312      10.767  19.502 -15.518  1.00  0.42           O  
HETATM  314  O   HOH T 313      22.045  30.112  27.855  1.00  0.42           O  
HETATM  315  O   HOH T 314       0.962  34.402  29.451  1.00  0.42           O  
HETATM  316  O   HOH T 315      36.520  44.665   8.854  1.00  0.42           O  
HETATM  317  O   HOH T 316     -13.763  26.476 -12.033  1.00  0.42           O  
HETATM  318  O   HOH T 317      18.302  36.871  -5.030  1.00  0.42           O  
HETATM  319  O   HOH T 318       1.819  36.711  -1.556  1.00  0.42           O  
HETATM  320  O   HOH T 319      22.866  23.488  20.379  1.00  0.42           O  
HETATM  321  O   HOH T 320      14.434  31.740 -25.911  1.00  0.42           O  
HETATM  322  O   HOH T 321      -4.851  10.360   8.354  1.00  0.42           O  
HETATM  323  O   HOH T 322       0.696  18.424 -19.513  1.00  0.42           O  
HETATM  324  O   HOH T 323      22.513  63.845  29.313  1.00  0.43           O  
HETATM  325  O   HOH T 324      -5.443  24.232  20.457  1.00  0.43           O  
HETATM  326  O   HOH T 325      17.162  56.723  10.515  1.00  0.43           O  
HETATM  327  O   HOH T 326      -3.230  12.073 -18.159  1.00  0.43           O  
HETATM  328  O   HOH T 327      25.967  55.829   1.092  1.00  0.43           O  
HETATM  329  O   HOH T 328     -10.593  15.793  -9.545  1.00  0.43           O  
HETATM  330  O   HOH T 329       3.800  17.699  17.226  1.00  0.43           O  
HETATM  331  O   HOH T 330      22.148  59.922   7.328  1.00  0.43           O  
HETATM  332  O   HOH T 331      16.217  67.627  34.757  1.00  0.43           O  
HETATM  333  O   HOH T 332       7.785  10.499  -0.773  1.00  0.43           O  
HETATM  334  O   HOH T 333      19.328  36.552  -9.215  1.00  0.43           O  
HETATM  335  O   HOH T 334      35.887  52.547  34.003  1.00  0.43           O  
HETATM  336  O   HOH T 335     -19.948  23.959  -9.693  1.00  0.43           O  
HETATM  337  O   HOH T 336      32.676  36.828  30.033  1.00  0.43           O  
HETATM  338  O   HOH T 337      -7.376  40.100   6.698  1.00  0.43           O  
HETATM  339  O   HOH T 338       5.561  38.504   3.200  1.00  0.43           O  
HETATM  340  O   HOH T 339       3.716  21.635 -18.497  1.00  0.43           O  
HETATM  341  O   HOH T 340      21.265  72.508  22.570  1.00  0.43           O  
HETATM  342  O   HOH T 341       5.713  16.908  12.151  1.00  0.43           O  
HETATM  343  O   HOH T 342      15.348  51.210  39.087  1.00  0.43           O  
HETATM  344  O   HOH T 343      36.436  40.456  29.260  1.00  0.43           O  
HETATM  345  O   HOH T 344       1.016  42.381   5.891  1.00  0.43           O  
HETATM  346  O   HOH T 345      28.233  58.026  30.024  1.00  0.43           O  
HETATM  347  O   HOH T 346      12.928  62.503  31.699  1.00  0.43           O  
HETATM  348  O   HOH T 347      13.180  39.644 -20.117  1.00  0.43           O  
HETATM  349  O   HOH T 348      29.839  56.050  11.448  1.00  0.43           O  
HETATM  350  O   HOH T 349      38.571  25.710  25.115  1.00  0.43           O  
HETATM  351  O   HOH T 350      19.245  39.667  46.396  1.00  0.43           O  
HETATM  352  O   HOH T 351      11.910  22.414   7.258  1.00  0.43           O  
HETATM  353  O   HOH T 352      16.919  29.126   6.048  1.00  0.43           O  
HETATM  354  O   HOH T 353      35.808  33.742  26.817  1.00  0.43           O  
HETATM  355  O   HOH T 354      -2.850  20.989 -23.755  1.00  0.43           O  
HETATM  356  O   HOH T 355      19.385  39.213   1.741  1.00  0.43           O  
HETATM  357  O   HOH T 356      17.179  70.632  29.498  1.00  0.44           O  
HETATM  358  O   HOH T 357      17.916  33.578 -12.706  1.00  0.44           O  
HETATM  359  O   HOH T 358      -9.243  14.931   0.517  1.00  0.44           O  
HETATM  360  O   HOH T 359      11.994  19.555   6.642  1.00  0.44           O  
HETATM  361  O   HOH T 360       5.656   9.640 -16.230  1.00  0.44           O  
HETATM  362  O   HOH T 361      21.456  28.747  -0.546  1.00  0.44           O  
HETATM  363  O   HOH T 362      20.865  57.184   4.019  1.00  0.44           O  
HETATM  364  O   HOH T 363      13.915  59.271  27.146  1.00  0.44           O  
HETATM  365  O   HOH T 364       1.556  13.596  11.266  1.00  0.44           O  
HETATM  366  O   HOH T 365      26.667  55.804  39.808  1.00  0.44           O  
HETATM  367  O   HOH T 366      29.515  31.953   0.354  1.00  0.44           O  
HETATM  368  O   HOH T 367      29.332  51.436  39.982  1.00  0.44           O  
HETATM  369  O   HOH T 368      35.787  27.171  12.066  1.00  0.44           O  
HETATM  370  O   HOH T 369       9.759  14.690 -13.744  1.00  0.44           O  
HETATM  371  O   HOH T 370      -3.274  21.463  18.023  1.00  0.44           O  
HETATM  372  O   HOH T 371      37.448  51.421  31.939  1.00  0.44           O  
HETATM  373  O   HOH T 372       2.269  32.939 -19.743  1.00  0.44           O  
HETATM  374  O   HOH T 373      19.493  50.983  42.248  1.00  0.44           O  
HETATM  375  O   HOH T 374       9.046  13.146 -18.638  1.00  0.44           O  
HETATM  376  O   HOH T 375     -16.043  18.827  16.325  1.00  0.44           O  
HETATM  377  O   HOH T 376       9.747  33.210   8.878  1.00  0.44           O  
HETATM  378  O   HOH T 377      11.948  33.974   7.481  1.00  0.44           O  
HETATM  379  O   HOH T 378      18.344  31.685  11.265  1.00  0.44           O  
HETATM  380  O   HOH T 379      14.414  70.539  26.339  1.00  0.44           O  
HETATM  381  O   HOH T 380      19.735  36.663   2.929  1.00  0.44           O  
HETATM  382  O   HOH T 381      10.343  23.263   9.506  1.00  0.44           O  
HETATM  383  O   HOH T 382       3.778  36.197   0.343  1.00  0.44           O  
HETATM  384  O   HOH T 383     -16.310  12.059  14.363  1.00  0.44           O  
HETATM  385  O   HOH T 384       1.756  43.653  14.514  1.00  0.44           O  
HETATM  386  O   HOH T 385      12.217  42.247   3.667  1.00  0.44           O  
HETATM  387  O   HOH T 386      -9.976  32.046  -3.153  1.00  0.44           O  
HETATM  388  O   HOH T 387       0.651  17.396 -22.075  1.00  0.44           O  
HETATM  389  O   HOH T 388      35.924  53.741  31.618  1.00  0.44           O  
HETATM  390  O   HOH T 389      13.299  22.542 -12.950  1.00  0.45           O  
HETATM  391  O   HOH T 390       3.308   2.172 -18.493  1.00  0.45           O  
HETATM  392  O   HOH T 391     -15.324  22.576 -10.619  1.00  0.45           O  
HETATM  393  O   HOH T 392      26.188  39.779  45.164  1.00  0.45           O  
HETATM  394  O   HOH T 393      -0.674  23.286  21.646  1.00  0.45           O  
HETATM  395  O   HOH T 394      -3.191  22.635  20.616  1.00  0.45           O  
HETATM  396  O   HOH T 395      -6.784  31.095 -12.333  1.00  0.45           O  
HETATM  397  O   HOH T 396       9.738  16.927 -15.474  1.00  0.45           O  
HETATM  398  O   HOH T 397      -3.374  16.976  19.390  1.00  0.45           O  
HETATM  399  O   HOH T 398       7.038  42.001   7.133  1.00  0.45           O  
HETATM  400  O   HOH T 399      30.512  37.277  31.546  1.00  0.45           O  
HETATM  401  O   HOH T 400      26.359  33.194  28.651  1.00  0.45           O  
HETATM  402  O   HOH T 401       4.553  13.631 -23.203  1.00  0.45           O  
HETATM  403  O   HOH T 402      36.617  32.395   3.179  1.00  0.45           O  
HETATM  404  O   HOH T 403      27.554  31.826   2.289  1.00  0.45           O  
HETATM  405  O   HOH T 404      16.489  60.731  41.402  1.00  0.45           O  
HETATM  406  O   HOH T 405      15.763  47.520  -1.329  1.00  0.45           O  
HETATM  407  O   HOH T 406      -9.575  38.419   6.476  1.00  0.45           O  
HETATM  408  O   HOH T 407      24.533  67.168  22.656  1.00  0.45           O  
HETATM  409  O   HOH T 408      18.393  33.635 -15.498  1.00  0.45           O  
HETATM  410  O   HOH T 409      15.509  28.260 -18.701  1.00  0.45           O  
HETATM  411  O   HOH T 410      34.828  53.514  29.193  1.00  0.46           O  
HETATM  412  O   HOH T 411      -6.144  18.531  14.998  1.00  0.46           O  
HETATM  413  O   HOH T 412       2.336  41.337   8.230  1.00  0.46           O  
HETATM  414  O   HOH T 413       4.138  11.219   6.677  1.00  0.46           O  
HETATM  415  O   HOH T 414      14.612  43.722   3.006  1.00  0.46           O  
HETATM  416  O   HOH T 415       5.063  38.728   5.898  1.00  0.46           O  
HETATM  417  O   HOH T 416      14.668  72.243  33.701  1.00  0.46           O  
HETATM  418  O   HOH T 417      10.764  15.311 -11.353  1.00  0.46           O  
HETATM  419  O   HOH T 418      28.263  42.625  -3.160  1.00  0.46           O  
HETATM  420  O   HOH T 419      18.638  29.554 -15.719  1.00  0.46           O  
HETATM  421  O   HOH T 420      17.121  27.619 -16.648  1.00  0.46           O  
HETATM  422  O   HOH T 421      -1.940  13.122 -24.259  1.00  0.46           O  
HETATM  423  O   HOH T 422      -8.062  40.260   0.915  1.00  0.46           O  
HETATM  424  O   HOH T 423      -5.660  36.534  -1.652  1.00  0.46           O  
HETATM  425  O   HOH T 424      33.782  51.982  25.845  1.00  0.46           O  
HETATM  426  O   HOH T 425      23.871  52.627   7.115  1.00  0.46           O  
HETATM  427  O   HOH T 426       8.036  52.638  28.576  1.00  0.46           O  
HETATM  428  O   HOH T 427       9.642  33.164  14.274  1.00  0.46           O  
HETATM  429  O   HOH T 428      29.095  48.282   6.079  1.00  0.46           O  
HETATM  430  O   HOH T 429       9.785  25.199  17.215  1.00  0.46           O  
HETATM  431  O   HOH T 430      -9.019  37.787   1.478  1.00  0.46           O  
HETATM  432  O   HOH T 431      14.319  68.283  24.658  1.00  0.46           O  
HETATM  433  O   HOH T 432      29.265  51.065   5.650  1.00  0.46           O  
HETATM  434  O   HOH T 433       7.925  42.175  29.597  1.00  0.46           O  
HETATM  435  O   HOH T 434      13.218  28.880  19.426  1.00  0.46           O  
HETATM  436  O   HOH T 435      12.967  37.060  -1.532  1.00  0.46           O  
HETATM  437  O   HOH T 436       8.831  28.617  13.928  1.00  0.47           O  
HETATM  438  O   HOH T 437     -19.503  12.087   8.958  1.00  0.47           O  
HETATM  439  O   HOH T 438     -20.245  24.485  13.709  1.00  0.47           O  
HETATM  440  O   HOH T 439      15.978  26.245 -20.529  1.00  0.47           O  
HETATM  441  O   HOH T 440      33.180  28.100  12.449  1.00  0.47           O  
HETATM  442  O   HOH T 441      18.059  36.368  37.997  1.00  0.47           O  
HETATM  443  O   HOH T 442      19.469  68.022  30.861  1.00  0.47           O  
HETATM  444  O   HOH T 443      20.438  33.727 -13.754  1.00  0.47           O  
HETATM  445  O   HOH T 444      14.069  57.992  16.758  1.00  0.47           O  
HETATM  446  O   HOH T 445       2.426  36.431  -6.801  1.00  0.47           O  
HETATM  447  O   HOH T 446      31.717  23.878  14.739  1.00  0.47           O  
HETATM  448  O   HOH T 447      19.579  56.119  13.652  1.00  0.47           O  
HETATM  449  O   HOH T 448      22.082  57.615   8.908  1.00  0.47           O  
HETATM  450  O   HOH T 449      13.191  24.648   5.879  1.00  0.47           O  
HETATM  451  O   HOH T 450      24.290  61.285  23.290  1.00  0.47           O  
HETATM  452  O   HOH T 451      32.406  40.838  22.670  1.00  0.47           O  
HETATM  453  O   HOH T 452      29.149  57.909  16.245  1.00  0.47           O  
HETATM  454  O   HOH T 453       8.367  38.223   7.615  1.00  0.47           O  
HETATM  455  O   HOH T 454       4.913   2.380  -9.837  1.00  0.47           O  
HETATM  456  O   HOH T 455      28.423  50.111   8.118  1.00  0.47           O  
HETATM  457  O   HOH T 456      13.625  47.940  43.073  1.00  0.47           O  
HETATM  458  O   HOH T 457      10.732  34.891  43.938  1.00  0.47           O  
HETATM  459  O   HOH T 458      27.105  52.913   5.483  1.00  0.47           O  
HETATM  460  O   HOH T 459      18.909  44.456  44.772  1.00  0.47           O  
HETATM  461  O   HOH T 460      13.647  34.871  15.110  1.00  0.47           O  
HETATM  462  O   HOH T 461      -4.523  28.147 -16.110  1.00  0.47           O  
HETATM  463  O   HOH T 462      17.683  54.844  15.309  1.00  0.47           O  
HETATM  464  O   HOH T 463      16.919  71.596  32.118  1.00  0.47           O  
HETATM  465  O   HOH T 464     -11.319  29.142  -8.102  1.00  0.47           O  
HETATM  466  O   HOH T 465      -5.165  30.020  27.630  1.00  0.48           O  
HETATM  467  O   HOH T 466     -21.576  22.107  -8.579  1.00  0.48           O  
HETATM  468  O   HOH T 467      -3.802  18.994 -19.494  1.00  0.48           O  
HETATM  469  O   HOH T 468      29.877  53.939  38.788  1.00  0.48           O  
HETATM  470  O   HOH T 469      15.938  36.456   8.712  1.00  0.48           O  
HETATM  471  O   HOH T 470      30.119  41.689  20.220  1.00  0.48           O  
HETATM  472  O   HOH T 471     -17.622  13.151   7.230  1.00  0.48           O  
HETATM  473  O   HOH T 472       6.787   6.082  -9.888  1.00  0.48           O  
HETATM  474  O   HOH T 473       8.566  30.782  28.330  1.00  0.48           O  
HETATM  475  O   HOH T 474       3.724  18.963 -17.276  1.00  0.48           O  
HETATM  476  O   HOH T 475      32.485  31.809  -2.403  1.00  0.48           O  
HETATM  477  O   HOH T 476      -8.174  35.670 -10.556  1.00  0.48           O  
HETATM  478  O   HOH T 477      27.687  42.121  45.502  1.00  0.48           O  
HETATM  479  O   HOH T 478      13.816  -0.131  -5.078  1.00  0.48           O  
HETATM  480  O   HOH T 479      14.799  16.128   0.240  1.00  0.48           O  
HETATM  481  O   HOH T 480      24.810  32.284   1.933  1.00  0.48           O  
HETATM  482  O   HOH T 481      12.817  28.817   7.706  1.00  0.48           O  
HETATM  483  O   HOH T 482      -3.562  33.512  18.541  1.00  0.48           O  
HETATM  484  O   HOH T 483       3.285   2.272  -5.821  1.00  0.48           O  
HETATM  485  O   HOH T 484      12.328  37.926  -4.054  1.00  0.48           O  
HETATM  486  O   HOH T 485      20.311  25.615 -15.282  1.00  0.48           O  
HETATM  487  O   HOH T 486     -15.606  28.947  -4.167  1.00  0.48           O  
HETATM  488  O   HOH T 487      36.566  24.407  23.724  1.00  0.48           O  
HETATM  489  O   HOH T 488      -5.938  28.518  25.336  1.00  0.48           O  
HETATM  490  O   HOH T 489      16.445  52.616   3.637  1.00  0.48           O  
HETATM  491  O   HOH T 490       3.002  37.224  -4.120  1.00  0.48           O  
HETATM  492  O   HOH T 491      15.383  69.656  22.615  1.00  0.48           O  
HETATM  493  O   HOH T 492      -9.970  12.270  -0.093  1.00  0.48           O  
HETATM  494  O   HOH T 493      14.456  43.352  29.967  1.00  0.49           O  
HETATM  495  O   HOH T 494      30.735  44.719   6.732  1.00  0.49           O  
HETATM  496  O   HOH T 495     -16.985  27.100  -8.092  1.00  0.49           O  
HETATM  497  O   HOH T 496      20.464  57.942   6.669  1.00  0.49           O  
HETATM  498  O   HOH T 497      12.977  37.270  30.839  1.00  0.49           O  
HETATM  499  O   HOH T 498      30.805  24.634  12.179  1.00  0.49           O  
HETATM  500  O   HOH T 499     -28.286  21.448  -4.787  1.00  0.49           O  
HETATM  501  O   HOH T 500       1.886  32.146  -6.926  1.00  0.49           O  
HETATM  502  O   HOH T 501      10.237  38.192   5.548  1.00  0.49           O  
HETATM  503  O   HOH T 502      -5.657  17.431  17.631  1.00  0.49           O  
HETATM  504  O   HOH T 503      -3.611  31.155 -20.363  1.00  0.49           O  
HETATM  505  O   HOH T 504      -7.372  20.286 -19.893  1.00  0.49           O  
HETATM  506  O   HOH T 505      10.492  33.187  11.589  1.00  0.49           O  
HETATM  507  O   HOH T 506      33.196  26.177  14.490  1.00  0.49           O  
HETATM  508  O   HOH T 507      -8.802  41.629   4.814  1.00  0.49           O  
HETATM  509  O   HOH T 508      29.149  47.780   3.352  1.00  0.49           O  
HETATM  510  O   HOH T 509      14.432  28.239   5.505  1.00  0.49           O  
HETATM  511  O   HOH T 510      -8.356  25.068 -22.590  1.00  0.49           O  
HETATM  512  O   HOH T 511      13.353   6.937  -6.495  1.00  0.49           O  
HETATM  513  O   HOH T 512      -4.359   4.759  -4.110  1.00  0.49           O  
HETATM  514  O   HOH T 513     -21.900  25.848  -1.676  1.00  0.49           O  
HETATM  515  O   HOH T 514      -8.549  42.560   2.338  1.00  0.49           O  
HETATM  516  O   HOH T 515      24.934  61.541  19.498  1.00  0.50           O  
HETATM  517  O   HOH T 516      10.719  33.842 -24.732  1.00  0.50           O  
HETATM  518  O   HOH T 517      -9.277  21.239  -9.818  1.00  0.50           O  
HETATM  519  O   HOH T 518      35.858  40.365  26.563  1.00  0.50           O  
HETATM  520  O   HOH T 519      -9.812  33.121  13.610  1.00  0.50           O  
HETATM  521  O   HOH T 520     -18.116  24.261  -2.857  1.00  0.50           O  
HETATM  522  O   HOH T 521      18.587  26.073  20.201  1.00  0.50           O  
HETATM  523  O   HOH T 522       8.962  35.971  21.007  1.00  0.50           O  
HETATM  524  O   HOH T 523      16.484  35.562   6.245  1.00  0.50           O  
HETATM  525  O   HOH T 524     -21.132  24.714   4.642  1.00  0.50           O  
HETATM  526  O   HOH T 525      28.567  50.913  42.731  1.00  0.50           O  
HETATM  527  O   HOH T 526       9.895  40.561   4.042  1.00  0.50           O  
HETATM  528  O   HOH T 527       9.822  29.190  21.955  1.00  0.50           O  
HETATM  529  O   HOH T 528      15.525  54.231   1.585  1.00  0.50           O  
HETATM  530  O   HOH T 529      18.493  68.109  19.309  1.00  0.50           O  
HETATM  531  O   HOH T 530     -13.519  30.741   4.053  1.00  0.50           O  
HETATM  532  O   HOH T 531       9.742   8.645  -0.268  1.00  0.50           O  
HETATM  533  O   HOH T 532      14.613  30.767   6.682  1.00  0.50           O  
HETATM  534  O   HOH T 533      26.426  53.700   2.786  1.00  0.50           O  
HETATM  535  O   HOH T 534      -1.754  28.761 -24.870  1.00  0.50           O  
HETATM  536  O   HOH T 535       0.376  51.955  18.169  1.00  0.50           O  
HETATM  537  O   HOH T 536      17.638  46.981  44.589  1.00  0.50           O  
HETATM  538  O   HOH T 537      22.955  26.175 -11.419  1.00  0.50           O  
HETATM  539  O   HOH T 538       9.848  19.217  11.071  1.00  0.50           O  
HETATM  540  O   HOH T 539      14.599  12.844  -6.296  1.00  0.50           O  
HETATM  541  O   HOH T 540      34.745  32.390  24.665  1.00  0.50           O  
HETATM  542  O   HOH T 541      33.065  33.694   2.561  1.00  0.50           O  
HETATM  543  O   HOH T 542     -15.220  14.179   7.386  1.00  0.50           O  
HETATM  544  O   HOH T 543      -0.829  36.411  -0.802  1.00  0.50           O  
HETATM  545  O   HOH T 544       5.836  20.893  21.471  1.00  0.50           O  
HETATM  546  O   HOH T 545      -8.210   6.597  -1.585  1.00  0.50           O  
HETATM  547  O   HOH T 546      15.363  68.883  28.332  1.00  0.50           O  
HETATM  548  O   HOH T 547      11.609  22.017 -20.429  1.00  0.50           O  
HETATM  549  O   HOH T 548      35.672  41.741  31.591  1.00  0.50           O  
HETATM  550  O   HOH T 549       4.920   7.143 -17.433  1.00  0.50           O  
HETATM  551  O   HOH T 550       3.912  44.094  24.294  1.00  0.50           O  
HETATM  552  O   HOH T 551      35.091  38.013  29.352  1.00  0.50           O  
HETATM  553  O   HOH T 552      33.214  30.608  20.320  1.00  0.50           O  
HETATM  554  O   HOH T 553       9.854  42.733   2.282  1.00  0.50           O  
HETATM  555  O   HOH T 554       6.057   4.836 -14.571  1.00  0.50           O  
HETATM  556  O   HOH T 555      -1.595  31.359 -18.484  1.00  0.51           O  
HETATM  557  O   HOH T 556       5.740   4.221 -11.807  1.00  0.51           O  
HETATM  558  O   HOH T 557      11.589  26.757  18.630  1.00  0.51           O  
HETATM  559  O   HOH T 558      25.179  35.858  47.358  1.00  0.51           O  
HETATM  560  O   HOH T 559      12.153  36.522  11.188  1.00  0.51           O  
HETATM  561  O   HOH T 560      35.982  25.442  26.216  1.00  0.51           O  
HETATM  562  O   HOH T 561      -8.540   3.972  -5.095  1.00  0.51           O  
HETATM  563  O   HOH T 562      11.459  18.856 -18.149  1.00  0.51           O  
HETATM  564  O   HOH T 563      37.356  49.788  36.304  1.00  0.51           O  
HETATM  565  O   HOH T 564      16.827  39.482  45.116  1.00  0.51           O  
HETATM  566  O   HOH T 565      35.335  42.196  36.440  1.00  0.51           O  
HETATM  567  O   HOH T 566      39.205  52.728  30.096  1.00  0.51           O  
HETATM  568  O   HOH T 567      31.846  36.403  -1.064  1.00  0.51           O  
HETATM  569  O   HOH T 568     -14.732  16.621   6.341  1.00  0.51           O  
HETATM  570  O   HOH T 569      16.070  41.335   3.104  1.00  0.51           O  
HETATM  571  O   HOH T 570      13.799   5.636  -4.086  1.00  0.51           O  
HETATM  572  O   HOH T 571       3.257  30.960 -22.921  1.00  0.51           O  
HETATM  573  O   HOH T 572       6.067  36.394   1.907  1.00  0.51           O  
HETATM  574  O   HOH T 573       9.563  31.455  20.399  1.00  0.51           O  
HETATM  575  O   HOH T 574      24.668  35.515  44.549  1.00  0.51           O  
HETATM  576  O   HOH T 575      14.471  53.427  -0.751  1.00  0.51           O  
HETATM  577  O   HOH T 576       8.448  51.613  33.814  1.00  0.51           O  
HETATM  578  O   HOH T 577       2.564  52.477  21.476  1.00  0.51           O  
HETATM  579  O   HOH T 578      29.466  45.501   1.834  1.00  0.51           O  
HETATM  580  O   HOH T 579       2.991  40.698 -15.022  1.00  0.51           O  
HETATM  581  O   HOH T 580      19.850  27.494 -17.149  1.00  0.51           O  
HETATM  582  O   HOH T 581      16.018  25.547 -17.881  1.00  0.51           O  
HETATM  583  O   HOH T 582      14.613  44.228   8.047  1.00  0.51           O  
HETATM  584  O   HOH T 583      -5.605  20.248  17.073  1.00  0.51           O  
HETATM  585  O   HOH T 584     -28.319  24.044  -5.661  1.00  0.51           O  
HETATM  586  O   HOH T 585       8.377  42.977  32.980  1.00  0.51           O  
HETATM  587  O   HOH T 586       5.838   3.186  -4.859  1.00  0.51           O  
HETATM  588  O   HOH T 587      36.813  46.650  38.594  1.00  0.51           O  
HETATM  589  O   HOH T 588      -6.559  23.494  18.072  1.00  0.51           O  
HETATM  590  O   HOH T 589      31.795  39.920  16.124  1.00  0.51           O  
HETATM  591  O   HOH T 590       7.989  29.553  19.973  1.00  0.51           O  
HETATM  592  O   HOH T 591     -13.098  16.027  -4.037  1.00  0.51           O  
HETATM  593  O   HOH T 592       0.415  15.210  16.782  1.00  0.52           O  
HETATM  594  O   HOH T 593      27.661  40.504  -0.171  1.00  0.52           O  
HETATM  595  O   HOH T 594       4.062  58.618  22.022  1.00  0.52           O  
HETATM  596  O   HOH T 595      23.138  64.777  22.968  1.00  0.52           O  
HETATM  597  O   HOH T 596      13.860  11.129   0.325  1.00  0.52           O  
HETATM  598  O   HOH T 597      20.878  34.504  40.389  1.00  0.52           O  
HETATM  599  O   HOH T 598       7.833  32.817  12.232  1.00  0.52           O  
HETATM  600  O   HOH T 599     -23.402  22.749  10.650  1.00  0.52           O  
HETATM  601  O   HOH T 600      24.390  72.197  25.496  1.00  0.52           O  
HETATM  602  O   HOH T 601      32.580  39.660  24.910  1.00  0.52           O  
HETATM  603  O   HOH T 602      -6.063  28.331 -18.488  1.00  0.52           O  
HETATM  604  O   HOH T 603      11.992  36.169 -21.540  1.00  0.52           O  
HETATM  605  O   HOH T 604      37.008  47.478   9.266  1.00  0.52           O  
HETATM  606  O   HOH T 605      29.739  59.960  28.651  1.00  0.52           O  
HETATM  607  O   HOH T 606       2.651   3.869  -9.070  1.00  0.52           O  
HETATM  608  O   HOH T 607      26.229  51.726   7.957  1.00  0.52           O  
HETATM  609  O   HOH T 608      24.957  41.913  46.461  1.00  0.52           O  
HETATM  610  O   HOH T 609       8.890  40.438   1.473  1.00  0.52           O  
HETATM  611  O   HOH T 610      20.967  33.043   4.745  1.00  0.52           O  
HETATM  612  O   HOH T 611       7.335  18.169  10.231  1.00  0.52           O  
HETATM  613  O   HOH T 612      12.380  41.813 -18.572  1.00  0.52           O  
HETATM  614  O   HOH T 613      16.155  48.816  43.202  1.00  0.52           O  
HETATM  615  O   HOH T 614      15.321  12.139  -8.805  1.00  0.53           O  
HETATM  616  O   HOH T 615      11.506  59.849  28.562  1.00  0.53           O  
HETATM  617  O   HOH T 616      30.004  27.699  28.671  1.00  0.53           O  
HETATM  618  O   HOH T 617      -7.615  38.203  -0.835  1.00  0.53           O  
HETATM  619  O   HOH T 618      13.556  33.721 -24.228  1.00  0.53           O  
HETATM  620  O   HOH T 619      21.978  66.696  15.319  1.00  0.53           O  
HETATM  621  O   HOH T 620       1.674  46.162  13.302  1.00  0.53           O  
HETATM  622  O   HOH T 621      26.849  37.901  47.098  1.00  0.53           O  
HETATM  623  O   HOH T 622     -22.616  24.004  15.169  1.00  0.53           O  
HETATM  624  O   HOH T 623      21.969  55.593  15.025  1.00  0.53           O  
HETATM  625  O   HOH T 624      18.650  48.429  42.350  1.00  0.53           O  
HETATM  626  O   HOH T 625      -3.246  11.711 -20.855  1.00  0.53           O  
HETATM  627  O   HOH T 626      32.475  43.129   2.142  1.00  0.53           O  
HETATM  628  O   HOH T 627       4.035  33.051  -3.860  1.00  0.53           O  
HETATM  629  O   HOH T 628       5.544  30.199 -24.138  1.00  0.53           O  
HETATM  630  O   HOH T 629      17.172  40.572   0.647  1.00  0.53           O  
HETATM  631  O   HOH T 630       1.911  16.118  18.763  1.00  0.53           O  
HETATM  632  O   HOH T 631      15.147  47.788  45.470  1.00  0.53           O  
HETATM  633  O   HOH T 632      17.814  27.377  22.692  1.00  0.53           O  
HETATM  634  O   HOH T 633      25.141  23.588  13.849  1.00  0.53           O  
HETATM  635  O   HOH T 634      29.820  53.522  12.870  1.00  0.53           O  
HETATM  636  O   HOH T 635      43.856  40.438  10.714  1.00  0.53           O  
HETATM  637  O   HOH T 636      27.575  53.379  40.283  1.00  0.54           O  
HETATM  638  O   HOH T 637       7.915  31.096 -22.994  1.00  0.54           O  
HETATM  639  O   HOH T 638      -2.743  39.508  11.718  1.00  0.54           O  
HETATM  640  O   HOH T 639       1.691  34.705  19.337  1.00  0.54           O  
HETATM  641  O   HOH T 640      -6.542  23.531 -21.159  1.00  0.54           O  
HETATM  642  O   HOH T 641       9.600  37.874  24.332  1.00  0.54           O  
HETATM  643  O   HOH T 642       9.742  41.986 -12.169  1.00  0.54           O  
HETATM  644  O   HOH T 643      17.318  46.423   7.070  1.00  0.54           O  
HETATM  645  O   HOH T 644       1.606  12.067   7.324  1.00  0.54           O  
HETATM  646  O   HOH T 645      14.512  21.824 -15.302  1.00  0.54           O  
HETATM  647  O   HOH T 646      40.445  52.077  27.617  1.00  0.54           O  
HETATM  648  O   HOH T 647      23.608  65.767  20.413  1.00  0.54           O  
HETATM  649  O   HOH T 648     -18.843  25.229  -7.449  1.00  0.54           O  
HETATM  650  O   HOH T 649      12.184  30.005   5.416  1.00  0.54           O  
HETATM  651  O   HOH T 650      16.912  56.314  13.107  1.00  0.54           O  
HETATM  652  O   HOH T 651      25.832  54.351  42.107  1.00  0.54           O  
HETATM  653  O   HOH T 652      20.856  54.611  41.769  1.00  0.54           O  
HETATM  654  O   HOH T 653      20.449  49.353  44.300  1.00  0.54           O  
HETATM  655  O   HOH T 654      40.963  38.986  13.544  1.00  0.54           O  
HETATM  656  O   HOH T 655     -13.329  21.176  15.287  1.00  0.54           O  
HETATM  657  O   HOH T 656      -5.583   8.125   2.588  1.00  0.54           O  
HETATM  658  O   HOH T 657     -20.383  12.927  11.444  1.00  0.54           O  
HETATM  659  O   HOH T 658       3.379  39.834   4.008  1.00  0.54           O  
HETATM  660  O   HOH T 659     -14.584  12.146  18.572  1.00  0.54           O  
HETATM  661  O   HOH T 660      37.205  39.789  32.844  1.00  0.54           O  
HETATM  662  O   HOH T 661      -7.902  36.997  -8.090  1.00  0.54           O  
HETATM  663  O   HOH T 662     -18.110  26.060  12.889  1.00  0.54           O  
HETATM  664  O   HOH T 663       8.913   2.559 -10.102  1.00  0.55           O  
HETATM  665  O   HOH T 664      34.686  41.970  19.600  1.00  0.55           O  
HETATM  666  O   HOH T 665       8.100  59.151  42.091  1.00  0.55           O  
HETATM  667  O   HOH T 666       1.569  39.686  -8.966  1.00  0.55           O  
HETATM  668  O   HOH T 667      17.602  36.369  34.912  1.00  0.55           O  
HETATM  669  O   HOH T 668       2.489  39.077   6.635  1.00  0.55           O  
HETATM  670  O   HOH T 669       8.191  17.760 -17.750  1.00  0.55           O  
HETATM  671  O   HOH T 670       4.081  35.355  -2.304  1.00  0.55           O  
HETATM  672  O   HOH T 671      -0.130  44.756  17.839  1.00  0.55           O  
HETATM  673  O   HOH T 672     -11.502   9.837  12.136  1.00  0.55           O  
HETATM  674  O   HOH T 673       5.080   3.700  -7.446  1.00  0.55           O  
HETATM  675  O   HOH T 674      20.304  42.234  51.379  1.00  0.55           O  
HETATM  676  O   HOH T 675     -21.094  21.879  14.079  1.00  0.55           O  
HETATM  677  O   HOH T 676       8.030  28.305  17.831  1.00  0.55           O  
HETATM  678  O   HOH T 677      -7.455  11.128   7.383  1.00  0.56           O  
HETATM  679  O   HOH T 678      23.299  32.972  31.429  1.00  0.56           O  
HETATM  680  O   HOH T 679       3.059  18.072   8.046  1.00  0.56           O  
HETATM  681  O   HOH T 680      23.546  66.419  29.922  1.00  0.56           O  
HETATM  682  O   HOH T 681       3.280  37.324 -20.105  1.00  0.56           O  
HETATM  683  O   HOH T 682     -11.231  16.273   4.984  1.00  0.56           O  
HETATM  684  O   HOH T 683      11.348  18.357  -7.327  1.00  0.56           O  
HETATM  685  O   HOH T 684      13.744  13.747   1.535  1.00  0.56           O  
HETATM  686  O   HOH T 685       2.993  43.730  26.802  1.00  0.56           O  
HETATM  687  O   HOH T 686       6.241  51.309  26.870  1.00  0.57           O  
HETATM  688  O   HOH T 687      26.907  45.082   0.855  1.00  0.57           O  
HETATM  689  O   HOH T 688       3.445  20.011  -4.997  1.00  0.57           O  
HETATM  690  O   HOH T 689      17.677  29.056  11.228  1.00  0.57           O  
HETATM  691  O   HOH T 690       3.985   6.386   0.019  1.00  0.57           O  
HETATM  692  O   HOH T 691      25.153  66.661  18.393  1.00  0.57           O  
HETATM  693  O   HOH T 692       4.797  40.517   7.991  1.00  0.57           O  
HETATM  694  O   HOH T 693      14.456  33.723   6.503  1.00  0.57           O  
HETATM  695  O   HOH T 694      17.768  65.850  42.239  1.00  0.58           O  
HETATM  696  O   HOH T 695      30.883  21.069  21.038  1.00  0.58           O  
HETATM  697  O   HOH T 696      17.254  35.141 -17.586  1.00  0.58           O  
HETATM  698  O   HOH T 697       0.070  14.775 -25.111  1.00  0.59           O  
HETATM  699  O   HOH T 698      11.192  61.205  42.684  1.00  0.59           O  
HETATM  700  O   HOH T 699      15.273  52.502  41.397  1.00  0.59           O  
HETATM  701  O   HOH T 700      23.647  58.742  39.839  1.00  0.60           O  
HETATM  702  O   HOH T 701      34.627  27.454  22.341  1.00  0.60           O  
HETATM  703  O   HOH T 702       5.071  31.646  17.875  1.00  0.61           O  
HETATM  704  O   HOH T 703      30.801  27.175  13.481  1.00  0.61           O  
HETATM  705  O   HOH T 704       0.907  51.251  23.434  1.00  0.61           O  
HETATM  706  O   HOH T 705      10.499  29.136  19.531  1.00  0.66           O  
TER     707      HOH T 705 
