# Supplementary material for: Accurate Prediction of Hydration Sites of Proteins Using Energy Model With Atom Embedding
Source: Front Mol Biosci. 2021 Sep 20;8:756075. doi: 10.3389/fmolb.2021.756075 (PMC8488165; doi:10.3389/fmolb.2021.756075)
Supplement: Supplementary file 1 [file DataSheet1.ZIP › Data Sheet 1/Our_result_pdb/our_dataset_output/2CIT_watersite.pdb]

HEADER                                                        XXXX


JRNL        PMID   -1
HETATM    1  O   HOH T   0      18.379  41.624  11.750  1.00  0.14           O  
HETATM    2  O   HOH T   1       5.928  13.319  10.840  1.00  0.18           O  
HETATM    3  O   HOH T   2       7.442  34.893   4.597  1.00  0.18           O  
HETATM    4  O   HOH T   3      36.269  45.154   4.910  1.00  0.18           O  
HETATM    5  O   HOH T   4       3.557  23.621   9.754  1.00  0.19           O  
HETATM    6  O   HOH T   5      32.698  32.895  16.990  1.00  0.20           O  
HETATM    7  O   HOH T   6      17.682  18.069  11.364  1.00  0.20           O  
HETATM    8  O   HOH T   7       5.983  15.000   7.048  1.00  0.20           O  
HETATM    9  O   HOH T   8      21.128  50.036   9.700  1.00  0.21           O  
HETATM   10  O   HOH T   9      44.629  31.583  -0.972  1.00  0.21           O  
HETATM   11  O   HOH T  10       4.787  32.712  14.906  1.00  0.21           O  
HETATM   12  O   HOH T  11      19.014  53.774  17.505  1.00  0.21           O  
HETATM   13  O   HOH T  12      21.204  13.001  21.504  1.00  0.21           O  
HETATM   14  O   HOH T  13      25.560  36.647   9.562  1.00  0.22           O  
HETATM   15  O   HOH T  14       8.805  16.657  -3.695  1.00  0.22           O  
HETATM   16  O   HOH T  15      16.086  31.769  -5.006  1.00  0.22           O  
HETATM   17  O   HOH T  16      41.115  32.814   9.307  1.00  0.22           O  
HETATM   18  O   HOH T  17       4.130  12.619  17.231  1.00  0.22           O  
HETATM   19  O   HOH T  18      45.526  29.691   0.791  1.00  0.23           O  
HETATM   20  O   HOH T  19      14.546   9.764  11.306  1.00  0.23           O  
HETATM   21  O   HOH T  20       1.574  20.460   4.679  1.00  0.23           O  
HETATM   22  O   HOH T  21      17.662  34.427  10.959  1.00  0.24           O  
HETATM   23  O   HOH T  22      13.412  55.450   7.164  1.00  0.24           O  
HETATM   24  O   HOH T  23      -0.459  21.748  14.365  1.00  0.24           O  
HETATM   25  O   HOH T  24      19.424   5.278  20.355  1.00  0.25           O  
HETATM   26  O   HOH T  25      10.665  49.776   4.039  1.00  0.25           O  
HETATM   27  O   HOH T  26      38.649  40.774  13.051  1.00  0.25           O  
HETATM   28  O   HOH T  27      21.448  38.311   3.104  1.00  0.25           O  
HETATM   29  O   HOH T  28      19.443  23.568  24.011  1.00  0.26           O  
HETATM   30  O   HOH T  29      40.554  35.508   9.514  1.00  0.26           O  
HETATM   31  O   HOH T  30      11.876  20.014  -5.711  1.00  0.27           O  
HETATM   32  O   HOH T  31      36.358  21.823  -3.063  1.00  0.27           O  
HETATM   33  O   HOH T  32      39.293  47.695  11.308  1.00  0.27           O  
HETATM   34  O   HOH T  33       7.498  48.114   3.320  1.00  0.27           O  
HETATM   35  O   HOH T  34       2.618  21.524  21.110  1.00  0.27           O  
HETATM   36  O   HOH T  35      41.488  20.131  13.734  1.00  0.27           O  
HETATM   37  O   HOH T  36      37.979  25.760  18.434  1.00  0.27           O  
HETATM   38  O   HOH T  37       0.937  23.108  10.480  1.00  0.28           O  
HETATM   39  O   HOH T  38      15.697  47.115   1.418  1.00  0.28           O  
HETATM   40  O   HOH T  39      19.567  26.679  11.975  1.00  0.28           O  
HETATM   41  O   HOH T  40      28.750  25.937  21.995  1.00  0.28           O  
HETATM   42  O   HOH T  41      27.008  23.687  -3.796  1.00  0.28           O  
HETATM   43  O   HOH T  42      10.026  42.814   0.276  1.00  0.28           O  
HETATM   44  O   HOH T  43      -5.638  24.832  13.900  1.00  0.28           O  
HETATM   45  O   HOH T  44      16.335  44.750   2.985  1.00  0.28           O  
HETATM   46  O   HOH T  45      27.653  44.854  12.087  1.00  0.28           O  
HETATM   47  O   HOH T  46      43.537  26.211   6.346  1.00  0.29           O  
HETATM   48  O   HOH T  47      11.022  15.658  25.330  1.00  0.29           O  
HETATM   49  O   HOH T  48      35.176  17.009  18.707  1.00  0.29           O  
HETATM   50  O   HOH T  49      12.711  13.742  24.352  1.00  0.29           O  
HETATM   51  O   HOH T  50       8.352  25.971  22.893  1.00  0.29           O  
HETATM   52  O   HOH T  51       2.501  14.494  13.768  1.00  0.30           O  
HETATM   53  O   HOH T  52       3.696  30.617  27.158  1.00  0.30           O  
HETATM   54  O   HOH T  53      42.034  51.551   6.250  1.00  0.30           O  
HETATM   55  O   HOH T  54       1.633  19.564   1.999  1.00  0.30           O  
HETATM   56  O   HOH T  55      45.290  38.891   5.884  1.00  0.30           O  
HETATM   57  O   HOH T  56      -2.131  31.874  18.353  1.00  0.30           O  
HETATM   58  O   HOH T  57      25.969  54.728   6.396  1.00  0.30           O  
HETATM   59  O   HOH T  58       6.696  27.963  27.516  1.00  0.30           O  
HETATM   60  O   HOH T  59      21.331  42.964  18.657  1.00  0.30           O  
HETATM   61  O   HOH T  60      34.012  18.922  -0.173  1.00  0.30           O  
HETATM   62  O   HOH T  61      14.053  24.045  32.788  1.00  0.31           O  
HETATM   63  O   HOH T  62      42.516  22.389  14.869  1.00  0.31           O  
HETATM   64  O   HOH T  63      27.165  49.751  18.958  1.00  0.31           O  
HETATM   65  O   HOH T  64      33.993  31.629  -3.003  1.00  0.31           O  
HETATM   66  O   HOH T  65       9.817  34.109 -11.884  1.00  0.31           O  
HETATM   67  O   HOH T  66       7.366  25.850  -5.461  1.00  0.31           O  
HETATM   68  O   HOH T  67      16.362  51.111   9.244  1.00  0.31           O  
HETATM   69  O   HOH T  68       3.482  23.729  28.526  1.00  0.31           O  
HETATM   70  O   HOH T  69      18.754  51.732  -2.436  1.00  0.31           O  
HETATM   71  O   HOH T  70       6.985  38.464  -1.532  1.00  0.32           O  
HETATM   72  O   HOH T  71      25.801  22.941  15.532  1.00  0.32           O  
HETATM   73  O   HOH T  72      -2.838  31.788  15.733  1.00  0.32           O  
HETATM   74  O   HOH T  73      -3.262  33.209   6.052  1.00  0.32           O  
HETATM   75  O   HOH T  74       7.887  12.979  30.360  1.00  0.32           O  
HETATM   76  O   HOH T  75      23.011  54.207   0.520  1.00  0.32           O  
HETATM   77  O   HOH T  76       1.651  34.946   5.732  1.00  0.32           O  
HETATM   78  O   HOH T  77       8.859   8.577  14.559  1.00  0.32           O  
HETATM   79  O   HOH T  78      30.935  29.947  -4.949  1.00  0.32           O  
HETATM   80  O   HOH T  79       8.568  46.410  10.872  1.00  0.32           O  
HETATM   81  O   HOH T  80      26.165  48.857  13.517  1.00  0.32           O  
HETATM   82  O   HOH T  81      34.493  52.833   7.120  1.00  0.32           O  
HETATM   83  O   HOH T  82      14.455  34.873  14.559  1.00  0.32           O  
HETATM   84  O   HOH T  83       5.656  12.435   8.177  1.00  0.32           O  
HETATM   85  O   HOH T  84      31.787  30.486  20.724  1.00  0.33           O  
HETATM   86  O   HOH T  85       1.534  39.645  26.633  1.00  0.33           O  
HETATM   87  O   HOH T  86      34.063  12.248   4.507  1.00  0.33           O  
HETATM   88  O   HOH T  87      25.349   9.032  15.709  1.00  0.33           O  
HETATM   89  O   HOH T  88      43.815  28.214   9.810  1.00  0.33           O  
HETATM   90  O   HOH T  89       2.008  34.404   0.687  1.00  0.33           O  
HETATM   91  O   HOH T  90      42.747  43.355  -2.520  1.00  0.33           O  
HETATM   92  O   HOH T  91      39.397  41.849  18.014  1.00  0.33           O  
HETATM   93  O   HOH T  92      25.942  34.818  20.334  1.00  0.33           O  
HETATM   94  O   HOH T  93      11.340  21.342  -1.640  1.00  0.33           O  
HETATM   95  O   HOH T  94       9.302  46.471   1.827  1.00  0.33           O  
HETATM   96  O   HOH T  95      -5.661  30.749  11.130  1.00  0.33           O  
HETATM   97  O   HOH T  96      24.870  17.855   2.331  1.00  0.33           O  
HETATM   98  O   HOH T  97      20.332  40.456  17.769  1.00  0.34           O  
HETATM   99  O   HOH T  98      44.740  51.097   6.914  1.00  0.34           O  
HETATM  100  O   HOH T  99      13.944  50.126  12.066  1.00  0.34           O  
HETATM  101  O   HOH T 100      12.512  43.038  15.990  1.00  0.34           O  
HETATM  102  O   HOH T 101      34.894  32.076  18.533  1.00  0.34           O  
HETATM  103  O   HOH T 102       9.460  33.987  12.734  1.00  0.34           O  
HETATM  104  O   HOH T 103      25.814  27.583  -7.562  1.00  0.34           O  
HETATM  105  O   HOH T 104      20.098  28.664  24.861  1.00  0.34           O  
HETATM  106  O   HOH T 105       7.049  41.264   5.858  1.00  0.34           O  
HETATM  107  O   HOH T 106      16.282  25.649 -13.100  1.00  0.34           O  
HETATM  108  O   HOH T 107      11.228   7.066   6.436  1.00  0.34           O  
HETATM  109  O   HOH T 108       7.094  33.916  -7.187  1.00  0.34           O  
HETATM  110  O   HOH T 109      24.162  31.260  21.391  1.00  0.34           O  
HETATM  111  O   HOH T 110      20.189  36.238  17.117  1.00  0.34           O  
HETATM  112  O   HOH T 111      23.474  36.362   3.387  1.00  0.35           O  
HETATM  113  O   HOH T 112      16.507  55.050  17.202  1.00  0.35           O  
HETATM  114  O   HOH T 113      -3.314  13.027  17.966  1.00  0.35           O  
HETATM  115  O   HOH T 114      15.579  47.238  18.527  1.00  0.35           O  
HETATM  116  O   HOH T 115       4.886  30.789  -1.482  1.00  0.35           O  
HETATM  117  O   HOH T 116       0.303  24.052  13.002  1.00  0.35           O  
HETATM  118  O   HOH T 117       6.155  40.052   3.498  1.00  0.35           O  
HETATM  119  O   HOH T 118      20.986  28.411  -9.813  1.00  0.36           O  
HETATM  120  O   HOH T 119       8.164  39.701  12.122  1.00  0.36           O  
HETATM  121  O   HOH T 120      20.147  25.943  25.355  1.00  0.36           O  
HETATM  122  O   HOH T 121      43.846  42.246  -0.273  1.00  0.36           O  
HETATM  123  O   HOH T 122      19.535  54.213   6.469  1.00  0.36           O  
HETATM  124  O   HOH T 123       5.045  27.952  -1.668  1.00  0.36           O  
HETATM  125  O   HOH T 124      -1.002  25.575   3.926  1.00  0.36           O  
HETATM  126  O   HOH T 125       6.452  15.330  -3.067  1.00  0.36           O  
HETATM  127  O   HOH T 126      16.754  35.750  13.208  1.00  0.36           O  
HETATM  128  O   HOH T 127      10.225   8.744  18.811  1.00  0.37           O  
HETATM  129  O   HOH T 128       6.919  33.869  11.714  1.00  0.37           O  
HETATM  130  O   HOH T 129      32.209  17.415   1.188  1.00  0.37           O  
HETATM  131  O   HOH T 130      23.088  28.093  -7.910  1.00  0.37           O  
HETATM  132  O   HOH T 131       3.935  34.074   4.604  1.00  0.37           O  
HETATM  133  O   HOH T 132      14.801  53.330   6.143  1.00  0.37           O  
HETATM  134  O   HOH T 133       6.710  42.294   8.397  1.00  0.37           O  
HETATM  135  O   HOH T 134      10.175  37.887  11.779  1.00  0.37           O  
HETATM  136  O   HOH T 135      24.981  50.769  17.825  1.00  0.37           O  
HETATM  137  O   HOH T 136      41.439  47.960   9.651  1.00  0.37           O  
HETATM  138  O   HOH T 137      41.312  39.799  13.123  1.00  0.37           O  
HETATM  139  O   HOH T 138      14.851  34.155  11.840  1.00  0.37           O  
HETATM  140  O   HOH T 139      11.318  45.475  15.939  1.00  0.37           O  
HETATM  141  O   HOH T 140      -1.584  28.280   4.254  1.00  0.38           O  
HETATM  142  O   HOH T 141       2.719  18.132  19.702  1.00  0.38           O  
HETATM  143  O   HOH T 142       1.078  15.771  19.704  1.00  0.38           O  
HETATM  144  O   HOH T 143      43.661  47.383   4.881  1.00  0.38           O  
HETATM  145  O   HOH T 144      39.422  19.343  -3.697  1.00  0.38           O  
HETATM  146  O   HOH T 145      17.946   7.610  20.482  1.00  0.38           O  
HETATM  147  O   HOH T 146      32.676  32.077  -5.396  1.00  0.38           O  
HETATM  148  O   HOH T 147      10.760  38.128  16.145  1.00  0.39           O  
HETATM  149  O   HOH T 148       7.595  43.834  10.457  1.00  0.39           O  
HETATM  150  O   HOH T 149      10.020  21.472  26.440  1.00  0.39           O  
HETATM  151  O   HOH T 150      28.447  34.488  21.485  1.00  0.39           O  
HETATM  152  O   HOH T 151       8.766  37.993  14.188  1.00  0.39           O  
HETATM  153  O   HOH T 152       0.444  17.752  -3.827  1.00  0.39           O  
HETATM  154  O   HOH T 153      -1.810  23.555  15.928  1.00  0.39           O  
HETATM  155  O   HOH T 154      46.067  37.622  -0.401  1.00  0.39           O  
HETATM  156  O   HOH T 155      16.472  43.096  19.432  1.00  0.39           O  
HETATM  157  O   HOH T 156      10.554  29.994 -10.056  1.00  0.39           O  
HETATM  158  O   HOH T 157       2.307  40.951   3.433  1.00  0.39           O  
HETATM  159  O   HOH T 158      23.341  55.234   6.093  1.00  0.39           O  
HETATM  160  O   HOH T 159      10.640  47.209  13.911  1.00  0.39           O  
HETATM  161  O   HOH T 160       5.482  36.486  29.296  1.00  0.39           O  
HETATM  162  O   HOH T 161      36.298  25.716  20.539  1.00  0.40           O  
HETATM  163  O   HOH T 162      30.504  46.783  15.418  1.00  0.40           O  
HETATM  164  O   HOH T 163      16.989  45.260  -5.611  1.00  0.40           O  
HETATM  165  O   HOH T 164      27.055  55.902  15.165  1.00  0.40           O  
HETATM  166  O   HOH T 165       1.622  39.838   5.871  1.00  0.40           O  
HETATM  167  O   HOH T 166      24.789  37.665 -14.916  1.00  0.40           O  
HETATM  168  O   HOH T 167      16.959  36.495  20.378  1.00  0.40           O  
HETATM  169  O   HOH T 168      34.616  19.800  -2.691  1.00  0.40           O  
HETATM  170  O   HOH T 169       3.876  21.446  29.967  1.00  0.40           O  
HETATM  171  O   HOH T 170      23.895  36.413  19.454  1.00  0.40           O  
HETATM  172  O   HOH T 171      31.591  16.764  23.360  1.00  0.40           O  
HETATM  173  O   HOH T 172      25.476   7.178  17.838  1.00  0.40           O  
HETATM  174  O   HOH T 173       8.107  33.821  -9.744  1.00  0.40           O  
HETATM  175  O   HOH T 174      14.545  14.279   2.150  1.00  0.40           O  
HETATM  176  O   HOH T 175      -2.469  30.742   4.986  1.00  0.40           O  
HETATM  177  O   HOH T 176      37.432  17.276  15.381  1.00  0.41           O  
HETATM  178  O   HOH T 177      19.071  35.044  19.362  1.00  0.41           O  
HETATM  179  O   HOH T 178      43.775  25.460   8.973  1.00  0.41           O  
HETATM  180  O   HOH T 179      27.561  28.203  21.159  1.00  0.41           O  
HETATM  181  O   HOH T 180      17.241  55.830  14.553  1.00  0.41           O  
HETATM  182  O   HOH T 181      47.476  38.333   1.779  1.00  0.41           O  
HETATM  183  O   HOH T 182      13.311  30.484  -9.961  1.00  0.41           O  
HETATM  184  O   HOH T 183       3.271  36.308  -4.983  1.00  0.41           O  
HETATM  185  O   HOH T 184       3.751  35.142  15.657  1.00  0.41           O  
HETATM  186  O   HOH T 185      12.888  48.740  14.045  1.00  0.41           O  
HETATM  187  O   HOH T 186       2.584  35.544  25.463  1.00  0.41           O  
HETATM  188  O   HOH T 187       8.841  42.401  18.827  1.00  0.41           O  
HETATM  189  O   HOH T 188       6.105  23.006  29.238  1.00  0.41           O  
HETATM  190  O   HOH T 189      22.935  22.430  -5.244  1.00  0.41           O  
HETATM  191  O   HOH T 190       3.467  11.964  14.629  1.00  0.41           O  
HETATM  192  O   HOH T 191       3.750  38.195  -6.895  1.00  0.41           O  
HETATM  193  O   HOH T 192       7.338  20.476  26.047  1.00  0.42           O  
HETATM  194  O   HOH T 193       8.409   4.951   9.956  1.00  0.42           O  
HETATM  195  O   HOH T 194      13.949  20.736  -4.214  1.00  0.42           O  
HETATM  196  O   HOH T 195       2.172  15.522  -3.227  1.00  0.42           O  
HETATM  197  O   HOH T 196      26.708   9.046   4.488  1.00  0.42           O  
HETATM  198  O   HOH T 197       7.462  41.647  16.518  1.00  0.42           O  
HETATM  199  O   HOH T 198      12.672  36.468  22.806  1.00  0.42           O  
HETATM  200  O   HOH T 199       7.944  44.137   1.510  1.00  0.42           O  
HETATM  201  O   HOH T 200       7.054  44.022   6.401  1.00  0.42           O  
HETATM  202  O   HOH T 201      15.105  35.998  18.464  1.00  0.42           O  
HETATM  203  O   HOH T 202      -2.302  15.969  15.493  1.00  0.42           O  
HETATM  204  O   HOH T 203       3.748  22.264  26.048  1.00  0.42           O  
HETATM  205  O   HOH T 204      14.871   6.989  11.559  1.00  0.42           O  
HETATM  206  O   HOH T 205      17.998  48.726  -6.569  1.00  0.42           O  
HETATM  207  O   HOH T 206       7.711  45.412   3.951  1.00  0.42           O  
HETATM  208  O   HOH T 207      30.618  16.321  -2.070  1.00  0.42           O  
HETATM  209  O   HOH T 208      46.162  33.742  -1.616  1.00  0.42           O  
HETATM  210  O   HOH T 209       7.263  15.091   4.561  1.00  0.42           O  
HETATM  211  O   HOH T 210       7.709  17.921  26.958  1.00  0.42           O  
HETATM  212  O   HOH T 211      -2.221  27.579  -0.260  1.00  0.43           O  
HETATM  213  O   HOH T 212      40.362  44.162  -1.273  1.00  0.43           O  
HETATM  214  O   HOH T 213      22.869  39.588 -14.546  1.00  0.43           O  
HETATM  215  O   HOH T 214       2.139  10.471   3.135  1.00  0.43           O  
HETATM  216  O   HOH T 215      -2.386  30.212  12.486  1.00  0.43           O  
HETATM  217  O   HOH T 216      14.597  37.719 -11.309  1.00  0.43           O  
HETATM  218  O   HOH T 217      13.768  16.021  25.643  1.00  0.43           O  
HETATM  219  O   HOH T 218      13.373   6.841   8.100  1.00  0.43           O  
HETATM  220  O   HOH T 219      10.810  55.359   8.034  1.00  0.43           O  
HETATM  221  O   HOH T 220      11.613  34.674  24.614  1.00  0.43           O  
HETATM  222  O   HOH T 221       1.460  31.465  25.692  1.00  0.43           O  
HETATM  223  O   HOH T 222       3.494  12.561  11.992  1.00  0.43           O  
HETATM  224  O   HOH T 223      22.995  43.803  -6.725  1.00  0.43           O  
HETATM  225  O   HOH T 224      32.133  18.638  -2.620  1.00  0.43           O  
HETATM  226  O   HOH T 225      28.721   9.373   6.342  1.00  0.43           O  
HETATM  227  O   HOH T 226      25.767  54.797  13.019  1.00  0.44           O  
HETATM  228  O   HOH T 227      32.451  56.647   6.537  1.00  0.44           O  
HETATM  229  O   HOH T 228       0.806  23.666   0.091  1.00  0.44           O  
HETATM  230  O   HOH T 229      20.756  48.623  -6.279  1.00  0.44           O  
HETATM  231  O   HOH T 230      26.777  16.707   0.464  1.00  0.44           O  
HETATM  232  O   HOH T 231       8.748  45.537  15.066  1.00  0.44           O  
HETATM  233  O   HOH T 232      36.502  54.386   8.275  1.00  0.44           O  
HETATM  234  O   HOH T 233      49.469  36.492   1.705  1.00  0.44           O  
HETATM  235  O   HOH T 234       2.898  40.737   0.693  1.00  0.44           O  
HETATM  236  O   HOH T 235      17.381  37.586 -11.070  1.00  0.44           O  
HETATM  237  O   HOH T 236       8.237  24.918  25.429  1.00  0.44           O  
HETATM  238  O   HOH T 237      17.444  27.722 -11.519  1.00  0.44           O  
HETATM  239  O   HOH T 238      21.368  15.628  20.618  1.00  0.44           O  
HETATM  240  O   HOH T 239       0.347  37.363   5.603  1.00  0.45           O  
HETATM  241  O   HOH T 240       6.931  42.133  12.590  1.00  0.45           O  
HETATM  242  O   HOH T 241      -1.196  26.660   6.461  1.00  0.45           O  
HETATM  243  O   HOH T 242      40.512  37.323  14.139  1.00  0.45           O  
HETATM  244  O   HOH T 243       7.146  38.658  -4.174  1.00  0.45           O  
HETATM  245  O   HOH T 244      15.671  19.208   8.645  1.00  0.45           O  
HETATM  246  O   HOH T 245       2.237  39.149  -1.580  1.00  0.45           O  
HETATM  247  O   HOH T 246      19.572   6.724  15.635  1.00  0.45           O  
HETATM  248  O   HOH T 247      12.634   4.869  19.928  1.00  0.45           O  
HETATM  249  O   HOH T 248       1.929  26.218   0.140  1.00  0.45           O  
HETATM  250  O   HOH T 249       6.486  34.904   9.076  1.00  0.45           O  
HETATM  251  O   HOH T 250      19.844  22.073  21.754  1.00  0.45           O  
HETATM  252  O   HOH T 251      41.578  40.369  17.183  1.00  0.45           O  
HETATM  253  O   HOH T 252      40.582  35.154  15.956  1.00  0.45           O  
HETATM  254  O   HOH T 253       1.698  35.712  22.712  1.00  0.45           O  
HETATM  255  O   HOH T 254       7.206  44.934  12.870  1.00  0.45           O  
HETATM  256  O   HOH T 255      26.061  48.722  -3.693  1.00  0.45           O  
HETATM  257  O   HOH T 256      -1.326  36.658   9.730  1.00  0.45           O  
HETATM  258  O   HOH T 257      26.142  51.199  15.274  1.00  0.46           O  
HETATM  259  O   HOH T 258      25.511  25.090  25.314  1.00  0.46           O  
HETATM  260  O   HOH T 259      37.771  42.811  14.635  1.00  0.46           O  
HETATM  261  O   HOH T 260      15.481  28.265 -13.383  1.00  0.46           O  
HETATM  262  O   HOH T 261       7.156  36.222  -8.790  1.00  0.46           O  
HETATM  263  O   HOH T 262      -3.459  28.267   6.233  1.00  0.46           O  
HETATM  264  O   HOH T 263      39.908  32.523  16.554  1.00  0.46           O  
HETATM  265  O   HOH T 264      15.120  39.844  17.347  1.00  0.46           O  
HETATM  266  O   HOH T 265       0.035  34.346   9.980  1.00  0.46           O  
HETATM  267  O   HOH T 266      17.065  53.511   7.716  1.00  0.46           O  
HETATM  268  O   HOH T 267       6.416  23.043  26.443  1.00  0.46           O  
HETATM  269  O   HOH T 268       6.333  40.225  31.801  1.00  0.46           O  
HETATM  270  O   HOH T 269      23.959  26.332  -5.940  1.00  0.46           O  
HETATM  271  O   HOH T 270      14.787  35.529 -13.146  1.00  0.46           O  
HETATM  272  O   HOH T 271      25.044  55.135   3.839  1.00  0.46           O  
HETATM  273  O   HOH T 272      21.798  25.874  -9.236  1.00  0.46           O  
HETATM  274  O   HOH T 273      -1.143  39.665   5.800  1.00  0.46           O  
HETATM  275  O   HOH T 274      22.915  24.168  -7.388  1.00  0.46           O  
HETATM  276  O   HOH T 275      -4.551  31.604  13.630  1.00  0.46           O  
HETATM  277  O   HOH T 276      37.132  33.754  18.373  1.00  0.46           O  
HETATM  278  O   HOH T 277      24.320  56.068  11.117  1.00  0.46           O  
HETATM  279  O   HOH T 278      35.371  18.736  16.573  1.00  0.46           O  
HETATM  280  O   HOH T 279      17.912   7.099   8.771  1.00  0.46           O  
HETATM  281  O   HOH T 280       4.108  17.951  21.949  1.00  0.46           O  
HETATM  282  O   HOH T 281      -1.951  34.796  11.733  1.00  0.46           O  
HETATM  283  O   HOH T 282       8.901   7.106  16.992  1.00  0.47           O  
HETATM  284  O   HOH T 283      41.065  38.677  19.378  1.00  0.47           O  
HETATM  285  O   HOH T 284       4.844  41.194  29.709  1.00  0.47           O  
HETATM  286  O   HOH T 285      20.351   7.951   7.880  1.00  0.47           O  
HETATM  287  O   HOH T 286      27.671  55.304   4.247  1.00  0.47           O  
HETATM  288  O   HOH T 287       3.756   4.958   7.292  1.00  0.47           O  
HETATM  289  O   HOH T 288       6.795  39.960  14.397  1.00  0.47           O  
HETATM  290  O   HOH T 289      -1.748  25.752  12.064  1.00  0.47           O  
HETATM  291  O   HOH T 290      -1.772  31.645  -0.152  1.00  0.47           O  
HETATM  292  O   HOH T 291      12.060  34.734  12.148  1.00  0.47           O  
HETATM  293  O   HOH T 292      36.745  54.965  10.959  1.00  0.47           O  
HETATM  294  O   HOH T 293      11.485   8.761   8.726  1.00  0.47           O  
HETATM  295  O   HOH T 294       4.686  14.758  23.902  1.00  0.47           O  
HETATM  296  O   HOH T 295      28.375  18.783  -3.421  1.00  0.47           O  
HETATM  297  O   HOH T 296      30.181  28.502  21.985  1.00  0.47           O  
HETATM  298  O   HOH T 297      12.981  37.292  14.749  1.00  0.47           O  
HETATM  299  O   HOH T 298       1.668  13.313  16.141  1.00  0.47           O  
HETATM  300  O   HOH T 299      -0.915  30.022  25.120  1.00  0.47           O  
HETATM  301  O   HOH T 300      22.009  23.131  -9.754  1.00  0.48           O  
HETATM  302  O   HOH T 301       0.235  16.225  -1.493  1.00  0.48           O  
HETATM  303  O   HOH T 302      -0.172  23.300   8.019  1.00  0.48           O  
HETATM  304  O   HOH T 303       7.338  40.017  29.171  1.00  0.48           O  
HETATM  305  O   HOH T 304       1.953  24.613   6.704  1.00  0.48           O  
HETATM  306  O   HOH T 305      19.279  49.540  -4.128  1.00  0.48           O  
HETATM  307  O   HOH T 306       2.306  27.618  -2.181  1.00  0.48           O  
HETATM  308  O   HOH T 307      33.063  13.223  12.781  1.00  0.48           O  
HETATM  309  O   HOH T 308       4.715  38.991  -0.333  1.00  0.48           O  
HETATM  310  O   HOH T 309      -3.543  32.533  11.323  1.00  0.48           O  
HETATM  311  O   HOH T 310      40.466  37.797  16.836  1.00  0.48           O  
HETATM  312  O   HOH T 311      10.454  47.695   5.698  1.00  0.48           O  
HETATM  313  O   HOH T 312      13.233  37.859  17.419  1.00  0.48           O  
HETATM  314  O   HOH T 313       0.689  20.930  -0.283  1.00  0.48           O  
HETATM  315  O   HOH T 314      -1.145  34.983   5.598  1.00  0.48           O  
HETATM  316  O   HOH T 315       4.449   9.776   7.876  1.00  0.48           O  
HETATM  317  O   HOH T 316       5.575   2.930   7.141  1.00  0.48           O  
HETATM  318  O   HOH T 317      11.355  37.684  20.792  1.00  0.48           O  
HETATM  319  O   HOH T 318       8.740  31.662 -11.377  1.00  0.48           O  
HETATM  320  O   HOH T 319       0.537  40.400  24.257  1.00  0.48           O  
HETATM  321  O   HOH T 320      45.932  22.818   0.891  1.00  0.48           O  
HETATM  322  O   HOH T 321      39.799  19.391  -0.836  1.00  0.48           O  
HETATM  323  O   HOH T 322      37.191  14.556  16.272  1.00  0.48           O  
HETATM  324  O   HOH T 323      28.822  30.716  -8.205  1.00  0.48           O  
HETATM  325  O   HOH T 324       9.952  40.551  17.082  1.00  0.49           O  
HETATM  326  O   HOH T 325      46.223  25.039  -0.856  1.00  0.49           O  
HETATM  327  O   HOH T 326      27.243  52.422  13.028  1.00  0.49           O  
HETATM  328  O   HOH T 327       8.784  49.089   9.941  1.00  0.49           O  
HETATM  329  O   HOH T 328       8.335  49.598   5.637  1.00  0.49           O  
HETATM  330  O   HOH T 329      41.172  20.970  -2.507  1.00  0.49           O  
HETATM  331  O   HOH T 330      31.567  30.743  -7.574  1.00  0.49           O  
HETATM  332  O   HOH T 331       2.993  20.894  23.816  1.00  0.49           O  
HETATM  333  O   HOH T 332      12.094  29.688 -12.317  1.00  0.49           O  
HETATM  334  O   HOH T 333      17.835  36.484  15.653  1.00  0.49           O  
HETATM  335  O   HOH T 334      11.457   6.395  17.878  1.00  0.49           O  
HETATM  336  O   HOH T 335      29.597  37.981   1.000  1.00  0.49           O  
HETATM  337  O   HOH T 336      29.663  16.352   0.535  1.00  0.49           O  
HETATM  338  O   HOH T 337      11.107   7.074  15.224  1.00  0.50           O  
HETATM  339  O   HOH T 338      14.965  43.745  17.074  1.00  0.50           O  
HETATM  340  O   HOH T 339       9.165  46.955   8.130  1.00  0.50           O  
HETATM  341  O   HOH T 340       2.117  12.559   1.292  1.00  0.50           O  
HETATM  342  O   HOH T 341      -3.479  23.640  12.581  1.00  0.50           O  
HETATM  343  O   HOH T 342      18.475  53.593   2.427  1.00  0.50           O  
HETATM  344  O   HOH T 343       4.094  26.915  -4.124  1.00  0.50           O  
HETATM  345  O   HOH T 344      26.202  48.656  16.485  1.00  0.50           O  
HETATM  346  O   HOH T 345      31.382  26.094  22.333  1.00  0.50           O  
HETATM  347  O   HOH T 346      10.980   4.029  10.614  1.00  0.50           O  
HETATM  348  O   HOH T 347       9.099   5.553   7.361  1.00  0.50           O  
HETATM  349  O   HOH T 348      -3.110  29.578  19.516  1.00  0.50           O  
HETATM  350  O   HOH T 349      14.543  19.269  -1.976  1.00  0.50           O  
HETATM  351  O   HOH T 350      19.089  51.716   7.314  1.00  0.50           O  
HETATM  352  O   HOH T 351      -1.946  37.248   7.072  1.00  0.50           O  
HETATM  353  O   HOH T 352       1.413  37.839  24.502  1.00  0.50           O  
HETATM  354  O   HOH T 353      22.750  21.664  -2.673  1.00  0.50           O  
HETATM  355  O   HOH T 354      18.112  18.296  23.564  1.00  0.50           O  
HETATM  356  O   HOH T 355      25.047  27.375  22.059  1.00  0.50           O  
HETATM  357  O   HOH T 356       3.376  33.200  26.770  1.00  0.50           O  
HETATM  358  O   HOH T 357      26.615  32.456  21.817  1.00  0.50           O  
HETATM  359  O   HOH T 358      45.679  35.379  -3.806  1.00  0.50           O  
HETATM  360  O   HOH T 359      23.207  33.935  20.733  1.00  0.51           O  
HETATM  361  O   HOH T 360      33.352   8.587  17.216  1.00  0.51           O  
HETATM  362  O   HOH T 361      30.744  32.891  21.692  1.00  0.51           O  
HETATM  363  O   HOH T 362      17.858  18.400  -1.823  1.00  0.51           O  
HETATM  364  O   HOH T 363       5.657  36.290  11.421  1.00  0.51           O  
HETATM  365  O   HOH T 364      16.523  52.563   4.033  1.00  0.51           O  
HETATM  366  O   HOH T 365      27.178   9.043  19.040  1.00  0.51           O  
HETATM  367  O   HOH T 366      21.946  49.249  -3.881  1.00  0.51           O  
HETATM  368  O   HOH T 367      42.808  51.753   8.882  1.00  0.51           O  
HETATM  369  O   HOH T 368      25.272  23.759  -5.991  1.00  0.51           O  
HETATM  370  O   HOH T 369       0.027  18.348   0.111  1.00  0.51           O  
HETATM  371  O   HOH T 370       7.342  37.797  31.011  1.00  0.51           O  
HETATM  372  O   HOH T 371       0.682  25.295  -2.224  1.00  0.51           O  
HETATM  373  O   HOH T 372      -0.776  12.388  17.140  1.00  0.51           O  
HETATM  374  O   HOH T 373      27.712   7.807  16.422  1.00  0.52           O  
HETATM  375  O   HOH T 374      30.901  25.978  -8.078  1.00  0.52           O  
HETATM  376  O   HOH T 375       2.751   9.664   5.739  1.00  0.52           O  
HETATM  377  O   HOH T 376       8.503  51.156   8.021  1.00  0.52           O  
HETATM  378  O   HOH T 377      -4.596  25.938  11.526  1.00  0.52           O  
HETATM  379  O   HOH T 378      -6.693  24.578  16.483  1.00  0.52           O  
HETATM  380  O   HOH T 379       5.316  52.133  11.148  1.00  0.52           O  
HETATM  381  O   HOH T 380       3.739  21.778  -9.094  1.00  0.52           O  
HETATM  382  O   HOH T 381       0.283  32.418   1.566  1.00  0.52           O  
HETATM  383  O   HOH T 382       9.721  43.237  16.258  1.00  0.52           O  
HETATM  384  O   HOH T 383       3.107  12.060   7.159  1.00  0.52           O  
HETATM  385  O   HOH T 384      -2.000  37.495  12.252  1.00  0.52           O  
HETATM  386  O   HOH T 385      34.058  26.085  21.969  1.00  0.52           O  
HETATM  387  O   HOH T 386       5.453  36.045  -6.670  1.00  0.53           O  
HETATM  388  O   HOH T 387      29.832  52.632  13.552  1.00  0.53           O  
HETATM  389  O   HOH T 388       1.528  36.631  -0.775  1.00  0.53           O  
HETATM  390  O   HOH T 389      -1.036  13.936  19.441  1.00  0.53           O  
HETATM  391  O   HOH T 390      47.456  37.393  -3.974  1.00  0.53           O  
HETATM  392  O   HOH T 391      23.810  38.266 -12.277  1.00  0.53           O  
HETATM  393  O   HOH T 392      17.043  37.998  17.953  1.00  0.53           O  
HETATM  394  O   HOH T 393       6.472  42.322  27.755  1.00  0.53           O  
HETATM  395  O   HOH T 394      15.309  37.341  22.533  1.00  0.53           O  
HETATM  396  O   HOH T 395      19.584  57.851   7.436  1.00  0.53           O  
HETATM  397  O   HOH T 396      42.680  38.695  15.300  1.00  0.54           O  
HETATM  398  O   HOH T 397       8.792  27.665  -6.955  1.00  0.54           O  
HETATM  399  O   HOH T 398      27.485  33.125  -8.191  1.00  0.54           O  
HETATM  400  O   HOH T 399      -2.851  26.717   9.668  1.00  0.54           O  
HETATM  401  O   HOH T 400      42.626  45.539  10.642  1.00  0.54           O  
HETATM  402  O   HOH T 401      15.477   8.263   9.172  1.00  0.54           O  
HETATM  403  O   HOH T 402      36.419  13.743  13.754  1.00  0.54           O  
HETATM  404  O   HOH T 403      -0.022  29.923  27.561  1.00  0.54           O  
HETATM  405  O   HOH T 404      16.900   5.351  12.227  1.00  0.54           O  
HETATM  406  O   HOH T 405      11.495  21.300  -8.221  1.00  0.54           O  
HETATM  407  O   HOH T 406      -0.089  15.172  17.147  1.00  0.54           O  
HETATM  408  O   HOH T 407       8.139  37.336  28.627  1.00  0.54           O  
HETATM  409  O   HOH T 408      17.083   5.482  15.996  1.00  0.54           O  
HETATM  410  O   HOH T 409      37.321  19.421  -1.881  1.00  0.54           O  
HETATM  411  O   HOH T 410      38.750  32.118  -7.552  1.00  0.54           O  
HETATM  412  O   HOH T 411      28.308  47.053  13.733  1.00  0.55           O  
HETATM  413  O   HOH T 412      16.529   8.049  16.779  1.00  0.55           O  
HETATM  414  O   HOH T 413      11.402  41.248  19.397  1.00  0.55           O  
HETATM  415  O   HOH T 414       4.218  40.857   5.491  1.00  0.55           O  
HETATM  416  O   HOH T 415      42.118  20.197   4.568  1.00  0.55           O  
HETATM  417  O   HOH T 416      34.693   9.796  19.382  1.00  0.55           O  
HETATM  418  O   HOH T 417      40.440  26.773  -6.483  1.00  0.55           O  
HETATM  419  O   HOH T 418      12.599  46.013  20.176  1.00  0.55           O  
HETATM  420  O   HOH T 419      48.279  25.727   1.096  1.00  0.55           O  
HETATM  421  O   HOH T 420       0.622  17.924   5.641  1.00  0.56           O  
HETATM  422  O   HOH T 421       7.976  51.689  10.609  1.00  0.56           O  
HETATM  423  O   HOH T 422      19.382   8.007   0.783  1.00  0.56           O  
HETATM  424  O   HOH T 423      11.405  42.186  21.878  1.00  0.56           O  
HETATM  425  O   HOH T 424       8.516  53.906   8.970  1.00  0.56           O  
HETATM  426  O   HOH T 425      18.448   6.584  18.109  1.00  0.56           O  
HETATM  427  O   HOH T 426      44.841  33.617  -5.768  1.00  0.56           O  
HETATM  428  O   HOH T 427      -4.143  33.931  17.055  1.00  0.56           O  
HETATM  429  O   HOH T 428       2.575  44.629  23.842  1.00  0.56           O  
HETATM  430  O   HOH T 429      29.050  51.996  -2.373  1.00  0.57           O  
HETATM  431  O   HOH T 430      -3.110  26.015  17.071  1.00  0.57           O  
HETATM  432  O   HOH T 431      13.649  51.260  14.698  1.00  0.57           O  
HETATM  433  O   HOH T 432      28.519  50.188  14.125  1.00  0.58           O  
HETATM  434  O   HOH T 433      -1.631  16.245   9.702  1.00  0.58           O  
HETATM  435  O   HOH T 434       7.329  11.313  28.322  1.00  0.58           O  
HETATM  436  O   HOH T 435      23.585  29.265  23.430  1.00  0.59           O  
HETATM  437  O   HOH T 436      38.087  26.407 -10.086  1.00  0.60           O  
HETATM  438  O   HOH T 437      10.178   6.510  11.499  1.00  0.60           O  
HETATM  439  O   HOH T 438      28.177  47.143  -4.947  1.00  0.61           O  
HETATM  440  O   HOH T 439      -2.251  15.087  12.871  1.00  0.61           O  
TER     441      HOH T 439 
