# Supplementary material for: Accurate Prediction of Hydration Sites of Proteins Using Energy Model With Atom Embedding
Source: Front Mol Biosci. 2021 Sep 20;8:756075. doi: 10.3389/fmolb.2021.756075 (PMC8488165; doi:10.3389/fmolb.2021.756075)
Supplement: Supplementary file 1 [file DataSheet1.ZIP › Data Sheet 1/Our_result_pdb/our_dataset_output/2CL2_watersite.pdb]

HEADER                                                        XXXX


JRNL        PMID   -1
HETATM    1  O   HOH T   0       8.325   8.251  70.752  1.00  0.16           O  
HETATM    2  O   HOH T   1      -7.210  38.651  48.563  1.00  0.18           O  
HETATM    3  O   HOH T   2      14.813  13.899  60.801  1.00  0.18           O  
HETATM    4  O   HOH T   3     -13.531  25.180  64.805  1.00  0.19           O  
HETATM    5  O   HOH T   4       4.735  26.015  41.995  1.00  0.19           O  
HETATM    6  O   HOH T   5      -9.599  32.495  46.160  1.00  0.19           O  
HETATM    7  O   HOH T   6      -2.906  11.142  60.773  1.00  0.20           O  
HETATM    8  O   HOH T   7      -2.977  38.945  60.474  1.00  0.21           O  
HETATM    9  O   HOH T   8       1.704   8.796  65.428  1.00  0.21           O  
HETATM   10  O   HOH T   9      -9.428  32.515  76.841  1.00  0.21           O  
HETATM   11  O   HOH T  10      -0.449  33.187  72.072  1.00  0.21           O  
HETATM   12  O   HOH T  11       6.617  20.195  40.774  1.00  0.22           O  
HETATM   13  O   HOH T  12      -1.328  33.837  67.390  1.00  0.22           O  
HETATM   14  O   HOH T  13     -14.637  22.660  45.148  1.00  0.22           O  
HETATM   15  O   HOH T  14     -10.689  22.211  53.385  1.00  0.22           O  
HETATM   16  O   HOH T  15       0.555  14.544  76.947  1.00  0.23           O  
HETATM   17  O   HOH T  16      10.729  35.635  60.548  1.00  0.23           O  
HETATM   18  O   HOH T  17      13.339  28.460  68.909  1.00  0.23           O  
HETATM   19  O   HOH T  18      -2.287  27.279  32.630  1.00  0.23           O  
HETATM   20  O   HOH T  19       4.459  31.090  46.482  1.00  0.23           O  
HETATM   21  O   HOH T  20      -7.717  15.438  54.970  1.00  0.24           O  
HETATM   22  O   HOH T  21      -8.850  20.673  52.013  1.00  0.24           O  
HETATM   23  O   HOH T  22     -13.534  30.768  72.484  1.00  0.24           O  
HETATM   24  O   HOH T  23      11.870  32.985  54.094  1.00  0.24           O  
HETATM   25  O   HOH T  24      12.833   2.807  76.133  1.00  0.24           O  
HETATM   26  O   HOH T  25     -12.809  15.951  35.290  1.00  0.24           O  
HETATM   27  O   HOH T  26     -13.409  27.121  47.522  1.00  0.25           O  
HETATM   28  O   HOH T  27      13.401  19.275  69.132  1.00  0.25           O  
HETATM   29  O   HOH T  28     -15.680  28.409  37.457  1.00  0.25           O  
HETATM   30  O   HOH T  29     -13.150  46.014  54.842  1.00  0.26           O  
HETATM   31  O   HOH T  30      13.731   4.008  60.853  1.00  0.26           O  
HETATM   32  O   HOH T  31       9.048  36.004  46.597  1.00  0.26           O  
HETATM   33  O   HOH T  32      -8.489  35.403  41.167  1.00  0.27           O  
HETATM   34  O   HOH T  33      -1.424   3.780  67.932  1.00  0.27           O  
HETATM   35  O   HOH T  34      -3.506  20.415  32.774  1.00  0.28           O  
HETATM   36  O   HOH T  35       4.383  23.578  40.839  1.00  0.28           O  
HETATM   37  O   HOH T  36     -16.163  18.347  53.996  1.00  0.28           O  
HETATM   38  O   HOH T  37      -3.842  22.021  26.035  1.00  0.28           O  
HETATM   39  O   HOH T  38       0.177  21.455  51.266  1.00  0.28           O  
HETATM   40  O   HOH T  39      15.894   1.963  70.143  1.00  0.28           O  
HETATM   41  O   HOH T  40      -3.999   7.323  69.785  1.00  0.28           O  
HETATM   42  O   HOH T  41      -2.098   7.595  71.860  1.00  0.29           O  
HETATM   43  O   HOH T  42     -14.156  32.582  38.146  1.00  0.29           O  
HETATM   44  O   HOH T  43     -14.434  31.012  58.627  1.00  0.29           O  
HETATM   45  O   HOH T  44      16.588   7.877  71.902  1.00  0.29           O  
HETATM   46  O   HOH T  45     -16.940  16.309  65.427  1.00  0.29           O  
HETATM   47  O   HOH T  46     -15.619  23.200  49.994  1.00  0.30           O  
HETATM   48  O   HOH T  47     -11.578  35.151  68.895  1.00  0.30           O  
HETATM   49  O   HOH T  48       9.478  37.065  49.129  1.00  0.30           O  
HETATM   50  O   HOH T  49      -5.495   6.640  43.088  1.00  0.30           O  
HETATM   51  O   HOH T  50      -9.091  32.687  32.042  1.00  0.30           O  
HETATM   52  O   HOH T  51      15.134  14.017  73.758  1.00  0.30           O  
HETATM   53  O   HOH T  52     -11.713  30.024  77.900  1.00  0.30           O  
HETATM   54  O   HOH T  53      -3.605  29.594  31.683  1.00  0.30           O  
HETATM   55  O   HOH T  54      12.282  25.312  55.575  1.00  0.30           O  
HETATM   56  O   HOH T  55       2.311   2.896  74.240  1.00  0.31           O  
HETATM   57  O   HOH T  56      -7.850  12.916  40.485  1.00  0.31           O  
HETATM   58  O   HOH T  57       4.004  20.888  40.437  1.00  0.31           O  
HETATM   59  O   HOH T  58     -14.792  19.944  57.269  1.00  0.31           O  
HETATM   60  O   HOH T  59       2.302   2.320  62.558  1.00  0.31           O  
HETATM   61  O   HOH T  60     -19.326  24.532  55.915  1.00  0.32           O  
HETATM   62  O   HOH T  61      16.028  33.023  56.019  1.00  0.32           O  
HETATM   63  O   HOH T  62       2.782  25.242  37.599  1.00  0.32           O  
HETATM   64  O   HOH T  63      10.343  37.756  62.444  1.00  0.32           O  
HETATM   65  O   HOH T  64      -5.821  13.074  57.378  1.00  0.32           O  
HETATM   66  O   HOH T  65       9.969  22.140  64.265  1.00  0.32           O  
HETATM   67  O   HOH T  66      14.448  21.630  75.072  1.00  0.32           O  
HETATM   68  O   HOH T  67      13.411  21.825  70.280  1.00  0.32           O  
HETATM   69  O   HOH T  68      -2.928  34.564  79.603  1.00  0.32           O  
HETATM   70  O   HOH T  69       6.812  20.660  50.358  1.00  0.32           O  
HETATM   71  O   HOH T  70      -3.664  34.910  39.604  1.00  0.32           O  
HETATM   72  O   HOH T  71      -8.479  20.946  31.610  1.00  0.32           O  
HETATM   73  O   HOH T  72      -3.792  30.903  37.794  1.00  0.33           O  
HETATM   74  O   HOH T  73      12.765   4.726  51.020  1.00  0.33           O  
HETATM   75  O   HOH T  74      10.782  23.286  49.424  1.00  0.33           O  
HETATM   76  O   HOH T  75      10.869  33.073  45.982  1.00  0.33           O  
HETATM   77  O   HOH T  76      -0.689  45.635  44.198  1.00  0.33           O  
HETATM   78  O   HOH T  77     -10.255  18.392  67.255  1.00  0.33           O  
HETATM   79  O   HOH T  78     -14.610  48.088  56.004  1.00  0.33           O  
HETATM   80  O   HOH T  79      -0.947  30.199  81.657  1.00  0.33           O  
HETATM   81  O   HOH T  80      -6.363  10.347  35.768  1.00  0.33           O  
HETATM   82  O   HOH T  81     -18.577  23.055  65.502  1.00  0.33           O  
HETATM   83  O   HOH T  82      11.054  31.756  78.714  1.00  0.33           O  
HETATM   84  O   HOH T  83       5.589  37.720  52.930  1.00  0.34           O  
HETATM   85  O   HOH T  84     -17.107  41.335  52.341  1.00  0.34           O  
HETATM   86  O   HOH T  85      15.589   4.555  56.815  1.00  0.34           O  
HETATM   87  O   HOH T  86      -2.625  42.444  47.685  1.00  0.34           O  
HETATM   88  O   HOH T  87     -15.405  44.639  61.498  1.00  0.34           O  
HETATM   89  O   HOH T  88       3.908   1.385  72.469  1.00  0.34           O  
HETATM   90  O   HOH T  89     -13.644  11.792  68.346  1.00  0.34           O  
HETATM   91  O   HOH T  90       7.613  40.779  66.212  1.00  0.34           O  
HETATM   92  O   HOH T  91     -16.026  14.711  67.437  1.00  0.34           O  
HETATM   93  O   HOH T  92       8.874  39.495  64.136  1.00  0.34           O  
HETATM   94  O   HOH T  93       0.898  41.144  35.670  1.00  0.34           O  
HETATM   95  O   HOH T  94     -15.026  16.504  55.832  1.00  0.34           O  
HETATM   96  O   HOH T  95      16.076   8.537  67.742  1.00  0.34           O  
HETATM   97  O   HOH T  96     -16.770  19.145  65.234  1.00  0.34           O  
HETATM   98  O   HOH T  97      12.893   4.349  66.910  1.00  0.35           O  
HETATM   99  O   HOH T  98     -14.708  41.281  55.588  1.00  0.35           O  
HETATM  100  O   HOH T  99       5.549   7.081  76.342  1.00  0.35           O  
HETATM  101  O   HOH T 100      -7.696  35.010  43.735  1.00  0.35           O  
HETATM  102  O   HOH T 101      -1.029  45.418  59.428  1.00  0.35           O  
HETATM  103  O   HOH T 102       4.622  45.366  55.210  1.00  0.35           O  
HETATM  104  O   HOH T 103     -12.822  48.017  60.558  1.00  0.35           O  
HETATM  105  O   HOH T 104      11.681   5.298  76.322  1.00  0.35           O  
HETATM  106  O   HOH T 105      11.823   4.833  62.562  1.00  0.35           O  
HETATM  107  O   HOH T 106      -8.241  47.085  42.849  1.00  0.35           O  
HETATM  108  O   HOH T 107      16.523  32.760  63.025  1.00  0.35           O  
HETATM  109  O   HOH T 108     -18.657  42.038  57.441  1.00  0.35           O  
HETATM  110  O   HOH T 109      -9.546  45.864  51.535  1.00  0.36           O  
HETATM  111  O   HOH T 110       6.026  44.629  57.479  1.00  0.36           O  
HETATM  112  O   HOH T 111      -6.960  46.497  55.767  1.00  0.36           O  
HETATM  113  O   HOH T 112      -9.059  11.622  67.051  1.00  0.36           O  
HETATM  114  O   HOH T 113     -16.032  38.367  58.863  1.00  0.36           O  
HETATM  115  O   HOH T 114     -15.630  19.137  49.059  1.00  0.36           O  
HETATM  116  O   HOH T 115     -12.350  39.413  51.912  1.00  0.36           O  
HETATM  117  O   HOH T 116       8.901  12.680  75.761  1.00  0.36           O  
HETATM  118  O   HOH T 117      -0.320  16.470  59.016  1.00  0.36           O  
HETATM  119  O   HOH T 118     -17.336  38.106  61.371  1.00  0.36           O  
HETATM  120  O   HOH T 119      18.272   9.641  61.761  1.00  0.36           O  
HETATM  121  O   HOH T 120     -18.493  17.959  59.832  1.00  0.36           O  
HETATM  122  O   HOH T 121     -11.446  46.538  49.505  1.00  0.36           O  
HETATM  123  O   HOH T 122       7.307  17.846  53.042  1.00  0.36           O  
HETATM  124  O   HOH T 123      -8.093  24.016  78.137  1.00  0.36           O  
HETATM  125  O   HOH T 124       3.749  22.948  48.705  1.00  0.36           O  
HETATM  126  O   HOH T 125       1.075  20.168  37.797  1.00  0.36           O  
HETATM  127  O   HOH T 126      -9.266  10.457  69.602  1.00  0.36           O  
HETATM  128  O   HOH T 127      -9.987  38.999  47.941  1.00  0.36           O  
HETATM  129  O   HOH T 128      -0.088  45.490  52.228  1.00  0.36           O  
HETATM  130  O   HOH T 129      15.689  30.695  57.253  1.00  0.36           O  
HETATM  131  O   HOH T 130      14.792  14.356  77.717  1.00  0.37           O  
HETATM  132  O   HOH T 131      -8.257  35.133  33.043  1.00  0.37           O  
HETATM  133  O   HOH T 132       1.962  19.944  49.795  1.00  0.37           O  
HETATM  134  O   HOH T 133     -14.670  47.763  53.210  1.00  0.37           O  
HETATM  135  O   HOH T 134     -14.730  16.650  49.851  1.00  0.37           O  
HETATM  136  O   HOH T 135       3.189  21.212  77.667  1.00  0.37           O  
HETATM  137  O   HOH T 136      15.485  25.745  58.281  1.00  0.37           O  
HETATM  138  O   HOH T 137     -20.997  28.241  68.421  1.00  0.37           O  
HETATM  139  O   HOH T 138      -2.184  34.065  70.070  1.00  0.37           O  
HETATM  140  O   HOH T 139     -12.320  31.970  33.763  1.00  0.37           O  
HETATM  141  O   HOH T 140      -2.546   0.573  57.220  1.00  0.37           O  
HETATM  142  O   HOH T 141      -0.393   8.142  81.014  1.00  0.37           O  
HETATM  143  O   HOH T 142     -19.365  29.076  72.798  1.00  0.37           O  
HETATM  144  O   HOH T 143     -10.605  40.641  57.642  1.00  0.37           O  
HETATM  145  O   HOH T 144      -4.969  43.415  42.923  1.00  0.38           O  
HETATM  146  O   HOH T 145       1.235  14.212  41.630  1.00  0.38           O  
HETATM  147  O   HOH T 146      16.231  23.447  73.871  1.00  0.38           O  
HETATM  148  O   HOH T 147       1.192  10.120  79.964  1.00  0.38           O  
HETATM  149  O   HOH T 148      13.285  -2.174  69.582  1.00  0.38           O  
HETATM  150  O   HOH T 149      16.559  25.292  54.866  1.00  0.38           O  
HETATM  151  O   HOH T 150     -11.199  40.425  60.427  1.00  0.38           O  
HETATM  152  O   HOH T 151      -6.386  15.846  57.452  1.00  0.38           O  
HETATM  153  O   HOH T 152     -17.749  30.270  74.755  1.00  0.38           O  
HETATM  154  O   HOH T 153       9.525  21.159  50.917  1.00  0.38           O  
HETATM  155  O   HOH T 154      11.211  35.043  48.028  1.00  0.38           O  
HETATM  156  O   HOH T 155      11.795  25.567  41.992  1.00  0.38           O  
HETATM  157  O   HOH T 156      -4.050   4.571  67.489  1.00  0.39           O  
HETATM  158  O   HOH T 157       2.771  20.180  55.217  1.00  0.39           O  
HETATM  159  O   HOH T 158     -15.888  31.080  36.580  1.00  0.39           O  
HETATM  160  O   HOH T 159       4.023  25.806  85.633  1.00  0.39           O  
HETATM  161  O   HOH T 160     -15.462  25.625  48.701  1.00  0.39           O  
HETATM  162  O   HOH T 161     -15.504  32.259  71.266  1.00  0.39           O  
HETATM  163  O   HOH T 162      -4.667  36.718  67.652  1.00  0.39           O  
HETATM  164  O   HOH T 163      11.392  32.517  49.403  1.00  0.39           O  
HETATM  165  O   HOH T 164     -15.909  24.942  46.085  1.00  0.39           O  
HETATM  166  O   HOH T 165      -6.218   6.906  37.992  1.00  0.39           O  
HETATM  167  O   HOH T 166      -8.144  26.554  79.401  1.00  0.39           O  
HETATM  168  O   HOH T 167     -16.231  47.712  50.901  1.00  0.39           O  
HETATM  169  O   HOH T 168       6.159  28.177  41.201  1.00  0.39           O  
HETATM  170  O   HOH T 169     -11.071  38.712  55.908  1.00  0.39           O  
HETATM  171  O   HOH T 170       8.888   4.907  52.672  1.00  0.39           O  
HETATM  172  O   HOH T 171       0.762   9.429  59.053  1.00  0.39           O  
HETATM  173  O   HOH T 172      -7.514  18.578  72.252  1.00  0.40           O  
HETATM  174  O   HOH T 173     -13.764  27.651  33.227  1.00  0.40           O  
HETATM  175  O   HOH T 174     -11.870  21.409  78.979  1.00  0.40           O  
HETATM  176  O   HOH T 175     -13.039  35.064  47.295  1.00  0.40           O  
HETATM  177  O   HOH T 176      -4.800   3.971  63.789  1.00  0.40           O  
HETATM  178  O   HOH T 177      10.112  21.059  43.803  1.00  0.40           O  
HETATM  179  O   HOH T 178     -17.398  26.424  55.341  1.00  0.40           O  
HETATM  180  O   HOH T 179       1.155  25.952  85.779  1.00  0.40           O  
HETATM  181  O   HOH T 180      -4.977  37.207  70.278  1.00  0.40           O  
HETATM  182  O   HOH T 181     -11.920  38.309  58.619  1.00  0.40           O  
HETATM  183  O   HOH T 182      12.448  28.578  48.524  1.00  0.40           O  
HETATM  184  O   HOH T 183      11.336  23.482  43.812  1.00  0.40           O  
HETATM  185  O   HOH T 184     -10.567  11.144  50.384  1.00  0.40           O  
HETATM  186  O   HOH T 185      -6.004  45.516  47.821  1.00  0.40           O  
HETATM  187  O   HOH T 186     -16.115  28.687  54.187  1.00  0.40           O  
HETATM  188  O   HOH T 187     -17.350  42.146  54.937  1.00  0.40           O  
HETATM  189  O   HOH T 188     -11.495  37.266  64.590  1.00  0.40           O  
HETATM  190  O   HOH T 189      14.616   6.014  71.205  1.00  0.41           O  
HETATM  191  O   HOH T 190      -5.861  38.877  40.521  1.00  0.41           O  
HETATM  192  O   HOH T 191       9.907  26.818  78.733  1.00  0.41           O  
HETATM  193  O   HOH T 192      14.276  26.778  54.330  1.00  0.41           O  
HETATM  194  O   HOH T 193      -6.121  20.996  72.207  1.00  0.41           O  
HETATM  195  O   HOH T 194     -13.841  18.439  35.667  1.00  0.41           O  
HETATM  196  O   HOH T 195       1.674  15.144  53.638  1.00  0.41           O  
HETATM  197  O   HOH T 196      11.314  29.205  77.746  1.00  0.41           O  
HETATM  198  O   HOH T 197       8.350  10.728  80.013  1.00  0.41           O  
HETATM  199  O   HOH T 198       0.676  12.155  56.448  1.00  0.41           O  
HETATM  200  O   HOH T 199      -8.397  14.002  57.239  1.00  0.41           O  
HETATM  201  O   HOH T 200      12.957   7.474  50.834  1.00  0.41           O  
HETATM  202  O   HOH T 201     -19.239  44.594  63.888  1.00  0.41           O  
HETATM  203  O   HOH T 202       1.740  43.824  63.071  1.00  0.41           O  
HETATM  204  O   HOH T 203       0.827   9.825  44.514  1.00  0.41           O  
HETATM  205  O   HOH T 204       5.252  16.003  78.052  1.00  0.41           O  
HETATM  206  O   HOH T 205     -16.969  19.442  51.510  1.00  0.41           O  
HETATM  207  O   HOH T 206      -3.239  28.570  25.684  1.00  0.41           O  
HETATM  208  O   HOH T 207      -3.239   7.967  41.905  1.00  0.41           O  
HETATM  209  O   HOH T 208     -13.025  35.667  58.668  1.00  0.41           O  
HETATM  210  O   HOH T 209      -4.896   6.265  40.329  1.00  0.41           O  
HETATM  211  O   HOH T 210      14.026  18.761  57.325  1.00  0.42           O  
HETATM  212  O   HOH T 211       8.983  -0.122  54.913  1.00  0.42           O  
HETATM  213  O   HOH T 212      -8.122  35.755  35.743  1.00  0.42           O  
HETATM  214  O   HOH T 213      -8.963  38.034  37.110  1.00  0.42           O  
HETATM  215  O   HOH T 214      -8.109  38.625  45.850  1.00  0.42           O  
HETATM  216  O   HOH T 215      12.069  25.789  48.856  1.00  0.42           O  
HETATM  217  O   HOH T 216     -12.376  35.594  35.038  1.00  0.42           O  
HETATM  218  O   HOH T 217      -9.377  11.323  38.712  1.00  0.42           O  
HETATM  219  O   HOH T 218      -0.593  14.301  57.399  1.00  0.42           O  
HETATM  220  O   HOH T 219      14.752   4.228  69.009  1.00  0.42           O  
HETATM  221  O   HOH T 220     -15.444  47.333  60.848  1.00  0.42           O  
HETATM  222  O   HOH T 221     -13.711  34.217  56.273  1.00  0.42           O  
HETATM  223  O   HOH T 222     -12.508  39.769  49.176  1.00  0.42           O  
HETATM  224  O   HOH T 223     -19.739  13.808  61.779  1.00  0.42           O  
HETATM  225  O   HOH T 224     -17.995  31.449  72.250  1.00  0.42           O  
HETATM  226  O   HOH T 225     -21.439  28.579  65.780  1.00  0.42           O  
HETATM  227  O   HOH T 226     -13.965  37.447  65.627  1.00  0.42           O  
HETATM  228  O   HOH T 227     -10.504  11.596  64.638  1.00  0.42           O  
HETATM  229  O   HOH T 228      18.015  11.673  59.948  1.00  0.42           O  
HETATM  230  O   HOH T 229       4.238  20.319  51.399  1.00  0.42           O  
HETATM  231  O   HOH T 230      -0.787  11.966  59.001  1.00  0.43           O  
HETATM  232  O   HOH T 231      -5.744  14.621  38.308  1.00  0.43           O  
HETATM  233  O   HOH T 232      10.159  39.752  66.623  1.00  0.43           O  
HETATM  234  O   HOH T 233      -0.611  21.005  78.940  1.00  0.43           O  
HETATM  235  O   HOH T 234      -9.981  21.879  72.212  1.00  0.43           O  
HETATM  236  O   HOH T 235     -16.558  16.809  47.893  1.00  0.43           O  
HETATM  237  O   HOH T 236      -7.153  31.708  30.512  1.00  0.43           O  
HETATM  238  O   HOH T 237      -4.050  25.324  23.447  1.00  0.43           O  
HETATM  239  O   HOH T 238      -5.878  35.624  34.266  1.00  0.43           O  
HETATM  240  O   HOH T 239     -14.771  40.445  50.884  1.00  0.43           O  
HETATM  241  O   HOH T 240      -3.164  42.250  39.076  1.00  0.43           O  
HETATM  242  O   HOH T 241       7.172  38.177  78.917  1.00  0.43           O  
HETATM  243  O   HOH T 242      -1.672  43.690  51.029  1.00  0.43           O  
HETATM  244  O   HOH T 243       9.553  40.077  73.012  1.00  0.43           O  
HETATM  245  O   HOH T 244     -19.562  16.346  62.827  1.00  0.43           O  
HETATM  246  O   HOH T 245     -21.249  20.228  67.921  1.00  0.43           O  
HETATM  247  O   HOH T 246       4.669  32.923  38.414  1.00  0.43           O  
HETATM  248  O   HOH T 247      -0.302  34.733  80.253  1.00  0.43           O  
HETATM  249  O   HOH T 248      15.711  20.440  70.229  1.00  0.43           O  
HETATM  250  O   HOH T 249       4.301  30.491  84.306  1.00  0.43           O  
HETATM  251  O   HOH T 250     -12.324  46.439  52.115  1.00  0.43           O  
HETATM  252  O   HOH T 251       1.664  22.818  38.497  1.00  0.43           O  
HETATM  253  O   HOH T 252      18.271  31.247  61.406  1.00  0.43           O  
HETATM  254  O   HOH T 253      -9.143  35.891  67.741  1.00  0.43           O  
HETATM  255  O   HOH T 254     -16.438  45.102  64.096  1.00  0.44           O  
HETATM  256  O   HOH T 255       9.685  18.390  51.596  1.00  0.44           O  
HETATM  257  O   HOH T 256      -2.017   9.371  58.792  1.00  0.44           O  
HETATM  258  O   HOH T 257     -23.576  32.428  66.373  1.00  0.44           O  
HETATM  259  O   HOH T 258      -1.119  41.211  37.573  1.00  0.44           O  
HETATM  260  O   HOH T 259      -8.501  19.547  69.858  1.00  0.44           O  
HETATM  261  O   HOH T 260       0.629  32.422  81.286  1.00  0.44           O  
HETATM  262  O   HOH T 261      -6.018   3.964  46.506  1.00  0.44           O  
HETATM  263  O   HOH T 262       6.692  41.273  63.630  1.00  0.44           O  
HETATM  264  O   HOH T 263     -11.324  38.117  35.687  1.00  0.44           O  
HETATM  265  O   HOH T 264     -14.553  13.995  69.658  1.00  0.44           O  
HETATM  266  O   HOH T 265      -0.349   2.200  62.034  1.00  0.44           O  
HETATM  267  O   HOH T 266      -9.382  35.463  64.946  1.00  0.44           O  
HETATM  268  O   HOH T 267      14.846  28.457  71.217  1.00  0.44           O  
HETATM  269  O   HOH T 268       5.902  25.978  83.473  1.00  0.44           O  
HETATM  270  O   HOH T 269       7.851   5.890  50.264  1.00  0.44           O  
HETATM  271  O   HOH T 270       7.289  17.893  50.335  1.00  0.44           O  
HETATM  272  O   HOH T 271      18.578   9.162  59.101  1.00  0.44           O  
HETATM  273  O   HOH T 272      -2.218  23.214  24.266  1.00  0.44           O  
HETATM  274  O   HOH T 273     -10.858  34.250  33.250  1.00  0.45           O  
HETATM  275  O   HOH T 274       2.399  32.319  83.270  1.00  0.45           O  
HETATM  276  O   HOH T 275     -14.158  35.736  67.788  1.00  0.45           O  
HETATM  277  O   HOH T 276      -8.840  15.454  31.630  1.00  0.45           O  
HETATM  278  O   HOH T 277       9.820  15.553  79.239  1.00  0.45           O  
HETATM  279  O   HOH T 278      -9.623  46.792  55.116  1.00  0.45           O  
HETATM  280  O   HOH T 279       3.679  16.462  55.022  1.00  0.45           O  
HETATM  281  O   HOH T 280      -0.250  48.512  55.735  1.00  0.45           O  
HETATM  282  O   HOH T 281     -16.943  48.825  54.676  1.00  0.45           O  
HETATM  283  O   HOH T 282      15.552  17.028  76.991  1.00  0.45           O  
HETATM  284  O   HOH T 283     -11.852  48.325  55.692  1.00  0.45           O  
HETATM  285  O   HOH T 284      14.857  -0.474  55.994  1.00  0.45           O  
HETATM  286  O   HOH T 285      17.288  21.268  75.102  1.00  0.45           O  
HETATM  287  O   HOH T 286     -17.133  14.009  60.724  1.00  0.45           O  
HETATM  288  O   HOH T 287       4.692  13.706  79.556  1.00  0.45           O  
HETATM  289  O   HOH T 288     -14.489  13.806  56.646  1.00  0.45           O  
HETATM  290  O   HOH T 289     -14.995  22.504  76.920  1.00  0.45           O  
HETATM  291  O   HOH T 290     -19.457  42.122  50.941  1.00  0.45           O  
HETATM  292  O   HOH T 291     -11.433   6.599  41.971  1.00  0.45           O  
HETATM  293  O   HOH T 292      -9.813   4.393  42.570  1.00  0.45           O  
HETATM  294  O   HOH T 293      12.959   2.314  70.006  1.00  0.45           O  
HETATM  295  O   HOH T 294      -6.722  11.216  52.681  1.00  0.45           O  
HETATM  296  O   HOH T 295     -14.799  33.991  48.975  1.00  0.45           O  
HETATM  297  O   HOH T 296      -8.997  41.006  44.372  1.00  0.45           O  
HETATM  298  O   HOH T 297     -16.450  37.133  66.611  1.00  0.45           O  
HETATM  299  O   HOH T 298      -6.832  37.600  43.777  1.00  0.45           O  
HETATM  300  O   HOH T 299     -10.893  20.787  74.616  1.00  0.46           O  
HETATM  301  O   HOH T 300      -7.270   5.594  48.516  1.00  0.46           O  
HETATM  302  O   HOH T 301      17.409  27.563  71.062  1.00  0.46           O  
HETATM  303  O   HOH T 302       3.885   3.531  60.683  1.00  0.46           O  
HETATM  304  O   HOH T 303     -17.884  21.974  50.654  1.00  0.46           O  
HETATM  305  O   HOH T 304      -4.762  26.146  26.022  1.00  0.46           O  
HETATM  306  O   HOH T 305       1.057  19.249  77.843  1.00  0.46           O  
HETATM  307  O   HOH T 306      -7.205  37.859  67.058  1.00  0.46           O  
HETATM  308  O   HOH T 307      -5.697  30.605  80.575  1.00  0.46           O  
HETATM  309  O   HOH T 308       4.839   9.749  48.488  1.00  0.46           O  
HETATM  310  O   HOH T 309     -12.964  20.601  76.507  1.00  0.46           O  
HETATM  311  O   HOH T 310       6.846  30.022  85.474  1.00  0.46           O  
HETATM  312  O   HOH T 311       3.097   4.587  57.527  1.00  0.46           O  
HETATM  313  O   HOH T 312     -18.468  23.895  62.877  1.00  0.46           O  
HETATM  314  O   HOH T 313       0.087  15.359  79.560  1.00  0.46           O  
HETATM  315  O   HOH T 314       8.872  42.679  72.386  1.00  0.46           O  
HETATM  316  O   HOH T 315     -18.008  18.065  67.337  1.00  0.46           O  
HETATM  317  O   HOH T 316       4.582  18.700  53.539  1.00  0.46           O  
HETATM  318  O   HOH T 317      -3.510   5.191  71.420  1.00  0.46           O  
HETATM  319  O   HOH T 318      -3.111  45.337  42.828  1.00  0.46           O  
HETATM  320  O   HOH T 319      -7.237   5.092  41.426  1.00  0.46           O  
HETATM  321  O   HOH T 320       1.877  14.801  56.482  1.00  0.46           O  
HETATM  322  O   HOH T 321     -21.253  43.587  52.605  1.00  0.46           O  
HETATM  323  O   HOH T 322     -15.108  34.968  65.276  1.00  0.46           O  
HETATM  324  O   HOH T 323     -11.554  37.334  53.558  1.00  0.46           O  
HETATM  325  O   HOH T 324     -20.954  48.285  51.609  1.00  0.46           O  
HETATM  326  O   HOH T 325       1.882   9.508  77.456  1.00  0.47           O  
HETATM  327  O   HOH T 326     -17.741  31.993  69.545  1.00  0.47           O  
HETATM  328  O   HOH T 327       2.653  15.380  78.526  1.00  0.47           O  
HETATM  329  O   HOH T 328      -8.953  11.039  35.867  1.00  0.47           O  
HETATM  330  O   HOH T 329     -19.996  42.830  55.042  1.00  0.47           O  
HETATM  331  O   HOH T 330      11.282   2.302  67.758  1.00  0.47           O  
HETATM  332  O   HOH T 331      -8.302  37.804  39.760  1.00  0.47           O  
HETATM  333  O   HOH T 332       1.478   2.269  59.983  1.00  0.47           O  
HETATM  334  O   HOH T 333       9.051   5.290  78.853  1.00  0.47           O  
HETATM  335  O   HOH T 334     -12.207  17.132  72.011  1.00  0.47           O  
HETATM  336  O   HOH T 335       8.043  28.836  87.762  1.00  0.47           O  
HETATM  337  O   HOH T 336     -16.341  26.538  35.524  1.00  0.47           O  
HETATM  338  O   HOH T 337      -9.207  31.770  26.822  1.00  0.47           O  
HETATM  339  O   HOH T 338     -17.237  23.144  44.480  1.00  0.47           O  
HETATM  340  O   HOH T 339     -13.265  33.880  63.390  1.00  0.47           O  
HETATM  341  O   HOH T 340      -5.068  27.992  80.898  1.00  0.47           O  
HETATM  342  O   HOH T 341     -10.821  42.870  61.709  1.00  0.47           O  
HETATM  343  O   HOH T 342     -14.858  33.426  40.530  1.00  0.47           O  
HETATM  344  O   HOH T 343      -3.764  33.280  36.428  1.00  0.47           O  
HETATM  345  O   HOH T 344       1.858  19.476  52.711  1.00  0.47           O  
HETATM  346  O   HOH T 345     -16.331  17.842  58.145  1.00  0.48           O  
HETATM  347  O   HOH T 346     -21.938  50.711  54.369  1.00  0.48           O  
HETATM  348  O   HOH T 347      -0.018   0.457  58.455  1.00  0.48           O  
HETATM  349  O   HOH T 348      -7.872  46.756  49.391  1.00  0.48           O  
HETATM  350  O   HOH T 349       1.631   7.531  82.877  1.00  0.48           O  
HETATM  351  O   HOH T 350     -19.656  38.876  68.526  1.00  0.48           O  
HETATM  352  O   HOH T 351      -2.712   2.375  63.212  1.00  0.48           O  
HETATM  353  O   HOH T 352      17.024   8.595  57.046  1.00  0.48           O  
HETATM  354  O   HOH T 353      10.525   2.273  74.620  1.00  0.48           O  
HETATM  355  O   HOH T 354      -5.856   3.904  43.641  1.00  0.48           O  
HETATM  356  O   HOH T 355     -19.155  33.729  71.177  1.00  0.48           O  
HETATM  357  O   HOH T 356     -18.075  43.783  61.285  1.00  0.48           O  
HETATM  358  O   HOH T 357     -15.507  29.083  34.751  1.00  0.48           O  
HETATM  359  O   HOH T 358      -4.759  11.106  39.725  1.00  0.48           O  
HETATM  360  O   HOH T 359     -11.227  16.075  74.414  1.00  0.48           O  
HETATM  361  O   HOH T 360      12.519  17.336  82.388  1.00  0.48           O  
HETATM  362  O   HOH T 361     -19.663  29.713  63.817  1.00  0.48           O  
HETATM  363  O   HOH T 362       7.305  14.489  78.724  1.00  0.48           O  
HETATM  364  O   HOH T 363     -20.967  21.376  72.312  1.00  0.48           O  
HETATM  365  O   HOH T 364       3.149   9.607  46.180  1.00  0.48           O  
HETATM  366  O   HOH T 365     -14.807  13.765  62.246  1.00  0.48           O  
HETATM  367  O   HOH T 366     -17.017  39.944  56.694  1.00  0.48           O  
HETATM  368  O   HOH T 367      -3.985  30.927  26.834  1.00  0.48           O  
HETATM  369  O   HOH T 368      12.082  30.911  47.126  1.00  0.48           O  
HETATM  370  O   HOH T 369     -13.289  12.045  71.129  1.00  0.48           O  
HETATM  371  O   HOH T 370      -7.377  12.639  55.072  1.00  0.49           O  
HETATM  372  O   HOH T 371      -0.847  20.141  81.488  1.00  0.49           O  
HETATM  373  O   HOH T 372       8.896  -0.421  57.570  1.00  0.49           O  
HETATM  374  O   HOH T 373     -19.466  49.528  53.669  1.00  0.49           O  
HETATM  375  O   HOH T 374      12.474  -0.692  71.835  1.00  0.49           O  
HETATM  376  O   HOH T 375     -21.457  34.046  65.570  1.00  0.49           O  
HETATM  377  O   HOH T 376      -3.408   3.039  69.689  1.00  0.49           O  
HETATM  378  O   HOH T 377     -15.920  34.010  69.072  1.00  0.49           O  
HETATM  379  O   HOH T 378     -11.387  20.018  69.150  1.00  0.49           O  
HETATM  380  O   HOH T 379     -10.344  13.846  75.799  1.00  0.49           O  
HETATM  381  O   HOH T 380      15.013   0.265  58.631  1.00  0.49           O  
HETATM  382  O   HOH T 381      -3.195  32.259  32.474  1.00  0.49           O  
HETATM  383  O   HOH T 382      12.233  16.969  79.415  1.00  0.49           O  
HETATM  384  O   HOH T 383      14.426  33.855  54.008  1.00  0.49           O  
HETATM  385  O   HOH T 384      -0.509  29.091  28.914  1.00  0.49           O  
HETATM  386  O   HOH T 385      -7.395  29.169  29.378  1.00  0.49           O  
HETATM  387  O   HOH T 386      -0.796  11.582  43.024  1.00  0.49           O  
HETATM  388  O   HOH T 387     -18.444  39.728  59.192  1.00  0.49           O  
HETATM  389  O   HOH T 388      -8.904  25.110  29.954  1.00  0.49           O  
HETATM  390  O   HOH T 389      -4.765  34.480  69.447  1.00  0.50           O  
HETATM  391  O   HOH T 390     -22.044  49.257  56.696  1.00  0.50           O  
HETATM  392  O   HOH T 391       1.489  44.897  60.596  1.00  0.50           O  
HETATM  393  O   HOH T 392     -17.174  23.542  78.313  1.00  0.50           O  
HETATM  394  O   HOH T 393      -2.193   5.038  46.812  1.00  0.50           O  
HETATM  395  O   HOH T 394      13.548  30.621  79.127  1.00  0.50           O  
HETATM  396  O   HOH T 395      18.323   5.734  72.689  1.00  0.50           O  
HETATM  397  O   HOH T 396       5.659  42.701  65.724  1.00  0.50           O  
HETATM  398  O   HOH T 397       8.827  31.404  87.194  1.00  0.50           O  
HETATM  399  O   HOH T 398       9.873  16.794  45.301  1.00  0.50           O  
HETATM  400  O   HOH T 399       9.909  32.586  83.528  1.00  0.50           O  
HETATM  401  O   HOH T 400       8.794  19.381  42.056  1.00  0.50           O  
HETATM  402  O   HOH T 401      -4.100   2.342  45.173  1.00  0.50           O  
HETATM  403  O   HOH T 402       7.195  45.482  54.033  1.00  0.50           O  
HETATM  404  O   HOH T 403      15.243   2.980  58.981  1.00  0.50           O  
HETATM  405  O   HOH T 404      11.541  -0.032  69.245  1.00  0.50           O  
HETATM  406  O   HOH T 405      10.739   9.068  51.349  1.00  0.50           O  
HETATM  407  O   HOH T 406       9.738  26.818  81.616  1.00  0.50           O  
HETATM  408  O   HOH T 407      -2.511   3.780  65.436  1.00  0.50           O  
HETATM  409  O   HOH T 408       7.069   1.433  58.673  1.00  0.50           O  
HETATM  410  O   HOH T 409     -15.517  28.574  46.435  1.00  0.50           O  
HETATM  411  O   HOH T 410      -6.641  39.116  37.951  1.00  0.50           O  
HETATM  412  O   HOH T 411      -5.035  42.412  37.019  1.00  0.50           O  
HETATM  413  O   HOH T 412       6.739   0.848  53.439  1.00  0.50           O  
HETATM  414  O   HOH T 413      -8.154   5.655  36.406  1.00  0.50           O  
HETATM  415  O   HOH T 414      -0.119  26.837  27.437  1.00  0.50           O  
HETATM  416  O   HOH T 415      -3.515  38.631  79.298  1.00  0.50           O  
HETATM  417  O   HOH T 416      14.571  19.669  77.127  1.00  0.50           O  
HETATM  418  O   HOH T 417      -1.513  13.691  41.350  1.00  0.50           O  
HETATM  419  O   HOH T 418     -17.466  14.323  63.456  1.00  0.51           O  
HETATM  420  O   HOH T 419      -9.714   5.552  40.138  1.00  0.51           O  
HETATM  421  O   HOH T 420      -9.580  48.085  45.040  1.00  0.51           O  
HETATM  422  O   HOH T 421       0.165  20.553  84.073  1.00  0.51           O  
HETATM  423  O   HOH T 422      18.170  19.435  70.435  1.00  0.51           O  
HETATM  424  O   HOH T 423      11.612  14.982  81.284  1.00  0.51           O  
HETATM  425  O   HOH T 424     -21.068  42.313  64.058  1.00  0.51           O  
HETATM  426  O   HOH T 425      13.755  31.487  55.471  1.00  0.51           O  
HETATM  427  O   HOH T 426      -9.761  47.986  47.789  1.00  0.51           O  
HETATM  428  O   HOH T 427      12.373  28.387  42.038  1.00  0.51           O  
HETATM  429  O   HOH T 428     -10.537   7.072  35.941  1.00  0.51           O  
HETATM  430  O   HOH T 429      -3.813  14.792  40.287  1.00  0.51           O  
HETATM  431  O   HOH T 430      -4.916  22.620  23.535  1.00  0.51           O  
HETATM  432  O   HOH T 431     -12.425  22.588  73.093  1.00  0.51           O  
HETATM  433  O   HOH T 432      -2.667  30.666  29.271  1.00  0.51           O  
HETATM  434  O   HOH T 433     -22.394  34.140  68.234  1.00  0.51           O  
HETATM  435  O   HOH T 434     -19.073  20.371  66.170  1.00  0.51           O  
HETATM  436  O   HOH T 435     -16.401  11.333  43.517  1.00  0.51           O  
HETATM  437  O   HOH T 436     -20.191  42.025  61.445  1.00  0.51           O  
HETATM  438  O   HOH T 437     -17.588  16.103  54.939  1.00  0.51           O  
HETATM  439  O   HOH T 438      -8.167   2.313  43.535  1.00  0.52           O  
HETATM  440  O   HOH T 439     -13.343  13.955  75.162  1.00  0.52           O  
HETATM  441  O   HOH T 440      -3.306  34.615  33.998  1.00  0.52           O  
HETATM  442  O   HOH T 441     -15.390  16.200  36.450  1.00  0.52           O  
HETATM  443  O   HOH T 442      -8.212   8.433  36.741  1.00  0.52           O  
HETATM  444  O   HOH T 443      -1.922  30.853  24.942  1.00  0.52           O  
HETATM  445  O   HOH T 444      -5.799  45.999  43.655  1.00  0.52           O  
HETATM  446  O   HOH T 445      12.241  14.293  78.700  1.00  0.52           O  
HETATM  447  O   HOH T 446     -21.571  47.875  54.285  1.00  0.52           O  
HETATM  448  O   HOH T 447     -21.457  32.401  70.290  1.00  0.52           O  
HETATM  449  O   HOH T 448      -3.405  46.236  47.804  1.00  0.52           O  
HETATM  450  O   HOH T 449     -15.532  24.015  74.632  1.00  0.52           O  
HETATM  451  O   HOH T 450       2.533  34.626  37.839  1.00  0.52           O  
HETATM  452  O   HOH T 451       7.394  11.874  77.716  1.00  0.52           O  
HETATM  453  O   HOH T 452      -7.343  47.714  51.836  1.00  0.52           O  
HETATM  454  O   HOH T 453     -14.743  13.717  59.290  1.00  0.53           O  
HETATM  455  O   HOH T 454     -15.788  32.390  52.762  1.00  0.53           O  
HETATM  456  O   HOH T 455      14.307   3.099  52.503  1.00  0.53           O  
HETATM  457  O   HOH T 456     -15.411  25.380  33.138  1.00  0.53           O  
HETATM  458  O   HOH T 457      12.315  38.918  69.653  1.00  0.53           O  
HETATM  459  O   HOH T 458     -13.917  36.244  54.391  1.00  0.53           O  
HETATM  460  O   HOH T 459     -21.310  31.339  65.412  1.00  0.53           O  
HETATM  461  O   HOH T 460     -14.683  48.795  58.678  1.00  0.53           O  
HETATM  462  O   HOH T 461      -8.572  40.266  70.867  1.00  0.53           O  
HETATM  463  O   HOH T 462     -18.505  49.331  51.025  1.00  0.53           O  
HETATM  464  O   HOH T 463      -6.609  31.251  27.761  1.00  0.53           O  
HETATM  465  O   HOH T 464     -12.403  13.592  64.099  1.00  0.53           O  
HETATM  466  O   HOH T 465      -3.549  43.828  45.317  1.00  0.53           O  
HETATM  467  O   HOH T 466      12.443  28.192  73.915  1.00  0.53           O  
HETATM  468  O   HOH T 467     -20.222  44.397  57.361  1.00  0.53           O  
HETATM  469  O   HOH T 468     -12.097   5.774  46.194  1.00  0.54           O  
HETATM  470  O   HOH T 469     -12.954  42.124  47.762  1.00  0.54           O  
HETATM  471  O   HOH T 470     -21.739  45.070  54.962  1.00  0.54           O  
HETATM  472  O   HOH T 471      -2.310  10.499  41.014  1.00  0.54           O  
HETATM  473  O   HOH T 472     -16.921  42.001  49.709  1.00  0.54           O  
HETATM  474  O   HOH T 473       0.990  13.881  81.740  1.00  0.54           O  
HETATM  475  O   HOH T 474      -0.912  44.917  62.062  1.00  0.54           O  
HETATM  476  O   HOH T 475     -13.015  35.733  50.166  1.00  0.54           O  
HETATM  477  O   HOH T 476      -4.218  25.883  70.181  1.00  0.54           O  
HETATM  478  O   HOH T 477      17.127  17.199  50.823  1.00  0.55           O  
HETATM  479  O   HOH T 478      -4.065  48.026  42.810  1.00  0.55           O  
HETATM  480  O   HOH T 479     -11.396  10.405  67.995  1.00  0.55           O  
HETATM  481  O   HOH T 480       2.703  26.248  28.213  1.00  0.55           O  
HETATM  482  O   HOH T 481     -13.992  33.284  59.965  1.00  0.55           O  
HETATM  483  O   HOH T 482     -10.659   8.873  38.102  1.00  0.55           O  
HETATM  484  O   HOH T 483       2.834  37.138  53.428  1.00  0.55           O  
HETATM  485  O   HOH T 484      -4.789  37.181  38.628  1.00  0.55           O  
HETATM  486  O   HOH T 485     -16.009  10.847  39.650  1.00  0.55           O  
HETATM  487  O   HOH T 486     -19.517  37.259  60.043  1.00  0.55           O  
HETATM  488  O   HOH T 487      -8.286   3.031  47.856  1.00  0.55           O  
HETATM  489  O   HOH T 488     -17.842  21.904  42.172  1.00  0.55           O  
HETATM  490  O   HOH T 489       2.444  42.392  65.497  1.00  0.56           O  
HETATM  491  O   HOH T 490      -8.874   9.672  51.930  1.00  0.56           O  
HETATM  492  O   HOH T 491     -13.770  37.260  36.450  1.00  0.56           O  
HETATM  493  O   HOH T 492      12.409  31.009  42.944  1.00  0.56           O  
HETATM  494  O   HOH T 493     -12.855  28.168  80.814  1.00  0.56           O  
HETATM  495  O   HOH T 494       1.565   2.426  57.335  1.00  0.56           O  
HETATM  496  O   HOH T 495       6.419   4.929  77.882  1.00  0.57           O  
HETATM  497  O   HOH T 496     -16.195  18.647  37.197  1.00  0.57           O  
HETATM  498  O   HOH T 497       4.268  46.900  57.530  1.00  0.57           O  
HETATM  499  O   HOH T 498      13.158  20.318  50.375  1.00  0.57           O  
HETATM  500  O   HOH T 499      10.498   6.361  51.069  1.00  0.57           O  
HETATM  501  O   HOH T 500      -0.156   3.891  55.885  1.00  0.58           O  
HETATM  502  O   HOH T 501      -3.747  36.568  81.061  1.00  0.60           O  
HETATM  503  O   HOH T 502     -17.736  29.439  56.265  1.00  0.60           O  
HETATM  504  O   HOH T 503      -7.485  26.685  28.160  1.00  0.60           O  
HETATM  505  O   HOH T 504      10.599  15.503  42.862  1.00  0.60           O  
HETATM  506  O   HOH T 505      -0.603   7.499  43.098  1.00  0.60           O  
TER     507      HOH T 505 
