# Supplementary material for: Accurate Prediction of Hydration Sites of Proteins Using Energy Model With Atom Embedding
Source: Front Mol Biosci. 2021 Sep 20;8:756075. doi: 10.3389/fmolb.2021.756075 (PMC8488165; doi:10.3389/fmolb.2021.756075)
Supplement: Supplementary file 1 [file DataSheet1.ZIP › Data Sheet 1/Our_result_pdb/our_dataset_output/2D3M_watersite.pdb]

HEADER                                                        XXXX


JRNL        PMID   -1
HETATM    1  O   HOH T   0      11.754  42.245   5.659  1.00  0.15           O  
HETATM    2  O   HOH T   1      43.243  30.260  -8.934  1.00  0.16           O  
HETATM    3  O   HOH T   2      15.910  42.519  20.786  1.00  0.17           O  
HETATM    4  O   HOH T   3      33.224  44.873  -2.650  1.00  0.17           O  
HETATM    5  O   HOH T   4      18.921  24.105  -8.570  1.00  0.18           O  
HETATM    6  O   HOH T   5      16.096  19.765  10.044  1.00  0.18           O  
HETATM    7  O   HOH T   6      14.577  29.652  40.959  1.00  0.18           O  
HETATM    8  O   HOH T   7      33.849  64.540  -2.810  1.00  0.18           O  
HETATM    9  O   HOH T   8      14.641  14.654  29.631  1.00  0.18           O  
HETATM   10  O   HOH T   9      23.493  19.264 -21.071  1.00  0.18           O  
HETATM   11  O   HOH T  10      19.435  12.934 -15.585  1.00  0.18           O  
HETATM   12  O   HOH T  11       5.240  12.164  23.878  1.00  0.18           O  
HETATM   13  O   HOH T  12      33.858  37.203  17.872  1.00  0.19           O  
HETATM   14  O   HOH T  13      17.968  21.097  17.445  1.00  0.19           O  
HETATM   15  O   HOH T  14      22.161  28.781 -13.919  1.00  0.19           O  
HETATM   16  O   HOH T  15      17.453  40.226  -7.365  1.00  0.19           O  
HETATM   17  O   HOH T  16      12.082   3.606 -22.849  1.00  0.19           O  
HETATM   18  O   HOH T  17       2.414   8.982  37.521  1.00  0.20           O  
HETATM   19  O   HOH T  18      18.977  18.555 -27.099  1.00  0.20           O  
HETATM   20  O   HOH T  19       6.651  18.591  20.369  1.00  0.20           O  
HETATM   21  O   HOH T  20      16.984  21.055   7.673  1.00  0.20           O  
HETATM   22  O   HOH T  21      19.130  24.146  -5.739  1.00  0.20           O  
HETATM   23  O   HOH T  22      14.102   4.067 -24.514  1.00  0.20           O  
HETATM   24  O   HOH T  23       6.919  24.986   1.594  1.00  0.20           O  
HETATM   25  O   HOH T  24      19.892  46.759  11.764  1.00  0.21           O  
HETATM   26  O   HOH T  25      20.569  14.075  -2.704  1.00  0.21           O  
HETATM   27  O   HOH T  26      23.082  12.934  -2.374  1.00  0.21           O  
HETATM   28  O   HOH T  27       6.554  31.067  -9.413  1.00  0.21           O  
HETATM   29  O   HOH T  28      12.824  27.124  -4.130  1.00  0.21           O  
HETATM   30  O   HOH T  29      22.586  19.179 -36.426  1.00  0.21           O  
HETATM   31  O   HOH T  30      25.290  45.273  11.713  1.00  0.21           O  
HETATM   32  O   HOH T  31       5.244  35.881  -5.945  1.00  0.22           O  
HETATM   33  O   HOH T  32      10.185   6.784   8.969  1.00  0.22           O  
HETATM   34  O   HOH T  33       6.480  19.407  -3.267  1.00  0.22           O  
HETATM   35  O   HOH T  34      32.151  41.487  18.633  1.00  0.22           O  
HETATM   36  O   HOH T  35      12.746  19.190   4.041  1.00  0.22           O  
HETATM   37  O   HOH T  36      31.749  47.976 -17.162  1.00  0.22           O  
HETATM   38  O   HOH T  37      25.028   8.770   9.371  1.00  0.22           O  
HETATM   39  O   HOH T  38      21.712  16.126   5.458  1.00  0.22           O  
HETATM   40  O   HOH T  39       8.370  22.614   1.615  1.00  0.22           O  
HETATM   41  O   HOH T  40      11.877  26.934  25.714  1.00  0.22           O  
HETATM   42  O   HOH T  41       8.002  16.992 -14.674  1.00  0.23           O  
HETATM   43  O   HOH T  42      30.900   9.242   7.916  1.00  0.23           O  
HETATM   44  O   HOH T  43      43.362  30.689   1.640  1.00  0.23           O  
HETATM   45  O   HOH T  44      30.936  26.845 -21.208  1.00  0.23           O  
HETATM   46  O   HOH T  45      18.096  13.482 -29.453  1.00  0.23           O  
HETATM   47  O   HOH T  46      45.023  16.386 -10.448  1.00  0.23           O  
HETATM   48  O   HOH T  47       9.886  42.560  -6.198  1.00  0.23           O  
HETATM   49  O   HOH T  48      36.570  24.446   7.465  1.00  0.23           O  
HETATM   50  O   HOH T  49      20.771  25.948   2.312  1.00  0.23           O  
HETATM   51  O   HOH T  50      41.984  14.201 -11.219  1.00  0.24           O  
HETATM   52  O   HOH T  51      16.332  10.012  -0.488  1.00  0.24           O  
HETATM   53  O   HOH T  52       3.459  16.354  12.025  1.00  0.24           O  
HETATM   54  O   HOH T  53      34.036  48.800 -18.517  1.00  0.24           O  
HETATM   55  O   HOH T  54      39.789  34.660  15.426  1.00  0.24           O  
HETATM   56  O   HOH T  55      22.563  23.201   4.407  1.00  0.24           O  
HETATM   57  O   HOH T  56     -12.053   2.187  14.130  1.00  0.24           O  
HETATM   58  O   HOH T  57      21.216  22.145  28.399  1.00  0.24           O  
HETATM   59  O   HOH T  58      19.234  49.317  -3.463  1.00  0.24           O  
HETATM   60  O   HOH T  59      21.752  16.861  39.966  1.00  0.25           O  
HETATM   61  O   HOH T  60      10.152   4.190  -8.376  1.00  0.25           O  
HETATM   62  O   HOH T  61      16.300  25.867  16.717  1.00  0.25           O  
HETATM   63  O   HOH T  62      26.658  27.480 -12.016  1.00  0.25           O  
HETATM   64  O   HOH T  63      20.484  41.975  26.701  1.00  0.25           O  
HETATM   65  O   HOH T  64      26.597  52.037   5.845  1.00  0.25           O  
HETATM   66  O   HOH T  65      32.286  30.498  30.875  1.00  0.25           O  
HETATM   67  O   HOH T  66      33.341  59.796  -8.259  1.00  0.25           O  
HETATM   68  O   HOH T  67      28.154  40.662 -22.068  1.00  0.25           O  
HETATM   69  O   HOH T  68      26.264  36.063 -22.009  1.00  0.25           O  
HETATM   70  O   HOH T  69       7.012  11.077  15.879  1.00  0.25           O  
HETATM   71  O   HOH T  70      34.000  35.700  15.583  1.00  0.26           O  
HETATM   72  O   HOH T  71      35.079  18.492  32.582  1.00  0.26           O  
HETATM   73  O   HOH T  72      28.246  37.269 -23.622  1.00  0.26           O  
HETATM   74  O   HOH T  73      20.374  20.869  15.951  1.00  0.26           O  
HETATM   75  O   HOH T  74      37.992  43.906  -2.216  1.00  0.26           O  
HETATM   76  O   HOH T  75       5.534  40.191  15.184  1.00  0.26           O  
HETATM   77  O   HOH T  76      17.801  41.971   2.105  1.00  0.26           O  
HETATM   78  O   HOH T  77      32.547  18.447   6.531  1.00  0.26           O  
HETATM   79  O   HOH T  78      15.892   1.919  -8.533  1.00  0.26           O  
HETATM   80  O   HOH T  79      31.725  20.365  14.658  1.00  0.26           O  
HETATM   81  O   HOH T  80      37.697  30.846  13.368  1.00  0.26           O  
HETATM   82  O   HOH T  81      -5.544   6.298  12.920  1.00  0.26           O  
HETATM   83  O   HOH T  82      21.481  23.467  30.821  1.00  0.26           O  
HETATM   84  O   HOH T  83      35.009  12.982  22.743  1.00  0.26           O  
HETATM   85  O   HOH T  84      27.211  27.449 -29.759  1.00  0.26           O  
HETATM   86  O   HOH T  85      29.535  38.649  29.191  1.00  0.26           O  
HETATM   87  O   HOH T  86       6.472  26.906  21.978  1.00  0.26           O  
HETATM   88  O   HOH T  87      42.441  28.203   2.487  1.00  0.27           O  
HETATM   89  O   HOH T  88      12.812  45.285 -16.657  1.00  0.27           O  
HETATM   90  O   HOH T  89      28.811  49.200  14.449  1.00  0.27           O  
HETATM   91  O   HOH T  90      13.030  14.789 -33.979  1.00  0.27           O  
HETATM   92  O   HOH T  91      -1.927  43.223  -4.669  1.00  0.27           O  
HETATM   93  O   HOH T  92      19.167  28.909  32.809  1.00  0.27           O  
HETATM   94  O   HOH T  93      21.734  37.819 -29.055  1.00  0.27           O  
HETATM   95  O   HOH T  94      21.334  45.998   5.933  1.00  0.27           O  
HETATM   96  O   HOH T  95      34.030  36.272  28.551  1.00  0.27           O  
HETATM   97  O   HOH T  96      38.378  34.209   2.094  1.00  0.27           O  
HETATM   98  O   HOH T  97      -4.945  10.644  21.656  1.00  0.27           O  
HETATM   99  O   HOH T  98      27.116  41.769  20.411  1.00  0.27           O  
HETATM  100  O   HOH T  99      31.368  40.687  24.169  1.00  0.27           O  
HETATM  101  O   HOH T 100       7.378  10.712  13.135  1.00  0.27           O  
HETATM  102  O   HOH T 101      40.964  24.451  15.302  1.00  0.27           O  
HETATM  103  O   HOH T 102      25.021  24.355  31.026  1.00  0.28           O  
HETATM  104  O   HOH T 103      39.966  40.093  -5.547  1.00  0.28           O  
HETATM  105  O   HOH T 104      12.826  31.800  41.131  1.00  0.28           O  
HETATM  106  O   HOH T 105       3.258   5.015   4.224  1.00  0.28           O  
HETATM  107  O   HOH T 106      11.491  -5.581  16.950  1.00  0.28           O  
HETATM  108  O   HOH T 107       7.732   2.500  12.724  1.00  0.28           O  
HETATM  109  O   HOH T 108      43.672  38.843 -12.260  1.00  0.28           O  
HETATM  110  O   HOH T 109      32.632  41.962   9.111  1.00  0.28           O  
HETATM  111  O   HOH T 110      36.174  19.434  14.264  1.00  0.28           O  
HETATM  112  O   HOH T 111      16.378  49.572 -20.518  1.00  0.28           O  
HETATM  113  O   HOH T 112      18.026  16.986  38.483  1.00  0.28           O  
HETATM  114  O   HOH T 113      -3.522  14.919   0.595  1.00  0.28           O  
HETATM  115  O   HOH T 114       7.338   4.482 -21.786  1.00  0.28           O  
HETATM  116  O   HOH T 115       3.663   4.835  26.369  1.00  0.28           O  
HETATM  117  O   HOH T 116      24.384  42.639  11.233  1.00  0.28           O  
HETATM  118  O   HOH T 117      26.047  28.007  35.852  1.00  0.29           O  
HETATM  119  O   HOH T 118      28.698  55.589  -9.570  1.00  0.29           O  
HETATM  120  O   HOH T 119      18.581  23.080   1.197  1.00  0.29           O  
HETATM  121  O   HOH T 120      31.599  20.547 -19.297  1.00  0.29           O  
HETATM  122  O   HOH T 121      -8.683   0.563   0.264  1.00  0.29           O  
HETATM  123  O   HOH T 122       5.931  15.633 -20.294  1.00  0.29           O  
HETATM  124  O   HOH T 123      30.338  53.053  -4.890  1.00  0.29           O  
HETATM  125  O   HOH T 124      35.972  10.924   2.370  1.00  0.29           O  
HETATM  126  O   HOH T 125       2.235  27.393  19.634  1.00  0.29           O  
HETATM  127  O   HOH T 126       6.381   8.552 -13.493  1.00  0.29           O  
HETATM  128  O   HOH T 127      39.425  45.447 -13.614  1.00  0.29           O  
HETATM  129  O   HOH T 128      25.525  15.490   6.858  1.00  0.29           O  
HETATM  130  O   HOH T 129      18.756  28.891  -0.263  1.00  0.29           O  
HETATM  131  O   HOH T 130      35.812  49.648 -12.104  1.00  0.29           O  
HETATM  132  O   HOH T 131      31.805  29.107  10.633  1.00  0.29           O  
HETATM  133  O   HOH T 132      21.102  49.876 -22.921  1.00  0.29           O  
HETATM  134  O   HOH T 133      44.116  44.999 -18.603  1.00  0.29           O  
HETATM  135  O   HOH T 134      44.959  21.691  -7.086  1.00  0.29           O  
HETATM  136  O   HOH T 135      23.530   7.372 -10.406  1.00  0.29           O  
HETATM  137  O   HOH T 136       7.931  22.072   4.278  1.00  0.29           O  
HETATM  138  O   HOH T 137      18.545  33.495 -30.409  1.00  0.30           O  
HETATM  139  O   HOH T 138      35.587  41.324   3.446  1.00  0.30           O  
HETATM  140  O   HOH T 139      31.810  41.388  11.829  1.00  0.30           O  
HETATM  141  O   HOH T 140      34.641  42.764  22.549  1.00  0.30           O  
HETATM  142  O   HOH T 141      36.352  24.863 -16.931  1.00  0.30           O  
HETATM  143  O   HOH T 142      47.769  27.530  -7.206  1.00  0.30           O  
HETATM  144  O   HOH T 143      11.651  16.638   3.658  1.00  0.30           O  
HETATM  145  O   HOH T 144      18.032  46.021   9.834  1.00  0.30           O  
HETATM  146  O   HOH T 145       8.269  44.049  16.100  1.00  0.30           O  
HETATM  147  O   HOH T 146      36.752  13.426  20.701  1.00  0.30           O  
HETATM  148  O   HOH T 147      18.641  36.024 -31.445  1.00  0.30           O  
HETATM  149  O   HOH T 148      33.447  30.310  12.420  1.00  0.31           O  
HETATM  150  O   HOH T 149      30.583   5.268   6.400  1.00  0.31           O  
HETATM  151  O   HOH T 150      15.328  44.039  -6.381  1.00  0.31           O  
HETATM  152  O   HOH T 151      39.652  42.784  10.606  1.00  0.31           O  
HETATM  153  O   HOH T 152      30.647  27.157 -23.969  1.00  0.31           O  
HETATM  154  O   HOH T 153      35.148  40.902   6.208  1.00  0.31           O  
HETATM  155  O   HOH T 154      21.014  14.572  -5.430  1.00  0.31           O  
HETATM  156  O   HOH T 155      -2.286  11.146 -33.245  1.00  0.31           O  
HETATM  157  O   HOH T 156      27.023  13.641  35.263  1.00  0.31           O  
HETATM  158  O   HOH T 157      -0.004   9.994  -0.699  1.00  0.31           O  
HETATM  159  O   HOH T 158       2.673  -2.634  12.249  1.00  0.31           O  
HETATM  160  O   HOH T 159      19.458  43.141 -29.749  1.00  0.31           O  
HETATM  161  O   HOH T 160      20.925   4.431  18.605  1.00  0.31           O  
HETATM  162  O   HOH T 161      32.400  36.055 -23.781  1.00  0.31           O  
HETATM  163  O   HOH T 162      32.086  16.120 -18.749  1.00  0.31           O  
HETATM  164  O   HOH T 163      21.751   2.733   7.616  1.00  0.31           O  
HETATM  165  O   HOH T 164      -4.366  -1.237  16.507  1.00  0.31           O  
HETATM  166  O   HOH T 165      -9.608   2.659  17.461  1.00  0.31           O  
HETATM  167  O   HOH T 166       8.196   3.433 -28.731  1.00  0.31           O  
HETATM  168  O   HOH T 167      12.355  37.331   0.044  1.00  0.31           O  
HETATM  169  O   HOH T 168      -3.316   2.266   8.276  1.00  0.31           O  
HETATM  170  O   HOH T 169      -2.500  -2.349   8.649  1.00  0.31           O  
HETATM  171  O   HOH T 170      -3.646   2.396  10.837  1.00  0.31           O  
HETATM  172  O   HOH T 171      10.977   2.639 -20.513  1.00  0.31           O  
HETATM  173  O   HOH T 172      20.960  30.219 -11.806  1.00  0.31           O  
HETATM  174  O   HOH T 173      32.150   2.001  10.333  1.00  0.32           O  
HETATM  175  O   HOH T 174      44.387  42.303 -18.874  1.00  0.32           O  
HETATM  176  O   HOH T 175      17.189  12.453  31.838  1.00  0.32           O  
HETATM  177  O   HOH T 176      24.184  52.455   4.531  1.00  0.32           O  
HETATM  178  O   HOH T 177      36.386  45.128  22.583  1.00  0.32           O  
HETATM  179  O   HOH T 178      17.959  44.976 -28.200  1.00  0.32           O  
HETATM  180  O   HOH T 179      13.527  22.302  34.653  1.00  0.32           O  
HETATM  181  O   HOH T 180      15.037  17.046 -20.463  1.00  0.32           O  
HETATM  182  O   HOH T 181      32.757  40.024   7.242  1.00  0.32           O  
HETATM  183  O   HOH T 182      42.673  29.320 -11.498  1.00  0.32           O  
HETATM  184  O   HOH T 183      23.396  38.253  39.060  1.00  0.32           O  
HETATM  185  O   HOH T 184      23.561  45.352   4.357  1.00  0.32           O  
HETATM  186  O   HOH T 185      -7.757   2.340  15.473  1.00  0.32           O  
HETATM  187  O   HOH T 186      26.574  47.880  18.660  1.00  0.32           O  
HETATM  188  O   HOH T 187       2.259  10.300 -23.551  1.00  0.32           O  
HETATM  189  O   HOH T 188      35.371  34.528  30.290  1.00  0.32           O  
HETATM  190  O   HOH T 189      20.797  10.667 -28.547  1.00  0.32           O  
HETATM  191  O   HOH T 190      14.566  31.018  -2.240  1.00  0.32           O  
HETATM  192  O   HOH T 191      -6.267  12.264  19.687  1.00  0.32           O  
HETATM  193  O   HOH T 192       6.180  25.648  -1.002  1.00  0.32           O  
HETATM  194  O   HOH T 193      40.510  25.734  32.262  1.00  0.32           O  
HETATM  195  O   HOH T 194      45.675  26.210 -13.752  1.00  0.33           O  
HETATM  196  O   HOH T 195      33.171  43.952 -24.452  1.00  0.33           O  
HETATM  197  O   HOH T 196      10.861  49.975   8.787  1.00  0.33           O  
HETATM  198  O   HOH T 197      -4.156  18.847  22.729  1.00  0.33           O  
HETATM  199  O   HOH T 198      22.987  11.292  -0.065  1.00  0.33           O  
HETATM  200  O   HOH T 199      17.111  13.393  29.291  1.00  0.33           O  
HETATM  201  O   HOH T 200      27.875  42.697  17.723  1.00  0.33           O  
HETATM  202  O   HOH T 201      16.223  -6.480  10.601  1.00  0.33           O  
HETATM  203  O   HOH T 202       1.341   6.649 -16.375  1.00  0.33           O  
HETATM  204  O   HOH T 203      31.178  43.785  -1.250  1.00  0.33           O  
HETATM  205  O   HOH T 204       1.342   4.343 -17.906  1.00  0.33           O  
HETATM  206  O   HOH T 205      32.851  53.231   4.874  1.00  0.33           O  
HETATM  207  O   HOH T 206      32.211  38.085  29.462  1.00  0.33           O  
HETATM  208  O   HOH T 207      30.311   3.227  12.112  1.00  0.33           O  
HETATM  209  O   HOH T 208       3.733  38.890   1.731  1.00  0.33           O  
HETATM  210  O   HOH T 209      27.938  30.222   7.330  1.00  0.33           O  
HETATM  211  O   HOH T 210      25.672  46.891  -0.021  1.00  0.33           O  
HETATM  212  O   HOH T 211      15.242  49.320  -8.168  1.00  0.33           O  
HETATM  213  O   HOH T 212      30.036  12.922 -24.868  1.00  0.33           O  
HETATM  214  O   HOH T 213      34.604   6.403  -1.831  1.00  0.33           O  
HETATM  215  O   HOH T 214      -3.348 -10.540  24.199  1.00  0.33           O  
HETATM  216  O   HOH T 215      24.184  41.007  34.849  1.00  0.34           O  
HETATM  217  O   HOH T 216      37.440  10.102  -1.131  1.00  0.34           O  
HETATM  218  O   HOH T 217      39.058  48.705  -4.758  1.00  0.34           O  
HETATM  219  O   HOH T 218      29.370  13.045  33.946  1.00  0.34           O  
HETATM  220  O   HOH T 219      13.505   4.055 -27.165  1.00  0.34           O  
HETATM  221  O   HOH T 220      36.550   4.161  19.420  1.00  0.34           O  
HETATM  222  O   HOH T 221      33.361  55.677   1.697  1.00  0.34           O  
HETATM  223  O   HOH T 222      24.873  34.720   1.867  1.00  0.34           O  
HETATM  224  O   HOH T 223      21.936  14.873  33.860  1.00  0.34           O  
HETATM  225  O   HOH T 224      26.261  56.111   5.595  1.00  0.34           O  
HETATM  226  O   HOH T 225       5.190  12.111  13.937  1.00  0.34           O  
HETATM  227  O   HOH T 226      12.231  43.498  -9.732  1.00  0.34           O  
HETATM  228  O   HOH T 227      37.802  12.959  -6.047  1.00  0.34           O  
HETATM  229  O   HOH T 228      16.121  -2.101  14.504  1.00  0.34           O  
HETATM  230  O   HOH T 229      10.122  32.649  23.316  1.00  0.34           O  
HETATM  231  O   HOH T 230      39.134  52.528  -6.216  1.00  0.34           O  
HETATM  232  O   HOH T 231      44.484  19.949  -5.105  1.00  0.34           O  
HETATM  233  O   HOH T 232       2.453  27.240 -13.632  1.00  0.34           O  
HETATM  234  O   HOH T 233       1.561   6.946 -19.016  1.00  0.34           O  
HETATM  235  O   HOH T 234      40.658  35.541   2.961  1.00  0.34           O  
HETATM  236  O   HOH T 235      35.287  15.001  15.924  1.00  0.34           O  
HETATM  237  O   HOH T 236      33.253  56.076  -9.992  1.00  0.34           O  
HETATM  238  O   HOH T 237      10.267   8.553  31.396  1.00  0.34           O  
HETATM  239  O   HOH T 238       3.289  38.074  -3.523  1.00  0.34           O  
HETATM  240  O   HOH T 239      15.677  46.617 -27.664  1.00  0.34           O  
HETATM  241  O   HOH T 240      33.521  53.058   2.246  1.00  0.34           O  
HETATM  242  O   HOH T 241      -3.116  12.682  22.151  1.00  0.35           O  
HETATM  243  O   HOH T 242       5.724   3.993  28.084  1.00  0.35           O  
HETATM  244  O   HOH T 243      11.656  30.962  -4.422  1.00  0.35           O  
HETATM  245  O   HOH T 244       6.485  17.432  37.220  1.00  0.35           O  
HETATM  246  O   HOH T 245       5.383  39.893  12.349  1.00  0.35           O  
HETATM  247  O   HOH T 246      14.632  -4.484  14.063  1.00  0.35           O  
HETATM  248  O   HOH T 247      22.523  40.402 -26.124  1.00  0.35           O  
HETATM  249  O   HOH T 248      -4.757  14.776 -20.072  1.00  0.35           O  
HETATM  250  O   HOH T 249      29.298  35.847  34.904  1.00  0.35           O  
HETATM  251  O   HOH T 250       8.498  20.198  33.245  1.00  0.35           O  
HETATM  252  O   HOH T 251      25.495  19.176   5.849  1.00  0.35           O  
HETATM  253  O   HOH T 252      26.883   9.966 -26.703  1.00  0.35           O  
HETATM  254  O   HOH T 253       0.643  27.106 -11.441  1.00  0.35           O  
HETATM  255  O   HOH T 254      48.031  36.081  -8.892  1.00  0.35           O  
HETATM  256  O   HOH T 255      35.097  12.737  14.285  1.00  0.35           O  
HETATM  257  O   HOH T 256      29.754  50.744 -12.872  1.00  0.35           O  
HETATM  258  O   HOH T 257      -0.165  40.605 -11.975  1.00  0.35           O  
HETATM  259  O   HOH T 258      -5.265   4.567  10.889  1.00  0.35           O  
HETATM  260  O   HOH T 259       1.161   3.591  26.708  1.00  0.35           O  
HETATM  261  O   HOH T 260       3.836  39.525  10.048  1.00  0.35           O  
HETATM  262  O   HOH T 261      10.497   9.607  34.020  1.00  0.35           O  
HETATM  263  O   HOH T 262       3.967  11.225  30.087  1.00  0.35           O  
HETATM  264  O   HOH T 263      18.706  47.650  24.868  1.00  0.35           O  
HETATM  265  O   HOH T 264      34.925  28.074 -23.421  1.00  0.35           O  
HETATM  266  O   HOH T 265      42.894  31.060  26.086  1.00  0.35           O  
HETATM  267  O   HOH T 266      12.806  46.717  20.762  1.00  0.35           O  
HETATM  268  O   HOH T 267       3.778  17.015 -21.106  1.00  0.36           O  
HETATM  269  O   HOH T 268      24.727   9.925 -28.440  1.00  0.36           O  
HETATM  270  O   HOH T 269       6.576  29.875 -20.429  1.00  0.36           O  
HETATM  271  O   HOH T 270      42.935  25.285  29.614  1.00  0.36           O  
HETATM  272  O   HOH T 271      21.784  54.406  10.800  1.00  0.36           O  
HETATM  273  O   HOH T 272      23.876   5.748 -18.956  1.00  0.36           O  
HETATM  274  O   HOH T 273      20.095  23.077  37.241  1.00  0.36           O  
HETATM  275  O   HOH T 274      33.364   6.055  18.301  1.00  0.36           O  
HETATM  276  O   HOH T 275      40.550  29.761   6.772  1.00  0.36           O  
HETATM  277  O   HOH T 276      21.009  16.994 -36.813  1.00  0.36           O  
HETATM  278  O   HOH T 277      34.290  21.330  15.226  1.00  0.36           O  
HETATM  279  O   HOH T 278      23.167  47.743   0.760  1.00  0.36           O  
HETATM  280  O   HOH T 279      30.541  33.477  35.683  1.00  0.36           O  
HETATM  281  O   HOH T 280      13.790  37.778  -2.130  1.00  0.36           O  
HETATM  282  O   HOH T 281       2.797  36.932   9.796  1.00  0.36           O  
HETATM  283  O   HOH T 282      33.470   6.947   0.653  1.00  0.36           O  
HETATM  284  O   HOH T 283      23.435   7.084 -15.033  1.00  0.36           O  
HETATM  285  O   HOH T 284      10.408  -9.785  17.007  1.00  0.36           O  
HETATM  286  O   HOH T 285      41.175  29.735  27.627  1.00  0.36           O  
HETATM  287  O   HOH T 286       9.969  28.256  24.400  1.00  0.36           O  
HETATM  288  O   HOH T 287      21.113   3.387  24.018  1.00  0.36           O  
HETATM  289  O   HOH T 288      33.515  30.013  33.301  1.00  0.36           O  
HETATM  290  O   HOH T 289      37.322  34.090  32.203  1.00  0.36           O  
HETATM  291  O   HOH T 290      43.701  47.629 -18.464  1.00  0.36           O  
HETATM  292  O   HOH T 291       8.019  44.138  -4.933  1.00  0.37           O  
HETATM  293  O   HOH T 292       6.863  43.815  21.164  1.00  0.37           O  
HETATM  294  O   HOH T 293      41.244  48.368 -19.490  1.00  0.37           O  
HETATM  295  O   HOH T 294      -5.569 -12.238  23.933  1.00  0.37           O  
HETATM  296  O   HOH T 295      -2.612   8.478 -34.081  1.00  0.37           O  
HETATM  297  O   HOH T 296       6.147   3.019 -19.772  1.00  0.37           O  
HETATM  298  O   HOH T 297      28.921  54.253  12.902  1.00  0.37           O  
HETATM  299  O   HOH T 298      13.490  20.387  36.624  1.00  0.37           O  
HETATM  300  O   HOH T 299      27.045  11.516  33.613  1.00  0.37           O  
HETATM  301  O   HOH T 300      -2.710  15.900   2.966  1.00  0.37           O  
HETATM  302  O   HOH T 301      38.351  22.481   7.038  1.00  0.37           O  
HETATM  303  O   HOH T 302      15.967  14.499 -18.290  1.00  0.37           O  
HETATM  304  O   HOH T 303       6.695  18.954  34.755  1.00  0.37           O  
HETATM  305  O   HOH T 304      31.076  24.816 -25.505  1.00  0.37           O  
HETATM  306  O   HOH T 305      37.100  16.980  14.987  1.00  0.37           O  
HETATM  307  O   HOH T 306      32.601  25.069 -19.644  1.00  0.37           O  
HETATM  308  O   HOH T 307       8.188  49.174   8.254  1.00  0.37           O  
HETATM  309  O   HOH T 308      23.506  38.887  41.790  1.00  0.37           O  
HETATM  310  O   HOH T 309      29.524  10.435 -26.013  1.00  0.37           O  
HETATM  311  O   HOH T 310      49.540  28.474  -9.086  1.00  0.37           O  
HETATM  312  O   HOH T 311      45.097  18.257  -3.169  1.00  0.37           O  
HETATM  313  O   HOH T 312       0.354   9.990  23.294  1.00  0.37           O  
HETATM  314  O   HOH T 313      13.911  16.293 -17.902  1.00  0.37           O  
HETATM  315  O   HOH T 314      35.510  45.535 -23.666  1.00  0.37           O  
HETATM  316  O   HOH T 315      39.812  14.233  -4.555  1.00  0.38           O  
HETATM  317  O   HOH T 316      25.809  37.663   0.122  1.00  0.38           O  
HETATM  318  O   HOH T 317      30.349  12.765 -16.802  1.00  0.38           O  
HETATM  319  O   HOH T 318      25.920  60.838   8.855  1.00  0.38           O  
HETATM  320  O   HOH T 319      -4.513  16.129  23.479  1.00  0.38           O  
HETATM  321  O   HOH T 320      36.806  12.491  24.782  1.00  0.38           O  
HETATM  322  O   HOH T 321      12.662  -0.078   5.479  1.00  0.38           O  
HETATM  323  O   HOH T 322      27.015  30.533  36.762  1.00  0.38           O  
HETATM  324  O   HOH T 323      25.185  56.338 -15.337  1.00  0.38           O  
HETATM  325  O   HOH T 324      22.628   9.588 -26.695  1.00  0.38           O  
HETATM  326  O   HOH T 325       9.269   9.482  36.401  1.00  0.38           O  
HETATM  327  O   HOH T 326      35.118  57.395 -11.638  1.00  0.38           O  
HETATM  328  O   HOH T 327      13.733   1.894  -6.627  1.00  0.38           O  
HETATM  329  O   HOH T 328      29.596  45.009 -27.372  1.00  0.38           O  
HETATM  330  O   HOH T 329      24.797  21.776 -30.892  1.00  0.38           O  
HETATM  331  O   HOH T 330      23.559  51.483  19.578  1.00  0.38           O  
HETATM  332  O   HOH T 331      15.574  44.620 -29.535  1.00  0.38           O  
HETATM  333  O   HOH T 332      43.266  26.256  32.222  1.00  0.38           O  
HETATM  334  O   HOH T 333      24.018   8.641 -12.795  1.00  0.38           O  
HETATM  335  O   HOH T 334      24.566   5.465 -25.780  1.00  0.38           O  
HETATM  336  O   HOH T 335      41.497  41.145  22.693  1.00  0.38           O  
HETATM  337  O   HOH T 336      11.969   2.573 -25.405  1.00  0.38           O  
HETATM  338  O   HOH T 337      24.057  19.424 -32.107  1.00  0.38           O  
HETATM  339  O   HOH T 338      -4.675   1.448  22.559  1.00  0.38           O  
HETATM  340  O   HOH T 339       7.566  46.524   8.817  1.00  0.38           O  
HETATM  341  O   HOH T 340       8.032  35.338  -0.498  1.00  0.38           O  
HETATM  342  O   HOH T 341      23.237  38.928  -0.122  1.00  0.38           O  
HETATM  343  O   HOH T 342      -5.007  16.252 -17.619  1.00  0.38           O  
HETATM  344  O   HOH T 343      18.791  27.109  16.513  1.00  0.39           O  
HETATM  345  O   HOH T 344       3.295  32.454 -29.113  1.00  0.39           O  
HETATM  346  O   HOH T 345       3.825   6.945  36.295  1.00  0.39           O  
HETATM  347  O   HOH T 346      -6.760   6.946  15.261  1.00  0.39           O  
HETATM  348  O   HOH T 347      -0.455   3.769  29.060  1.00  0.39           O  
HETATM  349  O   HOH T 348      21.885  51.579  11.729  1.00  0.39           O  
HETATM  350  O   HOH T 349      21.214  46.817  24.059  1.00  0.39           O  
HETATM  351  O   HOH T 350      37.217  52.046 -12.883  1.00  0.39           O  
HETATM  352  O   HOH T 351      29.792   4.162  14.695  1.00  0.39           O  
HETATM  353  O   HOH T 352      38.957  47.652 -17.992  1.00  0.39           O  
HETATM  354  O   HOH T 353      10.364  26.111  36.408  1.00  0.39           O  
HETATM  355  O   HOH T 354      29.138  50.866 -15.525  1.00  0.39           O  
HETATM  356  O   HOH T 355      33.097   3.689  12.395  1.00  0.39           O  
HETATM  357  O   HOH T 356       6.425  -3.373  28.568  1.00  0.39           O  
HETATM  358  O   HOH T 357      43.042  36.082   4.050  1.00  0.39           O  
HETATM  359  O   HOH T 358       7.246  29.989 -22.987  1.00  0.39           O  
HETATM  360  O   HOH T 359      37.186  12.938  16.143  1.00  0.39           O  
HETATM  361  O   HOH T 360      14.019  19.953 -10.283  1.00  0.39           O  
HETATM  362  O   HOH T 361      39.682  39.870  -2.189  1.00  0.39           O  
HETATM  363  O   HOH T 362      39.037  45.312  23.391  1.00  0.39           O  
HETATM  364  O   HOH T 363      48.175  21.555  -5.142  1.00  0.39           O  
HETATM  365  O   HOH T 364      29.098  59.547  -7.119  1.00  0.39           O  
HETATM  366  O   HOH T 365       5.785  18.001  30.376  1.00  0.39           O  
HETATM  367  O   HOH T 366      33.190  51.417   6.952  1.00  0.39           O  
HETATM  368  O   HOH T 367      18.412  27.046  34.895  1.00  0.39           O  
HETATM  369  O   HOH T 368      12.273  49.193   6.520  1.00  0.39           O  
HETATM  370  O   HOH T 369      18.742  10.116 -33.288  1.00  0.39           O  
HETATM  371  O   HOH T 370      46.458  21.453  -9.509  1.00  0.39           O  
HETATM  372  O   HOH T 371      23.036   1.735 -21.597  1.00  0.40           O  
HETATM  373  O   HOH T 372      37.901  24.941  32.900  1.00  0.40           O  
HETATM  374  O   HOH T 373     -10.530   5.617   8.806  1.00  0.40           O  
HETATM  375  O   HOH T 374     -12.209   3.639  17.825  1.00  0.40           O  
HETATM  376  O   HOH T 375       7.701  31.538  22.562  1.00  0.40           O  
HETATM  377  O   HOH T 376      -1.180  22.974 -18.621  1.00  0.40           O  
HETATM  378  O   HOH T 377      -3.222  18.451 -17.257  1.00  0.40           O  
HETATM  379  O   HOH T 378      38.569  30.903   8.279  1.00  0.40           O  
HETATM  380  O   HOH T 379      39.960  30.025  12.229  1.00  0.40           O  
HETATM  381  O   HOH T 380      10.787  22.750  28.379  1.00  0.40           O  
HETATM  382  O   HOH T 381      17.258  30.798  -1.634  1.00  0.40           O  
HETATM  383  O   HOH T 382       5.395  26.538  -3.503  1.00  0.40           O  
HETATM  384  O   HOH T 383      28.403  52.002  14.424  1.00  0.40           O  
HETATM  385  O   HOH T 384      13.645  49.039 -19.963  1.00  0.40           O  
HETATM  386  O   HOH T 385      34.956  37.309 -24.265  1.00  0.40           O  
HETATM  387  O   HOH T 386       1.509   4.110  31.128  1.00  0.40           O  
HETATM  388  O   HOH T 387      39.004  51.419 -15.957  1.00  0.40           O  
HETATM  389  O   HOH T 388      23.223  42.094  27.172  1.00  0.40           O  
HETATM  390  O   HOH T 389      37.262  10.903  -7.911  1.00  0.40           O  
HETATM  391  O   HOH T 390      33.110  52.601  11.494  1.00  0.40           O  
HETATM  392  O   HOH T 391      -7.031  -0.774   9.403  1.00  0.40           O  
HETATM  393  O   HOH T 392      25.764  56.954  -4.517  1.00  0.40           O  
HETATM  394  O   HOH T 393      -0.226  35.695 -10.968  1.00  0.40           O  
HETATM  395  O   HOH T 394       8.096  43.734   5.614  1.00  0.41           O  
HETATM  396  O   HOH T 395      22.493  39.950  36.811  1.00  0.41           O  
HETATM  397  O   HOH T 396      11.622  -2.648   6.334  1.00  0.41           O  
HETATM  398  O   HOH T 397       9.247   0.358  12.980  1.00  0.41           O  
HETATM  399  O   HOH T 398      25.228  32.652  39.534  1.00  0.41           O  
HETATM  400  O   HOH T 399      20.084   7.003 -26.909  1.00  0.41           O  
HETATM  401  O   HOH T 400      38.845  54.804  -4.566  1.00  0.41           O  
HETATM  402  O   HOH T 401      18.978  43.613  -6.578  1.00  0.41           O  
HETATM  403  O   HOH T 402      14.704   9.489 -39.424  1.00  0.41           O  
HETATM  404  O   HOH T 403      11.066  25.344  27.729  1.00  0.41           O  
HETATM  405  O   HOH T 404      10.689  42.720  24.115  1.00  0.41           O  
HETATM  406  O   HOH T 405      11.271  28.229  28.196  1.00  0.41           O  
HETATM  407  O   HOH T 406      29.897  54.717  -7.092  1.00  0.41           O  
HETATM  408  O   HOH T 407       3.285  35.309  -4.014  1.00  0.41           O  
HETATM  409  O   HOH T 408      27.082  29.728 -10.396  1.00  0.41           O  
HETATM  410  O   HOH T 409      11.944  22.697  36.946  1.00  0.41           O  
HETATM  411  O   HOH T 410      39.180  45.670  -8.219  1.00  0.41           O  
HETATM  412  O   HOH T 411      39.761  43.122  21.794  1.00  0.41           O  
HETATM  413  O   HOH T 412      46.212  36.391  -6.827  1.00  0.41           O  
HETATM  414  O   HOH T 413      49.927  24.285  -8.160  1.00  0.41           O  
HETATM  415  O   HOH T 414      23.150   9.681   2.161  1.00  0.41           O  
HETATM  416  O   HOH T 415      20.132  22.143   3.343  1.00  0.41           O  
HETATM  417  O   HOH T 416      25.420  49.106   1.486  1.00  0.41           O  
HETATM  418  O   HOH T 417       5.781  32.917 -27.925  1.00  0.41           O  
HETATM  419  O   HOH T 418      -1.045  42.785  -7.354  1.00  0.41           O  
HETATM  420  O   HOH T 419      -4.517  -4.295  14.702  1.00  0.41           O  
HETATM  421  O   HOH T 420      24.700  17.590  32.563  1.00  0.41           O  
HETATM  422  O   HOH T 421      42.920  34.640   1.662  1.00  0.41           O  
HETATM  423  O   HOH T 422      36.864  12.313  27.540  1.00  0.41           O  
HETATM  424  O   HOH T 423      26.139  60.125   6.257  1.00  0.41           O  
HETATM  425  O   HOH T 424      40.123  44.747   6.649  1.00  0.41           O  
HETATM  426  O   HOH T 425      48.781  21.818  -7.902  1.00  0.41           O  
HETATM  427  O   HOH T 426      25.354   7.030 -16.973  1.00  0.41           O  
HETATM  428  O   HOH T 427      -5.688  17.143  21.182  1.00  0.42           O  
HETATM  429  O   HOH T 428      26.460  55.646 -17.739  1.00  0.42           O  
HETATM  430  O   HOH T 429      -0.062  26.067  16.860  1.00  0.42           O  
HETATM  431  O   HOH T 430      25.638  30.567  41.301  1.00  0.42           O  
HETATM  432  O   HOH T 431      45.553  30.728  26.812  1.00  0.42           O  
HETATM  433  O   HOH T 432      27.223  57.695 -14.013  1.00  0.42           O  
HETATM  434  O   HOH T 433       3.227  40.374  16.715  1.00  0.42           O  
HETATM  435  O   HOH T 434      -0.514  -0.761   9.648  1.00  0.42           O  
HETATM  436  O   HOH T 435      44.869  32.869   2.504  1.00  0.42           O  
HETATM  437  O   HOH T 436      17.831  25.202  -0.463  1.00  0.42           O  
HETATM  438  O   HOH T 437      37.685  11.788  18.647  1.00  0.42           O  
HETATM  439  O   HOH T 438      42.660  14.645 -13.856  1.00  0.42           O  
HETATM  440  O   HOH T 439       0.199  23.606 -20.939  1.00  0.42           O  
HETATM  441  O   HOH T 440      30.712  42.716 -24.236  1.00  0.42           O  
HETATM  442  O   HOH T 441      26.642  53.488 -19.632  1.00  0.42           O  
HETATM  443  O   HOH T 442      18.818   0.765  10.597  1.00  0.42           O  
HETATM  444  O   HOH T 443      28.216  49.337  17.203  1.00  0.42           O  
HETATM  445  O   HOH T 444      24.980  41.080  -0.833  1.00  0.42           O  
HETATM  446  O   HOH T 445      19.428  -0.693  14.434  1.00  0.42           O  
HETATM  447  O   HOH T 446      14.402  22.817 -13.131  1.00  0.42           O  
HETATM  448  O   HOH T 447       9.296  25.267  34.109  1.00  0.42           O  
HETATM  449  O   HOH T 448      29.001   3.505   7.958  1.00  0.43           O  
HETATM  450  O   HOH T 449      27.092  54.920 -14.131  1.00  0.43           O  
HETATM  451  O   HOH T 450      34.197  39.596  30.829  1.00  0.43           O  
HETATM  452  O   HOH T 451      11.144  42.631 -23.639  1.00  0.43           O  
HETATM  453  O   HOH T 452      33.106  66.256  -4.959  1.00  0.43           O  
HETATM  454  O   HOH T 453      49.550  25.951  -5.791  1.00  0.43           O  
HETATM  455  O   HOH T 454      44.870  37.528 -14.428  1.00  0.43           O  
HETATM  456  O   HOH T 455       4.992  16.297  32.366  1.00  0.43           O  
HETATM  457  O   HOH T 456      14.137  -6.046  16.238  1.00  0.43           O  
HETATM  458  O   HOH T 457      26.769  40.299  35.043  1.00  0.43           O  
HETATM  459  O   HOH T 458      23.494  43.835  29.252  1.00  0.43           O  
HETATM  460  O   HOH T 459      15.260  14.471  32.376  1.00  0.43           O  
HETATM  461  O   HOH T 460      10.204  27.817  30.756  1.00  0.43           O  
HETATM  462  O   HOH T 461      -1.650  15.924 -14.187  1.00  0.43           O  
HETATM  463  O   HOH T 462      28.093  55.966  -3.376  1.00  0.43           O  
HETATM  464  O   HOH T 463      41.888  32.391  28.240  1.00  0.43           O  
HETATM  465  O   HOH T 464      -1.971  20.930 -16.922  1.00  0.43           O  
HETATM  466  O   HOH T 465      34.183  38.981 -26.387  1.00  0.43           O  
HETATM  467  O   HOH T 466       1.518  -2.659   9.730  1.00  0.43           O  
HETATM  468  O   HOH T 467       2.629   4.632 -29.118  1.00  0.43           O  
HETATM  469  O   HOH T 468      20.193  15.467  38.193  1.00  0.43           O  
HETATM  470  O   HOH T 469      31.709  29.787   8.212  1.00  0.43           O  
HETATM  471  O   HOH T 470       5.269  36.499  -2.427  1.00  0.43           O  
HETATM  472  O   HOH T 471      40.811  38.833  21.260  1.00  0.43           O  
HETATM  473  O   HOH T 472      24.127  38.452   2.348  1.00  0.43           O  
HETATM  474  O   HOH T 473      44.748  34.224   5.126  1.00  0.43           O  
HETATM  475  O   HOH T 474      13.148  50.294  -9.684  1.00  0.43           O  
HETATM  476  O   HOH T 475      -0.794 -11.424  18.597  1.00  0.43           O  
HETATM  477  O   HOH T 476      -3.565   1.185   5.709  1.00  0.44           O  
HETATM  478  O   HOH T 477      47.076  44.923 -15.547  1.00  0.44           O  
HETATM  479  O   HOH T 478       1.049  24.231  10.641  1.00  0.44           O  
HETATM  480  O   HOH T 479      19.532  11.512 -30.964  1.00  0.44           O  
HETATM  481  O   HOH T 480      31.623  54.235  13.162  1.00  0.44           O  
HETATM  482  O   HOH T 481      40.520  44.466  -6.298  1.00  0.44           O  
HETATM  483  O   HOH T 482      35.003  57.468  13.047  1.00  0.44           O  
HETATM  484  O   HOH T 483      25.949  56.042  -1.786  1.00  0.44           O  
HETATM  485  O   HOH T 484       6.492  -0.899  29.959  1.00  0.44           O  
HETATM  486  O   HOH T 485      -3.970  13.633  24.617  1.00  0.44           O  
HETATM  487  O   HOH T 486      27.645  52.257 -13.577  1.00  0.44           O  
HETATM  488  O   HOH T 487      36.326  21.912 -16.987  1.00  0.44           O  
HETATM  489  O   HOH T 488      23.615  59.118   5.756  1.00  0.44           O  
HETATM  490  O   HOH T 489      41.252  21.982 -14.631  1.00  0.44           O  
HETATM  491  O   HOH T 490       4.557  24.542 -31.371  1.00  0.44           O  
HETATM  492  O   HOH T 491      -7.850  16.625  19.535  1.00  0.44           O  
HETATM  493  O   HOH T 492      31.602  28.311 -29.724  1.00  0.44           O  
HETATM  494  O   HOH T 493      29.817  46.290 -24.956  1.00  0.44           O  
HETATM  495  O   HOH T 494       8.262  34.012 -27.577  1.00  0.44           O  
HETATM  496  O   HOH T 495      27.456   8.794  34.072  1.00  0.44           O  
HETATM  497  O   HOH T 496      16.965  47.183   7.599  1.00  0.44           O  
HETATM  498  O   HOH T 497      21.923  -1.522  13.478  1.00  0.44           O  
HETATM  499  O   HOH T 498      35.844  11.167  29.950  1.00  0.44           O  
HETATM  500  O   HOH T 499      20.864   0.840  25.273  1.00  0.44           O  
HETATM  501  O   HOH T 500      47.086  31.161 -10.744  1.00  0.44           O  
HETATM  502  O   HOH T 501       3.874  14.653  34.187  1.00  0.44           O  
HETATM  503  O   HOH T 502      24.163  45.315   1.679  1.00  0.44           O  
HETATM  504  O   HOH T 503      44.829  30.775  24.170  1.00  0.44           O  
HETATM  505  O   HOH T 504      48.755  33.481 -10.060  1.00  0.44           O  
HETATM  506  O   HOH T 505      12.731  14.194   8.157  1.00  0.44           O  
HETATM  507  O   HOH T 506       8.948  42.186 -21.722  1.00  0.44           O  
HETATM  508  O   HOH T 507      30.183   8.714  34.346  1.00  0.44           O  
HETATM  509  O   HOH T 508      13.283  46.621  23.434  1.00  0.44           O  
HETATM  510  O   HOH T 509      39.468  32.943   9.834  1.00  0.44           O  
HETATM  511  O   HOH T 510      35.576  43.674 -25.692  1.00  0.44           O  
HETATM  512  O   HOH T 511      15.410  40.263 -28.518  1.00  0.45           O  
HETATM  513  O   HOH T 512      46.964  21.924 -12.203  1.00  0.45           O  
HETATM  514  O   HOH T 513      25.789   9.725  32.129  1.00  0.45           O  
HETATM  515  O   HOH T 514      16.760  24.437 -31.079  1.00  0.45           O  
HETATM  516  O   HOH T 515      26.266  55.201   2.343  1.00  0.45           O  
HETATM  517  O   HOH T 516      31.638  14.070   3.814  1.00  0.45           O  
HETATM  518  O   HOH T 517      27.532  51.948  17.040  1.00  0.45           O  
HETATM  519  O   HOH T 518      43.897  27.856  30.047  1.00  0.45           O  
HETATM  520  O   HOH T 519      12.709  -2.520  24.390  1.00  0.45           O  
HETATM  521  O   HOH T 520      41.397  27.423  28.903  1.00  0.45           O  
HETATM  522  O   HOH T 521       3.155  40.675  13.909  1.00  0.45           O  
HETATM  523  O   HOH T 522      24.645  21.842   5.782  1.00  0.45           O  
HETATM  524  O   HOH T 523      14.583   8.901 -35.454  1.00  0.45           O  
HETATM  525  O   HOH T 524      11.549  35.795 -28.390  1.00  0.45           O  
HETATM  526  O   HOH T 525      24.409   3.079 -19.566  1.00  0.45           O  
HETATM  527  O   HOH T 526     -13.015   5.710  12.492  1.00  0.45           O  
HETATM  528  O   HOH T 527      28.222  58.362  -9.615  1.00  0.45           O  
HETATM  529  O   HOH T 528       5.266  42.433  13.477  1.00  0.45           O  
HETATM  530  O   HOH T 529      25.601  25.790  34.346  1.00  0.45           O  
HETATM  531  O   HOH T 530      31.577  26.572 -27.632  1.00  0.45           O  
HETATM  532  O   HOH T 531       7.664  24.658  31.950  1.00  0.45           O  
HETATM  533  O   HOH T 532      51.790  36.382  -2.499  1.00  0.45           O  
HETATM  534  O   HOH T 533      -0.900  21.677   6.777  1.00  0.46           O  
HETATM  535  O   HOH T 534       4.769  43.309   3.245  1.00  0.46           O  
HETATM  536  O   HOH T 535       0.708  17.119 -13.587  1.00  0.46           O  
HETATM  537  O   HOH T 536      -1.871  22.614  23.366  1.00  0.46           O  
HETATM  538  O   HOH T 537      19.242   8.406 -29.091  1.00  0.46           O  
HETATM  539  O   HOH T 538      -2.274  16.022 -16.807  1.00  0.46           O  
HETATM  540  O   HOH T 539      41.665  48.381  -3.997  1.00  0.46           O  
HETATM  541  O   HOH T 540       4.064   4.369  30.241  1.00  0.46           O  
HETATM  542  O   HOH T 541      33.606  27.118 -21.247  1.00  0.46           O  
HETATM  543  O   HOH T 542      21.723  53.289  20.434  1.00  0.46           O  
HETATM  544  O   HOH T 543      -3.704  13.771 -17.706  1.00  0.46           O  
HETATM  545  O   HOH T 544      24.612  44.529  26.854  1.00  0.46           O  
HETATM  546  O   HOH T 545       9.748  50.087   6.224  1.00  0.46           O  
HETATM  547  O   HOH T 546      43.544  35.417  12.212  1.00  0.46           O  
HETATM  548  O   HOH T 547      -1.696  22.113 -22.444  1.00  0.46           O  
HETATM  549  O   HOH T 548      11.328  44.919  22.469  1.00  0.46           O  
HETATM  550  O   HOH T 549      12.644  48.697  -7.423  1.00  0.46           O  
HETATM  551  O   HOH T 550       2.253   7.360 -24.282  1.00  0.46           O  
HETATM  552  O   HOH T 551      29.694  42.679  23.113  1.00  0.46           O  
HETATM  553  O   HOH T 552      42.124  32.216   9.339  1.00  0.46           O  
HETATM  554  O   HOH T 553      22.815  52.557  14.475  1.00  0.46           O  
HETATM  555  O   HOH T 554      17.040  13.729  34.324  1.00  0.46           O  
HETATM  556  O   HOH T 555      45.207  15.472 -13.065  1.00  0.46           O  
HETATM  557  O   HOH T 556      14.337  -2.213   5.662  1.00  0.46           O  
HETATM  558  O   HOH T 557       5.777   2.104 -10.694  1.00  0.46           O  
HETATM  559  O   HOH T 558       0.725  31.458 -28.337  1.00  0.46           O  
HETATM  560  O   HOH T 559      -0.171  21.784   9.580  1.00  0.46           O  
HETATM  561  O   HOH T 560       1.935   9.685  16.617  1.00  0.46           O  
HETATM  562  O   HOH T 561       6.418  -6.412  11.958  1.00  0.46           O  
HETATM  563  O   HOH T 562       9.678  42.942  -8.990  1.00  0.46           O  
HETATM  564  O   HOH T 563      22.905   6.075 -12.651  1.00  0.47           O  
HETATM  565  O   HOH T 564      41.282  53.672  -5.161  1.00  0.47           O  
HETATM  566  O   HOH T 565       1.191  30.974  10.491  1.00  0.47           O  
HETATM  567  O   HOH T 566      32.085  31.633  10.306  1.00  0.47           O  
HETATM  568  O   HOH T 567      42.222  33.898  14.271  1.00  0.47           O  
HETATM  569  O   HOH T 568      22.361   1.763  21.981  1.00  0.47           O  
HETATM  570  O   HOH T 569      15.500  45.363  24.160  1.00  0.47           O  
HETATM  571  O   HOH T 570      19.121  44.124  27.881  1.00  0.47           O  
HETATM  572  O   HOH T 571      39.174  42.477   7.860  1.00  0.47           O  
HETATM  573  O   HOH T 572      41.539  42.026  -6.478  1.00  0.47           O  
HETATM  574  O   HOH T 573      -3.275 -13.065  25.373  1.00  0.47           O  
HETATM  575  O   HOH T 574      46.121  37.501 -12.000  1.00  0.47           O  
HETATM  576  O   HOH T 575      22.879   0.706   8.913  1.00  0.47           O  
HETATM  577  O   HOH T 576       5.469  41.146   1.566  1.00  0.47           O  
HETATM  578  O   HOH T 577      23.313   1.851  24.553  1.00  0.47           O  
HETATM  579  O   HOH T 578      10.587  -7.532  18.563  1.00  0.47           O  
HETATM  580  O   HOH T 579       6.482  38.727   1.652  1.00  0.47           O  
HETATM  581  O   HOH T 580      17.675  45.368  25.903  1.00  0.47           O  
HETATM  582  O   HOH T 581       9.850   8.957  28.636  1.00  0.47           O  
HETATM  583  O   HOH T 582       7.348  37.276  21.882  1.00  0.47           O  
HETATM  584  O   HOH T 583      18.249  15.479  36.141  1.00  0.47           O  
HETATM  585  O   HOH T 584      31.114  61.065  15.434  1.00  0.47           O  
HETATM  586  O   HOH T 585      39.002  28.189   8.519  1.00  0.47           O  
HETATM  587  O   HOH T 586      -2.551  13.788  -1.818  1.00  0.47           O  
HETATM  588  O   HOH T 587      21.542  25.108  38.671  1.00  0.47           O  
HETATM  589  O   HOH T 588      18.613  50.472 -21.912  1.00  0.47           O  
HETATM  590  O   HOH T 589       6.861  43.509   1.421  1.00  0.47           O  
HETATM  591  O   HOH T 590       7.058  44.325 -21.980  1.00  0.47           O  
HETATM  592  O   HOH T 591      37.629   8.994  21.265  1.00  0.48           O  
HETATM  593  O   HOH T 592       4.513  -8.664  18.485  1.00  0.48           O  
HETATM  594  O   HOH T 593      34.909  17.851  35.191  1.00  0.48           O  
HETATM  595  O   HOH T 594      21.210   2.406  10.439  1.00  0.48           O  
HETATM  596  O   HOH T 595      40.756  47.241  -6.434  1.00  0.48           O  
HETATM  597  O   HOH T 596       8.964  46.630  -5.647  1.00  0.48           O  
HETATM  598  O   HOH T 597      15.130  12.480 -22.784  1.00  0.48           O  
HETATM  599  O   HOH T 598      12.606  35.072  32.335  1.00  0.48           O  
HETATM  600  O   HOH T 599      32.435   9.844  33.228  1.00  0.48           O  
HETATM  601  O   HOH T 600       3.074 -10.985  19.535  1.00  0.48           O  
HETATM  602  O   HOH T 601      14.696  20.551 -33.083  1.00  0.48           O  
HETATM  603  O   HOH T 602      17.095  18.595  -4.803  1.00  0.48           O  
HETATM  604  O   HOH T 603      12.856  47.713   4.251  1.00  0.48           O  
HETATM  605  O   HOH T 604      33.892  45.335  23.478  1.00  0.48           O  
HETATM  606  O   HOH T 605      25.221   3.279 -22.151  1.00  0.48           O  
HETATM  607  O   HOH T 606      28.141  57.414  -5.817  1.00  0.48           O  
HETATM  608  O   HOH T 607      32.321  21.249 -21.888  1.00  0.48           O  
HETATM  609  O   HOH T 608      12.297   0.094  -8.209  1.00  0.48           O  
HETATM  610  O   HOH T 609      33.855  36.311 -26.874  1.00  0.48           O  
HETATM  611  O   HOH T 610      24.104  55.585  11.542  1.00  0.48           O  
HETATM  612  O   HOH T 611      32.944  58.708 -10.706  1.00  0.48           O  
HETATM  613  O   HOH T 612      36.626  47.948 -22.159  1.00  0.48           O  
HETATM  614  O   HOH T 613      14.456  40.845  22.531  1.00  0.48           O  
HETATM  615  O   HOH T 614      -1.307 -10.672  16.032  1.00  0.48           O  
HETATM  616  O   HOH T 615       2.294   3.195 -26.748  1.00  0.48           O  
HETATM  617  O   HOH T 616       7.097  44.364  18.593  1.00  0.48           O  
HETATM  618  O   HOH T 617      49.689  23.652  -4.366  1.00  0.48           O  
HETATM  619  O   HOH T 618      14.291  37.438  37.911  1.00  0.48           O  
HETATM  620  O   HOH T 619      34.814  51.106 -17.118  1.00  0.48           O  
HETATM  621  O   HOH T 620       9.426  36.378 -26.782  1.00  0.48           O  
HETATM  622  O   HOH T 621       0.901  26.731 -19.299  1.00  0.48           O  
HETATM  623  O   HOH T 622      16.273  -4.278  16.280  1.00  0.48           O  
HETATM  624  O   HOH T 623      12.297  -8.010  16.248  1.00  0.48           O  
HETATM  625  O   HOH T 624      37.953  10.287  -5.403  1.00  0.48           O  
HETATM  626  O   HOH T 625      30.681  37.765  33.506  1.00  0.48           O  
HETATM  627  O   HOH T 626       2.076  33.252 -26.704  1.00  0.48           O  
HETATM  628  O   HOH T 627      -0.139  26.800 -25.986  1.00  0.49           O  
HETATM  629  O   HOH T 628       0.899  35.053   8.947  1.00  0.49           O  
HETATM  630  O   HOH T 629      49.421  37.380  -1.703  1.00  0.49           O  
HETATM  631  O   HOH T 630      -2.514   0.276  21.320  1.00  0.49           O  
HETATM  632  O   HOH T 631      43.977  32.538   7.259  1.00  0.49           O  
HETATM  633  O   HOH T 632      26.604  -0.618  17.803  1.00  0.49           O  
HETATM  634  O   HOH T 633      38.184  45.345   4.876  1.00  0.49           O  
HETATM  635  O   HOH T 634      -0.158  35.645   6.515  1.00  0.49           O  
HETATM  636  O   HOH T 635       3.399   3.151 -19.375  1.00  0.49           O  
HETATM  637  O   HOH T 636      20.436  22.789  39.865  1.00  0.49           O  
HETATM  638  O   HOH T 637      22.809   6.896 -27.512  1.00  0.49           O  
HETATM  639  O   HOH T 638      24.556  29.547  37.548  1.00  0.49           O  
HETATM  640  O   HOH T 639      13.588  -4.712   6.198  1.00  0.49           O  
HETATM  641  O   HOH T 640      14.527  30.023 -15.497  1.00  0.49           O  
HETATM  642  O   HOH T 641      17.686  -4.309  19.894  1.00  0.49           O  
HETATM  643  O   HOH T 642       5.462  45.921  20.215  1.00  0.49           O  
HETATM  644  O   HOH T 643      43.685  30.306  28.734  1.00  0.49           O  
HETATM  645  O   HOH T 644      -4.319  21.494  23.439  1.00  0.49           O  
HETATM  646  O   HOH T 645      24.957   8.082 -26.246  1.00  0.49           O  
HETATM  647  O   HOH T 646      -1.262   9.079  35.597  1.00  0.49           O  
HETATM  648  O   HOH T 647       8.862  24.280  29.492  1.00  0.49           O  
HETATM  649  O   HOH T 648      41.517  27.371   7.712  1.00  0.49           O  
HETATM  650  O   HOH T 649      18.325   4.420  19.568  1.00  0.49           O  
HETATM  651  O   HOH T 650      33.821   6.181  13.468  1.00  0.49           O  
HETATM  652  O   HOH T 651       6.500  44.657  12.227  1.00  0.49           O  
HETATM  653  O   HOH T 652      22.635  54.432  -3.989  1.00  0.49           O  
HETATM  654  O   HOH T 653       5.871  39.167  -2.897  1.00  0.49           O  
HETATM  655  O   HOH T 654      24.211   1.804 -24.125  1.00  0.49           O  
HETATM  656  O   HOH T 655      18.384  13.631  11.656  1.00  0.49           O  
HETATM  657  O   HOH T 656      31.584   7.280  32.443  1.00  0.49           O  
HETATM  658  O   HOH T 657      21.791  44.466  27.143  1.00  0.49           O  
HETATM  659  O   HOH T 658      14.717  48.003   6.161  1.00  0.50           O  
HETATM  660  O   HOH T 659      42.076  31.347  13.242  1.00  0.50           O  
HETATM  661  O   HOH T 660      14.546  16.666  -6.483  1.00  0.50           O  
HETATM  662  O   HOH T 661      31.501  42.152  21.227  1.00  0.50           O  
HETATM  663  O   HOH T 662      35.125   8.729  -0.423  1.00  0.50           O  
HETATM  664  O   HOH T 663      41.271  30.769 -22.769  1.00  0.50           O  
HETATM  665  O   HOH T 664      -0.059  28.317 -13.759  1.00  0.50           O  
HETATM  666  O   HOH T 665      -8.654  12.609  18.061  1.00  0.50           O  
HETATM  667  O   HOH T 666      26.153  50.981   3.365  1.00  0.50           O  
HETATM  668  O   HOH T 667       9.720  35.665  22.743  1.00  0.50           O  
HETATM  669  O   HOH T 668      42.276  28.273   5.215  1.00  0.50           O  
HETATM  670  O   HOH T 669      14.629  43.917   4.115  1.00  0.50           O  
HETATM  671  O   HOH T 670      29.154  29.110 -30.713  1.00  0.50           O  
HETATM  672  O   HOH T 671      29.120  56.976 -11.999  1.00  0.50           O  
HETATM  673  O   HOH T 672      38.156  23.606 -15.383  1.00  0.50           O  
HETATM  674  O   HOH T 673      20.627   3.532 -26.276  1.00  0.50           O  
HETATM  675  O   HOH T 674      23.131  46.730  26.094  1.00  0.50           O  
HETATM  676  O   HOH T 675      23.520  54.375  -6.590  1.00  0.50           O  
HETATM  677  O   HOH T 676      21.654  43.490   4.859  1.00  0.50           O  
HETATM  678  O   HOH T 677      28.743  53.555 -15.854  1.00  0.50           O  
HETATM  679  O   HOH T 678      40.871  50.949  -4.619  1.00  0.50           O  
HETATM  680  O   HOH T 679      25.016  56.677  -7.212  1.00  0.50           O  
HETATM  681  O   HOH T 680      32.757  31.999  35.074  1.00  0.50           O  
HETATM  682  O   HOH T 681      25.163  59.027 -15.427  1.00  0.50           O  
HETATM  683  O   HOH T 682       7.375  47.128  18.554  1.00  0.50           O  
HETATM  684  O   HOH T 683      36.421  29.176   8.987  1.00  0.50           O  
HETATM  685  O   HOH T 684      -3.567  10.925  24.167  1.00  0.50           O  
HETATM  686  O   HOH T 685      19.828  24.735  34.949  1.00  0.50           O  
HETATM  687  O   HOH T 686      36.579  15.458 -13.768  1.00  0.50           O  
HETATM  688  O   HOH T 687      34.172  17.748 -17.873  1.00  0.50           O  
HETATM  689  O   HOH T 688      10.403  47.138  -8.053  1.00  0.51           O  
HETATM  690  O   HOH T 689      28.913   6.904  32.631  1.00  0.51           O  
HETATM  691  O   HOH T 690      17.062  42.360 -28.943  1.00  0.51           O  
HETATM  692  O   HOH T 691      -1.515  17.950 -12.272  1.00  0.51           O  
HETATM  693  O   HOH T 692      25.691  58.450   4.084  1.00  0.51           O  
HETATM  694  O   HOH T 693      21.551  -0.035  11.252  1.00  0.51           O  
HETATM  695  O   HOH T 694      -0.183  25.949  19.617  1.00  0.51           O  
HETATM  696  O   HOH T 695      31.799  50.285  10.996  1.00  0.51           O  
HETATM  697  O   HOH T 696      23.371   3.077 -26.468  1.00  0.51           O  
HETATM  698  O   HOH T 697      48.564  23.160 -10.358  1.00  0.51           O  
HETATM  699  O   HOH T 698      25.321  40.579  37.369  1.00  0.51           O  
HETATM  700  O   HOH T 699       7.089  37.874  -0.848  1.00  0.51           O  
HETATM  701  O   HOH T 700      11.407  44.570  -7.388  1.00  0.51           O  
HETATM  702  O   HOH T 701       2.344  11.436  32.970  1.00  0.51           O  
HETATM  703  O   HOH T 702      19.578  17.735  35.022  1.00  0.51           O  
HETATM  704  O   HOH T 703      -8.893   1.564   2.921  1.00  0.51           O  
HETATM  705  O   HOH T 704      19.724  13.582  34.799  1.00  0.51           O  
HETATM  706  O   HOH T 705      16.052  14.348  10.737  1.00  0.51           O  
HETATM  707  O   HOH T 706      30.629   8.601  27.580  1.00  0.51           O  
HETATM  708  O   HOH T 707      39.195  18.007   9.760  1.00  0.51           O  
HETATM  709  O   HOH T 708      46.966  27.286 -11.636  1.00  0.51           O  
HETATM  710  O   HOH T 709      45.240  29.097 -10.455  1.00  0.51           O  
HETATM  711  O   HOH T 710      -3.351  10.475 -30.784  1.00  0.51           O  
HETATM  712  O   HOH T 711      31.677  50.112 -18.767  1.00  0.51           O  
HETATM  713  O   HOH T 712      30.871  58.855  -8.921  1.00  0.51           O  
HETATM  714  O   HOH T 713      36.628   8.547  15.628  1.00  0.51           O  
HETATM  715  O   HOH T 714      14.582  -0.654   3.447  1.00  0.52           O  
HETATM  716  O   HOH T 715      13.862  -7.357   6.645  1.00  0.52           O  
HETATM  717  O   HOH T 716       0.780  34.242  -7.091  1.00  0.52           O  
HETATM  718  O   HOH T 717      19.271  47.833   6.284  1.00  0.52           O  
HETATM  719  O   HOH T 718      34.284  54.745  13.075  1.00  0.52           O  
HETATM  720  O   HOH T 719      -0.451  10.779  33.447  1.00  0.52           O  
HETATM  721  O   HOH T 720      19.171  38.334 -30.154  1.00  0.52           O  
HETATM  722  O   HOH T 721      32.379  56.885  13.252  1.00  0.52           O  
HETATM  723  O   HOH T 722       9.714  38.152   0.052  1.00  0.52           O  
HETATM  724  O   HOH T 723      27.687  57.488   0.032  1.00  0.52           O  
HETATM  725  O   HOH T 724      26.767  11.069 -12.267  1.00  0.52           O  
HETATM  726  O   HOH T 725      25.924  21.796  23.830  1.00  0.52           O  
HETATM  727  O   HOH T 726      -3.636   7.972 -31.579  1.00  0.52           O  
HETATM  728  O   HOH T 727      27.911  59.987   4.086  1.00  0.52           O  
HETATM  729  O   HOH T 728      23.439  16.315  42.140  1.00  0.52           O  
HETATM  730  O   HOH T 729      19.810   2.914   5.504  1.00  0.52           O  
HETATM  731  O   HOH T 730      16.642  40.610  29.385  1.00  0.52           O  
HETATM  732  O   HOH T 731      40.437  18.631  17.713  1.00  0.52           O  
HETATM  733  O   HOH T 732      -5.431  16.033   2.338  1.00  0.52           O  
HETATM  734  O   HOH T 733      10.389  25.167  31.659  1.00  0.52           O  
HETATM  735  O   HOH T 734      11.310   7.597  12.795  1.00  0.52           O  
HETATM  736  O   HOH T 735      42.286  19.647 -15.414  1.00  0.52           O  
HETATM  737  O   HOH T 736       7.297  33.556 -30.158  1.00  0.52           O  
HETATM  738  O   HOH T 737      10.423   2.350 -27.688  1.00  0.52           O  
HETATM  739  O   HOH T 738      42.399  40.892  16.230  1.00  0.52           O  
HETATM  740  O   HOH T 739      37.144  14.539  13.836  1.00  0.52           O  
HETATM  741  O   HOH T 740      35.056  32.578  32.398  1.00  0.52           O  
HETATM  742  O   HOH T 741      -4.954  22.087 -20.164  1.00  0.52           O  
HETATM  743  O   HOH T 742      47.158  35.109 -11.283  1.00  0.52           O  
HETATM  744  O   HOH T 743       7.316  27.129  24.642  1.00  0.52           O  
HETATM  745  O   HOH T 744      43.546  22.756  26.845  1.00  0.52           O  
HETATM  746  O   HOH T 745       8.826  30.818  24.997  1.00  0.52           O  
HETATM  747  O   HOH T 746      37.234   9.023  18.446  1.00  0.52           O  
HETATM  748  O   HOH T 747      24.856  40.534  40.048  1.00  0.53           O  
HETATM  749  O   HOH T 748      18.376  42.627  30.067  1.00  0.53           O  
HETATM  750  O   HOH T 749      37.390  11.339  22.477  1.00  0.53           O  
HETATM  751  O   HOH T 750      34.172  28.194  10.630  1.00  0.53           O  
HETATM  752  O   HOH T 751       4.449  14.507 -35.805  1.00  0.53           O  
HETATM  753  O   HOH T 752      31.665  37.809 -25.876  1.00  0.53           O  
HETATM  754  O   HOH T 753      46.537  24.633 -11.702  1.00  0.53           O  
HETATM  755  O   HOH T 754       1.351   7.785  35.236  1.00  0.53           O  
HETATM  756  O   HOH T 755      31.061  52.647 -14.543  1.00  0.53           O  
HETATM  757  O   HOH T 756      13.692  46.121  -7.056  1.00  0.53           O  
HETATM  758  O   HOH T 757      35.504  42.022  31.792  1.00  0.53           O  
HETATM  759  O   HOH T 758      46.961  35.660 -13.960  1.00  0.53           O  
HETATM  760  O   HOH T 759      37.662  17.901  12.379  1.00  0.53           O  
HETATM  761  O   HOH T 760      39.335   8.357  15.046  1.00  0.53           O  
HETATM  762  O   HOH T 761      -1.746   4.830  -0.789  1.00  0.53           O  
HETATM  763  O   HOH T 762      24.261  -0.791  12.059  1.00  0.53           O  
HETATM  764  O   HOH T 763       9.834  19.456 -17.363  1.00  0.53           O  
HETATM  765  O   HOH T 764       3.816  -2.859  28.432  1.00  0.53           O  
HETATM  766  O   HOH T 765      -1.615  34.478 -12.999  1.00  0.53           O  
HETATM  767  O   HOH T 766      20.063  41.384  36.685  1.00  0.53           O  
HETATM  768  O   HOH T 767      25.223   4.218 -17.130  1.00  0.53           O  
HETATM  769  O   HOH T 768      34.076   4.341  -3.570  1.00  0.53           O  
HETATM  770  O   HOH T 769       2.203   4.498 -24.213  1.00  0.53           O  
HETATM  771  O   HOH T 770       5.544   3.840 -29.314  1.00  0.53           O  
HETATM  772  O   HOH T 771      33.085  44.627  26.052  1.00  0.53           O  
HETATM  773  O   HOH T 772       2.896  41.450   2.393  1.00  0.53           O  
HETATM  774  O   HOH T 773      14.578  -0.154  -9.831  1.00  0.53           O  
HETATM  775  O   HOH T 774      41.462  43.851   8.837  1.00  0.53           O  
HETATM  776  O   HOH T 775      31.123  12.791 -19.547  1.00  0.53           O  
HETATM  777  O   HOH T 776      45.614  23.428 -13.990  1.00  0.53           O  
HETATM  778  O   HOH T 777       7.235  45.310  -7.391  1.00  0.53           O  
HETATM  779  O   HOH T 778       7.160  26.861  33.439  1.00  0.54           O  
HETATM  780  O   HOH T 779      -3.751  22.559 -17.965  1.00  0.54           O  
HETATM  781  O   HOH T 780      16.870  -4.008   9.659  1.00  0.54           O  
HETATM  782  O   HOH T 781       8.201  -8.971  18.452  1.00  0.54           O  
HETATM  783  O   HOH T 782      -0.080  30.931 -13.854  1.00  0.54           O  
HETATM  784  O   HOH T 783      -8.173   4.744  16.262  1.00  0.54           O  
HETATM  785  O   HOH T 784       4.393  13.651  31.612  1.00  0.54           O  
HETATM  786  O   HOH T 785       0.923  24.536 -10.363  1.00  0.54           O  
HETATM  787  O   HOH T 786      28.109   8.879  -5.762  1.00  0.54           O  
HETATM  788  O   HOH T 787      45.257  39.898  -2.328  1.00  0.54           O  
HETATM  789  O   HOH T 788      11.918   0.633 -13.018  1.00  0.54           O  
HETATM  790  O   HOH T 789      31.867  20.790 -24.561  1.00  0.54           O  
HETATM  791  O   HOH T 790       2.161  17.961  -8.858  1.00  0.54           O  
HETATM  792  O   HOH T 791      25.889   1.516  11.305  1.00  0.54           O  
HETATM  793  O   HOH T 792      33.889  55.157 -12.459  1.00  0.54           O  
HETATM  794  O   HOH T 793      -0.178  29.327 -18.896  1.00  0.54           O  
HETATM  795  O   HOH T 794      14.434   3.801   2.326  1.00  0.54           O  
HETATM  796  O   HOH T 795      24.143  55.068   4.164  1.00  0.54           O  
HETATM  797  O   HOH T 796      20.259  52.567 -22.687  1.00  0.54           O  
HETATM  798  O   HOH T 797      29.407  39.431  31.850  1.00  0.54           O  
HETATM  799  O   HOH T 798       8.853  31.684 -32.375  1.00  0.54           O  
HETATM  800  O   HOH T 799     -12.271   4.825  15.262  1.00  0.54           O  
HETATM  801  O   HOH T 800      40.625  43.197  24.361  1.00  0.54           O  
HETATM  802  O   HOH T 801      20.944  13.232  16.993  1.00  0.54           O  
HETATM  803  O   HOH T 802      10.434   0.491 -10.366  1.00  0.54           O  
HETATM  804  O   HOH T 803       0.759  27.850   4.817  1.00  0.54           O  
HETATM  805  O   HOH T 804      -3.311  12.280 -28.980  1.00  0.54           O  
HETATM  806  O   HOH T 805      12.738  28.875  30.612  1.00  0.54           O  
HETATM  807  O   HOH T 806      21.573  55.963 -13.898  1.00  0.54           O  
HETATM  808  O   HOH T 807      51.896  29.775  -9.068  1.00  0.54           O  
HETATM  809  O   HOH T 808      20.215   1.492 -13.612  1.00  0.54           O  
HETATM  810  O   HOH T 809      16.981  47.104   4.930  1.00  0.55           O  
HETATM  811  O   HOH T 810      49.686  30.760 -10.534  1.00  0.55           O  
HETATM  812  O   HOH T 811      33.531  15.474 -16.451  1.00  0.55           O  
HETATM  813  O   HOH T 812      22.230   6.387  29.241  1.00  0.55           O  
HETATM  814  O   HOH T 813      -6.742  14.591  21.039  1.00  0.55           O  
HETATM  815  O   HOH T 814      44.629  46.394 -16.123  1.00  0.55           O  
HETATM  816  O   HOH T 815      45.470  31.743   4.951  1.00  0.55           O  
HETATM  817  O   HOH T 816       2.411  33.252  16.984  1.00  0.55           O  
HETATM  818  O   HOH T 817      14.142  44.430  21.901  1.00  0.55           O  
HETATM  819  O   HOH T 818       4.867   1.476 -17.939  1.00  0.55           O  
HETATM  820  O   HOH T 819      -9.814   7.371   5.575  1.00  0.55           O  
HETATM  821  O   HOH T 820      -5.263  17.802  13.763  1.00  0.55           O  
HETATM  822  O   HOH T 821      17.132  -1.404  10.340  1.00  0.55           O  
HETATM  823  O   HOH T 822      -1.143  20.275 -26.182  1.00  0.55           O  
HETATM  824  O   HOH T 823      33.173  26.696 -25.272  1.00  0.55           O  
HETATM  825  O   HOH T 824       9.020  -1.592  30.790  1.00  0.55           O  
HETATM  826  O   HOH T 825      25.684  60.066  11.495  1.00  0.55           O  
HETATM  827  O   HOH T 826      -6.785  16.432   6.375  1.00  0.55           O  
HETATM  828  O   HOH T 827      15.342  37.838  27.723  1.00  0.55           O  
HETATM  829  O   HOH T 828       8.129  -8.204  24.264  1.00  0.56           O  
HETATM  830  O   HOH T 829      -1.768  21.209   0.611  1.00  0.56           O  
HETATM  831  O   HOH T 830      -9.845   9.677   3.916  1.00  0.56           O  
HETATM  832  O   HOH T 831      13.794  51.227 -14.736  1.00  0.56           O  
HETATM  833  O   HOH T 832      21.233   4.581  -5.337  1.00  0.56           O  
HETATM  834  O   HOH T 833      35.579  26.577   8.889  1.00  0.56           O  
HETATM  835  O   HOH T 834      -3.312  10.641 -35.687  1.00  0.56           O  
HETATM  836  O   HOH T 835       4.914  42.984  22.865  1.00  0.56           O  
HETATM  837  O   HOH T 836      -0.772   7.979 -17.681  1.00  0.56           O  
HETATM  838  O   HOH T 837      34.881  28.947 -25.912  1.00  0.56           O  
HETATM  839  O   HOH T 838      16.974  50.163  -4.787  1.00  0.56           O  
HETATM  840  O   HOH T 839       7.337   2.185  -6.690  1.00  0.56           O  
HETATM  841  O   HOH T 840       8.037  47.786  15.501  1.00  0.56           O  
HETATM  842  O   HOH T 841      -0.056  19.402 -34.742  1.00  0.56           O  
HETATM  843  O   HOH T 842      41.532  33.647  11.609  1.00  0.56           O  
HETATM  844  O   HOH T 843      39.857  33.138  32.065  1.00  0.56           O  
HETATM  845  O   HOH T 844      22.690  39.299 -34.836  1.00  0.56           O  
HETATM  846  O   HOH T 845      44.716  28.189  18.618  1.00  0.56           O  
HETATM  847  O   HOH T 846       2.049  29.941  18.131  1.00  0.57           O  
HETATM  848  O   HOH T 847      16.279  -2.617  29.377  1.00  0.57           O  
HETATM  849  O   HOH T 848       8.305   2.223  -9.311  1.00  0.57           O  
HETATM  850  O   HOH T 849      39.722  32.649  13.583  1.00  0.57           O  
HETATM  851  O   HOH T 850      25.897  44.634 -32.599  1.00  0.57           O  
HETATM  852  O   HOH T 851      45.370  35.417 -22.017  1.00  0.57           O  
HETATM  853  O   HOH T 852      -0.227  28.634  11.461  1.00  0.57           O  
HETATM  854  O   HOH T 853      13.651  24.521 -11.262  1.00  0.57           O  
HETATM  855  O   HOH T 854      36.798  13.873  29.771  1.00  0.57           O  
HETATM  856  O   HOH T 855      14.606  50.256  13.834  1.00  0.57           O  
HETATM  857  O   HOH T 856      -5.682   8.908   2.806  1.00  0.57           O  
HETATM  858  O   HOH T 857      11.518   2.586  -0.625  1.00  0.57           O  
HETATM  859  O   HOH T 858      31.647  12.025 -26.885  1.00  0.57           O  
HETATM  860  O   HOH T 859       6.319  45.563   6.545  1.00  0.57           O  
HETATM  861  O   HOH T 860      32.258  43.207  23.757  1.00  0.57           O  
HETATM  862  O   HOH T 861      14.489  42.179 -30.124  1.00  0.57           O  
HETATM  863  O   HOH T 862      12.385   9.665 -38.118  1.00  0.58           O  
HETATM  864  O   HOH T 863       8.735  43.733  22.584  1.00  0.58           O  
HETATM  865  O   HOH T 864       7.277  46.152   1.761  1.00  0.58           O  
HETATM  866  O   HOH T 865      -0.520   5.717  31.077  1.00  0.59           O  
HETATM  867  O   HOH T 866      30.933  55.018 -12.977  1.00  0.59           O  
HETATM  868  O   HOH T 867      21.963  45.326   0.067  1.00  0.59           O  
HETATM  869  O   HOH T 868      16.883  44.533   2.500  1.00  0.59           O  
HETATM  870  O   HOH T 869      -1.655  24.960 -22.598  1.00  0.60           O  
HETATM  871  O   HOH T 870      40.590  44.495  -2.214  1.00  0.61           O  
HETATM  872  O   HOH T 871      39.547  27.865  30.943  1.00  0.61           O  
HETATM  873  O   HOH T 872      15.348  -5.705   8.227  1.00  0.64           O  
TER     874      HOH T 872 
