# Supplementary material for: Accurate Prediction of Hydration Sites of Proteins Using Energy Model With Atom Embedding
Source: Front Mol Biosci. 2021 Sep 20;8:756075. doi: 10.3389/fmolb.2021.756075 (PMC8488165; doi:10.3389/fmolb.2021.756075)
Supplement: Supplementary file 1 [file DataSheet1.ZIP › Data Sheet 1/Our_result_pdb/our_dataset_output/2D59_watersite.pdb]

HEADER                                                        XXXX


JRNL        PMID   -1
HETATM    1  O   HOH T   0      47.231  38.638  43.635  1.00  0.17           O  
HETATM    2  O   HOH T   1      50.225  33.865  19.692  1.00  0.20           O  
HETATM    3  O   HOH T   2      41.413  28.162  19.738  1.00  0.20           O  
HETATM    4  O   HOH T   3      47.645  37.878  41.016  1.00  0.22           O  
HETATM    5  O   HOH T   4      45.301  40.613  29.255  1.00  0.22           O  
HETATM    6  O   HOH T   5      37.226  49.428  18.494  1.00  0.24           O  
HETATM    7  O   HOH T   6      32.063  43.541   2.951  1.00  0.25           O  
HETATM    8  O   HOH T   7      37.893  31.516  11.110  1.00  0.25           O  
HETATM    9  O   HOH T   8      59.993  37.049  32.722  1.00  0.25           O  
HETATM   10  O   HOH T   9      40.500  30.486  42.705  1.00  0.26           O  
HETATM   11  O   HOH T  10      51.721  37.648  34.329  1.00  0.26           O  
HETATM   12  O   HOH T  11      31.840  38.996   4.208  1.00  0.27           O  
HETATM   13  O   HOH T  12      39.917  24.266  23.611  1.00  0.27           O  
HETATM   14  O   HOH T  13      37.241  25.018  24.072  1.00  0.28           O  
HETATM   15  O   HOH T  14      27.765  26.697  33.076  1.00  0.29           O  
HETATM   16  O   HOH T  15      27.293  47.271  30.690  1.00  0.29           O  
HETATM   17  O   HOH T  16      46.023  47.975  35.044  1.00  0.29           O  
HETATM   18  O   HOH T  17      27.077  33.201  17.684  1.00  0.29           O  
HETATM   19  O   HOH T  18      38.964  21.336  35.454  1.00  0.29           O  
HETATM   20  O   HOH T  19      32.210  38.138  46.409  1.00  0.30           O  
HETATM   21  O   HOH T  20      36.016  43.422   7.438  1.00  0.30           O  
HETATM   22  O   HOH T  21      38.120  48.963  24.513  1.00  0.30           O  
HETATM   23  O   HOH T  22      37.901  26.335  16.143  1.00  0.30           O  
HETATM   24  O   HOH T  23      51.293  27.713  42.677  1.00  0.30           O  
HETATM   25  O   HOH T  24      51.627  32.650  16.002  1.00  0.30           O  
HETATM   26  O   HOH T  25      35.476  48.626  25.252  1.00  0.30           O  
HETATM   27  O   HOH T  26      52.047  39.646   7.635  1.00  0.30           O  
HETATM   28  O   HOH T  27      46.328  21.571  30.549  1.00  0.31           O  
HETATM   29  O   HOH T  28      31.003  48.769  24.244  1.00  0.31           O  
HETATM   30  O   HOH T  29      53.689  42.781  32.490  1.00  0.31           O  
HETATM   31  O   HOH T  30      42.108  33.610  38.795  1.00  0.32           O  
HETATM   32  O   HOH T  31      33.054  30.303   9.721  1.00  0.32           O  
HETATM   33  O   HOH T  32      32.925  47.883  26.162  1.00  0.32           O  
HETATM   34  O   HOH T  33      41.376  33.134  14.901  1.00  0.32           O  
HETATM   35  O   HOH T  34      27.745  29.532  36.963  1.00  0.33           O  
HETATM   36  O   HOH T  35      29.423  33.568  41.460  1.00  0.33           O  
HETATM   37  O   HOH T  36      36.269  42.085  11.228  1.00  0.33           O  
HETATM   38  O   HOH T  37      56.451  31.721  30.631  1.00  0.33           O  
HETATM   39  O   HOH T  38      44.869  43.998  10.787  1.00  0.34           O  
HETATM   40  O   HOH T  39      54.094  47.384  26.277  1.00  0.34           O  
HETATM   41  O   HOH T  40      27.518  26.950  40.489  1.00  0.34           O  
HETATM   42  O   HOH T  41      41.230  20.499  34.236  1.00  0.34           O  
HETATM   43  O   HOH T  42      49.789  34.718  15.997  1.00  0.34           O  
HETATM   44  O   HOH T  43      59.444  32.510  27.315  1.00  0.34           O  
HETATM   45  O   HOH T  44      31.164  31.952  11.020  1.00  0.34           O  
HETATM   46  O   HOH T  45      21.419  24.598  42.419  1.00  0.35           O  
HETATM   47  O   HOH T  46      30.130  27.603  24.348  1.00  0.35           O  
HETATM   48  O   HOH T  47      31.928  21.165  35.699  1.00  0.35           O  
HETATM   49  O   HOH T  48      45.140  29.809  13.358  1.00  0.35           O  
HETATM   50  O   HOH T  49      39.755  25.545  30.604  1.00  0.35           O  
HETATM   51  O   HOH T  50      34.568  19.450  17.157  1.00  0.36           O  
HETATM   52  O   HOH T  51      59.220  32.244  30.920  1.00  0.36           O  
HETATM   53  O   HOH T  52      56.800  47.670  26.651  1.00  0.36           O  
HETATM   54  O   HOH T  53      33.363  44.623  32.628  1.00  0.36           O  
HETATM   55  O   HOH T  54      52.391  42.150  16.896  1.00  0.36           O  
HETATM   56  O   HOH T  55      49.360  38.640  35.655  1.00  0.37           O  
HETATM   57  O   HOH T  56      40.233  32.064  12.540  1.00  0.37           O  
HETATM   58  O   HOH T  57      60.409  34.520  25.844  1.00  0.37           O  
HETATM   59  O   HOH T  58      43.800  25.665  38.973  1.00  0.37           O  
HETATM   60  O   HOH T  59      31.166  41.027   2.567  1.00  0.37           O  
HETATM   61  O   HOH T  60      38.212  21.853  38.958  1.00  0.37           O  
HETATM   62  O   HOH T  61      42.429  29.162  41.287  1.00  0.37           O  
HETATM   63  O   HOH T  62      40.019  26.838  17.825  1.00  0.37           O  
HETATM   64  O   HOH T  63      29.289  34.020  10.822  1.00  0.37           O  
HETATM   65  O   HOH T  64      43.548  41.488  39.460  1.00  0.37           O  
HETATM   66  O   HOH T  65      31.091  31.385   6.507  1.00  0.38           O  
HETATM   67  O   HOH T  66      27.851  45.472  32.315  1.00  0.38           O  
HETATM   68  O   HOH T  67      40.097  30.079  10.569  1.00  0.38           O  
HETATM   69  O   HOH T  68      34.174  31.732  42.674  1.00  0.38           O  
HETATM   70  O   HOH T  69      26.621  33.478  14.799  1.00  0.39           O  
HETATM   71  O   HOH T  70      35.618  46.171  31.583  1.00  0.39           O  
HETATM   72  O   HOH T  71      44.028  46.041  13.880  1.00  0.39           O  
HETATM   73  O   HOH T  72      45.329  42.505  41.414  1.00  0.39           O  
HETATM   74  O   HOH T  73      47.117  40.568  41.693  1.00  0.39           O  
HETATM   75  O   HOH T  74      41.423  19.186  39.994  1.00  0.39           O  
HETATM   76  O   HOH T  75      58.939  41.302  20.921  1.00  0.40           O  
HETATM   77  O   HOH T  76      29.090  27.519  38.214  1.00  0.40           O  
HETATM   78  O   HOH T  77      34.370  45.467   8.423  1.00  0.40           O  
HETATM   79  O   HOH T  78      34.119  48.556  31.619  1.00  0.40           O  
HETATM   80  O   HOH T  79      45.711  21.210  22.383  1.00  0.40           O  
HETATM   81  O   HOH T  80      41.381  35.298  40.929  1.00  0.40           O  
HETATM   82  O   HOH T  81      36.781  23.196  44.312  1.00  0.40           O  
HETATM   83  O   HOH T  82      31.540  28.856  26.354  1.00  0.41           O  
HETATM   84  O   HOH T  83      20.581  42.524  24.479  1.00  0.41           O  
HETATM   85  O   HOH T  84      60.039  38.147  26.643  1.00  0.41           O  
HETATM   86  O   HOH T  85      24.382  37.191  22.674  1.00  0.41           O  
HETATM   87  O   HOH T  86      28.619  46.471  34.825  1.00  0.41           O  
HETATM   88  O   HOH T  87      47.219  19.243  23.567  1.00  0.41           O  
HETATM   89  O   HOH T  88      34.259  47.619  10.237  1.00  0.42           O  
HETATM   90  O   HOH T  89      33.426  38.406  43.823  1.00  0.42           O  
HETATM   91  O   HOH T  90      45.532  20.551  32.964  1.00  0.42           O  
HETATM   92  O   HOH T  91      59.784  35.361  35.022  1.00  0.42           O  
HETATM   93  O   HOH T  92      33.344  50.195  24.592  1.00  0.42           O  
HETATM   94  O   HOH T  93      36.627  21.168  17.657  1.00  0.42           O  
HETATM   95  O   HOH T  94      45.260  43.661  38.882  1.00  0.42           O  
HETATM   96  O   HOH T  95      27.686  28.360  23.370  1.00  0.42           O  
HETATM   97  O   HOH T  96      37.606  23.596  16.752  1.00  0.42           O  
HETATM   98  O   HOH T  97      27.588  26.968  35.879  1.00  0.42           O  
HETATM   99  O   HOH T  98      33.896  47.734  12.941  1.00  0.43           O  
HETATM  100  O   HOH T  99      31.574  20.857  38.389  1.00  0.43           O  
HETATM  101  O   HOH T 100      33.128  21.000  25.894  1.00  0.43           O  
HETATM  102  O   HOH T 101      24.123  35.009  24.301  1.00  0.43           O  
HETATM  103  O   HOH T 102      28.576  48.493  25.693  1.00  0.43           O  
HETATM  104  O   HOH T 103      26.366  32.049  26.850  1.00  0.43           O  
HETATM  105  O   HOH T 104      25.782  34.666  38.190  1.00  0.43           O  
HETATM  106  O   HOH T 105      48.518  30.026  40.631  1.00  0.44           O  
HETATM  107  O   HOH T 106      41.010  21.088  38.271  1.00  0.44           O  
HETATM  108  O   HOH T 107      61.961  36.964  34.890  1.00  0.44           O  
HETATM  109  O   HOH T 108      61.565  41.264  21.962  1.00  0.44           O  
HETATM  110  O   HOH T 109      49.441  25.130  30.841  1.00  0.44           O  
HETATM  111  O   HOH T 110      29.070  34.212  13.626  1.00  0.45           O  
HETATM  112  O   HOH T 111      32.031  47.062  32.584  1.00  0.45           O  
HETATM  113  O   HOH T 112      45.119  18.519  21.835  1.00  0.45           O  
HETATM  114  O   HOH T 113      44.000  27.201  19.801  1.00  0.46           O  
HETATM  115  O   HOH T 114      34.469  20.358  34.973  1.00  0.46           O  
HETATM  116  O   HOH T 115      39.336  24.445  14.703  1.00  0.46           O  
HETATM  117  O   HOH T 116      33.887  17.919  19.288  1.00  0.46           O  
HETATM  118  O   HOH T 117      25.061  28.980  22.701  1.00  0.46           O  
HETATM  119  O   HOH T 118      42.895  31.004  12.350  1.00  0.46           O  
HETATM  120  O   HOH T 119      38.258  25.058  21.567  1.00  0.47           O  
HETATM  121  O   HOH T 120      23.956  33.397  26.739  1.00  0.47           O  
HETATM  122  O   HOH T 121      30.941  45.074  34.027  1.00  0.47           O  
HETATM  123  O   HOH T 122      62.217  36.504  26.600  1.00  0.47           O  
HETATM  124  O   HOH T 123      33.225  41.114  43.747  1.00  0.47           O  
HETATM  125  O   HOH T 124      41.938  25.437  19.390  1.00  0.47           O  
HETATM  126  O   HOH T 125      34.960  20.411  19.743  1.00  0.47           O  
HETATM  127  O   HOH T 126      58.337  30.534  28.946  1.00  0.48           O  
HETATM  128  O   HOH T 127      40.615  16.806  22.780  1.00  0.48           O  
HETATM  129  O   HOH T 128      59.590  40.008  23.390  1.00  0.48           O  
HETATM  130  O   HOH T 129      50.265  44.610  35.813  1.00  0.48           O  
HETATM  131  O   HOH T 130      58.701  38.581  21.242  1.00  0.48           O  
HETATM  132  O   HOH T 131      47.604  48.049  24.093  1.00  0.48           O  
HETATM  133  O   HOH T 132      56.266  46.754  19.197  1.00  0.49           O  
HETATM  134  O   HOH T 133      55.702  44.548  16.420  1.00  0.49           O  
HETATM  135  O   HOH T 134      23.368  32.919  22.603  1.00  0.50           O  
HETATM  136  O   HOH T 135      35.799  20.382  25.815  1.00  0.50           O  
HETATM  137  O   HOH T 136      39.871  49.026  13.040  1.00  0.50           O  
HETATM  138  O   HOH T 137      35.530  25.506  21.970  1.00  0.50           O  
HETATM  139  O   HOH T 138      26.304  30.075  24.914  1.00  0.50           O  
HETATM  140  O   HOH T 139      25.227  32.570  24.488  1.00  0.50           O  
HETATM  141  O   HOH T 140      24.347  30.971  28.284  1.00  0.50           O  
HETATM  142  O   HOH T 141      52.928  29.868  39.178  1.00  0.50           O  
HETATM  143  O   HOH T 142      29.284  25.232  25.554  1.00  0.50           O  
HETATM  144  O   HOH T 143      52.406  38.943  10.384  1.00  0.50           O  
HETATM  145  O   HOH T 144      31.626  28.954   7.774  1.00  0.50           O  
HETATM  146  O   HOH T 145      58.901  34.311  32.760  1.00  0.50           O  
HETATM  147  O   HOH T 146      54.154  30.628  36.917  1.00  0.50           O  
HETATM  148  O   HOH T 147      71.563  34.637  28.829  1.00  0.51           O  
HETATM  149  O   HOH T 148      36.705  20.572  36.730  1.00  0.51           O  
HETATM  150  O   HOH T 149      51.312  39.841  32.531  1.00  0.51           O  
HETATM  151  O   HOH T 150      25.000  25.942  41.280  1.00  0.52           O  
HETATM  152  O   HOH T 151      55.443  31.338  23.385  1.00  0.52           O  
HETATM  153  O   HOH T 152      66.167  32.926  31.804  1.00  0.52           O  
HETATM  154  O   HOH T 153      19.282  41.071  22.611  1.00  0.52           O  
HETATM  155  O   HOH T 154      27.271  48.084  33.099  1.00  0.52           O  
HETATM  156  O   HOH T 155      56.328  34.260  31.871  1.00  0.52           O  
HETATM  157  O   HOH T 156      47.429  41.231  10.503  1.00  0.53           O  
HETATM  158  O   HOH T 157      26.863  34.319  12.087  1.00  0.53           O  
HETATM  159  O   HOH T 158      25.654  28.711  41.594  1.00  0.53           O  
HETATM  160  O   HOH T 159      63.950  30.647  29.937  1.00  0.53           O  
HETATM  161  O   HOH T 160      48.521  46.793  35.152  1.00  0.53           O  
HETATM  162  O   HOH T 161      43.057  20.379  21.854  1.00  0.54           O  
HETATM  163  O   HOH T 162      49.550  27.444  40.569  1.00  0.54           O  
HETATM  164  O   HOH T 163      22.691  45.372  21.854  1.00  0.54           O  
HETATM  165  O   HOH T 164      56.224  28.991  29.917  1.00  0.54           O  
HETATM  166  O   HOH T 165      29.938  50.944  22.834  1.00  0.54           O  
HETATM  167  O   HOH T 166      39.931  24.988  12.052  1.00  0.54           O  
HETATM  168  O   HOH T 167      51.871  42.653  34.646  1.00  0.55           O  
HETATM  169  O   HOH T 168      49.411  50.210  23.480  1.00  0.55           O  
HETATM  170  O   HOH T 169      51.971  34.800  17.770  1.00  0.55           O  
HETATM  171  O   HOH T 170      33.225  20.249  40.474  1.00  0.55           O  
HETATM  172  O   HOH T 171      33.960  49.463  29.098  1.00  0.55           O  
HETATM  173  O   HOH T 172      28.954  42.915  12.134  1.00  0.55           O  
HETATM  174  O   HOH T 173      45.394  28.414  21.810  1.00  0.56           O  
HETATM  175  O   HOH T 174      28.693  47.598  17.891  1.00  0.56           O  
HETATM  176  O   HOH T 175      25.178  43.648  22.649  1.00  0.56           O  
HETATM  177  O   HOH T 176      23.549  35.660  36.552  1.00  0.56           O  
HETATM  178  O   HOH T 177      43.819  48.432  33.390  1.00  0.56           O  
HETATM  179  O   HOH T 178      51.110  25.935  32.554  1.00  0.57           O  
HETATM  180  O   HOH T 179      42.318  31.867  41.062  1.00  0.57           O  
HETATM  181  O   HOH T 180      47.730  44.549  38.003  1.00  0.57           O  
HETATM  182  O   HOH T 181      32.165  33.473  42.196  1.00  0.58           O  
HETATM  183  O   HOH T 182      42.000  46.901  36.360  1.00  0.58           O  
HETATM  184  O   HOH T 183      30.676  26.619  11.378  1.00  0.59           O  
HETATM  185  O   HOH T 184      23.488  30.667  21.106  1.00  0.60           O  
HETATM  186  O   HOH T 185      28.275  37.954  43.987  1.00  0.63           O  
TER     187      HOH T 185 
