# Supplementary material for: Accurate Prediction of Hydration Sites of Proteins Using Energy Model With Atom Embedding
Source: Front Mol Biosci. 2021 Sep 20;8:756075. doi: 10.3389/fmolb.2021.756075 (PMC8488165; doi:10.3389/fmolb.2021.756075)
Supplement: Supplementary file 1 [file DataSheet1.ZIP › Data Sheet 1/Our_result_pdb/our_dataset_output/2DPL_watersite.pdb]

HEADER                                                        XXXX


JRNL        PMID   -1
HETATM    1  O   HOH T   0      17.980  21.166  40.566  1.00  0.14           O  
HETATM    2  O   HOH T   1      11.768  24.794 -13.544  1.00  0.15           O  
HETATM    3  O   HOH T   2       6.106  19.625  61.281  1.00  0.16           O  
HETATM    4  O   HOH T   3       3.699  28.092  63.440  1.00  0.16           O  
HETATM    5  O   HOH T   4       3.429  43.239  17.061  1.00  0.16           O  
HETATM    6  O   HOH T   5       6.420  22.339  13.314  1.00  0.16           O  
HETATM    7  O   HOH T   6      16.242  28.478 -16.102  1.00  0.16           O  
HETATM    8  O   HOH T   7       5.501  22.831  36.850  1.00  0.17           O  
HETATM    9  O   HOH T   8      -3.074  30.571   9.379  1.00  0.17           O  
HETATM   10  O   HOH T   9      17.951  31.852  40.731  1.00  0.18           O  
HETATM   11  O   HOH T  10       4.302  20.644 -11.293  1.00  0.18           O  
HETATM   12  O   HOH T  11       4.050   9.720  38.070  1.00  0.18           O  
HETATM   13  O   HOH T  12      17.536  19.010  68.453  1.00  0.18           O  
HETATM   14  O   HOH T  13      -0.688  20.972   3.058  1.00  0.19           O  
HETATM   15  O   HOH T  14       9.241  16.633  46.961  1.00  0.19           O  
HETATM   16  O   HOH T  15      -3.785  28.748 -18.286  1.00  0.19           O  
HETATM   17  O   HOH T  16      17.838  13.768  16.392  1.00  0.19           O  
HETATM   18  O   HOH T  17      -9.170  32.163 -14.961  1.00  0.20           O  
HETATM   19  O   HOH T  18      -2.510  12.441  12.096  1.00  0.20           O  
HETATM   20  O   HOH T  19      10.750  16.514  55.889  1.00  0.20           O  
HETATM   21  O   HOH T  20      13.240  23.504  56.957  1.00  0.20           O  
HETATM   22  O   HOH T  21      16.204  35.934   7.982  1.00  0.21           O  
HETATM   23  O   HOH T  22       7.722  32.729  32.291  1.00  0.21           O  
HETATM   24  O   HOH T  23      10.110  16.288  26.544  1.00  0.21           O  
HETATM   25  O   HOH T  24      12.140  30.650  17.707  1.00  0.22           O  
HETATM   26  O   HOH T  25      24.010  26.755  55.924  1.00  0.22           O  
HETATM   27  O   HOH T  26      -2.342  17.138 -24.218  1.00  0.22           O  
HETATM   28  O   HOH T  27      10.763  29.277  51.655  1.00  0.22           O  
HETATM   29  O   HOH T  28       5.005  34.826   4.080  1.00  0.22           O  
HETATM   30  O   HOH T  29       3.550  33.834  65.686  1.00  0.23           O  
HETATM   31  O   HOH T  30     -10.813  17.902  -9.217  1.00  0.23           O  
HETATM   32  O   HOH T  31      16.193  38.398  -5.291  1.00  0.23           O  
HETATM   33  O   HOH T  32     -14.962   9.395   4.614  1.00  0.24           O  
HETATM   34  O   HOH T  33       6.537  31.480   8.515  1.00  0.24           O  
HETATM   35  O   HOH T  34       4.340  15.412   3.094  1.00  0.24           O  
HETATM   36  O   HOH T  35      -6.646  24.574   4.083  1.00  0.24           O  
HETATM   37  O   HOH T  36      15.345  31.751 -21.322  1.00  0.24           O  
HETATM   38  O   HOH T  37      -0.386  29.558  39.557  1.00  0.24           O  
HETATM   39  O   HOH T  38       5.694  42.111  -9.113  1.00  0.24           O  
HETATM   40  O   HOH T  39      19.004  26.822  67.007  1.00  0.24           O  
HETATM   41  O   HOH T  40       7.888  14.906  30.679  1.00  0.24           O  
HETATM   42  O   HOH T  41      16.584  25.110  52.671  1.00  0.24           O  
HETATM   43  O   HOH T  42      -2.553  38.928  33.301  1.00  0.24           O  
HETATM   44  O   HOH T  43      -1.024  18.954  19.199  1.00  0.25           O  
HETATM   45  O   HOH T  44      27.259  24.691  28.249  1.00  0.25           O  
HETATM   46  O   HOH T  45      25.195  28.014 -12.878  1.00  0.25           O  
HETATM   47  O   HOH T  46      17.649   7.363  55.549  1.00  0.25           O  
HETATM   48  O   HOH T  47      11.837  31.896  51.539  1.00  0.25           O  
HETATM   49  O   HOH T  48      15.773  14.469  45.807  1.00  0.25           O  
HETATM   50  O   HOH T  49      13.898  22.993  -6.994  1.00  0.25           O  
HETATM   51  O   HOH T  50      -6.823  39.961  21.785  1.00  0.25           O  
HETATM   52  O   HOH T  51      23.416  17.620  65.207  1.00  0.25           O  
HETATM   53  O   HOH T  52      17.099  27.057  50.814  1.00  0.25           O  
HETATM   54  O   HOH T  53      15.508  22.724  10.111  1.00  0.26           O  
HETATM   55  O   HOH T  54       9.630  17.986 -22.418  1.00  0.26           O  
HETATM   56  O   HOH T  55      -1.250  12.229 -16.605  1.00  0.26           O  
HETATM   57  O   HOH T  56      27.142  27.994 -10.879  1.00  0.26           O  
HETATM   58  O   HOH T  57      -2.740  27.414  33.041  1.00  0.26           O  
HETATM   59  O   HOH T  58      12.329  28.943  41.530  1.00  0.26           O  
HETATM   60  O   HOH T  59       3.301  14.297  14.975  1.00  0.26           O  
HETATM   61  O   HOH T  60      13.355  42.052  11.388  1.00  0.27           O  
HETATM   62  O   HOH T  61      22.757  22.757   7.300  1.00  0.27           O  
HETATM   63  O   HOH T  62      -2.306  14.729 -17.620  1.00  0.27           O  
HETATM   64  O   HOH T  63      20.618  35.620  58.979  1.00  0.27           O  
HETATM   65  O   HOH T  64      15.717  30.610  45.754  1.00  0.27           O  
HETATM   66  O   HOH T  65       8.438   6.089  39.081  1.00  0.27           O  
HETATM   67  O   HOH T  66      15.000   4.947  48.799  1.00  0.27           O  
HETATM   68  O   HOH T  67      -4.629  16.376  44.477  1.00  0.27           O  
HETATM   69  O   HOH T  68       4.451  38.345   8.980  1.00  0.27           O  
HETATM   70  O   HOH T  69      -1.444  22.089  22.677  1.00  0.27           O  
HETATM   71  O   HOH T  70       6.180  14.550  20.960  1.00  0.27           O  
HETATM   72  O   HOH T  71     -13.898  10.227  13.461  1.00  0.27           O  
HETATM   73  O   HOH T  72       0.773  32.041  -2.360  1.00  0.28           O  
HETATM   74  O   HOH T  73      -1.607  43.266  18.934  1.00  0.28           O  
HETATM   75  O   HOH T  74       4.869  22.724  -9.542  1.00  0.28           O  
HETATM   76  O   HOH T  75       6.746  26.657  -5.367  1.00  0.28           O  
HETATM   77  O   HOH T  76      21.705  26.031  67.351  1.00  0.28           O  
HETATM   78  O   HOH T  77      -3.116  43.248  21.289  1.00  0.28           O  
HETATM   79  O   HOH T  78      -8.751  22.647   7.959  1.00  0.28           O  
HETATM   80  O   HOH T  79      -0.507  46.075  11.290  1.00  0.28           O  
HETATM   81  O   HOH T  80      15.648  40.853  60.849  1.00  0.28           O  
HETATM   82  O   HOH T  81       8.536  25.795  55.335  1.00  0.29           O  
HETATM   83  O   HOH T  82      17.826  23.831  41.210  1.00  0.29           O  
HETATM   84  O   HOH T  83       0.785  27.778  56.898  1.00  0.29           O  
HETATM   85  O   HOH T  84     -13.403  11.840   0.394  1.00  0.29           O  
HETATM   86  O   HOH T  85     -10.636  19.560 -11.480  1.00  0.29           O  
HETATM   87  O   HOH T  86       9.008  10.374  12.920  1.00  0.29           O  
HETATM   88  O   HOH T  87      17.595  34.556  41.313  1.00  0.29           O  
HETATM   89  O   HOH T  88      15.235  23.390 -18.580  1.00  0.29           O  
HETATM   90  O   HOH T  89     -12.899  17.963 -10.976  1.00  0.29           O  
HETATM   91  O   HOH T  90      -0.224  17.583  29.074  1.00  0.29           O  
HETATM   92  O   HOH T  91      11.874  24.716  -6.875  1.00  0.29           O  
HETATM   93  O   HOH T  92       9.418  37.533   6.944  1.00  0.29           O  
HETATM   94  O   HOH T  93      29.700  31.244  19.431  1.00  0.29           O  
HETATM   95  O   HOH T  94       0.132  36.493  28.677  1.00  0.29           O  
HETATM   96  O   HOH T  95      20.091  19.440  69.440  1.00  0.29           O  
HETATM   97  O   HOH T  96      -5.551   2.803  48.105  1.00  0.29           O  
HETATM   98  O   HOH T  97       8.381  34.239  85.310  1.00  0.29           O  
HETATM   99  O   HOH T  98       7.113  21.544  59.580  1.00  0.30           O  
HETATM  100  O   HOH T  99      14.394  12.234  11.664  1.00  0.30           O  
HETATM  101  O   HOH T 100       9.687  23.908   6.883  1.00  0.30           O  
HETATM  102  O   HOH T 101      26.868  37.335  38.979  1.00  0.30           O  
HETATM  103  O   HOH T 102      19.629  30.970  66.388  1.00  0.30           O  
HETATM  104  O   HOH T 103      13.410  39.093  69.611  1.00  0.30           O  
HETATM  105  O   HOH T 104      14.501  43.306  13.644  1.00  0.30           O  
HETATM  106  O   HOH T 105      11.953  24.966   7.945  1.00  0.30           O  
HETATM  107  O   HOH T 106      -7.463  44.475  -6.446  1.00  0.30           O  
HETATM  108  O   HOH T 107     -10.173  22.397  21.280  1.00  0.30           O  
HETATM  109  O   HOH T 108      12.997  38.883  26.749  1.00  0.30           O  
HETATM  110  O   HOH T 109      23.634  11.496  18.540  1.00  0.30           O  
HETATM  111  O   HOH T 110       6.448  44.191  -7.376  1.00  0.30           O  
HETATM  112  O   HOH T 111     -12.327  16.894   6.251  1.00  0.31           O  
HETATM  113  O   HOH T 112      16.066  14.389  10.964  1.00  0.31           O  
HETATM  114  O   HOH T 113       4.999   0.642  41.582  1.00  0.31           O  
HETATM  115  O   HOH T 114       9.732  41.769  33.289  1.00  0.31           O  
HETATM  116  O   HOH T 115       8.345  29.906  -2.035  1.00  0.31           O  
HETATM  117  O   HOH T 116      23.349  27.075  18.841  1.00  0.31           O  
HETATM  118  O   HOH T 117      22.353  20.464   5.796  1.00  0.31           O  
HETATM  119  O   HOH T 118      17.619  19.275  18.742  1.00  0.31           O  
HETATM  120  O   HOH T 119       3.938  36.575   2.175  1.00  0.31           O  
HETATM  121  O   HOH T 120      12.713  39.043  66.872  1.00  0.31           O  
HETATM  122  O   HOH T 121      -5.206   8.577  -8.246  1.00  0.31           O  
HETATM  123  O   HOH T 122      -2.359  33.726   6.880  1.00  0.31           O  
HETATM  124  O   HOH T 123      -1.733  21.828  71.311  1.00  0.31           O  
HETATM  125  O   HOH T 124       0.822  21.969  31.437  1.00  0.31           O  
HETATM  126  O   HOH T 125       2.554  26.374 -28.162  1.00  0.31           O  
HETATM  127  O   HOH T 126      -4.706   6.464   9.065  1.00  0.31           O  
HETATM  128  O   HOH T 127       4.352  32.303   3.065  1.00  0.32           O  
HETATM  129  O   HOH T 128      17.837  16.636  11.016  1.00  0.32           O  
HETATM  130  O   HOH T 129      13.634  26.446   6.411  1.00  0.32           O  
HETATM  131  O   HOH T 130      -1.747  12.582 -19.303  1.00  0.32           O  
HETATM  132  O   HOH T 131      21.361  18.487  22.883  1.00  0.32           O  
HETATM  133  O   HOH T 132      19.697  28.653  21.328  1.00  0.32           O  
HETATM  134  O   HOH T 133      -1.887  48.500  42.344  1.00  0.32           O  
HETATM  135  O   HOH T 134       8.023  28.142  54.042  1.00  0.32           O  
HETATM  136  O   HOH T 135       1.232  27.486  40.238  1.00  0.32           O  
HETATM  137  O   HOH T 136       6.744  28.809   7.802  1.00  0.32           O  
HETATM  138  O   HOH T 137      -8.903  30.738   5.649  1.00  0.32           O  
HETATM  139  O   HOH T 138      13.005   8.431  13.976  1.00  0.32           O  
HETATM  140  O   HOH T 139     -12.796   7.715   8.242  1.00  0.32           O  
HETATM  141  O   HOH T 140      -8.536  23.475  24.795  1.00  0.32           O  
HETATM  142  O   HOH T 141      11.569  23.901 -27.374  1.00  0.32           O  
HETATM  143  O   HOH T 142      -4.541  21.167 -26.330  1.00  0.32           O  
HETATM  144  O   HOH T 143       8.319  -0.811  63.550  1.00  0.32           O  
HETATM  145  O   HOH T 144      -0.738  24.430  36.968  1.00  0.32           O  
HETATM  146  O   HOH T 145     -10.360  18.799 -18.189  1.00  0.32           O  
HETATM  147  O   HOH T 146       4.031  28.355  70.594  1.00  0.32           O  
HETATM  148  O   HOH T 147      -1.660  24.160  34.422  1.00  0.32           O  
HETATM  149  O   HOH T 148       4.870  22.889  59.100  1.00  0.32           O  
HETATM  150  O   HOH T 149       8.705  27.960  -3.974  1.00  0.32           O  
HETATM  151  O   HOH T 150      13.919  39.983  -5.574  1.00  0.33           O  
HETATM  152  O   HOH T 151       9.309  13.079  29.200  1.00  0.33           O  
HETATM  153  O   HOH T 152      14.965  19.727  17.900  1.00  0.33           O  
HETATM  154  O   HOH T 153       3.579  28.090  56.749  1.00  0.33           O  
HETATM  155  O   HOH T 154     -12.675  17.377   0.472  1.00  0.33           O  
HETATM  156  O   HOH T 155       2.353  33.712  -0.792  1.00  0.33           O  
HETATM  157  O   HOH T 156      19.723  23.610  43.211  1.00  0.33           O  
HETATM  158  O   HOH T 157      -9.724  22.844  10.522  1.00  0.33           O  
HETATM  159  O   HOH T 158      -8.167   9.393   2.363  1.00  0.33           O  
HETATM  160  O   HOH T 159      14.174  35.797  43.781  1.00  0.33           O  
HETATM  161  O   HOH T 160      20.643  21.259  71.330  1.00  0.33           O  
HETATM  162  O   HOH T 161      -5.702  17.099  36.204  1.00  0.33           O  
HETATM  163  O   HOH T 162      15.814  11.072  42.766  1.00  0.33           O  
HETATM  164  O   HOH T 163      -4.830  35.348 -18.933  1.00  0.33           O  
HETATM  165  O   HOH T 164      13.909  29.211  81.116  1.00  0.33           O  
HETATM  166  O   HOH T 165      17.923  41.756  25.931  1.00  0.33           O  
HETATM  167  O   HOH T 166      -0.730  39.184  35.319  1.00  0.33           O  
HETATM  168  O   HOH T 167      12.964  22.258 -19.614  1.00  0.33           O  
HETATM  169  O   HOH T 168      27.120  17.565  31.197  1.00  0.33           O  
HETATM  170  O   HOH T 169      12.439  33.029 -33.132  1.00  0.34           O  
HETATM  171  O   HOH T 170       7.879  16.097  17.131  1.00  0.34           O  
HETATM  172  O   HOH T 171      -0.476  43.153  11.300  1.00  0.34           O  
HETATM  173  O   HOH T 172      20.422  23.116 -12.467  1.00  0.34           O  
HETATM  174  O   HOH T 173       1.037  23.105   2.376  1.00  0.34           O  
HETATM  175  O   HOH T 174       9.923  17.371 -25.157  1.00  0.34           O  
HETATM  176  O   HOH T 175      -4.998  21.916 -29.044  1.00  0.34           O  
HETATM  177  O   HOH T 176      -1.453  22.134  -5.918  1.00  0.34           O  
HETATM  178  O   HOH T 177      18.787  31.249  20.920  1.00  0.34           O  
HETATM  179  O   HOH T 178      -6.735  22.221 -24.944  1.00  0.34           O  
HETATM  180  O   HOH T 179     -19.723  27.778  39.475  1.00  0.34           O  
HETATM  181  O   HOH T 180     -17.836  29.746  39.757  1.00  0.34           O  
HETATM  182  O   HOH T 181      23.793  33.194  54.187  1.00  0.34           O  
HETATM  183  O   HOH T 182     -17.975  13.519  -1.039  1.00  0.34           O  
HETATM  184  O   HOH T 183       1.334  28.803 -27.741  1.00  0.35           O  
HETATM  185  O   HOH T 184       8.131  26.591  49.457  1.00  0.35           O  
HETATM  186  O   HOH T 185      12.586  37.034  24.828  1.00  0.35           O  
HETATM  187  O   HOH T 186      14.312  28.267  46.439  1.00  0.35           O  
HETATM  188  O   HOH T 187     -14.617  21.610  35.012  1.00  0.35           O  
HETATM  189  O   HOH T 188       9.591  19.352  47.785  1.00  0.35           O  
HETATM  190  O   HOH T 189       7.490  41.281  31.740  1.00  0.35           O  
HETATM  191  O   HOH T 190      22.128  22.973   4.647  1.00  0.35           O  
HETATM  192  O   HOH T 191       7.842  12.823  74.370  1.00  0.35           O  
HETATM  193  O   HOH T 192      -2.482  32.661  60.885  1.00  0.35           O  
HETATM  194  O   HOH T 193       7.480  22.009  -9.057  1.00  0.35           O  
HETATM  195  O   HOH T 194       0.109   6.677  15.906  1.00  0.35           O  
HETATM  196  O   HOH T 195       5.391  17.982  14.001  1.00  0.36           O  
HETATM  197  O   HOH T 196      17.109  35.180   4.189  1.00  0.36           O  
HETATM  198  O   HOH T 197       4.037  42.775  -7.055  1.00  0.36           O  
HETATM  199  O   HOH T 198      -0.965  20.550  33.077  1.00  0.36           O  
HETATM  200  O   HOH T 199       3.475  49.291  17.548  1.00  0.36           O  
HETATM  201  O   HOH T 200      19.504  33.139  19.177  1.00  0.36           O  
HETATM  202  O   HOH T 201      -4.349  28.678  31.224  1.00  0.36           O  
HETATM  203  O   HOH T 202      -7.263  28.553   4.945  1.00  0.36           O  
HETATM  204  O   HOH T 203      14.671  43.132   7.372  1.00  0.36           O  
HETATM  205  O   HOH T 204       4.214  17.224  78.441  1.00  0.36           O  
HETATM  206  O   HOH T 205      -2.967   9.018  36.263  1.00  0.36           O  
HETATM  207  O   HOH T 206       2.747  12.623 -22.180  1.00  0.36           O  
HETATM  208  O   HOH T 207       8.494  38.764  42.045  1.00  0.36           O  
HETATM  209  O   HOH T 208       2.337  23.969  58.836  1.00  0.36           O  
HETATM  210  O   HOH T 209       9.428  34.432  45.775  1.00  0.36           O  
HETATM  211  O   HOH T 210      12.092  30.241 -32.850  1.00  0.36           O  
HETATM  212  O   HOH T 211       1.386  46.711  22.894  1.00  0.36           O  
HETATM  213  O   HOH T 212      -6.245  26.662 -27.049  1.00  0.36           O  
HETATM  214  O   HOH T 213      12.833  21.988  10.072  1.00  0.36           O  
HETATM  215  O   HOH T 214      -6.568  10.315  -2.650  1.00  0.36           O  
HETATM  216  O   HOH T 215       7.397  14.420  79.472  1.00  0.36           O  
HETATM  217  O   HOH T 216      -9.973   7.350   8.277  1.00  0.36           O  
HETATM  218  O   HOH T 217      21.980  14.542  31.540  1.00  0.36           O  
HETATM  219  O   HOH T 218     -16.665  16.325  -3.824  1.00  0.36           O  
HETATM  220  O   HOH T 219     -13.595  19.312   2.314  1.00  0.36           O  
HETATM  221  O   HOH T 220       7.451  39.302  45.618  1.00  0.36           O  
HETATM  222  O   HOH T 221       9.332  31.058   0.343  1.00  0.36           O  
HETATM  223  O   HOH T 222       1.490  23.885  29.391  1.00  0.37           O  
HETATM  224  O   HOH T 223      -4.247  43.166   9.962  1.00  0.37           O  
HETATM  225  O   HOH T 224      12.681  18.094  21.804  1.00  0.37           O  
HETATM  226  O   HOH T 225       5.623   3.131  47.854  1.00  0.37           O  
HETATM  227  O   HOH T 226       9.868  31.044  49.690  1.00  0.37           O  
HETATM  228  O   HOH T 227      20.612  21.902 -10.134  1.00  0.37           O  
HETATM  229  O   HOH T 228      14.102   8.083  18.994  1.00  0.37           O  
HETATM  230  O   HOH T 229      15.117  42.414  58.598  1.00  0.37           O  
HETATM  231  O   HOH T 230     -12.012  24.624  -9.993  1.00  0.37           O  
HETATM  232  O   HOH T 231       9.797   4.579  37.140  1.00  0.37           O  
HETATM  233  O   HOH T 232      10.328  27.306  42.326  1.00  0.37           O  
HETATM  234  O   HOH T 233      -3.277  19.070  20.841  1.00  0.37           O  
HETATM  235  O   HOH T 234      11.031  38.065   2.580  1.00  0.37           O  
HETATM  236  O   HOH T 235      22.146  34.800  56.971  1.00  0.37           O  
HETATM  237  O   HOH T 236      -3.131  20.118  69.671  1.00  0.37           O  
HETATM  238  O   HOH T 237      11.250  22.894 -34.124  1.00  0.37           O  
HETATM  239  O   HOH T 238      13.559  25.004 -20.032  1.00  0.37           O  
HETATM  240  O   HOH T 239      -8.236  30.108  30.531  1.00  0.37           O  
HETATM  241  O   HOH T 240      30.852  28.627  23.805  1.00  0.37           O  
HETATM  242  O   HOH T 241       0.445  14.760  32.944  1.00  0.37           O  
HETATM  243  O   HOH T 242     -10.486  27.192 -22.450  1.00  0.37           O  
HETATM  244  O   HOH T 243      12.143  39.861  24.366  1.00  0.37           O  
HETATM  245  O   HOH T 244     -12.136  32.565  30.751  1.00  0.37           O  
HETATM  246  O   HOH T 245      20.579  43.775  67.433  1.00  0.37           O  
HETATM  247  O   HOH T 246      12.430  40.638  -3.312  1.00  0.37           O  
HETATM  248  O   HOH T 247       2.145  28.362  -7.285  1.00  0.37           O  
HETATM  249  O   HOH T 248      11.249  25.238 -21.662  1.00  0.37           O  
HETATM  250  O   HOH T 249       1.788  19.422 -29.800  1.00  0.37           O  
HETATM  251  O   HOH T 250      13.660  20.260  50.545  1.00  0.37           O  
HETATM  252  O   HOH T 251       6.097   3.556  31.492  1.00  0.37           O  
HETATM  253  O   HOH T 252     -13.341  26.281  -8.115  1.00  0.37           O  
HETATM  254  O   HOH T 253       6.998  23.498  55.455  1.00  0.38           O  
HETATM  255  O   HOH T 254      18.172  37.428  17.011  1.00  0.38           O  
HETATM  256  O   HOH T 255      -6.589  31.577  35.004  1.00  0.38           O  
HETATM  257  O   HOH T 256      19.542  36.405  67.283  1.00  0.38           O  
HETATM  258  O   HOH T 257       5.085  40.401  30.769  1.00  0.38           O  
HETATM  259  O   HOH T 258       3.906  40.571   2.422  1.00  0.38           O  
HETATM  260  O   HOH T 259       7.536  21.182  56.826  1.00  0.38           O  
HETATM  261  O   HOH T 260      15.422   4.556  53.945  1.00  0.38           O  
HETATM  262  O   HOH T 261       8.879  12.448  26.546  1.00  0.38           O  
HETATM  263  O   HOH T 262      12.676   4.872  53.468  1.00  0.38           O  
HETATM  264  O   HOH T 263       1.757  35.240   1.408  1.00  0.38           O  
HETATM  265  O   HOH T 264      -7.611  29.739  27.756  1.00  0.38           O  
HETATM  266  O   HOH T 265      -4.958  36.864  27.072  1.00  0.38           O  
HETATM  267  O   HOH T 266      23.592  33.001  58.476  1.00  0.38           O  
HETATM  268  O   HOH T 267       3.862  30.986   9.076  1.00  0.38           O  
HETATM  269  O   HOH T 268      -8.907  28.370  11.805  1.00  0.38           O  
HETATM  270  O   HOH T 269       3.975  49.002  14.806  1.00  0.38           O  
HETATM  271  O   HOH T 270       1.217  39.873  42.204  1.00  0.38           O  
HETATM  272  O   HOH T 271       9.664  20.300 -29.564  1.00  0.38           O  
HETATM  273  O   HOH T 272      14.191  38.547   5.604  1.00  0.38           O  
HETATM  274  O   HOH T 273       5.202  15.411  10.343  1.00  0.38           O  
HETATM  275  O   HOH T 274       7.735  39.512   7.866  1.00  0.38           O  
HETATM  276  O   HOH T 275     -12.666  14.583  12.798  1.00  0.38           O  
HETATM  277  O   HOH T 276       9.873  40.506   3.291  1.00  0.38           O  
HETATM  278  O   HOH T 277      13.179   4.044  50.786  1.00  0.38           O  
HETATM  279  O   HOH T 278      -8.809  33.360 -18.816  1.00  0.38           O  
HETATM  280  O   HOH T 279       0.237  12.023 -21.191  1.00  0.38           O  
HETATM  281  O   HOH T 280      27.548  26.825  63.408  1.00  0.38           O  
HETATM  282  O   HOH T 281     -12.223  20.699  34.071  1.00  0.39           O  
HETATM  283  O   HOH T 282      11.641  19.233  12.557  1.00  0.39           O  
HETATM  284  O   HOH T 283       0.828  21.851  72.304  1.00  0.39           O  
HETATM  285  O   HOH T 284      -0.916  34.941  60.944  1.00  0.39           O  
HETATM  286  O   HOH T 285     -11.576  22.883  27.540  1.00  0.39           O  
HETATM  287  O   HOH T 286      11.528  22.799 -22.997  1.00  0.39           O  
HETATM  288  O   HOH T 287      26.896  31.721  32.256  1.00  0.39           O  
HETATM  289  O   HOH T 288      24.519  24.872  20.108  1.00  0.39           O  
HETATM  290  O   HOH T 289      -4.329  30.946  36.575  1.00  0.39           O  
HETATM  291  O   HOH T 290       6.190  40.427  47.710  1.00  0.39           O  
HETATM  292  O   HOH T 291      -0.634  26.904  -0.654  1.00  0.39           O  
HETATM  293  O   HOH T 292       0.184  33.710   5.464  1.00  0.39           O  
HETATM  294  O   HOH T 293       7.504  26.763   0.618  1.00  0.39           O  
HETATM  295  O   HOH T 294     -11.228  25.606 -20.256  1.00  0.39           O  
HETATM  296  O   HOH T 295       0.616  19.161  31.270  1.00  0.39           O  
HETATM  297  O   HOH T 296       5.125  21.505 -31.860  1.00  0.39           O  
HETATM  298  O   HOH T 297      -9.002   9.062  15.654  1.00  0.39           O  
HETATM  299  O   HOH T 298      -2.306  39.884  42.961  1.00  0.39           O  
HETATM  300  O   HOH T 299      -6.295  34.428  14.092  1.00  0.39           O  
HETATM  301  O   HOH T 300     -11.372  17.577  15.586  1.00  0.39           O  
HETATM  302  O   HOH T 301       2.163  31.749  67.076  1.00  0.39           O  
HETATM  303  O   HOH T 302      -0.679  46.884  44.342  1.00  0.39           O  
HETATM  304  O   HOH T 303       4.271  13.734 -24.125  1.00  0.39           O  
HETATM  305  O   HOH T 304      10.063  20.944  -8.976  1.00  0.39           O  
HETATM  306  O   HOH T 305       6.287  41.863  41.177  1.00  0.39           O  
HETATM  307  O   HOH T 306      -5.589  30.711 -19.205  1.00  0.39           O  
HETATM  308  O   HOH T 307       1.573  27.139  69.837  1.00  0.39           O  
HETATM  309  O   HOH T 308      17.785  30.372  47.676  1.00  0.39           O  
HETATM  310  O   HOH T 309      16.299  21.876  -7.246  1.00  0.39           O  
HETATM  311  O   HOH T 310      -4.774   5.877   6.500  1.00  0.39           O  
HETATM  312  O   HOH T 311      -3.404   6.297  17.340  1.00  0.39           O  
HETATM  313  O   HOH T 312      -1.591  23.225  -1.585  1.00  0.40           O  
HETATM  314  O   HOH T 313       8.008  43.509   7.857  1.00  0.40           O  
HETATM  315  O   HOH T 314     -13.467  16.947  14.023  1.00  0.40           O  
HETATM  316  O   HOH T 315      -3.387   5.269  12.440  1.00  0.40           O  
HETATM  317  O   HOH T 316      23.109  31.466  52.291  1.00  0.40           O  
HETATM  318  O   HOH T 317      -0.568  25.981  68.387  1.00  0.40           O  
HETATM  319  O   HOH T 318       7.473  13.782  18.620  1.00  0.40           O  
HETATM  320  O   HOH T 319       0.797  24.459  -0.954  1.00  0.40           O  
HETATM  321  O   HOH T 320      -6.028   6.961  43.325  1.00  0.40           O  
HETATM  322  O   HOH T 321      12.170  11.526  10.132  1.00  0.40           O  
HETATM  323  O   HOH T 322      -9.661  28.137   6.280  1.00  0.40           O  
HETATM  324  O   HOH T 323      13.618  38.308  22.662  1.00  0.40           O  
HETATM  325  O   HOH T 324       4.257  15.814  12.864  1.00  0.40           O  
HETATM  326  O   HOH T 325      -9.838  35.962 -14.809  1.00  0.40           O  
HETATM  327  O   HOH T 326      20.929  12.143  18.637  1.00  0.40           O  
HETATM  328  O   HOH T 327      20.967  40.714 -23.144  1.00  0.40           O  
HETATM  329  O   HOH T 328       9.662  45.714  23.306  1.00  0.40           O  
HETATM  330  O   HOH T 329       2.679  28.343  82.126  1.00  0.40           O  
HETATM  331  O   HOH T 330      18.024  22.466 -11.604  1.00  0.40           O  
HETATM  332  O   HOH T 331      20.303  36.086   9.671  1.00  0.40           O  
HETATM  333  O   HOH T 332       7.344  42.406 -17.218  1.00  0.40           O  
HETATM  334  O   HOH T 333      -1.165  32.476   8.867  1.00  0.40           O  
HETATM  335  O   HOH T 334       0.721  21.947  -2.279  1.00  0.40           O  
HETATM  336  O   HOH T 335       9.705  38.057  44.572  1.00  0.40           O  
HETATM  337  O   HOH T 336       7.798  24.498  52.997  1.00  0.40           O  
HETATM  338  O   HOH T 337       6.503  24.265  -0.124  1.00  0.41           O  
HETATM  339  O   HOH T 338     -13.354  11.719   4.863  1.00  0.41           O  
HETATM  340  O   HOH T 339      13.792   6.000  34.856  1.00  0.41           O  
HETATM  341  O   HOH T 340     -15.765  13.492   0.797  1.00  0.41           O  
HETATM  342  O   HOH T 341       5.074  47.222  16.784  1.00  0.41           O  
HETATM  343  O   HOH T 342      14.604  42.859  19.991  1.00  0.41           O  
HETATM  344  O   HOH T 343       4.911  18.030 -10.435  1.00  0.41           O  
HETATM  345  O   HOH T 344     -11.024  21.219   8.751  1.00  0.41           O  
HETATM  346  O   HOH T 345      20.133  39.517  53.446  1.00  0.41           O  
HETATM  347  O   HOH T 346      -5.519  29.096  34.956  1.00  0.41           O  
HETATM  348  O   HOH T 347       3.684  28.299  41.578  1.00  0.41           O  
HETATM  349  O   HOH T 348      20.591  40.841  26.654  1.00  0.41           O  
HETATM  350  O   HOH T 349       2.506  42.969  -4.663  1.00  0.41           O  
HETATM  351  O   HOH T 350      23.587  34.454  33.680  1.00  0.41           O  
HETATM  352  O   HOH T 351      25.010  37.221  40.851  1.00  0.41           O  
HETATM  353  O   HOH T 352     -11.859  21.710 -21.632  1.00  0.41           O  
HETATM  354  O   HOH T 353      13.177  32.351  76.480  1.00  0.41           O  
HETATM  355  O   HOH T 354       5.770  10.453  68.123  1.00  0.41           O  
HETATM  356  O   HOH T 355     -11.690  21.943 -10.441  1.00  0.41           O  
HETATM  357  O   HOH T 356      11.689  13.003  12.474  1.00  0.42           O  
HETATM  358  O   HOH T 357       3.586  27.395  73.254  1.00  0.42           O  
HETATM  359  O   HOH T 358       5.668  38.633   1.262  1.00  0.42           O  
HETATM  360  O   HOH T 359      -7.511  42.561  21.318  1.00  0.42           O  
HETATM  361  O   HOH T 360     -18.855  28.187  33.324  1.00  0.42           O  
HETATM  362  O   HOH T 361       7.164   1.253  64.921  1.00  0.42           O  
HETATM  363  O   HOH T 362      12.530  39.888   3.892  1.00  0.42           O  
HETATM  364  O   HOH T 363     -13.391  10.195  -8.408  1.00  0.42           O  
HETATM  365  O   HOH T 364       8.507  18.579  50.184  1.00  0.42           O  
HETATM  366  O   HOH T 365      -7.780  24.720 -25.780  1.00  0.42           O  
HETATM  367  O   HOH T 366       3.192  40.291  38.577  1.00  0.42           O  
HETATM  368  O   HOH T 367       9.655  23.573   4.151  1.00  0.42           O  
HETATM  369  O   HOH T 368      -7.480  13.072  40.326  1.00  0.42           O  
HETATM  370  O   HOH T 369      12.376  16.385  83.918  1.00  0.42           O  
HETATM  371  O   HOH T 370      24.843  31.877  56.396  1.00  0.42           O  
HETATM  372  O   HOH T 371     -15.600  20.860  37.407  1.00  0.42           O  
HETATM  373  O   HOH T 372      15.915   4.021  51.272  1.00  0.42           O  
HETATM  374  O   HOH T 373       8.034  21.282  50.714  1.00  0.42           O  
HETATM  375  O   HOH T 374      27.236  39.108  41.034  1.00  0.42           O  
HETATM  376  O   HOH T 375      25.434  29.168  56.396  1.00  0.42           O  
HETATM  377  O   HOH T 376      21.202  11.960  62.542  1.00  0.42           O  
HETATM  378  O   HOH T 377      12.941  26.291  42.072  1.00  0.42           O  
HETATM  379  O   HOH T 378      -7.286   6.351   7.904  1.00  0.42           O  
HETATM  380  O   HOH T 379      19.487  25.065  71.553  1.00  0.42           O  
HETATM  381  O   HOH T 380      -5.008  30.132 -24.895  1.00  0.42           O  
HETATM  382  O   HOH T 381      -2.689  10.960 -14.473  1.00  0.42           O  
HETATM  383  O   HOH T 382      -7.077  17.377  47.968  1.00  0.42           O  
HETATM  384  O   HOH T 383     -12.926  25.781 -22.421  1.00  0.42           O  
HETATM  385  O   HOH T 384      26.034  17.582  64.183  1.00  0.42           O  
HETATM  386  O   HOH T 385     -14.834  24.613  -9.771  1.00  0.42           O  
HETATM  387  O   HOH T 386      18.299  21.364  -9.015  1.00  0.42           O  
HETATM  388  O   HOH T 387       3.558  39.321  54.216  1.00  0.42           O  
HETATM  389  O   HOH T 388      -4.913  13.381  33.564  1.00  0.42           O  
HETATM  390  O   HOH T 389     -10.354  34.017 -16.692  1.00  0.42           O  
HETATM  391  O   HOH T 390       2.842  41.700   4.819  1.00  0.42           O  
HETATM  392  O   HOH T 391       3.172  37.105   6.928  1.00  0.42           O  
HETATM  393  O   HOH T 392      -3.298   8.186  47.021  1.00  0.42           O  
HETATM  394  O   HOH T 393      25.802  15.276  30.652  1.00  0.42           O  
HETATM  395  O   HOH T 394      10.177   7.964  13.749  1.00  0.42           O  
HETATM  396  O   HOH T 395      -2.461  38.709  -6.104  1.00  0.43           O  
HETATM  397  O   HOH T 396      -6.312  37.560 -17.938  1.00  0.43           O  
HETATM  398  O   HOH T 397      16.276  24.476  50.086  1.00  0.43           O  
HETATM  399  O   HOH T 398      19.903  42.705  64.911  1.00  0.43           O  
HETATM  400  O   HOH T 399       9.803  23.003  49.476  1.00  0.43           O  
HETATM  401  O   HOH T 400       5.473  43.085 -15.284  1.00  0.43           O  
HETATM  402  O   HOH T 401       4.781  26.475   0.060  1.00  0.43           O  
HETATM  403  O   HOH T 402       7.581  18.551 -30.372  1.00  0.43           O  
HETATM  404  O   HOH T 403      11.798  39.460  64.230  1.00  0.43           O  
HETATM  405  O   HOH T 404       6.866  44.271 -10.161  1.00  0.43           O  
HETATM  406  O   HOH T 405       4.162  38.165  29.374  1.00  0.43           O  
HETATM  407  O   HOH T 406     -14.853  11.426   2.619  1.00  0.43           O  
HETATM  408  O   HOH T 407       2.120  27.257   0.012  1.00  0.43           O  
HETATM  409  O   HOH T 408      19.741  10.992  60.325  1.00  0.43           O  
HETATM  410  O   HOH T 409       3.192   4.705  58.523  1.00  0.43           O  
HETATM  411  O   HOH T 410     -12.090   9.724  -0.813  1.00  0.43           O  
HETATM  412  O   HOH T 411      13.969  43.497  16.439  1.00  0.43           O  
HETATM  413  O   HOH T 412       3.763  30.499  43.157  1.00  0.43           O  
HETATM  414  O   HOH T 413      -2.141  32.944   4.235  1.00  0.43           O  
HETATM  415  O   HOH T 414      -5.675  44.308  21.983  1.00  0.43           O  
HETATM  416  O   HOH T 415      15.576  17.544  19.474  1.00  0.43           O  
HETATM  417  O   HOH T 416      21.589  37.461  57.073  1.00  0.43           O  
HETATM  418  O   HOH T 417      15.778  41.499  24.273  1.00  0.43           O  
HETATM  419  O   HOH T 418      22.232  41.110  44.750  1.00  0.43           O  
HETATM  420  O   HOH T 419       4.203  22.640  -6.819  1.00  0.43           O  
HETATM  421  O   HOH T 420      21.940  31.639  11.199  1.00  0.43           O  
HETATM  422  O   HOH T 421      26.716  20.135  65.011  1.00  0.44           O  
HETATM  423  O   HOH T 422      -6.820   9.235  -0.093  1.00  0.44           O  
HETATM  424  O   HOH T 423       3.008  50.267  24.606  1.00  0.44           O  
HETATM  425  O   HOH T 424      16.732   8.591  59.995  1.00  0.44           O  
HETATM  426  O   HOH T 425      17.839  35.457  69.137  1.00  0.44           O  
HETATM  427  O   HOH T 426      -0.067  28.730  68.207  1.00  0.44           O  
HETATM  428  O   HOH T 427     -11.326  34.850  25.864  1.00  0.44           O  
HETATM  429  O   HOH T 428      18.963  40.606  12.776  1.00  0.44           O  
HETATM  430  O   HOH T 429      -1.862  44.522   9.414  1.00  0.44           O  
HETATM  431  O   HOH T 430      16.099  33.412  46.266  1.00  0.44           O  
HETATM  432  O   HOH T 431      21.377  14.342  63.997  1.00  0.44           O  
HETATM  433  O   HOH T 432      17.606  40.318  52.476  1.00  0.44           O  
HETATM  434  O   HOH T 433      -8.776  21.138  23.392  1.00  0.44           O  
HETATM  435  O   HOH T 434       2.755  22.463 -32.786  1.00  0.44           O  
HETATM  436  O   HOH T 435      17.496  41.646   3.042  1.00  0.44           O  
HETATM  437  O   HOH T 436       9.757  33.458  48.361  1.00  0.44           O  
HETATM  438  O   HOH T 437      -6.351  33.273 -20.097  1.00  0.44           O  
HETATM  439  O   HOH T 438      17.117  28.263 -18.726  1.00  0.44           O  
HETATM  440  O   HOH T 439      11.081   5.166  55.775  1.00  0.44           O  
HETATM  441  O   HOH T 440       1.453  41.482  -2.429  1.00  0.44           O  
HETATM  442  O   HOH T 441     -13.991  16.731  -3.015  1.00  0.44           O  
HETATM  443  O   HOH T 442       1.584  16.345  47.788  1.00  0.44           O  
HETATM  444  O   HOH T 443      10.730  20.453  50.261  1.00  0.44           O  
HETATM  445  O   HOH T 444      18.998  33.574  67.430  1.00  0.44           O  
HETATM  446  O   HOH T 445      -0.810  44.585  42.843  1.00  0.44           O  
HETATM  447  O   HOH T 446       6.680  16.413  50.053  1.00  0.44           O  
HETATM  448  O   HOH T 447      21.337  38.081  59.786  1.00  0.44           O  
HETATM  449  O   HOH T 448      13.810  43.008  60.923  1.00  0.44           O  
HETATM  450  O   HOH T 449       0.974  38.760  27.189  1.00  0.44           O  
HETATM  451  O   HOH T 450      -6.440  41.157 -13.939  1.00  0.44           O  
HETATM  452  O   HOH T 451      -9.701  28.972   3.627  1.00  0.44           O  
HETATM  453  O   HOH T 452       5.200  26.567  43.199  1.00  0.44           O  
HETATM  454  O   HOH T 453      17.901  16.328  45.245  1.00  0.44           O  
HETATM  455  O   HOH T 454      19.313  16.192   7.328  1.00  0.44           O  
HETATM  456  O   HOH T 455      -2.434  12.350 -21.904  1.00  0.44           O  
HETATM  457  O   HOH T 456      20.922  28.735  67.407  1.00  0.44           O  
HETATM  458  O   HOH T 457       3.479  19.833 -33.336  1.00  0.44           O  
HETATM  459  O   HOH T 458      14.026  29.813 -26.986  1.00  0.45           O  
HETATM  460  O   HOH T 459       5.538  45.847  42.437  1.00  0.45           O  
HETATM  461  O   HOH T 460      25.670  27.958  54.007  1.00  0.45           O  
HETATM  462  O   HOH T 461      12.807  43.985   9.496  1.00  0.45           O  
HETATM  463  O   HOH T 462       6.783  12.506  29.950  1.00  0.45           O  
HETATM  464  O   HOH T 463      13.653  25.675   3.767  1.00  0.45           O  
HETATM  465  O   HOH T 464      11.327  43.133  -2.562  1.00  0.45           O  
HETATM  466  O   HOH T 465      17.193  42.984  64.202  1.00  0.45           O  
HETATM  467  O   HOH T 466      16.597  39.774  16.575  1.00  0.45           O  
HETATM  468  O   HOH T 467       7.923  46.897  20.266  1.00  0.45           O  
HETATM  469  O   HOH T 468      -7.938  20.772  20.799  1.00  0.45           O  
HETATM  470  O   HOH T 469      23.439  30.116  61.542  1.00  0.45           O  
HETATM  471  O   HOH T 470       4.841  44.058  40.445  1.00  0.45           O  
HETATM  472  O   HOH T 471      -7.867  15.561  36.453  1.00  0.45           O  
HETATM  473  O   HOH T 472       2.472  25.596  56.546  1.00  0.45           O  
HETATM  474  O   HOH T 473      13.892  38.449  72.281  1.00  0.45           O  
HETATM  475  O   HOH T 474     -12.107  12.280  14.186  1.00  0.45           O  
HETATM  476  O   HOH T 475      20.243  39.713  56.304  1.00  0.45           O  
HETATM  477  O   HOH T 476      14.406   7.171  59.948  1.00  0.45           O  
HETATM  478  O   HOH T 477      -3.868  27.868 -26.140  1.00  0.45           O  
HETATM  479  O   HOH T 478       4.166  18.545 -28.592  1.00  0.45           O  
HETATM  480  O   HOH T 479       0.095  34.690  58.340  1.00  0.45           O  
HETATM  481  O   HOH T 480      19.496  26.614   1.523  1.00  0.45           O  
HETATM  482  O   HOH T 481      19.708  37.379  69.929  1.00  0.45           O  
HETATM  483  O   HOH T 482      -2.560  37.122  28.337  1.00  0.45           O  
HETATM  484  O   HOH T 483       3.712  15.930 -27.678  1.00  0.45           O  
HETATM  485  O   HOH T 484      12.294  20.891 -24.884  1.00  0.45           O  
HETATM  486  O   HOH T 485       7.458   7.308  31.362  1.00  0.45           O  
HETATM  487  O   HOH T 486       6.548  43.692 -12.760  1.00  0.45           O  
HETATM  488  O   HOH T 487       5.288  42.099  38.573  1.00  0.45           O  
HETATM  489  O   HOH T 488      -3.382  17.783  68.210  1.00  0.46           O  
HETATM  490  O   HOH T 489     -11.174  17.528 -22.755  1.00  0.46           O  
HETATM  491  O   HOH T 490      12.554  22.541  49.724  1.00  0.46           O  
HETATM  492  O   HOH T 491      -3.492  44.673  23.715  1.00  0.46           O  
HETATM  493  O   HOH T 492      13.172  19.011  83.571  1.00  0.46           O  
HETATM  494  O   HOH T 493      12.080  23.504 -31.517  1.00  0.46           O  
HETATM  495  O   HOH T 494      -2.126  16.651  20.103  1.00  0.46           O  
HETATM  496  O   HOH T 495      -3.184   4.529  15.179  1.00  0.46           O  
HETATM  497  O   HOH T 496      25.187  28.774  20.138  1.00  0.46           O  
HETATM  498  O   HOH T 497      20.313  40.512  33.655  1.00  0.46           O  
HETATM  499  O   HOH T 498      18.051  18.246   8.738  1.00  0.46           O  
HETATM  500  O   HOH T 499       7.969  20.335   3.106  1.00  0.46           O  
HETATM  501  O   HOH T 500       7.376  32.582  83.094  1.00  0.46           O  
HETATM  502  O   HOH T 501       4.840  43.647   5.433  1.00  0.46           O  
HETATM  503  O   HOH T 502      -8.802  26.402   4.203  1.00  0.46           O  
HETATM  504  O   HOH T 503      -8.014  25.192 -28.574  1.00  0.46           O  
HETATM  505  O   HOH T 504      16.781  34.911  43.975  1.00  0.46           O  
HETATM  506  O   HOH T 505      16.868  15.705   8.608  1.00  0.46           O  
HETATM  507  O   HOH T 506      -2.559   4.943   8.043  1.00  0.46           O  
HETATM  508  O   HOH T 507      18.695  39.452  71.586  1.00  0.46           O  
HETATM  509  O   HOH T 508      -7.538  35.701 -19.514  1.00  0.46           O  
HETATM  510  O   HOH T 509     -11.410  33.708 -14.217  1.00  0.46           O  
HETATM  511  O   HOH T 510       2.698   3.320  11.314  1.00  0.46           O  
HETATM  512  O   HOH T 511       8.642  24.497   1.688  1.00  0.46           O  
HETATM  513  O   HOH T 512      24.303  32.612  61.065  1.00  0.46           O  
HETATM  514  O   HOH T 513       0.815  40.526  37.164  1.00  0.46           O  
HETATM  515  O   HOH T 514      -5.048  19.891 -30.981  1.00  0.46           O  
HETATM  516  O   HOH T 515       9.670  39.578  62.353  1.00  0.46           O  
HETATM  517  O   HOH T 516       6.002  24.040  -5.347  1.00  0.46           O  
HETATM  518  O   HOH T 517       0.032  25.169  70.975  1.00  0.46           O  
HETATM  519  O   HOH T 518      16.211   6.906  57.875  1.00  0.46           O  
HETATM  520  O   HOH T 519      17.868  33.006  48.546  1.00  0.46           O  
HETATM  521  O   HOH T 520      -4.041  38.611 -16.759  1.00  0.47           O  
HETATM  522  O   HOH T 521      17.159  37.231  71.129  1.00  0.47           O  
HETATM  523  O   HOH T 522      20.223  40.505  59.020  1.00  0.47           O  
HETATM  524  O   HOH T 523       3.670  25.768 -30.628  1.00  0.47           O  
HETATM  525  O   HOH T 524      -1.528  17.490 -28.932  1.00  0.47           O  
HETATM  526  O   HOH T 525     -12.729  19.127   7.991  1.00  0.47           O  
HETATM  527  O   HOH T 526      28.291  29.784  23.604  1.00  0.47           O  
HETATM  528  O   HOH T 527      19.247   8.697  58.929  1.00  0.47           O  
HETATM  529  O   HOH T 528     -11.565  20.880   6.120  1.00  0.47           O  
HETATM  530  O   HOH T 529      22.803  14.137  18.666  1.00  0.47           O  
HETATM  531  O   HOH T 530      18.049  30.234  42.951  1.00  0.47           O  
HETATM  532  O   HOH T 531      18.146  37.692   8.905  1.00  0.47           O  
HETATM  533  O   HOH T 532      22.058  33.915  18.476  1.00  0.47           O  
HETATM  534  O   HOH T 533      11.293  25.035   2.478  1.00  0.47           O  
HETATM  535  O   HOH T 534      16.202  42.293  17.809  1.00  0.47           O  
HETATM  536  O   HOH T 535      -0.071  44.360  45.523  1.00  0.47           O  
HETATM  537  O   HOH T 536      22.833  21.124  35.749  1.00  0.47           O  
HETATM  538  O   HOH T 537      15.361   8.051  62.363  1.00  0.47           O  
HETATM  539  O   HOH T 538      19.755  38.429  11.111  1.00  0.47           O  
HETATM  540  O   HOH T 539      -7.124  35.775   0.966  1.00  0.47           O  
HETATM  541  O   HOH T 540      17.170  20.893   8.831  1.00  0.47           O  
HETATM  542  O   HOH T 541       5.140  37.929  26.859  1.00  0.47           O  
HETATM  543  O   HOH T 542      14.660   8.744  21.705  1.00  0.47           O  
HETATM  544  O   HOH T 543      -9.078   5.649  40.398  1.00  0.47           O  
HETATM  545  O   HOH T 544       0.498   8.074  -4.377  1.00  0.47           O  
HETATM  546  O   HOH T 545       8.834  34.840  82.706  1.00  0.47           O  
HETATM  547  O   HOH T 546      10.813   2.698  43.022  1.00  0.47           O  
HETATM  548  O   HOH T 547     -12.031  10.728   2.706  1.00  0.47           O  
HETATM  549  O   HOH T 548       6.285  12.797  23.110  1.00  0.47           O  
HETATM  550  O   HOH T 549      24.109  20.177  69.255  1.00  0.47           O  
HETATM  551  O   HOH T 550      13.816  41.374  68.139  1.00  0.47           O  
HETATM  552  O   HOH T 551       9.667  28.335  -0.228  1.00  0.47           O  
HETATM  553  O   HOH T 552      18.534  32.889  43.265  1.00  0.47           O  
HETATM  554  O   HOH T 553       6.292  11.346 -16.364  1.00  0.47           O  
HETATM  555  O   HOH T 554      16.203  26.473   3.135  1.00  0.47           O  
HETATM  556  O   HOH T 555      -4.153  40.932 -15.281  1.00  0.47           O  
HETATM  557  O   HOH T 556       7.208   5.401  36.772  1.00  0.47           O  
HETATM  558  O   HOH T 557      13.752   4.657  56.085  1.00  0.47           O  
HETATM  559  O   HOH T 558      -7.419  14.286  34.026  1.00  0.48           O  
HETATM  560  O   HOH T 559      11.591  35.959  45.047  1.00  0.48           O  
HETATM  561  O   HOH T 560       8.231  29.115  50.481  1.00  0.48           O  
HETATM  562  O   HOH T 561     -11.877  15.033  -2.294  1.00  0.48           O  
HETATM  563  O   HOH T 562      -1.767  42.303  39.668  1.00  0.48           O  
HETATM  564  O   HOH T 563      27.858  29.657  20.814  1.00  0.48           O  
HETATM  565  O   HOH T 564      -7.264  32.479  28.034  1.00  0.48           O  
HETATM  566  O   HOH T 565      10.898  39.865  42.796  1.00  0.48           O  
HETATM  567  O   HOH T 566       7.350  41.435  43.764  1.00  0.48           O  
HETATM  568  O   HOH T 567     -14.298  33.520  32.266  1.00  0.48           O  
HETATM  569  O   HOH T 568     -13.977  11.559  -6.915  1.00  0.48           O  
HETATM  570  O   HOH T 569      20.042  35.841  18.597  1.00  0.48           O  
HETATM  571  O   HOH T 570      12.202  21.029 -30.326  1.00  0.48           O  
HETATM  572  O   HOH T 571      12.520  44.236  24.196  1.00  0.48           O  
HETATM  573  O   HOH T 572      13.122  25.864 -28.325  1.00  0.48           O  
HETATM  574  O   HOH T 573      -5.057   9.020  45.026  1.00  0.48           O  
HETATM  575  O   HOH T 574      15.449  42.251  66.207  1.00  0.48           O  
HETATM  576  O   HOH T 575      -4.195  15.309 -25.202  1.00  0.48           O  
HETATM  577  O   HOH T 576     -10.957  38.197 -13.886  1.00  0.48           O  
HETATM  578  O   HOH T 577     -11.706   5.453   7.095  1.00  0.48           O  
HETATM  579  O   HOH T 578      -2.346  34.217   1.710  1.00  0.48           O  
HETATM  580  O   HOH T 579       0.109  33.399   2.693  1.00  0.48           O  
HETATM  581  O   HOH T 580      13.720  36.862  47.719  1.00  0.48           O  
HETATM  582  O   HOH T 581      17.853  37.886  47.667  1.00  0.48           O  
HETATM  583  O   HOH T 582      11.281  25.555   5.258  1.00  0.48           O  
HETATM  584  O   HOH T 583      -9.778  21.350  26.012  1.00  0.48           O  
HETATM  585  O   HOH T 584      -3.795  35.174   3.828  1.00  0.48           O  
HETATM  586  O   HOH T 585      10.556  13.826 -19.441  1.00  0.48           O  
HETATM  587  O   HOH T 586      18.426  34.956 -22.045  1.00  0.48           O  
HETATM  588  O   HOH T 587       3.837  52.948  24.101  1.00  0.49           O  
HETATM  589  O   HOH T 588     -11.621  20.467  30.104  1.00  0.49           O  
HETATM  590  O   HOH T 589      -0.063  29.664  -1.262  1.00  0.49           O  
HETATM  591  O   HOH T 590      -9.456  11.653  14.776  1.00  0.49           O  
HETATM  592  O   HOH T 591     -10.328  23.963 -24.966  1.00  0.49           O  
HETATM  593  O   HOH T 592      -2.165  24.120  69.762  1.00  0.49           O  
HETATM  594  O   HOH T 593     -10.642   8.399   2.832  1.00  0.49           O  
HETATM  595  O   HOH T 594      -9.602   8.787   0.133  1.00  0.49           O  
HETATM  596  O   HOH T 595      13.728  40.793  62.752  1.00  0.49           O  
HETATM  597  O   HOH T 596     -11.741   5.716   9.814  1.00  0.49           O  
HETATM  598  O   HOH T 597      19.543  23.538  45.985  1.00  0.49           O  
HETATM  599  O   HOH T 598       1.545  36.273  54.811  1.00  0.49           O  
HETATM  600  O   HOH T 599       8.410   4.812  32.176  1.00  0.49           O  
HETATM  601  O   HOH T 600       0.875  41.360  39.794  1.00  0.49           O  
HETATM  602  O   HOH T 601      14.592  41.312   5.205  1.00  0.49           O  
HETATM  603  O   HOH T 602       9.881  39.625 -22.672  1.00  0.49           O  
HETATM  604  O   HOH T 603     -16.304  27.575  40.154  1.00  0.49           O  
HETATM  605  O   HOH T 604       6.432  15.901  81.702  1.00  0.49           O  
HETATM  606  O   HOH T 605      -8.954  25.095 -21.805  1.00  0.49           O  
HETATM  607  O   HOH T 606      10.629   3.655  33.254  1.00  0.49           O  
HETATM  608  O   HOH T 607       6.199  49.452  18.047  1.00  0.49           O  
HETATM  609  O   HOH T 608       0.065   4.853   9.036  1.00  0.49           O  
HETATM  610  O   HOH T 609       4.055  39.673   6.399  1.00  0.49           O  
HETATM  611  O   HOH T 610       5.738   3.100  50.692  1.00  0.49           O  
HETATM  612  O   HOH T 611      20.444  16.361  17.007  1.00  0.50           O  
HETATM  613  O   HOH T 612      24.289  22.534  37.675  1.00  0.50           O  
HETATM  614  O   HOH T 613      17.691  30.362 -20.439  1.00  0.50           O  
HETATM  615  O   HOH T 614      -6.470  39.689 -16.182  1.00  0.50           O  
HETATM  616  O   HOH T 615      13.815  22.516 -26.480  1.00  0.50           O  
HETATM  617  O   HOH T 616       3.187  13.428 -26.591  1.00  0.50           O  
HETATM  618  O   HOH T 617       7.381  24.026  50.333  1.00  0.50           O  
HETATM  619  O   HOH T 618      -0.586  41.946  42.158  1.00  0.50           O  
HETATM  620  O   HOH T 619      -3.211   5.640  45.725  1.00  0.50           O  
HETATM  621  O   HOH T 620      -6.886  30.045  37.191  1.00  0.50           O  
HETATM  622  O   HOH T 621      -2.168  39.173 -14.749  1.00  0.50           O  
HETATM  623  O   HOH T 622     -13.368  19.212   5.138  1.00  0.50           O  
HETATM  624  O   HOH T 623       6.471  13.154  77.068  1.00  0.50           O  
HETATM  625  O   HOH T 624      24.148  43.005 -16.135  1.00  0.50           O  
HETATM  626  O   HOH T 625       3.233   0.819  43.717  1.00  0.50           O  
HETATM  627  O   HOH T 626      19.490  41.260  44.829  1.00  0.50           O  
HETATM  628  O   HOH T 627     -11.616  24.879  25.654  1.00  0.50           O  
HETATM  629  O   HOH T 628       7.092  16.078   3.069  1.00  0.50           O  
HETATM  630  O   HOH T 629      -9.084  10.251 -12.999  1.00  0.50           O  
HETATM  631  O   HOH T 630     -11.088  22.682  23.900  1.00  0.50           O  
HETATM  632  O   HOH T 631     -13.240   7.786  -9.682  1.00  0.50           O  
HETATM  633  O   HOH T 632      10.578  47.379  21.132  1.00  0.50           O  
HETATM  634  O   HOH T 633      19.117  37.129 -20.691  1.00  0.50           O  
HETATM  635  O   HOH T 634      22.015  21.757  75.634  1.00  0.50           O  
HETATM  636  O   HOH T 635      -5.722   4.944  16.398  1.00  0.50           O  
HETATM  637  O   HOH T 636     -10.521  34.029  -4.012  1.00  0.50           O  
HETATM  638  O   HOH T 637      10.637  18.521  84.616  1.00  0.50           O  
HETATM  639  O   HOH T 638      19.297  35.735   2.403  1.00  0.50           O  
HETATM  640  O   HOH T 639       8.398  48.153  22.666  1.00  0.50           O  
HETATM  641  O   HOH T 640      18.650  41.457  54.809  1.00  0.50           O  
HETATM  642  O   HOH T 641       3.325   9.730  30.735  1.00  0.50           O  
HETATM  643  O   HOH T 642      18.818  42.109  50.693  1.00  0.50           O  
HETATM  644  O   HOH T 643      -8.078  42.235  -4.937  1.00  0.50           O  
HETATM  645  O   HOH T 644      18.779  28.320  73.764  1.00  0.50           O  
HETATM  646  O   HOH T 645      11.613  21.097 -27.602  1.00  0.51           O  
HETATM  647  O   HOH T 646      14.929  29.307 -24.431  1.00  0.51           O  
HETATM  648  O   HOH T 647     -17.109  26.847  31.315  1.00  0.51           O  
HETATM  649  O   HOH T 648      19.165  39.587  15.459  1.00  0.51           O  
HETATM  650  O   HOH T 649      11.162  30.387  -1.429  1.00  0.51           O  
HETATM  651  O   HOH T 650       9.019  41.483  41.537  1.00  0.51           O  
HETATM  652  O   HOH T 651       4.727  20.142  58.975  1.00  0.51           O  
HETATM  653  O   HOH T 652      20.274  26.919  69.545  1.00  0.51           O  
HETATM  654  O   HOH T 653      13.105  19.536 -19.394  1.00  0.51           O  
HETATM  655  O   HOH T 654      -6.958   9.496  -6.305  1.00  0.51           O  
HETATM  656  O   HOH T 655       5.477  41.162   4.528  1.00  0.51           O  
HETATM  657  O   HOH T 656      21.017  16.406  45.451  1.00  0.51           O  
HETATM  658  O   HOH T 657      30.296  30.639  21.969  1.00  0.51           O  
HETATM  659  O   HOH T 658      -0.260  31.523  68.343  1.00  0.51           O  
HETATM  660  O   HOH T 659      14.491  31.684 -32.035  1.00  0.51           O  
HETATM  661  O   HOH T 660       4.747   9.011   0.153  1.00  0.51           O  
HETATM  662  O   HOH T 661      26.277  20.375  67.692  1.00  0.51           O  
HETATM  663  O   HOH T 662      24.923  29.330  51.730  1.00  0.51           O  
HETATM  664  O   HOH T 663      14.676  26.716  81.865  1.00  0.51           O  
HETATM  665  O   HOH T 664      12.047   4.701  58.325  1.00  0.51           O  
HETATM  666  O   HOH T 665      -9.835  15.346  34.716  1.00  0.51           O  
HETATM  667  O   HOH T 666      11.523  17.006  53.289  1.00  0.51           O  
HETATM  668  O   HOH T 667      13.695   9.817  70.473  1.00  0.51           O  
HETATM  669  O   HOH T 668      16.283  11.282  39.895  1.00  0.51           O  
HETATM  670  O   HOH T 669      21.855  29.814  22.656  1.00  0.51           O  
HETATM  671  O   HOH T 670      25.107  22.713  68.782  1.00  0.51           O  
HETATM  672  O   HOH T 671      11.974   4.043  35.567  1.00  0.51           O  
HETATM  673  O   HOH T 672     -13.011  24.915  -0.488  1.00  0.51           O  
HETATM  674  O   HOH T 673      -1.878  12.819  19.439  1.00  0.51           O  
HETATM  675  O   HOH T 674       2.022  29.967  69.356  1.00  0.52           O  
HETATM  676  O   HOH T 675      13.193  40.881  16.489  1.00  0.52           O  
HETATM  677  O   HOH T 676      11.408  16.305 -21.075  1.00  0.52           O  
HETATM  678  O   HOH T 677      13.992  23.212 -34.598  1.00  0.52           O  
HETATM  679  O   HOH T 678      14.787  35.906   5.593  1.00  0.52           O  
HETATM  680  O   HOH T 679       9.952  15.933  84.799  1.00  0.52           O  
HETATM  681  O   HOH T 680      12.569  18.228  14.919  1.00  0.52           O  
HETATM  682  O   HOH T 681      -5.882  17.546 -29.905  1.00  0.52           O  
HETATM  683  O   HOH T 682      -7.372  19.162  43.866  1.00  0.52           O  
HETATM  684  O   HOH T 683       3.827  38.155 -16.610  1.00  0.52           O  
HETATM  685  O   HOH T 684     -11.263  29.839  18.835  1.00  0.52           O  
HETATM  686  O   HOH T 685      -8.773  39.791 -14.631  1.00  0.52           O  
HETATM  687  O   HOH T 686       6.280  37.291   3.615  1.00  0.52           O  
HETATM  688  O   HOH T 687       2.422  47.591  25.280  1.00  0.52           O  
HETATM  689  O   HOH T 688      24.341  34.125  25.848  1.00  0.52           O  
HETATM  690  O   HOH T 689      28.490  26.133  31.610  1.00  0.52           O  
HETATM  691  O   HOH T 690      -7.987   7.933  -8.187  1.00  0.52           O  
HETATM  692  O   HOH T 691       2.471  29.835  72.241  1.00  0.52           O  
HETATM  693  O   HOH T 692      19.653  29.210 -18.896  1.00  0.52           O  
HETATM  694  O   HOH T 693      25.228  17.742  54.174  1.00  0.52           O  
HETATM  695  O   HOH T 694       4.619   9.389  70.395  1.00  0.52           O  
HETATM  696  O   HOH T 695      18.659   4.073  51.839  1.00  0.52           O  
HETATM  697  O   HOH T 696       8.914  38.053   4.229  1.00  0.52           O  
HETATM  698  O   HOH T 697      24.865  16.925  32.708  1.00  0.52           O  
HETATM  699  O   HOH T 698      14.266  22.393 -23.704  1.00  0.52           O  
HETATM  700  O   HOH T 699      19.485  39.352  50.731  1.00  0.52           O  
HETATM  701  O   HOH T 700      17.298  39.766  10.627  1.00  0.52           O  
HETATM  702  O   HOH T 701      -2.029  30.538  59.136  1.00  0.52           O  
HETATM  703  O   HOH T 702       7.372  15.857 -27.869  1.00  0.52           O  
HETATM  704  O   HOH T 703       9.909  47.090  18.404  1.00  0.52           O  
HETATM  705  O   HOH T 704      -9.009   5.315   9.887  1.00  0.52           O  
HETATM  706  O   HOH T 705       8.971  44.510  -3.195  1.00  0.52           O  
HETATM  707  O   HOH T 706       4.078  13.174  17.352  1.00  0.52           O  
HETATM  708  O   HOH T 707      -8.360  45.199  21.304  1.00  0.53           O  
HETATM  709  O   HOH T 708      -5.136  17.567 -32.579  1.00  0.53           O  
HETATM  710  O   HOH T 709       3.236  28.247  76.971  1.00  0.53           O  
HETATM  711  O   HOH T 710       0.939  19.708  -0.564  1.00  0.53           O  
HETATM  712  O   HOH T 711      11.370  22.001  -6.815  1.00  0.53           O  
HETATM  713  O   HOH T 712       7.713  21.961   0.916  1.00  0.53           O  
HETATM  714  O   HOH T 713       5.573  20.090  -8.800  1.00  0.53           O  
HETATM  715  O   HOH T 714      14.864   2.198  49.535  1.00  0.53           O  
HETATM  716  O   HOH T 715       7.410  49.657  20.511  1.00  0.53           O  
HETATM  717  O   HOH T 716      29.836  25.685  27.675  1.00  0.53           O  
HETATM  718  O   HOH T 717      11.527   9.456  11.914  1.00  0.53           O  
HETATM  719  O   HOH T 718      -0.574  25.288  39.572  1.00  0.53           O  
HETATM  720  O   HOH T 719       4.052  40.040  49.295  1.00  0.53           O  
HETATM  721  O   HOH T 720      -7.258  16.794  45.281  1.00  0.53           O  
HETATM  722  O   HOH T 721      17.084  42.810  56.684  1.00  0.53           O  
HETATM  723  O   HOH T 722      -0.795  15.319  30.566  1.00  0.53           O  
HETATM  724  O   HOH T 723      -8.954  24.161   5.673  1.00  0.53           O  
HETATM  725  O   HOH T 724      27.062  39.027  36.998  1.00  0.53           O  
HETATM  726  O   HOH T 725      -8.156   9.811 -19.403  1.00  0.53           O  
HETATM  727  O   HOH T 726      12.941  43.916  -4.732  1.00  0.53           O  
HETATM  728  O   HOH T 727      -0.223  18.539 -34.067  1.00  0.53           O  
HETATM  729  O   HOH T 728      -6.042  22.322 -31.585  1.00  0.53           O  
HETATM  730  O   HOH T 729       5.936  13.876   1.656  1.00  0.53           O  
HETATM  731  O   HOH T 730      25.382  31.372  39.085  1.00  0.53           O  
HETATM  732  O   HOH T 731     -14.713  23.514  -1.720  1.00  0.53           O  
HETATM  733  O   HOH T 732      21.397  22.898 -16.148  1.00  0.53           O  
HETATM  734  O   HOH T 733      -3.161  12.892  50.182  1.00  0.53           O  
HETATM  735  O   HOH T 734      18.147   4.845  54.488  1.00  0.53           O  
HETATM  736  O   HOH T 735      21.054  36.245  12.282  1.00  0.53           O  
HETATM  737  O   HOH T 736      24.429  21.868  48.612  1.00  0.53           O  
HETATM  738  O   HOH T 737      -1.669  27.442  40.627  1.00  0.53           O  
HETATM  739  O   HOH T 738      25.286  30.762  54.012  1.00  0.54           O  
HETATM  740  O   HOH T 739      17.225  12.453  44.576  1.00  0.54           O  
HETATM  741  O   HOH T 740       0.097  25.196  57.870  1.00  0.54           O  
HETATM  742  O   HOH T 741       3.139  22.648  47.058  1.00  0.54           O  
HETATM  743  O   HOH T 742      26.058  20.343  22.143  1.00  0.54           O  
HETATM  744  O   HOH T 743       6.931  30.180  52.632  1.00  0.54           O  
HETATM  745  O   HOH T 744      10.667  47.291   9.557  1.00  0.54           O  
HETATM  746  O   HOH T 745       6.577  33.027  55.026  1.00  0.54           O  
HETATM  747  O   HOH T 746      14.616  38.947  -3.083  1.00  0.54           O  
HETATM  748  O   HOH T 747       4.888   2.501  57.533  1.00  0.54           O  
HETATM  749  O   HOH T 748      -2.709  34.615  58.911  1.00  0.54           O  
HETATM  750  O   HOH T 749       8.140  10.679   5.471  1.00  0.54           O  
HETATM  751  O   HOH T 750      11.655  34.207   4.519  1.00  0.54           O  
HETATM  752  O   HOH T 751       1.479  30.655  74.655  1.00  0.54           O  
HETATM  753  O   HOH T 752      27.484  29.025  32.875  1.00  0.54           O  
HETATM  754  O   HOH T 753      19.416   9.632  50.036  1.00  0.54           O  
HETATM  755  O   HOH T 754      10.774  15.465 -23.476  1.00  0.54           O  
HETATM  756  O   HOH T 755      -2.444  13.771  32.353  1.00  0.54           O  
HETATM  757  O   HOH T 756      -0.906   5.652  -3.891  1.00  0.54           O  
HETATM  758  O   HOH T 757      -1.444  20.198  -7.710  1.00  0.55           O  
HETATM  759  O   HOH T 758      -2.997  12.820   4.530  1.00  0.55           O  
HETATM  760  O   HOH T 759       1.612   6.420   3.098  1.00  0.55           O  
HETATM  761  O   HOH T 760      -9.706  33.010  26.857  1.00  0.55           O  
HETATM  762  O   HOH T 761      -6.824   7.205  40.724  1.00  0.55           O  
HETATM  763  O   HOH T 762     -10.455  19.431 -20.844  1.00  0.55           O  
HETATM  764  O   HOH T 763      -2.436  42.155   8.119  1.00  0.55           O  
HETATM  765  O   HOH T 764      -2.582  16.027  66.150  1.00  0.55           O  
HETATM  766  O   HOH T 765      -2.559  19.464 -34.666  1.00  0.55           O  
HETATM  767  O   HOH T 766      12.836  17.024 -20.212  1.00  0.55           O  
HETATM  768  O   HOH T 767      28.915  21.709  64.514  1.00  0.55           O  
HETATM  769  O   HOH T 768       5.115   9.596 -15.198  1.00  0.55           O  
HETATM  770  O   HOH T 769      22.614  36.429  19.411  1.00  0.55           O  
HETATM  771  O   HOH T 770       7.184  12.007  20.709  1.00  0.56           O  
HETATM  772  O   HOH T 771      26.821  30.711  25.724  1.00  0.56           O  
HETATM  773  O   HOH T 772      -8.127  36.622  -1.548  1.00  0.56           O  
HETATM  774  O   HOH T 773       7.969  13.591 -16.157  1.00  0.56           O  
HETATM  775  O   HOH T 774     -10.543  17.128  41.428  1.00  0.56           O  
HETATM  776  O   HOH T 775      10.560  40.618  54.969  1.00  0.56           O  
HETATM  777  O   HOH T 776       0.415  14.560  72.635  1.00  0.56           O  
HETATM  778  O   HOH T 777     -13.349  32.490  34.776  1.00  0.56           O  
HETATM  779  O   HOH T 778      -7.246  20.366  41.350  1.00  0.56           O  
HETATM  780  O   HOH T 779      -6.584  35.089  28.203  1.00  0.56           O  
HETATM  781  O   HOH T 780      -9.434  20.871  33.695  1.00  0.56           O  
HETATM  782  O   HOH T 781       9.020  13.704 -28.462  1.00  0.56           O  
HETATM  783  O   HOH T 782      17.180  10.252  22.041  1.00  0.56           O  
HETATM  784  O   HOH T 783      20.375  37.198  46.828  1.00  0.56           O  
HETATM  785  O   HOH T 784      12.181   3.886  69.750  1.00  0.56           O  
HETATM  786  O   HOH T 785      16.179  12.122  25.128  1.00  0.56           O  
HETATM  787  O   HOH T 786     -14.571  32.387 -12.143  1.00  0.56           O  
HETATM  788  O   HOH T 787      10.538  40.531 -25.190  1.00  0.56           O  
HETATM  789  O   HOH T 788      28.345  17.804  62.543  1.00  0.56           O  
HETATM  790  O   HOH T 789      11.825  35.090  48.657  1.00  0.56           O  
HETATM  791  O   HOH T 790      18.762  40.422 -11.976  1.00  0.56           O  
HETATM  792  O   HOH T 791       5.994  41.720   7.122  1.00  0.56           O  
HETATM  793  O   HOH T 792      15.422  17.106 -14.589  1.00  0.56           O  
HETATM  794  O   HOH T 793      14.472  -0.062  47.929  1.00  0.56           O  
HETATM  795  O   HOH T 794      12.611  37.387  50.130  1.00  0.56           O  
HETATM  796  O   HOH T 795      -6.639  22.525  38.872  1.00  0.56           O  
HETATM  797  O   HOH T 796      -8.849  34.070  15.457  1.00  0.56           O  
HETATM  798  O   HOH T 797      17.053  29.844  74.445  1.00  0.56           O  
HETATM  799  O   HOH T 798      22.796  33.138  50.111  1.00  0.56           O  
HETATM  800  O   HOH T 799      -8.038   6.421  15.477  1.00  0.57           O  
HETATM  801  O   HOH T 800       3.704  15.927  26.548  1.00  0.57           O  
HETATM  802  O   HOH T 801      -6.453  13.672  18.652  1.00  0.57           O  
HETATM  803  O   HOH T 802     -11.309  37.223  25.075  1.00  0.57           O  
HETATM  804  O   HOH T 803      -4.788  18.698  43.019  1.00  0.57           O  
HETATM  805  O   HOH T 804     -13.144  18.115  40.740  1.00  0.57           O  
HETATM  806  O   HOH T 805       3.973  17.019  49.390  1.00  0.57           O  
HETATM  807  O   HOH T 806      -2.497  17.042 -33.298  1.00  0.57           O  
HETATM  808  O   HOH T 807      -1.465  42.992  23.470  1.00  0.57           O  
HETATM  809  O   HOH T 808      -1.715  39.756  30.791  1.00  0.57           O  
HETATM  810  O   HOH T 809      14.532  43.182  22.565  1.00  0.57           O  
HETATM  811  O   HOH T 810      10.439  43.065  39.718  1.00  0.57           O  
HETATM  812  O   HOH T 811      18.637  24.305  48.610  1.00  0.57           O  
HETATM  813  O   HOH T 812      -3.240  38.119  30.775  1.00  0.57           O  
HETATM  814  O   HOH T 813      18.895  10.498  62.779  1.00  0.57           O  
HETATM  815  O   HOH T 814       1.584  14.846  53.232  1.00  0.57           O  
HETATM  816  O   HOH T 815      20.312  27.547  72.072  1.00  0.57           O  
HETATM  817  O   HOH T 816      15.133  43.893  -8.052  1.00  0.58           O  
HETATM  818  O   HOH T 817      13.087   7.273  16.334  1.00  0.58           O  
HETATM  819  O   HOH T 818      17.891  32.472 -22.040  1.00  0.58           O  
HETATM  820  O   HOH T 819       7.960  40.448   5.285  1.00  0.58           O  
HETATM  821  O   HOH T 820     -10.475  41.310  -5.771  1.00  0.58           O  
HETATM  822  O   HOH T 821      -8.871  41.211  23.316  1.00  0.58           O  
HETATM  823  O   HOH T 822      10.492  10.364  26.830  1.00  0.58           O  
HETATM  824  O   HOH T 823      -9.565  32.511  30.703  1.00  0.59           O  
HETATM  825  O   HOH T 824      19.401  39.731 -29.871  1.00  0.59           O  
HETATM  826  O   HOH T 825      18.735  43.585  -9.745  1.00  0.59           O  
HETATM  827  O   HOH T 826      -9.709  13.912  47.294  1.00  0.60           O  
HETATM  828  O   HOH T 827       1.577  21.710  -4.934  1.00  0.60           O  
HETATM  829  O   HOH T 828       4.168   0.742  62.305  1.00  0.60           O  
HETATM  830  O   HOH T 829      10.430  47.641  12.233  1.00  0.60           O  
HETATM  831  O   HOH T 830      11.208  19.874   8.730  1.00  0.61           O  
HETATM  832  O   HOH T 831      -0.869   6.375  18.587  1.00  0.61           O  
HETATM  833  O   HOH T 832      -9.706  14.467  41.309  1.00  0.61           O  
HETATM  834  O   HOH T 833      -9.082  29.205 -19.434  1.00  0.62           O  
HETATM  835  O   HOH T 834      18.651  21.854   6.650  1.00  0.68           O  
TER     836      HOH T 834 
