# Supplementary material for: Accurate Prediction of Hydration Sites of Proteins Using Energy Model With Atom Embedding
Source: Front Mol Biosci. 2021 Sep 20;8:756075. doi: 10.3389/fmolb.2021.756075 (PMC8488165; doi:10.3389/fmolb.2021.756075)
Supplement: Supplementary file 1 [file DataSheet1.ZIP › Data Sheet 1/Our_result_pdb/our_dataset_output/2E2O_watersite.pdb]

HEADER                                                        XXXX


JRNL        PMID   -1
HETATM    1  O   HOH T   0      -0.201 -16.344  54.549  1.00  0.19           O  
HETATM    2  O   HOH T   1       4.651  -6.139  87.367  1.00  0.20           O  
HETATM    3  O   HOH T   2      15.081   0.182  50.004  1.00  0.21           O  
HETATM    4  O   HOH T   3      17.869   6.945  59.976  1.00  0.23           O  
HETATM    5  O   HOH T   4       6.340  22.051  68.503  1.00  0.23           O  
HETATM    6  O   HOH T   5       8.731  13.416  55.638  1.00  0.24           O  
HETATM    7  O   HOH T   6       8.352   0.074  67.336  1.00  0.24           O  
HETATM    8  O   HOH T   7      -2.304   0.830  34.773  1.00  0.24           O  
HETATM    9  O   HOH T   8      -1.191   7.929  43.712  1.00  0.24           O  
HETATM   10  O   HOH T   9      10.145  22.970  71.680  1.00  0.25           O  
HETATM   11  O   HOH T  10      13.409  -8.812  64.799  1.00  0.25           O  
HETATM   12  O   HOH T  11      -0.431   9.956  53.231  1.00  0.25           O  
HETATM   13  O   HOH T  12       1.586  -1.855  36.794  1.00  0.25           O  
HETATM   14  O   HOH T  13       7.960   5.899  44.649  1.00  0.26           O  
HETATM   15  O   HOH T  14       7.311  -1.266  81.985  1.00  0.26           O  
HETATM   16  O   HOH T  15     -13.900  12.308  34.470  1.00  0.26           O  
HETATM   17  O   HOH T  16      -0.881  19.479  52.667  1.00  0.27           O  
HETATM   18  O   HOH T  17       8.655  -5.993  73.061  1.00  0.27           O  
HETATM   19  O   HOH T  18      15.074  10.374  66.007  1.00  0.27           O  
HETATM   20  O   HOH T  19       9.358  -3.144  52.117  1.00  0.27           O  
HETATM   21  O   HOH T  20      24.426  -4.723  68.104  1.00  0.27           O  
HETATM   22  O   HOH T  21       3.060  21.667  52.707  1.00  0.28           O  
HETATM   23  O   HOH T  22       1.979   4.859  50.182  1.00  0.28           O  
HETATM   24  O   HOH T  23       9.934  25.613  60.678  1.00  0.28           O  
HETATM   25  O   HOH T  24       1.515   7.308  60.362  1.00  0.28           O  
HETATM   26  O   HOH T  25       7.005   5.212  82.421  1.00  0.28           O  
HETATM   27  O   HOH T  26     -10.385 -10.444  32.777  1.00  0.28           O  
HETATM   28  O   HOH T  27       4.773 -16.176  64.935  1.00  0.28           O  
HETATM   29  O   HOH T  28      17.390  10.269  84.209  1.00  0.29           O  
HETATM   30  O   HOH T  29      -2.196  12.261  50.431  1.00  0.29           O  
HETATM   31  O   HOH T  30      25.899   0.967  64.238  1.00  0.29           O  
HETATM   32  O   HOH T  31      19.356 -10.148  68.107  1.00  0.29           O  
HETATM   33  O   HOH T  32      19.515  19.685  67.764  1.00  0.29           O  
HETATM   34  O   HOH T  33      15.742  -5.125  73.469  1.00  0.29           O  
HETATM   35  O   HOH T  34      -4.732  -9.752  64.773  1.00  0.29           O  
HETATM   36  O   HOH T  35      12.008 -14.364  51.208  1.00  0.29           O  
HETATM   37  O   HOH T  36       1.799  23.416  64.186  1.00  0.30           O  
HETATM   38  O   HOH T  37      -0.320 -17.294  62.557  1.00  0.30           O  
HETATM   39  O   HOH T  38      -7.611 -20.084  49.578  1.00  0.30           O  
HETATM   40  O   HOH T  39     -11.739  -1.562  58.666  1.00  0.30           O  
HETATM   41  O   HOH T  40      -8.029  -9.331  33.641  1.00  0.30           O  
HETATM   42  O   HOH T  41      17.927  23.581  50.574  1.00  0.31           O  
HETATM   43  O   HOH T  42      -0.725   2.719  39.428  1.00  0.31           O  
HETATM   44  O   HOH T  43     -16.642 -14.840  49.996  1.00  0.31           O  
HETATM   45  O   HOH T  44      12.276  -8.114  74.346  1.00  0.32           O  
HETATM   46  O   HOH T  45      -2.089  11.151  70.632  1.00  0.32           O  
HETATM   47  O   HOH T  46     -22.756   0.729  41.159  1.00  0.32           O  
HETATM   48  O   HOH T  47       7.812  -1.142  50.894  1.00  0.32           O  
HETATM   49  O   HOH T  48       1.285   5.280  58.213  1.00  0.32           O  
HETATM   50  O   HOH T  49       3.185  10.521  84.915  1.00  0.32           O  
HETATM   51  O   HOH T  50       4.256   8.015  84.082  1.00  0.32           O  
HETATM   52  O   HOH T  51       4.841   6.492  54.274  1.00  0.32           O  
HETATM   53  O   HOH T  52       0.742  23.888  56.176  1.00  0.32           O  
HETATM   54  O   HOH T  53     -17.292  -5.577  58.566  1.00  0.32           O  
HETATM   55  O   HOH T  54       4.957   3.424  62.564  1.00  0.32           O  
HETATM   56  O   HOH T  55      17.677  21.745  67.169  1.00  0.32           O  
HETATM   57  O   HOH T  56      -2.307   8.657  54.730  1.00  0.32           O  
HETATM   58  O   HOH T  57      -2.621  -6.490  65.735  1.00  0.32           O  
HETATM   59  O   HOH T  58       6.363  13.574  44.878  1.00  0.32           O  
HETATM   60  O   HOH T  59       3.429   5.293  56.449  1.00  0.32           O  
HETATM   61  O   HOH T  60     -29.001   4.864  46.383  1.00  0.32           O  
HETATM   62  O   HOH T  61     -13.031   9.750  48.938  1.00  0.33           O  
HETATM   63  O   HOH T  62       7.651  24.042  78.279  1.00  0.33           O  
HETATM   64  O   HOH T  63     -11.499   4.950  55.311  1.00  0.33           O  
HETATM   65  O   HOH T  64      -1.585  12.442  53.135  1.00  0.33           O  
HETATM   66  O   HOH T  65     -20.135 -16.177  51.327  1.00  0.33           O  
HETATM   67  O   HOH T  66      18.578  -4.053  51.039  1.00  0.33           O  
HETATM   68  O   HOH T  67       7.350   8.316  50.857  1.00  0.33           O  
HETATM   69  O   HOH T  68      -0.941  12.620  47.899  1.00  0.33           O  
HETATM   70  O   HOH T  69     -17.308  11.304  41.493  1.00  0.33           O  
HETATM   71  O   HOH T  70     -15.206  -5.178  60.226  1.00  0.33           O  
HETATM   72  O   HOH T  71     -11.008   8.142  49.805  1.00  0.33           O  
HETATM   73  O   HOH T  72       8.264  24.127  68.200  1.00  0.33           O  
HETATM   74  O   HOH T  73      21.108   7.969  78.674  1.00  0.34           O  
HETATM   75  O   HOH T  74     -20.361  -7.975  38.016  1.00  0.34           O  
HETATM   76  O   HOH T  75       4.140  13.047  85.013  1.00  0.34           O  
HETATM   77  O   HOH T  76      -9.684  -2.432  36.491  1.00  0.34           O  
HETATM   78  O   HOH T  77       6.117   5.153  60.762  1.00  0.34           O  
HETATM   79  O   HOH T  78       6.265  22.546  71.189  1.00  0.34           O  
HETATM   80  O   HOH T  79      23.317   2.396  59.185  1.00  0.34           O  
HETATM   81  O   HOH T  80       8.524  25.105  58.458  1.00  0.34           O  
HETATM   82  O   HOH T  81       2.209  -0.756  65.786  1.00  0.35           O  
HETATM   83  O   HOH T  82      19.743 -17.106  58.422  1.00  0.35           O  
HETATM   84  O   HOH T  83      -6.592 -22.567  64.092  1.00  0.35           O  
HETATM   85  O   HOH T  84     -10.298   7.304  35.951  1.00  0.35           O  
HETATM   86  O   HOH T  85     -12.161 -14.848  45.860  1.00  0.35           O  
HETATM   87  O   HOH T  86      -1.554   3.324  59.041  1.00  0.35           O  
HETATM   88  O   HOH T  87       5.192   8.975  49.200  1.00  0.35           O  
HETATM   89  O   HOH T  88      16.433 -13.712  66.654  1.00  0.36           O  
HETATM   90  O   HOH T  89      13.910 -18.887  58.167  1.00  0.36           O  
HETATM   91  O   HOH T  90       7.661  -2.939  48.732  1.00  0.36           O  
HETATM   92  O   HOH T  91       9.878 -16.164  51.813  1.00  0.36           O  
HETATM   93  O   HOH T  92      23.008 -10.591  63.401  1.00  0.36           O  
HETATM   94  O   HOH T  93      -5.462  13.688  42.877  1.00  0.36           O  
HETATM   95  O   HOH T  94      -1.166  20.944  61.579  1.00  0.36           O  
HETATM   96  O   HOH T  95       2.574  -3.577  66.811  1.00  0.36           O  
HETATM   97  O   HOH T  96      -1.585   1.135  37.405  1.00  0.36           O  
HETATM   98  O   HOH T  97      -1.570   4.323  61.632  1.00  0.37           O  
HETATM   99  O   HOH T  98      -6.248  -4.336  37.204  1.00  0.37           O  
HETATM  100  O   HOH T  99      24.125 -10.122  60.835  1.00  0.37           O  
HETATM  101  O   HOH T 100      21.740   2.458  56.776  1.00  0.37           O  
HETATM  102  O   HOH T 101       1.019  -3.964  85.965  1.00  0.37           O  
HETATM  103  O   HOH T 102     -26.298   4.763  45.789  1.00  0.37           O  
HETATM  104  O   HOH T 103     -27.125  10.877  42.623  1.00  0.38           O  
HETATM  105  O   HOH T 104      -2.108  13.986  76.315  1.00  0.38           O  
HETATM  106  O   HOH T 105       2.650 -10.601  69.001  1.00  0.38           O  
HETATM  107  O   HOH T 106      20.479 -11.528  64.286  1.00  0.38           O  
HETATM  108  O   HOH T 107      21.683   3.083  89.034  1.00  0.38           O  
HETATM  109  O   HOH T 108       7.622   4.281  62.782  1.00  0.38           O  
HETATM  110  O   HOH T 109       4.736  11.236  44.524  1.00  0.38           O  
HETATM  111  O   HOH T 110      -7.121  -5.807  42.017  1.00  0.38           O  
HETATM  112  O   HOH T 111       7.206   4.029  79.939  1.00  0.38           O  
HETATM  113  O   HOH T 112       5.419  15.418  46.801  1.00  0.38           O  
HETATM  114  O   HOH T 113      18.975   1.783  56.328  1.00  0.39           O  
HETATM  115  O   HOH T 114      18.899   2.354  81.565  1.00  0.39           O  
HETATM  116  O   HOH T 115      20.371   7.994  59.903  1.00  0.39           O  
HETATM  117  O   HOH T 116      19.808  -6.537  51.088  1.00  0.39           O  
HETATM  118  O   HOH T 117      -4.948  -5.187  66.567  1.00  0.39           O  
HETATM  119  O   HOH T 118      14.195 -19.782  60.815  1.00  0.39           O  
HETATM  120  O   HOH T 119      -4.708  14.883  49.786  1.00  0.39           O  
HETATM  121  O   HOH T 120       3.243   0.156  68.189  1.00  0.39           O  
HETATM  122  O   HOH T 121      -0.304  16.132  76.465  1.00  0.39           O  
HETATM  123  O   HOH T 122      19.657  13.685  64.400  1.00  0.40           O  
HETATM  124  O   HOH T 123      20.132   5.458  60.837  1.00  0.40           O  
HETATM  125  O   HOH T 124     -10.487  14.065  45.428  1.00  0.40           O  
HETATM  126  O   HOH T 125       2.451  19.957  48.450  1.00  0.40           O  
HETATM  127  O   HOH T 126       7.529 -21.311  62.600  1.00  0.40           O  
HETATM  128  O   HOH T 127       4.489   8.893  86.729  1.00  0.40           O  
HETATM  129  O   HOH T 128       1.772  13.029  47.179  1.00  0.40           O  
HETATM  130  O   HOH T 129      12.989  26.041  68.862  1.00  0.40           O  
HETATM  131  O   HOH T 130     -11.877  14.022  34.011  1.00  0.40           O  
HETATM  132  O   HOH T 131       2.683 -10.813  65.566  1.00  0.40           O  
HETATM  133  O   HOH T 132       4.287  21.175  80.087  1.00  0.40           O  
HETATM  134  O   HOH T 133      -5.039  -7.041  64.435  1.00  0.40           O  
HETATM  135  O   HOH T 134     -12.986  -3.796  59.707  1.00  0.40           O  
HETATM  136  O   HOH T 135      16.131 -18.197  59.637  1.00  0.40           O  
HETATM  137  O   HOH T 136      21.747   0.263  66.778  1.00  0.41           O  
HETATM  138  O   HOH T 137     -12.019 -12.438  31.897  1.00  0.41           O  
HETATM  139  O   HOH T 138      -2.535  18.241  54.528  1.00  0.41           O  
HETATM  140  O   HOH T 139       5.878  25.957  77.140  1.00  0.41           O  
HETATM  141  O   HOH T 140      -9.768  -6.528  61.185  1.00  0.41           O  
HETATM  142  O   HOH T 141       5.849  24.611  58.658  1.00  0.41           O  
HETATM  143  O   HOH T 142     -16.636   0.268  53.965  1.00  0.41           O  
HETATM  144  O   HOH T 143      17.057  24.391  67.853  1.00  0.41           O  
HETATM  145  O   HOH T 144       1.825  -6.562  71.585  1.00  0.41           O  
HETATM  146  O   HOH T 145      16.884 -10.277  66.695  1.00  0.41           O  
HETATM  147  O   HOH T 146      -6.673 -20.002  65.192  1.00  0.41           O  
HETATM  148  O   HOH T 147      -7.329  -4.157  65.594  1.00  0.41           O  
HETATM  149  O   HOH T 148      16.658   3.376  56.535  1.00  0.41           O  
HETATM  150  O   HOH T 149      14.346 -15.622  52.189  1.00  0.41           O  
HETATM  151  O   HOH T 150      22.537 -14.536  58.543  1.00  0.41           O  
HETATM  152  O   HOH T 151      17.765 -16.027  60.151  1.00  0.41           O  
HETATM  153  O   HOH T 152      17.455  -6.778  72.284  1.00  0.41           O  
HETATM  154  O   HOH T 153     -10.482 -16.986  47.030  1.00  0.41           O  
HETATM  155  O   HOH T 154     -15.362   7.277  54.157  1.00  0.42           O  
HETATM  156  O   HOH T 155      -0.560 -15.296  64.447  1.00  0.42           O  
HETATM  157  O   HOH T 156       0.763   3.162  60.654  1.00  0.42           O  
HETATM  158  O   HOH T 157       7.224  -8.358  72.888  1.00  0.42           O  
HETATM  159  O   HOH T 158      17.315  -8.624  69.014  1.00  0.42           O  
HETATM  160  O   HOH T 159       1.949 -12.179  47.402  1.00  0.42           O  
HETATM  161  O   HOH T 160       8.539  16.052  86.002  1.00  0.42           O  
HETATM  162  O   HOH T 161      -0.976  23.846  64.549  1.00  0.42           O  
HETATM  163  O   HOH T 162       4.599   4.828  79.475  1.00  0.42           O  
HETATM  164  O   HOH T 163     -22.709   3.293  47.802  1.00  0.42           O  
HETATM  165  O   HOH T 164       1.876  -4.117  72.956  1.00  0.43           O  
HETATM  166  O   HOH T 165     -11.545  -3.896  33.371  1.00  0.43           O  
HETATM  167  O   HOH T 166       8.929   6.491  63.868  1.00  0.43           O  
HETATM  168  O   HOH T 167       2.190  -9.227  42.969  1.00  0.43           O  
HETATM  169  O   HOH T 168      -3.469  17.994  62.344  1.00  0.43           O  
HETATM  170  O   HOH T 169       4.978   0.003  81.273  1.00  0.43           O  
HETATM  171  O   HOH T 170      18.440  -4.951  74.073  1.00  0.43           O  
HETATM  172  O   HOH T 171     -18.447 -17.871  49.763  1.00  0.43           O  
HETATM  173  O   HOH T 172       3.888 -13.016  69.045  1.00  0.43           O  
HETATM  174  O   HOH T 173       1.236  23.679  53.425  1.00  0.43           O  
HETATM  175  O   HOH T 174     -14.458 -12.596  33.105  1.00  0.43           O  
HETATM  176  O   HOH T 175      11.819 -18.758  64.368  1.00  0.43           O  
HETATM  177  O   HOH T 176      20.973   0.940  54.510  1.00  0.43           O  
HETATM  178  O   HOH T 177       5.795   7.473  44.334  1.00  0.43           O  
HETATM  179  O   HOH T 178      25.960  -2.412  67.306  1.00  0.43           O  
HETATM  180  O   HOH T 179     -13.167 -17.376  46.225  1.00  0.43           O  
HETATM  181  O   HOH T 180     -10.068  16.501  44.253  1.00  0.43           O  
HETATM  182  O   HOH T 181       3.423  -4.885  44.407  1.00  0.43           O  
HETATM  183  O   HOH T 182     -27.585   9.033  44.694  1.00  0.43           O  
HETATM  184  O   HOH T 183      -0.858  -3.831  38.569  1.00  0.44           O  
HETATM  185  O   HOH T 184     -22.476  -2.962  35.610  1.00  0.44           O  
HETATM  186  O   HOH T 185       4.054  17.752  47.699  1.00  0.44           O  
HETATM  187  O   HOH T 186     -21.790   5.822  48.471  1.00  0.44           O  
HETATM  188  O   HOH T 187      -1.048  17.014  49.519  1.00  0.44           O  
HETATM  189  O   HOH T 188       6.552  17.086  48.654  1.00  0.44           O  
HETATM  190  O   HOH T 189       3.183   4.731  85.074  1.00  0.44           O  
HETATM  191  O   HOH T 190       3.024  -7.871  73.694  1.00  0.44           O  
HETATM  192  O   HOH T 191       3.335   7.673  52.284  1.00  0.44           O  
HETATM  193  O   HOH T 192      -9.593  -3.981  61.804  1.00  0.44           O  
HETATM  194  O   HOH T 193     -11.007   9.060  52.483  1.00  0.44           O  
HETATM  195  O   HOH T 194      17.232   7.468  53.710  1.00  0.44           O  
HETATM  196  O   HOH T 195       8.173  14.710  46.574  1.00  0.44           O  
HETATM  197  O   HOH T 196      19.069  21.077  51.040  1.00  0.44           O  
HETATM  198  O   HOH T 197     -15.254  10.969  47.902  1.00  0.45           O  
HETATM  199  O   HOH T 198       0.951   1.591  89.106  1.00  0.45           O  
HETATM  200  O   HOH T 199       3.464  -8.842  71.091  1.00  0.45           O  
HETATM  201  O   HOH T 200       6.515  26.054  67.183  1.00  0.45           O  
HETATM  202  O   HOH T 201     -28.786   1.646  44.819  1.00  0.45           O  
HETATM  203  O   HOH T 202     -19.595  11.945  46.023  1.00  0.45           O  
HETATM  204  O   HOH T 203      27.517  -0.903  65.593  1.00  0.45           O  
HETATM  205  O   HOH T 204       4.132 -15.215  67.424  1.00  0.45           O  
HETATM  206  O   HOH T 205       1.542  -2.868  90.274  1.00  0.45           O  
HETATM  207  O   HOH T 206     -23.991  -0.677  44.696  1.00  0.45           O  
HETATM  208  O   HOH T 207     -16.275  12.095  43.818  1.00  0.46           O  
HETATM  209  O   HOH T 208      18.901 -12.310  66.498  1.00  0.46           O  
HETATM  210  O   HOH T 209       1.471  17.391  48.557  1.00  0.46           O  
HETATM  211  O   HOH T 210     -27.070   5.576  34.737  1.00  0.46           O  
HETATM  212  O   HOH T 211      -9.489  -8.440  59.343  1.00  0.46           O  
HETATM  213  O   HOH T 212       6.439  14.345  85.734  1.00  0.46           O  
HETATM  214  O   HOH T 213      13.061 -21.020  63.074  1.00  0.46           O  
HETATM  215  O   HOH T 214       0.621  21.528  51.664  1.00  0.46           O  
HETATM  216  O   HOH T 215       9.803  28.107  61.674  1.00  0.46           O  
HETATM  217  O   HOH T 216       0.094  15.161  47.796  1.00  0.46           O  
HETATM  218  O   HOH T 217       2.145 -15.263  65.340  1.00  0.46           O  
HETATM  219  O   HOH T 218       2.492  -5.432  90.165  1.00  0.46           O  
HETATM  220  O   HOH T 219     -18.697  10.581  43.749  1.00  0.46           O  
HETATM  221  O   HOH T 220      -4.799 -12.087  63.445  1.00  0.47           O  
HETATM  222  O   HOH T 221       7.105 -19.105  64.044  1.00  0.47           O  
HETATM  223  O   HOH T 222      18.129   3.470  54.193  1.00  0.47           O  
HETATM  224  O   HOH T 223      22.726   1.691  68.890  1.00  0.47           O  
HETATM  225  O   HOH T 224      24.961  -2.660  69.908  1.00  0.47           O  
HETATM  226  O   HOH T 225       2.028 -11.582  44.646  1.00  0.47           O  
HETATM  227  O   HOH T 226      -4.078  -7.282  38.401  1.00  0.47           O  
HETATM  228  O   HOH T 227       3.897  26.127  67.939  1.00  0.47           O  
HETATM  229  O   HOH T 228       4.984  25.508  50.950  1.00  0.47           O  
HETATM  230  O   HOH T 229      28.578   0.499  63.514  1.00  0.47           O  
HETATM  231  O   HOH T 230     -18.705   6.986  32.394  1.00  0.47           O  
HETATM  232  O   HOH T 231     -21.391  -5.306  36.433  1.00  0.47           O  
HETATM  233  O   HOH T 232     -21.308  10.457  44.510  1.00  0.47           O  
HETATM  234  O   HOH T 233     -16.876   2.977  54.532  1.00  0.47           O  
HETATM  235  O   HOH T 234      -2.380  17.837  57.478  1.00  0.47           O  
HETATM  236  O   HOH T 235      13.043  27.724  66.624  1.00  0.47           O  
HETATM  237  O   HOH T 236      17.954 -19.171  57.709  1.00  0.47           O  
HETATM  238  O   HOH T 237     -17.559  12.563  47.854  1.00  0.47           O  
HETATM  239  O   HOH T 238       2.769  22.262  50.012  1.00  0.48           O  
HETATM  240  O   HOH T 239      27.098  -4.875  67.514  1.00  0.48           O  
HETATM  241  O   HOH T 240      -2.506  17.385  51.848  1.00  0.48           O  
HETATM  242  O   HOH T 241       1.977  -5.762  75.250  1.00  0.48           O  
HETATM  243  O   HOH T 242       4.032  11.571  87.398  1.00  0.48           O  
HETATM  244  O   HOH T 243      22.987  -7.425  56.832  1.00  0.48           O  
HETATM  245  O   HOH T 244      21.651   4.368  58.806  1.00  0.48           O  
HETATM  246  O   HOH T 245       1.064  -1.610  68.136  1.00  0.48           O  
HETATM  247  O   HOH T 246       2.261   6.063  80.067  1.00  0.48           O  
HETATM  248  O   HOH T 247     -12.556   7.236  53.961  1.00  0.48           O  
HETATM  249  O   HOH T 248       3.491   5.558  61.496  1.00  0.48           O  
HETATM  250  O   HOH T 249      -8.891 -10.077  45.007  1.00  0.48           O  
HETATM  251  O   HOH T 250     -22.160  -9.284  39.681  1.00  0.48           O  
HETATM  252  O   HOH T 251      11.461  25.302  71.093  1.00  0.48           O  
HETATM  253  O   HOH T 252     -17.202  10.744  45.936  1.00  0.48           O  
HETATM  254  O   HOH T 253       3.528  -2.459  69.141  1.00  0.49           O  
HETATM  255  O   HOH T 254      19.245   1.637  52.393  1.00  0.49           O  
HETATM  256  O   HOH T 255       5.938  23.460  80.405  1.00  0.49           O  
HETATM  257  O   HOH T 256     -16.131 -13.716  39.698  1.00  0.49           O  
HETATM  258  O   HOH T 257       2.585   0.303  72.194  1.00  0.49           O  
HETATM  259  O   HOH T 258      -1.614  25.685  62.618  1.00  0.49           O  
HETATM  260  O   HOH T 259     -21.665  -5.368  47.693  1.00  0.49           O  
HETATM  261  O   HOH T 260      -2.634  -4.921  68.064  1.00  0.49           O  
HETATM  262  O   HOH T 261       1.806  -6.110  87.537  1.00  0.49           O  
HETATM  263  O   HOH T 262      23.881  -0.726  68.369  1.00  0.49           O  
HETATM  264  O   HOH T 263      -5.662  20.782  55.793  1.00  0.49           O  
HETATM  265  O   HOH T 264       0.849   5.500  62.348  1.00  0.49           O  
HETATM  266  O   HOH T 265      24.295   1.371  66.509  1.00  0.49           O  
HETATM  267  O   HOH T 266      -6.023  -5.797  39.606  1.00  0.49           O  
HETATM  268  O   HOH T 267      18.802  -2.141  67.259  1.00  0.49           O  
HETATM  269  O   HOH T 268     -24.251   3.023  45.471  1.00  0.49           O  
HETATM  270  O   HOH T 269       5.714  27.371  69.560  1.00  0.50           O  
HETATM  271  O   HOH T 270      -2.811  19.376  59.888  1.00  0.50           O  
HETATM  272  O   HOH T 271       1.949 -21.038  58.950  1.00  0.50           O  
HETATM  273  O   HOH T 272     -13.253   8.306  51.261  1.00  0.50           O  
HETATM  274  O   HOH T 273      -5.794   7.503  54.422  1.00  0.50           O  
HETATM  275  O   HOH T 274      19.523  24.457  68.822  1.00  0.50           O  
HETATM  276  O   HOH T 275      -1.406  29.102  58.066  1.00  0.50           O  
HETATM  277  O   HOH T 276      -4.032   9.780  56.656  1.00  0.50           O  
HETATM  278  O   HOH T 277      20.440   0.755  50.061  1.00  0.50           O  
HETATM  279  O   HOH T 278     -24.851  -0.767  42.004  1.00  0.50           O  
HETATM  280  O   HOH T 279       4.046   6.560  49.774  1.00  0.50           O  
HETATM  281  O   HOH T 280     -21.370   6.801  51.092  1.00  0.50           O  
HETATM  282  O   HOH T 281      23.569   8.253  77.523  1.00  0.50           O  
HETATM  283  O   HOH T 282       3.973  24.697  78.709  1.00  0.50           O  
HETATM  284  O   HOH T 283      -4.092  15.416  68.841  1.00  0.50           O  
HETATM  285  O   HOH T 284       5.517  22.410  77.820  1.00  0.50           O  
HETATM  286  O   HOH T 285       0.510 -17.668  65.229  1.00  0.51           O  
HETATM  287  O   HOH T 286     -19.677  12.818  34.521  1.00  0.51           O  
HETATM  288  O   HOH T 287      21.997   3.017  66.608  1.00  0.51           O  
HETATM  289  O   HOH T 288      21.734 -15.410  64.853  1.00  0.51           O  
HETATM  290  O   HOH T 289     -15.361  12.978  46.192  1.00  0.51           O  
HETATM  291  O   HOH T 290       5.110  13.224  42.601  1.00  0.51           O  
HETATM  292  O   HOH T 291     -20.928 -10.423  33.121  1.00  0.51           O  
HETATM  293  O   HOH T 292      -2.911  14.590  51.930  1.00  0.51           O  
HETATM  294  O   HOH T 293      13.285 -10.076  72.790  1.00  0.51           O  
HETATM  295  O   HOH T 294     -10.402  16.367  34.389  1.00  0.51           O  
HETATM  296  O   HOH T 295      -4.263  17.090  59.649  1.00  0.51           O  
HETATM  297  O   HOH T 296      14.727  -9.002  69.740  1.00  0.51           O  
HETATM  298  O   HOH T 297     -25.393   1.692  40.648  1.00  0.51           O  
HETATM  299  O   HOH T 298     -24.942   1.664  47.793  1.00  0.52           O  
HETATM  300  O   HOH T 299     -10.227 -12.435  44.289  1.00  0.52           O  
HETATM  301  O   HOH T 300     -25.391  11.336  40.615  1.00  0.52           O  
HETATM  302  O   HOH T 301      17.964   5.739  55.804  1.00  0.52           O  
HETATM  303  O   HOH T 302      10.543  27.438  65.650  1.00  0.52           O  
HETATM  304  O   HOH T 303     -21.543   0.443  38.739  1.00  0.52           O  
HETATM  305  O   HOH T 304       4.438   6.098  81.954  1.00  0.52           O  
HETATM  306  O   HOH T 305      16.114  14.996  57.396  1.00  0.52           O  
HETATM  307  O   HOH T 306       1.461  -6.506  42.946  1.00  0.52           O  
HETATM  308  O   HOH T 307      -6.593   1.578  41.551  1.00  0.52           O  
HETATM  309  O   HOH T 308      17.944 -13.953  52.794  1.00  0.52           O  
HETATM  310  O   HOH T 309      -7.959  17.117  42.738  1.00  0.52           O  
HETATM  311  O   HOH T 310     -14.996 -15.311  45.509  1.00  0.52           O  
HETATM  312  O   HOH T 311     -16.185 -13.715  47.476  1.00  0.52           O  
HETATM  313  O   HOH T 312      -4.631  10.675  34.076  1.00  0.52           O  
HETATM  314  O   HOH T 313      -5.323 -20.383  62.941  1.00  0.52           O  
HETATM  315  O   HOH T 314      -8.812  -2.663  63.965  1.00  0.52           O  
HETATM  316  O   HOH T 315      17.822  -0.016  50.593  1.00  0.52           O  
HETATM  317  O   HOH T 316       2.271  23.084  80.310  1.00  0.52           O  
HETATM  318  O   HOH T 317      19.643  13.087  61.724  1.00  0.52           O  
HETATM  319  O   HOH T 318       3.006   5.585  66.187  1.00  0.53           O  
HETATM  320  O   HOH T 319       0.170   3.175  63.451  1.00  0.53           O  
HETATM  321  O   HOH T 320      -3.404  -4.722  39.650  1.00  0.53           O  
HETATM  322  O   HOH T 321      22.738 -12.847  65.101  1.00  0.53           O  
HETATM  323  O   HOH T 322     -14.213   2.368  54.842  1.00  0.53           O  
HETATM  324  O   HOH T 323      -7.284  14.458  50.536  1.00  0.53           O  
HETATM  325  O   HOH T 324     -21.490  -4.885  33.795  1.00  0.53           O  
HETATM  326  O   HOH T 325      11.364  -6.573  72.326  1.00  0.53           O  
HETATM  327  O   HOH T 326      -4.098 -13.703  47.565  1.00  0.53           O  
HETATM  328  O   HOH T 327       1.562 -18.189  53.495  1.00  0.53           O  
HETATM  329  O   HOH T 328     -19.680  -1.914  31.649  1.00  0.53           O  
HETATM  330  O   HOH T 329     -26.067   0.860  45.330  1.00  0.53           O  
HETATM  331  O   HOH T 330      -2.264  19.375  75.259  1.00  0.53           O  
HETATM  332  O   HOH T 331       5.761  24.591  69.404  1.00  0.53           O  
HETATM  333  O   HOH T 332     -13.723  -0.049  59.896  1.00  0.53           O  
HETATM  334  O   HOH T 333      -8.658 -11.981  34.241  1.00  0.54           O  
HETATM  335  O   HOH T 334      -0.085  -0.869  89.669  1.00  0.54           O  
HETATM  336  O   HOH T 335      19.562   5.949  58.110  1.00  0.54           O  
HETATM  337  O   HOH T 336       9.575 -20.370  63.956  1.00  0.54           O  
HETATM  338  O   HOH T 337     -17.132  -7.065  60.912  1.00  0.54           O  
HETATM  339  O   HOH T 338     -21.122  -4.187  51.506  1.00  0.54           O  
HETATM  340  O   HOH T 339      20.223   4.649  80.950  1.00  0.54           O  
HETATM  341  O   HOH T 340      -8.047 -17.801  47.885  1.00  0.54           O  
HETATM  342  O   HOH T 341     -16.433 -16.485  47.739  1.00  0.54           O  
HETATM  343  O   HOH T 342     -24.446  11.614  43.111  1.00  0.54           O  
HETATM  344  O   HOH T 343       0.786   6.439  77.675  1.00  0.54           O  
HETATM  345  O   HOH T 344     -23.573  -4.206  46.140  1.00  0.55           O  
HETATM  346  O   HOH T 345       0.103  -4.163  68.405  1.00  0.55           O  
HETATM  347  O   HOH T 346      12.330 -17.018  50.988  1.00  0.55           O  
HETATM  348  O   HOH T 347       1.413  15.551  82.796  1.00  0.55           O  
HETATM  349  O   HOH T 348      26.638  -9.008  61.534  1.00  0.55           O  
HETATM  350  O   HOH T 349       2.454  24.325  66.549  1.00  0.55           O  
HETATM  351  O   HOH T 350     -27.366   7.097  46.740  1.00  0.55           O  
HETATM  352  O   HOH T 351      12.072  15.354  44.697  1.00  0.55           O  
HETATM  353  O   HOH T 352       7.276 -18.675  50.189  1.00  0.55           O  
HETATM  354  O   HOH T 353      20.264  24.304  71.278  1.00  0.55           O  
HETATM  355  O   HOH T 354      14.809  10.207  68.776  1.00  0.55           O  
HETATM  356  O   HOH T 355      21.060  21.142  69.688  1.00  0.55           O  
HETATM  357  O   HOH T 356      -7.069  -3.335  55.868  1.00  0.55           O  
HETATM  358  O   HOH T 357      -4.007  22.655  67.423  1.00  0.56           O  
HETATM  359  O   HOH T 358      -5.553  21.618  64.111  1.00  0.56           O  
HETATM  360  O   HOH T 359      -3.332   4.839  55.955  1.00  0.56           O  
HETATM  361  O   HOH T 360      10.701  -9.264  72.196  1.00  0.56           O  
HETATM  362  O   HOH T 361     -17.842  -9.615  60.333  1.00  0.56           O  
HETATM  363  O   HOH T 362      20.798   9.470  70.567  1.00  0.56           O  
HETATM  364  O   HOH T 363       5.084  20.332  47.771  1.00  0.56           O  
HETATM  365  O   HOH T 364     -23.329 -10.475  43.041  1.00  0.56           O  
HETATM  366  O   HOH T 365      20.969   5.083  87.222  1.00  0.56           O  
HETATM  367  O   HOH T 366       2.161   2.456  84.149  1.00  0.56           O  
HETATM  368  O   HOH T 367      13.540  30.000  62.917  1.00  0.56           O  
HETATM  369  O   HOH T 368       6.552 -13.322  69.587  1.00  0.56           O  
HETATM  370  O   HOH T 369     -19.592 -11.599  48.700  1.00  0.56           O  
HETATM  371  O   HOH T 370       8.342 -10.779  72.999  1.00  0.56           O  
HETATM  372  O   HOH T 371       2.261  -2.976  75.514  1.00  0.57           O  
HETATM  373  O   HOH T 372      -4.936  23.383  54.065  1.00  0.57           O  
HETATM  374  O   HOH T 373      20.133  17.879  48.436  1.00  0.57           O  
HETATM  375  O   HOH T 374      -4.794  19.113  57.909  1.00  0.57           O  
HETATM  376  O   HOH T 375       6.542 -16.250  48.484  1.00  0.57           O  
HETATM  377  O   HOH T 376      13.750 -20.410  65.689  1.00  0.57           O  
HETATM  378  O   HOH T 377      10.437  14.546  87.434  1.00  0.57           O  
HETATM  379  O   HOH T 378      -6.037  14.775  40.499  1.00  0.57           O  
HETATM  380  O   HOH T 379       2.109  12.039  44.503  1.00  0.58           O  
HETATM  381  O   HOH T 380      10.375  26.122  68.116  1.00  0.58           O  
HETATM  382  O   HOH T 381       4.903  28.266  72.127  1.00  0.58           O  
HETATM  383  O   HOH T 382      21.045  -3.094  51.755  1.00  0.59           O  
HETATM  384  O   HOH T 383     -24.438  -1.784  37.292  1.00  0.59           O  
HETATM  385  O   HOH T 384       2.991  -5.777  85.154  1.00  0.60           O  
HETATM  386  O   HOH T 385     -14.009   5.765  55.931  1.00  0.60           O  
HETATM  387  O   HOH T 386       5.846 -12.218  73.088  1.00  0.61           O  
TER     388      HOH T 386 
