# Supplementary material for: Accurate Prediction of Hydration Sites of Proteins Using Energy Model With Atom Embedding
Source: Front Mol Biosci. 2021 Sep 20;8:756075. doi: 10.3389/fmolb.2021.756075 (PMC8488165; doi:10.3389/fmolb.2021.756075)
Supplement: Supplementary file 1 [file DataSheet1.ZIP › Data Sheet 1/Our_result_pdb/our_dataset_output/2E2R_watersite.pdb]

HEADER                                                        XXXX


JRNL        PMID   -1
HETATM    1  O   HOH T   0       4.915   0.538 -30.085  1.00  0.17           O  
HETATM    2  O   HOH T   1       6.482   0.105 -11.318  1.00  0.19           O  
HETATM    3  O   HOH T   2     -22.160   3.404 -32.932  1.00  0.20           O  
HETATM    4  O   HOH T   3     -30.435  -4.250 -30.734  1.00  0.21           O  
HETATM    5  O   HOH T   4     -19.743 -16.691 -24.402  1.00  0.22           O  
HETATM    6  O   HOH T   5       1.710   0.988 -21.247  1.00  0.22           O  
HETATM    7  O   HOH T   6     -19.106  -6.514 -42.870  1.00  0.22           O  
HETATM    8  O   HOH T   7       8.135 -12.606 -42.025  1.00  0.23           O  
HETATM    9  O   HOH T   8      -7.051   8.308 -39.184  1.00  0.23           O  
HETATM   10  O   HOH T   9     -12.911 -16.578 -15.466  1.00  0.23           O  
HETATM   11  O   HOH T  10     -30.891 -10.432 -46.705  1.00  0.23           O  
HETATM   12  O   HOH T  11       2.087   4.953 -13.962  1.00  0.23           O  
HETATM   13  O   HOH T  12     -12.778 -11.783 -41.570  1.00  0.24           O  
HETATM   14  O   HOH T  13     -13.218  -9.769 -25.591  1.00  0.24           O  
HETATM   15  O   HOH T  14      -6.159  -0.436 -26.009  1.00  0.24           O  
HETATM   16  O   HOH T  15     -29.602  -5.544 -23.654  1.00  0.24           O  
HETATM   17  O   HOH T  16     -27.325  -4.298 -33.901  1.00  0.24           O  
HETATM   18  O   HOH T  17      -1.106 -25.071 -20.138  1.00  0.25           O  
HETATM   19  O   HOH T  18       2.160 -10.357 -40.015  1.00  0.25           O  
HETATM   20  O   HOH T  19     -22.084  -9.949 -13.531  1.00  0.25           O  
HETATM   21  O   HOH T  20     -13.904 -19.280 -33.607  1.00  0.25           O  
HETATM   22  O   HOH T  21       8.588  -1.657 -11.027  1.00  0.25           O  
HETATM   23  O   HOH T  22     -21.516 -14.844 -18.111  1.00  0.25           O  
HETATM   24  O   HOH T  23      -1.472   2.296 -42.202  1.00  0.25           O  
HETATM   25  O   HOH T  24     -15.227 -14.150 -38.401  1.00  0.25           O  
HETATM   26  O   HOH T  25      -6.591 -21.416 -32.502  1.00  0.26           O  
HETATM   27  O   HOH T  26      11.339 -17.900 -32.936  1.00  0.26           O  
HETATM   28  O   HOH T  27      15.107 -22.104 -19.829  1.00  0.26           O  
HETATM   29  O   HOH T  28      11.588   5.121 -15.326  1.00  0.26           O  
HETATM   30  O   HOH T  29      -2.236   4.752 -19.611  1.00  0.27           O  
HETATM   31  O   HOH T  30     -24.031  -5.834 -15.780  1.00  0.27           O  
HETATM   32  O   HOH T  31     -24.827   7.858 -26.519  1.00  0.27           O  
HETATM   33  O   HOH T  32      -5.829  -0.618 -41.570  1.00  0.27           O  
HETATM   34  O   HOH T  33       5.498   6.375 -20.126  1.00  0.27           O  
HETATM   35  O   HOH T  34     -15.402 -21.120 -20.530  1.00  0.28           O  
HETATM   36  O   HOH T  35     -28.434  -6.067 -27.867  1.00  0.28           O  
HETATM   37  O   HOH T  36      10.802 -15.218 -20.854  1.00  0.28           O  
HETATM   38  O   HOH T  37      -8.246  -0.202 -38.007  1.00  0.28           O  
HETATM   39  O   HOH T  38      -9.295   6.738 -22.815  1.00  0.28           O  
HETATM   40  O   HOH T  39     -23.698   7.431 -23.391  1.00  0.28           O  
HETATM   41  O   HOH T  40     -19.521   2.865 -39.200  1.00  0.29           O  
HETATM   42  O   HOH T  41     -20.108 -17.656 -39.722  1.00  0.29           O  
HETATM   43  O   HOH T  42     -14.517 -13.857 -41.064  1.00  0.29           O  
HETATM   44  O   HOH T  43     -18.257  -1.397 -13.370  1.00  0.29           O  
HETATM   45  O   HOH T  44      -4.543 -16.066 -20.893  1.00  0.29           O  
HETATM   46  O   HOH T  45     -25.715 -16.228 -30.728  1.00  0.29           O  
HETATM   47  O   HOH T  46      -7.787 -15.127 -15.065  1.00  0.29           O  
HETATM   48  O   HOH T  47     -28.982 -16.130 -21.151  1.00  0.29           O  
HETATM   49  O   HOH T  48       6.253 -27.038 -37.082  1.00  0.30           O  
HETATM   50  O   HOH T  49     -21.717  -4.755 -16.828  1.00  0.30           O  
HETATM   51  O   HOH T  50      -8.093 -15.444 -44.217  1.00  0.30           O  
HETATM   52  O   HOH T  51       4.710 -12.549 -11.108  1.00  0.30           O  
HETATM   53  O   HOH T  52      10.155 -17.042 -35.231  1.00  0.31           O  
HETATM   54  O   HOH T  53     -26.241  -6.447 -32.446  1.00  0.31           O  
HETATM   55  O   HOH T  54       8.759  -9.709 -15.811  1.00  0.31           O  
HETATM   56  O   HOH T  55      -8.157   4.325 -22.258  1.00  0.31           O  
HETATM   57  O   HOH T  56     -31.140   6.356 -25.047  1.00  0.31           O  
HETATM   58  O   HOH T  57      -0.310  -2.608 -27.193  1.00  0.31           O  
HETATM   59  O   HOH T  58     -17.367 -15.361 -24.124  1.00  0.31           O  
HETATM   60  O   HOH T  59      -3.088  -7.525 -37.744  1.00  0.32           O  
HETATM   61  O   HOH T  60     -30.415   1.070 -35.696  1.00  0.32           O  
HETATM   62  O   HOH T  61       8.825 -23.616 -26.624  1.00  0.32           O  
HETATM   63  O   HOH T  62       8.004 -27.178 -28.404  1.00  0.32           O  
HETATM   64  O   HOH T  63       8.607  -4.486 -11.257  1.00  0.32           O  
HETATM   65  O   HOH T  64     -34.393  -0.328 -27.528  1.00  0.32           O  
HETATM   66  O   HOH T  65      -4.573  -9.846 -37.529  1.00  0.33           O  
HETATM   67  O   HOH T  66      -1.913   4.909 -13.582  1.00  0.33           O  
HETATM   68  O   HOH T  67     -12.018 -10.865 -19.667  1.00  0.33           O  
HETATM   69  O   HOH T  68       7.523   7.499 -18.698  1.00  0.33           O  
HETATM   70  O   HOH T  69       0.045 -19.741  -9.067  1.00  0.34           O  
HETATM   71  O   HOH T  70     -11.252  12.104 -19.423  1.00  0.34           O  
HETATM   72  O   HOH T  71     -10.261   9.391 -22.597  1.00  0.34           O  
HETATM   73  O   HOH T  72     -26.384 -13.758 -31.558  1.00  0.34           O  
HETATM   74  O   HOH T  73      12.146 -13.558 -47.343  1.00  0.34           O  
HETATM   75  O   HOH T  74       2.458 -10.904 -11.561  1.00  0.34           O  
HETATM   76  O   HOH T  75      -0.764  -3.216 -30.642  1.00  0.34           O  
HETATM   77  O   HOH T  76     -30.070   1.269 -22.695  1.00  0.34           O  
HETATM   78  O   HOH T  77      12.924   2.743 -14.778  1.00  0.34           O  
HETATM   79  O   HOH T  78     -30.417  -9.567 -19.827  1.00  0.35           O  
HETATM   80  O   HOH T  79       8.270  -5.827 -14.712  1.00  0.35           O  
HETATM   81  O   HOH T  80      -6.717 -20.226 -36.448  1.00  0.35           O  
HETATM   82  O   HOH T  81     -21.842   4.399 -14.216  1.00  0.35           O  
HETATM   83  O   HOH T  82     -12.819  -0.507 -41.490  1.00  0.35           O  
HETATM   84  O   HOH T  83      -0.783 -22.781 -36.771  1.00  0.35           O  
HETATM   85  O   HOH T  84     -16.252  -0.140 -43.659  1.00  0.35           O  
HETATM   86  O   HOH T  85      -7.325 -11.397 -21.146  1.00  0.35           O  
HETATM   87  O   HOH T  86       6.395 -31.312 -27.522  1.00  0.35           O  
HETATM   88  O   HOH T  87       4.124   0.073 -22.515  1.00  0.35           O  
HETATM   89  O   HOH T  88      -4.656  -5.847 -42.957  1.00  0.36           O  
HETATM   90  O   HOH T  89       4.119 -25.182 -12.344  1.00  0.36           O  
HETATM   91  O   HOH T  90       1.791 -19.084 -11.095  1.00  0.36           O  
HETATM   92  O   HOH T  91       1.599  -3.324 -29.180  1.00  0.36           O  
HETATM   93  O   HOH T  92      14.589 -17.729 -36.314  1.00  0.36           O  
HETATM   94  O   HOH T  93      -9.464 -13.264 -13.900  1.00  0.36           O  
HETATM   95  O   HOH T  94       2.401   0.794  -5.661  1.00  0.36           O  
HETATM   96  O   HOH T  95       7.331 -24.488 -28.831  1.00  0.36           O  
HETATM   97  O   HOH T  96       5.824 -28.666 -27.503  1.00  0.36           O  
HETATM   98  O   HOH T  97     -20.398  -0.274 -19.463  1.00  0.36           O  
HETATM   99  O   HOH T  98      14.335 -10.627 -32.535  1.00  0.36           O  
HETATM  100  O   HOH T  99      13.278 -17.021 -26.801  1.00  0.36           O  
HETATM  101  O   HOH T 100      12.353 -23.134 -28.439  1.00  0.36           O  
HETATM  102  O   HOH T 101     -27.210 -22.021 -23.942  1.00  0.37           O  
HETATM  103  O   HOH T 102     -26.583  -4.887 -16.344  1.00  0.37           O  
HETATM  104  O   HOH T 103     -16.104 -18.877 -30.626  1.00  0.37           O  
HETATM  105  O   HOH T 104      -8.423  -0.970 -40.703  1.00  0.37           O  
HETATM  106  O   HOH T 105     -10.983 -21.066 -15.241  1.00  0.37           O  
HETATM  107  O   HOH T 106       0.990 -25.944 -34.401  1.00  0.37           O  
HETATM  108  O   HOH T 107     -17.970   2.083 -37.048  1.00  0.37           O  
HETATM  109  O   HOH T 108     -23.814   2.233 -11.182  1.00  0.37           O  
HETATM  110  O   HOH T 109      -4.575   3.013 -25.910  1.00  0.37           O  
HETATM  111  O   HOH T 110     -17.824 -12.742 -24.134  1.00  0.37           O  
HETATM  112  O   HOH T 111     -23.208 -12.340 -14.071  1.00  0.37           O  
HETATM  113  O   HOH T 112       1.778 -12.818 -41.238  1.00  0.38           O  
HETATM  114  O   HOH T 113     -25.909   8.020 -29.164  1.00  0.38           O  
HETATM  115  O   HOH T 114       3.215 -26.836 -35.804  1.00  0.38           O  
HETATM  116  O   HOH T 115       4.026 -19.208 -40.284  1.00  0.38           O  
HETATM  117  O   HOH T 116     -16.793 -18.198 -28.237  1.00  0.38           O  
HETATM  118  O   HOH T 117     -23.599 -24.864 -21.891  1.00  0.38           O  
HETATM  119  O   HOH T 118     -36.887  -8.547 -33.419  1.00  0.38           O  
HETATM  120  O   HOH T 119     -32.384  -9.819 -26.472  1.00  0.38           O  
HETATM  121  O   HOH T 120     -24.018  -0.802 -20.800  1.00  0.38           O  
HETATM  122  O   HOH T 121      -5.672   8.833 -17.009  1.00  0.38           O  
HETATM  123  O   HOH T 122     -11.428  -2.687 -42.697  1.00  0.38           O  
HETATM  124  O   HOH T 123     -14.728 -15.280 -16.954  1.00  0.38           O  
HETATM  125  O   HOH T 124      -3.825  -7.298 -11.948  1.00  0.38           O  
HETATM  126  O   HOH T 125     -27.507   6.886 -21.003  1.00  0.38           O  
HETATM  127  O   HOH T 126      12.142 -12.277 -32.243  1.00  0.38           O  
HETATM  128  O   HOH T 127      -0.654 -25.081 -38.356  1.00  0.38           O  
HETATM  129  O   HOH T 128     -30.622   5.031 -22.726  1.00  0.39           O  
HETATM  130  O   HOH T 129     -19.847 -13.922 -16.150  1.00  0.39           O  
HETATM  131  O   HOH T 130     -32.973  -5.601 -35.610  1.00  0.39           O  
HETATM  132  O   HOH T 131     -36.164  -9.792 -27.823  1.00  0.39           O  
HETATM  133  O   HOH T 132     -20.456 -17.492 -18.649  1.00  0.39           O  
HETATM  134  O   HOH T 133       0.169  -5.821  -7.195  1.00  0.39           O  
HETATM  135  O   HOH T 134      -7.727 -21.390  -9.832  1.00  0.39           O  
HETATM  136  O   HOH T 135       6.026 -11.025 -42.781  1.00  0.39           O  
HETATM  137  O   HOH T 136       5.682   9.107 -17.430  1.00  0.39           O  
HETATM  138  O   HOH T 137     -38.213  -4.058 -21.009  1.00  0.39           O  
HETATM  139  O   HOH T 138     -34.225  -0.237 -22.488  1.00  0.39           O  
HETATM  140  O   HOH T 139     -16.901 -18.183 -14.558  1.00  0.39           O  
HETATM  141  O   HOH T 140      -3.377 -23.203 -35.997  1.00  0.39           O  
HETATM  142  O   HOH T 141       4.829 -23.513 -45.954  1.00  0.39           O  
HETATM  143  O   HOH T 142     -17.889 -16.559 -26.497  1.00  0.39           O  
HETATM  144  O   HOH T 143     -31.123  -3.410 -22.715  1.00  0.39           O  
HETATM  145  O   HOH T 144     -18.401 -17.972 -16.897  1.00  0.39           O  
HETATM  146  O   HOH T 145      -7.821 -21.453 -18.673  1.00  0.40           O  
HETATM  147  O   HOH T 146      -1.113   6.856 -21.223  1.00  0.40           O  
HETATM  148  O   HOH T 147      -5.246 -20.002  -7.636  1.00  0.40           O  
HETATM  149  O   HOH T 148     -10.422 -15.761 -14.566  1.00  0.40           O  
HETATM  150  O   HOH T 149     -35.827  -7.412 -29.134  1.00  0.40           O  
HETATM  151  O   HOH T 150     -22.125   2.073 -39.227  1.00  0.40           O  
HETATM  152  O   HOH T 151      -4.576   0.936 -27.848  1.00  0.40           O  
HETATM  153  O   HOH T 152      -6.642   3.087 -24.080  1.00  0.40           O  
HETATM  154  O   HOH T 153       0.903  -7.865 -40.362  1.00  0.40           O  
HETATM  155  O   HOH T 154      -8.168  10.081 -16.663  1.00  0.40           O  
HETATM  156  O   HOH T 155     -41.024  -7.124 -24.094  1.00  0.40           O  
HETATM  157  O   HOH T 156      -3.885  -4.643 -11.212  1.00  0.40           O  
HETATM  158  O   HOH T 157     -27.985 -12.396 -29.742  1.00  0.40           O  
HETATM  159  O   HOH T 158       1.372 -12.208  -9.303  1.00  0.40           O  
HETATM  160  O   HOH T 159       2.818 -17.962 -27.887  1.00  0.40           O  
HETATM  161  O   HOH T 160      -4.470 -17.530  -8.785  1.00  0.40           O  
HETATM  162  O   HOH T 161      14.111 -21.017 -28.318  1.00  0.40           O  
HETATM  163  O   HOH T 162      13.076 -26.264 -32.131  1.00  0.41           O  
HETATM  164  O   HOH T 163     -26.582   6.837 -18.358  1.00  0.41           O  
HETATM  165  O   HOH T 164     -13.068   3.223 -44.950  1.00  0.41           O  
HETATM  166  O   HOH T 165      13.888 -18.449 -29.148  1.00  0.41           O  
HETATM  167  O   HOH T 166     -36.240   0.813 -29.294  1.00  0.41           O  
HETATM  168  O   HOH T 167     -22.621  12.026 -21.005  1.00  0.41           O  
HETATM  169  O   HOH T 168       4.053 -21.723 -41.272  1.00  0.41           O  
HETATM  170  O   HOH T 169      -8.424 -20.371 -16.166  1.00  0.41           O  
HETATM  171  O   HOH T 170      -3.249  -4.833  -8.520  1.00  0.41           O  
HETATM  172  O   HOH T 171     -11.455  -9.994 -23.541  1.00  0.41           O  
HETATM  173  O   HOH T 172      13.107 -21.249 -35.525  1.00  0.41           O  
HETATM  174  O   HOH T 173     -13.756 -14.584 -21.078  1.00  0.42           O  
HETATM  175  O   HOH T 174     -19.433   7.426 -31.749  1.00  0.42           O  
HETATM  176  O   HOH T 175     -28.923 -13.827 -27.639  1.00  0.42           O  
HETATM  177  O   HOH T 176     -20.317 -19.291 -23.542  1.00  0.42           O  
HETATM  178  O   HOH T 177     -21.986 -10.497 -42.158  1.00  0.42           O  
HETATM  179  O   HOH T 178     -26.586 -11.002 -31.693  1.00  0.42           O  
HETATM  180  O   HOH T 179     -17.903  -8.706 -12.187  1.00  0.42           O  
HETATM  181  O   HOH T 180      13.171 -22.591 -37.892  1.00  0.42           O  
HETATM  182  O   HOH T 181     -25.803  -9.385 -42.415  1.00  0.42           O  
HETATM  183  O   HOH T 182      12.452 -23.980 -41.928  1.00  0.42           O  
HETATM  184  O   HOH T 183     -10.967 -17.367 -24.296  1.00  0.42           O  
HETATM  185  O   HOH T 184     -36.789  -0.732 -23.482  1.00  0.42           O  
HETATM  186  O   HOH T 185      -8.536   9.696 -30.199  1.00  0.42           O  
HETATM  187  O   HOH T 186      -5.647  -8.239 -10.215  1.00  0.43           O  
HETATM  188  O   HOH T 187      -6.504  -8.875 -43.219  1.00  0.43           O  
HETATM  189  O   HOH T 188      -2.646   5.820 -16.061  1.00  0.43           O  
HETATM  190  O   HOH T 189      -4.343 -14.466 -46.922  1.00  0.43           O  
HETATM  191  O   HOH T 190     -21.887   5.283 -35.111  1.00  0.43           O  
HETATM  192  O   HOH T 191       9.017   0.760 -20.996  1.00  0.43           O  
HETATM  193  O   HOH T 192     -31.688  -4.049 -20.012  1.00  0.43           O  
HETATM  194  O   HOH T 193      -3.482  -5.270 -46.118  1.00  0.43           O  
HETATM  195  O   HOH T 194      -7.883  10.751 -23.144  1.00  0.43           O  
HETATM  196  O   HOH T 195     -23.139 -21.564 -25.880  1.00  0.43           O  
HETATM  197  O   HOH T 196       4.189  -9.294 -41.650  1.00  0.43           O  
HETATM  198  O   HOH T 197       4.578 -27.276 -21.828  1.00  0.43           O  
HETATM  199  O   HOH T 198      -5.254 -12.703 -44.953  1.00  0.43           O  
HETATM  200  O   HOH T 199     -21.112 -21.887 -24.036  1.00  0.43           O  
HETATM  201  O   HOH T 200     -27.336  -7.717 -49.787  1.00  0.43           O  
HETATM  202  O   HOH T 201      -0.722 -17.984 -11.149  1.00  0.43           O  
HETATM  203  O   HOH T 202     -38.910 -12.239 -20.335  1.00  0.43           O  
HETATM  204  O   HOH T 203     -36.291  -4.861 -19.311  1.00  0.43           O  
HETATM  205  O   HOH T 204      11.202 -28.231 -31.869  1.00  0.44           O  
HETATM  206  O   HOH T 205      -3.420   4.977 -39.764  1.00  0.44           O  
HETATM  207  O   HOH T 206       0.060  -5.843 -43.116  1.00  0.44           O  
HETATM  208  O   HOH T 207     -21.977   6.275 -32.534  1.00  0.44           O  
HETATM  209  O   HOH T 208     -10.492   7.341 -15.471  1.00  0.44           O  
HETATM  210  O   HOH T 209     -21.932 -14.299 -12.495  1.00  0.44           O  
HETATM  211  O   HOH T 210     -16.112   5.547 -13.466  1.00  0.44           O  
HETATM  212  O   HOH T 211     -17.989 -11.914 -15.732  1.00  0.44           O  
HETATM  213  O   HOH T 212      -4.071   6.628 -18.222  1.00  0.44           O  
HETATM  214  O   HOH T 213     -12.834 -12.032 -22.004  1.00  0.44           O  
HETATM  215  O   HOH T 214     -29.157  -4.447 -21.118  1.00  0.44           O  
HETATM  216  O   HOH T 215      -2.298  -6.739 -44.092  1.00  0.44           O  
HETATM  217  O   HOH T 216       1.756 -27.214 -21.728  1.00  0.44           O  
HETATM  218  O   HOH T 217      -8.967   6.584 -40.077  1.00  0.45           O  
HETATM  219  O   HOH T 218     -24.238   7.059 -31.107  1.00  0.45           O  
HETATM  220  O   HOH T 219     -13.968   1.297 -43.193  1.00  0.45           O  
HETATM  221  O   HOH T 220      13.819 -16.933 -33.780  1.00  0.45           O  
HETATM  222  O   HOH T 221       7.538 -29.649 -29.252  1.00  0.45           O  
HETATM  223  O   HOH T 222      -9.495   9.872 -25.192  1.00  0.45           O  
HETATM  224  O   HOH T 223       0.627 -27.130 -36.880  1.00  0.45           O  
HETATM  225  O   HOH T 224     -11.327 -15.905 -22.020  1.00  0.45           O  
HETATM  226  O   HOH T 225     -31.644  -0.841 -23.425  1.00  0.46           O  
HETATM  227  O   HOH T 226     -34.974   0.736 -24.994  1.00  0.46           O  
HETATM  228  O   HOH T 227     -13.540 -16.245 -23.486  1.00  0.46           O  
HETATM  229  O   HOH T 228      -0.755 -27.236 -16.691  1.00  0.46           O  
HETATM  230  O   HOH T 229      -5.843  12.465 -23.401  1.00  0.46           O  
HETATM  231  O   HOH T 230       9.982 -25.506 -22.586  1.00  0.46           O  
HETATM  232  O   HOH T 231     -31.526  -3.594 -34.230  1.00  0.46           O  
HETATM  233  O   HOH T 232       9.844   7.370 -15.562  1.00  0.46           O  
HETATM  234  O   HOH T 233       8.872 -31.842 -28.616  1.00  0.46           O  
HETATM  235  O   HOH T 234     -34.171  -3.180 -19.368  1.00  0.46           O  
HETATM  236  O   HOH T 235     -28.442 -14.923 -23.542  1.00  0.46           O  
HETATM  237  O   HOH T 236     -10.529  -8.146 -10.940  1.00  0.46           O  
HETATM  238  O   HOH T 237     -21.456   2.251  -9.845  1.00  0.46           O  
HETATM  239  O   HOH T 238     -10.534  11.552 -16.821  1.00  0.46           O  
HETATM  240  O   HOH T 239     -25.298  -6.222 -44.991  1.00  0.46           O  
HETATM  241  O   HOH T 240     -32.392   1.875 -33.743  1.00  0.46           O  
HETATM  242  O   HOH T 241     -19.516  -6.455 -12.723  1.00  0.47           O  
HETATM  243  O   HOH T 242       1.463   3.089  -6.820  1.00  0.47           O  
HETATM  244  O   HOH T 243     -16.445 -25.562 -19.854  1.00  0.47           O  
HETATM  245  O   HOH T 244     -34.094  -3.034 -35.221  1.00  0.47           O  
HETATM  246  O   HOH T 245      -6.218  -5.765 -45.464  1.00  0.47           O  
HETATM  247  O   HOH T 246       7.908 -33.788 -39.323  1.00  0.47           O  
HETATM  248  O   HOH T 247     -24.737  -6.637 -50.038  1.00  0.47           O  
HETATM  249  O   HOH T 248     -22.796   6.945 -14.779  1.00  0.47           O  
HETATM  250  O   HOH T 249      10.088 -25.754 -25.256  1.00  0.47           O  
HETATM  251  O   HOH T 250     -14.313 -23.662 -20.231  1.00  0.48           O  
HETATM  252  O   HOH T 251     -11.205 -18.431 -14.483  1.00  0.48           O  
HETATM  253  O   HOH T 252     -30.123   6.425 -20.294  1.00  0.48           O  
HETATM  254  O   HOH T 253      -6.583 -18.875  -9.850  1.00  0.48           O  
HETATM  255  O   HOH T 254     -10.521   0.814 -41.115  1.00  0.48           O  
HETATM  256  O   HOH T 255     -28.652  -6.543 -30.844  1.00  0.48           O  
HETATM  257  O   HOH T 256     -18.676 -19.443 -30.096  1.00  0.48           O  
HETATM  258  O   HOH T 257     -13.275 -18.543 -25.149  1.00  0.48           O  
HETATM  259  O   HOH T 258     -19.442 -10.557 -13.661  1.00  0.48           O  
HETATM  260  O   HOH T 259     -32.029  -1.040 -35.081  1.00  0.48           O  
HETATM  261  O   HOH T 260      10.833 -10.855 -34.219  1.00  0.48           O  
HETATM  262  O   HOH T 261      -1.632  -7.048  -8.927  1.00  0.48           O  
HETATM  263  O   HOH T 262     -39.746  -9.038 -17.688  1.00  0.48           O  
HETATM  264  O   HOH T 263     -14.660 -22.695 -22.775  1.00  0.48           O  
HETATM  265  O   HOH T 264       2.203 -13.653 -11.585  1.00  0.48           O  
HETATM  266  O   HOH T 265      -6.625  -8.114 -47.122  1.00  0.48           O  
HETATM  267  O   HOH T 266      14.691  -3.145 -18.788  1.00  0.48           O  
HETATM  268  O   HOH T 267       5.182 -29.108 -19.833  1.00  0.48           O  
HETATM  269  O   HOH T 268     -12.748 -21.415 -21.157  1.00  0.48           O  
HETATM  270  O   HOH T 269     -34.930  -7.423 -36.551  1.00  0.48           O  
HETATM  271  O   HOH T 270     -32.680   1.710 -23.654  1.00  0.48           O  
HETATM  272  O   HOH T 271     -22.304 -19.709 -18.485  1.00  0.48           O  
HETATM  273  O   HOH T 272       2.827 -25.349 -45.117  1.00  0.48           O  
HETATM  274  O   HOH T 273     -10.407 -20.944 -17.939  1.00  0.49           O  
HETATM  275  O   HOH T 274      15.346 -17.751 -25.060  1.00  0.49           O  
HETATM  276  O   HOH T 275      -3.027  -7.970 -46.431  1.00  0.49           O  
HETATM  277  O   HOH T 276      -9.755 -12.178 -24.123  1.00  0.49           O  
HETATM  278  O   HOH T 277     -11.010  11.403 -26.779  1.00  0.49           O  
HETATM  279  O   HOH T 278      -5.636 -23.408 -30.790  1.00  0.49           O  
HETATM  280  O   HOH T 279       0.532 -27.140 -19.163  1.00  0.49           O  
HETATM  281  O   HOH T 280     -25.294 -12.917 -36.442  1.00  0.49           O  
HETATM  282  O   HOH T 281       9.425 -31.532 -39.250  1.00  0.49           O  
HETATM  283  O   HOH T 282      14.811 -19.501 -34.121  1.00  0.49           O  
HETATM  284  O   HOH T 283      -5.809 -22.306 -34.978  1.00  0.49           O  
HETATM  285  O   HOH T 284      10.266  -7.736 -14.551  1.00  0.49           O  
HETATM  286  O   HOH T 285      -6.089   5.928 -40.328  1.00  0.49           O  
HETATM  287  O   HOH T 286     -26.699   5.725 -30.848  1.00  0.49           O  
HETATM  288  O   HOH T 287     -22.665 -19.586 -30.216  1.00  0.50           O  
HETATM  289  O   HOH T 288      10.235 -26.492 -20.034  1.00  0.50           O  
HETATM  290  O   HOH T 289      -7.086 -14.217 -46.491  1.00  0.50           O  
HETATM  291  O   HOH T 290     -22.210 -12.575 -16.529  1.00  0.50           O  
HETATM  292  O   HOH T 291     -32.866   4.376 -24.247  1.00  0.50           O  
HETATM  293  O   HOH T 292       0.141 -24.790 -17.622  1.00  0.50           O  
HETATM  294  O   HOH T 293       9.717 -30.173 -30.626  1.00  0.50           O  
HETATM  295  O   HOH T 294      14.923 -18.351 -31.639  1.00  0.50           O  
HETATM  296  O   HOH T 295     -22.980 -17.133 -17.747  1.00  0.50           O  
HETATM  297  O   HOH T 296     -19.078 -25.046 -20.710  1.00  0.50           O  
HETATM  298  O   HOH T 297     -24.687   2.555 -39.747  1.00  0.50           O  
HETATM  299  O   HOH T 298     -26.961 -12.884 -34.064  1.00  0.51           O  
HETATM  300  O   HOH T 299     -12.316   1.006 -39.104  1.00  0.51           O  
HETATM  301  O   HOH T 300     -29.803  -5.557 -33.144  1.00  0.51           O  
HETATM  302  O   HOH T 301     -14.177   4.922 -11.454  1.00  0.51           O  
HETATM  303  O   HOH T 302       8.964 -16.715 -43.376  1.00  0.51           O  
HETATM  304  O   HOH T 303      -3.461  -0.939  -9.952  1.00  0.51           O  
HETATM  305  O   HOH T 304     -15.159   1.473 -45.677  1.00  0.51           O  
HETATM  306  O   HOH T 305      14.007 -23.483 -34.203  1.00  0.51           O  
HETATM  307  O   HOH T 306     -16.900 -23.370 -21.408  1.00  0.51           O  
HETATM  308  O   HOH T 307       3.703 -23.410 -43.365  1.00  0.51           O  
HETATM  309  O   HOH T 308     -21.402 -16.500 -41.951  1.00  0.51           O  
HETATM  310  O   HOH T 309     -24.099  -7.218 -47.355  1.00  0.52           O  
HETATM  311  O   HOH T 310     -17.980  -4.100 -12.831  1.00  0.52           O  
HETATM  312  O   HOH T 311       9.057  -3.205  -8.810  1.00  0.52           O  
HETATM  313  O   HOH T 312     -29.480  -8.262 -48.027  1.00  0.52           O  
HETATM  314  O   HOH T 313     -20.510  -8.877 -11.637  1.00  0.52           O  
HETATM  315  O   HOH T 314      -7.958   3.969 -39.996  1.00  0.52           O  
HETATM  316  O   HOH T 315     -28.234 -15.170 -30.007  1.00  0.52           O  
HETATM  317  O   HOH T 316     -12.994  -6.340 -43.501  1.00  0.52           O  
HETATM  318  O   HOH T 317      -1.694 -17.514  -8.656  1.00  0.52           O  
HETATM  319  O   HOH T 318     -21.230  15.420 -22.722  1.00  0.52           O  
HETATM  320  O   HOH T 319     -18.211 -15.861 -15.074  1.00  0.52           O  
HETATM  321  O   HOH T 320      -9.473   9.066 -27.737  1.00  0.52           O  
HETATM  322  O   HOH T 321     -12.494 -18.674 -22.412  1.00  0.52           O  
HETATM  323  O   HOH T 322      -7.156 -20.374 -39.123  1.00  0.52           O  
HETATM  324  O   HOH T 323     -20.274  13.676 -20.971  1.00  0.52           O  
HETATM  325  O   HOH T 324      -8.448 -17.797 -15.007  1.00  0.53           O  
HETATM  326  O   HOH T 325     -22.301   2.014  -7.097  1.00  0.53           O  
HETATM  327  O   HOH T 326     -10.061 -12.109 -21.239  1.00  0.53           O  
HETATM  328  O   HOH T 327     -34.018   2.286 -28.345  1.00  0.53           O  
HETATM  329  O   HOH T 328       9.882   7.671 -12.766  1.00  0.53           O  
HETATM  330  O   HOH T 329     -13.075   6.606 -34.211  1.00  0.53           O  
HETATM  331  O   HOH T 330     -12.853 -20.986 -23.934  1.00  0.53           O  
HETATM  332  O   HOH T 331     -35.640  -5.432 -34.809  1.00  0.53           O  
HETATM  333  O   HOH T 332      -8.354  13.474 -22.783  1.00  0.53           O  
HETATM  334  O   HOH T 333     -20.207   4.941 -37.339  1.00  0.53           O  
HETATM  335  O   HOH T 334      -3.386 -25.152 -37.893  1.00  0.53           O  
HETATM  336  O   HOH T 335       0.199 -14.579 -10.095  1.00  0.53           O  
HETATM  337  O   HOH T 336       3.303 -27.063 -19.466  1.00  0.54           O  
HETATM  338  O   HOH T 337      14.043 -24.356 -39.674  1.00  0.54           O  
HETATM  339  O   HOH T 338      -6.660 -21.844 -22.452  1.00  0.54           O  
HETATM  340  O   HOH T 339     -22.617  14.621 -21.853  1.00  0.54           O  
HETATM  341  O   HOH T 340      -5.702 -23.752 -37.360  1.00  0.54           O  
HETATM  342  O   HOH T 341      -0.787 -26.576 -22.614  1.00  0.55           O  
HETATM  343  O   HOH T 342     -27.568  11.408 -20.321  1.00  0.55           O  
HETATM  344  O   HOH T 343     -12.124 -19.460 -31.555  1.00  0.55           O  
HETATM  345  O   HOH T 344     -13.990  12.294 -19.882  1.00  0.55           O  
HETATM  346  O   HOH T 345     -13.058   8.178 -14.634  1.00  0.55           O  
HETATM  347  O   HOH T 346     -25.217 -18.824 -30.851  1.00  0.56           O  
HETATM  348  O   HOH T 347       1.797  -8.034 -19.685  1.00  0.56           O  
HETATM  349  O   HOH T 348     -29.216   9.081 -20.347  1.00  0.56           O  
HETATM  350  O   HOH T 349      -4.972  -9.673 -45.411  1.00  0.56           O  
HETATM  351  O   HOH T 350       7.278   2.415  -9.799  1.00  0.56           O  
HETATM  352  O   HOH T 351     -21.506 -26.378 -21.271  1.00  0.56           O  
HETATM  353  O   HOH T 352     -29.215   6.664 -31.535  1.00  0.56           O  
HETATM  354  O   HOH T 353     -26.680  13.720 -27.404  1.00  0.56           O  
HETATM  355  O   HOH T 354      13.855  -4.197 -14.541  1.00  0.56           O  
HETATM  356  O   HOH T 355       0.874   2.504  -4.134  1.00  0.56           O  
HETATM  357  O   HOH T 356      15.546 -15.565 -26.696  1.00  0.56           O  
HETATM  358  O   HOH T 357      -5.767  -5.640  -9.070  1.00  0.56           O  
HETATM  359  O   HOH T 358     -28.511  -2.694 -41.216  1.00  0.56           O  
HETATM  360  O   HOH T 359      15.550 -20.310 -36.510  1.00  0.57           O  
HETATM  361  O   HOH T 360     -11.284 -10.734 -11.826  1.00  0.57           O  
HETATM  362  O   HOH T 361      -1.843   6.467 -25.971  1.00  0.57           O  
HETATM  363  O   HOH T 362     -11.028  13.689 -21.741  1.00  0.57           O  
HETATM  364  O   HOH T 363     -14.766 -10.672 -43.103  1.00  0.57           O  
HETATM  365  O   HOH T 364       7.380   8.959 -15.313  1.00  0.57           O  
HETATM  366  O   HOH T 365     -25.131  -8.865 -45.258  1.00  0.58           O  
HETATM  367  O   HOH T 366     -12.895  -3.971 -44.644  1.00  0.59           O  
HETATM  368  O   HOH T 367     -29.118   5.652 -17.762  1.00  0.59           O  
HETATM  369  O   HOH T 368      -0.181 -12.124 -42.985  1.00  0.60           O  
TER     370      HOH T 368 
