# Supplementary material for: Accurate Prediction of Hydration Sites of Proteins Using Energy Model With Atom Embedding
Source: Front Mol Biosci. 2021 Sep 20;8:756075. doi: 10.3389/fmolb.2021.756075 (PMC8488165; doi:10.3389/fmolb.2021.756075)
Supplement: Supplementary file 1 [file DataSheet1.ZIP › Data Sheet 1/Our_result_pdb/our_dataset_output/2E3P_watersite.pdb]

HEADER                                                        XXXX


JRNL        PMID   -1
HETATM    1  O   HOH T   0      42.900   0.414  42.351  1.00  0.17           O  
HETATM    2  O   HOH T   1      23.316  56.570  68.935  1.00  0.17           O  
HETATM    3  O   HOH T   2      17.121  63.011  68.878  1.00  0.18           O  
HETATM    4  O   HOH T   3      19.744  52.347  17.922  1.00  0.19           O  
HETATM    5  O   HOH T   4      50.136  18.665  37.034  1.00  0.20           O  
HETATM    6  O   HOH T   5      45.074  33.843  25.018  1.00  0.20           O  
HETATM    7  O   HOH T   6      21.645  65.339  43.858  1.00  0.20           O  
HETATM    8  O   HOH T   7      23.254  56.970  64.492  1.00  0.21           O  
HETATM    9  O   HOH T   8      16.520  51.546  53.758  1.00  0.22           O  
HETATM   10  O   HOH T   9       8.811  70.120  46.125  1.00  0.22           O  
HETATM   11  O   HOH T  10      40.308  33.292  16.365  1.00  0.22           O  
HETATM   12  O   HOH T  11       9.377  56.484  43.522  1.00  0.22           O  
HETATM   13  O   HOH T  12      48.643  13.464  33.383  1.00  0.22           O  
HETATM   14  O   HOH T  13      45.343   4.149  36.442  1.00  0.22           O  
HETATM   15  O   HOH T  14      48.051  35.625  19.383  1.00  0.22           O  
HETATM   16  O   HOH T  15      16.988  70.012  64.107  1.00  0.22           O  
HETATM   17  O   HOH T  16      46.788  38.263  28.576  1.00  0.23           O  
HETATM   18  O   HOH T  17      23.112  62.403  66.053  1.00  0.23           O  
HETATM   19  O   HOH T  18       7.973  50.994  51.927  1.00  0.23           O  
HETATM   20  O   HOH T  19      41.495  51.038  28.532  1.00  0.23           O  
HETATM   21  O   HOH T  20      40.209   9.361  36.987  1.00  0.23           O  
HETATM   22  O   HOH T  21      41.308  57.157  22.585  1.00  0.24           O  
HETATM   23  O   HOH T  22      14.394  59.153  38.976  1.00  0.24           O  
HETATM   24  O   HOH T  23      19.872  50.875   6.286  1.00  0.25           O  
HETATM   25  O   HOH T  24      26.517  63.774  71.567  1.00  0.25           O  
HETATM   26  O   HOH T  25      45.125  -0.075  43.994  1.00  0.25           O  
HETATM   27  O   HOH T  26      24.861  44.496  26.766  1.00  0.25           O  
HETATM   28  O   HOH T  27       1.009  59.100  61.512  1.00  0.25           O  
HETATM   29  O   HOH T  28      41.268  25.796  40.053  1.00  0.25           O  
HETATM   30  O   HOH T  29      32.841  56.799  70.748  1.00  0.26           O  
HETATM   31  O   HOH T  30      17.747  65.496  69.892  1.00  0.26           O  
HETATM   32  O   HOH T  31      33.075  36.290  20.498  1.00  0.26           O  
HETATM   33  O   HOH T  32      34.491  34.170  19.463  1.00  0.26           O  
HETATM   34  O   HOH T  33      47.591  55.463  28.382  1.00  0.26           O  
HETATM   35  O   HOH T  34      27.563  40.218  59.089  1.00  0.26           O  
HETATM   36  O   HOH T  35      25.412  54.210  38.664  1.00  0.26           O  
HETATM   37  O   HOH T  36      43.043  23.974  41.145  1.00  0.26           O  
HETATM   38  O   HOH T  37      11.682  61.030  66.199  1.00  0.26           O  
HETATM   39  O   HOH T  38      47.846  52.265  67.182  1.00  0.26           O  
HETATM   40  O   HOH T  39      47.090  54.246  22.420  1.00  0.26           O  
HETATM   41  O   HOH T  40       4.294  64.577  47.173  1.00  0.26           O  
HETATM   42  O   HOH T  41      25.951  52.083  37.018  1.00  0.26           O  
HETATM   43  O   HOH T  42      27.684  25.910  25.590  1.00  0.26           O  
HETATM   44  O   HOH T  43      39.553  12.464  24.583  1.00  0.26           O  
HETATM   45  O   HOH T  44      34.056  73.851  70.449  1.00  0.26           O  
HETATM   46  O   HOH T  45      45.157  24.920  47.674  1.00  0.26           O  
HETATM   47  O   HOH T  46      12.767  45.518  56.645  1.00  0.26           O  
HETATM   48  O   HOH T  47      12.132  51.234  47.290  1.00  0.27           O  
HETATM   49  O   HOH T  48      21.552  54.814  22.852  1.00  0.27           O  
HETATM   50  O   HOH T  49      23.634  64.269  45.589  1.00  0.27           O  
HETATM   51  O   HOH T  50      44.654  64.978  45.200  1.00  0.27           O  
HETATM   52  O   HOH T  51      25.921  55.293  25.088  1.00  0.27           O  
HETATM   53  O   HOH T  52      19.446  51.772   9.837  1.00  0.27           O  
HETATM   54  O   HOH T  53      35.768  51.117  67.376  1.00  0.27           O  
HETATM   55  O   HOH T  54      39.842  10.973  26.934  1.00  0.27           O  
HETATM   56  O   HOH T  55      45.431  13.914  28.324  1.00  0.28           O  
HETATM   57  O   HOH T  56      52.209  59.646  25.974  1.00  0.28           O  
HETATM   58  O   HOH T  57      30.123  59.806  47.301  1.00  0.28           O  
HETATM   59  O   HOH T  58      50.597  29.536  35.341  1.00  0.28           O  
HETATM   60  O   HOH T  59      34.763  77.848  57.407  1.00  0.28           O  
HETATM   61  O   HOH T  60      43.224  40.061  22.772  1.00  0.28           O  
HETATM   62  O   HOH T  61      33.262  48.377  17.926  1.00  0.28           O  
HETATM   63  O   HOH T  62      20.809  43.019  68.830  1.00  0.28           O  
HETATM   64  O   HOH T  63      41.835  23.899  52.171  1.00  0.28           O  
HETATM   65  O   HOH T  64      37.344  71.574  52.201  1.00  0.28           O  
HETATM   66  O   HOH T  65      46.483   5.772  31.943  1.00  0.28           O  
HETATM   67  O   HOH T  66      19.846  60.267  44.901  1.00  0.28           O  
HETATM   68  O   HOH T  67      29.769  44.875  30.674  1.00  0.28           O  
HETATM   69  O   HOH T  68      46.226  43.255  12.899  1.00  0.29           O  
HETATM   70  O   HOH T  69      62.947  39.875  43.752  1.00  0.29           O  
HETATM   71  O   HOH T  70      34.655  48.079  61.243  1.00  0.29           O  
HETATM   72  O   HOH T  71      -0.251  68.332  43.188  1.00  0.29           O  
HETATM   73  O   HOH T  72      56.134  56.241  70.045  1.00  0.29           O  
HETATM   74  O   HOH T  73      18.923  51.943  38.810  1.00  0.29           O  
HETATM   75  O   HOH T  74       6.348  49.495  57.828  1.00  0.29           O  
HETATM   76  O   HOH T  75      42.545  58.905  43.751  1.00  0.29           O  
HETATM   77  O   HOH T  76      20.800  62.454  48.118  1.00  0.29           O  
HETATM   78  O   HOH T  77      17.915  42.666  60.698  1.00  0.29           O  
HETATM   79  O   HOH T  78      29.616  53.993  70.707  1.00  0.29           O  
HETATM   80  O   HOH T  79      11.857  47.769  67.490  1.00  0.29           O  
HETATM   81  O   HOH T  80      38.551  64.638  34.002  1.00  0.29           O  
HETATM   82  O   HOH T  81      30.369  76.849  55.548  1.00  0.29           O  
HETATM   83  O   HOH T  82       8.973  50.060  58.314  1.00  0.29           O  
HETATM   84  O   HOH T  83      46.842  57.974  70.715  1.00  0.29           O  
HETATM   85  O   HOH T  84      32.744  24.724  24.606  1.00  0.29           O  
HETATM   86  O   HOH T  85      63.795  33.148  36.496  1.00  0.29           O  
HETATM   87  O   HOH T  86      26.459  27.179  34.340  1.00  0.29           O  
HETATM   88  O   HOH T  87      27.443  22.497  39.814  1.00  0.29           O  
HETATM   89  O   HOH T  88      36.496  33.960  21.362  1.00  0.29           O  
HETATM   90  O   HOH T  89      29.474  18.048  42.220  1.00  0.29           O  
HETATM   91  O   HOH T  90       8.363  49.232  64.200  1.00  0.29           O  
HETATM   92  O   HOH T  91      55.148  44.466  21.749  1.00  0.29           O  
HETATM   93  O   HOH T  92      45.976  46.189  47.498  1.00  0.29           O  
HETATM   94  O   HOH T  93      30.969  19.331  31.466  1.00  0.30           O  
HETATM   95  O   HOH T  94      52.067  -1.907  44.492  1.00  0.30           O  
HETATM   96  O   HOH T  95      22.056  43.657  76.541  1.00  0.30           O  
HETATM   97  O   HOH T  96      37.133  56.941  26.852  1.00  0.30           O  
HETATM   98  O   HOH T  97      50.237  60.648  30.711  1.00  0.30           O  
HETATM   99  O   HOH T  98      37.460  72.253  45.186  1.00  0.30           O  
HETATM  100  O   HOH T  99      51.640  51.633  32.767  1.00  0.30           O  
HETATM  101  O   HOH T 100      50.157  33.184  41.364  1.00  0.30           O  
HETATM  102  O   HOH T 101      15.999  35.467  33.286  1.00  0.30           O  
HETATM  103  O   HOH T 102      53.565  42.089  21.498  1.00  0.30           O  
HETATM  104  O   HOH T 103      33.479  37.954  16.682  1.00  0.30           O  
HETATM  105  O   HOH T 104      17.068  59.334  72.556  1.00  0.30           O  
HETATM  106  O   HOH T 105      55.936  50.527  26.716  1.00  0.30           O  
HETATM  107  O   HOH T 106      38.149  69.420  49.198  1.00  0.31           O  
HETATM  108  O   HOH T 107      58.521  45.337  29.019  1.00  0.31           O  
HETATM  109  O   HOH T 108      26.522  77.728  79.691  1.00  0.31           O  
HETATM  110  O   HOH T 109      19.510  68.379  58.158  1.00  0.31           O  
HETATM  111  O   HOH T 110      13.265  63.197  35.900  1.00  0.31           O  
HETATM  112  O   HOH T 111      42.346  77.813  66.370  1.00  0.31           O  
HETATM  113  O   HOH T 112      49.402  75.236  69.166  1.00  0.31           O  
HETATM  114  O   HOH T 113      23.469  61.519  48.087  1.00  0.31           O  
HETATM  115  O   HOH T 114      32.259  20.040  29.052  1.00  0.31           O  
HETATM  116  O   HOH T 115      19.691  69.058  55.465  1.00  0.31           O  
HETATM  117  O   HOH T 116      43.851  23.764  38.453  1.00  0.31           O  
HETATM  118  O   HOH T 117      15.458  59.088  70.366  1.00  0.31           O  
HETATM  119  O   HOH T 118      50.562  36.236  27.902  1.00  0.31           O  
HETATM  120  O   HOH T 119      37.143  57.021  45.363  1.00  0.31           O  
HETATM  121  O   HOH T 120      35.810  76.063  62.025  1.00  0.31           O  
HETATM  122  O   HOH T 121      26.650  43.092  28.435  1.00  0.31           O  
HETATM  123  O   HOH T 122      32.850  59.638  46.912  1.00  0.31           O  
HETATM  124  O   HOH T 123      33.319  44.423  12.293  1.00  0.31           O  
HETATM  125  O   HOH T 124      47.018  75.827  77.642  1.00  0.32           O  
HETATM  126  O   HOH T 125      44.293  57.450  45.326  1.00  0.32           O  
HETATM  127  O   HOH T 126      45.392  53.560  39.780  1.00  0.32           O  
HETATM  128  O   HOH T 127      51.011  66.658  77.247  1.00  0.32           O  
HETATM  129  O   HOH T 128      37.123  73.171  76.193  1.00  0.32           O  
HETATM  130  O   HOH T 129      50.549  33.044  38.542  1.00  0.32           O  
HETATM  131  O   HOH T 130      31.701  53.159  61.276  1.00  0.32           O  
HETATM  132  O   HOH T 131      34.257  70.226  35.964  1.00  0.32           O  
HETATM  133  O   HOH T 132      30.765  67.239  74.285  1.00  0.32           O  
HETATM  134  O   HOH T 133      11.153  64.363  34.848  1.00  0.32           O  
HETATM  135  O   HOH T 134      23.163  24.897  32.253  1.00  0.32           O  
HETATM  136  O   HOH T 135       9.153  62.919  48.407  1.00  0.32           O  
HETATM  137  O   HOH T 136      28.290  76.913  74.031  1.00  0.32           O  
HETATM  138  O   HOH T 137      21.661  50.774   8.356  1.00  0.32           O  
HETATM  139  O   HOH T 138      19.627  52.242  20.610  1.00  0.32           O  
HETATM  140  O   HOH T 139      47.760  56.552  21.053  1.00  0.33           O  
HETATM  141  O   HOH T 140      19.225  50.277  30.645  1.00  0.33           O  
HETATM  142  O   HOH T 141       6.708  71.734  46.516  1.00  0.33           O  
HETATM  143  O   HOH T 142      47.043  24.280  39.958  1.00  0.33           O  
HETATM  144  O   HOH T 143      26.568  74.798  74.521  1.00  0.33           O  
HETATM  145  O   HOH T 144      25.049  40.438  58.343  1.00  0.33           O  
HETATM  146  O   HOH T 145      18.913  42.326  33.524  1.00  0.33           O  
HETATM  147  O   HOH T 146      41.857  35.511  15.505  1.00  0.33           O  
HETATM  148  O   HOH T 147      52.761  50.604  23.040  1.00  0.33           O  
HETATM  149  O   HOH T 148      50.541  -0.276  42.761  1.00  0.33           O  
HETATM  150  O   HOH T 149      21.697  60.183  19.528  1.00  0.33           O  
HETATM  151  O   HOH T 150      48.792   1.803  48.278  1.00  0.33           O  
HETATM  152  O   HOH T 151       3.801  59.171  50.393  1.00  0.33           O  
HETATM  153  O   HOH T 152      40.991  18.201  27.473  1.00  0.33           O  
HETATM  154  O   HOH T 153      55.177  49.549  24.254  1.00  0.34           O  
HETATM  155  O   HOH T 154      30.083  56.719  70.514  1.00  0.34           O  
HETATM  156  O   HOH T 155      47.137  53.300  35.639  1.00  0.34           O  
HETATM  157  O   HOH T 156      36.250  46.324  48.141  1.00  0.34           O  
HETATM  158  O   HOH T 157      15.662  34.970  30.688  1.00  0.34           O  
HETATM  159  O   HOH T 158      38.548  63.116  56.789  1.00  0.34           O  
HETATM  160  O   HOH T 159      43.382  53.084  29.438  1.00  0.34           O  
HETATM  161  O   HOH T 160      26.560  52.667  25.224  1.00  0.34           O  
HETATM  162  O   HOH T 161      19.981  58.193  20.232  1.00  0.34           O  
HETATM  163  O   HOH T 162      45.658  17.201  55.028  1.00  0.34           O  
HETATM  164  O   HOH T 163      19.755  71.788  76.537  1.00  0.34           O  
HETATM  165  O   HOH T 164      54.607  56.847  63.038  1.00  0.34           O  
HETATM  166  O   HOH T 165      46.573  25.855  49.876  1.00  0.34           O  
HETATM  167  O   HOH T 166      28.538  38.683  61.154  1.00  0.34           O  
HETATM  168  O   HOH T 167      38.168  57.998  24.383  1.00  0.34           O  
HETATM  169  O   HOH T 168      38.952  46.870  47.577  1.00  0.34           O  
HETATM  170  O   HOH T 169      50.404  67.961  69.058  1.00  0.34           O  
HETATM  171  O   HOH T 170      37.688  63.967  46.319  1.00  0.34           O  
HETATM  172  O   HOH T 171      36.156   4.329  49.303  1.00  0.34           O  
HETATM  173  O   HOH T 172      28.104  21.938  27.834  1.00  0.34           O  
HETATM  174  O   HOH T 173      16.207  67.788  70.057  1.00  0.35           O  
HETATM  175  O   HOH T 174      28.439  66.460  38.385  1.00  0.35           O  
HETATM  176  O   HOH T 175      37.723  14.470  29.351  1.00  0.35           O  
HETATM  177  O   HOH T 176      18.973  42.144  30.739  1.00  0.35           O  
HETATM  178  O   HOH T 177      14.790  68.234  64.370  1.00  0.35           O  
HETATM  179  O   HOH T 178      65.286  35.378  36.977  1.00  0.35           O  
HETATM  180  O   HOH T 179      19.819  47.146  12.935  1.00  0.35           O  
HETATM  181  O   HOH T 180      46.780  34.582  45.487  1.00  0.35           O  
HETATM  182  O   HOH T 181       9.612  61.434  68.006  1.00  0.35           O  
HETATM  183  O   HOH T 182      45.003  55.438  29.296  1.00  0.35           O  
HETATM  184  O   HOH T 183      29.539  75.247  60.718  1.00  0.35           O  
HETATM  185  O   HOH T 184      14.123  39.162  36.360  1.00  0.35           O  
HETATM  186  O   HOH T 185      46.309  47.274  18.481  1.00  0.35           O  
HETATM  187  O   HOH T 186      29.161  74.502  75.226  1.00  0.36           O  
HETATM  188  O   HOH T 187      24.011  68.385  73.048  1.00  0.36           O  
HETATM  189  O   HOH T 188      24.681  58.342  62.486  1.00  0.36           O  
HETATM  190  O   HOH T 189      35.043  75.298  68.281  1.00  0.36           O  
HETATM  191  O   HOH T 190       8.907  44.159  53.746  1.00  0.36           O  
HETATM  192  O   HOH T 191       6.694  56.387  43.241  1.00  0.36           O  
HETATM  193  O   HOH T 192      13.415  71.124  44.204  1.00  0.36           O  
HETATM  194  O   HOH T 193      28.276  72.443  30.698  1.00  0.36           O  
HETATM  195  O   HOH T 194      36.542  55.067  14.568  1.00  0.36           O  
HETATM  196  O   HOH T 195      30.758  52.089   7.730  1.00  0.36           O  
HETATM  197  O   HOH T 196      57.964  58.219  70.705  1.00  0.36           O  
HETATM  198  O   HOH T 197      10.501  61.981  51.757  1.00  0.36           O  
HETATM  199  O   HOH T 198      13.118  41.535  37.509  1.00  0.36           O  
HETATM  200  O   HOH T 199      49.333  11.545  24.045  1.00  0.36           O  
HETATM  201  O   HOH T 200      59.910  46.875  30.997  1.00  0.36           O  
HETATM  202  O   HOH T 201      39.216  28.410  18.828  1.00  0.37           O  
HETATM  203  O   HOH T 202      48.895  34.552  43.537  1.00  0.37           O  
HETATM  204  O   HOH T 203      35.615  45.866  52.496  1.00  0.37           O  
HETATM  205  O   HOH T 204      40.231  50.098  54.271  1.00  0.37           O  
HETATM  206  O   HOH T 205      26.816  53.489  73.518  1.00  0.37           O  
HETATM  207  O   HOH T 206      43.332  56.630  59.016  1.00  0.37           O  
HETATM  208  O   HOH T 207      32.535  57.610  14.463  1.00  0.37           O  
HETATM  209  O   HOH T 208      11.683  50.456  67.801  1.00  0.37           O  
HETATM  210  O   HOH T 209      35.356  43.165  10.931  1.00  0.37           O  
HETATM  211  O   HOH T 210      37.909  43.868  40.603  1.00  0.37           O  
HETATM  212  O   HOH T 211      43.939  39.454  15.340  1.00  0.37           O  
HETATM  213  O   HOH T 212      35.136  44.752  50.089  1.00  0.37           O  
HETATM  214  O   HOH T 213       3.729  61.144  56.742  1.00  0.37           O  
HETATM  215  O   HOH T 214      47.240  75.252  74.861  1.00  0.37           O  
HETATM  216  O   HOH T 215      44.227  55.671  74.789  1.00  0.37           O  
HETATM  217  O   HOH T 216      45.448   9.497  41.784  1.00  0.37           O  
HETATM  218  O   HOH T 217      30.914  59.829  22.756  1.00  0.37           O  
HETATM  219  O   HOH T 218      17.425  46.116  70.911  1.00  0.37           O  
HETATM  220  O   HOH T 219      49.659  54.692  36.043  1.00  0.37           O  
HETATM  221  O   HOH T 220      26.220  46.239  10.146  1.00  0.37           O  
HETATM  222  O   HOH T 221      62.192  42.489  43.225  1.00  0.38           O  
HETATM  223  O   HOH T 222      31.405  67.385  33.766  1.00  0.38           O  
HETATM  224  O   HOH T 223      26.418  67.909  74.366  1.00  0.38           O  
HETATM  225  O   HOH T 224      41.764  14.029  45.397  1.00  0.38           O  
HETATM  226  O   HOH T 225      40.162  74.701  75.572  1.00  0.38           O  
HETATM  227  O   HOH T 226      36.664  59.184  47.165  1.00  0.38           O  
HETATM  228  O   HOH T 227      35.785  72.562  80.980  1.00  0.38           O  
HETATM  229  O   HOH T 228      30.555  50.846  52.309  1.00  0.38           O  
HETATM  230  O   HOH T 229      22.656  29.252  46.915  1.00  0.38           O  
HETATM  231  O   HOH T 230      -2.636  66.928  43.751  1.00  0.38           O  
HETATM  232  O   HOH T 231      21.515  54.197  26.813  1.00  0.38           O  
HETATM  233  O   HOH T 232      28.238  57.583  33.083  1.00  0.38           O  
HETATM  234  O   HOH T 233       3.525  56.104  45.543  1.00  0.38           O  
HETATM  235  O   HOH T 234      -3.665  54.971  54.844  1.00  0.38           O  
HETATM  236  O   HOH T 235      44.592  57.622  61.294  1.00  0.38           O  
HETATM  237  O   HOH T 236      32.236  50.609  16.693  1.00  0.38           O  
HETATM  238  O   HOH T 237      46.974   9.507  44.224  1.00  0.38           O  
HETATM  239  O   HOH T 238      19.906  71.205  58.267  1.00  0.38           O  
HETATM  240  O   HOH T 239      33.365  66.892  77.490  1.00  0.38           O  
HETATM  241  O   HOH T 240      46.871  19.254  53.645  1.00  0.38           O  
HETATM  242  O   HOH T 241      51.112  56.606  32.445  1.00  0.38           O  
HETATM  243  O   HOH T 242      13.377  38.683  33.679  1.00  0.38           O  
HETATM  244  O   HOH T 243      49.342  50.475  17.626  1.00  0.38           O  
HETATM  245  O   HOH T 244      32.114  28.676  38.921  1.00  0.38           O  
HETATM  246  O   HOH T 245      17.539  60.150  62.514  1.00  0.38           O  
HETATM  247  O   HOH T 246      23.623  40.211  17.190  1.00  0.38           O  
HETATM  248  O   HOH T 247      22.570  69.688  60.506  1.00  0.38           O  
HETATM  249  O   HOH T 248      45.595  11.017  32.451  1.00  0.38           O  
HETATM  250  O   HOH T 249      28.226  45.280  28.567  1.00  0.38           O  
HETATM  251  O   HOH T 250       1.451  49.273  54.546  1.00  0.39           O  
HETATM  252  O   HOH T 251      43.733  11.152  43.422  1.00  0.39           O  
HETATM  253  O   HOH T 252      48.933  47.778  17.843  1.00  0.39           O  
HETATM  254  O   HOH T 253      28.723  64.317  36.624  1.00  0.39           O  
HETATM  255  O   HOH T 254      30.918  57.625  42.556  1.00  0.39           O  
HETATM  256  O   HOH T 255      50.180  32.234  43.952  1.00  0.39           O  
HETATM  257  O   HOH T 256      41.976  58.637  57.759  1.00  0.39           O  
HETATM  258  O   HOH T 257      21.134  71.335  41.970  1.00  0.39           O  
HETATM  259  O   HOH T 258      26.596  54.668   7.243  1.00  0.39           O  
HETATM  260  O   HOH T 259      47.607  11.151  42.123  1.00  0.39           O  
HETATM  261  O   HOH T 260      20.028  49.401  11.279  1.00  0.39           O  
HETATM  262  O   HOH T 261      49.793  57.980  30.568  1.00  0.39           O  
HETATM  263  O   HOH T 262      38.320  61.652  17.920  1.00  0.39           O  
HETATM  264  O   HOH T 263      42.837  37.457  28.394  1.00  0.39           O  
HETATM  265  O   HOH T 264      31.677  57.421  21.464  1.00  0.39           O  
HETATM  266  O   HOH T 265      33.497  12.059  35.787  1.00  0.39           O  
HETATM  267  O   HOH T 266      12.099  52.680  69.325  1.00  0.39           O  
HETATM  268  O   HOH T 267      42.868  53.696  32.161  1.00  0.39           O  
HETATM  269  O   HOH T 268      39.205  70.175  45.283  1.00  0.39           O  
HETATM  270  O   HOH T 269      33.266  58.395  41.156  1.00  0.39           O  
HETATM  271  O   HOH T 270      13.979  46.750  54.531  1.00  0.39           O  
HETATM  272  O   HOH T 271      23.845  74.581  64.595  1.00  0.39           O  
HETATM  273  O   HOH T 272      33.092  71.804  81.282  1.00  0.39           O  
HETATM  274  O   HOH T 273      24.176  37.938  59.142  1.00  0.39           O  
HETATM  275  O   HOH T 274      24.101  77.027  78.354  1.00  0.39           O  
HETATM  276  O   HOH T 275      23.601  60.764  61.735  1.00  0.39           O  
HETATM  277  O   HOH T 276      29.384  46.704  66.303  1.00  0.39           O  
HETATM  278  O   HOH T 277      14.636  61.222  37.199  1.00  0.39           O  
HETATM  279  O   HOH T 278      12.886  67.270  71.530  1.00  0.39           O  
HETATM  280  O   HOH T 279      18.509  44.534  34.967  1.00  0.39           O  
HETATM  281  O   HOH T 280      40.168  44.446  47.211  1.00  0.39           O  
HETATM  282  O   HOH T 281      39.677  38.838  15.134  1.00  0.39           O  
HETATM  283  O   HOH T 282      28.482  56.661   6.512  1.00  0.39           O  
HETATM  284  O   HOH T 283      30.510  75.682  58.106  1.00  0.39           O  
HETATM  285  O   HOH T 284      40.764  49.546  35.934  1.00  0.40           O  
HETATM  286  O   HOH T 285      30.682  27.534  36.817  1.00  0.40           O  
HETATM  287  O   HOH T 286      24.628  29.704  36.711  1.00  0.40           O  
HETATM  288  O   HOH T 287      36.515  65.726  44.458  1.00  0.40           O  
HETATM  289  O   HOH T 288      49.608  55.296  60.716  1.00  0.40           O  
HETATM  290  O   HOH T 289      38.593  38.434  48.498  1.00  0.40           O  
HETATM  291  O   HOH T 290       0.841  51.985  54.915  1.00  0.40           O  
HETATM  292  O   HOH T 291      28.312  20.227  38.406  1.00  0.40           O  
HETATM  293  O   HOH T 292      38.839  72.790  54.066  1.00  0.40           O  
HETATM  294  O   HOH T 293      44.385  37.478  38.222  1.00  0.40           O  
HETATM  295  O   HOH T 294      35.338  67.338  30.934  1.00  0.40           O  
HETATM  296  O   HOH T 295      27.495  24.677  34.823  1.00  0.40           O  
HETATM  297  O   HOH T 296      38.222  50.130  67.174  1.00  0.40           O  
HETATM  298  O   HOH T 297      37.223  26.441  19.486  1.00  0.40           O  
HETATM  299  O   HOH T 298      28.895  47.893  28.203  1.00  0.40           O  
HETATM  300  O   HOH T 299      14.079  41.415  57.398  1.00  0.40           O  
HETATM  301  O   HOH T 300      23.933  47.519  13.576  1.00  0.40           O  
HETATM  302  O   HOH T 301      39.770  15.694  27.839  1.00  0.40           O  
HETATM  303  O   HOH T 302      57.237  59.241  68.226  1.00  0.40           O  
HETATM  304  O   HOH T 303      27.522  24.113  23.541  1.00  0.40           O  
HETATM  305  O   HOH T 304      44.486  48.426  47.721  1.00  0.40           O  
HETATM  306  O   HOH T 305      22.390  52.254  74.627  1.00  0.41           O  
HETATM  307  O   HOH T 306      11.397  70.854  46.051  1.00  0.41           O  
HETATM  308  O   HOH T 307      37.597   5.603  44.865  1.00  0.41           O  
HETATM  309  O   HOH T 308      35.891  36.450  20.384  1.00  0.41           O  
HETATM  310  O   HOH T 309      39.162  62.016  15.289  1.00  0.41           O  
HETATM  311  O   HOH T 310      23.006  49.521  74.795  1.00  0.41           O  
HETATM  312  O   HOH T 311      23.334  54.210  24.809  1.00  0.41           O  
HETATM  313  O   HOH T 312      33.361  51.793  68.288  1.00  0.41           O  
HETATM  314  O   HOH T 313      19.088  43.988  70.757  1.00  0.41           O  
HETATM  315  O   HOH T 314      48.539  42.141  13.873  1.00  0.41           O  
HETATM  316  O   HOH T 315      49.687  66.328  66.947  1.00  0.41           O  
HETATM  317  O   HOH T 316      38.577  46.274  41.826  1.00  0.41           O  
HETATM  318  O   HOH T 317      32.803  67.712  29.771  1.00  0.41           O  
HETATM  319  O   HOH T 318      30.950  63.106  72.959  1.00  0.41           O  
HETATM  320  O   HOH T 319       4.257  64.831  61.748  1.00  0.41           O  
HETATM  321  O   HOH T 320      52.484  55.426  64.095  1.00  0.41           O  
HETATM  322  O   HOH T 321      51.484  15.344  25.186  1.00  0.41           O  
HETATM  323  O   HOH T 322       0.514  67.970  48.220  1.00  0.41           O  
HETATM  324  O   HOH T 323      24.234  57.363  71.478  1.00  0.41           O  
HETATM  325  O   HOH T 324      41.134  75.517  66.770  1.00  0.41           O  
HETATM  326  O   HOH T 325      14.358  40.590  44.078  1.00  0.41           O  
HETATM  327  O   HOH T 326      15.656  70.138  71.464  1.00  0.41           O  
HETATM  328  O   HOH T 327      21.784  72.708  65.320  1.00  0.41           O  
HETATM  329  O   HOH T 328      16.080  73.688  46.763  1.00  0.42           O  
HETATM  330  O   HOH T 329      62.728  35.662  35.956  1.00  0.42           O  
HETATM  331  O   HOH T 330      15.883  48.789  54.033  1.00  0.42           O  
HETATM  332  O   HOH T 331      33.686  55.919  48.126  1.00  0.42           O  
HETATM  333  O   HOH T 332      21.965  37.556  44.360  1.00  0.42           O  
HETATM  334  O   HOH T 333      37.854  76.143  60.139  1.00  0.42           O  
HETATM  335  O   HOH T 334      28.861  20.504  41.123  1.00  0.42           O  
HETATM  336  O   HOH T 335      47.197  56.026  36.183  1.00  0.42           O  
HETATM  337  O   HOH T 336      38.904  63.829  51.858  1.00  0.42           O  
HETATM  338  O   HOH T 337      39.883  58.657  40.478  1.00  0.42           O  
HETATM  339  O   HOH T 338      38.326  67.840  55.225  1.00  0.42           O  
HETATM  340  O   HOH T 339       6.460  59.789  60.096  1.00  0.42           O  
HETATM  341  O   HOH T 340      -1.673  69.540  47.794  1.00  0.42           O  
HETATM  342  O   HOH T 341      39.937  27.400  46.014  1.00  0.42           O  
HETATM  343  O   HOH T 342      37.123  78.523  50.470  1.00  0.42           O  
HETATM  344  O   HOH T 343      16.281  61.656  71.226  1.00  0.42           O  
HETATM  345  O   HOH T 344      30.493  22.107  29.058  1.00  0.42           O  
HETATM  346  O   HOH T 345      -3.883  51.024  46.433  1.00  0.42           O  
HETATM  347  O   HOH T 346      49.443  48.593  64.200  1.00  0.42           O  
HETATM  348  O   HOH T 347      43.691  75.384  65.576  1.00  0.42           O  
HETATM  349  O   HOH T 348      18.879  29.135  26.060  1.00  0.42           O  
HETATM  350  O   HOH T 349      24.091  36.617  45.681  1.00  0.43           O  
HETATM  351  O   HOH T 350       6.240  47.483  47.896  1.00  0.43           O  
HETATM  352  O   HOH T 351      30.720  16.538  31.615  1.00  0.43           O  
HETATM  353  O   HOH T 352      15.293  58.426  41.454  1.00  0.43           O  
HETATM  354  O   HOH T 353      23.680  38.757  42.562  1.00  0.43           O  
HETATM  355  O   HOH T 354      58.434  46.305  33.402  1.00  0.43           O  
HETATM  356  O   HOH T 355      46.001  56.234  72.677  1.00  0.43           O  
HETATM  357  O   HOH T 356      43.325  61.427  62.536  1.00  0.43           O  
HETATM  358  O   HOH T 357      59.126  40.315  28.232  1.00  0.43           O  
HETATM  359  O   HOH T 358      34.694  29.330  39.301  1.00  0.43           O  
HETATM  360  O   HOH T 359      54.220  52.599  21.747  1.00  0.43           O  
HETATM  361  O   HOH T 360      12.828  45.309  66.814  1.00  0.43           O  
HETATM  362  O   HOH T 361      52.519  17.547  36.170  1.00  0.43           O  
HETATM  363  O   HOH T 362      44.348  74.879  77.587  1.00  0.43           O  
HETATM  364  O   HOH T 363      44.886  19.813  55.481  1.00  0.43           O  
HETATM  365  O   HOH T 364      49.665  12.671  27.846  1.00  0.43           O  
HETATM  366  O   HOH T 365      39.207  25.736  43.880  1.00  0.43           O  
HETATM  367  O   HOH T 366      42.832  63.719  27.192  1.00  0.43           O  
HETATM  368  O   HOH T 367      46.205  54.373  67.135  1.00  0.43           O  
HETATM  369  O   HOH T 368      -1.964  51.061  48.453  1.00  0.43           O  
HETATM  370  O   HOH T 369      22.220  39.166  19.283  1.00  0.43           O  
HETATM  371  O   HOH T 370      46.192  75.987  66.406  1.00  0.43           O  
HETATM  372  O   HOH T 371      38.546  76.948  69.803  1.00  0.43           O  
HETATM  373  O   HOH T 372      25.686  79.197  77.499  1.00  0.43           O  
HETATM  374  O   HOH T 373      21.623  49.148  13.582  1.00  0.43           O  
HETATM  375  O   HOH T 374      39.506  17.163  25.426  1.00  0.44           O  
HETATM  376  O   HOH T 375      31.153  58.072  45.311  1.00  0.44           O  
HETATM  377  O   HOH T 376      37.937  47.629  50.017  1.00  0.44           O  
HETATM  378  O   HOH T 377      41.322  64.405  34.115  1.00  0.44           O  
HETATM  379  O   HOH T 378      24.849  47.722  73.743  1.00  0.44           O  
HETATM  380  O   HOH T 379      23.290  42.209  69.860  1.00  0.44           O  
HETATM  381  O   HOH T 380      49.264  53.203  16.744  1.00  0.44           O  
HETATM  382  O   HOH T 381      51.919  48.702  65.563  1.00  0.44           O  
HETATM  383  O   HOH T 382      16.249  40.529  35.233  1.00  0.44           O  
HETATM  384  O   HOH T 383       6.194  54.994  58.918  1.00  0.44           O  
HETATM  385  O   HOH T 384      25.961  65.111  73.977  1.00  0.44           O  
HETATM  386  O   HOH T 385      37.158  11.405  47.738  1.00  0.44           O  
HETATM  387  O   HOH T 386      47.721  19.711  29.482  1.00  0.44           O  
HETATM  388  O   HOH T 387       9.636  71.534  43.929  1.00  0.44           O  
HETATM  389  O   HOH T 388      33.671  53.805  49.873  1.00  0.44           O  
HETATM  390  O   HOH T 389      35.839  58.679  17.874  1.00  0.44           O  
HETATM  391  O   HOH T 390      33.002  11.331  38.408  1.00  0.44           O  
HETATM  392  O   HOH T 391      56.703  53.532  39.727  1.00  0.44           O  
HETATM  393  O   HOH T 392      36.728  53.292  12.495  1.00  0.44           O  
HETATM  394  O   HOH T 393       0.651  64.774  51.909  1.00  0.44           O  
HETATM  395  O   HOH T 394      42.878  56.606  34.577  1.00  0.44           O  
HETATM  396  O   HOH T 395      31.437  57.486  47.993  1.00  0.44           O  
HETATM  397  O   HOH T 396      38.858  59.154  26.745  1.00  0.44           O  
HETATM  398  O   HOH T 397      35.860  48.578  17.912  1.00  0.44           O  
HETATM  399  O   HOH T 398      47.231  60.372  20.562  1.00  0.44           O  
HETATM  400  O   HOH T 399      39.350  69.619  51.664  1.00  0.44           O  
HETATM  401  O   HOH T 400      40.099  67.305  53.192  1.00  0.45           O  
HETATM  402  O   HOH T 401      36.569  47.146  63.132  1.00  0.45           O  
HETATM  403  O   HOH T 402      55.215  37.501  31.526  1.00  0.45           O  
HETATM  404  O   HOH T 403      38.598  55.296  43.689  1.00  0.45           O  
HETATM  405  O   HOH T 404      39.809  77.919  67.560  1.00  0.45           O  
HETATM  406  O   HOH T 405      13.824  36.594  31.905  1.00  0.45           O  
HETATM  407  O   HOH T 406      50.646  51.991  21.557  1.00  0.45           O  
HETATM  408  O   HOH T 407      19.816  40.562  28.582  1.00  0.45           O  
HETATM  409  O   HOH T 408      30.622  49.187  50.022  1.00  0.45           O  
HETATM  410  O   HOH T 409      16.442  40.008  56.856  1.00  0.45           O  
HETATM  411  O   HOH T 410      20.529  70.647  73.488  1.00  0.45           O  
HETATM  412  O   HOH T 411      39.696  72.470  77.169  1.00  0.45           O  
HETATM  413  O   HOH T 412      37.298  47.937  65.709  1.00  0.45           O  
HETATM  414  O   HOH T 413      25.749  34.662  46.929  1.00  0.45           O  
HETATM  415  O   HOH T 414      53.901  60.795  27.790  1.00  0.45           O  
HETATM  416  O   HOH T 415       2.523  52.518  57.106  1.00  0.45           O  
HETATM  417  O   HOH T 416      18.443  41.483  58.204  1.00  0.45           O  
HETATM  418  O   HOH T 417       2.234  58.172  46.857  1.00  0.45           O  
HETATM  419  O   HOH T 418      32.697  77.134  59.155  1.00  0.45           O  
HETATM  420  O   HOH T 419      29.407  66.830  35.677  1.00  0.45           O  
HETATM  421  O   HOH T 420      38.175  17.920  27.620  1.00  0.45           O  
HETATM  422  O   HOH T 421      28.405  54.367  75.677  1.00  0.45           O  
HETATM  423  O   HOH T 422      36.596   1.979  51.097  1.00  0.45           O  
HETATM  424  O   HOH T 423      53.508  60.044  23.517  1.00  0.45           O  
HETATM  425  O   HOH T 424      29.466  53.305  73.354  1.00  0.46           O  
HETATM  426  O   HOH T 425      41.094  29.842  46.366  1.00  0.46           O  
HETATM  427  O   HOH T 426      24.349  51.050  76.447  1.00  0.46           O  
HETATM  428  O   HOH T 427      19.852  43.029  56.335  1.00  0.46           O  
HETATM  429  O   HOH T 428      16.359  43.634  70.323  1.00  0.46           O  
HETATM  430  O   HOH T 429      36.796   4.671  34.871  1.00  0.46           O  
HETATM  431  O   HOH T 430      47.913  75.310  80.299  1.00  0.46           O  
HETATM  432  O   HOH T 431      35.682   8.772  41.259  1.00  0.46           O  
HETATM  433  O   HOH T 432      39.703  65.319  49.641  1.00  0.46           O  
HETATM  434  O   HOH T 433      27.332  72.532  76.028  1.00  0.46           O  
HETATM  435  O   HOH T 434      19.095  41.851  72.558  1.00  0.46           O  
HETATM  436  O   HOH T 435      50.295  44.293  14.710  1.00  0.46           O  
HETATM  437  O   HOH T 436      -1.658  51.834  53.670  1.00  0.46           O  
HETATM  438  O   HOH T 437       5.603  51.566  49.094  1.00  0.46           O  
HETATM  439  O   HOH T 438      18.880  54.293  22.366  1.00  0.46           O  
HETATM  440  O   HOH T 439      25.670  37.658  26.102  1.00  0.46           O  
HETATM  441  O   HOH T 440      32.542  65.127  74.026  1.00  0.46           O  
HETATM  442  O   HOH T 441       1.650  53.692  47.265  1.00  0.46           O  
HETATM  443  O   HOH T 442       6.788  64.892  63.142  1.00  0.46           O  
HETATM  444  O   HOH T 443      28.811  79.276  79.789  1.00  0.46           O  
HETATM  445  O   HOH T 444      31.703  76.712  61.764  1.00  0.46           O  
HETATM  446  O   HOH T 445      24.239  43.698  13.255  1.00  0.46           O  
HETATM  447  O   HOH T 446      34.686   2.975  44.087  1.00  0.46           O  
HETATM  448  O   HOH T 447      52.147  32.268  18.639  1.00  0.46           O  
HETATM  449  O   HOH T 448      57.537  42.217  39.799  1.00  0.46           O  
HETATM  450  O   HOH T 449      35.507  17.124  27.355  1.00  0.46           O  
HETATM  451  O   HOH T 450      12.317  37.791  37.858  1.00  0.46           O  
HETATM  452  O   HOH T 451      22.150  61.854  45.760  1.00  0.46           O  
HETATM  453  O   HOH T 452      28.404  63.839  73.614  1.00  0.46           O  
HETATM  454  O   HOH T 453      45.297  76.160  79.841  1.00  0.46           O  
HETATM  455  O   HOH T 454      37.076  75.775  50.909  1.00  0.46           O  
HETATM  456  O   HOH T 455      12.547  45.253  36.001  1.00  0.46           O  
HETATM  457  O   HOH T 456       6.793  46.915  63.798  1.00  0.47           O  
HETATM  458  O   HOH T 457      37.435  48.681  61.033  1.00  0.47           O  
HETATM  459  O   HOH T 458      15.433  33.442  35.108  1.00  0.47           O  
HETATM  460  O   HOH T 459      45.031  54.180  54.956  1.00  0.47           O  
HETATM  461  O   HOH T 460      13.969  38.745  57.230  1.00  0.47           O  
HETATM  462  O   HOH T 461      30.473  46.396  49.247  1.00  0.47           O  
HETATM  463  O   HOH T 462      13.841  44.000  31.104  1.00  0.47           O  
HETATM  464  O   HOH T 463      13.722  67.063  60.983  1.00  0.47           O  
HETATM  465  O   HOH T 464      10.910  49.330  65.376  1.00  0.47           O  
HETATM  466  O   HOH T 465       8.985  71.378  41.224  1.00  0.47           O  
HETATM  467  O   HOH T 466      14.421  40.247  54.919  1.00  0.47           O  
HETATM  468  O   HOH T 467      31.515  42.195  12.293  1.00  0.47           O  
HETATM  469  O   HOH T 468      37.952  67.969  83.843  1.00  0.47           O  
HETATM  470  O   HOH T 469      32.434  58.301  18.958  1.00  0.47           O  
HETATM  471  O   HOH T 470      47.063  56.721  60.083  1.00  0.47           O  
HETATM  472  O   HOH T 471      20.221  63.010  44.325  1.00  0.47           O  
HETATM  473  O   HOH T 472      -0.646  64.104  49.481  1.00  0.47           O  
HETATM  474  O   HOH T 473      24.148  42.552  15.798  1.00  0.47           O  
HETATM  475  O   HOH T 474      43.803  53.321  16.161  1.00  0.47           O  
HETATM  476  O   HOH T 475      35.273  76.026  59.324  1.00  0.47           O  
HETATM  477  O   HOH T 476      14.695  41.245  61.612  1.00  0.47           O  
HETATM  478  O   HOH T 477      50.094  68.581  71.827  1.00  0.47           O  
HETATM  479  O   HOH T 478      37.351  59.962  19.962  1.00  0.47           O  
HETATM  480  O   HOH T 479      49.204  58.574  19.869  1.00  0.47           O  
HETATM  481  O   HOH T 480      54.167  54.059  34.499  1.00  0.47           O  
HETATM  482  O   HOH T 481      19.248  74.376  45.422  1.00  0.47           O  
HETATM  483  O   HOH T 482      29.329  47.113  34.200  1.00  0.47           O  
HETATM  484  O   HOH T 483      26.797  63.556  34.753  1.00  0.47           O  
HETATM  485  O   HOH T 484      34.396  42.753  36.698  1.00  0.48           O  
HETATM  486  O   HOH T 485      50.416  25.257  47.027  1.00  0.48           O  
HETATM  487  O   HOH T 486      52.222  16.275  22.687  1.00  0.48           O  
HETATM  488  O   HOH T 487      14.047  69.691  66.573  1.00  0.48           O  
HETATM  489  O   HOH T 488      28.947  46.052  72.788  1.00  0.48           O  
HETATM  490  O   HOH T 489       1.611  63.934  47.807  1.00  0.48           O  
HETATM  491  O   HOH T 490      17.751  71.190  39.754  1.00  0.48           O  
HETATM  492  O   HOH T 491      17.678  47.191  34.882  1.00  0.48           O  
HETATM  493  O   HOH T 492      15.237  42.935  36.224  1.00  0.48           O  
HETATM  494  O   HOH T 493      37.320  60.036  15.972  1.00  0.48           O  
HETATM  495  O   HOH T 494      20.313  51.710  72.804  1.00  0.48           O  
HETATM  496  O   HOH T 495      28.695  61.713  35.557  1.00  0.48           O  
HETATM  497  O   HOH T 496      40.336  57.421  42.969  1.00  0.48           O  
HETATM  498  O   HOH T 497      56.772  48.085  37.202  1.00  0.48           O  
HETATM  499  O   HOH T 498      25.533  57.153  44.520  1.00  0.48           O  
HETATM  500  O   HOH T 499      22.604  39.745  66.459  1.00  0.48           O  
HETATM  501  O   HOH T 500      19.859  47.074  36.744  1.00  0.48           O  
HETATM  502  O   HOH T 501      31.403  29.733  19.364  1.00  0.48           O  
HETATM  503  O   HOH T 502      55.977  46.084  46.934  1.00  0.48           O  
HETATM  504  O   HOH T 503      28.497  37.711  41.280  1.00  0.48           O  
HETATM  505  O   HOH T 504      40.594  16.691  49.657  1.00  0.48           O  
HETATM  506  O   HOH T 505      22.742  62.423  35.520  1.00  0.48           O  
HETATM  507  O   HOH T 506       2.880  62.466  61.369  1.00  0.48           O  
HETATM  508  O   HOH T 507      52.193  54.091  20.541  1.00  0.48           O  
HETATM  509  O   HOH T 508      30.124  71.443  32.472  1.00  0.48           O  
HETATM  510  O   HOH T 509      32.590  44.722  62.490  1.00  0.48           O  
HETATM  511  O   HOH T 510       1.688  54.169  59.141  1.00  0.48           O  
HETATM  512  O   HOH T 511      33.273  57.300  43.673  1.00  0.48           O  
HETATM  513  O   HOH T 512      46.158  57.807  28.292  1.00  0.48           O  
HETATM  514  O   HOH T 513      49.489  54.499  20.943  1.00  0.48           O  
HETATM  515  O   HOH T 514      32.362  37.162  49.589  1.00  0.48           O  
HETATM  516  O   HOH T 515      51.866  30.911  37.360  1.00  0.48           O  
HETATM  517  O   HOH T 516      33.475  67.634  74.842  1.00  0.48           O  
HETATM  518  O   HOH T 517      40.516  71.995  81.884  1.00  0.48           O  
HETATM  519  O   HOH T 518      36.300   4.474  42.674  1.00  0.48           O  
HETATM  520  O   HOH T 519      24.409  32.033  40.366  1.00  0.48           O  
HETATM  521  O   HOH T 520      11.683  71.837  42.021  1.00  0.48           O  
HETATM  522  O   HOH T 521      40.603  40.431  12.924  1.00  0.48           O  
HETATM  523  O   HOH T 522      29.733  41.193  35.867  1.00  0.49           O  
HETATM  524  O   HOH T 523      18.198  39.878  60.448  1.00  0.49           O  
HETATM  525  O   HOH T 524      47.787  25.711  47.459  1.00  0.49           O  
HETATM  526  O   HOH T 525      12.011  71.390  39.014  1.00  0.49           O  
HETATM  527  O   HOH T 526      33.312  76.492  69.869  1.00  0.49           O  
HETATM  528  O   HOH T 527      51.632  27.377  33.984  1.00  0.49           O  
HETATM  529  O   HOH T 528      17.040  40.389  54.156  1.00  0.49           O  
HETATM  530  O   HOH T 529      43.794  62.939  24.755  1.00  0.49           O  
HETATM  531  O   HOH T 530      12.029  61.838  33.871  1.00  0.49           O  
HETATM  532  O   HOH T 531      39.239  59.007  21.916  1.00  0.49           O  
HETATM  533  O   HOH T 532      31.753  72.890  34.121  1.00  0.49           O  
HETATM  534  O   HOH T 533      51.308  31.006  40.127  1.00  0.49           O  
HETATM  535  O   HOH T 534      41.083  54.474  34.152  1.00  0.49           O  
HETATM  536  O   HOH T 535      55.058  60.716  31.613  1.00  0.49           O  
HETATM  537  O   HOH T 536      17.641  48.501  37.352  1.00  0.49           O  
HETATM  538  O   HOH T 537      42.977  52.622  55.975  1.00  0.49           O  
HETATM  539  O   HOH T 538       4.138  47.151  49.658  1.00  0.49           O  
HETATM  540  O   HOH T 539      37.574  73.060  78.911  1.00  0.49           O  
HETATM  541  O   HOH T 540      28.454  58.916  35.429  1.00  0.49           O  
HETATM  542  O   HOH T 541      62.320  41.563  45.811  1.00  0.49           O  
HETATM  543  O   HOH T 542      41.122  10.465  29.348  1.00  0.49           O  
HETATM  544  O   HOH T 543       3.572  59.860  60.521  1.00  0.49           O  
HETATM  545  O   HOH T 544      55.466  34.647  31.392  1.00  0.49           O  
HETATM  546  O   HOH T 545      31.324   7.506  41.414  1.00  0.49           O  
HETATM  547  O   HOH T 546      28.949  60.277  33.160  1.00  0.49           O  
HETATM  548  O   HOH T 547      37.999  48.694  43.104  1.00  0.49           O  
HETATM  549  O   HOH T 548       4.336  53.930  48.372  1.00  0.49           O  
HETATM  550  O   HOH T 549      47.976   9.756  25.749  1.00  0.49           O  
HETATM  551  O   HOH T 550      49.517  24.866  41.204  1.00  0.49           O  
HETATM  552  O   HOH T 551      33.286  35.483  15.603  1.00  0.49           O  
HETATM  553  O   HOH T 552      37.339  49.802  63.617  1.00  0.49           O  
HETATM  554  O   HOH T 553      48.875  52.332  19.385  1.00  0.49           O  
HETATM  555  O   HOH T 554      13.681  43.763  33.970  1.00  0.49           O  
HETATM  556  O   HOH T 555      38.546  25.090  46.460  1.00  0.49           O  
HETATM  557  O   HOH T 556      13.920  43.752  40.193  1.00  0.49           O  
HETATM  558  O   HOH T 557      41.933  31.608  14.665  1.00  0.50           O  
HETATM  559  O   HOH T 558      39.723  62.200  33.216  1.00  0.50           O  
HETATM  560  O   HOH T 559      26.252  36.955  60.646  1.00  0.50           O  
HETATM  561  O   HOH T 560      48.883  22.817  53.060  1.00  0.50           O  
HETATM  562  O   HOH T 561       6.266  50.049  46.720  1.00  0.50           O  
HETATM  563  O   HOH T 562      40.320  73.662  79.608  1.00  0.50           O  
HETATM  564  O   HOH T 563      32.551  73.891  39.998  1.00  0.50           O  
HETATM  565  O   HOH T 564      32.713  76.267  56.502  1.00  0.50           O  
HETATM  566  O   HOH T 565      43.028  13.610  26.789  1.00  0.50           O  
HETATM  567  O   HOH T 566      25.367  49.586  38.310  1.00  0.50           O  
HETATM  568  O   HOH T 567      60.746  42.281  29.103  1.00  0.50           O  
HETATM  569  O   HOH T 568      19.254  45.069  21.136  1.00  0.50           O  
HETATM  570  O   HOH T 569      28.451  67.978  81.465  1.00  0.50           O  
HETATM  571  O   HOH T 570      34.221  54.389  13.060  1.00  0.50           O  
HETATM  572  O   HOH T 571      39.451  62.574  49.537  1.00  0.50           O  
HETATM  573  O   HOH T 572      55.343  47.130  22.750  1.00  0.50           O  
HETATM  574  O   HOH T 573      16.282  71.391  66.413  1.00  0.50           O  
HETATM  575  O   HOH T 574      41.695  55.709  50.961  1.00  0.50           O  
HETATM  576  O   HOH T 575      18.379  26.547  26.721  1.00  0.50           O  
HETATM  577  O   HOH T 576      42.818  61.441  51.817  1.00  0.50           O  
HETATM  578  O   HOH T 577      18.631  59.233  24.014  1.00  0.50           O  
HETATM  579  O   HOH T 578      26.925  67.644  36.436  1.00  0.50           O  
HETATM  580  O   HOH T 579      22.021  45.459  13.423  1.00  0.50           O  
HETATM  581  O   HOH T 580      51.098  12.758  25.628  1.00  0.51           O  
HETATM  582  O   HOH T 581      14.681  45.289  68.866  1.00  0.51           O  
HETATM  583  O   HOH T 582      39.295  65.325  55.155  1.00  0.51           O  
HETATM  584  O   HOH T 583      46.660  56.004  46.059  1.00  0.51           O  
HETATM  585  O   HOH T 584      37.457  65.957  48.163  1.00  0.51           O  
HETATM  586  O   HOH T 585      45.480  71.817  64.892  1.00  0.51           O  
HETATM  587  O   HOH T 586      52.521  35.210  16.643  1.00  0.51           O  
HETATM  588  O   HOH T 587      30.938  60.107  35.529  1.00  0.51           O  
HETATM  589  O   HOH T 588      15.495  70.148  55.932  1.00  0.51           O  
HETATM  590  O   HOH T 589      47.755  50.019  65.699  1.00  0.51           O  
HETATM  591  O   HOH T 590      52.875  34.839  19.385  1.00  0.51           O  
HETATM  592  O   HOH T 591      37.041  20.789  21.779  1.00  0.51           O  
HETATM  593  O   HOH T 592      38.877  77.352  52.246  1.00  0.51           O  
HETATM  594  O   HOH T 593      53.955  41.323  18.940  1.00  0.51           O  
HETATM  595  O   HOH T 594      41.610  52.058  35.577  1.00  0.51           O  
HETATM  596  O   HOH T 595      13.327  64.558  71.982  1.00  0.51           O  
HETATM  597  O   HOH T 596      34.765  59.029  15.359  1.00  0.51           O  
HETATM  598  O   HOH T 597      29.914  24.422  25.014  1.00  0.51           O  
HETATM  599  O   HOH T 598      40.261  11.264  38.940  1.00  0.51           O  
HETATM  600  O   HOH T 599      36.399  76.042  74.537  1.00  0.51           O  
HETATM  601  O   HOH T 600      21.015  58.788  22.866  1.00  0.51           O  
HETATM  602  O   HOH T 601      58.444  42.896  27.535  1.00  0.51           O  
HETATM  603  O   HOH T 602      21.862  75.551  51.785  1.00  0.51           O  
HETATM  604  O   HOH T 603      37.097  77.053  67.504  1.00  0.51           O  
HETATM  605  O   HOH T 604      50.374  58.953  17.459  1.00  0.51           O  
HETATM  606  O   HOH T 605       6.191  44.506  53.557  1.00  0.51           O  
HETATM  607  O   HOH T 606      20.135  49.565  38.063  1.00  0.51           O  
HETATM  608  O   HOH T 607       3.756  46.956  52.370  1.00  0.51           O  
HETATM  609  O   HOH T 608      34.877  58.589  45.335  1.00  0.51           O  
HETATM  610  O   HOH T 609      15.605  70.274  68.813  1.00  0.51           O  
HETATM  611  O   HOH T 610      21.020  23.430  26.741  1.00  0.51           O  
HETATM  612  O   HOH T 611      47.790  45.903  49.425  1.00  0.52           O  
HETATM  613  O   HOH T 612      22.772  75.516  58.177  1.00  0.52           O  
HETATM  614  O   HOH T 613      30.575  67.054  77.044  1.00  0.52           O  
HETATM  615  O   HOH T 614      32.105  18.745  46.962  1.00  0.52           O  
HETATM  616  O   HOH T 615      26.185  27.524  37.031  1.00  0.52           O  
HETATM  617  O   HOH T 616      42.611  75.428  79.645  1.00  0.52           O  
HETATM  618  O   HOH T 617      11.281  48.615  47.904  1.00  0.52           O  
HETATM  619  O   HOH T 618      17.248  55.067  24.437  1.00  0.52           O  
HETATM  620  O   HOH T 619      23.431  48.538  52.470  1.00  0.52           O  
HETATM  621  O   HOH T 620      50.390  19.595  29.878  1.00  0.52           O  
HETATM  622  O   HOH T 621      30.978  39.514  49.443  1.00  0.52           O  
HETATM  623  O   HOH T 622      11.477  45.391  54.281  1.00  0.52           O  
HETATM  624  O   HOH T 623      43.618  54.015  58.312  1.00  0.52           O  
HETATM  625  O   HOH T 624       8.855  66.402  62.455  1.00  0.52           O  
HETATM  626  O   HOH T 625      20.431  39.613  58.947  1.00  0.52           O  
HETATM  627  O   HOH T 626      25.862  22.829  21.842  1.00  0.52           O  
HETATM  628  O   HOH T 627      18.512  72.896  67.257  1.00  0.52           O  
HETATM  629  O   HOH T 628      12.895  65.427  69.388  1.00  0.52           O  
HETATM  630  O   HOH T 629      15.377  59.969  34.829  1.00  0.52           O  
HETATM  631  O   HOH T 630      49.024  33.368  46.074  1.00  0.52           O  
HETATM  632  O   HOH T 631       1.553  57.568  50.217  1.00  0.52           O  
HETATM  633  O   HOH T 632      41.361  50.698  56.880  1.00  0.52           O  
HETATM  634  O   HOH T 633      61.157  47.090  33.517  1.00  0.52           O  
HETATM  635  O   HOH T 634      22.695  39.626  57.503  1.00  0.52           O  
HETATM  636  O   HOH T 635      48.719  76.725  66.994  1.00  0.52           O  
HETATM  637  O   HOH T 636       2.332  61.866  58.858  1.00  0.52           O  
HETATM  638  O   HOH T 637      19.013  62.175  56.967  1.00  0.52           O  
HETATM  639  O   HOH T 638      28.402  66.113  75.233  1.00  0.53           O  
HETATM  640  O   HOH T 639      26.795  77.108  51.786  1.00  0.53           O  
HETATM  641  O   HOH T 640      17.498  42.175  28.452  1.00  0.53           O  
HETATM  642  O   HOH T 641      30.330  22.373  42.517  1.00  0.53           O  
HETATM  643  O   HOH T 642       3.475  64.628  64.562  1.00  0.53           O  
HETATM  644  O   HOH T 643      36.662  59.707  22.729  1.00  0.53           O  
HETATM  645  O   HOH T 644      29.896  76.888  76.260  1.00  0.53           O  
HETATM  646  O   HOH T 645      26.020  33.414  20.163  1.00  0.53           O  
HETATM  647  O   HOH T 646      23.022  45.744  73.350  1.00  0.53           O  
HETATM  648  O   HOH T 647      22.020  70.398  75.872  1.00  0.53           O  
HETATM  649  O   HOH T 648      43.757  78.872  73.794  1.00  0.53           O  
HETATM  650  O   HOH T 649      31.342  35.056  27.905  1.00  0.53           O  
HETATM  651  O   HOH T 650      41.398  29.000  15.319  1.00  0.53           O  
HETATM  652  O   HOH T 651      49.262  -1.714  44.747  1.00  0.53           O  
HETATM  653  O   HOH T 652      48.628  28.373  26.716  1.00  0.54           O  
HETATM  654  O   HOH T 653      39.247  77.021  49.546  1.00  0.54           O  
HETATM  655  O   HOH T 654      31.478  18.546  44.242  1.00  0.54           O  
HETATM  656  O   HOH T 655      54.156  55.228  21.982  1.00  0.54           O  
HETATM  657  O   HOH T 656      37.179  77.291  72.178  1.00  0.54           O  
HETATM  658  O   HOH T 657      61.426  48.632  35.766  1.00  0.54           O  
HETATM  659  O   HOH T 658      30.978  37.145  15.296  1.00  0.54           O  
HETATM  660  O   HOH T 659      33.874  41.308  56.677  1.00  0.54           O  
HETATM  661  O   HOH T 660      51.043  70.605  75.523  1.00  0.54           O  
HETATM  662  O   HOH T 661      39.951  60.085  24.425  1.00  0.54           O  
HETATM  663  O   HOH T 662       7.551  49.571  49.263  1.00  0.54           O  
HETATM  664  O   HOH T 663      42.872  38.915  12.993  1.00  0.54           O  
HETATM  665  O   HOH T 664      48.548  22.007  22.726  1.00  0.54           O  
HETATM  666  O   HOH T 665      42.468  11.335  45.950  1.00  0.54           O  
HETATM  667  O   HOH T 666      38.578  13.414  26.947  1.00  0.54           O  
HETATM  668  O   HOH T 667      19.620  56.537  23.925  1.00  0.54           O  
HETATM  669  O   HOH T 668      39.572  49.281  64.919  1.00  0.54           O  
HETATM  670  O   HOH T 669      -0.583  53.080  60.145  1.00  0.54           O  
HETATM  671  O   HOH T 670       8.905  63.993  67.304  1.00  0.54           O  
HETATM  672  O   HOH T 671       8.937  64.908  64.874  1.00  0.54           O  
HETATM  673  O   HOH T 672      50.364  34.297  18.339  1.00  0.54           O  
HETATM  674  O   HOH T 673      35.710  19.390  45.829  1.00  0.54           O  
HETATM  675  O   HOH T 674      49.297  41.554  43.897  1.00  0.55           O  
HETATM  676  O   HOH T 675      33.122  66.096  31.985  1.00  0.55           O  
HETATM  677  O   HOH T 676      52.825  66.941  69.995  1.00  0.55           O  
HETATM  678  O   HOH T 677      33.220  27.546  41.289  1.00  0.55           O  
HETATM  679  O   HOH T 678      40.400  67.229  84.701  1.00  0.55           O  
HETATM  680  O   HOH T 679      20.127  25.170  24.994  1.00  0.55           O  
HETATM  681  O   HOH T 680      44.637  32.175  49.642  1.00  0.55           O  
HETATM  682  O   HOH T 681      51.852  -2.802  47.187  1.00  0.55           O  
HETATM  683  O   HOH T 682      52.750  55.607  61.411  1.00  0.55           O  
HETATM  684  O   HOH T 683      -0.908  67.697  45.814  1.00  0.55           O  
HETATM  685  O   HOH T 684      17.784  47.084  52.626  1.00  0.55           O  
HETATM  686  O   HOH T 685      51.701  42.514  17.887  1.00  0.55           O  
HETATM  687  O   HOH T 686      21.390  42.743  73.926  1.00  0.55           O  
HETATM  688  O   HOH T 687      52.055  39.864  20.413  1.00  0.55           O  
HETATM  689  O   HOH T 688       5.184  57.458  60.102  1.00  0.55           O  
HETATM  690  O   HOH T 689      25.373  68.976  40.154  1.00  0.56           O  
HETATM  691  O   HOH T 690      25.961  21.884  24.342  1.00  0.56           O  
HETATM  692  O   HOH T 691      35.563  59.268  39.649  1.00  0.56           O  
HETATM  693  O   HOH T 692      28.376  40.554  44.523  1.00  0.56           O  
HETATM  694  O   HOH T 693      29.099  77.061  67.073  1.00  0.56           O  
HETATM  695  O   HOH T 694      28.847  56.514  50.460  1.00  0.56           O  
HETATM  696  O   HOH T 695      37.996  79.451  70.565  1.00  0.56           O  
HETATM  697  O   HOH T 696      51.374  54.213  33.862  1.00  0.56           O  
HETATM  698  O   HOH T 697      28.408  68.118  78.506  1.00  0.56           O  
HETATM  699  O   HOH T 698      24.764  69.618  47.796  1.00  0.56           O  
HETATM  700  O   HOH T 699       3.141  47.016  55.075  1.00  0.56           O  
HETATM  701  O   HOH T 700      43.951  50.267  61.705  1.00  0.56           O  
HETATM  702  O   HOH T 701      29.948  77.784  63.513  1.00  0.56           O  
HETATM  703  O   HOH T 702      31.516  52.020  50.110  1.00  0.56           O  
HETATM  704  O   HOH T 703      56.309  43.683  24.205  1.00  0.56           O  
HETATM  705  O   HOH T 704      35.650  52.567  69.639  1.00  0.56           O  
HETATM  706  O   HOH T 705      36.483   6.188  40.475  1.00  0.56           O  
HETATM  707  O   HOH T 706      32.905  58.213  73.114  1.00  0.56           O  
HETATM  708  O   HOH T 707      43.986  21.152  17.474  1.00  0.56           O  
HETATM  709  O   HOH T 708      27.715  55.635  39.269  1.00  0.57           O  
HETATM  710  O   HOH T 709       8.630  48.460  47.005  1.00  0.57           O  
HETATM  711  O   HOH T 710      28.221  44.604  49.454  1.00  0.57           O  
HETATM  712  O   HOH T 711      21.088  31.537  46.162  1.00  0.57           O  
HETATM  713  O   HOH T 712      51.854  40.349  39.046  1.00  0.57           O  
HETATM  714  O   HOH T 713      13.908  75.425  47.009  1.00  0.57           O  
HETATM  715  O   HOH T 714      31.778  52.647  34.385  1.00  0.57           O  
HETATM  716  O   HOH T 715      20.249  42.034  23.496  1.00  0.57           O  
HETATM  717  O   HOH T 716       7.928  41.849  58.907  1.00  0.57           O  
HETATM  718  O   HOH T 717      53.379  70.302  79.314  1.00  0.57           O  
HETATM  719  O   HOH T 718      35.881  75.354  80.495  1.00  0.57           O  
HETATM  720  O   HOH T 719      -0.768  62.420  51.770  1.00  0.57           O  
HETATM  721  O   HOH T 720      41.952  76.280  77.074  1.00  0.58           O  
HETATM  722  O   HOH T 721      21.756  69.898  39.499  1.00  0.58           O  
HETATM  723  O   HOH T 722      53.355  13.755  26.576  1.00  0.58           O  
HETATM  724  O   HOH T 723      26.893  19.526  27.535  1.00  0.58           O  
HETATM  725  O   HOH T 724      38.844   2.588  37.740  1.00  0.59           O  
HETATM  726  O   HOH T 725      24.455  43.583  72.182  1.00  0.59           O  
HETATM  727  O   HOH T 726      13.421  72.840  46.286  1.00  0.59           O  
HETATM  728  O   HOH T 727      32.899  17.929  27.409  1.00  0.59           O  
HETATM  729  O   HOH T 728       4.093  66.314  59.236  1.00  0.59           O  
HETATM  730  O   HOH T 729       4.691  51.579  58.498  1.00  0.60           O  
HETATM  731  O   HOH T 730      41.374  65.204  51.855  1.00  0.60           O  
HETATM  732  O   HOH T 731      43.708  59.249  50.244  1.00  0.60           O  
HETATM  733  O   HOH T 732      19.698  73.754  42.685  1.00  0.61           O  
TER     734      HOH T 732 
