# Supplementary material for: Accurate Prediction of Hydration Sites of Proteins Using Energy Model With Atom Embedding
Source: Front Mol Biosci. 2021 Sep 20;8:756075. doi: 10.3389/fmolb.2021.756075 (PMC8488165; doi:10.3389/fmolb.2021.756075)
Supplement: Supplementary file 1 [file DataSheet1.ZIP › Data Sheet 1/Our_result_pdb/our_dataset_output/2EUZ_watersite.pdb]

HEADER                                                        XXXX


JRNL        PMID   -1
HETATM    1  O   HOH T   0      18.553  24.948  58.541  1.00  0.16           O  
HETATM    2  O   HOH T   1      16.149  17.550  59.256  1.00  0.16           O  
HETATM    3  O   HOH T   2      15.808  22.255  52.599  1.00  0.17           O  
HETATM    4  O   HOH T   3       4.907   9.781  53.595  1.00  0.17           O  
HETATM    5  O   HOH T   4      14.951   0.134  60.385  1.00  0.18           O  
HETATM    6  O   HOH T   5      19.019  10.591  50.160  1.00  0.18           O  
HETATM    7  O   HOH T   6       1.004  28.350  68.739  1.00  0.18           O  
HETATM    8  O   HOH T   7       4.703  26.027  48.582  1.00  0.18           O  
HETATM    9  O   HOH T   8       7.564  18.352  69.290  1.00  0.20           O  
HETATM   10  O   HOH T   9      -2.050  26.262  85.978  1.00  0.20           O  
HETATM   11  O   HOH T  10      -0.339   9.360  57.741  1.00  0.20           O  
HETATM   12  O   HOH T  11       2.947  22.820  54.826  1.00  0.20           O  
HETATM   13  O   HOH T  12       0.520  31.769  55.762  1.00  0.20           O  
HETATM   14  O   HOH T  13      11.561   4.354  48.855  1.00  0.20           O  
HETATM   15  O   HOH T  14       6.645   2.979  69.873  1.00  0.21           O  
HETATM   16  O   HOH T  15     -14.517  34.612  78.139  1.00  0.21           O  
HETATM   17  O   HOH T  16      -1.292  12.730  82.596  1.00  0.21           O  
HETATM   18  O   HOH T  17      -0.626  37.449  66.127  1.00  0.22           O  
HETATM   19  O   HOH T  18      -5.399  21.919  66.410  1.00  0.22           O  
HETATM   20  O   HOH T  19     -18.537  36.809  74.841  1.00  0.23           O  
HETATM   21  O   HOH T  20      12.112  12.038  70.152  1.00  0.23           O  
HETATM   22  O   HOH T  21     -12.859  15.199  70.079  1.00  0.23           O  
HETATM   23  O   HOH T  22     -11.591  12.553  42.086  1.00  0.23           O  
HETATM   24  O   HOH T  23      28.601  16.132  44.413  1.00  0.23           O  
HETATM   25  O   HOH T  24       6.367  17.200  39.920  1.00  0.24           O  
HETATM   26  O   HOH T  25      -6.306  14.796  52.536  1.00  0.24           O  
HETATM   27  O   HOH T  26      -8.810  13.100  41.970  1.00  0.24           O  
HETATM   28  O   HOH T  27      -4.150  46.312  61.345  1.00  0.24           O  
HETATM   29  O   HOH T  28      18.650   8.946  68.885  1.00  0.24           O  
HETATM   30  O   HOH T  29      10.232   1.751  42.724  1.00  0.24           O  
HETATM   31  O   HOH T  30     -17.447  29.820  76.907  1.00  0.24           O  
HETATM   32  O   HOH T  31      11.289  13.109  51.704  1.00  0.25           O  
HETATM   33  O   HOH T  32      -6.661  34.971  62.981  1.00  0.25           O  
HETATM   34  O   HOH T  33      26.513  21.996  50.312  1.00  0.25           O  
HETATM   35  O   HOH T  34       9.439  -3.921  52.327  1.00  0.25           O  
HETATM   36  O   HOH T  35      11.004  17.672  79.600  1.00  0.25           O  
HETATM   37  O   HOH T  36      20.909  22.735  38.685  1.00  0.25           O  
HETATM   38  O   HOH T  37      18.616   3.406  66.608  1.00  0.25           O  
HETATM   39  O   HOH T  38      24.314   9.553  59.522  1.00  0.26           O  
HETATM   40  O   HOH T  39      17.315  14.594  51.746  1.00  0.26           O  
HETATM   41  O   HOH T  40      13.794   9.903  44.775  1.00  0.26           O  
HETATM   42  O   HOH T  41      18.231  17.107  41.241  1.00  0.26           O  
HETATM   43  O   HOH T  42      -8.428  27.394  81.021  1.00  0.26           O  
HETATM   44  O   HOH T  43     -10.673  28.585  62.978  1.00  0.26           O  
HETATM   45  O   HOH T  44     -21.529  37.153  66.970  1.00  0.27           O  
HETATM   46  O   HOH T  45       7.709  -0.694  58.507  1.00  0.27           O  
HETATM   47  O   HOH T  46       2.467  13.903  88.170  1.00  0.27           O  
HETATM   48  O   HOH T  47      23.442   5.057  57.957  1.00  0.27           O  
HETATM   49  O   HOH T  48       1.414  25.433  61.233  1.00  0.27           O  
HETATM   50  O   HOH T  49      24.785  14.830  43.995  1.00  0.27           O  
HETATM   51  O   HOH T  50      10.861   5.121  51.386  1.00  0.28           O  
HETATM   52  O   HOH T  51      -6.414  29.311  81.767  1.00  0.28           O  
HETATM   53  O   HOH T  52      -3.184  25.298  88.374  1.00  0.28           O  
HETATM   54  O   HOH T  53       5.040  -2.563  47.446  1.00  0.28           O  
HETATM   55  O   HOH T  54      -5.608  12.298  60.084  1.00  0.28           O  
HETATM   56  O   HOH T  55      32.447  17.982  49.154  1.00  0.28           O  
HETATM   57  O   HOH T  56      11.429  22.700  77.740  1.00  0.28           O  
HETATM   58  O   HOH T  57      17.236  26.561  50.569  1.00  0.28           O  
HETATM   59  O   HOH T  58     -13.590  38.863  68.285  1.00  0.28           O  
HETATM   60  O   HOH T  59       9.104  17.067  46.421  1.00  0.28           O  
HETATM   61  O   HOH T  60      39.551  10.672  49.767  1.00  0.28           O  
HETATM   62  O   HOH T  61     -13.753  13.694  83.507  1.00  0.28           O  
HETATM   63  O   HOH T  62      -6.696   4.872  77.502  1.00  0.29           O  
HETATM   64  O   HOH T  63     -19.383  15.316  81.003  1.00  0.29           O  
HETATM   65  O   HOH T  64      -5.595  11.329  52.763  1.00  0.29           O  
HETATM   66  O   HOH T  65      14.414  -7.195  59.006  1.00  0.29           O  
HETATM   67  O   HOH T  66       3.467  10.628  45.711  1.00  0.29           O  
HETATM   68  O   HOH T  67       9.822  19.468  52.776  1.00  0.30           O  
HETATM   69  O   HOH T  68       5.205   0.195  47.066  1.00  0.30           O  
HETATM   70  O   HOH T  69       2.421   0.304  47.992  1.00  0.30           O  
HETATM   71  O   HOH T  70      33.132  17.701  52.738  1.00  0.30           O  
HETATM   72  O   HOH T  71      -3.794  39.128  72.358  1.00  0.30           O  
HETATM   73  O   HOH T  72      26.913   2.950  55.270  1.00  0.30           O  
HETATM   74  O   HOH T  73      19.464  20.123  35.839  1.00  0.30           O  
HETATM   75  O   HOH T  74      -5.715  24.211  49.597  1.00  0.30           O  
HETATM   76  O   HOH T  75      27.801  23.481  48.435  1.00  0.30           O  
HETATM   77  O   HOH T  76      33.756  15.954  57.498  1.00  0.30           O  
HETATM   78  O   HOH T  77      22.489  -2.093  66.319  1.00  0.30           O  
HETATM   79  O   HOH T  78      -7.350  21.943  53.531  1.00  0.30           O  
HETATM   80  O   HOH T  79       9.155  11.621  50.592  1.00  0.30           O  
HETATM   81  O   HOH T  80      19.545   0.400  55.757  1.00  0.30           O  
HETATM   82  O   HOH T  81     -19.471  24.521  72.781  1.00  0.30           O  
HETATM   83  O   HOH T  82       7.533  16.802  36.162  1.00  0.30           O  
HETATM   84  O   HOH T  83      34.164   8.440  47.357  1.00  0.31           O  
HETATM   85  O   HOH T  84      -9.776  16.791  60.625  1.00  0.31           O  
HETATM   86  O   HOH T  85      24.077   7.480  50.905  1.00  0.31           O  
HETATM   87  O   HOH T  86      18.779  14.205  43.315  1.00  0.31           O  
HETATM   88  O   HOH T  87      19.149   7.210  53.935  1.00  0.31           O  
HETATM   89  O   HOH T  88      22.994  21.073  59.355  1.00  0.31           O  
HETATM   90  O   HOH T  89     -18.740  15.235  78.343  1.00  0.31           O  
HETATM   91  O   HOH T  90       4.654  28.920  77.542  1.00  0.31           O  
HETATM   92  O   HOH T  91      15.316  29.942  30.803  1.00  0.31           O  
HETATM   93  O   HOH T  92      -8.201  22.623  58.207  1.00  0.31           O  
HETATM   94  O   HOH T  93      -5.578   3.512  43.749  1.00  0.32           O  
HETATM   95  O   HOH T  94      22.169   4.249  60.302  1.00  0.32           O  
HETATM   96  O   HOH T  95      24.610  -3.484  65.331  1.00  0.32           O  
HETATM   97  O   HOH T  96      26.633  10.396  64.427  1.00  0.32           O  
HETATM   98  O   HOH T  97      -9.224   8.426  72.570  1.00  0.32           O  
HETATM   99  O   HOH T  98      15.320  10.724  58.646  1.00  0.32           O  
HETATM  100  O   HOH T  99       6.287  23.906  59.418  1.00  0.32           O  
HETATM  101  O   HOH T 100       3.859  30.708  58.404  1.00  0.32           O  
HETATM  102  O   HOH T 101       0.523  33.566  57.992  1.00  0.32           O  
HETATM  103  O   HOH T 102       5.999  11.704  83.544  1.00  0.32           O  
HETATM  104  O   HOH T 103      16.792   2.187  68.283  1.00  0.32           O  
HETATM  105  O   HOH T 104      -1.249   0.891  42.159  1.00  0.32           O  
HETATM  106  O   HOH T 105      12.340   9.653  54.397  1.00  0.32           O  
HETATM  107  O   HOH T 106      32.488  12.900  59.247  1.00  0.32           O  
HETATM  108  O   HOH T 107     -24.423  23.108  79.738  1.00  0.32           O  
HETATM  109  O   HOH T 108      -1.066   2.040  69.871  1.00  0.32           O  
HETATM  110  O   HOH T 109      21.524  14.692  64.038  1.00  0.32           O  
HETATM  111  O   HOH T 110      19.417  11.973  59.465  1.00  0.32           O  
HETATM  112  O   HOH T 111     -14.022  32.687  70.968  1.00  0.33           O  
HETATM  113  O   HOH T 112     -11.843  24.929  64.829  1.00  0.33           O  
HETATM  114  O   HOH T 113      -7.958   5.056  48.459  1.00  0.33           O  
HETATM  115  O   HOH T 114       2.033  -2.778  50.907  1.00  0.33           O  
HETATM  116  O   HOH T 115     -13.020  43.758  78.659  1.00  0.33           O  
HETATM  117  O   HOH T 116      -9.952  44.094  70.885  1.00  0.33           O  
HETATM  118  O   HOH T 117       9.398  18.035  55.031  1.00  0.33           O  
HETATM  119  O   HOH T 118     -10.812  14.781  79.074  1.00  0.33           O  
HETATM  120  O   HOH T 119      -7.331  13.016  78.384  1.00  0.33           O  
HETATM  121  O   HOH T 120      19.082   1.855  38.832  1.00  0.33           O  
HETATM  122  O   HOH T 121       2.064  -5.201  49.541  1.00  0.33           O  
HETATM  123  O   HOH T 122      26.681   6.832  51.729  1.00  0.33           O  
HETATM  124  O   HOH T 123      -6.628  24.253  59.852  1.00  0.33           O  
HETATM  125  O   HOH T 124       7.282  23.097  47.894  1.00  0.33           O  
HETATM  126  O   HOH T 125     -20.418  16.155  76.329  1.00  0.33           O  
HETATM  127  O   HOH T 126      24.617   4.044  45.720  1.00  0.33           O  
HETATM  128  O   HOH T 127     -17.108  27.825  66.945  1.00  0.33           O  
HETATM  129  O   HOH T 128       3.613  20.892  40.377  1.00  0.33           O  
HETATM  130  O   HOH T 129     -16.358  17.632  86.803  1.00  0.33           O  
HETATM  131  O   HOH T 130       2.910  39.382  47.558  1.00  0.34           O  
HETATM  132  O   HOH T 131      11.459  29.615  80.158  1.00  0.34           O  
HETATM  133  O   HOH T 132     -21.208  40.690  76.662  1.00  0.34           O  
HETATM  134  O   HOH T 133      -6.461  33.830  80.948  1.00  0.34           O  
HETATM  135  O   HOH T 134      24.270  21.351  38.048  1.00  0.34           O  
HETATM  136  O   HOH T 135      20.031  19.185  50.531  1.00  0.34           O  
HETATM  137  O   HOH T 136      22.276  13.504  43.599  1.00  0.34           O  
HETATM  138  O   HOH T 137      12.127  29.898  27.459  1.00  0.34           O  
HETATM  139  O   HOH T 138      12.209  31.698  51.091  1.00  0.34           O  
HETATM  140  O   HOH T 139      11.543  33.249  42.901  1.00  0.34           O  
HETATM  141  O   HOH T 140       9.989  28.438  47.837  1.00  0.34           O  
HETATM  142  O   HOH T 141      -3.727   8.782  60.806  1.00  0.34           O  
HETATM  143  O   HOH T 142      22.971  23.426  60.874  1.00  0.34           O  
HETATM  144  O   HOH T 143       2.821  37.342  71.308  1.00  0.35           O  
HETATM  145  O   HOH T 144      27.589  -0.112  42.207  1.00  0.35           O  
HETATM  146  O   HOH T 145     -10.168  10.445  71.047  1.00  0.35           O  
HETATM  147  O   HOH T 146     -26.272  24.269  77.989  1.00  0.35           O  
HETATM  148  O   HOH T 147      15.656   5.592  38.502  1.00  0.35           O  
HETATM  149  O   HOH T 148      25.982   6.332  65.624  1.00  0.35           O  
HETATM  150  O   HOH T 149      -1.014   2.493  51.624  1.00  0.35           O  
HETATM  151  O   HOH T 150      -2.333   7.481  56.962  1.00  0.35           O  
HETATM  152  O   HOH T 151      14.666   3.204  37.739  1.00  0.36           O  
HETATM  153  O   HOH T 152     -13.774  23.486  88.518  1.00  0.36           O  
HETATM  154  O   HOH T 153       8.952  26.973  75.824  1.00  0.36           O  
HETATM  155  O   HOH T 154      -6.282  35.361  58.282  1.00  0.36           O  
HETATM  156  O   HOH T 155      35.671  14.580  55.732  1.00  0.36           O  
HETATM  157  O   HOH T 156      10.902  14.440  74.048  1.00  0.36           O  
HETATM  158  O   HOH T 157       9.619  22.619  65.932  1.00  0.36           O  
HETATM  159  O   HOH T 158      27.486  23.170  42.936  1.00  0.36           O  
HETATM  160  O   HOH T 159      10.348   6.694  47.734  1.00  0.36           O  
HETATM  161  O   HOH T 160     -20.730  26.572  89.963  1.00  0.36           O  
HETATM  162  O   HOH T 161      38.711  10.550  47.054  1.00  0.36           O  
HETATM  163  O   HOH T 162      13.140  10.329  56.972  1.00  0.36           O  
HETATM  164  O   HOH T 163       3.153  20.258  45.471  1.00  0.36           O  
HETATM  165  O   HOH T 164      26.954   6.431  42.883  1.00  0.36           O  
HETATM  166  O   HOH T 165       8.843  22.057  53.154  1.00  0.36           O  
HETATM  167  O   HOH T 166      -7.857  32.672  62.395  1.00  0.36           O  
HETATM  168  O   HOH T 167       9.039  18.967  71.700  1.00  0.36           O  
HETATM  169  O   HOH T 168       0.259  31.100  71.979  1.00  0.36           O  
HETATM  170  O   HOH T 169       4.811  21.947  47.279  1.00  0.36           O  
HETATM  171  O   HOH T 170      27.197  -3.498  50.660  1.00  0.36           O  
HETATM  172  O   HOH T 171      26.849  26.231  56.680  1.00  0.36           O  
HETATM  173  O   HOH T 172       9.267  33.503  77.488  1.00  0.36           O  
HETATM  174  O   HOH T 173       4.488  28.578  47.526  1.00  0.36           O  
HETATM  175  O   HOH T 174      -1.319  34.928  78.207  1.00  0.36           O  
HETATM  176  O   HOH T 175       7.176   2.255  72.458  1.00  0.36           O  
HETATM  177  O   HOH T 176      11.964  17.151  70.239  1.00  0.37           O  
HETATM  178  O   HOH T 177      -0.817  25.135  89.940  1.00  0.37           O  
HETATM  179  O   HOH T 178       5.893  27.725  53.775  1.00  0.37           O  
HETATM  180  O   HOH T 179      16.427  12.992  44.206  1.00  0.37           O  
HETATM  181  O   HOH T 180      -2.079   5.206  51.130  1.00  0.37           O  
HETATM  182  O   HOH T 181     -17.325  12.991  77.841  1.00  0.37           O  
HETATM  183  O   HOH T 182     -26.955  19.976  84.346  1.00  0.37           O  
HETATM  184  O   HOH T 183      -6.985  37.678  62.364  1.00  0.37           O  
HETATM  185  O   HOH T 184     -11.218  23.851  44.208  1.00  0.37           O  
HETATM  186  O   HOH T 185     -15.451  19.571  47.014  1.00  0.37           O  
HETATM  187  O   HOH T 186      25.114  22.846  59.199  1.00  0.37           O  
HETATM  188  O   HOH T 187      -5.493   2.027  68.874  1.00  0.37           O  
HETATM  189  O   HOH T 188      -9.525  26.390  64.307  1.00  0.37           O  
HETATM  190  O   HOH T 189     -16.752  30.779  89.973  1.00  0.37           O  
HETATM  191  O   HOH T 190      20.960  25.824  51.401  1.00  0.37           O  
HETATM  192  O   HOH T 191      -3.963   1.495  42.698  1.00  0.37           O  
HETATM  193  O   HOH T 192     -15.688  20.448  78.538  1.00  0.37           O  
HETATM  194  O   HOH T 193       8.755  37.349  37.246  1.00  0.37           O  
HETATM  195  O   HOH T 194      24.335   3.059  61.595  1.00  0.37           O  
HETATM  196  O   HOH T 195      16.573  22.553  36.502  1.00  0.37           O  
HETATM  197  O   HOH T 196     -10.730  12.103  74.842  1.00  0.37           O  
HETATM  198  O   HOH T 197       7.318  35.264  77.619  1.00  0.38           O  
HETATM  199  O   HOH T 198       0.593  30.307  79.828  1.00  0.38           O  
HETATM  200  O   HOH T 199      25.510  -1.552  55.178  1.00  0.38           O  
HETATM  201  O   HOH T 200     -22.280  11.718  76.688  1.00  0.38           O  
HETATM  202  O   HOH T 201     -12.157  33.515  56.966  1.00  0.38           O  
HETATM  203  O   HOH T 202      33.304  16.564  45.582  1.00  0.38           O  
HETATM  204  O   HOH T 203      11.122  14.592  69.300  1.00  0.38           O  
HETATM  205  O   HOH T 204      13.453  -3.273  48.758  1.00  0.38           O  
HETATM  206  O   HOH T 205     -12.419  39.108  62.313  1.00  0.38           O  
HETATM  207  O   HOH T 206      -4.754  44.133  69.902  1.00  0.38           O  
HETATM  208  O   HOH T 207      33.128   7.920  44.773  1.00  0.38           O  
HETATM  209  O   HOH T 208      -7.853  30.616  83.657  1.00  0.38           O  
HETATM  210  O   HOH T 209      -6.541  24.066  42.815  1.00  0.38           O  
HETATM  211  O   HOH T 210       8.245  22.654  60.773  1.00  0.38           O  
HETATM  212  O   HOH T 211     -14.516  14.758  45.624  1.00  0.38           O  
HETATM  213  O   HOH T 212      -8.287  15.025  54.391  1.00  0.38           O  
HETATM  214  O   HOH T 213     -12.121  47.788  73.682  1.00  0.38           O  
HETATM  215  O   HOH T 214      17.019   6.834  44.413  1.00  0.38           O  
HETATM  216  O   HOH T 215      -2.550  13.196  41.791  1.00  0.38           O  
HETATM  217  O   HOH T 216      35.019   7.946  50.079  1.00  0.38           O  
HETATM  218  O   HOH T 217      -1.732  43.714  66.471  1.00  0.39           O  
HETATM  219  O   HOH T 218       8.196  20.559  35.793  1.00  0.39           O  
HETATM  220  O   HOH T 219      -6.189  26.509  51.099  1.00  0.39           O  
HETATM  221  O   HOH T 220     -22.346  17.429  77.891  1.00  0.39           O  
HETATM  222  O   HOH T 221      -5.535   2.485  74.078  1.00  0.39           O  
HETATM  223  O   HOH T 222      35.125  22.579  46.670  1.00  0.39           O  
HETATM  224  O   HOH T 223       8.588   0.034  44.015  1.00  0.39           O  
HETATM  225  O   HOH T 224      42.104  10.581  42.176  1.00  0.39           O  
HETATM  226  O   HOH T 225      28.536  14.611  39.621  1.00  0.39           O  
HETATM  227  O   HOH T 226      26.417  14.392  37.766  1.00  0.39           O  
HETATM  228  O   HOH T 227      -9.782  16.961  57.946  1.00  0.39           O  
HETATM  229  O   HOH T 228      36.447  16.193  50.072  1.00  0.39           O  
HETATM  230  O   HOH T 229       9.667  22.757  73.083  1.00  0.39           O  
HETATM  231  O   HOH T 230      19.737   6.755  43.505  1.00  0.39           O  
HETATM  232  O   HOH T 231      -6.909   4.160  46.060  1.00  0.39           O  
HETATM  233  O   HOH T 232      20.885  15.962  42.282  1.00  0.39           O  
HETATM  234  O   HOH T 233      -8.556  29.659  47.224  1.00  0.39           O  
HETATM  235  O   HOH T 234      17.247  39.828  39.946  1.00  0.39           O  
HETATM  236  O   HOH T 235      21.935  19.391  34.739  1.00  0.39           O  
HETATM  237  O   HOH T 236      -3.898  37.498  79.704  1.00  0.39           O  
HETATM  238  O   HOH T 237      23.455  15.010  41.545  1.00  0.39           O  
HETATM  239  O   HOH T 238      -8.249  43.496  68.774  1.00  0.40           O  
HETATM  240  O   HOH T 239      11.845  11.467  49.654  1.00  0.40           O  
HETATM  241  O   HOH T 240      22.745   4.343  67.332  1.00  0.40           O  
HETATM  242  O   HOH T 241     -22.290  21.241  80.132  1.00  0.40           O  
HETATM  243  O   HOH T 242     -12.148  28.225  46.381  1.00  0.40           O  
HETATM  244  O   HOH T 243      13.210  10.390  37.660  1.00  0.40           O  
HETATM  245  O   HOH T 244      10.417  29.914  50.084  1.00  0.40           O  
HETATM  246  O   HOH T 245      21.429  14.748  66.817  1.00  0.40           O  
HETATM  247  O   HOH T 246      21.496  21.293  51.694  1.00  0.40           O  
HETATM  248  O   HOH T 247       1.535  29.868  53.937  1.00  0.40           O  
HETATM  249  O   HOH T 248      26.097  18.048  60.161  1.00  0.40           O  
HETATM  250  O   HOH T 249      29.406   9.918  64.918  1.00  0.40           O  
HETATM  251  O   HOH T 250      11.469  33.120  45.751  1.00  0.40           O  
HETATM  252  O   HOH T 251      -6.893   7.650  51.324  1.00  0.40           O  
HETATM  253  O   HOH T 252      -6.714   3.932  67.153  1.00  0.40           O  
HETATM  254  O   HOH T 253     -13.228  21.061  68.059  1.00  0.40           O  
HETATM  255  O   HOH T 254      11.829  -2.707  52.900  1.00  0.40           O  
HETATM  256  O   HOH T 255      25.560   9.434  51.937  1.00  0.40           O  
HETATM  257  O   HOH T 256      -8.790  10.304  80.419  1.00  0.41           O  
HETATM  258  O   HOH T 257      10.463  29.706  31.532  1.00  0.41           O  
HETATM  259  O   HOH T 258     -17.091  49.695  80.573  1.00  0.41           O  
HETATM  260  O   HOH T 259      18.886 -11.963  60.780  1.00  0.41           O  
HETATM  261  O   HOH T 260       8.558  15.943  38.569  1.00  0.41           O  
HETATM  262  O   HOH T 261      27.282   4.316  64.047  1.00  0.41           O  
HETATM  263  O   HOH T 262      31.541   2.213  59.547  1.00  0.41           O  
HETATM  264  O   HOH T 263       2.142  13.466  41.845  1.00  0.41           O  
HETATM  265  O   HOH T 264       6.012   0.688  44.403  1.00  0.41           O  
HETATM  266  O   HOH T 265      -7.639  26.546  42.962  1.00  0.41           O  
HETATM  267  O   HOH T 266      -4.308  44.414  67.209  1.00  0.41           O  
HETATM  268  O   HOH T 267      16.912  13.182  41.452  1.00  0.41           O  
HETATM  269  O   HOH T 268     -14.581  36.546  69.569  1.00  0.41           O  
HETATM  270  O   HOH T 269       3.259  28.006  54.849  1.00  0.41           O  
HETATM  271  O   HOH T 270      -0.144  27.575  47.127  1.00  0.41           O  
HETATM  272  O   HOH T 271     -19.307  24.232  89.395  1.00  0.41           O  
HETATM  273  O   HOH T 272      -6.422  33.274  55.187  1.00  0.41           O  
HETATM  274  O   HOH T 273       5.211  24.980  61.769  1.00  0.41           O  
HETATM  275  O   HOH T 274      -8.981  32.894  88.826  1.00  0.41           O  
HETATM  276  O   HOH T 275       4.965  34.862  76.249  1.00  0.41           O  
HETATM  277  O   HOH T 276       7.872  22.506  63.453  1.00  0.41           O  
HETATM  278  O   HOH T 277      25.138  22.892  41.479  1.00  0.41           O  
HETATM  279  O   HOH T 278       5.669  38.766  48.126  1.00  0.41           O  
HETATM  280  O   HOH T 279     -15.323  21.737  86.947  1.00  0.41           O  
HETATM  281  O   HOH T 280      -8.712  14.726  58.950  1.00  0.41           O  
HETATM  282  O   HOH T 281      -5.489  26.166  41.273  1.00  0.41           O  
HETATM  283  O   HOH T 282      14.862  39.157  35.430  1.00  0.41           O  
HETATM  284  O   HOH T 283      12.671  20.967  81.140  1.00  0.41           O  
HETATM  285  O   HOH T 284      10.018  30.753  46.178  1.00  0.41           O  
HETATM  286  O   HOH T 285      12.181  30.890  44.228  1.00  0.41           O  
HETATM  287  O   HOH T 286     -10.280  19.411  56.945  1.00  0.41           O  
HETATM  288  O   HOH T 287      11.433  26.141  45.343  1.00  0.41           O  
HETATM  289  O   HOH T 288     -25.614  21.957  73.882  1.00  0.41           O  
HETATM  290  O   HOH T 289      -0.029  -0.803  47.204  1.00  0.41           O  
HETATM  291  O   HOH T 290      12.678   9.138  51.027  1.00  0.41           O  
HETATM  292  O   HOH T 291      -7.199  26.005  53.662  1.00  0.41           O  
HETATM  293  O   HOH T 292      10.505  27.908  52.033  1.00  0.41           O  
HETATM  294  O   HOH T 293     -16.414  33.359  79.491  1.00  0.41           O  
HETATM  295  O   HOH T 294      37.844  17.077  47.776  1.00  0.41           O  
HETATM  296  O   HOH T 295      23.492  -5.277  61.715  1.00  0.41           O  
HETATM  297  O   HOH T 296       4.978  -1.043  58.565  1.00  0.41           O  
HETATM  298  O   HOH T 297      -9.008   5.589  76.031  1.00  0.41           O  
HETATM  299  O   HOH T 298      -7.989  12.629  75.672  1.00  0.41           O  
HETATM  300  O   HOH T 299      24.094  21.358  49.051  1.00  0.41           O  
HETATM  301  O   HOH T 300      -4.375  36.515  84.281  1.00  0.42           O  
HETATM  302  O   HOH T 301      25.128  15.034  35.405  1.00  0.42           O  
HETATM  303  O   HOH T 302      11.534  28.719  45.445  1.00  0.42           O  
HETATM  304  O   HOH T 303      34.512  17.059  55.090  1.00  0.42           O  
HETATM  305  O   HOH T 304      24.154   6.497  47.086  1.00  0.42           O  
HETATM  306  O   HOH T 305      26.738  24.388  54.609  1.00  0.42           O  
HETATM  307  O   HOH T 306       5.758  19.389  53.958  1.00  0.42           O  
HETATM  308  O   HOH T 307      30.870  15.298  45.938  1.00  0.42           O  
HETATM  309  O   HOH T 308       8.287  18.411  34.015  1.00  0.42           O  
HETATM  310  O   HOH T 309      -2.213   2.517  62.890  1.00  0.42           O  
HETATM  311  O   HOH T 310      13.343  20.729  78.426  1.00  0.42           O  
HETATM  312  O   HOH T 311      20.973 -12.854  62.238  1.00  0.42           O  
HETATM  313  O   HOH T 312      25.163  16.955  54.892  1.00  0.42           O  
HETATM  314  O   HOH T 313      26.038  -1.045  49.961  1.00  0.42           O  
HETATM  315  O   HOH T 314      21.387 -12.031  59.579  1.00  0.42           O  
HETATM  316  O   HOH T 315     -12.172  30.476  85.406  1.00  0.42           O  
HETATM  317  O   HOH T 316      11.880  35.372  41.218  1.00  0.42           O  
HETATM  318  O   HOH T 317      20.179  26.780  40.388  1.00  0.42           O  
HETATM  319  O   HOH T 318      12.180  27.763  82.218  1.00  0.42           O  
HETATM  320  O   HOH T 319     -10.574  43.694  64.194  1.00  0.42           O  
HETATM  321  O   HOH T 320      -1.675  -1.835  42.026  1.00  0.42           O  
HETATM  322  O   HOH T 321       4.279  23.716  64.158  1.00  0.42           O  
HETATM  323  O   HOH T 322       6.344  14.435  39.377  1.00  0.42           O  
HETATM  324  O   HOH T 323     -10.612  11.019  47.196  1.00  0.42           O  
HETATM  325  O   HOH T 324      -5.784  10.402  55.344  1.00  0.42           O  
HETATM  326  O   HOH T 325       7.856  -3.180  66.247  1.00  0.42           O  
HETATM  327  O   HOH T 326      25.719  17.061  57.608  1.00  0.42           O  
HETATM  328  O   HOH T 327     -15.105  28.845  88.829  1.00  0.42           O  
HETATM  329  O   HOH T 328     -21.723  16.242  82.071  1.00  0.42           O  
HETATM  330  O   HOH T 329       1.886  29.474  56.779  1.00  0.42           O  
HETATM  331  O   HOH T 330      11.480  22.674  59.977  1.00  0.42           O  
HETATM  332  O   HOH T 331       3.115  32.027  65.266  1.00  0.42           O  
HETATM  333  O   HOH T 332      10.337  35.956  38.945  1.00  0.42           O  
HETATM  334  O   HOH T 333      21.972  11.114  58.687  1.00  0.42           O  
HETATM  335  O   HOH T 334      31.203  16.920  43.720  1.00  0.43           O  
HETATM  336  O   HOH T 335       0.066   0.788  49.562  1.00  0.43           O  
HETATM  337  O   HOH T 336      28.293   7.155  45.267  1.00  0.43           O  
HETATM  338  O   HOH T 337      18.007  18.515  33.927  1.00  0.43           O  
HETATM  339  O   HOH T 338      32.778  15.375  48.062  1.00  0.43           O  
HETATM  340  O   HOH T 339      23.191  24.081  43.060  1.00  0.43           O  
HETATM  341  O   HOH T 340     -14.163  47.164  68.153  1.00  0.43           O  
HETATM  342  O   HOH T 341     -12.962  11.243  82.420  1.00  0.43           O  
HETATM  343  O   HOH T 342       7.375  36.922  46.500  1.00  0.43           O  
HETATM  344  O   HOH T 343      -8.861  26.164  55.895  1.00  0.43           O  
HETATM  345  O   HOH T 344     -10.780  17.608  47.377  1.00  0.43           O  
HETATM  346  O   HOH T 345      -6.014  36.034  55.546  1.00  0.43           O  
HETATM  347  O   HOH T 346     -18.688  41.854  76.954  1.00  0.43           O  
HETATM  348  O   HOH T 347       1.042  18.977  44.051  1.00  0.43           O  
HETATM  349  O   HOH T 348      -3.847  33.977  85.234  1.00  0.43           O  
HETATM  350  O   HOH T 349     -13.506  11.466  75.305  1.00  0.43           O  
HETATM  351  O   HOH T 350      29.718  22.976  58.062  1.00  0.43           O  
HETATM  352  O   HOH T 351     -13.017  15.977  47.629  1.00  0.43           O  
HETATM  353  O   HOH T 352       2.549  30.185  67.288  1.00  0.43           O  
HETATM  354  O   HOH T 353      11.547  31.811  48.303  1.00  0.43           O  
HETATM  355  O   HOH T 354      -3.300   0.905  45.364  1.00  0.43           O  
HETATM  356  O   HOH T 355      17.048  -0.811  55.938  1.00  0.43           O  
HETATM  357  O   HOH T 356      24.443   2.682  56.672  1.00  0.43           O  
HETATM  358  O   HOH T 357      24.538  25.398  59.827  1.00  0.43           O  
HETATM  359  O   HOH T 358      20.400  37.361  43.636  1.00  0.43           O  
HETATM  360  O   HOH T 359      29.069  25.865  47.771  1.00  0.43           O  
HETATM  361  O   HOH T 360      19.145  14.567  40.542  1.00  0.43           O  
HETATM  362  O   HOH T 361      28.279   8.888  52.406  1.00  0.43           O  
HETATM  363  O   HOH T 362     -16.969  11.363  80.006  1.00  0.43           O  
HETATM  364  O   HOH T 363      -6.620   5.573  80.195  1.00  0.44           O  
HETATM  365  O   HOH T 364       8.327  31.792  54.313  1.00  0.44           O  
HETATM  366  O   HOH T 365      35.626   8.060  43.485  1.00  0.44           O  
HETATM  367  O   HOH T 366      16.367  27.196  36.364  1.00  0.44           O  
HETATM  368  O   HOH T 367      -7.885  36.536  64.811  1.00  0.44           O  
HETATM  369  O   HOH T 368     -16.668  19.887  88.470  1.00  0.44           O  
HETATM  370  O   HOH T 369      11.233  28.567  75.642  1.00  0.44           O  
HETATM  371  O   HOH T 370      -6.530  30.147  54.974  1.00  0.44           O  
HETATM  372  O   HOH T 371      21.826  17.052  33.250  1.00  0.44           O  
HETATM  373  O   HOH T 372      -6.096  28.497  53.006  1.00  0.44           O  
HETATM  374  O   HOH T 373      -0.713  20.401  45.547  1.00  0.44           O  
HETATM  375  O   HOH T 374      29.682   5.155  63.097  1.00  0.44           O  
HETATM  376  O   HOH T 375      22.373  23.797  52.681  1.00  0.44           O  
HETATM  377  O   HOH T 376      30.652   7.559  64.041  1.00  0.44           O  
HETATM  378  O   HOH T 377       3.586  27.189  60.980  1.00  0.44           O  
HETATM  379  O   HOH T 378      -8.872  25.285  58.537  1.00  0.44           O  
HETATM  380  O   HOH T 379      14.794  32.778  24.158  1.00  0.44           O  
HETATM  381  O   HOH T 380      10.470  25.099  66.540  1.00  0.44           O  
HETATM  382  O   HOH T 381      -7.743   3.157  75.628  1.00  0.44           O  
HETATM  383  O   HOH T 382      22.274  -8.322  55.763  1.00  0.44           O  
HETATM  384  O   HOH T 383      28.367  12.481  64.950  1.00  0.44           O  
HETATM  385  O   HOH T 384      -2.866  37.040  77.235  1.00  0.44           O  
HETATM  386  O   HOH T 385      23.419  11.482  68.889  1.00  0.44           O  
HETATM  387  O   HOH T 386      -6.966  35.010  53.101  1.00  0.44           O  
HETATM  388  O   HOH T 387      14.671  28.938  28.212  1.00  0.44           O  
HETATM  389  O   HOH T 388       6.379  30.133  55.103  1.00  0.44           O  
HETATM  390  O   HOH T 389      21.902  17.084  52.819  1.00  0.44           O  
HETATM  391  O   HOH T 390     -13.267  23.450  69.506  1.00  0.45           O  
HETATM  392  O   HOH T 391      13.605  18.674  41.754  1.00  0.45           O  
HETATM  393  O   HOH T 392       9.090  20.968  48.138  1.00  0.45           O  
HETATM  394  O   HOH T 393       2.382  25.838  42.832  1.00  0.45           O  
HETATM  395  O   HOH T 394       4.776  26.976  42.108  1.00  0.45           O  
HETATM  396  O   HOH T 395      -8.766  28.892  56.353  1.00  0.45           O  
HETATM  397  O   HOH T 396      38.276  10.475  40.530  1.00  0.45           O  
HETATM  398  O   HOH T 397       3.119  33.295  59.255  1.00  0.45           O  
HETATM  399  O   HOH T 398      13.747  23.782  69.122  1.00  0.45           O  
HETATM  400  O   HOH T 399     -17.083  33.412  89.587  1.00  0.45           O  
HETATM  401  O   HOH T 400      -7.984  11.184  64.719  1.00  0.45           O  
HETATM  402  O   HOH T 401      -1.475  15.588  40.568  1.00  0.45           O  
HETATM  403  O   HOH T 402      13.828  28.079  32.246  1.00  0.45           O  
HETATM  404  O   HOH T 403      37.606   8.840  49.147  1.00  0.45           O  
HETATM  405  O   HOH T 404       2.637  35.094  77.774  1.00  0.45           O  
HETATM  406  O   HOH T 405      20.682  25.315  42.796  1.00  0.45           O  
HETATM  407  O   HOH T 406      10.703  28.185  54.818  1.00  0.45           O  
HETATM  408  O   HOH T 407     -19.506  29.104  67.123  1.00  0.45           O  
HETATM  409  O   HOH T 408       3.878  31.648  82.040  1.00  0.45           O  
HETATM  410  O   HOH T 409      16.655  35.184  26.630  1.00  0.45           O  
HETATM  411  O   HOH T 410      13.780  13.059  37.238  1.00  0.45           O  
HETATM  412  O   HOH T 411       8.404  20.720  50.761  1.00  0.45           O  
HETATM  413  O   HOH T 412      -4.995   7.074  81.927  1.00  0.45           O  
HETATM  414  O   HOH T 413      12.793  21.993  70.841  1.00  0.45           O  
HETATM  415  O   HOH T 414      34.841  18.838  45.394  1.00  0.45           O  
HETATM  416  O   HOH T 415      -8.971  17.457  55.484  1.00  0.45           O  
HETATM  417  O   HOH T 416       7.390  29.169  76.793  1.00  0.45           O  
HETATM  418  O   HOH T 417      -7.404   3.159  50.357  1.00  0.45           O  
HETATM  419  O   HOH T 418      27.210  19.360  57.871  1.00  0.45           O  
HETATM  420  O   HOH T 419       2.387  21.005  42.890  1.00  0.45           O  
HETATM  421  O   HOH T 420       1.778  24.614  45.222  1.00  0.45           O  
HETATM  422  O   HOH T 421      -0.775  13.447  43.912  1.00  0.45           O  
HETATM  423  O   HOH T 422      -3.501  43.589  61.471  1.00  0.45           O  
HETATM  424  O   HOH T 423       9.662  37.163  41.367  1.00  0.45           O  
HETATM  425  O   HOH T 424     -20.981  22.431  73.398  1.00  0.45           O  
HETATM  426  O   HOH T 425       5.659  25.588  55.380  1.00  0.45           O  
HETATM  427  O   HOH T 426      -9.896   7.858  80.079  1.00  0.45           O  
HETATM  428  O   HOH T 427      -4.475  40.032  57.473  1.00  0.45           O  
HETATM  429  O   HOH T 428      -2.552   3.907  53.509  1.00  0.45           O  
HETATM  430  O   HOH T 429       4.682  23.460  39.820  1.00  0.45           O  
HETATM  431  O   HOH T 430      -2.437  22.122  44.381  1.00  0.46           O  
HETATM  432  O   HOH T 431      27.714  21.805  55.051  1.00  0.46           O  
HETATM  433  O   HOH T 432      22.207  37.831  41.565  1.00  0.46           O  
HETATM  434  O   HOH T 433      11.845  18.667  77.240  1.00  0.46           O  
HETATM  435  O   HOH T 434      10.442  15.732  85.861  1.00  0.46           O  
HETATM  436  O   HOH T 435      30.088  24.165  43.728  1.00  0.46           O  
HETATM  437  O   HOH T 436       3.022  35.933  68.814  1.00  0.46           O  
HETATM  438  O   HOH T 437      21.362  24.504  49.087  1.00  0.46           O  
HETATM  439  O   HOH T 438      16.324  22.807  69.670  1.00  0.46           O  
HETATM  440  O   HOH T 439     -12.256  11.123  72.762  1.00  0.46           O  
HETATM  441  O   HOH T 440     -12.913  23.401  66.752  1.00  0.46           O  
HETATM  442  O   HOH T 441      -5.691  25.242  89.625  1.00  0.46           O  
HETATM  443  O   HOH T 442      35.232  20.124  47.914  1.00  0.46           O  
HETATM  444  O   HOH T 443      21.085  12.978  35.645  1.00  0.46           O  
HETATM  445  O   HOH T 444       8.399  29.070  53.549  1.00  0.46           O  
HETATM  446  O   HOH T 445      12.724  29.389  30.082  1.00  0.46           O  
HETATM  447  O   HOH T 446      12.523  19.452  74.725  1.00  0.46           O  
HETATM  448  O   HOH T 447      29.829  15.161  42.077  1.00  0.46           O  
HETATM  449  O   HOH T 448      -1.664  18.161  43.961  1.00  0.46           O  
HETATM  450  O   HOH T 449      -5.168   8.676  53.241  1.00  0.46           O  
HETATM  451  O   HOH T 450      -9.033   5.490  78.856  1.00  0.46           O  
HETATM  452  O   HOH T 451      17.003  38.746  42.601  1.00  0.46           O  
HETATM  453  O   HOH T 452       4.921  36.072  78.791  1.00  0.46           O  
HETATM  454  O   HOH T 453      20.467  13.432  38.349  1.00  0.46           O  
HETATM  455  O   HOH T 454     -18.594  16.325  86.035  1.00  0.46           O  
HETATM  456  O   HOH T 455      12.282  29.970  53.380  1.00  0.46           O  
HETATM  457  O   HOH T 456      14.574   6.457  76.146  1.00  0.46           O  
HETATM  458  O   HOH T 457      27.633  12.277  40.904  1.00  0.46           O  
HETATM  459  O   HOH T 458      12.081  27.527  87.610  1.00  0.46           O  
HETATM  460  O   HOH T 459      22.092   1.639  55.329  1.00  0.46           O  
HETATM  461  O   HOH T 460      32.395  10.474  60.615  1.00  0.46           O  
HETATM  462  O   HOH T 461     -11.175  26.374  59.592  1.00  0.46           O  
HETATM  463  O   HOH T 462      25.614  14.645  56.297  1.00  0.46           O  
HETATM  464  O   HOH T 463       8.076  19.626  45.900  1.00  0.46           O  
HETATM  465  O   HOH T 464      -6.294  34.954  48.711  1.00  0.46           O  
HETATM  466  O   HOH T 465      22.011  17.091  65.499  1.00  0.47           O  
HETATM  467  O   HOH T 466     -18.005  33.293  84.757  1.00  0.47           O  
HETATM  468  O   HOH T 467     -14.435  10.374  80.300  1.00  0.47           O  
HETATM  469  O   HOH T 468      -5.761  41.325  54.107  1.00  0.47           O  
HETATM  470  O   HOH T 469      -7.073  11.079  62.110  1.00  0.47           O  
HETATM  471  O   HOH T 470      38.067  11.240  62.137  1.00  0.47           O  
HETATM  472  O   HOH T 471      -9.594  38.732  62.092  1.00  0.47           O  
HETATM  473  O   HOH T 472     -10.546   6.413  73.877  1.00  0.47           O  
HETATM  474  O   HOH T 473      15.273  36.709  34.432  1.00  0.47           O  
HETATM  475  O   HOH T 474      24.314   4.877  38.736  1.00  0.47           O  
HETATM  476  O   HOH T 475       1.103  17.311  51.842  1.00  0.47           O  
HETATM  477  O   HOH T 476      13.759  27.473  76.015  1.00  0.47           O  
HETATM  478  O   HOH T 477      21.385  -1.063  54.323  1.00  0.47           O  
HETATM  479  O   HOH T 478     -18.065  15.382  83.425  1.00  0.47           O  
HETATM  480  O   HOH T 479      28.014  15.342  35.724  1.00  0.47           O  
HETATM  481  O   HOH T 480      18.549  13.688  34.659  1.00  0.47           O  
HETATM  482  O   HOH T 481      26.426  17.125  34.186  1.00  0.47           O  
HETATM  483  O   HOH T 482      38.121  15.546  45.367  1.00  0.47           O  
HETATM  484  O   HOH T 483      25.951  14.514  40.538  1.00  0.47           O  
HETATM  485  O   HOH T 484     -16.022  24.997  65.784  1.00  0.47           O  
HETATM  486  O   HOH T 485     -13.940  33.673  80.695  1.00  0.47           O  
HETATM  487  O   HOH T 486      14.459  21.715  35.107  1.00  0.47           O  
HETATM  488  O   HOH T 487      -8.248  12.122  59.679  1.00  0.47           O  
HETATM  489  O   HOH T 488      -3.996  18.520  42.140  1.00  0.47           O  
HETATM  490  O   HOH T 489      -8.542  23.169  44.509  1.00  0.47           O  
HETATM  491  O   HOH T 490      21.915 -14.640  60.482  1.00  0.47           O  
HETATM  492  O   HOH T 491     -11.995  45.588  69.380  1.00  0.47           O  
HETATM  493  O   HOH T 492      19.364  22.840  36.360  1.00  0.47           O  
HETATM  494  O   HOH T 493      -5.586  37.320  59.928  1.00  0.47           O  
HETATM  495  O   HOH T 494      -2.201  29.022  85.831  1.00  0.47           O  
HETATM  496  O   HOH T 495     -17.008  43.537  78.376  1.00  0.48           O  
HETATM  497  O   HOH T 496      24.156   0.667  60.128  1.00  0.48           O  
HETATM  498  O   HOH T 497       8.918  13.188  81.778  1.00  0.48           O  
HETATM  499  O   HOH T 498       4.223  11.806  87.625  1.00  0.48           O  
HETATM  500  O   HOH T 499     -11.548  11.910  44.778  1.00  0.48           O  
HETATM  501  O   HOH T 500       2.601  26.745  46.730  1.00  0.48           O  
HETATM  502  O   HOH T 501       6.872  -1.609  45.580  1.00  0.48           O  
HETATM  503  O   HOH T 502     -14.639  30.047  84.142  1.00  0.48           O  
HETATM  504  O   HOH T 503      -6.542   8.806  83.576  1.00  0.48           O  
HETATM  505  O   HOH T 504      33.306   8.896  42.138  1.00  0.48           O  
HETATM  506  O   HOH T 505      -1.073   6.308  53.472  1.00  0.48           O  
HETATM  507  O   HOH T 506      35.489  15.662  52.886  1.00  0.48           O  
HETATM  508  O   HOH T 507      13.695  30.024  81.814  1.00  0.48           O  
HETATM  509  O   HOH T 508      -6.330  13.121  54.837  1.00  0.48           O  
HETATM  510  O   HOH T 509      -5.871  38.929  52.635  1.00  0.48           O  
HETATM  511  O   HOH T 510      11.201  20.460  72.476  1.00  0.48           O  
HETATM  512  O   HOH T 511     -19.075  23.691  92.088  1.00  0.48           O  
HETATM  513  O   HOH T 512       3.700  32.458  68.100  1.00  0.48           O  
HETATM  514  O   HOH T 513      40.194  12.333  41.279  1.00  0.48           O  
HETATM  515  O   HOH T 514      17.716  12.925  38.717  1.00  0.48           O  
HETATM  516  O   HOH T 515      -4.207  36.540  49.369  1.00  0.48           O  
HETATM  517  O   HOH T 516      21.780  24.936  45.338  1.00  0.48           O  
HETATM  518  O   HOH T 517      -1.282  -0.759  44.581  1.00  0.48           O  
HETATM  519  O   HOH T 518      20.197  19.110  66.055  1.00  0.48           O  
HETATM  520  O   HOH T 519     -21.712  13.950  75.059  1.00  0.48           O  
HETATM  521  O   HOH T 520     -13.344  46.486  71.645  1.00  0.48           O  
HETATM  522  O   HOH T 521      -1.287  42.325  64.109  1.00  0.48           O  
HETATM  523  O   HOH T 522      19.429  38.550  41.294  1.00  0.48           O  
HETATM  524  O   HOH T 523      12.692  -3.677  55.277  1.00  0.48           O  
HETATM  525  O   HOH T 524      12.738  27.631  56.619  1.00  0.48           O  
HETATM  526  O   HOH T 525      21.958  -0.513  56.980  1.00  0.49           O  
HETATM  527  O   HOH T 526     -15.194  11.254  77.672  1.00  0.49           O  
HETATM  528  O   HOH T 527      34.907  18.533  50.386  1.00  0.49           O  
HETATM  529  O   HOH T 528      27.041   2.412  41.169  1.00  0.49           O  
HETATM  530  O   HOH T 529      13.107  -6.542  61.469  1.00  0.49           O  
HETATM  531  O   HOH T 530      -9.407  34.759  63.200  1.00  0.49           O  
HETATM  532  O   HOH T 531     -15.622  16.804  47.180  1.00  0.49           O  
HETATM  533  O   HOH T 532       6.289  26.735  76.751  1.00  0.49           O  
HETATM  534  O   HOH T 533       5.795  20.867  45.033  1.00  0.49           O  
HETATM  535  O   HOH T 534     -23.137  20.825  73.049  1.00  0.49           O  
HETATM  536  O   HOH T 535       4.599   2.391  71.775  1.00  0.49           O  
HETATM  537  O   HOH T 536      -7.563  24.130  51.724  1.00  0.49           O  
HETATM  538  O   HOH T 537      12.185  -5.605  58.210  1.00  0.49           O  
HETATM  539  O   HOH T 538      26.397   5.021  40.428  1.00  0.49           O  
HETATM  540  O   HOH T 539      37.365  13.931  42.989  1.00  0.49           O  
HETATM  541  O   HOH T 540      -8.119  31.583  51.988  1.00  0.49           O  
HETATM  542  O   HOH T 541      -6.971  44.257  66.558  1.00  0.49           O  
HETATM  543  O   HOH T 542      16.089  -2.907  54.525  1.00  0.49           O  
HETATM  544  O   HOH T 543     -12.288  48.336  69.766  1.00  0.49           O  
HETATM  545  O   HOH T 544      10.834  32.354  53.359  1.00  0.49           O  
HETATM  546  O   HOH T 545      -8.484  24.734  90.019  1.00  0.49           O  
HETATM  547  O   HOH T 546     -18.967  39.138  76.341  1.00  0.49           O  
HETATM  548  O   HOH T 547     -18.411  28.214  78.838  1.00  0.49           O  
HETATM  549  O   HOH T 548       0.885  34.655  60.477  1.00  0.49           O  
HETATM  550  O   HOH T 549      36.233  12.831  57.852  1.00  0.49           O  
HETATM  551  O   HOH T 550      16.915  -0.524  58.619  1.00  0.49           O  
HETATM  552  O   HOH T 551      12.857  29.562  77.696  1.00  0.49           O  
HETATM  553  O   HOH T 552      21.891  16.220  59.002  1.00  0.49           O  
HETATM  554  O   HOH T 553      -6.630  32.319  87.552  1.00  0.49           O  
HETATM  555  O   HOH T 554      16.350  12.866  36.250  1.00  0.49           O  
HETATM  556  O   HOH T 555      -4.092   7.393  50.980  1.00  0.49           O  
HETATM  557  O   HOH T 556      26.611  -1.690  52.646  1.00  0.49           O  
HETATM  558  O   HOH T 557     -18.796  21.669  88.407  1.00  0.49           O  
HETATM  559  O   HOH T 558      24.176  21.948  51.723  1.00  0.49           O  
HETATM  560  O   HOH T 559      -5.799  31.927  85.007  1.00  0.49           O  
HETATM  561  O   HOH T 560      14.785  27.766  78.516  1.00  0.50           O  
HETATM  562  O   HOH T 561      20.477  17.099  67.892  1.00  0.50           O  
HETATM  563  O   HOH T 562      -7.077   1.659  45.249  1.00  0.50           O  
HETATM  564  O   HOH T 563      -5.603   1.579  71.532  1.00  0.50           O  
HETATM  565  O   HOH T 564      -7.984  23.519  92.545  1.00  0.50           O  
HETATM  566  O   HOH T 565      -3.431   0.622  70.094  1.00  0.50           O  
HETATM  567  O   HOH T 566      18.635  40.861  42.229  1.00  0.50           O  
HETATM  568  O   HOH T 567       3.815   0.769  66.649  1.00  0.50           O  
HETATM  569  O   HOH T 568       3.718  -4.970  47.311  1.00  0.50           O  
HETATM  570  O   HOH T 569      23.351  12.324  55.756  1.00  0.50           O  
HETATM  571  O   HOH T 570      -4.060  34.384  82.414  1.00  0.50           O  
HETATM  572  O   HOH T 571     -18.135  12.979  82.022  1.00  0.50           O  
HETATM  573  O   HOH T 572       6.653  11.792  80.895  1.00  0.50           O  
HETATM  574  O   HOH T 573      -6.295  21.322  93.473  1.00  0.50           O  
HETATM  575  O   HOH T 574      33.278  21.988  39.750  1.00  0.50           O  
HETATM  576  O   HOH T 575      14.636   7.892  37.239  1.00  0.50           O  
HETATM  577  O   HOH T 576      12.280  -0.939  36.586  1.00  0.50           O  
HETATM  578  O   HOH T 577     -10.761  34.546  59.121  1.00  0.50           O  
HETATM  579  O   HOH T 578      -5.584   7.008  61.777  1.00  0.50           O  
HETATM  580  O   HOH T 579      -0.732  39.680  64.545  1.00  0.50           O  
HETATM  581  O   HOH T 580     -10.097   3.708  74.311  1.00  0.50           O  
HETATM  582  O   HOH T 581      21.856  17.800  56.792  1.00  0.50           O  
HETATM  583  O   HOH T 582      20.742  10.607  68.889  1.00  0.50           O  
HETATM  584  O   HOH T 583      -0.742   1.599  46.157  1.00  0.50           O  
HETATM  585  O   HOH T 584      -4.841   7.907  58.326  1.00  0.50           O  
HETATM  586  O   HOH T 585     -15.609  11.778  82.539  1.00  0.50           O  
HETATM  587  O   HOH T 586       3.636   8.040  77.144  1.00  0.50           O  
HETATM  588  O   HOH T 587       4.735  25.964  74.663  1.00  0.50           O  
HETATM  589  O   HOH T 588      29.255   6.359  47.799  1.00  0.50           O  
HETATM  590  O   HOH T 589      16.037  -9.340  58.182  1.00  0.51           O  
HETATM  591  O   HOH T 590      -6.561  13.322  57.648  1.00  0.51           O  
HETATM  592  O   HOH T 591     -24.781  18.722  85.556  1.00  0.51           O  
HETATM  593  O   HOH T 592     -16.156  50.839  78.242  1.00  0.51           O  
HETATM  594  O   HOH T 593      26.745   5.584  46.844  1.00  0.51           O  
HETATM  595  O   HOH T 594      14.819  37.350  28.955  1.00  0.51           O  
HETATM  596  O   HOH T 595      -5.892   5.453  50.178  1.00  0.51           O  
HETATM  597  O   HOH T 596      31.583  20.353  38.686  1.00  0.51           O  
HETATM  598  O   HOH T 597      29.082  23.707  53.379  1.00  0.51           O  
HETATM  599  O   HOH T 598      24.354  20.464  35.462  1.00  0.51           O  
HETATM  600  O   HOH T 599      39.060  13.720  61.455  1.00  0.51           O  
HETATM  601  O   HOH T 600     -21.554  26.429  72.770  1.00  0.51           O  
HETATM  602  O   HOH T 601      13.743  26.536  35.916  1.00  0.51           O  
HETATM  603  O   HOH T 602       3.243  23.369  41.973  1.00  0.51           O  
HETATM  604  O   HOH T 603      -0.587  45.792  52.412  1.00  0.51           O  
HETATM  605  O   HOH T 604       8.041  25.149  72.749  1.00  0.51           O  
HETATM  606  O   HOH T 605      33.342  22.763  44.554  1.00  0.51           O  
HETATM  607  O   HOH T 606      16.466  30.620  23.396  1.00  0.51           O  
HETATM  608  O   HOH T 607      29.228  23.786  41.135  1.00  0.52           O  
HETATM  609  O   HOH T 608       8.045   2.335  33.059  1.00  0.52           O  
HETATM  610  O   HOH T 609      24.638  12.037  58.404  1.00  0.52           O  
HETATM  611  O   HOH T 610      22.632  13.789  58.091  1.00  0.52           O  
HETATM  612  O   HOH T 611      27.097  23.552  57.379  1.00  0.52           O  
HETATM  613  O   HOH T 612      39.779  17.981  49.598  1.00  0.52           O  
HETATM  614  O   HOH T 613     -12.233  10.572  49.370  1.00  0.52           O  
HETATM  615  O   HOH T 614      24.895  -8.421  55.119  1.00  0.52           O  
HETATM  616  O   HOH T 615       3.845  -7.198  48.715  1.00  0.52           O  
HETATM  617  O   HOH T 616      16.894  -6.743  57.690  1.00  0.52           O  
HETATM  618  O   HOH T 617     -14.023  11.421  84.949  1.00  0.52           O  
HETATM  619  O   HOH T 618      10.643  32.026  79.269  1.00  0.52           O  
HETATM  620  O   HOH T 619     -22.536  22.774  87.403  1.00  0.52           O  
HETATM  621  O   HOH T 620      -7.170  44.641  71.107  1.00  0.52           O  
HETATM  622  O   HOH T 621      38.888  12.892  45.274  1.00  0.52           O  
HETATM  623  O   HOH T 622       2.265  35.717  58.297  1.00  0.52           O  
HETATM  624  O   HOH T 623      10.606  -5.021  50.030  1.00  0.52           O  
HETATM  625  O   HOH T 624      25.733   7.794  40.809  1.00  0.52           O  
HETATM  626  O   HOH T 625      11.502  25.898  75.094  1.00  0.52           O  
HETATM  627  O   HOH T 626      15.536  26.524  33.789  1.00  0.52           O  
HETATM  628  O   HOH T 627      33.659  15.923  50.699  1.00  0.53           O  
HETATM  629  O   HOH T 628      21.922  25.042  64.877  1.00  0.53           O  
HETATM  630  O   HOH T 629     -11.430  24.339  89.930  1.00  0.53           O  
HETATM  631  O   HOH T 630      29.167  24.969  50.418  1.00  0.53           O  
HETATM  632  O   HOH T 631      23.454  19.406  52.479  1.00  0.53           O  
HETATM  633  O   HOH T 632       5.007  31.772  60.752  1.00  0.53           O  
HETATM  634  O   HOH T 633      -5.745  38.823  55.474  1.00  0.53           O  
HETATM  635  O   HOH T 634     -18.725  36.686  68.504  1.00  0.53           O  
HETATM  636  O   HOH T 635       4.781  29.277  62.426  1.00  0.53           O  
HETATM  637  O   HOH T 636     -10.822  38.667  64.679  1.00  0.53           O  
HETATM  638  O   HOH T 637      39.679   8.167  50.914  1.00  0.53           O  
HETATM  639  O   HOH T 638      21.058  39.958  42.884  1.00  0.53           O  
HETATM  640  O   HOH T 639      -2.232  44.710  69.016  1.00  0.53           O  
HETATM  641  O   HOH T 640     -11.417  25.942  62.317  1.00  0.53           O  
HETATM  642  O   HOH T 641       3.391  30.308  79.629  1.00  0.53           O  
HETATM  643  O   HOH T 642      26.690   0.093  39.615  1.00  0.53           O  
HETATM  644  O   HOH T 643      -1.812   0.905  73.691  1.00  0.53           O  
HETATM  645  O   HOH T 644      -8.518  35.801  56.741  1.00  0.53           O  
HETATM  646  O   HOH T 645      20.891  14.441  54.527  1.00  0.53           O  
HETATM  647  O   HOH T 646      10.483  -2.643  46.155  1.00  0.53           O  
HETATM  648  O   HOH T 647       9.730  16.981  73.773  1.00  0.53           O  
HETATM  649  O   HOH T 648       2.509  34.048  63.216  1.00  0.53           O  
HETATM  650  O   HOH T 649       7.937  11.502  78.590  1.00  0.53           O  
HETATM  651  O   HOH T 650     -17.902  30.984  79.353  1.00  0.53           O  
HETATM  652  O   HOH T 651      -2.198  35.515  80.682  1.00  0.53           O  
HETATM  653  O   HOH T 652      31.732   9.960  63.259  1.00  0.53           O  
HETATM  654  O   HOH T 653       6.555  31.497  73.786  1.00  0.53           O  
HETATM  655  O   HOH T 654       8.195  31.543  75.939  1.00  0.53           O  
HETATM  656  O   HOH T 655       3.546  27.676  68.050  1.00  0.53           O  
HETATM  657  O   HOH T 656      34.900  24.416  48.728  1.00  0.53           O  
HETATM  658  O   HOH T 657      -5.502  36.735  81.734  1.00  0.53           O  
HETATM  659  O   HOH T 658      37.167   7.093  51.429  1.00  0.54           O  
HETATM  660  O   HOH T 659      -3.275  38.879  59.860  1.00  0.54           O  
HETATM  661  O   HOH T 660     -13.853  32.468  83.031  1.00  0.54           O  
HETATM  662  O   HOH T 661      10.398  21.872  34.772  1.00  0.54           O  
HETATM  663  O   HOH T 662      25.769  10.465  39.716  1.00  0.54           O  
HETATM  664  O   HOH T 663      -2.294   1.602  76.254  1.00  0.54           O  
HETATM  665  O   HOH T 664       9.794   8.862  50.909  1.00  0.54           O  
HETATM  666  O   HOH T 665      31.715   7.238  47.039  1.00  0.54           O  
HETATM  667  O   HOH T 666       5.747  28.453  88.218  1.00  0.54           O  
HETATM  668  O   HOH T 667      12.063  25.239  89.125  1.00  0.54           O  
HETATM  669  O   HOH T 668      -9.916  12.152  78.756  1.00  0.54           O  
HETATM  670  O   HOH T 669      -7.349   8.101  81.088  1.00  0.54           O  
HETATM  671  O   HOH T 670      29.228  24.959  56.001  1.00  0.54           O  
HETATM  672  O   HOH T 671      14.159  -4.236  52.968  1.00  0.54           O  
HETATM  673  O   HOH T 672     -12.870  12.153  51.703  1.00  0.54           O  
HETATM  674  O   HOH T 673      22.611  23.017  47.252  1.00  0.54           O  
HETATM  675  O   HOH T 674      23.929   8.875  48.578  1.00  0.54           O  
HETATM  676  O   HOH T 675     -12.129  21.043  65.554  1.00  0.54           O  
HETATM  677  O   HOH T 676      34.907  13.869  41.913  1.00  0.54           O  
HETATM  678  O   HOH T 677      -8.857  28.200  44.752  1.00  0.55           O  
HETATM  679  O   HOH T 678      34.068  20.346  43.077  1.00  0.55           O  
HETATM  680  O   HOH T 679      27.459   8.676  66.417  1.00  0.55           O  
HETATM  681  O   HOH T 680     -19.533  26.687  65.780  1.00  0.55           O  
HETATM  682  O   HOH T 681      -6.318  34.570  84.054  1.00  0.55           O  
HETATM  683  O   HOH T 682      31.757  23.890  41.292  1.00  0.55           O  
HETATM  684  O   HOH T 683      24.335  -2.173  59.942  1.00  0.55           O  
HETATM  685  O   HOH T 684      -2.430  29.072  46.947  1.00  0.55           O  
HETATM  686  O   HOH T 685      25.909   2.686  38.779  1.00  0.55           O  
HETATM  687  O   HOH T 686      21.930  21.752  36.262  1.00  0.55           O  
HETATM  688  O   HOH T 687       0.723  26.995  44.658  1.00  0.55           O  
HETATM  689  O   HOH T 688      -3.334  24.410  90.910  1.00  0.55           O  
HETATM  690  O   HOH T 689     -18.588  17.920  88.328  1.00  0.55           O  
HETATM  691  O   HOH T 690     -16.040  21.016  68.005  1.00  0.55           O  
HETATM  692  O   HOH T 691       5.807   8.785  74.539  1.00  0.55           O  
HETATM  693  O   HOH T 692      21.172  13.199  72.658  1.00  0.55           O  
HETATM  694  O   HOH T 693      13.764  34.064  44.484  1.00  0.55           O  
HETATM  695  O   HOH T 694      -5.841   5.719  56.778  1.00  0.55           O  
HETATM  696  O   HOH T 695      23.637  18.371  58.934  1.00  0.55           O  
HETATM  697  O   HOH T 696       9.628  26.958  88.831  1.00  0.55           O  
HETATM  698  O   HOH T 697      -0.006  -3.316  40.425  1.00  0.56           O  
HETATM  699  O   HOH T 698      36.538  12.947  60.630  1.00  0.56           O  
HETATM  700  O   HOH T 699      -3.350   1.209  72.763  1.00  0.56           O  
HETATM  701  O   HOH T 700       7.418  35.613  53.701  1.00  0.56           O  
HETATM  702  O   HOH T 701      42.115  17.001  48.566  1.00  0.56           O  
HETATM  703  O   HOH T 702      -9.243   8.771  82.719  1.00  0.56           O  
HETATM  704  O   HOH T 703      18.377 -13.079  63.272  1.00  0.56           O  
HETATM  705  O   HOH T 704      23.480  23.646  39.416  1.00  0.56           O  
HETATM  706  O   HOH T 705     -19.752  29.853  70.550  1.00  0.56           O  
HETATM  707  O   HOH T 706      10.262  15.456  71.590  1.00  0.56           O  
HETATM  708  O   HOH T 707      33.379  19.334  40.506  1.00  0.56           O  
HETATM  709  O   HOH T 708       4.766  20.358  90.702  1.00  0.56           O  
HETATM  710  O   HOH T 709      35.634  22.504  49.403  1.00  0.56           O  
HETATM  711  O   HOH T 710      -7.944  39.874  54.263  1.00  0.56           O  
HETATM  712  O   HOH T 711       9.475  24.581  64.012  1.00  0.56           O  
HETATM  713  O   HOH T 712      36.476   9.569  60.734  1.00  0.56           O  
HETATM  714  O   HOH T 713       2.697   6.415  79.166  1.00  0.56           O  
HETATM  715  O   HOH T 714      -0.671  30.639  87.502  1.00  0.56           O  
HETATM  716  O   HOH T 715      -6.674   5.629  64.852  1.00  0.56           O  
HETATM  717  O   HOH T 716       7.260  36.471  80.051  1.00  0.56           O  
HETATM  718  O   HOH T 717      -9.639  15.449  91.474  1.00  0.57           O  
HETATM  719  O   HOH T 718       5.463   4.212  73.791  1.00  0.57           O  
HETATM  720  O   HOH T 719      31.593  22.545  60.017  1.00  0.57           O  
HETATM  721  O   HOH T 720     -18.638  16.956  67.103  1.00  0.57           O  
HETATM  722  O   HOH T 721      12.582  -5.069  46.885  1.00  0.57           O  
HETATM  723  O   HOH T 722       1.638  39.742  45.249  1.00  0.57           O  
HETATM  724  O   HOH T 723       1.974  12.832  44.512  1.00  0.57           O  
HETATM  725  O   HOH T 724      22.722  14.583  34.077  1.00  0.57           O  
HETATM  726  O   HOH T 725      22.734  12.327  66.359  1.00  0.57           O  
HETATM  727  O   HOH T 726       1.792  32.523  80.234  1.00  0.57           O  
HETATM  728  O   HOH T 727      19.200  16.086  33.020  1.00  0.58           O  
HETATM  729  O   HOH T 728      -3.510   5.099  55.782  1.00  0.58           O  
HETATM  730  O   HOH T 729      29.195  19.378  37.747  1.00  0.58           O  
HETATM  731  O   HOH T 730      -7.055   8.233  56.631  1.00  0.58           O  
HETATM  732  O   HOH T 731      30.113  17.169  36.519  1.00  0.58           O  
HETATM  733  O   HOH T 732      33.323  15.391  60.181  1.00  0.58           O  
HETATM  734  O   HOH T 733     -10.382  22.031  56.700  1.00  0.58           O  
HETATM  735  O   HOH T 734      26.553  25.264  46.734  1.00  0.58           O  
HETATM  736  O   HOH T 735      29.247   8.120  38.926  1.00  0.58           O  
HETATM  737  O   HOH T 736      21.177  15.419  61.447  1.00  0.59           O  
HETATM  738  O   HOH T 737      26.701  14.650  64.814  1.00  0.59           O  
HETATM  739  O   HOH T 738       6.506  11.291  85.985  1.00  0.59           O  
HETATM  740  O   HOH T 739      34.871  17.396  47.820  1.00  0.61           O  
HETATM  741  O   HOH T 740      35.763   9.966  41.387  1.00  0.62           O  
HETATM  742  O   HOH T 741      18.070  25.901  39.029  1.00  0.62           O  
HETATM  743  O   HOH T 742      38.021   9.005  44.679  1.00  0.63           O  
TER     744      HOH T 742 
