# Supplementary material for: Accurate Prediction of Hydration Sites of Proteins Using Energy Model With Atom Embedding
Source: Front Mol Biosci. 2021 Sep 20;8:756075. doi: 10.3389/fmolb.2021.756075 (PMC8488165; doi:10.3389/fmolb.2021.756075)
Supplement: Supplementary file 1 [file DataSheet1.ZIP › Data Sheet 1/Our_result_pdb/our_dataset_output/2F2X_watersite.pdb]

HEADER                                                        XXXX


JRNL        PMID   -1
HETATM    1  O   HOH T   0       0.960  12.390  11.086  1.00  0.25           O  
HETATM    2  O   HOH T   1      -5.402  -2.431  10.143  1.00  0.25           O  
HETATM    3  O   HOH T   2      -3.921  -2.613  14.561  1.00  0.26           O  
HETATM    4  O   HOH T   3      12.421   6.006  29.408  1.00  0.28           O  
HETATM    5  O   HOH T   4       0.436  12.076  25.786  1.00  0.29           O  
HETATM    6  O   HOH T   5     -10.025   9.493  30.712  1.00  0.29           O  
HETATM    7  O   HOH T   6      -5.644  -3.355  12.675  1.00  0.30           O  
HETATM    8  O   HOH T   7      -5.264  -4.221  18.518  1.00  0.32           O  
HETATM    9  O   HOH T   8       3.020   3.122  29.065  1.00  0.32           O  
HETATM   10  O   HOH T   9      10.726   5.704  21.881  1.00  0.33           O  
HETATM   11  O   HOH T  10       4.256  13.191  20.612  1.00  0.34           O  
HETATM   12  O   HOH T  11       3.202   9.701   5.927  1.00  0.34           O  
HETATM   13  O   HOH T  12       5.747   1.384   9.075  1.00  0.35           O  
HETATM   14  O   HOH T  13      -8.102   1.605  21.096  1.00  0.35           O  
HETATM   15  O   HOH T  14      -0.769   6.680  28.374  1.00  0.35           O  
HETATM   16  O   HOH T  15      10.931   5.579  19.176  1.00  0.35           O  
HETATM   17  O   HOH T  16       1.548   5.369  28.569  1.00  0.35           O  
HETATM   18  O   HOH T  17      10.560   4.009  16.912  1.00  0.37           O  
HETATM   19  O   HOH T  18       3.226  17.482   8.169  1.00  0.37           O  
HETATM   20  O   HOH T  19       6.151  -1.243   8.134  1.00  0.37           O  
HETATM   21  O   HOH T  20       1.529   4.862   5.981  1.00  0.37           O  
HETATM   22  O   HOH T  21     -10.085   6.002  17.882  1.00  0.38           O  
HETATM   23  O   HOH T  22      11.534   3.763  27.973  1.00  0.39           O  
HETATM   24  O   HOH T  23      -1.725  13.491  24.843  1.00  0.39           O  
HETATM   25  O   HOH T  24      -6.407   8.927  34.847  1.00  0.39           O  
HETATM   26  O   HOH T  25     -12.544  10.053  21.025  1.00  0.39           O  
HETATM   27  O   HOH T  26      -4.212  13.130   6.421  1.00  0.39           O  
HETATM   28  O   HOH T  27       4.134   0.738  28.590  1.00  0.40           O  
HETATM   29  O   HOH T  28      -8.357   8.533  28.727  1.00  0.40           O  
HETATM   30  O   HOH T  29     -13.558  10.564  23.591  1.00  0.40           O  
HETATM   31  O   HOH T  30       3.102   6.909   6.567  1.00  0.41           O  
HETATM   32  O   HOH T  31       9.002   6.091  15.756  1.00  0.42           O  
HETATM   33  O   HOH T  32      -4.506  15.567  25.876  1.00  0.43           O  
HETATM   34  O   HOH T  33      -5.762   9.146  29.326  1.00  0.43           O  
HETATM   35  O   HOH T  34      -8.004  16.130  20.099  1.00  0.43           O  
HETATM   36  O   HOH T  35      -0.579  -5.974  22.872  1.00  0.43           O  
HETATM   37  O   HOH T  36       8.802  11.310  13.108  1.00  0.44           O  
HETATM   38  O   HOH T  37      11.669   3.231  22.819  1.00  0.44           O  
HETATM   39  O   HOH T  38     -11.523   5.729  15.544  1.00  0.44           O  
HETATM   40  O   HOH T  39      12.133   0.880  12.139  1.00  0.44           O  
HETATM   41  O   HOH T  40       7.368  12.348   7.992  1.00  0.44           O  
HETATM   42  O   HOH T  41      -1.678   6.437   3.927  1.00  0.45           O  
HETATM   43  O   HOH T  42      -9.981   9.566  21.866  1.00  0.45           O  
HETATM   44  O   HOH T  43     -11.572   8.947  24.960  1.00  0.45           O  
HETATM   45  O   HOH T  44       5.902   6.494   6.611  1.00  0.45           O  
HETATM   46  O   HOH T  45       7.288  11.669  10.779  1.00  0.45           O  
HETATM   47  O   HOH T  46     -13.088   8.252  27.081  1.00  0.46           O  
HETATM   48  O   HOH T  47       6.723  14.729   6.871  1.00  0.46           O  
HETATM   49  O   HOH T  48      -9.377   8.650  17.627  1.00  0.46           O  
HETATM   50  O   HOH T  49       1.729   8.099  27.981  1.00  0.47           O  
HETATM   51  O   HOH T  50      -6.543   6.648  33.204  1.00  0.47           O  
HETATM   52  O   HOH T  51      11.675   6.434  16.590  1.00  0.47           O  
HETATM   53  O   HOH T  52      -1.456   9.104   4.563  1.00  0.47           O  
HETATM   54  O   HOH T  53       9.773   9.792  16.951  1.00  0.47           O  
HETATM   55  O   HOH T  54       9.140  -1.787  23.634  1.00  0.47           O  
HETATM   56  O   HOH T  55       7.291  -3.142  21.934  1.00  0.48           O  
HETATM   57  O   HOH T  56       7.539   0.900   7.099  1.00  0.48           O  
HETATM   58  O   HOH T  57      -7.884   8.928  32.456  1.00  0.48           O  
HETATM   59  O   HOH T  58       5.828  13.409  22.968  1.00  0.50           O  
HETATM   60  O   HOH T  59       7.962   4.776   5.737  1.00  0.50           O  
HETATM   61  O   HOH T  60     -12.354   5.701  27.881  1.00  0.50           O  
HETATM   62  O   HOH T  61       7.504   9.763   8.765  1.00  0.51           O  
HETATM   63  O   HOH T  62      -8.734  -0.301  19.223  1.00  0.52           O  
HETATM   64  O   HOH T  63      -2.902  15.673  23.502  1.00  0.52           O  
HETATM   65  O   HOH T  64      -8.150  11.295  15.084  1.00  0.53           O  
HETATM   66  O   HOH T  65      -3.682  10.595   5.436  1.00  0.53           O  
HETATM   67  O   HOH T  66       5.902  10.441   6.501  1.00  0.54           O  
HETATM   68  O   HOH T  67       9.648  10.413  10.584  1.00  0.54           O  
HETATM   69  O   HOH T  68      11.442   8.259  18.596  1.00  0.54           O  
HETATM   70  O   HOH T  69     -14.921   8.827  21.838  1.00  0.54           O  
HETATM   71  O   HOH T  70      -3.119   1.327  26.940  1.00  0.55           O  
HETATM   72  O   HOH T  71      -0.896   4.125   4.929  1.00  0.55           O  
HETATM   73  O   HOH T  72       0.772   7.315   4.924  1.00  0.56           O  
HETATM   74  O   HOH T  73      -3.300  -6.416  22.686  1.00  0.56           O  
HETATM   75  O   HOH T  74      12.210   1.606  26.677  1.00  0.56           O  
HETATM   76  O   HOH T  75       5.801   3.011  29.441  1.00  0.57           O  
HETATM   77  O   HOH T  76       0.897  -5.578  26.550  1.00  0.58           O  
HETATM   78  O   HOH T  77      10.503  -5.632  29.075  1.00  0.58           O  
HETATM   79  O   HOH T  78      11.341  15.386  11.333  1.00  0.59           O  
TER      80      HOH T  78 
