# Supplementary material for: Accurate Prediction of Hydration Sites of Proteins Using Energy Model With Atom Embedding
Source: Front Mol Biosci. 2021 Sep 20;8:756075. doi: 10.3389/fmolb.2021.756075 (PMC8488165; doi:10.3389/fmolb.2021.756075)
Supplement: Supplementary file 1 [file DataSheet1.ZIP › Data Sheet 1/Our_result_pdb/our_dataset_output/2F21_watersite.pdb]

HEADER                                                        XXXX


JRNL        PMID   -1
HETATM    1  O   HOH T   0       4.913   8.140  53.255  1.00  0.17           O  
HETATM    2  O   HOH T   1      -1.403   3.637  55.938  1.00  0.18           O  
HETATM    3  O   HOH T   2     -14.538  16.111  35.641  1.00  0.19           O  
HETATM    4  O   HOH T   3     -25.789  27.486  45.545  1.00  0.19           O  
HETATM    5  O   HOH T   4      12.842  21.931  34.536  1.00  0.21           O  
HETATM    6  O   HOH T   5     -18.768   9.083  37.230  1.00  0.22           O  
HETATM    7  O   HOH T   6     -10.647   9.584  49.551  1.00  0.24           O  
HETATM    8  O   HOH T   7       3.270   3.671  40.182  1.00  0.24           O  
HETATM    9  O   HOH T   8     -19.797   9.495  34.753  1.00  0.25           O  
HETATM   10  O   HOH T   9     -10.423   9.561  46.882  1.00  0.25           O  
HETATM   11  O   HOH T  10       8.739  11.618  38.106  1.00  0.25           O  
HETATM   12  O   HOH T  11      -1.960  16.484  51.044  1.00  0.25           O  
HETATM   13  O   HOH T  12       0.108  29.986  38.902  1.00  0.26           O  
HETATM   14  O   HOH T  13       7.054  19.281  52.284  1.00  0.26           O  
HETATM   15  O   HOH T  14      13.542  20.116  44.969  1.00  0.26           O  
HETATM   16  O   HOH T  15       7.619   4.549  58.217  1.00  0.27           O  
HETATM   17  O   HOH T  16     -20.246   9.777  39.354  1.00  0.27           O  
HETATM   18  O   HOH T  17     -10.596   3.106  42.745  1.00  0.28           O  
HETATM   19  O   HOH T  18       6.841   0.632  52.596  1.00  0.28           O  
HETATM   20  O   HOH T  19     -14.819  26.685  38.717  1.00  0.28           O  
HETATM   21  O   HOH T  20     -21.156  18.120  38.092  1.00  0.29           O  
HETATM   22  O   HOH T  21      -5.914  21.930  35.177  1.00  0.29           O  
HETATM   23  O   HOH T  22     -20.194  17.970  50.591  1.00  0.29           O  
HETATM   24  O   HOH T  23     -23.651  -3.994  53.118  1.00  0.29           O  
HETATM   25  O   HOH T  24      -8.806  12.055  42.206  1.00  0.30           O  
HETATM   26  O   HOH T  25     -12.297  13.938  30.322  1.00  0.30           O  
HETATM   27  O   HOH T  26     -19.417   4.609  46.185  1.00  0.31           O  
HETATM   28  O   HOH T  27      16.015  15.187  38.386  1.00  0.31           O  
HETATM   29  O   HOH T  28      12.412  15.167  28.104  1.00  0.31           O  
HETATM   30  O   HOH T  29      -8.901  10.983  39.672  1.00  0.31           O  
HETATM   31  O   HOH T  30     -23.541  14.657  41.291  1.00  0.32           O  
HETATM   32  O   HOH T  31      10.777  13.751  49.216  1.00  0.32           O  
HETATM   33  O   HOH T  32     -21.847  12.032  38.891  1.00  0.32           O  
HETATM   34  O   HOH T  33      13.073  26.658  35.537  1.00  0.33           O  
HETATM   35  O   HOH T  34       8.565   3.795  47.262  1.00  0.33           O  
HETATM   36  O   HOH T  35      23.760  29.173  33.974  1.00  0.33           O  
HETATM   37  O   HOH T  36       3.069   6.501  28.014  1.00  0.33           O  
HETATM   38  O   HOH T  37      -2.419  -1.482  51.013  1.00  0.33           O  
HETATM   39  O   HOH T  38      11.183  24.262  49.237  1.00  0.33           O  
HETATM   40  O   HOH T  39     -16.261  26.968  36.328  1.00  0.34           O  
HETATM   41  O   HOH T  40      13.077  10.351  31.398  1.00  0.34           O  
HETATM   42  O   HOH T  41      -8.237  21.345  41.839  1.00  0.34           O  
HETATM   43  O   HOH T  42      -1.605  -0.756  38.418  1.00  0.34           O  
HETATM   44  O   HOH T  43     -10.115   5.120  39.753  1.00  0.34           O  
HETATM   45  O   HOH T  44       1.851  33.051  49.719  1.00  0.34           O  
HETATM   46  O   HOH T  45      -7.958   7.444  52.474  1.00  0.34           O  
HETATM   47  O   HOH T  46     -11.513  10.394  40.519  1.00  0.34           O  
HETATM   48  O   HOH T  47       6.344  23.833  46.364  1.00  0.34           O  
HETATM   49  O   HOH T  48       1.160  -0.605  38.917  1.00  0.34           O  
HETATM   50  O   HOH T  49      15.815  17.568  28.867  1.00  0.35           O  
HETATM   51  O   HOH T  50     -24.313  24.314  33.829  1.00  0.35           O  
HETATM   52  O   HOH T  51       5.502  11.808  56.217  1.00  0.35           O  
HETATM   53  O   HOH T  52      12.172  32.319  40.263  1.00  0.35           O  
HETATM   54  O   HOH T  53     -20.559  20.751  50.638  1.00  0.35           O  
HETATM   55  O   HOH T  54     -11.420  -0.906  41.833  1.00  0.36           O  
HETATM   56  O   HOH T  55     -18.511  27.680  31.267  1.00  0.36           O  
HETATM   57  O   HOH T  56      11.354  32.679  36.279  1.00  0.36           O  
HETATM   58  O   HOH T  57     -22.682   1.689  53.774  1.00  0.36           O  
HETATM   59  O   HOH T  58     -27.385  -2.289  50.008  1.00  0.36           O  
HETATM   60  O   HOH T  59      16.537  30.039  40.550  1.00  0.36           O  
HETATM   61  O   HOH T  60      -8.721   1.763  46.019  1.00  0.36           O  
HETATM   62  O   HOH T  61     -18.581  12.216  53.568  1.00  0.36           O  
HETATM   63  O   HOH T  62     -21.161   5.012  40.095  1.00  0.36           O  
HETATM   64  O   HOH T  63     -20.943   0.307  52.156  1.00  0.36           O  
HETATM   65  O   HOH T  64      15.375  33.357  42.117  1.00  0.37           O  
HETATM   66  O   HOH T  65      14.220  17.517  45.624  1.00  0.37           O  
HETATM   67  O   HOH T  66      10.774  14.682  46.482  1.00  0.37           O  
HETATM   68  O   HOH T  67      -4.658  11.004  53.768  1.00  0.37           O  
HETATM   69  O   HOH T  68     -14.188  13.537  54.555  1.00  0.37           O  
HETATM   70  O   HOH T  69       4.701  -2.026  54.147  1.00  0.37           O  
HETATM   71  O   HOH T  70      -8.955   3.166  36.009  1.00  0.37           O  
HETATM   72  O   HOH T  71      -0.356   7.073  31.474  1.00  0.37           O  
HETATM   73  O   HOH T  72      20.240  14.563  32.475  1.00  0.37           O  
HETATM   74  O   HOH T  73     -28.517  24.640  40.573  1.00  0.38           O  
HETATM   75  O   HOH T  74     -27.050   3.572  58.525  1.00  0.38           O  
HETATM   76  O   HOH T  75     -16.244   8.692  53.681  1.00  0.38           O  
HETATM   77  O   HOH T  76       5.367  21.464  52.540  1.00  0.38           O  
HETATM   78  O   HOH T  77      15.684  20.201  29.179  1.00  0.38           O  
HETATM   79  O   HOH T  78     -26.924   4.824  56.035  1.00  0.38           O  
HETATM   80  O   HOH T  79      14.738  12.983  41.997  1.00  0.39           O  
HETATM   81  O   HOH T  80     -16.028  13.551  52.565  1.00  0.39           O  
HETATM   82  O   HOH T  81      -8.720  16.754  39.486  1.00  0.39           O  
HETATM   83  O   HOH T  82       9.252  24.795  51.178  1.00  0.39           O  
HETATM   84  O   HOH T  83     -22.672   6.626  61.080  1.00  0.39           O  
HETATM   85  O   HOH T  84      14.605   5.578  31.316  1.00  0.39           O  
HETATM   86  O   HOH T  85     -15.976  11.388  54.208  1.00  0.39           O  
HETATM   87  O   HOH T  86     -26.893  -0.071  48.263  1.00  0.39           O  
HETATM   88  O   HOH T  87      20.194  18.782  43.256  1.00  0.39           O  
HETATM   89  O   HOH T  88      11.575  17.730  28.166  1.00  0.40           O  
HETATM   90  O   HOH T  89       8.963  23.890  47.329  1.00  0.40           O  
HETATM   91  O   HOH T  90       3.537  31.466  48.265  1.00  0.40           O  
HETATM   92  O   HOH T  91      16.458  33.742  38.031  1.00  0.40           O  
HETATM   93  O   HOH T  92      22.147  24.344  32.685  1.00  0.40           O  
HETATM   94  O   HOH T  93       7.357  10.578  26.912  1.00  0.40           O  
HETATM   95  O   HOH T  94     -21.114  30.099  40.439  1.00  0.40           O  
HETATM   96  O   HOH T  95      -6.153   8.753  53.915  1.00  0.40           O  
HETATM   97  O   HOH T  96     -25.957  24.322  39.583  1.00  0.41           O  
HETATM   98  O   HOH T  97      11.192  31.000  34.061  1.00  0.41           O  
HETATM   99  O   HOH T  98     -26.417  20.012  40.497  1.00  0.41           O  
HETATM  100  O   HOH T  99      -3.862  22.567  44.811  1.00  0.41           O  
HETATM  101  O   HOH T 100     -17.961  24.189  52.772  1.00  0.41           O  
HETATM  102  O   HOH T 101      -6.381  22.166  43.567  1.00  0.41           O  
HETATM  103  O   HOH T 102       7.196   7.849  28.031  1.00  0.41           O  
HETATM  104  O   HOH T 103     -18.111  -2.935  51.169  1.00  0.41           O  
HETATM  105  O   HOH T 104       7.331  15.462  55.898  1.00  0.41           O  
HETATM  106  O   HOH T 105       8.088  12.845  55.876  1.00  0.42           O  
HETATM  107  O   HOH T 106     -21.822  31.316  37.959  1.00  0.42           O  
HETATM  108  O   HOH T 107     -22.618  30.779  42.625  1.00  0.42           O  
HETATM  109  O   HOH T 108     -16.846  29.463  52.222  1.00  0.42           O  
HETATM  110  O   HOH T 109     -31.556   1.557  51.490  1.00  0.43           O  
HETATM  111  O   HOH T 110      10.141  14.149  43.703  1.00  0.43           O  
HETATM  112  O   HOH T 111     -22.959   6.947  58.374  1.00  0.43           O  
HETATM  113  O   HOH T 112       9.470  26.269  48.785  1.00  0.43           O  
HETATM  114  O   HOH T 113       2.585  -0.695  55.048  1.00  0.43           O  
HETATM  115  O   HOH T 114     -25.171   5.498  57.997  1.00  0.43           O  
HETATM  116  O   HOH T 115      -7.332   5.524  36.003  1.00  0.43           O  
HETATM  117  O   HOH T 116     -27.731  -2.467  47.268  1.00  0.43           O  
HETATM  118  O   HOH T 117     -11.339  23.481  42.918  1.00  0.44           O  
HETATM  119  O   HOH T 118      22.953  30.917  36.000  1.00  0.44           O  
HETATM  120  O   HOH T 119      -7.537  23.618  33.809  1.00  0.44           O  
HETATM  121  O   HOH T 120      20.376  31.456  36.811  1.00  0.44           O  
HETATM  122  O   HOH T 121      22.124  26.874  33.819  1.00  0.44           O  
HETATM  123  O   HOH T 122      13.592  32.172  34.680  1.00  0.44           O  
HETATM  124  O   HOH T 123      14.602  13.522  27.417  1.00  0.44           O  
HETATM  125  O   HOH T 124      13.311  13.514  46.057  1.00  0.44           O  
HETATM  126  O   HOH T 125      -3.886   0.793  38.295  1.00  0.44           O  
HETATM  127  O   HOH T 126     -28.636  27.806  43.202  1.00  0.44           O  
HETATM  128  O   HOH T 127     -13.432  28.621  48.069  1.00  0.44           O  
HETATM  129  O   HOH T 128      -9.734  22.530  32.650  1.00  0.45           O  
HETATM  130  O   HOH T 129       5.943  32.786  42.717  1.00  0.45           O  
HETATM  131  O   HOH T 130      -8.744  12.565  44.843  1.00  0.45           O  
HETATM  132  O   HOH T 131     -11.426   2.010  45.161  1.00  0.45           O  
HETATM  133  O   HOH T 132      -8.947  10.417  29.182  1.00  0.45           O  
HETATM  134  O   HOH T 133     -20.873   8.641  41.566  1.00  0.45           O  
HETATM  135  O   HOH T 134     -31.172  -0.806  49.996  1.00  0.45           O  
HETATM  136  O   HOH T 135     -22.922   9.750  40.042  1.00  0.45           O  
HETATM  137  O   HOH T 136     -23.859  18.500  37.328  1.00  0.45           O  
HETATM  138  O   HOH T 137       8.857  29.878  33.269  1.00  0.45           O  
HETATM  139  O   HOH T 138     -20.803  -2.318  51.272  1.00  0.46           O  
HETATM  140  O   HOH T 139     -20.262  19.287  52.968  1.00  0.46           O  
HETATM  141  O   HOH T 140      -2.340  18.262  49.086  1.00  0.46           O  
HETATM  142  O   HOH T 141       2.115  33.458  47.021  1.00  0.46           O  
HETATM  143  O   HOH T 142       8.967  31.834  43.320  1.00  0.46           O  
HETATM  144  O   HOH T 143      17.472  32.678  40.417  1.00  0.46           O  
HETATM  145  O   HOH T 144       2.916   1.502  38.726  1.00  0.46           O  
HETATM  146  O   HOH T 145      17.730  17.756  42.466  1.00  0.46           O  
HETATM  147  O   HOH T 146      13.879  33.477  37.171  1.00  0.46           O  
HETATM  148  O   HOH T 147     -26.076  18.630  42.872  1.00  0.46           O  
HETATM  149  O   HOH T 148     -17.631  29.349  42.801  1.00  0.46           O  
HETATM  150  O   HOH T 149       9.620   8.938  27.351  1.00  0.46           O  
HETATM  151  O   HOH T 150     -23.806  29.253  40.751  1.00  0.47           O  
HETATM  152  O   HOH T 151      -8.580  23.857  43.017  1.00  0.47           O  
HETATM  153  O   HOH T 152      10.669  17.948  25.581  1.00  0.47           O  
HETATM  154  O   HOH T 153     -21.389   8.690  32.699  1.00  0.47           O  
HETATM  155  O   HOH T 154       0.736  33.848  44.701  1.00  0.47           O  
HETATM  156  O   HOH T 155      12.274  12.365  28.278  1.00  0.47           O  
HETATM  157  O   HOH T 156     -14.631  15.901  53.289  1.00  0.47           O  
HETATM  158  O   HOH T 157     -19.452   6.126  50.157  1.00  0.47           O  
HETATM  159  O   HOH T 158      -8.971  -1.757  43.022  1.00  0.47           O  
HETATM  160  O   HOH T 159      14.875  32.228  39.597  1.00  0.47           O  
HETATM  161  O   HOH T 160     -21.137  13.000  52.169  1.00  0.47           O  
HETATM  162  O   HOH T 161      -6.718  15.038  38.935  1.00  0.47           O  
HETATM  163  O   HOH T 162     -21.194   4.662  48.447  1.00  0.48           O  
HETATM  164  O   HOH T 163     -27.232  25.542  44.091  1.00  0.48           O  
HETATM  165  O   HOH T 164     -22.691  -4.200  50.517  1.00  0.48           O  
HETATM  166  O   HOH T 165     -23.439   8.837  42.595  1.00  0.48           O  
HETATM  167  O   HOH T 166     -10.580   6.403  37.352  1.00  0.48           O  
HETATM  168  O   HOH T 167     -14.506  28.108  51.861  1.00  0.49           O  
HETATM  169  O   HOH T 168     -26.204  17.935  38.688  1.00  0.49           O  
HETATM  170  O   HOH T 169      -6.522  23.457  41.126  1.00  0.49           O  
HETATM  171  O   HOH T 170     -21.812  14.786  39.141  1.00  0.49           O  
HETATM  172  O   HOH T 171     -12.278   2.437  49.966  1.00  0.49           O  
HETATM  173  O   HOH T 172     -17.755   7.285  51.866  1.00  0.49           O  
HETATM  174  O   HOH T 173       8.125  -0.902  45.347  1.00  0.49           O  
HETATM  175  O   HOH T 174      14.136  11.477  44.284  1.00  0.49           O  
HETATM  176  O   HOH T 175      13.932  18.995  27.393  1.00  0.49           O  
HETATM  177  O   HOH T 176     -18.128  22.699  57.605  1.00  0.49           O  
HETATM  178  O   HOH T 177       9.352   0.949  47.018  1.00  0.49           O  
HETATM  179  O   HOH T 178     -21.195   0.855  56.105  1.00  0.49           O  
HETATM  180  O   HOH T 179      12.452  15.621  44.481  1.00  0.49           O  
HETATM  181  O   HOH T 180     -10.476  12.012  30.917  1.00  0.49           O  
HETATM  182  O   HOH T 181      18.699  33.553  36.546  1.00  0.49           O  
HETATM  183  O   HOH T 182      -4.761  24.458  43.100  1.00  0.50           O  
HETATM  184  O   HOH T 183     -13.832   2.517  46.332  1.00  0.50           O  
HETATM  185  O   HOH T 184      -4.375  25.107  40.522  1.00  0.50           O  
HETATM  186  O   HOH T 185      -9.521   6.182  54.324  1.00  0.50           O  
HETATM  187  O   HOH T 186      19.155  31.976  34.332  1.00  0.50           O  
HETATM  188  O   HOH T 187       2.826   4.883  25.749  1.00  0.50           O  
HETATM  189  O   HOH T 188       5.728  34.178  37.949  1.00  0.50           O  
HETATM  190  O   HOH T 189      -1.765  26.876  33.148  1.00  0.50           O  
HETATM  191  O   HOH T 190     -23.732  15.275  46.130  1.00  0.50           O  
HETATM  192  O   HOH T 191      -8.071   8.448  31.041  1.00  0.51           O  
HETATM  193  O   HOH T 192     -24.945  -1.895  47.310  1.00  0.51           O  
HETATM  194  O   HOH T 193     -15.490  29.523  49.693  1.00  0.51           O  
HETATM  195  O   HOH T 194      10.581   6.837  31.434  1.00  0.51           O  
HETATM  196  O   HOH T 195     -16.670  26.664  52.648  1.00  0.51           O  
HETATM  197  O   HOH T 196      14.553  11.244  29.132  1.00  0.51           O  
HETATM  198  O   HOH T 197      -2.914  -0.717  48.405  1.00  0.51           O  
HETATM  199  O   HOH T 198       1.754  22.652  31.130  1.00  0.51           O  
HETATM  200  O   HOH T 199     -22.593   3.389  38.472  1.00  0.51           O  
HETATM  201  O   HOH T 200       1.572   4.086  28.000  1.00  0.51           O  
HETATM  202  O   HOH T 201     -26.807  23.464  42.263  1.00  0.51           O  
HETATM  203  O   HOH T 202     -11.881  -2.286  50.703  1.00  0.51           O  
HETATM  204  O   HOH T 203     -24.324   2.470  46.111  1.00  0.51           O  
HETATM  205  O   HOH T 204     -23.543  -0.192  45.786  1.00  0.52           O  
HETATM  206  O   HOH T 205      13.043   7.618  30.342  1.00  0.52           O  
HETATM  207  O   HOH T 206       9.489   6.559  28.819  1.00  0.52           O  
HETATM  208  O   HOH T 207      15.872  16.787  40.623  1.00  0.52           O  
HETATM  209  O   HOH T 208     -15.308  24.295  53.517  1.00  0.52           O  
HETATM  210  O   HOH T 209     -24.221  12.142  40.444  1.00  0.52           O  
HETATM  211  O   HOH T 210     -10.479  14.718  40.109  1.00  0.52           O  
HETATM  212  O   HOH T 211      -3.353   4.313  37.943  1.00  0.52           O  
HETATM  213  O   HOH T 212      14.053  15.592  42.385  1.00  0.53           O  
HETATM  214  O   HOH T 213       7.665  20.254  33.778  1.00  0.53           O  
HETATM  215  O   HOH T 214      12.378  13.689  25.803  1.00  0.53           O  
HETATM  216  O   HOH T 215      12.245   4.792  30.503  1.00  0.53           O  
HETATM  217  O   HOH T 216       8.847   1.624  50.972  1.00  0.53           O  
HETATM  218  O   HOH T 217      -1.535  17.356  53.633  1.00  0.53           O  
HETATM  219  O   HOH T 218       6.481  13.801  57.900  1.00  0.53           O  
HETATM  220  O   HOH T 219      10.433   5.582  46.142  1.00  0.53           O  
HETATM  221  O   HOH T 220      11.393   6.361  41.320  1.00  0.54           O  
HETATM  222  O   HOH T 221      -9.656   6.487  34.716  1.00  0.54           O  
HETATM  223  O   HOH T 222      12.688  33.232  42.864  1.00  0.54           O  
HETATM  224  O   HOH T 223     -24.411  30.406  38.192  1.00  0.54           O  
HETATM  225  O   HOH T 224     -22.768  17.224  40.329  1.00  0.54           O  
HETATM  226  O   HOH T 225     -21.890  -0.934  54.411  1.00  0.54           O  
HETATM  227  O   HOH T 226     -13.477  26.575  36.333  1.00  0.54           O  
HETATM  228  O   HOH T 227     -20.082  -4.928  51.011  1.00  0.54           O  
HETATM  229  O   HOH T 228      -2.532  29.153  38.595  1.00  0.54           O  
HETATM  230  O   HOH T 229      23.476  27.093  40.339  1.00  0.54           O  
HETATM  231  O   HOH T 230     -12.986   5.706  55.004  1.00  0.55           O  
HETATM  232  O   HOH T 231      11.418  20.237  27.088  1.00  0.55           O  
HETATM  233  O   HOH T 232      10.636   3.308  32.371  1.00  0.55           O  
HETATM  234  O   HOH T 233     -17.968  20.065  54.361  1.00  0.55           O  
HETATM  235  O   HOH T 234      -4.938  -2.598  48.483  1.00  0.55           O  
HETATM  236  O   HOH T 235       9.043  27.109  33.055  1.00  0.55           O  
HETATM  237  O   HOH T 236      11.347   3.203  51.811  1.00  0.55           O  
HETATM  238  O   HOH T 237     -26.776  21.153  47.729  1.00  0.55           O  
HETATM  239  O   HOH T 238       4.010  10.618  58.300  1.00  0.55           O  
HETATM  240  O   HOH T 239      21.193  17.662  40.939  1.00  0.56           O  
HETATM  241  O   HOH T 240      10.693   9.733  55.932  1.00  0.56           O  
HETATM  242  O   HOH T 241     -21.764   3.297  46.114  1.00  0.56           O  
HETATM  243  O   HOH T 242      11.365  11.196  48.644  1.00  0.56           O  
HETATM  244  O   HOH T 243      -1.416  34.169  42.885  1.00  0.56           O  
HETATM  245  O   HOH T 244       7.159  22.750  54.266  1.00  0.57           O  
HETATM  246  O   HOH T 245     -11.370  24.410  51.699  1.00  0.57           O  
HETATM  247  O   HOH T 246      -6.289   3.026  36.332  1.00  0.57           O  
HETATM  248  O   HOH T 247     -15.292  21.828  54.585  1.00  0.59           O  
TER     249      HOH T 247 
