# Supplementary material for: Accurate Prediction of Hydration Sites of Proteins Using Energy Model With Atom Embedding
Source: Front Mol Biosci. 2021 Sep 20;8:756075. doi: 10.3389/fmolb.2021.756075 (PMC8488165; doi:10.3389/fmolb.2021.756075)
Supplement: Supplementary file 1 [file DataSheet1.ZIP › Data Sheet 1/Our_result_pdb/our_dataset_output/2FC3_watersite.pdb]

HEADER                                                        XXXX


JRNL        PMID   -1
HETATM    1  O   HOH T   0      27.480  31.080  30.790  1.00  0.18           O  
HETATM    2  O   HOH T   1      19.146  21.769  10.824  1.00  0.19           O  
HETATM    3  O   HOH T   2      17.873  11.300  31.055  1.00  0.20           O  
HETATM    4  O   HOH T   3      17.898  37.698  30.011  1.00  0.21           O  
HETATM    5  O   HOH T   4      16.929  33.240  35.091  1.00  0.22           O  
HETATM    6  O   HOH T   5      10.126  11.018  21.604  1.00  0.22           O  
HETATM    7  O   HOH T   6       4.084  27.534  25.423  1.00  0.23           O  
HETATM    8  O   HOH T   7      21.750  11.516  26.666  1.00  0.23           O  
HETATM    9  O   HOH T   8       5.450  34.013  20.101  1.00  0.24           O  
HETATM   10  O   HOH T   9      17.839  10.147  23.949  1.00  0.24           O  
HETATM   11  O   HOH T  10      15.369  32.213  16.220  1.00  0.25           O  
HETATM   12  O   HOH T  11      16.908  38.324  13.591  1.00  0.25           O  
HETATM   13  O   HOH T  12       6.415  37.103  22.645  1.00  0.26           O  
HETATM   14  O   HOH T  13       7.496  34.791  21.737  1.00  0.26           O  
HETATM   15  O   HOH T  14      11.752   9.329  33.465  1.00  0.27           O  
HETATM   16  O   HOH T  15      11.595   7.843  35.739  1.00  0.27           O  
HETATM   17  O   HOH T  16      14.561  29.842  17.398  1.00  0.27           O  
HETATM   18  O   HOH T  17       9.909  27.824  28.523  1.00  0.28           O  
HETATM   19  O   HOH T  18      -0.008  13.236  31.236  1.00  0.28           O  
HETATM   20  O   HOH T  19      28.642  31.249  33.374  1.00  0.29           O  
HETATM   21  O   HOH T  20      15.343  25.878  35.657  1.00  0.29           O  
HETATM   22  O   HOH T  21      32.534  17.127  26.892  1.00  0.29           O  
HETATM   23  O   HOH T  22      14.922  37.377  15.295  1.00  0.29           O  
HETATM   24  O   HOH T  23      20.197  28.496  13.499  1.00  0.29           O  
HETATM   25  O   HOH T  24      31.057  13.398  11.038  1.00  0.30           O  
HETATM   26  O   HOH T  25      20.824   8.299  38.098  1.00  0.30           O  
HETATM   27  O   HOH T  26      29.177  35.325  33.317  1.00  0.30           O  
HETATM   28  O   HOH T  27      -3.509  14.417  17.917  1.00  0.30           O  
HETATM   29  O   HOH T  28      29.920  18.552  17.481  1.00  0.30           O  
HETATM   30  O   HOH T  29      18.857  34.119  10.629  1.00  0.31           O  
HETATM   31  O   HOH T  30      36.184  21.048  30.121  1.00  0.31           O  
HETATM   32  O   HOH T  31      12.848  39.718  21.771  1.00  0.32           O  
HETATM   33  O   HOH T  32      14.396  23.328  35.791  1.00  0.32           O  
HETATM   34  O   HOH T  33      21.714  32.865  13.564  1.00  0.32           O  
HETATM   35  O   HOH T  34       4.086  21.157  21.865  1.00  0.32           O  
HETATM   36  O   HOH T  35       3.924  19.578  24.052  1.00  0.32           O  
HETATM   37  O   HOH T  36       3.231  32.313  20.847  1.00  0.33           O  
HETATM   38  O   HOH T  37      31.180  31.019  32.431  1.00  0.34           O  
HETATM   39  O   HOH T  38      -0.304  25.054  27.562  1.00  0.34           O  
HETATM   40  O   HOH T  39      10.599  30.070  17.686  1.00  0.35           O  
HETATM   41  O   HOH T  40       9.280   9.350  36.351  1.00  0.35           O  
HETATM   42  O   HOH T  41       2.591  14.179  30.875  1.00  0.36           O  
HETATM   43  O   HOH T  42      10.574  11.093  24.388  1.00  0.36           O  
HETATM   44  O   HOH T  43      -1.417  27.312  28.836  1.00  0.36           O  
HETATM   45  O   HOH T  44       2.453  19.682  20.483  1.00  0.37           O  
HETATM   46  O   HOH T  45       6.334  12.424  36.710  1.00  0.37           O  
HETATM   47  O   HOH T  46      32.690  16.136  19.949  1.00  0.37           O  
HETATM   48  O   HOH T  47      26.608  32.230  40.115  1.00  0.37           O  
HETATM   49  O   HOH T  48      11.528   8.921  27.676  1.00  0.37           O  
HETATM   50  O   HOH T  49      31.316  34.591  34.977  1.00  0.37           O  
HETATM   51  O   HOH T  50       0.826  33.949  21.180  1.00  0.38           O  
HETATM   52  O   HOH T  51      18.658  32.943  39.771  1.00  0.38           O  
HETATM   53  O   HOH T  52      15.442  12.602  39.767  1.00  0.38           O  
HETATM   54  O   HOH T  53      14.206  38.178  12.715  1.00  0.38           O  
HETATM   55  O   HOH T  54      27.430  26.137  37.134  1.00  0.38           O  
HETATM   56  O   HOH T  55       0.059  23.701  18.775  1.00  0.39           O  
HETATM   57  O   HOH T  56       8.614  38.769  22.610  1.00  0.39           O  
HETATM   58  O   HOH T  57      -0.311  19.202  35.193  1.00  0.40           O  
HETATM   59  O   HOH T  58      25.000  18.414  12.599  1.00  0.40           O  
HETATM   60  O   HOH T  59      18.433  33.911  37.230  1.00  0.40           O  
HETATM   61  O   HOH T  60      12.732  25.239  36.640  1.00  0.40           O  
HETATM   62  O   HOH T  61      -1.703  17.479  14.958  1.00  0.40           O  
HETATM   63  O   HOH T  62      28.547  14.619  22.755  1.00  0.40           O  
HETATM   64  O   HOH T  63      23.321   9.600  16.898  1.00  0.41           O  
HETATM   65  O   HOH T  64       1.931  18.060  22.724  1.00  0.41           O  
HETATM   66  O   HOH T  65      27.042  15.506  24.841  1.00  0.41           O  
HETATM   67  O   HOH T  66       0.905  38.260  30.083  1.00  0.41           O  
HETATM   68  O   HOH T  67       1.807  20.069  36.756  1.00  0.41           O  
HETATM   69  O   HOH T  68      20.336  32.067  15.842  1.00  0.41           O  
HETATM   70  O   HOH T  69      26.810  17.847  14.513  1.00  0.42           O  
HETATM   71  O   HOH T  70      10.294  19.962  10.224  1.00  0.42           O  
HETATM   72  O   HOH T  71      -2.428  33.873  28.319  1.00  0.42           O  
HETATM   73  O   HOH T  72      14.601  21.057  37.411  1.00  0.42           O  
HETATM   74  O   HOH T  73      29.437  18.290  14.784  1.00  0.42           O  
HETATM   75  O   HOH T  74      15.603  35.890  12.895  1.00  0.42           O  
HETATM   76  O   HOH T  75      -0.054  17.335  33.250  1.00  0.42           O  
HETATM   77  O   HOH T  76       2.873  34.642  19.445  1.00  0.43           O  
HETATM   78  O   HOH T  77      31.908  21.300  14.315  1.00  0.43           O  
HETATM   79  O   HOH T  78      -2.829  34.203  25.734  1.00  0.43           O  
HETATM   80  O   HOH T  79       3.320  21.854  38.138  1.00  0.43           O  
HETATM   81  O   HOH T  80      26.731  23.546  37.209  1.00  0.43           O  
HETATM   82  O   HOH T  81       7.714   7.312  26.970  1.00  0.43           O  
HETATM   83  O   HOH T  82       1.682  41.213  20.221  1.00  0.44           O  
HETATM   84  O   HOH T  83      29.185  22.540  37.969  1.00  0.44           O  
HETATM   85  O   HOH T  84      34.779  17.853  28.321  1.00  0.44           O  
HETATM   86  O   HOH T  85      25.940  30.311  19.299  1.00  0.44           O  
HETATM   87  O   HOH T  86      31.070  20.924  18.482  1.00  0.44           O  
HETATM   88  O   HOH T  87      32.214  14.675  25.582  1.00  0.44           O  
HETATM   89  O   HOH T  88       0.877  26.216  29.829  1.00  0.45           O  
HETATM   90  O   HOH T  89       4.935  12.622  20.940  1.00  0.45           O  
HETATM   91  O   HOH T  90       8.185  25.568  30.808  1.00  0.45           O  
HETATM   92  O   HOH T  91       5.699  29.896  17.289  1.00  0.45           O  
HETATM   93  O   HOH T  92       7.501  40.286  28.864  1.00  0.45           O  
HETATM   94  O   HOH T  93      32.107  23.887  34.760  1.00  0.45           O  
HETATM   95  O   HOH T  94      30.125  31.517  29.956  1.00  0.45           O  
HETATM   96  O   HOH T  95       2.146  26.437  27.285  1.00  0.46           O  
HETATM   97  O   HOH T  96       6.350  30.594  14.677  1.00  0.46           O  
HETATM   98  O   HOH T  97      12.599  31.611  16.369  1.00  0.46           O  
HETATM   99  O   HOH T  98      32.903  32.871  33.521  1.00  0.46           O  
HETATM  100  O   HOH T  99      -0.476  38.371  25.923  1.00  0.46           O  
HETATM  101  O   HOH T 100      33.421  12.151  11.966  1.00  0.46           O  
HETATM  102  O   HOH T 101      19.416  31.275  13.464  1.00  0.46           O  
HETATM  103  O   HOH T 102       9.233   9.396  26.128  1.00  0.46           O  
HETATM  104  O   HOH T 103       9.603  22.573  10.949  1.00  0.46           O  
HETATM  105  O   HOH T 104      33.885  21.799  34.667  1.00  0.46           O  
HETATM  106  O   HOH T 105      33.608  14.457  10.445  1.00  0.46           O  
HETATM  107  O   HOH T 106       1.641  43.949  19.556  1.00  0.46           O  
HETATM  108  O   HOH T 107      29.927  12.867  21.229  1.00  0.47           O  
HETATM  109  O   HOH T 108      25.991  24.937  17.165  1.00  0.47           O  
HETATM  110  O   HOH T 109       2.914  26.556  16.230  1.00  0.47           O  
HETATM  111  O   HOH T 110      -0.827  21.094  21.822  1.00  0.47           O  
HETATM  112  O   HOH T 111      18.013  39.868  28.317  1.00  0.47           O  
HETATM  113  O   HOH T 112      32.625  32.606  30.742  1.00  0.47           O  
HETATM  114  O   HOH T 113      18.862  37.305  27.459  1.00  0.47           O  
HETATM  115  O   HOH T 114       2.842  44.415  22.112  1.00  0.47           O  
HETATM  116  O   HOH T 115      21.287   9.887  24.503  1.00  0.48           O  
HETATM  117  O   HOH T 116      13.035  20.078  39.482  1.00  0.48           O  
HETATM  118  O   HOH T 117      33.845  21.215  18.790  1.00  0.48           O  
HETATM  119  O   HOH T 118       1.740  30.532  19.352  1.00  0.48           O  
HETATM  120  O   HOH T 119       3.159  29.005  17.469  1.00  0.48           O  
HETATM  121  O   HOH T 120      17.860  38.801  17.091  1.00  0.48           O  
HETATM  122  O   HOH T 121       4.917  28.261  15.350  1.00  0.48           O  
HETATM  123  O   HOH T 122       2.710  43.223  24.694  1.00  0.48           O  
HETATM  124  O   HOH T 123       8.440   9.690  23.421  1.00  0.48           O  
HETATM  125  O   HOH T 124      20.455  28.702  38.091  1.00  0.48           O  
HETATM  126  O   HOH T 125      10.550  19.696  38.046  1.00  0.48           O  
HETATM  127  O   HOH T 126      11.471  30.932  31.499  1.00  0.49           O  
HETATM  128  O   HOH T 127       4.486  32.603  14.995  1.00  0.49           O  
HETATM  129  O   HOH T 128      30.625  19.504  12.639  1.00  0.49           O  
HETATM  130  O   HOH T 129      28.788  32.481  41.693  1.00  0.49           O  
HETATM  131  O   HOH T 130       1.169  18.621  39.106  1.00  0.49           O  
HETATM  132  O   HOH T 131      26.864  26.017  14.797  1.00  0.50           O  
HETATM  133  O   HOH T 132      16.965  20.123  38.296  1.00  0.50           O  
HETATM  134  O   HOH T 133      20.546  10.767  36.922  1.00  0.50           O  
HETATM  135  O   HOH T 134       1.596  25.914  18.592  1.00  0.50           O  
HETATM  136  O   HOH T 135      36.844  18.045  30.233  1.00  0.50           O  
HETATM  137  O   HOH T 136      26.119  16.848  10.567  1.00  0.50           O  
HETATM  138  O   HOH T 137      27.508  10.528  25.876  1.00  0.50           O  
HETATM  139  O   HOH T 138      18.102   9.802  36.058  1.00  0.51           O  
HETATM  140  O   HOH T 139       1.321  28.444  21.013  1.00  0.51           O  
HETATM  141  O   HOH T 140       1.889  22.477  20.691  1.00  0.51           O  
HETATM  142  O   HOH T 141      23.674  39.029  32.947  1.00  0.51           O  
HETATM  143  O   HOH T 142       8.482  18.028  10.290  1.00  0.51           O  
HETATM  144  O   HOH T 143      -1.785  36.365  24.468  1.00  0.51           O  
HETATM  145  O   HOH T 144      14.412  34.604  15.082  1.00  0.51           O  
HETATM  146  O   HOH T 145       9.763  20.532  12.858  1.00  0.52           O  
HETATM  147  O   HOH T 146      33.964  18.488  18.966  1.00  0.52           O  
HETATM  148  O   HOH T 147       7.329  11.229  21.316  1.00  0.53           O  
HETATM  149  O   HOH T 148      17.662  26.980  34.822  1.00  0.53           O  
HETATM  150  O   HOH T 149      20.149  16.873   9.619  1.00  0.53           O  
HETATM  151  O   HOH T 150      -2.434  36.507  27.260  1.00  0.53           O  
HETATM  152  O   HOH T 151       3.543  34.349  16.810  1.00  0.53           O  
HETATM  153  O   HOH T 152      30.649  21.722  35.881  1.00  0.53           O  
HETATM  154  O   HOH T 153      31.382  24.058  37.395  1.00  0.53           O  
HETATM  155  O   HOH T 154      12.989  15.370   6.449  1.00  0.54           O  
HETATM  156  O   HOH T 155      14.658  14.597   8.802  1.00  0.54           O  
HETATM  157  O   HOH T 156      20.044   1.840  29.348  1.00  0.54           O  
HETATM  158  O   HOH T 157      19.372   7.827  23.998  1.00  0.54           O  
HETATM  159  O   HOH T 158      20.342  38.772  29.196  1.00  0.54           O  
HETATM  160  O   HOH T 159      22.606   8.859  26.646  1.00  0.54           O  
HETATM  161  O   HOH T 160      14.331  33.827  35.667  1.00  0.54           O  
HETATM  162  O   HOH T 161      -1.585  16.976  24.354  1.00  0.54           O  
HETATM  163  O   HOH T 162       8.083  43.718  23.472  1.00  0.54           O  
HETATM  164  O   HOH T 163      28.344  11.892  23.424  1.00  0.55           O  
HETATM  165  O   HOH T 164      32.219  17.032  17.404  1.00  0.55           O  
HETATM  166  O   HOH T 165       9.002  11.561  14.999  1.00  0.55           O  
HETATM  167  O   HOH T 166      15.404  40.853  28.729  1.00  0.55           O  
HETATM  168  O   HOH T 167      13.850  25.933  11.391  1.00  0.55           O  
HETATM  169  O   HOH T 168      18.037   2.730  32.440  1.00  0.56           O  
HETATM  170  O   HOH T 169       4.517  36.557  13.799  1.00  0.56           O  
HETATM  171  O   HOH T 170      10.600  25.992  38.151  1.00  0.56           O  
HETATM  172  O   HOH T 171      13.504   8.809  21.646  1.00  0.56           O  
HETATM  173  O   HOH T 172       2.524  21.886  12.154  1.00  0.56           O  
HETATM  174  O   HOH T 173      28.239  13.863  26.668  1.00  0.56           O  
HETATM  175  O   HOH T 174      30.400  12.595  25.044  1.00  0.56           O  
HETATM  176  O   HOH T 175       1.434  16.673  24.980  1.00  0.57           O  
HETATM  177  O   HOH T 176      21.170  28.092  40.635  1.00  0.57           O  
HETATM  178  O   HOH T 177      18.565  15.071  10.594  1.00  0.57           O  
HETATM  179  O   HOH T 178       5.526  20.274  38.395  1.00  0.57           O  
HETATM  180  O   HOH T 179      19.979  17.970  37.980  1.00  0.58           O  
HETATM  181  O   HOH T 180      -1.926  27.072  24.881  1.00  0.58           O  
HETATM  182  O   HOH T 181      -0.659  31.670  20.310  1.00  0.58           O  
HETATM  183  O   HOH T 182      18.695  29.871  11.416  1.00  0.59           O  
HETATM  184  O   HOH T 183       4.894  29.216  12.870  1.00  0.59           O  
TER     185      HOH T 183 
