# Supplementary material for: Accurate Prediction of Hydration Sites of Proteins Using Energy Model With Atom Embedding
Source: Front Mol Biosci. 2021 Sep 20;8:756075. doi: 10.3389/fmolb.2021.756075 (PMC8488165; doi:10.3389/fmolb.2021.756075)
Supplement: Supplementary file 1 [file DataSheet1.ZIP › Data Sheet 1/Our_result_pdb/our_dataset_output/2FCJ_watersite.pdb]

HEADER                                                        XXXX


JRNL        PMID   -1
HETATM    1  O   HOH T   0      18.261  26.681  32.077  1.00  0.15           O  
HETATM    2  O   HOH T   1      16.317  47.718   6.454  1.00  0.16           O  
HETATM    3  O   HOH T   2       8.968   8.775  30.489  1.00  0.16           O  
HETATM    4  O   HOH T   3      24.999  29.205 -27.200  1.00  0.18           O  
HETATM    5  O   HOH T   4      16.671  27.039  -7.997  1.00  0.18           O  
HETATM    6  O   HOH T   5       8.767  35.591   5.066  1.00  0.19           O  
HETATM    7  O   HOH T   6       3.911  45.637  12.614  1.00  0.20           O  
HETATM    8  O   HOH T   7       9.637   5.124  -0.819  1.00  0.20           O  
HETATM    9  O   HOH T   8      16.162  62.965  17.540  1.00  0.20           O  
HETATM   10  O   HOH T   9      16.844  24.968  -3.356  1.00  0.20           O  
HETATM   11  O   HOH T  10       9.808  40.331  15.724  1.00  0.20           O  
HETATM   12  O   HOH T  11      10.731  28.191  36.318  1.00  0.21           O  
HETATM   13  O   HOH T  12      12.348  37.869  26.005  1.00  0.21           O  
HETATM   14  O   HOH T  13      22.712  38.532  32.341  1.00  0.21           O  
HETATM   15  O   HOH T  14      10.436  32.637  -6.321  1.00  0.21           O  
HETATM   16  O   HOH T  15      11.251  35.664 -17.603  1.00  0.22           O  
HETATM   17  O   HOH T  16       9.499   6.623  37.501  1.00  0.22           O  
HETATM   18  O   HOH T  17      19.078  44.653  22.521  1.00  0.22           O  
HETATM   19  O   HOH T  18      -1.637  35.473  12.366  1.00  0.23           O  
HETATM   20  O   HOH T  19       3.020  28.522  -3.992  1.00  0.23           O  
HETATM   21  O   HOH T  20       2.787  22.605  10.522  1.00  0.23           O  
HETATM   22  O   HOH T  21       4.449  17.333   0.982  1.00  0.23           O  
HETATM   23  O   HOH T  22       4.437  23.794 -13.828  1.00  0.23           O  
HETATM   24  O   HOH T  23      10.028  22.376  46.930  1.00  0.23           O  
HETATM   25  O   HOH T  24      20.868  37.724  -9.202  1.00  0.23           O  
HETATM   26  O   HOH T  25       7.186  53.134  -5.808  1.00  0.23           O  
HETATM   27  O   HOH T  26      14.140  23.691  14.254  1.00  0.24           O  
HETATM   28  O   HOH T  27      17.828   5.192  23.461  1.00  0.24           O  
HETATM   29  O   HOH T  28      26.104  27.357  23.775  1.00  0.24           O  
HETATM   30  O   HOH T  29      -1.777  43.307  -7.321  1.00  0.24           O  
HETATM   31  O   HOH T  30       6.364  14.818  20.155  1.00  0.24           O  
HETATM   32  O   HOH T  31      11.350  13.421  -1.862  1.00  0.24           O  
HETATM   33  O   HOH T  32       5.555  35.332 -21.898  1.00  0.24           O  
HETATM   34  O   HOH T  33      15.707  45.874   8.481  1.00  0.24           O  
HETATM   35  O   HOH T  34      11.391  43.729  14.558  1.00  0.25           O  
HETATM   36  O   HOH T  35      23.096  46.301  32.065  1.00  0.25           O  
HETATM   37  O   HOH T  36       3.237  31.672  14.384  1.00  0.25           O  
HETATM   38  O   HOH T  37      16.167  52.361  23.493  1.00  0.25           O  
HETATM   39  O   HOH T  38      17.041  48.406  12.584  1.00  0.25           O  
HETATM   40  O   HOH T  39      27.840  35.615  45.244  1.00  0.25           O  
HETATM   41  O   HOH T  40      -1.648  27.230  11.372  1.00  0.25           O  
HETATM   42  O   HOH T  41       7.068  50.448  -5.915  1.00  0.25           O  
HETATM   43  O   HOH T  42       9.564  27.556  14.584  1.00  0.25           O  
HETATM   44  O   HOH T  43      -0.501  21.865  18.611  1.00  0.25           O  
HETATM   45  O   HOH T  44       8.118  29.297  10.504  1.00  0.26           O  
HETATM   46  O   HOH T  45       4.964  25.914 -12.148  1.00  0.26           O  
HETATM   47  O   HOH T  46       9.762  37.623  -8.228  1.00  0.26           O  
HETATM   48  O   HOH T  47      13.630  35.864  14.584  1.00  0.26           O  
HETATM   49  O   HOH T  48      16.958  47.210  25.011  1.00  0.26           O  
HETATM   50  O   HOH T  49       9.621  34.513  14.418  1.00  0.26           O  
HETATM   51  O   HOH T  50      15.026  53.266  25.825  1.00  0.27           O  
HETATM   52  O   HOH T  51       3.798  21.152 -25.781  1.00  0.27           O  
HETATM   53  O   HOH T  52      14.390  23.668 -41.416  1.00  0.27           O  
HETATM   54  O   HOH T  53       1.936  54.537  -0.698  1.00  0.27           O  
HETATM   55  O   HOH T  54       7.268  65.310  14.612  1.00  0.27           O  
HETATM   56  O   HOH T  55      16.500  67.591  14.837  1.00  0.27           O  
HETATM   57  O   HOH T  56      22.934  48.112  23.398  1.00  0.27           O  
HETATM   58  O   HOH T  57       4.047  43.626  14.561  1.00  0.27           O  
HETATM   59  O   HOH T  58      12.244  27.588  33.968  1.00  0.27           O  
HETATM   60  O   HOH T  59      14.274  32.091  35.725  1.00  0.28           O  
HETATM   61  O   HOH T  60       5.649  25.709  27.495  1.00  0.28           O  
HETATM   62  O   HOH T  61       4.190  34.352  -4.235  1.00  0.28           O  
HETATM   63  O   HOH T  62      25.268  42.154 -21.176  1.00  0.28           O  
HETATM   64  O   HOH T  63      26.108  32.948 -12.745  1.00  0.28           O  
HETATM   65  O   HOH T  64       1.414  20.112  19.785  1.00  0.28           O  
HETATM   66  O   HOH T  65       8.480  41.331 -10.972  1.00  0.28           O  
HETATM   67  O   HOH T  66      19.864  41.992  22.655  1.00  0.28           O  
HETATM   68  O   HOH T  67      14.315  16.640 -24.764  1.00  0.28           O  
HETATM   69  O   HOH T  68      26.928  14.924  21.308  1.00  0.29           O  
HETATM   70  O   HOH T  69      23.127  23.342  34.088  1.00  0.29           O  
HETATM   71  O   HOH T  70       4.859  14.583   0.852  1.00  0.29           O  
HETATM   72  O   HOH T  71      17.440  30.932  -2.969  1.00  0.29           O  
HETATM   73  O   HOH T  72       5.866  34.846  19.756  1.00  0.29           O  
HETATM   74  O   HOH T  73       8.416  11.979  -3.579  1.00  0.29           O  
HETATM   75  O   HOH T  74      19.707  53.286   7.597  1.00  0.29           O  
HETATM   76  O   HOH T  75       8.226  35.482  21.084  1.00  0.29           O  
HETATM   77  O   HOH T  76      -5.323  48.878   1.319  1.00  0.29           O  
HETATM   78  O   HOH T  77      26.142  38.771  16.086  1.00  0.29           O  
HETATM   79  O   HOH T  78       8.102   9.951  39.693  1.00  0.29           O  
HETATM   80  O   HOH T  79       5.244  63.152   6.665  1.00  0.29           O  
HETATM   81  O   HOH T  80      -3.405  49.965  -0.248  1.00  0.30           O  
HETATM   82  O   HOH T  81       6.604  26.233   5.191  1.00  0.30           O  
HETATM   83  O   HOH T  82      -2.988  23.890 -19.244  1.00  0.30           O  
HETATM   84  O   HOH T  83       4.882  47.267  28.209  1.00  0.30           O  
HETATM   85  O   HOH T  84      -3.261  26.039   7.892  1.00  0.30           O  
HETATM   86  O   HOH T  85      -3.609  28.257   3.864  1.00  0.30           O  
HETATM   87  O   HOH T  86       7.755   1.011  29.342  1.00  0.30           O  
HETATM   88  O   HOH T  87       0.631  56.436  13.136  1.00  0.30           O  
HETATM   89  O   HOH T  88       5.894  29.517  29.172  1.00  0.30           O  
HETATM   90  O   HOH T  89      14.625  38.721   5.699  1.00  0.30           O  
HETATM   91  O   HOH T  90       5.879   3.261  41.842  1.00  0.30           O  
HETATM   92  O   HOH T  91       1.109  30.400   0.957  1.00  0.30           O  
HETATM   93  O   HOH T  92      18.527  45.621  17.688  1.00  0.31           O  
HETATM   94  O   HOH T  93       7.590   9.735  14.709  1.00  0.31           O  
HETATM   95  O   HOH T  94       5.289  13.872  29.457  1.00  0.31           O  
HETATM   96  O   HOH T  95      17.206  25.591  49.169  1.00  0.31           O  
HETATM   97  O   HOH T  96      10.471  22.690 -26.104  1.00  0.31           O  
HETATM   98  O   HOH T  97      14.507  19.295 -25.241  1.00  0.31           O  
HETATM   99  O   HOH T  98       0.616  38.516  16.207  1.00  0.31           O  
HETATM  100  O   HOH T  99       5.978  42.060  34.658  1.00  0.31           O  
HETATM  101  O   HOH T 100       7.590  -0.140  26.874  1.00  0.31           O  
HETATM  102  O   HOH T 101       4.889  24.678  29.922  1.00  0.31           O  
HETATM  103  O   HOH T 102      13.427  24.972   2.635  1.00  0.32           O  
HETATM  104  O   HOH T 103       1.550   8.973  -4.820  1.00  0.32           O  
HETATM  105  O   HOH T 104      29.496  41.620  20.222  1.00  0.32           O  
HETATM  106  O   HOH T 105      16.409  48.038  33.917  1.00  0.32           O  
HETATM  107  O   HOH T 106       7.393  56.969 -12.360  1.00  0.32           O  
HETATM  108  O   HOH T 107      16.725  34.055   0.398  1.00  0.32           O  
HETATM  109  O   HOH T 108      -6.851  44.064  -1.153  1.00  0.32           O  
HETATM  110  O   HOH T 109      16.997  36.968  17.305  1.00  0.32           O  
HETATM  111  O   HOH T 110       6.455  32.958 -16.843  1.00  0.32           O  
HETATM  112  O   HOH T 111      15.501  15.899 -27.237  1.00  0.32           O  
HETATM  113  O   HOH T 112      20.437  33.886  11.876  1.00  0.33           O  
HETATM  114  O   HOH T 113      -4.609  30.024  10.564  1.00  0.33           O  
HETATM  115  O   HOH T 114       5.672  30.651  26.631  1.00  0.33           O  
HETATM  116  O   HOH T 115       3.793  41.366  22.073  1.00  0.33           O  
HETATM  117  O   HOH T 116       7.977  63.670   6.434  1.00  0.33           O  
HETATM  118  O   HOH T 117      11.395  15.367  43.029  1.00  0.33           O  
HETATM  119  O   HOH T 118      18.630  46.991  29.337  1.00  0.33           O  
HETATM  120  O   HOH T 119       9.928  39.968  -1.286  1.00  0.33           O  
HETATM  121  O   HOH T 120       8.398  41.386  33.559  1.00  0.33           O  
HETATM  122  O   HOH T 121      -1.788  38.771  -8.752  1.00  0.33           O  
HETATM  123  O   HOH T 122      16.064  38.253 -23.158  1.00  0.33           O  
HETATM  124  O   HOH T 123       4.596  16.594 -19.485  1.00  0.33           O  
HETATM  125  O   HOH T 124       6.451  26.991  29.850  1.00  0.33           O  
HETATM  126  O   HOH T 125      -7.657  27.850  -1.575  1.00  0.33           O  
HETATM  127  O   HOH T 126      11.375  35.197   4.417  1.00  0.33           O  
HETATM  128  O   HOH T 127       8.313  25.163  19.097  1.00  0.33           O  
HETATM  129  O   HOH T 128       2.329   7.744  -9.307  1.00  0.33           O  
HETATM  130  O   HOH T 129       8.279  13.326  18.536  1.00  0.33           O  
HETATM  131  O   HOH T 130      -5.848  30.743   0.525  1.00  0.33           O  
HETATM  132  O   HOH T 131       9.494  29.966  -6.630  1.00  0.34           O  
HETATM  133  O   HOH T 132       3.894   6.018   3.404  1.00  0.34           O  
HETATM  134  O   HOH T 133      17.862  39.055   8.790  1.00  0.34           O  
HETATM  135  O   HOH T 134       3.087  57.946   1.289  1.00  0.34           O  
HETATM  136  O   HOH T 135      28.313  27.963  -5.680  1.00  0.34           O  
HETATM  137  O   HOH T 136       4.628  16.176  18.469  1.00  0.34           O  
HETATM  138  O   HOH T 137       9.580  43.000  26.969  1.00  0.34           O  
HETATM  139  O   HOH T 138       4.917  12.351  37.191  1.00  0.34           O  
HETATM  140  O   HOH T 139      -2.646   6.588  -2.142  1.00  0.34           O  
HETATM  141  O   HOH T 140      12.783  36.867  12.143  1.00  0.34           O  
HETATM  142  O   HOH T 141      -2.167  56.017   3.794  1.00  0.34           O  
HETATM  143  O   HOH T 142      19.986  19.500  -1.052  1.00  0.34           O  
HETATM  144  O   HOH T 143       0.952   9.833 -10.331  1.00  0.34           O  
HETATM  145  O   HOH T 144      -6.489  29.551   7.797  1.00  0.34           O  
HETATM  146  O   HOH T 145       3.676  24.326  -7.452  1.00  0.34           O  
HETATM  147  O   HOH T 146       8.272  14.589  40.174  1.00  0.34           O  
HETATM  148  O   HOH T 147       0.275  11.913  -8.458  1.00  0.34           O  
HETATM  149  O   HOH T 148       7.197  28.077 -27.371  1.00  0.34           O  
HETATM  150  O   HOH T 149      12.118  18.462   2.642  1.00  0.34           O  
HETATM  151  O   HOH T 150       6.970  29.542  -5.666  1.00  0.34           O  
HETATM  152  O   HOH T 151      11.803  24.299  10.925  1.00  0.34           O  
HETATM  153  O   HOH T 152      -0.042  48.475 -11.212  1.00  0.34           O  
HETATM  154  O   HOH T 153      11.108  56.410  21.174  1.00  0.35           O  
HETATM  155  O   HOH T 154       5.923  27.679  20.090  1.00  0.35           O  
HETATM  156  O   HOH T 155      20.586  29.182 -33.976  1.00  0.35           O  
HETATM  157  O   HOH T 156      17.662  18.103  -1.334  1.00  0.35           O  
HETATM  158  O   HOH T 157      16.718  33.829 -25.532  1.00  0.35           O  
HETATM  159  O   HOH T 158       9.787  60.809  16.195  1.00  0.35           O  
HETATM  160  O   HOH T 159       3.012  44.033  19.291  1.00  0.35           O  
HETATM  161  O   HOH T 160       7.694  28.149   3.508  1.00  0.35           O  
HETATM  162  O   HOH T 161      12.675  48.608  -1.242  1.00  0.35           O  
HETATM  163  O   HOH T 162      15.362  46.025  -0.650  1.00  0.35           O  
HETATM  164  O   HOH T 163      22.267  30.055  10.882  1.00  0.35           O  
HETATM  165  O   HOH T 164      11.310   8.875  20.219  1.00  0.35           O  
HETATM  166  O   HOH T 165      22.185  46.908  -4.482  1.00  0.35           O  
HETATM  167  O   HOH T 166       4.883  31.367 -15.196  1.00  0.35           O  
HETATM  168  O   HOH T 167      -6.881  35.714  12.575  1.00  0.35           O  
HETATM  169  O   HOH T 168      20.589  32.186  -4.847  1.00  0.36           O  
HETATM  170  O   HOH T 169      -8.306  50.062   5.080  1.00  0.36           O  
HETATM  171  O   HOH T 170      18.394  33.040  10.154  1.00  0.36           O  
HETATM  172  O   HOH T 171      13.501  52.434 -20.317  1.00  0.36           O  
HETATM  173  O   HOH T 172       9.191  30.857  39.088  1.00  0.36           O  
HETATM  174  O   HOH T 173      28.411  31.247 -21.846  1.00  0.36           O  
HETATM  175  O   HOH T 174      23.345  36.532  40.748  1.00  0.36           O  
HETATM  176  O   HOH T 175      -1.482  39.738  17.641  1.00  0.36           O  
HETATM  177  O   HOH T 176       2.203  20.452  -1.705  1.00  0.36           O  
HETATM  178  O   HOH T 177      28.717  20.817 -14.595  1.00  0.36           O  
HETATM  179  O   HOH T 178      22.521  48.896  -2.555  1.00  0.36           O  
HETATM  180  O   HOH T 179       2.323  24.295  12.626  1.00  0.36           O  
HETATM  181  O   HOH T 180      16.178  10.740  26.678  1.00  0.36           O  
HETATM  182  O   HOH T 181      25.040  24.790  24.056  1.00  0.36           O  
HETATM  183  O   HOH T 182      10.563  42.386 -12.491  1.00  0.36           O  
HETATM  184  O   HOH T 183      13.862  20.768 -36.872  1.00  0.36           O  
HETATM  185  O   HOH T 184      14.503  13.384 -26.786  1.00  0.36           O  
HETATM  186  O   HOH T 185      12.927  47.251  26.595  1.00  0.36           O  
HETATM  187  O   HOH T 186       4.779  28.504  22.483  1.00  0.36           O  
HETATM  188  O   HOH T 187      22.878   7.668  15.958  1.00  0.36           O  
HETATM  189  O   HOH T 188      10.147   3.821   8.145  1.00  0.36           O  
HETATM  190  O   HOH T 189      24.271  39.850  36.427  1.00  0.36           O  
HETATM  191  O   HOH T 190      12.329  41.535  15.966  1.00  0.36           O  
HETATM  192  O   HOH T 191      20.392  51.938  18.460  1.00  0.37           O  
HETATM  193  O   HOH T 192      -1.200  43.949  17.223  1.00  0.37           O  
HETATM  194  O   HOH T 193       2.374  28.287   2.199  1.00  0.37           O  
HETATM  195  O   HOH T 194       5.557  14.075 -20.279  1.00  0.37           O  
HETATM  196  O   HOH T 195      26.016  33.998  44.061  1.00  0.37           O  
HETATM  197  O   HOH T 196      -7.987  32.559  15.085  1.00  0.37           O  
HETATM  198  O   HOH T 197       8.895  14.793   1.679  1.00  0.37           O  
HETATM  199  O   HOH T 198       2.751  27.529 -20.138  1.00  0.37           O  
HETATM  200  O   HOH T 199       2.924  26.822   4.413  1.00  0.37           O  
HETATM  201  O   HOH T 200      26.032  26.355  38.632  1.00  0.37           O  
HETATM  202  O   HOH T 201       3.498  25.022 -10.012  1.00  0.37           O  
HETATM  203  O   HOH T 202       0.888  34.899  13.273  1.00  0.37           O  
HETATM  204  O   HOH T 203      12.990  15.638  -2.342  1.00  0.37           O  
HETATM  205  O   HOH T 204      -4.969  30.851  -2.220  1.00  0.37           O  
HETATM  206  O   HOH T 205      16.031  41.533  -8.841  1.00  0.37           O  
HETATM  207  O   HOH T 206      -5.828  26.848   8.422  1.00  0.37           O  
HETATM  208  O   HOH T 207      23.473  48.479  20.690  1.00  0.37           O  
HETATM  209  O   HOH T 208      16.317  28.998  10.147  1.00  0.37           O  
HETATM  210  O   HOH T 209       4.070   4.922   0.784  1.00  0.37           O  
HETATM  211  O   HOH T 210      28.134  19.815  36.110  1.00  0.37           O  
HETATM  212  O   HOH T 211      14.478  39.867  16.093  1.00  0.37           O  
HETATM  213  O   HOH T 212      14.047  43.709  15.757  1.00  0.38           O  
HETATM  214  O   HOH T 213      12.578  27.720   8.645  1.00  0.38           O  
HETATM  215  O   HOH T 214       4.081  41.826  30.150  1.00  0.38           O  
HETATM  216  O   HOH T 215     -15.142  51.613   8.849  1.00  0.38           O  
HETATM  217  O   HOH T 216       6.462   2.839  34.918  1.00  0.38           O  
HETATM  218  O   HOH T 217      25.613  31.920  38.908  1.00  0.38           O  
HETATM  219  O   HOH T 218      15.534  50.962  27.362  1.00  0.38           O  
HETATM  220  O   HOH T 219      10.636  16.814   0.925  1.00  0.38           O  
HETATM  221  O   HOH T 220       6.579  12.311  14.868  1.00  0.38           O  
HETATM  222  O   HOH T 221       3.932  23.922 -25.993  1.00  0.38           O  
HETATM  223  O   HOH T 222      12.142  54.904 -20.655  1.00  0.38           O  
HETATM  224  O   HOH T 223      10.086  25.543  12.779  1.00  0.38           O  
HETATM  225  O   HOH T 224      20.958  17.197  -4.832  1.00  0.38           O  
HETATM  226  O   HOH T 225      16.245  41.854  15.156  1.00  0.38           O  
HETATM  227  O   HOH T 226      15.008  43.170 -10.777  1.00  0.38           O  
HETATM  228  O   HOH T 227      14.249  26.794  47.748  1.00  0.38           O  
HETATM  229  O   HOH T 228       9.177  39.416  -6.450  1.00  0.38           O  
HETATM  230  O   HOH T 229      14.939  42.113 -21.884  1.00  0.39           O  
HETATM  231  O   HOH T 230       4.155   2.609  39.661  1.00  0.39           O  
HETATM  232  O   HOH T 231      14.004  16.962 -33.196  1.00  0.39           O  
HETATM  233  O   HOH T 232      20.088  27.907 -31.625  1.00  0.39           O  
HETATM  234  O   HOH T 233      21.348  54.329   9.627  1.00  0.39           O  
HETATM  235  O   HOH T 234      15.279  38.043   8.310  1.00  0.39           O  
HETATM  236  O   HOH T 235      20.323  22.251  -1.178  1.00  0.39           O  
HETATM  237  O   HOH T 236      24.446  15.446  -4.129  1.00  0.39           O  
HETATM  238  O   HOH T 237      22.128  41.613  36.330  1.00  0.39           O  
HETATM  239  O   HOH T 238      26.176  24.437  36.500  1.00  0.39           O  
HETATM  240  O   HOH T 239       0.858  39.360  -8.829  1.00  0.39           O  
HETATM  241  O   HOH T 240      11.706  45.609 -19.172  1.00  0.39           O  
HETATM  242  O   HOH T 241      16.427  48.640  28.715  1.00  0.39           O  
HETATM  243  O   HOH T 242       9.837  28.402   8.436  1.00  0.39           O  
HETATM  244  O   HOH T 243      -2.094  27.497 -17.780  1.00  0.39           O  
HETATM  245  O   HOH T 244       6.821  29.836  38.124  1.00  0.39           O  
HETATM  246  O   HOH T 245       3.279  58.400  -3.038  1.00  0.39           O  
HETATM  247  O   HOH T 246       8.047  31.864 -22.744  1.00  0.39           O  
HETATM  248  O   HOH T 247      26.834  30.035  24.300  1.00  0.39           O  
HETATM  249  O   HOH T 248      10.752  58.994  23.720  1.00  0.39           O  
HETATM  250  O   HOH T 249      23.682  31.015 -15.574  1.00  0.39           O  
HETATM  251  O   HOH T 250      16.150  43.330   7.317  1.00  0.39           O  
HETATM  252  O   HOH T 251      24.552  26.259  45.670  1.00  0.39           O  
HETATM  253  O   HOH T 252      11.525  32.433  39.636  1.00  0.39           O  
HETATM  254  O   HOH T 253       4.060  19.631  20.795  1.00  0.40           O  
HETATM  255  O   HOH T 254       0.222  17.230  35.013  1.00  0.40           O  
HETATM  256  O   HOH T 255      11.042  45.291  26.201  1.00  0.40           O  
HETATM  257  O   HOH T 256      23.949  47.352  -0.463  1.00  0.40           O  
HETATM  258  O   HOH T 257       5.872  65.612  12.261  1.00  0.40           O  
HETATM  259  O   HOH T 258      18.219  43.761  12.150  1.00  0.40           O  
HETATM  260  O   HOH T 259       0.606  23.669   0.527  1.00  0.40           O  
HETATM  261  O   HOH T 260      18.946  33.777  -6.458  1.00  0.40           O  
HETATM  262  O   HOH T 261      30.938  41.830  22.674  1.00  0.40           O  
HETATM  263  O   HOH T 262      13.067  15.176  13.843  1.00  0.40           O  
HETATM  264  O   HOH T 263       6.451  33.260  27.233  1.00  0.40           O  
HETATM  265  O   HOH T 264       4.510  43.741  23.404  1.00  0.40           O  
HETATM  266  O   HOH T 265      24.585  13.925  34.005  1.00  0.40           O  
HETATM  267  O   HOH T 266      16.710  57.929  -1.633  1.00  0.40           O  
HETATM  268  O   HOH T 267       0.991  56.037   1.327  1.00  0.40           O  
HETATM  269  O   HOH T 268      16.353  45.245   1.827  1.00  0.40           O  
HETATM  270  O   HOH T 269       7.063  35.214  30.400  1.00  0.40           O  
HETATM  271  O   HOH T 270      17.233  39.310  15.906  1.00  0.40           O  
HETATM  272  O   HOH T 271      25.676  49.772   5.680  1.00  0.40           O  
HETATM  273  O   HOH T 272      24.893  34.581  39.498  1.00  0.40           O  
HETATM  274  O   HOH T 273       4.176   3.331   3.092  1.00  0.40           O  
HETATM  275  O   HOH T 274      12.203  61.297  14.856  1.00  0.40           O  
HETATM  276  O   HOH T 275      23.359  42.008 -25.788  1.00  0.41           O  
HETATM  277  O   HOH T 276       1.667  57.329  -1.008  1.00  0.41           O  
HETATM  278  O   HOH T 277      26.966  25.035  33.806  1.00  0.41           O  
HETATM  279  O   HOH T 278       6.359  38.379  -3.977  1.00  0.41           O  
HETATM  280  O   HOH T 279      11.200  24.051   3.918  1.00  0.41           O  
HETATM  281  O   HOH T 280      10.037  33.671  20.284  1.00  0.41           O  
HETATM  282  O   HOH T 281      20.041  44.724  30.025  1.00  0.41           O  
HETATM  283  O   HOH T 282       2.257  11.753  -5.316  1.00  0.41           O  
HETATM  284  O   HOH T 283       5.447   4.825  -1.686  1.00  0.41           O  
HETATM  285  O   HOH T 284      20.027  10.737  -6.585  1.00  0.41           O  
HETATM  286  O   HOH T 285       5.922  23.528   4.936  1.00  0.41           O  
HETATM  287  O   HOH T 286      18.133  41.846   8.655  1.00  0.41           O  
HETATM  288  O   HOH T 287      13.875  30.092   9.525  1.00  0.41           O  
HETATM  289  O   HOH T 288       9.557  37.874  25.606  1.00  0.41           O  
HETATM  290  O   HOH T 289      23.169  16.206  34.461  1.00  0.41           O  
HETATM  291  O   HOH T 290      -5.188  32.893  -3.929  1.00  0.41           O  
HETATM  292  O   HOH T 291      14.281  46.981  24.251  1.00  0.41           O  
HETATM  293  O   HOH T 292      -4.906  26.636   5.731  1.00  0.41           O  
HETATM  294  O   HOH T 293      -7.118  29.582  -3.641  1.00  0.41           O  
HETATM  295  O   HOH T 294      16.975  39.562   4.470  1.00  0.41           O  
HETATM  296  O   HOH T 295      22.006  39.193  11.933  1.00  0.41           O  
HETATM  297  O   HOH T 296      12.817  15.146 -28.172  1.00  0.41           O  
HETATM  298  O   HOH T 297       7.883  35.593  26.629  1.00  0.41           O  
HETATM  299  O   HOH T 298      -1.019  23.692  16.618  1.00  0.41           O  
HETATM  300  O   HOH T 299      10.968  36.057  41.775  1.00  0.41           O  
HETATM  301  O   HOH T 300       4.058  25.758 -18.229  1.00  0.41           O  
HETATM  302  O   HOH T 301       4.103  41.248  -9.979  1.00  0.41           O  
HETATM  303  O   HOH T 302      15.430  31.347 -25.527  1.00  0.41           O  
HETATM  304  O   HOH T 303      16.043  55.324  -2.228  1.00  0.41           O  
HETATM  305  O   HOH T 304       7.350  16.207  42.170  1.00  0.41           O  
HETATM  306  O   HOH T 305      19.185  22.874   3.576  1.00  0.41           O  
HETATM  307  O   HOH T 306       7.878  58.507  16.489  1.00  0.41           O  
HETATM  308  O   HOH T 307       8.134  27.914 -22.267  1.00  0.41           O  
HETATM  309  O   HOH T 308      26.974  30.796  36.829  1.00  0.41           O  
HETATM  310  O   HOH T 309       3.207  29.696  12.396  1.00  0.41           O  
HETATM  311  O   HOH T 310       1.760  12.880   3.743  1.00  0.41           O  
HETATM  312  O   HOH T 311      18.303  16.254  41.183  1.00  0.41           O  
HETATM  313  O   HOH T 312      25.309  16.953  24.314  1.00  0.41           O  
HETATM  314  O   HOH T 313      10.881  52.516  22.718  1.00  0.42           O  
HETATM  315  O   HOH T 314      21.840  43.793  31.923  1.00  0.42           O  
HETATM  316  O   HOH T 315       4.882  33.953 -13.862  1.00  0.42           O  
HETATM  317  O   HOH T 316      11.643  42.134  -0.572  1.00  0.42           O  
HETATM  318  O   HOH T 317       9.737  12.263  39.842  1.00  0.42           O  
HETATM  319  O   HOH T 318       3.213   7.519   0.156  1.00  0.42           O  
HETATM  320  O   HOH T 319      17.713  42.073 -21.961  1.00  0.42           O  
HETATM  321  O   HOH T 320       8.297  43.088  24.495  1.00  0.42           O  
HETATM  322  O   HOH T 321      13.845  42.311 -24.455  1.00  0.42           O  
HETATM  323  O   HOH T 322       3.317  35.411  20.709  1.00  0.42           O  
HETATM  324  O   HOH T 323       0.263  41.273 -10.929  1.00  0.42           O  
HETATM  325  O   HOH T 324     -10.683  30.000   4.146  1.00  0.42           O  
HETATM  326  O   HOH T 325       2.841  47.710  26.383  1.00  0.42           O  
HETATM  327  O   HOH T 326       2.646  26.928  22.261  1.00  0.42           O  
HETATM  328  O   HOH T 327     -12.601  54.250   9.549  1.00  0.42           O  
HETATM  329  O   HOH T 328       3.989  32.865  19.931  1.00  0.42           O  
HETATM  330  O   HOH T 329       1.773   8.835  37.169  1.00  0.42           O  
HETATM  331  O   HOH T 330      23.522  43.171  38.147  1.00  0.42           O  
HETATM  332  O   HOH T 331      14.403  19.205 -34.698  1.00  0.42           O  
HETATM  333  O   HOH T 332      13.272  33.206  43.810  1.00  0.42           O  
HETATM  334  O   HOH T 333       8.853  14.896  44.172  1.00  0.42           O  
HETATM  335  O   HOH T 334      25.954  15.509 -16.330  1.00  0.42           O  
HETATM  336  O   HOH T 335       8.232  31.633  19.817  1.00  0.42           O  
HETATM  337  O   HOH T 336       1.003  26.407   0.517  1.00  0.42           O  
HETATM  338  O   HOH T 337      12.055  33.341  36.980  1.00  0.42           O  
HETATM  339  O   HOH T 338      12.288  23.367 -33.489  1.00  0.42           O  
HETATM  340  O   HOH T 339       9.216  16.752   6.682  1.00  0.42           O  
HETATM  341  O   HOH T 340      -6.162  46.290   6.833  1.00  0.42           O  
HETATM  342  O   HOH T 341      21.011  13.003  -7.839  1.00  0.42           O  
HETATM  343  O   HOH T 342      21.541  36.480  11.747  1.00  0.42           O  
HETATM  344  O   HOH T 343       4.969  60.116  -1.672  1.00  0.42           O  
HETATM  345  O   HOH T 344      12.359  31.852  46.126  1.00  0.42           O  
HETATM  346  O   HOH T 345      16.288  10.640 -18.244  1.00  0.43           O  
HETATM  347  O   HOH T 346      18.631  26.892  -4.455  1.00  0.43           O  
HETATM  348  O   HOH T 347      14.266  37.223  16.939  1.00  0.43           O  
HETATM  349  O   HOH T 348      -3.753  57.996   4.696  1.00  0.43           O  
HETATM  350  O   HOH T 349      12.818  56.025  -6.794  1.00  0.43           O  
HETATM  351  O   HOH T 350      18.867  46.336   2.522  1.00  0.43           O  
HETATM  352  O   HOH T 351      14.582  39.692 -25.076  1.00  0.43           O  
HETATM  353  O   HOH T 352       7.518   5.639  17.570  1.00  0.43           O  
HETATM  354  O   HOH T 353       5.699  12.564  18.732  1.00  0.43           O  
HETATM  355  O   HOH T 354      10.234  24.481   6.475  1.00  0.43           O  
HETATM  356  O   HOH T 355      -7.492  28.607   1.101  1.00  0.43           O  
HETATM  357  O   HOH T 356      -5.894  41.370  -0.934  1.00  0.43           O  
HETATM  358  O   HOH T 357      17.640  49.489  26.410  1.00  0.43           O  
HETATM  359  O   HOH T 358      21.949  53.564  16.952  1.00  0.43           O  
HETATM  360  O   HOH T 359      20.808  44.640  16.359  1.00  0.43           O  
HETATM  361  O   HOH T 360      -0.032  12.756  29.734  1.00  0.43           O  
HETATM  362  O   HOH T 361      -3.821  47.162  -0.115  1.00  0.43           O  
HETATM  363  O   HOH T 362       8.621  10.400  -5.677  1.00  0.43           O  
HETATM  364  O   HOH T 363      15.017  34.594 -32.533  1.00  0.43           O  
HETATM  365  O   HOH T 364       3.882  32.244  -6.061  1.00  0.43           O  
HETATM  366  O   HOH T 365      19.521  46.869  15.401  1.00  0.43           O  
HETATM  367  O   HOH T 366      -8.798  42.181  13.091  1.00  0.44           O  
HETATM  368  O   HOH T 367      13.371  18.474 -30.817  1.00  0.44           O  
HETATM  369  O   HOH T 368       8.854   8.109 -17.621  1.00  0.44           O  
HETATM  370  O   HOH T 369       7.516   6.993  15.186  1.00  0.44           O  
HETATM  371  O   HOH T 370      -6.247  48.358   8.770  1.00  0.44           O  
HETATM  372  O   HOH T 371      28.338  33.313 -14.430  1.00  0.44           O  
HETATM  373  O   HOH T 372      -7.995  30.643  -6.100  1.00  0.44           O  
HETATM  374  O   HOH T 373      -4.692  16.022 -11.103  1.00  0.44           O  
HETATM  375  O   HOH T 374       0.151  53.907  18.030  1.00  0.44           O  
HETATM  376  O   HOH T 375      18.546  13.060  -6.480  1.00  0.44           O  
HETATM  377  O   HOH T 376      25.690  32.883  41.513  1.00  0.44           O  
HETATM  378  O   HOH T 377      20.327  47.073  22.722  1.00  0.44           O  
HETATM  379  O   HOH T 378       9.603  34.500  39.922  1.00  0.44           O  
HETATM  380  O   HOH T 379      14.947  10.200 -22.791  1.00  0.44           O  
HETATM  381  O   HOH T 380      22.467  50.924  19.758  1.00  0.44           O  
HETATM  382  O   HOH T 381      23.143  15.202 -16.473  1.00  0.44           O  
HETATM  383  O   HOH T 382      10.836   8.916  -6.371  1.00  0.44           O  
HETATM  384  O   HOH T 383       9.113  40.636  25.656  1.00  0.44           O  
HETATM  385  O   HOH T 384      -0.425  24.037 -20.281  1.00  0.44           O  
HETATM  386  O   HOH T 385       3.242  28.346  20.080  1.00  0.44           O  
HETATM  387  O   HOH T 386       4.868  15.323  33.948  1.00  0.45           O  
HETATM  388  O   HOH T 387      24.559  12.868 -16.129  1.00  0.45           O  
HETATM  389  O   HOH T 388      10.611  25.791   8.898  1.00  0.45           O  
HETATM  390  O   HOH T 389       3.800  56.159  16.752  1.00  0.45           O  
HETATM  391  O   HOH T 390      11.215  30.751  37.390  1.00  0.45           O  
HETATM  392  O   HOH T 391       0.070  33.848  -7.931  1.00  0.45           O  
HETATM  393  O   HOH T 392       9.313  50.621  23.639  1.00  0.45           O  
HETATM  394  O   HOH T 393       8.337  26.298   7.389  1.00  0.45           O  
HETATM  395  O   HOH T 394      -6.774  55.546   6.378  1.00  0.45           O  
HETATM  396  O   HOH T 395      24.499  40.353 -27.727  1.00  0.45           O  
HETATM  397  O   HOH T 396      18.864  36.503  -6.492  1.00  0.45           O  
HETATM  398  O   HOH T 397       5.513  25.978  32.267  1.00  0.45           O  
HETATM  399  O   HOH T 398      11.635  45.187 -21.788  1.00  0.45           O  
HETATM  400  O   HOH T 399       3.888   8.731   2.620  1.00  0.45           O  
HETATM  401  O   HOH T 400       6.127  55.164  22.974  1.00  0.45           O  
HETATM  402  O   HOH T 401      12.816  29.784  35.452  1.00  0.45           O  
HETATM  403  O   HOH T 402      20.247  38.288  10.004  1.00  0.45           O  
HETATM  404  O   HOH T 403      28.105  33.611  31.368  1.00  0.45           O  
HETATM  405  O   HOH T 404      -2.175  26.499   5.443  1.00  0.45           O  
HETATM  406  O   HOH T 405      21.200  40.172  34.034  1.00  0.45           O  
HETATM  407  O   HOH T 406      -1.267   9.644  -8.585  1.00  0.45           O  
HETATM  408  O   HOH T 407       4.565  11.681  39.727  1.00  0.45           O  
HETATM  409  O   HOH T 408      -3.155  50.881  15.844  1.00  0.45           O  
HETATM  410  O   HOH T 409      -3.194  28.977  -3.326  1.00  0.45           O  
HETATM  411  O   HOH T 410       2.387  57.644  14.879  1.00  0.46           O  
HETATM  412  O   HOH T 411      16.777  42.243   4.789  1.00  0.46           O  
HETATM  413  O   HOH T 412       8.454  49.491  26.078  1.00  0.46           O  
HETATM  414  O   HOH T 413       7.133  12.356  38.802  1.00  0.46           O  
HETATM  415  O   HOH T 414       1.964  37.650 -10.525  1.00  0.46           O  
HETATM  416  O   HOH T 415      16.673  26.295  46.399  1.00  0.46           O  
HETATM  417  O   HOH T 416       5.450  18.820  12.055  1.00  0.46           O  
HETATM  418  O   HOH T 417     -10.625  33.169   1.672  1.00  0.46           O  
HETATM  419  O   HOH T 418      25.199  42.469 -23.865  1.00  0.46           O  
HETATM  420  O   HOH T 419      -2.289  16.152  -9.537  1.00  0.46           O  
HETATM  421  O   HOH T 420       8.807   5.571 -18.883  1.00  0.46           O  
HETATM  422  O   HOH T 421      -5.138  33.602  12.762  1.00  0.46           O  
HETATM  423  O   HOH T 422       5.052   0.846  36.135  1.00  0.46           O  
HETATM  424  O   HOH T 423       7.643  32.354  -5.987  1.00  0.46           O  
HETATM  425  O   HOH T 424      21.182  47.843   3.062  1.00  0.46           O  
HETATM  426  O   HOH T 425      18.513  39.655 -22.869  1.00  0.46           O  
HETATM  427  O   HOH T 426      13.216  21.205  13.880  1.00  0.46           O  
HETATM  428  O   HOH T 427      26.205  41.530  16.377  1.00  0.46           O  
HETATM  429  O   HOH T 428       7.332  10.896  17.216  1.00  0.46           O  
HETATM  430  O   HOH T 429       3.977  39.281  31.248  1.00  0.46           O  
HETATM  431  O   HOH T 430       1.696  37.245  21.853  1.00  0.46           O  
HETATM  432  O   HOH T 431       3.139   6.444  36.354  1.00  0.46           O  
HETATM  433  O   HOH T 432      -0.079   4.641   0.340  1.00  0.46           O  
HETATM  434  O   HOH T 433       9.294  58.795 -11.407  1.00  0.46           O  
HETATM  435  O   HOH T 434       9.678  37.312  39.549  1.00  0.46           O  
HETATM  436  O   HOH T 435      -7.734  37.984  11.039  1.00  0.46           O  
HETATM  437  O   HOH T 436      26.535  28.892  43.458  1.00  0.46           O  
HETATM  438  O   HOH T 437      -9.077  41.873  10.396  1.00  0.46           O  
HETATM  439  O   HOH T 438       6.962  61.735   8.215  1.00  0.46           O  
HETATM  440  O   HOH T 439       1.896  24.554 -16.996  1.00  0.46           O  
HETATM  441  O   HOH T 440      -1.117   9.766  -4.643  1.00  0.47           O  
HETATM  442  O   HOH T 441      22.084  13.164 -14.801  1.00  0.47           O  
HETATM  443  O   HOH T 442       2.234  15.953  33.323  1.00  0.47           O  
HETATM  444  O   HOH T 443       0.767  59.729 -14.274  1.00  0.47           O  
HETATM  445  O   HOH T 444       8.473  15.957   4.157  1.00  0.47           O  
HETATM  446  O   HOH T 445     -11.698  32.586   4.054  1.00  0.47           O  
HETATM  447  O   HOH T 446       8.842  47.803  28.288  1.00  0.47           O  
HETATM  448  O   HOH T 447      18.278  21.412 -39.792  1.00  0.47           O  
HETATM  449  O   HOH T 448      11.962  10.587  39.315  1.00  0.47           O  
HETATM  450  O   HOH T 449       8.251   5.681 -21.574  1.00  0.47           O  
HETATM  451  O   HOH T 450      24.560  38.260  38.746  1.00  0.47           O  
HETATM  452  O   HOH T 451       0.306  44.069 -10.852  1.00  0.47           O  
HETATM  453  O   HOH T 452      29.403  34.579  29.044  1.00  0.47           O  
HETATM  454  O   HOH T 453      12.806  39.152  -3.399  1.00  0.47           O  
HETATM  455  O   HOH T 454      20.113  42.569  10.493  1.00  0.47           O  
HETATM  456  O   HOH T 455      13.841  40.705  -1.520  1.00  0.47           O  
HETATM  457  O   HOH T 456       4.933  43.797  -8.934  1.00  0.47           O  
HETATM  458  O   HOH T 457      23.047  33.788  41.333  1.00  0.47           O  
HETATM  459  O   HOH T 458       7.024  46.040  29.488  1.00  0.47           O  
HETATM  460  O   HOH T 459      19.694  35.520   9.864  1.00  0.47           O  
HETATM  461  O   HOH T 460      10.387  38.466  36.998  1.00  0.47           O  
HETATM  462  O   HOH T 461      23.021  17.479 -18.147  1.00  0.47           O  
HETATM  463  O   HOH T 462       9.522  28.846 -25.892  1.00  0.47           O  
HETATM  464  O   HOH T 463      13.792  11.059 -28.086  1.00  0.47           O  
HETATM  465  O   HOH T 464      19.474  12.125 -15.077  1.00  0.47           O  
HETATM  466  O   HOH T 465       7.908   3.711 -14.364  1.00  0.47           O  
HETATM  467  O   HOH T 466       9.888  27.568  -8.164  1.00  0.47           O  
HETATM  468  O   HOH T 467       2.796  21.869   0.600  1.00  0.47           O  
HETATM  469  O   HOH T 468       5.543  28.527  11.508  1.00  0.47           O  
HETATM  470  O   HOH T 469      10.875   4.231 -17.658  1.00  0.47           O  
HETATM  471  O   HOH T 470       8.979  38.865  -3.610  1.00  0.47           O  
HETATM  472  O   HOH T 471      10.069   4.519  16.866  1.00  0.47           O  
HETATM  473  O   HOH T 472      17.899  45.468   6.864  1.00  0.47           O  
HETATM  474  O   HOH T 473       3.054  31.648  -8.609  1.00  0.47           O  
HETATM  475  O   HOH T 474      11.315  46.578  28.745  1.00  0.47           O  
HETATM  476  O   HOH T 475      -0.647   7.249  -0.458  1.00  0.47           O  
HETATM  477  O   HOH T 476      11.048  35.792  37.794  1.00  0.47           O  
HETATM  478  O   HOH T 477      12.744  64.908  13.912  1.00  0.47           O  
HETATM  479  O   HOH T 478      16.296  11.300 -26.640  1.00  0.48           O  
HETATM  480  O   HOH T 479       1.050  56.268  16.890  1.00  0.48           O  
HETATM  481  O   HOH T 480      -0.030  58.529   7.105  1.00  0.48           O  
HETATM  482  O   HOH T 481      -3.122  32.170  11.530  1.00  0.48           O  
HETATM  483  O   HOH T 482      -6.083  39.539   9.298  1.00  0.48           O  
HETATM  484  O   HOH T 483      -0.494  12.284  -5.736  1.00  0.48           O  
HETATM  485  O   HOH T 484      12.170  34.463  18.855  1.00  0.48           O  
HETATM  486  O   HOH T 485       6.198  23.975  33.992  1.00  0.48           O  
HETATM  487  O   HOH T 486      18.351  23.986 -38.952  1.00  0.48           O  
HETATM  488  O   HOH T 487       3.084  46.118  24.107  1.00  0.48           O  
HETATM  489  O   HOH T 488      26.920  33.543 -10.254  1.00  0.48           O  
HETATM  490  O   HOH T 489      -4.571  46.296   4.610  1.00  0.48           O  
HETATM  491  O   HOH T 490      -1.371  25.359  -0.672  1.00  0.48           O  
HETATM  492  O   HOH T 491      18.627  11.022 -25.193  1.00  0.48           O  
HETATM  493  O   HOH T 492      13.903  11.098 -25.281  1.00  0.48           O  
HETATM  494  O   HOH T 493      25.384  14.176  23.648  1.00  0.48           O  
HETATM  495  O   HOH T 494      -6.585  14.627  -9.790  1.00  0.48           O  
HETATM  496  O   HOH T 495       2.792  27.390 -11.262  1.00  0.48           O  
HETATM  497  O   HOH T 496      18.503  30.363   9.419  1.00  0.48           O  
HETATM  498  O   HOH T 497      -0.054  36.585  -8.879  1.00  0.48           O  
HETATM  499  O   HOH T 498      13.526  44.260 -26.550  1.00  0.48           O  
HETATM  500  O   HOH T 499      -9.770  28.824   6.273  1.00  0.48           O  
HETATM  501  O   HOH T 500      15.161  18.274 -37.238  1.00  0.48           O  
HETATM  502  O   HOH T 501      -4.010  25.743  -1.606  1.00  0.48           O  
HETATM  503  O   HOH T 502       2.033  46.521  15.890  1.00  0.48           O  
HETATM  504  O   HOH T 503      29.043  18.580  31.110  1.00  0.48           O  
HETATM  505  O   HOH T 504       2.616  44.140  16.746  1.00  0.48           O  
HETATM  506  O   HOH T 505       7.966  32.788  17.249  1.00  0.48           O  
HETATM  507  O   HOH T 506       8.307  42.759  35.960  1.00  0.48           O  
HETATM  508  O   HOH T 507      28.738  37.607  16.163  1.00  0.48           O  
HETATM  509  O   HOH T 508      18.608  55.821  -1.248  1.00  0.48           O  
HETATM  510  O   HOH T 509      10.160  63.533  16.921  1.00  0.48           O  
HETATM  511  O   HOH T 510       5.684   3.073 -12.875  1.00  0.48           O  
HETATM  512  O   HOH T 511      15.325  16.668  -1.419  1.00  0.49           O  
HETATM  513  O   HOH T 512       4.607  33.785  30.486  1.00  0.49           O  
HETATM  514  O   HOH T 513      16.063  33.210 -34.698  1.00  0.49           O  
HETATM  515  O   HOH T 514      10.324   8.428  39.345  1.00  0.49           O  
HETATM  516  O   HOH T 515       2.330  29.143 -17.728  1.00  0.49           O  
HETATM  517  O   HOH T 516      17.464  45.909  13.792  1.00  0.49           O  
HETATM  518  O   HOH T 517      28.703  15.851  31.472  1.00  0.49           O  
HETATM  519  O   HOH T 518      28.198  26.402  22.082  1.00  0.49           O  
HETATM  520  O   HOH T 519       0.237  13.191  -0.945  1.00  0.49           O  
HETATM  521  O   HOH T 520      -8.912  39.505   8.926  1.00  0.49           O  
HETATM  522  O   HOH T 521      11.050  11.017 -28.857  1.00  0.49           O  
HETATM  523  O   HOH T 522      23.305  49.071   4.439  1.00  0.49           O  
HETATM  524  O   HOH T 523       4.769  27.681  34.288  1.00  0.49           O  
HETATM  525  O   HOH T 524       0.625  29.363  -5.173  1.00  0.49           O  
HETATM  526  O   HOH T 525       0.385  19.716  36.343  1.00  0.49           O  
HETATM  527  O   HOH T 526      15.452   6.484  24.009  1.00  0.49           O  
HETATM  528  O   HOH T 527       9.903  20.123   2.684  1.00  0.49           O  
HETATM  529  O   HOH T 528       4.147  56.668  19.485  1.00  0.49           O  
HETATM  530  O   HOH T 529      22.276  46.740   5.480  1.00  0.49           O  
HETATM  531  O   HOH T 530       8.794  18.707 -26.412  1.00  0.49           O  
HETATM  532  O   HOH T 531      -6.690  25.199  -1.672  1.00  0.49           O  
HETATM  533  O   HOH T 532       7.047  24.864 -24.151  1.00  0.49           O  
HETATM  534  O   HOH T 533      20.784  24.895 -37.944  1.00  0.49           O  
HETATM  535  O   HOH T 534      23.638  48.599   7.171  1.00  0.49           O  
HETATM  536  O   HOH T 535      16.306  43.967 -20.505  1.00  0.49           O  
HETATM  537  O   HOH T 536       3.569  20.963   2.980  1.00  0.49           O  
HETATM  538  O   HOH T 537      13.452  17.720 -27.218  1.00  0.49           O  
HETATM  539  O   HOH T 538      20.627  45.089   7.068  1.00  0.49           O  
HETATM  540  O   HOH T 539       2.219   7.114  -2.678  1.00  0.49           O  
HETATM  541  O   HOH T 540      11.347  13.973   0.901  1.00  0.49           O  
HETATM  542  O   HOH T 541       3.649  22.385 -28.253  1.00  0.50           O  
HETATM  543  O   HOH T 542       8.657  65.153  12.259  1.00  0.50           O  
HETATM  544  O   HOH T 543      11.839  11.243 -23.385  1.00  0.50           O  
HETATM  545  O   HOH T 544      28.767  31.931  28.263  1.00  0.50           O  
HETATM  546  O   HOH T 545      -0.177  39.158  22.057  1.00  0.50           O  
HETATM  547  O   HOH T 546       9.348  50.118  29.765  1.00  0.50           O  
HETATM  548  O   HOH T 547      25.673  17.035 -13.977  1.00  0.50           O  
HETATM  549  O   HOH T 548       5.044  35.833 -11.760  1.00  0.50           O  
HETATM  550  O   HOH T 549      10.912  20.083  48.395  1.00  0.50           O  
HETATM  551  O   HOH T 550      -6.980  40.632  11.723  1.00  0.50           O  
HETATM  552  O   HOH T 551      13.166  36.388   9.425  1.00  0.50           O  
HETATM  553  O   HOH T 552      18.262  29.867 -32.889  1.00  0.50           O  
HETATM  554  O   HOH T 553      -1.895  26.531  -3.179  1.00  0.50           O  
HETATM  555  O   HOH T 554       9.493  28.900 -28.674  1.00  0.50           O  
HETATM  556  O   HOH T 555       5.067  18.559   3.392  1.00  0.50           O  
HETATM  557  O   HOH T 556      24.077  25.651  40.612  1.00  0.50           O  
HETATM  558  O   HOH T 557       9.226   5.792 -16.097  1.00  0.50           O  
HETATM  559  O   HOH T 558       3.874  34.213 -16.548  1.00  0.50           O  
HETATM  560  O   HOH T 559      -0.018  21.052  34.022  1.00  0.50           O  
HETATM  561  O   HOH T 560      17.214  46.928  36.411  1.00  0.50           O  
HETATM  562  O   HOH T 561       7.983  50.271  -8.486  1.00  0.51           O  
HETATM  563  O   HOH T 562      24.499  24.068  38.675  1.00  0.51           O  
HETATM  564  O   HOH T 563      -0.269  37.173  14.082  1.00  0.51           O  
HETATM  565  O   HOH T 564     -12.796  51.570  10.349  1.00  0.51           O  
HETATM  566  O   HOH T 565      -1.535  29.981  11.964  1.00  0.51           O  
HETATM  567  O   HOH T 566       0.484  27.145 -17.130  1.00  0.51           O  
HETATM  568  O   HOH T 567      -7.306  41.735   8.243  1.00  0.51           O  
HETATM  569  O   HOH T 568      26.098  32.153 -15.323  1.00  0.51           O  
HETATM  570  O   HOH T 569      -0.284  16.761  -0.949  1.00  0.51           O  
HETATM  571  O   HOH T 570       4.718  28.352  25.350  1.00  0.51           O  
HETATM  572  O   HOH T 571       5.520  36.718 -14.257  1.00  0.51           O  
HETATM  573  O   HOH T 572       6.632  24.758   8.942  1.00  0.51           O  
HETATM  574  O   HOH T 573      11.067  15.664   5.073  1.00  0.51           O  
HETATM  575  O   HOH T 574      10.318  16.588 -25.718  1.00  0.51           O  
HETATM  576  O   HOH T 575       3.740  25.995 -15.507  1.00  0.51           O  
HETATM  577  O   HOH T 576      27.862  28.021  25.832  1.00  0.51           O  
HETATM  578  O   HOH T 577      15.452  14.575  -3.220  1.00  0.51           O  
HETATM  579  O   HOH T 578      -4.990  55.644   4.151  1.00  0.51           O  
HETATM  580  O   HOH T 579       5.144  21.318  11.048  1.00  0.52           O  
HETATM  581  O   HOH T 580      23.952  51.695  17.612  1.00  0.52           O  
HETATM  582  O   HOH T 581       2.292  54.859  14.775  1.00  0.52           O  
HETATM  583  O   HOH T 582       1.579  27.842  -1.699  1.00  0.52           O  
HETATM  584  O   HOH T 583      27.202  20.307  33.493  1.00  0.52           O  
HETATM  585  O   HOH T 584      12.563  58.858  21.521  1.00  0.52           O  
HETATM  586  O   HOH T 585       7.994  27.413  12.405  1.00  0.52           O  
HETATM  587  O   HOH T 586      19.594  48.024  25.202  1.00  0.52           O  
HETATM  588  O   HOH T 587      10.415  58.503  -8.898  1.00  0.52           O  
HETATM  589  O   HOH T 588      14.444  43.644  -8.124  1.00  0.52           O  
HETATM  590  O   HOH T 589      23.339  15.457 -13.722  1.00  0.52           O  
HETATM  591  O   HOH T 590      21.146  49.476  21.812  1.00  0.52           O  
HETATM  592  O   HOH T 591      13.156  34.147   2.523  1.00  0.52           O  
HETATM  593  O   HOH T 592      -8.553  26.659   2.927  1.00  0.52           O  
HETATM  594  O   HOH T 593      -6.141  30.735  15.559  1.00  0.52           O  
HETATM  595  O   HOH T 594       2.950   2.368   0.870  1.00  0.52           O  
HETATM  596  O   HOH T 595       6.749  57.181  18.636  1.00  0.52           O  
HETATM  597  O   HOH T 596     -10.232  31.639   6.311  1.00  0.52           O  
HETATM  598  O   HOH T 597      25.228  41.040  38.785  1.00  0.52           O  
HETATM  599  O   HOH T 598      19.265  34.034   0.986  1.00  0.52           O  
HETATM  600  O   HOH T 599      -6.081  32.577  -6.442  1.00  0.52           O  
HETATM  601  O   HOH T 600       0.760  26.836  -4.069  1.00  0.52           O  
HETATM  602  O   HOH T 601      15.903  24.940 -39.564  1.00  0.53           O  
HETATM  603  O   HOH T 602      15.937  33.171  43.103  1.00  0.53           O  
HETATM  604  O   HOH T 603       2.514  42.674 -11.911  1.00  0.53           O  
HETATM  605  O   HOH T 604       0.836  30.814  13.040  1.00  0.53           O  
HETATM  606  O   HOH T 605      -0.642   7.221  37.380  1.00  0.53           O  
HETATM  607  O   HOH T 606      28.789  41.358  17.368  1.00  0.53           O  
HETATM  608  O   HOH T 607      15.437   8.900 -20.267  1.00  0.53           O  
HETATM  609  O   HOH T 608      17.795  35.706  45.341  1.00  0.53           O  
HETATM  610  O   HOH T 609      28.211  28.458  35.801  1.00  0.53           O  
HETATM  611  O   HOH T 610      -0.796  16.546  37.635  1.00  0.53           O  
HETATM  612  O   HOH T 611      14.546  30.821  42.992  1.00  0.53           O  
HETATM  613  O   HOH T 612       1.429  21.652   4.626  1.00  0.53           O  
HETATM  614  O   HOH T 613      17.524  36.299 -26.269  1.00  0.53           O  
HETATM  615  O   HOH T 614      16.392  12.454  -4.762  1.00  0.53           O  
HETATM  616  O   HOH T 615      -5.607  38.019   1.695  1.00  0.54           O  
HETATM  617  O   HOH T 616      14.047  67.302  13.617  1.00  0.54           O  
HETATM  618  O   HOH T 617      18.744  44.179   0.839  1.00  0.54           O  
HETATM  619  O   HOH T 618      10.066  18.254   4.638  1.00  0.54           O  
HETATM  620  O   HOH T 619       1.141  31.800  -6.452  1.00  0.54           O  
HETATM  621  O   HOH T 620      22.501  49.205   9.682  1.00  0.54           O  
HETATM  622  O   HOH T 621      30.527  21.021  36.835  1.00  0.54           O  
HETATM  623  O   HOH T 622      18.594  32.669 -33.500  1.00  0.54           O  
HETATM  624  O   HOH T 623      12.141  51.038  -7.382  1.00  0.54           O  
HETATM  625  O   HOH T 624      12.206  58.803  -6.782  1.00  0.54           O  
HETATM  626  O   HOH T 625       8.862  13.604  15.791  1.00  0.54           O  
HETATM  627  O   HOH T 626      -4.728  36.277  19.388  1.00  0.54           O  
HETATM  628  O   HOH T 627      21.070  41.478  12.910  1.00  0.54           O  
HETATM  629  O   HOH T 628       5.685  58.810  10.635  1.00  0.54           O  
HETATM  630  O   HOH T 629       6.228  25.448 -26.730  1.00  0.54           O  
HETATM  631  O   HOH T 630      17.569  31.363  44.460  1.00  0.54           O  
HETATM  632  O   HOH T 631       5.383  22.770   7.453  1.00  0.54           O  
HETATM  633  O   HOH T 632      11.478  23.208  13.469  1.00  0.54           O  
HETATM  634  O   HOH T 633       0.920   9.862  39.572  1.00  0.55           O  
HETATM  635  O   HOH T 634       1.686  43.967  23.278  1.00  0.55           O  
HETATM  636  O   HOH T 635      17.000  36.500 -32.438  1.00  0.55           O  
HETATM  637  O   HOH T 636      21.131  35.674 -29.911  1.00  0.55           O  
HETATM  638  O   HOH T 637      16.401  43.486  -0.510  1.00  0.55           O  
HETATM  639  O   HOH T 638      -7.160  35.075  15.334  1.00  0.55           O  
HETATM  640  O   HOH T 639      16.233  40.489   7.025  1.00  0.55           O  
HETATM  641  O   HOH T 640      -1.958  19.200  34.880  1.00  0.55           O  
HETATM  642  O   HOH T 641       0.898   5.638  38.997  1.00  0.55           O  
HETATM  643  O   HOH T 642       9.468  51.715  -6.724  1.00  0.55           O  
HETATM  644  O   HOH T 643       5.031   3.469  37.196  1.00  0.55           O  
HETATM  645  O   HOH T 644      13.693  55.815 -15.391  1.00  0.55           O  
HETATM  646  O   HOH T 645      12.312  53.553 -18.175  1.00  0.55           O  
HETATM  647  O   HOH T 646      17.851  15.393  37.569  1.00  0.55           O  
HETATM  648  O   HOH T 647      18.651  10.169 -13.153  1.00  0.55           O  
HETATM  649  O   HOH T 648      15.400  15.401  12.155  1.00  0.56           O  
HETATM  650  O   HOH T 649      19.525  42.977  14.501  1.00  0.56           O  
HETATM  651  O   HOH T 650      -2.668  40.737  -7.126  1.00  0.56           O  
HETATM  652  O   HOH T 651      26.413  15.068  26.118  1.00  0.56           O  
HETATM  653  O   HOH T 652       9.580  66.597  10.005  1.00  0.56           O  
HETATM  654  O   HOH T 653      22.857  46.210   8.241  1.00  0.56           O  
HETATM  655  O   HOH T 654      18.553  39.041  -8.673  1.00  0.56           O  
HETATM  656  O   HOH T 655       1.269  61.889 -12.683  1.00  0.56           O  
HETATM  657  O   HOH T 656      17.896   6.670  16.827  1.00  0.56           O  
HETATM  658  O   HOH T 657       7.114  28.479  47.619  1.00  0.57           O  
HETATM  659  O   HOH T 658       1.612  25.076  -5.773  1.00  0.57           O  
HETATM  660  O   HOH T 659      27.178  36.344 -10.362  1.00  0.57           O  
HETATM  661  O   HOH T 660      16.233  38.047 -28.322  1.00  0.57           O  
HETATM  662  O   HOH T 661      12.121  29.330 -29.014  1.00  0.57           O  
HETATM  663  O   HOH T 662       6.023  25.817  11.488  1.00  0.57           O  
HETATM  664  O   HOH T 663      10.572  20.447 -27.651  1.00  0.58           O  
HETATM  665  O   HOH T 664       2.281  29.063  -9.125  1.00  0.58           O  
HETATM  666  O   HOH T 665       3.906  17.738  38.910  1.00  0.58           O  
HETATM  667  O   HOH T 666      29.249  35.930 -14.178  1.00  0.58           O  
HETATM  668  O   HOH T 667      -8.083  43.706  15.373  1.00  0.58           O  
HETATM  669  O   HOH T 668      -0.173  19.323  -2.332  1.00  0.58           O  
HETATM  670  O   HOH T 669      11.175  22.044   5.573  1.00  0.59           O  
HETATM  671  O   HOH T 670      12.166  15.328 -31.841  1.00  0.59           O  
HETATM  672  O   HOH T 671       2.220  30.821  19.553  1.00  0.59           O  
HETATM  673  O   HOH T 672      -3.850  52.434   8.833  1.00  0.60           O  
HETATM  674  O   HOH T 673      15.256  24.610   4.702  1.00  0.61           O  
TER     675      HOH T 673 
