# Supplementary material for: Accurate Prediction of Hydration Sites of Proteins Using Energy Model With Atom Embedding
Source: Front Mol Biosci. 2021 Sep 20;8:756075. doi: 10.3389/fmolb.2021.756075 (PMC8488165; doi:10.3389/fmolb.2021.756075)
Supplement: Supplementary file 1 [file DataSheet1.ZIP › Data Sheet 1/Our_result_pdb/our_dataset_output/2FCL_watersite.pdb]

HEADER                                                        XXXX


JRNL        PMID   -1
HETATM    1  O   HOH T   0      49.102  20.266  11.482  1.00  0.03           O  
HETATM    2  O   HOH T   1      19.025  23.155  11.372  1.00  0.08           O  
HETATM    3  O   HOH T   2      49.699  21.323  12.935  1.00  0.09           O  
HETATM    4  O   HOH T   3      48.083  21.720   8.910  1.00  0.13           O  
HETATM    5  O   HOH T   4      48.416  24.957  12.890  1.00  0.14           O  
HETATM    6  O   HOH T   5      50.644  22.715   8.590  1.00  0.17           O  
HETATM    7  O   HOH T   6      49.399  23.264  11.107  1.00  0.17           O  
HETATM    8  O   HOH T   7      17.946  25.462  11.486  1.00  0.17           O  
HETATM    9  O   HOH T   8      36.056  36.279  18.251  1.00  0.20           O  
HETATM   10  O   HOH T   9      18.246  24.650  13.710  1.00  0.21           O  
HETATM   11  O   HOH T  10      48.988  23.609  15.295  1.00  0.22           O  
HETATM   12  O   HOH T  11      41.880  21.877   8.961  1.00  0.22           O  
HETATM   13  O   HOH T  12      39.497  14.020   5.078  1.00  0.22           O  
HETATM   14  O   HOH T  13      29.272  44.876   6.588  1.00  0.23           O  
HETATM   15  O   HOH T  14      35.839  22.614  -4.338  1.00  0.23           O  
HETATM   16  O   HOH T  15      34.729  38.734  18.430  1.00  0.23           O  
HETATM   17  O   HOH T  16      38.750  19.745  14.438  1.00  0.23           O  
HETATM   18  O   HOH T  17      24.478  38.171  16.990  1.00  0.24           O  
HETATM   19  O   HOH T  18      45.095  27.210  -1.179  1.00  0.25           O  
HETATM   20  O   HOH T  19      49.968  29.845   1.718  1.00  0.25           O  
HETATM   21  O   HOH T  20      49.809  18.873   9.320  1.00  0.26           O  
HETATM   22  O   HOH T  21      21.835  24.709  10.928  1.00  0.26           O  
HETATM   23  O   HOH T  22      29.398  38.889  20.389  1.00  0.26           O  
HETATM   24  O   HOH T  23      27.724  40.335  18.759  1.00  0.26           O  
HETATM   25  O   HOH T  24      52.729  15.688   6.580  1.00  0.26           O  
HETATM   26  O   HOH T  25      52.054  22.107   9.844  1.00  0.27           O  
HETATM   27  O   HOH T  26      35.529  16.778   6.866  1.00  0.27           O  
HETATM   28  O   HOH T  27      33.326  37.079  -4.143  1.00  0.28           O  
HETATM   29  O   HOH T  28      20.522  25.081  14.939  1.00  0.28           O  
HETATM   30  O   HOH T  29      29.883  34.342  -3.853  1.00  0.28           O  
HETATM   31  O   HOH T  30      35.043  15.643   1.178  1.00  0.29           O  
HETATM   32  O   HOH T  31      17.620  33.450   5.401  1.00  0.29           O  
HETATM   33  O   HOH T  32      18.016  30.988   4.092  1.00  0.29           O  
HETATM   34  O   HOH T  33      26.532  22.730  18.606  1.00  0.29           O  
HETATM   35  O   HOH T  34      25.788  20.159  19.139  1.00  0.29           O  
HETATM   36  O   HOH T  35      33.113  22.131  -4.193  1.00  0.29           O  
HETATM   37  O   HOH T  36      29.654  31.738  -4.958  1.00  0.29           O  
HETATM   38  O   HOH T  37      27.479   6.397  16.848  1.00  0.30           O  
HETATM   39  O   HOH T  38      40.564  20.850  25.820  1.00  0.30           O  
HETATM   40  O   HOH T  39      44.426  10.494   1.344  1.00  0.30           O  
HETATM   41  O   HOH T  40      33.664  20.185   6.653  1.00  0.30           O  
HETATM   42  O   HOH T  41      36.366  14.027  -0.665  1.00  0.31           O  
HETATM   43  O   HOH T  42      48.191  25.659   1.274  1.00  0.31           O  
HETATM   44  O   HOH T  43      40.864  35.874  -7.891  1.00  0.31           O  
HETATM   45  O   HOH T  44      41.239  34.726  12.963  1.00  0.32           O  
HETATM   46  O   HOH T  45      34.846  20.004  -4.631  1.00  0.32           O  
HETATM   47  O   HOH T  46      32.925  43.954   8.593  1.00  0.32           O  
HETATM   48  O   HOH T  47      49.479  21.973   3.889  1.00  0.32           O  
HETATM   49  O   HOH T  48      48.140   8.146  13.763  1.00  0.33           O  
HETATM   50  O   HOH T  49      18.936  42.514  10.949  1.00  0.33           O  
HETATM   51  O   HOH T  50      22.796  34.689  -0.335  1.00  0.33           O  
HETATM   52  O   HOH T  51      37.350  27.356  21.003  1.00  0.33           O  
HETATM   53  O   HOH T  52      40.190   7.301   4.117  1.00  0.33           O  
HETATM   54  O   HOH T  53      38.018  10.998  27.652  1.00  0.33           O  
HETATM   55  O   HOH T  54      17.890  38.202   4.123  1.00  0.33           O  
HETATM   56  O   HOH T  55      34.611  21.338  10.407  1.00  0.33           O  
HETATM   57  O   HOH T  56      42.217  25.954  -4.916  1.00  0.33           O  
HETATM   58  O   HOH T  57      35.621  26.629  19.006  1.00  0.34           O  
HETATM   59  O   HOH T  58      38.236  28.633  -7.606  1.00  0.34           O  
HETATM   60  O   HOH T  59      29.933  20.070   5.494  1.00  0.34           O  
HETATM   61  O   HOH T  60      38.362  21.603  -3.572  1.00  0.35           O  
HETATM   62  O   HOH T  61      40.578  27.558  -6.716  1.00  0.35           O  
HETATM   63  O   HOH T  62      23.776  32.573  11.945  1.00  0.35           O  
HETATM   64  O   HOH T  63      52.526  42.583   6.491  1.00  0.35           O  
HETATM   65  O   HOH T  64      41.115  47.154   3.069  1.00  0.35           O  
HETATM   66  O   HOH T  65      34.040   5.090  12.316  1.00  0.35           O  
HETATM   67  O   HOH T  66      36.213  13.502  23.227  1.00  0.36           O  
HETATM   68  O   HOH T  67      40.959  41.966  -4.342  1.00  0.36           O  
HETATM   69  O   HOH T  68      18.765  41.746  13.683  1.00  0.36           O  
HETATM   70  O   HOH T  69      31.234  11.222  18.217  1.00  0.36           O  
HETATM   71  O   HOH T  70      43.263  28.045  -3.164  1.00  0.36           O  
HETATM   72  O   HOH T  71      17.030  30.792  13.030  1.00  0.36           O  
HETATM   73  O   HOH T  72      32.224  19.501  -4.059  1.00  0.36           O  
HETATM   74  O   HOH T  73      52.559  24.554  21.362  1.00  0.37           O  
HETATM   75  O   HOH T  74      39.948  29.909  21.113  1.00  0.37           O  
HETATM   76  O   HOH T  75      34.898  23.389  13.374  1.00  0.37           O  
HETATM   77  O   HOH T  76      29.517  21.468  -2.567  1.00  0.37           O  
HETATM   78  O   HOH T  77      29.596  13.035  16.919  1.00  0.37           O  
HETATM   79  O   HOH T  78      21.564  22.887   8.696  1.00  0.37           O  
HETATM   80  O   HOH T  79      39.401  19.753  -7.233  1.00  0.37           O  
HETATM   81  O   HOH T  80      17.162  40.485  11.866  1.00  0.37           O  
HETATM   82  O   HOH T  81      20.953  23.743  23.693  1.00  0.38           O  
HETATM   83  O   HOH T  82      17.249  28.254   3.970  1.00  0.38           O  
HETATM   84  O   HOH T  83      25.761  24.789  -1.776  1.00  0.38           O  
HETATM   85  O   HOH T  84      43.966  12.737  -0.007  1.00  0.38           O  
HETATM   86  O   HOH T  85      20.849  33.978   2.503  1.00  0.38           O  
HETATM   87  O   HOH T  86      22.935  39.580  15.235  1.00  0.38           O  
HETATM   88  O   HOH T  87      21.741  32.335  -1.235  1.00  0.38           O  
HETATM   89  O   HOH T  88      41.222  12.843  -0.926  1.00  0.38           O  
HETATM   90  O   HOH T  89      23.076  20.188  18.666  1.00  0.38           O  
HETATM   91  O   HOH T  90      35.683   4.016   8.852  1.00  0.39           O  
HETATM   92  O   HOH T  91      45.419  29.556  -4.392  1.00  0.39           O  
HETATM   93  O   HOH T  92      39.961  21.446  23.276  1.00  0.39           O  
HETATM   94  O   HOH T  93      27.546  29.954  -5.011  1.00  0.39           O  
HETATM   95  O   HOH T  94      39.968  19.979  28.432  1.00  0.39           O  
HETATM   96  O   HOH T  95      37.295  21.721  22.584  1.00  0.39           O  
HETATM   97  O   HOH T  96      46.539  11.391  -0.336  1.00  0.39           O  
HETATM   98  O   HOH T  97      42.706  31.810  20.488  1.00  0.40           O  
HETATM   99  O   HOH T  98      37.836  21.744  16.135  1.00  0.40           O  
HETATM  100  O   HOH T  99      17.246  30.098  18.350  1.00  0.40           O  
HETATM  101  O   HOH T 100      36.886  24.630  20.561  1.00  0.40           O  
HETATM  102  O   HOH T 101      37.885  48.643  14.313  1.00  0.40           O  
HETATM  103  O   HOH T 102      29.028  23.691  -5.857  1.00  0.41           O  
HETATM  104  O   HOH T 103      47.015  28.986  -2.092  1.00  0.41           O  
HETATM  105  O   HOH T 104      47.173  31.668  22.630  1.00  0.41           O  
HETATM  106  O   HOH T 105      32.429  13.546  22.029  1.00  0.41           O  
HETATM  107  O   HOH T 106      30.450  44.634   4.097  1.00  0.41           O  
HETATM  108  O   HOH T 107      44.122  40.620   1.935  1.00  0.41           O  
HETATM  109  O   HOH T 108      37.092  21.723  13.565  1.00  0.41           O  
HETATM  110  O   HOH T 109      27.227  24.237   0.538  1.00  0.41           O  
HETATM  111  O   HOH T 110      34.979  13.375  20.850  1.00  0.41           O  
HETATM  112  O   HOH T 111      19.458  35.081   4.633  1.00  0.41           O  
HETATM  113  O   HOH T 112      25.844  27.626  -4.513  1.00  0.41           O  
HETATM  114  O   HOH T 113      52.557  25.013  18.624  1.00  0.42           O  
HETATM  115  O   HOH T 114      21.776  34.708  17.998  1.00  0.42           O  
HETATM  116  O   HOH T 115      24.319  41.559   0.897  1.00  0.42           O  
HETATM  117  O   HOH T 116      37.469  45.383   5.695  1.00  0.42           O  
HETATM  118  O   HOH T 117      25.983  45.161  12.108  1.00  0.42           O  
HETATM  119  O   HOH T 118      38.284  29.011  23.062  1.00  0.42           O  
HETATM  120  O   HOH T 119      54.987  22.067  12.086  1.00  0.43           O  
HETATM  121  O   HOH T 120      38.513  12.146  -0.198  1.00  0.43           O  
HETATM  122  O   HOH T 121      47.888  16.954  -2.700  1.00  0.43           O  
HETATM  123  O   HOH T 122      37.428  14.538  32.737  1.00  0.43           O  
HETATM  124  O   HOH T 123      30.579  21.461  -5.170  1.00  0.43           O  
HETATM  125  O   HOH T 124      18.216  40.285   5.936  1.00  0.43           O  
HETATM  126  O   HOH T 125      47.878  19.440  -3.357  1.00  0.43           O  
HETATM  127  O   HOH T 126      30.826  36.559  -5.323  1.00  0.43           O  
HETATM  128  O   HOH T 127      53.430  23.455  13.000  1.00  0.44           O  
HETATM  129  O   HOH T 128      42.737  49.425   3.024  1.00  0.44           O  
HETATM  130  O   HOH T 129      20.944  32.554  21.059  1.00  0.44           O  
HETATM  131  O   HOH T 130      48.825  24.729   3.843  1.00  0.44           O  
HETATM  132  O   HOH T 131      42.655  11.233  18.801  1.00  0.44           O  
HETATM  133  O   HOH T 132      33.020  11.355  20.306  1.00  0.44           O  
HETATM  134  O   HOH T 133      53.616  10.849   8.450  1.00  0.44           O  
HETATM  135  O   HOH T 134      37.802  45.710  14.203  1.00  0.44           O  
HETATM  136  O   HOH T 135      29.883  11.660  12.097  1.00  0.44           O  
HETATM  137  O   HOH T 136      33.589   2.316   9.754  1.00  0.44           O  
HETATM  138  O   HOH T 137      36.599   4.714  29.426  1.00  0.44           O  
HETATM  139  O   HOH T 138      32.067   3.089  12.062  1.00  0.44           O  
HETATM  140  O   HOH T 139      33.275  19.649  31.822  1.00  0.44           O  
HETATM  141  O   HOH T 140      32.971  24.977  12.361  1.00  0.44           O  
HETATM  142  O   HOH T 141      49.592  29.690  -1.035  1.00  0.44           O  
HETATM  143  O   HOH T 142      38.909  19.061  -4.603  1.00  0.44           O  
HETATM  144  O   HOH T 143      24.509  43.617  10.424  1.00  0.44           O  
HETATM  145  O   HOH T 144      52.045  40.939   8.530  1.00  0.45           O  
HETATM  146  O   HOH T 145      32.880  17.493   6.543  1.00  0.45           O  
HETATM  147  O   HOH T 146      42.053  17.493  18.349  1.00  0.45           O  
HETATM  148  O   HOH T 147      18.705  22.865  14.377  1.00  0.45           O  
HETATM  149  O   HOH T 148      50.125  23.823  17.963  1.00  0.45           O  
HETATM  150  O   HOH T 149      37.839  12.043   3.880  1.00  0.45           O  
HETATM  151  O   HOH T 150      21.604  18.702  16.788  1.00  0.45           O  
HETATM  152  O   HOH T 151      42.313  36.017  10.713  1.00  0.45           O  
HETATM  153  O   HOH T 152      27.632  32.294  -6.732  1.00  0.45           O  
HETATM  154  O   HOH T 153      36.715  43.228   7.358  1.00  0.45           O  
HETATM  155  O   HOH T 154      34.596  46.915  16.253  1.00  0.45           O  
HETATM  156  O   HOH T 155      39.256   5.514   0.248  1.00  0.45           O  
HETATM  157  O   HOH T 156      39.089   3.988   6.642  1.00  0.46           O  
HETATM  158  O   HOH T 157      37.252   2.083   7.420  1.00  0.46           O  
HETATM  159  O   HOH T 158      35.791  44.797   3.433  1.00  0.46           O  
HETATM  160  O   HOH T 159      37.291  22.389  18.833  1.00  0.46           O  
HETATM  161  O   HOH T 160      22.370  45.092  16.279  1.00  0.46           O  
HETATM  162  O   HOH T 161      44.647  32.751  22.237  1.00  0.46           O  
HETATM  163  O   HOH T 162      22.584  42.277  16.017  1.00  0.46           O  
HETATM  164  O   HOH T 163      53.498  21.049  22.662  1.00  0.46           O  
HETATM  165  O   HOH T 164      32.078  45.232   6.338  1.00  0.46           O  
HETATM  166  O   HOH T 165      32.433  19.308   4.409  1.00  0.46           O  
HETATM  167  O   HOH T 166      20.027  25.003   5.338  1.00  0.46           O  
HETATM  168  O   HOH T 167      24.527  24.949   0.679  1.00  0.46           O  
HETATM  169  O   HOH T 168      30.058  26.761  23.088  1.00  0.46           O  
HETATM  170  O   HOH T 169      33.141  39.667  -3.308  1.00  0.46           O  
HETATM  171  O   HOH T 170      42.619  38.628  11.490  1.00  0.46           O  
HETATM  172  O   HOH T 171      43.947  24.262  23.060  1.00  0.46           O  
HETATM  173  O   HOH T 172      19.620  38.797   2.128  1.00  0.47           O  
HETATM  174  O   HOH T 173      32.729  11.959   0.761  1.00  0.47           O  
HETATM  175  O   HOH T 174      46.351  32.141  -5.059  1.00  0.47           O  
HETATM  176  O   HOH T 175      25.331  30.749  -6.412  1.00  0.47           O  
HETATM  177  O   HOH T 176      21.579  26.519  17.057  1.00  0.47           O  
HETATM  178  O   HOH T 177      54.457  17.813   5.976  1.00  0.47           O  
HETATM  179  O   HOH T 178      19.484  26.117  23.513  1.00  0.47           O  
HETATM  180  O   HOH T 179      38.793  21.242  -9.375  1.00  0.47           O  
HETATM  181  O   HOH T 180      37.412  38.614  18.972  1.00  0.47           O  
HETATM  182  O   HOH T 181      21.463  41.189  13.656  1.00  0.47           O  
HETATM  183  O   HOH T 182      32.960  46.632   8.665  1.00  0.47           O  
HETATM  184  O   HOH T 183      30.975  12.820   9.733  1.00  0.47           O  
HETATM  185  O   HOH T 184      30.708   8.002  28.103  1.00  0.47           O  
HETATM  186  O   HOH T 185      17.954  26.034   2.292  1.00  0.47           O  
HETATM  187  O   HOH T 186      54.773  16.134   8.253  1.00  0.47           O  
HETATM  188  O   HOH T 187      34.965   0.620   7.932  1.00  0.47           O  
HETATM  189  O   HOH T 188      34.334  34.203  23.653  1.00  0.47           O  
HETATM  190  O   HOH T 189      49.298  26.575  14.931  1.00  0.48           O  
HETATM  191  O   HOH T 190      31.426  11.079  22.632  1.00  0.48           O  
HETATM  192  O   HOH T 191      22.739  40.186  17.892  1.00  0.48           O  
HETATM  193  O   HOH T 192      44.751  11.478  -2.422  1.00  0.48           O  
HETATM  194  O   HOH T 193      25.024  39.725  19.256  1.00  0.48           O  
HETATM  195  O   HOH T 194      33.110  47.891  11.202  1.00  0.48           O  
HETATM  196  O   HOH T 195      52.524  20.967  12.851  1.00  0.48           O  
HETATM  197  O   HOH T 196      35.935  18.877  32.089  1.00  0.48           O  
HETATM  198  O   HOH T 197      42.829  28.865  -7.471  1.00  0.49           O  
HETATM  199  O   HOH T 198      33.854  39.927  -0.726  1.00  0.49           O  
HETATM  200  O   HOH T 199      48.647  20.281  15.526  1.00  0.49           O  
HETATM  201  O   HOH T 200      37.521   7.620   1.159  1.00  0.49           O  
HETATM  202  O   HOH T 201      19.068  31.481  -1.097  1.00  0.49           O  
HETATM  203  O   HOH T 202      36.902  47.776   7.308  1.00  0.49           O  
HETATM  204  O   HOH T 203      15.960  31.856  16.598  1.00  0.49           O  
HETATM  205  O   HOH T 204      45.802  40.573   4.176  1.00  0.49           O  
HETATM  206  O   HOH T 205      28.973  34.804  -6.480  1.00  0.49           O  
HETATM  207  O   HOH T 206      36.974  15.317   4.953  1.00  0.49           O  
HETATM  208  O   HOH T 207      21.900  30.897  23.024  1.00  0.50           O  
HETATM  209  O   HOH T 208      34.029  12.845  -1.584  1.00  0.50           O  
HETATM  210  O   HOH T 209      47.715  34.944  -2.465  1.00  0.50           O  
HETATM  211  O   HOH T 210      19.309  31.875  18.772  1.00  0.50           O  
HETATM  212  O   HOH T 211      31.187  29.122  -9.994  1.00  0.50           O  
HETATM  213  O   HOH T 212      52.190  16.106   9.300  1.00  0.50           O  
HETATM  214  O   HOH T 213      49.626  31.730  -2.745  1.00  0.50           O  
HETATM  215  O   HOH T 214      42.707  10.449  -0.894  1.00  0.50           O  
HETATM  216  O   HOH T 215      32.728  14.604   0.146  1.00  0.50           O  
HETATM  217  O   HOH T 216      21.114  22.627  14.534  1.00  0.50           O  
HETATM  218  O   HOH T 217      38.880  10.382  25.117  1.00  0.50           O  
HETATM  219  O   HOH T 218      33.232  47.073  13.877  1.00  0.51           O  
HETATM  220  O   HOH T 219      50.130  20.954   6.449  1.00  0.51           O  
HETATM  221  O   HOH T 220      37.079  20.688  -5.937  1.00  0.51           O  
HETATM  222  O   HOH T 221      52.191  28.219  16.367  1.00  0.51           O  
HETATM  223  O   HOH T 222      19.194  39.053  10.458  1.00  0.51           O  
HETATM  224  O   HOH T 223      33.225  44.646  17.053  1.00  0.51           O  
HETATM  225  O   HOH T 224      27.317  25.175  -4.090  1.00  0.51           O  
HETATM  226  O   HOH T 225      30.396  15.341  15.620  1.00  0.51           O  
HETATM  227  O   HOH T 226      41.329   8.051   1.644  1.00  0.52           O  
HETATM  228  O   HOH T 227      50.399  13.821   0.190  1.00  0.52           O  
HETATM  229  O   HOH T 228      46.453  39.005   2.005  1.00  0.52           O  
HETATM  230  O   HOH T 229      46.887  34.131  21.650  1.00  0.52           O  
HETATM  231  O   HOH T 230      38.358  19.201  30.656  1.00  0.52           O  
HETATM  232  O   HOH T 231      24.297  45.667  14.283  1.00  0.52           O  
HETATM  233  O   HOH T 232      20.924  36.452   0.883  1.00  0.52           O  
HETATM  234  O   HOH T 233      27.979  14.120  32.409  1.00  0.52           O  
HETATM  235  O   HOH T 234      33.720  16.237   8.940  1.00  0.53           O  
HETATM  236  O   HOH T 235      20.844  18.594  19.449  1.00  0.53           O  
HETATM  237  O   HOH T 236      23.489  21.345  14.553  1.00  0.53           O  
HETATM  238  O   HOH T 237      26.889  39.738  21.308  1.00  0.53           O  
HETATM  239  O   HOH T 238      33.141  44.604   3.814  1.00  0.53           O  
HETATM  240  O   HOH T 239      21.745  21.516  16.753  1.00  0.53           O  
HETATM  241  O   HOH T 240      53.180  13.733   8.538  1.00  0.53           O  
HETATM  242  O   HOH T 241      39.364   9.622   0.534  1.00  0.53           O  
HETATM  243  O   HOH T 242      26.584  28.370  -7.070  1.00  0.53           O  
HETATM  244  O   HOH T 243      17.065  23.407   1.602  1.00  0.54           O  
HETATM  245  O   HOH T 244      35.533  44.382  15.446  1.00  0.54           O  
HETATM  246  O   HOH T 245      56.118  20.997   9.908  1.00  0.54           O  
HETATM  247  O   HOH T 246      37.675  23.545  -9.165  1.00  0.54           O  
HETATM  248  O   HOH T 247      36.401  21.220  31.018  1.00  0.54           O  
HETATM  249  O   HOH T 248      48.609  14.451  15.394  1.00  0.54           O  
HETATM  250  O   HOH T 249      36.358  11.015  24.462  1.00  0.54           O  
HETATM  251  O   HOH T 250      22.563  13.473  21.258  1.00  0.54           O  
HETATM  252  O   HOH T 251      19.990  34.032  -0.095  1.00  0.54           O  
HETATM  253  O   HOH T 252      34.168  11.596  22.838  1.00  0.55           O  
HETATM  254  O   HOH T 253      49.666  29.399  15.539  1.00  0.55           O  
HETATM  255  O   HOH T 254      23.591  23.635   9.410  1.00  0.55           O  
HETATM  256  O   HOH T 255      41.010  41.646  -7.135  1.00  0.55           O  
HETATM  257  O   HOH T 256      43.767  29.966  -9.753  1.00  0.55           O  
HETATM  258  O   HOH T 257      42.197  22.596  24.408  1.00  0.55           O  
HETATM  259  O   HOH T 258      28.449  11.717   9.694  1.00  0.55           O  
HETATM  260  O   HOH T 259      24.229  17.763  26.037  1.00  0.56           O  
HETATM  261  O   HOH T 260      43.858  45.441  -0.676  1.00  0.56           O  
HETATM  262  O   HOH T 261      32.453  29.853  25.958  1.00  0.56           O  
HETATM  263  O   HOH T 262      39.680  26.899  26.846  1.00  0.56           O  
HETATM  264  O   HOH T 263      32.641  22.348  11.946  1.00  0.56           O  
HETATM  265  O   HOH T 264      51.135  33.957  -2.343  1.00  0.56           O  
HETATM  266  O   HOH T 265      37.247  40.470  21.011  1.00  0.56           O  
HETATM  267  O   HOH T 266      31.791  46.874  16.180  1.00  0.56           O  
HETATM  268  O   HOH T 267      45.842  17.989  -4.007  1.00  0.56           O  
HETATM  269  O   HOH T 268      43.761  25.235  -2.538  1.00  0.57           O  
HETATM  270  O   HOH T 269      29.178  11.337  24.339  1.00  0.57           O  
HETATM  271  O   HOH T 270      30.521  10.455  27.475  1.00  0.57           O  
HETATM  272  O   HOH T 271      21.672  27.695  14.653  1.00  0.57           O  
HETATM  273  O   HOH T 272      28.416  44.806  10.632  1.00  0.58           O  
HETATM  274  O   HOH T 273      52.535  20.259  15.305  1.00  0.58           O  
HETATM  275  O   HOH T 274      36.360  21.794 -10.697  1.00  0.58           O  
HETATM  276  O   HOH T 275      17.605  23.694   5.835  1.00  0.59           O  
HETATM  277  O   HOH T 276      45.909   9.072  17.781  1.00  0.59           O  
HETATM  278  O   HOH T 277      20.969  20.345   4.806  1.00  0.59           O  
HETATM  279  O   HOH T 278      31.443  12.229   3.263  1.00  0.59           O  
HETATM  280  O   HOH T 279      39.060  12.386  29.916  1.00  0.59           O  
HETATM  281  O   HOH T 280      51.804  19.914  11.581  1.00  0.60           O  
HETATM  282  O   HOH T 281      31.274  44.726  12.041  1.00  0.60           O  
HETATM  283  O   HOH T 282      29.377  21.076   8.100  1.00  0.61           O  
HETATM  284  O   HOH T 283      52.964  18.655  12.942  1.00  0.63           O  
HETATM  285  O   HOH T 284      52.547  22.569   6.620  1.00  0.63           O  
TER     286      HOH T 284 
