# Supplementary material for: Accurate Prediction of Hydration Sites of Proteins Using Energy Model With Atom Embedding
Source: Front Mol Biosci. 2021 Sep 20;8:756075. doi: 10.3389/fmolb.2021.756075 (PMC8488165; doi:10.3389/fmolb.2021.756075)
Supplement: Supplementary file 1 [file DataSheet1.ZIP › Data Sheet 1/Our_result_pdb/our_dataset_output/2FNU_watersite.pdb]

HEADER                                                        XXXX


JRNL        PMID   -1
HETATM    1  O   HOH T   0      26.404  26.723  32.496  1.00  0.15           O  
HETATM    2  O   HOH T   1      10.688  48.511  19.526  1.00  0.15           O  
HETATM    3  O   HOH T   2       0.420  36.754  21.142  1.00  0.17           O  
HETATM    4  O   HOH T   3      31.795  19.139  52.360  1.00  0.18           O  
HETATM    5  O   HOH T   4      34.125  20.966  30.711  1.00  0.18           O  
HETATM    6  O   HOH T   5      25.739  35.437  19.975  1.00  0.19           O  
HETATM    7  O   HOH T   6       2.485  49.887  17.099  1.00  0.19           O  
HETATM    8  O   HOH T   7      13.117  23.405  42.945  1.00  0.19           O  
HETATM    9  O   HOH T   8      31.749  27.063  17.707  1.00  0.19           O  
HETATM   10  O   HOH T   9       8.357  47.287   1.945  1.00  0.20           O  
HETATM   11  O   HOH T  10      20.763  21.006  41.312  1.00  0.20           O  
HETATM   12  O   HOH T  11      35.926  23.305  40.742  1.00  0.20           O  
HETATM   13  O   HOH T  12      17.000  35.574   8.803  1.00  0.20           O  
HETATM   14  O   HOH T  13       0.360  26.144   3.907  1.00  0.20           O  
HETATM   15  O   HOH T  14      21.207  13.362   7.190  1.00  0.20           O  
HETATM   16  O   HOH T  15      19.831  18.450  41.882  1.00  0.20           O  
HETATM   17  O   HOH T  16      36.869  30.161  40.162  1.00  0.21           O  
HETATM   18  O   HOH T  17      21.937  17.738   9.496  1.00  0.21           O  
HETATM   19  O   HOH T  18      -1.991  59.233  13.796  1.00  0.21           O  
HETATM   20  O   HOH T  19      32.076  39.425   1.182  1.00  0.21           O  
HETATM   21  O   HOH T  20      22.696  29.835  -2.411  1.00  0.21           O  
HETATM   22  O   HOH T  21      11.077   3.598  55.074  1.00  0.21           O  
HETATM   23  O   HOH T  22       2.684  45.807   7.823  1.00  0.21           O  
HETATM   24  O   HOH T  23       2.180  27.670   8.300  1.00  0.21           O  
HETATM   25  O   HOH T  24      21.015  10.009  29.494  1.00  0.21           O  
HETATM   26  O   HOH T  25      -4.058  44.692  -5.287  1.00  0.21           O  
HETATM   27  O   HOH T  26      23.825  59.019  16.584  1.00  0.22           O  
HETATM   28  O   HOH T  27      -0.262  27.758  25.372  1.00  0.22           O  
HETATM   29  O   HOH T  28      16.189  41.301  18.504  1.00  0.22           O  
HETATM   30  O   HOH T  29       0.901  33.885  -4.839  1.00  0.22           O  
HETATM   31  O   HOH T  30      30.154   2.803  22.503  1.00  0.22           O  
HETATM   32  O   HOH T  31      19.778   3.921  13.979  1.00  0.22           O  
HETATM   33  O   HOH T  32      18.632  28.987  28.072  1.00  0.22           O  
HETATM   34  O   HOH T  33       0.228  49.289   1.398  1.00  0.23           O  
HETATM   35  O   HOH T  34      13.944  32.205  14.120  1.00  0.23           O  
HETATM   36  O   HOH T  35      26.724  52.886  12.923  1.00  0.23           O  
HETATM   37  O   HOH T  36      24.393  12.201  43.856  1.00  0.23           O  
HETATM   38  O   HOH T  37       8.150  54.957   4.958  1.00  0.23           O  
HETATM   39  O   HOH T  38      11.400   3.202  57.778  1.00  0.23           O  
HETATM   40  O   HOH T  39      33.533  60.013  -1.388  1.00  0.23           O  
HETATM   41  O   HOH T  40       1.492  57.977   7.378  1.00  0.23           O  
HETATM   42  O   HOH T  41      17.237  55.753  12.377  1.00  0.23           O  
HETATM   43  O   HOH T  42       9.430  54.703  21.110  1.00  0.24           O  
HETATM   44  O   HOH T  43      15.762  26.057  18.620  1.00  0.24           O  
HETATM   45  O   HOH T  44      18.004  20.955  35.559  1.00  0.24           O  
HETATM   46  O   HOH T  45      -4.501  45.531  -1.043  1.00  0.24           O  
HETATM   47  O   HOH T  46       8.935  36.648  -6.434  1.00  0.24           O  
HETATM   48  O   HOH T  47      11.930  68.604   4.018  1.00  0.24           O  
HETATM   49  O   HOH T  48      12.308  61.281   6.017  1.00  0.24           O  
HETATM   50  O   HOH T  49      17.307  56.416   9.725  1.00  0.24           O  
HETATM   51  O   HOH T  50      12.240  21.641  22.779  1.00  0.24           O  
HETATM   52  O   HOH T  51       2.241  55.000  10.934  1.00  0.24           O  
HETATM   53  O   HOH T  52      17.072  49.469  11.144  1.00  0.24           O  
HETATM   54  O   HOH T  53      10.582  47.145  34.623  1.00  0.24           O  
HETATM   55  O   HOH T  54       7.847  15.553  32.196  1.00  0.24           O  
HETATM   56  O   HOH T  55      27.571  13.822  26.131  1.00  0.24           O  
HETATM   57  O   HOH T  56      23.335  10.222  27.896  1.00  0.24           O  
HETATM   58  O   HOH T  57      27.579  -0.645  21.829  1.00  0.24           O  
HETATM   59  O   HOH T  58      37.251  21.068  35.880  1.00  0.25           O  
HETATM   60  O   HOH T  59       4.690  26.396   8.210  1.00  0.25           O  
HETATM   61  O   HOH T  60      24.819  -2.847  21.440  1.00  0.25           O  
HETATM   62  O   HOH T  61      22.614  43.989   1.815  1.00  0.25           O  
HETATM   63  O   HOH T  62      18.519  -4.673   6.384  1.00  0.25           O  
HETATM   64  O   HOH T  63      32.511  14.360  34.238  1.00  0.25           O  
HETATM   65  O   HOH T  64      24.792  39.696  19.952  1.00  0.25           O  
HETATM   66  O   HOH T  65      30.312  26.430  37.624  1.00  0.25           O  
HETATM   67  O   HOH T  66      31.859  40.626  31.816  1.00  0.25           O  
HETATM   68  O   HOH T  67      13.447   4.819  19.538  1.00  0.25           O  
HETATM   69  O   HOH T  68       5.363  25.722  26.770  1.00  0.25           O  
HETATM   70  O   HOH T  69      20.205  36.632  40.323  1.00  0.25           O  
HETATM   71  O   HOH T  70      18.759  42.098   4.646  1.00  0.25           O  
HETATM   72  O   HOH T  71      38.770  14.742  36.506  1.00  0.25           O  
HETATM   73  O   HOH T  72      29.133  36.045   1.255  1.00  0.25           O  
HETATM   74  O   HOH T  73       5.857  46.546   3.015  1.00  0.25           O  
HETATM   75  O   HOH T  74      16.590  -1.987  56.455  1.00  0.25           O  
HETATM   76  O   HOH T  75       2.312  20.401  23.112  1.00  0.25           O  
HETATM   77  O   HOH T  76      24.930  17.367  29.676  1.00  0.25           O  
HETATM   78  O   HOH T  77       8.045  47.233  10.137  1.00  0.26           O  
HETATM   79  O   HOH T  78     -11.904  60.150  14.223  1.00  0.26           O  
HETATM   80  O   HOH T  79      -9.301  45.884  20.221  1.00  0.26           O  
HETATM   81  O   HOH T  80       2.220   3.202  22.297  1.00  0.26           O  
HETATM   82  O   HOH T  81       5.754  59.226   4.567  1.00  0.26           O  
HETATM   83  O   HOH T  82      32.954  10.489  36.316  1.00  0.26           O  
HETATM   84  O   HOH T  83      30.657  34.833  44.217  1.00  0.26           O  
HETATM   85  O   HOH T  84      28.195   2.543  57.063  1.00  0.26           O  
HETATM   86  O   HOH T  85       2.306  45.342  33.135  1.00  0.26           O  
HETATM   87  O   HOH T  86      11.459  59.667  10.571  1.00  0.26           O  
HETATM   88  O   HOH T  87      28.978  46.066  24.962  1.00  0.26           O  
HETATM   89  O   HOH T  88      28.433   6.177  27.774  1.00  0.26           O  
HETATM   90  O   HOH T  89      35.253  23.653  57.402  1.00  0.26           O  
HETATM   91  O   HOH T  90      22.747  28.593  38.305  1.00  0.26           O  
HETATM   92  O   HOH T  91       3.939  23.277  20.355  1.00  0.27           O  
HETATM   93  O   HOH T  92      32.284  66.383  -7.487  1.00  0.27           O  
HETATM   94  O   HOH T  93      22.685  64.057  20.965  1.00  0.27           O  
HETATM   95  O   HOH T  94       3.047  34.218  27.905  1.00  0.27           O  
HETATM   96  O   HOH T  95       0.803  49.706  28.658  1.00  0.27           O  
HETATM   97  O   HOH T  96       3.457  43.429  -7.599  1.00  0.27           O  
HETATM   98  O   HOH T  97      29.156  33.129  -1.499  1.00  0.27           O  
HETATM   99  O   HOH T  98      30.944  32.308   8.891  1.00  0.27           O  
HETATM  100  O   HOH T  99      13.000  25.712  30.697  1.00  0.27           O  
HETATM  101  O   HOH T 100      13.647  26.381  -5.624  1.00  0.27           O  
HETATM  102  O   HOH T 101      29.720  71.598  -0.082  1.00  0.27           O  
HETATM  103  O   HOH T 102      22.629  41.990   9.121  1.00  0.27           O  
HETATM  104  O   HOH T 103      -4.265  31.301  13.032  1.00  0.27           O  
HETATM  105  O   HOH T 104      -6.004  51.322   3.297  1.00  0.27           O  
HETATM  106  O   HOH T 105      29.378  39.613   8.531  1.00  0.27           O  
HETATM  107  O   HOH T 106      18.381  43.576   2.336  1.00  0.27           O  
HETATM  108  O   HOH T 107       3.103   7.718  43.890  1.00  0.27           O  
HETATM  109  O   HOH T 108      -0.841  37.739  26.082  1.00  0.27           O  
HETATM  110  O   HOH T 109      10.071   0.551  19.965  1.00  0.28           O  
HETATM  111  O   HOH T 110      12.643  45.317  37.843  1.00  0.28           O  
HETATM  112  O   HOH T 111      21.881  56.797  23.126  1.00  0.28           O  
HETATM  113  O   HOH T 112      26.254  16.337  42.468  1.00  0.28           O  
HETATM  114  O   HOH T 113      11.525  33.487  30.030  1.00  0.28           O  
HETATM  115  O   HOH T 114      27.718  72.114  21.906  1.00  0.28           O  
HETATM  116  O   HOH T 115      10.887  31.387  -9.183  1.00  0.28           O  
HETATM  117  O   HOH T 116      23.349  73.861  15.682  1.00  0.28           O  
HETATM  118  O   HOH T 117      29.161  73.537  13.405  1.00  0.28           O  
HETATM  119  O   HOH T 118      17.976  26.086  47.467  1.00  0.28           O  
HETATM  120  O   HOH T 119      14.303  53.100  16.653  1.00  0.28           O  
HETATM  121  O   HOH T 120      10.174  36.361 -12.253  1.00  0.28           O  
HETATM  122  O   HOH T 121      -5.199  30.837  -2.817  1.00  0.28           O  
HETATM  123  O   HOH T 122      23.344   1.257  47.275  1.00  0.29           O  
HETATM  124  O   HOH T 123      -4.210  31.621   5.383  1.00  0.29           O  
HETATM  125  O   HOH T 124      15.781  55.030  15.616  1.00  0.29           O  
HETATM  126  O   HOH T 125      -2.675  43.963  -8.598  1.00  0.29           O  
HETATM  127  O   HOH T 126      21.087  -0.208  29.331  1.00  0.29           O  
HETATM  128  O   HOH T 127      15.749  57.085  27.705  1.00  0.29           O  
HETATM  129  O   HOH T 128      16.325  66.507  18.155  1.00  0.29           O  
HETATM  130  O   HOH T 129      11.248  14.652  30.389  1.00  0.29           O  
HETATM  131  O   HOH T 130      31.610  65.432   0.035  1.00  0.29           O  
HETATM  132  O   HOH T 131      -2.313  42.080  14.135  1.00  0.29           O  
HETATM  133  O   HOH T 132       5.407  61.347  18.377  1.00  0.29           O  
HETATM  134  O   HOH T 133       9.195  34.886  26.594  1.00  0.29           O  
HETATM  135  O   HOH T 134      22.710  23.600  39.118  1.00  0.29           O  
HETATM  136  O   HOH T 135      38.854  20.198  46.539  1.00  0.29           O  
HETATM  137  O   HOH T 136      34.962  21.074  42.071  1.00  0.29           O  
HETATM  138  O   HOH T 137      16.816  52.104  20.328  1.00  0.29           O  
HETATM  139  O   HOH T 138       6.628  33.987  32.346  1.00  0.29           O  
HETATM  140  O   HOH T 139      -4.765  49.243  17.975  1.00  0.29           O  
HETATM  141  O   HOH T 140      21.308  32.108  44.738  1.00  0.30           O  
HETATM  142  O   HOH T 141      16.089  28.233  47.261  1.00  0.30           O  
HETATM  143  O   HOH T 142      24.336  75.134  17.949  1.00  0.30           O  
HETATM  144  O   HOH T 143      24.960   4.305   9.296  1.00  0.30           O  
HETATM  145  O   HOH T 144      28.473  54.134  -6.540  1.00  0.30           O  
HETATM  146  O   HOH T 145      23.756  30.210   6.879  1.00  0.30           O  
HETATM  147  O   HOH T 146      34.067  19.473  20.268  1.00  0.30           O  
HETATM  148  O   HOH T 147      22.635  51.833  26.856  1.00  0.30           O  
HETATM  149  O   HOH T 148      29.291  66.180   9.994  1.00  0.30           O  
HETATM  150  O   HOH T 149      -4.832  48.015  15.496  1.00  0.30           O  
HETATM  151  O   HOH T 150       5.401  41.541  -8.370  1.00  0.30           O  
HETATM  152  O   HOH T 151      33.783  37.944  37.341  1.00  0.30           O  
HETATM  153  O   HOH T 152      13.497  20.204  55.823  1.00  0.30           O  
HETATM  154  O   HOH T 153      32.203   9.782  33.770  1.00  0.30           O  
HETATM  155  O   HOH T 154       6.438  16.397  54.948  1.00  0.30           O  
HETATM  156  O   HOH T 155       4.616  49.237  -7.359  1.00  0.30           O  
HETATM  157  O   HOH T 156      30.667  45.881  22.830  1.00  0.30           O  
HETATM  158  O   HOH T 157      12.943  69.581  -3.216  1.00  0.30           O  
HETATM  159  O   HOH T 158       4.404  22.915  17.572  1.00  0.30           O  
HETATM  160  O   HOH T 159      26.635   4.854  50.165  1.00  0.30           O  
HETATM  161  O   HOH T 160      18.698  40.629  13.943  1.00  0.30           O  
HETATM  162  O   HOH T 161      20.815  70.523  21.312  1.00  0.30           O  
HETATM  163  O   HOH T 162       7.604  52.627  20.630  1.00  0.30           O  
HETATM  164  O   HOH T 163      25.870  35.970  10.102  1.00  0.31           O  
HETATM  165  O   HOH T 164      11.403  17.041  29.079  1.00  0.31           O  
HETATM  166  O   HOH T 165      20.508  47.014  -7.465  1.00  0.31           O  
HETATM  167  O   HOH T 166      21.669  51.342  -2.828  1.00  0.31           O  
HETATM  168  O   HOH T 167      32.529   0.592  28.403  1.00  0.31           O  
HETATM  169  O   HOH T 168      19.913   0.348  23.537  1.00  0.31           O  
HETATM  170  O   HOH T 169      -0.418  41.133  36.431  1.00  0.31           O  
HETATM  171  O   HOH T 170      33.513  17.006  53.093  1.00  0.31           O  
HETATM  172  O   HOH T 171      -4.609  39.501  29.509  1.00  0.31           O  
HETATM  173  O   HOH T 172      19.692  36.340  23.641  1.00  0.31           O  
HETATM  174  O   HOH T 173      17.908   2.119  35.620  1.00  0.31           O  
HETATM  175  O   HOH T 174      32.638  59.639  18.270  1.00  0.31           O  
HETATM  176  O   HOH T 175      19.432  18.853   9.941  1.00  0.31           O  
HETATM  177  O   HOH T 176      16.294  32.597  24.989  1.00  0.31           O  
HETATM  178  O   HOH T 177      12.946   5.286  16.831  1.00  0.31           O  
HETATM  179  O   HOH T 178      -4.857  41.769  35.844  1.00  0.31           O  
HETATM  180  O   HOH T 179      35.382  19.099  17.875  1.00  0.31           O  
HETATM  181  O   HOH T 180      33.893  59.100  10.782  1.00  0.31           O  
HETATM  182  O   HOH T 181       8.609  39.085  -7.913  1.00  0.31           O  
HETATM  183  O   HOH T 182      26.050  57.755  17.753  1.00  0.31           O  
HETATM  184  O   HOH T 183       9.210  18.713  14.465  1.00  0.31           O  
HETATM  185  O   HOH T 184      17.272  37.798  23.518  1.00  0.31           O  
HETATM  186  O   HOH T 185      12.199  27.360  -7.871  1.00  0.32           O  
HETATM  187  O   HOH T 186      -6.328  42.547  31.516  1.00  0.32           O  
HETATM  188  O   HOH T 187      16.325  35.218  -9.174  1.00  0.32           O  
HETATM  189  O   HOH T 188      35.153   5.328  27.392  1.00  0.32           O  
HETATM  190  O   HOH T 189      34.824   9.226  16.256  1.00  0.32           O  
HETATM  191  O   HOH T 190      24.991  32.400   4.022  1.00  0.32           O  
HETATM  192  O   HOH T 191      39.768  20.289  22.252  1.00  0.32           O  
HETATM  193  O   HOH T 192       5.957  38.717  -8.186  1.00  0.32           O  
HETATM  194  O   HOH T 193      14.626  25.694  28.455  1.00  0.32           O  
HETATM  195  O   HOH T 194      32.829  11.436  44.023  1.00  0.32           O  
HETATM  196  O   HOH T 195      -2.406  25.527   3.979  1.00  0.32           O  
HETATM  197  O   HOH T 196       9.495  21.033  35.554  1.00  0.32           O  
HETATM  198  O   HOH T 197      33.272  63.753   3.303  1.00  0.32           O  
HETATM  199  O   HOH T 198      27.111  25.345  47.691  1.00  0.32           O  
HETATM  200  O   HOH T 199       0.708  55.401   6.628  1.00  0.32           O  
HETATM  201  O   HOH T 200      -5.272  39.905  15.337  1.00  0.32           O  
HETATM  202  O   HOH T 201      39.587  28.617  34.875  1.00  0.32           O  
HETATM  203  O   HOH T 202      17.737  33.397 -10.622  1.00  0.32           O  
HETATM  204  O   HOH T 203       6.019  58.610  27.303  1.00  0.32           O  
HETATM  205  O   HOH T 204      -7.105  54.243  18.834  1.00  0.32           O  
HETATM  206  O   HOH T 205      31.578  64.433  12.768  1.00  0.32           O  
HETATM  207  O   HOH T 206      25.318  10.597  34.613  1.00  0.33           O  
HETATM  208  O   HOH T 207       5.731  54.715  20.770  1.00  0.33           O  
HETATM  209  O   HOH T 208      26.686  35.125  14.074  1.00  0.33           O  
HETATM  210  O   HOH T 209       7.086   0.285  45.282  1.00  0.33           O  
HETATM  211  O   HOH T 210      16.852  73.006   2.003  1.00  0.33           O  
HETATM  212  O   HOH T 211      28.693   7.151  32.587  1.00  0.33           O  
HETATM  213  O   HOH T 212       9.966  36.693  38.266  1.00  0.33           O  
HETATM  214  O   HOH T 213      -4.728  29.305   0.793  1.00  0.33           O  
HETATM  215  O   HOH T 214       2.463  22.541   9.823  1.00  0.33           O  
HETATM  216  O   HOH T 215       8.811  46.225 -12.233  1.00  0.33           O  
HETATM  217  O   HOH T 216      25.964  53.533  18.767  1.00  0.33           O  
HETATM  218  O   HOH T 217       1.982  25.034  28.869  1.00  0.33           O  
HETATM  219  O   HOH T 218      -5.333  47.985  -8.024  1.00  0.33           O  
HETATM  220  O   HOH T 219      29.421  46.168  -1.416  1.00  0.33           O  
HETATM  221  O   HOH T 220      35.089  31.190  18.653  1.00  0.33           O  
HETATM  222  O   HOH T 221       5.946  60.325  13.136  1.00  0.34           O  
HETATM  223  O   HOH T 222      33.904  39.845  33.451  1.00  0.34           O  
HETATM  224  O   HOH T 223      12.887  51.226  37.381  1.00  0.34           O  
HETATM  225  O   HOH T 224       6.582  66.746   8.532  1.00  0.34           O  
HETATM  226  O   HOH T 225      13.858   5.740   9.694  1.00  0.34           O  
HETATM  227  O   HOH T 226      32.837  16.941  24.434  1.00  0.34           O  
HETATM  228  O   HOH T 227      12.336  18.855  57.961  1.00  0.34           O  
HETATM  229  O   HOH T 228      -1.162  55.259   8.683  1.00  0.34           O  
HETATM  230  O   HOH T 229      11.493  25.517  43.051  1.00  0.34           O  
HETATM  231  O   HOH T 230       1.365  14.187  36.867  1.00  0.34           O  
HETATM  232  O   HOH T 231      15.807  62.923  19.088  1.00  0.34           O  
HETATM  233  O   HOH T 232       1.487  24.454  31.592  1.00  0.34           O  
HETATM  234  O   HOH T 233      -1.640  53.362  24.380  1.00  0.34           O  
HETATM  235  O   HOH T 234      -3.906  59.874  17.037  1.00  0.34           O  
HETATM  236  O   HOH T 235      15.146  61.662  -9.692  1.00  0.34           O  
HETATM  237  O   HOH T 236      22.792  46.500   0.577  1.00  0.34           O  
HETATM  238  O   HOH T 237      28.426  24.026  49.626  1.00  0.34           O  
HETATM  239  O   HOH T 238      15.987  36.107  25.342  1.00  0.34           O  
HETATM  240  O   HOH T 239       1.059  56.620  18.839  1.00  0.34           O  
HETATM  241  O   HOH T 240      24.738  27.762   7.894  1.00  0.35           O  
HETATM  242  O   HOH T 241      22.260  27.867   6.659  1.00  0.35           O  
HETATM  243  O   HOH T 242      24.074  51.286  -1.446  1.00  0.35           O  
HETATM  244  O   HOH T 243     -10.565  35.079  23.918  1.00  0.35           O  
HETATM  245  O   HOH T 244      20.131  21.961   7.396  1.00  0.35           O  
HETATM  246  O   HOH T 245      32.456   1.321  21.850  1.00  0.35           O  
HETATM  247  O   HOH T 246      11.952  70.024  15.486  1.00  0.35           O  
HETATM  248  O   HOH T 247       8.368  55.193  33.951  1.00  0.35           O  
HETATM  249  O   HOH T 248      13.238  24.529  13.369  1.00  0.35           O  
HETATM  250  O   HOH T 249      12.078   0.764  22.141  1.00  0.35           O  
HETATM  251  O   HOH T 250      10.370  44.962  36.270  1.00  0.35           O  
HETATM  252  O   HOH T 251       8.106  47.105  -9.723  1.00  0.35           O  
HETATM  253  O   HOH T 252      18.334  34.656  25.492  1.00  0.35           O  
HETATM  254  O   HOH T 253      -3.533  41.706  16.666  1.00  0.35           O  
HETATM  255  O   HOH T 254      25.018  39.648  13.574  1.00  0.35           O  
HETATM  256  O   HOH T 255      -7.269  45.004  18.675  1.00  0.35           O  
HETATM  257  O   HOH T 256      15.542  35.894  -6.656  1.00  0.35           O  
HETATM  258  O   HOH T 257      14.831  29.322  43.236  1.00  0.35           O  
HETATM  259  O   HOH T 258      27.167  15.422  38.795  1.00  0.35           O  
HETATM  260  O   HOH T 259       0.905   3.860  43.401  1.00  0.35           O  
HETATM  261  O   HOH T 260      28.787  52.319  14.634  1.00  0.35           O  
HETATM  262  O   HOH T 261      30.244  13.890  26.121  1.00  0.35           O  
HETATM  263  O   HOH T 262      26.575  24.448  30.845  1.00  0.35           O  
HETATM  264  O   HOH T 263      34.813   9.582  34.346  1.00  0.35           O  
HETATM  265  O   HOH T 264      10.336  16.213  35.745  1.00  0.35           O  
HETATM  266  O   HOH T 265       5.596  22.581  15.118  1.00  0.35           O  
HETATM  267  O   HOH T 266      21.483   5.067   3.918  1.00  0.35           O  
HETATM  268  O   HOH T 267      13.826   2.607  58.893  1.00  0.35           O  
HETATM  269  O   HOH T 268      23.523   7.020  56.236  1.00  0.35           O  
HETATM  270  O   HOH T 269      25.033  29.093  -3.697  1.00  0.36           O  
HETATM  271  O   HOH T 270      14.455  65.423  19.936  1.00  0.36           O  
HETATM  272  O   HOH T 271      13.401  35.409  -4.985  1.00  0.36           O  
HETATM  273  O   HOH T 272      -1.273  45.450  12.802  1.00  0.36           O  
HETATM  274  O   HOH T 273      11.508  30.398  51.625  1.00  0.36           O  
HETATM  275  O   HOH T 274      25.010  77.168  -3.851  1.00  0.36           O  
HETATM  276  O   HOH T 275      18.398  36.773  21.168  1.00  0.36           O  
HETATM  277  O   HOH T 276      31.706  40.058   7.212  1.00  0.36           O  
HETATM  278  O   HOH T 277      21.536  35.015  42.163  1.00  0.36           O  
HETATM  279  O   HOH T 278      21.007  42.082  13.337  1.00  0.36           O  
HETATM  280  O   HOH T 279      -5.090  31.135   2.784  1.00  0.36           O  
HETATM  281  O   HOH T 280      12.024  38.306  37.951  1.00  0.36           O  
HETATM  282  O   HOH T 281       2.801  25.042  18.498  1.00  0.36           O  
HETATM  283  O   HOH T 282      13.377  11.090  10.005  1.00  0.36           O  
HETATM  284  O   HOH T 283      31.372   7.707  32.144  1.00  0.36           O  
HETATM  285  O   HOH T 284      14.647  68.114  -4.949  1.00  0.36           O  
HETATM  286  O   HOH T 285      13.951  30.065 -15.314  1.00  0.36           O  
HETATM  287  O   HOH T 286      13.891  36.397  44.384  1.00  0.36           O  
HETATM  288  O   HOH T 287      -6.539  50.145  -2.382  1.00  0.36           O  
HETATM  289  O   HOH T 288      32.965  65.048  -2.361  1.00  0.36           O  
HETATM  290  O   HOH T 289      14.079  62.574  -4.805  1.00  0.36           O  
HETATM  291  O   HOH T 290      33.221   9.019  12.214  1.00  0.36           O  
HETATM  292  O   HOH T 291      -6.521  50.310  -9.129  1.00  0.36           O  
HETATM  293  O   HOH T 292      37.869  17.563  25.450  1.00  0.36           O  
HETATM  294  O   HOH T 293      25.118  26.728  41.292  1.00  0.36           O  
HETATM  295  O   HOH T 294      17.492  19.506   8.067  1.00  0.36           O  
HETATM  296  O   HOH T 295       8.717  22.539  37.772  1.00  0.36           O  
HETATM  297  O   HOH T 296       4.633  64.757   8.205  1.00  0.37           O  
HETATM  298  O   HOH T 297      12.839  25.135  56.382  1.00  0.37           O  
HETATM  299  O   HOH T 298      37.614  30.575  17.568  1.00  0.37           O  
HETATM  300  O   HOH T 299      20.853   0.462  33.667  1.00  0.37           O  
HETATM  301  O   HOH T 300      23.176  58.430 -11.691  1.00  0.37           O  
HETATM  302  O   HOH T 301      -7.902  37.605   6.458  1.00  0.37           O  
HETATM  303  O   HOH T 302      10.488  34.850  -7.879  1.00  0.37           O  
HETATM  304  O   HOH T 303      18.770  -5.551   9.025  1.00  0.37           O  
HETATM  305  O   HOH T 304       1.150  23.242  19.927  1.00  0.37           O  
HETATM  306  O   HOH T 305      32.243  16.842  40.933  1.00  0.37           O  
HETATM  307  O   HOH T 306      28.922  64.203  11.938  1.00  0.37           O  
HETATM  308  O   HOH T 307      39.756  21.300  44.156  1.00  0.37           O  
HETATM  309  O   HOH T 308      26.381  40.370  22.052  1.00  0.37           O  
HETATM  310  O   HOH T 309      36.444  40.472   2.660  1.00  0.37           O  
HETATM  311  O   HOH T 310      23.194  21.645  60.246  1.00  0.38           O  
HETATM  312  O   HOH T 311      32.446  12.874  15.520  1.00  0.38           O  
HETATM  313  O   HOH T 312      12.987  24.858   8.925  1.00  0.38           O  
HETATM  314  O   HOH T 313      28.296  34.171  42.885  1.00  0.38           O  
HETATM  315  O   HOH T 314       2.386  65.374   6.645  1.00  0.38           O  
HETATM  316  O   HOH T 315       2.352   2.550  47.818  1.00  0.38           O  
HETATM  317  O   HOH T 316      16.969  39.089  -9.924  1.00  0.38           O  
HETATM  318  O   HOH T 317      -8.274  34.113  25.194  1.00  0.38           O  
HETATM  319  O   HOH T 318      28.614   3.098  50.619  1.00  0.38           O  
HETATM  320  O   HOH T 319      34.159   6.571  42.478  1.00  0.38           O  
HETATM  321  O   HOH T 320      13.435  31.313  41.949  1.00  0.38           O  
HETATM  322  O   HOH T 321     -10.351  43.391  -4.830  1.00  0.38           O  
HETATM  323  O   HOH T 322      24.105   4.297  57.069  1.00  0.39           O  
HETATM  324  O   HOH T 323      17.956   2.405  41.023  1.00  0.39           O  
HETATM  325  O   HOH T 324       9.122  47.426  17.494  1.00  0.39           O  
HETATM  326  O   HOH T 325      36.981  34.720  39.577  1.00  0.39           O  
HETATM  327  O   HOH T 326      -5.723  56.117   5.723  1.00  0.39           O  
HETATM  328  O   HOH T 327      20.063   2.342  42.841  1.00  0.39           O  
HETATM  329  O   HOH T 328       6.124  60.338  15.919  1.00  0.39           O  
HETATM  330  O   HOH T 329       2.294  53.712   3.541  1.00  0.39           O  
HETATM  331  O   HOH T 330      27.454   9.827   9.559  1.00  0.39           O  
HETATM  332  O   HOH T 331      23.221  61.574  19.888  1.00  0.39           O  
HETATM  333  O   HOH T 332      27.340  -4.864  23.899  1.00  0.39           O  
HETATM  334  O   HOH T 333      39.160  19.801  26.435  1.00  0.39           O  
HETATM  335  O   HOH T 334      27.792  55.044  26.071  1.00  0.39           O  
HETATM  336  O   HOH T 335       9.602  68.915   2.462  1.00  0.39           O  
HETATM  337  O   HOH T 336      35.522  39.375   4.824  1.00  0.39           O  
HETATM  338  O   HOH T 337       5.205  49.342  30.406  1.00  0.39           O  
HETATM  339  O   HOH T 338      29.327  70.333   7.798  1.00  0.39           O  
HETATM  340  O   HOH T 339       7.171  26.597  -1.178  1.00  0.39           O  
HETATM  341  O   HOH T 340      35.527   9.498  13.627  1.00  0.39           O  
HETATM  342  O   HOH T 341      13.413  23.598  54.239  1.00  0.39           O  
HETATM  343  O   HOH T 342      31.731  64.743  -9.770  1.00  0.39           O  
HETATM  344  O   HOH T 343      27.520   0.671  10.076  1.00  0.39           O  
HETATM  345  O   HOH T 344      27.502   3.308   9.163  1.00  0.39           O  
HETATM  346  O   HOH T 345      15.350  55.776  19.529  1.00  0.39           O  
HETATM  347  O   HOH T 346      13.288  67.889  -0.973  1.00  0.39           O  
HETATM  348  O   HOH T 347      20.536  25.120  61.680  1.00  0.39           O  
HETATM  349  O   HOH T 348      17.858   2.019  14.443  1.00  0.39           O  
HETATM  350  O   HOH T 349       0.233  55.228  25.399  1.00  0.39           O  
HETATM  351  O   HOH T 350      10.918   4.409  18.591  1.00  0.39           O  
HETATM  352  O   HOH T 351      16.275  27.842  28.738  1.00  0.40           O  
HETATM  353  O   HOH T 352      11.180  45.660 -13.489  1.00  0.40           O  
HETATM  354  O   HOH T 353      -7.692  45.248  -7.446  1.00  0.40           O  
HETATM  355  O   HOH T 354      25.861   2.708  58.627  1.00  0.40           O  
HETATM  356  O   HOH T 355      18.277  -2.289  15.953  1.00  0.40           O  
HETATM  357  O   HOH T 356       8.579  12.183  12.564  1.00  0.40           O  
HETATM  358  O   HOH T 357      38.919   8.624  33.894  1.00  0.40           O  
HETATM  359  O   HOH T 358      25.532  44.763   9.740  1.00  0.40           O  
HETATM  360  O   HOH T 359      11.288  17.295  31.792  1.00  0.40           O  
HETATM  361  O   HOH T 360      16.224  -0.394  58.737  1.00  0.40           O  
HETATM  362  O   HOH T 361       8.864  56.771   9.794  1.00  0.40           O  
HETATM  363  O   HOH T 362       7.282   2.256  50.361  1.00  0.40           O  
HETATM  364  O   HOH T 363      28.044  27.627  49.073  1.00  0.40           O  
HETATM  365  O   HOH T 364      34.065  33.449  14.646  1.00  0.40           O  
HETATM  366  O   HOH T 365      11.085  35.842  31.448  1.00  0.40           O  
HETATM  367  O   HOH T 366      20.780  46.148   2.498  1.00  0.40           O  
HETATM  368  O   HOH T 367      -4.646  37.218  -9.490  1.00  0.40           O  
HETATM  369  O   HOH T 368      23.894  27.383  -1.835  1.00  0.40           O  
HETATM  370  O   HOH T 369      15.533  27.691  20.836  1.00  0.40           O  
HETATM  371  O   HOH T 370      -7.361  29.935   1.579  1.00  0.40           O  
HETATM  372  O   HOH T 371       2.254   5.765  42.257  1.00  0.40           O  
HETATM  373  O   HOH T 372      17.537  68.969  22.001  1.00  0.40           O  
HETATM  374  O   HOH T 373      23.957  48.816  -0.202  1.00  0.40           O  
HETATM  375  O   HOH T 374       4.642  60.165  20.772  1.00  0.40           O  
HETATM  376  O   HOH T 375      34.307  23.523  54.768  1.00  0.40           O  
HETATM  377  O   HOH T 376      -0.053  44.249  34.139  1.00  0.40           O  
HETATM  378  O   HOH T 377      30.765  56.697  -9.009  1.00  0.40           O  
HETATM  379  O   HOH T 378      -9.825  34.937  19.994  1.00  0.40           O  
HETATM  380  O   HOH T 379      -9.168  35.608   5.095  1.00  0.40           O  
HETATM  381  O   HOH T 380      26.199  34.612   3.064  1.00  0.40           O  
HETATM  382  O   HOH T 381      41.300  20.110  24.544  1.00  0.40           O  
HETATM  383  O   HOH T 382      19.866  44.631   4.650  1.00  0.40           O  
HETATM  384  O   HOH T 383      20.545  67.967  -7.626  1.00  0.41           O  
HETATM  385  O   HOH T 384      11.916  56.169  32.404  1.00  0.41           O  
HETATM  386  O   HOH T 385      26.055  28.902   5.823  1.00  0.41           O  
HETATM  387  O   HOH T 386      22.717  43.947   7.235  1.00  0.41           O  
HETATM  388  O   HOH T 387       8.879  27.642  30.022  1.00  0.41           O  
HETATM  389  O   HOH T 388      21.590  54.251  26.065  1.00  0.41           O  
HETATM  390  O   HOH T 389      39.512   8.316  36.539  1.00  0.41           O  
HETATM  391  O   HOH T 390      10.552  15.143  33.166  1.00  0.41           O  
HETATM  392  O   HOH T 391      16.343  28.711  51.145  1.00  0.41           O  
HETATM  393  O   HOH T 392      11.809   7.017  18.543  1.00  0.41           O  
HETATM  394  O   HOH T 393       4.409  24.539  10.423  1.00  0.41           O  
HETATM  395  O   HOH T 394      26.665  75.074  -4.823  1.00  0.41           O  
HETATM  396  O   HOH T 395      28.309  31.139  45.489  1.00  0.41           O  
HETATM  397  O   HOH T 396      33.330  56.679   9.704  1.00  0.41           O  
HETATM  398  O   HOH T 397      41.257  29.162  18.615  1.00  0.41           O  
HETATM  399  O   HOH T 398      13.400  26.735  34.811  1.00  0.41           O  
HETATM  400  O   HOH T 399      29.900  55.330 -11.172  1.00  0.41           O  
HETATM  401  O   HOH T 400      -0.225  52.174  27.946  1.00  0.41           O  
HETATM  402  O   HOH T 401      -3.454  56.843   4.128  1.00  0.41           O  
HETATM  403  O   HOH T 402      13.985   2.589  21.373  1.00  0.41           O  
HETATM  404  O   HOH T 403      23.692  39.719  -4.052  1.00  0.41           O  
HETATM  405  O   HOH T 404      22.959  45.149  -3.890  1.00  0.41           O  
HETATM  406  O   HOH T 405      23.450  13.317   5.471  1.00  0.41           O  
HETATM  407  O   HOH T 406      40.592  10.474  35.275  1.00  0.41           O  
HETATM  408  O   HOH T 407       4.709  27.558  60.257  1.00  0.41           O  
HETATM  409  O   HOH T 408      -0.963  23.296  32.363  1.00  0.41           O  
HETATM  410  O   HOH T 409       0.750  42.898  38.278  1.00  0.41           O  
HETATM  411  O   HOH T 410      26.790  30.365   3.554  1.00  0.41           O  
HETATM  412  O   HOH T 411       4.908  36.549  -9.539  1.00  0.41           O  
HETATM  413  O   HOH T 412      30.837  35.043   9.239  1.00  0.41           O  
HETATM  414  O   HOH T 413      11.334  11.612  12.146  1.00  0.41           O  
HETATM  415  O   HOH T 414      24.282  -2.793  14.339  1.00  0.41           O  
HETATM  416  O   HOH T 415      21.319  27.409  63.126  1.00  0.41           O  
HETATM  417  O   HOH T 416      -5.831  52.261   0.708  1.00  0.41           O  
HETATM  418  O   HOH T 417      28.376  48.697  -0.799  1.00  0.42           O  
HETATM  419  O   HOH T 418      21.987  19.140  60.659  1.00  0.42           O  
HETATM  420  O   HOH T 419       7.371  12.166  55.399  1.00  0.42           O  
HETATM  421  O   HOH T 420       3.136  11.382  28.481  1.00  0.42           O  
HETATM  422  O   HOH T 421      32.653  42.971  37.192  1.00  0.42           O  
HETATM  423  O   HOH T 422      34.480  46.439   3.740  1.00  0.42           O  
HETATM  424  O   HOH T 423      15.433  74.488   3.849  1.00  0.42           O  
HETATM  425  O   HOH T 424      -2.425  35.692 -10.509  1.00  0.42           O  
HETATM  426  O   HOH T 425      34.269   9.031  43.586  1.00  0.42           O  
HETATM  427  O   HOH T 426      33.297   7.200  34.144  1.00  0.42           O  
HETATM  428  O   HOH T 427      23.748  69.589  -8.162  1.00  0.42           O  
HETATM  429  O   HOH T 428      21.287  70.587  -7.425  1.00  0.42           O  
HETATM  430  O   HOH T 429      16.198  52.317  23.135  1.00  0.42           O  
HETATM  431  O   HOH T 430      -7.197  59.508   9.274  1.00  0.42           O  
HETATM  432  O   HOH T 431       2.277  35.697  -9.613  1.00  0.42           O  
HETATM  433  O   HOH T 432      23.417  67.436 -16.214  1.00  0.42           O  
HETATM  434  O   HOH T 433      22.248  47.838   4.134  1.00  0.42           O  
HETATM  435  O   HOH T 434       7.185  16.725  15.048  1.00  0.42           O  
HETATM  436  O   HOH T 435      22.709  45.603  -6.595  1.00  0.42           O  
HETATM  437  O   HOH T 436       9.461  39.647 -10.446  1.00  0.42           O  
HETATM  438  O   HOH T 437      -6.844  27.406  -3.859  1.00  0.42           O  
HETATM  439  O   HOH T 438       7.747  13.247  37.047  1.00  0.42           O  
HETATM  440  O   HOH T 439      10.393  34.119 -13.793  1.00  0.42           O  
HETATM  441  O   HOH T 440       9.986  16.035  11.992  1.00  0.42           O  
HETATM  442  O   HOH T 441      15.525  33.807  15.608  1.00  0.42           O  
HETATM  443  O   HOH T 442      -6.522  43.624  -9.516  1.00  0.42           O  
HETATM  444  O   HOH T 443      33.520  40.564   3.341  1.00  0.42           O  
HETATM  445  O   HOH T 444      27.050  16.815   4.757  1.00  0.42           O  
HETATM  446  O   HOH T 445      26.310  37.611  15.061  1.00  0.42           O  
HETATM  447  O   HOH T 446      39.841  21.827  36.069  1.00  0.42           O  
HETATM  448  O   HOH T 447      -4.880  57.955  18.636  1.00  0.42           O  
HETATM  449  O   HOH T 448       8.321  33.902  -6.265  1.00  0.42           O  
HETATM  450  O   HOH T 449      10.288  70.413   0.158  1.00  0.42           O  
HETATM  451  O   HOH T 450       7.102   5.554  33.780  1.00  0.42           O  
HETATM  452  O   HOH T 451      35.116  61.590  10.892  1.00  0.42           O  
HETATM  453  O   HOH T 452      18.468  74.786  -5.375  1.00  0.42           O  
HETATM  454  O   HOH T 453       0.107  21.186  21.599  1.00  0.42           O  
HETATM  455  O   HOH T 454       4.236  67.234   7.027  1.00  0.42           O  
HETATM  456  O   HOH T 455     -11.837  35.463   4.542  1.00  0.42           O  
HETATM  457  O   HOH T 456      25.225  14.897   4.068  1.00  0.42           O  
HETATM  458  O   HOH T 457      41.167  28.408  13.142  1.00  0.42           O  
HETATM  459  O   HOH T 458      22.380  39.712  10.682  1.00  0.43           O  
HETATM  460  O   HOH T 459      20.214  20.320   4.868  1.00  0.43           O  
HETATM  461  O   HOH T 460      15.259  27.498   4.655  1.00  0.43           O  
HETATM  462  O   HOH T 461       5.479  65.368  10.718  1.00  0.43           O  
HETATM  463  O   HOH T 462      10.587  53.297  -6.400  1.00  0.43           O  
HETATM  464  O   HOH T 463       9.310   2.254  17.815  1.00  0.43           O  
HETATM  465  O   HOH T 464      33.275  36.486   8.737  1.00  0.43           O  
HETATM  466  O   HOH T 465      27.489  73.018  24.539  1.00  0.43           O  
HETATM  467  O   HOH T 466      34.871   6.396   9.734  1.00  0.43           O  
HETATM  468  O   HOH T 467      13.951  54.992  21.691  1.00  0.43           O  
HETATM  469  O   HOH T 468      15.104  20.439   8.951  1.00  0.43           O  
HETATM  470  O   HOH T 469      24.572  30.744  38.574  1.00  0.43           O  
HETATM  471  O   HOH T 470      -0.649  39.372  28.292  1.00  0.43           O  
HETATM  472  O   HOH T 471       5.439  -0.085  21.515  1.00  0.43           O  
HETATM  473  O   HOH T 472      30.594  67.830   8.160  1.00  0.43           O  
HETATM  474  O   HOH T 473      40.317  32.263  22.701  1.00  0.43           O  
HETATM  475  O   HOH T 474      40.691  17.612  25.547  1.00  0.43           O  
HETATM  476  O   HOH T 475       0.669  46.837   9.300  1.00  0.43           O  
HETATM  477  O   HOH T 476      33.643   8.144  46.230  1.00  0.43           O  
HETATM  478  O   HOH T 477       8.901  34.182  30.605  1.00  0.43           O  
HETATM  479  O   HOH T 478      22.581  45.855  14.448  1.00  0.43           O  
HETATM  480  O   HOH T 479      -0.156  53.892   4.437  1.00  0.43           O  
HETATM  481  O   HOH T 480      16.991  77.723   8.572  1.00  0.43           O  
HETATM  482  O   HOH T 481      -0.337  25.999  27.589  1.00  0.43           O  
HETATM  483  O   HOH T 482      18.009  74.920   4.763  1.00  0.43           O  
HETATM  484  O   HOH T 483      -5.052  52.392  -1.893  1.00  0.43           O  
HETATM  485  O   HOH T 484      16.236  71.492  -8.159  1.00  0.44           O  
HETATM  486  O   HOH T 485      26.352  37.122  17.851  1.00  0.44           O  
HETATM  487  O   HOH T 486      12.820  18.960   8.442  1.00  0.44           O  
HETATM  488  O   HOH T 487       8.457  14.314  34.694  1.00  0.44           O  
HETATM  489  O   HOH T 488      37.600  21.889  42.483  1.00  0.44           O  
HETATM  490  O   HOH T 489      28.456   8.931  39.322  1.00  0.44           O  
HETATM  491  O   HOH T 490       6.197  24.260   8.090  1.00  0.44           O  
HETATM  492  O   HOH T 491      37.120  33.055  18.694  1.00  0.44           O  
HETATM  493  O   HOH T 492       1.018  37.365  29.427  1.00  0.44           O  
HETATM  494  O   HOH T 493       4.003  51.719  -6.690  1.00  0.44           O  
HETATM  495  O   HOH T 494      26.138   7.536  56.988  1.00  0.44           O  
HETATM  496  O   HOH T 495      41.088  16.061  37.172  1.00  0.44           O  
HETATM  497  O   HOH T 496      -2.737  24.662  28.131  1.00  0.44           O  
HETATM  498  O   HOH T 497      11.986  14.257  12.210  1.00  0.44           O  
HETATM  499  O   HOH T 498      11.507  62.595  -5.556  1.00  0.44           O  
HETATM  500  O   HOH T 499       4.280  33.903  -8.938  1.00  0.44           O  
HETATM  501  O   HOH T 500      24.618  34.960  45.120  1.00  0.44           O  
HETATM  502  O   HOH T 501      38.130  22.193  39.712  1.00  0.44           O  
HETATM  503  O   HOH T 502      10.642  34.711  -5.104  1.00  0.44           O  
HETATM  504  O   HOH T 503      22.582  53.561  -6.498  1.00  0.44           O  
HETATM  505  O   HOH T 504      32.478  64.916  -5.031  1.00  0.44           O  
HETATM  506  O   HOH T 505      28.219  53.354 -10.564  1.00  0.44           O  
HETATM  507  O   HOH T 506       9.136  59.432   9.151  1.00  0.44           O  
HETATM  508  O   HOH T 507       9.559  28.815  40.926  1.00  0.44           O  
HETATM  509  O   HOH T 508      27.594  14.221  41.199  1.00  0.44           O  
HETATM  510  O   HOH T 509      -2.596  22.721  30.158  1.00  0.44           O  
HETATM  511  O   HOH T 510      16.550  -0.890  28.736  1.00  0.44           O  
HETATM  512  O   HOH T 511      16.257  37.253  45.626  1.00  0.44           O  
HETATM  513  O   HOH T 512      26.999  33.575  45.227  1.00  0.44           O  
HETATM  514  O   HOH T 513      -3.466  28.908  14.021  1.00  0.44           O  
HETATM  515  O   HOH T 514       1.978   9.052  25.776  1.00  0.44           O  
HETATM  516  O   HOH T 515      29.625  40.158  18.467  1.00  0.44           O  
HETATM  517  O   HOH T 516      42.279  30.301  14.837  1.00  0.44           O  
HETATM  518  O   HOH T 517      26.717  39.831   9.302  1.00  0.44           O  
HETATM  519  O   HOH T 518      30.680  23.845  36.648  1.00  0.44           O  
HETATM  520  O   HOH T 519       9.861  69.981   4.961  1.00  0.44           O  
HETATM  521  O   HOH T 520      -2.224  42.843  35.218  1.00  0.44           O  
HETATM  522  O   HOH T 521       4.931  56.505  31.979  1.00  0.44           O  
HETATM  523  O   HOH T 522      18.503  -4.411  46.397  1.00  0.44           O  
HETATM  524  O   HOH T 523      27.462  26.490  57.012  1.00  0.45           O  
HETATM  525  O   HOH T 524       1.280  46.237  35.542  1.00  0.45           O  
HETATM  526  O   HOH T 525       6.098  58.266  30.104  1.00  0.45           O  
HETATM  527  O   HOH T 526      33.350   4.696  40.638  1.00  0.45           O  
HETATM  528  O   HOH T 527      12.554  66.859  -3.495  1.00  0.45           O  
HETATM  529  O   HOH T 528      -9.827  26.823  -6.456  1.00  0.45           O  
HETATM  530  O   HOH T 529      16.572  64.107  21.362  1.00  0.45           O  
HETATM  531  O   HOH T 530      25.393  10.573  37.300  1.00  0.45           O  
HETATM  532  O   HOH T 531      -5.856  45.431  -3.389  1.00  0.45           O  
HETATM  533  O   HOH T 532      18.144   3.132  38.317  1.00  0.45           O  
HETATM  534  O   HOH T 533      -9.666  44.508  -2.407  1.00  0.45           O  
HETATM  535  O   HOH T 534      -5.041  40.185  32.196  1.00  0.45           O  
HETATM  536  O   HOH T 535      -8.982  31.740  18.343  1.00  0.45           O  
HETATM  537  O   HOH T 536       6.283  29.919  26.262  1.00  0.45           O  
HETATM  538  O   HOH T 537      37.897  23.793  36.085  1.00  0.45           O  
HETATM  539  O   HOH T 538       8.810  31.345  -7.276  1.00  0.45           O  
HETATM  540  O   HOH T 539      14.324  65.353  -4.978  1.00  0.45           O  
HETATM  541  O   HOH T 540      27.715   3.658  47.992  1.00  0.45           O  
HETATM  542  O   HOH T 541      13.655  26.447  11.419  1.00  0.45           O  
HETATM  543  O   HOH T 542       7.427  25.544  28.606  1.00  0.45           O  
HETATM  544  O   HOH T 543      38.998   8.027  39.096  1.00  0.45           O  
HETATM  545  O   HOH T 544      11.097  18.004  10.369  1.00  0.45           O  
HETATM  546  O   HOH T 545      12.491   1.273  54.319  1.00  0.45           O  
HETATM  547  O   HOH T 546      30.269  72.708   6.611  1.00  0.45           O  
HETATM  548  O   HOH T 547      31.907  66.224 -12.156  1.00  0.45           O  
HETATM  549  O   HOH T 548      24.213  29.979  -6.220  1.00  0.45           O  
HETATM  550  O   HOH T 549      -5.839  28.458   3.218  1.00  0.45           O  
HETATM  551  O   HOH T 550      -5.651  28.339  -1.678  1.00  0.45           O  
HETATM  552  O   HOH T 551       9.251  63.843  23.798  1.00  0.45           O  
HETATM  553  O   HOH T 552     -13.199  42.060   1.549  1.00  0.45           O  
HETATM  554  O   HOH T 553       2.536  51.769  28.430  1.00  0.45           O  
HETATM  555  O   HOH T 554       0.949   4.805  48.733  1.00  0.45           O  
HETATM  556  O   HOH T 555      14.763  26.210  -8.048  1.00  0.45           O  
HETATM  557  O   HOH T 556      38.768  31.663  38.729  1.00  0.45           O  
HETATM  558  O   HOH T 557     -11.503  52.591   8.644  1.00  0.45           O  
HETATM  559  O   HOH T 558     -14.548  36.907   1.562  1.00  0.45           O  
HETATM  560  O   HOH T 559      12.010  37.960  43.118  1.00  0.45           O  
HETATM  561  O   HOH T 560      36.810   5.304  29.912  1.00  0.45           O  
HETATM  562  O   HOH T 561      36.397  11.406  54.708  1.00  0.45           O  
HETATM  563  O   HOH T 562     -13.862  34.561   0.092  1.00  0.46           O  
HETATM  564  O   HOH T 563      22.294  27.836  52.655  1.00  0.46           O  
HETATM  565  O   HOH T 564      -4.970  45.217  -7.877  1.00  0.46           O  
HETATM  566  O   HOH T 565      24.219  -3.127  27.638  1.00  0.46           O  
HETATM  567  O   HOH T 566      35.621  33.339  12.313  1.00  0.46           O  
HETATM  568  O   HOH T 567      -3.954  41.975 -13.697  1.00  0.46           O  
HETATM  569  O   HOH T 568      41.985  16.001  39.774  1.00  0.46           O  
HETATM  570  O   HOH T 569       0.134  48.759  31.133  1.00  0.46           O  
HETATM  571  O   HOH T 570       5.558  10.004  33.294  1.00  0.46           O  
HETATM  572  O   HOH T 571      19.376  27.995   3.080  1.00  0.46           O  
HETATM  573  O   HOH T 572      12.921  60.268  -5.760  1.00  0.46           O  
HETATM  574  O   HOH T 573      -6.103  38.278   8.551  1.00  0.46           O  
HETATM  575  O   HOH T 574      28.121  53.211  17.126  1.00  0.46           O  
HETATM  576  O   HOH T 575      24.072  46.352   7.846  1.00  0.46           O  
HETATM  577  O   HOH T 576      -4.265  55.258  18.894  1.00  0.46           O  
HETATM  578  O   HOH T 577      29.642  -2.377  21.049  1.00  0.46           O  
HETATM  579  O   HOH T 578       8.376  26.585  39.918  1.00  0.46           O  
HETATM  580  O   HOH T 579      -3.226  48.511  -9.836  1.00  0.46           O  
HETATM  581  O   HOH T 580      -8.219  37.900  -8.669  1.00  0.46           O  
HETATM  582  O   HOH T 581      15.158   7.165   2.429  1.00  0.46           O  
HETATM  583  O   HOH T 582      33.978  13.878  43.094  1.00  0.46           O  
HETATM  584  O   HOH T 583      33.848  38.459   6.806  1.00  0.46           O  
HETATM  585  O   HOH T 584      34.257   2.835  28.118  1.00  0.46           O  
HETATM  586  O   HOH T 585      26.463  47.439   9.091  1.00  0.46           O  
HETATM  587  O   HOH T 586       2.999  13.167  51.277  1.00  0.46           O  
HETATM  588  O   HOH T 587      24.102   4.227   4.675  1.00  0.46           O  
HETATM  589  O   HOH T 588      16.858  18.527  59.353  1.00  0.46           O  
HETATM  590  O   HOH T 589       7.248  27.144  61.058  1.00  0.46           O  
HETATM  591  O   HOH T 590      24.515  -4.763  23.456  1.00  0.46           O  
HETATM  592  O   HOH T 591     -11.961  57.945  12.348  1.00  0.46           O  
HETATM  593  O   HOH T 592      12.176   7.829  10.180  1.00  0.46           O  
HETATM  594  O   HOH T 593      12.717   0.872  57.026  1.00  0.46           O  
HETATM  595  O   HOH T 594      13.643  62.325  -7.496  1.00  0.46           O  
HETATM  596  O   HOH T 595      16.313  59.126  25.978  1.00  0.46           O  
HETATM  597  O   HOH T 596      22.805  -4.223  25.530  1.00  0.46           O  
HETATM  598  O   HOH T 597      33.282  40.415  36.150  1.00  0.46           O  
HETATM  599  O   HOH T 598      -8.424  29.703  22.645  1.00  0.46           O  
HETATM  600  O   HOH T 599      10.529  53.758  32.771  1.00  0.46           O  
HETATM  601  O   HOH T 600      23.322  61.820  22.612  1.00  0.46           O  
HETATM  602  O   HOH T 601      16.060  73.637  -4.815  1.00  0.47           O  
HETATM  603  O   HOH T 602      29.281  53.419  24.321  1.00  0.47           O  
HETATM  604  O   HOH T 603      -5.107  60.005  11.019  1.00  0.47           O  
HETATM  605  O   HOH T 604      -8.514  48.583  -1.565  1.00  0.47           O  
HETATM  606  O   HOH T 605      15.795   1.991  39.442  1.00  0.47           O  
HETATM  607  O   HOH T 606      11.550  20.748  10.268  1.00  0.47           O  
HETATM  608  O   HOH T 607      38.166  36.511  26.679  1.00  0.47           O  
HETATM  609  O   HOH T 608       8.686  37.256  40.672  1.00  0.47           O  
HETATM  610  O   HOH T 609      33.127  33.848   7.977  1.00  0.47           O  
HETATM  611  O   HOH T 610      18.526  -2.645  11.951  1.00  0.47           O  
HETATM  612  O   HOH T 611      34.742  61.545   0.638  1.00  0.47           O  
HETATM  613  O   HOH T 612       7.257  -0.415  50.461  1.00  0.47           O  
HETATM  614  O   HOH T 613      33.206  44.435  44.374  1.00  0.47           O  
HETATM  615  O   HOH T 614       4.069  24.677  30.592  1.00  0.47           O  
HETATM  616  O   HOH T 615       9.439  43.622 -12.964  1.00  0.47           O  
HETATM  617  O   HOH T 616      42.176  17.862  35.340  1.00  0.47           O  
HETATM  618  O   HOH T 617      29.331  26.542  54.394  1.00  0.47           O  
HETATM  619  O   HOH T 618      16.069  66.516  -6.794  1.00  0.47           O  
HETATM  620  O   HOH T 619       8.024  42.014  39.055  1.00  0.47           O  
HETATM  621  O   HOH T 620      14.882  59.848  -7.564  1.00  0.47           O  
HETATM  622  O   HOH T 621       7.591  14.870  12.882  1.00  0.47           O  
HETATM  623  O   HOH T 622      11.522  21.441  57.278  1.00  0.47           O  
HETATM  624  O   HOH T 623      33.289  -0.042  24.217  1.00  0.47           O  
HETATM  625  O   HOH T 624      28.974  36.950   9.039  1.00  0.47           O  
HETATM  626  O   HOH T 625      20.273  58.469  29.149  1.00  0.47           O  
HETATM  627  O   HOH T 626      27.492  66.509  12.117  1.00  0.47           O  
HETATM  628  O   HOH T 627      22.990   4.972  50.276  1.00  0.47           O  
HETATM  629  O   HOH T 628      -2.699  41.245  28.588  1.00  0.47           O  
HETATM  630  O   HOH T 629     -12.308  33.487  20.244  1.00  0.47           O  
HETATM  631  O   HOH T 630      18.605  25.802  58.373  1.00  0.47           O  
HETATM  632  O   HOH T 631      22.589  36.531  44.258  1.00  0.47           O  
HETATM  633  O   HOH T 632       9.485  19.728  11.847  1.00  0.47           O  
HETATM  634  O   HOH T 633      36.354   2.807  26.337  1.00  0.47           O  
HETATM  635  O   HOH T 634       1.723  54.187  27.571  1.00  0.47           O  
HETATM  636  O   HOH T 635      -2.588  26.555  26.124  1.00  0.47           O  
HETATM  637  O   HOH T 636      -4.695  25.111   9.688  1.00  0.47           O  
HETATM  638  O   HOH T 637      -4.157  42.541  33.261  1.00  0.48           O  
HETATM  639  O   HOH T 638      -6.423  58.597   6.752  1.00  0.48           O  
HETATM  640  O   HOH T 639      -8.146  44.947  -4.706  1.00  0.48           O  
HETATM  641  O   HOH T 640       6.274  -0.756  47.801  1.00  0.48           O  
HETATM  642  O   HOH T 641      18.433  57.788  27.260  1.00  0.48           O  
HETATM  643  O   HOH T 642      30.257  18.858  55.965  1.00  0.48           O  
HETATM  644  O   HOH T 643      29.110  45.319  -4.053  1.00  0.48           O  
HETATM  645  O   HOH T 644      21.612  56.834  30.672  1.00  0.48           O  
HETATM  646  O   HOH T 645      30.036   2.353  31.703  1.00  0.48           O  
HETATM  647  O   HOH T 646      24.757  75.629  20.631  1.00  0.48           O  
HETATM  648  O   HOH T 647      33.263  43.781  33.290  1.00  0.48           O  
HETATM  649  O   HOH T 648      -4.763  43.441 -11.589  1.00  0.48           O  
HETATM  650  O   HOH T 649      26.710  50.955  -0.762  1.00  0.48           O  
HETATM  651  O   HOH T 650      18.644  72.670  -8.933  1.00  0.48           O  
HETATM  652  O   HOH T 651       3.239   7.383  27.504  1.00  0.48           O  
HETATM  653  O   HOH T 652      -0.084  34.475  -9.386  1.00  0.48           O  
HETATM  654  O   HOH T 653      26.673  28.389  39.815  1.00  0.48           O  
HETATM  655  O   HOH T 654      24.442   0.162  34.766  1.00  0.48           O  
HETATM  656  O   HOH T 655      21.099  56.894  26.953  1.00  0.48           O  
HETATM  657  O   HOH T 656      41.131  20.090  28.537  1.00  0.48           O  
HETATM  658  O   HOH T 657      34.701   0.505  26.639  1.00  0.48           O  
HETATM  659  O   HOH T 658      12.080  68.611   1.279  1.00  0.48           O  
HETATM  660  O   HOH T 659       1.982  34.010  -7.408  1.00  0.48           O  
HETATM  661  O   HOH T 660       8.318  44.589  38.088  1.00  0.48           O  
HETATM  662  O   HOH T 661      15.263  18.144   7.312  1.00  0.48           O  
HETATM  663  O   HOH T 662      19.297  18.472  60.779  1.00  0.48           O  
HETATM  664  O   HOH T 663      -4.398  49.588 -12.121  1.00  0.48           O  
HETATM  665  O   HOH T 664      25.459  -4.876  25.960  1.00  0.48           O  
HETATM  666  O   HOH T 665      -4.223  25.013  -3.375  1.00  0.48           O  
HETATM  667  O   HOH T 666      16.589   2.387  58.963  1.00  0.48           O  
HETATM  668  O   HOH T 667      20.256  37.275  42.985  1.00  0.48           O  
HETATM  669  O   HOH T 668       9.676  27.529  -6.430  1.00  0.49           O  
HETATM  670  O   HOH T 669      12.551  23.150  11.095  1.00  0.49           O  
HETATM  671  O   HOH T 670      24.831  38.499  10.855  1.00  0.49           O  
HETATM  672  O   HOH T 671      -1.106  12.726  26.768  1.00  0.49           O  
HETATM  673  O   HOH T 672      46.283  15.484  34.907  1.00  0.49           O  
HETATM  674  O   HOH T 673       5.801   2.119  48.033  1.00  0.49           O  
HETATM  675  O   HOH T 674      39.943  12.248  37.443  1.00  0.49           O  
HETATM  676  O   HOH T 675      31.144  34.861  17.049  1.00  0.49           O  
HETATM  677  O   HOH T 676      22.721  32.341  -6.637  1.00  0.49           O  
HETATM  678  O   HOH T 677       3.915  57.360  28.604  1.00  0.49           O  
HETATM  679  O   HOH T 678      11.206  51.815  35.129  1.00  0.49           O  
HETATM  680  O   HOH T 679      16.724   4.909   2.063  1.00  0.49           O  
HETATM  681  O   HOH T 680      28.417  36.288  19.592  1.00  0.49           O  
HETATM  682  O   HOH T 681      -0.629   6.269  46.926  1.00  0.49           O  
HETATM  683  O   HOH T 682      22.676  -0.392  31.462  1.00  0.49           O  
HETATM  684  O   HOH T 683      10.541  35.805  42.246  1.00  0.49           O  
HETATM  685  O   HOH T 684       5.669   8.850  12.197  1.00  0.49           O  
HETATM  686  O   HOH T 685      24.984   3.252  48.572  1.00  0.49           O  
HETATM  687  O   HOH T 686      25.998  51.759  -3.331  1.00  0.49           O  
HETATM  688  O   HOH T 687      37.938   7.026  31.809  1.00  0.49           O  
HETATM  689  O   HOH T 688      34.083  64.004  11.593  1.00  0.49           O  
HETATM  690  O   HOH T 689      22.425  69.685 -11.846  1.00  0.49           O  
HETATM  691  O   HOH T 690      24.816  59.816  21.288  1.00  0.49           O  
HETATM  692  O   HOH T 691      -3.042  38.494  31.609  1.00  0.49           O  
HETATM  693  O   HOH T 692       0.119  14.835  19.964  1.00  0.49           O  
HETATM  694  O   HOH T 693      21.799  51.889  14.066  1.00  0.49           O  
HETATM  695  O   HOH T 694       9.792  30.615  49.422  1.00  0.49           O  
HETATM  696  O   HOH T 695      -2.574  24.292  -5.210  1.00  0.49           O  
HETATM  697  O   HOH T 696       9.595  36.525 -14.904  1.00  0.49           O  
HETATM  698  O   HOH T 697      21.910  68.607 -14.398  1.00  0.49           O  
HETATM  699  O   HOH T 698      22.189  54.979  28.736  1.00  0.49           O  
HETATM  700  O   HOH T 699      17.327   0.667  22.769  1.00  0.49           O  
HETATM  701  O   HOH T 700       9.607  40.293   2.948  1.00  0.50           O  
HETATM  702  O   HOH T 701      30.407  58.003  18.552  1.00  0.50           O  
HETATM  703  O   HOH T 702      17.790  -0.674  13.758  1.00  0.50           O  
HETATM  704  O   HOH T 703       4.300   2.231  22.696  1.00  0.50           O  
HETATM  705  O   HOH T 704       5.558  14.019  55.964  1.00  0.50           O  
HETATM  706  O   HOH T 705      -6.657  40.928   9.484  1.00  0.50           O  
HETATM  707  O   HOH T 706      12.236  35.988 -14.152  1.00  0.50           O  
HETATM  708  O   HOH T 707      -6.444  54.202   3.900  1.00  0.50           O  
HETATM  709  O   HOH T 708      37.168  31.162  12.794  1.00  0.50           O  
HETATM  710  O   HOH T 709      34.692  61.487  18.798  1.00  0.50           O  
HETATM  711  O   HOH T 710       3.092  39.085  35.976  1.00  0.50           O  
HETATM  712  O   HOH T 711      -9.814  58.499  13.923  1.00  0.50           O  
HETATM  713  O   HOH T 712      12.638  16.270  59.034  1.00  0.50           O  
HETATM  714  O   HOH T 713       9.501  49.632  34.893  1.00  0.50           O  
HETATM  715  O   HOH T 714      11.138  28.293  43.114  1.00  0.50           O  
HETATM  716  O   HOH T 715      14.763  68.500  17.013  1.00  0.50           O  
HETATM  717  O   HOH T 716      22.280  23.219  62.457  1.00  0.50           O  
HETATM  718  O   HOH T 717      10.164  32.420 -11.672  1.00  0.50           O  
HETATM  719  O   HOH T 718       4.942  23.256  -2.452  1.00  0.50           O  
HETATM  720  O   HOH T 719       8.998  53.443  35.950  1.00  0.50           O  
HETATM  721  O   HOH T 720       8.963  26.733  42.745  1.00  0.50           O  
HETATM  722  O   HOH T 721      33.145  10.508  14.484  1.00  0.50           O  
HETATM  723  O   HOH T 722      33.908  18.999  40.674  1.00  0.50           O  
HETATM  724  O   HOH T 723      16.836  68.844  -8.321  1.00  0.50           O  
HETATM  725  O   HOH T 724      17.123  12.072  59.986  1.00  0.50           O  
HETATM  726  O   HOH T 725      12.931  43.757 -14.618  1.00  0.50           O  
HETATM  727  O   HOH T 726      -9.039  28.876  -4.732  1.00  0.50           O  
HETATM  728  O   HOH T 727      -0.059  44.761 -14.098  1.00  0.50           O  
HETATM  729  O   HOH T 728      21.733  44.514  41.345  1.00  0.50           O  
HETATM  730  O   HOH T 729      -0.043   7.215  16.161  1.00  0.50           O  
HETATM  731  O   HOH T 730      23.345  59.153  23.415  1.00  0.50           O  
HETATM  732  O   HOH T 731      35.854  32.345  16.311  1.00  0.51           O  
HETATM  733  O   HOH T 732      33.514  66.786  -9.972  1.00  0.51           O  
HETATM  734  O   HOH T 733      19.637  53.558  38.020  1.00  0.51           O  
HETATM  735  O   HOH T 734      10.722  26.865   1.676  1.00  0.51           O  
HETATM  736  O   HOH T 735      -8.152  40.406   6.489  1.00  0.51           O  
HETATM  737  O   HOH T 736      -0.849  54.957  28.006  1.00  0.51           O  
HETATM  738  O   HOH T 737      21.847  63.953  23.559  1.00  0.51           O  
HETATM  739  O   HOH T 738      32.528  49.655   5.119  1.00  0.51           O  
HETATM  740  O   HOH T 739      -6.851  41.585  13.809  1.00  0.51           O  
HETATM  741  O   HOH T 740      11.073  25.734  10.666  1.00  0.51           O  
HETATM  742  O   HOH T 741       8.823   3.355  15.363  1.00  0.51           O  
HETATM  743  O   HOH T 742      31.288  69.628   0.887  1.00  0.51           O  
HETATM  744  O   HOH T 743     -11.094  49.843   8.976  1.00  0.51           O  
HETATM  745  O   HOH T 744      25.889  56.229  27.723  1.00  0.51           O  
HETATM  746  O   HOH T 745      41.497  21.960  20.887  1.00  0.51           O  
HETATM  747  O   HOH T 746      41.241  25.884  31.509  1.00  0.51           O  
HETATM  748  O   HOH T 747       7.464  39.817  40.780  1.00  0.51           O  
HETATM  749  O   HOH T 748       2.577  50.289  30.758  1.00  0.51           O  
HETATM  750  O   HOH T 749      34.200  62.629  -1.767  1.00  0.51           O  
HETATM  751  O   HOH T 750      28.305  39.734  46.246  1.00  0.51           O  
HETATM  752  O   HOH T 751       2.152   5.760  16.856  1.00  0.51           O  
HETATM  753  O   HOH T 752       3.787  47.058  34.795  1.00  0.51           O  
HETATM  754  O   HOH T 753      13.761  -2.969  27.860  1.00  0.51           O  
HETATM  755  O   HOH T 754      -7.176  49.241  16.813  1.00  0.51           O  
HETATM  756  O   HOH T 755       1.603  47.865  33.270  1.00  0.51           O  
HETATM  757  O   HOH T 756      -7.849  35.789  27.294  1.00  0.51           O  
HETATM  758  O   HOH T 757      26.642  46.283  -4.937  1.00  0.51           O  
HETATM  759  O   HOH T 758      25.508  41.897  -4.341  1.00  0.51           O  
HETATM  760  O   HOH T 759      -4.004  51.197 -10.003  1.00  0.51           O  
HETATM  761  O   HOH T 760      26.714   5.622  46.228  1.00  0.51           O  
HETATM  762  O   HOH T 761      19.043  37.021  45.499  1.00  0.51           O  
HETATM  763  O   HOH T 762      38.112  35.561  18.222  1.00  0.51           O  
HETATM  764  O   HOH T 763      19.532  39.635  46.321  1.00  0.51           O  
HETATM  765  O   HOH T 764      34.240  41.937  31.578  1.00  0.51           O  
HETATM  766  O   HOH T 765      25.188  41.957   9.968  1.00  0.51           O  
HETATM  767  O   HOH T 766      -1.939  55.528   5.922  1.00  0.51           O  
HETATM  768  O   HOH T 767      30.562  19.162  10.375  1.00  0.51           O  
HETATM  769  O   HOH T 768      22.062  -0.981  35.701  1.00  0.51           O  
HETATM  770  O   HOH T 769      23.658   0.437  44.549  1.00  0.51           O  
HETATM  771  O   HOH T 770      20.230  18.691   2.426  1.00  0.51           O  
HETATM  772  O   HOH T 771       0.693  19.123   1.788  1.00  0.52           O  
HETATM  773  O   HOH T 772      39.786  14.512  39.088  1.00  0.52           O  
HETATM  774  O   HOH T 773      35.844   0.951  24.230  1.00  0.52           O  
HETATM  775  O   HOH T 774      43.623  27.430  26.865  1.00  0.52           O  
HETATM  776  O   HOH T 775      35.618   6.295  33.058  1.00  0.52           O  
HETATM  777  O   HOH T 776       5.418  18.444  16.517  1.00  0.52           O  
HETATM  778  O   HOH T 777      17.393  52.439 -10.534  1.00  0.52           O  
HETATM  779  O   HOH T 778      31.596   4.549  38.525  1.00  0.52           O  
HETATM  780  O   HOH T 779      21.255   1.054  44.888  1.00  0.52           O  
HETATM  781  O   HOH T 780      16.945  36.859 -11.341  1.00  0.52           O  
HETATM  782  O   HOH T 781      33.357  33.046  17.360  1.00  0.52           O  
HETATM  783  O   HOH T 782      30.671  48.501  -2.213  1.00  0.52           O  
HETATM  784  O   HOH T 783      17.843  13.079   0.605  1.00  0.52           O  
HETATM  785  O   HOH T 784       1.057  35.979  27.049  1.00  0.52           O  
HETATM  786  O   HOH T 785      37.158   2.484  16.085  1.00  0.52           O  
HETATM  787  O   HOH T 786      29.044  30.140  47.985  1.00  0.52           O  
HETATM  788  O   HOH T 787      -4.069  62.672   8.116  1.00  0.52           O  
HETATM  789  O   HOH T 788      24.355   9.529  58.503  1.00  0.52           O  
HETATM  790  O   HOH T 789      -6.425  39.583 -10.164  1.00  0.52           O  
HETATM  791  O   HOH T 790      -2.569  37.828 -12.429  1.00  0.52           O  
HETATM  792  O   HOH T 791       7.612  56.881  31.917  1.00  0.52           O  
HETATM  793  O   HOH T 792      -0.693  37.292  31.537  1.00  0.52           O  
HETATM  794  O   HOH T 793       6.273  34.657  29.684  1.00  0.52           O  
HETATM  795  O   HOH T 794      -6.229  32.191  25.279  1.00  0.52           O  
HETATM  796  O   HOH T 795      27.419  45.546  41.968  1.00  0.52           O  
HETATM  797  O   HOH T 796      34.160  11.721  53.010  1.00  0.52           O  
HETATM  798  O   HOH T 797      30.099  60.692  18.766  1.00  0.52           O  
HETATM  799  O   HOH T 798      -6.591  35.690  -8.179  1.00  0.52           O  
HETATM  800  O   HOH T 799       1.592  40.182  38.049  1.00  0.52           O  
HETATM  801  O   HOH T 800      18.679  59.162  33.282  1.00  0.52           O  
HETATM  802  O   HOH T 801      10.289  28.127  -0.976  1.00  0.52           O  
HETATM  803  O   HOH T 802      38.213   3.966  27.918  1.00  0.52           O  
HETATM  804  O   HOH T 803      37.465  17.593  18.717  1.00  0.52           O  
HETATM  805  O   HOH T 804       8.196  34.885  39.206  1.00  0.52           O  
HETATM  806  O   HOH T 805      30.162  53.995  -8.742  1.00  0.52           O  
HETATM  807  O   HOH T 806      36.801  60.762   8.958  1.00  0.52           O  
HETATM  808  O   HOH T 807      43.170  28.550  16.775  1.00  0.52           O  
HETATM  809  O   HOH T 808       2.978  57.219   9.548  1.00  0.52           O  
HETATM  810  O   HOH T 809      14.539  59.116  29.241  1.00  0.52           O  
HETATM  811  O   HOH T 810      35.692   8.785  10.997  1.00  0.53           O  
HETATM  812  O   HOH T 811      28.560  33.379   1.164  1.00  0.53           O  
HETATM  813  O   HOH T 812      29.313   8.264   6.930  1.00  0.53           O  
HETATM  814  O   HOH T 813      32.608   5.676  46.311  1.00  0.53           O  
HETATM  815  O   HOH T 814       0.751   6.359  44.528  1.00  0.53           O  
HETATM  816  O   HOH T 815      32.363  61.552  20.159  1.00  0.53           O  
HETATM  817  O   HOH T 816      -9.131  51.661   9.851  1.00  0.53           O  
HETATM  818  O   HOH T 817     -10.682  37.175   6.646  1.00  0.53           O  
HETATM  819  O   HOH T 818      27.584  39.353  16.752  1.00  0.53           O  
HETATM  820  O   HOH T 819      32.870   4.705  43.848  1.00  0.53           O  
HETATM  821  O   HOH T 820      27.338  60.178  18.577  1.00  0.53           O  
HETATM  822  O   HOH T 821       0.584  34.500  29.282  1.00  0.53           O  
HETATM  823  O   HOH T 822       6.338  32.537  -7.717  1.00  0.53           O  
HETATM  824  O   HOH T 823       1.821   4.905  20.745  1.00  0.53           O  
HETATM  825  O   HOH T 824      18.635  71.319  22.720  1.00  0.53           O  
HETATM  826  O   HOH T 825      25.996  28.330  -7.505  1.00  0.53           O  
HETATM  827  O   HOH T 826       8.475   5.865  41.294  1.00  0.53           O  
HETATM  828  O   HOH T 827      -3.750  57.625   6.874  1.00  0.53           O  
HETATM  829  O   HOH T 828      -8.920  53.305   4.610  1.00  0.53           O  
HETATM  830  O   HOH T 829      29.559  49.173  36.309  1.00  0.53           O  
HETATM  831  O   HOH T 830      24.327  47.731  -4.016  1.00  0.53           O  
HETATM  832  O   HOH T 831       1.589  20.432   8.075  1.00  0.53           O  
HETATM  833  O   HOH T 832      13.686   9.670   5.746  1.00  0.53           O  
HETATM  834  O   HOH T 833      26.022  53.212  -7.231  1.00  0.53           O  
HETATM  835  O   HOH T 834      32.441   2.997   8.658  1.00  0.53           O  
HETATM  836  O   HOH T 835      29.490  33.523  46.401  1.00  0.53           O  
HETATM  837  O   HOH T 836      10.352   0.530  37.354  1.00  0.53           O  
HETATM  838  O   HOH T 837      27.002   1.230   7.418  1.00  0.53           O  
HETATM  839  O   HOH T 838      -4.656  60.020   8.209  1.00  0.53           O  
HETATM  840  O   HOH T 839      23.588  70.844 -14.018  1.00  0.53           O  
HETATM  841  O   HOH T 840      17.490   1.486  43.639  1.00  0.53           O  
HETATM  842  O   HOH T 841      16.733  28.096   2.261  1.00  0.53           O  
HETATM  843  O   HOH T 842      32.500  43.684   6.387  1.00  0.53           O  
HETATM  844  O   HOH T 843      16.220  25.134  -6.063  1.00  0.53           O  
HETATM  845  O   HOH T 844      12.092  40.483  42.025  1.00  0.53           O  
HETATM  846  O   HOH T 845      17.556  -4.029  49.032  1.00  0.53           O  
HETATM  847  O   HOH T 846      -0.722  25.756  -8.981  1.00  0.53           O  
HETATM  848  O   HOH T 847       6.872  12.856  58.110  1.00  0.53           O  
HETATM  849  O   HOH T 848     -16.185  36.829   3.848  1.00  0.53           O  
HETATM  850  O   HOH T 849       0.767   4.047  46.064  1.00  0.53           O  
HETATM  851  O   HOH T 850      -4.293  26.631  20.436  1.00  0.53           O  
HETATM  852  O   HOH T 851       7.392  -0.378  19.490  1.00  0.54           O  
HETATM  853  O   HOH T 852      44.524  17.452  33.888  1.00  0.54           O  
HETATM  854  O   HOH T 853      29.989   8.727  55.923  1.00  0.54           O  
HETATM  855  O   HOH T 854      25.014  68.804 -17.879  1.00  0.54           O  
HETATM  856  O   HOH T 855      24.366  51.726  -5.591  1.00  0.54           O  
HETATM  857  O   HOH T 856      30.266  51.318  29.876  1.00  0.54           O  
HETATM  858  O   HOH T 857      39.720  18.569  44.550  1.00  0.54           O  
HETATM  859  O   HOH T 858       3.355  21.767  -4.280  1.00  0.54           O  
HETATM  860  O   HOH T 859      12.681  12.884   7.940  1.00  0.54           O  
HETATM  861  O   HOH T 860      -0.612  24.647  29.928  1.00  0.54           O  
HETATM  862  O   HOH T 861      28.721  -4.788  19.964  1.00  0.54           O  
HETATM  863  O   HOH T 862       4.727  20.353  16.392  1.00  0.54           O  
HETATM  864  O   HOH T 863      10.464  45.567  39.696  1.00  0.54           O  
HETATM  865  O   HOH T 864      26.968  55.925  19.617  1.00  0.54           O  
HETATM  866  O   HOH T 865      10.774   9.766  60.224  1.00  0.54           O  
HETATM  867  O   HOH T 866      17.786  12.727  23.572  1.00  0.54           O  
HETATM  868  O   HOH T 867      24.096  54.266  26.922  1.00  0.54           O  
HETATM  869  O   HOH T 868       3.162  55.820  20.437  1.00  0.54           O  
HETATM  870  O   HOH T 869      13.663  67.408  21.832  1.00  0.54           O  
HETATM  871  O   HOH T 870      40.649  21.156  33.572  1.00  0.54           O  
HETATM  872  O   HOH T 871      -5.675  29.992  15.254  1.00  0.54           O  
HETATM  873  O   HOH T 872      -2.453  59.222  19.404  1.00  0.54           O  
HETATM  874  O   HOH T 873       9.297   9.088  38.684  1.00  0.54           O  
HETATM  875  O   HOH T 874      24.269  73.089   4.749  1.00  0.54           O  
HETATM  876  O   HOH T 875      22.704  40.457  -6.522  1.00  0.54           O  
HETATM  877  O   HOH T 876      26.690  12.695  38.993  1.00  0.54           O  
HETATM  878  O   HOH T 877       8.201  24.048   0.603  1.00  0.55           O  
HETATM  879  O   HOH T 878       9.032  24.205   8.116  1.00  0.55           O  
HETATM  880  O   HOH T 879      24.931  44.256  -5.627  1.00  0.55           O  
HETATM  881  O   HOH T 880       7.391  28.968  -7.184  1.00  0.55           O  
HETATM  882  O   HOH T 881      27.519  56.074  29.862  1.00  0.55           O  
HETATM  883  O   HOH T 882      33.127  34.166  47.735  1.00  0.55           O  
HETATM  884  O   HOH T 883      -1.134  20.785  31.452  1.00  0.55           O  
HETATM  885  O   HOH T 884       3.170  13.809  38.901  1.00  0.55           O  
HETATM  886  O   HOH T 885       6.597  52.841  -6.681  1.00  0.55           O  
HETATM  887  O   HOH T 886      27.550  43.619  -5.581  1.00  0.55           O  
HETATM  888  O   HOH T 887       0.764  24.992  12.413  1.00  0.55           O  
HETATM  889  O   HOH T 888       4.027  55.308  -5.033  1.00  0.55           O  
HETATM  890  O   HOH T 889      33.825  68.762  -4.878  1.00  0.55           O  
HETATM  891  O   HOH T 890       6.406   3.643  25.696  1.00  0.55           O  
HETATM  892  O   HOH T 891      24.337  60.721 -13.070  1.00  0.55           O  
HETATM  893  O   HOH T 892      17.858  48.565  41.221  1.00  0.55           O  
HETATM  894  O   HOH T 893      36.102  16.391  45.534  1.00  0.55           O  
HETATM  895  O   HOH T 894      28.269   5.779   8.075  1.00  0.55           O  
HETATM  896  O   HOH T 895      16.178  66.643  21.982  1.00  0.55           O  
HETATM  897  O   HOH T 896       4.845  23.223  54.282  1.00  0.55           O  
HETATM  898  O   HOH T 897      14.477  41.530  43.106  1.00  0.55           O  
HETATM  899  O   HOH T 898       2.430  -0.076  46.982  1.00  0.56           O  
HETATM  900  O   HOH T 899       2.561  20.397  42.217  1.00  0.56           O  
HETATM  901  O   HOH T 900      32.572  55.044  -8.027  1.00  0.56           O  
HETATM  902  O   HOH T 901      34.916  -0.065  10.450  1.00  0.56           O  
HETATM  903  O   HOH T 902      34.083  56.667   4.697  1.00  0.56           O  
HETATM  904  O   HOH T 903       7.565  57.520   5.714  1.00  0.56           O  
HETATM  905  O   HOH T 904      -4.348  20.319  -0.517  1.00  0.56           O  
HETATM  906  O   HOH T 905      -3.430  24.309   6.373  1.00  0.56           O  
HETATM  907  O   HOH T 906       5.614   8.017  60.009  1.00  0.56           O  
HETATM  908  O   HOH T 907       4.586  24.321  13.344  1.00  0.56           O  
HETATM  909  O   HOH T 908      12.125  75.367   6.441  1.00  0.56           O  
HETATM  910  O   HOH T 909      12.850   7.178   7.490  1.00  0.56           O  
HETATM  911  O   HOH T 910      32.496   1.629  30.904  1.00  0.56           O  
HETATM  912  O   HOH T 911      10.418  53.523  -9.153  1.00  0.56           O  
HETATM  913  O   HOH T 912      34.282  12.990  17.765  1.00  0.56           O  
HETATM  914  O   HOH T 913      35.036  11.390  42.380  1.00  0.56           O  
HETATM  915  O   HOH T 914       4.962  21.998   9.001  1.00  0.56           O  
HETATM  916  O   HOH T 915      45.087  16.142  37.243  1.00  0.56           O  
HETATM  917  O   HOH T 916      30.078  51.901  33.210  1.00  0.57           O  
HETATM  918  O   HOH T 917      10.454  25.227  30.020  1.00  0.57           O  
HETATM  919  O   HOH T 918      23.632   3.215  41.178  1.00  0.57           O  
HETATM  920  O   HOH T 919      11.938  33.439  42.961  1.00  0.57           O  
HETATM  921  O   HOH T 920      17.014  -1.608  37.233  1.00  0.57           O  
HETATM  922  O   HOH T 921      -0.929  12.945  29.399  1.00  0.57           O  
HETATM  923  O   HOH T 922      33.271  48.518   7.398  1.00  0.57           O  
HETATM  924  O   HOH T 923      31.673  52.783   8.145  1.00  0.57           O  
HETATM  925  O   HOH T 924       0.053   9.662  21.248  1.00  0.57           O  
HETATM  926  O   HOH T 925      10.537  29.162  47.049  1.00  0.57           O  
HETATM  927  O   HOH T 926      30.174  46.961  27.443  1.00  0.57           O  
HETATM  928  O   HOH T 927       8.081   9.745  11.311  1.00  0.57           O  
HETATM  929  O   HOH T 928       0.878   4.959  23.396  1.00  0.57           O  
HETATM  930  O   HOH T 929      41.370  30.077  21.260  1.00  0.57           O  
HETATM  931  O   HOH T 930      25.954  -4.986  20.049  1.00  0.57           O  
HETATM  932  O   HOH T 931       8.746   1.235  52.392  1.00  0.57           O  
HETATM  933  O   HOH T 932      11.155  53.255  37.546  1.00  0.57           O  
HETATM  934  O   HOH T 933      35.570  59.029  -0.064  1.00  0.57           O  
HETATM  935  O   HOH T 934      16.822  30.947  47.364  1.00  0.58           O  
HETATM  936  O   HOH T 935      32.385  54.260   8.911  1.00  0.58           O  
HETATM  937  O   HOH T 936      22.569  21.406   6.289  1.00  0.58           O  
HETATM  938  O   HOH T 937       7.789  54.591  18.743  1.00  0.58           O  
HETATM  939  O   HOH T 938      40.713  17.875  22.826  1.00  0.58           O  
HETATM  940  O   HOH T 939       1.605   0.792  21.906  1.00  0.59           O  
HETATM  941  O   HOH T 940      20.070   0.780  36.512  1.00  0.59           O  
HETATM  942  O   HOH T 941       9.699  33.228  41.386  1.00  0.59           O  
HETATM  943  O   HOH T 942      38.921   5.755  37.278  1.00  0.59           O  
HETATM  944  O   HOH T 943       9.477  39.367  38.961  1.00  0.59           O  
HETATM  945  O   HOH T 944      17.197  -0.836  35.600  1.00  0.59           O  
HETATM  946  O   HOH T 945       0.629  10.605  27.534  1.00  0.59           O  
HETATM  947  O   HOH T 946      16.200  31.386 -14.832  1.00  0.60           O  
HETATM  948  O   HOH T 947      29.981  -3.994  23.248  1.00  0.60           O  
HETATM  949  O   HOH T 948     -10.334  46.949  -1.068  1.00  0.60           O  
HETATM  950  O   HOH T 949      35.861  63.467   2.484  1.00  0.60           O  
HETATM  951  O   HOH T 950      41.581  24.295  29.259  1.00  0.60           O  
HETATM  952  O   HOH T 951       0.121  49.477  -8.858  1.00  0.60           O  
TER     953      HOH T 951 
