# Supplementary material for: Accurate Prediction of Hydration Sites of Proteins Using Energy Model With Atom Embedding
Source: Front Mol Biosci. 2021 Sep 20;8:756075. doi: 10.3389/fmolb.2021.756075 (PMC8488165; doi:10.3389/fmolb.2021.756075)
Supplement: Supplementary file 1 [file DataSheet1.ZIP › Data Sheet 1/Our_result_pdb/our_dataset_output/2FQ3_watersite.pdb]

HEADER                                                        XXXX


JRNL        PMID   -1
HETATM    1  O   HOH T   0      48.962  29.526  30.413  1.00  0.16           O  
HETATM    2  O   HOH T   1      52.608  34.366  33.797  1.00  0.19           O  
HETATM    3  O   HOH T   2      40.683  23.552  26.406  1.00  0.22           O  
HETATM    4  O   HOH T   3      45.098  32.967   7.852  1.00  0.23           O  
HETATM    5  O   HOH T   4      39.694  17.976  19.732  1.00  0.23           O  
HETATM    6  O   HOH T   5      33.686  37.474   7.553  1.00  0.23           O  
HETATM    7  O   HOH T   6      52.512  46.314  18.302  1.00  0.24           O  
HETATM    8  O   HOH T   7      39.907  37.420  21.908  1.00  0.24           O  
HETATM    9  O   HOH T   8      38.412  38.177   9.722  1.00  0.25           O  
HETATM   10  O   HOH T   9      45.316  35.709   6.991  1.00  0.25           O  
HETATM   11  O   HOH T  10      32.639  20.288   3.269  1.00  0.26           O  
HETATM   12  O   HOH T  11      52.146  32.472  13.908  1.00  0.27           O  
HETATM   13  O   HOH T  12      43.715  35.066  26.727  1.00  0.27           O  
HETATM   14  O   HOH T  13      47.168  40.837   2.484  1.00  0.28           O  
HETATM   15  O   HOH T  14      46.781  39.783   9.668  1.00  0.28           O  
HETATM   16  O   HOH T  15      32.845  37.742  12.021  1.00  0.28           O  
HETATM   17  O   HOH T  16      53.559  15.649  19.351  1.00  0.28           O  
HETATM   18  O   HOH T  17      53.687  44.132   1.487  1.00  0.28           O  
HETATM   19  O   HOH T  18      51.419  28.440  29.610  1.00  0.29           O  
HETATM   20  O   HOH T  19      57.630  38.836   6.509  1.00  0.29           O  
HETATM   21  O   HOH T  20      52.420  44.552  13.364  1.00  0.30           O  
HETATM   22  O   HOH T  21      43.645  23.478   5.451  1.00  0.31           O  
HETATM   23  O   HOH T  22      48.197  22.120  11.266  1.00  0.31           O  
HETATM   24  O   HOH T  23      30.935  27.150  10.270  1.00  0.31           O  
HETATM   25  O   HOH T  24      50.857  36.368  32.711  1.00  0.32           O  
HETATM   26  O   HOH T  25      57.362  31.377  17.631  1.00  0.33           O  
HETATM   27  O   HOH T  26      28.894  29.666  21.201  1.00  0.34           O  
HETATM   28  O   HOH T  27      45.698  23.423  34.180  1.00  0.35           O  
HETATM   29  O   HOH T  28      44.548  41.906  19.855  1.00  0.35           O  
HETATM   30  O   HOH T  29      45.354  21.502  14.649  1.00  0.35           O  
HETATM   31  O   HOH T  30      48.677  28.475  38.294  1.00  0.35           O  
HETATM   32  O   HOH T  31      44.242  21.487  27.384  1.00  0.35           O  
HETATM   33  O   HOH T  32      50.370  35.529  30.026  1.00  0.35           O  
HETATM   34  O   HOH T  33      50.786  37.398  40.808  1.00  0.35           O  
HETATM   35  O   HOH T  34      41.874  19.712  24.329  1.00  0.35           O  
HETATM   36  O   HOH T  35      44.749  21.336  11.917  1.00  0.36           O  
HETATM   37  O   HOH T  36      42.674  37.292  25.739  1.00  0.37           O  
HETATM   38  O   HOH T  37      56.039  35.404   5.719  1.00  0.37           O  
HETATM   39  O   HOH T  38      43.408  40.752  23.512  1.00  0.37           O  
HETATM   40  O   HOH T  39      42.348  38.835  22.032  1.00  0.38           O  
HETATM   41  O   HOH T  40      40.387  39.644  20.248  1.00  0.38           O  
HETATM   42  O   HOH T  41      35.637  38.414   9.442  1.00  0.38           O  
HETATM   43  O   HOH T  42      56.990  37.999  17.112  1.00  0.39           O  
HETATM   44  O   HOH T  43      35.047  28.108   6.421  1.00  0.39           O  
HETATM   45  O   HOH T  44      29.546  23.327  23.106  1.00  0.39           O  
HETATM   46  O   HOH T  45      35.958  32.498  30.552  1.00  0.39           O  
HETATM   47  O   HOH T  46      42.810  28.398   0.918  1.00  0.39           O  
HETATM   48  O   HOH T  47      32.138  16.975  12.699  1.00  0.39           O  
HETATM   49  O   HOH T  48      50.932  36.328  43.295  1.00  0.40           O  
HETATM   50  O   HOH T  49      36.519  29.795  -1.799  1.00  0.40           O  
HETATM   51  O   HOH T  50      43.233  24.187  27.274  1.00  0.40           O  
HETATM   52  O   HOH T  51      34.543  18.498  24.051  1.00  0.41           O  
HETATM   53  O   HOH T  52      56.215  26.387  33.286  1.00  0.41           O  
HETATM   54  O   HOH T  53      32.193  16.943  15.473  1.00  0.41           O  
HETATM   55  O   HOH T  54      58.750  26.717  32.450  1.00  0.41           O  
HETATM   56  O   HOH T  55      50.422  23.175  15.642  1.00  0.41           O  
HETATM   57  O   HOH T  56      54.313  33.711   7.036  1.00  0.42           O  
HETATM   58  O   HOH T  57      56.765  32.304  20.092  1.00  0.42           O  
HETATM   59  O   HOH T  58      48.322  36.421  31.821  1.00  0.42           O  
HETATM   60  O   HOH T  59      27.559  22.018  24.546  1.00  0.42           O  
HETATM   61  O   HOH T  60      57.678  42.742  18.978  1.00  0.43           O  
HETATM   62  O   HOH T  61      42.896  25.840  32.277  1.00  0.43           O  
HETATM   63  O   HOH T  62      37.242  40.469  10.502  1.00  0.43           O  
HETATM   64  O   HOH T  63      55.196  45.194  -0.624  1.00  0.43           O  
HETATM   65  O   HOH T  64      50.130  30.599   7.298  1.00  0.43           O  
HETATM   66  O   HOH T  65      52.607  43.615  18.646  1.00  0.43           O  
HETATM   67  O   HOH T  66      52.529  31.619   6.546  1.00  0.44           O  
HETATM   68  O   HOH T  67      43.679  39.713  26.065  1.00  0.44           O  
HETATM   69  O   HOH T  68      50.231  20.442  15.310  1.00  0.44           O  
HETATM   70  O   HOH T  69      50.357  33.384   6.847  1.00  0.45           O  
HETATM   71  O   HOH T  70      33.203  40.369  12.868  1.00  0.45           O  
HETATM   72  O   HOH T  71      26.866  23.972  22.670  1.00  0.45           O  
HETATM   73  O   HOH T  72      53.933  43.653  -2.444  1.00  0.46           O  
HETATM   74  O   HOH T  73      24.860  22.644  24.062  1.00  0.46           O  
HETATM   75  O   HOH T  74      54.294  43.028  14.664  1.00  0.46           O  
HETATM   76  O   HOH T  75      45.483  41.525  25.228  1.00  0.46           O  
HETATM   77  O   HOH T  76      35.818  25.723  -0.893  1.00  0.47           O  
HETATM   78  O   HOH T  77      47.963  20.892  13.833  1.00  0.47           O  
HETATM   79  O   HOH T  78      35.481  31.769  -3.461  1.00  0.47           O  
HETATM   80  O   HOH T  79      47.156  40.803  27.342  1.00  0.48           O  
HETATM   81  O   HOH T  80      41.780  22.126  28.504  1.00  0.48           O  
HETATM   82  O   HOH T  81      54.533  42.069  17.307  1.00  0.48           O  
HETATM   83  O   HOH T  82      36.252  32.694  -0.986  1.00  0.48           O  
HETATM   84  O   HOH T  83      47.635  34.073   7.254  1.00  0.49           O  
HETATM   85  O   HOH T  84      40.569  24.264  -0.350  1.00  0.49           O  
HETATM   86  O   HOH T  85      42.121  19.300  19.383  1.00  0.49           O  
HETATM   87  O   HOH T  86      50.834  26.789  38.723  1.00  0.50           O  
HETATM   88  O   HOH T  87      57.116  40.842  17.052  1.00  0.50           O  
HETATM   89  O   HOH T  88      57.744  37.192   4.320  1.00  0.50           O  
HETATM   90  O   HOH T  89      43.093  23.680   0.591  1.00  0.50           O  
HETATM   91  O   HOH T  90      42.382  24.438  29.974  1.00  0.50           O  
HETATM   92  O   HOH T  91      40.777  18.366  17.205  1.00  0.50           O  
HETATM   93  O   HOH T  92      52.268  44.521  16.119  1.00  0.51           O  
HETATM   94  O   HOH T  93      54.454  33.734  13.156  1.00  0.51           O  
HETATM   95  O   HOH T  94      42.182  41.516  21.102  1.00  0.51           O  
HETATM   96  O   HOH T  95      47.664  26.037  37.421  1.00  0.51           O  
HETATM   97  O   HOH T  96      41.443  32.215  23.773  1.00  0.52           O  
HETATM   98  O   HOH T  97      36.504  21.337  28.697  1.00  0.52           O  
HETATM   99  O   HOH T  98      37.582  30.226  30.225  1.00  0.52           O  
HETATM  100  O   HOH T  99      41.848  23.327  32.540  1.00  0.52           O  
HETATM  101  O   HOH T 100      57.148  36.586   8.042  1.00  0.53           O  
HETATM  102  O   HOH T 101      53.537  26.677  37.993  1.00  0.53           O  
HETATM  103  O   HOH T 102      40.865  27.005  -0.398  1.00  0.53           O  
HETATM  104  O   HOH T 103      50.640  23.217  11.825  1.00  0.53           O  
HETATM  105  O   HOH T 104      30.699  27.165   7.412  1.00  0.53           O  
HETATM  106  O   HOH T 105      49.390  35.051  41.330  1.00  0.53           O  
HETATM  107  O   HOH T 106      32.267  19.288  11.042  1.00  0.54           O  
HETATM  108  O   HOH T 107      40.567  20.745  26.507  1.00  0.54           O  
HETATM  109  O   HOH T 108      29.053  23.399  19.208  1.00  0.54           O  
HETATM  110  O   HOH T 109      38.224  24.525  -1.503  1.00  0.54           O  
HETATM  111  O   HOH T 110      56.606  36.305  11.979  1.00  0.54           O  
HETATM  112  O   HOH T 111      35.372  39.563   7.062  1.00  0.55           O  
HETATM  113  O   HOH T 112      50.364  31.601   4.753  1.00  0.55           O  
HETATM  114  O   HOH T 113      51.315  20.807  30.013  1.00  0.55           O  
HETATM  115  O   HOH T 114      43.721  24.530   3.041  1.00  0.55           O  
HETATM  116  O   HOH T 115      42.191  30.768   2.337  1.00  0.55           O  
HETATM  117  O   HOH T 116      45.526  25.248   5.518  1.00  0.55           O  
HETATM  118  O   HOH T 117      55.955  24.135  15.324  1.00  0.56           O  
HETATM  119  O   HOH T 118      36.698  15.142  24.320  1.00  0.56           O  
HETATM  120  O   HOH T 119      46.895  38.829  31.558  1.00  0.56           O  
HETATM  121  O   HOH T 120      45.304  25.036  36.425  1.00  0.56           O  
HETATM  122  O   HOH T 121      39.871  25.020  17.637  1.00  0.57           O  
HETATM  123  O   HOH T 122      40.518  41.280   8.321  1.00  0.60           O  
TER     124      HOH T 122 
