# Supplementary material for: Accurate Prediction of Hydration Sites of Proteins Using Energy Model With Atom Embedding
Source: Front Mol Biosci. 2021 Sep 20;8:756075. doi: 10.3389/fmolb.2021.756075 (PMC8488165; doi:10.3389/fmolb.2021.756075)
Supplement: Supplementary file 1 [file DataSheet1.ZIP › Data Sheet 1/Our_result_pdb/our_dataset_output/2FSR_watersite.pdb]

HEADER                                                        XXXX


JRNL        PMID   -1
HETATM    1  O   HOH T   0      16.115  27.011   1.895  1.00  0.15           O  
HETATM    2  O   HOH T   1      15.177  14.048  -6.764  1.00  0.18           O  
HETATM    3  O   HOH T   2      19.876  -1.467  -8.940  1.00  0.18           O  
HETATM    4  O   HOH T   3      19.190  10.463   1.494  1.00  0.18           O  
HETATM    5  O   HOH T   4       5.740  11.977  20.960  1.00  0.20           O  
HETATM    6  O   HOH T   5      21.956   8.554  18.837  1.00  0.21           O  
HETATM    7  O   HOH T   6     -21.358  -7.747   3.972  1.00  0.22           O  
HETATM    8  O   HOH T   7      13.334  31.561  -4.982  1.00  0.23           O  
HETATM    9  O   HOH T   8      22.297  19.468  -6.074  1.00  0.23           O  
HETATM   10  O   HOH T   9      23.264  22.496  20.987  1.00  0.23           O  
HETATM   11  O   HOH T  10      20.880   0.461  14.925  1.00  0.24           O  
HETATM   12  O   HOH T  11      14.638   6.640   6.046  1.00  0.24           O  
HETATM   13  O   HOH T  12      14.251  13.763  23.417  1.00  0.24           O  
HETATM   14  O   HOH T  13      25.356   7.524  14.227  1.00  0.25           O  
HETATM   15  O   HOH T  14      32.746  19.445  -0.654  1.00  0.25           O  
HETATM   16  O   HOH T  15      15.129  17.885  -8.858  1.00  0.25           O  
HETATM   17  O   HOH T  16       8.456  28.643  -1.812  1.00  0.25           O  
HETATM   18  O   HOH T  17      30.091  23.896   7.068  1.00  0.26           O  
HETATM   19  O   HOH T  18     -24.138  -2.449   7.260  1.00  0.26           O  
HETATM   20  O   HOH T  19      16.172   6.235  21.372  1.00  0.26           O  
HETATM   21  O   HOH T  20       8.478   1.330   2.145  1.00  0.26           O  
HETATM   22  O   HOH T  21       8.345  25.610  -8.261  1.00  0.26           O  
HETATM   23  O   HOH T  22       4.227  19.778  -5.809  1.00  0.26           O  
HETATM   24  O   HOH T  23      16.315  26.291   6.790  1.00  0.27           O  
HETATM   25  O   HOH T  24      17.091  25.780   4.213  1.00  0.27           O  
HETATM   26  O   HOH T  25      22.090  10.317  25.884  1.00  0.27           O  
HETATM   27  O   HOH T  26      17.489  13.799   3.420  1.00  0.27           O  
HETATM   28  O   HOH T  27       2.114  -4.629   0.484  1.00  0.28           O  
HETATM   29  O   HOH T  28      13.350  20.005  20.468  1.00  0.28           O  
HETATM   30  O   HOH T  29      27.644   9.001  13.675  1.00  0.29           O  
HETATM   31  O   HOH T  30      15.446  13.257 -10.699  1.00  0.29           O  
HETATM   32  O   HOH T  31      12.970   7.371  18.800  1.00  0.29           O  
HETATM   33  O   HOH T  32      26.677  16.412   8.765  1.00  0.29           O  
HETATM   34  O   HOH T  33     -18.986  -5.044   2.970  1.00  0.29           O  
HETATM   35  O   HOH T  34      -3.181   5.210  11.191  1.00  0.29           O  
HETATM   36  O   HOH T  35      31.726  13.893   3.903  1.00  0.29           O  
HETATM   37  O   HOH T  36      14.765   7.853 -13.243  1.00  0.30           O  
HETATM   38  O   HOH T  37      20.816  16.930   7.465  1.00  0.30           O  
HETATM   39  O   HOH T  38      29.399  21.210  -5.808  1.00  0.30           O  
HETATM   40  O   HOH T  39     -13.027 -12.024   7.045  1.00  0.30           O  
HETATM   41  O   HOH T  40      -1.714  14.569   0.770  1.00  0.30           O  
HETATM   42  O   HOH T  41      28.604  24.742  14.447  1.00  0.31           O  
HETATM   43  O   HOH T  42      11.611  27.662   7.911  1.00  0.31           O  
HETATM   44  O   HOH T  43      26.811  28.844  -0.838  1.00  0.31           O  
HETATM   45  O   HOH T  44      23.936   6.592  11.994  1.00  0.31           O  
HETATM   46  O   HOH T  45       4.225  16.986  -5.205  1.00  0.31           O  
HETATM   47  O   HOH T  46      30.127   5.430  -1.440  1.00  0.31           O  
HETATM   48  O   HOH T  47       8.898   7.784   0.383  1.00  0.32           O  
HETATM   49  O   HOH T  48       7.503  22.927 -11.856  1.00  0.32           O  
HETATM   50  O   HOH T  49       1.123   9.815  -0.376  1.00  0.32           O  
HETATM   51  O   HOH T  50      31.044  18.665   5.622  1.00  0.32           O  
HETATM   52  O   HOH T  51      27.335  15.251  -9.668  1.00  0.32           O  
HETATM   53  O   HOH T  52       3.891   4.618  19.170  1.00  0.32           O  
HETATM   54  O   HOH T  53      16.248  32.459  -7.973  1.00  0.32           O  
HETATM   55  O   HOH T  54      15.288   5.968  18.728  1.00  0.32           O  
HETATM   56  O   HOH T  55      17.970  27.195  -8.120  1.00  0.32           O  
HETATM   57  O   HOH T  56      22.340  12.434 -14.360  1.00  0.33           O  
HETATM   58  O   HOH T  57      21.924  19.777   0.971  1.00  0.33           O  
HETATM   59  O   HOH T  58      30.080   8.371 -12.510  1.00  0.33           O  
HETATM   60  O   HOH T  59      28.452   5.113  19.940  1.00  0.33           O  
HETATM   61  O   HOH T  60      -4.768  23.166  -8.532  1.00  0.33           O  
HETATM   62  O   HOH T  61      24.356   5.700   9.403  1.00  0.33           O  
HETATM   63  O   HOH T  62      29.131  15.020   6.720  1.00  0.33           O  
HETATM   64  O   HOH T  63      32.015   9.822   1.203  1.00  0.34           O  
HETATM   65  O   HOH T  64     -15.739  -1.929   2.647  1.00  0.34           O  
HETATM   66  O   HOH T  65      29.145   8.822   4.713  1.00  0.34           O  
HETATM   67  O   HOH T  66      25.863  24.720  -3.849  1.00  0.34           O  
HETATM   68  O   HOH T  67       0.679  14.537  13.003  1.00  0.34           O  
HETATM   69  O   HOH T  68      14.668  21.958  -8.354  1.00  0.34           O  
HETATM   70  O   HOH T  69      -1.555   7.193  22.028  1.00  0.34           O  
HETATM   71  O   HOH T  70      27.589  23.153   6.261  1.00  0.34           O  
HETATM   72  O   HOH T  71     -31.465 -10.327   7.224  1.00  0.35           O  
HETATM   73  O   HOH T  72     -18.366  -2.406   3.351  1.00  0.35           O  
HETATM   74  O   HOH T  73       4.320   4.448  16.419  1.00  0.35           O  
HETATM   75  O   HOH T  74      -0.897  20.117   6.044  1.00  0.35           O  
HETATM   76  O   HOH T  75      19.233  20.705   3.835  1.00  0.35           O  
HETATM   77  O   HOH T  76      23.749  10.976   2.773  1.00  0.35           O  
HETATM   78  O   HOH T  77      20.269  15.938  10.033  1.00  0.36           O  
HETATM   79  O   HOH T  78      22.342   6.463   4.900  1.00  0.36           O  
HETATM   80  O   HOH T  79      29.790  22.211  -3.222  1.00  0.36           O  
HETATM   81  O   HOH T  80      -1.725   5.446   5.160  1.00  0.36           O  
HETATM   82  O   HOH T  81      -2.762   5.437  13.979  1.00  0.36           O  
HETATM   83  O   HOH T  82       2.536  25.219  -0.606  1.00  0.36           O  
HETATM   84  O   HOH T  83      24.268  14.502 -14.338  1.00  0.37           O  
HETATM   85  O   HOH T  84      19.617  26.924   4.002  1.00  0.37           O  
HETATM   86  O   HOH T  85      26.664  21.748   0.108  1.00  0.37           O  
HETATM   87  O   HOH T  86      26.122  15.602  20.784  1.00  0.37           O  
HETATM   88  O   HOH T  87       1.190  18.316   6.542  1.00  0.37           O  
HETATM   89  O   HOH T  88      22.105  30.574  19.436  1.00  0.37           O  
HETATM   90  O   HOH T  89       7.310  -0.012  -0.027  1.00  0.37           O  
HETATM   91  O   HOH T  90       9.010   2.583  14.345  1.00  0.37           O  
HETATM   92  O   HOH T  91       6.925   4.247  15.306  1.00  0.37           O  
HETATM   93  O   HOH T  92      15.366   8.736  18.215  1.00  0.37           O  
HETATM   94  O   HOH T  93       7.358  16.100  -8.166  1.00  0.37           O  
HETATM   95  O   HOH T  94       9.670  12.026  25.528  1.00  0.37           O  
HETATM   96  O   HOH T  95      30.249  10.887  25.860  1.00  0.37           O  
HETATM   97  O   HOH T  96     -19.960 -13.465   5.563  1.00  0.38           O  
HETATM   98  O   HOH T  97       8.879  19.337  19.020  1.00  0.38           O  
HETATM   99  O   HOH T  98     -19.384 -14.848   7.943  1.00  0.38           O  
HETATM  100  O   HOH T  99     -30.000  -4.587   7.175  1.00  0.38           O  
HETATM  101  O   HOH T 100      25.343  17.971   2.033  1.00  0.38           O  
HETATM  102  O   HOH T 101      17.176   2.607  18.535  1.00  0.38           O  
HETATM  103  O   HOH T 102       1.332  16.815  22.048  1.00  0.38           O  
HETATM  104  O   HOH T 103      24.175  23.969  18.722  1.00  0.38           O  
HETATM  105  O   HOH T 104      11.252  18.382 -10.322  1.00  0.38           O  
HETATM  106  O   HOH T 105      10.412  13.720  23.464  1.00  0.38           O  
HETATM  107  O   HOH T 106      24.553  20.247   0.770  1.00  0.38           O  
HETATM  108  O   HOH T 107     -23.971  -1.969   0.035  1.00  0.38           O  
HETATM  109  O   HOH T 108      20.068  13.121   4.358  1.00  0.38           O  
HETATM  110  O   HOH T 109      23.723  -5.067  -6.711  1.00  0.39           O  
HETATM  111  O   HOH T 110      31.428   7.423  -0.082  1.00  0.39           O  
HETATM  112  O   HOH T 111       9.687  29.217  -4.242  1.00  0.39           O  
HETATM  113  O   HOH T 112      15.662   8.974   5.060  1.00  0.39           O  
HETATM  114  O   HOH T 113      21.580  25.084   3.976  1.00  0.39           O  
HETATM  115  O   HOH T 114      -0.304  18.319  -3.115  1.00  0.39           O  
HETATM  116  O   HOH T 115      23.635  17.272   7.235  1.00  0.39           O  
HETATM  117  O   HOH T 116      17.556  28.365   5.154  1.00  0.40           O  
HETATM  118  O   HOH T 117      16.529  11.399   4.332  1.00  0.40           O  
HETATM  119  O   HOH T 118      -2.048  19.972  -6.880  1.00  0.40           O  
HETATM  120  O   HOH T 119      13.495  19.868  -9.725  1.00  0.40           O  
HETATM  121  O   HOH T 120       4.675  -2.428   6.487  1.00  0.40           O  
HETATM  122  O   HOH T 121      12.384  28.026  15.451  1.00  0.40           O  
HETATM  123  O   HOH T 122     -23.678   0.044   6.039  1.00  0.40           O  
HETATM  124  O   HOH T 123       7.165  20.166 -12.232  1.00  0.40           O  
HETATM  125  O   HOH T 124      33.027  20.619   1.897  1.00  0.40           O  
HETATM  126  O   HOH T 125      19.999  23.103   5.178  1.00  0.40           O  
HETATM  127  O   HOH T 126      33.286  24.315   8.894  1.00  0.40           O  
HETATM  128  O   HOH T 127      13.675  22.327  21.997  1.00  0.40           O  
HETATM  129  O   HOH T 128      11.882  10.301  26.172  1.00  0.41           O  
HETATM  130  O   HOH T 129      15.576  19.304  22.030  1.00  0.41           O  
HETATM  131  O   HOH T 130      13.572   5.612  20.826  1.00  0.41           O  
HETATM  132  O   HOH T 131     -29.246  -3.334   9.563  1.00  0.41           O  
HETATM  133  O   HOH T 132      18.697  24.723  -9.211  1.00  0.41           O  
HETATM  134  O   HOH T 133      11.604  14.251  -9.666  1.00  0.42           O  
HETATM  135  O   HOH T 134      22.507  30.424   2.573  1.00  0.42           O  
HETATM  136  O   HOH T 135       0.565  28.451   2.315  1.00  0.42           O  
HETATM  137  O   HOH T 136      11.049  30.654  -6.183  1.00  0.42           O  
HETATM  138  O   HOH T 137       8.019  13.032  22.162  1.00  0.42           O  
HETATM  139  O   HOH T 138       6.451   4.664  18.007  1.00  0.42           O  
HETATM  140  O   HOH T 139      22.896  -3.779  -4.300  1.00  0.42           O  
HETATM  141  O   HOH T 140       6.700  23.318   8.771  1.00  0.42           O  
HETATM  142  O   HOH T 141      32.350  13.074  11.811  1.00  0.42           O  
HETATM  143  O   HOH T 142      14.123  15.219  -9.067  1.00  0.42           O  
HETATM  144  O   HOH T 143      26.131   4.281   7.865  1.00  0.42           O  
HETATM  145  O   HOH T 144      24.951  -5.661  -4.313  1.00  0.42           O  
HETATM  146  O   HOH T 145       1.789  16.943  12.269  1.00  0.42           O  
HETATM  147  O   HOH T 146      28.300  19.987   1.759  1.00  0.42           O  
HETATM  148  O   HOH T 147      22.279  27.852   3.878  1.00  0.42           O  
HETATM  149  O   HOH T 148      24.449  21.061   5.656  1.00  0.43           O  
HETATM  150  O   HOH T 149     -27.745  -3.073   7.104  1.00  0.43           O  
HETATM  151  O   HOH T 150       7.276  16.555 -10.776  1.00  0.43           O  
HETATM  152  O   HOH T 151      21.319  32.666   3.954  1.00  0.43           O  
HETATM  153  O   HOH T 152      22.914  10.336   7.918  1.00  0.43           O  
HETATM  154  O   HOH T 153     -30.230  -5.903   9.568  1.00  0.43           O  
HETATM  155  O   HOH T 154     -21.315  -2.601  -0.467  1.00  0.43           O  
HETATM  156  O   HOH T 155      30.192  24.744  -4.092  1.00  0.43           O  
HETATM  157  O   HOH T 156      20.939  17.567  -7.509  1.00  0.44           O  
HETATM  158  O   HOH T 157      -0.275  20.139  -9.040  1.00  0.44           O  
HETATM  159  O   HOH T 158      18.926  33.837   3.912  1.00  0.44           O  
HETATM  160  O   HOH T 159      21.059  22.047  26.061  1.00  0.44           O  
HETATM  161  O   HOH T 160      24.416  12.464   9.013  1.00  0.44           O  
HETATM  162  O   HOH T 161      30.879   6.145  18.797  1.00  0.44           O  
HETATM  163  O   HOH T 162      21.852  21.497   6.366  1.00  0.44           O  
HETATM  164  O   HOH T 163      23.771  29.385   0.211  1.00  0.44           O  
HETATM  165  O   HOH T 164       6.446  27.056  -2.792  1.00  0.44           O  
HETATM  166  O   HOH T 165      -2.915  12.068  -0.089  1.00  0.44           O  
HETATM  167  O   HOH T 166      30.851  12.125   9.788  1.00  0.44           O  
HETATM  168  O   HOH T 167      13.022   7.532  26.788  1.00  0.44           O  
HETATM  169  O   HOH T 168     -17.144  -3.818   1.292  1.00  0.44           O  
HETATM  170  O   HOH T 169     -15.337 -14.623   4.763  1.00  0.44           O  
HETATM  171  O   HOH T 170      27.718   2.264   8.964  1.00  0.45           O  
HETATM  172  O   HOH T 171     -30.080  -4.654  12.009  1.00  0.45           O  
HETATM  173  O   HOH T 172      29.390  26.607  -2.353  1.00  0.45           O  
HETATM  174  O   HOH T 173       0.004  15.648  10.528  1.00  0.45           O  
HETATM  175  O   HOH T 174       3.526  17.977  10.557  1.00  0.45           O  
HETATM  176  O   HOH T 175      33.881  10.074  -0.806  1.00  0.45           O  
HETATM  177  O   HOH T 176      23.233  16.871 -15.500  1.00  0.45           O  
HETATM  178  O   HOH T 177      16.009  24.035  -9.467  1.00  0.45           O  
HETATM  179  O   HOH T 178      22.026  13.914   9.438  1.00  0.45           O  
HETATM  180  O   HOH T 179      21.880   9.086   5.627  1.00  0.45           O  
HETATM  181  O   HOH T 180       0.515  18.933  -6.672  1.00  0.45           O  
HETATM  182  O   HOH T 181      26.264  26.265   0.040  1.00  0.45           O  
HETATM  183  O   HOH T 182      26.780  12.655  10.329  1.00  0.45           O  
HETATM  184  O   HOH T 183       2.764  14.739  -4.340  1.00  0.45           O  
HETATM  185  O   HOH T 184      18.954   1.459  16.652  1.00  0.45           O  
HETATM  186  O   HOH T 185     -30.644  -3.678   4.685  1.00  0.46           O  
HETATM  187  O   HOH T 186      31.725  15.867   5.986  1.00  0.46           O  
HETATM  188  O   HOH T 187      30.654  20.515   3.395  1.00  0.46           O  
HETATM  189  O   HOH T 188       8.809  25.222 -10.953  1.00  0.46           O  
HETATM  190  O   HOH T 189       3.528  18.689  18.529  1.00  0.47           O  
HETATM  191  O   HOH T 190      25.324  23.885  -1.313  1.00  0.47           O  
HETATM  192  O   HOH T 191      20.936  16.968  25.194  1.00  0.47           O  
HETATM  193  O   HOH T 192      26.738  13.780   7.832  1.00  0.47           O  
HETATM  194  O   HOH T 193      28.456  10.668   9.651  1.00  0.47           O  
HETATM  195  O   HOH T 194      31.720  22.670  -5.172  1.00  0.47           O  
HETATM  196  O   HOH T 195       2.977  12.051  -4.678  1.00  0.47           O  
HETATM  197  O   HOH T 196      21.210  30.165   5.023  1.00  0.47           O  
HETATM  198  O   HOH T 197      20.065  17.139 -11.488  1.00  0.47           O  
HETATM  199  O   HOH T 198      -0.635   5.844  12.240  1.00  0.48           O  
HETATM  200  O   HOH T 199      18.645  11.389   6.134  1.00  0.48           O  
HETATM  201  O   HOH T 200      26.115   3.853  10.686  1.00  0.48           O  
HETATM  202  O   HOH T 201       5.160  10.395  -4.966  1.00  0.48           O  
HETATM  203  O   HOH T 202      14.548   3.354  19.338  1.00  0.49           O  
HETATM  204  O   HOH T 203       4.877  25.156   7.304  1.00  0.49           O  
HETATM  205  O   HOH T 204     -26.010  -1.444   5.579  1.00  0.49           O  
HETATM  206  O   HOH T 205      -0.295   4.124  14.367  1.00  0.49           O  
HETATM  207  O   HOH T 206     -31.886 -13.656  -2.157  1.00  0.49           O  
HETATM  208  O   HOH T 207      33.074  20.365   4.708  1.00  0.49           O  
HETATM  209  O   HOH T 208       1.371  16.968  -4.947  1.00  0.49           O  
HETATM  210  O   HOH T 209       6.293  18.616  18.053  1.00  0.49           O  
HETATM  211  O   HOH T 210       3.808  -3.020   1.695  1.00  0.49           O  
HETATM  212  O   HOH T 211       3.958  -1.501   3.993  1.00  0.49           O  
HETATM  213  O   HOH T 212      -1.526  10.549  24.093  1.00  0.49           O  
HETATM  214  O   HOH T 213      16.003  16.964  23.371  1.00  0.49           O  
HETATM  215  O   HOH T 214      -2.263  22.002  -8.787  1.00  0.49           O  
HETATM  216  O   HOH T 215      21.082  10.643   3.464  1.00  0.49           O  
HETATM  217  O   HOH T 216      30.633  20.666   0.499  1.00  0.49           O  
HETATM  218  O   HOH T 217      30.314   9.051  -7.419  1.00  0.50           O  
HETATM  219  O   HOH T 218       0.029  25.836   2.347  1.00  0.50           O  
HETATM  220  O   HOH T 219       9.505   9.847   8.447  1.00  0.50           O  
HETATM  221  O   HOH T 220      -3.851   5.755  23.364  1.00  0.50           O  
HETATM  222  O   HOH T 221      30.803   9.582   8.953  1.00  0.50           O  
HETATM  223  O   HOH T 222     -12.145 -14.003   8.736  1.00  0.50           O  
HETATM  224  O   HOH T 223       9.880  30.641  -0.750  1.00  0.50           O  
HETATM  225  O   HOH T 224      25.854  17.510  -9.184  1.00  0.50           O  
HETATM  226  O   HOH T 225     -15.441 -13.537   7.352  1.00  0.50           O  
HETATM  227  O   HOH T 226       2.370  26.123  -5.741  1.00  0.51           O  
HETATM  228  O   HOH T 227     -28.366  -2.220   4.500  1.00  0.51           O  
HETATM  229  O   HOH T 228      27.937  23.370  -5.026  1.00  0.51           O  
HETATM  230  O   HOH T 229      16.094  21.740  23.180  1.00  0.51           O  
HETATM  231  O   HOH T 230      24.196  10.599   5.492  1.00  0.51           O  
HETATM  232  O   HOH T 231      12.827  26.737  17.883  1.00  0.51           O  
HETATM  233  O   HOH T 232      26.669   7.683   5.131  1.00  0.51           O  
HETATM  234  O   HOH T 233       8.622   3.180  17.081  1.00  0.51           O  
HETATM  235  O   HOH T 234       0.526  27.004  -0.006  1.00  0.51           O  
HETATM  236  O   HOH T 235     -22.871  -1.133  -2.298  1.00  0.51           O  
HETATM  237  O   HOH T 236      -4.434  20.389  -8.213  1.00  0.51           O  
HETATM  238  O   HOH T 237      -0.710  11.406  -1.720  1.00  0.51           O  
HETATM  239  O   HOH T 238       9.663  16.217  -9.689  1.00  0.52           O  
HETATM  240  O   HOH T 239      31.657  11.304  -7.315  1.00  0.52           O  
HETATM  241  O   HOH T 240      21.076  14.247   6.747  1.00  0.52           O  
HETATM  242  O   HOH T 241     -30.930  -4.779   2.218  1.00  0.52           O  
HETATM  243  O   HOH T 242      19.538  22.118  -8.669  1.00  0.52           O  
HETATM  244  O   HOH T 243      32.519  22.811   6.631  1.00  0.53           O  
HETATM  245  O   HOH T 244       5.293  -0.830   1.646  1.00  0.53           O  
HETATM  246  O   HOH T 245       6.355  25.394 -12.272  1.00  0.53           O  
HETATM  247  O   HOH T 246     -16.870 -15.863   7.870  1.00  0.53           O  
HETATM  248  O   HOH T 247      20.844  22.725   2.643  1.00  0.53           O  
HETATM  249  O   HOH T 248       3.557  16.707  20.403  1.00  0.53           O  
HETATM  250  O   HOH T 249      31.616   9.757   4.877  1.00  0.53           O  
HETATM  251  O   HOH T 250      28.221  21.337   4.229  1.00  0.53           O  
HETATM  252  O   HOH T 251       8.106  14.286  24.683  1.00  0.54           O  
HETATM  253  O   HOH T 252      32.671   8.078  -2.481  1.00  0.54           O  
HETATM  254  O   HOH T 253      21.798  17.992 -13.432  1.00  0.54           O  
HETATM  255  O   HOH T 254      11.137  26.544 -11.422  1.00  0.54           O  
HETATM  256  O   HOH T 255       5.579  17.895 -12.247  1.00  0.54           O  
HETATM  257  O   HOH T 256      28.338   4.904   9.569  1.00  0.54           O  
HETATM  258  O   HOH T 257      -0.680  15.651  -3.454  1.00  0.54           O  
HETATM  259  O   HOH T 258      14.499  15.481 -11.857  1.00  0.54           O  
HETATM  260  O   HOH T 259      10.418  14.661  26.097  1.00  0.54           O  
HETATM  261  O   HOH T 260       9.416  28.455   6.530  1.00  0.54           O  
HETATM  262  O   HOH T 261      20.640  11.893   8.031  1.00  0.54           O  
HETATM  263  O   HOH T 262     -25.178  -0.016  -1.518  1.00  0.55           O  
HETATM  264  O   HOH T 263      34.757  15.700  16.375  1.00  0.55           O  
HETATM  265  O   HOH T 264      25.903  14.627  30.040  1.00  0.55           O  
HETATM  266  O   HOH T 265      16.011  17.806 -11.550  1.00  0.55           O  
HETATM  267  O   HOH T 266      13.868  29.115   8.937  1.00  0.56           O  
HETATM  268  O   HOH T 267      32.441  14.916  -5.727  1.00  0.56           O  
HETATM  269  O   HOH T 268       4.884  -0.009   8.016  1.00  0.56           O  
HETATM  270  O   HOH T 269     -32.249  -7.523  -0.450  1.00  0.56           O  
HETATM  271  O   HOH T 270       2.894  20.526  12.970  1.00  0.56           O  
HETATM  272  O   HOH T 271     -15.313   0.678   1.689  1.00  0.56           O  
HETATM  273  O   HOH T 272       1.580   4.103  12.135  1.00  0.56           O  
HETATM  274  O   HOH T 273      30.814  12.962  27.577  1.00  0.57           O  
HETATM  275  O   HOH T 274      21.672  26.766   7.903  1.00  0.57           O  
HETATM  276  O   HOH T 275      19.474  18.475  27.013  1.00  0.61           O  
TER     277      HOH T 275 
