# Supplementary material for: Accurate Prediction of Hydration Sites of Proteins Using Energy Model With Atom Embedding
Source: Front Mol Biosci. 2021 Sep 20;8:756075. doi: 10.3389/fmolb.2021.756075 (PMC8488165; doi:10.3389/fmolb.2021.756075)
Supplement: Supplementary file 1 [file DataSheet1.ZIP › Data Sheet 1/Our_result_pdb/our_dataset_output/2FZ9_watersite.pdb]

HEADER                                                        XXXX


JRNL        PMID   -1
HETATM    1  O   HOH T   0      15.544  12.124  25.859  1.00  0.18           O  
HETATM    2  O   HOH T   1       4.670  -5.096   7.079  1.00  0.19           O  
HETATM    3  O   HOH T   2      25.982   3.251  27.996  1.00  0.19           O  
HETATM    4  O   HOH T   3      12.034  13.979   6.266  1.00  0.19           O  
HETATM    5  O   HOH T   4      11.349   3.002  24.860  1.00  0.20           O  
HETATM    6  O   HOH T   5      -0.651 -14.955  38.894  1.00  0.21           O  
HETATM    7  O   HOH T   6      -3.075  -3.402  31.734  1.00  0.21           O  
HETATM    8  O   HOH T   7      10.649 -15.574  42.966  1.00  0.21           O  
HETATM    9  O   HOH T   8      12.005   5.728   5.310  1.00  0.22           O  
HETATM   10  O   HOH T   9       8.476  -2.530  13.029  1.00  0.22           O  
HETATM   11  O   HOH T  10       7.889  12.778  24.950  1.00  0.22           O  
HETATM   12  O   HOH T  11      26.942 -16.166  31.947  1.00  0.22           O  
HETATM   13  O   HOH T  12      -0.687  -8.905  34.314  1.00  0.23           O  
HETATM   14  O   HOH T  13       2.360   6.536  28.482  1.00  0.23           O  
HETATM   15  O   HOH T  14       6.509 -13.064   6.844  1.00  0.24           O  
HETATM   16  O   HOH T  15      20.956   3.616  43.907  1.00  0.24           O  
HETATM   17  O   HOH T  16      12.016   1.453  37.126  1.00  0.24           O  
HETATM   18  O   HOH T  17      21.237  12.162   8.078  1.00  0.24           O  
HETATM   19  O   HOH T  18      22.969  10.323  15.840  1.00  0.25           O  
HETATM   20  O   HOH T  19      32.949  12.252  19.026  1.00  0.25           O  
HETATM   21  O   HOH T  20      12.837  16.990  25.099  1.00  0.25           O  
HETATM   22  O   HOH T  21      -6.682 -15.733  32.715  1.00  0.25           O  
HETATM   23  O   HOH T  22      20.730   6.899  10.643  1.00  0.25           O  
HETATM   24  O   HOH T  23      19.176   2.332  16.679  1.00  0.25           O  
HETATM   25  O   HOH T  24      12.733 -13.751  17.160  1.00  0.25           O  
HETATM   26  O   HOH T  25      10.559  15.100  33.134  1.00  0.25           O  
HETATM   27  O   HOH T  26      -5.633  -3.279  12.448  1.00  0.25           O  
HETATM   28  O   HOH T  27      16.294 -15.335  35.752  1.00  0.25           O  
HETATM   29  O   HOH T  28      15.054  -5.563  49.359  1.00  0.25           O  
HETATM   30  O   HOH T  29      -3.156   8.186  26.871  1.00  0.25           O  
HETATM   31  O   HOH T  30       0.432   1.229  45.718  1.00  0.26           O  
HETATM   32  O   HOH T  31       3.518  -6.398  19.201  1.00  0.26           O  
HETATM   33  O   HOH T  32       2.424   9.218  21.622  1.00  0.26           O  
HETATM   34  O   HOH T  33      33.162  18.044  36.064  1.00  0.26           O  
HETATM   35  O   HOH T  34      17.122  10.648  32.300  1.00  0.26           O  
HETATM   36  O   HOH T  35     -10.150  -5.063  31.025  1.00  0.26           O  
HETATM   37  O   HOH T  36      18.975   5.572   5.570  1.00  0.26           O  
HETATM   38  O   HOH T  37      -1.868  17.865  12.655  1.00  0.27           O  
HETATM   39  O   HOH T  38       0.182  -4.632  49.116  1.00  0.27           O  
HETATM   40  O   HOH T  39      30.147  -4.162  35.387  1.00  0.27           O  
HETATM   41  O   HOH T  40      20.898   0.151  15.972  1.00  0.27           O  
HETATM   42  O   HOH T  41      -3.013  18.415  10.316  1.00  0.27           O  
HETATM   43  O   HOH T  42      23.577  -8.534  12.521  1.00  0.28           O  
HETATM   44  O   HOH T  43      11.870   0.914  26.486  1.00  0.28           O  
HETATM   45  O   HOH T  44      24.156   7.747  26.522  1.00  0.28           O  
HETATM   46  O   HOH T  45      28.343  -9.472  30.224  1.00  0.28           O  
HETATM   47  O   HOH T  46       2.132   8.728  34.614  1.00  0.28           O  
HETATM   48  O   HOH T  47       3.336  18.814   7.105  1.00  0.28           O  
HETATM   49  O   HOH T  48      29.436  10.076  42.383  1.00  0.28           O  
HETATM   50  O   HOH T  49       5.732 -12.772  11.368  1.00  0.28           O  
HETATM   51  O   HOH T  50      31.642  -7.221  27.047  1.00  0.28           O  
HETATM   52  O   HOH T  51      -4.107 -12.680  28.952  1.00  0.28           O  
HETATM   53  O   HOH T  52      25.000  15.468  32.276  1.00  0.29           O  
HETATM   54  O   HOH T  53      15.485  -9.791  31.283  1.00  0.29           O  
HETATM   55  O   HOH T  54       4.045 -11.807  22.029  1.00  0.29           O  
HETATM   56  O   HOH T  55       6.284 -13.295  22.590  1.00  0.29           O  
HETATM   57  O   HOH T  56      18.119   0.815   1.206  1.00  0.29           O  
HETATM   58  O   HOH T  57      19.952  20.500  25.086  1.00  0.29           O  
HETATM   59  O   HOH T  58      22.744  15.319  21.861  1.00  0.29           O  
HETATM   60  O   HOH T  59       1.539   5.387  30.866  1.00  0.29           O  
HETATM   61  O   HOH T  60       8.011   4.855   4.697  1.00  0.30           O  
HETATM   62  O   HOH T  61     -12.958   4.412  21.894  1.00  0.30           O  
HETATM   63  O   HOH T  62      10.447   1.445  42.461  1.00  0.30           O  
HETATM   64  O   HOH T  63       7.672 -15.106  49.404  1.00  0.30           O  
HETATM   65  O   HOH T  64       4.799  -7.764   1.215  1.00  0.30           O  
HETATM   66  O   HOH T  65       6.084 -16.090  24.878  1.00  0.30           O  
HETATM   67  O   HOH T  66      30.403 -10.284  23.431  1.00  0.30           O  
HETATM   68  O   HOH T  67      18.237  -9.405  42.926  1.00  0.30           O  
HETATM   69  O   HOH T  68      33.813  19.557  32.691  1.00  0.30           O  
HETATM   70  O   HOH T  69      -0.404 -10.596  48.744  1.00  0.30           O  
HETATM   71  O   HOH T  70      36.232  -0.475  37.869  1.00  0.30           O  
HETATM   72  O   HOH T  71      14.210 -19.198  23.276  1.00  0.30           O  
HETATM   73  O   HOH T  72      13.267  -6.401  47.503  1.00  0.30           O  
HETATM   74  O   HOH T  73      26.566  14.703  28.304  1.00  0.30           O  
HETATM   75  O   HOH T  74      29.446  -8.508  15.506  1.00  0.30           O  
HETATM   76  O   HOH T  75       7.587  -1.205   4.102  1.00  0.31           O  
HETATM   77  O   HOH T  76      -7.056  -0.238  15.356  1.00  0.31           O  
HETATM   78  O   HOH T  77      11.997 -15.750   9.908  1.00  0.31           O  
HETATM   79  O   HOH T  78      18.591  -3.202  43.765  1.00  0.31           O  
HETATM   80  O   HOH T  79      -5.835  -8.921  23.849  1.00  0.31           O  
HETATM   81  O   HOH T  80       0.781   0.626   6.893  1.00  0.31           O  
HETATM   82  O   HOH T  81      10.506 -18.117  33.001  1.00  0.31           O  
HETATM   83  O   HOH T  82      25.061   1.375  45.560  1.00  0.31           O  
HETATM   84  O   HOH T  83       2.808 -11.216   9.785  1.00  0.31           O  
HETATM   85  O   HOH T  84      35.633  -5.691  32.879  1.00  0.32           O  
HETATM   86  O   HOH T  85      30.846  14.985  22.474  1.00  0.32           O  
HETATM   87  O   HOH T  86      37.311  -3.807  25.783  1.00  0.32           O  
HETATM   88  O   HOH T  87      28.764  16.964  22.543  1.00  0.32           O  
HETATM   89  O   HOH T  88      -6.160  13.393  10.961  1.00  0.32           O  
HETATM   90  O   HOH T  89       9.681  -1.716  47.842  1.00  0.32           O  
HETATM   91  O   HOH T  90      -0.197  18.368  22.207  1.00  0.33           O  
HETATM   92  O   HOH T  91      28.706 -14.722  16.394  1.00  0.33           O  
HETATM   93  O   HOH T  92      11.734 -17.927  23.259  1.00  0.33           O  
HETATM   94  O   HOH T  93      26.365  12.680  16.250  1.00  0.33           O  
HETATM   95  O   HOH T  94       5.451   5.337  35.323  1.00  0.33           O  
HETATM   96  O   HOH T  95       6.665  16.447  21.470  1.00  0.33           O  
HETATM   97  O   HOH T  96      33.132  17.738  38.937  1.00  0.33           O  
HETATM   98  O   HOH T  97      35.801  -8.888  22.202  1.00  0.33           O  
HETATM   99  O   HOH T  98      19.819   6.468  13.276  1.00  0.33           O  
HETATM  100  O   HOH T  99      27.291   8.229  17.168  1.00  0.33           O  
HETATM  101  O   HOH T 100     -12.716  -2.004  23.691  1.00  0.33           O  
HETATM  102  O   HOH T 101      16.549   4.217   3.426  1.00  0.33           O  
HETATM  103  O   HOH T 102      -5.246   0.534  13.536  1.00  0.33           O  
HETATM  104  O   HOH T 103      25.257  18.943  23.669  1.00  0.34           O  
HETATM  105  O   HOH T 104      13.484   4.865  36.850  1.00  0.34           O  
HETATM  106  O   HOH T 105      13.337  22.970  20.374  1.00  0.34           O  
HETATM  107  O   HOH T 106       4.821 -15.816  13.567  1.00  0.34           O  
HETATM  108  O   HOH T 107      18.602  -6.621  46.106  1.00  0.34           O  
HETATM  109  O   HOH T 108      28.125  -6.273  16.631  1.00  0.34           O  
HETATM  110  O   HOH T 109      32.679  -3.880  36.647  1.00  0.34           O  
HETATM  111  O   HOH T 110      22.733   3.974  48.474  1.00  0.34           O  
HETATM  112  O   HOH T 111       2.073  -9.575  19.376  1.00  0.34           O  
HETATM  113  O   HOH T 112       2.824   6.495  33.108  1.00  0.34           O  
HETATM  114  O   HOH T 113      30.263  -4.832  26.796  1.00  0.34           O  
HETATM  115  O   HOH T 114       0.401   2.043  33.992  1.00  0.34           O  
HETATM  116  O   HOH T 115      38.807  12.498  18.382  1.00  0.34           O  
HETATM  117  O   HOH T 116       0.752  18.305  13.067  1.00  0.35           O  
HETATM  118  O   HOH T 117       5.551   4.483  37.993  1.00  0.35           O  
HETATM  119  O   HOH T 118       8.136  -6.922  18.037  1.00  0.35           O  
HETATM  120  O   HOH T 119       0.915   2.150   3.405  1.00  0.35           O  
HETATM  121  O   HOH T 120       8.391   0.731   5.921  1.00  0.35           O  
HETATM  122  O   HOH T 121      14.684  14.193  27.388  1.00  0.35           O  
HETATM  123  O   HOH T 122      -4.242 -16.341  36.263  1.00  0.35           O  
HETATM  124  O   HOH T 123       7.764  16.902  25.327  1.00  0.35           O  
HETATM  125  O   HOH T 124      24.296  15.504  29.677  1.00  0.35           O  
HETATM  126  O   HOH T 125      -6.986  13.657  20.292  1.00  0.35           O  
HETATM  127  O   HOH T 126      28.761   0.943  12.841  1.00  0.35           O  
HETATM  128  O   HOH T 127      24.176  -6.129  13.736  1.00  0.35           O  
HETATM  129  O   HOH T 128      32.272 -12.638  21.048  1.00  0.35           O  
HETATM  130  O   HOH T 129      12.139  18.678  11.338  1.00  0.35           O  
HETATM  131  O   HOH T 130     -11.431  -0.495  21.952  1.00  0.35           O  
HETATM  132  O   HOH T 131      29.738  -5.918  23.273  1.00  0.35           O  
HETATM  133  O   HOH T 132      31.495 -15.130  16.910  1.00  0.35           O  
HETATM  134  O   HOH T 133      29.616  17.320  30.061  1.00  0.36           O  
HETATM  135  O   HOH T 134      28.582  -9.705  13.254  1.00  0.36           O  
HETATM  136  O   HOH T 135       4.102  -7.347  16.541  1.00  0.36           O  
HETATM  137  O   HOH T 136      -5.542   5.532  25.063  1.00  0.36           O  
HETATM  138  O   HOH T 137      -0.072   4.684  34.961  1.00  0.36           O  
HETATM  139  O   HOH T 138      11.255 -16.915   3.535  1.00  0.36           O  
HETATM  140  O   HOH T 139     -10.977  -5.105  20.045  1.00  0.36           O  
HETATM  141  O   HOH T 140      -2.593  -9.776  47.191  1.00  0.36           O  
HETATM  142  O   HOH T 141      -7.389   9.249  22.568  1.00  0.36           O  
HETATM  143  O   HOH T 142      29.114  -6.180  36.980  1.00  0.36           O  
HETATM  144  O   HOH T 143       9.519  13.140  37.406  1.00  0.36           O  
HETATM  145  O   HOH T 144     -11.074   7.509  22.246  1.00  0.36           O  
HETATM  146  O   HOH T 145      22.629  15.842  33.626  1.00  0.36           O  
HETATM  147  O   HOH T 146      -7.936  -4.105  26.129  1.00  0.36           O  
HETATM  148  O   HOH T 147      17.001  20.220  16.425  1.00  0.37           O  
HETATM  149  O   HOH T 148      18.891  -4.606  34.230  1.00  0.37           O  
HETATM  150  O   HOH T 149      12.599 -23.275  27.808  1.00  0.37           O  
HETATM  151  O   HOH T 150      11.965 -18.192  35.292  1.00  0.37           O  
HETATM  152  O   HOH T 151      12.236  15.493  27.401  1.00  0.37           O  
HETATM  153  O   HOH T 152      10.182 -15.329  -0.453  1.00  0.37           O  
HETATM  154  O   HOH T 153      17.649   5.491  14.676  1.00  0.37           O  
HETATM  155  O   HOH T 154      35.765  15.118  37.054  1.00  0.37           O  
HETATM  156  O   HOH T 155      21.778  -8.931  -2.061  1.00  0.38           O  
HETATM  157  O   HOH T 156      29.134  -1.817  13.641  1.00  0.38           O  
HETATM  158  O   HOH T 157      15.904  -0.569  45.093  1.00  0.38           O  
HETATM  159  O   HOH T 158       9.242 -18.986  22.787  1.00  0.38           O  
HETATM  160  O   HOH T 159      24.195  -0.071  10.222  1.00  0.38           O  
HETATM  161  O   HOH T 160      25.593   6.540   3.903  1.00  0.38           O  
HETATM  162  O   HOH T 161      35.031  -0.561  40.305  1.00  0.38           O  
HETATM  163  O   HOH T 162      25.154  14.600  25.876  1.00  0.38           O  
HETATM  164  O   HOH T 163      13.611  24.317  16.325  1.00  0.38           O  
HETATM  165  O   HOH T 164     -10.824  -3.187  22.046  1.00  0.38           O  
HETATM  166  O   HOH T 165      23.554  -0.220   3.982  1.00  0.38           O  
HETATM  167  O   HOH T 166       2.234   2.352   0.956  1.00  0.38           O  
HETATM  168  O   HOH T 167      32.153  -9.919  21.250  1.00  0.38           O  
HETATM  169  O   HOH T 168      37.049 -11.675  28.773  1.00  0.39           O  
HETATM  170  O   HOH T 169      14.441 -13.896  21.698  1.00  0.39           O  
HETATM  171  O   HOH T 170      21.600   8.437  14.237  1.00  0.39           O  
HETATM  172  O   HOH T 171      26.578   7.872  10.614  1.00  0.39           O  
HETATM  173  O   HOH T 172      30.392  -3.263  23.747  1.00  0.39           O  
HETATM  174  O   HOH T 173      26.771  -2.420  12.214  1.00  0.39           O  
HETATM  175  O   HOH T 174       7.058  -3.007  45.538  1.00  0.39           O  
HETATM  176  O   HOH T 175       8.043   4.356  39.084  1.00  0.39           O  
HETATM  177  O   HOH T 176       5.744   0.166   6.654  1.00  0.39           O  
HETATM  178  O   HOH T 177       9.690  -3.189  44.603  1.00  0.39           O  
HETATM  179  O   HOH T 178       5.652   1.655  42.861  1.00  0.39           O  
HETATM  180  O   HOH T 179      13.967 -13.033  24.237  1.00  0.39           O  
HETATM  181  O   HOH T 180      23.118   5.865  10.767  1.00  0.39           O  
HETATM  182  O   HOH T 181      26.394  16.361  23.939  1.00  0.39           O  
HETATM  183  O   HOH T 182      13.839  -2.490  -1.251  1.00  0.39           O  
HETATM  184  O   HOH T 183      38.003  -7.633  21.190  1.00  0.39           O  
HETATM  185  O   HOH T 184       6.458  18.462  23.405  1.00  0.40           O  
HETATM  186  O   HOH T 185      24.714 -15.438  30.448  1.00  0.40           O  
HETATM  187  O   HOH T 186      24.194  -3.498   1.646  1.00  0.40           O  
HETATM  188  O   HOH T 187     -12.989   7.112  17.318  1.00  0.40           O  
HETATM  189  O   HOH T 188      -5.830  -6.003  13.093  1.00  0.40           O  
HETATM  190  O   HOH T 189      13.060 -16.407   5.777  1.00  0.40           O  
HETATM  191  O   HOH T 190      -1.715  11.269  30.071  1.00  0.40           O  
HETATM  192  O   HOH T 191      20.637  21.994  17.960  1.00  0.40           O  
HETATM  193  O   HOH T 192      30.791  18.239  37.331  1.00  0.40           O  
HETATM  194  O   HOH T 193      15.151   0.034  -2.129  1.00  0.40           O  
HETATM  195  O   HOH T 194       1.525 -10.450  16.796  1.00  0.40           O  
HETATM  196  O   HOH T 195      24.330 -13.136  28.897  1.00  0.40           O  
HETATM  197  O   HOH T 196      -3.227  11.043  11.481  1.00  0.40           O  
HETATM  198  O   HOH T 197      37.400  10.774  20.115  1.00  0.41           O  
HETATM  199  O   HOH T 198      26.633   9.784  12.650  1.00  0.41           O  
HETATM  200  O   HOH T 199      12.493   5.619   2.607  1.00  0.41           O  
HETATM  201  O   HOH T 200      33.469  10.311  17.046  1.00  0.41           O  
HETATM  202  O   HOH T 201       8.729   4.461   2.039  1.00  0.41           O  
HETATM  203  O   HOH T 202      28.358  -8.864  37.299  1.00  0.41           O  
HETATM  204  O   HOH T 203      -1.594  16.586  17.269  1.00  0.41           O  
HETATM  205  O   HOH T 204      32.473 -15.315  20.885  1.00  0.41           O  
HETATM  206  O   HOH T 205       4.936 -19.867  33.679  1.00  0.41           O  
HETATM  207  O   HOH T 206      -7.229  12.053  22.554  1.00  0.41           O  
HETATM  208  O   HOH T 207      -8.381  -2.899  13.040  1.00  0.42           O  
HETATM  209  O   HOH T 208      -3.145 -15.253  38.525  1.00  0.42           O  
HETATM  210  O   HOH T 209      36.393  11.112  33.463  1.00  0.42           O  
HETATM  211  O   HOH T 210     -12.286   5.387  19.354  1.00  0.42           O  
HETATM  212  O   HOH T 211      19.560   9.850  41.227  1.00  0.42           O  
HETATM  213  O   HOH T 212      -2.527  -9.018  13.108  1.00  0.42           O  
HETATM  214  O   HOH T 213       6.185 -15.879   5.961  1.00  0.42           O  
HETATM  215  O   HOH T 214      -1.501   8.696  29.040  1.00  0.42           O  
HETATM  216  O   HOH T 215      26.754   7.705  14.579  1.00  0.42           O  
HETATM  217  O   HOH T 216      19.838 -11.376  44.031  1.00  0.42           O  
HETATM  218  O   HOH T 217      21.005  20.095  16.001  1.00  0.42           O  
HETATM  219  O   HOH T 218       3.040  16.463  27.705  1.00  0.42           O  
HETATM  220  O   HOH T 219      20.857  17.625  32.301  1.00  0.42           O  
HETATM  221  O   HOH T 220      10.807 -17.491  -4.842  1.00  0.42           O  
HETATM  222  O   HOH T 221      -7.210  -8.326  13.855  1.00  0.42           O  
HETATM  223  O   HOH T 222      25.323  -2.295   3.871  1.00  0.42           O  
HETATM  224  O   HOH T 223      24.619 -15.418  24.859  1.00  0.42           O  
HETATM  225  O   HOH T 224      33.004 -16.857  18.567  1.00  0.42           O  
HETATM  226  O   HOH T 225      20.171   4.723  15.480  1.00  0.43           O  
HETATM  227  O   HOH T 226      13.143  19.714  24.787  1.00  0.43           O  
HETATM  228  O   HOH T 227      18.535   2.220  43.472  1.00  0.43           O  
HETATM  229  O   HOH T 228      21.594  16.160  30.020  1.00  0.43           O  
HETATM  230  O   HOH T 229      -0.841   6.830  31.040  1.00  0.43           O  
HETATM  231  O   HOH T 230      20.176   1.636  45.664  1.00  0.43           O  
HETATM  232  O   HOH T 231      15.874  23.725  19.439  1.00  0.43           O  
HETATM  233  O   HOH T 232       1.910  11.873  21.921  1.00  0.43           O  
HETATM  234  O   HOH T 233       6.433 -14.234  19.909  1.00  0.43           O  
HETATM  235  O   HOH T 234       7.347  15.732  18.846  1.00  0.43           O  
HETATM  236  O   HOH T 235      -5.111  -8.394  12.035  1.00  0.43           O  
HETATM  237  O   HOH T 236      16.962  -7.240  48.272  1.00  0.43           O  
HETATM  238  O   HOH T 237      -5.145  -7.620  32.674  1.00  0.43           O  
HETATM  239  O   HOH T 238       7.234  18.508  18.495  1.00  0.43           O  
HETATM  240  O   HOH T 239      26.809  16.520  30.442  1.00  0.43           O  
HETATM  241  O   HOH T 240      16.574  12.205  36.742  1.00  0.44           O  
HETATM  242  O   HOH T 241       8.086 -18.668  20.321  1.00  0.44           O  
HETATM  243  O   HOH T 242      22.929  11.624   5.650  1.00  0.44           O  
HETATM  244  O   HOH T 243      10.630  19.544   9.130  1.00  0.44           O  
HETATM  245  O   HOH T 244      24.519   0.819   7.726  1.00  0.44           O  
HETATM  246  O   HOH T 245     -10.306   0.656  12.239  1.00  0.44           O  
HETATM  247  O   HOH T 246      31.400  -7.848  24.352  1.00  0.44           O  
HETATM  248  O   HOH T 247      -4.064  -8.190  37.267  1.00  0.44           O  
HETATM  249  O   HOH T 248      26.885   0.024  10.923  1.00  0.44           O  
HETATM  250  O   HOH T 249      33.312  -4.705  33.945  1.00  0.44           O  
HETATM  251  O   HOH T 250      -2.139   9.611  24.665  1.00  0.44           O  
HETATM  252  O   HOH T 251      -2.318  -3.377  48.906  1.00  0.44           O  
HETATM  253  O   HOH T 252      24.258   2.048   5.180  1.00  0.44           O  
HETATM  254  O   HOH T 253      20.374 -21.179  33.671  1.00  0.44           O  
HETATM  255  O   HOH T 254      26.574   2.615  11.997  1.00  0.44           O  
HETATM  256  O   HOH T 255      31.704  12.420  16.633  1.00  0.44           O  
HETATM  257  O   HOH T 256      -6.781  -6.581  25.230  1.00  0.44           O  
HETATM  258  O   HOH T 257      -5.315 -11.032  30.837  1.00  0.44           O  
HETATM  259  O   HOH T 258       4.566  -0.446  44.660  1.00  0.44           O  
HETATM  260  O   HOH T 259      29.046  -4.390  14.782  1.00  0.44           O  
HETATM  261  O   HOH T 260      -3.907  -2.423  40.101  1.00  0.44           O  
HETATM  262  O   HOH T 261      21.008  14.952  25.932  1.00  0.44           O  
HETATM  263  O   HOH T 262      -3.531  -5.512  33.514  1.00  0.45           O  
HETATM  264  O   HOH T 263      33.344  -7.258  32.789  1.00  0.45           O  
HETATM  265  O   HOH T 264       0.148  -5.103  -4.364  1.00  0.45           O  
HETATM  266  O   HOH T 265      -0.089   9.990  22.634  1.00  0.45           O  
HETATM  267  O   HOH T 266      18.773  19.423  14.441  1.00  0.45           O  
HETATM  268  O   HOH T 267      19.856  -4.425  47.466  1.00  0.45           O  
HETATM  269  O   HOH T 268       3.304 -13.881  12.261  1.00  0.45           O  
HETATM  270  O   HOH T 269      34.540  -0.780  31.284  1.00  0.45           O  
HETATM  271  O   HOH T 270      -5.695 -14.787  24.209  1.00  0.45           O  
HETATM  272  O   HOH T 271      38.117 -10.368  26.599  1.00  0.45           O  
HETATM  273  O   HOH T 272      -2.447  10.749  27.332  1.00  0.45           O  
HETATM  274  O   HOH T 273      -7.775   7.182  24.473  1.00  0.45           O  
HETATM  275  O   HOH T 274      29.204  -7.375  39.474  1.00  0.45           O  
HETATM  276  O   HOH T 275      24.390   5.098  26.762  1.00  0.45           O  
HETATM  277  O   HOH T 276      10.507   6.319  42.141  1.00  0.45           O  
HETATM  278  O   HOH T 277       8.797 -13.599  43.198  1.00  0.45           O  
HETATM  279  O   HOH T 278       5.236 -18.718  24.471  1.00  0.45           O  
HETATM  280  O   HOH T 279       1.904  16.521  22.760  1.00  0.45           O  
HETATM  281  O   HOH T 280       6.098 -18.259  13.376  1.00  0.46           O  
HETATM  282  O   HOH T 281      -5.617  -8.631  26.639  1.00  0.46           O  
HETATM  283  O   HOH T 282      26.168   8.447   5.722  1.00  0.46           O  
HETATM  284  O   HOH T 283      18.703  -0.468  44.420  1.00  0.46           O  
HETATM  285  O   HOH T 284      36.473  13.279  35.156  1.00  0.46           O  
HETATM  286  O   HOH T 285      16.217   5.703   5.680  1.00  0.46           O  
HETATM  287  O   HOH T 286       9.158 -21.098  21.016  1.00  0.46           O  
HETATM  288  O   HOH T 287      22.174  10.537  41.698  1.00  0.46           O  
HETATM  289  O   HOH T 288      18.606 -16.673  35.215  1.00  0.46           O  
HETATM  290  O   HOH T 289       8.222  18.110  27.740  1.00  0.46           O  
HETATM  291  O   HOH T 290      11.310   2.439  39.779  1.00  0.46           O  
HETATM  292  O   HOH T 291      -4.459 -15.976  22.043  1.00  0.46           O  
HETATM  293  O   HOH T 292      -1.835 -18.872  23.805  1.00  0.46           O  
HETATM  294  O   HOH T 293      27.460 -18.370  13.836  1.00  0.46           O  
HETATM  295  O   HOH T 294      -9.669  -0.875  14.501  1.00  0.46           O  
HETATM  296  O   HOH T 295      35.807  -8.457  32.765  1.00  0.46           O  
HETATM  297  O   HOH T 296      37.828  -6.543  25.469  1.00  0.46           O  
HETATM  298  O   HOH T 297     -12.866   8.047  19.992  1.00  0.47           O  
HETATM  299  O   HOH T 298      22.797  -0.657  48.787  1.00  0.47           O  
HETATM  300  O   HOH T 299      20.714  17.087  27.691  1.00  0.47           O  
HETATM  301  O   HOH T 300      33.266  -7.735  22.302  1.00  0.47           O  
HETATM  302  O   HOH T 301      39.503  -4.650  24.251  1.00  0.47           O  
HETATM  303  O   HOH T 302      39.418  15.786  31.019  1.00  0.47           O  
HETATM  304  O   HOH T 303      -0.915  18.017  19.542  1.00  0.47           O  
HETATM  305  O   HOH T 304       3.906 -17.825   6.385  1.00  0.47           O  
HETATM  306  O   HOH T 305      -9.700   9.162  24.133  1.00  0.47           O  
HETATM  307  O   HOH T 306      18.215   3.509  -3.140  1.00  0.47           O  
HETATM  308  O   HOH T 307       4.100 -14.540  21.363  1.00  0.47           O  
HETATM  309  O   HOH T 308       3.358  19.541   9.837  1.00  0.47           O  
HETATM  310  O   HOH T 309      26.213   3.961   4.717  1.00  0.47           O  
HETATM  311  O   HOH T 310      20.672   4.029  -1.837  1.00  0.47           O  
HETATM  312  O   HOH T 311      11.250  10.172  41.453  1.00  0.47           O  
HETATM  313  O   HOH T 312      -6.695  11.121  12.591  1.00  0.47           O  
HETATM  314  O   HOH T 313      34.329  -2.358  38.274  1.00  0.47           O  
HETATM  315  O   HOH T 314      41.365  -6.791  16.008  1.00  0.47           O  
HETATM  316  O   HOH T 315      15.411  12.151  34.117  1.00  0.48           O  
HETATM  317  O   HOH T 316      15.222 -14.902  16.865  1.00  0.48           O  
HETATM  318  O   HOH T 317      -1.461  12.161  23.643  1.00  0.48           O  
HETATM  319  O   HOH T 318      10.423  20.330  24.209  1.00  0.48           O  
HETATM  320  O   HOH T 319       7.979  19.696  25.424  1.00  0.48           O  
HETATM  321  O   HOH T 320      -3.337  -8.081  34.641  1.00  0.48           O  
HETATM  322  O   HOH T 321      43.576  18.697  31.265  1.00  0.48           O  
HETATM  323  O   HOH T 322       8.595 -16.175   4.374  1.00  0.48           O  
HETATM  324  O   HOH T 323       5.580   7.362   4.836  1.00  0.48           O  
HETATM  325  O   HOH T 324      36.092 -11.485  25.069  1.00  0.48           O  
HETATM  326  O   HOH T 325       7.337   6.717   2.706  1.00  0.48           O  
HETATM  327  O   HOH T 326      24.337   8.895  13.787  1.00  0.48           O  
HETATM  328  O   HOH T 327      25.842  -2.291   9.648  1.00  0.48           O  
HETATM  329  O   HOH T 328      -3.446 -12.217  46.134  1.00  0.48           O  
HETATM  330  O   HOH T 329      15.589  14.255  32.612  1.00  0.49           O  
HETATM  331  O   HOH T 330      -3.977   1.538  35.583  1.00  0.49           O  
HETATM  332  O   HOH T 331      29.714  21.722  34.845  1.00  0.49           O  
HETATM  333  O   HOH T 332      13.100  13.915  33.713  1.00  0.49           O  
HETATM  334  O   HOH T 333      14.445  20.616  15.561  1.00  0.49           O  
HETATM  335  O   HOH T 334      23.735  -7.159  43.403  1.00  0.49           O  
HETATM  336  O   HOH T 335      21.339 -11.166  -0.397  1.00  0.49           O  
HETATM  337  O   HOH T 336      43.541   2.401  28.204  1.00  0.49           O  
HETATM  338  O   HOH T 337      17.491  19.435  25.972  1.00  0.49           O  
HETATM  339  O   HOH T 338       1.611 -13.053  16.200  1.00  0.49           O  
HETATM  340  O   HOH T 339      17.030  22.078  21.324  1.00  0.49           O  
HETATM  341  O   HOH T 340      -4.645  -9.797  45.288  1.00  0.49           O  
HETATM  342  O   HOH T 341      13.297 -15.713  23.574  1.00  0.49           O  
HETATM  343  O   HOH T 342      17.033   1.970  -1.111  1.00  0.49           O  
HETATM  344  O   HOH T 343       0.114   7.138  33.665  1.00  0.49           O  
HETATM  345  O   HOH T 344      25.026   6.275   8.872  1.00  0.49           O  
HETATM  346  O   HOH T 345      -9.619  -5.235  28.189  1.00  0.49           O  
HETATM  347  O   HOH T 346       7.190 -18.727  32.997  1.00  0.49           O  
HETATM  348  O   HOH T 347      -9.161  12.078  13.632  1.00  0.49           O  
HETATM  349  O   HOH T 348       0.234 -12.975  49.945  1.00  0.49           O  
HETATM  350  O   HOH T 349      38.804  -5.707  16.001  1.00  0.49           O  
HETATM  351  O   HOH T 350      -0.871 -15.326  48.723  1.00  0.50           O  
HETATM  352  O   HOH T 351       8.754  14.875  35.326  1.00  0.50           O  
HETATM  353  O   HOH T 352      17.213 -13.832  18.480  1.00  0.50           O  
HETATM  354  O   HOH T 353      40.088   5.106  38.931  1.00  0.50           O  
HETATM  355  O   HOH T 354      20.339  -1.644  47.799  1.00  0.50           O  
HETATM  356  O   HOH T 355      33.326  -4.796  39.092  1.00  0.50           O  
HETATM  357  O   HOH T 356      20.258  -9.620   1.551  1.00  0.50           O  
HETATM  358  O   HOH T 357       6.839 -19.622  35.666  1.00  0.50           O  
HETATM  359  O   HOH T 358      22.164 -14.726  29.912  1.00  0.50           O  
HETATM  360  O   HOH T 359       5.059 -15.613  42.759  1.00  0.50           O  
HETATM  361  O   HOH T 360      -1.731 -17.819  21.262  1.00  0.50           O  
HETATM  362  O   HOH T 361      -7.273  -1.787  10.762  1.00  0.50           O  
HETATM  363  O   HOH T 362      29.876  12.728  41.951  1.00  0.50           O  
HETATM  364  O   HOH T 363      -7.580  -7.311  11.319  1.00  0.50           O  
HETATM  365  O   HOH T 364       9.508  18.048  11.275  1.00  0.50           O  
HETATM  366  O   HOH T 365       1.260 -14.711  47.138  1.00  0.50           O  
HETATM  367  O   HOH T 366       3.169   1.429  46.130  1.00  0.50           O  
HETATM  368  O   HOH T 367       0.125  15.348  19.561  1.00  0.50           O  
HETATM  369  O   HOH T 368      11.445 -17.026  -2.227  1.00  0.50           O  
HETATM  370  O   HOH T 369      30.183  11.741  18.807  1.00  0.50           O  
HETATM  371  O   HOH T 370      25.110   2.529  48.092  1.00  0.51           O  
HETATM  372  O   HOH T 371      16.388  20.553  13.654  1.00  0.51           O  
HETATM  373  O   HOH T 372      31.472  17.539  23.017  1.00  0.51           O  
HETATM  374  O   HOH T 373      39.830  10.409  26.723  1.00  0.51           O  
HETATM  375  O   HOH T 374       5.874   3.277  40.504  1.00  0.51           O  
HETATM  376  O   HOH T 375       8.894 -20.297  31.627  1.00  0.51           O  
HETATM  377  O   HOH T 376      -4.740 -10.289  33.416  1.00  0.51           O  
HETATM  378  O   HOH T 377       0.911 -13.751  13.686  1.00  0.51           O  
HETATM  379  O   HOH T 378      33.231  -2.608  40.798  1.00  0.51           O  
HETATM  380  O   HOH T 379      23.541  -3.280   8.263  1.00  0.51           O  
HETATM  381  O   HOH T 380       0.179  -0.765   1.404  1.00  0.51           O  
HETATM  382  O   HOH T 381       2.591 -15.983  45.128  1.00  0.51           O  
HETATM  383  O   HOH T 382       9.799  10.902  39.124  1.00  0.51           O  
HETATM  384  O   HOH T 383      -8.210   0.821  10.390  1.00  0.51           O  
HETATM  385  O   HOH T 384      37.583 -17.522  18.515  1.00  0.51           O  
HETATM  386  O   HOH T 385      40.905   0.152  34.308  1.00  0.51           O  
HETATM  387  O   HOH T 386      16.322   4.156   0.647  1.00  0.51           O  
HETATM  388  O   HOH T 387      -7.731  -0.219  12.778  1.00  0.51           O  
HETATM  389  O   HOH T 388       7.881 -18.126  24.911  1.00  0.51           O  
HETATM  390  O   HOH T 389      -3.238 -14.548  47.605  1.00  0.51           O  
HETATM  391  O   HOH T 390      12.346   4.408  41.411  1.00  0.51           O  
HETATM  392  O   HOH T 391       6.994 -13.454  45.230  1.00  0.51           O  
HETATM  393  O   HOH T 392      20.576 -16.903  30.219  1.00  0.51           O  
HETATM  394  O   HOH T 393      11.296  14.396  35.730  1.00  0.51           O  
HETATM  395  O   HOH T 394       5.683  17.280  27.142  1.00  0.51           O  
HETATM  396  O   HOH T 395      29.229   3.269  11.368  1.00  0.51           O  
HETATM  397  O   HOH T 396      10.518   5.308  39.495  1.00  0.51           O  
HETATM  398  O   HOH T 397      24.327 -15.296  22.021  1.00  0.52           O  
HETATM  399  O   HOH T 398      29.038 -12.326  13.238  1.00  0.52           O  
HETATM  400  O   HOH T 399      21.697 -10.621   7.515  1.00  0.52           O  
HETATM  401  O   HOH T 400      40.048   8.233  28.429  1.00  0.52           O  
HETATM  402  O   HOH T 401      -4.212  -5.740  36.133  1.00  0.52           O  
HETATM  403  O   HOH T 402      28.838 -15.054  23.550  1.00  0.52           O  
HETATM  404  O   HOH T 403       5.404 -15.964  18.075  1.00  0.52           O  
HETATM  405  O   HOH T 404      27.688  12.038  43.365  1.00  0.52           O  
HETATM  406  O   HOH T 405      17.766  10.082  38.217  1.00  0.52           O  
HETATM  407  O   HOH T 406      -7.750  -7.350  27.732  1.00  0.52           O  
HETATM  408  O   HOH T 407      -5.925 -12.926  32.596  1.00  0.52           O  
HETATM  409  O   HOH T 408       5.733  19.441  16.412  1.00  0.52           O  
HETATM  410  O   HOH T 409      -3.998  -3.339   5.547  1.00  0.52           O  
HETATM  411  O   HOH T 410      36.232 -10.661  31.130  1.00  0.52           O  
HETATM  412  O   HOH T 411       8.201   2.502  43.708  1.00  0.52           O  
HETATM  413  O   HOH T 412      17.853  22.049  18.479  1.00  0.52           O  
HETATM  414  O   HOH T 413      22.656   1.593  47.066  1.00  0.53           O  
HETATM  415  O   HOH T 414      -4.449  -9.964  28.533  1.00  0.53           O  
HETATM  416  O   HOH T 415      27.313   7.653   8.052  1.00  0.53           O  
HETATM  417  O   HOH T 416      31.612  -5.360  15.029  1.00  0.53           O  
HETATM  418  O   HOH T 417      18.048  13.063  33.499  1.00  0.53           O  
HETATM  419  O   HOH T 418       9.991   6.446   3.517  1.00  0.53           O  
HETATM  420  O   HOH T 419      -0.966 -12.964  47.354  1.00  0.53           O  
HETATM  421  O   HOH T 420      25.128   4.921  49.538  1.00  0.53           O  
HETATM  422  O   HOH T 421      -2.637   3.832  34.672  1.00  0.53           O  
HETATM  423  O   HOH T 422      36.580  -8.750  24.893  1.00  0.53           O  
HETATM  424  O   HOH T 423       9.467  15.311   6.203  1.00  0.53           O  
HETATM  425  O   HOH T 424      38.921  13.657  29.321  1.00  0.53           O  
HETATM  426  O   HOH T 425      26.682  16.863  26.625  1.00  0.53           O  
HETATM  427  O   HOH T 426       9.074  -9.631  24.939  1.00  0.54           O  
HETATM  428  O   HOH T 427      26.702  -8.306  39.597  1.00  0.54           O  
HETATM  429  O   HOH T 428      24.372  -1.431   6.361  1.00  0.54           O  
HETATM  430  O   HOH T 429      -4.891 -10.703  17.934  1.00  0.54           O  
HETATM  431  O   HOH T 430      24.301  -8.137   9.787  1.00  0.54           O  
HETATM  432  O   HOH T 431      -5.363 -14.468  34.715  1.00  0.54           O  
HETATM  433  O   HOH T 432      20.749  16.588  23.237  1.00  0.54           O  
HETATM  434  O   HOH T 433      25.902   3.008   7.257  1.00  0.55           O  
HETATM  435  O   HOH T 434      22.699 -13.786  -2.328  1.00  0.55           O  
HETATM  436  O   HOH T 435       5.256 -17.324  15.801  1.00  0.55           O  
HETATM  437  O   HOH T 436      13.675  21.034  12.935  1.00  0.55           O  
HETATM  438  O   HOH T 437       5.586  13.168   6.121  1.00  0.55           O  
HETATM  439  O   HOH T 438      21.595  12.998  40.566  1.00  0.55           O  
HETATM  440  O   HOH T 439     -10.816   1.628  14.814  1.00  0.55           O  
HETATM  441  O   HOH T 440       1.577  11.447  34.475  1.00  0.55           O  
HETATM  442  O   HOH T 441      35.506  -6.374  15.033  1.00  0.55           O  
HETATM  443  O   HOH T 442      15.326  -7.215  14.868  1.00  0.55           O  
HETATM  444  O   HOH T 443      18.588   9.754  43.790  1.00  0.56           O  
HETATM  445  O   HOH T 444      -9.085  -7.345  29.983  1.00  0.56           O  
HETATM  446  O   HOH T 445      24.240   8.993   3.979  1.00  0.56           O  
HETATM  447  O   HOH T 446      16.715 -15.069  20.843  1.00  0.56           O  
HETATM  448  O   HOH T 447      -5.026   8.972  12.126  1.00  0.56           O  
HETATM  449  O   HOH T 448      -1.653  11.455   6.311  1.00  0.56           O  
HETATM  450  O   HOH T 449      38.999   7.217  32.292  1.00  0.56           O  
HETATM  451  O   HOH T 450      38.182  12.937  32.396  1.00  0.56           O  
HETATM  452  O   HOH T 451     -10.808   4.254  14.665  1.00  0.57           O  
HETATM  453  O   HOH T 452       3.346  17.098   4.938  1.00  0.57           O  
HETATM  454  O   HOH T 453     -11.207   9.048  17.910  1.00  0.57           O  
HETATM  455  O   HOH T 454       9.497   3.829  41.541  1.00  0.57           O  
HETATM  456  O   HOH T 455      14.433  16.403  31.479  1.00  0.58           O  
HETATM  457  O   HOH T 456      -8.997   6.728  15.619  1.00  0.58           O  
HETATM  458  O   HOH T 457      38.262  -6.598  13.528  1.00  0.58           O  
HETATM  459  O   HOH T 458      -3.000  13.110  28.573  1.00  0.59           O  
TER     460      HOH T 458 
