# Supplementary material for: Accurate Prediction of Hydration Sites of Proteins Using Energy Model With Atom Embedding
Source: Front Mol Biosci. 2021 Sep 20;8:756075. doi: 10.3389/fmolb.2021.756075 (PMC8488165; doi:10.3389/fmolb.2021.756075)
Supplement: Supplementary file 1 [file DataSheet1.ZIP › Data Sheet 1/Our_result_pdb/our_dataset_output/2G13_watersite.pdb]

HEADER                                                        XXXX


JRNL        PMID   -1
HETATM    1  O   HOH T   0       0.018   0.022 -18.813  1.00  0.02           O  
HETATM    2  O   HOH T   1       0.128  -2.519 -13.467  1.00  0.08           O  
HETATM    3  O   HOH T   2      36.228  20.935  -8.313  1.00  0.13           O  
HETATM    4  O   HOH T   3       6.676   1.199 -13.895  1.00  0.20           O  
HETATM    5  O   HOH T   4      17.845   2.919 -25.562  1.00  0.20           O  
HETATM    6  O   HOH T   5      13.907  -3.861 -19.896  1.00  0.22           O  
HETATM    7  O   HOH T   6      33.104  19.087  -5.835  1.00  0.22           O  
HETATM    8  O   HOH T   7      28.417  -4.482 -31.159  1.00  0.22           O  
HETATM    9  O   HOH T   8      34.938  13.205  -5.844  1.00  0.22           O  
HETATM   10  O   HOH T   9       8.890   3.185  -6.470  1.00  0.25           O  
HETATM   11  O   HOH T  10      31.005  16.888  -2.069  1.00  0.25           O  
HETATM   12  O   HOH T  11      10.698  14.708   2.408  1.00  0.25           O  
HETATM   13  O   HOH T  12      20.321  19.389  -8.320  1.00  0.26           O  
HETATM   14  O   HOH T  13       8.519  15.368   0.886  1.00  0.26           O  
HETATM   15  O   HOH T  14      16.476  22.152 -14.815  1.00  0.27           O  
HETATM   16  O   HOH T  15      34.662  12.243  -0.742  1.00  0.27           O  
HETATM   17  O   HOH T  16      32.854  -2.720 -28.909  1.00  0.27           O  
HETATM   18  O   HOH T  17      17.161  12.757 -22.020  1.00  0.28           O  
HETATM   19  O   HOH T  18      21.043   7.031  -0.443  1.00  0.28           O  
HETATM   20  O   HOH T  19      35.471   5.762 -12.169  1.00  0.29           O  
HETATM   21  O   HOH T  20      13.194  28.619  -2.340  1.00  0.30           O  
HETATM   22  O   HOH T  21      30.505  14.207  -6.011  1.00  0.30           O  
HETATM   23  O   HOH T  22      13.426   5.073  -4.399  1.00  0.30           O  
HETATM   24  O   HOH T  23      22.670  16.123  -2.348  1.00  0.30           O  
HETATM   25  O   HOH T  24       7.285   5.340  -7.293  1.00  0.31           O  
HETATM   26  O   HOH T  25       8.556  -5.629 -23.553  1.00  0.31           O  
HETATM   27  O   HOH T  26      31.975  -3.051  -5.629  1.00  0.31           O  
HETATM   28  O   HOH T  27      26.011  13.990  -2.890  1.00  0.31           O  
HETATM   29  O   HOH T  28      34.407  11.743  -8.143  1.00  0.32           O  
HETATM   30  O   HOH T  29      10.287   1.477  -4.775  1.00  0.32           O  
HETATM   31  O   HOH T  30      14.176   8.014 -25.585  1.00  0.32           O  
HETATM   32  O   HOH T  31      16.194   3.977 -14.953  1.00  0.33           O  
HETATM   33  O   HOH T  32      16.210  -1.964  -7.837  1.00  0.33           O  
HETATM   34  O   HOH T  33      32.618  15.504 -15.619  1.00  0.34           O  
HETATM   35  O   HOH T  34      36.227   7.229 -14.472  1.00  0.34           O  
HETATM   36  O   HOH T  35      33.926  14.418  -2.367  1.00  0.35           O  
HETATM   37  O   HOH T  36      18.315  29.182  -0.110  1.00  0.36           O  
HETATM   38  O   HOH T  37      29.564  15.145  -3.640  1.00  0.36           O  
HETATM   39  O   HOH T  38       5.345  -1.614 -20.301  1.00  0.37           O  
HETATM   40  O   HOH T  39      12.540  10.150 -26.341  1.00  0.37           O  
HETATM   41  O   HOH T  40      27.596  12.067  -3.768  1.00  0.37           O  
HETATM   42  O   HOH T  41      20.588  17.761 -18.510  1.00  0.38           O  
HETATM   43  O   HOH T  42      20.699   8.561 -25.564  1.00  0.38           O  
HETATM   44  O   HOH T  43      21.696   9.882 -23.256  1.00  0.38           O  
HETATM   45  O   HOH T  44      18.968  21.228 -15.678  1.00  0.38           O  
HETATM   46  O   HOH T  45      23.115   5.700 -28.776  1.00  0.39           O  
HETATM   47  O   HOH T  46      10.835   4.147  -4.748  1.00  0.40           O  
HETATM   48  O   HOH T  47      32.201  -3.141  -8.468  1.00  0.40           O  
HETATM   49  O   HOH T  48       5.298   0.835 -11.478  1.00  0.40           O  
HETATM   50  O   HOH T  49      17.497  15.232 -20.986  1.00  0.40           O  
HETATM   51  O   HOH T  50       7.023   0.550 -20.671  1.00  0.41           O  
HETATM   52  O   HOH T  51       9.571  -3.324  -4.828  1.00  0.41           O  
HETATM   53  O   HOH T  52      11.670  25.756  -0.756  1.00  0.41           O  
HETATM   54  O   HOH T  53      12.077  22.614   0.259  1.00  0.41           O  
HETATM   55  O   HOH T  54      27.448   7.531 -27.571  1.00  0.41           O  
HETATM   56  O   HOH T  55       4.506   2.346  -9.320  1.00  0.41           O  
HETATM   57  O   HOH T  56       6.180   2.833  -7.117  1.00  0.42           O  
HETATM   58  O   HOH T  57      23.393   8.461 -24.816  1.00  0.42           O  
HETATM   59  O   HOH T  58      21.415  -5.540 -28.798  1.00  0.42           O  
HETATM   60  O   HOH T  59       4.394   6.895 -22.848  1.00  0.43           O  
HETATM   61  O   HOH T  60      14.589  -3.629  -4.183  1.00  0.43           O  
HETATM   62  O   HOH T  61      24.408  13.687 -20.358  1.00  0.43           O  
HETATM   63  O   HOH T  62      23.623  11.369 -21.811  1.00  0.43           O  
HETATM   64  O   HOH T  63       8.787  -0.723  -4.232  1.00  0.43           O  
HETATM   65  O   HOH T  64      19.712  12.980 -22.849  1.00  0.43           O  
HETATM   66  O   HOH T  65      29.204  10.375  -2.330  1.00  0.44           O  
HETATM   67  O   HOH T  66      12.745   7.905 -27.962  1.00  0.44           O  
HETATM   68  O   HOH T  67      24.936  15.347  -0.923  1.00  0.45           O  
HETATM   69  O   HOH T  68      10.864  -8.152  -0.797  1.00  0.45           O  
HETATM   70  O   HOH T  69      33.104  19.114 -15.007  1.00  0.45           O  
HETATM   71  O   HOH T  70      25.868   9.593 -22.663  1.00  0.46           O  
HETATM   72  O   HOH T  71      25.115  19.354   0.882  1.00  0.46           O  
HETATM   73  O   HOH T  72      19.565  10.968 -24.659  1.00  0.46           O  
HETATM   74  O   HOH T  73      23.498  23.650 -15.558  1.00  0.46           O  
HETATM   75  O   HOH T  74      16.193  -4.483  -7.341  1.00  0.46           O  
HETATM   76  O   HOH T  75      10.710   6.642 -26.533  1.00  0.47           O  
HETATM   77  O   HOH T  76       4.664   4.793  -8.114  1.00  0.47           O  
HETATM   78  O   HOH T  77       5.654   7.655 -25.222  1.00  0.47           O  
HETATM   79  O   HOH T  78      30.841   3.188 -15.343  1.00  0.47           O  
HETATM   80  O   HOH T  79      21.816  13.559 -21.325  1.00  0.47           O  
HETATM   81  O   HOH T  80      11.275  24.710   1.835  1.00  0.47           O  
HETATM   82  O   HOH T  81       6.456   5.275 -23.810  1.00  0.48           O  
HETATM   83  O   HOH T  82      26.083   8.196 -25.234  1.00  0.49           O  
HETATM   84  O   HOH T  83      25.187   6.070 -27.141  1.00  0.49           O  
HETATM   85  O   HOH T  84       2.824   7.405 -25.067  1.00  0.49           O  
HETATM   86  O   HOH T  85      20.208  15.718 -20.400  1.00  0.49           O  
HETATM   87  O   HOH T  86      17.870  13.385  -3.247  1.00  0.50           O  
HETATM   88  O   HOH T  87      18.609  15.263 -13.267  1.00  0.50           O  
HETATM   89  O   HOH T  88      11.941  -3.439  -3.376  1.00  0.50           O  
HETATM   90  O   HOH T  89       2.531  -1.649 -20.664  1.00  0.51           O  
HETATM   91  O   HOH T  90      31.064   8.592  -1.510  1.00  0.52           O  
HETATM   92  O   HOH T  91      22.823  -5.381 -26.441  1.00  0.52           O  
HETATM   93  O   HOH T  92      29.190   3.244 -19.503  1.00  0.52           O  
HETATM   94  O   HOH T  93      30.660  -3.678 -29.713  1.00  0.53           O  
HETATM   95  O   HOH T  94       7.445  28.460  -2.775  1.00  0.53           O  
HETATM   96  O   HOH T  95      27.595  15.895 -18.859  1.00  0.53           O  
HETATM   97  O   HOH T  96      31.639   9.043 -17.813  1.00  0.54           O  
HETATM   98  O   HOH T  97      10.707  28.124  -1.590  1.00  0.54           O  
HETATM   99  O   HOH T  98      31.785  17.723 -16.971  1.00  0.54           O  
HETATM  100  O   HOH T  99      25.257  16.386 -20.264  1.00  0.54           O  
HETATM  101  O   HOH T 100       6.586   2.955 -19.866  1.00  0.54           O  
HETATM  102  O   HOH T 101      25.827  -2.340 -20.997  1.00  0.54           O  
HETATM  103  O   HOH T 102      28.681  -0.719 -14.680  1.00  0.55           O  
HETATM  104  O   HOH T 103      20.258  20.288 -17.852  1.00  0.55           O  
HETATM  105  O   HOH T 104       7.298  -0.699 -26.753  1.00  0.55           O  
HETATM  106  O   HOH T 105      23.455  17.152   0.080  1.00  0.56           O  
HETATM  107  O   HOH T 106       9.677  -2.433  -2.226  1.00  0.56           O  
HETATM  108  O   HOH T 107      28.625  -5.116 -28.532  1.00  0.56           O  
HETATM  109  O   HOH T 108       9.603   4.208 -26.303  1.00  0.57           O  
HETATM  110  O   HOH T 109      32.319  -0.680  -7.309  1.00  0.57           O  
HETATM  111  O   HOH T 110      21.277  26.717  -0.821  1.00  0.58           O  
HETATM  112  O   HOH T 111      13.052  30.544  -3.341  1.00  0.60           O  
TER     113      HOH T 111 
