# Supplementary material for: Accurate Prediction of Hydration Sites of Proteins Using Energy Model With Atom Embedding
Source: Front Mol Biosci. 2021 Sep 20;8:756075. doi: 10.3389/fmolb.2021.756075 (PMC8488165; doi:10.3389/fmolb.2021.756075)
Supplement: Supplementary file 1 [file DataSheet1.ZIP › Data Sheet 1/Our_result_pdb/our_dataset_output/2GB4_watersite.pdb]

HEADER                                                        XXXX


JRNL        PMID   -1
HETATM    1  O   HOH T   0      26.211 -24.133  19.707  1.00  0.15           O  
HETATM    2  O   HOH T   1      28.079 -34.794  31.424  1.00  0.15           O  
HETATM    3  O   HOH T   2      19.589   7.610  20.774  1.00  0.17           O  
HETATM    4  O   HOH T   3      26.105   4.164   5.654  1.00  0.18           O  
HETATM    5  O   HOH T   4      31.168  -3.220  16.004  1.00  0.19           O  
HETATM    6  O   HOH T   5      36.741  -2.537  11.109  1.00  0.19           O  
HETATM    7  O   HOH T   6      31.506 -23.292  24.623  1.00  0.19           O  
HETATM    8  O   HOH T   7      32.856 -39.238   9.322  1.00  0.19           O  
HETATM    9  O   HOH T   8      33.913 -26.575  18.430  1.00  0.19           O  
HETATM   10  O   HOH T   9      48.476 -35.684  33.521  1.00  0.19           O  
HETATM   11  O   HOH T  10      29.074   0.021   9.767  1.00  0.20           O  
HETATM   12  O   HOH T  11      43.224 -34.157  29.445  1.00  0.20           O  
HETATM   13  O   HOH T  12      14.552   9.206  24.735  1.00  0.21           O  
HETATM   14  O   HOH T  13      30.260  12.805   0.555  1.00  0.21           O  
HETATM   15  O   HOH T  14      59.494 -24.275  33.296  1.00  0.21           O  
HETATM   16  O   HOH T  15      31.715   0.860  16.432  1.00  0.21           O  
HETATM   17  O   HOH T  16      31.047 -41.030   8.198  1.00  0.21           O  
HETATM   18  O   HOH T  17      26.019  -0.072  -3.920  1.00  0.22           O  
HETATM   19  O   HOH T  18      34.769 -32.059  37.822  1.00  0.22           O  
HETATM   20  O   HOH T  19      18.423   0.724  15.587  1.00  0.22           O  
HETATM   21  O   HOH T  20       3.499  -2.224  24.577  1.00  0.22           O  
HETATM   22  O   HOH T  21       3.671   7.601  11.971  1.00  0.23           O  
HETATM   23  O   HOH T  22      28.391 -29.167  11.906  1.00  0.23           O  
HETATM   24  O   HOH T  23      40.184   1.668   7.209  1.00  0.23           O  
HETATM   25  O   HOH T  24      56.034 -28.425  41.523  1.00  0.23           O  
HETATM   26  O   HOH T  25      28.490  -7.410  26.920  1.00  0.24           O  
HETATM   27  O   HOH T  26      30.450  22.362   9.621  1.00  0.24           O  
HETATM   28  O   HOH T  27      32.407  -9.939  11.398  1.00  0.24           O  
HETATM   29  O   HOH T  28      41.733 -31.395  18.642  1.00  0.24           O  
HETATM   30  O   HOH T  29      46.352 -33.852  43.182  1.00  0.24           O  
HETATM   31  O   HOH T  30       3.213   4.105   6.478  1.00  0.25           O  
HETATM   32  O   HOH T  31      35.331 -27.723  38.970  1.00  0.25           O  
HETATM   33  O   HOH T  32      50.089 -26.044   1.136  1.00  0.25           O  
HETATM   34  O   HOH T  33      14.907   9.265  18.480  1.00  0.25           O  
HETATM   35  O   HOH T  34      48.227 -21.302  43.604  1.00  0.25           O  
HETATM   36  O   HOH T  35      38.206 -30.206   9.636  1.00  0.25           O  
HETATM   37  O   HOH T  36      47.774 -35.702  27.380  1.00  0.26           O  
HETATM   38  O   HOH T  37      45.006  -5.229  34.232  1.00  0.26           O  
HETATM   39  O   HOH T  38      44.301 -27.592  24.327  1.00  0.26           O  
HETATM   40  O   HOH T  39      47.512 -41.891  24.169  1.00  0.26           O  
HETATM   41  O   HOH T  40      49.100 -10.894  13.440  1.00  0.26           O  
HETATM   42  O   HOH T  41      37.194  11.942   9.725  1.00  0.26           O  
HETATM   43  O   HOH T  42      40.884 -13.099  12.603  1.00  0.26           O  
HETATM   44  O   HOH T  43      34.666   2.402   3.247  1.00  0.26           O  
HETATM   45  O   HOH T  44      13.934 -15.566   4.110  1.00  0.26           O  
HETATM   46  O   HOH T  45      51.136 -19.570   9.558  1.00  0.26           O  
HETATM   47  O   HOH T  46      30.591 -47.034  12.125  1.00  0.26           O  
HETATM   48  O   HOH T  47      17.622   8.897  17.884  1.00  0.26           O  
HETATM   49  O   HOH T  48      45.161 -35.560  26.676  1.00  0.27           O  
HETATM   50  O   HOH T  49      21.666   8.356  32.734  1.00  0.27           O  
HETATM   51  O   HOH T  50      21.270   5.079  10.055  1.00  0.27           O  
HETATM   52  O   HOH T  51      31.212 -26.682  11.683  1.00  0.28           O  
HETATM   53  O   HOH T  52      52.996 -20.635  35.243  1.00  0.28           O  
HETATM   54  O   HOH T  53      22.021  14.643  19.337  1.00  0.28           O  
HETATM   55  O   HOH T  54      31.325 -27.456  25.034  1.00  0.28           O  
HETATM   56  O   HOH T  55       8.705   5.151   0.318  1.00  0.28           O  
HETATM   57  O   HOH T  56      30.264 -28.234  13.737  1.00  0.28           O  
HETATM   58  O   HOH T  57      28.814 -12.524  18.418  1.00  0.28           O  
HETATM   59  O   HOH T  58      41.523 -41.396  25.271  1.00  0.28           O  
HETATM   60  O   HOH T  59      26.401  11.490  30.587  1.00  0.28           O  
HETATM   61  O   HOH T  60      63.552 -22.489  28.080  1.00  0.28           O  
HETATM   62  O   HOH T  61      30.702  -9.052  29.832  1.00  0.28           O  
HETATM   63  O   HOH T  62      42.966 -13.018  43.305  1.00  0.28           O  
HETATM   64  O   HOH T  63      35.774 -13.670  16.572  1.00  0.28           O  
HETATM   65  O   HOH T  64      22.382 -27.774  15.498  1.00  0.28           O  
HETATM   66  O   HOH T  65      35.899  23.734   7.450  1.00  0.29           O  
HETATM   67  O   HOH T  66      36.949 -30.586  14.388  1.00  0.29           O  
HETATM   68  O   HOH T  67      48.588 -36.405   4.808  1.00  0.29           O  
HETATM   69  O   HOH T  68      35.608 -12.376  30.760  1.00  0.29           O  
HETATM   70  O   HOH T  69       8.658 -11.136   1.539  1.00  0.29           O  
HETATM   71  O   HOH T  70       9.913  -5.753  26.467  1.00  0.29           O  
HETATM   72  O   HOH T  71      30.595 -16.782  19.789  1.00  0.29           O  
HETATM   73  O   HOH T  72      36.715 -26.385   4.861  1.00  0.29           O  
HETATM   74  O   HOH T  73      34.981   8.066  22.656  1.00  0.30           O  
HETATM   75  O   HOH T  74      35.391 -13.628  44.175  1.00  0.30           O  
HETATM   76  O   HOH T  75      26.296  15.798  21.633  1.00  0.30           O  
HETATM   77  O   HOH T  76      47.112 -32.211  23.709  1.00  0.30           O  
HETATM   78  O   HOH T  77      43.707  -8.934   7.211  1.00  0.30           O  
HETATM   79  O   HOH T  78      23.413  -5.712  -7.508  1.00  0.30           O  
HETATM   80  O   HOH T  79       3.051   0.003  26.302  1.00  0.30           O  
HETATM   81  O   HOH T  80      25.056   2.228  -2.491  1.00  0.30           O  
HETATM   82  O   HOH T  81      59.809 -26.450  35.039  1.00  0.30           O  
HETATM   83  O   HOH T  82      27.537 -23.507  30.778  1.00  0.30           O  
HETATM   84  O   HOH T  83      19.307 -16.158  21.800  1.00  0.30           O  
HETATM   85  O   HOH T  84      46.260 -11.755  18.011  1.00  0.30           O  
HETATM   86  O   HOH T  85      32.790 -25.371  26.224  1.00  0.30           O  
HETATM   87  O   HOH T  86      32.184  14.708  -0.185  1.00  0.30           O  
HETATM   88  O   HOH T  87      -0.603  -3.785  19.266  1.00  0.30           O  
HETATM   89  O   HOH T  88      22.709  10.874  32.518  1.00  0.30           O  
HETATM   90  O   HOH T  89      16.428   8.460  15.342  1.00  0.30           O  
HETATM   91  O   HOH T  90      56.290 -12.626  21.278  1.00  0.30           O  
HETATM   92  O   HOH T  91      47.046 -20.446   0.965  1.00  0.30           O  
HETATM   93  O   HOH T  92      12.649 -16.036   6.561  1.00  0.31           O  
HETATM   94  O   HOH T  93      39.096 -13.669  10.456  1.00  0.31           O  
HETATM   95  O   HOH T  94       9.870  -3.995  34.967  1.00  0.31           O  
HETATM   96  O   HOH T  95      29.571  12.832  32.808  1.00  0.31           O  
HETATM   97  O   HOH T  96      34.685 -25.052  38.314  1.00  0.31           O  
HETATM   98  O   HOH T  97       3.218  -3.947   5.565  1.00  0.31           O  
HETATM   99  O   HOH T  98      29.629 -16.703  22.431  1.00  0.31           O  
HETATM  100  O   HOH T  99      63.687 -25.787  19.678  1.00  0.31           O  
HETATM  101  O   HOH T 100      27.389 -13.891  14.574  1.00  0.31           O  
HETATM  102  O   HOH T 101      57.971 -44.537  27.519  1.00  0.31           O  
HETATM  103  O   HOH T 102      38.754   7.381  17.730  1.00  0.31           O  
HETATM  104  O   HOH T 103       7.906  -4.604  36.874  1.00  0.31           O  
HETATM  105  O   HOH T 104      23.598 -12.589   1.599  1.00  0.31           O  
HETATM  106  O   HOH T 105      15.386  12.982  23.270  1.00  0.31           O  
HETATM  107  O   HOH T 106      22.063   1.726  10.730  1.00  0.31           O  
HETATM  108  O   HOH T 107      16.341   5.728  15.486  1.00  0.31           O  
HETATM  109  O   HOH T 108      40.950 -28.118  19.332  1.00  0.32           O  
HETATM  110  O   HOH T 109      18.552  15.802  17.903  1.00  0.32           O  
HETATM  111  O   HOH T 110      40.184   2.608  17.227  1.00  0.32           O  
HETATM  112  O   HOH T 111      48.613 -37.274  17.442  1.00  0.32           O  
HETATM  113  O   HOH T 112      29.889  -1.009  17.384  1.00  0.32           O  
HETATM  114  O   HOH T 113      59.897 -32.442  17.929  1.00  0.32           O  
HETATM  115  O   HOH T 114      29.342   7.300  -1.740  1.00  0.32           O  
HETATM  116  O   HOH T 115      39.113 -19.378   0.415  1.00  0.32           O  
HETATM  117  O   HOH T 116      59.899 -30.629  15.490  1.00  0.32           O  
HETATM  118  O   HOH T 117      32.117 -37.868  21.566  1.00  0.32           O  
HETATM  119  O   HOH T 118      35.358 -42.281   3.408  1.00  0.32           O  
HETATM  120  O   HOH T 119      43.502 -16.534  -3.396  1.00  0.32           O  
HETATM  121  O   HOH T 120      41.209   1.502  19.672  1.00  0.32           O  
HETATM  122  O   HOH T 121      22.568 -18.589  27.513  1.00  0.32           O  
HETATM  123  O   HOH T 122      48.722 -40.457  22.126  1.00  0.32           O  
HETATM  124  O   HOH T 123      55.979 -10.036  20.271  1.00  0.32           O  
HETATM  125  O   HOH T 124      31.648   0.060   2.970  1.00  0.32           O  
HETATM  126  O   HOH T 125      21.866 -13.378   3.537  1.00  0.33           O  
HETATM  127  O   HOH T 126      33.238   9.660  13.220  1.00  0.33           O  
HETATM  128  O   HOH T 127      20.834 -10.202 -10.610  1.00  0.33           O  
HETATM  129  O   HOH T 128      62.127 -30.641  34.487  1.00  0.33           O  
HETATM  130  O   HOH T 129      17.879 -12.247  29.867  1.00  0.33           O  
HETATM  131  O   HOH T 130      64.322 -16.706  24.202  1.00  0.33           O  
HETATM  132  O   HOH T 131      30.140 -18.067  17.302  1.00  0.33           O  
HETATM  133  O   HOH T 132      14.598  -8.154  -3.490  1.00  0.33           O  
HETATM  134  O   HOH T 133      15.797  10.483  -4.266  1.00  0.33           O  
HETATM  135  O   HOH T 134      32.795 -41.381   3.032  1.00  0.33           O  
HETATM  136  O   HOH T 135      55.934 -24.120  14.330  1.00  0.33           O  
HETATM  137  O   HOH T 136      34.184 -39.952  27.362  1.00  0.34           O  
HETATM  138  O   HOH T 137      39.580  -3.179  29.065  1.00  0.34           O  
HETATM  139  O   HOH T 138      37.183  -5.188   7.445  1.00  0.34           O  
HETATM  140  O   HOH T 139      10.071 -14.557  20.474  1.00  0.34           O  
HETATM  141  O   HOH T 140      16.174 -16.559  12.845  1.00  0.34           O  
HETATM  142  O   HOH T 141      25.848 -33.671  32.625  1.00  0.34           O  
HETATM  143  O   HOH T 142      39.638 -47.453  19.679  1.00  0.34           O  
HETATM  144  O   HOH T 143      17.638   1.006  38.179  1.00  0.34           O  
HETATM  145  O   HOH T 144      63.882 -21.018  30.512  1.00  0.34           O  
HETATM  146  O   HOH T 145      35.221   1.299  36.028  1.00  0.34           O  
HETATM  147  O   HOH T 146      25.144  13.157  10.697  1.00  0.34           O  
HETATM  148  O   HOH T 147      51.036 -30.088  46.649  1.00  0.34           O  
HETATM  149  O   HOH T 148      30.692  20.815  11.825  1.00  0.34           O  
HETATM  150  O   HOH T 149      32.312  16.949  26.567  1.00  0.35           O  
HETATM  151  O   HOH T 150      50.131  -9.782  15.835  1.00  0.35           O  
HETATM  152  O   HOH T 151      36.917 -30.213   7.148  1.00  0.35           O  
HETATM  153  O   HOH T 152      28.832 -29.873  37.995  1.00  0.35           O  
HETATM  154  O   HOH T 153      29.182 -43.114   8.465  1.00  0.35           O  
HETATM  155  O   HOH T 154      26.979 -17.496  29.901  1.00  0.35           O  
HETATM  156  O   HOH T 155      25.586  -7.977  36.510  1.00  0.35           O  
HETATM  157  O   HOH T 156      31.897 -36.438   3.500  1.00  0.35           O  
HETATM  158  O   HOH T 157       1.519   6.281  13.104  1.00  0.35           O  
HETATM  159  O   HOH T 158      31.216   0.207   6.650  1.00  0.35           O  
HETATM  160  O   HOH T 159       9.594  -7.174  28.905  1.00  0.35           O  
HETATM  161  O   HOH T 160      26.969 -44.228   9.797  1.00  0.36           O  
HETATM  162  O   HOH T 161      36.171 -38.022  39.609  1.00  0.36           O  
HETATM  163  O   HOH T 162      59.123 -38.406  43.097  1.00  0.36           O  
HETATM  164  O   HOH T 163      -1.203  -2.206  13.893  1.00  0.36           O  
HETATM  165  O   HOH T 164      13.814 -15.347   8.942  1.00  0.36           O  
HETATM  166  O   HOH T 165      18.382 -11.462  37.140  1.00  0.36           O  
HETATM  167  O   HOH T 166      37.107 -49.384   7.636  1.00  0.36           O  
HETATM  168  O   HOH T 167      38.313 -37.857  36.702  1.00  0.36           O  
HETATM  169  O   HOH T 168      12.193   3.187  38.025  1.00  0.36           O  
HETATM  170  O   HOH T 169      53.589 -20.516   8.881  1.00  0.36           O  
HETATM  171  O   HOH T 170      53.158 -22.295  43.663  1.00  0.36           O  
HETATM  172  O   HOH T 171      40.406 -33.429  20.155  1.00  0.36           O  
HETATM  173  O   HOH T 172      46.803 -34.889  23.550  1.00  0.36           O  
HETATM  174  O   HOH T 173      27.144 -37.134  21.332  1.00  0.36           O  
HETATM  175  O   HOH T 174      45.866 -36.716   4.204  1.00  0.36           O  
HETATM  176  O   HOH T 175      25.197  16.364  24.186  1.00  0.36           O  
HETATM  177  O   HOH T 176      41.985 -38.450   1.652  1.00  0.36           O  
HETATM  178  O   HOH T 177      36.307 -38.758  22.800  1.00  0.36           O  
HETATM  179  O   HOH T 178      39.719   9.933  18.222  1.00  0.36           O  
HETATM  180  O   HOH T 179      60.230 -31.862  36.125  1.00  0.36           O  
HETATM  181  O   HOH T 180      33.884 -35.423  25.366  1.00  0.36           O  
HETATM  182  O   HOH T 181      34.459 -19.234  35.488  1.00  0.36           O  
HETATM  183  O   HOH T 182      45.508 -10.599  27.438  1.00  0.36           O  
HETATM  184  O   HOH T 183      35.738 -34.449  23.379  1.00  0.36           O  
HETATM  185  O   HOH T 184      19.617 -12.905  35.022  1.00  0.36           O  
HETATM  186  O   HOH T 185       6.355 -13.296  12.230  1.00  0.36           O  
HETATM  187  O   HOH T 186      39.875   3.151  14.487  1.00  0.37           O  
HETATM  188  O   HOH T 187      22.432 -10.248  -8.489  1.00  0.37           O  
HETATM  189  O   HOH T 188      29.895  -1.155   4.758  1.00  0.37           O  
HETATM  190  O   HOH T 189      15.216  -3.191  40.040  1.00  0.37           O  
HETATM  191  O   HOH T 190      36.046  13.957   8.222  1.00  0.37           O  
HETATM  192  O   HOH T 191      28.936 -32.534  38.773  1.00  0.37           O  
HETATM  193  O   HOH T 192      59.947 -29.208  35.263  1.00  0.37           O  
HETATM  194  O   HOH T 193      30.118  -5.277  -0.398  1.00  0.37           O  
HETATM  195  O   HOH T 194      33.040 -13.512   8.716  1.00  0.37           O  
HETATM  196  O   HOH T 195       3.147  -1.253  36.223  1.00  0.37           O  
HETATM  197  O   HOH T 196      36.544  10.881  12.207  1.00  0.37           O  
HETATM  198  O   HOH T 197      50.470 -26.509   3.851  1.00  0.37           O  
HETATM  199  O   HOH T 198      37.705   7.067   6.182  1.00  0.37           O  
HETATM  200  O   HOH T 199      43.663 -12.049  30.726  1.00  0.37           O  
HETATM  201  O   HOH T 200       3.139   6.261   9.488  1.00  0.37           O  
HETATM  202  O   HOH T 201      16.655 -16.767  22.388  1.00  0.37           O  
HETATM  203  O   HOH T 202      13.123  -0.176  -7.197  1.00  0.38           O  
HETATM  204  O   HOH T 203      17.728   3.393  16.055  1.00  0.38           O  
HETATM  205  O   HOH T 204      19.356 -13.644  23.073  1.00  0.38           O  
HETATM  206  O   HOH T 205      35.108 -12.756  28.066  1.00  0.38           O  
HETATM  207  O   HOH T 206      45.079 -39.396   4.022  1.00  0.38           O  
HETATM  208  O   HOH T 207      41.008 -41.249  27.821  1.00  0.38           O  
HETATM  209  O   HOH T 208      32.367 -11.232  24.325  1.00  0.38           O  
HETATM  210  O   HOH T 209      33.170 -28.246   5.721  1.00  0.38           O  
HETATM  211  O   HOH T 210      29.940  14.974  31.008  1.00  0.38           O  
HETATM  212  O   HOH T 211       4.434   5.156   4.199  1.00  0.38           O  
HETATM  213  O   HOH T 212      38.328 -33.750  22.173  1.00  0.38           O  
HETATM  214  O   HOH T 213      56.988 -28.089  12.304  1.00  0.38           O  
HETATM  215  O   HOH T 214      28.325 -10.909  36.602  1.00  0.38           O  
HETATM  216  O   HOH T 215      37.381  18.797   6.394  1.00  0.38           O  
HETATM  217  O   HOH T 216      11.091  -8.175  26.832  1.00  0.38           O  
HETATM  218  O   HOH T 217      56.203 -26.804  14.709  1.00  0.38           O  
HETATM  219  O   HOH T 218      32.810  -8.825   8.862  1.00  0.38           O  
HETATM  220  O   HOH T 219      20.664   7.779   9.898  1.00  0.38           O  
HETATM  221  O   HOH T 220      23.553  11.688   9.012  1.00  0.38           O  
HETATM  222  O   HOH T 221      61.713 -16.342  24.279  1.00  0.38           O  
HETATM  223  O   HOH T 222      46.730  -9.631  21.555  1.00  0.38           O  
HETATM  224  O   HOH T 223      23.081 -14.884  17.035  1.00  0.38           O  
HETATM  225  O   HOH T 224      46.941 -44.585  23.771  1.00  0.38           O  
HETATM  226  O   HOH T 225       4.896  -9.619  24.430  1.00  0.38           O  
HETATM  227  O   HOH T 226      16.540 -14.668   9.149  1.00  0.38           O  
HETATM  228  O   HOH T 227      24.407  10.517  11.337  1.00  0.38           O  
HETATM  229  O   HOH T 228      48.367 -38.772  19.756  1.00  0.38           O  
HETATM  230  O   HOH T 229      11.726  -6.652   0.916  1.00  0.38           O  
HETATM  231  O   HOH T 230      37.142 -43.956  32.596  1.00  0.38           O  
HETATM  232  O   HOH T 231      34.767  19.586  12.508  1.00  0.38           O  
HETATM  233  O   HOH T 232      43.434   1.694  21.277  1.00  0.38           O  
HETATM  234  O   HOH T 233      19.894  20.332   5.643  1.00  0.38           O  
HETATM  235  O   HOH T 234      42.665  -5.781  29.069  1.00  0.38           O  
HETATM  236  O   HOH T 235      34.620 -37.244  27.365  1.00  0.38           O  
HETATM  237  O   HOH T 236      16.107  -5.401  -7.341  1.00  0.38           O  
HETATM  238  O   HOH T 237      32.304  -4.993   6.027  1.00  0.38           O  
HETATM  239  O   HOH T 238      35.700   8.637  13.408  1.00  0.39           O  
HETATM  240  O   HOH T 239      51.665 -37.937  42.386  1.00  0.39           O  
HETATM  241  O   HOH T 240      28.262   5.432  29.188  1.00  0.39           O  
HETATM  242  O   HOH T 241      29.728 -36.307  21.777  1.00  0.39           O  
HETATM  243  O   HOH T 242      55.870 -25.679  12.095  1.00  0.39           O  
HETATM  244  O   HOH T 243      25.992 -42.174  13.846  1.00  0.39           O  
HETATM  245  O   HOH T 244      36.482 -16.197  43.971  1.00  0.39           O  
HETATM  246  O   HOH T 245      -1.597  -9.631  15.402  1.00  0.39           O  
HETATM  247  O   HOH T 246      18.024 -10.855  34.291  1.00  0.39           O  
HETATM  248  O   HOH T 247      26.719 -19.417  24.234  1.00  0.39           O  
HETATM  249  O   HOH T 248      53.552  -8.121  21.962  1.00  0.39           O  
HETATM  250  O   HOH T 249      30.168  17.093  24.620  1.00  0.39           O  
HETATM  251  O   HOH T 250       0.059   6.330   6.969  1.00  0.39           O  
HETATM  252  O   HOH T 251       2.871  -6.596  22.767  1.00  0.39           O  
HETATM  253  O   HOH T 252      30.977 -12.049  21.984  1.00  0.39           O  
HETATM  254  O   HOH T 253      -0.062  -0.801  15.940  1.00  0.39           O  
HETATM  255  O   HOH T 254      37.010 -13.639   8.572  1.00  0.39           O  
HETATM  256  O   HOH T 255      45.977 -41.631  36.855  1.00  0.39           O  
HETATM  257  O   HOH T 256      28.734   0.242  -4.040  1.00  0.40           O  
HETATM  258  O   HOH T 257      38.820 -35.645  20.276  1.00  0.40           O  
HETATM  259  O   HOH T 258      37.695  19.459  -0.095  1.00  0.40           O  
HETATM  260  O   HOH T 259      32.847 -25.495  13.598  1.00  0.40           O  
HETATM  261  O   HOH T 260      50.137 -43.783  39.499  1.00  0.40           O  
HETATM  262  O   HOH T 261      33.609  -9.576  14.029  1.00  0.40           O  
HETATM  263  O   HOH T 262      33.979 -10.432  38.483  1.00  0.40           O  
HETATM  264  O   HOH T 263      18.942   9.804  10.436  1.00  0.40           O  
HETATM  265  O   HOH T 264      40.641 -19.468  37.916  1.00  0.40           O  
HETATM  266  O   HOH T 265      15.906 -12.298  27.882  1.00  0.40           O  
HETATM  267  O   HOH T 266      45.443 -30.132  24.523  1.00  0.40           O  
HETATM  268  O   HOH T 267      37.483 -38.016  20.384  1.00  0.40           O  
HETATM  269  O   HOH T 268      28.777  17.019  22.147  1.00  0.40           O  
HETATM  270  O   HOH T 269      38.635  -0.879  30.406  1.00  0.40           O  
HETATM  271  O   HOH T 270      27.503 -40.494  17.129  1.00  0.40           O  
HETATM  272  O   HOH T 271      42.623 -33.980  18.586  1.00  0.40           O  
HETATM  273  O   HOH T 272      22.636  14.146   9.772  1.00  0.40           O  
HETATM  274  O   HOH T 273      26.011 -17.757  19.413  1.00  0.40           O  
HETATM  275  O   HOH T 274      27.092 -32.195  23.453  1.00  0.40           O  
HETATM  276  O   HOH T 275      14.488  -5.745  39.711  1.00  0.40           O  
HETATM  277  O   HOH T 276       2.433   7.903   7.253  1.00  0.40           O  
HETATM  278  O   HOH T 277      11.441 -18.634  14.119  1.00  0.40           O  
HETATM  279  O   HOH T 278      18.575  12.004  -1.883  1.00  0.40           O  
HETATM  280  O   HOH T 279      29.396 -16.449   9.516  1.00  0.40           O  
HETATM  281  O   HOH T 280      46.484 -43.916  31.750  1.00  0.40           O  
HETATM  282  O   HOH T 281      13.821 -16.417  27.383  1.00  0.40           O  
HETATM  283  O   HOH T 282      64.122 -30.766  32.632  1.00  0.40           O  
HETATM  284  O   HOH T 283      30.849 -24.122  37.225  1.00  0.40           O  
HETATM  285  O   HOH T 284      38.934 -10.545  17.835  1.00  0.40           O  
HETATM  286  O   HOH T 285      -2.010  -0.484  17.835  1.00  0.40           O  
HETATM  287  O   HOH T 286      13.800 -18.031  12.737  1.00  0.40           O  
HETATM  288  O   HOH T 287      44.512 -15.371  45.910  1.00  0.41           O  
HETATM  289  O   HOH T 288      65.478 -23.251  24.852  1.00  0.41           O  
HETATM  290  O   HOH T 289      34.849  -2.638   4.095  1.00  0.41           O  
HETATM  291  O   HOH T 290      35.105 -13.355  10.508  1.00  0.41           O  
HETATM  292  O   HOH T 291       3.920  -5.113  24.993  1.00  0.41           O  
HETATM  293  O   HOH T 292      30.819 -30.878  39.665  1.00  0.41           O  
HETATM  294  O   HOH T 293      -0.425   1.704   6.280  1.00  0.41           O  
HETATM  295  O   HOH T 294       2.199 -10.650  21.398  1.00  0.41           O  
HETATM  296  O   HOH T 295      33.940 -12.941  14.644  1.00  0.41           O  
HETATM  297  O   HOH T 296      56.987  -7.844  18.702  1.00  0.41           O  
HETATM  298  O   HOH T 297      47.617 -26.935  47.123  1.00  0.41           O  
HETATM  299  O   HOH T 298      59.808 -19.465  30.965  1.00  0.41           O  
HETATM  300  O   HOH T 299      54.042 -35.360  30.661  1.00  0.41           O  
HETATM  301  O   HOH T 300      21.922  21.944   4.736  1.00  0.41           O  
HETATM  302  O   HOH T 301       9.765 -11.943  -0.868  1.00  0.41           O  
HETATM  303  O   HOH T 302      31.357  -3.665  -2.303  1.00  0.41           O  
HETATM  304  O   HOH T 303      29.997 -34.417   3.626  1.00  0.41           O  
HETATM  305  O   HOH T 304      15.350 -14.905   6.400  1.00  0.41           O  
HETATM  306  O   HOH T 305      59.322 -34.023  20.294  1.00  0.42           O  
HETATM  307  O   HOH T 306      34.276  16.245  28.374  1.00  0.42           O  
HETATM  308  O   HOH T 307      24.311 -11.902  -1.015  1.00  0.42           O  
HETATM  309  O   HOH T 308      36.443  -9.000   9.625  1.00  0.42           O  
HETATM  310  O   HOH T 309      26.623 -38.448  18.952  1.00  0.42           O  
HETATM  311  O   HOH T 310      33.880 -10.281  31.297  1.00  0.42           O  
HETATM  312  O   HOH T 311      49.026  -8.767  20.163  1.00  0.42           O  
HETATM  313  O   HOH T 312      26.105 -14.955  36.798  1.00  0.42           O  
HETATM  314  O   HOH T 313      41.611 -41.563  30.503  1.00  0.42           O  
HETATM  315  O   HOH T 314      33.915  21.208   3.172  1.00  0.42           O  
HETATM  316  O   HOH T 315      27.548 -34.908  22.942  1.00  0.42           O  
HETATM  317  O   HOH T 316      10.104   1.425  -3.295  1.00  0.42           O  
HETATM  318  O   HOH T 317      -5.935  -6.482  12.268  1.00  0.42           O  
HETATM  319  O   HOH T 318      25.699 -46.353  11.063  1.00  0.42           O  
HETATM  320  O   HOH T 319      42.546  -9.481  30.574  1.00  0.42           O  
HETATM  321  O   HOH T 320      45.079 -27.849  47.025  1.00  0.42           O  
HETATM  322  O   HOH T 321      15.268 -10.253  34.209  1.00  0.42           O  
HETATM  323  O   HOH T 322      32.673   1.756   4.959  1.00  0.42           O  
HETATM  324  O   HOH T 323      64.002 -25.527  16.937  1.00  0.42           O  
HETATM  325  O   HOH T 324      37.261 -42.208  30.445  1.00  0.42           O  
HETATM  326  O   HOH T 325      50.359 -12.655   6.297  1.00  0.42           O  
HETATM  327  O   HOH T 326      39.953  -5.784   7.227  1.00  0.42           O  
HETATM  328  O   HOH T 327      39.571 -42.788  31.980  1.00  0.42           O  
HETATM  329  O   HOH T 328      31.630 -32.205   3.283  1.00  0.42           O  
HETATM  330  O   HOH T 329       4.339  -8.862  21.834  1.00  0.42           O  
HETATM  331  O   HOH T 330       4.252  -6.374  28.720  1.00  0.42           O  
HETATM  332  O   HOH T 331      16.467 -11.108  31.953  1.00  0.42           O  
HETATM  333  O   HOH T 332      35.845 -29.634   2.318  1.00  0.42           O  
HETATM  334  O   HOH T 333      28.458 -46.463  10.528  1.00  0.42           O  
HETATM  335  O   HOH T 334      17.307 -14.877  20.463  1.00  0.42           O  
HETATM  336  O   HOH T 335      34.164  -3.431  -2.258  1.00  0.42           O  
HETATM  337  O   HOH T 336      41.491 -35.140  40.892  1.00  0.42           O  
HETATM  338  O   HOH T 337       3.143   9.047   9.703  1.00  0.42           O  
HETATM  339  O   HOH T 338       8.922 -17.948  13.152  1.00  0.42           O  
HETATM  340  O   HOH T 339      47.836 -23.618  48.780  1.00  0.42           O  
HETATM  341  O   HOH T 340      41.519  -0.387  21.794  1.00  0.42           O  
HETATM  342  O   HOH T 341      48.033 -45.917  28.330  1.00  0.42           O  
HETATM  343  O   HOH T 342      46.993 -15.339  38.993  1.00  0.43           O  
HETATM  344  O   HOH T 343      60.794 -16.015  30.277  1.00  0.43           O  
HETATM  345  O   HOH T 344      50.390 -36.323  44.218  1.00  0.43           O  
HETATM  346  O   HOH T 345      31.523 -15.546  30.862  1.00  0.43           O  
HETATM  347  O   HOH T 346      25.118 -15.390  15.233  1.00  0.43           O  
HETATM  348  O   HOH T 347      12.910 -12.857  -3.092  1.00  0.43           O  
HETATM  349  O   HOH T 348      48.459 -29.453  46.892  1.00  0.43           O  
HETATM  350  O   HOH T 349      31.653 -36.370  23.849  1.00  0.43           O  
HETATM  351  O   HOH T 350      -4.380  -5.553  14.481  1.00  0.43           O  
HETATM  352  O   HOH T 351      28.483  15.508  19.815  1.00  0.43           O  
HETATM  353  O   HOH T 352      40.799 -28.689   4.281  1.00  0.43           O  
HETATM  354  O   HOH T 353       8.846   9.019  22.003  1.00  0.43           O  
HETATM  355  O   HOH T 354      30.966 -14.380  10.496  1.00  0.43           O  
HETATM  356  O   HOH T 355      26.093 -13.182   0.649  1.00  0.43           O  
HETATM  357  O   HOH T 356      27.038 -22.209  24.326  1.00  0.43           O  
HETATM  358  O   HOH T 357      39.079   5.065  16.316  1.00  0.43           O  
HETATM  359  O   HOH T 358      34.790   0.043   4.812  1.00  0.43           O  
HETATM  360  O   HOH T 359      47.095  -8.669  28.725  1.00  0.43           O  
HETATM  361  O   HOH T 360      45.340 -15.288   6.474  1.00  0.43           O  
HETATM  362  O   HOH T 361      59.393 -15.153  25.272  1.00  0.44           O  
HETATM  363  O   HOH T 362      32.986 -12.784  39.678  1.00  0.44           O  
HETATM  364  O   HOH T 363      53.512 -39.895  38.190  1.00  0.44           O  
HETATM  365  O   HOH T 364      58.838 -30.044  12.950  1.00  0.44           O  
HETATM  366  O   HOH T 365      25.184 -18.635  28.279  1.00  0.44           O  
HETATM  367  O   HOH T 366      63.217 -24.404  23.706  1.00  0.44           O  
HETATM  368  O   HOH T 367       4.578 -10.999  18.512  1.00  0.44           O  
HETATM  369  O   HOH T 368      33.880 -33.884   6.559  1.00  0.44           O  
HETATM  370  O   HOH T 369      48.524 -43.214  21.934  1.00  0.44           O  
HETATM  371  O   HOH T 370      29.756 -14.658  13.074  1.00  0.44           O  
HETATM  372  O   HOH T 371      33.991 -20.411  39.543  1.00  0.44           O  
HETATM  373  O   HOH T 372      37.514 -38.145  17.628  1.00  0.44           O  
HETATM  374  O   HOH T 373      35.653 -22.464  38.749  1.00  0.44           O  
HETATM  375  O   HOH T 374      29.734  18.526  12.816  1.00  0.44           O  
HETATM  376  O   HOH T 375      25.146 -12.836   6.576  1.00  0.44           O  
HETATM  377  O   HOH T 376      27.877   1.675  30.675  1.00  0.44           O  
HETATM  378  O   HOH T 377      17.989  14.513  -2.927  1.00  0.44           O  
HETATM  379  O   HOH T 378      48.873 -10.748  18.146  1.00  0.44           O  
HETATM  380  O   HOH T 379      47.034  -9.433  13.057  1.00  0.44           O  
HETATM  381  O   HOH T 380      36.310  -4.855   3.166  1.00  0.44           O  
HETATM  382  O   HOH T 381      21.072 -27.493  13.103  1.00  0.44           O  
HETATM  383  O   HOH T 382      46.980 -11.474  15.155  1.00  0.44           O  
HETATM  384  O   HOH T 383      64.263 -23.674  21.376  1.00  0.44           O  
HETATM  385  O   HOH T 384      58.220 -12.671  24.521  1.00  0.44           O  
HETATM  386  O   HOH T 385      41.724   3.344   4.065  1.00  0.44           O  
HETATM  387  O   HOH T 386       9.798 -17.415  15.911  1.00  0.45           O  
HETATM  388  O   HOH T 387      25.447  10.916  33.129  1.00  0.45           O  
HETATM  389  O   HOH T 388      13.482 -13.603  27.251  1.00  0.45           O  
HETATM  390  O   HOH T 389      43.520 -36.585  18.821  1.00  0.45           O  
HETATM  391  O   HOH T 390      48.503 -41.919  38.149  1.00  0.45           O  
HETATM  392  O   HOH T 391      58.220 -17.089  30.007  1.00  0.45           O  
HETATM  393  O   HOH T 392      15.109  11.525  10.502  1.00  0.45           O  
HETATM  394  O   HOH T 393      24.403 -18.304  23.113  1.00  0.45           O  
HETATM  395  O   HOH T 394       3.200  -4.055  35.704  1.00  0.45           O  
HETATM  396  O   HOH T 395      43.773 -38.012  16.418  1.00  0.45           O  
HETATM  397  O   HOH T 396      51.912 -14.733   5.379  1.00  0.45           O  
HETATM  398  O   HOH T 397      21.633  13.748  14.589  1.00  0.45           O  
HETATM  399  O   HOH T 398      26.583 -23.123  35.419  1.00  0.45           O  
HETATM  400  O   HOH T 399      34.826  23.311   4.839  1.00  0.45           O  
HETATM  401  O   HOH T 400      23.828  22.268  10.142  1.00  0.45           O  
HETATM  402  O   HOH T 401      58.553 -21.692  33.817  1.00  0.45           O  
HETATM  403  O   HOH T 402      51.954 -27.957   2.095  1.00  0.45           O  
HETATM  404  O   HOH T 403      39.158  11.201  11.613  1.00  0.45           O  
HETATM  405  O   HOH T 404      17.771 -10.599  -2.320  1.00  0.45           O  
HETATM  406  O   HOH T 405      51.845 -18.231  36.302  1.00  0.45           O  
HETATM  407  O   HOH T 406      35.503  19.456   1.672  1.00  0.45           O  
HETATM  408  O   HOH T 407      33.825  -6.990   7.124  1.00  0.45           O  
HETATM  409  O   HOH T 408      48.516 -21.049  48.526  1.00  0.45           O  
HETATM  410  O   HOH T 409      19.659 -27.275  15.453  1.00  0.45           O  
HETATM  411  O   HOH T 410      34.990 -43.816  30.802  1.00  0.45           O  
HETATM  412  O   HOH T 411      31.780 -40.170  40.805  1.00  0.45           O  
HETATM  413  O   HOH T 412      26.782  16.081  -5.398  1.00  0.45           O  
HETATM  414  O   HOH T 413      42.495  -6.556   8.155  1.00  0.45           O  
HETATM  415  O   HOH T 414       4.872  -7.460  26.198  1.00  0.45           O  
HETATM  416  O   HOH T 415      38.753 -12.472  14.153  1.00  0.45           O  
HETATM  417  O   HOH T 416      39.902 -37.864  18.967  1.00  0.46           O  
HETATM  418  O   HOH T 417      46.058 -13.632  40.959  1.00  0.46           O  
HETATM  419  O   HOH T 418      41.373 -39.289  17.029  1.00  0.46           O  
HETATM  420  O   HOH T 419       6.634 -16.115  11.552  1.00  0.46           O  
HETATM  421  O   HOH T 420      30.422 -14.050  20.027  1.00  0.46           O  
HETATM  422  O   HOH T 421      64.473 -25.558  25.903  1.00  0.46           O  
HETATM  423  O   HOH T 422      25.725 -15.325  17.952  1.00  0.46           O  
HETATM  424  O   HOH T 423      30.754 -25.636  28.097  1.00  0.46           O  
HETATM  425  O   HOH T 424      18.291 -13.110  32.516  1.00  0.46           O  
HETATM  426  O   HOH T 425      52.466 -11.724  29.491  1.00  0.46           O  
HETATM  427  O   HOH T 426      53.612 -15.389   9.584  1.00  0.46           O  
HETATM  428  O   HOH T 427      12.131  -2.356  -5.769  1.00  0.46           O  
HETATM  429  O   HOH T 428      45.221 -40.878  32.910  1.00  0.46           O  
HETATM  430  O   HOH T 429      28.725  -7.177  29.758  1.00  0.46           O  
HETATM  431  O   HOH T 430      -1.845   0.536  22.569  1.00  0.46           O  
HETATM  432  O   HOH T 431      38.359   9.111  13.330  1.00  0.46           O  
HETATM  433  O   HOH T 432      44.196  -7.265  30.898  1.00  0.46           O  
HETATM  434  O   HOH T 433      30.847  -3.120  18.801  1.00  0.46           O  
HETATM  435  O   HOH T 434      35.772   4.489  14.093  1.00  0.46           O  
HETATM  436  O   HOH T 435      57.992 -15.468  27.665  1.00  0.46           O  
HETATM  437  O   HOH T 436      20.823 -12.586  37.440  1.00  0.46           O  
HETATM  438  O   HOH T 437      57.596 -10.599  22.604  1.00  0.46           O  
HETATM  439  O   HOH T 438      17.738 -14.891  30.310  1.00  0.46           O  
HETATM  440  O   HOH T 439      -1.056  -5.021  21.924  1.00  0.46           O  
HETATM  441  O   HOH T 440       0.713   4.113   5.312  1.00  0.46           O  
HETATM  442  O   HOH T 441      41.040  -5.440  32.521  1.00  0.46           O  
HETATM  443  O   HOH T 442      33.555 -11.480  21.943  1.00  0.46           O  
HETATM  444  O   HOH T 443      43.709 -41.634  24.036  1.00  0.46           O  
HETATM  445  O   HOH T 444      32.553 -13.916  28.721  1.00  0.46           O  
HETATM  446  O   HOH T 445      35.803 -30.394  39.737  1.00  0.46           O  
HETATM  447  O   HOH T 446      39.575 -42.961  29.249  1.00  0.46           O  
HETATM  448  O   HOH T 447      27.493  17.901  24.371  1.00  0.46           O  
HETATM  449  O   HOH T 448      56.637 -23.388  46.714  1.00  0.46           O  
HETATM  450  O   HOH T 449      -1.263 -10.746  17.878  1.00  0.46           O  
HETATM  451  O   HOH T 450      35.026  -4.965   5.645  1.00  0.47           O  
HETATM  452  O   HOH T 451      34.398 -12.123  42.064  1.00  0.47           O  
HETATM  453  O   HOH T 452      31.563 -12.073  26.792  1.00  0.47           O  
HETATM  454  O   HOH T 453      34.066 -41.409  39.901  1.00  0.47           O  
HETATM  455  O   HOH T 454      40.721   4.296   6.537  1.00  0.47           O  
HETATM  456  O   HOH T 455      32.965 -22.815  38.444  1.00  0.47           O  
HETATM  457  O   HOH T 456      53.631 -20.214  45.493  1.00  0.47           O  
HETATM  458  O   HOH T 457      46.535  -6.601  32.314  1.00  0.47           O  
HETATM  459  O   HOH T 458      45.404 -13.109  38.234  1.00  0.47           O  
HETATM  460  O   HOH T 459      52.720 -26.917   5.451  1.00  0.47           O  
HETATM  461  O   HOH T 460      34.742 -14.865  12.840  1.00  0.47           O  
HETATM  462  O   HOH T 461      58.389 -38.780  38.751  1.00  0.47           O  
HETATM  463  O   HOH T 462      54.492 -30.116   7.906  1.00  0.47           O  
HETATM  464  O   HOH T 463      29.202 -22.552  35.662  1.00  0.47           O  
HETATM  465  O   HOH T 464      49.492 -21.771   3.841  1.00  0.47           O  
HETATM  466  O   HOH T 465      60.757 -14.799  27.731  1.00  0.47           O  
HETATM  467  O   HOH T 466      37.370 -23.137  40.802  1.00  0.47           O  
HETATM  468  O   HOH T 467      15.810  15.569  15.574  1.00  0.47           O  
HETATM  469  O   HOH T 468      54.374 -17.857   9.051  1.00  0.47           O  
HETATM  470  O   HOH T 469      38.549 -10.236  12.478  1.00  0.47           O  
HETATM  471  O   HOH T 470      42.819 -40.804   3.104  1.00  0.47           O  
HETATM  472  O   HOH T 471      51.881 -18.244  44.490  1.00  0.47           O  
HETATM  473  O   HOH T 472      41.668 -39.907  23.171  1.00  0.47           O  
HETATM  474  O   HOH T 473      39.739 -42.919  24.424  1.00  0.47           O  
HETATM  475  O   HOH T 474      44.808 -15.274  42.918  1.00  0.47           O  
HETATM  476  O   HOH T 475      34.191  -3.799   1.760  1.00  0.47           O  
HETATM  477  O   HOH T 476      24.534 -19.173  25.714  1.00  0.47           O  
HETATM  478  O   HOH T 477      23.871   8.960  34.229  1.00  0.47           O  
HETATM  479  O   HOH T 478      34.865 -50.902  15.364  1.00  0.47           O  
HETATM  480  O   HOH T 479      22.330  22.900   7.346  1.00  0.47           O  
HETATM  481  O   HOH T 480      29.062 -15.646  29.493  1.00  0.47           O  
HETATM  482  O   HOH T 481      24.354   1.787  -5.192  1.00  0.47           O  
HETATM  483  O   HOH T 482      28.691  12.912  18.633  1.00  0.48           O  
HETATM  484  O   HOH T 483      24.911   6.884  -3.474  1.00  0.48           O  
HETATM  485  O   HOH T 484      34.238 -39.090  41.367  1.00  0.48           O  
HETATM  486  O   HOH T 485      53.763 -18.792  38.244  1.00  0.48           O  
HETATM  487  O   HOH T 486      27.084 -13.004  35.204  1.00  0.48           O  
HETATM  488  O   HOH T 487      55.701 -43.419  28.839  1.00  0.48           O  
HETATM  489  O   HOH T 488      55.132 -14.699  14.649  1.00  0.48           O  
HETATM  490  O   HOH T 489      47.732 -17.507   5.176  1.00  0.48           O  
HETATM  491  O   HOH T 490      33.371  13.702  -2.451  1.00  0.48           O  
HETATM  492  O   HOH T 491      58.682  -6.691  20.542  1.00  0.48           O  
HETATM  493  O   HOH T 492      32.071  13.931  32.516  1.00  0.48           O  
HETATM  494  O   HOH T 493       1.431   3.521  13.592  1.00  0.48           O  
HETATM  495  O   HOH T 494      40.488 -10.277  20.213  1.00  0.48           O  
HETATM  496  O   HOH T 495      27.914 -36.158   3.107  1.00  0.48           O  
HETATM  497  O   HOH T 496      29.910 -28.812   4.128  1.00  0.48           O  
HETATM  498  O   HOH T 497      36.415  15.820  30.071  1.00  0.48           O  
HETATM  499  O   HOH T 498       9.679 -16.433  18.505  1.00  0.48           O  
HETATM  500  O   HOH T 499      15.873  -5.936  -4.588  1.00  0.48           O  
HETATM  501  O   HOH T 500      56.019  -7.270  21.116  1.00  0.48           O  
HETATM  502  O   HOH T 501      25.518 -15.806  -3.717  1.00  0.48           O  
HETATM  503  O   HOH T 502      21.274  15.413  16.864  1.00  0.49           O  
HETATM  504  O   HOH T 503      37.237   6.528  13.084  1.00  0.49           O  
HETATM  505  O   HOH T 504       3.102   7.501   4.627  1.00  0.49           O  
HETATM  506  O   HOH T 505      31.674 -21.658  36.246  1.00  0.49           O  
HETATM  507  O   HOH T 506      17.899  12.269  -4.760  1.00  0.49           O  
HETATM  508  O   HOH T 507      37.872   0.716  35.345  1.00  0.49           O  
HETATM  509  O   HOH T 508      41.442 -48.576  17.819  1.00  0.49           O  
HETATM  510  O   HOH T 509      45.922 -37.552  18.060  1.00  0.49           O  
HETATM  511  O   HOH T 510      50.204 -40.035  41.351  1.00  0.49           O  
HETATM  512  O   HOH T 511      23.461 -30.662  22.055  1.00  0.49           O  
HETATM  513  O   HOH T 512      17.864  -3.279  40.773  1.00  0.49           O  
HETATM  514  O   HOH T 513      37.352 -18.564  45.062  1.00  0.49           O  
HETATM  515  O   HOH T 514       8.910   3.240  -1.620  1.00  0.49           O  
HETATM  516  O   HOH T 515       2.337  -6.683  26.745  1.00  0.49           O  
HETATM  517  O   HOH T 516      12.907  13.895  22.742  1.00  0.49           O  
HETATM  518  O   HOH T 517       7.947  12.191   8.862  1.00  0.49           O  
HETATM  519  O   HOH T 518      27.929 -14.737  33.211  1.00  0.49           O  
HETATM  520  O   HOH T 519      27.499 -14.301  19.982  1.00  0.49           O  
HETATM  521  O   HOH T 520      47.807 -46.449  25.599  1.00  0.49           O  
HETATM  522  O   HOH T 521      53.586 -19.610  42.809  1.00  0.49           O  
HETATM  523  O   HOH T 522      32.743  -4.786  -0.245  1.00  0.49           O  
HETATM  524  O   HOH T 523      54.574 -12.864   9.757  1.00  0.49           O  
HETATM  525  O   HOH T 524      21.116 -30.032  12.214  1.00  0.49           O  
HETATM  526  O   HOH T 525      33.759  18.441  -0.230  1.00  0.49           O  
HETATM  527  O   HOH T 526      35.945  -0.219  33.787  1.00  0.49           O  
HETATM  528  O   HOH T 527      55.280 -14.725  11.728  1.00  0.49           O  
HETATM  529  O   HOH T 528      55.806  -8.605  23.595  1.00  0.49           O  
HETATM  530  O   HOH T 529      20.833 -29.123  17.140  1.00  0.49           O  
HETATM  531  O   HOH T 530      45.012  -2.976  32.547  1.00  0.49           O  
HETATM  532  O   HOH T 531      48.629  -8.094  17.536  1.00  0.50           O  
HETATM  533  O   HOH T 532      49.744 -18.621  48.214  1.00  0.50           O  
HETATM  534  O   HOH T 533      31.756 -30.516   5.431  1.00  0.50           O  
HETATM  535  O   HOH T 534      19.483  14.920  20.404  1.00  0.50           O  
HETATM  536  O   HOH T 535      16.452   7.253  34.648  1.00  0.50           O  
HETATM  537  O   HOH T 536      49.506 -38.932  43.809  1.00  0.50           O  
HETATM  538  O   HOH T 537      22.396 -30.618  15.352  1.00  0.50           O  
HETATM  539  O   HOH T 538      59.309 -17.203  32.435  1.00  0.50           O  
HETATM  540  O   HOH T 539      38.650 -47.061   7.214  1.00  0.50           O  
HETATM  541  O   HOH T 540      48.476 -34.553  44.828  1.00  0.50           O  
HETATM  542  O   HOH T 541      29.954 -32.550   5.628  1.00  0.50           O  
HETATM  543  O   HOH T 542      55.727 -20.854  43.737  1.00  0.50           O  
HETATM  544  O   HOH T 543      36.208 -32.028  22.221  1.00  0.50           O  
HETATM  545  O   HOH T 544      54.566 -38.213  33.560  1.00  0.50           O  
HETATM  546  O   HOH T 545       2.565  -4.962   8.085  1.00  0.50           O  
HETATM  547  O   HOH T 546      52.023  -8.065  15.050  1.00  0.50           O  
HETATM  548  O   HOH T 547      42.414  -4.707  34.795  1.00  0.50           O  
HETATM  549  O   HOH T 548      23.933 -17.175  -1.949  1.00  0.50           O  
HETATM  550  O   HOH T 549      55.245 -38.412  17.535  1.00  0.50           O  
HETATM  551  O   HOH T 550      17.730  14.270  24.298  1.00  0.50           O  
HETATM  552  O   HOH T 551      44.563 -42.088   4.757  1.00  0.50           O  
HETATM  553  O   HOH T 552      37.068 -45.334  40.099  1.00  0.50           O  
HETATM  554  O   HOH T 553      38.298  -7.239   8.851  1.00  0.50           O  
HETATM  555  O   HOH T 554      25.483 -17.357  35.802  1.00  0.50           O  
HETATM  556  O   HOH T 555      42.093 -14.148  45.599  1.00  0.50           O  
HETATM  557  O   HOH T 556      12.953 -15.283  25.154  1.00  0.50           O  
HETATM  558  O   HOH T 557      29.737   8.719  34.262  1.00  0.51           O  
HETATM  559  O   HOH T 558      31.916 -11.372  29.528  1.00  0.51           O  
HETATM  560  O   HOH T 559      50.958 -20.080  46.108  1.00  0.51           O  
HETATM  561  O   HOH T 560      30.937 -15.008   7.760  1.00  0.51           O  
HETATM  562  O   HOH T 561      35.576  20.683   5.293  1.00  0.51           O  
HETATM  563  O   HOH T 562      47.240 -15.995  41.733  1.00  0.51           O  
HETATM  564  O   HOH T 563      47.472 -19.938   3.765  1.00  0.51           O  
HETATM  565  O   HOH T 564      34.115  -7.979  37.273  1.00  0.51           O  
HETATM  566  O   HOH T 565       8.582  14.439  17.026  1.00  0.51           O  
HETATM  567  O   HOH T 566      44.495  -7.905   9.605  1.00  0.51           O  
HETATM  568  O   HOH T 567      26.525 -33.466  38.004  1.00  0.51           O  
HETATM  569  O   HOH T 568      53.703 -16.205   6.919  1.00  0.51           O  
HETATM  570  O   HOH T 569       5.811  -3.442  38.055  1.00  0.51           O  
HETATM  571  O   HOH T 570      52.462 -18.735   7.203  1.00  0.52           O  
HETATM  572  O   HOH T 571      55.877 -18.438  36.544  1.00  0.52           O  
HETATM  573  O   HOH T 572      37.147 -51.007  13.704  1.00  0.52           O  
HETATM  574  O   HOH T 573       7.400   0.442   6.405  1.00  0.52           O  
HETATM  575  O   HOH T 574      41.464 -45.644  20.580  1.00  0.52           O  
HETATM  576  O   HOH T 575      63.195 -15.430  26.414  1.00  0.52           O  
HETATM  577  O   HOH T 576      22.969 -11.810 -10.751  1.00  0.52           O  
HETATM  578  O   HOH T 577      35.781  25.918   4.579  1.00  0.52           O  
HETATM  579  O   HOH T 578      21.999 -16.431  11.797  1.00  0.52           O  
HETATM  580  O   HOH T 579      51.929 -45.502  22.596  1.00  0.52           O  
HETATM  581  O   HOH T 580      26.859  20.170  -1.767  1.00  0.52           O  
HETATM  582  O   HOH T 581      42.811 -11.024  28.335  1.00  0.52           O  
HETATM  583  O   HOH T 582      28.242 -16.778  12.019  1.00  0.52           O  
HETATM  584  O   HOH T 583      25.625 -27.781   7.055  1.00  0.52           O  
HETATM  585  O   HOH T 584      34.288 -36.834  23.019  1.00  0.52           O  
HETATM  586  O   HOH T 585       5.509   7.650  21.242  1.00  0.52           O  
HETATM  587  O   HOH T 586      39.702  -7.782  32.374  1.00  0.52           O  
HETATM  588  O   HOH T 587      60.017 -34.860  14.574  1.00  0.52           O  
HETATM  589  O   HOH T 588      41.194  -8.132   6.313  1.00  0.52           O  
HETATM  590  O   HOH T 589      -5.445  -7.407  16.110  1.00  0.52           O  
HETATM  591  O   HOH T 590       8.521 -13.827   0.610  1.00  0.52           O  
HETATM  592  O   HOH T 591      46.375 -33.338  46.002  1.00  0.52           O  
HETATM  593  O   HOH T 592      56.918  -8.865  13.836  1.00  0.52           O  
HETATM  594  O   HOH T 593      32.320  -8.037  31.764  1.00  0.53           O  
HETATM  595  O   HOH T 594      43.361  -5.952  26.452  1.00  0.53           O  
HETATM  596  O   HOH T 595      30.682 -43.121  36.583  1.00  0.53           O  
HETATM  597  O   HOH T 596      10.778 -11.221  -3.234  1.00  0.53           O  
HETATM  598  O   HOH T 597       3.073   7.208  20.407  1.00  0.53           O  
HETATM  599  O   HOH T 598      48.433 -41.566  19.662  1.00  0.53           O  
HETATM  600  O   HOH T 599      41.350   0.927  13.651  1.00  0.53           O  
HETATM  601  O   HOH T 600      35.037 -10.966  16.230  1.00  0.53           O  
HETATM  602  O   HOH T 601      40.414 -37.572  40.676  1.00  0.53           O  
HETATM  603  O   HOH T 602      28.149  -3.141  17.775  1.00  0.53           O  
HETATM  604  O   HOH T 603      47.041 -22.558   2.728  1.00  0.53           O  
HETATM  605  O   HOH T 604      32.068 -17.129  38.657  1.00  0.53           O  
HETATM  606  O   HOH T 605      22.029 -18.965  24.738  1.00  0.53           O  
HETATM  607  O   HOH T 606      32.322  18.615  11.630  1.00  0.53           O  
HETATM  608  O   HOH T 607       8.728  13.792  14.608  1.00  0.53           O  
HETATM  609  O   HOH T 608      45.950 -43.148  34.453  1.00  0.53           O  
HETATM  610  O   HOH T 609      26.006 -10.307  37.957  1.00  0.53           O  
HETATM  611  O   HOH T 610      -3.188  -4.141  20.314  1.00  0.53           O  
HETATM  612  O   HOH T 611      29.211 -18.184  28.452  1.00  0.53           O  
HETATM  613  O   HOH T 612      29.700 -39.998   5.973  1.00  0.53           O  
HETATM  614  O   HOH T 613      35.949 -11.235  45.182  1.00  0.53           O  
HETATM  615  O   HOH T 614      11.043  -1.853  -8.233  1.00  0.53           O  
HETATM  616  O   HOH T 615      -1.911  -3.058  16.691  1.00  0.53           O  
HETATM  617  O   HOH T 616      15.371 -14.841  28.911  1.00  0.53           O  
HETATM  618  O   HOH T 617      22.472   6.767  11.627  1.00  0.53           O  
HETATM  619  O   HOH T 618      26.027 -10.376  35.197  1.00  0.53           O  
HETATM  620  O   HOH T 619      37.292 -11.488  10.275  1.00  0.53           O  
HETATM  621  O   HOH T 620      42.792  -7.099  24.018  1.00  0.53           O  
HETATM  622  O   HOH T 621      22.756   2.402  -0.811  1.00  0.53           O  
HETATM  623  O   HOH T 622      46.901 -42.415   9.570  1.00  0.54           O  
HETATM  624  O   HOH T 623      35.741 -29.047   4.973  1.00  0.54           O  
HETATM  625  O   HOH T 624      38.412 -13.107  16.787  1.00  0.54           O  
HETATM  626  O   HOH T 625      35.823  -5.576  -2.357  1.00  0.54           O  
HETATM  627  O   HOH T 626      67.341 -20.237  23.367  1.00  0.54           O  
HETATM  628  O   HOH T 627      19.082  -8.094  -2.398  1.00  0.54           O  
HETATM  629  O   HOH T 628      58.174 -42.621  29.598  1.00  0.54           O  
HETATM  630  O   HOH T 629      -3.270  -1.446  21.162  1.00  0.54           O  
HETATM  631  O   HOH T 630      37.044   9.533  17.596  1.00  0.54           O  
HETATM  632  O   HOH T 631      40.004 -39.942  35.975  1.00  0.54           O  
HETATM  633  O   HOH T 632      36.551 -37.841  42.365  1.00  0.54           O  
HETATM  634  O   HOH T 633      31.690   8.924  -4.928  1.00  0.54           O  
HETATM  635  O   HOH T 634      25.210   4.056   1.661  1.00  0.54           O  
HETATM  636  O   HOH T 635      25.160 -43.833  11.935  1.00  0.54           O  
HETATM  637  O   HOH T 636      25.676 -32.145  21.178  1.00  0.54           O  
HETATM  638  O   HOH T 637      27.478  18.531  -4.065  1.00  0.54           O  
HETATM  639  O   HOH T 638      35.545 -10.165  29.082  1.00  0.54           O  
HETATM  640  O   HOH T 639      35.877  -9.863  12.239  1.00  0.54           O  
HETATM  641  O   HOH T 640      24.198  17.079  26.876  1.00  0.54           O  
HETATM  642  O   HOH T 641      34.748 -42.334  28.555  1.00  0.54           O  
HETATM  643  O   HOH T 642      32.573  15.394  30.259  1.00  0.54           O  
HETATM  644  O   HOH T 643      52.783 -13.584   7.736  1.00  0.54           O  
HETATM  645  O   HOH T 644       2.247  -9.159  23.668  1.00  0.54           O  
HETATM  646  O   HOH T 645      14.762   1.767  38.437  1.00  0.54           O  
HETATM  647  O   HOH T 646      50.234 -29.239   3.944  1.00  0.54           O  
HETATM  648  O   HOH T 647       2.451   3.607   3.158  1.00  0.54           O  
HETATM  649  O   HOH T 648      -1.726   4.181   6.475  1.00  0.54           O  
HETATM  650  O   HOH T 649      12.982   2.623  -4.907  1.00  0.55           O  
HETATM  651  O   HOH T 650      56.024 -36.387  32.246  1.00  0.55           O  
HETATM  652  O   HOH T 651       9.463  11.697   6.339  1.00  0.55           O  
HETATM  653  O   HOH T 652      31.864  -2.451  27.638  1.00  0.55           O  
HETATM  654  O   HOH T 653      11.998  -7.264  -3.332  1.00  0.55           O  
HETATM  655  O   HOH T 654      28.182 -16.480  18.365  1.00  0.55           O  
HETATM  656  O   HOH T 655      13.712  13.088  -0.987  1.00  0.55           O  
HETATM  657  O   HOH T 656      58.412 -36.576  29.054  1.00  0.55           O  
HETATM  658  O   HOH T 657      21.715  10.354  10.568  1.00  0.55           O  
HETATM  659  O   HOH T 658      25.909 -11.371  -3.227  1.00  0.55           O  
HETATM  660  O   HOH T 659      13.305  -9.645  26.508  1.00  0.56           O  
HETATM  661  O   HOH T 660      38.894  -9.841  15.163  1.00  0.56           O  
HETATM  662  O   HOH T 661      36.580  21.705  11.967  1.00  0.56           O  
HETATM  663  O   HOH T 662      41.273   0.568   3.848  1.00  0.56           O  
HETATM  664  O   HOH T 663      59.746 -19.352  39.659  1.00  0.56           O  
HETATM  665  O   HOH T 664      13.058  -4.100  41.366  1.00  0.56           O  
HETATM  666  O   HOH T 665      19.463  17.663   5.830  1.00  0.56           O  
HETATM  667  O   HOH T 666      31.725  15.096  -4.236  1.00  0.56           O  
HETATM  668  O   HOH T 667      14.119  18.840  18.869  1.00  0.56           O  
HETATM  669  O   HOH T 668      65.573 -29.191  30.797  1.00  0.56           O  
HETATM  670  O   HOH T 669      43.756 -42.985  31.498  1.00  0.56           O  
HETATM  671  O   HOH T 670      22.602  11.582  13.125  1.00  0.56           O  
HETATM  672  O   HOH T 671       5.532  -3.229   4.169  1.00  0.56           O  
HETATM  673  O   HOH T 672      26.603 -21.860  15.893  1.00  0.56           O  
HETATM  674  O   HOH T 673      43.694 -40.803  16.415  1.00  0.56           O  
HETATM  675  O   HOH T 674      38.945   2.468  -2.431  1.00  0.56           O  
HETATM  676  O   HOH T 675      25.114 -23.383  29.292  1.00  0.56           O  
HETATM  677  O   HOH T 676      25.048 -33.959  14.656  1.00  0.56           O  
HETATM  678  O   HOH T 677      14.866  13.139  12.654  1.00  0.56           O  
HETATM  679  O   HOH T 678       5.443  -5.682  36.466  1.00  0.56           O  
HETATM  680  O   HOH T 679       7.271 -17.834  15.367  1.00  0.56           O  
HETATM  681  O   HOH T 680      35.698  -4.958  24.340  1.00  0.56           O  
HETATM  682  O   HOH T 681      39.749  11.364   8.912  1.00  0.56           O  
HETATM  683  O   HOH T 682      26.899 -17.198  33.450  1.00  0.57           O  
HETATM  684  O   HOH T 683      13.396  -4.713  -5.043  1.00  0.57           O  
HETATM  685  O   HOH T 684      17.831  -0.594  40.473  1.00  0.57           O  
HETATM  686  O   HOH T 685      59.846 -35.005  17.703  1.00  0.57           O  
HETATM  687  O   HOH T 686      66.191 -25.047  18.599  1.00  0.57           O  
HETATM  688  O   HOH T 687      52.659 -16.967  33.994  1.00  0.57           O  
HETATM  689  O   HOH T 688      30.385 -14.760  33.246  1.00  0.57           O  
HETATM  690  O   HOH T 689      55.020 -32.668   8.857  1.00  0.57           O  
HETATM  691  O   HOH T 690       7.085   9.630  26.456  1.00  0.57           O  
HETATM  692  O   HOH T 691      20.395  13.082  12.159  1.00  0.57           O  
HETATM  693  O   HOH T 692      -4.024  -2.155  18.534  1.00  0.57           O  
HETATM  694  O   HOH T 693      -0.277 -10.530  20.413  1.00  0.58           O  
HETATM  695  O   HOH T 694      -4.705  -8.810  11.474  1.00  0.58           O  
HETATM  696  O   HOH T 695      27.135 -17.750  22.027  1.00  0.58           O  
HETATM  697  O   HOH T 696      52.594 -33.020   5.957  1.00  0.58           O  
HETATM  698  O   HOH T 697      35.632  -9.678  42.145  1.00  0.59           O  
HETATM  699  O   HOH T 698      -1.987  -8.258  20.514  1.00  0.59           O  
HETATM  700  O   HOH T 699      43.004  -0.035   5.747  1.00  0.59           O  
HETATM  701  O   HOH T 700      23.634 -14.676   5.194  1.00  0.61           O  
HETATM  702  O   HOH T 701      44.611  -9.660  18.656  1.00  0.61           O  
TER     703      HOH T 701 
