# Supplementary material for: Accurate Prediction of Hydration Sites of Proteins Using Energy Model With Atom Embedding
Source: Front Mol Biosci. 2021 Sep 20;8:756075. doi: 10.3389/fmolb.2021.756075 (PMC8488165; doi:10.3389/fmolb.2021.756075)
Supplement: Supplementary file 1 [file DataSheet1.ZIP › Data Sheet 1/Our_result_pdb/our_dataset_output/2GHA_watersite.pdb]

HEADER                                                        XXXX


JRNL        PMID   -1
HETATM    1  O   HOH T   0      13.791  50.495 110.298  1.00  0.17           O  
HETATM    2  O   HOH T   1      29.079  64.084 135.597  1.00  0.18           O  
HETATM    3  O   HOH T   2      10.429  57.703 136.629  1.00  0.18           O  
HETATM    4  O   HOH T   3      12.875  44.971 149.786  1.00  0.18           O  
HETATM    5  O   HOH T   4      16.817  39.969  91.898  1.00  0.18           O  
HETATM    6  O   HOH T   5      37.365  22.091 114.288  1.00  0.18           O  
HETATM    7  O   HOH T   6      36.319  24.073 110.179  1.00  0.18           O  
HETATM    8  O   HOH T   7      12.244  40.332 133.252  1.00  0.18           O  
HETATM    9  O   HOH T   8      28.932  37.582 121.107  1.00  0.18           O  
HETATM   10  O   HOH T   9      26.786  47.493 127.343  1.00  0.19           O  
HETATM   11  O   HOH T  10      19.055  60.572  79.410  1.00  0.19           O  
HETATM   12  O   HOH T  11      27.138  77.131 126.263  1.00  0.19           O  
HETATM   13  O   HOH T  12      21.781  35.654  71.772  1.00  0.19           O  
HETATM   14  O   HOH T  13      21.610  25.397 101.054  1.00  0.20           O  
HETATM   15  O   HOH T  14      26.845  34.819  90.179  1.00  0.20           O  
HETATM   16  O   HOH T  15      34.293  51.847 145.996  1.00  0.20           O  
HETATM   17  O   HOH T  16      27.635  57.039 144.795  1.00  0.20           O  
HETATM   18  O   HOH T  17      46.960  41.286 128.730  1.00  0.20           O  
HETATM   19  O   HOH T  18       8.201  36.791 111.446  1.00  0.20           O  
HETATM   20  O   HOH T  19      20.788  49.592  99.928  1.00  0.21           O  
HETATM   21  O   HOH T  20      13.595  43.312  86.354  1.00  0.21           O  
HETATM   22  O   HOH T  21      20.587  39.853  82.419  1.00  0.21           O  
HETATM   23  O   HOH T  22      29.677  62.082 155.225  1.00  0.21           O  
HETATM   24  O   HOH T  23      24.229  47.130  79.914  1.00  0.21           O  
HETATM   25  O   HOH T  24      24.715  76.897  89.020  1.00  0.21           O  
HETATM   26  O   HOH T  25      16.610  40.693 145.178  1.00  0.21           O  
HETATM   27  O   HOH T  26      22.368  64.130 141.401  1.00  0.21           O  
HETATM   28  O   HOH T  27      19.591  31.608  86.709  1.00  0.21           O  
HETATM   29  O   HOH T  28       3.896  32.902  81.153  1.00  0.22           O  
HETATM   30  O   HOH T  29       2.317  32.111 100.434  1.00  0.22           O  
HETATM   31  O   HOH T  30      19.428  67.358 140.192  1.00  0.22           O  
HETATM   32  O   HOH T  31      14.030  43.489  89.148  1.00  0.22           O  
HETATM   33  O   HOH T  32      33.847  23.000  98.577  1.00  0.22           O  
HETATM   34  O   HOH T  33      27.179  65.240 147.132  1.00  0.22           O  
HETATM   35  O   HOH T  34      21.730  54.900 136.815  1.00  0.23           O  
HETATM   36  O   HOH T  35      13.078  31.955  68.111  1.00  0.23           O  
HETATM   37  O   HOH T  36      21.491  29.876  75.789  1.00  0.23           O  
HETATM   38  O   HOH T  37       9.611  33.446  71.827  1.00  0.23           O  
HETATM   39  O   HOH T  38       0.250  38.395 108.344  1.00  0.23           O  
HETATM   40  O   HOH T  39      26.883  45.211 105.010  1.00  0.23           O  
HETATM   41  O   HOH T  40      21.348  50.874 139.940  1.00  0.23           O  
HETATM   42  O   HOH T  41      15.434  28.543 114.442  1.00  0.23           O  
HETATM   43  O   HOH T  42      37.968  42.622 153.517  1.00  0.23           O  
HETATM   44  O   HOH T  43      21.052  76.392 114.489  1.00  0.23           O  
HETATM   45  O   HOH T  44      21.576  51.143 142.701  1.00  0.23           O  
HETATM   46  O   HOH T  45       4.696  50.773  85.639  1.00  0.23           O  
HETATM   47  O   HOH T  46       4.328  56.190  77.896  1.00  0.23           O  
HETATM   48  O   HOH T  47      18.732  27.567  88.393  1.00  0.23           O  
HETATM   49  O   HOH T  48      39.678  34.104 109.047  1.00  0.23           O  
HETATM   50  O   HOH T  49      31.158  53.876 121.833  1.00  0.24           O  
HETATM   51  O   HOH T  50      17.678  53.155 122.770  1.00  0.24           O  
HETATM   52  O   HOH T  51      34.647  38.298  91.988  1.00  0.24           O  
HETATM   53  O   HOH T  52      28.580  73.145 117.732  1.00  0.24           O  
HETATM   54  O   HOH T  53      14.078  39.246 106.681  1.00  0.24           O  
HETATM   55  O   HOH T  54      24.605  47.359 101.932  1.00  0.24           O  
HETATM   56  O   HOH T  55      21.833  39.701 115.796  1.00  0.24           O  
HETATM   57  O   HOH T  56      32.703  57.514 131.017  1.00  0.24           O  
HETATM   58  O   HOH T  57      14.478  56.961 147.735  1.00  0.24           O  
HETATM   59  O   HOH T  58      30.513  16.315 105.210  1.00  0.24           O  
HETATM   60  O   HOH T  59      29.741  32.297 125.298  1.00  0.24           O  
HETATM   61  O   HOH T  60      17.724  23.227 110.159  1.00  0.25           O  
HETATM   62  O   HOH T  61       1.641  39.774 106.299  1.00  0.25           O  
HETATM   63  O   HOH T  62      30.235  40.017 120.774  1.00  0.25           O  
HETATM   64  O   HOH T  63      23.000  67.262  80.770  1.00  0.25           O  
HETATM   65  O   HOH T  64       8.574  35.450  82.581  1.00  0.25           O  
HETATM   66  O   HOH T  65       1.917  45.002  82.010  1.00  0.25           O  
HETATM   67  O   HOH T  66      16.126  42.761 143.351  1.00  0.25           O  
HETATM   68  O   HOH T  67      28.705  33.718  88.393  1.00  0.25           O  
HETATM   69  O   HOH T  68      17.198  69.600 127.650  1.00  0.25           O  
HETATM   70  O   HOH T  69      22.037  56.903  72.108  1.00  0.25           O  
HETATM   71  O   HOH T  70      24.057  50.462  98.640  1.00  0.25           O  
HETATM   72  O   HOH T  71      18.276  43.458 141.856  1.00  0.25           O  
HETATM   73  O   HOH T  72       5.166  48.812  87.595  1.00  0.25           O  
HETATM   74  O   HOH T  73      36.561  26.193 147.917  1.00  0.25           O  
HETATM   75  O   HOH T  74      25.114  50.666 163.480  1.00  0.25           O  
HETATM   76  O   HOH T  75       3.925  34.045 101.664  1.00  0.25           O  
HETATM   77  O   HOH T  76      20.283  36.384 141.909  1.00  0.25           O  
HETATM   78  O   HOH T  77      29.507  60.392 157.381  1.00  0.25           O  
HETATM   79  O   HOH T  78      20.772  76.185 111.669  1.00  0.25           O  
HETATM   80  O   HOH T  79      36.979  63.749 129.899  1.00  0.25           O  
HETATM   81  O   HOH T  80      22.945  21.650 111.725  1.00  0.26           O  
HETATM   82  O   HOH T  81      -1.597  37.737 110.418  1.00  0.26           O  
HETATM   83  O   HOH T  82      12.734  63.624 141.447  1.00  0.26           O  
HETATM   84  O   HOH T  83      22.963  32.019  79.647  1.00  0.26           O  
HETATM   85  O   HOH T  84      21.801  61.280  91.545  1.00  0.26           O  
HETATM   86  O   HOH T  85      33.373  33.101 130.641  1.00  0.26           O  
HETATM   87  O   HOH T  86      26.002  67.079 151.505  1.00  0.26           O  
HETATM   88  O   HOH T  87      36.081  62.558 151.156  1.00  0.26           O  
HETATM   89  O   HOH T  88      13.589  59.551 147.238  1.00  0.26           O  
HETATM   90  O   HOH T  89       7.515  56.709  88.476  1.00  0.26           O  
HETATM   91  O   HOH T  90      23.663  46.117 113.393  1.00  0.26           O  
HETATM   92  O   HOH T  91      -4.319  50.193  79.229  1.00  0.26           O  
HETATM   93  O   HOH T  92      28.986  49.361 162.825  1.00  0.26           O  
HETATM   94  O   HOH T  93      28.995  18.772 108.607  1.00  0.26           O  
HETATM   95  O   HOH T  94      30.851  79.391 134.561  1.00  0.26           O  
HETATM   96  O   HOH T  95      29.230  62.818 114.193  1.00  0.27           O  
HETATM   97  O   HOH T  96      28.346  55.828  99.380  1.00  0.27           O  
HETATM   98  O   HOH T  97      25.809  48.821  60.023  1.00  0.27           O  
HETATM   99  O   HOH T  98      17.721  59.211 158.023  1.00  0.27           O  
HETATM  100  O   HOH T  99      31.635  72.807 137.552  1.00  0.27           O  
HETATM  101  O   HOH T 100       4.540  59.875 129.990  1.00  0.27           O  
HETATM  102  O   HOH T 101      -3.687  63.978 153.696  1.00  0.27           O  
HETATM  103  O   HOH T 102      19.268  42.192 122.088  1.00  0.27           O  
HETATM  104  O   HOH T 103       3.703  72.987  96.076  1.00  0.27           O  
HETATM  105  O   HOH T 104      24.965  37.408  88.066  1.00  0.27           O  
HETATM  106  O   HOH T 105      27.573  50.064 126.752  1.00  0.27           O  
HETATM  107  O   HOH T 106      37.811  49.156 167.698  1.00  0.28           O  
HETATM  108  O   HOH T 107      16.466  40.711 106.549  1.00  0.28           O  
HETATM  109  O   HOH T 108       4.803  70.856 120.567  1.00  0.28           O  
HETATM  110  O   HOH T 109      26.586  76.584 136.308  1.00  0.28           O  
HETATM  111  O   HOH T 110      28.928  50.839 124.511  1.00  0.28           O  
HETATM  112  O   HOH T 111      28.704  64.891 111.313  1.00  0.28           O  
HETATM  113  O   HOH T 112      34.240  37.324 134.512  1.00  0.28           O  
HETATM  114  O   HOH T 113      25.675  38.290  97.884  1.00  0.28           O  
HETATM  115  O   HOH T 114      20.359  65.068  95.745  1.00  0.28           O  
HETATM  116  O   HOH T 115       8.850  54.050 137.562  1.00  0.28           O  
HETATM  117  O   HOH T 116      13.470  35.395 149.176  1.00  0.28           O  
HETATM  118  O   HOH T 117      24.911  73.463 140.437  1.00  0.28           O  
HETATM  119  O   HOH T 118      13.172  51.616 150.163  1.00  0.28           O  
HETATM  120  O   HOH T 119      11.332  56.609  98.407  1.00  0.28           O  
HETATM  121  O   HOH T 120       9.767  66.543  88.548  1.00  0.28           O  
HETATM  122  O   HOH T 121       8.841  63.075  94.742  1.00  0.29           O  
HETATM  123  O   HOH T 122      20.169  50.996 125.455  1.00  0.29           O  
HETATM  124  O   HOH T 123       4.884  41.880 107.663  1.00  0.29           O  
HETATM  125  O   HOH T 124       8.850  65.128 143.450  1.00  0.29           O  
HETATM  126  O   HOH T 125      27.056  59.976 128.203  1.00  0.29           O  
HETATM  127  O   HOH T 126      32.535  47.088 130.792  1.00  0.29           O  
HETATM  128  O   HOH T 127       6.690  53.012 132.362  1.00  0.29           O  
HETATM  129  O   HOH T 128      16.057  75.223 132.544  1.00  0.29           O  
HETATM  130  O   HOH T 129      12.969  72.783 117.305  1.00  0.29           O  
HETATM  131  O   HOH T 130      31.731  63.383 115.411  1.00  0.29           O  
HETATM  132  O   HOH T 131      26.921  62.425  96.078  1.00  0.29           O  
HETATM  133  O   HOH T 132      37.964  49.012 134.410  1.00  0.29           O  
HETATM  134  O   HOH T 133      18.778  48.542 161.759  1.00  0.29           O  
HETATM  135  O   HOH T 134      24.650  58.669 105.590  1.00  0.29           O  
HETATM  136  O   HOH T 135      28.629  42.725  93.513  1.00  0.29           O  
HETATM  137  O   HOH T 136       4.651  62.487  90.046  1.00  0.29           O  
HETATM  138  O   HOH T 137      44.009  35.859 137.547  1.00  0.29           O  
HETATM  139  O   HOH T 138      28.532  53.650 120.864  1.00  0.29           O  
HETATM  140  O   HOH T 139       8.572  48.192 138.893  1.00  0.29           O  
HETATM  141  O   HOH T 140      28.814  84.465 136.620  1.00  0.29           O  
HETATM  142  O   HOH T 141      22.614  47.502 100.097  1.00  0.29           O  
HETATM  143  O   HOH T 142       5.464  48.443 102.799  1.00  0.29           O  
HETATM  144  O   HOH T 143       7.862  49.146  88.453  1.00  0.29           O  
HETATM  145  O   HOH T 144      23.980  66.875  92.044  1.00  0.29           O  
HETATM  146  O   HOH T 145      30.361  47.879 127.770  1.00  0.30           O  
HETATM  147  O   HOH T 146      15.282  47.093 157.976  1.00  0.30           O  
HETATM  148  O   HOH T 147      14.598  66.670 110.943  1.00  0.30           O  
HETATM  149  O   HOH T 148      22.133  60.045 105.522  1.00  0.30           O  
HETATM  150  O   HOH T 149      40.434  32.572 143.833  1.00  0.30           O  
HETATM  151  O   HOH T 150       2.003  40.431 101.467  1.00  0.30           O  
HETATM  152  O   HOH T 151       6.317  46.052 102.044  1.00  0.30           O  
HETATM  153  O   HOH T 152      21.875  19.682  96.092  1.00  0.30           O  
HETATM  154  O   HOH T 153      10.745  52.774 153.901  1.00  0.30           O  
HETATM  155  O   HOH T 154      34.789  27.139 137.690  1.00  0.30           O  
HETATM  156  O   HOH T 155      32.051  49.581 131.968  1.00  0.30           O  
HETATM  157  O   HOH T 156       8.756  32.681  83.228  1.00  0.30           O  
HETATM  158  O   HOH T 157       4.884  71.421 124.838  1.00  0.30           O  
HETATM  159  O   HOH T 158      10.643  73.109 135.016  1.00  0.30           O  
HETATM  160  O   HOH T 159       7.097  67.388 126.251  1.00  0.30           O  
HETATM  161  O   HOH T 160      12.961  48.741 161.562  1.00  0.30           O  
HETATM  162  O   HOH T 161      28.657  49.659  91.227  1.00  0.30           O  
HETATM  163  O   HOH T 162      24.249  28.369 117.694  1.00  0.30           O  
HETATM  164  O   HOH T 163      21.257  42.622 120.176  1.00  0.30           O  
HETATM  165  O   HOH T 164      20.299  34.763 135.489  1.00  0.30           O  
HETATM  166  O   HOH T 165      18.380  66.194  75.226  1.00  0.30           O  
HETATM  167  O   HOH T 166      24.827  51.867  95.057  1.00  0.31           O  
HETATM  168  O   HOH T 167      11.975  57.768 143.139  1.00  0.31           O  
HETATM  169  O   HOH T 168      22.938  46.861 110.884  1.00  0.31           O  
HETATM  170  O   HOH T 169      30.442  36.574 125.224  1.00  0.31           O  
HETATM  171  O   HOH T 170      33.273  70.959 123.053  1.00  0.31           O  
HETATM  172  O   HOH T 171      16.364  50.269  99.745  1.00  0.31           O  
HETATM  173  O   HOH T 172       4.592  39.261  81.055  1.00  0.31           O  
HETATM  174  O   HOH T 173      25.831  27.389 140.251  1.00  0.31           O  
HETATM  175  O   HOH T 174      30.815  65.996 136.679  1.00  0.31           O  
HETATM  176  O   HOH T 175       1.913  29.256 100.100  1.00  0.31           O  
HETATM  177  O   HOH T 176      19.214  49.448  63.701  1.00  0.31           O  
HETATM  178  O   HOH T 177       7.424  33.377  88.135  1.00  0.31           O  
HETATM  179  O   HOH T 178      13.435  75.792 131.716  1.00  0.31           O  
HETATM  180  O   HOH T 179      18.112  70.432 109.385  1.00  0.31           O  
HETATM  181  O   HOH T 180       9.309  23.848  71.882  1.00  0.31           O  
HETATM  182  O   HOH T 181      20.735  36.858  69.560  1.00  0.31           O  
HETATM  183  O   HOH T 182      26.355  47.855 105.754  1.00  0.31           O  
HETATM  184  O   HOH T 183      11.905  75.168 125.191  1.00  0.31           O  
HETATM  185  O   HOH T 184       9.604  47.891 142.907  1.00  0.31           O  
HETATM  186  O   HOH T 185      17.977  78.138 118.413  1.00  0.32           O  
HETATM  187  O   HOH T 186      21.205  40.653 154.456  1.00  0.32           O  
HETATM  188  O   HOH T 187      34.303  47.209 157.611  1.00  0.32           O  
HETATM  189  O   HOH T 188      29.024  45.883 103.374  1.00  0.32           O  
HETATM  190  O   HOH T 189      41.670  37.661 141.944  1.00  0.32           O  
HETATM  191  O   HOH T 190      12.954  17.450  68.532  1.00  0.32           O  
HETATM  192  O   HOH T 191      18.512  26.019 114.903  1.00  0.32           O  
HETATM  193  O   HOH T 192      33.265  27.067 140.041  1.00  0.32           O  
HETATM  194  O   HOH T 193       3.726  49.397 100.900  1.00  0.32           O  
HETATM  195  O   HOH T 194      30.492  76.323 109.242  1.00  0.32           O  
HETATM  196  O   HOH T 195      -4.548  61.665 144.975  1.00  0.32           O  
HETATM  197  O   HOH T 196      27.389  16.844  93.151  1.00  0.32           O  
HETATM  198  O   HOH T 197      25.845  81.014 125.395  1.00  0.32           O  
HETATM  199  O   HOH T 198      22.456  48.588 113.001  1.00  0.32           O  
HETATM  200  O   HOH T 199      29.991  58.006 138.280  1.00  0.32           O  
HETATM  201  O   HOH T 200      10.819  68.835 149.015  1.00  0.33           O  
HETATM  202  O   HOH T 201      19.618  18.306  95.395  1.00  0.33           O  
HETATM  203  O   HOH T 202      15.354  39.866 120.365  1.00  0.33           O  
HETATM  204  O   HOH T 203      11.815  59.533 138.216  1.00  0.33           O  
HETATM  205  O   HOH T 204       3.474  29.024  96.424  1.00  0.33           O  
HETATM  206  O   HOH T 205      35.610  38.129 146.498  1.00  0.33           O  
HETATM  207  O   HOH T 206      25.346  43.874  59.236  1.00  0.33           O  
HETATM  208  O   HOH T 207      41.249  51.226 145.050  1.00  0.33           O  
HETATM  209  O   HOH T 208      -8.362  24.360  85.859  1.00  0.33           O  
HETATM  210  O   HOH T 209      17.843  55.090 162.786  1.00  0.33           O  
HETATM  211  O   HOH T 210      21.481  28.887 142.644  1.00  0.33           O  
HETATM  212  O   HOH T 211      21.641  43.194 125.519  1.00  0.33           O  
HETATM  213  O   HOH T 212      13.532  74.951 136.929  1.00  0.33           O  
HETATM  214  O   HOH T 213      11.078  68.094 146.218  1.00  0.33           O  
HETATM  215  O   HOH T 214      36.072  27.728 106.076  1.00  0.33           O  
HETATM  216  O   HOH T 215      31.599  57.258 136.121  1.00  0.33           O  
HETATM  217  O   HOH T 216      16.935  65.844  72.946  1.00  0.33           O  
HETATM  218  O   HOH T 217      24.783  44.374  87.641  1.00  0.33           O  
HETATM  219  O   HOH T 218      25.887  63.323  79.498  1.00  0.33           O  
HETATM  220  O   HOH T 219      11.111  28.128  89.284  1.00  0.33           O  
HETATM  221  O   HOH T 220      27.728  42.983  90.845  1.00  0.34           O  
HETATM  222  O   HOH T 221      31.171  50.059 161.173  1.00  0.34           O  
HETATM  223  O   HOH T 222      23.900  50.878 113.754  1.00  0.34           O  
HETATM  224  O   HOH T 223      29.312  51.766 122.257  1.00  0.34           O  
HETATM  225  O   HOH T 224      28.884  62.533  97.952  1.00  0.34           O  
HETATM  226  O   HOH T 225      23.980  69.757  88.911  1.00  0.34           O  
HETATM  227  O   HOH T 226       2.927  27.359 101.908  1.00  0.34           O  
HETATM  228  O   HOH T 227      31.672  45.649  61.457  1.00  0.34           O  
HETATM  229  O   HOH T 228      20.352  18.361 104.657  1.00  0.34           O  
HETATM  230  O   HOH T 229      20.459  51.733 108.514  1.00  0.34           O  
HETATM  231  O   HOH T 230      23.087  73.115  99.668  1.00  0.34           O  
HETATM  232  O   HOH T 231      17.438  16.360  69.003  1.00  0.34           O  
HETATM  233  O   HOH T 232      26.904  65.428 143.247  1.00  0.34           O  
HETATM  234  O   HOH T 233      28.926  24.524 140.460  1.00  0.34           O  
HETATM  235  O   HOH T 234      19.221  51.093 106.295  1.00  0.34           O  
HETATM  236  O   HOH T 235      33.040  54.266 133.530  1.00  0.34           O  
HETATM  237  O   HOH T 236       7.774  45.607 139.453  1.00  0.34           O  
HETATM  238  O   HOH T 237      33.899  16.776  94.941  1.00  0.34           O  
HETATM  239  O   HOH T 238      18.407  39.921 159.530  1.00  0.34           O  
HETATM  240  O   HOH T 239      18.792  76.382 116.187  1.00  0.34           O  
HETATM  241  O   HOH T 240      11.543  36.426 127.159  1.00  0.34           O  
HETATM  242  O   HOH T 241      40.144  36.132 145.253  1.00  0.34           O  
HETATM  243  O   HOH T 242      34.779  29.808  88.054  1.00  0.34           O  
HETATM  244  O   HOH T 243      42.086  34.121 136.637  1.00  0.34           O  
HETATM  245  O   HOH T 244       3.346  19.244  86.887  1.00  0.34           O  
HETATM  246  O   HOH T 245      29.335  60.707 138.441  1.00  0.34           O  
HETATM  247  O   HOH T 246      12.108  51.193  68.408  1.00  0.35           O  
HETATM  248  O   HOH T 247      24.981  42.580  76.887  1.00  0.35           O  
HETATM  249  O   HOH T 248      18.630  63.370  75.445  1.00  0.35           O  
HETATM  250  O   HOH T 249       9.346  26.207 100.953  1.00  0.35           O  
HETATM  251  O   HOH T 250      13.710  51.621 107.808  1.00  0.35           O  
HETATM  252  O   HOH T 251       7.838  46.482 136.817  1.00  0.35           O  
HETATM  253  O   HOH T 252       7.568  44.230 100.434  1.00  0.35           O  
HETATM  254  O   HOH T 253      23.271  40.099  96.603  1.00  0.35           O  
HETATM  255  O   HOH T 254       9.933  22.610  95.611  1.00  0.35           O  
HETATM  256  O   HOH T 255      36.370  24.965 101.388  1.00  0.35           O  
HETATM  257  O   HOH T 256      30.282  57.295 140.935  1.00  0.35           O  
HETATM  258  O   HOH T 257      30.184  34.490  86.269  1.00  0.35           O  
HETATM  259  O   HOH T 258      11.955  49.208 150.794  1.00  0.35           O  
HETATM  260  O   HOH T 259      12.962  39.702 121.477  1.00  0.35           O  
HETATM  261  O   HOH T 260      23.738  30.992  77.091  1.00  0.35           O  
HETATM  262  O   HOH T 261      13.700  45.971  64.759  1.00  0.35           O  
HETATM  263  O   HOH T 262      15.730  25.975 115.358  1.00  0.35           O  
HETATM  264  O   HOH T 263      21.135  41.630 117.714  1.00  0.35           O  
HETATM  265  O   HOH T 264      39.590  43.798  96.397  1.00  0.35           O  
HETATM  266  O   HOH T 265      14.927  53.328 123.373  1.00  0.35           O  
HETATM  267  O   HOH T 266       8.996  41.220 101.729  1.00  0.35           O  
HETATM  268  O   HOH T 267      -7.287  65.470 149.803  1.00  0.35           O  
HETATM  269  O   HOH T 268      22.697  59.041  76.128  1.00  0.35           O  
HETATM  270  O   HOH T 269      24.619  50.273 116.418  1.00  0.35           O  
HETATM  271  O   HOH T 270      16.931  43.889 103.622  1.00  0.35           O  
HETATM  272  O   HOH T 271      32.823  54.028  83.948  1.00  0.35           O  
HETATM  273  O   HOH T 272       6.967  26.341 114.239  1.00  0.35           O  
HETATM  274  O   HOH T 273       6.726  66.462 149.607  1.00  0.36           O  
HETATM  275  O   HOH T 274      10.886  65.934 138.743  1.00  0.36           O  
HETATM  276  O   HOH T 275      20.804  45.117 127.265  1.00  0.36           O  
HETATM  277  O   HOH T 276      34.268  59.113 149.311  1.00  0.36           O  
HETATM  278  O   HOH T 277      -3.900  57.821  86.954  1.00  0.36           O  
HETATM  279  O   HOH T 278      13.530  35.017 116.167  1.00  0.36           O  
HETATM  280  O   HOH T 279       9.590  56.197 115.656  1.00  0.36           O  
HETATM  281  O   HOH T 280      18.262  79.578 130.442  1.00  0.36           O  
HETATM  282  O   HOH T 281      21.669  37.091 130.965  1.00  0.36           O  
HETATM  283  O   HOH T 282       9.038  62.589 115.885  1.00  0.36           O  
HETATM  284  O   HOH T 283      16.918  80.792 117.803  1.00  0.36           O  
HETATM  285  O   HOH T 284      23.445  31.942  84.138  1.00  0.36           O  
HETATM  286  O   HOH T 285      26.851  44.594  76.610  1.00  0.36           O  
HETATM  287  O   HOH T 286      13.083  23.415 106.149  1.00  0.36           O  
HETATM  288  O   HOH T 287      -0.871  56.504 149.090  1.00  0.36           O  
HETATM  289  O   HOH T 288      35.697  54.967 123.311  1.00  0.36           O  
HETATM  290  O   HOH T 289      33.547  33.394  89.071  1.00  0.36           O  
HETATM  291  O   HOH T 290      11.697  41.464 140.040  1.00  0.36           O  
HETATM  292  O   HOH T 291      28.898  47.247  85.143  1.00  0.36           O  
HETATM  293  O   HOH T 292      31.760  22.070  88.201  1.00  0.36           O  
HETATM  294  O   HOH T 293       8.692  56.150  97.658  1.00  0.36           O  
HETATM  295  O   HOH T 294      37.497  61.709 135.622  1.00  0.36           O  
HETATM  296  O   HOH T 295       7.257  64.347  86.769  1.00  0.37           O  
HETATM  297  O   HOH T 296      21.634  80.224 133.701  1.00  0.37           O  
HETATM  298  O   HOH T 297      25.416  44.616  61.984  1.00  0.37           O  
HETATM  299  O   HOH T 298      12.137  46.073 153.634  1.00  0.37           O  
HETATM  300  O   HOH T 299      21.585  42.534  61.226  1.00  0.37           O  
HETATM  301  O   HOH T 300       5.673  47.693 126.371  1.00  0.37           O  
HETATM  302  O   HOH T 301       6.667  63.242 132.085  1.00  0.37           O  
HETATM  303  O   HOH T 302      34.127  73.554 126.345  1.00  0.37           O  
HETATM  304  O   HOH T 303      25.914  48.572  77.253  1.00  0.37           O  
HETATM  305  O   HOH T 304      19.363  81.169 121.698  1.00  0.37           O  
HETATM  306  O   HOH T 305      26.027  57.439 130.371  1.00  0.37           O  
HETATM  307  O   HOH T 306      32.520  52.475  76.284  1.00  0.37           O  
HETATM  308  O   HOH T 307       8.880  26.842 112.312  1.00  0.37           O  
HETATM  309  O   HOH T 308      34.193  20.948  88.689  1.00  0.37           O  
HETATM  310  O   HOH T 309      18.889  42.136  61.505  1.00  0.37           O  
HETATM  311  O   HOH T 310      36.585  51.466 147.744  1.00  0.37           O  
HETATM  312  O   HOH T 311      17.820  48.173 166.473  1.00  0.37           O  
HETATM  313  O   HOH T 312      32.325  81.763 124.738  1.00  0.37           O  
HETATM  314  O   HOH T 313      15.935  51.901 101.948  1.00  0.37           O  
HETATM  315  O   HOH T 314      21.882  71.170  90.154  1.00  0.37           O  
HETATM  316  O   HOH T 315       9.033  22.366  81.613  1.00  0.37           O  
HETATM  317  O   HOH T 316      44.191  41.190 128.637  1.00  0.37           O  
HETATM  318  O   HOH T 317       9.061  70.582 128.147  1.00  0.37           O  
HETATM  319  O   HOH T 318      10.115  38.679 101.075  1.00  0.37           O  
HETATM  320  O   HOH T 319      20.793  29.265  87.604  1.00  0.37           O  
HETATM  321  O   HOH T 320       9.526  39.573 132.905  1.00  0.37           O  
HETATM  322  O   HOH T 321      12.698  70.928  88.683  1.00  0.37           O  
HETATM  323  O   HOH T 322       9.498  28.030  72.703  1.00  0.37           O  
HETATM  324  O   HOH T 323      21.063  62.813  74.045  1.00  0.37           O  
HETATM  325  O   HOH T 324      11.871  70.591 147.174  1.00  0.37           O  
HETATM  326  O   HOH T 325       4.766  63.309  87.281  1.00  0.37           O  
HETATM  327  O   HOH T 326      -0.277  62.943 143.937  1.00  0.37           O  
HETATM  328  O   HOH T 327      11.147  25.146  92.503  1.00  0.38           O  
HETATM  329  O   HOH T 328       8.917  21.865  78.903  1.00  0.38           O  
HETATM  330  O   HOH T 329      13.167  58.288  99.477  1.00  0.38           O  
HETATM  331  O   HOH T 330      11.032  50.175 162.930  1.00  0.38           O  
HETATM  332  O   HOH T 331      26.618  46.342  78.747  1.00  0.38           O  
HETATM  333  O   HOH T 332       3.049  26.163  77.589  1.00  0.38           O  
HETATM  334  O   HOH T 333      35.870  66.390 117.620  1.00  0.38           O  
HETATM  335  O   HOH T 334      -6.818  63.173 142.115  1.00  0.38           O  
HETATM  336  O   HOH T 335      16.184  31.270 151.365  1.00  0.38           O  
HETATM  337  O   HOH T 336       3.845  56.557 126.475  1.00  0.38           O  
HETATM  338  O   HOH T 337       8.611  27.421 116.165  1.00  0.38           O  
HETATM  339  O   HOH T 338       0.960  43.889  74.615  1.00  0.38           O  
HETATM  340  O   HOH T 339      33.335  66.020 138.036  1.00  0.38           O  
HETATM  341  O   HOH T 340      33.796  23.794 101.226  1.00  0.38           O  
HETATM  342  O   HOH T 341      21.322  43.662 161.338  1.00  0.38           O  
HETATM  343  O   HOH T 342      37.204  40.873  89.510  1.00  0.38           O  
HETATM  344  O   HOH T 343       6.593  65.919 131.303  1.00  0.38           O  
HETATM  345  O   HOH T 344      10.918  22.411  91.970  1.00  0.38           O  
HETATM  346  O   HOH T 345      43.185  45.388 142.162  1.00  0.38           O  
HETATM  347  O   HOH T 346      36.918  44.251 158.267  1.00  0.38           O  
HETATM  348  O   HOH T 347      32.368  73.469 111.236  1.00  0.38           O  
HETATM  349  O   HOH T 348       0.112  45.537  76.668  1.00  0.38           O  
HETATM  350  O   HOH T 349      37.108  46.986 157.738  1.00  0.38           O  
HETATM  351  O   HOH T 350       1.807  63.711 121.949  1.00  0.38           O  
HETATM  352  O   HOH T 351      12.903  35.146 158.009  1.00  0.38           O  
HETATM  353  O   HOH T 352      28.641  16.467  88.878  1.00  0.38           O  
HETATM  354  O   HOH T 353      13.069  31.421  65.460  1.00  0.38           O  
HETATM  355  O   HOH T 354      10.497  23.707 100.989  1.00  0.38           O  
HETATM  356  O   HOH T 355      23.301  30.926 117.741  1.00  0.38           O  
HETATM  357  O   HOH T 356      21.111  20.134 110.230  1.00  0.38           O  
HETATM  358  O   HOH T 357      15.959  62.203 108.694  1.00  0.38           O  
HETATM  359  O   HOH T 358      -3.605  55.419  85.551  1.00  0.38           O  
HETATM  360  O   HOH T 359      20.230  80.285 124.138  1.00  0.38           O  
HETATM  361  O   HOH T 360      23.471  64.758  79.529  1.00  0.38           O  
HETATM  362  O   HOH T 361      20.966  61.107 101.564  1.00  0.38           O  
HETATM  363  O   HOH T 362      37.864  48.843 162.907  1.00  0.38           O  
HETATM  364  O   HOH T 363      29.401  52.719  97.036  1.00  0.38           O  
HETATM  365  O   HOH T 364      16.875  68.894 154.229  1.00  0.39           O  
HETATM  366  O   HOH T 365      30.729  62.996 139.089  1.00  0.39           O  
HETATM  367  O   HOH T 366      15.159  21.100 102.866  1.00  0.39           O  
HETATM  368  O   HOH T 367      13.643  51.833 158.491  1.00  0.39           O  
HETATM  369  O   HOH T 368      27.473  34.824  75.744  1.00  0.39           O  
HETATM  370  O   HOH T 369      45.667  36.754 139.571  1.00  0.39           O  
HETATM  371  O   HOH T 370       5.352  55.104  88.247  1.00  0.39           O  
HETATM  372  O   HOH T 371      34.627  64.899 151.630  1.00  0.39           O  
HETATM  373  O   HOH T 372      22.651  50.925 164.784  1.00  0.39           O  
HETATM  374  O   HOH T 373      27.478  67.964 146.681  1.00  0.39           O  
HETATM  375  O   HOH T 374      18.668  53.178 164.650  1.00  0.39           O  
HETATM  376  O   HOH T 375       8.703  74.808 136.036  1.00  0.39           O  
HETATM  377  O   HOH T 376      44.064  42.102 135.530  1.00  0.39           O  
HETATM  378  O   HOH T 377       7.561  63.436 154.301  1.00  0.39           O  
HETATM  379  O   HOH T 378      27.433  35.741 127.765  1.00  0.39           O  
HETATM  380  O   HOH T 379       4.582  59.836  89.269  1.00  0.39           O  
HETATM  381  O   HOH T 380      38.217  20.879 101.531  1.00  0.39           O  
HETATM  382  O   HOH T 381      12.414  68.761  87.107  1.00  0.39           O  
HETATM  383  O   HOH T 382      17.098  79.820 120.469  1.00  0.39           O  
HETATM  384  O   HOH T 383      28.668  80.309 136.069  1.00  0.39           O  
HETATM  385  O   HOH T 384       3.735  30.746  98.552  1.00  0.39           O  
HETATM  386  O   HOH T 385      18.425  36.599 132.718  1.00  0.39           O  
HETATM  387  O   HOH T 386       4.097  44.504 107.451  1.00  0.39           O  
HETATM  388  O   HOH T 387      26.184  37.610  77.625  1.00  0.39           O  
HETATM  389  O   HOH T 388      37.059  28.403 129.717  1.00  0.39           O  
HETATM  390  O   HOH T 389       9.467  68.198 139.584  1.00  0.39           O  
HETATM  391  O   HOH T 390      28.475  74.008 121.580  1.00  0.39           O  
HETATM  392  O   HOH T 391      32.560  57.660  94.134  1.00  0.39           O  
HETATM  393  O   HOH T 392       2.083  65.763 150.119  1.00  0.39           O  
HETATM  394  O   HOH T 393      26.466  23.052 136.221  1.00  0.39           O  
HETATM  395  O   HOH T 394      41.633  41.222 127.612  1.00  0.39           O  
HETATM  396  O   HOH T 395      42.220  47.012 151.680  1.00  0.39           O  
HETATM  397  O   HOH T 396      10.242  35.558 158.256  1.00  0.40           O  
HETATM  398  O   HOH T 397      29.823  17.618 102.948  1.00  0.40           O  
HETATM  399  O   HOH T 398       9.065  17.960 107.405  1.00  0.40           O  
HETATM  400  O   HOH T 399       7.011  63.954 129.349  1.00  0.40           O  
HETATM  401  O   HOH T 400      31.624  45.235 110.250  1.00  0.40           O  
HETATM  402  O   HOH T 401       1.426  61.237 119.129  1.00  0.40           O  
HETATM  403  O   HOH T 402      30.317  20.247 110.576  1.00  0.40           O  
HETATM  404  O   HOH T 403      29.139  46.601  87.832  1.00  0.40           O  
HETATM  405  O   HOH T 404       6.426  37.265  81.894  1.00  0.40           O  
HETATM  406  O   HOH T 405      21.136  23.117 113.205  1.00  0.40           O  
HETATM  407  O   HOH T 406      34.407  43.689  91.466  1.00  0.40           O  
HETATM  408  O   HOH T 407      10.886  38.954 128.082  1.00  0.40           O  
HETATM  409  O   HOH T 408       8.516  36.899  99.485  1.00  0.40           O  
HETATM  410  O   HOH T 409      18.057  32.195 153.206  1.00  0.40           O  
HETATM  411  O   HOH T 410      15.024  64.106 157.690  1.00  0.40           O  
HETATM  412  O   HOH T 411      28.994  76.464 122.741  1.00  0.40           O  
HETATM  413  O   HOH T 412      13.017  61.318 139.943  1.00  0.40           O  
HETATM  414  O   HOH T 413      12.058  37.688 119.792  1.00  0.40           O  
HETATM  415  O   HOH T 414       3.114  63.428 124.469  1.00  0.40           O  
HETATM  416  O   HOH T 415      18.536  55.390 112.107  1.00  0.40           O  
HETATM  417  O   HOH T 416      20.272  46.204 161.730  1.00  0.40           O  
HETATM  418  O   HOH T 417       8.173  21.316  72.462  1.00  0.40           O  
HETATM  419  O   HOH T 418      24.942  30.102  82.790  1.00  0.40           O  
HETATM  420  O   HOH T 419      28.760  29.914 124.223  1.00  0.40           O  
HETATM  421  O   HOH T 420      22.165  34.358 130.539  1.00  0.40           O  
HETATM  422  O   HOH T 421      26.772  69.208 141.558  1.00  0.40           O  
HETATM  423  O   HOH T 422      20.886  71.396 103.301  1.00  0.40           O  
HETATM  424  O   HOH T 423      27.431  33.370 126.335  1.00  0.40           O  
HETATM  425  O   HOH T 424      31.449  52.109 132.784  1.00  0.41           O  
HETATM  426  O   HOH T 425      16.593  68.319 110.163  1.00  0.41           O  
HETATM  427  O   HOH T 426      22.041  66.553 140.133  1.00  0.41           O  
HETATM  428  O   HOH T 427      35.649  32.573 132.179  1.00  0.41           O  
HETATM  429  O   HOH T 428       0.201  55.104  86.972  1.00  0.41           O  
HETATM  430  O   HOH T 429      34.954  72.617 128.714  1.00  0.41           O  
HETATM  431  O   HOH T 430      38.916  45.410 156.547  1.00  0.41           O  
HETATM  432  O   HOH T 431      16.013  67.870  96.708  1.00  0.41           O  
HETATM  433  O   HOH T 432      22.405  38.150 153.911  1.00  0.41           O  
HETATM  434  O   HOH T 433      25.962  46.008  83.461  1.00  0.41           O  
HETATM  435  O   HOH T 434      23.186  33.348  86.613  1.00  0.41           O  
HETATM  436  O   HOH T 435      15.558  64.008 110.812  1.00  0.41           O  
HETATM  437  O   HOH T 436       9.339  58.393  96.022  1.00  0.41           O  
HETATM  438  O   HOH T 437       9.956  45.117 132.780  1.00  0.41           O  
HETATM  439  O   HOH T 438      21.259  60.696  77.751  1.00  0.41           O  
HETATM  440  O   HOH T 439      41.985  43.849 136.225  1.00  0.41           O  
HETATM  441  O   HOH T 440      35.746  64.022 119.170  1.00  0.41           O  
HETATM  442  O   HOH T 441      31.726  43.232  62.898  1.00  0.41           O  
HETATM  443  O   HOH T 442      27.577  52.181  95.011  1.00  0.41           O  
HETATM  444  O   HOH T 443      30.972  75.474 137.639  1.00  0.41           O  
HETATM  445  O   HOH T 444       2.937  55.281  86.936  1.00  0.41           O  
HETATM  446  O   HOH T 445      30.779  16.413  90.687  1.00  0.41           O  
HETATM  447  O   HOH T 446      13.539  53.409 160.730  1.00  0.41           O  
HETATM  448  O   HOH T 447      27.197  82.538 135.420  1.00  0.41           O  
HETATM  449  O   HOH T 448      41.582  55.710 136.531  1.00  0.41           O  
HETATM  450  O   HOH T 449      13.218  19.502  66.757  1.00  0.41           O  
HETATM  451  O   HOH T 450       3.673  50.020  98.250  1.00  0.41           O  
HETATM  452  O   HOH T 451       4.616  62.518 129.064  1.00  0.41           O  
HETATM  453  O   HOH T 452       9.542  63.984 137.220  1.00  0.41           O  
HETATM  454  O   HOH T 453       5.647  40.397  94.050  1.00  0.41           O  
HETATM  455  O   HOH T 454       9.847  68.965 120.502  1.00  0.41           O  
HETATM  456  O   HOH T 455       4.868  33.125  87.035  1.00  0.41           O  
HETATM  457  O   HOH T 456      21.720  65.729 101.290  1.00  0.41           O  
HETATM  458  O   HOH T 457      36.775  65.992 128.400  1.00  0.41           O  
HETATM  459  O   HOH T 458      38.810  35.990 129.629  1.00  0.41           O  
HETATM  460  O   HOH T 459      10.581  32.439  69.406  1.00  0.41           O  
HETATM  461  O   HOH T 460       2.075  42.362  80.849  1.00  0.42           O  
HETATM  462  O   HOH T 461       0.670  43.501  78.587  1.00  0.42           O  
HETATM  463  O   HOH T 462      26.645  63.830 139.719  1.00  0.42           O  
HETATM  464  O   HOH T 463      36.132  40.577  92.091  1.00  0.42           O  
HETATM  465  O   HOH T 464       3.215  52.348 104.471  1.00  0.42           O  
HETATM  466  O   HOH T 465      18.581  53.242 104.698  1.00  0.42           O  
HETATM  467  O   HOH T 466      -0.766  45.460  81.291  1.00  0.42           O  
HETATM  468  O   HOH T 467      34.097  64.360 116.810  1.00  0.42           O  
HETATM  469  O   HOH T 468      19.266  80.665 135.158  1.00  0.42           O  
HETATM  470  O   HOH T 469       9.663  26.144  94.569  1.00  0.42           O  
HETATM  471  O   HOH T 470       7.041  56.731  95.550  1.00  0.42           O  
HETATM  472  O   HOH T 471      23.701  66.511  99.540  1.00  0.42           O  
HETATM  473  O   HOH T 472      26.638  83.499 131.985  1.00  0.42           O  
HETATM  474  O   HOH T 473      11.649  70.308 116.646  1.00  0.42           O  
HETATM  475  O   HOH T 474      31.533  72.947 123.508  1.00  0.42           O  
HETATM  476  O   HOH T 475      10.876  74.277 137.578  1.00  0.42           O  
HETATM  477  O   HOH T 476       2.163  65.740 125.661  1.00  0.42           O  
HETATM  478  O   HOH T 477       9.857  68.263 117.581  1.00  0.42           O  
HETATM  479  O   HOH T 478      19.603  82.831 129.163  1.00  0.42           O  
HETATM  480  O   HOH T 479      34.597  35.804 113.152  1.00  0.42           O  
HETATM  481  O   HOH T 480       7.093  33.058  85.427  1.00  0.42           O  
HETATM  482  O   HOH T 481       7.006  21.396  93.024  1.00  0.42           O  
HETATM  483  O   HOH T 482       8.213  22.677  97.815  1.00  0.42           O  
HETATM  484  O   HOH T 483       4.106  52.822  87.255  1.00  0.42           O  
HETATM  485  O   HOH T 484       7.814  62.593 143.336  1.00  0.42           O  
HETATM  486  O   HOH T 485      21.765  33.144 118.315  1.00  0.42           O  
HETATM  487  O   HOH T 486      33.714  74.727 123.846  1.00  0.42           O  
HETATM  488  O   HOH T 487      37.935  24.404 124.032  1.00  0.43           O  
HETATM  489  O   HOH T 488       7.070  27.443 102.053  1.00  0.43           O  
HETATM  490  O   HOH T 489      21.911  34.155  69.506  1.00  0.43           O  
HETATM  491  O   HOH T 490      40.257  42.241 125.425  1.00  0.43           O  
HETATM  492  O   HOH T 491      29.805  73.840 139.460  1.00  0.43           O  
HETATM  493  O   HOH T 492      29.409  52.026  90.117  1.00  0.43           O  
HETATM  494  O   HOH T 493      40.982  44.489 129.783  1.00  0.43           O  
HETATM  495  O   HOH T 494      39.754  39.628 126.251  1.00  0.43           O  
HETATM  496  O   HOH T 495       9.649  24.183 111.732  1.00  0.43           O  
HETATM  497  O   HOH T 496      23.679  66.081  77.080  1.00  0.43           O  
HETATM  498  O   HOH T 497      30.554  58.562  95.739  1.00  0.43           O  
HETATM  499  O   HOH T 498       5.672  73.323  94.237  1.00  0.43           O  
HETATM  500  O   HOH T 499      40.970  41.234 150.005  1.00  0.43           O  
HETATM  501  O   HOH T 500       0.254  46.800 111.476  1.00  0.43           O  
HETATM  502  O   HOH T 501      26.783  48.688 164.464  1.00  0.43           O  
HETATM  503  O   HOH T 502      28.807  64.808 138.284  1.00  0.43           O  
HETATM  504  O   HOH T 503      14.754  61.193 110.868  1.00  0.43           O  
HETATM  505  O   HOH T 504      42.114  44.448 152.736  1.00  0.43           O  
HETATM  506  O   HOH T 505      24.426  34.721  88.765  1.00  0.43           O  
HETATM  507  O   HOH T 506      -2.850  65.138 151.269  1.00  0.43           O  
HETATM  508  O   HOH T 507       7.741  70.089  70.890  1.00  0.43           O  
HETATM  509  O   HOH T 508      14.253  61.749  99.804  1.00  0.43           O  
HETATM  510  O   HOH T 509      13.424  31.194 151.613  1.00  0.43           O  
HETATM  511  O   HOH T 510      20.029  59.654  85.116  1.00  0.43           O  
HETATM  512  O   HOH T 511      35.834  28.514 151.090  1.00  0.43           O  
HETATM  513  O   HOH T 512      28.384  48.779  99.394  1.00  0.43           O  
HETATM  514  O   HOH T 513      22.039  38.484 159.956  1.00  0.43           O  
HETATM  515  O   HOH T 514      26.965  72.009 141.598  1.00  0.43           O  
HETATM  516  O   HOH T 515      30.772  54.838  98.182  1.00  0.43           O  
HETATM  517  O   HOH T 516      17.080  25.931  68.823  1.00  0.43           O  
HETATM  518  O   HOH T 517      43.346  46.320 149.156  1.00  0.43           O  
HETATM  519  O   HOH T 518       2.208  69.868 120.723  1.00  0.43           O  
HETATM  520  O   HOH T 519      10.026  57.577 157.367  1.00  0.43           O  
HETATM  521  O   HOH T 520       8.013  65.621  95.634  1.00  0.43           O  
HETATM  522  O   HOH T 521      37.255  53.127 139.988  1.00  0.43           O  
HETATM  523  O   HOH T 522      31.407  44.771  93.184  1.00  0.43           O  
HETATM  524  O   HOH T 523       2.085  57.620  77.193  1.00  0.43           O  
HETATM  525  O   HOH T 524      23.469  71.094  92.429  1.00  0.44           O  
HETATM  526  O   HOH T 525      14.706  33.071 149.895  1.00  0.44           O  
HETATM  527  O   HOH T 526      12.978  18.369  71.976  1.00  0.44           O  
HETATM  528  O   HOH T 527       8.228  23.221  85.716  1.00  0.44           O  
HETATM  529  O   HOH T 528      30.170  57.495  98.253  1.00  0.44           O  
HETATM  530  O   HOH T 529      20.454  58.402 106.988  1.00  0.44           O  
HETATM  531  O   HOH T 530      34.530  21.256 100.777  1.00  0.44           O  
HETATM  532  O   HOH T 531      35.948  75.379 125.473  1.00  0.44           O  
HETATM  533  O   HOH T 532      16.558  68.134  74.465  1.00  0.44           O  
HETATM  534  O   HOH T 533       5.219  67.644  72.801  1.00  0.44           O  
HETATM  535  O   HOH T 534      14.591  49.379 101.766  1.00  0.44           O  
HETATM  536  O   HOH T 535      21.037  56.760 134.809  1.00  0.44           O  
HETATM  537  O   HOH T 536       5.927  19.360  94.734  1.00  0.44           O  
HETATM  538  O   HOH T 537      27.486  67.930 143.953  1.00  0.44           O  
HETATM  539  O   HOH T 538      17.519  36.310 141.869  1.00  0.44           O  
HETATM  540  O   HOH T 539       6.577  19.564 110.481  1.00  0.44           O  
HETATM  541  O   HOH T 540      36.033  27.612 135.158  1.00  0.44           O  
HETATM  542  O   HOH T 541      24.796  48.374 114.443  1.00  0.44           O  
HETATM  543  O   HOH T 542      21.448  44.779 163.811  1.00  0.44           O  
HETATM  544  O   HOH T 543       2.895  43.665  73.115  1.00  0.44           O  
HETATM  545  O   HOH T 544      37.588  33.837 130.739  1.00  0.44           O  
HETATM  546  O   HOH T 545      12.861  22.954  68.708  1.00  0.44           O  
HETATM  547  O   HOH T 546       2.938  38.781  72.952  1.00  0.44           O  
HETATM  548  O   HOH T 547      15.475  38.252 118.049  1.00  0.44           O  
HETATM  549  O   HOH T 548      32.725  26.603 142.761  1.00  0.44           O  
HETATM  550  O   HOH T 549       8.776  46.014 117.988  1.00  0.44           O  
HETATM  551  O   HOH T 550      34.893  39.870 119.830  1.00  0.44           O  
HETATM  552  O   HOH T 551      17.871  36.337 135.350  1.00  0.44           O  
HETATM  553  O   HOH T 552      35.318  42.863 101.769  1.00  0.44           O  
HETATM  554  O   HOH T 553       5.988  32.919  82.884  1.00  0.44           O  
HETATM  555  O   HOH T 554       1.871  61.667  71.209  1.00  0.44           O  
HETATM  556  O   HOH T 555      35.718  25.970 152.206  1.00  0.44           O  
HETATM  557  O   HOH T 556       7.708  37.185  96.761  1.00  0.44           O  
HETATM  558  O   HOH T 557      38.177  32.881 133.326  1.00  0.44           O  
HETATM  559  O   HOH T 558      24.089  29.186 142.925  1.00  0.44           O  
HETATM  560  O   HOH T 559      21.240  62.342 161.213  1.00  0.44           O  
HETATM  561  O   HOH T 560       5.230  70.808 129.741  1.00  0.44           O  
HETATM  562  O   HOH T 561      35.092  26.961 102.920  1.00  0.44           O  
HETATM  563  O   HOH T 562       5.996  37.900  98.906  1.00  0.44           O  
HETATM  564  O   HOH T 563       6.861  68.953 128.536  1.00  0.44           O  
HETATM  565  O   HOH T 564      34.760  53.599 141.743  1.00  0.44           O  
HETATM  566  O   HOH T 565       6.529  41.597 100.510  1.00  0.45           O  
HETATM  567  O   HOH T 566       5.631  43.780  68.602  1.00  0.45           O  
HETATM  568  O   HOH T 567      10.609  21.136 102.192  1.00  0.45           O  
HETATM  569  O   HOH T 568       8.264  51.444 109.244  1.00  0.45           O  
HETATM  570  O   HOH T 569      30.148  57.676 143.712  1.00  0.45           O  
HETATM  571  O   HOH T 570      12.082  55.951 158.485  1.00  0.45           O  
HETATM  572  O   HOH T 571      37.330  35.521 127.220  1.00  0.45           O  
HETATM  573  O   HOH T 572      10.770  43.617 128.816  1.00  0.45           O  
HETATM  574  O   HOH T 573       2.151  50.306 106.099  1.00  0.45           O  
HETATM  575  O   HOH T 574       7.374  38.970 101.142  1.00  0.45           O  
HETATM  576  O   HOH T 575      15.484  59.346 100.516  1.00  0.45           O  
HETATM  577  O   HOH T 576       2.486  44.520 100.764  1.00  0.45           O  
HETATM  578  O   HOH T 577      25.301  46.781  93.171  1.00  0.45           O  
HETATM  579  O   HOH T 578      27.403  74.518 140.494  1.00  0.45           O  
HETATM  580  O   HOH T 579      30.339  60.161  98.060  1.00  0.45           O  
HETATM  581  O   HOH T 580      30.400  76.935 106.147  1.00  0.45           O  
HETATM  582  O   HOH T 581      17.341  38.189  94.037  1.00  0.45           O  
HETATM  583  O   HOH T 582      27.459  49.130 167.151  1.00  0.45           O  
HETATM  584  O   HOH T 583      24.803  49.334  93.912  1.00  0.45           O  
HETATM  585  O   HOH T 584      31.686  51.209 121.041  1.00  0.45           O  
HETATM  586  O   HOH T 585      40.186  43.836 154.635  1.00  0.45           O  
HETATM  587  O   HOH T 586      10.572  38.844 154.749  1.00  0.45           O  
HETATM  588  O   HOH T 587      21.263  66.937  72.459  1.00  0.45           O  
HETATM  589  O   HOH T 588      25.720  26.877 142.963  1.00  0.45           O  
HETATM  590  O   HOH T 589      19.007  34.088 141.421  1.00  0.45           O  
HETATM  591  O   HOH T 590       4.340  67.139 150.678  1.00  0.45           O  
HETATM  592  O   HOH T 591      35.297  54.494 131.947  1.00  0.45           O  
HETATM  593  O   HOH T 592      30.929  53.670 138.298  1.00  0.45           O  
HETATM  594  O   HOH T 593      13.703  34.907 126.446  1.00  0.45           O  
HETATM  595  O   HOH T 594      -0.308  60.732  72.732  1.00  0.45           O  
HETATM  596  O   HOH T 595      15.586  76.413 130.199  1.00  0.45           O  
HETATM  597  O   HOH T 596      35.107  38.124 117.634  1.00  0.45           O  
HETATM  598  O   HOH T 597      27.723  43.664 159.848  1.00  0.45           O  
HETATM  599  O   HOH T 598      28.291  36.335 123.539  1.00  0.45           O  
HETATM  600  O   HOH T 599      16.778  70.895 107.015  1.00  0.45           O  
HETATM  601  O   HOH T 600       9.967  63.423 141.695  1.00  0.45           O  
HETATM  602  O   HOH T 601       3.128  55.788  75.363  1.00  0.45           O  
HETATM  603  O   HOH T 602      16.266  44.328 161.989  1.00  0.45           O  
HETATM  604  O   HOH T 603       4.729  53.328 130.269  1.00  0.45           O  
HETATM  605  O   HOH T 604      10.329  25.147 103.384  1.00  0.45           O  
HETATM  606  O   HOH T 605      16.338  35.589 144.299  1.00  0.45           O  
HETATM  607  O   HOH T 606       7.962  46.240 125.290  1.00  0.45           O  
HETATM  608  O   HOH T 607      21.498  71.161 100.553  1.00  0.45           O  
HETATM  609  O   HOH T 608       5.873  65.905 116.327  1.00  0.45           O  
HETATM  610  O   HOH T 609      24.350  54.607 106.752  1.00  0.46           O  
HETATM  611  O   HOH T 610       0.851  54.267 120.717  1.00  0.46           O  
HETATM  612  O   HOH T 611       5.045  43.771 101.243  1.00  0.46           O  
HETATM  613  O   HOH T 612      44.367  38.093 141.678  1.00  0.46           O  
HETATM  614  O   HOH T 613      20.065  30.549 149.122  1.00  0.46           O  
HETATM  615  O   HOH T 614      39.765  50.939 166.857  1.00  0.46           O  
HETATM  616  O   HOH T 615       1.257  32.323  81.532  1.00  0.46           O  
HETATM  617  O   HOH T 616      40.513  21.583  98.332  1.00  0.46           O  
HETATM  618  O   HOH T 617      33.007  45.021  78.684  1.00  0.46           O  
HETATM  619  O   HOH T 618      11.772  46.453 134.550  1.00  0.46           O  
HETATM  620  O   HOH T 619      10.580  67.256 115.052  1.00  0.46           O  
HETATM  621  O   HOH T 620       2.231  59.930  78.712  1.00  0.46           O  
HETATM  622  O   HOH T 621      32.833  34.609  86.721  1.00  0.46           O  
HETATM  623  O   HOH T 622      34.107  18.697  96.982  1.00  0.46           O  
HETATM  624  O   HOH T 623      36.099  27.546 132.252  1.00  0.46           O  
HETATM  625  O   HOH T 624      38.354  40.880 148.967  1.00  0.46           O  
HETATM  626  O   HOH T 625      20.877  35.323 132.859  1.00  0.46           O  
HETATM  627  O   HOH T 626      38.189  42.776 156.266  1.00  0.46           O  
HETATM  628  O   HOH T 627      23.403  82.118 124.837  1.00  0.46           O  
HETATM  629  O   HOH T 628       8.995  57.421 150.617  1.00  0.46           O  
HETATM  630  O   HOH T 629      26.532  51.636 168.056  1.00  0.46           O  
HETATM  631  O   HOH T 630      37.438  52.579 151.090  1.00  0.46           O  
HETATM  632  O   HOH T 631       6.342  21.410  86.611  1.00  0.46           O  
HETATM  633  O   HOH T 632      14.606  45.337 159.823  1.00  0.46           O  
HETATM  634  O   HOH T 633      22.145  81.315 122.514  1.00  0.46           O  
HETATM  635  O   HOH T 634       9.443  30.614  71.308  1.00  0.46           O  
HETATM  636  O   HOH T 635      31.193  50.178 166.213  1.00  0.46           O  
HETATM  637  O   HOH T 636      39.934  25.024 122.183  1.00  0.46           O  
HETATM  638  O   HOH T 637      11.969  54.433 112.926  1.00  0.46           O  
HETATM  639  O   HOH T 638      21.977  66.155  93.776  1.00  0.46           O  
HETATM  640  O   HOH T 639      10.276  39.717 120.708  1.00  0.46           O  
HETATM  641  O   HOH T 640      27.536  65.664 160.445  1.00  0.46           O  
HETATM  642  O   HOH T 641      18.518  53.546 107.535  1.00  0.46           O  
HETATM  643  O   HOH T 642      32.562  72.335 119.202  1.00  0.46           O  
HETATM  644  O   HOH T 643       7.404  31.740  95.632  1.00  0.46           O  
HETATM  645  O   HOH T 644      38.897  52.561 148.842  1.00  0.46           O  
HETATM  646  O   HOH T 645      23.977  34.674  84.309  1.00  0.46           O  
HETATM  647  O   HOH T 646       1.344  48.024 104.918  1.00  0.46           O  
HETATM  648  O   HOH T 647       9.037  59.252 138.498  1.00  0.46           O  
HETATM  649  O   HOH T 648      12.178  38.880 140.893  1.00  0.46           O  
HETATM  650  O   HOH T 649      18.640  55.883 165.378  1.00  0.46           O  
HETATM  651  O   HOH T 650      32.377  32.792 124.826  1.00  0.46           O  
HETATM  652  O   HOH T 651      -3.904  46.609  77.802  1.00  0.47           O  
HETATM  653  O   HOH T 652       6.575  52.243 121.200  1.00  0.47           O  
HETATM  654  O   HOH T 653      28.562  37.371  76.209  1.00  0.47           O  
HETATM  655  O   HOH T 654      32.599  46.189 112.637  1.00  0.47           O  
HETATM  656  O   HOH T 655      15.487  23.654  69.297  1.00  0.47           O  
HETATM  657  O   HOH T 656      37.535  63.581 127.246  1.00  0.47           O  
HETATM  658  O   HOH T 657       2.724  38.991  96.572  1.00  0.47           O  
HETATM  659  O   HOH T 658      27.684  53.396 102.024  1.00  0.47           O  
HETATM  660  O   HOH T 659      12.640  39.204 156.624  1.00  0.47           O  
HETATM  661  O   HOH T 660       2.652  61.225 121.618  1.00  0.47           O  
HETATM  662  O   HOH T 661      36.181  24.359 149.993  1.00  0.47           O  
HETATM  663  O   HOH T 662      23.578  36.435 129.224  1.00  0.47           O  
HETATM  664  O   HOH T 663      38.908  37.090 125.423  1.00  0.47           O  
HETATM  665  O   HOH T 664      15.140  37.369 142.554  1.00  0.47           O  
HETATM  666  O   HOH T 665       5.195  68.197 130.605  1.00  0.47           O  
HETATM  667  O   HOH T 666      29.228  51.170 119.634  1.00  0.47           O  
HETATM  668  O   HOH T 667      43.825  43.882 150.545  1.00  0.47           O  
HETATM  669  O   HOH T 668       7.660  26.112  71.851  1.00  0.47           O  
HETATM  670  O   HOH T 669      29.399  27.300 123.961  1.00  0.47           O  
HETATM  671  O   HOH T 670      16.153  34.703 127.220  1.00  0.47           O  
HETATM  672  O   HOH T 671      29.094  60.820  95.722  1.00  0.47           O  
HETATM  673  O   HOH T 672      24.590  65.664  94.506  1.00  0.47           O  
HETATM  674  O   HOH T 673       3.157  71.645 122.650  1.00  0.47           O  
HETATM  675  O   HOH T 674      39.323  48.662 165.292  1.00  0.47           O  
HETATM  676  O   HOH T 675      11.433  36.408 117.369  1.00  0.47           O  
HETATM  677  O   HOH T 676      41.972  44.726 132.318  1.00  0.47           O  
HETATM  678  O   HOH T 677      11.857  52.585 156.471  1.00  0.47           O  
HETATM  679  O   HOH T 678      19.254  64.748 101.681  1.00  0.47           O  
HETATM  680  O   HOH T 679      32.785  58.258 144.190  1.00  0.47           O  
HETATM  681  O   HOH T 680       1.196  42.480 110.251  1.00  0.47           O  
HETATM  682  O   HOH T 681       7.912  67.673  72.118  1.00  0.47           O  
HETATM  683  O   HOH T 682       7.174  32.307  71.769  1.00  0.47           O  
HETATM  684  O   HOH T 683       6.325  35.626 113.020  1.00  0.47           O  
HETATM  685  O   HOH T 684      10.233  70.320  88.022  1.00  0.47           O  
HETATM  686  O   HOH T 685      26.355  16.438  90.505  1.00  0.47           O  
HETATM  687  O   HOH T 686      31.205  73.684 108.867  1.00  0.47           O  
HETATM  688  O   HOH T 687      15.892  20.267  66.277  1.00  0.48           O  
HETATM  689  O   HOH T 688      15.427  34.205 147.404  1.00  0.48           O  
HETATM  690  O   HOH T 689      16.738  22.338 112.748  1.00  0.48           O  
HETATM  691  O   HOH T 690      15.148  59.178 158.771  1.00  0.48           O  
HETATM  692  O   HOH T 691       7.420  25.104  87.564  1.00  0.48           O  
HETATM  693  O   HOH T 692      18.961  43.987 162.773  1.00  0.48           O  
HETATM  694  O   HOH T 693       1.622  41.232  73.670  1.00  0.48           O  
HETATM  695  O   HOH T 694      17.732  61.051 100.757  1.00  0.48           O  
HETATM  696  O   HOH T 695      29.254  72.914  86.744  1.00  0.48           O  
HETATM  697  O   HOH T 696      13.016  56.162 161.152  1.00  0.48           O  
HETATM  698  O   HOH T 697      13.099  18.672 107.718  1.00  0.48           O  
HETATM  699  O   HOH T 698      25.044  50.204 166.137  1.00  0.48           O  
HETATM  700  O   HOH T 699      22.356  68.778  93.342  1.00  0.48           O  
HETATM  701  O   HOH T 700      12.132  72.180 114.746  1.00  0.48           O  
HETATM  702  O   HOH T 701       0.001  46.287 106.633  1.00  0.48           O  
HETATM  703  O   HOH T 702      29.276  53.225  99.800  1.00  0.48           O  
HETATM  704  O   HOH T 703      34.207  56.775 133.128  1.00  0.48           O  
HETATM  705  O   HOH T 704       3.259  30.974 116.491  1.00  0.48           O  
HETATM  706  O   HOH T 705      20.077  15.932  90.027  1.00  0.48           O  
HETATM  707  O   HOH T 706      29.076  46.380  80.022  1.00  0.48           O  
HETATM  708  O   HOH T 707      25.990  15.233  94.964  1.00  0.48           O  
HETATM  709  O   HOH T 708      11.329  16.542 107.774  1.00  0.48           O  
HETATM  710  O   HOH T 709      -3.272  47.734  84.255  1.00  0.48           O  
HETATM  711  O   HOH T 710      11.087  33.767 116.564  1.00  0.48           O  
HETATM  712  O   HOH T 711      22.503  30.692 135.088  1.00  0.48           O  
HETATM  713  O   HOH T 712      22.624  56.728 106.259  1.00  0.48           O  
HETATM  714  O   HOH T 713      19.617  38.682 157.399  1.00  0.48           O  
HETATM  715  O   HOH T 714      27.623  51.135 100.555  1.00  0.48           O  
HETATM  716  O   HOH T 715      10.190  66.243 141.372  1.00  0.48           O  
HETATM  717  O   HOH T 716       6.565  58.225 137.750  1.00  0.48           O  
HETATM  718  O   HOH T 717       4.586  31.492  95.977  1.00  0.48           O  
HETATM  719  O   HOH T 718      28.349  63.981  78.661  1.00  0.48           O  
HETATM  720  O   HOH T 719      -8.355  26.511  84.184  1.00  0.48           O  
HETATM  721  O   HOH T 720      18.569  24.215 112.751  1.00  0.48           O  
HETATM  722  O   HOH T 721       4.100  41.288  97.357  1.00  0.48           O  
HETATM  723  O   HOH T 722      26.838  23.722 138.957  1.00  0.48           O  
HETATM  724  O   HOH T 723      28.499  67.959  76.786  1.00  0.48           O  
HETATM  725  O   HOH T 724       5.727  60.251  69.553  1.00  0.48           O  
HETATM  726  O   HOH T 725      21.842  42.981 122.802  1.00  0.48           O  
HETATM  727  O   HOH T 726       7.424  59.103  94.249  1.00  0.48           O  
HETATM  728  O   HOH T 727      20.948  53.368 106.124  1.00  0.48           O  
HETATM  729  O   HOH T 728      42.219  37.953 144.751  1.00  0.48           O  
HETATM  730  O   HOH T 729      11.900  57.657 148.399  1.00  0.49           O  
HETATM  731  O   HOH T 730      11.449  43.901 151.958  1.00  0.49           O  
HETATM  732  O   HOH T 731      32.369  56.643  96.720  1.00  0.49           O  
HETATM  733  O   HOH T 732      43.596  45.187 130.158  1.00  0.49           O  
HETATM  734  O   HOH T 733      28.330  49.538 106.809  1.00  0.49           O  
HETATM  735  O   HOH T 734       6.409  71.331 127.229  1.00  0.49           O  
HETATM  736  O   HOH T 735      44.041  48.618 150.625  1.00  0.49           O  
HETATM  737  O   HOH T 736      19.233  21.592 111.832  1.00  0.49           O  
HETATM  738  O   HOH T 737      42.889  40.020 151.763  1.00  0.49           O  
HETATM  739  O   HOH T 738       5.889  55.243  75.803  1.00  0.49           O  
HETATM  740  O   HOH T 739      27.209  78.674 137.866  1.00  0.49           O  
HETATM  741  O   HOH T 740      11.336  53.303 159.014  1.00  0.49           O  
HETATM  742  O   HOH T 741      10.088  50.945 151.941  1.00  0.49           O  
HETATM  743  O   HOH T 742      15.734  40.390 160.269  1.00  0.49           O  
HETATM  744  O   HOH T 743       3.056  53.521 122.187  1.00  0.49           O  
HETATM  745  O   HOH T 744      20.040  67.471  70.097  1.00  0.49           O  
HETATM  746  O   HOH T 745       5.618  54.482 134.520  1.00  0.49           O  
HETATM  747  O   HOH T 746      38.332  21.783 121.085  1.00  0.49           O  
HETATM  748  O   HOH T 747      35.092  47.904 130.285  1.00  0.49           O  
HETATM  749  O   HOH T 748      38.831  52.215 146.150  1.00  0.49           O  
HETATM  750  O   HOH T 749       5.947  66.383 128.608  1.00  0.49           O  
HETATM  751  O   HOH T 750      31.621  46.160 101.364  1.00  0.49           O  
HETATM  752  O   HOH T 751      28.656  49.908  73.312  1.00  0.49           O  
HETATM  753  O   HOH T 752      34.274  73.155 131.404  1.00  0.49           O  
HETATM  754  O   HOH T 753      35.507  49.819 163.881  1.00  0.49           O  
HETATM  755  O   HOH T 754       4.158  60.169  71.853  1.00  0.49           O  
HETATM  756  O   HOH T 755      11.505  58.278 145.797  1.00  0.49           O  
HETATM  757  O   HOH T 756       2.250  51.527 101.959  1.00  0.49           O  
HETATM  758  O   HOH T 757      26.839  60.341 164.456  1.00  0.49           O  
HETATM  759  O   HOH T 758      25.638  33.652 128.444  1.00  0.49           O  
HETATM  760  O   HOH T 759      10.569  66.505  95.841  1.00  0.49           O  
HETATM  761  O   HOH T 760      30.161  27.344 143.520  1.00  0.49           O  
HETATM  762  O   HOH T 761      34.949  33.138 124.100  1.00  0.49           O  
HETATM  763  O   HOH T 762       2.414  40.475 111.917  1.00  0.49           O  
HETATM  764  O   HOH T 763      17.355  66.849  70.478  1.00  0.49           O  
HETATM  765  O   HOH T 764       0.775  45.301 109.203  1.00  0.49           O  
HETATM  766  O   HOH T 765       3.105  42.633 102.783  1.00  0.49           O  
HETATM  767  O   HOH T 766      36.088  35.540 150.614  1.00  0.49           O  
HETATM  768  O   HOH T 767      28.146  26.847 141.707  1.00  0.50           O  
HETATM  769  O   HOH T 768      23.783  65.368  97.083  1.00  0.50           O  
HETATM  770  O   HOH T 769      31.609  50.400 118.435  1.00  0.50           O  
HETATM  771  O   HOH T 770      43.053  41.899 137.971  1.00  0.50           O  
HETATM  772  O   HOH T 771      43.813  41.232 149.573  1.00  0.50           O  
HETATM  773  O   HOH T 772       7.088  29.691  72.473  1.00  0.50           O  
HETATM  774  O   HOH T 773      33.996  81.840 127.062  1.00  0.50           O  
HETATM  775  O   HOH T 774       8.292  68.107 146.062  1.00  0.50           O  
HETATM  776  O   HOH T 775      11.190  71.520 149.703  1.00  0.50           O  
HETATM  777  O   HOH T 776      19.557  23.505 115.326  1.00  0.50           O  
HETATM  778  O   HOH T 777      12.046  62.386 110.789  1.00  0.50           O  
HETATM  779  O   HOH T 778      20.328  55.660 107.530  1.00  0.50           O  
HETATM  780  O   HOH T 779      24.417  29.851  80.154  1.00  0.50           O  
HETATM  781  O   HOH T 780       9.181  37.618 126.365  1.00  0.50           O  
HETATM  782  O   HOH T 781      13.050  65.629 106.937  1.00  0.50           O  
HETATM  783  O   HOH T 782      27.430  59.204 105.116  1.00  0.50           O  
HETATM  784  O   HOH T 783       5.026  19.935  84.678  1.00  0.50           O  
HETATM  785  O   HOH T 784      22.506  18.544 106.511  1.00  0.50           O  
HETATM  786  O   HOH T 785      27.504  45.214  92.414  1.00  0.50           O  
HETATM  787  O   HOH T 786      21.278  69.463  73.685  1.00  0.50           O  
HETATM  788  O   HOH T 787      28.440  53.650 167.852  1.00  0.50           O  
HETATM  789  O   HOH T 788      35.262  75.298 128.218  1.00  0.50           O  
HETATM  790  O   HOH T 789      15.425  33.900 124.657  1.00  0.50           O  
HETATM  791  O   HOH T 790       4.892  34.599  84.713  1.00  0.50           O  
HETATM  792  O   HOH T 791      28.661  47.103  73.231  1.00  0.50           O  
HETATM  793  O   HOH T 792      38.849  40.506  91.799  1.00  0.50           O  
HETATM  794  O   HOH T 793      24.438  82.551 127.229  1.00  0.50           O  
HETATM  795  O   HOH T 794      27.423  48.664  93.481  1.00  0.50           O  
HETATM  796  O   HOH T 795      24.145  83.412 122.491  1.00  0.50           O  
HETATM  797  O   HOH T 796      30.880  54.494 167.875  1.00  0.50           O  
HETATM  798  O   HOH T 797      28.074  50.263  97.005  1.00  0.50           O  
HETATM  799  O   HOH T 798       1.004  41.129 103.928  1.00  0.50           O  
HETATM  800  O   HOH T 799       2.607  45.686 105.476  1.00  0.50           O  
HETATM  801  O   HOH T 800      13.747  24.911  75.305  1.00  0.50           O  
HETATM  802  O   HOH T 801      24.564  40.408  85.030  1.00  0.50           O  
HETATM  803  O   HOH T 802      -5.420  64.200 144.273  1.00  0.50           O  
HETATM  804  O   HOH T 803      27.458  44.445  88.467  1.00  0.50           O  
HETATM  805  O   HOH T 804      11.231  59.950 158.421  1.00  0.50           O  
HETATM  806  O   HOH T 805      24.312  27.402 145.197  1.00  0.50           O  
HETATM  807  O   HOH T 806      -0.731  44.152 111.353  1.00  0.50           O  
HETATM  808  O   HOH T 807      -3.008  60.460  87.411  1.00  0.51           O  
HETATM  809  O   HOH T 808      -0.462  70.645 120.584  1.00  0.51           O  
HETATM  810  O   HOH T 809       6.785  37.925  94.259  1.00  0.51           O  
HETATM  811  O   HOH T 810       0.119  39.934 110.689  1.00  0.51           O  
HETATM  812  O   HOH T 811      42.545  37.959 131.264  1.00  0.51           O  
HETATM  813  O   HOH T 812      28.596  33.767 155.892  1.00  0.51           O  
HETATM  814  O   HOH T 813      15.421  57.090 102.294  1.00  0.51           O  
HETATM  815  O   HOH T 814      37.034  70.465 125.032  1.00  0.51           O  
HETATM  816  O   HOH T 815      25.081  37.132 126.982  1.00  0.51           O  
HETATM  817  O   HOH T 816      37.390  38.314 148.398  1.00  0.51           O  
HETATM  818  O   HOH T 817      -2.423  25.932  82.269  1.00  0.51           O  
HETATM  819  O   HOH T 818       7.449  67.314 136.870  1.00  0.51           O  
HETATM  820  O   HOH T 819      12.977  75.645 122.747  1.00  0.51           O  
HETATM  821  O   HOH T 820       1.728  60.020  76.015  1.00  0.51           O  
HETATM  822  O   HOH T 821      42.995  43.104 140.524  1.00  0.51           O  
HETATM  823  O   HOH T 822       2.012  36.991  77.886  1.00  0.51           O  
HETATM  824  O   HOH T 823      13.467  36.380 140.630  1.00  0.51           O  
HETATM  825  O   HOH T 824      11.513  36.697 156.158  1.00  0.51           O  
HETATM  826  O   HOH T 825      10.259  42.304 133.004  1.00  0.51           O  
HETATM  827  O   HOH T 826      40.203  22.674 100.845  1.00  0.51           O  
HETATM  828  O   HOH T 827      37.333  68.210 126.769  1.00  0.51           O  
HETATM  829  O   HOH T 828      35.888  43.923 125.357  1.00  0.51           O  
HETATM  830  O   HOH T 829       8.041  68.750 148.731  1.00  0.51           O  
HETATM  831  O   HOH T 830      -2.250  55.927  87.901  1.00  0.51           O  
HETATM  832  O   HOH T 831      11.918  51.024 160.396  1.00  0.51           O  
HETATM  833  O   HOH T 832       2.749  43.770  98.085  1.00  0.51           O  
HETATM  834  O   HOH T 833      21.886  63.185 163.709  1.00  0.51           O  
HETATM  835  O   HOH T 834      26.874  48.869 101.808  1.00  0.51           O  
HETATM  836  O   HOH T 835       6.269  57.416 150.891  1.00  0.51           O  
HETATM  837  O   HOH T 836      38.250  38.000 127.855  1.00  0.51           O  
HETATM  838  O   HOH T 837       4.036  68.809 118.924  1.00  0.51           O  
HETATM  839  O   HOH T 838       6.698  21.663  95.694  1.00  0.51           O  
HETATM  840  O   HOH T 839      31.421  61.485 113.211  1.00  0.51           O  
HETATM  841  O   HOH T 840      30.540  49.197  76.660  1.00  0.51           O  
HETATM  842  O   HOH T 841       8.807  23.731  93.200  1.00  0.51           O  
HETATM  843  O   HOH T 842      28.981  70.293  77.874  1.00  0.52           O  
HETATM  844  O   HOH T 843       6.120  52.555  75.405  1.00  0.52           O  
HETATM  845  O   HOH T 844      16.705  18.977  68.665  1.00  0.52           O  
HETATM  846  O   HOH T 845      26.382  36.930 121.660  1.00  0.52           O  
HETATM  847  O   HOH T 846       8.699  59.933 157.394  1.00  0.52           O  
HETATM  848  O   HOH T 847      25.905  16.598  97.343  1.00  0.52           O  
HETATM  849  O   HOH T 848      18.177  81.008 132.691  1.00  0.52           O  
HETATM  850  O   HOH T 849      26.062  72.137 104.462  1.00  0.52           O  
HETATM  851  O   HOH T 850      21.012  30.720 119.202  1.00  0.52           O  
HETATM  852  O   HOH T 851      22.630  71.296  75.398  1.00  0.52           O  
HETATM  853  O   HOH T 852      37.591  31.772 151.026  1.00  0.52           O  
HETATM  854  O   HOH T 853      30.002  42.125 160.399  1.00  0.52           O  
HETATM  855  O   HOH T 854      10.504  69.658 151.702  1.00  0.52           O  
HETATM  856  O   HOH T 855      21.028  31.677  67.853  1.00  0.52           O  
HETATM  857  O   HOH T 856      19.584  58.247 135.427  1.00  0.52           O  
HETATM  858  O   HOH T 857      13.347  32.754 117.697  1.00  0.52           O  
HETATM  859  O   HOH T 858       8.583  56.609 138.520  1.00  0.52           O  
HETATM  860  O   HOH T 859      24.214  34.929  70.735  1.00  0.52           O  
HETATM  861  O   HOH T 860      28.377  76.144 138.526  1.00  0.52           O  
HETATM  862  O   HOH T 861      39.480  43.645 131.439  1.00  0.52           O  
HETATM  863  O   HOH T 862      16.475  47.439 160.455  1.00  0.52           O  
HETATM  864  O   HOH T 863       2.358  37.236  75.219  1.00  0.52           O  
HETATM  865  O   HOH T 864      24.227  46.109 145.905  1.00  0.52           O  
HETATM  866  O   HOH T 865      13.914  75.545 134.356  1.00  0.52           O  
HETATM  867  O   HOH T 866      13.102  64.727 109.573  1.00  0.52           O  
HETATM  868  O   HOH T 867      -0.056  43.080  82.502  1.00  0.52           O  
HETATM  869  O   HOH T 868      30.736  26.603 140.895  1.00  0.52           O  
HETATM  870  O   HOH T 869      32.893  28.605  86.477  1.00  0.52           O  
HETATM  871  O   HOH T 870      28.066  48.350  75.558  1.00  0.52           O  
HETATM  872  O   HOH T 871      27.050  70.310 154.516  1.00  0.52           O  
HETATM  873  O   HOH T 872      26.647  70.583 143.984  1.00  0.52           O  
HETATM  874  O   HOH T 873      35.525  54.951 134.615  1.00  0.52           O  
HETATM  875  O   HOH T 874      28.215  35.805  78.306  1.00  0.52           O  
HETATM  876  O   HOH T 875       3.324  43.719  70.378  1.00  0.52           O  
HETATM  877  O   HOH T 876      31.694  46.809  80.462  1.00  0.52           O  
HETATM  878  O   HOH T 877       4.052  23.427  81.965  1.00  0.53           O  
HETATM  879  O   HOH T 878      33.398  63.494 139.409  1.00  0.53           O  
HETATM  880  O   HOH T 879      -5.029  66.761 150.797  1.00  0.53           O  
HETATM  881  O   HOH T 880      16.228  54.180 103.528  1.00  0.53           O  
HETATM  882  O   HOH T 881      18.598  50.604 165.490  1.00  0.53           O  
HETATM  883  O   HOH T 882       3.859  72.038  72.988  1.00  0.53           O  
HETATM  884  O   HOH T 883      35.750  59.744 163.752  1.00  0.53           O  
HETATM  885  O   HOH T 884      31.497  55.848 114.400  1.00  0.53           O  
HETATM  886  O   HOH T 885       7.253  50.106  72.889  1.00  0.53           O  
HETATM  887  O   HOH T 886      33.934  45.725  93.203  1.00  0.53           O  
HETATM  888  O   HOH T 887      39.869  37.229 147.745  1.00  0.53           O  
HETATM  889  O   HOH T 888      22.456  69.192 159.744  1.00  0.53           O  
HETATM  890  O   HOH T 889       7.392  50.435 139.879  1.00  0.53           O  
HETATM  891  O   HOH T 890      36.458  59.932 150.711  1.00  0.53           O  
HETATM  892  O   HOH T 891      28.620  66.603  86.786  1.00  0.53           O  
HETATM  893  O   HOH T 892      34.136  32.165  86.672  1.00  0.53           O  
HETATM  894  O   HOH T 893      30.470  73.668 119.705  1.00  0.53           O  
HETATM  895  O   HOH T 894      36.074  50.868 133.541  1.00  0.53           O  
HETATM  896  O   HOH T 895      41.289  52.617 147.442  1.00  0.53           O  
HETATM  897  O   HOH T 896      25.815  53.551  68.003  1.00  0.53           O  
HETATM  898  O   HOH T 897      30.237  81.248 122.777  1.00  0.53           O  
HETATM  899  O   HOH T 898      29.158  45.756  75.669  1.00  0.53           O  
HETATM  900  O   HOH T 899      29.258  51.094 168.012  1.00  0.53           O  
HETATM  901  O   HOH T 900       3.187  66.305 115.718  1.00  0.53           O  
HETATM  902  O   HOH T 901       9.037  65.430 116.393  1.00  0.53           O  
HETATM  903  O   HOH T 902      34.042  83.404 129.396  1.00  0.53           O  
HETATM  904  O   HOH T 903       2.139  34.056  79.458  1.00  0.54           O  
HETATM  905  O   HOH T 904       3.286  49.648 103.668  1.00  0.54           O  
HETATM  906  O   HOH T 905      17.812  21.103  80.261  1.00  0.54           O  
HETATM  907  O   HOH T 906      30.887  66.723 153.338  1.00  0.54           O  
HETATM  908  O   HOH T 907      13.094  64.122 100.372  1.00  0.54           O  
HETATM  909  O   HOH T 908      10.611  31.623  66.806  1.00  0.54           O  
HETATM  910  O   HOH T 909       5.761  55.980 103.811  1.00  0.54           O  
HETATM  911  O   HOH T 910      22.382  43.475 157.487  1.00  0.54           O  
HETATM  912  O   HOH T 911      25.824  28.967  85.187  1.00  0.54           O  
HETATM  913  O   HOH T 912      15.036  17.334  70.327  1.00  0.54           O  
HETATM  914  O   HOH T 913      10.598  40.621 142.420  1.00  0.54           O  
HETATM  915  O   HOH T 914      35.920  17.944  90.052  1.00  0.54           O  
HETATM  916  O   HOH T 915      10.490  20.211 104.840  1.00  0.54           O  
HETATM  917  O   HOH T 916      17.836  71.366 154.885  1.00  0.54           O  
HETATM  918  O   HOH T 917      34.030  57.626 146.555  1.00  0.54           O  
HETATM  919  O   HOH T 918      23.117  39.571 156.245  1.00  0.54           O  
HETATM  920  O   HOH T 919       2.716  70.690  94.882  1.00  0.54           O  
HETATM  921  O   HOH T 920      18.627  80.460 127.868  1.00  0.54           O  
HETATM  922  O   HOH T 921      30.046  45.248  63.743  1.00  0.54           O  
HETATM  923  O   HOH T 922       5.410  38.896  96.403  1.00  0.54           O  
HETATM  924  O   HOH T 923      28.594  62.561 106.620  1.00  0.54           O  
HETATM  925  O   HOH T 924      25.237  44.832 119.996  1.00  0.54           O  
HETATM  926  O   HOH T 925      37.193  68.705 116.633  1.00  0.54           O  
HETATM  927  O   HOH T 926      40.561  20.038 100.525  1.00  0.54           O  
HETATM  928  O   HOH T 927       8.052  18.605 100.453  1.00  0.54           O  
HETATM  929  O   HOH T 928      22.403  19.300 112.738  1.00  0.54           O  
HETATM  930  O   HOH T 929      25.906  64.998  98.794  1.00  0.54           O  
HETATM  931  O   HOH T 930      34.015  72.189 136.171  1.00  0.54           O  
HETATM  932  O   HOH T 931      35.338  48.958 166.420  1.00  0.54           O  
HETATM  933  O   HOH T 932      11.103  47.765 117.297  1.00  0.54           O  
HETATM  934  O   HOH T 933       3.988  65.018  89.256  1.00  0.54           O  
HETATM  935  O   HOH T 934      14.364  39.579 143.965  1.00  0.54           O  
HETATM  936  O   HOH T 935      11.462  62.278 137.903  1.00  0.54           O  
HETATM  937  O   HOH T 936      13.671  61.491 158.179  1.00  0.54           O  
HETATM  938  O   HOH T 937      13.494  62.889 107.464  1.00  0.54           O  
HETATM  939  O   HOH T 938      13.298  70.508 144.778  1.00  0.54           O  
HETATM  940  O   HOH T 939      13.770  25.351  67.887  1.00  0.54           O  
HETATM  941  O   HOH T 940      -1.865  64.859 145.124  1.00  0.54           O  
HETATM  942  O   HOH T 941      14.597  19.419 111.763  1.00  0.54           O  
HETATM  943  O   HOH T 942       5.282  57.290  89.973  1.00  0.54           O  
HETATM  944  O   HOH T 943      39.921  34.615 131.895  1.00  0.54           O  
HETATM  945  O   HOH T 944      33.951  38.497 141.106  1.00  0.55           O  
HETATM  946  O   HOH T 945      22.908  27.372  72.124  1.00  0.55           O  
HETATM  947  O   HOH T 946      11.020  22.706 104.568  1.00  0.55           O  
HETATM  948  O   HOH T 947      36.478  28.759  91.658  1.00  0.55           O  
HETATM  949  O   HOH T 948      28.018  84.823 133.985  1.00  0.55           O  
HETATM  950  O   HOH T 949      12.242  67.568  76.601  1.00  0.55           O  
HETATM  951  O   HOH T 950      36.336  38.776  94.095  1.00  0.55           O  
HETATM  952  O   HOH T 951      35.622  33.210 121.502  1.00  0.55           O  
HETATM  953  O   HOH T 952       2.319  55.946 128.784  1.00  0.55           O  
HETATM  954  O   HOH T 953      41.311  25.113 138.488  1.00  0.55           O  
HETATM  955  O   HOH T 954      25.151  30.872 128.580  1.00  0.55           O  
HETATM  956  O   HOH T 955       7.183  43.070 114.285  1.00  0.55           O  
HETATM  957  O   HOH T 956      33.592  30.846 123.276  1.00  0.55           O  
HETATM  958  O   HOH T 957      12.085  33.381 150.621  1.00  0.55           O  
HETATM  959  O   HOH T 958      34.741  52.426 164.595  1.00  0.55           O  
HETATM  960  O   HOH T 959       4.484  63.218 133.882  1.00  0.55           O  
HETATM  961  O   HOH T 960      28.457  48.693 104.157  1.00  0.55           O  
HETATM  962  O   HOH T 961      22.062  58.493 136.574  1.00  0.55           O  
HETATM  963  O   HOH T 962      26.144  66.683  88.719  1.00  0.55           O  
HETATM  964  O   HOH T 963      35.544  46.177 159.936  1.00  0.55           O  
HETATM  965  O   HOH T 964      31.622  78.084 136.887  1.00  0.55           O  
HETATM  966  O   HOH T 965      32.864  53.490 166.212  1.00  0.55           O  
HETATM  967  O   HOH T 966      29.144  46.936  90.702  1.00  0.55           O  
HETATM  968  O   HOH T 967      22.648  52.716 168.995  1.00  0.55           O  
HETATM  969  O   HOH T 968      14.072  57.824 145.056  1.00  0.55           O  
HETATM  970  O   HOH T 969      24.837  67.976  75.362  1.00  0.55           O  
HETATM  971  O   HOH T 970      19.303  80.712 119.035  1.00  0.56           O  
HETATM  972  O   HOH T 971      11.288  75.897 135.404  1.00  0.56           O  
HETATM  973  O   HOH T 972      31.651  28.963 151.650  1.00  0.56           O  
HETATM  974  O   HOH T 973      22.082  37.259 157.378  1.00  0.56           O  
HETATM  975  O   HOH T 974      13.027  21.801  86.784  1.00  0.56           O  
HETATM  976  O   HOH T 975      20.305  21.105  71.337  1.00  0.56           O  
HETATM  977  O   HOH T 976      11.028  30.564  90.961  1.00  0.56           O  
HETATM  978  O   HOH T 977      24.302  37.294 159.039  1.00  0.56           O  
HETATM  979  O   HOH T 978       9.619  67.284  74.032  1.00  0.56           O  
HETATM  980  O   HOH T 979       2.731  60.980  82.271  1.00  0.56           O  
HETATM  981  O   HOH T 980      39.625  50.964 133.379  1.00  0.56           O  
HETATM  982  O   HOH T 981      14.802  21.040  68.503  1.00  0.56           O  
HETATM  983  O   HOH T 982      40.601  39.840 147.682  1.00  0.56           O  
HETATM  984  O   HOH T 983      27.687  72.072  77.689  1.00  0.56           O  
HETATM  985  O   HOH T 984      18.655  60.534 103.325  1.00  0.56           O  
HETATM  986  O   HOH T 985      33.957  45.323 114.900  1.00  0.56           O  
HETATM  987  O   HOH T 986      23.676  22.582  76.960  1.00  0.56           O  
HETATM  988  O   HOH T 987      38.070  30.008 120.797  1.00  0.56           O  
HETATM  989  O   HOH T 988      30.716  84.217 134.489  1.00  0.56           O  
HETATM  990  O   HOH T 989      34.583  68.277 134.521  1.00  0.56           O  
HETATM  991  O   HOH T 990      39.678  38.083 151.481  1.00  0.56           O  
HETATM  992  O   HOH T 991       5.639  56.778 106.199  1.00  0.56           O  
HETATM  993  O   HOH T 992      26.770  68.074 161.801  1.00  0.56           O  
HETATM  994  O   HOH T 993      13.202  53.600  67.665  1.00  0.56           O  
HETATM  995  O   HOH T 994      13.880  68.198 158.380  1.00  0.56           O  
HETATM  996  O   HOH T 995      41.150  52.727 140.369  1.00  0.56           O  
HETATM  997  O   HOH T 996      43.309  29.222 148.436  1.00  0.56           O  
HETATM  998  O   HOH T 997       7.295  66.436  80.921  1.00  0.57           O  
HETATM  999  O   HOH T 998      16.231  19.235 104.607  1.00  0.57           O  
HETATM 1000  O   HOH T 999       6.506  67.999  95.491  1.00  0.57           O  
HETATM 1001  O   HOH T1000       5.814  46.949 123.819  1.00  0.57           O  
HETATM 1002  O   HOH T1001      13.618  67.283  98.008  1.00  0.57           O  
HETATM 1003  O   HOH T1002      22.570  18.465  98.540  1.00  0.57           O  
HETATM 1004  O   HOH T1003      24.492  74.723 150.574  1.00  0.57           O  
HETATM 1005  O   HOH T1004      22.630  25.876  80.990  1.00  0.57           O  
HETATM 1006  O   HOH T1005      32.459  83.452 127.129  1.00  0.57           O  
HETATM 1007  O   HOH T1006      26.866  41.062  75.333  1.00  0.57           O  
HETATM 1008  O   HOH T1007      26.165  41.047  71.253  1.00  0.57           O  
HETATM 1009  O   HOH T1008      11.265  53.450 151.339  1.00  0.57           O  
HETATM 1010  O   HOH T1009      32.342  40.534 119.095  1.00  0.57           O  
HETATM 1011  O   HOH T1010      29.424  47.738 101.642  1.00  0.57           O  
HETATM 1012  O   HOH T1011      24.029  30.582 154.904  1.00  0.57           O  
HETATM 1013  O   HOH T1012      29.373  68.757  79.388  1.00  0.57           O  
HETATM 1014  O   HOH T1013      18.620  72.887  89.223  1.00  0.57           O  
HETATM 1015  O   HOH T1014      34.977  30.053 128.711  1.00  0.57           O  
HETATM 1016  O   HOH T1015      28.366  71.284  80.195  1.00  0.58           O  
HETATM 1017  O   HOH T1016       7.009  46.067 128.193  1.00  0.58           O  
HETATM 1018  O   HOH T1017      11.064  43.799 154.723  1.00  0.58           O  
HETATM 1019  O   HOH T1018      -2.398  61.531 143.373  1.00  0.58           O  
HETATM 1020  O   HOH T1019      26.238  63.141  82.170  1.00  0.58           O  
HETATM 1021  O   HOH T1020      39.930  43.409 127.980  1.00  0.58           O  
HETATM 1022  O   HOH T1021      31.302  74.253 106.159  1.00  0.58           O  
HETATM 1023  O   HOH T1022      13.124  48.928  67.068  1.00  0.58           O  
HETATM 1024  O   HOH T1023      10.415  67.232  85.923  1.00  0.59           O  
HETATM 1025  O   HOH T1024      40.523  33.229 134.480  1.00  0.59           O  
HETATM 1026  O   HOH T1025       8.777  15.703 107.216  1.00  0.59           O  
HETATM 1027  O   HOH T1026      35.667  51.733 119.793  1.00  0.59           O  
HETATM 1028  O   HOH T1027      22.674  79.023 138.802  1.00  0.59           O  
HETATM 1029  O   HOH T1028       6.042  25.567 103.718  1.00  0.60           O  
HETATM 1030  O   HOH T1029      13.845  18.725 103.075  1.00  0.60           O  
HETATM 1031  O   HOH T1030       9.170  17.065 109.495  1.00  0.60           O  
HETATM 1032  O   HOH T1031      26.130  75.357 104.149  1.00  0.60           O  
HETATM 1033  O   HOH T1032      11.291  47.939 155.625  1.00  0.64           O  
TER    1034      HOH T1032 
