# Supplementary material for: Accurate Prediction of Hydration Sites of Proteins Using Energy Model With Atom Embedding
Source: Front Mol Biosci. 2021 Sep 20;8:756075. doi: 10.3389/fmolb.2021.756075 (PMC8488165; doi:10.3389/fmolb.2021.756075)
Supplement: Supplementary file 1 [file DataSheet1.ZIP › Data Sheet 1/Our_result_pdb/our_dataset_output/2GI9_watersite.pdb]

HEADER                                                        XXXX


JRNL        PMID   -1
HETATM    1  O   HOH T   0      -6.520   1.263   9.547  1.00  0.21           O  
HETATM    2  O   HOH T   1      15.609  -1.115  21.761  1.00  0.22           O  
HETATM    3  O   HOH T   2      13.722  -2.632  23.218  1.00  0.23           O  
HETATM    4  O   HOH T   3       6.503   4.420  21.033  1.00  0.25           O  
HETATM    5  O   HOH T   4      10.954   8.064   8.196  1.00  0.25           O  
HETATM    6  O   HOH T   5      25.204  -1.882  17.749  1.00  0.27           O  
HETATM    7  O   HOH T   6       1.869   9.959  11.107  1.00  0.27           O  
HETATM    8  O   HOH T   7      14.157   8.056  14.092  1.00  0.27           O  
HETATM    9  O   HOH T   8       9.106   5.676  21.039  1.00  0.27           O  
HETATM   10  O   HOH T   9      14.780  -5.914   7.352  1.00  0.28           O  
HETATM   11  O   HOH T  10       8.819  13.019  15.714  1.00  0.31           O  
HETATM   12  O   HOH T  11       2.241  -5.159   5.906  1.00  0.31           O  
HETATM   13  O   HOH T  12      17.130  -0.981  25.669  1.00  0.32           O  
HETATM   14  O   HOH T  13      -4.388  13.107  12.328  1.00  0.32           O  
HETATM   15  O   HOH T  14     -12.541   6.900   6.398  1.00  0.32           O  
HETATM   16  O   HOH T  15       4.841  -0.575   1.716  1.00  0.33           O  
HETATM   17  O   HOH T  16       3.850  -7.903  21.297  1.00  0.34           O  
HETATM   18  O   HOH T  17      17.406   9.328  18.726  1.00  0.35           O  
HETATM   19  O   HOH T  18      12.005  -3.579   4.041  1.00  0.36           O  
HETATM   20  O   HOH T  19      13.556   8.921   8.097  1.00  0.36           O  
HETATM   21  O   HOH T  20      -5.629  10.828   6.024  1.00  0.37           O  
HETATM   22  O   HOH T  21       4.950  -6.637  10.604  1.00  0.37           O  
HETATM   23  O   HOH T  22      15.929   8.993  21.066  1.00  0.37           O  
HETATM   24  O   HOH T  23       2.766  -3.245  14.253  1.00  0.37           O  
HETATM   25  O   HOH T  24       7.552  -8.974  20.223  1.00  0.37           O  
HETATM   26  O   HOH T  25      12.088   2.402   0.599  1.00  0.37           O  
HETATM   27  O   HOH T  26      20.145   4.043  18.284  1.00  0.37           O  
HETATM   28  O   HOH T  27      17.580   9.851  10.045  1.00  0.37           O  
HETATM   29  O   HOH T  28      -7.392   4.907   3.037  1.00  0.37           O  
HETATM   30  O   HOH T  29      -1.637  -4.342  10.103  1.00  0.37           O  
HETATM   31  O   HOH T  30      11.173  -8.259   2.334  1.00  0.38           O  
HETATM   32  O   HOH T  31       3.223  -1.718  26.471  1.00  0.38           O  
HETATM   33  O   HOH T  32      -2.077  -4.497   0.310  1.00  0.38           O  
HETATM   34  O   HOH T  33       7.939  -7.372  23.879  1.00  0.39           O  
HETATM   35  O   HOH T  34      -9.558   8.281  11.518  1.00  0.39           O  
HETATM   36  O   HOH T  35      12.522   9.167   0.435  1.00  0.39           O  
HETATM   37  O   HOH T  36      16.062   7.927   8.721  1.00  0.40           O  
HETATM   38  O   HOH T  37     -12.650   7.205   3.636  1.00  0.40           O  
HETATM   39  O   HOH T  38      -1.752   8.967   4.881  1.00  0.40           O  
HETATM   40  O   HOH T  39      -9.783   3.918  13.115  1.00  0.40           O  
HETATM   41  O   HOH T  40      16.952  10.334  16.213  1.00  0.40           O  
HETATM   42  O   HOH T  41      20.383  -2.710  12.491  1.00  0.40           O  
HETATM   43  O   HOH T  42       1.710  -0.124  24.639  1.00  0.40           O  
HETATM   44  O   HOH T  43      -3.911  -5.659   8.906  1.00  0.40           O  
HETATM   45  O   HOH T  44      15.539   7.659  23.437  1.00  0.41           O  
HETATM   46  O   HOH T  45       0.771   8.119   4.131  1.00  0.41           O  
HETATM   47  O   HOH T  46       1.740  -4.822  12.194  1.00  0.41           O  
HETATM   48  O   HOH T  47       6.150 -10.814  21.793  1.00  0.41           O  
HETATM   49  O   HOH T  48      -7.407   5.228  12.959  1.00  0.42           O  
HETATM   50  O   HOH T  49       1.494  -3.926  16.652  1.00  0.42           O  
HETATM   51  O   HOH T  50      21.995  -4.095  22.959  1.00  0.42           O  
HETATM   52  O   HOH T  51      13.082   3.884  -1.586  1.00  0.42           O  
HETATM   53  O   HOH T  52       6.048  -7.450  13.014  1.00  0.42           O  
HETATM   54  O   HOH T  53      -5.301  -6.534  -0.670  1.00  0.42           O  
HETATM   55  O   HOH T  54      -6.016  -0.523   3.930  1.00  0.42           O  
HETATM   56  O   HOH T  55       6.840   1.252   2.424  1.00  0.43           O  
HETATM   57  O   HOH T  56       3.867  13.952   4.860  1.00  0.43           O  
HETATM   58  O   HOH T  57       1.292  14.283   8.845  1.00  0.43           O  
HETATM   59  O   HOH T  58      -1.669  -1.791   0.759  1.00  0.43           O  
HETATM   60  O   HOH T  59      20.430  -0.386  10.924  1.00  0.43           O  
HETATM   61  O   HOH T  60      15.926  -7.637   5.649  1.00  0.44           O  
HETATM   62  O   HOH T  61       1.624  -3.490  19.430  1.00  0.44           O  
HETATM   63  O   HOH T  62      -7.243   0.410  12.053  1.00  0.44           O  
HETATM   64  O   HOH T  63      17.034  -0.718   5.694  1.00  0.44           O  
HETATM   65  O   HOH T  64      16.734   0.716   3.342  1.00  0.44           O  
HETATM   66  O   HOH T  65       7.789  13.030  -2.245  1.00  0.44           O  
HETATM   67  O   HOH T  66      -5.234   8.792  14.045  1.00  0.44           O  
HETATM   68  O   HOH T  67      -5.271  -0.231  13.718  1.00  0.44           O  
HETATM   69  O   HOH T  68       7.982 -11.168  23.830  1.00  0.45           O  
HETATM   70  O   HOH T  69      22.743  -1.902  11.450  1.00  0.46           O  
HETATM   71  O   HOH T  70      23.058  -5.843  12.490  1.00  0.47           O  
HETATM   72  O   HOH T  71       4.008   0.874  27.508  1.00  0.47           O  
HETATM   73  O   HOH T  72      -4.982   8.630  18.837  1.00  0.47           O  
HETATM   74  O   HOH T  73      16.702   1.267  27.188  1.00  0.48           O  
HETATM   75  O   HOH T  74      20.377  -4.633  25.109  1.00  0.48           O  
HETATM   76  O   HOH T  75     -11.293   5.003   4.860  1.00  0.48           O  
HETATM   77  O   HOH T  76       2.899  12.297  10.008  1.00  0.48           O  
HETATM   78  O   HOH T  77      14.872  -0.350  24.228  1.00  0.48           O  
HETATM   79  O   HOH T  78      21.858   2.012  17.491  1.00  0.48           O  
HETATM   80  O   HOH T  79       6.590  -5.045   1.687  1.00  0.48           O  
HETATM   81  O   HOH T  80      13.070  12.228   2.952  1.00  0.49           O  
HETATM   82  O   HOH T  81      -2.517  10.626   8.017  1.00  0.49           O  
HETATM   83  O   HOH T  82      12.113  -5.621   2.221  1.00  0.49           O  
HETATM   84  O   HOH T  83      15.586   6.139  27.573  1.00  0.50           O  
HETATM   85  O   HOH T  84       0.006   4.211  20.187  1.00  0.50           O  
HETATM   86  O   HOH T  85       4.007  -7.186   5.372  1.00  0.50           O  
HETATM   87  O   HOH T  86      22.707  -3.459  13.789  1.00  0.50           O  
HETATM   88  O   HOH T  87       3.406  -8.200  -2.849  1.00  0.50           O  
HETATM   89  O   HOH T  88      23.335  -7.464  26.603  1.00  0.50           O  
HETATM   90  O   HOH T  89      -9.764  -1.717   3.720  1.00  0.50           O  
HETATM   91  O   HOH T  90       7.545   5.950  23.246  1.00  0.50           O  
HETATM   92  O   HOH T  91       7.966  -8.949  11.448  1.00  0.51           O  
HETATM   93  O   HOH T  92      -0.304  -4.767  20.878  1.00  0.51           O  
HETATM   94  O   HOH T  93      23.514  -1.764  29.108  1.00  0.52           O  
HETATM   95  O   HOH T  94       2.306   2.363  25.926  1.00  0.52           O  
HETATM   96  O   HOH T  95      17.152  10.215   7.420  1.00  0.52           O  
HETATM   97  O   HOH T  96      -5.417  -5.024   1.697  1.00  0.52           O  
HETATM   98  O   HOH T  97      17.972   8.930  23.003  1.00  0.52           O  
HETATM   99  O   HOH T  98      -1.391  -6.290   8.168  1.00  0.52           O  
HETATM  100  O   HOH T  99       1.580  -6.517  21.821  1.00  0.53           O  
HETATM  101  O   HOH T 100      23.270  -5.286  18.656  1.00  0.53           O  
HETATM  102  O   HOH T 101       3.349  11.409  18.772  1.00  0.54           O  
HETATM  103  O   HOH T 102      17.574  -6.005   7.178  1.00  0.54           O  
HETATM  104  O   HOH T 103       3.207   5.000  26.582  1.00  0.54           O  
HETATM  105  O   HOH T 104      -7.929   3.007  11.276  1.00  0.55           O  
HETATM  106  O   HOH T 105      13.646   3.854   2.369  1.00  0.55           O  
HETATM  107  O   HOH T 106       5.631  -7.162   3.134  1.00  0.55           O  
HETATM  108  O   HOH T 107      -0.273  -6.545   3.038  1.00  0.56           O  
HETATM  109  O   HOH T 108      23.368   3.889  27.569  1.00  0.58           O  
HETATM  110  O   HOH T 109      -1.446  10.495  19.402  1.00  0.60           O  
HETATM  111  O   HOH T 110      11.494   9.255  23.634  1.00  0.60           O  
TER     112      HOH T 110 
