# Supplementary material for: Accurate Prediction of Hydration Sites of Proteins Using Energy Model With Atom Embedding
Source: Front Mol Biosci. 2021 Sep 20;8:756075. doi: 10.3389/fmolb.2021.756075 (PMC8488165; doi:10.3389/fmolb.2021.756075)
Supplement: Supplementary file 1 [file DataSheet1.ZIP › Data Sheet 1/Our_result_pdb/our_dataset_output/2GUD_watersite.pdb]

HEADER                                                        XXXX


JRNL        PMID   -1
HETATM    1  O   HOH T   0      12.411  23.107  33.262  1.00  0.14           O  
HETATM    2  O   HOH T   1      11.413  35.311 -19.299  1.00  0.16           O  
HETATM    3  O   HOH T   2      -0.302  30.084  20.690  1.00  0.16           O  
HETATM    4  O   HOH T   3      23.005  29.919 -17.753  1.00  0.18           O  
HETATM    5  O   HOH T   4      23.645  29.504 -12.772  1.00  0.18           O  
HETATM    6  O   HOH T   5       8.300  18.142  17.263  1.00  0.18           O  
HETATM    7  O   HOH T   6      -1.137  23.028  23.611  1.00  0.18           O  
HETATM    8  O   HOH T   7      11.184  30.075 -28.761  1.00  0.19           O  
HETATM    9  O   HOH T   8      11.535  22.740   3.425  1.00  0.20           O  
HETATM   10  O   HOH T   9      18.014  24.847  22.074  1.00  0.20           O  
HETATM   11  O   HOH T  10      19.650  31.907   6.422  1.00  0.21           O  
HETATM   12  O   HOH T  11       7.255  29.155   3.387  1.00  0.22           O  
HETATM   13  O   HOH T  12       7.270  38.139  18.708  1.00  0.22           O  
HETATM   14  O   HOH T  13      19.129  18.361 -15.516  1.00  0.22           O  
HETATM   15  O   HOH T  14      18.829  28.807   1.384  1.00  0.23           O  
HETATM   16  O   HOH T  15       6.657  19.152  22.048  1.00  0.23           O  
HETATM   17  O   HOH T  16      16.719  31.896  32.196  1.00  0.23           O  
HETATM   18  O   HOH T  17       7.875  35.425   7.139  1.00  0.24           O  
HETATM   19  O   HOH T  18      -1.791  39.505  16.396  1.00  0.24           O  
HETATM   20  O   HOH T  19      10.081  19.040  -0.530  1.00  0.24           O  
HETATM   21  O   HOH T  20       5.002  29.908  -4.870  1.00  0.24           O  
HETATM   22  O   HOH T  21      -0.402  21.019 -17.584  1.00  0.24           O  
HETATM   23  O   HOH T  22       1.264  34.645   8.493  1.00  0.24           O  
HETATM   24  O   HOH T  23      10.023  33.573  30.356  1.00  0.24           O  
HETATM   25  O   HOH T  24      17.400  32.552  21.911  1.00  0.24           O  
HETATM   26  O   HOH T  25       2.165  32.679   1.481  1.00  0.24           O  
HETATM   27  O   HOH T  26       6.667  27.388   5.424  1.00  0.25           O  
HETATM   28  O   HOH T  27       4.162  27.104 -16.468  1.00  0.25           O  
HETATM   29  O   HOH T  28      12.739  32.554  -2.545  1.00  0.25           O  
HETATM   30  O   HOH T  29      19.608  17.017  16.006  1.00  0.25           O  
HETATM   31  O   HOH T  30      10.431  42.817   6.289  1.00  0.26           O  
HETATM   32  O   HOH T  31      28.197  26.086  14.889  1.00  0.26           O  
HETATM   33  O   HOH T  32      16.304  16.193 -10.904  1.00  0.27           O  
HETATM   34  O   HOH T  33      -0.834  16.195   5.664  1.00  0.27           O  
HETATM   35  O   HOH T  34      20.183  44.617  13.622  1.00  0.27           O  
HETATM   36  O   HOH T  35       6.174  18.949   6.535  1.00  0.27           O  
HETATM   37  O   HOH T  36      20.948  27.591  17.771  1.00  0.27           O  
HETATM   38  O   HOH T  37      31.232  17.524   5.587  1.00  0.28           O  
HETATM   39  O   HOH T  38      11.036  34.076  32.962  1.00  0.28           O  
HETATM   40  O   HOH T  39       0.634  30.227  -9.702  1.00  0.28           O  
HETATM   41  O   HOH T  40      -0.385  13.384  17.825  1.00  0.28           O  
HETATM   42  O   HOH T  41      11.211  17.389 -16.358  1.00  0.28           O  
HETATM   43  O   HOH T  42      11.340  27.838   0.863  1.00  0.28           O  
HETATM   44  O   HOH T  43       1.213  20.412 -12.121  1.00  0.28           O  
HETATM   45  O   HOH T  44      27.556  21.872  12.974  1.00  0.28           O  
HETATM   46  O   HOH T  45       2.384  36.574   6.893  1.00  0.28           O  
HETATM   47  O   HOH T  46       0.028  19.925  -9.731  1.00  0.29           O  
HETATM   48  O   HOH T  47      11.447  19.964   3.325  1.00  0.29           O  
HETATM   49  O   HOH T  48      29.366  33.213  13.961  1.00  0.29           O  
HETATM   50  O   HOH T  49       1.130  42.567  15.572  1.00  0.29           O  
HETATM   51  O   HOH T  50       8.345  37.122  23.587  1.00  0.29           O  
HETATM   52  O   HOH T  51      35.330  29.415   6.357  1.00  0.29           O  
HETATM   53  O   HOH T  52      19.222  39.886 -20.411  1.00  0.29           O  
HETATM   54  O   HOH T  53      10.758  32.383  -0.614  1.00  0.29           O  
HETATM   55  O   HOH T  54       6.706  22.901  29.870  1.00  0.30           O  
HETATM   56  O   HOH T  55      23.204  16.434  10.764  1.00  0.30           O  
HETATM   57  O   HOH T  56      11.603   9.305  -0.959  1.00  0.30           O  
HETATM   58  O   HOH T  57      -1.862  10.395  -0.472  1.00  0.30           O  
HETATM   59  O   HOH T  58       1.094  35.022  11.327  1.00  0.30           O  
HETATM   60  O   HOH T  59       5.896  25.237 -20.778  1.00  0.30           O  
HETATM   61  O   HOH T  60      -0.334  26.882  12.146  1.00  0.30           O  
HETATM   62  O   HOH T  61       5.469  19.996   4.034  1.00  0.30           O  
HETATM   63  O   HOH T  62      26.547  44.863   6.562  1.00  0.30           O  
HETATM   64  O   HOH T  63      -1.637  20.122   5.741  1.00  0.31           O  
HETATM   65  O   HOH T  64       1.798  23.307  27.296  1.00  0.31           O  
HETATM   66  O   HOH T  65      14.906  20.998  23.192  1.00  0.31           O  
HETATM   67  O   HOH T  66      24.618  18.091  -9.822  1.00  0.31           O  
HETATM   68  O   HOH T  67      16.263  34.860  -2.490  1.00  0.31           O  
HETATM   69  O   HOH T  68      19.594  34.531 -22.004  1.00  0.31           O  
HETATM   70  O   HOH T  69      -3.250  34.182  14.149  1.00  0.31           O  
HETATM   71  O   HOH T  70       5.666  16.547  14.373  1.00  0.31           O  
HETATM   72  O   HOH T  71       8.532  21.037   0.772  1.00  0.31           O  
HETATM   73  O   HOH T  72       4.224  37.049  27.084  1.00  0.32           O  
HETATM   74  O   HOH T  73      -1.077  21.795  -4.220  1.00  0.32           O  
HETATM   75  O   HOH T  74      15.040  23.262  30.206  1.00  0.32           O  
HETATM   76  O   HOH T  75      20.383  29.091  32.786  1.00  0.32           O  
HETATM   77  O   HOH T  76      25.157  24.429  20.366  1.00  0.32           O  
HETATM   78  O   HOH T  77      13.211  37.743 -10.757  1.00  0.32           O  
HETATM   79  O   HOH T  78      -5.106  34.887  12.189  1.00  0.32           O  
HETATM   80  O   HOH T  79       3.245  24.999  28.846  1.00  0.32           O  
HETATM   81  O   HOH T  80      20.144  12.661 -19.832  1.00  0.33           O  
HETATM   82  O   HOH T  81      -0.229  28.579   7.201  1.00  0.33           O  
HETATM   83  O   HOH T  82      18.196  36.047  -9.577  1.00  0.33           O  
HETATM   84  O   HOH T  83      12.905  43.217   7.278  1.00  0.33           O  
HETATM   85  O   HOH T  84      11.549  41.488  14.224  1.00  0.33           O  
HETATM   86  O   HOH T  85       6.308  37.406   8.092  1.00  0.33           O  
HETATM   87  O   HOH T  86      21.312  12.060  -5.617  1.00  0.33           O  
HETATM   88  O   HOH T  87      14.093  41.633  15.551  1.00  0.33           O  
HETATM   89  O   HOH T  88       9.329  19.298   9.601  1.00  0.33           O  
HETATM   90  O   HOH T  89      14.691  40.623  23.543  1.00  0.33           O  
HETATM   91  O   HOH T  90      19.027  37.223 -21.494  1.00  0.33           O  
HETATM   92  O   HOH T  91       2.682  30.808  -3.574  1.00  0.33           O  
HETATM   93  O   HOH T  92      14.241  41.599  21.036  1.00  0.34           O  
HETATM   94  O   HOH T  93      15.532  37.059 -12.196  1.00  0.34           O  
HETATM   95  O   HOH T  94       6.354  20.189 -20.227  1.00  0.34           O  
HETATM   96  O   HOH T  95       7.444  20.120  30.371  1.00  0.34           O  
HETATM   97  O   HOH T  96       5.088  22.602 -20.692  1.00  0.34           O  
HETATM   98  O   HOH T  97      -3.995  29.121  18.735  1.00  0.34           O  
HETATM   99  O   HOH T  98      19.368  36.078   0.866  1.00  0.34           O  
HETATM  100  O   HOH T  99      22.055   3.339   0.026  1.00  0.34           O  
HETATM  101  O   HOH T 100       2.841  31.080  -6.380  1.00  0.34           O  
HETATM  102  O   HOH T 101      17.432  42.404  17.364  1.00  0.35           O  
HETATM  103  O   HOH T 102       8.046  17.177  23.800  1.00  0.35           O  
HETATM  104  O   HOH T 103      26.348  34.037  19.427  1.00  0.35           O  
HETATM  105  O   HOH T 104      27.937  23.415 -14.695  1.00  0.35           O  
HETATM  106  O   HOH T 105      26.054  16.249   4.412  1.00  0.35           O  
HETATM  107  O   HOH T 106      17.802  43.809  12.330  1.00  0.35           O  
HETATM  108  O   HOH T 107      -2.220  36.698  20.523  1.00  0.35           O  
HETATM  109  O   HOH T 108      -2.986  26.545  -6.475  1.00  0.35           O  
HETATM  110  O   HOH T 109      21.535  30.055  -5.076  1.00  0.35           O  
HETATM  111  O   HOH T 110      23.819  13.096  -5.553  1.00  0.35           O  
HETATM  112  O   HOH T 111      10.039  18.614  13.646  1.00  0.35           O  
HETATM  113  O   HOH T 112      30.128  26.528 -16.133  1.00  0.35           O  
HETATM  114  O   HOH T 113       0.888  15.809 -13.345  1.00  0.35           O  
HETATM  115  O   HOH T 114      16.713  21.784  26.635  1.00  0.35           O  
HETATM  116  O   HOH T 115       7.080  25.757  30.497  1.00  0.35           O  
HETATM  117  O   HOH T 116      21.514  27.457  30.984  1.00  0.36           O  
HETATM  118  O   HOH T 117      22.590  21.597 -17.640  1.00  0.36           O  
HETATM  119  O   HOH T 118      18.102   5.492   3.298  1.00  0.36           O  
HETATM  120  O   HOH T 119      21.048  30.056   2.514  1.00  0.36           O  
HETATM  121  O   HOH T 120       8.987  36.335   2.393  1.00  0.36           O  
HETATM  122  O   HOH T 121      16.073  11.351 -15.941  1.00  0.36           O  
HETATM  123  O   HOH T 122      25.874  26.283  22.362  1.00  0.36           O  
HETATM  124  O   HOH T 123      -1.768  25.827  -4.103  1.00  0.36           O  
HETATM  125  O   HOH T 124      35.571  26.767   5.623  1.00  0.36           O  
HETATM  126  O   HOH T 125       3.922  27.227 -21.218  1.00  0.36           O  
HETATM  127  O   HOH T 126      26.514  17.886  -1.201  1.00  0.36           O  
HETATM  128  O   HOH T 127       2.398  24.099  10.670  1.00  0.36           O  
HETATM  129  O   HOH T 128       3.372  14.956  14.106  1.00  0.36           O  
HETATM  130  O   HOH T 129       3.187  24.485   3.167  1.00  0.36           O  
HETATM  131  O   HOH T 130       4.692  36.054 -20.587  1.00  0.37           O  
HETATM  132  O   HOH T 131       2.182  10.464  -8.180  1.00  0.37           O  
HETATM  133  O   HOH T 132      -1.867  27.772   1.455  1.00  0.37           O  
HETATM  134  O   HOH T 133      11.509  38.530  -6.398  1.00  0.37           O  
HETATM  135  O   HOH T 134      21.943  33.741 -20.917  1.00  0.37           O  
HETATM  136  O   HOH T 135      19.244  34.530  22.321  1.00  0.37           O  
HETATM  137  O   HOH T 136      -3.149  18.473  21.726  1.00  0.37           O  
HETATM  138  O   HOH T 137      19.507  20.758  19.731  1.00  0.37           O  
HETATM  139  O   HOH T 138      20.965  33.882   1.233  1.00  0.37           O  
HETATM  140  O   HOH T 139      23.452  13.418   6.328  1.00  0.37           O  
HETATM  141  O   HOH T 140      32.430  31.487   8.329  1.00  0.37           O  
HETATM  142  O   HOH T 141       5.510  40.492  10.860  1.00  0.38           O  
HETATM  143  O   HOH T 142       0.326  37.519  24.650  1.00  0.38           O  
HETATM  144  O   HOH T 143      23.774   5.441  -0.961  1.00  0.38           O  
HETATM  145  O   HOH T 144      -1.197  31.161 -16.923  1.00  0.38           O  
HETATM  146  O   HOH T 145      23.420  28.067  -5.016  1.00  0.38           O  
HETATM  147  O   HOH T 146       2.751  43.886   7.963  1.00  0.38           O  
HETATM  148  O   HOH T 147      19.957  40.690  19.373  1.00  0.38           O  
HETATM  149  O   HOH T 148      28.742  18.949   3.200  1.00  0.38           O  
HETATM  150  O   HOH T 149       3.015  30.904  28.731  1.00  0.38           O  
HETATM  151  O   HOH T 150      36.413  28.335  10.519  1.00  0.38           O  
HETATM  152  O   HOH T 151      22.562  20.273 -15.362  1.00  0.38           O  
HETATM  153  O   HOH T 152       9.439  15.200 -16.442  1.00  0.38           O  
HETATM  154  O   HOH T 153      20.951  36.420  -3.417  1.00  0.38           O  
HETATM  155  O   HOH T 154      14.905  43.612   5.579  1.00  0.39           O  
HETATM  156  O   HOH T 155      17.911  20.839  28.910  1.00  0.39           O  
HETATM  157  O   HOH T 156       2.224  20.118  24.189  1.00  0.39           O  
HETATM  158  O   HOH T 157      21.851  19.212 -21.845  1.00  0.39           O  
HETATM  159  O   HOH T 158       9.940  35.845 -23.493  1.00  0.39           O  
HETATM  160  O   HOH T 159      10.766  38.362  23.960  1.00  0.39           O  
HETATM  161  O   HOH T 160      12.957  42.072  11.963  1.00  0.39           O  
HETATM  162  O   HOH T 161      13.240  37.255  24.374  1.00  0.39           O  
HETATM  163  O   HOH T 162       5.110  23.453   4.963  1.00  0.39           O  
HETATM  164  O   HOH T 163       7.541  13.757 -12.268  1.00  0.39           O  
HETATM  165  O   HOH T 164      35.143  17.193   4.870  1.00  0.39           O  
HETATM  166  O   HOH T 165      21.083  15.569  12.267  1.00  0.39           O  
HETATM  167  O   HOH T 166       4.684  35.892  -7.088  1.00  0.39           O  
HETATM  168  O   HOH T 167      -6.628  33.342  19.776  1.00  0.39           O  
HETATM  169  O   HOH T 168      19.314  44.910  -3.582  1.00  0.39           O  
HETATM  170  O   HOH T 169      21.204  19.797 -24.521  1.00  0.40           O  
HETATM  171  O   HOH T 170      -0.873   8.352  -2.249  1.00  0.40           O  
HETATM  172  O   HOH T 171      14.225  37.864   0.827  1.00  0.40           O  
HETATM  173  O   HOH T 172      11.504  38.096 -19.397  1.00  0.40           O  
HETATM  174  O   HOH T 173       5.642  28.117  31.541  1.00  0.40           O  
HETATM  175  O   HOH T 174      24.494  28.507  23.603  1.00  0.40           O  
HETATM  176  O   HOH T 175       7.510  35.005  30.017  1.00  0.40           O  
HETATM  177  O   HOH T 176      18.594  27.601  31.199  1.00  0.40           O  
HETATM  178  O   HOH T 177       3.800  31.926  33.372  1.00  0.40           O  
HETATM  179  O   HOH T 178      12.777  19.592  29.203  1.00  0.40           O  
HETATM  180  O   HOH T 179      23.650  26.971  -2.561  1.00  0.40           O  
HETATM  181  O   HOH T 180      23.412   8.221  -0.430  1.00  0.40           O  
HETATM  182  O   HOH T 181      -2.590  28.379  -8.515  1.00  0.40           O  
HETATM  183  O   HOH T 182      10.488  11.372 -14.591  1.00  0.40           O  
HETATM  184  O   HOH T 183      22.787  34.491  -2.516  1.00  0.40           O  
HETATM  185  O   HOH T 184      -4.426  20.845  20.920  1.00  0.40           O  
HETATM  186  O   HOH T 185      -0.372  21.962  13.578  1.00  0.41           O  
HETATM  187  O   HOH T 186      23.798  18.620  14.222  1.00  0.41           O  
HETATM  188  O   HOH T 187      28.233  27.655  18.488  1.00  0.41           O  
HETATM  189  O   HOH T 188      20.363   7.070   2.817  1.00  0.41           O  
HETATM  190  O   HOH T 189      17.995  38.078 -11.405  1.00  0.41           O  
HETATM  191  O   HOH T 190      15.829  36.059  -8.384  1.00  0.41           O  
HETATM  192  O   HOH T 191      23.032  37.779 -14.223  1.00  0.41           O  
HETATM  193  O   HOH T 192      18.628  43.030  -1.543  1.00  0.41           O  
HETATM  194  O   HOH T 193      11.551  38.985  -8.990  1.00  0.41           O  
HETATM  195  O   HOH T 194       9.968  12.553 -12.068  1.00  0.41           O  
HETATM  196  O   HOH T 195      -0.481  20.490  24.518  1.00  0.41           O  
HETATM  197  O   HOH T 196      -1.053  17.352   0.747  1.00  0.41           O  
HETATM  198  O   HOH T 197      25.801  16.171   9.814  1.00  0.41           O  
HETATM  199  O   HOH T 198      27.361  19.547   0.806  1.00  0.41           O  
HETATM  200  O   HOH T 199      -1.517  28.167  -1.207  1.00  0.41           O  
HETATM  201  O   HOH T 200      12.154   6.538   1.417  1.00  0.41           O  
HETATM  202  O   HOH T 201      26.747  27.642 -18.661  1.00  0.41           O  
HETATM  203  O   HOH T 202      -0.818  35.454 -14.655  1.00  0.41           O  
HETATM  204  O   HOH T 203      13.682  44.619   3.300  1.00  0.41           O  
HETATM  205  O   HOH T 204      25.612  25.226 -19.534  1.00  0.41           O  
HETATM  206  O   HOH T 205      28.862  20.739  -1.152  1.00  0.42           O  
HETATM  207  O   HOH T 206       3.479  36.656   0.608  1.00  0.42           O  
HETATM  208  O   HOH T 207      25.586  22.527 -13.601  1.00  0.42           O  
HETATM  209  O   HOH T 208      23.697  15.777   8.061  1.00  0.42           O  
HETATM  210  O   HOH T 209      16.466  17.163 -25.602  1.00  0.42           O  
HETATM  211  O   HOH T 210       7.121  35.015   0.700  1.00  0.42           O  
HETATM  212  O   HOH T 211      31.615  27.469  14.569  1.00  0.42           O  
HETATM  213  O   HOH T 212      -0.464  17.642  16.300  1.00  0.42           O  
HETATM  214  O   HOH T 213      32.465  20.736  11.972  1.00  0.42           O  
HETATM  215  O   HOH T 214      11.981  28.476   3.416  1.00  0.42           O  
HETATM  216  O   HOH T 215      25.148  11.550   5.069  1.00  0.42           O  
HETATM  217  O   HOH T 216      16.075  38.815  -1.033  1.00  0.42           O  
HETATM  218  O   HOH T 217       4.700  14.160  21.489  1.00  0.42           O  
HETATM  219  O   HOH T 218      24.717  39.179  -9.985  1.00  0.42           O  
HETATM  220  O   HOH T 219      22.582  38.552  17.268  1.00  0.43           O  
HETATM  221  O   HOH T 220      -1.553  16.893  13.856  1.00  0.43           O  
HETATM  222  O   HOH T 221       7.882  17.470   4.898  1.00  0.43           O  
HETATM  223  O   HOH T 222      -0.273  28.677 -17.818  1.00  0.43           O  
HETATM  224  O   HOH T 223       5.951  13.995 -14.557  1.00  0.43           O  
HETATM  225  O   HOH T 224      22.120  15.591 -18.082  1.00  0.43           O  
HETATM  226  O   HOH T 225      -1.294  30.786  -7.826  1.00  0.43           O  
HETATM  227  O   HOH T 226      13.745  38.125  -5.055  1.00  0.43           O  
HETATM  228  O   HOH T 227      30.127  37.754  12.313  1.00  0.43           O  
HETATM  229  O   HOH T 228      -4.490  22.666 -12.843  1.00  0.43           O  
HETATM  230  O   HOH T 229       2.449  37.386  29.193  1.00  0.43           O  
HETATM  231  O   HOH T 230       3.623  42.382  10.237  1.00  0.43           O  
HETATM  232  O   HOH T 231      13.985  15.834 -26.086  1.00  0.43           O  
HETATM  233  O   HOH T 232      10.567   8.821   1.518  1.00  0.43           O  
HETATM  234  O   HOH T 233      11.261  15.437 -18.448  1.00  0.43           O  
HETATM  235  O   HOH T 234       1.920  38.394  26.688  1.00  0.43           O  
HETATM  236  O   HOH T 235      25.001  45.620  10.334  1.00  0.43           O  
HETATM  237  O   HOH T 236       6.412  43.048   9.662  1.00  0.43           O  
HETATM  238  O   HOH T 237      21.920  22.557  28.714  1.00  0.44           O  
HETATM  239  O   HOH T 238      17.922  42.527  20.213  1.00  0.44           O  
HETATM  240  O   HOH T 239      27.855  25.521 -12.882  1.00  0.44           O  
HETATM  241  O   HOH T 240       1.605  25.060   5.420  1.00  0.44           O  
HETATM  242  O   HOH T 241      19.822  38.518  17.585  1.00  0.44           O  
HETATM  243  O   HOH T 242      21.957  16.732  14.553  1.00  0.44           O  
HETATM  244  O   HOH T 243      24.144  45.591   7.637  1.00  0.44           O  
HETATM  245  O   HOH T 244      -2.180  29.357  22.561  1.00  0.44           O  
HETATM  246  O   HOH T 245      28.375  17.455   5.672  1.00  0.44           O  
HETATM  247  O   HOH T 246      27.882  33.251  -3.282  1.00  0.44           O  
HETATM  248  O   HOH T 247      -6.512  29.743  17.795  1.00  0.44           O  
HETATM  249  O   HOH T 248      15.350  42.643  13.206  1.00  0.45           O  
HETATM  250  O   HOH T 249       0.708  29.624  -2.006  1.00  0.45           O  
HETATM  251  O   HOH T 250       0.389  17.896  24.105  1.00  0.45           O  
HETATM  252  O   HOH T 251      21.348  23.443  26.109  1.00  0.45           O  
HETATM  253  O   HOH T 252      26.052  30.841  -6.161  1.00  0.45           O  
HETATM  254  O   HOH T 253      25.143  12.630 -18.931  1.00  0.45           O  
HETATM  255  O   HOH T 254       2.140  34.937  30.406  1.00  0.45           O  
HETATM  256  O   HOH T 255       2.858  33.952  -6.252  1.00  0.45           O  
HETATM  257  O   HOH T 256      25.553  36.645 -10.883  1.00  0.45           O  
HETATM  258  O   HOH T 257       8.816  38.240  -5.793  1.00  0.45           O  
HETATM  259  O   HOH T 258      -6.555  31.275  15.513  1.00  0.45           O  
HETATM  260  O   HOH T 259      21.133  36.365  21.615  1.00  0.45           O  
HETATM  261  O   HOH T 260      26.169  33.812 -12.954  1.00  0.45           O  
HETATM  262  O   HOH T 261      21.633  36.421 -21.659  1.00  0.45           O  
HETATM  263  O   HOH T 262      -4.372  29.606  15.986  1.00  0.45           O  
HETATM  264  O   HOH T 263       9.443  17.737 -21.910  1.00  0.45           O  
HETATM  265  O   HOH T 264      10.945  40.367 -17.824  1.00  0.45           O  
HETATM  266  O   HOH T 265      34.560  29.775   8.945  1.00  0.45           O  
HETATM  267  O   HOH T 266       0.063  24.750  14.012  1.00  0.45           O  
HETATM  268  O   HOH T 267       0.001  30.103  26.206  1.00  0.45           O  
HETATM  269  O   HOH T 268      24.931  27.490  -0.063  1.00  0.45           O  
HETATM  270  O   HOH T 269      35.385  29.721  12.815  1.00  0.45           O  
HETATM  271  O   HOH T 270      -1.087  22.331  -9.031  1.00  0.46           O  
HETATM  272  O   HOH T 271       1.586  23.890   7.983  1.00  0.46           O  
HETATM  273  O   HOH T 272      -3.752  22.092  23.309  1.00  0.46           O  
HETATM  274  O   HOH T 273      20.966  46.560  15.397  1.00  0.46           O  
HETATM  275  O   HOH T 274      30.782  28.051 -13.864  1.00  0.46           O  
HETATM  276  O   HOH T 275      24.646  24.726  24.302  1.00  0.46           O  
HETATM  277  O   HOH T 276       5.455  11.824  20.203  1.00  0.46           O  
HETATM  278  O   HOH T 277       8.463  16.650  14.889  1.00  0.46           O  
HETATM  279  O   HOH T 278      13.415  39.235 -17.803  1.00  0.46           O  
HETATM  280  O   HOH T 279      -0.127  15.964  18.532  1.00  0.46           O  
HETATM  281  O   HOH T 280      -0.125  27.112   4.810  1.00  0.46           O  
HETATM  282  O   HOH T 281      24.133  30.585  -4.152  1.00  0.46           O  
HETATM  283  O   HOH T 282      -3.225  23.053  17.817  1.00  0.46           O  
HETATM  284  O   HOH T 283      22.533  24.906  30.231  1.00  0.46           O  
HETATM  285  O   HOH T 284       1.176   8.356  -9.708  1.00  0.46           O  
HETATM  286  O   HOH T 285      21.010  18.566  19.329  1.00  0.46           O  
HETATM  287  O   HOH T 286      -1.865  25.331 -16.501  1.00  0.46           O  
HETATM  288  O   HOH T 287      27.702  30.733 -12.000  1.00  0.46           O  
HETATM  289  O   HOH T 288       2.719  16.971  22.707  1.00  0.46           O  
HETATM  290  O   HOH T 289       3.712  30.050  31.304  1.00  0.47           O  
HETATM  291  O   HOH T 290      16.898  34.953   0.256  1.00  0.47           O  
HETATM  292  O   HOH T 291       3.968  34.432 -22.840  1.00  0.47           O  
HETATM  293  O   HOH T 292       6.733  23.935  32.485  1.00  0.47           O  
HETATM  294  O   HOH T 293      20.256   4.367   2.013  1.00  0.47           O  
HETATM  295  O   HOH T 294      31.424  28.997 -16.437  1.00  0.47           O  
HETATM  296  O   HOH T 295      18.055  22.015  21.867  1.00  0.47           O  
HETATM  297  O   HOH T 296      25.883  21.927   1.071  1.00  0.47           O  
HETATM  298  O   HOH T 297       7.544  16.111 -20.563  1.00  0.47           O  
HETATM  299  O   HOH T 298      -2.061  21.671  -1.559  1.00  0.47           O  
HETATM  300  O   HOH T 299       7.472  19.598 -22.692  1.00  0.47           O  
HETATM  301  O   HOH T 300      16.517  35.692  30.726  1.00  0.47           O  
HETATM  302  O   HOH T 301      24.114  11.887  -8.050  1.00  0.47           O  
HETATM  303  O   HOH T 302      -1.995  31.200  24.651  1.00  0.47           O  
HETATM  304  O   HOH T 303      29.162  29.801  20.020  1.00  0.47           O  
HETATM  305  O   HOH T 304      21.932  26.891  -8.919  1.00  0.47           O  
HETATM  306  O   HOH T 305      27.532  28.311   0.628  1.00  0.47           O  
HETATM  307  O   HOH T 306       4.616  15.181  16.589  1.00  0.47           O  
HETATM  308  O   HOH T 307      -2.538  21.981   3.928  1.00  0.48           O  
HETATM  309  O   HOH T 308       0.222  31.065  28.746  1.00  0.48           O  
HETATM  310  O   HOH T 309      -0.159  23.352   4.047  1.00  0.48           O  
HETATM  311  O   HOH T 310      -3.148  19.288   3.521  1.00  0.48           O  
HETATM  312  O   HOH T 311      -3.364  16.853   2.148  1.00  0.48           O  
HETATM  313  O   HOH T 312      19.767  43.445  18.553  1.00  0.48           O  
HETATM  314  O   HOH T 313       2.174  34.528  -0.634  1.00  0.48           O  
HETATM  315  O   HOH T 314      26.404  23.993 -17.040  1.00  0.48           O  
HETATM  316  O   HOH T 315      23.743  13.727 -16.691  1.00  0.48           O  
HETATM  317  O   HOH T 316      -4.510  14.330  -0.748  1.00  0.48           O  
HETATM  318  O   HOH T 317      24.403  26.908  26.013  1.00  0.48           O  
HETATM  319  O   HOH T 318      26.157  19.946  14.431  1.00  0.48           O  
HETATM  320  O   HOH T 319      -1.777  27.927 -15.519  1.00  0.48           O  
HETATM  321  O   HOH T 320      20.235  38.095 -13.058  1.00  0.48           O  
HETATM  322  O   HOH T 321       4.250  38.085   9.752  1.00  0.48           O  
HETATM  323  O   HOH T 322      -1.384  17.520  -9.560  1.00  0.48           O  
HETATM  324  O   HOH T 323       0.465  43.431  18.174  1.00  0.48           O  
HETATM  325  O   HOH T 324      17.905  44.208  15.149  1.00  0.48           O  
HETATM  326  O   HOH T 325       3.185   7.795 -14.652  1.00  0.48           O  
HETATM  327  O   HOH T 326       0.707  26.110 -17.327  1.00  0.48           O  
HETATM  328  O   HOH T 327      21.811  40.502 -19.474  1.00  0.48           O  
HETATM  329  O   HOH T 328      -4.714  21.022  16.473  1.00  0.48           O  
HETATM  330  O   HOH T 329      -5.685  30.776  20.250  1.00  0.48           O  
HETATM  331  O   HOH T 330       2.513  37.616  -7.146  1.00  0.48           O  
HETATM  332  O   HOH T 331       0.660  25.907   9.645  1.00  0.48           O  
HETATM  333  O   HOH T 332      25.107  33.114  -3.321  1.00  0.48           O  
HETATM  334  O   HOH T 333       5.511  43.709  15.229  1.00  0.48           O  
HETATM  335  O   HOH T 334       4.048  13.763  18.791  1.00  0.49           O  
HETATM  336  O   HOH T 335      16.055  43.129   3.165  1.00  0.49           O  
HETATM  337  O   HOH T 336      18.399  33.951   2.440  1.00  0.49           O  
HETATM  338  O   HOH T 337      26.133  19.293 -11.584  1.00  0.49           O  
HETATM  339  O   HOH T 338      14.558  36.378  32.415  1.00  0.49           O  
HETATM  340  O   HOH T 339      20.959  44.733  -1.500  1.00  0.49           O  
HETATM  341  O   HOH T 340      18.618  15.474 -25.063  1.00  0.49           O  
HETATM  342  O   HOH T 341      12.081  40.549  22.628  1.00  0.49           O  
HETATM  343  O   HOH T 342       1.411  28.629  28.224  1.00  0.49           O  
HETATM  344  O   HOH T 343      22.023  16.838  17.338  1.00  0.49           O  
HETATM  345  O   HOH T 344      24.990  31.600 -11.441  1.00  0.49           O  
HETATM  346  O   HOH T 345      17.174  33.150  29.796  1.00  0.49           O  
HETATM  347  O   HOH T 346      -1.612  26.074  26.776  1.00  0.49           O  
HETATM  348  O   HOH T 347      15.204  18.201  19.424  1.00  0.49           O  
HETATM  349  O   HOH T 348      22.740  25.144  27.611  1.00  0.49           O  
HETATM  350  O   HOH T 349      26.044  13.110   7.237  1.00  0.49           O  
HETATM  351  O   HOH T 350       1.890  21.719   9.524  1.00  0.50           O  
HETATM  352  O   HOH T 351      -1.462  16.391  22.521  1.00  0.50           O  
HETATM  353  O   HOH T 352       6.427  12.799  17.766  1.00  0.50           O  
HETATM  354  O   HOH T 353       0.700  25.860  28.004  1.00  0.50           O  
HETATM  355  O   HOH T 354      19.273  10.799 -18.166  1.00  0.50           O  
HETATM  356  O   HOH T 355      33.736  27.427  12.903  1.00  0.50           O  
HETATM  357  O   HOH T 356      32.552  20.215  14.790  1.00  0.50           O  
HETATM  358  O   HOH T 357      15.985  43.036   0.467  1.00  0.50           O  
HETATM  359  O   HOH T 358      19.464  31.593  32.087  1.00  0.50           O  
HETATM  360  O   HOH T 359       3.257  27.522  30.118  1.00  0.50           O  
HETATM  361  O   HOH T 360      20.395   5.108   4.726  1.00  0.50           O  
HETATM  362  O   HOH T 361      29.469  28.192 -18.290  1.00  0.50           O  
HETATM  363  O   HOH T 362      21.293  38.181  19.688  1.00  0.50           O  
HETATM  364  O   HOH T 363      13.251   4.071   0.780  1.00  0.50           O  
HETATM  365  O   HOH T 364      28.011  23.311  -0.085  1.00  0.50           O  
HETATM  366  O   HOH T 365      -1.956  25.710  24.180  1.00  0.50           O  
HETATM  367  O   HOH T 366      19.278  31.573   3.756  1.00  0.51           O  
HETATM  368  O   HOH T 367      -2.344  21.791  15.478  1.00  0.51           O  
HETATM  369  O   HOH T 368      26.446  25.291  -1.015  1.00  0.51           O  
HETATM  370  O   HOH T 369      30.110  20.797  13.588  1.00  0.51           O  
HETATM  371  O   HOH T 370      16.159  16.027   8.795  1.00  0.51           O  
HETATM  372  O   HOH T 371      -2.091  28.400  25.229  1.00  0.51           O  
HETATM  373  O   HOH T 372      25.625  36.393 -13.699  1.00  0.51           O  
HETATM  374  O   HOH T 373      27.142  24.833  17.064  1.00  0.51           O  
HETATM  375  O   HOH T 374       7.415  37.984   4.144  1.00  0.51           O  
HETATM  376  O   HOH T 375       7.408  35.871 -24.600  1.00  0.51           O  
HETATM  377  O   HOH T 376      -3.433  16.675   4.811  1.00  0.51           O  
HETATM  378  O   HOH T 377      -2.666  33.956  24.314  1.00  0.51           O  
HETATM  379  O   HOH T 378      26.446  15.890   7.159  1.00  0.51           O  
HETATM  380  O   HOH T 379      18.653  17.235  18.591  1.00  0.51           O  
HETATM  381  O   HOH T 380       0.681  12.834  20.358  1.00  0.51           O  
HETATM  382  O   HOH T 381      16.311  14.361 -26.102  1.00  0.51           O  
HETATM  383  O   HOH T 382      17.625  38.883  -3.262  1.00  0.51           O  
HETATM  384  O   HOH T 383      23.275  38.160 -20.189  1.00  0.51           O  
HETATM  385  O   HOH T 384      28.836  42.352  18.773  1.00  0.51           O  
HETATM  386  O   HOH T 385       5.652  17.876 -21.395  1.00  0.51           O  
HETATM  387  O   HOH T 386      16.973  38.178 -23.241  1.00  0.51           O  
HETATM  388  O   HOH T 387       8.776  19.147   2.862  1.00  0.52           O  
HETATM  389  O   HOH T 388       6.320  38.985  21.196  1.00  0.52           O  
HETATM  390  O   HOH T 389      -1.892  36.354  25.830  1.00  0.52           O  
HETATM  391  O   HOH T 390      11.156   4.300   2.571  1.00  0.52           O  
HETATM  392  O   HOH T 391      20.300  20.603  30.008  1.00  0.52           O  
HETATM  393  O   HOH T 392       0.859  15.482  21.151  1.00  0.52           O  
HETATM  394  O   HOH T 393       3.042  26.160 -18.792  1.00  0.52           O  
HETATM  395  O   HOH T 394      29.198  39.912  13.573  1.00  0.52           O  
HETATM  396  O   HOH T 395      -2.495  19.437  16.980  1.00  0.52           O  
HETATM  397  O   HOH T 396      15.681  18.616  22.015  1.00  0.52           O  
HETATM  398  O   HOH T 397      16.058  37.174  -6.023  1.00  0.52           O  
HETATM  399  O   HOH T 398      30.133  30.926 -17.924  1.00  0.52           O  
HETATM  400  O   HOH T 399      17.730  23.253  24.422  1.00  0.52           O  
HETATM  401  O   HOH T 400      16.039  34.961  28.207  1.00  0.52           O  
HETATM  402  O   HOH T 401      -4.701  35.293  20.359  1.00  0.52           O  
HETATM  403  O   HOH T 402       4.305  34.106  31.769  1.00  0.53           O  
HETATM  404  O   HOH T 403      20.767   9.142 -16.556  1.00  0.53           O  
HETATM  405  O   HOH T 404      25.819  21.739  16.357  1.00  0.53           O  
HETATM  406  O   HOH T 405       8.896  44.012   8.258  1.00  0.53           O  
HETATM  407  O   HOH T 406      10.204  15.254 -20.992  1.00  0.53           O  
HETATM  408  O   HOH T 407       6.325  12.259  22.780  1.00  0.53           O  
HETATM  409  O   HOH T 408      15.211  20.782  28.761  1.00  0.53           O  
HETATM  410  O   HOH T 409      -4.847  32.930  21.881  1.00  0.53           O  
HETATM  411  O   HOH T 410      -1.759  30.166 -19.495  1.00  0.53           O  
HETATM  412  O   HOH T 411      10.510   9.883 -12.241  1.00  0.53           O  
HETATM  413  O   HOH T 412       8.939  19.018   6.920  1.00  0.54           O  
HETATM  414  O   HOH T 413      12.603  17.972   7.994  1.00  0.54           O  
HETATM  415  O   HOH T 414      14.551  37.069  -2.584  1.00  0.54           O  
HETATM  416  O   HOH T 415      32.135  22.814  13.836  1.00  0.54           O  
HETATM  417  O   HOH T 416       4.750  35.779  29.472  1.00  0.54           O  
HETATM  418  O   HOH T 417      16.398  42.492  22.580  1.00  0.54           O  
HETATM  419  O   HOH T 418      22.725  19.347 -19.282  1.00  0.54           O  
HETATM  420  O   HOH T 419      36.902  28.632  14.889  1.00  0.54           O  
HETATM  421  O   HOH T 420      -3.263  25.916  17.041  1.00  0.54           O  
HETATM  422  O   HOH T 421      11.858  16.988  28.836  1.00  0.54           O  
HETATM  423  O   HOH T 422      24.982  26.793  -6.819  1.00  0.54           O  
HETATM  424  O   HOH T 423      -1.668  25.533   3.161  1.00  0.54           O  
HETATM  425  O   HOH T 424      13.069  43.737   9.873  1.00  0.54           O  
HETATM  426  O   HOH T 425       8.905  42.109 -18.631  1.00  0.55           O  
HETATM  427  O   HOH T 426      25.901  31.527  -8.854  1.00  0.55           O  
HETATM  428  O   HOH T 427      14.399  11.957   6.757  1.00  0.55           O  
HETATM  429  O   HOH T 428      24.331  34.191  21.264  1.00  0.55           O  
HETATM  430  O   HOH T 429      30.957  33.413  20.124  1.00  0.55           O  
HETATM  431  O   HOH T 430      28.230  27.521  21.220  1.00  0.55           O  
HETATM  432  O   HOH T 431      26.884  22.813  18.813  1.00  0.55           O  
HETATM  433  O   HOH T 432      18.792  10.760 -15.534  1.00  0.56           O  
HETATM  434  O   HOH T 433       4.820  37.919 -16.698  1.00  0.56           O  
HETATM  435  O   HOH T 434      28.459  28.163 -12.202  1.00  0.56           O  
HETATM  436  O   HOH T 435       5.616  39.263   6.322  1.00  0.56           O  
HETATM  437  O   HOH T 436      23.557  17.756  19.401  1.00  0.56           O  
HETATM  438  O   HOH T 437      12.641   9.661 -14.000  1.00  0.56           O  
HETATM  439  O   HOH T 438      25.000  34.116  -0.792  1.00  0.56           O  
HETATM  440  O   HOH T 439      -2.395  21.079   1.343  1.00  0.56           O  
HETATM  441  O   HOH T 440       7.088   9.598   3.460  1.00  0.56           O  
HETATM  442  O   HOH T 441      -3.964  27.485  23.489  1.00  0.56           O  
HETATM  443  O   HOH T 442       3.906  37.903   4.814  1.00  0.56           O  
HETATM  444  O   HOH T 443      29.094  32.391 -13.775  1.00  0.57           O  
HETATM  445  O   HOH T 444       7.203  40.511 -20.318  1.00  0.57           O  
HETATM  446  O   HOH T 445       1.592  13.805   7.245  1.00  0.57           O  
HETATM  447  O   HOH T 446       0.824  15.438   9.655  1.00  0.57           O  
HETATM  448  O   HOH T 447      17.009  40.551 -21.885  1.00  0.57           O  
HETATM  449  O   HOH T 448      26.486  25.166  -3.864  1.00  0.57           O  
HETATM  450  O   HOH T 449       5.442  16.092  23.460  1.00  0.57           O  
HETATM  451  O   HOH T 450      13.934  38.066  -7.913  1.00  0.58           O  
HETATM  452  O   HOH T 451      22.695  32.539  -0.459  1.00  0.58           O  
HETATM  453  O   HOH T 452       4.124  22.326  28.617  1.00  0.58           O  
HETATM  454  O   HOH T 453      23.800  16.106 -21.156  1.00  0.58           O  
HETATM  455  O   HOH T 454       8.138  37.943 -22.787  1.00  0.60           O  
HETATM  456  O   HOH T 455      -2.441  21.724  -6.629  1.00  0.61           O  
HETATM  457  O   HOH T 456      -4.439  25.296 -13.210  1.00  0.61           O  
TER     458      HOH T 456 
