# Supplementary material for: Accurate Prediction of Hydration Sites of Proteins Using Energy Model With Atom Embedding
Source: Front Mol Biosci. 2021 Sep 20;8:756075. doi: 10.3389/fmolb.2021.756075 (PMC8488165; doi:10.3389/fmolb.2021.756075)
Supplement: Supplementary file 1 [file DataSheet1.ZIP › Data Sheet 1/Our_result_pdb/our_dataset_output/2H90_watersite.pdb]

HEADER                                                        XXXX


JRNL        PMID   -1
HETATM    1  O   HOH T   0      16.034  33.867  57.437  1.00  0.15           O  
HETATM    2  O   HOH T   1       2.474  18.320  52.229  1.00  0.17           O  
HETATM    3  O   HOH T   2      22.650  21.817  71.234  1.00  0.17           O  
HETATM    4  O   HOH T   3      24.666  26.460  68.141  1.00  0.19           O  
HETATM    5  O   HOH T   4      38.908  27.699  56.775  1.00  0.19           O  
HETATM    6  O   HOH T   5       7.700  15.541  58.117  1.00  0.19           O  
HETATM    7  O   HOH T   6      10.992  15.726  66.379  1.00  0.19           O  
HETATM    8  O   HOH T   7      -3.651  32.898  38.008  1.00  0.19           O  
HETATM    9  O   HOH T   8      -1.056  10.473  46.941  1.00  0.20           O  
HETATM   10  O   HOH T   9       7.751  18.409  47.786  1.00  0.20           O  
HETATM   11  O   HOH T  10      17.108  28.412  50.868  1.00  0.21           O  
HETATM   12  O   HOH T  11       7.968  23.932  56.070  1.00  0.21           O  
HETATM   13  O   HOH T  12      34.745  19.791  78.453  1.00  0.21           O  
HETATM   14  O   HOH T  13      19.335  19.097  40.687  1.00  0.22           O  
HETATM   15  O   HOH T  14      12.467   9.299  68.601  1.00  0.22           O  
HETATM   16  O   HOH T  15      13.579   4.491  51.794  1.00  0.22           O  
HETATM   17  O   HOH T  16      13.175  31.038  45.331  1.00  0.22           O  
HETATM   18  O   HOH T  17       5.101   5.097  34.474  1.00  0.23           O  
HETATM   19  O   HOH T  18      25.160   4.707  50.794  1.00  0.23           O  
HETATM   20  O   HOH T  19      35.791  10.833  58.612  1.00  0.23           O  
HETATM   21  O   HOH T  20      19.022  -0.549  52.716  1.00  0.23           O  
HETATM   22  O   HOH T  21      28.671   4.923  45.229  1.00  0.23           O  
HETATM   23  O   HOH T  22      42.346  17.340  61.956  1.00  0.23           O  
HETATM   24  O   HOH T  23      24.097  -7.119  55.702  1.00  0.24           O  
HETATM   25  O   HOH T  24       2.476  17.921  55.049  1.00  0.24           O  
HETATM   26  O   HOH T  25      33.450  29.422  81.608  1.00  0.24           O  
HETATM   27  O   HOH T  26      12.792   3.903  42.535  1.00  0.24           O  
HETATM   28  O   HOH T  27      17.164  27.798  65.199  1.00  0.24           O  
HETATM   29  O   HOH T  28      22.823  45.688  50.879  1.00  0.25           O  
HETATM   30  O   HOH T  29      34.709  21.855  43.862  1.00  0.25           O  
HETATM   31  O   HOH T  30      40.831  42.488  69.826  1.00  0.25           O  
HETATM   32  O   HOH T  31      21.522  17.614  77.037  1.00  0.25           O  
HETATM   33  O   HOH T  32      42.287  29.292  64.264  1.00  0.25           O  
HETATM   34  O   HOH T  33      15.426  15.885  52.374  1.00  0.25           O  
HETATM   35  O   HOH T  34      18.075  -0.969  65.637  1.00  0.26           O  
HETATM   36  O   HOH T  35      15.271  15.369  55.112  1.00  0.26           O  
HETATM   37  O   HOH T  36       5.497   3.375  41.117  1.00  0.26           O  
HETATM   38  O   HOH T  37      26.801  -2.451  62.206  1.00  0.26           O  
HETATM   39  O   HOH T  38      25.091  21.215  59.844  1.00  0.26           O  
HETATM   40  O   HOH T  39      23.304  19.428  63.448  1.00  0.26           O  
HETATM   41  O   HOH T  40      17.125  32.263  49.985  1.00  0.26           O  
HETATM   42  O   HOH T  41       5.604  33.409  51.718  1.00  0.26           O  
HETATM   43  O   HOH T  42      13.688  -4.135  60.008  1.00  0.27           O  
HETATM   44  O   HOH T  43      25.175  42.709  67.073  1.00  0.27           O  
HETATM   45  O   HOH T  44      -2.869  13.100  56.716  1.00  0.27           O  
HETATM   46  O   HOH T  45       0.516  17.905  47.920  1.00  0.27           O  
HETATM   47  O   HOH T  46      39.823  33.291  61.198  1.00  0.27           O  
HETATM   48  O   HOH T  47      32.883  11.202  47.465  1.00  0.27           O  
HETATM   49  O   HOH T  48       5.094  10.814  53.787  1.00  0.27           O  
HETATM   50  O   HOH T  49      34.218   8.662  57.849  1.00  0.27           O  
HETATM   51  O   HOH T  50      28.069  19.237  57.004  1.00  0.28           O  
HETATM   52  O   HOH T  51       9.107  17.715  66.486  1.00  0.28           O  
HETATM   53  O   HOH T  52      -1.816  18.932  49.106  1.00  0.28           O  
HETATM   54  O   HOH T  53      -1.762  13.687  59.229  1.00  0.28           O  
HETATM   55  O   HOH T  54      36.332  21.868  79.038  1.00  0.28           O  
HETATM   56  O   HOH T  55       0.075   7.051  50.578  1.00  0.28           O  
HETATM   57  O   HOH T  56      24.786  16.581  36.601  1.00  0.29           O  
HETATM   58  O   HOH T  57       6.854   4.518  38.881  1.00  0.29           O  
HETATM   59  O   HOH T  58      22.981  31.422  55.797  1.00  0.29           O  
HETATM   60  O   HOH T  59      10.706  -1.483  60.536  1.00  0.29           O  
HETATM   61  O   HOH T  60      10.861  27.585  57.066  1.00  0.29           O  
HETATM   62  O   HOH T  61      10.567   8.149  63.417  1.00  0.29           O  
HETATM   63  O   HOH T  62       3.923  16.328  41.991  1.00  0.29           O  
HETATM   64  O   HOH T  63       9.414  12.670  39.213  1.00  0.30           O  
HETATM   65  O   HOH T  64      10.623  14.039  75.201  1.00  0.30           O  
HETATM   66  O   HOH T  65       2.370  12.934  60.119  1.00  0.30           O  
HETATM   67  O   HOH T  66      10.413   7.824  66.116  1.00  0.30           O  
HETATM   68  O   HOH T  67      20.355  28.096  74.441  1.00  0.30           O  
HETATM   69  O   HOH T  68       6.609  29.994  43.830  1.00  0.30           O  
HETATM   70  O   HOH T  69      10.204  23.523  57.734  1.00  0.30           O  
HETATM   71  O   HOH T  70      22.876  32.194  35.707  1.00  0.30           O  
HETATM   72  O   HOH T  71      22.731  44.375  48.393  1.00  0.30           O  
HETATM   73  O   HOH T  72      44.246  20.889  53.287  1.00  0.30           O  
HETATM   74  O   HOH T  73      46.185  38.505  72.496  1.00  0.30           O  
HETATM   75  O   HOH T  74       5.530  13.117  36.412  1.00  0.30           O  
HETATM   76  O   HOH T  75      40.189  12.699  56.762  1.00  0.31           O  
HETATM   77  O   HOH T  76      33.354   9.122  49.381  1.00  0.31           O  
HETATM   78  O   HOH T  77      27.503   5.528  49.534  1.00  0.31           O  
HETATM   79  O   HOH T  78      16.083  13.981  37.710  1.00  0.31           O  
HETATM   80  O   HOH T  79      20.753  30.012  42.448  1.00  0.31           O  
HETATM   81  O   HOH T  80      16.756  25.024  64.671  1.00  0.31           O  
HETATM   82  O   HOH T  81      15.696   9.038  63.105  1.00  0.31           O  
HETATM   83  O   HOH T  82      16.084  22.792  63.074  1.00  0.31           O  
HETATM   84  O   HOH T  83      10.361  28.191  59.811  1.00  0.31           O  
HETATM   85  O   HOH T  84      24.625  36.757  59.197  1.00  0.31           O  
HETATM   86  O   HOH T  85      -4.205  30.002  41.603  1.00  0.32           O  
HETATM   87  O   HOH T  86      32.335  34.907  62.426  1.00  0.32           O  
HETATM   88  O   HOH T  87      28.375  13.574  76.312  1.00  0.32           O  
HETATM   89  O   HOH T  88      24.747  29.488  56.572  1.00  0.32           O  
HETATM   90  O   HOH T  89       0.868  35.400  40.282  1.00  0.32           O  
HETATM   91  O   HOH T  90      24.122  -3.401  69.968  1.00  0.32           O  
HETATM   92  O   HOH T  91      13.144   8.069  62.462  1.00  0.32           O  
HETATM   93  O   HOH T  92      25.157  21.425  62.866  1.00  0.32           O  
HETATM   94  O   HOH T  93      40.734  31.229  62.920  1.00  0.32           O  
HETATM   95  O   HOH T  94      33.001  11.022  71.606  1.00  0.32           O  
HETATM   96  O   HOH T  95      40.126  29.632  51.229  1.00  0.32           O  
HETATM   97  O   HOH T  96      23.053  30.641  53.110  1.00  0.32           O  
HETATM   98  O   HOH T  97      22.802  33.015  51.701  1.00  0.32           O  
HETATM   99  O   HOH T  98      25.204  24.719  29.387  1.00  0.32           O  
HETATM  100  O   HOH T  99      11.330   4.066  67.003  1.00  0.33           O  
HETATM  101  O   HOH T 100      45.472  31.437  73.944  1.00  0.33           O  
HETATM  102  O   HOH T 101      25.969  -2.156  68.357  1.00  0.33           O  
HETATM  103  O   HOH T 102       8.297  28.419  56.607  1.00  0.33           O  
HETATM  104  O   HOH T 103      22.626  13.574  79.076  1.00  0.33           O  
HETATM  105  O   HOH T 104      12.133   5.159  74.043  1.00  0.33           O  
HETATM  106  O   HOH T 105      10.166  32.742  43.887  1.00  0.33           O  
HETATM  107  O   HOH T 106      32.236  19.703  79.605  1.00  0.33           O  
HETATM  108  O   HOH T 107      26.928  -1.812  59.550  1.00  0.34           O  
HETATM  109  O   HOH T 108      13.213  23.556  77.468  1.00  0.34           O  
HETATM  110  O   HOH T 109      25.258  13.324  80.078  1.00  0.34           O  
HETATM  111  O   HOH T 110       4.958  20.172  42.358  1.00  0.34           O  
HETATM  112  O   HOH T 111      -1.053  31.380  50.741  1.00  0.34           O  
HETATM  113  O   HOH T 112      10.452  11.405  74.165  1.00  0.34           O  
HETATM  114  O   HOH T 113      25.909  37.952  57.035  1.00  0.34           O  
HETATM  115  O   HOH T 114      24.615  -0.234  53.626  1.00  0.35           O  
HETATM  116  O   HOH T 115       5.403   2.964  59.115  1.00  0.35           O  
HETATM  117  O   HOH T 116      -2.059  18.035  41.923  1.00  0.35           O  
HETATM  118  O   HOH T 117      26.531  10.570  75.386  1.00  0.35           O  
HETATM  119  O   HOH T 118      32.336  13.731  36.819  1.00  0.35           O  
HETATM  120  O   HOH T 119      12.548  36.203  47.518  1.00  0.35           O  
HETATM  121  O   HOH T 120      42.565  35.633  49.585  1.00  0.35           O  
HETATM  122  O   HOH T 121      22.322   2.461  69.995  1.00  0.35           O  
HETATM  123  O   HOH T 122      14.491  11.402  63.813  1.00  0.35           O  
HETATM  124  O   HOH T 123      45.904  31.255  71.273  1.00  0.35           O  
HETATM  125  O   HOH T 124      15.090  29.994  51.966  1.00  0.35           O  
HETATM  126  O   HOH T 125      22.802  44.886  45.674  1.00  0.36           O  
HETATM  127  O   HOH T 126       8.921  15.125  54.052  1.00  0.36           O  
HETATM  128  O   HOH T 127      30.776  17.417  78.665  1.00  0.36           O  
HETATM  129  O   HOH T 128      38.169  27.730  50.764  1.00  0.36           O  
HETATM  130  O   HOH T 129      15.048  31.983  66.619  1.00  0.36           O  
HETATM  131  O   HOH T 130      23.529   9.551  38.160  1.00  0.36           O  
HETATM  132  O   HOH T 131       6.154   0.440  44.179  1.00  0.36           O  
HETATM  133  O   HOH T 132      41.411  24.236  53.240  1.00  0.36           O  
HETATM  134  O   HOH T 133      11.412   7.895  74.462  1.00  0.36           O  
HETATM  135  O   HOH T 134      38.295  13.762  61.419  1.00  0.36           O  
HETATM  136  O   HOH T 135       4.559  14.295  38.858  1.00  0.36           O  
HETATM  137  O   HOH T 136       1.387   9.364  42.853  1.00  0.36           O  
HETATM  138  O   HOH T 137      15.368  38.752  46.322  1.00  0.36           O  
HETATM  139  O   HOH T 138      23.995  -3.789  51.996  1.00  0.36           O  
HETATM  140  O   HOH T 139      38.091  16.457  65.676  1.00  0.36           O  
HETATM  141  O   HOH T 140      14.670  22.702  50.283  1.00  0.36           O  
HETATM  142  O   HOH T 141      34.161   7.123  68.082  1.00  0.37           O  
HETATM  143  O   HOH T 142      42.973  35.304  65.827  1.00  0.37           O  
HETATM  144  O   HOH T 143      34.264  12.608  49.343  1.00  0.37           O  
HETATM  145  O   HOH T 144      11.449  21.485  59.198  1.00  0.37           O  
HETATM  146  O   HOH T 145      47.804  39.728  70.699  1.00  0.37           O  
HETATM  147  O   HOH T 146      -0.455  27.169  42.932  1.00  0.37           O  
HETATM  148  O   HOH T 147      -4.291  11.623  49.507  1.00  0.37           O  
HETATM  149  O   HOH T 148       0.382  25.129  48.315  1.00  0.37           O  
HETATM  150  O   HOH T 149      36.375  32.103  78.598  1.00  0.37           O  
HETATM  151  O   HOH T 150       5.638  18.009  40.777  1.00  0.37           O  
HETATM  152  O   HOH T 151       2.900  33.658  39.533  1.00  0.37           O  
HETATM  153  O   HOH T 152      34.790  -0.773  66.083  1.00  0.38           O  
HETATM  154  O   HOH T 153      25.039  40.620  57.380  1.00  0.38           O  
HETATM  155  O   HOH T 154      28.098  21.893  80.729  1.00  0.38           O  
HETATM  156  O   HOH T 155      40.137  13.581  59.317  1.00  0.38           O  
HETATM  157  O   HOH T 156      -3.712  11.406  54.669  1.00  0.38           O  
HETATM  158  O   HOH T 157      21.795  15.360  73.819  1.00  0.38           O  
HETATM  159  O   HOH T 158       4.086   1.338  48.790  1.00  0.38           O  
HETATM  160  O   HOH T 159      20.760  15.042  77.690  1.00  0.38           O  
HETATM  161  O   HOH T 160      41.549  33.138  64.814  1.00  0.38           O  
HETATM  162  O   HOH T 161      38.178  14.062  64.231  1.00  0.38           O  
HETATM  163  O   HOH T 162      -1.889  15.173  41.982  1.00  0.38           O  
HETATM  164  O   HOH T 163      40.768  15.149  61.417  1.00  0.38           O  
HETATM  165  O   HOH T 164      39.020  46.112  69.964  1.00  0.38           O  
HETATM  166  O   HOH T 165       5.100   5.818  37.175  1.00  0.38           O  
HETATM  167  O   HOH T 166      14.577  -1.944  64.199  1.00  0.39           O  
HETATM  168  O   HOH T 167      41.529  39.783  72.784  1.00  0.39           O  
HETATM  169  O   HOH T 168      24.473  17.778  34.065  1.00  0.39           O  
HETATM  170  O   HOH T 169      23.996  30.701  67.836  1.00  0.39           O  
HETATM  171  O   HOH T 170      20.211  26.221  33.142  1.00  0.40           O  
HETATM  172  O   HOH T 171      -1.351  -0.442  55.303  1.00  0.40           O  
HETATM  173  O   HOH T 172      -2.074   8.535  58.807  1.00  0.40           O  
HETATM  174  O   HOH T 173      38.017  35.439  57.155  1.00  0.40           O  
HETATM  175  O   HOH T 174      13.660  43.582  55.898  1.00  0.40           O  
HETATM  176  O   HOH T 175      15.104  29.496  65.609  1.00  0.40           O  
HETATM  177  O   HOH T 176      26.809  19.677  79.481  1.00  0.40           O  
HETATM  178  O   HOH T 177      16.054  -0.043  67.246  1.00  0.40           O  
HETATM  179  O   HOH T 178      25.602  14.043  35.707  1.00  0.40           O  
HETATM  180  O   HOH T 179      24.322  42.293  69.695  1.00  0.40           O  
HETATM  181  O   HOH T 180      13.155  17.696  39.017  1.00  0.40           O  
HETATM  182  O   HOH T 181      -1.322  26.802  45.585  1.00  0.40           O  
HETATM  183  O   HOH T 182      23.641  40.402  54.882  1.00  0.40           O  
HETATM  184  O   HOH T 183      43.536  38.034  73.198  1.00  0.41           O  
HETATM  185  O   HOH T 184       1.652   8.079  61.388  1.00  0.41           O  
HETATM  186  O   HOH T 185      38.466  34.287  44.921  1.00  0.41           O  
HETATM  187  O   HOH T 186      33.596   9.752  45.347  1.00  0.41           O  
HETATM  188  O   HOH T 187      38.331  19.886  57.247  1.00  0.41           O  
HETATM  189  O   HOH T 188      -4.129  10.389  52.036  1.00  0.41           O  
HETATM  190  O   HOH T 189      42.861  21.533  78.137  1.00  0.41           O  
HETATM  191  O   HOH T 190      20.456   8.873  40.300  1.00  0.41           O  
HETATM  192  O   HOH T 191      14.424   1.576  42.782  1.00  0.41           O  
HETATM  193  O   HOH T 192      33.235   8.355  41.008  1.00  0.41           O  
HETATM  194  O   HOH T 193      18.110  17.851  38.470  1.00  0.41           O  
HETATM  195  O   HOH T 194       2.409   6.467  44.068  1.00  0.41           O  
HETATM  196  O   HOH T 195      14.549  26.785  65.342  1.00  0.41           O  
HETATM  197  O   HOH T 196      -3.419   8.702  54.103  1.00  0.41           O  
HETATM  198  O   HOH T 197       0.204  34.340  44.601  1.00  0.42           O  
HETATM  199  O   HOH T 198      -1.976   5.268  51.187  1.00  0.42           O  
HETATM  200  O   HOH T 199       3.159   5.194  50.699  1.00  0.42           O  
HETATM  201  O   HOH T 200      47.881  41.414  68.495  1.00  0.42           O  
HETATM  202  O   HOH T 201      37.373  14.382  76.312  1.00  0.42           O  
HETATM  203  O   HOH T 202      35.707   7.953  61.507  1.00  0.42           O  
HETATM  204  O   HOH T 203      45.597  40.812  67.132  1.00  0.42           O  
HETATM  205  O   HOH T 204      22.609  31.187  49.457  1.00  0.42           O  
HETATM  206  O   HOH T 205      20.399  -7.772  50.962  1.00  0.42           O  
HETATM  207  O   HOH T 206      42.243  44.221  71.585  1.00  0.42           O  
HETATM  208  O   HOH T 207      46.026  19.548  56.656  1.00  0.42           O  
HETATM  209  O   HOH T 208      41.240  37.953  74.733  1.00  0.42           O  
HETATM  210  O   HOH T 209      -3.003  28.378  53.819  1.00  0.42           O  
HETATM  211  O   HOH T 210      -1.954  26.755  55.869  1.00  0.42           O  
HETATM  212  O   HOH T 211      24.891  22.962  27.326  1.00  0.42           O  
HETATM  213  O   HOH T 212      35.013  25.163  39.741  1.00  0.42           O  
HETATM  214  O   HOH T 213       9.607  -3.690  54.324  1.00  0.42           O  
HETATM  215  O   HOH T 214      26.775   1.551  53.315  1.00  0.42           O  
HETATM  216  O   HOH T 215       8.137  13.067  74.123  1.00  0.42           O  
HETATM  217  O   HOH T 216      -2.469  34.020  44.002  1.00  0.42           O  
HETATM  218  O   HOH T 217      24.319  27.363  29.690  1.00  0.42           O  
HETATM  219  O   HOH T 218      39.794  21.148  68.374  1.00  0.42           O  
HETATM  220  O   HOH T 219      19.681  16.117  72.614  1.00  0.43           O  
HETATM  221  O   HOH T 220       2.454  10.548  61.445  1.00  0.43           O  
HETATM  222  O   HOH T 221      45.146  36.906  60.119  1.00  0.43           O  
HETATM  223  O   HOH T 222      -1.198   5.985  58.138  1.00  0.43           O  
HETATM  224  O   HOH T 223      10.836  34.608  45.825  1.00  0.43           O  
HETATM  225  O   HOH T 224      36.742  17.158  69.787  1.00  0.43           O  
HETATM  226  O   HOH T 225       7.059  26.131  57.552  1.00  0.43           O  
HETATM  227  O   HOH T 226       8.764  20.185  71.236  1.00  0.43           O  
HETATM  228  O   HOH T 227       8.400  13.654  76.826  1.00  0.43           O  
HETATM  229  O   HOH T 228      15.535  -4.368  57.954  1.00  0.43           O  
HETATM  230  O   HOH T 229       3.277   4.150  42.722  1.00  0.43           O  
HETATM  231  O   HOH T 230      20.967  46.791  44.989  1.00  0.43           O  
HETATM  232  O   HOH T 231       0.223  15.420  40.243  1.00  0.43           O  
HETATM  233  O   HOH T 232      14.070  24.152  64.516  1.00  0.44           O  
HETATM  234  O   HOH T 233      41.438  28.227  55.750  1.00  0.44           O  
HETATM  235  O   HOH T 234      26.695  27.271  33.668  1.00  0.44           O  
HETATM  236  O   HOH T 235      -3.431  24.943  51.181  1.00  0.44           O  
HETATM  237  O   HOH T 236      22.774   7.408  39.671  1.00  0.44           O  
HETATM  238  O   HOH T 237      42.492  34.239  51.998  1.00  0.44           O  
HETATM  239  O   HOH T 238      18.135   7.853  39.696  1.00  0.44           O  
HETATM  240  O   HOH T 239      -3.454  10.472  57.365  1.00  0.44           O  
HETATM  241  O   HOH T 240      40.442  36.403  56.045  1.00  0.45           O  
HETATM  242  O   HOH T 241       9.492  21.414  73.726  1.00  0.45           O  
HETATM  243  O   HOH T 242      21.554  30.248  75.876  1.00  0.45           O  
HETATM  244  O   HOH T 243      15.648  18.998  39.379  1.00  0.45           O  
HETATM  245  O   HOH T 244      12.212   8.860  36.827  1.00  0.45           O  
HETATM  246  O   HOH T 245      11.064  22.066  76.105  1.00  0.45           O  
HETATM  247  O   HOH T 246       3.186  -3.049  55.990  1.00  0.45           O  
HETATM  248  O   HOH T 247      41.190  25.461  49.245  1.00  0.45           O  
HETATM  249  O   HOH T 248       4.819  -0.821  55.733  1.00  0.45           O  
HETATM  250  O   HOH T 249       7.302   0.961  58.494  1.00  0.45           O  
HETATM  251  O   HOH T 250       5.374  36.410  49.668  1.00  0.45           O  
HETATM  252  O   HOH T 251      36.468   5.848  63.039  1.00  0.46           O  
HETATM  253  O   HOH T 252      42.133  32.936  49.642  1.00  0.46           O  
HETATM  254  O   HOH T 253      11.973  21.361  78.638  1.00  0.46           O  
HETATM  255  O   HOH T 254      12.078  37.306  50.050  1.00  0.46           O  
HETATM  256  O   HOH T 255      42.243  25.418  78.478  1.00  0.46           O  
HETATM  257  O   HOH T 256       8.079  11.045  75.964  1.00  0.46           O  
HETATM  258  O   HOH T 257      15.126  -3.947  62.371  1.00  0.46           O  
HETATM  259  O   HOH T 258      16.004   0.139  44.641  1.00  0.46           O  
HETATM  260  O   HOH T 259      36.203   9.656  56.163  1.00  0.46           O  
HETATM  261  O   HOH T 260       4.681  34.840  60.237  1.00  0.46           O  
HETATM  262  O   HOH T 261      20.503  23.421  33.179  1.00  0.46           O  
HETATM  263  O   HOH T 262      30.293  43.399  55.720  1.00  0.46           O  
HETATM  264  O   HOH T 263      26.590  28.838  30.258  1.00  0.46           O  
HETATM  265  O   HOH T 264      29.112  39.729  69.622  1.00  0.46           O  
HETATM  266  O   HOH T 265       9.981  10.680  37.260  1.00  0.46           O  
HETATM  267  O   HOH T 266      10.418   9.673  76.349  1.00  0.47           O  
HETATM  268  O   HOH T 267      11.313   0.821  64.349  1.00  0.47           O  
HETATM  269  O   HOH T 268       6.287   1.611  55.926  1.00  0.47           O  
HETATM  270  O   HOH T 269      -0.985   3.262  57.684  1.00  0.47           O  
HETATM  271  O   HOH T 270       5.699   0.756  60.721  1.00  0.47           O  
HETATM  272  O   HOH T 271      42.270  34.477  60.576  1.00  0.47           O  
HETATM  273  O   HOH T 272      38.381  10.603  57.524  1.00  0.47           O  
HETATM  274  O   HOH T 273      14.484  46.191  56.675  1.00  0.47           O  
HETATM  275  O   HOH T 274      -5.905  26.291  50.941  1.00  0.47           O  
HETATM  276  O   HOH T 275       8.949  30.659  42.294  1.00  0.47           O  
HETATM  277  O   HOH T 276      22.340  26.748  31.506  1.00  0.48           O  
HETATM  278  O   HOH T 277      29.986  19.940  81.219  1.00  0.48           O  
HETATM  279  O   HOH T 278      40.332  28.013  48.885  1.00  0.48           O  
HETATM  280  O   HOH T 279       3.471  30.019  39.660  1.00  0.48           O  
HETATM  281  O   HOH T 280      28.773  41.658  54.337  1.00  0.48           O  
HETATM  282  O   HOH T 281      -4.117  17.688  57.388  1.00  0.48           O  
HETATM  283  O   HOH T 282      24.462  28.264  32.389  1.00  0.48           O  
HETATM  284  O   HOH T 283      46.285  21.755  55.023  1.00  0.48           O  
HETATM  285  O   HOH T 284      -1.307   5.003  55.520  1.00  0.48           O  
HETATM  286  O   HOH T 285       7.405  32.647  43.546  1.00  0.48           O  
HETATM  287  O   HOH T 286       0.156  -4.159  53.071  1.00  0.48           O  
HETATM  288  O   HOH T 287       8.158  12.756  36.858  1.00  0.48           O  
HETATM  289  O   HOH T 288       9.018  -1.702  62.715  1.00  0.48           O  
HETATM  290  O   HOH T 289      33.410  10.558  42.831  1.00  0.48           O  
HETATM  291  O   HOH T 290      19.278  29.093  76.884  1.00  0.48           O  
HETATM  292  O   HOH T 291      29.123   3.955  47.871  1.00  0.48           O  
HETATM  293  O   HOH T 292      -0.008  32.363  55.087  1.00  0.48           O  
HETATM  294  O   HOH T 293      35.586  34.821  78.659  1.00  0.48           O  
HETATM  295  O   HOH T 294      19.691  16.286  75.461  1.00  0.49           O  
HETATM  296  O   HOH T 295      22.584   4.668  44.276  1.00  0.49           O  
HETATM  297  O   HOH T 296      19.417  -0.483  47.554  1.00  0.49           O  
HETATM  298  O   HOH T 297      23.278  -4.820  54.441  1.00  0.49           O  
HETATM  299  O   HOH T 298      17.121  36.366  42.776  1.00  0.49           O  
HETATM  300  O   HOH T 299      -0.904  35.813  42.480  1.00  0.49           O  
HETATM  301  O   HOH T 300      33.545  12.049  74.171  1.00  0.49           O  
HETATM  302  O   HOH T 301       1.757   0.864  50.236  1.00  0.49           O  
HETATM  303  O   HOH T 302      -3.955  15.067  58.278  1.00  0.49           O  
HETATM  304  O   HOH T 303      33.991   9.041  69.975  1.00  0.49           O  
HETATM  305  O   HOH T 304      41.494  30.456  49.021  1.00  0.49           O  
HETATM  306  O   HOH T 305      42.969  25.906  54.973  1.00  0.49           O  
HETATM  307  O   HOH T 306      22.775  20.115  33.983  1.00  0.49           O  
HETATM  308  O   HOH T 307      19.198  30.575  74.521  1.00  0.49           O  
HETATM  309  O   HOH T 308      46.237  18.622  59.219  1.00  0.49           O  
HETATM  310  O   HOH T 309      15.407  46.993  46.972  1.00  0.50           O  
HETATM  311  O   HOH T 310       7.411  32.409  40.751  1.00  0.50           O  
HETATM  312  O   HOH T 311      43.157  18.888  64.018  1.00  0.50           O  
HETATM  313  O   HOH T 312      42.653  13.748  55.733  1.00  0.50           O  
HETATM  314  O   HOH T 313       4.201  18.903  70.510  1.00  0.50           O  
HETATM  315  O   HOH T 314      22.904  -8.988  51.883  1.00  0.50           O  
HETATM  316  O   HOH T 315      42.956  30.353  73.688  1.00  0.50           O  
HETATM  317  O   HOH T 316      44.411  20.253  60.726  1.00  0.50           O  
HETATM  318  O   HOH T 317      33.061   7.773  43.590  1.00  0.50           O  
HETATM  319  O   HOH T 318      40.467  23.270  50.748  1.00  0.50           O  
HETATM  320  O   HOH T 319      47.693  30.071  72.933  1.00  0.50           O  
HETATM  321  O   HOH T 320      26.988   2.960  49.534  1.00  0.50           O  
HETATM  322  O   HOH T 321      28.776   0.012  58.471  1.00  0.50           O  
HETATM  323  O   HOH T 322      -3.549   7.619  51.589  1.00  0.50           O  
HETATM  324  O   HOH T 323      30.688  41.924  68.906  1.00  0.50           O  
HETATM  325  O   HOH T 324      44.478  20.872  65.104  1.00  0.50           O  
HETATM  326  O   HOH T 325      13.572  44.380  58.550  1.00  0.50           O  
HETATM  327  O   HOH T 326      14.604  16.251  37.120  1.00  0.50           O  
HETATM  328  O   HOH T 327      42.590  36.857  59.372  1.00  0.50           O  
HETATM  329  O   HOH T 328      39.753  25.663  51.606  1.00  0.51           O  
HETATM  330  O   HOH T 329      -3.024  36.226  40.698  1.00  0.51           O  
HETATM  331  O   HOH T 330       8.857  -0.146  64.967  1.00  0.51           O  
HETATM  332  O   HOH T 331      15.342  25.244  51.009  1.00  0.51           O  
HETATM  333  O   HOH T 332      36.477  11.325  42.961  1.00  0.51           O  
HETATM  334  O   HOH T 333       8.248  19.095  64.302  1.00  0.51           O  
HETATM  335  O   HOH T 334      -0.752   3.405  49.424  1.00  0.51           O  
HETATM  336  O   HOH T 335      41.073  33.964  46.074  1.00  0.51           O  
HETATM  337  O   HOH T 336      26.173  37.116  68.342  1.00  0.51           O  
HETATM  338  O   HOH T 337      26.677  12.054  77.810  1.00  0.51           O  
HETATM  339  O   HOH T 338       3.636  35.376  51.578  1.00  0.52           O  
HETATM  340  O   HOH T 339      -2.787  25.687  53.619  1.00  0.52           O  
HETATM  341  O   HOH T 340      21.585  12.075  81.090  1.00  0.52           O  
HETATM  342  O   HOH T 341       1.900  35.691  42.868  1.00  0.52           O  
HETATM  343  O   HOH T 342      -0.948  30.245  53.423  1.00  0.52           O  
HETATM  344  O   HOH T 343      16.806  19.711  37.020  1.00  0.52           O  
HETATM  345  O   HOH T 344      13.094   9.702  75.868  1.00  0.52           O  
HETATM  346  O   HOH T 345      12.939  -2.269  62.001  1.00  0.52           O  
HETATM  347  O   HOH T 346      19.871  -0.016  50.202  1.00  0.52           O  
HETATM  348  O   HOH T 347      20.320  -7.272  53.688  1.00  0.52           O  
HETATM  349  O   HOH T 348      44.151  28.525  62.368  1.00  0.52           O  
HETATM  350  O   HOH T 349      11.753  16.033  76.860  1.00  0.53           O  
HETATM  351  O   HOH T 350      17.182  -2.339  63.330  1.00  0.53           O  
HETATM  352  O   HOH T 351      13.460  38.796  48.214  1.00  0.53           O  
HETATM  353  O   HOH T 352      38.777   0.701  62.963  1.00  0.53           O  
HETATM  354  O   HOH T 353      30.928   6.133  44.301  1.00  0.53           O  
HETATM  355  O   HOH T 354      -2.441  11.021  59.947  1.00  0.53           O  
HETATM  356  O   HOH T 355      44.961  19.491  50.979  1.00  0.53           O  
HETATM  357  O   HOH T 356      14.515  21.092  52.724  1.00  0.53           O  
HETATM  358  O   HOH T 357       4.111   3.971  38.876  1.00  0.53           O  
HETATM  359  O   HOH T 358      22.386  -1.315  70.603  1.00  0.53           O  
HETATM  360  O   HOH T 359      42.015  34.748  57.742  1.00  0.53           O  
HETATM  361  O   HOH T 360      16.086  47.125  53.406  1.00  0.54           O  
HETATM  362  O   HOH T 361      -5.093  34.581  41.279  1.00  0.54           O  
HETATM  363  O   HOH T 362      -2.279   7.096  49.118  1.00  0.54           O  
HETATM  364  O   HOH T 363      30.871  34.338  76.482  1.00  0.54           O  
HETATM  365  O   HOH T 364      10.668  19.545  77.052  1.00  0.54           O  
HETATM  366  O   HOH T 365      -4.013  21.711  46.121  1.00  0.54           O  
HETATM  367  O   HOH T 366       7.891  24.503  42.705  1.00  0.55           O  
HETATM  368  O   HOH T 367      -3.793  10.793  46.855  1.00  0.55           O  
HETATM  369  O   HOH T 368       9.717  38.877  52.576  1.00  0.55           O  
HETATM  370  O   HOH T 369      38.754   8.959  55.254  1.00  0.55           O  
HETATM  371  O   HOH T 370      -0.575   2.294  55.149  1.00  0.55           O  
HETATM  372  O   HOH T 371      40.383  36.334  44.901  1.00  0.55           O  
HETATM  373  O   HOH T 372       1.655  35.515  53.549  1.00  0.55           O  
HETATM  374  O   HOH T 373      29.086   3.347  42.856  1.00  0.55           O  
HETATM  375  O   HOH T 374      33.983  14.417  40.584  1.00  0.55           O  
HETATM  376  O   HOH T 375      50.015  51.591  61.939  1.00  0.55           O  
HETATM  377  O   HOH T 376      -2.469  27.618  58.311  1.00  0.55           O  
HETATM  378  O   HOH T 377      39.070  17.172  68.103  1.00  0.55           O  
HETATM  379  O   HOH T 378      17.792  25.292  79.407  1.00  0.55           O  
HETATM  380  O   HOH T 379       5.611   3.102  43.855  1.00  0.55           O  
HETATM  381  O   HOH T 380      15.436   4.030  41.924  1.00  0.56           O  
HETATM  382  O   HOH T 381       1.564  14.219  62.375  1.00  0.56           O  
HETATM  383  O   HOH T 382       3.983   4.554  45.395  1.00  0.56           O  
HETATM  384  O   HOH T 383      17.677  -6.580  53.496  1.00  0.56           O  
HETATM  385  O   HOH T 384      26.001   5.392  74.671  1.00  0.56           O  
HETATM  386  O   HOH T 385      43.802  27.586  69.663  1.00  0.56           O  
HETATM  387  O   HOH T 386      42.209  30.742  55.957  1.00  0.56           O  
HETATM  388  O   HOH T 387      -4.092  21.832  60.842  1.00  0.56           O  
HETATM  389  O   HOH T 388      -2.538  18.567  63.276  1.00  0.56           O  
HETATM  390  O   HOH T 389      21.084  41.295  42.899  1.00  0.56           O  
HETATM  391  O   HOH T 390       9.540   2.170  68.133  1.00  0.56           O  
HETATM  392  O   HOH T 391       2.331   8.928  63.910  1.00  0.56           O  
HETATM  393  O   HOH T 392      35.272  22.827  41.222  1.00  0.56           O  
HETATM  394  O   HOH T 393      34.885  39.167  74.586  1.00  0.56           O  
HETATM  395  O   HOH T 394      38.973  33.141  78.643  1.00  0.56           O  
HETATM  396  O   HOH T 395      22.854  31.655  33.071  1.00  0.56           O  
HETATM  397  O   HOH T 396      37.954   8.078  63.045  1.00  0.57           O  
HETATM  398  O   HOH T 397      24.224   1.365  68.379  1.00  0.57           O  
HETATM  399  O   HOH T 398      27.551  22.688  59.976  1.00  0.57           O  
HETATM  400  O   HOH T 399       4.566   1.670  46.007  1.00  0.57           O  
HETATM  401  O   HOH T 400      22.522  -6.260  52.207  1.00  0.57           O  
HETATM  402  O   HOH T 401      -0.837   7.042  60.711  1.00  0.57           O  
HETATM  403  O   HOH T 402      11.190  25.783  59.024  1.00  0.57           O  
HETATM  404  O   HOH T 403      40.538  42.332  72.719  1.00  0.57           O  
HETATM  405  O   HOH T 404      -2.441  31.564  55.932  1.00  0.57           O  
HETATM  406  O   HOH T 405      33.426   9.588  37.213  1.00  0.57           O  
HETATM  407  O   HOH T 406      10.335  -0.292  67.310  1.00  0.59           O  
HETATM  408  O   HOH T 407      37.339  44.344  71.139  1.00  0.59           O  
HETATM  409  O   HOH T 408      -0.699  -1.483  52.727  1.00  0.59           O  
HETATM  410  O   HOH T 409      41.236  46.813  71.241  1.00  0.59           O  
HETATM  411  O   HOH T 410      30.338  14.640  78.009  1.00  0.59           O  
HETATM  412  O   HOH T 411       6.376  -1.433  62.085  1.00  0.60           O  
HETATM  413  O   HOH T 412      37.482   9.841  62.102  1.00  0.62           O  
TER     414      HOH T 412 
