# Supplementary material for: Accurate Prediction of Hydration Sites of Proteins Using Energy Model With Atom Embedding
Source: Front Mol Biosci. 2021 Sep 20;8:756075. doi: 10.3389/fmolb.2021.756075 (PMC8488165; doi:10.3389/fmolb.2021.756075)
Supplement: Supplementary file 1 [file DataSheet1.ZIP › Data Sheet 1/Our_result_pdb/our_dataset_output/2HA8_watersite.pdb]

HEADER                                                        XXXX


JRNL        PMID   -1
HETATM    1  O   HOH T   0      31.256  47.930  30.489  1.00  0.19           O  
HETATM    2  O   HOH T   1      17.767  43.760  22.361  1.00  0.20           O  
HETATM    3  O   HOH T   2      27.952  45.393   0.853  1.00  0.21           O  
HETATM    4  O   HOH T   3       6.949  25.400   3.077  1.00  0.21           O  
HETATM    5  O   HOH T   4       6.392  29.959  -2.533  1.00  0.21           O  
HETATM    6  O   HOH T   5      27.817  53.198  29.151  1.00  0.22           O  
HETATM    7  O   HOH T   6      26.080  41.206  14.978  1.00  0.22           O  
HETATM    8  O   HOH T   7       6.982  17.920  13.432  1.00  0.24           O  
HETATM    9  O   HOH T   8      12.466  35.316   7.595  1.00  0.24           O  
HETATM   10  O   HOH T   9      50.073  33.900  25.282  1.00  0.24           O  
HETATM   11  O   HOH T  10      13.221  43.500  16.227  1.00  0.24           O  
HETATM   12  O   HOH T  11      -1.047  35.827  10.232  1.00  0.24           O  
HETATM   13  O   HOH T  12      39.879  33.533  31.946  1.00  0.24           O  
HETATM   14  O   HOH T  13      30.212  56.974  39.239  1.00  0.25           O  
HETATM   15  O   HOH T  14       3.968  38.406  24.996  1.00  0.25           O  
HETATM   16  O   HOH T  15      13.556  17.079   6.107  1.00  0.26           O  
HETATM   17  O   HOH T  16      37.324  53.310  40.768  1.00  0.26           O  
HETATM   18  O   HOH T  17      19.582  63.168  24.941  1.00  0.26           O  
HETATM   19  O   HOH T  18      37.954  52.643  37.310  1.00  0.26           O  
HETATM   20  O   HOH T  19      12.236  53.417  25.373  1.00  0.26           O  
HETATM   21  O   HOH T  20      20.206  34.881  38.899  1.00  0.26           O  
HETATM   22  O   HOH T  21      35.217  37.723  43.307  1.00  0.26           O  
HETATM   23  O   HOH T  22      15.061  39.953  41.235  1.00  0.26           O  
HETATM   24  O   HOH T  23      28.000  27.244   2.845  1.00  0.26           O  
HETATM   25  O   HOH T  24      19.451  16.717  10.519  1.00  0.26           O  
HETATM   26  O   HOH T  25      33.797  26.745  34.614  1.00  0.27           O  
HETATM   27  O   HOH T  26      29.851  46.059   5.406  1.00  0.27           O  
HETATM   28  O   HOH T  27      25.844  55.241  29.531  1.00  0.27           O  
HETATM   29  O   HOH T  28      25.281  67.141  29.097  1.00  0.27           O  
HETATM   30  O   HOH T  29      36.509  41.305  21.088  1.00  0.27           O  
HETATM   31  O   HOH T  30      28.017  32.668  43.242  1.00  0.27           O  
HETATM   32  O   HOH T  31      45.194  43.932  29.045  1.00  0.27           O  
HETATM   33  O   HOH T  32       9.970  28.509  44.765  1.00  0.27           O  
HETATM   34  O   HOH T  33      44.305  50.749  31.270  1.00  0.28           O  
HETATM   35  O   HOH T  34      40.669  36.586  41.728  1.00  0.28           O  
HETATM   36  O   HOH T  35      26.465  43.758  13.937  1.00  0.29           O  
HETATM   37  O   HOH T  36      10.463  39.712  28.663  1.00  0.29           O  
HETATM   38  O   HOH T  37       2.975  27.059  16.554  1.00  0.29           O  
HETATM   39  O   HOH T  38      16.676  46.012  21.153  1.00  0.29           O  
HETATM   40  O   HOH T  39      28.070  58.672  38.785  1.00  0.29           O  
HETATM   41  O   HOH T  40      14.370  33.766  30.463  1.00  0.29           O  
HETATM   42  O   HOH T  41      34.593  46.347  49.400  1.00  0.29           O  
HETATM   43  O   HOH T  42      13.057  42.157  34.113  1.00  0.30           O  
HETATM   44  O   HOH T  43      33.510  37.471  45.410  1.00  0.30           O  
HETATM   45  O   HOH T  44      19.424  36.452  33.211  1.00  0.30           O  
HETATM   46  O   HOH T  45      11.964  58.932  34.530  1.00  0.30           O  
HETATM   47  O   HOH T  46      24.544  47.688  41.482  1.00  0.30           O  
HETATM   48  O   HOH T  47      -3.819  31.890  18.761  1.00  0.30           O  
HETATM   49  O   HOH T  48      16.790  43.827  40.591  1.00  0.30           O  
HETATM   50  O   HOH T  49      33.841  53.539  20.807  1.00  0.31           O  
HETATM   51  O   HOH T  50      14.917  40.353   4.267  1.00  0.31           O  
HETATM   52  O   HOH T  51      17.055  17.955   9.839  1.00  0.31           O  
HETATM   53  O   HOH T  52       5.601  32.134   0.457  1.00  0.31           O  
HETATM   54  O   HOH T  53      -4.657  41.912  11.072  1.00  0.31           O  
HETATM   55  O   HOH T  54       9.658  22.550  25.213  1.00  0.31           O  
HETATM   56  O   HOH T  55      31.779  32.147   8.108  1.00  0.31           O  
HETATM   57  O   HOH T  56      13.917  44.079  35.911  1.00  0.31           O  
HETATM   58  O   HOH T  57      21.201  17.649  18.883  1.00  0.31           O  
HETATM   59  O   HOH T  58      -6.694  34.983  13.396  1.00  0.31           O  
HETATM   60  O   HOH T  59      27.762  52.128   5.427  1.00  0.32           O  
HETATM   61  O   HOH T  60       0.887  27.545  18.364  1.00  0.32           O  
HETATM   62  O   HOH T  61      22.615  55.580  39.500  1.00  0.32           O  
HETATM   63  O   HOH T  62       8.360  33.319  28.122  1.00  0.32           O  
HETATM   64  O   HOH T  63      17.358  35.756  34.691  1.00  0.32           O  
HETATM   65  O   HOH T  64      36.384  43.153  47.784  1.00  0.32           O  
HETATM   66  O   HOH T  65       3.136  33.591  14.585  1.00  0.32           O  
HETATM   67  O   HOH T  66      31.202  43.537  -5.701  1.00  0.32           O  
HETATM   68  O   HOH T  67      41.141  43.741  26.473  1.00  0.32           O  
HETATM   69  O   HOH T  68       7.885  37.041  30.855  1.00  0.32           O  
HETATM   70  O   HOH T  69      39.623  38.243  17.015  1.00  0.33           O  
HETATM   71  O   HOH T  70      37.814  29.669  23.061  1.00  0.33           O  
HETATM   72  O   HOH T  71       7.173  45.354  25.076  1.00  0.33           O  
HETATM   73  O   HOH T  72      14.768  42.257  44.179  1.00  0.33           O  
HETATM   74  O   HOH T  73       3.370  33.138  -3.275  1.00  0.33           O  
HETATM   75  O   HOH T  74       4.345  41.183  29.596  1.00  0.33           O  
HETATM   76  O   HOH T  75      35.833  54.426  22.389  1.00  0.33           O  
HETATM   77  O   HOH T  76      19.848  48.421  41.406  1.00  0.33           O  
HETATM   78  O   HOH T  77      16.660  41.959   2.024  1.00  0.33           O  
HETATM   79  O   HOH T  78      34.218  32.797   3.384  1.00  0.33           O  
HETATM   80  O   HOH T  79      16.357  42.340  -5.019  1.00  0.33           O  
HETATM   81  O   HOH T  80      30.188  34.339  42.602  1.00  0.33           O  
HETATM   82  O   HOH T  81      13.360  18.857  15.940  1.00  0.33           O  
HETATM   83  O   HOH T  82      17.875  13.304  18.458  1.00  0.34           O  
HETATM   84  O   HOH T  83      33.335  28.346  36.822  1.00  0.34           O  
HETATM   85  O   HOH T  84      30.989  49.931  10.681  1.00  0.34           O  
HETATM   86  O   HOH T  85       7.988  52.058  35.800  1.00  0.34           O  
HETATM   87  O   HOH T  86      29.920  30.819   6.664  1.00  0.34           O  
HETATM   88  O   HOH T  87      38.144  27.246  28.375  1.00  0.34           O  
HETATM   89  O   HOH T  88      13.809  51.002  36.063  1.00  0.34           O  
HETATM   90  O   HOH T  89      12.745  46.246   3.871  1.00  0.34           O  
HETATM   91  O   HOH T  90      15.527  45.896   3.910  1.00  0.34           O  
HETATM   92  O   HOH T  91      20.886  19.034   2.453  1.00  0.34           O  
HETATM   93  O   HOH T  92      23.533  52.496  -0.195  1.00  0.34           O  
HETATM   94  O   HOH T  93      18.029  62.027  20.695  1.00  0.34           O  
HETATM   95  O   HOH T  94      35.679  43.663   9.051  1.00  0.34           O  
HETATM   96  O   HOH T  95      39.563  53.855  39.111  1.00  0.35           O  
HETATM   97  O   HOH T  96      11.321  42.712  18.076  1.00  0.35           O  
HETATM   98  O   HOH T  97      -1.792  30.042  25.119  1.00  0.35           O  
HETATM   99  O   HOH T  98      16.576  44.236  44.631  1.00  0.35           O  
HETATM  100  O   HOH T  99      22.731  39.972  44.661  1.00  0.35           O  
HETATM  101  O   HOH T 100      25.275  56.658  24.671  1.00  0.35           O  
HETATM  102  O   HOH T 101       8.962  45.331  10.109  1.00  0.35           O  
HETATM  103  O   HOH T 102      28.208  25.856   7.517  1.00  0.35           O  
HETATM  104  O   HOH T 103      15.624  17.372  16.764  1.00  0.35           O  
HETATM  105  O   HOH T 104      34.134  23.158  23.931  1.00  0.35           O  
HETATM  106  O   HOH T 105      14.104  33.959  38.735  1.00  0.36           O  
HETATM  107  O   HOH T 106      17.000  52.621  37.812  1.00  0.36           O  
HETATM  108  O   HOH T 107      28.862  22.649  27.768  1.00  0.36           O  
HETATM  109  O   HOH T 108       1.526  30.485  27.152  1.00  0.36           O  
HETATM  110  O   HOH T 109      31.040  48.968   8.086  1.00  0.36           O  
HETATM  111  O   HOH T 110       2.989  40.385  15.655  1.00  0.36           O  
HETATM  112  O   HOH T 111      33.251  47.131  51.663  1.00  0.37           O  
HETATM  113  O   HOH T 112      27.578  42.031  51.862  1.00  0.37           O  
HETATM  114  O   HOH T 113      13.376  42.396  -7.743  1.00  0.37           O  
HETATM  115  O   HOH T 114      17.857  25.059  31.069  1.00  0.37           O  
HETATM  116  O   HOH T 115      21.625  53.077   1.766  1.00  0.37           O  
HETATM  117  O   HOH T 116      31.711  53.127  42.131  1.00  0.37           O  
HETATM  118  O   HOH T 117      11.541  18.353   7.373  1.00  0.37           O  
HETATM  119  O   HOH T 118      10.371  52.982  36.614  1.00  0.37           O  
HETATM  120  O   HOH T 119      24.356  54.480  18.430  1.00  0.37           O  
HETATM  121  O   HOH T 120       7.109  35.913  28.371  1.00  0.37           O  
HETATM  122  O   HOH T 121      25.078  56.194  40.742  1.00  0.37           O  
HETATM  123  O   HOH T 122      -3.889  32.770  13.881  1.00  0.37           O  
HETATM  124  O   HOH T 123      28.871  66.960  36.023  1.00  0.37           O  
HETATM  125  O   HOH T 124      -3.126  40.253   9.484  1.00  0.38           O  
HETATM  126  O   HOH T 125      29.782  54.813  40.991  1.00  0.38           O  
HETATM  127  O   HOH T 126      21.091  53.127   4.539  1.00  0.38           O  
HETATM  128  O   HOH T 127      42.165  39.033  33.906  1.00  0.38           O  
HETATM  129  O   HOH T 128       2.427  32.889  22.317  1.00  0.38           O  
HETATM  130  O   HOH T 129      20.936  33.346  47.059  1.00  0.38           O  
HETATM  131  O   HOH T 130      20.220  27.597  39.506  1.00  0.38           O  
HETATM  132  O   HOH T 131      12.767  31.560  39.388  1.00  0.38           O  
HETATM  133  O   HOH T 132       0.978  36.080   4.820  1.00  0.38           O  
HETATM  134  O   HOH T 133      43.713  47.888  38.396  1.00  0.38           O  
HETATM  135  O   HOH T 134       4.236  31.361  23.927  1.00  0.38           O  
HETATM  136  O   HOH T 135      20.012  54.487  39.709  1.00  0.38           O  
HETATM  137  O   HOH T 136      34.212  25.458  22.161  1.00  0.38           O  
HETATM  138  O   HOH T 137      42.337  36.851  30.296  1.00  0.38           O  
HETATM  139  O   HOH T 138      -4.581  27.851  11.829  1.00  0.38           O  
HETATM  140  O   HOH T 139      16.979  33.144  45.500  1.00  0.38           O  
HETATM  141  O   HOH T 140      29.034  52.896  42.825  1.00  0.38           O  
HETATM  142  O   HOH T 141      19.558  33.941  44.562  1.00  0.38           O  
HETATM  143  O   HOH T 142       8.752  43.723  22.655  1.00  0.38           O  
HETATM  144  O   HOH T 143      17.450  41.281  41.688  1.00  0.38           O  
HETATM  145  O   HOH T 144       6.453  18.482  10.711  1.00  0.38           O  
HETATM  146  O   HOH T 145      -4.114  35.506  14.349  1.00  0.39           O  
HETATM  147  O   HOH T 146      27.647  45.985  -6.160  1.00  0.39           O  
HETATM  148  O   HOH T 147       0.269  31.968  25.105  1.00  0.39           O  
HETATM  149  O   HOH T 148       1.797  23.571  23.946  1.00  0.39           O  
HETATM  150  O   HOH T 149      15.595  43.326  38.044  1.00  0.39           O  
HETATM  151  O   HOH T 150      33.570  33.024   6.124  1.00  0.39           O  
HETATM  152  O   HOH T 151      -0.012  30.828  19.528  1.00  0.39           O  
HETATM  153  O   HOH T 152      18.424  52.187  40.132  1.00  0.39           O  
HETATM  154  O   HOH T 153      -0.963  28.839  11.605  1.00  0.39           O  
HETATM  155  O   HOH T 154      31.303  66.086  36.943  1.00  0.39           O  
HETATM  156  O   HOH T 155       8.898  17.587  23.620  1.00  0.39           O  
HETATM  157  O   HOH T 156      42.288  39.805  39.315  1.00  0.39           O  
HETATM  158  O   HOH T 157      30.081  50.996   6.330  1.00  0.39           O  
HETATM  159  O   HOH T 158      14.466  35.702  -5.589  1.00  0.39           O  
HETATM  160  O   HOH T 159       2.793  26.997  25.482  1.00  0.39           O  
HETATM  161  O   HOH T 160      46.793  50.902  30.150  1.00  0.39           O  
HETATM  162  O   HOH T 161       2.641  36.227  13.809  1.00  0.39           O  
HETATM  163  O   HOH T 162      17.210  49.866   9.813  1.00  0.40           O  
HETATM  164  O   HOH T 163      12.664  35.041  36.720  1.00  0.40           O  
HETATM  165  O   HOH T 164      27.557  56.546  26.008  1.00  0.40           O  
HETATM  166  O   HOH T 165      41.095  35.007  39.576  1.00  0.40           O  
HETATM  167  O   HOH T 166      26.685  50.133  -1.533  1.00  0.40           O  
HETATM  168  O   HOH T 167       3.052  34.200  17.305  1.00  0.40           O  
HETATM  169  O   HOH T 168      42.363  32.973  32.979  1.00  0.40           O  
HETATM  170  O   HOH T 169      10.452  41.420   4.348  1.00  0.40           O  
HETATM  171  O   HOH T 170      13.659  46.028  15.061  1.00  0.40           O  
HETATM  172  O   HOH T 171      19.438  60.933  37.651  1.00  0.40           O  
HETATM  173  O   HOH T 172      36.654  34.137  20.095  1.00  0.40           O  
HETATM  174  O   HOH T 173      27.349  23.851   5.733  1.00  0.40           O  
HETATM  175  O   HOH T 174       4.229  39.642  27.369  1.00  0.40           O  
HETATM  176  O   HOH T 175       4.253  24.941  24.168  1.00  0.40           O  
HETATM  177  O   HOH T 176      22.440  19.910  18.046  1.00  0.40           O  
HETATM  178  O   HOH T 177       0.856  38.401   3.269  1.00  0.40           O  
HETATM  179  O   HOH T 178       0.797  39.656  12.934  1.00  0.40           O  
HETATM  180  O   HOH T 179      -1.306  37.893  12.173  1.00  0.40           O  
HETATM  181  O   HOH T 180      44.062  35.597  21.872  1.00  0.40           O  
HETATM  182  O   HOH T 181      35.717  24.036  32.380  1.00  0.40           O  
HETATM  183  O   HOH T 182       5.974  45.330  27.727  1.00  0.40           O  
HETATM  184  O   HOH T 183      32.301  34.638   0.524  1.00  0.40           O  
HETATM  185  O   HOH T 184       4.104  21.664  20.963  1.00  0.40           O  
HETATM  186  O   HOH T 185      29.061  26.422  29.246  1.00  0.40           O  
HETATM  187  O   HOH T 186      44.075  38.880  29.627  1.00  0.40           O  
HETATM  188  O   HOH T 187      52.074  46.831  37.989  1.00  0.41           O  
HETATM  189  O   HOH T 188       4.583  37.616  22.466  1.00  0.41           O  
HETATM  190  O   HOH T 189      15.363  44.382   1.583  1.00  0.41           O  
HETATM  191  O   HOH T 190      41.658  46.245  25.357  1.00  0.41           O  
HETATM  192  O   HOH T 191      34.082  43.467  -2.827  1.00  0.41           O  
HETATM  193  O   HOH T 192       6.895  43.006  20.776  1.00  0.41           O  
HETATM  194  O   HOH T 193      10.316  29.046  25.885  1.00  0.41           O  
HETATM  195  O   HOH T 194      41.423  34.616  21.945  1.00  0.41           O  
HETATM  196  O   HOH T 195      12.051  59.654  30.591  1.00  0.41           O  
HETATM  197  O   HOH T 196       5.482  33.016  42.590  1.00  0.41           O  
HETATM  198  O   HOH T 197      24.354  50.174  42.882  1.00  0.41           O  
HETATM  199  O   HOH T 198      21.106  44.219  14.248  1.00  0.41           O  
HETATM  200  O   HOH T 199      -1.057  38.489   9.551  1.00  0.41           O  
HETATM  201  O   HOH T 200      28.371  40.696  54.215  1.00  0.41           O  
HETATM  202  O   HOH T 201      30.015  23.903  29.991  1.00  0.41           O  
HETATM  203  O   HOH T 202       6.282  31.649  27.270  1.00  0.41           O  
HETATM  204  O   HOH T 203      15.317  33.800  -7.435  1.00  0.42           O  
HETATM  205  O   HOH T 204      35.679  26.794  32.547  1.00  0.42           O  
HETATM  206  O   HOH T 205       5.065  27.489  24.034  1.00  0.42           O  
HETATM  207  O   HOH T 206      18.173  41.022  -6.580  1.00  0.42           O  
HETATM  208  O   HOH T 207      25.858  27.574  36.299  1.00  0.42           O  
HETATM  209  O   HOH T 208      38.014  50.272  46.179  1.00  0.42           O  
HETATM  210  O   HOH T 209      30.234  56.846  26.502  1.00  0.42           O  
HETATM  211  O   HOH T 210      15.968  45.823  42.363  1.00  0.42           O  
HETATM  212  O   HOH T 211       4.887  21.040  23.577  1.00  0.42           O  
HETATM  213  O   HOH T 212      25.746  58.506  26.725  1.00  0.42           O  
HETATM  214  O   HOH T 213      30.186  46.069  -5.142  1.00  0.42           O  
HETATM  215  O   HOH T 214      35.095  42.338  51.933  1.00  0.42           O  
HETATM  216  O   HOH T 215      22.969  38.026  -7.897  1.00  0.43           O  
HETATM  217  O   HOH T 216       9.534  32.002  30.468  1.00  0.43           O  
HETATM  218  O   HOH T 217      17.611  33.164  34.961  1.00  0.43           O  
HETATM  219  O   HOH T 218      -4.336  30.447   8.754  1.00  0.43           O  
HETATM  220  O   HOH T 219      11.250  44.033  34.913  1.00  0.43           O  
HETATM  221  O   HOH T 220      32.814  27.434  10.008  1.00  0.43           O  
HETATM  222  O   HOH T 221      33.236  24.154  33.756  1.00  0.43           O  
HETATM  223  O   HOH T 222      24.600  23.248   5.870  1.00  0.43           O  
HETATM  224  O   HOH T 223       4.057  31.021  -1.653  1.00  0.43           O  
HETATM  225  O   HOH T 224       1.291  31.619  15.366  1.00  0.43           O  
HETATM  226  O   HOH T 225      -1.280  41.370  22.369  1.00  0.43           O  
HETATM  227  O   HOH T 226       6.428  18.764  23.687  1.00  0.43           O  
HETATM  228  O   HOH T 227       9.835  33.042  33.110  1.00  0.43           O  
HETATM  229  O   HOH T 228      42.651  39.506  36.556  1.00  0.43           O  
HETATM  230  O   HOH T 229      34.843  35.095  42.483  1.00  0.43           O  
HETATM  231  O   HOH T 230       9.025  28.547  39.796  1.00  0.43           O  
HETATM  232  O   HOH T 231      13.847  45.711  17.755  1.00  0.43           O  
HETATM  233  O   HOH T 232      33.123  42.317  53.876  1.00  0.44           O  
HETATM  234  O   HOH T 233      23.781  25.732  36.803  1.00  0.44           O  
HETATM  235  O   HOH T 234       9.480  50.559  37.659  1.00  0.44           O  
HETATM  236  O   HOH T 235       0.336  27.342  15.721  1.00  0.44           O  
HETATM  237  O   HOH T 236       6.452  22.750   3.937  1.00  0.44           O  
HETATM  238  O   HOH T 237      18.351  54.908  37.463  1.00  0.44           O  
HETATM  239  O   HOH T 238       3.029  45.104   4.383  1.00  0.44           O  
HETATM  240  O   HOH T 239      44.489  50.078  28.626  1.00  0.44           O  
HETATM  241  O   HOH T 240       4.849  31.534  40.469  1.00  0.44           O  
HETATM  242  O   HOH T 241       6.136  43.997  17.002  1.00  0.44           O  
HETATM  243  O   HOH T 242      32.981  45.225   2.664  1.00  0.44           O  
HETATM  244  O   HOH T 243       3.444  44.559  16.153  1.00  0.44           O  
HETATM  245  O   HOH T 244      35.443  36.105  46.966  1.00  0.44           O  
HETATM  246  O   HOH T 245      38.962  47.809  17.673  1.00  0.44           O  
HETATM  247  O   HOH T 246      23.302  49.605  -4.477  1.00  0.44           O  
HETATM  248  O   HOH T 247      12.141  32.375  31.561  1.00  0.44           O  
HETATM  249  O   HOH T 248      30.908  41.085  52.794  1.00  0.44           O  
HETATM  250  O   HOH T 249      40.462  28.716  27.412  1.00  0.44           O  
HETATM  251  O   HOH T 250      13.618  37.549  36.692  1.00  0.44           O  
HETATM  252  O   HOH T 251      35.299  45.138  16.829  1.00  0.45           O  
HETATM  253  O   HOH T 252      30.714  51.732   8.847  1.00  0.45           O  
HETATM  254  O   HOH T 253      31.291  54.690  27.849  1.00  0.45           O  
HETATM  255  O   HOH T 254      29.941  46.704  19.116  1.00  0.45           O  
HETATM  256  O   HOH T 255      30.804  43.807  53.597  1.00  0.45           O  
HETATM  257  O   HOH T 256       6.102  20.190   8.521  1.00  0.45           O  
HETATM  258  O   HOH T 257      43.321  45.076  27.259  1.00  0.45           O  
HETATM  259  O   HOH T 258      -5.587  31.473   5.269  1.00  0.45           O  
HETATM  260  O   HOH T 259      24.582  43.352  15.889  1.00  0.45           O  
HETATM  261  O   HOH T 260      17.810  33.999  39.705  1.00  0.45           O  
HETATM  262  O   HOH T 261      35.421  43.823  54.246  1.00  0.45           O  
HETATM  263  O   HOH T 262      26.500  53.782   7.195  1.00  0.45           O  
HETATM  264  O   HOH T 263      20.215  59.076  39.521  1.00  0.45           O  
HETATM  265  O   HOH T 264       4.079  25.062  13.294  1.00  0.45           O  
HETATM  266  O   HOH T 265      10.514  41.894   1.599  1.00  0.45           O  
HETATM  267  O   HOH T 266      17.704  16.102  18.184  1.00  0.45           O  
HETATM  268  O   HOH T 267      29.159  33.949  45.369  1.00  0.45           O  
HETATM  269  O   HOH T 268       4.096  42.250  17.280  1.00  0.45           O  
HETATM  270  O   HOH T 269      17.895  47.123  14.547  1.00  0.46           O  
HETATM  271  O   HOH T 270      23.806  29.720  -7.117  1.00  0.46           O  
HETATM  272  O   HOH T 271      18.319  59.916  32.556  1.00  0.46           O  
HETATM  273  O   HOH T 272      19.339  59.897  19.445  1.00  0.46           O  
HETATM  274  O   HOH T 273      32.294  47.040   4.590  1.00  0.46           O  
HETATM  275  O   HOH T 274       8.038  39.108  -4.898  1.00  0.46           O  
HETATM  276  O   HOH T 275      18.896  23.375  29.225  1.00  0.46           O  
HETATM  277  O   HOH T 276      -0.510  38.320   5.579  1.00  0.46           O  
HETATM  278  O   HOH T 277      35.651  45.377   3.193  1.00  0.46           O  
HETATM  279  O   HOH T 278      -3.292  30.269   6.166  1.00  0.46           O  
HETATM  280  O   HOH T 279      -0.465  30.725  13.466  1.00  0.46           O  
HETATM  281  O   HOH T 280      16.936  59.588  34.899  1.00  0.46           O  
HETATM  282  O   HOH T 281      21.945  30.804  46.782  1.00  0.46           O  
HETATM  283  O   HOH T 282      35.650  45.863   7.274  1.00  0.46           O  
HETATM  284  O   HOH T 283      34.660  22.924  21.255  1.00  0.46           O  
HETATM  285  O   HOH T 284      28.292  58.329  27.909  1.00  0.46           O  
HETATM  286  O   HOH T 285      -2.379  30.846  20.839  1.00  0.46           O  
HETATM  287  O   HOH T 286      12.912  43.106   1.241  1.00  0.47           O  
HETATM  288  O   HOH T 287      15.251  31.465  38.266  1.00  0.47           O  
HETATM  289  O   HOH T 288      31.357  21.966  28.533  1.00  0.47           O  
HETATM  290  O   HOH T 289      35.484  49.476  46.807  1.00  0.47           O  
HETATM  291  O   HOH T 290       8.177  41.453   5.940  1.00  0.47           O  
HETATM  292  O   HOH T 291       0.462  39.230  15.582  1.00  0.47           O  
HETATM  293  O   HOH T 292      -0.415  34.915   1.197  1.00  0.47           O  
HETATM  294  O   HOH T 293      18.746  44.725  19.981  1.00  0.47           O  
HETATM  295  O   HOH T 294      18.870  23.827  23.829  1.00  0.47           O  
HETATM  296  O   HOH T 295       8.531  19.972  25.054  1.00  0.47           O  
HETATM  297  O   HOH T 296      27.616  29.872  42.537  1.00  0.47           O  
HETATM  298  O   HOH T 297       4.697  34.543   1.426  1.00  0.47           O  
HETATM  299  O   HOH T 298      19.381  51.008  42.408  1.00  0.47           O  
HETATM  300  O   HOH T 299      12.867  53.509  35.586  1.00  0.48           O  
HETATM  301  O   HOH T 300      21.298  40.983  42.546  1.00  0.48           O  
HETATM  302  O   HOH T 301      26.796  60.646  28.060  1.00  0.48           O  
HETATM  303  O   HOH T 302       6.265  37.984  26.529  1.00  0.48           O  
HETATM  304  O   HOH T 303      29.318  53.573   7.243  1.00  0.48           O  
HETATM  305  O   HOH T 304      19.809  32.113  39.523  1.00  0.48           O  
HETATM  306  O   HOH T 305      32.552  55.984  20.751  1.00  0.48           O  
HETATM  307  O   HOH T 306      33.688  22.519  31.622  1.00  0.48           O  
HETATM  308  O   HOH T 307      24.855  61.059  26.082  1.00  0.48           O  
HETATM  309  O   HOH T 308      22.576  17.511  16.532  1.00  0.48           O  
HETATM  310  O   HOH T 309      42.296  37.195  38.175  1.00  0.48           O  
HETATM  311  O   HOH T 310      27.246  24.899  27.778  1.00  0.48           O  
HETATM  312  O   HOH T 311      19.375  31.422  45.590  1.00  0.48           O  
HETATM  313  O   HOH T 312      33.296  29.908   8.820  1.00  0.48           O  
HETATM  314  O   HOH T 313      12.347  30.032  41.744  1.00  0.48           O  
HETATM  315  O   HOH T 314      21.134  62.299  33.160  1.00  0.48           O  
HETATM  316  O   HOH T 315      22.997  44.967  -3.348  1.00  0.48           O  
HETATM  317  O   HOH T 316       7.721  27.484  24.587  1.00  0.48           O  
HETATM  318  O   HOH T 317       5.197  17.613   8.327  1.00  0.48           O  
HETATM  319  O   HOH T 318      24.304  51.292  -2.513  1.00  0.48           O  
HETATM  320  O   HOH T 319      19.557  23.479  26.519  1.00  0.49           O  
HETATM  321  O   HOH T 320      19.471  60.777  34.915  1.00  0.49           O  
HETATM  322  O   HOH T 321      19.239  14.090  15.058  1.00  0.49           O  
HETATM  323  O   HOH T 322       0.406  25.760  25.053  1.00  0.49           O  
HETATM  324  O   HOH T 323      30.778  46.348  52.411  1.00  0.49           O  
HETATM  325  O   HOH T 324      10.854  51.826  19.289  1.00  0.49           O  
HETATM  326  O   HOH T 325      12.862  46.135  39.743  1.00  0.49           O  
HETATM  327  O   HOH T 326      21.891  29.001  41.375  1.00  0.49           O  
HETATM  328  O   HOH T 327      28.909  44.488  51.632  1.00  0.49           O  
HETATM  329  O   HOH T 328      -4.139  29.313  17.760  1.00  0.49           O  
HETATM  330  O   HOH T 329      21.057  21.161   0.727  1.00  0.49           O  
HETATM  331  O   HOH T 330      16.906  50.088  43.192  1.00  0.49           O  
HETATM  332  O   HOH T 331      29.254  28.796   4.826  1.00  0.49           O  
HETATM  333  O   HOH T 332      17.782  32.186  37.548  1.00  0.49           O  
HETATM  334  O   HOH T 333      41.697  35.538  32.615  1.00  0.49           O  
HETATM  335  O   HOH T 334       6.339  23.216  24.597  1.00  0.49           O  
HETATM  336  O   HOH T 335      -0.737  41.011  17.362  1.00  0.49           O  
HETATM  337  O   HOH T 336      31.802  32.320   1.704  1.00  0.49           O  
HETATM  338  O   HOH T 337      34.194  20.962  19.419  1.00  0.49           O  
HETATM  339  O   HOH T 338      29.181  25.901   4.896  1.00  0.49           O  
HETATM  340  O   HOH T 339       8.857  43.703  17.690  1.00  0.49           O  
HETATM  341  O   HOH T 340      28.072  43.903  -1.478  1.00  0.50           O  
HETATM  342  O   HOH T 341      11.213  43.948   3.388  1.00  0.50           O  
HETATM  343  O   HOH T 342      11.051  18.930  24.572  1.00  0.50           O  
HETATM  344  O   HOH T 343      17.967  61.480  17.688  1.00  0.50           O  
HETATM  345  O   HOH T 344      16.307  36.808  36.824  1.00  0.50           O  
HETATM  346  O   HOH T 345      33.190  46.851  17.663  1.00  0.50           O  
HETATM  347  O   HOH T 346      18.179  34.872  37.075  1.00  0.50           O  
HETATM  348  O   HOH T 347      30.753  26.813   8.223  1.00  0.50           O  
HETATM  349  O   HOH T 348       0.117  35.696  12.725  1.00  0.50           O  
HETATM  350  O   HOH T 349      10.486  28.181  42.084  1.00  0.50           O  
HETATM  351  O   HOH T 350      31.614  53.629  19.411  1.00  0.50           O  
HETATM  352  O   HOH T 351      21.834  51.222  43.721  1.00  0.50           O  
HETATM  353  O   HOH T 352       1.791  25.182  14.823  1.00  0.50           O  
HETATM  354  O   HOH T 353       8.425  47.583   8.641  1.00  0.50           O  
HETATM  355  O   HOH T 354      22.498  47.024  -5.083  1.00  0.50           O  
HETATM  356  O   HOH T 355      23.674  40.716  -8.756  1.00  0.50           O  
HETATM  357  O   HOH T 356      26.517  51.849  42.942  1.00  0.50           O  
HETATM  358  O   HOH T 357      33.849  54.159  26.764  1.00  0.50           O  
HETATM  359  O   HOH T 358      18.636  56.846  39.335  1.00  0.51           O  
HETATM  360  O   HOH T 359      26.165  51.794   0.532  1.00  0.51           O  
HETATM  361  O   HOH T 360      36.318  47.770  17.022  1.00  0.51           O  
HETATM  362  O   HOH T 361      42.987  30.776  31.618  1.00  0.51           O  
HETATM  363  O   HOH T 362      27.930  54.868   5.181  1.00  0.51           O  
HETATM  364  O   HOH T 363      22.703  22.679   2.443  1.00  0.51           O  
HETATM  365  O   HOH T 364      15.596  36.488  -7.920  1.00  0.51           O  
HETATM  366  O   HOH T 365      18.452  11.532  14.074  1.00  0.51           O  
HETATM  367  O   HOH T 366      39.676  56.602  38.896  1.00  0.51           O  
HETATM  368  O   HOH T 367       3.863  35.878  19.325  1.00  0.51           O  
HETATM  369  O   HOH T 368      25.677  18.370  22.124  1.00  0.51           O  
HETATM  370  O   HOH T 369       9.625  23.553  -3.954  1.00  0.51           O  
HETATM  371  O   HOH T 370      26.993  54.277  41.512  1.00  0.51           O  
HETATM  372  O   HOH T 371      18.466  52.459   5.245  1.00  0.52           O  
HETATM  373  O   HOH T 372       0.075  29.784  16.994  1.00  0.52           O  
HETATM  374  O   HOH T 373       8.312  24.386   5.324  1.00  0.52           O  
HETATM  375  O   HOH T 374      45.318  30.468  28.344  1.00  0.52           O  
HETATM  376  O   HOH T 375      15.973  53.701  33.858  1.00  0.52           O  
HETATM  377  O   HOH T 376       3.334  40.083  34.661  1.00  0.52           O  
HETATM  378  O   HOH T 377      23.758  45.364  42.950  1.00  0.52           O  
HETATM  379  O   HOH T 378      14.814  41.852  -9.985  1.00  0.52           O  
HETATM  380  O   HOH T 379      43.037  33.994  19.790  1.00  0.52           O  
HETATM  381  O   HOH T 380      19.742  29.038   0.024  1.00  0.52           O  
HETATM  382  O   HOH T 381      37.311  55.837  41.719  1.00  0.52           O  
HETATM  383  O   HOH T 382       3.143  33.305  -0.433  1.00  0.52           O  
HETATM  384  O   HOH T 383       2.323  38.309   5.618  1.00  0.52           O  
HETATM  385  O   HOH T 384      28.108  43.545  54.190  1.00  0.52           O  
HETATM  386  O   HOH T 385      21.922  46.885  20.181  1.00  0.52           O  
HETATM  387  O   HOH T 386      49.745  44.645  35.190  1.00  0.52           O  
HETATM  388  O   HOH T 387       9.180  26.162  43.449  1.00  0.52           O  
HETATM  389  O   HOH T 388      33.196  47.307   7.198  1.00  0.52           O  
HETATM  390  O   HOH T 389       2.206  21.095  22.852  1.00  0.52           O  
HETATM  391  O   HOH T 390      11.957  49.400  37.442  1.00  0.52           O  
HETATM  392  O   HOH T 391      27.810  56.738  40.626  1.00  0.52           O  
HETATM  393  O   HOH T 392       1.240  37.187   0.846  1.00  0.52           O  
HETATM  394  O   HOH T 393       7.892  38.608  28.588  1.00  0.53           O  
HETATM  395  O   HOH T 394      19.008  37.319  35.952  1.00  0.53           O  
HETATM  396  O   HOH T 395      -2.241  26.522  12.357  1.00  0.53           O  
HETATM  397  O   HOH T 396      42.333  48.701  24.293  1.00  0.53           O  
HETATM  398  O   HOH T 397      31.658  29.197  17.077  1.00  0.53           O  
HETATM  399  O   HOH T 398      12.993  57.324  20.301  1.00  0.53           O  
HETATM  400  O   HOH T 399      27.614  24.547   3.049  1.00  0.53           O  
HETATM  401  O   HOH T 400      22.903  20.411   3.900  1.00  0.53           O  
HETATM  402  O   HOH T 401      48.838  29.245  26.679  1.00  0.53           O  
HETATM  403  O   HOH T 402      25.060  16.163  16.181  1.00  0.53           O  
HETATM  404  O   HOH T 403      20.471  16.741   0.803  1.00  0.54           O  
HETATM  405  O   HOH T 404      36.305  41.326  49.734  1.00  0.54           O  
HETATM  406  O   HOH T 405       4.103  21.783   2.665  1.00  0.54           O  
HETATM  407  O   HOH T 406      14.575  58.150  34.601  1.00  0.54           O  
HETATM  408  O   HOH T 407      22.057  26.263  40.815  1.00  0.54           O  
HETATM  409  O   HOH T 408       0.878  33.127  13.094  1.00  0.54           O  
HETATM  410  O   HOH T 409      20.920  42.073  45.068  1.00  0.54           O  
HETATM  411  O   HOH T 410       0.684  27.648   3.534  1.00  0.54           O  
HETATM  412  O   HOH T 411      44.835  40.233  38.196  1.00  0.54           O  
HETATM  413  O   HOH T 412      17.715  15.478   8.781  1.00  0.54           O  
HETATM  414  O   HOH T 413      22.190  48.541  42.936  1.00  0.54           O  
HETATM  415  O   HOH T 414      10.342  30.674  38.623  1.00  0.54           O  
HETATM  416  O   HOH T 415      49.400  46.876  38.782  1.00  0.54           O  
HETATM  417  O   HOH T 416      13.949  43.643   3.871  1.00  0.54           O  
HETATM  418  O   HOH T 417      38.008  52.200  34.607  1.00  0.55           O  
HETATM  419  O   HOH T 418       8.372  27.398  28.434  1.00  0.55           O  
HETATM  420  O   HOH T 419       2.407  43.009  25.206  1.00  0.55           O  
HETATM  421  O   HOH T 420      40.336  50.935  44.704  1.00  0.55           O  
HETATM  422  O   HOH T 421      31.662  17.051  24.407  1.00  0.55           O  
HETATM  423  O   HOH T 422      52.384  33.027  35.612  1.00  0.55           O  
HETATM  424  O   HOH T 423      15.864  47.022  16.423  1.00  0.55           O  
HETATM  425  O   HOH T 424       6.460  40.438  39.774  1.00  0.55           O  
HETATM  426  O   HOH T 425      31.522  28.296  38.779  1.00  0.55           O  
HETATM  427  O   HOH T 426      34.807  25.975  11.218  1.00  0.55           O  
HETATM  428  O   HOH T 427      38.243  31.496  16.187  1.00  0.55           O  
HETATM  429  O   HOH T 428      24.356  49.239  17.692  1.00  0.55           O  
HETATM  430  O   HOH T 429      -0.113  22.481   8.023  1.00  0.56           O  
HETATM  431  O   HOH T 430      38.096  55.802  22.695  1.00  0.56           O  
HETATM  432  O   HOH T 431      38.846  32.979   0.844  1.00  0.56           O  
HETATM  433  O   HOH T 432      34.084  49.373  16.905  1.00  0.56           O  
HETATM  434  O   HOH T 433      33.998  30.837  38.023  1.00  0.56           O  
HETATM  435  O   HOH T 434      25.866  20.302  12.013  1.00  0.56           O  
HETATM  436  O   HOH T 435      -0.045  42.276  20.140  1.00  0.56           O  
HETATM  437  O   HOH T 436      25.889  28.336  39.555  1.00  0.56           O  
HETATM  438  O   HOH T 437      11.343  17.739  29.983  1.00  0.56           O  
HETATM  439  O   HOH T 438      37.191  32.385   3.211  1.00  0.56           O  
HETATM  440  O   HOH T 439       6.507  45.331  22.482  1.00  0.56           O  
HETATM  441  O   HOH T 440      29.951  49.371  12.990  1.00  0.57           O  
HETATM  442  O   HOH T 441       7.377  47.902  25.071  1.00  0.57           O  
HETATM  443  O   HOH T 442      10.510  54.321  18.638  1.00  0.57           O  
HETATM  444  O   HOH T 443      23.846  59.488  20.203  1.00  0.57           O  
HETATM  445  O   HOH T 444      38.857  46.276  15.409  1.00  0.57           O  
HETATM  446  O   HOH T 445      11.815  41.421  -0.825  1.00  0.57           O  
HETATM  447  O   HOH T 446      23.633  60.744  17.639  1.00  0.58           O  
HETATM  448  O   HOH T 447      -1.025  24.306  11.409  1.00  0.58           O  
HETATM  449  O   HOH T 448      35.472  28.149   9.489  1.00  0.58           O  
HETATM  450  O   HOH T 449      40.861  38.855  19.343  1.00  0.59           O  
HETATM  451  O   HOH T 450      12.936  31.539  34.035  1.00  0.60           O  
HETATM  452  O   HOH T 451       4.749  22.736  16.831  1.00  0.60           O  
HETATM  453  O   HOH T 452       9.568  20.898  27.417  1.00  0.61           O  
HETATM  454  O   HOH T 453       0.536  32.449  -0.011  1.00  0.61           O  
TER     455      HOH T 453 
