# Supplementary material for: Accurate Prediction of Hydration Sites of Proteins Using Energy Model With Atom Embedding
Source: Front Mol Biosci. 2021 Sep 20;8:756075. doi: 10.3389/fmolb.2021.756075 (PMC8488165; doi:10.3389/fmolb.2021.756075)
Supplement: Supplementary file 1 [file DataSheet1.ZIP › Data Sheet 1/Our_result_pdb/our_dataset_output/2HHJ_watersite.pdb]

HEADER                                                        XXXX


JRNL        PMID   -1
HETATM    1  O   HOH T   0      42.905  28.181  49.947  1.00  0.18           O  
HETATM    2  O   HOH T   1      41.111  38.657 103.188  1.00  0.18           O  
HETATM    3  O   HOH T   2      18.693  31.705  97.553  1.00  0.19           O  
HETATM    4  O   HOH T   3      38.225  56.217  81.327  1.00  0.19           O  
HETATM    5  O   HOH T   4      36.810  29.006  78.453  1.00  0.19           O  
HETATM    6  O   HOH T   5      44.727  50.101 118.636  1.00  0.20           O  
HETATM    7  O   HOH T   6      42.280  25.042 118.088  1.00  0.20           O  
HETATM    8  O   HOH T   7      39.418  52.749  81.105  1.00  0.20           O  
HETATM    9  O   HOH T   8      46.541  39.536  74.622  1.00  0.20           O  
HETATM   10  O   HOH T   9      26.143  36.715  65.976  1.00  0.21           O  
HETATM   11  O   HOH T  10      40.809  28.427  83.368  1.00  0.21           O  
HETATM   12  O   HOH T  11      30.495  37.973 118.836  1.00  0.21           O  
HETATM   13  O   HOH T  12      32.240  23.528  76.507  1.00  0.21           O  
HETATM   14  O   HOH T  13      45.337  44.456 105.190  1.00  0.21           O  
HETATM   15  O   HOH T  14      32.482  30.429  82.794  1.00  0.21           O  
HETATM   16  O   HOH T  15      34.150  33.341 114.189  1.00  0.21           O  
HETATM   17  O   HOH T  16      33.471  62.264  79.167  1.00  0.21           O  
HETATM   18  O   HOH T  17      45.221  31.531  67.842  1.00  0.22           O  
HETATM   19  O   HOH T  18      29.623  49.196 112.629  1.00  0.22           O  
HETATM   20  O   HOH T  19      31.633  27.729 106.900  1.00  0.22           O  
HETATM   21  O   HOH T  20      18.249  15.250  86.767  1.00  0.22           O  
HETATM   22  O   HOH T  21      34.181  55.192 101.302  1.00  0.22           O  
HETATM   23  O   HOH T  22      23.844  17.939 106.878  1.00  0.22           O  
HETATM   24  O   HOH T  23      26.866  49.289 112.786  1.00  0.22           O  
HETATM   25  O   HOH T  24      27.806  14.540 101.842  1.00  0.23           O  
HETATM   26  O   HOH T  25      49.204  49.113 108.975  1.00  0.23           O  
HETATM   27  O   HOH T  26      19.432  32.689  76.870  1.00  0.23           O  
HETATM   28  O   HOH T  27      38.091  37.264  61.589  1.00  0.23           O  
HETATM   29  O   HOH T  28      39.623  41.990  98.013  1.00  0.24           O  
HETATM   30  O   HOH T  29      15.338  31.828  96.338  1.00  0.24           O  
HETATM   31  O   HOH T  30      24.122  20.574 110.793  1.00  0.24           O  
HETATM   32  O   HOH T  31      55.298  40.542  84.201  1.00  0.24           O  
HETATM   33  O   HOH T  32      26.007  44.786  95.956  1.00  0.24           O  
HETATM   34  O   HOH T  33      16.885  27.880 114.713  1.00  0.24           O  
HETATM   35  O   HOH T  34      52.503  28.059  65.483  1.00  0.24           O  
HETATM   36  O   HOH T  35      49.854  22.435  64.140  1.00  0.25           O  
HETATM   37  O   HOH T  36      29.132  18.097  73.079  1.00  0.25           O  
HETATM   38  O   HOH T  37      25.485  39.358  65.633  1.00  0.25           O  
HETATM   39  O   HOH T  38      41.678  34.934 112.226  1.00  0.25           O  
HETATM   40  O   HOH T  39      46.358  30.713  56.706  1.00  0.25           O  
HETATM   41  O   HOH T  40      42.364  35.469  67.062  1.00  0.25           O  
HETATM   42  O   HOH T  41      42.361  23.982  77.755  1.00  0.26           O  
HETATM   43  O   HOH T  42      28.929  60.054  88.850  1.00  0.26           O  
HETATM   44  O   HOH T  43       7.865  35.094  99.315  1.00  0.26           O  
HETATM   45  O   HOH T  44      26.636  46.397 121.256  1.00  0.26           O  
HETATM   46  O   HOH T  45      34.609  30.402 135.142  1.00  0.26           O  
HETATM   47  O   HOH T  46      41.691  31.849  88.491  1.00  0.27           O  
HETATM   48  O   HOH T  47      40.630  31.982  93.767  1.00  0.27           O  
HETATM   49  O   HOH T  48      30.731  62.838  69.886  1.00  0.27           O  
HETATM   50  O   HOH T  49      37.342  51.753  92.333  1.00  0.27           O  
HETATM   51  O   HOH T  50      31.658  47.977  99.849  1.00  0.28           O  
HETATM   52  O   HOH T  51      32.792  29.242  55.066  1.00  0.28           O  
HETATM   53  O   HOH T  52      21.607  31.814  86.554  1.00  0.28           O  
HETATM   54  O   HOH T  53      44.622  61.340  66.910  1.00  0.28           O  
HETATM   55  O   HOH T  54      42.450  13.026  53.006  1.00  0.28           O  
HETATM   56  O   HOH T  55      49.813  57.252  89.569  1.00  0.28           O  
HETATM   57  O   HOH T  56      48.175  26.636  50.557  1.00  0.28           O  
HETATM   58  O   HOH T  57      33.391  54.351  70.067  1.00  0.29           O  
HETATM   59  O   HOH T  58      35.100  36.282  59.575  1.00  0.29           O  
HETATM   60  O   HOH T  59      49.671  33.260  71.853  1.00  0.29           O  
HETATM   61  O   HOH T  60      22.555  34.385  87.029  1.00  0.29           O  
HETATM   62  O   HOH T  61      27.469  21.819  79.055  1.00  0.29           O  
HETATM   63  O   HOH T  62      25.776  21.760  90.519  1.00  0.29           O  
HETATM   64  O   HOH T  63      45.926  39.505  96.159  1.00  0.29           O  
HETATM   65  O   HOH T  64      40.161  41.961  75.478  1.00  0.29           O  
HETATM   66  O   HOH T  65      38.021  31.234 125.187  1.00  0.29           O  
HETATM   67  O   HOH T  66      16.027  30.656  75.842  1.00  0.29           O  
HETATM   68  O   HOH T  67      15.972  26.401 107.831  1.00  0.29           O  
HETATM   69  O   HOH T  68      28.235  41.267  98.574  1.00  0.30           O  
HETATM   70  O   HOH T  69      43.501  24.909 123.055  1.00  0.30           O  
HETATM   71  O   HOH T  70      48.470  30.512  46.889  1.00  0.30           O  
HETATM   72  O   HOH T  71      33.850  37.285  89.023  1.00  0.30           O  
HETATM   73  O   HOH T  72      31.068  41.193  51.931  1.00  0.30           O  
HETATM   74  O   HOH T  73      32.015  62.331  75.026  1.00  0.30           O  
HETATM   75  O   HOH T  74      47.686  47.047  92.656  1.00  0.30           O  
HETATM   76  O   HOH T  75      24.157  53.288  78.039  1.00  0.30           O  
HETATM   77  O   HOH T  76      38.267  31.574 114.353  1.00  0.30           O  
HETATM   78  O   HOH T  77      37.899  26.017 110.883  1.00  0.30           O  
HETATM   79  O   HOH T  78      23.809  15.344 107.889  1.00  0.30           O  
HETATM   80  O   HOH T  79      32.059  56.731  69.570  1.00  0.31           O  
HETATM   81  O   HOH T  80      44.179  28.167 115.020  1.00  0.31           O  
HETATM   82  O   HOH T  81      35.529  57.667 101.479  1.00  0.31           O  
HETATM   83  O   HOH T  82      46.475  46.259 120.456  1.00  0.31           O  
HETATM   84  O   HOH T  83      22.195  36.001  68.703  1.00  0.31           O  
HETATM   85  O   HOH T  84      39.219  29.633  91.099  1.00  0.31           O  
HETATM   86  O   HOH T  85      13.007  30.797 112.540  1.00  0.31           O  
HETATM   87  O   HOH T  86      23.425  31.270  63.393  1.00  0.31           O  
HETATM   88  O   HOH T  87      27.427  12.801  65.528  1.00  0.31           O  
HETATM   89  O   HOH T  88      42.018  24.628 128.203  1.00  0.31           O  
HETATM   90  O   HOH T  89      48.853  42.174 106.992  1.00  0.31           O  
HETATM   91  O   HOH T  90      51.094  27.904  86.142  1.00  0.31           O  
HETATM   92  O   HOH T  91      30.236  29.764 120.569  1.00  0.32           O  
HETATM   93  O   HOH T  92      44.871  53.003  86.664  1.00  0.32           O  
HETATM   94  O   HOH T  93      27.504  17.190  70.633  1.00  0.32           O  
HETATM   95  O   HOH T  94      35.396  50.107  91.575  1.00  0.32           O  
HETATM   96  O   HOH T  95      13.077  33.383 112.143  1.00  0.32           O  
HETATM   97  O   HOH T  96      46.986  52.795  71.916  1.00  0.32           O  
HETATM   98  O   HOH T  97      48.567  18.013 127.487  1.00  0.32           O  
HETATM   99  O   HOH T  98      29.559  38.665  57.270  1.00  0.32           O  
HETATM  100  O   HOH T  99      53.027  41.040  77.809  1.00  0.32           O  
HETATM  101  O   HOH T 100      45.522  55.708 100.459  1.00  0.32           O  
HETATM  102  O   HOH T 101      31.556  41.624  80.250  1.00  0.33           O  
HETATM  103  O   HOH T 102      49.578  51.062 111.058  1.00  0.33           O  
HETATM  104  O   HOH T 103      27.527  26.460 115.796  1.00  0.33           O  
HETATM  105  O   HOH T 104      32.067  35.103  88.735  1.00  0.33           O  
HETATM  106  O   HOH T 105      23.195  17.035  69.620  1.00  0.33           O  
HETATM  107  O   HOH T 106      31.028  32.755  54.001  1.00  0.33           O  
HETATM  108  O   HOH T 107      40.908  34.838 109.520  1.00  0.33           O  
HETATM  109  O   HOH T 108      53.726  30.946  80.103  1.00  0.33           O  
HETATM  110  O   HOH T 109      33.483  51.651 115.677  1.00  0.33           O  
HETATM  111  O   HOH T 110      40.504  56.284 113.497  1.00  0.33           O  
HETATM  112  O   HOH T 111      42.951  34.719  91.530  1.00  0.33           O  
HETATM  113  O   HOH T 112      32.857  45.304  85.989  1.00  0.33           O  
HETATM  114  O   HOH T 113      48.168  30.358  88.736  1.00  0.33           O  
HETATM  115  O   HOH T 114      20.234  18.926  96.898  1.00  0.33           O  
HETATM  116  O   HOH T 115      27.589  36.332  83.374  1.00  0.33           O  
HETATM  117  O   HOH T 116      19.433  34.272  65.554  1.00  0.34           O  
HETATM  118  O   HOH T 117      17.722  27.716  95.989  1.00  0.34           O  
HETATM  119  O   HOH T 118      43.172  24.161  84.179  1.00  0.34           O  
HETATM  120  O   HOH T 119      42.997  34.243  99.311  1.00  0.34           O  
HETATM  121  O   HOH T 120      28.157  19.141 112.517  1.00  0.34           O  
HETATM  122  O   HOH T 121      27.789  29.770  57.292  1.00  0.34           O  
HETATM  123  O   HOH T 122      32.730  27.687  83.350  1.00  0.34           O  
HETATM  124  O   HOH T 123      46.781  35.005  62.654  1.00  0.34           O  
HETATM  125  O   HOH T 124      25.201  53.884  74.586  1.00  0.34           O  
HETATM  126  O   HOH T 125      50.851  49.151  91.916  1.00  0.34           O  
HETATM  127  O   HOH T 126      39.135  19.436  96.836  1.00  0.34           O  
HETATM  128  O   HOH T 127      32.209  41.341  90.977  1.00  0.34           O  
HETATM  129  O   HOH T 128      20.601  18.142  88.838  1.00  0.34           O  
HETATM  130  O   HOH T 129      21.025  24.432  66.171  1.00  0.34           O  
HETATM  131  O   HOH T 130      36.325  61.431  85.429  1.00  0.34           O  
HETATM  132  O   HOH T 131      16.806  35.673  76.530  1.00  0.34           O  
HETATM  133  O   HOH T 132      27.640  22.627  88.875  1.00  0.34           O  
HETATM  134  O   HOH T 133      38.866  43.575  73.671  1.00  0.34           O  
HETATM  135  O   HOH T 134      36.239  29.293 129.597  1.00  0.34           O  
HETATM  136  O   HOH T 135      45.277  32.708  98.760  1.00  0.34           O  
HETATM  137  O   HOH T 136      50.585  24.836  63.218  1.00  0.34           O  
HETATM  138  O   HOH T 137       8.461  36.116  96.776  1.00  0.34           O  
HETATM  139  O   HOH T 138      29.686  44.659  62.162  1.00  0.35           O  
HETATM  140  O   HOH T 139      21.133  42.111 124.786  1.00  0.35           O  
HETATM  141  O   HOH T 140      39.614  27.171 133.039  1.00  0.35           O  
HETATM  142  O   HOH T 141       9.611  38.128 102.713  1.00  0.35           O  
HETATM  143  O   HOH T 142      44.710  53.124  64.777  1.00  0.35           O  
HETATM  144  O   HOH T 143      36.657  29.343 126.777  1.00  0.35           O  
HETATM  145  O   HOH T 144      34.739  49.742 122.629  1.00  0.35           O  
HETATM  146  O   HOH T 145      56.061  20.411  54.488  1.00  0.35           O  
HETATM  147  O   HOH T 146      31.665  35.973  86.110  1.00  0.35           O  
HETATM  148  O   HOH T 147      33.546  41.727 121.388  1.00  0.35           O  
HETATM  149  O   HOH T 148      43.555  49.118  94.997  1.00  0.35           O  
HETATM  150  O   HOH T 149      36.620  60.177 104.691  1.00  0.35           O  
HETATM  151  O   HOH T 150      44.147  54.291  98.530  1.00  0.35           O  
HETATM  152  O   HOH T 151      26.594  34.659 106.021  1.00  0.35           O  
HETATM  153  O   HOH T 152      30.838  30.660 123.150  1.00  0.35           O  
HETATM  154  O   HOH T 153      29.633  49.808  99.497  1.00  0.35           O  
HETATM  155  O   HOH T 154      50.507  33.365 116.136  1.00  0.36           O  
HETATM  156  O   HOH T 155      41.896  27.777  70.144  1.00  0.36           O  
HETATM  157  O   HOH T 156      44.302  49.621  97.620  1.00  0.36           O  
HETATM  158  O   HOH T 157      49.677  26.700 105.576  1.00  0.36           O  
HETATM  159  O   HOH T 158      52.919  26.011  75.351  1.00  0.36           O  
HETATM  160  O   HOH T 159      14.445  36.914 108.393  1.00  0.36           O  
HETATM  161  O   HOH T 160      16.582  23.724 108.450  1.00  0.36           O  
HETATM  162  O   HOH T 161      47.189  57.085  71.618  1.00  0.36           O  
HETATM  163  O   HOH T 162      37.035  32.804  67.182  1.00  0.36           O  
HETATM  164  O   HOH T 163      38.981  59.858 106.060  1.00  0.36           O  
HETATM  165  O   HOH T 164      48.204  54.813  70.588  1.00  0.36           O  
HETATM  166  O   HOH T 165      53.742  34.432  59.720  1.00  0.36           O  
HETATM  167  O   HOH T 166      33.396  42.339  93.395  1.00  0.36           O  
HETATM  168  O   HOH T 167      18.577  27.845  66.343  1.00  0.36           O  
HETATM  169  O   HOH T 168      56.481  31.312  64.446  1.00  0.36           O  
HETATM  170  O   HOH T 169       1.153  27.131 102.831  1.00  0.36           O  
HETATM  171  O   HOH T 170      18.540  50.316  77.748  1.00  0.36           O  
HETATM  172  O   HOH T 171      30.766  27.698  76.555  1.00  0.36           O  
HETATM  173  O   HOH T 172      23.357  50.771  71.285  1.00  0.36           O  
HETATM  174  O   HOH T 173      42.937  45.722 105.295  1.00  0.36           O  
HETATM  175  O   HOH T 174      29.932  41.767 120.510  1.00  0.36           O  
HETATM  176  O   HOH T 175      15.573  29.184  96.606  1.00  0.36           O  
HETATM  177  O   HOH T 176      45.998  54.628  82.360  1.00  0.36           O  
HETATM  178  O   HOH T 177      31.333  44.794  55.247  1.00  0.37           O  
HETATM  179  O   HOH T 178      21.296  50.004  77.530  1.00  0.37           O  
HETATM  180  O   HOH T 179      47.787  51.243  94.013  1.00  0.37           O  
HETATM  181  O   HOH T 180      30.511  46.733  85.639  1.00  0.37           O  
HETATM  182  O   HOH T 181      51.759  41.524  90.881  1.00  0.37           O  
HETATM  183  O   HOH T 182      48.521  42.766  65.028  1.00  0.37           O  
HETATM  184  O   HOH T 183      48.043  36.400 103.536  1.00  0.37           O  
HETATM  185  O   HOH T 184      31.266  38.637  88.590  1.00  0.37           O  
HETATM  186  O   HOH T 185      33.498  19.878  91.868  1.00  0.37           O  
HETATM  187  O   HOH T 186      18.354  41.576  74.098  1.00  0.37           O  
HETATM  188  O   HOH T 187      27.062  35.521  58.639  1.00  0.37           O  
HETATM  189  O   HOH T 188      42.241  58.271 112.706  1.00  0.37           O  
HETATM  190  O   HOH T 189      35.407  25.173  85.908  1.00  0.37           O  
HETATM  191  O   HOH T 190      34.909  67.305  73.262  1.00  0.37           O  
HETATM  192  O   HOH T 191      23.370  38.396  78.247  1.00  0.37           O  
HETATM  193  O   HOH T 192      34.246  29.814 119.270  1.00  0.37           O  
HETATM  194  O   HOH T 193      26.626  15.652  68.555  1.00  0.37           O  
HETATM  195  O   HOH T 194      40.337  22.589  79.243  1.00  0.37           O  
HETATM  196  O   HOH T 195      45.322  55.034  71.163  1.00  0.37           O  
HETATM  197  O   HOH T 196      18.825  52.882  76.726  1.00  0.37           O  
HETATM  198  O   HOH T 197      40.674  26.765  48.947  1.00  0.37           O  
HETATM  199  O   HOH T 198      30.180  51.259  97.129  1.00  0.38           O  
HETATM  200  O   HOH T 199      33.631  49.232  93.452  1.00  0.38           O  
HETATM  201  O   HOH T 200      41.916  56.762 108.675  1.00  0.38           O  
HETATM  202  O   HOH T 201      36.073  49.827  61.349  1.00  0.38           O  
HETATM  203  O   HOH T 202      52.063  25.202  70.512  1.00  0.38           O  
HETATM  204  O   HOH T 203      26.065  49.985 115.271  1.00  0.38           O  
HETATM  205  O   HOH T 204      35.540  41.023  92.109  1.00  0.38           O  
HETATM  206  O   HOH T 205      28.571  13.885  67.710  1.00  0.38           O  
HETATM  207  O   HOH T 206      49.501  26.247  68.207  1.00  0.38           O  
HETATM  208  O   HOH T 207      34.414  62.753  76.567  1.00  0.38           O  
HETATM  209  O   HOH T 208      44.927  53.997  95.857  1.00  0.38           O  
HETATM  210  O   HOH T 209      31.833  39.691 120.645  1.00  0.38           O  
HETATM  211  O   HOH T 210      20.945  18.514  69.713  1.00  0.38           O  
HETATM  212  O   HOH T 211      14.539  38.672 106.183  1.00  0.38           O  
HETATM  213  O   HOH T 212      21.035  43.756 122.540  1.00  0.38           O  
HETATM  214  O   HOH T 213      17.376  31.627 120.526  1.00  0.38           O  
HETATM  215  O   HOH T 214      55.682  43.814  69.481  1.00  0.38           O  
HETATM  216  O   HOH T 215      37.597  24.200 108.935  1.00  0.38           O  
HETATM  217  O   HOH T 216      26.261  25.864 118.260  1.00  0.38           O  
HETATM  218  O   HOH T 217      17.040  39.624  72.596  1.00  0.38           O  
HETATM  219  O   HOH T 218      35.602  28.223 132.166  1.00  0.38           O  
HETATM  220  O   HOH T 219      48.449  44.084 116.068  1.00  0.38           O  
HETATM  221  O   HOH T 220      31.499  17.166 102.728  1.00  0.38           O  
HETATM  222  O   HOH T 221      27.647  38.990  84.395  1.00  0.39           O  
HETATM  223  O   HOH T 222      43.573  26.015  94.570  1.00  0.39           O  
HETATM  224  O   HOH T 223      35.380  62.521  81.108  1.00  0.39           O  
HETATM  225  O   HOH T 224      40.369  61.852  81.063  1.00  0.39           O  
HETATM  226  O   HOH T 225      49.430  48.620  66.500  1.00  0.39           O  
HETATM  227  O   HOH T 226      54.301  34.853  86.823  1.00  0.39           O  
HETATM  228  O   HOH T 227      46.037  51.383 120.739  1.00  0.39           O  
HETATM  229  O   HOH T 228      43.530  58.272 110.312  1.00  0.39           O  
HETATM  230  O   HOH T 229      54.176  33.571  80.630  1.00  0.39           O  
HETATM  231  O   HOH T 230      20.295  30.160  66.223  1.00  0.39           O  
HETATM  232  O   HOH T 231      27.519  40.848  86.482  1.00  0.39           O  
HETATM  233  O   HOH T 232      40.351  57.705  82.052  1.00  0.39           O  
HETATM  234  O   HOH T 233      14.597  29.410 114.322  1.00  0.39           O  
HETATM  235  O   HOH T 234      35.527  22.135 103.074  1.00  0.39           O  
HETATM  236  O   HOH T 235      40.958  37.174  78.559  1.00  0.39           O  
HETATM  237  O   HOH T 236      27.899  26.302  83.501  1.00  0.39           O  
HETATM  238  O   HOH T 237      26.454  34.147  61.100  1.00  0.39           O  
HETATM  239  O   HOH T 238      21.037  36.212  88.371  1.00  0.39           O  
HETATM  240  O   HOH T 239      50.770  30.211  87.585  1.00  0.39           O  
HETATM  241  O   HOH T 240      51.256  34.462  73.751  1.00  0.39           O  
HETATM  242  O   HOH T 241      42.640  28.832  85.439  1.00  0.39           O  
HETATM  243  O   HOH T 242      48.761  22.487  82.039  1.00  0.39           O  
HETATM  244  O   HOH T 243      28.267  16.667  75.409  1.00  0.39           O  
HETATM  245  O   HOH T 244      35.192  33.466  59.258  1.00  0.39           O  
HETATM  246  O   HOH T 245      19.281  36.673  82.590  1.00  0.40           O  
HETATM  247  O   HOH T 246      15.357  29.218  73.481  1.00  0.40           O  
HETATM  248  O   HOH T 247      45.584  33.784  60.307  1.00  0.40           O  
HETATM  249  O   HOH T 248      48.058  49.632  91.801  1.00  0.40           O  
HETATM  250  O   HOH T 249      29.734  47.438 124.186  1.00  0.40           O  
HETATM  251  O   HOH T 250      12.839  38.183 110.289  1.00  0.40           O  
HETATM  252  O   HOH T 251      50.943  50.722  67.766  1.00  0.40           O  
HETATM  253  O   HOH T 252      30.741  53.656  87.664  1.00  0.40           O  
HETATM  254  O   HOH T 253      25.620  25.880  85.235  1.00  0.40           O  
HETATM  255  O   HOH T 254      22.826  17.602  62.553  1.00  0.40           O  
HETATM  256  O   HOH T 255      25.921  35.067  63.702  1.00  0.40           O  
HETATM  257  O   HOH T 256      44.534  27.183 121.871  1.00  0.40           O  
HETATM  258  O   HOH T 257      21.885  20.319  62.956  1.00  0.40           O  
HETATM  259  O   HOH T 258      46.974  38.368  57.588  1.00  0.40           O  
HETATM  260  O   HOH T 259      32.924  56.383  99.045  1.00  0.40           O  
HETATM  261  O   HOH T 260      42.914  30.636  94.726  1.00  0.40           O  
HETATM  262  O   HOH T 261      17.332  17.268  93.167  1.00  0.40           O  
HETATM  263  O   HOH T 262      42.156  54.466  88.168  1.00  0.40           O  
HETATM  264  O   HOH T 263      33.014  21.574 103.854  1.00  0.40           O  
HETATM  265  O   HOH T 264      36.256  23.084 105.649  1.00  0.40           O  
HETATM  266  O   HOH T 265      25.181  30.145  61.615  1.00  0.40           O  
HETATM  267  O   HOH T 266      23.986  37.796  67.414  1.00  0.40           O  
HETATM  268  O   HOH T 267      36.419  28.380 124.076  1.00  0.40           O  
HETATM  269  O   HOH T 268      39.865  55.716  87.040  1.00  0.41           O  
HETATM  270  O   HOH T 269      26.913  47.279 123.920  1.00  0.41           O  
HETATM  271  O   HOH T 270      25.644  19.215  89.798  1.00  0.41           O  
HETATM  272  O   HOH T 271      40.160  40.564 132.433  1.00  0.41           O  
HETATM  273  O   HOH T 272      42.394  42.181  98.042  1.00  0.41           O  
HETATM  274  O   HOH T 273      37.311  20.162 103.683  1.00  0.41           O  
HETATM  275  O   HOH T 274      22.478  53.684  74.370  1.00  0.41           O  
HETATM  276  O   HOH T 275      49.276  43.629  62.470  1.00  0.41           O  
HETATM  277  O   HOH T 276      19.005  27.473  90.768  1.00  0.41           O  
HETATM  278  O   HOH T 277      47.268  60.926  67.313  1.00  0.41           O  
HETATM  279  O   HOH T 278      39.509  57.905 108.009  1.00  0.41           O  
HETATM  280  O   HOH T 279      48.704  39.144  61.348  1.00  0.41           O  
HETATM  281  O   HOH T 280      28.804  40.346  55.064  1.00  0.41           O  
HETATM  282  O   HOH T 281       7.407  33.535 108.690  1.00  0.41           O  
HETATM  283  O   HOH T 282      16.219  28.773  93.913  1.00  0.41           O  
HETATM  284  O   HOH T 283      44.257  57.015 102.569  1.00  0.41           O  
HETATM  285  O   HOH T 284      31.785  59.060  68.253  1.00  0.41           O  
HETATM  286  O   HOH T 285      30.147  42.713  89.794  1.00  0.41           O  
HETATM  287  O   HOH T 286      43.612  56.918 105.160  1.00  0.41           O  
HETATM  288  O   HOH T 287      41.229  29.029  72.042  1.00  0.41           O  
HETATM  289  O   HOH T 288      55.057  39.126  63.949  1.00  0.41           O  
HETATM  290  O   HOH T 289      16.058  40.415  74.991  1.00  0.41           O  
HETATM  291  O   HOH T 290      51.409  40.243  93.336  1.00  0.42           O  
HETATM  292  O   HOH T 291      20.042  36.335  67.083  1.00  0.42           O  
HETATM  293  O   HOH T 292      49.247  29.178 106.762  1.00  0.42           O  
HETATM  294  O   HOH T 293      19.289  18.913  94.352  1.00  0.42           O  
HETATM  295  O   HOH T 294      26.699  12.968 109.318  1.00  0.42           O  
HETATM  296  O   HOH T 295      42.481  50.518  58.089  1.00  0.42           O  
HETATM  297  O   HOH T 296      28.171  49.777  83.114  1.00  0.42           O  
HETATM  298  O   HOH T 297      40.710  44.862 104.079  1.00  0.42           O  
HETATM  299  O   HOH T 298      31.756  17.088  73.440  1.00  0.42           O  
HETATM  300  O   HOH T 299      41.310  67.082  80.318  1.00  0.42           O  
HETATM  301  O   HOH T 300      31.986  31.695 114.144  1.00  0.42           O  
HETATM  302  O   HOH T 301      36.532  58.829  87.274  1.00  0.42           O  
HETATM  303  O   HOH T 302      43.718  23.094  81.634  1.00  0.42           O  
HETATM  304  O   HOH T 303      30.710  49.673 115.225  1.00  0.42           O  
HETATM  305  O   HOH T 304      44.394  37.133  66.377  1.00  0.42           O  
HETATM  306  O   HOH T 305      44.589  32.492  96.047  1.00  0.42           O  
HETATM  307  O   HOH T 306      36.147  30.890 122.951  1.00  0.42           O  
HETATM  308  O   HOH T 307      22.615  23.611  64.082  1.00  0.42           O  
HETATM  309  O   HOH T 308      16.281  29.945 116.412  1.00  0.42           O  
HETATM  310  O   HOH T 309      28.612  39.999  52.203  1.00  0.42           O  
HETATM  311  O   HOH T 310      17.091  29.404  91.363  1.00  0.42           O  
HETATM  312  O   HOH T 311      21.667  42.974  77.936  1.00  0.42           O  
HETATM  313  O   HOH T 312      24.269  44.793  74.665  1.00  0.42           O  
HETATM  314  O   HOH T 313      51.929  39.532  79.928  1.00  0.42           O  
HETATM  315  O   HOH T 314      28.447  33.427 104.699  1.00  0.42           O  
HETATM  316  O   HOH T 315      21.515  23.390  81.583  1.00  0.42           O  
HETATM  317  O   HOH T 316      29.965  25.113  77.005  1.00  0.43           O  
HETATM  318  O   HOH T 317      42.015  71.476  78.769  1.00  0.43           O  
HETATM  319  O   HOH T 318      35.503  39.185 113.666  1.00  0.43           O  
HETATM  320  O   HOH T 319      31.436  19.369 104.408  1.00  0.43           O  
HETATM  321  O   HOH T 320      21.640  26.054  77.329  1.00  0.43           O  
HETATM  322  O   HOH T 321      30.104  13.562  65.475  1.00  0.43           O  
HETATM  323  O   HOH T 322      50.259  22.482  68.016  1.00  0.43           O  
HETATM  324  O   HOH T 323      34.483  22.211  77.624  1.00  0.43           O  
HETATM  325  O   HOH T 324      22.051  17.173 108.791  1.00  0.43           O  
HETATM  326  O   HOH T 325      38.003  47.838  53.312  1.00  0.43           O  
HETATM  327  O   HOH T 326      12.696  28.155 112.731  1.00  0.43           O  
HETATM  328  O   HOH T 327      45.453  23.318  98.455  1.00  0.43           O  
HETATM  329  O   HOH T 328      24.865  35.662  83.265  1.00  0.43           O  
HETATM  330  O   HOH T 329      53.779  28.347  54.965  1.00  0.43           O  
HETATM  331  O   HOH T 330      33.600  65.664  71.477  1.00  0.43           O  
HETATM  332  O   HOH T 331      39.905  20.454 103.014  1.00  0.43           O  
HETATM  333  O   HOH T 332      30.754  45.070  94.552  1.00  0.43           O  
HETATM  334  O   HOH T 333      34.920  48.472  98.021  1.00  0.43           O  
HETATM  335  O   HOH T 334      23.333  33.974  63.732  1.00  0.43           O  
HETATM  336  O   HOH T 335      31.367  49.593 124.755  1.00  0.43           O  
HETATM  337  O   HOH T 336      29.690  23.957 119.936  1.00  0.44           O  
HETATM  338  O   HOH T 337      43.177  47.005  97.237  1.00  0.44           O  
HETATM  339  O   HOH T 338      46.473  38.162  60.346  1.00  0.44           O  
HETATM  340  O   HOH T 339      27.761  48.353 100.857  1.00  0.44           O  
HETATM  341  O   HOH T 340      30.058  65.076  68.429  1.00  0.44           O  
HETATM  342  O   HOH T 341      24.838  40.551  77.297  1.00  0.44           O  
HETATM  343  O   HOH T 342      51.415  53.126 110.617  1.00  0.44           O  
HETATM  344  O   HOH T 343      46.466  19.303 126.267  1.00  0.44           O  
HETATM  345  O   HOH T 344      28.994  37.579  54.752  1.00  0.44           O  
HETATM  346  O   HOH T 345      29.255  51.358  87.247  1.00  0.44           O  
HETATM  347  O   HOH T 346      22.587  12.954 108.123  1.00  0.44           O  
HETATM  348  O   HOH T 347      22.590  18.513  59.906  1.00  0.44           O  
HETATM  349  O   HOH T 348      35.744  24.541  81.718  1.00  0.44           O  
HETATM  350  O   HOH T 349      41.988  25.215 130.837  1.00  0.44           O  
HETATM  351  O   HOH T 350      35.232  20.035  76.188  1.00  0.44           O  
HETATM  352  O   HOH T 351      12.129  38.229 107.607  1.00  0.44           O  
HETATM  353  O   HOH T 352      15.549  41.897  77.205  1.00  0.44           O  
HETATM  354  O   HOH T 353      41.271  32.629  91.116  1.00  0.44           O  
HETATM  355  O   HOH T 354      45.573  24.724  96.072  1.00  0.44           O  
HETATM  356  O   HOH T 355      42.248  27.623 132.275  1.00  0.44           O  
HETATM  357  O   HOH T 356      29.603  47.048  88.301  1.00  0.44           O  
HETATM  358  O   HOH T 357      51.989  21.843  84.070  1.00  0.44           O  
HETATM  359  O   HOH T 358      40.540  17.193 100.511  1.00  0.44           O  
HETATM  360  O   HOH T 359      51.010  25.823  65.808  1.00  0.44           O  
HETATM  361  O   HOH T 360      25.578  39.966 124.713  1.00  0.44           O  
HETATM  362  O   HOH T 361      34.240  23.678  83.882  1.00  0.45           O  
HETATM  363  O   HOH T 362      49.359  39.776  97.939  1.00  0.45           O  
HETATM  364  O   HOH T 363      38.107  58.516 101.145  1.00  0.45           O  
HETATM  365  O   HOH T 364      25.673  47.925 119.243  1.00  0.45           O  
HETATM  366  O   HOH T 365      22.076  36.350  83.185  1.00  0.45           O  
HETATM  367  O   HOH T 366      39.016  29.723 112.445  1.00  0.45           O  
HETATM  368  O   HOH T 367      17.414  33.886  78.455  1.00  0.45           O  
HETATM  369  O   HOH T 368      41.472  18.056  62.425  1.00  0.45           O  
HETATM  370  O   HOH T 369      52.774  30.781  89.598  1.00  0.45           O  
HETATM  371  O   HOH T 370      25.626  36.983  78.897  1.00  0.45           O  
HETATM  372  O   HOH T 371      21.155  38.113  81.114  1.00  0.45           O  
HETATM  373  O   HOH T 372      29.761  49.868 119.723  1.00  0.45           O  
HETATM  374  O   HOH T 373      49.523  30.875  73.222  1.00  0.45           O  
HETATM  375  O   HOH T 374      52.915  47.793 110.905  1.00  0.45           O  
HETATM  376  O   HOH T 375      25.091  39.435  62.955  1.00  0.45           O  
HETATM  377  O   HOH T 376      22.195  36.927  85.926  1.00  0.45           O  
HETATM  378  O   HOH T 377      37.037  58.969 111.714  1.00  0.45           O  
HETATM  379  O   HOH T 378      40.861  19.493  94.665  1.00  0.45           O  
HETATM  380  O   HOH T 379      51.199  42.983  64.324  1.00  0.45           O  
HETATM  381  O   HOH T 380      44.517  46.210 103.042  1.00  0.45           O  
HETATM  382  O   HOH T 381      38.009  60.684  88.782  1.00  0.45           O  
HETATM  383  O   HOH T 382      33.514  47.687  95.761  1.00  0.45           O  
HETATM  384  O   HOH T 383      19.199  19.582  62.987  1.00  0.45           O  
HETATM  385  O   HOH T 384      46.643  35.858  58.810  1.00  0.45           O  
HETATM  386  O   HOH T 385      32.245  51.075 122.561  1.00  0.45           O  
HETATM  387  O   HOH T 386      62.382  43.981  77.255  1.00  0.45           O  
HETATM  388  O   HOH T 387      27.442  45.879  61.057  1.00  0.45           O  
HETATM  389  O   HOH T 388      40.685  26.959  85.700  1.00  0.45           O  
HETATM  390  O   HOH T 389      39.649  20.086  92.225  1.00  0.45           O  
HETATM  391  O   HOH T 390      25.197  24.056  82.957  1.00  0.45           O  
HETATM  392  O   HOH T 391       2.261  28.966 104.589  1.00  0.45           O  
HETATM  393  O   HOH T 392      53.689  39.727  91.857  1.00  0.45           O  
HETATM  394  O   HOH T 393      14.485  40.835 104.471  1.00  0.45           O  
HETATM  395  O   HOH T 394      27.416  35.380  55.779  1.00  0.45           O  
HETATM  396  O   HOH T 395      47.249  31.906  59.110  1.00  0.45           O  
HETATM  397  O   HOH T 396      33.922  48.642 125.023  1.00  0.46           O  
HETATM  398  O   HOH T 397      44.186  55.474  89.878  1.00  0.46           O  
HETATM  399  O   HOH T 398      42.728  55.072  64.599  1.00  0.46           O  
HETATM  400  O   HOH T 399      23.563  29.230  59.465  1.00  0.46           O  
HETATM  401  O   HOH T 400      31.639  20.947 118.278  1.00  0.46           O  
HETATM  402  O   HOH T 401      36.227  49.309  54.928  1.00  0.46           O  
HETATM  403  O   HOH T 402      36.456  58.528  98.968  1.00  0.46           O  
HETATM  404  O   HOH T 403      32.141  50.070  95.613  1.00  0.46           O  
HETATM  405  O   HOH T 404       6.936  37.386 100.395  1.00  0.46           O  
HETATM  406  O   HOH T 405      31.053  53.111  69.536  1.00  0.46           O  
HETATM  407  O   HOH T 406      28.227  45.454  86.528  1.00  0.46           O  
HETATM  408  O   HOH T 407      55.055  28.915  65.092  1.00  0.46           O  
HETATM  409  O   HOH T 408      46.303  54.279  88.633  1.00  0.46           O  
HETATM  410  O   HOH T 409      27.055  50.204 119.692  1.00  0.46           O  
HETATM  411  O   HOH T 410      34.971  20.059  89.609  1.00  0.46           O  
HETATM  412  O   HOH T 411      46.070  51.860  78.275  1.00  0.46           O  
HETATM  413  O   HOH T 412      24.056  42.196  79.286  1.00  0.46           O  
HETATM  414  O   HOH T 413      14.452  26.676 114.253  1.00  0.46           O  
HETATM  415  O   HOH T 414      42.767  68.783  78.647  1.00  0.46           O  
HETATM  416  O   HOH T 415      48.030  40.090 100.382  1.00  0.46           O  
HETATM  417  O   HOH T 416      15.005  41.299 107.128  1.00  0.46           O  
HETATM  418  O   HOH T 417      32.193  22.607  79.180  1.00  0.46           O  
HETATM  419  O   HOH T 418      34.412  38.631  91.337  1.00  0.46           O  
HETATM  420  O   HOH T 419      32.997  24.188  81.389  1.00  0.46           O  
HETATM  421  O   HOH T 420      26.944  59.359  90.748  1.00  0.46           O  
HETATM  422  O   HOH T 421      43.333  34.056 108.200  1.00  0.46           O  
HETATM  423  O   HOH T 422      43.819  25.546 115.818  1.00  0.46           O  
HETATM  424  O   HOH T 423      41.364  18.454  50.825  1.00  0.46           O  
HETATM  425  O   HOH T 424      46.112  21.978  82.652  1.00  0.46           O  
HETATM  426  O   HOH T 425      41.068  54.135 102.252  1.00  0.46           O  
HETATM  427  O   HOH T 426      51.838  36.134  76.928  1.00  0.46           O  
HETATM  428  O   HOH T 427      27.124  24.019  86.637  1.00  0.46           O  
HETATM  429  O   HOH T 428      38.948  60.121 103.267  1.00  0.46           O  
HETATM  430  O   HOH T 429      42.408  63.138  79.659  1.00  0.46           O  
HETATM  431  O   HOH T 430      50.146  28.437  50.083  1.00  0.46           O  
HETATM  432  O   HOH T 431      31.596  52.003 119.995  1.00  0.46           O  
HETATM  433  O   HOH T 432      50.507  52.499 113.158  1.00  0.46           O  
HETATM  434  O   HOH T 433      49.544  41.063  63.108  1.00  0.46           O  
HETATM  435  O   HOH T 434      28.909  20.843  62.362  1.00  0.46           O  
HETATM  436  O   HOH T 435      25.112  50.181 117.803  1.00  0.46           O  
HETATM  437  O   HOH T 436      27.320  53.916  90.661  1.00  0.47           O  
HETATM  438  O   HOH T 437      25.266  40.390  85.062  1.00  0.47           O  
HETATM  439  O   HOH T 438      23.910  38.181  84.064  1.00  0.47           O  
HETATM  440  O   HOH T 439      28.808  57.561  90.110  1.00  0.47           O  
HETATM  441  O   HOH T 440      34.415  27.197 129.813  1.00  0.47           O  
HETATM  442  O   HOH T 441      25.219  34.124  81.020  1.00  0.47           O  
HETATM  443  O   HOH T 442      26.751  38.994  53.920  1.00  0.47           O  
HETATM  444  O   HOH T 443      31.295  47.867  94.200  1.00  0.47           O  
HETATM  445  O   HOH T 444      23.348  22.724 112.552  1.00  0.47           O  
HETATM  446  O   HOH T 445      25.724  15.607  76.133  1.00  0.47           O  
HETATM  447  O   HOH T 446      22.742  23.089  84.129  1.00  0.47           O  
HETATM  448  O   HOH T 447      30.030  20.904  79.756  1.00  0.47           O  
HETATM  449  O   HOH T 448      20.240  25.181  93.094  1.00  0.47           O  
HETATM  450  O   HOH T 449      52.217  26.827  68.099  1.00  0.47           O  
HETATM  451  O   HOH T 450      49.636  19.779  67.721  1.00  0.47           O  
HETATM  452  O   HOH T 451      40.253  25.185 109.278  1.00  0.47           O  
HETATM  453  O   HOH T 452      28.949  26.075 118.137  1.00  0.47           O  
HETATM  454  O   HOH T 453      43.407  23.135  96.888  1.00  0.47           O  
HETATM  455  O   HOH T 454      49.557  45.250  64.651  1.00  0.47           O  
HETATM  456  O   HOH T 455      22.590  24.999  60.739  1.00  0.47           O  
HETATM  457  O   HOH T 456      40.731  53.686  90.330  1.00  0.47           O  
HETATM  458  O   HOH T 457      21.999  26.926  58.899  1.00  0.47           O  
HETATM  459  O   HOH T 458      34.902  55.996 112.158  1.00  0.47           O  
HETATM  460  O   HOH T 459      46.062  26.324 114.354  1.00  0.47           O  
HETATM  461  O   HOH T 460      49.304  24.206  86.601  1.00  0.47           O  
HETATM  462  O   HOH T 461      42.897  21.759  79.428  1.00  0.47           O  
HETATM  463  O   HOH T 462      17.048  38.137 123.089  1.00  0.47           O  
HETATM  464  O   HOH T 463      29.125  30.769  55.093  1.00  0.47           O  
HETATM  465  O   HOH T 464      21.227  32.379  64.680  1.00  0.47           O  
HETATM  466  O   HOH T 465       8.734  33.873  95.113  1.00  0.48           O  
HETATM  467  O   HOH T 466      43.215  20.915  95.232  1.00  0.48           O  
HETATM  468  O   HOH T 467      29.669  49.817 122.599  1.00  0.48           O  
HETATM  469  O   HOH T 468      40.525  56.723  65.401  1.00  0.48           O  
HETATM  470  O   HOH T 469      53.228  38.229  77.923  1.00  0.48           O  
HETATM  471  O   HOH T 470      22.521  48.073  79.130  1.00  0.48           O  
HETATM  472  O   HOH T 471      57.693  33.025  66.316  1.00  0.48           O  
HETATM  473  O   HOH T 472      47.486  39.092 102.889  1.00  0.48           O  
HETATM  474  O   HOH T 473      45.431  29.274  69.360  1.00  0.48           O  
HETATM  475  O   HOH T 474      55.890  31.643  81.787  1.00  0.48           O  
HETATM  476  O   HOH T 475      25.937  18.548 113.959  1.00  0.48           O  
HETATM  477  O   HOH T 476      50.313  30.038  90.365  1.00  0.48           O  
HETATM  478  O   HOH T 477      29.767  46.248  59.788  1.00  0.48           O  
HETATM  479  O   HOH T 478      24.233  21.120  88.206  1.00  0.48           O  
HETATM  480  O   HOH T 479      49.705  43.277  94.812  1.00  0.48           O  
HETATM  481  O   HOH T 480      42.369  20.659  92.608  1.00  0.48           O  
HETATM  482  O   HOH T 481      20.652  21.706  79.532  1.00  0.48           O  
HETATM  483  O   HOH T 482      42.194  59.704  81.343  1.00  0.48           O  
HETATM  484  O   HOH T 483      34.971  18.764  66.344  1.00  0.48           O  
HETATM  485  O   HOH T 484      49.714  44.554 118.401  1.00  0.48           O  
HETATM  486  O   HOH T 485      34.947  51.908  62.902  1.00  0.48           O  
HETATM  487  O   HOH T 486      29.054  40.381  88.727  1.00  0.48           O  
HETATM  488  O   HOH T 487      43.570  29.892  87.826  1.00  0.48           O  
HETATM  489  O   HOH T 488      20.318  48.076  80.963  1.00  0.48           O  
HETATM  490  O   HOH T 489      29.926  24.356  83.358  1.00  0.48           O  
HETATM  491  O   HOH T 490      25.893  30.731  59.105  1.00  0.48           O  
HETATM  492  O   HOH T 491      17.649  37.593 116.520  1.00  0.48           O  
HETATM  493  O   HOH T 492      28.155  47.303  84.295  1.00  0.48           O  
HETATM  494  O   HOH T 493      32.356  66.983  77.263  1.00  0.48           O  
HETATM  495  O   HOH T 494      39.524  58.759 112.807  1.00  0.48           O  
HETATM  496  O   HOH T 495      51.815  22.967  86.561  1.00  0.48           O  
HETATM  497  O   HOH T 496      29.472  38.847  86.390  1.00  0.49           O  
HETATM  498  O   HOH T 497      35.137  20.553 105.373  1.00  0.49           O  
HETATM  499  O   HOH T 498      39.244  59.271  86.776  1.00  0.49           O  
HETATM  500  O   HOH T 499      22.174  34.703  66.104  1.00  0.49           O  
HETATM  501  O   HOH T 500      44.554  26.531 118.258  1.00  0.49           O  
HETATM  502  O   HOH T 501      49.060  38.201 121.460  1.00  0.49           O  
HETATM  503  O   HOH T 502      38.449  19.214 117.277  1.00  0.49           O  
HETATM  504  O   HOH T 503      47.086  42.422 104.948  1.00  0.49           O  
HETATM  505  O   HOH T 504      21.878  20.057  87.322  1.00  0.49           O  
HETATM  506  O   HOH T 505      51.899  45.308 111.000  1.00  0.49           O  
HETATM  507  O   HOH T 506      45.433  51.209  95.528  1.00  0.49           O  
HETATM  508  O   HOH T 507      46.301  28.000 119.808  1.00  0.49           O  
HETATM  509  O   HOH T 508      41.510  20.320  48.838  1.00  0.49           O  
HETATM  510  O   HOH T 509      22.173  28.173 123.133  1.00  0.49           O  
HETATM  511  O   HOH T 510      35.722  23.256 122.662  1.00  0.49           O  
HETATM  512  O   HOH T 511      28.983  14.949  71.502  1.00  0.49           O  
HETATM  513  O   HOH T 512      34.894  66.800  76.042  1.00  0.49           O  
HETATM  514  O   HOH T 513      28.359  12.275 111.505  1.00  0.49           O  
HETATM  515  O   HOH T 514      49.621  27.947  88.598  1.00  0.49           O  
HETATM  516  O   HOH T 515      31.558  14.671  72.043  1.00  0.49           O  
HETATM  517  O   HOH T 516      36.257  64.733  77.332  1.00  0.49           O  
HETATM  518  O   HOH T 517      19.243  13.682 109.874  1.00  0.49           O  
HETATM  519  O   HOH T 518      48.470  38.524  95.596  1.00  0.49           O  
HETATM  520  O   HOH T 519      33.129  19.657  61.550  1.00  0.49           O  
HETATM  521  O   HOH T 520       8.021  39.859 101.216  1.00  0.49           O  
HETATM  522  O   HOH T 521      41.490  29.202  89.499  1.00  0.49           O  
HETATM  523  O   HOH T 522      39.536  16.913  97.990  1.00  0.49           O  
HETATM  524  O   HOH T 523      45.306  45.422  98.009  1.00  0.49           O  
HETATM  525  O   HOH T 524      53.672  36.205  79.834  1.00  0.49           O  
HETATM  526  O   HOH T 525      15.220  38.183 113.537  1.00  0.49           O  
HETATM  527  O   HOH T 526      37.767  46.905  50.765  1.00  0.50           O  
HETATM  528  O   HOH T 527      42.095  21.579 103.968  1.00  0.50           O  
HETATM  529  O   HOH T 528      37.221  22.782  80.178  1.00  0.50           O  
HETATM  530  O   HOH T 529      48.773  33.087  47.115  1.00  0.50           O  
HETATM  531  O   HOH T 530      43.217  26.036  48.264  1.00  0.50           O  
HETATM  532  O   HOH T 531       6.825  38.090 103.000  1.00  0.50           O  
HETATM  533  O   HOH T 532      25.175  33.418  58.802  1.00  0.50           O  
HETATM  534  O   HOH T 533      18.498  25.327 107.358  1.00  0.50           O  
HETATM  535  O   HOH T 534      21.798  38.807 127.882  1.00  0.50           O  
HETATM  536  O   HOH T 535      27.624  51.440  89.366  1.00  0.50           O  
HETATM  537  O   HOH T 536      40.497  58.957  84.447  1.00  0.50           O  
HETATM  538  O   HOH T 537      47.731  37.244 133.720  1.00  0.50           O  
HETATM  539  O   HOH T 538      45.310  40.693 100.392  1.00  0.50           O  
HETATM  540  O   HOH T 539      23.590  46.283  85.816  1.00  0.50           O  
HETATM  541  O   HOH T 540      32.029  63.490  72.331  1.00  0.50           O  
HETATM  542  O   HOH T 541      29.527  23.409  78.934  1.00  0.50           O  
HETATM  543  O   HOH T 542      40.356  37.308  49.310  1.00  0.50           O  
HETATM  544  O   HOH T 543      48.112  58.614  66.264  1.00  0.50           O  
HETATM  545  O   HOH T 544      43.795  28.452  93.237  1.00  0.50           O  
HETATM  546  O   HOH T 545      27.328  28.456  54.970  1.00  0.50           O  
HETATM  547  O   HOH T 546      37.236  62.225  67.162  1.00  0.50           O  
HETATM  548  O   HOH T 547      30.942  43.275  92.376  1.00  0.50           O  
HETATM  549  O   HOH T 548      42.284  25.017  86.589  1.00  0.50           O  
HETATM  550  O   HOH T 549      25.054  46.285  93.760  1.00  0.50           O  
HETATM  551  O   HOH T 550      45.892  59.725  65.144  1.00  0.50           O  
HETATM  552  O   HOH T 551      50.581  27.550  70.327  1.00  0.50           O  
HETATM  553  O   HOH T 552      13.811  35.666 110.869  1.00  0.50           O  
HETATM  554  O   HOH T 553      24.797  17.043  60.487  1.00  0.50           O  
HETATM  555  O   HOH T 554      31.393  52.622  94.946  1.00  0.50           O  
HETATM  556  O   HOH T 555      27.395  23.939 116.648  1.00  0.50           O  
HETATM  557  O   HOH T 556      25.752  39.576  82.433  1.00  0.50           O  
HETATM  558  O   HOH T 557      40.783  31.662 113.239  1.00  0.50           O  
HETATM  559  O   HOH T 558      41.917  23.524 107.550  1.00  0.50           O  
HETATM  560  O   HOH T 559      29.743  49.595  89.398  1.00  0.50           O  
HETATM  561  O   HOH T 560      47.703  28.679  48.612  1.00  0.50           O  
HETATM  562  O   HOH T 561      50.969  46.900 108.973  1.00  0.51           O  
HETATM  563  O   HOH T 562      30.182  28.218  54.624  1.00  0.51           O  
HETATM  564  O   HOH T 563      42.188  55.583  91.790  1.00  0.51           O  
HETATM  565  O   HOH T 564      37.329  18.430 110.994  1.00  0.51           O  
HETATM  566  O   HOH T 565      46.150  47.872 101.935  1.00  0.51           O  
HETATM  567  O   HOH T 566      33.208  15.281 116.317  1.00  0.51           O  
HETATM  568  O   HOH T 567      48.326  54.916  90.120  1.00  0.51           O  
HETATM  569  O   HOH T 568      21.922  17.739  72.101  1.00  0.51           O  
HETATM  570  O   HOH T 569      28.734  22.747  81.409  1.00  0.51           O  
HETATM  571  O   HOH T 570      42.170  16.283  98.565  1.00  0.51           O  
HETATM  572  O   HOH T 571      16.088  30.093  78.607  1.00  0.51           O  
HETATM  573  O   HOH T 572      46.171  49.001  93.854  1.00  0.51           O  
HETATM  574  O   HOH T 573      20.156  47.926 110.496  1.00  0.51           O  
HETATM  575  O   HOH T 574      51.935  26.874  72.745  1.00  0.51           O  
HETATM  576  O   HOH T 575      46.323  46.146  59.210  1.00  0.51           O  
HETATM  577  O   HOH T 576      41.101  69.805  80.642  1.00  0.51           O  
HETATM  578  O   HOH T 577      56.759  28.967  63.024  1.00  0.51           O  
HETATM  579  O   HOH T 578      36.465  65.024  80.173  1.00  0.51           O  
HETATM  580  O   HOH T 579      51.017  20.945  69.966  1.00  0.51           O  
HETATM  581  O   HOH T 580      48.641  46.940 119.060  1.00  0.51           O  
HETATM  582  O   HOH T 581       1.346  29.801 102.120  1.00  0.51           O  
HETATM  583  O   HOH T 582      51.361  46.584  66.142  1.00  0.51           O  
HETATM  584  O   HOH T 583      22.652  28.361 120.624  1.00  0.52           O  
HETATM  585  O   HOH T 584      44.277  23.316  94.211  1.00  0.52           O  
HETATM  586  O   HOH T 585      43.815  24.923 120.390  1.00  0.52           O  
HETATM  587  O   HOH T 586      57.441  34.894  72.173  1.00  0.52           O  
HETATM  588  O   HOH T 587      33.955  51.794 118.433  1.00  0.52           O  
HETATM  589  O   HOH T 588      23.326  46.290  76.877  1.00  0.52           O  
HETATM  590  O   HOH T 589      44.440  57.492 107.762  1.00  0.52           O  
HETATM  591  O   HOH T 590      28.443  51.037 114.309  1.00  0.52           O  
HETATM  592  O   HOH T 591      31.774  61.879 106.866  1.00  0.52           O  
HETATM  593  O   HOH T 592      46.954  41.193  98.156  1.00  0.52           O  
HETATM  594  O   HOH T 593      36.350  42.893  72.841  1.00  0.52           O  
HETATM  595  O   HOH T 594      41.696  15.424  54.313  1.00  0.52           O  
HETATM  596  O   HOH T 595      41.345  21.625  81.678  1.00  0.52           O  
HETATM  597  O   HOH T 596      44.426  18.807  96.442  1.00  0.52           O  
HETATM  598  O   HOH T 597      46.870  48.903 120.007  1.00  0.52           O  
HETATM  599  O   HOH T 598      57.434  40.592  77.763  1.00  0.52           O  
HETATM  600  O   HOH T 599      60.249  38.792  66.903  1.00  0.52           O  
HETATM  601  O   HOH T 600      34.562  19.915  63.908  1.00  0.52           O  
HETATM  602  O   HOH T 601      24.428  46.895 122.949  1.00  0.52           O  
HETATM  603  O   HOH T 602      21.274  22.756  61.723  1.00  0.53           O  
HETATM  604  O   HOH T 603      48.756  52.386  78.966  1.00  0.53           O  
HETATM  605  O   HOH T 604      38.822  54.050  92.308  1.00  0.53           O  
HETATM  606  O   HOH T 605      47.669  20.354  87.260  1.00  0.53           O  
HETATM  607  O   HOH T 606      21.719  43.915  75.283  1.00  0.53           O  
HETATM  608  O   HOH T 607      32.429  21.020  87.510  1.00  0.53           O  
HETATM  609  O   HOH T 608      22.600  27.637  61.533  1.00  0.53           O  
HETATM  610  O   HOH T 609      58.171  25.023  58.875  1.00  0.53           O  
HETATM  611  O   HOH T 610      28.437  11.117 108.417  1.00  0.53           O  
HETATM  612  O   HOH T 611      22.705  24.251  58.214  1.00  0.53           O  
HETATM  613  O   HOH T 612      25.867  42.090  81.279  1.00  0.53           O  
HETATM  614  O   HOH T 613       9.591  27.384  96.080  1.00  0.53           O  
HETATM  615  O   HOH T 614      20.255  52.114  74.388  1.00  0.53           O  
HETATM  616  O   HOH T 615      18.488  18.017  87.030  1.00  0.53           O  
HETATM  617  O   HOH T 616       9.833  39.176 106.241  1.00  0.53           O  
HETATM  618  O   HOH T 617      13.685  27.275  96.415  1.00  0.53           O  
HETATM  619  O   HOH T 618      26.708  37.357 106.609  1.00  0.53           O  
HETATM  620  O   HOH T 619      38.923  61.895  86.363  1.00  0.53           O  
HETATM  621  O   HOH T 620      33.293  17.677  99.067  1.00  0.53           O  
HETATM  622  O   HOH T 621      48.712  50.873 119.949  1.00  0.54           O  
HETATM  623  O   HOH T 622      30.207  30.268  52.642  1.00  0.54           O  
HETATM  624  O   HOH T 623      37.144  26.759 130.243  1.00  0.54           O  
HETATM  625  O   HOH T 624      33.114  68.545  75.008  1.00  0.54           O  
HETATM  626  O   HOH T 625      43.730  55.862  94.089  1.00  0.54           O  
HETATM  627  O   HOH T 626      32.945  64.905  75.574  1.00  0.54           O  
HETATM  628  O   HOH T 627      17.810  21.842 110.074  1.00  0.54           O  
HETATM  629  O   HOH T 628      41.322  51.928 121.725  1.00  0.54           O  
HETATM  630  O   HOH T 629      46.973  46.052  56.638  1.00  0.54           O  
HETATM  631  O   HOH T 630       9.791  25.038  97.374  1.00  0.54           O  
HETATM  632  O   HOH T 631      49.608  21.471  85.610  1.00  0.54           O  
HETATM  633  O   HOH T 632      43.617  34.840  52.336  1.00  0.54           O  
HETATM  634  O   HOH T 633      12.192  35.561 113.364  1.00  0.54           O  
HETATM  635  O   HOH T 634      47.194  32.229  95.510  1.00  0.54           O  
HETATM  636  O   HOH T 635      20.500  20.301  60.585  1.00  0.54           O  
HETATM  637  O   HOH T 636      39.484  21.828  50.080  1.00  0.54           O  
HETATM  638  O   HOH T 637      26.235  51.751  67.639  1.00  0.54           O  
HETATM  639  O   HOH T 638      47.714  23.315  84.516  1.00  0.54           O  
HETATM  640  O   HOH T 639      30.928  16.796  93.235  1.00  0.54           O  
HETATM  641  O   HOH T 640      43.895  19.417  49.990  1.00  0.54           O  
HETATM  642  O   HOH T 641      43.784  56.998 117.079  1.00  0.54           O  
HETATM  643  O   HOH T 642      44.956  42.958  98.849  1.00  0.54           O  
HETATM  644  O   HOH T 643       8.766  27.453 103.599  1.00  0.54           O  
HETATM  645  O   HOH T 644      28.550  25.906 121.542  1.00  0.54           O  
HETATM  646  O   HOH T 645      43.572  52.672  62.369  1.00  0.55           O  
HETATM  647  O   HOH T 646      30.344  52.657 108.632  1.00  0.55           O  
HETATM  648  O   HOH T 647      33.458  29.939 122.178  1.00  0.55           O  
HETATM  649  O   HOH T 648      55.846  33.094  58.980  1.00  0.55           O  
HETATM  650  O   HOH T 649      29.794  47.476  97.849  1.00  0.55           O  
HETATM  651  O   HOH T 650      31.581  50.657 117.628  1.00  0.55           O  
HETATM  652  O   HOH T 651      51.037  30.823 115.889  1.00  0.55           O  
HETATM  653  O   HOH T 652      45.199  22.602  85.232  1.00  0.55           O  
HETATM  654  O   HOH T 653      46.890  25.985  48.268  1.00  0.55           O  
HETATM  655  O   HOH T 654      39.917  20.942 118.856  1.00  0.55           O  
HETATM  656  O   HOH T 655      29.174  22.661  85.381  1.00  0.55           O  
HETATM  657  O   HOH T 656      23.490  45.360  66.420  1.00  0.55           O  
HETATM  658  O   HOH T 657      17.166  17.199  68.108  1.00  0.55           O  
HETATM  659  O   HOH T 658      34.900  21.914  87.598  1.00  0.55           O  
HETATM  660  O   HOH T 659      43.760  23.276 129.810  1.00  0.55           O  
HETATM  661  O   HOH T 660      37.229  21.832  77.032  1.00  0.55           O  
HETATM  662  O   HOH T 661      35.792  21.853  82.458  1.00  0.55           O  
HETATM  663  O   HOH T 662      55.131  25.152  76.856  1.00  0.55           O  
HETATM  664  O   HOH T 663      48.037  29.971 119.227  1.00  0.55           O  
HETATM  665  O   HOH T 664      47.718  39.602 132.138  1.00  0.55           O  
HETATM  666  O   HOH T 665      51.107  43.716 106.861  1.00  0.56           O  
HETATM  667  O   HOH T 666      52.581  33.241 114.223  1.00  0.56           O  
HETATM  668  O   HOH T 667      39.813  21.579 107.032  1.00  0.56           O  
HETATM  669  O   HOH T 668      53.564  49.426  91.696  1.00  0.56           O  
HETATM  670  O   HOH T 669      28.628  13.640  63.240  1.00  0.56           O  
HETATM  671  O   HOH T 670      25.089  46.222  66.356  1.00  0.56           O  
HETATM  672  O   HOH T 671      21.622  21.156 111.259  1.00  0.56           O  
HETATM  673  O   HOH T 672      48.270  41.098  95.704  1.00  0.56           O  
HETATM  674  O   HOH T 673      11.220  38.037 112.582  1.00  0.56           O  
HETATM  675  O   HOH T 674      46.072  23.404  48.611  1.00  0.56           O  
HETATM  676  O   HOH T 675      39.760  60.574 108.604  1.00  0.56           O  
HETATM  677  O   HOH T 676      20.964  21.235  84.990  1.00  0.56           O  
HETATM  678  O   HOH T 677      20.152  28.416  64.106  1.00  0.56           O  
HETATM  679  O   HOH T 678      11.195  26.649  95.607  1.00  0.56           O  
HETATM  680  O   HOH T 679      50.268  18.537  71.243  1.00  0.56           O  
HETATM  681  O   HOH T 680      38.880  60.750 110.970  1.00  0.56           O  
HETATM  682  O   HOH T 681      19.422  29.923  86.516  1.00  0.56           O  
HETATM  683  O   HOH T 682      33.084  19.349 102.176  1.00  0.56           O  
HETATM  684  O   HOH T 683      30.759  57.050 100.427  1.00  0.56           O  
HETATM  685  O   HOH T 684      38.821  19.584  56.470  1.00  0.56           O  
HETATM  686  O   HOH T 685      30.891  16.928  76.133  1.00  0.56           O  
HETATM  687  O   HOH T 686      44.507  43.628 132.080  1.00  0.56           O  
HETATM  688  O   HOH T 687      11.920  40.545  94.984  1.00  0.56           O  
HETATM  689  O   HOH T 688      28.271  22.155 118.462  1.00  0.57           O  
HETATM  690  O   HOH T 689      13.743  43.129 101.270  1.00  0.57           O  
HETATM  691  O   HOH T 690      53.684  33.258  89.025  1.00  0.57           O  
HETATM  692  O   HOH T 691      16.986  40.454 114.056  1.00  0.57           O  
HETATM  693  O   HOH T 692      56.761  31.609  84.238  1.00  0.57           O  
HETATM  694  O   HOH T 693      14.687  43.769 108.490  1.00  0.57           O  
HETATM  695  O   HOH T 694      17.612  33.389 125.443  1.00  0.57           O  
HETATM  696  O   HOH T 695      19.361  25.938  64.643  1.00  0.57           O  
HETATM  697  O   HOH T 696      15.372  33.325  76.580  1.00  0.57           O  
HETATM  698  O   HOH T 697      24.301  46.994  96.387  1.00  0.57           O  
HETATM  699  O   HOH T 698      48.573  16.810  72.845  1.00  0.58           O  
HETATM  700  O   HOH T 699      22.078  38.852  69.220  1.00  0.58           O  
HETATM  701  O   HOH T 700      41.857  30.164  92.125  1.00  0.58           O  
HETATM  702  O   HOH T 701      22.714  42.797 127.037  1.00  0.58           O  
HETATM  703  O   HOH T 702      34.929  46.240 125.628  1.00  0.58           O  
HETATM  704  O   HOH T 703      46.900  44.379 118.435  1.00  0.59           O  
HETATM  705  O   HOH T 704      56.109  33.301  84.040  1.00  0.60           O  
HETATM  706  O   HOH T 705      66.421  42.051  71.441  1.00  0.60           O  
HETATM  707  O   HOH T 706      47.834  29.875  94.615  1.00  0.60           O  
HETATM  708  O   HOH T 707      49.351  30.946  49.034  1.00  0.61           O  
HETATM  709  O   HOH T 708      51.169  55.931  67.281  1.00  0.61           O  
HETATM  710  O   HOH T 709      23.999  43.194  76.805  1.00  0.61           O  
TER     711      HOH T 709 
