# Supplementary material for: Accurate Prediction of Hydration Sites of Proteins Using Energy Model With Atom Embedding
Source: Front Mol Biosci. 2021 Sep 20;8:756075. doi: 10.3389/fmolb.2021.756075 (PMC8488165; doi:10.3389/fmolb.2021.756075)
Supplement: Supplementary file 1 [file DataSheet1.ZIP › Data Sheet 1/Our_result_pdb/our_dataset_output/2I51_watersite.pdb]

HEADER                                                        XXXX


JRNL        PMID   -1
HETATM    1  O   HOH T   0      45.163  53.719  18.085  1.00  0.16           O  
HETATM    2  O   HOH T   1      56.623  59.176  22.697  1.00  0.16           O  
HETATM    3  O   HOH T   2      53.349  72.681  26.678  1.00  0.18           O  
HETATM    4  O   HOH T   3      43.943  57.763   4.348  1.00  0.18           O  
HETATM    5  O   HOH T   4      67.304  75.601  20.633  1.00  0.19           O  
HETATM    6  O   HOH T   5      51.336  90.823  31.422  1.00  0.19           O  
HETATM    7  O   HOH T   6      46.668  49.626 -15.396  1.00  0.19           O  
HETATM    8  O   HOH T   7      47.467  63.845  19.443  1.00  0.21           O  
HETATM    9  O   HOH T   8      65.436  75.257  36.289  1.00  0.21           O  
HETATM   10  O   HOH T   9      46.426  81.048  13.909  1.00  0.21           O  
HETATM   11  O   HOH T  10      55.172  52.520  11.438  1.00  0.21           O  
HETATM   12  O   HOH T  11      28.717  58.640   8.581  1.00  0.21           O  
HETATM   13  O   HOH T  12      44.491  74.532   3.209  1.00  0.21           O  
HETATM   14  O   HOH T  13      39.216  65.823  -8.524  1.00  0.21           O  
HETATM   15  O   HOH T  14      64.219  61.108  18.363  1.00  0.22           O  
HETATM   16  O   HOH T  15      27.594  41.997  -2.608  1.00  0.22           O  
HETATM   17  O   HOH T  16      58.293  54.215  -5.704  1.00  0.22           O  
HETATM   18  O   HOH T  17      55.433  77.299  12.293  1.00  0.23           O  
HETATM   19  O   HOH T  18      56.894  64.115  -5.497  1.00  0.23           O  
HETATM   20  O   HOH T  19      64.598  81.430  13.641  1.00  0.23           O  
HETATM   21  O   HOH T  20      59.926  75.160  40.609  1.00  0.23           O  
HETATM   22  O   HOH T  21      66.517  70.212  28.847  1.00  0.24           O  
HETATM   23  O   HOH T  22      53.833  71.098  -3.464  1.00  0.24           O  
HETATM   24  O   HOH T  23      27.373  60.032  16.360  1.00  0.24           O  
HETATM   25  O   HOH T  24      39.950  63.427 -12.809  1.00  0.24           O  
HETATM   26  O   HOH T  25      21.287  54.945  17.885  1.00  0.24           O  
HETATM   27  O   HOH T  26      66.637  82.381  35.268  1.00  0.25           O  
HETATM   28  O   HOH T  27      49.025  78.195  34.840  1.00  0.25           O  
HETATM   29  O   HOH T  28      36.222  59.938  26.297  1.00  0.25           O  
HETATM   30  O   HOH T  29      58.221  66.402  -2.769  1.00  0.25           O  
HETATM   31  O   HOH T  30      64.036  58.414  11.435  1.00  0.25           O  
HETATM   32  O   HOH T  31      62.922  68.092  37.408  1.00  0.25           O  
HETATM   33  O   HOH T  32      33.145  67.960  -2.568  1.00  0.25           O  
HETATM   34  O   HOH T  33      35.817  77.076  26.689  1.00  0.25           O  
HETATM   35  O   HOH T  34      28.840  71.929  34.141  1.00  0.25           O  
HETATM   36  O   HOH T  35      42.351  49.818   3.959  1.00  0.25           O  
HETATM   37  O   HOH T  36      39.913  76.978   2.137  1.00  0.25           O  
HETATM   38  O   HOH T  37      69.973  70.405  14.755  1.00  0.26           O  
HETATM   39  O   HOH T  38      55.220  53.904   1.032  1.00  0.26           O  
HETATM   40  O   HOH T  39      28.497  69.014  11.522  1.00  0.26           O  
HETATM   41  O   HOH T  40      42.384  82.017  25.263  1.00  0.26           O  
HETATM   42  O   HOH T  41      32.985  50.053   7.423  1.00  0.26           O  
HETATM   43  O   HOH T  42      36.708  55.136  20.841  1.00  0.26           O  
HETATM   44  O   HOH T  43      37.218  70.758   9.001  1.00  0.27           O  
HETATM   45  O   HOH T  44      61.737  70.539  20.492  1.00  0.27           O  
HETATM   46  O   HOH T  45      27.880  47.615  -6.396  1.00  0.27           O  
HETATM   47  O   HOH T  46      49.265  84.678  11.622  1.00  0.27           O  
HETATM   48  O   HOH T  47      61.515  72.213  18.301  1.00  0.28           O  
HETATM   49  O   HOH T  48      66.644  64.797   9.279  1.00  0.28           O  
HETATM   50  O   HOH T  49      51.119  61.852  14.171  1.00  0.28           O  
HETATM   51  O   HOH T  50      34.363  54.886 -10.818  1.00  0.28           O  
HETATM   52  O   HOH T  51      45.981  76.067  36.784  1.00  0.28           O  
HETATM   53  O   HOH T  52      17.685  58.055  12.292  1.00  0.28           O  
HETATM   54  O   HOH T  53      39.858  45.346  -4.710  1.00  0.28           O  
HETATM   55  O   HOH T  54      24.458  68.406  11.987  1.00  0.28           O  
HETATM   56  O   HOH T  55      34.766  61.782  11.454  1.00  0.29           O  
HETATM   57  O   HOH T  56      37.875  44.384   5.585  1.00  0.29           O  
HETATM   58  O   HOH T  57      46.702  84.544  36.719  1.00  0.29           O  
HETATM   59  O   HOH T  58      38.012  81.453  22.531  1.00  0.29           O  
HETATM   60  O   HOH T  59      20.767  63.191   9.360  1.00  0.29           O  
HETATM   61  O   HOH T  60      22.185  64.761  19.632  1.00  0.29           O  
HETATM   62  O   HOH T  61      60.401  75.017  43.304  1.00  0.29           O  
HETATM   63  O   HOH T  62      71.513  78.931  37.749  1.00  0.29           O  
HETATM   64  O   HOH T  63      54.548  84.493  11.682  1.00  0.29           O  
HETATM   65  O   HOH T  64      60.587  65.647  -4.068  1.00  0.29           O  
HETATM   66  O   HOH T  65      66.657  67.045  -5.123  1.00  0.30           O  
HETATM   67  O   HOH T  66      36.123  59.593   8.409  1.00  0.30           O  
HETATM   68  O   HOH T  67      37.374  57.541  27.052  1.00  0.30           O  
HETATM   69  O   HOH T  68      37.059  54.021  23.336  1.00  0.30           O  
HETATM   70  O   HOH T  69      27.238  44.761  -2.768  1.00  0.30           O  
HETATM   71  O   HOH T  70      49.294  49.333  17.957  1.00  0.30           O  
HETATM   72  O   HOH T  71      60.046  86.928  35.759  1.00  0.30           O  
HETATM   73  O   HOH T  72      49.998  67.240  -4.604  1.00  0.30           O  
HETATM   74  O   HOH T  73      37.199  54.516   4.910  1.00  0.30           O  
HETATM   75  O   HOH T  74      47.914  51.745 -13.981  1.00  0.31           O  
HETATM   76  O   HOH T  75      22.170  45.601   1.701  1.00  0.31           O  
HETATM   77  O   HOH T  76      58.424  62.489  23.640  1.00  0.31           O  
HETATM   78  O   HOH T  77      61.430  84.575  16.184  1.00  0.31           O  
HETATM   79  O   HOH T  78      34.323  46.008  -1.461  1.00  0.31           O  
HETATM   80  O   HOH T  79      49.397  51.493  22.912  1.00  0.31           O  
HETATM   81  O   HOH T  80      26.845  75.406  29.150  1.00  0.31           O  
HETATM   82  O   HOH T  81      58.142  49.289  16.828  1.00  0.31           O  
HETATM   83  O   HOH T  82      69.443  78.964  31.283  1.00  0.31           O  
HETATM   84  O   HOH T  83      62.998  64.616  -4.846  1.00  0.31           O  
HETATM   85  O   HOH T  84      33.605  63.242  -6.930  1.00  0.31           O  
HETATM   86  O   HOH T  85      53.163  48.403  11.119  1.00  0.32           O  
HETATM   87  O   HOH T  86      22.977  50.727   4.737  1.00  0.32           O  
HETATM   88  O   HOH T  87      30.195  49.639   7.282  1.00  0.32           O  
HETATM   89  O   HOH T  88      59.944  55.234  -3.721  1.00  0.32           O  
HETATM   90  O   HOH T  89      24.088  48.104  19.366  1.00  0.32           O  
HETATM   91  O   HOH T  90      51.464  89.589  29.015  1.00  0.32           O  
HETATM   92  O   HOH T  91      29.864  49.516  10.081  1.00  0.32           O  
HETATM   93  O   HOH T  92      36.433  61.825   4.825  1.00  0.32           O  
HETATM   94  O   HOH T  93      60.728  54.145  22.986  1.00  0.32           O  
HETATM   95  O   HOH T  94      45.853  52.045  15.978  1.00  0.32           O  
HETATM   96  O   HOH T  95      31.379  51.721  -7.453  1.00  0.32           O  
HETATM   97  O   HOH T  96      40.366  73.695  -6.853  1.00  0.32           O  
HETATM   98  O   HOH T  97      66.797  60.801   5.197  1.00  0.32           O  
HETATM   99  O   HOH T  98      42.749  73.715  -5.568  1.00  0.32           O  
HETATM  100  O   HOH T  99      77.599  74.859  29.141  1.00  0.33           O  
HETATM  101  O   HOH T 100      35.262  74.920   3.304  1.00  0.33           O  
HETATM  102  O   HOH T 101      59.316  72.214  14.322  1.00  0.33           O  
HETATM  103  O   HOH T 102      39.015  76.239  13.447  1.00  0.33           O  
HETATM  104  O   HOH T 103      46.511  70.257  -6.858  1.00  0.33           O  
HETATM  105  O   HOH T 104      30.246  59.463   6.563  1.00  0.33           O  
HETATM  106  O   HOH T 105      36.180  65.493  12.534  1.00  0.33           O  
HETATM  107  O   HOH T 106      68.067  57.617  -4.181  1.00  0.33           O  
HETATM  108  O   HOH T 107      54.493  77.430   4.885  1.00  0.34           O  
HETATM  109  O   HOH T 108      39.707  68.200  -7.244  1.00  0.34           O  
HETATM  110  O   HOH T 109      20.528  61.904  16.340  1.00  0.34           O  
HETATM  111  O   HOH T 110      27.738  49.350  11.990  1.00  0.34           O  
HETATM  112  O   HOH T 111      23.345  54.279  13.997  1.00  0.34           O  
HETATM  113  O   HOH T 112      21.756  60.123  17.995  1.00  0.34           O  
HETATM  114  O   HOH T 113      58.539  76.998  21.358  1.00  0.34           O  
HETATM  115  O   HOH T 114      59.881  77.286  12.707  1.00  0.34           O  
HETATM  116  O   HOH T 115      29.426  65.050  26.861  1.00  0.34           O  
HETATM  117  O   HOH T 116      19.174  86.309  26.498  1.00  0.34           O  
HETATM  118  O   HOH T 117      31.639  67.390  31.210  1.00  0.34           O  
HETATM  119  O   HOH T 118      56.884  83.544  12.862  1.00  0.34           O  
HETATM  120  O   HOH T 119      25.869  49.449  -0.774  1.00  0.34           O  
HETATM  121  O   HOH T 120      68.048  60.470  -3.860  1.00  0.34           O  
HETATM  122  O   HOH T 121      33.078  58.316 -15.963  1.00  0.34           O  
HETATM  123  O   HOH T 122      34.467  70.360  -2.740  1.00  0.34           O  
HETATM  124  O   HOH T 123      65.856  78.859  44.120  1.00  0.34           O  
HETATM  125  O   HOH T 124      54.913  52.778  22.580  1.00  0.34           O  
HETATM  126  O   HOH T 125      34.868  59.023  10.822  1.00  0.34           O  
HETATM  127  O   HOH T 126      52.882  51.037  11.991  1.00  0.34           O  
HETATM  128  O   HOH T 127      32.927  60.698 -13.066  1.00  0.34           O  
HETATM  129  O   HOH T 128      66.481  59.860   1.367  1.00  0.35           O  
HETATM  130  O   HOH T 129      40.743  68.679 -16.623  1.00  0.35           O  
HETATM  131  O   HOH T 130      55.148  92.356  23.310  1.00  0.35           O  
HETATM  132  O   HOH T 131      66.355  58.175  -6.434  1.00  0.35           O  
HETATM  133  O   HOH T 132      69.782  65.446   6.481  1.00  0.35           O  
HETATM  134  O   HOH T 133      66.442  65.574  13.170  1.00  0.35           O  
HETATM  135  O   HOH T 134      31.050  51.848 -14.060  1.00  0.35           O  
HETATM  136  O   HOH T 135      33.436  57.922   3.888  1.00  0.35           O  
HETATM  137  O   HOH T 136      21.993  82.590  32.828  1.00  0.35           O  
HETATM  138  O   HOH T 137      29.166  66.803  -0.957  1.00  0.35           O  
HETATM  139  O   HOH T 138      56.042  48.567  20.986  1.00  0.35           O  
HETATM  140  O   HOH T 139      52.170  87.961  39.528  1.00  0.35           O  
HETATM  141  O   HOH T 140      62.357  86.842  19.591  1.00  0.35           O  
HETATM  142  O   HOH T 141      51.834  88.523  26.431  1.00  0.36           O  
HETATM  143  O   HOH T 142      28.787  53.124  -1.495  1.00  0.36           O  
HETATM  144  O   HOH T 143      42.390  45.117  -1.410  1.00  0.36           O  
HETATM  145  O   HOH T 144      50.425  58.724  19.518  1.00  0.36           O  
HETATM  146  O   HOH T 145      25.675  83.473  19.719  1.00  0.36           O  
HETATM  147  O   HOH T 146      31.606  76.039  30.230  1.00  0.36           O  
HETATM  148  O   HOH T 147      71.614  80.573  27.429  1.00  0.36           O  
HETATM  149  O   HOH T 148      57.684  69.844  32.787  1.00  0.36           O  
HETATM  150  O   HOH T 149      43.247  77.241  44.398  1.00  0.36           O  
HETATM  151  O   HOH T 150      22.280  61.637   7.515  1.00  0.36           O  
HETATM  152  O   HOH T 151      52.203  53.164  -1.512  1.00  0.36           O  
HETATM  153  O   HOH T 152      49.455  80.183  -0.116  1.00  0.36           O  
HETATM  154  O   HOH T 153      57.505  56.375  -4.129  1.00  0.37           O  
HETATM  155  O   HOH T 154      50.152  85.047   0.836  1.00  0.37           O  
HETATM  156  O   HOH T 155      68.135  62.925  -2.451  1.00  0.37           O  
HETATM  157  O   HOH T 156      59.191  68.816  13.166  1.00  0.37           O  
HETATM  158  O   HOH T 157      32.344  57.612   6.334  1.00  0.37           O  
HETATM  159  O   HOH T 158      34.830  50.563   9.355  1.00  0.37           O  
HETATM  160  O   HOH T 159      21.635  64.397  16.892  1.00  0.37           O  
HETATM  161  O   HOH T 160      72.273  78.887  25.187  1.00  0.37           O  
HETATM  162  O   HOH T 161      65.727  51.669  19.703  1.00  0.37           O  
HETATM  163  O   HOH T 162      24.839  53.446   1.614  1.00  0.37           O  
HETATM  164  O   HOH T 163      61.040  76.815  20.106  1.00  0.37           O  
HETATM  165  O   HOH T 164      51.374  61.117  20.811  1.00  0.37           O  
HETATM  166  O   HOH T 165      39.703  73.964  35.510  1.00  0.37           O  
HETATM  167  O   HOH T 166      55.292  64.149  -7.725  1.00  0.37           O  
HETATM  168  O   HOH T 167      68.803  63.857  24.486  1.00  0.37           O  
HETATM  169  O   HOH T 168      69.712  62.260   3.055  1.00  0.37           O  
HETATM  170  O   HOH T 169      61.268  47.864  19.822  1.00  0.37           O  
HETATM  171  O   HOH T 170      52.764  75.453   5.739  1.00  0.37           O  
HETATM  172  O   HOH T 171      61.821  86.968  22.515  1.00  0.37           O  
HETATM  173  O   HOH T 172      48.757  58.171  16.245  1.00  0.37           O  
HETATM  174  O   HOH T 173      66.959  73.738  34.504  1.00  0.38           O  
HETATM  175  O   HOH T 174      56.719  59.722 -11.395  1.00  0.38           O  
HETATM  176  O   HOH T 175      71.750  80.294  31.987  1.00  0.38           O  
HETATM  177  O   HOH T 176      53.354  70.057  -6.002  1.00  0.38           O  
HETATM  178  O   HOH T 177      37.448  50.772   8.397  1.00  0.38           O  
HETATM  179  O   HOH T 178      60.678  72.882  27.481  1.00  0.38           O  
HETATM  180  O   HOH T 179      26.578  71.591  19.146  1.00  0.38           O  
HETATM  181  O   HOH T 180      51.766  86.324  41.719  1.00  0.38           O  
HETATM  182  O   HOH T 181      42.296  83.179  31.023  1.00  0.38           O  
HETATM  183  O   HOH T 182      62.210  80.390  14.633  1.00  0.38           O  
HETATM  184  O   HOH T 183      32.250  60.656  20.280  1.00  0.38           O  
HETATM  185  O   HOH T 184      37.279  64.678  16.095  1.00  0.38           O  
HETATM  186  O   HOH T 185      61.765  87.582  33.693  1.00  0.38           O  
HETATM  187  O   HOH T 186      64.303  75.522  23.372  1.00  0.38           O  
HETATM  188  O   HOH T 187      63.928  67.345  34.928  1.00  0.38           O  
HETATM  189  O   HOH T 188      29.395  49.940  -6.269  1.00  0.38           O  
HETATM  190  O   HOH T 189      47.513  55.495  -5.612  1.00  0.38           O  
HETATM  191  O   HOH T 190      30.121  68.977   3.833  1.00  0.38           O  
HETATM  192  O   HOH T 191      31.687  71.254   3.275  1.00  0.38           O  
HETATM  193  O   HOH T 192      34.259  57.592   8.479  1.00  0.39           O  
HETATM  194  O   HOH T 193      42.735  83.776  28.311  1.00  0.39           O  
HETATM  195  O   HOH T 194      59.397  59.259 -11.391  1.00  0.39           O  
HETATM  196  O   HOH T 195      51.161  48.333  19.785  1.00  0.39           O  
HETATM  197  O   HOH T 196      17.970  47.420  17.041  1.00  0.39           O  
HETATM  198  O   HOH T 197      66.622  57.851  -0.426  1.00  0.39           O  
HETATM  199  O   HOH T 198      22.588  57.481  18.107  1.00  0.39           O  
HETATM  200  O   HOH T 199      47.575  93.905  31.175  1.00  0.39           O  
HETATM  201  O   HOH T 200      19.563  50.235  15.182  1.00  0.39           O  
HETATM  202  O   HOH T 201      36.601  78.863  30.789  1.00  0.39           O  
HETATM  203  O   HOH T 202      25.673  76.753  22.183  1.00  0.39           O  
HETATM  204  O   HOH T 203      31.796  64.623  28.454  1.00  0.39           O  
HETATM  205  O   HOH T 204      23.345  81.144  30.852  1.00  0.39           O  
HETATM  206  O   HOH T 205      38.190  69.684  -8.928  1.00  0.39           O  
HETATM  207  O   HOH T 206      25.646  86.136  18.927  1.00  0.39           O  
HETATM  208  O   HOH T 207      53.997  70.593  33.177  1.00  0.39           O  
HETATM  209  O   HOH T 208      27.817  64.118  24.683  1.00  0.39           O  
HETATM  210  O   HOH T 209      35.549  68.168  -4.043  1.00  0.39           O  
HETATM  211  O   HOH T 210      47.593  78.412  37.242  1.00  0.40           O  
HETATM  212  O   HOH T 211      38.549  67.376  31.801  1.00  0.40           O  
HETATM  213  O   HOH T 212      18.257  60.050  13.976  1.00  0.40           O  
HETATM  214  O   HOH T 213      35.000  52.256  11.494  1.00  0.40           O  
HETATM  215  O   HOH T 214      65.254  53.520  21.712  1.00  0.40           O  
HETATM  216  O   HOH T 215      32.387  56.535  -9.623  1.00  0.40           O  
HETATM  217  O   HOH T 216      67.263  68.082  27.156  1.00  0.40           O  
HETATM  218  O   HOH T 217      55.872  82.063  10.885  1.00  0.40           O  
HETATM  219  O   HOH T 218      29.444  69.830  32.507  1.00  0.40           O  
HETATM  220  O   HOH T 219      40.300  46.877   7.569  1.00  0.40           O  
HETATM  221  O   HOH T 220      28.477  68.141   7.352  1.00  0.40           O  
HETATM  222  O   HOH T 221      48.158  49.116 -13.068  1.00  0.40           O  
HETATM  223  O   HOH T 222      60.967  53.467  -5.624  1.00  0.40           O  
HETATM  224  O   HOH T 223      62.773  66.466  24.473  1.00  0.40           O  
HETATM  225  O   HOH T 224      22.746  60.891   4.844  1.00  0.40           O  
HETATM  226  O   HOH T 225      45.293  93.220  35.740  1.00  0.40           O  
HETATM  227  O   HOH T 226      39.943  66.381 -17.967  1.00  0.40           O  
HETATM  228  O   HOH T 227      48.870  60.125  21.498  1.00  0.40           O  
HETATM  229  O   HOH T 228      75.216  68.316  19.635  1.00  0.40           O  
HETATM  230  O   HOH T 229      58.393  88.155  26.827  1.00  0.40           O  
HETATM  231  O   HOH T 230      44.686  71.325  35.808  1.00  0.40           O  
HETATM  232  O   HOH T 231      34.534  54.523  22.446  1.00  0.40           O  
HETATM  233  O   HOH T 232      59.108  67.745  31.726  1.00  0.40           O  
HETATM  234  O   HOH T 233      49.863  65.898  -7.653  1.00  0.40           O  
HETATM  235  O   HOH T 234      41.251  77.558  42.500  1.00  0.40           O  
HETATM  236  O   HOH T 235      21.655  63.376   5.462  1.00  0.41           O  
HETATM  237  O   HOH T 236      13.804  51.892  12.204  1.00  0.41           O  
HETATM  238  O   HOH T 237      38.877  81.701  41.529  1.00  0.41           O  
HETATM  239  O   HOH T 238      68.342  63.212   5.386  1.00  0.41           O  
HETATM  240  O   HOH T 239      31.392  52.819  -0.598  1.00  0.41           O  
HETATM  241  O   HOH T 240      33.637  76.935  28.376  1.00  0.41           O  
HETATM  242  O   HOH T 241      43.370  52.180  11.426  1.00  0.41           O  
HETATM  243  O   HOH T 242      49.298  76.361  40.912  1.00  0.41           O  
HETATM  244  O   HOH T 243      55.268  82.578   8.317  1.00  0.41           O  
HETATM  245  O   HOH T 244      33.442  57.947 -13.219  1.00  0.41           O  
HETATM  246  O   HOH T 245      42.953  70.481 -12.278  1.00  0.41           O  
HETATM  247  O   HOH T 246      24.788  48.311  16.674  1.00  0.41           O  
HETATM  248  O   HOH T 247      74.528  80.090  31.555  1.00  0.41           O  
HETATM  249  O   HOH T 248      41.611  54.271  10.892  1.00  0.41           O  
HETATM  250  O   HOH T 249      20.325  82.150  28.332  1.00  0.41           O  
HETATM  251  O   HOH T 250      66.615  60.015  17.497  1.00  0.41           O  
HETATM  252  O   HOH T 251      71.941  72.059   1.714  1.00  0.42           O  
HETATM  253  O   HOH T 252      29.171  74.522  30.709  1.00  0.42           O  
HETATM  254  O   HOH T 253      42.002  53.440  13.514  1.00  0.42           O  
HETATM  255  O   HOH T 254      51.746  46.803  14.504  1.00  0.42           O  
HETATM  256  O   HOH T 255      69.527  67.149  -1.660  1.00  0.42           O  
HETATM  257  O   HOH T 256      58.070  68.750  25.325  1.00  0.42           O  
HETATM  258  O   HOH T 257      52.138  45.240  16.796  1.00  0.42           O  
HETATM  259  O   HOH T 258      29.117  55.882  -1.670  1.00  0.42           O  
HETATM  260  O   HOH T 259      58.286  61.547 -10.075  1.00  0.42           O  
HETATM  261  O   HOH T 260      33.871  50.186  16.516  1.00  0.42           O  
HETATM  262  O   HOH T 261      60.549  87.379  25.068  1.00  0.42           O  
HETATM  263  O   HOH T 262      64.668  68.442  27.978  1.00  0.42           O  
HETATM  264  O   HOH T 263      31.571  63.204  -5.023  1.00  0.42           O  
HETATM  265  O   HOH T 264      58.376  71.295  26.699  1.00  0.42           O  
HETATM  266  O   HOH T 265      35.394  74.870   6.248  1.00  0.42           O  
HETATM  267  O   HOH T 266      47.693  57.829 -12.249  1.00  0.42           O  
HETATM  268  O   HOH T 267      70.293  81.095  29.806  1.00  0.42           O  
HETATM  269  O   HOH T 268      24.396  74.412  28.152  1.00  0.42           O  
HETATM  270  O   HOH T 269      44.372  79.690  44.492  1.00  0.43           O  
HETATM  271  O   HOH T 270      73.643  72.060   8.213  1.00  0.43           O  
HETATM  272  O   HOH T 271      37.443  84.160  10.516  1.00  0.43           O  
HETATM  273  O   HOH T 272      25.687  50.761  13.163  1.00  0.43           O  
HETATM  274  O   HOH T 273      24.198  54.457   4.325  1.00  0.43           O  
HETATM  275  O   HOH T 274      19.200  62.579  14.003  1.00  0.43           O  
HETATM  276  O   HOH T 275      18.728  65.155   9.646  1.00  0.43           O  
HETATM  277  O   HOH T 276      31.061  54.247  -8.645  1.00  0.43           O  
HETATM  278  O   HOH T 277      54.444  95.529  27.034  1.00  0.43           O  
HETATM  279  O   HOH T 278      38.650  47.749  25.867  1.00  0.43           O  
HETATM  280  O   HOH T 279      31.424  45.230   8.166  1.00  0.43           O  
HETATM  281  O   HOH T 280      57.321  54.276   2.835  1.00  0.43           O  
HETATM  282  O   HOH T 281      20.981  62.906  21.346  1.00  0.43           O  
HETATM  283  O   HOH T 282      33.844  72.726   4.040  1.00  0.43           O  
HETATM  284  O   HOH T 283      66.862  75.427  38.696  1.00  0.43           O  
HETATM  285  O   HOH T 284      26.688  52.010   0.012  1.00  0.43           O  
HETATM  286  O   HOH T 285      50.121  88.339  24.003  1.00  0.43           O  
HETATM  287  O   HOH T 286      43.322  53.146  15.977  1.00  0.43           O  
HETATM  288  O   HOH T 287      22.602  83.463  29.405  1.00  0.43           O  
HETATM  289  O   HOH T 288      34.416  43.270   5.948  1.00  0.43           O  
HETATM  290  O   HOH T 289      65.662  77.522  21.937  1.00  0.43           O  
HETATM  291  O   HOH T 290      28.096  72.014  31.444  1.00  0.44           O  
HETATM  292  O   HOH T 291      51.181  90.875  23.670  1.00  0.44           O  
HETATM  293  O   HOH T 292      33.934  67.184 -13.861  1.00  0.44           O  
HETATM  294  O   HOH T 293      34.555  51.333  14.084  1.00  0.44           O  
HETATM  295  O   HOH T 294      23.236  82.816  20.838  1.00  0.44           O  
HETATM  296  O   HOH T 295      52.226  48.840  22.323  1.00  0.44           O  
HETATM  297  O   HOH T 296      39.220  57.002   7.533  1.00  0.44           O  
HETATM  298  O   HOH T 297      40.696  54.754   8.312  1.00  0.44           O  
HETATM  299  O   HOH T 298      36.082  46.552  25.420  1.00  0.44           O  
HETATM  300  O   HOH T 299      52.311  51.547  23.169  1.00  0.44           O  
HETATM  301  O   HOH T 300      28.266  66.252  29.211  1.00  0.44           O  
HETATM  302  O   HOH T 301      62.520  76.820  11.981  1.00  0.44           O  
HETATM  303  O   HOH T 302      46.252  66.505 -12.862  1.00  0.44           O  
HETATM  304  O   HOH T 303      49.651  93.105  23.151  1.00  0.44           O  
HETATM  305  O   HOH T 304      57.844  57.989 -13.250  1.00  0.44           O  
HETATM  306  O   HOH T 305      52.100  95.016  25.645  1.00  0.44           O  
HETATM  307  O   HOH T 306      64.680  66.207  38.442  1.00  0.44           O  
HETATM  308  O   HOH T 307      25.177  50.358  23.030  1.00  0.44           O  
HETATM  309  O   HOH T 308      34.714  58.145  27.582  1.00  0.44           O  
HETATM  310  O   HOH T 309      39.632  66.473 -20.704  1.00  0.44           O  
HETATM  311  O   HOH T 310      27.848  90.551  22.651  1.00  0.44           O  
HETATM  312  O   HOH T 311      68.486  82.947  33.279  1.00  0.45           O  
HETATM  313  O   HOH T 312      37.691  74.545  39.879  1.00  0.45           O  
HETATM  314  O   HOH T 313      42.527  73.107  39.105  1.00  0.45           O  
HETATM  315  O   HOH T 314      66.366  65.372  24.507  1.00  0.45           O  
HETATM  316  O   HOH T 315      57.343  60.374  25.140  1.00  0.45           O  
HETATM  317  O   HOH T 316      26.387  69.877  13.210  1.00  0.45           O  
HETATM  318  O   HOH T 317      54.201  87.650  41.451  1.00  0.45           O  
HETATM  319  O   HOH T 318      62.634  65.520  36.660  1.00  0.45           O  
HETATM  320  O   HOH T 319      71.804  69.318   1.808  1.00  0.45           O  
HETATM  321  O   HOH T 320      23.627  50.504  20.723  1.00  0.45           O  
HETATM  322  O   HOH T 321      48.699  82.850   0.155  1.00  0.45           O  
HETATM  323  O   HOH T 322      49.704  45.216  15.495  1.00  0.45           O  
HETATM  324  O   HOH T 323      35.223  78.754   6.429  1.00  0.45           O  
HETATM  325  O   HOH T 324      43.831  50.934  20.945  1.00  0.45           O  
HETATM  326  O   HOH T 325      42.047  70.482  -9.638  1.00  0.45           O  
HETATM  327  O   HOH T 326      32.918  80.867  28.435  1.00  0.45           O  
HETATM  328  O   HOH T 327      76.012  71.981  23.428  1.00  0.45           O  
HETATM  329  O   HOH T 328      64.877  84.208  13.302  1.00  0.45           O  
HETATM  330  O   HOH T 329      25.015  73.704  18.069  1.00  0.45           O  
HETATM  331  O   HOH T 330      39.156  43.224   3.287  1.00  0.45           O  
HETATM  332  O   HOH T 331      25.743  71.437  16.628  1.00  0.45           O  
HETATM  333  O   HOH T 332      31.780  42.940   6.617  1.00  0.45           O  
HETATM  334  O   HOH T 333      31.756  47.928   8.691  1.00  0.45           O  
HETATM  335  O   HOH T 334      39.911  73.738  38.259  1.00  0.45           O  
HETATM  336  O   HOH T 335      68.212  65.578  -3.411  1.00  0.45           O  
HETATM  337  O   HOH T 336      27.836  46.883  12.931  1.00  0.45           O  
HETATM  338  O   HOH T 337      51.698  59.894  17.390  1.00  0.45           O  
HETATM  339  O   HOH T 338      23.237  48.050   0.759  1.00  0.45           O  
HETATM  340  O   HOH T 339      21.784  49.418   2.635  1.00  0.45           O  
HETATM  341  O   HOH T 340      62.518  77.201  24.752  1.00  0.45           O  
HETATM  342  O   HOH T 341      64.722  57.716  -8.771  1.00  0.45           O  
HETATM  343  O   HOH T 342      20.602  45.868   4.046  1.00  0.45           O  
HETATM  344  O   HOH T 343      71.212  69.113  -0.902  1.00  0.45           O  
HETATM  345  O   HOH T 344      22.171  48.032   4.958  1.00  0.45           O  
HETATM  346  O   HOH T 345      40.989  56.072   5.808  1.00  0.45           O  
HETATM  347  O   HOH T 346      45.350  92.404  33.022  1.00  0.45           O  
HETATM  348  O   HOH T 347      59.286  86.680  33.103  1.00  0.46           O  
HETATM  349  O   HOH T 348      50.910  63.776  -9.057  1.00  0.46           O  
HETATM  350  O   HOH T 349      74.709  70.207  21.630  1.00  0.46           O  
HETATM  351  O   HOH T 350      27.603  53.738  19.793  1.00  0.46           O  
HETATM  352  O   HOH T 351      60.261  69.249  26.891  1.00  0.46           O  
HETATM  353  O   HOH T 352      66.644  58.296  12.160  1.00  0.46           O  
HETATM  354  O   HOH T 353      57.340  90.833  33.180  1.00  0.46           O  
HETATM  355  O   HOH T 354      20.221  64.980   7.262  1.00  0.46           O  
HETATM  356  O   HOH T 355      43.763  69.516  34.249  1.00  0.46           O  
HETATM  357  O   HOH T 356      42.062  44.013  -3.937  1.00  0.46           O  
HETATM  358  O   HOH T 357      38.091  70.456 -13.924  1.00  0.46           O  
HETATM  359  O   HOH T 358      61.498  54.082  -8.307  1.00  0.46           O  
HETATM  360  O   HOH T 359      65.111  67.823  25.319  1.00  0.46           O  
HETATM  361  O   HOH T 360      69.024  57.298   7.980  1.00  0.46           O  
HETATM  362  O   HOH T 361      31.374  78.572  28.814  1.00  0.46           O  
HETATM  363  O   HOH T 362      76.771  76.584  31.156  1.00  0.46           O  
HETATM  364  O   HOH T 363      71.823  66.544   4.850  1.00  0.46           O  
HETATM  365  O   HOH T 364      51.256  58.856  14.891  1.00  0.46           O  
HETATM  366  O   HOH T 365      73.025  81.370  29.699  1.00  0.46           O  
HETATM  367  O   HOH T 366      54.684  50.047  22.962  1.00  0.46           O  
HETATM  368  O   HOH T 367      60.630  51.482  23.578  1.00  0.46           O  
HETATM  369  O   HOH T 368      33.847  76.742   4.983  1.00  0.46           O  
HETATM  370  O   HOH T 369      63.109  55.084  21.937  1.00  0.47           O  
HETATM  371  O   HOH T 370      40.219  44.226   0.002  1.00  0.47           O  
HETATM  372  O   HOH T 371      63.085  72.056  22.354  1.00  0.47           O  
HETATM  373  O   HOH T 372      65.999  74.544  -1.519  1.00  0.47           O  
HETATM  374  O   HOH T 373      45.281  92.595  30.336  1.00  0.47           O  
HETATM  375  O   HOH T 374      46.190  93.120  26.049  1.00  0.47           O  
HETATM  376  O   HOH T 375      69.115  78.449  39.077  1.00  0.47           O  
HETATM  377  O   HOH T 376      28.977  67.127  31.762  1.00  0.47           O  
HETATM  378  O   HOH T 377      44.121  45.394  -5.121  1.00  0.47           O  
HETATM  379  O   HOH T 378      24.372  76.182  30.233  1.00  0.47           O  
HETATM  380  O   HOH T 379      33.513  47.121   0.844  1.00  0.47           O  
HETATM  381  O   HOH T 380      30.172  66.852   5.600  1.00  0.47           O  
HETATM  382  O   HOH T 381      39.566  71.579 -10.242  1.00  0.47           O  
HETATM  383  O   HOH T 382      42.117  72.691  36.450  1.00  0.47           O  
HETATM  384  O   HOH T 383      68.914  58.476  10.560  1.00  0.47           O  
HETATM  385  O   HOH T 384      34.689  70.385  -5.532  1.00  0.47           O  
HETATM  386  O   HOH T 385      43.541  45.409 -10.230  1.00  0.47           O  
HETATM  387  O   HOH T 386      31.722  63.895 -17.505  1.00  0.47           O  
HETATM  388  O   HOH T 387      35.449  70.535 -14.688  1.00  0.47           O  
HETATM  389  O   HOH T 388      54.534  94.915  24.313  1.00  0.47           O  
HETATM  390  O   HOH T 389      42.630  72.514  -7.926  1.00  0.47           O  
HETATM  391  O   HOH T 390      70.057  64.754   3.770  1.00  0.47           O  
HETATM  392  O   HOH T 391      44.623  73.644  37.307  1.00  0.47           O  
HETATM  393  O   HOH T 392      39.691  52.219   7.730  1.00  0.47           O  
HETATM  394  O   HOH T 393      18.733  83.612  26.551  1.00  0.47           O  
HETATM  395  O   HOH T 394      59.051  84.829  17.590  1.00  0.47           O  
HETATM  396  O   HOH T 395      64.571  77.729  10.377  1.00  0.47           O  
HETATM  397  O   HOH T 396      20.740  84.919  28.071  1.00  0.47           O  
HETATM  398  O   HOH T 397      47.120  77.780  39.988  1.00  0.47           O  
HETATM  399  O   HOH T 398      70.681  66.846   2.275  1.00  0.47           O  
HETATM  400  O   HOH T 399      22.539  70.525  22.698  1.00  0.47           O  
HETATM  401  O   HOH T 400      51.328  53.982  -5.684  1.00  0.47           O  
HETATM  402  O   HOH T 401      59.645  73.273  -4.921  1.00  0.48           O  
HETATM  403  O   HOH T 402      17.350  48.664  14.634  1.00  0.48           O  
HETATM  404  O   HOH T 403      47.649  86.844  23.293  1.00  0.48           O  
HETATM  405  O   HOH T 404      41.951  51.056   6.473  1.00  0.48           O  
HETATM  406  O   HOH T 405      25.019  76.063  19.499  1.00  0.48           O  
HETATM  407  O   HOH T 406      62.911  77.444  21.995  1.00  0.48           O  
HETATM  408  O   HOH T 407      33.007  64.887 -15.225  1.00  0.48           O  
HETATM  409  O   HOH T 408      23.110  59.456  20.182  1.00  0.48           O  
HETATM  410  O   HOH T 409      68.975  68.124  -4.198  1.00  0.48           O  
HETATM  411  O   HOH T 410      62.045  55.841 -12.369  1.00  0.48           O  
HETATM  412  O   HOH T 411      19.619  49.542  17.820  1.00  0.48           O  
HETATM  413  O   HOH T 412      53.748  83.819   6.635  1.00  0.48           O  
HETATM  414  O   HOH T 413      51.502  68.086  -6.804  1.00  0.48           O  
HETATM  415  O   HOH T 414      48.216  57.993 -14.848  1.00  0.48           O  
HETATM  416  O   HOH T 415      23.998  51.458  -0.148  1.00  0.48           O  
HETATM  417  O   HOH T 416      56.591  86.225  41.617  1.00  0.48           O  
HETATM  418  O   HOH T 417      35.684  57.281 -11.617  1.00  0.48           O  
HETATM  419  O   HOH T 418      57.712  91.698  24.224  1.00  0.48           O  
HETATM  420  O   HOH T 419      41.309  68.255 -19.370  1.00  0.48           O  
HETATM  421  O   HOH T 420      60.038  51.666   3.840  1.00  0.48           O  
HETATM  422  O   HOH T 421      68.871  59.081   5.813  1.00  0.48           O  
HETATM  423  O   HOH T 422      54.467  55.769  26.921  1.00  0.48           O  
HETATM  424  O   HOH T 423      73.226  74.509   9.467  1.00  0.49           O  
HETATM  425  O   HOH T 424      41.366  80.193  41.843  1.00  0.49           O  
HETATM  426  O   HOH T 425      41.983  65.500 -19.637  1.00  0.49           O  
HETATM  427  O   HOH T 426      18.045  62.508   9.536  1.00  0.49           O  
HETATM  428  O   HOH T 427      63.130  52.742  23.425  1.00  0.49           O  
HETATM  429  O   HOH T 428      58.542  48.441  19.458  1.00  0.49           O  
HETATM  430  O   HOH T 429      42.178  52.397   8.940  1.00  0.49           O  
HETATM  431  O   HOH T 430      28.945  69.666  -0.808  1.00  0.49           O  
HETATM  432  O   HOH T 431      25.773  52.241  21.049  1.00  0.49           O  
HETATM  433  O   HOH T 432      36.393  43.666   7.848  1.00  0.49           O  
HETATM  434  O   HOH T 433      68.960  61.408  17.121  1.00  0.49           O  
HETATM  435  O   HOH T 434      62.398  83.172  13.937  1.00  0.49           O  
HETATM  436  O   HOH T 435      39.205  44.973  25.765  1.00  0.49           O  
HETATM  437  O   HOH T 436      29.963  72.857  36.485  1.00  0.49           O  
HETATM  438  O   HOH T 437      38.986  44.524   8.109  1.00  0.49           O  
HETATM  439  O   HOH T 438      58.483  89.102  24.178  1.00  0.49           O  
HETATM  440  O   HOH T 439      24.237  85.395  21.107  1.00  0.49           O  
HETATM  441  O   HOH T 440      60.288  49.848  21.373  1.00  0.49           O  
HETATM  442  O   HOH T 441      37.226  51.491  14.595  1.00  0.49           O  
HETATM  443  O   HOH T 442      66.143  68.457  43.329  1.00  0.49           O  
HETATM  444  O   HOH T 443      48.895  60.311  17.858  1.00  0.49           O  
HETATM  445  O   HOH T 444      63.181  85.833  14.663  1.00  0.49           O  
HETATM  446  O   HOH T 445      57.636  83.627  41.697  1.00  0.49           O  
HETATM  447  O   HOH T 446      23.775  55.068  18.976  1.00  0.49           O  
HETATM  448  O   HOH T 447      54.554  50.357   9.887  1.00  0.49           O  
HETATM  449  O   HOH T 448      31.397  63.295  23.029  1.00  0.49           O  
HETATM  450  O   HOH T 449      22.617  51.987   2.235  1.00  0.50           O  
HETATM  451  O   HOH T 450      66.419  69.610  40.952  1.00  0.50           O  
HETATM  452  O   HOH T 451      66.411  76.146  43.945  1.00  0.50           O  
HETATM  453  O   HOH T 452      38.046  83.345  24.406  1.00  0.50           O  
HETATM  454  O   HOH T 453      55.721  89.711  24.142  1.00  0.50           O  
HETATM  455  O   HOH T 454      25.055  53.617  17.087  1.00  0.50           O  
HETATM  456  O   HOH T 455      67.466  81.233  25.391  1.00  0.50           O  
HETATM  457  O   HOH T 456      44.541  62.361 -19.416  1.00  0.50           O  
HETATM  458  O   HOH T 457      49.291  69.672  -6.080  1.00  0.50           O  
HETATM  459  O   HOH T 458      32.623  65.657  -5.833  1.00  0.50           O  
HETATM  460  O   HOH T 459      39.587  42.881  -3.441  1.00  0.50           O  
HETATM  461  O   HOH T 460      27.692  83.356  30.643  1.00  0.50           O  
HETATM  462  O   HOH T 461      42.018  70.302 -14.687  1.00  0.50           O  
HETATM  463  O   HOH T 462      26.119  69.884  10.445  1.00  0.50           O  
HETATM  464  O   HOH T 463      39.746  49.492   7.344  1.00  0.50           O  
HETATM  465  O   HOH T 464      76.131  68.022  22.101  1.00  0.50           O  
HETATM  466  O   HOH T 465      62.403  69.700  39.502  1.00  0.50           O  
HETATM  467  O   HOH T 466      68.205  59.849   8.315  1.00  0.50           O  
HETATM  468  O   HOH T 467      19.566  62.306   7.064  1.00  0.50           O  
HETATM  469  O   HOH T 468      42.214  47.065 -12.223  1.00  0.50           O  
HETATM  470  O   HOH T 469      37.380  42.953  -1.737  1.00  0.50           O  
HETATM  471  O   HOH T 470      23.340  84.596  18.686  1.00  0.50           O  
HETATM  472  O   HOH T 471      67.222  74.994  41.496  1.00  0.50           O  
HETATM  473  O   HOH T 472      56.696  76.054   4.054  1.00  0.50           O  
HETATM  474  O   HOH T 473      67.983  78.635   9.675  1.00  0.51           O  
HETATM  475  O   HOH T 474      54.205  52.647   3.379  1.00  0.51           O  
HETATM  476  O   HOH T 475      77.088  73.830  31.678  1.00  0.51           O  
HETATM  477  O   HOH T 476      69.660  61.401  23.575  1.00  0.51           O  
HETATM  478  O   HOH T 477      40.281  46.549 -16.672  1.00  0.51           O  
HETATM  479  O   HOH T 478      53.542  72.768  -5.659  1.00  0.51           O  
HETATM  480  O   HOH T 479      52.789  45.968  12.186  1.00  0.51           O  
HETATM  481  O   HOH T 480      59.833  74.553  21.087  1.00  0.51           O  
HETATM  482  O   HOH T 481      44.598  80.340   3.172  1.00  0.51           O  
HETATM  483  O   HOH T 482      49.998  45.817  12.730  1.00  0.51           O  
HETATM  484  O   HOH T 483      30.391  43.338   9.940  1.00  0.51           O  
HETATM  485  O   HOH T 484      46.026  94.418  28.488  1.00  0.51           O  
HETATM  486  O   HOH T 485      67.272  60.736  10.890  1.00  0.51           O  
HETATM  487  O   HOH T 486      35.238  66.664  -6.395  1.00  0.51           O  
HETATM  488  O   HOH T 487      39.511  84.163  13.650  1.00  0.51           O  
HETATM  489  O   HOH T 488      63.283  78.544  -5.667  1.00  0.51           O  
HETATM  490  O   HOH T 489      62.096  68.796  28.669  1.00  0.51           O  
HETATM  491  O   HOH T 490      41.174  85.185  16.221  1.00  0.51           O  
HETATM  492  O   HOH T 491      42.108  48.320   6.296  1.00  0.52           O  
HETATM  493  O   HOH T 492      62.666  43.046  10.592  1.00  0.52           O  
HETATM  494  O   HOH T 493      44.506  92.101  27.819  1.00  0.52           O  
HETATM  495  O   HOH T 494      34.640  72.749  -4.066  1.00  0.52           O  
HETATM  496  O   HOH T 495      71.240  81.974  20.158  1.00  0.52           O  
HETATM  497  O   HOH T 496      69.795  79.300  -8.161  1.00  0.52           O  
HETATM  498  O   HOH T 497      26.703  68.021  -0.858  1.00  0.52           O  
HETATM  499  O   HOH T 498      57.378  67.245  33.970  1.00  0.52           O  
HETATM  500  O   HOH T 499      19.722  44.565  12.373  1.00  0.52           O  
HETATM  501  O   HOH T 500      54.154  85.053  42.383  1.00  0.52           O  
HETATM  502  O   HOH T 501      68.925  59.004  18.553  1.00  0.52           O  
HETATM  503  O   HOH T 502      48.470  76.064  38.243  1.00  0.52           O  
HETATM  504  O   HOH T 503      57.466  86.781  20.231  1.00  0.52           O  
HETATM  505  O   HOH T 504      48.449  90.577  23.412  1.00  0.53           O  
HETATM  506  O   HOH T 505      68.070  62.490   8.980  1.00  0.53           O  
HETATM  507  O   HOH T 506      49.349  95.125  25.116  1.00  0.53           O  
HETATM  508  O   HOH T 507      50.178  63.281  19.502  1.00  0.53           O  
HETATM  509  O   HOH T 508      55.880  69.454  34.843  1.00  0.53           O  
HETATM  510  O   HOH T 509      23.825  71.400  18.838  1.00  0.53           O  
HETATM  511  O   HOH T 510      31.423  81.968  23.354  1.00  0.53           O  
HETATM  512  O   HOH T 511      49.349  81.809  -2.360  1.00  0.53           O  
HETATM  513  O   HOH T 512      48.241  73.944  39.814  1.00  0.53           O  
HETATM  514  O   HOH T 513      40.252  70.998  -7.557  1.00  0.53           O  
HETATM  515  O   HOH T 514      27.664  54.581  17.166  1.00  0.53           O  
HETATM  516  O   HOH T 515      41.495  62.294  34.077  1.00  0.53           O  
HETATM  517  O   HOH T 516      46.931  60.538  30.025  1.00  0.53           O  
HETATM  518  O   HOH T 517      54.580  91.535  32.744  1.00  0.53           O  
HETATM  519  O   HOH T 518      67.888  63.702  11.513  1.00  0.53           O  
HETATM  520  O   HOH T 519      27.555  57.343   1.264  1.00  0.53           O  
HETATM  521  O   HOH T 520      68.066  65.481  26.649  1.00  0.53           O  
HETATM  522  O   HOH T 521      59.034  90.776  26.504  1.00  0.53           O  
HETATM  523  O   HOH T 522      73.089  80.420  14.009  1.00  0.53           O  
HETATM  524  O   HOH T 523      37.287  41.360  -3.940  1.00  0.53           O  
HETATM  525  O   HOH T 524      69.134  60.789   0.914  1.00  0.53           O  
HETATM  526  O   HOH T 525      29.886  69.697   9.121  1.00  0.54           O  
HETATM  527  O   HOH T 526      53.948  68.196  -7.985  1.00  0.54           O  
HETATM  528  O   HOH T 527      56.113  63.374 -10.224  1.00  0.54           O  
HETATM  529  O   HOH T 528      27.476  50.906  -2.495  1.00  0.54           O  
HETATM  530  O   HOH T 529      56.940  64.146  27.793  1.00  0.54           O  
HETATM  531  O   HOH T 530      56.782  80.374   8.891  1.00  0.54           O  
HETATM  532  O   HOH T 531      55.254  68.220  32.472  1.00  0.54           O  
HETATM  533  O   HOH T 532      34.023  61.471   7.839  1.00  0.54           O  
HETATM  534  O   HOH T 533      33.998  74.715   8.661  1.00  0.54           O  
HETATM  535  O   HOH T 534      41.549  45.584  24.472  1.00  0.54           O  
HETATM  536  O   HOH T 535      59.123  47.790   8.103  1.00  0.54           O  
HETATM  537  O   HOH T 536      40.312  84.216  10.441  1.00  0.54           O  
HETATM  538  O   HOH T 537      48.484  52.484   5.677  1.00  0.54           O  
HETATM  539  O   HOH T 538      69.301  75.920  40.030  1.00  0.54           O  
HETATM  540  O   HOH T 539      23.438  50.352  17.918  1.00  0.54           O  
HETATM  541  O   HOH T 540      50.187  46.699  17.857  1.00  0.54           O  
HETATM  542  O   HOH T 541      45.288  76.146  41.395  1.00  0.54           O  
HETATM  543  O   HOH T 542      37.137  48.412  23.691  1.00  0.54           O  
HETATM  544  O   HOH T 543      50.406  62.344  16.851  1.00  0.54           O  
HETATM  545  O   HOH T 544      26.023  66.117  25.350  1.00  0.54           O  
HETATM  546  O   HOH T 545      20.853  81.983  25.622  1.00  0.55           O  
HETATM  547  O   HOH T 546      55.771  83.472   2.476  1.00  0.55           O  
HETATM  548  O   HOH T 547      37.230  84.198  22.032  1.00  0.55           O  
HETATM  549  O   HOH T 548      38.894  81.926  31.287  1.00  0.55           O  
HETATM  550  O   HOH T 549      67.466  60.461  -1.247  1.00  0.55           O  
HETATM  551  O   HOH T 550      59.470  89.244  34.230  1.00  0.55           O  
HETATM  552  O   HOH T 551      36.117  80.517  33.876  1.00  0.55           O  
HETATM  553  O   HOH T 552      54.492  47.316  22.974  1.00  0.55           O  
HETATM  554  O   HOH T 553      46.934  95.812  33.167  1.00  0.55           O  
HETATM  555  O   HOH T 554      18.541  62.396  20.253  1.00  0.55           O  
HETATM  556  O   HOH T 555      51.342  67.967  31.686  1.00  0.55           O  
HETATM  557  O   HOH T 556      33.293  59.822  25.934  1.00  0.56           O  
HETATM  558  O   HOH T 557      33.991  69.688 -12.323  1.00  0.56           O  
HETATM  559  O   HOH T 558      68.028  64.694  -6.017  1.00  0.56           O  
HETATM  560  O   HOH T 559      28.386  69.861   1.888  1.00  0.56           O  
HETATM  561  O   HOH T 560      36.277  68.818 -12.620  1.00  0.56           O  
HETATM  562  O   HOH T 561      24.976  55.910  21.167  1.00  0.56           O  
HETATM  563  O   HOH T 562      56.572  68.757  -7.948  1.00  0.56           O  
HETATM  564  O   HOH T 563      51.877  51.729   2.401  1.00  0.56           O  
HETATM  565  O   HOH T 564      15.278  56.677  15.421  1.00  0.56           O  
HETATM  566  O   HOH T 565      58.358  64.826  25.221  1.00  0.56           O  
HETATM  567  O   HOH T 566      49.155  96.557  30.910  1.00  0.56           O  
HETATM  568  O   HOH T 567      66.216  82.433  28.746  1.00  0.56           O  
HETATM  569  O   HOH T 568      41.438  79.376   2.913  1.00  0.56           O  
HETATM  570  O   HOH T 569      56.750  85.859  11.321  1.00  0.56           O  
HETATM  571  O   HOH T 570      35.679  76.072  41.207  1.00  0.56           O  
HETATM  572  O   HOH T 571      25.800  72.063  27.682  1.00  0.56           O  
HETATM  573  O   HOH T 572      63.984  88.247  17.839  1.00  0.56           O  
HETATM  574  O   HOH T 573      43.003  74.408  41.534  1.00  0.56           O  
HETATM  575  O   HOH T 574      48.643  78.046  -1.747  1.00  0.56           O  
HETATM  576  O   HOH T 575      46.979  45.318  -4.860  1.00  0.56           O  
HETATM  577  O   HOH T 576      58.337  50.185   7.252  1.00  0.57           O  
HETATM  578  O   HOH T 577      59.906  87.479  20.728  1.00  0.57           O  
HETATM  579  O   HOH T 578      53.351  52.786  31.414  1.00  0.57           O  
HETATM  580  O   HOH T 579      72.925  72.788  32.362  1.00  0.57           O  
HETATM  581  O   HOH T 580      36.207  71.536 -12.093  1.00  0.57           O  
HETATM  582  O   HOH T 581      33.076  76.165   2.462  1.00  0.57           O  
HETATM  583  O   HOH T 582      34.641  69.073  -7.985  1.00  0.57           O  
HETATM  584  O   HOH T 583      71.206  71.285  -2.399  1.00  0.57           O  
HETATM  585  O   HOH T 584      52.465  93.259  23.460  1.00  0.58           O  
HETATM  586  O   HOH T 585      17.728  64.004  12.032  1.00  0.58           O  
HETATM  587  O   HOH T 586      36.556  40.264   0.557  1.00  0.58           O  
HETATM  588  O   HOH T 587      30.800  65.500  33.123  1.00  0.59           O  
HETATM  589  O   HOH T 588      56.726  67.953  30.155  1.00  0.60           O  
HETATM  590  O   HOH T 589      31.589  72.226   5.690  1.00  0.60           O  
HETATM  591  O   HOH T 590      53.563  64.530  -9.703  1.00  0.60           O  
HETATM  592  O   HOH T 591      68.206  81.981  40.471  1.00  0.61           O  
HETATM  593  O   HOH T 592      50.991  51.118  -0.126  1.00  0.63           O  
HETATM  594  O   HOH T 593      38.811  77.671  43.811  1.00  0.63           O  
TER     595      HOH T 593 
