# Supplementary material for: Accurate Prediction of Hydration Sites of Proteins Using Energy Model With Atom Embedding
Source: Front Mol Biosci. 2021 Sep 20;8:756075. doi: 10.3389/fmolb.2021.756075 (PMC8488165; doi:10.3389/fmolb.2021.756075)
Supplement: Supplementary file 1 [file DataSheet1.ZIP › Data Sheet 1/Our_result_pdb/our_dataset_output/2IA1_watersite.pdb]

HEADER                                                        XXXX


JRNL        PMID   -1
HETATM    1  O   HOH T   0      29.780   8.933  11.307  1.00  0.19           O  
HETATM    2  O   HOH T   1      -4.851  13.811  26.386  1.00  0.19           O  
HETATM    3  O   HOH T   2      13.925  33.837  27.638  1.00  0.20           O  
HETATM    4  O   HOH T   3      18.683  10.325  24.389  1.00  0.20           O  
HETATM    5  O   HOH T   4      34.602  -2.235  26.597  1.00  0.20           O  
HETATM    6  O   HOH T   5      22.674  24.799  28.695  1.00  0.21           O  
HETATM    7  O   HOH T   6      16.642  36.512  21.129  1.00  0.22           O  
HETATM    8  O   HOH T   7       4.926  35.159  10.209  1.00  0.22           O  
HETATM    9  O   HOH T   8       0.033  42.715  17.068  1.00  0.22           O  
HETATM   10  O   HOH T   9      23.379  18.562  -1.276  1.00  0.22           O  
HETATM   11  O   HOH T  10      36.700  12.012   3.502  1.00  0.23           O  
HETATM   12  O   HOH T  11      17.015  19.395  14.771  1.00  0.23           O  
HETATM   13  O   HOH T  12      -5.919  23.611  33.434  1.00  0.23           O  
HETATM   14  O   HOH T  13      18.025  21.224  16.604  1.00  0.24           O  
HETATM   15  O   HOH T  14       1.063  49.881  22.539  1.00  0.24           O  
HETATM   16  O   HOH T  15       4.379  16.326  -6.718  1.00  0.24           O  
HETATM   17  O   HOH T  16      34.751   3.167  19.884  1.00  0.24           O  
HETATM   18  O   HOH T  17      41.754  25.261  31.641  1.00  0.24           O  
HETATM   19  O   HOH T  18      -0.848  18.765  36.025  1.00  0.25           O  
HETATM   20  O   HOH T  19      -0.896  31.050  34.043  1.00  0.25           O  
HETATM   21  O   HOH T  20     -22.168  48.427  29.101  1.00  0.25           O  
HETATM   22  O   HOH T  21      16.931  23.786  16.419  1.00  0.25           O  
HETATM   23  O   HOH T  22      21.638  18.694   5.770  1.00  0.25           O  
HETATM   24  O   HOH T  23      12.407  37.040  13.271  1.00  0.26           O  
HETATM   25  O   HOH T  24      36.938  30.614  33.087  1.00  0.26           O  
HETATM   26  O   HOH T  25      17.442  31.121  16.163  1.00  0.26           O  
HETATM   27  O   HOH T  26      44.733  24.423  13.061  1.00  0.26           O  
HETATM   28  O   HOH T  27      12.548  23.923   5.626  1.00  0.26           O  
HETATM   29  O   HOH T  28      33.154  32.717  26.353  1.00  0.27           O  
HETATM   30  O   HOH T  29     -16.306  46.807  25.191  1.00  0.27           O  
HETATM   31  O   HOH T  30      13.146  29.263  19.413  1.00  0.27           O  
HETATM   32  O   HOH T  31      37.400  17.851  33.941  1.00  0.27           O  
HETATM   33  O   HOH T  32      17.656  25.150  14.107  1.00  0.27           O  
HETATM   34  O   HOH T  33      38.326   9.735  15.884  1.00  0.27           O  
HETATM   35  O   HOH T  34       6.861  28.639  33.052  1.00  0.28           O  
HETATM   36  O   HOH T  35      -4.839  13.831  23.601  1.00  0.28           O  
HETATM   37  O   HOH T  36      31.350 -12.019  27.211  1.00  0.28           O  
HETATM   38  O   HOH T  37      38.661  12.388  16.506  1.00  0.28           O  
HETATM   39  O   HOH T  38      12.962  12.184   7.257  1.00  0.28           O  
HETATM   40  O   HOH T  39      17.337  14.190  18.012  1.00  0.28           O  
HETATM   41  O   HOH T  40      35.179  31.567  15.283  1.00  0.29           O  
HETATM   42  O   HOH T  41      31.825  12.419  14.588  1.00  0.29           O  
HETATM   43  O   HOH T  42      13.975  17.958   5.310  1.00  0.29           O  
HETATM   44  O   HOH T  43      15.251  30.829  17.889  1.00  0.29           O  
HETATM   45  O   HOH T  44      26.935  -1.375  16.452  1.00  0.29           O  
HETATM   46  O   HOH T  45      52.712  -1.189  29.394  1.00  0.29           O  
HETATM   47  O   HOH T  46      38.737  16.478  14.797  1.00  0.29           O  
HETATM   48  O   HOH T  47       0.620  15.296  36.473  1.00  0.29           O  
HETATM   49  O   HOH T  48      18.650  17.305  10.570  1.00  0.29           O  
HETATM   50  O   HOH T  49      22.114  16.610  20.724  1.00  0.29           O  
HETATM   51  O   HOH T  50      30.007  -7.985  25.300  1.00  0.29           O  
HETATM   52  O   HOH T  51     -16.867  45.713  22.717  1.00  0.30           O  
HETATM   53  O   HOH T  52      11.601  14.767  13.760  1.00  0.30           O  
HETATM   54  O   HOH T  53      -7.703  25.753  12.198  1.00  0.30           O  
HETATM   55  O   HOH T  54      36.273  -0.016  26.843  1.00  0.30           O  
HETATM   56  O   HOH T  55      12.006  29.177   1.403  1.00  0.30           O  
HETATM   57  O   HOH T  56      16.745  14.551  15.321  1.00  0.30           O  
HETATM   58  O   HOH T  57      27.850   2.368   9.085  1.00  0.30           O  
HETATM   59  O   HOH T  58      21.853  14.220  29.678  1.00  0.30           O  
HETATM   60  O   HOH T  59      30.760  18.514  -7.253  1.00  0.30           O  
HETATM   61  O   HOH T  60       2.368  13.636   6.104  1.00  0.30           O  
HETATM   62  O   HOH T  61      39.041  16.332  17.541  1.00  0.30           O  
HETATM   63  O   HOH T  62      -3.583  34.758  14.932  1.00  0.30           O  
HETATM   64  O   HOH T  63      25.473  31.604  28.151  1.00  0.30           O  
HETATM   65  O   HOH T  64      14.076  27.590   5.160  1.00  0.30           O  
HETATM   66  O   HOH T  65      19.569  14.651  19.571  1.00  0.30           O  
HETATM   67  O   HOH T  66      23.568  24.308   2.091  1.00  0.31           O  
HETATM   68  O   HOH T  67      36.173  33.250  33.087  1.00  0.31           O  
HETATM   69  O   HOH T  68      24.807  11.966  28.265  1.00  0.31           O  
HETATM   70  O   HOH T  69      -4.994  33.355  12.985  1.00  0.31           O  
HETATM   71  O   HOH T  70      40.495  14.841  19.483  1.00  0.31           O  
HETATM   72  O   HOH T  71       7.621  34.817  10.171  1.00  0.31           O  
HETATM   73  O   HOH T  72      35.566   8.757  35.787  1.00  0.31           O  
HETATM   74  O   HOH T  73      11.293  13.519  33.358  1.00  0.31           O  
HETATM   75  O   HOH T  74      24.027  20.663  22.035  1.00  0.31           O  
HETATM   76  O   HOH T  75       2.782  32.108  13.589  1.00  0.32           O  
HETATM   77  O   HOH T  76      14.006  43.147  11.731  1.00  0.32           O  
HETATM   78  O   HOH T  77      21.671  12.706   2.930  1.00  0.32           O  
HETATM   79  O   HOH T  78      18.365  33.448  32.230  1.00  0.32           O  
HETATM   80  O   HOH T  79     -10.129  19.639  16.104  1.00  0.32           O  
HETATM   81  O   HOH T  80      17.613  37.045  31.805  1.00  0.32           O  
HETATM   82  O   HOH T  81      29.628  -9.513  17.988  1.00  0.33           O  
HETATM   83  O   HOH T  82       3.101  14.648  28.703  1.00  0.33           O  
HETATM   84  O   HOH T  83      21.078  30.658   4.885  1.00  0.33           O  
HETATM   85  O   HOH T  84      15.896  44.603  35.222  1.00  0.33           O  
HETATM   86  O   HOH T  85      10.378  17.649   3.438  1.00  0.33           O  
HETATM   87  O   HOH T  86      35.257  31.563  35.048  1.00  0.33           O  
HETATM   88  O   HOH T  87       2.631  27.001  -7.829  1.00  0.33           O  
HETATM   89  O   HOH T  88       0.402  41.590  33.064  1.00  0.34           O  
HETATM   90  O   HOH T  89      15.330  25.560  29.038  1.00  0.34           O  
HETATM   91  O   HOH T  90      21.110   7.330  12.164  1.00  0.34           O  
HETATM   92  O   HOH T  91       3.408  21.035  -6.511  1.00  0.34           O  
HETATM   93  O   HOH T  92      31.454  34.535  27.469  1.00  0.34           O  
HETATM   94  O   HOH T  93      34.026  35.528  23.451  1.00  0.34           O  
HETATM   95  O   HOH T  94      15.756  26.152   9.589  1.00  0.34           O  
HETATM   96  O   HOH T  95      39.799  18.973  33.341  1.00  0.34           O  
HETATM   97  O   HOH T  96       1.723  11.024   0.497  1.00  0.34           O  
HETATM   98  O   HOH T  97      37.149  11.983  33.001  1.00  0.34           O  
HETATM   99  O   HOH T  98      -4.631  17.470  18.363  1.00  0.34           O  
HETATM  100  O   HOH T  99       7.781  11.887  27.972  1.00  0.34           O  
HETATM  101  O   HOH T 100      29.261  20.850  -7.872  1.00  0.34           O  
HETATM  102  O   HOH T 101      -0.353  37.091  32.017  1.00  0.34           O  
HETATM  103  O   HOH T 102      -1.834  25.992   5.232  1.00  0.34           O  
HETATM  104  O   HOH T 103      40.741  30.046  11.351  1.00  0.34           O  
HETATM  105  O   HOH T 104      27.934   8.277  13.275  1.00  0.34           O  
HETATM  106  O   HOH T 105      24.902  33.905  29.872  1.00  0.34           O  
HETATM  107  O   HOH T 106      53.161   0.389  27.129  1.00  0.35           O  
HETATM  108  O   HOH T 107      26.929   0.317  14.262  1.00  0.35           O  
HETATM  109  O   HOH T 108      11.412  25.131   3.491  1.00  0.35           O  
HETATM  110  O   HOH T 109       2.390  40.057  34.118  1.00  0.35           O  
HETATM  111  O   HOH T 110       2.459  10.640  26.540  1.00  0.35           O  
HETATM  112  O   HOH T 111      10.969  35.703  26.158  1.00  0.35           O  
HETATM  113  O   HOH T 112      31.131   8.635  30.265  1.00  0.35           O  
HETATM  114  O   HOH T 113      22.576  16.994   3.748  1.00  0.35           O  
HETATM  115  O   HOH T 114       5.537  13.466  28.363  1.00  0.35           O  
HETATM  116  O   HOH T 115      12.184  29.955  22.025  1.00  0.35           O  
HETATM  117  O   HOH T 116       9.564  17.058  38.992  1.00  0.35           O  
HETATM  118  O   HOH T 117       8.310  23.618  34.772  1.00  0.35           O  
HETATM  119  O   HOH T 118      18.971  11.968  34.925  1.00  0.36           O  
HETATM  120  O   HOH T 119      14.277  13.940  13.890  1.00  0.36           O  
HETATM  121  O   HOH T 120      -0.333  47.537  23.349  1.00  0.36           O  
HETATM  122  O   HOH T 121      42.948  18.241  22.555  1.00  0.36           O  
HETATM  123  O   HOH T 122       8.710  15.823   9.585  1.00  0.36           O  
HETATM  124  O   HOH T 123       8.024  14.538   5.615  1.00  0.36           O  
HETATM  125  O   HOH T 124       9.850  14.332  11.715  1.00  0.36           O  
HETATM  126  O   HOH T 125      -6.171  29.038  21.168  1.00  0.36           O  
HETATM  127  O   HOH T 126      17.594  16.383  34.228  1.00  0.36           O  
HETATM  128  O   HOH T 127      24.927  32.630  25.658  1.00  0.36           O  
HETATM  129  O   HOH T 128      31.630   2.430  13.610  1.00  0.36           O  
HETATM  130  O   HOH T 129      23.060  16.756  23.323  1.00  0.36           O  
HETATM  131  O   HOH T 130      31.549  17.545  22.899  1.00  0.36           O  
HETATM  132  O   HOH T 131      -5.613  34.120  24.400  1.00  0.36           O  
HETATM  133  O   HOH T 132      -4.388  54.130  14.650  1.00  0.37           O  
HETATM  134  O   HOH T 133      12.210  17.082  39.673  1.00  0.37           O  
HETATM  135  O   HOH T 134      21.917  18.984  22.027  1.00  0.37           O  
HETATM  136  O   HOH T 135      32.130  -9.365  26.585  1.00  0.37           O  
HETATM  137  O   HOH T 136      41.206  19.322   9.934  1.00  0.37           O  
HETATM  138  O   HOH T 137      12.193  11.241  28.343  1.00  0.37           O  
HETATM  139  O   HOH T 138      21.722  35.382  17.596  1.00  0.37           O  
HETATM  140  O   HOH T 139      20.474  24.536   4.651  1.00  0.37           O  
HETATM  141  O   HOH T 140      14.665  16.090  38.837  1.00  0.37           O  
HETATM  142  O   HOH T 141      10.543  23.358  22.918  1.00  0.37           O  
HETATM  143  O   HOH T 142      38.333  11.218   9.013  1.00  0.37           O  
HETATM  144  O   HOH T 143      10.326  53.637  24.837  1.00  0.37           O  
HETATM  145  O   HOH T 144      38.750  30.862   5.517  1.00  0.37           O  
HETATM  146  O   HOH T 145       1.637  11.635  12.171  1.00  0.37           O  
HETATM  147  O   HOH T 146      14.258  11.456  23.586  1.00  0.38           O  
HETATM  148  O   HOH T 147      33.306   6.121   8.190  1.00  0.38           O  
HETATM  149  O   HOH T 148       7.462  21.769  -6.466  1.00  0.38           O  
HETATM  150  O   HOH T 149       9.457  13.009  14.209  1.00  0.38           O  
HETATM  151  O   HOH T 150      20.865   6.052  14.632  1.00  0.38           O  
HETATM  152  O   HOH T 151      40.961  29.883  15.001  1.00  0.38           O  
HETATM  153  O   HOH T 152      33.648   6.327  12.277  1.00  0.38           O  
HETATM  154  O   HOH T 153       5.110  39.589  27.918  1.00  0.38           O  
HETATM  155  O   HOH T 154      37.625  29.648  17.442  1.00  0.38           O  
HETATM  156  O   HOH T 155      34.087  15.687  19.177  1.00  0.38           O  
HETATM  157  O   HOH T 156      34.015  -4.076  14.568  1.00  0.38           O  
HETATM  158  O   HOH T 157      57.661  -4.110  36.591  1.00  0.38           O  
HETATM  159  O   HOH T 158      23.028  14.873   2.016  1.00  0.38           O  
HETATM  160  O   HOH T 159      -6.396  10.162  21.029  1.00  0.38           O  
HETATM  161  O   HOH T 160      30.115  26.965  33.463  1.00  0.38           O  
HETATM  162  O   HOH T 161       0.035  21.245  40.826  1.00  0.38           O  
HETATM  163  O   HOH T 162      13.396  10.464  21.065  1.00  0.38           O  
HETATM  164  O   HOH T 163      12.124  12.211  14.675  1.00  0.38           O  
HETATM  165  O   HOH T 164      34.963  36.431  18.731  1.00  0.38           O  
HETATM  166  O   HOH T 165      20.242  14.975   6.168  1.00  0.38           O  
HETATM  167  O   HOH T 166      34.813  27.885  35.999  1.00  0.39           O  
HETATM  168  O   HOH T 167      36.662  16.770  18.977  1.00  0.39           O  
HETATM  169  O   HOH T 168      25.800  23.596  -1.971  1.00  0.39           O  
HETATM  170  O   HOH T 169      -7.538  28.112  23.391  1.00  0.39           O  
HETATM  171  O   HOH T 170      27.471   4.098   6.986  1.00  0.39           O  
HETATM  172  O   HOH T 171      32.431  25.612  34.016  1.00  0.39           O  
HETATM  173  O   HOH T 172      42.875  29.353  12.982  1.00  0.39           O  
HETATM  174  O   HOH T 173      25.082  34.415  23.481  1.00  0.39           O  
HETATM  175  O   HOH T 174      14.099  44.631  37.429  1.00  0.39           O  
HETATM  176  O   HOH T 175      41.315  12.964  24.490  1.00  0.39           O  
HETATM  177  O   HOH T 176      27.471   1.550  11.786  1.00  0.39           O  
HETATM  178  O   HOH T 177       3.291  24.547  -7.850  1.00  0.39           O  
HETATM  179  O   HOH T 178      -3.559  16.498  15.960  1.00  0.40           O  
HETATM  180  O   HOH T 179      37.286   6.557  34.876  1.00  0.40           O  
HETATM  181  O   HOH T 180       7.413  13.475  33.964  1.00  0.40           O  
HETATM  182  O   HOH T 181       2.896  54.377  23.872  1.00  0.40           O  
HETATM  183  O   HOH T 182      19.338  14.082   3.640  1.00  0.40           O  
HETATM  184  O   HOH T 183      -4.325  30.765  20.061  1.00  0.40           O  
HETATM  185  O   HOH T 184      26.515  21.288  -8.074  1.00  0.40           O  
HETATM  186  O   HOH T 185      17.806  29.972  13.664  1.00  0.40           O  
HETATM  187  O   HOH T 186      11.181  36.599   7.911  1.00  0.40           O  
HETATM  188  O   HOH T 187       9.603  33.330   8.917  1.00  0.40           O  
HETATM  189  O   HOH T 188      13.051  11.353   9.730  1.00  0.41           O  
HETATM  190  O   HOH T 189      -2.250  53.810  12.958  1.00  0.41           O  
HETATM  191  O   HOH T 190      34.363  38.617  20.313  1.00  0.41           O  
HETATM  192  O   HOH T 191       3.758  29.037  22.669  1.00  0.41           O  
HETATM  193  O   HOH T 192      19.497  33.121  34.727  1.00  0.41           O  
HETATM  194  O   HOH T 193      31.557  15.811  -6.651  1.00  0.41           O  
HETATM  195  O   HOH T 194      24.377  17.373  14.478  1.00  0.41           O  
HETATM  196  O   HOH T 195       4.443  18.743  -5.439  1.00  0.41           O  
HETATM  197  O   HOH T 196      21.269  15.200  32.430  1.00  0.41           O  
HETATM  198  O   HOH T 197       7.195  18.359  38.267  1.00  0.41           O  
HETATM  199  O   HOH T 198       5.738  19.505  36.307  1.00  0.41           O  
HETATM  200  O   HOH T 199      -4.077  27.587   6.189  1.00  0.41           O  
HETATM  201  O   HOH T 200      -5.771  31.822   7.078  1.00  0.41           O  
HETATM  202  O   HOH T 201      -3.990  16.196  13.218  1.00  0.41           O  
HETATM  203  O   HOH T 202      24.998  -4.314  31.450  1.00  0.42           O  
HETATM  204  O   HOH T 203      36.822   9.405   7.543  1.00  0.42           O  
HETATM  205  O   HOH T 204      20.795   6.404   9.638  1.00  0.42           O  
HETATM  206  O   HOH T 205      44.486  23.481   0.322  1.00  0.42           O  
HETATM  207  O   HOH T 206       2.511  41.240  10.765  1.00  0.42           O  
HETATM  208  O   HOH T 207      -4.184  16.093  22.001  1.00  0.42           O  
HETATM  209  O   HOH T 208      26.657  18.627  -7.269  1.00  0.42           O  
HETATM  210  O   HOH T 209      37.122  32.348  17.300  1.00  0.42           O  
HETATM  211  O   HOH T 210      -3.230  29.854  33.235  1.00  0.42           O  
HETATM  212  O   HOH T 211     -17.937  49.004  19.385  1.00  0.42           O  
HETATM  213  O   HOH T 212      -0.090  29.445  19.295  1.00  0.42           O  
HETATM  214  O   HOH T 213      24.557  14.145  29.898  1.00  0.42           O  
HETATM  215  O   HOH T 214      20.221   7.731   7.296  1.00  0.42           O  
HETATM  216  O   HOH T 215      20.209  37.392  16.387  1.00  0.42           O  
HETATM  217  O   HOH T 216       9.819  11.671  26.052  1.00  0.42           O  
HETATM  218  O   HOH T 217      -5.440  12.744  21.100  1.00  0.42           O  
HETATM  219  O   HOH T 218      39.605   7.360  33.671  1.00  0.42           O  
HETATM  220  O   HOH T 219      27.306  33.165  26.834  1.00  0.43           O  
HETATM  221  O   HOH T 220      33.216  36.216  20.877  1.00  0.43           O  
HETATM  222  O   HOH T 221      21.046   5.621  39.662  1.00  0.43           O  
HETATM  223  O   HOH T 222      16.523  27.448   3.825  1.00  0.43           O  
HETATM  224  O   HOH T 223       1.020  21.789  38.276  1.00  0.43           O  
HETATM  225  O   HOH T 224      -5.396  15.068  17.502  1.00  0.43           O  
HETATM  226  O   HOH T 225      -8.108  23.143  13.042  1.00  0.43           O  
HETATM  227  O   HOH T 226      19.385  36.986  20.980  1.00  0.43           O  
HETATM  228  O   HOH T 227      30.882  35.573  22.259  1.00  0.44           O  
HETATM  229  O   HOH T 228      34.070  24.370  35.776  1.00  0.44           O  
HETATM  230  O   HOH T 229      37.976  41.038  32.611  1.00  0.44           O  
HETATM  231  O   HOH T 230      14.583  12.645  11.440  1.00  0.44           O  
HETATM  232  O   HOH T 231      44.498  27.234  13.004  1.00  0.44           O  
HETATM  233  O   HOH T 232       5.660  13.067   8.575  1.00  0.44           O  
HETATM  234  O   HOH T 233       7.947  14.343  29.358  1.00  0.44           O  
HETATM  235  O   HOH T 234      10.013  25.288  36.130  1.00  0.44           O  
HETATM  236  O   HOH T 235      -2.642  29.112   2.667  1.00  0.44           O  
HETATM  237  O   HOH T 236      29.204   4.693   4.962  1.00  0.44           O  
HETATM  238  O   HOH T 237      29.008   2.074  13.881  1.00  0.44           O  
HETATM  239  O   HOH T 238      34.664  17.675  34.263  1.00  0.45           O  
HETATM  240  O   HOH T 239      11.414  15.209   3.272  1.00  0.45           O  
HETATM  241  O   HOH T 240      -2.296  33.939   6.449  1.00  0.45           O  
HETATM  242  O   HOH T 241       8.655  16.800  36.476  1.00  0.45           O  
HETATM  243  O   HOH T 242      18.024  22.654   9.800  1.00  0.45           O  
HETATM  244  O   HOH T 243      39.765  31.740  13.231  1.00  0.45           O  
HETATM  245  O   HOH T 244      23.451  -4.128  29.164  1.00  0.45           O  
HETATM  246  O   HOH T 245      62.087   5.715  31.718  1.00  0.45           O  
HETATM  247  O   HOH T 246       4.170  14.488  36.553  1.00  0.45           O  
HETATM  248  O   HOH T 247      40.899  17.113  21.011  1.00  0.45           O  
HETATM  249  O   HOH T 248      12.766  14.012   5.255  1.00  0.45           O  
HETATM  250  O   HOH T 249      17.996  26.086  28.595  1.00  0.45           O  
HETATM  251  O   HOH T 250      13.317  41.401   9.668  1.00  0.45           O  
HETATM  252  O   HOH T 251      -2.573  18.835  17.187  1.00  0.45           O  
HETATM  253  O   HOH T 252      -0.191  35.838   6.551  1.00  0.45           O  
HETATM  254  O   HOH T 253       6.979  14.659  36.291  1.00  0.45           O  
HETATM  255  O   HOH T 254       3.459  11.653   7.636  1.00  0.45           O  
HETATM  256  O   HOH T 255      10.335  12.952   6.377  1.00  0.45           O  
HETATM  257  O   HOH T 256      22.401  17.238   0.869  1.00  0.45           O  
HETATM  258  O   HOH T 257      16.124  35.865  33.812  1.00  0.45           O  
HETATM  259  O   HOH T 258      12.179  24.962  24.408  1.00  0.45           O  
HETATM  260  O   HOH T 259      41.611  17.123  18.386  1.00  0.45           O  
HETATM  261  O   HOH T 260       3.809  12.053  10.388  1.00  0.46           O  
HETATM  262  O   HOH T 261      24.080  15.296  32.506  1.00  0.46           O  
HETATM  263  O   HOH T 262      24.919  -2.489  33.347  1.00  0.46           O  
HETATM  264  O   HOH T 263      21.074  -2.805  29.668  1.00  0.46           O  
HETATM  265  O   HOH T 264      29.592  20.088  33.291  1.00  0.46           O  
HETATM  266  O   HOH T 265       6.141  21.862  34.940  1.00  0.46           O  
HETATM  267  O   HOH T 266      -3.525  30.262   6.867  1.00  0.46           O  
HETATM  268  O   HOH T 267      32.294  28.342   3.846  1.00  0.46           O  
HETATM  269  O   HOH T 268      13.843  27.446  33.247  1.00  0.46           O  
HETATM  270  O   HOH T 269      15.666  18.748  35.935  1.00  0.46           O  
HETATM  271  O   HOH T 270      18.133  19.780   9.442  1.00  0.46           O  
HETATM  272  O   HOH T 271       6.714  23.595  37.072  1.00  0.46           O  
HETATM  273  O   HOH T 272      16.530  23.964   7.887  1.00  0.46           O  
HETATM  274  O   HOH T 273      17.584  15.050   5.564  1.00  0.46           O  
HETATM  275  O   HOH T 274      14.610  29.042   0.706  1.00  0.46           O  
HETATM  276  O   HOH T 275       3.375  11.846  28.857  1.00  0.46           O  
HETATM  277  O   HOH T 276      36.229  34.955  16.792  1.00  0.46           O  
HETATM  278  O   HOH T 277      17.547  19.187  12.104  1.00  0.46           O  
HETATM  279  O   HOH T 278      21.359  -0.143  30.242  1.00  0.46           O  
HETATM  280  O   HOH T 279       2.084  30.848  -4.987  1.00  0.46           O  
HETATM  281  O   HOH T 280       4.252  23.656  35.784  1.00  0.46           O  
HETATM  282  O   HOH T 281      18.465  28.294  27.162  1.00  0.46           O  
HETATM  283  O   HOH T 282     -11.523  15.231  20.073  1.00  0.46           O  
HETATM  284  O   HOH T 283       0.809  51.248  11.294  1.00  0.47           O  
HETATM  285  O   HOH T 284      16.237  24.961  26.620  1.00  0.47           O  
HETATM  286  O   HOH T 285      11.195  25.703  21.758  1.00  0.47           O  
HETATM  287  O   HOH T 286      22.831   5.790  41.700  1.00  0.47           O  
HETATM  288  O   HOH T 287      20.517   1.060  16.818  1.00  0.47           O  
HETATM  289  O   HOH T 288       2.260  42.620  34.976  1.00  0.47           O  
HETATM  290  O   HOH T 289      15.527  13.699   4.794  1.00  0.47           O  
HETATM  291  O   HOH T 290       8.278  13.675   8.097  1.00  0.47           O  
HETATM  292  O   HOH T 291      38.479   5.252  32.552  1.00  0.47           O  
HETATM  293  O   HOH T 292      20.983  12.964  36.491  1.00  0.47           O  
HETATM  294  O   HOH T 293       5.630  40.909   6.269  1.00  0.47           O  
HETATM  295  O   HOH T 294      41.949  17.460  11.679  1.00  0.47           O  
HETATM  296  O   HOH T 295      -7.449  21.858  34.772  1.00  0.47           O  
HETATM  297  O   HOH T 296      22.635  21.117  -2.246  1.00  0.47           O  
HETATM  298  O   HOH T 297      33.497  35.538  29.184  1.00  0.47           O  
HETATM  299  O   HOH T 298      45.434  21.770  13.695  1.00  0.47           O  
HETATM  300  O   HOH T 299      22.648  35.011  22.627  1.00  0.48           O  
HETATM  301  O   HOH T 300      -3.130  30.778  35.726  1.00  0.48           O  
HETATM  302  O   HOH T 301      15.999  25.834   5.945  1.00  0.48           O  
HETATM  303  O   HOH T 302       5.744  24.040  -9.084  1.00  0.48           O  
HETATM  304  O   HOH T 303      32.666  29.695  -2.872  1.00  0.48           O  
HETATM  305  O   HOH T 304       7.324  26.023  35.852  1.00  0.48           O  
HETATM  306  O   HOH T 305       7.424  24.190  -5.190  1.00  0.48           O  
HETATM  307  O   HOH T 306      21.071  31.309  36.060  1.00  0.48           O  
HETATM  308  O   HOH T 307      16.459  21.215   7.890  1.00  0.49           O  
HETATM  309  O   HOH T 308      14.887   8.418  19.820  1.00  0.49           O  
HETATM  310  O   HOH T 309      39.025  18.779  35.957  1.00  0.49           O  
HETATM  311  O   HOH T 310      52.499   2.677  28.284  1.00  0.49           O  
HETATM  312  O   HOH T 311      16.140   9.615  24.450  1.00  0.49           O  
HETATM  313  O   HOH T 312      30.849  14.130  -8.799  1.00  0.49           O  
HETATM  314  O   HOH T 313      22.639  14.447  34.800  1.00  0.49           O  
HETATM  315  O   HOH T 314      59.254  -1.832  36.288  1.00  0.49           O  
HETATM  316  O   HOH T 315       9.601  14.550  35.319  1.00  0.49           O  
HETATM  317  O   HOH T 316       8.133  53.047  24.943  1.00  0.49           O  
HETATM  318  O   HOH T 317     -20.005  41.558  13.133  1.00  0.49           O  
HETATM  319  O   HOH T 318       0.425  47.898  26.003  1.00  0.49           O  
HETATM  320  O   HOH T 319      -4.225  39.734  21.845  1.00  0.49           O  
HETATM  321  O   HOH T 320     -20.376  43.049  15.457  1.00  0.49           O  
HETATM  322  O   HOH T 321      35.658   7.286   8.860  1.00  0.49           O  
HETATM  323  O   HOH T 322      52.253  -2.172  26.770  1.00  0.49           O  
HETATM  324  O   HOH T 323      23.447  -1.997  30.820  1.00  0.49           O  
HETATM  325  O   HOH T 324      28.336  34.899  31.593  1.00  0.49           O  
HETATM  326  O   HOH T 325      26.918   6.285   5.594  1.00  0.49           O  
HETATM  327  O   HOH T 326      23.141  17.935  33.229  1.00  0.49           O  
HETATM  328  O   HOH T 327      18.950  35.695  33.781  1.00  0.49           O  
HETATM  329  O   HOH T 328      21.271  16.861  34.904  1.00  0.49           O  
HETATM  330  O   HOH T 329       5.279  11.028  26.996  1.00  0.50           O  
HETATM  331  O   HOH T 330      34.532   2.406  11.382  1.00  0.50           O  
HETATM  332  O   HOH T 331      -1.571  46.919  27.510  1.00  0.50           O  
HETATM  333  O   HOH T 332       8.930  14.547  -0.887  1.00  0.50           O  
HETATM  334  O   HOH T 333      43.891  28.450  10.505  1.00  0.50           O  
HETATM  335  O   HOH T 334      44.741  25.300  -1.851  1.00  0.50           O  
HETATM  336  O   HOH T 335      -8.274  27.582  20.084  1.00  0.50           O  
HETATM  337  O   HOH T 336      16.124  21.389  13.009  1.00  0.50           O  
HETATM  338  O   HOH T 337      -9.621  21.029  13.811  1.00  0.50           O  
HETATM  339  O   HOH T 338       1.784  30.820  34.742  1.00  0.50           O  
HETATM  340  O   HOH T 339      22.131  20.466  32.890  1.00  0.50           O  
HETATM  341  O   HOH T 340      64.155   5.437  33.526  1.00  0.50           O  
HETATM  342  O   HOH T 341      -4.172  48.669  13.735  1.00  0.50           O  
HETATM  343  O   HOH T 342       9.065  13.974  31.760  1.00  0.50           O  
HETATM  344  O   HOH T 343      36.492   7.540   3.962  1.00  0.50           O  
HETATM  345  O   HOH T 344      34.256  23.179   9.072  1.00  0.50           O  
HETATM  346  O   HOH T 345      16.774  15.617  36.967  1.00  0.50           O  
HETATM  347  O   HOH T 346      10.847  26.629   1.323  1.00  0.50           O  
HETATM  348  O   HOH T 347      21.069  -1.798  32.300  1.00  0.50           O  
HETATM  349  O   HOH T 348      39.708   6.888  23.532  1.00  0.50           O  
HETATM  350  O   HOH T 349      20.966  37.417  34.890  1.00  0.51           O  
HETATM  351  O   HOH T 350      25.253   8.580  12.036  1.00  0.51           O  
HETATM  352  O   HOH T 351      -0.951  11.732  21.749  1.00  0.51           O  
HETATM  353  O   HOH T 352      21.100  34.927  20.316  1.00  0.51           O  
HETATM  354  O   HOH T 353      -1.816   8.890  17.718  1.00  0.51           O  
HETATM  355  O   HOH T 354      16.074   7.577  22.715  1.00  0.51           O  
HETATM  356  O   HOH T 355      12.586  10.841  25.676  1.00  0.51           O  
HETATM  357  O   HOH T 356       1.786  45.405  10.936  1.00  0.51           O  
HETATM  358  O   HOH T 357      11.555  34.780  28.722  1.00  0.51           O  
HETATM  359  O   HOH T 358      32.924  21.868  34.890  1.00  0.51           O  
HETATM  360  O   HOH T 359      56.543  -1.486  36.464  1.00  0.51           O  
HETATM  361  O   HOH T 360      -4.011  12.118   9.012  1.00  0.51           O  
HETATM  362  O   HOH T 361     -10.676  26.136  20.541  1.00  0.51           O  
HETATM  363  O   HOH T 362      27.573   9.554   2.719  1.00  0.51           O  
HETATM  364  O   HOH T 363      17.060  24.752  11.457  1.00  0.51           O  
HETATM  365  O   HOH T 364      -7.328  30.105   5.549  1.00  0.51           O  
HETATM  366  O   HOH T 365      14.447  20.584   6.026  1.00  0.51           O  
HETATM  367  O   HOH T 366      38.878  32.659  33.473  1.00  0.51           O  
HETATM  368  O   HOH T 367      13.721  41.976  38.287  1.00  0.51           O  
HETATM  369  O   HOH T 368      27.463  35.688  24.269  1.00  0.51           O  
HETATM  370  O   HOH T 369      10.367  48.651  17.748  1.00  0.51           O  
HETATM  371  O   HOH T 370      46.967  23.929  -0.972  1.00  0.51           O  
HETATM  372  O   HOH T 371      15.024  13.472  39.815  1.00  0.52           O  
HETATM  373  O   HOH T 372      33.349   4.752  38.344  1.00  0.52           O  
HETATM  374  O   HOH T 373       5.121  23.271  -6.469  1.00  0.52           O  
HETATM  375  O   HOH T 374      10.234  27.278  13.815  1.00  0.52           O  
HETATM  376  O   HOH T 375      28.641  32.483  14.197  1.00  0.52           O  
HETATM  377  O   HOH T 376      -4.023  32.291   4.967  1.00  0.52           O  
HETATM  378  O   HOH T 377      34.279   7.287  37.689  1.00  0.52           O  
HETATM  379  O   HOH T 378       5.589  41.763   8.862  1.00  0.52           O  
HETATM  380  O   HOH T 379      10.493  19.158  40.446  1.00  0.52           O  
HETATM  381  O   HOH T 380      29.999   3.077   7.208  1.00  0.52           O  
HETATM  382  O   HOH T 381      43.374  27.408  32.420  1.00  0.52           O  
HETATM  383  O   HOH T 382      39.690  12.960  32.400  1.00  0.52           O  
HETATM  384  O   HOH T 383      16.143  11.425  38.311  1.00  0.52           O  
HETATM  385  O   HOH T 384      18.404  22.812  12.645  1.00  0.52           O  
HETATM  386  O   HOH T 385      -0.078  38.986  33.950  1.00  0.52           O  
HETATM  387  O   HOH T 386     -12.009  13.370  22.186  1.00  0.52           O  
HETATM  388  O   HOH T 387      28.023  25.173  34.179  1.00  0.53           O  
HETATM  389  O   HOH T 388      11.393  36.687  10.650  1.00  0.53           O  
HETATM  390  O   HOH T 389      36.844  32.512   6.721  1.00  0.53           O  
HETATM  391  O   HOH T 390       1.934  13.287  35.231  1.00  0.53           O  
HETATM  392  O   HOH T 391      38.769  37.164  33.350  1.00  0.53           O  
HETATM  393  O   HOH T 392      -2.582  45.975  23.246  1.00  0.53           O  
HETATM  394  O   HOH T 393      16.211  42.903  37.436  1.00  0.53           O  
HETATM  395  O   HOH T 394      -5.145  32.912  26.720  1.00  0.53           O  
HETATM  396  O   HOH T 395      31.757  34.488  24.677  1.00  0.53           O  
HETATM  397  O   HOH T 396      11.323  48.893  32.353  1.00  0.53           O  
HETATM  398  O   HOH T 397      29.024  -4.663  14.273  1.00  0.53           O  
HETATM  399  O   HOH T 398       1.022  47.120  28.554  1.00  0.53           O  
HETATM  400  O   HOH T 399      11.072  16.197  -1.665  1.00  0.53           O  
HETATM  401  O   HOH T 400      36.432  17.750  36.426  1.00  0.53           O  
HETATM  402  O   HOH T 401      21.966   9.893  12.791  1.00  0.53           O  
HETATM  403  O   HOH T 402      21.013  31.702   7.358  1.00  0.53           O  
HETATM  404  O   HOH T 403      17.840  25.032   4.038  1.00  0.53           O  
HETATM  405  O   HOH T 404      -1.514  50.523  21.390  1.00  0.53           O  
HETATM  406  O   HOH T 405      34.893   4.938  10.305  1.00  0.53           O  
HETATM  407  O   HOH T 406     -25.307  39.499  26.802  1.00  0.53           O  
HETATM  408  O   HOH T 407       2.578  16.011  38.289  1.00  0.53           O  
HETATM  409  O   HOH T 408      17.118  28.356   1.375  1.00  0.53           O  
HETATM  410  O   HOH T 409      39.043  10.040  33.581  1.00  0.54           O  
HETATM  411  O   HOH T 410      17.050  12.969  38.078  1.00  0.54           O  
HETATM  412  O   HOH T 411      44.787  25.850  10.600  1.00  0.54           O  
HETATM  413  O   HOH T 412      41.327  14.542  26.648  1.00  0.54           O  
HETATM  414  O   HOH T 413      37.765  31.057  14.913  1.00  0.54           O  
HETATM  415  O   HOH T 414       6.973  17.119  -7.368  1.00  0.54           O  
HETATM  416  O   HOH T 415      42.175  12.451   7.101  1.00  0.54           O  
HETATM  417  O   HOH T 416      12.232  27.540  23.479  1.00  0.54           O  
HETATM  418  O   HOH T 417      54.075   4.717  27.637  1.00  0.54           O  
HETATM  419  O   HOH T 418      21.280  28.356   3.244  1.00  0.54           O  
HETATM  420  O   HOH T 419       6.301  12.612  16.826  1.00  0.54           O  
HETATM  421  O   HOH T 420      -6.546  37.389  18.530  1.00  0.54           O  
HETATM  422  O   HOH T 421      27.386  34.898  29.035  1.00  0.55           O  
HETATM  423  O   HOH T 422       5.030  27.507  34.988  1.00  0.55           O  
HETATM  424  O   HOH T 423     -24.513  37.992  21.891  1.00  0.55           O  
HETATM  425  O   HOH T 424      30.787   5.412  38.431  1.00  0.55           O  
HETATM  426  O   HOH T 425      26.055  12.155  -5.546  1.00  0.55           O  
HETATM  427  O   HOH T 426      -9.880  25.173  13.607  1.00  0.55           O  
HETATM  428  O   HOH T 427      45.472  19.235  18.493  1.00  0.55           O  
HETATM  429  O   HOH T 428      22.138  37.346  21.262  1.00  0.55           O  
HETATM  430  O   HOH T 429      -2.488  42.947  30.789  1.00  0.55           O  
HETATM  431  O   HOH T 430      15.599  11.290   3.806  1.00  0.55           O  
HETATM  432  O   HOH T 431      36.119  28.888  38.313  1.00  0.55           O  
HETATM  433  O   HOH T 432       0.641  37.434  10.133  1.00  0.56           O  
HETATM  434  O   HOH T 433      19.788  14.589  34.579  1.00  0.56           O  
HETATM  435  O   HOH T 434      26.569  27.554   3.360  1.00  0.56           O  
HETATM  436  O   HOH T 435      22.680  26.786   1.541  1.00  0.56           O  
HETATM  437  O   HOH T 436      21.941   5.662   7.229  1.00  0.56           O  
HETATM  438  O   HOH T 437       0.210  10.429  18.549  1.00  0.56           O  
HETATM  439  O   HOH T 438      38.259   1.631  25.917  1.00  0.56           O  
HETATM  440  O   HOH T 439       4.298  18.172  38.299  1.00  0.56           O  
HETATM  441  O   HOH T 440      -0.844  31.642  -2.310  1.00  0.56           O  
HETATM  442  O   HOH T 441      13.067  19.663  39.987  1.00  0.56           O  
HETATM  443  O   HOH T 442       4.995  32.428   0.779  1.00  0.56           O  
HETATM  444  O   HOH T 443      34.788  34.100  14.606  1.00  0.56           O  
HETATM  445  O   HOH T 444      -8.514  20.000  27.448  1.00  0.56           O  
HETATM  446  O   HOH T 445     -11.108  22.026  16.987  1.00  0.56           O  
HETATM  447  O   HOH T 446      23.298  23.554  -3.240  1.00  0.56           O  
HETATM  448  O   HOH T 447      33.122  32.267   8.858  1.00  0.56           O  
HETATM  449  O   HOH T 448      -3.504  50.253  11.896  1.00  0.56           O  
HETATM  450  O   HOH T 449      26.489  16.322  -5.624  1.00  0.57           O  
HETATM  451  O   HOH T 450      17.989  30.862   1.470  1.00  0.57           O  
HETATM  452  O   HOH T 451      -7.668  19.331  35.652  1.00  0.57           O  
HETATM  453  O   HOH T 452      51.623   0.841  20.989  1.00  0.57           O  
HETATM  454  O   HOH T 453      41.105  11.574   9.653  1.00  0.57           O  
HETATM  455  O   HOH T 454      21.120  23.440  26.805  1.00  0.57           O  
HETATM  456  O   HOH T 455      16.402  18.849   6.292  1.00  0.57           O  
HETATM  457  O   HOH T 456      42.209  21.723  10.918  1.00  0.58           O  
HETATM  458  O   HOH T 457      -1.572  16.450  37.491  1.00  0.59           O  
HETATM  459  O   HOH T 458      36.500  11.355  35.671  1.00  0.59           O  
HETATM  460  O   HOH T 459       0.142  18.459  40.660  1.00  0.59           O  
HETATM  461  O   HOH T 460      -5.671  33.970   8.805  1.00  0.60           O  
TER     462      HOH T 460 
