# Supplementary material for: Accurate Prediction of Hydration Sites of Proteins Using Energy Model With Atom Embedding
Source: Front Mol Biosci. 2021 Sep 20;8:756075. doi: 10.3389/fmolb.2021.756075 (PMC8488165; doi:10.3389/fmolb.2021.756075)
Supplement: Supplementary file 1 [file DataSheet1.ZIP › Data Sheet 1/Our_result_pdb/our_dataset_output/2IKI_watersite.pdb]

HEADER                                                        XXXX


JRNL        PMID   -1
HETATM    1  O   HOH T   0      25.814   3.325  27.810  1.00  0.18           O  
HETATM    2  O   HOH T   1      11.704   0.772  26.639  1.00  0.18           O  
HETATM    3  O   HOH T   2      15.284  12.128  25.845  1.00  0.19           O  
HETATM    4  O   HOH T   3      18.890  23.922  16.828  1.00  0.19           O  
HETATM    5  O   HOH T   4      -0.384 -15.165  38.848  1.00  0.19           O  
HETATM    6  O   HOH T   5       7.539  12.647  24.814  1.00  0.19           O  
HETATM    7  O   HOH T   6      -3.367  -3.930  32.418  1.00  0.20           O  
HETATM    8  O   HOH T   7      17.059  10.549  32.233  1.00  0.21           O  
HETATM    9  O   HOH T   8      11.312   2.911  24.964  1.00  0.21           O  
HETATM   10  O   HOH T   9       6.460 -13.399   6.786  1.00  0.21           O  
HETATM   11  O   HOH T  10       4.053  -5.701   7.306  1.00  0.22           O  
HETATM   12  O   HOH T  11      14.739 -21.355  28.566  1.00  0.22           O  
HETATM   13  O   HOH T  12      14.028 -15.138  11.909  1.00  0.22           O  
HETATM   14  O   HOH T  13      15.765  -9.777  31.265  1.00  0.22           O  
HETATM   15  O   HOH T  14      18.829   2.554  16.707  1.00  0.23           O  
HETATM   16  O   HOH T  15       2.308   6.404  28.594  1.00  0.23           O  
HETATM   17  O   HOH T  16      31.078  18.641  36.779  1.00  0.23           O  
HETATM   18  O   HOH T  17      12.000   1.429  37.056  1.00  0.23           O  
HETATM   19  O   HOH T  18       2.066  16.991  11.005  1.00  0.23           O  
HETATM   20  O   HOH T  19       8.518  -2.838  13.076  1.00  0.23           O  
HETATM   21  O   HOH T  20       4.133 -11.932  22.162  1.00  0.23           O  
HETATM   22  O   HOH T  21      28.763  10.865  42.899  1.00  0.24           O  
HETATM   23  O   HOH T  22       9.723  -1.894  47.448  1.00  0.24           O  
HETATM   24  O   HOH T  23      21.697   0.439  15.645  1.00  0.25           O  
HETATM   25  O   HOH T  24      16.531 -15.163  35.893  1.00  0.25           O  
HETATM   26  O   HOH T  25      10.438  15.397  32.552  1.00  0.25           O  
HETATM   27  O   HOH T  26     -10.092  -4.987  30.880  1.00  0.25           O  
HETATM   28  O   HOH T  27       0.227  -4.838  49.132  1.00  0.25           O  
HETATM   29  O   HOH T  28       2.889  -7.946  48.507  1.00  0.25           O  
HETATM   30  O   HOH T  29       2.881 -11.532   9.959  1.00  0.25           O  
HETATM   31  O   HOH T  30      30.300  -4.802  26.658  1.00  0.26           O  
HETATM   32  O   HOH T  31      -5.805  -3.938  12.610  1.00  0.26           O  
HETATM   33  O   HOH T  32      23.977   7.826  26.399  1.00  0.26           O  
HETATM   34  O   HOH T  33      12.677 -13.974  16.945  1.00  0.26           O  
HETATM   35  O   HOH T  34       1.360   5.248  31.051  1.00  0.27           O  
HETATM   36  O   HOH T  35      19.801 -13.434   4.622  1.00  0.27           O  
HETATM   37  O   HOH T  36      41.749  -4.799  26.435  1.00  0.27           O  
HETATM   38  O   HOH T  37      12.078  13.912   6.392  1.00  0.27           O  
HETATM   39  O   HOH T  38      30.431  -3.942  35.288  1.00  0.27           O  
HETATM   40  O   HOH T  39       2.796   6.346  33.286  1.00  0.27           O  
HETATM   41  O   HOH T  40       6.009   3.386  39.849  1.00  0.27           O  
HETATM   42  O   HOH T  41       3.443   1.323  46.210  1.00  0.28           O  
HETATM   43  O   HOH T  42       3.608  -6.639  19.389  1.00  0.28           O  
HETATM   44  O   HOH T  43      27.423 -12.974  22.235  1.00  0.28           O  
HETATM   45  O   HOH T  44     -13.061   4.282  21.579  1.00  0.28           O  
HETATM   46  O   HOH T  45      24.595  17.764  15.459  1.00  0.28           O  
HETATM   47  O   HOH T  46      12.609 -23.119  28.170  1.00  0.28           O  
HETATM   48  O   HOH T  47      11.844 -15.725  10.304  1.00  0.29           O  
HETATM   49  O   HOH T  48      12.846 -15.420  -4.288  1.00  0.29           O  
HETATM   50  O   HOH T  49      -0.570  -8.786  34.475  1.00  0.29           O  
HETATM   51  O   HOH T  50       2.369   9.044  21.530  1.00  0.29           O  
HETATM   52  O   HOH T  51       4.483  -0.787  44.900  1.00  0.29           O  
HETATM   53  O   HOH T  52      13.482 -13.779  14.295  1.00  0.29           O  
HETATM   54  O   HOH T  53      -5.592  -9.311  24.218  1.00  0.29           O  
HETATM   55  O   HOH T  54       3.259  18.598   7.081  1.00  0.29           O  
HETATM   56  O   HOH T  55      25.044  17.924  12.741  1.00  0.30           O  
HETATM   57  O   HOH T  56      30.763  -3.296  23.269  1.00  0.30           O  
HETATM   58  O   HOH T  57       1.098 -15.207  36.556  1.00  0.30           O  
HETATM   59  O   HOH T  58      12.016  18.877  11.516  1.00  0.30           O  
HETATM   60  O   HOH T  59      10.728   1.710  42.339  1.00  0.30           O  
HETATM   61  O   HOH T  60      29.238  22.025  34.722  1.00  0.30           O  
HETATM   62  O   HOH T  61      -1.762  -5.202  42.202  1.00  0.30           O  
HETATM   63  O   HOH T  62       6.713 -12.878  22.465  1.00  0.30           O  
HETATM   64  O   HOH T  63       2.124  20.464  18.176  1.00  0.30           O  
HETATM   65  O   HOH T  64       7.549  -1.189   4.331  1.00  0.30           O  
HETATM   66  O   HOH T  65      22.546  15.308  21.926  1.00  0.30           O  
HETATM   67  O   HOH T  66      39.946   8.296  28.412  1.00  0.30           O  
HETATM   68  O   HOH T  67      20.437  17.225  15.136  1.00  0.30           O  
HETATM   69  O   HOH T  68      23.218  20.384  18.440  1.00  0.31           O  
HETATM   70  O   HOH T  69      41.265   1.091  33.978  1.00  0.31           O  
HETATM   71  O   HOH T  70       5.159 -20.058  27.036  1.00  0.31           O  
HETATM   72  O   HOH T  71      16.391   4.241   3.705  1.00  0.31           O  
HETATM   73  O   HOH T  72      18.514  -2.976  43.159  1.00  0.31           O  
HETATM   74  O   HOH T  73      13.478   4.830  36.724  1.00  0.31           O  
HETATM   75  O   HOH T  74      28.615  16.910  22.429  1.00  0.31           O  
HETATM   76  O   HOH T  75      -1.430  17.726  12.926  1.00  0.31           O  
HETATM   77  O   HOH T  76       6.199 -16.308  24.989  1.00  0.32           O  
HETATM   78  O   HOH T  77      37.379  -2.997  23.330  1.00  0.32           O  
HETATM   79  O   HOH T  78      12.311 -18.137  35.686  1.00  0.32           O  
HETATM   80  O   HOH T  79      18.967  -4.492  34.231  1.00  0.32           O  
HETATM   81  O   HOH T  80      38.305   8.181  43.467  1.00  0.32           O  
HETATM   82  O   HOH T  81      35.840  15.511  23.729  1.00  0.32           O  
HETATM   83  O   HOH T  82      23.807  -8.509  12.523  1.00  0.32           O  
HETATM   84  O   HOH T  83      16.857 -21.702  26.803  1.00  0.33           O  
HETATM   85  O   HOH T  84      29.502  -8.423  15.233  1.00  0.33           O  
HETATM   86  O   HOH T  85      16.705 -18.398  24.963  1.00  0.33           O  
HETATM   87  O   HOH T  86      -5.739   3.790  10.363  1.00  0.33           O  
HETATM   88  O   HOH T  87     -12.071  -0.283  22.613  1.00  0.33           O  
HETATM   89  O   HOH T  88     -11.247   7.325  21.625  1.00  0.33           O  
HETATM   90  O   HOH T  89       9.970  -3.099  44.822  1.00  0.33           O  
HETATM   91  O   HOH T  90       5.216   0.206   7.081  1.00  0.33           O  
HETATM   92  O   HOH T  91     -12.059  10.924  20.126  1.00  0.33           O  
HETATM   93  O   HOH T  92      30.386  -9.822  22.821  1.00  0.34           O  
HETATM   94  O   HOH T  93      39.462  -1.757  22.128  1.00  0.34           O  
HETATM   95  O   HOH T  94     -11.157  -6.972  20.460  1.00  0.34           O  
HETATM   96  O   HOH T  95      31.589  -7.335  13.739  1.00  0.34           O  
HETATM   97  O   HOH T  96      -5.570   5.315  25.105  1.00  0.34           O  
HETATM   98  O   HOH T  97       7.864   4.172   4.752  1.00  0.34           O  
HETATM   99  O   HOH T  98      10.968 -18.095  33.346  1.00  0.34           O  
HETATM  100  O   HOH T  99      33.226  14.435  23.793  1.00  0.34           O  
HETATM  101  O   HOH T 100      36.597  -0.380  37.529  1.00  0.34           O  
HETATM  102  O   HOH T 101      18.926  -1.573  -2.314  1.00  0.34           O  
HETATM  103  O   HOH T 102      32.285  -9.385  20.734  1.00  0.34           O  
HETATM  104  O   HOH T 103     -10.546  -1.139  24.798  1.00  0.35           O  
HETATM  105  O   HOH T 104       4.894 -12.661  11.676  1.00  0.35           O  
HETATM  106  O   HOH T 105      10.495  11.950  38.246  1.00  0.35           O  
HETATM  107  O   HOH T 106      16.463  12.151  36.722  1.00  0.35           O  
HETATM  108  O   HOH T 107      10.750 -19.215  21.306  1.00  0.35           O  
HETATM  109  O   HOH T 108      24.603  -6.060  13.556  1.00  0.35           O  
HETATM  110  O   HOH T 109      21.575 -18.551  19.711  1.00  0.35           O  
HETATM  111  O   HOH T 110      33.016  -3.462  36.583  1.00  0.35           O  
HETATM  112  O   HOH T 111       8.347  14.720  26.424  1.00  0.35           O  
HETATM  113  O   HOH T 112      -3.587   2.950   8.692  1.00  0.35           O  
HETATM  114  O   HOH T 113       6.185 -16.150   6.209  1.00  0.35           O  
HETATM  115  O   HOH T 114      17.129 -13.505   8.212  1.00  0.35           O  
HETATM  116  O   HOH T 115       9.040 -21.393  21.071  1.00  0.35           O  
HETATM  117  O   HOH T 116       2.085  -9.805  19.479  1.00  0.35           O  
HETATM  118  O   HOH T 117      10.356  22.012  18.529  1.00  0.35           O  
HETATM  119  O   HOH T 118      22.721  10.528  16.025  1.00  0.35           O  
HETATM  120  O   HOH T 119      -9.521  -5.355  28.218  1.00  0.35           O  
HETATM  121  O   HOH T 120      -4.038   1.030  35.593  1.00  0.36           O  
HETATM  122  O   HOH T 121      38.226  10.128  32.784  1.00  0.36           O  
HETATM  123  O   HOH T 122      28.865 -14.696  16.307  1.00  0.36           O  
HETATM  124  O   HOH T 123      -2.012 -14.999  23.772  1.00  0.36           O  
HETATM  125  O   HOH T 124       0.841   1.769  46.074  1.00  0.36           O  
HETATM  126  O   HOH T 125       8.123  10.761  38.957  1.00  0.36           O  
HETATM  127  O   HOH T 126      14.150 -13.164  24.216  1.00  0.36           O  
HETATM  128  O   HOH T 127      19.779  -8.753  45.242  1.00  0.36           O  
HETATM  129  O   HOH T 128      30.681   7.878  43.659  1.00  0.36           O  
HETATM  130  O   HOH T 129      41.047  -1.485  33.310  1.00  0.36           O  
HETATM  131  O   HOH T 130      -0.177 -10.354  48.904  1.00  0.36           O  
HETATM  132  O   HOH T 131      20.991  14.714  25.609  1.00  0.36           O  
HETATM  133  O   HOH T 132      -3.322   8.289  25.861  1.00  0.36           O  
HETATM  134  O   HOH T 133       1.768  11.849  21.792  1.00  0.36           O  
HETATM  135  O   HOH T 134      28.456  -9.616  13.089  1.00  0.36           O  
HETATM  136  O   HOH T 135       0.322  16.616  17.097  1.00  0.36           O  
HETATM  137  O   HOH T 136      21.712 -11.455  -2.177  1.00  0.37           O  
HETATM  138  O   HOH T 137      32.295  18.024  39.235  1.00  0.37           O  
HETATM  139  O   HOH T 138      33.248   1.500  14.879  1.00  0.37           O  
HETATM  140  O   HOH T 139      20.825 -13.862  44.959  1.00  0.37           O  
HETATM  141  O   HOH T 140      -6.748  -0.460  15.160  1.00  0.37           O  
HETATM  142  O   HOH T 141      -2.645  12.131  26.154  1.00  0.37           O  
HETATM  143  O   HOH T 142       0.285   2.010  34.020  1.00  0.37           O  
HETATM  144  O   HOH T 143      28.418  -8.631  37.309  1.00  0.37           O  
HETATM  145  O   HOH T 144       6.030   2.253  42.347  1.00  0.37           O  
HETATM  146  O   HOH T 145      14.029  11.793  35.459  1.00  0.37           O  
HETATM  147  O   HOH T 146      26.575  21.359  34.477  1.00  0.37           O  
HETATM  148  O   HOH T 147      26.804  -8.359  39.605  1.00  0.37           O  
HETATM  149  O   HOH T 148      23.383 -17.882  17.704  1.00  0.38           O  
HETATM  150  O   HOH T 149       3.929  -7.333  16.619  1.00  0.38           O  
HETATM  151  O   HOH T 150      19.523  -7.637   1.505  1.00  0.38           O  
HETATM  152  O   HOH T 151      17.893  21.998  18.494  1.00  0.38           O  
HETATM  153  O   HOH T 152      29.591  17.268  29.679  1.00  0.38           O  
HETATM  154  O   HOH T 153       0.647  14.209  20.549  1.00  0.38           O  
HETATM  155  O   HOH T 154       9.873 -17.269  38.859  1.00  0.38           O  
HETATM  156  O   HOH T 155      -5.577  -8.727  26.909  1.00  0.38           O  
HETATM  157  O   HOH T 156      -1.501   8.949  23.780  1.00  0.38           O  
HETATM  158  O   HOH T 157      -0.153   4.650  35.172  1.00  0.38           O  
HETATM  159  O   HOH T 158      -5.865  -0.084  10.783  1.00  0.38           O  
HETATM  160  O   HOH T 159      16.636  24.480  18.348  1.00  0.38           O  
HETATM  161  O   HOH T 160      15.175  20.917  15.953  1.00  0.39           O  
HETATM  162  O   HOH T 161       8.989   6.213  40.201  1.00  0.39           O  
HETATM  163  O   HOH T 162       0.796   0.508   7.110  1.00  0.39           O  
HETATM  164  O   HOH T 163      28.341  17.798  25.034  1.00  0.39           O  
HETATM  165  O   HOH T 164       1.072  17.978   8.682  1.00  0.39           O  
HETATM  166  O   HOH T 165       9.465  17.693  11.530  1.00  0.39           O  
HETATM  167  O   HOH T 166       9.210  17.578  31.394  1.00  0.39           O  
HETATM  168  O   HOH T 167      -4.105 -12.026  45.565  1.00  0.39           O  
HETATM  169  O   HOH T 168      12.469 -16.764   5.188  1.00  0.39           O  
HETATM  170  O   HOH T 169      10.709 -16.492   3.062  1.00  0.39           O  
HETATM  171  O   HOH T 170      12.983 -22.738  34.033  1.00  0.39           O  
HETATM  172  O   HOH T 171      27.663  18.461  31.156  1.00  0.39           O  
HETATM  173  O   HOH T 172       2.181  17.322  24.919  1.00  0.39           O  
HETATM  174  O   HOH T 173      21.868  15.512  33.691  1.00  0.39           O  
HETATM  175  O   HOH T 174      24.163  -8.593   9.736  1.00  0.39           O  
HETATM  176  O   HOH T 175       4.136  17.807  14.400  1.00  0.39           O  
HETATM  177  O   HOH T 176      22.607 -14.711  23.260  1.00  0.39           O  
HETATM  178  O   HOH T 177       5.737 -17.828  13.562  1.00  0.39           O  
HETATM  179  O   HOH T 178      23.576 -18.730  21.604  1.00  0.39           O  
HETATM  180  O   HOH T 179      20.483  12.472  13.042  1.00  0.39           O  
HETATM  181  O   HOH T 180      43.345  18.542  31.477  1.00  0.39           O  
HETATM  182  O   HOH T 181       3.303  16.959   4.884  1.00  0.39           O  
HETATM  183  O   HOH T 182      36.638 -10.453  22.083  1.00  0.40           O  
HETATM  184  O   HOH T 183      36.161   9.820  43.805  1.00  0.40           O  
HETATM  185  O   HOH T 184      11.385   2.447  39.599  1.00  0.40           O  
HETATM  186  O   HOH T 185       3.773 -17.648   6.217  1.00  0.40           O  
HETATM  187  O   HOH T 186      12.173   5.865   5.097  1.00  0.40           O  
HETATM  188  O   HOH T 187     -12.357   5.880  19.429  1.00  0.40           O  
HETATM  189  O   HOH T 188      21.647 -10.534   7.652  1.00  0.40           O  
HETATM  190  O   HOH T 189       2.368  23.252  18.419  1.00  0.40           O  
HETATM  191  O   HOH T 190      -8.308  -7.292   9.813  1.00  0.40           O  
HETATM  192  O   HOH T 191      -2.420  -9.545  13.373  1.00  0.40           O  
HETATM  193  O   HOH T 192      -4.000  -4.496   5.559  1.00  0.40           O  
HETATM  194  O   HOH T 193      -3.801  10.473  24.173  1.00  0.40           O  
HETATM  195  O   HOH T 194      20.516 -15.452  26.713  1.00  0.40           O  
HETATM  196  O   HOH T 195      -2.407 -10.632  47.276  1.00  0.40           O  
HETATM  197  O   HOH T 196      13.966   5.005   0.058  1.00  0.40           O  
HETATM  198  O   HOH T 197      18.654  -6.633  46.376  1.00  0.40           O  
HETATM  199  O   HOH T 198     -10.728  12.224  18.079  1.00  0.41           O  
HETATM  200  O   HOH T 199      10.394  10.169  40.506  1.00  0.41           O  
HETATM  201  O   HOH T 200      17.906  11.909  34.478  1.00  0.41           O  
HETATM  202  O   HOH T 201      31.882  -7.082  27.105  1.00  0.41           O  
HETATM  203  O   HOH T 202      26.989   8.307  17.124  1.00  0.41           O  
HETATM  204  O   HOH T 203      -8.305  -6.826  14.409  1.00  0.41           O  
HETATM  205  O   HOH T 204       2.140  18.529  16.129  1.00  0.41           O  
HETATM  206  O   HOH T 205      -6.721  -6.991  25.044  1.00  0.41           O  
HETATM  207  O   HOH T 206       6.768  16.945  26.828  1.00  0.41           O  
HETATM  208  O   HOH T 207       5.773   4.320  37.358  1.00  0.41           O  
HETATM  209  O   HOH T 208       4.865   5.352  35.011  1.00  0.41           O  
HETATM  210  O   HOH T 209      20.113   4.778  15.450  1.00  0.41           O  
HETATM  211  O   HOH T 210       8.289  -7.060  18.082  1.00  0.41           O  
HETATM  212  O   HOH T 211       9.700  -9.390  25.659  1.00  0.41           O  
HETATM  213  O   HOH T 212      12.714  16.984  25.155  1.00  0.41           O  
HETATM  214  O   HOH T 213      16.999  21.929  22.231  1.00  0.41           O  
HETATM  215  O   HOH T 214      11.991  -1.423  45.749  1.00  0.42           O  
HETATM  216  O   HOH T 215      38.306  12.773  31.944  1.00  0.42           O  
HETATM  217  O   HOH T 216      -7.298   7.416  24.344  1.00  0.42           O  
HETATM  218  O   HOH T 217      -7.330  -7.987  12.008  1.00  0.42           O  
HETATM  219  O   HOH T 218       2.109   8.763  34.652  1.00  0.42           O  
HETATM  220  O   HOH T 219      14.739  16.038  26.913  1.00  0.42           O  
HETATM  221  O   HOH T 220      19.472  13.952  33.355  1.00  0.42           O  
HETATM  222  O   HOH T 221      28.492 -12.288  13.069  1.00  0.42           O  
HETATM  223  O   HOH T 222      -0.499 -12.499  50.457  1.00  0.42           O  
HETATM  224  O   HOH T 223       6.574  -2.340  45.770  1.00  0.42           O  
HETATM  225  O   HOH T 224      27.755  15.752  38.300  1.00  0.42           O  
HETATM  226  O   HOH T 225      19.032 -16.871   6.398  1.00  0.42           O  
HETATM  227  O   HOH T 226      29.255  -5.935  36.871  1.00  0.42           O  
HETATM  228  O   HOH T 227      -5.949   6.710  13.520  1.00  0.42           O  
HETATM  229  O   HOH T 228      28.448  -3.576  13.693  1.00  0.42           O  
HETATM  230  O   HOH T 229      11.707 -19.557  11.418  1.00  0.42           O  
HETATM  231  O   HOH T 230      16.647 -21.405  30.600  1.00  0.42           O  
HETATM  232  O   HOH T 231      31.525  -7.886  24.450  1.00  0.42           O  
HETATM  233  O   HOH T 232      18.546  19.040  14.745  1.00  0.42           O  
HETATM  234  O   HOH T 233      12.818   3.407  43.082  1.00  0.43           O  
HETATM  235  O   HOH T 234      12.125  15.432  27.535  1.00  0.43           O  
HETATM  236  O   HOH T 235      25.165 -14.930  30.625  1.00  0.43           O  
HETATM  237  O   HOH T 236      40.348  15.822  31.149  1.00  0.43           O  
HETATM  238  O   HOH T 237      34.321  12.926  38.179  1.00  0.43           O  
HETATM  239  O   HOH T 238      29.458   5.824  44.659  1.00  0.43           O  
HETATM  240  O   HOH T 239      37.988   5.489  44.011  1.00  0.43           O  
HETATM  241  O   HOH T 240      35.900 -12.851  13.120  1.00  0.43           O  
HETATM  242  O   HOH T 241      -3.540  -5.237  34.878  1.00  0.43           O  
HETATM  243  O   HOH T 242      23.716  -7.134  43.389  1.00  0.43           O  
HETATM  244  O   HOH T 243      -6.489  -9.376   9.976  1.00  0.43           O  
HETATM  245  O   HOH T 244      -2.314  10.038  27.856  1.00  0.43           O  
HETATM  246  O   HOH T 245      34.765  -8.606  21.324  1.00  0.43           O  
HETATM  247  O   HOH T 246       1.364  18.073  13.527  1.00  0.43           O  
HETATM  248  O   HOH T 247      29.759  -5.769  24.064  1.00  0.43           O  
HETATM  249  O   HOH T 248      41.944  17.234  29.359  1.00  0.44           O  
HETATM  250  O   HOH T 249       6.278  16.919  21.857  1.00  0.44           O  
HETATM  251  O   HOH T 250      19.451  -0.095  -0.065  1.00  0.44           O  
HETATM  252  O   HOH T 251     -10.310  -9.425  21.406  1.00  0.44           O  
HETATM  253  O   HOH T 252      36.090  12.006  42.162  1.00  0.44           O  
HETATM  254  O   HOH T 253      34.005 -14.665  14.298  1.00  0.44           O  
HETATM  255  O   HOH T 254      13.197  19.491  26.516  1.00  0.44           O  
HETATM  256  O   HOH T 255      -3.073  -3.941  39.883  1.00  0.44           O  
HETATM  257  O   HOH T 256      13.354  14.175  25.300  1.00  0.44           O  
HETATM  258  O   HOH T 257      19.871  -4.447  47.688  1.00  0.44           O  
HETATM  259  O   HOH T 258       4.615 -15.252  13.084  1.00  0.44           O  
HETATM  260  O   HOH T 259      -0.363   2.142  48.565  1.00  0.44           O  
HETATM  261  O   HOH T 260      16.427   4.070   0.863  1.00  0.44           O  
HETATM  262  O   HOH T 261      11.957  17.245  31.089  1.00  0.44           O  
HETATM  263  O   HOH T 262      34.015 -11.288  21.772  1.00  0.44           O  
HETATM  264  O   HOH T 263      32.039  18.847  29.769  1.00  0.44           O  
HETATM  265  O   HOH T 264      19.568  10.293  40.625  1.00  0.45           O  
HETATM  266  O   HOH T 265      18.684   4.930   5.223  1.00  0.45           O  
HETATM  267  O   HOH T 266      -3.660  -8.123  37.361  1.00  0.45           O  
HETATM  268  O   HOH T 267      19.520  16.254  27.362  1.00  0.45           O  
HETATM  269  O   HOH T 268       8.091 -18.826  20.423  1.00  0.45           O  
HETATM  270  O   HOH T 269      -3.409 -17.284  24.752  1.00  0.45           O  
HETATM  271  O   HOH T 270      18.150  -4.073  45.634  1.00  0.45           O  
HETATM  272  O   HOH T 271      -4.171 -10.310  33.781  1.00  0.45           O  
HETATM  273  O   HOH T 272      -5.672  -6.695  13.370  1.00  0.45           O  
HETATM  274  O   HOH T 273      19.284 -11.858   8.468  1.00  0.45           O  
HETATM  275  O   HOH T 274      21.721 -13.983  14.511  1.00  0.45           O  
HETATM  276  O   HOH T 275      25.929  16.503  25.363  1.00  0.45           O  
HETATM  277  O   HOH T 276      27.678  16.917  27.554  1.00  0.45           O  
HETATM  278  O   HOH T 277      35.753  -5.682  32.458  1.00  0.45           O  
HETATM  279  O   HOH T 278      37.185  -5.628  22.504  1.00  0.45           O  
HETATM  280  O   HOH T 279      40.850   7.055  30.771  1.00  0.45           O  
HETATM  281  O   HOH T 280      24.043   5.050  26.735  1.00  0.45           O  
HETATM  282  O   HOH T 281      26.144 -17.186  17.674  1.00  0.45           O  
HETATM  283  O   HOH T 282      26.209  -9.423  11.469  1.00  0.45           O  
HETATM  284  O   HOH T 283      -9.358  -0.944  14.548  1.00  0.45           O  
HETATM  285  O   HOH T 284      -9.923  -7.243  12.132  1.00  0.46           O  
HETATM  286  O   HOH T 285       7.905   8.733  40.673  1.00  0.46           O  
HETATM  287  O   HOH T 286      -2.612  12.969  23.560  1.00  0.46           O  
HETATM  288  O   HOH T 287      -4.030  -5.395  37.608  1.00  0.46           O  
HETATM  289  O   HOH T 288      -4.836 -14.549  44.484  1.00  0.46           O  
HETATM  290  O   HOH T 289      15.983   5.351   6.087  1.00  0.46           O  
HETATM  291  O   HOH T 290     -10.652 -12.098  21.161  1.00  0.46           O  
HETATM  292  O   HOH T 291      29.835  14.505  39.735  1.00  0.46           O  
HETATM  293  O   HOH T 292      -1.654  -0.789   5.251  1.00  0.46           O  
HETATM  294  O   HOH T 293       7.460  19.527  30.486  1.00  0.46           O  
HETATM  295  O   HOH T 294      -7.898  -7.398  27.484  1.00  0.46           O  
HETATM  296  O   HOH T 295      32.031  10.417  14.739  1.00  0.46           O  
HETATM  297  O   HOH T 296      19.514   9.912  12.164  1.00  0.46           O  
HETATM  298  O   HOH T 297      22.158  18.507  24.996  1.00  0.46           O  
HETATM  299  O   HOH T 298       7.053  -1.384  48.354  1.00  0.46           O  
HETATM  300  O   HOH T 299      14.582  -5.716   0.850  1.00  0.46           O  
HETATM  301  O   HOH T 300      18.495 -10.001  43.122  1.00  0.46           O  
HETATM  302  O   HOH T 301      12.831   5.605   2.506  1.00  0.46           O  
HETATM  303  O   HOH T 302      40.107   9.698  30.787  1.00  0.46           O  
HETATM  304  O   HOH T 303      17.612   5.503  14.485  1.00  0.46           O  
HETATM  305  O   HOH T 304      18.431  18.445  23.753  1.00  0.46           O  
HETATM  306  O   HOH T 305       4.741 -18.685  24.588  1.00  0.46           O  
HETATM  307  O   HOH T 306      16.589  20.625  13.523  1.00  0.46           O  
HETATM  308  O   HOH T 307      29.197  -0.906  13.454  1.00  0.47           O  
HETATM  309  O   HOH T 308      16.448  -0.249  -2.047  1.00  0.47           O  
HETATM  310  O   HOH T 309      -0.810   4.149  32.562  1.00  0.47           O  
HETATM  311  O   HOH T 310      39.044  13.773  29.552  1.00  0.47           O  
HETATM  312  O   HOH T 311      43.101  -0.661  35.065  1.00  0.47           O  
HETATM  313  O   HOH T 312      24.492  15.758  34.329  1.00  0.47           O  
HETATM  314  O   HOH T 313      28.289  20.828  32.291  1.00  0.47           O  
HETATM  315  O   HOH T 314      33.327  12.352  42.150  1.00  0.47           O  
HETATM  316  O   HOH T 315      26.782  15.998  35.755  1.00  0.47           O  
HETATM  317  O   HOH T 316      10.778 -21.262  13.378  1.00  0.47           O  
HETATM  318  O   HOH T 317      26.690 -14.359  12.861  1.00  0.47           O  
HETATM  319  O   HOH T 318       7.015  19.682  27.687  1.00  0.47           O  
HETATM  320  O   HOH T 319       3.983 -15.931  20.207  1.00  0.47           O  
HETATM  321  O   HOH T 320      -1.969  14.889  21.567  1.00  0.47           O  
HETATM  322  O   HOH T 321      29.334  -7.188  39.435  1.00  0.47           O  
HETATM  323  O   HOH T 322      15.929  18.880  31.813  1.00  0.47           O  
HETATM  324  O   HOH T 323       9.854 -19.010  36.706  1.00  0.47           O  
HETATM  325  O   HOH T 324       4.058 -15.528   4.453  1.00  0.47           O  
HETATM  326  O   HOH T 325      -1.958  -3.154   4.021  1.00  0.47           O  
HETATM  327  O   HOH T 326      10.357  19.539   9.519  1.00  0.47           O  
HETATM  328  O   HOH T 327      -4.657  -9.541  44.609  1.00  0.47           O  
HETATM  329  O   HOH T 328      -0.827 -15.302  28.287  1.00  0.47           O  
HETATM  330  O   HOH T 329      15.331   3.333  -1.545  1.00  0.47           O  
HETATM  331  O   HOH T 330      -8.472  -3.044  12.964  1.00  0.47           O  
HETATM  332  O   HOH T 331       5.579 -15.429  22.434  1.00  0.47           O  
HETATM  333  O   HOH T 332      36.402   7.430  45.185  1.00  0.47           O  
HETATM  334  O   HOH T 333      17.300   1.775  -0.374  1.00  0.47           O  
HETATM  335  O   HOH T 334      -5.253  -3.183  34.211  1.00  0.48           O  
HETATM  336  O   HOH T 335      17.704  10.192  38.259  1.00  0.48           O  
HETATM  337  O   HOH T 336      18.078  10.571   8.538  1.00  0.48           O  
HETATM  338  O   HOH T 337      31.822   6.688  45.809  1.00  0.48           O  
HETATM  339  O   HOH T 338      34.946  14.104  40.729  1.00  0.48           O  
HETATM  340  O   HOH T 339      20.754 -15.622  42.844  1.00  0.48           O  
HETATM  341  O   HOH T 340      34.551  -3.719  34.038  1.00  0.48           O  
HETATM  342  O   HOH T 341      18.014   0.870   2.096  1.00  0.48           O  
HETATM  343  O   HOH T 342       6.969  15.103  20.065  1.00  0.48           O  
HETATM  344  O   HOH T 343      26.837  -5.454  15.006  1.00  0.48           O  
HETATM  345  O   HOH T 344      10.993  17.934  27.112  1.00  0.48           O  
HETATM  346  O   HOH T 345      36.541 -15.446  13.715  1.00  0.48           O  
HETATM  347  O   HOH T 346      -3.148  -7.960  34.666  1.00  0.48           O  
HETATM  348  O   HOH T 347      18.789 -16.597  35.534  1.00  0.48           O  
HETATM  349  O   HOH T 348      29.252  10.530  14.908  1.00  0.48           O  
HETATM  350  O   HOH T 349       6.773 -17.949  22.763  1.00  0.48           O  
HETATM  351  O   HOH T 350      28.151  10.936  17.402  1.00  0.48           O  
HETATM  352  O   HOH T 351     -10.247  10.292  24.208  1.00  0.49           O  
HETATM  353  O   HOH T 352       5.196 -21.309  24.647  1.00  0.49           O  
HETATM  354  O   HOH T 353      12.870  22.013  17.186  1.00  0.49           O  
HETATM  355  O   HOH T 354      -1.682   0.927   8.366  1.00  0.49           O  
HETATM  356  O   HOH T 355       6.417 -14.422  19.977  1.00  0.49           O  
HETATM  357  O   HOH T 356       7.923   4.145  41.668  1.00  0.49           O  
HETATM  358  O   HOH T 357      19.592  15.053  13.589  1.00  0.49           O  
HETATM  359  O   HOH T 358      15.445  23.704  20.778  1.00  0.49           O  
HETATM  360  O   HOH T 359       9.517 -17.264  41.575  1.00  0.49           O  
HETATM  361  O   HOH T 360      21.183 -11.431   3.158  1.00  0.49           O  
HETATM  362  O   HOH T 361       8.684  17.772  28.698  1.00  0.49           O  
HETATM  363  O   HOH T 362      32.059  -4.649  14.477  1.00  0.49           O  
HETATM  364  O   HOH T 363      16.834 -20.910   5.740  1.00  0.49           O  
HETATM  365  O   HOH T 364      20.209   3.731  43.606  1.00  0.49           O  
HETATM  366  O   HOH T 365      35.590  -2.458  36.257  1.00  0.49           O  
HETATM  367  O   HOH T 366      -1.098  11.225   6.242  1.00  0.49           O  
HETATM  368  O   HOH T 367      24.652 -15.348  25.004  1.00  0.49           O  
HETATM  369  O   HOH T 368      -2.646  10.808  11.362  1.00  0.49           O  
HETATM  370  O   HOH T 369      -6.917  -9.186  14.319  1.00  0.49           O  
HETATM  371  O   HOH T 370      29.620  -5.738  15.078  1.00  0.49           O  
HETATM  372  O   HOH T 371      20.657  16.649  23.361  1.00  0.49           O  
HETATM  373  O   HOH T 372      19.593 -14.314   7.256  1.00  0.49           O  
HETATM  374  O   HOH T 373      -5.014  -1.277  13.057  1.00  0.49           O  
HETATM  375  O   HOH T 374      34.213  17.655  23.148  1.00  0.49           O  
HETATM  376  O   HOH T 375      -2.332  -5.850   3.680  1.00  0.49           O  
HETATM  377  O   HOH T 376      -6.335   9.737  23.109  1.00  0.49           O  
HETATM  378  O   HOH T 377      -0.649 -17.917  28.287  1.00  0.50           O  
HETATM  379  O   HOH T 378      31.515  10.443  43.014  1.00  0.50           O  
HETATM  380  O   HOH T 379       8.508 -16.657   4.615  1.00  0.50           O  
HETATM  381  O   HOH T 380      31.167  -6.596  34.932  1.00  0.50           O  
HETATM  382  O   HOH T 381      29.792   3.250  45.617  1.00  0.50           O  
HETATM  383  O   HOH T 382      17.518 -18.495   4.708  1.00  0.50           O  
HETATM  384  O   HOH T 383      -7.688  -2.241  10.457  1.00  0.50           O  
HETATM  385  O   HOH T 384      -8.128   6.696  15.309  1.00  0.50           O  
HETATM  386  O   HOH T 385      -8.902   8.736  22.394  1.00  0.50           O  
HETATM  387  O   HOH T 386     -10.258  -4.989  13.705  1.00  0.50           O  
HETATM  388  O   HOH T 387      -2.701   3.520  34.738  1.00  0.50           O  
HETATM  389  O   HOH T 388      40.249   8.246  33.142  1.00  0.51           O  
HETATM  390  O   HOH T 389       0.261  -7.610  49.330  1.00  0.51           O  
HETATM  391  O   HOH T 390      12.937  22.873  21.086  1.00  0.51           O  
HETATM  392  O   HOH T 391       8.723 -18.977  32.479  1.00  0.51           O  
HETATM  393  O   HOH T 392       9.536  21.117  21.090  1.00  0.51           O  
HETATM  394  O   HOH T 393      33.070  -5.751  33.078  1.00  0.51           O  
HETATM  395  O   HOH T 394      26.037  -7.270  42.009  1.00  0.51           O  
HETATM  396  O   HOH T 395      -4.720 -11.183  18.523  1.00  0.51           O  
HETATM  397  O   HOH T 396     -12.998   7.114  17.009  1.00  0.51           O  
HETATM  398  O   HOH T 397      -0.224   1.070   3.287  1.00  0.51           O  
HETATM  399  O   HOH T 398      -7.376   5.768  11.325  1.00  0.52           O  
HETATM  400  O   HOH T 399       0.003  13.726  23.070  1.00  0.52           O  
HETATM  401  O   HOH T 400       7.452   1.412   5.689  1.00  0.52           O  
HETATM  402  O   HOH T 401      -2.048 -17.303  20.999  1.00  0.52           O  
HETATM  403  O   HOH T 402      11.234 -20.597  34.868  1.00  0.52           O  
HETATM  404  O   HOH T 403      24.700 -16.668  35.406  1.00  0.52           O  
HETATM  405  O   HOH T 404      -0.866 -12.840  47.797  1.00  0.52           O  
HETATM  406  O   HOH T 405      10.515 -18.772   4.545  1.00  0.52           O  
HETATM  407  O   HOH T 406      21.436   0.403   3.310  1.00  0.53           O  
HETATM  408  O   HOH T 407      37.956  -2.270  15.798  1.00  0.53           O  
HETATM  409  O   HOH T 408      43.020   2.681  27.869  1.00  0.53           O  
HETATM  410  O   HOH T 409      -4.555   8.384  28.336  1.00  0.53           O  
HETATM  411  O   HOH T 410      13.330  17.666  28.676  1.00  0.53           O  
HETATM  412  O   HOH T 411      13.386   4.357  40.568  1.00  0.53           O  
HETATM  413  O   HOH T 412      -7.376   1.735   9.487  1.00  0.53           O  
HETATM  414  O   HOH T 413       1.519  11.523  34.639  1.00  0.53           O  
HETATM  415  O   HOH T 414      40.127   5.705  38.317  1.00  0.53           O  
HETATM  416  O   HOH T 415      14.761 -13.711  21.508  1.00  0.53           O  
HETATM  417  O   HOH T 416       2.604 -16.138  17.818  1.00  0.53           O  
HETATM  418  O   HOH T 417      12.614  24.369  15.762  1.00  0.53           O  
HETATM  419  O   HOH T 418      30.299  -9.178  35.410  1.00  0.53           O  
HETATM  420  O   HOH T 419      23.151 -15.045  27.331  1.00  0.53           O  
HETATM  421  O   HOH T 420      23.156  18.072  33.465  1.00  0.53           O  
HETATM  422  O   HOH T 421      -6.464 -13.865  42.394  1.00  0.53           O  
HETATM  423  O   HOH T 422      17.926  21.477  15.824  1.00  0.53           O  
HETATM  424  O   HOH T 423      34.891  -0.075  40.854  1.00  0.53           O  
HETATM  425  O   HOH T 424      -5.025  -8.028  32.639  1.00  0.54           O  
HETATM  426  O   HOH T 425      16.614 -16.438  23.051  1.00  0.54           O  
HETATM  427  O   HOH T 426      22.562  18.698  13.831  1.00  0.54           O  
HETATM  428  O   HOH T 427      26.722 -15.917  15.148  1.00  0.54           O  
HETATM  429  O   HOH T 428       9.558  15.335   6.313  1.00  0.54           O  
HETATM  430  O   HOH T 429      -5.057  -9.217  12.361  1.00  0.54           O  
HETATM  431  O   HOH T 430       7.077  18.701  18.580  1.00  0.54           O  
HETATM  432  O   HOH T 431       5.550  13.149   6.094  1.00  0.54           O  
HETATM  433  O   HOH T 432       0.396 -17.173  30.766  1.00  0.54           O  
HETATM  434  O   HOH T 433      37.186   1.771  43.524  1.00  0.54           O  
HETATM  435  O   HOH T 434      21.060  14.580  11.340  1.00  0.54           O  
HETATM  436  O   HOH T 435       8.345   2.413  43.735  1.00  0.54           O  
HETATM  437  O   HOH T 436      34.018  -7.295  12.212  1.00  0.55           O  
HETATM  438  O   HOH T 437      17.842  18.703  12.069  1.00  0.55           O  
HETATM  439  O   HOH T 438       4.289 -20.327  36.487  1.00  0.55           O  
HETATM  440  O   HOH T 439      -6.241   6.414  29.396  1.00  0.55           O  
HETATM  441  O   HOH T 440      34.131  -1.319  38.370  1.00  0.55           O  
HETATM  442  O   HOH T 441      22.162 -12.265   5.578  1.00  0.55           O  
HETATM  443  O   HOH T 442       1.626 -10.674  16.921  1.00  0.55           O  
HETATM  444  O   HOH T 443       4.797 -15.415  -0.758  1.00  0.55           O  
HETATM  445  O   HOH T 444       0.785  15.409  33.192  1.00  0.55           O  
HETATM  446  O   HOH T 445      21.148   7.155  14.272  1.00  0.56           O  
HETATM  447  O   HOH T 446      10.739   4.440  41.486  1.00  0.56           O  
HETATM  448  O   HOH T 447      11.424 -19.532  38.913  1.00  0.56           O  
HETATM  449  O   HOH T 448      30.848   0.824  46.149  1.00  0.56           O  
HETATM  450  O   HOH T 449       9.653  20.322  12.113  1.00  0.56           O  
HETATM  451  O   HOH T 450      34.788   3.323  13.749  1.00  0.56           O  
HETATM  452  O   HOH T 451      23.587  -0.849   8.948  1.00  0.56           O  
HETATM  453  O   HOH T 452      20.309 -17.024  -4.887  1.00  0.56           O  
HETATM  454  O   HOH T 453      34.594  -4.800  15.151  1.00  0.56           O  
HETATM  455  O   HOH T 454       2.336  16.235   2.407  1.00  0.56           O  
HETATM  456  O   HOH T 455      20.270 -14.735  12.248  1.00  0.56           O  
HETATM  457  O   HOH T 456      18.386  10.082  43.066  1.00  0.57           O  
HETATM  458  O   HOH T 457      26.043 -12.219  11.353  1.00  0.57           O  
HETATM  459  O   HOH T 458       8.887   5.025   2.369  1.00  0.57           O  
HETATM  460  O   HOH T 459      -4.889  -4.011  48.850  1.00  0.57           O  
HETATM  461  O   HOH T 460     -11.405   4.843  16.983  1.00  0.57           O  
HETATM  462  O   HOH T 461       8.935  20.252  23.595  1.00  0.58           O  
HETATM  463  O   HOH T 462      38.398  12.858  21.760  1.00  0.58           O  
HETATM  464  O   HOH T 463      -0.866  -3.217  -1.594  1.00  0.58           O  
HETATM  465  O   HOH T 464      22.096  -4.100  49.292  1.00  0.58           O  
HETATM  466  O   HOH T 465       6.585  18.001  24.277  1.00  0.59           O  
HETATM  467  O   HOH T 466      16.151  19.811  23.447  1.00  0.59           O  
HETATM  468  O   HOH T 467      33.677   8.188  14.629  1.00  0.59           O  
HETATM  469  O   HOH T 468      22.072 -13.090   1.477  1.00  0.60           O  
HETATM  470  O   HOH T 469      20.290   2.783   4.178  1.00  0.60           O  
TER     471      HOH T 469 
