# Supplementary material for: Accurate Prediction of Hydration Sites of Proteins Using Energy Model With Atom Embedding
Source: Front Mol Biosci. 2021 Sep 20;8:756075. doi: 10.3389/fmolb.2021.756075 (PMC8488165; doi:10.3389/fmolb.2021.756075)
Supplement: Supplementary file 1 [file DataSheet1.ZIP › Data Sheet 1/Our_result_pdb/our_dataset_output/2JDC_watersite.pdb]

HEADER                                                        XXXX


JRNL        PMID   -1
HETATM    1  O   HOH T   0      13.381   0.875  24.159  1.00  0.16           O  
HETATM    2  O   HOH T   1      16.439   3.807  -0.698  1.00  0.19           O  
HETATM    3  O   HOH T   2      15.455 -19.130  19.429  1.00  0.19           O  
HETATM    4  O   HOH T   3      25.882   9.441  24.893  1.00  0.20           O  
HETATM    5  O   HOH T   4      30.485   6.346   3.509  1.00  0.20           O  
HETATM    6  O   HOH T   5      21.792  -0.129  17.549  1.00  0.20           O  
HETATM    7  O   HOH T   6      13.071 -10.932  22.335  1.00  0.20           O  
HETATM    8  O   HOH T   7      35.549   2.169  13.526  1.00  0.21           O  
HETATM    9  O   HOH T   8      36.323   5.447  20.408  1.00  0.23           O  
HETATM   10  O   HOH T   9       6.483  -4.765  12.263  1.00  0.23           O  
HETATM   11  O   HOH T  10      24.493   3.640  14.978  1.00  0.23           O  
HETATM   12  O   HOH T  11      12.214 -10.301   0.428  1.00  0.24           O  
HETATM   13  O   HOH T  12      11.209   2.219  -0.384  1.00  0.24           O  
HETATM   14  O   HOH T  13      18.074  -1.017  24.431  1.00  0.24           O  
HETATM   15  O   HOH T  14       7.342  -1.848  15.378  1.00  0.24           O  
HETATM   16  O   HOH T  15      34.149   6.600   4.617  1.00  0.24           O  
HETATM   17  O   HOH T  16      17.112  10.257  17.338  1.00  0.24           O  
HETATM   18  O   HOH T  17      29.208   8.018  -1.299  1.00  0.25           O  
HETATM   19  O   HOH T  18      12.294 -16.143   9.841  1.00  0.25           O  
HETATM   20  O   HOH T  19      30.793  12.736  13.451  1.00  0.26           O  
HETATM   21  O   HOH T  20      42.531   1.797   8.562  1.00  0.26           O  
HETATM   22  O   HOH T  21       9.784   7.144  27.126  1.00  0.26           O  
HETATM   23  O   HOH T  22      32.230  -9.650  20.106  1.00  0.26           O  
HETATM   24  O   HOH T  23      13.379  -7.397   7.511  1.00  0.27           O  
HETATM   25  O   HOH T  24      35.827  -2.990  20.125  1.00  0.27           O  
HETATM   26  O   HOH T  25      29.179  -0.681  14.420  1.00  0.27           O  
HETATM   27  O   HOH T  26      27.543  -2.874  14.375  1.00  0.27           O  
HETATM   28  O   HOH T  27      14.928   8.993  10.618  1.00  0.28           O  
HETATM   29  O   HOH T  28      31.786  -6.202   5.391  1.00  0.28           O  
HETATM   30  O   HOH T  29      27.402   1.879   9.306  1.00  0.28           O  
HETATM   31  O   HOH T  30      34.689  -3.981  11.030  1.00  0.28           O  
HETATM   32  O   HOH T  31      20.324   3.033 -12.543  1.00  0.29           O  
HETATM   33  O   HOH T  32      25.182  15.645  14.770  1.00  0.29           O  
HETATM   34  O   HOH T  33      22.551  -6.635  31.412  1.00  0.29           O  
HETATM   35  O   HOH T  34      34.521  -1.642   0.002  1.00  0.30           O  
HETATM   36  O   HOH T  35      35.680  -3.934   8.393  1.00  0.30           O  
HETATM   37  O   HOH T  36      10.124 -16.431   8.077  1.00  0.30           O  
HETATM   38  O   HOH T  37       9.014   7.096   4.062  1.00  0.30           O  
HETATM   39  O   HOH T  38      10.832 -18.672  15.844  1.00  0.30           O  
HETATM   40  O   HOH T  39      21.165   4.935  27.372  1.00  0.30           O  
HETATM   41  O   HOH T  40      30.108  -2.909  13.165  1.00  0.30           O  
HETATM   42  O   HOH T  41      19.536   7.016  27.942  1.00  0.31           O  
HETATM   43  O   HOH T  42      21.936  -6.523  -4.739  1.00  0.31           O  
HETATM   44  O   HOH T  43      31.291   3.423  19.719  1.00  0.31           O  
HETATM   45  O   HOH T  44      15.250  17.088   0.919  1.00  0.31           O  
HETATM   46  O   HOH T  45      25.320 -20.314   0.538  1.00  0.31           O  
HETATM   47  O   HOH T  46      10.098 -10.502  14.638  1.00  0.31           O  
HETATM   48  O   HOH T  47      37.303   4.619  24.007  1.00  0.32           O  
HETATM   49  O   HOH T  48      20.440  13.331   8.375  1.00  0.32           O  
HETATM   50  O   HOH T  49       9.193   6.663  11.610  1.00  0.32           O  
HETATM   51  O   HOH T  50      14.462  10.368  16.464  1.00  0.32           O  
HETATM   52  O   HOH T  51      13.574   7.284   3.837  1.00  0.32           O  
HETATM   53  O   HOH T  52       6.166   5.201  23.808  1.00  0.32           O  
HETATM   54  O   HOH T  53       8.523   7.134  19.606  1.00  0.33           O  
HETATM   55  O   HOH T  54      23.081  -7.988  33.827  1.00  0.33           O  
HETATM   56  O   HOH T  55      27.299  -1.675  20.302  1.00  0.33           O  
HETATM   57  O   HOH T  56      31.943   4.190  -3.014  1.00  0.33           O  
HETATM   58  O   HOH T  57      29.979   3.987 -12.384  1.00  0.33           O  
HETATM   59  O   HOH T  58      12.207  -9.688  24.761  1.00  0.33           O  
HETATM   60  O   HOH T  59      12.704 -10.754   3.184  1.00  0.34           O  
HETATM   61  O   HOH T  60      24.795  -2.328  23.815  1.00  0.34           O  
HETATM   62  O   HOH T  61      17.874 -17.732  11.983  1.00  0.34           O  
HETATM   63  O   HOH T  62      29.878   1.085  18.980  1.00  0.34           O  
HETATM   64  O   HOH T  63      38.388   6.714   3.249  1.00  0.34           O  
HETATM   65  O   HOH T  64      20.645  12.680  -5.567  1.00  0.34           O  
HETATM   66  O   HOH T  65      12.860 -22.121  10.103  1.00  0.34           O  
HETATM   67  O   HOH T  66       6.040  -2.508  17.803  1.00  0.34           O  
HETATM   68  O   HOH T  67      19.394 -12.238  26.366  1.00  0.35           O  
HETATM   69  O   HOH T  68       8.319  -8.363  15.076  1.00  0.35           O  
HETATM   70  O   HOH T  69      31.608 -12.316  19.783  1.00  0.35           O  
HETATM   71  O   HOH T  70      16.051  -1.384  30.836  1.00  0.35           O  
HETATM   72  O   HOH T  71      27.265  -4.271  21.339  1.00  0.36           O  
HETATM   73  O   HOH T  72      31.494   6.357  -5.939  1.00  0.36           O  
HETATM   74  O   HOH T  73      25.912  16.370  17.436  1.00  0.36           O  
HETATM   75  O   HOH T  74      37.342  -0.613  20.332  1.00  0.36           O  
HETATM   76  O   HOH T  75      35.418  -4.997  -6.940  1.00  0.36           O  
HETATM   77  O   HOH T  76      27.016  14.382  24.152  1.00  0.36           O  
HETATM   78  O   HOH T  77      41.803   8.742  16.630  1.00  0.36           O  
HETATM   79  O   HOH T  78       7.257   1.000  15.307  1.00  0.37           O  
HETATM   80  O   HOH T  79      16.366  11.189  14.665  1.00  0.37           O  
HETATM   81  O   HOH T  80      27.660   7.752  26.134  1.00  0.37           O  
HETATM   82  O   HOH T  81       9.129   9.451  11.357  1.00  0.37           O  
HETATM   83  O   HOH T  82      41.739  -0.030  18.674  1.00  0.37           O  
HETATM   84  O   HOH T  83      14.402   8.687   7.927  1.00  0.38           O  
HETATM   85  O   HOH T  84       9.052   4.672  18.430  1.00  0.38           O  
HETATM   86  O   HOH T  85      29.962  17.827  18.962  1.00  0.38           O  
HETATM   87  O   HOH T  86      22.874   2.267  16.652  1.00  0.38           O  
HETATM   88  O   HOH T  87      12.439   0.681  28.940  1.00  0.38           O  
HETATM   89  O   HOH T  88      21.649  15.177  -5.611  1.00  0.39           O  
HETATM   90  O   HOH T  89      27.308  17.426  19.528  1.00  0.39           O  
HETATM   91  O   HOH T  90      28.099  19.753  18.267  1.00  0.39           O  
HETATM   92  O   HOH T  91      36.714  -2.381  11.994  1.00  0.39           O  
HETATM   93  O   HOH T  92      24.008  -8.156  -4.121  1.00  0.39           O  
HETATM   94  O   HOH T  93      21.143 -21.790   7.119  1.00  0.39           O  
HETATM   95  O   HOH T  94      16.855  10.425  11.913  1.00  0.39           O  
HETATM   96  O   HOH T  95      22.756  14.201  14.486  1.00  0.39           O  
HETATM   97  O   HOH T  96      20.113 -20.179  16.147  1.00  0.40           O  
HETATM   98  O   HOH T  97      23.257   1.582  19.375  1.00  0.40           O  
HETATM   99  O   HOH T  98      24.279 -20.118  18.201  1.00  0.40           O  
HETATM  100  O   HOH T  99      30.873 -12.898  17.165  1.00  0.40           O  
HETATM  101  O   HOH T 100      25.901   9.041  20.886  1.00  0.40           O  
HETATM  102  O   HOH T 101       6.886   4.574  16.736  1.00  0.40           O  
HETATM  103  O   HOH T 102      30.840   7.433   0.933  1.00  0.41           O  
HETATM  104  O   HOH T 103      42.013  10.448  14.430  1.00  0.41           O  
HETATM  105  O   HOH T 104      44.186  -1.211  19.410  1.00  0.41           O  
HETATM  106  O   HOH T 105      25.861  13.723  16.664  1.00  0.41           O  
HETATM  107  O   HOH T 106      21.980   7.493  26.609  1.00  0.41           O  
HETATM  108  O   HOH T 107      29.153  16.240  21.194  1.00  0.41           O  
HETATM  109  O   HOH T 108       8.135  -9.894  12.726  1.00  0.41           O  
HETATM  110  O   HOH T 109      21.255   2.277  12.994  1.00  0.41           O  
HETATM  111  O   HOH T 110      29.096  -6.018  22.581  1.00  0.41           O  
HETATM  112  O   HOH T 111      17.691  -4.160  -4.145  1.00  0.41           O  
HETATM  113  O   HOH T 112      21.648  16.205   1.404  1.00  0.41           O  
HETATM  114  O   HOH T 113      34.523  -4.424  -0.001  1.00  0.42           O  
HETATM  115  O   HOH T 114      32.946   6.036   2.164  1.00  0.42           O  
HETATM  116  O   HOH T 115      22.303  14.962   7.293  1.00  0.42           O  
HETATM  117  O   HOH T 116      21.582  13.161  12.202  1.00  0.42           O  
HETATM  118  O   HOH T 117      23.790 -22.246   8.025  1.00  0.42           O  
HETATM  119  O   HOH T 118      14.638  -1.022  28.438  1.00  0.42           O  
HETATM  120  O   HOH T 119      27.775   2.344 -12.327  1.00  0.42           O  
HETATM  121  O   HOH T 120      21.580   3.631  18.618  1.00  0.42           O  
HETATM  122  O   HOH T 121      20.129 -10.005  -0.806  1.00  0.43           O  
HETATM  123  O   HOH T 122      35.764   6.132  25.760  1.00  0.43           O  
HETATM  124  O   HOH T 123      19.966  11.630  10.489  1.00  0.43           O  
HETATM  125  O   HOH T 124      19.338 -11.388  30.622  1.00  0.43           O  
HETATM  126  O   HOH T 125       6.059  -4.094  20.056  1.00  0.43           O  
HETATM  127  O   HOH T 126      10.346 -11.438  21.714  1.00  0.43           O  
HETATM  128  O   HOH T 127      19.145 -23.625   6.516  1.00  0.43           O  
HETATM  129  O   HOH T 128      16.801 -20.310  12.374  1.00  0.43           O  
HETATM  130  O   HOH T 129       6.843   3.418   6.468  1.00  0.44           O  
HETATM  131  O   HOH T 130      37.299   0.330  12.314  1.00  0.44           O  
HETATM  132  O   HOH T 131       6.649   3.230  21.846  1.00  0.44           O  
HETATM  133  O   HOH T 132      34.909  -0.791  23.025  1.00  0.44           O  
HETATM  134  O   HOH T 133      21.956  14.833  10.062  1.00  0.44           O  
HETATM  135  O   HOH T 134      10.377  11.836  14.640  1.00  0.45           O  
HETATM  136  O   HOH T 135      29.866  -7.819   4.505  1.00  0.45           O  
HETATM  137  O   HOH T 136      11.171   8.582   4.974  1.00  0.45           O  
HETATM  138  O   HOH T 137      29.093  13.711  22.559  1.00  0.45           O  
HETATM  139  O   HOH T 138       6.896   5.584   4.830  1.00  0.45           O  
HETATM  140  O   HOH T 139      34.377  -6.187   9.366  1.00  0.45           O  
HETATM  141  O   HOH T 140      21.557  -8.360  -2.527  1.00  0.45           O  
HETATM  142  O   HOH T 141      18.215 -15.395  25.441  1.00  0.45           O  
HETATM  143  O   HOH T 142      43.070  -5.515  12.488  1.00  0.45           O  
HETATM  144  O   HOH T 143      15.749  16.973  23.085  1.00  0.45           O  
HETATM  145  O   HOH T 144      18.631  -6.005  31.908  1.00  0.45           O  
HETATM  146  O   HOH T 145      28.660  -1.916 -10.034  1.00  0.45           O  
HETATM  147  O   HOH T 146      12.462 -24.304   8.416  1.00  0.45           O  
HETATM  148  O   HOH T 147      21.314  12.311   3.887  1.00  0.45           O  
HETATM  149  O   HOH T 148       6.972 -19.437  13.172  1.00  0.45           O  
HETATM  150  O   HOH T 149      39.169   1.079  19.170  1.00  0.46           O  
HETATM  151  O   HOH T 150      10.232 -11.579  12.001  1.00  0.46           O  
HETATM  152  O   HOH T 151      16.700 -15.476  29.119  1.00  0.46           O  
HETATM  153  O   HOH T 152       8.471   6.845  16.822  1.00  0.46           O  
HETATM  154  O   HOH T 153      37.258   8.644   1.423  1.00  0.46           O  
HETATM  155  O   HOH T 154       8.270 -17.825  15.038  1.00  0.46           O  
HETATM  156  O   HOH T 155       6.509   3.423  14.242  1.00  0.46           O  
HETATM  157  O   HOH T 156      39.014  -3.885  11.425  1.00  0.46           O  
HETATM  158  O   HOH T 157       7.529   2.904  24.499  1.00  0.46           O  
HETATM  159  O   HOH T 158      22.623 -21.075  16.253  1.00  0.46           O  
HETATM  160  O   HOH T 159      36.680  15.601  12.709  1.00  0.47           O  
HETATM  161  O   HOH T 160      44.864   1.153   9.928  1.00  0.47           O  
HETATM  162  O   HOH T 161      16.346  14.198  22.864  1.00  0.47           O  
HETATM  163  O   HOH T 162       6.797   5.941  21.288  1.00  0.47           O  
HETATM  164  O   HOH T 163      12.840 -10.450  27.433  1.00  0.47           O  
HETATM  165  O   HOH T 164      24.830   7.290  26.464  1.00  0.47           O  
HETATM  166  O   HOH T 165       5.653   0.646  21.811  1.00  0.47           O  
HETATM  167  O   HOH T 166      11.380 -13.594  10.526  1.00  0.48           O  
HETATM  168  O   HOH T 167      21.556  -5.802  -7.428  1.00  0.48           O  
HETATM  169  O   HOH T 168      21.910 -10.609  31.543  1.00  0.48           O  
HETATM  170  O   HOH T 169      12.113  11.647  16.868  1.00  0.48           O  
HETATM  171  O   HOH T 170       7.305  -0.776  23.523  1.00  0.48           O  
HETATM  172  O   HOH T 171      16.156  -1.774  -4.228  1.00  0.48           O  
HETATM  173  O   HOH T 172      25.143 -20.249  15.509  1.00  0.48           O  
HETATM  174  O   HOH T 173      27.020  -0.787  22.903  1.00  0.48           O  
HETATM  175  O   HOH T 174      23.445  15.376  16.901  1.00  0.49           O  
HETATM  176  O   HOH T 175       5.763  -4.015  14.751  1.00  0.49           O  
HETATM  177  O   HOH T 176       9.877 -13.949  12.848  1.00  0.49           O  
HETATM  178  O   HOH T 177      16.894  -6.196  -2.335  1.00  0.49           O  
HETATM  179  O   HOH T 178      19.043 -14.508  27.959  1.00  0.49           O  
HETATM  180  O   HOH T 179      19.381  -5.787  -5.728  1.00  0.49           O  
HETATM  181  O   HOH T 180       4.794   3.356  26.926  1.00  0.50           O  
HETATM  182  O   HOH T 181      27.763   1.024  20.810  1.00  0.50           O  
HETATM  183  O   HOH T 182      22.731 -22.389  18.657  1.00  0.50           O  
HETATM  184  O   HOH T 183      21.429 -19.834  18.447  1.00  0.50           O  
HETATM  185  O   HOH T 184       7.949  -3.916  25.957  1.00  0.51           O  
HETATM  186  O   HOH T 185      12.785  10.394   1.798  1.00  0.51           O  
HETATM  187  O   HOH T 186       9.616  -9.273  23.375  1.00  0.51           O  
HETATM  188  O   HOH T 187      15.086  -4.259  -3.342  1.00  0.51           O  
HETATM  189  O   HOH T 188      19.657 -11.949  -2.739  1.00  0.51           O  
HETATM  190  O   HOH T 189      17.219  16.870   6.407  1.00  0.51           O  
HETATM  191  O   HOH T 190      11.927   2.549  31.235  1.00  0.51           O  
HETATM  192  O   HOH T 191      19.656  15.683   7.146  1.00  0.51           O  
HETATM  193  O   HOH T 192      25.889  16.496   6.424  1.00  0.51           O  
HETATM  194  O   HOH T 193      13.656   9.613   5.434  1.00  0.51           O  
HETATM  195  O   HOH T 194      19.026 -19.405  13.837  1.00  0.52           O  
HETATM  196  O   HOH T 195      28.616  10.032  24.955  1.00  0.52           O  
HETATM  197  O   HOH T 196      12.357  -7.968  28.246  1.00  0.52           O  
HETATM  198  O   HOH T 197       7.782  -5.118  23.520  1.00  0.52           O  
HETATM  199  O   HOH T 198      19.290 -20.427   8.706  1.00  0.52           O  
HETATM  200  O   HOH T 199      25.811  -6.671  -5.823  1.00  0.52           O  
HETATM  201  O   HOH T 200       5.482 -10.357  12.678  1.00  0.52           O  
HETATM  202  O   HOH T 201      23.527 -22.631   3.146  1.00  0.52           O  
HETATM  203  O   HOH T 202      38.783  15.480  14.615  1.00  0.52           O  
HETATM  204  O   HOH T 203      20.703  13.806  22.570  1.00  0.52           O  
HETATM  205  O   HOH T 204      35.726   6.522   2.329  1.00  0.53           O  
HETATM  206  O   HOH T 205      16.183  14.409   5.645  1.00  0.53           O  
HETATM  207  O   HOH T 206      15.414  15.317   3.204  1.00  0.53           O  
HETATM  208  O   HOH T 207      26.995 -16.325   7.059  1.00  0.53           O  
HETATM  209  O   HOH T 208      41.642  -3.178  12.178  1.00  0.53           O  
HETATM  210  O   HOH T 209      34.706  -5.748   2.368  1.00  0.53           O  
HETATM  211  O   HOH T 210      28.768   5.529 -15.558  1.00  0.54           O  
HETATM  212  O   HOH T 211      29.269  21.083  16.193  1.00  0.54           O  
HETATM  213  O   HOH T 212      29.329  17.767   8.955  1.00  0.54           O  
HETATM  214  O   HOH T 213      29.659 -11.353  15.165  1.00  0.54           O  
HETATM  215  O   HOH T 214       8.616   9.848  14.012  1.00  0.55           O  
HETATM  216  O   HOH T 215      18.920   0.850 -13.711  1.00  0.55           O  
HETATM  217  O   HOH T 216       5.514   1.727   9.530  1.00  0.55           O  
HETATM  218  O   HOH T 217      42.975  12.282  16.245  1.00  0.55           O  
HETATM  219  O   HOH T 218      11.231  10.727  10.302  1.00  0.55           O  
HETATM  220  O   HOH T 219       6.305  -4.029   4.729  1.00  0.55           O  
HETATM  221  O   HOH T 220      31.609  17.859  12.300  1.00  0.55           O  
HETATM  222  O   HOH T 221      20.600 -13.788  30.171  1.00  0.56           O  
HETATM  223  O   HOH T 222      29.159   5.003  19.461  1.00  0.56           O  
HETATM  224  O   HOH T 223      37.247 -16.293  16.133  1.00  0.56           O  
HETATM  225  O   HOH T 224       4.932  -1.638  20.325  1.00  0.56           O  
HETATM  226  O   HOH T 225      15.091 -10.707  29.248  1.00  0.56           O  
HETATM  227  O   HOH T 226      23.490  -5.670 -11.309  1.00  0.56           O  
HETATM  228  O   HOH T 227      20.489  -7.506  33.209  1.00  0.56           O  
HETATM  229  O   HOH T 228      26.351  16.427   4.009  1.00  0.56           O  
HETATM  230  O   HOH T 229      13.658  -0.914  -5.295  1.00  0.56           O  
HETATM  231  O   HOH T 230      25.014   2.243 -12.307  1.00  0.56           O  
HETATM  232  O   HOH T 231       7.964  -9.168  17.751  1.00  0.56           O  
HETATM  233  O   HOH T 232      29.025   0.015 -13.052  1.00  0.57           O  
HETATM  234  O   HOH T 233      27.811   1.806  23.528  1.00  0.57           O  
HETATM  235  O   HOH T 234      28.204 -18.605  13.724  1.00  0.57           O  
HETATM  236  O   HOH T 235      13.727   3.099  29.195  1.00  0.57           O  
HETATM  237  O   HOH T 236      32.384 -14.712  20.389  1.00  0.58           O  
HETATM  238  O   HOH T 237      10.653  -8.807  -2.890  1.00  0.59           O  
HETATM  239  O   HOH T 238      30.050  -8.193  21.008  1.00  0.59           O  
HETATM  240  O   HOH T 239      23.748 -22.023  10.747  1.00  0.59           O  
TER     241      HOH T 239 
