# Supplementary material for: Accurate Prediction of Hydration Sites of Proteins Using Energy Model With Atom Embedding
Source: Front Mol Biosci. 2021 Sep 20;8:756075. doi: 10.3389/fmolb.2021.756075 (PMC8488165; doi:10.3389/fmolb.2021.756075)
Supplement: Supplementary file 1 [file DataSheet1.ZIP › Data Sheet 1/Our_result_pdb/our_dataset_output/2JIK_watersite.pdb]

HEADER                                                        XXXX


JRNL        PMID   -1
HETATM    1  O   HOH T   0      21.653   1.686  35.017  1.00  0.17           O  
HETATM    2  O   HOH T   1       8.986  -8.285 -12.293  1.00  0.17           O  
HETATM    3  O   HOH T   2      19.635   1.073  18.674  1.00  0.17           O  
HETATM    4  O   HOH T   3      10.643  -9.636  14.391  1.00  0.17           O  
HETATM    5  O   HOH T   4      11.064   0.501  10.869  1.00  0.18           O  
HETATM    6  O   HOH T   5      25.048  14.017  30.361  1.00  0.19           O  
HETATM    7  O   HOH T   6      18.090  -4.008  14.321  1.00  0.20           O  
HETATM    8  O   HOH T   7       1.713   0.204  -7.784  1.00  0.20           O  
HETATM    9  O   HOH T   8      24.987  -3.493  17.134  1.00  0.20           O  
HETATM   10  O   HOH T   9      -1.028  -4.453  -4.758  1.00  0.20           O  
HETATM   11  O   HOH T  10       8.903   0.687  -5.625  1.00  0.20           O  
HETATM   12  O   HOH T  11      12.904  -4.153  15.512  1.00  0.21           O  
HETATM   13  O   HOH T  12       7.349   1.731  12.162  1.00  0.22           O  
HETATM   14  O   HOH T  13      28.944  -8.592  39.332  1.00  0.22           O  
HETATM   15  O   HOH T  14      23.122   2.837  39.870  1.00  0.22           O  
HETATM   16  O   HOH T  15      23.491  -0.799  38.089  1.00  0.23           O  
HETATM   17  O   HOH T  16      -2.326  -6.732 -17.540  1.00  0.23           O  
HETATM   18  O   HOH T  17      10.599 -10.807  16.879  1.00  0.23           O  
HETATM   19  O   HOH T  18      29.086   2.441  36.091  1.00  0.23           O  
HETATM   20  O   HOH T  19      23.294  -8.350  16.983  1.00  0.23           O  
HETATM   21  O   HOH T  20       7.050  -2.356  -9.085  1.00  0.23           O  
HETATM   22  O   HOH T  21       5.918  -4.164  12.500  1.00  0.23           O  
HETATM   23  O   HOH T  22       5.876   8.337   4.478  1.00  0.24           O  
HETATM   24  O   HOH T  23       9.957  10.922  29.009  1.00  0.24           O  
HETATM   25  O   HOH T  24       2.673 -10.455  -9.371  1.00  0.24           O  
HETATM   26  O   HOH T  25       5.336  13.099  -0.980  1.00  0.24           O  
HETATM   27  O   HOH T  26       9.280  18.431 -11.928  1.00  0.24           O  
HETATM   28  O   HOH T  27      24.705   9.317  24.764  1.00  0.25           O  
HETATM   29  O   HOH T  28      -2.240  -2.091  -5.436  1.00  0.25           O  
HETATM   30  O   HOH T  29      23.263   2.249  17.269  1.00  0.26           O  
HETATM   31  O   HOH T  30       4.868  -2.262  18.184  1.00  0.26           O  
HETATM   32  O   HOH T  31      30.467  21.094  39.701  1.00  0.26           O  
HETATM   33  O   HOH T  32      31.071  -7.785  43.318  1.00  0.26           O  
HETATM   34  O   HOH T  33      16.522  16.344  30.497  1.00  0.26           O  
HETATM   35  O   HOH T  34      16.227  -2.222  13.232  1.00  0.27           O  
HETATM   36  O   HOH T  35      18.365   8.658  -3.856  1.00  0.27           O  
HETATM   37  O   HOH T  36      11.323   7.742  23.339  1.00  0.27           O  
HETATM   38  O   HOH T  37      14.644  -2.153  16.536  1.00  0.27           O  
HETATM   39  O   HOH T  38      13.345  11.004  -3.069  1.00  0.28           O  
HETATM   40  O   HOH T  39      39.182   8.018  34.485  1.00  0.28           O  
HETATM   41  O   HOH T  40      30.112   0.734  44.883  1.00  0.28           O  
HETATM   42  O   HOH T  41      15.309   2.790  14.757  1.00  0.28           O  
HETATM   43  O   HOH T  42       3.093 -10.690  10.588  1.00  0.29           O  
HETATM   44  O   HOH T  43       9.556   8.810  27.205  1.00  0.29           O  
HETATM   45  O   HOH T  44       7.006  -5.893 -14.425  1.00  0.29           O  
HETATM   46  O   HOH T  45      20.123   9.746   0.636  1.00  0.29           O  
HETATM   47  O   HOH T  46      19.857   6.958   5.609  1.00  0.30           O  
HETATM   48  O   HOH T  47      24.388  -3.912  43.841  1.00  0.30           O  
HETATM   49  O   HOH T  48      29.983 -13.139  32.837  1.00  0.30           O  
HETATM   50  O   HOH T  49      23.653  -7.688  10.319  1.00  0.30           O  
HETATM   51  O   HOH T  50      20.152 -11.176   5.603  1.00  0.30           O  
HETATM   52  O   HOH T  51       9.143 -15.949   3.983  1.00  0.31           O  
HETATM   53  O   HOH T  52       6.554   2.260  14.836  1.00  0.31           O  
HETATM   54  O   HOH T  53      10.606 -10.640  23.936  1.00  0.31           O  
HETATM   55  O   HOH T  54      14.570  -4.398  13.361  1.00  0.31           O  
HETATM   56  O   HOH T  55      10.931  -8.429  36.940  1.00  0.31           O  
HETATM   57  O   HOH T  56      18.480  -1.651  -0.285  1.00  0.31           O  
HETATM   58  O   HOH T  57       5.656 -10.499   9.567  1.00  0.31           O  
HETATM   59  O   HOH T  58      25.109   5.856  37.273  1.00  0.31           O  
HETATM   60  O   HOH T  59      24.983   9.085  34.379  1.00  0.32           O  
HETATM   61  O   HOH T  60      21.607  -5.952   2.530  1.00  0.32           O  
HETATM   62  O   HOH T  61      10.451  18.240   4.241  1.00  0.32           O  
HETATM   63  O   HOH T  62      25.177  12.629  32.725  1.00  0.32           O  
HETATM   64  O   HOH T  63      19.653  27.785  37.551  1.00  0.32           O  
HETATM   65  O   HOH T  64      17.332  -1.737  40.337  1.00  0.32           O  
HETATM   66  O   HOH T  65      24.336   2.751  14.628  1.00  0.32           O  
HETATM   67  O   HOH T  66      28.582   0.224  15.558  1.00  0.32           O  
HETATM   68  O   HOH T  67      19.270   5.282   1.553  1.00  0.32           O  
HETATM   69  O   HOH T  68      16.501  -4.228  16.554  1.00  0.33           O  
HETATM   70  O   HOH T  69      13.863  -3.388 -10.567  1.00  0.33           O  
HETATM   71  O   HOH T  70       7.264  -8.908  19.257  1.00  0.33           O  
HETATM   72  O   HOH T  71      10.512 -13.334  -7.868  1.00  0.33           O  
HETATM   73  O   HOH T  72       0.657   5.887  -4.929  1.00  0.33           O  
HETATM   74  O   HOH T  73      16.531  20.963  -9.630  1.00  0.33           O  
HETATM   75  O   HOH T  74      22.643  -8.103  13.012  1.00  0.33           O  
HETATM   76  O   HOH T  75      15.956 -17.386   0.333  1.00  0.33           O  
HETATM   77  O   HOH T  76      10.541   2.006  19.426  1.00  0.33           O  
HETATM   78  O   HOH T  77       4.428   4.083 -12.802  1.00  0.33           O  
HETATM   79  O   HOH T  78       6.421 -13.287   9.715  1.00  0.33           O  
HETATM   80  O   HOH T  79      30.895 -10.941  27.340  1.00  0.33           O  
HETATM   81  O   HOH T  80      25.957   2.842  43.511  1.00  0.34           O  
HETATM   82  O   HOH T  81       9.292 -11.698   4.858  1.00  0.34           O  
HETATM   83  O   HOH T  82      15.545  -5.233  38.343  1.00  0.34           O  
HETATM   84  O   HOH T  83      29.680 -10.432  32.899  1.00  0.34           O  
HETATM   85  O   HOH T  84       6.990 -16.344  23.022  1.00  0.34           O  
HETATM   86  O   HOH T  85      12.370  18.073  29.609  1.00  0.34           O  
HETATM   87  O   HOH T  86      -1.485  -2.425  12.218  1.00  0.34           O  
HETATM   88  O   HOH T  87      18.740   7.446  -0.113  1.00  0.34           O  
HETATM   89  O   HOH T  88      17.357  17.771  28.229  1.00  0.34           O  
HETATM   90  O   HOH T  89      28.548  -0.496   7.842  1.00  0.34           O  
HETATM   91  O   HOH T  90      23.120   2.863  -3.910  1.00  0.34           O  
HETATM   92  O   HOH T  91      28.653 -15.413  33.741  1.00  0.34           O  
HETATM   93  O   HOH T  92      16.328  18.033  24.511  1.00  0.34           O  
HETATM   94  O   HOH T  93      11.307   2.241  35.846  1.00  0.35           O  
HETATM   95  O   HOH T  94      -2.831  10.525  -7.531  1.00  0.35           O  
HETATM   96  O   HOH T  95      21.855 -17.631  15.947  1.00  0.35           O  
HETATM   97  O   HOH T  96      -4.350  -3.174   6.106  1.00  0.35           O  
HETATM   98  O   HOH T  97       8.142  -7.331  27.136  1.00  0.35           O  
HETATM   99  O   HOH T  98       0.211  12.482 -15.215  1.00  0.35           O  
HETATM  100  O   HOH T  99      11.807   7.514   9.765  1.00  0.35           O  
HETATM  101  O   HOH T 100      27.748  21.239  39.083  1.00  0.35           O  
HETATM  102  O   HOH T 101       5.647   8.068  -4.832  1.00  0.36           O  
HETATM  103  O   HOH T 102      20.956   1.190  46.468  1.00  0.36           O  
HETATM  104  O   HOH T 103      12.169 -13.058  39.662  1.00  0.36           O  
HETATM  105  O   HOH T 104      -4.002   7.579 -15.006  1.00  0.36           O  
HETATM  106  O   HOH T 105      15.621   8.316  40.326  1.00  0.36           O  
HETATM  107  O   HOH T 106      21.497 -12.460  38.406  1.00  0.36           O  
HETATM  108  O   HOH T 107       2.420  25.257   2.632  1.00  0.36           O  
HETATM  109  O   HOH T 108      15.509 -11.730  -1.618  1.00  0.37           O  
HETATM  110  O   HOH T 109      31.324   9.592  24.052  1.00  0.37           O  
HETATM  111  O   HOH T 110      10.325  -8.001  16.593  1.00  0.37           O  
HETATM  112  O   HOH T 111      11.427   8.558  29.298  1.00  0.37           O  
HETATM  113  O   HOH T 112       3.850  -0.683  21.933  1.00  0.37           O  
HETATM  114  O   HOH T 113       0.396   3.342   1.420  1.00  0.37           O  
HETATM  115  O   HOH T 114      17.293 -12.269  14.122  1.00  0.37           O  
HETATM  116  O   HOH T 115      -1.376  -4.233  14.386  1.00  0.37           O  
HETATM  117  O   HOH T 116      12.967  17.992   3.166  1.00  0.37           O  
HETATM  118  O   HOH T 117       8.726   6.785  23.326  1.00  0.37           O  
HETATM  119  O   HOH T 118       4.446  17.662   7.087  1.00  0.37           O  
HETATM  120  O   HOH T 119       1.348 -11.086  -5.705  1.00  0.37           O  
HETATM  121  O   HOH T 120       4.397  -9.112  14.364  1.00  0.37           O  
HETATM  122  O   HOH T 121      18.960   8.107  19.441  1.00  0.37           O  
HETATM  123  O   HOH T 122      15.660   5.663  39.525  1.00  0.37           O  
HETATM  124  O   HOH T 123       8.810  15.822  -4.339  1.00  0.38           O  
HETATM  125  O   HOH T 124      14.016  19.873  -9.978  1.00  0.38           O  
HETATM  126  O   HOH T 125      21.602   2.880  37.527  1.00  0.38           O  
HETATM  127  O   HOH T 126      13.542  16.749   0.794  1.00  0.38           O  
HETATM  128  O   HOH T 127       8.148   0.273  -9.259  1.00  0.38           O  
HETATM  129  O   HOH T 128      21.929  14.489  26.171  1.00  0.38           O  
HETATM  130  O   HOH T 129      27.411  12.259  34.263  1.00  0.38           O  
HETATM  131  O   HOH T 130      18.047   6.154  10.303  1.00  0.38           O  
HETATM  132  O   HOH T 131      -1.175  -2.869  21.932  1.00  0.38           O  
HETATM  133  O   HOH T 132      -1.644  -8.389  -3.823  1.00  0.38           O  
HETATM  134  O   HOH T 133      21.767 -18.515  13.361  1.00  0.38           O  
HETATM  135  O   HOH T 134      17.696   5.401  37.656  1.00  0.38           O  
HETATM  136  O   HOH T 135      14.487 -12.930  -4.001  1.00  0.38           O  
HETATM  137  O   HOH T 136      21.237  17.207  25.389  1.00  0.38           O  
HETATM  138  O   HOH T 137       4.883  11.342  -3.097  1.00  0.38           O  
HETATM  139  O   HOH T 138      18.432 -13.749  35.815  1.00  0.39           O  
HETATM  140  O   HOH T 139      14.337 -13.387  38.123  1.00  0.39           O  
HETATM  141  O   HOH T 140      20.181  13.135  22.631  1.00  0.39           O  
HETATM  142  O   HOH T 141       2.256 -12.145  -2.336  1.00  0.39           O  
HETATM  143  O   HOH T 142      25.972  -8.604  17.547  1.00  0.39           O  
HETATM  144  O   HOH T 143      15.618  17.445  -1.075  1.00  0.39           O  
HETATM  145  O   HOH T 144       7.128  19.859 -12.968  1.00  0.39           O  
HETATM  146  O   HOH T 145      10.539  -6.539 -13.839  1.00  0.39           O  
HETATM  147  O   HOH T 146      14.692  18.402  30.895  1.00  0.39           O  
HETATM  148  O   HOH T 147       1.061   8.342  -7.301  1.00  0.39           O  
HETATM  149  O   HOH T 148       2.438  -0.398  14.091  1.00  0.39           O  
HETATM  150  O   HOH T 149       8.517  -5.610  29.270  1.00  0.39           O  
HETATM  151  O   HOH T 150      -3.047 -13.557  -9.653  1.00  0.40           O  
HETATM  152  O   HOH T 151       0.975   1.158  12.166  1.00  0.40           O  
HETATM  153  O   HOH T 152      22.760 -10.216  15.050  1.00  0.40           O  
HETATM  154  O   HOH T 153      29.985   1.777  17.376  1.00  0.40           O  
HETATM  155  O   HOH T 154      13.698  15.502  -1.540  1.00  0.40           O  
HETATM  156  O   HOH T 155      13.993  -1.962 -12.917  1.00  0.40           O  
HETATM  157  O   HOH T 156       0.148   7.051  -2.450  1.00  0.41           O  
HETATM  158  O   HOH T 157      -2.444 -11.529  -7.797  1.00  0.41           O  
HETATM  159  O   HOH T 158      -3.194  -4.701 -15.851  1.00  0.41           O  
HETATM  160  O   HOH T 159      11.500  -4.211 -14.952  1.00  0.41           O  
HETATM  161  O   HOH T 160      25.511  -9.219  20.435  1.00  0.41           O  
HETATM  162  O   HOH T 161       7.022  10.463  -4.674  1.00  0.41           O  
HETATM  163  O   HOH T 162       2.269 -10.284  13.157  1.00  0.41           O  
HETATM  164  O   HOH T 163      27.556  12.731  24.199  1.00  0.41           O  
HETATM  165  O   HOH T 164      -1.173 -11.080  -1.357  1.00  0.41           O  
HETATM  166  O   HOH T 165      -4.218  -3.418  16.039  1.00  0.41           O  
HETATM  167  O   HOH T 166       8.451 -11.609   8.317  1.00  0.41           O  
HETATM  168  O   HOH T 167      17.512  13.447  22.248  1.00  0.41           O  
HETATM  169  O   HOH T 168      22.262  -1.819  -5.506  1.00  0.41           O  
HETATM  170  O   HOH T 169      11.622   7.086  -7.308  1.00  0.41           O  
HETATM  171  O   HOH T 170      27.043   9.477  26.398  1.00  0.41           O  
HETATM  172  O   HOH T 171      23.502   6.003  17.482  1.00  0.41           O  
HETATM  173  O   HOH T 172      26.125  -2.233   6.468  1.00  0.41           O  
HETATM  174  O   HOH T 173       0.938  22.412  -3.987  1.00  0.41           O  
HETATM  175  O   HOH T 174      37.408  -4.773  38.136  1.00  0.42           O  
HETATM  176  O   HOH T 175      20.678  -2.506  45.071  1.00  0.42           O  
HETATM  177  O   HOH T 176      35.588  -4.000  42.106  1.00  0.42           O  
HETATM  178  O   HOH T 177      23.658  -2.041   7.808  1.00  0.42           O  
HETATM  179  O   HOH T 178      26.780  20.443  23.493  1.00  0.42           O  
HETATM  180  O   HOH T 179       9.628  -5.681  25.325  1.00  0.42           O  
HETATM  181  O   HOH T 180      -2.642  -8.298   4.664  1.00  0.42           O  
HETATM  182  O   HOH T 181      16.679 -16.853  29.197  1.00  0.42           O  
HETATM  183  O   HOH T 182       0.777   5.699  -0.124  1.00  0.42           O  
HETATM  184  O   HOH T 183      18.801  18.536  25.926  1.00  0.42           O  
HETATM  185  O   HOH T 184       3.701  24.304   0.364  1.00  0.42           O  
HETATM  186  O   HOH T 185      -0.327  -0.452  13.875  1.00  0.43           O  
HETATM  187  O   HOH T 186       9.240 -19.056  17.881  1.00  0.43           O  
HETATM  188  O   HOH T 187       8.143 -18.539   4.455  1.00  0.43           O  
HETATM  189  O   HOH T 188       9.108  15.915   4.351  1.00  0.43           O  
HETATM  190  O   HOH T 189       7.147 -20.294  16.703  1.00  0.43           O  
HETATM  191  O   HOH T 190      27.724  -7.715  21.753  1.00  0.43           O  
HETATM  192  O   HOH T 191      31.185 -12.975  25.529  1.00  0.43           O  
HETATM  193  O   HOH T 192      16.088   7.682  37.654  1.00  0.43           O  
HETATM  194  O   HOH T 193      21.302   7.594  18.001  1.00  0.43           O  
HETATM  195  O   HOH T 194      12.378  -9.893  25.950  1.00  0.43           O  
HETATM  196  O   HOH T 195       8.183   3.050  -8.818  1.00  0.43           O  
HETATM  197  O   HOH T 196       1.739   0.882  18.704  1.00  0.43           O  
HETATM  198  O   HOH T 197      11.335   6.099  28.020  1.00  0.43           O  
HETATM  199  O   HOH T 198      -4.773   0.859 -10.621  1.00  0.43           O  
HETATM  200  O   HOH T 199      19.519   5.752   8.046  1.00  0.43           O  
HETATM  201  O   HOH T 200      24.931 -11.813  25.628  1.00  0.44           O  
HETATM  202  O   HOH T 201      15.005  21.603 -11.853  1.00  0.44           O  
HETATM  203  O   HOH T 202      20.149   0.047  -4.790  1.00  0.44           O  
HETATM  204  O   HOH T 203      13.435  13.039  -4.918  1.00  0.44           O  
HETATM  205  O   HOH T 204       8.044 -18.068  15.511  1.00  0.44           O  
HETATM  206  O   HOH T 205      13.075   1.647  -7.047  1.00  0.44           O  
HETATM  207  O   HOH T 206      30.038  -2.820   7.859  1.00  0.44           O  
HETATM  208  O   HOH T 207      10.413   2.426  -7.238  1.00  0.44           O  
HETATM  209  O   HOH T 208       3.231  -0.419  16.835  1.00  0.44           O  
HETATM  210  O   HOH T 209       3.357   8.621   3.127  1.00  0.44           O  
HETATM  211  O   HOH T 210      24.539 -11.370  13.449  1.00  0.44           O  
HETATM  212  O   HOH T 211      12.646  -0.449 -14.977  1.00  0.45           O  
HETATM  213  O   HOH T 212      13.004  -2.651 -16.675  1.00  0.45           O  
HETATM  214  O   HOH T 213       0.298  -6.526  21.803  1.00  0.45           O  
HETATM  215  O   HOH T 214       4.706   2.417  12.810  1.00  0.45           O  
HETATM  216  O   HOH T 215      -2.324  -2.564 -12.599  1.00  0.45           O  
HETATM  217  O   HOH T 216      -6.527   3.295  -6.964  1.00  0.45           O  
HETATM  218  O   HOH T 217      -1.426 -10.711  -5.298  1.00  0.45           O  
HETATM  219  O   HOH T 218      17.493  -6.706  39.581  1.00  0.45           O  
HETATM  220  O   HOH T 219      25.225  -9.888  11.193  1.00  0.45           O  
HETATM  221  O   HOH T 220      15.215  -7.995  38.845  1.00  0.45           O  
HETATM  222  O   HOH T 221       8.670  -3.305  36.928  1.00  0.45           O  
HETATM  223  O   HOH T 222       3.881   1.696  15.273  1.00  0.45           O  
HETATM  224  O   HOH T 223      32.025   4.917  37.648  1.00  0.45           O  
HETATM  225  O   HOH T 224       8.085  -0.299 -16.849  1.00  0.45           O  
HETATM  226  O   HOH T 225      -7.397   5.936  -6.236  1.00  0.45           O  
HETATM  227  O   HOH T 226      33.470  -8.155  44.616  1.00  0.46           O  
HETATM  228  O   HOH T 227       4.846  17.479   9.809  1.00  0.46           O  
HETATM  229  O   HOH T 228      25.954  22.924  37.647  1.00  0.46           O  
HETATM  230  O   HOH T 229      15.288  27.570  38.386  1.00  0.46           O  
HETATM  231  O   HOH T 230       7.351   2.133 -11.217  1.00  0.46           O  
HETATM  232  O   HOH T 231      10.875 -16.503  24.015  1.00  0.46           O  
HETATM  233  O   HOH T 232      21.178 -13.841  25.582  1.00  0.46           O  
HETATM  234  O   HOH T 233       6.068  19.790   6.260  1.00  0.46           O  
HETATM  235  O   HOH T 234      -2.624  -1.733  14.619  1.00  0.46           O  
HETATM  236  O   HOH T 235       1.269  -1.603  21.913  1.00  0.46           O  
HETATM  237  O   HOH T 236      25.696   5.788  40.857  1.00  0.47           O  
HETATM  238  O   HOH T 237      17.625  28.906  39.178  1.00  0.47           O  
HETATM  239  O   HOH T 238      14.476  10.739   5.651  1.00  0.47           O  
HETATM  240  O   HOH T 239       9.232  -8.409  24.913  1.00  0.47           O  
HETATM  241  O   HOH T 240      32.081  -9.700  31.453  1.00  0.47           O  
HETATM  242  O   HOH T 241      12.040   9.604  -8.550  1.00  0.47           O  
HETATM  243  O   HOH T 242      32.331   6.722  41.547  1.00  0.47           O  
HETATM  244  O   HOH T 243      -2.733  -6.777 -14.030  1.00  0.47           O  
HETATM  245  O   HOH T 244      27.582   5.034  19.298  1.00  0.47           O  
HETATM  246  O   HOH T 245      22.787   2.772   6.355  1.00  0.48           O  
HETATM  247  O   HOH T 246      25.882 -11.368  22.016  1.00  0.48           O  
HETATM  248  O   HOH T 247       6.716   2.948 -13.835  1.00  0.48           O  
HETATM  249  O   HOH T 248       1.405 -13.643  -6.854  1.00  0.48           O  
HETATM  250  O   HOH T 249      30.686   3.453  33.929  1.00  0.48           O  
HETATM  251  O   HOH T 250      35.456   3.721  44.499  1.00  0.48           O  
HETATM  252  O   HOH T 251      12.102  -3.259  38.360  1.00  0.48           O  
HETATM  253  O   HOH T 252      23.465   5.461  14.805  1.00  0.48           O  
HETATM  254  O   HOH T 253      26.488  14.130  20.022  1.00  0.48           O  
HETATM  255  O   HOH T 254      21.870   5.670  42.930  1.00  0.48           O  
HETATM  256  O   HOH T 255      18.962  -0.327  45.244  1.00  0.48           O  
HETATM  257  O   HOH T 256       8.150 -16.955  13.018  1.00  0.48           O  
HETATM  258  O   HOH T 257      -1.798  10.479 -15.446  1.00  0.48           O  
HETATM  259  O   HOH T 258      24.234 -13.064  38.720  1.00  0.48           O  
HETATM  260  O   HOH T 259       9.923  -5.773  36.350  1.00  0.49           O  
HETATM  261  O   HOH T 260       9.317 -15.528  21.937  1.00  0.49           O  
HETATM  262  O   HOH T 261      17.219 -15.408  26.896  1.00  0.49           O  
HETATM  263  O   HOH T 262      24.000 -17.078  14.227  1.00  0.49           O  
HETATM  264  O   HOH T 263      22.705   5.184  38.561  1.00  0.49           O  
HETATM  265  O   HOH T 264      -2.297   4.223   1.775  1.00  0.49           O  
HETATM  266  O   HOH T 265      10.311  -4.259  22.959  1.00  0.49           O  
HETATM  267  O   HOH T 266      21.815  15.153  23.466  1.00  0.49           O  
HETATM  268  O   HOH T 267       6.391  14.527  -4.919  1.00  0.49           O  
HETATM  269  O   HOH T 268      28.051   8.063  21.148  1.00  0.50           O  
HETATM  270  O   HOH T 269      21.095   2.570  -5.733  1.00  0.50           O  
HETATM  271  O   HOH T 270      12.052 -11.247  -7.150  1.00  0.50           O  
HETATM  272  O   HOH T 271      26.498  13.952  36.257  1.00  0.50           O  
HETATM  273  O   HOH T 272       2.667  20.663  -2.543  1.00  0.50           O  
HETATM  274  O   HOH T 273      20.086  -8.141  11.825  1.00  0.50           O  
HETATM  275  O   HOH T 274       7.531  19.857 -10.267  1.00  0.50           O  
HETATM  276  O   HOH T 275       7.987 -14.803  11.611  1.00  0.50           O  
HETATM  277  O   HOH T 276      -9.183   5.091  -9.310  1.00  0.50           O  
HETATM  278  O   HOH T 277      18.557 -14.201  25.061  1.00  0.50           O  
HETATM  279  O   HOH T 278      20.972  20.073  25.187  1.00  0.50           O  
HETATM  280  O   HOH T 279      28.015  19.618  25.729  1.00  0.50           O  
HETATM  281  O   HOH T 280      39.454  -6.421  39.201  1.00  0.50           O  
HETATM  282  O   HOH T 281       0.429  -7.538  17.535  1.00  0.50           O  
HETATM  283  O   HOH T 282      23.257  11.261  34.070  1.00  0.50           O  
HETATM  284  O   HOH T 283       8.188  -8.081  36.241  1.00  0.50           O  
HETATM  285  O   HOH T 284       8.422  13.623   3.197  1.00  0.51           O  
HETATM  286  O   HOH T 285      30.840  -7.387  21.687  1.00  0.51           O  
HETATM  287  O   HOH T 286      10.836 -14.803  11.384  1.00  0.51           O  
HETATM  288  O   HOH T 287      10.434   0.524  33.900  1.00  0.51           O  
HETATM  289  O   HOH T 288      27.624 -12.485  25.463  1.00  0.51           O  
HETATM  290  O   HOH T 289      13.579   8.050  -5.548  1.00  0.51           O  
HETATM  291  O   HOH T 290      30.730  -6.567  14.585  1.00  0.51           O  
HETATM  292  O   HOH T 291      25.600   8.594  37.012  1.00  0.51           O  
HETATM  293  O   HOH T 292      18.773  -4.039  -8.497  1.00  0.51           O  
HETATM  294  O   HOH T 293      29.516  20.995  23.824  1.00  0.51           O  
HETATM  295  O   HOH T 294      12.826  12.149  -7.490  1.00  0.51           O  
HETATM  296  O   HOH T 295      -1.232  -9.893 -10.090  1.00  0.52           O  
HETATM  297  O   HOH T 296      23.692 -12.284  23.180  1.00  0.52           O  
HETATM  298  O   HOH T 297      -0.678  -5.753  19.362  1.00  0.52           O  
HETATM  299  O   HOH T 298      15.330  -5.496  -9.605  1.00  0.52           O  
HETATM  300  O   HOH T 299      22.401  -4.388   6.911  1.00  0.52           O  
HETATM  301  O   HOH T 300      26.927 -15.636  31.645  1.00  0.52           O  
HETATM  302  O   HOH T 301      38.203  -4.559  40.932  1.00  0.52           O  
HETATM  303  O   HOH T 302       1.754   1.089  21.389  1.00  0.52           O  
HETATM  304  O   HOH T 303       2.528   3.380  11.391  1.00  0.52           O  
HETATM  305  O   HOH T 304      -2.635  -8.617 -12.167  1.00  0.52           O  
HETATM  306  O   HOH T 305      24.476  12.312  19.605  1.00  0.53           O  
HETATM  307  O   HOH T 306      28.863  11.628  26.442  1.00  0.53           O  
HETATM  308  O   HOH T 307       4.453   0.252  19.289  1.00  0.53           O  
HETATM  309  O   HOH T 308      18.506   5.062  12.834  1.00  0.53           O  
HETATM  310  O   HOH T 309      -2.633  -4.794  17.775  1.00  0.53           O  
HETATM  311  O   HOH T 310      27.389  23.841  39.796  1.00  0.53           O  
HETATM  312  O   HOH T 311      18.811  17.569  38.997  1.00  0.53           O  
HETATM  313  O   HOH T 312      33.964   6.347  39.340  1.00  0.54           O  
HETATM  314  O   HOH T 313       5.026  12.122  -5.736  1.00  0.54           O  
HETATM  315  O   HOH T 314      30.952  -9.786  38.091  1.00  0.54           O  
HETATM  316  O   HOH T 315      21.722   0.865  -2.585  1.00  0.54           O  
HETATM  317  O   HOH T 316      11.795 -19.928  18.315  1.00  0.54           O  
HETATM  318  O   HOH T 317      19.484   2.435  -8.043  1.00  0.54           O  
HETATM  319  O   HOH T 318      30.246   4.189  18.809  1.00  0.54           O  
HETATM  320  O   HOH T 319      -2.760  -7.477   7.339  1.00  0.54           O  
HETATM  321  O   HOH T 320      29.457  -9.171  20.205  1.00  0.55           O  
HETATM  322  O   HOH T 321       9.576   7.347  11.350  1.00  0.55           O  
HETATM  323  O   HOH T 322      27.498 -10.437  18.832  1.00  0.56           O  
HETATM  324  O   HOH T 323      20.263 -15.363   6.503  1.00  0.56           O  
HETATM  325  O   HOH T 324      40.483   4.675  40.365  1.00  0.56           O  
HETATM  326  O   HOH T 325      29.323  -9.307  41.903  1.00  0.56           O  
HETATM  327  O   HOH T 326      30.070   4.120  28.353  1.00  0.56           O  
HETATM  328  O   HOH T 327       9.887   4.987  -8.137  1.00  0.56           O  
HETATM  329  O   HOH T 328      -6.213  -6.680  11.929  1.00  0.56           O  
HETATM  330  O   HOH T 329      11.447 -14.730   5.104  1.00  0.56           O  
HETATM  331  O   HOH T 330       9.641  20.740 -13.621  1.00  0.56           O  
HETATM  332  O   HOH T 331      32.292  -5.983  37.474  1.00  0.56           O  
HETATM  333  O   HOH T 332      25.913 -10.655  46.441  1.00  0.57           O  
HETATM  334  O   HOH T 333      16.924  20.190  40.813  1.00  0.57           O  
HETATM  335  O   HOH T 334       3.798   8.181  -6.784  1.00  0.58           O  
HETATM  336  O   HOH T 335       0.999  -4.069  20.815  1.00  0.59           O  
HETATM  337  O   HOH T 336       1.683 -13.215  -9.558  1.00  0.59           O  
TER     338      HOH T 336 
