# Supplementary material for: Accurate Prediction of Hydration Sites of Proteins Using Energy Model With Atom Embedding
Source: Front Mol Biosci. 2021 Sep 20;8:756075. doi: 10.3389/fmolb.2021.756075 (PMC8488165; doi:10.3389/fmolb.2021.756075)
Supplement: Supplementary file 1 [file DataSheet1.ZIP › Data Sheet 1/Our_result_pdb/our_dataset_output/2NVD_watersite.pdb]

HEADER                                                        XXXX


JRNL        PMID   -1
HETATM    1  O   HOH T   0      17.464  10.548  32.149  1.00  0.19           O  
HETATM    2  O   HOH T   1      26.358   3.277  27.829  1.00  0.19           O  
HETATM    3  O   HOH T   2       4.616  -5.534   7.324  1.00  0.20           O  
HETATM    4  O   HOH T   3      11.936   0.840  26.491  1.00  0.21           O  
HETATM    5  O   HOH T   4      15.682  -9.723  31.124  1.00  0.22           O  
HETATM    6  O   HOH T   5     -12.590   4.350  21.755  1.00  0.22           O  
HETATM    7  O   HOH T   6      16.535 -15.262  35.673  1.00  0.22           O  
HETATM    8  O   HOH T   7      30.770  -3.477  24.047  1.00  0.23           O  
HETATM    9  O   HOH T   8       8.764  -2.714  12.956  1.00  0.23           O  
HETATM   10  O   HOH T   9      -1.395  18.313   8.229  1.00  0.23           O  
HETATM   11  O   HOH T  10      15.853  12.004  25.594  1.00  0.23           O  
HETATM   12  O   HOH T  11      11.621   2.968  24.791  1.00  0.23           O  
HETATM   13  O   HOH T  12       6.580 -13.302   6.608  1.00  0.23           O  
HETATM   14  O   HOH T  13      18.852  -3.116  43.463  1.00  0.24           O  
HETATM   15  O   HOH T  14      13.779   4.869  36.682  1.00  0.24           O  
HETATM   16  O   HOH T  15       1.182 -15.173  36.410  1.00  0.24           O  
HETATM   17  O   HOH T  16      19.352   2.361  16.609  1.00  0.24           O  
HETATM   18  O   HOH T  17       7.973  12.674  24.498  1.00  0.24           O  
HETATM   19  O   HOH T  18       4.110 -11.751  22.016  1.00  0.25           O  
HETATM   20  O   HOH T  19       1.494   5.446  30.720  1.00  0.25           O  
HETATM   21  O   HOH T  20      10.953  15.149  32.435  1.00  0.25           O  
HETATM   22  O   HOH T  21       3.811  -6.454  19.276  1.00  0.25           O  
HETATM   23  O   HOH T  22      23.301  10.401  15.765  1.00  0.25           O  
HETATM   24  O   HOH T  23      -6.551 -16.073  32.632  1.00  0.26           O  
HETATM   25  O   HOH T  24       2.209   8.835  34.047  1.00  0.26           O  
HETATM   26  O   HOH T  25      12.302   1.565  36.970  1.00  0.26           O  
HETATM   27  O   HOH T  26      19.552 -16.043  25.129  1.00  0.26           O  
HETATM   28  O   HOH T  27       2.632   9.094  21.358  1.00  0.26           O  
HETATM   29  O   HOH T  28       2.962 -11.393   9.689  1.00  0.26           O  
HETATM   30  O   HOH T  29      30.881 -10.611  24.314  1.00  0.27           O  
HETATM   31  O   HOH T  30      33.099  12.171  18.994  1.00  0.27           O  
HETATM   32  O   HOH T  31      17.566 -18.021  24.626  1.00  0.27           O  
HETATM   33  O   HOH T  32      12.954   2.480  -5.856  1.00  0.27           O  
HETATM   34  O   HOH T  33      33.885  18.088  35.644  1.00  0.27           O  
HETATM   35  O   HOH T  34      31.384  18.794  36.522  1.00  0.27           O  
HETATM   36  O   HOH T  35      12.649   5.582   5.198  1.00  0.28           O  
HETATM   37  O   HOH T  36      20.941   6.751  10.475  1.00  0.28           O  
HETATM   38  O   HOH T  37      -4.461  -0.308  14.493  1.00  0.28           O  
HETATM   39  O   HOH T  38      12.675 -23.065  27.969  1.00  0.28           O  
HETATM   40  O   HOH T  39      -5.596  -6.170  13.170  1.00  0.28           O  
HETATM   41  O   HOH T  40      10.271   5.361  38.690  1.00  0.28           O  
HETATM   42  O   HOH T  41      24.784  -0.911   7.057  1.00  0.28           O  
HETATM   43  O   HOH T  42      21.913  11.781   7.877  1.00  0.28           O  
HETATM   44  O   HOH T  43      18.648  -6.511   2.300  1.00  0.28           O  
HETATM   45  O   HOH T  44      34.113  -7.967  22.728  1.00  0.28           O  
HETATM   46  O   HOH T  45      19.408 -10.882   3.794  1.00  0.28           O  
HETATM   47  O   HOH T  46      30.615  -4.615  26.679  1.00  0.29           O  
HETATM   48  O   HOH T  47      27.255 -16.178  32.387  1.00  0.29           O  
HETATM   49  O   HOH T  48      18.713  -9.196  12.495  1.00  0.29           O  
HETATM   50  O   HOH T  49     -12.543   8.202  19.528  1.00  0.29           O  
HETATM   51  O   HOH T  50       3.181  -7.577  48.402  1.00  0.29           O  
HETATM   52  O   HOH T  51       2.446  -4.625   1.983  1.00  0.29           O  
HETATM   53  O   HOH T  52       8.898   0.320   5.534  1.00  0.29           O  
HETATM   54  O   HOH T  53      24.823   1.625   5.974  1.00  0.29           O  
HETATM   55  O   HOH T  54      16.954  17.664  27.527  1.00  0.29           O  
HETATM   56  O   HOH T  55      -5.291  -3.403  12.490  1.00  0.30           O  
HETATM   57  O   HOH T  56       6.277 -16.047  24.785  1.00  0.30           O  
HETATM   58  O   HOH T  57      27.538  16.299  36.526  1.00  0.30           O  
HETATM   59  O   HOH T  58      -4.193 -12.246  28.681  1.00  0.30           O  
HETATM   60  O   HOH T  59       2.415   6.452  28.402  1.00  0.30           O  
HETATM   61  O   HOH T  60      -1.509  -4.904  41.783  1.00  0.30           O  
HETATM   62  O   HOH T  61      23.467  11.401   5.556  1.00  0.30           O  
HETATM   63  O   HOH T  62      35.482  -5.671  15.579  1.00  0.31           O  
HETATM   64  O   HOH T  63       5.938   7.042   4.848  1.00  0.31           O  
HETATM   65  O   HOH T  64       5.101 -19.957  27.145  1.00  0.31           O  
HETATM   66  O   HOH T  65       5.413   0.701   7.258  1.00  0.31           O  
HETATM   67  O   HOH T  66      31.945 -13.833  14.874  1.00  0.31           O  
HETATM   68  O   HOH T  67      18.825   2.312  43.328  1.00  0.31           O  
HETATM   69  O   HOH T  68      14.985 -12.363  22.041  1.00  0.31           O  
HETATM   70  O   HOH T  69      10.095  -2.980  44.442  1.00  0.31           O  
HETATM   71  O   HOH T  70      -4.322 -11.018  18.097  1.00  0.31           O  
HETATM   72  O   HOH T  71      29.669  10.745  42.129  1.00  0.31           O  
HETATM   73  O   HOH T  72     -12.194   1.299  16.712  1.00  0.31           O  
HETATM   74  O   HOH T  73      20.246   4.744  15.328  1.00  0.31           O  
HETATM   75  O   HOH T  74      25.917   5.211   4.048  1.00  0.32           O  
HETATM   76  O   HOH T  75      21.245   0.245  15.944  1.00  0.32           O  
HETATM   77  O   HOH T  76      40.413   8.162  28.425  1.00  0.32           O  
HETATM   78  O   HOH T  77       3.535   4.041  35.437  1.00  0.32           O  
HETATM   79  O   HOH T  78       7.635   4.815   4.323  1.00  0.32           O  
HETATM   80  O   HOH T  79      20.314  -8.642  10.218  1.00  0.32           O  
HETATM   81  O   HOH T  80      20.142 -12.890  44.336  1.00  0.32           O  
HETATM   82  O   HOH T  81     -10.999   7.790  21.695  1.00  0.33           O  
HETATM   83  O   HOH T  82      24.993  17.363  11.435  1.00  0.33           O  
HETATM   84  O   HOH T  83      26.663 -16.922  18.740  1.00  0.33           O  
HETATM   85  O   HOH T  84     -12.491  -1.716  23.558  1.00  0.33           O  
HETATM   86  O   HOH T  85      17.486   3.314   2.943  1.00  0.33           O  
HETATM   87  O   HOH T  86      14.385  11.828  35.382  1.00  0.33           O  
HETATM   88  O   HOH T  87      12.512 -16.235  23.737  1.00  0.33           O  
HETATM   89  O   HOH T  88      19.436 -13.609   4.665  1.00  0.33           O  
HETATM   90  O   HOH T  89      17.705  10.154  38.325  1.00  0.33           O  
HETATM   91  O   HOH T  90      18.849 -16.530  35.034  1.00  0.33           O  
HETATM   92  O   HOH T  91      -4.142 -12.921  20.086  1.00  0.33           O  
HETATM   93  O   HOH T  92      -0.206   4.900  35.297  1.00  0.33           O  
HETATM   94  O   HOH T  93      34.131  19.840  32.437  1.00  0.33           O  
HETATM   95  O   HOH T  94      29.072   0.737  12.825  1.00  0.33           O  
HETATM   96  O   HOH T  95      19.163   5.370   5.667  1.00  0.33           O  
HETATM   97  O   HOH T  96      11.522 -17.289  -8.802  1.00  0.33           O  
HETATM   98  O   HOH T  97      20.508 -11.332  15.281  1.00  0.33           O  
HETATM   99  O   HOH T  98      12.453 -15.731   9.204  1.00  0.34           O  
HETATM  100  O   HOH T  99      16.329  -0.068  -2.008  1.00  0.34           O  
HETATM  101  O   HOH T 100      19.317  -6.938  45.851  1.00  0.34           O  
HETATM  102  O   HOH T 101      23.797  -7.248  43.355  1.00  0.34           O  
HETATM  103  O   HOH T 102       4.848  12.941  38.243  1.00  0.34           O  
HETATM  104  O   HOH T 103       2.530  17.064  10.375  1.00  0.34           O  
HETATM  105  O   HOH T 104      18.633 -10.826  10.199  1.00  0.34           O  
HETATM  106  O   HOH T 105      40.425   4.994  38.734  1.00  0.34           O  
HETATM  107  O   HOH T 106     -11.655  -3.213  25.751  1.00  0.34           O  
HETATM  108  O   HOH T 107      42.414  -4.825  26.217  1.00  0.34           O  
HETATM  109  O   HOH T 108       7.118  -1.314   4.289  1.00  0.34           O  
HETATM  110  O   HOH T 109      34.411  14.554  24.026  1.00  0.34           O  
HETATM  111  O   HOH T 110       4.129  16.501  28.591  1.00  0.34           O  
HETATM  112  O   HOH T 111      -0.921  17.617  12.730  1.00  0.35           O  
HETATM  113  O   HOH T 112      -4.185 -15.305  31.574  1.00  0.35           O  
HETATM  114  O   HOH T 113      21.054  -6.355  13.879  1.00  0.35           O  
HETATM  115  O   HOH T 114       0.596   2.248  33.886  1.00  0.35           O  
HETATM  116  O   HOH T 115      11.371 -17.928  33.234  1.00  0.35           O  
HETATM  117  O   HOH T 116      37.315 -17.600  17.465  1.00  0.36           O  
HETATM  118  O   HOH T 117       1.748 -10.634  16.730  1.00  0.36           O  
HETATM  119  O   HOH T 118      11.684  18.121  28.689  1.00  0.36           O  
HETATM  120  O   HOH T 119      19.361   7.037   3.562  1.00  0.36           O  
HETATM  121  O   HOH T 120      16.968 -21.660  26.626  1.00  0.36           O  
HETATM  122  O   HOH T 121      19.481   6.056  12.876  1.00  0.36           O  
HETATM  123  O   HOH T 122      38.515   9.920  32.815  1.00  0.36           O  
HETATM  124  O   HOH T 123       6.496 -14.412  42.560  1.00  0.36           O  
HETATM  125  O   HOH T 124       4.320  -7.352  16.637  1.00  0.36           O  
HETATM  126  O   HOH T 125      17.737  18.646  25.200  1.00  0.36           O  
HETATM  127  O   HOH T 126       4.589   3.650  -1.610  1.00  0.36           O  
HETATM  128  O   HOH T 127      20.013  20.084  24.558  1.00  0.36           O  
HETATM  129  O   HOH T 128       6.725  16.487  21.024  1.00  0.36           O  
HETATM  130  O   HOH T 129      39.938  -4.203  27.086  1.00  0.36           O  
HETATM  131  O   HOH T 130      11.931 -18.183  10.316  1.00  0.36           O  
HETATM  132  O   HOH T 131      36.430  -0.379  37.947  1.00  0.36           O  
HETATM  133  O   HOH T 132      12.609  -5.613  48.043  1.00  0.37           O  
HETATM  134  O   HOH T 133      -9.890  -1.542  22.480  1.00  0.37           O  
HETATM  135  O   HOH T 134      37.186  12.310  32.515  1.00  0.37           O  
HETATM  136  O   HOH T 135      14.267 -11.349  18.651  1.00  0.37           O  
HETATM  137  O   HOH T 136       8.512  -7.039  17.938  1.00  0.37           O  
HETATM  138  O   HOH T 137       2.334  -9.681  19.296  1.00  0.37           O  
HETATM  139  O   HOH T 138      35.315  19.077  30.188  1.00  0.37           O  
HETATM  140  O   HOH T 139      12.088  22.662  21.099  1.00  0.37           O  
HETATM  141  O   HOH T 140       8.921  14.682  26.153  1.00  0.37           O  
HETATM  142  O   HOH T 141      -2.939  -3.344  31.846  1.00  0.37           O  
HETATM  143  O   HOH T 142      23.670 -14.879  21.116  1.00  0.38           O  
HETATM  144  O   HOH T 143      16.890  12.110  36.612  1.00  0.38           O  
HETATM  145  O   HOH T 144      -4.167  -8.857  43.956  1.00  0.38           O  
HETATM  146  O   HOH T 145      31.948  -7.095  26.698  1.00  0.38           O  
HETATM  147  O   HOH T 146      -1.667 -15.222  25.307  1.00  0.38           O  
HETATM  148  O   HOH T 147      -0.899  10.482  29.768  1.00  0.38           O  
HETATM  149  O   HOH T 148      -4.899  -2.514  33.880  1.00  0.38           O  
HETATM  150  O   HOH T 149      30.355  13.355  41.529  1.00  0.38           O  
HETATM  151  O   HOH T 150      12.244  -2.599  46.070  1.00  0.38           O  
HETATM  152  O   HOH T 151      -2.882  -3.576  39.685  1.00  0.38           O  
HETATM  153  O   HOH T 152       9.336 -15.430   1.823  1.00  0.38           O  
HETATM  154  O   HOH T 153       0.267  10.356  22.341  1.00  0.38           O  
HETATM  155  O   HOH T 154     -12.242  -7.793  16.020  1.00  0.38           O  
HETATM  156  O   HOH T 155      -0.742  -8.797  49.159  1.00  0.38           O  
HETATM  157  O   HOH T 156      26.402   6.639   6.377  1.00  0.38           O  
HETATM  158  O   HOH T 157      24.876 -15.348  31.119  1.00  0.39           O  
HETATM  159  O   HOH T 158      24.156 -15.357  23.768  1.00  0.39           O  
HETATM  160  O   HOH T 159      22.129 -18.960  22.785  1.00  0.39           O  
HETATM  161  O   HOH T 160       9.548  17.949  11.161  1.00  0.39           O  
HETATM  162  O   HOH T 161     -10.295  -0.836  25.069  1.00  0.39           O  
HETATM  163  O   HOH T 162       3.495   6.405  34.075  1.00  0.39           O  
HETATM  164  O   HOH T 163      19.213  -4.403  34.091  1.00  0.39           O  
HETATM  165  O   HOH T 164     -12.968   0.543  19.254  1.00  0.39           O  
HETATM  166  O   HOH T 165      -3.836 -16.050  16.646  1.00  0.39           O  
HETATM  167  O   HOH T 166      23.637 -17.759  24.756  1.00  0.39           O  
HETATM  168  O   HOH T 167       8.133  17.215  25.424  1.00  0.39           O  
HETATM  169  O   HOH T 168      38.577 -15.276  17.107  1.00  0.39           O  
HETATM  170  O   HOH T 169      -1.804  -1.059   4.616  1.00  0.39           O  
HETATM  171  O   HOH T 170      -5.210   5.140  25.083  1.00  0.39           O  
HETATM  172  O   HOH T 171      19.145  18.139  22.799  1.00  0.40           O  
HETATM  173  O   HOH T 172      23.105  -7.060  11.766  1.00  0.40           O  
HETATM  174  O   HOH T 173      15.231 -16.639  23.726  1.00  0.40           O  
HETATM  175  O   HOH T 174      18.568 -18.056   2.233  1.00  0.40           O  
HETATM  176  O   HOH T 175       4.936 -12.512  11.481  1.00  0.40           O  
HETATM  177  O   HOH T 176      14.828   5.216   0.485  1.00  0.40           O  
HETATM  178  O   HOH T 177       3.913 -14.680  15.574  1.00  0.40           O  
HETATM  179  O   HOH T 178       6.941   0.265   2.006  1.00  0.40           O  
HETATM  180  O   HOH T 179      -4.171  -9.886  33.851  1.00  0.40           O  
HETATM  181  O   HOH T 180      21.808   6.741  14.110  1.00  0.40           O  
HETATM  182  O   HOH T 181      39.809  -7.026  16.570  1.00  0.40           O  
HETATM  183  O   HOH T 182      27.931  17.234  43.555  1.00  0.40           O  
HETATM  184  O   HOH T 183      38.465  -5.891  25.459  1.00  0.40           O  
HETATM  185  O   HOH T 184      24.692   0.073   9.663  1.00  0.40           O  
HETATM  186  O   HOH T 185       1.374  18.915   8.606  1.00  0.40           O  
HETATM  187  O   HOH T 186       2.252  12.302  37.070  1.00  0.40           O  
HETATM  188  O   HOH T 187      26.661 -17.985  21.146  1.00  0.40           O  
HETATM  189  O   HOH T 188     -11.305  -1.623  20.032  1.00  0.40           O  
HETATM  190  O   HOH T 189      -0.689   2.165  49.455  1.00  0.40           O  
HETATM  191  O   HOH T 190      11.083 -17.150   3.189  1.00  0.40           O  
HETATM  192  O   HOH T 191      21.399  -6.675   3.076  1.00  0.41           O  
HETATM  193  O   HOH T 192       0.006  -9.138  33.860  1.00  0.41           O  
HETATM  194  O   HOH T 193      21.133   3.737  43.696  1.00  0.41           O  
HETATM  195  O   HOH T 194      22.999  14.038  24.369  1.00  0.41           O  
HETATM  196  O   HOH T 195       9.300 -21.065  20.675  1.00  0.41           O  
HETATM  197  O   HOH T 196      27.629  16.178  28.407  1.00  0.41           O  
HETATM  198  O   HOH T 197       6.326 -15.989   5.931  1.00  0.41           O  
HETATM  199  O   HOH T 198      21.966  15.498  33.496  1.00  0.41           O  
HETATM  200  O   HOH T 199      30.455  -4.154  35.457  1.00  0.41           O  
HETATM  201  O   HOH T 200      -4.703  -9.494  28.267  1.00  0.41           O  
HETATM  202  O   HOH T 201       5.155 -21.278  24.689  1.00  0.41           O  
HETATM  203  O   HOH T 202       9.210 -13.929  42.869  1.00  0.41           O  
HETATM  204  O   HOH T 203      -1.997 -10.445  47.327  1.00  0.41           O  
HETATM  205  O   HOH T 204       5.448  -1.003  44.805  1.00  0.41           O  
HETATM  206  O   HOH T 205      29.887  -5.951  23.390  1.00  0.42           O  
HETATM  207  O   HOH T 206      23.468   5.662  10.532  1.00  0.42           O  
HETATM  208  O   HOH T 207       6.530 -13.178  22.437  1.00  0.42           O  
HETATM  209  O   HOH T 208      -0.729   0.882  47.013  1.00  0.42           O  
HETATM  210  O   HOH T 209      -8.223  -6.211  14.221  1.00  0.42           O  
HETATM  211  O   HOH T 210       9.429   4.939   2.110  1.00  0.42           O  
HETATM  212  O   HOH T 211      -7.852   0.775  34.262  1.00  0.42           O  
HETATM  213  O   HOH T 212      34.699   0.443  17.015  1.00  0.42           O  
HETATM  214  O   HOH T 213       3.317  18.320   6.622  1.00  0.42           O  
HETATM  215  O   HOH T 214      -1.479 -22.783   9.764  1.00  0.42           O  
HETATM  216  O   HOH T 215      15.477  12.403  32.891  1.00  0.42           O  
HETATM  217  O   HOH T 216      -5.705  -0.635  12.012  1.00  0.42           O  
HETATM  218  O   HOH T 217      42.150  15.911  33.603  1.00  0.42           O  
HETATM  219  O   HOH T 218       8.072   2.671   2.588  1.00  0.42           O  
HETATM  220  O   HOH T 219      17.863 -17.901   7.440  1.00  0.42           O  
HETATM  221  O   HOH T 220      37.867  -5.213  16.822  1.00  0.42           O  
HETATM  222  O   HOH T 221      27.022 -17.325  16.105  1.00  0.43           O  
HETATM  223  O   HOH T 222      32.696  -8.254  29.150  1.00  0.43           O  
HETATM  224  O   HOH T 223       7.450  -2.919  45.435  1.00  0.43           O  
HETATM  225  O   HOH T 224      14.161 -14.015  24.190  1.00  0.43           O  
HETATM  226  O   HOH T 225      12.484   3.680  38.919  1.00  0.43           O  
HETATM  227  O   HOH T 226      19.531 -15.986   6.294  1.00  0.43           O  
HETATM  228  O   HOH T 227      12.173  18.752  11.347  1.00  0.43           O  
HETATM  229  O   HOH T 228      19.728 -10.189  43.641  1.00  0.43           O  
HETATM  230  O   HOH T 229       8.548 -19.977  18.124  1.00  0.43           O  
HETATM  231  O   HOH T 230      21.133 -14.276  26.598  1.00  0.43           O  
HETATM  232  O   HOH T 231      27.349   3.014  12.927  1.00  0.43           O  
HETATM  233  O   HOH T 232      21.023 -12.202  -0.149  1.00  0.43           O  
HETATM  234  O   HOH T 233      14.323  21.437  16.387  1.00  0.43           O  
HETATM  235  O   HOH T 234      -6.787  -6.636  24.219  1.00  0.43           O  
HETATM  236  O   HOH T 235      -2.611  10.823  11.287  1.00  0.43           O  
HETATM  237  O   HOH T 236      10.923  10.557  40.781  1.00  0.43           O  
HETATM  238  O   HOH T 237      27.695  -3.463  12.578  1.00  0.43           O  
HETATM  239  O   HOH T 238      24.823  -5.742  13.590  1.00  0.43           O  
HETATM  240  O   HOH T 239       1.506 -13.174  15.516  1.00  0.43           O  
HETATM  241  O   HOH T 240      16.025  20.287  23.809  1.00  0.43           O  
HETATM  242  O   HOH T 241      -3.297   8.141  25.799  1.00  0.43           O  
HETATM  243  O   HOH T 242       0.960  14.078  20.475  1.00  0.43           O  
HETATM  244  O   HOH T 243      -5.536  -9.056  23.872  1.00  0.43           O  
HETATM  245  O   HOH T 244      -4.627  -7.393  33.026  1.00  0.43           O  
HETATM  246  O   HOH T 245      29.606  -1.869  13.732  1.00  0.44           O  
HETATM  247  O   HOH T 246      15.955   2.651  -2.359  1.00  0.44           O  
HETATM  248  O   HOH T 247      35.783  12.143  11.888  1.00  0.44           O  
HETATM  249  O   HOH T 248      18.297 -18.806  38.857  1.00  0.44           O  
HETATM  250  O   HOH T 249      17.500 -12.897   8.698  1.00  0.44           O  
HETATM  251  O   HOH T 250      38.373  -6.136  22.654  1.00  0.44           O  
HETATM  252  O   HOH T 251      18.595   0.341   0.862  1.00  0.44           O  
HETATM  253  O   HOH T 252      14.044 -19.388  36.023  1.00  0.44           O  
HETATM  254  O   HOH T 253      19.806  13.880  32.639  1.00  0.44           O  
HETATM  255  O   HOH T 254      19.652  -1.760  45.713  1.00  0.44           O  
HETATM  256  O   HOH T 255      18.976 -18.989  36.093  1.00  0.44           O  
HETATM  257  O   HOH T 256      30.385 -15.021  12.891  1.00  0.44           O  
HETATM  258  O   HOH T 257      27.541   8.132  16.944  1.00  0.44           O  
HETATM  259  O   HOH T 258      -3.937  -3.283   5.515  1.00  0.44           O  
HETATM  260  O   HOH T 259       2.156  11.649  34.235  1.00  0.44           O  
HETATM  261  O   HOH T 260      10.651  19.329   8.958  1.00  0.44           O  
HETATM  262  O   HOH T 261      12.189  13.804   6.089  1.00  0.44           O  
HETATM  263  O   HOH T 262       3.041  18.165  12.859  1.00  0.44           O  
HETATM  264  O   HOH T 263       0.467 -11.109  48.460  1.00  0.44           O  
HETATM  265  O   HOH T 264      22.212  -9.163  44.487  1.00  0.44           O  
HETATM  266  O   HOH T 265      32.434  19.585  27.466  1.00  0.45           O  
HETATM  267  O   HOH T 266      -0.319   4.501  32.446  1.00  0.45           O  
HETATM  268  O   HOH T 267      -6.881   9.320  22.450  1.00  0.45           O  
HETATM  269  O   HOH T 268      36.701  14.252  25.724  1.00  0.45           O  
HETATM  270  O   HOH T 269      -2.646 -16.316  29.578  1.00  0.45           O  
HETATM  271  O   HOH T 270      29.904  17.025  29.644  1.00  0.45           O  
HETATM  272  O   HOH T 271      -7.088  -0.456  15.316  1.00  0.45           O  
HETATM  273  O   HOH T 272     -11.839   0.430  21.861  1.00  0.45           O  
HETATM  274  O   HOH T 273     -10.771  -4.388  20.515  1.00  0.45           O  
HETATM  275  O   HOH T 274      10.629  21.925  18.662  1.00  0.45           O  
HETATM  276  O   HOH T 275      22.757 -16.619  19.205  1.00  0.45           O  
HETATM  277  O   HOH T 276       9.756 -19.651  34.848  1.00  0.45           O  
HETATM  278  O   HOH T 277       1.643 -13.405  -0.185  1.00  0.45           O  
HETATM  279  O   HOH T 278      31.780  11.555  16.520  1.00  0.45           O  
HETATM  280  O   HOH T 279       8.374  -0.998   0.105  1.00  0.45           O  
HETATM  281  O   HOH T 280      38.715   7.495  31.484  1.00  0.45           O  
HETATM  282  O   HOH T 281       2.354  11.899  21.586  1.00  0.45           O  
HETATM  283  O   HOH T 282       8.587 -16.324   4.268  1.00  0.45           O  
HETATM  284  O   HOH T 283      22.638 -17.028  38.242  1.00  0.45           O  
HETATM  285  O   HOH T 284      26.264  10.749  12.717  1.00  0.45           O  
HETATM  286  O   HOH T 285      13.348  22.923  18.646  1.00  0.45           O  
HETATM  287  O   HOH T 286      34.080  10.527  13.256  1.00  0.46           O  
HETATM  288  O   HOH T 287       9.113 -18.866  32.269  1.00  0.46           O  
HETATM  289  O   HOH T 288      31.851  -6.779  21.583  1.00  0.46           O  
HETATM  290  O   HOH T 289      -4.407 -11.477  44.655  1.00  0.46           O  
HETATM  291  O   HOH T 290      28.628  -6.002  16.864  1.00  0.46           O  
HETATM  292  O   HOH T 291      14.158  18.082  27.316  1.00  0.46           O  
HETATM  293  O   HOH T 292      18.837  19.379  14.441  1.00  0.46           O  
HETATM  294  O   HOH T 293      29.274  -4.549  14.542  1.00  0.46           O  
HETATM  295  O   HOH T 294      13.003   5.472   2.511  1.00  0.46           O  
HETATM  296  O   HOH T 295      -9.732  -3.998  13.535  1.00  0.46           O  
HETATM  297  O   HOH T 296       8.516 -18.792  22.154  1.00  0.46           O  
HETATM  298  O   HOH T 297      -3.669   0.885  35.610  1.00  0.46           O  
HETATM  299  O   HOH T 298      20.892  -3.505  47.533  1.00  0.46           O  
HETATM  300  O   HOH T 299      -3.112  -2.635  42.208  1.00  0.46           O  
HETATM  301  O   HOH T 300      -3.277  -0.020  46.738  1.00  0.46           O  
HETATM  302  O   HOH T 301      37.147  -8.385  25.196  1.00  0.46           O  
HETATM  303  O   HOH T 302      43.396  -7.393  26.822  1.00  0.46           O  
HETATM  304  O   HOH T 303      36.674  13.167  35.045  1.00  0.46           O  
HETATM  305  O   HOH T 304      -7.638  -1.880  33.906  1.00  0.46           O  
HETATM  306  O   HOH T 305       1.917  17.775  27.726  1.00  0.46           O  
HETATM  307  O   HOH T 306      -0.430   8.821  35.141  1.00  0.46           O  
HETATM  308  O   HOH T 307      11.452 -19.230  37.080  1.00  0.46           O  
HETATM  309  O   HOH T 308      16.919  20.260  16.191  1.00  0.46           O  
HETATM  310  O   HOH T 309       0.880 -13.571  49.585  1.00  0.46           O  
HETATM  311  O   HOH T 310      21.092  -0.825  47.893  1.00  0.46           O  
HETATM  312  O   HOH T 311      -1.545   8.714  27.747  1.00  0.46           O  
HETATM  313  O   HOH T 312      28.691  12.861  43.665  1.00  0.46           O  
HETATM  314  O   HOH T 313      27.557  -6.216  13.032  1.00  0.47           O  
HETATM  315  O   HOH T 314      -2.439  -1.679  -2.474  1.00  0.47           O  
HETATM  316  O   HOH T 315      19.880 -13.513   7.441  1.00  0.47           O  
HETATM  317  O   HOH T 316      -1.773  -9.219  13.262  1.00  0.47           O  
HETATM  318  O   HOH T 317      -0.658 -11.300  15.450  1.00  0.47           O  
HETATM  319  O   HOH T 318      17.954  20.464  21.684  1.00  0.47           O  
HETATM  320  O   HOH T 319      -1.574  -1.165  48.703  1.00  0.47           O  
HETATM  321  O   HOH T 320      34.873 -16.252  22.141  1.00  0.47           O  
HETATM  322  O   HOH T 321      20.268   7.758  49.450  1.00  0.47           O  
HETATM  323  O   HOH T 322      -5.947 -14.071  24.055  1.00  0.47           O  
HETATM  324  O   HOH T 323       8.314 -16.471  42.250  1.00  0.47           O  
HETATM  325  O   HOH T 324      20.662 -13.018  13.037  1.00  0.47           O  
HETATM  326  O   HOH T 325      -9.797  -5.144  30.926  1.00  0.47           O  
HETATM  327  O   HOH T 326      16.445   5.631   5.771  1.00  0.47           O  
HETATM  328  O   HOH T 327      17.058  17.067  31.748  1.00  0.47           O  
HETATM  329  O   HOH T 328      19.346  10.853  36.227  1.00  0.47           O  
HETATM  330  O   HOH T 329      23.847   9.217   3.715  1.00  0.47           O  
HETATM  331  O   HOH T 330      31.688  -7.994  24.063  1.00  0.47           O  
HETATM  332  O   HOH T 331      24.953 -15.420  33.851  1.00  0.47           O  
HETATM  333  O   HOH T 332      26.078   3.895   6.494  1.00  0.47           O  
HETATM  334  O   HOH T 333      20.334  10.512  49.160  1.00  0.47           O  
HETATM  335  O   HOH T 334      21.772 -18.560  36.164  1.00  0.48           O  
HETATM  336  O   HOH T 335       0.068  13.005  38.826  1.00  0.48           O  
HETATM  337  O   HOH T 336      -2.723   8.501  30.257  1.00  0.48           O  
HETATM  338  O   HOH T 337      41.466   7.146  30.861  1.00  0.48           O  
HETATM  339  O   HOH T 338      20.644 -15.631  44.505  1.00  0.48           O  
HETATM  340  O   HOH T 339       3.383 -17.547   5.800  1.00  0.48           O  
HETATM  341  O   HOH T 340      35.019  -0.149  40.493  1.00  0.48           O  
HETATM  342  O   HOH T 341      16.882   3.304   0.166  1.00  0.48           O  
HETATM  343  O   HOH T 342      22.299   9.049  47.977  1.00  0.48           O  
HETATM  344  O   HOH T 343      -1.593   9.478  24.133  1.00  0.48           O  
HETATM  345  O   HOH T 344       9.819  -9.385  26.171  1.00  0.48           O  
HETATM  346  O   HOH T 345      20.302 -17.315  39.967  1.00  0.48           O  
HETATM  347  O   HOH T 346       2.452  14.547  38.666  1.00  0.48           O  
HETATM  348  O   HOH T 347      27.322  17.516  34.015  1.00  0.48           O  
HETATM  349  O   HOH T 348       7.156 -18.867  34.011  1.00  0.48           O  
HETATM  350  O   HOH T 349      34.055   1.746  14.600  1.00  0.48           O  
HETATM  351  O   HOH T 350      16.709   4.020  43.908  1.00  0.48           O  
HETATM  352  O   HOH T 351      15.707   5.345   3.113  1.00  0.48           O  
HETATM  353  O   HOH T 352      40.471   9.715  30.838  1.00  0.48           O  
HETATM  354  O   HOH T 353      33.133  -4.990  33.602  1.00  0.48           O  
HETATM  355  O   HOH T 354      -3.993 -16.120  23.988  1.00  0.48           O  
HETATM  356  O   HOH T 355      40.581   8.131  33.268  1.00  0.48           O  
HETATM  357  O   HOH T 356      11.826  22.672  16.337  1.00  0.48           O  
HETATM  358  O   HOH T 357      17.719 -15.965  22.922  1.00  0.48           O  
HETATM  359  O   HOH T 358       8.050 -17.853  16.246  1.00  0.48           O  
HETATM  360  O   HOH T 359      25.891   4.716   1.275  1.00  0.48           O  
HETATM  361  O   HOH T 360      22.914   6.858  49.461  1.00  0.48           O  
HETATM  362  O   HOH T 361      26.752   7.349  11.539  1.00  0.49           O  
HETATM  363  O   HOH T 362       4.576 -14.995  12.856  1.00  0.49           O  
HETATM  364  O   HOH T 363      13.042  13.763  33.846  1.00  0.49           O  
HETATM  365  O   HOH T 364       9.757 -15.423  -0.802  1.00  0.49           O  
HETATM  366  O   HOH T 365      -1.432  16.295  17.002  1.00  0.49           O  
HETATM  367  O   HOH T 366      13.500  20.842  22.839  1.00  0.49           O  
HETATM  368  O   HOH T 367      30.044  19.820  28.967  1.00  0.49           O  
HETATM  369  O   HOH T 368      -2.538  -2.666  46.759  1.00  0.49           O  
HETATM  370  O   HOH T 369       1.486  15.638  32.596  1.00  0.49           O  
HETATM  371  O   HOH T 370      32.572  19.136  30.155  1.00  0.49           O  
HETATM  372  O   HOH T 371       6.888  18.169  23.168  1.00  0.49           O  
HETATM  373  O   HOH T 372      10.088  11.492  38.326  1.00  0.49           O  
HETATM  374  O   HOH T 373      -9.210   8.391  23.629  1.00  0.49           O  
HETATM  375  O   HOH T 374      21.215 -15.573  41.850  1.00  0.49           O  
HETATM  376  O   HOH T 375      34.051   9.728  16.663  1.00  0.49           O  
HETATM  377  O   HOH T 376      -2.503 -12.871  46.066  1.00  0.50           O  
HETATM  378  O   HOH T 377      19.432 -17.857  -5.594  1.00  0.50           O  
HETATM  379  O   HOH T 378      26.933  -0.136  11.181  1.00  0.50           O  
HETATM  380  O   HOH T 379      23.927   4.203  26.886  1.00  0.50           O  
HETATM  381  O   HOH T 380      18.561 -15.513   8.917  1.00  0.50           O  
HETATM  382  O   HOH T 381      33.061  17.500  39.394  1.00  0.50           O  
HETATM  383  O   HOH T 382      13.603  15.585  31.822  1.00  0.50           O  
HETATM  384  O   HOH T 383      28.409  -9.727  16.820  1.00  0.50           O  
HETATM  385  O   HOH T 384      27.041  -1.047   8.650  1.00  0.50           O  
HETATM  386  O   HOH T 385      -2.435  -7.847  34.667  1.00  0.50           O  
HETATM  387  O   HOH T 386      25.975   4.724  11.127  1.00  0.50           O  
HETATM  388  O   HOH T 387       5.804  17.814  26.829  1.00  0.50           O  
HETATM  389  O   HOH T 388      -7.243   6.811  24.818  1.00  0.50           O  
HETATM  390  O   HOH T 389      21.822 -16.332  16.523  1.00  0.50           O  
HETATM  391  O   HOH T 390      41.379   6.680  15.449  1.00  0.50           O  
HETATM  392  O   HOH T 391      35.482   4.036  13.785  1.00  0.50           O  
HETATM  393  O   HOH T 392      31.411  10.815  13.893  1.00  0.50           O  
HETATM  394  O   HOH T 393      25.213  18.669  32.781  1.00  0.50           O  
HETATM  395  O   HOH T 394      18.149  12.264  34.120  1.00  0.50           O  
HETATM  396  O   HOH T 395       3.431  18.259  25.436  1.00  0.51           O  
HETATM  397  O   HOH T 396      -9.768  -1.358  14.704  1.00  0.51           O  
HETATM  398  O   HOH T 397      11.588   5.255  41.128  1.00  0.51           O  
HETATM  399  O   HOH T 398       5.618   3.609  45.361  1.00  0.51           O  
HETATM  400  O   HOH T 399       2.082  -6.459   7.796  1.00  0.51           O  
HETATM  401  O   HOH T 400      18.497   1.702  -1.649  1.00  0.51           O  
HETATM  402  O   HOH T 401       8.725 -18.894  24.829  1.00  0.51           O  
HETATM  403  O   HOH T 402       8.127  16.497  28.109  1.00  0.51           O  
HETATM  404  O   HOH T 403      -0.785 -15.209  28.081  1.00  0.51           O  
HETATM  405  O   HOH T 404      25.538  -8.211  12.844  1.00  0.51           O  
HETATM  406  O   HOH T 405      10.019   5.654   5.624  1.00  0.51           O  
HETATM  407  O   HOH T 406      42.381  16.339  30.875  1.00  0.51           O  
HETATM  408  O   HOH T 407      -1.130  11.236   5.917  1.00  0.51           O  
HETATM  409  O   HOH T 408      29.549   3.053  11.281  1.00  0.51           O  
HETATM  410  O   HOH T 409      26.436  -7.238  15.397  1.00  0.51           O  
HETATM  411  O   HOH T 410      -3.480  -6.392  42.764  1.00  0.51           O  
HETATM  412  O   HOH T 411      28.407  -9.676  30.087  1.00  0.51           O  
HETATM  413  O   HOH T 412      -7.750  -2.227  13.161  1.00  0.51           O  
HETATM  414  O   HOH T 413      -5.814 -13.514  26.790  1.00  0.52           O  
HETATM  415  O   HOH T 414      27.577  19.161  31.667  1.00  0.52           O  
HETATM  416  O   HOH T 415      -6.393   4.060  38.873  1.00  0.52           O  
HETATM  417  O   HOH T 416      -4.952  -4.088  43.619  1.00  0.52           O  
HETATM  418  O   HOH T 417      27.666 -14.741  12.311  1.00  0.52           O  
HETATM  419  O   HOH T 418       0.288  13.116  22.981  1.00  0.52           O  
HETATM  420  O   HOH T 419      21.245  -9.159  13.739  1.00  0.52           O  
HETATM  421  O   HOH T 420      -5.629   2.497  28.312  1.00  0.52           O  
HETATM  422  O   HOH T 421       5.869  13.150   5.779  1.00  0.52           O  
HETATM  423  O   HOH T 422      -3.371 -13.525  17.547  1.00  0.52           O  
HETATM  424  O   HOH T 423      19.698 -20.637  33.972  1.00  0.52           O  
HETATM  425  O   HOH T 424      10.354 -17.727   0.605  1.00  0.52           O  
HETATM  426  O   HOH T 425      -3.911  -4.822  32.918  1.00  0.52           O  
HETATM  427  O   HOH T 426      -5.263   7.374  30.001  1.00  0.53           O  
HETATM  428  O   HOH T 427      19.931  -8.927   2.039  1.00  0.53           O  
HETATM  429  O   HOH T 428      26.991   6.351   9.028  1.00  0.53           O  
HETATM  430  O   HOH T 429      -7.903  -6.453   9.748  1.00  0.53           O  
HETATM  431  O   HOH T 430      23.991   8.326  13.937  1.00  0.53           O  
HETATM  432  O   HOH T 431      21.200 -21.181  30.886  1.00  0.53           O  
HETATM  433  O   HOH T 432      -3.414 -14.648  27.490  1.00  0.53           O  
HETATM  434  O   HOH T 433      24.372   7.827  26.306  1.00  0.53           O  
HETATM  435  O   HOH T 434      -5.335 -18.700  10.768  1.00  0.53           O  
HETATM  436  O   HOH T 435      25.177  -9.796  16.199  1.00  0.53           O  
HETATM  437  O   HOH T 436      -0.820 -13.769  16.731  1.00  0.53           O  
HETATM  438  O   HOH T 437      32.893  -5.472  15.969  1.00  0.53           O  
HETATM  439  O   HOH T 438      26.690  14.755  43.818  1.00  0.53           O  
HETATM  440  O   HOH T 439       7.376   6.807   2.480  1.00  0.54           O  
HETATM  441  O   HOH T 440      16.236 -17.997   0.727  1.00  0.54           O  
HETATM  442  O   HOH T 441      32.351 -15.099  17.320  1.00  0.54           O  
HETATM  443  O   HOH T 442      27.433 -14.637  34.772  1.00  0.54           O  
HETATM  444  O   HOH T 443       4.615   5.763  -0.034  1.00  0.54           O  
HETATM  445  O   HOH T 444      18.679 -22.914  31.632  1.00  0.54           O  
HETATM  446  O   HOH T 445      25.136 -16.020  39.026  1.00  0.54           O  
HETATM  447  O   HOH T 446       6.030 -18.707  24.929  1.00  0.54           O  
HETATM  448  O   HOH T 447      24.407 -17.339  17.315  1.00  0.54           O  
HETATM  449  O   HOH T 448       3.885   1.234  45.909  1.00  0.54           O  
HETATM  450  O   HOH T 449      34.846  12.936  38.087  1.00  0.54           O  
HETATM  451  O   HOH T 450      -2.749   3.538  34.880  1.00  0.54           O  
HETATM  452  O   HOH T 451     -10.446  12.315  18.016  1.00  0.55           O  
HETATM  453  O   HOH T 452       0.045 -21.821   6.489  1.00  0.55           O  
HETATM  454  O   HOH T 453      22.588  18.223  33.475  1.00  0.55           O  
HETATM  455  O   HOH T 454      28.592 -16.952  13.718  1.00  0.55           O  
HETATM  456  O   HOH T 455      -7.582  -4.767  11.876  1.00  0.55           O  
HETATM  457  O   HOH T 456       6.612   1.516  43.749  1.00  0.55           O  
HETATM  458  O   HOH T 457      34.954  -0.776  31.238  1.00  0.55           O  
HETATM  459  O   HOH T 458      -3.851  -5.979   6.449  1.00  0.56           O  
HETATM  460  O   HOH T 459      19.611   9.976  40.417  1.00  0.56           O  
HETATM  461  O   HOH T 460      -0.127  17.108  10.225  1.00  0.56           O  
HETATM  462  O   HOH T 461      13.713 -19.483  38.812  1.00  0.56           O  
HETATM  463  O   HOH T 462       4.051  16.302   4.670  1.00  0.56           O  
HETATM  464  O   HOH T 463      -5.724  -6.617  43.869  1.00  0.56           O  
HETATM  465  O   HOH T 464      22.136  -6.683  45.612  1.00  0.56           O  
HETATM  466  O   HOH T 465      42.929   7.371  27.478  1.00  0.56           O  
HETATM  467  O   HOH T 466      -4.875   7.899  12.721  1.00  0.57           O  
HETATM  468  O   HOH T 467       8.649  20.209  10.397  1.00  0.57           O  
HETATM  469  O   HOH T 468      37.257  -1.603  40.386  1.00  0.57           O  
HETATM  470  O   HOH T 469       0.474   8.183  43.963  1.00  0.57           O  
HETATM  471  O   HOH T 470       2.262 -14.843  47.593  1.00  0.57           O  
HETATM  472  O   HOH T 471      41.362   4.064  41.215  1.00  0.57           O  
HETATM  473  O   HOH T 472      -0.967   9.066  32.332  1.00  0.57           O  
HETATM  474  O   HOH T 473      -6.568   0.820   9.820  1.00  0.57           O  
HETATM  475  O   HOH T 474      21.812  -9.610  -0.760  1.00  0.57           O  
HETATM  476  O   HOH T 475      32.275  -8.155  31.767  1.00  0.59           O  
HETATM  477  O   HOH T 476      34.868   8.205  14.642  1.00  0.60           O  
HETATM  478  O   HOH T 477       2.383   4.919  -1.442  1.00  0.62           O  
TER     479      HOH T 477 
