# Supplementary material for: Accurate Prediction of Hydration Sites of Proteins Using Energy Model With Atom Embedding
Source: Front Mol Biosci. 2021 Sep 20;8:756075. doi: 10.3389/fmolb.2021.756075 (PMC8488165; doi:10.3389/fmolb.2021.756075)
Supplement: Supplementary file 1 [file DataSheet1.ZIP › Data Sheet 1/Our_result_pdb/our_dataset_output/2NWD_watersite.pdb]

HEADER                                                        XXXX


JRNL        PMID   -1
HETATM    1  O   HOH T   0       3.183  -8.144  35.942  1.00  0.20           O  
HETATM    2  O   HOH T   1      -1.637  18.471  34.090  1.00  0.21           O  
HETATM    3  O   HOH T   2       1.788  17.456  39.590  1.00  0.22           O  
HETATM    4  O   HOH T   3       6.067  17.097  27.862  1.00  0.22           O  
HETATM    5  O   HOH T   4      19.426  28.341  29.195  1.00  0.24           O  
HETATM    6  O   HOH T   5       6.465  25.901  27.170  1.00  0.24           O  
HETATM    7  O   HOH T   6       2.204   3.022  33.835  1.00  0.25           O  
HETATM    8  O   HOH T   7      18.555  15.975  10.054  1.00  0.25           O  
HETATM    9  O   HOH T   8      24.635  25.207  15.411  1.00  0.25           O  
HETATM   10  O   HOH T   9       4.480  23.274  33.017  1.00  0.26           O  
HETATM   11  O   HOH T  10      -0.449  18.013  18.758  1.00  0.26           O  
HETATM   12  O   HOH T  11       4.951  -1.795  25.160  1.00  0.26           O  
HETATM   13  O   HOH T  12      21.984   7.843  37.862  1.00  0.26           O  
HETATM   14  O   HOH T  13       5.333  20.239  31.674  1.00  0.27           O  
HETATM   15  O   HOH T  14      16.712  -2.944  24.923  1.00  0.27           O  
HETATM   16  O   HOH T  15      -2.942  17.267  24.871  1.00  0.27           O  
HETATM   17  O   HOH T  16      15.266   6.600  25.941  1.00  0.27           O  
HETATM   18  O   HOH T  17      -0.775 -10.384  31.773  1.00  0.27           O  
HETATM   19  O   HOH T  18      -2.333  -8.674  33.312  1.00  0.28           O  
HETATM   20  O   HOH T  19      -1.699  25.524  18.610  1.00  0.28           O  
HETATM   21  O   HOH T  20      -0.995  11.330  38.990  1.00  0.28           O  
HETATM   22  O   HOH T  21      11.122  24.498  35.031  1.00  0.28           O  
HETATM   23  O   HOH T  22      10.291  29.250  27.789  1.00  0.28           O  
HETATM   24  O   HOH T  23      21.171  10.407  15.408  1.00  0.29           O  
HETATM   25  O   HOH T  24      20.647  10.849  35.361  1.00  0.29           O  
HETATM   26  O   HOH T  25      13.278  26.056  34.700  1.00  0.29           O  
HETATM   27  O   HOH T  26      -2.486  16.680  27.668  1.00  0.29           O  
HETATM   28  O   HOH T  27       9.932  29.718  21.792  1.00  0.29           O  
HETATM   29  O   HOH T  28       4.114   6.257  38.519  1.00  0.30           O  
HETATM   30  O   HOH T  29       2.434   4.062  40.491  1.00  0.30           O  
HETATM   31  O   HOH T  30       5.432  11.834  19.181  1.00  0.30           O  
HETATM   32  O   HOH T  31      19.871   8.369  36.168  1.00  0.30           O  
HETATM   33  O   HOH T  32      -3.094  12.071  19.658  1.00  0.30           O  
HETATM   34  O   HOH T  33      15.248  18.585  14.354  1.00  0.31           O  
HETATM   35  O   HOH T  34      15.808   5.479  28.489  1.00  0.31           O  
HETATM   36  O   HOH T  35      12.955   8.144  32.195  1.00  0.31           O  
HETATM   37  O   HOH T  36      13.698  13.080  44.529  1.00  0.31           O  
HETATM   38  O   HOH T  37       4.990  19.155  29.212  1.00  0.31           O  
HETATM   39  O   HOH T  38       8.620  17.571  47.866  1.00  0.32           O  
HETATM   40  O   HOH T  39       0.349  17.567  42.044  1.00  0.32           O  
HETATM   41  O   HOH T  40      28.451  11.939  40.275  1.00  0.32           O  
HETATM   42  O   HOH T  41      13.045   3.143  43.649  1.00  0.32           O  
HETATM   43  O   HOH T  42      17.719  32.996  22.657  1.00  0.32           O  
HETATM   44  O   HOH T  43       9.243   0.181  45.480  1.00  0.32           O  
HETATM   45  O   HOH T  44      28.230  17.695  18.839  1.00  0.32           O  
HETATM   46  O   HOH T  45       1.432  -4.929  42.370  1.00  0.32           O  
HETATM   47  O   HOH T  46      -8.020   3.734  30.931  1.00  0.32           O  
HETATM   48  O   HOH T  47      23.246  14.507  15.671  1.00  0.32           O  
HETATM   49  O   HOH T  48      14.506  20.272  39.162  1.00  0.33           O  
HETATM   50  O   HOH T  49      -4.706   1.408  35.700  1.00  0.33           O  
HETATM   51  O   HOH T  50      17.788   9.710  43.152  1.00  0.33           O  
HETATM   52  O   HOH T  51       0.142  25.161  20.746  1.00  0.33           O  
HETATM   53  O   HOH T  52      25.164  13.748  13.733  1.00  0.34           O  
HETATM   54  O   HOH T  53      15.367   9.526  32.188  1.00  0.34           O  
HETATM   55  O   HOH T  54      -1.510  17.865  31.224  1.00  0.34           O  
HETATM   56  O   HOH T  55      18.037  -0.548  24.712  1.00  0.34           O  
HETATM   57  O   HOH T  56       2.553  -0.562  24.470  1.00  0.34           O  
HETATM   58  O   HOH T  57      11.775  25.748  13.557  1.00  0.34           O  
HETATM   59  O   HOH T  58       0.138  12.138  41.388  1.00  0.35           O  
HETATM   60  O   HOH T  59       4.847  21.902  14.784  1.00  0.35           O  
HETATM   61  O   HOH T  60      26.923  23.450  34.179  1.00  0.35           O  
HETATM   62  O   HOH T  61      18.977   7.778  38.641  1.00  0.35           O  
HETATM   63  O   HOH T  62      27.557  22.720  12.052  1.00  0.35           O  
HETATM   64  O   HOH T  63      -1.435  -6.145  36.883  1.00  0.35           O  
HETATM   65  O   HOH T  64      -3.825   6.865  43.670  1.00  0.35           O  
HETATM   66  O   HOH T  65      23.341  29.406  13.930  1.00  0.36           O  
HETATM   67  O   HOH T  66      12.879  11.778  15.724  1.00  0.36           O  
HETATM   68  O   HOH T  67      -6.920   2.244  34.499  1.00  0.36           O  
HETATM   69  O   HOH T  68      11.386  20.310  13.026  1.00  0.36           O  
HETATM   70  O   HOH T  69       5.628  19.387  42.549  1.00  0.36           O  
HETATM   71  O   HOH T  70      -0.555  10.200  24.246  1.00  0.36           O  
HETATM   72  O   HOH T  71      10.351   9.319  45.133  1.00  0.36           O  
HETATM   73  O   HOH T  72       9.192   6.030  25.089  1.00  0.36           O  
HETATM   74  O   HOH T  73      15.924   6.208  45.422  1.00  0.36           O  
HETATM   75  O   HOH T  74      -2.670  14.630  31.535  1.00  0.36           O  
HETATM   76  O   HOH T  75      10.943  23.065  12.832  1.00  0.36           O  
HETATM   77  O   HOH T  76      12.392   8.075  17.853  1.00  0.37           O  
HETATM   78  O   HOH T  77      -5.216  17.995  23.314  1.00  0.37           O  
HETATM   79  O   HOH T  78      21.736  21.253  39.822  1.00  0.37           O  
HETATM   80  O   HOH T  79       0.003  -4.784  25.838  1.00  0.37           O  
HETATM   81  O   HOH T  80       2.441   2.164  23.845  1.00  0.37           O  
HETATM   82  O   HOH T  81      25.714  23.498  19.477  1.00  0.38           O  
HETATM   83  O   HOH T  82      21.474  29.262  17.455  1.00  0.38           O  
HETATM   84  O   HOH T  83      -4.450   6.776  29.674  1.00  0.38           O  
HETATM   85  O   HOH T  84       0.957   4.180  25.014  1.00  0.38           O  
HETATM   86  O   HOH T  85       2.406   0.005  43.754  1.00  0.38           O  
HETATM   87  O   HOH T  86      -6.359   4.336  33.075  1.00  0.38           O  
HETATM   88  O   HOH T  87       8.513  14.766  29.349  1.00  0.38           O  
HETATM   89  O   HOH T  88       0.618  17.458  21.142  1.00  0.38           O  
HETATM   90  O   HOH T  89      19.600  22.916  40.159  1.00  0.38           O  
HETATM   91  O   HOH T  90       1.875  23.545  35.681  1.00  0.38           O  
HETATM   92  O   HOH T  91       6.186  13.507  17.086  1.00  0.38           O  
HETATM   93  O   HOH T  92      17.806  33.602  31.624  1.00  0.39           O  
HETATM   94  O   HOH T  93       7.103  15.421  48.135  1.00  0.39           O  
HETATM   95  O   HOH T  94      25.824   5.458  40.528  1.00  0.39           O  
HETATM   96  O   HOH T  95       7.766  28.089  28.547  1.00  0.39           O  
HETATM   97  O   HOH T  96       4.329  25.873  25.343  1.00  0.39           O  
HETATM   98  O   HOH T  97      12.770  10.710  45.873  1.00  0.39           O  
HETATM   99  O   HOH T  98       7.916  29.684  26.299  1.00  0.40           O  
HETATM  100  O   HOH T  99       7.965  -3.068  27.190  1.00  0.40           O  
HETATM  101  O   HOH T 100       0.549   0.706  34.314  1.00  0.40           O  
HETATM  102  O   HOH T 101      10.694  32.401  21.185  1.00  0.40           O  
HETATM  103  O   HOH T 102      26.189  21.958  39.681  1.00  0.40           O  
HETATM  104  O   HOH T 103      12.634   7.918  12.932  1.00  0.40           O  
HETATM  105  O   HOH T 104      11.262  14.296  45.176  1.00  0.40           O  
HETATM  106  O   HOH T 105       1.729  -5.490  39.622  1.00  0.41           O  
HETATM  107  O   HOH T 106      -1.365   2.960  43.278  1.00  0.41           O  
HETATM  108  O   HOH T 107      -0.322  -1.816  38.089  1.00  0.41           O  
HETATM  109  O   HOH T 108      28.324  31.288  25.121  1.00  0.41           O  
HETATM  110  O   HOH T 109      15.662  31.968  24.299  1.00  0.41           O  
HETATM  111  O   HOH T 110      27.134  14.477  20.942  1.00  0.41           O  
HETATM  112  O   HOH T 111      17.018  30.986  31.368  1.00  0.41           O  
HETATM  113  O   HOH T 112      17.733  18.696  13.007  1.00  0.41           O  
HETATM  114  O   HOH T 113       2.356  20.096  40.464  1.00  0.41           O  
HETATM  115  O   HOH T 114      27.748  20.246  19.878  1.00  0.41           O  
HETATM  116  O   HOH T 115      21.420  31.213  15.568  1.00  0.41           O  
HETATM  117  O   HOH T 116      -1.355  20.486  19.273  1.00  0.42           O  
HETATM  118  O   HOH T 117       7.003   0.096  25.022  1.00  0.42           O  
HETATM  119  O   HOH T 118       4.753   6.673  41.236  1.00  0.43           O  
HETATM  120  O   HOH T 119       9.712  15.057  47.336  1.00  0.43           O  
HETATM  121  O   HOH T 120      15.060   2.947  27.468  1.00  0.43           O  
HETATM  122  O   HOH T 121      11.741   6.681  27.825  1.00  0.43           O  
HETATM  123  O   HOH T 122       8.975  20.246  14.453  1.00  0.43           O  
HETATM  124  O   HOH T 123      12.798   6.640  48.310  1.00  0.43           O  
HETATM  125  O   HOH T 124      -0.224  -1.727  33.439  1.00  0.43           O  
HETATM  126  O   HOH T 125      -4.610   0.423  38.243  1.00  0.43           O  
HETATM  127  O   HOH T 126       5.096   6.769  43.970  1.00  0.43           O  
HETATM  128  O   HOH T 127       4.520  17.887  44.588  1.00  0.44           O  
HETATM  129  O   HOH T 128      19.824   8.471  14.226  1.00  0.44           O  
HETATM  130  O   HOH T 129      23.767  22.691  38.580  1.00  0.44           O  
HETATM  131  O   HOH T 130      21.046  14.155  13.990  1.00  0.44           O  
HETATM  132  O   HOH T 131       2.216   4.637  22.572  1.00  0.44           O  
HETATM  133  O   HOH T 132      16.749  34.374  20.332  1.00  0.44           O  
HETATM  134  O   HOH T 133       0.887  -2.198  42.874  1.00  0.44           O  
HETATM  135  O   HOH T 134      11.037  -4.887  35.916  1.00  0.44           O  
HETATM  136  O   HOH T 135      17.799  16.015  12.605  1.00  0.44           O  
HETATM  137  O   HOH T 136      11.868  -0.750  45.136  1.00  0.45           O  
HETATM  138  O   HOH T 137      17.805   3.251  13.732  1.00  0.45           O  
HETATM  139  O   HOH T 138      23.774  27.833  16.286  1.00  0.45           O  
HETATM  140  O   HOH T 139      18.629   4.115  30.967  1.00  0.45           O  
HETATM  141  O   HOH T 140      28.451  22.880  19.652  1.00  0.45           O  
HETATM  142  O   HOH T 141      10.383   7.654  47.364  1.00  0.45           O  
HETATM  143  O   HOH T 142       7.685  34.742  21.071  1.00  0.45           O  
HETATM  144  O   HOH T 143      -1.385  10.995  43.382  1.00  0.45           O  
HETATM  145  O   HOH T 144      10.416   5.128  48.541  1.00  0.46           O  
HETATM  146  O   HOH T 145       9.698  35.918  22.679  1.00  0.46           O  
HETATM  147  O   HOH T 146       7.928   8.590  20.897  1.00  0.46           O  
HETATM  148  O   HOH T 147      13.047   5.968  24.354  1.00  0.46           O  
HETATM  149  O   HOH T 148       9.362  30.851  19.317  1.00  0.46           O  
HETATM  150  O   HOH T 149       4.748   2.570  45.122  1.00  0.46           O  
HETATM  151  O   HOH T 150       6.253  27.764  25.039  1.00  0.46           O  
HETATM  152  O   HOH T 151      19.064  35.831  20.170  1.00  0.46           O  
HETATM  153  O   HOH T 152      11.217  10.614  17.654  1.00  0.46           O  
HETATM  154  O   HOH T 153      -5.184  18.425  18.648  1.00  0.46           O  
HETATM  155  O   HOH T 154      18.353  21.101  44.701  1.00  0.46           O  
HETATM  156  O   HOH T 155       9.748  18.656  39.711  1.00  0.47           O  
HETATM  157  O   HOH T 156      20.780   7.301  43.168  1.00  0.47           O  
HETATM  158  O   HOH T 157       1.326  14.812  45.354  1.00  0.47           O  
HETATM  159  O   HOH T 158      26.429  24.970  13.262  1.00  0.47           O  
HETATM  160  O   HOH T 159      -4.130  -6.661  36.325  1.00  0.47           O  
HETATM  161  O   HOH T 160       0.087  10.471  21.571  1.00  0.47           O  
HETATM  162  O   HOH T 161      17.251  22.674  38.845  1.00  0.47           O  
HETATM  163  O   HOH T 162       7.879   3.994  47.875  1.00  0.47           O  
HETATM  164  O   HOH T 163      20.966   7.176  40.420  1.00  0.47           O  
HETATM  165  O   HOH T 164       0.950  26.400  18.441  1.00  0.47           O  
HETATM  166  O   HOH T 165      25.336  27.458  14.003  1.00  0.47           O  
HETATM  167  O   HOH T 166       4.780   0.620  23.596  1.00  0.47           O  
HETATM  168  O   HOH T 167       8.052   6.616  48.092  1.00  0.47           O  
HETATM  169  O   HOH T 168       2.690  22.939  38.173  1.00  0.48           O  
HETATM  170  O   HOH T 169      15.282   7.227  30.678  1.00  0.48           O  
HETATM  171  O   HOH T 170      18.557  32.107  29.359  1.00  0.48           O  
HETATM  172  O   HOH T 171      -1.583  23.136  20.095  1.00  0.48           O  
HETATM  173  O   HOH T 172       4.994  16.289  46.721  1.00  0.48           O  
HETATM  174  O   HOH T 173      25.557  20.784  11.781  1.00  0.48           O  
HETATM  175  O   HOH T 174      -3.558   4.423  42.320  1.00  0.48           O  
HETATM  176  O   HOH T 175       0.167  24.246  37.765  1.00  0.48           O  
HETATM  177  O   HOH T 176      10.389   1.529  33.621  1.00  0.48           O  
HETATM  178  O   HOH T 177       3.446   2.490  42.765  1.00  0.49           O  
HETATM  179  O   HOH T 178      -1.354  -0.795  35.797  1.00  0.49           O  
HETATM  180  O   HOH T 179      14.479   7.300  19.488  1.00  0.49           O  
HETATM  181  O   HOH T 180       6.329   5.601  46.103  1.00  0.49           O  
HETATM  182  O   HOH T 181       8.123   6.500  22.694  1.00  0.49           O  
HETATM  183  O   HOH T 182      18.425   5.508  33.214  1.00  0.49           O  
HETATM  184  O   HOH T 183      16.106   3.145  30.091  1.00  0.49           O  
HETATM  185  O   HOH T 184      13.078   7.287  21.872  1.00  0.49           O  
HETATM  186  O   HOH T 185       5.868   8.010  22.612  1.00  0.49           O  
HETATM  187  O   HOH T 186      -0.053  23.956  29.692  1.00  0.50           O  
HETATM  188  O   HOH T 187      15.518   3.452  44.981  1.00  0.50           O  
HETATM  189  O   HOH T 188      25.370  25.920  20.741  1.00  0.50           O  
HETATM  190  O   HOH T 189      23.682  28.467  18.916  1.00  0.50           O  
HETATM  191  O   HOH T 190      11.453   5.796  35.723  1.00  0.50           O  
HETATM  192  O   HOH T 191      15.956  24.952  37.918  1.00  0.50           O  
HETATM  193  O   HOH T 192       5.365   9.197  20.124  1.00  0.50           O  
HETATM  194  O   HOH T 193      -0.938   6.043  25.947  1.00  0.50           O  
HETATM  195  O   HOH T 194       8.067  12.851  15.117  1.00  0.50           O  
HETATM  196  O   HOH T 195      20.245   9.659  44.536  1.00  0.50           O  
HETATM  197  O   HOH T 196      20.876  14.437  43.146  1.00  0.50           O  
HETATM  198  O   HOH T 197      26.277  29.756  24.152  1.00  0.51           O  
HETATM  199  O   HOH T 198      23.301   6.055  39.608  1.00  0.51           O  
HETATM  200  O   HOH T 199      10.500  -1.901  27.642  1.00  0.51           O  
HETATM  201  O   HOH T 200      13.636   5.439  31.912  1.00  0.51           O  
HETATM  202  O   HOH T 201      15.187   7.159  33.569  1.00  0.51           O  
HETATM  203  O   HOH T 202      12.367  18.789  39.843  1.00  0.51           O  
HETATM  204  O   HOH T 203      24.983  23.496  11.456  1.00  0.52           O  
HETATM  205  O   HOH T 204      12.315  16.821  42.012  1.00  0.52           O  
HETATM  206  O   HOH T 205      -5.289  11.055  24.088  1.00  0.52           O  
HETATM  207  O   HOH T 206      11.564  -2.278  35.182  1.00  0.52           O  
HETATM  208  O   HOH T 207      13.302  21.803  11.691  1.00  0.52           O  
HETATM  209  O   HOH T 208      10.924   1.386  43.616  1.00  0.52           O  
HETATM  210  O   HOH T 209      -1.284  18.707  23.062  1.00  0.52           O  
HETATM  211  O   HOH T 210      10.166  35.045  20.002  1.00  0.52           O  
HETATM  212  O   HOH T 211      11.251   4.563  26.059  1.00  0.53           O  
HETATM  213  O   HOH T 212      20.272  22.766  11.070  1.00  0.53           O  
HETATM  214  O   HOH T 213      -5.394   5.415  27.562  1.00  0.53           O  
HETATM  215  O   HOH T 214      15.399   2.433  42.372  1.00  0.53           O  
HETATM  216  O   HOH T 215      14.990   3.996  24.836  1.00  0.53           O  
HETATM  217  O   HOH T 216       1.340  -4.039  44.940  1.00  0.53           O  
HETATM  218  O   HOH T 217      14.352  22.986  38.885  1.00  0.53           O  
HETATM  219  O   HOH T 218       3.889  15.102  44.573  1.00  0.53           O  
HETATM  220  O   HOH T 219       4.064  24.538  17.828  1.00  0.53           O  
HETATM  221  O   HOH T 220       3.199  17.893  42.018  1.00  0.53           O  
HETATM  222  O   HOH T 221      18.369   7.486  11.942  1.00  0.53           O  
HETATM  223  O   HOH T 222       5.810  30.216  28.091  1.00  0.54           O  
HETATM  224  O   HOH T 223      12.844  19.366  43.677  1.00  0.54           O  
HETATM  225  O   HOH T 224       7.248   2.156  45.985  1.00  0.54           O  
HETATM  226  O   HOH T 225       0.643   6.382  43.706  1.00  0.54           O  
HETATM  227  O   HOH T 226      10.179  -4.705  27.757  1.00  0.54           O  
HETATM  228  O   HOH T 227       3.032   5.255  42.900  1.00  0.54           O  
HETATM  229  O   HOH T 228      -5.157  16.669  20.839  1.00  0.54           O  
HETATM  230  O   HOH T 229      15.278  34.187  22.723  1.00  0.54           O  
HETATM  231  O   HOH T 230      16.267  13.712  12.814  1.00  0.54           O  
HETATM  232  O   HOH T 231      15.392  19.667  11.761  1.00  0.54           O  
HETATM  233  O   HOH T 232       7.229  12.275  45.506  1.00  0.55           O  
HETATM  234  O   HOH T 233      -1.804  -3.435  36.417  1.00  0.55           O  
HETATM  235  O   HOH T 234      11.956   4.649  29.774  1.00  0.55           O  
HETATM  236  O   HOH T 235      32.522  24.576  11.364  1.00  0.55           O  
HETATM  237  O   HOH T 236      -3.364  -0.046  33.932  1.00  0.56           O  
HETATM  238  O   HOH T 237      -1.424   0.638  32.220  1.00  0.56           O  
HETATM  239  O   HOH T 238      22.699   8.264  12.135  1.00  0.56           O  
HETATM  240  O   HOH T 239       6.321  28.420  22.281  1.00  0.56           O  
HETATM  241  O   HOH T 240      16.952  33.301  27.500  1.00  0.56           O  
HETATM  242  O   HOH T 241      -1.503   8.318  44.005  1.00  0.57           O  
HETATM  243  O   HOH T 242       0.799   1.619  42.097  1.00  0.57           O  
HETATM  244  O   HOH T 243      22.681  32.524  28.362  1.00  0.57           O  
HETATM  245  O   HOH T 244       1.195  -6.938  37.532  1.00  0.58           O  
HETATM  246  O   HOH T 245       1.832  13.802  42.862  1.00  0.59           O  
HETATM  247  O   HOH T 246      22.625  33.177  18.678  1.00  0.61           O  
TER     248      HOH T 246 
