# Supplementary material for: Accurate Prediction of Hydration Sites of Proteins Using Energy Model With Atom Embedding
Source: Front Mol Biosci. 2021 Sep 20;8:756075. doi: 10.3389/fmolb.2021.756075 (PMC8488165; doi:10.3389/fmolb.2021.756075)
Supplement: Supplementary file 1 [file DataSheet1.ZIP › Data Sheet 1/Our_result_pdb/our_dataset_output/2O3T_watersite.pdb]

HEADER                                                        XXXX


JRNL        PMID   -1
HETATM    1  O   HOH T   0      -3.778   8.595 -10.889  1.00  0.16           O  
HETATM    2  O   HOH T   1      19.741   7.094 -33.767  1.00  0.16           O  
HETATM    3  O   HOH T   2      12.633  22.937 -22.525  1.00  0.16           O  
HETATM    4  O   HOH T   3       6.752  18.589  -8.108  1.00  0.17           O  
HETATM    5  O   HOH T   4       4.635 -12.811 -10.609  1.00  0.17           O  
HETATM    6  O   HOH T   5       2.550  10.264   8.137  1.00  0.18           O  
HETATM    7  O   HOH T   6       8.162   7.450 -39.169  1.00  0.18           O  
HETATM    8  O   HOH T   7     -20.926   8.574   7.850  1.00  0.18           O  
HETATM    9  O   HOH T   8      14.086 -14.658  -3.254  1.00  0.19           O  
HETATM   10  O   HOH T   9      15.567   6.502 -42.809  1.00  0.19           O  
HETATM   11  O   HOH T  10      15.074  18.341 -11.758  1.00  0.20           O  
HETATM   12  O   HOH T  11       8.408  19.991  -9.806  1.00  0.20           O  
HETATM   13  O   HOH T  12      24.945  19.986  -6.278  1.00  0.20           O  
HETATM   14  O   HOH T  13      20.702  -4.522 -29.895  1.00  0.20           O  
HETATM   15  O   HOH T  14      13.786 -20.241  -3.301  1.00  0.20           O  
HETATM   16  O   HOH T  15      14.570  14.151 -32.223  1.00  0.21           O  
HETATM   17  O   HOH T  16      -4.296 -22.891   2.217  1.00  0.21           O  
HETATM   18  O   HOH T  17      13.802  14.597 -40.441  1.00  0.21           O  
HETATM   19  O   HOH T  18      22.069  13.832  -3.632  1.00  0.21           O  
HETATM   20  O   HOH T  19      -5.697  -6.585  -6.762  1.00  0.22           O  
HETATM   21  O   HOH T  20      -9.533   8.863  -5.415  1.00  0.22           O  
HETATM   22  O   HOH T  21      17.073  22.818  -9.231  1.00  0.22           O  
HETATM   23  O   HOH T  22      16.277  -3.199 -29.110  1.00  0.23           O  
HETATM   24  O   HOH T  23      -9.966 -19.400   3.046  1.00  0.23           O  
HETATM   25  O   HOH T  24      -3.459   1.529   0.933  1.00  0.23           O  
HETATM   26  O   HOH T  25      17.602   1.101 -27.795  1.00  0.23           O  
HETATM   27  O   HOH T  26     -16.554   4.062   5.514  1.00  0.23           O  
HETATM   28  O   HOH T  27      12.577  -3.247 -10.665  1.00  0.23           O  
HETATM   29  O   HOH T  28     -33.125  10.582  13.066  1.00  0.23           O  
HETATM   30  O   HOH T  29       9.527  15.054   3.850  1.00  0.24           O  
HETATM   31  O   HOH T  30       4.717  10.388   4.050  1.00  0.24           O  
HETATM   32  O   HOH T  31       5.660 -15.305 -11.548  1.00  0.24           O  
HETATM   33  O   HOH T  32     -13.547  12.082  -5.560  1.00  0.24           O  
HETATM   34  O   HOH T  33      -3.266   1.395 -12.172  1.00  0.24           O  
HETATM   35  O   HOH T  34      18.335  18.970 -33.008  1.00  0.24           O  
HETATM   36  O   HOH T  35      -7.224 -13.533 -12.921  1.00  0.24           O  
HETATM   37  O   HOH T  36      -5.971  13.499  21.693  1.00  0.24           O  
HETATM   38  O   HOH T  37     -12.141  -1.722   3.977  1.00  0.24           O  
HETATM   39  O   HOH T  38      13.490  19.338 -31.910  1.00  0.24           O  
HETATM   40  O   HOH T  39      32.006   5.814 -31.704  1.00  0.25           O  
HETATM   41  O   HOH T  40       8.109  13.565  -2.703  1.00  0.25           O  
HETATM   42  O   HOH T  41      -2.083  -2.306  -6.960  1.00  0.25           O  
HETATM   43  O   HOH T  42     -12.628  15.663 -10.619  1.00  0.25           O  
HETATM   44  O   HOH T  43      17.774   4.192 -31.634  1.00  0.25           O  
HETATM   45  O   HOH T  44      11.546  -0.143 -20.597  1.00  0.25           O  
HETATM   46  O   HOH T  45      13.546 -22.046   5.519  1.00  0.26           O  
HETATM   47  O   HOH T  46      -1.804  10.405  14.815  1.00  0.26           O  
HETATM   48  O   HOH T  47      22.650  10.094 -18.076  1.00  0.26           O  
HETATM   49  O   HOH T  48      27.131  13.226 -30.459  1.00  0.26           O  
HETATM   50  O   HOH T  49      18.113 -12.323 -28.859  1.00  0.26           O  
HETATM   51  O   HOH T  50      -1.925  23.044   4.168  1.00  0.26           O  
HETATM   52  O   HOH T  51      -5.445 -16.924   6.046  1.00  0.26           O  
HETATM   53  O   HOH T  52      31.546 -13.020 -36.549  1.00  0.26           O  
HETATM   54  O   HOH T  53     -11.219  17.121  14.231  1.00  0.27           O  
HETATM   55  O   HOH T  54      24.389 -21.698  -7.960  1.00  0.27           O  
HETATM   56  O   HOH T  55      -4.285  11.672  21.810  1.00  0.27           O  
HETATM   57  O   HOH T  56     -23.052  17.256  22.180  1.00  0.27           O  
HETATM   58  O   HOH T  57      17.883  16.324  -6.592  1.00  0.27           O  
HETATM   59  O   HOH T  58      22.052 -20.045 -38.089  1.00  0.27           O  
HETATM   60  O   HOH T  59       5.053  13.640 -20.048  1.00  0.27           O  
HETATM   61  O   HOH T  60      -9.501   1.373 -10.792  1.00  0.27           O  
HETATM   62  O   HOH T  61      17.750   1.732 -25.103  1.00  0.27           O  
HETATM   63  O   HOH T  62      -2.837  -5.630 -10.742  1.00  0.28           O  
HETATM   64  O   HOH T  63       8.528  -8.087 -44.818  1.00  0.28           O  
HETATM   65  O   HOH T  64      28.490 -14.625  15.077  1.00  0.28           O  
HETATM   66  O   HOH T  65      21.051 -13.391  13.472  1.00  0.28           O  
HETATM   67  O   HOH T  66      15.206  20.484  -2.700  1.00  0.28           O  
HETATM   68  O   HOH T  67      24.751  -3.592   6.428  1.00  0.28           O  
HETATM   69  O   HOH T  68      -5.456 -10.106   4.737  1.00  0.28           O  
HETATM   70  O   HOH T  69      21.218   5.424 -13.085  1.00  0.28           O  
HETATM   71  O   HOH T  70      20.146 -18.890 -36.631  1.00  0.28           O  
HETATM   72  O   HOH T  71      17.731   6.946 -32.009  1.00  0.28           O  
HETATM   73  O   HOH T  72      12.749  -9.207   6.393  1.00  0.28           O  
HETATM   74  O   HOH T  73      28.980  24.083 -13.383  1.00  0.28           O  
HETATM   75  O   HOH T  74       4.606  16.208 -12.880  1.00  0.28           O  
HETATM   76  O   HOH T  75       8.319  -3.424 -29.072  1.00  0.28           O  
HETATM   77  O   HOH T  76      14.862 -12.260 -40.483  1.00  0.28           O  
HETATM   78  O   HOH T  77      12.216  25.150 -20.929  1.00  0.29           O  
HETATM   79  O   HOH T  78     -12.956  -4.940   0.723  1.00  0.29           O  
HETATM   80  O   HOH T  79       2.263 -17.189  18.279  1.00  0.29           O  
HETATM   81  O   HOH T  80     -11.333  21.012 -11.848  1.00  0.29           O  
HETATM   82  O   HOH T  81       7.479  29.279   3.655  1.00  0.29           O  
HETATM   83  O   HOH T  82      19.267 -17.034   7.596  1.00  0.29           O  
HETATM   84  O   HOH T  83      -4.824 -18.870  13.078  1.00  0.29           O  
HETATM   85  O   HOH T  84      -5.650  -7.317   4.860  1.00  0.29           O  
HETATM   86  O   HOH T  85      20.298 -16.852  -1.712  1.00  0.29           O  
HETATM   87  O   HOH T  86       3.630  25.160  -0.094  1.00  0.29           O  
HETATM   88  O   HOH T  87      29.366  -9.323 -43.078  1.00  0.29           O  
HETATM   89  O   HOH T  88     -15.837 -12.279 -11.289  1.00  0.29           O  
HETATM   90  O   HOH T  89      25.976 -17.801  -6.296  1.00  0.29           O  
HETATM   91  O   HOH T  90     -16.860   5.608  -8.888  1.00  0.29           O  
HETATM   92  O   HOH T  91      28.179  -6.716 -31.763  1.00  0.30           O  
HETATM   93  O   HOH T  92      18.066  12.622 -14.662  1.00  0.30           O  
HETATM   94  O   HOH T  93      29.153  29.290 -35.991  1.00  0.30           O  
HETATM   95  O   HOH T  94     -20.041   8.126   0.823  1.00  0.30           O  
HETATM   96  O   HOH T  95      15.688   5.171 -47.639  1.00  0.30           O  
HETATM   97  O   HOH T  96       1.880  23.524  12.347  1.00  0.30           O  
HETATM   98  O   HOH T  97      13.369  27.301  -7.459  1.00  0.30           O  
HETATM   99  O   HOH T  98      21.478  -6.562 -28.166  1.00  0.30           O  
HETATM  100  O   HOH T  99     -11.025  14.511 -12.655  1.00  0.30           O  
HETATM  101  O   HOH T 100       6.535  17.298  10.540  1.00  0.30           O  
HETATM  102  O   HOH T 101     -10.162  20.548  11.154  1.00  0.30           O  
HETATM  103  O   HOH T 102      17.986   4.862 -43.410  1.00  0.31           O  
HETATM  104  O   HOH T 103       2.728   6.739 -13.274  1.00  0.31           O  
HETATM  105  O   HOH T 104     -23.996   0.799   0.794  1.00  0.31           O  
HETATM  106  O   HOH T 105      11.528  29.417  -7.857  1.00  0.31           O  
HETATM  107  O   HOH T 106      13.412  -3.941   6.116  1.00  0.31           O  
HETATM  108  O   HOH T 107      16.752   1.447 -50.606  1.00  0.31           O  
HETATM  109  O   HOH T 108      15.252  15.403 -38.304  1.00  0.31           O  
HETATM  110  O   HOH T 109      -5.162  -8.791 -16.522  1.00  0.31           O  
HETATM  111  O   HOH T 110       3.581  -7.531   3.503  1.00  0.31           O  
HETATM  112  O   HOH T 111       8.168   1.666  -1.841  1.00  0.31           O  
HETATM  113  O   HOH T 112      26.267  15.306 -43.351  1.00  0.31           O  
HETATM  114  O   HOH T 113      21.528   9.189 -12.703  1.00  0.31           O  
HETATM  115  O   HOH T 114      20.052  -0.992 -47.189  1.00  0.31           O  
HETATM  116  O   HOH T 115      19.574   6.377 -52.473  1.00  0.31           O  
HETATM  117  O   HOH T 116       3.405 -19.439  17.152  1.00  0.31           O  
HETATM  118  O   HOH T 117      14.533   7.359 -21.769  1.00  0.31           O  
HETATM  119  O   HOH T 118     -14.037   5.950  17.954  1.00  0.31           O  
HETATM  120  O   HOH T 119     -12.595 -18.850   3.227  1.00  0.31           O  
HETATM  121  O   HOH T 120     -10.629   9.716  -2.473  1.00  0.31           O  
HETATM  122  O   HOH T 121      34.156   9.727 -45.249  1.00  0.31           O  
HETATM  123  O   HOH T 122       7.234  -7.802   5.429  1.00  0.32           O  
HETATM  124  O   HOH T 123      12.408  -8.312 -27.128  1.00  0.32           O  
HETATM  125  O   HOH T 124      16.190  25.314 -34.815  1.00  0.32           O  
HETATM  126  O   HOH T 125     -13.195  14.128   7.245  1.00  0.32           O  
HETATM  127  O   HOH T 126      12.857  -7.598 -24.489  1.00  0.32           O  
HETATM  128  O   HOH T 127       7.971  19.014 -13.880  1.00  0.32           O  
HETATM  129  O   HOH T 128     -19.214  -8.762   7.387  1.00  0.32           O  
HETATM  130  O   HOH T 129      35.711  -7.629 -37.424  1.00  0.32           O  
HETATM  131  O   HOH T 130      28.191  15.031 -28.526  1.00  0.32           O  
HETATM  132  O   HOH T 131      -4.142  -4.264  -6.084  1.00  0.32           O  
HETATM  133  O   HOH T 132      -5.903  20.079 -10.719  1.00  0.32           O  
HETATM  134  O   HOH T 133       7.795 -10.116 -16.453  1.00  0.32           O  
HETATM  135  O   HOH T 134      -7.210 -16.288 -12.308  1.00  0.32           O  
HETATM  136  O   HOH T 135      11.636  -9.724   1.239  1.00  0.32           O  
HETATM  137  O   HOH T 136     -17.929  -7.870  -1.651  1.00  0.32           O  
HETATM  138  O   HOH T 137       2.693  29.499   2.235  1.00  0.32           O  
HETATM  139  O   HOH T 138      16.472  21.889 -40.566  1.00  0.32           O  
HETATM  140  O   HOH T 139      24.605 -14.572 -44.344  1.00  0.32           O  
HETATM  141  O   HOH T 140      -3.389   4.028  12.894  1.00  0.32           O  
HETATM  142  O   HOH T 141      24.779  15.844 -38.702  1.00  0.33           O  
HETATM  143  O   HOH T 142       4.184  21.848  12.911  1.00  0.33           O  
HETATM  144  O   HOH T 143     -17.571  -5.622   1.560  1.00  0.33           O  
HETATM  145  O   HOH T 144       8.038   3.996   4.892  1.00  0.33           O  
HETATM  146  O   HOH T 145      16.953 -15.605   1.739  1.00  0.33           O  
HETATM  147  O   HOH T 146      13.346   6.224 -24.045  1.00  0.33           O  
HETATM  148  O   HOH T 147      -7.940  23.437  11.869  1.00  0.33           O  
HETATM  149  O   HOH T 148      13.671  -5.860   8.027  1.00  0.33           O  
HETATM  150  O   HOH T 149      16.732  32.569 -23.444  1.00  0.33           O  
HETATM  151  O   HOH T 150      17.209  -6.203  -8.767  1.00  0.33           O  
HETATM  152  O   HOH T 151       5.319  -8.232 -47.853  1.00  0.33           O  
HETATM  153  O   HOH T 152      32.397  12.956 -41.356  1.00  0.33           O  
HETATM  154  O   HOH T 153      36.061 -16.705 -40.787  1.00  0.33           O  
HETATM  155  O   HOH T 154      17.829   6.154  -3.981  1.00  0.33           O  
HETATM  156  O   HOH T 155       7.835   9.483 -11.308  1.00  0.33           O  
HETATM  157  O   HOH T 156      24.643  30.788 -31.281  1.00  0.33           O  
HETATM  158  O   HOH T 157      -2.990  -5.615 -13.508  1.00  0.33           O  
HETATM  159  O   HOH T 158     -11.149 -19.911   5.513  1.00  0.33           O  
HETATM  160  O   HOH T 159       1.940  10.630 -12.909  1.00  0.33           O  
HETATM  161  O   HOH T 160      31.229   5.974 -46.911  1.00  0.33           O  
HETATM  162  O   HOH T 161      -4.001  23.965  -4.605  1.00  0.33           O  
HETATM  163  O   HOH T 162      22.287 -24.344  -5.252  1.00  0.33           O  
HETATM  164  O   HOH T 163      10.130  24.114 -19.470  1.00  0.33           O  
HETATM  165  O   HOH T 164      19.117   4.333 -29.216  1.00  0.33           O  
HETATM  166  O   HOH T 165      13.738   7.070  -4.722  1.00  0.34           O  
HETATM  167  O   HOH T 166      28.683  10.025 -35.507  1.00  0.34           O  
HETATM  168  O   HOH T 167      11.940  19.219  -0.617  1.00  0.34           O  
HETATM  169  O   HOH T 168     -14.118   0.240 -10.350  1.00  0.34           O  
HETATM  170  O   HOH T 169      11.524  13.211   4.376  1.00  0.34           O  
HETATM  171  O   HOH T 170      20.079   1.101 -26.521  1.00  0.34           O  
HETATM  172  O   HOH T 171      30.909  -6.512 -32.265  1.00  0.34           O  
HETATM  173  O   HOH T 172       5.413  29.079   1.681  1.00  0.34           O  
HETATM  174  O   HOH T 173      16.073  27.755 -33.402  1.00  0.34           O  
HETATM  175  O   HOH T 174     -17.959   7.170  -0.911  1.00  0.34           O  
HETATM  176  O   HOH T 175      18.622 -15.490 -25.779  1.00  0.34           O  
HETATM  177  O   HOH T 176      -9.446  -0.668   3.664  1.00  0.34           O  
HETATM  178  O   HOH T 177     -11.483  16.231   8.201  1.00  0.34           O  
HETATM  179  O   HOH T 178      24.588  -9.254 -44.880  1.00  0.34           O  
HETATM  180  O   HOH T 179      -3.020  24.324  -2.056  1.00  0.34           O  
HETATM  181  O   HOH T 180     -21.568  -5.259  -4.686  1.00  0.34           O  
HETATM  182  O   HOH T 181     -13.096  -4.697 -10.173  1.00  0.35           O  
HETATM  183  O   HOH T 182      17.914   7.192 -18.642  1.00  0.35           O  
HETATM  184  O   HOH T 183     -12.055 -11.222   4.869  1.00  0.35           O  
HETATM  185  O   HOH T 184      22.890  11.352 -22.018  1.00  0.35           O  
HETATM  186  O   HOH T 185       4.757  -6.710   5.780  1.00  0.35           O  
HETATM  187  O   HOH T 186      19.528   7.060 -29.904  1.00  0.35           O  
HETATM  188  O   HOH T 187      22.903 -16.836  -2.416  1.00  0.35           O  
HETATM  189  O   HOH T 188       8.316  -0.848  -0.698  1.00  0.35           O  
HETATM  190  O   HOH T 189      -3.060  16.620  19.481  1.00  0.35           O  
HETATM  191  O   HOH T 190      -8.348  21.917   9.555  1.00  0.35           O  
HETATM  192  O   HOH T 191      21.086   1.421 -47.984  1.00  0.35           O  
HETATM  193  O   HOH T 192      17.537   6.336 -25.196  1.00  0.35           O  
HETATM  194  O   HOH T 193       2.779 -14.808 -38.611  1.00  0.35           O  
HETATM  195  O   HOH T 194      19.436  -5.730  -7.255  1.00  0.35           O  
HETATM  196  O   HOH T 195       6.383  23.797 -22.447  1.00  0.35           O  
HETATM  197  O   HOH T 196      23.318  32.840 -32.694  1.00  0.36           O  
HETATM  198  O   HOH T 197       7.378  26.023  -2.351  1.00  0.36           O  
HETATM  199  O   HOH T 198      -2.058  23.262  -6.476  1.00  0.36           O  
HETATM  200  O   HOH T 199      23.760   9.520 -24.333  1.00  0.36           O  
HETATM  201  O   HOH T 200      27.604 -12.168 -32.264  1.00  0.36           O  
HETATM  202  O   HOH T 201       0.095  14.810  17.219  1.00  0.36           O  
HETATM  203  O   HOH T 202      30.570  10.193 -46.557  1.00  0.36           O  
HETATM  204  O   HOH T 203      29.114  28.677 -33.194  1.00  0.36           O  
HETATM  205  O   HOH T 204      40.470  -0.436 -40.806  1.00  0.36           O  
HETATM  206  O   HOH T 205     -11.234  19.488  -4.761  1.00  0.36           O  
HETATM  207  O   HOH T 206      21.452 -19.350  -2.291  1.00  0.36           O  
HETATM  208  O   HOH T 207      13.036  18.581 -35.682  1.00  0.36           O  
HETATM  209  O   HOH T 208      -3.657  24.293  25.955  1.00  0.36           O  
HETATM  210  O   HOH T 209      31.295  -7.552 -42.045  1.00  0.36           O  
HETATM  211  O   HOH T 210       1.017  29.963   7.193  1.00  0.36           O  
HETATM  212  O   HOH T 211      15.986  -6.062  14.185  1.00  0.36           O  
HETATM  213  O   HOH T 212      17.405 -20.442  -9.953  1.00  0.36           O  
HETATM  214  O   HOH T 213     -16.132   8.876   0.461  1.00  0.36           O  
HETATM  215  O   HOH T 214      19.103   4.678 -14.661  1.00  0.36           O  
HETATM  216  O   HOH T 215      -8.777  -9.636 -13.684  1.00  0.37           O  
HETATM  217  O   HOH T 216      -5.636  17.295  18.796  1.00  0.37           O  
HETATM  218  O   HOH T 217      11.938   1.858 -22.445  1.00  0.37           O  
HETATM  219  O   HOH T 218      28.963 -16.317 -32.382  1.00  0.37           O  
HETATM  220  O   HOH T 219      -1.543  23.044  -9.241  1.00  0.37           O  
HETATM  221  O   HOH T 220      32.057 -22.819 -42.284  1.00  0.37           O  
HETATM  222  O   HOH T 221      29.226  32.088 -41.670  1.00  0.37           O  
HETATM  223  O   HOH T 222     -13.552  -7.982 -12.416  1.00  0.37           O  
HETATM  224  O   HOH T 223      12.482  -8.627   3.644  1.00  0.37           O  
HETATM  225  O   HOH T 224      13.741 -20.917  15.967  1.00  0.37           O  
HETATM  226  O   HOH T 225      23.501  25.483 -25.328  1.00  0.37           O  
HETATM  227  O   HOH T 226     -13.767   4.041 -11.400  1.00  0.37           O  
HETATM  228  O   HOH T 227       8.774 -13.172 -37.595  1.00  0.37           O  
HETATM  229  O   HOH T 228      39.758 -14.289 -34.223  1.00  0.37           O  
HETATM  230  O   HOH T 229       3.591  24.866  19.336  1.00  0.37           O  
HETATM  231  O   HOH T 230      -5.620  24.379  15.747  1.00  0.37           O  
HETATM  232  O   HOH T 231      -8.240  14.479  22.426  1.00  0.37           O  
HETATM  233  O   HOH T 232     -17.050  -6.507  -3.976  1.00  0.37           O  
HETATM  234  O   HOH T 233     -13.139  15.380   1.583  1.00  0.37           O  
HETATM  235  O   HOH T 234      28.980  12.678 -18.409  1.00  0.37           O  
HETATM  236  O   HOH T 235      11.172   2.290 -14.006  1.00  0.37           O  
HETATM  237  O   HOH T 236       3.878  16.102 -20.973  1.00  0.37           O  
HETATM  238  O   HOH T 237       0.025  -5.290 -41.523  1.00  0.37           O  
HETATM  239  O   HOH T 238      -8.060  -2.337  -7.677  1.00  0.37           O  
HETATM  240  O   HOH T 239      13.844  -3.694  -8.207  1.00  0.37           O  
HETATM  241  O   HOH T 240      -1.685  -5.593 -39.382  1.00  0.37           O  
HETATM  242  O   HOH T 241      -2.615 -24.836   1.109  1.00  0.37           O  
HETATM  243  O   HOH T 242      29.328 -17.076 -40.292  1.00  0.37           O  
HETATM  244  O   HOH T 243      11.214  20.428 -33.115  1.00  0.37           O  
HETATM  245  O   HOH T 244      17.602  21.712  -2.338  1.00  0.37           O  
HETATM  246  O   HOH T 245       8.123 -12.324 -14.647  1.00  0.37           O  
HETATM  247  O   HOH T 246      -9.028  17.045  30.241  1.00  0.37           O  
HETATM  248  O   HOH T 247      -3.182 -17.533  -4.037  1.00  0.37           O  
HETATM  249  O   HOH T 248       9.418 -13.862  10.634  1.00  0.38           O  
HETATM  250  O   HOH T 249      17.948  31.122 -42.903  1.00  0.38           O  
HETATM  251  O   HOH T 250      26.985  10.885 -17.733  1.00  0.38           O  
HETATM  252  O   HOH T 251     -12.222  14.729  15.348  1.00  0.38           O  
HETATM  253  O   HOH T 252      24.625  22.696  -6.636  1.00  0.38           O  
HETATM  254  O   HOH T 253      -0.315  22.791  21.170  1.00  0.38           O  
HETATM  255  O   HOH T 254      31.550  30.130 -32.923  1.00  0.38           O  
HETATM  256  O   HOH T 255      29.522 -23.108  17.642  1.00  0.38           O  
HETATM  257  O   HOH T 256     -14.051  11.633 -13.480  1.00  0.38           O  
HETATM  258  O   HOH T 257      38.096  -0.710 -39.639  1.00  0.38           O  
HETATM  259  O   HOH T 258      36.374 -12.136 -35.503  1.00  0.38           O  
HETATM  260  O   HOH T 259     -11.866  -5.784 -12.351  1.00  0.38           O  
HETATM  261  O   HOH T 260       9.634  13.628 -42.039  1.00  0.38           O  
HETATM  262  O   HOH T 261      14.802  -0.423 -51.158  1.00  0.38           O  
HETATM  263  O   HOH T 262       6.092  11.552 -12.311  1.00  0.38           O  
HETATM  264  O   HOH T 263       7.531  -2.204   1.627  1.00  0.38           O  
HETATM  265  O   HOH T 264       2.176   0.262 -13.786  1.00  0.38           O  
HETATM  266  O   HOH T 265      15.154   1.653 -19.351  1.00  0.38           O  
HETATM  267  O   HOH T 266       8.978  23.948  -1.009  1.00  0.38           O  
HETATM  268  O   HOH T 267     -22.165   1.465   2.746  1.00  0.38           O  
HETATM  269  O   HOH T 268      11.383   7.328   6.484  1.00  0.38           O  
HETATM  270  O   HOH T 269     -22.051  -1.642  -2.301  1.00  0.39           O  
HETATM  271  O   HOH T 270      13.203   6.062   0.651  1.00  0.39           O  
HETATM  272  O   HOH T 271      20.002  -5.573 -26.083  1.00  0.39           O  
HETATM  273  O   HOH T 272       7.852   7.590  -9.234  1.00  0.39           O  
HETATM  274  O   HOH T 273      25.312  -6.717 -43.964  1.00  0.39           O  
HETATM  275  O   HOH T 274       2.513  -5.300   4.891  1.00  0.39           O  
HETATM  276  O   HOH T 275      -6.699 -22.685   0.833  1.00  0.39           O  
HETATM  277  O   HOH T 276       6.975  20.825 -12.077  1.00  0.39           O  
HETATM  278  O   HOH T 277      15.394  30.178 -24.302  1.00  0.39           O  
HETATM  279  O   HOH T 278       5.071  -4.086   4.734  1.00  0.39           O  
HETATM  280  O   HOH T 279      22.920 -20.423  -4.411  1.00  0.39           O  
HETATM  281  O   HOH T 280       8.366  23.729   3.901  1.00  0.39           O  
HETATM  282  O   HOH T 281      35.287   7.634 -46.501  1.00  0.39           O  
HETATM  283  O   HOH T 282      20.323  15.968  -3.175  1.00  0.39           O  
HETATM  284  O   HOH T 283      42.411 -18.628 -33.001  1.00  0.39           O  
HETATM  285  O   HOH T 284      13.821  11.290  -2.363  1.00  0.39           O  
HETATM  286  O   HOH T 285     -21.407  10.849  21.778  1.00  0.39           O  
HETATM  287  O   HOH T 286     -22.516   8.633  18.648  1.00  0.39           O  
HETATM  288  O   HOH T 287      15.337  17.012 -35.003  1.00  0.39           O  
HETATM  289  O   HOH T 288      44.574   0.919 -54.686  1.00  0.39           O  
HETATM  290  O   HOH T 289       9.420   6.398  -7.233  1.00  0.39           O  
HETATM  291  O   HOH T 290      -4.335  24.961  21.022  1.00  0.39           O  
HETATM  292  O   HOH T 291      -4.625  20.872 -13.205  1.00  0.39           O  
HETATM  293  O   HOH T 292      24.291  -1.081  -1.707  1.00  0.39           O  
HETATM  294  O   HOH T 293      10.630  10.494  -4.960  1.00  0.39           O  
HETATM  295  O   HOH T 294      -8.731   3.499 -12.416  1.00  0.39           O  
HETATM  296  O   HOH T 295     -15.075  12.463   0.948  1.00  0.39           O  
HETATM  297  O   HOH T 296      10.581  26.780  -7.635  1.00  0.39           O  
HETATM  298  O   HOH T 297       0.069 -25.790  -9.748  1.00  0.39           O  
HETATM  299  O   HOH T 298      11.192  15.538 -40.826  1.00  0.39           O  
HETATM  300  O   HOH T 299      29.568  10.618 -26.808  1.00  0.40           O  
HETATM  301  O   HOH T 300      14.910   6.527 -49.899  1.00  0.40           O  
HETATM  302  O   HOH T 301      34.183  -8.991 -31.663  1.00  0.40           O  
HETATM  303  O   HOH T 302       7.157  -8.920 -50.016  1.00  0.40           O  
HETATM  304  O   HOH T 303      27.094 -10.265 -44.492  1.00  0.40           O  
HETATM  305  O   HOH T 304      -4.479  -8.644   6.905  1.00  0.40           O  
HETATM  306  O   HOH T 305      15.839   0.136  -5.071  1.00  0.40           O  
HETATM  307  O   HOH T 306      11.540   5.410  -5.575  1.00  0.40           O  
HETATM  308  O   HOH T 307      12.842   5.098   3.150  1.00  0.40           O  
HETATM  309  O   HOH T 308      41.646   0.217 -54.586  1.00  0.40           O  
HETATM  310  O   HOH T 309      14.119  12.309   0.198  1.00  0.40           O  
HETATM  311  O   HOH T 310      26.682  11.868 -40.789  1.00  0.40           O  
HETATM  312  O   HOH T 311      32.517 -10.699 -35.127  1.00  0.40           O  
HETATM  313  O   HOH T 312      32.693  11.247 -43.587  1.00  0.40           O  
HETATM  314  O   HOH T 313      19.419 -16.039   0.736  1.00  0.40           O  
HETATM  315  O   HOH T 314      18.546  26.030 -41.564  1.00  0.40           O  
HETATM  316  O   HOH T 315       5.575 -10.468   8.509  1.00  0.40           O  
HETATM  317  O   HOH T 316      26.401  29.215 -32.581  1.00  0.40           O  
HETATM  318  O   HOH T 317      17.581 -12.054  15.877  1.00  0.40           O  
HETATM  319  O   HOH T 318      -8.584   6.241 -13.100  1.00  0.40           O  
HETATM  320  O   HOH T 319      -0.203 -27.830   3.004  1.00  0.40           O  
HETATM  321  O   HOH T 320      -9.754 -20.804  -7.171  1.00  0.40           O  
HETATM  322  O   HOH T 321       4.214  16.110  14.535  1.00  0.40           O  
HETATM  323  O   HOH T 322       7.728   2.037  -8.905  1.00  0.40           O  
HETATM  324  O   HOH T 323      -3.038  29.221  19.702  1.00  0.40           O  
HETATM  325  O   HOH T 324      22.974 -22.182  19.271  1.00  0.41           O  
HETATM  326  O   HOH T 325      13.082 -12.385 -38.383  1.00  0.41           O  
HETATM  327  O   HOH T 326     -28.951  11.047   5.639  1.00  0.41           O  
HETATM  328  O   HOH T 327      10.030 -16.519  10.014  1.00  0.41           O  
HETATM  329  O   HOH T 328     -24.806   6.667   1.399  1.00  0.41           O  
HETATM  330  O   HOH T 329     -17.566 -16.028  -4.697  1.00  0.41           O  
HETATM  331  O   HOH T 330      13.139 -14.771  11.480  1.00  0.41           O  
HETATM  332  O   HOH T 331      12.889  -6.427 -18.694  1.00  0.41           O  
HETATM  333  O   HOH T 332      23.689 -12.092  10.973  1.00  0.41           O  
HETATM  334  O   HOH T 333      -6.681 -14.459   9.524  1.00  0.41           O  
HETATM  335  O   HOH T 334      -7.979  28.104  13.098  1.00  0.41           O  
HETATM  336  O   HOH T 335      17.208   7.566 -21.217  1.00  0.41           O  
HETATM  337  O   HOH T 336      16.865  -9.043 -45.534  1.00  0.41           O  
HETATM  338  O   HOH T 337      22.575  -9.807   9.966  1.00  0.41           O  
HETATM  339  O   HOH T 338      -1.432   2.167  12.301  1.00  0.41           O  
HETATM  340  O   HOH T 339      22.759 -11.256 -44.072  1.00  0.41           O  
HETATM  341  O   HOH T 340      -7.327  16.850 -17.660  1.00  0.41           O  
HETATM  342  O   HOH T 341       1.060  27.940   0.681  1.00  0.41           O  
HETATM  343  O   HOH T 342       0.123  27.663  20.420  1.00  0.41           O  
HETATM  344  O   HOH T 343     -16.225   4.730  17.030  1.00  0.41           O  
HETATM  345  O   HOH T 344     -12.852 -19.011  -8.932  1.00  0.41           O  
HETATM  346  O   HOH T 345      11.281   3.216 -11.295  1.00  0.41           O  
HETATM  347  O   HOH T 346      33.302  -9.786 -29.230  1.00  0.41           O  
HETATM  348  O   HOH T 347      11.027   5.097  -0.629  1.00  0.41           O  
HETATM  349  O   HOH T 348      16.866  15.494 -33.024  1.00  0.41           O  
HETATM  350  O   HOH T 349      11.338   8.047  -5.837  1.00  0.41           O  
HETATM  351  O   HOH T 350       2.498  10.132 -41.891  1.00  0.42           O  
HETATM  352  O   HOH T 351      -1.629  27.675  -0.138  1.00  0.42           O  
HETATM  353  O   HOH T 352      27.598  13.090 -33.263  1.00  0.42           O  
HETATM  354  O   HOH T 353      19.247  10.066 -14.136  1.00  0.42           O  
HETATM  355  O   HOH T 354      14.627  -1.123  -7.362  1.00  0.42           O  
HETATM  356  O   HOH T 355      23.752   8.016 -26.713  1.00  0.42           O  
HETATM  357  O   HOH T 356      -7.744  -0.394  -9.629  1.00  0.42           O  
HETATM  358  O   HOH T 357       5.195  20.061 -16.991  1.00  0.42           O  
HETATM  359  O   HOH T 358      20.406  14.772   2.782  1.00  0.42           O  
HETATM  360  O   HOH T 359     -12.142   1.832 -11.683  1.00  0.42           O  
HETATM  361  O   HOH T 360      21.095  19.318 -40.225  1.00  0.42           O  
HETATM  362  O   HOH T 361      -1.543  25.124  20.204  1.00  0.42           O  
HETATM  363  O   HOH T 362       9.211  -6.500 -19.524  1.00  0.42           O  
HETATM  364  O   HOH T 363      18.581  -4.337 -28.155  1.00  0.42           O  
HETATM  365  O   HOH T 364      24.600  30.756 -34.095  1.00  0.42           O  
HETATM  366  O   HOH T 365      14.837  -1.592   6.655  1.00  0.42           O  
HETATM  367  O   HOH T 366     -23.165  -3.138  -3.964  1.00  0.42           O  
HETATM  368  O   HOH T 367      28.283   6.133 -51.075  1.00  0.42           O  
HETATM  369  O   HOH T 368       2.600  17.314 -14.396  1.00  0.42           O  
HETATM  370  O   HOH T 369      -6.957  22.721  18.501  1.00  0.42           O  
HETATM  371  O   HOH T 370     -13.305  -4.132  -1.867  1.00  0.42           O  
HETATM  372  O   HOH T 371      -7.530 -22.759  -7.649  1.00  0.42           O  
HETATM  373  O   HOH T 372      -8.351  13.830  27.315  1.00  0.42           O  
HETATM  374  O   HOH T 373     -29.175  15.457  21.030  1.00  0.42           O  
HETATM  375  O   HOH T 374      -0.187  22.633  24.040  1.00  0.42           O  
HETATM  376  O   HOH T 375     -12.975 -18.717  -3.564  1.00  0.42           O  
HETATM  377  O   HOH T 376      29.590 -15.605 -43.789  1.00  0.42           O  
HETATM  378  O   HOH T 377       4.906  10.244   6.900  1.00  0.42           O  
HETATM  379  O   HOH T 378      22.892 -11.616  14.556  1.00  0.42           O  
HETATM  380  O   HOH T 379      -9.895  -2.507   5.574  1.00  0.42           O  
HETATM  381  O   HOH T 380      10.121  11.742  -2.504  1.00  0.42           O  
HETATM  382  O   HOH T 381       9.924 -21.827  14.297  1.00  0.42           O  
HETATM  383  O   HOH T 382      10.285  -7.983  13.927  1.00  0.42           O  
HETATM  384  O   HOH T 383      40.559   2.336 -40.691  1.00  0.42           O  
HETATM  385  O   HOH T 384      10.302 -19.152  10.880  1.00  0.42           O  
HETATM  386  O   HOH T 385      -0.485  29.093   4.959  1.00  0.42           O  
HETATM  387  O   HOH T 386       8.048 -13.984 -12.410  1.00  0.42           O  
HETATM  388  O   HOH T 387       8.191   2.560   2.582  1.00  0.42           O  
HETATM  389  O   HOH T 388       0.103  17.104  22.753  1.00  0.43           O  
HETATM  390  O   HOH T 389       6.472  21.232 -14.810  1.00  0.43           O  
HETATM  391  O   HOH T 390       6.862  26.912   2.399  1.00  0.43           O  
HETATM  392  O   HOH T 391      10.550  21.643  -0.480  1.00  0.43           O  
HETATM  393  O   HOH T 392      -0.032   8.887  16.232  1.00  0.43           O  
HETATM  394  O   HOH T 393      22.228  16.594 -38.136  1.00  0.43           O  
HETATM  395  O   HOH T 394      -5.865 -11.439 -17.120  1.00  0.43           O  
HETATM  396  O   HOH T 395       5.900 -16.194  11.406  1.00  0.43           O  
HETATM  397  O   HOH T 396      -5.565 -19.087  10.451  1.00  0.43           O  
HETATM  398  O   HOH T 397      -0.713 -25.243  11.477  1.00  0.43           O  
HETATM  399  O   HOH T 398     -19.616  -6.159  -3.145  1.00  0.43           O  
HETATM  400  O   HOH T 399      22.353   3.895 -11.114  1.00  0.43           O  
HETATM  401  O   HOH T 400      23.517 -13.386 -29.401  1.00  0.43           O  
HETATM  402  O   HOH T 401       8.004  -7.663 -47.595  1.00  0.43           O  
HETATM  403  O   HOH T 402      18.715  23.396 -40.483  1.00  0.43           O  
HETATM  404  O   HOH T 403      14.971 -22.875   3.455  1.00  0.43           O  
HETATM  405  O   HOH T 404      -7.358  23.684  -0.900  1.00  0.43           O  
HETATM  406  O   HOH T 405      41.851  18.601 -16.299  1.00  0.43           O  
HETATM  407  O   HOH T 406      15.175  23.178  -2.249  1.00  0.43           O  
HETATM  408  O   HOH T 407      14.973  25.135 -37.193  1.00  0.43           O  
HETATM  409  O   HOH T 408      31.559 -15.438 -40.315  1.00  0.43           O  
HETATM  410  O   HOH T 409      19.006  13.982   0.578  1.00  0.43           O  
HETATM  411  O   HOH T 410      -5.803  25.207  18.594  1.00  0.43           O  
HETATM  412  O   HOH T 411      -4.863  -5.039  -8.785  1.00  0.43           O  
HETATM  413  O   HOH T 412      12.138  19.159 -38.233  1.00  0.43           O  
HETATM  414  O   HOH T 413     -16.959  -2.467  -4.056  1.00  0.43           O  
HETATM  415  O   HOH T 414      12.361 -23.106  14.909  1.00  0.43           O  
HETATM  416  O   HOH T 415       5.139 -14.469 -35.015  1.00  0.43           O  
HETATM  417  O   HOH T 416      15.816  -2.503 -21.738  1.00  0.43           O  
HETATM  418  O   HOH T 417       5.762  22.227 -18.674  1.00  0.43           O  
HETATM  419  O   HOH T 418      12.056  -5.725 -46.976  1.00  0.43           O  
HETATM  420  O   HOH T 419      13.343 -10.186 -25.312  1.00  0.43           O  
HETATM  421  O   HOH T 420      22.864  15.325   1.739  1.00  0.43           O  
HETATM  422  O   HOH T 421      22.126 -16.299   0.338  1.00  0.43           O  
HETATM  423  O   HOH T 422     -27.121  10.545   7.768  1.00  0.43           O  
HETATM  424  O   HOH T 423     -12.821  -4.074  -6.681  1.00  0.43           O  
HETATM  425  O   HOH T 424      15.878  10.247  -0.661  1.00  0.43           O  
HETATM  426  O   HOH T 425      29.174 -19.810 -40.005  1.00  0.44           O  
HETATM  427  O   HOH T 426      12.845  -6.596   5.480  1.00  0.44           O  
HETATM  428  O   HOH T 427      -2.220  28.312  17.237  1.00  0.44           O  
HETATM  429  O   HOH T 428      24.335  21.389 -44.886  1.00  0.44           O  
HETATM  430  O   HOH T 429     -18.604   1.647  -1.495  1.00  0.44           O  
HETATM  431  O   HOH T 430       7.853   7.779 -47.893  1.00  0.44           O  
HETATM  432  O   HOH T 431      13.056  21.596  -1.533  1.00  0.44           O  
HETATM  433  O   HOH T 432      21.352 -21.202 -35.731  1.00  0.44           O  
HETATM  434  O   HOH T 433      -3.390  25.102   5.368  1.00  0.44           O  
HETATM  435  O   HOH T 434      -1.795  -0.709 -13.054  1.00  0.44           O  
HETATM  436  O   HOH T 435      -9.058  23.061   1.184  1.00  0.44           O  
HETATM  437  O   HOH T 436      -6.312  25.197  -5.503  1.00  0.44           O  
HETATM  438  O   HOH T 437       5.001  13.676 -13.850  1.00  0.44           O  
HETATM  439  O   HOH T 438       9.365  -9.786 -48.597  1.00  0.44           O  
HETATM  440  O   HOH T 439      12.907   0.855  -2.495  1.00  0.44           O  
HETATM  441  O   HOH T 440     -14.301  -2.558   0.335  1.00  0.44           O  
HETATM  442  O   HOH T 441     -15.313  -9.979 -12.837  1.00  0.44           O  
HETATM  443  O   HOH T 442      -3.802 -25.484   8.864  1.00  0.44           O  
HETATM  444  O   HOH T 443       9.662   9.775 -48.495  1.00  0.44           O  
HETATM  445  O   HOH T 444      30.091  12.564 -39.716  1.00  0.44           O  
HETATM  446  O   HOH T 445      19.723  18.063 -42.277  1.00  0.44           O  
HETATM  447  O   HOH T 446      15.619   5.958 -19.563  1.00  0.44           O  
HETATM  448  O   HOH T 447       5.772  12.752 -16.280  1.00  0.44           O  
HETATM  449  O   HOH T 448      -2.584  -4.680 -41.873  1.00  0.44           O  
HETATM  450  O   HOH T 449      32.447  -7.359 -44.596  1.00  0.44           O  
HETATM  451  O   HOH T 450      28.440 -16.914 -29.734  1.00  0.44           O  
HETATM  452  O   HOH T 451      19.533 -19.835 -39.259  1.00  0.44           O  
HETATM  453  O   HOH T 452      -1.420  12.338 -16.282  1.00  0.44           O  
HETATM  454  O   HOH T 453      17.810   1.544  -3.796  1.00  0.45           O  
HETATM  455  O   HOH T 454       7.114  12.268 -18.587  1.00  0.45           O  
HETATM  456  O   HOH T 455      25.866  19.911 -43.122  1.00  0.45           O  
HETATM  457  O   HOH T 456      18.173   8.481 -16.203  1.00  0.45           O  
HETATM  458  O   HOH T 457      -0.635   4.728  13.271  1.00  0.45           O  
HETATM  459  O   HOH T 458      25.330  34.548 -33.615  1.00  0.45           O  
HETATM  460  O   HOH T 459      13.745   3.867 -22.758  1.00  0.45           O  
HETATM  461  O   HOH T 460      24.513  17.467 -43.007  1.00  0.45           O  
HETATM  462  O   HOH T 461     -11.327  18.645   9.589  1.00  0.45           O  
HETATM  463  O   HOH T 462       2.345   7.444  16.143  1.00  0.45           O  
HETATM  464  O   HOH T 463       7.474   4.862  -8.756  1.00  0.45           O  
HETATM  465  O   HOH T 464      23.944 -19.457 -24.272  1.00  0.45           O  
HETATM  466  O   HOH T 465       4.860  29.357  -1.118  1.00  0.45           O  
HETATM  467  O   HOH T 466      -1.580   1.728 -14.344  1.00  0.45           O  
HETATM  468  O   HOH T 467      -4.825  14.581  28.498  1.00  0.45           O  
HETATM  469  O   HOH T 468      -9.322  21.433  -4.843  1.00  0.45           O  
HETATM  470  O   HOH T 469       7.973  23.625 -17.819  1.00  0.45           O  
HETATM  471  O   HOH T 470      16.292  -0.660 -18.290  1.00  0.45           O  
HETATM  472  O   HOH T 471      14.186  -0.824 -20.155  1.00  0.45           O  
HETATM  473  O   HOH T 472     -10.954  21.258   8.679  1.00  0.45           O  
HETATM  474  O   HOH T 473      -8.183  12.274  20.646  1.00  0.45           O  
HETATM  475  O   HOH T 474     -14.886  14.621  14.373  1.00  0.45           O  
HETATM  476  O   HOH T 475     -13.751  -0.391   2.025  1.00  0.45           O  
HETATM  477  O   HOH T 476      29.923  -7.126 -29.676  1.00  0.45           O  
HETATM  478  O   HOH T 477       5.326  22.822 -12.670  1.00  0.45           O  
HETATM  479  O   HOH T 478      29.313  31.334 -34.221  1.00  0.45           O  
HETATM  480  O   HOH T 479      -4.561  -4.292 -45.232  1.00  0.45           O  
HETATM  481  O   HOH T 480       3.354 -12.772 -33.820  1.00  0.45           O  
HETATM  482  O   HOH T 481      -7.808  -9.591 -16.312  1.00  0.45           O  
HETATM  483  O   HOH T 482      17.979   4.120 -23.724  1.00  0.45           O  
HETATM  484  O   HOH T 483       9.354   3.078   0.144  1.00  0.45           O  
HETATM  485  O   HOH T 484      23.445  35.182 -27.186  1.00  0.45           O  
HETATM  486  O   HOH T 485      10.718 -18.318  -9.827  1.00  0.45           O  
HETATM  487  O   HOH T 486     -12.961  15.019  10.029  1.00  0.45           O  
HETATM  488  O   HOH T 487     -23.016 -13.982  -9.121  1.00  0.45           O  
HETATM  489  O   HOH T 488      20.902  35.073 -25.990  1.00  0.45           O  
HETATM  490  O   HOH T 489      15.051   8.779  -2.852  1.00  0.45           O  
HETATM  491  O   HOH T 490      21.094   8.346 -26.774  1.00  0.46           O  
HETATM  492  O   HOH T 491      15.592 -14.843  14.374  1.00  0.46           O  
HETATM  493  O   HOH T 492     -23.337   7.254   7.953  1.00  0.46           O  
HETATM  494  O   HOH T 493      12.167  13.531  -3.067  1.00  0.46           O  
HETATM  495  O   HOH T 494      -8.350  20.929 -11.716  1.00  0.46           O  
HETATM  496  O   HOH T 495       0.152 -18.705 -12.525  1.00  0.46           O  
HETATM  497  O   HOH T 496       7.773  -3.541   4.078  1.00  0.46           O  
HETATM  498  O   HOH T 497      30.657  33.559 -34.904  1.00  0.46           O  
HETATM  499  O   HOH T 498       2.328  16.560  16.611  1.00  0.46           O  
HETATM  500  O   HOH T 499      25.039 -11.959 -45.390  1.00  0.46           O  
HETATM  501  O   HOH T 500     -22.866   8.607   0.939  1.00  0.46           O  
HETATM  502  O   HOH T 501       2.588  19.233 -16.387  1.00  0.46           O  
HETATM  503  O   HOH T 502      33.767 -18.248 -41.536  1.00  0.46           O  
HETATM  504  O   HOH T 503     -33.038  10.770  10.319  1.00  0.46           O  
HETATM  505  O   HOH T 504      -5.406 -25.162   1.144  1.00  0.46           O  
HETATM  506  O   HOH T 505      18.318  29.252 -29.822  1.00  0.46           O  
HETATM  507  O   HOH T 506      15.074  17.187  -4.968  1.00  0.46           O  
HETATM  508  O   HOH T 507      29.216  12.528 -28.617  1.00  0.46           O  
HETATM  509  O   HOH T 508      16.844  20.884 -43.014  1.00  0.46           O  
HETATM  510  O   HOH T 509      25.245 -20.379  -5.802  1.00  0.46           O  
HETATM  511  O   HOH T 510     -18.389   4.413  -1.307  1.00  0.46           O  
HETATM  512  O   HOH T 511      24.118   9.575 -20.348  1.00  0.46           O  
HETATM  513  O   HOH T 512      15.241   2.218  -3.169  1.00  0.46           O  
HETATM  514  O   HOH T 513      18.777  20.507 -41.223  1.00  0.46           O  
HETATM  515  O   HOH T 514      20.585 -13.695 -28.763  1.00  0.46           O  
HETATM  516  O   HOH T 515     -17.997   3.170  -9.081  1.00  0.46           O  
HETATM  517  O   HOH T 516      24.458  32.636 -27.786  1.00  0.46           O  
HETATM  518  O   HOH T 517      -5.134 -14.503   7.167  1.00  0.46           O  
HETATM  519  O   HOH T 518      -5.142  17.901 -16.330  1.00  0.47           O  
HETATM  520  O   HOH T 519      41.153 -14.061 -36.614  1.00  0.47           O  
HETATM  521  O   HOH T 520     -23.675   5.086   3.369  1.00  0.47           O  
HETATM  522  O   HOH T 521       9.523  -9.131 -18.472  1.00  0.47           O  
HETATM  523  O   HOH T 522      -8.968 -21.857   2.260  1.00  0.47           O  
HETATM  524  O   HOH T 523       9.745  22.980   1.651  1.00  0.47           O  
HETATM  525  O   HOH T 524      24.269  24.355  -8.923  1.00  0.47           O  
HETATM  526  O   HOH T 525      -6.957  23.152   2.998  1.00  0.47           O  
HETATM  527  O   HOH T 526      11.809  17.619 -33.271  1.00  0.47           O  
HETATM  528  O   HOH T 527       1.873  12.980  20.307  1.00  0.47           O  
HETATM  529  O   HOH T 528      17.937  -6.189  12.181  1.00  0.47           O  
HETATM  530  O   HOH T 529      15.384  -7.334  11.886  1.00  0.47           O  
HETATM  531  O   HOH T 530      -5.236  12.526  23.940  1.00  0.47           O  
HETATM  532  O   HOH T 531      11.598  -0.599 -10.665  1.00  0.47           O  
HETATM  533  O   HOH T 532       9.343  -1.041 -21.835  1.00  0.47           O  
HETATM  534  O   HOH T 533      -5.850  -2.485  -9.430  1.00  0.47           O  
HETATM  535  O   HOH T 534       6.208  24.522  18.401  1.00  0.47           O  
HETATM  536  O   HOH T 535      -0.931  28.019   2.478  1.00  0.47           O  
HETATM  537  O   HOH T 536      32.589  -7.265 -30.153  1.00  0.47           O  
HETATM  538  O   HOH T 537      29.784  -6.621 -44.027  1.00  0.47           O  
HETATM  539  O   HOH T 538       0.866   2.319   9.756  1.00  0.47           O  
HETATM  540  O   HOH T 539      20.291 -11.629  15.466  1.00  0.47           O  
HETATM  541  O   HOH T 540       1.955  15.164  21.998  1.00  0.47           O  
HETATM  542  O   HOH T 541       1.461  -7.249 -15.355  1.00  0.47           O  
HETATM  543  O   HOH T 542     -16.556  -4.295   3.791  1.00  0.47           O  
HETATM  544  O   HOH T 543     -16.356 -13.529   9.764  1.00  0.47           O  
HETATM  545  O   HOH T 544      -4.137   9.610  20.372  1.00  0.47           O  
HETATM  546  O   HOH T 545      27.248 -15.050 -45.268  1.00  0.47           O  
HETATM  547  O   HOH T 546      26.747   9.785 -15.307  1.00  0.47           O  
HETATM  548  O   HOH T 547      29.937   8.021 -48.051  1.00  0.47           O  
HETATM  549  O   HOH T 548      -8.328 -22.570   4.859  1.00  0.47           O  
HETATM  550  O   HOH T 549      11.284  -0.070   3.390  1.00  0.47           O  
HETATM  551  O   HOH T 550     -15.599   2.052  21.047  1.00  0.47           O  
HETATM  552  O   HOH T 551     -23.401  14.742  23.481  1.00  0.47           O  
HETATM  553  O   HOH T 552      10.577   9.165 -51.021  1.00  0.47           O  
HETATM  554  O   HOH T 553      14.899 -11.929  -9.670  1.00  0.47           O  
HETATM  555  O   HOH T 554      20.860   9.020 -16.222  1.00  0.47           O  
HETATM  556  O   HOH T 555      16.671  23.610 -38.532  1.00  0.48           O  
HETATM  557  O   HOH T 556      23.861  -6.278   6.828  1.00  0.48           O  
HETATM  558  O   HOH T 557       9.220  -7.736   7.367  1.00  0.48           O  
HETATM  559  O   HOH T 558      23.020  16.485  -3.686  1.00  0.48           O  
HETATM  560  O   HOH T 559      20.339  30.727 -41.330  1.00  0.48           O  
HETATM  561  O   HOH T 560      10.095  -2.543   2.736  1.00  0.48           O  
HETATM  562  O   HOH T 561      21.260 -15.452 -30.739  1.00  0.48           O  
HETATM  563  O   HOH T 562       4.160  20.920  20.236  1.00  0.48           O  
HETATM  564  O   HOH T 563      10.527 -15.506  12.532  1.00  0.48           O  
HETATM  565  O   HOH T 564      -2.562  -3.261 -12.211  1.00  0.48           O  
HETATM  566  O   HOH T 565      16.973 -12.741  13.179  1.00  0.48           O  
HETATM  567  O   HOH T 566      24.185  -6.772   4.076  1.00  0.48           O  
HETATM  568  O   HOH T 567      31.429   3.286 -54.402  1.00  0.48           O  
HETATM  569  O   HOH T 568      13.606  14.732 -45.493  1.00  0.48           O  
HETATM  570  O   HOH T 569      26.587  32.986 -41.875  1.00  0.48           O  
HETATM  571  O   HOH T 570      -5.157 -16.832   8.824  1.00  0.48           O  
HETATM  572  O   HOH T 571      31.690  20.429 -41.379  1.00  0.48           O  
HETATM  573  O   HOH T 572       8.430 -17.465  12.048  1.00  0.48           O  
HETATM  574  O   HOH T 573      25.359   1.645 -26.724  1.00  0.48           O  
HETATM  575  O   HOH T 574       1.529 -25.342  -7.432  1.00  0.48           O  
HETATM  576  O   HOH T 575       2.850  -2.697   5.757  1.00  0.48           O  
HETATM  577  O   HOH T 576      38.437  -6.058 -48.430  1.00  0.48           O  
HETATM  578  O   HOH T 577      -1.213  25.660   3.792  1.00  0.48           O  
HETATM  579  O   HOH T 578      30.716   5.921 -49.777  1.00  0.48           O  
HETATM  580  O   HOH T 579      24.046   4.531 -47.086  1.00  0.48           O  
HETATM  581  O   HOH T 580      10.502  25.148 -33.975  1.00  0.48           O  
HETATM  582  O   HOH T 581       4.104  13.783  18.716  1.00  0.48           O  
HETATM  583  O   HOH T 582      12.997  -8.294 -46.630  1.00  0.48           O  
HETATM  584  O   HOH T 583      -6.721  22.845   7.446  1.00  0.48           O  
HETATM  585  O   HOH T 584      35.040  -9.744 -35.721  1.00  0.48           O  
HETATM  586  O   HOH T 585      13.151  15.307 -34.342  1.00  0.48           O  
HETATM  587  O   HOH T 586      -7.462  25.398  13.834  1.00  0.48           O  
HETATM  588  O   HOH T 587      32.613   8.370 -47.119  1.00  0.48           O  
HETATM  589  O   HOH T 588     -18.665   3.191  -6.374  1.00  0.49           O  
HETATM  590  O   HOH T 589      17.771   4.470 -46.102  1.00  0.49           O  
HETATM  591  O   HOH T 590      20.159   5.361 -25.024  1.00  0.49           O  
HETATM  592  O   HOH T 591      38.674  18.693 -14.486  1.00  0.49           O  
HETATM  593  O   HOH T 592      28.535   0.771 -27.627  1.00  0.49           O  
HETATM  594  O   HOH T 593      -1.514   8.915  20.267  1.00  0.49           O  
HETATM  595  O   HOH T 594      43.730  -1.161 -53.188  1.00  0.49           O  
HETATM  596  O   HOH T 595      -2.834  22.363  24.258  1.00  0.49           O  
HETATM  597  O   HOH T 596      26.828  15.613 -40.592  1.00  0.49           O  
HETATM  598  O   HOH T 597      -4.018  22.223 -10.645  1.00  0.49           O  
HETATM  599  O   HOH T 598      20.174  27.609 -12.050  1.00  0.49           O  
HETATM  600  O   HOH T 599       6.484   9.951   9.250  1.00  0.49           O  
HETATM  601  O   HOH T 600       8.795  -5.537   5.702  1.00  0.49           O  
HETATM  602  O   HOH T 601      34.200  12.207 -39.519  1.00  0.49           O  
HETATM  603  O   HOH T 602      -3.991  28.009  -4.700  1.00  0.49           O  
HETATM  604  O   HOH T 603      -3.371 -29.857   5.381  1.00  0.49           O  
HETATM  605  O   HOH T 604     -10.810  -6.587   1.279  1.00  0.49           O  
HETATM  606  O   HOH T 605      -0.724  29.093  -2.402  1.00  0.49           O  
HETATM  607  O   HOH T 606     -13.720  17.017  15.202  1.00  0.49           O  
HETATM  608  O   HOH T 607     -19.168  10.796  20.304  1.00  0.49           O  
HETATM  609  O   HOH T 608      29.195   8.838 -28.660  1.00  0.49           O  
HETATM  610  O   HOH T 609       2.575  14.739 -18.863  1.00  0.49           O  
HETATM  611  O   HOH T 610      33.851  30.162 -34.705  1.00  0.49           O  
HETATM  612  O   HOH T 611      17.728 -14.454 -23.473  1.00  0.49           O  
HETATM  613  O   HOH T 612      23.433  17.719 -40.437  1.00  0.49           O  
HETATM  614  O   HOH T 613      -3.974  24.203   0.560  1.00  0.49           O  
HETATM  615  O   HOH T 614      -4.059  -0.881  -8.219  1.00  0.49           O  
HETATM  616  O   HOH T 615     -25.067  19.347  16.226  1.00  0.49           O  
HETATM  617  O   HOH T 616      -3.815  26.095  16.952  1.00  0.49           O  
HETATM  618  O   HOH T 617      29.995   6.577 -29.854  1.00  0.49           O  
HETATM  619  O   HOH T 618      13.586  -1.617  -4.728  1.00  0.49           O  
HETATM  620  O   HOH T 619       9.760 -17.140 -12.204  1.00  0.49           O  
HETATM  621  O   HOH T 620      23.246  21.339  -4.568  1.00  0.49           O  
HETATM  622  O   HOH T 621      14.565 -10.733 -42.634  1.00  0.50           O  
HETATM  623  O   HOH T 622      37.315  -6.332 -57.460  1.00  0.50           O  
HETATM  624  O   HOH T 623      30.969  11.904 -16.692  1.00  0.50           O  
HETATM  625  O   HOH T 624      -3.292   5.676 -14.873  1.00  0.50           O  
HETATM  626  O   HOH T 625      10.739   2.664  -2.256  1.00  0.50           O  
HETATM  627  O   HOH T 626      12.721  16.420 -38.636  1.00  0.50           O  
HETATM  628  O   HOH T 627       8.983   4.898 -12.159  1.00  0.50           O  
HETATM  629  O   HOH T 628       2.188  17.717  21.010  1.00  0.50           O  
HETATM  630  O   HOH T 629      25.887  -3.441  -1.591  1.00  0.50           O  
HETATM  631  O   HOH T 630       4.594  19.086  13.745  1.00  0.50           O  
HETATM  632  O   HOH T 631      -1.646 -25.958  -3.410  1.00  0.50           O  
HETATM  633  O   HOH T 632      -5.158  14.670  19.632  1.00  0.50           O  
HETATM  634  O   HOH T 633      -6.027  26.750   8.748  1.00  0.50           O  
HETATM  635  O   HOH T 634      32.145  -9.868 -43.383  1.00  0.50           O  
HETATM  636  O   HOH T 635      -1.497  25.049  -4.353  1.00  0.50           O  
HETATM  637  O   HOH T 636      40.233  -6.389 -56.944  1.00  0.50           O  
HETATM  638  O   HOH T 637     -10.771 -20.137  -4.755  1.00  0.50           O  
HETATM  639  O   HOH T 638      26.326 -19.624  -8.310  1.00  0.50           O  
HETATM  640  O   HOH T 639      21.236   7.836 -24.024  1.00  0.50           O  
HETATM  641  O   HOH T 640      12.171   5.893 -21.594  1.00  0.50           O  
HETATM  642  O   HOH T 641       7.374  -7.608 -17.803  1.00  0.50           O  
HETATM  643  O   HOH T 642      40.122  -7.098 -59.641  1.00  0.50           O  
HETATM  644  O   HOH T 643      39.493  17.375 -16.812  1.00  0.50           O  
HETATM  645  O   HOH T 644      -7.390  22.185  -3.117  1.00  0.50           O  
HETATM  646  O   HOH T 645       7.493  24.465   1.323  1.00  0.50           O  
HETATM  647  O   HOH T 646     -21.473   4.049   2.015  1.00  0.50           O  
HETATM  648  O   HOH T 647     -25.751   8.362   7.263  1.00  0.50           O  
HETATM  649  O   HOH T 648     -11.395 -18.259  -6.545  1.00  0.50           O  
HETATM  650  O   HOH T 649      16.333  13.689   0.867  1.00  0.50           O  
HETATM  651  O   HOH T 650     -29.690   9.535   8.004  1.00  0.50           O  
HETATM  652  O   HOH T 651      31.520  11.271 -25.065  1.00  0.50           O  
HETATM  653  O   HOH T 652     -27.500   8.332   9.434  1.00  0.50           O  
HETATM  654  O   HOH T 653      34.217 -14.556 -40.529  1.00  0.50           O  
HETATM  655  O   HOH T 654      -8.406  12.280 -17.392  1.00  0.51           O  
HETATM  656  O   HOH T 655       3.091  19.796  22.658  1.00  0.51           O  
HETATM  657  O   HOH T 656      28.360 -12.916  10.476  1.00  0.51           O  
HETATM  658  O   HOH T 657      -6.668 -13.739 -15.726  1.00  0.51           O  
HETATM  659  O   HOH T 658       5.440 -14.452 -37.818  1.00  0.51           O  
HETATM  660  O   HOH T 659       7.909  19.537  11.554  1.00  0.51           O  
HETATM  661  O   HOH T 660      31.243 -17.344 -42.344  1.00  0.51           O  
HETATM  662  O   HOH T 661      10.479 -13.279 -13.593  1.00  0.51           O  
HETATM  663  O   HOH T 662      -5.911  13.863  26.117  1.00  0.51           O  
HETATM  664  O   HOH T 663      -7.679  14.521 -18.939  1.00  0.51           O  
HETATM  665  O   HOH T 664      30.926  27.035 -22.106  1.00  0.51           O  
HETATM  666  O   HOH T 665      26.160 -16.408 -28.261  1.00  0.51           O  
HETATM  667  O   HOH T 666      -3.982   3.121 -14.145  1.00  0.51           O  
HETATM  668  O   HOH T 667      16.994  32.693 -40.870  1.00  0.51           O  
HETATM  669  O   HOH T 668       5.697  -2.582 -12.920  1.00  0.51           O  
HETATM  670  O   HOH T 669       4.496  -3.798 -45.556  1.00  0.51           O  
HETATM  671  O   HOH T 670     -16.605  14.729   0.837  1.00  0.51           O  
HETATM  672  O   HOH T 671       9.878  25.497 -17.084  1.00  0.51           O  
HETATM  673  O   HOH T 672      19.064   6.556 -22.868  1.00  0.51           O  
HETATM  674  O   HOH T 673      16.641   0.059 -20.987  1.00  0.51           O  
HETATM  675  O   HOH T 674       5.622  25.884  -4.771  1.00  0.51           O  
HETATM  676  O   HOH T 675      -2.408  -7.341 -37.270  1.00  0.51           O  
HETATM  677  O   HOH T 676       5.666  22.454  15.175  1.00  0.51           O  
HETATM  678  O   HOH T 677      32.973  25.039 -28.266  1.00  0.51           O  
HETATM  679  O   HOH T 678       1.968  15.538  19.222  1.00  0.51           O  
HETATM  680  O   HOH T 679      17.882   2.217 -14.139  1.00  0.51           O  
HETATM  681  O   HOH T 680      16.092 -10.157  12.117  1.00  0.51           O  
HETATM  682  O   HOH T 681      -1.055 -21.114  12.066  1.00  0.51           O  
HETATM  683  O   HOH T 682      34.069 -12.009 -37.115  1.00  0.51           O  
HETATM  684  O   HOH T 683      21.187  39.075 -30.743  1.00  0.51           O  
HETATM  685  O   HOH T 684       8.454 -20.314  12.419  1.00  0.51           O  
HETATM  686  O   HOH T 685      -3.068  -3.040  -9.551  1.00  0.51           O  
HETATM  687  O   HOH T 686     -14.673  -0.009  11.476  1.00  0.51           O  
HETATM  688  O   HOH T 687     -25.062  10.375  20.394  1.00  0.51           O  
HETATM  689  O   HOH T 688      11.340  -8.046 -20.336  1.00  0.51           O  
HETATM  690  O   HOH T 689      37.520  -8.112 -39.577  1.00  0.51           O  
HETATM  691  O   HOH T 690     -15.255  14.786  11.726  1.00  0.52           O  
HETATM  692  O   HOH T 691     -12.408  11.052  -3.391  1.00  0.52           O  
HETATM  693  O   HOH T 692      22.583   2.443 -45.924  1.00  0.52           O  
HETATM  694  O   HOH T 693      13.761  26.588 -34.158  1.00  0.52           O  
HETATM  695  O   HOH T 694      32.361 -16.190 -29.953  1.00  0.52           O  
HETATM  696  O   HOH T 695       1.689  16.708 -17.022  1.00  0.52           O  
HETATM  697  O   HOH T 696      17.050 -17.755 -10.723  1.00  0.52           O  
HETATM  698  O   HOH T 697      -0.838 -13.803 -15.427  1.00  0.52           O  
HETATM  699  O   HOH T 698      20.375   5.551  -3.030  1.00  0.52           O  
HETATM  700  O   HOH T 699     -10.807  -8.273 -12.470  1.00  0.52           O  
HETATM  701  O   HOH T 700      12.257   0.014  -8.104  1.00  0.52           O  
HETATM  702  O   HOH T 701       1.173  25.090  20.534  1.00  0.52           O  
HETATM  703  O   HOH T 702      31.551  25.057 -12.899  1.00  0.52           O  
HETATM  704  O   HOH T 703     -17.674 -11.598   4.181  1.00  0.52           O  
HETATM  705  O   HOH T 704       5.798  26.973  -0.218  1.00  0.52           O  
HETATM  706  O   HOH T 705      -7.273  26.417  -0.927  1.00  0.52           O  
HETATM  707  O   HOH T 706      22.772 -10.455 -22.761  1.00  0.52           O  
HETATM  708  O   HOH T 707      11.372  15.257 -43.570  1.00  0.52           O  
HETATM  709  O   HOH T 708     -16.526 -12.770   6.396  1.00  0.52           O  
HETATM  710  O   HOH T 709     -12.181 -18.664 -13.855  1.00  0.52           O  
HETATM  711  O   HOH T 710      16.687  -1.016 -49.228  1.00  0.52           O  
HETATM  712  O   HOH T 711      23.702  10.384 -51.377  1.00  0.52           O  
HETATM  713  O   HOH T 712      33.231  32.760 -34.858  1.00  0.52           O  
HETATM  714  O   HOH T 713      14.442  16.863 -32.369  1.00  0.52           O  
HETATM  715  O   HOH T 714      12.620  25.457 -14.628  1.00  0.52           O  
HETATM  716  O   HOH T 715       5.649 -20.972  -9.696  1.00  0.52           O  
HETATM  717  O   HOH T 716      -1.323  -6.469 -43.615  1.00  0.52           O  
HETATM  718  O   HOH T 717      10.734  -9.302 -25.175  1.00  0.52           O  
HETATM  719  O   HOH T 718      12.219   2.499   4.175  1.00  0.52           O  
HETATM  720  O   HOH T 719      29.449  15.207 -39.619  1.00  0.52           O  
HETATM  721  O   HOH T 720      17.008 -11.405 -43.886  1.00  0.52           O  
HETATM  722  O   HOH T 721       4.048  24.135  16.664  1.00  0.53           O  
HETATM  723  O   HOH T 722      12.889   0.183   5.658  1.00  0.53           O  
HETATM  724  O   HOH T 723      -2.606 -27.639   4.307  1.00  0.53           O  
HETATM  725  O   HOH T 724      17.739  -1.498   9.673  1.00  0.53           O  
HETATM  726  O   HOH T 725      18.020  11.353   0.884  1.00  0.53           O  
HETATM  727  O   HOH T 726      17.140  -0.663 -15.636  1.00  0.53           O  
HETATM  728  O   HOH T 727       8.967 -23.568  -3.875  1.00  0.53           O  
HETATM  729  O   HOH T 728      16.146  29.051 -17.971  1.00  0.53           O  
HETATM  730  O   HOH T 729     -22.738   0.791  -1.670  1.00  0.53           O  
HETATM  731  O   HOH T 730      35.112 -11.359 -30.568  1.00  0.53           O  
HETATM  732  O   HOH T 731     -11.907   4.049  17.954  1.00  0.53           O  
HETATM  733  O   HOH T 732      31.466 -19.836  12.830  1.00  0.53           O  
HETATM  734  O   HOH T 733     -11.408  11.997 -13.900  1.00  0.53           O  
HETATM  735  O   HOH T 734      29.160 -17.817   8.849  1.00  0.53           O  
HETATM  736  O   HOH T 735       4.232   9.043 -12.932  1.00  0.53           O  
HETATM  737  O   HOH T 736     -25.189   8.066  18.835  1.00  0.53           O  
HETATM  738  O   HOH T 737      -9.629 -17.009 -13.778  1.00  0.53           O  
HETATM  739  O   HOH T 738       5.785  20.816  22.448  1.00  0.53           O  
HETATM  740  O   HOH T 739      -0.982   3.540 -43.135  1.00  0.53           O  
HETATM  741  O   HOH T 740     -12.938  15.659  12.787  1.00  0.53           O  
HETATM  742  O   HOH T 741     -25.024   4.859   5.718  1.00  0.53           O  
HETATM  743  O   HOH T 742       0.130  24.036 -11.147  1.00  0.54           O  
HETATM  744  O   HOH T 743      34.711   6.340 -38.040  1.00  0.54           O  
HETATM  745  O   HOH T 744      11.292  -1.274  -3.291  1.00  0.54           O  
HETATM  746  O   HOH T 745      12.242  -8.996 -17.884  1.00  0.54           O  
HETATM  747  O   HOH T 746       9.741 -14.625 -31.578  1.00  0.54           O  
HETATM  748  O   HOH T 747     -26.341   8.660  13.786  1.00  0.54           O  
HETATM  749  O   HOH T 748       9.079  28.764  -8.932  1.00  0.54           O  
HETATM  750  O   HOH T 749      22.009 -23.541  17.094  1.00  0.54           O  
HETATM  751  O   HOH T 750       8.855  17.859  13.748  1.00  0.54           O  
HETATM  752  O   HOH T 751     -18.623 -18.695  -0.444  1.00  0.54           O  
HETATM  753  O   HOH T 752      27.228  17.729 -42.398  1.00  0.54           O  
HETATM  754  O   HOH T 753      16.713  34.273 -25.558  1.00  0.54           O  
HETATM  755  O   HOH T 754      26.727  25.002 -12.053  1.00  0.54           O  
HETATM  756  O   HOH T 755      34.534  -4.186 -53.624  1.00  0.54           O  
HETATM  757  O   HOH T 756      22.070  25.836 -11.265  1.00  0.54           O  
HETATM  758  O   HOH T 757      -5.637  -2.466  10.524  1.00  0.54           O  
HETATM  759  O   HOH T 758      19.430 -17.174 -31.638  1.00  0.54           O  
HETATM  760  O   HOH T 759     -15.118  -4.616  -3.970  1.00  0.54           O  
HETATM  761  O   HOH T 760      19.215  -5.633 -23.476  1.00  0.54           O  
HETATM  762  O   HOH T 761      19.291 -19.441 -11.556  1.00  0.54           O  
HETATM  763  O   HOH T 762      34.873 -11.143 -33.305  1.00  0.54           O  
HETATM  764  O   HOH T 763      -2.576   9.824  22.644  1.00  0.54           O  
HETATM  765  O   HOH T 764      31.618  20.605 -24.544  1.00  0.54           O  
HETATM  766  O   HOH T 765       3.944  24.648 -21.630  1.00  0.54           O  
HETATM  767  O   HOH T 766     -20.292  -0.020  10.490  1.00  0.54           O  
HETATM  768  O   HOH T 767      41.881 -15.885 -33.139  1.00  0.55           O  
HETATM  769  O   HOH T 768      -3.374  28.718  -1.949  1.00  0.55           O  
HETATM  770  O   HOH T 769       5.598   0.755 -25.914  1.00  0.55           O  
HETATM  771  O   HOH T 770      -3.883   9.455  16.388  1.00  0.55           O  
HETATM  772  O   HOH T 771      -4.461  19.635  28.279  1.00  0.55           O  
HETATM  773  O   HOH T 772      17.620  16.392  -3.854  1.00  0.55           O  
HETATM  774  O   HOH T 773     -12.624   5.770  21.954  1.00  0.55           O  
HETATM  775  O   HOH T 774      -2.247  -5.619 -46.064  1.00  0.55           O  
HETATM  776  O   HOH T 775      33.975   7.293 -56.461  1.00  0.55           O  
HETATM  777  O   HOH T 776      -9.565  22.031   3.733  1.00  0.55           O  
HETATM  778  O   HOH T 777       2.844  -4.101 -33.938  1.00  0.55           O  
HETATM  779  O   HOH T 778     -21.791   2.873  16.247  1.00  0.55           O  
HETATM  780  O   HOH T 779     -24.300  17.010  14.580  1.00  0.55           O  
HETATM  781  O   HOH T 780     -18.378  -4.991  -0.952  1.00  0.55           O  
HETATM  782  O   HOH T 781      17.910  13.324   3.067  1.00  0.55           O  
HETATM  783  O   HOH T 782       8.949  14.036 -35.728  1.00  0.55           O  
HETATM  784  O   HOH T 783       0.126  14.531 -17.157  1.00  0.55           O  
HETATM  785  O   HOH T 784      28.302  11.615 -37.664  1.00  0.55           O  
HETATM  786  O   HOH T 785      24.991 -21.797  12.609  1.00  0.55           O  
HETATM  787  O   HOH T 786       4.045  -9.692  10.564  1.00  0.55           O  
HETATM  788  O   HOH T 787       8.154  -2.444 -23.621  1.00  0.55           O  
HETATM  789  O   HOH T 788      32.201   5.444 -55.935  1.00  0.55           O  
HETATM  790  O   HOH T 789      27.587  16.303   8.135  1.00  0.55           O  
HETATM  791  O   HOH T 790      15.601   5.985   3.561  1.00  0.55           O  
HETATM  792  O   HOH T 791      17.931 -15.093 -28.349  1.00  0.55           O  
HETATM  793  O   HOH T 792     -19.355  12.213  17.958  1.00  0.55           O  
HETATM  794  O   HOH T 793      34.704   5.223 -31.341  1.00  0.55           O  
HETATM  795  O   HOH T 794      -0.044  10.528 -42.097  1.00  0.55           O  
HETATM  796  O   HOH T 795      -9.899  17.964  21.736  1.00  0.56           O  
HETATM  797  O   HOH T 796      -2.672 -26.975  11.069  1.00  0.56           O  
HETATM  798  O   HOH T 797      31.662  17.901 -18.645  1.00  0.56           O  
HETATM  799  O   HOH T 798      16.274 -13.929 -25.820  1.00  0.56           O  
HETATM  800  O   HOH T 799       8.230  10.229 -26.284  1.00  0.56           O  
HETATM  801  O   HOH T 800       7.310  21.148 -30.981  1.00  0.56           O  
HETATM  802  O   HOH T 801      -2.841 -19.293  11.108  1.00  0.56           O  
HETATM  803  O   HOH T 802       0.697  20.133  21.127  1.00  0.56           O  
HETATM  804  O   HOH T 803      -5.450  11.937  19.650  1.00  0.56           O  
HETATM  805  O   HOH T 804      28.514 -25.388  16.506  1.00  0.56           O  
HETATM  806  O   HOH T 805       7.318 -16.234 -13.712  1.00  0.56           O  
HETATM  807  O   HOH T 806      20.327   2.718  -3.319  1.00  0.56           O  
HETATM  808  O   HOH T 807     -22.057  14.498  10.650  1.00  0.56           O  
HETATM  809  O   HOH T 808       8.129   2.456   7.248  1.00  0.56           O  
HETATM  810  O   HOH T 809       8.679  -7.165  10.005  1.00  0.56           O  
HETATM  811  O   HOH T 810       4.397   9.007  16.273  1.00  0.56           O  
HETATM  812  O   HOH T 811     -11.371 -20.186 -11.401  1.00  0.56           O  
HETATM  813  O   HOH T 812       3.971   2.389 -14.529  1.00  0.56           O  
HETATM  814  O   HOH T 813      -2.406   4.840  15.381  1.00  0.56           O  
HETATM  815  O   HOH T 814      20.269  22.699  -2.376  1.00  0.56           O  
HETATM  816  O   HOH T 815      -9.858  22.000  26.794  1.00  0.56           O  
HETATM  817  O   HOH T 816      15.342  -7.515 -47.919  1.00  0.56           O  
HETATM  818  O   HOH T 817      -4.686  20.222  30.981  1.00  0.56           O  
HETATM  819  O   HOH T 818       2.422  -0.803 -32.392  1.00  0.56           O  
HETATM  820  O   HOH T 819      -1.546  -1.601 -38.217  1.00  0.57           O  
HETATM  821  O   HOH T 820       1.644   8.841  18.441  1.00  0.57           O  
HETATM  822  O   HOH T 821     -15.477  -3.176  -6.274  1.00  0.57           O  
HETATM  823  O   HOH T 822      31.904  17.858 -24.395  1.00  0.57           O  
HETATM  824  O   HOH T 823      -1.663 -27.349  -8.271  1.00  0.57           O  
HETATM  825  O   HOH T 824     -15.812   2.355 -10.646  1.00  0.57           O  
HETATM  826  O   HOH T 825      29.334  12.693 -25.758  1.00  0.57           O  
HETATM  827  O   HOH T 826      11.285  27.621 -27.604  1.00  0.57           O  
HETATM  828  O   HOH T 827      27.629  14.473 -35.630  1.00  0.57           O  
HETATM  829  O   HOH T 828       6.460  23.640  12.898  1.00  0.57           O  
HETATM  830  O   HOH T 829      13.778   6.295   5.589  1.00  0.57           O  
HETATM  831  O   HOH T 830     -10.581  22.774   6.425  1.00  0.57           O  
HETATM  832  O   HOH T 831      -7.222  -8.887   6.526  1.00  0.57           O  
HETATM  833  O   HOH T 832      -6.726 -11.322 -14.468  1.00  0.57           O  
HETATM  834  O   HOH T 833       7.720  -2.097 -26.712  1.00  0.58           O  
HETATM  835  O   HOH T 834      16.087   4.875  -2.329  1.00  0.58           O  
HETATM  836  O   HOH T 835      14.073  25.656  -1.430  1.00  0.58           O  
HETATM  837  O   HOH T 836      22.406   7.383 -14.678  1.00  0.58           O  
HETATM  838  O   HOH T 837      30.666  20.487 -43.863  1.00  0.58           O  
HETATM  839  O   HOH T 838      -9.679  23.177 -11.148  1.00  0.59           O  
HETATM  840  O   HOH T 839     -12.437 -17.570   5.651  1.00  0.59           O  
HETATM  841  O   HOH T 840      -4.796  24.544  -9.876  1.00  0.59           O  
HETATM  842  O   HOH T 841      18.004   4.744  -0.382  1.00  0.60           O  
HETATM  843  O   HOH T 842      30.652  20.238 -46.487  1.00  0.60           O  
HETATM  844  O   HOH T 843       8.894  22.027  12.231  1.00  0.60           O  
HETATM  845  O   HOH T 844       8.003 -11.654  11.302  1.00  0.61           O  
HETATM  846  O   HOH T 845       5.822  -7.936   9.600  1.00  0.62           O  
HETATM  847  O   HOH T 846      35.743  -2.731 -51.978  1.00  0.69           O  
TER     848      HOH T 846 
