# Supplementary material for: Accurate Prediction of Hydration Sites of Proteins Using Energy Model With Atom Embedding
Source: Front Mol Biosci. 2021 Sep 20;8:756075. doi: 10.3389/fmolb.2021.756075 (PMC8488165; doi:10.3389/fmolb.2021.756075)
Supplement: Supplementary file 1 [file DataSheet1.ZIP › Data Sheet 1/Our_result_pdb/our_dataset_output/2O6F_watersite.pdb]

HEADER                                                        XXXX


JRNL        PMID   -1
HETATM    1  O   HOH T   0       2.620   0.065  34.107  1.00  0.17           O  
HETATM    2  O   HOH T   1      12.964  32.767  55.833  1.00  0.17           O  
HETATM    3  O   HOH T   2      11.735  23.823  53.248  1.00  0.18           O  
HETATM    4  O   HOH T   3      23.206  50.895  72.523  1.00  0.18           O  
HETATM    5  O   HOH T   4      18.871  21.877  67.383  1.00  0.20           O  
HETATM    6  O   HOH T   5      21.809  55.556  63.230  1.00  0.20           O  
HETATM    7  O   HOH T   6       4.386  41.237  68.012  1.00  0.21           O  
HETATM    8  O   HOH T   7      -4.184   5.185  41.667  1.00  0.21           O  
HETATM    9  O   HOH T   8      14.426  50.739  76.072  1.00  0.21           O  
HETATM   10  O   HOH T   9       1.062  20.667  55.289  1.00  0.21           O  
HETATM   11  O   HOH T  10       4.045  46.127  66.743  1.00  0.21           O  
HETATM   12  O   HOH T  11       4.393  45.308  47.064  1.00  0.22           O  
HETATM   13  O   HOH T  12      13.410  41.103  78.404  1.00  0.22           O  
HETATM   14  O   HOH T  13       5.545  30.854  52.707  1.00  0.22           O  
HETATM   15  O   HOH T  14      -3.645   1.722  32.245  1.00  0.22           O  
HETATM   16  O   HOH T  15      13.229  18.127  48.819  1.00  0.22           O  
HETATM   17  O   HOH T  16      14.027  36.502  56.918  1.00  0.22           O  
HETATM   18  O   HOH T  17       3.626  53.300  67.928  1.00  0.23           O  
HETATM   19  O   HOH T  18      16.077  30.272  56.389  1.00  0.23           O  
HETATM   20  O   HOH T  19      -3.389  38.990  40.193  1.00  0.23           O  
HETATM   21  O   HOH T  20       8.558  33.709  69.071  1.00  0.23           O  
HETATM   22  O   HOH T  21      -7.847  30.569  56.736  1.00  0.24           O  
HETATM   23  O   HOH T  22      10.510  25.482  61.387  1.00  0.24           O  
HETATM   24  O   HOH T  23       9.157  40.741  47.513  1.00  0.24           O  
HETATM   25  O   HOH T  24      -3.138  12.253  35.904  1.00  0.24           O  
HETATM   26  O   HOH T  25      11.273  20.139  51.754  1.00  0.25           O  
HETATM   27  O   HOH T  26      -0.689  29.124  56.587  1.00  0.25           O  
HETATM   28  O   HOH T  27      12.297   7.986  62.053  1.00  0.25           O  
HETATM   29  O   HOH T  28      20.337  38.794  77.979  1.00  0.25           O  
HETATM   30  O   HOH T  29      -2.645   2.408  48.463  1.00  0.25           O  
HETATM   31  O   HOH T  30      11.348  19.920  43.737  1.00  0.25           O  
HETATM   32  O   HOH T  31       8.680  13.901  40.935  1.00  0.25           O  
HETATM   33  O   HOH T  32      -7.502   6.526  34.832  1.00  0.25           O  
HETATM   34  O   HOH T  33      18.795  24.366  66.222  1.00  0.26           O  
HETATM   35  O   HOH T  34       6.831   7.022  60.821  1.00  0.26           O  
HETATM   36  O   HOH T  35      -1.211   9.655  55.605  1.00  0.26           O  
HETATM   37  O   HOH T  36      12.100  31.173  74.244  1.00  0.26           O  
HETATM   38  O   HOH T  37      18.110  22.139  62.192  1.00  0.27           O  
HETATM   39  O   HOH T  38      13.204  32.823  50.820  1.00  0.27           O  
HETATM   40  O   HOH T  39      -1.653  38.095  46.892  1.00  0.27           O  
HETATM   41  O   HOH T  40      17.820  16.164  60.196  1.00  0.27           O  
HETATM   42  O   HOH T  41      -7.187  30.023  50.131  1.00  0.28           O  
HETATM   43  O   HOH T  42      16.258  57.260  75.438  1.00  0.28           O  
HETATM   44  O   HOH T  43       8.111  34.594  45.762  1.00  0.28           O  
HETATM   45  O   HOH T  44       6.434   4.841  59.201  1.00  0.28           O  
HETATM   46  O   HOH T  45      12.311  42.650  81.811  1.00  0.28           O  
HETATM   47  O   HOH T  46      14.277  -3.606  38.902  1.00  0.28           O  
HETATM   48  O   HOH T  47      17.688  60.204  68.860  1.00  0.28           O  
HETATM   49  O   HOH T  48      10.470  16.266  72.036  1.00  0.28           O  
HETATM   50  O   HOH T  49      -5.687  18.791  51.330  1.00  0.28           O  
HETATM   51  O   HOH T  50       9.618  35.023  71.251  1.00  0.28           O  
HETATM   52  O   HOH T  51      18.825  24.797  61.762  1.00  0.29           O  
HETATM   53  O   HOH T  52       1.041  29.821  63.171  1.00  0.29           O  
HETATM   54  O   HOH T  53      15.917  58.754  61.946  1.00  0.29           O  
HETATM   55  O   HOH T  54      10.912   0.070  41.316  1.00  0.29           O  
HETATM   56  O   HOH T  55      23.601  38.135  60.079  1.00  0.29           O  
HETATM   57  O   HOH T  56      12.672  26.448  50.448  1.00  0.29           O  
HETATM   58  O   HOH T  57      21.236  46.464  76.672  1.00  0.29           O  
HETATM   59  O   HOH T  58       2.311  28.727  59.538  1.00  0.29           O  
HETATM   60  O   HOH T  59      20.902  43.792  77.306  1.00  0.29           O  
HETATM   61  O   HOH T  60       0.360  16.296  59.152  1.00  0.29           O  
HETATM   62  O   HOH T  61      27.004  29.959  64.157  1.00  0.29           O  
HETATM   63  O   HOH T  62      18.629  12.986  66.438  1.00  0.29           O  
HETATM   64  O   HOH T  63      26.462  28.217  66.366  1.00  0.30           O  
HETATM   65  O   HOH T  64       1.528  21.619  32.229  1.00  0.30           O  
HETATM   66  O   HOH T  65       5.929  40.301  78.300  1.00  0.30           O  
HETATM   67  O   HOH T  66      -0.750  49.449  59.093  1.00  0.30           O  
HETATM   68  O   HOH T  67      12.691  18.228  41.836  1.00  0.30           O  
HETATM   69  O   HOH T  68      15.751  34.597  77.351  1.00  0.30           O  
HETATM   70  O   HOH T  69       1.121  20.827  47.414  1.00  0.30           O  
HETATM   71  O   HOH T  70       4.312  51.717  59.252  1.00  0.30           O  
HETATM   72  O   HOH T  71      -2.459  28.271  33.422  1.00  0.30           O  
HETATM   73  O   HOH T  72       9.736  21.831  37.301  1.00  0.30           O  
HETATM   74  O   HOH T  73      -5.721  -1.687  30.980  1.00  0.30           O  
HETATM   75  O   HOH T  74       4.695  27.506  71.269  1.00  0.31           O  
HETATM   76  O   HOH T  75      29.233  40.606  63.262  1.00  0.31           O  
HETATM   77  O   HOH T  76       3.646  27.281  61.505  1.00  0.31           O  
HETATM   78  O   HOH T  77      -4.310  17.499  36.431  1.00  0.31           O  
HETATM   79  O   HOH T  78       1.867  39.781  63.717  1.00  0.31           O  
HETATM   80  O   HOH T  79      -0.311  22.713  56.472  1.00  0.31           O  
HETATM   81  O   HOH T  80      15.037  32.517  75.676  1.00  0.31           O  
HETATM   82  O   HOH T  81      17.478  11.737  64.209  1.00  0.31           O  
HETATM   83  O   HOH T  82      20.995  37.631  60.717  1.00  0.31           O  
HETATM   84  O   HOH T  83      -4.241   4.156  33.370  1.00  0.31           O  
HETATM   85  O   HOH T  84      11.487  25.338  46.870  1.00  0.31           O  
HETATM   86  O   HOH T  85       5.611  25.031  72.222  1.00  0.31           O  
HETATM   87  O   HOH T  86       0.834   1.007  52.502  1.00  0.32           O  
HETATM   88  O   HOH T  87      -7.276  22.849  37.278  1.00  0.32           O  
HETATM   89  O   HOH T  88      -6.295  18.742  47.053  1.00  0.32           O  
HETATM   90  O   HOH T  89      10.769  22.978  75.695  1.00  0.32           O  
HETATM   91  O   HOH T  90      -1.596  24.995  66.414  1.00  0.32           O  
HETATM   92  O   HOH T  91      20.594  31.118  80.064  1.00  0.32           O  
HETATM   93  O   HOH T  92      -6.388  23.537  47.156  1.00  0.32           O  
HETATM   94  O   HOH T  93       5.992  35.394  64.752  1.00  0.32           O  
HETATM   95  O   HOH T  94      18.840  30.919  61.859  1.00  0.32           O  
HETATM   96  O   HOH T  95       6.466  53.271  67.753  1.00  0.33           O  
HETATM   97  O   HOH T  96      -0.062  26.023  60.632  1.00  0.33           O  
HETATM   98  O   HOH T  97      10.998  26.797  37.240  1.00  0.33           O  
HETATM   99  O   HOH T  98      23.480  46.018  65.540  1.00  0.33           O  
HETATM  100  O   HOH T  99      -0.981  47.305  68.208  1.00  0.33           O  
HETATM  101  O   HOH T 100       4.071  24.103  36.973  1.00  0.33           O  
HETATM  102  O   HOH T 101      26.789  32.190  62.439  1.00  0.33           O  
HETATM  103  O   HOH T 102      -6.153  30.330  52.653  1.00  0.33           O  
HETATM  104  O   HOH T 103      12.205  15.357  42.187  1.00  0.33           O  
HETATM  105  O   HOH T 104      14.900   8.001  61.275  1.00  0.33           O  
HETATM  106  O   HOH T 105      18.859  31.549  59.126  1.00  0.33           O  
HETATM  107  O   HOH T 106      22.953  42.091  59.284  1.00  0.34           O  
HETATM  108  O   HOH T 107      29.369  41.727  60.825  1.00  0.34           O  
HETATM  109  O   HOH T 108       8.617  28.349  36.530  1.00  0.34           O  
HETATM  110  O   HOH T 109      22.607  21.822  82.947  1.00  0.34           O  
HETATM  111  O   HOH T 110      -8.341  34.943  65.169  1.00  0.34           O  
HETATM  112  O   HOH T 111       9.735   2.578  51.089  1.00  0.34           O  
HETATM  113  O   HOH T 112      -4.379  -0.646  33.164  1.00  0.34           O  
HETATM  114  O   HOH T 113      -5.009  20.543  38.708  1.00  0.34           O  
HETATM  115  O   HOH T 114      -9.971  32.049  57.696  1.00  0.34           O  
HETATM  116  O   HOH T 115      13.596  16.708  68.065  1.00  0.34           O  
HETATM  117  O   HOH T 116      26.229  45.872  65.426  1.00  0.35           O  
HETATM  118  O   HOH T 117      -5.938  24.829  35.534  1.00  0.35           O  
HETATM  119  O   HOH T 118      22.788  39.977  77.672  1.00  0.35           O  
HETATM  120  O   HOH T 119      11.524  24.023  37.304  1.00  0.35           O  
HETATM  121  O   HOH T 120       2.549  -6.306  45.593  1.00  0.35           O  
HETATM  122  O   HOH T 121       2.502  22.798  34.798  1.00  0.35           O  
HETATM  123  O   HOH T 122      -0.232  23.679  71.158  1.00  0.35           O  
HETATM  124  O   HOH T 123      15.836  31.929  43.996  1.00  0.35           O  
HETATM  125  O   HOH T 124      -2.293  22.947  54.570  1.00  0.35           O  
HETATM  126  O   HOH T 125      10.163  -1.987  35.873  1.00  0.35           O  
HETATM  127  O   HOH T 126       4.775  25.008  52.316  1.00  0.35           O  
HETATM  128  O   HOH T 127      11.061   2.769  41.589  1.00  0.35           O  
HETATM  129  O   HOH T 128      -2.689  37.701  49.277  1.00  0.35           O  
HETATM  130  O   HOH T 129     -11.464  12.252  41.414  1.00  0.35           O  
HETATM  131  O   HOH T 130       8.487  12.244  38.857  1.00  0.35           O  
HETATM  132  O   HOH T 131       7.405  35.219  38.134  1.00  0.35           O  
HETATM  133  O   HOH T 132       0.929  43.033  71.592  1.00  0.36           O  
HETATM  134  O   HOH T 133      21.970  40.246  61.011  1.00  0.36           O  
HETATM  135  O   HOH T 134      23.582  35.611  69.645  1.00  0.36           O  
HETATM  136  O   HOH T 135      10.661  40.428  45.184  1.00  0.36           O  
HETATM  137  O   HOH T 136      -4.235   3.274  46.362  1.00  0.36           O  
HETATM  138  O   HOH T 137      -3.631  44.936  44.774  1.00  0.36           O  
HETATM  139  O   HOH T 138      -4.899  21.181  47.124  1.00  0.36           O  
HETATM  140  O   HOH T 139      23.584  43.881  61.347  1.00  0.36           O  
HETATM  141  O   HOH T 140      -6.660  27.681  53.179  1.00  0.36           O  
HETATM  142  O   HOH T 141      24.771  47.761  59.216  1.00  0.36           O  
HETATM  143  O   HOH T 142      20.453  58.311  55.923  1.00  0.36           O  
HETATM  144  O   HOH T 143      -2.378  14.682  55.025  1.00  0.36           O  
HETATM  145  O   HOH T 144       3.281   6.058  63.282  1.00  0.36           O  
HETATM  146  O   HOH T 145       8.765  25.695  45.959  1.00  0.36           O  
HETATM  147  O   HOH T 146      -9.313   8.498  35.394  1.00  0.36           O  
HETATM  148  O   HOH T 147      -0.924  14.803  52.739  1.00  0.36           O  
HETATM  149  O   HOH T 148       3.136  41.798  70.421  1.00  0.36           O  
HETATM  150  O   HOH T 149      12.805  25.483  42.263  1.00  0.36           O  
HETATM  151  O   HOH T 150       8.051   5.393  32.569  1.00  0.37           O  
HETATM  152  O   HOH T 151      10.849  41.262  85.260  1.00  0.37           O  
HETATM  153  O   HOH T 152      -8.415  29.976  43.567  1.00  0.37           O  
HETATM  154  O   HOH T 153       8.298   8.505  67.206  1.00  0.37           O  
HETATM  155  O   HOH T 154       7.126  21.345  37.933  1.00  0.37           O  
HETATM  156  O   HOH T 155      -4.985  39.338  48.855  1.00  0.37           O  
HETATM  157  O   HOH T 156      23.849  33.057  70.548  1.00  0.37           O  
HETATM  158  O   HOH T 157      -2.571  43.560  42.580  1.00  0.37           O  
HETATM  159  O   HOH T 158      25.787  35.322  67.868  1.00  0.37           O  
HETATM  160  O   HOH T 159      -0.409  49.133  54.925  1.00  0.37           O  
HETATM  161  O   HOH T 160      14.662  17.075  70.671  1.00  0.37           O  
HETATM  162  O   HOH T 161       9.021  31.944  45.897  1.00  0.37           O  
HETATM  163  O   HOH T 162      18.334  32.209  81.138  1.00  0.37           O  
HETATM  164  O   HOH T 163      28.154  36.376  64.960  1.00  0.37           O  
HETATM  165  O   HOH T 164      23.784  46.642  61.563  1.00  0.37           O  
HETATM  166  O   HOH T 165       9.714  31.583  77.822  1.00  0.37           O  
HETATM  167  O   HOH T 166      16.065  15.676  68.758  1.00  0.38           O  
HETATM  168  O   HOH T 167      -2.874  11.920  55.133  1.00  0.38           O  
HETATM  169  O   HOH T 168      14.501   9.095  40.412  1.00  0.38           O  
HETATM  170  O   HOH T 169      -0.029  32.001  64.497  1.00  0.38           O  
HETATM  171  O   HOH T 170       0.782  47.745  70.286  1.00  0.38           O  
HETATM  172  O   HOH T 171      -9.276  38.843  50.844  1.00  0.38           O  
HETATM  173  O   HOH T 172      22.891  58.254  54.650  1.00  0.38           O  
HETATM  174  O   HOH T 173      -8.924  27.284  43.070  1.00  0.38           O  
HETATM  175  O   HOH T 174      10.985  20.292  35.407  1.00  0.38           O  
HETATM  176  O   HOH T 175       3.122   0.427  55.910  1.00  0.38           O  
HETATM  177  O   HOH T 176      16.152  25.031  80.346  1.00  0.38           O  
HETATM  178  O   HOH T 177       2.224  40.551  66.372  1.00  0.38           O  
HETATM  179  O   HOH T 178      -5.816  29.315  40.612  1.00  0.38           O  
HETATM  180  O   HOH T 179      13.240  22.142  51.716  1.00  0.38           O  
HETATM  181  O   HOH T 180      16.865  34.002  79.734  1.00  0.38           O  
HETATM  182  O   HOH T 181      -7.881  29.263  46.264  1.00  0.38           O  
HETATM  183  O   HOH T 182      10.730  31.202  62.385  1.00  0.38           O  
HETATM  184  O   HOH T 183      20.998  29.120  62.252  1.00  0.39           O  
HETATM  185  O   HOH T 184      16.158  26.098  77.803  1.00  0.39           O  
HETATM  186  O   HOH T 185      23.344  22.061  57.425  1.00  0.39           O  
HETATM  187  O   HOH T 186      29.217  30.813  62.544  1.00  0.39           O  
HETATM  188  O   HOH T 187      11.571  25.866  80.214  1.00  0.39           O  
HETATM  189  O   HOH T 188      11.434  35.193  78.001  1.00  0.39           O  
HETATM  190  O   HOH T 189      12.667  22.865  47.550  1.00  0.39           O  
HETATM  191  O   HOH T 190       9.836  27.878  43.405  1.00  0.39           O  
HETATM  192  O   HOH T 191      21.379  52.903  63.808  1.00  0.39           O  
HETATM  193  O   HOH T 192       3.053  -4.506  39.549  1.00  0.39           O  
HETATM  194  O   HOH T 193       8.749  51.034  73.458  1.00  0.39           O  
HETATM  195  O   HOH T 194      -8.295  12.363  34.077  1.00  0.39           O  
HETATM  196  O   HOH T 195      -1.612  29.813  64.036  1.00  0.39           O  
HETATM  197  O   HOH T 196       4.072  50.215  54.006  1.00  0.39           O  
HETATM  198  O   HOH T 197       5.542  55.041  60.783  1.00  0.39           O  
HETATM  199  O   HOH T 198       6.760  37.670  39.009  1.00  0.39           O  
HETATM  200  O   HOH T 199       1.767  28.260  67.767  1.00  0.39           O  
HETATM  201  O   HOH T 200      13.037  33.808  74.160  1.00  0.39           O  
HETATM  202  O   HOH T 201      28.378  47.629  76.597  1.00  0.39           O  
HETATM  203  O   HOH T 202      12.582  14.614  37.389  1.00  0.39           O  
HETATM  204  O   HOH T 203       9.673  10.421  37.100  1.00  0.40           O  
HETATM  205  O   HOH T 204       5.330  32.642  67.266  1.00  0.40           O  
HETATM  206  O   HOH T 205      -0.917  47.664  52.687  1.00  0.40           O  
HETATM  207  O   HOH T 206       9.636  49.531  81.610  1.00  0.40           O  
HETATM  208  O   HOH T 207       9.768  -6.545  46.129  1.00  0.40           O  
HETATM  209  O   HOH T 208      16.960   3.271  40.656  1.00  0.40           O  
HETATM  210  O   HOH T 209      12.078  17.799  70.315  1.00  0.40           O  
HETATM  211  O   HOH T 210      11.804  59.314  62.371  1.00  0.40           O  
HETATM  212  O   HOH T 211     -13.807  25.676  34.245  1.00  0.40           O  
HETATM  213  O   HOH T 212      20.259  19.480  66.934  1.00  0.40           O  
HETATM  214  O   HOH T 213      12.764  37.364  76.999  1.00  0.40           O  
HETATM  215  O   HOH T 214      10.599   4.941  33.080  1.00  0.40           O  
HETATM  216  O   HOH T 215      16.451  37.927  56.457  1.00  0.40           O  
HETATM  217  O   HOH T 216       7.130   6.506  63.548  1.00  0.40           O  
HETATM  218  O   HOH T 217      24.847  30.566  70.815  1.00  0.40           O  
HETATM  219  O   HOH T 218       4.835  48.555  51.996  1.00  0.41           O  
HETATM  220  O   HOH T 219      14.464  13.721  42.316  1.00  0.41           O  
HETATM  221  O   HOH T 220      -6.840  23.378  55.148  1.00  0.41           O  
HETATM  222  O   HOH T 221       0.133  36.366  53.996  1.00  0.41           O  
HETATM  223  O   HOH T 222       6.019  37.052  70.480  1.00  0.41           O  
HETATM  224  O   HOH T 223      -1.840  24.618  69.013  1.00  0.41           O  
HETATM  225  O   HOH T 224      15.650  29.226  53.986  1.00  0.41           O  
HETATM  226  O   HOH T 225      -4.602   8.299  59.078  1.00  0.41           O  
HETATM  227  O   HOH T 226      -3.947   9.425  55.608  1.00  0.41           O  
HETATM  228  O   HOH T 227     -10.536  29.916  61.908  1.00  0.41           O  
HETATM  229  O   HOH T 228      11.863  28.056  41.374  1.00  0.41           O  
HETATM  230  O   HOH T 229       4.381  21.303  37.371  1.00  0.41           O  
HETATM  231  O   HOH T 230      27.079  42.007  62.357  1.00  0.41           O  
HETATM  232  O   HOH T 231      12.922  21.909  44.926  1.00  0.41           O  
HETATM  233  O   HOH T 232      -7.496  40.404  49.524  1.00  0.41           O  
HETATM  234  O   HOH T 233      17.985  60.606  61.352  1.00  0.41           O  
HETATM  235  O   HOH T 234      22.095  31.709  56.017  1.00  0.41           O  
HETATM  236  O   HOH T 235      11.502  36.534  45.195  1.00  0.41           O  
HETATM  237  O   HOH T 236       7.682  19.586  65.409  1.00  0.41           O  
HETATM  238  O   HOH T 237       4.507  32.978  64.719  1.00  0.41           O  
HETATM  239  O   HOH T 238      25.770  34.015  72.920  1.00  0.42           O  
HETATM  240  O   HOH T 239      -5.373   6.625  33.016  1.00  0.42           O  
HETATM  241  O   HOH T 240      -4.792  21.712  54.409  1.00  0.42           O  
HETATM  242  O   HOH T 241      -1.030  26.937  58.253  1.00  0.42           O  
HETATM  243  O   HOH T 242      -6.545  31.214  47.894  1.00  0.42           O  
HETATM  244  O   HOH T 243      12.946  17.070  72.892  1.00  0.42           O  
HETATM  245  O   HOH T 244      -2.509  40.632  42.405  1.00  0.42           O  
HETATM  246  O   HOH T 245      10.541   5.907  61.503  1.00  0.42           O  
HETATM  247  O   HOH T 246      12.912  16.225  35.202  1.00  0.42           O  
HETATM  248  O   HOH T 247       9.408  53.320  72.131  1.00  0.42           O  
HETATM  249  O   HOH T 248      23.412  44.723  76.695  1.00  0.43           O  
HETATM  250  O   HOH T 249       3.330  28.554  64.021  1.00  0.43           O  
HETATM  251  O   HOH T 250     -11.583  31.546  59.915  1.00  0.43           O  
HETATM  252  O   HOH T 251      16.710   6.726  44.358  1.00  0.43           O  
HETATM  253  O   HOH T 252      23.285  55.723  55.708  1.00  0.43           O  
HETATM  254  O   HOH T 253       7.758  25.766  73.798  1.00  0.43           O  
HETATM  255  O   HOH T 254      13.131  18.867  34.358  1.00  0.43           O  
HETATM  256  O   HOH T 255       6.483  51.166  71.883  1.00  0.43           O  
HETATM  257  O   HOH T 256      11.311  25.064  77.512  1.00  0.43           O  
HETATM  258  O   HOH T 257       5.492   5.200  33.779  1.00  0.43           O  
HETATM  259  O   HOH T 258      19.231  45.105  85.503  1.00  0.43           O  
HETATM  260  O   HOH T 259       0.049  23.566  33.617  1.00  0.43           O  
HETATM  261  O   HOH T 260      -0.957  -4.598  46.519  1.00  0.43           O  
HETATM  262  O   HOH T 261       5.505  46.988  48.791  1.00  0.43           O  
HETATM  263  O   HOH T 262      -3.436  17.811  52.036  1.00  0.43           O  
HETATM  264  O   HOH T 263      -7.590  21.095  46.357  1.00  0.43           O  
HETATM  265  O   HOH T 264      28.255  40.309  65.721  1.00  0.43           O  
HETATM  266  O   HOH T 265      -5.651  -4.590  38.898  1.00  0.43           O  
HETATM  267  O   HOH T 266      16.484  -2.502  45.809  1.00  0.43           O  
HETATM  268  O   HOH T 267      -8.194  19.617  51.165  1.00  0.43           O  
HETATM  269  O   HOH T 268      -3.257  -4.971  40.529  1.00  0.43           O  
HETATM  270  O   HOH T 269       3.090  39.860  72.430  1.00  0.43           O  
HETATM  271  O   HOH T 270       4.513  50.973  56.603  1.00  0.43           O  
HETATM  272  O   HOH T 271      18.728  15.398  67.921  1.00  0.44           O  
HETATM  273  O   HOH T 272      16.104   9.967  62.767  1.00  0.44           O  
HETATM  274  O   HOH T 273      13.980  30.477  52.131  1.00  0.44           O  
HETATM  275  O   HOH T 274      -3.247  24.564  34.906  1.00  0.44           O  
HETATM  276  O   HOH T 275      13.865  42.545  53.048  1.00  0.44           O  
HETATM  277  O   HOH T 276      16.494  26.097  51.440  1.00  0.44           O  
HETATM  278  O   HOH T 277       6.653  25.296  33.882  1.00  0.44           O  
HETATM  279  O   HOH T 278       9.842  29.471  79.562  1.00  0.44           O  
HETATM  280  O   HOH T 279      22.564  34.177  57.305  1.00  0.44           O  
HETATM  281  O   HOH T 280      12.246  -2.203  37.403  1.00  0.44           O  
HETATM  282  O   HOH T 281      20.832  25.420  76.427  1.00  0.44           O  
HETATM  283  O   HOH T 282     -11.455  11.182  47.715  1.00  0.44           O  
HETATM  284  O   HOH T 283       4.201  47.618  45.470  1.00  0.44           O  
HETATM  285  O   HOH T 284      16.040  62.487  61.810  1.00  0.44           O  
HETATM  286  O   HOH T 285      -7.278  28.443  58.497  1.00  0.44           O  
HETATM  287  O   HOH T 286      14.683  16.343  41.484  1.00  0.44           O  
HETATM  288  O   HOH T 287      -9.990  37.106  52.816  1.00  0.44           O  
HETATM  289  O   HOH T 288       7.563  -1.749  35.942  1.00  0.44           O  
HETATM  290  O   HOH T 289       4.048  54.378  58.527  1.00  0.45           O  
HETATM  291  O   HOH T 290      16.874  30.584  46.257  1.00  0.45           O  
HETATM  292  O   HOH T 291      13.147  -6.194  38.901  1.00  0.45           O  
HETATM  293  O   HOH T 292      15.404   6.555  39.664  1.00  0.45           O  
HETATM  294  O   HOH T 293      -0.514  27.128  31.898  1.00  0.45           O  
HETATM  295  O   HOH T 294       9.772  26.606  75.708  1.00  0.45           O  
HETATM  296  O   HOH T 295      -5.336  52.034  67.513  1.00  0.45           O  
HETATM  297  O   HOH T 296       6.722   4.070  30.594  1.00  0.45           O  
HETATM  298  O   HOH T 297      22.737  64.097  60.449  1.00  0.45           O  
HETATM  299  O   HOH T 298       5.901   0.641  56.230  1.00  0.45           O  
HETATM  300  O   HOH T 299      21.140  24.339  79.016  1.00  0.45           O  
HETATM  301  O   HOH T 300      19.852  15.463  58.486  1.00  0.45           O  
HETATM  302  O   HOH T 301      -8.425  29.626  54.183  1.00  0.45           O  
HETATM  303  O   HOH T 302      18.664  36.492  56.760  1.00  0.45           O  
HETATM  304  O   HOH T 303      -7.926  14.672  42.123  1.00  0.45           O  
HETATM  305  O   HOH T 304       9.751  48.484  49.672  1.00  0.45           O  
HETATM  306  O   HOH T 305      21.164  23.947  81.800  1.00  0.45           O  
HETATM  307  O   HOH T 306       2.832  46.208  69.238  1.00  0.46           O  
HETATM  308  O   HOH T 307       9.314  36.440  73.546  1.00  0.46           O  
HETATM  309  O   HOH T 308      24.801  62.341  60.646  1.00  0.46           O  
HETATM  310  O   HOH T 309       7.530  53.267  70.311  1.00  0.46           O  
HETATM  311  O   HOH T 310      16.909  33.697  53.318  1.00  0.46           O  
HETATM  312  O   HOH T 311      26.273  26.577  85.498  1.00  0.46           O  
HETATM  313  O   HOH T 312      -5.566  12.576  34.510  1.00  0.46           O  
HETATM  314  O   HOH T 313      17.155  36.256  54.415  1.00  0.46           O  
HETATM  315  O   HOH T 314      -8.440  26.528  45.596  1.00  0.46           O  
HETATM  316  O   HOH T 315      28.051  34.591  69.316  1.00  0.46           O  
HETATM  317  O   HOH T 316      28.524  32.035  68.502  1.00  0.46           O  
HETATM  318  O   HOH T 317     -10.279  33.850  44.409  1.00  0.46           O  
HETATM  319  O   HOH T 318      24.219  42.028  76.509  1.00  0.46           O  
HETATM  320  O   HOH T 319      -0.208  40.980  67.548  1.00  0.46           O  
HETATM  321  O   HOH T 320      -5.562  46.947  60.701  1.00  0.46           O  
HETATM  322  O   HOH T 321       9.867  37.314  77.111  1.00  0.46           O  
HETATM  323  O   HOH T 322       9.094  12.949  36.271  1.00  0.46           O  
HETATM  324  O   HOH T 323      28.804  37.934  67.029  1.00  0.46           O  
HETATM  325  O   HOH T 324      -8.336  23.178  57.429  1.00  0.46           O  
HETATM  326  O   HOH T 325     -10.357  35.267  42.068  1.00  0.46           O  
HETATM  327  O   HOH T 326      15.640   4.117  38.346  1.00  0.46           O  
HETATM  328  O   HOH T 327      -0.329  26.357  70.561  1.00  0.47           O  
HETATM  329  O   HOH T 328      27.204  26.069  59.983  1.00  0.47           O  
HETATM  330  O   HOH T 329      18.747  23.965  80.388  1.00  0.47           O  
HETATM  331  O   HOH T 330       4.868  27.962  59.147  1.00  0.47           O  
HETATM  332  O   HOH T 331      -8.197  25.978  57.533  1.00  0.47           O  
HETATM  333  O   HOH T 332      -2.723  47.540  54.761  1.00  0.47           O  
HETATM  334  O   HOH T 333      29.098  50.426  65.356  1.00  0.47           O  
HETATM  335  O   HOH T 334      -3.367  44.779  55.122  1.00  0.47           O  
HETATM  336  O   HOH T 335       4.452  39.352  70.069  1.00  0.47           O  
HETATM  337  O   HOH T 336      21.721  31.678  77.602  1.00  0.47           O  
HETATM  338  O   HOH T 337      11.460   0.558  51.645  1.00  0.47           O  
HETATM  339  O   HOH T 338      -2.067  24.361  61.268  1.00  0.47           O  
HETATM  340  O   HOH T 339      19.793  23.336  63.890  1.00  0.47           O  
HETATM  341  O   HOH T 340      12.089  -5.562  47.202  1.00  0.47           O  
HETATM  342  O   HOH T 341      17.117  23.504  78.187  1.00  0.47           O  
HETATM  343  O   HOH T 342      29.339  38.890  69.468  1.00  0.47           O  
HETATM  344  O   HOH T 343      16.132  41.357  84.978  1.00  0.47           O  
HETATM  345  O   HOH T 344      10.771  11.955  40.502  1.00  0.47           O  
HETATM  346  O   HOH T 345      15.681  53.744  80.947  1.00  0.47           O  
HETATM  347  O   HOH T 346      -1.084  24.175  58.759  1.00  0.47           O  
HETATM  348  O   HOH T 347     -12.311  31.905  40.794  1.00  0.47           O  
HETATM  349  O   HOH T 348      26.006  49.617  60.762  1.00  0.47           O  
HETATM  350  O   HOH T 349      -3.311  14.356  34.188  1.00  0.47           O  
HETATM  351  O   HOH T 350      14.228  19.863  43.574  1.00  0.48           O  
HETATM  352  O   HOH T 351      -3.263  46.920  62.235  1.00  0.48           O  
HETATM  353  O   HOH T 352      10.499  15.190  35.664  1.00  0.48           O  
HETATM  354  O   HOH T 353      10.634  17.657  34.448  1.00  0.48           O  
HETATM  355  O   HOH T 354      28.061  34.132  66.655  1.00  0.48           O  
HETATM  356  O   HOH T 355      20.322  17.232  60.627  1.00  0.48           O  
HETATM  357  O   HOH T 356       2.518  31.037  65.023  1.00  0.48           O  
HETATM  358  O   HOH T 357       5.692   2.255  58.467  1.00  0.48           O  
HETATM  359  O   HOH T 358       6.909  48.985  50.041  1.00  0.48           O  
HETATM  360  O   HOH T 359      30.100  49.135  67.674  1.00  0.48           O  
HETATM  361  O   HOH T 360       8.778  54.917  75.279  1.00  0.48           O  
HETATM  362  O   HOH T 361       4.836  50.882  44.053  1.00  0.48           O  
HETATM  363  O   HOH T 362     -10.528  24.746  56.709  1.00  0.48           O  
HETATM  364  O   HOH T 363      -5.851  17.192  53.310  1.00  0.48           O  
HETATM  365  O   HOH T 364      10.987  14.686  39.643  1.00  0.48           O  
HETATM  366  O   HOH T 365       8.957  34.132  43.025  1.00  0.49           O  
HETATM  367  O   HOH T 366      18.731  33.865  57.665  1.00  0.49           O  
HETATM  368  O   HOH T 367      11.265  33.040  76.173  1.00  0.49           O  
HETATM  369  O   HOH T 368       3.310  30.589  67.680  1.00  0.49           O  
HETATM  370  O   HOH T 369       5.073  23.890  32.212  1.00  0.49           O  
HETATM  371  O   HOH T 370      -8.987  34.553  46.603  1.00  0.49           O  
HETATM  372  O   HOH T 371       2.731  49.027  43.592  1.00  0.49           O  
HETATM  373  O   HOH T 372      -2.428  49.478  56.814  1.00  0.49           O  
HETATM  374  O   HOH T 373      -4.268  24.132  55.912  1.00  0.49           O  
HETATM  375  O   HOH T 374      24.405  53.472  56.732  1.00  0.49           O  
HETATM  376  O   HOH T 375      14.998  34.562  55.080  1.00  0.49           O  
HETATM  377  O   HOH T 376      18.675  -1.562  44.514  1.00  0.49           O  
HETATM  378  O   HOH T 377       5.598   4.833  61.882  1.00  0.49           O  
HETATM  379  O   HOH T 378      10.795  25.273  34.946  1.00  0.49           O  
HETATM  380  O   HOH T 379      22.726  16.250  61.337  1.00  0.49           O  
HETATM  381  O   HOH T 380       1.910  13.686  29.269  1.00  0.49           O  
HETATM  382  O   HOH T 381       3.742  33.858  69.132  1.00  0.49           O  
HETATM  383  O   HOH T 382     -10.866  13.112  49.504  1.00  0.49           O  
HETATM  384  O   HOH T 383      17.941   4.802  42.788  1.00  0.49           O  
HETATM  385  O   HOH T 384      -2.359  39.069  44.627  1.00  0.49           O  
HETATM  386  O   HOH T 385      10.719  -4.249  45.162  1.00  0.49           O  
HETATM  387  O   HOH T 386      16.331  60.966  71.214  1.00  0.49           O  
HETATM  388  O   HOH T 387      24.523  41.360  61.446  1.00  0.49           O  
HETATM  389  O   HOH T 388       0.918  41.156  73.594  1.00  0.50           O  
HETATM  390  O   HOH T 389      21.691  29.104  78.480  1.00  0.50           O  
HETATM  391  O   HOH T 390      25.311  27.884  60.742  1.00  0.50           O  
HETATM  392  O   HOH T 391      -0.858  14.067  32.879  1.00  0.50           O  
HETATM  393  O   HOH T 392      28.552  30.071  66.488  1.00  0.50           O  
HETATM  394  O   HOH T 393       5.089  53.636  56.053  1.00  0.50           O  
HETATM  395  O   HOH T 394      15.435  11.469  41.189  1.00  0.50           O  
HETATM  396  O   HOH T 395      31.585  47.807  64.864  1.00  0.50           O  
HETATM  397  O   HOH T 396      -8.671  29.003  40.902  1.00  0.50           O  
HETATM  398  O   HOH T 397      15.016  31.854  54.283  1.00  0.50           O  
HETATM  399  O   HOH T 398       7.601  36.403  43.772  1.00  0.50           O  
HETATM  400  O   HOH T 399      25.417  28.437  72.415  1.00  0.50           O  
HETATM  401  O   HOH T 400       0.736   5.583  62.445  1.00  0.50           O  
HETATM  402  O   HOH T 401      25.083  64.692  59.152  1.00  0.50           O  
HETATM  403  O   HOH T 402       8.084  34.102  40.476  1.00  0.50           O  
HETATM  404  O   HOH T 403      28.646  44.499  65.640  1.00  0.50           O  
HETATM  405  O   HOH T 404      12.923  18.439  75.360  1.00  0.50           O  
HETATM  406  O   HOH T 405      26.307  31.140  73.055  1.00  0.50           O  
HETATM  407  O   HOH T 406      16.274  56.369  81.507  1.00  0.50           O  
HETATM  408  O   HOH T 407      -7.965  23.412  34.625  1.00  0.50           O  
HETATM  409  O   HOH T 408      18.696  -4.127  45.361  1.00  0.50           O  
HETATM  410  O   HOH T 409      -0.198  40.289  46.010  1.00  0.50           O  
HETATM  411  O   HOH T 410       9.675  29.185  76.794  1.00  0.50           O  
HETATM  412  O   HOH T 411      16.244   7.858  41.992  1.00  0.51           O  
HETATM  413  O   HOH T 412      11.054  27.517  78.179  1.00  0.51           O  
HETATM  414  O   HOH T 413      13.441  41.970  84.300  1.00  0.51           O  
HETATM  415  O   HOH T 414      -0.618  26.859  67.795  1.00  0.51           O  
HETATM  416  O   HOH T 415      -2.044  25.343  63.932  1.00  0.51           O  
HETATM  417  O   HOH T 416      13.703  44.615  85.210  1.00  0.51           O  
HETATM  418  O   HOH T 417      21.108  56.378  54.011  1.00  0.51           O  
HETATM  419  O   HOH T 418       0.760  -1.229  54.235  1.00  0.51           O  
HETATM  420  O   HOH T 419      10.594  -9.338  40.355  1.00  0.51           O  
HETATM  421  O   HOH T 420      26.700  32.551  70.590  1.00  0.51           O  
HETATM  422  O   HOH T 421      17.656  21.093  76.832  1.00  0.51           O  
HETATM  423  O   HOH T 422      -3.184  44.592  67.254  1.00  0.51           O  
HETATM  424  O   HOH T 423      12.186  -6.524  44.601  1.00  0.51           O  
HETATM  425  O   HOH T 424      -0.016  39.103  65.551  1.00  0.51           O  
HETATM  426  O   HOH T 425      20.684  16.802  66.631  1.00  0.51           O  
HETATM  427  O   HOH T 426       9.710  -4.167  47.673  1.00  0.52           O  
HETATM  428  O   HOH T 427      11.269  43.769  86.532  1.00  0.52           O  
HETATM  429  O   HOH T 428      15.331  44.856  52.537  1.00  0.52           O  
HETATM  430  O   HOH T 429      -0.402  15.316  28.868  1.00  0.52           O  
HETATM  431  O   HOH T 430      -0.903  45.492  44.033  1.00  0.52           O  
HETATM  432  O   HOH T 431      14.249  27.606  52.385  1.00  0.52           O  
HETATM  433  O   HOH T 432       1.784  52.771  59.098  1.00  0.52           O  
HETATM  434  O   HOH T 433       2.357  24.288  32.410  1.00  0.52           O  
HETATM  435  O   HOH T 434      -1.701  49.438  61.720  1.00  0.52           O  
HETATM  436  O   HOH T 435      18.891  25.665  78.143  1.00  0.52           O  
HETATM  437  O   HOH T 436      11.021  25.536  44.274  1.00  0.52           O  
HETATM  438  O   HOH T 437       2.459  31.651  70.265  1.00  0.52           O  
HETATM  439  O   HOH T 438       2.002  29.191  56.885  1.00  0.52           O  
HETATM  440  O   HOH T 439      20.877  41.485  78.871  1.00  0.52           O  
HETATM  441  O   HOH T 440      20.045  11.152  64.856  1.00  0.52           O  
HETATM  442  O   HOH T 441       2.108  27.658  70.473  1.00  0.52           O  
HETATM  443  O   HOH T 442      13.702  21.235  35.534  1.00  0.52           O  
HETATM  444  O   HOH T 443      -6.692  19.906  53.422  1.00  0.52           O  
HETATM  445  O   HOH T 444       8.788  26.967  34.142  1.00  0.53           O  
HETATM  446  O   HOH T 445      13.614  20.252  47.109  1.00  0.53           O  
HETATM  447  O   HOH T 446      -1.685   2.302  51.084  1.00  0.53           O  
HETATM  448  O   HOH T 447      -5.675  15.413  35.035  1.00  0.53           O  
HETATM  449  O   HOH T 448      11.036  27.297  82.557  1.00  0.53           O  
HETATM  450  O   HOH T 449      17.007  32.763  55.905  1.00  0.53           O  
HETATM  451  O   HOH T 450       3.948  25.295  34.455  1.00  0.53           O  
HETATM  452  O   HOH T 451      -4.815  27.383  59.156  1.00  0.53           O  
HETATM  453  O   HOH T 452      -4.532  19.315  49.133  1.00  0.53           O  
HETATM  454  O   HOH T 453      11.299  35.707  75.299  1.00  0.53           O  
HETATM  455  O   HOH T 454      25.045  27.599  68.768  1.00  0.53           O  
HETATM  456  O   HOH T 455      -3.355  21.861  61.589  1.00  0.53           O  
HETATM  457  O   HOH T 456      12.593  20.790  49.441  1.00  0.53           O  
HETATM  458  O   HOH T 457      14.031  58.154  76.882  1.00  0.53           O  
HETATM  459  O   HOH T 458       0.020   8.016  63.954  1.00  0.53           O  
HETATM  460  O   HOH T 459       1.089  -5.866  47.981  1.00  0.54           O  
HETATM  461  O   HOH T 460      19.566  28.485  52.338  1.00  0.54           O  
HETATM  462  O   HOH T 461       4.172  -8.241  44.499  1.00  0.54           O  
HETATM  463  O   HOH T 462      -0.379  51.737  60.718  1.00  0.54           O  
HETATM  464  O   HOH T 463      14.303   8.293  63.972  1.00  0.54           O  
HETATM  465  O   HOH T 464      12.971   1.636  34.176  1.00  0.54           O  
HETATM  466  O   HOH T 465      18.032  23.781  51.885  1.00  0.54           O  
HETATM  467  O   HOH T 466      18.443  29.202  44.423  1.00  0.54           O  
HETATM  468  O   HOH T 467      11.464   6.264  64.062  1.00  0.54           O  
HETATM  469  O   HOH T 468      23.684  26.448  84.757  1.00  0.54           O  
HETATM  470  O   HOH T 469     -12.609   9.895  42.118  1.00  0.54           O  
HETATM  471  O   HOH T 470      -4.084  49.453  63.049  1.00  0.54           O  
HETATM  472  O   HOH T 471      -5.926   5.436  46.342  1.00  0.54           O  
HETATM  473  O   HOH T 472      13.989  60.696  61.485  1.00  0.54           O  
HETATM  474  O   HOH T 473      15.532  23.457  50.887  1.00  0.54           O  
HETATM  475  O   HOH T 474      12.949  38.918  45.028  1.00  0.55           O  
HETATM  476  O   HOH T 475      -6.512  42.045  55.159  1.00  0.55           O  
HETATM  477  O   HOH T 476      15.354  22.556  43.723  1.00  0.55           O  
HETATM  478  O   HOH T 477      -3.507  23.613  65.491  1.00  0.55           O  
HETATM  479  O   HOH T 478      12.117   9.011  37.298  1.00  0.55           O  
HETATM  480  O   HOH T 479      22.878  24.435  83.582  1.00  0.55           O  
HETATM  481  O   HOH T 480      -0.043  14.398  69.449  1.00  0.55           O  
HETATM  482  O   HOH T 481      -8.911  41.384  51.812  1.00  0.55           O  
HETATM  483  O   HOH T 482      15.289  14.642  53.454  1.00  0.55           O  
HETATM  484  O   HOH T 483      17.184   8.646  58.251  1.00  0.55           O  
HETATM  485  O   HOH T 484      -4.993   3.329  43.687  1.00  0.55           O  
HETATM  486  O   HOH T 485      -2.350  23.406  32.416  1.00  0.55           O  
HETATM  487  O   HOH T 486      25.200  50.243  58.286  1.00  0.55           O  
HETATM  488  O   HOH T 487      -5.562  17.840  34.015  1.00  0.56           O  
HETATM  489  O   HOH T 488       4.503  39.534  76.194  1.00  0.56           O  
HETATM  490  O   HOH T 489     -10.018   9.007  48.885  1.00  0.56           O  
HETATM  491  O   HOH T 490      -4.063   4.026  50.287  1.00  0.56           O  
HETATM  492  O   HOH T 491      10.232  58.237  71.245  1.00  0.56           O  
HETATM  493  O   HOH T 492      17.860  42.940  86.612  1.00  0.56           O  
HETATM  494  O   HOH T 493      -0.027   8.061  66.526  1.00  0.56           O  
HETATM  495  O   HOH T 494       4.248  57.452  61.482  1.00  0.56           O  
HETATM  496  O   HOH T 495      -9.461  36.491  44.475  1.00  0.56           O  
HETATM  497  O   HOH T 496     -12.297  35.414  54.920  1.00  0.56           O  
HETATM  498  O   HOH T 497       7.479  -1.552  56.067  1.00  0.56           O  
HETATM  499  O   HOH T 498       8.691  38.744  44.535  1.00  0.56           O  
HETATM  500  O   HOH T 499      29.260  42.311  67.174  1.00  0.56           O  
HETATM  501  O   HOH T 500      12.261  -8.243  37.250  1.00  0.56           O  
HETATM  502  O   HOH T 501       0.635  23.175  48.333  1.00  0.56           O  
HETATM  503  O   HOH T 502      -5.973  46.170  63.357  1.00  0.56           O  
HETATM  504  O   HOH T 503      19.405  28.286  85.445  1.00  0.57           O  
HETATM  505  O   HOH T 504      15.425  24.131  54.627  1.00  0.57           O  
HETATM  506  O   HOH T 505       8.170  21.949  76.180  1.00  0.57           O  
HETATM  507  O   HOH T 506       3.228  34.958  71.382  1.00  0.57           O  
HETATM  508  O   HOH T 507      12.087  -0.684  49.576  1.00  0.57           O  
HETATM  509  O   HOH T 508      19.638  39.770  80.404  1.00  0.57           O  
HETATM  510  O   HOH T 509       6.328  -8.463  42.894  1.00  0.57           O  
HETATM  511  O   HOH T 510     -13.673  30.215  54.218  1.00  0.57           O  
HETATM  512  O   HOH T 511      -4.978  26.860  55.293  1.00  0.58           O  
HETATM  513  O   HOH T 512      -3.191  27.592  63.253  1.00  0.58           O  
HETATM  514  O   HOH T 513       7.451  22.750  33.156  1.00  0.58           O  
HETATM  515  O   HOH T 514      -8.114  18.665  44.946  1.00  0.59           O  
HETATM  516  O   HOH T 515      15.465  24.969  42.194  1.00  0.59           O  
HETATM  517  O   HOH T 516       5.728  35.468  40.417  1.00  0.59           O  
HETATM  518  O   HOH T 517      -3.015   7.423  61.703  1.00  0.60           O  
HETATM  519  O   HOH T 518      -7.289  46.096  58.911  1.00  0.60           O  
HETATM  520  O   HOH T 519      11.165  43.767  83.952  1.00  0.60           O  
HETATM  521  O   HOH T 520     -10.528  13.820  33.973  1.00  0.61           O  
HETATM  522  O   HOH T 521      -2.639  -3.374  42.960  1.00  0.61           O  
HETATM  523  O   HOH T 522      12.970  38.621  79.423  1.00  0.61           O  
HETATM  524  O   HOH T 523       6.336  33.948  43.642  1.00  0.63           O  
TER     525      HOH T 523 
