# Supplementary material for: Accurate Prediction of Hydration Sites of Proteins Using Energy Model With Atom Embedding
Source: Front Mol Biosci. 2021 Sep 20;8:756075. doi: 10.3389/fmolb.2021.756075 (PMC8488165; doi:10.3389/fmolb.2021.756075)
Supplement: Supplementary file 1 [file DataSheet1.ZIP › Data Sheet 1/Our_result_pdb/our_dataset_output/2OFB_watersite.pdb]

HEADER                                                        XXXX


JRNL        PMID   -1
HETATM    1  O   HOH T   0      20.971  48.111  32.281  1.00  0.16           O  
HETATM    2  O   HOH T   1      22.470  57.054   7.549  1.00  0.16           O  
HETATM    3  O   HOH T   2      36.362  50.870  23.155  1.00  0.17           O  
HETATM    4  O   HOH T   3      21.732  28.958  22.299  1.00  0.18           O  
HETATM    5  O   HOH T   4      10.685  39.683  24.194  1.00  0.18           O  
HETATM    6  O   HOH T   5      33.498  17.950   8.234  1.00  0.18           O  
HETATM    7  O   HOH T   6       7.954  36.656  22.356  1.00  0.19           O  
HETATM    8  O   HOH T   7      19.860  54.268  31.917  1.00  0.19           O  
HETATM    9  O   HOH T   8       5.820  51.040  29.761  1.00  0.20           O  
HETATM   10  O   HOH T   9      34.674  47.317   7.993  1.00  0.20           O  
HETATM   11  O   HOH T  10      11.160  25.582  14.508  1.00  0.21           O  
HETATM   12  O   HOH T  11      40.856  31.066  14.594  1.00  0.21           O  
HETATM   13  O   HOH T  12      35.427  53.002  11.310  1.00  0.21           O  
HETATM   14  O   HOH T  13      14.163  38.438  29.327  1.00  0.22           O  
HETATM   15  O   HOH T  14      11.483  43.495   6.496  1.00  0.22           O  
HETATM   16  O   HOH T  15      24.712  29.576  32.898  1.00  0.22           O  
HETATM   17  O   HOH T  16      21.242  42.159  13.416  1.00  0.24           O  
HETATM   18  O   HOH T  17       9.169  40.970  26.033  1.00  0.24           O  
HETATM   19  O   HOH T  18      12.878  54.080  36.416  1.00  0.24           O  
HETATM   20  O   HOH T  19      34.392  47.166   3.562  1.00  0.25           O  
HETATM   21  O   HOH T  20      18.188  48.566  25.726  1.00  0.25           O  
HETATM   22  O   HOH T  21      17.627  54.391  25.978  1.00  0.25           O  
HETATM   23  O   HOH T  22       4.435  46.692  35.257  1.00  0.25           O  
HETATM   24  O   HOH T  23      30.336  33.163   2.415  1.00  0.27           O  
HETATM   25  O   HOH T  24      12.040  33.111  22.679  1.00  0.27           O  
HETATM   26  O   HOH T  25      24.239  45.614   3.761  1.00  0.27           O  
HETATM   27  O   HOH T  26       4.407  62.109  14.986  1.00  0.28           O  
HETATM   28  O   HOH T  27      18.446  49.301  29.530  1.00  0.28           O  
HETATM   29  O   HOH T  28      19.724  42.074  30.537  1.00  0.28           O  
HETATM   30  O   HOH T  29      18.641  41.376  33.025  1.00  0.28           O  
HETATM   31  O   HOH T  30      34.047  44.855  19.498  1.00  0.28           O  
HETATM   32  O   HOH T  31      23.598  27.417  11.246  1.00  0.28           O  
HETATM   33  O   HOH T  32      14.055  53.140  33.962  1.00  0.28           O  
HETATM   34  O   HOH T  33      13.846  35.537  29.433  1.00  0.28           O  
HETATM   35  O   HOH T  34      -4.973  51.701  29.200  1.00  0.29           O  
HETATM   36  O   HOH T  35      38.321  43.487  -0.939  1.00  0.29           O  
HETATM   37  O   HOH T  36      17.554  21.880  24.894  1.00  0.29           O  
HETATM   38  O   HOH T  37      10.552  25.753  11.816  1.00  0.29           O  
HETATM   39  O   HOH T  38      37.304  47.175   8.672  1.00  0.29           O  
HETATM   40  O   HOH T  39      26.952  30.865  34.058  1.00  0.29           O  
HETATM   41  O   HOH T  40      17.413  23.731  19.914  1.00  0.29           O  
HETATM   42  O   HOH T  41      43.890  46.226  21.884  1.00  0.29           O  
HETATM   43  O   HOH T  42      -1.440  61.835  25.930  1.00  0.29           O  
HETATM   44  O   HOH T  43      17.743  31.656  30.467  1.00  0.29           O  
HETATM   45  O   HOH T  44      24.002  41.629  36.670  1.00  0.30           O  
HETATM   46  O   HOH T  45      36.605  47.344  21.305  1.00  0.30           O  
HETATM   47  O   HOH T  46       4.926  44.080   9.717  1.00  0.30           O  
HETATM   48  O   HOH T  47      23.678  33.405   5.433  1.00  0.30           O  
HETATM   49  O   HOH T  48      46.366  46.831  22.907  1.00  0.31           O  
HETATM   50  O   HOH T  49      23.276  32.784   2.861  1.00  0.31           O  
HETATM   51  O   HOH T  50      38.935  46.178  26.506  1.00  0.31           O  
HETATM   52  O   HOH T  51      33.755  53.154  17.671  1.00  0.32           O  
HETATM   53  O   HOH T  52      31.770  29.662  30.528  1.00  0.32           O  
HETATM   54  O   HOH T  53      29.393  33.912  -0.113  1.00  0.32           O  
HETATM   55  O   HOH T  54      14.233  64.056  12.748  1.00  0.32           O  
HETATM   56  O   HOH T  55      19.635  32.444  11.422  1.00  0.32           O  
HETATM   57  O   HOH T  56      17.365  50.727  27.354  1.00  0.32           O  
HETATM   58  O   HOH T  57      41.260  44.945  27.324  1.00  0.33           O  
HETATM   59  O   HOH T  58      41.029  45.909   6.723  1.00  0.33           O  
HETATM   60  O   HOH T  59      21.661  59.477  22.049  1.00  0.33           O  
HETATM   61  O   HOH T  60      12.178  33.233  15.439  1.00  0.33           O  
HETATM   62  O   HOH T  61      31.662  59.065   9.547  1.00  0.33           O  
HETATM   63  O   HOH T  62      30.519  51.119   4.027  1.00  0.33           O  
HETATM   64  O   HOH T  63      32.461  58.777   6.785  1.00  0.33           O  
HETATM   65  O   HOH T  64      13.762  25.817  26.821  1.00  0.33           O  
HETATM   66  O   HOH T  65      28.145  25.971  23.439  1.00  0.34           O  
HETATM   67  O   HOH T  66      21.566  31.747   4.852  1.00  0.34           O  
HETATM   68  O   HOH T  67      40.429  38.966   4.777  1.00  0.34           O  
HETATM   69  O   HOH T  68      35.243  28.133  10.808  1.00  0.34           O  
HETATM   70  O   HOH T  69       5.178  54.772   9.533  1.00  0.34           O  
HETATM   71  O   HOH T  70       5.533  53.535  25.512  1.00  0.35           O  
HETATM   72  O   HOH T  71       0.353  49.277  20.188  1.00  0.35           O  
HETATM   73  O   HOH T  72       1.221  50.232  29.637  1.00  0.35           O  
HETATM   74  O   HOH T  73      14.607  39.570  19.290  1.00  0.35           O  
HETATM   75  O   HOH T  74      19.417  29.224  13.395  1.00  0.35           O  
HETATM   76  O   HOH T  75      11.439  32.015  20.255  1.00  0.35           O  
HETATM   77  O   HOH T  76      17.942  34.625  11.933  1.00  0.35           O  
HETATM   78  O   HOH T  77      41.277  31.229  11.806  1.00  0.35           O  
HETATM   79  O   HOH T  78      24.342  31.729  34.673  1.00  0.36           O  
HETATM   80  O   HOH T  79      34.965  53.459   3.931  1.00  0.36           O  
HETATM   81  O   HOH T  80      24.986  25.269  30.017  1.00  0.36           O  
HETATM   82  O   HOH T  81      -1.926  53.159  34.208  1.00  0.36           O  
HETATM   83  O   HOH T  82      29.105  49.793   2.025  1.00  0.36           O  
HETATM   84  O   HOH T  83      20.679  25.785   4.873  1.00  0.36           O  
HETATM   85  O   HOH T  84      51.163  36.771   6.698  1.00  0.36           O  
HETATM   86  O   HOH T  85      25.676  65.588   4.791  1.00  0.36           O  
HETATM   87  O   HOH T  86      41.116  53.339  12.860  1.00  0.37           O  
HETATM   88  O   HOH T  87      34.913  61.452  21.291  1.00  0.37           O  
HETATM   89  O   HOH T  88      19.028  52.891  27.863  1.00  0.37           O  
HETATM   90  O   HOH T  89       3.970  48.523  13.423  1.00  0.37           O  
HETATM   91  O   HOH T  90      28.556  45.539   9.023  1.00  0.38           O  
HETATM   92  O   HOH T  91      -5.321  56.480  30.774  1.00  0.38           O  
HETATM   93  O   HOH T  92      13.373  27.055  15.197  1.00  0.38           O  
HETATM   94  O   HOH T  93      37.036  48.188  23.942  1.00  0.38           O  
HETATM   95  O   HOH T  94      14.152  34.759  14.626  1.00  0.38           O  
HETATM   96  O   HOH T  95      12.890  39.124  31.838  1.00  0.38           O  
HETATM   97  O   HOH T  96      39.513  25.246  17.205  1.00  0.38           O  
HETATM   98  O   HOH T  97      25.848  27.336   9.485  1.00  0.38           O  
HETATM   99  O   HOH T  98      38.774  53.483  17.308  1.00  0.38           O  
HETATM  100  O   HOH T  99      37.473  33.641   6.357  1.00  0.38           O  
HETATM  101  O   HOH T 100      28.609  44.765   3.261  1.00  0.38           O  
HETATM  102  O   HOH T 101      19.473  30.695   6.446  1.00  0.38           O  
HETATM  103  O   HOH T 102       5.644  31.015  12.871  1.00  0.39           O  
HETATM  104  O   HOH T 103       3.668  56.034  35.122  1.00  0.39           O  
HETATM  105  O   HOH T 104      15.191  30.545  29.936  1.00  0.39           O  
HETATM  106  O   HOH T 105      34.848  54.544   9.026  1.00  0.39           O  
HETATM  107  O   HOH T 106      36.475  41.218  23.170  1.00  0.39           O  
HETATM  108  O   HOH T 107      38.823  49.052   7.305  1.00  0.39           O  
HETATM  109  O   HOH T 108      42.112  39.564  26.575  1.00  0.39           O  
HETATM  110  O   HOH T 109      20.160  50.608  31.314  1.00  0.39           O  
HETATM  111  O   HOH T 110      17.483  19.777  26.685  1.00  0.39           O  
HETATM  112  O   HOH T 111      -8.089  56.086  31.485  1.00  0.39           O  
HETATM  113  O   HOH T 112       2.410  47.857  16.976  1.00  0.39           O  
HETATM  114  O   HOH T 113      15.147  31.022  12.100  1.00  0.39           O  
HETATM  115  O   HOH T 114      12.728  60.015  20.001  1.00  0.39           O  
HETATM  116  O   HOH T 115      39.042  27.629  18.373  1.00  0.39           O  
HETATM  117  O   HOH T 116       8.059  25.041  12.734  1.00  0.39           O  
HETATM  118  O   HOH T 117      35.504  58.499  10.804  1.00  0.39           O  
HETATM  119  O   HOH T 118       0.888  58.879  27.285  1.00  0.39           O  
HETATM  120  O   HOH T 119      10.173  44.387  35.460  1.00  0.39           O  
HETATM  121  O   HOH T 120      33.798  49.371   2.115  1.00  0.40           O  
HETATM  122  O   HOH T 121      17.210  26.562  10.616  1.00  0.40           O  
HETATM  123  O   HOH T 122      22.742  49.200   0.671  1.00  0.40           O  
HETATM  124  O   HOH T 123      48.547  36.482   7.507  1.00  0.40           O  
HETATM  125  O   HOH T 124      46.240  42.077  11.324  1.00  0.40           O  
HETATM  126  O   HOH T 125      16.881  29.461   6.394  1.00  0.40           O  
HETATM  127  O   HOH T 126      36.412  44.570  21.015  1.00  0.40           O  
HETATM  128  O   HOH T 127      17.097  42.276  38.345  1.00  0.40           O  
HETATM  129  O   HOH T 128      19.153  38.665   2.332  1.00  0.40           O  
HETATM  130  O   HOH T 129      19.213  44.170   5.417  1.00  0.40           O  
HETATM  131  O   HOH T 130      23.548  47.370  -1.346  1.00  0.40           O  
HETATM  132  O   HOH T 131       5.660  55.409  12.107  1.00  0.41           O  
HETATM  133  O   HOH T 132      24.373  33.887   0.585  1.00  0.41           O  
HETATM  134  O   HOH T 133      28.377  36.131  -1.615  1.00  0.41           O  
HETATM  135  O   HOH T 134      14.134  41.296  33.220  1.00  0.41           O  
HETATM  136  O   HOH T 135      21.587  38.012  -2.406  1.00  0.41           O  
HETATM  137  O   HOH T 136       5.819  41.200  19.156  1.00  0.41           O  
HETATM  138  O   HOH T 137      11.045  43.653   3.676  1.00  0.41           O  
HETATM  139  O   HOH T 138       5.913  53.360  28.240  1.00  0.41           O  
HETATM  140  O   HOH T 139      25.923  46.392  -0.214  1.00  0.42           O  
HETATM  141  O   HOH T 140      16.739  27.604  16.583  1.00  0.42           O  
HETATM  142  O   HOH T 141      50.507  49.044  17.121  1.00  0.42           O  
HETATM  143  O   HOH T 142      35.679  27.630  23.594  1.00  0.42           O  
HETATM  144  O   HOH T 143      28.457  26.472  31.291  1.00  0.42           O  
HETATM  145  O   HOH T 144      12.299  61.988  17.987  1.00  0.42           O  
HETATM  146  O   HOH T 145      10.609  29.249  24.211  1.00  0.42           O  
HETATM  147  O   HOH T 146      46.466  41.202   8.780  1.00  0.42           O  
HETATM  148  O   HOH T 147       4.365  41.577   8.772  1.00  0.42           O  
HETATM  149  O   HOH T 148      14.560  28.485  13.121  1.00  0.42           O  
HETATM  150  O   HOH T 149      19.012  26.415   6.999  1.00  0.42           O  
HETATM  151  O   HOH T 150      21.695  45.374   2.747  1.00  0.43           O  
HETATM  152  O   HOH T 151       3.504  64.329  16.449  1.00  0.43           O  
HETATM  153  O   HOH T 152      34.099  31.735   3.579  1.00  0.43           O  
HETATM  154  O   HOH T 153      18.517  22.348  27.410  1.00  0.43           O  
HETATM  155  O   HOH T 154      37.320  59.260  15.307  1.00  0.43           O  
HETATM  156  O   HOH T 155      16.323  34.134  30.154  1.00  0.43           O  
HETATM  157  O   HOH T 156      40.059  37.865  27.575  1.00  0.43           O  
HETATM  158  O   HOH T 157      15.964  35.009  32.713  1.00  0.43           O  
HETATM  159  O   HOH T 158       3.214  56.106  12.744  1.00  0.44           O  
HETATM  160  O   HOH T 159       9.430  27.451  26.025  1.00  0.44           O  
HETATM  161  O   HOH T 160       4.338  56.781  32.535  1.00  0.44           O  
HETATM  162  O   HOH T 161      45.661  42.311  13.949  1.00  0.44           O  
HETATM  163  O   HOH T 162       6.307  53.947  37.494  1.00  0.44           O  
HETATM  164  O   HOH T 163      11.133  40.769   7.174  1.00  0.44           O  
HETATM  165  O   HOH T 164      27.649  24.756  29.278  1.00  0.44           O  
HETATM  166  O   HOH T 165      50.122  41.327  12.786  1.00  0.44           O  
HETATM  167  O   HOH T 166      12.596  28.188  27.779  1.00  0.44           O  
HETATM  168  O   HOH T 167      21.849  34.727   1.544  1.00  0.44           O  
HETATM  169  O   HOH T 168       7.166  46.966  41.731  1.00  0.44           O  
HETATM  170  O   HOH T 169      13.853  63.940  16.633  1.00  0.44           O  
HETATM  171  O   HOH T 170      12.133  41.384   4.758  1.00  0.45           O  
HETATM  172  O   HOH T 171      11.227  29.213  20.461  1.00  0.45           O  
HETATM  173  O   HOH T 172      28.153  44.869   0.536  1.00  0.45           O  
HETATM  174  O   HOH T 173      18.683  61.033   2.379  1.00  0.45           O  
HETATM  175  O   HOH T 174      13.137  54.337  31.507  1.00  0.45           O  
HETATM  176  O   HOH T 175      25.864  27.128  31.972  1.00  0.45           O  
HETATM  177  O   HOH T 176       3.131  55.285  19.131  1.00  0.45           O  
HETATM  178  O   HOH T 177       5.135  54.245  39.995  1.00  0.45           O  
HETATM  179  O   HOH T 178      50.566  48.453  14.389  1.00  0.45           O  
HETATM  180  O   HOH T 179      25.774  35.805  -2.644  1.00  0.45           O  
HETATM  181  O   HOH T 180       2.184  61.938  16.706  1.00  0.45           O  
HETATM  182  O   HOH T 181      38.930  53.609  14.512  1.00  0.45           O  
HETATM  183  O   HOH T 182      26.770  34.032  -0.805  1.00  0.45           O  
HETATM  184  O   HOH T 183      51.161  50.942  15.174  1.00  0.45           O  
HETATM  185  O   HOH T 184      19.732  23.861   3.054  1.00  0.45           O  
HETATM  186  O   HOH T 185      41.408  51.871  10.488  1.00  0.46           O  
HETATM  187  O   HOH T 186      12.025  27.059  25.248  1.00  0.46           O  
HETATM  188  O   HOH T 187       4.904  56.171  26.067  1.00  0.46           O  
HETATM  189  O   HOH T 188      33.423  56.749  10.098  1.00  0.46           O  
HETATM  190  O   HOH T 189       9.623  34.404  22.712  1.00  0.46           O  
HETATM  191  O   HOH T 190      17.033  28.982  12.042  1.00  0.46           O  
HETATM  192  O   HOH T 191      13.805  29.797  15.360  1.00  0.46           O  
HETATM  193  O   HOH T 192       3.277  46.857  32.683  1.00  0.46           O  
HETATM  194  O   HOH T 193      37.459  53.664   9.603  1.00  0.46           O  
HETATM  195  O   HOH T 194      17.218  27.966   4.054  1.00  0.46           O  
HETATM  196  O   HOH T 195       1.654  59.922  33.609  1.00  0.46           O  
HETATM  197  O   HOH T 196       6.501  56.160  28.380  1.00  0.46           O  
HETATM  198  O   HOH T 197      31.036  54.480   0.714  1.00  0.46           O  
HETATM  199  O   HOH T 198      48.663  43.368  11.498  1.00  0.46           O  
HETATM  200  O   HOH T 199      24.213  38.164  -2.956  1.00  0.46           O  
HETATM  201  O   HOH T 200      36.783  32.308   3.997  1.00  0.47           O  
HETATM  202  O   HOH T 201      23.058  35.651  -2.545  1.00  0.47           O  
HETATM  203  O   HOH T 202       9.727  45.902  42.167  1.00  0.47           O  
HETATM  204  O   HOH T 203       5.973  49.195  17.708  1.00  0.47           O  
HETATM  205  O   HOH T 204      34.347  56.067   4.627  1.00  0.47           O  
HETATM  206  O   HOH T 205      14.650  37.123  31.623  1.00  0.47           O  
HETATM  207  O   HOH T 206      32.477  24.366  24.261  1.00  0.47           O  
HETATM  208  O   HOH T 207      39.405  39.616   2.306  1.00  0.47           O  
HETATM  209  O   HOH T 208       3.762  49.337  29.466  1.00  0.47           O  
HETATM  210  O   HOH T 209      42.785  46.684   8.822  1.00  0.47           O  
HETATM  211  O   HOH T 210      17.233  32.040   5.731  1.00  0.47           O  
HETATM  212  O   HOH T 211      46.437  44.602  10.296  1.00  0.48           O  
HETATM  213  O   HOH T 212      48.513  40.737  10.602  1.00  0.48           O  
HETATM  214  O   HOH T 213      37.883  40.044   4.601  1.00  0.48           O  
HETATM  215  O   HOH T 214      27.544  55.728   0.802  1.00  0.48           O  
HETATM  216  O   HOH T 215      34.177  23.294   9.780  1.00  0.48           O  
HETATM  217  O   HOH T 216      28.465  51.741   0.116  1.00  0.48           O  
HETATM  218  O   HOH T 217      10.538  36.201  17.028  1.00  0.48           O  
HETATM  219  O   HOH T 218       7.736  42.624  27.786  1.00  0.48           O  
HETATM  220  O   HOH T 219      34.154  20.385   9.571  1.00  0.48           O  
HETATM  221  O   HOH T 220       3.862  53.494  11.735  1.00  0.48           O  
HETATM  222  O   HOH T 221       5.673  56.614  37.098  1.00  0.48           O  
HETATM  223  O   HOH T 222      21.291  42.000  36.095  1.00  0.48           O  
HETATM  224  O   HOH T 223      36.476  41.501  -0.378  1.00  0.48           O  
HETATM  225  O   HOH T 224      12.799  65.603  11.012  1.00  0.49           O  
HETATM  226  O   HOH T 225      32.342  65.862   7.617  1.00  0.49           O  
HETATM  227  O   HOH T 226      39.618  42.250   1.278  1.00  0.49           O  
HETATM  228  O   HOH T 227      22.105  33.511  -0.944  1.00  0.49           O  
HETATM  229  O   HOH T 228      45.457  47.641   8.664  1.00  0.49           O  
HETATM  230  O   HOH T 229       3.874  44.398  31.607  1.00  0.49           O  
HETATM  231  O   HOH T 230       6.369  58.386  26.651  1.00  0.49           O  
HETATM  232  O   HOH T 231      41.095  46.627   4.093  1.00  0.49           O  
HETATM  233  O   HOH T 232      48.978  49.282  12.152  1.00  0.49           O  
HETATM  234  O   HOH T 233      32.591  57.655   2.961  1.00  0.49           O  
HETATM  235  O   HOH T 234       3.929  39.849  26.714  1.00  0.49           O  
HETATM  236  O   HOH T 235      50.740  51.759  17.804  1.00  0.49           O  
HETATM  237  O   HOH T 236      11.232  30.625  15.501  1.00  0.49           O  
HETATM  238  O   HOH T 237      21.012  36.790   3.295  1.00  0.49           O  
HETATM  239  O   HOH T 238      32.958  33.777   2.004  1.00  0.49           O  
HETATM  240  O   HOH T 239      30.671  27.334  30.017  1.00  0.49           O  
HETATM  241  O   HOH T 240      37.915  45.600  23.107  1.00  0.49           O  
HETATM  242  O   HOH T 241      34.796  39.764   2.426  1.00  0.49           O  
HETATM  243  O   HOH T 242       2.492  49.480  31.973  1.00  0.49           O  
HETATM  244  O   HOH T 243      29.374  59.177   1.342  1.00  0.49           O  
HETATM  245  O   HOH T 244      34.030  40.427  -0.099  1.00  0.49           O  
HETATM  246  O   HOH T 245      16.394  40.142  34.190  1.00  0.50           O  
HETATM  247  O   HOH T 246      53.585  36.423   7.903  1.00  0.50           O  
HETATM  248  O   HOH T 247       1.624  54.168  30.882  1.00  0.50           O  
HETATM  249  O   HOH T 248       4.799  28.425  12.901  1.00  0.50           O  
HETATM  250  O   HOH T 249      49.529  51.858  13.084  1.00  0.50           O  
HETATM  251  O   HOH T 250      33.195  54.847   2.398  1.00  0.50           O  
HETATM  252  O   HOH T 251      29.833  24.368  25.036  1.00  0.50           O  
HETATM  253  O   HOH T 252      37.121  57.724  12.882  1.00  0.50           O  
HETATM  254  O   HOH T 253      18.589  26.016  34.881  1.00  0.50           O  
HETATM  255  O   HOH T 254       4.287  40.454  16.932  1.00  0.50           O  
HETATM  256  O   HOH T 255      50.722  38.883  14.065  1.00  0.50           O  
HETATM  257  O   HOH T 256      18.954  40.654  36.943  1.00  0.50           O  
HETATM  258  O   HOH T 257      34.678  25.200  22.652  1.00  0.51           O  
HETATM  259  O   HOH T 258      50.043  34.222   6.883  1.00  0.51           O  
HETATM  260  O   HOH T 259       5.012  54.201  33.298  1.00  0.51           O  
HETATM  261  O   HOH T 260      35.133  32.032   6.234  1.00  0.51           O  
HETATM  262  O   HOH T 261       4.469  41.254  11.587  1.00  0.51           O  
HETATM  263  O   HOH T 262      12.384  45.307  41.927  1.00  0.51           O  
HETATM  264  O   HOH T 263       4.705  29.919  10.465  1.00  0.51           O  
HETATM  265  O   HOH T 264      23.543  25.927   8.801  1.00  0.51           O  
HETATM  266  O   HOH T 265      15.357  55.490   7.109  1.00  0.51           O  
HETATM  267  O   HOH T 266      50.289  40.010   8.592  1.00  0.51           O  
HETATM  268  O   HOH T 267      40.528  44.567  23.466  1.00  0.52           O  
HETATM  269  O   HOH T 268      50.790  42.198  10.205  1.00  0.52           O  
HETATM  270  O   HOH T 269      23.549  54.338   0.557  1.00  0.52           O  
HETATM  271  O   HOH T 270      16.860  37.539  35.030  1.00  0.52           O  
HETATM  272  O   HOH T 271      36.065  55.762  11.062  1.00  0.52           O  
HETATM  273  O   HOH T 272      10.928  32.274  17.588  1.00  0.52           O  
HETATM  274  O   HOH T 273      30.770  26.568  15.858  1.00  0.52           O  
HETATM  275  O   HOH T 274      39.203  51.551   8.599  1.00  0.52           O  
HETATM  276  O   HOH T 275      23.619  46.684   1.291  1.00  0.52           O  
HETATM  277  O   HOH T 276      47.757  47.117  10.446  1.00  0.52           O  
HETATM  278  O   HOH T 277       3.251  51.868  30.623  1.00  0.52           O  
HETATM  279  O   HOH T 278      25.048  62.099   0.864  1.00  0.53           O  
HETATM  280  O   HOH T 279      12.596  34.991   5.686  1.00  0.53           O  
HETATM  281  O   HOH T 280      41.198  28.662  16.042  1.00  0.53           O  
HETATM  282  O   HOH T 281      -1.095  51.550  19.925  1.00  0.53           O  
HETATM  283  O   HOH T 282      22.484  30.190  36.007  1.00  0.53           O  
HETATM  284  O   HOH T 283      37.145  41.237   2.283  1.00  0.53           O  
HETATM  285  O   HOH T 284      12.911  50.618   4.976  1.00  0.53           O  
HETATM  286  O   HOH T 285      -5.909  54.334  29.075  1.00  0.53           O  
HETATM  287  O   HOH T 286      26.838  48.549   1.305  1.00  0.54           O  
HETATM  288  O   HOH T 287      38.998  52.606  -7.337  1.00  0.54           O  
HETATM  289  O   HOH T 288      12.232  55.282  33.993  1.00  0.54           O  
HETATM  290  O   HOH T 289      35.549  33.187   1.696  1.00  0.54           O  
HETATM  291  O   HOH T 290      41.365  54.467  15.456  1.00  0.54           O  
HETATM  292  O   HOH T 291       5.570  35.877   6.595  1.00  0.54           O  
HETATM  293  O   HOH T 292      49.784  54.314  17.572  1.00  0.54           O  
HETATM  294  O   HOH T 293      21.178  46.938  -0.049  1.00  0.54           O  
HETATM  295  O   HOH T 294      18.614  20.925  29.861  1.00  0.54           O  
HETATM  296  O   HOH T 295      17.997  25.380   4.641  1.00  0.54           O  
HETATM  297  O   HOH T 296      41.869  40.506   1.325  1.00  0.55           O  
HETATM  298  O   HOH T 297      39.985  47.037   9.064  1.00  0.55           O  
HETATM  299  O   HOH T 298       3.321  43.713  12.005  1.00  0.55           O  
HETATM  300  O   HOH T 299      13.558  37.400   6.603  1.00  0.55           O  
HETATM  301  O   HOH T 300      10.644  61.677  20.277  1.00  0.55           O  
HETATM  302  O   HOH T 301      30.751  51.865   1.421  1.00  0.55           O  
HETATM  303  O   HOH T 302      34.865  63.952  13.793  1.00  0.56           O  
HETATM  304  O   HOH T 303      25.835  26.072  34.773  1.00  0.56           O  
HETATM  305  O   HOH T 304      25.149  24.393  32.618  1.00  0.56           O  
HETATM  306  O   HOH T 305      43.599  33.960   6.989  1.00  0.56           O  
HETATM  307  O   HOH T 306       7.853  28.692  24.340  1.00  0.56           O  
HETATM  308  O   HOH T 307      29.918  56.869   0.008  1.00  0.56           O  
HETATM  309  O   HOH T 308      16.038  59.998  28.345  1.00  0.57           O  
HETATM  310  O   HOH T 309       4.881  42.987  28.423  1.00  0.57           O  
HETATM  311  O   HOH T 310      28.465  27.212   8.898  1.00  0.57           O  
HETATM  312  O   HOH T 311      34.209  56.692   7.480  1.00  0.57           O  
HETATM  313  O   HOH T 312       5.492  57.609   9.003  1.00  0.57           O  
HETATM  314  O   HOH T 313      40.530  35.706   7.088  1.00  0.58           O  
HETATM  315  O   HOH T 314      27.740  62.316   1.264  1.00  0.59           O  
HETATM  316  O   HOH T 315      32.351  37.324   3.200  1.00  0.59           O  
HETATM  317  O   HOH T 316      32.941  51.995   3.003  1.00  0.59           O  
HETATM  318  O   HOH T 317      46.159  39.778   6.439  1.00  0.61           O  
TER     319      HOH T 317 
