# Supplementary material for: Accurate Prediction of Hydration Sites of Proteins Using Energy Model With Atom Embedding
Source: Front Mol Biosci. 2021 Sep 20;8:756075. doi: 10.3389/fmolb.2021.756075 (PMC8488165; doi:10.3389/fmolb.2021.756075)
Supplement: Supplementary file 1 [file DataSheet1.ZIP › Data Sheet 1/Our_result_pdb/our_dataset_output/2OFZ_watersite.pdb]

HEADER                                                        XXXX


JRNL        PMID   -1
HETATM    1  O   HOH T   0      22.235  20.003  51.016  1.00  0.14           O  
HETATM    2  O   HOH T   1      25.633  19.548  24.003  1.00  0.17           O  
HETATM    3  O   HOH T   2      28.621   4.986  39.943  1.00  0.17           O  
HETATM    4  O   HOH T   3      21.151  16.887  27.247  1.00  0.17           O  
HETATM    5  O   HOH T   4      24.054  12.904  48.746  1.00  0.19           O  
HETATM    6  O   HOH T   5      21.431   8.630  30.867  1.00  0.19           O  
HETATM    7  O   HOH T   6      33.677  14.427  36.431  1.00  0.22           O  
HETATM    8  O   HOH T   7      34.244  13.661  40.387  1.00  0.22           O  
HETATM    9  O   HOH T   8      17.782  -1.018  30.692  1.00  0.22           O  
HETATM   10  O   HOH T   9       3.464   5.488  59.561  1.00  0.23           O  
HETATM   11  O   HOH T  10      30.185   7.982  33.704  1.00  0.23           O  
HETATM   12  O   HOH T  11      21.357   7.945  33.509  1.00  0.23           O  
HETATM   13  O   HOH T  12      12.078  19.117  49.664  1.00  0.24           O  
HETATM   14  O   HOH T  13      16.975  19.252  51.652  1.00  0.24           O  
HETATM   15  O   HOH T  14      23.439   7.119  45.367  1.00  0.25           O  
HETATM   16  O   HOH T  15      25.914   7.985  46.192  1.00  0.25           O  
HETATM   17  O   HOH T  16      33.831  26.115  48.931  1.00  0.25           O  
HETATM   18  O   HOH T  17      21.431   9.075  39.286  1.00  0.25           O  
HETATM   19  O   HOH T  18      36.258  14.926  11.058  1.00  0.26           O  
HETATM   20  O   HOH T  19      41.841  12.262  44.981  1.00  0.26           O  
HETATM   21  O   HOH T  20      42.593  10.069  46.497  1.00  0.26           O  
HETATM   22  O   HOH T  21      32.116  19.025  35.994  1.00  0.27           O  
HETATM   23  O   HOH T  22      32.061   0.117  45.036  1.00  0.27           O  
HETATM   24  O   HOH T  23      17.581  22.167  45.702  1.00  0.27           O  
HETATM   25  O   HOH T  24      21.229  24.230  34.116  1.00  0.27           O  
HETATM   26  O   HOH T  25      23.372  24.540  42.194  1.00  0.27           O  
HETATM   27  O   HOH T  26      35.556   6.122  44.196  1.00  0.27           O  
HETATM   28  O   HOH T  27      26.757  23.553  24.589  1.00  0.27           O  
HETATM   29  O   HOH T  28      18.735   6.413  45.151  1.00  0.28           O  
HETATM   30  O   HOH T  29      27.835  21.061  38.571  1.00  0.28           O  
HETATM   31  O   HOH T  30      11.508  17.501  54.165  1.00  0.28           O  
HETATM   32  O   HOH T  31      15.331  13.290  37.464  1.00  0.29           O  
HETATM   33  O   HOH T  32      14.620  -9.181  34.080  1.00  0.29           O  
HETATM   34  O   HOH T  33      26.789  10.968  19.515  1.00  0.29           O  
HETATM   35  O   HOH T  34      30.070  13.660  51.839  1.00  0.29           O  
HETATM   36  O   HOH T  35      36.120  10.772  48.558  1.00  0.29           O  
HETATM   37  O   HOH T  36      34.530  29.640  44.797  1.00  0.30           O  
HETATM   38  O   HOH T  37      15.523   7.912  37.625  1.00  0.30           O  
HETATM   39  O   HOH T  38      14.527  19.455  38.120  1.00  0.30           O  
HETATM   40  O   HOH T  39      31.545   1.510  37.597  1.00  0.31           O  
HETATM   41  O   HOH T  40      44.652   8.401  46.881  1.00  0.31           O  
HETATM   42  O   HOH T  41      17.828  25.280  40.453  1.00  0.31           O  
HETATM   43  O   HOH T  42      20.394  -5.350  36.708  1.00  0.31           O  
HETATM   44  O   HOH T  43      27.655  17.921  55.012  1.00  0.32           O  
HETATM   45  O   HOH T  44      23.354  16.395  56.281  1.00  0.32           O  
HETATM   46  O   HOH T  45      22.817  35.817  36.130  1.00  0.32           O  
HETATM   47  O   HOH T  46      17.092   9.249  26.346  1.00  0.32           O  
HETATM   48  O   HOH T  47       6.350  16.218  44.083  1.00  0.32           O  
HETATM   49  O   HOH T  48      14.607  17.667  26.688  1.00  0.32           O  
HETATM   50  O   HOH T  49      10.945  23.826  56.272  1.00  0.33           O  
HETATM   51  O   HOH T  50      34.022  12.185  38.019  1.00  0.33           O  
HETATM   52  O   HOH T  51      17.143  27.203  42.250  1.00  0.33           O  
HETATM   53  O   HOH T  52      10.454  -6.433  35.384  1.00  0.33           O  
HETATM   54  O   HOH T  53      30.630   9.521  23.620  1.00  0.33           O  
HETATM   55  O   HOH T  54       3.420   9.673  42.579  1.00  0.33           O  
HETATM   56  O   HOH T  55      36.629  12.331  30.136  1.00  0.33           O  
HETATM   57  O   HOH T  56      38.018  19.930  21.269  1.00  0.33           O  
HETATM   58  O   HOH T  57      23.780  16.163  23.210  1.00  0.33           O  
HETATM   59  O   HOH T  58      13.705   9.865  33.657  1.00  0.34           O  
HETATM   60  O   HOH T  59      37.904  16.813  19.766  1.00  0.34           O  
HETATM   61  O   HOH T  60      12.391  19.553  42.729  1.00  0.34           O  
HETATM   62  O   HOH T  61      21.012   6.997  46.781  1.00  0.34           O  
HETATM   63  O   HOH T  62      12.906  20.799  20.507  1.00  0.34           O  
HETATM   64  O   HOH T  63      35.981   6.865  24.911  1.00  0.34           O  
HETATM   65  O   HOH T  64      23.125  21.799  53.003  1.00  0.34           O  
HETATM   66  O   HOH T  65      11.521  11.920  55.394  1.00  0.35           O  
HETATM   67  O   HOH T  66      23.177  10.353  48.594  1.00  0.35           O  
HETATM   68  O   HOH T  67      32.228  18.702  14.448  1.00  0.35           O  
HETATM   69  O   HOH T  68      21.641  17.230  24.482  1.00  0.35           O  
HETATM   70  O   HOH T  69      17.726  29.141  29.922  1.00  0.35           O  
HETATM   71  O   HOH T  70      27.891   2.340  50.600  1.00  0.35           O  
HETATM   72  O   HOH T  71      26.915  26.901  31.749  1.00  0.36           O  
HETATM   73  O   HOH T  72      21.869  28.726  28.820  1.00  0.36           O  
HETATM   74  O   HOH T  73      13.262  23.608  24.074  1.00  0.36           O  
HETATM   75  O   HOH T  74      27.219  -0.248  49.880  1.00  0.36           O  
HETATM   76  O   HOH T  75      11.226   7.311  45.132  1.00  0.36           O  
HETATM   77  O   HOH T  76      30.809  20.157  44.881  1.00  0.36           O  
HETATM   78  O   HOH T  77       0.538  17.511  47.783  1.00  0.36           O  
HETATM   79  O   HOH T  78       3.529  11.483  60.658  1.00  0.36           O  
HETATM   80  O   HOH T  79       5.069   9.885  59.076  1.00  0.36           O  
HETATM   81  O   HOH T  80      30.476  -0.311  41.584  1.00  0.37           O  
HETATM   82  O   HOH T  81      10.642  17.809  41.303  1.00  0.37           O  
HETATM   83  O   HOH T  82      18.362  27.008  28.577  1.00  0.37           O  
HETATM   84  O   HOH T  83      30.361  20.703  37.335  1.00  0.37           O  
HETATM   85  O   HOH T  84      33.472  27.569  37.192  1.00  0.37           O  
HETATM   86  O   HOH T  85      35.599  23.041  26.721  1.00  0.37           O  
HETATM   87  O   HOH T  86      37.377  13.098  14.859  1.00  0.37           O  
HETATM   88  O   HOH T  87      12.875  13.580  46.364  1.00  0.37           O  
HETATM   89  O   HOH T  88      39.563  22.088  20.820  1.00  0.38           O  
HETATM   90  O   HOH T  89      -0.719   8.007  48.493  1.00  0.38           O  
HETATM   91  O   HOH T  90      32.138  27.916  34.765  1.00  0.38           O  
HETATM   92  O   HOH T  91      34.184  23.980  47.088  1.00  0.38           O  
HETATM   93  O   HOH T  92      30.305  26.966  39.443  1.00  0.38           O  
HETATM   94  O   HOH T  93      34.883  10.600  34.490  1.00  0.38           O  
HETATM   95  O   HOH T  94      24.883  25.749  40.193  1.00  0.38           O  
HETATM   96  O   HOH T  95      27.978   3.427  48.132  1.00  0.38           O  
HETATM   97  O   HOH T  96      11.515  -3.690  40.655  1.00  0.38           O  
HETATM   98  O   HOH T  97      15.011  11.980  49.640  1.00  0.38           O  
HETATM   99  O   HOH T  98      14.602   3.531  29.160  1.00  0.38           O  
HETATM  100  O   HOH T  99       8.215  17.934  42.774  1.00  0.38           O  
HETATM  101  O   HOH T 100      31.100   6.875  50.667  1.00  0.38           O  
HETATM  102  O   HOH T 101      11.279  -6.304  29.146  1.00  0.39           O  
HETATM  103  O   HOH T 102      27.826  16.515  57.437  1.00  0.39           O  
HETATM  104  O   HOH T 103      16.675   9.661  49.447  1.00  0.39           O  
HETATM  105  O   HOH T 104      32.933  20.277  16.646  1.00  0.39           O  
HETATM  106  O   HOH T 105      -0.142  23.494  48.758  1.00  0.39           O  
HETATM  107  O   HOH T 106      18.874   3.625  19.021  1.00  0.39           O  
HETATM  108  O   HOH T 107      29.308   1.916  42.828  1.00  0.39           O  
HETATM  109  O   HOH T 108      16.621  21.858  50.745  1.00  0.39           O  
HETATM  110  O   HOH T 109      28.705  24.323  48.509  1.00  0.39           O  
HETATM  111  O   HOH T 110      26.114  17.381  22.485  1.00  0.39           O  
HETATM  112  O   HOH T 111      18.968   9.665  24.281  1.00  0.39           O  
HETATM  113  O   HOH T 112      31.148  17.473  51.566  1.00  0.39           O  
HETATM  114  O   HOH T 113      21.997  23.252  55.145  1.00  0.39           O  
HETATM  115  O   HOH T 114      36.406  14.217  18.104  1.00  0.39           O  
HETATM  116  O   HOH T 115      15.144  -1.797  38.333  1.00  0.39           O  
HETATM  117  O   HOH T 116      13.501  20.791  40.392  1.00  0.40           O  
HETATM  118  O   HOH T 117      28.609   6.152  51.501  1.00  0.40           O  
HETATM  119  O   HOH T 118      27.781  25.647  39.852  1.00  0.40           O  
HETATM  120  O   HOH T 119      33.956  12.510  48.098  1.00  0.40           O  
HETATM  121  O   HOH T 120      37.634  22.205  22.826  1.00  0.40           O  
HETATM  122  O   HOH T 121      12.897  20.771  45.266  1.00  0.40           O  
HETATM  123  O   HOH T 122      30.917  23.052  32.941  1.00  0.40           O  
HETATM  124  O   HOH T 123      16.638  -2.410  28.499  1.00  0.40           O  
HETATM  125  O   HOH T 124      16.147  28.420  32.133  1.00  0.40           O  
HETATM  126  O   HOH T 125      35.740  25.922  26.327  1.00  0.40           O  
HETATM  127  O   HOH T 126      12.733   4.458  38.426  1.00  0.40           O  
HETATM  128  O   HOH T 127       6.750  15.035  59.200  1.00  0.40           O  
HETATM  129  O   HOH T 128      20.029  22.322  56.719  1.00  0.40           O  
HETATM  130  O   HOH T 129      13.059  -6.503  26.920  1.00  0.40           O  
HETATM  131  O   HOH T 130       9.953   6.876  32.963  1.00  0.40           O  
HETATM  132  O   HOH T 131      29.404   0.856  45.358  1.00  0.40           O  
HETATM  133  O   HOH T 132      31.244   6.184  21.489  1.00  0.41           O  
HETATM  134  O   HOH T 133      11.014  19.290  52.203  1.00  0.41           O  
HETATM  135  O   HOH T 134       2.669   6.190  57.042  1.00  0.41           O  
HETATM  136  O   HOH T 135      37.528  -1.650  34.876  1.00  0.41           O  
HETATM  137  O   HOH T 136      10.967  27.834  41.380  1.00  0.41           O  
HETATM  138  O   HOH T 137      29.960  22.056  20.655  1.00  0.41           O  
HETATM  139  O   HOH T 138      31.308  13.013  54.300  1.00  0.41           O  
HETATM  140  O   HOH T 139       3.140  20.259  60.113  1.00  0.41           O  
HETATM  141  O   HOH T 140      33.465   6.632  34.554  1.00  0.42           O  
HETATM  142  O   HOH T 141      36.724  14.079  41.276  1.00  0.42           O  
HETATM  143  O   HOH T 142      15.068   2.878  26.406  1.00  0.42           O  
HETATM  144  O   HOH T 143      -1.065   6.313  60.244  1.00  0.42           O  
HETATM  145  O   HOH T 144      15.818   6.781  26.614  1.00  0.42           O  
HETATM  146  O   HOH T 145      10.866  -1.909  38.583  1.00  0.42           O  
HETATM  147  O   HOH T 146      12.251  21.055  47.830  1.00  0.42           O  
HETATM  148  O   HOH T 147      21.762   9.975  51.057  1.00  0.42           O  
HETATM  149  O   HOH T 148      38.002  16.258  34.984  1.00  0.42           O  
HETATM  150  O   HOH T 149       0.855   4.868  58.658  1.00  0.42           O  
HETATM  151  O   HOH T 150      19.292   8.745  50.287  1.00  0.43           O  
HETATM  152  O   HOH T 151      31.177  26.145  36.829  1.00  0.43           O  
HETATM  153  O   HOH T 152      22.332  -6.889  38.007  1.00  0.43           O  
HETATM  154  O   HOH T 153      26.150   7.192  20.006  1.00  0.43           O  
HETATM  155  O   HOH T 154      34.139  12.814  17.370  1.00  0.43           O  
HETATM  156  O   HOH T 155      -0.005   6.461  62.924  1.00  0.44           O  
HETATM  157  O   HOH T 156       7.693  18.216  45.402  1.00  0.44           O  
HETATM  158  O   HOH T 157      13.641  11.787  35.761  1.00  0.44           O  
HETATM  159  O   HOH T 158      28.443  10.159  21.728  1.00  0.44           O  
HETATM  160  O   HOH T 159      31.148  25.432  48.749  1.00  0.44           O  
HETATM  161  O   HOH T 160      15.306  -2.627  26.044  1.00  0.44           O  
HETATM  162  O   HOH T 161      13.651  20.979  23.192  1.00  0.44           O  
HETATM  163  O   HOH T 162      38.119   4.921  24.657  1.00  0.44           O  
HETATM  164  O   HOH T 163      11.988   6.601  36.592  1.00  0.44           O  
HETATM  165  O   HOH T 164      25.536  18.018  56.757  1.00  0.44           O  
HETATM  166  O   HOH T 165      19.856   5.437  20.896  1.00  0.45           O  
HETATM  167  O   HOH T 166      16.817  24.846  45.498  1.00  0.45           O  
HETATM  168  O   HOH T 167      35.219   4.035  32.617  1.00  0.45           O  
HETATM  169  O   HOH T 168      34.727  25.632  38.744  1.00  0.45           O  
HETATM  170  O   HOH T 169      14.682  -5.165  36.659  1.00  0.45           O  
HETATM  171  O   HOH T 170      10.755   8.355  47.731  1.00  0.45           O  
HETATM  172  O   HOH T 171      13.259  -4.315  25.131  1.00  0.45           O  
HETATM  173  O   HOH T 172      38.516  -3.851  36.262  1.00  0.46           O  
HETATM  174  O   HOH T 173      18.111   6.350  18.867  1.00  0.46           O  
HETATM  175  O   HOH T 174      21.506  -8.134  40.374  1.00  0.46           O  
HETATM  176  O   HOH T 175       3.558  12.831  63.110  1.00  0.46           O  
HETATM  177  O   HOH T 176      17.616   7.249  24.523  1.00  0.46           O  
HETATM  178  O   HOH T 177      17.938  11.684  22.809  1.00  0.46           O  
HETATM  179  O   HOH T 178      15.085   5.715  39.247  1.00  0.46           O  
HETATM  180  O   HOH T 179      -5.925  13.111  62.307  1.00  0.46           O  
HETATM  181  O   HOH T 180      36.550   5.649  31.003  1.00  0.46           O  
HETATM  182  O   HOH T 181      15.097  10.607  37.712  1.00  0.46           O  
HETATM  183  O   HOH T 182      18.843  -0.821  28.194  1.00  0.46           O  
HETATM  184  O   HOH T 183      25.000   8.191  48.784  1.00  0.46           O  
HETATM  185  O   HOH T 184       2.498   6.647  61.788  1.00  0.47           O  
HETATM  186  O   HOH T 185      19.684  23.464  39.666  1.00  0.47           O  
HETATM  187  O   HOH T 186      18.783  -8.573  40.115  1.00  0.47           O  
HETATM  188  O   HOH T 187      12.232   0.189  39.763  1.00  0.47           O  
HETATM  189  O   HOH T 188      24.999  25.370  25.799  1.00  0.47           O  
HETATM  190  O   HOH T 189      36.001  15.337  13.860  1.00  0.47           O  
HETATM  191  O   HOH T 190      18.617  -7.060  35.496  1.00  0.47           O  
HETATM  192  O   HOH T 191      -2.355   7.725  62.209  1.00  0.48           O  
HETATM  193  O   HOH T 192      15.690  25.165  48.017  1.00  0.48           O  
HETATM  194  O   HOH T 193      37.582  22.839  39.006  1.00  0.48           O  
HETATM  195  O   HOH T 194      14.016  11.192  56.392  1.00  0.48           O  
HETATM  196  O   HOH T 195      31.207  21.972  18.097  1.00  0.48           O  
HETATM  197  O   HOH T 196      34.232   4.763  24.809  1.00  0.48           O  
HETATM  198  O   HOH T 197      14.896  18.132  53.192  1.00  0.48           O  
HETATM  199  O   HOH T 198      33.314   8.992  35.987  1.00  0.48           O  
HETATM  200  O   HOH T 199      30.045  18.461  53.827  1.00  0.48           O  
HETATM  201  O   HOH T 200      10.850   2.273  38.566  1.00  0.48           O  
HETATM  202  O   HOH T 201      16.035  22.401  48.068  1.00  0.48           O  
HETATM  203  O   HOH T 202      29.534  10.571  19.191  1.00  0.48           O  
HETATM  204  O   HOH T 203       3.199  22.060  62.204  1.00  0.48           O  
HETATM  205  O   HOH T 204      19.797   4.657  46.969  1.00  0.49           O  
HETATM  206  O   HOH T 205      15.396  19.663  20.004  1.00  0.49           O  
HETATM  207  O   HOH T 206      11.980  -8.284  34.134  1.00  0.49           O  
HETATM  208  O   HOH T 207      29.054   6.888  19.887  1.00  0.49           O  
HETATM  209  O   HOH T 208      13.561   5.196  27.122  1.00  0.49           O  
HETATM  210  O   HOH T 209      38.814  13.243  42.668  1.00  0.49           O  
HETATM  211  O   HOH T 210      12.353   2.965  25.858  1.00  0.49           O  
HETATM  212  O   HOH T 211      11.366   8.673  34.700  1.00  0.49           O  
HETATM  213  O   HOH T 212      12.860  19.893  54.202  1.00  0.49           O  
HETATM  214  O   HOH T 213      37.939  20.246  39.788  1.00  0.49           O  
HETATM  215  O   HOH T 214      32.273  28.072  41.015  1.00  0.50           O  
HETATM  216  O   HOH T 215      29.230  19.558  20.022  1.00  0.50           O  
HETATM  217  O   HOH T 216       4.648  14.057  60.795  1.00  0.50           O  
HETATM  218  O   HOH T 217      30.859   8.816  20.926  1.00  0.50           O  
HETATM  219  O   HOH T 218      13.740  18.946  33.980  1.00  0.50           O  
HETATM  220  O   HOH T 219       2.244  24.003  47.326  1.00  0.50           O  
HETATM  221  O   HOH T 220       4.685  -3.514  36.717  1.00  0.50           O  
HETATM  222  O   HOH T 221      33.129  27.459  43.630  1.00  0.50           O  
HETATM  223  O   HOH T 222      14.326  21.592  25.791  1.00  0.51           O  
HETATM  224  O   HOH T 223      15.981  26.816  29.834  1.00  0.51           O  
HETATM  225  O   HOH T 224      23.118  26.990  38.538  1.00  0.51           O  
HETATM  226  O   HOH T 225      40.094  18.337  20.099  1.00  0.51           O  
HETATM  227  O   HOH T 226      10.562   4.322  36.632  1.00  0.52           O  
HETATM  228  O   HOH T 227      21.025   3.697  49.204  1.00  0.52           O  
HETATM  229  O   HOH T 228      20.230  25.070  37.543  1.00  0.52           O  
HETATM  230  O   HOH T 229       6.753  -4.260  38.394  1.00  0.52           O  
HETATM  231  O   HOH T 230      40.627  14.627  44.225  1.00  0.52           O  
HETATM  232  O   HOH T 231      16.944  11.266  55.979  1.00  0.52           O  
HETATM  233  O   HOH T 232      13.976   7.742  52.608  1.00  0.52           O  
HETATM  234  O   HOH T 233      30.359  15.494  56.693  1.00  0.52           O  
HETATM  235  O   HOH T 234      19.119  27.544  37.406  1.00  0.52           O  
HETATM  236  O   HOH T 235      15.059  11.113  26.345  1.00  0.52           O  
HETATM  237  O   HOH T 236      14.643  22.032  54.217  1.00  0.52           O  
HETATM  238  O   HOH T 237      31.225   2.080  40.454  1.00  0.53           O  
HETATM  239  O   HOH T 238      38.290  11.848  25.057  1.00  0.53           O  
HETATM  240  O   HOH T 239      13.782  -0.486  27.007  1.00  0.53           O  
HETATM  241  O   HOH T 240      10.553  -3.655  29.706  1.00  0.53           O  
HETATM  242  O   HOH T 241      12.070  18.772  39.077  1.00  0.53           O  
HETATM  243  O   HOH T 242      11.913  -3.965  27.467  1.00  0.53           O  
HETATM  244  O   HOH T 243      25.296  28.771  30.524  1.00  0.53           O  
HETATM  245  O   HOH T 244       6.288  -4.237  34.567  1.00  0.53           O  
HETATM  246  O   HOH T 245      12.787  19.234  25.207  1.00  0.53           O  
HETATM  247  O   HOH T 246      -3.309  17.838  55.700  1.00  0.53           O  
HETATM  248  O   HOH T 247       8.339  -5.048  36.298  1.00  0.53           O  
HETATM  249  O   HOH T 248      15.773  28.516  51.606  1.00  0.53           O  
HETATM  250  O   HOH T 249      30.330  15.640  53.781  1.00  0.54           O  
HETATM  251  O   HOH T 250       8.867  20.336  43.994  1.00  0.54           O  
HETATM  252  O   HOH T 251      37.070  -4.255  33.942  1.00  0.54           O  
HETATM  253  O   HOH T 252       9.695  25.992  30.594  1.00  0.54           O  
HETATM  254  O   HOH T 253      24.984   9.161  18.369  1.00  0.54           O  
HETATM  255  O   HOH T 254       2.445  15.296  63.165  1.00  0.54           O  
HETATM  256  O   HOH T 255      11.466  23.701  47.816  1.00  0.54           O  
HETATM  257  O   HOH T 256      26.508   7.996  51.136  1.00  0.54           O  
HETATM  258  O   HOH T 257       2.999   7.736  40.650  1.00  0.54           O  
HETATM  259  O   HOH T 258      11.375  11.356  34.117  1.00  0.55           O  
HETATM  260  O   HOH T 259      44.632  18.812  24.967  1.00  0.55           O  
HETATM  261  O   HOH T 260      29.353  22.865  25.183  1.00  0.55           O  
HETATM  262  O   HOH T 261       9.459   6.545  29.929  1.00  0.55           O  
HETATM  263  O   HOH T 262       9.813  27.593  38.888  1.00  0.55           O  
HETATM  264  O   HOH T 263       6.615  -1.723  35.539  1.00  0.56           O  
HETATM  265  O   HOH T 264      20.202   8.759  52.844  1.00  0.56           O  
HETATM  266  O   HOH T 265      19.348  24.959  57.690  1.00  0.56           O  
HETATM  267  O   HOH T 266      -5.739  10.581  55.699  1.00  0.56           O  
HETATM  268  O   HOH T 267      29.740   8.561  52.430  1.00  0.57           O  
HETATM  269  O   HOH T 268      14.603  15.981  21.567  1.00  0.57           O  
HETATM  270  O   HOH T 269      15.881  10.982  58.575  1.00  0.57           O  
HETATM  271  O   HOH T 270      15.256  -4.426  39.171  1.00  0.57           O  
HETATM  272  O   HOH T 271      23.499  27.587  26.691  1.00  0.57           O  
HETATM  273  O   HOH T 272      26.488  21.707  22.586  1.00  0.58           O  
HETATM  274  O   HOH T 273      36.381  11.392  36.688  1.00  0.58           O  
HETATM  275  O   HOH T 274      20.137  28.292  26.787  1.00  0.59           O  
HETATM  276  O   HOH T 275      10.234  -1.669  26.750  1.00  0.59           O  
HETATM  277  O   HOH T 276      12.750  26.004  32.560  1.00  0.59           O  
HETATM  278  O   HOH T 277      34.923   3.000  41.944  1.00  0.64           O  
TER     279      HOH T 277 
