# Supplementary material for: Accurate Prediction of Hydration Sites of Proteins Using Energy Model With Atom Embedding
Source: Front Mol Biosci. 2021 Sep 20;8:756075. doi: 10.3389/fmolb.2021.756075 (PMC8488165; doi:10.3389/fmolb.2021.756075)
Supplement: Supplementary file 1 [file DataSheet1.ZIP › Data Sheet 1/Our_result_pdb/our_dataset_output/2OKM_watersite.pdb]

HEADER                                                        XXXX


JRNL        PMID   -1
HETATM    1  O   HOH T   0      -0.872 -24.170  60.322  1.00  0.18           O  
HETATM    2  O   HOH T   1       0.147 -45.423  80.326  1.00  0.21           O  
HETATM    3  O   HOH T   2      -1.135  -6.998  81.562  1.00  0.22           O  
HETATM    4  O   HOH T   3      14.444  -5.151  77.540  1.00  0.22           O  
HETATM    5  O   HOH T   4      15.483  -2.625  72.402  1.00  0.23           O  
HETATM    6  O   HOH T   5       6.956 -25.840  87.437  1.00  0.23           O  
HETATM    7  O   HOH T   6      -4.598 -26.944  90.696  1.00  0.23           O  
HETATM    8  O   HOH T   7       8.939  -3.447  70.025  1.00  0.24           O  
HETATM    9  O   HOH T   8      -6.032 -26.697  69.140  1.00  0.24           O  
HETATM   10  O   HOH T   9       7.789 -30.211  76.266  1.00  0.24           O  
HETATM   11  O   HOH T  10       7.487 -27.035  68.170  1.00  0.25           O  
HETATM   12  O   HOH T  11       4.872 -27.593  88.082  1.00  0.25           O  
HETATM   13  O   HOH T  12      -4.412  -7.968  62.966  1.00  0.25           O  
HETATM   14  O   HOH T  13      14.960   3.347  69.758  1.00  0.26           O  
HETATM   15  O   HOH T  14      -9.170 -28.026  89.371  1.00  0.26           O  
HETATM   16  O   HOH T  15      11.216 -35.950  80.021  1.00  0.26           O  
HETATM   17  O   HOH T  16      -0.704  -3.601  70.498  1.00  0.27           O  
HETATM   18  O   HOH T  17      16.826  -4.956  85.921  1.00  0.27           O  
HETATM   19  O   HOH T  18      14.809  -5.374  84.096  1.00  0.27           O  
HETATM   20  O   HOH T  19      -3.591 -27.429  84.360  1.00  0.28           O  
HETATM   21  O   HOH T  20      -8.046 -26.963  91.660  1.00  0.28           O  
HETATM   22  O   HOH T  21      -7.929  -8.045  87.530  1.00  0.28           O  
HETATM   23  O   HOH T  22       8.520  -5.293  82.065  1.00  0.28           O  
HETATM   24  O   HOH T  23      -6.247 -14.670  89.202  1.00  0.29           O  
HETATM   25  O   HOH T  24       4.098  -6.725  90.610  1.00  0.29           O  
HETATM   26  O   HOH T  25      13.883 -20.461  81.254  1.00  0.29           O  
HETATM   27  O   HOH T  26      -1.974  -0.837  67.553  1.00  0.29           O  
HETATM   28  O   HOH T  27      -7.688 -18.530  71.133  1.00  0.30           O  
HETATM   29  O   HOH T  28      -4.898 -13.298  79.924  1.00  0.30           O  
HETATM   30  O   HOH T  29      -3.660 -18.589  62.359  1.00  0.30           O  
HETATM   31  O   HOH T  30      18.244  -8.878  76.079  1.00  0.30           O  
HETATM   32  O   HOH T  31      -8.124 -23.204  78.241  1.00  0.30           O  
HETATM   33  O   HOH T  32       7.369  -2.598  63.443  1.00  0.30           O  
HETATM   34  O   HOH T  33     -10.249 -30.667  85.022  1.00  0.30           O  
HETATM   35  O   HOH T  34       5.916 -30.302  62.102  1.00  0.31           O  
HETATM   36  O   HOH T  35       5.938  -3.252  87.521  1.00  0.31           O  
HETATM   37  O   HOH T  36     -12.438  -6.346  79.276  1.00  0.31           O  
HETATM   38  O   HOH T  37      14.228 -13.114  81.767  1.00  0.31           O  
HETATM   39  O   HOH T  38       8.187   5.130  71.003  1.00  0.31           O  
HETATM   40  O   HOH T  39      -6.763 -24.732  83.545  1.00  0.31           O  
HETATM   41  O   HOH T  40      -7.837 -22.080  88.007  1.00  0.31           O  
HETATM   42  O   HOH T  41      -7.864 -40.801  80.837  1.00  0.31           O  
HETATM   43  O   HOH T  42      -9.525 -24.543  74.726  1.00  0.31           O  
HETATM   44  O   HOH T  43      -6.003  -1.918  78.504  1.00  0.32           O  
HETATM   45  O   HOH T  44      -3.523 -27.483  68.099  1.00  0.32           O  
HETATM   46  O   HOH T  45       4.560 -24.712  58.963  1.00  0.32           O  
HETATM   47  O   HOH T  46     -11.990  -2.161  82.842  1.00  0.32           O  
HETATM   48  O   HOH T  47      -4.906 -10.275  54.341  1.00  0.32           O  
HETATM   49  O   HOH T  48       1.546 -42.213  73.137  1.00  0.32           O  
HETATM   50  O   HOH T  49      -9.976 -16.534  72.380  1.00  0.32           O  
HETATM   51  O   HOH T  50      18.200 -14.680  74.720  1.00  0.33           O  
HETATM   52  O   HOH T  51       1.258  -8.136  60.604  1.00  0.33           O  
HETATM   53  O   HOH T  52     -13.427  -6.656  69.505  1.00  0.33           O  
HETATM   54  O   HOH T  53     -11.642 -18.802  71.652  1.00  0.33           O  
HETATM   55  O   HOH T  54       1.031 -39.322  73.091  1.00  0.33           O  
HETATM   56  O   HOH T  55      -6.400 -11.389  90.249  1.00  0.33           O  
HETATM   57  O   HOH T  56       3.815  -3.613  75.022  1.00  0.34           O  
HETATM   58  O   HOH T  57       7.306 -39.368  76.909  1.00  0.34           O  
HETATM   59  O   HOH T  58       1.554 -13.934  84.592  1.00  0.34           O  
HETATM   60  O   HOH T  59       3.946 -30.865  68.968  1.00  0.34           O  
HETATM   61  O   HOH T  60       8.919   1.001  81.930  1.00  0.34           O  
HETATM   62  O   HOH T  61       1.436  -3.998  83.836  1.00  0.35           O  
HETATM   63  O   HOH T  62      -6.257   1.698  75.977  1.00  0.35           O  
HETATM   64  O   HOH T  63      -5.869  -6.818  85.868  1.00  0.35           O  
HETATM   65  O   HOH T  64       3.801 -29.364  71.110  1.00  0.35           O  
HETATM   66  O   HOH T  65      20.110  -4.399  67.250  1.00  0.36           O  
HETATM   67  O   HOH T  66       3.359 -22.758  72.994  1.00  0.36           O  
HETATM   68  O   HOH T  67      -6.703  -5.564  88.116  1.00  0.36           O  
HETATM   69  O   HOH T  68      10.508 -30.780  72.651  1.00  0.36           O  
HETATM   70  O   HOH T  69      -2.950 -11.904  53.196  1.00  0.36           O  
HETATM   71  O   HOH T  70       8.893  -4.877  64.229  1.00  0.36           O  
HETATM   72  O   HOH T  71      13.987 -23.309  81.453  1.00  0.36           O  
HETATM   73  O   HOH T  72     -11.665 -15.571  70.270  1.00  0.36           O  
HETATM   74  O   HOH T  73       7.405   0.187  86.261  1.00  0.36           O  
HETATM   75  O   HOH T  74       0.063 -17.142  87.289  1.00  0.37           O  
HETATM   76  O   HOH T  75      -5.669  -1.018  75.888  1.00  0.37           O  
HETATM   77  O   HOH T  76       6.990   1.644  64.364  1.00  0.37           O  
HETATM   78  O   HOH T  77      10.102 -25.818  72.861  1.00  0.37           O  
HETATM   79  O   HOH T  78       8.577 -41.307  75.496  1.00  0.37           O  
HETATM   80  O   HOH T  79      20.946   2.956  73.724  1.00  0.38           O  
HETATM   81  O   HOH T  80      -2.940 -30.183  84.572  1.00  0.38           O  
HETATM   82  O   HOH T  81      -4.979 -22.669  63.099  1.00  0.38           O  
HETATM   83  O   HOH T  82      -2.624   0.685  74.699  1.00  0.38           O  
HETATM   84  O   HOH T  83       1.721  -9.547  86.703  1.00  0.38           O  
HETATM   85  O   HOH T  84     -15.136  -4.057  80.793  1.00  0.39           O  
HETATM   86  O   HOH T  85     -18.992  -8.576  71.199  1.00  0.39           O  
HETATM   87  O   HOH T  86       1.972  -1.787  63.714  1.00  0.39           O  
HETATM   88  O   HOH T  87      -3.516   0.813  85.271  1.00  0.39           O  
HETATM   89  O   HOH T  88     -13.310  -8.748  80.260  1.00  0.39           O  
HETATM   90  O   HOH T  89      10.753 -33.218  79.914  1.00  0.40           O  
HETATM   91  O   HOH T  90      -1.396 -34.291  83.932  1.00  0.40           O  
HETATM   92  O   HOH T  91      20.676   5.748  73.847  1.00  0.40           O  
HETATM   93  O   HOH T  92       2.548 -26.290  88.605  1.00  0.40           O  
HETATM   94  O   HOH T  93      -3.966 -29.110  88.956  1.00  0.40           O  
HETATM   95  O   HOH T  94      -0.619   2.458  73.627  1.00  0.41           O  
HETATM   96  O   HOH T  95      -3.395 -16.176  61.087  1.00  0.41           O  
HETATM   97  O   HOH T  96     -16.712 -10.165  70.979  1.00  0.41           O  
HETATM   98  O   HOH T  97     -12.415  -3.838  80.340  1.00  0.41           O  
HETATM   99  O   HOH T  98     -10.054 -39.441  80.028  1.00  0.41           O  
HETATM  100  O   HOH T  99       3.653 -12.931  98.590  1.00  0.41           O  
HETATM  101  O   HOH T 100      -0.921 -45.578  76.368  1.00  0.41           O  
HETATM  102  O   HOH T 101      -0.780 -13.060  54.606  1.00  0.42           O  
HETATM  103  O   HOH T 102      16.347 -14.810  76.588  1.00  0.42           O  
HETATM  104  O   HOH T 103     -14.385 -13.163  77.659  1.00  0.42           O  
HETATM  105  O   HOH T 104     -11.631  -1.252  80.269  1.00  0.42           O  
HETATM  106  O   HOH T 105      -4.393  10.034  82.491  1.00  0.42           O  
HETATM  107  O   HOH T 106      -8.726 -30.477  90.679  1.00  0.42           O  
HETATM  108  O   HOH T 107       2.457   5.900  68.358  1.00  0.42           O  
HETATM  109  O   HOH T 108      11.301 -28.241  73.599  1.00  0.42           O  
HETATM  110  O   HOH T 109      -5.006 -29.168  69.759  1.00  0.42           O  
HETATM  111  O   HOH T 110       8.279 -29.365  69.624  1.00  0.42           O  
HETATM  112  O   HOH T 111       5.822 -37.623  84.421  1.00  0.42           O  
HETATM  113  O   HOH T 112      -5.409 -12.993  54.032  1.00  0.42           O  
HETATM  114  O   HOH T 113       9.578 -31.751  77.765  1.00  0.42           O  
HETATM  115  O   HOH T 114      -6.609 -28.723  89.945  1.00  0.42           O  
HETATM  116  O   HOH T 115      -5.207   0.598  73.597  1.00  0.43           O  
HETATM  117  O   HOH T 116      21.940 -17.499  80.873  1.00  0.43           O  
HETATM  118  O   HOH T 117     -10.989 -28.133  85.926  1.00  0.43           O  
HETATM  119  O   HOH T 118      -4.893 -14.398  62.580  1.00  0.43           O  
HETATM  120  O   HOH T 119      -3.257 -33.182  85.754  1.00  0.43           O  
HETATM  121  O   HOH T 120      -4.207   7.838  84.093  1.00  0.43           O  
HETATM  122  O   HOH T 121      10.992  -4.164  81.577  1.00  0.43           O  
HETATM  123  O   HOH T 122       4.816  -0.873  86.570  1.00  0.43           O  
HETATM  124  O   HOH T 123     -13.082 -11.424  79.427  1.00  0.43           O  
HETATM  125  O   HOH T 124       3.898  -4.571  86.429  1.00  0.44           O  
HETATM  126  O   HOH T 125       4.492  -4.099  90.695  1.00  0.44           O  
HETATM  127  O   HOH T 126     -13.906  -8.000  77.637  1.00  0.44           O  
HETATM  128  O   HOH T 127      -9.962 -17.712  69.755  1.00  0.44           O  
HETATM  129  O   HOH T 128      10.351 -38.536  79.913  1.00  0.44           O  
HETATM  130  O   HOH T 129      18.835 -14.091  71.142  1.00  0.44           O  
HETATM  131  O   HOH T 130       1.475 -13.304  63.815  1.00  0.44           O  
HETATM  132  O   HOH T 131      15.357 -15.681  81.749  1.00  0.44           O  
HETATM  133  O   HOH T 132       7.955 -38.889  74.265  1.00  0.44           O  
HETATM  134  O   HOH T 133      13.627   5.890  70.211  1.00  0.44           O  
HETATM  135  O   HOH T 134      -9.818 -25.114  79.289  1.00  0.45           O  
HETATM  136  O   HOH T 135      18.676  -5.048  74.578  1.00  0.45           O  
HETATM  137  O   HOH T 136       0.682  -6.591  83.469  1.00  0.45           O  
HETATM  138  O   HOH T 137      -5.191 -27.030  63.972  1.00  0.45           O  
HETATM  139  O   HOH T 138      19.664 -11.249  75.882  1.00  0.45           O  
HETATM  140  O   HOH T 139      -3.738  -7.758  54.178  1.00  0.45           O  
HETATM  141  O   HOH T 140      13.028 -32.351  81.384  1.00  0.45           O  
HETATM  142  O   HOH T 141      -9.948 -32.290  87.338  1.00  0.45           O  
HETATM  143  O   HOH T 142       8.871 -36.279  74.429  1.00  0.45           O  
HETATM  144  O   HOH T 143       1.746 -19.385  87.568  1.00  0.45           O  
HETATM  145  O   HOH T 144     -11.732 -28.973  83.397  1.00  0.45           O  
HETATM  146  O   HOH T 145      10.423 -13.020  66.849  1.00  0.45           O  
HETATM  147  O   HOH T 146      -3.088 -14.458  54.416  1.00  0.45           O  
HETATM  148  O   HOH T 147       0.150 -26.888  89.845  1.00  0.46           O  
HETATM  149  O   HOH T 148      -1.917  -7.386  84.218  1.00  0.46           O  
HETATM  150  O   HOH T 149      16.156  -4.968  75.473  1.00  0.46           O  
HETATM  151  O   HOH T 150      11.251 -33.313  73.624  1.00  0.46           O  
HETATM  152  O   HOH T 151     -19.067 -12.517  73.400  1.00  0.46           O  
HETATM  153  O   HOH T 152      19.586   6.993  76.210  1.00  0.46           O  
HETATM  154  O   HOH T 153      21.046  -4.811  69.763  1.00  0.46           O  
HETATM  155  O   HOH T 154      -2.278 -38.872  73.271  1.00  0.46           O  
HETATM  156  O   HOH T 155     -10.369 -21.372  87.240  1.00  0.46           O  
HETATM  157  O   HOH T 156     -15.298 -10.554  81.124  1.00  0.46           O  
HETATM  158  O   HOH T 157       6.427 -20.214  65.503  1.00  0.47           O  
HETATM  159  O   HOH T 158       1.334 -34.671  83.467  1.00  0.47           O  
HETATM  160  O   HOH T 159       2.362 -16.188  86.040  1.00  0.47           O  
HETATM  161  O   HOH T 160     -11.301  -4.836  62.908  1.00  0.47           O  
HETATM  162  O   HOH T 161       2.610  -8.269  88.978  1.00  0.47           O  
HETATM  163  O   HOH T 162       6.591 -31.622  69.381  1.00  0.47           O  
HETATM  164  O   HOH T 163      -2.261 -31.067  90.117  1.00  0.47           O  
HETATM  165  O   HOH T 164      18.017 -20.226  79.510  1.00  0.47           O  
HETATM  166  O   HOH T 165       8.173 -37.257  72.023  1.00  0.47           O  
HETATM  167  O   HOH T 166      -0.894 -31.886  85.081  1.00  0.48           O  
HETATM  168  O   HOH T 167      18.227  -2.783  73.045  1.00  0.48           O  
HETATM  169  O   HOH T 168      19.670   4.288  75.774  1.00  0.48           O  
HETATM  170  O   HOH T 169      -5.919 -38.931  80.316  1.00  0.48           O  
HETATM  171  O   HOH T 170      -2.516   3.395  71.803  1.00  0.48           O  
HETATM  172  O   HOH T 171     -11.713 -12.551  77.157  1.00  0.48           O  
HETATM  173  O   HOH T 172      -8.668 -24.925  72.001  1.00  0.48           O  
HETATM  174  O   HOH T 173     -18.237 -12.132  69.704  1.00  0.48           O  
HETATM  175  O   HOH T 174       8.498 -29.466  62.483  1.00  0.48           O  
HETATM  176  O   HOH T 175      19.254 -16.994  81.403  1.00  0.48           O  
HETATM  177  O   HOH T 176      18.353 -19.512  82.252  1.00  0.49           O  
HETATM  178  O   HOH T 177      -2.977 -18.584  59.802  1.00  0.49           O  
HETATM  179  O   HOH T 178      -1.062  -6.868  59.713  1.00  0.49           O  
HETATM  180  O   HOH T 179     -10.711 -29.021  80.792  1.00  0.49           O  
HETATM  181  O   HOH T 180     -11.953 -26.868  79.531  1.00  0.49           O  
HETATM  182  O   HOH T 181     -19.452  -9.787  73.614  1.00  0.49           O  
HETATM  183  O   HOH T 182      -5.822 -20.325  61.956  1.00  0.50           O  
HETATM  184  O   HOH T 183      -0.220   4.833  72.024  1.00  0.50           O  
HETATM  185  O   HOH T 184      19.407  -4.999  71.987  1.00  0.50           O  
HETATM  186  O   HOH T 185      -9.133 -31.234  81.499  1.00  0.50           O  
HETATM  187  O   HOH T 186      -4.451 -13.153  87.708  1.00  0.50           O  
HETATM  188  O   HOH T 187      21.036   0.685  72.088  1.00  0.50           O  
HETATM  189  O   HOH T 188      -1.461  -0.648  86.536  1.00  0.50           O  
HETATM  190  O   HOH T 189       3.989 -17.748  87.721  1.00  0.50           O  
HETATM  191  O   HOH T 190       7.202 -27.543  64.086  1.00  0.51           O  
HETATM  192  O   HOH T 191       8.976  -7.666  63.597  1.00  0.51           O  
HETATM  193  O   HOH T 192      -3.982   5.890  85.889  1.00  0.51           O  
HETATM  194  O   HOH T 193       4.598 -11.192  96.517  1.00  0.51           O  
HETATM  195  O   HOH T 194      17.860  -0.852  65.722  1.00  0.51           O  
HETATM  196  O   HOH T 195      -3.263   3.244  86.582  1.00  0.51           O  
HETATM  197  O   HOH T 196       5.881   2.645  82.725  1.00  0.51           O  
HETATM  198  O   HOH T 197       3.350  -2.641  88.383  1.00  0.51           O  
HETATM  199  O   HOH T 198      -0.884   7.689  72.144  1.00  0.51           O  
HETATM  200  O   HOH T 199      -4.643  10.244  85.297  1.00  0.51           O  
HETATM  201  O   HOH T 200      -2.061   4.731  74.214  1.00  0.52           O  
HETATM  202  O   HOH T 201      -5.077  -8.216  58.317  1.00  0.52           O  
HETATM  203  O   HOH T 202      13.067 -37.898  80.094  1.00  0.52           O  
HETATM  204  O   HOH T 203     -12.805 -20.914  72.992  1.00  0.52           O  
HETATM  205  O   HOH T 204      -3.926 -30.215  67.447  1.00  0.52           O  
HETATM  206  O   HOH T 205      -9.104 -24.741  81.987  1.00  0.52           O  
HETATM  207  O   HOH T 206       0.771 -42.210  70.303  1.00  0.52           O  
HETATM  208  O   HOH T 207       3.578 -16.005  60.651  1.00  0.52           O  
HETATM  209  O   HOH T 208      -0.993   0.950  84.412  1.00  0.52           O  
HETATM  210  O   HOH T 209      -7.443 -22.809  85.350  1.00  0.52           O  
HETATM  211  O   HOH T 210       3.828  -7.825  59.822  1.00  0.52           O  
HETATM  212  O   HOH T 211      -8.252 -25.687  77.000  1.00  0.53           O  
HETATM  213  O   HOH T 212       0.719  -2.219  87.331  1.00  0.53           O  
HETATM  214  O   HOH T 213      11.312  -6.330  64.617  1.00  0.53           O  
HETATM  215  O   HOH T 214      -7.364 -22.558  81.966  1.00  0.53           O  
HETATM  216  O   HOH T 215       4.636  -3.184  69.578  1.00  0.53           O  
HETATM  217  O   HOH T 216      17.983  -9.690  80.977  1.00  0.53           O  
HETATM  218  O   HOH T 217      -5.448 -25.118  61.872  1.00  0.53           O  
HETATM  219  O   HOH T 218      -2.206 -28.419  90.999  1.00  0.54           O  
HETATM  220  O   HOH T 219       1.629 -12.256  86.694  1.00  0.54           O  
HETATM  221  O   HOH T 220     -13.785 -10.622  76.714  1.00  0.54           O  
HETATM  222  O   HOH T 221      -3.340   8.778  80.170  1.00  0.54           O  
HETATM  223  O   HOH T 222      22.255 -10.474  75.371  1.00  0.54           O  
HETATM  224  O   HOH T 223       9.252  -7.056  66.093  1.00  0.54           O  
HETATM  225  O   HOH T 224       5.604 -29.053  68.870  1.00  0.54           O  
HETATM  226  O   HOH T 225       9.981 -31.338  75.093  1.00  0.55           O  
HETATM  227  O   HOH T 226      16.527 -22.536  74.512  1.00  0.55           O  
HETATM  228  O   HOH T 227      22.734  -3.445  68.032  1.00  0.55           O  
HETATM  229  O   HOH T 228       2.372  -0.044  87.502  1.00  0.55           O  
HETATM  230  O   HOH T 229      10.486 -35.647  72.205  1.00  0.55           O  
HETATM  231  O   HOH T 230       3.198 -11.431  62.340  1.00  0.56           O  
HETATM  232  O   HOH T 231      -9.092  -1.381  71.624  1.00  0.56           O  
HETATM  233  O   HOH T 232      12.766 -26.451  72.152  1.00  0.56           O  
HETATM  234  O   HOH T 233     -10.716 -10.631  64.710  1.00  0.56           O  
HETATM  235  O   HOH T 234     -14.585  -8.913  68.091  1.00  0.56           O  
HETATM  236  O   HOH T 235      16.910 -21.920  77.533  1.00  0.57           O  
HETATM  237  O   HOH T 236      19.406 -16.961  73.816  1.00  0.57           O  
HETATM  238  O   HOH T 237       6.459 -26.671  90.040  1.00  0.57           O  
HETATM  239  O   HOH T 238       0.406 -33.830  66.700  1.00  0.58           O  
HETATM  240  O   HOH T 239      -0.249 -35.483  69.453  1.00  0.58           O  
HETATM  241  O   HOH T 240      -7.908   0.091  74.439  1.00  0.58           O  
HETATM  242  O   HOH T 241      16.391  -7.195  77.049  1.00  0.58           O  
HETATM  243  O   HOH T 242      -0.168 -31.631  88.488  1.00  0.59           O  
HETATM  244  O   HOH T 243       2.406 -32.481  67.970  1.00  0.64           O  
TER     245      HOH T 243 
