# Supplementary material for: Accurate Prediction of Hydration Sites of Proteins Using Energy Model With Atom Embedding
Source: Front Mol Biosci. 2021 Sep 20;8:756075. doi: 10.3389/fmolb.2021.756075 (PMC8488165; doi:10.3389/fmolb.2021.756075)
Supplement: Supplementary file 1 [file DataSheet1.ZIP › Data Sheet 1/Our_result_pdb/our_dataset_output/2OXC_watersite.pdb]

HEADER                                                        XXXX


JRNL        PMID   -1
HETATM    1  O   HOH T   0      59.057  11.291  13.786  1.00  0.16           O  
HETATM    2  O   HOH T   1      59.640 -10.924  36.650  1.00  0.16           O  
HETATM    3  O   HOH T   2      38.725  10.290  20.449  1.00  0.16           O  
HETATM    4  O   HOH T   3      60.381 -31.451  40.880  1.00  0.17           O  
HETATM    5  O   HOH T   4      24.977   2.708   7.263  1.00  0.18           O  
HETATM    6  O   HOH T   5      54.160   2.296  -5.248  1.00  0.19           O  
HETATM    7  O   HOH T   6      61.081 -21.978  18.331  1.00  0.19           O  
HETATM    8  O   HOH T   7      26.847   3.643  -2.331  1.00  0.19           O  
HETATM    9  O   HOH T   8      48.311  23.219  -7.183  1.00  0.20           O  
HETATM   10  O   HOH T   9      41.800  25.123  -1.271  1.00  0.20           O  
HETATM   11  O   HOH T  10      64.615 -17.511  43.049  1.00  0.20           O  
HETATM   12  O   HOH T  11      31.763  -8.274  29.501  1.00  0.21           O  
HETATM   13  O   HOH T  12      53.708 -11.585  20.711  1.00  0.21           O  
HETATM   14  O   HOH T  13      51.022   0.791  11.292  1.00  0.21           O  
HETATM   15  O   HOH T  14      32.111   7.377  17.287  1.00  0.21           O  
HETATM   16  O   HOH T  15      57.436   9.405 -11.481  1.00  0.22           O  
HETATM   17  O   HOH T  16      32.947 -12.629  39.699  1.00  0.22           O  
HETATM   18  O   HOH T  17      49.983  -2.027  18.667  1.00  0.22           O  
HETATM   19  O   HOH T  18      37.547  -2.977  33.730  1.00  0.22           O  
HETATM   20  O   HOH T  19      40.142 -17.939  45.844  1.00  0.22           O  
HETATM   21  O   HOH T  20      47.123 -26.749  10.621  1.00  0.22           O  
HETATM   22  O   HOH T  21      48.943  16.865  23.993  1.00  0.23           O  
HETATM   23  O   HOH T  22      54.689   9.641  22.319  1.00  0.23           O  
HETATM   24  O   HOH T  23      42.911 -26.925  17.190  1.00  0.24           O  
HETATM   25  O   HOH T  24      50.273  18.534  -7.699  1.00  0.24           O  
HETATM   26  O   HOH T  25      42.143   0.518 -12.448  1.00  0.24           O  
HETATM   27  O   HOH T  26      33.934 -18.803  19.802  1.00  0.25           O  
HETATM   28  O   HOH T  27      41.479  15.345  18.905  1.00  0.25           O  
HETATM   29  O   HOH T  28      24.094  -1.011   4.036  1.00  0.25           O  
HETATM   30  O   HOH T  29      30.653   9.617  -5.802  1.00  0.25           O  
HETATM   31  O   HOH T  30      39.702  23.469  -1.989  1.00  0.26           O  
HETATM   32  O   HOH T  31      56.165   7.018  -6.690  1.00  0.26           O  
HETATM   33  O   HOH T  32      53.535 -34.778  40.007  1.00  0.26           O  
HETATM   34  O   HOH T  33      56.966 -26.986  41.557  1.00  0.26           O  
HETATM   35  O   HOH T  34      36.301 -12.336  17.052  1.00  0.26           O  
HETATM   36  O   HOH T  35      58.909 -10.219  26.832  1.00  0.26           O  
HETATM   37  O   HOH T  36      65.445 -23.259  35.711  1.00  0.26           O  
HETATM   38  O   HOH T  37      43.412 -22.925  26.232  1.00  0.26           O  
HETATM   39  O   HOH T  38      69.680   2.590   5.219  1.00  0.26           O  
HETATM   40  O   HOH T  39      39.740 -22.019  15.823  1.00  0.26           O  
HETATM   41  O   HOH T  40      49.522  -2.555  -8.527  1.00  0.27           O  
HETATM   42  O   HOH T  41      49.225 -33.090  45.150  1.00  0.27           O  
HETATM   43  O   HOH T  42      69.034 -18.471  28.398  1.00  0.27           O  
HETATM   44  O   HOH T  43      45.047   8.162  26.853  1.00  0.27           O  
HETATM   45  O   HOH T  44      71.137 -13.528  43.968  1.00  0.27           O  
HETATM   46  O   HOH T  45      28.729  -8.544  33.330  1.00  0.27           O  
HETATM   47  O   HOH T  46      44.603 -21.116   7.991  1.00  0.27           O  
HETATM   48  O   HOH T  47      59.895  14.302  -4.023  1.00  0.27           O  
HETATM   49  O   HOH T  48      49.659 -27.271  42.340  1.00  0.28           O  
HETATM   50  O   HOH T  49      32.922   9.669  -9.339  1.00  0.28           O  
HETATM   51  O   HOH T  50      38.608 -10.565  39.961  1.00  0.28           O  
HETATM   52  O   HOH T  51      48.286 -26.282  21.078  1.00  0.28           O  
HETATM   53  O   HOH T  52      32.539   1.688  -4.160  1.00  0.28           O  
HETATM   54  O   HOH T  53      59.279   4.867  12.560  1.00  0.28           O  
HETATM   55  O   HOH T  54      53.400  17.115 -19.520  1.00  0.28           O  
HETATM   56  O   HOH T  55      44.249  -3.390  25.542  1.00  0.28           O  
HETATM   57  O   HOH T  56      55.077  10.232 -20.067  1.00  0.28           O  
HETATM   58  O   HOH T  57      35.273   0.896  18.833  1.00  0.28           O  
HETATM   59  O   HOH T  58      52.762 -10.328  24.250  1.00  0.28           O  
HETATM   60  O   HOH T  59      32.760  -6.465   9.044  1.00  0.28           O  
HETATM   61  O   HOH T  60      37.360 -18.124  42.315  1.00  0.28           O  
HETATM   62  O   HOH T  61      37.126  -6.299  31.530  1.00  0.28           O  
HETATM   63  O   HOH T  62      54.770  15.066 -18.167  1.00  0.29           O  
HETATM   64  O   HOH T  63      28.958 -15.007  27.095  1.00  0.29           O  
HETATM   65  O   HOH T  64      41.049  -6.900   7.748  1.00  0.29           O  
HETATM   66  O   HOH T  65      58.336 -11.314  44.964  1.00  0.29           O  
HETATM   67  O   HOH T  66      52.369   1.088   4.780  1.00  0.29           O  
HETATM   68  O   HOH T  67      36.298  -6.580  21.209  1.00  0.29           O  
HETATM   69  O   HOH T  68      55.373 -21.477  10.304  1.00  0.29           O  
HETATM   70  O   HOH T  69      31.177  -5.075  -6.275  1.00  0.29           O  
HETATM   71  O   HOH T  70      41.757  -3.366  39.702  1.00  0.29           O  
HETATM   72  O   HOH T  71      29.230  -8.774  30.679  1.00  0.29           O  
HETATM   73  O   HOH T  72      62.921 -14.406  40.873  1.00  0.29           O  
HETATM   74  O   HOH T  73      56.146  -6.296  40.238  1.00  0.29           O  
HETATM   75  O   HOH T  74      49.491  -0.572   9.386  1.00  0.29           O  
HETATM   76  O   HOH T  75      66.511   4.763  -0.001  1.00  0.29           O  
HETATM   77  O   HOH T  76      49.132  -2.178  31.567  1.00  0.29           O  
HETATM   78  O   HOH T  77      29.302 -18.781  28.340  1.00  0.30           O  
HETATM   79  O   HOH T  78      25.602   4.321  10.590  1.00  0.30           O  
HETATM   80  O   HOH T  79      41.488 -29.358  17.499  1.00  0.30           O  
HETATM   81  O   HOH T  80      45.424 -25.775  27.916  1.00  0.30           O  
HETATM   82  O   HOH T  81      60.994   2.606   8.925  1.00  0.30           O  
HETATM   83  O   HOH T  82      46.699   1.030  25.669  1.00  0.30           O  
HETATM   84  O   HOH T  83      45.409 -32.256  38.690  1.00  0.30           O  
HETATM   85  O   HOH T  84      47.759   9.739  16.885  1.00  0.30           O  
HETATM   86  O   HOH T  85      30.983  -1.323   4.630  1.00  0.30           O  
HETATM   87  O   HOH T  86      48.540  -2.098  22.227  1.00  0.30           O  
HETATM   88  O   HOH T  87      35.831 -13.644  23.533  1.00  0.30           O  
HETATM   89  O   HOH T  88      45.237 -31.090  15.409  1.00  0.30           O  
HETATM   90  O   HOH T  89      41.433  -1.538  20.304  1.00  0.30           O  
HETATM   91  O   HOH T  90      52.487 -21.657   7.962  1.00  0.30           O  
HETATM   92  O   HOH T  91      47.157   8.508 -19.652  1.00  0.30           O  
HETATM   93  O   HOH T  92      39.090  21.292  -3.495  1.00  0.31           O  
HETATM   94  O   HOH T  93      56.279 -10.954  27.047  1.00  0.31           O  
HETATM   95  O   HOH T  94      44.943  19.746  20.570  1.00  0.31           O  
HETATM   96  O   HOH T  95      40.076  12.576   9.647  1.00  0.31           O  
HETATM   97  O   HOH T  96      42.102 -21.782   9.433  1.00  0.31           O  
HETATM   98  O   HOH T  97      41.962  -5.124  -9.869  1.00  0.31           O  
HETATM   99  O   HOH T  98      47.414  18.816  14.148  1.00  0.32           O  
HETATM  100  O   HOH T  99      40.170  17.831  19.510  1.00  0.32           O  
HETATM  101  O   HOH T 100      53.393   8.050 -19.307  1.00  0.32           O  
HETATM  102  O   HOH T 101      45.550  23.274   4.359  1.00  0.32           O  
HETATM  103  O   HOH T 102      64.656 -16.547   6.735  1.00  0.32           O  
HETATM  104  O   HOH T 103      44.317  -6.826   0.501  1.00  0.32           O  
HETATM  105  O   HOH T 104      52.681  17.792  -6.510  1.00  0.32           O  
HETATM  106  O   HOH T 105      55.064  -7.074  44.001  1.00  0.32           O  
HETATM  107  O   HOH T 106      53.497 -23.425   9.839  1.00  0.32           O  
HETATM  108  O   HOH T 107      62.338 -15.312  38.325  1.00  0.32           O  
HETATM  109  O   HOH T 108      33.884 -21.680  19.580  1.00  0.32           O  
HETATM  110  O   HOH T 109      38.063 -10.171  17.559  1.00  0.33           O  
HETATM  111  O   HOH T 110      32.597  -3.555   3.898  1.00  0.33           O  
HETATM  112  O   HOH T 111      48.771  -3.288  42.794  1.00  0.33           O  
HETATM  113  O   HOH T 112      47.584  14.519  24.278  1.00  0.33           O  
HETATM  114  O   HOH T 113      60.762 -13.906  20.730  1.00  0.33           O  
HETATM  115  O   HOH T 114      49.739  -8.122  -4.009  1.00  0.33           O  
HETATM  116  O   HOH T 115      59.142 -26.429  39.848  1.00  0.33           O  
HETATM  117  O   HOH T 116      67.853 -20.152  18.491  1.00  0.33           O  
HETATM  118  O   HOH T 117      34.801 -14.819  39.909  1.00  0.33           O  
HETATM  119  O   HOH T 118      35.647  -5.572  -5.104  1.00  0.33           O  
HETATM  120  O   HOH T 119      26.065 -16.105  33.627  1.00  0.33           O  
HETATM  121  O   HOH T 120      54.670  -8.902  46.095  1.00  0.33           O  
HETATM  122  O   HOH T 121      37.650  -6.031  -3.230  1.00  0.33           O  
HETATM  123  O   HOH T 122      53.094  -0.613  12.411  1.00  0.33           O  
HETATM  124  O   HOH T 123      34.822  -3.581  16.325  1.00  0.33           O  
HETATM  125  O   HOH T 124      52.128 -34.997  32.259  1.00  0.34           O  
HETATM  126  O   HOH T 125      50.190  21.106  -6.569  1.00  0.34           O  
HETATM  127  O   HOH T 126      47.549 -28.288  22.830  1.00  0.34           O  
HETATM  128  O   HOH T 127      16.412   2.941  -2.163  1.00  0.34           O  
HETATM  129  O   HOH T 128      37.718  12.258   8.152  1.00  0.34           O  
HETATM  130  O   HOH T 129      31.507 -17.798  20.698  1.00  0.34           O  
HETATM  131  O   HOH T 130      67.103 -24.181  27.111  1.00  0.34           O  
HETATM  132  O   HOH T 131      51.371   7.709 -21.253  1.00  0.34           O  
HETATM  133  O   HOH T 132      54.966   0.517   4.388  1.00  0.34           O  
HETATM  134  O   HOH T 133      41.753  -4.139  28.464  1.00  0.35           O  
HETATM  135  O   HOH T 134      64.109 -13.053  21.745  1.00  0.35           O  
HETATM  136  O   HOH T 135      42.209  16.804  21.151  1.00  0.35           O  
HETATM  137  O   HOH T 136      56.239   5.632  -9.087  1.00  0.35           O  
HETATM  138  O   HOH T 137      41.749  15.680   7.888  1.00  0.35           O  
HETATM  139  O   HOH T 138      42.420   8.952  26.093  1.00  0.35           O  
HETATM  140  O   HOH T 139      50.960   3.429 -12.670  1.00  0.35           O  
HETATM  141  O   HOH T 140      52.640  -3.289  12.158  1.00  0.35           O  
HETATM  142  O   HOH T 141      70.173   2.004   7.806  1.00  0.35           O  
HETATM  143  O   HOH T 142      67.151 -27.356  47.582  1.00  0.36           O  
HETATM  144  O   HOH T 143      26.969   7.771  -3.093  1.00  0.36           O  
HETATM  145  O   HOH T 144      42.470  -3.844   1.912  1.00  0.36           O  
HETATM  146  O   HOH T 145      45.437 -26.142  40.929  1.00  0.36           O  
HETATM  147  O   HOH T 146      45.499  -8.178   9.626  1.00  0.36           O  
HETATM  148  O   HOH T 147      35.697 -24.408  41.810  1.00  0.36           O  
HETATM  149  O   HOH T 148      58.662  -1.106   0.885  1.00  0.36           O  
HETATM  150  O   HOH T 149      55.421   4.370  -6.738  1.00  0.36           O  
HETATM  151  O   HOH T 150      59.139  15.294 -15.631  1.00  0.36           O  
HETATM  152  O   HOH T 151      42.164  19.509  20.456  1.00  0.36           O  
HETATM  153  O   HOH T 152      45.190 -32.561  17.829  1.00  0.36           O  
HETATM  154  O   HOH T 153      49.217  -4.295   3.539  1.00  0.36           O  
HETATM  155  O   HOH T 154      50.602 -30.324  25.526  1.00  0.36           O  
HETATM  156  O   HOH T 155      50.747  -6.462  11.354  1.00  0.36           O  
HETATM  157  O   HOH T 156      59.106  -8.138  25.013  1.00  0.36           O  
HETATM  158  O   HOH T 157      61.713  -9.616  37.772  1.00  0.36           O  
HETATM  159  O   HOH T 158      70.274 -14.956  11.867  1.00  0.36           O  
HETATM  160  O   HOH T 159      37.068  -1.238  -7.885  1.00  0.37           O  
HETATM  161  O   HOH T 160      64.955   5.970   1.839  1.00  0.37           O  
HETATM  162  O   HOH T 161      34.904  17.779  -2.561  1.00  0.37           O  
HETATM  163  O   HOH T 162      60.788 -25.983  29.032  1.00  0.37           O  
HETATM  164  O   HOH T 163      64.634  14.097  11.252  1.00  0.37           O  
HETATM  165  O   HOH T 164      50.367  -3.878  40.661  1.00  0.37           O  
HETATM  166  O   HOH T 165      52.215  -8.126  22.702  1.00  0.37           O  
HETATM  167  O   HOH T 166      56.156   3.834 -17.390  1.00  0.37           O  
HETATM  168  O   HOH T 167      51.052  20.864   4.335  1.00  0.37           O  
HETATM  169  O   HOH T 168      53.565  16.383  23.599  1.00  0.37           O  
HETATM  170  O   HOH T 169      43.638  -7.327  42.287  1.00  0.37           O  
HETATM  171  O   HOH T 170      53.176  -5.438  28.273  1.00  0.37           O  
HETATM  172  O   HOH T 171      64.183 -28.217  50.771  1.00  0.37           O  
HETATM  173  O   HOH T 172      58.246   7.240  -4.730  1.00  0.37           O  
HETATM  174  O   HOH T 173      44.264 -26.855  25.564  1.00  0.37           O  
HETATM  175  O   HOH T 174      64.733   9.794   1.616  1.00  0.37           O  
HETATM  176  O   HOH T 175      62.876 -10.684  50.750  1.00  0.37           O  
HETATM  177  O   HOH T 176      35.655   3.330 -12.046  1.00  0.37           O  
HETATM  178  O   HOH T 177      57.536  14.733 -17.905  1.00  0.38           O  
HETATM  179  O   HOH T 178      45.013  12.599 -20.572  1.00  0.38           O  
HETATM  180  O   HOH T 179      54.782  -7.429  18.625  1.00  0.38           O  
HETATM  181  O   HOH T 180      46.966  -5.731  31.321  1.00  0.38           O  
HETATM  182  O   HOH T 181      64.301   7.913   3.637  1.00  0.38           O  
HETATM  183  O   HOH T 182      45.532 -29.814  40.235  1.00  0.38           O  
HETATM  184  O   HOH T 183      41.251 -26.496  40.414  1.00  0.38           O  
HETATM  185  O   HOH T 184      61.553  14.846   5.999  1.00  0.38           O  
HETATM  186  O   HOH T 185      63.014 -25.009  30.232  1.00  0.38           O  
HETATM  187  O   HOH T 186      33.323   2.822  12.745  1.00  0.38           O  
HETATM  188  O   HOH T 187      49.341 -29.699  16.894  1.00  0.38           O  
HETATM  189  O   HOH T 188      43.404  -2.911  37.498  1.00  0.38           O  
HETATM  190  O   HOH T 189      66.502 -24.906  21.514  1.00  0.38           O  
HETATM  191  O   HOH T 190      43.401 -29.097  15.513  1.00  0.38           O  
HETATM  192  O   HOH T 191      53.528  -4.996  18.185  1.00  0.38           O  
HETATM  193  O   HOH T 192      48.899 -28.812  11.291  1.00  0.38           O  
HETATM  194  O   HOH T 193      41.898  -4.125  24.195  1.00  0.38           O  
HETATM  195  O   HOH T 194      66.055 -13.327  52.706  1.00  0.38           O  
HETATM  196  O   HOH T 195      24.539 -11.593  39.923  1.00  0.38           O  
HETATM  197  O   HOH T 196      51.568  -5.702   3.282  1.00  0.38           O  
HETATM  198  O   HOH T 197      63.242  16.067   9.840  1.00  0.39           O  
HETATM  199  O   HOH T 198      51.710  -0.966  29.143  1.00  0.39           O  
HETATM  200  O   HOH T 199      58.522   3.777  10.100  1.00  0.39           O  
HETATM  201  O   HOH T 200      47.392  12.963 -18.890  1.00  0.39           O  
HETATM  202  O   HOH T 201      61.557  13.941  -6.187  1.00  0.39           O  
HETATM  203  O   HOH T 202      73.921 -12.759  31.211  1.00  0.39           O  
HETATM  204  O   HOH T 203      37.687 -10.863  44.909  1.00  0.39           O  
HETATM  205  O   HOH T 204      49.530  20.274  21.787  1.00  0.39           O  
HETATM  206  O   HOH T 205      47.764  12.251  18.241  1.00  0.39           O  
HETATM  207  O   HOH T 206      43.994  17.392  11.343  1.00  0.39           O  
HETATM  208  O   HOH T 207      21.516   6.386   5.041  1.00  0.39           O  
HETATM  209  O   HOH T 208      70.757 -19.488   5.725  1.00  0.39           O  
HETATM  210  O   HOH T 209      55.508  -4.085  27.829  1.00  0.39           O  
HETATM  211  O   HOH T 210      56.161  -4.961  32.767  1.00  0.39           O  
HETATM  212  O   HOH T 211      49.641  -5.350  -8.465  1.00  0.39           O  
HETATM  213  O   HOH T 212      47.747  -4.415  27.228  1.00  0.39           O  
HETATM  214  O   HOH T 213      32.410 -10.141  40.893  1.00  0.40           O  
HETATM  215  O   HOH T 214      28.343   9.787  -7.463  1.00  0.40           O  
HETATM  216  O   HOH T 215      37.972  -5.828   5.585  1.00  0.40           O  
HETATM  217  O   HOH T 216      37.139   1.319 -12.917  1.00  0.40           O  
HETATM  218  O   HOH T 217      37.780  -0.330  18.773  1.00  0.40           O  
HETATM  219  O   HOH T 218      37.943 -22.864  29.700  1.00  0.40           O  
HETATM  220  O   HOH T 219      50.090 -31.867  13.686  1.00  0.40           O  
HETATM  221  O   HOH T 220      28.589   5.697  -2.377  1.00  0.40           O  
HETATM  222  O   HOH T 221      67.456 -22.507  46.404  1.00  0.40           O  
HETATM  223  O   HOH T 222      50.399  19.421 -16.950  1.00  0.40           O  
HETATM  224  O   HOH T 223      65.410 -29.309  48.503  1.00  0.40           O  
HETATM  225  O   HOH T 224      32.186 -20.408  21.230  1.00  0.40           O  
HETATM  226  O   HOH T 225      53.751  11.879  23.606  1.00  0.40           O  
HETATM  227  O   HOH T 226      33.973  12.915   7.352  1.00  0.40           O  
HETATM  228  O   HOH T 227      44.312  -0.189  29.604  1.00  0.40           O  
HETATM  229  O   HOH T 228      37.294  -7.531  10.942  1.00  0.40           O  
HETATM  230  O   HOH T 229      65.788 -26.928  41.470  1.00  0.41           O  
HETATM  231  O   HOH T 230      48.416 -11.009  10.021  1.00  0.41           O  
HETATM  232  O   HOH T 231      31.567  17.185  -0.273  1.00  0.41           O  
HETATM  233  O   HOH T 232      39.136  12.835  21.262  1.00  0.41           O  
HETATM  234  O   HOH T 233      49.765 -28.587  21.036  1.00  0.41           O  
HETATM  235  O   HOH T 234      43.923  -5.398   5.581  1.00  0.41           O  
HETATM  236  O   HOH T 235      40.488   0.540  24.277  1.00  0.41           O  
HETATM  237  O   HOH T 236      42.832 -28.872  24.239  1.00  0.41           O  
HETATM  238  O   HOH T 237      71.943 -10.435  27.505  1.00  0.41           O  
HETATM  239  O   HOH T 238      39.401  -0.078 -12.747  1.00  0.41           O  
HETATM  240  O   HOH T 239      61.039  -0.435  -3.227  1.00  0.41           O  
HETATM  241  O   HOH T 240      53.535   9.618  24.923  1.00  0.41           O  
HETATM  242  O   HOH T 241      43.377 -28.070  40.794  1.00  0.41           O  
HETATM  243  O   HOH T 242      51.147  19.415  15.542  1.00  0.41           O  
HETATM  244  O   HOH T 243      60.599 -11.085  20.704  1.00  0.41           O  
HETATM  245  O   HOH T 244      46.177  -4.603  33.869  1.00  0.42           O  
HETATM  246  O   HOH T 245      62.173 -26.361  50.569  1.00  0.42           O  
HETATM  247  O   HOH T 246      56.786  14.747   5.572  1.00  0.42           O  
HETATM  248  O   HOH T 247      74.330 -12.473  35.979  1.00  0.42           O  
HETATM  249  O   HOH T 248      50.669  -9.881  13.466  1.00  0.42           O  
HETATM  250  O   HOH T 249      54.421  -0.892  38.280  1.00  0.42           O  
HETATM  251  O   HOH T 250      48.035 -29.407  25.179  1.00  0.42           O  
HETATM  252  O   HOH T 251      39.592 -24.695  41.757  1.00  0.42           O  
HETATM  253  O   HOH T 252      30.688  -7.980  41.376  1.00  0.42           O  
HETATM  254  O   HOH T 253      47.927   2.484 -14.696  1.00  0.42           O  
HETATM  255  O   HOH T 254      37.133  -2.228  17.002  1.00  0.42           O  
HETATM  256  O   HOH T 255      44.548 -27.381  43.248  1.00  0.42           O  
HETATM  257  O   HOH T 256      29.368  15.493  -3.730  1.00  0.42           O  
HETATM  258  O   HOH T 257      42.795 -31.621  16.764  1.00  0.42           O  
HETATM  259  O   HOH T 258      61.141   4.788  10.508  1.00  0.42           O  
HETATM  260  O   HOH T 259      49.914  20.021  18.975  1.00  0.42           O  
HETATM  261  O   HOH T 260      60.072   0.536  -5.682  1.00  0.42           O  
HETATM  262  O   HOH T 261      74.739 -13.896  33.630  1.00  0.42           O  
HETATM  263  O   HOH T 262      58.086   2.378  12.460  1.00  0.42           O  
HETATM  264  O   HOH T 263      39.254   2.446  25.919  1.00  0.42           O  
HETATM  265  O   HOH T 264      51.114 -31.768  11.131  1.00  0.42           O  
HETATM  266  O   HOH T 265      66.391 -19.519  16.249  1.00  0.42           O  
HETATM  267  O   HOH T 266      49.329  -8.795  11.347  1.00  0.42           O  
HETATM  268  O   HOH T 267      43.957  -2.796  30.815  1.00  0.43           O  
HETATM  269  O   HOH T 268      48.545   0.654 -12.635  1.00  0.43           O  
HETATM  270  O   HOH T 269      67.481 -21.913  16.165  1.00  0.43           O  
HETATM  271  O   HOH T 270      69.144 -20.965  29.477  1.00  0.43           O  
HETATM  272  O   HOH T 271      42.675  -0.362  22.641  1.00  0.43           O  
HETATM  273  O   HOH T 272      57.554  -8.130  22.860  1.00  0.43           O  
HETATM  274  O   HOH T 273      55.769  -3.349  30.483  1.00  0.43           O  
HETATM  275  O   HOH T 274      55.225 -10.144  18.922  1.00  0.43           O  
HETATM  276  O   HOH T 275      52.813  -4.991  -3.641  1.00  0.43           O  
HETATM  277  O   HOH T 276      63.041  14.614   3.693  1.00  0.43           O  
HETATM  278  O   HOH T 277      43.421  -4.655  41.562  1.00  0.43           O  
HETATM  279  O   HOH T 278      39.143  22.955  -5.717  1.00  0.43           O  
HETATM  280  O   HOH T 279      52.598  -4.099  41.967  1.00  0.43           O  
HETATM  281  O   HOH T 280      56.284  -1.660  -0.488  1.00  0.43           O  
HETATM  282  O   HOH T 281      46.071  21.003  15.270  1.00  0.43           O  
HETATM  283  O   HOH T 282      39.537  -6.700   2.334  1.00  0.43           O  
HETATM  284  O   HOH T 283      41.208  16.612  10.664  1.00  0.43           O  
HETATM  285  O   HOH T 284      51.134  -4.087  -1.555  1.00  0.43           O  
HETATM  286  O   HOH T 285      39.880  -9.998  46.440  1.00  0.43           O  
HETATM  287  O   HOH T 286      66.195 -15.252  43.005  1.00  0.43           O  
HETATM  288  O   HOH T 287      29.598   6.465  16.851  1.00  0.43           O  
HETATM  289  O   HOH T 288      40.161  -6.765  -4.153  1.00  0.43           O  
HETATM  290  O   HOH T 289      55.492   0.883  -7.288  1.00  0.44           O  
HETATM  291  O   HOH T 290      43.936 -23.668   8.689  1.00  0.44           O  
HETATM  292  O   HOH T 291      73.454 -14.495  29.110  1.00  0.44           O  
HETATM  293  O   HOH T 292      41.124  -4.811  -0.300  1.00  0.44           O  
HETATM  294  O   HOH T 293      51.101  -4.130   9.923  1.00  0.44           O  
HETATM  295  O   HOH T 294      62.066 -25.495  23.841  1.00  0.44           O  
HETATM  296  O   HOH T 295      37.005  11.463  22.385  1.00  0.44           O  
HETATM  297  O   HOH T 296      38.942  -8.655   8.943  1.00  0.44           O  
HETATM  298  O   HOH T 297      49.236   6.559 -19.832  1.00  0.44           O  
HETATM  299  O   HOH T 298      42.178 -11.290  47.113  1.00  0.44           O  
HETATM  300  O   HOH T 299      29.173  17.768   0.878  1.00  0.44           O  
HETATM  301  O   HOH T 300      58.948  15.472   8.652  1.00  0.44           O  
HETATM  302  O   HOH T 301      46.095 -32.698  22.077  1.00  0.44           O  
HETATM  303  O   HOH T 302      24.260   2.766  -2.117  1.00  0.44           O  
HETATM  304  O   HOH T 303      65.975 -28.531  39.158  1.00  0.44           O  
HETATM  305  O   HOH T 304      39.448  -3.255  23.089  1.00  0.44           O  
HETATM  306  O   HOH T 305      53.542  19.320 -17.577  1.00  0.44           O  
HETATM  307  O   HOH T 306      44.374   0.794  26.958  1.00  0.44           O  
HETATM  308  O   HOH T 307      40.434  26.455   0.692  1.00  0.45           O  
HETATM  309  O   HOH T 308      38.957  16.008   8.082  1.00  0.45           O  
HETATM  310  O   HOH T 309      49.323 -30.534  23.015  1.00  0.45           O  
HETATM  311  O   HOH T 310      49.959  25.152   4.183  1.00  0.45           O  
HETATM  312  O   HOH T 311      66.805 -27.622  50.263  1.00  0.45           O  
HETATM  313  O   HOH T 312      67.368 -24.428  24.281  1.00  0.45           O  
HETATM  314  O   HOH T 313      43.682 -26.587  14.506  1.00  0.45           O  
HETATM  315  O   HOH T 314      55.311  -0.846  35.485  1.00  0.45           O  
HETATM  316  O   HOH T 315      74.386 -11.203  33.546  1.00  0.45           O  
HETATM  317  O   HOH T 316      22.610   7.091   2.487  1.00  0.45           O  
HETATM  318  O   HOH T 317      33.438  16.058  -4.243  1.00  0.45           O  
HETATM  319  O   HOH T 318      68.923 -14.832  42.863  1.00  0.45           O  
HETATM  320  O   HOH T 319      70.457  -0.051   5.820  1.00  0.45           O  
HETATM  321  O   HOH T 320      49.461  -2.657  25.910  1.00  0.45           O  
HETATM  322  O   HOH T 321      49.366  -8.489  46.052  1.00  0.45           O  
HETATM  323  O   HOH T 322      26.083   1.538  -3.878  1.00  0.45           O  
HETATM  324  O   HOH T 323      30.822 -20.209  39.785  1.00  0.45           O  
HETATM  325  O   HOH T 324      54.987  26.620 -15.317  1.00  0.45           O  
HETATM  326  O   HOH T 325      57.563   0.035  20.908  1.00  0.45           O  
HETATM  327  O   HOH T 326      58.706  13.892 -20.328  1.00  0.45           O  
HETATM  328  O   HOH T 327      33.971  -4.512  13.924  1.00  0.45           O  
HETATM  329  O   HOH T 328      56.854   5.889 -15.665  1.00  0.45           O  
HETATM  330  O   HOH T 329      36.495 -14.871  45.479  1.00  0.45           O  
HETATM  331  O   HOH T 330      34.162  18.018   0.081  1.00  0.45           O  
HETATM  332  O   HOH T 331      28.526   7.913  -5.348  1.00  0.45           O  
HETATM  333  O   HOH T 332      44.678 -25.448  10.641  1.00  0.45           O  
HETATM  334  O   HOH T 333      48.795  19.627 -14.702  1.00  0.45           O  
HETATM  335  O   HOH T 334      42.811  19.257  -6.827  1.00  0.45           O  
HETATM  336  O   HOH T 335      55.940   1.773  22.168  1.00  0.45           O  
HETATM  337  O   HOH T 336      67.470 -25.974  45.257  1.00  0.45           O  
HETATM  338  O   HOH T 337      18.309   2.813  -4.229  1.00  0.45           O  
HETATM  339  O   HOH T 338      65.823  15.384   9.147  1.00  0.45           O  
HETATM  340  O   HOH T 339      61.354  14.234   8.768  1.00  0.45           O  
HETATM  341  O   HOH T 340      47.259  25.333   3.183  1.00  0.46           O  
HETATM  342  O   HOH T 341      56.089  -0.205  15.939  1.00  0.46           O  
HETATM  343  O   HOH T 342      63.184 -12.919  37.187  1.00  0.46           O  
HETATM  344  O   HOH T 343      47.912 -31.340  15.257  1.00  0.46           O  
HETATM  345  O   HOH T 344      41.390  -4.928  -7.147  1.00  0.46           O  
HETATM  346  O   HOH T 345      32.357 -16.778  42.960  1.00  0.46           O  
HETATM  347  O   HOH T 346      66.338 -17.262  31.753  1.00  0.46           O  
HETATM  348  O   HOH T 347      45.921  -3.814  42.663  1.00  0.46           O  
HETATM  349  O   HOH T 348      38.344  17.010  10.645  1.00  0.46           O  
HETATM  350  O   HOH T 349      45.915  10.099 -17.823  1.00  0.46           O  
HETATM  351  O   HOH T 350      63.942 -16.042  36.011  1.00  0.46           O  
HETATM  352  O   HOH T 351      74.409 -15.543  31.457  1.00  0.46           O  
HETATM  353  O   HOH T 352      51.394  -5.820   0.496  1.00  0.46           O  
HETATM  354  O   HOH T 353      50.078 -33.064  32.005  1.00  0.46           O  
HETATM  355  O   HOH T 354      37.011  -7.813  18.720  1.00  0.46           O  
HETATM  356  O   HOH T 355      47.515  19.417  20.125  1.00  0.46           O  
HETATM  357  O   HOH T 356      54.393 -35.121  30.577  1.00  0.46           O  
HETATM  358  O   HOH T 357      43.501  21.286  18.835  1.00  0.46           O  
HETATM  359  O   HOH T 358      67.554 -22.904  37.456  1.00  0.46           O  
HETATM  360  O   HOH T 359      38.947  -6.411  17.250  1.00  0.46           O  
HETATM  361  O   HOH T 360      54.586  -9.680  48.809  1.00  0.46           O  
HETATM  362  O   HOH T 361      38.754  -1.304  21.213  1.00  0.46           O  
HETATM  363  O   HOH T 362      36.229  -5.932  16.816  1.00  0.46           O  
HETATM  364  O   HOH T 363      31.182  15.522  12.850  1.00  0.46           O  
HETATM  365  O   HOH T 364      34.009 -26.137  25.109  1.00  0.46           O  
HETATM  366  O   HOH T 365      68.091 -12.881  35.753  1.00  0.46           O  
HETATM  367  O   HOH T 366      42.995  -9.998  13.920  1.00  0.47           O  
HETATM  368  O   HOH T 367      39.591  -3.705  20.275  1.00  0.47           O  
HETATM  369  O   HOH T 368      48.838  -2.391  38.755  1.00  0.47           O  
HETATM  370  O   HOH T 369      31.565  13.028 -10.039  1.00  0.47           O  
HETATM  371  O   HOH T 370      55.771 -28.756  47.974  1.00  0.47           O  
HETATM  372  O   HOH T 371      63.689   7.927  12.109  1.00  0.47           O  
HETATM  373  O   HOH T 372      30.327  10.828  -9.102  1.00  0.47           O  
HETATM  374  O   HOH T 373      41.373 -22.489  28.084  1.00  0.47           O  
HETATM  375  O   HOH T 374      39.241  -6.024   9.583  1.00  0.47           O  
HETATM  376  O   HOH T 375      39.747  -2.205  35.170  1.00  0.47           O  
HETATM  377  O   HOH T 376      31.670  10.193  17.733  1.00  0.47           O  
HETATM  378  O   HOH T 377      62.354  -3.891   3.153  1.00  0.47           O  
HETATM  379  O   HOH T 378      49.860   2.963 -16.985  1.00  0.47           O  
HETATM  380  O   HOH T 379      49.354  -5.167  38.669  1.00  0.47           O  
HETATM  381  O   HOH T 380      69.543 -10.670  31.456  1.00  0.47           O  
HETATM  382  O   HOH T 381      68.140 -17.570  25.958  1.00  0.47           O  
HETATM  383  O   HOH T 382      61.170  -1.913  -5.607  1.00  0.47           O  
HETATM  384  O   HOH T 383      68.674 -18.731  31.097  1.00  0.47           O  
HETATM  385  O   HOH T 384      31.114  -9.811  43.319  1.00  0.47           O  
HETATM  386  O   HOH T 385      43.821 -32.643  20.344  1.00  0.47           O  
HETATM  387  O   HOH T 386      54.420  26.269 -12.520  1.00  0.47           O  
HETATM  388  O   HOH T 387      37.014  -4.198  -7.298  1.00  0.47           O  
HETATM  389  O   HOH T 388      44.005 -31.863  41.274  1.00  0.47           O  
HETATM  390  O   HOH T 389      48.480 -32.002  20.719  1.00  0.47           O  
HETATM  391  O   HOH T 390      51.131  -6.583  -2.201  1.00  0.48           O  
HETATM  392  O   HOH T 391      48.485  20.179  16.474  1.00  0.48           O  
HETATM  393  O   HOH T 392      51.624  -3.203  27.563  1.00  0.48           O  
HETATM  394  O   HOH T 393      53.171 -37.239  29.027  1.00  0.48           O  
HETATM  395  O   HOH T 394      54.102  20.179   9.604  1.00  0.48           O  
HETATM  396  O   HOH T 395      27.586 -16.215  36.391  1.00  0.48           O  
HETATM  397  O   HOH T 396      39.505   4.416  24.017  1.00  0.48           O  
HETATM  398  O   HOH T 397      47.564  -1.209  24.536  1.00  0.48           O  
HETATM  399  O   HOH T 398      56.935  25.707 -13.563  1.00  0.48           O  
HETATM  400  O   HOH T 399      25.077  10.530  -1.477  1.00  0.48           O  
HETATM  401  O   HOH T 400      33.226 -14.179  42.122  1.00  0.48           O  
HETATM  402  O   HOH T 401      48.546 -10.585   7.269  1.00  0.48           O  
HETATM  403  O   HOH T 402      48.083 -30.691  46.169  1.00  0.48           O  
HETATM  404  O   HOH T 403      47.726  24.527   5.776  1.00  0.48           O  
HETATM  405  O   HOH T 404      38.087  -3.163  42.023  1.00  0.48           O  
HETATM  406  O   HOH T 405      50.377   3.081  29.267  1.00  0.48           O  
HETATM  407  O   HOH T 406      46.244 -28.209  26.868  1.00  0.48           O  
HETATM  408  O   HOH T 407      47.276 -12.815   8.209  1.00  0.48           O  
HETATM  409  O   HOH T 408      57.054  -8.795  44.698  1.00  0.48           O  
HETATM  410  O   HOH T 409      36.182 -17.486  44.720  1.00  0.49           O  
HETATM  411  O   HOH T 410      46.230  -2.202  37.462  1.00  0.49           O  
HETATM  412  O   HOH T 411      54.571 -29.145   9.923  1.00  0.49           O  
HETATM  413  O   HOH T 412      56.868 -10.281  47.178  1.00  0.49           O  
HETATM  414  O   HOH T 413      52.841  -5.181  -6.460  1.00  0.49           O  
HETATM  415  O   HOH T 414      50.656 -30.876  45.346  1.00  0.49           O  
HETATM  416  O   HOH T 415      59.151 -26.796  50.714  1.00  0.49           O  
HETATM  417  O   HOH T 416      53.420 -31.548   9.763  1.00  0.49           O  
HETATM  418  O   HOH T 417      44.724  -0.736  24.592  1.00  0.49           O  
HETATM  419  O   HOH T 418      53.556  -4.104  25.880  1.00  0.49           O  
HETATM  420  O   HOH T 419      37.999  -6.546  -5.948  1.00  0.49           O  
HETATM  421  O   HOH T 420      64.985 -15.983  45.388  1.00  0.49           O  
HETATM  422  O   HOH T 421      68.051 -15.040  52.024  1.00  0.49           O  
HETATM  423  O   HOH T 422      50.987 -10.469   6.304  1.00  0.49           O  
HETATM  424  O   HOH T 423      43.640 -11.366  11.483  1.00  0.49           O  
HETATM  425  O   HOH T 424      34.142 -18.684  46.124  1.00  0.49           O  
HETATM  426  O   HOH T 425      60.105  -8.813  22.400  1.00  0.49           O  
HETATM  427  O   HOH T 426      37.725 -19.252  46.372  1.00  0.49           O  
HETATM  428  O   HOH T 427      56.875   0.043  13.272  1.00  0.49           O  
HETATM  429  O   HOH T 428      43.507  -9.998   8.911  1.00  0.49           O  
HETATM  430  O   HOH T 429      55.185  -4.915  42.355  1.00  0.49           O  
HETATM  431  O   HOH T 430      37.592 -24.573  39.698  1.00  0.49           O  
HETATM  432  O   HOH T 431      64.968 -24.825  25.663  1.00  0.49           O  
HETATM  433  O   HOH T 432      47.215   3.049 -17.319  1.00  0.50           O  
HETATM  434  O   HOH T 433      32.383  17.290  16.219  1.00  0.50           O  
HETATM  435  O   HOH T 434      24.579   1.447  -6.270  1.00  0.50           O  
HETATM  436  O   HOH T 435      30.054 -15.593  24.615  1.00  0.50           O  
HETATM  437  O   HOH T 436      60.858 -26.111  11.141  1.00  0.50           O  
HETATM  438  O   HOH T 437      47.992 -32.006  17.977  1.00  0.50           O  
HETATM  439  O   HOH T 438      58.240  11.315 -21.365  1.00  0.50           O  
HETATM  440  O   HOH T 439      38.622  -8.193  44.687  1.00  0.50           O  
HETATM  441  O   HOH T 440      64.760  11.706  -0.542  1.00  0.50           O  
HETATM  442  O   HOH T 441      39.698  15.532  20.988  1.00  0.50           O  
HETATM  443  O   HOH T 442      65.629 -26.668  23.508  1.00  0.50           O  
HETATM  444  O   HOH T 443      51.900  -1.585  10.147  1.00  0.50           O  
HETATM  445  O   HOH T 444      64.315 -24.221  22.992  1.00  0.50           O  
HETATM  446  O   HOH T 445      25.747 -18.114  31.768  1.00  0.50           O  
HETATM  447  O   HOH T 446      39.351  -4.703  -8.943  1.00  0.50           O  
HETATM  448  O   HOH T 447      40.254 -24.160  39.205  1.00  0.51           O  
HETATM  449  O   HOH T 448      42.429  -0.982  27.846  1.00  0.51           O  
HETATM  450  O   HOH T 449      30.685 -17.759  40.802  1.00  0.51           O  
HETATM  451  O   HOH T 450      60.527   6.524  -9.993  1.00  0.51           O  
HETATM  452  O   HOH T 451      61.622   1.607  17.082  1.00  0.51           O  
HETATM  453  O   HOH T 452      53.923   4.156 -19.034  1.00  0.51           O  
HETATM  454  O   HOH T 453      47.612  -2.434  34.936  1.00  0.51           O  
HETATM  455  O   HOH T 454      35.081 -16.373  42.313  1.00  0.51           O  
HETATM  456  O   HOH T 455      19.570   2.299  -0.468  1.00  0.51           O  
HETATM  457  O   HOH T 456      53.392 -22.138   5.442  1.00  0.51           O  
HETATM  458  O   HOH T 457      64.758   8.986  14.504  1.00  0.51           O  
HETATM  459  O   HOH T 458      58.587  -0.763  -1.840  1.00  0.51           O  
HETATM  460  O   HOH T 459      55.929  -6.591  21.116  1.00  0.51           O  
HETATM  461  O   HOH T 460      63.821 -13.725  43.405  1.00  0.51           O  
HETATM  462  O   HOH T 461      46.100  20.702  18.075  1.00  0.51           O  
HETATM  463  O   HOH T 462      68.016 -15.624  10.494  1.00  0.51           O  
HETATM  464  O   HOH T 463      35.281  10.665  24.507  1.00  0.51           O  
HETATM  465  O   HOH T 464      59.303  15.626   4.688  1.00  0.51           O  
HETATM  466  O   HOH T 465      57.313 -11.041  15.234  1.00  0.51           O  
HETATM  467  O   HOH T 466      27.229 -17.317  29.500  1.00  0.51           O  
HETATM  468  O   HOH T 467      61.614 -15.469  18.574  1.00  0.51           O  
HETATM  469  O   HOH T 468      51.285   0.762 -13.284  1.00  0.51           O  
HETATM  470  O   HOH T 469      54.155  -8.716  20.895  1.00  0.51           O  
HETATM  471  O   HOH T 470      64.979 -25.468  28.337  1.00  0.51           O  
HETATM  472  O   HOH T 471      35.383  -9.917  18.018  1.00  0.51           O  
HETATM  473  O   HOH T 472      29.741   6.446  -8.695  1.00  0.51           O  
HETATM  474  O   HOH T 473      38.153  -2.537 -12.083  1.00  0.51           O  
HETATM  475  O   HOH T 474      64.415 -14.595  47.698  1.00  0.52           O  
HETATM  476  O   HOH T 475      64.180  -8.957  36.671  1.00  0.52           O  
HETATM  477  O   HOH T 476      62.477 -12.979  12.907  1.00  0.52           O  
HETATM  478  O   HOH T 477      57.340 -30.721  24.296  1.00  0.52           O  
HETATM  479  O   HOH T 478      63.860  14.645   7.380  1.00  0.52           O  
HETATM  480  O   HOH T 479      48.792 -29.565  43.683  1.00  0.52           O  
HETATM  481  O   HOH T 480      42.865  17.939   9.027  1.00  0.52           O  
HETATM  482  O   HOH T 481      45.767 -11.031   9.811  1.00  0.52           O  
HETATM  483  O   HOH T 482      57.356   7.186 -13.233  1.00  0.52           O  
HETATM  484  O   HOH T 483      69.554 -21.857  38.872  1.00  0.52           O  
HETATM  485  O   HOH T 484      37.401  -5.095  19.201  1.00  0.52           O  
HETATM  486  O   HOH T 485      44.800   9.779 -20.390  1.00  0.52           O  
HETATM  487  O   HOH T 486      62.547 -10.630  53.523  1.00  0.52           O  
HETATM  488  O   HOH T 487      42.041  -1.568  25.187  1.00  0.52           O  
HETATM  489  O   HOH T 488      52.667  -2.397  39.889  1.00  0.52           O  
HETATM  490  O   HOH T 489      63.234 -11.507  44.899  1.00  0.52           O  
HETATM  491  O   HOH T 490      60.846  15.621   2.351  1.00  0.53           O  
HETATM  492  O   HOH T 491      28.796 -17.558  25.977  1.00  0.53           O  
HETATM  493  O   HOH T 492      29.530 -17.045  22.341  1.00  0.53           O  
HETATM  494  O   HOH T 493      69.691 -17.661  11.354  1.00  0.53           O  
HETATM  495  O   HOH T 494      42.017 -24.511  10.438  1.00  0.53           O  
HETATM  496  O   HOH T 495      65.520 -26.066  30.890  1.00  0.53           O  
HETATM  497  O   HOH T 496      65.710  11.408  14.579  1.00  0.53           O  
HETATM  498  O   HOH T 497      44.261  10.781  26.957  1.00  0.53           O  
HETATM  499  O   HOH T 498      46.273 -28.994  44.777  1.00  0.53           O  
HETATM  500  O   HOH T 499      43.853  -7.600   7.297  1.00  0.53           O  
HETATM  501  O   HOH T 500      63.255  13.221  -8.170  1.00  0.53           O  
HETATM  502  O   HOH T 501      34.636 -28.550  21.862  1.00  0.53           O  
HETATM  503  O   HOH T 502      24.666 -16.526  29.765  1.00  0.53           O  
HETATM  504  O   HOH T 503      57.435  -6.514  42.810  1.00  0.53           O  
HETATM  505  O   HOH T 504      58.297  26.661  -9.808  1.00  0.53           O  
HETATM  506  O   HOH T 505      34.226  13.201  -9.652  1.00  0.53           O  
HETATM  507  O   HOH T 506      59.263  25.509 -12.143  1.00  0.53           O  
HETATM  508  O   HOH T 507      52.580 -29.130  21.109  1.00  0.53           O  
HETATM  509  O   HOH T 508      46.983 -28.193  42.125  1.00  0.53           O  
HETATM  510  O   HOH T 509      52.092 -33.532  13.013  1.00  0.53           O  
HETATM  511  O   HOH T 510      35.428  17.940   2.514  1.00  0.54           O  
HETATM  512  O   HOH T 511      47.569  -3.889  40.466  1.00  0.54           O  
HETATM  513  O   HOH T 512      66.492  14.317   6.682  1.00  0.54           O  
HETATM  514  O   HOH T 513      31.713  15.395  -2.252  1.00  0.54           O  
HETATM  515  O   HOH T 514      25.915  14.538  -2.457  1.00  0.54           O  
HETATM  516  O   HOH T 515      40.642 -27.514  25.922  1.00  0.54           O  
HETATM  517  O   HOH T 516      66.564 -15.207  35.738  1.00  0.54           O  
HETATM  518  O   HOH T 517      63.198  -4.776   0.682  1.00  0.54           O  
HETATM  519  O   HOH T 518      56.711 -13.715   8.098  1.00  0.54           O  
HETATM  520  O   HOH T 519      70.355  -9.063  29.221  1.00  0.54           O  
HETATM  521  O   HOH T 520      51.434  -8.118   1.844  1.00  0.54           O  
HETATM  522  O   HOH T 521      49.390  -7.372   9.103  1.00  0.54           O  
HETATM  523  O   HOH T 522      65.512 -10.658  21.391  1.00  0.54           O  
HETATM  524  O   HOH T 523      42.427  -8.081  -3.130  1.00  0.54           O  
HETATM  525  O   HOH T 524      49.482 -19.493  48.427  1.00  0.54           O  
HETATM  526  O   HOH T 525      37.289 -12.196   8.112  1.00  0.54           O  
HETATM  527  O   HOH T 526      19.388   4.780   4.001  1.00  0.54           O  
HETATM  528  O   HOH T 527      50.234  19.243  24.195  1.00  0.54           O  
HETATM  529  O   HOH T 528      32.184 -23.631  41.157  1.00  0.54           O  
HETATM  530  O   HOH T 529      31.549   0.097  -6.355  1.00  0.54           O  
HETATM  531  O   HOH T 530      40.485  15.429  -8.024  1.00  0.55           O  
HETATM  532  O   HOH T 531      32.330 -23.702  24.982  1.00  0.55           O  
HETATM  533  O   HOH T 532      59.392   2.083  20.550  1.00  0.55           O  
HETATM  534  O   HOH T 533      43.840 -31.100  22.735  1.00  0.55           O  
HETATM  535  O   HOH T 534      26.753   8.089  11.296  1.00  0.55           O  
HETATM  536  O   HOH T 535      47.099 -10.795  -7.870  1.00  0.55           O  
HETATM  537  O   HOH T 536      31.579  10.599 -11.509  1.00  0.55           O  
HETATM  538  O   HOH T 537      49.228  -2.362  28.729  1.00  0.55           O  
HETATM  539  O   HOH T 538      36.917  19.536  -3.552  1.00  0.55           O  
HETATM  540  O   HOH T 539      49.355   0.144  30.050  1.00  0.55           O  
HETATM  541  O   HOH T 540      54.330  -2.022   7.198  1.00  0.55           O  
HETATM  542  O   HOH T 541      49.999  17.923  13.556  1.00  0.55           O  
HETATM  543  O   HOH T 542      57.579  -0.888  18.405  1.00  0.55           O  
HETATM  544  O   HOH T 543      38.149  18.578  12.957  1.00  0.55           O  
HETATM  545  O   HOH T 544      59.906  18.259 -13.134  1.00  0.55           O  
HETATM  546  O   HOH T 545      43.626  18.679  22.654  1.00  0.56           O  
HETATM  547  O   HOH T 546      60.772  13.607 -13.989  1.00  0.56           O  
HETATM  548  O   HOH T 547      35.665 -16.335  27.877  1.00  0.56           O  
HETATM  549  O   HOH T 548      37.292  -0.486 -10.757  1.00  0.56           O  
HETATM  550  O   HOH T 549      40.478  -9.788   2.479  1.00  0.56           O  
HETATM  551  O   HOH T 550      69.590 -19.637   8.081  1.00  0.56           O  
HETATM  552  O   HOH T 551      40.594  22.686  -8.079  1.00  0.56           O  
HETATM  553  O   HOH T 552      66.485 -10.577  36.754  1.00  0.56           O  
HETATM  554  O   HOH T 553      27.582  16.171   2.434  1.00  0.56           O  
HETATM  555  O   HOH T 554      59.699   7.899 -12.289  1.00  0.56           O  
HETATM  556  O   HOH T 555      42.029  11.460 -13.753  1.00  0.56           O  
HETATM  557  O   HOH T 556      56.762   4.983 -11.759  1.00  0.56           O  
HETATM  558  O   HOH T 557      65.493 -10.495  42.104  1.00  0.56           O  
HETATM  559  O   HOH T 558      60.624  -7.333  30.882  1.00  0.56           O  
HETATM  560  O   HOH T 559      41.346 -31.561  19.277  1.00  0.56           O  
HETATM  561  O   HOH T 560      61.500  16.913  -0.007  1.00  0.56           O  
HETATM  562  O   HOH T 561      64.162  -7.304  33.039  1.00  0.56           O  
HETATM  563  O   HOH T 562      68.972 -21.176  44.591  1.00  0.56           O  
HETATM  564  O   HOH T 563      46.634 -37.336  29.091  1.00  0.56           O  
HETATM  565  O   HOH T 564      28.096 -19.491  30.673  1.00  0.57           O  
HETATM  566  O   HOH T 565      48.551 -24.389  43.949  1.00  0.57           O  
HETATM  567  O   HOH T 566      34.843   0.725 -11.542  1.00  0.57           O  
HETATM  568  O   HOH T 567      59.795   8.759  22.796  1.00  0.57           O  
HETATM  569  O   HOH T 568      36.456  -2.973  -9.865  1.00  0.57           O  
HETATM  570  O   HOH T 569      58.462  -3.290  37.284  1.00  0.57           O  
HETATM  571  O   HOH T 570      49.473 -16.196  52.810  1.00  0.57           O  
HETATM  572  O   HOH T 571      30.661 -21.076  25.636  1.00  0.57           O  
HETATM  573  O   HOH T 572      54.344 -31.581  18.543  1.00  0.57           O  
HETATM  574  O   HOH T 573      58.610 -29.349  18.427  1.00  0.57           O  
HETATM  575  O   HOH T 574      30.726 -15.253  41.584  1.00  0.57           O  
HETATM  576  O   HOH T 575      52.038 -32.411  15.619  1.00  0.57           O  
HETATM  577  O   HOH T 576      65.737 -20.954  13.958  1.00  0.57           O  
HETATM  578  O   HOH T 577      47.655   0.042  38.076  1.00  0.58           O  
HETATM  579  O   HOH T 578      52.598 -30.267  18.697  1.00  0.58           O  
HETATM  580  O   HOH T 579      63.244   7.197 -10.458  1.00  0.59           O  
HETATM  581  O   HOH T 580      56.891  12.177 -19.022  1.00  0.59           O  
HETATM  582  O   HOH T 581      37.168  14.550   9.702  1.00  0.60           O  
HETATM  583  O   HOH T 582      59.928   3.116  -6.423  1.00  0.60           O  
TER     584      HOH T 582 
