# Supplementary material for: Accurate Prediction of Hydration Sites of Proteins Using Energy Model With Atom Embedding
Source: Front Mol Biosci. 2021 Sep 20;8:756075. doi: 10.3389/fmolb.2021.756075 (PMC8488165; doi:10.3389/fmolb.2021.756075)
Supplement: Supplementary file 1 [file DataSheet1.ZIP › Data Sheet 1/Our_result_pdb/our_dataset_output/2PDI_watersite.pdb]

HEADER                                                        XXXX


JRNL        PMID   -1
HETATM    1  O   HOH T   0      22.819  -6.353  13.739  1.00  0.17           O  
HETATM    2  O   HOH T   1      15.256  12.031  25.878  1.00  0.18           O  
HETATM    3  O   HOH T   2      25.708   3.342  27.846  1.00  0.18           O  
HETATM    4  O   HOH T   3      11.349   0.859  26.677  1.00  0.19           O  
HETATM    5  O   HOH T   4       4.272  -5.539   7.398  1.00  0.19           O  
HETATM    6  O   HOH T   5      11.070   3.015  25.016  1.00  0.19           O  
HETATM    7  O   HOH T   6      11.445  14.242   6.530  1.00  0.19           O  
HETATM    8  O   HOH T   7      41.057   0.948  33.709  1.00  0.20           O  
HETATM    9  O   HOH T   8      -0.159 -15.733  34.464  1.00  0.21           O  
HETATM   10  O   HOH T   9      16.766  10.636  32.421  1.00  0.21           O  
HETATM   11  O   HOH T  10       0.896   5.269  30.861  1.00  0.21           O  
HETATM   12  O   HOH T  11       6.517 -13.211   6.808  1.00  0.22           O  
HETATM   13  O   HOH T  12      14.518 -21.227  28.486  1.00  0.22           O  
HETATM   14  O   HOH T  13       2.078   6.433  28.634  1.00  0.22           O  
HETATM   15  O   HOH T  14      18.821   5.653   5.720  1.00  0.22           O  
HETATM   16  O   HOH T  15       0.964 -15.328  37.027  1.00  0.23           O  
HETATM   17  O   HOH T  16      17.218  -5.578   2.227  1.00  0.23           O  
HETATM   18  O   HOH T  17      30.215  -4.077  34.841  1.00  0.23           O  
HETATM   19  O   HOH T  18      32.931  18.371  35.302  1.00  0.23           O  
HETATM   20  O   HOH T  19       7.234  12.640  24.937  1.00  0.24           O  
HETATM   21  O   HOH T  20      -2.088  -5.149  42.354  1.00  0.25           O  
HETATM   22  O   HOH T  21      11.311 -17.953  23.502  1.00  0.25           O  
HETATM   23  O   HOH T  22       3.480  -6.497  19.343  1.00  0.25           O  
HETATM   24  O   HOH T  23      30.784  -2.740  23.047  1.00  0.25           O  
HETATM   25  O   HOH T  24      13.149   4.782  36.840  1.00  0.25           O  
HETATM   26  O   HOH T  25       8.326  -2.602  13.116  1.00  0.25           O  
HETATM   27  O   HOH T  26      20.332   7.498  10.274  1.00  0.25           O  
HETATM   28  O   HOH T  27      15.071  -9.762  31.389  1.00  0.25           O  
HETATM   29  O   HOH T  28      18.696   2.508  16.804  1.00  0.26           O  
HETATM   30  O   HOH T  29      19.097  23.683  16.728  1.00  0.26           O  
HETATM   31  O   HOH T  30      -4.969  -0.187  14.605  1.00  0.26           O  
HETATM   32  O   HOH T  31      23.806   7.913  26.424  1.00  0.26           O  
HETATM   33  O   HOH T  32      33.109  14.411  23.793  1.00  0.26           O  
HETATM   34  O   HOH T  33      11.711   1.523  37.133  1.00  0.26           O  
HETATM   35  O   HOH T  34      24.461 -17.705  25.176  1.00  0.26           O  
HETATM   36  O   HOH T  35      -5.971  -3.715  12.580  1.00  0.26           O  
HETATM   37  O   HOH T  36      -5.762   5.416  25.145  1.00  0.26           O  
HETATM   38  O   HOH T  37      36.372  -7.572  21.601  1.00  0.26           O  
HETATM   39  O   HOH T  38      19.782  -2.230  -3.220  1.00  0.27           O  
HETATM   40  O   HOH T  39      12.645 -13.784  17.019  1.00  0.27           O  
HETATM   41  O   HOH T  40      10.426   1.608  42.401  1.00  0.27           O  
HETATM   42  O   HOH T  41      16.432 -14.748  10.576  1.00  0.27           O  
HETATM   43  O   HOH T  42      19.852 -13.201   4.959  1.00  0.27           O  
HETATM   44  O   HOH T  43      38.363   7.621  30.941  1.00  0.27           O  
HETATM   45  O   HOH T  44      11.196 -16.717   3.251  1.00  0.27           O  
HETATM   46  O   HOH T  45      13.294 -13.749  14.284  1.00  0.28           O  
HETATM   47  O   HOH T  46      21.516   0.546  15.690  1.00  0.28           O  
HETATM   48  O   HOH T  47      22.467  10.672  16.024  1.00  0.28           O  
HETATM   49  O   HOH T  48      36.461  -0.366  37.280  1.00  0.28           O  
HETATM   50  O   HOH T  49      12.151   6.043   5.111  1.00  0.28           O  
HETATM   51  O   HOH T  50      -1.459  -0.507   5.622  1.00  0.28           O  
HETATM   52  O   HOH T  51      12.345  -5.648  48.093  1.00  0.28           O  
HETATM   53  O   HOH T  52      21.776 -14.384  23.636  1.00  0.28           O  
HETATM   54  O   HOH T  53       2.023   9.126  21.727  1.00  0.28           O  
HETATM   55  O   HOH T  54      -3.882   2.849   8.813  1.00  0.28           O  
HETATM   56  O   HOH T  55      29.784  -8.762  15.090  1.00  0.28           O  
HETATM   57  O   HOH T  56      26.747 -15.568  31.022  1.00  0.29           O  
HETATM   58  O   HOH T  57      20.591  -9.584  12.770  1.00  0.29           O  
HETATM   59  O   HOH T  58       2.995   1.380  46.230  1.00  0.29           O  
HETATM   60  O   HOH T  59       4.849  -7.830   1.252  1.00  0.29           O  
HETATM   61  O   HOH T  60      29.341  15.239  40.637  1.00  0.29           O  
HETATM   62  O   HOH T  61       2.871 -11.385   9.710  1.00  0.30           O  
HETATM   63  O   HOH T  62     -11.013  12.355  17.954  1.00  0.30           O  
HETATM   64  O   HOH T  63      32.631  -4.485  33.460  1.00  0.30           O  
HETATM   65  O   HOH T  64      -5.832   7.066  12.911  1.00  0.30           O  
HETATM   66  O   HOH T  65       0.295  14.344  20.557  1.00  0.30           O  
HETATM   67  O   HOH T  66       0.757   0.541   7.004  1.00  0.31           O  
HETATM   68  O   HOH T  67      32.410 -14.741  16.913  1.00  0.31           O  
HETATM   69  O   HOH T  68      17.057 -17.330   1.763  1.00  0.31           O  
HETATM   70  O   HOH T  69      34.060 -10.430  25.885  1.00  0.31           O  
HETATM   71  O   HOH T  70      16.454   4.338   3.372  1.00  0.31           O  
HETATM   72  O   HOH T  71      13.808  -2.447  -1.139  1.00  0.31           O  
HETATM   73  O   HOH T  72     -10.406  -4.922  30.566  1.00  0.31           O  
HETATM   74  O   HOH T  73      36.101   4.329  21.178  1.00  0.31           O  
HETATM   75  O   HOH T  74       4.100  -0.813  44.878  1.00  0.31           O  
HETATM   76  O   HOH T  75       3.776 -11.832  22.128  1.00  0.31           O  
HETATM   77  O   HOH T  76      27.426 -12.913  22.421  1.00  0.31           O  
HETATM   78  O   HOH T  77      10.571 -18.057  33.233  1.00  0.31           O  
HETATM   79  O   HOH T  78      20.714  14.864  25.760  1.00  0.31           O  
HETATM   80  O   HOH T  79       7.549  -1.165   4.294  1.00  0.31           O  
HETATM   81  O   HOH T  80      11.415  19.006  11.809  1.00  0.32           O  
HETATM   82  O   HOH T  81      16.890  22.699  18.182  1.00  0.32           O  
HETATM   83  O   HOH T  82      12.093  16.995  25.229  1.00  0.32           O  
HETATM   84  O   HOH T  83       5.014   5.405  35.263  1.00  0.32           O  
HETATM   85  O   HOH T  84      45.392  -5.090  33.072  1.00  0.32           O  
HETATM   86  O   HOH T  85      16.140   8.798   5.547  1.00  0.32           O  
HETATM   87  O   HOH T  86      35.040  17.658  36.987  1.00  0.32           O  
HETATM   88  O   HOH T  87      -0.952  -8.838  34.584  1.00  0.32           O  
HETATM   89  O   HOH T  88       6.250 -16.288  25.086  1.00  0.32           O  
HETATM   90  O   HOH T  89      11.968 -18.099  35.531  1.00  0.33           O  
HETATM   91  O   HOH T  90      12.677 -16.318   5.563  1.00  0.33           O  
HETATM   92  O   HOH T  91      24.863  11.975  16.069  1.00  0.33           O  
HETATM   93  O   HOH T  92      28.666 -14.950  23.805  1.00  0.33           O  
HETATM   94  O   HOH T  93      26.412   3.860  12.929  1.00  0.33           O  
HETATM   95  O   HOH T  94      -7.837  -4.967  26.449  1.00  0.33           O  
HETATM   96  O   HOH T  95      -6.178  -7.104  26.518  1.00  0.33           O  
HETATM   97  O   HOH T  96      41.490  16.865  33.248  1.00  0.33           O  
HETATM   98  O   HOH T  97      10.819 -15.722  43.247  1.00  0.33           O  
HETATM   99  O   HOH T  98      19.366   7.472  12.881  1.00  0.33           O  
HETATM  100  O   HOH T  99       1.221  11.858  21.700  1.00  0.33           O  
HETATM  101  O   HOH T 100      18.725  -4.329  34.278  1.00  0.33           O  
HETATM  102  O   HOH T 101       6.429 -12.889  22.542  1.00  0.34           O  
HETATM  103  O   HOH T 102      19.731   4.808  15.751  1.00  0.34           O  
HETATM  104  O   HOH T 103      -1.668  -4.607  49.267  1.00  0.34           O  
HETATM  105  O   HOH T 104      20.017 -15.741  25.411  1.00  0.34           O  
HETATM  106  O   HOH T 105      -2.987  -3.600  44.591  1.00  0.34           O  
HETATM  107  O   HOH T 106      -4.216 -16.172  36.543  1.00  0.34           O  
HETATM  108  O   HOH T 107      -1.814 -15.375  25.567  1.00  0.34           O  
HETATM  109  O   HOH T 108      37.245 -11.289  28.143  1.00  0.34           O  
HETATM  110  O   HOH T 109       7.650   4.408   4.696  1.00  0.34           O  
HETATM  111  O   HOH T 110       1.914  -9.688  19.496  1.00  0.34           O  
HETATM  112  O   HOH T 111      18.967 -11.830  13.196  1.00  0.34           O  
HETATM  113  O   HOH T 112      38.636  -1.053  24.816  1.00  0.34           O  
HETATM  114  O   HOH T 113      19.293 -13.163  15.643  1.00  0.35           O  
HETATM  115  O   HOH T 114      -3.231   8.085  27.539  1.00  0.35           O  
HETATM  116  O   HOH T 115      20.254 -16.001   4.474  1.00  0.35           O  
HETATM  117  O   HOH T 116      14.287  14.076  27.358  1.00  0.35           O  
HETATM  118  O   HOH T 117      37.054  -0.155  22.674  1.00  0.35           O  
HETATM  119  O   HOH T 118      13.686 -16.085   8.086  1.00  0.35           O  
HETATM  120  O   HOH T 119       3.915  -7.400  16.700  1.00  0.35           O  
HETATM  121  O   HOH T 120      33.318  19.952  27.646  1.00  0.35           O  
HETATM  122  O   HOH T 121      29.933   7.058  44.466  1.00  0.35           O  
HETATM  123  O   HOH T 122      38.832 -15.269  16.874  1.00  0.35           O  
HETATM  124  O   HOH T 123      16.128  20.449  16.643  1.00  0.35           O  
HETATM  125  O   HOH T 124      31.985  -6.686  21.887  1.00  0.35           O  
HETATM  126  O   HOH T 125     -12.640  10.940  19.739  1.00  0.35           O  
HETATM  127  O   HOH T 126      17.820  18.685  28.239  1.00  0.35           O  
HETATM  128  O   HOH T 127      -2.965  -3.331  31.441  1.00  0.36           O  
HETATM  129  O   HOH T 128      18.047   0.692   1.418  1.00  0.36           O  
HETATM  130  O   HOH T 129      43.525  -3.086  33.609  1.00  0.36           O  
HETATM  131  O   HOH T 130      17.605   5.848  14.370  1.00  0.36           O  
HETATM  132  O   HOH T 131      27.036  -3.001  12.792  1.00  0.36           O  
HETATM  133  O   HOH T 132      15.150  12.123  35.861  1.00  0.36           O  
HETATM  134  O   HOH T 133     -10.156  -3.444  26.127  1.00  0.36           O  
HETATM  135  O   HOH T 134      36.563   1.563  20.593  1.00  0.36           O  
HETATM  136  O   HOH T 135      -0.104   2.092  34.044  1.00  0.36           O  
HETATM  137  O   HOH T 136      23.806 -12.988  28.865  1.00  0.36           O  
HETATM  138  O   HOH T 137      17.867 -17.573  24.993  1.00  0.36           O  
HETATM  139  O   HOH T 138      -6.096  -6.530  13.270  1.00  0.36           O  
HETATM  140  O   HOH T 139      -7.796   6.108  11.215  1.00  0.36           O  
HETATM  141  O   HOH T 140      36.804   3.385  15.065  1.00  0.36           O  
HETATM  142  O   HOH T 141      30.629   9.131  42.950  1.00  0.36           O  
HETATM  143  O   HOH T 142      39.762   8.135  28.533  1.00  0.37           O  
HETATM  144  O   HOH T 143      -7.381  13.597  20.328  1.00  0.37           O  
HETATM  145  O   HOH T 144      19.664  13.568   8.865  1.00  0.37           O  
HETATM  146  O   HOH T 145       5.835   3.926  37.387  1.00  0.37           O  
HETATM  147  O   HOH T 146      32.416  -3.685  36.218  1.00  0.37           O  
HETATM  148  O   HOH T 147      29.314  17.297  29.718  1.00  0.37           O  
HETATM  149  O   HOH T 148       5.770   3.295  39.937  1.00  0.37           O  
HETATM  150  O   HOH T 149      -3.456  10.844  11.444  1.00  0.37           O  
HETATM  151  O   HOH T 150     -10.693  10.120  24.044  1.00  0.37           O  
HETATM  152  O   HOH T 151      28.436  -6.979  16.762  1.00  0.37           O  
HETATM  153  O   HOH T 152       8.786  19.264  25.271  1.00  0.37           O  
HETATM  154  O   HOH T 153      28.981  11.179  42.363  1.00  0.37           O  
HETATM  155  O   HOH T 154      16.618 -21.677  26.816  1.00  0.37           O  
HETATM  156  O   HOH T 155      26.513 -16.783  23.646  1.00  0.38           O  
HETATM  157  O   HOH T 156     -13.095  -3.253  16.096  1.00  0.38           O  
HETATM  158  O   HOH T 157      32.455  19.493  25.051  1.00  0.38           O  
HETATM  159  O   HOH T 158      18.548 -10.842   9.331  1.00  0.38           O  
HETATM  160  O   HOH T 159      19.684   3.792  43.485  1.00  0.38           O  
HETATM  161  O   HOH T 160      -1.010 -15.277  28.284  1.00  0.38           O  
HETATM  162  O   HOH T 161      33.192   1.680  14.764  1.00  0.38           O  
HETATM  163  O   HOH T 162      16.499 -16.246   8.218  1.00  0.38           O  
HETATM  164  O   HOH T 163      -4.140  -8.284  37.311  1.00  0.38           O  
HETATM  165  O   HOH T 164      -5.649   9.826  12.801  1.00  0.38           O  
HETATM  166  O   HOH T 165       2.989  18.800   7.208  1.00  0.38           O  
HETATM  167  O   HOH T 166      34.432   3.886  13.683  1.00  0.38           O  
HETATM  168  O   HOH T 167      28.530 -14.507  16.351  1.00  0.39           O  
HETATM  169  O   HOH T 168      14.590 -15.397  24.632  1.00  0.39           O  
HETATM  170  O   HOH T 169       8.728 -19.007  23.004  1.00  0.39           O  
HETATM  171  O   HOH T 170      39.116  -1.775  22.195  1.00  0.39           O  
HETATM  172  O   HOH T 171      -4.230   1.121  35.641  1.00  0.39           O  
HETATM  173  O   HOH T 172      -0.243   4.712  35.059  1.00  0.39           O  
HETATM  174  O   HOH T 173      19.526  -8.598  45.480  1.00  0.39           O  
HETATM  175  O   HOH T 174      21.137 -10.084   8.459  1.00  0.39           O  
HETATM  176  O   HOH T 175      -8.300  -7.109  28.192  1.00  0.39           O  
HETATM  177  O   HOH T 176      18.583 -12.898   7.442  1.00  0.39           O  
HETATM  178  O   HOH T 177      -2.855 -15.288  34.251  1.00  0.40           O  
HETATM  179  O   HOH T 178      25.138 -10.730   8.679  1.00  0.40           O  
HETATM  180  O   HOH T 179      25.363   7.456  11.089  1.00  0.40           O  
HETATM  181  O   HOH T 180      38.160  -6.404  20.377  1.00  0.40           O  
HETATM  182  O   HOH T 181      10.164  11.779  38.565  1.00  0.40           O  
HETATM  183  O   HOH T 182      19.606 -19.733  -2.236  1.00  0.40           O  
HETATM  184  O   HOH T 183      18.784  13.872  33.409  1.00  0.40           O  
HETATM  185  O   HOH T 184      18.582 -19.068   0.263  1.00  0.40           O  
HETATM  186  O   HOH T 185      11.518 -18.504  10.521  1.00  0.40           O  
HETATM  187  O   HOH T 186      18.111  -9.180  43.205  1.00  0.40           O  
HETATM  188  O   HOH T 187      -8.087   2.254   9.189  1.00  0.40           O  
HETATM  189  O   HOH T 188      16.671  22.949  23.741  1.00  0.40           O  
HETATM  190  O   HOH T 189     -11.790   7.199  21.471  1.00  0.40           O  
HETATM  191  O   HOH T 190       4.827 -12.481  11.501  1.00  0.40           O  
HETATM  192  O   HOH T 191      -5.130  -8.951  12.253  1.00  0.40           O  
HETATM  193  O   HOH T 192      35.845   7.273  16.745  1.00  0.40           O  
HETATM  194  O   HOH T 193      -8.809  -6.382  14.349  1.00  0.40           O  
HETATM  195  O   HOH T 194      -2.977 -15.274  38.810  1.00  0.40           O  
HETATM  196  O   HOH T 195      10.706  10.703  41.274  1.00  0.41           O  
HETATM  197  O   HOH T 196      29.068  -5.773  36.719  1.00  0.41           O  
HETATM  198  O   HOH T 197      14.436  25.363  21.081  1.00  0.41           O  
HETATM  199  O   HOH T 198      11.894  15.523  27.623  1.00  0.41           O  
HETATM  200  O   HOH T 199     -11.538  13.305  15.358  1.00  0.41           O  
HETATM  201  O   HOH T 200      34.365  10.194  18.976  1.00  0.41           O  
HETATM  202  O   HOH T 201      23.336  -9.112  10.049  1.00  0.41           O  
HETATM  203  O   HOH T 202       5.911  16.560  21.735  1.00  0.41           O  
HETATM  204  O   HOH T 203      30.140  -4.533  26.612  1.00  0.41           O  
HETATM  205  O   HOH T 204      34.764  -3.477  34.940  1.00  0.41           O  
HETATM  206  O   HOH T 205      25.972 -11.724  30.233  1.00  0.41           O  
HETATM  207  O   HOH T 206      25.677   5.115   6.801  1.00  0.41           O  
HETATM  208  O   HOH T 207       8.683  18.669  11.693  1.00  0.41           O  
HETATM  209  O   HOH T 208      26.648   8.255  17.070  1.00  0.41           O  
HETATM  210  O   HOH T 209      16.308 -15.270  35.810  1.00  0.41           O  
HETATM  211  O   HOH T 210      24.373   6.438   8.635  1.00  0.41           O  
HETATM  212  O   HOH T 211      24.323 -15.181  23.591  1.00  0.41           O  
HETATM  213  O   HOH T 212       8.838   5.228   2.260  1.00  0.42           O  
HETATM  214  O   HOH T 213      36.107   8.207  19.388  1.00  0.42           O  
HETATM  215  O   HOH T 214      18.487  -6.309  46.420  1.00  0.42           O  
HETATM  216  O   HOH T 215       8.091   4.341  38.845  1.00  0.42           O  
HETATM  217  O   HOH T 216      19.100 -10.596  47.368  1.00  0.42           O  
HETATM  218  O   HOH T 217      -3.202  -3.200  47.392  1.00  0.42           O  
HETATM  219  O   HOH T 218       9.833 -14.919   1.672  1.00  0.42           O  
HETATM  220  O   HOH T 219      11.667  -1.806   0.628  1.00  0.42           O  
HETATM  221  O   HOH T 220      34.056  -8.260  21.132  1.00  0.42           O  
HETATM  222  O   HOH T 221       8.084 -18.854  20.338  1.00  0.42           O  
HETATM  223  O   HOH T 222       8.032  -6.985  18.120  1.00  0.42           O  
HETATM  224  O   HOH T 223       8.217   6.420  40.591  1.00  0.42           O  
HETATM  225  O   HOH T 224      -2.476  -9.359  13.217  1.00  0.42           O  
HETATM  226  O   HOH T 225      14.648   4.613  42.160  1.00  0.42           O  
HETATM  227  O   HOH T 226      12.640   0.038  45.434  1.00  0.42           O  
HETATM  228  O   HOH T 227      23.540  14.680  25.807  1.00  0.42           O  
HETATM  229  O   HOH T 228       2.413   6.279  32.976  1.00  0.43           O  
HETATM  230  O   HOH T 229      -1.147   4.230  32.458  1.00  0.43           O  
HETATM  231  O   HOH T 230      26.010   9.659  12.796  1.00  0.43           O  
HETATM  232  O   HOH T 231      22.769  11.662   5.346  1.00  0.43           O  
HETATM  233  O   HOH T 232      -4.076  -1.850  40.099  1.00  0.43           O  
HETATM  234  O   HOH T 233      23.759  15.645  29.627  1.00  0.43           O  
HETATM  235  O   HOH T 234      -2.256   9.278  24.299  1.00  0.43           O  
HETATM  236  O   HOH T 235      10.125  19.812   9.540  1.00  0.43           O  
HETATM  237  O   HOH T 236       1.196 -13.948  13.877  1.00  0.43           O  
HETATM  238  O   HOH T 237      22.264 -17.904  15.152  1.00  0.43           O  
HETATM  239  O   HOH T 238      36.510 -12.956  14.405  1.00  0.43           O  
HETATM  240  O   HOH T 239       0.675 -19.053  24.365  1.00  0.43           O  
HETATM  241  O   HOH T 240      27.335  16.514  36.357  1.00  0.43           O  
HETATM  242  O   HOH T 241      14.320   6.025   3.441  1.00  0.43           O  
HETATM  243  O   HOH T 242       9.007  -9.654  24.897  1.00  0.43           O  
HETATM  244  O   HOH T 243      40.448   8.983  25.958  1.00  0.43           O  
HETATM  245  O   HOH T 244       5.147   0.982  43.034  1.00  0.43           O  
HETATM  246  O   HOH T 245      25.535  -4.232  10.775  1.00  0.43           O  
HETATM  247  O   HOH T 246      12.956 -24.012  30.906  1.00  0.43           O  
HETATM  248  O   HOH T 247      -7.747  -2.515  10.849  1.00  0.43           O  
HETATM  249  O   HOH T 248      11.134   2.476  39.796  1.00  0.43           O  
HETATM  250  O   HOH T 249      29.894 -12.715  25.004  1.00  0.43           O  
HETATM  251  O   HOH T 250       5.619  -2.071  46.823  1.00  0.43           O  
HETATM  252  O   HOH T 251      24.829 -17.073  19.786  1.00  0.44           O  
HETATM  253  O   HOH T 252      17.071  11.392  37.599  1.00  0.44           O  
HETATM  254  O   HOH T 253      20.535 -17.106  17.255  1.00  0.44           O  
HETATM  255  O   HOH T 254      34.842  -0.430  39.444  1.00  0.44           O  
HETATM  256  O   HOH T 255      -7.404  -8.871  13.905  1.00  0.44           O  
HETATM  257  O   HOH T 256      -4.879  -9.272  44.268  1.00  0.44           O  
HETATM  258  O   HOH T 257      41.400  -8.060  16.435  1.00  0.44           O  
HETATM  259  O   HOH T 258      20.982 -15.711  28.109  1.00  0.44           O  
HETATM  260  O   HOH T 259      -4.728  10.385  24.439  1.00  0.44           O  
HETATM  261  O   HOH T 260      23.663  -7.127  43.397  1.00  0.44           O  
HETATM  262  O   HOH T 261      -5.773 -15.735  25.174  1.00  0.44           O  
HETATM  263  O   HOH T 262      31.888 -14.100  19.532  1.00  0.45           O  
HETATM  264  O   HOH T 263      22.961  21.160  40.612  1.00  0.45           O  
HETATM  265  O   HOH T 264      31.684  18.906  29.660  1.00  0.45           O  
HETATM  266  O   HOH T 265      19.381  -7.149   1.372  1.00  0.45           O  
HETATM  267  O   HOH T 266      11.913   2.573  44.556  1.00  0.45           O  
HETATM  268  O   HOH T 267      21.356 -12.618   7.264  1.00  0.45           O  
HETATM  269  O   HOH T 268      21.330 -18.583  19.489  1.00  0.45           O  
HETATM  270  O   HOH T 269      15.938 -17.260  23.028  1.00  0.45           O  
HETATM  271  O   HOH T 270      12.235  17.291  29.778  1.00  0.45           O  
HETATM  272  O   HOH T 271      -0.438 -17.069  30.214  1.00  0.45           O  
HETATM  273  O   HOH T 272      19.875 -17.245   1.925  1.00  0.45           O  
HETATM  274  O   HOH T 273      23.975   5.199  26.708  1.00  0.45           O  
HETATM  275  O   HOH T 274      17.865  -0.387  -2.033  1.00  0.45           O  
HETATM  276  O   HOH T 275      -4.789 -11.168  18.521  1.00  0.45           O  
HETATM  277  O   HOH T 276      21.979  -4.188   0.693  1.00  0.45           O  
HETATM  278  O   HOH T 277      -5.768   1.617  10.602  1.00  0.45           O  
HETATM  279  O   HOH T 278       0.345   1.797  46.270  1.00  0.46           O  
HETATM  280  O   HOH T 279       6.148  -0.262   6.524  1.00  0.46           O  
HETATM  281  O   HOH T 280      26.031  -8.405   9.914  1.00  0.46           O  
HETATM  282  O   HOH T 281       6.435   1.620   8.582  1.00  0.46           O  
HETATM  283  O   HOH T 282      18.117  -0.749  46.051  1.00  0.46           O  
HETATM  284  O   HOH T 283      36.919  -5.204  22.483  1.00  0.46           O  
HETATM  285  O   HOH T 284      42.956  18.424  31.442  1.00  0.46           O  
HETATM  286  O   HOH T 285      38.247  12.091  25.940  1.00  0.46           O  
HETATM  287  O   HOH T 286      21.009  16.298  29.937  1.00  0.46           O  
HETATM  288  O   HOH T 287     -11.390   5.564  16.240  1.00  0.46           O  
HETATM  289  O   HOH T 288      25.302 -10.611  11.387  1.00  0.46           O  
HETATM  290  O   HOH T 289       8.153  14.672  26.517  1.00  0.46           O  
HETATM  291  O   HOH T 290      30.737  12.906  41.095  1.00  0.46           O  
HETATM  292  O   HOH T 291       4.550 -14.625  23.864  1.00  0.46           O  
HETATM  293  O   HOH T 292      25.278 -14.168  32.959  1.00  0.46           O  
HETATM  294  O   HOH T 293      25.110  -4.796  13.509  1.00  0.46           O  
HETATM  295  O   HOH T 294     -13.358   5.968  14.343  1.00  0.46           O  
HETATM  296  O   HOH T 295      28.768  -0.910  13.440  1.00  0.47           O  
HETATM  297  O   HOH T 296      16.019  13.215  33.345  1.00  0.47           O  
HETATM  298  O   HOH T 297       6.169 -15.974   6.101  1.00  0.47           O  
HETATM  299  O   HOH T 298      -7.535   7.349  24.352  1.00  0.47           O  
HETATM  300  O   HOH T 299      10.152  15.358  32.616  1.00  0.47           O  
HETATM  301  O   HOH T 300      18.025   9.965   3.874  1.00  0.47           O  
HETATM  302  O   HOH T 301      17.749  11.664  34.871  1.00  0.47           O  
HETATM  303  O   HOH T 302      21.019 -17.979  -0.545  1.00  0.47           O  
HETATM  304  O   HOH T 303      16.779   3.547  43.923  1.00  0.47           O  
HETATM  305  O   HOH T 304      29.835  -5.338  23.125  1.00  0.47           O  
HETATM  306  O   HOH T 305      41.304  -1.694  33.031  1.00  0.47           O  
HETATM  307  O   HOH T 306      39.910  10.845  27.951  1.00  0.47           O  
HETATM  308  O   HOH T 307      16.902  22.825  15.404  1.00  0.47           O  
HETATM  309  O   HOH T 308      -3.567 -17.437  24.677  1.00  0.47           O  
HETATM  310  O   HOH T 309      36.461 -15.461  15.454  1.00  0.47           O  
HETATM  311  O   HOH T 310      13.858 -12.703  24.387  1.00  0.47           O  
HETATM  312  O   HOH T 311      12.879   6.353  43.356  1.00  0.47           O  
HETATM  313  O   HOH T 312       1.762   8.306  34.830  1.00  0.47           O  
HETATM  314  O   HOH T 313      39.983 -16.339  21.516  1.00  0.47           O  
HETATM  315  O   HOH T 314      22.755 -15.649  25.897  1.00  0.47           O  
HETATM  316  O   HOH T 315      36.765 -10.900  25.279  1.00  0.47           O  
HETATM  317  O   HOH T 316      22.666  15.691  33.871  1.00  0.48           O  
HETATM  318  O   HOH T 317      -6.242   4.239   9.703  1.00  0.48           O  
HETATM  319  O   HOH T 318      -5.075  13.046  24.288  1.00  0.48           O  
HETATM  320  O   HOH T 319      22.023 -11.380   4.854  1.00  0.48           O  
HETATM  321  O   HOH T 320      -9.991  -0.089  13.088  1.00  0.48           O  
HETATM  322  O   HOH T 321       9.566   6.491   4.634  1.00  0.48           O  
HETATM  323  O   HOH T 322      -6.385   2.491  28.022  1.00  0.48           O  
HETATM  324  O   HOH T 323       7.083   6.919   3.500  1.00  0.48           O  
HETATM  325  O   HOH T 324      16.982   2.214  -2.083  1.00  0.48           O  
HETATM  326  O   HOH T 325      18.028  18.997  15.167  1.00  0.48           O  
HETATM  327  O   HOH T 326      15.258 -22.394  30.900  1.00  0.48           O  
HETATM  328  O   HOH T 327       0.027  -0.876   1.587  1.00  0.48           O  
HETATM  329  O   HOH T 328      -4.171  -7.064  42.684  1.00  0.48           O  
HETATM  330  O   HOH T 329      18.419   1.329  44.067  1.00  0.48           O  
HETATM  331  O   HOH T 330      -1.869  -7.184  49.868  1.00  0.49           O  
HETATM  332  O   HOH T 331       3.948 -17.705   6.234  1.00  0.49           O  
HETATM  333  O   HOH T 332      34.088  -1.695  37.018  1.00  0.49           O  
HETATM  334  O   HOH T 333      20.516 -12.228  45.701  1.00  0.49           O  
HETATM  335  O   HOH T 334      21.397   8.651  14.355  1.00  0.49           O  
HETATM  336  O   HOH T 335      -1.613  11.271   6.404  1.00  0.49           O  
HETATM  337  O   HOH T 336      -8.187   0.241  10.953  1.00  0.49           O  
HETATM  338  O   HOH T 337      -1.784   9.809  29.149  1.00  0.49           O  
HETATM  339  O   HOH T 338      -2.050 -19.743  24.086  1.00  0.49           O  
HETATM  340  O   HOH T 339      -4.270  -4.054   5.664  1.00  0.49           O  
HETATM  341  O   HOH T 340      16.096   6.028   5.583  1.00  0.49           O  
HETATM  342  O   HOH T 341      28.584   9.577  44.690  1.00  0.49           O  
HETATM  343  O   HOH T 342       8.978  15.596   6.546  1.00  0.49           O  
HETATM  344  O   HOH T 343      30.769  -7.792  24.083  1.00  0.49           O  
HETATM  345  O   HOH T 344       7.401  16.374  28.434  1.00  0.49           O  
HETATM  346  O   HOH T 345      -2.445  12.067  24.263  1.00  0.49           O  
HETATM  347  O   HOH T 346      20.351  16.100  32.675  1.00  0.49           O  
HETATM  348  O   HOH T 347      27.431   7.242  45.565  1.00  0.49           O  
HETATM  349  O   HOH T 348      24.745   4.676  10.857  1.00  0.49           O  
HETATM  350  O   HOH T 349      39.859   9.936  30.640  1.00  0.49           O  
HETATM  351  O   HOH T 350      23.852 -15.732  28.518  1.00  0.49           O  
HETATM  352  O   HOH T 351      37.206  -9.689  22.668  1.00  0.50           O  
HETATM  353  O   HOH T 352      14.367  16.697  28.309  1.00  0.50           O  
HETATM  354  O   HOH T 353     -11.150  -1.517  15.257  1.00  0.50           O  
HETATM  355  O   HOH T 354       2.191  17.414  24.584  1.00  0.50           O  
HETATM  356  O   HOH T 355      -8.913   6.676  15.507  1.00  0.50           O  
HETATM  357  O   HOH T 356      26.781  16.613  33.662  1.00  0.50           O  
HETATM  358  O   HOH T 357      39.330 -14.486  19.511  1.00  0.50           O  
HETATM  359  O   HOH T 358       7.784   1.956   6.121  1.00  0.50           O  
HETATM  360  O   HOH T 359     -10.456  -7.575  29.828  1.00  0.50           O  
HETATM  361  O   HOH T 360      24.201  -3.193   1.843  1.00  0.50           O  
HETATM  362  O   HOH T 361      -2.829  10.706  26.731  1.00  0.50           O  
HETATM  363  O   HOH T 362      -0.847   1.095   3.391  1.00  0.50           O  
HETATM  364  O   HOH T 363      -7.542  -6.594  24.102  1.00  0.50           O  
HETATM  365  O   HOH T 364      11.906   3.993  42.127  1.00  0.50           O  
HETATM  366  O   HOH T 365       3.223   4.930  37.358  1.00  0.50           O  
HETATM  367  O   HOH T 366      22.256  -1.380   1.027  1.00  0.50           O  
HETATM  368  O   HOH T 367      25.485   1.669  43.291  1.00  0.50           O  
HETATM  369  O   HOH T 368      40.463  -0.921  35.628  1.00  0.51           O  
HETATM  370  O   HOH T 369      -6.373  -0.657  34.980  1.00  0.51           O  
HETATM  371  O   HOH T 370       1.645 -16.148  12.173  1.00  0.51           O  
HETATM  372  O   HOH T 371      -2.668   3.495  34.740  1.00  0.51           O  
HETATM  373  O   HOH T 372      16.279  20.685  13.819  1.00  0.51           O  
HETATM  374  O   HOH T 373      16.341 -18.651   4.119  1.00  0.51           O  
HETATM  375  O   HOH T 374      -1.848   1.007   8.025  1.00  0.51           O  
HETATM  376  O   HOH T 375      20.229 -21.322  33.170  1.00  0.51           O  
HETATM  377  O   HOH T 376       5.326 -15.785  -1.754  1.00  0.51           O  
HETATM  378  O   HOH T 377      10.334   6.335  42.399  1.00  0.51           O  
HETATM  379  O   HOH T 378      -5.882  -0.810  12.125  1.00  0.51           O  
HETATM  380  O   HOH T 379       9.212 -17.337  41.633  1.00  0.51           O  
HETATM  381  O   HOH T 380      13.117   4.315  39.647  1.00  0.51           O  
HETATM  382  O   HOH T 381      -1.620 -16.188  36.589  1.00  0.51           O  
HETATM  383  O   HOH T 382      -2.938 -10.223  38.836  1.00  0.51           O  
HETATM  384  O   HOH T 383      40.050   5.605  38.206  1.00  0.51           O  
HETATM  385  O   HOH T 384      18.781 -14.977   9.202  1.00  0.51           O  
HETATM  386  O   HOH T 385      34.131  12.849  38.107  1.00  0.52           O  
HETATM  387  O   HOH T 386      -3.666  -8.830  34.667  1.00  0.52           O  
HETATM  388  O   HOH T 387      28.435  -8.820  37.321  1.00  0.52           O  
HETATM  389  O   HOH T 388      -4.258  -8.195  40.223  1.00  0.52           O  
HETATM  390  O   HOH T 389      44.356  -7.603  33.038  1.00  0.52           O  
HETATM  391  O   HOH T 390      -6.412   8.413  10.549  1.00  0.52           O  
HETATM  392  O   HOH T 391      11.480   8.774  43.261  1.00  0.52           O  
HETATM  393  O   HOH T 392      34.080   7.349  44.717  1.00  0.52           O  
HETATM  394  O   HOH T 393      -8.893  -4.027  12.894  1.00  0.52           O  
HETATM  395  O   HOH T 394      25.969   7.878   6.833  1.00  0.52           O  
HETATM  396  O   HOH T 395      28.976 -10.474  13.042  1.00  0.52           O  
HETATM  397  O   HOH T 396      35.617 -13.804  22.591  1.00  0.53           O  
HETATM  398  O   HOH T 397       6.907  18.806  18.465  1.00  0.53           O  
HETATM  399  O   HOH T 398      -7.106 -10.028  18.062  1.00  0.53           O  
HETATM  400  O   HOH T 399       8.261  18.766  33.096  1.00  0.53           O  
HETATM  401  O   HOH T 400      24.554  -4.589   8.235  1.00  0.53           O  
HETATM  402  O   HOH T 401      -7.635  -0.599  14.455  1.00  0.53           O  
HETATM  403  O   HOH T 402     -11.258  -4.757  14.608  1.00  0.53           O  
HETATM  404  O   HOH T 403      24.408  -6.714  11.430  1.00  0.53           O  
HETATM  405  O   HOH T 404      24.838   9.304  15.285  1.00  0.53           O  
HETATM  406  O   HOH T 405       3.454 -18.818  24.810  1.00  0.53           O  
HETATM  407  O   HOH T 406       4.995 -15.549  43.779  1.00  0.53           O  
HETATM  408  O   HOH T 407      -9.786   9.031  21.742  1.00  0.53           O  
HETATM  409  O   HOH T 408       4.014  17.814  14.549  1.00  0.53           O  
HETATM  410  O   HOH T 409      30.111  18.141  25.886  1.00  0.53           O  
HETATM  411  O   HOH T 410      21.889 -15.370   2.379  1.00  0.54           O  
HETATM  412  O   HOH T 411      18.399 -15.704  -5.827  1.00  0.54           O  
HETATM  413  O   HOH T 412       8.994   8.661  42.034  1.00  0.54           O  
HETATM  414  O   HOH T 413      22.749   6.332  10.762  1.00  0.54           O  
HETATM  415  O   HOH T 414      -5.735 -16.272  42.120  1.00  0.54           O  
HETATM  416  O   HOH T 415      22.698  18.206  11.908  1.00  0.54           O  
HETATM  417  O   HOH T 416      -4.152 -12.957  29.145  1.00  0.54           O  
HETATM  418  O   HOH T 417      17.833 -22.113  31.995  1.00  0.55           O  
HETATM  419  O   HOH T 418      36.559   1.611  43.041  1.00  0.55           O  
HETATM  420  O   HOH T 419      -4.153  -3.285  42.224  1.00  0.55           O  
HETATM  421  O   HOH T 420      25.867  -7.446  41.547  1.00  0.55           O  
HETATM  422  O   HOH T 421       1.551 -10.586  16.964  1.00  0.55           O  
HETATM  423  O   HOH T 422      -9.616  14.618  14.061  1.00  0.55           O  
HETATM  424  O   HOH T 423      21.168 -17.725  -3.344  1.00  0.55           O  
HETATM  425  O   HOH T 424       6.631 -14.606  46.276  1.00  0.55           O  
HETATM  426  O   HOH T 425       7.988  20.988  10.525  1.00  0.55           O  
HETATM  427  O   HOH T 426      43.203  18.814  34.180  1.00  0.56           O  
HETATM  428  O   HOH T 427       0.770  15.410  33.207  1.00  0.56           O  
HETATM  429  O   HOH T 428       9.757 -17.277  38.883  1.00  0.56           O  
HETATM  430  O   HOH T 429      26.563  19.267  33.945  1.00  0.56           O  
HETATM  431  O   HOH T 430      10.699 -19.330  21.160  1.00  0.56           O  
HETATM  432  O   HOH T 431       9.634  17.013  26.791  1.00  0.56           O  
HETATM  433  O   HOH T 432       1.945 -13.464  11.235  1.00  0.56           O  
HETATM  434  O   HOH T 433      28.405   3.210  11.290  1.00  0.56           O  
HETATM  435  O   HOH T 434      11.359 -19.410  -3.963  1.00  0.56           O  
HETATM  436  O   HOH T 435     -10.488   1.628  15.299  1.00  0.57           O  
HETATM  437  O   HOH T 436       8.246  -3.880  44.691  1.00  0.57           O  
HETATM  438  O   HOH T 437      22.724 -11.242  12.023  1.00  0.57           O  
HETATM  439  O   HOH T 438      38.097  -5.692  24.982  1.00  0.57           O  
HETATM  440  O   HOH T 439      23.367 -13.913   0.501  1.00  0.58           O  
HETATM  441  O   HOH T 440      16.119  19.406  11.295  1.00  0.58           O  
HETATM  442  O   HOH T 441      24.365 -12.303   3.884  1.00  0.58           O  
HETATM  443  O   HOH T 442      -5.814   7.160  27.460  1.00  0.59           O  
HETATM  444  O   HOH T 443      38.818  -9.752  26.715  1.00  0.59           O  
HETATM  445  O   HOH T 444      14.650  18.721  10.489  1.00  0.59           O  
HETATM  446  O   HOH T 445      24.482   9.520   4.774  1.00  0.59           O  
HETATM  447  O   HOH T 446       7.800   1.947  43.017  1.00  0.61           O  
HETATM  448  O   HOH T 447      20.154  11.684   4.552  1.00  0.61           O  
TER     449      HOH T 447 
