# Supplementary material for: Accurate Prediction of Hydration Sites of Proteins Using Energy Model With Atom Embedding
Source: Front Mol Biosci. 2021 Sep 20;8:756075. doi: 10.3389/fmolb.2021.756075 (PMC8488165; doi:10.3389/fmolb.2021.756075)
Supplement: Supplementary file 1 [file DataSheet1.ZIP › Data Sheet 1/Our_result_pdb/our_dataset_output/2PDY_watersite.pdb]

HEADER                                                        XXXX


JRNL        PMID   -1
HETATM    1  O   HOH T   0      12.084   0.832  26.644  1.00  0.17           O  
HETATM    2  O   HOH T   1       0.178 -15.000  38.755  1.00  0.18           O  
HETATM    3  O   HOH T   2      15.043 -21.306  28.620  1.00  0.19           O  
HETATM    4  O   HOH T   3       4.643  -5.476   7.464  1.00  0.19           O  
HETATM    5  O   HOH T   4      33.722  18.278  35.608  1.00  0.20           O  
HETATM    6  O   HOH T   5      21.608  12.143   8.329  1.00  0.20           O  
HETATM    7  O   HOH T   6      24.282  -6.025  13.728  1.00  0.21           O  
HETATM    8  O   HOH T   7      16.994 -15.400  35.748  1.00  0.21           O  
HETATM    9  O   HOH T   8      17.537  10.534  32.307  1.00  0.21           O  
HETATM   10  O   HOH T   9      16.995  -1.280  45.275  1.00  0.21           O  
HETATM   11  O   HOH T  10      11.721   2.966  24.967  1.00  0.21           O  
HETATM   12  O   HOH T  11      25.915   3.289  27.911  1.00  0.22           O  
HETATM   13  O   HOH T  12      15.751  12.069  25.894  1.00  0.23           O  
HETATM   14  O   HOH T  13      23.388  10.516  16.097  1.00  0.23           O  
HETATM   15  O   HOH T  14      -0.134  -8.879  34.471  1.00  0.23           O  
HETATM   16  O   HOH T  15       2.033   5.506  31.291  1.00  0.23           O  
HETATM   17  O   HOH T  16      21.265   6.680  10.668  1.00  0.23           O  
HETATM   18  O   HOH T  17      12.531   1.378  37.042  1.00  0.24           O  
HETATM   19  O   HOH T  18       7.997  12.701  24.677  1.00  0.24           O  
HETATM   20  O   HOH T  19      20.902  17.386  15.634  1.00  0.24           O  
HETATM   21  O   HOH T  20       2.614   6.473  28.749  1.00  0.24           O  
HETATM   22  O   HOH T  21      19.378   2.346  16.820  1.00  0.25           O  
HETATM   23  O   HOH T  22      36.601  15.242  24.008  1.00  0.25           O  
HETATM   24  O   HOH T  23      17.033 -21.664  26.733  1.00  0.25           O  
HETATM   25  O   HOH T  24       0.539 -15.643  34.904  1.00  0.25           O  
HETATM   26  O   HOH T  25      -4.331  -0.133  14.541  1.00  0.25           O  
HETATM   27  O   HOH T  26      16.253  -9.763  31.273  1.00  0.26           O  
HETATM   28  O   HOH T  27      31.450  -3.117  23.529  1.00  0.26           O  
HETATM   29  O   HOH T  28      -5.517  -6.360  13.402  1.00  0.26           O  
HETATM   30  O   HOH T  29       6.233  -0.732  -2.631  1.00  0.26           O  
HETATM   31  O   HOH T  30     -12.599   4.316  21.852  1.00  0.26           O  
HETATM   32  O   HOH T  31     -14.281  10.229  19.253  1.00  0.27           O  
HETATM   33  O   HOH T  32      18.908  23.970  16.813  1.00  0.27           O  
HETATM   34  O   HOH T  33      39.556   7.178  32.208  1.00  0.27           O  
HETATM   35  O   HOH T  34      31.257  18.664  36.966  1.00  0.27           O  
HETATM   36  O   HOH T  35      18.486 -11.376   4.362  1.00  0.27           O  
HETATM   37  O   HOH T  36       3.567  18.676   6.918  1.00  0.27           O  
HETATM   38  O   HOH T  37       3.956  -6.493  19.404  1.00  0.27           O  
HETATM   39  O   HOH T  38      -2.721  -3.639  32.497  1.00  0.27           O  
HETATM   40  O   HOH T  39      -9.668  -0.607  25.464  1.00  0.28           O  
HETATM   41  O   HOH T  40      21.553  -6.657   3.768  1.00  0.28           O  
HETATM   42  O   HOH T  41      13.890 -13.632  14.250  1.00  0.28           O  
HETATM   43  O   HOH T  42      29.375   0.147  13.281  1.00  0.28           O  
HETATM   44  O   HOH T  43       2.770   9.162  21.696  1.00  0.28           O  
HETATM   45  O   HOH T  44       6.397   0.594   6.902  1.00  0.28           O  
HETATM   46  O   HOH T  45      21.294   0.389  16.152  1.00  0.28           O  
HETATM   47  O   HOH T  46       6.523 -16.107  25.097  1.00  0.28           O  
HETATM   48  O   HOH T  47      11.370   2.302  42.120  1.00  0.29           O  
HETATM   49  O   HOH T  48      18.855   2.316  43.558  1.00  0.29           O  
HETATM   50  O   HOH T  49      22.795  15.372  21.920  1.00  0.29           O  
HETATM   51  O   HOH T  50       8.095   4.208   4.735  1.00  0.29           O  
HETATM   52  O   HOH T  51      19.438 -12.537  15.909  1.00  0.29           O  
HETATM   53  O   HOH T  52      -1.699  -3.875  44.622  1.00  0.29           O  
HETATM   54  O   HOH T  53      19.519  -8.551  10.496  1.00  0.29           O  
HETATM   55  O   HOH T  54      34.061  17.052  39.661  1.00  0.29           O  
HETATM   56  O   HOH T  55      -5.894  13.258  10.997  1.00  0.29           O  
HETATM   57  O   HOH T  56      -5.192  -9.014  24.377  1.00  0.29           O  
HETATM   58  O   HOH T  57     -10.290  12.275  18.349  1.00  0.29           O  
HETATM   59  O   HOH T  58       3.376   6.450  33.580  1.00  0.29           O  
HETATM   60  O   HOH T  59       5.469   5.283  35.149  1.00  0.30           O  
HETATM   61  O   HOH T  60      22.442  -7.450  12.197  1.00  0.30           O  
HETATM   62  O   HOH T  61      18.688  -9.967  12.749  1.00  0.30           O  
HETATM   63  O   HOH T  62       8.856 -13.902  43.396  1.00  0.30           O  
HETATM   64  O   HOH T  63      21.503  14.965  25.936  1.00  0.30           O  
HETATM   65  O   HOH T  64      -5.385  -3.653  12.648  1.00  0.30           O  
HETATM   66  O   HOH T  65      17.368  21.854  21.827  1.00  0.30           O  
HETATM   67  O   HOH T  66       4.888  17.722  14.566  1.00  0.30           O  
HETATM   68  O   HOH T  67      12.634  -5.504  49.220  1.00  0.30           O  
HETATM   69  O   HOH T  68      30.702  -4.603  26.941  1.00  0.30           O  
HETATM   70  O   HOH T  69       2.451  -9.621  19.595  1.00  0.31           O  
HETATM   71  O   HOH T  70      22.664 -14.425  23.938  1.00  0.31           O  
HETATM   72  O   HOH T  71       4.415 -11.802  22.189  1.00  0.31           O  
HETATM   73  O   HOH T  72      12.615   6.201   5.163  1.00  0.31           O  
HETATM   74  O   HOH T  73      -9.591  -4.943  31.268  1.00  0.31           O  
HETATM   75  O   HOH T  74       6.994 -12.838  22.461  1.00  0.31           O  
HETATM   76  O   HOH T  75      -0.607 -15.065  28.558  1.00  0.31           O  
HETATM   77  O   HOH T  76      25.930  17.781  12.285  1.00  0.31           O  
HETATM   78  O   HOH T  77       3.207 -11.310   9.889  1.00  0.31           O  
HETATM   79  O   HOH T  78       8.969  -2.860  13.123  1.00  0.32           O  
HETATM   80  O   HOH T  79      11.262 -17.923  33.204  1.00  0.32           O  
HETATM   81  O   HOH T  80      29.952  -8.183  16.937  1.00  0.32           O  
HETATM   82  O   HOH T  81       6.710 -13.283   6.897  1.00  0.32           O  
HETATM   83  O   HOH T  82      13.881   4.757  36.835  1.00  0.32           O  
HETATM   84  O   HOH T  83      12.265 -16.483   5.717  1.00  0.32           O  
HETATM   85  O   HOH T  84      20.749  22.157  17.894  1.00  0.32           O  
HETATM   86  O   HOH T  85       4.854  -7.612   1.323  1.00  0.32           O  
HETATM   87  O   HOH T  86      34.966  -7.982  22.861  1.00  0.32           O  
HETATM   88  O   HOH T  87      29.975  10.366  42.141  1.00  0.32           O  
HETATM   89  O   HOH T  88      12.676 -17.975  35.521  1.00  0.32           O  
HETATM   90  O   HOH T  89       4.998   1.332  -1.189  1.00  0.32           O  
HETATM   91  O   HOH T  90      33.990  14.468  24.080  1.00  0.32           O  
HETATM   92  O   HOH T  91      -1.580  -1.473   5.058  1.00  0.33           O  
HETATM   93  O   HOH T  92      30.775  -3.992  35.610  1.00  0.33           O  
HETATM   94  O   HOH T  93      16.033  26.288  20.363  1.00  0.33           O  
HETATM   95  O   HOH T  94      18.623   0.596   1.506  1.00  0.33           O  
HETATM   96  O   HOH T  95       1.516  14.543  20.681  1.00  0.33           O  
HETATM   97  O   HOH T  96      30.360 -14.267  15.820  1.00  0.33           O  
HETATM   98  O   HOH T  97      10.944  -2.050  48.248  1.00  0.33           O  
HETATM   99  O   HOH T  98      27.117   8.730  12.176  1.00  0.33           O  
HETATM  100  O   HOH T  99      -1.506 -10.342  47.519  1.00  0.33           O  
HETATM  101  O   HOH T 100      44.316   5.182  25.224  1.00  0.33           O  
HETATM  102  O   HOH T 101      27.329  17.723  21.942  1.00  0.33           O  
HETATM  103  O   HOH T 102      -3.291   3.233   8.860  1.00  0.33           O  
HETATM  104  O   HOH T 103       0.705   2.424  34.037  1.00  0.34           O  
HETATM  105  O   HOH T 104       0.074  -0.028   6.751  1.00  0.34           O  
HETATM  106  O   HOH T 105      22.728 -17.937  15.501  1.00  0.34           O  
HETATM  107  O   HOH T 106      19.313  17.998  13.394  1.00  0.34           O  
HETATM  108  O   HOH T 107       2.219  18.072  15.495  1.00  0.34           O  
HETATM  109  O   HOH T 108      30.400  13.062  41.850  1.00  0.34           O  
HETATM  110  O   HOH T 109      35.048  19.517  30.559  1.00  0.34           O  
HETATM  111  O   HOH T 110       6.527   2.203  42.652  1.00  0.34           O  
HETATM  112  O   HOH T 111      36.653  11.156  33.370  1.00  0.34           O  
HETATM  113  O   HOH T 112       2.216  11.990  21.769  1.00  0.34           O  
HETATM  114  O   HOH T 113      37.461 -10.948  23.877  1.00  0.34           O  
HETATM  115  O   HOH T 114     -10.750   7.402  22.221  1.00  0.34           O  
HETATM  116  O   HOH T 115      39.785   8.227  34.728  1.00  0.34           O  
HETATM  117  O   HOH T 116       7.305 -18.735  33.187  1.00  0.35           O  
HETATM  118  O   HOH T 117      27.900 -12.955  22.576  1.00  0.35           O  
HETATM  119  O   HOH T 118      14.499 -13.280  24.110  1.00  0.35           O  
HETATM  120  O   HOH T 119     -11.780  10.844  20.125  1.00  0.35           O  
HETATM  121  O   HOH T 120      11.948   2.436  39.480  1.00  0.35           O  
HETATM  122  O   HOH T 121      19.191   5.760   5.986  1.00  0.35           O  
HETATM  123  O   HOH T 122      32.906  -9.313  21.550  1.00  0.35           O  
HETATM  124  O   HOH T 123      -3.982 -12.520  28.948  1.00  0.36           O  
HETATM  125  O   HOH T 124      40.229  -5.124  28.459  1.00  0.36           O  
HETATM  126  O   HOH T 125      17.445  -7.879   2.459  1.00  0.36           O  
HETATM  127  O   HOH T 126      10.985   5.417   7.224  1.00  0.36           O  
HETATM  128  O   HOH T 127      24.617   8.006  26.509  1.00  0.36           O  
HETATM  129  O   HOH T 128      27.560   8.099  17.149  1.00  0.36           O  
HETATM  130  O   HOH T 129       5.304 -19.615  27.132  1.00  0.36           O  
HETATM  131  O   HOH T 130       8.991   0.553   5.801  1.00  0.36           O  
HETATM  132  O   HOH T 131      21.730 -13.836  14.886  1.00  0.36           O  
HETATM  133  O   HOH T 132      17.934  10.132  38.347  1.00  0.36           O  
HETATM  134  O   HOH T 133      23.262  18.207  16.950  1.00  0.37           O  
HETATM  135  O   HOH T 134      -1.412  -4.913  42.164  1.00  0.37           O  
HETATM  136  O   HOH T 135      20.109   7.378  13.058  1.00  0.37           O  
HETATM  137  O   HOH T 136       6.687   4.129  37.424  1.00  0.37           O  
HETATM  138  O   HOH T 137      38.590  12.315  26.409  1.00  0.37           O  
HETATM  139  O   HOH T 138      13.403  23.012  20.278  1.00  0.37           O  
HETATM  140  O   HOH T 139       7.318  15.747  20.840  1.00  0.37           O  
HETATM  141  O   HOH T 140      28.268  -2.356  12.743  1.00  0.37           O  
HETATM  142  O   HOH T 141       4.613  -7.410  16.765  1.00  0.37           O  
HETATM  143  O   HOH T 142       0.629 -10.599  49.151  1.00  0.37           O  
HETATM  144  O   HOH T 143      26.523   5.697   5.632  1.00  0.37           O  
HETATM  145  O   HOH T 144      -2.566 -15.060  39.111  1.00  0.38           O  
HETATM  146  O   HOH T 145      19.415 -13.993   4.645  1.00  0.38           O  
HETATM  147  O   HOH T 146      31.664  11.979  16.502  1.00  0.38           O  
HETATM  148  O   HOH T 147      18.373   5.648  14.471  1.00  0.38           O  
HETATM  149  O   HOH T 148      27.228  -8.651  39.721  1.00  0.38           O  
HETATM  150  O   HOH T 149      34.780  -8.078  14.322  1.00  0.38           O  
HETATM  151  O   HOH T 150      41.968  -4.171  26.654  1.00  0.38           O  
HETATM  152  O   HOH T 151      35.864  17.579  37.319  1.00  0.38           O  
HETATM  153  O   HOH T 152      17.461   3.615   3.132  1.00  0.38           O  
HETATM  154  O   HOH T 153       0.189  -4.276   2.052  1.00  0.38           O  
HETATM  155  O   HOH T 154      14.555  11.657  35.640  1.00  0.38           O  
HETATM  156  O   HOH T 155       8.982 -18.873  22.734  1.00  0.38           O  
HETATM  157  O   HOH T 156       0.371  18.595  23.904  1.00  0.38           O  
HETATM  158  O   HOH T 157      24.204   6.447  50.618  1.00  0.38           O  
HETATM  159  O   HOH T 158      29.604  16.258  22.399  1.00  0.39           O  
HETATM  160  O   HOH T 159      -0.289   4.418  32.449  1.00  0.39           O  
HETATM  161  O   HOH T 160      20.958  17.035  27.663  1.00  0.39           O  
HETATM  162  O   HOH T 161      32.805 -14.785  16.900  1.00  0.39           O  
HETATM  163  O   HOH T 162      22.248  16.368  29.990  1.00  0.39           O  
HETATM  164  O   HOH T 163      -3.127   8.102  26.003  1.00  0.39           O  
HETATM  165  O   HOH T 164      24.142  20.304  18.649  1.00  0.39           O  
HETATM  166  O   HOH T 165       6.335 -12.689  11.104  1.00  0.39           O  
HETATM  167  O   HOH T 166      30.143  21.083  36.101  1.00  0.39           O  
HETATM  168  O   HOH T 167      19.433 -16.416  34.866  1.00  0.39           O  
HETATM  169  O   HOH T 168      25.126 -15.350  24.982  1.00  0.39           O  
HETATM  170  O   HOH T 169      23.351  11.773   6.125  1.00  0.39           O  
HETATM  171  O   HOH T 170       7.868  -0.806   3.769  1.00  0.39           O  
HETATM  172  O   HOH T 171      23.165  16.073  33.540  1.00  0.39           O  
HETATM  173  O   HOH T 172     -12.097  -1.962  24.980  1.00  0.39           O  
HETATM  174  O   HOH T 173      19.325  -4.387  34.257  1.00  0.39           O  
HETATM  175  O   HOH T 174       8.132  16.436  28.322  1.00  0.39           O  
HETATM  176  O   HOH T 175      30.167  -5.618  23.668  1.00  0.39           O  
HETATM  177  O   HOH T 176      10.525  11.157  39.257  1.00  0.39           O  
HETATM  178  O   HOH T 177      25.956 -15.351  38.149  1.00  0.40           O  
HETATM  179  O   HOH T 178       1.343   2.544   2.536  1.00  0.40           O  
HETATM  180  O   HOH T 179       9.523  -9.661  24.968  1.00  0.40           O  
HETATM  181  O   HOH T 180      21.157   5.400  14.690  1.00  0.40           O  
HETATM  182  O   HOH T 181       2.456   8.841  34.772  1.00  0.40           O  
HETATM  183  O   HOH T 182      15.491  12.301  33.147  1.00  0.40           O  
HETATM  184  O   HOH T 183      14.535   5.277   0.010  1.00  0.40           O  
HETATM  185  O   HOH T 184      13.355 -16.049  23.909  1.00  0.40           O  
HETATM  186  O   HOH T 185      16.276  20.523  15.883  1.00  0.40           O  
HETATM  187  O   HOH T 186      38.693  12.717  32.353  1.00  0.40           O  
HETATM  188  O   HOH T 187      -3.633  -4.406   5.830  1.00  0.40           O  
HETATM  189  O   HOH T 188      23.508  16.117  27.515  1.00  0.40           O  
HETATM  190  O   HOH T 189       6.173 -13.955  42.467  1.00  0.40           O  
HETATM  191  O   HOH T 190      32.203  16.342  23.222  1.00  0.40           O  
HETATM  192  O   HOH T 191       1.850 -10.620  17.078  1.00  0.40           O  
HETATM  193  O   HOH T 192      14.425  -0.166  45.579  1.00  0.40           O  
HETATM  194  O   HOH T 193      -8.617  -5.668  22.791  1.00  0.40           O  
HETATM  195  O   HOH T 194      21.365  20.129  16.082  1.00  0.40           O  
HETATM  196  O   HOH T 195      27.467  -0.142  11.283  1.00  0.41           O  
HETATM  197  O   HOH T 196       6.361 -16.131   5.988  1.00  0.41           O  
HETATM  198  O   HOH T 197      12.023 -19.554  11.454  1.00  0.41           O  
HETATM  199  O   HOH T 198       2.755  17.433  24.760  1.00  0.41           O  
HETATM  200  O   HOH T 199      24.902 -15.326  35.524  1.00  0.41           O  
HETATM  201  O   HOH T 200      42.118  16.910  33.412  1.00  0.41           O  
HETATM  202  O   HOH T 201      19.050 -17.837   5.698  1.00  0.41           O  
HETATM  203  O   HOH T 202      21.179   3.944  43.917  1.00  0.41           O  
HETATM  204  O   HOH T 203       3.278   2.830   0.493  1.00  0.41           O  
HETATM  205  O   HOH T 204      10.216  -3.260  44.875  1.00  0.41           O  
HETATM  206  O   HOH T 205       6.620   3.385  40.086  1.00  0.41           O  
HETATM  207  O   HOH T 206      31.300  17.307  39.383  1.00  0.41           O  
HETATM  208  O   HOH T 207      -1.409   8.598  28.078  1.00  0.41           O  
HETATM  209  O   HOH T 208      19.441  10.885  36.242  1.00  0.41           O  
HETATM  210  O   HOH T 209      19.623 -16.592   3.361  1.00  0.41           O  
HETATM  211  O   HOH T 210      -4.383  -9.731  28.826  1.00  0.41           O  
HETATM  212  O   HOH T 211      29.942  17.352  29.946  1.00  0.41           O  
HETATM  213  O   HOH T 212      -6.727   7.394  24.753  1.00  0.42           O  
HETATM  214  O   HOH T 213      18.793  19.260  15.812  1.00  0.42           O  
HETATM  215  O   HOH T 214       8.599  -6.264  17.835  1.00  0.42           O  
HETATM  216  O   HOH T 215     -10.468  -1.304  22.828  1.00  0.42           O  
HETATM  217  O   HOH T 216      11.788  10.497  41.655  1.00  0.42           O  
HETATM  218  O   HOH T 217       1.164   1.111   0.089  1.00  0.42           O  
HETATM  219  O   HOH T 218      26.900 -11.408  39.112  1.00  0.42           O  
HETATM  220  O   HOH T 219       5.865  13.599   6.192  1.00  0.42           O  
HETATM  221  O   HOH T 220      38.070  -5.479  23.256  1.00  0.42           O  
HETATM  222  O   HOH T 221      14.153  19.338  25.330  1.00  0.42           O  
HETATM  223  O   HOH T 222      -2.705  -7.977  34.863  1.00  0.42           O  
HETATM  224  O   HOH T 223      43.856  18.744  32.170  1.00  0.42           O  
HETATM  225  O   HOH T 224      17.024  12.177  36.836  1.00  0.43           O  
HETATM  226  O   HOH T 225      41.189  14.673  34.525  1.00  0.43           O  
HETATM  227  O   HOH T 226      12.034  20.080  23.680  1.00  0.43           O  
HETATM  228  O   HOH T 227       8.369 -18.723  20.037  1.00  0.43           O  
HETATM  229  O   HOH T 228      26.718   4.935  12.929  1.00  0.43           O  
HETATM  230  O   HOH T 229      12.719  -2.482  46.303  1.00  0.43           O  
HETATM  231  O   HOH T 230      28.774  -8.569  37.298  1.00  0.43           O  
HETATM  232  O   HOH T 231      -5.394   4.478  10.262  1.00  0.43           O  
HETATM  233  O   HOH T 232       1.181 -19.674  23.939  1.00  0.43           O  
HETATM  234  O   HOH T 233      11.497  22.008  18.455  1.00  0.43           O  
HETATM  235  O   HOH T 234     -11.895   5.408  19.355  1.00  0.43           O  
HETATM  236  O   HOH T 235      13.275  13.662  34.320  1.00  0.44           O  
HETATM  237  O   HOH T 236      24.610   3.798  51.151  1.00  0.44           O  
HETATM  238  O   HOH T 237      -4.630  -7.891  32.884  1.00  0.44           O  
HETATM  239  O   HOH T 238      -6.906  -0.399  15.434  1.00  0.44           O  
HETATM  240  O   HOH T 239      17.040 -13.449  37.628  1.00  0.44           O  
HETATM  241  O   HOH T 240       2.959  16.140  22.356  1.00  0.44           O  
HETATM  242  O   HOH T 241       2.065 -13.989  13.620  1.00  0.44           O  
HETATM  243  O   HOH T 242      -6.741   9.325  22.710  1.00  0.44           O  
HETATM  244  O   HOH T 243      26.131  15.377  27.514  1.00  0.44           O  
HETATM  245  O   HOH T 244      -5.968   2.837   8.077  1.00  0.44           O  
HETATM  246  O   HOH T 245      20.765 -16.377  14.573  1.00  0.44           O  
HETATM  247  O   HOH T 246      40.554   5.549  38.857  1.00  0.44           O  
HETATM  248  O   HOH T 247      40.692  11.411  30.955  1.00  0.44           O  
HETATM  249  O   HOH T 248      25.012  -0.825   8.025  1.00  0.44           O  
HETATM  250  O   HOH T 249      -2.860  -7.069   5.589  1.00  0.44           O  
HETATM  251  O   HOH T 250      17.079  23.677  23.870  1.00  0.44           O  
HETATM  252  O   HOH T 251      33.793  -7.052  32.453  1.00  0.44           O  
HETATM  253  O   HOH T 252      30.332  17.428  24.900  1.00  0.44           O  
HETATM  254  O   HOH T 253      12.347  -5.973   3.803  1.00  0.44           O  
HETATM  255  O   HOH T 254      -7.670  -2.154  13.419  1.00  0.44           O  
HETATM  256  O   HOH T 255      26.680  -4.545  13.466  1.00  0.44           O  
HETATM  257  O   HOH T 256      34.362  10.440  13.653  1.00  0.44           O  
HETATM  258  O   HOH T 257       8.103  16.893  25.593  1.00  0.44           O  
HETATM  259  O   HOH T 258     -12.362   8.134  19.925  1.00  0.44           O  
HETATM  260  O   HOH T 259      -2.165 -15.256  34.372  1.00  0.45           O  
HETATM  261  O   HOH T 260      24.849   2.072   5.549  1.00  0.45           O  
HETATM  262  O   HOH T 261      10.745  15.510  28.447  1.00  0.45           O  
HETATM  263  O   HOH T 262      -4.723  12.367  24.433  1.00  0.45           O  
HETATM  264  O   HOH T 263       8.067   4.331   1.843  1.00  0.45           O  
HETATM  265  O   HOH T 264      -1.712   3.765  34.754  1.00  0.45           O  
HETATM  266  O   HOH T 265      34.153  -9.581  31.638  1.00  0.45           O  
HETATM  267  O   HOH T 266      25.742   1.949   8.202  1.00  0.45           O  
HETATM  268  O   HOH T 267       8.368 -15.759  45.327  1.00  0.45           O  
HETATM  269  O   HOH T 268      -1.448 -16.144  36.783  1.00  0.45           O  
HETATM  270  O   HOH T 269      39.090   9.756  23.670  1.00  0.45           O  
HETATM  271  O   HOH T 270      -3.192  -2.504  40.532  1.00  0.45           O  
HETATM  272  O   HOH T 271       8.990  14.532  26.523  1.00  0.45           O  
HETATM  273  O   HOH T 272      -5.181   1.728  10.489  1.00  0.45           O  
HETATM  274  O   HOH T 273      44.849  17.050  34.192  1.00  0.45           O  
HETATM  275  O   HOH T 274      21.179  17.664  32.301  1.00  0.45           O  
HETATM  276  O   HOH T 275      -5.199   9.689  25.032  1.00  0.45           O  
HETATM  277  O   HOH T 276      18.208  21.353  17.642  1.00  0.45           O  
HETATM  278  O   HOH T 277      23.903   5.715  10.622  1.00  0.45           O  
HETATM  279  O   HOH T 278      36.150  -8.917  25.261  1.00  0.45           O  
HETATM  280  O   HOH T 279      32.419 -14.805  19.633  1.00  0.45           O  
HETATM  281  O   HOH T 280      24.660   5.385  26.724  1.00  0.45           O  
HETATM  282  O   HOH T 281      19.496 -12.130  44.429  1.00  0.45           O  
HETATM  283  O   HOH T 282       4.744 -16.070  43.675  1.00  0.45           O  
HETATM  284  O   HOH T 283     -10.273  -4.746  20.750  1.00  0.45           O  
HETATM  285  O   HOH T 284      -8.478  -0.105  11.817  1.00  0.45           O  
HETATM  286  O   HOH T 285      20.092 -12.319  13.203  1.00  0.45           O  
HETATM  287  O   HOH T 286      31.544  -8.774  32.366  1.00  0.45           O  
HETATM  288  O   HOH T 287      20.765 -12.179  -0.279  1.00  0.46           O  
HETATM  289  O   HOH T 288      13.436 -20.259   9.138  1.00  0.46           O  
HETATM  290  O   HOH T 289      24.314  14.767   8.283  1.00  0.46           O  
HETATM  291  O   HOH T 290      -3.134  -5.683   3.232  1.00  0.46           O  
HETATM  292  O   HOH T 291      19.973  14.001  33.324  1.00  0.46           O  
HETATM  293  O   HOH T 292      29.370  11.297  14.978  1.00  0.46           O  
HETATM  294  O   HOH T 293      -0.896  10.539  29.959  1.00  0.46           O  
HETATM  295  O   HOH T 294       3.359 -17.764   6.293  1.00  0.46           O  
HETATM  296  O   HOH T 295      -0.617 -17.723  27.999  1.00  0.46           O  
HETATM  297  O   HOH T 296      26.417  -7.327  42.007  1.00  0.46           O  
HETATM  298  O   HOH T 297      25.779  14.497  24.725  1.00  0.46           O  
HETATM  299  O   HOH T 298      29.938  19.530  40.351  1.00  0.46           O  
HETATM  300  O   HOH T 299      29.687  -7.402  39.637  1.00  0.46           O  
HETATM  301  O   HOH T 300       7.947  17.857  17.830  1.00  0.46           O  
HETATM  302  O   HOH T 301      -2.551  10.820  11.451  1.00  0.46           O  
HETATM  303  O   HOH T 302       7.881   3.581  44.726  1.00  0.46           O  
HETATM  304  O   HOH T 303      -6.781  12.160  22.584  1.00  0.46           O  
HETATM  305  O   HOH T 304      29.925  -5.901  37.393  1.00  0.46           O  
HETATM  306  O   HOH T 305      15.905   5.102   4.540  1.00  0.46           O  
HETATM  307  O   HOH T 306      20.530  -9.971  45.874  1.00  0.46           O  
HETATM  308  O   HOH T 307      35.604  -5.711  15.500  1.00  0.46           O  
HETATM  309  O   HOH T 308      26.844   7.266  14.528  1.00  0.47           O  
HETATM  310  O   HOH T 309      -1.955 -10.314  50.160  1.00  0.47           O  
HETATM  311  O   HOH T 310       8.466   0.942  -2.430  1.00  0.47           O  
HETATM  312  O   HOH T 311      -3.184   5.533   7.093  1.00  0.47           O  
HETATM  313  O   HOH T 312      12.756   1.688  44.388  1.00  0.47           O  
HETATM  314  O   HOH T 313      -7.884   1.665   9.772  1.00  0.47           O  
HETATM  315  O   HOH T 314      22.713 -16.219  40.373  1.00  0.47           O  
HETATM  316  O   HOH T 315       1.662 -17.071  24.608  1.00  0.47           O  
HETATM  317  O   HOH T 316      32.401  -6.989  22.761  1.00  0.47           O  
HETATM  318  O   HOH T 317       2.219  20.259  13.622  1.00  0.47           O  
HETATM  319  O   HOH T 318      -7.551  -5.582  11.714  1.00  0.47           O  
HETATM  320  O   HOH T 319       4.861 -14.526  21.833  1.00  0.47           O  
HETATM  321  O   HOH T 320      13.052  16.940  25.226  1.00  0.47           O  
HETATM  322  O   HOH T 321       9.331   5.315  -0.503  1.00  0.48           O  
HETATM  323  O   HOH T 322      33.897  -4.709  33.844  1.00  0.48           O  
HETATM  324  O   HOH T 323      25.116   9.448  14.076  1.00  0.48           O  
HETATM  325  O   HOH T 324      24.908  -8.635  12.751  1.00  0.48           O  
HETATM  326  O   HOH T 325       4.207 -16.559  23.553  1.00  0.48           O  
HETATM  327  O   HOH T 326      -5.549   2.632  28.382  1.00  0.48           O  
HETATM  328  O   HOH T 327      11.262 -17.131   3.213  1.00  0.48           O  
HETATM  329  O   HOH T 328       3.496  19.399   9.591  1.00  0.48           O  
HETATM  330  O   HOH T 329      24.247  -6.613  43.511  1.00  0.48           O  
HETATM  331  O   HOH T 330       9.899   1.593  44.466  1.00  0.48           O  
HETATM  332  O   HOH T 331       1.497  -4.760  49.607  1.00  0.48           O  
HETATM  333  O   HOH T 332      21.669 -17.953   4.589  1.00  0.48           O  
HETATM  334  O   HOH T 333      26.712  15.096   9.851  1.00  0.48           O  
HETATM  335  O   HOH T 334       2.042 -13.212  16.219  1.00  0.48           O  
HETATM  336  O   HOH T 335      25.174  16.320  22.796  1.00  0.48           O  
HETATM  337  O   HOH T 336      10.496  -0.853  45.742  1.00  0.48           O  
HETATM  338  O   HOH T 337      -3.311   1.594  35.649  1.00  0.48           O  
HETATM  339  O   HOH T 338      11.992   5.811  -0.134  1.00  0.48           O  
HETATM  340  O   HOH T 339      -0.982  -2.134  -0.790  1.00  0.48           O  
HETATM  341  O   HOH T 340      19.606  -6.386   1.838  1.00  0.48           O  
HETATM  342  O   HOH T 341      -8.814  11.903  13.667  1.00  0.49           O  
HETATM  343  O   HOH T 342      -7.446  15.111   9.468  1.00  0.49           O  
HETATM  344  O   HOH T 343       9.270 -14.745   1.772  1.00  0.49           O  
HETATM  345  O   HOH T 344       9.865   6.407   4.846  1.00  0.49           O  
HETATM  346  O   HOH T 345      27.742   2.339  12.523  1.00  0.49           O  
HETATM  347  O   HOH T 346      -0.250   0.748   4.041  1.00  0.49           O  
HETATM  348  O   HOH T 347      33.268  -3.517  37.232  1.00  0.49           O  
HETATM  349  O   HOH T 348      -0.974  11.392   6.320  1.00  0.49           O  
HETATM  350  O   HOH T 349      24.382   4.665  48.516  1.00  0.49           O  
HETATM  351  O   HOH T 350      24.673  16.944   9.867  1.00  0.49           O  
HETATM  352  O   HOH T 351      28.492  13.874  43.780  1.00  0.49           O  
HETATM  353  O   HOH T 352      38.342   8.233  43.976  1.00  0.49           O  
HETATM  354  O   HOH T 353      -4.254 -10.495  44.582  1.00  0.49           O  
HETATM  355  O   HOH T 354      -2.537  -7.714  50.920  1.00  0.49           O  
HETATM  356  O   HOH T 355      11.068  15.022  33.229  1.00  0.49           O  
HETATM  357  O   HOH T 356      -5.006 -10.311  31.499  1.00  0.49           O  
HETATM  358  O   HOH T 357      20.935 -12.130   3.322  1.00  0.49           O  
HETATM  359  O   HOH T 358      12.649  14.344   6.486  1.00  0.49           O  
HETATM  360  O   HOH T 359      25.718   3.383  10.756  1.00  0.49           O  
HETATM  361  O   HOH T 360      32.388  18.952  29.947  1.00  0.50           O  
HETATM  362  O   HOH T 361      16.913   4.037   0.428  1.00  0.50           O  
HETATM  363  O   HOH T 362      17.526  20.071  13.425  1.00  0.50           O  
HETATM  364  O   HOH T 363      39.466  -3.221  26.430  1.00  0.50           O  
HETATM  365  O   HOH T 364      16.147  23.546  19.982  1.00  0.50           O  
HETATM  366  O   HOH T 365      13.785  21.291  16.891  1.00  0.50           O  
HETATM  367  O   HOH T 366      38.795  -7.353  21.597  1.00  0.50           O  
HETATM  368  O   HOH T 367      19.341  -7.474  45.660  1.00  0.50           O  
HETATM  369  O   HOH T 368      -3.872   3.021   6.206  1.00  0.50           O  
HETATM  370  O   HOH T 369      30.143  -9.364  14.357  1.00  0.50           O  
HETATM  371  O   HOH T 370      39.628  -9.474  23.189  1.00  0.50           O  
HETATM  372  O   HOH T 371      24.945   0.530  10.316  1.00  0.50           O  
HETATM  373  O   HOH T 372      18.801  18.496  23.550  1.00  0.50           O  
HETATM  374  O   HOH T 373      20.685 -14.590  44.196  1.00  0.50           O  
HETATM  375  O   HOH T 374      16.891  19.272  25.454  1.00  0.51           O  
HETATM  376  O   HOH T 375       6.877 -14.340  19.953  1.00  0.51           O  
HETATM  377  O   HOH T 376      12.015  18.836  11.718  1.00  0.51           O  
HETATM  378  O   HOH T 377      21.285 -10.036  12.179  1.00  0.51           O  
HETATM  379  O   HOH T 378      -0.094  -0.763   1.558  1.00  0.51           O  
HETATM  380  O   HOH T 379     -10.550  12.904  15.673  1.00  0.51           O  
HETATM  381  O   HOH T 380      -1.619  -9.243  13.621  1.00  0.51           O  
HETATM  382  O   HOH T 381      19.634  -9.626   2.576  1.00  0.51           O  
HETATM  383  O   HOH T 382      16.840   1.481  45.394  1.00  0.51           O  
HETATM  384  O   HOH T 383      11.747 -21.411  34.818  1.00  0.51           O  
HETATM  385  O   HOH T 384      -3.815 -10.317  33.989  1.00  0.51           O  
HETATM  386  O   HOH T 385       6.000   7.257   5.087  1.00  0.51           O  
HETATM  387  O   HOH T 386      27.249 -14.053  36.086  1.00  0.52           O  
HETATM  388  O   HOH T 387      36.621  -0.241  37.963  1.00  0.52           O  
HETATM  389  O   HOH T 388       3.885  20.177  15.955  1.00  0.52           O  
HETATM  390  O   HOH T 389      39.972   7.701  37.385  1.00  0.52           O  
HETATM  391  O   HOH T 390      40.114   8.842  30.178  1.00  0.52           O  
HETATM  392  O   HOH T 391      23.707  18.749  33.063  1.00  0.52           O  
HETATM  393  O   HOH T 392     -12.463   7.139  17.272  1.00  0.52           O  
HETATM  394  O   HOH T 393      34.297  19.421  27.841  1.00  0.52           O  
HETATM  395  O   HOH T 394      -2.101  11.200  27.553  1.00  0.52           O  
HETATM  396  O   HOH T 395     -11.286  -4.818  16.167  1.00  0.52           O  
HETATM  397  O   HOH T 396      38.541  10.556  35.326  1.00  0.52           O  
HETATM  398  O   HOH T 397       3.766 -18.930  24.833  1.00  0.52           O  
HETATM  399  O   HOH T 398      31.751  11.381  13.731  1.00  0.52           O  
HETATM  400  O   HOH T 399       9.646  15.569   6.435  1.00  0.52           O  
HETATM  401  O   HOH T 400      40.579  12.212  28.341  1.00  0.52           O  
HETATM  402  O   HOH T 401      30.860   8.143  43.784  1.00  0.53           O  
HETATM  403  O   HOH T 402       7.658 -21.259  23.150  1.00  0.53           O  
HETATM  404  O   HOH T 403      15.854 -13.921  21.721  1.00  0.53           O  
HETATM  405  O   HOH T 404      41.623   0.748  34.300  1.00  0.53           O  
HETATM  406  O   HOH T 405      27.548  16.193  35.654  1.00  0.53           O  
HETATM  407  O   HOH T 406      -4.233 -10.804  18.532  1.00  0.53           O  
HETATM  408  O   HOH T 407      19.209 -15.927   9.525  1.00  0.53           O  
HETATM  409  O   HOH T 408       4.764  16.995   5.036  1.00  0.53           O  
HETATM  410  O   HOH T 409      37.218   1.731  43.736  1.00  0.53           O  
HETATM  411  O   HOH T 410      31.669  -6.358  33.986  1.00  0.53           O  
HETATM  412  O   HOH T 411      17.065  14.558  33.416  1.00  0.53           O  
HETATM  413  O   HOH T 412       7.187 -19.574  35.913  1.00  0.53           O  
HETATM  414  O   HOH T 413      29.534  20.156  28.977  1.00  0.53           O  
HETATM  415  O   HOH T 414       6.960 -13.916  46.842  1.00  0.53           O  
HETATM  416  O   HOH T 415      10.311   5.884   2.109  1.00  0.53           O  
HETATM  417  O   HOH T 416      -3.142 -12.149  46.261  1.00  0.53           O  
HETATM  418  O   HOH T 417      -7.376  -7.362   9.634  1.00  0.54           O  
HETATM  419  O   HOH T 418      -5.363  -8.177  26.908  1.00  0.54           O  
HETATM  420  O   HOH T 419       7.340 -16.299  42.875  1.00  0.54           O  
HETATM  421  O   HOH T 420      39.109   9.910  32.641  1.00  0.54           O  
HETATM  422  O   HOH T 421      18.271  10.795   8.705  1.00  0.54           O  
HETATM  423  O   HOH T 422       6.489  19.407  16.135  1.00  0.54           O  
HETATM  424  O   HOH T 423      -1.844  -9.654   5.078  1.00  0.54           O  
HETATM  425  O   HOH T 424       2.247  11.671  34.726  1.00  0.54           O  
HETATM  426  O   HOH T 425      37.124  -7.414  12.992  1.00  0.55           O  
HETATM  427  O   HOH T 426     -10.861  13.631  12.955  1.00  0.55           O  
HETATM  428  O   HOH T 427      27.247  16.285  30.095  1.00  0.55           O  
HETATM  429  O   HOH T 428       4.354  19.204  12.207  1.00  0.55           O  
HETATM  430  O   HOH T 429      38.106   5.571  44.237  1.00  0.55           O  
HETATM  431  O   HOH T 430      27.738 -12.916  41.195  1.00  0.55           O  
HETATM  432  O   HOH T 431      34.007   6.504  12.938  1.00  0.55           O  
HETATM  433  O   HOH T 432      26.755  14.595   7.204  1.00  0.55           O  
HETATM  434  O   HOH T 433      -5.701  -0.599  12.083  1.00  0.55           O  
HETATM  435  O   HOH T 434       1.582  15.455  33.216  1.00  0.55           O  
HETATM  436  O   HOH T 435      35.543   4.757  13.896  1.00  0.55           O  
HETATM  437  O   HOH T 436       7.273  15.496   4.859  1.00  0.55           O  
HETATM  438  O   HOH T 437       9.958 -17.450  46.497  1.00  0.55           O  
HETATM  439  O   HOH T 438      25.380   6.112   8.192  1.00  0.55           O  
HETATM  440  O   HOH T 439       4.286 -18.656  13.896  1.00  0.55           O  
HETATM  441  O   HOH T 440      18.609  17.113  33.384  1.00  0.55           O  
HETATM  442  O   HOH T 441      -7.471  -8.027  23.465  1.00  0.56           O  
HETATM  443  O   HOH T 442      35.029  -0.637  31.498  1.00  0.56           O  
HETATM  444  O   HOH T 443      34.027   8.115  15.287  1.00  0.56           O  
HETATM  445  O   HOH T 444      15.521 -20.256  35.824  1.00  0.56           O  
HETATM  446  O   HOH T 445       5.462  17.369  21.932  1.00  0.56           O  
HETATM  447  O   HOH T 446      10.494  12.928  41.372  1.00  0.56           O  
HETATM  448  O   HOH T 447      16.795   4.036  43.982  1.00  0.56           O  
HETATM  449  O   HOH T 448      18.104  12.208  34.281  1.00  0.56           O  
HETATM  450  O   HOH T 449      24.389  -0.587   5.442  1.00  0.56           O  
HETATM  451  O   HOH T 450       3.342  16.208  28.274  1.00  0.56           O  
HETATM  452  O   HOH T 451      26.300   8.162   6.461  1.00  0.57           O  
HETATM  453  O   HOH T 452       0.562  16.316  25.928  1.00  0.57           O  
HETATM  454  O   HOH T 453      -0.116  12.221  23.268  1.00  0.57           O  
HETATM  455  O   HOH T 454      13.038   5.967   2.368  1.00  0.58           O  
HETATM  456  O   HOH T 455      19.108  -9.446  43.617  1.00  0.58           O  
HETATM  457  O   HOH T 456      -1.432   9.196  24.216  1.00  0.59           O  
HETATM  458  O   HOH T 457      -6.321  11.094  12.845  1.00  0.59           O  
HETATM  459  O   HOH T 458      28.243  17.133  26.733  1.00  0.59           O  
HETATM  460  O   HOH T 459       0.856   6.305  37.240  1.00  0.62           O  
HETATM  461  O   HOH T 460      21.248 -15.976  29.331  1.00  0.65           O  
TER     462      HOH T 460 
