# Supplementary material for: Accurate Prediction of Hydration Sites of Proteins Using Energy Model With Atom Embedding
Source: Front Mol Biosci. 2021 Sep 20;8:756075. doi: 10.3389/fmolb.2021.756075 (PMC8488165; doi:10.3389/fmolb.2021.756075)
Supplement: Supplementary file 1 [file DataSheet1.ZIP › Data Sheet 1/Our_result_pdb/our_dataset_output/2PMK_watersite.pdb]

HEADER                                                        XXXX


JRNL        PMID   -1
HETATM    1  O   HOH T   0     -36.030  21.731 -13.396  1.00  0.14           O  
HETATM    2  O   HOH T   1     -27.361   7.187 -14.838  1.00  0.18           O  
HETATM    3  O   HOH T   2     -18.832  20.101   5.364  1.00  0.19           O  
HETATM    4  O   HOH T   3     -41.439  21.066  -8.525  1.00  0.19           O  
HETATM    5  O   HOH T   4     -18.168  11.250  -4.782  1.00  0.19           O  
HETATM    6  O   HOH T   5     -20.782 -13.746  -1.446  1.00  0.20           O  
HETATM    7  O   HOH T   6     -23.001  -2.421  -2.097  1.00  0.21           O  
HETATM    8  O   HOH T   7     -39.436   8.086   7.415  1.00  0.21           O  
HETATM    9  O   HOH T   8     -20.162 -11.092  -0.835  1.00  0.22           O  
HETATM   10  O   HOH T   9     -23.291  16.598  -4.586  1.00  0.22           O  
HETATM   11  O   HOH T  10     -17.809   6.639  16.051  1.00  0.22           O  
HETATM   12  O   HOH T  11     -38.148  18.764   0.288  1.00  0.22           O  
HETATM   13  O   HOH T  12     -32.259  21.792   6.383  1.00  0.22           O  
HETATM   14  O   HOH T  13     -15.244  23.240   7.336  1.00  0.22           O  
HETATM   15  O   HOH T  14     -33.920  23.514   7.710  1.00  0.23           O  
HETATM   16  O   HOH T  15     -18.760  14.512  16.191  1.00  0.23           O  
HETATM   17  O   HOH T  16     -15.098  -0.033 -12.240  1.00  0.23           O  
HETATM   18  O   HOH T  17     -18.270  15.772   0.056  1.00  0.23           O  
HETATM   19  O   HOH T  18     -19.816   8.200  14.834  1.00  0.24           O  
HETATM   20  O   HOH T  19       0.109  26.837  12.151  1.00  0.24           O  
HETATM   21  O   HOH T  20     -23.355  18.378  12.714  1.00  0.24           O  
HETATM   22  O   HOH T  21     -13.627  36.988   7.736  1.00  0.24           O  
HETATM   23  O   HOH T  22     -17.846   1.390   0.211  1.00  0.24           O  
HETATM   24  O   HOH T  23      -1.625  28.131  -3.115  1.00  0.24           O  
HETATM   25  O   HOH T  24       2.205  25.249  11.192  1.00  0.24           O  
HETATM   26  O   HOH T  25     -18.471  16.676  17.929  1.00  0.24           O  
HETATM   27  O   HOH T  26     -15.721  21.885   2.014  1.00  0.25           O  
HETATM   28  O   HOH T  27     -35.277   0.254  -8.553  1.00  0.25           O  
HETATM   29  O   HOH T  28     -20.119   2.313  10.631  1.00  0.25           O  
HETATM   30  O   HOH T  29     -45.495  13.323   9.630  1.00  0.26           O  
HETATM   31  O   HOH T  30     -20.891  23.220  23.152  1.00  0.26           O  
HETATM   32  O   HOH T  31      -5.498   6.066  -0.219  1.00  0.26           O  
HETATM   33  O   HOH T  32     -33.673  22.265 -14.696  1.00  0.26           O  
HETATM   34  O   HOH T  33     -14.127  17.045  28.926  1.00  0.26           O  
HETATM   35  O   HOH T  34     -33.631  27.438 -10.601  1.00  0.26           O  
HETATM   36  O   HOH T  35      -6.565  12.432  13.685  1.00  0.26           O  
HETATM   37  O   HOH T  36     -16.674   8.865  -5.420  1.00  0.27           O  
HETATM   38  O   HOH T  37     -15.250   3.224  -9.927  1.00  0.27           O  
HETATM   39  O   HOH T  38     -11.021  17.503  24.080  1.00  0.27           O  
HETATM   40  O   HOH T  39     -27.476  27.112  23.570  1.00  0.28           O  
HETATM   41  O   HOH T  40     -22.317   8.670 -10.043  1.00  0.28           O  
HETATM   42  O   HOH T  41       1.768  24.222   7.351  1.00  0.28           O  
HETATM   43  O   HOH T  42     -24.685  -3.713 -18.730  1.00  0.28           O  
HETATM   44  O   HOH T  43     -32.339  -7.340 -16.133  1.00  0.28           O  
HETATM   45  O   HOH T  44     -37.760  22.864   6.478  1.00  0.29           O  
HETATM   46  O   HOH T  45     -50.640  22.730   7.668  1.00  0.29           O  
HETATM   47  O   HOH T  46     -39.772  17.434 -18.002  1.00  0.29           O  
HETATM   48  O   HOH T  47     -25.416  28.846  22.732  1.00  0.29           O  
HETATM   49  O   HOH T  48      -5.021  24.058  19.230  1.00  0.29           O  
HETATM   50  O   HOH T  49     -21.914   0.036   4.411  1.00  0.29           O  
HETATM   51  O   HOH T  50     -27.079  -8.176 -26.673  1.00  0.29           O  
HETATM   52  O   HOH T  51     -22.621 -10.516  -9.438  1.00  0.29           O  
HETATM   53  O   HOH T  52      -4.160  33.046   3.480  1.00  0.30           O  
HETATM   54  O   HOH T  53     -29.382  -6.519  -2.704  1.00  0.30           O  
HETATM   55  O   HOH T  54     -47.247  10.260  -2.098  1.00  0.30           O  
HETATM   56  O   HOH T  55     -45.502  17.707  -2.602  1.00  0.30           O  
HETATM   57  O   HOH T  56     -10.410  19.933  25.138  1.00  0.30           O  
HETATM   58  O   HOH T  57     -22.461  -6.728  -2.481  1.00  0.30           O  
HETATM   59  O   HOH T  58     -42.182  16.539   2.636  1.00  0.30           O  
HETATM   60  O   HOH T  59     -23.083   6.262 -21.857  1.00  0.30           O  
HETATM   61  O   HOH T  60     -28.499  20.539   7.964  1.00  0.30           O  
HETATM   62  O   HOH T  61     -26.456  17.462  -0.174  1.00  0.30           O  
HETATM   63  O   HOH T  62     -24.039   3.742   9.765  1.00  0.31           O  
HETATM   64  O   HOH T  63     -31.834  -3.607  -8.780  1.00  0.31           O  
HETATM   65  O   HOH T  64     -44.290  26.523  -8.858  1.00  0.31           O  
HETATM   66  O   HOH T  65     -29.173  10.356 -16.446  1.00  0.31           O  
HETATM   67  O   HOH T  66     -37.357  16.016 -17.631  1.00  0.31           O  
HETATM   68  O   HOH T  67     -30.054  16.357 -16.532  1.00  0.31           O  
HETATM   69  O   HOH T  68     -24.885   0.335   8.153  1.00  0.31           O  
HETATM   70  O   HOH T  69     -23.332  20.206   7.965  1.00  0.31           O  
HETATM   71  O   HOH T  70      -4.469  13.803  10.838  1.00  0.31           O  
HETATM   72  O   HOH T  71     -13.126  21.058   1.461  1.00  0.31           O  
HETATM   73  O   HOH T  72     -29.405   7.570  12.397  1.00  0.32           O  
HETATM   74  O   HOH T  73     -20.905  17.947  -5.196  1.00  0.32           O  
HETATM   75  O   HOH T  74     -23.272   2.037  13.329  1.00  0.32           O  
HETATM   76  O   HOH T  75     -18.904  11.948  -2.167  1.00  0.32           O  
HETATM   77  O   HOH T  76      -9.676  10.895  -4.742  1.00  0.32           O  
HETATM   78  O   HOH T  77     -18.411   4.101   0.734  1.00  0.32           O  
HETATM   79  O   HOH T  78     -38.119   6.981  -9.702  1.00  0.32           O  
HETATM   80  O   HOH T  79     -36.996  13.093 -14.011  1.00  0.32           O  
HETATM   81  O   HOH T  80     -12.141  24.885   0.595  1.00  0.32           O  
HETATM   82  O   HOH T  81     -16.152  25.785   6.510  1.00  0.32           O  
HETATM   83  O   HOH T  82     -41.512   3.296   3.971  1.00  0.32           O  
HETATM   84  O   HOH T  83      -7.242  32.233  14.664  1.00  0.33           O  
HETATM   85  O   HOH T  84     -43.984   4.276   3.174  1.00  0.33           O  
HETATM   86  O   HOH T  85     -25.761  17.578 -12.706  1.00  0.33           O  
HETATM   87  O   HOH T  86     -14.224  10.234  -6.166  1.00  0.33           O  
HETATM   88  O   HOH T  87     -32.675   0.190  11.285  1.00  0.33           O  
HETATM   89  O   HOH T  88      -4.788  26.795  18.759  1.00  0.33           O  
HETATM   90  O   HOH T  89      -5.597  25.841   2.502  1.00  0.33           O  
HETATM   91  O   HOH T  90     -12.659   3.955  -9.247  1.00  0.33           O  
HETATM   92  O   HOH T  91     -18.483  19.596  25.182  1.00  0.33           O  
HETATM   93  O   HOH T  92     -18.858   8.870  17.388  1.00  0.33           O  
HETATM   94  O   HOH T  93      -0.323  14.654  16.214  1.00  0.34           O  
HETATM   95  O   HOH T  94     -27.766  19.862  -0.793  1.00  0.34           O  
HETATM   96  O   HOH T  95     -25.962   1.368  12.993  1.00  0.34           O  
HETATM   97  O   HOH T  96      -5.280  16.317  -1.588  1.00  0.34           O  
HETATM   98  O   HOH T  97     -31.857  -0.031 -15.710  1.00  0.34           O  
HETATM   99  O   HOH T  98      -9.821   1.133  10.119  1.00  0.34           O  
HETATM  100  O   HOH T  99       0.004  33.356   0.003  1.00  0.35           O  
HETATM  101  O   HOH T 100     -12.398  -1.926   3.206  1.00  0.35           O  
HETATM  102  O   HOH T 101      -8.144  10.456  14.609  1.00  0.35           O  
HETATM  103  O   HOH T 102     -25.728 -10.534  -2.749  1.00  0.35           O  
HETATM  104  O   HOH T 103      -7.313  17.442  -3.188  1.00  0.35           O  
HETATM  105  O   HOH T 104       9.404  28.439  21.232  1.00  0.35           O  
HETATM  106  O   HOH T 105     -41.186  -2.061   2.766  1.00  0.35           O  
HETATM  107  O   HOH T 106     -13.343  16.005  -3.744  1.00  0.35           O  
HETATM  108  O   HOH T 107     -28.734  10.060 -19.269  1.00  0.35           O  
HETATM  109  O   HOH T 108     -21.072  21.180   6.708  1.00  0.35           O  
HETATM  110  O   HOH T 109     -20.298  28.405   4.033  1.00  0.35           O  
HETATM  111  O   HOH T 110     -32.439  17.532 -15.773  1.00  0.35           O  
HETATM  112  O   HOH T 111      -3.980   0.308   5.643  1.00  0.35           O  
HETATM  113  O   HOH T 112     -19.285  10.333 -11.984  1.00  0.35           O  
HETATM  114  O   HOH T 113     -38.939  24.727  -4.257  1.00  0.36           O  
HETATM  115  O   HOH T 114     -42.223  24.016 -20.327  1.00  0.36           O  
HETATM  116  O   HOH T 115     -36.523  -0.022 -13.051  1.00  0.36           O  
HETATM  117  O   HOH T 116     -47.973  21.263  -6.664  1.00  0.36           O  
HETATM  118  O   HOH T 117     -23.383  -0.116 -27.532  1.00  0.36           O  
HETATM  119  O   HOH T 118     -33.121   7.923  14.148  1.00  0.36           O  
HETATM  120  O   HOH T 119     -25.392  -8.853 -18.585  1.00  0.36           O  
HETATM  121  O   HOH T 120     -25.130  17.542  -8.158  1.00  0.36           O  
HETATM  122  O   HOH T 121     -27.508  11.818  16.412  1.00  0.36           O  
HETATM  123  O   HOH T 122       9.352  25.457  13.254  1.00  0.36           O  
HETATM  124  O   HOH T 123      -2.593  14.581  20.290  1.00  0.36           O  
HETATM  125  O   HOH T 124      -7.046  17.488  -6.817  1.00  0.36           O  
HETATM  126  O   HOH T 125     -25.720  28.676  11.830  1.00  0.36           O  
HETATM  127  O   HOH T 126     -15.357  28.490  -0.627  1.00  0.36           O  
HETATM  128  O   HOH T 127     -42.719  10.719  13.272  1.00  0.37           O  
HETATM  129  O   HOH T 128     -26.107  23.607  10.518  1.00  0.37           O  
HETATM  130  O   HOH T 129     -12.070   4.954 -13.108  1.00  0.37           O  
HETATM  131  O   HOH T 130     -36.163   1.557  -0.099  1.00  0.37           O  
HETATM  132  O   HOH T 131      -4.059  21.259  18.785  1.00  0.37           O  
HETATM  133  O   HOH T 132     -40.563   3.428   9.105  1.00  0.37           O  
HETATM  134  O   HOH T 133     -38.157  25.058  -6.856  1.00  0.37           O  
HETATM  135  O   HOH T 134     -25.940 -12.117  -6.814  1.00  0.37           O  
HETATM  136  O   HOH T 135      -6.634  -4.197 -15.319  1.00  0.37           O  
HETATM  137  O   HOH T 136       4.113  22.865   1.157  1.00  0.37           O  
HETATM  138  O   HOH T 137      -7.943  39.333   0.469  1.00  0.37           O  
HETATM  139  O   HOH T 138     -16.341  26.834  18.435  1.00  0.37           O  
HETATM  140  O   HOH T 139     -19.918  -5.051   1.505  1.00  0.37           O  
HETATM  141  O   HOH T 140     -19.784  20.222  27.600  1.00  0.37           O  
HETATM  142  O   HOH T 141     -40.250   6.147   9.148  1.00  0.37           O  
HETATM  143  O   HOH T 142     -21.332  22.522  11.548  1.00  0.37           O  
HETATM  144  O   HOH T 143     -44.861  19.872  -1.158  1.00  0.37           O  
HETATM  145  O   HOH T 144     -25.827 -12.840 -13.596  1.00  0.38           O  
HETATM  146  O   HOH T 145     -21.775  16.954  19.287  1.00  0.38           O  
HETATM  147  O   HOH T 146     -23.642  15.519  -7.165  1.00  0.38           O  
HETATM  148  O   HOH T 147     -38.805  20.673   7.770  1.00  0.38           O  
HETATM  149  O   HOH T 148       4.950  25.010  11.177  1.00  0.38           O  
HETATM  150  O   HOH T 149     -40.670   7.244 -12.437  1.00  0.38           O  
HETATM  151  O   HOH T 150       0.356  22.669   5.665  1.00  0.38           O  
HETATM  152  O   HOH T 151     -14.195  14.497  -1.527  1.00  0.38           O  
HETATM  153  O   HOH T 152     -19.390  -2.761   6.666  1.00  0.38           O  
HETATM  154  O   HOH T 153     -23.653   8.505  15.826  1.00  0.38           O  
HETATM  155  O   HOH T 154     -34.296  -0.653 -14.602  1.00  0.38           O  
HETATM  156  O   HOH T 155     -35.261  26.977  -8.389  1.00  0.38           O  
HETATM  157  O   HOH T 156     -14.786  -0.781   2.335  1.00  0.38           O  
HETATM  158  O   HOH T 157     -27.481  18.392  15.598  1.00  0.38           O  
HETATM  159  O   HOH T 158     -24.370  23.144  19.044  1.00  0.38           O  
HETATM  160  O   HOH T 159     -24.275  27.733   9.558  1.00  0.38           O  
HETATM  161  O   HOH T 160     -25.201 -10.223 -14.835  1.00  0.39           O  
HETATM  162  O   HOH T 161     -34.903  16.599 -16.547  1.00  0.39           O  
HETATM  163  O   HOH T 162     -34.629  27.257   0.208  1.00  0.39           O  
HETATM  164  O   HOH T 163     -13.985  33.954   5.024  1.00  0.39           O  
HETATM  165  O   HOH T 164       4.104  31.421  16.292  1.00  0.39           O  
HETATM  166  O   HOH T 165     -11.227  19.461  27.801  1.00  0.39           O  
HETATM  167  O   HOH T 166     -16.934  23.482   5.150  1.00  0.39           O  
HETATM  168  O   HOH T 167     -22.446  -0.584  16.782  1.00  0.39           O  
HETATM  169  O   HOH T 168     -34.687  14.338 -15.003  1.00  0.39           O  
HETATM  170  O   HOH T 169     -52.071  20.743   6.393  1.00  0.39           O  
HETATM  171  O   HOH T 170     -13.893  36.770   4.940  1.00  0.39           O  
HETATM  172  O   HOH T 171     -13.608  -2.415 -12.034  1.00  0.39           O  
HETATM  173  O   HOH T 172     -30.404   0.655  12.568  1.00  0.39           O  
HETATM  174  O   HOH T 173     -12.737  23.932  27.526  1.00  0.39           O  
HETATM  175  O   HOH T 174     -27.295  21.437   5.620  1.00  0.39           O  
HETATM  176  O   HOH T 175     -32.428  14.555 -13.327  1.00  0.40           O  
HETATM  177  O   HOH T 176     -13.124  20.538  -1.289  1.00  0.40           O  
HETATM  178  O   HOH T 177     -13.277   5.247  -5.336  1.00  0.40           O  
HETATM  179  O   HOH T 178     -13.997  27.267  -2.748  1.00  0.40           O  
HETATM  180  O   HOH T 179      -3.250  31.519  13.001  1.00  0.40           O  
HETATM  181  O   HOH T 180     -19.359   2.224   2.494  1.00  0.40           O  
HETATM  182  O   HOH T 181     -10.945  -1.750 -12.662  1.00  0.40           O  
HETATM  183  O   HOH T 182     -21.012  25.807  24.222  1.00  0.40           O  
HETATM  184  O   HOH T 183     -26.768 -13.785  -8.850  1.00  0.40           O  
HETATM  185  O   HOH T 184     -15.687  35.439   6.617  1.00  0.40           O  
HETATM  186  O   HOH T 185     -52.383  19.354   8.892  1.00  0.40           O  
HETATM  187  O   HOH T 186     -42.724  23.446   8.450  1.00  0.40           O  
HETATM  188  O   HOH T 187     -40.407  18.404   1.749  1.00  0.40           O  
HETATM  189  O   HOH T 188     -30.080  29.126  15.614  1.00  0.40           O  
HETATM  190  O   HOH T 189     -32.437   9.356  16.477  1.00  0.41           O  
HETATM  191  O   HOH T 190     -30.485   7.917  14.999  1.00  0.41           O  
HETATM  192  O   HOH T 191     -16.971  13.778  -1.360  1.00  0.41           O  
HETATM  193  O   HOH T 192     -48.331  18.836   2.938  1.00  0.41           O  
HETATM  194  O   HOH T 193     -29.263  26.054   0.798  1.00  0.41           O  
HETATM  195  O   HOH T 194     -14.024  10.558   0.890  1.00  0.41           O  
HETATM  196  O   HOH T 195     -43.289  22.815  -9.580  1.00  0.41           O  
HETATM  197  O   HOH T 196     -11.346  23.432  -2.763  1.00  0.41           O  
HETATM  198  O   HOH T 197      -6.577  11.936  16.408  1.00  0.41           O  
HETATM  199  O   HOH T 198     -13.281  -0.907 -19.267  1.00  0.41           O  
HETATM  200  O   HOH T 199       0.013  20.662   3.830  1.00  0.41           O  
HETATM  201  O   HOH T 200     -23.786  -8.907  -1.665  1.00  0.41           O  
HETATM  202  O   HOH T 201     -22.832  25.307   9.024  1.00  0.41           O  
HETATM  203  O   HOH T 202     -29.641  22.571   6.406  1.00  0.41           O  
HETATM  204  O   HOH T 203     -13.189  19.766  -3.993  1.00  0.41           O  
HETATM  205  O   HOH T 204     -12.460   3.730  -3.101  1.00  0.41           O  
HETATM  206  O   HOH T 205     -41.986  26.388 -21.714  1.00  0.41           O  
HETATM  207  O   HOH T 206     -16.506  28.231  20.730  1.00  0.41           O  
HETATM  208  O   HOH T 207     -12.816  27.415  -0.278  1.00  0.41           O  
HETATM  209  O   HOH T 208     -12.865  16.095  22.728  1.00  0.41           O  
HETATM  210  O   HOH T 209     -16.788   7.441  18.540  1.00  0.41           O  
HETATM  211  O   HOH T 210     -31.375  29.848 -16.290  1.00  0.42           O  
HETATM  212  O   HOH T 211       0.263  21.788  -1.366  1.00  0.42           O  
HETATM  213  O   HOH T 212     -33.755  -4.156  -6.690  1.00  0.42           O  
HETATM  214  O   HOH T 213      -5.880  -3.112 -12.747  1.00  0.42           O  
HETATM  215  O   HOH T 214      -3.936  18.641  -2.361  1.00  0.42           O  
HETATM  216  O   HOH T 215     -24.348  12.776 -18.159  1.00  0.42           O  
HETATM  217  O   HOH T 216     -27.428  22.164  -2.335  1.00  0.42           O  
HETATM  218  O   HOH T 217     -11.233  22.319  -0.154  1.00  0.42           O  
HETATM  219  O   HOH T 218     -19.846   1.737   5.220  1.00  0.42           O  
HETATM  220  O   HOH T 219     -17.295  -1.204   7.818  1.00  0.42           O  
HETATM  221  O   HOH T 220     -32.950  30.522  -3.985  1.00  0.42           O  
HETATM  222  O   HOH T 221     -19.542 -12.070  -3.369  1.00  0.42           O  
HETATM  223  O   HOH T 222      -7.245  37.141   2.090  1.00  0.42           O  
HETATM  224  O   HOH T 223     -36.640   2.161  -2.808  1.00  0.42           O  
HETATM  225  O   HOH T 224     -16.098  19.171  28.618  1.00  0.42           O  
HETATM  226  O   HOH T 225     -40.236  25.168   3.506  1.00  0.42           O  
HETATM  227  O   HOH T 226     -25.591  17.070  -2.901  1.00  0.43           O  
HETATM  228  O   HOH T 227     -26.627  21.032   9.836  1.00  0.43           O  
HETATM  229  O   HOH T 228     -40.493  22.729   7.198  1.00  0.43           O  
HETATM  230  O   HOH T 229     -31.495  27.763  13.598  1.00  0.43           O  
HETATM  231  O   HOH T 230     -24.018  17.857 -14.662  1.00  0.43           O  
HETATM  232  O   HOH T 231     -41.325  19.638 -17.082  1.00  0.43           O  
HETATM  233  O   HOH T 232     -41.734   6.574   6.769  1.00  0.43           O  
HETATM  234  O   HOH T 233     -16.662  34.139   4.296  1.00  0.43           O  
HETATM  235  O   HOH T 234     -40.475   5.600 -10.144  1.00  0.43           O  
HETATM  236  O   HOH T 235     -12.780  11.393  -8.246  1.00  0.43           O  
HETATM  237  O   HOH T 236     -24.959  30.551  13.718  1.00  0.43           O  
HETATM  238  O   HOH T 237     -24.877  27.038  24.752  1.00  0.43           O  
HETATM  239  O   HOH T 238     -11.497   7.728 -16.602  1.00  0.43           O  
HETATM  240  O   HOH T 239     -19.457  29.916  24.339  1.00  0.43           O  
HETATM  241  O   HOH T 240      -2.257  30.815  10.564  1.00  0.43           O  
HETATM  242  O   HOH T 241     -24.832  -7.425 -15.212  1.00  0.43           O  
HETATM  243  O   HOH T 242      -5.483  31.981   1.299  1.00  0.43           O  
HETATM  244  O   HOH T 243     -45.643  11.585   7.549  1.00  0.44           O  
HETATM  245  O   HOH T 244     -10.479   4.049  12.304  1.00  0.44           O  
HETATM  246  O   HOH T 245     -22.204   6.737 -11.901  1.00  0.44           O  
HETATM  247  O   HOH T 246     -21.325  34.748  14.225  1.00  0.44           O  
HETATM  248  O   HOH T 247     -46.481  19.607   1.037  1.00  0.44           O  
HETATM  249  O   HOH T 248     -18.449  15.452  22.100  1.00  0.44           O  
HETATM  250  O   HOH T 249     -24.614  -6.294 -17.790  1.00  0.44           O  
HETATM  251  O   HOH T 250      -2.284  20.946  -2.148  1.00  0.44           O  
HETATM  252  O   HOH T 251     -31.675  24.486   6.439  1.00  0.44           O  
HETATM  253  O   HOH T 252     -30.184  28.120  -8.925  1.00  0.44           O  
HETATM  254  O   HOH T 253     -19.048  35.893  12.890  1.00  0.44           O  
HETATM  255  O   HOH T 254     -19.837  17.710  26.774  1.00  0.44           O  
HETATM  256  O   HOH T 255     -19.912  -7.205  -3.263  1.00  0.44           O  
HETATM  257  O   HOH T 256     -22.820  -3.936 -20.889  1.00  0.44           O  
HETATM  258  O   HOH T 257     -30.123  25.531  -1.831  1.00  0.44           O  
HETATM  259  O   HOH T 258      -9.604  17.635  26.428  1.00  0.44           O  
HETATM  260  O   HOH T 259     -16.172  27.368  23.383  1.00  0.44           O  
HETATM  261  O   HOH T 260     -13.373   6.733 -14.775  1.00  0.45           O  
HETATM  262  O   HOH T 261     -18.473  16.884  24.500  1.00  0.45           O  
HETATM  263  O   HOH T 262     -26.343  26.311  10.636  1.00  0.45           O  
HETATM  264  O   HOH T 263     -32.395  12.199 -22.762  1.00  0.45           O  
HETATM  265  O   HOH T 264     -26.135  18.167  13.192  1.00  0.45           O  
HETATM  266  O   HOH T 265     -44.573   6.629   7.928  1.00  0.45           O  
HETATM  267  O   HOH T 266     -25.281 -15.056  -9.534  1.00  0.45           O  
HETATM  268  O   HOH T 267     -24.128  -0.127  14.601  1.00  0.45           O  
HETATM  269  O   HOH T 268      -3.431  36.355   0.715  1.00  0.45           O  
HETATM  270  O   HOH T 269     -25.298  26.144  22.193  1.00  0.45           O  
HETATM  271  O   HOH T 270     -27.907   9.015  15.680  1.00  0.45           O  
HETATM  272  O   HOH T 271     -38.143  25.144   1.585  1.00  0.45           O  
HETATM  273  O   HOH T 272     -40.354  28.782 -14.856  1.00  0.45           O  
HETATM  274  O   HOH T 273     -52.163  19.303  11.645  1.00  0.45           O  
HETATM  275  O   HOH T 274     -36.476   0.052   2.184  1.00  0.45           O  
HETATM  276  O   HOH T 275     -38.117  11.253 -15.739  1.00  0.45           O  
HETATM  277  O   HOH T 276     -41.758  29.082 -21.204  1.00  0.45           O  
HETATM  278  O   HOH T 277     -22.575   1.427   9.444  1.00  0.45           O  
HETATM  279  O   HOH T 278     -24.563  32.172  15.988  1.00  0.45           O  
HETATM  280  O   HOH T 279     -46.847  27.756 -18.399  1.00  0.45           O  
HETATM  281  O   HOH T 280       3.122  31.383  13.641  1.00  0.45           O  
HETATM  282  O   HOH T 281     -25.636  14.548  20.816  1.00  0.45           O  
HETATM  283  O   HOH T 282     -17.173   8.905  23.747  1.00  0.45           O  
HETATM  284  O   HOH T 283      -9.682  21.225  -2.262  1.00  0.45           O  
HETATM  285  O   HOH T 284     -10.287  21.211  -7.430  1.00  0.45           O  
HETATM  286  O   HOH T 285     -48.540  19.029   5.609  1.00  0.45           O  
HETATM  287  O   HOH T 286     -42.420  14.468 -17.279  1.00  0.45           O  
HETATM  288  O   HOH T 287      -2.692  33.114  18.957  1.00  0.45           O  
HETATM  289  O   HOH T 288     -21.800  11.393 -16.944  1.00  0.45           O  
HETATM  290  O   HOH T 289     -22.832  24.934  22.268  1.00  0.45           O  
HETATM  291  O   HOH T 290     -12.557  -0.055 -11.164  1.00  0.46           O  
HETATM  292  O   HOH T 291     -32.570  27.046  -8.001  1.00  0.46           O  
HETATM  293  O   HOH T 292     -26.691  24.894   1.510  1.00  0.46           O  
HETATM  294  O   HOH T 293      -4.326  25.044  -2.786  1.00  0.46           O  
HETATM  295  O   HOH T 294     -22.785  20.353  10.751  1.00  0.46           O  
HETATM  296  O   HOH T 295     -10.838  32.680  12.432  1.00  0.46           O  
HETATM  297  O   HOH T 296     -27.152  21.829  12.412  1.00  0.46           O  
HETATM  298  O   HOH T 297     -13.741  11.025  18.084  1.00  0.46           O  
HETATM  299  O   HOH T 298     -12.106  12.156  -5.716  1.00  0.46           O  
HETATM  300  O   HOH T 299     -40.307  12.892 -16.258  1.00  0.46           O  
HETATM  301  O   HOH T 300      -6.654  -5.747 -12.968  1.00  0.46           O  
HETATM  302  O   HOH T 301     -20.211  14.705  18.593  1.00  0.46           O  
HETATM  303  O   HOH T 302      -8.069   2.681  11.512  1.00  0.46           O  
HETATM  304  O   HOH T 303     -21.751  -2.770 -23.277  1.00  0.46           O  
HETATM  305  O   HOH T 304      -1.910  16.255   2.748  1.00  0.46           O  
HETATM  306  O   HOH T 305     -34.639  12.427 -21.044  1.00  0.46           O  
HETATM  307  O   HOH T 306     -11.336   3.331  -5.661  1.00  0.46           O  
HETATM  308  O   HOH T 307      -4.598  32.509  15.114  1.00  0.46           O  
HETATM  309  O   HOH T 308     -33.366  23.299 -17.225  1.00  0.46           O  
HETATM  310  O   HOH T 309     -18.079  22.122  -5.608  1.00  0.46           O  
HETATM  311  O   HOH T 310     -26.449  19.711  -3.249  1.00  0.46           O  
HETATM  312  O   HOH T 311     -34.273  -2.343  -8.636  1.00  0.46           O  
HETATM  313  O   HOH T 312     -28.261  26.067   3.571  1.00  0.47           O  
HETATM  314  O   HOH T 313      -7.691  23.811  20.187  1.00  0.47           O  
HETATM  315  O   HOH T 314     -45.636  22.227   1.644  1.00  0.47           O  
HETATM  316  O   HOH T 315     -21.822  -3.899  -0.236  1.00  0.47           O  
HETATM  317  O   HOH T 316      -5.621  37.959   0.049  1.00  0.47           O  
HETATM  318  O   HOH T 317     -29.619  -1.589  13.928  1.00  0.47           O  
HETATM  319  O   HOH T 318     -48.437  12.555  -3.174  1.00  0.47           O  
HETATM  320  O   HOH T 319     -27.531  24.241   5.592  1.00  0.47           O  
HETATM  321  O   HOH T 320     -47.032  24.947 -18.806  1.00  0.47           O  
HETATM  322  O   HOH T 321      -0.447  13.878   2.375  1.00  0.47           O  
HETATM  323  O   HOH T 322      -2.670  28.632  18.957  1.00  0.47           O  
HETATM  324  O   HOH T 323     -33.471  25.059 -15.192  1.00  0.47           O  
HETATM  325  O   HOH T 324     -46.309  17.085   2.266  1.00  0.47           O  
HETATM  326  O   HOH T 325     -20.814  12.742  16.891  1.00  0.47           O  
HETATM  327  O   HOH T 326     -21.445  -4.517   5.924  1.00  0.47           O  
HETATM  328  O   HOH T 327     -27.064  22.602  18.773  1.00  0.47           O  
HETATM  329  O   HOH T 328     -20.079 -14.176  -5.095  1.00  0.47           O  
HETATM  330  O   HOH T 329      -3.951  31.032  19.263  1.00  0.47           O  
HETATM  331  O   HOH T 330     -25.520  10.433  15.401  1.00  0.47           O  
HETATM  332  O   HOH T 331       7.262  26.474  11.672  1.00  0.48           O  
HETATM  333  O   HOH T 332     -37.512  24.484   4.144  1.00  0.48           O  
HETATM  334  O   HOH T 333     -23.412  22.662   6.449  1.00  0.48           O  
HETATM  335  O   HOH T 334      -2.931  13.891   3.660  1.00  0.48           O  
HETATM  336  O   HOH T 335     -12.184  -3.758   1.092  1.00  0.48           O  
HETATM  337  O   HOH T 336     -17.596   3.295  20.263  1.00  0.48           O  
HETATM  338  O   HOH T 337     -19.745   8.837  24.688  1.00  0.48           O  
HETATM  339  O   HOH T 338     -45.168  24.630 -10.619  1.00  0.48           O  
HETATM  340  O   HOH T 339     -45.273  23.565 -13.046  1.00  0.48           O  
HETATM  341  O   HOH T 340     -14.271  -1.635  -1.691  1.00  0.48           O  
HETATM  342  O   HOH T 341     -40.318   7.809  14.292  1.00  0.48           O  
HETATM  343  O   HOH T 342     -22.415  -2.727   4.037  1.00  0.48           O  
HETATM  344  O   HOH T 343     -39.059  -0.342   3.083  1.00  0.48           O  
HETATM  345  O   HOH T 344     -13.632   8.967  -1.510  1.00  0.48           O  
HETATM  346  O   HOH T 345     -31.544  29.555  -1.731  1.00  0.48           O  
HETATM  347  O   HOH T 346      -2.447  24.248  -4.639  1.00  0.48           O  
HETATM  348  O   HOH T 347     -16.102   9.141   2.171  1.00  0.48           O  
HETATM  349  O   HOH T 348     -26.393  11.494 -19.568  1.00  0.48           O  
HETATM  350  O   HOH T 349     -25.714 -11.723  -0.235  1.00  0.48           O  
HETATM  351  O   HOH T 350     -24.011  24.871   0.888  1.00  0.49           O  
HETATM  352  O   HOH T 351      -2.640  -0.765  -0.188  1.00  0.49           O  
HETATM  353  O   HOH T 352      -6.175   4.594  11.311  1.00  0.49           O  
HETATM  354  O   HOH T 353     -41.616   0.631   3.137  1.00  0.49           O  
HETATM  355  O   HOH T 354      -7.472   6.541  12.790  1.00  0.49           O  
HETATM  356  O   HOH T 355     -22.217  22.496   8.955  1.00  0.49           O  
HETATM  357  O   HOH T 356      -4.569   6.094   9.633  1.00  0.49           O  
HETATM  358  O   HOH T 357      -3.032  10.228  12.020  1.00  0.49           O  
HETATM  359  O   HOH T 358     -43.615  16.742  10.672  1.00  0.49           O  
HETATM  360  O   HOH T 359     -39.898  18.915  13.747  1.00  0.49           O  
HETATM  361  O   HOH T 360     -13.866  -0.572  -4.135  1.00  0.49           O  
HETATM  362  O   HOH T 361     -49.948   9.412   8.208  1.00  0.49           O  
HETATM  363  O   HOH T 362     -20.085  14.626  24.117  1.00  0.49           O  
HETATM  364  O   HOH T 363     -23.554  25.099   4.839  1.00  0.49           O  
HETATM  365  O   HOH T 364      -7.244   6.758   9.974  1.00  0.49           O  
HETATM  366  O   HOH T 365     -20.252   1.504   7.979  1.00  0.49           O  
HETATM  367  O   HOH T 366     -21.143  16.005  21.913  1.00  0.49           O  
HETATM  368  O   HOH T 367     -35.074  27.588  -2.546  1.00  0.49           O  
HETATM  369  O   HOH T 368     -20.599  21.418  25.251  1.00  0.49           O  
HETATM  370  O   HOH T 369     -14.136   3.114  -0.881  1.00  0.49           O  
HETATM  371  O   HOH T 370     -22.673  13.833 -11.211  1.00  0.49           O  
HETATM  372  O   HOH T 371     -33.457  18.444 -18.165  1.00  0.49           O  
HETATM  373  O   HOH T 372     -11.029  21.399  -4.739  1.00  0.49           O  
HETATM  374  O   HOH T 373       3.403  23.447   9.473  1.00  0.49           O  
HETATM  375  O   HOH T 374     -17.792  -7.104  -1.621  1.00  0.50           O  
HETATM  376  O   HOH T 375     -36.567   9.437 -17.127  1.00  0.50           O  
HETATM  377  O   HOH T 376      -5.010   8.447  11.015  1.00  0.50           O  
HETATM  378  O   HOH T 377      -5.461  11.267  11.312  1.00  0.50           O  
HETATM  379  O   HOH T 378     -25.965 -11.261 -17.380  1.00  0.50           O  
HETATM  380  O   HOH T 379     -30.991  32.445 -17.270  1.00  0.50           O  
HETATM  381  O   HOH T 380     -42.750   5.551 -11.751  1.00  0.50           O  
HETATM  382  O   HOH T 381     -27.244  -1.090  12.481  1.00  0.50           O  
HETATM  383  O   HOH T 382     -19.783  -3.559   3.935  1.00  0.50           O  
HETATM  384  O   HOH T 383     -10.399  10.535  -7.380  1.00  0.50           O  
HETATM  385  O   HOH T 384     -29.344  -3.755  -0.418  1.00  0.50           O  
HETATM  386  O   HOH T 385     -32.638  26.866  -1.661  1.00  0.50           O  
HETATM  387  O   HOH T 386     -29.309  14.882  14.613  1.00  0.51           O  
HETATM  388  O   HOH T 387      -7.107   9.769  -4.924  1.00  0.51           O  
HETATM  389  O   HOH T 388      -3.067  35.851  -2.035  1.00  0.51           O  
HETATM  390  O   HOH T 389     -23.072  16.462 -12.426  1.00  0.51           O  
HETATM  391  O   HOH T 390     -25.969  -8.171   4.919  1.00  0.51           O  
HETATM  392  O   HOH T 391     -29.218  19.419  -8.031  1.00  0.51           O  
HETATM  393  O   HOH T 392      -2.251  15.243   6.664  1.00  0.51           O  
HETATM  394  O   HOH T 393     -32.324  -2.619 -14.814  1.00  0.51           O  
HETATM  395  O   HOH T 394     -23.327  -9.957 -20.078  1.00  0.51           O  
HETATM  396  O   HOH T 395     -11.478  10.153  -0.010  1.00  0.51           O  
HETATM  397  O   HOH T 396     -20.016  13.088 -12.083  1.00  0.51           O  
HETATM  398  O   HOH T 397     -39.755  14.714 -18.011  1.00  0.51           O  
HETATM  399  O   HOH T 398      -4.980  20.943  -3.040  1.00  0.51           O  
HETATM  400  O   HOH T 399     -31.754  28.024  -4.107  1.00  0.51           O  
HETATM  401  O   HOH T 400      -7.553  20.180  -3.813  1.00  0.51           O  
HETATM  402  O   HOH T 401     -50.347   7.596  -6.036  1.00  0.52           O  
HETATM  403  O   HOH T 402     -17.225  29.182  13.754  1.00  0.52           O  
HETATM  404  O   HOH T 403     -38.798   0.853  -6.695  1.00  0.52           O  
HETATM  405  O   HOH T 404     -44.535  23.780 -18.801  1.00  0.52           O  
HETATM  406  O   HOH T 405     -44.810  14.630  12.038  1.00  0.52           O  
HETATM  407  O   HOH T 406     -12.290  13.447  -3.305  1.00  0.52           O  
HETATM  408  O   HOH T 407     -45.909  27.552 -15.715  1.00  0.52           O  
HETATM  409  O   HOH T 408      -1.631  25.471  -2.223  1.00  0.52           O  
HETATM  410  O   HOH T 409     -21.804  11.178 -11.196  1.00  0.52           O  
HETATM  411  O   HOH T 410     -18.407  26.501  24.790  1.00  0.52           O  
HETATM  412  O   HOH T 411      -6.400  33.915   4.952  1.00  0.52           O  
HETATM  413  O   HOH T 412     -35.866  -1.461 -10.708  1.00  0.52           O  
HETATM  414  O   HOH T 413     -45.621  24.760 -16.310  1.00  0.52           O  
HETATM  415  O   HOH T 414     -17.060  29.926  22.908  1.00  0.52           O  
HETATM  416  O   HOH T 415     -25.798  16.899  19.354  1.00  0.52           O  
HETATM  417  O   HOH T 416      -6.341  34.479   2.245  1.00  0.52           O  
HETATM  418  O   HOH T 417     -15.471   0.804  -1.280  1.00  0.52           O  
HETATM  419  O   HOH T 418     -23.707  16.243  21.056  1.00  0.52           O  
HETATM  420  O   HOH T 419     -15.419  24.015  26.877  1.00  0.52           O  
HETATM  421  O   HOH T 420     -16.161   9.744  -0.556  1.00  0.53           O  
HETATM  422  O   HOH T 421     -10.352   4.642  -7.993  1.00  0.53           O  
HETATM  423  O   HOH T 422     -25.317  21.088  20.378  1.00  0.53           O  
HETATM  424  O   HOH T 423     -39.051   2.033  -4.219  1.00  0.53           O  
HETATM  425  O   HOH T 424     -32.624  25.959   8.519  1.00  0.53           O  
HETATM  426  O   HOH T 425     -25.233 -14.829  -6.769  1.00  0.53           O  
HETATM  427  O   HOH T 426     -17.971  13.057  23.439  1.00  0.53           O  
HETATM  428  O   HOH T 427     -43.881  29.506 -16.092  1.00  0.53           O  
HETATM  429  O   HOH T 428     -18.611   7.276 -15.407  1.00  0.53           O  
HETATM  430  O   HOH T 429      -7.320   9.312  12.261  1.00  0.53           O  
HETATM  431  O   HOH T 430     -20.478   6.084 -13.859  1.00  0.53           O  
HETATM  432  O   HOH T 431     -38.074  14.392  16.984  1.00  0.53           O  
HETATM  433  O   HOH T 432     -26.209  20.008 -11.353  1.00  0.53           O  
HETATM  434  O   HOH T 433      -5.394  18.726  -4.814  1.00  0.53           O  
HETATM  435  O   HOH T 434     -48.186  26.045 -16.558  1.00  0.53           O  
HETATM  436  O   HOH T 435      -4.156  -5.104 -11.850  1.00  0.53           O  
HETATM  437  O   HOH T 436      -4.854  33.161  17.795  1.00  0.53           O  
HETATM  438  O   HOH T 437     -41.785  25.182  -9.363  1.00  0.54           O  
HETATM  439  O   HOH T 438     -14.607   5.965 -17.105  1.00  0.54           O  
HETATM  440  O   HOH T 439      -0.840   1.388  -0.338  1.00  0.54           O  
HETATM  441  O   HOH T 440     -30.096  13.583 -21.628  1.00  0.54           O  
HETATM  442  O   HOH T 441     -23.609 -12.939 -10.485  1.00  0.54           O  
HETATM  443  O   HOH T 442     -11.248   5.646  -1.569  1.00  0.54           O  
HETATM  444  O   HOH T 443      -8.073  19.621  -8.165  1.00  0.54           O  
HETATM  445  O   HOH T 444     -29.200  21.773  20.282  1.00  0.54           O  
HETATM  446  O   HOH T 445      -9.565  37.035   0.519  1.00  0.54           O  
HETATM  447  O   HOH T 446     -11.716  -3.033 -18.259  1.00  0.54           O  
HETATM  448  O   HOH T 447     -25.492   0.610 -22.711  1.00  0.54           O  
HETATM  449  O   HOH T 448     -27.764  14.047  18.006  1.00  0.54           O  
HETATM  450  O   HOH T 449     -23.914  18.695  19.836  1.00  0.54           O  
HETATM  451  O   HOH T 450     -29.364  27.347  17.564  1.00  0.54           O  
HETATM  452  O   HOH T 451     -17.057   8.988 -12.734  1.00  0.54           O  
HETATM  453  O   HOH T 452     -32.888   1.258  13.816  1.00  0.54           O  
HETATM  454  O   HOH T 453       0.490  18.746  10.392  1.00  0.55           O  
HETATM  455  O   HOH T 454     -19.311  -0.918   4.665  1.00  0.55           O  
HETATM  456  O   HOH T 455     -19.577  -5.067  -1.337  1.00  0.55           O  
HETATM  457  O   HOH T 456     -34.810  10.482 -23.068  1.00  0.55           O  
HETATM  458  O   HOH T 457     -20.368   9.788  19.532  1.00  0.55           O  
HETATM  459  O   HOH T 458     -37.310  26.229  -2.493  1.00  0.55           O  
HETATM  460  O   HOH T 459     -32.099  26.851   1.035  1.00  0.55           O  
HETATM  461  O   HOH T 460     -10.351   3.265 -14.531  1.00  0.55           O  
HETATM  462  O   HOH T 461     -25.075  16.917 -17.022  1.00  0.55           O  
HETATM  463  O   HOH T 462     -22.574   9.721  18.008  1.00  0.56           O  
HETATM  464  O   HOH T 463     -44.707  10.466 -12.263  1.00  0.56           O  
HETATM  465  O   HOH T 464     -15.344   5.238 -19.584  1.00  0.56           O  
HETATM  466  O   HOH T 465     -42.495  17.195 -18.040  1.00  0.56           O  
HETATM  467  O   HOH T 466       3.836  31.006  21.892  1.00  0.56           O  
HETATM  468  O   HOH T 467     -10.621   1.554 -12.224  1.00  0.56           O  
HETATM  469  O   HOH T 468     -37.312   2.313 -14.393  1.00  0.56           O  
HETATM  470  O   HOH T 469     -32.447  13.107  16.296  1.00  0.56           O  
HETATM  471  O   HOH T 470       1.859  31.797   8.223  1.00  0.56           O  
HETATM  472  O   HOH T 471     -31.388  19.168 -10.712  1.00  0.56           O  
HETATM  473  O   HOH T 472     -10.972   5.668 -10.593  1.00  0.57           O  
HETATM  474  O   HOH T 473     -48.812  11.216  -5.597  1.00  0.57           O  
HETATM  475  O   HOH T 474       0.244  27.489   0.875  1.00  0.57           O  
HETATM  476  O   HOH T 475     -17.147   6.637 -17.790  1.00  0.57           O  
HETATM  477  O   HOH T 476     -44.780  11.694  -9.827  1.00  0.58           O  
HETATM  478  O   HOH T 477     -24.266  26.571   7.006  1.00  0.58           O  
HETATM  479  O   HOH T 478     -17.188  -8.073 -11.477  1.00  0.58           O  
HETATM  480  O   HOH T 479     -26.187  -1.206   9.958  1.00  0.58           O  
HETATM  481  O   HOH T 480     -16.200  11.384  24.383  1.00  0.58           O  
HETATM  482  O   HOH T 481     -10.554  11.435  -9.940  1.00  0.59           O  
HETATM  483  O   HOH T 482     -15.971  10.536 -14.769  1.00  0.59           O  
HETATM  484  O   HOH T 483     -13.873  30.863  17.704  1.00  0.60           O  
HETATM  485  O   HOH T 484     -17.179   3.876   3.221  1.00  0.61           O  
HETATM  486  O   HOH T 485      -2.684  31.705  16.955  1.00  0.64           O  
TER     487      HOH T 485 
