# Supplementary material for: Accurate Prediction of Hydration Sites of Proteins Using Energy Model With Atom Embedding
Source: Front Mol Biosci. 2021 Sep 20;8:756075. doi: 10.3389/fmolb.2021.756075 (PMC8488165; doi:10.3389/fmolb.2021.756075)
Supplement: Supplementary file 1 [file DataSheet1.ZIP › Data Sheet 1/Our_result_pdb/our_dataset_output/2PWO_watersite.pdb]

HEADER                                                        XXXX


JRNL        PMID   -1
HETATM    1  O   HOH T   0       9.958  -6.230   7.918  1.00  0.19           O  
HETATM    2  O   HOH T   1      12.212  47.268  45.292  1.00  0.19           O  
HETATM    3  O   HOH T   2       6.871  49.556  44.824  1.00  0.19           O  
HETATM    4  O   HOH T   3      -0.910 -21.115  14.496  1.00  0.19           O  
HETATM    5  O   HOH T   4      29.616  57.875  45.480  1.00  0.20           O  
HETATM    6  O   HOH T   5       1.544  -3.180  18.142  1.00  0.20           O  
HETATM    7  O   HOH T   6       7.946  34.897  42.126  1.00  0.20           O  
HETATM    8  O   HOH T   7     -18.632 -44.342  11.096  1.00  0.21           O  
HETATM    9  O   HOH T   8      17.869 -18.240  -0.635  1.00  0.21           O  
HETATM   10  O   HOH T   9      18.206  30.571  49.174  1.00  0.21           O  
HETATM   11  O   HOH T  10      15.009  24.714  42.989  1.00  0.21           O  
HETATM   12  O   HOH T  11      -7.695  11.599  29.276  1.00  0.22           O  
HETATM   13  O   HOH T  12      -3.907  -1.055  17.917  1.00  0.22           O  
HETATM   14  O   HOH T  13     -21.050  -8.144  18.657  1.00  0.22           O  
HETATM   15  O   HOH T  14      -9.925  43.079  45.827  1.00  0.22           O  
HETATM   16  O   HOH T  15      -0.032 -11.142   2.551  1.00  0.22           O  
HETATM   17  O   HOH T  16      -0.964 -37.137   2.221  1.00  0.23           O  
HETATM   18  O   HOH T  17      16.071  13.297  25.079  1.00  0.23           O  
HETATM   19  O   HOH T  18      -4.830  15.543  38.230  1.00  0.23           O  
HETATM   20  O   HOH T  19      16.706  12.370  27.649  1.00  0.23           O  
HETATM   21  O   HOH T  20       6.162  42.162  57.079  1.00  0.23           O  
HETATM   22  O   HOH T  21       4.166  40.898  32.842  1.00  0.23           O  
HETATM   23  O   HOH T  22       5.879  27.780  45.028  1.00  0.23           O  
HETATM   24  O   HOH T  23     -19.568   0.624  21.039  1.00  0.23           O  
HETATM   25  O   HOH T  24       2.376  71.678  58.503  1.00  0.23           O  
HETATM   26  O   HOH T  25      14.150  45.676  35.110  1.00  0.23           O  
HETATM   27  O   HOH T  26       5.552 -38.403   0.719  1.00  0.24           O  
HETATM   28  O   HOH T  27      -4.977 -22.844  17.923  1.00  0.24           O  
HETATM   29  O   HOH T  28      12.322  41.407  30.316  1.00  0.24           O  
HETATM   30  O   HOH T  29       3.227  -8.299  29.007  1.00  0.24           O  
HETATM   31  O   HOH T  30      10.482  29.319  41.466  1.00  0.24           O  
HETATM   32  O   HOH T  31      17.103  62.365  45.772  1.00  0.24           O  
HETATM   33  O   HOH T  32      10.899  38.964  30.211  1.00  0.24           O  
HETATM   34  O   HOH T  33     -10.776  16.909  32.335  1.00  0.24           O  
HETATM   35  O   HOH T  34      27.416  24.530  34.675  1.00  0.24           O  
HETATM   36  O   HOH T  35     -13.359 -36.006  10.484  1.00  0.24           O  
HETATM   37  O   HOH T  36       1.631 -11.089   9.673  1.00  0.24           O  
HETATM   38  O   HOH T  37      -2.260 -17.174  29.135  1.00  0.25           O  
HETATM   39  O   HOH T  38      24.083   4.537   8.164  1.00  0.25           O  
HETATM   40  O   HOH T  39       3.098  -4.413   7.828  1.00  0.25           O  
HETATM   41  O   HOH T  40      16.496  37.017  47.966  1.00  0.25           O  
HETATM   42  O   HOH T  41       2.294  -7.962  26.459  1.00  0.25           O  
HETATM   43  O   HOH T  42      26.763  63.903  51.769  1.00  0.25           O  
HETATM   44  O   HOH T  43      18.741   7.789  39.311  1.00  0.25           O  
HETATM   45  O   HOH T  44      37.787  51.895  48.080  1.00  0.25           O  
HETATM   46  O   HOH T  45     -19.145 -12.044  18.396  1.00  0.25           O  
HETATM   47  O   HOH T  46     -22.209  11.277  39.501  1.00  0.25           O  
HETATM   48  O   HOH T  47      22.461 -15.299  15.449  1.00  0.25           O  
HETATM   49  O   HOH T  48       4.253 -36.446  19.362  1.00  0.26           O  
HETATM   50  O   HOH T  49     -19.549  14.472  27.654  1.00  0.26           O  
HETATM   51  O   HOH T  50       4.197  35.547  47.461  1.00  0.26           O  
HETATM   52  O   HOH T  51      21.505  11.358  15.521  1.00  0.26           O  
HETATM   53  O   HOH T  52       1.743  21.670  24.464  1.00  0.26           O  
HETATM   54  O   HOH T  53      -4.247  11.699  41.519  1.00  0.26           O  
HETATM   55  O   HOH T  54      20.729  58.836  53.958  1.00  0.26           O  
HETATM   56  O   HOH T  55      13.767  34.941  38.430  1.00  0.27           O  
HETATM   57  O   HOH T  56      18.723   6.925  18.831  1.00  0.27           O  
HETATM   58  O   HOH T  57      13.701 -33.123  -4.198  1.00  0.27           O  
HETATM   59  O   HOH T  58       8.266 -15.306  26.373  1.00  0.27           O  
HETATM   60  O   HOH T  59       5.727  62.892  55.818  1.00  0.27           O  
HETATM   61  O   HOH T  60      -7.496   6.905  37.343  1.00  0.27           O  
HETATM   62  O   HOH T  61      24.440  31.979  45.294  1.00  0.27           O  
HETATM   63  O   HOH T  62      20.551  63.197  54.602  1.00  0.27           O  
HETATM   64  O   HOH T  63      36.868  20.164  31.695  1.00  0.27           O  
HETATM   65  O   HOH T  64      17.026 -27.016  -3.364  1.00  0.27           O  
HETATM   66  O   HOH T  65      -1.214   2.868  35.140  1.00  0.27           O  
HETATM   67  O   HOH T  66      16.664  41.703  46.140  1.00  0.27           O  
HETATM   68  O   HOH T  67       5.189 -13.330  20.061  1.00  0.27           O  
HETATM   69  O   HOH T  68      11.807 -32.455   3.810  1.00  0.28           O  
HETATM   70  O   HOH T  69       3.563  18.196  48.073  1.00  0.28           O  
HETATM   71  O   HOH T  70       2.457 -15.661  11.078  1.00  0.28           O  
HETATM   72  O   HOH T  71       5.516  -8.972  18.611  1.00  0.28           O  
HETATM   73  O   HOH T  72      -5.856 -46.328  11.937  1.00  0.28           O  
HETATM   74  O   HOH T  73       9.779  42.150  46.642  1.00  0.28           O  
HETATM   75  O   HOH T  74      19.461 -14.866  -2.044  1.00  0.28           O  
HETATM   76  O   HOH T  75      -4.609 -21.278  22.479  1.00  0.28           O  
HETATM   77  O   HOH T  76       4.127  11.398  29.585  1.00  0.28           O  
HETATM   78  O   HOH T  77      -4.879  11.592  29.596  1.00  0.28           O  
HETATM   79  O   HOH T  78      -5.288  48.454  45.720  1.00  0.28           O  
HETATM   80  O   HOH T  79      -6.669   1.935  28.303  1.00  0.28           O  
HETATM   81  O   HOH T  80      20.130 -11.773  24.394  1.00  0.28           O  
HETATM   82  O   HOH T  81     -15.272 -35.764  12.507  1.00  0.28           O  
HETATM   83  O   HOH T  82       2.054  14.926  39.592  1.00  0.28           O  
HETATM   84  O   HOH T  83      -2.646  25.004  38.116  1.00  0.28           O  
HETATM   85  O   HOH T  84      -1.180 -17.473  -0.862  1.00  0.28           O  
HETATM   86  O   HOH T  85      -2.403 -16.450   3.439  1.00  0.28           O  
HETATM   87  O   HOH T  86      23.416  15.651  37.610  1.00  0.28           O  
HETATM   88  O   HOH T  87       0.894   8.989  43.913  1.00  0.28           O  
HETATM   89  O   HOH T  88      -4.180  35.112  44.598  1.00  0.28           O  
HETATM   90  O   HOH T  89      -3.002 -15.524  14.787  1.00  0.28           O  
HETATM   91  O   HOH T  90       4.748   1.503  13.944  1.00  0.28           O  
HETATM   92  O   HOH T  91      13.193  39.654  37.464  1.00  0.28           O  
HETATM   93  O   HOH T  92     -15.546 -16.275  16.341  1.00  0.29           O  
HETATM   94  O   HOH T  93      -5.925 -36.264   4.513  1.00  0.29           O  
HETATM   95  O   HOH T  94      15.675  52.019  40.738  1.00  0.29           O  
HETATM   96  O   HOH T  95       8.537  42.674  33.794  1.00  0.29           O  
HETATM   97  O   HOH T  96      11.921 -14.243  -5.253  1.00  0.29           O  
HETATM   98  O   HOH T  97     -11.966   6.874  33.873  1.00  0.29           O  
HETATM   99  O   HOH T  98     -12.863 -14.678  22.140  1.00  0.29           O  
HETATM  100  O   HOH T  99      23.651 -16.100   2.398  1.00  0.29           O  
HETATM  101  O   HOH T 100       2.424  41.894  36.332  1.00  0.29           O  
HETATM  102  O   HOH T 101      17.518 -18.548  24.294  1.00  0.29           O  
HETATM  103  O   HOH T 102      28.643  23.837  24.411  1.00  0.29           O  
HETATM  104  O   HOH T 103      10.142  35.447  27.144  1.00  0.29           O  
HETATM  105  O   HOH T 104      21.139  53.802  54.738  1.00  0.29           O  
HETATM  106  O   HOH T 105      -1.880  -7.599   8.470  1.00  0.29           O  
HETATM  107  O   HOH T 106       5.892  27.797  29.973  1.00  0.29           O  
HETATM  108  O   HOH T 107      30.207  60.286  46.802  1.00  0.30           O  
HETATM  109  O   HOH T 108      27.092  42.840  28.075  1.00  0.30           O  
HETATM  110  O   HOH T 109       8.148  -4.902  29.898  1.00  0.30           O  
HETATM  111  O   HOH T 110     -13.072 -19.834   3.989  1.00  0.30           O  
HETATM  112  O   HOH T 111      12.036 -16.204  -1.763  1.00  0.30           O  
HETATM  113  O   HOH T 112      24.178 -23.400   2.610  1.00  0.30           O  
HETATM  114  O   HOH T 113     -11.789   7.301  25.469  1.00  0.30           O  
HETATM  115  O   HOH T 114     -15.800 -24.270  20.562  1.00  0.30           O  
HETATM  116  O   HOH T 115     -19.299 -36.287  14.898  1.00  0.30           O  
HETATM  117  O   HOH T 116     -13.639 -26.170  11.329  1.00  0.30           O  
HETATM  118  O   HOH T 117      30.070  47.630  53.803  1.00  0.31           O  
HETATM  119  O   HOH T 118      -7.087   3.743  30.413  1.00  0.31           O  
HETATM  120  O   HOH T 119     -15.168 -39.127  14.720  1.00  0.31           O  
HETATM  121  O   HOH T 120      -0.911  43.720  52.733  1.00  0.31           O  
HETATM  122  O   HOH T 121       7.233   8.101  33.204  1.00  0.31           O  
HETATM  123  O   HOH T 122      -0.034  46.074  43.074  1.00  0.31           O  
HETATM  124  O   HOH T 123      18.275  69.843  54.709  1.00  0.31           O  
HETATM  125  O   HOH T 124       7.564  43.976  58.546  1.00  0.31           O  
HETATM  126  O   HOH T 125       3.667   6.792  37.596  1.00  0.31           O  
HETATM  127  O   HOH T 126      23.049  18.035  31.274  1.00  0.31           O  
HETATM  128  O   HOH T 127       6.462  21.898  16.257  1.00  0.31           O  
HETATM  129  O   HOH T 128      21.450  44.035  34.801  1.00  0.31           O  
HETATM  130  O   HOH T 129      -2.898  15.506  36.378  1.00  0.31           O  
HETATM  131  O   HOH T 130      -4.712 -32.115  17.704  1.00  0.31           O  
HETATM  132  O   HOH T 131      -2.470  23.423  29.734  1.00  0.31           O  
HETATM  133  O   HOH T 132      23.768  34.797  26.067  1.00  0.31           O  
HETATM  134  O   HOH T 133      41.346  39.622  49.156  1.00  0.31           O  
HETATM  135  O   HOH T 134     -10.555  -1.743  24.209  1.00  0.31           O  
HETATM  136  O   HOH T 135     -10.900 -32.371  25.832  1.00  0.31           O  
HETATM  137  O   HOH T 136      21.215  26.737  57.165  1.00  0.31           O  
HETATM  138  O   HOH T 137       4.809 -37.162  -1.719  1.00  0.31           O  
HETATM  139  O   HOH T 138       9.849  -8.763   0.205  1.00  0.31           O  
HETATM  140  O   HOH T 139       9.343 -13.222  -5.361  1.00  0.32           O  
HETATM  141  O   HOH T 140       3.703  34.074  45.178  1.00  0.32           O  
HETATM  142  O   HOH T 141     -11.266 -43.038  10.228  1.00  0.32           O  
HETATM  143  O   HOH T 142      -2.971  19.469  27.511  1.00  0.32           O  
HETATM  144  O   HOH T 143     -17.583  15.662  36.622  1.00  0.32           O  
HETATM  145  O   HOH T 144      18.675  13.669  34.474  1.00  0.32           O  
HETATM  146  O   HOH T 145       8.044 -21.951  -3.043  1.00  0.32           O  
HETATM  147  O   HOH T 146       2.474  43.550  34.081  1.00  0.32           O  
HETATM  148  O   HOH T 147      18.106 -13.429   7.425  1.00  0.32           O  
HETATM  149  O   HOH T 148      32.540  60.833  39.353  1.00  0.32           O  
HETATM  150  O   HOH T 149       4.943  24.084  24.202  1.00  0.32           O  
HETATM  151  O   HOH T 150     -15.606 -37.548  10.377  1.00  0.32           O  
HETATM  152  O   HOH T 151      -2.671 -14.081   4.799  1.00  0.32           O  
HETATM  153  O   HOH T 152       7.985  46.948  60.979  1.00  0.32           O  
HETATM  154  O   HOH T 153      17.631  24.706  42.219  1.00  0.32           O  
HETATM  155  O   HOH T 154     -13.669 -21.121  21.848  1.00  0.32           O  
HETATM  156  O   HOH T 155       5.513  18.244  26.217  1.00  0.32           O  
HETATM  157  O   HOH T 156      14.746  -1.150  39.127  1.00  0.32           O  
HETATM  158  O   HOH T 157      -2.198  70.066  51.351  1.00  0.32           O  
HETATM  159  O   HOH T 158     -10.281 -41.629  17.415  1.00  0.32           O  
HETATM  160  O   HOH T 159      -0.154  39.129  34.730  1.00  0.32           O  
HETATM  161  O   HOH T 160      28.851  34.414  50.381  1.00  0.32           O  
HETATM  162  O   HOH T 161      16.858 -27.070  -6.954  1.00  0.32           O  
HETATM  163  O   HOH T 162       3.504 -15.442  26.140  1.00  0.32           O  
HETATM  164  O   HOH T 163      10.221 -14.544  -2.993  1.00  0.32           O  
HETATM  165  O   HOH T 164      -0.385   7.439  36.969  1.00  0.32           O  
HETATM  166  O   HOH T 165       2.075   8.677  36.438  1.00  0.32           O  
HETATM  167  O   HOH T 166      11.958 -19.949  -8.024  1.00  0.32           O  
HETATM  168  O   HOH T 167      13.267  11.661  19.512  1.00  0.32           O  
HETATM  169  O   HOH T 168      -1.318 -11.401  21.568  1.00  0.32           O  
HETATM  170  O   HOH T 169      -8.342  14.266  43.042  1.00  0.32           O  
HETATM  171  O   HOH T 170     -15.254 -32.979  16.220  1.00  0.33           O  
HETATM  172  O   HOH T 171      -5.124  15.272  21.713  1.00  0.33           O  
HETATM  173  O   HOH T 172       6.950 -17.182  28.023  1.00  0.33           O  
HETATM  174  O   HOH T 173       1.265  -8.773   2.592  1.00  0.33           O  
HETATM  175  O   HOH T 174      -1.339  -8.898   1.413  1.00  0.33           O  
HETATM  176  O   HOH T 175     -11.271  -5.255  16.115  1.00  0.33           O  
HETATM  177  O   HOH T 176      25.147  15.134  29.887  1.00  0.33           O  
HETATM  178  O   HOH T 177      11.496  47.676  61.423  1.00  0.33           O  
HETATM  179  O   HOH T 178      -7.050 -14.880   2.755  1.00  0.33           O  
HETATM  180  O   HOH T 179     -13.576  12.817  27.521  1.00  0.33           O  
HETATM  181  O   HOH T 180      22.153 -16.596  19.412  1.00  0.33           O  
HETATM  182  O   HOH T 181      -9.032 -39.397  16.461  1.00  0.33           O  
HETATM  183  O   HOH T 182       1.594  11.465  42.928  1.00  0.33           O  
HETATM  184  O   HOH T 183      17.195  40.545  54.406  1.00  0.33           O  
HETATM  185  O   HOH T 184      29.205  38.503  34.853  1.00  0.33           O  
HETATM  186  O   HOH T 185      -4.154  30.698  51.750  1.00  0.33           O  
HETATM  187  O   HOH T 186      -3.037  51.713  49.079  1.00  0.33           O  
HETATM  188  O   HOH T 187      -0.792  31.832  48.028  1.00  0.33           O  
HETATM  189  O   HOH T 188      -7.750  64.669  61.083  1.00  0.33           O  
HETATM  190  O   HOH T 189      -9.407 -36.832  15.273  1.00  0.33           O  
HETATM  191  O   HOH T 190     -17.781 -29.293   9.793  1.00  0.33           O  
HETATM  192  O   HOH T 191      38.085  39.410  46.558  1.00  0.33           O  
HETATM  193  O   HOH T 192       5.096   4.606  37.022  1.00  0.33           O  
HETATM  194  O   HOH T 193      14.885  62.416  56.087  1.00  0.33           O  
HETATM  195  O   HOH T 194      -1.581  -7.092  19.421  1.00  0.33           O  
HETATM  196  O   HOH T 195       1.741  32.434  55.892  1.00  0.33           O  
HETATM  197  O   HOH T 196       3.669  -1.208  31.173  1.00  0.33           O  
HETATM  198  O   HOH T 197       8.376   7.679  30.750  1.00  0.33           O  
HETATM  199  O   HOH T 198      16.263  68.915  52.830  1.00  0.34           O  
HETATM  200  O   HOH T 199     -14.916 -29.451  22.577  1.00  0.34           O  
HETATM  201  O   HOH T 200       2.126  66.195  53.306  1.00  0.34           O  
HETATM  202  O   HOH T 201      -8.095 -30.258  21.058  1.00  0.34           O  
HETATM  203  O   HOH T 202      -8.949 -17.770   1.480  1.00  0.34           O  
HETATM  204  O   HOH T 203      25.222   6.823  23.541  1.00  0.34           O  
HETATM  205  O   HOH T 204      39.795  51.806  51.013  1.00  0.34           O  
HETATM  206  O   HOH T 205      -1.314  51.597  41.212  1.00  0.34           O  
HETATM  207  O   HOH T 206      12.419  14.432  38.135  1.00  0.34           O  
HETATM  208  O   HOH T 207       4.750  14.925  31.065  1.00  0.34           O  
HETATM  209  O   HOH T 208      10.131   2.664  28.166  1.00  0.34           O  
HETATM  210  O   HOH T 209      -6.204  67.769  64.771  1.00  0.34           O  
HETATM  211  O   HOH T 210      10.136  24.552  46.742  1.00  0.34           O  
HETATM  212  O   HOH T 211       1.597  57.330  59.198  1.00  0.34           O  
HETATM  213  O   HOH T 212     -13.200 -14.520  33.251  1.00  0.34           O  
HETATM  214  O   HOH T 213      -6.861  12.176  42.042  1.00  0.34           O  
HETATM  215  O   HOH T 214      -3.715 -46.543  13.620  1.00  0.34           O  
HETATM  216  O   HOH T 215       7.250 -13.387  15.848  1.00  0.34           O  
HETATM  217  O   HOH T 216     -18.062 -15.861  27.147  1.00  0.35           O  
HETATM  218  O   HOH T 217      10.899  23.495  28.412  1.00  0.35           O  
HETATM  219  O   HOH T 218      35.659  20.451  37.137  1.00  0.35           O  
HETATM  220  O   HOH T 219      15.144  51.771  60.275  1.00  0.35           O  
HETATM  221  O   HOH T 220      -0.752  -9.659   9.956  1.00  0.35           O  
HETATM  222  O   HOH T 221     -13.259 -27.961   2.981  1.00  0.35           O  
HETATM  223  O   HOH T 222      20.454 -17.898  21.012  1.00  0.35           O  
HETATM  224  O   HOH T 223      20.970  69.001  50.450  1.00  0.35           O  
HETATM  225  O   HOH T 224      10.452  -4.554   5.742  1.00  0.35           O  
HETATM  226  O   HOH T 225       0.029  19.674  24.636  1.00  0.35           O  
HETATM  227  O   HOH T 226       2.606 -31.316   0.541  1.00  0.35           O  
HETATM  228  O   HOH T 227       9.090 -31.348  13.724  1.00  0.35           O  
HETATM  229  O   HOH T 228     -19.696 -24.194  21.424  1.00  0.35           O  
HETATM  230  O   HOH T 229     -11.129  -4.088  18.663  1.00  0.35           O  
HETATM  231  O   HOH T 230     -10.675  15.954  34.859  1.00  0.35           O  
HETATM  232  O   HOH T 231      -8.809   5.282  32.076  1.00  0.35           O  
HETATM  233  O   HOH T 232      -3.745 -19.028  19.542  1.00  0.35           O  
HETATM  234  O   HOH T 233      -7.353   3.314  33.103  1.00  0.35           O  
HETATM  235  O   HOH T 234      -9.081   7.351  25.134  1.00  0.35           O  
HETATM  236  O   HOH T 235      16.685  37.312  44.438  1.00  0.35           O  
HETATM  237  O   HOH T 236       7.178  35.281  29.737  1.00  0.35           O  
HETATM  238  O   HOH T 237     -13.798 -30.873  15.495  1.00  0.35           O  
HETATM  239  O   HOH T 238      -4.156 -20.118  -1.088  1.00  0.35           O  
HETATM  240  O   HOH T 239      23.679  41.954  28.473  1.00  0.35           O  
HETATM  241  O   HOH T 240       2.124  20.554  48.096  1.00  0.35           O  
HETATM  242  O   HOH T 241       7.388 -13.331  31.064  1.00  0.35           O  
HETATM  243  O   HOH T 242      11.640 -19.283  17.054  1.00  0.35           O  
HETATM  244  O   HOH T 243      -5.415  20.184  43.795  1.00  0.35           O  
HETATM  245  O   HOH T 244      17.259  49.726  56.966  1.00  0.35           O  
HETATM  246  O   HOH T 245      34.718  43.683  36.251  1.00  0.35           O  
HETATM  247  O   HOH T 246      21.582 -11.127  22.151  1.00  0.36           O  
HETATM  248  O   HOH T 247      -9.147 -32.903  17.863  1.00  0.36           O  
HETATM  249  O   HOH T 248      36.927  58.503  35.103  1.00  0.36           O  
HETATM  250  O   HOH T 249      28.873  52.848  53.549  1.00  0.36           O  
HETATM  251  O   HOH T 250      -0.553  17.472  31.739  1.00  0.36           O  
HETATM  252  O   HOH T 251       1.657 -36.535  11.327  1.00  0.36           O  
HETATM  253  O   HOH T 252     -11.236  24.012  46.962  1.00  0.36           O  
HETATM  254  O   HOH T 253      21.232 -17.744  14.532  1.00  0.36           O  
HETATM  255  O   HOH T 254      37.201  60.391  37.132  1.00  0.36           O  
HETATM  256  O   HOH T 255      -6.163 -40.848   4.801  1.00  0.36           O  
HETATM  257  O   HOH T 256       2.665 -15.925  23.622  1.00  0.36           O  
HETATM  258  O   HOH T 257      -4.770  55.085  47.962  1.00  0.36           O  
HETATM  259  O   HOH T 258      17.107   9.125  35.629  1.00  0.36           O  
HETATM  260  O   HOH T 259       5.983  21.686  54.285  1.00  0.36           O  
HETATM  261  O   HOH T 260       0.702  45.693  51.784  1.00  0.36           O  
HETATM  262  O   HOH T 261      13.340   6.469  27.580  1.00  0.36           O  
HETATM  263  O   HOH T 262       5.684  18.677  44.329  1.00  0.36           O  
HETATM  264  O   HOH T 263     -16.563 -13.784  25.889  1.00  0.36           O  
HETATM  265  O   HOH T 264     -17.848 -38.652  15.373  1.00  0.36           O  
HETATM  266  O   HOH T 265      27.713  26.327  20.130  1.00  0.36           O  
HETATM  267  O   HOH T 266      16.767  30.900  46.751  1.00  0.36           O  
HETATM  268  O   HOH T 267      37.091  61.325  34.582  1.00  0.36           O  
HETATM  269  O   HOH T 268      -5.430  13.920  40.393  1.00  0.36           O  
HETATM  270  O   HOH T 269      -7.671 -35.416  13.572  1.00  0.36           O  
HETATM  271  O   HOH T 270       1.318  44.689  54.263  1.00  0.37           O  
HETATM  272  O   HOH T 271     -16.970   1.289  20.539  1.00  0.37           O  
HETATM  273  O   HOH T 272      -1.754  58.817  53.118  1.00  0.37           O  
HETATM  274  O   HOH T 273       3.506 -13.962  12.812  1.00  0.37           O  
HETATM  275  O   HOH T 274      -9.045 -11.713  20.378  1.00  0.37           O  
HETATM  276  O   HOH T 275      -1.798  21.863  27.485  1.00  0.37           O  
HETATM  277  O   HOH T 276     -14.499 -42.737   6.176  1.00  0.37           O  
HETATM  278  O   HOH T 277      -3.840 -42.209   5.630  1.00  0.37           O  
HETATM  279  O   HOH T 278      -0.903  34.236  49.260  1.00  0.37           O  
HETATM  280  O   HOH T 279     -10.794 -30.034  20.569  1.00  0.37           O  
HETATM  281  O   HOH T 280      19.083  41.093  47.388  1.00  0.37           O  
HETATM  282  O   HOH T 281      -0.983  -7.625   3.843  1.00  0.37           O  
HETATM  283  O   HOH T 282     -14.128 -21.917  16.748  1.00  0.37           O  
HETATM  284  O   HOH T 283      -7.528 -41.460  17.855  1.00  0.37           O  
HETATM  285  O   HOH T 284      13.357   9.726  10.337  1.00  0.37           O  
HETATM  286  O   HOH T 285      -7.706  -9.878  18.587  1.00  0.37           O  
HETATM  287  O   HOH T 286      -4.734  25.570  48.644  1.00  0.37           O  
HETATM  288  O   HOH T 287      12.369  -1.667  37.769  1.00  0.37           O  
HETATM  289  O   HOH T 288      18.401  58.169  62.599  1.00  0.37           O  
HETATM  290  O   HOH T 289       0.717 -31.831  -1.408  1.00  0.37           O  
HETATM  291  O   HOH T 290      16.485   7.326  37.649  1.00  0.37           O  
HETATM  292  O   HOH T 291     -18.442 -19.702  22.609  1.00  0.37           O  
HETATM  293  O   HOH T 292      -2.915  32.762  43.729  1.00  0.37           O  
HETATM  294  O   HOH T 293       8.442  49.050  42.683  1.00  0.37           O  
HETATM  295  O   HOH T 294      -5.735  16.673  40.624  1.00  0.37           O  
HETATM  296  O   HOH T 295      23.825  50.770  54.475  1.00  0.37           O  
HETATM  297  O   HOH T 296       3.002  62.923  55.206  1.00  0.37           O  
HETATM  298  O   HOH T 297       3.999  64.497  57.380  1.00  0.37           O  
HETATM  299  O   HOH T 298     -10.445   9.640  25.897  1.00  0.37           O  
HETATM  300  O   HOH T 299      35.199  39.700  54.690  1.00  0.38           O  
HETATM  301  O   HOH T 300      31.653   2.326  21.245  1.00  0.38           O  
HETATM  302  O   HOH T 301      18.600  52.919  61.712  1.00  0.38           O  
HETATM  303  O   HOH T 302      -6.046  65.507  63.090  1.00  0.38           O  
HETATM  304  O   HOH T 303      25.935 -15.369  25.576  1.00  0.38           O  
HETATM  305  O   HOH T 304      -1.819   5.862  38.727  1.00  0.38           O  
HETATM  306  O   HOH T 305      22.527  15.617  29.963  1.00  0.38           O  
HETATM  307  O   HOH T 306       9.947  29.864  44.042  1.00  0.38           O  
HETATM  308  O   HOH T 307      -6.694 -23.594   2.801  1.00  0.38           O  
HETATM  309  O   HOH T 308     -17.060 -27.664   7.635  1.00  0.38           O  
HETATM  310  O   HOH T 309      -2.456  48.969  48.605  1.00  0.38           O  
HETATM  311  O   HOH T 310      -0.829   8.938  46.047  1.00  0.38           O  
HETATM  312  O   HOH T 311      16.801  63.203  54.588  1.00  0.38           O  
HETATM  313  O   HOH T 312      25.032  58.521  37.079  1.00  0.38           O  
HETATM  314  O   HOH T 313      15.697 -32.594  -2.414  1.00  0.38           O  
HETATM  315  O   HOH T 314      12.478  -8.201   0.070  1.00  0.38           O  
HETATM  316  O   HOH T 315     -11.175  14.382  28.273  1.00  0.38           O  
HETATM  317  O   HOH T 316      15.597  41.082  56.540  1.00  0.38           O  
HETATM  318  O   HOH T 317       4.782  62.818  59.654  1.00  0.38           O  
HETATM  319  O   HOH T 318      -6.589  -8.810   6.568  1.00  0.38           O  
HETATM  320  O   HOH T 319     -13.981 -19.258  19.793  1.00  0.38           O  
HETATM  321  O   HOH T 320      37.761  25.226  26.931  1.00  0.38           O  
HETATM  322  O   HOH T 321       1.679  69.280  47.306  1.00  0.38           O  
HETATM  323  O   HOH T 322      -1.865 -19.701   0.742  1.00  0.38           O  
HETATM  324  O   HOH T 323      -0.716  -8.462  15.181  1.00  0.38           O  
HETATM  325  O   HOH T 324      11.790  14.309  42.436  1.00  0.38           O  
HETATM  326  O   HOH T 325      -3.819  15.563  33.874  1.00  0.38           O  
HETATM  327  O   HOH T 326       5.658  38.972  46.061  1.00  0.39           O  
HETATM  328  O   HOH T 327      -5.126 -40.119  18.373  1.00  0.39           O  
HETATM  329  O   HOH T 328     -12.162 -44.799  12.080  1.00  0.39           O  
HETATM  330  O   HOH T 329      -8.032  22.441  44.000  1.00  0.39           O  
HETATM  331  O   HOH T 330       0.066 -36.657  -2.587  1.00  0.39           O  
HETATM  332  O   HOH T 331       2.203  29.053  47.727  1.00  0.39           O  
HETATM  333  O   HOH T 332     -18.508 -33.751  14.033  1.00  0.39           O  
HETATM  334  O   HOH T 333       6.375  -3.131   4.718  1.00  0.39           O  
HETATM  335  O   HOH T 334      -4.570  56.729  45.777  1.00  0.39           O  
HETATM  336  O   HOH T 335      29.990  39.925  31.504  1.00  0.39           O  
HETATM  337  O   HOH T 336     -12.164 -14.578   8.067  1.00  0.39           O  
HETATM  338  O   HOH T 337      18.543  55.414  62.747  1.00  0.39           O  
HETATM  339  O   HOH T 338     -18.654 -29.912   7.252  1.00  0.39           O  
HETATM  340  O   HOH T 339       4.136  41.131  45.232  1.00  0.39           O  
HETATM  341  O   HOH T 340      11.861  26.296  47.906  1.00  0.39           O  
HETATM  342  O   HOH T 341      23.633  54.460  35.867  1.00  0.39           O  
HETATM  343  O   HOH T 342       9.650  41.370  37.193  1.00  0.39           O  
HETATM  344  O   HOH T 343       7.246 -38.016  12.177  1.00  0.39           O  
HETATM  345  O   HOH T 344      -2.149 -10.995  32.857  1.00  0.39           O  
HETATM  346  O   HOH T 345     -13.981   5.774  24.793  1.00  0.39           O  
HETATM  347  O   HOH T 346      10.248  12.414  41.182  1.00  0.39           O  
HETATM  348  O   HOH T 347     -16.585 -27.267  22.576  1.00  0.39           O  
HETATM  349  O   HOH T 348     -19.610 -14.452  10.659  1.00  0.39           O  
HETATM  350  O   HOH T 349       2.083  51.805  39.094  1.00  0.39           O  
HETATM  351  O   HOH T 350       9.732  54.733  61.735  1.00  0.39           O  
HETATM  352  O   HOH T 351       0.749  17.899  44.810  1.00  0.39           O  
HETATM  353  O   HOH T 352       3.050  26.015  27.541  1.00  0.39           O  
HETATM  354  O   HOH T 353       2.878 -14.052  21.607  1.00  0.40           O  
HETATM  355  O   HOH T 354      -0.886  36.534  35.456  1.00  0.40           O  
HETATM  356  O   HOH T 355       3.247  47.927  44.289  1.00  0.40           O  
HETATM  357  O   HOH T 356      28.634   0.631  23.198  1.00  0.40           O  
HETATM  358  O   HOH T 357      30.449  62.661  39.146  1.00  0.40           O  
HETATM  359  O   HOH T 358       7.855 -37.460   7.395  1.00  0.40           O  
HETATM  360  O   HOH T 359     -17.757 -22.126  24.186  1.00  0.40           O  
HETATM  361  O   HOH T 360      26.402   8.949   9.509  1.00  0.40           O  
HETATM  362  O   HOH T 361     -17.899 -26.044  20.471  1.00  0.40           O  
HETATM  363  O   HOH T 362      16.437  40.042  44.049  1.00  0.40           O  
HETATM  364  O   HOH T 363       3.329  36.615  57.654  1.00  0.40           O  
HETATM  365  O   HOH T 364       6.439   2.200  36.612  1.00  0.40           O  
HETATM  366  O   HOH T 365       7.698 -33.742  14.099  1.00  0.40           O  
HETATM  367  O   HOH T 366     -10.360 -26.772  28.054  1.00  0.40           O  
HETATM  368  O   HOH T 367      39.695  50.666  46.499  1.00  0.40           O  
HETATM  369  O   HOH T 368       8.829  44.649  45.769  1.00  0.40           O  
HETATM  370  O   HOH T 369      -5.181  63.222  66.085  1.00  0.40           O  
HETATM  371  O   HOH T 370       3.999  20.126  46.095  1.00  0.40           O  
HETATM  372  O   HOH T 371      -7.152 -25.901  -1.712  1.00  0.40           O  
HETATM  373  O   HOH T 372      17.764  59.941  42.229  1.00  0.40           O  
HETATM  374  O   HOH T 373       8.767  35.679  55.085  1.00  0.40           O  
HETATM  375  O   HOH T 374      -4.261  13.135  35.514  1.00  0.40           O  
HETATM  376  O   HOH T 375      27.518   6.367   9.413  1.00  0.40           O  
HETATM  377  O   HOH T 376       4.055 -11.297  12.326  1.00  0.40           O  
HETATM  378  O   HOH T 377      15.787  60.961  43.827  1.00  0.40           O  
HETATM  379  O   HOH T 378      19.860  74.032  49.004  1.00  0.40           O  
HETATM  380  O   HOH T 379       2.003  -9.749  22.412  1.00  0.40           O  
HETATM  381  O   HOH T 380      -0.037 -31.778   1.273  1.00  0.40           O  
HETATM  382  O   HOH T 381      -3.637 -43.287   2.877  1.00  0.40           O  
HETATM  383  O   HOH T 382       4.130  23.758  53.401  1.00  0.40           O  
HETATM  384  O   HOH T 383      -6.440  11.470  31.843  1.00  0.40           O  
HETATM  385  O   HOH T 384       0.501  48.555  44.330  1.00  0.40           O  
HETATM  386  O   HOH T 385      -6.589 -34.057  17.523  1.00  0.40           O  
HETATM  387  O   HOH T 386      -1.432  15.152  30.453  1.00  0.40           O  
HETATM  388  O   HOH T 387      10.920   5.286  28.520  1.00  0.40           O  
HETATM  389  O   HOH T 388      -8.443  13.933  27.920  1.00  0.41           O  
HETATM  390  O   HOH T 389      -5.499  28.293  51.851  1.00  0.41           O  
HETATM  391  O   HOH T 390      -4.333  36.491  46.930  1.00  0.41           O  
HETATM  392  O   HOH T 391      -2.976 -22.221   0.170  1.00  0.41           O  
HETATM  393  O   HOH T 392       2.557  30.034  50.296  1.00  0.41           O  
HETATM  394  O   HOH T 393     -10.126  -6.547  18.345  1.00  0.41           O  
HETATM  395  O   HOH T 394       9.817   7.013  33.077  1.00  0.41           O  
HETATM  396  O   HOH T 395       7.551 -23.384  15.909  1.00  0.41           O  
HETATM  397  O   HOH T 396      -2.466  -5.071  33.657  1.00  0.41           O  
HETATM  398  O   HOH T 397     -15.705 -16.322  13.650  1.00  0.41           O  
HETATM  399  O   HOH T 398      39.538  23.690  28.501  1.00  0.41           O  
HETATM  400  O   HOH T 399      39.308  32.390  50.328  1.00  0.41           O  
HETATM  401  O   HOH T 400       7.745  25.723  48.034  1.00  0.41           O  
HETATM  402  O   HOH T 401      15.171  60.279  41.208  1.00  0.41           O  
HETATM  403  O   HOH T 402      -5.585 -20.151  17.899  1.00  0.41           O  
HETATM  404  O   HOH T 403      12.329  41.053  59.840  1.00  0.41           O  
HETATM  405  O   HOH T 404      12.102  73.074  49.387  1.00  0.41           O  
HETATM  406  O   HOH T 405       4.918  38.613  58.863  1.00  0.41           O  
HETATM  407  O   HOH T 406      10.549  12.969  28.404  1.00  0.41           O  
HETATM  408  O   HOH T 407       3.381   9.845  44.534  1.00  0.41           O  
HETATM  409  O   HOH T 408      19.324 -25.283  21.402  1.00  0.41           O  
HETATM  410  O   HOH T 409      -9.241  63.378  65.086  1.00  0.41           O  
HETATM  411  O   HOH T 410       8.068  41.273  58.884  1.00  0.41           O  
HETATM  412  O   HOH T 411     -20.990  11.763  37.121  1.00  0.41           O  
HETATM  413  O   HOH T 412      -2.330 -22.625  18.764  1.00  0.41           O  
HETATM  414  O   HOH T 413       3.055  44.568  36.594  1.00  0.41           O  
HETATM  415  O   HOH T 414      -7.614  63.451  67.334  1.00  0.41           O  
HETATM  416  O   HOH T 415      36.858  23.736  29.083  1.00  0.41           O  
HETATM  417  O   HOH T 416     -16.677 -29.420   5.422  1.00  0.41           O  
HETATM  418  O   HOH T 417      13.884  43.121  60.766  1.00  0.41           O  
HETATM  419  O   HOH T 418      19.222   9.323  20.171  1.00  0.41           O  
HETATM  420  O   HOH T 419       7.149  30.079  44.127  1.00  0.41           O  
HETATM  421  O   HOH T 420       4.529  -9.229  21.172  1.00  0.41           O  
HETATM  422  O   HOH T 421       1.950 -19.428  17.480  1.00  0.41           O  
HETATM  423  O   HOH T 422     -13.524 -42.412   8.750  1.00  0.41           O  
HETATM  424  O   HOH T 423       1.667 -20.708  15.171  1.00  0.41           O  
HETATM  425  O   HOH T 424      16.969  37.342  41.669  1.00  0.41           O  
HETATM  426  O   HOH T 425      34.710  22.568  35.604  1.00  0.41           O  
HETATM  427  O   HOH T 426       1.210 -16.956  18.607  1.00  0.41           O  
HETATM  428  O   HOH T 427      -9.024  41.614  47.964  1.00  0.42           O  
HETATM  429  O   HOH T 428     -11.561 -32.369  19.184  1.00  0.42           O  
HETATM  430  O   HOH T 429      34.029  46.065  34.796  1.00  0.42           O  
HETATM  431  O   HOH T 430      -0.158 -10.971  30.847  1.00  0.42           O  
HETATM  432  O   HOH T 431      33.765  41.086  35.413  1.00  0.42           O  
HETATM  433  O   HOH T 432      25.393 -10.259  24.422  1.00  0.42           O  
HETATM  434  O   HOH T 433      34.248  31.647  35.063  1.00  0.42           O  
HETATM  435  O   HOH T 434     -15.463   4.946  20.923  1.00  0.42           O  
HETATM  436  O   HOH T 435       4.259  45.380  43.868  1.00  0.42           O  
HETATM  437  O   HOH T 436      -7.014 -31.719  19.088  1.00  0.42           O  
HETATM  438  O   HOH T 437      13.871 -34.136  10.016  1.00  0.42           O  
HETATM  439  O   HOH T 438      22.878  64.537  55.169  1.00  0.42           O  
HETATM  440  O   HOH T 439       4.390 -39.892  -1.323  1.00  0.42           O  
HETATM  441  O   HOH T 440      -2.306  64.025  55.802  1.00  0.42           O  
HETATM  442  O   HOH T 441      11.078  40.355  44.910  1.00  0.42           O  
HETATM  443  O   HOH T 442       0.972  18.241  50.778  1.00  0.42           O  
HETATM  444  O   HOH T 443     -24.912  11.129  28.447  1.00  0.42           O  
HETATM  445  O   HOH T 444     -15.467 -20.973   3.059  1.00  0.42           O  
HETATM  446  O   HOH T 445      38.158  36.083  49.478  1.00  0.42           O  
HETATM  447  O   HOH T 446      15.996  58.608  66.444  1.00  0.42           O  
HETATM  448  O   HOH T 447       7.923  18.459  27.228  1.00  0.42           O  
HETATM  449  O   HOH T 448      13.659   7.140  30.289  1.00  0.42           O  
HETATM  450  O   HOH T 449      -0.608 -33.930  -2.733  1.00  0.42           O  
HETATM  451  O   HOH T 450      14.763  36.588  40.230  1.00  0.42           O  
HETATM  452  O   HOH T 451       9.505  52.501  40.399  1.00  0.42           O  
HETATM  453  O   HOH T 452      -2.250 -15.538   0.793  1.00  0.42           O  
HETATM  454  O   HOH T 453      37.379  35.532  46.794  1.00  0.42           O  
HETATM  455  O   HOH T 454      -2.679  30.751  28.294  1.00  0.42           O  
HETATM  456  O   HOH T 455      12.551  60.463  58.607  1.00  0.42           O  
HETATM  457  O   HOH T 456      24.340  56.635  53.608  1.00  0.42           O  
HETATM  458  O   HOH T 457      19.031  62.312  41.723  1.00  0.42           O  
HETATM  459  O   HOH T 458      21.944  43.995  27.259  1.00  0.42           O  
HETATM  460  O   HOH T 459      19.274  28.075  49.683  1.00  0.42           O  
HETATM  461  O   HOH T 460      -5.008  69.695  51.400  1.00  0.42           O  
HETATM  462  O   HOH T 461      -6.148 -45.920   9.190  1.00  0.42           O  
HETATM  463  O   HOH T 462      -6.921 -28.840  30.716  1.00  0.42           O  
HETATM  464  O   HOH T 463      -7.151 -19.355  31.916  1.00  0.42           O  
HETATM  465  O   HOH T 464      -2.710  25.897  25.118  1.00  0.42           O  
HETATM  466  O   HOH T 465      -9.918   6.795  35.864  1.00  0.42           O  
HETATM  467  O   HOH T 466      -1.170  -4.679  38.084  1.00  0.42           O  
HETATM  468  O   HOH T 467       9.887 -20.945  -6.442  1.00  0.42           O  
HETATM  469  O   HOH T 468     -16.775 -46.629  13.165  1.00  0.43           O  
HETATM  470  O   HOH T 469       4.027  43.727  46.047  1.00  0.43           O  
HETATM  471  O   HOH T 470      16.142  59.230  63.770  1.00  0.43           O  
HETATM  472  O   HOH T 471      -9.528 -26.708  -0.489  1.00  0.43           O  
HETATM  473  O   HOH T 472      -1.507 -17.719  18.512  1.00  0.43           O  
HETATM  474  O   HOH T 473      20.191  52.006  59.609  1.00  0.43           O  
HETATM  475  O   HOH T 474       3.274  -3.950  13.238  1.00  0.43           O  
HETATM  476  O   HOH T 475       0.044  16.965  29.038  1.00  0.43           O  
HETATM  477  O   HOH T 476       6.643 -19.646  21.728  1.00  0.43           O  
HETATM  478  O   HOH T 477      -7.863 -24.996   0.790  1.00  0.43           O  
HETATM  479  O   HOH T 478     -16.220  -3.340  19.181  1.00  0.43           O  
HETATM  480  O   HOH T 479      10.938  70.459  51.922  1.00  0.43           O  
HETATM  481  O   HOH T 480      -9.547 -32.542  23.429  1.00  0.43           O  
HETATM  482  O   HOH T 481       0.771  58.447  51.906  1.00  0.43           O  
HETATM  483  O   HOH T 482       3.482 -15.306   8.623  1.00  0.43           O  
HETATM  484  O   HOH T 483     -15.322   3.826  23.424  1.00  0.43           O  
HETATM  485  O   HOH T 484       5.063  -5.599  11.850  1.00  0.43           O  
HETATM  486  O   HOH T 485       0.260  55.914  61.180  1.00  0.43           O  
HETATM  487  O   HOH T 486      17.920   9.483  29.559  1.00  0.43           O  
HETATM  488  O   HOH T 487      32.090  40.611  33.148  1.00  0.43           O  
HETATM  489  O   HOH T 488      -4.089  34.677  41.998  1.00  0.43           O  
HETATM  490  O   HOH T 489      14.205 -32.738  -6.943  1.00  0.43           O  
HETATM  491  O   HOH T 490      20.938  13.819  32.948  1.00  0.43           O  
HETATM  492  O   HOH T 491      -3.245  44.927  46.435  1.00  0.43           O  
HETATM  493  O   HOH T 492       5.409 -33.341  12.609  1.00  0.43           O  
HETATM  494  O   HOH T 493       9.279  47.323  63.271  1.00  0.43           O  
HETATM  495  O   HOH T 494      18.269  69.588  50.906  1.00  0.43           O  
HETATM  496  O   HOH T 495      41.716  53.704  50.453  1.00  0.43           O  
HETATM  497  O   HOH T 496      39.959  34.934  51.253  1.00  0.43           O  
HETATM  498  O   HOH T 497      -3.072  19.823  42.547  1.00  0.43           O  
HETATM  499  O   HOH T 498      -9.096 -35.716   0.589  1.00  0.43           O  
HETATM  500  O   HOH T 499     -10.062  11.716  27.694  1.00  0.43           O  
HETATM  501  O   HOH T 500       6.678  28.281  47.657  1.00  0.43           O  
HETATM  502  O   HOH T 501      -3.334  16.982  31.490  1.00  0.43           O  
HETATM  503  O   HOH T 502       2.942  23.961  55.830  1.00  0.43           O  
HETATM  504  O   HOH T 503      20.081  71.559  50.172  1.00  0.43           O  
HETATM  505  O   HOH T 504       1.267  14.590  29.663  1.00  0.43           O  
HETATM  506  O   HOH T 505      24.098  57.164  56.283  1.00  0.43           O  
HETATM  507  O   HOH T 506       4.136   0.333  33.509  1.00  0.43           O  
HETATM  508  O   HOH T 507       3.958  73.366  60.061  1.00  0.43           O  
HETATM  509  O   HOH T 508       1.270  73.105  60.669  1.00  0.43           O  
HETATM  510  O   HOH T 509     -17.183  14.437  47.986  1.00  0.44           O  
HETATM  511  O   HOH T 510       1.248   8.940  32.390  1.00  0.44           O  
HETATM  512  O   HOH T 511      12.116  45.534  41.565  1.00  0.44           O  
HETATM  513  O   HOH T 512       3.712  55.343  59.015  1.00  0.44           O  
HETATM  514  O   HOH T 513       3.362  28.577  29.995  1.00  0.44           O  
HETATM  515  O   HOH T 514      23.500  56.334  37.950  1.00  0.44           O  
HETATM  516  O   HOH T 515      20.734  11.568  12.863  1.00  0.44           O  
HETATM  517  O   HOH T 516       4.770  31.540  44.659  1.00  0.44           O  
HETATM  518  O   HOH T 517      14.405  36.198  49.591  1.00  0.44           O  
HETATM  519  O   HOH T 518       3.772  55.816  56.246  1.00  0.44           O  
HETATM  520  O   HOH T 519      10.708  17.849  17.769  1.00  0.44           O  
HETATM  521  O   HOH T 520      -2.568  42.463  50.893  1.00  0.44           O  
HETATM  522  O   HOH T 521      13.029  -5.550   0.722  1.00  0.44           O  
HETATM  523  O   HOH T 522     -17.471  13.068  26.574  1.00  0.44           O  
HETATM  524  O   HOH T 523       4.528 -17.864  26.833  1.00  0.44           O  
HETATM  525  O   HOH T 524     -15.305 -38.767   7.872  1.00  0.44           O  
HETATM  526  O   HOH T 525      16.847  67.513  55.240  1.00  0.44           O  
HETATM  527  O   HOH T 526      -1.574   1.824  37.639  1.00  0.44           O  
HETATM  528  O   HOH T 527      -8.102 -33.384  15.430  1.00  0.44           O  
HETATM  529  O   HOH T 528       6.334 -20.906  16.708  1.00  0.44           O  
HETATM  530  O   HOH T 529     -17.640 -29.748  23.114  1.00  0.44           O  
HETATM  531  O   HOH T 530       0.125 -19.868  -1.413  1.00  0.44           O  
HETATM  532  O   HOH T 531      13.556  49.511  60.732  1.00  0.44           O  
HETATM  533  O   HOH T 532       0.655  49.833  40.392  1.00  0.44           O  
HETATM  534  O   HOH T 533     -20.061  15.769  37.919  1.00  0.44           O  
HETATM  535  O   HOH T 534       3.285  32.460  51.659  1.00  0.44           O  
HETATM  536  O   HOH T 535      -1.274  -5.725  14.927  1.00  0.44           O  
HETATM  537  O   HOH T 536      39.670  49.341  52.243  1.00  0.44           O  
HETATM  538  O   HOH T 537      13.398  33.707  50.171  1.00  0.44           O  
HETATM  539  O   HOH T 538      -7.498 -26.396  31.865  1.00  0.44           O  
HETATM  540  O   HOH T 539      16.922  30.076  44.007  1.00  0.44           O  
HETATM  541  O   HOH T 540       7.694  18.747  24.468  1.00  0.44           O  
HETATM  542  O   HOH T 541      10.454 -30.225  15.798  1.00  0.44           O  
HETATM  543  O   HOH T 542      -3.481  10.646  34.573  1.00  0.44           O  
HETATM  544  O   HOH T 543       7.461  39.716  41.260  1.00  0.44           O  
HETATM  545  O   HOH T 544      -1.719  48.389  45.966  1.00  0.44           O  
HETATM  546  O   HOH T 545     -13.152 -34.432   8.331  1.00  0.45           O  
HETATM  547  O   HOH T 546      29.940  60.041  38.427  1.00  0.45           O  
HETATM  548  O   HOH T 547     -15.738 -20.308  25.025  1.00  0.45           O  
HETATM  549  O   HOH T 548      -3.233  10.552  23.375  1.00  0.45           O  
HETATM  550  O   HOH T 549       2.439  17.582  42.711  1.00  0.45           O  
HETATM  551  O   HOH T 550     -12.486  14.632  25.802  1.00  0.45           O  
HETATM  552  O   HOH T 551      14.588  34.013  52.665  1.00  0.45           O  
HETATM  553  O   HOH T 552     -15.591 -27.682  10.050  1.00  0.45           O  
HETATM  554  O   HOH T 553      17.145  39.267  39.706  1.00  0.45           O  
HETATM  555  O   HOH T 554      11.064   1.405  35.034  1.00  0.45           O  
HETATM  556  O   HOH T 555     -12.783 -13.029  30.791  1.00  0.45           O  
HETATM  557  O   HOH T 556      -6.793  22.150  36.608  1.00  0.45           O  
HETATM  558  O   HOH T 557      -9.757 -10.582  22.842  1.00  0.45           O  
HETATM  559  O   HOH T 558       7.658 -36.498  14.511  1.00  0.45           O  
HETATM  560  O   HOH T 559     -15.508  19.727  42.918  1.00  0.45           O  
HETATM  561  O   HOH T 560       0.519  61.565  54.788  1.00  0.45           O  
HETATM  562  O   HOH T 561     -14.061 -18.450  17.127  1.00  0.45           O  
HETATM  563  O   HOH T 562       1.729  44.686  44.809  1.00  0.45           O  
HETATM  564  O   HOH T 563       0.256  26.707  27.396  1.00  0.45           O  
HETATM  565  O   HOH T 564     -21.060 -14.787  14.581  1.00  0.45           O  
HETATM  566  O   HOH T 565       3.104  37.116  60.398  1.00  0.45           O  
HETATM  567  O   HOH T 566       1.733  47.786  41.917  1.00  0.45           O  
HETATM  568  O   HOH T 567      -4.151 -24.710  23.612  1.00  0.45           O  
HETATM  569  O   HOH T 568       1.010  32.423  50.091  1.00  0.45           O  
HETATM  570  O   HOH T 569     -16.150   6.401  23.201  1.00  0.45           O  
HETATM  571  O   HOH T 570       7.090  41.265  45.729  1.00  0.45           O  
HETATM  572  O   HOH T 571     -14.706 -44.903  12.807  1.00  0.45           O  
HETATM  573  O   HOH T 572     -13.997 -31.533  18.201  1.00  0.45           O  
HETATM  574  O   HOH T 573       5.143 -10.590  16.435  1.00  0.45           O  
HETATM  575  O   HOH T 574      -6.176 -47.534  14.411  1.00  0.45           O  
HETATM  576  O   HOH T 575       1.723  65.495  48.570  1.00  0.45           O  
HETATM  577  O   HOH T 576       1.303  63.931  53.769  1.00  0.45           O  
HETATM  578  O   HOH T 577     -15.266 -14.967  18.695  1.00  0.45           O  
HETATM  579  O   HOH T 578     -18.976 -14.870  21.753  1.00  0.45           O  
HETATM  580  O   HOH T 579       8.766   1.245  30.147  1.00  0.45           O  
HETATM  581  O   HOH T 580      -7.745   5.507  34.793  1.00  0.45           O  
HETATM  582  O   HOH T 581      12.279  -1.385  40.457  1.00  0.45           O  
HETATM  583  O   HOH T 582      12.266  37.225  41.334  1.00  0.45           O  
HETATM  584  O   HOH T 583       7.447  38.871  57.703  1.00  0.45           O  
HETATM  585  O   HOH T 584      -9.809 -11.445   6.133  1.00  0.45           O  
HETATM  586  O   HOH T 585      12.314   4.766  30.861  1.00  0.45           O  
HETATM  587  O   HOH T 586       8.254   2.419  38.680  1.00  0.45           O  
HETATM  588  O   HOH T 587      13.914  46.781  43.228  1.00  0.45           O  
HETATM  589  O   HOH T 588     -13.080 -17.403  21.632  1.00  0.45           O  
HETATM  590  O   HOH T 589      -8.876  25.415  46.619  1.00  0.46           O  
HETATM  591  O   HOH T 590       1.832  26.726  25.174  1.00  0.46           O  
HETATM  592  O   HOH T 591      -2.672  -9.021  21.110  1.00  0.46           O  
HETATM  593  O   HOH T 592      -6.925  43.285  51.668  1.00  0.46           O  
HETATM  594  O   HOH T 593       5.252  36.374  44.993  1.00  0.46           O  
HETATM  595  O   HOH T 594       1.691 -10.031  18.436  1.00  0.46           O  
HETATM  596  O   HOH T 595      -5.665  28.127  49.083  1.00  0.46           O  
HETATM  597  O   HOH T 596      22.698  56.843  58.562  1.00  0.46           O  
HETATM  598  O   HOH T 597     -14.527  14.488  48.845  1.00  0.46           O  
HETATM  599  O   HOH T 598       7.012  27.840  25.760  1.00  0.46           O  
HETATM  600  O   HOH T 599      38.540  21.709  33.396  1.00  0.46           O  
HETATM  601  O   HOH T 600      19.380  13.032  14.826  1.00  0.46           O  
HETATM  602  O   HOH T 601     -18.422  13.997  34.538  1.00  0.46           O  
HETATM  603  O   HOH T 602     -18.655 -12.183  21.114  1.00  0.46           O  
HETATM  604  O   HOH T 603      -1.425  46.338  47.914  1.00  0.46           O  
HETATM  605  O   HOH T 604     -13.349 -31.010  20.888  1.00  0.46           O  
HETATM  606  O   HOH T 605     -14.411 -13.354  24.078  1.00  0.46           O  
HETATM  607  O   HOH T 606     -17.697  -3.887  21.623  1.00  0.46           O  
HETATM  608  O   HOH T 607      -4.793 -11.263  17.126  1.00  0.46           O  
HETATM  609  O   HOH T 608      20.716  27.991  54.720  1.00  0.46           O  
HETATM  610  O   HOH T 609      -4.795  17.792  42.816  1.00  0.46           O  
HETATM  611  O   HOH T 610      -8.279 -37.787   4.494  1.00  0.46           O  
HETATM  612  O   HOH T 611     -11.424 -32.444   4.009  1.00  0.46           O  
HETATM  613  O   HOH T 612      10.498  41.688  42.483  1.00  0.46           O  
HETATM  614  O   HOH T 613      -1.343   9.611  31.847  1.00  0.46           O  
HETATM  615  O   HOH T 614       2.404 -12.125  30.372  1.00  0.46           O  
HETATM  616  O   HOH T 615     -13.419  -1.737  20.970  1.00  0.46           O  
HETATM  617  O   HOH T 616     -19.257 -48.513   5.962  1.00  0.46           O  
HETATM  618  O   HOH T 617      -3.538 -18.621  16.812  1.00  0.46           O  
HETATM  619  O   HOH T 618      11.332 -32.677  14.828  1.00  0.46           O  
HETATM  620  O   HOH T 619      -0.872  -3.757   6.676  1.00  0.46           O  
HETATM  621  O   HOH T 620     -14.112   4.576  27.259  1.00  0.46           O  
HETATM  622  O   HOH T 621     -12.135 -29.593   0.064  1.00  0.46           O  
HETATM  623  O   HOH T 622      18.548  29.495  55.653  1.00  0.46           O  
HETATM  624  O   HOH T 623      -7.006  -9.469  25.297  1.00  0.46           O  
HETATM  625  O   HOH T 624      -6.657  24.025  47.414  1.00  0.46           O  
HETATM  626  O   HOH T 625      -2.571  -7.330  16.833  1.00  0.46           O  
HETATM  627  O   HOH T 626       0.275  24.627  55.946  1.00  0.46           O  
HETATM  628  O   HOH T 627       9.719  -0.975  34.386  1.00  0.46           O  
HETATM  629  O   HOH T 628      10.498 -35.806   2.207  1.00  0.46           O  
HETATM  630  O   HOH T 629     -12.954 -30.761   2.395  1.00  0.46           O  
HETATM  631  O   HOH T 630       5.011  34.863  56.109  1.00  0.46           O  
HETATM  632  O   HOH T 631      -4.616 -38.724   3.829  1.00  0.46           O  
HETATM  633  O   HOH T 632      10.383   5.712  12.845  1.00  0.46           O  
HETATM  634  O   HOH T 633       8.483 -38.809   9.793  1.00  0.46           O  
HETATM  635  O   HOH T 634      26.665  51.182  54.431  1.00  0.46           O  
HETATM  636  O   HOH T 635      38.561  40.671  51.725  1.00  0.46           O  
HETATM  637  O   HOH T 636     -17.731  15.693  25.855  1.00  0.46           O  
HETATM  638  O   HOH T 637     -11.970 -12.319  23.090  1.00  0.46           O  
HETATM  639  O   HOH T 638      -0.458 -20.917  17.274  1.00  0.46           O  
HETATM  640  O   HOH T 639      -1.647  24.671  27.402  1.00  0.46           O  
HETATM  641  O   HOH T 640       6.389 -39.371  16.464  1.00  0.46           O  
HETATM  642  O   HOH T 641      -4.107  10.118  31.885  1.00  0.46           O  
HETATM  643  O   HOH T 642      11.435  18.116  24.970  1.00  0.46           O  
HETATM  644  O   HOH T 643      17.770  75.423  50.228  1.00  0.46           O  
HETATM  645  O   HOH T 644      -2.488  -1.558  15.597  1.00  0.47           O  
HETATM  646  O   HOH T 645      17.362 -20.956  22.914  1.00  0.47           O  
HETATM  647  O   HOH T 646      -0.008  -9.256  33.071  1.00  0.47           O  
HETATM  648  O   HOH T 647      -3.456 -23.487  21.192  1.00  0.47           O  
HETATM  649  O   HOH T 648      20.037  60.736  55.870  1.00  0.47           O  
HETATM  650  O   HOH T 649       8.559  28.201  45.617  1.00  0.47           O  
HETATM  651  O   HOH T 650      -9.767  -1.984  17.564  1.00  0.47           O  
HETATM  652  O   HOH T 651       9.996  34.060  57.231  1.00  0.47           O  
HETATM  653  O   HOH T 652      39.663  46.958  49.494  1.00  0.47           O  
HETATM  654  O   HOH T 653      14.921 -11.313  22.686  1.00  0.47           O  
HETATM  655  O   HOH T 654      35.648  38.056  52.510  1.00  0.47           O  
HETATM  656  O   HOH T 655      23.983  -9.586  22.111  1.00  0.47           O  
HETATM  657  O   HOH T 656       8.964  44.589  31.900  1.00  0.47           O  
HETATM  658  O   HOH T 657      -3.594 -34.965   0.464  1.00  0.47           O  
HETATM  659  O   HOH T 658     -11.989 -33.320   1.521  1.00  0.47           O  
HETATM  660  O   HOH T 659       6.248  64.722  61.162  1.00  0.47           O  
HETATM  661  O   HOH T 660      40.570  52.433  48.344  1.00  0.47           O  
HETATM  662  O   HOH T 661      12.329  39.660  42.574  1.00  0.47           O  
HETATM  663  O   HOH T 662     -11.286  41.950  49.445  1.00  0.47           O  
HETATM  664  O   HOH T 663      14.433  47.760  33.359  1.00  0.47           O  
HETATM  665  O   HOH T 664      16.782 -33.691  -6.506  1.00  0.47           O  
HETATM  666  O   HOH T 665      -8.906  -8.030  20.374  1.00  0.47           O  
HETATM  667  O   HOH T 666      22.957  -4.584   7.560  1.00  0.47           O  
HETATM  668  O   HOH T 667      11.938  35.489  48.691  1.00  0.47           O  
HETATM  669  O   HOH T 668      16.464  75.725  47.737  1.00  0.47           O  
HETATM  670  O   HOH T 669      -2.682  -3.411  17.773  1.00  0.47           O  
HETATM  671  O   HOH T 670      -7.025  67.826  51.395  1.00  0.47           O  
HETATM  672  O   HOH T 671      -6.184  -8.191  20.259  1.00  0.47           O  
HETATM  673  O   HOH T 672       9.785 -34.938  15.535  1.00  0.47           O  
HETATM  674  O   HOH T 673     -15.438  17.267  25.620  1.00  0.47           O  
HETATM  675  O   HOH T 674      -3.673  52.564  40.188  1.00  0.47           O  
HETATM  676  O   HOH T 675      -3.569  23.347  25.887  1.00  0.47           O  
HETATM  677  O   HOH T 676       1.030  14.172  42.063  1.00  0.47           O  
HETATM  678  O   HOH T 677      37.996  32.752  46.600  1.00  0.47           O  
HETATM  679  O   HOH T 678       5.061 -36.937  13.586  1.00  0.47           O  
HETATM  680  O   HOH T 679      -2.966  31.643  46.350  1.00  0.47           O  
HETATM  681  O   HOH T 680     -11.286 -13.792   5.519  1.00  0.47           O  
HETATM  682  O   HOH T 681      18.606 -18.101  13.388  1.00  0.47           O  
HETATM  683  O   HOH T 682      -3.941 -23.599   2.218  1.00  0.47           O  
HETATM  684  O   HOH T 683       8.242  47.200  44.757  1.00  0.47           O  
HETATM  685  O   HOH T 684       0.655  -3.912   9.075  1.00  0.47           O  
HETATM  686  O   HOH T 685      -7.482  -8.942  22.645  1.00  0.47           O  
HETATM  687  O   HOH T 686      25.158   2.065   8.360  1.00  0.47           O  
HETATM  688  O   HOH T 687     -16.241 -17.751  25.990  1.00  0.47           O  
HETATM  689  O   HOH T 688      19.909  13.517  36.977  1.00  0.47           O  
HETATM  690  O   HOH T 689       6.235  33.887  44.132  1.00  0.47           O  
HETATM  691  O   HOH T 690     -11.983 -45.746   7.321  1.00  0.47           O  
HETATM  692  O   HOH T 691     -12.301 -11.928   7.262  1.00  0.48           O  
HETATM  693  O   HOH T 692      -0.472  -3.372  16.227  1.00  0.48           O  
HETATM  694  O   HOH T 693      -1.894  -6.297   6.081  1.00  0.48           O  
HETATM  695  O   HOH T 694      29.987   1.761   9.171  1.00  0.48           O  
HETATM  696  O   HOH T 695     -18.565 -15.884  13.858  1.00  0.48           O  
HETATM  697  O   HOH T 696     -16.973 -21.439  -1.122  1.00  0.48           O  
HETATM  698  O   HOH T 697     -12.070 -26.770   0.670  1.00  0.48           O  
HETATM  699  O   HOH T 698      36.224  20.579  34.396  1.00  0.48           O  
HETATM  700  O   HOH T 699      -4.259  33.211  50.577  1.00  0.48           O  
HETATM  701  O   HOH T 700      -2.455  19.166  47.651  1.00  0.48           O  
HETATM  702  O   HOH T 701       5.572 -23.342  17.845  1.00  0.48           O  
HETATM  703  O   HOH T 702      26.940 -17.006  23.506  1.00  0.48           O  
HETATM  704  O   HOH T 703       7.311  25.109  25.014  1.00  0.48           O  
HETATM  705  O   HOH T 704       9.012  -2.458   4.618  1.00  0.48           O  
HETATM  706  O   HOH T 705     -16.597 -13.919  20.793  1.00  0.48           O  
HETATM  707  O   HOH T 706      18.114  75.911  45.402  1.00  0.48           O  
HETATM  708  O   HOH T 707       6.840  33.896  54.153  1.00  0.48           O  
HETATM  709  O   HOH T 708      21.405 -15.703  12.930  1.00  0.48           O  
HETATM  710  O   HOH T 709      -0.212 -35.388  -5.023  1.00  0.48           O  
HETATM  711  O   HOH T 710      18.817 -22.666  21.320  1.00  0.48           O  
HETATM  712  O   HOH T 711      28.736  -1.805  24.370  1.00  0.48           O  
HETATM  713  O   HOH T 712      12.594  72.651  51.965  1.00  0.48           O  
HETATM  714  O   HOH T 713      -8.065 -30.096  -2.590  1.00  0.48           O  
HETATM  715  O   HOH T 714       6.281 -11.545  13.981  1.00  0.48           O  
HETATM  716  O   HOH T 715      -1.627  17.165  45.921  1.00  0.48           O  
HETATM  717  O   HOH T 716       9.900  -1.318  39.061  1.00  0.48           O  
HETATM  718  O   HOH T 717     -10.527 -24.340   0.373  1.00  0.48           O  
HETATM  719  O   HOH T 718     -25.042  13.236  30.273  1.00  0.48           O  
HETATM  720  O   HOH T 719       0.981  33.060  58.504  1.00  0.48           O  
HETATM  721  O   HOH T 720     -15.069 -21.820  19.526  1.00  0.49           O  
HETATM  722  O   HOH T 721      -0.120  58.398  49.445  1.00  0.49           O  
HETATM  723  O   HOH T 722      11.749   5.071  33.523  1.00  0.49           O  
HETATM  724  O   HOH T 723       1.674  25.267  53.597  1.00  0.49           O  
HETATM  725  O   HOH T 724      21.745  58.626  56.614  1.00  0.49           O  
HETATM  726  O   HOH T 725     -16.949 -37.875  12.824  1.00  0.49           O  
HETATM  727  O   HOH T 726     -22.757  12.324  27.149  1.00  0.49           O  
HETATM  728  O   HOH T 727      24.792  44.171  26.924  1.00  0.49           O  
HETATM  729  O   HOH T 728      -0.070  49.929  51.672  1.00  0.49           O  
HETATM  730  O   HOH T 729      -9.931 -25.945  30.631  1.00  0.49           O  
HETATM  731  O   HOH T 730       9.761  45.216  34.412  1.00  0.49           O  
HETATM  732  O   HOH T 731     -17.834 -46.155   6.381  1.00  0.49           O  
HETATM  733  O   HOH T 732      19.571 -13.710  12.651  1.00  0.49           O  
HETATM  734  O   HOH T 733     -17.681  -1.386  20.284  1.00  0.49           O  
HETATM  735  O   HOH T 734       2.221  26.617  55.911  1.00  0.49           O  
HETATM  736  O   HOH T 735       4.204  53.380  55.251  1.00  0.49           O  
HETATM  737  O   HOH T 736     -21.661   9.884  26.667  1.00  0.49           O  
HETATM  738  O   HOH T 737       1.361  59.519  47.387  1.00  0.49           O  
HETATM  739  O   HOH T 738       0.898  -3.375  11.840  1.00  0.49           O  
HETATM  740  O   HOH T 739      27.767   7.366  24.383  1.00  0.49           O  
HETATM  741  O   HOH T 740       3.679   2.412  36.511  1.00  0.49           O  
HETATM  742  O   HOH T 741       1.718  65.306  55.970  1.00  0.49           O  
HETATM  743  O   HOH T 742      -9.762 -15.207   2.293  1.00  0.49           O  
HETATM  744  O   HOH T 743     -16.147 -45.367  10.495  1.00  0.49           O  
HETATM  745  O   HOH T 744      18.247  11.596  36.020  1.00  0.49           O  
HETATM  746  O   HOH T 745      -3.204  29.104  43.722  1.00  0.49           O  
HETATM  747  O   HOH T 746     -16.793 -48.043  10.756  1.00  0.49           O  
HETATM  748  O   HOH T 747      19.147  27.402  52.405  1.00  0.49           O  
HETATM  749  O   HOH T 748      -0.928 -34.404   1.424  1.00  0.49           O  
HETATM  750  O   HOH T 749      -4.992  12.511  22.559  1.00  0.49           O  
HETATM  751  O   HOH T 750      -0.378 -26.203  20.171  1.00  0.49           O  
HETATM  752  O   HOH T 751       8.857  43.854  43.142  1.00  0.50           O  
HETATM  753  O   HOH T 752      -1.053  58.196  46.981  1.00  0.50           O  
HETATM  754  O   HOH T 753       7.436  42.601  41.111  1.00  0.50           O  
HETATM  755  O   HOH T 754     -15.536 -24.066  17.820  1.00  0.50           O  
HETATM  756  O   HOH T 755      27.896   1.926   7.264  1.00  0.50           O  
HETATM  757  O   HOH T 756      15.777 -36.619  13.014  1.00  0.50           O  
HETATM  758  O   HOH T 757       1.128 -14.644  17.079  1.00  0.50           O  
HETATM  759  O   HOH T 758       8.095  61.530  49.479  1.00  0.50           O  
HETATM  760  O   HOH T 759      21.898  54.242  59.260  1.00  0.50           O  
HETATM  761  O   HOH T 760      13.602  70.264  52.922  1.00  0.50           O  
HETATM  762  O   HOH T 761      14.728  50.052  58.203  1.00  0.50           O  
HETATM  763  O   HOH T 762      13.765  39.597  45.009  1.00  0.50           O  
HETATM  764  O   HOH T 763       3.273  -3.895  16.007  1.00  0.50           O  
HETATM  765  O   HOH T 764      -0.520  65.533  54.229  1.00  0.50           O  
HETATM  766  O   HOH T 765       3.045 -11.504  20.429  1.00  0.50           O  
HETATM  767  O   HOH T 766       9.430  41.251  39.874  1.00  0.50           O  
HETATM  768  O   HOH T 767       7.946  33.812  27.444  1.00  0.50           O  
HETATM  769  O   HOH T 768       8.006  28.417  28.343  1.00  0.50           O  
HETATM  770  O   HOH T 769       5.660  -0.993   3.046  1.00  0.50           O  
HETATM  771  O   HOH T 770       8.317   1.460  34.696  1.00  0.50           O  
HETATM  772  O   HOH T 771      -2.501   8.101  35.328  1.00  0.50           O  
HETATM  773  O   HOH T 772      -6.650  41.842  49.354  1.00  0.50           O  
HETATM  774  O   HOH T 773     -20.928 -16.336  12.288  1.00  0.50           O  
HETATM  775  O   HOH T 774     -12.989 -24.518  -0.704  1.00  0.50           O  
HETATM  776  O   HOH T 775      15.345  47.657  59.967  1.00  0.50           O  
HETATM  777  O   HOH T 776      24.807   4.226   5.388  1.00  0.50           O  
HETATM  778  O   HOH T 777      35.670  41.322  37.428  1.00  0.50           O  
HETATM  779  O   HOH T 778      -1.170  -3.165  13.664  1.00  0.50           O  
HETATM  780  O   HOH T 779     -13.775 -10.176   5.840  1.00  0.50           O  
HETATM  781  O   HOH T 780      22.817  54.774  56.691  1.00  0.50           O  
HETATM  782  O   HOH T 781      -9.586  65.361  67.069  1.00  0.50           O  
HETATM  783  O   HOH T 782      33.731  53.280  54.673  1.00  0.50           O  
HETATM  784  O   HOH T 783     -13.239 -40.319   6.993  1.00  0.50           O  
HETATM  785  O   HOH T 784      -3.543 -36.334   2.988  1.00  0.50           O  
HETATM  786  O   HOH T 785       4.669  33.685  49.496  1.00  0.50           O  
HETATM  787  O   HOH T 786     -16.974 -14.758  11.839  1.00  0.50           O  
HETATM  788  O   HOH T 787       5.605  25.828  52.049  1.00  0.50           O  
HETATM  789  O   HOH T 788      -9.599 -34.148   2.921  1.00  0.50           O  
HETATM  790  O   HOH T 789      -8.895  22.534  46.734  1.00  0.50           O  
HETATM  791  O   HOH T 790       2.382 -10.962  16.001  1.00  0.51           O  
HETATM  792  O   HOH T 791      34.561  18.020  36.569  1.00  0.51           O  
HETATM  793  O   HOH T 792     -17.980 -28.775  20.581  1.00  0.51           O  
HETATM  794  O   HOH T 793      10.461  47.257  43.074  1.00  0.51           O  
HETATM  795  O   HOH T 794       6.367  -1.192   0.375  1.00  0.51           O  
HETATM  796  O   HOH T 795       4.118  15.468  43.559  1.00  0.51           O  
HETATM  797  O   HOH T 796     -13.605  12.268  24.839  1.00  0.51           O  
HETATM  798  O   HOH T 797      16.725  47.382  62.532  1.00  0.51           O  
HETATM  799  O   HOH T 798      40.754  46.201  47.264  1.00  0.51           O  
HETATM  800  O   HOH T 799       0.959   2.376  36.777  1.00  0.51           O  
HETATM  801  O   HOH T 800       4.112 -37.749  16.499  1.00  0.51           O  
HETATM  802  O   HOH T 801      10.843  58.953  60.067  1.00  0.51           O  
HETATM  803  O   HOH T 802      12.540  37.314  38.664  1.00  0.51           O  
HETATM  804  O   HOH T 803       4.879 -13.245  17.318  1.00  0.51           O  
HETATM  805  O   HOH T 804     -12.376  -4.313  21.136  1.00  0.51           O  
HETATM  806  O   HOH T 805      25.527   6.936   7.731  1.00  0.51           O  
HETATM  807  O   HOH T 806      -1.419 -10.948  14.294  1.00  0.51           O  
HETATM  808  O   HOH T 807      12.080   7.312  11.153  1.00  0.51           O  
HETATM  809  O   HOH T 808       3.018  46.999  55.686  1.00  0.51           O  
HETATM  810  O   HOH T 809      19.808 -19.745  23.003  1.00  0.51           O  
HETATM  811  O   HOH T 810      -6.286  34.635  46.305  1.00  0.51           O  
HETATM  812  O   HOH T 811      13.667  64.541  57.395  1.00  0.51           O  
HETATM  813  O   HOH T 812      -9.565   2.841  31.430  1.00  0.51           O  
HETATM  814  O   HOH T 813       3.416  17.475  45.360  1.00  0.51           O  
HETATM  815  O   HOH T 814      -2.361 -22.587  23.618  1.00  0.51           O  
HETATM  816  O   HOH T 815      11.377  67.242  55.132  1.00  0.51           O  
HETATM  817  O   HOH T 816      13.494  31.198  44.803  1.00  0.51           O  
HETATM  818  O   HOH T 817      22.246  34.196  28.332  1.00  0.51           O  
HETATM  819  O   HOH T 818      -3.458  68.917  49.234  1.00  0.51           O  
HETATM  820  O   HOH T 819       6.989 -27.322  -0.642  1.00  0.51           O  
HETATM  821  O   HOH T 820      19.745  49.525  58.342  1.00  0.51           O  
HETATM  822  O   HOH T 821       3.026 -39.496   1.013  1.00  0.51           O  
HETATM  823  O   HOH T 822       1.606 -13.263  14.754  1.00  0.51           O  
HETATM  824  O   HOH T 823      28.427  -6.464  20.215  1.00  0.51           O  
HETATM  825  O   HOH T 824      30.863  38.085  39.597  1.00  0.51           O  
HETATM  826  O   HOH T 825       8.113  58.426  45.022  1.00  0.51           O  
HETATM  827  O   HOH T 826      -0.832  47.528  50.384  1.00  0.51           O  
HETATM  828  O   HOH T 827      -3.362  19.472  50.294  1.00  0.52           O  
HETATM  829  O   HOH T 828      28.391  -3.493  12.010  1.00  0.52           O  
HETATM  830  O   HOH T 829      -8.537 -40.339   3.369  1.00  0.52           O  
HETATM  831  O   HOH T 830      -0.772  18.094  26.628  1.00  0.52           O  
HETATM  832  O   HOH T 831      25.091  51.933  56.681  1.00  0.52           O  
HETATM  833  O   HOH T 832      12.409  -6.270  -1.862  1.00  0.52           O  
HETATM  834  O   HOH T 833       3.233  61.524  47.718  1.00  0.52           O  
HETATM  835  O   HOH T 834      26.169  -7.864  21.352  1.00  0.52           O  
HETATM  836  O   HOH T 835     -18.857   7.118  32.207  1.00  0.52           O  
HETATM  837  O   HOH T 836       2.992  -4.550  10.506  1.00  0.52           O  
HETATM  838  O   HOH T 837      18.866  12.079  29.352  1.00  0.52           O  
HETATM  839  O   HOH T 838     -14.576 -44.850   8.103  1.00  0.52           O  
HETATM  840  O   HOH T 839      19.024   7.249  36.529  1.00  0.52           O  
HETATM  841  O   HOH T 840      -7.708  -4.268  28.355  1.00  0.52           O  
HETATM  842  O   HOH T 841      -3.889  29.187  47.195  1.00  0.52           O  
HETATM  843  O   HOH T 842       2.441  11.347  31.798  1.00  0.52           O  
HETATM  844  O   HOH T 843     -16.743 -35.569   7.066  1.00  0.52           O  
HETATM  845  O   HOH T 844      15.396  -5.605   4.037  1.00  0.52           O  
HETATM  846  O   HOH T 845       7.134  -0.564   5.413  1.00  0.52           O  
HETATM  847  O   HOH T 846       9.923  24.389  25.882  1.00  0.52           O  
HETATM  848  O   HOH T 847     -14.619  -6.553  19.549  1.00  0.52           O  
HETATM  849  O   HOH T 848      -9.907   6.162  19.527  1.00  0.52           O  
HETATM  850  O   HOH T 849     -11.880   4.891  35.768  1.00  0.52           O  
HETATM  851  O   HOH T 850      27.367  -8.417  23.797  1.00  0.52           O  
HETATM  852  O   HOH T 851     -15.340  -5.282  12.089  1.00  0.52           O  
HETATM  853  O   HOH T 852      18.597  75.933  52.859  1.00  0.52           O  
HETATM  854  O   HOH T 853      -2.238 -12.020  18.056  1.00  0.52           O  
HETATM  855  O   HOH T 854       6.438  43.799  44.646  1.00  0.53           O  
HETATM  856  O   HOH T 855      29.368  32.336  41.296  1.00  0.53           O  
HETATM  857  O   HOH T 856      19.589  -9.892  -1.822  1.00  0.53           O  
HETATM  858  O   HOH T 857     -14.450 -12.470  21.486  1.00  0.53           O  
HETATM  859  O   HOH T 858      -1.033  -9.465  17.847  1.00  0.53           O  
HETATM  860  O   HOH T 859       4.049 -21.160  18.516  1.00  0.53           O  
HETATM  861  O   HOH T 860      16.398 -24.323  -7.693  1.00  0.53           O  
HETATM  862  O   HOH T 861      16.838 -18.012  -3.206  1.00  0.53           O  
HETATM  863  O   HOH T 862      18.023 -10.679   6.613  1.00  0.53           O  
HETATM  864  O   HOH T 863      -7.724  40.437  39.575  1.00  0.53           O  
HETATM  865  O   HOH T 864      -3.975  -6.568  20.966  1.00  0.53           O  
HETATM  866  O   HOH T 865     -15.149 -17.830  23.477  1.00  0.53           O  
HETATM  867  O   HOH T 866       1.664  30.400  57.938  1.00  0.53           O  
HETATM  868  O   HOH T 867      -9.848  -6.362  13.904  1.00  0.53           O  
HETATM  869  O   HOH T 868      11.436  16.118  44.477  1.00  0.53           O  
HETATM  870  O   HOH T 869       7.109  -1.331  11.307  1.00  0.53           O  
HETATM  871  O   HOH T 870       3.163  34.455  59.549  1.00  0.53           O  
HETATM  872  O   HOH T 871       2.243  24.231  24.116  1.00  0.53           O  
HETATM  873  O   HOH T 872     -11.112   0.814  24.560  1.00  0.53           O  
HETATM  874  O   HOH T 873       3.940 -19.639  20.929  1.00  0.53           O  
HETATM  875  O   HOH T 874      22.767   2.124  27.744  1.00  0.53           O  
HETATM  876  O   HOH T 875     -10.684  22.681  44.610  1.00  0.53           O  
HETATM  877  O   HOH T 876      22.668 -17.686  16.915  1.00  0.53           O  
HETATM  878  O   HOH T 877      -3.543  31.030  38.345  1.00  0.53           O  
HETATM  879  O   HOH T 878      18.059  22.237  43.691  1.00  0.53           O  
HETATM  880  O   HOH T 879       3.091  44.823  39.345  1.00  0.54           O  
HETATM  881  O   HOH T 880      -3.028 -12.775  15.522  1.00  0.54           O  
HETATM  882  O   HOH T 881       1.646  43.008  56.536  1.00  0.54           O  
HETATM  883  O   HOH T 882      -2.552  54.247  38.168  1.00  0.54           O  
HETATM  884  O   HOH T 883      24.247  29.909  47.054  1.00  0.54           O  
HETATM  885  O   HOH T 884      -7.372 -23.556  37.174  1.00  0.54           O  
HETATM  886  O   HOH T 885      10.875 -23.428  -5.741  1.00  0.54           O  
HETATM  887  O   HOH T 886      -7.490 -38.765  18.687  1.00  0.54           O  
HETATM  888  O   HOH T 887     -17.961 -32.449  16.369  1.00  0.54           O  
HETATM  889  O   HOH T 888       6.749  61.700  58.098  1.00  0.54           O  
HETATM  890  O   HOH T 889      23.623 -15.247   4.958  1.00  0.54           O  
HETATM  891  O   HOH T 890       8.130  37.596  42.965  1.00  0.54           O  
HETATM  892  O   HOH T 891      -9.738 -44.379   8.361  1.00  0.54           O  
HETATM  893  O   HOH T 892     -16.314  12.230  24.277  1.00  0.54           O  
HETATM  894  O   HOH T 893     -14.025 -19.390  11.355  1.00  0.54           O  
HETATM  895  O   HOH T 894     -13.055  -9.550   8.428  1.00  0.54           O  
HETATM  896  O   HOH T 895      -1.269  14.995  47.652  1.00  0.54           O  
HETATM  897  O   HOH T 896      18.019  23.483  25.944  1.00  0.55           O  
HETATM  898  O   HOH T 897      16.010  49.491  34.826  1.00  0.55           O  
HETATM  899  O   HOH T 898      -3.115  45.842  39.292  1.00  0.55           O  
HETATM  900  O   HOH T 899       8.967 -32.513  16.274  1.00  0.55           O  
HETATM  901  O   HOH T 900      -9.677  14.587  45.410  1.00  0.55           O  
HETATM  902  O   HOH T 901      17.210   1.702  25.863  1.00  0.55           O  
HETATM  903  O   HOH T 902      34.895  34.228  35.939  1.00  0.55           O  
HETATM  904  O   HOH T 903      23.658   8.878  24.104  1.00  0.55           O  
HETATM  905  O   HOH T 904       9.626 -27.571  -5.851  1.00  0.55           O  
HETATM  906  O   HOH T 905      18.008  -7.878  -0.740  1.00  0.55           O  
HETATM  907  O   HOH T 906     -13.115  -0.776  23.458  1.00  0.55           O  
HETATM  908  O   HOH T 907      30.796  54.310  55.174  1.00  0.55           O  
HETATM  909  O   HOH T 908      -8.045  59.100  60.720  1.00  0.55           O  
HETATM  910  O   HOH T 909      20.121   8.250  30.872  1.00  0.56           O  
HETATM  911  O   HOH T 910      -7.111  47.256  39.290  1.00  0.56           O  
HETATM  912  O   HOH T 911      -2.379  61.424  52.084  1.00  0.56           O  
HETATM  913  O   HOH T 912       8.060  31.784  52.757  1.00  0.56           O  
HETATM  914  O   HOH T 913      11.420   2.151  30.600  1.00  0.56           O  
HETATM  915  O   HOH T 914       2.175 -38.168  -1.404  1.00  0.56           O  
HETATM  916  O   HOH T 915      16.941  15.948  24.025  1.00  0.56           O  
HETATM  917  O   HOH T 916      11.465  48.622  64.053  1.00  0.56           O  
HETATM  918  O   HOH T 917       8.915 -38.106  -5.712  1.00  0.56           O  
HETATM  919  O   HOH T 918      19.126  76.528  48.020  1.00  0.56           O  
HETATM  920  O   HOH T 919     -14.715 -16.291  11.107  1.00  0.56           O  
HETATM  921  O   HOH T 920       4.761  30.047  48.611  1.00  0.56           O  
HETATM  922  O   HOH T 921      -1.553 -14.522  16.958  1.00  0.56           O  
HETATM  923  O   HOH T 922      25.154 -12.987  24.263  1.00  0.56           O  
HETATM  924  O   HOH T 923      10.642  18.506  27.526  1.00  0.56           O  
HETATM  925  O   HOH T 924      24.493  46.884  27.708  1.00  0.56           O  
HETATM  926  O   HOH T 925      14.431  16.948  41.240  1.00  0.56           O  
HETATM  927  O   HOH T 926       4.892  -3.244  34.012  1.00  0.56           O  
HETATM  928  O   HOH T 927      -0.033  60.859  50.787  1.00  0.56           O  
HETATM  929  O   HOH T 928     -15.226  14.385  25.680  1.00  0.56           O  
HETATM  930  O   HOH T 929       2.204  -9.528  31.306  1.00  0.57           O  
HETATM  931  O   HOH T 930      21.700  40.306  48.291  1.00  0.57           O  
HETATM  932  O   HOH T 931      -8.091 -13.807  30.007  1.00  0.57           O  
HETATM  933  O   HOH T 932      23.466 -27.683   7.126  1.00  0.57           O  
HETATM  934  O   HOH T 933      29.462  30.678  20.853  1.00  0.57           O  
HETATM  935  O   HOH T 934      39.861  57.496  47.784  1.00  0.57           O  
HETATM  936  O   HOH T 935      20.171 -13.157  -4.057  1.00  0.57           O  
HETATM  937  O   HOH T 936       7.047  -9.078  27.886  1.00  0.57           O  
HETATM  938  O   HOH T 937       2.307  13.566  44.531  1.00  0.57           O  
HETATM  939  O   HOH T 938      22.742  13.050  37.751  1.00  0.57           O  
HETATM  940  O   HOH T 939      10.613  -4.641  -0.362  1.00  0.57           O  
HETATM  941  O   HOH T 940       6.824  11.539  30.117  1.00  0.57           O  
HETATM  942  O   HOH T 941       7.290  27.473  50.257  1.00  0.57           O  
HETATM  943  O   HOH T 942      14.381 -20.882  -9.176  1.00  0.57           O  
HETATM  944  O   HOH T 943      20.215   8.068  34.113  1.00  0.58           O  
HETATM  945  O   HOH T 944      -7.403  -3.158  17.186  1.00  0.58           O  
HETATM  946  O   HOH T 945      40.799  46.708  51.901  1.00  0.58           O  
HETATM  947  O   HOH T 946       1.959 -18.490  22.656  1.00  0.59           O  
HETATM  948  O   HOH T 947     -19.273   9.609  25.816  1.00  0.59           O  
HETATM  949  O   HOH T 948      18.570  65.234  55.331  1.00  0.59           O  
HETATM  950  O   HOH T 949      30.031   0.119  25.732  1.00  0.59           O  
HETATM  951  O   HOH T 950      14.657 -36.702   9.227  1.00  0.59           O  
HETATM  952  O   HOH T 951      -5.022  20.021  46.689  1.00  0.60           O  
HETATM  953  O   HOH T 952       6.914  24.021  53.577  1.00  0.60           O  
HETATM  954  O   HOH T 953       9.279   7.473  28.174  1.00  0.61           O  
HETATM  955  O   HOH T 954       5.568  36.053  59.561  1.00  0.61           O  
HETATM  956  O   HOH T 955       8.160  25.911  27.251  1.00  0.62           O  
HETATM  957  O   HOH T 956      -2.351  12.797  42.978  1.00  0.64           O  
TER     958      HOH T 956 
