# Supplementary material for: Accurate Prediction of Hydration Sites of Proteins Using Energy Model With Atom Embedding
Source: Front Mol Biosci. 2021 Sep 20;8:756075. doi: 10.3389/fmolb.2021.756075 (PMC8488165; doi:10.3389/fmolb.2021.756075)
Supplement: Supplementary file 1 [file DataSheet1.ZIP › Data Sheet 1/Our_result_pdb/our_dataset_output/2Q8K_watersite.pdb]

HEADER                                                        XXXX


JRNL        PMID   -1
HETATM    1  O   HOH T   0      33.910  11.360  22.725  1.00  0.13           O  
HETATM    2  O   HOH T   1      26.872  18.643  49.773  1.00  0.17           O  
HETATM    3  O   HOH T   2      27.503   0.859  28.429  1.00  0.17           O  
HETATM    4  O   HOH T   3      50.281   1.877  15.453  1.00  0.19           O  
HETATM    5  O   HOH T   4      27.944   6.213  36.344  1.00  0.21           O  
HETATM    6  O   HOH T   5      38.052   2.592  36.361  1.00  0.21           O  
HETATM    7  O   HOH T   6      19.352  26.131  27.076  1.00  0.21           O  
HETATM    8  O   HOH T   7      21.179   7.882  64.474  1.00  0.21           O  
HETATM    9  O   HOH T   8      25.969  16.523  35.758  1.00  0.22           O  
HETATM   10  O   HOH T   9       1.977 -13.644  46.734  1.00  0.22           O  
HETATM   11  O   HOH T  10      28.969  -2.945  50.056  1.00  0.22           O  
HETATM   12  O   HOH T  11      12.944  28.063  36.276  1.00  0.22           O  
HETATM   13  O   HOH T  12      24.308  25.406  20.568  1.00  0.22           O  
HETATM   14  O   HOH T  13      17.166  36.071  27.229  1.00  0.22           O  
HETATM   15  O   HOH T  14      22.795  24.970  24.363  1.00  0.23           O  
HETATM   16  O   HOH T  15      22.524  19.468  26.287  1.00  0.23           O  
HETATM   17  O   HOH T  16      28.158  24.299  44.568  1.00  0.23           O  
HETATM   18  O   HOH T  17      45.652   8.889  10.648  1.00  0.23           O  
HETATM   19  O   HOH T  18      17.778  17.242  60.094  1.00  0.24           O  
HETATM   20  O   HOH T  19      34.491   3.314  33.385  1.00  0.24           O  
HETATM   21  O   HOH T  20      12.710   9.884  41.326  1.00  0.24           O  
HETATM   22  O   HOH T  21      39.687  19.454  13.818  1.00  0.24           O  
HETATM   23  O   HOH T  22      29.186 -11.684  39.922  1.00  0.24           O  
HETATM   24  O   HOH T  23      18.477  30.527  21.723  1.00  0.24           O  
HETATM   25  O   HOH T  24      15.464   0.832  59.142  1.00  0.25           O  
HETATM   26  O   HOH T  25      40.874   1.793  29.548  1.00  0.25           O  
HETATM   27  O   HOH T  26      46.588   6.342  11.290  1.00  0.25           O  
HETATM   28  O   HOH T  27      30.123  16.848  25.643  1.00  0.26           O  
HETATM   29  O   HOH T  28      38.821   1.409  40.251  1.00  0.26           O  
HETATM   30  O   HOH T  29      20.385 -13.889  44.676  1.00  0.26           O  
HETATM   31  O   HOH T  30      17.925  12.829  61.941  1.00  0.26           O  
HETATM   32  O   HOH T  31      26.242  24.696  22.510  1.00  0.26           O  
HETATM   33  O   HOH T  32      25.386  -9.988  27.690  1.00  0.26           O  
HETATM   34  O   HOH T  33      41.547   3.365   9.518  1.00  0.26           O  
HETATM   35  O   HOH T  34      12.349  -8.150  50.489  1.00  0.26           O  
HETATM   36  O   HOH T  35      28.882  26.538  31.974  1.00  0.26           O  
HETATM   37  O   HOH T  36      33.603   0.541  33.755  1.00  0.26           O  
HETATM   38  O   HOH T  37      43.668   0.490  27.299  1.00  0.26           O  
HETATM   39  O   HOH T  38      42.029   5.557  32.152  1.00  0.26           O  
HETATM   40  O   HOH T  39      36.680   4.721  49.328  1.00  0.26           O  
HETATM   41  O   HOH T  40      24.513  -2.394  23.007  1.00  0.27           O  
HETATM   42  O   HOH T  41      53.079  10.050  22.112  1.00  0.27           O  
HETATM   43  O   HOH T  42      26.266   5.099  39.820  1.00  0.27           O  
HETATM   44  O   HOH T  43      22.304  25.544  29.667  1.00  0.27           O  
HETATM   45  O   HOH T  44       4.502 -12.762  47.535  1.00  0.27           O  
HETATM   46  O   HOH T  45      11.773  -7.610  31.995  1.00  0.27           O  
HETATM   47  O   HOH T  46      32.288  -9.183  30.854  1.00  0.27           O  
HETATM   48  O   HOH T  47      30.655  18.103  54.662  1.00  0.27           O  
HETATM   49  O   HOH T  48      26.681  17.021  42.453  1.00  0.28           O  
HETATM   50  O   HOH T  49      55.246   8.928  14.500  1.00  0.28           O  
HETATM   51  O   HOH T  50      41.597  16.311  28.849  1.00  0.28           O  
HETATM   52  O   HOH T  51      36.909  22.179  43.327  1.00  0.28           O  
HETATM   53  O   HOH T  52      28.238   8.207  23.058  1.00  0.28           O  
HETATM   54  O   HOH T  53      29.979  26.773  39.395  1.00  0.28           O  
HETATM   55  O   HOH T  54      11.411  33.241  35.798  1.00  0.29           O  
HETATM   56  O   HOH T  55      47.077  17.314  24.436  1.00  0.29           O  
HETATM   57  O   HOH T  56      30.397  25.275  49.599  1.00  0.29           O  
HETATM   58  O   HOH T  57      32.075  25.090  47.340  1.00  0.29           O  
HETATM   59  O   HOH T  58      36.195   4.758  10.163  1.00  0.29           O  
HETATM   60  O   HOH T  59      26.327   0.771  55.216  1.00  0.29           O  
HETATM   61  O   HOH T  60      26.900   3.964  37.432  1.00  0.30           O  
HETATM   62  O   HOH T  61      32.991 -12.652  34.048  1.00  0.30           O  
HETATM   63  O   HOH T  62      30.597  16.340  58.440  1.00  0.30           O  
HETATM   64  O   HOH T  63      39.778   4.310  11.197  1.00  0.30           O  
HETATM   65  O   HOH T  64      15.700  -7.297  48.263  1.00  0.30           O  
HETATM   66  O   HOH T  65      20.052   3.072  60.862  1.00  0.30           O  
HETATM   67  O   HOH T  66      29.529   3.880  23.696  1.00  0.30           O  
HETATM   68  O   HOH T  67      27.482  14.566  41.504  1.00  0.31           O  
HETATM   69  O   HOH T  68      14.126   3.419  44.720  1.00  0.31           O  
HETATM   70  O   HOH T  69      20.091  24.424  24.891  1.00  0.31           O  
HETATM   71  O   HOH T  70      25.752  19.842  57.360  1.00  0.31           O  
HETATM   72  O   HOH T  71      11.069 -11.078  45.830  1.00  0.31           O  
HETATM   73  O   HOH T  72       9.587  10.075  39.015  1.00  0.31           O  
HETATM   74  O   HOH T  73       4.245  -4.246  45.833  1.00  0.31           O  
HETATM   75  O   HOH T  74      21.370 -11.623  32.052  1.00  0.31           O  
HETATM   76  O   HOH T  75      15.645  11.564  63.092  1.00  0.31           O  
HETATM   77  O   HOH T  76      33.327  13.470  53.779  1.00  0.32           O  
HETATM   78  O   HOH T  77      36.012  -2.589  33.998  1.00  0.32           O  
HETATM   79  O   HOH T  78      34.485  25.548  39.419  1.00  0.32           O  
HETATM   80  O   HOH T  79      13.222  31.289  40.403  1.00  0.32           O  
HETATM   81  O   HOH T  80      40.482  21.097  44.483  1.00  0.32           O  
HETATM   82  O   HOH T  81      15.326  31.910  43.497  1.00  0.32           O  
HETATM   83  O   HOH T  82      27.803   7.194  15.803  1.00  0.32           O  
HETATM   84  O   HOH T  83      10.969  -6.431  37.842  1.00  0.33           O  
HETATM   85  O   HOH T  84      12.454  14.730  43.097  1.00  0.33           O  
HETATM   86  O   HOH T  85      21.687  -2.019  58.374  1.00  0.33           O  
HETATM   87  O   HOH T  86      10.693  -5.691  55.433  1.00  0.33           O  
HETATM   88  O   HOH T  87      36.679  16.164  28.433  1.00  0.33           O  
HETATM   89  O   HOH T  88      10.829  14.221  29.075  1.00  0.33           O  
HETATM   90  O   HOH T  89      13.191 -15.340  47.237  1.00  0.33           O  
HETATM   91  O   HOH T  90      10.452  -0.219  35.931  1.00  0.33           O  
HETATM   92  O   HOH T  91      34.770  12.035  44.309  1.00  0.33           O  
HETATM   93  O   HOH T  92       4.677 -14.065  52.112  1.00  0.33           O  
HETATM   94  O   HOH T  93      37.895  -2.887  41.913  1.00  0.33           O  
HETATM   95  O   HOH T  94      29.879  11.094  35.150  1.00  0.33           O  
HETATM   96  O   HOH T  95       9.801  24.355  44.253  1.00  0.34           O  
HETATM   97  O   HOH T  96      18.536  24.813  57.699  1.00  0.34           O  
HETATM   98  O   HOH T  97      11.469   2.642  44.590  1.00  0.34           O  
HETATM   99  O   HOH T  98      41.257  -0.662  28.217  1.00  0.34           O  
HETATM  100  O   HOH T  99      17.121  14.876   5.712  1.00  0.34           O  
HETATM  101  O   HOH T 100      32.265  27.236  45.516  1.00  0.34           O  
HETATM  102  O   HOH T 101      19.152  11.229  11.538  1.00  0.34           O  
HETATM  103  O   HOH T 102      10.203  12.080  34.586  1.00  0.34           O  
HETATM  104  O   HOH T 103      13.981   9.447  63.858  1.00  0.34           O  
HETATM  105  O   HOH T 104      34.472  28.560  45.952  1.00  0.34           O  
HETATM  106  O   HOH T 105      15.528  22.857  63.511  1.00  0.34           O  
HETATM  107  O   HOH T 106      21.177 -11.767  28.314  1.00  0.34           O  
HETATM  108  O   HOH T 107      33.623  22.853  38.990  1.00  0.34           O  
HETATM  109  O   HOH T 108       7.411  -7.044  35.802  1.00  0.34           O  
HETATM  110  O   HOH T 109      10.784  27.800  24.659  1.00  0.35           O  
HETATM  111  O   HOH T 110      23.960  14.907  47.896  1.00  0.35           O  
HETATM  112  O   HOH T 111      31.719  14.379  39.482  1.00  0.35           O  
HETATM  113  O   HOH T 112      31.819  27.599  37.440  1.00  0.35           O  
HETATM  114  O   HOH T 113      35.444  11.487  46.917  1.00  0.35           O  
HETATM  115  O   HOH T 114       9.235  24.971  46.878  1.00  0.35           O  
HETATM  116  O   HOH T 115      28.218 -13.308  33.120  1.00  0.35           O  
HETATM  117  O   HOH T 116       6.101 -11.624  49.535  1.00  0.35           O  
HETATM  118  O   HOH T 117       8.399  32.248  22.294  1.00  0.35           O  
HETATM  119  O   HOH T 118      31.589 -11.418  29.329  1.00  0.36           O  
HETATM  120  O   HOH T 119      37.933   9.668  38.835  1.00  0.36           O  
HETATM  121  O   HOH T 120      26.664   8.345  20.899  1.00  0.36           O  
HETATM  122  O   HOH T 121      16.993  -3.949  53.874  1.00  0.36           O  
HETATM  123  O   HOH T 122      18.958  16.116   7.445  1.00  0.36           O  
HETATM  124  O   HOH T 123       6.900  -0.916  45.985  1.00  0.36           O  
HETATM  125  O   HOH T 124      30.457  27.322  47.669  1.00  0.36           O  
HETATM  126  O   HOH T 125      15.828  25.053  60.892  1.00  0.36           O  
HETATM  127  O   HOH T 126      37.929  14.804  48.050  1.00  0.36           O  
HETATM  128  O   HOH T 127      36.869  -3.095  44.465  1.00  0.36           O  
HETATM  129  O   HOH T 128      26.491 -11.116  29.984  1.00  0.36           O  
HETATM  130  O   HOH T 129      38.961  -3.182  19.106  1.00  0.36           O  
HETATM  131  O   HOH T 130      11.235  15.703  62.381  1.00  0.37           O  
HETATM  132  O   HOH T 131      18.140  21.858  63.292  1.00  0.37           O  
HETATM  133  O   HOH T 132      11.795  17.921  63.971  1.00  0.37           O  
HETATM  134  O   HOH T 133      35.684  11.913  34.803  1.00  0.37           O  
HETATM  135  O   HOH T 134      10.020   1.131  30.188  1.00  0.37           O  
HETATM  136  O   HOH T 135      27.315  -4.943  51.081  1.00  0.37           O  
HETATM  137  O   HOH T 136      33.263   4.388  52.725  1.00  0.37           O  
HETATM  138  O   HOH T 137      39.742  25.982  39.740  1.00  0.37           O  
HETATM  139  O   HOH T 138      35.127  -6.243  36.735  1.00  0.37           O  
HETATM  140  O   HOH T 139      12.713  12.829  56.664  1.00  0.37           O  
HETATM  141  O   HOH T 140      20.642  30.926  30.133  1.00  0.37           O  
HETATM  142  O   HOH T 141      26.183  15.936  33.029  1.00  0.37           O  
HETATM  143  O   HOH T 142      29.241  24.863  47.062  1.00  0.37           O  
HETATM  144  O   HOH T 143      11.270  26.343  45.538  1.00  0.38           O  
HETATM  145  O   HOH T 144      16.456   8.037  11.950  1.00  0.38           O  
HETATM  146  O   HOH T 145      24.310  -0.197  21.153  1.00  0.38           O  
HETATM  147  O   HOH T 146      28.128  -6.574  45.350  1.00  0.38           O  
HETATM  148  O   HOH T 147      23.456  27.780  28.384  1.00  0.38           O  
HETATM  149  O   HOH T 148      37.554  -7.043  35.345  1.00  0.38           O  
HETATM  150  O   HOH T 149      19.698  -2.645  60.214  1.00  0.38           O  
HETATM  151  O   HOH T 150      41.256  21.627  41.856  1.00  0.38           O  
HETATM  152  O   HOH T 151      34.054  15.839  40.483  1.00  0.38           O  
HETATM  153  O   HOH T 152      11.566  32.202  24.166  1.00  0.38           O  
HETATM  154  O   HOH T 153      41.120  15.729  21.656  1.00  0.38           O  
HETATM  155  O   HOH T 154      15.186  22.380  39.633  1.00  0.38           O  
HETATM  156  O   HOH T 155      21.303 -12.483  47.939  1.00  0.38           O  
HETATM  157  O   HOH T 156      43.441  11.433  30.161  1.00  0.38           O  
HETATM  158  O   HOH T 157      21.684   9.096   7.537  1.00  0.38           O  
HETATM  159  O   HOH T 158      22.607  -0.760  18.910  1.00  0.38           O  
HETATM  160  O   HOH T 159      11.736  29.306  26.861  1.00  0.38           O  
HETATM  161  O   HOH T 160      41.297  22.938  21.035  1.00  0.38           O  
HETATM  162  O   HOH T 161      46.377  21.085  23.832  1.00  0.39           O  
HETATM  163  O   HOH T 162      17.476  29.405  16.167  1.00  0.39           O  
HETATM  164  O   HOH T 163      10.305  17.015  48.707  1.00  0.39           O  
HETATM  165  O   HOH T 164      10.845  23.173  41.905  1.00  0.39           O  
HETATM  166  O   HOH T 165      29.134  11.901  16.230  1.00  0.39           O  
HETATM  167  O   HOH T 166      31.694 -10.519  39.722  1.00  0.39           O  
HETATM  168  O   HOH T 167       9.615  20.207  37.307  1.00  0.39           O  
HETATM  169  O   HOH T 168      16.753  -8.950  50.248  1.00  0.39           O  
HETATM  170  O   HOH T 169      28.069 -12.683  28.449  1.00  0.39           O  
HETATM  171  O   HOH T 170      30.403  -2.879  44.610  1.00  0.39           O  
HETATM  172  O   HOH T 171      27.561   1.748  23.590  1.00  0.39           O  
HETATM  173  O   HOH T 172      18.992  32.347  23.725  1.00  0.39           O  
HETATM  174  O   HOH T 173      39.400  -4.103  43.896  1.00  0.39           O  
HETATM  175  O   HOH T 174       5.967   6.575  43.835  1.00  0.39           O  
HETATM  176  O   HOH T 175      17.174   9.730   9.879  1.00  0.39           O  
HETATM  177  O   HOH T 176       7.072   6.198  41.279  1.00  0.39           O  
HETATM  178  O   HOH T 177      26.174  32.588  37.683  1.00  0.39           O  
HETATM  179  O   HOH T 178      26.984  -2.507  24.284  1.00  0.39           O  
HETATM  180  O   HOH T 179      17.177  22.812  17.679  1.00  0.39           O  
HETATM  181  O   HOH T 180      20.035   9.178   9.818  1.00  0.39           O  
HETATM  182  O   HOH T 181      20.789  32.065  21.705  1.00  0.40           O  
HETATM  183  O   HOH T 182       2.209 -11.214  48.011  1.00  0.40           O  
HETATM  184  O   HOH T 183      50.269  18.982  21.264  1.00  0.40           O  
HETATM  185  O   HOH T 184      18.512  31.791  26.224  1.00  0.40           O  
HETATM  186  O   HOH T 185       9.659  14.538  35.724  1.00  0.40           O  
HETATM  187  O   HOH T 186      28.622   4.830  17.045  1.00  0.40           O  
HETATM  188  O   HOH T 187      35.290   8.878  38.104  1.00  0.40           O  
HETATM  189  O   HOH T 188      12.246   1.855  41.999  1.00  0.40           O  
HETATM  190  O   HOH T 189      33.985  23.526  36.309  1.00  0.40           O  
HETATM  191  O   HOH T 190      42.263  24.542  23.101  1.00  0.40           O  
HETATM  192  O   HOH T 191      17.179  -3.496  59.248  1.00  0.40           O  
HETATM  193  O   HOH T 192      21.995  10.817  11.231  1.00  0.41           O  
HETATM  194  O   HOH T 193      48.156   2.744  19.817  1.00  0.41           O  
HETATM  195  O   HOH T 194       8.481  17.743  37.838  1.00  0.41           O  
HETATM  196  O   HOH T 195      34.985   6.795  52.277  1.00  0.41           O  
HETATM  197  O   HOH T 196      10.055  10.978  49.301  1.00  0.41           O  
HETATM  198  O   HOH T 197      21.873 -14.049  42.270  1.00  0.41           O  
HETATM  199  O   HOH T 198      13.340  21.413  10.045  1.00  0.41           O  
HETATM  200  O   HOH T 199       6.829 -14.208  50.599  1.00  0.41           O  
HETATM  201  O   HOH T 200      21.168  26.976  12.962  1.00  0.41           O  
HETATM  202  O   HOH T 201      20.286  -2.381  54.951  1.00  0.41           O  
HETATM  203  O   HOH T 202      10.209  16.121  44.359  1.00  0.41           O  
HETATM  204  O   HOH T 203      11.621  32.160  26.986  1.00  0.41           O  
HETATM  205  O   HOH T 204       8.498  15.492  42.271  1.00  0.41           O  
HETATM  206  O   HOH T 205      43.677   4.882  30.008  1.00  0.41           O  
HETATM  207  O   HOH T 206      27.782   3.780  21.639  1.00  0.41           O  
HETATM  208  O   HOH T 207      20.898 -16.613  32.303  1.00  0.41           O  
HETATM  209  O   HOH T 208      14.532 -10.045  35.221  1.00  0.41           O  
HETATM  210  O   HOH T 209      28.223   2.936  19.122  1.00  0.41           O  
HETATM  211  O   HOH T 210       8.957   9.667  15.198  1.00  0.41           O  
HETATM  212  O   HOH T 211      40.944   1.889  11.753  1.00  0.42           O  
HETATM  213  O   HOH T 212      14.625  -4.816  55.041  1.00  0.42           O  
HETATM  214  O   HOH T 213      29.278  16.236  22.057  1.00  0.42           O  
HETATM  215  O   HOH T 214      42.145  13.762  29.892  1.00  0.42           O  
HETATM  216  O   HOH T 215      52.435  15.789  19.024  1.00  0.42           O  
HETATM  217  O   HOH T 216      41.226  19.970  51.386  1.00  0.42           O  
HETATM  218  O   HOH T 217      21.211  23.963  27.506  1.00  0.42           O  
HETATM  219  O   HOH T 218      44.590   2.354  29.244  1.00  0.42           O  
HETATM  220  O   HOH T 219      14.646  31.651  46.211  1.00  0.42           O  
HETATM  221  O   HOH T 220      12.057  29.337  38.793  1.00  0.42           O  
HETATM  222  O   HOH T 221       6.643  25.813  46.725  1.00  0.42           O  
HETATM  223  O   HOH T 222      33.886  30.753  44.442  1.00  0.42           O  
HETATM  224  O   HOH T 223      24.924   8.228  18.637  1.00  0.42           O  
HETATM  225  O   HOH T 224      16.025 -15.602  43.354  1.00  0.42           O  
HETATM  226  O   HOH T 225      37.063  10.604  44.695  1.00  0.42           O  
HETATM  227  O   HOH T 226      28.506  23.397  21.696  1.00  0.42           O  
HETATM  228  O   HOH T 227       8.639  22.414  19.331  1.00  0.42           O  
HETATM  229  O   HOH T 228      49.488  18.618  23.905  1.00  0.42           O  
HETATM  230  O   HOH T 229      40.321  -6.010  28.416  1.00  0.42           O  
HETATM  231  O   HOH T 230      21.066  32.710  25.562  1.00  0.42           O  
HETATM  232  O   HOH T 231       9.373  13.589  45.374  1.00  0.43           O  
HETATM  233  O   HOH T 232       9.292  -1.364  31.196  1.00  0.43           O  
HETATM  234  O   HOH T 233      22.756  -8.928  47.854  1.00  0.43           O  
HETATM  235  O   HOH T 234      11.684  25.661  42.846  1.00  0.43           O  
HETATM  236  O   HOH T 235       9.641  11.222  46.600  1.00  0.43           O  
HETATM  237  O   HOH T 236      53.465  12.216  15.916  1.00  0.43           O  
HETATM  238  O   HOH T 237      30.446  12.431  12.515  1.00  0.43           O  
HETATM  239  O   HOH T 238      44.945  22.797  25.294  1.00  0.43           O  
HETATM  240  O   HOH T 239      10.753 -11.368  52.568  1.00  0.43           O  
HETATM  241  O   HOH T 240      38.304  10.777  46.943  1.00  0.43           O  
HETATM  242  O   HOH T 241      35.494  -7.678  39.123  1.00  0.43           O  
HETATM  243  O   HOH T 242      39.599  -7.475  30.602  1.00  0.43           O  
HETATM  244  O   HOH T 243       6.524  18.257  48.766  1.00  0.43           O  
HETATM  245  O   HOH T 244      35.549  21.566  37.408  1.00  0.43           O  
HETATM  246  O   HOH T 245      19.155  27.957  14.475  1.00  0.43           O  
HETATM  247  O   HOH T 246       8.923  -1.977  42.012  1.00  0.43           O  
HETATM  248  O   HOH T 247      37.388  12.299  48.828  1.00  0.43           O  
HETATM  249  O   HOH T 248      11.435  -3.912  38.968  1.00  0.44           O  
HETATM  250  O   HOH T 249       9.924  12.222  15.628  1.00  0.44           O  
HETATM  251  O   HOH T 250      20.133  33.058  46.271  1.00  0.44           O  
HETATM  252  O   HOH T 251      22.756  16.893  14.514  1.00  0.44           O  
HETATM  253  O   HOH T 252      20.546  17.024  59.789  1.00  0.44           O  
HETATM  254  O   HOH T 253      14.326  -9.554  49.021  1.00  0.44           O  
HETATM  255  O   HOH T 254       9.882   1.475  40.673  1.00  0.44           O  
HETATM  256  O   HOH T 255      48.671  20.888  22.470  1.00  0.44           O  
HETATM  257  O   HOH T 256      34.881  -2.807  46.346  1.00  0.44           O  
HETATM  258  O   HOH T 257      27.490   9.826  34.779  1.00  0.44           O  
HETATM  259  O   HOH T 258      23.578  10.594   8.938  1.00  0.45           O  
HETATM  260  O   HOH T 259      11.498   6.700  51.356  1.00  0.45           O  
HETATM  261  O   HOH T 260      19.987   6.194  16.834  1.00  0.45           O  
HETATM  262  O   HOH T 261      22.507  -5.632  50.341  1.00  0.45           O  
HETATM  263  O   HOH T 262      14.399 -13.844  41.890  1.00  0.45           O  
HETATM  264  O   HOH T 263      17.026  -6.239  50.538  1.00  0.45           O  
HETATM  265  O   HOH T 264      18.603  33.909  28.422  1.00  0.45           O  
HETATM  266  O   HOH T 265       7.470  17.057  44.427  1.00  0.45           O  
HETATM  267  O   HOH T 266      27.354  14.545  37.212  1.00  0.45           O  
HETATM  268  O   HOH T 267      17.648  34.371  35.647  1.00  0.45           O  
HETATM  269  O   HOH T 268      25.074  32.175  22.198  1.00  0.45           O  
HETATM  270  O   HOH T 269       8.117  16.209  34.159  1.00  0.45           O  
HETATM  271  O   HOH T 270      37.110  10.061  36.258  1.00  0.45           O  
HETATM  272  O   HOH T 271      39.100  -4.536  36.209  1.00  0.45           O  
HETATM  273  O   HOH T 272      39.050  16.721  29.826  1.00  0.45           O  
HETATM  274  O   HOH T 273      25.560 -14.264  32.977  1.00  0.45           O  
HETATM  275  O   HOH T 274      12.154  34.693  28.173  1.00  0.45           O  
HETATM  276  O   HOH T 275      18.733 -15.978  43.753  1.00  0.45           O  
HETATM  277  O   HOH T 276      14.028   7.676  68.465  1.00  0.45           O  
HETATM  278  O   HOH T 277      37.384  15.408  54.453  1.00  0.45           O  
HETATM  279  O   HOH T 278      23.539  31.703  24.598  1.00  0.45           O  
HETATM  280  O   HOH T 279      12.129  -8.975  34.276  1.00  0.45           O  
HETATM  281  O   HOH T 280      28.861  13.742  39.330  1.00  0.46           O  
HETATM  282  O   HOH T 281      42.142   1.238  38.030  1.00  0.46           O  
HETATM  283  O   HOH T 282       8.485  18.722  35.257  1.00  0.46           O  
HETATM  284  O   HOH T 283       5.313  19.013  44.466  1.00  0.46           O  
HETATM  285  O   HOH T 284      13.875  15.849  41.008  1.00  0.46           O  
HETATM  286  O   HOH T 285       8.934  10.513  30.081  1.00  0.46           O  
HETATM  287  O   HOH T 286      19.477 -11.702  49.750  1.00  0.46           O  
HETATM  288  O   HOH T 287      26.999  10.006  37.522  1.00  0.46           O  
HETATM  289  O   HOH T 288      38.635  12.062  34.923  1.00  0.46           O  
HETATM  290  O   HOH T 289      12.937  -6.694  54.094  1.00  0.46           O  
HETATM  291  O   HOH T 290       8.336  19.828  39.569  1.00  0.46           O  
HETATM  292  O   HOH T 291      34.070  17.392  52.708  1.00  0.46           O  
HETATM  293  O   HOH T 292      26.024 -16.338  34.683  1.00  0.46           O  
HETATM  294  O   HOH T 293      23.599 -16.329  33.183  1.00  0.46           O  
HETATM  295  O   HOH T 294      11.389  -0.723  41.401  1.00  0.46           O  
HETATM  296  O   HOH T 295       2.094  -4.090  49.589  1.00  0.46           O  
HETATM  297  O   HOH T 296       4.665  25.131  48.491  1.00  0.46           O  
HETATM  298  O   HOH T 297      25.068  -6.583  50.991  1.00  0.46           O  
HETATM  299  O   HOH T 298      23.709  10.173  33.063  1.00  0.47           O  
HETATM  300  O   HOH T 299      33.148  -5.670  41.993  1.00  0.47           O  
HETATM  301  O   HOH T 300      38.636  -2.008  24.527  1.00  0.47           O  
HETATM  302  O   HOH T 301      30.119  15.047  37.340  1.00  0.47           O  
HETATM  303  O   HOH T 302      36.666  20.339  39.651  1.00  0.47           O  
HETATM  304  O   HOH T 303      25.073  30.062  31.571  1.00  0.47           O  
HETATM  305  O   HOH T 304      15.514   8.001   8.346  1.00  0.47           O  
HETATM  306  O   HOH T 305      27.192   9.833  18.751  1.00  0.47           O  
HETATM  307  O   HOH T 306      42.023   1.630  33.975  1.00  0.47           O  
HETATM  308  O   HOH T 307      11.451   6.245  58.090  1.00  0.47           O  
HETATM  309  O   HOH T 308      31.683 -13.063  31.583  1.00  0.47           O  
HETATM  310  O   HOH T 309      26.220  31.343  24.532  1.00  0.47           O  
HETATM  311  O   HOH T 310      15.441 -13.931  39.323  1.00  0.47           O  
HETATM  312  O   HOH T 311      33.192  12.189  38.795  1.00  0.47           O  
HETATM  313  O   HOH T 312       8.614   8.461  41.130  1.00  0.47           O  
HETATM  314  O   HOH T 313      52.802  18.131  20.437  1.00  0.47           O  
HETATM  315  O   HOH T 314      35.020  21.931  41.305  1.00  0.47           O  
HETATM  316  O   HOH T 315      11.133  14.570  58.415  1.00  0.47           O  
HETATM  317  O   HOH T 316      25.162   0.401  18.612  1.00  0.47           O  
HETATM  318  O   HOH T 317      37.263   5.799  51.680  1.00  0.47           O  
HETATM  319  O   HOH T 318      43.069   0.164  30.072  1.00  0.47           O  
HETATM  320  O   HOH T 319      13.059   9.260  66.484  1.00  0.47           O  
HETATM  321  O   HOH T 320      34.832  21.915  53.625  1.00  0.47           O  
HETATM  322  O   HOH T 321       9.061  -4.333  37.671  1.00  0.47           O  
HETATM  323  O   HOH T 322      27.717  29.073  32.081  1.00  0.47           O  
HETATM  324  O   HOH T 323      11.379 -12.894  43.866  1.00  0.47           O  
HETATM  325  O   HOH T 324      30.778  13.717  35.087  1.00  0.48           O  
HETATM  326  O   HOH T 325      33.146  12.487  36.069  1.00  0.48           O  
HETATM  327  O   HOH T 326      53.891  14.608  17.084  1.00  0.48           O  
HETATM  328  O   HOH T 327      54.986  19.807  20.648  1.00  0.48           O  
HETATM  329  O   HOH T 328       9.009   8.012  29.022  1.00  0.48           O  
HETATM  330  O   HOH T 329      26.592  -8.580  46.441  1.00  0.48           O  
HETATM  331  O   HOH T 330      11.812  30.563  36.229  1.00  0.48           O  
HETATM  332  O   HOH T 331      13.790  12.446  42.019  1.00  0.48           O  
HETATM  333  O   HOH T 332      27.266   9.922  15.939  1.00  0.48           O  
HETATM  334  O   HOH T 333      26.874  -4.600  53.803  1.00  0.48           O  
HETATM  335  O   HOH T 334      16.278  10.145  38.852  1.00  0.48           O  
HETATM  336  O   HOH T 335      22.840   9.647  15.261  1.00  0.48           O  
HETATM  337  O   HOH T 336      41.694   6.790  44.557  1.00  0.48           O  
HETATM  338  O   HOH T 337       7.719  17.403  40.539  1.00  0.48           O  
HETATM  339  O   HOH T 338      33.843  17.018  19.543  1.00  0.48           O  
HETATM  340  O   HOH T 339      39.569  19.566  53.642  1.00  0.48           O  
HETATM  341  O   HOH T 340      22.843  31.760  31.578  1.00  0.48           O  
HETATM  342  O   HOH T 341      28.937  11.075  39.021  1.00  0.48           O  
HETATM  343  O   HOH T 342      18.710  34.169  31.497  1.00  0.48           O  
HETATM  344  O   HOH T 343      19.903   1.081  62.469  1.00  0.48           O  
HETATM  345  O   HOH T 344      49.264  16.404  25.598  1.00  0.48           O  
HETATM  346  O   HOH T 345      36.026  20.856  17.340  1.00  0.48           O  
HETATM  347  O   HOH T 346      41.806   1.070   8.087  1.00  0.49           O  
HETATM  348  O   HOH T 347      24.013  19.053  62.524  1.00  0.49           O  
HETATM  349  O   HOH T 348      33.491  20.853  35.653  1.00  0.49           O  
HETATM  350  O   HOH T 349       3.094  -6.561  54.523  1.00  0.49           O  
HETATM  351  O   HOH T 350       9.779  30.126  23.527  1.00  0.49           O  
HETATM  352  O   HOH T 351      55.609  11.751  14.093  1.00  0.49           O  
HETATM  353  O   HOH T 352      15.449   2.375  15.210  1.00  0.49           O  
HETATM  354  O   HOH T 353      27.522 -11.547  42.207  1.00  0.49           O  
HETATM  355  O   HOH T 354      38.077  28.119  39.739  1.00  0.49           O  
HETATM  356  O   HOH T 355       8.215 -12.162  51.768  1.00  0.49           O  
HETATM  357  O   HOH T 356       9.715  14.282  32.980  1.00  0.49           O  
HETATM  358  O   HOH T 357      30.764 -14.186  33.993  1.00  0.49           O  
HETATM  359  O   HOH T 358      37.231  -1.635  51.754  1.00  0.49           O  
HETATM  360  O   HOH T 359      45.658  -0.195  29.146  1.00  0.49           O  
HETATM  361  O   HOH T 360      27.444   6.990  18.484  1.00  0.49           O  
HETATM  362  O   HOH T 361      54.212   4.700  10.507  1.00  0.49           O  
HETATM  363  O   HOH T 362      12.922  34.167  25.593  1.00  0.49           O  
HETATM  364  O   HOH T 363      15.295  25.669  63.530  1.00  0.49           O  
HETATM  365  O   HOH T 364      26.477   1.505  20.907  1.00  0.49           O  
HETATM  366  O   HOH T 365      47.014   5.825  29.088  1.00  0.49           O  
HETATM  367  O   HOH T 366      35.753  29.788  47.844  1.00  0.49           O  
HETATM  368  O   HOH T 367      12.886   5.729  64.853  1.00  0.50           O  
HETATM  369  O   HOH T 368      12.857  26.284  54.174  1.00  0.50           O  
HETATM  370  O   HOH T 369      33.409  -4.897  22.650  1.00  0.50           O  
HETATM  371  O   HOH T 370       8.160  24.242  38.059  1.00  0.50           O  
HETATM  372  O   HOH T 371      21.067  29.150  28.023  1.00  0.50           O  
HETATM  373  O   HOH T 372      32.516  -4.221  45.834  1.00  0.50           O  
HETATM  374  O   HOH T 373      27.223  29.346  26.136  1.00  0.50           O  
HETATM  375  O   HOH T 374      34.600  -4.666  44.190  1.00  0.50           O  
HETATM  376  O   HOH T 375       8.596  22.621  22.831  1.00  0.50           O  
HETATM  377  O   HOH T 376      10.161  21.905  39.434  1.00  0.50           O  
HETATM  378  O   HOH T 377      17.421 -15.104  50.168  1.00  0.50           O  
HETATM  379  O   HOH T 378      31.816  33.458  42.058  1.00  0.50           O  
HETATM  380  O   HOH T 379      29.155 -11.936  30.889  1.00  0.50           O  
HETATM  381  O   HOH T 380      32.917  -7.446  38.078  1.00  0.50           O  
HETATM  382  O   HOH T 381      30.930  13.349  15.060  1.00  0.50           O  
HETATM  383  O   HOH T 382      19.294 -14.337  48.371  1.00  0.50           O  
HETATM  384  O   HOH T 383      30.754  12.433  37.563  1.00  0.50           O  
HETATM  385  O   HOH T 384      34.070  26.177  36.739  1.00  0.50           O  
HETATM  386  O   HOH T 385      41.986   4.344  34.694  1.00  0.50           O  
HETATM  387  O   HOH T 386      18.555  25.420  60.400  1.00  0.50           O  
HETATM  388  O   HOH T 387       9.869  -1.745  38.141  1.00  0.50           O  
HETATM  389  O   HOH T 388      12.674  10.378  49.844  1.00  0.50           O  
HETATM  390  O   HOH T 389      17.415  15.245  25.041  1.00  0.51           O  
HETATM  391  O   HOH T 390      20.024 -13.955  33.026  1.00  0.51           O  
HETATM  392  O   HOH T 391       8.087  25.141  33.947  1.00  0.51           O  
HETATM  393  O   HOH T 392      42.352   6.967  34.569  1.00  0.51           O  
HETATM  394  O   HOH T 393       7.311   9.044  43.697  1.00  0.51           O  
HETATM  395  O   HOH T 394      12.341  -9.159  53.047  1.00  0.51           O  
HETATM  396  O   HOH T 395      42.760  24.334  25.853  1.00  0.51           O  
HETATM  397  O   HOH T 396      26.468  23.784  19.928  1.00  0.51           O  
HETATM  398  O   HOH T 397       3.100  -6.152  41.496  1.00  0.51           O  
HETATM  399  O   HOH T 398      38.586  21.740  41.087  1.00  0.51           O  
HETATM  400  O   HOH T 399      20.117  27.019  45.312  1.00  0.51           O  
HETATM  401  O   HOH T 400      11.330   6.426  20.115  1.00  0.51           O  
HETATM  402  O   HOH T 401      28.322  11.030  13.673  1.00  0.51           O  
HETATM  403  O   HOH T 402      15.210  -5.863  52.564  1.00  0.51           O  
HETATM  404  O   HOH T 403       9.513  31.757  37.386  1.00  0.51           O  
HETATM  405  O   HOH T 404       3.312  18.618  51.649  1.00  0.51           O  
HETATM  406  O   HOH T 405      29.426  -5.166  43.368  1.00  0.51           O  
HETATM  407  O   HOH T 406      35.755  18.398  42.830  1.00  0.51           O  
HETATM  408  O   HOH T 407      43.008   4.235  45.419  1.00  0.51           O  
HETATM  409  O   HOH T 408      18.500  25.053  13.955  1.00  0.51           O  
HETATM  410  O   HOH T 409       9.717  -8.114  56.272  1.00  0.51           O  
HETATM  411  O   HOH T 410      25.965  13.911  34.901  1.00  0.51           O  
HETATM  412  O   HOH T 411      36.300  17.620  40.295  1.00  0.51           O  
HETATM  413  O   HOH T 412      13.741  -8.169  30.023  1.00  0.51           O  
HETATM  414  O   HOH T 413      38.858  30.727  46.132  1.00  0.52           O  
HETATM  415  O   HOH T 414      22.071  -4.008  60.236  1.00  0.52           O  
HETATM  416  O   HOH T 415      12.081  11.211  64.868  1.00  0.52           O  
HETATM  417  O   HOH T 416       1.311  -6.441  50.851  1.00  0.52           O  
HETATM  418  O   HOH T 417      19.451  36.398  43.548  1.00  0.52           O  
HETATM  419  O   HOH T 418       8.615  15.776  46.735  1.00  0.52           O  
HETATM  420  O   HOH T 419      51.809  15.536  25.962  1.00  0.52           O  
HETATM  421  O   HOH T 420      33.967  -5.378  39.308  1.00  0.52           O  
HETATM  422  O   HOH T 421       9.486  15.423  50.786  1.00  0.52           O  
HETATM  423  O   HOH T 422      37.374   7.232  54.040  1.00  0.52           O  
HETATM  424  O   HOH T 423      36.155  27.361  37.912  1.00  0.52           O  
HETATM  425  O   HOH T 424      31.599 -12.903  36.366  1.00  0.52           O  
HETATM  426  O   HOH T 425      34.974   2.406  15.228  1.00  0.52           O  
HETATM  427  O   HOH T 426      22.820 -13.639  33.670  1.00  0.52           O  
HETATM  428  O   HOH T 427      40.929  15.582  31.478  1.00  0.52           O  
HETATM  429  O   HOH T 428      13.734  19.400  65.501  1.00  0.52           O  
HETATM  430  O   HOH T 429      40.224  -4.311  41.204  1.00  0.52           O  
HETATM  431  O   HOH T 430       8.101  28.597  30.784  1.00  0.52           O  
HETATM  432  O   HOH T 431      39.465  13.774  50.116  1.00  0.53           O  
HETATM  433  O   HOH T 432      20.933  25.378  52.014  1.00  0.53           O  
HETATM  434  O   HOH T 433       6.415  23.626  53.553  1.00  0.53           O  
HETATM  435  O   HOH T 434      10.429   4.511  60.074  1.00  0.53           O  
HETATM  436  O   HOH T 435      14.640  -4.163  59.876  1.00  0.53           O  
HETATM  437  O   HOH T 436      39.563  -7.662  19.962  1.00  0.53           O  
HETATM  438  O   HOH T 437      32.460  18.200  26.141  1.00  0.53           O  
HETATM  439  O   HOH T 438       4.873   0.132  47.683  1.00  0.53           O  
HETATM  440  O   HOH T 439       8.972   0.859  38.092  1.00  0.53           O  
HETATM  441  O   HOH T 440      52.440  20.620  21.535  1.00  0.53           O  
HETATM  442  O   HOH T 441      20.241 -16.110  41.351  1.00  0.53           O  
HETATM  443  O   HOH T 442      24.260  19.358   5.658  1.00  0.53           O  
HETATM  444  O   HOH T 443       4.117  17.875  50.218  1.00  0.53           O  
HETATM  445  O   HOH T 444      19.516  16.218   4.743  1.00  0.53           O  
HETATM  446  O   HOH T 445      28.931  -0.713  23.634  1.00  0.53           O  
HETATM  447  O   HOH T 446      50.393  -0.373  13.888  1.00  0.53           O  
HETATM  448  O   HOH T 447       9.019  22.762  59.211  1.00  0.54           O  
HETATM  449  O   HOH T 448      15.537  -1.610  60.621  1.00  0.54           O  
HETATM  450  O   HOH T 449      54.535  17.782  22.606  1.00  0.54           O  
HETATM  451  O   HOH T 450      11.885  -6.974  17.971  1.00  0.54           O  
HETATM  452  O   HOH T 451      42.821   2.120  15.529  1.00  0.54           O  
HETATM  453  O   HOH T 452      30.955  -4.720  49.524  1.00  0.54           O  
HETATM  454  O   HOH T 453      17.095   5.448  11.959  1.00  0.54           O  
HETATM  455  O   HOH T 454      17.721  24.511  62.887  1.00  0.54           O  
HETATM  456  O   HOH T 455       6.474  24.196  18.774  1.00  0.54           O  
HETATM  457  O   HOH T 456      40.511  23.310  39.767  1.00  0.54           O  
HETATM  458  O   HOH T 457      49.300   3.097  22.370  1.00  0.54           O  
HETATM  459  O   HOH T 458      15.313 -11.090  51.147  1.00  0.54           O  
HETATM  460  O   HOH T 459      25.388  21.953  55.456  1.00  0.54           O  
HETATM  461  O   HOH T 460      30.086  15.965  55.696  1.00  0.54           O  
HETATM  462  O   HOH T 461      14.791  11.264  65.829  1.00  0.55           O  
HETATM  463  O   HOH T 462      18.872  15.445  61.874  1.00  0.55           O  
HETATM  464  O   HOH T 463      36.318   8.110  11.456  1.00  0.55           O  
HETATM  465  O   HOH T 464      12.070 -10.522  36.531  1.00  0.55           O  
HETATM  466  O   HOH T 465      36.282  17.824  54.287  1.00  0.55           O  
HETATM  467  O   HOH T 466      33.176  34.116  39.835  1.00  0.55           O  
HETATM  468  O   HOH T 467       8.895  16.366  31.533  1.00  0.55           O  
HETATM  469  O   HOH T 468      12.008  32.260  38.347  1.00  0.55           O  
HETATM  470  O   HOH T 469      39.664  -5.833  33.978  1.00  0.55           O  
HETATM  471  O   HOH T 470      19.802 -10.231  30.149  1.00  0.55           O  
HETATM  472  O   HOH T 471      22.737  11.327   6.431  1.00  0.55           O  
HETATM  473  O   HOH T 472      14.438  17.137  66.736  1.00  0.55           O  
HETATM  474  O   HOH T 473      29.062  31.591  19.397  1.00  0.55           O  
HETATM  475  O   HOH T 474      28.590 -15.492  34.882  1.00  0.55           O  
HETATM  476  O   HOH T 475      35.815  -1.009  48.364  1.00  0.55           O  
HETATM  477  O   HOH T 476      17.004  35.707  29.966  1.00  0.56           O  
HETATM  478  O   HOH T 477      26.909  16.168  20.284  1.00  0.56           O  
HETATM  479  O   HOH T 478      29.336  26.603  51.835  1.00  0.56           O  
HETATM  480  O   HOH T 479      35.780  11.355  38.862  1.00  0.56           O  
HETATM  481  O   HOH T 480      43.122  20.926  43.785  1.00  0.56           O  
HETATM  482  O   HOH T 481      16.960  31.626  47.865  1.00  0.56           O  
HETATM  483  O   HOH T 482      14.682  13.835   4.403  1.00  0.56           O  
HETATM  484  O   HOH T 483       2.964   2.228  48.504  1.00  0.56           O  
HETATM  485  O   HOH T 484      40.651   3.044  36.826  1.00  0.56           O  
HETATM  486  O   HOH T 485      33.902  21.003  33.059  1.00  0.56           O  
HETATM  487  O   HOH T 486      34.882  17.037  31.775  1.00  0.56           O  
HETATM  488  O   HOH T 487       7.609  22.821  35.559  1.00  0.57           O  
HETATM  489  O   HOH T 488      20.283   5.665  65.543  1.00  0.57           O  
HETATM  490  O   HOH T 489      29.834  33.986  15.265  1.00  0.57           O  
HETATM  491  O   HOH T 490      12.229   0.051  22.678  1.00  0.57           O  
HETATM  492  O   HOH T 491      30.794 -11.396  42.145  1.00  0.57           O  
HETATM  493  O   HOH T 492      56.841  10.463  16.029  1.00  0.57           O  
HETATM  494  O   HOH T 493      37.248  25.631  39.409  1.00  0.57           O  
HETATM  495  O   HOH T 494       5.180   5.143  47.957  1.00  0.57           O  
HETATM  496  O   HOH T 495      36.355  18.847  15.467  1.00  0.57           O  
HETATM  497  O   HOH T 496      34.847  13.760  42.104  1.00  0.57           O  
HETATM  498  O   HOH T 497      27.511  -7.388  49.755  1.00  0.57           O  
HETATM  499  O   HOH T 498       9.616  -8.898  33.249  1.00  0.58           O  
HETATM  500  O   HOH T 499      17.737  19.371  64.014  1.00  0.58           O  
HETATM  501  O   HOH T 500      25.042  34.933  37.107  1.00  0.58           O  
HETATM  502  O   HOH T 501       5.658  -4.978  35.468  1.00  0.58           O  
HETATM  503  O   HOH T 502       4.173  -4.854  47.916  1.00  0.58           O  
HETATM  504  O   HOH T 503      21.041  34.765  44.482  1.00  0.59           O  
HETATM  505  O   HOH T 504      53.559  17.097  25.122  1.00  0.59           O  
HETATM  506  O   HOH T 505      32.426  21.788  54.938  1.00  0.59           O  
HETATM  507  O   HOH T 506      25.082  -7.511  48.469  1.00  0.60           O  
HETATM  508  O   HOH T 507      16.264  33.521  45.428  1.00  0.61           O  
HETATM  509  O   HOH T 508      32.494  19.440  53.434  1.00  0.61           O  
HETATM  510  O   HOH T 509      36.368  29.861  45.087  1.00  0.61           O  
HETATM  511  O   HOH T 510      56.566   4.740   9.876  1.00  0.61           O  
HETATM  512  O   HOH T 511      34.677  15.604  54.917  1.00  0.62           O  
HETATM  513  O   HOH T 512       6.582  -3.953  54.968  1.00  0.63           O  
HETATM  514  O   HOH T 513       2.029  -6.503  48.257  1.00  0.67           O  
HETATM  515  O   HOH T 514       2.338  -4.880  46.875  1.00  0.68           O  
TER     516      HOH T 514 
