# Supplementary material for: Accurate Prediction of Hydration Sites of Proteins Using Energy Model With Atom Embedding
Source: Front Mol Biosci. 2021 Sep 20;8:756075. doi: 10.3389/fmolb.2021.756075 (PMC8488165; doi:10.3389/fmolb.2021.756075)
Supplement: Supplementary file 1 [file DataSheet1.ZIP › Data Sheet 1/Our_result_pdb/our_dataset_output/2QXW_watersite.pdb]

HEADER                                                        XXXX


JRNL        PMID   -1
HETATM    1  O   HOH T   0      15.624  12.123  25.695  1.00  0.18           O  
HETATM    2  O   HOH T   1      -1.546  18.383   8.438  1.00  0.18           O  
HETATM    3  O   HOH T   2      25.926   3.400  27.885  1.00  0.18           O  
HETATM    4  O   HOH T   3      17.123  10.618  32.250  1.00  0.18           O  
HETATM    5  O   HOH T   4      11.879   0.851  26.635  1.00  0.19           O  
HETATM    6  O   HOH T   5      30.560  -3.906  35.257  1.00  0.19           O  
HETATM    7  O   HOH T   6       7.866  12.649  24.894  1.00  0.20           O  
HETATM    8  O   HOH T   7      11.435   2.900  24.908  1.00  0.21           O  
HETATM    9  O   HOH T   8       3.275  -7.935  48.438  1.00  0.21           O  
HETATM   10  O   HOH T   9       6.371 -13.509  22.844  1.00  0.21           O  
HETATM   11  O   HOH T  10       1.324   5.153  30.791  1.00  0.21           O  
HETATM   12  O   HOH T  11       4.143  -5.734   7.334  1.00  0.22           O  
HETATM   13  O   HOH T  12       8.588  -2.864  13.149  1.00  0.22           O  
HETATM   14  O   HOH T  13      17.770  -2.294  44.035  1.00  0.22           O  
HETATM   15  O   HOH T  14      18.676  24.363  16.927  1.00  0.22           O  
HETATM   16  O   HOH T  15      16.525 -14.645  10.693  1.00  0.22           O  
HETATM   17  O   HOH T  16       2.392   6.443  28.556  1.00  0.22           O  
HETATM   18  O   HOH T  17      23.010  10.436  15.809  1.00  0.23           O  
HETATM   19  O   HOH T  18       6.602 -13.416   6.827  1.00  0.23           O  
HETATM   20  O   HOH T  19      31.067  -2.839  23.334  1.00  0.23           O  
HETATM   21  O   HOH T  20      14.197 -15.119  12.013  1.00  0.23           O  
HETATM   22  O   HOH T  21      -5.612  -3.974  12.690  1.00  0.24           O  
HETATM   23  O   HOH T  22      21.784   0.514  15.788  1.00  0.24           O  
HETATM   24  O   HOH T  23      12.160   1.461  36.940  1.00  0.24           O  
HETATM   25  O   HOH T  24      17.148  -5.811   1.951  1.00  0.25           O  
HETATM   26  O   HOH T  25      15.690  -9.802  31.455  1.00  0.25           O  
HETATM   27  O   HOH T  26      34.905  10.236  19.204  1.00  0.25           O  
HETATM   28  O   HOH T  27      32.966  12.060  18.765  1.00  0.25           O  
HETATM   29  O   HOH T  28      -2.939  -3.494  31.903  1.00  0.25           O  
HETATM   30  O   HOH T  29       4.228 -11.844  22.204  1.00  0.25           O  
HETATM   31  O   HOH T  30       3.726  -6.482  19.396  1.00  0.25           O  
HETATM   32  O   HOH T  31      18.893 -12.250  15.283  1.00  0.25           O  
HETATM   33  O   HOH T  32       4.706  -0.830  44.930  1.00  0.26           O  
HETATM   34  O   HOH T  33      24.218   7.874  26.416  1.00  0.26           O  
HETATM   35  O   HOH T  34      -3.274   2.905   8.664  1.00  0.26           O  
HETATM   36  O   HOH T  35      10.163  -1.838  47.340  1.00  0.26           O  
HETATM   37  O   HOH T  36       2.910 -11.571  10.010  1.00  0.26           O  
HETATM   38  O   HOH T  37      12.124  13.990   6.426  1.00  0.26           O  
HETATM   39  O   HOH T  38      31.082  18.600  11.486  1.00  0.26           O  
HETATM   40  O   HOH T  39      -0.116 -15.634  34.404  1.00  0.26           O  
HETATM   41  O   HOH T  40      12.974  -5.826  48.000  1.00  0.26           O  
HETATM   42  O   HOH T  41      14.231  11.731  35.678  1.00  0.27           O  
HETATM   43  O   HOH T  42      16.004  -0.478  45.287  1.00  0.27           O  
HETATM   44  O   HOH T  43      12.194 -18.081  35.471  1.00  0.27           O  
HETATM   45  O   HOH T  44      -4.558  -0.272  14.395  1.00  0.28           O  
HETATM   46  O   HOH T  45      12.436   5.787   5.124  1.00  0.28           O  
HETATM   47  O   HOH T  46       7.894   4.596   4.802  1.00  0.28           O  
HETATM   48  O   HOH T  47       8.319  -7.028  18.090  1.00  0.28           O  
HETATM   49  O   HOH T  48       9.854  -9.357  25.712  1.00  0.28           O  
HETATM   50  O   HOH T  49      34.049  19.734  33.029  1.00  0.28           O  
HETATM   51  O   HOH T  50      -4.262 -11.266  18.653  1.00  0.28           O  
HETATM   52  O   HOH T  51       1.285 -15.200  36.676  1.00  0.28           O  
HETATM   53  O   HOH T  52      18.600   2.559  43.328  1.00  0.28           O  
HETATM   54  O   HOH T  53      11.124  22.945  20.428  1.00  0.28           O  
HETATM   55  O   HOH T  54      -5.414  -0.226  11.833  1.00  0.29           O  
HETATM   56  O   HOH T  55      -5.719  -6.624  13.398  1.00  0.29           O  
HETATM   57  O   HOH T  56      20.231  22.704  18.398  1.00  0.29           O  
HETATM   58  O   HOH T  57      34.857  19.527  30.351  1.00  0.29           O  
HETATM   59  O   HOH T  58      19.442   1.747  16.755  1.00  0.29           O  
HETATM   60  O   HOH T  59      39.359  -4.897  31.045  1.00  0.29           O  
HETATM   61  O   HOH T  60      36.557  -0.197  37.580  1.00  0.29           O  
HETATM   62  O   HOH T  61       2.393   9.156  21.663  1.00  0.29           O  
HETATM   63  O   HOH T  62       0.016  -5.122  -5.120  1.00  0.30           O  
HETATM   64  O   HOH T  63      30.415  -4.442  26.733  1.00  0.30           O  
HETATM   65  O   HOH T  64      23.931 -12.869  28.738  1.00  0.30           O  
HETATM   66  O   HOH T  65      26.737 -15.981  31.418  1.00  0.30           O  
HETATM   67  O   HOH T  66      30.814  -9.880  23.420  1.00  0.30           O  
HETATM   68  O   HOH T  67      29.941  -8.608  15.178  1.00  0.30           O  
HETATM   69  O   HOH T  68      18.291 -11.426  12.627  1.00  0.30           O  
HETATM   70  O   HOH T  69      -2.583 -19.065  26.784  1.00  0.30           O  
HETATM   71  O   HOH T  70       9.331 -18.931  24.254  1.00  0.30           O  
HETATM   72  O   HOH T  71      -4.271  -9.435  44.635  1.00  0.30           O  
HETATM   73  O   HOH T  72       3.383  18.770   7.299  1.00  0.31           O  
HETATM   74  O   HOH T  73      14.453 -18.975  23.513  1.00  0.31           O  
HETATM   75  O   HOH T  74      13.601   4.793  36.769  1.00  0.31           O  
HETATM   76  O   HOH T  75      19.140  -4.342  34.252  1.00  0.31           O  
HETATM   77  O   HOH T  76      10.761 -17.944  33.192  1.00  0.31           O  
HETATM   78  O   HOH T  77       5.454   5.108  35.155  1.00  0.31           O  
HETATM   79  O   HOH T  78      17.837   5.408  14.626  1.00  0.31           O  
HETATM   80  O   HOH T  79     -10.550  12.417  18.163  1.00  0.31           O  
HETATM   81  O   HOH T  80      10.027 -17.232  39.038  1.00  0.31           O  
HETATM   82  O   HOH T  81      -3.891 -16.290  36.490  1.00  0.31           O  
HETATM   83  O   HOH T  82      16.881 -18.478  25.018  1.00  0.32           O  
HETATM   84  O   HOH T  83       7.161  -1.416   4.295  1.00  0.32           O  
HETATM   85  O   HOH T  84      14.363 -13.078  24.101  1.00  0.32           O  
HETATM   86  O   HOH T  85      22.168 -14.322  21.975  1.00  0.32           O  
HETATM   87  O   HOH T  86      24.124  15.512  29.417  1.00  0.32           O  
HETATM   88  O   HOH T  87       3.783   1.309  46.278  1.00  0.32           O  
HETATM   89  O   HOH T  88      27.589 -12.957  22.314  1.00  0.32           O  
HETATM   90  O   HOH T  89      27.092   8.264  17.020  1.00  0.32           O  
HETATM   91  O   HOH T  90      10.211  -3.062  44.870  1.00  0.32           O  
HETATM   92  O   HOH T  91      36.789   1.730  20.740  1.00  0.32           O  
HETATM   93  O   HOH T  92      20.913   4.062  43.767  1.00  0.32           O  
HETATM   94  O   HOH T  93     -10.787  -1.906  20.763  1.00  0.32           O  
HETATM   95  O   HOH T  94      12.144 -15.734  10.254  1.00  0.32           O  
HETATM   96  O   HOH T  95       8.505   0.483   5.789  1.00  0.33           O  
HETATM   97  O   HOH T  96      29.132 -10.430  13.223  1.00  0.33           O  
HETATM   98  O   HOH T  97      19.639   3.265   4.787  1.00  0.33           O  
HETATM   99  O   HOH T  98       0.544  -4.782  49.168  1.00  0.33           O  
HETATM  100  O   HOH T  99      33.046  -3.327  36.499  1.00  0.33           O  
HETATM  101  O   HOH T 100      10.510  15.561  29.817  1.00  0.33           O  
HETATM  102  O   HOH T 101      -5.737   6.654  12.956  1.00  0.33           O  
HETATM  103  O   HOH T 102      -2.325 -16.740  30.558  1.00  0.33           O  
HETATM  104  O   HOH T 103     -12.855   4.381  21.436  1.00  0.33           O  
HETATM  105  O   HOH T 104      11.830 -17.926  23.578  1.00  0.33           O  
HETATM  106  O   HOH T 105     -12.022  11.075  20.074  1.00  0.34           O  
HETATM  107  O   HOH T 106      20.469   5.995  13.705  1.00  0.34           O  
HETATM  108  O   HOH T 107      12.774 -15.451  -4.246  1.00  0.34           O  
HETATM  109  O   HOH T 108      -0.456  -8.778  34.697  1.00  0.34           O  
HETATM  110  O   HOH T 109      24.197   4.979  10.003  1.00  0.34           O  
HETATM  111  O   HOH T 110       1.852  11.954  21.697  1.00  0.34           O  
HETATM  112  O   HOH T 111       6.531   1.004   7.731  1.00  0.34           O  
HETATM  113  O   HOH T 112       5.249 -19.566  26.548  1.00  0.34           O  
HETATM  114  O   HOH T 113      15.162  12.398  33.156  1.00  0.34           O  
HETATM  115  O   HOH T 114      27.106  -3.378  13.030  1.00  0.35           O  
HETATM  116  O   HOH T 115      -2.891  -3.435  40.302  1.00  0.35           O  
HETATM  117  O   HOH T 116      21.667  -8.551  -2.128  1.00  0.35           O  
HETATM  118  O   HOH T 117      32.238  -9.267  21.087  1.00  0.35           O  
HETATM  119  O   HOH T 118       6.679  16.539  21.580  1.00  0.35           O  
HETATM  120  O   HOH T 119       0.279   1.919   2.999  1.00  0.35           O  
HETATM  121  O   HOH T 120      28.856  -6.647  16.621  1.00  0.35           O  
HETATM  122  O   HOH T 121      -7.453  -4.876  24.369  1.00  0.35           O  
HETATM  123  O   HOH T 122      -3.478  -8.174  37.551  1.00  0.35           O  
HETATM  124  O   HOH T 123       5.410 -19.720  33.530  1.00  0.35           O  
HETATM  125  O   HOH T 124      -2.849 -14.657  38.501  1.00  0.36           O  
HETATM  126  O   HOH T 125      23.182  18.282  17.310  1.00  0.36           O  
HETATM  127  O   HOH T 126       4.250  -7.644  16.791  1.00  0.36           O  
HETATM  128  O   HOH T 127      20.409  -6.422  -1.053  1.00  0.36           O  
HETATM  129  O   HOH T 128      13.835 -16.035   8.067  1.00  0.36           O  
HETATM  130  O   HOH T 129       4.443 -20.500  35.971  1.00  0.36           O  
HETATM  131  O   HOH T 130      36.679  -9.709  22.831  1.00  0.36           O  
HETATM  132  O   HOH T 131       0.250   4.573  35.108  1.00  0.36           O  
HETATM  133  O   HOH T 132     -12.058   5.878  19.288  1.00  0.36           O  
HETATM  134  O   HOH T 133      -0.430 -22.376  17.125  1.00  0.36           O  
HETATM  135  O   HOH T 134      -5.435   5.488  25.167  1.00  0.36           O  
HETATM  136  O   HOH T 135      12.350  22.304  18.301  1.00  0.36           O  
HETATM  137  O   HOH T 136     -11.201   7.425  21.522  1.00  0.36           O  
HETATM  138  O   HOH T 137      24.484  -6.168  13.580  1.00  0.36           O  
HETATM  139  O   HOH T 138      11.249   1.903  42.343  1.00  0.36           O  
HETATM  140  O   HOH T 139       2.253  -9.675  19.535  1.00  0.36           O  
HETATM  141  O   HOH T 140      25.542  11.694  15.944  1.00  0.36           O  
HETATM  142  O   HOH T 141      -7.329   7.341  15.118  1.00  0.36           O  
HETATM  143  O   HOH T 142      -2.320  10.513  27.751  1.00  0.36           O  
HETATM  144  O   HOH T 143      21.979 -13.748  26.904  1.00  0.37           O  
HETATM  145  O   HOH T 144      13.060 -22.712  34.119  1.00  0.37           O  
HETATM  146  O   HOH T 145      27.127   3.437  12.697  1.00  0.37           O  
HETATM  147  O   HOH T 146      31.035  -5.625  22.772  1.00  0.37           O  
HETATM  148  O   HOH T 147      -7.619  -2.424  25.765  1.00  0.37           O  
HETATM  149  O   HOH T 148      12.107 -16.808   4.760  1.00  0.37           O  
HETATM  150  O   HOH T 149      21.078  14.508  25.596  1.00  0.37           O  
HETATM  151  O   HOH T 150      -3.050   7.933  27.360  1.00  0.38           O  
HETATM  152  O   HOH T 151      19.770 -21.506   4.064  1.00  0.38           O  
HETATM  153  O   HOH T 152      21.103 -13.833  45.234  1.00  0.38           O  
HETATM  154  O   HOH T 153       8.026 -18.851  33.136  1.00  0.38           O  
HETATM  155  O   HOH T 154      -1.801  -0.774   5.407  1.00  0.38           O  
HETATM  156  O   HOH T 155      16.296  20.234  15.988  1.00  0.38           O  
HETATM  157  O   HOH T 156      17.998  10.423   8.386  1.00  0.38           O  
HETATM  158  O   HOH T 157      31.337  15.875  10.842  1.00  0.38           O  
HETATM  159  O   HOH T 158      27.779  18.719  31.241  1.00  0.38           O  
HETATM  160  O   HOH T 159      16.668 -16.049   8.270  1.00  0.38           O  
HETATM  161  O   HOH T 160       8.054 -18.828  20.393  1.00  0.38           O  
HETATM  162  O   HOH T 161      12.786  16.806  25.110  1.00  0.38           O  
HETATM  163  O   HOH T 162     -11.850   0.002  22.694  1.00  0.38           O  
HETATM  164  O   HOH T 163      24.324  17.977  12.009  1.00  0.38           O  
HETATM  165  O   HOH T 164      25.374   2.505  10.502  1.00  0.38           O  
HETATM  166  O   HOH T 165       1.741 -10.598  16.997  1.00  0.39           O  
HETATM  167  O   HOH T 166      20.704 -22.122  33.886  1.00  0.39           O  
HETATM  168  O   HOH T 167       6.458  18.330  23.665  1.00  0.39           O  
HETATM  169  O   HOH T 168      -7.328  -2.207  11.371  1.00  0.39           O  
HETATM  170  O   HOH T 169       4.896 -12.506  11.779  1.00  0.39           O  
HETATM  171  O   HOH T 170       0.526   1.970  34.088  1.00  0.39           O  
HETATM  172  O   HOH T 171       0.723  17.021  28.252  1.00  0.39           O  
HETATM  173  O   HOH T 172      21.764   8.359  14.290  1.00  0.39           O  
HETATM  174  O   HOH T 173       9.612 -17.281  41.730  1.00  0.40           O  
HETATM  175  O   HOH T 174      -5.247   2.224  10.481  1.00  0.40           O  
HETATM  176  O   HOH T 175      14.351 -19.486  36.348  1.00  0.40           O  
HETATM  177  O   HOH T 176      18.893 -10.315  43.425  1.00  0.40           O  
HETATM  178  O   HOH T 177      -6.846  -0.610  15.667  1.00  0.40           O  
HETATM  179  O   HOH T 178      -0.759 -11.335  16.022  1.00  0.40           O  
HETATM  180  O   HOH T 179      17.842  13.105  33.283  1.00  0.40           O  
HETATM  181  O   HOH T 180      10.673  15.006  33.295  1.00  0.40           O  
HETATM  182  O   HOH T 181      -2.790 -15.236  34.272  1.00  0.40           O  
HETATM  183  O   HOH T 182      19.182 -17.817   5.495  1.00  0.40           O  
HETATM  184  O   HOH T 183      -1.197   8.511  29.267  1.00  0.40           O  
HETATM  185  O   HOH T 184      10.358 -19.278  21.645  1.00  0.40           O  
HETATM  186  O   HOH T 185       1.830 -14.289  13.584  1.00  0.41           O  
HETATM  187  O   HOH T 186      31.410  12.640  20.941  1.00  0.41           O  
HETATM  188  O   HOH T 187      24.395 -15.041  23.439  1.00  0.41           O  
HETATM  189  O   HOH T 188      20.055   4.291  15.763  1.00  0.41           O  
HETATM  190  O   HOH T 189      14.085  18.864  26.449  1.00  0.41           O  
HETATM  191  O   HOH T 190      -4.046  -7.991  40.236  1.00  0.41           O  
HETATM  192  O   HOH T 191      37.307  -7.296  21.669  1.00  0.41           O  
HETATM  193  O   HOH T 192      28.341   0.964  12.809  1.00  0.41           O  
HETATM  194  O   HOH T 193      -3.681  -5.687  38.827  1.00  0.41           O  
HETATM  195  O   HOH T 194       5.586  17.301  28.017  1.00  0.41           O  
HETATM  196  O   HOH T 195       8.655  14.764  26.459  1.00  0.41           O  
HETATM  197  O   HOH T 196      29.710  17.426  29.672  1.00  0.41           O  
HETATM  198  O   HOH T 197      17.431 -16.320  23.255  1.00  0.41           O  
HETATM  199  O   HOH T 198      17.506  22.714  18.882  1.00  0.41           O  
HETATM  200  O   HOH T 199      39.245 -14.033  22.101  1.00  0.42           O  
HETATM  201  O   HOH T 200      26.176  16.458  30.923  1.00  0.42           O  
HETATM  202  O   HOH T 201      39.697  16.069  30.731  1.00  0.42           O  
HETATM  203  O   HOH T 202      20.158 -11.263  45.665  1.00  0.42           O  
HETATM  204  O   HOH T 203      28.970 -14.441  31.975  1.00  0.42           O  
HETATM  205  O   HOH T 204      -3.700 -13.149  29.438  1.00  0.42           O  
HETATM  206  O   HOH T 205      42.164   9.227  22.601  1.00  0.42           O  
HETATM  207  O   HOH T 206      18.053   0.846   2.030  1.00  0.42           O  
HETATM  208  O   HOH T 207      -3.952 -14.763  31.767  1.00  0.42           O  
HETATM  209  O   HOH T 208      12.920  13.643  34.272  1.00  0.42           O  
HETATM  210  O   HOH T 209       3.608 -14.685  15.714  1.00  0.42           O  
HETATM  211  O   HOH T 210      11.960 -19.601  11.396  1.00  0.42           O  
HETATM  212  O   HOH T 211      40.669  -5.145  21.844  1.00  0.42           O  
HETATM  213  O   HOH T 212       1.106 -20.493  18.473  1.00  0.42           O  
HETATM  214  O   HOH T 213      -0.018 -18.050  19.047  1.00  0.42           O  
HETATM  215  O   HOH T 214       9.811  21.445  18.863  1.00  0.42           O  
HETATM  216  O   HOH T 215      18.506   0.285  44.797  1.00  0.43           O  
HETATM  217  O   HOH T 216      16.422 -21.473  30.634  1.00  0.43           O  
HETATM  218  O   HOH T 217      13.668  14.124  25.501  1.00  0.43           O  
HETATM  219  O   HOH T 218       1.349 -13.150  16.010  1.00  0.43           O  
HETATM  220  O   HOH T 219      10.486 -16.205   2.753  1.00  0.43           O  
HETATM  221  O   HOH T 220      30.116 -12.490  23.318  1.00  0.43           O  
HETATM  222  O   HOH T 221      -0.061 -10.240  49.031  1.00  0.43           O  
HETATM  223  O   HOH T 222      -1.585  14.937  21.614  1.00  0.43           O  
HETATM  224  O   HOH T 223      16.210   4.251   3.800  1.00  0.43           O  
HETATM  225  O   HOH T 224      -4.894 -12.270  21.253  1.00  0.43           O  
HETATM  226  O   HOH T 225      -2.169 -15.228  28.272  1.00  0.43           O  
HETATM  227  O   HOH T 226      12.150  15.390  27.540  1.00  0.43           O  
HETATM  228  O   HOH T 227      11.567   2.381  39.483  1.00  0.43           O  
HETATM  229  O   HOH T 228      26.473   7.577  14.316  1.00  0.43           O  
HETATM  230  O   HOH T 229      33.363   1.631  14.660  1.00  0.43           O  
HETATM  231  O   HOH T 230      31.574  -6.458  25.362  1.00  0.43           O  
HETATM  232  O   HOH T 231      13.203 -15.598  24.078  1.00  0.43           O  
HETATM  233  O   HOH T 232      39.921   9.227  28.299  1.00  0.44           O  
HETATM  234  O   HOH T 233      22.463  16.372  27.366  1.00  0.44           O  
HETATM  235  O   HOH T 234      25.432  15.583  33.398  1.00  0.44           O  
HETATM  236  O   HOH T 235      30.748   8.171  43.621  1.00  0.44           O  
HETATM  237  O   HOH T 236      34.242  13.045  38.386  1.00  0.44           O  
HETATM  238  O   HOH T 237      -4.055  -4.175   5.725  1.00  0.44           O  
HETATM  239  O   HOH T 238       2.214   2.442   1.192  1.00  0.44           O  
HETATM  240  O   HOH T 239      23.470  -8.579  12.696  1.00  0.44           O  
HETATM  241  O   HOH T 240      23.500  16.762  31.844  1.00  0.44           O  
HETATM  242  O   HOH T 241      40.889  -1.929  13.853  1.00  0.44           O  
HETATM  243  O   HOH T 242       6.379 -16.181   6.070  1.00  0.44           O  
HETATM  244  O   HOH T 243      -8.257   5.570  13.179  1.00  0.44           O  
HETATM  245  O   HOH T 244      13.951  21.489  16.382  1.00  0.44           O  
HETATM  246  O   HOH T 245       5.005 -21.535  24.538  1.00  0.44           O  
HETATM  247  O   HOH T 246      38.599  -0.871  14.922  1.00  0.44           O  
HETATM  248  O   HOH T 247      29.088  -1.496  13.587  1.00  0.44           O  
HETATM  249  O   HOH T 248      21.741  -4.362   0.426  1.00  0.44           O  
HETATM  250  O   HOH T 249      -0.077  10.148  22.503  1.00  0.44           O  
HETATM  251  O   HOH T 250      18.155 -16.336  20.525  1.00  0.44           O  
HETATM  252  O   HOH T 251      20.108 -16.074  22.533  1.00  0.45           O  
HETATM  253  O   HOH T 252       9.049   5.456   2.471  1.00  0.45           O  
HETATM  254  O   HOH T 253      41.290   0.941  33.940  1.00  0.45           O  
HETATM  255  O   HOH T 254       0.700  -7.610  49.421  1.00  0.45           O  
HETATM  256  O   HOH T 255       8.233  16.535  28.631  1.00  0.45           O  
HETATM  257  O   HOH T 256      -5.743 -13.804  23.423  1.00  0.45           O  
HETATM  258  O   HOH T 257      -1.949 -15.253  24.245  1.00  0.45           O  
HETATM  259  O   HOH T 258      -0.875   6.733  31.347  1.00  0.45           O  
HETATM  260  O   HOH T 259      14.740  16.240  27.079  1.00  0.45           O  
HETATM  261  O   HOH T 260      38.597  12.380  31.833  1.00  0.45           O  
HETATM  262  O   HOH T 261      29.761  10.425  41.977  1.00  0.45           O  
HETATM  263  O   HOH T 262      19.108  18.925  28.188  1.00  0.45           O  
HETATM  264  O   HOH T 263      10.891 -20.914  13.585  1.00  0.45           O  
HETATM  265  O   HOH T 264      -3.721  -7.313  42.904  1.00  0.45           O  
HETATM  266  O   HOH T 265      22.691  15.341  21.768  1.00  0.45           O  
HETATM  267  O   HOH T 266      11.851 -17.084  -0.972  1.00  0.46           O  
HETATM  268  O   HOH T 267       9.869  21.056  21.645  1.00  0.46           O  
HETATM  269  O   HOH T 268      11.255  10.551  41.440  1.00  0.46           O  
HETATM  270  O   HOH T 269      40.481  11.253  30.154  1.00  0.46           O  
HETATM  271  O   HOH T 270      18.565  18.523  23.755  1.00  0.46           O  
HETATM  272  O   HOH T 271      29.267 -13.116  14.088  1.00  0.46           O  
HETATM  273  O   HOH T 272      -0.120 -18.577  21.759  1.00  0.46           O  
HETATM  274  O   HOH T 273      40.141  11.930  27.455  1.00  0.46           O  
HETATM  275  O   HOH T 274       9.863   6.511   4.830  1.00  0.46           O  
HETATM  276  O   HOH T 275      34.670  -3.572  34.139  1.00  0.46           O  
HETATM  277  O   HOH T 276      -6.479   4.476  11.430  1.00  0.46           O  
HETATM  278  O   HOH T 277      34.776  -8.540  21.272  1.00  0.46           O  
HETATM  279  O   HOH T 278      26.752 -15.762  15.091  1.00  0.46           O  
HETATM  280  O   HOH T 279       6.294  -2.108  46.822  1.00  0.46           O  
HETATM  281  O   HOH T 280      -2.426  -9.347  13.496  1.00  0.46           O  
HETATM  282  O   HOH T 281      -7.581   7.154  24.345  1.00  0.46           O  
HETATM  283  O   HOH T 282      34.580  -9.436  31.118  1.00  0.46           O  
HETATM  284  O   HOH T 283      24.183   5.100  26.726  1.00  0.46           O  
HETATM  285  O   HOH T 284      -3.659   1.105  35.783  1.00  0.46           O  
HETATM  286  O   HOH T 285      -3.399   0.221  39.667  1.00  0.46           O  
HETATM  287  O   HOH T 286      20.515   1.103   3.276  1.00  0.47           O  
HETATM  288  O   HOH T 287      24.256  -8.890   9.538  1.00  0.47           O  
HETATM  289  O   HOH T 288      -3.129  -8.057  34.841  1.00  0.47           O  
HETATM  290  O   HOH T 289      12.052 -20.854  35.819  1.00  0.47           O  
HETATM  291  O   HOH T 290      17.876 -18.551   7.803  1.00  0.47           O  
HETATM  292  O   HOH T 291       1.536 -19.713  23.765  1.00  0.47           O  
HETATM  293  O   HOH T 292      -0.701  -3.953  -2.761  1.00  0.47           O  
HETATM  294  O   HOH T 293      -2.699  10.906  11.472  1.00  0.47           O  
HETATM  295  O   HOH T 294      -5.470   9.092  13.931  1.00  0.47           O  
HETATM  296  O   HOH T 295      21.882  16.805  12.540  1.00  0.47           O  
HETATM  297  O   HOH T 296      29.838  13.181  41.829  1.00  0.47           O  
HETATM  298  O   HOH T 297      40.047 -14.337  19.467  1.00  0.47           O  
HETATM  299  O   HOH T 298      33.973  19.585  27.754  1.00  0.47           O  
HETATM  300  O   HOH T 299      20.568 -15.996  26.797  1.00  0.47           O  
HETATM  301  O   HOH T 300      10.222  21.191  24.440  1.00  0.47           O  
HETATM  302  O   HOH T 301      32.032  19.136  29.686  1.00  0.47           O  
HETATM  303  O   HOH T 302      28.879 -14.555  16.429  1.00  0.47           O  
HETATM  304  O   HOH T 303       6.630 -14.263  20.114  1.00  0.48           O  
HETATM  305  O   HOH T 304      12.091  -0.996  45.542  1.00  0.48           O  
HETATM  306  O   HOH T 305      32.894  -8.840  24.897  1.00  0.48           O  
HETATM  307  O   HOH T 306      29.350  20.238  29.488  1.00  0.48           O  
HETATM  308  O   HOH T 307      26.899  -5.514  14.958  1.00  0.48           O  
HETATM  309  O   HOH T 308       3.301  16.383  29.117  1.00  0.48           O  
HETATM  310  O   HOH T 309     -12.455  -1.957  24.493  1.00  0.48           O  
HETATM  311  O   HOH T 310      -1.055  11.415   6.335  1.00  0.48           O  
HETATM  312  O   HOH T 311      20.016  -6.125   1.797  1.00  0.48           O  
HETATM  313  O   HOH T 312      29.422  -5.828  36.986  1.00  0.48           O  
HETATM  314  O   HOH T 313      25.314   2.431  43.784  1.00  0.48           O  
HETATM  315  O   HOH T 314      -6.312 -15.697  32.932  1.00  0.48           O  
HETATM  316  O   HOH T 315      10.344  11.669  38.750  1.00  0.48           O  
HETATM  317  O   HOH T 316      26.936  -1.076  11.720  1.00  0.48           O  
HETATM  318  O   HOH T 317       3.058   1.811  -1.280  1.00  0.48           O  
HETATM  319  O   HOH T 318      15.547 -22.800  32.898  1.00  0.48           O  
HETATM  320  O   HOH T 319      23.228  18.212  14.533  1.00  0.48           O  
HETATM  321  O   HOH T 320     -10.347  -3.252  25.788  1.00  0.48           O  
HETATM  322  O   HOH T 321       4.743 -21.740  20.306  1.00  0.49           O  
HETATM  323  O   HOH T 322      21.889 -15.311  24.555  1.00  0.49           O  
HETATM  324  O   HOH T 323      35.569  -2.309  36.286  1.00  0.49           O  
HETATM  325  O   HOH T 324       2.859   7.343  34.036  1.00  0.49           O  
HETATM  326  O   HOH T 325      -5.611   4.412   8.822  1.00  0.49           O  
HETATM  327  O   HOH T 326      19.668  16.316  27.222  1.00  0.49           O  
HETATM  328  O   HOH T 327      -4.986  -9.058  12.499  1.00  0.49           O  
HETATM  329  O   HOH T 328      -0.015  -0.768   2.019  1.00  0.49           O  
HETATM  330  O   HOH T 329      39.586   8.685  23.494  1.00  0.49           O  
HETATM  331  O   HOH T 330      -0.204 -12.317  50.609  1.00  0.50           O  
HETATM  332  O   HOH T 331      -3.986  -5.791  36.133  1.00  0.50           O  
HETATM  333  O   HOH T 332       7.341   7.219   4.004  1.00  0.50           O  
HETATM  334  O   HOH T 333      18.636  21.559  16.569  1.00  0.50           O  
HETATM  335  O   HOH T 334      -2.119  16.407  16.657  1.00  0.50           O  
HETATM  336  O   HOH T 335      32.287 -15.073  18.510  1.00  0.50           O  
HETATM  337  O   HOH T 336     -10.684  -3.571  22.984  1.00  0.50           O  
HETATM  338  O   HOH T 337      -0.635   4.207  32.547  1.00  0.50           O  
HETATM  339  O   HOH T 338      31.704  12.919  39.715  1.00  0.50           O  
HETATM  340  O   HOH T 339      18.205 -22.033  32.606  1.00  0.50           O  
HETATM  341  O   HOH T 340       9.199 -18.587  44.148  1.00  0.50           O  
HETATM  342  O   HOH T 341      13.598  22.970  20.654  1.00  0.50           O  
HETATM  343  O   HOH T 342      23.185  13.935  37.355  1.00  0.50           O  
HETATM  344  O   HOH T 343      -3.509 -13.828  19.483  1.00  0.50           O  
HETATM  345  O   HOH T 344      29.404 -15.942  14.203  1.00  0.50           O  
HETATM  346  O   HOH T 345       2.985   3.909  34.215  1.00  0.50           O  
HETATM  347  O   HOH T 346      -2.441   3.547  34.788  1.00  0.50           O  
HETATM  348  O   HOH T 347       3.990 -17.760   6.449  1.00  0.50           O  
HETATM  349  O   HOH T 348      -5.177 -13.959  37.349  1.00  0.50           O  
HETATM  350  O   HOH T 349      -4.373 -16.246  23.455  1.00  0.50           O  
HETATM  351  O   HOH T 350      29.134  17.006  11.972  1.00  0.51           O  
HETATM  352  O   HOH T 351      -0.748 -17.654  28.389  1.00  0.51           O  
HETATM  353  O   HOH T 352      12.833 -17.761   2.402  1.00  0.51           O  
HETATM  354  O   HOH T 353      12.030  18.923  11.459  1.00  0.51           O  
HETATM  355  O   HOH T 354      32.389  -4.979  33.400  1.00  0.51           O  
HETATM  356  O   HOH T 355      -9.262  10.787  19.985  1.00  0.51           O  
HETATM  357  O   HOH T 356      14.877  23.397  18.215  1.00  0.51           O  
HETATM  358  O   HOH T 357      23.744 -18.759  21.696  1.00  0.51           O  
HETATM  359  O   HOH T 358       6.485 -18.192  38.075  1.00  0.51           O  
HETATM  360  O   HOH T 359      17.912 -20.080  -1.675  1.00  0.51           O  
HETATM  361  O   HOH T 360       3.087 -21.743  22.491  1.00  0.51           O  
HETATM  362  O   HOH T 361      -2.227 -16.750  21.893  1.00  0.52           O  
HETATM  363  O   HOH T 362      15.346 -17.971   6.799  1.00  0.52           O  
HETATM  364  O   HOH T 363       7.099 -19.605  35.725  1.00  0.52           O  
HETATM  365  O   HOH T 364      24.223  -6.634  43.458  1.00  0.52           O  
HETATM  366  O   HOH T 365       6.917 -16.741  19.068  1.00  0.52           O  
HETATM  367  O   HOH T 366     -10.960  -4.842  20.439  1.00  0.52           O  
HETATM  368  O   HOH T 367       9.647  15.334   6.435  1.00  0.52           O  
HETATM  369  O   HOH T 368      20.928  17.060  23.145  1.00  0.52           O  
HETATM  370  O   HOH T 369      11.959  24.629  22.220  1.00  0.52           O  
HETATM  371  O   HOH T 370      -2.343  11.183  23.736  1.00  0.52           O  
HETATM  372  O   HOH T 371       8.968 -19.356  37.710  1.00  0.52           O  
HETATM  373  O   HOH T 372      23.574  -0.900   8.981  1.00  0.52           O  
HETATM  374  O   HOH T 373      35.325 -13.993  22.868  1.00  0.52           O  
HETATM  375  O   HOH T 374      23.498  -3.671   8.168  1.00  0.52           O  
HETATM  376  O   HOH T 375      14.668   4.858   0.113  1.00  0.52           O  
HETATM  377  O   HOH T 376       5.835   4.321  37.937  1.00  0.53           O  
HETATM  378  O   HOH T 377      16.392  14.693  38.881  1.00  0.53           O  
HETATM  379  O   HOH T 378      34.927  -5.774  32.618  1.00  0.53           O  
HETATM  380  O   HOH T 379       1.822   9.754  34.789  1.00  0.53           O  
HETATM  381  O   HOH T 380      43.158   2.704  28.270  1.00  0.53           O  
HETATM  382  O   HOH T 381       4.000  17.268   5.127  1.00  0.53           O  
HETATM  383  O   HOH T 382      12.694 -18.447   6.957  1.00  0.53           O  
HETATM  384  O   HOH T 383      -0.191 -15.890  26.348  1.00  0.53           O  
HETATM  385  O   HOH T 384      19.473 -22.539  30.109  1.00  0.53           O  
HETATM  386  O   HOH T 385      28.998   9.948  44.610  1.00  0.53           O  
HETATM  387  O   HOH T 386      21.881 -10.597   7.424  1.00  0.53           O  
HETATM  388  O   HOH T 387      42.139  15.999  33.719  1.00  0.53           O  
HETATM  389  O   HOH T 388      23.568 -12.989  45.918  1.00  0.54           O  
HETATM  390  O   HOH T 389       7.453  10.954  39.081  1.00  0.54           O  
HETATM  391  O   HOH T 390      43.167  18.565  34.214  1.00  0.54           O  
HETATM  392  O   HOH T 391      20.133   2.296  45.659  1.00  0.54           O  
HETATM  393  O   HOH T 392      16.013   5.297   6.240  1.00  0.54           O  
HETATM  394  O   HOH T 393      21.012 -15.389  42.966  1.00  0.54           O  
HETATM  395  O   HOH T 394      -2.728 -13.006  17.050  1.00  0.54           O  
HETATM  396  O   HOH T 395      10.413 -21.972  33.952  1.00  0.55           O  
HETATM  397  O   HOH T 396       5.620  13.317   6.207  1.00  0.55           O  
HETATM  398  O   HOH T 397      -5.048  -9.708  42.098  1.00  0.55           O  
HETATM  399  O   HOH T 398      39.015   7.443  31.598  1.00  0.55           O  
HETATM  400  O   HOH T 399      25.850   5.786  12.181  1.00  0.55           O  
HETATM  401  O   HOH T 400      40.499   5.673  38.197  1.00  0.55           O  
HETATM  402  O   HOH T 401       7.351  17.073  25.977  1.00  0.55           O  
HETATM  403  O   HOH T 402      22.825   0.741   4.747  1.00  0.56           O  
HETATM  404  O   HOH T 403       9.816 -15.429   0.099  1.00  0.56           O  
HETATM  405  O   HOH T 404      39.084  13.585  29.458  1.00  0.56           O  
HETATM  406  O   HOH T 405      27.470   8.986  12.167  1.00  0.56           O  
HETATM  407  O   HOH T 406     -10.482  12.217  15.467  1.00  0.56           O  
HETATM  408  O   HOH T 407      -1.646   1.031   7.518  1.00  0.56           O  
HETATM  409  O   HOH T 408      27.405  16.076  34.876  1.00  0.56           O  
HETATM  410  O   HOH T 409      -1.997  -3.196   4.087  1.00  0.56           O  
HETATM  411  O   HOH T 410      12.909   1.585  44.587  1.00  0.56           O  
HETATM  412  O   HOH T 411      -8.074  11.407  12.803  1.00  0.56           O  
HETATM  413  O   HOH T 412      19.843 -13.645   4.359  1.00  0.56           O  
HETATM  414  O   HOH T 413      34.826   4.033  13.716  1.00  0.56           O  
HETATM  415  O   HOH T 414      38.035   8.839  43.748  1.00  0.56           O  
HETATM  416  O   HOH T 415      28.642  -8.727  37.452  1.00  0.56           O  
HETATM  417  O   HOH T 416      -6.541  -1.367  33.591  1.00  0.56           O  
HETATM  418  O   HOH T 417      17.791 -12.314   9.813  1.00  0.57           O  
HETATM  419  O   HOH T 418       7.284  18.641  18.616  1.00  0.57           O  
HETATM  420  O   HOH T 419      36.457   7.234  17.067  1.00  0.57           O  
HETATM  421  O   HOH T 420      35.026  -0.155  39.764  1.00  0.57           O  
HETATM  422  O   HOH T 421       1.422  15.440  33.231  1.00  0.57           O  
HETATM  423  O   HOH T 422      -6.495  -6.647  26.240  1.00  0.57           O  
HETATM  424  O   HOH T 423      -0.929  -3.178  -0.017  1.00  0.57           O  
HETATM  425  O   HOH T 424      37.245 -16.170  15.404  1.00  0.57           O  
HETATM  426  O   HOH T 425      12.916   5.670   2.397  1.00  0.57           O  
HETATM  427  O   HOH T 426      39.855  -5.030  28.084  1.00  0.58           O  
HETATM  428  O   HOH T 427      16.959 -20.295  36.418  1.00  0.58           O  
HETATM  429  O   HOH T 428      12.128 -19.496   0.616  1.00  0.58           O  
HETATM  430  O   HOH T 429      20.983 -16.904  30.533  1.00  0.60           O  
HETATM  431  O   HOH T 430      17.052 -14.015  21.631  1.00  0.60           O  
TER     432      HOH T 430 
