# Supplementary material for: Accurate Prediction of Hydration Sites of Proteins Using Energy Model With Atom Embedding
Source: Front Mol Biosci. 2021 Sep 20;8:756075. doi: 10.3389/fmolb.2021.756075 (PMC8488165; doi:10.3389/fmolb.2021.756075)
Supplement: Supplementary file 1 [file DataSheet1.ZIP › Data Sheet 1/Our_result_pdb/our_dataset_output/2QZZ_watersite.pdb]

HEADER                                                        XXXX


JRNL        PMID   -1
HETATM    1  O   HOH T   0      -0.952 -30.945  24.277  1.00  0.16           O  
HETATM    2  O   HOH T   1       6.897 -26.745  16.237  1.00  0.16           O  
HETATM    3  O   HOH T   2      -2.723  -2.472  20.436  1.00  0.16           O  
HETATM    4  O   HOH T   3       8.555  -6.674  20.382  1.00  0.16           O  
HETATM    5  O   HOH T   4       1.839 -42.069  30.855  1.00  0.17           O  
HETATM    6  O   HOH T   5      22.616   4.574  22.341  1.00  0.18           O  
HETATM    7  O   HOH T   6      -2.459  -0.262  22.113  1.00  0.18           O  
HETATM    8  O   HOH T   7      -1.980 -33.194  22.953  1.00  0.18           O  
HETATM    9  O   HOH T   8      15.056 -37.725   4.634  1.00  0.19           O  
HETATM   10  O   HOH T   9      26.476  -1.204  24.521  1.00  0.19           O  
HETATM   11  O   HOH T  10      16.478 -32.205   0.570  1.00  0.19           O  
HETATM   12  O   HOH T  11      -7.038 -41.799 -10.872  1.00  0.19           O  
HETATM   13  O   HOH T  12      12.576 -34.250  24.028  1.00  0.20           O  
HETATM   14  O   HOH T  13      15.281 -17.524  33.194  1.00  0.20           O  
HETATM   15  O   HOH T  14       1.712 -31.549  -1.906  1.00  0.20           O  
HETATM   16  O   HOH T  15      -6.311 -32.133   5.940  1.00  0.20           O  
HETATM   17  O   HOH T  16       7.148 -20.257   7.365  1.00  0.20           O  
HETATM   18  O   HOH T  17      10.283   7.501  18.279  1.00  0.20           O  
HETATM   19  O   HOH T  18      14.949 -13.030  26.501  1.00  0.21           O  
HETATM   20  O   HOH T  19       5.484 -25.360  12.504  1.00  0.21           O  
HETATM   21  O   HOH T  20      22.603 -30.766   9.193  1.00  0.21           O  
HETATM   22  O   HOH T  21       2.602 -52.061   1.431  1.00  0.21           O  
HETATM   23  O   HOH T  22      10.149  -8.173  23.932  1.00  0.21           O  
HETATM   24  O   HOH T  23       2.030 -39.680  32.165  1.00  0.21           O  
HETATM   25  O   HOH T  24      -5.457   8.675  13.749  1.00  0.21           O  
HETATM   26  O   HOH T  25      25.118 -18.769  24.983  1.00  0.21           O  
HETATM   27  O   HOH T  26      -6.331 -35.247  -3.286  1.00  0.21           O  
HETATM   28  O   HOH T  27      17.933  -1.911  36.777  1.00  0.22           O  
HETATM   29  O   HOH T  28      17.764  16.346  26.438  1.00  0.22           O  
HETATM   30  O   HOH T  29       8.926 -32.196  -9.414  1.00  0.22           O  
HETATM   31  O   HOH T  30       9.078 -13.071  30.647  1.00  0.22           O  
HETATM   32  O   HOH T  31       4.240 -30.138  21.589  1.00  0.22           O  
HETATM   33  O   HOH T  32       2.637 -44.054  36.361  1.00  0.22           O  
HETATM   34  O   HOH T  33      15.109 -14.746   1.180  1.00  0.23           O  
HETATM   35  O   HOH T  34      15.491 -17.538   1.374  1.00  0.23           O  
HETATM   36  O   HOH T  35      -6.293   6.272  12.676  1.00  0.23           O  
HETATM   37  O   HOH T  36       0.185 -37.124  -6.045  1.00  0.23           O  
HETATM   38  O   HOH T  37     -18.078 -31.940  18.619  1.00  0.23           O  
HETATM   39  O   HOH T  38      13.314   1.774  43.212  1.00  0.23           O  
HETATM   40  O   HOH T  39       3.109 -10.693 -14.045  1.00  0.24           O  
HETATM   41  O   HOH T  40       0.223  12.088  12.343  1.00  0.24           O  
HETATM   42  O   HOH T  41      19.930   3.602  40.764  1.00  0.24           O  
HETATM   43  O   HOH T  42      16.178  18.586  33.773  1.00  0.24           O  
HETATM   44  O   HOH T  43      -6.542  13.336  10.101  1.00  0.25           O  
HETATM   45  O   HOH T  44      -1.130  16.897  42.065  1.00  0.25           O  
HETATM   46  O   HOH T  45      32.419  -7.665  21.544  1.00  0.25           O  
HETATM   47  O   HOH T  46       9.631 -50.436  24.486  1.00  0.25           O  
HETATM   48  O   HOH T  47       9.039 -28.334  16.669  1.00  0.25           O  
HETATM   49  O   HOH T  48      22.743 -25.753  -1.557  1.00  0.25           O  
HETATM   50  O   HOH T  49      -2.355  17.324  22.136  1.00  0.25           O  
HETATM   51  O   HOH T  50       9.635 -41.216  16.195  1.00  0.25           O  
HETATM   52  O   HOH T  51       3.738 -46.774  34.235  1.00  0.25           O  
HETATM   53  O   HOH T  52      23.551   5.013  28.338  1.00  0.25           O  
HETATM   54  O   HOH T  53      11.694 -38.393  -0.047  1.00  0.25           O  
HETATM   55  O   HOH T  54      14.408 -46.463  22.940  1.00  0.25           O  
HETATM   56  O   HOH T  55      25.743 -14.510  -3.865  1.00  0.25           O  
HETATM   57  O   HOH T  56       4.794 -26.012  20.238  1.00  0.25           O  
HETATM   58  O   HOH T  57      29.250 -12.761  41.440  1.00  0.25           O  
HETATM   59  O   HOH T  58      12.524 -38.241   3.606  1.00  0.25           O  
HETATM   60  O   HOH T  59       9.737  -5.073  18.545  1.00  0.25           O  
HETATM   61  O   HOH T  60       5.734 -41.221  12.288  1.00  0.26           O  
HETATM   62  O   HOH T  61       3.083  20.041  28.773  1.00  0.26           O  
HETATM   63  O   HOH T  62      33.102 -10.739  41.943  1.00  0.26           O  
HETATM   64  O   HOH T  63       8.914 -49.982   5.621  1.00  0.26           O  
HETATM   65  O   HOH T  64      29.230  11.400  30.507  1.00  0.26           O  
HETATM   66  O   HOH T  65      -4.507 -25.590 -12.706  1.00  0.26           O  
HETATM   67  O   HOH T  66      11.303 -37.095  11.113  1.00  0.26           O  
HETATM   68  O   HOH T  67       5.766  -9.134  -8.926  1.00  0.26           O  
HETATM   69  O   HOH T  68      26.191   0.273  16.123  1.00  0.26           O  
HETATM   70  O   HOH T  69       8.174 -33.857  17.484  1.00  0.26           O  
HETATM   71  O   HOH T  70      -1.311 -17.740 -10.129  1.00  0.26           O  
HETATM   72  O   HOH T  71      16.967  12.779  20.690  1.00  0.26           O  
HETATM   73  O   HOH T  72       0.656 -31.765  28.645  1.00  0.26           O  
HETATM   74  O   HOH T  73      -0.896 -51.491  20.893  1.00  0.26           O  
HETATM   75  O   HOH T  74       0.908 -34.730  -7.210  1.00  0.26           O  
HETATM   76  O   HOH T  75      -8.270 -43.620   7.517  1.00  0.26           O  
HETATM   77  O   HOH T  76       8.135  19.536  20.592  1.00  0.26           O  
HETATM   78  O   HOH T  77       8.799 -13.301  -2.953  1.00  0.26           O  
HETATM   79  O   HOH T  78     -17.981 -18.894  20.960  1.00  0.26           O  
HETATM   80  O   HOH T  79       3.938  -6.621  16.412  1.00  0.27           O  
HETATM   81  O   HOH T  80      27.699 -28.650  13.682  1.00  0.27           O  
HETATM   82  O   HOH T  81       9.981   7.989  24.830  1.00  0.27           O  
HETATM   83  O   HOH T  82      -2.099 -10.569  -5.832  1.00  0.27           O  
HETATM   84  O   HOH T  83      14.055 -44.903  -5.493  1.00  0.27           O  
HETATM   85  O   HOH T  84     -12.398 -23.544  23.014  1.00  0.27           O  
HETATM   86  O   HOH T  85     -11.698 -46.471  29.737  1.00  0.27           O  
HETATM   87  O   HOH T  86       0.658 -16.250 -11.447  1.00  0.27           O  
HETATM   88  O   HOH T  87     -14.484 -19.390  18.745  1.00  0.27           O  
HETATM   89  O   HOH T  88      24.008  -2.890  45.497  1.00  0.27           O  
HETATM   90  O   HOH T  89      12.646 -46.387  10.059  1.00  0.27           O  
HETATM   91  O   HOH T  90     -10.689  -8.077  36.611  1.00  0.27           O  
HETATM   92  O   HOH T  91      -7.325 -19.385  19.378  1.00  0.27           O  
HETATM   93  O   HOH T  92      -5.148  19.512  11.535  1.00  0.27           O  
HETATM   94  O   HOH T  93      23.691 -20.133  32.453  1.00  0.27           O  
HETATM   95  O   HOH T  94      12.756  19.746  31.197  1.00  0.27           O  
HETATM   96  O   HOH T  95      -1.793 -23.423  23.028  1.00  0.27           O  
HETATM   97  O   HOH T  96      23.375 -21.584  30.021  1.00  0.27           O  
HETATM   98  O   HOH T  97      11.014 -18.687  38.243  1.00  0.28           O  
HETATM   99  O   HOH T  98       1.274 -12.663  -6.557  1.00  0.28           O  
HETATM  100  O   HOH T  99      25.051 -15.987  24.486  1.00  0.28           O  
HETATM  101  O   HOH T 100      10.349 -11.848  -1.046  1.00  0.28           O  
HETATM  102  O   HOH T 101      31.523 -19.760  43.241  1.00  0.28           O  
HETATM  103  O   HOH T 102      31.981  -2.812  32.419  1.00  0.28           O  
HETATM  104  O   HOH T 103      12.389 -11.544   3.975  1.00  0.28           O  
HETATM  105  O   HOH T 104      -5.173  16.918  28.996  1.00  0.28           O  
HETATM  106  O   HOH T 105      26.152  12.068  23.570  1.00  0.28           O  
HETATM  107  O   HOH T 106      -9.976   3.702   9.332  1.00  0.28           O  
HETATM  108  O   HOH T 107      21.691   4.685  24.992  1.00  0.28           O  
HETATM  109  O   HOH T 108      36.716 -20.776  27.284  1.00  0.28           O  
HETATM  110  O   HOH T 109       7.284  -8.452  30.885  1.00  0.28           O  
HETATM  111  O   HOH T 110       6.692  -1.517  36.996  1.00  0.28           O  
HETATM  112  O   HOH T 111       3.096 -21.257   6.415  1.00  0.28           O  
HETATM  113  O   HOH T 112     -13.335   5.663  15.243  1.00  0.28           O  
HETATM  114  O   HOH T 113      -4.737  -1.701  16.042  1.00  0.29           O  
HETATM  115  O   HOH T 114      -8.974 -50.362  20.055  1.00  0.29           O  
HETATM  116  O   HOH T 115      -2.320  -9.948  21.839  1.00  0.29           O  
HETATM  117  O   HOH T 116       2.931  -3.337  18.569  1.00  0.29           O  
HETATM  118  O   HOH T 117      24.436 -24.375  32.460  1.00  0.29           O  
HETATM  119  O   HOH T 118     -16.705  -5.482  22.256  1.00  0.29           O  
HETATM  120  O   HOH T 119      15.554   4.769  23.315  1.00  0.29           O  
HETATM  121  O   HOH T 120      -1.309  16.606  37.032  1.00  0.29           O  
HETATM  122  O   HOH T 121      16.357   7.761  41.211  1.00  0.29           O  
HETATM  123  O   HOH T 122      34.377  -7.007  19.589  1.00  0.29           O  
HETATM  124  O   HOH T 123      -7.687   3.537  35.410  1.00  0.30           O  
HETATM  125  O   HOH T 124      15.273  -4.914  -1.508  1.00  0.30           O  
HETATM  126  O   HOH T 125      11.388   6.419  51.344  1.00  0.30           O  
HETATM  127  O   HOH T 126     -11.385 -38.095  -6.520  1.00  0.30           O  
HETATM  128  O   HOH T 127      -6.214  21.764  12.986  1.00  0.30           O  
HETATM  129  O   HOH T 128      12.763 -12.176  29.363  1.00  0.30           O  
HETATM  130  O   HOH T 129       5.166  18.051  33.971  1.00  0.30           O  
HETATM  131  O   HOH T 130      21.150   1.121  40.768  1.00  0.30           O  
HETATM  132  O   HOH T 131      23.943 -17.177  44.103  1.00  0.30           O  
HETATM  133  O   HOH T 132       9.660 -38.159   9.192  1.00  0.30           O  
HETATM  134  O   HOH T 133      10.351  18.293  39.200  1.00  0.30           O  
HETATM  135  O   HOH T 134      -4.819 -39.008  35.512  1.00  0.30           O  
HETATM  136  O   HOH T 135      -9.023   3.700   6.709  1.00  0.30           O  
HETATM  137  O   HOH T 136     -11.907 -49.962  11.614  1.00  0.30           O  
HETATM  138  O   HOH T 137      -1.635 -24.971   9.825  1.00  0.30           O  
HETATM  139  O   HOH T 138      -5.387 -51.764   1.803  1.00  0.30           O  
HETATM  140  O   HOH T 139      28.278 -13.414  26.102  1.00  0.30           O  
HETATM  141  O   HOH T 140       9.371 -39.154  17.859  1.00  0.31           O  
HETATM  142  O   HOH T 141      17.550  -9.611  44.254  1.00  0.31           O  
HETATM  143  O   HOH T 142      21.234 -22.012  25.054  1.00  0.31           O  
HETATM  144  O   HOH T 143       1.287  15.676  33.302  1.00  0.31           O  
HETATM  145  O   HOH T 144       8.973  13.023  10.354  1.00  0.31           O  
HETATM  146  O   HOH T 145       6.756 -26.781  22.127  1.00  0.31           O  
HETATM  147  O   HOH T 146      -0.151  18.808  22.921  1.00  0.31           O  
HETATM  148  O   HOH T 147      19.597 -13.268  -9.353  1.00  0.31           O  
HETATM  149  O   HOH T 148     -12.688   6.682  12.761  1.00  0.31           O  
HETATM  150  O   HOH T 149      22.682 -15.606  22.868  1.00  0.31           O  
HETATM  151  O   HOH T 150      -7.109  12.905  37.642  1.00  0.31           O  
HETATM  152  O   HOH T 151      16.560 -19.992  -1.867  1.00  0.31           O  
HETATM  153  O   HOH T 152      17.682 -44.617  19.435  1.00  0.31           O  
HETATM  154  O   HOH T 153      17.144 -15.553  18.605  1.00  0.31           O  
HETATM  155  O   HOH T 154      16.337  -6.074   7.813  1.00  0.31           O  
HETATM  156  O   HOH T 155       8.303 -13.145  23.845  1.00  0.31           O  
HETATM  157  O   HOH T 156      27.370   9.680  19.976  1.00  0.32           O  
HETATM  158  O   HOH T 157      -7.307 -19.187 -12.866  1.00  0.32           O  
HETATM  159  O   HOH T 158       7.081 -51.742  -0.488  1.00  0.32           O  
HETATM  160  O   HOH T 159      21.684 -15.647  44.659  1.00  0.32           O  
HETATM  161  O   HOH T 160     -14.898 -44.124  21.944  1.00  0.32           O  
HETATM  162  O   HOH T 161      12.088 -11.201  37.457  1.00  0.32           O  
HETATM  163  O   HOH T 162      20.263  16.241  25.129  1.00  0.32           O  
HETATM  164  O   HOH T 163      15.244   0.735  18.568  1.00  0.32           O  
HETATM  165  O   HOH T 164      30.569 -28.952  35.122  1.00  0.32           O  
HETATM  166  O   HOH T 165     -16.518 -46.995  15.153  1.00  0.32           O  
HETATM  167  O   HOH T 166      25.524 -26.452  -1.560  1.00  0.32           O  
HETATM  168  O   HOH T 167     -13.978 -48.012  15.816  1.00  0.32           O  
HETATM  169  O   HOH T 168      -0.892 -24.945   4.290  1.00  0.32           O  
HETATM  170  O   HOH T 169      25.073   7.591  34.540  1.00  0.32           O  
HETATM  171  O   HOH T 170     -12.851  -8.314  22.313  1.00  0.32           O  
HETATM  172  O   HOH T 171       8.570   0.681  18.656  1.00  0.32           O  
HETATM  173  O   HOH T 172      15.285   3.523  20.914  1.00  0.32           O  
HETATM  174  O   HOH T 173      -6.549 -56.322  16.128  1.00  0.33           O  
HETATM  175  O   HOH T 174       7.904  -8.620  22.198  1.00  0.33           O  
HETATM  176  O   HOH T 175      -5.041 -49.016  11.856  1.00  0.33           O  
HETATM  177  O   HOH T 176      -0.000 -20.398   8.633  1.00  0.33           O  
HETATM  178  O   HOH T 177      -1.442  20.469  24.698  1.00  0.33           O  
HETATM  179  O   HOH T 178      12.328  20.571  22.378  1.00  0.33           O  
HETATM  180  O   HOH T 179     -14.115  12.997  24.191  1.00  0.33           O  
HETATM  181  O   HOH T 180       4.243 -20.285  14.039  1.00  0.33           O  
HETATM  182  O   HOH T 181      20.569   8.684  47.675  1.00  0.33           O  
HETATM  183  O   HOH T 182     -10.585  -1.199  36.579  1.00  0.33           O  
HETATM  184  O   HOH T 183       5.299  -3.096  25.181  1.00  0.33           O  
HETATM  185  O   HOH T 184      -4.362 -42.128 -11.260  1.00  0.33           O  
HETATM  186  O   HOH T 185       9.027 -50.497   9.324  1.00  0.33           O  
HETATM  187  O   HOH T 186      -4.223 -14.772   2.198  1.00  0.33           O  
HETATM  188  O   HOH T 187      27.922   3.706  19.050  1.00  0.33           O  
HETATM  189  O   HOH T 188      14.995  20.858  34.814  1.00  0.34           O  
HETATM  190  O   HOH T 189     -15.121 -36.901  17.386  1.00  0.34           O  
HETATM  191  O   HOH T 190      31.848   3.077  28.355  1.00  0.34           O  
HETATM  192  O   HOH T 191      -9.962 -50.278  13.759  1.00  0.34           O  
HETATM  193  O   HOH T 192      20.467 -32.967  -5.019  1.00  0.34           O  
HETATM  194  O   HOH T 193     -11.982  -1.140  34.258  1.00  0.34           O  
HETATM  195  O   HOH T 194     -11.333  -8.714  32.331  1.00  0.34           O  
HETATM  196  O   HOH T 195       6.388  13.499   9.414  1.00  0.34           O  
HETATM  197  O   HOH T 196      20.162 -42.220  10.556  1.00  0.34           O  
HETATM  198  O   HOH T 197       8.825 -36.527  17.918  1.00  0.34           O  
HETATM  199  O   HOH T 198      19.638  13.326  21.588  1.00  0.34           O  
HETATM  200  O   HOH T 199     -12.757 -49.961  14.227  1.00  0.34           O  
HETATM  201  O   HOH T 200       4.637  18.363  30.193  1.00  0.34           O  
HETATM  202  O   HOH T 201      16.838 -46.056  21.698  1.00  0.34           O  
HETATM  203  O   HOH T 202     -17.930 -24.988  18.509  1.00  0.34           O  
HETATM  204  O   HOH T 203      23.397  16.155  31.386  1.00  0.34           O  
HETATM  205  O   HOH T 204      10.711 -34.428  11.632  1.00  0.34           O  
HETATM  206  O   HOH T 205      15.371 -14.812  24.395  1.00  0.34           O  
HETATM  207  O   HOH T 206      30.874   0.731  24.914  1.00  0.34           O  
HETATM  208  O   HOH T 207       4.806 -39.626  -8.290  1.00  0.34           O  
HETATM  209  O   HOH T 208      15.195  -3.853   8.881  1.00  0.35           O  
HETATM  210  O   HOH T 209       3.597 -56.141   9.937  1.00  0.35           O  
HETATM  211  O   HOH T 210      27.475 -27.955  16.396  1.00  0.35           O  
HETATM  212  O   HOH T 211      27.630 -10.612  40.920  1.00  0.35           O  
HETATM  213  O   HOH T 212      -1.536 -31.875  26.946  1.00  0.35           O  
HETATM  214  O   HOH T 213       4.204  10.130  37.338  1.00  0.35           O  
HETATM  215  O   HOH T 214     -10.407  -2.688  39.969  1.00  0.35           O  
HETATM  216  O   HOH T 215      -7.716 -49.247  12.459  1.00  0.35           O  
HETATM  217  O   HOH T 216       0.164 -39.456  36.402  1.00  0.35           O  
HETATM  218  O   HOH T 217      -0.059  -8.782  22.534  1.00  0.35           O  
HETATM  219  O   HOH T 218      27.546 -11.478   3.318  1.00  0.35           O  
HETATM  220  O   HOH T 219      14.978 -17.654   4.135  1.00  0.35           O  
HETATM  221  O   HOH T 220      17.582  -4.171  47.829  1.00  0.35           O  
HETATM  222  O   HOH T 221       9.249  21.611  19.165  1.00  0.35           O  
HETATM  223  O   HOH T 222      13.552 -32.966  21.817  1.00  0.35           O  
HETATM  224  O   HOH T 223       7.958 -13.853  21.233  1.00  0.35           O  
HETATM  225  O   HOH T 224      -0.358  16.059  39.547  1.00  0.35           O  
HETATM  226  O   HOH T 225      26.522   5.482  35.106  1.00  0.35           O  
HETATM  227  O   HOH T 226      11.873  -8.280  34.176  1.00  0.35           O  
HETATM  228  O   HOH T 227      26.064 -21.028  23.544  1.00  0.35           O  
HETATM  229  O   HOH T 228      21.758 -33.883   6.486  1.00  0.35           O  
HETATM  230  O   HOH T 229       9.671  -9.318   8.082  1.00  0.35           O  
HETATM  231  O   HOH T 230       5.810 -19.655  16.119  1.00  0.36           O  
HETATM  232  O   HOH T 231      -4.237 -14.443  28.373  1.00  0.36           O  
HETATM  233  O   HOH T 232      24.071  18.665  32.354  1.00  0.36           O  
HETATM  234  O   HOH T 233      -2.344 -50.455  23.056  1.00  0.36           O  
HETATM  235  O   HOH T 234     -13.188  -1.588  26.205  1.00  0.36           O  
HETATM  236  O   HOH T 235      -4.791 -51.247  -5.370  1.00  0.36           O  
HETATM  237  O   HOH T 236     -14.175  -5.909  21.726  1.00  0.36           O  
HETATM  238  O   HOH T 237      32.142 -25.992  39.763  1.00  0.36           O  
HETATM  239  O   HOH T 238      21.339 -37.222   3.355  1.00  0.36           O  
HETATM  240  O   HOH T 239      16.944 -24.538  24.014  1.00  0.36           O  
HETATM  241  O   HOH T 240      32.471 -24.167  18.688  1.00  0.36           O  
HETATM  242  O   HOH T 241       7.958  -3.474   3.008  1.00  0.36           O  
HETATM  243  O   HOH T 242      18.289 -26.806  -1.811  1.00  0.36           O  
HETATM  244  O   HOH T 243      22.775 -30.456  34.435  1.00  0.36           O  
HETATM  245  O   HOH T 244       3.005 -22.221 -18.568  1.00  0.36           O  
HETATM  246  O   HOH T 245      -8.153 -13.761  19.388  1.00  0.36           O  
HETATM  247  O   HOH T 246      -2.537 -12.593  29.215  1.00  0.36           O  
HETATM  248  O   HOH T 247       1.737 -37.332  37.253  1.00  0.37           O  
HETATM  249  O   HOH T 248       1.935 -13.419  -3.960  1.00  0.37           O  
HETATM  250  O   HOH T 249      10.250   4.635  47.802  1.00  0.37           O  
HETATM  251  O   HOH T 250     -15.373   6.257  13.407  1.00  0.37           O  
HETATM  252  O   HOH T 251      -2.584 -53.684  20.718  1.00  0.37           O  
HETATM  253  O   HOH T 252      19.419 -20.022  37.866  1.00  0.37           O  
HETATM  254  O   HOH T 253     -16.572 -19.320  25.066  1.00  0.37           O  
HETATM  255  O   HOH T 254      19.144 -33.883  -2.815  1.00  0.37           O  
HETATM  256  O   HOH T 255      -2.592 -41.236  -3.860  1.00  0.37           O  
HETATM  257  O   HOH T 256      34.536 -15.728  33.024  1.00  0.37           O  
HETATM  258  O   HOH T 257      -2.888 -23.214   3.190  1.00  0.37           O  
HETATM  259  O   HOH T 258      26.341 -33.208   1.547  1.00  0.37           O  
HETATM  260  O   HOH T 259      -3.372  22.884  21.834  1.00  0.37           O  
HETATM  261  O   HOH T 260      18.915 -11.966   0.379  1.00  0.37           O  
HETATM  262  O   HOH T 261       3.161  -9.684  -9.569  1.00  0.37           O  
HETATM  263  O   HOH T 262       4.188 -46.958  -2.629  1.00  0.37           O  
HETATM  264  O   HOH T 263      -5.890 -47.940  -3.394  1.00  0.37           O  
HETATM  265  O   HOH T 264      32.749   1.180  19.412  1.00  0.37           O  
HETATM  266  O   HOH T 265      16.297  18.584  25.524  1.00  0.37           O  
HETATM  267  O   HOH T 266      15.282  -5.549   5.316  1.00  0.37           O  
HETATM  268  O   HOH T 267       2.466 -15.653   2.650  1.00  0.37           O  
HETATM  269  O   HOH T 268       4.917  22.028  23.691  1.00  0.37           O  
HETATM  270  O   HOH T 269      -2.044  -2.727  23.198  1.00  0.37           O  
HETATM  271  O   HOH T 270      16.928 -45.463   1.610  1.00  0.37           O  
HETATM  272  O   HOH T 271      29.477  -6.564  24.894  1.00  0.37           O  
HETATM  273  O   HOH T 272      32.765 -24.459   8.326  1.00  0.37           O  
HETATM  274  O   HOH T 273      36.834 -15.536  26.311  1.00  0.37           O  
HETATM  275  O   HOH T 274      -7.810 -23.278  26.943  1.00  0.37           O  
HETATM  276  O   HOH T 275      17.071  -6.402  49.469  1.00  0.37           O  
HETATM  277  O   HOH T 276      24.897 -23.890  21.036  1.00  0.37           O  
HETATM  278  O   HOH T 277      25.856  -1.881  14.388  1.00  0.37           O  
HETATM  279  O   HOH T 278      19.569 -14.048  49.646  1.00  0.37           O  
HETATM  280  O   HOH T 279      13.784 -46.843   7.458  1.00  0.37           O  
HETATM  281  O   HOH T 280      10.388 -11.650  15.923  1.00  0.38           O  
HETATM  282  O   HOH T 281      20.895 -20.560  40.091  1.00  0.38           O  
HETATM  283  O   HOH T 282       8.833 -38.750  29.121  1.00  0.38           O  
HETATM  284  O   HOH T 283      -0.510 -24.630  20.953  1.00  0.38           O  
HETATM  285  O   HOH T 284      -4.211 -19.806  28.856  1.00  0.38           O  
HETATM  286  O   HOH T 285      20.300  14.842  41.172  1.00  0.38           O  
HETATM  287  O   HOH T 286      15.058  17.023  23.612  1.00  0.38           O  
HETATM  288  O   HOH T 287      12.396   4.635  49.448  1.00  0.38           O  
HETATM  289  O   HOH T 288       9.591 -52.544  -3.340  1.00  0.38           O  
HETATM  290  O   HOH T 289      -9.624 -10.711  22.850  1.00  0.38           O  
HETATM  291  O   HOH T 290      15.141 -14.385  20.154  1.00  0.38           O  
HETATM  292  O   HOH T 291      22.696  19.294  25.043  1.00  0.38           O  
HETATM  293  O   HOH T 292     -14.350   9.568  10.214  1.00  0.38           O  
HETATM  294  O   HOH T 293      13.320  13.999  43.500  1.00  0.38           O  
HETATM  295  O   HOH T 294      -6.599 -20.985  27.958  1.00  0.38           O  
HETATM  296  O   HOH T 295      12.835 -35.259  28.349  1.00  0.38           O  
HETATM  297  O   HOH T 296      -3.521 -51.354  12.172  1.00  0.38           O  
HETATM  298  O   HOH T 297      11.157 -11.442  31.414  1.00  0.38           O  
HETATM  299  O   HOH T 298       3.804  -8.994  24.128  1.00  0.38           O  
HETATM  300  O   HOH T 299      31.954  -2.245  15.794  1.00  0.38           O  
HETATM  301  O   HOH T 300      -9.845   2.588  38.917  1.00  0.38           O  
HETATM  302  O   HOH T 301      -4.974  -1.501  18.880  1.00  0.38           O  
HETATM  303  O   HOH T 302      33.289  -0.470  25.581  1.00  0.38           O  
HETATM  304  O   HOH T 303       0.131 -43.701  37.641  1.00  0.38           O  
HETATM  305  O   HOH T 304     -13.028 -49.437   9.113  1.00  0.39           O  
HETATM  306  O   HOH T 305      16.847 -18.961  -9.897  1.00  0.39           O  
HETATM  307  O   HOH T 306      13.201  21.467  29.215  1.00  0.39           O  
HETATM  308  O   HOH T 307      14.474 -11.693  19.874  1.00  0.39           O  
HETATM  309  O   HOH T 308       2.636 -41.340  -7.989  1.00  0.39           O  
HETATM  310  O   HOH T 309      21.674 -16.139  20.220  1.00  0.39           O  
HETATM  311  O   HOH T 310      21.440  17.970  32.042  1.00  0.39           O  
HETATM  312  O   HOH T 311     -12.334   7.694  10.179  1.00  0.39           O  
HETATM  313  O   HOH T 312      -9.988   6.301  10.109  1.00  0.39           O  
HETATM  314  O   HOH T 313       7.512 -11.864  19.421  1.00  0.39           O  
HETATM  315  O   HOH T 314      19.102  -6.467  47.636  1.00  0.39           O  
HETATM  316  O   HOH T 315      13.118   2.490   7.303  1.00  0.39           O  
HETATM  317  O   HOH T 316      -7.252  -1.277   6.013  1.00  0.39           O  
HETATM  318  O   HOH T 317      27.343 -28.505  26.836  1.00  0.39           O  
HETATM  319  O   HOH T 318      16.703 -12.749  18.588  1.00  0.39           O  
HETATM  320  O   HOH T 319      21.103 -27.558  19.470  1.00  0.39           O  
HETATM  321  O   HOH T 320       0.509 -52.879  31.742  1.00  0.39           O  
HETATM  322  O   HOH T 321      -4.755 -20.097 -12.133  1.00  0.39           O  
HETATM  323  O   HOH T 322      34.713 -23.444  20.327  1.00  0.39           O  
HETATM  324  O   HOH T 323       8.405 -10.358  24.318  1.00  0.39           O  
HETATM  325  O   HOH T 324     -14.845 -48.870  30.386  1.00  0.39           O  
HETATM  326  O   HOH T 325      32.411   5.749  25.886  1.00  0.40           O  
HETATM  327  O   HOH T 326      27.072   4.108  16.454  1.00  0.40           O  
HETATM  328  O   HOH T 327      -0.195 -50.030  -2.826  1.00  0.40           O  
HETATM  329  O   HOH T 328       3.321  -9.285  26.888  1.00  0.40           O  
HETATM  330  O   HOH T 329      -5.547 -13.515   0.291  1.00  0.40           O  
HETATM  331  O   HOH T 330      18.146 -45.636  16.814  1.00  0.40           O  
HETATM  332  O   HOH T 331     -11.440 -47.222   9.651  1.00  0.40           O  
HETATM  333  O   HOH T 332      32.625  -0.423  33.694  1.00  0.40           O  
HETATM  334  O   HOH T 333      -0.451 -12.229  -4.351  1.00  0.40           O  
HETATM  335  O   HOH T 334      -7.230 -17.927  23.245  1.00  0.40           O  
HETATM  336  O   HOH T 335      28.927  12.030  23.506  1.00  0.40           O  
HETATM  337  O   HOH T 336      23.164  13.192  35.474  1.00  0.40           O  
HETATM  338  O   HOH T 337       6.384 -56.012  10.336  1.00  0.40           O  
HETATM  339  O   HOH T 338      34.164 -16.344  37.306  1.00  0.40           O  
HETATM  340  O   HOH T 339      18.219 -21.257  39.992  1.00  0.40           O  
HETATM  341  O   HOH T 340      21.052  -8.071   1.874  1.00  0.40           O  
HETATM  342  O   HOH T 341      -2.481 -30.679  21.905  1.00  0.40           O  
HETATM  343  O   HOH T 342      22.065  -4.579  46.866  1.00  0.40           O  
HETATM  344  O   HOH T 343      -8.915  -8.109  23.531  1.00  0.40           O  
HETATM  345  O   HOH T 344      -0.982 -22.542 -13.248  1.00  0.40           O  
HETATM  346  O   HOH T 345     -11.481 -38.224  -3.789  1.00  0.40           O  
HETATM  347  O   HOH T 346      20.427  13.951  35.190  1.00  0.40           O  
HETATM  348  O   HOH T 347      26.662 -13.965  -1.348  1.00  0.40           O  
HETATM  349  O   HOH T 348      31.944   6.790  20.327  1.00  0.40           O  
HETATM  350  O   HOH T 349       4.074  -7.392  19.116  1.00  0.40           O  
HETATM  351  O   HOH T 350      -9.694 -40.505  30.245  1.00  0.40           O  
HETATM  352  O   HOH T 351      -3.292 -37.495  37.263  1.00  0.40           O  
HETATM  353  O   HOH T 352      28.588 -11.064  43.562  1.00  0.40           O  
HETATM  354  O   HOH T 353      -8.861 -47.995   6.120  1.00  0.41           O  
HETATM  355  O   HOH T 354      -9.864 -15.579  27.506  1.00  0.41           O  
HETATM  356  O   HOH T 355       8.494  -1.361  11.174  1.00  0.41           O  
HETATM  357  O   HOH T 356       8.270 -34.700  32.799  1.00  0.41           O  
HETATM  358  O   HOH T 357      -1.564 -55.310  22.698  1.00  0.41           O  
HETATM  359  O   HOH T 358      14.734 -30.818  -8.630  1.00  0.41           O  
HETATM  360  O   HOH T 359     -13.638   0.115  30.047  1.00  0.41           O  
HETATM  361  O   HOH T 360      20.264  16.386  33.890  1.00  0.41           O  
HETATM  362  O   HOH T 361       1.451 -51.260  -0.951  1.00  0.41           O  
HETATM  363  O   HOH T 362     -13.711   4.082  12.990  1.00  0.41           O  
HETATM  364  O   HOH T 363      -0.696 -24.931   7.183  1.00  0.41           O  
HETATM  365  O   HOH T 364      20.261 -29.415  -9.214  1.00  0.41           O  
HETATM  366  O   HOH T 365     -10.273  19.185  17.789  1.00  0.41           O  
HETATM  367  O   HOH T 366      19.452 -45.234  -0.822  1.00  0.41           O  
HETATM  368  O   HOH T 367     -11.620  10.382  10.333  1.00  0.41           O  
HETATM  369  O   HOH T 368       7.058 -36.763  34.167  1.00  0.41           O  
HETATM  370  O   HOH T 369      -5.414 -17.093  21.308  1.00  0.41           O  
HETATM  371  O   HOH T 370      14.850 -50.959  21.972  1.00  0.41           O  
HETATM  372  O   HOH T 371      23.529 -12.189  -7.374  1.00  0.41           O  
HETATM  373  O   HOH T 372      13.607  -6.693   3.513  1.00  0.41           O  
HETATM  374  O   HOH T 373      10.656 -13.607  38.040  1.00  0.41           O  
HETATM  375  O   HOH T 374       1.525  20.995  21.748  1.00  0.41           O  
HETATM  376  O   HOH T 375       8.844 -16.974   6.406  1.00  0.41           O  
HETATM  377  O   HOH T 376      23.035  -5.420   5.631  1.00  0.41           O  
HETATM  378  O   HOH T 377       6.671 -54.314   8.131  1.00  0.41           O  
HETATM  379  O   HOH T 378      28.991 -30.239  33.408  1.00  0.41           O  
HETATM  380  O   HOH T 379      13.378 -52.691   3.016  1.00  0.41           O  
HETATM  381  O   HOH T 380      -2.479 -40.130  36.748  1.00  0.41           O  
HETATM  382  O   HOH T 381       9.668 -20.838  17.927  1.00  0.41           O  
HETATM  383  O   HOH T 382       9.251  -9.075  -3.532  1.00  0.41           O  
HETATM  384  O   HOH T 383       9.757  21.393  21.886  1.00  0.41           O  
HETATM  385  O   HOH T 384       2.363 -38.580  -7.381  1.00  0.42           O  
HETATM  386  O   HOH T 385       6.792 -12.035  25.880  1.00  0.42           O  
HETATM  387  O   HOH T 386      22.036   8.899  14.971  1.00  0.42           O  
HETATM  388  O   HOH T 387       3.878 -54.970   7.372  1.00  0.42           O  
HETATM  389  O   HOH T 388      24.551 -34.639  -0.011  1.00  0.42           O  
HETATM  390  O   HOH T 389      15.218 -19.602  24.144  1.00  0.42           O  
HETATM  391  O   HOH T 390      16.185  17.722  42.967  1.00  0.42           O  
HETATM  392  O   HOH T 391       7.899  15.692  10.107  1.00  0.42           O  
HETATM  393  O   HOH T 392      -4.822 -39.615  38.234  1.00  0.42           O  
HETATM  394  O   HOH T 393       8.572 -52.269   7.233  1.00  0.42           O  
HETATM  395  O   HOH T 394       8.515 -46.349  -2.012  1.00  0.42           O  
HETATM  396  O   HOH T 395      -2.680  -1.486  13.975  1.00  0.42           O  
HETATM  397  O   HOH T 396       9.702  -8.291  32.333  1.00  0.42           O  
HETATM  398  O   HOH T 397      30.686 -25.962  19.622  1.00  0.42           O  
HETATM  399  O   HOH T 398      10.224 -36.259  29.101  1.00  0.42           O  
HETATM  400  O   HOH T 399     -17.720 -44.915  13.780  1.00  0.42           O  
HETATM  401  O   HOH T 400      11.582 -49.599   4.781  1.00  0.42           O  
HETATM  402  O   HOH T 401       8.480  20.155  39.866  1.00  0.42           O  
HETATM  403  O   HOH T 402      16.978 -39.002  -5.521  1.00  0.42           O  
HETATM  404  O   HOH T 403      -0.257 -39.515  40.638  1.00  0.42           O  
HETATM  405  O   HOH T 404      33.655  -2.379  17.901  1.00  0.42           O  
HETATM  406  O   HOH T 405      -8.098  20.113  16.261  1.00  0.42           O  
HETATM  407  O   HOH T 406       9.120 -50.341  -1.681  1.00  0.42           O  
HETATM  408  O   HOH T 407      18.914 -35.546  -5.003  1.00  0.42           O  
HETATM  409  O   HOH T 408      26.419 -24.335  18.838  1.00  0.42           O  
HETATM  410  O   HOH T 409      11.292 -29.380  26.529  1.00  0.42           O  
HETATM  411  O   HOH T 410      16.269 -18.253  21.895  1.00  0.42           O  
HETATM  412  O   HOH T 411      -3.274 -15.996  26.173  1.00  0.42           O  
HETATM  413  O   HOH T 412      10.757 -13.416  17.961  1.00  0.42           O  
HETATM  414  O   HOH T 413      14.070  16.481  44.426  1.00  0.43           O  
HETATM  415  O   HOH T 414       0.505 -22.372   6.593  1.00  0.43           O  
HETATM  416  O   HOH T 415      18.795 -22.998  25.062  1.00  0.43           O  
HETATM  417  O   HOH T 416      11.124 -19.539  35.689  1.00  0.43           O  
HETATM  418  O   HOH T 417      -2.371 -42.914  -6.569  1.00  0.43           O  
HETATM  419  O   HOH T 418       6.374 -30.649  27.969  1.00  0.43           O  
HETATM  420  O   HOH T 419      17.003 -16.376  25.900  1.00  0.43           O  
HETATM  421  O   HOH T 420      -6.590 -29.509   6.600  1.00  0.43           O  
HETATM  422  O   HOH T 421      -1.799 -13.926  26.949  1.00  0.43           O  
HETATM  423  O   HOH T 422      24.881 -12.128  -4.943  1.00  0.43           O  
HETATM  424  O   HOH T 423      17.183 -42.316  27.801  1.00  0.43           O  
HETATM  425  O   HOH T 424       4.156 -23.032  13.415  1.00  0.43           O  
HETATM  426  O   HOH T 425      36.486 -10.522  13.451  1.00  0.43           O  
HETATM  427  O   HOH T 426       0.949 -54.278   1.637  1.00  0.43           O  
HETATM  428  O   HOH T 427      -3.097 -45.565  -6.763  1.00  0.43           O  
HETATM  429  O   HOH T 428      17.060 -14.480  -9.863  1.00  0.43           O  
HETATM  430  O   HOH T 429       9.505 -53.129  25.313  1.00  0.43           O  
HETATM  431  O   HOH T 430       8.069 -11.300  14.580  1.00  0.43           O  
HETATM  432  O   HOH T 431       5.360 -10.762  27.870  1.00  0.43           O  
HETATM  433  O   HOH T 432       1.756 -56.448  20.153  1.00  0.43           O  
HETATM  434  O   HOH T 433      -5.943 -33.154   1.048  1.00  0.43           O  
HETATM  435  O   HOH T 434      18.563  15.930  36.057  1.00  0.43           O  
HETATM  436  O   HOH T 435     -10.056 -45.894   7.358  1.00  0.43           O  
HETATM  437  O   HOH T 436       0.494 -37.001  -8.781  1.00  0.43           O  
HETATM  438  O   HOH T 437      29.888 -27.891  17.829  1.00  0.43           O  
HETATM  439  O   HOH T 438      -5.427  -1.651  13.239  1.00  0.43           O  
HETATM  440  O   HOH T 439       6.289 -53.219  16.296  1.00  0.43           O  
HETATM  441  O   HOH T 440      -1.674 -55.695  13.733  1.00  0.43           O  
HETATM  442  O   HOH T 441      -5.031 -26.810 -10.207  1.00  0.43           O  
HETATM  443  O   HOH T 442       2.385 -49.045  -2.248  1.00  0.43           O  
HETATM  444  O   HOH T 443      -3.957  16.437  36.389  1.00  0.43           O  
HETATM  445  O   HOH T 444      33.584  -1.225  20.456  1.00  0.43           O  
HETATM  446  O   HOH T 445       5.081 -24.874  15.222  1.00  0.44           O  
HETATM  447  O   HOH T 446      34.981  -4.822  17.889  1.00  0.44           O  
HETATM  448  O   HOH T 447      10.587 -21.874  20.257  1.00  0.44           O  
HETATM  449  O   HOH T 448       9.818   2.240  46.508  1.00  0.44           O  
HETATM  450  O   HOH T 449      -7.265 -50.093  -4.448  1.00  0.44           O  
HETATM  451  O   HOH T 450      15.873  14.958  42.955  1.00  0.44           O  
HETATM  452  O   HOH T 451      11.853  -5.398   1.906  1.00  0.44           O  
HETATM  453  O   HOH T 452     -10.769 -49.345  21.953  1.00  0.44           O  
HETATM  454  O   HOH T 453      -6.208 -12.929  17.592  1.00  0.44           O  
HETATM  455  O   HOH T 454     -16.535 -37.318  15.089  1.00  0.44           O  
HETATM  456  O   HOH T 455       7.425 -12.626  28.467  1.00  0.44           O  
HETATM  457  O   HOH T 456      26.387 -30.946   3.130  1.00  0.44           O  
HETATM  458  O   HOH T 457       8.046 -53.734  10.689  1.00  0.44           O  
HETATM  459  O   HOH T 458      -8.961 -55.871  14.892  1.00  0.44           O  
HETATM  460  O   HOH T 459       9.505  -8.268   5.659  1.00  0.44           O  
HETATM  461  O   HOH T 460      -0.165 -51.886  23.738  1.00  0.44           O  
HETATM  462  O   HOH T 461      -5.903  14.625  35.570  1.00  0.44           O  
HETATM  463  O   HOH T 462      -3.174 -41.334  -8.747  1.00  0.44           O  
HETATM  464  O   HOH T 463      -4.044  22.766  40.672  1.00  0.44           O  
HETATM  465  O   HOH T 464       2.154  -2.707  11.274  1.00  0.44           O  
HETATM  466  O   HOH T 465     -10.577  19.491  15.077  1.00  0.44           O  
HETATM  467  O   HOH T 466      28.456 -24.927  20.568  1.00  0.44           O  
HETATM  468  O   HOH T 467      -8.867 -15.030  29.983  1.00  0.44           O  
HETATM  469  O   HOH T 468      37.525 -18.038  27.471  1.00  0.44           O  
HETATM  470  O   HOH T 469       7.182 -52.599  26.755  1.00  0.44           O  
HETATM  471  O   HOH T 470     -14.762 -46.760  22.477  1.00  0.44           O  
HETATM  472  O   HOH T 471       3.157  23.392  21.933  1.00  0.44           O  
HETATM  473  O   HOH T 472      31.373 -23.500   1.366  1.00  0.44           O  
HETATM  474  O   HOH T 473       9.001 -55.765  24.834  1.00  0.44           O  
HETATM  475  O   HOH T 474      32.258 -20.248  40.635  1.00  0.45           O  
HETATM  476  O   HOH T 475      18.425  11.753  43.745  1.00  0.45           O  
HETATM  477  O   HOH T 476      24.871 -14.401  -6.472  1.00  0.45           O  
HETATM  478  O   HOH T 477      19.507 -29.888  19.633  1.00  0.45           O  
HETATM  479  O   HOH T 478      -6.779  19.156  13.856  1.00  0.45           O  
HETATM  480  O   HOH T 479      -4.101 -55.882  14.997  1.00  0.45           O  
HETATM  481  O   HOH T 480      16.670 -11.096   1.651  1.00  0.45           O  
HETATM  482  O   HOH T 481       9.874   4.204  50.535  1.00  0.45           O  
HETATM  483  O   HOH T 482      16.591  -3.491   6.581  1.00  0.45           O  
HETATM  484  O   HOH T 483      20.391  -8.994   4.470  1.00  0.45           O  
HETATM  485  O   HOH T 484      19.010 -26.014  -9.655  1.00  0.45           O  
HETATM  486  O   HOH T 485      -1.697 -48.665  -4.662  1.00  0.45           O  
HETATM  487  O   HOH T 486      19.462 -42.645  26.173  1.00  0.45           O  
HETATM  488  O   HOH T 487      24.473  13.881  37.852  1.00  0.45           O  
HETATM  489  O   HOH T 488      -6.104   1.728  40.854  1.00  0.45           O  
HETATM  490  O   HOH T 489       9.248   4.960  18.050  1.00  0.45           O  
HETATM  491  O   HOH T 490      22.616 -37.193   5.683  1.00  0.45           O  
HETATM  492  O   HOH T 491     -17.133 -32.278  21.281  1.00  0.45           O  
HETATM  493  O   HOH T 492      17.991  -5.681   5.678  1.00  0.45           O  
HETATM  494  O   HOH T 493       7.241 -10.902  -2.717  1.00  0.45           O  
HETATM  495  O   HOH T 494       5.962 -25.380  24.377  1.00  0.45           O  
HETATM  496  O   HOH T 495     -12.621 -48.974  28.871  1.00  0.45           O  
HETATM  497  O   HOH T 496      11.520 -20.011  43.131  1.00  0.45           O  
HETATM  498  O   HOH T 497     -11.049 -49.247  32.602  1.00  0.45           O  
HETATM  499  O   HOH T 498      -1.325  21.138  22.075  1.00  0.45           O  
HETATM  500  O   HOH T 499      31.065   5.715  28.340  1.00  0.45           O  
HETATM  501  O   HOH T 500       5.513 -22.008  20.118  1.00  0.45           O  
HETATM  502  O   HOH T 501       8.056 -46.275  -4.785  1.00  0.45           O  
HETATM  503  O   HOH T 502      11.419 -52.447  27.175  1.00  0.45           O  
HETATM  504  O   HOH T 503       7.238  20.976  22.704  1.00  0.46           O  
HETATM  505  O   HOH T 504       4.524  22.375  28.160  1.00  0.46           O  
HETATM  506  O   HOH T 505       5.786  -4.055  36.719  1.00  0.46           O  
HETATM  507  O   HOH T 506      29.666  10.721  21.212  1.00  0.46           O  
HETATM  508  O   HOH T 507      16.248 -48.616  22.666  1.00  0.46           O  
HETATM  509  O   HOH T 508       3.771 -21.790 -15.983  1.00  0.46           O  
HETATM  510  O   HOH T 509       8.264 -24.567  23.052  1.00  0.46           O  
HETATM  511  O   HOH T 510      32.936   0.113  16.813  1.00  0.46           O  
HETATM  512  O   HOH T 511      11.126   0.860  44.526  1.00  0.46           O  
HETATM  513  O   HOH T 512       9.294 -29.381  -9.741  1.00  0.46           O  
HETATM  514  O   HOH T 513      -5.140 -32.754  -2.850  1.00  0.46           O  
HETATM  515  O   HOH T 514       8.865 -18.572   8.571  1.00  0.46           O  
HETATM  516  O   HOH T 515       8.040 -20.955  20.170  1.00  0.46           O  
HETATM  517  O   HOH T 516      -3.199 -24.574 -10.429  1.00  0.46           O  
HETATM  518  O   HOH T 517      25.290  11.628  36.455  1.00  0.46           O  
HETATM  519  O   HOH T 518       1.514 -22.704 -14.584  1.00  0.46           O  
HETATM  520  O   HOH T 519      -7.439  21.242  22.804  1.00  0.46           O  
HETATM  521  O   HOH T 520       2.387  22.449  13.659  1.00  0.46           O  
HETATM  522  O   HOH T 521      20.246 -45.105  18.606  1.00  0.46           O  
HETATM  523  O   HOH T 522      18.483   6.410  42.392  1.00  0.46           O  
HETATM  524  O   HOH T 523       1.805  -8.183  15.434  1.00  0.46           O  
HETATM  525  O   HOH T 524      19.014 -46.965  20.315  1.00  0.46           O  
HETATM  526  O   HOH T 525      -7.949   1.432   5.831  1.00  0.46           O  
HETATM  527  O   HOH T 526      -0.141 -48.510  36.277  1.00  0.46           O  
HETATM  528  O   HOH T 527      24.299 -28.074  34.078  1.00  0.46           O  
HETATM  529  O   HOH T 528      20.746  12.756  42.790  1.00  0.46           O  
HETATM  530  O   HOH T 529       8.282 -39.415  31.732  1.00  0.46           O  
HETATM  531  O   HOH T 530     -11.594 -11.828  24.312  1.00  0.46           O  
HETATM  532  O   HOH T 531      -4.861 -34.831  -0.968  1.00  0.46           O  
HETATM  533  O   HOH T 532      -4.112  -3.898  14.353  1.00  0.46           O  
HETATM  534  O   HOH T 533      13.924 -50.936  -3.407  1.00  0.46           O  
HETATM  535  O   HOH T 534      -4.147   3.383  40.735  1.00  0.46           O  
HETATM  536  O   HOH T 535      17.267  16.686  38.499  1.00  0.46           O  
HETATM  537  O   HOH T 536       3.019 -56.152  22.620  1.00  0.46           O  
HETATM  538  O   HOH T 537      34.704   9.634  25.864  1.00  0.47           O  
HETATM  539  O   HOH T 538      10.643 -10.636   5.765  1.00  0.47           O  
HETATM  540  O   HOH T 539      18.650  -9.137   1.046  1.00  0.47           O  
HETATM  541  O   HOH T 540      12.080 -29.476 -10.323  1.00  0.47           O  
HETATM  542  O   HOH T 541      -6.513 -18.820  29.751  1.00  0.47           O  
HETATM  543  O   HOH T 542       0.975 -54.381  23.375  1.00  0.47           O  
HETATM  544  O   HOH T 543      14.093 -51.950  19.543  1.00  0.47           O  
HETATM  545  O   HOH T 544      12.691 -52.045   5.649  1.00  0.47           O  
HETATM  546  O   HOH T 545      33.540   6.957  22.472  1.00  0.47           O  
HETATM  547  O   HOH T 546      -4.724  22.534  19.462  1.00  0.47           O  
HETATM  548  O   HOH T 547      11.990 -24.051  40.235  1.00  0.47           O  
HETATM  549  O   HOH T 548     -11.531 -40.880  32.317  1.00  0.47           O  
HETATM  550  O   HOH T 549       6.512  12.356  41.085  1.00  0.47           O  
HETATM  551  O   HOH T 550      25.861 -29.359  -1.431  1.00  0.47           O  
HETATM  552  O   HOH T 551      19.969  16.048  22.396  1.00  0.47           O  
HETATM  553  O   HOH T 552       8.134 -12.935  16.928  1.00  0.47           O  
HETATM  554  O   HOH T 553      14.417   0.820  21.186  1.00  0.47           O  
HETATM  555  O   HOH T 554     -10.717 -14.419  23.441  1.00  0.47           O  
HETATM  556  O   HOH T 555      -8.840   2.046  41.471  1.00  0.47           O  
HETATM  557  O   HOH T 556      -4.831 -17.199  28.158  1.00  0.47           O  
HETATM  558  O   HOH T 557      -9.738 -43.709  36.540  1.00  0.47           O  
HETATM  559  O   HOH T 558     -13.030 -43.151  31.619  1.00  0.47           O  
HETATM  560  O   HOH T 559       7.145  -8.762   6.945  1.00  0.47           O  
HETATM  561  O   HOH T 560      31.325 -26.928  22.128  1.00  0.47           O  
HETATM  562  O   HOH T 561     -12.166 -32.361  28.467  1.00  0.47           O  
HETATM  563  O   HOH T 562      -2.205 -23.025   5.848  1.00  0.47           O  
HETATM  564  O   HOH T 563      31.280  -3.805  35.137  1.00  0.47           O  
HETATM  565  O   HOH T 564      12.681 -48.958   9.033  1.00  0.47           O  
HETATM  566  O   HOH T 565      -0.792 -46.167  -8.049  1.00  0.47           O  
HETATM  567  O   HOH T 566      14.726 -35.645  -8.932  1.00  0.47           O  
HETATM  568  O   HOH T 567      35.885 -10.457  16.300  1.00  0.47           O  
HETATM  569  O   HOH T 568      -3.246  -6.574  14.543  1.00  0.47           O  
HETATM  570  O   HOH T 569      -9.819 -13.372  -0.357  1.00  0.48           O  
HETATM  571  O   HOH T 570       9.212 -48.438  -3.672  1.00  0.48           O  
HETATM  572  O   HOH T 571     -12.138  -3.197  37.806  1.00  0.48           O  
HETATM  573  O   HOH T 572       1.854  22.593  29.021  1.00  0.48           O  
HETATM  574  O   HOH T 573     -12.188 -16.123  21.663  1.00  0.48           O  
HETATM  575  O   HOH T 574      11.262 -12.916  40.607  1.00  0.48           O  
HETATM  576  O   HOH T 575       3.188  17.339  32.177  1.00  0.48           O  
HETATM  577  O   HOH T 576      21.740 -32.720  -2.617  1.00  0.48           O  
HETATM  578  O   HOH T 577     -14.614 -20.191  23.240  1.00  0.48           O  
HETATM  579  O   HOH T 578       5.793 -24.123  21.980  1.00  0.48           O  
HETATM  580  O   HOH T 579      15.050  16.899  20.820  1.00  0.48           O  
HETATM  581  O   HOH T 580      -0.267  -2.592  12.689  1.00  0.48           O  
HETATM  582  O   HOH T 581       0.133 -54.201  20.694  1.00  0.48           O  
HETATM  583  O   HOH T 582      37.461 -19.029  32.151  1.00  0.48           O  
HETATM  584  O   HOH T 583      14.495 -16.218  22.123  1.00  0.48           O  
HETATM  585  O   HOH T 584     -15.906 -17.281  20.165  1.00  0.48           O  
HETATM  586  O   HOH T 585       8.517 -10.715  31.974  1.00  0.48           O  
HETATM  587  O   HOH T 586      35.932 -17.795  34.042  1.00  0.48           O  
HETATM  588  O   HOH T 587       4.041 -30.718  29.359  1.00  0.48           O  
HETATM  589  O   HOH T 588      29.208 -22.952  -0.368  1.00  0.48           O  
HETATM  590  O   HOH T 589      13.222 -21.740  39.183  1.00  0.48           O  
HETATM  591  O   HOH T 590     -13.601  12.163  17.506  1.00  0.48           O  
HETATM  592  O   HOH T 591      32.400  -8.963   7.361  1.00  0.48           O  
HETATM  593  O   HOH T 592       4.134 -11.448  25.391  1.00  0.48           O  
HETATM  594  O   HOH T 593       4.726 -55.138  24.564  1.00  0.48           O  
HETATM  595  O   HOH T 594     -19.354 -49.039   8.448  1.00  0.48           O  
HETATM  596  O   HOH T 595       2.006 -46.799  36.448  1.00  0.48           O  
HETATM  597  O   HOH T 596      -8.866  -4.086  44.703  1.00  0.48           O  
HETATM  598  O   HOH T 597      28.555 -21.209  46.686  1.00  0.48           O  
HETATM  599  O   HOH T 598      26.135 -17.690  45.541  1.00  0.48           O  
HETATM  600  O   HOH T 599      -2.083 -39.987  -6.422  1.00  0.48           O  
HETATM  601  O   HOH T 600      32.470  -0.613  22.955  1.00  0.48           O  
HETATM  602  O   HOH T 601      -8.604 -17.087  25.594  1.00  0.48           O  
HETATM  603  O   HOH T 602       4.289 -23.849  18.427  1.00  0.48           O  
HETATM  604  O   HOH T 603     -11.256 -48.637  35.353  1.00  0.48           O  
HETATM  605  O   HOH T 604      25.883  19.216  24.837  1.00  0.48           O  
HETATM  606  O   HOH T 605     -10.642  15.165  11.453  1.00  0.48           O  
HETATM  607  O   HOH T 606      -1.375 -58.362  13.946  1.00  0.48           O  
HETATM  608  O   HOH T 607       8.269 -55.046  16.422  1.00  0.48           O  
HETATM  609  O   HOH T 608     -14.780 -16.316  22.555  1.00  0.48           O  
HETATM  610  O   HOH T 609     -14.027 -25.762  22.259  1.00  0.48           O  
HETATM  611  O   HOH T 610     -13.947 -20.718  16.268  1.00  0.48           O  
HETATM  612  O   HOH T 611      11.238 -57.338  -1.648  1.00  0.49           O  
HETATM  613  O   HOH T 612      -6.417 -45.593  34.030  1.00  0.49           O  
HETATM  614  O   HOH T 613     -14.992  -3.888  23.502  1.00  0.49           O  
HETATM  615  O   HOH T 614      34.912 -19.430  18.521  1.00  0.49           O  
HETATM  616  O   HOH T 615      23.615 -32.003   6.933  1.00  0.49           O  
HETATM  617  O   HOH T 616      17.865 -13.920  13.863  1.00  0.49           O  
HETATM  618  O   HOH T 617      24.312   9.082  36.693  1.00  0.49           O  
HETATM  619  O   HOH T 618      -9.972  -9.742  30.076  1.00  0.49           O  
HETATM  620  O   HOH T 619     -10.096  -9.624  25.401  1.00  0.49           O  
HETATM  621  O   HOH T 620      30.017   8.131  29.123  1.00  0.49           O  
HETATM  622  O   HOH T 621     -15.085 -17.004  25.267  1.00  0.49           O  
HETATM  623  O   HOH T 622     -11.365 -42.126  34.860  1.00  0.49           O  
HETATM  624  O   HOH T 623      16.223 -17.369   7.226  1.00  0.49           O  
HETATM  625  O   HOH T 624       2.785 -53.290  25.181  1.00  0.49           O  
HETATM  626  O   HOH T 625      27.275 -23.306  22.440  1.00  0.49           O  
HETATM  627  O   HOH T 626       0.893 -30.295  15.491  1.00  0.49           O  
HETATM  628  O   HOH T 627      -0.378 -41.130  38.376  1.00  0.49           O  
HETATM  629  O   HOH T 628     -18.856 -36.538  16.198  1.00  0.49           O  
HETATM  630  O   HOH T 629      35.771 -21.501  22.074  1.00  0.49           O  
HETATM  631  O   HOH T 630      19.387  15.070  38.575  1.00  0.49           O  
HETATM  632  O   HOH T 631      11.429 -55.112  26.051  1.00  0.49           O  
HETATM  633  O   HOH T 632       8.324 -42.719  -8.187  1.00  0.50           O  
HETATM  634  O   HOH T 633      -1.621 -22.556   8.428  1.00  0.50           O  
HETATM  635  O   HOH T 634      -8.255  -1.668  10.408  1.00  0.50           O  
HETATM  636  O   HOH T 635      28.129  -6.595  42.982  1.00  0.50           O  
HETATM  637  O   HOH T 636      -4.239 -12.229  19.285  1.00  0.50           O  
HETATM  638  O   HOH T 637      17.527 -24.595  26.732  1.00  0.50           O  
HETATM  639  O   HOH T 638      19.631 -38.340  -5.024  1.00  0.50           O  
HETATM  640  O   HOH T 639      10.250 -12.990   6.996  1.00  0.50           O  
HETATM  641  O   HOH T 640      -7.725  15.972  29.122  1.00  0.50           O  
HETATM  642  O   HOH T 641      10.584 -22.318  41.876  1.00  0.50           O  
HETATM  643  O   HOH T 642      17.810  -9.516   3.710  1.00  0.50           O  
HETATM  644  O   HOH T 643     -18.621 -42.047   9.700  1.00  0.50           O  
HETATM  645  O   HOH T 644      17.608  15.417  21.130  1.00  0.50           O  
HETATM  646  O   HOH T 645       2.460  13.680  11.894  1.00  0.50           O  
HETATM  647  O   HOH T 646       3.642  -9.276  17.190  1.00  0.50           O  
HETATM  648  O   HOH T 647      37.070 -24.844  21.103  1.00  0.50           O  
HETATM  649  O   HOH T 648     -17.269 -38.720  17.429  1.00  0.50           O  
HETATM  650  O   HOH T 649      -7.111 -32.173   3.310  1.00  0.50           O  
HETATM  651  O   HOH T 650       4.436  -3.981  10.112  1.00  0.50           O  
HETATM  652  O   HOH T 651      12.241  -4.525  19.695  1.00  0.50           O  
HETATM  653  O   HOH T 652     -10.489 -17.154  23.544  1.00  0.50           O  
HETATM  654  O   HOH T 653       4.662 -25.104 -13.530  1.00  0.50           O  
HETATM  655  O   HOH T 654      14.211 -21.019  -3.056  1.00  0.50           O  
HETATM  656  O   HOH T 655       6.956 -21.589  17.691  1.00  0.50           O  
HETATM  657  O   HOH T 656      27.541 -12.276  28.577  1.00  0.50           O  
HETATM  658  O   HOH T 657       9.566 -55.158  -2.346  1.00  0.50           O  
HETATM  659  O   HOH T 658      29.625 -29.476  15.515  1.00  0.50           O  
HETATM  660  O   HOH T 659      15.536 -43.315  -7.314  1.00  0.50           O  
HETATM  661  O   HOH T 660      18.717 -41.046  -4.834  1.00  0.50           O  
HETATM  662  O   HOH T 661      21.212   8.733  42.748  1.00  0.50           O  
HETATM  663  O   HOH T 662       0.112 -48.295  -6.700  1.00  0.50           O  
HETATM  664  O   HOH T 663      32.524   8.297  24.661  1.00  0.50           O  
HETATM  665  O   HOH T 664     -17.945 -42.744  12.154  1.00  0.50           O  
HETATM  666  O   HOH T 665       5.809 -22.153 -17.888  1.00  0.50           O  
HETATM  667  O   HOH T 666      12.973 -18.821  33.936  1.00  0.51           O  
HETATM  668  O   HOH T 667      -2.202 -51.370  -4.164  1.00  0.51           O  
HETATM  669  O   HOH T 668      23.963 -30.972  -2.692  1.00  0.51           O  
HETATM  670  O   HOH T 669      16.432  18.567  40.308  1.00  0.51           O  
HETATM  671  O   HOH T 670      19.752  10.682  45.964  1.00  0.51           O  
HETATM  672  O   HOH T 671      23.558  -7.924   0.726  1.00  0.51           O  
HETATM  673  O   HOH T 672      29.215   8.851  31.739  1.00  0.51           O  
HETATM  674  O   HOH T 673       4.073 -53.497  27.563  1.00  0.51           O  
HETATM  675  O   HOH T 674       2.318 -28.567  29.955  1.00  0.51           O  
HETATM  676  O   HOH T 675      11.202 -50.331  -3.510  1.00  0.51           O  
HETATM  677  O   HOH T 676       0.103  -1.826  39.880  1.00  0.51           O  
HETATM  678  O   HOH T 677     -10.688 -34.031  30.143  1.00  0.51           O  
HETATM  679  O   HOH T 678     -16.060 -42.849  19.694  1.00  0.51           O  
HETATM  680  O   HOH T 679      13.025 -19.390  45.404  1.00  0.51           O  
HETATM  681  O   HOH T 680      35.803 -26.884  28.656  1.00  0.51           O  
HETATM  682  O   HOH T 681       9.475 -17.284  36.518  1.00  0.51           O  
HETATM  683  O   HOH T 682      -7.383 -13.653  -1.674  1.00  0.51           O  
HETATM  684  O   HOH T 683       0.192 -26.828  30.324  1.00  0.51           O  
HETATM  685  O   HOH T 684     -14.627 -22.675  24.176  1.00  0.51           O  
HETATM  686  O   HOH T 685      33.315  10.752  23.710  1.00  0.51           O  
HETATM  687  O   HOH T 686      -0.357 -18.665 -12.542  1.00  0.51           O  
HETATM  688  O   HOH T 687      24.075 -14.786  45.598  1.00  0.51           O  
HETATM  689  O   HOH T 688     -13.634 -18.518  21.250  1.00  0.51           O  
HETATM  690  O   HOH T 689      35.823  -7.274  17.200  1.00  0.51           O  
HETATM  691  O   HOH T 690      -7.583 -16.849  28.228  1.00  0.51           O  
HETATM  692  O   HOH T 691     -12.939 -31.561   8.731  1.00  0.51           O  
HETATM  693  O   HOH T 692       3.355 -48.477  -4.777  1.00  0.51           O  
HETATM  694  O   HOH T 693      27.797  14.281  24.406  1.00  0.51           O  
HETATM  695  O   HOH T 694      20.377  18.590  23.624  1.00  0.51           O  
HETATM  696  O   HOH T 695      14.616 -47.714  -5.163  1.00  0.51           O  
HETATM  697  O   HOH T 696      -7.668 -11.765   0.398  1.00  0.52           O  
HETATM  698  O   HOH T 697      -9.531 -15.460  21.117  1.00  0.52           O  
HETATM  699  O   HOH T 698      -5.719 -52.389  29.757  1.00  0.52           O  
HETATM  700  O   HOH T 699      13.223  19.133  20.156  1.00  0.52           O  
HETATM  701  O   HOH T 700      20.553  -6.334   5.285  1.00  0.52           O  
HETATM  702  O   HOH T 701      10.997 -50.591   7.358  1.00  0.52           O  
HETATM  703  O   HOH T 702      16.011 -52.646   0.677  1.00  0.52           O  
HETATM  704  O   HOH T 703      12.079  18.059  14.175  1.00  0.52           O  
HETATM  705  O   HOH T 704      29.615   8.079  20.484  1.00  0.52           O  
HETATM  706  O   HOH T 705      29.303  14.152  29.944  1.00  0.52           O  
HETATM  707  O   HOH T 706      25.320 -32.121  -0.779  1.00  0.52           O  
HETATM  708  O   HOH T 707     -12.962   7.115  22.603  1.00  0.52           O  
HETATM  709  O   HOH T 708      14.476  -0.840  43.054  1.00  0.52           O  
HETATM  710  O   HOH T 709      -7.468 -16.536  19.509  1.00  0.52           O  
HETATM  711  O   HOH T 710      14.619  19.716  23.621  1.00  0.52           O  
HETATM  712  O   HOH T 711     -13.545  -2.337  28.935  1.00  0.52           O  
HETATM  713  O   HOH T 712      -6.056  23.362  21.792  1.00  0.52           O  
HETATM  714  O   HOH T 713      -7.530   3.937  38.152  1.00  0.52           O  
HETATM  715  O   HOH T 714      14.584  -5.141   1.274  1.00  0.52           O  
HETATM  716  O   HOH T 715      36.904 -20.307  34.553  1.00  0.52           O  
HETATM  717  O   HOH T 716      23.394 -14.236  50.419  1.00  0.52           O  
HETATM  718  O   HOH T 717     -19.262 -46.459  15.399  1.00  0.52           O  
HETATM  719  O   HOH T 718       8.210   7.544  43.784  1.00  0.52           O  
HETATM  720  O   HOH T 719      13.595 -49.569   6.575  1.00  0.52           O  
HETATM  721  O   HOH T 720     -12.173 -10.951  21.739  1.00  0.52           O  
HETATM  722  O   HOH T 721      31.834   9.091  22.000  1.00  0.52           O  
HETATM  723  O   HOH T 722      12.459 -48.599  11.797  1.00  0.52           O  
HETATM  724  O   HOH T 723      34.865 -11.737  43.795  1.00  0.53           O  
HETATM  725  O   HOH T 724       2.299 -32.238  30.824  1.00  0.53           O  
HETATM  726  O   HOH T 725     -10.773  10.631  31.903  1.00  0.53           O  
HETATM  727  O   HOH T 726      17.172 -11.341  46.252  1.00  0.53           O  
HETATM  728  O   HOH T 727      26.967 -12.932   1.140  1.00  0.53           O  
HETATM  729  O   HOH T 728      17.436 -41.214  -7.220  1.00  0.53           O  
HETATM  730  O   HOH T 729      21.841  14.675  37.405  1.00  0.53           O  
HETATM  731  O   HOH T 730      -5.781 -36.525  36.511  1.00  0.53           O  
HETATM  732  O   HOH T 731      -3.073 -17.990 -12.263  1.00  0.53           O  
HETATM  733  O   HOH T 732      -9.903 -36.291  -4.905  1.00  0.53           O  
HETATM  734  O   HOH T 733       8.414  23.034  15.294  1.00  0.53           O  
HETATM  735  O   HOH T 734       7.143 -11.323  22.022  1.00  0.53           O  
HETATM  736  O   HOH T 735       2.353 -53.836  -0.692  1.00  0.53           O  
HETATM  737  O   HOH T 736      -7.282  21.533  20.086  1.00  0.53           O  
HETATM  738  O   HOH T 737      -3.997 -23.985  -7.725  1.00  0.53           O  
HETATM  739  O   HOH T 738     -15.566 -33.239  25.088  1.00  0.53           O  
HETATM  740  O   HOH T 739      15.755 -41.483  -5.182  1.00  0.53           O  
HETATM  741  O   HOH T 740      19.480 -47.773  17.724  1.00  0.53           O  
HETATM  742  O   HOH T 741      -2.671 -40.497  39.778  1.00  0.53           O  
HETATM  743  O   HOH T 742      22.025  12.013  46.245  1.00  0.53           O  
HETATM  744  O   HOH T 743      10.875  21.808  27.935  1.00  0.53           O  
HETATM  745  O   HOH T 744      11.151 -21.190  10.653  1.00  0.53           O  
HETATM  746  O   HOH T 745      38.127 -11.396  24.334  1.00  0.53           O  
HETATM  747  O   HOH T 746      27.358 -30.824   0.538  1.00  0.53           O  
HETATM  748  O   HOH T 747      24.249  21.218  31.625  1.00  0.53           O  
HETATM  749  O   HOH T 748     -12.725 -50.613  31.051  1.00  0.54           O  
HETATM  750  O   HOH T 749      -5.635  -2.429  10.624  1.00  0.54           O  
HETATM  751  O   HOH T 750     -11.210  13.120  31.613  1.00  0.54           O  
HETATM  752  O   HOH T 751       7.589 -56.510   4.870  1.00  0.54           O  
HETATM  753  O   HOH T 752      17.772 -20.635  24.628  1.00  0.54           O  
HETATM  754  O   HOH T 753      -9.023 -48.436  -6.039  1.00  0.54           O  
HETATM  755  O   HOH T 754      -6.229  22.169  15.765  1.00  0.54           O  
HETATM  756  O   HOH T 755      10.745 -57.161  20.888  1.00  0.54           O  
HETATM  757  O   HOH T 756      22.786  14.681  39.913  1.00  0.54           O  
HETATM  758  O   HOH T 757       4.692 -22.227  16.096  1.00  0.54           O  
HETATM  759  O   HOH T 758     -13.720  -0.088  23.626  1.00  0.54           O  
HETATM  760  O   HOH T 759      12.859 -14.741  -0.471  1.00  0.54           O  
HETATM  761  O   HOH T 760     -10.481  21.647  16.786  1.00  0.54           O  
HETATM  762  O   HOH T 761       9.813 -52.954  12.942  1.00  0.54           O  
HETATM  763  O   HOH T 762      20.153 -42.192  22.090  1.00  0.54           O  
HETATM  764  O   HOH T 763      11.722 -39.618  -7.277  1.00  0.54           O  
HETATM  765  O   HOH T 764      17.873 -47.426  -0.148  1.00  0.54           O  
HETATM  766  O   HOH T 765      32.587   2.960  25.705  1.00  0.54           O  
HETATM  767  O   HOH T 766     -17.030 -32.398   9.756  1.00  0.54           O  
HETATM  768  O   HOH T 767     -10.534 -51.104  25.097  1.00  0.54           O  
HETATM  769  O   HOH T 768       9.988 -28.974  14.118  1.00  0.54           O  
HETATM  770  O   HOH T 769     -12.731  -8.184  34.725  1.00  0.54           O  
HETATM  771  O   HOH T 770      32.363   4.702  30.558  1.00  0.54           O  
HETATM  772  O   HOH T 771      24.547 -21.712  -7.601  1.00  0.54           O  
HETATM  773  O   HOH T 772      32.465  13.216  24.346  1.00  0.54           O  
HETATM  774  O   HOH T 773      35.963 -15.383  35.397  1.00  0.54           O  
HETATM  775  O   HOH T 774     -16.600 -36.630  11.185  1.00  0.54           O  
HETATM  776  O   HOH T 775      32.545 -26.921  17.842  1.00  0.55           O  
HETATM  777  O   HOH T 776      16.219 -52.509  -3.195  1.00  0.55           O  
HETATM  778  O   HOH T 777      -9.727 -46.304   4.224  1.00  0.55           O  
HETATM  779  O   HOH T 778     -13.822   0.851  27.340  1.00  0.55           O  
HETATM  780  O   HOH T 779      10.394 -13.401  43.104  1.00  0.55           O  
HETATM  781  O   HOH T 780      19.858 -40.528  24.326  1.00  0.55           O  
HETATM  782  O   HOH T 781      10.485 -10.038  35.628  1.00  0.55           O  
HETATM  783  O   HOH T 782       2.551   8.846  43.101  1.00  0.55           O  
HETATM  784  O   HOH T 783      16.332  -3.062  -3.267  1.00  0.55           O  
HETATM  785  O   HOH T 784       9.663 -42.042   8.271  1.00  0.55           O  
HETATM  786  O   HOH T 785      16.879  19.549  36.341  1.00  0.55           O  
HETATM  787  O   HOH T 786      16.382  -7.319   0.929  1.00  0.55           O  
HETATM  788  O   HOH T 787      -4.108  -0.784   9.114  1.00  0.55           O  
HETATM  789  O   HOH T 788      31.546   9.836  30.728  1.00  0.56           O  
HETATM  790  O   HOH T 789     -15.228   2.357  14.650  1.00  0.56           O  
HETATM  791  O   HOH T 790      16.102   8.728  24.108  1.00  0.56           O  
HETATM  792  O   HOH T 791      -4.012  -1.383  42.353  1.00  0.56           O  
HETATM  793  O   HOH T 792      20.559 -31.661  -7.535  1.00  0.56           O  
HETATM  794  O   HOH T 793     -10.006  -6.530  31.267  1.00  0.56           O  
HETATM  795  O   HOH T 794      -5.657 -12.230  35.699  1.00  0.56           O  
HETATM  796  O   HOH T 795      25.075  -4.810   7.297  1.00  0.56           O  
HETATM  797  O   HOH T 796       3.139 -32.441  36.532  1.00  0.56           O  
HETATM  798  O   HOH T 797      32.338 -28.296  24.286  1.00  0.56           O  
HETATM  799  O   HOH T 798      26.718  11.237  17.838  1.00  0.56           O  
HETATM  800  O   HOH T 799      -9.814 -41.350   0.013  1.00  0.56           O  
HETATM  801  O   HOH T 800      29.101 -30.659  27.483  1.00  0.56           O  
HETATM  802  O   HOH T 801      15.787 -17.583 -12.196  1.00  0.56           O  
HETATM  803  O   HOH T 802       0.767   1.682  45.384  1.00  0.56           O  
HETATM  804  O   HOH T 803      -2.465  14.550  42.963  1.00  0.56           O  
HETATM  805  O   HOH T 804      17.822 -14.163  16.430  1.00  0.56           O  
HETATM  806  O   HOH T 805      -9.820  17.790  26.760  1.00  0.56           O  
HETATM  807  O   HOH T 806       9.027 -17.802  27.546  1.00  0.56           O  
HETATM  808  O   HOH T 807       2.381 -56.863  17.620  1.00  0.56           O  
HETATM  809  O   HOH T 808     -16.153 -41.340  24.274  1.00  0.56           O  
HETATM  810  O   HOH T 809      33.249 -25.068  11.194  1.00  0.56           O  
HETATM  811  O   HOH T 810      -7.499  -0.187  42.531  1.00  0.56           O  
HETATM  812  O   HOH T 811      -9.541  13.083  38.984  1.00  0.56           O  
HETATM  813  O   HOH T 812     -13.215 -48.925  23.247  1.00  0.56           O  
HETATM  814  O   HOH T 813     -16.353  11.344  23.644  1.00  0.57           O  
HETATM  815  O   HOH T 814      20.542 -46.285  -3.165  1.00  0.57           O  
HETATM  816  O   HOH T 815      -6.497  -3.998  43.209  1.00  0.57           O  
HETATM  817  O   HOH T 816       2.177  22.207  24.130  1.00  0.57           O  
HETATM  818  O   HOH T 817      -5.495 -14.777  19.529  1.00  0.57           O  
HETATM  819  O   HOH T 818      15.308 -22.269  24.448  1.00  0.57           O  
HETATM  820  O   HOH T 819      20.079 -24.320 -11.647  1.00  0.57           O  
HETATM  821  O   HOH T 820       9.981  17.175  11.001  1.00  0.57           O  
HETATM  822  O   HOH T 821      26.610 -29.049  33.279  1.00  0.57           O  
HETATM  823  O   HOH T 822      13.152 -42.287  -6.410  1.00  0.57           O  
HETATM  824  O   HOH T 823      -0.965  -8.182  14.641  1.00  0.57           O  
HETATM  825  O   HOH T 824      -1.626 -38.893  -8.894  1.00  0.58           O  
HETATM  826  O   HOH T 825     -10.378 -45.908  -1.822  1.00  0.58           O  
HETATM  827  O   HOH T 826      25.958 -27.967  -3.870  1.00  0.59           O  
HETATM  828  O   HOH T 827      13.626 -18.667  20.980  1.00  0.59           O  
HETATM  829  O   HOH T 828      34.200   8.907  28.431  1.00  0.59           O  
HETATM  830  O   HOH T 829      -6.477 -31.347  -0.940  1.00  0.59           O  
HETATM  831  O   HOH T 830       6.652  25.278  15.067  1.00  0.60           O  
HETATM  832  O   HOH T 831      -7.285  19.589  46.821  1.00  0.60           O  
HETATM  833  O   HOH T 832       4.801 -57.540  12.098  1.00  0.65           O  
TER     834      HOH T 832 
