# Supplementary material for: Accurate Prediction of Hydration Sites of Proteins Using Energy Model With Atom Embedding
Source: Front Mol Biosci. 2021 Sep 20;8:756075. doi: 10.3389/fmolb.2021.756075 (PMC8488165; doi:10.3389/fmolb.2021.756075)
Supplement: Supplementary file 1 [file DataSheet1.ZIP › Data Sheet 1/Our_result_pdb/our_dataset_output/2R5D_watersite.pdb]

HEADER                                                        XXXX


JRNL        PMID   -1
HETATM    1  O   HOH T   0       1.772  -1.461  13.987  1.00  0.16           O  
HETATM    2  O   HOH T   1       2.946 -22.959  20.894  1.00  0.18           O  
HETATM    3  O   HOH T   2      16.992  -1.897   6.480  1.00  0.21           O  
HETATM    4  O   HOH T   3       4.400  -3.939  -4.926  1.00  0.23           O  
HETATM    5  O   HOH T   4     -10.032  11.547  15.798  1.00  0.24           O  
HETATM    6  O   HOH T   5       0.749  -5.993   7.009  1.00  0.24           O  
HETATM    7  O   HOH T   6      26.820 -10.194 -18.336  1.00  0.24           O  
HETATM    8  O   HOH T   7       5.717  -2.198  37.562  1.00  0.25           O  
HETATM    9  O   HOH T   8      16.477 -10.511   4.849  1.00  0.26           O  
HETATM   10  O   HOH T   9      25.388   4.998  -5.446  1.00  0.26           O  
HETATM   11  O   HOH T  10      26.562 -12.678 -19.523  1.00  0.26           O  
HETATM   12  O   HOH T  11       6.714  -0.541  31.010  1.00  0.28           O  
HETATM   13  O   HOH T  12     -13.342  -8.410  27.786  1.00  0.28           O  
HETATM   14  O   HOH T  13       5.348  -2.447  26.724  1.00  0.29           O  
HETATM   15  O   HOH T  14      -0.420   5.119  29.221  1.00  0.29           O  
HETATM   16  O   HOH T  15       2.416  -4.196   0.058  1.00  0.29           O  
HETATM   17  O   HOH T  16     -11.408 -12.934  21.378  1.00  0.29           O  
HETATM   18  O   HOH T  17      17.707   0.568 -17.942  1.00  0.30           O  
HETATM   19  O   HOH T  18      25.980  -9.948 -12.992  1.00  0.30           O  
HETATM   20  O   HOH T  19      21.350   2.527   3.582  1.00  0.30           O  
HETATM   21  O   HOH T  20      -7.953 -10.968  24.316  1.00  0.30           O  
HETATM   22  O   HOH T  21       4.978  14.479  19.401  1.00  0.31           O  
HETATM   23  O   HOH T  22     -11.838   5.713  19.473  1.00  0.31           O  
HETATM   24  O   HOH T  23       8.303   6.803  32.972  1.00  0.32           O  
HETATM   25  O   HOH T  24     -16.609   3.879   8.348  1.00  0.33           O  
HETATM   26  O   HOH T  25      26.133  -3.160  -5.956  1.00  0.33           O  
HETATM   27  O   HOH T  26     -18.194  19.557  12.062  1.00  0.33           O  
HETATM   28  O   HOH T  27      24.456   8.571 -17.550  1.00  0.33           O  
HETATM   29  O   HOH T  28     -17.227  18.320   7.072  1.00  0.33           O  
HETATM   30  O   HOH T  29      21.394   7.064  -1.382  1.00  0.33           O  
HETATM   31  O   HOH T  30      -4.849   8.101  28.446  1.00  0.34           O  
HETATM   32  O   HOH T  31      -8.930 -15.254  26.636  1.00  0.34           O  
HETATM   33  O   HOH T  32       0.809  -7.079  27.603  1.00  0.34           O  
HETATM   34  O   HOH T  33       1.390   3.285  30.296  1.00  0.34           O  
HETATM   35  O   HOH T  34     -12.340  -4.053  17.075  1.00  0.35           O  
HETATM   36  O   HOH T  35      22.818   6.432 -17.149  1.00  0.35           O  
HETATM   37  O   HOH T  36     -17.283  -4.839  22.540  1.00  0.36           O  
HETATM   38  O   HOH T  37      -8.682  -9.075  17.145  1.00  0.36           O  
HETATM   39  O   HOH T  38       7.969   4.075  -1.389  1.00  0.37           O  
HETATM   40  O   HOH T  39       5.846   7.966  33.556  1.00  0.37           O  
HETATM   41  O   HOH T  40      28.591 -12.360 -17.832  1.00  0.37           O  
HETATM   42  O   HOH T  41     -14.001   3.997   9.108  1.00  0.38           O  
HETATM   43  O   HOH T  42     -14.633  -2.448   5.065  1.00  0.39           O  
HETATM   44  O   HOH T  43      -5.041 -22.513  19.209  1.00  0.39           O  
HETATM   45  O   HOH T  44      -4.177 -20.948  23.910  1.00  0.39           O  
HETATM   46  O   HOH T  45       0.586   5.414  31.822  1.00  0.39           O  
HETATM   47  O   HOH T  46     -13.606  -4.318   3.228  1.00  0.40           O  
HETATM   48  O   HOH T  47      32.412  -9.476 -24.160  1.00  0.40           O  
HETATM   49  O   HOH T  48     -11.662  -0.659   0.264  1.00  0.40           O  
HETATM   50  O   HOH T  49       4.489   4.722   8.619  1.00  0.41           O  
HETATM   51  O   HOH T  50      21.844   3.083 -25.997  1.00  0.41           O  
HETATM   52  O   HOH T  51      16.912  -2.207  -4.957  1.00  0.41           O  
HETATM   53  O   HOH T  52       6.173   1.832  34.991  1.00  0.41           O  
HETATM   54  O   HOH T  53       6.511  -0.895  35.200  1.00  0.41           O  
HETATM   55  O   HOH T  54       6.501  -4.440  30.231  1.00  0.41           O  
HETATM   56  O   HOH T  55     -14.157   4.225  18.851  1.00  0.41           O  
HETATM   57  O   HOH T  56     -10.444 -12.893  18.754  1.00  0.41           O  
HETATM   58  O   HOH T  57      23.854 -11.469 -12.141  1.00  0.42           O  
HETATM   59  O   HOH T  58      -7.446 -11.171  27.945  1.00  0.42           O  
HETATM   60  O   HOH T  59       0.036 -21.110  18.906  1.00  0.42           O  
HETATM   61  O   HOH T  60      -4.217   7.261  30.992  1.00  0.42           O  
HETATM   62  O   HOH T  61      19.236  -4.703   2.474  1.00  0.42           O  
HETATM   63  O   HOH T  62      32.528  -0.590 -14.285  1.00  0.42           O  
HETATM   64  O   HOH T  63      17.902  -5.888 -23.675  1.00  0.42           O  
HETATM   65  O   HOH T  64      18.844   7.116  -7.359  1.00  0.42           O  
HETATM   66  O   HOH T  65     -16.643  -3.844   6.471  1.00  0.43           O  
HETATM   67  O   HOH T  66       8.431  -8.975  -0.164  1.00  0.43           O  
HETATM   68  O   HOH T  67      17.076  -5.072 -21.439  1.00  0.43           O  
HETATM   69  O   HOH T  68      16.261   1.706  31.787  1.00  0.43           O  
HETATM   70  O   HOH T  69       2.281 -20.233  20.274  1.00  0.44           O  
HETATM   71  O   HOH T  70      15.177  -6.702 -20.462  1.00  0.44           O  
HETATM   72  O   HOH T  71      23.057  -0.116  -2.377  1.00  0.44           O  
HETATM   73  O   HOH T  72      -7.423  12.152  15.314  1.00  0.45           O  
HETATM   74  O   HOH T  73     -14.030  19.057  10.575  1.00  0.45           O  
HETATM   75  O   HOH T  74       8.641   0.675  34.206  1.00  0.45           O  
HETATM   76  O   HOH T  75     -13.798   6.591  17.648  1.00  0.45           O  
HETATM   77  O   HOH T  76      11.942  -7.771 -12.046  1.00  0.45           O  
HETATM   78  O   HOH T  77      21.099   1.650 -23.634  1.00  0.45           O  
HETATM   79  O   HOH T  78       3.105  14.468  21.302  1.00  0.45           O  
HETATM   80  O   HOH T  79      -8.341 -11.591  30.409  1.00  0.45           O  
HETATM   81  O   HOH T  80     -18.794  16.880  12.884  1.00  0.45           O  
HETATM   82  O   HOH T  81      22.875   5.552 -25.193  1.00  0.46           O  
HETATM   83  O   HOH T  82      -5.555  11.404  17.147  1.00  0.46           O  
HETATM   84  O   HOH T  83      12.921  -7.653   8.875  1.00  0.46           O  
HETATM   85  O   HOH T  84     -11.841  -3.010   1.661  1.00  0.46           O  
HETATM   86  O   HOH T  85       4.196  -3.450  29.096  1.00  0.46           O  
HETATM   87  O   HOH T  86     -18.090  -3.233   4.085  1.00  0.46           O  
HETATM   88  O   HOH T  87       4.871  -2.553  31.581  1.00  0.46           O  
HETATM   89  O   HOH T  88      28.718   2.200 -11.055  1.00  0.47           O  
HETATM   90  O   HOH T  89       4.047  -3.214  -7.535  1.00  0.47           O  
HETATM   91  O   HOH T  90      24.486   8.167 -11.338  1.00  0.47           O  
HETATM   92  O   HOH T  91     -12.837   5.027   3.349  1.00  0.47           O  
HETATM   93  O   HOH T  92     -10.659 -12.772  29.289  1.00  0.48           O  
HETATM   94  O   HOH T  93      12.270  -1.800  33.850  1.00  0.48           O  
HETATM   95  O   HOH T  94      27.518   3.336  -4.719  1.00  0.48           O  
HETATM   96  O   HOH T  95      22.854   9.739 -12.918  1.00  0.48           O  
HETATM   97  O   HOH T  96       8.932  -3.866  20.774  1.00  0.48           O  
HETATM   98  O   HOH T  97      -3.799 -19.464  30.007  1.00  0.49           O  
HETATM   99  O   HOH T  98      23.388 -12.188  -6.488  1.00  0.49           O  
HETATM  100  O   HOH T  99      29.233  -9.152  -6.264  1.00  0.49           O  
HETATM  101  O   HOH T 100      13.688   3.199  -8.240  1.00  0.49           O  
HETATM  102  O   HOH T 101     -15.304  17.375   8.852  1.00  0.49           O  
HETATM  103  O   HOH T 102      22.510   8.648 -15.534  1.00  0.49           O  
HETATM  104  O   HOH T 103       7.340  -3.251 -10.635  1.00  0.49           O  
HETATM  105  O   HOH T 104      26.927   8.655 -18.725  1.00  0.49           O  
HETATM  106  O   HOH T 105      -3.653   4.069  33.278  1.00  0.49           O  
HETATM  107  O   HOH T 106      15.592   6.822   2.993  1.00  0.49           O  
HETATM  108  O   HOH T 107      28.093   5.732 -26.690  1.00  0.49           O  
HETATM  109  O   HOH T 108      -0.299  -4.123  -0.434  1.00  0.49           O  
HETATM  110  O   HOH T 109      16.872  -3.600   8.571  1.00  0.49           O  
HETATM  111  O   HOH T 110      13.773   4.945  -1.533  1.00  0.50           O  
HETATM  112  O   HOH T 111      16.600  -8.361  -9.622  1.00  0.50           O  
HETATM  113  O   HOH T 112      25.590 -10.541 -15.747  1.00  0.50           O  
HETATM  114  O   HOH T 113       7.524  -3.849  27.649  1.00  0.51           O  
HETATM  115  O   HOH T 114      18.813   7.909  -4.878  1.00  0.51           O  
HETATM  116  O   HOH T 115      10.503   3.229  -1.076  1.00  0.51           O  
HETATM  117  O   HOH T 116     -20.108  -0.228  13.031  1.00  0.51           O  
HETATM  118  O   HOH T 117      -0.129   8.075  12.682  1.00  0.51           O  
HETATM  119  O   HOH T 118       7.317   2.356  -7.305  1.00  0.51           O  
HETATM  120  O   HOH T 119      13.165   1.724 -10.588  1.00  0.51           O  
HETATM  121  O   HOH T 120     -14.265   6.506  20.456  1.00  0.51           O  
HETATM  122  O   HOH T 121      25.230   3.416  -3.112  1.00  0.52           O  
HETATM  123  O   HOH T 122      11.610   0.798  18.267  1.00  0.52           O  
HETATM  124  O   HOH T 123      -4.752  -8.488  11.143  1.00  0.52           O  
HETATM  125  O   HOH T 124       2.549  13.117  23.708  1.00  0.52           O  
HETATM  126  O   HOH T 125       7.382 -11.276  11.429  1.00  0.52           O  
HETATM  127  O   HOH T 126     -10.396 -21.872  18.583  1.00  0.52           O  
HETATM  128  O   HOH T 127      -2.166   5.394  31.273  1.00  0.52           O  
HETATM  129  O   HOH T 128      24.235  -3.189  -3.826  1.00  0.52           O  
HETATM  130  O   HOH T 129      11.235   5.170  12.932  1.00  0.52           O  
HETATM  131  O   HOH T 130      34.131  -5.618  -8.916  1.00  0.53           O  
HETATM  132  O   HOH T 131     -14.566   8.854  18.991  1.00  0.53           O  
HETATM  133  O   HOH T 132      12.069   0.598 -15.624  1.00  0.53           O  
HETATM  134  O   HOH T 133       0.665 -12.290  11.058  1.00  0.53           O  
HETATM  135  O   HOH T 134      -5.581 -10.421  33.978  1.00  0.53           O  
HETATM  136  O   HOH T 135      18.688   3.071  31.431  1.00  0.54           O  
HETATM  137  O   HOH T 136       3.141   5.802   1.772  1.00  0.54           O  
HETATM  138  O   HOH T 137     -16.376  17.505  11.496  1.00  0.54           O  
HETATM  139  O   HOH T 138      20.354 -12.403  -0.644  1.00  0.54           O  
HETATM  140  O   HOH T 139      20.993   6.602   1.479  1.00  0.54           O  
HETATM  141  O   HOH T 140      25.608   5.033 -25.818  1.00  0.54           O  
HETATM  142  O   HOH T 141      -9.647 -12.878  25.424  1.00  0.54           O  
HETATM  143  O   HOH T 142       4.575 -11.617   4.614  1.00  0.54           O  
HETATM  144  O   HOH T 143      31.618  10.382 -21.169  1.00  0.55           O  
HETATM  145  O   HOH T 144      17.886 -11.681  -9.150  1.00  0.55           O  
HETATM  146  O   HOH T 145     -18.743  -2.512  22.510  1.00  0.55           O  
HETATM  147  O   HOH T 146      -2.510   6.014   7.152  1.00  0.55           O  
HETATM  148  O   HOH T 147      13.825 -12.889  -1.510  1.00  0.55           O  
HETATM  149  O   HOH T 148      16.288 -13.265   5.141  1.00  0.55           O  
HETATM  150  O   HOH T 149      23.187   3.250 -23.563  1.00  0.55           O  
HETATM  151  O   HOH T 150      -8.188  11.966  17.914  1.00  0.56           O  
HETATM  152  O   HOH T 151      -1.774   0.035   3.195  1.00  0.56           O  
HETATM  153  O   HOH T 152     -14.509   1.707  19.977  1.00  0.56           O  
HETATM  154  O   HOH T 153      35.682  -6.508 -10.623  1.00  0.56           O  
HETATM  155  O   HOH T 154      30.139 -10.666 -25.420  1.00  0.56           O  
HETATM  156  O   HOH T 155      38.870   0.019 -17.831  1.00  0.56           O  
HETATM  157  O   HOH T 156      -9.614 -13.557  16.256  1.00  0.56           O  
HETATM  158  O   HOH T 157       9.989  -4.937  13.206  1.00  0.56           O  
HETATM  159  O   HOH T 158      29.154   2.281  -8.121  1.00  0.56           O  
HETATM  160  O   HOH T 159       8.131   5.712   0.738  1.00  0.56           O  
HETATM  161  O   HOH T 160      -2.659 -21.275  18.351  1.00  0.56           O  
HETATM  162  O   HOH T 161      10.242  -4.288  27.245  1.00  0.56           O  
HETATM  163  O   HOH T 162      25.894 -13.766  -6.469  1.00  0.57           O  
HETATM  164  O   HOH T 163      17.855   7.681   2.957  1.00  0.57           O  
HETATM  165  O   HOH T 164      30.043  -6.499  -6.032  1.00  0.57           O  
HETATM  166  O   HOH T 165       5.699  -1.818  -9.223  1.00  0.57           O  
HETATM  167  O   HOH T 166      15.628  -4.138 -23.492  1.00  0.61           O  
TER     168      HOH T 166 
