# Supplementary material for: Accurate Prediction of Hydration Sites of Proteins Using Energy Model With Atom Embedding
Source: Front Mol Biosci. 2021 Sep 20;8:756075. doi: 10.3389/fmolb.2021.756075 (PMC8488165; doi:10.3389/fmolb.2021.756075)
Supplement: Supplementary file 1 [file DataSheet1.ZIP › Data Sheet 1/Our_result_pdb/our_dataset_output/2RBD_watersite.pdb]

HEADER                                                        XXXX


JRNL        PMID   -1
HETATM    1  O   HOH T   0      16.303  49.100  72.830  1.00  0.18           O  
HETATM    2  O   HOH T   1      15.890  21.041  42.148  1.00  0.18           O  
HETATM    3  O   HOH T   2      16.608  21.502  70.495  1.00  0.19           O  
HETATM    4  O   HOH T   3      17.409  30.734  50.601  1.00  0.19           O  
HETATM    5  O   HOH T   4      13.251   0.022  58.980  1.00  0.20           O  
HETATM    6  O   HOH T   5      22.240   5.838  44.243  1.00  0.21           O  
HETATM    7  O   HOH T   6      14.243  43.110  81.243  1.00  0.21           O  
HETATM    8  O   HOH T   7      15.112  16.608 119.972  1.00  0.21           O  
HETATM    9  O   HOH T   8      18.534  28.547  76.019  1.00  0.22           O  
HETATM   10  O   HOH T   9       9.916  -4.775  80.832  1.00  0.22           O  
HETATM   11  O   HOH T  10       4.462   5.706  70.331  1.00  0.22           O  
HETATM   12  O   HOH T  11      15.290  12.981 117.207  1.00  0.22           O  
HETATM   13  O   HOH T  12       7.147  33.933  92.080  1.00  0.23           O  
HETATM   14  O   HOH T  13      21.992  -3.474  72.286  1.00  0.23           O  
HETATM   15  O   HOH T  14       2.685  19.992  92.434  1.00  0.23           O  
HETATM   16  O   HOH T  15      -3.802  23.274  90.292  1.00  0.24           O  
HETATM   17  O   HOH T  16      15.322  38.057  52.159  1.00  0.24           O  
HETATM   18  O   HOH T  17      27.157  31.774  66.499  1.00  0.24           O  
HETATM   19  O   HOH T  18      10.374  -2.208  73.872  1.00  0.24           O  
HETATM   20  O   HOH T  19      15.420  30.394  59.662  1.00  0.24           O  
HETATM   21  O   HOH T  20       5.536  25.333  71.874  1.00  0.25           O  
HETATM   22  O   HOH T  21      16.871  12.318  77.048  1.00  0.25           O  
HETATM   23  O   HOH T  22      18.202  17.888  99.540  1.00  0.25           O  
HETATM   24  O   HOH T  23      18.503  29.888  54.363  1.00  0.25           O  
HETATM   25  O   HOH T  24       4.126   8.283  71.288  1.00  0.26           O  
HETATM   26  O   HOH T  25       4.032   1.984  74.585  1.00  0.26           O  
HETATM   27  O   HOH T  26      21.368  31.720  80.875  1.00  0.26           O  
HETATM   28  O   HOH T  27       9.111   9.407  74.470  1.00  0.26           O  
HETATM   29  O   HOH T  28       2.172  26.870  91.581  1.00  0.26           O  
HETATM   30  O   HOH T  29       1.584  10.340  87.141  1.00  0.26           O  
HETATM   31  O   HOH T  30       7.058  13.144  74.278  1.00  0.26           O  
HETATM   32  O   HOH T  31      26.528  32.922  97.471  1.00  0.26           O  
HETATM   33  O   HOH T  32      17.040  37.172  58.953  1.00  0.27           O  
HETATM   34  O   HOH T  33      19.555  -2.326  67.913  1.00  0.27           O  
HETATM   35  O   HOH T  34      17.594  25.518  85.866  1.00  0.27           O  
HETATM   36  O   HOH T  35       9.869  -7.542  90.732  1.00  0.27           O  
HETATM   37  O   HOH T  36      10.726  29.685  87.929  1.00  0.27           O  
HETATM   38  O   HOH T  37       5.315  22.489  81.544  1.00  0.27           O  
HETATM   39  O   HOH T  38      18.669  32.745  96.302  1.00  0.27           O  
HETATM   40  O   HOH T  39      17.130  25.836  72.523  1.00  0.27           O  
HETATM   41  O   HOH T  40      12.349   0.100  70.151  1.00  0.28           O  
HETATM   42  O   HOH T  41      14.820  38.777  97.989  1.00  0.28           O  
HETATM   43  O   HOH T  42       3.795  -2.029  76.633  1.00  0.28           O  
HETATM   44  O   HOH T  43      12.082   2.101  96.632  1.00  0.28           O  
HETATM   45  O   HOH T  44      12.430  -5.612  94.970  1.00  0.28           O  
HETATM   46  O   HOH T  45      27.703  31.891  73.794  1.00  0.28           O  
HETATM   47  O   HOH T  46      22.245  26.845  55.576  1.00  0.28           O  
HETATM   48  O   HOH T  47       1.793  16.837  98.122  1.00  0.28           O  
HETATM   49  O   HOH T  48      20.015  -2.620  94.620  1.00  0.29           O  
HETATM   50  O   HOH T  49      17.876  12.092 119.778  1.00  0.29           O  
HETATM   51  O   HOH T  50      10.177  14.791 109.426  1.00  0.29           O  
HETATM   52  O   HOH T  51       4.945   9.433  50.982  1.00  0.29           O  
HETATM   53  O   HOH T  52      16.998  38.156  61.130  1.00  0.29           O  
HETATM   54  O   HOH T  53       5.603  37.371  74.635  1.00  0.29           O  
HETATM   55  O   HOH T  54       5.329  42.788  75.612  1.00  0.29           O  
HETATM   56  O   HOH T  55       9.624   3.772 103.865  1.00  0.29           O  
HETATM   57  O   HOH T  56      25.770  40.762  90.277  1.00  0.29           O  
HETATM   58  O   HOH T  57      15.953  12.011  89.939  1.00  0.29           O  
HETATM   59  O   HOH T  58      18.929  20.706  75.903  1.00  0.30           O  
HETATM   60  O   HOH T  59      20.479  26.024  60.202  1.00  0.30           O  
HETATM   61  O   HOH T  60      18.476  14.455  72.120  1.00  0.30           O  
HETATM   62  O   HOH T  61      13.382  38.488  86.515  1.00  0.30           O  
HETATM   63  O   HOH T  62      17.654  -7.658  80.845  1.00  0.30           O  
HETATM   64  O   HOH T  63       9.965  21.088 119.849  1.00  0.30           O  
HETATM   65  O   HOH T  64      26.413  43.110  89.048  1.00  0.30           O  
HETATM   66  O   HOH T  65       3.297  16.130  53.108  1.00  0.30           O  
HETATM   67  O   HOH T  66       4.464  14.709 104.027  1.00  0.30           O  
HETATM   68  O   HOH T  67      23.713  25.838 101.889  1.00  0.30           O  
HETATM   69  O   HOH T  68      12.082  24.809  89.607  1.00  0.30           O  
HETATM   70  O   HOH T  69      12.724  47.667  74.459  1.00  0.30           O  
HETATM   71  O   HOH T  70      10.980  -8.206  79.263  1.00  0.31           O  
HETATM   72  O   HOH T  71      21.649  11.767 100.272  1.00  0.31           O  
HETATM   73  O   HOH T  72      16.288  30.339  99.811  1.00  0.31           O  
HETATM   74  O   HOH T  73      10.442   0.069  75.702  1.00  0.31           O  
HETATM   75  O   HOH T  74      18.656  16.897  86.512  1.00  0.31           O  
HETATM   76  O   HOH T  75      19.855  37.173  58.980  1.00  0.31           O  
HETATM   77  O   HOH T  76      12.800  23.396 119.760  1.00  0.31           O  
HETATM   78  O   HOH T  77      13.566  -1.259 101.512  1.00  0.31           O  
HETATM   79  O   HOH T  78       9.813  21.952 122.500  1.00  0.31           O  
HETATM   80  O   HOH T  79      15.834  23.423  85.726  1.00  0.31           O  
HETATM   81  O   HOH T  80       3.114  21.139  67.258  1.00  0.31           O  
HETATM   82  O   HOH T  81      24.290  28.535 102.077  1.00  0.31           O  
HETATM   83  O   HOH T  82      17.119  23.016  72.824  1.00  0.31           O  
HETATM   84  O   HOH T  83      13.759  41.332  88.639  1.00  0.31           O  
HETATM   85  O   HOH T  84       2.490  32.240  69.623  1.00  0.31           O  
HETATM   86  O   HOH T  85      11.918  39.355  88.836  1.00  0.31           O  
HETATM   87  O   HOH T  86      -1.874  11.575  65.426  1.00  0.32           O  
HETATM   88  O   HOH T  87       3.512  29.800  62.869  1.00  0.32           O  
HETATM   89  O   HOH T  88      -0.058   9.639  64.761  1.00  0.32           O  
HETATM   90  O   HOH T  89       2.993   8.815  76.061  1.00  0.32           O  
HETATM   91  O   HOH T  90      23.695  29.188  92.545  1.00  0.32           O  
HETATM   92  O   HOH T  91      21.033  -7.964  81.526  1.00  0.32           O  
HETATM   93  O   HOH T  92      19.323  -2.748  91.854  1.00  0.32           O  
HETATM   94  O   HOH T  93      10.408   1.451  64.145  1.00  0.32           O  
HETATM   95  O   HOH T  94      19.261  24.726 116.590  1.00  0.32           O  
HETATM   96  O   HOH T  95      10.653  31.788  60.617  1.00  0.32           O  
HETATM   97  O   HOH T  96      17.957  -2.673  96.570  1.00  0.32           O  
HETATM   98  O   HOH T  97       4.044  30.298  76.076  1.00  0.32           O  
HETATM   99  O   HOH T  98      14.710   8.116  52.454  1.00  0.32           O  
HETATM  100  O   HOH T  99      23.612   4.021  65.121  1.00  0.32           O  
HETATM  101  O   HOH T 100      14.721  29.481  57.148  1.00  0.32           O  
HETATM  102  O   HOH T 101       2.095  19.832  55.758  1.00  0.33           O  
HETATM  103  O   HOH T 102      19.998  20.861  96.057  1.00  0.33           O  
HETATM  104  O   HOH T 103       5.610  28.123  85.947  1.00  0.33           O  
HETATM  105  O   HOH T 104      24.963  30.655  98.040  1.00  0.33           O  
HETATM  106  O   HOH T 105      10.416  12.046  69.889  1.00  0.33           O  
HETATM  107  O   HOH T 106       7.451  26.814  87.764  1.00  0.33           O  
HETATM  108  O   HOH T 107      20.232  23.070 103.081  1.00  0.33           O  
HETATM  109  O   HOH T 108      16.138   3.802  60.814  1.00  0.33           O  
HETATM  110  O   HOH T 109       1.655  20.409 103.126  1.00  0.33           O  
HETATM  111  O   HOH T 110      24.114  31.252  81.333  1.00  0.33           O  
HETATM  112  O   HOH T 111      19.230   6.396 105.116  1.00  0.33           O  
HETATM  113  O   HOH T 112      26.308  32.585  69.044  1.00  0.33           O  
HETATM  114  O   HOH T 113      19.570  17.965  75.901  1.00  0.33           O  
HETATM  115  O   HOH T 114       7.628  45.322  72.268  1.00  0.33           O  
HETATM  116  O   HOH T 115      21.644   5.278  89.957  1.00  0.33           O  
HETATM  117  O   HOH T 116      19.789  -2.917  70.714  1.00  0.34           O  
HETATM  118  O   HOH T 117      18.794  16.434 101.903  1.00  0.34           O  
HETATM  119  O   HOH T 118      12.600  25.114  92.394  1.00  0.34           O  
HETATM  120  O   HOH T 119      15.362  47.918  83.546  1.00  0.34           O  
HETATM  121  O   HOH T 120       7.516  37.586  88.409  1.00  0.34           O  
HETATM  122  O   HOH T 121      19.935  23.181  76.548  1.00  0.34           O  
HETATM  123  O   HOH T 122       2.580  22.017  94.267  1.00  0.34           O  
HETATM  124  O   HOH T 123      22.731  25.575  61.947  1.00  0.34           O  
HETATM  125  O   HOH T 124       4.913   8.958  73.888  1.00  0.34           O  
HETATM  126  O   HOH T 125      19.172   5.822  72.636  1.00  0.34           O  
HETATM  127  O   HOH T 126      13.267  -1.878  98.782  1.00  0.35           O  
HETATM  128  O   HOH T 127      17.700  -4.677  71.622  1.00  0.35           O  
HETATM  129  O   HOH T 128       3.901  18.575  54.193  1.00  0.35           O  
HETATM  130  O   HOH T 129       2.731  10.509  61.808  1.00  0.35           O  
HETATM  131  O   HOH T 130      18.588  22.946  85.959  1.00  0.35           O  
HETATM  132  O   HOH T 131       7.967  41.676  78.906  1.00  0.35           O  
HETATM  133  O   HOH T 132       1.069  13.968  94.330  1.00  0.35           O  
HETATM  134  O   HOH T 133       8.628  -0.120  73.692  1.00  0.35           O  
HETATM  135  O   HOH T 134       6.928   0.005  58.997  1.00  0.35           O  
HETATM  136  O   HOH T 135       8.035  29.098  52.099  1.00  0.35           O  
HETATM  137  O   HOH T 136       3.721   0.304  94.279  1.00  0.35           O  
HETATM  138  O   HOH T 137      14.095   7.937  62.610  1.00  0.35           O  
HETATM  139  O   HOH T 138      23.601  32.146  68.192  1.00  0.35           O  
HETATM  140  O   HOH T 139      33.018  25.192 109.740  1.00  0.35           O  
HETATM  141  O   HOH T 140      21.057  47.109  67.138  1.00  0.36           O  
HETATM  142  O   HOH T 141       8.845   3.108  56.018  1.00  0.36           O  
HETATM  143  O   HOH T 142       4.571  19.922  82.021  1.00  0.36           O  
HETATM  144  O   HOH T 143      10.775  -5.690  92.714  1.00  0.36           O  
HETATM  145  O   HOH T 144      20.579 -14.288  76.849  1.00  0.36           O  
HETATM  146  O   HOH T 145      15.745  -2.999  98.240  1.00  0.36           O  
HETATM  147  O   HOH T 146      11.139  16.854  49.180  1.00  0.36           O  
HETATM  148  O   HOH T 147       1.943  27.549 105.113  1.00  0.36           O  
HETATM  149  O   HOH T 148      14.481   0.384 103.691  1.00  0.36           O  
HETATM  150  O   HOH T 149       4.390   1.331  96.624  1.00  0.36           O  
HETATM  151  O   HOH T 150      18.255  12.713  45.404  1.00  0.36           O  
HETATM  152  O   HOH T 151      12.088  11.963  72.136  1.00  0.37           O  
HETATM  153  O   HOH T 152       2.320  19.316  95.082  1.00  0.37           O  
HETATM  154  O   HOH T 153       9.762   9.334 109.414  1.00  0.37           O  
HETATM  155  O   HOH T 154      13.193  35.092  53.968  1.00  0.37           O  
HETATM  156  O   HOH T 155      10.453   6.978  53.512  1.00  0.37           O  
HETATM  157  O   HOH T 156      19.624  16.285  66.308  1.00  0.37           O  
HETATM  158  O   HOH T 157      19.330  14.333  59.402  1.00  0.37           O  
HETATM  159  O   HOH T 158       3.297   4.125  66.399  1.00  0.37           O  
HETATM  160  O   HOH T 159      -0.816  29.008  74.453  1.00  0.37           O  
HETATM  161  O   HOH T 160      16.512  14.805  89.680  1.00  0.37           O  
HETATM  162  O   HOH T 161       7.907  33.788  63.989  1.00  0.37           O  
HETATM  163  O   HOH T 162       7.049  39.010  67.839  1.00  0.38           O  
HETATM  164  O   HOH T 163      17.320   9.779 111.971  1.00  0.38           O  
HETATM  165  O   HOH T 164       1.383  13.158  71.225  1.00  0.38           O  
HETATM  166  O   HOH T 165      17.172  11.933  71.818  1.00  0.38           O  
HETATM  167  O   HOH T 166      10.331  32.674  63.208  1.00  0.38           O  
HETATM  168  O   HOH T 167       2.212  34.954  69.876  1.00  0.38           O  
HETATM  169  O   HOH T 168      16.845   9.118  86.554  1.00  0.38           O  
HETATM  170  O   HOH T 169      24.415   3.687  93.717  1.00  0.38           O  
HETATM  171  O   HOH T 170      21.263  23.153 120.948  1.00  0.38           O  
HETATM  172  O   HOH T 171      18.940  19.619  63.716  1.00  0.38           O  
HETATM  173  O   HOH T 172      12.620   7.321  70.991  1.00  0.38           O  
HETATM  174  O   HOH T 173      18.162  47.363  77.189  1.00  0.38           O  
HETATM  175  O   HOH T 174       9.383  25.018  88.643  1.00  0.38           O  
HETATM  176  O   HOH T 175      13.197   2.316 109.540  1.00  0.38           O  
HETATM  177  O   HOH T 176      15.255  -0.823  63.760  1.00  0.38           O  
HETATM  178  O   HOH T 177      10.370   3.090 106.481  1.00  0.38           O  
HETATM  179  O   HOH T 178      18.487  46.189  67.565  1.00  0.38           O  
HETATM  180  O   HOH T 179      24.742  11.672  43.119  1.00  0.38           O  
HETATM  181  O   HOH T 180       7.761  29.086 113.744  1.00  0.39           O  
HETATM  182  O   HOH T 181      15.518   8.480  41.295  1.00  0.39           O  
HETATM  183  O   HOH T 182      14.223  16.060 122.563  1.00  0.39           O  
HETATM  184  O   HOH T 183      14.655  -4.871  96.447  1.00  0.39           O  
HETATM  185  O   HOH T 184       5.150  -4.764  79.218  1.00  0.39           O  
HETATM  186  O   HOH T 185      12.260  -0.359  67.441  1.00  0.39           O  
HETATM  187  O   HOH T 186       2.434  11.633  91.370  1.00  0.39           O  
HETATM  188  O   HOH T 187      11.334  -0.094  98.076  1.00  0.39           O  
HETATM  189  O   HOH T 188      16.353  16.495  92.010  1.00  0.39           O  
HETATM  190  O   HOH T 189       9.749   0.011  66.396  1.00  0.39           O  
HETATM  191  O   HOH T 190      12.557  45.152  81.959  1.00  0.39           O  
HETATM  192  O   HOH T 191      22.182  29.530  82.479  1.00  0.39           O  
HETATM  193  O   HOH T 192       9.726   5.678 105.672  1.00  0.39           O  
HETATM  194  O   HOH T 193      21.293  29.231  69.868  1.00  0.39           O  
HETATM  195  O   HOH T 194      17.489   6.465  64.533  1.00  0.39           O  
HETATM  196  O   HOH T 195      14.825   4.003 111.188  1.00  0.39           O  
HETATM  197  O   HOH T 196       1.684  20.029  58.488  1.00  0.39           O  
HETATM  198  O   HOH T 197      12.656   8.413  41.043  1.00  0.39           O  
HETATM  199  O   HOH T 198      17.963   6.357  44.095  1.00  0.39           O  
HETATM  200  O   HOH T 199      22.272  28.109  63.109  1.00  0.39           O  
HETATM  201  O   HOH T 200      16.647   6.833 101.835  1.00  0.39           O  
HETATM  202  O   HOH T 201      -1.290  13.268  75.293  1.00  0.40           O  
HETATM  203  O   HOH T 202      13.728  -9.320  85.255  1.00  0.40           O  
HETATM  204  O   HOH T 203      16.300   7.780 110.372  1.00  0.40           O  
HETATM  205  O   HOH T 204      17.053   4.334  71.747  1.00  0.40           O  
HETATM  206  O   HOH T 205      17.892  32.948  88.486  1.00  0.40           O  
HETATM  207  O   HOH T 206      12.226   7.981  68.280  1.00  0.40           O  
HETATM  208  O   HOH T 207      19.888  31.703  51.036  1.00  0.40           O  
HETATM  209  O   HOH T 208      23.389  11.473  65.708  1.00  0.40           O  
HETATM  210  O   HOH T 209       3.541  13.619  93.034  1.00  0.40           O  
HETATM  211  O   HOH T 210      14.438  31.101  90.447  1.00  0.40           O  
HETATM  212  O   HOH T 211      12.125  39.038  98.040  1.00  0.40           O  
HETATM  213  O   HOH T 212       4.095  28.743  71.224  1.00  0.40           O  
HETATM  214  O   HOH T 213      18.805  26.179 121.563  1.00  0.40           O  
HETATM  215  O   HOH T 214       4.943  -9.144  86.476  1.00  0.40           O  
HETATM  216  O   HOH T 215       1.985  20.496 105.932  1.00  0.40           O  
HETATM  217  O   HOH T 216      11.837  27.600 120.809  1.00  0.40           O  
HETATM  218  O   HOH T 217       8.319  -0.435  64.156  1.00  0.40           O  
HETATM  219  O   HOH T 218      17.018   4.167 102.618  1.00  0.40           O  
HETATM  220  O   HOH T 219      13.404   8.861 106.078  1.00  0.40           O  
HETATM  221  O   HOH T 220       4.607  26.560  69.489  1.00  0.40           O  
HETATM  222  O   HOH T 221       9.283  27.607  54.143  1.00  0.41           O  
HETATM  223  O   HOH T 222      10.572   3.623  98.595  1.00  0.41           O  
HETATM  224  O   HOH T 223      10.082  13.753  92.922  1.00  0.41           O  
HETATM  225  O   HOH T 224      15.128  14.545  76.751  1.00  0.41           O  
HETATM  226  O   HOH T 225      12.449  28.675  94.558  1.00  0.41           O  
HETATM  227  O   HOH T 226      16.797  11.410  74.434  1.00  0.41           O  
HETATM  228  O   HOH T 227      19.139  26.529  83.892  1.00  0.41           O  
HETATM  229  O   HOH T 228       7.901   6.774  52.324  1.00  0.41           O  
HETATM  230  O   HOH T 229      25.207  44.611  84.970  1.00  0.41           O  
HETATM  231  O   HOH T 230      21.374  13.846  63.414  1.00  0.41           O  
HETATM  232  O   HOH T 231      20.420   9.645 109.439  1.00  0.41           O  
HETATM  233  O   HOH T 232       3.147  26.525  72.804  1.00  0.41           O  
HETATM  234  O   HOH T 233       8.490  45.693  79.043  1.00  0.41           O  
HETATM  235  O   HOH T 234       6.308  40.482  77.058  1.00  0.41           O  
HETATM  236  O   HOH T 235      12.352   1.554 105.221  1.00  0.41           O  
HETATM  237  O   HOH T 236      23.378  14.611  40.942  1.00  0.41           O  
HETATM  238  O   HOH T 237      18.812   7.272  62.178  1.00  0.41           O  
HETATM  239  O   HOH T 238      16.994  38.546  99.754  1.00  0.41           O  
HETATM  240  O   HOH T 239      18.748  20.598  68.878  1.00  0.41           O  
HETATM  241  O   HOH T 240       3.997  12.024 103.936  1.00  0.42           O  
HETATM  242  O   HOH T 241      16.466   2.161 104.486  1.00  0.42           O  
HETATM  243  O   HOH T 242       8.913  11.255 116.567  1.00  0.42           O  
HETATM  244  O   HOH T 243       1.792  23.652  67.441  1.00  0.42           O  
HETATM  245  O   HOH T 244      15.470   6.341 112.603  1.00  0.42           O  
HETATM  246  O   HOH T 245       3.586  22.349 111.601  1.00  0.42           O  
HETATM  247  O   HOH T 246      10.332  27.723  51.637  1.00  0.42           O  
HETATM  248  O   HOH T 247      24.372  25.770  89.949  1.00  0.42           O  
HETATM  249  O   HOH T 248      10.555  21.168  47.052  1.00  0.42           O  
HETATM  250  O   HOH T 249      12.867  32.622  62.093  1.00  0.42           O  
HETATM  251  O   HOH T 250      -0.783  29.958  77.024  1.00  0.42           O  
HETATM  252  O   HOH T 251      22.901  45.877  68.674  1.00  0.42           O  
HETATM  253  O   HOH T 252      22.046  16.102  64.862  1.00  0.42           O  
HETATM  254  O   HOH T 253      10.014  27.468  49.021  1.00  0.42           O  
HETATM  255  O   HOH T 254      22.676  43.731  88.372  1.00  0.42           O  
HETATM  256  O   HOH T 255      16.836  -4.641  94.909  1.00  0.42           O  
HETATM  257  O   HOH T 256       0.102  25.133  92.505  1.00  0.42           O  
HETATM  258  O   HOH T 257       7.516  12.768  47.865  1.00  0.42           O  
HETATM  259  O   HOH T 258       6.083  35.839  95.953  1.00  0.42           O  
HETATM  260  O   HOH T 259      17.105  46.958  85.473  1.00  0.42           O  
HETATM  261  O   HOH T 260       2.456  20.178  69.766  1.00  0.42           O  
HETATM  262  O   HOH T 261      10.615  16.854  44.631  1.00  0.43           O  
HETATM  263  O   HOH T 262       0.009   3.819  70.174  1.00  0.43           O  
HETATM  264  O   HOH T 263       9.496   6.107  99.352  1.00  0.43           O  
HETATM  265  O   HOH T 264       2.567   4.026  69.049  1.00  0.43           O  
HETATM  266  O   HOH T 265      11.006  25.422 119.202  1.00  0.43           O  
HETATM  267  O   HOH T 266      24.436  23.296 100.780  1.00  0.43           O  
HETATM  268  O   HOH T 267       7.863  27.769  56.543  1.00  0.43           O  
HETATM  269  O   HOH T 268       9.459  14.840  48.170  1.00  0.43           O  
HETATM  270  O   HOH T 269      15.937  38.989  95.507  1.00  0.43           O  
HETATM  271  O   HOH T 270       7.260   8.205  50.012  1.00  0.43           O  
HETATM  272  O   HOH T 271      20.946  28.263  65.606  1.00  0.43           O  
HETATM  273  O   HOH T 272       3.036  13.031  73.627  1.00  0.43           O  
HETATM  274  O   HOH T 273      13.855  37.774  54.503  1.00  0.43           O  
HETATM  275  O   HOH T 274       0.780  29.755  63.256  1.00  0.43           O  
HETATM  276  O   HOH T 275      10.987   4.485  54.705  1.00  0.43           O  
HETATM  277  O   HOH T 276       6.723  29.401  88.115  1.00  0.43           O  
HETATM  278  O   HOH T 277       8.956  43.483  80.711  1.00  0.43           O  
HETATM  279  O   HOH T 278      -1.356   6.724  87.747  1.00  0.43           O  
HETATM  280  O   HOH T 279       5.832  38.171  78.702  1.00  0.43           O  
HETATM  281  O   HOH T 280       9.735  15.304 112.073  1.00  0.43           O  
HETATM  282  O   HOH T 281      20.274   7.189  42.880  1.00  0.44           O  
HETATM  283  O   HOH T 282      20.007  27.207 117.529  1.00  0.44           O  
HETATM  284  O   HOH T 283      17.912 -11.610  78.138  1.00  0.44           O  
HETATM  285  O   HOH T 284      21.569  21.159 101.786  1.00  0.44           O  
HETATM  286  O   HOH T 285      11.312  48.307  77.986  1.00  0.44           O  
HETATM  287  O   HOH T 286       3.129   1.887  77.064  1.00  0.44           O  
HETATM  288  O   HOH T 287       2.554  12.658  60.068  1.00  0.44           O  
HETATM  289  O   HOH T 288      28.073  31.267  70.959  1.00  0.44           O  
HETATM  290  O   HOH T 289      17.325   4.817 100.015  1.00  0.44           O  
HETATM  291  O   HOH T 290       7.818  -0.117  71.073  1.00  0.44           O  
HETATM  292  O   HOH T 291      15.325  45.353  82.480  1.00  0.44           O  
HETATM  293  O   HOH T 292      20.912  10.228  71.202  1.00  0.44           O  
HETATM  294  O   HOH T 293       4.966  17.507  80.922  1.00  0.44           O  
HETATM  295  O   HOH T 294       7.064  44.770  69.737  1.00  0.44           O  
HETATM  296  O   HOH T 295      16.203   6.214  62.066  1.00  0.44           O  
HETATM  297  O   HOH T 296       8.394   5.483  54.655  1.00  0.44           O  
HETATM  298  O   HOH T 297      11.075  46.346  79.904  1.00  0.44           O  
HETATM  299  O   HOH T 298      16.883  15.517 121.732  1.00  0.44           O  
HETATM  300  O   HOH T 299      21.193  19.883  74.653  1.00  0.44           O  
HETATM  301  O   HOH T 300      16.913  -9.190  83.049  1.00  0.45           O  
HETATM  302  O   HOH T 301      -1.692  19.401  76.974  1.00  0.45           O  
HETATM  303  O   HOH T 302       4.089  29.869  87.594  1.00  0.45           O  
HETATM  304  O   HOH T 303       7.916   2.339 102.281  1.00  0.45           O  
HETATM  305  O   HOH T 304      22.927  27.122 112.068  1.00  0.45           O  
HETATM  306  O   HOH T 305      22.888   7.282  41.932  1.00  0.45           O  
HETATM  307  O   HOH T 306      -0.791  24.284  57.911  1.00  0.45           O  
HETATM  308  O   HOH T 307      10.695  10.221  67.934  1.00  0.45           O  
HETATM  309  O   HOH T 308      21.795  -5.280  90.414  1.00  0.45           O  
HETATM  310  O   HOH T 309      20.471  19.367  61.383  1.00  0.45           O  
HETATM  311  O   HOH T 310       2.272  27.962 107.800  1.00  0.45           O  
HETATM  312  O   HOH T 311       0.696   3.348  65.646  1.00  0.45           O  
HETATM  313  O   HOH T 312      19.445 -12.489  74.985  1.00  0.45           O  
HETATM  314  O   HOH T 313       6.154  10.710 105.234  1.00  0.45           O  
HETATM  315  O   HOH T 314      -2.353  10.927  68.096  1.00  0.45           O  
HETATM  316  O   HOH T 315      20.596  -7.859  77.651  1.00  0.45           O  
HETATM  317  O   HOH T 316       7.162  10.533  73.106  1.00  0.45           O  
HETATM  318  O   HOH T 317      22.364  27.068  91.412  1.00  0.45           O  
HETATM  319  O   HOH T 318      -0.003  18.588  99.473  1.00  0.45           O  
HETATM  320  O   HOH T 319       0.306   6.073  65.320  1.00  0.45           O  
HETATM  321  O   HOH T 320      14.510  11.083  71.489  1.00  0.45           O  
HETATM  322  O   HOH T 321      21.058  -4.515  92.914  1.00  0.45           O  
HETATM  323  O   HOH T 322      17.565  28.104  89.685  1.00  0.45           O  
HETATM  324  O   HOH T 323      12.155  15.211  42.136  1.00  0.45           O  
HETATM  325  O   HOH T 324       1.872  30.812  77.679  1.00  0.45           O  
HETATM  326  O   HOH T 325      22.238   5.123  92.701  1.00  0.46           O  
HETATM  327  O   HOH T 326       7.362  -9.143  85.161  1.00  0.46           O  
HETATM  328  O   HOH T 327       8.700  47.675  77.088  1.00  0.46           O  
HETATM  329  O   HOH T 328       9.926  19.570  44.783  1.00  0.46           O  
HETATM  330  O   HOH T 329       2.529  10.690  64.524  1.00  0.46           O  
HETATM  331  O   HOH T 330      23.524  31.102 107.900  1.00  0.46           O  
HETATM  332  O   HOH T 331      10.993  -1.579 100.381  1.00  0.46           O  
HETATM  333  O   HOH T 332       3.260  24.661  58.469  1.00  0.46           O  
HETATM  334  O   HOH T 333      20.174  28.422  78.378  1.00  0.46           O  
HETATM  335  O   HOH T 334      18.926  10.578  75.832  1.00  0.46           O  
HETATM  336  O   HOH T 335       4.794  27.280  88.387  1.00  0.46           O  
HETATM  337  O   HOH T 336       1.551  22.915 109.779  1.00  0.46           O  
HETATM  338  O   HOH T 337      27.302  43.634  86.489  1.00  0.46           O  
HETATM  339  O   HOH T 338      -0.024  11.975  69.041  1.00  0.46           O  
HETATM  340  O   HOH T 339      20.735  27.572 120.166  1.00  0.46           O  
HETATM  341  O   HOH T 340       6.378   3.859 100.447  1.00  0.46           O  
HETATM  342  O   HOH T 341      20.353  -8.409  84.184  1.00  0.46           O  
HETATM  343  O   HOH T 342       7.725  29.853  54.700  1.00  0.46           O  
HETATM  344  O   HOH T 343      20.492  11.721  85.544  1.00  0.47           O  
HETATM  345  O   HOH T 344       0.801  35.010  72.230  1.00  0.47           O  
HETATM  346  O   HOH T 345      -1.818   4.417  65.714  1.00  0.47           O  
HETATM  347  O   HOH T 346      20.001  25.047 119.263  1.00  0.47           O  
HETATM  348  O   HOH T 347      21.791  22.735  72.136  1.00  0.47           O  
HETATM  349  O   HOH T 348       5.837  -0.759  97.323  1.00  0.47           O  
HETATM  350  O   HOH T 349      27.666  26.164 119.130  1.00  0.47           O  
HETATM  351  O   HOH T 350      21.646  -9.719  79.440  1.00  0.47           O  
HETATM  352  O   HOH T 351       6.262  31.512  91.126  1.00  0.47           O  
HETATM  353  O   HOH T 352      23.901  33.121  98.074  1.00  0.47           O  
HETATM  354  O   HOH T 353      18.788   9.957  73.060  1.00  0.47           O  
HETATM  355  O   HOH T 354       9.739  -8.273  93.374  1.00  0.47           O  
HETATM  356  O   HOH T 355      21.947  13.605  86.924  1.00  0.47           O  
HETATM  357  O   HOH T 356      19.739  29.747  89.142  1.00  0.47           O  
HETATM  358  O   HOH T 357      11.374   9.208  72.788  1.00  0.47           O  
HETATM  359  O   HOH T 358      11.933  13.449 110.940  1.00  0.47           O  
HETATM  360  O   HOH T 359      17.215  28.393  93.659  1.00  0.47           O  
HETATM  361  O   HOH T 360       7.419  -6.011  80.275  1.00  0.47           O  
HETATM  362  O   HOH T 361      28.820  25.275 121.483  1.00  0.47           O  
HETATM  363  O   HOH T 362      17.873   8.702  39.702  1.00  0.47           O  
HETATM  364  O   HOH T 363      22.250  29.872  67.307  1.00  0.47           O  
HETATM  365  O   HOH T 364      -0.646  14.621  69.735  1.00  0.47           O  
HETATM  366  O   HOH T 365      13.263  38.908  95.629  1.00  0.47           O  
HETATM  367  O   HOH T 366       0.468   8.082  86.166  1.00  0.48           O  
HETATM  368  O   HOH T 367      24.104   4.176  90.945  1.00  0.48           O  
HETATM  369  O   HOH T 368      14.434  23.020  40.781  1.00  0.48           O  
HETATM  370  O   HOH T 369      20.277  25.621  77.840  1.00  0.48           O  
HETATM  371  O   HOH T 370      21.963   7.584  91.516  1.00  0.48           O  
HETATM  372  O   HOH T 371      19.187   8.099  70.975  1.00  0.48           O  
HETATM  373  O   HOH T 372      19.115  13.720 121.662  1.00  0.48           O  
HETATM  374  O   HOH T 373      22.568  25.534 120.354  1.00  0.48           O  
HETATM  375  O   HOH T 374       1.304  14.292  91.495  1.00  0.48           O  
HETATM  376  O   HOH T 375       3.790  32.255  63.995  1.00  0.48           O  
HETATM  377  O   HOH T 376      13.891  26.811  90.639  1.00  0.48           O  
HETATM  378  O   HOH T 377       5.772   1.542  99.038  1.00  0.48           O  
HETATM  379  O   HOH T 378       0.612  14.693  97.094  1.00  0.48           O  
HETATM  380  O   HOH T 379       6.578  30.001 111.549  1.00  0.48           O  
HETATM  381  O   HOH T 380      19.335  14.243  86.016  1.00  0.48           O  
HETATM  382  O   HOH T 381      -0.736   9.338  72.634  1.00  0.48           O  
HETATM  383  O   HOH T 382      12.474  -0.405  63.443  1.00  0.48           O  
HETATM  384  O   HOH T 383       0.627  12.453  54.968  1.00  0.48           O  
HETATM  385  O   HOH T 384      18.552  31.675  98.817  1.00  0.48           O  
HETATM  386  O   HOH T 385      11.612  27.648  92.233  1.00  0.48           O  
HETATM  387  O   HOH T 386       0.038  32.672  77.007  1.00  0.48           O  
HETATM  388  O   HOH T 387      22.673  27.726 100.010  1.00  0.48           O  
HETATM  389  O   HOH T 388      16.414  30.192 109.738  1.00  0.49           O  
HETATM  390  O   HOH T 389      21.694  40.789  66.152  1.00  0.49           O  
HETATM  391  O   HOH T 390      21.044  16.114  87.434  1.00  0.49           O  
HETATM  392  O   HOH T 391      12.326  34.356  64.189  1.00  0.49           O  
HETATM  393  O   HOH T 392      20.510  15.604  96.834  1.00  0.49           O  
HETATM  394  O   HOH T 393      21.432   9.285  84.600  1.00  0.49           O  
HETATM  395  O   HOH T 394      15.003  38.941  59.548  1.00  0.49           O  
HETATM  396  O   HOH T 395      13.678 -10.436  87.670  1.00  0.49           O  
HETATM  397  O   HOH T 396       6.095  10.437  48.688  1.00  0.49           O  
HETATM  398  O   HOH T 397       3.395  26.782 102.840  1.00  0.49           O  
HETATM  399  O   HOH T 398      21.778  45.709  86.785  1.00  0.49           O  
HETATM  400  O   HOH T 399       5.571  35.982  93.251  1.00  0.49           O  
HETATM  401  O   HOH T 400      18.718   8.215  84.273  1.00  0.49           O  
HETATM  402  O   HOH T 401       7.102  -0.710  61.750  1.00  0.49           O  
HETATM  403  O   HOH T 402       5.703   5.883  98.756  1.00  0.50           O  
HETATM  404  O   HOH T 403      19.222  21.937  71.291  1.00  0.50           O  
HETATM  405  O   HOH T 404       5.474  13.198 106.037  1.00  0.50           O  
HETATM  406  O   HOH T 405      25.189  28.935 108.160  1.00  0.50           O  
HETATM  407  O   HOH T 406       7.796  47.377  70.330  1.00  0.50           O  
HETATM  408  O   HOH T 407      16.373  31.464  97.237  1.00  0.50           O  
HETATM  409  O   HOH T 408      12.721   9.008  50.718  1.00  0.50           O  
HETATM  410  O   HOH T 409      19.538  24.362  72.626  1.00  0.50           O  
HETATM  411  O   HOH T 410      14.729  38.845  88.920  1.00  0.50           O  
HETATM  412  O   HOH T 411      21.035  29.271  55.140  1.00  0.50           O  
HETATM  413  O   HOH T 412       0.549   7.309  93.258  1.00  0.50           O  
HETATM  414  O   HOH T 413       5.011  11.486  74.702  1.00  0.50           O  
HETATM  415  O   HOH T 414      -1.531  13.478  56.582  1.00  0.50           O  
HETATM  416  O   HOH T 415      22.948  28.129  77.768  1.00  0.50           O  
HETATM  417  O   HOH T 416      20.357  17.289 121.348  1.00  0.50           O  
HETATM  418  O   HOH T 417      20.142  18.390  97.575  1.00  0.50           O  
HETATM  419  O   HOH T 418      14.983  29.867  94.583  1.00  0.51           O  
HETATM  420  O   HOH T 419      10.978  18.377  46.980  1.00  0.51           O  
HETATM  421  O   HOH T 420       1.502  22.808  59.216  1.00  0.51           O  
HETATM  422  O   HOH T 421       2.264  22.690 101.415  1.00  0.51           O  
HETATM  423  O   HOH T 422      21.737  21.851  60.897  1.00  0.51           O  
HETATM  424  O   HOH T 423      18.759   3.731 104.712  1.00  0.51           O  
HETATM  425  O   HOH T 424      -2.404   8.813  89.237  1.00  0.51           O  
HETATM  426  O   HOH T 425       7.233  -9.090  87.984  1.00  0.51           O  
HETATM  427  O   HOH T 426      -0.604  12.094  72.907  1.00  0.51           O  
HETATM  428  O   HOH T 427       9.790  -6.361  95.299  1.00  0.51           O  
HETATM  429  O   HOH T 428      11.566  -2.409  69.271  1.00  0.51           O  
HETATM  430  O   HOH T 429      18.751  -4.856  68.999  1.00  0.51           O  
HETATM  431  O   HOH T 430      22.280   5.773  53.475  1.00  0.51           O  
HETATM  432  O   HOH T 431      -0.714   3.781  74.466  1.00  0.52           O  
HETATM  433  O   HOH T 432       9.835  -0.349  69.116  1.00  0.52           O  
HETATM  434  O   HOH T 433       0.008  18.606  54.310  1.00  0.52           O  
HETATM  435  O   HOH T 434       1.067   5.589  87.000  1.00  0.52           O  
HETATM  436  O   HOH T 435      18.498  15.434  74.779  1.00  0.52           O  
HETATM  437  O   HOH T 436      19.308  33.301 101.028  1.00  0.52           O  
HETATM  438  O   HOH T 437       8.419   2.179  99.593  1.00  0.52           O  
HETATM  439  O   HOH T 438      21.362   6.426  62.318  1.00  0.52           O  
HETATM  440  O   HOH T 439      13.089   6.080  53.506  1.00  0.52           O  
HETATM  441  O   HOH T 440       4.012  23.977 109.232  1.00  0.52           O  
HETATM  442  O   HOH T 441      22.159  12.343  42.163  1.00  0.52           O  
HETATM  443  O   HOH T 442      -0.024  18.595  96.659  1.00  0.52           O  
HETATM  444  O   HOH T 443       1.752  25.736 109.496  1.00  0.52           O  
HETATM  445  O   HOH T 444      14.770   0.926 106.338  1.00  0.52           O  
HETATM  446  O   HOH T 445      21.226  21.808  69.571  1.00  0.52           O  
HETATM  447  O   HOH T 446      15.774   1.489  62.280  1.00  0.52           O  
HETATM  448  O   HOH T 447       8.865  24.510  69.031  1.00  0.52           O  
HETATM  449  O   HOH T 448      15.556  13.773 119.884  1.00  0.52           O  
HETATM  450  O   HOH T 449       8.672   7.225 102.077  1.00  0.53           O  
HETATM  451  O   HOH T 450       8.729  -0.106 101.172  1.00  0.53           O  
HETATM  452  O   HOH T 451      14.507  29.369 111.715  1.00  0.53           O  
HETATM  453  O   HOH T 452      21.556  18.569  58.963  1.00  0.53           O  
HETATM  454  O   HOH T 453      18.548  11.493  96.636  1.00  0.53           O  
HETATM  455  O   HOH T 454       3.671  -7.525  84.799  1.00  0.53           O  
HETATM  456  O   HOH T 455      16.278   8.104  66.450  1.00  0.53           O  
HETATM  457  O   HOH T 456       9.054  12.097 112.268  1.00  0.53           O  
HETATM  458  O   HOH T 457       8.713  33.680  61.316  1.00  0.53           O  
HETATM  459  O   HOH T 458      17.126  49.568  84.795  1.00  0.53           O  
HETATM  460  O   HOH T 459      24.994  30.086 112.376  1.00  0.53           O  
HETATM  461  O   HOH T 460      16.164  30.615  92.463  1.00  0.53           O  
HETATM  462  O   HOH T 461       2.915   7.828  60.938  1.00  0.53           O  
HETATM  463  O   HOH T 462      16.197  39.858 102.019  1.00  0.54           O  
HETATM  464  O   HOH T 463      11.954  -1.476  60.037  1.00  0.54           O  
HETATM  465  O   HOH T 464      12.228  -7.987  92.217  1.00  0.54           O  
HETATM  466  O   HOH T 465      16.417  26.650  91.700  1.00  0.54           O  
HETATM  467  O   HOH T 466       2.962   2.177  87.554  1.00  0.54           O  
HETATM  468  O   HOH T 467       9.970   8.057  50.980  1.00  0.54           O  
HETATM  469  O   HOH T 468       3.949  37.106  76.878  1.00  0.54           O  
HETATM  470  O   HOH T 469      17.272  30.811  90.035  1.00  0.54           O  
HETATM  471  O   HOH T 470       1.896  -2.234  74.602  1.00  0.54           O  
HETATM  472  O   HOH T 471      21.918  26.652  79.732  1.00  0.54           O  
HETATM  473  O   HOH T 472      12.200  50.011  76.028  1.00  0.55           O  
HETATM  474  O   HOH T 473       5.605  42.951  78.324  1.00  0.55           O  
HETATM  475  O   HOH T 474       3.375  -5.658  91.780  1.00  0.55           O  
HETATM  476  O   HOH T 475      11.130  27.135  88.496  1.00  0.55           O  
HETATM  477  O   HOH T 476      12.152  35.647 106.261  1.00  0.55           O  
HETATM  478  O   HOH T 477      11.193 -10.420  77.740  1.00  0.55           O  
HETATM  479  O   HOH T 478      13.500  33.198  57.642  1.00  0.55           O  
HETATM  480  O   HOH T 479       1.504   2.264  73.639  1.00  0.55           O  
HETATM  481  O   HOH T 480       1.557  15.499  51.024  1.00  0.55           O  
HETATM  482  O   HOH T 481      19.359  26.579  74.198  1.00  0.56           O  
HETATM  483  O   HOH T 482      20.075  15.951  99.351  1.00  0.56           O  
HETATM  484  O   HOH T 483      21.158   3.877  61.524  1.00  0.56           O  
HETATM  485  O   HOH T 484       5.603  28.257  58.086  1.00  0.56           O  
HETATM  486  O   HOH T 485      17.689  30.890  94.711  1.00  0.56           O  
HETATM  487  O   HOH T 486      11.306  24.342  52.573  1.00  0.56           O  
HETATM  488  O   HOH T 487      11.814  24.949 121.792  1.00  0.56           O  
HETATM  489  O   HOH T 488      14.821  49.480  75.209  1.00  0.56           O  
HETATM  490  O   HOH T 489      15.500  -8.370  88.390  1.00  0.56           O  
HETATM  491  O   HOH T 490       1.635   6.415  82.724  1.00  0.56           O  
HETATM  492  O   HOH T 491      12.240   9.938  70.250  1.00  0.56           O  
HETATM  493  O   HOH T 492      14.092  36.633  78.884  1.00  0.56           O  
HETATM  494  O   HOH T 493      12.996  29.133  89.374  1.00  0.56           O  
HETATM  495  O   HOH T 494       3.881  34.014  80.101  1.00  0.56           O  
HETATM  496  O   HOH T 495       4.839  32.445 101.209  1.00  0.57           O  
HETATM  497  O   HOH T 496       6.478  -7.300  82.617  1.00  0.57           O  
HETATM  498  O   HOH T 497      17.073  23.474  41.583  1.00  0.57           O  
HETATM  499  O   HOH T 498      14.582   2.309  58.955  1.00  0.57           O  
HETATM  500  O   HOH T 499      19.621  21.846  62.428  1.00  0.57           O  
HETATM  501  O   HOH T 500      18.645  49.780  78.468  1.00  0.57           O  
HETATM  502  O   HOH T 501       0.787  17.826 102.072  1.00  0.57           O  
HETATM  503  O   HOH T 502      17.820  26.851 115.928  1.00  0.58           O  
HETATM  504  O   HOH T 503      -1.657   7.437  91.520  1.00  0.58           O  
HETATM  505  O   HOH T 504       0.052  20.394  91.654  1.00  0.58           O  
HETATM  506  O   HOH T 505      14.316  -0.737  61.289  1.00  0.58           O  
HETATM  507  O   HOH T 506      10.472  -3.869  71.432  1.00  0.58           O  
HETATM  508  O   HOH T 507       3.279  38.777  74.693  1.00  0.59           O  
HETATM  509  O   HOH T 508      17.705   8.841  68.780  1.00  0.59           O  
HETATM  510  O   HOH T 509      22.079  43.564  69.672  1.00  0.60           O  
HETATM  511  O   HOH T 510       3.293   9.690  48.632  1.00  0.60           O  
HETATM  512  O   HOH T 511       2.528   1.592  59.935  1.00  0.61           O  
TER     513      HOH T 511 
