# Supplementary material for: Accurate Prediction of Hydration Sites of Proteins Using Energy Model With Atom Embedding
Source: Front Mol Biosci. 2021 Sep 20;8:756075. doi: 10.3389/fmolb.2021.756075 (PMC8488165; doi:10.3389/fmolb.2021.756075)
Supplement: Supplementary file 1 [file DataSheet1.ZIP › Data Sheet 1/Our_result_pdb/our_dataset_output/2RC3_watersite.pdb]

HEADER                                                        XXXX


JRNL        PMID   -1
HETATM    1  O   HOH T   0      72.648  50.200  40.240  1.00  0.16           O  
HETATM    2  O   HOH T   1      49.533  53.119  29.186  1.00  0.17           O  
HETATM    3  O   HOH T   2      35.382  56.298   4.091  1.00  0.17           O  
HETATM    4  O   HOH T   3      25.915  42.846  15.688  1.00  0.18           O  
HETATM    5  O   HOH T   4      39.300  70.406   5.922  1.00  0.19           O  
HETATM    6  O   HOH T   5      35.945  53.473  15.956  1.00  0.19           O  
HETATM    7  O   HOH T   6      47.105  61.024  44.126  1.00  0.20           O  
HETATM    8  O   HOH T   7      37.660  69.107  24.522  1.00  0.20           O  
HETATM    9  O   HOH T   8      46.071  52.578  40.775  1.00  0.20           O  
HETATM   10  O   HOH T   9      63.826  49.718  31.988  1.00  0.20           O  
HETATM   11  O   HOH T  10      46.106  52.453  23.271  1.00  0.20           O  
HETATM   12  O   HOH T  11      67.001  32.216  36.853  1.00  0.21           O  
HETATM   13  O   HOH T  12      15.883  57.594  25.108  1.00  0.21           O  
HETATM   14  O   HOH T  13      16.264  38.187   9.196  1.00  0.21           O  
HETATM   15  O   HOH T  14      34.800  62.041  39.685  1.00  0.21           O  
HETATM   16  O   HOH T  15      19.096  47.068  -1.842  1.00  0.21           O  
HETATM   17  O   HOH T  16      48.302  73.056  50.027  1.00  0.22           O  
HETATM   18  O   HOH T  17      49.744  44.474  33.353  1.00  0.22           O  
HETATM   19  O   HOH T  18      51.003  70.245  43.866  1.00  0.22           O  
HETATM   20  O   HOH T  19      23.978  49.945   4.269  1.00  0.22           O  
HETATM   21  O   HOH T  20      21.033  67.586   7.161  1.00  0.22           O  
HETATM   22  O   HOH T  21      17.259  61.601  22.380  1.00  0.22           O  
HETATM   23  O   HOH T  22      40.613  88.719   9.285  1.00  0.23           O  
HETATM   24  O   HOH T  23      69.170  68.291  31.156  1.00  0.23           O  
HETATM   25  O   HOH T  24      59.719  68.096  32.589  1.00  0.23           O  
HETATM   26  O   HOH T  25      19.613  71.679   1.639  1.00  0.23           O  
HETATM   27  O   HOH T  26      24.352  54.802   7.904  1.00  0.23           O  
HETATM   28  O   HOH T  27      59.749  54.399  43.161  1.00  0.23           O  
HETATM   29  O   HOH T  28      42.213  64.857  29.016  1.00  0.23           O  
HETATM   30  O   HOH T  29      54.163  47.598  28.723  1.00  0.23           O  
HETATM   31  O   HOH T  30      28.246  57.391  38.134  1.00  0.24           O  
HETATM   32  O   HOH T  31       8.519  64.611  10.640  1.00  0.24           O  
HETATM   33  O   HOH T  32      30.387  71.676  34.098  1.00  0.24           O  
HETATM   34  O   HOH T  33      20.933  37.489   1.773  1.00  0.24           O  
HETATM   35  O   HOH T  34      55.559  59.887  29.014  1.00  0.24           O  
HETATM   36  O   HOH T  35      34.333  35.796   4.895  1.00  0.24           O  
HETATM   37  O   HOH T  36      33.698  61.520  24.698  1.00  0.24           O  
HETATM   38  O   HOH T  37      28.642  84.148  14.589  1.00  0.24           O  
HETATM   39  O   HOH T  38      13.934  41.520  -0.783  1.00  0.24           O  
HETATM   40  O   HOH T  39      63.147  75.408  44.275  1.00  0.24           O  
HETATM   41  O   HOH T  40      34.016  66.947  21.527  1.00  0.24           O  
HETATM   42  O   HOH T  41      10.575  71.183  13.025  1.00  0.25           O  
HETATM   43  O   HOH T  42      39.725  54.855  42.274  1.00  0.25           O  
HETATM   44  O   HOH T  43      66.642  46.189  26.739  1.00  0.25           O  
HETATM   45  O   HOH T  44      38.181  48.851   1.387  1.00  0.25           O  
HETATM   46  O   HOH T  45      39.807  49.289  34.693  1.00  0.25           O  
HETATM   47  O   HOH T  46      58.010  65.668  27.069  1.00  0.25           O  
HETATM   48  O   HOH T  47      14.663  44.128  -1.749  1.00  0.25           O  
HETATM   49  O   HOH T  48      53.492  67.074   8.419  1.00  0.25           O  
HETATM   50  O   HOH T  49      55.156  68.680  38.148  1.00  0.25           O  
HETATM   51  O   HOH T  50      39.021  52.632  40.857  1.00  0.25           O  
HETATM   52  O   HOH T  51      24.126  54.582  -0.342  1.00  0.26           O  
HETATM   53  O   HOH T  52      35.530  46.159  16.149  1.00  0.26           O  
HETATM   54  O   HOH T  53      42.026  49.280  26.042  1.00  0.26           O  
HETATM   55  O   HOH T  54      44.391  75.319  -4.117  1.00  0.26           O  
HETATM   56  O   HOH T  55      29.987  54.305  19.870  1.00  0.26           O  
HETATM   57  O   HOH T  56      64.984  64.741  49.285  1.00  0.26           O  
HETATM   58  O   HOH T  57      43.311  62.087   4.272  1.00  0.26           O  
HETATM   59  O   HOH T  58      45.927  72.984  21.969  1.00  0.26           O  
HETATM   60  O   HOH T  59      35.401  73.524  23.342  1.00  0.26           O  
HETATM   61  O   HOH T  60      64.004  69.692  27.543  1.00  0.26           O  
HETATM   62  O   HOH T  61      23.395  65.454   1.611  1.00  0.26           O  
HETATM   63  O   HOH T  62      35.329  61.504  43.928  1.00  0.27           O  
HETATM   64  O   HOH T  63      30.134  56.877  44.612  1.00  0.27           O  
HETATM   65  O   HOH T  64      33.760  47.783  17.491  1.00  0.27           O  
HETATM   66  O   HOH T  65      62.950  58.565  25.720  1.00  0.27           O  
HETATM   67  O   HOH T  66      59.001  55.415  47.438  1.00  0.27           O  
HETATM   68  O   HOH T  67      29.002  62.495   3.476  1.00  0.27           O  
HETATM   69  O   HOH T  68      37.837  73.191  21.996  1.00  0.27           O  
HETATM   70  O   HOH T  69      49.250  84.733  38.998  1.00  0.27           O  
HETATM   71  O   HOH T  70      46.152  58.539  44.624  1.00  0.27           O  
HETATM   72  O   HOH T  71      59.066  75.443  41.047  1.00  0.27           O  
HETATM   73  O   HOH T  72      58.254  76.107  38.477  1.00  0.27           O  
HETATM   74  O   HOH T  73      22.525  35.939   3.456  1.00  0.27           O  
HETATM   75  O   HOH T  74      63.139  78.870  38.759  1.00  0.27           O  
HETATM   76  O   HOH T  75      38.413  72.675  27.340  1.00  0.27           O  
HETATM   77  O   HOH T  76      45.992  82.458  11.464  1.00  0.27           O  
HETATM   78  O   HOH T  77      41.035  60.779   3.368  1.00  0.27           O  
HETATM   79  O   HOH T  78      41.345  47.204  43.790  1.00  0.28           O  
HETATM   80  O   HOH T  79      21.070  76.919   4.833  1.00  0.28           O  
HETATM   81  O   HOH T  80      11.376  55.023   3.242  1.00  0.28           O  
HETATM   82  O   HOH T  81      11.320  64.558   3.881  1.00  0.28           O  
HETATM   83  O   HOH T  82      39.879  69.624  22.928  1.00  0.28           O  
HETATM   84  O   HOH T  83      61.314  77.402  44.672  1.00  0.28           O  
HETATM   85  O   HOH T  84      11.476  53.902  22.094  1.00  0.28           O  
HETATM   86  O   HOH T  85      16.095  53.318  -3.647  1.00  0.28           O  
HETATM   87  O   HOH T  86      17.617  60.404  19.940  1.00  0.28           O  
HETATM   88  O   HOH T  87      25.069  40.090  -1.058  1.00  0.28           O  
HETATM   89  O   HOH T  88      32.346  73.508  26.875  1.00  0.28           O  
HETATM   90  O   HOH T  89       8.299  60.190   3.192  1.00  0.28           O  
HETATM   91  O   HOH T  90      58.175  34.781  39.923  1.00  0.28           O  
HETATM   92  O   HOH T  91      56.254  58.127  40.910  1.00  0.29           O  
HETATM   93  O   HOH T  92      36.700  53.110  39.384  1.00  0.29           O  
HETATM   94  O   HOH T  93      38.914  62.248   2.444  1.00  0.29           O  
HETATM   95  O   HOH T  94      63.808  79.449  30.240  1.00  0.29           O  
HETATM   96  O   HOH T  95      56.067  45.760  29.400  1.00  0.29           O  
HETATM   97  O   HOH T  96      40.664  31.172  12.184  1.00  0.29           O  
HETATM   98  O   HOH T  97      64.074  60.484  53.530  1.00  0.29           O  
HETATM   99  O   HOH T  98      10.025  71.194  10.359  1.00  0.29           O  
HETATM  100  O   HOH T  99      60.697  35.280  34.264  1.00  0.29           O  
HETATM  101  O   HOH T 100       7.202  71.515  29.626  1.00  0.29           O  
HETATM  102  O   HOH T 101      52.657  71.593  47.759  1.00  0.30           O  
HETATM  103  O   HOH T 102      22.604  58.266  23.224  1.00  0.30           O  
HETATM  104  O   HOH T 103      17.062  68.806  23.534  1.00  0.30           O  
HETATM  105  O   HOH T 104      39.598  71.450  46.748  1.00  0.30           O  
HETATM  106  O   HOH T 105      48.487  72.888  14.444  1.00  0.30           O  
HETATM  107  O   HOH T 106      44.938  66.393  -4.557  1.00  0.30           O  
HETATM  108  O   HOH T 107      64.323  41.022  31.647  1.00  0.30           O  
HETATM  109  O   HOH T 108      40.773  36.198   7.047  1.00  0.30           O  
HETATM  110  O   HOH T 109      38.084  57.157  45.185  1.00  0.30           O  
HETATM  111  O   HOH T 110       5.431  65.518   3.736  1.00  0.30           O  
HETATM  112  O   HOH T 111      56.266  80.358  36.065  1.00  0.30           O  
HETATM  113  O   HOH T 112      38.942  79.296  10.462  1.00  0.30           O  
HETATM  114  O   HOH T 113      55.967  79.763  45.486  1.00  0.30           O  
HETATM  115  O   HOH T 114      44.775  76.881  46.677  1.00  0.30           O  
HETATM  116  O   HOH T 115      12.810  42.603  -3.038  1.00  0.30           O  
HETATM  117  O   HOH T 116       5.660  60.664   4.028  1.00  0.30           O  
HETATM  118  O   HOH T 117      53.889  59.048  41.744  1.00  0.30           O  
HETATM  119  O   HOH T 118      23.846  51.868  -0.112  1.00  0.30           O  
HETATM  120  O   HOH T 119      32.508  77.680  36.585  1.00  0.31           O  
HETATM  121  O   HOH T 120      50.044  41.488  44.539  1.00  0.31           O  
HETATM  122  O   HOH T 121      49.290  63.134  31.686  1.00  0.31           O  
HETATM  123  O   HOH T 122      34.958  43.932  14.735  1.00  0.31           O  
HETATM  124  O   HOH T 123      43.860  68.779  52.970  1.00  0.31           O  
HETATM  125  O   HOH T 124      36.399  76.752   3.412  1.00  0.31           O  
HETATM  126  O   HOH T 125      55.327  49.994  27.808  1.00  0.31           O  
HETATM  127  O   HOH T 126      40.625  80.090  43.254  1.00  0.31           O  
HETATM  128  O   HOH T 127      49.408  65.881  48.288  1.00  0.31           O  
HETATM  129  O   HOH T 128      28.363  64.458  18.074  1.00  0.31           O  
HETATM  130  O   HOH T 129      46.829  64.228  32.369  1.00  0.31           O  
HETATM  131  O   HOH T 130      28.342  68.566  37.393  1.00  0.31           O  
HETATM  132  O   HOH T 131       4.589  35.602   5.325  1.00  0.32           O  
HETATM  133  O   HOH T 132      11.525  73.264  -1.724  1.00  0.32           O  
HETATM  134  O   HOH T 133      33.551  81.244  36.892  1.00  0.32           O  
HETATM  135  O   HOH T 134       9.667  70.735   3.070  1.00  0.32           O  
HETATM  136  O   HOH T 135      22.482  51.180   2.239  1.00  0.32           O  
HETATM  137  O   HOH T 136       8.152  67.480  15.501  1.00  0.32           O  
HETATM  138  O   HOH T 137      51.764  38.247  47.557  1.00  0.32           O  
HETATM  139  O   HOH T 138      28.340  73.271  33.127  1.00  0.32           O  
HETATM  140  O   HOH T 139      47.308  77.352  28.004  1.00  0.32           O  
HETATM  141  O   HOH T 140      57.319  77.796  51.547  1.00  0.32           O  
HETATM  142  O   HOH T 141      37.860  72.966  43.398  1.00  0.32           O  
HETATM  143  O   HOH T 142      31.698  65.424  21.962  1.00  0.32           O  
HETATM  144  O   HOH T 143      46.730  78.510  47.940  1.00  0.32           O  
HETATM  145  O   HOH T 144      57.870  56.193  42.182  1.00  0.32           O  
HETATM  146  O   HOH T 145      58.202  47.889  46.933  1.00  0.32           O  
HETATM  147  O   HOH T 146      24.845  73.799  23.429  1.00  0.32           O  
HETATM  148  O   HOH T 147      29.999  70.683  36.624  1.00  0.33           O  
HETATM  149  O   HOH T 148      18.103  39.816  13.591  1.00  0.33           O  
HETATM  150  O   HOH T 149      58.304  59.193  44.546  1.00  0.33           O  
HETATM  151  O   HOH T 150      34.918  49.319  24.665  1.00  0.33           O  
HETATM  152  O   HOH T 151      41.186  64.067  46.809  1.00  0.33           O  
HETATM  153  O   HOH T 152      44.544  64.927  30.717  1.00  0.33           O  
HETATM  154  O   HOH T 153      55.752  32.855  36.797  1.00  0.33           O  
HETATM  155  O   HOH T 154      43.784  65.750  26.876  1.00  0.33           O  
HETATM  156  O   HOH T 155      28.239  63.805  39.121  1.00  0.33           O  
HETATM  157  O   HOH T 156      27.516  55.174  19.292  1.00  0.33           O  
HETATM  158  O   HOH T 157      15.850  42.813   2.199  1.00  0.33           O  
HETATM  159  O   HOH T 158      35.476  72.138  42.282  1.00  0.33           O  
HETATM  160  O   HOH T 159      44.418  41.387  42.083  1.00  0.33           O  
HETATM  161  O   HOH T 160      20.238  63.355  12.893  1.00  0.33           O  
HETATM  162  O   HOH T 161      19.315  45.018   0.059  1.00  0.33           O  
HETATM  163  O   HOH T 162      37.320  66.571  48.390  1.00  0.33           O  
HETATM  164  O   HOH T 163      58.848  56.447  44.815  1.00  0.33           O  
HETATM  165  O   HOH T 164      28.519  65.449  27.271  1.00  0.33           O  
HETATM  166  O   HOH T 165      30.295  71.683  27.505  1.00  0.34           O  
HETATM  167  O   HOH T 166      65.574  38.853  30.587  1.00  0.34           O  
HETATM  168  O   HOH T 167      36.639  48.590  -4.008  1.00  0.34           O  
HETATM  169  O   HOH T 168      31.508  85.916  33.903  1.00  0.34           O  
HETATM  170  O   HOH T 169      71.408  50.366  42.722  1.00  0.34           O  
HETATM  171  O   HOH T 170      70.967  50.660  45.446  1.00  0.34           O  
HETATM  172  O   HOH T 171       7.327  44.910  11.664  1.00  0.34           O  
HETATM  173  O   HOH T 172      23.419  55.230  39.358  1.00  0.34           O  
HETATM  174  O   HOH T 173      39.895  87.531  16.735  1.00  0.34           O  
HETATM  175  O   HOH T 174      59.429  53.311  27.489  1.00  0.34           O  
HETATM  176  O   HOH T 175      41.616  71.796  48.588  1.00  0.35           O  
HETATM  177  O   HOH T 176      17.350  72.000   0.069  1.00  0.35           O  
HETATM  178  O   HOH T 177       8.519  41.842  -1.731  1.00  0.35           O  
HETATM  179  O   HOH T 178      25.495  56.913   6.776  1.00  0.35           O  
HETATM  180  O   HOH T 179      45.334  76.234  17.997  1.00  0.35           O  
HETATM  181  O   HOH T 180      17.197  52.993  30.795  1.00  0.35           O  
HETATM  182  O   HOH T 181      55.800  35.615  33.089  1.00  0.35           O  
HETATM  183  O   HOH T 182      52.749  80.130  28.681  1.00  0.35           O  
HETATM  184  O   HOH T 183      32.007  72.751  29.528  1.00  0.35           O  
HETATM  185  O   HOH T 184      12.940  66.914  12.609  1.00  0.35           O  
HETATM  186  O   HOH T 185      28.223  75.356  -2.295  1.00  0.35           O  
HETATM  187  O   HOH T 186      16.926  45.428   2.683  1.00  0.35           O  
HETATM  188  O   HOH T 187      11.194  72.483   8.227  1.00  0.35           O  
HETATM  189  O   HOH T 188      17.206  46.955   0.274  1.00  0.35           O  
HETATM  190  O   HOH T 189      30.272  66.246  24.235  1.00  0.35           O  
HETATM  191  O   HOH T 190      35.709  66.505   2.315  1.00  0.35           O  
HETATM  192  O   HOH T 191      25.081  57.863  21.945  1.00  0.35           O  
HETATM  193  O   HOH T 192      43.547  42.924  30.868  1.00  0.35           O  
HETATM  194  O   HOH T 193      48.997  68.091  20.438  1.00  0.35           O  
HETATM  195  O   HOH T 194      66.138  43.450  47.254  1.00  0.35           O  
HETATM  196  O   HOH T 195      21.240  32.496   9.614  1.00  0.35           O  
HETATM  197  O   HOH T 196      54.022  59.349  44.527  1.00  0.35           O  
HETATM  198  O   HOH T 197      44.314  51.080  19.798  1.00  0.36           O  
HETATM  199  O   HOH T 198      44.808  86.713  43.983  1.00  0.36           O  
HETATM  200  O   HOH T 199      29.920  65.633  39.969  1.00  0.36           O  
HETATM  201  O   HOH T 200      48.294  78.057  50.237  1.00  0.36           O  
HETATM  202  O   HOH T 201      42.156  49.083  -0.682  1.00  0.36           O  
HETATM  203  O   HOH T 202      33.720  89.557  30.032  1.00  0.36           O  
HETATM  204  O   HOH T 203      43.089  51.419  47.876  1.00  0.36           O  
HETATM  205  O   HOH T 204      33.295  84.062  13.331  1.00  0.36           O  
HETATM  206  O   HOH T 205      25.566  56.938  38.758  1.00  0.36           O  
HETATM  207  O   HOH T 206      33.439  32.794   1.469  1.00  0.36           O  
HETATM  208  O   HOH T 207      22.994  62.817   2.290  1.00  0.36           O  
HETATM  209  O   HOH T 208      51.197  67.724  -1.745  1.00  0.36           O  
HETATM  210  O   HOH T 209      42.020  42.807  35.520  1.00  0.36           O  
HETATM  211  O   HOH T 210      26.968  40.952   0.709  1.00  0.36           O  
HETATM  212  O   HOH T 211      41.101  67.330  21.752  1.00  0.36           O  
HETATM  213  O   HOH T 212      51.851  88.279  36.464  1.00  0.36           O  
HETATM  214  O   HOH T 213       9.534  44.694  13.330  1.00  0.36           O  
HETATM  215  O   HOH T 214      31.227  68.747   0.523  1.00  0.36           O  
HETATM  216  O   HOH T 215      43.970  65.610  24.091  1.00  0.37           O  
HETATM  217  O   HOH T 216      17.660  30.691   6.469  1.00  0.37           O  
HETATM  218  O   HOH T 217      13.528  67.395  15.233  1.00  0.37           O  
HETATM  219  O   HOH T 218      30.429  37.365  19.713  1.00  0.37           O  
HETATM  220  O   HOH T 219      48.550  74.501  16.904  1.00  0.37           O  
HETATM  221  O   HOH T 220      39.353  70.440  49.300  1.00  0.37           O  
HETATM  222  O   HOH T 221      46.150  73.617  18.001  1.00  0.37           O  
HETATM  223  O   HOH T 222      40.882  76.941  25.879  1.00  0.37           O  
HETATM  224  O   HOH T 223       8.619  67.450   9.756  1.00  0.37           O  
HETATM  225  O   HOH T 224      36.795  77.186  39.152  1.00  0.37           O  
HETATM  226  O   HOH T 225      64.667  72.213  25.089  1.00  0.37           O  
HETATM  227  O   HOH T 226      37.148  52.959  -3.267  1.00  0.37           O  
HETATM  228  O   HOH T 227      71.760  78.213  48.830  1.00  0.37           O  
HETATM  229  O   HOH T 228      70.103  59.050  56.797  1.00  0.37           O  
HETATM  230  O   HOH T 229      28.967  59.444  20.183  1.00  0.37           O  
HETATM  231  O   HOH T 230      59.490  79.460  50.732  1.00  0.37           O  
HETATM  232  O   HOH T 231      45.411  41.292  29.816  1.00  0.37           O  
HETATM  233  O   HOH T 232      26.891  71.359  24.407  1.00  0.37           O  
HETATM  234  O   HOH T 233      36.429  62.549  46.360  1.00  0.37           O  
HETATM  235  O   HOH T 234      11.375  69.686  17.975  1.00  0.38           O  
HETATM  236  O   HOH T 235      46.959  80.623  13.207  1.00  0.38           O  
HETATM  237  O   HOH T 236      22.984  77.822   6.386  1.00  0.38           O  
HETATM  238  O   HOH T 237       8.691  57.742   2.058  1.00  0.38           O  
HETATM  239  O   HOH T 238      16.952  37.973  11.912  1.00  0.38           O  
HETATM  240  O   HOH T 239      45.157  53.460  18.767  1.00  0.38           O  
HETATM  241  O   HOH T 240      33.051  70.897  41.500  1.00  0.38           O  
HETATM  242  O   HOH T 241      48.189  39.478  45.140  1.00  0.38           O  
HETATM  243  O   HOH T 242      40.319  51.004  -1.765  1.00  0.38           O  
HETATM  244  O   HOH T 243       9.731  68.916  25.058  1.00  0.38           O  
HETATM  245  O   HOH T 244      38.356  54.873  -1.616  1.00  0.38           O  
HETATM  246  O   HOH T 245      38.848  79.448  18.483  1.00  0.38           O  
HETATM  247  O   HOH T 246      43.988  56.590   7.858  1.00  0.38           O  
HETATM  248  O   HOH T 247      49.906  60.150  20.863  1.00  0.38           O  
HETATM  249  O   HOH T 248      51.973  63.128  28.215  1.00  0.38           O  
HETATM  250  O   HOH T 249      17.436  57.228  27.380  1.00  0.38           O  
HETATM  251  O   HOH T 250      50.083  40.347  31.545  1.00  0.38           O  
HETATM  252  O   HOH T 251      16.238  56.744  29.806  1.00  0.38           O  
HETATM  253  O   HOH T 252      72.617  77.752  40.247  1.00  0.38           O  
HETATM  254  O   HOH T 253      35.759  69.105   3.201  1.00  0.38           O  
HETATM  255  O   HOH T 254      47.848  82.829  47.178  1.00  0.38           O  
HETATM  256  O   HOH T 255      39.651  50.325  22.650  1.00  0.38           O  
HETATM  257  O   HOH T 256      17.780  40.935  18.020  1.00  0.38           O  
HETATM  258  O   HOH T 257      47.833  80.075  27.283  1.00  0.38           O  
HETATM  259  O   HOH T 258      16.279  60.364  24.629  1.00  0.39           O  
HETATM  260  O   HOH T 259      69.410  71.097  30.881  1.00  0.39           O  
HETATM  261  O   HOH T 260      54.076  63.750  47.342  1.00  0.39           O  
HETATM  262  O   HOH T 261      20.233  74.246   1.082  1.00  0.39           O  
HETATM  263  O   HOH T 262      42.681  46.097  24.229  1.00  0.39           O  
HETATM  264  O   HOH T 263      42.446  63.553  -5.937  1.00  0.39           O  
HETATM  265  O   HOH T 264      43.685  77.239  -2.144  1.00  0.39           O  
HETATM  266  O   HOH T 265      37.918  62.347  43.063  1.00  0.39           O  
HETATM  267  O   HOH T 266      39.990  63.261  44.515  1.00  0.39           O  
HETATM  268  O   HOH T 267      62.384  65.354  49.425  1.00  0.39           O  
HETATM  269  O   HOH T 268      32.497  75.901   2.229  1.00  0.39           O  
HETATM  270  O   HOH T 269      66.802  85.229  48.915  1.00  0.39           O  
HETATM  271  O   HOH T 270      31.354  43.145  33.094  1.00  0.39           O  
HETATM  272  O   HOH T 271      10.365  43.813  -2.471  1.00  0.39           O  
HETATM  273  O   HOH T 272      72.758  48.882  46.257  1.00  0.39           O  
HETATM  274  O   HOH T 273      10.420  72.301   5.483  1.00  0.39           O  
HETATM  275  O   HOH T 274      12.906  54.385  -1.127  1.00  0.39           O  
HETATM  276  O   HOH T 275      42.419  80.025  45.174  1.00  0.39           O  
HETATM  277  O   HOH T 276      57.928  79.683  38.251  1.00  0.40           O  
HETATM  278  O   HOH T 277      61.789  79.898  36.550  1.00  0.40           O  
HETATM  279  O   HOH T 278      27.493  61.281  29.913  1.00  0.40           O  
HETATM  280  O   HOH T 279      61.692  54.494  28.389  1.00  0.40           O  
HETATM  281  O   HOH T 280      56.571  63.750  46.252  1.00  0.40           O  
HETATM  282  O   HOH T 281      32.846  35.692   7.269  1.00  0.40           O  
HETATM  283  O   HOH T 282      24.525  32.321  11.299  1.00  0.40           O  
HETATM  284  O   HOH T 283      17.267  75.994   2.188  1.00  0.40           O  
HETATM  285  O   HOH T 284      37.360  62.275   0.047  1.00  0.40           O  
HETATM  286  O   HOH T 285      39.246  89.664  35.167  1.00  0.40           O  
HETATM  287  O   HOH T 286      39.058  75.471  20.972  1.00  0.40           O  
HETATM  288  O   HOH T 287      35.473  63.910   1.405  1.00  0.40           O  
HETATM  289  O   HOH T 288      22.556  50.355  -2.100  1.00  0.40           O  
HETATM  290  O   HOH T 289      41.355  76.189   5.868  1.00  0.40           O  
HETATM  291  O   HOH T 290      65.264  36.304  38.726  1.00  0.40           O  
HETATM  292  O   HOH T 291      44.641  41.329  39.309  1.00  0.40           O  
HETATM  293  O   HOH T 292       7.120  70.333   4.276  1.00  0.40           O  
HETATM  294  O   HOH T 293      45.579  41.989  32.510  1.00  0.40           O  
HETATM  295  O   HOH T 294      52.444  77.296  28.313  1.00  0.40           O  
HETATM  296  O   HOH T 295      14.432  63.906  27.469  1.00  0.40           O  
HETATM  297  O   HOH T 296      26.533  58.506  28.117  1.00  0.40           O  
HETATM  298  O   HOH T 297      47.028  75.070  23.447  1.00  0.40           O  
HETATM  299  O   HOH T 298      30.132  74.400  28.279  1.00  0.40           O  
HETATM  300  O   HOH T 299      10.862  68.150  15.708  1.00  0.40           O  
HETATM  301  O   HOH T 300      30.704  45.500  20.451  1.00  0.40           O  
HETATM  302  O   HOH T 301      50.493  80.210  27.063  1.00  0.40           O  
HETATM  303  O   HOH T 302      48.562  64.203  24.240  1.00  0.40           O  
HETATM  304  O   HOH T 303      40.076  74.245  25.734  1.00  0.41           O  
HETATM  305  O   HOH T 304      48.567  52.723  21.806  1.00  0.41           O  
HETATM  306  O   HOH T 305      42.866  75.357  -0.050  1.00  0.41           O  
HETATM  307  O   HOH T 306      49.092  37.594  47.005  1.00  0.41           O  
HETATM  308  O   HOH T 307      42.419  58.569   0.017  1.00  0.41           O  
HETATM  309  O   HOH T 308      43.063  75.950  22.100  1.00  0.41           O  
HETATM  310  O   HOH T 309      58.195  80.077  42.080  1.00  0.41           O  
HETATM  311  O   HOH T 310      39.544  46.885   9.924  1.00  0.41           O  
HETATM  312  O   HOH T 311      67.297  80.228  50.291  1.00  0.41           O  
HETATM  313  O   HOH T 312      63.314  62.846  54.867  1.00  0.41           O  
HETATM  314  O   HOH T 313      25.553  58.174  41.219  1.00  0.41           O  
HETATM  315  O   HOH T 314      33.020  69.458   2.565  1.00  0.41           O  
HETATM  316  O   HOH T 315      59.107  80.245  35.886  1.00  0.41           O  
HETATM  317  O   HOH T 316      23.625  71.262  23.412  1.00  0.41           O  
HETATM  318  O   HOH T 317      48.492  68.062  30.408  1.00  0.41           O  
HETATM  319  O   HOH T 318      14.661  56.812  27.458  1.00  0.41           O  
HETATM  320  O   HOH T 319      43.230  53.408  20.887  1.00  0.41           O  
HETATM  321  O   HOH T 320      10.600  36.942   0.164  1.00  0.41           O  
HETATM  322  O   HOH T 321      51.445  56.680  22.666  1.00  0.41           O  
HETATM  323  O   HOH T 322      13.394  68.137  -0.345  1.00  0.41           O  
HETATM  324  O   HOH T 323      64.136  42.677  25.206  1.00  0.41           O  
HETATM  325  O   HOH T 324      47.408  70.750   6.229  1.00  0.41           O  
HETATM  326  O   HOH T 325      49.091  64.048  37.609  1.00  0.41           O  
HETATM  327  O   HOH T 326      58.788  79.572  47.972  1.00  0.41           O  
HETATM  328  O   HOH T 327      68.612  39.814  43.664  1.00  0.42           O  
HETATM  329  O   HOH T 328       4.308  37.712   7.122  1.00  0.42           O  
HETATM  330  O   HOH T 329      55.557  51.152  25.186  1.00  0.42           O  
HETATM  331  O   HOH T 330      37.203  46.092  34.611  1.00  0.42           O  
HETATM  332  O   HOH T 331      39.485  48.468  -1.029  1.00  0.42           O  
HETATM  333  O   HOH T 332      65.370  58.099  27.094  1.00  0.42           O  
HETATM  334  O   HOH T 333      39.844  60.541  44.055  1.00  0.42           O  
HETATM  335  O   HOH T 334      34.292  75.486  21.966  1.00  0.42           O  
HETATM  336  O   HOH T 335      61.590  85.855  41.349  1.00  0.42           O  
HETATM  337  O   HOH T 336      33.155  66.949   1.404  1.00  0.42           O  
HETATM  338  O   HOH T 337      65.178  33.210  31.277  1.00  0.42           O  
HETATM  339  O   HOH T 338      78.732  68.756  48.011  1.00  0.42           O  
HETATM  340  O   HOH T 339      52.705  63.869  49.784  1.00  0.42           O  
HETATM  341  O   HOH T 340      46.074  67.302  52.523  1.00  0.42           O  
HETATM  342  O   HOH T 341      56.183  47.405  26.954  1.00  0.42           O  
HETATM  343  O   HOH T 342      27.647  37.392  20.041  1.00  0.42           O  
HETATM  344  O   HOH T 343      31.840  80.823   7.210  1.00  0.42           O  
HETATM  345  O   HOH T 344      40.697  57.973  44.537  1.00  0.42           O  
HETATM  346  O   HOH T 345      31.370  47.634  18.839  1.00  0.42           O  
HETATM  347  O   HOH T 346      51.352  64.118  47.361  1.00  0.42           O  
HETATM  348  O   HOH T 347      46.028  66.637  25.625  1.00  0.42           O  
HETATM  349  O   HOH T 348      35.481  68.300  47.079  1.00  0.42           O  
HETATM  350  O   HOH T 349      66.737  81.624  37.672  1.00  0.42           O  
HETATM  351  O   HOH T 350      59.932  44.596  22.841  1.00  0.42           O  
HETATM  352  O   HOH T 351      41.554  65.978  -2.423  1.00  0.42           O  
HETATM  353  O   HOH T 352      58.330  59.728  23.473  1.00  0.42           O  
HETATM  354  O   HOH T 353      52.852  35.782  31.190  1.00  0.42           O  
HETATM  355  O   HOH T 354      39.910  89.410   6.624  1.00  0.42           O  
HETATM  356  O   HOH T 355      49.858  75.972  27.934  1.00  0.42           O  
HETATM  357  O   HOH T 356      21.983  75.670   2.535  1.00  0.42           O  
HETATM  358  O   HOH T 357      54.284  60.350  16.639  1.00  0.42           O  
HETATM  359  O   HOH T 358      44.209  73.621  -1.846  1.00  0.42           O  
HETATM  360  O   HOH T 359      70.503  65.974  30.575  1.00  0.42           O  
HETATM  361  O   HOH T 360      67.899  37.784  31.630  1.00  0.42           O  
HETATM  362  O   HOH T 361      21.917  32.155  12.252  1.00  0.42           O  
HETATM  363  O   HOH T 362      27.595  72.123  26.933  1.00  0.42           O  
HETATM  364  O   HOH T 363       9.371  68.296   1.677  1.00  0.42           O  
HETATM  365  O   HOH T 364      34.150  34.828  -0.144  1.00  0.42           O  
HETATM  366  O   HOH T 365      27.313  75.553   2.247  1.00  0.42           O  
HETATM  367  O   HOH T 366      60.428  64.810  24.153  1.00  0.42           O  
HETATM  368  O   HOH T 367      36.118  47.214  40.411  1.00  0.43           O  
HETATM  369  O   HOH T 368      27.444  31.244   5.360  1.00  0.43           O  
HETATM  370  O   HOH T 369      56.148  78.973  48.074  1.00  0.43           O  
HETATM  371  O   HOH T 370       9.809  65.642  22.657  1.00  0.43           O  
HETATM  372  O   HOH T 371      13.342  64.055   2.194  1.00  0.43           O  
HETATM  373  O   HOH T 372      17.210  56.829   1.847  1.00  0.43           O  
HETATM  374  O   HOH T 373       6.266  65.487  17.457  1.00  0.43           O  
HETATM  375  O   HOH T 374       3.674  39.179   9.388  1.00  0.43           O  
HETATM  376  O   HOH T 375      47.620  68.324  24.116  1.00  0.43           O  
HETATM  377  O   HOH T 376      50.988  58.956  17.163  1.00  0.43           O  
HETATM  378  O   HOH T 377      18.270  44.188  20.551  1.00  0.43           O  
HETATM  379  O   HOH T 378      58.082  57.829  27.132  1.00  0.43           O  
HETATM  380  O   HOH T 379      47.070  80.084  10.520  1.00  0.43           O  
HETATM  381  O   HOH T 380       8.387  42.450  12.282  1.00  0.43           O  
HETATM  382  O   HOH T 381       9.583  67.516  18.095  1.00  0.43           O  
HETATM  383  O   HOH T 382      42.820  62.289  -1.531  1.00  0.43           O  
HETATM  384  O   HOH T 383      52.803  67.897  10.929  1.00  0.43           O  
HETATM  385  O   HOH T 384      49.590  64.378  29.306  1.00  0.43           O  
HETATM  386  O   HOH T 385      51.839  42.967  26.683  1.00  0.43           O  
HETATM  387  O   HOH T 386      29.471  65.632  20.271  1.00  0.43           O  
HETATM  388  O   HOH T 387      41.909  48.963  47.480  1.00  0.43           O  
HETATM  389  O   HOH T 388      63.962  84.679  40.810  1.00  0.43           O  
HETATM  390  O   HOH T 389      30.603  66.011   0.982  1.00  0.43           O  
HETATM  391  O   HOH T 390      24.906  31.498   4.099  1.00  0.43           O  
HETATM  392  O   HOH T 391      76.072  60.966  41.115  1.00  0.43           O  
HETATM  393  O   HOH T 392      52.489  70.475  50.376  1.00  0.43           O  
HETATM  394  O   HOH T 393      66.263  78.976  31.465  1.00  0.43           O  
HETATM  395  O   HOH T 394      32.490  76.308  23.834  1.00  0.44           O  
HETATM  396  O   HOH T 395      13.622  55.001   1.569  1.00  0.44           O  
HETATM  397  O   HOH T 396      76.025  57.612  38.209  1.00  0.44           O  
HETATM  398  O   HOH T 397      70.559  69.152  27.516  1.00  0.44           O  
HETATM  399  O   HOH T 398      13.069  70.136  26.018  1.00  0.44           O  
HETATM  400  O   HOH T 399      74.773  59.904  38.944  1.00  0.44           O  
HETATM  401  O   HOH T 400      12.764  57.386   2.816  1.00  0.44           O  
HETATM  402  O   HOH T 401      40.154  55.265  45.065  1.00  0.44           O  
HETATM  403  O   HOH T 402      34.022  33.267   4.119  1.00  0.44           O  
HETATM  404  O   HOH T 403      56.196  60.148  42.895  1.00  0.44           O  
HETATM  405  O   HOH T 404      44.041  64.653  -2.557  1.00  0.44           O  
HETATM  406  O   HOH T 405      47.518  50.213  22.452  1.00  0.44           O  
HETATM  407  O   HOH T 406      28.885  61.601  37.915  1.00  0.44           O  
HETATM  408  O   HOH T 407      59.935  51.045  25.917  1.00  0.44           O  
HETATM  409  O   HOH T 408      23.524  77.634   3.632  1.00  0.44           O  
HETATM  410  O   HOH T 409      43.677  43.744  33.498  1.00  0.44           O  
HETATM  411  O   HOH T 410      59.018  78.125  40.284  1.00  0.44           O  
HETATM  412  O   HOH T 411      25.785  71.779  29.038  1.00  0.44           O  
HETATM  413  O   HOH T 412      63.678  77.873  36.204  1.00  0.44           O  
HETATM  414  O   HOH T 413      28.623  72.981  35.825  1.00  0.44           O  
HETATM  415  O   HOH T 414      55.058  33.998  30.838  1.00  0.44           O  
HETATM  416  O   HOH T 415      55.873  82.098  43.833  1.00  0.44           O  
HETATM  417  O   HOH T 416      18.051  54.939  -2.574  1.00  0.44           O  
HETATM  418  O   HOH T 417      26.627  67.201  22.478  1.00  0.44           O  
HETATM  419  O   HOH T 418      74.586  48.884  44.220  1.00  0.44           O  
HETATM  420  O   HOH T 419      14.778  65.855   0.611  1.00  0.44           O  
HETATM  421  O   HOH T 420      45.235  38.723  42.288  1.00  0.44           O  
HETATM  422  O   HOH T 421      37.788  73.100  24.714  1.00  0.45           O  
HETATM  423  O   HOH T 422      47.594  47.543  23.180  1.00  0.45           O  
HETATM  424  O   HOH T 423      30.491  86.094  14.262  1.00  0.45           O  
HETATM  425  O   HOH T 424      39.378  81.942  10.899  1.00  0.45           O  
HETATM  426  O   HOH T 425      51.250  59.695  44.542  1.00  0.45           O  
HETATM  427  O   HOH T 426      69.903  58.127  54.071  1.00  0.45           O  
HETATM  428  O   HOH T 427      44.472  60.278  -0.661  1.00  0.45           O  
HETATM  429  O   HOH T 428      25.803  62.773  28.079  1.00  0.45           O  
HETATM  430  O   HOH T 429      11.545  69.867   0.965  1.00  0.45           O  
HETATM  431  O   HOH T 430      64.593  44.397  27.444  1.00  0.45           O  
HETATM  432  O   HOH T 431      38.442  64.554  46.617  1.00  0.45           O  
HETATM  433  O   HOH T 432       6.929  67.830   2.908  1.00  0.45           O  
HETATM  434  O   HOH T 433      64.315  55.091  28.820  1.00  0.45           O  
HETATM  435  O   HOH T 434      60.142  58.438  25.298  1.00  0.45           O  
HETATM  436  O   HOH T 435      56.779  77.396  29.444  1.00  0.45           O  
HETATM  437  O   HOH T 436      28.900  34.136  -3.366  1.00  0.45           O  
HETATM  438  O   HOH T 437      14.638  71.636  17.721  1.00  0.45           O  
HETATM  439  O   HOH T 438      57.618  63.537  50.855  1.00  0.45           O  
HETATM  440  O   HOH T 439      66.567  77.709  51.147  1.00  0.45           O  
HETATM  441  O   HOH T 440      39.452  43.524  36.317  1.00  0.45           O  
HETATM  442  O   HOH T 441      34.180  77.454  38.780  1.00  0.45           O  
HETATM  443  O   HOH T 442      38.036  41.328  -0.068  1.00  0.45           O  
HETATM  444  O   HOH T 443       8.428  70.839   6.768  1.00  0.45           O  
HETATM  445  O   HOH T 444      29.968  58.208  23.962  1.00  0.45           O  
HETATM  446  O   HOH T 445      63.785  54.925  24.465  1.00  0.45           O  
HETATM  447  O   HOH T 446      50.862  67.348  18.498  1.00  0.45           O  
HETATM  448  O   HOH T 447      26.805  72.910  -2.434  1.00  0.45           O  
HETATM  449  O   HOH T 448      44.736  60.783  45.573  1.00  0.45           O  
HETATM  450  O   HOH T 449      38.188  69.041  47.231  1.00  0.45           O  
HETATM  451  O   HOH T 450      40.298  87.775  36.877  1.00  0.45           O  
HETATM  452  O   HOH T 451      29.862  63.697  25.591  1.00  0.45           O  
HETATM  453  O   HOH T 452      48.131  66.186  22.246  1.00  0.45           O  
HETATM  454  O   HOH T 453      68.704  71.111  26.946  1.00  0.45           O  
HETATM  455  O   HOH T 454      13.916  61.865   0.825  1.00  0.45           O  
HETATM  456  O   HOH T 455      45.182  38.610  39.510  1.00  0.45           O  
HETATM  457  O   HOH T 456      58.928  78.644  53.463  1.00  0.45           O  
HETATM  458  O   HOH T 457      12.761  59.374   0.821  1.00  0.45           O  
HETATM  459  O   HOH T 458      29.095  48.626  34.018  1.00  0.45           O  
HETATM  460  O   HOH T 459      24.268  70.545  30.870  1.00  0.46           O  
HETATM  461  O   HOH T 460      37.698  77.712  41.736  1.00  0.46           O  
HETATM  462  O   HOH T 461      63.337  52.551  29.512  1.00  0.46           O  
HETATM  463  O   HOH T 462       6.672  71.972  26.842  1.00  0.46           O  
HETATM  464  O   HOH T 463      36.415  55.098  46.111  1.00  0.46           O  
HETATM  465  O   HOH T 464       6.723  69.000  20.464  1.00  0.46           O  
HETATM  466  O   HOH T 465      11.720  43.563  14.530  1.00  0.46           O  
HETATM  467  O   HOH T 466      37.031  50.086  23.112  1.00  0.46           O  
HETATM  468  O   HOH T 467      44.374  41.471  34.904  1.00  0.46           O  
HETATM  469  O   HOH T 468      27.702  57.059  22.718  1.00  0.46           O  
HETATM  470  O   HOH T 469      59.547  74.401  25.646  1.00  0.46           O  
HETATM  471  O   HOH T 470       7.950  71.236  12.273  1.00  0.46           O  
HETATM  472  O   HOH T 471      69.899  66.470  33.156  1.00  0.46           O  
HETATM  473  O   HOH T 472      44.792  47.339  23.014  1.00  0.46           O  
HETATM  474  O   HOH T 473      30.381  43.814  30.721  1.00  0.46           O  
HETATM  475  O   HOH T 474      28.867  52.858  24.489  1.00  0.46           O  
HETATM  476  O   HOH T 475      32.763  64.255   0.871  1.00  0.46           O  
HETATM  477  O   HOH T 476      37.446  77.805  21.156  1.00  0.46           O  
HETATM  478  O   HOH T 477      75.056  61.391  49.947  1.00  0.46           O  
HETATM  479  O   HOH T 478      68.500  72.911  28.965  1.00  0.46           O  
HETATM  480  O   HOH T 479      72.202  76.860  37.649  1.00  0.46           O  
HETATM  481  O   HOH T 480      39.894  83.743  31.649  1.00  0.46           O  
HETATM  482  O   HOH T 481      23.261  51.797   6.023  1.00  0.47           O  
HETATM  483  O   HOH T 482      48.601  72.758  19.127  1.00  0.47           O  
HETATM  484  O   HOH T 483      28.235  51.411  26.802  1.00  0.47           O  
HETATM  485  O   HOH T 484      20.371  54.133  28.294  1.00  0.47           O  
HETATM  486  O   HOH T 485      51.375  86.393  34.544  1.00  0.47           O  
HETATM  487  O   HOH T 486      31.324  60.665  23.472  1.00  0.47           O  
HETATM  488  O   HOH T 487      15.369  68.717  25.673  1.00  0.47           O  
HETATM  489  O   HOH T 488      40.434  56.398  -2.817  1.00  0.47           O  
HETATM  490  O   HOH T 489      18.041  28.856   8.573  1.00  0.47           O  
HETATM  491  O   HOH T 490      71.998  51.022  48.014  1.00  0.47           O  
HETATM  492  O   HOH T 491      61.865  64.941  53.512  1.00  0.47           O  
HETATM  493  O   HOH T 492      61.722  83.449  39.884  1.00  0.47           O  
HETATM  494  O   HOH T 493      50.332  54.744  20.923  1.00  0.47           O  
HETATM  495  O   HOH T 494      47.801  52.681  19.043  1.00  0.47           O  
HETATM  496  O   HOH T 495      64.925  45.323  24.760  1.00  0.47           O  
HETATM  497  O   HOH T 496      41.180  42.565  15.470  1.00  0.47           O  
HETATM  498  O   HOH T 497      53.323  33.317  37.931  1.00  0.47           O  
HETATM  499  O   HOH T 498      41.265  62.077   0.869  1.00  0.47           O  
HETATM  500  O   HOH T 499      39.097  35.708   3.134  1.00  0.47           O  
HETATM  501  O   HOH T 500      64.676  83.899  47.679  1.00  0.47           O  
HETATM  502  O   HOH T 501      48.204  41.330  29.683  1.00  0.47           O  
HETATM  503  O   HOH T 502       9.438  68.962  11.883  1.00  0.47           O  
HETATM  504  O   HOH T 503      25.309  81.353  10.244  1.00  0.47           O  
HETATM  505  O   HOH T 504       1.470  59.960   7.502  1.00  0.47           O  
HETATM  506  O   HOH T 505      35.284  67.020  17.884  1.00  0.47           O  
HETATM  507  O   HOH T 506      56.206  58.898  18.104  1.00  0.47           O  
HETATM  508  O   HOH T 507      40.782  48.525  19.184  1.00  0.47           O  
HETATM  509  O   HOH T 508      28.388  54.386  22.038  1.00  0.48           O  
HETATM  510  O   HOH T 509      68.731  82.119  35.762  1.00  0.48           O  
HETATM  511  O   HOH T 510      49.593  74.366  24.243  1.00  0.48           O  
HETATM  512  O   HOH T 511      62.514  81.828  44.766  1.00  0.48           O  
HETATM  513  O   HOH T 512       2.462  59.201   9.656  1.00  0.48           O  
HETATM  514  O   HOH T 513      36.073  81.912  36.110  1.00  0.48           O  
HETATM  515  O   HOH T 514      25.425  56.365  -2.053  1.00  0.48           O  
HETATM  516  O   HOH T 515      67.420  41.206  45.952  1.00  0.48           O  
HETATM  517  O   HOH T 516      48.955  86.261  33.200  1.00  0.48           O  
HETATM  518  O   HOH T 517      21.756  34.924   1.026  1.00  0.48           O  
HETATM  519  O   HOH T 518      18.364  52.149  28.441  1.00  0.48           O  
HETATM  520  O   HOH T 519      46.224  42.951  43.376  1.00  0.48           O  
HETATM  521  O   HOH T 520      37.420  50.959  -5.271  1.00  0.48           O  
HETATM  522  O   HOH T 521      66.693  43.537  25.869  1.00  0.48           O  
HETATM  523  O   HOH T 522      31.571  73.730   0.819  1.00  0.48           O  
HETATM  524  O   HOH T 523      37.574  53.261  42.996  1.00  0.48           O  
HETATM  525  O   HOH T 524      48.764  66.473  25.933  1.00  0.48           O  
HETATM  526  O   HOH T 525      33.489  80.262   5.031  1.00  0.48           O  
HETATM  527  O   HOH T 526      33.945  81.003   9.022  1.00  0.48           O  
HETATM  528  O   HOH T 527      59.304  57.219  22.866  1.00  0.48           O  
HETATM  529  O   HOH T 528      30.649  83.728  12.765  1.00  0.48           O  
HETATM  530  O   HOH T 529      17.879  54.821  28.753  1.00  0.48           O  
HETATM  531  O   HOH T 530      50.955  38.553  42.407  1.00  0.48           O  
HETATM  532  O   HOH T 531      12.913  80.993  18.604  1.00  0.48           O  
HETATM  533  O   HOH T 532      54.986  61.383  46.273  1.00  0.48           O  
HETATM  534  O   HOH T 533      55.595  34.529  38.968  1.00  0.48           O  
HETATM  535  O   HOH T 534      55.986  35.491  41.466  1.00  0.48           O  
HETATM  536  O   HOH T 535      55.511  64.949  27.989  1.00  0.48           O  
HETATM  537  O   HOH T 536      42.302  52.163  -3.206  1.00  0.48           O  
HETATM  538  O   HOH T 537      32.399  42.014  30.721  1.00  0.48           O  
HETATM  539  O   HOH T 538      44.367  39.715  37.082  1.00  0.48           O  
HETATM  540  O   HOH T 539      36.233  79.787   7.956  1.00  0.48           O  
HETATM  541  O   HOH T 540      35.723  78.607   5.454  1.00  0.48           O  
HETATM  542  O   HOH T 541      11.181  41.637  -1.022  1.00  0.48           O  
HETATM  543  O   HOH T 542      63.746  53.321  26.783  1.00  0.48           O  
HETATM  544  O   HOH T 543      39.899  34.740   0.675  1.00  0.48           O  
HETATM  545  O   HOH T 544      50.850  71.361  15.289  1.00  0.48           O  
HETATM  546  O   HOH T 545      20.536  29.940   8.852  1.00  0.48           O  
HETATM  547  O   HOH T 546      43.280  58.482  45.207  1.00  0.48           O  
HETATM  548  O   HOH T 547      32.805  87.536  31.879  1.00  0.48           O  
HETATM  549  O   HOH T 548      30.778  60.742  45.385  1.00  0.49           O  
HETATM  550  O   HOH T 549      37.143  75.447   0.913  1.00  0.49           O  
HETATM  551  O   HOH T 550      29.823  76.548   2.653  1.00  0.49           O  
HETATM  552  O   HOH T 551      50.766  38.955  45.182  1.00  0.49           O  
HETATM  553  O   HOH T 552      62.619  85.833  38.769  1.00  0.49           O  
HETATM  554  O   HOH T 553      38.777  80.984   8.273  1.00  0.49           O  
HETATM  555  O   HOH T 554      32.326  30.814   7.405  1.00  0.49           O  
HETATM  556  O   HOH T 555       9.254  68.002  21.023  1.00  0.49           O  
HETATM  557  O   HOH T 556      76.279  69.894  47.481  1.00  0.49           O  
HETATM  558  O   HOH T 557      68.931  40.448  32.024  1.00  0.49           O  
HETATM  559  O   HOH T 558      42.386  33.398  12.237  1.00  0.49           O  
HETATM  560  O   HOH T 559      33.212  44.577  21.049  1.00  0.49           O  
HETATM  561  O   HOH T 560      54.098  34.748  35.610  1.00  0.49           O  
HETATM  562  O   HOH T 561      62.068  81.756  42.102  1.00  0.49           O  
HETATM  563  O   HOH T 562      64.676  60.756  56.166  1.00  0.49           O  
HETATM  564  O   HOH T 563      32.450  55.842  45.550  1.00  0.49           O  
HETATM  565  O   HOH T 564      32.557  71.198   0.513  1.00  0.49           O  
HETATM  566  O   HOH T 565       4.361  73.479  27.584  1.00  0.49           O  
HETATM  567  O   HOH T 566      42.191  43.029  -3.269  1.00  0.49           O  
HETATM  568  O   HOH T 567      31.381  85.194  31.311  1.00  0.49           O  
HETATM  569  O   HOH T 568      81.799  59.179  45.061  1.00  0.49           O  
HETATM  570  O   HOH T 569      47.172  65.765  30.178  1.00  0.49           O  
HETATM  571  O   HOH T 570      17.130  80.442  21.058  1.00  0.49           O  
HETATM  572  O   HOH T 571      40.539  75.672  23.378  1.00  0.49           O  
HETATM  573  O   HOH T 572      16.583  36.646  14.369  1.00  0.49           O  
HETATM  574  O   HOH T 573      25.316  65.176  23.813  1.00  0.49           O  
HETATM  575  O   HOH T 574      71.612  66.755  28.233  1.00  0.49           O  
HETATM  576  O   HOH T 575       8.671  48.685  16.529  1.00  0.49           O  
HETATM  577  O   HOH T 576       6.789  68.186  17.797  1.00  0.49           O  
HETATM  578  O   HOH T 577      60.248  64.367  51.347  1.00  0.49           O  
HETATM  579  O   HOH T 578      57.390  45.338  23.321  1.00  0.49           O  
HETATM  580  O   HOH T 579      20.127  33.284  -0.482  1.00  0.49           O  
HETATM  581  O   HOH T 580      38.590  43.773  39.025  1.00  0.49           O  
HETATM  582  O   HOH T 581      34.939  77.914  22.925  1.00  0.49           O  
HETATM  583  O   HOH T 582      34.884  51.265   2.964  1.00  0.50           O  
HETATM  584  O   HOH T 583      59.133  67.061  25.033  1.00  0.50           O  
HETATM  585  O   HOH T 584      62.072  42.914  23.335  1.00  0.50           O  
HETATM  586  O   HOH T 585      21.358  55.228  37.606  1.00  0.50           O  
HETATM  587  O   HOH T 586      19.332  37.436  14.603  1.00  0.50           O  
HETATM  588  O   HOH T 587      27.493  66.484  38.949  1.00  0.50           O  
HETATM  589  O   HOH T 588      63.958  79.474  32.957  1.00  0.50           O  
HETATM  590  O   HOH T 589      41.654  46.618  26.769  1.00  0.50           O  
HETATM  591  O   HOH T 590      66.414  54.074  24.204  1.00  0.50           O  
HETATM  592  O   HOH T 591      12.345  72.558   0.930  1.00  0.50           O  
HETATM  593  O   HOH T 592      72.965  49.375  37.641  1.00  0.50           O  
HETATM  594  O   HOH T 593      48.334  42.366  32.309  1.00  0.50           O  
HETATM  595  O   HOH T 594      28.747  67.230  18.114  1.00  0.50           O  
HETATM  596  O   HOH T 595      29.244  75.239   0.224  1.00  0.50           O  
HETATM  597  O   HOH T 596      40.021  83.406   8.649  1.00  0.50           O  
HETATM  598  O   HOH T 597      57.011  54.409  26.781  1.00  0.50           O  
HETATM  599  O   HOH T 598      50.159  33.663  33.067  1.00  0.50           O  
HETATM  600  O   HOH T 599      67.867  45.661  47.933  1.00  0.50           O  
HETATM  601  O   HOH T 600      62.214  45.558  24.152  1.00  0.50           O  
HETATM  602  O   HOH T 601      16.597  44.374   0.124  1.00  0.50           O  
HETATM  603  O   HOH T 602      36.688  85.228   8.465  1.00  0.50           O  
HETATM  604  O   HOH T 603      38.138  85.271  33.367  1.00  0.50           O  
HETATM  605  O   HOH T 604      37.353  35.705   1.027  1.00  0.50           O  
HETATM  606  O   HOH T 605      69.345  60.767  53.842  1.00  0.50           O  
HETATM  607  O   HOH T 606      38.519  55.055  -4.443  1.00  0.50           O  
HETATM  608  O   HOH T 607      73.090  75.954  42.313  1.00  0.50           O  
HETATM  609  O   HOH T 608      27.707  63.306  11.143  1.00  0.50           O  
HETATM  610  O   HOH T 609      68.194  66.342  50.694  1.00  0.50           O  
HETATM  611  O   HOH T 610      46.387  84.590  43.161  1.00  0.50           O  
HETATM  612  O   HOH T 611      51.057  73.787  13.914  1.00  0.50           O  
HETATM  613  O   HOH T 612      36.498  86.766  19.854  1.00  0.50           O  
HETATM  614  O   HOH T 613      57.760  34.886  34.012  1.00  0.50           O  
HETATM  615  O   HOH T 614      31.917  64.686  16.106  1.00  0.50           O  
HETATM  616  O   HOH T 615      47.832  75.393  26.064  1.00  0.50           O  
HETATM  617  O   HOH T 616      54.838  78.485  27.814  1.00  0.50           O  
HETATM  618  O   HOH T 617      23.276  70.649  28.286  1.00  0.50           O  
HETATM  619  O   HOH T 618      29.759  59.411  17.529  1.00  0.50           O  
HETATM  620  O   HOH T 619       0.820  61.057   9.889  1.00  0.51           O  
HETATM  621  O   HOH T 620      57.481  47.755  24.331  1.00  0.51           O  
HETATM  622  O   HOH T 621      69.709  78.821  47.107  1.00  0.51           O  
HETATM  623  O   HOH T 622      62.850  84.222  43.309  1.00  0.51           O  
HETATM  624  O   HOH T 623      38.863  76.967   4.778  1.00  0.51           O  
HETATM  625  O   HOH T 624      34.924  51.651  45.497  1.00  0.51           O  
HETATM  626  O   HOH T 625      56.958  56.932  48.351  1.00  0.51           O  
HETATM  627  O   HOH T 626      51.194  56.668  49.528  1.00  0.51           O  
HETATM  628  O   HOH T 627      34.883  58.085  -5.109  1.00  0.51           O  
HETATM  629  O   HOH T 628      44.498  77.634  20.300  1.00  0.51           O  
HETATM  630  O   HOH T 629      50.324  41.301  28.012  1.00  0.51           O  
HETATM  631  O   HOH T 630      48.084  79.354  52.560  1.00  0.51           O  
HETATM  632  O   HOH T 631      32.437  78.904  23.746  1.00  0.51           O  
HETATM  633  O   HOH T 632      51.927  72.051  52.598  1.00  0.51           O  
HETATM  634  O   HOH T 633      27.491  66.658  25.005  1.00  0.51           O  
HETATM  635  O   HOH T 634      49.210  77.916  26.041  1.00  0.51           O  
HETATM  636  O   HOH T 635      48.648  73.526  21.776  1.00  0.51           O  
HETATM  637  O   HOH T 636      39.554  77.720  43.748  1.00  0.51           O  
HETATM  638  O   HOH T 637      67.124  35.152  30.963  1.00  0.51           O  
HETATM  639  O   HOH T 638      31.561  39.253  21.357  1.00  0.51           O  
HETATM  640  O   HOH T 639      14.763  79.506  19.958  1.00  0.51           O  
HETATM  641  O   HOH T 640      31.606  78.550   2.360  1.00  0.51           O  
HETATM  642  O   HOH T 641      73.860  64.338  36.987  1.00  0.51           O  
HETATM  643  O   HOH T 642      57.549  49.755  26.163  1.00  0.51           O  
HETATM  644  O   HOH T 643      34.192  55.294  -5.430  1.00  0.51           O  
HETATM  645  O   HOH T 644       8.785  54.976   2.279  1.00  0.52           O  
HETATM  646  O   HOH T 645      68.076  81.032  47.713  1.00  0.52           O  
HETATM  647  O   HOH T 646      60.026  55.919  26.701  1.00  0.52           O  
HETATM  648  O   HOH T 647      21.757  53.461   0.770  1.00  0.52           O  
HETATM  649  O   HOH T 648      23.797  33.604   2.539  1.00  0.52           O  
HETATM  650  O   HOH T 649      27.437  71.214  37.583  1.00  0.52           O  
HETATM  651  O   HOH T 650      25.467  83.460  20.598  1.00  0.52           O  
HETATM  652  O   HOH T 651      39.712  85.992   9.572  1.00  0.52           O  
HETATM  653  O   HOH T 652      37.340  45.276  37.136  1.00  0.52           O  
HETATM  654  O   HOH T 653      27.433  35.715  -0.874  1.00  0.52           O  
HETATM  655  O   HOH T 654      26.731  42.759  20.098  1.00  0.52           O  
HETATM  656  O   HOH T 655      26.193  52.146  25.235  1.00  0.52           O  
HETATM  657  O   HOH T 656      27.317  31.426   2.671  1.00  0.52           O  
HETATM  658  O   HOH T 657      62.401  72.078  27.754  1.00  0.52           O  
HETATM  659  O   HOH T 658      34.871  85.923  10.433  1.00  0.52           O  
HETATM  660  O   HOH T 659      40.368  64.082  -4.050  1.00  0.52           O  
HETATM  661  O   HOH T 660      44.732  50.075  22.294  1.00  0.52           O  
HETATM  662  O   HOH T 661       7.108  69.425  25.618  1.00  0.52           O  
HETATM  663  O   HOH T 662      24.185  58.428  26.750  1.00  0.52           O  
HETATM  664  O   HOH T 663      18.745  64.962  24.309  1.00  0.52           O  
HETATM  665  O   HOH T 664      40.206  79.045  41.364  1.00  0.52           O  
HETATM  666  O   HOH T 665      71.438  73.837  41.337  1.00  0.52           O  
HETATM  667  O   HOH T 666      46.433  37.873  37.182  1.00  0.52           O  
HETATM  668  O   HOH T 667      50.584  57.494  20.232  1.00  0.52           O  
HETATM  669  O   HOH T 668      41.914  78.077  23.566  1.00  0.52           O  
HETATM  670  O   HOH T 669      46.426  83.835  49.385  1.00  0.52           O  
HETATM  671  O   HOH T 670      26.493  74.720  -0.223  1.00  0.52           O  
HETATM  672  O   HOH T 671      53.972  61.507  27.377  1.00  0.52           O  
HETATM  673  O   HOH T 672      25.243  63.168  21.816  1.00  0.53           O  
HETATM  674  O   HOH T 673      56.667  64.827   5.596  1.00  0.53           O  
HETATM  675  O   HOH T 674       6.467  71.498  19.348  1.00  0.53           O  
HETATM  676  O   HOH T 675      53.588  34.072  40.605  1.00  0.53           O  
HETATM  677  O   HOH T 676      67.115  32.293  34.091  1.00  0.53           O  
HETATM  678  O   HOH T 677      51.125  72.720  50.016  1.00  0.53           O  
HETATM  679  O   HOH T 678      -1.541  63.151  17.219  1.00  0.53           O  
HETATM  680  O   HOH T 679      25.895  60.648  26.403  1.00  0.53           O  
HETATM  681  O   HOH T 680       6.253  58.205   3.095  1.00  0.53           O  
HETATM  682  O   HOH T 681      34.117  70.555  43.977  1.00  0.53           O  
HETATM  683  O   HOH T 682      46.067  81.195  48.585  1.00  0.53           O  
HETATM  684  O   HOH T 683      41.612  48.539  23.368  1.00  0.53           O  
HETATM  685  O   HOH T 684       5.410  58.762  19.362  1.00  0.53           O  
HETATM  686  O   HOH T 685      59.330  75.964  52.647  1.00  0.53           O  
HETATM  687  O   HOH T 686      23.259  63.222  28.547  1.00  0.53           O  
HETATM  688  O   HOH T 687      73.860  77.876  45.294  1.00  0.53           O  
HETATM  689  O   HOH T 688      50.154  35.606  31.109  1.00  0.53           O  
HETATM  690  O   HOH T 689      25.014  60.901   2.370  1.00  0.53           O  
HETATM  691  O   HOH T 690      10.545  75.007   4.758  1.00  0.53           O  
HETATM  692  O   HOH T 691      33.117  53.249  46.413  1.00  0.53           O  
HETATM  693  O   HOH T 692      50.298  72.372   3.095  1.00  0.53           O  
HETATM  694  O   HOH T 693      32.333  47.643  41.496  1.00  0.53           O  
HETATM  695  O   HOH T 694      14.713  57.400   0.769  1.00  0.53           O  
HETATM  696  O   HOH T 695      30.811  77.788  25.978  1.00  0.53           O  
HETATM  697  O   HOH T 696      62.231  67.998  50.224  1.00  0.53           O  
HETATM  698  O   HOH T 697      30.212  30.729   5.762  1.00  0.53           O  
HETATM  699  O   HOH T 698      59.904  81.484  43.800  1.00  0.53           O  
HETATM  700  O   HOH T 699      70.807  67.115  25.643  1.00  0.53           O  
HETATM  701  O   HOH T 700      46.351  56.815   1.529  1.00  0.53           O  
HETATM  702  O   HOH T 701      29.218  38.050  22.126  1.00  0.53           O  
HETATM  703  O   HOH T 702      52.718  82.940  29.272  1.00  0.54           O  
HETATM  704  O   HOH T 703      35.428  59.913  46.207  1.00  0.54           O  
HETATM  705  O   HOH T 704      61.191  77.614  51.860  1.00  0.54           O  
HETATM  706  O   HOH T 705      25.923  34.157   0.765  1.00  0.54           O  
HETATM  707  O   HOH T 706      45.479  62.265  -2.414  1.00  0.54           O  
HETATM  708  O   HOH T 707      16.530  41.007  15.546  1.00  0.54           O  
HETATM  709  O   HOH T 708      46.900  34.719  34.909  1.00  0.54           O  
HETATM  710  O   HOH T 709      55.632  61.163  36.375  1.00  0.54           O  
HETATM  711  O   HOH T 710      49.520  62.439  22.403  1.00  0.54           O  
HETATM  712  O   HOH T 711      34.328  45.270  18.552  1.00  0.54           O  
HETATM  713  O   HOH T 712      44.957  74.918  20.238  1.00  0.54           O  
HETATM  714  O   HOH T 713      24.937  59.399  24.230  1.00  0.54           O  
HETATM  715  O   HOH T 714      12.416  55.459  26.433  1.00  0.54           O  
HETATM  716  O   HOH T 715      41.930  50.396  21.022  1.00  0.54           O  
HETATM  717  O   HOH T 716      39.810  44.604  26.659  1.00  0.54           O  
HETATM  718  O   HOH T 717       2.312  57.409   7.640  1.00  0.54           O  
HETATM  719  O   HOH T 718      59.229  71.948  49.572  1.00  0.54           O  
HETATM  720  O   HOH T 719       0.421  58.234   5.837  1.00  0.54           O  
HETATM  721  O   HOH T 720      24.541  56.870  12.712  1.00  0.54           O  
HETATM  722  O   HOH T 721      42.226  41.290  37.986  1.00  0.54           O  
HETATM  723  O   HOH T 722      43.236  60.314   1.957  1.00  0.54           O  
HETATM  724  O   HOH T 723      18.874  55.950  -0.125  1.00  0.54           O  
HETATM  725  O   HOH T 724      70.465  64.688  26.900  1.00  0.54           O  
HETATM  726  O   HOH T 725      15.329  61.579  26.747  1.00  0.55           O  
HETATM  727  O   HOH T 726      27.717  61.694  21.242  1.00  0.55           O  
HETATM  728  O   HOH T 727      69.995  50.291  31.630  1.00  0.55           O  
HETATM  729  O   HOH T 728      23.427  29.913  12.492  1.00  0.55           O  
HETATM  730  O   HOH T 729      50.184  64.192  26.535  1.00  0.55           O  
HETATM  731  O   HOH T 730      38.203  75.349  48.325  1.00  0.55           O  
HETATM  732  O   HOH T 731      30.283  35.743  13.721  1.00  0.55           O  
HETATM  733  O   HOH T 732      48.399  39.708  36.505  1.00  0.55           O  
HETATM  734  O   HOH T 733      34.837  41.277  21.949  1.00  0.55           O  
HETATM  735  O   HOH T 734      66.520  47.982  50.946  1.00  0.55           O  
HETATM  736  O   HOH T 735      26.633  61.583  23.814  1.00  0.56           O  
HETATM  737  O   HOH T 736      40.788  82.068  44.184  1.00  0.56           O  
HETATM  738  O   HOH T 737      50.400  55.798   8.052  1.00  0.56           O  
HETATM  739  O   HOH T 738      40.778  47.873   1.360  1.00  0.56           O  
HETATM  740  O   HOH T 739      15.409  59.853  -0.112  1.00  0.56           O  
HETATM  741  O   HOH T 740      15.972  80.150  15.112  1.00  0.56           O  
HETATM  742  O   HOH T 741      29.441  73.117  30.666  1.00  0.56           O  
HETATM  743  O   HOH T 742      33.776  77.730   3.840  1.00  0.56           O  
HETATM  744  O   HOH T 743      50.115  65.589  20.425  1.00  0.56           O  
HETATM  745  O   HOH T 744      38.608  41.308  45.338  1.00  0.56           O  
HETATM  746  O   HOH T 745      63.974  74.334  26.778  1.00  0.56           O  
HETATM  747  O   HOH T 746      74.796  46.162  44.538  1.00  0.56           O  
HETATM  748  O   HOH T 747      65.646  77.724  29.106  1.00  0.56           O  
HETATM  749  O   HOH T 748      47.803  77.783   9.008  1.00  0.56           O  
HETATM  750  O   HOH T 749      71.423  54.282  33.134  1.00  0.56           O  
HETATM  751  O   HOH T 750      24.189  63.947  26.005  1.00  0.56           O  
HETATM  752  O   HOH T 751      44.378  49.292  33.773  1.00  0.56           O  
HETATM  753  O   HOH T 752      52.968  81.830  16.663  1.00  0.56           O  
HETATM  754  O   HOH T 753      43.990  36.358   3.775  1.00  0.56           O  
HETATM  755  O   HOH T 754      40.722  53.846  -1.729  1.00  0.56           O  
HETATM  756  O   HOH T 755      51.040  68.437  29.557  1.00  0.57           O  
HETATM  757  O   HOH T 756      71.280  80.980  36.536  1.00  0.57           O  
HETATM  758  O   HOH T 757      35.598  42.975  21.110  1.00  0.57           O  
HETATM  759  O   HOH T 758      36.421  59.476  -3.312  1.00  0.57           O  
HETATM  760  O   HOH T 759      29.144  63.972  -1.628  1.00  0.57           O  
HETATM  761  O   HOH T 760      71.630  73.978  32.973  1.00  0.57           O  
HETATM  762  O   HOH T 761      65.753  64.811  51.816  1.00  0.57           O  
HETATM  763  O   HOH T 762      15.365  81.948  19.415  1.00  0.57           O  
HETATM  764  O   HOH T 763      12.627  42.683  16.931  1.00  0.57           O  
HETATM  765  O   HOH T 764      57.364  60.060  46.937  1.00  0.57           O  
HETATM  766  O   HOH T 765      39.844  46.674  33.955  1.00  0.57           O  
HETATM  767  O   HOH T 766      49.410  88.273  35.018  1.00  0.58           O  
HETATM  768  O   HOH T 767      40.300  77.793  20.357  1.00  0.58           O  
HETATM  769  O   HOH T 768      51.175  88.608  39.043  1.00  0.58           O  
HETATM  770  O   HOH T 769       4.097  63.057   3.922  1.00  0.58           O  
HETATM  771  O   HOH T 770      34.818  82.635  11.319  1.00  0.59           O  
HETATM  772  O   HOH T 771      49.389  71.292  26.809  1.00  0.59           O  
HETATM  773  O   HOH T 772      12.007  74.544   2.575  1.00  0.60           O  
HETATM  774  O   HOH T 773       7.807  71.814  16.928  1.00  0.60           O  
HETATM  775  O   HOH T 774      13.571  78.991   6.732  1.00  0.60           O  
HETATM  776  O   HOH T 775       6.513  71.916  14.548  1.00  0.61           O  
HETATM  777  O   HOH T 776      33.748  78.756   7.325  1.00  0.61           O  
HETATM  778  O   HOH T 777      43.132  41.387  -1.173  1.00  0.62           O  
TER     779      HOH T 777 
