# Supplementary material for: Accurate Prediction of Hydration Sites of Proteins Using Energy Model With Atom Embedding
Source: Front Mol Biosci. 2021 Sep 20;8:756075. doi: 10.3389/fmolb.2021.756075 (PMC8488165; doi:10.3389/fmolb.2021.756075)
Supplement: Supplementary file 1 [file DataSheet1.ZIP › Data Sheet 1/Our_result_pdb/our_dataset_output/2RFF_watersite.pdb]

HEADER                                                        XXXX


JRNL        PMID   -1
HETATM    1  O   HOH T   0      11.423  32.759  -1.459  1.00  0.21           O  
HETATM    2  O   HOH T   1      13.791   8.746   7.426  1.00  0.24           O  
HETATM    3  O   HOH T   2      -5.840  13.117   0.983  1.00  0.24           O  
HETATM    4  O   HOH T   3       0.039  39.771   1.774  1.00  0.25           O  
HETATM    5  O   HOH T   4      -1.065   6.828   1.025  1.00  0.26           O  
HETATM    6  O   HOH T   5      17.536  29.731  11.122  1.00  0.27           O  
HETATM    7  O   HOH T   6       6.981  32.401  17.619  1.00  0.27           O  
HETATM    8  O   HOH T   7       8.305   8.089 -11.418  1.00  0.28           O  
HETATM    9  O   HOH T   8       6.258   6.034  -0.843  1.00  0.28           O  
HETATM   10  O   HOH T   9      -4.706  23.503   4.584  1.00  0.29           O  
HETATM   11  O   HOH T  10       6.414   3.464 -17.866  1.00  0.29           O  
HETATM   12  O   HOH T  11      20.447  28.462   3.127  1.00  0.29           O  
HETATM   13  O   HOH T  12       2.725  43.546  11.045  1.00  0.29           O  
HETATM   14  O   HOH T  13       6.681   9.400   5.128  1.00  0.30           O  
HETATM   15  O   HOH T  14      -0.033  43.567  17.728  1.00  0.30           O  
HETATM   16  O   HOH T  15      -1.138  12.158   5.160  1.00  0.30           O  
HETATM   17  O   HOH T  16       5.717  22.996 -13.426  1.00  0.30           O  
HETATM   18  O   HOH T  17      -0.898  21.613 -16.328  1.00  0.31           O  
HETATM   19  O   HOH T  18       7.450  30.894  -5.830  1.00  0.31           O  
HETATM   20  O   HOH T  19      -3.563  21.171   0.335  1.00  0.31           O  
HETATM   21  O   HOH T  20      13.293  25.126  12.920  1.00  0.31           O  
HETATM   22  O   HOH T  21      14.740  18.589  11.806  1.00  0.31           O  
HETATM   23  O   HOH T  22      -4.464  15.126  -2.637  1.00  0.32           O  
HETATM   24  O   HOH T  23      -0.273  28.295   4.517  1.00  0.32           O  
HETATM   25  O   HOH T  24       2.979  38.436   7.504  1.00  0.32           O  
HETATM   26  O   HOH T  25      -1.635  28.586  -2.523  1.00  0.32           O  
HETATM   27  O   HOH T  26      19.151  27.011   8.021  1.00  0.32           O  
HETATM   28  O   HOH T  27       4.931   7.451   5.872  1.00  0.32           O  
HETATM   29  O   HOH T  28      -4.818  26.108   4.657  1.00  0.33           O  
HETATM   30  O   HOH T  29      -5.129  21.838   2.458  1.00  0.33           O  
HETATM   31  O   HOH T  30      12.610  24.570  15.460  1.00  0.33           O  
HETATM   32  O   HOH T  31      -0.207  15.376  -3.070  1.00  0.34           O  
HETATM   33  O   HOH T  32      17.976  17.020  -4.703  1.00  0.34           O  
HETATM   34  O   HOH T  33       5.512  13.105  12.443  1.00  0.35           O  
HETATM   35  O   HOH T  34      -4.719  10.404   5.561  1.00  0.35           O  
HETATM   36  O   HOH T  35      -4.081  42.606  15.369  1.00  0.35           O  
HETATM   37  O   HOH T  36      -0.967  28.500  13.565  1.00  0.35           O  
HETATM   38  O   HOH T  37      -3.913  40.796  10.552  1.00  0.35           O  
HETATM   39  O   HOH T  38      22.441  16.874  -3.747  1.00  0.35           O  
HETATM   40  O   HOH T  39      -9.936  35.478  -1.495  1.00  0.36           O  
HETATM   41  O   HOH T  40      10.679  28.998  18.610  1.00  0.36           O  
HETATM   42  O   HOH T  41      23.955  15.979  -5.704  1.00  0.36           O  
HETATM   43  O   HOH T  42       8.370   5.323 -11.941  1.00  0.37           O  
HETATM   44  O   HOH T  43      -0.171  12.693  -3.340  1.00  0.37           O  
HETATM   45  O   HOH T  44      -2.879  26.818  -7.611  1.00  0.37           O  
HETATM   46  O   HOH T  45      -6.970  20.637   4.279  1.00  0.37           O  
HETATM   47  O   HOH T  46      13.170  27.899  18.877  1.00  0.38           O  
HETATM   48  O   HOH T  47      -4.799  26.254  14.704  1.00  0.38           O  
HETATM   49  O   HOH T  48      15.466  30.012  12.998  1.00  0.38           O  
HETATM   50  O   HOH T  49       8.243  22.332 -14.297  1.00  0.38           O  
HETATM   51  O   HOH T  50      -3.830  12.900   4.606  1.00  0.38           O  
HETATM   52  O   HOH T  51       5.476  33.104   3.410  1.00  0.38           O  
HETATM   53  O   HOH T  52       0.962  32.852  18.055  1.00  0.39           O  
HETATM   54  O   HOH T  53       4.661  10.406  12.434  1.00  0.39           O  
HETATM   55  O   HOH T  54      -1.493  17.003   6.616  1.00  0.39           O  
HETATM   56  O   HOH T  55       1.577  12.290   9.910  1.00  0.39           O  
HETATM   57  O   HOH T  56       8.291  37.433   8.694  1.00  0.39           O  
HETATM   58  O   HOH T  57      19.521  18.411  -6.739  1.00  0.39           O  
HETATM   59  O   HOH T  58      -3.534  30.388  -3.321  1.00  0.39           O  
HETATM   60  O   HOH T  59       8.638   5.491  13.880  1.00  0.39           O  
HETATM   61  O   HOH T  60      16.040  32.338  14.474  1.00  0.39           O  
HETATM   62  O   HOH T  61      14.887  22.993  12.440  1.00  0.40           O  
HETATM   63  O   HOH T  62      -6.592  18.271   5.704  1.00  0.40           O  
HETATM   64  O   HOH T  63     -11.587  38.822  12.478  1.00  0.40           O  
HETATM   65  O   HOH T  64      -9.686  39.738  10.562  1.00  0.40           O  
HETATM   66  O   HOH T  65     -12.179  33.332  12.286  1.00  0.40           O  
HETATM   67  O   HOH T  66       5.896   4.738 -20.310  1.00  0.41           O  
HETATM   68  O   HOH T  67       0.666  12.695   7.296  1.00  0.41           O  
HETATM   69  O   HOH T  68     -12.128  36.083  12.183  1.00  0.41           O  
HETATM   70  O   HOH T  69       8.336  39.031  11.022  1.00  0.41           O  
HETATM   71  O   HOH T  70      -7.617  34.716  14.767  1.00  0.42           O  
HETATM   72  O   HOH T  71      -3.360  18.592   1.086  1.00  0.42           O  
HETATM   73  O   HOH T  72       8.940  22.760  17.215  1.00  0.43           O  
HETATM   74  O   HOH T  73      -9.628  24.684  16.164  1.00  0.43           O  
HETATM   75  O   HOH T  74       5.820   5.327   9.986  1.00  0.43           O  
HETATM   76  O   HOH T  75       4.943   4.989   7.300  1.00  0.43           O  
HETATM   77  O   HOH T  76       3.796  31.208  -7.185  1.00  0.43           O  
HETATM   78  O   HOH T  77       3.598  43.151  13.650  1.00  0.43           O  
HETATM   79  O   HOH T  78      -4.207  28.315   5.954  1.00  0.43           O  
HETATM   80  O   HOH T  79      -3.583  38.036  10.734  1.00  0.43           O  
HETATM   81  O   HOH T  80      -5.089   3.361  -8.866  1.00  0.43           O  
HETATM   82  O   HOH T  81      -2.372  19.215 -16.516  1.00  0.43           O  
HETATM   83  O   HOH T  82       8.352  18.843  15.567  1.00  0.43           O  
HETATM   84  O   HOH T  83       6.705  21.307 -16.476  1.00  0.43           O  
HETATM   85  O   HOH T  84       8.208  12.250  12.373  1.00  0.44           O  
HETATM   86  O   HOH T  85       2.413  14.650 -14.505  1.00  0.44           O  
HETATM   87  O   HOH T  86       9.630   9.802 -13.274  1.00  0.44           O  
HETATM   88  O   HOH T  87      -3.296  25.481 -11.305  1.00  0.44           O  
HETATM   89  O   HOH T  88      -3.315   8.115   4.909  1.00  0.44           O  
HETATM   90  O   HOH T  89       7.244   4.783  -3.079  1.00  0.44           O  
HETATM   91  O   HOH T  90       2.589  44.181  18.175  1.00  0.44           O  
HETATM   92  O   HOH T  91       8.179  29.933  18.074  1.00  0.44           O  
HETATM   93  O   HOH T  92      10.432  32.584  11.017  1.00  0.45           O  
HETATM   94  O   HOH T  93       3.642   9.709 -17.029  1.00  0.45           O  
HETATM   95  O   HOH T  94       6.556  33.375  20.168  1.00  0.45           O  
HETATM   96  O   HOH T  95      -2.446  13.460  -2.225  1.00  0.45           O  
HETATM   97  O   HOH T  96      10.391  13.719 -13.184  1.00  0.45           O  
HETATM   98  O   HOH T  97      -5.394  36.262  13.792  1.00  0.45           O  
HETATM   99  O   HOH T  98       0.282  53.468  10.825  1.00  0.45           O  
HETATM  100  O   HOH T  99       2.037  12.457 -12.873  1.00  0.46           O  
HETATM  101  O   HOH T 100       1.697  44.183  15.448  1.00  0.46           O  
HETATM  102  O   HOH T 101      -0.058  19.296 -15.040  1.00  0.46           O  
HETATM  103  O   HOH T 102       6.977  36.580  10.871  1.00  0.46           O  
HETATM  104  O   HOH T 103       2.485   6.174   6.713  1.00  0.46           O  
HETATM  105  O   HOH T 104      -3.720  22.939 -10.441  1.00  0.46           O  
HETATM  106  O   HOH T 105      -2.740  28.295  -5.191  1.00  0.46           O  
HETATM  107  O   HOH T 106      -4.526  25.148  -8.991  1.00  0.46           O  
HETATM  108  O   HOH T 107       4.079   1.500  -6.592  1.00  0.46           O  
HETATM  109  O   HOH T 108      15.970  16.229  12.674  1.00  0.47           O  
HETATM  110  O   HOH T 109      15.112  13.456  12.550  1.00  0.47           O  
HETATM  111  O   HOH T 110      13.823  26.878  16.473  1.00  0.47           O  
HETATM  112  O   HOH T 111      -0.682  45.295  14.360  1.00  0.47           O  
HETATM  113  O   HOH T 112      -0.165  14.207 -15.619  1.00  0.47           O  
HETATM  114  O   HOH T 113      -1.732  16.182  -8.339  1.00  0.47           O  
HETATM  115  O   HOH T 114       2.737  30.670  -9.718  1.00  0.47           O  
HETATM  116  O   HOH T 115       6.047  35.145   5.228  1.00  0.47           O  
HETATM  117  O   HOH T 116       0.005   7.943   3.368  1.00  0.47           O  
HETATM  118  O   HOH T 117       2.211  10.602 -14.858  1.00  0.48           O  
HETATM  119  O   HOH T 118      18.645  20.106  -9.828  1.00  0.48           O  
HETATM  120  O   HOH T 119      -3.108  11.944   7.157  1.00  0.48           O  
HETATM  121  O   HOH T 120      13.765  17.198  13.973  1.00  0.48           O  
HETATM  122  O   HOH T 121       6.927  -0.231   4.580  1.00  0.48           O  
HETATM  123  O   HOH T 122       9.459  20.760 -16.079  1.00  0.48           O  
HETATM  124  O   HOH T 123      -7.292  22.726  -9.764  1.00  0.49           O  
HETATM  125  O   HOH T 124       7.057  20.786  16.996  1.00  0.49           O  
HETATM  126  O   HOH T 125      20.805  14.099   8.534  1.00  0.49           O  
HETATM  127  O   HOH T 126      -5.422  17.205   3.354  1.00  0.49           O  
HETATM  128  O   HOH T 127       1.452   8.857 -12.894  1.00  0.49           O  
HETATM  129  O   HOH T 128      -3.017   8.639  -8.430  1.00  0.50           O  
HETATM  130  O   HOH T 129      -3.866  16.239   5.462  1.00  0.50           O  
HETATM  131  O   HOH T 130      -7.502  34.749  -0.356  1.00  0.50           O  
HETATM  132  O   HOH T 131      -0.968  28.160 -14.463  1.00  0.50           O  
HETATM  133  O   HOH T 132       0.410  25.838 -15.276  1.00  0.50           O  
HETATM  134  O   HOH T 133       4.038  42.856  16.313  1.00  0.50           O  
HETATM  135  O   HOH T 134       1.480  23.305  14.900  1.00  0.51           O  
HETATM  136  O   HOH T 135       2.747  27.993 -10.251  1.00  0.51           O  
HETATM  137  O   HOH T 136       7.927  20.707 -19.890  1.00  0.51           O  
HETATM  138  O   HOH T 137       2.361   7.901 -15.331  1.00  0.52           O  
HETATM  139  O   HOH T 138      -5.040  40.005  15.085  1.00  0.53           O  
HETATM  140  O   HOH T 139      -8.082  33.215  17.045  1.00  0.53           O  
HETATM  141  O   HOH T 140       1.531  10.625 -10.848  1.00  0.53           O  
HETATM  142  O   HOH T 141      -1.492   3.321  -9.534  1.00  0.53           O  
HETATM  143  O   HOH T 142      -6.363  21.803 -12.090  1.00  0.54           O  
HETATM  144  O   HOH T 143      11.305  11.586 -14.585  1.00  0.54           O  
HETATM  145  O   HOH T 144      11.374  28.438  -7.382  1.00  0.54           O  
HETATM  146  O   HOH T 145       3.101   5.759   9.807  1.00  0.54           O  
HETATM  147  O   HOH T 146       0.830  16.263  15.414  1.00  0.54           O  
HETATM  148  O   HOH T 147       6.451   3.341 -12.110  1.00  0.56           O  
HETATM  149  O   HOH T 148      16.896  24.125  13.799  1.00  0.56           O  
HETATM  150  O   HOH T 149       7.246  13.582  14.520  1.00  0.57           O  
HETATM  151  O   HOH T 150      21.108  17.520  -8.934  1.00  0.57           O  
HETATM  152  O   HOH T 151       4.020  32.559  20.999  1.00  0.57           O  
HETATM  153  O   HOH T 152      -2.112   6.134   3.430  1.00  0.57           O  
TER     154      HOH T 152 
