# Supplementary material for: Accurate Prediction of Hydration Sites of Proteins Using Energy Model With Atom Embedding
Source: Front Mol Biosci. 2021 Sep 20;8:756075. doi: 10.3389/fmolb.2021.756075 (PMC8488165; doi:10.3389/fmolb.2021.756075)
Supplement: Supplementary file 1 [file DataSheet1.ZIP › Data Sheet 1/Our_result_pdb/our_dataset_output/2RJ6_watersite.pdb]

HEADER                                                        XXXX


JRNL        PMID   -1
HETATM    1  O   HOH T   0      -5.905  18.536   3.762  1.00  0.14           O  
HETATM    2  O   HOH T   1       3.740  17.213   6.312  1.00  0.16           O  
HETATM    3  O   HOH T   2      -0.016  28.365   7.398  1.00  0.17           O  
HETATM    4  O   HOH T   3      -0.705  16.321  -5.921  1.00  0.17           O  
HETATM    5  O   HOH T   4       2.791  18.351  -5.134  1.00  0.19           O  
HETATM    6  O   HOH T   5      -7.793  27.475  -5.773  1.00  0.19           O  
HETATM    7  O   HOH T   6     -16.949  19.705  19.304  1.00  0.20           O  
HETATM    8  O   HOH T   7     -18.782  35.026  12.679  1.00  0.20           O  
HETATM    9  O   HOH T   8     -27.917  18.556  -1.684  1.00  0.20           O  
HETATM   10  O   HOH T   9     -11.792  22.061  -0.050  1.00  0.20           O  
HETATM   11  O   HOH T  10     -19.409   8.083   0.696  1.00  0.21           O  
HETATM   12  O   HOH T  11       0.767   9.714  36.197  1.00  0.21           O  
HETATM   13  O   HOH T  12     -26.581  25.540  17.850  1.00  0.21           O  
HETATM   14  O   HOH T  13      -3.981  11.561  18.594  1.00  0.22           O  
HETATM   15  O   HOH T  14      -9.941   3.252  -7.170  1.00  0.22           O  
HETATM   16  O   HOH T  15     -29.145  29.286   6.381  1.00  0.22           O  
HETATM   17  O   HOH T  16     -33.080  22.512   4.276  1.00  0.22           O  
HETATM   18  O   HOH T  17      -8.327  33.314  -9.664  1.00  0.23           O  
HETATM   19  O   HOH T  18     -23.822  25.294  17.295  1.00  0.23           O  
HETATM   20  O   HOH T  19      11.678  17.149   2.841  1.00  0.24           O  
HETATM   21  O   HOH T  20     -34.503  19.642  12.231  1.00  0.24           O  
HETATM   22  O   HOH T  21       0.387  38.052  -2.428  1.00  0.24           O  
HETATM   23  O   HOH T  22       2.427   2.298  -1.876  1.00  0.24           O  
HETATM   24  O   HOH T  23       0.529  34.189 -13.531  1.00  0.24           O  
HETATM   25  O   HOH T  24     -33.256  23.134   7.026  1.00  0.24           O  
HETATM   26  O   HOH T  25     -10.913   4.959  13.578  1.00  0.24           O  
HETATM   27  O   HOH T  26     -19.941   6.854  11.564  1.00  0.25           O  
HETATM   28  O   HOH T  27     -12.338  40.912   3.530  1.00  0.25           O  
HETATM   29  O   HOH T  28      -3.145   9.882   2.162  1.00  0.25           O  
HETATM   30  O   HOH T  29      -7.223  23.568  29.925  1.00  0.25           O  
HETATM   31  O   HOH T  30     -28.843  22.597  -2.834  1.00  0.25           O  
HETATM   32  O   HOH T  31      -4.564  31.243  31.426  1.00  0.25           O  
HETATM   33  O   HOH T  32      -7.985  24.542  13.130  1.00  0.25           O  
HETATM   34  O   HOH T  33      -3.774  27.166 -11.916  1.00  0.26           O  
HETATM   35  O   HOH T  34      -2.897   5.564  21.094  1.00  0.26           O  
HETATM   36  O   HOH T  35       0.795   3.057   6.414  1.00  0.26           O  
HETATM   37  O   HOH T  36      -7.983  25.742  31.563  1.00  0.26           O  
HETATM   38  O   HOH T  37     -10.782  -0.000  -0.001  1.00  0.27           O  
HETATM   39  O   HOH T  38       3.774  15.396   2.761  1.00  0.27           O  
HETATM   40  O   HOH T  39       2.017  33.106   2.464  1.00  0.28           O  
HETATM   41  O   HOH T  40     -28.128  38.959  -7.669  1.00  0.28           O  
HETATM   42  O   HOH T  41     -19.473   4.678  13.341  1.00  0.28           O  
HETATM   43  O   HOH T  42     -29.785  29.063   3.783  1.00  0.28           O  
HETATM   44  O   HOH T  43     -26.882  22.956  14.609  1.00  0.28           O  
HETATM   45  O   HOH T  44     -10.223  14.889  36.391  1.00  0.28           O  
HETATM   46  O   HOH T  45       4.915   5.492  11.653  1.00  0.29           O  
HETATM   47  O   HOH T  46      -7.060  20.306  -6.400  1.00  0.29           O  
HETATM   48  O   HOH T  47     -10.371  19.480  41.417  1.00  0.29           O  
HETATM   49  O   HOH T  48       2.317  35.003   4.411  1.00  0.29           O  
HETATM   50  O   HOH T  49     -16.836  -2.946   6.656  1.00  0.29           O  
HETATM   51  O   HOH T  50       3.342  25.044  10.210  1.00  0.29           O  
HETATM   52  O   HOH T  51     -31.582  25.224  -3.938  1.00  0.29           O  
HETATM   53  O   HOH T  52     -15.143  34.101  18.760  1.00  0.29           O  
HETATM   54  O   HOH T  53     -11.312  10.402  29.591  1.00  0.29           O  
HETATM   55  O   HOH T  54       3.583  24.908  -4.546  1.00  0.30           O  
HETATM   56  O   HOH T  55      -9.938  39.504  -9.719  1.00  0.30           O  
HETATM   57  O   HOH T  56     -20.622  38.941  -2.418  1.00  0.30           O  
HETATM   58  O   HOH T  57     -10.173  42.447  10.376  1.00  0.30           O  
HETATM   59  O   HOH T  58     -10.797  32.071  29.417  1.00  0.30           O  
HETATM   60  O   HOH T  59       7.092  27.205 -11.977  1.00  0.30           O  
HETATM   61  O   HOH T  60     -10.634  28.467 -20.339  1.00  0.30           O  
HETATM   62  O   HOH T  61     -18.984  -0.104   2.841  1.00  0.30           O  
HETATM   63  O   HOH T  62      -3.282  37.796   6.771  1.00  0.30           O  
HETATM   64  O   HOH T  63     -21.783   9.473   1.533  1.00  0.30           O  
HETATM   65  O   HOH T  64     -10.169  27.011  -7.228  1.00  0.30           O  
HETATM   66  O   HOH T  65     -12.113  12.865  36.362  1.00  0.30           O  
HETATM   67  O   HOH T  66      -9.834  25.596  11.438  1.00  0.31           O  
HETATM   68  O   HOH T  67      -3.283  36.409  -1.862  1.00  0.31           O  
HETATM   69  O   HOH T  68     -30.285  16.048   5.429  1.00  0.31           O  
HETATM   70  O   HOH T  69      -4.483   3.672   1.375  1.00  0.31           O  
HETATM   71  O   HOH T  70       2.502  25.452  -2.124  1.00  0.31           O  
HETATM   72  O   HOH T  71       3.403  11.499  -8.325  1.00  0.31           O  
HETATM   73  O   HOH T  72     -20.259  29.680  29.556  1.00  0.31           O  
HETATM   74  O   HOH T  73     -16.425  11.371  17.645  1.00  0.31           O  
HETATM   75  O   HOH T  74      -2.685  40.395   1.523  1.00  0.32           O  
HETATM   76  O   HOH T  75     -22.412  32.455  14.302  1.00  0.32           O  
HETATM   77  O   HOH T  76     -13.682  -1.615  13.261  1.00  0.32           O  
HETATM   78  O   HOH T  77       1.371   5.694   5.632  1.00  0.32           O  
HETATM   79  O   HOH T  78     -15.299  24.227  -1.727  1.00  0.32           O  
HETATM   80  O   HOH T  79      -7.257  -0.103   5.851  1.00  0.32           O  
HETATM   81  O   HOH T  80     -33.848  23.908   2.018  1.00  0.32           O  
HETATM   82  O   HOH T  81       4.345  30.801  -2.558  1.00  0.32           O  
HETATM   83  O   HOH T  82     -12.937  19.596  42.381  1.00  0.32           O  
HETATM   84  O   HOH T  83       4.351   8.978  -7.519  1.00  0.32           O  
HETATM   85  O   HOH T  84      -1.087  27.006 -11.853  1.00  0.33           O  
HETATM   86  O   HOH T  85      -5.577  33.678  13.607  1.00  0.33           O  
HETATM   87  O   HOH T  86       0.132  24.688 -11.179  1.00  0.33           O  
HETATM   88  O   HOH T  87     -27.145  34.615   3.956  1.00  0.33           O  
HETATM   89  O   HOH T  88      -7.252  30.446  34.958  1.00  0.33           O  
HETATM   90  O   HOH T  89     -26.388  37.264  -9.209  1.00  0.33           O  
HETATM   91  O   HOH T  90     -11.812  14.987  -7.901  1.00  0.33           O  
HETATM   92  O   HOH T  91      -0.297  28.222 -17.809  1.00  0.33           O  
HETATM   93  O   HOH T  92     -23.091  39.873   8.194  1.00  0.33           O  
HETATM   94  O   HOH T  93       0.730   5.701  -7.419  1.00  0.33           O  
HETATM   95  O   HOH T  94      -7.286  42.836  -5.160  1.00  0.34           O  
HETATM   96  O   HOH T  95      -7.469  40.285  26.691  1.00  0.34           O  
HETATM   97  O   HOH T  96     -24.913   8.737  10.062  1.00  0.34           O  
HETATM   98  O   HOH T  97     -21.377  31.601  22.256  1.00  0.34           O  
HETATM   99  O   HOH T  98     -16.879  31.734 -16.636  1.00  0.34           O  
HETATM  100  O   HOH T  99       0.860  20.848 -16.784  1.00  0.34           O  
HETATM  101  O   HOH T 100     -15.804  26.698  35.638  1.00  0.34           O  
HETATM  102  O   HOH T 101     -19.216  28.913  27.188  1.00  0.34           O  
HETATM  103  O   HOH T 102      -9.781  41.761   2.781  1.00  0.34           O  
HETATM  104  O   HOH T 103      10.379  23.188  -8.330  1.00  0.35           O  
HETATM  105  O   HOH T 104     -12.079  10.192  20.505  1.00  0.35           O  
HETATM  106  O   HOH T 105     -14.189  40.094  -9.902  1.00  0.35           O  
HETATM  107  O   HOH T 106      -5.362  39.892  28.482  1.00  0.35           O  
HETATM  108  O   HOH T 107     -15.045  16.255  -3.085  1.00  0.35           O  
HETATM  109  O   HOH T 108     -24.151  17.255  -0.575  1.00  0.35           O  
HETATM  110  O   HOH T 109       4.570  15.273 -12.562  1.00  0.35           O  
HETATM  111  O   HOH T 110     -10.890  17.799  -3.573  1.00  0.35           O  
HETATM  112  O   HOH T 111     -14.942  38.125 -16.993  1.00  0.35           O  
HETATM  113  O   HOH T 112       7.371  11.247  -2.538  1.00  0.35           O  
HETATM  114  O   HOH T 113     -19.877  40.215  11.799  1.00  0.35           O  
HETATM  115  O   HOH T 114     -21.069   7.082   9.024  1.00  0.35           O  
HETATM  116  O   HOH T 115      -4.243  34.051 -14.433  1.00  0.35           O  
HETATM  117  O   HOH T 116      -1.522  10.548  -3.950  1.00  0.36           O  
HETATM  118  O   HOH T 117     -36.202  23.041   0.808  1.00  0.36           O  
HETATM  119  O   HOH T 118      -3.560  30.736  33.982  1.00  0.36           O  
HETATM  120  O   HOH T 119      -0.412   5.635  22.403  1.00  0.36           O  
HETATM  121  O   HOH T 120     -29.434  24.575  -5.604  1.00  0.36           O  
HETATM  122  O   HOH T 121       7.117  26.276   0.861  1.00  0.36           O  
HETATM  123  O   HOH T 122     -26.259  23.635  19.915  1.00  0.36           O  
HETATM  124  O   HOH T 123      -8.795  16.081  -4.283  1.00  0.36           O  
HETATM  125  O   HOH T 124      10.049  30.763 -12.468  1.00  0.36           O  
HETATM  126  O   HOH T 125     -19.409  14.504  -6.584  1.00  0.36           O  
HETATM  127  O   HOH T 126      -7.932   0.776  20.671  1.00  0.36           O  
HETATM  128  O   HOH T 127     -10.508   0.454  14.723  1.00  0.36           O  
HETATM  129  O   HOH T 128     -16.158  -1.853   9.165  1.00  0.36           O  
HETATM  130  O   HOH T 129      -7.137  42.785   2.993  1.00  0.37           O  
HETATM  131  O   HOH T 130      -7.084   3.629   0.557  1.00  0.37           O  
HETATM  132  O   HOH T 131     -36.039  14.708   7.456  1.00  0.37           O  
HETATM  133  O   HOH T 132      -0.783   0.732  35.030  1.00  0.37           O  
HETATM  134  O   HOH T 133      -8.753  34.296  17.105  1.00  0.37           O  
HETATM  135  O   HOH T 134     -31.691  22.672  -2.843  1.00  0.37           O  
HETATM  136  O   HOH T 135       3.098  36.751   2.384  1.00  0.37           O  
HETATM  137  O   HOH T 136     -25.599  12.065   6.371  1.00  0.37           O  
HETATM  138  O   HOH T 137     -30.393  20.635  -4.132  1.00  0.37           O  
HETATM  139  O   HOH T 138      -1.302  -2.005  27.459  1.00  0.37           O  
HETATM  140  O   HOH T 139       2.524  27.837   8.109  1.00  0.37           O  
HETATM  141  O   HOH T 140     -30.712  17.470   1.428  1.00  0.38           O  
HETATM  142  O   HOH T 141     -16.807  10.325  -5.233  1.00  0.38           O  
HETATM  143  O   HOH T 142     -27.471  12.770   8.409  1.00  0.38           O  
HETATM  144  O   HOH T 143     -18.869  13.390  -4.134  1.00  0.38           O  
HETATM  145  O   HOH T 144     -27.140  34.216   8.323  1.00  0.38           O  
HETATM  146  O   HOH T 145      -2.389  20.660  17.852  1.00  0.38           O  
HETATM  147  O   HOH T 146     -19.939  37.446  12.079  1.00  0.38           O  
HETATM  148  O   HOH T 147      -9.658  30.594  36.464  1.00  0.38           O  
HETATM  149  O   HOH T 148      -7.734  37.841 -10.153  1.00  0.38           O  
HETATM  150  O   HOH T 149     -27.746  20.633  15.775  1.00  0.38           O  
HETATM  151  O   HOH T 150     -10.271   1.591   2.112  1.00  0.38           O  
HETATM  152  O   HOH T 151     -14.365  33.409  26.374  1.00  0.38           O  
HETATM  153  O   HOH T 152     -12.354  38.536  -8.754  1.00  0.38           O  
HETATM  154  O   HOH T 153       6.908  28.406  -4.611  1.00  0.38           O  
HETATM  155  O   HOH T 154      -6.673   3.202  -2.111  1.00  0.39           O  
HETATM  156  O   HOH T 155      -0.723  31.927  13.690  1.00  0.39           O  
HETATM  157  O   HOH T 156     -24.059  31.038  25.157  1.00  0.39           O  
HETATM  158  O   HOH T 157     -16.933   1.660  15.539  1.00  0.39           O  
HETATM  159  O   HOH T 158     -19.562   8.060  -2.085  1.00  0.39           O  
HETATM  160  O   HOH T 159      -4.217  34.147 -21.033  1.00  0.39           O  
HETATM  161  O   HOH T 160     -35.834  25.681   1.850  1.00  0.39           O  
HETATM  162  O   HOH T 161     -16.628  22.607  -3.460  1.00  0.39           O  
HETATM  163  O   HOH T 162      -5.034  37.778  -6.924  1.00  0.39           O  
HETATM  164  O   HOH T 163       0.100  -2.467  29.801  1.00  0.39           O  
HETATM  165  O   HOH T 164      -6.396  25.279  18.688  1.00  0.39           O  
HETATM  166  O   HOH T 165     -15.586  35.752  25.274  1.00  0.39           O  
HETATM  167  O   HOH T 166       6.335  20.525  15.561  1.00  0.39           O  
HETATM  168  O   HOH T 167      -3.462  16.389 -14.455  1.00  0.40           O  
HETATM  169  O   HOH T 168      -1.426  26.678 -15.834  1.00  0.40           O  
HETATM  170  O   HOH T 169       8.420  26.106  -4.900  1.00  0.40           O  
HETATM  171  O   HOH T 170      -9.622  41.861  13.078  1.00  0.40           O  
HETATM  172  O   HOH T 171     -20.909  18.509  16.403  1.00  0.40           O  
HETATM  173  O   HOH T 172      12.217  12.648  -7.807  1.00  0.40           O  
HETATM  174  O   HOH T 173       4.991  25.942  -0.959  1.00  0.40           O  
HETATM  175  O   HOH T 174     -29.628  14.280   7.486  1.00  0.40           O  
HETATM  176  O   HOH T 175      10.433  13.543  -9.797  1.00  0.40           O  
HETATM  177  O   HOH T 176       2.912  40.503  12.376  1.00  0.40           O  
HETATM  178  O   HOH T 177     -15.816   7.992  -6.420  1.00  0.40           O  
HETATM  179  O   HOH T 178     -17.584  15.960  -8.082  1.00  0.40           O  
HETATM  180  O   HOH T 179     -18.147  34.122 -15.752  1.00  0.40           O  
HETATM  181  O   HOH T 180     -13.536  26.044   0.810  1.00  0.40           O  
HETATM  182  O   HOH T 181     -10.446  13.654 -12.254  1.00  0.40           O  
HETATM  183  O   HOH T 182      -8.434  33.870  26.037  1.00  0.40           O  
HETATM  184  O   HOH T 183     -18.806   2.057  13.713  1.00  0.41           O  
HETATM  185  O   HOH T 184      -3.118  37.790   0.602  1.00  0.41           O  
HETATM  186  O   HOH T 185     -11.879  43.613   2.948  1.00  0.41           O  
HETATM  187  O   HOH T 186      -8.670  37.077  14.142  1.00  0.41           O  
HETATM  188  O   HOH T 187       1.553  19.825  17.123  1.00  0.41           O  
HETATM  189  O   HOH T 188       2.355  35.887 -12.123  1.00  0.41           O  
HETATM  190  O   HOH T 189     -10.976  12.976  -9.587  1.00  0.41           O  
HETATM  191  O   HOH T 190      -2.654   8.208  34.661  1.00  0.41           O  
HETATM  192  O   HOH T 191     -18.597   3.882  15.824  1.00  0.41           O  
HETATM  193  O   HOH T 192     -11.367  -2.134  14.413  1.00  0.41           O  
HETATM  194  O   HOH T 193     -14.541  30.319 -16.932  1.00  0.41           O  
HETATM  195  O   HOH T 194      -9.398  16.473  -8.057  1.00  0.41           O  
HETATM  196  O   HOH T 195     -33.299  12.973   5.470  1.00  0.42           O  
HETATM  197  O   HOH T 196       1.720  -2.684  31.988  1.00  0.42           O  
HETATM  198  O   HOH T 197     -31.931  13.038   2.923  1.00  0.42           O  
HETATM  199  O   HOH T 198      -4.123  -0.947  11.175  1.00  0.42           O  
HETATM  200  O   HOH T 199       5.354  28.337   0.478  1.00  0.42           O  
HETATM  201  O   HOH T 200      -3.146  19.060 -14.165  1.00  0.42           O  
HETATM  202  O   HOH T 201      -8.763  30.193 -21.536  1.00  0.42           O  
HETATM  203  O   HOH T 202     -10.891  20.521  43.933  1.00  0.42           O  
HETATM  204  O   HOH T 203     -24.925  33.592  14.705  1.00  0.43           O  
HETATM  205  O   HOH T 204      -4.826  14.790 -12.745  1.00  0.43           O  
HETATM  206  O   HOH T 205      -0.837   4.253  -5.684  1.00  0.43           O  
HETATM  207  O   HOH T 206     -12.313  10.474  -9.574  1.00  0.43           O  
HETATM  208  O   HOH T 207      -7.256  32.705  15.529  1.00  0.43           O  
HETATM  209  O   HOH T 208     -18.951  17.859  25.644  1.00  0.43           O  
HETATM  210  O   HOH T 209      -8.331   1.352  -8.198  1.00  0.43           O  
HETATM  211  O   HOH T 210     -15.356  30.892 -20.722  1.00  0.43           O  
HETATM  212  O   HOH T 211      -1.519  -1.528  12.184  1.00  0.43           O  
HETATM  213  O   HOH T 212     -12.999  39.720 -15.658  1.00  0.43           O  
HETATM  214  O   HOH T 213     -19.633  19.458  18.761  1.00  0.43           O  
HETATM  215  O   HOH T 214      -5.643  22.650  19.446  1.00  0.43           O  
HETATM  216  O   HOH T 215     -31.293  31.107   0.435  1.00  0.43           O  
HETATM  217  O   HOH T 216      10.561   7.021  -1.574  1.00  0.43           O  
HETATM  218  O   HOH T 217      -4.510  42.545   2.131  1.00  0.43           O  
HETATM  219  O   HOH T 218     -25.188  22.962  22.452  1.00  0.43           O  
HETATM  220  O   HOH T 219       4.618  24.242  14.471  1.00  0.43           O  
HETATM  221  O   HOH T 220     -34.919  30.259  10.758  1.00  0.43           O  
HETATM  222  O   HOH T 221     -23.868  35.629   8.253  1.00  0.43           O  
HETATM  223  O   HOH T 222     -17.169  38.231 -18.674  1.00  0.44           O  
HETATM  224  O   HOH T 223      -6.646  37.730  27.498  1.00  0.44           O  
HETATM  225  O   HOH T 224      -6.306  -0.079  18.601  1.00  0.44           O  
HETATM  226  O   HOH T 225     -30.593  20.117   9.562  1.00  0.44           O  
HETATM  227  O   HOH T 226      -8.609  18.944  -4.549  1.00  0.44           O  
HETATM  228  O   HOH T 227     -22.132  38.881  -0.099  1.00  0.44           O  
HETATM  229  O   HOH T 228     -32.843  17.752  -2.311  1.00  0.44           O  
HETATM  230  O   HOH T 229     -12.574  42.342  17.386  1.00  0.44           O  
HETATM  231  O   HOH T 230     -35.668  30.297  -1.727  1.00  0.44           O  
HETATM  232  O   HOH T 231      -3.338  30.521  29.059  1.00  0.44           O  
HETATM  233  O   HOH T 232     -18.269  15.541  34.600  1.00  0.44           O  
HETATM  234  O   HOH T 233       5.945  25.918  10.079  1.00  0.44           O  
HETATM  235  O   HOH T 234       3.232  19.563  19.470  1.00  0.44           O  
HETATM  236  O   HOH T 235       7.173   5.267   9.986  1.00  0.44           O  
HETATM  237  O   HOH T 236     -29.669  14.304  -1.417  1.00  0.44           O  
HETATM  238  O   HOH T 237     -14.865  11.430  -9.371  1.00  0.44           O  
HETATM  239  O   HOH T 238     -29.541  11.720   3.378  1.00  0.44           O  
HETATM  240  O   HOH T 239     -13.096  41.637  -1.502  1.00  0.44           O  
HETATM  241  O   HOH T 240       0.228  -1.627  25.195  1.00  0.44           O  
HETATM  242  O   HOH T 241     -14.626  -0.344  11.017  1.00  0.44           O  
HETATM  243  O   HOH T 242     -20.393  34.221  14.737  1.00  0.44           O  
HETATM  244  O   HOH T 243       3.692  19.582  15.188  1.00  0.44           O  
HETATM  245  O   HOH T 244      -7.096  35.332 -11.120  1.00  0.45           O  
HETATM  246  O   HOH T 245     -28.546  33.875  -8.719  1.00  0.45           O  
HETATM  247  O   HOH T 246      -3.168   3.882  -2.560  1.00  0.45           O  
HETATM  248  O   HOH T 247      -2.075   5.446  -7.855  1.00  0.45           O  
HETATM  249  O   HOH T 248     -16.479  12.241  -7.238  1.00  0.45           O  
HETATM  250  O   HOH T 249     -14.631  11.819  22.675  1.00  0.45           O  
HETATM  251  O   HOH T 250      -8.789  -1.595  13.806  1.00  0.45           O  
HETATM  252  O   HOH T 251       4.680  21.622  13.557  1.00  0.45           O  
HETATM  253  O   HOH T 252     -15.220  42.859  17.790  1.00  0.45           O  
HETATM  254  O   HOH T 253     -17.387  36.820 -16.305  1.00  0.46           O  
HETATM  255  O   HOH T 254     -27.010  17.882  16.311  1.00  0.46           O  
HETATM  256  O   HOH T 255     -18.795  -0.003  -0.016  1.00  0.46           O  
HETATM  257  O   HOH T 256     -23.785  32.703  22.876  1.00  0.46           O  
HETATM  258  O   HOH T 257      -7.515  18.550  -8.522  1.00  0.46           O  
HETATM  259  O   HOH T 258      -9.114   4.427  33.315  1.00  0.46           O  
HETATM  260  O   HOH T 259     -15.583  14.865  -6.591  1.00  0.46           O  
HETATM  261  O   HOH T 260     -17.147  39.625 -16.257  1.00  0.46           O  
HETATM  262  O   HOH T 261       0.778  34.913 -16.162  1.00  0.46           O  
HETATM  263  O   HOH T 262      -9.721   2.464  22.029  1.00  0.46           O  
HETATM  264  O   HOH T 263     -16.133  35.489  16.511  1.00  0.46           O  
HETATM  265  O   HOH T 264     -18.771  -1.609   8.190  1.00  0.46           O  
HETATM  266  O   HOH T 265       6.011  25.948  -3.602  1.00  0.46           O  
HETATM  267  O   HOH T 266     -17.319  27.964  21.105  1.00  0.46           O  
HETATM  268  O   HOH T 267      -2.472   2.541  -0.185  1.00  0.46           O  
HETATM  269  O   HOH T 268     -27.843  15.985  -2.507  1.00  0.47           O  
HETATM  270  O   HOH T 269     -22.099  38.456   6.063  1.00  0.47           O  
HETATM  271  O   HOH T 270     -11.354  36.038 -17.196  1.00  0.47           O  
HETATM  272  O   HOH T 271      -1.634  37.269  -4.012  1.00  0.47           O  
HETATM  273  O   HOH T 272      -6.751  -1.217  12.085  1.00  0.47           O  
HETATM  274  O   HOH T 273     -35.274  26.928   6.334  1.00  0.47           O  
HETATM  275  O   HOH T 274      -6.124  36.160 -21.028  1.00  0.47           O  
HETATM  276  O   HOH T 275      -5.287  43.301  -3.260  1.00  0.47           O  
HETATM  277  O   HOH T 276     -11.780  42.607  14.712  1.00  0.47           O  
HETATM  278  O   HOH T 277     -18.384  24.106  -6.555  1.00  0.47           O  
HETATM  279  O   HOH T 278      -6.398  41.214   0.726  1.00  0.47           O  
HETATM  280  O   HOH T 279     -25.874  11.231  10.089  1.00  0.47           O  
HETATM  281  O   HOH T 280      -3.897  27.329 -14.645  1.00  0.47           O  
HETATM  282  O   HOH T 281     -20.141  22.308  30.195  1.00  0.47           O  
HETATM  283  O   HOH T 282     -16.711  34.399  27.400  1.00  0.47           O  
HETATM  284  O   HOH T 283     -26.237  34.684 -10.149  1.00  0.47           O  
HETATM  285  O   HOH T 284      -8.818  47.596   0.784  1.00  0.47           O  
HETATM  286  O   HOH T 285     -14.527   8.666  -8.925  1.00  0.47           O  
HETATM  287  O   HOH T 286     -32.027  15.809   3.236  1.00  0.47           O  
HETATM  288  O   HOH T 287      -3.127  23.187  18.609  1.00  0.47           O  
HETATM  289  O   HOH T 288      -9.255  17.755 -10.568  1.00  0.47           O  
HETATM  290  O   HOH T 289      -5.119  23.750  28.035  1.00  0.47           O  
HETATM  291  O   HOH T 290     -21.895  37.954  13.996  1.00  0.48           O  
HETATM  292  O   HOH T 291     -30.028  12.610   0.761  1.00  0.48           O  
HETATM  293  O   HOH T 292       0.237  -0.584   2.350  1.00  0.48           O  
HETATM  294  O   HOH T 293     -37.701  31.853  -0.403  1.00  0.48           O  
HETATM  295  O   HOH T 294     -10.413  40.224  15.197  1.00  0.48           O  
HETATM  296  O   HOH T 295      -5.236  36.667  -9.532  1.00  0.48           O  
HETATM  297  O   HOH T 296     -34.421  18.289   5.220  1.00  0.48           O  
HETATM  298  O   HOH T 297       3.286   1.568   2.288  1.00  0.48           O  
HETATM  299  O   HOH T 298       0.183   1.722  -5.946  1.00  0.48           O  
HETATM  300  O   HOH T 299      -0.508  36.445 -12.236  1.00  0.48           O  
HETATM  301  O   HOH T 300      -3.091  42.966  -4.847  1.00  0.48           O  
HETATM  302  O   HOH T 301      -0.530   7.194  36.382  1.00  0.48           O  
HETATM  303  O   HOH T 302     -16.607  31.695  26.910  1.00  0.48           O  
HETATM  304  O   HOH T 303     -32.280  15.022   7.127  1.00  0.49           O  
HETATM  305  O   HOH T 304      -8.192  36.278  36.885  1.00  0.49           O  
HETATM  306  O   HOH T 305     -21.714  38.644  10.280  1.00  0.49           O  
HETATM  307  O   HOH T 306       2.972  13.934 -10.845  1.00  0.49           O  
HETATM  308  O   HOH T 307       6.434  21.901  17.933  1.00  0.49           O  
HETATM  309  O   HOH T 308       9.468  32.586 -10.586  1.00  0.49           O  
HETATM  310  O   HOH T 309      -1.664  33.705 -15.303  1.00  0.49           O  
HETATM  311  O   HOH T 310     -17.914  41.683  13.138  1.00  0.49           O  
HETATM  312  O   HOH T 311     -11.242  44.060  12.423  1.00  0.49           O  
HETATM  313  O   HOH T 312     -34.338  16.868   7.597  1.00  0.49           O  
HETATM  314  O   HOH T 313      -6.234  36.213 -23.798  1.00  0.49           O  
HETATM  315  O   HOH T 314     -12.996  33.476  20.502  1.00  0.49           O  
HETATM  316  O   HOH T 315     -10.260  29.211  38.799  1.00  0.49           O  
HETATM  317  O   HOH T 316     -30.222  17.042  -1.300  1.00  0.49           O  
HETATM  318  O   HOH T 317      -9.793  25.062 -13.827  1.00  0.49           O  
HETATM  319  O   HOH T 318      12.869  22.651  -9.061  1.00  0.49           O  
HETATM  320  O   HOH T 319     -10.530  35.950  15.805  1.00  0.50           O  
HETATM  321  O   HOH T 320       0.242   3.065  -3.420  1.00  0.50           O  
HETATM  322  O   HOH T 321     -16.179  38.301 -21.272  1.00  0.50           O  
HETATM  323  O   HOH T 322      -8.137   0.163   3.234  1.00  0.50           O  
HETATM  324  O   HOH T 323      -4.804  -0.232  24.309  1.00  0.50           O  
HETATM  325  O   HOH T 324       1.452  25.798 -21.366  1.00  0.50           O  
HETATM  326  O   HOH T 325     -22.606   7.804  11.243  1.00  0.50           O  
HETATM  327  O   HOH T 326     -18.903  38.235 -14.611  1.00  0.50           O  
HETATM  328  O   HOH T 327      -3.247  32.494  14.587  1.00  0.50           O  
HETATM  329  O   HOH T 328     -18.586  40.745  15.661  1.00  0.50           O  
HETATM  330  O   HOH T 329       7.290   0.942  -3.939  1.00  0.50           O  
HETATM  331  O   HOH T 330      -8.054  39.711  13.967  1.00  0.50           O  
HETATM  332  O   HOH T 331      10.860   6.278   3.835  1.00  0.50           O  
HETATM  333  O   HOH T 332     -27.537  33.533  13.678  1.00  0.50           O  
HETATM  334  O   HOH T 333     -31.647  25.840  -6.645  1.00  0.51           O  
HETATM  335  O   HOH T 334      -7.461  24.109  -7.722  1.00  0.51           O  
HETATM  336  O   HOH T 335      -2.430  31.793 -17.171  1.00  0.51           O  
HETATM  337  O   HOH T 336       4.230  22.173  16.284  1.00  0.51           O  
HETATM  338  O   HOH T 337      -9.005   8.945  29.553  1.00  0.51           O  
HETATM  339  O   HOH T 338      -1.428  19.469 -16.150  1.00  0.51           O  
HETATM  340  O   HOH T 339     -34.033  20.758   6.207  1.00  0.51           O  
HETATM  341  O   HOH T 340     -28.293  12.578   5.762  1.00  0.51           O  
HETATM  342  O   HOH T 341     -13.113  27.556 -19.607  1.00  0.51           O  
HETATM  343  O   HOH T 342     -39.706  30.239   0.711  1.00  0.51           O  
HETATM  344  O   HOH T 343     -10.573  20.497  -3.287  1.00  0.51           O  
HETATM  345  O   HOH T 344      -4.908  27.586  17.899  1.00  0.51           O  
HETATM  346  O   HOH T 345      12.977  14.418  -9.820  1.00  0.51           O  
HETATM  347  O   HOH T 346      -6.611  22.532  -1.788  1.00  0.51           O  
HETATM  348  O   HOH T 347     -10.042  11.095 -11.304  1.00  0.51           O  
HETATM  349  O   HOH T 348      -6.481   0.976  26.066  1.00  0.51           O  
HETATM  350  O   HOH T 349      -2.304  29.974  14.747  1.00  0.51           O  
HETATM  351  O   HOH T 350     -15.417  45.475  16.819  1.00  0.52           O  
HETATM  352  O   HOH T 351      -9.740   4.937  23.477  1.00  0.52           O  
HETATM  353  O   HOH T 352     -32.258  15.135  -1.746  1.00  0.52           O  
HETATM  354  O   HOH T 353      -9.305  16.119 -12.745  1.00  0.52           O  
HETATM  355  O   HOH T 354       9.998  25.200 -10.153  1.00  0.52           O  
HETATM  356  O   HOH T 355     -10.377  28.989  20.514  1.00  0.52           O  
HETATM  357  O   HOH T 356     -27.347  10.506   4.666  1.00  0.52           O  
HETATM  358  O   HOH T 357       1.744   8.080  -8.210  1.00  0.52           O  
HETATM  359  O   HOH T 358       5.390  28.327  -2.256  1.00  0.52           O  
HETATM  360  O   HOH T 359       4.747  -0.813   2.619  1.00  0.52           O  
HETATM  361  O   HOH T 360       3.916  27.775  10.590  1.00  0.52           O  
HETATM  362  O   HOH T 361     -33.344  19.694   9.722  1.00  0.52           O  
HETATM  363  O   HOH T 362     -18.606  22.458  27.746  1.00  0.52           O  
HETATM  364  O   HOH T 363     -23.738   7.096   8.162  1.00  0.53           O  
HETATM  365  O   HOH T 364     -16.130  35.987   2.780  1.00  0.53           O  
HETATM  366  O   HOH T 365      -1.215   0.002   0.004  1.00  0.53           O  
HETATM  367  O   HOH T 366     -26.878  15.250  15.506  1.00  0.53           O  
HETATM  368  O   HOH T 367     -10.927  15.669 -10.413  1.00  0.53           O  
HETATM  369  O   HOH T 368     -22.185  23.331  27.483  1.00  0.53           O  
HETATM  370  O   HOH T 369     -32.995  20.308  -3.435  1.00  0.53           O  
HETATM  371  O   HOH T 370      -8.989  -2.188   4.734  1.00  0.53           O  
HETATM  372  O   HOH T 371     -19.435  31.665  27.636  1.00  0.54           O  
HETATM  373  O   HOH T 372     -15.361  38.895   2.328  1.00  0.54           O  
HETATM  374  O   HOH T 373       4.080  31.574   3.304  1.00  0.54           O  
HETATM  375  O   HOH T 374      -9.620   4.908  30.777  1.00  0.54           O  
HETATM  376  O   HOH T 375      -9.045  37.424 -16.324  1.00  0.54           O  
HETATM  377  O   HOH T 376     -21.735  12.933  -6.527  1.00  0.55           O  
HETATM  378  O   HOH T 377       1.465  34.115 -18.681  1.00  0.55           O  
HETATM  379  O   HOH T 378       9.710  26.748 -13.760  1.00  0.55           O  
HETATM  380  O   HOH T 379     -12.936  29.733 -21.299  1.00  0.55           O  
HETATM  381  O   HOH T 380       2.351  31.548 -19.541  1.00  0.55           O  
HETATM  382  O   HOH T 381      -3.142  37.229 -11.224  1.00  0.55           O  
HETATM  383  O   HOH T 382      -6.384  40.525  -6.517  1.00  0.56           O  
HETATM  384  O   HOH T 383     -13.792  27.558 -16.997  1.00  0.56           O  
HETATM  385  O   HOH T 384     -13.102  27.360  -8.731  1.00  0.56           O  
HETATM  386  O   HOH T 385     -16.416  39.059  15.711  1.00  0.56           O  
HETATM  387  O   HOH T 386     -14.323  37.426  16.015  1.00  0.56           O  
HETATM  388  O   HOH T 387     -18.043  -0.751  10.710  1.00  0.56           O  
HETATM  389  O   HOH T 388     -16.878  29.958 -18.654  1.00  0.56           O  
HETATM  390  O   HOH T 389     -25.906  33.040 -12.165  1.00  0.56           O  
HETATM  391  O   HOH T 390     -26.072  35.861  13.777  1.00  0.56           O  
HETATM  392  O   HOH T 391      -9.574  26.788  39.734  1.00  0.56           O  
HETATM  393  O   HOH T 392     -13.684  44.416  13.792  1.00  0.56           O  
HETATM  394  O   HOH T 393     -14.582  13.647  -2.345  1.00  0.56           O  
HETATM  395  O   HOH T 394       5.774  30.867  -4.836  1.00  0.57           O  
HETATM  396  O   HOH T 395      12.223   7.907   0.629  1.00  0.57           O  
HETATM  397  O   HOH T 396      -0.977  38.608 -10.484  1.00  0.57           O  
HETATM  398  O   HOH T 397     -33.975  29.280   6.499  1.00  0.58           O  
HETATM  399  O   HOH T 398     -13.508  14.747  -4.713  1.00  0.58           O  
HETATM  400  O   HOH T 399     -11.222  31.490  20.759  1.00  0.58           O  
HETATM  401  O   HOH T 400      -4.665   1.636  -3.128  1.00  0.59           O  
HETATM  402  O   HOH T 401     -29.970  31.735   7.432  1.00  0.59           O  
HETATM  403  O   HOH T 402     -28.419  35.832   6.278  1.00  0.59           O  
HETATM  404  O   HOH T 403       1.691  38.088  13.110  1.00  0.60           O  
HETATM  405  O   HOH T 404       4.996   2.204  -4.921  1.00  0.60           O  
HETATM  406  O   HOH T 405       0.285  30.803 -21.070  1.00  0.60           O  
HETATM  407  O   HOH T 406     -14.810  -0.134  15.319  1.00  0.61           O  
HETATM  408  O   HOH T 407      -5.536  26.783  25.882  1.00  0.62           O  
TER     409      HOH T 407 
