# Supplementary material for: Accurate Prediction of Hydration Sites of Proteins Using Energy Model With Atom Embedding
Source: Front Mol Biosci. 2021 Sep 20;8:756075. doi: 10.3389/fmolb.2021.756075 (PMC8488165; doi:10.3389/fmolb.2021.756075)
Supplement: Supplementary file 1 [file DataSheet1.ZIP › Data Sheet 1/Our_result_pdb/our_dataset_output/2RKL_watersite.pdb]

HEADER                                                        XXXX


JRNL        PMID   -1
HETATM    1  O   HOH T   0      69.185  35.963  70.621  1.00  0.19           O  
HETATM    2  O   HOH T   1      81.469  35.504  41.892  1.00  0.20           O  
HETATM    3  O   HOH T   2      73.138  34.916  71.066  1.00  0.21           O  
HETATM    4  O   HOH T   3      91.087   8.669  53.825  1.00  0.22           O  
HETATM    5  O   HOH T   4      77.470  24.578  72.447  1.00  0.24           O  
HETATM    6  O   HOH T   5      66.158  38.248  73.341  1.00  0.24           O  
HETATM    7  O   HOH T   6      71.126  41.086  66.627  1.00  0.24           O  
HETATM    8  O   HOH T   7      77.222  24.622  53.532  1.00  0.24           O  
HETATM    9  O   HOH T   8      62.596  22.321  70.430  1.00  0.25           O  
HETATM   10  O   HOH T   9      75.895   8.409  32.878  1.00  0.25           O  
HETATM   11  O   HOH T  10      81.574   2.180  80.796  1.00  0.25           O  
HETATM   12  O   HOH T  11      80.021  26.760  45.741  1.00  0.25           O  
HETATM   13  O   HOH T  12      65.689  -1.307  36.535  1.00  0.25           O  
HETATM   14  O   HOH T  13      61.719  22.997  67.839  1.00  0.25           O  
HETATM   15  O   HOH T  14      89.830  28.958  54.019  1.00  0.26           O  
HETATM   16  O   HOH T  15      83.030  -9.737  61.802  1.00  0.26           O  
HETATM   17  O   HOH T  16      71.925  42.748  53.938  1.00  0.26           O  
HETATM   18  O   HOH T  17      40.563  23.684  58.897  1.00  0.26           O  
HETATM   19  O   HOH T  18      71.659  -1.861  25.832  1.00  0.26           O  
HETATM   20  O   HOH T  19      72.673  40.456  47.688  1.00  0.26           O  
HETATM   21  O   HOH T  20      77.278  14.411  47.842  1.00  0.26           O  
HETATM   22  O   HOH T  21      73.979   2.828  57.838  1.00  0.26           O  
HETATM   23  O   HOH T  22      95.695  15.085  46.982  1.00  0.26           O  
HETATM   24  O   HOH T  23      45.413  20.558  60.867  1.00  0.26           O  
HETATM   25  O   HOH T  24      87.030  24.094  40.504  1.00  0.27           O  
HETATM   26  O   HOH T  25      80.322  16.984  50.930  1.00  0.27           O  
HETATM   27  O   HOH T  26      42.613  33.243  63.776  1.00  0.27           O  
HETATM   28  O   HOH T  27      92.073   8.988  82.534  1.00  0.27           O  
HETATM   29  O   HOH T  28      68.903  21.706  67.712  1.00  0.27           O  
HETATM   30  O   HOH T  29      74.239  30.705  66.801  1.00  0.27           O  
HETATM   31  O   HOH T  30     101.368  11.262  40.607  1.00  0.28           O  
HETATM   32  O   HOH T  31      73.700  29.662  43.441  1.00  0.28           O  
HETATM   33  O   HOH T  32      71.710  13.960  75.556  1.00  0.28           O  
HETATM   34  O   HOH T  33      40.977  26.450  58.606  1.00  0.28           O  
HETATM   35  O   HOH T  34      80.846  48.522  51.495  1.00  0.28           O  
HETATM   36  O   HOH T  35      69.502  12.309  35.420  1.00  0.28           O  
HETATM   37  O   HOH T  36      84.825  -1.727  64.074  1.00  0.28           O  
HETATM   38  O   HOH T  37      77.621  28.203  46.416  1.00  0.29           O  
HETATM   39  O   HOH T  38      92.867  31.183  44.887  1.00  0.29           O  
HETATM   40  O   HOH T  39      93.978  31.950  51.726  1.00  0.29           O  
HETATM   41  O   HOH T  40      81.507  -2.671  71.571  1.00  0.29           O  
HETATM   42  O   HOH T  41      42.955  29.211  63.898  1.00  0.29           O  
HETATM   43  O   HOH T  42      63.293  40.433  61.329  1.00  0.29           O  
HETATM   44  O   HOH T  43      90.044   5.125  60.653  1.00  0.29           O  
HETATM   45  O   HOH T  44      81.308  -4.144  44.712  1.00  0.30           O  
HETATM   46  O   HOH T  45      45.461  29.534  53.715  1.00  0.30           O  
HETATM   47  O   HOH T  46      64.691   3.123  67.521  1.00  0.30           O  
HETATM   48  O   HOH T  47      66.340  13.023  28.996  1.00  0.30           O  
HETATM   49  O   HOH T  48      65.909  24.114  73.386  1.00  0.31           O  
HETATM   50  O   HOH T  49      73.142  -0.114  64.034  1.00  0.31           O  
HETATM   51  O   HOH T  50      46.816  18.520  62.107  1.00  0.31           O  
HETATM   52  O   HOH T  51      70.094   3.813  59.152  1.00  0.31           O  
HETATM   53  O   HOH T  52      83.337 -10.391  47.974  1.00  0.31           O  
HETATM   54  O   HOH T  53      68.119  13.874  33.363  1.00  0.31           O  
HETATM   55  O   HOH T  54      48.085  16.075  61.541  1.00  0.31           O  
HETATM   56  O   HOH T  55      77.760  15.394  57.863  1.00  0.31           O  
HETATM   57  O   HOH T  56      51.837  28.842  71.525  1.00  0.31           O  
HETATM   58  O   HOH T  57      67.862  44.584  55.338  1.00  0.31           O  
HETATM   59  O   HOH T  58      77.956   1.656  52.826  1.00  0.32           O  
HETATM   60  O   HOH T  59      71.065  -3.661  27.960  1.00  0.32           O  
HETATM   61  O   HOH T  60      76.607  42.193  48.787  1.00  0.32           O  
HETATM   62  O   HOH T  61      70.328  10.526  53.296  1.00  0.32           O  
HETATM   63  O   HOH T  62      85.331  -1.789  40.565  1.00  0.32           O  
HETATM   64  O   HOH T  63      93.591  -0.295  76.925  1.00  0.32           O  
HETATM   65  O   HOH T  64      69.625  -3.533  32.532  1.00  0.32           O  
HETATM   66  O   HOH T  65      83.719  45.624  57.567  1.00  0.32           O  
HETATM   67  O   HOH T  66      89.463  16.559  43.962  1.00  0.33           O  
HETATM   68  O   HOH T  67      81.103  -4.853  56.478  1.00  0.33           O  
HETATM   69  O   HOH T  68      77.228   8.574  79.874  1.00  0.33           O  
HETATM   70  O   HOH T  69      71.560  39.551  44.039  1.00  0.33           O  
HETATM   71  O   HOH T  70      62.391  28.035  51.552  1.00  0.33           O  
HETATM   72  O   HOH T  71      81.391  18.989  36.405  1.00  0.33           O  
HETATM   73  O   HOH T  72      59.776   2.633  45.977  1.00  0.33           O  
HETATM   74  O   HOH T  73      75.169  34.738  44.463  1.00  0.34           O  
HETATM   75  O   HOH T  74      43.920  21.191  67.322  1.00  0.34           O  
HETATM   76  O   HOH T  75      64.321  -2.561  47.451  1.00  0.34           O  
HETATM   77  O   HOH T  76      78.771  22.902  55.087  1.00  0.34           O  
HETATM   78  O   HOH T  77      89.605  35.020  46.027  1.00  0.34           O  
HETATM   79  O   HOH T  78      77.137  41.689  46.121  1.00  0.35           O  
HETATM   80  O   HOH T  79      70.588  24.252  65.655  1.00  0.35           O  
HETATM   81  O   HOH T  80      62.952  28.358  69.870  1.00  0.35           O  
HETATM   82  O   HOH T  81      75.410  -7.804  68.755  1.00  0.35           O  
HETATM   83  O   HOH T  82      41.908  22.527  60.985  1.00  0.35           O  
HETATM   84  O   HOH T  83      72.986  -0.030  73.558  1.00  0.35           O  
HETATM   85  O   HOH T  84      90.523  15.970  46.341  1.00  0.35           O  
HETATM   86  O   HOH T  85      74.775  10.765  32.261  1.00  0.35           O  
HETATM   87  O   HOH T  86      76.234  43.788  52.330  1.00  0.35           O  
HETATM   88  O   HOH T  87      63.992 -10.336  37.189  1.00  0.35           O  
HETATM   89  O   HOH T  88      93.029   3.244  47.649  1.00  0.36           O  
HETATM   90  O   HOH T  89      91.306  17.205  48.677  1.00  0.36           O  
HETATM   91  O   HOH T  90      76.804  41.871  64.322  1.00  0.36           O  
HETATM   92  O   HOH T  91      94.768  29.313  51.465  1.00  0.36           O  
HETATM   93  O   HOH T  92      88.448  28.377  51.620  1.00  0.36           O  
HETATM   94  O   HOH T  93      79.353  -4.264  50.238  1.00  0.36           O  
HETATM   95  O   HOH T  94      69.100   2.575  68.675  1.00  0.36           O  
HETATM   96  O   HOH T  95     105.350  14.378  38.775  1.00  0.36           O  
HETATM   97  O   HOH T  96     108.916  16.052  49.744  1.00  0.36           O  
HETATM   98  O   HOH T  97      64.708  27.423  50.243  1.00  0.36           O  
HETATM   99  O   HOH T  98      50.882 -10.714  36.618  1.00  0.36           O  
HETATM  100  O   HOH T  99      78.591  -5.366  63.155  1.00  0.36           O  
HETATM  101  O   HOH T 100      61.412   0.979  39.320  1.00  0.36           O  
HETATM  102  O   HOH T 101      68.497  -5.838  33.821  1.00  0.36           O  
HETATM  103  O   HOH T 102      81.326  -5.098  70.245  1.00  0.37           O  
HETATM  104  O   HOH T 103      45.405  12.811  59.321  1.00  0.37           O  
HETATM  105  O   HOH T 104      62.472   9.954  62.781  1.00  0.37           O  
HETATM  106  O   HOH T 105      63.884  14.228  73.829  1.00  0.37           O  
HETATM  107  O   HOH T 106      74.633  26.935  67.736  1.00  0.37           O  
HETATM  108  O   HOH T 107      64.731  22.864  64.466  1.00  0.37           O  
HETATM  109  O   HOH T 108      87.919   7.066  57.526  1.00  0.37           O  
HETATM  110  O   HOH T 109      73.569   7.513  77.745  1.00  0.37           O  
HETATM  111  O   HOH T 110      61.237  26.730  63.139  1.00  0.37           O  
HETATM  112  O   HOH T 111      83.401  -2.418  52.645  1.00  0.37           O  
HETATM  113  O   HOH T 112      78.693  44.547  56.027  1.00  0.37           O  
HETATM  114  O   HOH T 113      67.669   0.394  69.444  1.00  0.37           O  
HETATM  115  O   HOH T 114      65.659  -4.987  42.186  1.00  0.37           O  
HETATM  116  O   HOH T 115      71.810  19.801  74.357  1.00  0.37           O  
HETATM  117  O   HOH T 116      65.625  15.482  57.375  1.00  0.37           O  
HETATM  118  O   HOH T 117      71.974  -0.094  68.998  1.00  0.38           O  
HETATM  119  O   HOH T 118      85.144  -4.396  51.593  1.00  0.38           O  
HETATM  120  O   HOH T 119      75.476  42.311  43.996  1.00  0.38           O  
HETATM  121  O   HOH T 120      69.129  23.445  59.304  1.00  0.38           O  
HETATM  122  O   HOH T 121      68.182  15.099  28.213  1.00  0.38           O  
HETATM  123  O   HOH T 122      74.007  15.626  55.347  1.00  0.38           O  
HETATM  124  O   HOH T 123      71.639  37.204  70.389  1.00  0.38           O  
HETATM  125  O   HOH T 124      64.345   4.799  31.091  1.00  0.38           O  
HETATM  126  O   HOH T 125      72.049  -1.040  66.400  1.00  0.38           O  
HETATM  127  O   HOH T 126      80.324   8.504  31.834  1.00  0.38           O  
HETATM  128  O   HOH T 127      84.294  -8.229  63.754  1.00  0.38           O  
HETATM  129  O   HOH T 128      87.412  -1.992  42.479  1.00  0.38           O  
HETATM  130  O   HOH T 129      89.114  25.980  50.324  1.00  0.38           O  
HETATM  131  O   HOH T 130      70.026  17.147  77.087  1.00  0.39           O  
HETATM  132  O   HOH T 131      90.052  37.592  45.193  1.00  0.39           O  
HETATM  133  O   HOH T 132      73.905  -1.899  68.296  1.00  0.39           O  
HETATM  134  O   HOH T 133      87.793  17.968  33.630  1.00  0.39           O  
HETATM  135  O   HOH T 134      91.477  27.856  47.574  1.00  0.39           O  
HETATM  136  O   HOH T 135      66.900  19.994  74.871  1.00  0.39           O  
HETATM  137  O   HOH T 136      91.250   3.924  58.458  1.00  0.39           O  
HETATM  138  O   HOH T 137      77.090  -5.931  49.824  1.00  0.39           O  
HETATM  139  O   HOH T 138      70.864   2.667  75.131  1.00  0.39           O  
HETATM  140  O   HOH T 139      70.597   3.045  79.510  1.00  0.40           O  
HETATM  141  O   HOH T 140      72.537  22.411  74.317  1.00  0.40           O  
HETATM  142  O   HOH T 141      86.239  -6.777  50.523  1.00  0.40           O  
HETATM  143  O   HOH T 142      83.983  45.856  45.179  1.00  0.40           O  
HETATM  144  O   HOH T 143      44.643  23.843  67.425  1.00  0.40           O  
HETATM  145  O   HOH T 144      83.030  46.584  60.183  1.00  0.40           O  
HETATM  146  O   HOH T 145      80.417  15.524  56.905  1.00  0.40           O  
HETATM  147  O   HOH T 146     105.732  12.878  41.139  1.00  0.40           O  
HETATM  148  O   HOH T 147      75.271   7.626  81.476  1.00  0.40           O  
HETATM  149  O   HOH T 148      71.925  39.600  68.885  1.00  0.40           O  
HETATM  150  O   HOH T 149      54.447  34.206  57.152  1.00  0.41           O  
HETATM  151  O   HOH T 150      62.348  25.323  66.571  1.00  0.41           O  
HETATM  152  O   HOH T 151      70.259  -9.147  48.592  1.00  0.41           O  
HETATM  153  O   HOH T 152      59.200  16.606  67.940  1.00  0.41           O  
HETATM  154  O   HOH T 153      75.725   6.420  79.014  1.00  0.41           O  
HETATM  155  O   HOH T 154      69.875  12.112  76.567  1.00  0.41           O  
HETATM  156  O   HOH T 155      42.629  14.754  67.492  1.00  0.41           O  
HETATM  157  O   HOH T 156      64.620  39.225  71.247  1.00  0.41           O  
HETATM  158  O   HOH T 157      84.721  -1.836  50.388  1.00  0.41           O  
HETATM  159  O   HOH T 158      93.443  28.582  45.749  1.00  0.41           O  
HETATM  160  O   HOH T 159      85.605  26.517  57.917  1.00  0.41           O  
HETATM  161  O   HOH T 160      71.240  -5.672  50.766  1.00  0.42           O  
HETATM  162  O   HOH T 161      68.196   3.180  74.284  1.00  0.42           O  
HETATM  163  O   HOH T 162      71.361  45.449  53.458  1.00  0.42           O  
HETATM  164  O   HOH T 163      89.494  17.361  50.833  1.00  0.42           O  
HETATM  165  O   HOH T 164      68.693  -3.113  50.413  1.00  0.42           O  
HETATM  166  O   HOH T 165      46.181  32.124  53.478  1.00  0.42           O  
HETATM  167  O   HOH T 166      74.261  43.084  64.211  1.00  0.42           O  
HETATM  168  O   HOH T 167      85.981  -4.157  64.661  1.00  0.42           O  
HETATM  169  O   HOH T 168      89.156  25.088  54.206  1.00  0.42           O  
HETATM  170  O   HOH T 169      79.055  16.391  48.494  1.00  0.42           O  
HETATM  171  O   HOH T 170      75.690  17.480  81.070  1.00  0.42           O  
HETATM  172  O   HOH T 171      84.339  -2.507  58.339  1.00  0.42           O  
HETATM  173  O   HOH T 172      78.819 -10.523  44.560  1.00  0.42           O  
HETATM  174  O   HOH T 173      91.327  11.617  81.891  1.00  0.42           O  
HETATM  175  O   HOH T 174      83.815  -0.403  34.130  1.00  0.42           O  
HETATM  176  O   HOH T 175      73.438  42.625  66.751  1.00  0.42           O  
HETATM  177  O   HOH T 176      91.000   5.778  67.967  1.00  0.42           O  
HETATM  178  O   HOH T 177      78.713   6.751  30.444  1.00  0.42           O  
HETATM  179  O   HOH T 178      71.165  -3.042  51.745  1.00  0.43           O  
HETATM  180  O   HOH T 179      72.579  43.753  62.237  1.00  0.43           O  
HETATM  181  O   HOH T 180      93.468   0.055  70.604  1.00  0.43           O  
HETATM  182  O   HOH T 181     103.213  13.296  40.153  1.00  0.43           O  
HETATM  183  O   HOH T 182      62.664  22.867  61.692  1.00  0.43           O  
HETATM  184  O   HOH T 183      82.954  41.705  45.640  1.00  0.43           O  
HETATM  185  O   HOH T 184      85.659  -9.539  70.245  1.00  0.43           O  
HETATM  186  O   HOH T 185      64.986  10.274  61.831  1.00  0.43           O  
HETATM  187  O   HOH T 186      68.729  -8.242  32.277  1.00  0.43           O  
HETATM  188  O   HOH T 187      67.419  25.391  54.283  1.00  0.43           O  
HETATM  189  O   HOH T 188      88.400  25.101  46.054  1.00  0.43           O  
HETATM  190  O   HOH T 189      67.258  21.846  65.294  1.00  0.43           O  
HETATM  191  O   HOH T 190      67.337  40.040  71.538  1.00  0.43           O  
HETATM  192  O   HOH T 191      80.879   6.151  29.039  1.00  0.43           O  
HETATM  193  O   HOH T 192      75.268   0.527  58.406  1.00  0.43           O  
HETATM  194  O   HOH T 193      88.902   3.217  36.625  1.00  0.43           O  
HETATM  195  O   HOH T 194      88.515   4.521  58.506  1.00  0.43           O  
HETATM  196  O   HOH T 195      86.792  -9.212  63.034  1.00  0.43           O  
HETATM  197  O   HOH T 196      73.493  -7.656  28.086  1.00  0.43           O  
HETATM  198  O   HOH T 197      75.859  15.488  53.301  1.00  0.43           O  
HETATM  199  O   HOH T 198      81.392   1.186  42.821  1.00  0.44           O  
HETATM  200  O   HOH T 199     102.433  13.698  47.756  1.00  0.44           O  
HETATM  201  O   HOH T 200      70.147  39.580  71.014  1.00  0.44           O  
HETATM  202  O   HOH T 201      70.312  -6.775  47.036  1.00  0.44           O  
HETATM  203  O   HOH T 202      86.520  16.389  46.667  1.00  0.44           O  
HETATM  204  O   HOH T 203     101.531  34.101  52.903  1.00  0.44           O  
HETATM  205  O   HOH T 204      63.186   0.471  33.398  1.00  0.44           O  
HETATM  206  O   HOH T 205      92.990  15.451  47.239  1.00  0.44           O  
HETATM  207  O   HOH T 206      78.223  42.813  43.836  1.00  0.44           O  
HETATM  208  O   HOH T 207      43.237  27.415  73.679  1.00  0.44           O  
HETATM  209  O   HOH T 208      74.389  -2.145  65.542  1.00  0.44           O  
HETATM  210  O   HOH T 209      63.849   7.811  61.672  1.00  0.44           O  
HETATM  211  O   HOH T 210      60.946  27.730  71.754  1.00  0.44           O  
HETATM  212  O   HOH T 211      69.465  21.129  63.927  1.00  0.44           O  
HETATM  213  O   HOH T 212      62.684  24.571  63.892  1.00  0.44           O  
HETATM  214  O   HOH T 213      68.988  -5.691  49.298  1.00  0.45           O  
HETATM  215  O   HOH T 214      59.938  -0.799  47.912  1.00  0.45           O  
HETATM  216  O   HOH T 215      79.472  18.676  54.226  1.00  0.45           O  
HETATM  217  O   HOH T 216      73.123  23.315  66.605  1.00  0.45           O  
HETATM  218  O   HOH T 217      78.042  16.924  52.598  1.00  0.45           O  
HETATM  219  O   HOH T 218      69.874  -9.655  34.341  1.00  0.45           O  
HETATM  220  O   HOH T 219      81.002  18.692  58.498  1.00  0.45           O  
HETATM  221  O   HOH T 220      86.292  15.816  33.045  1.00  0.45           O  
HETATM  222  O   HOH T 221      77.003  19.475  53.381  1.00  0.45           O  
HETATM  223  O   HOH T 222      64.643   2.143  31.780  1.00  0.45           O  
HETATM  224  O   HOH T 223      77.784  22.047  52.613  1.00  0.45           O  
HETATM  225  O   HOH T 224      64.765  13.613  31.204  1.00  0.45           O  
HETATM  226  O   HOH T 225      49.447  18.344  71.920  1.00  0.45           O  
HETATM  227  O   HOH T 226      70.991  -7.393  29.146  1.00  0.45           O  
HETATM  228  O   HOH T 227      83.668  -6.250  50.257  1.00  0.45           O  
HETATM  229  O   HOH T 228      75.895  25.083  48.649  1.00  0.45           O  
HETATM  230  O   HOH T 229      90.849  28.111  50.256  1.00  0.45           O  
HETATM  231  O   HOH T 230      86.975  -0.933  47.807  1.00  0.45           O  
HETATM  232  O   HOH T 231      51.060  26.654  73.040  1.00  0.46           O  
HETATM  233  O   HOH T 232      92.979  27.268  51.808  1.00  0.46           O  
HETATM  234  O   HOH T 233      80.401  -3.584  61.200  1.00  0.46           O  
HETATM  235  O   HOH T 234      73.627  19.463  72.020  1.00  0.46           O  
HETATM  236  O   HOH T 235      45.336  14.433  67.999  1.00  0.46           O  
HETATM  237  O   HOH T 236      38.028  24.783  59.469  1.00  0.46           O  
HETATM  238  O   HOH T 237      76.097  13.111  51.907  1.00  0.46           O  
HETATM  239  O   HOH T 238      52.686  21.801  72.994  1.00  0.46           O  
HETATM  240  O   HOH T 239      93.050  -4.450  72.140  1.00  0.46           O  
HETATM  241  O   HOH T 240      89.403  24.890  43.414  1.00  0.46           O  
HETATM  242  O   HOH T 241      73.766  20.707  76.093  1.00  0.46           O  
HETATM  243  O   HOH T 242      69.301   8.106  54.262  1.00  0.46           O  
HETATM  244  O   HOH T 243      73.673  -3.046  27.340  1.00  0.47           O  
HETATM  245  O   HOH T 244     101.081  31.794  54.587  1.00  0.47           O  
HETATM  246  O   HOH T 245      81.917  44.268  46.259  1.00  0.47           O  
HETATM  247  O   HOH T 246      92.320  -0.773  41.285  1.00  0.47           O  
HETATM  248  O   HOH T 247      91.453  26.704  54.085  1.00  0.47           O  
HETATM  249  O   HOH T 248      61.537   3.867  47.708  1.00  0.47           O  
HETATM  250  O   HOH T 249      76.872  -1.680  58.355  1.00  0.47           O  
HETATM  251  O   HOH T 250      77.094  25.653  67.194  1.00  0.47           O  
HETATM  252  O   HOH T 251      67.889  -4.279  30.458  1.00  0.47           O  
HETATM  253  O   HOH T 252      86.245  -1.891  60.257  1.00  0.47           O  
HETATM  254  O   HOH T 253      67.347  18.064  76.916  1.00  0.47           O  
HETATM  255  O   HOH T 254      66.816 -10.575  37.884  1.00  0.47           O  
HETATM  256  O   HOH T 255      63.166   5.744  41.783  1.00  0.47           O  
HETATM  257  O   HOH T 256      74.775  45.723  51.142  1.00  0.47           O  
HETATM  258  O   HOH T 257      79.942  41.323  42.248  1.00  0.47           O  
HETATM  259  O   HOH T 258      64.169  15.796  76.078  1.00  0.47           O  
HETATM  260  O   HOH T 259      60.761  43.108  59.870  1.00  0.47           O  
HETATM  261  O   HOH T 260      84.765 -10.983  63.507  1.00  0.47           O  
HETATM  262  O   HOH T 261      66.050  25.739  52.028  1.00  0.47           O  
HETATM  263  O   HOH T 262      72.311   0.425  76.230  1.00  0.47           O  
HETATM  264  O   HOH T 263      71.471  43.027  64.750  1.00  0.47           O  
HETATM  265  O   HOH T 264      62.233  19.103  75.251  1.00  0.47           O  
HETATM  266  O   HOH T 265      77.864  16.034  75.208  1.00  0.47           O  
HETATM  267  O   HOH T 266      63.381  17.016  73.700  1.00  0.48           O  
HETATM  268  O   HOH T 267      82.309   5.297  31.477  1.00  0.48           O  
HETATM  269  O   HOH T 268      85.763  -4.551  59.414  1.00  0.48           O  
HETATM  270  O   HOH T 269      62.810   3.859  29.031  1.00  0.48           O  
HETATM  271  O   HOH T 270      67.044   1.667  67.061  1.00  0.48           O  
HETATM  272  O   HOH T 271      60.332  29.281  69.433  1.00  0.48           O  
HETATM  273  O   HOH T 272      88.127  23.892  56.464  1.00  0.48           O  
HETATM  274  O   HOH T 273      84.425  41.750  50.131  1.00  0.48           O  
HETATM  275  O   HOH T 274      78.690  38.846  42.143  1.00  0.48           O  
HETATM  276  O   HOH T 275      82.104  -8.913  69.348  1.00  0.48           O  
HETATM  277  O   HOH T 276      70.493  44.206  55.796  1.00  0.48           O  
HETATM  278  O   HOH T 277      87.556  18.620  49.345  1.00  0.48           O  
HETATM  279  O   HOH T 278      88.679  16.134  48.389  1.00  0.48           O  
HETATM  280  O   HOH T 279      61.706  -5.730  42.099  1.00  0.48           O  
HETATM  281  O   HOH T 280      42.997  24.091  69.658  1.00  0.48           O  
HETATM  282  O   HOH T 281      94.031  18.276  40.389  1.00  0.49           O  
HETATM  283  O   HOH T 282     104.146  10.730  40.218  1.00  0.49           O  
HETATM  284  O   HOH T 283      48.596  -8.737  42.908  1.00  0.49           O  
HETATM  285  O   HOH T 284      82.514  42.202  42.897  1.00  0.49           O  
HETATM  286  O   HOH T 285      69.689  -1.499  69.673  1.00  0.49           O  
HETATM  287  O   HOH T 286      85.161  42.570  61.067  1.00  0.49           O  
HETATM  288  O   HOH T 287      99.570  10.927  42.837  1.00  0.49           O  
HETATM  289  O   HOH T 288      73.717  -1.939  75.402  1.00  0.49           O  
HETATM  290  O   HOH T 289      89.142  30.774  61.914  1.00  0.49           O  
HETATM  291  O   HOH T 290      77.558  16.717  46.252  1.00  0.49           O  
HETATM  292  O   HOH T 291      71.088  14.150  52.025  1.00  0.50           O  
HETATM  293  O   HOH T 292      96.359  37.963  55.052  1.00  0.50           O  
HETATM  294  O   HOH T 293      55.017  36.042  59.264  1.00  0.50           O  
HETATM  295  O   HOH T 294      94.026  26.792  47.787  1.00  0.50           O  
HETATM  296  O   HOH T 295      75.238  -4.108  48.677  1.00  0.50           O  
HETATM  297  O   HOH T 296      70.686  -5.043  30.479  1.00  0.50           O  
HETATM  298  O   HOH T 297      60.489  27.488  67.193  1.00  0.50           O  
HETATM  299  O   HOH T 298      86.848  17.244  44.090  1.00  0.50           O  
HETATM  300  O   HOH T 299      88.358  23.992  48.592  1.00  0.50           O  
HETATM  301  O   HOH T 300      73.660  13.895  53.093  1.00  0.50           O  
HETATM  302  O   HOH T 301      47.752  33.320  55.258  1.00  0.50           O  
HETATM  303  O   HOH T 302      92.499  12.207  79.453  1.00  0.50           O  
HETATM  304  O   HOH T 303      60.792  21.144  73.759  1.00  0.50           O  
HETATM  305  O   HOH T 304      91.532   4.000  70.475  1.00  0.50           O  
HETATM  306  O   HOH T 305      70.028   1.426  77.374  1.00  0.50           O  
HETATM  307  O   HOH T 306      63.977   4.095  39.639  1.00  0.50           O  
HETATM  308  O   HOH T 307      75.797  26.767  44.693  1.00  0.50           O  
HETATM  309  O   HOH T 308      53.289  15.426  68.933  1.00  0.50           O  
HETATM  310  O   HOH T 309      85.506  -3.168  46.857  1.00  0.50           O  
HETATM  311  O   HOH T 310      45.253  12.804  62.127  1.00  0.50           O  
HETATM  312  O   HOH T 311      85.160  -3.728  62.058  1.00  0.50           O  
HETATM  313  O   HOH T 312      94.677  28.775  57.822  1.00  0.51           O  
HETATM  314  O   HOH T 313      77.793   0.004  55.074  1.00  0.51           O  
HETATM  315  O   HOH T 314      80.205  -7.586  63.051  1.00  0.51           O  
HETATM  316  O   HOH T 315      80.934  -7.026  41.026  1.00  0.51           O  
HETATM  317  O   HOH T 316      86.537  -4.184  39.652  1.00  0.51           O  
HETATM  318  O   HOH T 317      62.864   4.828  68.841  1.00  0.51           O  
HETATM  319  O   HOH T 318      90.075  -2.325  41.913  1.00  0.51           O  
HETATM  320  O   HOH T 319      94.770  -3.223  67.212  1.00  0.51           O  
HETATM  321  O   HOH T 320      68.477   6.887  56.597  1.00  0.51           O  
HETATM  322  O   HOH T 321      49.797  -7.438  40.443  1.00  0.51           O  
HETATM  323  O   HOH T 322      61.903  -2.296  48.732  1.00  0.51           O  
HETATM  324  O   HOH T 323      70.385   9.932  78.000  1.00  0.51           O  
HETATM  325  O   HOH T 324      51.949  -3.215  46.385  1.00  0.51           O  
HETATM  326  O   HOH T 325      70.323  14.500  77.918  1.00  0.51           O  
HETATM  327  O   HOH T 326      61.562  15.343  74.690  1.00  0.51           O  
HETATM  328  O   HOH T 327      88.273   0.590  35.579  1.00  0.51           O  
HETATM  329  O   HOH T 328      67.054  -2.311  48.445  1.00  0.51           O  
HETATM  330  O   HOH T 329      70.038  42.969  61.306  1.00  0.52           O  
HETATM  331  O   HOH T 330      67.166  15.009  30.897  1.00  0.52           O  
HETATM  332  O   HOH T 331      82.669  -5.720  42.828  1.00  0.52           O  
HETATM  333  O   HOH T 332      65.555   3.412  48.949  1.00  0.52           O  
HETATM  334  O   HOH T 333      42.675  35.003  61.635  1.00  0.52           O  
HETATM  335  O   HOH T 334      66.300  -4.070  33.886  1.00  0.52           O  
HETATM  336  O   HOH T 335      77.295  43.583  58.155  1.00  0.52           O  
HETATM  337  O   HOH T 336      65.496  43.782  54.316  1.00  0.52           O  
HETATM  338  O   HOH T 337      77.439  25.898  69.989  1.00  0.52           O  
HETATM  339  O   HOH T 338      80.798  35.198  69.818  1.00  0.52           O  
HETATM  340  O   HOH T 339      94.036  38.076  56.671  1.00  0.52           O  
HETATM  341  O   HOH T 340      81.300  16.744  60.610  1.00  0.52           O  
HETATM  342  O   HOH T 341      63.077  16.081  58.509  1.00  0.52           O  
HETATM  343  O   HOH T 342      65.884  17.486  74.634  1.00  0.52           O  
HETATM  344  O   HOH T 343      97.736  20.292  36.740  1.00  0.52           O  
HETATM  345  O   HOH T 344      92.893  -1.663  72.763  1.00  0.52           O  
HETATM  346  O   HOH T 345      90.508   6.607  58.339  1.00  0.52           O  
HETATM  347  O   HOH T 346      78.910  17.792  56.831  1.00  0.52           O  
HETATM  348  O   HOH T 347      78.609  47.459  52.685  1.00  0.52           O  
HETATM  349  O   HOH T 348      79.614  24.431  70.827  1.00  0.53           O  
HETATM  350  O   HOH T 349      86.477  -7.992  65.515  1.00  0.53           O  
HETATM  351  O   HOH T 350      87.720  -6.725  67.782  1.00  0.53           O  
HETATM  352  O   HOH T 351      94.359  -2.563  70.645  1.00  0.53           O  
HETATM  353  O   HOH T 352      86.836  11.517  64.007  1.00  0.53           O  
HETATM  354  O   HOH T 353      87.964  22.574  42.733  1.00  0.53           O  
HETATM  355  O   HOH T 354      86.028   0.620  53.453  1.00  0.53           O  
HETATM  356  O   HOH T 355      55.665  28.544  51.784  1.00  0.53           O  
HETATM  357  O   HOH T 356      79.607  25.370  68.311  1.00  0.53           O  
HETATM  358  O   HOH T 357      68.811  12.926  53.230  1.00  0.53           O  
HETATM  359  O   HOH T 358      92.652   5.767  59.987  1.00  0.53           O  
HETATM  360  O   HOH T 359      58.366  13.823  67.234  1.00  0.53           O  
HETATM  361  O   HOH T 360     109.005  13.331  50.488  1.00  0.53           O  
HETATM  362  O   HOH T 361      95.085  -0.155  68.067  1.00  0.53           O  
HETATM  363  O   HOH T 362      80.727  -5.152  38.948  1.00  0.53           O  
HETATM  364  O   HOH T 363      86.455  18.089  31.253  1.00  0.53           O  
HETATM  365  O   HOH T 364      87.564  38.978  52.674  1.00  0.54           O  
HETATM  366  O   HOH T 365      58.984  43.101  55.833  1.00  0.54           O  
HETATM  367  O   HOH T 366     109.507  23.654  50.206  1.00  0.54           O  
HETATM  368  O   HOH T 367      61.528   6.513  62.514  1.00  0.54           O  
HETATM  369  O   HOH T 368      83.404  14.745  72.150  1.00  0.54           O  
HETATM  370  O   HOH T 369      92.732  10.449  52.591  1.00  0.54           O  
HETATM  371  O   HOH T 370      86.537  13.583  57.688  1.00  0.54           O  
HETATM  372  O   HOH T 371      74.747  24.790  60.845  1.00  0.54           O  
HETATM  373  O   HOH T 372      78.406  16.406  36.325  1.00  0.54           O  
HETATM  374  O   HOH T 373      89.943   8.433  56.314  1.00  0.54           O  
HETATM  375  O   HOH T 374      80.364  17.510  63.987  1.00  0.54           O  
HETATM  376  O   HOH T 375      77.943  -2.504  32.335  1.00  0.54           O  
HETATM  377  O   HOH T 376      71.197  21.556  65.924  1.00  0.54           O  
HETATM  378  O   HOH T 377      78.114  20.298  55.889  1.00  0.54           O  
HETATM  379  O   HOH T 378      74.204  13.292  39.036  1.00  0.54           O  
HETATM  380  O   HOH T 379      84.406  -4.300  41.305  1.00  0.54           O  
HETATM  381  O   HOH T 380      75.279  24.277  46.123  1.00  0.54           O  
HETATM  382  O   HOH T 381      68.870   0.657  74.973  1.00  0.54           O  
HETATM  383  O   HOH T 382      71.817  -1.295  71.434  1.00  0.54           O  
HETATM  384  O   HOH T 383      56.793  20.363  72.799  1.00  0.55           O  
HETATM  385  O   HOH T 384      38.313  27.301  58.407  1.00  0.55           O  
HETATM  386  O   HOH T 385      71.351   2.213  57.369  1.00  0.55           O  
HETATM  387  O   HOH T 386      48.045  34.966  61.556  1.00  0.55           O  
HETATM  388  O   HOH T 387      68.617   8.449  46.339  1.00  0.55           O  
HETATM  389  O   HOH T 388      92.416  37.439  43.633  1.00  0.55           O  
HETATM  390  O   HOH T 389      70.282  39.771  46.509  1.00  0.55           O  
HETATM  391  O   HOH T 390      91.507  17.129  37.289  1.00  0.55           O  
HETATM  392  O   HOH T 391      55.945  -8.941  43.785  1.00  0.55           O  
HETATM  393  O   HOH T 392      76.286  18.667  57.216  1.00  0.55           O  
HETATM  394  O   HOH T 393      81.556  37.735  70.689  1.00  0.55           O  
HETATM  395  O   HOH T 394      77.573  23.205  47.677  1.00  0.55           O  
HETATM  396  O   HOH T 395      95.036   1.358  64.538  1.00  0.55           O  
HETATM  397  O   HOH T 396      53.321  -8.184  46.925  1.00  0.56           O  
HETATM  398  O   HOH T 397      78.479  47.018  59.160  1.00  0.56           O  
HETATM  399  O   HOH T 398      90.015   6.522  70.530  1.00  0.56           O  
HETATM  400  O   HOH T 399      95.516  16.217  49.476  1.00  0.56           O  
HETATM  401  O   HOH T 400      76.123  -4.228  53.348  1.00  0.56           O  
HETATM  402  O   HOH T 401      82.774  39.594  40.490  1.00  0.56           O  
HETATM  403  O   HOH T 402      84.248   0.800  29.912  1.00  0.56           O  
HETATM  404  O   HOH T 403      84.261  37.098  64.046  1.00  0.56           O  
HETATM  405  O   HOH T 404      52.476  15.251  66.383  1.00  0.56           O  
HETATM  406  O   HOH T 405      38.021  32.489  58.112  1.00  0.56           O  
HETATM  407  O   HOH T 406     105.299  20.710  41.911  1.00  0.56           O  
HETATM  408  O   HOH T 407      63.954  44.459  60.743  1.00  0.56           O  
HETATM  409  O   HOH T 408      86.682  29.835  62.606  1.00  0.56           O  
HETATM  410  O   HOH T 409      72.683   1.804  52.239  1.00  0.56           O  
HETATM  411  O   HOH T 410      38.980  25.303  51.676  1.00  0.57           O  
HETATM  412  O   HOH T 411      97.913   1.770  42.217  1.00  0.57           O  
HETATM  413  O   HOH T 412      45.767  17.145  70.717  1.00  0.57           O  
HETATM  414  O   HOH T 413      75.524   1.634  54.292  1.00  0.57           O  
HETATM  415  O   HOH T 414      88.389  15.336  56.652  1.00  0.57           O  
HETATM  416  O   HOH T 415      95.608  12.148  38.058  1.00  0.57           O  
HETATM  417  O   HOH T 416      59.130  43.740  57.510  1.00  0.57           O  
HETATM  418  O   HOH T 417      93.134  35.136  60.278  1.00  0.57           O  
HETATM  419  O   HOH T 418      65.674   6.631  41.248  1.00  0.57           O  
HETATM  420  O   HOH T 419      82.279  16.465  43.004  1.00  0.58           O  
HETATM  421  O   HOH T 420      75.315  21.077  51.801  1.00  0.58           O  
HETATM  422  O   HOH T 421      79.377  25.140  65.656  1.00  0.58           O  
HETATM  423  O   HOH T 422      87.505  -1.595  50.351  1.00  0.58           O  
HETATM  424  O   HOH T 423      87.340  26.378  55.848  1.00  0.59           O  
HETATM  425  O   HOH T 424      80.204  16.336  36.563  1.00  0.60           O  
HETATM  426  O   HOH T 425      86.395  25.240  54.521  1.00  0.60           O  
HETATM  427  O   HOH T 426      77.581  25.474  46.294  1.00  0.60           O  
HETATM  428  O   HOH T 427      81.834  10.406  33.236  1.00  0.61           O  
HETATM  429  O   HOH T 428      59.912  42.191  62.424  1.00  0.63           O  
TER     430      HOH T 428 
