# Supplementary material for: Accurate Prediction of Hydration Sites of Proteins Using Energy Model With Atom Embedding
Source: Front Mol Biosci. 2021 Sep 20;8:756075. doi: 10.3389/fmolb.2021.756075 (PMC8488165; doi:10.3389/fmolb.2021.756075)
Supplement: Supplementary file 1 [file DataSheet1.ZIP › Data Sheet 1/Our_result_pdb/our_dataset_output/2UYT_watersite.pdb]

HEADER                                                        XXXX


JRNL        PMID   -1
HETATM    1  O   HOH T   0     -13.082 -27.456  28.896  1.00  0.17           O  
HETATM    2  O   HOH T   1     -39.794 -12.204  26.486  1.00  0.17           O  
HETATM    3  O   HOH T   2      -9.690 -11.325  -2.517  1.00  0.18           O  
HETATM    4  O   HOH T   3     -15.497   3.649  29.292  1.00  0.18           O  
HETATM    5  O   HOH T   4     -41.939 -12.379  28.322  1.00  0.19           O  
HETATM    6  O   HOH T   5     -35.788 -15.915  33.975  1.00  0.19           O  
HETATM    7  O   HOH T   6     -45.583  -3.933  13.870  1.00  0.20           O  
HETATM    8  O   HOH T   7       6.018  -0.715  30.698  1.00  0.20           O  
HETATM    9  O   HOH T   8     -13.217   3.698  14.001  1.00  0.20           O  
HETATM   10  O   HOH T   9     -10.977 -27.604  34.992  1.00  0.20           O  
HETATM   11  O   HOH T  10       6.632  -0.770  33.456  1.00  0.20           O  
HETATM   12  O   HOH T  11     -15.205  -7.937  13.560  1.00  0.21           O  
HETATM   13  O   HOH T  12      -0.657   2.644  16.717  1.00  0.21           O  
HETATM   14  O   HOH T  13     -15.704  -5.613  11.989  1.00  0.21           O  
HETATM   15  O   HOH T  14     -39.566   4.598  33.223  1.00  0.21           O  
HETATM   16  O   HOH T  15     -44.800   0.798  24.677  1.00  0.22           O  
HETATM   17  O   HOH T  16      -4.887   8.398  21.063  1.00  0.22           O  
HETATM   18  O   HOH T  17     -16.894  -5.745  17.049  1.00  0.22           O  
HETATM   19  O   HOH T  18     -10.312 -15.479  27.428  1.00  0.22           O  
HETATM   20  O   HOH T  19     -44.154 -11.262  29.758  1.00  0.23           O  
HETATM   21  O   HOH T  20     -19.721 -21.073  36.430  1.00  0.23           O  
HETATM   22  O   HOH T  21     -17.382   8.087   9.698  1.00  0.23           O  
HETATM   23  O   HOH T  22     -13.685  17.179  13.671  1.00  0.23           O  
HETATM   24  O   HOH T  23     -14.857  11.995   5.589  1.00  0.23           O  
HETATM   25  O   HOH T  24     -44.363   5.816  20.765  1.00  0.24           O  
HETATM   26  O   HOH T  25      -0.449  -9.764  29.679  1.00  0.24           O  
HETATM   27  O   HOH T  26      -6.163  16.274  -1.745  1.00  0.24           O  
HETATM   28  O   HOH T  27      -8.158  -8.859   9.907  1.00  0.24           O  
HETATM   29  O   HOH T  28     -16.233  14.165   6.610  1.00  0.24           O  
HETATM   30  O   HOH T  29     -22.997  -4.672   2.716  1.00  0.24           O  
HETATM   31  O   HOH T  30     -35.568 -23.706  43.699  1.00  0.25           O  
HETATM   32  O   HOH T  31      -7.288  -9.260  23.615  1.00  0.25           O  
HETATM   33  O   HOH T  32      -5.685  11.616  -6.443  1.00  0.25           O  
HETATM   34  O   HOH T  33     -23.100   1.050   6.553  1.00  0.25           O  
HETATM   35  O   HOH T  34      -4.443  -9.751  17.871  1.00  0.25           O  
HETATM   36  O   HOH T  35       3.481   5.441  39.745  1.00  0.25           O  
HETATM   37  O   HOH T  36      -9.761   3.219  38.426  1.00  0.26           O  
HETATM   38  O   HOH T  37      -6.204   5.350  11.137  1.00  0.26           O  
HETATM   39  O   HOH T  38     -17.292   5.690   8.183  1.00  0.26           O  
HETATM   40  O   HOH T  39       0.278   3.057  11.942  1.00  0.26           O  
HETATM   41  O   HOH T  40     -21.153  -0.711  21.700  1.00  0.26           O  
HETATM   42  O   HOH T  41     -26.491  -2.730  17.384  1.00  0.26           O  
HETATM   43  O   HOH T  42       4.389  -9.753  29.302  1.00  0.26           O  
HETATM   44  O   HOH T  43       1.751  -1.210  37.717  1.00  0.26           O  
HETATM   45  O   HOH T  44     -39.910 -21.155  31.436  1.00  0.27           O  
HETATM   46  O   HOH T  45     -33.132 -14.742  20.957  1.00  0.27           O  
HETATM   47  O   HOH T  46      -0.665   1.529   3.648  1.00  0.27           O  
HETATM   48  O   HOH T  47     -47.460   0.865  25.536  1.00  0.27           O  
HETATM   49  O   HOH T  48     -34.767   5.757  29.863  1.00  0.27           O  
HETATM   50  O   HOH T  49      -3.404  10.089  14.342  1.00  0.27           O  
HETATM   51  O   HOH T  50      -9.398  -6.595   8.942  1.00  0.27           O  
HETATM   52  O   HOH T  51     -37.644 -11.766  37.031  1.00  0.27           O  
HETATM   53  O   HOH T  52      -5.126  -8.405  25.050  1.00  0.27           O  
HETATM   54  O   HOH T  53     -20.198  16.839  30.996  1.00  0.27           O  
HETATM   55  O   HOH T  54     -36.457 -11.947  15.081  1.00  0.28           O  
HETATM   56  O   HOH T  55      -7.455 -25.782  29.748  1.00  0.28           O  
HETATM   57  O   HOH T  56     -31.935  -7.465  39.714  1.00  0.28           O  
HETATM   58  O   HOH T  57     -25.397  -4.589  25.207  1.00  0.28           O  
HETATM   59  O   HOH T  58     -32.202  -2.688   9.492  1.00  0.28           O  
HETATM   60  O   HOH T  59     -16.734   0.163  28.245  1.00  0.28           O  
HETATM   61  O   HOH T  60     -21.811   3.464   6.064  1.00  0.28           O  
HETATM   62  O   HOH T  61     -28.257   7.331  17.716  1.00  0.28           O  
HETATM   63  O   HOH T  62     -31.327 -14.884  18.755  1.00  0.28           O  
HETATM   64  O   HOH T  63      -6.929  10.216  -4.390  1.00  0.28           O  
HETATM   65  O   HOH T  64     -19.308  17.486  12.094  1.00  0.28           O  
HETATM   66  O   HOH T  65     -47.324  -2.438  15.354  1.00  0.28           O  
HETATM   67  O   HOH T  66     -20.841   1.153  18.214  1.00  0.28           O  
HETATM   68  O   HOH T  67      -5.927 -23.746  30.837  1.00  0.28           O  
HETATM   69  O   HOH T  68      -2.602   7.436  42.849  1.00  0.28           O  
HETATM   70  O   HOH T  69     -46.969  -0.832  21.688  1.00  0.28           O  
HETATM   71  O   HOH T  70     -13.665  15.531  -8.848  1.00  0.29           O  
HETATM   72  O   HOH T  71      -5.275  -9.492  13.307  1.00  0.29           O  
HETATM   73  O   HOH T  72     -20.638   1.947  20.930  1.00  0.29           O  
HETATM   74  O   HOH T  73     -30.108  -2.512  37.114  1.00  0.29           O  
HETATM   75  O   HOH T  74      -3.618 -25.332  30.529  1.00  0.29           O  
HETATM   76  O   HOH T  75       1.820  12.213  10.230  1.00  0.29           O  
HETATM   77  O   HOH T  76     -40.690  -1.138  11.714  1.00  0.29           O  
HETATM   78  O   HOH T  77     -35.800 -19.369  21.621  1.00  0.29           O  
HETATM   79  O   HOH T  78     -16.076  -8.676  35.638  1.00  0.29           O  
HETATM   80  O   HOH T  79     -20.174  12.384   1.242  1.00  0.29           O  
HETATM   81  O   HOH T  80     -48.683 -13.804  16.427  1.00  0.29           O  
HETATM   82  O   HOH T  81      -6.608 -21.204  17.084  1.00  0.30           O  
HETATM   83  O   HOH T  82       2.101   3.707   9.989  1.00  0.30           O  
HETATM   84  O   HOH T  83     -21.587   8.116   1.355  1.00  0.30           O  
HETATM   85  O   HOH T  84      -7.780   3.457  15.101  1.00  0.30           O  
HETATM   86  O   HOH T  85       8.282   5.516  29.696  1.00  0.30           O  
HETATM   87  O   HOH T  86     -28.959 -21.491  35.304  1.00  0.30           O  
HETATM   88  O   HOH T  87     -12.073  19.500   8.024  1.00  0.30           O  
HETATM   89  O   HOH T  88     -37.216   0.879   8.144  1.00  0.30           O  
HETATM   90  O   HOH T  89     -14.323 -29.819  16.766  1.00  0.30           O  
HETATM   91  O   HOH T  90      -2.238  21.904  33.765  1.00  0.30           O  
HETATM   92  O   HOH T  91     -40.520   0.642  38.198  1.00  0.30           O  
HETATM   93  O   HOH T  92       1.348   6.253   5.593  1.00  0.30           O  
HETATM   94  O   HOH T  93       1.497 -12.527  32.636  1.00  0.31           O  
HETATM   95  O   HOH T  94     -22.580  12.194  16.171  1.00  0.31           O  
HETATM   96  O   HOH T  95     -26.705  10.518  -2.475  1.00  0.31           O  
HETATM   97  O   HOH T  96     -15.943 -27.910  23.196  1.00  0.31           O  
HETATM   98  O   HOH T  97     -27.421  -7.937  11.602  1.00  0.31           O  
HETATM   99  O   HOH T  98      -1.298 -16.397  16.141  1.00  0.31           O  
HETATM  100  O   HOH T  99     -24.254 -21.222  26.944  1.00  0.31           O  
HETATM  101  O   HOH T 100     -30.795  13.888  13.126  1.00  0.31           O  
HETATM  102  O   HOH T 101     -16.170  -4.613  14.573  1.00  0.31           O  
HETATM  103  O   HOH T 102     -40.706 -21.995  36.443  1.00  0.31           O  
HETATM  104  O   HOH T 103       0.871  -0.638   4.581  1.00  0.31           O  
HETATM  105  O   HOH T 104     -33.670  -1.068  38.242  1.00  0.32           O  
HETATM  106  O   HOH T 105     -29.740   3.863   7.917  1.00  0.32           O  
HETATM  107  O   HOH T 106     -36.467 -16.356  36.649  1.00  0.32           O  
HETATM  108  O   HOH T 107      -1.246  -6.346  19.207  1.00  0.32           O  
HETATM  109  O   HOH T 108     -30.151 -20.071  23.780  1.00  0.32           O  
HETATM  110  O   HOH T 109      -0.693  19.306  32.029  1.00  0.32           O  
HETATM  111  O   HOH T 110     -12.969 -21.569   6.775  1.00  0.32           O  
HETATM  112  O   HOH T 111       3.333  -4.090  36.203  1.00  0.32           O  
HETATM  113  O   HOH T 112     -25.965  -7.078  31.214  1.00  0.32           O  
HETATM  114  O   HOH T 113      -5.260  17.586  44.033  1.00  0.32           O  
HETATM  115  O   HOH T 114      -8.867  -4.739  47.034  1.00  0.32           O  
HETATM  116  O   HOH T 115     -38.187  -4.938  40.453  1.00  0.32           O  
HETATM  117  O   HOH T 116     -25.669  -7.956  -3.935  1.00  0.32           O  
HETATM  118  O   HOH T 117     -26.751  -5.710   2.930  1.00  0.32           O  
HETATM  119  O   HOH T 118     -17.977   9.386  40.708  1.00  0.32           O  
HETATM  120  O   HOH T 119      -0.508  19.518  18.893  1.00  0.32           O  
HETATM  121  O   HOH T 120     -38.255 -19.431  38.679  1.00  0.32           O  
HETATM  122  O   HOH T 121      -1.564  10.965   0.210  1.00  0.33           O  
HETATM  123  O   HOH T 122      -0.102 -13.057  24.733  1.00  0.33           O  
HETATM  124  O   HOH T 123       6.948  21.061  26.874  1.00  0.33           O  
HETATM  125  O   HOH T 124      -7.076 -18.122   7.582  1.00  0.33           O  
HETATM  126  O   HOH T 125     -26.930 -14.465  42.158  1.00  0.33           O  
HETATM  127  O   HOH T 126     -19.799 -16.408   7.809  1.00  0.33           O  
HETATM  128  O   HOH T 127       3.626  -6.050   5.333  1.00  0.33           O  
HETATM  129  O   HOH T 128     -25.402  -0.131   7.712  1.00  0.34           O  
HETATM  130  O   HOH T 129     -25.301  -2.680   4.683  1.00  0.34           O  
HETATM  131  O   HOH T 130     -17.534 -20.938  38.129  1.00  0.34           O  
HETATM  132  O   HOH T 131     -17.206  -1.714  22.766  1.00  0.34           O  
HETATM  133  O   HOH T 132     -21.509   6.817  -9.131  1.00  0.34           O  
HETATM  134  O   HOH T 133       5.844  -4.649  38.738  1.00  0.34           O  
HETATM  135  O   HOH T 134     -31.580   5.671  13.880  1.00  0.34           O  
HETATM  136  O   HOH T 135     -21.080  15.842  10.459  1.00  0.34           O  
HETATM  137  O   HOH T 136     -36.620  -8.979  42.390  1.00  0.34           O  
HETATM  138  O   HOH T 137       6.107   4.907  39.686  1.00  0.34           O  
HETATM  139  O   HOH T 138     -41.103   6.430  10.739  1.00  0.34           O  
HETATM  140  O   HOH T 139      -0.380 -12.775  21.968  1.00  0.34           O  
HETATM  141  O   HOH T 140     -44.701  -8.705   9.586  1.00  0.34           O  
HETATM  142  O   HOH T 141      -8.012 -16.876  27.068  1.00  0.34           O  
HETATM  143  O   HOH T 142     -25.591   6.241  17.655  1.00  0.34           O  
HETATM  144  O   HOH T 143     -34.394 -25.908  34.386  1.00  0.34           O  
HETATM  145  O   HOH T 144     -37.348   5.791  15.539  1.00  0.34           O  
HETATM  146  O   HOH T 145      -3.886  -5.636  42.387  1.00  0.34           O  
HETATM  147  O   HOH T 146      -0.673 -13.958  19.350  1.00  0.34           O  
HETATM  148  O   HOH T 147      -0.720  -7.772   3.623  1.00  0.35           O  
HETATM  149  O   HOH T 148     -11.176 -23.658   6.459  1.00  0.35           O  
HETATM  150  O   HOH T 149     -30.779  11.145   6.689  1.00  0.35           O  
HETATM  151  O   HOH T 150     -10.523  24.484  37.572  1.00  0.35           O  
HETATM  152  O   HOH T 151     -22.873  16.199  21.858  1.00  0.35           O  
HETATM  153  O   HOH T 152     -49.680 -15.845  20.129  1.00  0.35           O  
HETATM  154  O   HOH T 153     -18.826   1.613  29.551  1.00  0.35           O  
HETATM  155  O   HOH T 154     -25.167  -0.413  -1.954  1.00  0.35           O  
HETATM  156  O   HOH T 155     -19.460  15.076  32.990  1.00  0.35           O  
HETATM  157  O   HOH T 156     -15.670  16.887  -0.079  1.00  0.35           O  
HETATM  158  O   HOH T 157       2.476   9.536  14.505  1.00  0.35           O  
HETATM  159  O   HOH T 158     -23.861  -9.886  10.305  1.00  0.35           O  
HETATM  160  O   HOH T 159     -17.638   2.870  23.650  1.00  0.35           O  
HETATM  161  O   HOH T 160      -6.342   6.958  19.212  1.00  0.35           O  
HETATM  162  O   HOH T 161     -53.726 -15.558  11.085  1.00  0.35           O  
HETATM  163  O   HOH T 162     -25.358  -7.612  28.579  1.00  0.35           O  
HETATM  164  O   HOH T 163     -21.021  -9.955  44.476  1.00  0.35           O  
HETATM  165  O   HOH T 164     -42.072 -19.462  26.686  1.00  0.35           O  
HETATM  166  O   HOH T 165       2.769  -9.189  25.343  1.00  0.35           O  
HETATM  167  O   HOH T 166     -12.861 -25.516  15.835  1.00  0.36           O  
HETATM  168  O   HOH T 167     -35.142 -13.288  13.004  1.00  0.36           O  
HETATM  169  O   HOH T 168      -3.517  23.013  21.654  1.00  0.36           O  
HETATM  170  O   HOH T 169       1.407  -4.966  26.677  1.00  0.36           O  
HETATM  171  O   HOH T 170       6.183   2.042  12.990  1.00  0.36           O  
HETATM  172  O   HOH T 171     -18.747 -17.525  -1.825  1.00  0.36           O  
HETATM  173  O   HOH T 172     -21.154  15.263  18.292  1.00  0.36           O  
HETATM  174  O   HOH T 173     -43.509 -11.157  39.085  1.00  0.36           O  
HETATM  175  O   HOH T 174     -22.367  10.756   1.520  1.00  0.36           O  
HETATM  176  O   HOH T 175      -3.945 -20.258  20.965  1.00  0.36           O  
HETATM  177  O   HOH T 176       1.797  18.057  31.095  1.00  0.36           O  
HETATM  178  O   HOH T 177       0.182   8.781   0.806  1.00  0.36           O  
HETATM  179  O   HOH T 178     -31.501  17.847   4.710  1.00  0.36           O  
HETATM  180  O   HOH T 179     -25.893   4.000  20.431  1.00  0.36           O  
HETATM  181  O   HOH T 180     -21.584  10.655  -7.307  1.00  0.36           O  
HETATM  182  O   HOH T 181     -48.234 -18.051  20.995  1.00  0.36           O  
HETATM  183  O   HOH T 182     -32.860   7.073  33.157  1.00  0.36           O  
HETATM  184  O   HOH T 183       5.333  -9.495  38.666  1.00  0.36           O  
HETATM  185  O   HOH T 184     -23.515  15.018  11.446  1.00  0.36           O  
HETATM  186  O   HOH T 185     -30.539   1.437  26.650  1.00  0.36           O  
HETATM  187  O   HOH T 186     -15.004  -5.375  44.087  1.00  0.37           O  
HETATM  188  O   HOH T 187     -40.003   7.200  32.044  1.00  0.37           O  
HETATM  189  O   HOH T 188     -30.887   6.791  11.469  1.00  0.37           O  
HETATM  190  O   HOH T 189      -9.498 -11.814  37.747  1.00  0.37           O  
HETATM  191  O   HOH T 190     -10.252  19.317  -0.837  1.00  0.37           O  
HETATM  192  O   HOH T 191     -32.046   2.434   7.757  1.00  0.37           O  
HETATM  193  O   HOH T 192       4.239   6.917  16.546  1.00  0.37           O  
HETATM  194  O   HOH T 193     -42.932 -17.374  31.557  1.00  0.37           O  
HETATM  195  O   HOH T 194       1.929   7.000  13.460  1.00  0.37           O  
HETATM  196  O   HOH T 195      -9.329 -20.059  33.839  1.00  0.37           O  
HETATM  197  O   HOH T 196     -18.003 -29.776  22.901  1.00  0.37           O  
HETATM  198  O   HOH T 197     -19.547  -0.063  25.410  1.00  0.37           O  
HETATM  199  O   HOH T 198     -43.656 -15.594  35.975  1.00  0.37           O  
HETATM  200  O   HOH T 199     -12.235  -4.984  43.819  1.00  0.37           O  
HETATM  201  O   HOH T 200     -11.289  26.207  35.535  1.00  0.37           O  
HETATM  202  O   HOH T 201      -8.694   9.908  39.038  1.00  0.37           O  
HETATM  203  O   HOH T 202     -48.807 -10.583  34.405  1.00  0.37           O  
HETATM  204  O   HOH T 203       4.385  -9.291   2.629  1.00  0.37           O  
HETATM  205  O   HOH T 204     -24.365 -14.466  43.338  1.00  0.37           O  
HETATM  206  O   HOH T 205     -19.267   5.445 -10.162  1.00  0.37           O  
HETATM  207  O   HOH T 206     -37.610 -27.085  31.766  1.00  0.37           O  
HETATM  208  O   HOH T 207      -1.743  24.515   0.701  1.00  0.38           O  
HETATM  209  O   HOH T 208      -9.074 -16.168  -7.700  1.00  0.38           O  
HETATM  210  O   HOH T 209     -43.609 -12.787  36.677  1.00  0.38           O  
HETATM  211  O   HOH T 210       0.730  -8.501  38.664  1.00  0.38           O  
HETATM  212  O   HOH T 211     -30.964 -24.404  31.770  1.00  0.38           O  
HETATM  213  O   HOH T 212       1.906  13.114  37.427  1.00  0.38           O  
HETATM  214  O   HOH T 213     -33.734 -17.542  20.882  1.00  0.38           O  
HETATM  215  O   HOH T 214     -31.560  15.763  11.128  1.00  0.38           O  
HETATM  216  O   HOH T 215      -8.369 -23.706  21.970  1.00  0.38           O  
HETATM  217  O   HOH T 216     -31.680 -25.377  34.491  1.00  0.38           O  
HETATM  218  O   HOH T 217      -6.808  -6.557  23.776  1.00  0.38           O  
HETATM  219  O   HOH T 218     -21.617 -12.342  -9.134  1.00  0.38           O  
HETATM  220  O   HOH T 219     -25.526   6.788  -1.546  1.00  0.38           O  
HETATM  221  O   HOH T 220     -34.916  -2.566   9.000  1.00  0.38           O  
HETATM  222  O   HOH T 221     -47.307  -8.015  10.678  1.00  0.38           O  
HETATM  223  O   HOH T 222       6.511  17.853  28.451  1.00  0.38           O  
HETATM  224  O   HOH T 223     -28.663  -0.140  37.421  1.00  0.38           O  
HETATM  225  O   HOH T 224     -45.097   0.066  17.532  1.00  0.38           O  
HETATM  226  O   HOH T 225     -21.320   4.693  29.953  1.00  0.38           O  
HETATM  227  O   HOH T 226      -6.378 -19.197  11.603  1.00  0.38           O  
HETATM  228  O   HOH T 227     -18.593  10.603   2.626  1.00  0.39           O  
HETATM  229  O   HOH T 228     -25.866   6.548  -4.344  1.00  0.39           O  
HETATM  230  O   HOH T 229     -29.934   9.360  11.567  1.00  0.39           O  
HETATM  231  O   HOH T 230      -3.333  14.495   4.082  1.00  0.39           O  
HETATM  232  O   HOH T 231     -39.763 -12.912  12.861  1.00  0.39           O  
HETATM  233  O   HOH T 232      -5.746 -14.083  33.296  1.00  0.39           O  
HETATM  234  O   HOH T 233     -51.028 -15.996  10.487  1.00  0.39           O  
HETATM  235  O   HOH T 234     -42.798   1.907  16.326  1.00  0.39           O  
HETATM  236  O   HOH T 235      -5.723 -18.340  27.667  1.00  0.39           O  
HETATM  237  O   HOH T 236     -29.818   9.620  16.930  1.00  0.39           O  
HETATM  238  O   HOH T 237      -2.227   7.790  45.609  1.00  0.39           O  
HETATM  239  O   HOH T 238     -42.658   9.411  20.370  1.00  0.39           O  
HETATM  240  O   HOH T 239       5.483  -0.152  11.312  1.00  0.39           O  
HETATM  241  O   HOH T 240     -36.831 -30.821  26.480  1.00  0.39           O  
HETATM  242  O   HOH T 241     -28.361  11.641  17.972  1.00  0.39           O  
HETATM  243  O   HOH T 242     -29.011 -22.988  33.062  1.00  0.39           O  
HETATM  244  O   HOH T 243     -23.070   5.811  28.189  1.00  0.39           O  
HETATM  245  O   HOH T 244       2.815  10.313  11.876  1.00  0.39           O  
HETATM  246  O   HOH T 245     -18.611  22.026  16.585  1.00  0.39           O  
HETATM  247  O   HOH T 246     -23.474  13.698  18.368  1.00  0.39           O  
HETATM  248  O   HOH T 247     -14.795 -27.466  15.316  1.00  0.39           O  
HETATM  249  O   HOH T 248     -16.489  10.458  38.403  1.00  0.40           O  
HETATM  250  O   HOH T 249     -29.355  -1.550  30.312  1.00  0.40           O  
HETATM  251  O   HOH T 250      -4.881 -17.031   6.346  1.00  0.40           O  
HETATM  252  O   HOH T 251       6.165  -2.878  11.363  1.00  0.40           O  
HETATM  253  O   HOH T 252       2.576  18.112   1.029  1.00  0.40           O  
HETATM  254  O   HOH T 253      -7.540 -19.167  23.884  1.00  0.40           O  
HETATM  255  O   HOH T 254     -38.841 -16.716  38.143  1.00  0.40           O  
HETATM  256  O   HOH T 255     -30.612 -29.961  39.594  1.00  0.40           O  
HETATM  257  O   HOH T 256     -13.052  20.204   3.119  1.00  0.40           O  
HETATM  258  O   HOH T 257      -3.780  25.002  23.513  1.00  0.40           O  
HETATM  259  O   HOH T 258     -18.705 -22.989  28.491  1.00  0.40           O  
HETATM  260  O   HOH T 259     -38.977   0.416  10.224  1.00  0.40           O  
HETATM  261  O   HOH T 260     -36.224 -19.667  40.656  1.00  0.40           O  
HETATM  262  O   HOH T 261       2.619   5.686   8.033  1.00  0.40           O  
HETATM  263  O   HOH T 262     -24.233  12.155  27.581  1.00  0.40           O  
HETATM  264  O   HOH T 263     -23.051 -12.272  15.169  1.00  0.40           O  
HETATM  265  O   HOH T 264       1.316 -11.360  26.195  1.00  0.40           O  
HETATM  266  O   HOH T 265       3.151  15.900  29.640  1.00  0.40           O  
HETATM  267  O   HOH T 266     -34.744 -28.748  34.014  1.00  0.40           O  
HETATM  268  O   HOH T 267     -22.192   3.773  32.337  1.00  0.40           O  
HETATM  269  O   HOH T 268     -17.643   3.429  36.583  1.00  0.40           O  
HETATM  270  O   HOH T 269      -7.729 -21.512  12.231  1.00  0.40           O  
HETATM  271  O   HOH T 270     -26.970   8.202  25.367  1.00  0.40           O  
HETATM  272  O   HOH T 271     -26.631 -22.415  28.152  1.00  0.40           O  
HETATM  273  O   HOH T 272     -19.606 -31.462  21.478  1.00  0.40           O  
HETATM  274  O   HOH T 273     -32.668  -9.743  38.328  1.00  0.40           O  
HETATM  275  O   HOH T 274      -8.898 -22.688  24.478  1.00  0.40           O  
HETATM  276  O   HOH T 275     -10.388 -18.271  38.790  1.00  0.40           O  
HETATM  277  O   HOH T 276      -6.416   0.613  25.259  1.00  0.41           O  
HETATM  278  O   HOH T 277     -17.998  -1.886  26.814  1.00  0.41           O  
HETATM  279  O   HOH T 278     -29.172  17.969   6.354  1.00  0.41           O  
HETATM  280  O   HOH T 279     -11.685 -18.681  34.599  1.00  0.41           O  
HETATM  281  O   HOH T 280       7.483   5.993  34.972  1.00  0.41           O  
HETATM  282  O   HOH T 281     -25.298   2.741  16.994  1.00  0.41           O  
HETATM  283  O   HOH T 282     -25.288  11.116  -9.565  1.00  0.41           O  
HETATM  284  O   HOH T 283     -39.646 -26.476  33.657  1.00  0.41           O  
HETATM  285  O   HOH T 284     -31.896   9.240   8.351  1.00  0.41           O  
HETATM  286  O   HOH T 285     -22.418  20.959  19.201  1.00  0.41           O  
HETATM  287  O   HOH T 286     -28.368 -16.900  42.091  1.00  0.41           O  
HETATM  288  O   HOH T 287     -11.166 -26.821  18.973  1.00  0.41           O  
HETATM  289  O   HOH T 288     -35.088 -19.917  43.201  1.00  0.41           O  
HETATM  290  O   HOH T 289     -23.553  16.458   1.486  1.00  0.41           O  
HETATM  291  O   HOH T 290     -44.435   9.650  18.282  1.00  0.41           O  
HETATM  292  O   HOH T 291     -32.517 -27.312  40.776  1.00  0.41           O  
HETATM  293  O   HOH T 292     -20.339  16.072  20.891  1.00  0.41           O  
HETATM  294  O   HOH T 293     -52.919 -15.389  13.679  1.00  0.41           O  
HETATM  295  O   HOH T 294     -49.233 -19.444  18.799  1.00  0.41           O  
HETATM  296  O   HOH T 295       3.449  -3.064  38.939  1.00  0.41           O  
HETATM  297  O   HOH T 296     -17.846 -27.876  12.166  1.00  0.41           O  
HETATM  298  O   HOH T 297      -4.817  20.285  18.352  1.00  0.41           O  
HETATM  299  O   HOH T 298     -18.383 -10.344  43.753  1.00  0.41           O  
HETATM  300  O   HOH T 299       1.184  27.295  23.457  1.00  0.41           O  
HETATM  301  O   HOH T 300     -20.483  20.617  15.070  1.00  0.41           O  
HETATM  302  O   HOH T 301       4.386  13.280  29.955  1.00  0.41           O  
HETATM  303  O   HOH T 302     -41.104 -24.101  34.507  1.00  0.41           O  
HETATM  304  O   HOH T 303     -20.106 -23.510  13.314  1.00  0.41           O  
HETATM  305  O   HOH T 304      -4.620 -19.174  23.443  1.00  0.41           O  
HETATM  306  O   HOH T 305     -45.238 -18.020  30.020  1.00  0.41           O  
HETATM  307  O   HOH T 306     -42.130  -3.333  10.998  1.00  0.42           O  
HETATM  308  O   HOH T 307       3.986  -8.808   5.297  1.00  0.42           O  
HETATM  309  O   HOH T 308       0.920  10.562   7.014  1.00  0.42           O  
HETATM  310  O   HOH T 309     -13.822 -26.707  11.379  1.00  0.42           O  
HETATM  311  O   HOH T 310     -17.470   7.288   5.923  1.00  0.42           O  
HETATM  312  O   HOH T 311     -10.362  19.857  39.497  1.00  0.42           O  
HETATM  313  O   HOH T 312     -11.561 -25.877   8.086  1.00  0.42           O  
HETATM  314  O   HOH T 313     -39.507 -30.986  25.665  1.00  0.42           O  
HETATM  315  O   HOH T 314      -7.317 -10.636  39.014  1.00  0.42           O  
HETATM  316  O   HOH T 315      -3.087  29.928  25.155  1.00  0.42           O  
HETATM  317  O   HOH T 316       4.900  24.582  23.187  1.00  0.42           O  
HETATM  318  O   HOH T 317       4.038  21.464  34.746  1.00  0.42           O  
HETATM  319  O   HOH T 318     -43.713 -23.935  35.752  1.00  0.42           O  
HETATM  320  O   HOH T 319      -8.796 -20.496  39.029  1.00  0.42           O  
HETATM  321  O   HOH T 320     -42.100 -14.758  37.852  1.00  0.42           O  
HETATM  322  O   HOH T 321     -46.577 -10.651  10.099  1.00  0.42           O  
HETATM  323  O   HOH T 322     -17.855 -12.911  44.588  1.00  0.42           O  
HETATM  324  O   HOH T 323      -2.312  18.890   9.445  1.00  0.42           O  
HETATM  325  O   HOH T 324     -49.453  -0.839  24.714  1.00  0.42           O  
HETATM  326  O   HOH T 325     -51.239 -13.928  15.261  1.00  0.42           O  
HETATM  327  O   HOH T 326     -20.666  -9.866 -10.200  1.00  0.42           O  
HETATM  328  O   HOH T 327      -3.392  19.989  -4.855  1.00  0.42           O  
HETATM  329  O   HOH T 328      -7.146 -11.287  36.297  1.00  0.42           O  
HETATM  330  O   HOH T 329     -19.175  -2.634  24.444  1.00  0.42           O  
HETATM  331  O   HOH T 330       0.559  31.557  24.999  1.00  0.42           O  
HETATM  332  O   HOH T 331     -26.841  19.630   6.466  1.00  0.42           O  
HETATM  333  O   HOH T 332     -38.444   5.908  39.510  1.00  0.43           O  
HETATM  334  O   HOH T 333     -35.575   5.962  39.779  1.00  0.43           O  
HETATM  335  O   HOH T 334      -1.471  26.529  23.796  1.00  0.43           O  
HETATM  336  O   HOH T 335     -25.042  -7.503   1.497  1.00  0.43           O  
HETATM  337  O   HOH T 336     -13.007  18.962  10.705  1.00  0.43           O  
HETATM  338  O   HOH T 337     -35.112   6.928   8.032  1.00  0.43           O  
HETATM  339  O   HOH T 338     -17.247   8.358   3.433  1.00  0.43           O  
HETATM  340  O   HOH T 339     -36.165 -11.303   8.890  1.00  0.43           O  
HETATM  341  O   HOH T 340      -1.736  21.179  20.697  1.00  0.43           O  
HETATM  342  O   HOH T 341     -15.019  19.323   4.701  1.00  0.43           O  
HETATM  343  O   HOH T 342       9.431   1.817  36.019  1.00  0.43           O  
HETATM  344  O   HOH T 343     -26.225  -2.710   7.295  1.00  0.43           O  
HETATM  345  O   HOH T 344     -10.663 -13.464  -4.146  1.00  0.43           O  
HETATM  346  O   HOH T 345     -33.185   9.775  30.599  1.00  0.43           O  
HETATM  347  O   HOH T 346       1.277 -12.280  18.433  1.00  0.43           O  
HETATM  348  O   HOH T 347      -7.811 -14.464  28.415  1.00  0.43           O  
HETATM  349  O   HOH T 348      -5.026   6.269  42.646  1.00  0.43           O  
HETATM  350  O   HOH T 349     -43.680   5.756  10.514  1.00  0.43           O  
HETATM  351  O   HOH T 350     -11.376 -30.980  12.901  1.00  0.43           O  
HETATM  352  O   HOH T 351     -29.520   1.205   7.507  1.00  0.43           O  
HETATM  353  O   HOH T 352       6.401  11.246  37.341  1.00  0.44           O  
HETATM  354  O   HOH T 353     -26.116 -10.654   8.998  1.00  0.44           O  
HETATM  355  O   HOH T 354      -9.056 -11.558  -5.262  1.00  0.44           O  
HETATM  356  O   HOH T 355     -44.870   9.581  26.363  1.00  0.44           O  
HETATM  357  O   HOH T 356     -27.183 -11.309  -3.827  1.00  0.44           O  
HETATM  358  O   HOH T 357     -24.760  -8.170  12.293  1.00  0.44           O  
HETATM  359  O   HOH T 358      -8.326  26.134  38.041  1.00  0.44           O  
HETATM  360  O   HOH T 359       4.500  13.059  36.294  1.00  0.44           O  
HETATM  361  O   HOH T 360     -44.666   6.893  18.247  1.00  0.44           O  
HETATM  362  O   HOH T 361     -23.706 -10.714  44.389  1.00  0.44           O  
HETATM  363  O   HOH T 362       2.169  -7.665   3.566  1.00  0.44           O  
HETATM  364  O   HOH T 363     -43.102  10.086  28.514  1.00  0.44           O  
HETATM  365  O   HOH T 364      -1.721 -10.289  15.020  1.00  0.44           O  
HETATM  366  O   HOH T 365     -29.216  16.041  12.287  1.00  0.44           O  
HETATM  367  O   HOH T 366     -31.585  11.232  12.761  1.00  0.44           O  
HETATM  368  O   HOH T 367     -23.760  18.845  18.019  1.00  0.44           O  
HETATM  369  O   HOH T 368     -28.079 -21.986  23.802  1.00  0.44           O  
HETATM  370  O   HOH T 369     -38.542 -14.430  36.528  1.00  0.44           O  
HETATM  371  O   HOH T 370     -35.979   6.282  13.163  1.00  0.44           O  
HETATM  372  O   HOH T 371     -42.168 -18.576  18.263  1.00  0.44           O  
HETATM  373  O   HOH T 372     -12.884   8.026  28.801  1.00  0.44           O  
HETATM  374  O   HOH T 373     -16.035   9.595   6.113  1.00  0.44           O  
HETATM  375  O   HOH T 374     -24.514   8.184  -6.167  1.00  0.44           O  
HETATM  376  O   HOH T 375     -32.204  -3.347  38.716  1.00  0.44           O  
HETATM  377  O   HOH T 376     -30.635   7.148  16.139  1.00  0.44           O  
HETATM  378  O   HOH T 377     -21.738 -18.017   8.728  1.00  0.44           O  
HETATM  379  O   HOH T 378     -33.331   6.959  15.541  1.00  0.45           O  
HETATM  380  O   HOH T 379     -16.870 -19.512  -0.673  1.00  0.45           O  
HETATM  381  O   HOH T 380     -27.263   8.515  -7.439  1.00  0.45           O  
HETATM  382  O   HOH T 381      -6.547  17.081  -4.266  1.00  0.45           O  
HETATM  383  O   HOH T 382     -30.384  -1.111   8.363  1.00  0.45           O  
HETATM  384  O   HOH T 383     -27.804  -0.859  -2.561  1.00  0.45           O  
HETATM  385  O   HOH T 384      -8.825 -25.339  24.015  1.00  0.45           O  
HETATM  386  O   HOH T 385      -5.746 -20.340  25.787  1.00  0.45           O  
HETATM  387  O   HOH T 386     -24.362  14.311   0.145  1.00  0.45           O  
HETATM  388  O   HOH T 387       4.439  -6.972  37.855  1.00  0.45           O  
HETATM  389  O   HOH T 388     -22.954  17.253  -7.087  1.00  0.45           O  
HETATM  390  O   HOH T 389     -32.085 -13.906  41.366  1.00  0.45           O  
HETATM  391  O   HOH T 390     -21.474 -16.574  -8.026  1.00  0.45           O  
HETATM  392  O   HOH T 391       0.246  13.038   5.763  1.00  0.45           O  
HETATM  393  O   HOH T 392     -37.287  -8.940   7.971  1.00  0.45           O  
HETATM  394  O   HOH T 393     -41.146 -21.259  33.854  1.00  0.45           O  
HETATM  395  O   HOH T 394     -35.262 -17.459  41.951  1.00  0.45           O  
HETATM  396  O   HOH T 395     -32.373   7.095  30.456  1.00  0.45           O  
HETATM  397  O   HOH T 396     -37.970 -29.251  30.138  1.00  0.46           O  
HETATM  398  O   HOH T 397       3.961  -1.886  12.753  1.00  0.46           O  
HETATM  399  O   HOH T 398     -33.783   4.698  12.394  1.00  0.46           O  
HETATM  400  O   HOH T 399      -6.294  22.801  21.743  1.00  0.46           O  
HETATM  401  O   HOH T 400      -3.100 -11.143  12.804  1.00  0.46           O  
HETATM  402  O   HOH T 401      -9.026  20.875  14.351  1.00  0.46           O  
HETATM  403  O   HOH T 402     -33.889 -16.105  18.595  1.00  0.46           O  
HETATM  404  O   HOH T 403     -21.042 -12.316  13.310  1.00  0.46           O  
HETATM  405  O   HOH T 404     -25.973  -9.170   6.547  1.00  0.46           O  
HETATM  406  O   HOH T 405     -47.598   1.078  17.436  1.00  0.46           O  
HETATM  407  O   HOH T 406     -14.744 -11.519  -9.503  1.00  0.46           O  
HETATM  408  O   HOH T 407      -7.882  -9.621  12.509  1.00  0.46           O  
HETATM  409  O   HOH T 408      -5.887  -1.960  43.984  1.00  0.46           O  
HETATM  410  O   HOH T 409     -25.545   8.248  -9.645  1.00  0.46           O  
HETATM  411  O   HOH T 410     -37.300 -11.700  12.564  1.00  0.46           O  
HETATM  412  O   HOH T 411     -11.445  18.547   1.553  1.00  0.46           O  
HETATM  413  O   HOH T 412       3.466   3.206   7.495  1.00  0.46           O  
HETATM  414  O   HOH T 413     -11.778 -22.169  36.018  1.00  0.46           O  
HETATM  415  O   HOH T 414       9.513   3.242  38.405  1.00  0.46           O  
HETATM  416  O   HOH T 415     -33.605 -12.785  36.330  1.00  0.46           O  
HETATM  417  O   HOH T 416     -36.632 -12.940   6.745  1.00  0.46           O  
HETATM  418  O   HOH T 417     -30.791 -11.381   8.955  1.00  0.46           O  
HETATM  419  O   HOH T 418     -33.987  11.402  11.298  1.00  0.46           O  
HETATM  420  O   HOH T 419      -1.602  -8.238   0.874  1.00  0.46           O  
HETATM  421  O   HOH T 420     -41.555 -20.720  29.158  1.00  0.46           O  
HETATM  422  O   HOH T 421       4.064 -11.899  38.638  1.00  0.46           O  
HETATM  423  O   HOH T 422     -30.187  -9.571  39.475  1.00  0.46           O  
HETATM  424  O   HOH T 423      -3.986 -15.417  34.820  1.00  0.46           O  
HETATM  425  O   HOH T 424      -7.622 -22.306  14.813  1.00  0.46           O  
HETATM  426  O   HOH T 425       4.917   5.397  48.025  1.00  0.46           O  
HETATM  427  O   HOH T 426     -38.844 -31.181  28.380  1.00  0.46           O  
HETATM  428  O   HOH T 427     -32.593   6.735   9.273  1.00  0.46           O  
HETATM  429  O   HOH T 428     -50.566 -17.220  17.940  1.00  0.47           O  
HETATM  430  O   HOH T 429     -35.508   3.204  39.982  1.00  0.47           O  
HETATM  431  O   HOH T 430     -19.851 -22.852  30.936  1.00  0.47           O  
HETATM  432  O   HOH T 431       1.343  -4.241  11.351  1.00  0.47           O  
HETATM  433  O   HOH T 432      -3.013   7.447  35.508  1.00  0.47           O  
HETATM  434  O   HOH T 433     -49.042 -15.209  14.027  1.00  0.47           O  
HETATM  435  O   HOH T 434      -6.430  24.366  24.034  1.00  0.47           O  
HETATM  436  O   HOH T 435     -20.683   5.253  34.136  1.00  0.47           O  
HETATM  437  O   HOH T 436     -15.872 -28.309  10.223  1.00  0.47           O  
HETATM  438  O   HOH T 437      -8.721  -0.801  46.200  1.00  0.47           O  
HETATM  439  O   HOH T 438     -43.278  -2.640  38.995  1.00  0.47           O  
HETATM  440  O   HOH T 439     -23.850 -13.168  17.569  1.00  0.47           O  
HETATM  441  O   HOH T 440     -34.300 -12.192  41.338  1.00  0.47           O  
HETATM  442  O   HOH T 441     -40.541 -18.704  30.769  1.00  0.47           O  
HETATM  443  O   HOH T 442     -26.865   6.567  20.079  1.00  0.47           O  
HETATM  444  O   HOH T 443     -31.789 -19.465  21.500  1.00  0.47           O  
HETATM  445  O   HOH T 444     -17.141  19.172  31.611  1.00  0.47           O  
HETATM  446  O   HOH T 445     -28.429 -11.366  10.381  1.00  0.47           O  
HETATM  447  O   HOH T 446     -24.395   9.582  28.531  1.00  0.48           O  
HETATM  448  O   HOH T 447     -20.292  -5.814  44.178  1.00  0.48           O  
HETATM  449  O   HOH T 448       0.164   7.231   3.298  1.00  0.48           O  
HETATM  450  O   HOH T 449     -43.603   9.933  31.292  1.00  0.48           O  
HETATM  451  O   HOH T 450     -34.755   2.210   8.036  1.00  0.48           O  
HETATM  452  O   HOH T 451     -23.594  16.342  19.177  1.00  0.48           O  
HETATM  453  O   HOH T 452      10.112   6.530  34.573  1.00  0.48           O  
HETATM  454  O   HOH T 453     -10.543 -28.298  13.068  1.00  0.48           O  
HETATM  455  O   HOH T 454     -32.735   7.249   6.609  1.00  0.48           O  
HETATM  456  O   HOH T 455      -3.746  -9.007  11.035  1.00  0.48           O  
HETATM  457  O   HOH T 456     -27.168   9.039  22.760  1.00  0.48           O  
HETATM  458  O   HOH T 457     -26.066 -22.688  25.536  1.00  0.48           O  
HETATM  459  O   HOH T 458     -12.738 -29.183  14.554  1.00  0.48           O  
HETATM  460  O   HOH T 459     -18.638 -27.305  23.681  1.00  0.48           O  
HETATM  461  O   HOH T 460     -46.690 -19.670  19.459  1.00  0.48           O  
HETATM  462  O   HOH T 461      -4.378 -11.200  35.428  1.00  0.48           O  
HETATM  463  O   HOH T 462     -25.860 -12.108  43.088  1.00  0.48           O  
HETATM  464  O   HOH T 463     -25.154  10.244  25.930  1.00  0.48           O  
HETATM  465  O   HOH T 464     -13.825 -18.516  -1.641  1.00  0.48           O  
HETATM  466  O   HOH T 465      -9.505  -7.903  -5.627  1.00  0.48           O  
HETATM  467  O   HOH T 466      -2.489   4.306  50.225  1.00  0.48           O  
HETATM  468  O   HOH T 467     -25.458  12.914  -1.832  1.00  0.48           O  
HETATM  469  O   HOH T 468     -29.391 -15.937  45.470  1.00  0.49           O  
HETATM  470  O   HOH T 469     -39.793 -13.593  16.760  1.00  0.49           O  
HETATM  471  O   HOH T 470     -20.637  11.308  -9.799  1.00  0.49           O  
HETATM  472  O   HOH T 471     -45.540   2.288  15.830  1.00  0.49           O  
HETATM  473  O   HOH T 472      -8.130  -5.978  49.482  1.00  0.49           O  
HETATM  474  O   HOH T 473     -10.439  -4.518  49.269  1.00  0.49           O  
HETATM  475  O   HOH T 474     -20.808   7.044 -11.803  1.00  0.49           O  
HETATM  476  O   HOH T 475     -33.167 -30.915  28.242  1.00  0.49           O  
HETATM  477  O   HOH T 476      -9.016  27.812  35.808  1.00  0.49           O  
HETATM  478  O   HOH T 477      -7.047   9.995  -8.502  1.00  0.49           O  
HETATM  479  O   HOH T 478      -9.995  18.336  37.245  1.00  0.49           O  
HETATM  480  O   HOH T 479       5.610  15.280  28.580  1.00  0.49           O  
HETATM  481  O   HOH T 480     -22.724  12.987  -6.367  1.00  0.49           O  
HETATM  482  O   HOH T 481     -30.268  -3.805   7.789  1.00  0.49           O  
HETATM  483  O   HOH T 482     -34.001   8.038  28.543  1.00  0.49           O  
HETATM  484  O   HOH T 483     -33.966  11.458  32.558  1.00  0.49           O  
HETATM  485  O   HOH T 484      -6.525 -20.730  21.884  1.00  0.49           O  
HETATM  486  O   HOH T 485      -0.775  -0.961   2.483  1.00  0.49           O  
HETATM  487  O   HOH T 486     -18.970 -16.775  -4.374  1.00  0.49           O  
HETATM  488  O   HOH T 487       1.859   9.478   9.495  1.00  0.49           O  
HETATM  489  O   HOH T 488     -26.689  -1.512  38.815  1.00  0.49           O  
HETATM  490  O   HOH T 489       4.770   9.622  16.133  1.00  0.49           O  
HETATM  491  O   HOH T 490       8.935  20.827  24.923  1.00  0.49           O  
HETATM  492  O   HOH T 491     -38.140  -6.363   8.018  1.00  0.49           O  
HETATM  493  O   HOH T 492     -47.916 -11.924  28.211  1.00  0.49           O  
HETATM  494  O   HOH T 493      -3.943  -9.555  -1.203  1.00  0.49           O  
HETATM  495  O   HOH T 494       2.300  16.884  17.851  1.00  0.49           O  
HETATM  496  O   HOH T 495      -3.555 -18.634  25.962  1.00  0.49           O  
HETATM  497  O   HOH T 496      -8.743 -25.415  19.935  1.00  0.49           O  
HETATM  498  O   HOH T 497     -29.547 -29.950  22.525  1.00  0.49           O  
HETATM  499  O   HOH T 498     -25.257   6.413  26.627  1.00  0.49           O  
HETATM  500  O   HOH T 499     -39.393 -21.899  38.959  1.00  0.49           O  
HETATM  501  O   HOH T 500     -35.096 -11.247  38.091  1.00  0.50           O  
HETATM  502  O   HOH T 501     -23.014   8.416 -10.812  1.00  0.50           O  
HETATM  503  O   HOH T 502     -27.793  -9.005  -2.452  1.00  0.50           O  
HETATM  504  O   HOH T 503     -48.239  -7.073  13.324  1.00  0.50           O  
HETATM  505  O   HOH T 504     -33.987  -9.700  42.307  1.00  0.50           O  
HETATM  506  O   HOH T 505     -17.558 -14.943  42.716  1.00  0.50           O  
HETATM  507  O   HOH T 506     -27.327  -4.485   5.454  1.00  0.50           O  
HETATM  508  O   HOH T 507     -40.007   9.781  20.177  1.00  0.50           O  
HETATM  509  O   HOH T 508     -21.941 -22.747  36.342  1.00  0.50           O  
HETATM  510  O   HOH T 509      -4.752  -2.686  -3.578  1.00  0.50           O  
HETATM  511  O   HOH T 510     -13.710 -27.276  17.894  1.00  0.50           O  
HETATM  512  O   HOH T 511       4.649   5.808  43.301  1.00  0.50           O  
HETATM  513  O   HOH T 512     -45.122   6.359  12.765  1.00  0.50           O  
HETATM  514  O   HOH T 513       6.976  23.768  26.814  1.00  0.50           O  
HETATM  515  O   HOH T 514     -14.061  18.300  -8.543  1.00  0.50           O  
HETATM  516  O   HOH T 515     -28.253  -7.621  -4.813  1.00  0.50           O  
HETATM  517  O   HOH T 516     -20.087 -26.230  12.846  1.00  0.50           O  
HETATM  518  O   HOH T 517      -0.548   4.774  51.950  1.00  0.50           O  
HETATM  519  O   HOH T 518     -26.233 -10.511  11.864  1.00  0.50           O  
HETATM  520  O   HOH T 519     -11.662 -29.097  17.143  1.00  0.50           O  
HETATM  521  O   HOH T 520     -21.640  14.611   0.490  1.00  0.50           O  
HETATM  522  O   HOH T 521     -35.475 -18.431  18.937  1.00  0.50           O  
HETATM  523  O   HOH T 522     -29.330  -5.598   3.939  1.00  0.50           O  
HETATM  524  O   HOH T 523     -23.359  10.493  -5.145  1.00  0.50           O  
HETATM  525  O   HOH T 524     -16.330  17.951  35.526  1.00  0.50           O  
HETATM  526  O   HOH T 525      -2.240  28.208  30.742  1.00  0.50           O  
HETATM  527  O   HOH T 526     -33.464 -31.149  34.592  1.00  0.50           O  
HETATM  528  O   HOH T 527      -1.478  23.966  38.930  1.00  0.50           O  
HETATM  529  O   HOH T 528     -12.417  17.630  -0.959  1.00  0.51           O  
HETATM  530  O   HOH T 529     -32.376 -19.678  43.576  1.00  0.51           O  
HETATM  531  O   HOH T 530       5.017  16.173  18.538  1.00  0.51           O  
HETATM  532  O   HOH T 531     -23.317  12.802  -3.684  1.00  0.51           O  
HETATM  533  O   HOH T 532     -43.910   7.427  27.998  1.00  0.51           O  
HETATM  534  O   HOH T 533     -30.001  -8.108   4.848  1.00  0.51           O  
HETATM  535  O   HOH T 534     -36.120 -13.714  35.602  1.00  0.51           O  
HETATM  536  O   HOH T 535      -4.767   5.175  18.090  1.00  0.51           O  
HETATM  537  O   HOH T 536      -6.808  -2.865  46.627  1.00  0.51           O  
HETATM  538  O   HOH T 537     -28.115 -23.293  30.487  1.00  0.51           O  
HETATM  539  O   HOH T 538      -2.373  23.676  31.850  1.00  0.51           O  
HETATM  540  O   HOH T 539     -43.436   7.393  14.719  1.00  0.51           O  
HETATM  541  O   HOH T 540       3.285  27.498  31.533  1.00  0.51           O  
HETATM  542  O   HOH T 541       9.541  20.342  27.603  1.00  0.51           O  
HETATM  543  O   HOH T 542     -22.697   4.721  37.253  1.00  0.51           O  
HETATM  544  O   HOH T 543     -14.547  20.618   9.013  1.00  0.51           O  
HETATM  545  O   HOH T 544      -5.551 -15.627  27.292  1.00  0.51           O  
HETATM  546  O   HOH T 545       1.774  18.639  17.846  1.00  0.51           O  
HETATM  547  O   HOH T 546     -12.357 -19.584  37.143  1.00  0.51           O  
HETATM  548  O   HOH T 547       5.940  22.475  21.628  1.00  0.51           O  
HETATM  549  O   HOH T 548     -42.657 -18.235  29.011  1.00  0.51           O  
HETATM  550  O   HOH T 549     -46.277 -17.818  12.121  1.00  0.51           O  
HETATM  551  O   HOH T 550     -38.070   3.494  40.954  1.00  0.51           O  
HETATM  552  O   HOH T 551     -24.266  16.700  25.794  1.00  0.52           O  
HETATM  553  O   HOH T 552       4.282  12.167  38.832  1.00  0.52           O  
HETATM  554  O   HOH T 553      -6.324  20.270  14.506  1.00  0.52           O  
HETATM  555  O   HOH T 554     -18.681  17.725  33.162  1.00  0.52           O  
HETATM  556  O   HOH T 555     -40.686  11.527  28.583  1.00  0.52           O  
HETATM  557  O   HOH T 556       1.957  29.192  25.292  1.00  0.52           O  
HETATM  558  O   HOH T 557     -27.306  -7.276   5.006  1.00  0.52           O  
HETATM  559  O   HOH T 558      -8.227  18.158  -2.333  1.00  0.52           O  
HETATM  560  O   HOH T 559     -42.007   8.089  30.154  1.00  0.52           O  
HETATM  561  O   HOH T 560     -15.371  16.609  -6.963  1.00  0.52           O  
HETATM  562  O   HOH T 561      -4.875  19.766   8.734  1.00  0.52           O  
HETATM  563  O   HOH T 562     -19.469  21.230  11.285  1.00  0.52           O  
HETATM  564  O   HOH T 563       5.727   8.578  38.067  1.00  0.52           O  
HETATM  565  O   HOH T 564      -7.315 -13.378  38.168  1.00  0.52           O  
HETATM  566  O   HOH T 565     -42.400   5.903  16.958  1.00  0.52           O  
HETATM  567  O   HOH T 566       7.461   2.692  40.129  1.00  0.52           O  
HETATM  568  O   HOH T 567       6.741  16.019  26.283  1.00  0.52           O  
HETATM  569  O   HOH T 568      -0.424  -3.859   2.201  1.00  0.52           O  
HETATM  570  O   HOH T 569      -4.813 -20.278  13.628  1.00  0.52           O  
HETATM  571  O   HOH T 570     -22.677   0.782  -4.312  1.00  0.53           O  
HETATM  572  O   HOH T 571      -4.957  22.802  19.380  1.00  0.53           O  
HETATM  573  O   HOH T 572     -18.928   0.549  22.727  1.00  0.53           O  
HETATM  574  O   HOH T 573       3.945  23.293  32.591  1.00  0.53           O  
HETATM  575  O   HOH T 574     -18.733 -23.688  17.363  1.00  0.53           O  
HETATM  576  O   HOH T 575       0.467   3.758   2.485  1.00  0.53           O  
HETATM  577  O   HOH T 576       1.085 -12.014  29.975  1.00  0.53           O  
HETATM  578  O   HOH T 577       3.380   7.418  47.125  1.00  0.53           O  
HETATM  579  O   HOH T 578     -12.236  22.392  37.116  1.00  0.53           O  
HETATM  580  O   HOH T 579     -16.964  17.495   5.099  1.00  0.53           O  
HETATM  581  O   HOH T 580     -48.536 -16.381  11.542  1.00  0.53           O  
HETATM  582  O   HOH T 581      -8.535 -13.505  -7.239  1.00  0.53           O  
HETATM  583  O   HOH T 582     -44.736 -18.834  27.335  1.00  0.53           O  
HETATM  584  O   HOH T 583     -23.388 -20.224   8.245  1.00  0.53           O  
HETATM  585  O   HOH T 584      -5.648  12.886  38.687  1.00  0.53           O  
HETATM  586  O   HOH T 585     -11.250   3.930  -6.559  1.00  0.53           O  
HETATM  587  O   HOH T 586     -14.020  18.682   1.026  1.00  0.54           O  
HETATM  588  O   HOH T 587     -47.567   5.181  12.070  1.00  0.54           O  
HETATM  589  O   HOH T 588     -25.916  -2.404  -3.800  1.00  0.54           O  
HETATM  590  O   HOH T 589     -18.068 -23.326   7.011  1.00  0.54           O  
HETATM  591  O   HOH T 590     -37.606  -1.671   9.022  1.00  0.54           O  
HETATM  592  O   HOH T 591       6.300  25.725  25.136  1.00  0.54           O  
HETATM  593  O   HOH T 592       1.783  20.491  32.211  1.00  0.54           O  
HETATM  594  O   HOH T 593      -3.355   4.795  47.728  1.00  0.54           O  
HETATM  595  O   HOH T 594     -38.039  10.724  21.898  1.00  0.54           O  
HETATM  596  O   HOH T 595       4.256  18.768  18.652  1.00  0.54           O  
HETATM  597  O   HOH T 596       0.137  -3.167  25.046  1.00  0.54           O  
HETATM  598  O   HOH T 597     -20.366   3.020  -9.734  1.00  0.54           O  
HETATM  599  O   HOH T 598     -20.952 -22.982  33.534  1.00  0.54           O  
HETATM  600  O   HOH T 599     -21.078 -33.177  22.918  1.00  0.54           O  
HETATM  601  O   HOH T 600     -30.778 -15.875  42.932  1.00  0.54           O  
HETATM  602  O   HOH T 601     -24.208  19.305   5.722  1.00  0.54           O  
HETATM  603  O   HOH T 602      -4.127  24.271  -0.671  1.00  0.54           O  
HETATM  604  O   HOH T 603     -44.523 -20.158  17.882  1.00  0.54           O  
HETATM  605  O   HOH T 604      10.371   9.169  33.990  1.00  0.54           O  
HETATM  606  O   HOH T 605     -11.620  17.371  -9.557  1.00  0.54           O  
HETATM  607  O   HOH T 606       1.852   9.882  46.384  1.00  0.55           O  
HETATM  608  O   HOH T 607     -32.562   9.023  17.129  1.00  0.55           O  
HETATM  609  O   HOH T 608     -11.042  -4.869  16.088  1.00  0.55           O  
HETATM  610  O   HOH T 609     -12.056  21.792   9.551  1.00  0.55           O  
HETATM  611  O   HOH T 610     -43.033   8.084  12.054  1.00  0.55           O  
HETATM  612  O   HOH T 611     -17.363  12.031  40.381  1.00  0.55           O  
HETATM  613  O   HOH T 612     -25.191 -22.549  20.257  1.00  0.55           O  
HETATM  614  O   HOH T 613      -0.660  29.161  24.263  1.00  0.55           O  
HETATM  615  O   HOH T 614     -30.857  -0.748   5.644  1.00  0.55           O  
HETATM  616  O   HOH T 615     -34.013  -2.428  40.570  1.00  0.55           O  
HETATM  617  O   HOH T 616     -12.835 -17.416  -4.047  1.00  0.55           O  
HETATM  618  O   HOH T 617     -41.409  11.345  32.399  1.00  0.55           O  
HETATM  619  O   HOH T 618     -26.113  12.978  18.679  1.00  0.55           O  
HETATM  620  O   HOH T 619     -24.400  -8.220  -6.556  1.00  0.56           O  
HETATM  621  O   HOH T 620     -30.911 -21.963  21.027  1.00  0.56           O  
HETATM  622  O   HOH T 621     -33.788  14.111  10.813  1.00  0.56           O  
HETATM  623  O   HOH T 622     -25.856   5.696  33.926  1.00  0.56           O  
HETATM  624  O   HOH T 623     -20.695  17.170   8.161  1.00  0.56           O  
HETATM  625  O   HOH T 624     -40.593  -5.906   8.774  1.00  0.56           O  
HETATM  626  O   HOH T 625       3.399  -1.679   4.704  1.00  0.56           O  
HETATM  627  O   HOH T 626     -12.176   1.778  38.413  1.00  0.56           O  
HETATM  628  O   HOH T 627     -32.178   5.932  24.338  1.00  0.56           O  
HETATM  629  O   HOH T 628     -21.047  19.646  12.721  1.00  0.56           O  
HETATM  630  O   HOH T 629     -48.006 -18.634  29.762  1.00  0.56           O  
HETATM  631  O   HOH T 630     -12.937   8.894  -9.753  1.00  0.56           O  
HETATM  632  O   HOH T 631      -8.910 -26.037  12.982  1.00  0.56           O  
HETATM  633  O   HOH T 632      -0.743   3.954  -4.392  1.00  0.56           O  
HETATM  634  O   HOH T 633     -25.223   3.086  38.744  1.00  0.56           O  
HETATM  635  O   HOH T 634     -40.644  -3.283   8.660  1.00  0.56           O  
HETATM  636  O   HOH T 635      -7.046 -14.632  30.997  1.00  0.57           O  
HETATM  637  O   HOH T 636      -4.749  18.060  12.431  1.00  0.57           O  
HETATM  638  O   HOH T 637     -31.479 -29.145  20.764  1.00  0.57           O  
HETATM  639  O   HOH T 638      -8.054 -16.522   0.758  1.00  0.57           O  
HETATM  640  O   HOH T 639     -16.003  17.832   2.528  1.00  0.57           O  
HETATM  641  O   HOH T 640     -33.259 -15.343  12.741  1.00  0.57           O  
HETATM  642  O   HOH T 641     -31.434 -17.679  44.974  1.00  0.57           O  
HETATM  643  O   HOH T 642     -21.953 -30.016  21.954  1.00  0.57           O  
HETATM  644  O   HOH T 643     -22.526  12.154  33.385  1.00  0.57           O  
HETATM  645  O   HOH T 644     -23.287 -10.113  -8.893  1.00  0.57           O  
HETATM  646  O   HOH T 645      -6.316 -11.519  41.421  1.00  0.57           O  
HETATM  647  O   HOH T 646     -19.751 -26.854  15.522  1.00  0.59           O  
HETATM  648  O   HOH T 647     -24.377  -8.740  14.970  1.00  0.59           O  
HETATM  649  O   HOH T 648      -7.211   7.396  -7.258  1.00  0.60           O  
HETATM  650  O   HOH T 649     -39.518 -15.376  11.718  1.00  0.60           O  
HETATM  651  O   HOH T 650      -4.806 -15.303  24.646  1.00  0.61           O  
HETATM  652  O   HOH T 651     -43.908   1.771  10.401  1.00  0.61           O  
HETATM  653  O   HOH T 652     -23.529   6.755  35.431  1.00  0.62           O  
HETATM  654  O   HOH T 653     -30.159 -17.287  17.990  1.00  0.62           O  
HETATM  655  O   HOH T 654     -32.717 -13.830  11.928  1.00  0.64           O  
TER     656      HOH T 654 
