# Supplementary material for: Accurate Prediction of Hydration Sites of Proteins Using Energy Model With Atom Embedding
Source: Front Mol Biosci. 2021 Sep 20;8:756075. doi: 10.3389/fmolb.2021.756075 (PMC8488165; doi:10.3389/fmolb.2021.756075)
Supplement: Supplementary file 1 [file DataSheet1.ZIP › Data Sheet 1/Our_result_pdb/our_dataset_output/2VCL_watersite.pdb]

HEADER                                                        XXXX


JRNL        PMID   -1
HETATM    1  O   HOH T   0      -6.474  23.430   8.544  1.00  0.14           O  
HETATM    2  O   HOH T   1       1.047  27.432  15.165  1.00  0.18           O  
HETATM    3  O   HOH T   2      -2.635  18.663  -3.158  1.00  0.19           O  
HETATM    4  O   HOH T   3       4.258  25.530  27.203  1.00  0.20           O  
HETATM    5  O   HOH T   4      14.778   9.597   5.878  1.00  0.20           O  
HETATM    6  O   HOH T   5     -11.696  -2.262  13.106  1.00  0.21           O  
HETATM    7  O   HOH T   6      16.849   8.102  -3.708  1.00  0.22           O  
HETATM    8  O   HOH T   7     -10.244  21.047  11.818  1.00  0.23           O  
HETATM    9  O   HOH T   8      -1.257   9.521  22.847  1.00  0.24           O  
HETATM   10  O   HOH T   9       2.350  24.369  25.518  1.00  0.24           O  
HETATM   11  O   HOH T  10      -0.004  29.891  14.422  1.00  0.24           O  
HETATM   12  O   HOH T  11      -1.798  24.191 -10.459  1.00  0.24           O  
HETATM   13  O   HOH T  12       4.519  27.871  -3.930  1.00  0.24           O  
HETATM   14  O   HOH T  13      -5.552  23.365  22.411  1.00  0.25           O  
HETATM   15  O   HOH T  14       0.234 -11.280  12.808  1.00  0.25           O  
HETATM   16  O   HOH T  15       7.189  31.531  27.400  1.00  0.25           O  
HETATM   17  O   HOH T  16       3.613  32.545   5.813  1.00  0.25           O  
HETATM   18  O   HOH T  17      -2.593  -2.706   3.111  1.00  0.25           O  
HETATM   19  O   HOH T  18       2.060  27.954  -0.733  1.00  0.26           O  
HETATM   20  O   HOH T  19      -2.690  28.600  16.793  1.00  0.27           O  
HETATM   21  O   HOH T  20      -9.911  11.968  22.427  1.00  0.28           O  
HETATM   22  O   HOH T  21       0.163  30.197   3.824  1.00  0.29           O  
HETATM   23  O   HOH T  22      10.627  32.749   3.510  1.00  0.29           O  
HETATM   24  O   HOH T  23      11.625  25.149  34.893  1.00  0.29           O  
HETATM   25  O   HOH T  24     -16.273   5.009  13.918  1.00  0.29           O  
HETATM   26  O   HOH T  25      -2.403   0.466  24.719  1.00  0.29           O  
HETATM   27  O   HOH T  26      -9.635  25.070  17.845  1.00  0.29           O  
HETATM   28  O   HOH T  27      -4.722  35.282  19.017  1.00  0.29           O  
HETATM   29  O   HOH T  28       9.200  29.718  30.472  1.00  0.29           O  
HETATM   30  O   HOH T  29      16.912  17.766  23.980  1.00  0.30           O  
HETATM   31  O   HOH T  30      -4.677  28.592  -3.284  1.00  0.30           O  
HETATM   32  O   HOH T  31       4.964  25.293   2.851  1.00  0.30           O  
HETATM   33  O   HOH T  32      -1.552 -10.010  18.020  1.00  0.30           O  
HETATM   34  O   HOH T  33      -1.091  26.844  -9.892  1.00  0.30           O  
HETATM   35  O   HOH T  34      -5.148  15.364  -3.216  1.00  0.30           O  
HETATM   36  O   HOH T  35       5.936  34.083  17.088  1.00  0.30           O  
HETATM   37  O   HOH T  36       5.736   1.307  -3.006  1.00  0.30           O  
HETATM   38  O   HOH T  37     -14.857  -1.811   9.682  1.00  0.31           O  
HETATM   39  O   HOH T  38      10.431  17.852  32.650  1.00  0.31           O  
HETATM   40  O   HOH T  39       6.428   0.701   3.017  1.00  0.31           O  
HETATM   41  O   HOH T  40      -7.151  17.020  28.307  1.00  0.31           O  
HETATM   42  O   HOH T  41       9.397  32.345  -3.749  1.00  0.31           O  
HETATM   43  O   HOH T  42     -11.149  22.777  18.472  1.00  0.31           O  
HETATM   44  O   HOH T  43       5.791  25.944  32.950  1.00  0.32           O  
HETATM   45  O   HOH T  44      -3.240 -10.530  11.340  1.00  0.32           O  
HETATM   46  O   HOH T  45      -3.182  31.516   0.884  1.00  0.32           O  
HETATM   47  O   HOH T  46      -3.063  35.915  16.754  1.00  0.32           O  
HETATM   48  O   HOH T  47      -7.541  23.706  24.884  1.00  0.32           O  
HETATM   49  O   HOH T  48      -5.640   8.923   8.655  1.00  0.32           O  
HETATM   50  O   HOH T  49      -4.398  12.103  11.767  1.00  0.33           O  
HETATM   51  O   HOH T  50     -11.988  21.613  23.519  1.00  0.34           O  
HETATM   52  O   HOH T  51      -0.891  22.347  20.007  1.00  0.34           O  
HETATM   53  O   HOH T  52      13.983  22.514   2.060  1.00  0.34           O  
HETATM   54  O   HOH T  53       8.483  19.530  -3.493  1.00  0.34           O  
HETATM   55  O   HOH T  54       3.841  -3.862   6.169  1.00  0.34           O  
HETATM   56  O   HOH T  55      -0.349  36.438  16.850  1.00  0.34           O  
HETATM   57  O   HOH T  56      -8.944  10.259   4.066  1.00  0.35           O  
HETATM   58  O   HOH T  57      -4.325   9.225   6.211  1.00  0.35           O  
HETATM   59  O   HOH T  58      -6.602  -7.276   7.469  1.00  0.35           O  
HETATM   60  O   HOH T  59       8.075  29.991  -3.003  1.00  0.35           O  
HETATM   61  O   HOH T  60      -9.685  18.535   4.304  1.00  0.35           O  
HETATM   62  O   HOH T  61      12.272  34.000   8.618  1.00  0.35           O  
HETATM   63  O   HOH T  62       6.088  20.642  -3.344  1.00  0.35           O  
HETATM   64  O   HOH T  63       7.890  26.901   5.475  1.00  0.35           O  
HETATM   65  O   HOH T  64      15.211  19.566  25.089  1.00  0.35           O  
HETATM   66  O   HOH T  65      12.261   3.192  26.754  1.00  0.35           O  
HETATM   67  O   HOH T  66      -4.065  -0.090  22.560  1.00  0.35           O  
HETATM   68  O   HOH T  67      -3.780  12.873  -3.873  1.00  0.36           O  
HETATM   69  O   HOH T  68     -13.616   2.093  18.603  1.00  0.36           O  
HETATM   70  O   HOH T  69     -13.193   4.108  20.410  1.00  0.36           O  
HETATM   71  O   HOH T  70      15.229  10.387  29.141  1.00  0.36           O  
HETATM   72  O   HOH T  71      -3.362  11.777  -6.438  1.00  0.36           O  
HETATM   73  O   HOH T  72      -3.194  16.421   0.270  1.00  0.36           O  
HETATM   74  O   HOH T  73     -11.303  13.673  10.564  1.00  0.36           O  
HETATM   75  O   HOH T  74      -0.010  12.198  28.429  1.00  0.36           O  
HETATM   76  O   HOH T  75      -5.444  19.215  33.596  1.00  0.36           O  
HETATM   77  O   HOH T  76      16.973  27.594  30.102  1.00  0.37           O  
HETATM   78  O   HOH T  77       3.748  20.331  -4.851  1.00  0.37           O  
HETATM   79  O   HOH T  78      18.632  19.662  14.478  1.00  0.37           O  
HETATM   80  O   HOH T  79      -6.297   8.587  11.344  1.00  0.37           O  
HETATM   81  O   HOH T  80       1.539  32.660   3.974  1.00  0.37           O  
HETATM   82  O   HOH T  81     -14.443  -2.238  12.403  1.00  0.37           O  
HETATM   83  O   HOH T  82       3.351  33.768  24.224  1.00  0.37           O  
HETATM   84  O   HOH T  83       8.665  35.426  14.496  1.00  0.37           O  
HETATM   85  O   HOH T  84      -2.685  14.649  -1.906  1.00  0.38           O  
HETATM   86  O   HOH T  85      -7.885  17.422   6.151  1.00  0.38           O  
HETATM   87  O   HOH T  86       4.860  12.892  30.928  1.00  0.38           O  
HETATM   88  O   HOH T  87       0.357  25.349   3.647  1.00  0.38           O  
HETATM   89  O   HOH T  88       0.178  23.063  -8.806  1.00  0.38           O  
HETATM   90  O   HOH T  89       5.627  28.315   0.047  1.00  0.38           O  
HETATM   91  O   HOH T  90      -0.734  14.785  12.977  1.00  0.38           O  
HETATM   92  O   HOH T  91      -0.761  -7.564  16.949  1.00  0.39           O  
HETATM   93  O   HOH T  92     -11.273  -2.394   3.954  1.00  0.39           O  
HETATM   94  O   HOH T  93       6.822  31.802  -4.562  1.00  0.39           O  
HETATM   95  O   HOH T  94       7.251   0.457  26.235  1.00  0.39           O  
HETATM   96  O   HOH T  95     -12.494  18.825  23.465  1.00  0.39           O  
HETATM   97  O   HOH T  96       5.125  22.785  -1.852  1.00  0.39           O  
HETATM   98  O   HOH T  97      -5.364  32.998  20.558  1.00  0.39           O  
HETATM   99  O   HOH T  98       7.306  30.430  24.876  1.00  0.39           O  
HETATM  100  O   HOH T  99      -5.327  10.751  -4.884  1.00  0.39           O  
HETATM  101  O   HOH T 100      -2.978  13.521  21.813  1.00  0.39           O  
HETATM  102  O   HOH T 101       2.486   8.407  29.433  1.00  0.39           O  
HETATM  103  O   HOH T 102      19.213   9.534  -3.970  1.00  0.39           O  
HETATM  104  O   HOH T 103       5.649  20.171  37.451  1.00  0.40           O  
HETATM  105  O   HOH T 104       9.726  30.836   1.823  1.00  0.40           O  
HETATM  106  O   HOH T 105       7.782   2.982  -3.769  1.00  0.40           O  
HETATM  107  O   HOH T 106      -7.291  31.538  21.682  1.00  0.40           O  
HETATM  108  O   HOH T 107     -12.138  12.068  12.768  1.00  0.40           O  
HETATM  109  O   HOH T 108      -7.359  11.073  -3.004  1.00  0.40           O  
HETATM  110  O   HOH T 109      -6.737   8.920   4.966  1.00  0.40           O  
HETATM  111  O   HOH T 110       2.866 -10.640  13.033  1.00  0.41           O  
HETATM  112  O   HOH T 111       7.571  13.532  30.369  1.00  0.41           O  
HETATM  113  O   HOH T 112      16.073   6.322  -5.690  1.00  0.41           O  
HETATM  114  O   HOH T 113     -13.893   5.288  12.470  1.00  0.41           O  
HETATM  115  O   HOH T 114      21.493  10.702  11.880  1.00  0.41           O  
HETATM  116  O   HOH T 115       4.161  13.310  -4.181  1.00  0.41           O  
HETATM  117  O   HOH T 116       9.253  35.014  11.749  1.00  0.41           O  
HETATM  118  O   HOH T 117       9.052  17.729  -5.572  1.00  0.41           O  
HETATM  119  O   HOH T 118       2.739  31.687  22.464  1.00  0.41           O  
HETATM  120  O   HOH T 119      -3.535  17.168  33.114  1.00  0.41           O  
HETATM  121  O   HOH T 120      19.505  17.835  23.014  1.00  0.41           O  
HETATM  122  O   HOH T 121      13.217   4.745  23.446  1.00  0.41           O  
HETATM  123  O   HOH T 122      -4.645  35.462  14.455  1.00  0.41           O  
HETATM  124  O   HOH T 123       5.480  32.397  25.426  1.00  0.41           O  
HETATM  125  O   HOH T 124      -6.669  31.550  11.517  1.00  0.42           O  
HETATM  126  O   HOH T 125      11.091  23.219  -2.240  1.00  0.42           O  
HETATM  127  O   HOH T 126      -0.280  13.441  31.074  1.00  0.42           O  
HETATM  128  O   HOH T 127       2.759  21.675  -2.597  1.00  0.42           O  
HETATM  129  O   HOH T 128      -8.414  10.409  26.217  1.00  0.42           O  
HETATM  130  O   HOH T 129      18.822  24.139  19.512  1.00  0.42           O  
HETATM  131  O   HOH T 130      -9.979  12.548  25.193  1.00  0.42           O  
HETATM  132  O   HOH T 131     -12.390  22.810  15.980  1.00  0.42           O  
HETATM  133  O   HOH T 132      11.169  31.317  31.628  1.00  0.42           O  
HETATM  134  O   HOH T 133     -10.360  -3.461   6.473  1.00  0.42           O  
HETATM  135  O   HOH T 134      12.536   9.937  29.336  1.00  0.42           O  
HETATM  136  O   HOH T 135       7.932  28.921   1.322  1.00  0.42           O  
HETATM  137  O   HOH T 136      10.763  20.639  32.387  1.00  0.42           O  
HETATM  138  O   HOH T 137      10.504  34.308  16.373  1.00  0.42           O  
HETATM  139  O   HOH T 138      -6.549  14.503  29.074  1.00  0.43           O  
HETATM  140  O   HOH T 139       6.649  29.023  -5.222  1.00  0.43           O  
HETATM  141  O   HOH T 140      -0.716  -1.488  -0.950  1.00  0.43           O  
HETATM  142  O   HOH T 141       5.734  10.738  -8.803  1.00  0.43           O  
HETATM  143  O   HOH T 142       0.309   9.318  27.884  1.00  0.43           O  
HETATM  144  O   HOH T 143      -5.806  30.234  -5.491  1.00  0.43           O  
HETATM  145  O   HOH T 144      -7.802  37.893  15.451  1.00  0.43           O  
HETATM  146  O   HOH T 145      -8.701  13.870  27.348  1.00  0.43           O  
HETATM  147  O   HOH T 146      -7.300  26.759  21.875  1.00  0.43           O  
HETATM  148  O   HOH T 147       0.365  -8.555  19.439  1.00  0.43           O  
HETATM  149  O   HOH T 148      12.059  23.643   0.295  1.00  0.44           O  
HETATM  150  O   HOH T 149      18.160   4.045   3.253  1.00  0.44           O  
HETATM  151  O   HOH T 150       1.086  -6.585  14.613  1.00  0.44           O  
HETATM  152  O   HOH T 151       9.640  26.471  36.239  1.00  0.44           O  
HETATM  153  O   HOH T 152       4.808  14.836  -6.516  1.00  0.44           O  
HETATM  154  O   HOH T 153      18.449   9.328  16.966  1.00  0.44           O  
HETATM  155  O   HOH T 154     -12.065  25.083  19.482  1.00  0.44           O  
HETATM  156  O   HOH T 155       5.740  10.512  32.226  1.00  0.44           O  
HETATM  157  O   HOH T 156       6.339  18.553  35.335  1.00  0.44           O  
HETATM  158  O   HOH T 157      -2.796  33.605  -0.905  1.00  0.45           O  
HETATM  159  O   HOH T 158      15.457  21.482  32.602  1.00  0.45           O  
HETATM  160  O   HOH T 159       7.597  27.308  34.552  1.00  0.45           O  
HETATM  161  O   HOH T 160       8.088  27.592  31.860  1.00  0.45           O  
HETATM  162  O   HOH T 161       9.968  33.122   9.734  1.00  0.45           O  
HETATM  163  O   HOH T 162       2.331  -4.010  13.711  1.00  0.45           O  
HETATM  164  O   HOH T 163      14.009  29.158  18.546  1.00  0.45           O  
HETATM  165  O   HOH T 164       5.686  12.220  -6.491  1.00  0.45           O  
HETATM  166  O   HOH T 165      -2.206  10.494  28.289  1.00  0.45           O  
HETATM  167  O   HOH T 166      -7.438  -5.005   2.125  1.00  0.45           O  
HETATM  168  O   HOH T 167      13.830  12.414  30.351  1.00  0.45           O  
HETATM  169  O   HOH T 168      11.400  33.448   6.035  1.00  0.45           O  
HETATM  170  O   HOH T 169     -15.261  21.886  20.504  1.00  0.45           O  
HETATM  171  O   HOH T 170      14.889   2.411   7.165  1.00  0.45           O  
HETATM  172  O   HOH T 171     -13.852   9.581  -2.793  1.00  0.45           O  
HETATM  173  O   HOH T 172      14.755   4.059  25.784  1.00  0.45           O  
HETATM  174  O   HOH T 173      -5.770  25.703  23.831  1.00  0.45           O  
HETATM  175  O   HOH T 174      18.617  16.825  14.681  1.00  0.46           O  
HETATM  176  O   HOH T 175     -10.835  26.378  15.653  1.00  0.46           O  
HETATM  177  O   HOH T 176       4.744  35.778  15.221  1.00  0.46           O  
HETATM  178  O   HOH T 177       0.057  14.785  35.567  1.00  0.46           O  
HETATM  179  O   HOH T 178       8.944  15.410  -7.152  1.00  0.46           O  
HETATM  180  O   HOH T 179       5.605  26.396  38.290  1.00  0.46           O  
HETATM  181  O   HOH T 180      -1.117  26.867  30.754  1.00  0.46           O  
HETATM  182  O   HOH T 181      -5.577   7.442  25.634  1.00  0.46           O  
HETATM  183  O   HOH T 182      -7.208  -8.833   5.160  1.00  0.46           O  
HETATM  184  O   HOH T 183       7.221   8.144  31.579  1.00  0.46           O  
HETATM  185  O   HOH T 184      12.070   4.940 -10.279  1.00  0.46           O  
HETATM  186  O   HOH T 185      -0.050  16.903  37.403  1.00  0.46           O  
HETATM  187  O   HOH T 186       8.277  19.262  37.161  1.00  0.46           O  
HETATM  188  O   HOH T 187      11.485  25.816  -1.346  1.00  0.46           O  
HETATM  189  O   HOH T 188     -17.325   1.464   8.030  1.00  0.46           O  
HETATM  190  O   HOH T 189       4.373   8.196  31.551  1.00  0.46           O  
HETATM  191  O   HOH T 190       9.273   5.444  -5.593  1.00  0.46           O  
HETATM  192  O   HOH T 191      13.389  20.090  33.567  1.00  0.46           O  
HETATM  193  O   HOH T 192       2.211  36.809  15.736  1.00  0.46           O  
HETATM  194  O   HOH T 193      12.427  31.662  29.147  1.00  0.46           O  
HETATM  195  O   HOH T 194      -6.944  -2.584   3.064  1.00  0.46           O  
HETATM  196  O   HOH T 195      -6.055   2.389   3.053  1.00  0.47           O  
HETATM  197  O   HOH T 196       6.137   3.363  31.190  1.00  0.47           O  
HETATM  198  O   HOH T 197       5.505   4.446  16.026  1.00  0.47           O  
HETATM  199  O   HOH T 198      18.378   5.512   5.665  1.00  0.47           O  
HETATM  200  O   HOH T 199       8.162   2.470   1.587  1.00  0.47           O  
HETATM  201  O   HOH T 200      16.126  21.582   0.555  1.00  0.47           O  
HETATM  202  O   HOH T 201      -7.666  -5.202   9.074  1.00  0.47           O  
HETATM  203  O   HOH T 202       4.312  26.557  -1.509  1.00  0.47           O  
HETATM  204  O   HOH T 203     -15.553   2.962   6.630  1.00  0.47           O  
HETATM  205  O   HOH T 204       0.360  22.820 -11.582  1.00  0.47           O  
HETATM  206  O   HOH T 205       0.463   3.072  -5.785  1.00  0.48           O  
HETATM  207  O   HOH T 206      -1.602  16.191   8.096  1.00  0.48           O  
HETATM  208  O   HOH T 207       0.037  21.861  35.663  1.00  0.48           O  
HETATM  209  O   HOH T 208      -4.697  30.875   3.149  1.00  0.48           O  
HETATM  210  O   HOH T 209       4.189  24.452   0.280  1.00  0.48           O  
HETATM  211  O   HOH T 210     -12.606  22.622  20.898  1.00  0.48           O  
HETATM  212  O   HOH T 211       3.118  10.637  31.113  1.00  0.48           O  
HETATM  213  O   HOH T 212       3.090  37.757  18.237  1.00  0.48           O  
HETATM  214  O   HOH T 213       9.917   1.297  26.758  1.00  0.48           O  
HETATM  215  O   HOH T 214      -1.854  33.875   1.658  1.00  0.48           O  
HETATM  216  O   HOH T 215      -6.331  16.878  32.504  1.00  0.48           O  
HETATM  217  O   HOH T 216      -2.100  31.754   3.443  1.00  0.48           O  
HETATM  218  O   HOH T 217      -1.060  15.462  33.039  1.00  0.48           O  
HETATM  219  O   HOH T 218       2.519  10.970  28.453  1.00  0.48           O  
HETATM  220  O   HOH T 219      21.283  16.208  21.878  1.00  0.48           O  
HETATM  221  O   HOH T 220      15.256   8.641  23.249  1.00  0.48           O  
HETATM  222  O   HOH T 221      -5.620  11.423   7.399  1.00  0.48           O  
HETATM  223  O   HOH T 222       2.049   5.754  -7.412  1.00  0.48           O  
HETATM  224  O   HOH T 223      -8.466  15.986   3.914  1.00  0.48           O  
HETATM  225  O   HOH T 224       1.452  14.292  33.203  1.00  0.49           O  
HETATM  226  O   HOH T 225      -5.842  14.617  11.782  1.00  0.49           O  
HETATM  227  O   HOH T 226       6.865  -1.852  -1.598  1.00  0.49           O  
HETATM  228  O   HOH T 227     -13.641  14.173  12.030  1.00  0.49           O  
HETATM  229  O   HOH T 228      -4.874  15.997   9.677  1.00  0.49           O  
HETATM  230  O   HOH T 229      15.014   5.144  -7.903  1.00  0.49           O  
HETATM  231  O   HOH T 230      -8.569  -6.638   4.087  1.00  0.49           O  
HETATM  232  O   HOH T 231       3.747  22.193  37.249  1.00  0.49           O  
HETATM  233  O   HOH T 232      -1.076  19.344  36.471  1.00  0.49           O  
HETATM  234  O   HOH T 233      11.954  26.246   1.337  1.00  0.49           O  
HETATM  235  O   HOH T 234     -14.734  16.131  10.477  1.00  0.49           O  
HETATM  236  O   HOH T 235      -1.824  28.287  28.423  1.00  0.49           O  
HETATM  237  O   HOH T 236       0.937  26.165   1.078  1.00  0.49           O  
HETATM  238  O   HOH T 237      -7.381  29.222  22.791  1.00  0.49           O  
HETATM  239  O   HOH T 238      -1.864  -3.244   0.568  1.00  0.49           O  
HETATM  240  O   HOH T 239      -3.613  18.873  35.543  1.00  0.50           O  
HETATM  241  O   HOH T 240      -2.525  13.144  32.608  1.00  0.50           O  
HETATM  242  O   HOH T 241      20.969   8.294  -2.519  1.00  0.50           O  
HETATM  243  O   HOH T 242       6.594  16.917  -6.601  1.00  0.50           O  
HETATM  244  O   HOH T 243      -5.804  33.333  13.346  1.00  0.50           O  
HETATM  245  O   HOH T 244       8.590  -0.470  28.450  1.00  0.50           O  
HETATM  246  O   HOH T 245       8.376  33.282   2.019  1.00  0.50           O  
HETATM  247  O   HOH T 246       4.997  -0.073  11.946  1.00  0.50           O  
HETATM  248  O   HOH T 247      10.195  27.118  33.615  1.00  0.50           O  
HETATM  249  O   HOH T 248       4.092  -4.882   3.643  1.00  0.50           O  
HETATM  250  O   HOH T 249     -12.297  -1.643   6.426  1.00  0.50           O  
HETATM  251  O   HOH T 250      17.899   8.680  23.436  1.00  0.50           O  
HETATM  252  O   HOH T 251      -5.340  16.909   7.186  1.00  0.50           O  
HETATM  253  O   HOH T 252      -8.001  -5.073   6.345  1.00  0.50           O  
HETATM  254  O   HOH T 253     -12.442  22.298  13.147  1.00  0.50           O  
HETATM  255  O   HOH T 254      -4.116   9.685  26.533  1.00  0.50           O  
HETATM  256  O   HOH T 255     -13.946  23.192  18.368  1.00  0.50           O  
HETATM  257  O   HOH T 256       4.911  23.772  39.035  1.00  0.51           O  
HETATM  258  O   HOH T 257       1.574  21.896  -5.056  1.00  0.51           O  
HETATM  259  O   HOH T 258      -3.308   8.470  24.318  1.00  0.51           O  
HETATM  260  O   HOH T 259      -1.663  29.470  -9.206  1.00  0.51           O  
HETATM  261  O   HOH T 260       8.937  19.417  34.438  1.00  0.51           O  
HETATM  262  O   HOH T 261      -1.406   9.863  25.684  1.00  0.51           O  
HETATM  263  O   HOH T 262      -3.927  38.018  15.418  1.00  0.51           O  
HETATM  264  O   HOH T 263      15.724   3.373   4.615  1.00  0.51           O  
HETATM  265  O   HOH T 264      -6.625  12.052  27.837  1.00  0.51           O  
HETATM  266  O   HOH T 265       4.183  13.079  -8.629  1.00  0.51           O  
HETATM  267  O   HOH T 266      20.879   8.690  15.699  1.00  0.52           O  
HETATM  268  O   HOH T 267      14.775  32.330  15.692  1.00  0.52           O  
HETATM  269  O   HOH T 268      -9.461  12.277   6.159  1.00  0.52           O  
HETATM  270  O   HOH T 269      14.693  28.381  31.480  1.00  0.52           O  
HETATM  271  O   HOH T 270       3.891  24.936  36.701  1.00  0.52           O  
HETATM  272  O   HOH T 271      -3.318  12.983   7.157  1.00  0.52           O  
HETATM  273  O   HOH T 272      -0.796  34.082   4.181  1.00  0.52           O  
HETATM  274  O   HOH T 273      19.756  18.560  16.724  1.00  0.52           O  
HETATM  275  O   HOH T 274       9.335  32.088  17.710  1.00  0.52           O  
HETATM  276  O   HOH T 275      -9.074  -3.973   4.089  1.00  0.52           O  
HETATM  277  O   HOH T 276       3.401  35.083  17.543  1.00  0.52           O  
HETATM  278  O   HOH T 277     -16.334   8.922   6.660  1.00  0.53           O  
HETATM  279  O   HOH T 278      12.327   4.419  -7.596  1.00  0.53           O  
HETATM  280  O   HOH T 279      10.339  35.849   9.343  1.00  0.53           O  
HETATM  281  O   HOH T 280      16.196  30.259  30.016  1.00  0.53           O  
HETATM  282  O   HOH T 281      -1.802  16.894  35.338  1.00  0.53           O  
HETATM  283  O   HOH T 282      12.075  22.569  33.997  1.00  0.53           O  
HETATM  284  O   HOH T 283       5.875  30.115  22.540  1.00  0.53           O  
HETATM  285  O   HOH T 284     -16.947  13.181   4.626  1.00  0.53           O  
HETATM  286  O   HOH T 285      -3.090  14.630  11.303  1.00  0.53           O  
HETATM  287  O   HOH T 286     -16.084  21.279  17.970  1.00  0.53           O  
HETATM  288  O   HOH T 287     -17.359  -1.142   8.805  1.00  0.53           O  
HETATM  289  O   HOH T 288      15.277  31.587  29.173  1.00  0.53           O  
HETATM  290  O   HOH T 289      -4.727  14.757  32.313  1.00  0.53           O  
HETATM  291  O   HOH T 290      -8.259  16.026  30.688  1.00  0.53           O  
HETATM  292  O   HOH T 291       0.945  -9.815   9.019  1.00  0.54           O  
HETATM  293  O   HOH T 292      13.115   2.312  24.386  1.00  0.54           O  
HETATM  294  O   HOH T 293      22.544  14.668  20.158  1.00  0.54           O  
HETATM  295  O   HOH T 294       4.139  24.360  -7.286  1.00  0.54           O  
HETATM  296  O   HOH T 295      20.194  21.830   8.990  1.00  0.54           O  
HETATM  297  O   HOH T 296     -17.012  -1.807  11.410  1.00  0.54           O  
HETATM  298  O   HOH T 297       8.923   1.527   4.034  1.00  0.54           O  
HETATM  299  O   HOH T 298      10.605   6.560  -8.246  1.00  0.54           O  
HETATM  300  O   HOH T 299       6.253  17.590  37.951  1.00  0.54           O  
HETATM  301  O   HOH T 300      -5.913  16.039   4.704  1.00  0.55           O  
HETATM  302  O   HOH T 301      -4.844  13.248   9.397  1.00  0.55           O  
HETATM  303  O   HOH T 302      -5.854  36.363  16.775  1.00  0.55           O  
HETATM  304  O   HOH T 303      -9.866   8.831  24.468  1.00  0.55           O  
HETATM  305  O   HOH T 304      20.567  26.085  18.656  1.00  0.55           O  
HETATM  306  O   HOH T 305     -14.599  18.468   9.200  1.00  0.55           O  
HETATM  307  O   HOH T 306      21.479  13.575  21.166  1.00  0.55           O  
HETATM  308  O   HOH T 307     -14.538  24.512  20.815  1.00  0.56           O  
HETATM  309  O   HOH T 308     -12.515  11.297   9.767  1.00  0.56           O  
HETATM  310  O   HOH T 309      17.014  31.518  17.006  1.00  0.56           O  
HETATM  311  O   HOH T 310       6.298  28.910  13.417  1.00  0.56           O  
HETATM  312  O   HOH T 311     -16.346   2.460  15.192  1.00  0.56           O  
HETATM  313  O   HOH T 312       4.994  -2.556  -3.497  1.00  0.56           O  
HETATM  314  O   HOH T 313     -13.018   1.516  21.166  1.00  0.56           O  
HETATM  315  O   HOH T 314      11.241   5.633  16.433  1.00  0.56           O  
HETATM  316  O   HOH T 315      17.977  30.277   9.793  1.00  0.57           O  
HETATM  317  O   HOH T 316      -7.349  30.875   2.475  1.00  0.57           O  
HETATM  318  O   HOH T 317       6.623  -1.268   1.111  1.00  0.57           O  
HETATM  319  O   HOH T 318       4.020  35.624  -0.834  1.00  0.57           O  
HETATM  320  O   HOH T 319       3.191  32.408  -7.336  1.00  0.57           O  
HETATM  321  O   HOH T 320      -9.718  -4.914  11.373  1.00  0.57           O  
HETATM  322  O   HOH T 321     -13.807  -2.444  17.124  1.00  0.59           O  
TER     323      HOH T 321 
