# Supplementary material for: Accurate Prediction of Hydration Sites of Proteins Using Energy Model With Atom Embedding
Source: Front Mol Biosci. 2021 Sep 20;8:756075. doi: 10.3389/fmolb.2021.756075 (PMC8488165; doi:10.3389/fmolb.2021.756075)
Supplement: Supplementary file 1 [file DataSheet1.ZIP › Data Sheet 1/Our_result_pdb/our_dataset_output/2VIJ_watersite.pdb]

HEADER                                                        XXXX


JRNL        PMID   -1
HETATM    1  O   HOH T   0      22.338   8.727  36.443  1.00  0.16           O  
HETATM    2  O   HOH T   1       6.404   0.959  48.020  1.00  0.16           O  
HETATM    3  O   HOH T   2      34.297  -8.938  47.688  1.00  0.16           O  
HETATM    4  O   HOH T   3      17.005  14.563  45.498  1.00  0.18           O  
HETATM    5  O   HOH T   4      12.260  -5.251  23.168  1.00  0.18           O  
HETATM    6  O   HOH T   5      20.493  -4.454  60.449  1.00  0.18           O  
HETATM    7  O   HOH T   6      14.679  -1.247  39.590  1.00  0.19           O  
HETATM    8  O   HOH T   7      13.660  15.983  34.078  1.00  0.19           O  
HETATM    9  O   HOH T   8       5.744   9.641  38.069  1.00  0.20           O  
HETATM   10  O   HOH T   9      33.219  10.518  45.542  1.00  0.20           O  
HETATM   11  O   HOH T  10      14.907  11.955   7.983  1.00  0.21           O  
HETATM   12  O   HOH T  11      24.038  15.035  44.377  1.00  0.21           O  
HETATM   13  O   HOH T  12      34.933  -2.588  47.888  1.00  0.21           O  
HETATM   14  O   HOH T  13      35.674  -4.007  24.688  1.00  0.21           O  
HETATM   15  O   HOH T  14      28.991 -27.428  33.881  1.00  0.22           O  
HETATM   16  O   HOH T  15      31.879 -18.305  42.824  1.00  0.22           O  
HETATM   17  O   HOH T  16       5.894   5.058  54.452  1.00  0.22           O  
HETATM   18  O   HOH T  17      21.867  -2.180  33.141  1.00  0.22           O  
HETATM   19  O   HOH T  18      33.001  -3.704  30.861  1.00  0.22           O  
HETATM   20  O   HOH T  19      35.114   7.532  57.658  1.00  0.23           O  
HETATM   21  O   HOH T  20      36.268  -6.245  26.077  1.00  0.23           O  
HETATM   22  O   HOH T  21      28.036   5.845  11.954  1.00  0.23           O  
HETATM   23  O   HOH T  22      29.002  -7.223  25.760  1.00  0.23           O  
HETATM   24  O   HOH T  23      25.809   4.885  13.358  1.00  0.23           O  
HETATM   25  O   HOH T  24       8.718   7.715  61.730  1.00  0.23           O  
HETATM   26  O   HOH T  25      30.001  -6.420  42.671  1.00  0.23           O  
HETATM   27  O   HOH T  26      13.606  13.924  17.736  1.00  0.23           O  
HETATM   28  O   HOH T  27      25.519  -5.051  36.703  1.00  0.23           O  
HETATM   29  O   HOH T  28      19.995   0.561  58.663  1.00  0.24           O  
HETATM   30  O   HOH T  29      23.257  11.312  22.651  1.00  0.24           O  
HETATM   31  O   HOH T  30      30.679 -12.895  24.334  1.00  0.25           O  
HETATM   32  O   HOH T  31      11.375   3.590  18.520  1.00  0.25           O  
HETATM   33  O   HOH T  32      14.435 -12.401  48.577  1.00  0.25           O  
HETATM   34  O   HOH T  33      17.528  11.154  27.365  1.00  0.25           O  
HETATM   35  O   HOH T  34      35.223  -9.009  59.217  1.00  0.25           O  
HETATM   36  O   HOH T  35      21.030   8.125  24.159  1.00  0.26           O  
HETATM   37  O   HOH T  36      15.047  -0.687  13.107  1.00  0.26           O  
HETATM   38  O   HOH T  37      18.211   8.760  26.185  1.00  0.26           O  
HETATM   39  O   HOH T  38      36.336  -0.294  46.823  1.00  0.26           O  
HETATM   40  O   HOH T  39       7.054  11.468  47.781  1.00  0.26           O  
HETATM   41  O   HOH T  40      26.390   5.215  26.658  1.00  0.26           O  
HETATM   42  O   HOH T  41      25.863  16.921  45.464  1.00  0.26           O  
HETATM   43  O   HOH T  42      34.798  -9.832  29.580  1.00  0.26           O  
HETATM   44  O   HOH T  43      21.502  15.368  17.444  1.00  0.26           O  
HETATM   45  O   HOH T  44      24.283  17.428  57.938  1.00  0.26           O  
HETATM   46  O   HOH T  45       1.827   6.140  45.674  1.00  0.27           O  
HETATM   47  O   HOH T  46      18.623 -10.586  55.151  1.00  0.27           O  
HETATM   48  O   HOH T  47      17.466  -5.695  67.513  1.00  0.27           O  
HETATM   49  O   HOH T  48      19.674  -3.345   7.629  1.00  0.27           O  
HETATM   50  O   HOH T  49      26.874  10.362  27.420  1.00  0.27           O  
HETATM   51  O   HOH T  50      36.717   0.883  56.842  1.00  0.27           O  
HETATM   52  O   HOH T  51      21.904  -8.174  14.277  1.00  0.27           O  
HETATM   53  O   HOH T  52      19.974 -12.486  24.905  1.00  0.27           O  
HETATM   54  O   HOH T  53      28.867  -1.315  10.563  1.00  0.28           O  
HETATM   55  O   HOH T  54      30.657   3.949  60.890  1.00  0.28           O  
HETATM   56  O   HOH T  55      14.967  -8.367  42.835  1.00  0.28           O  
HETATM   57  O   HOH T  56       7.945   0.034  52.376  1.00  0.28           O  
HETATM   58  O   HOH T  57       7.982  -8.244  27.283  1.00  0.28           O  
HETATM   59  O   HOH T  58      13.176  -6.977  25.072  1.00  0.28           O  
HETATM   60  O   HOH T  59      12.410  13.668  26.599  1.00  0.28           O  
HETATM   61  O   HOH T  60       8.540  -4.612  51.800  1.00  0.29           O  
HETATM   62  O   HOH T  61      12.324  15.183  24.216  1.00  0.29           O  
HETATM   63  O   HOH T  62      25.760   8.103  20.534  1.00  0.29           O  
HETATM   64  O   HOH T  63      31.071  14.665  58.536  1.00  0.29           O  
HETATM   65  O   HOH T  64       5.175  -2.937  49.850  1.00  0.29           O  
HETATM   66  O   HOH T  65      -0.779  -0.067  35.550  1.00  0.29           O  
HETATM   67  O   HOH T  66       0.851  -0.703  42.635  1.00  0.29           O  
HETATM   68  O   HOH T  67      34.211 -29.995  44.521  1.00  0.29           O  
HETATM   69  O   HOH T  68      19.458  19.258  56.618  1.00  0.29           O  
HETATM   70  O   HOH T  69      31.985  16.803  57.163  1.00  0.29           O  
HETATM   71  O   HOH T  70      13.633  18.584  40.619  1.00  0.29           O  
HETATM   72  O   HOH T  71      22.608 -12.178  47.012  1.00  0.29           O  
HETATM   73  O   HOH T  72      10.196 -20.558  63.997  1.00  0.29           O  
HETATM   74  O   HOH T  73      38.331 -14.914  45.841  1.00  0.30           O  
HETATM   75  O   HOH T  74      11.810 -19.685  59.799  1.00  0.30           O  
HETATM   76  O   HOH T  75      19.056 -28.295  52.920  1.00  0.30           O  
HETATM   77  O   HOH T  76      27.080 -10.553  22.013  1.00  0.30           O  
HETATM   78  O   HOH T  77      14.388  14.604  56.664  1.00  0.30           O  
HETATM   79  O   HOH T  78      23.211   4.818  12.542  1.00  0.30           O  
HETATM   80  O   HOH T  79       6.193   2.802  49.987  1.00  0.30           O  
HETATM   81  O   HOH T  80      30.467   3.851  38.148  1.00  0.30           O  
HETATM   82  O   HOH T  81      32.316  -3.283  17.469  1.00  0.30           O  
HETATM   83  O   HOH T  82      18.078  15.996  27.548  1.00  0.30           O  
HETATM   84  O   HOH T  83      17.060 -11.343  57.487  1.00  0.30           O  
HETATM   85  O   HOH T  84      37.849  -0.835  32.532  1.00  0.30           O  
HETATM   86  O   HOH T  85      36.206 -13.355  66.252  1.00  0.31           O  
HETATM   87  O   HOH T  86      24.037  -9.069  30.894  1.00  0.31           O  
HETATM   88  O   HOH T  87      32.825   9.829   7.110  1.00  0.31           O  
HETATM   89  O   HOH T  88       8.680  26.159  53.746  1.00  0.31           O  
HETATM   90  O   HOH T  89      23.232   8.955  21.211  1.00  0.31           O  
HETATM   91  O   HOH T  90       5.505  12.844  23.318  1.00  0.31           O  
HETATM   92  O   HOH T  91       8.391  18.780  62.317  1.00  0.31           O  
HETATM   93  O   HOH T  92       8.845  -0.407  18.389  1.00  0.31           O  
HETATM   94  O   HOH T  93      24.718  -2.502  35.955  1.00  0.32           O  
HETATM   95  O   HOH T  94      10.582  -7.350  58.246  1.00  0.32           O  
HETATM   96  O   HOH T  95      28.327   9.790  41.020  1.00  0.32           O  
HETATM   97  O   HOH T  96      20.303  23.764  60.889  1.00  0.32           O  
HETATM   98  O   HOH T  97      18.726 -13.200  31.623  1.00  0.32           O  
HETATM   99  O   HOH T  98      29.583  -3.564   9.015  1.00  0.32           O  
HETATM  100  O   HOH T  99       6.209  -6.113  46.697  1.00  0.32           O  
HETATM  101  O   HOH T 100      43.288 -10.122  55.066  1.00  0.32           O  
HETATM  102  O   HOH T 101       1.068   5.742  33.861  1.00  0.32           O  
HETATM  103  O   HOH T 102       7.954   6.825  12.813  1.00  0.32           O  
HETATM  104  O   HOH T 103      30.101   6.712  60.950  1.00  0.32           O  
HETATM  105  O   HOH T 104      26.823 -14.441  39.002  1.00  0.32           O  
HETATM  106  O   HOH T 105      37.245  -0.008  54.297  1.00  0.32           O  
HETATM  107  O   HOH T 106      24.487  11.537  58.878  1.00  0.32           O  
HETATM  108  O   HOH T 107      22.207  -8.062  44.088  1.00  0.33           O  
HETATM  109  O   HOH T 108      17.456   1.847  59.187  1.00  0.33           O  
HETATM  110  O   HOH T 109      30.088  -5.640  37.998  1.00  0.33           O  
HETATM  111  O   HOH T 110      34.238   1.306  42.720  1.00  0.33           O  
HETATM  112  O   HOH T 111      19.699   9.862   3.164  1.00  0.33           O  
HETATM  113  O   HOH T 112      27.194  14.057   7.195  1.00  0.33           O  
HETATM  114  O   HOH T 113      27.971 -11.983  24.532  1.00  0.33           O  
HETATM  115  O   HOH T 114       5.932  -7.331  23.504  1.00  0.33           O  
HETATM  116  O   HOH T 115      21.935   6.367  65.479  1.00  0.33           O  
HETATM  117  O   HOH T 116      35.381  10.205  47.299  1.00  0.33           O  
HETATM  118  O   HOH T 117      30.089  12.882  29.405  1.00  0.33           O  
HETATM  119  O   HOH T 118      18.549  20.884  35.696  1.00  0.33           O  
HETATM  120  O   HOH T 119      17.673 -10.881  20.289  1.00  0.33           O  
HETATM  121  O   HOH T 120       7.210   8.563  59.457  1.00  0.33           O  
HETATM  122  O   HOH T 121       3.128  -1.930  31.386  1.00  0.33           O  
HETATM  123  O   HOH T 122      22.371 -11.056  21.987  1.00  0.33           O  
HETATM  124  O   HOH T 123      21.219  14.324  14.846  1.00  0.33           O  
HETATM  125  O   HOH T 124      10.047   1.600  19.890  1.00  0.33           O  
HETATM  126  O   HOH T 125       7.344  19.906  45.913  1.00  0.33           O  
HETATM  127  O   HOH T 126      24.126   2.258   4.579  1.00  0.33           O  
HETATM  128  O   HOH T 127      20.249 -10.180  14.995  1.00  0.34           O  
HETATM  129  O   HOH T 128      21.835  -6.576  61.694  1.00  0.34           O  
HETATM  130  O   HOH T 129      29.144  20.122  59.629  1.00  0.34           O  
HETATM  131  O   HOH T 130      27.262  -1.362  63.061  1.00  0.34           O  
HETATM  132  O   HOH T 131      28.044 -23.624  56.687  1.00  0.34           O  
HETATM  133  O   HOH T 132      23.292 -19.781  51.004  1.00  0.34           O  
HETATM  134  O   HOH T 133      39.092  -4.525  55.517  1.00  0.34           O  
HETATM  135  O   HOH T 134      30.804  14.342  36.674  1.00  0.34           O  
HETATM  136  O   HOH T 135      16.148  23.876  54.840  1.00  0.34           O  
HETATM  137  O   HOH T 136      38.208 -15.905  48.462  1.00  0.34           O  
HETATM  138  O   HOH T 137      34.774   7.012  41.013  1.00  0.35           O  
HETATM  139  O   HOH T 138       8.499  13.372  49.186  1.00  0.35           O  
HETATM  140  O   HOH T 139      15.251   0.793  57.765  1.00  0.35           O  
HETATM  141  O   HOH T 140      24.897  -7.300  65.009  1.00  0.35           O  
HETATM  142  O   HOH T 141      17.280  17.180  44.678  1.00  0.35           O  
HETATM  143  O   HOH T 142      21.790  -8.145  38.327  1.00  0.35           O  
HETATM  144  O   HOH T 143      17.140  16.831  17.017  1.00  0.35           O  
HETATM  145  O   HOH T 144       0.027   4.393  35.989  1.00  0.35           O  
HETATM  146  O   HOH T 145      16.372  -9.445  24.897  1.00  0.35           O  
HETATM  147  O   HOH T 146      26.147 -17.189  45.579  1.00  0.35           O  
HETATM  148  O   HOH T 147      24.667   6.436  65.416  1.00  0.35           O  
HETATM  149  O   HOH T 148      15.772  -8.420  27.221  1.00  0.36           O  
HETATM  150  O   HOH T 149      15.308  16.650  52.844  1.00  0.36           O  
HETATM  151  O   HOH T 150      36.450   1.126  44.401  1.00  0.36           O  
HETATM  152  O   HOH T 151      32.294  -5.383  43.896  1.00  0.36           O  
HETATM  153  O   HOH T 152       4.390  14.953  55.732  1.00  0.36           O  
HETATM  154  O   HOH T 153       8.908  17.110  41.365  1.00  0.36           O  
HETATM  155  O   HOH T 154      21.854 -13.033  29.144  1.00  0.36           O  
HETATM  156  O   HOH T 155      22.276   4.089   3.753  1.00  0.36           O  
HETATM  157  O   HOH T 156       0.557   0.187  45.178  1.00  0.36           O  
HETATM  158  O   HOH T 157      32.368 -10.436  16.524  1.00  0.36           O  
HETATM  159  O   HOH T 158      13.011  19.270  49.211  1.00  0.36           O  
HETATM  160  O   HOH T 159      27.067  15.765   9.474  1.00  0.36           O  
HETATM  161  O   HOH T 160      39.182   1.632  50.633  1.00  0.36           O  
HETATM  162  O   HOH T 161       4.945   9.702  48.296  1.00  0.36           O  
HETATM  163  O   HOH T 162       6.342  14.690  57.725  1.00  0.36           O  
HETATM  164  O   HOH T 163      37.297   4.308  30.890  1.00  0.37           O  
HETATM  165  O   HOH T 164      29.948   9.295   4.648  1.00  0.37           O  
HETATM  166  O   HOH T 165      30.274 -22.698  55.354  1.00  0.37           O  
HETATM  167  O   HOH T 166       7.621   9.378  11.952  1.00  0.37           O  
HETATM  168  O   HOH T 167      11.278  11.795  61.399  1.00  0.37           O  
HETATM  169  O   HOH T 168      26.365   2.944  61.643  1.00  0.37           O  
HETATM  170  O   HOH T 169      20.269  20.310  46.877  1.00  0.37           O  
HETATM  171  O   HOH T 170      21.172 -16.971  30.611  1.00  0.37           O  
HETATM  172  O   HOH T 171      13.252  23.594  33.260  1.00  0.37           O  
HETATM  173  O   HOH T 172       3.783  -1.666  22.919  1.00  0.37           O  
HETATM  174  O   HOH T 173      23.748  24.013  16.427  1.00  0.37           O  
HETATM  175  O   HOH T 174      13.881 -23.636  54.334  1.00  0.37           O  
HETATM  176  O   HOH T 175       9.638   8.848  13.846  1.00  0.37           O  
HETATM  177  O   HOH T 176      37.959 -15.686  60.151  1.00  0.37           O  
HETATM  178  O   HOH T 177      27.449 -20.940  56.912  1.00  0.37           O  
HETATM  179  O   HOH T 178       4.061  16.477  49.491  1.00  0.38           O  
HETATM  180  O   HOH T 179      16.675  19.809  43.878  1.00  0.38           O  
HETATM  181  O   HOH T 180      17.818  21.647  42.083  1.00  0.38           O  
HETATM  182  O   HOH T 181      15.912 -14.833  34.921  1.00  0.38           O  
HETATM  183  O   HOH T 182      26.550   8.477  49.774  1.00  0.38           O  
HETATM  184  O   HOH T 183      46.711  -8.962  57.338  1.00  0.38           O  
HETATM  185  O   HOH T 184      33.820   6.666  38.391  1.00  0.38           O  
HETATM  186  O   HOH T 185       4.224   5.434  56.568  1.00  0.38           O  
HETATM  187  O   HOH T 186      22.802  22.034  34.259  1.00  0.38           O  
HETATM  188  O   HOH T 187      20.960 -19.357  54.367  1.00  0.38           O  
HETATM  189  O   HOH T 188      15.308  21.072  52.714  1.00  0.38           O  
HETATM  190  O   HOH T 189       3.069   8.508  44.752  1.00  0.38           O  
HETATM  191  O   HOH T 190      25.863 -22.299  41.873  1.00  0.38           O  
HETATM  192  O   HOH T 191      32.553  -8.214  33.972  1.00  0.38           O  
HETATM  193  O   HOH T 192      18.791  14.265  57.470  1.00  0.38           O  
HETATM  194  O   HOH T 193       3.089   8.599  50.040  1.00  0.38           O  
HETATM  195  O   HOH T 194       2.771   8.211  47.312  1.00  0.38           O  
HETATM  196  O   HOH T 195      30.088 -11.290  15.523  1.00  0.39           O  
HETATM  197  O   HOH T 196      24.223  -7.086  39.129  1.00  0.39           O  
HETATM  198  O   HOH T 197      38.923   0.818  29.352  1.00  0.39           O  
HETATM  199  O   HOH T 198      30.157  -6.169   8.063  1.00  0.39           O  
HETATM  200  O   HOH T 199       2.628  -3.184  27.536  1.00  0.39           O  
HETATM  201  O   HOH T 200      31.096 -15.639  24.886  1.00  0.39           O  
HETATM  202  O   HOH T 201      36.532   0.495  36.653  1.00  0.39           O  
HETATM  203  O   HOH T 202      17.747  -9.174  12.797  1.00  0.39           O  
HETATM  204  O   HOH T 203      19.245 -23.643  52.717  1.00  0.39           O  
HETATM  205  O   HOH T 204       2.205   0.694  30.857  1.00  0.39           O  
HETATM  206  O   HOH T 205      32.747  -5.016  37.362  1.00  0.39           O  
HETATM  207  O   HOH T 206      33.130 -16.950  63.218  1.00  0.39           O  
HETATM  208  O   HOH T 207      21.039  24.897  16.379  1.00  0.39           O  
HETATM  209  O   HOH T 208       1.244   9.535  56.416  1.00  0.39           O  
HETATM  210  O   HOH T 209      34.164  -1.634  63.166  1.00  0.39           O  
HETATM  211  O   HOH T 210      11.398  26.975  54.810  1.00  0.39           O  
HETATM  212  O   HOH T 211       3.131   8.121  18.609  1.00  0.39           O  
HETATM  213  O   HOH T 212       6.273  -9.256  25.372  1.00  0.39           O  
HETATM  214  O   HOH T 213       4.987  -5.701  49.265  1.00  0.40           O  
HETATM  215  O   HOH T 214       3.449   2.657  29.227  1.00  0.40           O  
HETATM  216  O   HOH T 215      22.534  17.242  60.101  1.00  0.40           O  
HETATM  217  O   HOH T 216      38.830  -2.188  54.086  1.00  0.40           O  
HETATM  218  O   HOH T 217      35.703  -1.089  42.931  1.00  0.40           O  
HETATM  219  O   HOH T 218      35.363 -15.884  61.730  1.00  0.40           O  
HETATM  220  O   HOH T 219       2.355   6.668  51.829  1.00  0.40           O  
HETATM  221  O   HOH T 220       2.643   7.817  34.505  1.00  0.40           O  
HETATM  222  O   HOH T 221      23.386 -16.447  23.978  1.00  0.40           O  
HETATM  223  O   HOH T 222      31.640  18.452  40.592  1.00  0.40           O  
HETATM  224  O   HOH T 223       8.628  15.415  51.097  1.00  0.40           O  
HETATM  225  O   HOH T 224       6.806  -2.486  52.028  1.00  0.40           O  
HETATM  226  O   HOH T 225      37.453  -1.583  35.133  1.00  0.40           O  
HETATM  227  O   HOH T 226      23.576  -7.247  36.236  1.00  0.40           O  
HETATM  228  O   HOH T 227       2.876   8.239  41.117  1.00  0.40           O  
HETATM  229  O   HOH T 228      28.748  14.274   2.664  1.00  0.40           O  
HETATM  230  O   HOH T 229      27.851 -18.866  44.088  1.00  0.40           O  
HETATM  231  O   HOH T 230       0.697  17.126  45.742  1.00  0.40           O  
HETATM  232  O   HOH T 231      10.345  25.402  60.664  1.00  0.40           O  
HETATM  233  O   HOH T 232      32.516  -9.237  59.883  1.00  0.40           O  
HETATM  234  O   HOH T 233      22.341  -7.411  66.190  1.00  0.40           O  
HETATM  235  O   HOH T 234       0.688   4.267  43.883  1.00  0.40           O  
HETATM  236  O   HOH T 235      25.852  12.292   5.387  1.00  0.40           O  
HETATM  237  O   HOH T 236      26.596  20.183  28.287  1.00  0.40           O  
HETATM  238  O   HOH T 237      39.985   3.656  63.140  1.00  0.41           O  
HETATM  239  O   HOH T 238      34.689 -14.940  64.369  1.00  0.41           O  
HETATM  240  O   HOH T 239       0.725   7.061  36.335  1.00  0.41           O  
HETATM  241  O   HOH T 240      28.469 -30.123  47.171  1.00  0.41           O  
HETATM  242  O   HOH T 241       3.911   2.158  51.345  1.00  0.41           O  
HETATM  243  O   HOH T 242      29.624  17.016  17.101  1.00  0.41           O  
HETATM  244  O   HOH T 243      29.831 -20.848  44.420  1.00  0.41           O  
HETATM  245  O   HOH T 244      34.153  -7.886  61.619  1.00  0.41           O  
HETATM  246  O   HOH T 245       3.405   7.917  55.673  1.00  0.41           O  
HETATM  247  O   HOH T 246      19.392  22.080  38.111  1.00  0.41           O  
HETATM  248  O   HOH T 247      31.076  13.335  34.048  1.00  0.41           O  
HETATM  249  O   HOH T 248      33.094 -10.875  33.352  1.00  0.41           O  
HETATM  250  O   HOH T 249      20.477 -22.974  36.222  1.00  0.41           O  
HETATM  251  O   HOH T 250      28.268  17.130  26.966  1.00  0.41           O  
HETATM  252  O   HOH T 251      36.720  17.231  44.417  1.00  0.41           O  
HETATM  253  O   HOH T 252       6.385  15.079  49.603  1.00  0.41           O  
HETATM  254  O   HOH T 253       9.513  12.931  51.825  1.00  0.41           O  
HETATM  255  O   HOH T 254      22.930  23.436  59.890  1.00  0.41           O  
HETATM  256  O   HOH T 255       8.276  -9.508  53.479  1.00  0.41           O  
HETATM  257  O   HOH T 256      31.418  21.064  21.632  1.00  0.41           O  
HETATM  258  O   HOH T 257       9.241  10.106  60.734  1.00  0.41           O  
HETATM  259  O   HOH T 258       2.920   0.779  21.968  1.00  0.42           O  
HETATM  260  O   HOH T 259      31.278  16.743   7.264  1.00  0.42           O  
HETATM  261  O   HOH T 260      18.105  23.633  52.886  1.00  0.42           O  
HETATM  262  O   HOH T 261      15.717  11.339  59.006  1.00  0.42           O  
HETATM  263  O   HOH T 262      21.867  -8.609  68.731  1.00  0.42           O  
HETATM  264  O   HOH T 263      35.438  -4.866  31.585  1.00  0.42           O  
HETATM  265  O   HOH T 264      45.177  -8.130  55.199  1.00  0.42           O  
HETATM  266  O   HOH T 265      24.442   0.966   2.130  1.00  0.42           O  
HETATM  267  O   HOH T 266      34.874  -2.635  19.480  1.00  0.42           O  
HETATM  268  O   HOH T 267      30.021 -15.307  37.394  1.00  0.42           O  
HETATM  269  O   HOH T 268      39.405  15.054  41.567  1.00  0.42           O  
HETATM  270  O   HOH T 269      31.852 -12.946  31.902  1.00  0.42           O  
HETATM  271  O   HOH T 270      29.210  22.848  60.065  1.00  0.42           O  
HETATM  272  O   HOH T 271      15.346  -7.717  13.086  1.00  0.42           O  
HETATM  273  O   HOH T 272       4.050  11.780  37.335  1.00  0.42           O  
HETATM  274  O   HOH T 273      27.681 -10.331  64.653  1.00  0.42           O  
HETATM  275  O   HOH T 274      15.466 -10.327  13.895  1.00  0.42           O  
HETATM  276  O   HOH T 275      39.271   6.157  62.091  1.00  0.42           O  
HETATM  277  O   HOH T 276      25.904 -20.531  51.463  1.00  0.42           O  
HETATM  278  O   HOH T 277       6.439 -11.275  54.679  1.00  0.42           O  
HETATM  279  O   HOH T 278      37.678   4.216  36.550  1.00  0.42           O  
HETATM  280  O   HOH T 279      35.469   2.414  64.006  1.00  0.42           O  
HETATM  281  O   HOH T 280      16.045 -11.127  66.603  1.00  0.42           O  
HETATM  282  O   HOH T 281      23.172  -9.138  40.530  1.00  0.42           O  
HETATM  283  O   HOH T 282      30.909  -5.753  66.849  1.00  0.42           O  
HETATM  284  O   HOH T 283      19.721 -17.195  37.486  1.00  0.43           O  
HETATM  285  O   HOH T 284      35.152   8.351  32.483  1.00  0.43           O  
HETATM  286  O   HOH T 285      19.444  -7.227  68.938  1.00  0.43           O  
HETATM  287  O   HOH T 286      12.319  17.739  32.365  1.00  0.43           O  
HETATM  288  O   HOH T 287      22.266  12.889  58.238  1.00  0.43           O  
HETATM  289  O   HOH T 288      27.406   1.298  63.585  1.00  0.43           O  
HETATM  290  O   HOH T 289      12.513 -20.328  62.396  1.00  0.43           O  
HETATM  291  O   HOH T 290      32.324 -11.512  13.861  1.00  0.43           O  
HETATM  292  O   HOH T 291      24.485  19.495  40.596  1.00  0.43           O  
HETATM  293  O   HOH T 292      38.637  -1.703  46.161  1.00  0.43           O  
HETATM  294  O   HOH T 293      19.999   6.040  63.702  1.00  0.43           O  
HETATM  295  O   HOH T 294       6.827  11.203  60.103  1.00  0.43           O  
HETATM  296  O   HOH T 295       7.054  -7.253  57.624  1.00  0.43           O  
HETATM  297  O   HOH T 296      33.431  12.008  34.803  1.00  0.43           O  
HETATM  298  O   HOH T 297      20.475  20.778  33.641  1.00  0.43           O  
HETATM  299  O   HOH T 298      20.207  22.393  40.763  1.00  0.43           O  
HETATM  300  O   HOH T 299      32.502   8.222  60.657  1.00  0.43           O  
HETATM  301  O   HOH T 300      34.860  -7.087  29.915  1.00  0.43           O  
HETATM  302  O   HOH T 301      10.749  20.333  62.523  1.00  0.43           O  
HETATM  303  O   HOH T 302      34.536 -17.840  53.066  1.00  0.43           O  
HETATM  304  O   HOH T 303       3.270  -4.256  29.943  1.00  0.44           O  
HETATM  305  O   HOH T 304      26.681 -14.460  25.454  1.00  0.44           O  
HETATM  306  O   HOH T 305      37.753   8.975  46.726  1.00  0.44           O  
HETATM  307  O   HOH T 306      25.769 -19.551  42.379  1.00  0.44           O  
HETATM  308  O   HOH T 307      38.410  -4.852  25.030  1.00  0.44           O  
HETATM  309  O   HOH T 308      20.164 -26.073  51.683  1.00  0.44           O  
HETATM  310  O   HOH T 309       1.278   8.153  53.965  1.00  0.44           O  
HETATM  311  O   HOH T 310       1.530   6.837  43.074  1.00  0.44           O  
HETATM  312  O   HOH T 311      -0.757  -2.697  36.198  1.00  0.44           O  
HETATM  313  O   HOH T 312      24.563 -27.264  53.536  1.00  0.44           O  
HETATM  314  O   HOH T 313      15.889   8.092  60.905  1.00  0.44           O  
HETATM  315  O   HOH T 314      28.223  26.774  45.940  1.00  0.44           O  
HETATM  316  O   HOH T 315      19.607  -8.633  45.123  1.00  0.44           O  
HETATM  317  O   HOH T 316       4.055  -2.698  52.435  1.00  0.44           O  
HETATM  318  O   HOH T 317      23.617  15.448  15.593  1.00  0.44           O  
HETATM  319  O   HOH T 318       1.591   5.805  40.441  1.00  0.44           O  
HETATM  320  O   HOH T 319      17.191 -12.114  24.898  1.00  0.44           O  
HETATM  321  O   HOH T 320      20.425  22.809  35.596  1.00  0.44           O  
HETATM  322  O   HOH T 321      14.507  16.410  16.945  1.00  0.44           O  
HETATM  323  O   HOH T 322      34.566   1.647  66.401  1.00  0.44           O  
HETATM  324  O   HOH T 323      31.530 -15.713  66.658  1.00  0.44           O  
HETATM  325  O   HOH T 324      37.407  -3.492  33.121  1.00  0.44           O  
HETATM  326  O   HOH T 325      32.562   5.707  61.759  1.00  0.44           O  
HETATM  327  O   HOH T 326      29.190 -12.882  38.830  1.00  0.45           O  
HETATM  328  O   HOH T 327      19.454 -20.926  52.668  1.00  0.45           O  
HETATM  329  O   HOH T 328      37.403 -14.988  64.402  1.00  0.45           O  
HETATM  330  O   HOH T 329      16.797  15.538  55.960  1.00  0.45           O  
HETATM  331  O   HOH T 330       9.928  19.600  45.205  1.00  0.45           O  
HETATM  332  O   HOH T 331       1.108   8.077  38.933  1.00  0.45           O  
HETATM  333  O   HOH T 332      13.962  11.983  61.044  1.00  0.45           O  
HETATM  334  O   HOH T 333      22.119  -4.635  66.346  1.00  0.45           O  
HETATM  335  O   HOH T 334      26.811 -18.568  34.100  1.00  0.45           O  
HETATM  336  O   HOH T 335      21.877  -9.883   6.461  1.00  0.45           O  
HETATM  337  O   HOH T 336      23.306  12.945  60.896  1.00  0.45           O  
HETATM  338  O   HOH T 337      18.575 -12.399  22.479  1.00  0.45           O  
HETATM  339  O   HOH T 338      28.019   7.209  63.846  1.00  0.45           O  
HETATM  340  O   HOH T 339      37.265   4.329  63.022  1.00  0.45           O  
HETATM  341  O   HOH T 340      23.185  -7.322   9.747  1.00  0.45           O  
HETATM  342  O   HOH T 341      31.355  -7.162  36.216  1.00  0.45           O  
HETATM  343  O   HOH T 342      33.762 -16.312  24.301  1.00  0.45           O  
HETATM  344  O   HOH T 343      26.891  -8.513  12.336  1.00  0.45           O  
HETATM  345  O   HOH T 344      17.075  18.302  55.534  1.00  0.45           O  
HETATM  346  O   HOH T 345      18.722 -15.639  30.313  1.00  0.46           O  
HETATM  347  O   HOH T 346      22.243 -25.967  53.425  1.00  0.46           O  
HETATM  348  O   HOH T 347      30.470 -17.036  64.332  1.00  0.46           O  
HETATM  349  O   HOH T 348      35.653   7.955  17.141  1.00  0.46           O  
HETATM  350  O   HOH T 349      17.856  22.025  50.476  1.00  0.46           O  
HETATM  351  O   HOH T 350      19.851 -12.180  70.134  1.00  0.46           O  
HETATM  352  O   HOH T 351      20.741   4.805   1.495  1.00  0.46           O  
HETATM  353  O   HOH T 352      34.164  -3.383  43.334  1.00  0.46           O  
HETATM  354  O   HOH T 353      15.622  20.236  41.300  1.00  0.46           O  
HETATM  355  O   HOH T 354      16.267  13.459  60.749  1.00  0.46           O  
HETATM  356  O   HOH T 355      36.707  -7.282  60.918  1.00  0.46           O  
HETATM  357  O   HOH T 356       2.090   3.967  52.294  1.00  0.46           O  
HETATM  358  O   HOH T 357      15.604 -11.824  37.860  1.00  0.46           O  
HETATM  359  O   HOH T 358      40.591 -13.445  45.260  1.00  0.46           O  
HETATM  360  O   HOH T 359      39.616   0.317  52.998  1.00  0.46           O  
HETATM  361  O   HOH T 360      29.419 -14.255  31.277  1.00  0.46           O  
HETATM  362  O   HOH T 361      31.628 -18.733  36.046  1.00  0.46           O  
HETATM  363  O   HOH T 362      19.021  19.577  50.988  1.00  0.46           O  
HETATM  364  O   HOH T 363      22.563 -21.432  35.381  1.00  0.46           O  
HETATM  365  O   HOH T 364      16.070   3.186  61.374  1.00  0.46           O  
HETATM  366  O   HOH T 365      37.664  11.033  48.694  1.00  0.46           O  
HETATM  367  O   HOH T 366      31.539 -12.951  37.426  1.00  0.46           O  
HETATM  368  O   HOH T 367      38.298   0.960  34.466  1.00  0.46           O  
HETATM  369  O   HOH T 368      22.750  23.576  36.471  1.00  0.46           O  
HETATM  370  O   HOH T 369      37.294   6.688  32.297  1.00  0.46           O  
HETATM  371  O   HOH T 370      34.054  12.254  22.526  1.00  0.46           O  
HETATM  372  O   HOH T 371      34.532  -8.821  32.129  1.00  0.46           O  
HETATM  373  O   HOH T 372      41.417  -1.768  46.928  1.00  0.46           O  
HETATM  374  O   HOH T 373      20.168  -6.004   7.482  1.00  0.46           O  
HETATM  375  O   HOH T 374      14.461  17.037  24.350  1.00  0.46           O  
HETATM  376  O   HOH T 375      11.663  24.432  64.288  1.00  0.46           O  
HETATM  377  O   HOH T 376      17.863 -15.333  50.970  1.00  0.47           O  
HETATM  378  O   HOH T 377       1.570  -7.248  34.806  1.00  0.47           O  
HETATM  379  O   HOH T 378      25.791  -0.959   0.867  1.00  0.47           O  
HETATM  380  O   HOH T 379       1.370  -4.105  31.945  1.00  0.47           O  
HETATM  381  O   HOH T 380      28.614  -9.231  23.876  1.00  0.47           O  
HETATM  382  O   HOH T 381       7.561  -6.971  52.685  1.00  0.47           O  
HETATM  383  O   HOH T 382      24.090  -7.993  62.500  1.00  0.47           O  
HETATM  384  O   HOH T 383      17.956  -7.011   8.698  1.00  0.47           O  
HETATM  385  O   HOH T 384      28.223 -20.765  42.023  1.00  0.47           O  
HETATM  386  O   HOH T 385      37.625  -7.824  58.338  1.00  0.47           O  
HETATM  387  O   HOH T 386      23.507  -9.803   8.643  1.00  0.47           O  
HETATM  388  O   HOH T 387      38.302   1.803  31.736  1.00  0.47           O  
HETATM  389  O   HOH T 388      32.795  -1.049  11.068  1.00  0.47           O  
HETATM  390  O   HOH T 389      38.045  12.803  41.969  1.00  0.47           O  
HETATM  391  O   HOH T 390      39.059  -2.720  20.147  1.00  0.47           O  
HETATM  392  O   HOH T 391      35.031  -4.098  17.201  1.00  0.47           O  
HETATM  393  O   HOH T 392      21.669  22.293  17.222  1.00  0.47           O  
HETATM  394  O   HOH T 393      27.945  20.233  25.848  1.00  0.47           O  
HETATM  395  O   HOH T 394      21.309  -8.512  11.550  1.00  0.47           O  
HETATM  396  O   HOH T 395      28.131  18.965  18.471  1.00  0.47           O  
HETATM  397  O   HOH T 396      20.381  16.136  12.895  1.00  0.47           O  
HETATM  398  O   HOH T 397      -1.055   2.411  34.452  1.00  0.47           O  
HETATM  399  O   HOH T 398      18.984  13.398  60.140  1.00  0.47           O  
HETATM  400  O   HOH T 399      -0.341   1.774  43.100  1.00  0.47           O  
HETATM  401  O   HOH T 400      32.395 -16.672  37.800  1.00  0.47           O  
HETATM  402  O   HOH T 401       5.722  14.480  21.043  1.00  0.47           O  
HETATM  403  O   HOH T 402      23.337  -6.847  12.467  1.00  0.47           O  
HETATM  404  O   HOH T 403      28.493  16.349   4.428  1.00  0.48           O  
HETATM  405  O   HOH T 404      16.380 -10.782  22.624  1.00  0.48           O  
HETATM  406  O   HOH T 405      34.333 -12.272  15.708  1.00  0.48           O  
HETATM  407  O   HOH T 406      16.999  18.836  52.789  1.00  0.48           O  
HETATM  408  O   HOH T 407      19.475 -10.019  68.537  1.00  0.48           O  
HETATM  409  O   HOH T 408      33.006 -12.754  18.171  1.00  0.48           O  
HETATM  410  O   HOH T 409      16.546 -14.477  37.652  1.00  0.48           O  
HETATM  411  O   HOH T 410      17.853  19.754  30.735  1.00  0.48           O  
HETATM  412  O   HOH T 411      20.938  22.640  43.523  1.00  0.48           O  
HETATM  413  O   HOH T 412      25.063  -9.905  64.177  1.00  0.48           O  
HETATM  414  O   HOH T 413      35.005 -15.428  22.037  1.00  0.48           O  
HETATM  415  O   HOH T 414      31.061  11.605  36.189  1.00  0.48           O  
HETATM  416  O   HOH T 415      30.775 -13.746  16.712  1.00  0.48           O  
HETATM  417  O   HOH T 416      20.196   8.717  20.160  1.00  0.48           O  
HETATM  418  O   HOH T 417      31.208  23.439  20.396  1.00  0.48           O  
HETATM  419  O   HOH T 418      21.707  22.736  46.234  1.00  0.48           O  
HETATM  420  O   HOH T 419      19.926  -4.651  67.951  1.00  0.48           O  
HETATM  421  O   HOH T 420      28.985  17.486  40.696  1.00  0.48           O  
HETATM  422  O   HOH T 421      28.460 -16.482  25.158  1.00  0.48           O  
HETATM  423  O   HOH T 422      20.890 -18.736  51.642  1.00  0.48           O  
HETATM  424  O   HOH T 423      10.460  -0.929  27.114  1.00  0.49           O  
HETATM  425  O   HOH T 424      23.577 -17.770  46.833  1.00  0.49           O  
HETATM  426  O   HOH T 425      31.493 -12.774  34.679  1.00  0.49           O  
HETATM  427  O   HOH T 426      39.490  -7.173  60.484  1.00  0.49           O  
HETATM  428  O   HOH T 427      29.286 -11.874  36.146  1.00  0.49           O  
HETATM  429  O   HOH T 428      28.381  10.713  29.711  1.00  0.49           O  
HETATM  430  O   HOH T 429      19.460 -17.202  49.900  1.00  0.49           O  
HETATM  431  O   HOH T 430       6.973  16.523  19.545  1.00  0.49           O  
HETATM  432  O   HOH T 431       4.834  13.800  29.154  1.00  0.49           O  
HETATM  433  O   HOH T 432      33.808  10.110  30.855  1.00  0.49           O  
HETATM  434  O   HOH T 433      31.712   9.756  29.224  1.00  0.49           O  
HETATM  435  O   HOH T 434      21.951 -18.164  49.110  1.00  0.49           O  
HETATM  436  O   HOH T 435      16.743  18.112  28.856  1.00  0.49           O  
HETATM  437  O   HOH T 436      28.493  16.527   7.166  1.00  0.49           O  
HETATM  438  O   HOH T 437      15.380  15.975  28.339  1.00  0.49           O  
HETATM  439  O   HOH T 438      36.537 -17.053  50.378  1.00  0.49           O  
HETATM  440  O   HOH T 439      22.061  -0.282   2.192  1.00  0.49           O  
HETATM  441  O   HOH T 440      14.485  18.912  51.531  1.00  0.49           O  
HETATM  442  O   HOH T 441      21.479 -10.765  44.804  1.00  0.49           O  
HETATM  443  O   HOH T 442      19.271  16.696  56.151  1.00  0.49           O  
HETATM  444  O   HOH T 443      16.955  16.251  63.180  1.00  0.49           O  
HETATM  445  O   HOH T 444      17.091   2.784  64.008  1.00  0.49           O  
HETATM  446  O   HOH T 445      35.335  -0.002  10.480  1.00  0.50           O  
HETATM  447  O   HOH T 446      36.404   6.585  37.295  1.00  0.50           O  
HETATM  448  O   HOH T 447      26.476  17.853  42.012  1.00  0.50           O  
HETATM  449  O   HOH T 448      31.518  -6.501  40.338  1.00  0.50           O  
HETATM  450  O   HOH T 449      21.090 -14.372  31.286  1.00  0.50           O  
HETATM  451  O   HOH T 450      25.718 -17.107  25.269  1.00  0.50           O  
HETATM  452  O   HOH T 451       0.112  -4.806  34.452  1.00  0.50           O  
HETATM  453  O   HOH T 452      36.871  16.434  41.681  1.00  0.50           O  
HETATM  454  O   HOH T 453      32.397 -14.474  22.700  1.00  0.50           O  
HETATM  455  O   HOH T 454      27.255  19.592  40.160  1.00  0.50           O  
HETATM  456  O   HOH T 455      17.218 -16.767  36.400  1.00  0.50           O  
HETATM  457  O   HOH T 456       5.610  -9.350  28.162  1.00  0.50           O  
HETATM  458  O   HOH T 457      12.853   1.825  53.831  1.00  0.50           O  
HETATM  459  O   HOH T 458       4.195  13.959  50.720  1.00  0.50           O  
HETATM  460  O   HOH T 459      40.358   3.941  50.946  1.00  0.50           O  
HETATM  461  O   HOH T 460      29.331  25.339  43.785  1.00  0.50           O  
HETATM  462  O   HOH T 461       5.092  13.729  53.305  1.00  0.50           O  
HETATM  463  O   HOH T 462      26.839  28.015  50.932  1.00  0.50           O  
HETATM  464  O   HOH T 463      29.865  -0.981   7.975  1.00  0.50           O  
HETATM  465  O   HOH T 464      16.177  10.751  61.712  1.00  0.50           O  
HETATM  466  O   HOH T 465      17.755  25.981  54.307  1.00  0.51           O  
HETATM  467  O   HOH T 466      15.227  20.957  49.903  1.00  0.51           O  
HETATM  468  O   HOH T 467      20.886  15.194  59.120  1.00  0.51           O  
HETATM  469  O   HOH T 468       8.746 -12.261  53.836  1.00  0.51           O  
HETATM  470  O   HOH T 469       0.448   0.610  33.087  1.00  0.51           O  
HETATM  471  O   HOH T 470      22.196   2.470   1.409  1.00  0.51           O  
HETATM  472  O   HOH T 471       3.338   0.185  24.770  1.00  0.51           O  
HETATM  473  O   HOH T 472       3.196   9.920  39.179  1.00  0.51           O  
HETATM  474  O   HOH T 473      13.283  -1.285   9.867  1.00  0.51           O  
HETATM  475  O   HOH T 474      26.794   5.056  64.690  1.00  0.51           O  
HETATM  476  O   HOH T 475      29.708  16.440   9.578  1.00  0.51           O  
HETATM  477  O   HOH T 476       5.389  14.505  18.389  1.00  0.51           O  
HETATM  478  O   HOH T 477       3.826  11.269  50.248  1.00  0.51           O  
HETATM  479  O   HOH T 478       0.682  -6.649  32.393  1.00  0.51           O  
HETATM  480  O   HOH T 479      23.394  24.563  53.934  1.00  0.52           O  
HETATM  481  O   HOH T 480      20.386 -21.879  33.681  1.00  0.52           O  
HETATM  482  O   HOH T 481      34.702   6.460  60.156  1.00  0.52           O  
HETATM  483  O   HOH T 482       9.646 -11.677  28.122  1.00  0.52           O  
HETATM  484  O   HOH T 483      15.859 -13.678  50.638  1.00  0.52           O  
HETATM  485  O   HOH T 484      21.157 -16.233  58.976  1.00  0.52           O  
HETATM  486  O   HOH T 485      36.251 -15.687  52.926  1.00  0.52           O  
HETATM  487  O   HOH T 486      14.529 -10.524  44.496  1.00  0.52           O  
HETATM  488  O   HOH T 487      30.197  21.275  63.269  1.00  0.52           O  
HETATM  489  O   HOH T 488      32.428  18.840  24.443  1.00  0.52           O  
HETATM  490  O   HOH T 489      21.162  -9.941  42.201  1.00  0.52           O  
HETATM  491  O   HOH T 490      24.538  15.394  59.885  1.00  0.52           O  
HETATM  492  O   HOH T 491      -0.001  -2.434  47.745  1.00  0.52           O  
HETATM  493  O   HOH T 492      40.526   3.249  15.343  1.00  0.52           O  
HETATM  494  O   HOH T 493      31.052  13.054  60.721  1.00  0.52           O  
HETATM  495  O   HOH T 494      14.432  17.754  30.543  1.00  0.52           O  
HETATM  496  O   HOH T 495      15.102  -4.017  47.147  1.00  0.52           O  
HETATM  497  O   HOH T 496      24.976 -27.892  50.995  1.00  0.53           O  
HETATM  498  O   HOH T 497      37.408  -5.542  17.747  1.00  0.53           O  
HETATM  499  O   HOH T 498      -0.147   3.263  53.788  1.00  0.53           O  
HETATM  500  O   HOH T 499       3.247  16.494  46.810  1.00  0.53           O  
HETATM  501  O   HOH T 500      31.202  21.079  18.885  1.00  0.53           O  
HETATM  502  O   HOH T 501      29.909  15.486  28.436  1.00  0.53           O  
HETATM  503  O   HOH T 502      13.658  23.457  35.925  1.00  0.53           O  
HETATM  504  O   HOH T 503      36.080  -2.699  45.245  1.00  0.53           O  
HETATM  505  O   HOH T 504      14.452 -19.519  60.517  1.00  0.53           O  
HETATM  506  O   HOH T 505       9.561 -10.690  46.098  1.00  0.53           O  
HETATM  507  O   HOH T 506      34.368   9.687  59.168  1.00  0.53           O  
HETATM  508  O   HOH T 507      31.024  17.133  11.952  1.00  0.53           O  
HETATM  509  O   HOH T 508      17.955  23.731  62.502  1.00  0.53           O  
HETATM  510  O   HOH T 509      26.422  19.686  16.651  1.00  0.53           O  
HETATM  511  O   HOH T 510      37.810   4.716  33.866  1.00  0.54           O  
HETATM  512  O   HOH T 511      13.224  16.285  26.640  1.00  0.54           O  
HETATM  513  O   HOH T 512      28.280 -17.161  62.534  1.00  0.54           O  
HETATM  514  O   HOH T 513       7.027  -5.879  18.230  1.00  0.54           O  
HETATM  515  O   HOH T 514      12.380  -1.728  13.392  1.00  0.54           O  
HETATM  516  O   HOH T 515      41.282  -3.152  44.511  1.00  0.54           O  
HETATM  517  O   HOH T 516      17.840 -11.463  14.523  1.00  0.54           O  
HETATM  518  O   HOH T 517      37.219  -5.644  14.582  1.00  0.54           O  
HETATM  519  O   HOH T 518       8.002  18.876  39.620  1.00  0.54           O  
HETATM  520  O   HOH T 519      21.770   8.301   4.009  1.00  0.54           O  
HETATM  521  O   HOH T 520      40.595 -15.537  47.064  1.00  0.54           O  
HETATM  522  O   HOH T 521       3.732   8.734  32.171  1.00  0.54           O  
HETATM  523  O   HOH T 522      18.698  21.435  44.788  1.00  0.54           O  
HETATM  524  O   HOH T 523       1.195  14.643  46.904  1.00  0.54           O  
HETATM  525  O   HOH T 524      30.985  10.428  61.521  1.00  0.54           O  
HETATM  526  O   HOH T 525      35.174   9.787  34.922  1.00  0.54           O  
HETATM  527  O   HOH T 526      26.164  14.916   4.700  1.00  0.54           O  
HETATM  528  O   HOH T 527      21.481  17.063   8.262  1.00  0.54           O  
HETATM  529  O   HOH T 528      41.466  -1.619  53.607  1.00  0.54           O  
HETATM  530  O   HOH T 529       6.340  -6.388  55.087  1.00  0.55           O  
HETATM  531  O   HOH T 530      29.861   2.468  63.152  1.00  0.55           O  
HETATM  532  O   HOH T 531      33.420  16.128  24.439  1.00  0.55           O  
HETATM  533  O   HOH T 532      30.133 -25.312  56.617  1.00  0.55           O  
HETATM  534  O   HOH T 533      31.433 -16.482  21.055  1.00  0.55           O  
HETATM  535  O   HOH T 534       2.829  -4.250  50.478  1.00  0.55           O  
HETATM  536  O   HOH T 535      28.550   4.817  62.499  1.00  0.55           O  
HETATM  537  O   HOH T 536      34.976  15.271  43.252  1.00  0.55           O  
HETATM  538  O   HOH T 537      12.715  -4.354  41.133  1.00  0.55           O  
HETATM  539  O   HOH T 538      42.125  -5.614  59.969  1.00  0.55           O  
HETATM  540  O   HOH T 539      33.113  12.980  37.442  1.00  0.56           O  
HETATM  541  O   HOH T 540      25.163 -21.045  58.427  1.00  0.56           O  
HETATM  542  O   HOH T 541      33.913  17.033  22.832  1.00  0.56           O  
HETATM  543  O   HOH T 542      29.114 -19.535  35.562  1.00  0.56           O  
HETATM  544  O   HOH T 543       5.569  13.656  26.025  1.00  0.56           O  
HETATM  545  O   HOH T 544      32.424  16.581   9.635  1.00  0.56           O  
HETATM  546  O   HOH T 545      32.336 -10.540  11.176  1.00  0.56           O  
HETATM  547  O   HOH T 546       7.924 -13.099  29.784  1.00  0.56           O  
HETATM  548  O   HOH T 547      29.886  17.761  14.386  1.00  0.56           O  
HETATM  549  O   HOH T 548      15.350  24.179  38.079  1.00  0.56           O  
HETATM  550  O   HOH T 549      29.773  19.442  38.886  1.00  0.56           O  
HETATM  551  O   HOH T 550      13.023 -11.785  46.236  1.00  0.57           O  
HETATM  552  O   HOH T 551       5.625  13.016  46.228  1.00  0.57           O  
HETATM  553  O   HOH T 552      19.271  -1.525  33.454  1.00  0.57           O  
HETATM  554  O   HOH T 553      33.110   0.827  64.133  1.00  0.57           O  
HETATM  555  O   HOH T 554      24.574  23.065  48.636  1.00  0.57           O  
HETATM  556  O   HOH T 555       4.809  12.863  34.816  1.00  0.57           O  
HETATM  557  O   HOH T 556      30.178  18.988  26.240  1.00  0.57           O  
HETATM  558  O   HOH T 557      37.316   9.108  36.561  1.00  0.58           O  
HETATM  559  O   HOH T 558       1.573  -0.885  26.529  1.00  0.58           O  
HETATM  560  O   HOH T 559       1.449   0.898  28.217  1.00  0.58           O  
HETATM  561  O   HOH T 560      46.074  -6.320  56.857  1.00  0.58           O  
HETATM  562  O   HOH T 561      12.202  20.228  46.761  1.00  0.59           O  
HETATM  563  O   HOH T 562      34.066  -6.632  35.643  1.00  0.59           O  
HETATM  564  O   HOH T 563      29.125  17.420  30.112  1.00  0.59           O  
HETATM  565  O   HOH T 564      27.917 -16.225  33.205  1.00  0.60           O  
HETATM  566  O   HOH T 565      28.183  15.484  13.740  1.00  0.60           O  
HETATM  567  O   HOH T 566      17.968  -2.335   2.049  1.00  0.61           O  
HETATM  568  O   HOH T 567      21.024  -8.402   8.732  1.00  0.62           O  
TER     569      HOH T 567 
