# Supplementary material for: Accurate Prediction of Hydration Sites of Proteins Using Energy Model With Atom Embedding
Source: Front Mol Biosci. 2021 Sep 20;8:756075. doi: 10.3389/fmolb.2021.756075 (PMC8488165; doi:10.3389/fmolb.2021.756075)
Supplement: Supplementary file 1 [file DataSheet1.ZIP › Data Sheet 1/Our_result_pdb/our_dataset_output/2VWR_watersite.pdb]

HEADER                                                        XXXX


JRNL        PMID   -1
HETATM    1  O   HOH T   0       5.911  10.159   2.592  1.00  0.16           O  
HETATM    2  O   HOH T   1      12.758  10.353   4.260  1.00  0.19           O  
HETATM    3  O   HOH T   2      12.157   9.628  -2.263  1.00  0.20           O  
HETATM    4  O   HOH T   3       4.146  21.890 -11.461  1.00  0.21           O  
HETATM    5  O   HOH T   4      12.118  23.015  14.750  1.00  0.23           O  
HETATM    6  O   HOH T   5       6.238  23.455  18.749  1.00  0.23           O  
HETATM    7  O   HOH T   6      10.931  14.974  19.299  1.00  0.25           O  
HETATM    8  O   HOH T   7      14.346  26.290  -1.833  1.00  0.26           O  
HETATM    9  O   HOH T   8      18.563  11.356  -7.920  1.00  0.26           O  
HETATM   10  O   HOH T   9       8.356  26.946  17.254  1.00  0.26           O  
HETATM   11  O   HOH T  10      -3.733  28.855  15.744  1.00  0.27           O  
HETATM   12  O   HOH T  11      15.362   3.660   5.664  1.00  0.27           O  
HETATM   13  O   HOH T  12       5.423  29.405  -0.964  1.00  0.29           O  
HETATM   14  O   HOH T  13      17.333   3.780   9.496  1.00  0.29           O  
HETATM   15  O   HOH T  14      13.401   6.787 -11.499  1.00  0.30           O  
HETATM   16  O   HOH T  15       6.257  26.309  21.854  1.00  0.30           O  
HETATM   17  O   HOH T  16      12.274  11.720  -6.860  1.00  0.30           O  
HETATM   18  O   HOH T  17      22.516   5.265  27.810  1.00  0.30           O  
HETATM   19  O   HOH T  18      -0.016   9.540   0.011  1.00  0.30           O  
HETATM   20  O   HOH T  19      12.396  10.444  15.443  1.00  0.31           O  
HETATM   21  O   HOH T  20       5.710  21.363  -4.135  1.00  0.31           O  
HETATM   22  O   HOH T  21       5.616  14.889  16.300  1.00  0.31           O  
HETATM   23  O   HOH T  22       5.881  25.210  15.345  1.00  0.31           O  
HETATM   24  O   HOH T  23      -1.664   8.998   2.095  1.00  0.32           O  
HETATM   25  O   HOH T  24       5.041  12.188  16.534  1.00  0.32           O  
HETATM   26  O   HOH T  25      -5.410  29.422  13.540  1.00  0.33           O  
HETATM   27  O   HOH T  26      11.964  21.601  21.516  1.00  0.33           O  
HETATM   28  O   HOH T  27      11.186   3.296   2.937  1.00  0.33           O  
HETATM   29  O   HOH T  28      16.663   4.885   3.466  1.00  0.33           O  
HETATM   30  O   HOH T  29       4.926  17.731  28.434  1.00  0.34           O  
HETATM   31  O   HOH T  30      13.090  10.501  18.144  1.00  0.34           O  
HETATM   32  O   HOH T  31       4.828  23.902  29.167  1.00  0.34           O  
HETATM   33  O   HOH T  32       5.498  12.570  -3.002  1.00  0.34           O  
HETATM   34  O   HOH T  33      10.269   9.930  -6.549  1.00  0.34           O  
HETATM   35  O   HOH T  34      11.844  12.351  19.946  1.00  0.34           O  
HETATM   36  O   HOH T  35      12.050  30.006  11.854  1.00  0.34           O  
HETATM   37  O   HOH T  36      15.515  25.832  22.294  1.00  0.35           O  
HETATM   38  O   HOH T  37      13.864  29.651  13.827  1.00  0.35           O  
HETATM   39  O   HOH T  38      -2.953  11.432   2.711  1.00  0.35           O  
HETATM   40  O   HOH T  39      12.158   5.833  13.617  1.00  0.35           O  
HETATM   41  O   HOH T  40      -0.773   8.022   4.544  1.00  0.35           O  
HETATM   42  O   HOH T  41      11.220  27.580  -7.077  1.00  0.35           O  
HETATM   43  O   HOH T  42       1.628  18.650  21.670  1.00  0.36           O  
HETATM   44  O   HOH T  43       1.458  26.793  13.534  1.00  0.36           O  
HETATM   45  O   HOH T  44       3.097  27.286  18.709  1.00  0.36           O  
HETATM   46  O   HOH T  45      14.617  12.009  -8.059  1.00  0.37           O  
HETATM   47  O   HOH T  46       2.483  18.080  27.155  1.00  0.37           O  
HETATM   48  O   HOH T  47       3.268  25.636  25.884  1.00  0.37           O  
HETATM   49  O   HOH T  48      -5.766  14.381  11.361  1.00  0.38           O  
HETATM   50  O   HOH T  49      18.174  -6.990  28.732  1.00  0.38           O  
HETATM   51  O   HOH T  50      11.148  32.843  -2.402  1.00  0.38           O  
HETATM   52  O   HOH T  51      18.723  22.234  -1.051  1.00  0.38           O  
HETATM   53  O   HOH T  52      10.222  25.140  -8.049  1.00  0.38           O  
HETATM   54  O   HOH T  53      -3.523  24.529  18.392  1.00  0.38           O  
HETATM   55  O   HOH T  54       9.877  24.268  29.107  1.00  0.38           O  
HETATM   56  O   HOH T  55      11.058  34.978   3.014  1.00  0.39           O  
HETATM   57  O   HOH T  56      11.280   3.044  -1.063  1.00  0.39           O  
HETATM   58  O   HOH T  57      13.016  19.371  20.420  1.00  0.39           O  
HETATM   59  O   HOH T  58      10.569  29.970  -5.795  1.00  0.39           O  
HETATM   60  O   HOH T  59       7.031   4.077   5.574  1.00  0.39           O  
HETATM   61  O   HOH T  60       8.763  12.160  23.275  1.00  0.40           O  
HETATM   62  O   HOH T  61       1.864  18.116  18.788  1.00  0.40           O  
HETATM   63  O   HOH T  62      18.429  21.722   5.608  1.00  0.40           O  
HETATM   64  O   HOH T  63      11.182  26.236  25.436  1.00  0.40           O  
HETATM   65  O   HOH T  64      13.759  26.697  24.328  1.00  0.41           O  
HETATM   66  O   HOH T  65      18.446   7.155  13.640  1.00  0.41           O  
HETATM   67  O   HOH T  66       3.815  16.145  18.077  1.00  0.41           O  
HETATM   68  O   HOH T  67      -1.053  23.403  18.898  1.00  0.41           O  
HETATM   69  O   HOH T  68       5.487  27.283  17.259  1.00  0.41           O  
HETATM   70  O   HOH T  69       8.838  27.141  24.249  1.00  0.41           O  
HETATM   71  O   HOH T  70      12.002  33.280  14.986  1.00  0.41           O  
HETATM   72  O   HOH T  71      19.826   8.295   0.895  1.00  0.42           O  
HETATM   73  O   HOH T  72      14.587   0.870  17.659  1.00  0.42           O  
HETATM   74  O   HOH T  73      12.066  32.485   2.625  1.00  0.42           O  
HETATM   75  O   HOH T  74       9.071  30.899   0.739  1.00  0.43           O  
HETATM   76  O   HOH T  75       3.983  17.453  22.609  1.00  0.43           O  
HETATM   77  O   HOH T  76      -4.115  12.705   8.008  1.00  0.43           O  
HETATM   78  O   HOH T  77      -2.323  26.588  24.586  1.00  0.43           O  
HETATM   79  O   HOH T  78       7.662  10.600  -7.062  1.00  0.43           O  
HETATM   80  O   HOH T  79       6.846  12.526  21.299  1.00  0.43           O  
HETATM   81  O   HOH T  80      -5.624  26.706  13.474  1.00  0.44           O  
HETATM   82  O   HOH T  81      -2.175  21.584   0.928  1.00  0.44           O  
HETATM   83  O   HOH T  82      -1.901  11.927  11.239  1.00  0.44           O  
HETATM   84  O   HOH T  83      -4.946  10.064   4.099  1.00  0.44           O  
HETATM   85  O   HOH T  84      15.324   3.909  31.187  1.00  0.45           O  
HETATM   86  O   HOH T  85      13.593  11.844  -3.210  1.00  0.45           O  
HETATM   87  O   HOH T  86       5.726  24.919  26.743  1.00  0.45           O  
HETATM   88  O   HOH T  87       9.198  32.258  -6.742  1.00  0.45           O  
HETATM   89  O   HOH T  88      12.014  16.959  21.029  1.00  0.45           O  
HETATM   90  O   HOH T  89      16.424   1.580  30.208  1.00  0.45           O  
HETATM   91  O   HOH T  90      11.023  33.205   5.110  1.00  0.45           O  
HETATM   92  O   HOH T  91      -0.850  24.355  25.753  1.00  0.45           O  
HETATM   93  O   HOH T  92       4.917  32.812  12.908  1.00  0.46           O  
HETATM   94  O   HOH T  93      22.924   8.578  23.502  1.00  0.46           O  
HETATM   95  O   HOH T  94       6.668  21.360 -12.452  1.00  0.46           O  
HETATM   96  O   HOH T  95       9.685  22.724  26.806  1.00  0.46           O  
HETATM   97  O   HOH T  96       8.954  35.209   9.536  1.00  0.46           O  
HETATM   98  O   HOH T  97      20.774   8.922  25.230  1.00  0.46           O  
HETATM   99  O   HOH T  98      21.287  22.957   8.931  1.00  0.46           O  
HETATM  100  O   HOH T  99      12.114  23.577  25.842  1.00  0.47           O  
HETATM  101  O   HOH T 100      11.708   3.512  -3.749  1.00  0.47           O  
HETATM  102  O   HOH T 101      11.706  31.540   0.027  1.00  0.47           O  
HETATM  103  O   HOH T 102      -3.366  14.160  10.157  1.00  0.48           O  
HETATM  104  O   HOH T 103       0.141   8.768   7.208  1.00  0.48           O  
HETATM  105  O   HOH T 104       9.521  31.610   3.393  1.00  0.48           O  
HETATM  106  O   HOH T 105      13.682  31.563  10.409  1.00  0.48           O  
HETATM  107  O   HOH T 106      16.902  13.543  -8.376  1.00  0.48           O  
HETATM  108  O   HOH T 107       8.567  32.529  -1.519  1.00  0.48           O  
HETATM  109  O   HOH T 108       2.513  16.167  20.603  1.00  0.48           O  
HETATM  110  O   HOH T 109       6.485  31.751   0.037  1.00  0.48           O  
HETATM  111  O   HOH T 110      -2.784  24.960  22.307  1.00  0.48           O  
HETATM  112  O   HOH T 111       0.085  20.164  19.169  1.00  0.49           O  
HETATM  113  O   HOH T 112      10.814   6.163  -7.863  1.00  0.49           O  
HETATM  114  O   HOH T 113       1.275  25.569  24.191  1.00  0.49           O  
HETATM  115  O   HOH T 114      23.823  10.034  25.715  1.00  0.49           O  
HETATM  116  O   HOH T 115      12.241  33.177   8.714  1.00  0.49           O  
HETATM  117  O   HOH T 116       4.788   4.039   2.280  1.00  0.49           O  
HETATM  118  O   HOH T 117       3.997  25.141  22.677  1.00  0.49           O  
HETATM  119  O   HOH T 118       1.634  22.555  27.541  1.00  0.49           O  
HETATM  120  O   HOH T 119       1.955  28.365   4.742  1.00  0.49           O  
HETATM  121  O   HOH T 120      -2.667  23.446   4.879  1.00  0.50           O  
HETATM  122  O   HOH T 121      20.619  23.159   6.460  1.00  0.50           O  
HETATM  123  O   HOH T 122      18.574  10.492  24.531  1.00  0.50           O  
HETATM  124  O   HOH T 123      17.164  12.971  24.359  1.00  0.51           O  
HETATM  125  O   HOH T 124      12.075  25.405  27.901  1.00  0.51           O  
HETATM  126  O   HOH T 125       7.085  25.750 -11.370  1.00  0.51           O  
HETATM  127  O   HOH T 126      11.102   5.776 -10.569  1.00  0.51           O  
HETATM  128  O   HOH T 127       2.308  28.191   2.133  1.00  0.52           O  
HETATM  129  O   HOH T 128      12.637  25.150  -9.683  1.00  0.52           O  
HETATM  130  O   HOH T 129      -0.582  21.241  -1.501  1.00  0.52           O  
HETATM  131  O   HOH T 130       6.217  31.622  -2.621  1.00  0.52           O  
HETATM  132  O   HOH T 131       6.692  16.040  26.958  1.00  0.52           O  
HETATM  133  O   HOH T 132      15.668  28.490  23.345  1.00  0.52           O  
HETATM  134  O   HOH T 133       9.617  32.002  14.578  1.00  0.53           O  
HETATM  135  O   HOH T 134       8.710   7.831  -7.081  1.00  0.53           O  
HETATM  136  O   HOH T 135      -3.436  13.913  12.827  1.00  0.53           O  
HETATM  137  O   HOH T 136       5.535  26.647  24.593  1.00  0.53           O  
HETATM  138  O   HOH T 137      11.484  12.189  22.699  1.00  0.53           O  
HETATM  139  O   HOH T 138       9.740   1.268  35.631  1.00  0.53           O  
HETATM  140  O   HOH T 139      13.890  16.170  -8.954  1.00  0.53           O  
HETATM  141  O   HOH T 140      14.417  31.992  15.158  1.00  0.53           O  
HETATM  142  O   HOH T 141      13.927  23.956  23.770  1.00  0.54           O  
HETATM  143  O   HOH T 142      -3.229  22.795  20.514  1.00  0.54           O  
HETATM  144  O   HOH T 143      10.554  35.009   7.231  1.00  0.55           O  
HETATM  145  O   HOH T 144      15.524  32.369  12.298  1.00  0.55           O  
HETATM  146  O   HOH T 145       0.001  28.318   0.002  1.00  0.56           O  
HETATM  147  O   HOH T 146      20.899   8.729  18.191  1.00  0.56           O  
HETATM  148  O   HOH T 147       5.728  33.304   7.308  1.00  0.56           O  
TER     149      HOH T 147 
