# Supplementary material for: Accurate Prediction of Hydration Sites of Proteins Using Energy Model With Atom Embedding
Source: Front Mol Biosci. 2021 Sep 20;8:756075. doi: 10.3389/fmolb.2021.756075 (PMC8488165; doi:10.3389/fmolb.2021.756075)
Supplement: Supplementary file 1 [file DataSheet1.ZIP › Data Sheet 1/Our_result_pdb/our_dataset_output/2W0R_watersite.pdb]

HEADER                                                        XXXX


JRNL        PMID   -1
HETATM    1  O   HOH T   0      13.346 -22.802  16.020  1.00  0.19           O  
HETATM    2  O   HOH T   1      25.922  -9.442   7.795  1.00  0.22           O  
HETATM    3  O   HOH T   2      29.423 -21.687 -10.586  1.00  0.23           O  
HETATM    4  O   HOH T   3      10.540 -22.508  -2.285  1.00  0.24           O  
HETATM    5  O   HOH T   4      28.593 -25.562  -4.970  1.00  0.24           O  
HETATM    6  O   HOH T   5      18.595  -2.886   7.992  1.00  0.24           O  
HETATM    7  O   HOH T   6       4.197 -21.498  -3.596  1.00  0.25           O  
HETATM    8  O   HOH T   7      -0.012 -19.972   6.224  1.00  0.26           O  
HETATM    9  O   HOH T   8      25.939 -12.250  -9.749  1.00  0.26           O  
HETATM   10  O   HOH T   9      30.599 -19.493  -9.295  1.00  0.26           O  
HETATM   11  O   HOH T  10      32.190 -20.401   5.830  1.00  0.26           O  
HETATM   12  O   HOH T  11      26.500 -23.072  12.716  1.00  0.27           O  
HETATM   13  O   HOH T  12      22.021 -28.650   5.624  1.00  0.28           O  
HETATM   14  O   HOH T  13      24.334 -25.911  -9.570  1.00  0.28           O  
HETATM   15  O   HOH T  14      10.368 -27.558  14.326  1.00  0.28           O  
HETATM   16  O   HOH T  15      11.130  -0.468  16.118  1.00  0.28           O  
HETATM   17  O   HOH T  16       4.187 -17.645  10.567  1.00  0.29           O  
HETATM   18  O   HOH T  17      17.151 -27.694  16.842  1.00  0.29           O  
HETATM   19  O   HOH T  18       9.763  -8.113   7.312  1.00  0.30           O  
HETATM   20  O   HOH T  19      28.432  -0.252   8.082  1.00  0.30           O  
HETATM   21  O   HOH T  20      20.391  -7.597  11.892  1.00  0.31           O  
HETATM   22  O   HOH T  21       3.869 -16.144   8.228  1.00  0.31           O  
HETATM   23  O   HOH T  22      31.867  -7.183  -8.959  1.00  0.31           O  
HETATM   24  O   HOH T  23      34.930  -5.256   6.335  1.00  0.31           O  
HETATM   25  O   HOH T  24      12.887 -29.525  11.317  1.00  0.32           O  
HETATM   26  O   HOH T  25      24.316   7.601   4.398  1.00  0.32           O  
HETATM   27  O   HOH T  26       2.349 -23.524   1.488  1.00  0.32           O  
HETATM   28  O   HOH T  27       7.757  -0.456   6.651  1.00  0.33           O  
HETATM   29  O   HOH T  28      18.697 -27.965  -0.613  1.00  0.33           O  
HETATM   30  O   HOH T  29      16.289 -12.130  13.657  1.00  0.33           O  
HETATM   31  O   HOH T  30      11.834  -4.806  10.327  1.00  0.33           O  
HETATM   32  O   HOH T  31      10.263 -12.523  -8.267  1.00  0.34           O  
HETATM   33  O   HOH T  32      35.894 -13.041  11.495  1.00  0.34           O  
HETATM   34  O   HOH T  33      15.165  -1.716  22.522  1.00  0.34           O  
HETATM   35  O   HOH T  34      15.432 -29.015  10.553  1.00  0.35           O  
HETATM   36  O   HOH T  35      36.976  -5.982   9.969  1.00  0.35           O  
HETATM   37  O   HOH T  36      33.743  -7.329  -5.173  1.00  0.35           O  
HETATM   38  O   HOH T  37       8.997 -18.549  18.429  1.00  0.35           O  
HETATM   39  O   HOH T  38      17.889 -16.151  -8.063  1.00  0.35           O  
HETATM   40  O   HOH T  39      31.158 -13.689  -8.882  1.00  0.36           O  
HETATM   41  O   HOH T  40      28.945 -10.734  17.365  1.00  0.37           O  
HETATM   42  O   HOH T  41      10.542  -2.584  11.058  1.00  0.37           O  
HETATM   43  O   HOH T  42      33.935 -20.462   9.324  1.00  0.37           O  
HETATM   44  O   HOH T  43      36.712 -11.208  13.517  1.00  0.37           O  
HETATM   45  O   HOH T  44      11.457 -24.625  -0.857  1.00  0.38           O  
HETATM   46  O   HOH T  45       3.112 -13.849   6.884  1.00  0.39           O  
HETATM   47  O   HOH T  46      14.710  -0.368   5.291  1.00  0.39           O  
HETATM   48  O   HOH T  47      12.075 -12.040  11.751  1.00  0.39           O  
HETATM   49  O   HOH T  48      12.964 -12.238  -7.378  1.00  0.39           O  
HETATM   50  O   HOH T  49      19.478  -9.812  13.232  1.00  0.40           O  
HETATM   51  O   HOH T  50      12.511 -21.123  18.143  1.00  0.40           O  
HETATM   52  O   HOH T  51      16.042   1.307   7.132  1.00  0.40           O  
HETATM   53  O   HOH T  52      20.765 -29.214   0.745  1.00  0.40           O  
HETATM   54  O   HOH T  53      14.351 -10.172   8.914  1.00  0.40           O  
HETATM   55  O   HOH T  54      29.735  -3.025  28.221  1.00  0.40           O  
HETATM   56  O   HOH T  55      33.588 -11.184  18.721  1.00  0.40           O  
HETATM   57  O   HOH T  56      21.617 -25.612  19.186  1.00  0.41           O  
HETATM   58  O   HOH T  57       8.939 -16.798  14.306  1.00  0.41           O  
HETATM   59  O   HOH T  58      19.223 -26.857  18.479  1.00  0.41           O  
HETATM   60  O   HOH T  59      15.743 -11.446  -6.840  1.00  0.41           O  
HETATM   61  O   HOH T  60      30.521 -11.155  15.100  1.00  0.41           O  
HETATM   62  O   HOH T  61      21.404 -30.039   3.310  1.00  0.42           O  
HETATM   63  O   HOH T  62      24.899 -24.281  14.798  1.00  0.42           O  
HETATM   64  O   HOH T  63      31.693  -3.385  14.536  1.00  0.42           O  
HETATM   65  O   HOH T  64       4.241 -14.894  10.691  1.00  0.42           O  
HETATM   66  O   HOH T  65      31.359  -8.354  -6.443  1.00  0.42           O  
HETATM   67  O   HOH T  66       8.275 -16.264  16.960  1.00  0.42           O  
HETATM   68  O   HOH T  67      34.135  -5.013  29.229  1.00  0.42           O  
HETATM   69  O   HOH T  68      34.730 -12.502  20.882  1.00  0.42           O  
HETATM   70  O   HOH T  69      11.627  -6.050   7.799  1.00  0.43           O  
HETATM   71  O   HOH T  70      38.728  -1.663  16.924  1.00  0.43           O  
HETATM   72  O   HOH T  71      20.561  -6.731   2.184  1.00  0.43           O  
HETATM   73  O   HOH T  72       4.023 -13.029   4.405  1.00  0.43           O  
HETATM   74  O   HOH T  73      11.563 -14.374  13.227  1.00  0.44           O  
HETATM   75  O   HOH T  74       4.605  -9.884   2.580  1.00  0.44           O  
HETATM   76  O   HOH T  75      10.585 -17.682  16.395  1.00  0.44           O  
HETATM   77  O   HOH T  76      13.550  -6.844   9.824  1.00  0.44           O  
HETATM   78  O   HOH T  77      36.576   0.004  17.396  1.00  0.44           O  
HETATM   79  O   HOH T  78      34.086  -6.522  16.970  1.00  0.45           O  
HETATM   80  O   HOH T  79      32.388  -4.251  -6.356  1.00  0.45           O  
HETATM   81  O   HOH T  80       2.248 -23.375  -3.062  1.00  0.45           O  
HETATM   82  O   HOH T  81       7.275  -2.339   3.298  1.00  0.45           O  
HETATM   83  O   HOH T  82      11.488 -20.982  -6.576  1.00  0.45           O  
HETATM   84  O   HOH T  83      25.362 -25.206   5.821  1.00  0.46           O  
HETATM   85  O   HOH T  84      13.681 -11.149  13.847  1.00  0.46           O  
HETATM   86  O   HOH T  85       6.993 -27.717   0.793  1.00  0.46           O  
HETATM   87  O   HOH T  86      29.845  -3.193  -6.413  1.00  0.46           O  
HETATM   88  O   HOH T  87      32.922 -10.277  16.252  1.00  0.46           O  
HETATM   89  O   HOH T  88      13.497 -14.396  18.833  1.00  0.46           O  
HETATM   90  O   HOH T  89      26.964 -27.099  -6.740  1.00  0.46           O  
HETATM   91  O   HOH T  90      31.955 -19.889  11.353  1.00  0.46           O  
HETATM   92  O   HOH T  91      12.977 -18.796  16.927  1.00  0.46           O  
HETATM   93  O   HOH T  92      37.230  -1.860  19.276  1.00  0.46           O  
HETATM   94  O   HOH T  93      29.190 -25.954  -7.641  1.00  0.46           O  
HETATM   95  O   HOH T  94       0.663 -20.801  -6.582  1.00  0.47           O  
HETATM   96  O   HOH T  95      28.912  -0.577   1.042  1.00  0.47           O  
HETATM   97  O   HOH T  96      15.235 -24.411  -4.329  1.00  0.47           O  
HETATM   98  O   HOH T  97      27.551 -24.163   1.714  1.00  0.47           O  
HETATM   99  O   HOH T  98       2.233 -14.169   2.615  1.00  0.48           O  
HETATM  100  O   HOH T  99      21.503   7.384   4.594  1.00  0.48           O  
HETATM  101  O   HOH T 100      10.677  -2.932  13.778  1.00  0.48           O  
HETATM  102  O   HOH T 101      22.874   5.701   2.963  1.00  0.48           O  
HETATM  103  O   HOH T 102      38.141  -1.800  12.578  1.00  0.48           O  
HETATM  104  O   HOH T 103      25.273 -14.765  -8.916  1.00  0.48           O  
HETATM  105  O   HOH T 104      31.296 -12.145  17.609  1.00  0.48           O  
HETATM  106  O   HOH T 105      31.654 -22.731 -14.447  1.00  0.49           O  
HETATM  107  O   HOH T 106       3.226 -20.552  -7.460  1.00  0.49           O  
HETATM  108  O   HOH T 107      32.549  -3.256  27.732  1.00  0.49           O  
HETATM  109  O   HOH T 108      29.824 -16.155  11.493  1.00  0.49           O  
HETATM  110  O   HOH T 109      33.861 -13.234  -9.197  1.00  0.49           O  
HETATM  111  O   HOH T 110      31.383  -0.736  13.752  1.00  0.49           O  
HETATM  112  O   HOH T 111      27.111 -26.067  -9.397  1.00  0.49           O  
HETATM  113  O   HOH T 112       9.630 -21.425  -8.501  1.00  0.49           O  
HETATM  114  O   HOH T 113       4.938  -9.736   5.836  1.00  0.50           O  
HETATM  115  O   HOH T 114      31.729 -25.153  -8.395  1.00  0.50           O  
HETATM  116  O   HOH T 115      12.248 -22.053  -4.254  1.00  0.50           O  
HETATM  117  O   HOH T 116      13.686  -2.362   3.855  1.00  0.50           O  
HETATM  118  O   HOH T 117       2.553 -22.686  -5.658  1.00  0.50           O  
HETATM  119  O   HOH T 118      26.152 -14.397 -11.485  1.00  0.50           O  
HETATM  120  O   HOH T 119      13.630 -25.384  -2.347  1.00  0.50           O  
HETATM  121  O   HOH T 120      23.070 -25.150  16.800  1.00  0.50           O  
HETATM  122  O   HOH T 121      30.297  -5.848  -7.172  1.00  0.50           O  
HETATM  123  O   HOH T 122      10.462  -0.980   2.164  1.00  0.50           O  
HETATM  124  O   HOH T 123      16.336 -14.035  -7.352  1.00  0.50           O  
HETATM  125  O   HOH T 124      34.493 -21.757   6.781  1.00  0.50           O  
HETATM  126  O   HOH T 125      23.700 -28.627   3.498  1.00  0.51           O  
HETATM  127  O   HOH T 126      31.787  -4.071  25.258  1.00  0.51           O  
HETATM  128  O   HOH T 127      -1.659 -21.026   4.273  1.00  0.51           O  
HETATM  129  O   HOH T 128      35.733  -3.894   8.526  1.00  0.51           O  
HETATM  130  O   HOH T 129      11.411  -6.511  -3.331  1.00  0.52           O  
HETATM  131  O   HOH T 130       7.413 -30.202   1.589  1.00  0.52           O  
HETATM  132  O   HOH T 131       1.291 -13.017   4.981  1.00  0.52           O  
HETATM  133  O   HOH T 132      26.099  -3.552  -2.479  1.00  0.53           O  
HETATM  134  O   HOH T 133      14.233 -13.601  12.577  1.00  0.53           O  
HETATM  135  O   HOH T 134      32.054 -13.096  21.695  1.00  0.53           O  
HETATM  136  O   HOH T 135      21.102 -28.458  -1.874  1.00  0.53           O  
HETATM  137  O   HOH T 136      24.110  -1.256   5.795  1.00  0.53           O  
HETATM  138  O   HOH T 137       9.386  -3.448  16.930  1.00  0.54           O  
HETATM  139  O   HOH T 138      18.663 -11.380  -7.171  1.00  0.54           O  
HETATM  140  O   HOH T 139       9.563   3.112   4.633  1.00  0.54           O  
HETATM  141  O   HOH T 140      18.518 -29.288  18.751  1.00  0.54           O  
HETATM  142  O   HOH T 141      25.627 -28.311  -8.912  1.00  0.54           O  
HETATM  143  O   HOH T 142      13.905  -7.384  16.152  1.00  0.54           O  
HETATM  144  O   HOH T 143      28.297 -21.117  14.146  1.00  0.55           O  
HETATM  145  O   HOH T 144      20.234 -21.031 -10.577  1.00  0.56           O  
HETATM  146  O   HOH T 145       8.700 -24.181  -1.605  1.00  0.56           O  
HETATM  147  O   HOH T 146       0.662 -22.346   3.353  1.00  0.56           O  
HETATM  148  O   HOH T 147      19.424 -13.776  -8.420  1.00  0.56           O  
HETATM  149  O   HOH T 148      31.586 -27.593  -3.091  1.00  0.57           O  
HETATM  150  O   HOH T 149      33.417  -6.493  25.185  1.00  0.57           O  
HETATM  151  O   HOH T 150       8.036  -5.911   7.920  1.00  0.57           O  
HETATM  152  O   HOH T 151       7.440  -3.148   7.439  1.00  0.57           O  
HETATM  153  O   HOH T 152      38.941  -0.004  14.664  1.00  0.57           O  
HETATM  154  O   HOH T 153       4.178 -17.759  -9.631  1.00  0.57           O  
HETATM  155  O   HOH T 154      34.050 -26.792  -7.959  1.00  0.57           O  
HETATM  156  O   HOH T 155       8.902   3.913   7.229  1.00  0.58           O  
HETATM  157  O   HOH T 156       3.036 -12.188   0.989  1.00  0.58           O  
HETATM  158  O   HOH T 157       8.095   0.100   2.343  1.00  0.58           O  
HETATM  159  O   HOH T 158      37.201 -21.069   6.399  1.00  0.60           O  
HETATM  160  O   HOH T 159      36.516  -5.706  17.891  1.00  0.61           O  
TER     161      HOH T 159 
