# Supplementary material for: Accurate Prediction of Hydration Sites of Proteins Using Energy Model With Atom Embedding
Source: Front Mol Biosci. 2021 Sep 20;8:756075. doi: 10.3389/fmolb.2021.756075 (PMC8488165; doi:10.3389/fmolb.2021.756075)
Supplement: Supplementary file 1 [file DataSheet1.ZIP › Data Sheet 1/Our_result_pdb/our_dataset_output/2W7F_watersite.pdb]

HEADER                                                        XXXX


JRNL        PMID   -1
HETATM    1  O   HOH T   0       4.281 -16.444   7.159  1.00  0.16           O  
HETATM    2  O   HOH T   1       1.991   3.557   4.122  1.00  0.17           O  
HETATM    3  O   HOH T   2      17.739  25.819  19.226  1.00  0.17           O  
HETATM    4  O   HOH T   3      10.877  -8.443  17.661  1.00  0.17           O  
HETATM    5  O   HOH T   4      26.226   7.093  16.232  1.00  0.19           O  
HETATM    6  O   HOH T   5      16.848  -9.324  18.064  1.00  0.20           O  
HETATM    7  O   HOH T   6      -1.250  -6.224  19.593  1.00  0.20           O  
HETATM    8  O   HOH T   7      23.304  -3.982  22.923  1.00  0.20           O  
HETATM    9  O   HOH T   8     -15.217   1.378   1.976  1.00  0.21           O  
HETATM   10  O   HOH T   9      12.941  24.480  -3.496  1.00  0.21           O  
HETATM   11  O   HOH T  10      12.674  -9.506  19.539  1.00  0.22           O  
HETATM   12  O   HOH T  11       2.482  26.527  11.464  1.00  0.22           O  
HETATM   13  O   HOH T  12      -0.063 -10.479  13.852  1.00  0.22           O  
HETATM   14  O   HOH T  13      -9.285  -8.688   8.464  1.00  0.22           O  
HETATM   15  O   HOH T  14      24.094  27.466  13.576  1.00  0.23           O  
HETATM   16  O   HOH T  15      11.789   5.809   3.807  1.00  0.23           O  
HETATM   17  O   HOH T  16      17.882 -12.568  27.953  1.00  0.23           O  
HETATM   18  O   HOH T  17      11.984  13.777  11.968  1.00  0.23           O  
HETATM   19  O   HOH T  18       3.363  -4.242  15.959  1.00  0.24           O  
HETATM   20  O   HOH T  19      -1.510 -22.843  15.020  1.00  0.24           O  
HETATM   21  O   HOH T  20      -1.186   7.908  -0.753  1.00  0.24           O  
HETATM   22  O   HOH T  21       0.184  -8.836  11.573  1.00  0.24           O  
HETATM   23  O   HOH T  22      18.810   4.790  42.998  1.00  0.24           O  
HETATM   24  O   HOH T  23       2.887   0.752  14.181  1.00  0.24           O  
HETATM   25  O   HOH T  24     -13.129   8.307  -6.309  1.00  0.24           O  
HETATM   26  O   HOH T  25      20.529  32.559  19.334  1.00  0.24           O  
HETATM   27  O   HOH T  26     -10.995  -3.732  -3.141  1.00  0.24           O  
HETATM   28  O   HOH T  27      -5.788  -6.872   8.644  1.00  0.24           O  
HETATM   29  O   HOH T  28       0.184  31.198  29.290  1.00  0.25           O  
HETATM   30  O   HOH T  29      11.671  19.581   7.806  1.00  0.25           O  
HETATM   31  O   HOH T  30      16.384 -11.248  29.964  1.00  0.25           O  
HETATM   32  O   HOH T  31      -4.734  19.632  -0.275  1.00  0.25           O  
HETATM   33  O   HOH T  32      15.448  21.919  25.191  1.00  0.25           O  
HETATM   34  O   HOH T  33      -3.572 -17.654   5.622  1.00  0.25           O  
HETATM   35  O   HOH T  34      19.798  36.844  16.504  1.00  0.25           O  
HETATM   36  O   HOH T  35      25.736  -3.665  21.840  1.00  0.25           O  
HETATM   37  O   HOH T  36      28.071  15.401  -3.118  1.00  0.25           O  
HETATM   38  O   HOH T  37      -1.362  34.624  14.800  1.00  0.26           O  
HETATM   39  O   HOH T  38      17.701  13.747  28.455  1.00  0.26           O  
HETATM   40  O   HOH T  39      -5.541 -14.496   7.092  1.00  0.26           O  
HETATM   41  O   HOH T  40      27.699  16.850  40.805  1.00  0.26           O  
HETATM   42  O   HOH T  41      -1.936  37.510  11.465  1.00  0.26           O  
HETATM   43  O   HOH T  42     -12.922  10.448  -4.630  1.00  0.26           O  
HETATM   44  O   HOH T  43      18.459  17.728   0.666  1.00  0.27           O  
HETATM   45  O   HOH T  44       4.762  10.624  38.445  1.00  0.27           O  
HETATM   46  O   HOH T  45       7.249  19.900   3.096  1.00  0.27           O  
HETATM   47  O   HOH T  46      11.109  17.384   9.946  1.00  0.27           O  
HETATM   48  O   HOH T  47       5.035 -11.346  30.064  1.00  0.27           O  
HETATM   49  O   HOH T  48      12.035   8.731  45.419  1.00  0.27           O  
HETATM   50  O   HOH T  49      -3.728  29.656  10.693  1.00  0.27           O  
HETATM   51  O   HOH T  50      -3.740  37.224   9.397  1.00  0.27           O  
HETATM   52  O   HOH T  51      22.764  -8.145  12.727  1.00  0.27           O  
HETATM   53  O   HOH T  52      -5.899  -9.619   1.450  1.00  0.28           O  
HETATM   54  O   HOH T  53      21.678  -0.668  24.687  1.00  0.28           O  
HETATM   55  O   HOH T  54      23.613  -1.299  26.082  1.00  0.28           O  
HETATM   56  O   HOH T  55      12.803 -15.162  17.967  1.00  0.28           O  
HETATM   57  O   HOH T  56     -17.107   6.719   0.179  1.00  0.28           O  
HETATM   58  O   HOH T  57       3.845  -3.612  39.652  1.00  0.28           O  
HETATM   59  O   HOH T  58      13.326  17.304  11.614  1.00  0.28           O  
HETATM   60  O   HOH T  59      11.085  31.477  -2.391  1.00  0.28           O  
HETATM   61  O   HOH T  60      -3.576  44.138  11.161  1.00  0.28           O  
HETATM   62  O   HOH T  61      16.003  22.579  12.587  1.00  0.28           O  
HETATM   63  O   HOH T  62       8.216  38.666  25.662  1.00  0.29           O  
HETATM   64  O   HOH T  63      21.512  32.446   0.238  1.00  0.29           O  
HETATM   65  O   HOH T  64      24.436  25.051  23.518  1.00  0.29           O  
HETATM   66  O   HOH T  65      14.612  26.426  -4.260  1.00  0.29           O  
HETATM   67  O   HOH T  66      14.717  12.073  29.512  1.00  0.29           O  
HETATM   68  O   HOH T  67      23.397  15.218  16.262  1.00  0.29           O  
HETATM   69  O   HOH T  68      25.209  16.805  41.948  1.00  0.29           O  
HETATM   70  O   HOH T  69       1.670  36.671  20.675  1.00  0.29           O  
HETATM   71  O   HOH T  70      15.517  11.846  21.807  1.00  0.29           O  
HETATM   72  O   HOH T  71       3.776  23.609  -4.317  1.00  0.30           O  
HETATM   73  O   HOH T  72      23.498  17.701  26.745  1.00  0.30           O  
HETATM   74  O   HOH T  73      24.209  25.576  15.526  1.00  0.30           O  
HETATM   75  O   HOH T  74       3.303  -7.550  19.449  1.00  0.30           O  
HETATM   76  O   HOH T  75       9.613  -8.887  31.329  1.00  0.30           O  
HETATM   77  O   HOH T  76      10.975 -21.762   3.348  1.00  0.30           O  
HETATM   78  O   HOH T  77      22.875  36.822  35.393  1.00  0.30           O  
HETATM   79  O   HOH T  78       4.916  -0.821  14.850  1.00  0.30           O  
HETATM   80  O   HOH T  79      28.987   6.690  19.108  1.00  0.31           O  
HETATM   81  O   HOH T  80      10.953 -13.839  25.605  1.00  0.31           O  
HETATM   82  O   HOH T  81      -3.390  23.693   9.857  1.00  0.31           O  
HETATM   83  O   HOH T  82       7.303  26.517  32.197  1.00  0.31           O  
HETATM   84  O   HOH T  83      25.494  24.267   7.354  1.00  0.31           O  
HETATM   85  O   HOH T  84       3.534 -10.917  19.576  1.00  0.31           O  
HETATM   86  O   HOH T  85      11.835  23.332  26.333  1.00  0.31           O  
HETATM   87  O   HOH T  86      24.402   3.588  15.077  1.00  0.31           O  
HETATM   88  O   HOH T  87       1.237  24.353  12.675  1.00  0.31           O  
HETATM   89  O   HOH T  88      -5.933 -12.032  13.215  1.00  0.31           O  
HETATM   90  O   HOH T  89      -2.939  -0.091  44.501  1.00  0.31           O  
HETATM   91  O   HOH T  90      17.742  -0.046  39.573  1.00  0.31           O  
HETATM   92  O   HOH T  91       6.979  -9.705  31.272  1.00  0.32           O  
HETATM   93  O   HOH T  92     -19.523   8.038   5.449  1.00  0.32           O  
HETATM   94  O   HOH T  93       2.074  29.338   0.490  1.00  0.32           O  
HETATM   95  O   HOH T  94      25.275  19.138  24.908  1.00  0.32           O  
HETATM   96  O   HOH T  95      12.427   7.877  14.795  1.00  0.32           O  
HETATM   97  O   HOH T  96       4.839   0.038  31.983  1.00  0.32           O  
HETATM   98  O   HOH T  97      26.850  10.664  24.235  1.00  0.32           O  
HETATM   99  O   HOH T  98      -1.089  29.972   2.670  1.00  0.32           O  
HETATM  100  O   HOH T  99      -5.246  -5.718  17.135  1.00  0.32           O  
HETATM  101  O   HOH T 100      25.279  -2.420  24.321  1.00  0.32           O  
HETATM  102  O   HOH T 101       2.841  25.487  -2.394  1.00  0.32           O  
HETATM  103  O   HOH T 102      26.484   2.965   4.799  1.00  0.32           O  
HETATM  104  O   HOH T 103      13.618  35.225  18.941  1.00  0.32           O  
HETATM  105  O   HOH T 104      -4.554  36.156  -3.867  1.00  0.32           O  
HETATM  106  O   HOH T 105      26.561   0.362  19.387  1.00  0.32           O  
HETATM  107  O   HOH T 106      28.533   5.922  21.754  1.00  0.32           O  
HETATM  108  O   HOH T 107      13.580  19.708  36.567  1.00  0.32           O  
HETATM  109  O   HOH T 108       1.367  25.065   7.134  1.00  0.32           O  
HETATM  110  O   HOH T 109      10.144  40.736  25.609  1.00  0.33           O  
HETATM  111  O   HOH T 110     -10.322  -6.394  -3.276  1.00  0.33           O  
HETATM  112  O   HOH T 111       3.934  12.849  36.987  1.00  0.33           O  
HETATM  113  O   HOH T 112      13.353  38.463   6.408  1.00  0.33           O  
HETATM  114  O   HOH T 113      24.209  26.586  -1.160  1.00  0.33           O  
HETATM  115  O   HOH T 114       5.881  22.030  24.744  1.00  0.33           O  
HETATM  116  O   HOH T 115      24.253   3.239  44.736  1.00  0.33           O  
HETATM  117  O   HOH T 116      -6.376 -11.657   9.556  1.00  0.33           O  
HETATM  118  O   HOH T 117       7.238 -20.524  15.132  1.00  0.33           O  
HETATM  119  O   HOH T 118       6.155 -21.944  22.368  1.00  0.34           O  
HETATM  120  O   HOH T 119      19.311  40.879   5.583  1.00  0.34           O  
HETATM  121  O   HOH T 120      -2.983 -16.759  22.116  1.00  0.34           O  
HETATM  122  O   HOH T 121      -1.581  12.143  38.035  1.00  0.34           O  
HETATM  123  O   HOH T 122       8.858  16.929  34.049  1.00  0.34           O  
HETATM  124  O   HOH T 123       7.170  41.664  17.377  1.00  0.34           O  
HETATM  125  O   HOH T 124      11.144  -8.242  33.711  1.00  0.34           O  
HETATM  126  O   HOH T 125      -2.687 -17.463   9.833  1.00  0.34           O  
HETATM  127  O   HOH T 126      26.189  24.354  29.450  1.00  0.34           O  
HETATM  128  O   HOH T 127      13.865   4.867   5.326  1.00  0.34           O  
HETATM  129  O   HOH T 128      -0.754   7.539  40.651  1.00  0.35           O  
HETATM  130  O   HOH T 129      -3.978  -3.083  -2.413  1.00  0.35           O  
HETATM  131  O   HOH T 130      -4.292  22.637   2.559  1.00  0.35           O  
HETATM  132  O   HOH T 131       4.536  19.528   3.738  1.00  0.35           O  
HETATM  133  O   HOH T 132      -4.020  26.513  23.054  1.00  0.35           O  
HETATM  134  O   HOH T 133      19.444 -11.018  20.039  1.00  0.35           O  
HETATM  135  O   HOH T 134       1.579  -3.153  38.173  1.00  0.35           O  
HETATM  136  O   HOH T 135      24.031  39.556   6.895  1.00  0.35           O  
HETATM  137  O   HOH T 136       3.917  -1.509  35.598  1.00  0.35           O  
HETATM  138  O   HOH T 137       0.769  24.805   9.934  1.00  0.35           O  
HETATM  139  O   HOH T 138      22.793  22.638  -0.056  1.00  0.35           O  
HETATM  140  O   HOH T 139       9.365  25.659  30.502  1.00  0.35           O  
HETATM  141  O   HOH T 140      18.783   5.194   1.624  1.00  0.35           O  
HETATM  142  O   HOH T 141      -1.137  33.527  21.644  1.00  0.35           O  
HETATM  143  O   HOH T 142      16.691  31.942  24.911  1.00  0.35           O  
HETATM  144  O   HOH T 143      30.319  20.031   2.765  1.00  0.35           O  
HETATM  145  O   HOH T 144      24.712   2.448  11.160  1.00  0.36           O  
HETATM  146  O   HOH T 145       2.656   2.363  10.715  1.00  0.36           O  
HETATM  147  O   HOH T 146      14.827  -5.455  36.792  1.00  0.36           O  
HETATM  148  O   HOH T 147      -3.336  -4.237  15.948  1.00  0.36           O  
HETATM  149  O   HOH T 148      14.987  16.213  20.852  1.00  0.36           O  
HETATM  150  O   HOH T 149      25.080  16.124  14.334  1.00  0.36           O  
HETATM  151  O   HOH T 150      -3.934   2.086  43.110  1.00  0.36           O  
HETATM  152  O   HOH T 151       8.773  40.463  15.417  1.00  0.36           O  
HETATM  153  O   HOH T 152       6.142  34.947  26.752  1.00  0.36           O  
HETATM  154  O   HOH T 153      21.520  39.274   5.726  1.00  0.36           O  
HETATM  155  O   HOH T 154      28.312  -7.966  27.191  1.00  0.36           O  
HETATM  156  O   HOH T 155      17.798  15.135  -0.119  1.00  0.36           O  
HETATM  157  O   HOH T 156       4.380 -20.511  12.538  1.00  0.36           O  
HETATM  158  O   HOH T 157       4.513  42.062  13.862  1.00  0.36           O  
HETATM  159  O   HOH T 158      17.786 -12.703  21.457  1.00  0.37           O  
HETATM  160  O   HOH T 159      -2.467  -6.492  17.009  1.00  0.37           O  
HETATM  161  O   HOH T 160      25.778  20.470  32.447  1.00  0.37           O  
HETATM  162  O   HOH T 161       8.158 -13.520  24.959  1.00  0.37           O  
HETATM  163  O   HOH T 162      -1.853   9.702  39.299  1.00  0.37           O  
HETATM  164  O   HOH T 163      -1.108  25.854   6.282  1.00  0.37           O  
HETATM  165  O   HOH T 164       4.969  25.934  30.860  1.00  0.37           O  
HETATM  166  O   HOH T 165      -6.143 -19.530  20.378  1.00  0.37           O  
HETATM  167  O   HOH T 166      31.827   6.579  23.394  1.00  0.37           O  
HETATM  168  O   HOH T 167      15.097  31.438  34.515  1.00  0.37           O  
HETATM  169  O   HOH T 168      -1.651  28.407  16.956  1.00  0.37           O  
HETATM  170  O   HOH T 169      18.850  35.334   7.179  1.00  0.37           O  
HETATM  171  O   HOH T 170      22.819  25.186  35.899  1.00  0.37           O  
HETATM  172  O   HOH T 171      -1.065  36.132  22.904  1.00  0.37           O  
HETATM  173  O   HOH T 172       3.161  41.308  20.597  1.00  0.38           O  
HETATM  174  O   HOH T 173      16.093  30.924  32.137  1.00  0.38           O  
HETATM  175  O   HOH T 174      22.517  21.039   2.381  1.00  0.38           O  
HETATM  176  O   HOH T 175      19.823  32.511  28.159  1.00  0.38           O  
HETATM  177  O   HOH T 176      -1.584  -1.941  -1.483  1.00  0.38           O  
HETATM  178  O   HOH T 177       7.610  20.286  33.063  1.00  0.38           O  
HETATM  179  O   HOH T 178      16.258 -17.666  30.802  1.00  0.38           O  
HETATM  180  O   HOH T 179      19.087  15.884  21.458  1.00  0.38           O  
HETATM  181  O   HOH T 180      15.358  -5.626  22.395  1.00  0.38           O  
HETATM  182  O   HOH T 181     -11.372  21.760   0.686  1.00  0.38           O  
HETATM  183  O   HOH T 182      12.688  44.823  22.769  1.00  0.38           O  
HETATM  184  O   HOH T 183      24.375  31.746  19.279  1.00  0.38           O  
HETATM  185  O   HOH T 184      10.541   5.844  21.353  1.00  0.38           O  
HETATM  186  O   HOH T 185      27.190   7.826  23.347  1.00  0.38           O  
HETATM  187  O   HOH T 186      -5.563  33.579  -3.370  1.00  0.38           O  
HETATM  188  O   HOH T 187      -2.549  34.922  12.370  1.00  0.38           O  
HETATM  189  O   HOH T 188      17.289  38.985   5.330  1.00  0.39           O  
HETATM  190  O   HOH T 189       3.122  20.358   6.276  1.00  0.39           O  
HETATM  191  O   HOH T 190      16.198  -6.192  34.546  1.00  0.39           O  
HETATM  192  O   HOH T 191      20.384  35.124  18.463  1.00  0.39           O  
HETATM  193  O   HOH T 192      -2.068 -14.900  23.811  1.00  0.39           O  
HETATM  194  O   HOH T 193      18.918 -13.647  25.630  1.00  0.39           O  
HETATM  195  O   HOH T 194      16.212  38.144  19.474  1.00  0.39           O  
HETATM  196  O   HOH T 195     -17.128   4.998  -7.150  1.00  0.39           O  
HETATM  197  O   HOH T 196      -1.813 -20.389  20.372  1.00  0.39           O  
HETATM  198  O   HOH T 197      27.548  -1.826  20.774  1.00  0.39           O  
HETATM  199  O   HOH T 198       0.518  29.197  -1.808  1.00  0.39           O  
HETATM  200  O   HOH T 199       7.141 -20.253  12.333  1.00  0.39           O  
HETATM  201  O   HOH T 200      -5.256   9.058  36.237  1.00  0.39           O  
HETATM  202  O   HOH T 201      -3.397  35.697   6.020  1.00  0.40           O  
HETATM  203  O   HOH T 202      -6.335  23.058   4.376  1.00  0.40           O  
HETATM  204  O   HOH T 203      20.434  24.067  36.382  1.00  0.40           O  
HETATM  205  O   HOH T 204      16.769  14.308  21.729  1.00  0.40           O  
HETATM  206  O   HOH T 205       3.028  22.068  24.537  1.00  0.40           O  
HETATM  207  O   HOH T 206     -10.718  -0.085  -9.663  1.00  0.40           O  
HETATM  208  O   HOH T 207      23.478   1.663  35.428  1.00  0.40           O  
HETATM  209  O   HOH T 208       5.057  28.080  32.578  1.00  0.40           O  
HETATM  210  O   HOH T 209      -6.667  -9.422   7.960  1.00  0.40           O  
HETATM  211  O   HOH T 210      28.811  10.195  26.123  1.00  0.40           O  
HETATM  212  O   HOH T 211      -9.209  -5.013 -12.413  1.00  0.40           O  
HETATM  213  O   HOH T 212      26.034  24.957  32.089  1.00  0.40           O  
HETATM  214  O   HOH T 213      -2.252  22.907  22.647  1.00  0.40           O  
HETATM  215  O   HOH T 214      -2.776  21.632  -0.769  1.00  0.40           O  
HETATM  216  O   HOH T 215       6.780  15.449  23.600  1.00  0.40           O  
HETATM  217  O   HOH T 216      -4.028  11.449  35.376  1.00  0.41           O  
HETATM  218  O   HOH T 217      -3.942  22.149   5.358  1.00  0.41           O  
HETATM  219  O   HOH T 218      -4.144  32.289   4.916  1.00  0.41           O  
HETATM  220  O   HOH T 219       8.818  18.643  25.780  1.00  0.41           O  
HETATM  221  O   HOH T 220      -6.288   6.492  -8.979  1.00  0.41           O  
HETATM  222  O   HOH T 221     -18.334   4.056  -4.834  1.00  0.41           O  
HETATM  223  O   HOH T 222      18.529  11.041   9.616  1.00  0.41           O  
HETATM  224  O   HOH T 223       8.941  27.552  -8.146  1.00  0.41           O  
HETATM  225  O   HOH T 224       0.123  20.258  -3.985  1.00  0.41           O  
HETATM  226  O   HOH T 225      13.480  -7.030  34.888  1.00  0.41           O  
HETATM  227  O   HOH T 226      -4.212   7.237  -7.250  1.00  0.41           O  
HETATM  228  O   HOH T 227      14.684  29.130  27.367  1.00  0.41           O  
HETATM  229  O   HOH T 228      27.479  26.043  27.555  1.00  0.41           O  
HETATM  230  O   HOH T 229      -4.302  -4.689  -9.915  1.00  0.42           O  
HETATM  231  O   HOH T 230      24.999  29.994  14.175  1.00  0.42           O  
HETATM  232  O   HOH T 231       0.421 -22.076  20.622  1.00  0.42           O  
HETATM  233  O   HOH T 232       3.604   6.824  20.960  1.00  0.42           O  
HETATM  234  O   HOH T 233      -2.987 -15.089   6.648  1.00  0.42           O  
HETATM  235  O   HOH T 234      -3.440  29.652   1.321  1.00  0.42           O  
HETATM  236  O   HOH T 235      27.877  10.400  38.751  1.00  0.42           O  
HETATM  237  O   HOH T 236      26.563  10.500   8.043  1.00  0.42           O  
HETATM  238  O   HOH T 237       5.746  -3.868  35.748  1.00  0.42           O  
HETATM  239  O   HOH T 238       0.833   9.742  40.015  1.00  0.42           O  
HETATM  240  O   HOH T 239       8.620  21.015  15.384  1.00  0.42           O  
HETATM  241  O   HOH T 240       6.425  21.054  27.379  1.00  0.42           O  
HETATM  242  O   HOH T 241       6.108  -6.591  35.112  1.00  0.42           O  
HETATM  243  O   HOH T 242      25.804  16.821  26.478  1.00  0.43           O  
HETATM  244  O   HOH T 243      15.428  29.989  29.754  1.00  0.43           O  
HETATM  245  O   HOH T 244       6.528  11.380  15.825  1.00  0.43           O  
HETATM  246  O   HOH T 245      13.037  13.862  14.592  1.00  0.43           O  
HETATM  247  O   HOH T 246      -6.160  35.330  11.669  1.00  0.43           O  
HETATM  248  O   HOH T 247      21.739  11.324  -0.096  1.00  0.43           O  
HETATM  249  O   HOH T 248       6.601  16.933  26.008  1.00  0.43           O  
HETATM  250  O   HOH T 249      23.598   4.226  -1.206  1.00  0.43           O  
HETATM  251  O   HOH T 250     -11.972   1.921 -11.036  1.00  0.43           O  
HETATM  252  O   HOH T 251      28.859  24.930   3.303  1.00  0.43           O  
HETATM  253  O   HOH T 252      -2.679  -8.948  15.665  1.00  0.43           O  
HETATM  254  O   HOH T 253      -3.549  29.829   4.026  1.00  0.43           O  
HETATM  255  O   HOH T 254       8.607   6.639  46.761  1.00  0.43           O  
HETATM  256  O   HOH T 255       2.544  38.037  22.923  1.00  0.43           O  
HETATM  257  O   HOH T 256      27.302   5.528  45.388  1.00  0.43           O  
HETATM  258  O   HOH T 257      25.894   0.494  40.485  1.00  0.43           O  
HETATM  259  O   HOH T 258      11.275 -19.379   8.841  1.00  0.43           O  
HETATM  260  O   HOH T 259      26.181  -9.689  26.474  1.00  0.43           O  
HETATM  261  O   HOH T 260     -12.671  -1.176  -5.799  1.00  0.43           O  
HETATM  262  O   HOH T 261       1.199  40.410  22.343  1.00  0.43           O  
HETATM  263  O   HOH T 262      -4.747 -12.037   0.919  1.00  0.44           O  
HETATM  264  O   HOH T 263      -4.279   1.931  45.763  1.00  0.44           O  
HETATM  265  O   HOH T 264      20.021  -1.054  38.464  1.00  0.44           O  
HETATM  266  O   HOH T 265      20.355  33.760  24.339  1.00  0.44           O  
HETATM  267  O   HOH T 266      26.284  20.974  22.971  1.00  0.44           O  
HETATM  268  O   HOH T 267      26.151  26.487   5.758  1.00  0.44           O  
HETATM  269  O   HOH T 268       8.155  -5.178  36.452  1.00  0.44           O  
HETATM  270  O   HOH T 269      22.580  35.397  33.052  1.00  0.44           O  
HETATM  271  O   HOH T 270      -6.423  21.917  19.481  1.00  0.44           O  
HETATM  272  O   HOH T 271       6.313  14.095  36.528  1.00  0.44           O  
HETATM  273  O   HOH T 272      -2.193  34.020  24.336  1.00  0.44           O  
HETATM  274  O   HOH T 273      -6.817   8.994  33.944  1.00  0.44           O  
HETATM  275  O   HOH T 274      14.786  39.149   4.146  1.00  0.44           O  
HETATM  276  O   HOH T 275      24.961  -0.630  35.566  1.00  0.44           O  
HETATM  277  O   HOH T 276      -8.169 -18.892  22.011  1.00  0.44           O  
HETATM  278  O   HOH T 277      -4.185  22.709  32.411  1.00  0.45           O  
HETATM  279  O   HOH T 278      -6.033  37.781  12.918  1.00  0.45           O  
HETATM  280  O   HOH T 279      12.210  38.219   3.925  1.00  0.45           O  
HETATM  281  O   HOH T 280      31.082  26.461   3.136  1.00  0.45           O  
HETATM  282  O   HOH T 281      25.724  27.705  18.485  1.00  0.45           O  
HETATM  283  O   HOH T 282      19.278  31.171  24.159  1.00  0.45           O  
HETATM  284  O   HOH T 283     -11.713  -5.293  -5.473  1.00  0.45           O  
HETATM  285  O   HOH T 284      25.925  -0.077  10.432  1.00  0.45           O  
HETATM  286  O   HOH T 285      -1.364   2.527  -1.548  1.00  0.45           O  
HETATM  287  O   HOH T 286      21.890  40.355  11.247  1.00  0.45           O  
HETATM  288  O   HOH T 287      21.769  -6.468   6.271  1.00  0.45           O  
HETATM  289  O   HOH T 288      27.416  -2.272  11.420  1.00  0.45           O  
HETATM  290  O   HOH T 289      -9.099  15.326  -3.308  1.00  0.45           O  
HETATM  291  O   HOH T 290      16.104   4.853   6.903  1.00  0.45           O  
HETATM  292  O   HOH T 291      22.665  -7.797   9.911  1.00  0.45           O  
HETATM  293  O   HOH T 292      18.915  37.367  19.188  1.00  0.45           O  
HETATM  294  O   HOH T 293       8.957 -22.616   4.837  1.00  0.45           O  
HETATM  295  O   HOH T 294       9.931  42.241  17.179  1.00  0.45           O  
HETATM  296  O   HOH T 295      -2.435  23.661   7.245  1.00  0.45           O  
HETATM  297  O   HOH T 296      27.728   3.276  16.662  1.00  0.45           O  
HETATM  298  O   HOH T 297       4.231  20.193  26.001  1.00  0.45           O  
HETATM  299  O   HOH T 298       4.493  41.394  16.680  1.00  0.45           O  
HETATM  300  O   HOH T 299     -13.217  -3.502  -7.075  1.00  0.45           O  
HETATM  301  O   HOH T 300      -9.417   2.289 -10.480  1.00  0.45           O  
HETATM  302  O   HOH T 301      12.577  18.873  38.971  1.00  0.45           O  
HETATM  303  O   HOH T 302      20.496  32.286  22.035  1.00  0.45           O  
HETATM  304  O   HOH T 303      24.648  22.744  31.297  1.00  0.45           O  
HETATM  305  O   HOH T 304      13.878 -18.631  31.704  1.00  0.45           O  
HETATM  306  O   HOH T 305       0.176  22.787   7.970  1.00  0.46           O  
HETATM  307  O   HOH T 306      13.650   7.327  47.223  1.00  0.46           O  
HETATM  308  O   HOH T 307      24.194  33.873  12.088  1.00  0.46           O  
HETATM  309  O   HOH T 308      -3.906  32.426  -1.555  1.00  0.46           O  
HETATM  310  O   HOH T 309      17.400  32.779  33.758  1.00  0.46           O  
HETATM  311  O   HOH T 310      25.353  28.240   0.656  1.00  0.46           O  
HETATM  312  O   HOH T 311       5.812  -3.431  14.913  1.00  0.46           O  
HETATM  313  O   HOH T 312     -18.088   1.297  -4.785  1.00  0.46           O  
HETATM  314  O   HOH T 313      29.846   8.234  22.603  1.00  0.46           O  
HETATM  315  O   HOH T 314       6.878  36.464  24.481  1.00  0.46           O  
HETATM  316  O   HOH T 315      -3.254  43.865   7.281  1.00  0.46           O  
HETATM  317  O   HOH T 316      -3.989  22.145  20.462  1.00  0.46           O  
HETATM  318  O   HOH T 317      29.504   5.868  38.820  1.00  0.46           O  
HETATM  319  O   HOH T 318      15.183  40.460   6.530  1.00  0.46           O  
HETATM  320  O   HOH T 319      29.668   4.042  18.551  1.00  0.46           O  
HETATM  321  O   HOH T 320       3.013  14.591  -1.622  1.00  0.46           O  
HETATM  322  O   HOH T 321       8.824  44.513  13.014  1.00  0.46           O  
HETATM  323  O   HOH T 322       9.438  25.227  33.419  1.00  0.46           O  
HETATM  324  O   HOH T 323      22.264   8.714  47.149  1.00  0.46           O  
HETATM  325  O   HOH T 324      22.768  33.255  20.887  1.00  0.46           O  
HETATM  326  O   HOH T 325      12.992 -13.912  23.708  1.00  0.46           O  
HETATM  327  O   HOH T 326      27.815   3.449  43.727  1.00  0.46           O  
HETATM  328  O   HOH T 327       2.836  43.868  12.197  1.00  0.46           O  
HETATM  329  O   HOH T 328      -1.655  30.880  -2.241  1.00  0.46           O  
HETATM  330  O   HOH T 329      26.773  23.715  22.795  1.00  0.46           O  
HETATM  331  O   HOH T 330     -14.585  -4.741  -9.255  1.00  0.47           O  
HETATM  332  O   HOH T 331      13.611  42.713  21.342  1.00  0.47           O  
HETATM  333  O   HOH T 332      26.744   5.013  14.670  1.00  0.47           O  
HETATM  334  O   HOH T 333      12.209  26.116  -5.727  1.00  0.47           O  
HETATM  335  O   HOH T 334      25.177   2.126  -0.166  1.00  0.47           O  
HETATM  336  O   HOH T 335      17.725 -11.169  16.199  1.00  0.47           O  
HETATM  337  O   HOH T 336      -5.643   4.184 -10.939  1.00  0.47           O  
HETATM  338  O   HOH T 337      16.910  -2.563  40.468  1.00  0.47           O  
HETATM  339  O   HOH T 338      19.386  -1.534  41.210  1.00  0.47           O  
HETATM  340  O   HOH T 339       8.163  43.148  15.272  1.00  0.47           O  
HETATM  341  O   HOH T 340      25.888  29.772  20.142  1.00  0.47           O  
HETATM  342  O   HOH T 341      29.649  10.795  23.598  1.00  0.47           O  
HETATM  343  O   HOH T 342      -5.604  31.645  10.953  1.00  0.47           O  
HETATM  344  O   HOH T 343     -18.112   2.525  -7.161  1.00  0.47           O  
HETATM  345  O   HOH T 344      31.657  10.493  31.671  1.00  0.47           O  
HETATM  346  O   HOH T 345      27.034  -2.663  14.030  1.00  0.47           O  
HETATM  347  O   HOH T 346       0.892   5.954  -1.046  1.00  0.47           O  
HETATM  348  O   HOH T 347      19.115  36.645  31.563  1.00  0.47           O  
HETATM  349  O   HOH T 348      -9.966   0.492 -12.275  1.00  0.47           O  
HETATM  350  O   HOH T 349       2.436  11.885  39.163  1.00  0.47           O  
HETATM  351  O   HOH T 350       8.689  22.559  34.394  1.00  0.47           O  
HETATM  352  O   HOH T 351      17.924   0.758  42.154  1.00  0.47           O  
HETATM  353  O   HOH T 352      -4.383  35.185  -1.263  1.00  0.47           O  
HETATM  354  O   HOH T 353      -5.881  22.195  16.834  1.00  0.47           O  
HETATM  355  O   HOH T 354       4.183  22.559  -6.953  1.00  0.48           O  
HETATM  356  O   HOH T 355      -2.239  29.861  29.437  1.00  0.48           O  
HETATM  357  O   HOH T 356      12.047  16.590  40.543  1.00  0.48           O  
HETATM  358  O   HOH T 357      22.410  29.987  36.124  1.00  0.48           O  
HETATM  359  O   HOH T 358       9.793  21.819  25.402  1.00  0.48           O  
HETATM  360  O   HOH T 359      28.685   5.813  16.556  1.00  0.48           O  
HETATM  361  O   HOH T 360       0.511  22.479  23.278  1.00  0.48           O  
HETATM  362  O   HOH T 361      11.578  43.049  19.317  1.00  0.48           O  
HETATM  363  O   HOH T 362      24.747  38.335  32.504  1.00  0.48           O  
HETATM  364  O   HOH T 363       8.442  21.944   1.759  1.00  0.48           O  
HETATM  365  O   HOH T 364      11.314   6.179  46.118  1.00  0.48           O  
HETATM  366  O   HOH T 365      -5.653  22.728  30.107  1.00  0.48           O  
HETATM  367  O   HOH T 366      26.604  22.716  16.932  1.00  0.48           O  
HETATM  368  O   HOH T 367      -5.112  -5.786 -12.342  1.00  0.48           O  
HETATM  369  O   HOH T 368      12.157   3.204  42.943  1.00  0.48           O  
HETATM  370  O   HOH T 369      24.223  28.416  16.259  1.00  0.48           O  
HETATM  371  O   HOH T 370      -3.128   8.115  -4.836  1.00  0.48           O  
HETATM  372  O   HOH T 371      13.742 -13.221   1.637  1.00  0.48           O  
HETATM  373  O   HOH T 372      26.256  28.137  26.085  1.00  0.48           O  
HETATM  374  O   HOH T 373      20.322  19.473   1.906  1.00  0.49           O  
HETATM  375  O   HOH T 374       3.000  42.207  23.436  1.00  0.49           O  
HETATM  376  O   HOH T 375      21.211  39.222  13.746  1.00  0.49           O  
HETATM  377  O   HOH T 376      15.982  13.933  -1.802  1.00  0.49           O  
HETATM  378  O   HOH T 377      -6.759  12.428  31.868  1.00  0.49           O  
HETATM  379  O   HOH T 378      28.709 -10.720  26.655  1.00  0.49           O  
HETATM  380  O   HOH T 379      11.904 -20.165  26.547  1.00  0.49           O  
HETATM  381  O   HOH T 380      27.622  24.148   5.621  1.00  0.49           O  
HETATM  382  O   HOH T 381      -3.016 -22.333  21.895  1.00  0.49           O  
HETATM  383  O   HOH T 382      -5.456  46.153  11.775  1.00  0.49           O  
HETATM  384  O   HOH T 383      19.371   2.263  44.037  1.00  0.49           O  
HETATM  385  O   HOH T 384       8.216  14.205  34.478  1.00  0.49           O  
HETATM  386  O   HOH T 385      25.934  -0.787   5.637  1.00  0.49           O  
HETATM  387  O   HOH T 386     -18.178   4.280  -0.821  1.00  0.49           O  
HETATM  388  O   HOH T 387      12.813 -13.441  20.239  1.00  0.49           O  
HETATM  389  O   HOH T 388      21.898  20.150  -0.308  1.00  0.49           O  
HETATM  390  O   HOH T 389      25.188  29.053  22.710  1.00  0.49           O  
HETATM  391  O   HOH T 390     -13.179  -3.154  -1.546  1.00  0.49           O  
HETATM  392  O   HOH T 391      -3.808   5.775  -9.613  1.00  0.49           O  
HETATM  393  O   HOH T 392       4.061  17.687  33.090  1.00  0.50           O  
HETATM  394  O   HOH T 393      -2.163  21.801  -3.462  1.00  0.50           O  
HETATM  395  O   HOH T 394       8.819  -7.329  34.905  1.00  0.50           O  
HETATM  396  O   HOH T 395      26.852  26.213  -0.412  1.00  0.50           O  
HETATM  397  O   HOH T 396      -0.458   4.618  -3.053  1.00  0.50           O  
HETATM  398  O   HOH T 397     -17.197   2.548   0.810  1.00  0.50           O  
HETATM  399  O   HOH T 398      17.984  23.105  35.819  1.00  0.50           O  
HETATM  400  O   HOH T 399      17.835  23.237  25.000  1.00  0.50           O  
HETATM  401  O   HOH T 400      -3.709  27.761  32.250  1.00  0.50           O  
HETATM  402  O   HOH T 401      25.775   1.742  42.884  1.00  0.50           O  
HETATM  403  O   HOH T 402      16.612  24.885  37.537  1.00  0.50           O  
HETATM  404  O   HOH T 403      21.972  24.953  -1.648  1.00  0.50           O  
HETATM  405  O   HOH T 404       1.183  24.470  -4.474  1.00  0.50           O  
HETATM  406  O   HOH T 405       4.332  16.364  24.496  1.00  0.50           O  
HETATM  407  O   HOH T 406     -18.537   0.864  -2.236  1.00  0.50           O  
HETATM  408  O   HOH T 407      21.338  31.818  25.977  1.00  0.50           O  
HETATM  409  O   HOH T 408      26.739  16.080  -0.684  1.00  0.51           O  
HETATM  410  O   HOH T 409      -1.646  44.710   4.041  1.00  0.51           O  
HETATM  411  O   HOH T 410      15.165  23.176  35.927  1.00  0.51           O  
HETATM  412  O   HOH T 411      11.361  28.344  -7.296  1.00  0.51           O  
HETATM  413  O   HOH T 412      -4.088  10.744  38.099  1.00  0.51           O  
HETATM  414  O   HOH T 413       1.009   5.394  41.183  1.00  0.51           O  
HETATM  415  O   HOH T 414      -1.444   4.833  40.366  1.00  0.51           O  
HETATM  416  O   HOH T 415      20.567  -8.189   8.033  1.00  0.51           O  
HETATM  417  O   HOH T 416     -15.132   6.756  -7.561  1.00  0.51           O  
HETATM  418  O   HOH T 417       6.439  18.205  34.368  1.00  0.51           O  
HETATM  419  O   HOH T 418      15.400  12.064   0.025  1.00  0.51           O  
HETATM  420  O   HOH T 419      23.084 -10.310  10.890  1.00  0.51           O  
HETATM  421  O   HOH T 420      29.990  -8.753  25.039  1.00  0.51           O  
HETATM  422  O   HOH T 421      13.520 -18.284  24.937  1.00  0.51           O  
HETATM  423  O   HOH T 422      -2.960  30.619  32.067  1.00  0.51           O  
HETATM  424  O   HOH T 423       8.794  14.814  37.170  1.00  0.51           O  
HETATM  425  O   HOH T 424      28.221   1.597  41.693  1.00  0.51           O  
HETATM  426  O   HOH T 425      -3.710  -2.387  -5.042  1.00  0.51           O  
HETATM  427  O   HOH T 426      26.919  -0.099  13.026  1.00  0.51           O  
HETATM  428  O   HOH T 427     -19.743   1.867   0.032  1.00  0.52           O  
HETATM  429  O   HOH T 428      16.315  -5.058  39.068  1.00  0.52           O  
HETATM  430  O   HOH T 429      24.961  26.734  36.403  1.00  0.52           O  
HETATM  431  O   HOH T 430      11.146  23.744  35.050  1.00  0.52           O  
HETATM  432  O   HOH T 431      26.532  -1.740   8.113  1.00  0.52           O  
HETATM  433  O   HOH T 432      25.103   4.767  46.867  1.00  0.52           O  
HETATM  434  O   HOH T 433      11.481 -15.268  21.826  1.00  0.52           O  
HETATM  435  O   HOH T 434       2.384  42.472  15.499  1.00  0.52           O  
HETATM  436  O   HOH T 435      25.429  15.181  -3.060  1.00  0.52           O  
HETATM  437  O   HOH T 436       4.894  31.792  -6.038  1.00  0.52           O  
HETATM  438  O   HOH T 437      -5.733  14.087  29.951  1.00  0.52           O  
HETATM  439  O   HOH T 438      17.169 -12.006  18.817  1.00  0.52           O  
HETATM  440  O   HOH T 439      -0.086  42.230  14.621  1.00  0.52           O  
HETATM  441  O   HOH T 440      15.669 -13.114   7.980  1.00  0.52           O  
HETATM  442  O   HOH T 441      15.688  21.034  37.648  1.00  0.52           O  
HETATM  443  O   HOH T 442     -12.143  -5.644  -8.321  1.00  0.52           O  
HETATM  444  O   HOH T 443      -5.606 -17.767  22.468  1.00  0.52           O  
HETATM  445  O   HOH T 444      11.774 -10.634  34.882  1.00  0.52           O  
HETATM  446  O   HOH T 445       9.529 -15.641  23.808  1.00  0.52           O  
HETATM  447  O   HOH T 446      10.162 -18.383  27.393  1.00  0.52           O  
HETATM  448  O   HOH T 447      22.714  32.397  23.565  1.00  0.52           O  
HETATM  449  O   HOH T 448      23.880  -2.391  28.363  1.00  0.52           O  
HETATM  450  O   HOH T 449      21.054  -1.726   2.480  1.00  0.53           O  
HETATM  451  O   HOH T 450       4.276  17.557  35.855  1.00  0.53           O  
HETATM  452  O   HOH T 451      26.446  25.334  17.248  1.00  0.53           O  
HETATM  453  O   HOH T 452      17.962  39.854  18.089  1.00  0.53           O  
HETATM  454  O   HOH T 453      26.616  17.867  15.847  1.00  0.53           O  
HETATM  455  O   HOH T 454      23.759  29.233  25.041  1.00  0.53           O  
HETATM  456  O   HOH T 455      22.722  21.106  13.230  1.00  0.53           O  
HETATM  457  O   HOH T 456      19.447  40.871  12.335  1.00  0.53           O  
HETATM  458  O   HOH T 457       9.449  43.059  20.857  1.00  0.53           O  
HETATM  459  O   HOH T 458      -4.932  -6.679  -8.013  1.00  0.53           O  
HETATM  460  O   HOH T 459      12.284  29.514  -4.180  1.00  0.53           O  
HETATM  461  O   HOH T 460      19.433  -6.637  35.897  1.00  0.53           O  
HETATM  462  O   HOH T 461      11.453  23.428  -5.601  1.00  0.53           O  
HETATM  463  O   HOH T 462       5.676  15.654  34.335  1.00  0.53           O  
HETATM  464  O   HOH T 463      28.370  16.867  28.989  1.00  0.53           O  
HETATM  465  O   HOH T 464      24.204   7.068  48.073  1.00  0.54           O  
HETATM  466  O   HOH T 465      13.728  38.436  14.374  1.00  0.54           O  
HETATM  467  O   HOH T 466      -3.698  33.224  22.196  1.00  0.54           O  
HETATM  468  O   HOH T 467     -12.205  10.565  -7.401  1.00  0.54           O  
HETATM  469  O   HOH T 468      14.709  33.328  32.494  1.00  0.54           O  
HETATM  470  O   HOH T 469      22.699  -0.223  37.197  1.00  0.54           O  
HETATM  471  O   HOH T 470      -4.679  20.927  -2.628  1.00  0.54           O  
HETATM  472  O   HOH T 471       2.405  41.351  -1.103  1.00  0.54           O  
HETATM  473  O   HOH T 472      29.845   5.885  31.098  1.00  0.54           O  
HETATM  474  O   HOH T 473      12.225   8.202   2.375  1.00  0.55           O  
HETATM  475  O   HOH T 474      -2.760  34.183  -3.375  1.00  0.55           O  
HETATM  476  O   HOH T 475      15.581 -13.733  20.271  1.00  0.55           O  
HETATM  477  O   HOH T 476       6.330 -12.447   4.690  1.00  0.55           O  
HETATM  478  O   HOH T 477      -0.870   7.298  -3.327  1.00  0.55           O  
HETATM  479  O   HOH T 478      17.777  11.129  50.044  1.00  0.55           O  
HETATM  480  O   HOH T 479      -4.906  31.666   2.424  1.00  0.55           O  
HETATM  481  O   HOH T 480      25.106  31.022   0.117  1.00  0.55           O  
HETATM  482  O   HOH T 481      21.255  14.715  46.225  1.00  0.55           O  
HETATM  483  O   HOH T 482      17.705  18.586  43.670  1.00  0.55           O  
HETATM  484  O   HOH T 483      26.113  31.778  12.406  1.00  0.55           O  
HETATM  485  O   HOH T 484      -3.485  24.827  21.027  1.00  0.55           O  
HETATM  486  O   HOH T 485       9.804  29.964  -8.886  1.00  0.55           O  
HETATM  487  O   HOH T 486      32.374   8.179  38.739  1.00  0.55           O  
HETATM  488  O   HOH T 487      27.502   8.788   2.436  1.00  0.56           O  
HETATM  489  O   HOH T 488       3.976  45.332   9.755  1.00  0.56           O  
HETATM  490  O   HOH T 489      -3.291  13.813  36.562  1.00  0.56           O  
HETATM  491  O   HOH T 490       6.297  44.531  13.831  1.00  0.56           O  
HETATM  492  O   HOH T 491       3.464  45.791   5.477  1.00  0.56           O  
HETATM  493  O   HOH T 492      11.173 -19.493  11.429  1.00  0.56           O  
HETATM  494  O   HOH T 493       4.115  16.402  27.268  1.00  0.56           O  
HETATM  495  O   HOH T 494       5.591  14.552  -0.041  1.00  0.56           O  
HETATM  496  O   HOH T 495       4.058  33.923  33.984  1.00  0.56           O  
HETATM  497  O   HOH T 496      29.918   8.454  39.715  1.00  0.56           O  
HETATM  498  O   HOH T 497      15.301   3.375  45.459  1.00  0.56           O  
HETATM  499  O   HOH T 498      20.193 -15.507  24.233  1.00  0.56           O  
HETATM  500  O   HOH T 499       4.840  32.348  34.740  1.00  0.57           O  
HETATM  501  O   HOH T 500       6.456  12.412  41.327  1.00  0.57           O  
HETATM  502  O   HOH T 501      10.515 -11.338  32.421  1.00  0.57           O  
HETATM  503  O   HOH T 502      26.719   0.919   3.144  1.00  0.57           O  
HETATM  504  O   HOH T 503      33.364  10.310  38.915  1.00  0.57           O  
HETATM  505  O   HOH T 504       6.472  29.840  34.249  1.00  0.58           O  
HETATM  506  O   HOH T 505      27.552   0.878  15.439  1.00  0.58           O  
HETATM  507  O   HOH T 506       9.619 -20.252  10.796  1.00  0.58           O  
HETATM  508  O   HOH T 507      23.573  34.028  35.242  1.00  0.59           O  
HETATM  509  O   HOH T 508      31.015   3.147  20.907  1.00  0.59           O  
HETATM  510  O   HOH T 509      31.534  11.714  29.151  1.00  0.60           O  
HETATM  511  O   HOH T 510       5.613  -5.653  38.965  1.00  0.62           O  
HETATM  512  O   HOH T 511       3.071  19.538  28.459  1.00  0.62           O  
HETATM  513  O   HOH T 512       6.381   7.932 -11.358  1.00  0.62           O  
HETATM  514  O   HOH T 513      21.904  -2.654  26.597  1.00  0.62           O  
TER     515      HOH T 513 
