# Supplementary material for: Accurate Prediction of Hydration Sites of Proteins Using Energy Model With Atom Embedding
Source: Front Mol Biosci. 2021 Sep 20;8:756075. doi: 10.3389/fmolb.2021.756075 (PMC8488165; doi:10.3389/fmolb.2021.756075)
Supplement: Supplementary file 1 [file DataSheet1.ZIP › Data Sheet 1/Our_result_pdb/our_dataset_output/2W39_watersite.pdb]

HEADER                                                        XXXX


JRNL        PMID   -1
HETATM    1  O   HOH T   0       8.246   8.065  70.851  1.00  0.16           O  
HETATM    2  O   HOH T   1       1.530   8.664  65.576  1.00  0.17           O  
HETATM    3  O   HOH T   2      -3.044  10.854  60.833  1.00  0.17           O  
HETATM    4  O   HOH T   3      14.661  13.643  60.992  1.00  0.18           O  
HETATM    5  O   HOH T   4     -13.693  24.787  64.916  1.00  0.20           O  
HETATM    6  O   HOH T   5      -9.556  31.850  77.023  1.00  0.21           O  
HETATM    7  O   HOH T   6       4.545  25.865  42.214  1.00  0.21           O  
HETATM    8  O   HOH T   7       4.362  30.940  46.773  1.00  0.22           O  
HETATM    9  O   HOH T   8     -14.855  22.417  45.082  1.00  0.22           O  
HETATM   10  O   HOH T   9      -0.659  32.805  72.226  1.00  0.22           O  
HETATM   11  O   HOH T  10      13.057  28.116  69.038  1.00  0.22           O  
HETATM   12  O   HOH T  11      -7.775  15.048  54.939  1.00  0.22           O  
HETATM   13  O   HOH T  12     -14.360  30.671  72.641  1.00  0.22           O  
HETATM   14  O   HOH T  13      -7.564  18.775  76.100  1.00  0.22           O  
HETATM   15  O   HOH T  14     -23.001  25.413  58.551  1.00  0.23           O  
HETATM   16  O   HOH T  15       0.148  21.220  51.255  1.00  0.23           O  
HETATM   17  O   HOH T  16     -10.816  21.977  53.449  1.00  0.23           O  
HETATM   18  O   HOH T  17      -2.996  38.389  60.704  1.00  0.23           O  
HETATM   19  O   HOH T  18       3.397  43.968  43.408  1.00  0.23           O  
HETATM   20  O   HOH T  19      -1.677  33.559  67.317  1.00  0.23           O  
HETATM   21  O   HOH T  20     -17.031  16.190  65.741  1.00  0.24           O  
HETATM   22  O   HOH T  21     -10.423  18.089  67.554  1.00  0.24           O  
HETATM   23  O   HOH T  22      11.668  32.841  54.244  1.00  0.24           O  
HETATM   24  O   HOH T  23      -8.974  20.453  52.023  1.00  0.24           O  
HETATM   25  O   HOH T  24      -7.651  12.842  40.589  1.00  0.24           O  
HETATM   26  O   HOH T  25      13.835   3.681  61.002  1.00  0.25           O  
HETATM   27  O   HOH T  26     -20.144  17.174  62.782  1.00  0.25           O  
HETATM   28  O   HOH T  27      12.521  25.151  55.764  1.00  0.25           O  
HETATM   29  O   HOH T  28      -4.146   7.959  41.396  1.00  0.26           O  
HETATM   30  O   HOH T  29      -9.804  32.415  46.216  1.00  0.26           O  
HETATM   31  O   HOH T  30      -2.898  42.263  47.772  1.00  0.27           O  
HETATM   32  O   HOH T  31     -10.601  33.825  48.288  1.00  0.27           O  
HETATM   33  O   HOH T  32      -1.428  45.123  59.815  1.00  0.27           O  
HETATM   34  O   HOH T  33     -13.522  26.973  47.619  1.00  0.27           O  
HETATM   35  O   HOH T  34       9.733  -0.578  55.826  1.00  0.27           O  
HETATM   36  O   HOH T  35       0.217  14.376  77.252  1.00  0.27           O  
HETATM   37  O   HOH T  36       7.425  39.855  65.511  1.00  0.27           O  
HETATM   38  O   HOH T  37       4.338  23.530  40.828  1.00  0.27           O  
HETATM   39  O   HOH T  38      -8.111  35.283  40.957  1.00  0.28           O  
HETATM   40  O   HOH T  39      23.229  19.581  57.287  1.00  0.28           O  
HETATM   41  O   HOH T  40       6.686  20.064  41.021  1.00  0.28           O  
HETATM   42  O   HOH T  41     -11.810  29.295  78.282  1.00  0.28           O  
HETATM   43  O   HOH T  42      10.408  35.096  60.641  1.00  0.28           O  
HETATM   44  O   HOH T  43      -8.260  46.152  48.935  1.00  0.28           O  
HETATM   45  O   HOH T  44      -4.197   6.870  69.711  1.00  0.28           O  
HETATM   46  O   HOH T  45       8.425  44.463  44.599  1.00  0.28           O  
HETATM   47  O   HOH T  46     -12.994  34.715  47.228  1.00  0.28           O  
HETATM   48  O   HOH T  47      10.885  32.717  46.560  1.00  0.28           O  
HETATM   49  O   HOH T  48      -6.220  44.710  47.885  1.00  0.28           O  
HETATM   50  O   HOH T  49     -15.800  28.403  37.494  1.00  0.28           O  
HETATM   51  O   HOH T  50       3.592  22.772  48.844  1.00  0.28           O  
HETATM   52  O   HOH T  51      15.875  36.138  72.391  1.00  0.28           O  
HETATM   53  O   HOH T  52       6.956  20.442  50.379  1.00  0.29           O  
HETATM   54  O   HOH T  53     -17.598  29.556  74.549  1.00  0.29           O  
HETATM   55  O   HOH T  54     -11.754  34.685  69.146  1.00  0.29           O  
HETATM   56  O   HOH T  55     -19.407  24.272  55.918  1.00  0.29           O  
HETATM   57  O   HOH T  56     -16.138  32.374  52.738  1.00  0.29           O  
HETATM   58  O   HOH T  57     -12.650  16.962  36.900  1.00  0.29           O  
HETATM   59  O   HOH T  58     -10.860  36.728  51.948  1.00  0.29           O  
HETATM   60  O   HOH T  59      -4.208  37.784  78.062  1.00  0.29           O  
HETATM   61  O   HOH T  60      -9.641  10.347  69.312  1.00  0.29           O  
HETATM   62  O   HOH T  61       6.041  35.475  41.034  1.00  0.29           O  
HETATM   63  O   HOH T  62      11.699  25.794  41.945  1.00  0.30           O  
HETATM   64  O   HOH T  63       9.736  21.931  64.443  1.00  0.30           O  
HETATM   65  O   HOH T  64      13.198  19.919  50.803  1.00  0.30           O  
HETATM   66  O   HOH T  65       2.541  20.492  50.039  1.00  0.30           O  
HETATM   67  O   HOH T  66     -16.894  18.896  65.467  1.00  0.30           O  
HETATM   68  O   HOH T  67       5.081  37.407  53.309  1.00  0.30           O  
HETATM   69  O   HOH T  68       3.979   0.929  72.763  1.00  0.31           O  
HETATM   70  O   HOH T  69      12.037  41.231  55.065  1.00  0.31           O  
HETATM   71  O   HOH T  70      -4.984  36.359  68.110  1.00  0.31           O  
HETATM   72  O   HOH T  71     -18.740  22.614  65.625  1.00  0.31           O  
HETATM   73  O   HOH T  72      13.197  19.226  69.508  1.00  0.31           O  
HETATM   74  O   HOH T  73       8.610  12.478  76.124  1.00  0.31           O  
HETATM   75  O   HOH T  74       0.907  40.699  35.702  1.00  0.31           O  
HETATM   76  O   HOH T  75       6.505  48.223  58.768  1.00  0.31           O  
HETATM   77  O   HOH T  76      11.723   4.436  62.750  1.00  0.31           O  
HETATM   78  O   HOH T  77      15.866  32.541  56.440  1.00  0.31           O  
HETATM   79  O   HOH T  78       2.393   2.194  62.291  1.00  0.31           O  
HETATM   80  O   HOH T  79      15.648   1.670  70.185  1.00  0.32           O  
HETATM   81  O   HOH T  80       4.019  37.805  36.175  1.00  0.32           O  
HETATM   82  O   HOH T  81       5.689  38.019  38.255  1.00  0.32           O  
HETATM   83  O   HOH T  82      11.707  37.640  60.624  1.00  0.32           O  
HETATM   84  O   HOH T  83     -14.302  32.489  38.454  1.00  0.32           O  
HETATM   85  O   HOH T  84       2.386   2.362  74.627  1.00  0.32           O  
HETATM   86  O   HOH T  85     -12.589  31.965  34.032  1.00  0.32           O  
HETATM   87  O   HOH T  86       5.771  44.457  57.637  1.00  0.32           O  
HETATM   88  O   HOH T  87     -15.713  22.961  50.005  1.00  0.32           O  
HETATM   89  O   HOH T  88       4.047  20.835  40.597  1.00  0.32           O  
HETATM   90  O   HOH T  89      -8.309  38.761  73.667  1.00  0.32           O  
HETATM   91  O   HOH T  90       9.969  37.803  62.856  1.00  0.32           O  
HETATM   92  O   HOH T  91      -0.779  29.951  81.817  1.00  0.32           O  
HETATM   93  O   HOH T  92     -17.506  26.110  55.309  1.00  0.32           O  
HETATM   94  O   HOH T  93      -3.953   3.683  66.842  1.00  0.33           O  
HETATM   95  O   HOH T  94      15.749   8.191  67.983  1.00  0.33           O  
HETATM   96  O   HOH T  95       1.472   9.695  77.892  1.00  0.33           O  
HETATM   97  O   HOH T  96       2.664  25.228  37.746  1.00  0.33           O  
HETATM   98  O   HOH T  97     -14.686  30.796  58.962  1.00  0.33           O  
HETATM   99  O   HOH T  98       8.824  36.187  47.376  1.00  0.33           O  
HETATM  100  O   HOH T  99      14.780  13.769  74.139  1.00  0.33           O  
HETATM  101  O   HOH T 100      17.118   8.138  57.490  1.00  0.33           O  
HETATM  102  O   HOH T 101      -5.833  12.622  57.477  1.00  0.33           O  
HETATM  103  O   HOH T 102       1.428   9.820  45.274  1.00  0.34           O  
HETATM  104  O   HOH T 103      -9.629  11.244  39.435  1.00  0.34           O  
HETATM  105  O   HOH T 104     -22.173  27.275  56.795  1.00  0.34           O  
HETATM  106  O   HOH T 105       1.783  14.580  56.710  1.00  0.35           O  
HETATM  107  O   HOH T 106       4.884  15.589  78.382  1.00  0.35           O  
HETATM  108  O   HOH T 107      -3.027   7.165  72.964  1.00  0.35           O  
HETATM  109  O   HOH T 108       6.578   2.105  73.264  1.00  0.35           O  
HETATM  110  O   HOH T 109      -3.984  34.958  39.811  1.00  0.35           O  
HETATM  111  O   HOH T 110      -2.039  33.866  70.032  1.00  0.35           O  
HETATM  112  O   HOH T 111       3.267  13.172  53.330  1.00  0.35           O  
HETATM  113  O   HOH T 112     -16.110  18.230  54.190  1.00  0.35           O  
HETATM  114  O   HOH T 113      -5.238   6.564  43.625  1.00  0.35           O  
HETATM  115  O   HOH T 114      -3.954  30.814  38.099  1.00  0.35           O  
HETATM  116  O   HOH T 115     -20.927  12.969  61.471  1.00  0.35           O  
HETATM  117  O   HOH T 116     -14.585  13.488  56.570  1.00  0.35           O  
HETATM  118  O   HOH T 117      12.434  27.907  74.193  1.00  0.35           O  
HETATM  119  O   HOH T 118     -15.590  25.431  48.732  1.00  0.35           O  
HETATM  120  O   HOH T 119      -6.549  20.522  72.330  1.00  0.35           O  
HETATM  121  O   HOH T 120      -9.239  40.395  44.371  1.00  0.35           O  
HETATM  122  O   HOH T 121       0.055  10.273  56.611  1.00  0.35           O  
HETATM  123  O   HOH T 122     -12.243  15.473  34.666  1.00  0.35           O  
HETATM  124  O   HOH T 123       3.022   4.028  56.913  1.00  0.36           O  
HETATM  125  O   HOH T 124      -3.268  29.322  25.822  1.00  0.36           O  
HETATM  126  O   HOH T 125      -8.426  25.968  79.544  1.00  0.36           O  
HETATM  127  O   HOH T 126      10.896  24.359  77.358  1.00  0.36           O  
HETATM  128  O   HOH T 127      -7.911  18.165  72.140  1.00  0.36           O  
HETATM  129  O   HOH T 128      -0.746  11.174  54.044  1.00  0.36           O  
HETATM  130  O   HOH T 129      -0.662  30.036  36.616  1.00  0.36           O  
HETATM  131  O   HOH T 130     -12.755  43.568  45.831  1.00  0.36           O  
HETATM  132  O   HOH T 131      -1.118  43.612  38.340  1.00  0.36           O  
HETATM  133  O   HOH T 132       2.102  38.366  79.629  1.00  0.36           O  
HETATM  134  O   HOH T 133      11.257  32.589  49.365  1.00  0.37           O  
HETATM  135  O   HOH T 134     -17.898  31.183  67.995  1.00  0.37           O  
HETATM  136  O   HOH T 135       4.223  42.311  70.391  1.00  0.37           O  
HETATM  137  O   HOH T 136     -12.838  35.568  35.613  1.00  0.37           O  
HETATM  138  O   HOH T 137      13.894  21.473  75.496  1.00  0.37           O  
HETATM  139  O   HOH T 138      -2.255  47.382  58.270  1.00  0.37           O  
HETATM  140  O   HOH T 139      14.626  18.403  57.362  1.00  0.37           O  
HETATM  141  O   HOH T 140      10.618  26.983  78.698  1.00  0.37           O  
HETATM  142  O   HOH T 141      -7.883  36.146  36.349  1.00  0.37           O  
HETATM  143  O   HOH T 142      -3.897  29.764  79.735  1.00  0.37           O  
HETATM  144  O   HOH T 143      -3.273  39.113  75.732  1.00  0.37           O  
HETATM  145  O   HOH T 144      -4.550   9.029  74.468  1.00  0.37           O  
HETATM  146  O   HOH T 145     -17.668  30.245  78.964  1.00  0.37           O  
HETATM  147  O   HOH T 146      -9.654  20.677  75.813  1.00  0.37           O  
HETATM  148  O   HOH T 147      -2.929  31.226  35.537  1.00  0.37           O  
HETATM  149  O   HOH T 148      11.272  23.652  43.710  1.00  0.37           O  
HETATM  150  O   HOH T 149       6.632  21.809  78.823  1.00  0.38           O  
HETATM  151  O   HOH T 150       0.617   8.996  59.061  1.00  0.38           O  
HETATM  152  O   HOH T 151      -8.426  45.161  61.116  1.00  0.38           O  
HETATM  153  O   HOH T 152      -7.928  20.664  78.046  1.00  0.38           O  
HETATM  154  O   HOH T 153     -19.605  28.401  72.976  1.00  0.38           O  
HETATM  155  O   HOH T 154      12.482  28.393  42.731  1.00  0.38           O  
HETATM  156  O   HOH T 155      -0.757  14.525  57.612  1.00  0.38           O  
HETATM  157  O   HOH T 156     -12.329  12.142  74.716  1.00  0.38           O  
HETATM  158  O   HOH T 157       6.560  14.942  47.377  1.00  0.38           O  
HETATM  159  O   HOH T 158      14.935  16.049  50.403  1.00  0.38           O  
HETATM  160  O   HOH T 159       9.771  34.573  84.227  1.00  0.38           O  
HETATM  161  O   HOH T 160       9.652  17.107  44.453  1.00  0.38           O  
HETATM  162  O   HOH T 161      -2.458  15.570  80.161  1.00  0.38           O  
HETATM  163  O   HOH T 162     -16.019  24.716  46.119  1.00  0.38           O  
HETATM  164  O   HOH T 163      20.239  22.901  51.466  1.00  0.38           O  
HETATM  165  O   HOH T 164      16.471  10.198  55.985  1.00  0.38           O  
HETATM  166  O   HOH T 165      -6.527  19.515  85.118  1.00  0.38           O  
HETATM  167  O   HOH T 166      11.499  45.062  57.623  1.00  0.39           O  
HETATM  168  O   HOH T 167      -6.480   9.492  72.437  1.00  0.39           O  
HETATM  169  O   HOH T 168     -12.107  38.160  36.288  1.00  0.39           O  
HETATM  170  O   HOH T 169      11.337  13.624  48.613  1.00  0.39           O  
HETATM  171  O   HOH T 170      -5.219  27.675  81.089  1.00  0.39           O  
HETATM  172  O   HOH T 171      10.318  21.167  44.289  1.00  0.39           O  
HETATM  173  O   HOH T 172     -15.133  16.166  55.847  1.00  0.39           O  
HETATM  174  O   HOH T 173     -14.000  11.840  69.000  1.00  0.39           O  
HETATM  175  O   HOH T 174     -23.572  28.279  71.368  1.00  0.39           O  
HETATM  176  O   HOH T 175       2.514   8.349  51.692  1.00  0.39           O  
HETATM  177  O   HOH T 176     -10.749  38.794  58.752  1.00  0.39           O  
HETATM  178  O   HOH T 177      -1.205  37.169  34.568  1.00  0.39           O  
HETATM  179  O   HOH T 178      -0.762  20.986  78.966  1.00  0.39           O  
HETATM  180  O   HOH T 179       7.562   7.358  77.993  1.00  0.39           O  
HETATM  181  O   HOH T 180      -5.701  36.811  41.190  1.00  0.39           O  
HETATM  182  O   HOH T 181      -2.446  44.707  40.461  1.00  0.39           O  
HETATM  183  O   HOH T 182     -16.046  13.634  66.246  1.00  0.40           O  
HETATM  184  O   HOH T 183      -6.445  15.473  57.459  1.00  0.40           O  
HETATM  185  O   HOH T 184      -9.447  32.814  32.311  1.00  0.40           O  
HETATM  186  O   HOH T 185     -12.100  19.935  68.922  1.00  0.40           O  
HETATM  187  O   HOH T 186      -7.991  34.865  43.736  1.00  0.40           O  
HETATM  188  O   HOH T 187       0.878  20.184  83.416  1.00  0.40           O  
HETATM  189  O   HOH T 188      -1.030  41.037  37.598  1.00  0.40           O  
HETATM  190  O   HOH T 189      -2.337  27.166  32.798  1.00  0.40           O  
HETATM  191  O   HOH T 190       6.488  42.317  72.048  1.00  0.40           O  
HETATM  192  O   HOH T 191      14.924  21.480  69.672  1.00  0.40           O  
HETATM  193  O   HOH T 192      -4.013   3.208  64.114  1.00  0.40           O  
HETATM  194  O   HOH T 193     -10.694  41.507  58.141  1.00  0.40           O  
HETATM  195  O   HOH T 194      -9.460  11.178  66.692  1.00  0.40           O  
HETATM  196  O   HOH T 195     -14.438  13.816  61.604  1.00  0.40           O  
HETATM  197  O   HOH T 196       0.751  36.283  80.762  1.00  0.40           O  
HETATM  198  O   HOH T 197      -7.302  29.730  80.744  1.00  0.40           O  
HETATM  199  O   HOH T 198     -14.937  16.312  49.703  1.00  0.40           O  
HETATM  200  O   HOH T 199     -11.582  13.904  72.642  1.00  0.40           O  
HETATM  201  O   HOH T 200       5.593  19.676  80.202  1.00  0.40           O  
HETATM  202  O   HOH T 201       4.723   1.459  68.983  1.00  0.40           O  
HETATM  203  O   HOH T 202       1.489   7.516  82.749  1.00  0.40           O  
HETATM  204  O   HOH T 203      11.130  34.959  48.146  1.00  0.41           O  
HETATM  205  O   HOH T 204      19.025   9.287  72.446  1.00  0.41           O  
HETATM  206  O   HOH T 205      15.126  30.666  67.089  1.00  0.41           O  
HETATM  207  O   HOH T 206       8.736  15.952  79.316  1.00  0.41           O  
HETATM  208  O   HOH T 207     -10.548  11.104  50.272  1.00  0.41           O  
HETATM  209  O   HOH T 208       1.004  32.083  82.076  1.00  0.41           O  
HETATM  210  O   HOH T 209      -0.508   8.241  80.905  1.00  0.41           O  
HETATM  211  O   HOH T 210       9.846  39.510  66.775  1.00  0.41           O  
HETATM  212  O   HOH T 211       8.842  19.200  42.761  1.00  0.41           O  
HETATM  213  O   HOH T 212       2.491   0.129  53.860  1.00  0.41           O  
HETATM  214  O   HOH T 213     -11.717  43.014  68.325  1.00  0.41           O  
HETATM  215  O   HOH T 214      -6.338  47.083  53.595  1.00  0.41           O  
HETATM  216  O   HOH T 215      13.970  13.690  49.303  1.00  0.41           O  
HETATM  217  O   HOH T 216     -16.702  17.614  57.997  1.00  0.41           O  
HETATM  218  O   HOH T 217      -8.744  16.011  30.744  1.00  0.41           O  
HETATM  219  O   HOH T 218     -16.572  16.421  47.504  1.00  0.41           O  
HETATM  220  O   HOH T 219       4.686  30.880  84.514  1.00  0.41           O  
HETATM  221  O   HOH T 220     -11.979  22.351  73.010  1.00  0.41           O  
HETATM  222  O   HOH T 221      10.494  30.920  40.498  1.00  0.41           O  
HETATM  223  O   HOH T 222      -4.478  10.447  40.222  1.00  0.41           O  
HETATM  224  O   HOH T 223      -8.472  13.631  57.294  1.00  0.41           O  
HETATM  225  O   HOH T 224      14.938  18.349  78.132  1.00  0.42           O  
HETATM  226  O   HOH T 225      -6.562  24.082  80.184  1.00  0.42           O  
HETATM  227  O   HOH T 226      -5.031  44.572  45.340  1.00  0.42           O  
HETATM  228  O   HOH T 227     -10.546  11.315  72.774  1.00  0.42           O  
HETATM  229  O   HOH T 228      -0.743  11.959  42.786  1.00  0.42           O  
HETATM  230  O   HOH T 229      11.022  17.535  46.878  1.00  0.42           O  
HETATM  231  O   HOH T 230      -8.741  19.073  69.668  1.00  0.42           O  
HETATM  232  O   HOH T 231     -14.144  35.188  67.861  1.00  0.42           O  
HETATM  233  O   HOH T 232       4.963  14.275  50.190  1.00  0.42           O  
HETATM  234  O   HOH T 233      -4.558  19.260  83.202  1.00  0.42           O  
HETATM  235  O   HOH T 234       3.888   1.590  55.750  1.00  0.42           O  
HETATM  236  O   HOH T 235      10.733  22.890  49.753  1.00  0.42           O  
HETATM  237  O   HOH T 236      11.169  28.031  85.834  1.00  0.42           O  
HETATM  238  O   HOH T 237       7.161  13.907  78.118  1.00  0.42           O  
HETATM  239  O   HOH T 238      10.384  39.357  53.898  1.00  0.43           O  
HETATM  240  O   HOH T 239      10.941  -0.195  74.406  1.00  0.43           O  
HETATM  241  O   HOH T 240     -16.971  13.759  60.472  1.00  0.43           O  
HETATM  242  O   HOH T 241     -10.978  46.422  48.392  1.00  0.43           O  
HETATM  243  O   HOH T 242      -0.159  46.060  53.679  1.00  0.43           O  
HETATM  244  O   HOH T 243       5.851  42.103  65.664  1.00  0.43           O  
HETATM  245  O   HOH T 244      -4.116  30.055  31.418  1.00  0.43           O  
HETATM  246  O   HOH T 245      -0.078   4.131  53.216  1.00  0.43           O  
HETATM  247  O   HOH T 246       5.958  40.676  63.368  1.00  0.43           O  
HETATM  248  O   HOH T 247      -1.733  32.541  82.061  1.00  0.43           O  
HETATM  249  O   HOH T 248      -4.722  11.134  37.533  1.00  0.43           O  
HETATM  250  O   HOH T 249     -12.239  20.358  74.853  1.00  0.43           O  
HETATM  251  O   HOH T 250      -1.339  29.246  31.338  1.00  0.43           O  
HETATM  252  O   HOH T 251      -2.641  12.202  39.100  1.00  0.43           O  
HETATM  253  O   HOH T 252     -11.124  13.037  33.843  1.00  0.43           O  
HETATM  254  O   HOH T 253      16.092  23.448  71.400  1.00  0.44           O  
HETATM  255  O   HOH T 254      16.033  22.189  73.861  1.00  0.44           O  
HETATM  256  O   HOH T 255      -7.332  34.617  31.603  1.00  0.44           O  
HETATM  257  O   HOH T 256     -17.541  31.339  65.218  1.00  0.44           O  
HETATM  258  O   HOH T 257       9.535  26.779  82.575  1.00  0.44           O  
HETATM  259  O   HOH T 258      -4.834  34.015  69.688  1.00  0.44           O  
HETATM  260  O   HOH T 259     -12.190  35.645  49.722  1.00  0.44           O  
HETATM  261  O   HOH T 260       2.710  42.041  72.643  1.00  0.44           O  
HETATM  262  O   HOH T 261      -4.533  17.328  81.148  1.00  0.44           O  
HETATM  263  O   HOH T 262       1.039  44.574  60.974  1.00  0.44           O  
HETATM  264  O   HOH T 263      10.678  28.163  40.728  1.00  0.44           O  
HETATM  265  O   HOH T 264      20.682  11.483  72.948  1.00  0.44           O  
HETATM  266  O   HOH T 265      16.784  19.852  68.165  1.00  0.44           O  
HETATM  267  O   HOH T 266      -8.666  43.081  59.412  1.00  0.44           O  
HETATM  268  O   HOH T 267      -9.763  30.377  79.396  1.00  0.44           O  
HETATM  269  O   HOH T 268     -20.252  30.936  61.358  1.00  0.44           O  
HETATM  270  O   HOH T 269     -12.126  10.528  70.586  1.00  0.44           O  
HETATM  271  O   HOH T 270     -13.704  33.370  63.240  1.00  0.44           O  
HETATM  272  O   HOH T 271      17.653  21.925  69.769  1.00  0.44           O  
HETATM  273  O   HOH T 272     -21.917  25.057  55.048  1.00  0.44           O  
HETATM  274  O   HOH T 273       1.574  43.417  63.396  1.00  0.44           O  
HETATM  275  O   HOH T 274       1.658   9.940  81.525  1.00  0.44           O  
HETATM  276  O   HOH T 275      -6.862  11.109  52.611  1.00  0.45           O  
HETATM  277  O   HOH T 276     -16.284  11.179  42.937  1.00  0.45           O  
HETATM  278  O   HOH T 277      14.779  26.795  75.387  1.00  0.45           O  
HETATM  279  O   HOH T 278      -4.553  25.500  70.257  1.00  0.45           O  
HETATM  280  O   HOH T 279       6.869  29.493  85.569  1.00  0.45           O  
HETATM  281  O   HOH T 280       6.666  32.998  40.065  1.00  0.45           O  
HETATM  282  O   HOH T 281      -3.499  11.216  58.183  1.00  0.45           O  
HETATM  283  O   HOH T 282      12.177  40.422  60.473  1.00  0.45           O  
HETATM  284  O   HOH T 283     -18.104  22.853  76.451  1.00  0.45           O  
HETATM  285  O   HOH T 284      -4.220  26.748  25.760  1.00  0.45           O  
HETATM  286  O   HOH T 285      11.973  20.082  46.184  1.00  0.45           O  
HETATM  287  O   HOH T 286      18.128  14.625  52.693  1.00  0.45           O  
HETATM  288  O   HOH T 287      16.047  13.567  51.125  1.00  0.45           O  
HETATM  289  O   HOH T 288      -1.463   6.504  70.574  1.00  0.45           O  
HETATM  290  O   HOH T 289     -17.296  18.536  70.449  1.00  0.45           O  
HETATM  291  O   HOH T 290       2.158  10.148  47.940  1.00  0.45           O  
HETATM  292  O   HOH T 291      -3.314  51.253  58.902  1.00  0.45           O  
HETATM  293  O   HOH T 292      16.286  32.452  63.224  1.00  0.45           O  
HETATM  294  O   HOH T 293      14.981  22.353  77.967  1.00  0.45           O  
HETATM  295  O   HOH T 294       8.855  -2.261  53.813  1.00  0.45           O  
HETATM  296  O   HOH T 295      -6.439  35.381  34.145  1.00  0.46           O  
HETATM  297  O   HOH T 296      -3.455  24.232  26.510  1.00  0.46           O  
HETATM  298  O   HOH T 297       0.564  18.814  77.981  1.00  0.46           O  
HETATM  299  O   HOH T 298      12.091  42.935  59.300  1.00  0.46           O  
HETATM  300  O   HOH T 299      -7.526  37.414  67.433  1.00  0.46           O  
HETATM  301  O   HOH T 300     -14.274  11.394  66.404  1.00  0.46           O  
HETATM  302  O   HOH T 301       1.346  34.718  82.870  1.00  0.46           O  
HETATM  303  O   HOH T 302      13.464  31.328  55.612  1.00  0.46           O  
HETATM  304  O   HOH T 303      -7.739  39.536  65.557  1.00  0.46           O  
HETATM  305  O   HOH T 304      -7.640   7.082  72.782  1.00  0.46           O  
HETATM  306  O   HOH T 305       0.939  22.942  37.550  1.00  0.46           O  
HETATM  307  O   HOH T 306       5.938  28.067  41.331  1.00  0.46           O  
HETATM  308  O   HOH T 307       5.853   2.474  66.662  1.00  0.46           O  
HETATM  309  O   HOH T 308      -1.521  13.847  40.992  1.00  0.46           O  
HETATM  310  O   HOH T 309      12.920  18.814  48.401  1.00  0.46           O  
HETATM  311  O   HOH T 310      -3.298  46.583  44.520  1.00  0.46           O  
HETATM  312  O   HOH T 311      17.024  31.832  58.869  1.00  0.46           O  
HETATM  313  O   HOH T 312     -18.574  25.182  77.840  1.00  0.46           O  
HETATM  314  O   HOH T 313     -18.575  30.621  59.105  1.00  0.46           O  
HETATM  315  O   HOH T 314      17.280  16.996  51.415  1.00  0.47           O  
HETATM  316  O   HOH T 315      -0.115   8.811  52.588  1.00  0.47           O  
HETATM  317  O   HOH T 316     -14.272  13.193  64.276  1.00  0.47           O  
HETATM  318  O   HOH T 317     -13.724  42.824  49.996  1.00  0.47           O  
HETATM  319  O   HOH T 318      10.504  15.816  42.088  1.00  0.47           O  
HETATM  320  O   HOH T 319     -13.157  41.214  52.231  1.00  0.47           O  
HETATM  321  O   HOH T 320      -6.906  31.506  82.733  1.00  0.47           O  
HETATM  322  O   HOH T 321     -17.071  33.345  50.225  1.00  0.47           O  
HETATM  323  O   HOH T 322      -5.407  32.630  31.164  1.00  0.47           O  
HETATM  324  O   HOH T 323     -14.259  32.907  60.607  1.00  0.47           O  
HETATM  325  O   HOH T 324      -2.412  44.666  46.357  1.00  0.47           O  
HETATM  326  O   HOH T 325       6.529  21.849  81.662  1.00  0.47           O  
HETATM  327  O   HOH T 326     -15.551  18.743  48.667  1.00  0.47           O  
HETATM  328  O   HOH T 327      -7.511  43.651  56.872  1.00  0.47           O  
HETATM  329  O   HOH T 328     -21.924  25.546  52.271  1.00  0.47           O  
HETATM  330  O   HOH T 329     -10.826  41.999  53.602  1.00  0.47           O  
HETATM  331  O   HOH T 330     -11.967  10.374  67.782  1.00  0.47           O  
HETATM  332  O   HOH T 331       7.262   2.416  69.046  1.00  0.47           O  
HETATM  333  O   HOH T 332     -12.251  45.051  50.452  1.00  0.47           O  
HETATM  334  O   HOH T 333      -1.582  -0.072  75.192  1.00  0.47           O  
HETATM  335  O   HOH T 334       8.699  13.566  48.586  1.00  0.47           O  
HETATM  336  O   HOH T 335      -1.746  29.057  34.197  1.00  0.47           O  
HETATM  337  O   HOH T 336      17.690  30.084  67.839  1.00  0.47           O  
HETATM  338  O   HOH T 337      -2.265  39.603  72.154  1.00  0.47           O  
HETATM  339  O   HOH T 338       9.405  15.115  39.581  1.00  0.47           O  
HETATM  340  O   HOH T 339      12.286  21.798  77.706  1.00  0.47           O  
HETATM  341  O   HOH T 340      -6.357  30.360  29.881  1.00  0.48           O  
HETATM  342  O   HOH T 341       6.298   7.088  80.497  1.00  0.48           O  
HETATM  343  O   HOH T 342     -10.575  20.605  71.228  1.00  0.48           O  
HETATM  344  O   HOH T 343      -2.810   4.494  69.140  1.00  0.48           O  
HETATM  345  O   HOH T 344       9.828  44.381  59.808  1.00  0.48           O  
HETATM  346  O   HOH T 345      -3.913  36.222  34.949  1.00  0.48           O  
HETATM  347  O   HOH T 346      12.435  26.647  76.751  1.00  0.48           O  
HETATM  348  O   HOH T 347      11.299  43.928  54.986  1.00  0.48           O  
HETATM  349  O   HOH T 348      11.539   2.203  60.966  1.00  0.48           O  
HETATM  350  O   HOH T 349      18.265   9.163  62.282  1.00  0.48           O  
HETATM  351  O   HOH T 350      -4.062  44.585  42.744  1.00  0.48           O  
HETATM  352  O   HOH T 351     -17.382  23.303  44.295  1.00  0.48           O  
HETATM  353  O   HOH T 352      17.637  29.390  57.568  1.00  0.48           O  
HETATM  354  O   HOH T 353       2.005  11.278  42.827  1.00  0.48           O  
HETATM  355  O   HOH T 354     -10.478  39.906  64.998  1.00  0.48           O  
HETATM  356  O   HOH T 355     -15.814  31.082  36.669  1.00  0.48           O  
HETATM  357  O   HOH T 356     -18.970  14.680  62.238  1.00  0.48           O  
HETATM  358  O   HOH T 357     -19.394  17.550  65.441  1.00  0.48           O  
HETATM  359  O   HOH T 358       2.421  36.735  53.565  1.00  0.48           O  
HETATM  360  O   HOH T 359     -17.342  18.609  51.917  1.00  0.48           O  
HETATM  361  O   HOH T 360      -1.596   3.584  65.423  1.00  0.48           O  
HETATM  362  O   HOH T 361       1.528  12.136  55.355  1.00  0.48           O  
HETATM  363  O   HOH T 362      -9.577  38.459  42.487  1.00  0.49           O  
HETATM  364  O   HOH T 363      -8.973  30.010  29.593  1.00  0.49           O  
HETATM  365  O   HOH T 364       4.384  45.518  55.415  1.00  0.49           O  
HETATM  366  O   HOH T 365       0.594   7.156  78.602  1.00  0.49           O  
HETATM  367  O   HOH T 366      12.471  39.138  62.857  1.00  0.49           O  
HETATM  368  O   HOH T 367      -3.764  -0.668  76.702  1.00  0.49           O  
HETATM  369  O   HOH T 368      -0.104   2.145  60.935  1.00  0.49           O  
HETATM  370  O   HOH T 369     -11.592  41.700  44.325  1.00  0.49           O  
HETATM  371  O   HOH T 370       9.226  32.905  38.994  1.00  0.49           O  
HETATM  372  O   HOH T 371     -15.396  34.803  51.926  1.00  0.49           O  
HETATM  373  O   HOH T 372      -1.125  40.455  74.429  1.00  0.49           O  
HETATM  374  O   HOH T 373     -15.680  28.390  46.477  1.00  0.49           O  
HETATM  375  O   HOH T 374       3.842  11.894  49.155  1.00  0.49           O  
HETATM  376  O   HOH T 375      -1.494   6.503  53.284  1.00  0.49           O  
HETATM  377  O   HOH T 376     -17.954  17.786  67.852  1.00  0.49           O  
HETATM  378  O   HOH T 377      21.504   8.916  73.631  1.00  0.49           O  
HETATM  379  O   HOH T 378       2.594  21.050  77.918  1.00  0.49           O  
HETATM  380  O   HOH T 379      12.488  18.830  77.125  1.00  0.49           O  
HETATM  381  O   HOH T 380      10.166  18.352  78.674  1.00  0.49           O  
HETATM  382  O   HOH T 381      -0.982  29.249  27.415  1.00  0.49           O  
HETATM  383  O   HOH T 382       2.282   7.584  46.924  1.00  0.50           O  
HETATM  384  O   HOH T 383     -11.402  34.432  33.494  1.00  0.50           O  
HETATM  385  O   HOH T 384      -0.009  27.054  25.816  1.00  0.50           O  
HETATM  386  O   HOH T 385      -0.840  11.365  59.127  1.00  0.50           O  
HETATM  387  O   HOH T 386     -16.953  20.652  44.449  1.00  0.50           O  
HETATM  388  O   HOH T 387      12.273  31.176  42.662  1.00  0.50           O  
HETATM  389  O   HOH T 388       5.394   6.189  76.621  1.00  0.50           O  
HETATM  390  O   HOH T 389      -3.128  46.260  48.491  1.00  0.50           O  
HETATM  391  O   HOH T 390     -16.570  25.049  79.767  1.00  0.50           O  
HETATM  392  O   HOH T 391      -7.495  12.191  55.191  1.00  0.50           O  
HETATM  393  O   HOH T 392       0.773   1.667  52.289  1.00  0.50           O  
HETATM  394  O   HOH T 393       5.942  30.376  39.846  1.00  0.50           O  
HETATM  395  O   HOH T 394      -7.115  39.071  41.355  1.00  0.50           O  
HETATM  396  O   HOH T 395     -16.356  14.890  58.047  1.00  0.50           O  
HETATM  397  O   HOH T 396      18.030  20.247  74.300  1.00  0.50           O  
HETATM  398  O   HOH T 397      12.698  16.082  48.652  1.00  0.50           O  
HETATM  399  O   HOH T 398      -0.775  45.456  44.123  1.00  0.51           O  
HETATM  400  O   HOH T 399     -10.548  42.577  65.871  1.00  0.51           O  
HETATM  401  O   HOH T 400      -7.612  40.987  72.045  1.00  0.51           O  
HETATM  402  O   HOH T 401      -3.258  32.270  32.937  1.00  0.51           O  
HETATM  403  O   HOH T 402       6.302   0.615  71.019  1.00  0.51           O  
HETATM  404  O   HOH T 403      -6.403  21.161  82.313  1.00  0.51           O  
HETATM  405  O   HOH T 404       1.730   1.503  57.539  1.00  0.51           O  
HETATM  406  O   HOH T 405       2.753  36.599  84.300  1.00  0.51           O  
HETATM  407  O   HOH T 406      16.301  26.774  73.089  1.00  0.51           O  
HETATM  408  O   HOH T 407      -8.094  47.194  51.443  1.00  0.51           O  
HETATM  409  O   HOH T 408      10.044  42.003  53.270  1.00  0.51           O  
HETATM  410  O   HOH T 409       1.732  20.200  24.992  1.00  0.51           O  
HETATM  411  O   HOH T 410     -10.755  44.505  52.704  1.00  0.51           O  
HETATM  412  O   HOH T 411     -14.602  35.158  37.787  1.00  0.51           O  
HETATM  413  O   HOH T 412       2.867  32.868  84.209  1.00  0.51           O  
HETATM  414  O   HOH T 413      14.346  33.686  54.497  1.00  0.51           O  
HETATM  415  O   HOH T 414     -10.269  36.550  34.929  1.00  0.51           O  
HETATM  416  O   HOH T 415      18.976  20.366  71.619  1.00  0.51           O  
HETATM  417  O   HOH T 416     -17.912  21.796  42.049  1.00  0.51           O  
HETATM  418  O   HOH T 417      -9.841  44.135  55.256  1.00  0.51           O  
HETATM  419  O   HOH T 418     -15.987  23.659  74.894  1.00  0.51           O  
HETATM  420  O   HOH T 419      -5.133  39.716  72.199  1.00  0.51           O  
HETATM  421  O   HOH T 420     -19.519  25.112  50.964  1.00  0.51           O  
HETATM  422  O   HOH T 421      14.707  38.280  70.939  1.00  0.52           O  
HETATM  423  O   HOH T 422      -0.857   5.581  46.811  1.00  0.52           O  
HETATM  424  O   HOH T 423      -4.860  39.690  65.610  1.00  0.52           O  
HETATM  425  O   HOH T 424      18.673  29.856  63.771  1.00  0.52           O  
HETATM  426  O   HOH T 425      -9.694  37.674  45.159  1.00  0.52           O  
HETATM  427  O   HOH T 426      -7.950  46.074  55.615  1.00  0.52           O  
HETATM  428  O   HOH T 427     -21.814  28.416  66.037  1.00  0.52           O  
HETATM  429  O   HOH T 428     -12.310  45.395  43.807  1.00  0.52           O  
HETATM  430  O   HOH T 429     -14.740  34.338  40.521  1.00  0.52           O  
HETATM  431  O   HOH T 430      -3.654   4.930  71.672  1.00  0.52           O  
HETATM  432  O   HOH T 431      14.598  29.541  74.870  1.00  0.52           O  
HETATM  433  O   HOH T 432     -21.057  27.662  70.720  1.00  0.52           O  
HETATM  434  O   HOH T 433      18.397   9.170  59.561  1.00  0.52           O  
HETATM  435  O   HOH T 434      -0.653  47.695  55.963  1.00  0.52           O  
HETATM  436  O   HOH T 435      -5.945   4.075  62.406  1.00  0.52           O  
HETATM  437  O   HOH T 436       9.742  -0.209  72.033  1.00  0.52           O  
HETATM  438  O   HOH T 437       6.504  12.008  49.426  1.00  0.52           O  
HETATM  439  O   HOH T 438       5.580  11.322  46.940  1.00  0.52           O  
HETATM  440  O   HOH T 439      -1.855  49.842  57.094  1.00  0.52           O  
HETATM  441  O   HOH T 440       1.812  10.757  52.961  1.00  0.53           O  
HETATM  442  O   HOH T 441      10.605  42.418  61.574  1.00  0.53           O  
HETATM  443  O   HOH T 442      -5.660  25.872  83.206  1.00  0.53           O  
HETATM  444  O   HOH T 443       2.184  30.289  85.300  1.00  0.53           O  
HETATM  445  O   HOH T 444       3.328  20.158  81.745  1.00  0.53           O  
HETATM  446  O   HOH T 445      11.676  22.821  46.284  1.00  0.53           O  
HETATM  447  O   HOH T 446      -7.177  37.526  43.649  1.00  0.53           O  
HETATM  448  O   HOH T 447      -5.673  47.008  49.410  1.00  0.53           O  
HETATM  449  O   HOH T 448       4.107  46.727  58.100  1.00  0.53           O  
HETATM  450  O   HOH T 449     -10.482  44.502  42.208  1.00  0.53           O  
HETATM  451  O   HOH T 450       6.363  16.999  80.341  1.00  0.53           O  
HETATM  452  O   HOH T 451      12.131  38.840  65.524  1.00  0.53           O  
HETATM  453  O   HOH T 452      13.088   2.148  63.262  1.00  0.53           O  
HETATM  454  O   HOH T 453       0.788  19.433  80.742  1.00  0.53           O  
HETATM  455  O   HOH T 454       4.397   1.282  60.570  1.00  0.53           O  
HETATM  456  O   HOH T 455      13.954  33.155  67.218  1.00  0.54           O  
HETATM  457  O   HOH T 456     -10.908  14.568  31.592  1.00  0.54           O  
HETATM  458  O   HOH T 457      -0.030   2.287  63.589  1.00  0.54           O  
HETATM  459  O   HOH T 458      10.719  29.177  83.292  1.00  0.54           O  
HETATM  460  O   HOH T 459      -5.717   4.732  59.885  1.00  0.54           O  
HETATM  461  O   HOH T 460      21.834  16.892  75.460  1.00  0.54           O  
HETATM  462  O   HOH T 461     -12.097   5.703  46.174  1.00  0.54           O  
HETATM  463  O   HOH T 462     -14.567  34.207  49.358  1.00  0.55           O  
HETATM  464  O   HOH T 463     -17.839  26.686  49.435  1.00  0.55           O  
HETATM  465  O   HOH T 464       0.664   6.259  51.582  1.00  0.55           O  
HETATM  466  O   HOH T 465      -5.225  42.228  42.063  1.00  0.55           O  
HETATM  467  O   HOH T 466     -14.691  12.845  59.074  1.00  0.55           O  
HETATM  468  O   HOH T 467     -13.965  33.086  69.698  1.00  0.55           O  
HETATM  469  O   HOH T 468     -10.877  42.086  60.895  1.00  0.55           O  
HETATM  470  O   HOH T 469     -12.762  38.700  51.689  1.00  0.55           O  
HETATM  471  O   HOH T 470     -16.201  11.305  38.868  1.00  0.55           O  
HETATM  472  O   HOH T 471      -8.971   9.639  51.866  1.00  0.56           O  
HETATM  473  O   HOH T 472       3.187  42.819  65.550  1.00  0.56           O  
HETATM  474  O   HOH T 473     -12.774  18.967  71.476  1.00  0.56           O  
HETATM  475  O   HOH T 474      19.555  23.251  68.291  1.00  0.56           O  
HETATM  476  O   HOH T 475     -17.991  30.019  37.284  1.00  0.56           O  
HETATM  477  O   HOH T 476      20.266  16.264  53.417  1.00  0.56           O  
HETATM  478  O   HOH T 477       5.069  29.209  36.220  1.00  0.56           O  
HETATM  479  O   HOH T 478      -7.346  28.350  28.258  1.00  0.56           O  
HETATM  480  O   HOH T 479     -13.765  33.995  56.640  1.00  0.56           O  
HETATM  481  O   HOH T 480      18.633   1.669  67.161  1.00  0.57           O  
HETATM  482  O   HOH T 481      16.378  27.600  54.111  1.00  0.57           O  
HETATM  483  O   HOH T 482      -7.315  47.786  57.568  1.00  0.57           O  
HETATM  484  O   HOH T 483     -13.673  30.815  31.669  1.00  0.57           O  
HETATM  485  O   HOH T 484     -19.115  20.040  66.533  1.00  0.58           O  
HETATM  486  O   HOH T 485     -16.277  28.405  54.257  1.00  0.58           O  
HETATM  487  O   HOH T 486      18.493  22.800  49.406  1.00  0.58           O  
HETATM  488  O   HOH T 487      -5.047   6.605  58.145  1.00  0.58           O  
HETATM  489  O   HOH T 488      -0.104  -2.345  72.106  1.00  0.58           O  
HETATM  490  O   HOH T 489       4.404   3.312  76.368  1.00  0.59           O  
HETATM  491  O   HOH T 490       6.632  41.341  69.607  1.00  0.59           O  
HETATM  492  O   HOH T 491     -18.482  29.012  66.303  1.00  0.59           O  
HETATM  493  O   HOH T 492       6.339  45.425  53.383  1.00  0.59           O  
HETATM  494  O   HOH T 493      19.210  12.101  63.237  1.00  0.59           O  
HETATM  495  O   HOH T 494      -8.154  47.696  60.004  1.00  0.59           O  
HETATM  496  O   HOH T 495      20.303  18.629  73.127  1.00  0.60           O  
HETATM  497  O   HOH T 496      -2.664  38.090  80.420  1.00  0.61           O  
TER     498      HOH T 496 
