# Supplementary material for: Accurate Prediction of Hydration Sites of Proteins Using Energy Model With Atom Embedding
Source: Front Mol Biosci. 2021 Sep 20;8:756075. doi: 10.3389/fmolb.2021.756075 (PMC8488165; doi:10.3389/fmolb.2021.756075)
Supplement: Supplementary file 1 [file DataSheet1.ZIP › Data Sheet 1/Our_result_pdb/our_dataset_output/2WB9_watersite.pdb]

HEADER                                                        XXXX


JRNL        PMID   -1
HETATM    1  O   HOH T   0     -13.603   3.250  39.829  1.00  0.17           O  
HETATM    2  O   HOH T   1      -4.922  23.437  16.635  1.00  0.17           O  
HETATM    3  O   HOH T   2     -22.336   6.583  52.492  1.00  0.18           O  
HETATM    4  O   HOH T   3      -3.247  11.980  28.043  1.00  0.19           O  
HETATM    5  O   HOH T   4     -16.635  -0.574  50.413  1.00  0.20           O  
HETATM    6  O   HOH T   5     -11.124   6.834  22.284  1.00  0.20           O  
HETATM    7  O   HOH T   6       2.286   6.147  43.325  1.00  0.20           O  
HETATM    8  O   HOH T   7       0.369  15.396  17.240  1.00  0.20           O  
HETATM    9  O   HOH T   8     -17.424   9.769  18.534  1.00  0.20           O  
HETATM   10  O   HOH T   9      -3.473  26.101  49.897  1.00  0.20           O  
HETATM   11  O   HOH T  10       2.195  26.316  40.412  1.00  0.21           O  
HETATM   12  O   HOH T  11      -5.419 -10.231  21.100  1.00  0.21           O  
HETATM   13  O   HOH T  12      -9.010   6.387  46.255  1.00  0.21           O  
HETATM   14  O   HOH T  13      -4.212 -10.269  32.529  1.00  0.21           O  
HETATM   15  O   HOH T  14       5.009   6.540  43.828  1.00  0.21           O  
HETATM   16  O   HOH T  15     -17.468  -3.807  57.650  1.00  0.22           O  
HETATM   17  O   HOH T  16     -30.018   5.068  29.062  1.00  0.22           O  
HETATM   18  O   HOH T  17      -5.424   8.071  45.336  1.00  0.22           O  
HETATM   19  O   HOH T  18      -8.207   9.706  21.556  1.00  0.23           O  
HETATM   20  O   HOH T  19      13.731  12.896  39.044  1.00  0.23           O  
HETATM   21  O   HOH T  20     -18.102  14.335  37.065  1.00  0.23           O  
HETATM   22  O   HOH T  21     -13.466  -3.699  22.781  1.00  0.23           O  
HETATM   23  O   HOH T  22     -24.066  15.014  55.520  1.00  0.23           O  
HETATM   24  O   HOH T  23     -14.481   4.656  17.527  1.00  0.24           O  
HETATM   25  O   HOH T  24     -21.443  -9.846  27.418  1.00  0.24           O  
HETATM   26  O   HOH T  25     -26.102  -0.119  18.859  1.00  0.24           O  
HETATM   27  O   HOH T  26      -6.884   8.560  50.012  1.00  0.24           O  
HETATM   28  O   HOH T  27      10.362  12.451  16.044  1.00  0.24           O  
HETATM   29  O   HOH T  28     -24.483  17.099  30.256  1.00  0.24           O  
HETATM   30  O   HOH T  29     -17.076  10.769   6.964  1.00  0.24           O  
HETATM   31  O   HOH T  30     -18.185  -7.979  53.382  1.00  0.24           O  
HETATM   32  O   HOH T  31       4.767  25.066  55.194  1.00  0.24           O  
HETATM   33  O   HOH T  32      -6.974   8.710  27.901  1.00  0.25           O  
HETATM   34  O   HOH T  33     -16.742   5.565  62.059  1.00  0.25           O  
HETATM   35  O   HOH T  34       6.950  -4.148  30.030  1.00  0.25           O  
HETATM   36  O   HOH T  35       5.200  24.006  25.253  1.00  0.25           O  
HETATM   37  O   HOH T  36     -11.643  -1.597  23.072  1.00  0.25           O  
HETATM   38  O   HOH T  37     -33.417  21.848  33.866  1.00  0.25           O  
HETATM   39  O   HOH T  38     -32.250  -1.702  23.472  1.00  0.25           O  
HETATM   40  O   HOH T  39       6.148  19.107  49.248  1.00  0.26           O  
HETATM   41  O   HOH T  40     -32.724  23.332  40.987  1.00  0.26           O  
HETATM   42  O   HOH T  41     -19.479  -5.820  47.365  1.00  0.26           O  
HETATM   43  O   HOH T  42      15.383  15.231  22.227  1.00  0.26           O  
HETATM   44  O   HOH T  43     -24.940  -8.761  46.725  1.00  0.26           O  
HETATM   45  O   HOH T  44     -26.717  12.983  59.785  1.00  0.26           O  
HETATM   46  O   HOH T  45     -11.425   8.575  18.340  1.00  0.26           O  
HETATM   47  O   HOH T  46      13.612   4.225  32.022  1.00  0.26           O  
HETATM   48  O   HOH T  47     -27.527   6.379  39.255  1.00  0.27           O  
HETATM   49  O   HOH T  48      -0.976  -8.692  20.994  1.00  0.27           O  
HETATM   50  O   HOH T  49     -21.839 -13.942  44.116  1.00  0.27           O  
HETATM   51  O   HOH T  50     -10.585  36.177  36.323  1.00  0.27           O  
HETATM   52  O   HOH T  51      -9.290   5.686  40.026  1.00  0.27           O  
HETATM   53  O   HOH T  52      -4.902  30.016  34.598  1.00  0.27           O  
HETATM   54  O   HOH T  53      10.711   4.955  42.903  1.00  0.27           O  
HETATM   55  O   HOH T  54     -16.085 -12.526  23.286  1.00  0.27           O  
HETATM   56  O   HOH T  55     -11.125  23.412  38.430  1.00  0.27           O  
HETATM   57  O   HOH T  56     -16.950 -10.482  21.562  1.00  0.27           O  
HETATM   58  O   HOH T  57       8.112   7.253  12.694  1.00  0.28           O  
HETATM   59  O   HOH T  58      14.361  11.173  21.159  1.00  0.28           O  
HETATM   60  O   HOH T  59       6.622  14.459  47.816  1.00  0.28           O  
HETATM   61  O   HOH T  60      -5.762   7.125  32.772  1.00  0.28           O  
HETATM   62  O   HOH T  61      -2.961  -0.100  26.688  1.00  0.28           O  
HETATM   63  O   HOH T  62     -15.607   3.347  60.916  1.00  0.28           O  
HETATM   64  O   HOH T  63     -15.831  35.850  49.783  1.00  0.28           O  
HETATM   65  O   HOH T  64      13.907   0.079  38.296  1.00  0.28           O  
HETATM   66  O   HOH T  65      -5.245  14.341  50.259  1.00  0.28           O  
HETATM   67  O   HOH T  66     -33.223  10.687  29.101  1.00  0.28           O  
HETATM   68  O   HOH T  67     -30.847  11.972  35.947  1.00  0.28           O  
HETATM   69  O   HOH T  68     -26.804  23.059  38.785  1.00  0.28           O  
HETATM   70  O   HOH T  69     -15.827  13.636  30.571  1.00  0.29           O  
HETATM   71  O   HOH T  70     -11.180  -9.303  21.313  1.00  0.29           O  
HETATM   72  O   HOH T  71      -4.058 -12.751  31.212  1.00  0.29           O  
HETATM   73  O   HOH T  72     -16.840 -11.254  49.726  1.00  0.29           O  
HETATM   74  O   HOH T  73       6.964  -2.230  31.901  1.00  0.29           O  
HETATM   75  O   HOH T  74     -25.308  -2.262  47.778  1.00  0.29           O  
HETATM   76  O   HOH T  75      18.429  16.882  38.857  1.00  0.29           O  
HETATM   77  O   HOH T  76      -1.644   9.568  50.311  1.00  0.30           O  
HETATM   78  O   HOH T  77      -6.431  11.687  56.262  1.00  0.30           O  
HETATM   79  O   HOH T  78     -12.561  -6.270  60.252  1.00  0.30           O  
HETATM   80  O   HOH T  79      -9.906 -12.475  57.054  1.00  0.30           O  
HETATM   81  O   HOH T  80      -8.591 -12.048  28.221  1.00  0.30           O  
HETATM   82  O   HOH T  81      -2.607  -0.553  32.956  1.00  0.30           O  
HETATM   83  O   HOH T  82     -33.876  16.472  29.251  1.00  0.30           O  
HETATM   84  O   HOH T  83     -10.044  40.521  38.881  1.00  0.30           O  
HETATM   85  O   HOH T  84      -7.466  10.738  43.421  1.00  0.30           O  
HETATM   86  O   HOH T  85     -17.884  -8.781  50.654  1.00  0.30           O  
HETATM   87  O   HOH T  86      -0.211   0.812  48.738  1.00  0.30           O  
HETATM   88  O   HOH T  87     -12.908   9.030  24.972  1.00  0.30           O  
HETATM   89  O   HOH T  88     -21.703   3.654  58.887  1.00  0.30           O  
HETATM   90  O   HOH T  89      11.074  13.752  20.173  1.00  0.30           O  
HETATM   91  O   HOH T  90       6.971  21.252  30.850  1.00  0.30           O  
HETATM   92  O   HOH T  91      -7.034  34.408  36.858  1.00  0.30           O  
HETATM   93  O   HOH T  92     -10.297  17.287  31.573  1.00  0.30           O  
HETATM   94  O   HOH T  93     -19.205  16.071  21.656  1.00  0.30           O  
HETATM   95  O   HOH T  94      -7.959 -11.096  30.767  1.00  0.30           O  
HETATM   96  O   HOH T  95     -23.319  -8.648  24.179  1.00  0.30           O  
HETATM   97  O   HOH T  96     -11.133  17.078  41.832  1.00  0.30           O  
HETATM   98  O   HOH T  97     -13.013  35.278  47.338  1.00  0.30           O  
HETATM   99  O   HOH T  98       9.226   5.751  37.675  1.00  0.31           O  
HETATM  100  O   HOH T  99      -3.983  36.055  41.927  1.00  0.31           O  
HETATM  101  O   HOH T 100     -12.917  36.718  52.440  1.00  0.31           O  
HETATM  102  O   HOH T 101     -21.319  -4.259  12.727  1.00  0.31           O  
HETATM  103  O   HOH T 102       8.400  14.366  16.337  1.00  0.31           O  
HETATM  104  O   HOH T 103      21.826  18.679  36.393  1.00  0.31           O  
HETATM  105  O   HOH T 104      -0.760  16.386  29.530  1.00  0.31           O  
HETATM  106  O   HOH T 105     -26.383  -0.561  44.155  1.00  0.31           O  
HETATM  107  O   HOH T 106      -2.611  29.457  28.431  1.00  0.31           O  
HETATM  108  O   HOH T 107     -35.616  14.611  32.404  1.00  0.31           O  
HETATM  109  O   HOH T 108     -14.077  20.634  47.196  1.00  0.31           O  
HETATM  110  O   HOH T 109      11.183  19.616  20.565  1.00  0.31           O  
HETATM  111  O   HOH T 110       4.192  14.683  50.943  1.00  0.31           O  
HETATM  112  O   HOH T 111     -16.489  12.169  37.949  1.00  0.31           O  
HETATM  113  O   HOH T 112     -18.924 -10.545  46.587  1.00  0.31           O  
HETATM  114  O   HOH T 113     -17.841   9.642  41.804  1.00  0.31           O  
HETATM  115  O   HOH T 114     -28.297  -4.726  41.856  1.00  0.31           O  
HETATM  116  O   HOH T 115      -9.776 -14.199  26.738  1.00  0.32           O  
HETATM  117  O   HOH T 116      -0.811  26.439  19.764  1.00  0.32           O  
HETATM  118  O   HOH T 117     -13.395 -10.361  58.563  1.00  0.32           O  
HETATM  119  O   HOH T 118       1.029  -1.543  12.706  1.00  0.32           O  
HETATM  120  O   HOH T 119     -14.232  26.057  32.673  1.00  0.32           O  
HETATM  121  O   HOH T 120     -31.532  -0.076  49.105  1.00  0.32           O  
HETATM  122  O   HOH T 121     -30.700  24.108  42.792  1.00  0.32           O  
HETATM  123  O   HOH T 122     -11.272 -12.128  27.857  1.00  0.32           O  
HETATM  124  O   HOH T 123       1.454  15.196  53.554  1.00  0.32           O  
HETATM  125  O   HOH T 124     -17.490  33.300  44.013  1.00  0.32           O  
HETATM  126  O   HOH T 125     -32.625  15.814  24.417  1.00  0.32           O  
HETATM  127  O   HOH T 126     -26.516  22.669  36.044  1.00  0.32           O  
HETATM  128  O   HOH T 127     -28.134   0.067  51.991  1.00  0.32           O  
HETATM  129  O   HOH T 128      -2.215  -1.313  39.217  1.00  0.32           O  
HETATM  130  O   HOH T 129       2.207  -2.596  48.450  1.00  0.32           O  
HETATM  131  O   HOH T 130      -6.607   4.011  29.596  1.00  0.33           O  
HETATM  132  O   HOH T 131      -8.602   4.897  34.522  1.00  0.33           O  
HETATM  133  O   HOH T 132     -23.648  -6.422  22.552  1.00  0.33           O  
HETATM  134  O   HOH T 133      10.348  13.041  48.882  1.00  0.33           O  
HETATM  135  O   HOH T 134      -6.417  -3.904  17.954  1.00  0.33           O  
HETATM  136  O   HOH T 135      -5.124   4.065  37.397  1.00  0.33           O  
HETATM  137  O   HOH T 136     -24.265  -1.561  38.111  1.00  0.33           O  
HETATM  138  O   HOH T 137     -33.431  15.098  27.012  1.00  0.33           O  
HETATM  139  O   HOH T 138     -12.206  25.602  41.142  1.00  0.33           O  
HETATM  140  O   HOH T 139      -8.799   8.996  18.944  1.00  0.33           O  
HETATM  141  O   HOH T 140      -9.650  32.221  29.684  1.00  0.33           O  
HETATM  142  O   HOH T 141       5.432  24.401  51.451  1.00  0.33           O  
HETATM  143  O   HOH T 142     -28.449   0.554  42.549  1.00  0.33           O  
HETATM  144  O   HOH T 143     -20.108   2.309  39.656  1.00  0.33           O  
HETATM  145  O   HOH T 144      -1.737  31.219  41.499  1.00  0.33           O  
HETATM  146  O   HOH T 145      11.952   3.248   6.785  1.00  0.34           O  
HETATM  147  O   HOH T 146     -17.887 -14.308  44.756  1.00  0.34           O  
HETATM  148  O   HOH T 147     -13.186   2.164  17.800  1.00  0.34           O  
HETATM  149  O   HOH T 148       2.152   0.017  47.518  1.00  0.34           O  
HETATM  150  O   HOH T 149       8.238  28.012  37.952  1.00  0.34           O  
HETATM  151  O   HOH T 150      -8.234  21.960  50.797  1.00  0.34           O  
HETATM  152  O   HOH T 151      12.967  15.057  42.748  1.00  0.34           O  
HETATM  153  O   HOH T 152     -11.812  19.860  48.663  1.00  0.34           O  
HETATM  154  O   HOH T 153     -13.217  31.519  44.793  1.00  0.34           O  
HETATM  155  O   HOH T 154      19.627  10.387  29.445  1.00  0.34           O  
HETATM  156  O   HOH T 155     -14.720  23.559  31.699  1.00  0.34           O  
HETATM  157  O   HOH T 156      -9.180  11.312  63.936  1.00  0.34           O  
HETATM  158  O   HOH T 157      -1.058  15.412  32.174  1.00  0.35           O  
HETATM  159  O   HOH T 158     -17.551  28.539  49.041  1.00  0.35           O  
HETATM  160  O   HOH T 159       2.757  19.444  12.836  1.00  0.35           O  
HETATM  161  O   HOH T 160     -10.097  12.005  34.753  1.00  0.35           O  
HETATM  162  O   HOH T 161     -10.950  17.582  47.231  1.00  0.35           O  
HETATM  163  O   HOH T 162      -7.507   2.431   8.094  1.00  0.35           O  
HETATM  164  O   HOH T 163      -6.269   0.042  17.299  1.00  0.35           O  
HETATM  165  O   HOH T 164      -8.104   2.060  17.864  1.00  0.35           O  
HETATM  166  O   HOH T 165     -12.589   0.847  40.843  1.00  0.35           O  
HETATM  167  O   HOH T 166      -2.700  14.451  29.141  1.00  0.35           O  
HETATM  168  O   HOH T 167     -21.163  -6.415  49.435  1.00  0.36           O  
HETATM  169  O   HOH T 168     -13.813  -3.716  60.422  1.00  0.36           O  
HETATM  170  O   HOH T 169     -21.308   6.073   8.957  1.00  0.36           O  
HETATM  171  O   HOH T 170      -0.223  30.947  43.869  1.00  0.36           O  
HETATM  172  O   HOH T 171      -3.192 -16.509  28.071  1.00  0.36           O  
HETATM  173  O   HOH T 172       3.504  25.879  26.245  1.00  0.36           O  
HETATM  174  O   HOH T 173      -9.352  23.184  24.958  1.00  0.36           O  
HETATM  175  O   HOH T 174     -15.955  11.311  40.581  1.00  0.36           O  
HETATM  176  O   HOH T 175     -22.742  17.106  26.545  1.00  0.36           O  
HETATM  177  O   HOH T 176     -12.860  14.787  26.160  1.00  0.36           O  
HETATM  178  O   HOH T 177     -12.551  35.789  38.292  1.00  0.36           O  
HETATM  179  O   HOH T 178       9.353   0.001  34.106  1.00  0.36           O  
HETATM  180  O   HOH T 179      15.302  19.392  41.399  1.00  0.36           O  
HETATM  181  O   HOH T 180     -29.978  -6.182  43.341  1.00  0.36           O  
HETATM  182  O   HOH T 181     -20.027 -18.757  35.679  1.00  0.36           O  
HETATM  183  O   HOH T 182      11.631  25.495  18.558  1.00  0.36           O  
HETATM  184  O   HOH T 183     -20.502  13.699  61.137  1.00  0.37           O  
HETATM  185  O   HOH T 184     -13.150  -9.008  28.087  1.00  0.37           O  
HETATM  186  O   HOH T 185      -6.493  -0.216  13.001  1.00  0.37           O  
HETATM  187  O   HOH T 186      -7.182  35.622  34.405  1.00  0.37           O  
HETATM  188  O   HOH T 187       3.056  -3.338  33.670  1.00  0.37           O  
HETATM  189  O   HOH T 188       0.840  -9.737  22.767  1.00  0.37           O  
HETATM  190  O   HOH T 189     -19.400  -2.575  59.230  1.00  0.37           O  
HETATM  191  O   HOH T 190       3.458   4.831   7.233  1.00  0.37           O  
HETATM  192  O   HOH T 191     -35.002  13.876  34.871  1.00  0.37           O  
HETATM  193  O   HOH T 192     -36.524  17.192  28.489  1.00  0.37           O  
HETATM  194  O   HOH T 193     -13.516   3.729  20.007  1.00  0.37           O  
HETATM  195  O   HOH T 194     -15.914  13.878  46.727  1.00  0.37           O  
HETATM  196  O   HOH T 195      -9.058 -10.074  16.244  1.00  0.37           O  
HETATM  197  O   HOH T 196      -1.605   3.060  48.112  1.00  0.37           O  
HETATM  198  O   HOH T 197      -0.563  -6.817  48.771  1.00  0.37           O  
HETATM  199  O   HOH T 198     -21.554   7.025  11.804  1.00  0.37           O  
HETATM  200  O   HOH T 199       9.588  15.516  18.564  1.00  0.37           O  
HETATM  201  O   HOH T 200      -4.832  12.804  58.196  1.00  0.37           O  
HETATM  202  O   HOH T 201     -37.627  15.823  30.866  1.00  0.37           O  
HETATM  203  O   HOH T 202     -15.625 -14.066  15.796  1.00  0.37           O  
HETATM  204  O   HOH T 203      -9.993 -12.108  14.666  1.00  0.37           O  
HETATM  205  O   HOH T 204      -7.914  -2.284  57.992  1.00  0.37           O  
HETATM  206  O   HOH T 205     -23.456   3.522  17.315  1.00  0.37           O  
HETATM  207  O   HOH T 206      -4.944 -15.447  31.245  1.00  0.38           O  
HETATM  208  O   HOH T 207      -7.861   6.228  48.815  1.00  0.38           O  
HETATM  209  O   HOH T 208      -8.149 -18.053  29.991  1.00  0.38           O  
HETATM  210  O   HOH T 209     -26.017   2.590  18.034  1.00  0.38           O  
HETATM  211  O   HOH T 210       6.518   2.545   5.416  1.00  0.38           O  
HETATM  212  O   HOH T 211     -32.753  24.361  34.701  1.00  0.38           O  
HETATM  213  O   HOH T 212       8.650  22.930  26.894  1.00  0.38           O  
HETATM  214  O   HOH T 213     -18.387   2.920  36.253  1.00  0.38           O  
HETATM  215  O   HOH T 214       1.008  20.455  10.914  1.00  0.38           O  
HETATM  216  O   HOH T 215      -5.702  26.095  21.101  1.00  0.38           O  
HETATM  217  O   HOH T 216     -28.062  -2.126  42.701  1.00  0.38           O  
HETATM  218  O   HOH T 217       8.716  -4.096  32.339  1.00  0.38           O  
HETATM  219  O   HOH T 218       7.496  17.493  18.261  1.00  0.38           O  
HETATM  220  O   HOH T 219      -2.424 -14.792  30.179  1.00  0.38           O  
HETATM  221  O   HOH T 220     -13.367  21.195  31.880  1.00  0.38           O  
HETATM  222  O   HOH T 221     -33.231  -0.649  51.349  1.00  0.38           O  
HETATM  223  O   HOH T 222     -13.226  14.416  46.998  1.00  0.38           O  
HETATM  224  O   HOH T 223     -23.794   0.212  20.371  1.00  0.38           O  
HETATM  225  O   HOH T 224       4.208  20.224  50.751  1.00  0.38           O  
HETATM  226  O   HOH T 225       0.800   0.717  52.607  1.00  0.38           O  
HETATM  227  O   HOH T 226       9.669  24.911  24.979  1.00  0.38           O  
HETATM  228  O   HOH T 227     -22.766  15.863  32.017  1.00  0.38           O  
HETATM  229  O   HOH T 228      -5.324   0.548   8.698  1.00  0.39           O  
HETATM  230  O   HOH T 229      -6.326  -9.887  16.464  1.00  0.39           O  
HETATM  231  O   HOH T 230     -10.563  16.598  44.587  1.00  0.39           O  
HETATM  232  O   HOH T 231     -23.142   0.988  38.099  1.00  0.39           O  
HETATM  233  O   HOH T 232     -34.992  15.962  36.647  1.00  0.39           O  
HETATM  234  O   HOH T 233      -1.485  10.533  26.477  1.00  0.39           O  
HETATM  235  O   HOH T 234      -7.595  30.378  28.957  1.00  0.39           O  
HETATM  236  O   HOH T 235       1.813  16.322  51.060  1.00  0.39           O  
HETATM  237  O   HOH T 236       8.684  -5.019  25.152  1.00  0.39           O  
HETATM  238  O   HOH T 237      12.417   2.698  27.545  1.00  0.39           O  
HETATM  239  O   HOH T 238      -3.469  26.090  19.414  1.00  0.39           O  
HETATM  240  O   HOH T 239      -1.171 -10.589  29.455  1.00  0.39           O  
HETATM  241  O   HOH T 240     -10.858 -17.685  24.159  1.00  0.39           O  
HETATM  242  O   HOH T 241     -16.210   3.900  39.006  1.00  0.39           O  
HETATM  243  O   HOH T 242      20.248  12.125  31.530  1.00  0.39           O  
HETATM  244  O   HOH T 243      -4.956  29.279  31.752  1.00  0.39           O  
HETATM  245  O   HOH T 244       6.589  21.195  19.539  1.00  0.39           O  
HETATM  246  O   HOH T 245     -24.251   5.803  60.980  1.00  0.39           O  
HETATM  247  O   HOH T 246     -24.694  13.883  58.051  1.00  0.39           O  
HETATM  248  O   HOH T 247      11.556  21.229  32.285  1.00  0.39           O  
HETATM  249  O   HOH T 248     -21.878  14.457  19.282  1.00  0.39           O  
HETATM  250  O   HOH T 249     -24.079  -1.248  45.615  1.00  0.39           O  
HETATM  251  O   HOH T 250     -12.856  17.065  24.467  1.00  0.40           O  
HETATM  252  O   HOH T 251      -7.355   8.484  47.213  1.00  0.40           O  
HETATM  253  O   HOH T 252     -16.368 -11.684  16.884  1.00  0.40           O  
HETATM  254  O   HOH T 253      -4.672  33.536  42.815  1.00  0.40           O  
HETATM  255  O   HOH T 254     -16.470  -5.716  14.230  1.00  0.40           O  
HETATM  256  O   HOH T 255     -13.633  -9.640  22.646  1.00  0.40           O  
HETATM  257  O   HOH T 256      -8.046   9.270   7.919  1.00  0.40           O  
HETATM  258  O   HOH T 257     -25.576  -4.848  48.876  1.00  0.40           O  
HETATM  259  O   HOH T 258       7.108  -5.368  27.474  1.00  0.40           O  
HETATM  260  O   HOH T 259      -9.602  -1.370  59.848  1.00  0.40           O  
HETATM  261  O   HOH T 260     -41.194  20.434  34.376  1.00  0.40           O  
HETATM  262  O   HOH T 261       5.688  18.611  20.260  1.00  0.40           O  
HETATM  263  O   HOH T 262     -11.063  -4.753  19.378  1.00  0.40           O  
HETATM  264  O   HOH T 263      -1.380  -6.527  32.836  1.00  0.40           O  
HETATM  265  O   HOH T 264       1.102  35.142  38.736  1.00  0.40           O  
HETATM  266  O   HOH T 265     -30.309  -3.550  43.435  1.00  0.40           O  
HETATM  267  O   HOH T 266     -31.564  -6.571  45.435  1.00  0.40           O  
HETATM  268  O   HOH T 267     -22.699 -18.605  31.746  1.00  0.40           O  
HETATM  269  O   HOH T 268     -16.021  -0.708  15.198  1.00  0.40           O  
HETATM  270  O   HOH T 269       1.088  -3.168  31.716  1.00  0.40           O  
HETATM  271  O   HOH T 270      16.131   8.064  30.204  1.00  0.40           O  
HETATM  272  O   HOH T 271     -19.440  -8.458  48.431  1.00  0.41           O  
HETATM  273  O   HOH T 272     -25.482   8.972  57.404  1.00  0.41           O  
HETATM  274  O   HOH T 273       0.148   7.676  49.340  1.00  0.41           O  
HETATM  275  O   HOH T 274     -13.718  12.025  42.045  1.00  0.41           O  
HETATM  276  O   HOH T 275     -15.097   0.666  61.326  1.00  0.41           O  
HETATM  277  O   HOH T 276       5.600  27.469  30.741  1.00  0.41           O  
HETATM  278  O   HOH T 277     -34.535   2.516  18.785  1.00  0.41           O  
HETATM  279  O   HOH T 278     -19.369  -4.675  55.796  1.00  0.41           O  
HETATM  280  O   HOH T 279     -33.090   3.798  31.162  1.00  0.41           O  
HETATM  281  O   HOH T 280       1.705  22.110  12.933  1.00  0.41           O  
HETATM  282  O   HOH T 281      -2.299  31.138  34.607  1.00  0.41           O  
HETATM  283  O   HOH T 282       1.182  -3.810  59.694  1.00  0.41           O  
HETATM  284  O   HOH T 283      -2.209  -8.748  31.251  1.00  0.41           O  
HETATM  285  O   HOH T 284     -22.744 -12.450  46.235  1.00  0.41           O  
HETATM  286  O   HOH T 285      14.378   6.990  28.429  1.00  0.41           O  
HETATM  287  O   HOH T 286       7.762  15.140  13.770  1.00  0.41           O  
HETATM  288  O   HOH T 287      -6.070   5.916  35.414  1.00  0.42           O  
HETATM  289  O   HOH T 288      -7.728   5.300  31.825  1.00  0.42           O  
HETATM  290  O   HOH T 289      -5.794  -1.386  10.583  1.00  0.42           O  
HETATM  291  O   HOH T 290       4.953  24.250  28.073  1.00  0.42           O  
HETATM  292  O   HOH T 291     -22.651 -11.133  25.211  1.00  0.42           O  
HETATM  293  O   HOH T 292     -11.335  38.295  37.935  1.00  0.42           O  
HETATM  294  O   HOH T 293      -4.078  33.903  40.108  1.00  0.42           O  
HETATM  295  O   HOH T 294     -19.416  11.157  17.130  1.00  0.42           O  
HETATM  296  O   HOH T 295      11.220  11.508  18.538  1.00  0.42           O  
HETATM  297  O   HOH T 296     -32.510   9.822  35.733  1.00  0.42           O  
HETATM  298  O   HOH T 297     -28.512  13.919  19.630  1.00  0.42           O  
HETATM  299  O   HOH T 298      -0.804  25.775  29.921  1.00  0.42           O  
HETATM  300  O   HOH T 299      -9.921   9.216  34.916  1.00  0.42           O  
HETATM  301  O   HOH T 300      -1.456   9.012  47.615  1.00  0.42           O  
HETATM  302  O   HOH T 301     -10.617 -14.750  58.396  1.00  0.42           O  
HETATM  303  O   HOH T 302      -9.150  28.705  27.252  1.00  0.42           O  
HETATM  304  O   HOH T 303     -30.646  -1.039  51.622  1.00  0.42           O  
HETATM  305  O   HOH T 304     -30.139   6.538  40.138  1.00  0.42           O  
HETATM  306  O   HOH T 305     -15.382 -11.663  19.496  1.00  0.42           O  
HETATM  307  O   HOH T 306     -16.626  14.432  28.076  1.00  0.42           O  
HETATM  308  O   HOH T 307      11.128  29.591  25.285  1.00  0.42           O  
HETATM  309  O   HOH T 308       1.392  -4.037  44.607  1.00  0.42           O  
HETATM  310  O   HOH T 309      -1.956  -8.158  28.475  1.00  0.42           O  
HETATM  311  O   HOH T 310      -2.937  27.484  30.494  1.00  0.42           O  
HETATM  312  O   HOH T 311      -8.338  -2.206  13.728  1.00  0.42           O  
HETATM  313  O   HOH T 312     -10.372  12.864  28.623  1.00  0.42           O  
HETATM  314  O   HOH T 313     -13.203  30.372  28.097  1.00  0.42           O  
HETATM  315  O   HOH T 314     -11.572 -16.240  26.502  1.00  0.43           O  
HETATM  316  O   HOH T 315      -0.552  22.676  11.224  1.00  0.43           O  
HETATM  317  O   HOH T 316     -21.108  -2.289  20.056  1.00  0.43           O  
HETATM  318  O   HOH T 317     -21.996  -9.008  49.418  1.00  0.43           O  
HETATM  319  O   HOH T 318      -8.046  25.892  22.552  1.00  0.43           O  
HETATM  320  O   HOH T 319     -10.517 -14.158  50.781  1.00  0.43           O  
HETATM  321  O   HOH T 320     -35.791  24.584  37.292  1.00  0.43           O  
HETATM  322  O   HOH T 321       3.547  -2.444   1.118  1.00  0.43           O  
HETATM  323  O   HOH T 322     -13.593  34.145  44.970  1.00  0.43           O  
HETATM  324  O   HOH T 323       0.684  -6.791  44.483  1.00  0.43           O  
HETATM  325  O   HOH T 324     -32.456  -7.145  42.868  1.00  0.43           O  
HETATM  326  O   HOH T 325       3.963  13.937  53.660  1.00  0.43           O  
HETATM  327  O   HOH T 326     -24.481  15.001  18.683  1.00  0.43           O  
HETATM  328  O   HOH T 327     -10.854   9.146  21.007  1.00  0.43           O  
HETATM  329  O   HOH T 328     -12.183  28.778  48.387  1.00  0.43           O  
HETATM  330  O   HOH T 329     -28.136  25.177  41.910  1.00  0.43           O  
HETATM  331  O   HOH T 330     -24.264  17.712  18.106  1.00  0.43           O  
HETATM  332  O   HOH T 331     -16.333  17.872  10.656  1.00  0.43           O  
HETATM  333  O   HOH T 332     -28.298  22.133  33.960  1.00  0.43           O  
HETATM  334  O   HOH T 333       2.330   5.242  10.540  1.00  0.43           O  
HETATM  335  O   HOH T 334     -24.330 -16.285  34.840  1.00  0.43           O  
HETATM  336  O   HOH T 335      11.825  26.788  25.268  1.00  0.43           O  
HETATM  337  O   HOH T 336       3.940  19.750  22.039  1.00  0.43           O  
HETATM  338  O   HOH T 337     -23.575   8.630  18.196  1.00  0.43           O  
HETATM  339  O   HOH T 338     -26.111   9.691  52.633  1.00  0.43           O  
HETATM  340  O   HOH T 339      -9.832  15.163  29.860  1.00  0.43           O  
HETATM  341  O   HOH T 340      -8.864  20.263   4.093  1.00  0.43           O  
HETATM  342  O   HOH T 341      -9.280  21.927  20.234  1.00  0.44           O  
HETATM  343  O   HOH T 342      -4.981  -6.271  63.651  1.00  0.44           O  
HETATM  344  O   HOH T 343     -14.517  21.982  29.471  1.00  0.44           O  
HETATM  345  O   HOH T 344      -2.342  -7.212  61.415  1.00  0.44           O  
HETATM  346  O   HOH T 345     -24.130   4.812  63.535  1.00  0.44           O  
HETATM  347  O   HOH T 346     -17.651   1.718  62.049  1.00  0.44           O  
HETATM  348  O   HOH T 347     -10.646  20.667  51.187  1.00  0.44           O  
HETATM  349  O   HOH T 348     -10.199  15.353  27.114  1.00  0.44           O  
HETATM  350  O   HOH T 349     -30.823  -4.102  23.455  1.00  0.44           O  
HETATM  351  O   HOH T 350     -27.020  17.524  18.434  1.00  0.44           O  
HETATM  352  O   HOH T 351     -13.008  27.939  26.960  1.00  0.44           O  
HETATM  353  O   HOH T 352     -11.718  19.285  33.035  1.00  0.44           O  
HETATM  354  O   HOH T 353      -9.309 -16.781  27.872  1.00  0.44           O  
HETATM  355  O   HOH T 354      13.069   4.714  29.367  1.00  0.44           O  
HETATM  356  O   HOH T 355     -39.945  20.225  31.851  1.00  0.44           O  
HETATM  357  O   HOH T 356       8.934  19.864  18.915  1.00  0.44           O  
HETATM  358  O   HOH T 357     -19.653 -17.665  51.796  1.00  0.44           O  
HETATM  359  O   HOH T 358       5.638  -6.840  43.118  1.00  0.44           O  
HETATM  360  O   HOH T 359     -36.583  22.728  35.548  1.00  0.44           O  
HETATM  361  O   HOH T 360       0.196  30.302  31.751  1.00  0.44           O  
HETATM  362  O   HOH T 361      -7.957 -13.988  58.503  1.00  0.44           O  
HETATM  363  O   HOH T 362       9.044  13.970  46.607  1.00  0.44           O  
HETATM  364  O   HOH T 363      15.456   7.449  33.921  1.00  0.44           O  
HETATM  365  O   HOH T 364     -12.934  21.444  38.226  1.00  0.44           O  
HETATM  366  O   HOH T 365      -6.727  -1.685  63.054  1.00  0.45           O  
HETATM  367  O   HOH T 366      -8.925   2.445  15.178  1.00  0.45           O  
HETATM  368  O   HOH T 367      18.318   6.170  38.801  1.00  0.45           O  
HETATM  369  O   HOH T 368     -14.116  19.291  29.940  1.00  0.45           O  
HETATM  370  O   HOH T 369     -25.072 -18.423  33.201  1.00  0.45           O  
HETATM  371  O   HOH T 370      -7.035 -16.986  61.604  1.00  0.45           O  
HETATM  372  O   HOH T 371       0.772   0.180  55.388  1.00  0.45           O  
HETATM  373  O   HOH T 372     -10.670 -11.127  61.817  1.00  0.45           O  
HETATM  374  O   HOH T 373       4.257  17.472  50.509  1.00  0.45           O  
HETATM  375  O   HOH T 374     -12.123  32.492  54.882  1.00  0.45           O  
HETATM  376  O   HOH T 375     -29.948   2.491  41.383  1.00  0.45           O  
HETATM  377  O   HOH T 376      18.791  19.614  39.513  1.00  0.45           O  
HETATM  378  O   HOH T 377     -13.931  30.016  46.886  1.00  0.45           O  
HETATM  379  O   HOH T 378      -2.417  -7.323  64.166  1.00  0.45           O  
HETATM  380  O   HOH T 379     -41.931  21.313  29.227  1.00  0.45           O  
HETATM  381  O   HOH T 380      -7.879 -13.222  50.349  1.00  0.45           O  
HETATM  382  O   HOH T 381      18.066   4.588  36.524  1.00  0.45           O  
HETATM  383  O   HOH T 382      -3.202 -10.914  51.790  1.00  0.45           O  
HETATM  384  O   HOH T 383     -13.894  18.051  34.318  1.00  0.45           O  
HETATM  385  O   HOH T 384     -22.887  -5.787  14.377  1.00  0.45           O  
HETATM  386  O   HOH T 385     -16.586  29.118  46.577  1.00  0.45           O  
HETATM  387  O   HOH T 386      -1.902  27.159  17.381  1.00  0.46           O  
HETATM  388  O   HOH T 387      -8.319  13.631  33.208  1.00  0.46           O  
HETATM  389  O   HOH T 388     -10.544  -5.148  58.854  1.00  0.46           O  
HETATM  390  O   HOH T 389     -21.057 -12.599  26.982  1.00  0.46           O  
HETATM  391  O   HOH T 390     -15.395  28.676  28.223  1.00  0.46           O  
HETATM  392  O   HOH T 391      -0.921  -8.062  46.280  1.00  0.46           O  
HETATM  393  O   HOH T 392       1.838  32.750  43.536  1.00  0.46           O  
HETATM  394  O   HOH T 393     -18.957 -17.998  38.357  1.00  0.46           O  
HETATM  395  O   HOH T 394     -34.721  14.037  24.872  1.00  0.46           O  
HETATM  396  O   HOH T 395       1.110  -3.244   2.096  1.00  0.46           O  
HETATM  397  O   HOH T 396     -20.022 -13.099  46.086  1.00  0.46           O  
HETATM  398  O   HOH T 397     -39.726  21.111  36.612  1.00  0.46           O  
HETATM  399  O   HOH T 398      -5.096  23.946  19.403  1.00  0.46           O  
HETATM  400  O   HOH T 399     -12.986  23.001  40.508  1.00  0.46           O  
HETATM  401  O   HOH T 400      18.615  23.086  37.785  1.00  0.46           O  
HETATM  402  O   HOH T 401      -7.359   1.018  10.595  1.00  0.46           O  
HETATM  403  O   HOH T 402     -33.209   4.737  17.750  1.00  0.46           O  
HETATM  404  O   HOH T 403     -15.538  26.857  34.986  1.00  0.46           O  
HETATM  405  O   HOH T 404     -36.120  22.029  33.006  1.00  0.46           O  
HETATM  406  O   HOH T 405     -23.255   7.056  14.057  1.00  0.46           O  
HETATM  407  O   HOH T 406     -10.741  27.426  25.337  1.00  0.46           O  
HETATM  408  O   HOH T 407       9.064   1.432  43.183  1.00  0.46           O  
HETATM  409  O   HOH T 408     -11.387  34.458  53.082  1.00  0.46           O  
HETATM  410  O   HOH T 409      -7.075  21.043  21.669  1.00  0.46           O  
HETATM  411  O   HOH T 410       0.835  -1.611  15.461  1.00  0.46           O  
HETATM  412  O   HOH T 411      -7.974  14.522  51.035  1.00  0.46           O  
HETATM  413  O   HOH T 412     -13.779   9.621  35.522  1.00  0.47           O  
HETATM  414  O   HOH T 413     -22.461  16.005  17.052  1.00  0.47           O  
HETATM  415  O   HOH T 414      17.020  20.607  49.495  1.00  0.47           O  
HETATM  416  O   HOH T 415     -16.862  14.997  18.602  1.00  0.47           O  
HETATM  417  O   HOH T 416     -33.205  25.603  37.045  1.00  0.47           O  
HETATM  418  O   HOH T 417     -15.611  10.476  43.238  1.00  0.47           O  
HETATM  419  O   HOH T 418     -28.551 -14.767  39.188  1.00  0.47           O  
HETATM  420  O   HOH T 419     -22.746  -3.214  46.980  1.00  0.47           O  
HETATM  421  O   HOH T 420     -10.553  25.286  23.587  1.00  0.47           O  
HETATM  422  O   HOH T 421      -5.205  18.678   6.828  1.00  0.47           O  
HETATM  423  O   HOH T 422     -19.399  13.781  17.855  1.00  0.47           O  
HETATM  424  O   HOH T 423     -12.281  10.787  22.860  1.00  0.47           O  
HETATM  425  O   HOH T 424     -32.881   0.799  19.988  1.00  0.47           O  
HETATM  426  O   HOH T 425      15.963   5.776  31.763  1.00  0.47           O  
HETATM  427  O   HOH T 426      -7.573  -3.112  60.757  1.00  0.47           O  
HETATM  428  O   HOH T 427     -18.751  16.862   9.817  1.00  0.47           O  
HETATM  429  O   HOH T 428       0.740  -4.906  33.786  1.00  0.47           O  
HETATM  430  O   HOH T 429     -15.159  13.015  44.188  1.00  0.47           O  
HETATM  431  O   HOH T 430      -8.587 -14.060  52.962  1.00  0.47           O  
HETATM  432  O   HOH T 431       1.746  -0.459  50.201  1.00  0.47           O  
HETATM  433  O   HOH T 432     -32.437  -2.467  47.825  1.00  0.47           O  
HETATM  434  O   HOH T 433      -4.763  34.831  35.400  1.00  0.47           O  
HETATM  435  O   HOH T 434       5.665  -8.921  40.570  1.00  0.47           O  
HETATM  436  O   HOH T 435       1.496   3.248   6.270  1.00  0.47           O  
HETATM  437  O   HOH T 436     -10.491  15.370  50.195  1.00  0.47           O  
HETATM  438  O   HOH T 437       9.790  25.038  45.239  1.00  0.47           O  
HETATM  439  O   HOH T 438     -18.940 -12.566  48.556  1.00  0.48           O  
HETATM  440  O   HOH T 439      -0.901  -2.312   3.713  1.00  0.48           O  
HETATM  441  O   HOH T 440      12.373  15.898  19.128  1.00  0.48           O  
HETATM  442  O   HOH T 441     -21.738  -0.862  17.635  1.00  0.48           O  
HETATM  443  O   HOH T 442     -12.797  27.379  50.714  1.00  0.48           O  
HETATM  444  O   HOH T 443      17.806  20.602  41.968  1.00  0.48           O  
HETATM  445  O   HOH T 444     -26.249   8.968  62.771  1.00  0.48           O  
HETATM  446  O   HOH T 445     -11.840  -9.006  60.380  1.00  0.48           O  
HETATM  447  O   HOH T 446      -5.643  20.955   5.444  1.00  0.48           O  
HETATM  448  O   HOH T 447     -16.472  16.013  21.171  1.00  0.48           O  
HETATM  449  O   HOH T 448      -0.515 -13.238  28.876  1.00  0.48           O  
HETATM  450  O   HOH T 449      -2.269  34.489  36.293  1.00  0.48           O  
HETATM  451  O   HOH T 450     -17.626  31.014  42.186  1.00  0.48           O  
HETATM  452  O   HOH T 451      -5.374  26.132  15.718  1.00  0.48           O  
HETATM  453  O   HOH T 452      19.296  22.254  40.371  1.00  0.48           O  
HETATM  454  O   HOH T 453     -22.051  17.872  29.094  1.00  0.48           O  
HETATM  455  O   HOH T 454     -36.148   8.841  24.890  1.00  0.48           O  
HETATM  456  O   HOH T 455       3.929   3.336   4.834  1.00  0.48           O  
HETATM  457  O   HOH T 456     -34.195  25.073  39.518  1.00  0.48           O  
HETATM  458  O   HOH T 457       9.524   3.748   7.102  1.00  0.48           O  
HETATM  459  O   HOH T 458     -16.257 -15.245  31.678  1.00  0.48           O  
HETATM  460  O   HOH T 459     -25.580  13.765  62.181  1.00  0.48           O  
HETATM  461  O   HOH T 460     -12.998  19.499  36.409  1.00  0.48           O  
HETATM  462  O   HOH T 461     -23.820  -7.070  48.685  1.00  0.48           O  
HETATM  463  O   HOH T 462       0.538  29.284  21.838  1.00  0.48           O  
HETATM  464  O   HOH T 463      -8.833  -5.160  17.911  1.00  0.48           O  
HETATM  465  O   HOH T 464      17.529   5.603  34.018  1.00  0.49           O  
HETATM  466  O   HOH T 465      19.827  10.583  33.757  1.00  0.49           O  
HETATM  467  O   HOH T 466     -10.001   9.050  29.733  1.00  0.49           O  
HETATM  468  O   HOH T 467      16.197   6.478  24.308  1.00  0.49           O  
HETATM  469  O   HOH T 468     -12.327  34.663  28.103  1.00  0.49           O  
HETATM  470  O   HOH T 469      -0.335 -11.483  20.731  1.00  0.49           O  
HETATM  471  O   HOH T 470      -2.608  11.211  54.849  1.00  0.49           O  
HETATM  472  O   HOH T 471       4.109   8.969  51.723  1.00  0.49           O  
HETATM  473  O   HOH T 472      17.714  17.944  41.480  1.00  0.49           O  
HETATM  474  O   HOH T 473     -22.351   9.485  13.176  1.00  0.49           O  
HETATM  475  O   HOH T 474     -42.483  21.427  32.094  1.00  0.49           O  
HETATM  476  O   HOH T 475     -13.269  18.730  22.196  1.00  0.49           O  
HETATM  477  O   HOH T 476     -34.274  24.040  32.451  1.00  0.49           O  
HETATM  478  O   HOH T 477      -4.967  -2.201  16.309  1.00  0.49           O  
HETATM  479  O   HOH T 478     -11.943 -16.358  49.193  1.00  0.49           O  
HETATM  480  O   HOH T 479     -10.138  -2.644  17.793  1.00  0.49           O  
HETATM  481  O   HOH T 480     -16.918  12.369  17.358  1.00  0.49           O  
HETATM  482  O   HOH T 481      12.876  -2.376  39.130  1.00  0.49           O  
HETATM  483  O   HOH T 482      11.449   0.001  37.041  1.00  0.49           O  
HETATM  484  O   HOH T 483      -7.531  12.084   6.656  1.00  0.49           O  
HETATM  485  O   HOH T 484     -37.318  19.665  27.854  1.00  0.49           O  
HETATM  486  O   HOH T 485       1.107  -9.062  42.874  1.00  0.49           O  
HETATM  487  O   HOH T 486     -30.314   8.410  41.920  1.00  0.49           O  
HETATM  488  O   HOH T 487      -9.494  17.544  28.846  1.00  0.49           O  
HETATM  489  O   HOH T 488     -16.041 -12.804  46.118  1.00  0.49           O  
HETATM  490  O   HOH T 489     -10.972  16.252  39.131  1.00  0.49           O  
HETATM  491  O   HOH T 490      -0.060  30.086  27.655  1.00  0.49           O  
HETATM  492  O   HOH T 491      -0.853 -16.976  29.309  1.00  0.49           O  
HETATM  493  O   HOH T 492       3.821  23.271  53.324  1.00  0.49           O  
HETATM  494  O   HOH T 493     -15.794  27.391  30.691  1.00  0.49           O  
HETATM  495  O   HOH T 494     -15.285  16.220  33.041  1.00  0.50           O  
HETATM  496  O   HOH T 495     -22.008  13.993  57.039  1.00  0.50           O  
HETATM  497  O   HOH T 496     -33.590   8.313  24.062  1.00  0.50           O  
HETATM  498  O   HOH T 497      14.057   4.794  26.850  1.00  0.50           O  
HETATM  499  O   HOH T 498      -8.855  14.910   5.626  1.00  0.50           O  
HETATM  500  O   HOH T 499     -12.171  19.293  25.995  1.00  0.50           O  
HETATM  501  O   HOH T 500     -20.295 -12.912  50.924  1.00  0.50           O  
HETATM  502  O   HOH T 501     -16.492  24.609  33.535  1.00  0.50           O  
HETATM  503  O   HOH T 502     -10.815  14.482  42.623  1.00  0.50           O  
HETATM  504  O   HOH T 503     -10.500 -19.398  30.691  1.00  0.50           O  
HETATM  505  O   HOH T 504     -22.875  13.692  62.371  1.00  0.50           O  
HETATM  506  O   HOH T 505      -4.070  31.816  32.628  1.00  0.50           O  
HETATM  507  O   HOH T 506     -28.290   5.689  17.085  1.00  0.50           O  
HETATM  508  O   HOH T 507       0.791  27.539  28.369  1.00  0.50           O  
HETATM  509  O   HOH T 508     -20.411 -19.414  33.033  1.00  0.50           O  
HETATM  510  O   HOH T 509     -22.662  14.560  59.711  1.00  0.50           O  
HETATM  511  O   HOH T 510       3.159  -5.786  36.841  1.00  0.50           O  
HETATM  512  O   HOH T 511      13.794   6.350  16.215  1.00  0.50           O  
HETATM  513  O   HOH T 512     -17.862   9.775  65.465  1.00  0.50           O  
HETATM  514  O   HOH T 513      18.223   7.808  25.776  1.00  0.50           O  
HETATM  515  O   HOH T 514      -8.100   7.658  36.287  1.00  0.50           O  
HETATM  516  O   HOH T 515     -29.360  16.167  18.355  1.00  0.50           O  
HETATM  517  O   HOH T 516     -28.699  10.454  53.041  1.00  0.50           O  
HETATM  518  O   HOH T 517      16.443  12.926  21.063  1.00  0.50           O  
HETATM  519  O   HOH T 518       2.455  -1.214  53.820  1.00  0.51           O  
HETATM  520  O   HOH T 519     -12.830 -14.139  33.377  1.00  0.51           O  
HETATM  521  O   HOH T 520      -9.909  24.516  21.009  1.00  0.51           O  
HETATM  522  O   HOH T 521     -34.043   9.337  26.616  1.00  0.51           O  
HETATM  523  O   HOH T 522      -4.893  36.567  33.243  1.00  0.51           O  
HETATM  524  O   HOH T 523     -19.402  16.158  38.774  1.00  0.51           O  
HETATM  525  O   HOH T 524     -24.011  10.561  51.080  1.00  0.51           O  
HETATM  526  O   HOH T 525       9.404  27.658  24.475  1.00  0.51           O  
HETATM  527  O   HOH T 526     -12.131  39.227  35.469  1.00  0.51           O  
HETATM  528  O   HOH T 527     -17.497  14.824  23.458  1.00  0.51           O  
HETATM  529  O   HOH T 528      -7.520   7.843  30.588  1.00  0.51           O  
HETATM  530  O   HOH T 529     -36.602  13.687  37.181  1.00  0.51           O  
HETATM  531  O   HOH T 530      -8.795   8.911  38.740  1.00  0.51           O  
HETATM  532  O   HOH T 531     -32.358   6.584  38.154  1.00  0.51           O  
HETATM  533  O   HOH T 532     -21.057  -4.851  53.565  1.00  0.52           O  
HETATM  534  O   HOH T 533     -25.905 -17.026  38.800  1.00  0.52           O  
HETATM  535  O   HOH T 534       9.358   6.413  10.319  1.00  0.52           O  
HETATM  536  O   HOH T 535       9.548  22.381  17.785  1.00  0.52           O  
HETATM  537  O   HOH T 536      -9.113   9.069  32.342  1.00  0.52           O  
HETATM  538  O   HOH T 537      17.203  21.446  27.754  1.00  0.52           O  
HETATM  539  O   HOH T 538      17.824   9.009  38.198  1.00  0.52           O  
HETATM  540  O   HOH T 539      -2.452 -13.069  19.506  1.00  0.52           O  
HETATM  541  O   HOH T 540      -4.800  16.028   7.287  1.00  0.52           O  
HETATM  542  O   HOH T 541     -17.709  13.834  44.634  1.00  0.52           O  
HETATM  543  O   HOH T 542     -29.462  12.990  42.001  1.00  0.52           O  
HETATM  544  O   HOH T 543     -23.308 -13.796  28.202  1.00  0.52           O  
HETATM  545  O   HOH T 544     -24.950  21.129  37.830  1.00  0.52           O  
HETATM  546  O   HOH T 545     -13.896  14.596  28.805  1.00  0.52           O  
HETATM  547  O   HOH T 546      -8.047  22.305   5.738  1.00  0.52           O  
HETATM  548  O   HOH T 547      10.586   5.453  14.408  1.00  0.52           O  
HETATM  549  O   HOH T 548     -12.967  15.270  58.535  1.00  0.52           O  
HETATM  550  O   HOH T 549       0.094   2.685  54.450  1.00  0.53           O  
HETATM  551  O   HOH T 550     -29.920  21.876  27.610  1.00  0.53           O  
HETATM  552  O   HOH T 551     -11.499   9.812  39.402  1.00  0.53           O  
HETATM  553  O   HOH T 552     -13.133  17.345  31.680  1.00  0.53           O  
HETATM  554  O   HOH T 553     -11.269  32.272  27.503  1.00  0.53           O  
HETATM  555  O   HOH T 554       7.355  27.611  35.406  1.00  0.53           O  
HETATM  556  O   HOH T 555     -23.891   0.797  17.576  1.00  0.53           O  
HETATM  557  O   HOH T 556     -13.776 -12.790  17.520  1.00  0.53           O  
HETATM  558  O   HOH T 557      14.787  22.610  35.925  1.00  0.53           O  
HETATM  559  O   HOH T 558       8.941  -3.994  22.611  1.00  0.53           O  
HETATM  560  O   HOH T 559     -23.728 -10.764  48.192  1.00  0.53           O  
HETATM  561  O   HOH T 560      -1.665  34.800  38.883  1.00  0.53           O  
HETATM  562  O   HOH T 561      -0.877  13.015  55.953  1.00  0.53           O  
HETATM  563  O   HOH T 562     -19.982   7.499  45.193  1.00  0.53           O  
HETATM  564  O   HOH T 563     -13.018   1.993  15.064  1.00  0.53           O  
HETATM  565  O   HOH T 564      -4.568  10.086  57.685  1.00  0.53           O  
HETATM  566  O   HOH T 565     -24.529   9.964  64.327  1.00  0.53           O  
HETATM  567  O   HOH T 566       5.827   5.124   5.991  1.00  0.53           O  
HETATM  568  O   HOH T 567      20.298   8.367  27.595  1.00  0.53           O  
HETATM  569  O   HOH T 568      18.872   7.819  29.924  1.00  0.53           O  
HETATM  570  O   HOH T 569       1.757  13.051  55.184  1.00  0.53           O  
HETATM  571  O   HOH T 570     -15.470  12.881  67.016  1.00  0.53           O  
HETATM  572  O   HOH T 571       4.001  29.287  29.227  1.00  0.53           O  
HETATM  573  O   HOH T 572      18.006   8.368  34.255  1.00  0.53           O  
HETATM  574  O   HOH T 573       1.209  -8.642  54.282  1.00  0.53           O  
HETATM  575  O   HOH T 574      -2.876 -10.509  19.999  1.00  0.53           O  
HETATM  576  O   HOH T 575       1.656  -1.557  58.013  1.00  0.53           O  
HETATM  577  O   HOH T 576     -10.340  13.836  64.133  1.00  0.53           O  
HETATM  578  O   HOH T 577       6.047  34.651  49.279  1.00  0.53           O  
HETATM  579  O   HOH T 578      -9.539 -11.786  51.941  1.00  0.53           O  
HETATM  580  O   HOH T 579      -8.141 -16.334  54.316  1.00  0.54           O  
HETATM  581  O   HOH T 580     -14.298  20.294  27.368  1.00  0.54           O  
HETATM  582  O   HOH T 581     -26.855   8.726  65.215  1.00  0.54           O  
HETATM  583  O   HOH T 582      -4.866  30.741  29.287  1.00  0.54           O  
HETATM  584  O   HOH T 583       1.624  -7.324  47.098  1.00  0.54           O  
HETATM  585  O   HOH T 584      13.770   2.430  23.490  1.00  0.54           O  
HETATM  586  O   HOH T 585      -7.283   0.123  59.238  1.00  0.54           O  
HETATM  587  O   HOH T 586     -15.349  29.137  42.121  1.00  0.54           O  
HETATM  588  O   HOH T 587     -13.106  36.555  49.724  1.00  0.54           O  
HETATM  589  O   HOH T 588      -7.086  27.713  12.838  1.00  0.54           O  
HETATM  590  O   HOH T 589     -26.117 -18.041  30.644  1.00  0.54           O  
HETATM  591  O   HOH T 590     -14.482  27.398  47.702  1.00  0.54           O  
HETATM  592  O   HOH T 591     -22.663 -18.676  34.515  1.00  0.54           O  
HETATM  593  O   HOH T 592      18.587  11.450  37.321  1.00  0.54           O  
HETATM  594  O   HOH T 593      11.379  20.343  17.830  1.00  0.54           O  
HETATM  595  O   HOH T 594     -33.542   6.282  35.673  1.00  0.54           O  
HETATM  596  O   HOH T 595      -0.527   3.325  51.828  1.00  0.54           O  
HETATM  597  O   HOH T 596      -7.273  23.765  20.975  1.00  0.54           O  
HETATM  598  O   HOH T 597       4.935  26.961  28.197  1.00  0.54           O  
HETATM  599  O   HOH T 598       7.054  -5.843  33.691  1.00  0.54           O  
HETATM  600  O   HOH T 599      -1.770  -7.199  14.162  1.00  0.54           O  
HETATM  601  O   HOH T 600     -33.520  12.232  36.513  1.00  0.54           O  
HETATM  602  O   HOH T 601      10.688  -0.903  42.877  1.00  0.55           O  
HETATM  603  O   HOH T 602     -14.630  39.674  34.825  1.00  0.55           O  
HETATM  604  O   HOH T 603       3.217  -6.378  21.144  1.00  0.55           O  
HETATM  605  O   HOH T 604      11.053  22.700  36.204  1.00  0.55           O  
HETATM  606  O   HOH T 605       3.309  -4.119   3.300  1.00  0.55           O  
HETATM  607  O   HOH T 606      12.936   2.315  21.870  1.00  0.55           O  
HETATM  608  O   HOH T 607     -35.776   3.911  25.274  1.00  0.55           O  
HETATM  609  O   HOH T 608      -5.809 -19.415  61.555  1.00  0.55           O  
HETATM  610  O   HOH T 609      14.659  16.979  20.261  1.00  0.55           O  
HETATM  611  O   HOH T 610      -4.866  12.971  60.779  1.00  0.55           O  
HETATM  612  O   HOH T 611       0.021 -15.351  61.460  1.00  0.56           O  
HETATM  613  O   HOH T 612       9.605  21.972  30.664  1.00  0.56           O  
HETATM  614  O   HOH T 613     -33.171  -9.668  42.995  1.00  0.56           O  
HETATM  615  O   HOH T 614      -2.281  29.639  32.214  1.00  0.56           O  
HETATM  616  O   HOH T 615      13.902  13.838  20.390  1.00  0.56           O  
HETATM  617  O   HOH T 616      10.525   2.517   4.808  1.00  0.56           O  
HETATM  618  O   HOH T 617       4.833  -4.911  34.922  1.00  0.56           O  
HETATM  619  O   HOH T 618      12.821  21.043  34.617  1.00  0.56           O  
HETATM  620  O   HOH T 619      12.514  24.270  44.712  1.00  0.56           O  
HETATM  621  O   HOH T 620       7.296   3.961  51.183  1.00  0.56           O  
HETATM  622  O   HOH T 621     -30.773   3.183  17.589  1.00  0.56           O  
HETATM  623  O   HOH T 622     -15.377 -16.385  38.037  1.00  0.56           O  
HETATM  624  O   HOH T 623     -38.734  14.525  40.319  1.00  0.56           O  
HETATM  625  O   HOH T 624      -4.783  28.437  49.693  1.00  0.57           O  
HETATM  626  O   HOH T 625      11.350   3.582   9.038  1.00  0.57           O  
HETATM  627  O   HOH T 626       8.841   4.835  51.744  1.00  0.57           O  
HETATM  628  O   HOH T 627      -7.827  19.667   6.745  1.00  0.57           O  
HETATM  629  O   HOH T 628     -12.587  25.301   8.741  1.00  0.57           O  
HETATM  630  O   HOH T 629      -6.960 -16.252  56.807  1.00  0.57           O  
HETATM  631  O   HOH T 630       4.057  11.147  53.489  1.00  0.57           O  
HETATM  632  O   HOH T 631      15.413  -2.333  38.112  1.00  0.57           O  
HETATM  633  O   HOH T 632     -18.682  13.503  13.833  1.00  0.57           O  
HETATM  634  O   HOH T 633      16.987   7.010  36.444  1.00  0.57           O  
HETATM  635  O   HOH T 634     -15.001  38.035  51.118  1.00  0.57           O  
HETATM  636  O   HOH T 635      -0.511  -7.185  16.292  1.00  0.57           O  
HETATM  637  O   HOH T 636      10.292  32.197  26.609  1.00  0.58           O  
HETATM  638  O   HOH T 637     -26.587  25.202  37.075  1.00  0.60           O  
HETATM  639  O   HOH T 638       1.647  -5.769  61.595  1.00  0.61           O  
HETATM  640  O   HOH T 639       0.712 -11.265  27.501  1.00  0.61           O  
TER     641      HOH T 639 
