# Supplementary material for: Accurate Prediction of Hydration Sites of Proteins Using Energy Model With Atom Embedding
Source: Front Mol Biosci. 2021 Sep 20;8:756075. doi: 10.3389/fmolb.2021.756075 (PMC8488165; doi:10.3389/fmolb.2021.756075)
Supplement: Supplementary file 1 [file DataSheet1.ZIP › Data Sheet 1/Our_result_pdb/our_dataset_output/2WFP_watersite.pdb]

HEADER                                                        XXXX


JRNL        PMID   -1
HETATM    1  O   HOH T   0      30.692  37.347  -1.831  1.00  0.11           O  
HETATM    2  O   HOH T   1       9.020  37.430  31.344  1.00  0.16           O  
HETATM    3  O   HOH T   2       6.869  56.939  24.428  1.00  0.16           O  
HETATM    4  O   HOH T   3      21.073  34.238   1.495  1.00  0.18           O  
HETATM    5  O   HOH T   4       0.911  56.475   9.714  1.00  0.19           O  
HETATM    6  O   HOH T   5       5.661  59.954  12.921  1.00  0.20           O  
HETATM    7  O   HOH T   6      20.856  19.281  28.697  1.00  0.20           O  
HETATM    8  O   HOH T   7       2.853  51.704  14.461  1.00  0.21           O  
HETATM    9  O   HOH T   8      18.614  56.029  24.970  1.00  0.21           O  
HETATM   10  O   HOH T   9      -0.535  50.627  -8.024  1.00  0.21           O  
HETATM   11  O   HOH T  10      24.244  19.337  19.751  1.00  0.21           O  
HETATM   12  O   HOH T  11      10.489  48.975  18.428  1.00  0.21           O  
HETATM   13  O   HOH T  12       3.699  57.990  13.093  1.00  0.22           O  
HETATM   14  O   HOH T  13       8.920  35.001  23.468  1.00  0.22           O  
HETATM   15  O   HOH T  14      10.525  37.817  -2.108  1.00  0.22           O  
HETATM   16  O   HOH T  15      17.573  49.370  -2.421  1.00  0.22           O  
HETATM   17  O   HOH T  16       4.554  55.080 -10.342  1.00  0.23           O  
HETATM   18  O   HOH T  17      -8.139  39.981  10.240  1.00  0.23           O  
HETATM   19  O   HOH T  18       2.940  29.040  24.791  1.00  0.24           O  
HETATM   20  O   HOH T  19      21.195  26.718  34.687  1.00  0.24           O  
HETATM   21  O   HOH T  20      -0.863  49.468  -3.967  1.00  0.24           O  
HETATM   22  O   HOH T  21       8.014   3.407  29.161  1.00  0.24           O  
HETATM   23  O   HOH T  22       7.314  16.986  34.413  1.00  0.24           O  
HETATM   24  O   HOH T  23      16.418  46.013   0.403  1.00  0.24           O  
HETATM   25  O   HOH T  24      -0.147  47.540  13.307  1.00  0.24           O  
HETATM   26  O   HOH T  25      16.398  51.204  12.623  1.00  0.24           O  
HETATM   27  O   HOH T  26      17.162  66.025  14.827  1.00  0.25           O  
HETATM   28  O   HOH T  27       0.401  46.783  10.765  1.00  0.25           O  
HETATM   29  O   HOH T  28      -0.162   9.272  28.766  1.00  0.25           O  
HETATM   30  O   HOH T  29      10.688  43.515  18.748  1.00  0.25           O  
HETATM   31  O   HOH T  30       2.432  51.851 -15.096  1.00  0.25           O  
HETATM   32  O   HOH T  31       3.841  61.973  12.756  1.00  0.26           O  
HETATM   33  O   HOH T  32      20.262  49.010  10.150  1.00  0.26           O  
HETATM   34  O   HOH T  33      20.153   2.838  21.996  1.00  0.26           O  
HETATM   35  O   HOH T  34      18.857   4.745  20.152  1.00  0.26           O  
HETATM   36  O   HOH T  35       1.112  27.958   8.137  1.00  0.26           O  
HETATM   37  O   HOH T  36      22.884  23.838   6.115  1.00  0.26           O  
HETATM   38  O   HOH T  37      12.248  20.309  36.566  1.00  0.26           O  
HETATM   39  O   HOH T  38      17.154  56.504  14.049  1.00  0.26           O  
HETATM   40  O   HOH T  39       3.905  18.691  14.117  1.00  0.26           O  
HETATM   41  O   HOH T  40      22.449  25.252  13.283  1.00  0.27           O  
HETATM   42  O   HOH T  41      16.973  57.437  -4.480  1.00  0.27           O  
HETATM   43  O   HOH T  42      -7.303  33.731  12.455  1.00  0.27           O  
HETATM   44  O   HOH T  43       3.149  10.335  18.952  1.00  0.27           O  
HETATM   45  O   HOH T  44       4.484  45.412 -18.725  1.00  0.27           O  
HETATM   46  O   HOH T  45      21.543  48.188   6.627  1.00  0.27           O  
HETATM   47  O   HOH T  46      24.442  49.539   4.793  1.00  0.28           O  
HETATM   48  O   HOH T  47      19.152  58.450  13.985  1.00  0.28           O  
HETATM   49  O   HOH T  48      21.143  31.408  -8.895  1.00  0.28           O  
HETATM   50  O   HOH T  49      -5.915  50.760  -1.928  1.00  0.28           O  
HETATM   51  O   HOH T  50       0.415  35.613  15.262  1.00  0.28           O  
HETATM   52  O   HOH T  51      19.061  43.338  20.078  1.00  0.28           O  
HETATM   53  O   HOH T  52      16.924  37.111  18.204  1.00  0.28           O  
HETATM   54  O   HOH T  53      -3.772  12.889  24.006  1.00  0.28           O  
HETATM   55  O   HOH T  54      24.348  43.036  -4.990  1.00  0.28           O  
HETATM   56  O   HOH T  55      31.250  55.136  -4.221  1.00  0.28           O  
HETATM   57  O   HOH T  56       8.563  39.431  21.044  1.00  0.28           O  
HETATM   58  O   HOH T  57       7.018  58.394   4.824  1.00  0.29           O  
HETATM   59  O   HOH T  58      -0.596  34.926   8.769  1.00  0.29           O  
HETATM   60  O   HOH T  59      13.106  64.075  -5.291  1.00  0.29           O  
HETATM   61  O   HOH T  60      25.207  29.509  -6.707  1.00  0.29           O  
HETATM   62  O   HOH T  61       3.430  39.501  24.619  1.00  0.29           O  
HETATM   63  O   HOH T  62      23.562  43.039  38.719  1.00  0.29           O  
HETATM   64  O   HOH T  63      -5.122  39.945  -0.910  1.00  0.30           O  
HETATM   65  O   HOH T  64      13.150  59.867   1.882  1.00  0.30           O  
HETATM   66  O   HOH T  65      29.260  38.945  -8.543  1.00  0.30           O  
HETATM   67  O   HOH T  66      13.159  54.517  21.196  1.00  0.30           O  
HETATM   68  O   HOH T  67       9.582  49.852  30.384  1.00  0.30           O  
HETATM   69  O   HOH T  68       2.608  44.530 -16.907  1.00  0.30           O  
HETATM   70  O   HOH T  69      25.261  31.806  27.407  1.00  0.30           O  
HETATM   71  O   HOH T  70      -3.635  30.295  24.427  1.00  0.30           O  
HETATM   72  O   HOH T  71      26.114  51.533  30.448  1.00  0.30           O  
HETATM   73  O   HOH T  72      -1.447  23.779  19.908  1.00  0.30           O  
HETATM   74  O   HOH T  73       4.163  64.323   4.493  1.00  0.30           O  
HETATM   75  O   HOH T  74      20.553  16.608  35.692  1.00  0.30           O  
HETATM   76  O   HOH T  75      24.147  27.647   2.454  1.00  0.30           O  
HETATM   77  O   HOH T  76       7.065  12.991   4.036  1.00  0.30           O  
HETATM   78  O   HOH T  77      -5.517  19.816  25.095  1.00  0.30           O  
HETATM   79  O   HOH T  78      -3.930  49.008 -13.473  1.00  0.31           O  
HETATM   80  O   HOH T  79      20.352  31.801  29.929  1.00  0.31           O  
HETATM   81  O   HOH T  80      26.754   9.489  28.293  1.00  0.31           O  
HETATM   82  O   HOH T  81      15.401  31.014  16.232  1.00  0.31           O  
HETATM   83  O   HOH T  82      -2.170  53.538   8.813  1.00  0.31           O  
HETATM   84  O   HOH T  83      31.250  22.180  26.458  1.00  0.31           O  
HETATM   85  O   HOH T  84      27.459  36.867  -7.713  1.00  0.31           O  
HETATM   86  O   HOH T  85      12.405  36.533  -6.474  1.00  0.31           O  
HETATM   87  O   HOH T  86      13.154  49.825  18.360  1.00  0.31           O  
HETATM   88  O   HOH T  87      15.337   5.143  29.438  1.00  0.31           O  
HETATM   89  O   HOH T  88      11.427  43.778  21.483  1.00  0.32           O  
HETATM   90  O   HOH T  89      16.376  41.844  -8.175  1.00  0.32           O  
HETATM   91  O   HOH T  90      25.447  54.866  11.345  1.00  0.32           O  
HETATM   92  O   HOH T  91       7.461  34.134  21.131  1.00  0.32           O  
HETATM   93  O   HOH T  92      23.576  38.740  32.478  1.00  0.32           O  
HETATM   94  O   HOH T  93       6.416   2.098  13.766  1.00  0.32           O  
HETATM   95  O   HOH T  94      -4.387  55.116  -1.528  1.00  0.32           O  
HETATM   96  O   HOH T  95      -1.019  43.002  -0.734  1.00  0.32           O  
HETATM   97  O   HOH T  96       8.612  12.070   7.839  1.00  0.32           O  
HETATM   98  O   HOH T  97       8.797  15.281   3.380  1.00  0.32           O  
HETATM   99  O   HOH T  98      -0.306  33.198   1.924  1.00  0.32           O  
HETATM  100  O   HOH T  99       8.295   4.778  18.367  1.00  0.32           O  
HETATM  101  O   HOH T 100      17.757  43.146  -5.119  1.00  0.32           O  
HETATM  102  O   HOH T 101      -3.945  23.169  18.783  1.00  0.32           O  
HETATM  103  O   HOH T 102      24.949  39.559  23.301  1.00  0.32           O  
HETATM  104  O   HOH T 103      19.976  56.832  -2.033  1.00  0.32           O  
HETATM  105  O   HOH T 104       1.615  32.346  21.508  1.00  0.32           O  
HETATM  106  O   HOH T 105      -9.524  16.667  29.860  1.00  0.32           O  
HETATM  107  O   HOH T 106      32.739  31.458   4.166  1.00  0.32           O  
HETATM  108  O   HOH T 107       5.492  11.014  38.736  1.00  0.33           O  
HETATM  109  O   HOH T 108      22.273  39.659 -12.549  1.00  0.33           O  
HETATM  110  O   HOH T 109      -4.942  32.733  13.626  1.00  0.33           O  
HETATM  111  O   HOH T 110      11.440   5.474  21.899  1.00  0.33           O  
HETATM  112  O   HOH T 111      21.094  38.048  31.687  1.00  0.33           O  
HETATM  113  O   HOH T 112      26.198  52.041  11.500  1.00  0.33           O  
HETATM  114  O   HOH T 113       4.199  31.169  26.324  1.00  0.33           O  
HETATM  115  O   HOH T 114      13.802  65.552   5.383  1.00  0.33           O  
HETATM  116  O   HOH T 115      26.798  18.098  19.365  1.00  0.33           O  
HETATM  117  O   HOH T 116      16.662  52.300  -8.886  1.00  0.33           O  
HETATM  118  O   HOH T 117      17.650  24.816   7.971  1.00  0.33           O  
HETATM  119  O   HOH T 118      20.221  32.907  27.585  1.00  0.33           O  
HETATM  120  O   HOH T 119      17.350  16.860  34.343  1.00  0.33           O  
HETATM  121  O   HOH T 120      27.552  17.245  32.370  1.00  0.33           O  
HETATM  122  O   HOH T 121      21.159  33.941 -12.334  1.00  0.33           O  
HETATM  123  O   HOH T 122      18.928   4.355  10.496  1.00  0.33           O  
HETATM  124  O   HOH T 123      -0.776  23.335  36.661  1.00  0.33           O  
HETATM  125  O   HOH T 124      -1.078  49.383   7.000  1.00  0.34           O  
HETATM  126  O   HOH T 125      -6.626  25.130  16.986  1.00  0.34           O  
HETATM  127  O   HOH T 126       3.658  38.036  28.355  1.00  0.34           O  
HETATM  128  O   HOH T 127      24.711  28.090   6.711  1.00  0.34           O  
HETATM  129  O   HOH T 128      25.280  13.165  27.340  1.00  0.34           O  
HETATM  130  O   HOH T 129      17.397   3.577  22.114  1.00  0.34           O  
HETATM  131  O   HOH T 130       7.735  10.251  37.009  1.00  0.34           O  
HETATM  132  O   HOH T 131      -5.513  33.326   8.509  1.00  0.34           O  
HETATM  133  O   HOH T 132      -1.120  27.506  12.493  1.00  0.34           O  
HETATM  134  O   HOH T 133     -13.887  47.015  -0.777  1.00  0.34           O  
HETATM  135  O   HOH T 134      -5.755  40.360  13.283  1.00  0.34           O  
HETATM  136  O   HOH T 135       3.283  12.706  15.057  1.00  0.34           O  
HETATM  137  O   HOH T 136      21.213   2.882  35.327  1.00  0.34           O  
HETATM  138  O   HOH T 137      15.929  36.145  13.985  1.00  0.34           O  
HETATM  139  O   HOH T 138      12.637  53.003  26.952  1.00  0.34           O  
HETATM  140  O   HOH T 139      12.885  41.047  23.608  1.00  0.34           O  
HETATM  141  O   HOH T 140     -12.389  29.249  19.778  1.00  0.34           O  
HETATM  142  O   HOH T 141      -2.739  23.680  33.727  1.00  0.34           O  
HETATM  143  O   HOH T 142      -1.745  55.788  10.446  1.00  0.35           O  
HETATM  144  O   HOH T 143      13.007  40.646  18.722  1.00  0.35           O  
HETATM  145  O   HOH T 144       1.722  25.977   9.986  1.00  0.35           O  
HETATM  146  O   HOH T 145      12.865  63.319   3.946  1.00  0.35           O  
HETATM  147  O   HOH T 146       4.860  33.633  20.234  1.00  0.35           O  
HETATM  148  O   HOH T 147      21.090  56.617  21.053  1.00  0.35           O  
HETATM  149  O   HOH T 148      -4.753  37.964  14.324  1.00  0.35           O  
HETATM  150  O   HOH T 149       7.318  31.560  34.501  1.00  0.35           O  
HETATM  151  O   HOH T 150      26.022  21.901  13.547  1.00  0.35           O  
HETATM  152  O   HOH T 151      -4.379  13.800  26.658  1.00  0.35           O  
HETATM  153  O   HOH T 152      23.041  24.587  25.782  1.00  0.36           O  
HETATM  154  O   HOH T 153       4.773  46.150 -16.005  1.00  0.36           O  
HETATM  155  O   HOH T 154      13.251  15.693  36.501  1.00  0.36           O  
HETATM  156  O   HOH T 155      -7.362  46.247  11.221  1.00  0.36           O  
HETATM  157  O   HOH T 156      12.521  43.817  24.105  1.00  0.36           O  
HETATM  158  O   HOH T 157      -8.876  39.275   1.557  1.00  0.36           O  
HETATM  159  O   HOH T 158      11.633  41.970  25.932  1.00  0.36           O  
HETATM  160  O   HOH T 159       7.369  42.267  41.168  1.00  0.36           O  
HETATM  161  O   HOH T 160       5.066  65.413   0.937  1.00  0.36           O  
HETATM  162  O   HOH T 161      11.683  50.871  25.530  1.00  0.36           O  
HETATM  163  O   HOH T 162      -4.718  18.166  30.538  1.00  0.36           O  
HETATM  164  O   HOH T 163      -3.572  47.878 -15.992  1.00  0.36           O  
HETATM  165  O   HOH T 164       4.838  44.292  23.628  1.00  0.36           O  
HETATM  166  O   HOH T 165      21.803  54.832  -2.561  1.00  0.37           O  
HETATM  167  O   HOH T 166       2.819  35.504  28.936  1.00  0.37           O  
HETATM  168  O   HOH T 167      11.136  51.458  19.491  1.00  0.37           O  
HETATM  169  O   HOH T 168      26.493  52.016   7.689  1.00  0.37           O  
HETATM  170  O   HOH T 169      -4.920  18.789  20.787  1.00  0.37           O  
HETATM  171  O   HOH T 170      14.694  52.093  17.871  1.00  0.37           O  
HETATM  172  O   HOH T 171       2.748  36.295  26.351  1.00  0.37           O  
HETATM  173  O   HOH T 172      -2.603  46.610 -13.712  1.00  0.37           O  
HETATM  174  O   HOH T 173      22.498  27.570  17.744  1.00  0.37           O  
HETATM  175  O   HOH T 174      23.322  55.158  -4.925  1.00  0.37           O  
HETATM  176  O   HOH T 175      15.555  22.752  42.800  1.00  0.37           O  
HETATM  177  O   HOH T 176       0.252  43.023  -8.065  1.00  0.37           O  
HETATM  178  O   HOH T 177      17.823  32.186  30.854  1.00  0.37           O  
HETATM  179  O   HOH T 178      15.520   3.179  31.345  1.00  0.37           O  
HETATM  180  O   HOH T 179      10.730  41.075  21.854  1.00  0.37           O  
HETATM  181  O   HOH T 180      -4.795  33.772  11.168  1.00  0.38           O  
HETATM  182  O   HOH T 181       4.068   1.893  23.491  1.00  0.38           O  
HETATM  183  O   HOH T 182       3.593  64.618  -4.567  1.00  0.38           O  
HETATM  184  O   HOH T 183       6.279  55.736 -14.613  1.00  0.38           O  
HETATM  185  O   HOH T 184      27.683  30.370  26.828  1.00  0.38           O  
HETATM  186  O   HOH T 185      -7.080  27.274  11.591  1.00  0.38           O  
HETATM  187  O   HOH T 186      26.454  53.988  13.586  1.00  0.38           O  
HETATM  188  O   HOH T 187      10.328  64.529  -5.623  1.00  0.38           O  
HETATM  189  O   HOH T 188       9.810  35.107  -2.311  1.00  0.38           O  
HETATM  190  O   HOH T 189      22.622  30.665  -6.694  1.00  0.38           O  
HETATM  191  O   HOH T 190      22.151  37.187 -13.724  1.00  0.38           O  
HETATM  192  O   HOH T 191       2.806  11.812  39.553  1.00  0.38           O  
HETATM  193  O   HOH T 192      20.133  42.970  -6.547  1.00  0.38           O  
HETATM  194  O   HOH T 193      -2.597  40.864  -1.449  1.00  0.38           O  
HETATM  195  O   HOH T 194      22.114  27.927  13.972  1.00  0.38           O  
HETATM  196  O   HOH T 195      27.094  53.584  16.234  1.00  0.38           O  
HETATM  197  O   HOH T 196      25.110  35.704  29.399  1.00  0.38           O  
HETATM  198  O   HOH T 197      -4.175  35.645   4.970  1.00  0.38           O  
HETATM  199  O   HOH T 198      -6.078   8.160  30.818  1.00  0.38           O  
HETATM  200  O   HOH T 199      -1.740  36.681   4.166  1.00  0.38           O  
HETATM  201  O   HOH T 200      20.949  36.864  24.531  1.00  0.38           O  
HETATM  202  O   HOH T 201      20.360  34.243  25.283  1.00  0.38           O  
HETATM  203  O   HOH T 202      23.055  12.556  21.294  1.00  0.38           O  
HETATM  204  O   HOH T 203      21.198  24.343   3.997  1.00  0.39           O  
HETATM  205  O   HOH T 204      -6.248  50.951   0.835  1.00  0.39           O  
HETATM  206  O   HOH T 205      -2.087  38.062  -0.722  1.00  0.39           O  
HETATM  207  O   HOH T 206      20.480  47.143  19.633  1.00  0.39           O  
HETATM  208  O   HOH T 207      17.560  34.153  -9.917  1.00  0.39           O  
HETATM  209  O   HOH T 208      -6.703  23.492  19.280  1.00  0.39           O  
HETATM  210  O   HOH T 209      -1.015  37.285  16.886  1.00  0.39           O  
HETATM  211  O   HOH T 210      24.473  46.183  21.377  1.00  0.39           O  
HETATM  212  O   HOH T 211       1.351  30.755  26.480  1.00  0.39           O  
HETATM  213  O   HOH T 212      20.935  48.271  22.151  1.00  0.39           O  
HETATM  214  O   HOH T 213      20.213  45.734  -6.013  1.00  0.39           O  
HETATM  215  O   HOH T 214       6.778  34.027  33.385  1.00  0.39           O  
HETATM  216  O   HOH T 215     -11.847  47.448  -2.366  1.00  0.39           O  
HETATM  217  O   HOH T 216       9.633  67.175  -5.536  1.00  0.39           O  
HETATM  218  O   HOH T 217      20.392  24.206  35.548  1.00  0.39           O  
HETATM  219  O   HOH T 218       1.604  23.694  14.758  1.00  0.39           O  
HETATM  220  O   HOH T 219       7.258  35.828  -1.331  1.00  0.39           O  
HETATM  221  O   HOH T 220       4.639  51.146 -13.641  1.00  0.39           O  
HETATM  222  O   HOH T 221      23.335  25.664  30.839  1.00  0.40           O  
HETATM  223  O   HOH T 222      22.795  43.687  17.142  1.00  0.40           O  
HETATM  224  O   HOH T 223       5.339  48.798 -14.962  1.00  0.40           O  
HETATM  225  O   HOH T 224       5.785  56.993 -12.236  1.00  0.40           O  
HETATM  226  O   HOH T 225     -10.481  45.210  -3.496  1.00  0.40           O  
HETATM  227  O   HOH T 226      19.315  22.977   6.909  1.00  0.40           O  
HETATM  228  O   HOH T 227      28.800  48.456  37.632  1.00  0.40           O  
HETATM  229  O   HOH T 228       9.368  13.417   5.402  1.00  0.40           O  
HETATM  230  O   HOH T 229       4.236   4.113  21.966  1.00  0.40           O  
HETATM  231  O   HOH T 230      -2.034  58.592   0.497  1.00  0.40           O  
HETATM  232  O   HOH T 231      -4.304  55.879 -10.644  1.00  0.40           O  
HETATM  233  O   HOH T 232      21.041  37.139  21.734  1.00  0.40           O  
HETATM  234  O   HOH T 233      20.025  31.683 -11.412  1.00  0.40           O  
HETATM  235  O   HOH T 234      31.455  38.388 -10.297  1.00  0.40           O  
HETATM  236  O   HOH T 235      -5.870  26.684  24.706  1.00  0.40           O  
HETATM  237  O   HOH T 236       2.505   7.948  17.720  1.00  0.40           O  
HETATM  238  O   HOH T 237       9.296   4.552  20.692  1.00  0.41           O  
HETATM  239  O   HOH T 238      24.213  22.335  26.912  1.00  0.41           O  
HETATM  240  O   HOH T 239      -1.389  30.641   2.309  1.00  0.41           O  
HETATM  241  O   HOH T 240      -5.412  52.339   3.066  1.00  0.41           O  
HETATM  242  O   HOH T 241       0.068  45.062 -12.030  1.00  0.41           O  
HETATM  243  O   HOH T 242      27.821  41.624  12.479  1.00  0.41           O  
HETATM  244  O   HOH T 243       3.202  20.650  12.309  1.00  0.41           O  
HETATM  245  O   HOH T 244      -4.443  54.873   2.476  1.00  0.41           O  
HETATM  246  O   HOH T 245      26.021  41.270  14.622  1.00  0.41           O  
HETATM  247  O   HOH T 246      15.382  39.220  -8.601  1.00  0.41           O  
HETATM  248  O   HOH T 247      -1.949  34.812   6.308  1.00  0.41           O  
HETATM  249  O   HOH T 248       2.555   6.596  28.349  1.00  0.41           O  
HETATM  250  O   HOH T 249      16.069  19.731  36.634  1.00  0.41           O  
HETATM  251  O   HOH T 250       8.805  31.255  15.331  1.00  0.41           O  
HETATM  252  O   HOH T 251      26.019  24.977  30.265  1.00  0.41           O  
HETATM  253  O   HOH T 252       2.397  23.414   9.658  1.00  0.41           O  
HETATM  254  O   HOH T 253       0.753  18.910  39.208  1.00  0.41           O  
HETATM  255  O   HOH T 254      12.878  65.852   2.767  1.00  0.42           O  
HETATM  256  O   HOH T 255      27.045  59.412   7.556  1.00  0.42           O  
HETATM  257  O   HOH T 256      -5.227  55.065  -6.945  1.00  0.42           O  
HETATM  258  O   HOH T 257      23.556  35.255  14.619  1.00  0.42           O  
HETATM  259  O   HOH T 258      -3.159  53.319   4.336  1.00  0.42           O  
HETATM  260  O   HOH T 259       7.233  48.163 -13.005  1.00  0.42           O  
HETATM  261  O   HOH T 260      13.969  67.728  14.033  1.00  0.42           O  
HETATM  262  O   HOH T 261       6.665  42.922 -14.481  1.00  0.42           O  
HETATM  263  O   HOH T 262      11.975  12.045  38.875  1.00  0.42           O  
HETATM  264  O   HOH T 263      -5.186  46.750   4.879  1.00  0.42           O  
HETATM  265  O   HOH T 264      -0.593  44.724  23.100  1.00  0.42           O  
HETATM  266  O   HOH T 265      -2.155  55.850   1.244  1.00  0.42           O  
HETATM  267  O   HOH T 266      22.828  43.017  -7.357  1.00  0.42           O  
HETATM  268  O   HOH T 267      -2.686  10.374  23.638  1.00  0.42           O  
HETATM  269  O   HOH T 268      16.452  28.200   4.022  1.00  0.42           O  
HETATM  270  O   HOH T 269       5.650   3.212  16.107  1.00  0.42           O  
HETATM  271  O   HOH T 270      17.113  38.261  12.865  1.00  0.42           O  
HETATM  272  O   HOH T 271      -0.817  27.022   9.769  1.00  0.43           O  
HETATM  273  O   HOH T 272       1.338  49.371  14.820  1.00  0.43           O  
HETATM  274  O   HOH T 273      26.305  49.941  32.790  1.00  0.43           O  
HETATM  275  O   HOH T 274      17.792  32.642  16.387  1.00  0.43           O  
HETATM  276  O   HOH T 275       1.428  24.224  12.142  1.00  0.43           O  
HETATM  277  O   HOH T 276      22.534  28.165   0.245  1.00  0.43           O  
HETATM  278  O   HOH T 277      22.772  32.460  28.657  1.00  0.43           O  
HETATM  279  O   HOH T 278      20.665  56.135  -4.723  1.00  0.43           O  
HETATM  280  O   HOH T 279      20.123  60.858  18.597  1.00  0.43           O  
HETATM  281  O   HOH T 280       1.469  54.265 -13.974  1.00  0.43           O  
HETATM  282  O   HOH T 281      22.739  33.103  21.009  1.00  0.43           O  
HETATM  283  O   HOH T 282      -9.684  28.129  12.149  1.00  0.43           O  
HETATM  284  O   HOH T 283      21.466  34.629  22.859  1.00  0.43           O  
HETATM  285  O   HOH T 284      26.802  19.749  15.109  1.00  0.43           O  
HETATM  286  O   HOH T 285      31.533  20.369  32.302  1.00  0.43           O  
HETATM  287  O   HOH T 286      18.819  38.971  34.189  1.00  0.43           O  
HETATM  288  O   HOH T 287      -7.948  27.142   8.831  1.00  0.43           O  
HETATM  289  O   HOH T 288      -4.940  20.167  35.810  1.00  0.43           O  
HETATM  290  O   HOH T 289      29.800   2.929  33.116  1.00  0.43           O  
HETATM  291  O   HOH T 290      10.765  60.988 -13.669  1.00  0.43           O  
HETATM  292  O   HOH T 291       0.500  35.664  24.832  1.00  0.43           O  
HETATM  293  O   HOH T 292       5.858  40.901 -12.848  1.00  0.43           O  
HETATM  294  O   HOH T 293      -9.595  29.732  19.500  1.00  0.43           O  
HETATM  295  O   HOH T 294      17.188  18.879  39.044  1.00  0.43           O  
HETATM  296  O   HOH T 295       6.462  45.563 -13.774  1.00  0.43           O  
HETATM  297  O   HOH T 296       6.908  13.980   6.660  1.00  0.43           O  
HETATM  298  O   HOH T 297       5.509   4.082  12.113  1.00  0.43           O  
HETATM  299  O   HOH T 298       5.725  46.094  26.578  1.00  0.43           O  
HETATM  300  O   HOH T 299      25.535  37.004  22.438  1.00  0.43           O  
HETATM  301  O   HOH T 300      25.188  48.885  30.511  1.00  0.43           O  
HETATM  302  O   HOH T 301      12.160  27.901   1.852  1.00  0.43           O  
HETATM  303  O   HOH T 302       2.553  71.571  19.988  1.00  0.44           O  
HETATM  304  O   HOH T 303      -3.636  41.126  14.788  1.00  0.44           O  
HETATM  305  O   HOH T 304       5.209  42.755  32.275  1.00  0.44           O  
HETATM  306  O   HOH T 305      -1.995  40.034  -4.053  1.00  0.44           O  
HETATM  307  O   HOH T 306       9.692  38.804  -8.970  1.00  0.44           O  
HETATM  308  O   HOH T 307      -6.238  53.268  -0.734  1.00  0.44           O  
HETATM  309  O   HOH T 308      -5.049  26.690  28.612  1.00  0.44           O  
HETATM  310  O   HOH T 309      20.145  47.963  -4.507  1.00  0.44           O  
HETATM  311  O   HOH T 310      24.281  23.714  14.764  1.00  0.44           O  
HETATM  312  O   HOH T 311       3.557  62.406   6.511  1.00  0.44           O  
HETATM  313  O   HOH T 312      -9.559  40.226  -0.863  1.00  0.44           O  
HETATM  314  O   HOH T 313      -5.441  30.661   7.567  1.00  0.44           O  
HETATM  315  O   HOH T 314      -7.664  18.770  23.710  1.00  0.44           O  
HETATM  316  O   HOH T 315      -7.902  47.806   8.951  1.00  0.44           O  
HETATM  317  O   HOH T 316      -7.266  17.330  21.378  1.00  0.44           O  
HETATM  318  O   HOH T 317      17.671  29.079   1.791  1.00  0.44           O  
HETATM  319  O   HOH T 318      31.925   9.533  25.960  1.00  0.44           O  
HETATM  320  O   HOH T 319      25.250  34.910  24.117  1.00  0.44           O  
HETATM  321  O   HOH T 320      -8.298  51.525  -0.975  1.00  0.44           O  
HETATM  322  O   HOH T 321      -9.082  24.065  17.883  1.00  0.44           O  
HETATM  323  O   HOH T 322      -6.131  48.109 -14.857  1.00  0.44           O  
HETATM  324  O   HOH T 323      28.264  18.517  26.496  1.00  0.45           O  
HETATM  325  O   HOH T 324      28.583  28.838   6.669  1.00  0.45           O  
HETATM  326  O   HOH T 325      25.333  44.179  -7.276  1.00  0.45           O  
HETATM  327  O   HOH T 326       6.060   3.666  27.171  1.00  0.45           O  
HETATM  328  O   HOH T 327       3.342  50.022  22.393  1.00  0.45           O  
HETATM  329  O   HOH T 328      19.439   5.026  36.068  1.00  0.45           O  
HETATM  330  O   HOH T 329       2.123  33.896  16.599  1.00  0.45           O  
HETATM  331  O   HOH T 330      19.061  42.176  -9.056  1.00  0.45           O  
HETATM  332  O   HOH T 331      -2.248   8.073  27.443  1.00  0.45           O  
HETATM  333  O   HOH T 332     -14.078  49.225  -2.569  1.00  0.45           O  
HETATM  334  O   HOH T 333      32.027  39.762  25.000  1.00  0.45           O  
HETATM  335  O   HOH T 334       0.650  34.723  -0.136  1.00  0.45           O  
HETATM  336  O   HOH T 335      21.505  39.884  14.090  1.00  0.45           O  
HETATM  337  O   HOH T 336      19.322  36.166  -9.584  1.00  0.45           O  
HETATM  338  O   HOH T 337      24.610  58.905  14.477  1.00  0.45           O  
HETATM  339  O   HOH T 338       3.772   5.412  26.210  1.00  0.45           O  
HETATM  340  O   HOH T 339      -0.185  37.932  -4.097  1.00  0.45           O  
HETATM  341  O   HOH T 340      19.886  53.588  24.995  1.00  0.45           O  
HETATM  342  O   HOH T 341      23.782  25.224   3.852  1.00  0.45           O  
HETATM  343  O   HOH T 342      18.217  26.517   2.937  1.00  0.45           O  
HETATM  344  O   HOH T 343      28.981  55.152  -2.677  1.00  0.45           O  
HETATM  345  O   HOH T 344      -6.722  53.618  -5.067  1.00  0.45           O  
HETATM  346  O   HOH T 345      17.063  43.499  18.032  1.00  0.45           O  
HETATM  347  O   HOH T 346      14.314  22.848  40.343  1.00  0.45           O  
HETATM  348  O   HOH T 347       6.579   3.865  20.431  1.00  0.45           O  
HETATM  349  O   HOH T 348      30.373  23.969  28.432  1.00  0.46           O  
HETATM  350  O   HOH T 349      -8.613  43.607  -2.318  1.00  0.46           O  
HETATM  351  O   HOH T 350      -7.470  32.394  14.812  1.00  0.46           O  
HETATM  352  O   HOH T 351      11.550  20.194  39.236  1.00  0.46           O  
HETATM  353  O   HOH T 352      15.385  54.239 -10.458  1.00  0.46           O  
HETATM  354  O   HOH T 353      12.710  22.523  38.126  1.00  0.46           O  
HETATM  355  O   HOH T 354      27.521  19.445  33.923  1.00  0.46           O  
HETATM  356  O   HOH T 355       4.805  32.103  33.803  1.00  0.46           O  
HETATM  357  O   HOH T 356      17.642  35.447  16.091  1.00  0.46           O  
HETATM  358  O   HOH T 357      -4.663  40.727  -3.492  1.00  0.46           O  
HETATM  359  O   HOH T 358      33.634  37.748 -12.013  1.00  0.46           O  
HETATM  360  O   HOH T 359      16.314  20.980  40.684  1.00  0.46           O  
HETATM  361  O   HOH T 360      25.427  55.823  16.764  1.00  0.46           O  
HETATM  362  O   HOH T 361       1.403   8.567  20.145  1.00  0.46           O  
HETATM  363  O   HOH T 362      20.081  27.676   1.356  1.00  0.46           O  
HETATM  364  O   HOH T 363      -5.809  22.446  16.842  1.00  0.46           O  
HETATM  365  O   HOH T 364       1.994  17.289  15.591  1.00  0.46           O  
HETATM  366  O   HOH T 365      -3.328  29.683   6.281  1.00  0.46           O  
HETATM  367  O   HOH T 366      11.369   4.663   9.675  1.00  0.47           O  
HETATM  368  O   HOH T 367      -5.612  20.948  19.207  1.00  0.47           O  
HETATM  369  O   HOH T 368      23.874  21.925  21.042  1.00  0.47           O  
HETATM  370  O   HOH T 369      26.169  56.832  13.244  1.00  0.47           O  
HETATM  371  O   HOH T 370       2.999  43.068 -19.295  1.00  0.47           O  
HETATM  372  O   HOH T 371       1.926  36.556  -5.041  1.00  0.47           O  
HETATM  373  O   HOH T 372      22.772  17.023  37.117  1.00  0.47           O  
HETATM  374  O   HOH T 373      -2.296  51.910   6.574  1.00  0.47           O  
HETATM  375  O   HOH T 374       0.488  37.882   1.930  1.00  0.47           O  
HETATM  376  O   HOH T 375       0.156  69.003  14.025  1.00  0.47           O  
HETATM  377  O   HOH T 376      20.700  32.391  19.232  1.00  0.47           O  
HETATM  378  O   HOH T 377       5.466  48.832  26.814  1.00  0.47           O  
HETATM  379  O   HOH T 378      20.561  26.141  37.411  1.00  0.47           O  
HETATM  380  O   HOH T 379      24.698  35.690  26.644  1.00  0.47           O  
HETATM  381  O   HOH T 380      27.814  13.512  28.127  1.00  0.47           O  
HETATM  382  O   HOH T 381      10.727  17.615  39.774  1.00  0.47           O  
HETATM  383  O   HOH T 382      17.912   6.795  11.386  1.00  0.47           O  
HETATM  384  O   HOH T 383      -4.197  28.517  26.654  1.00  0.47           O  
HETATM  385  O   HOH T 384      17.490  40.191 -10.132  1.00  0.47           O  
HETATM  386  O   HOH T 385      17.006  23.712  40.703  1.00  0.47           O  
HETATM  387  O   HOH T 386      -0.210  25.942  37.308  1.00  0.47           O  
HETATM  388  O   HOH T 387      25.644  37.487  31.333  1.00  0.47           O  
HETATM  389  O   HOH T 388      30.344   5.584  33.384  1.00  0.47           O  
HETATM  390  O   HOH T 389      -1.006  30.873  24.884  1.00  0.47           O  
HETATM  391  O   HOH T 390      -4.828   8.053  28.275  1.00  0.47           O  
HETATM  392  O   HOH T 391      10.465  19.278   8.937  1.00  0.47           O  
HETATM  393  O   HOH T 392      -2.434  42.274  -8.059  1.00  0.47           O  
HETATM  394  O   HOH T 393      37.430  31.023  -0.599  1.00  0.47           O  
HETATM  395  O   HOH T 394      20.705  34.864  20.141  1.00  0.48           O  
HETATM  396  O   HOH T 395      33.432  56.000   4.028  1.00  0.48           O  
HETATM  397  O   HOH T 396      27.858  50.587   9.683  1.00  0.48           O  
HETATM  398  O   HOH T 397      14.054  60.199 -10.743  1.00  0.48           O  
HETATM  399  O   HOH T 398      -5.317  53.635  -9.268  1.00  0.48           O  
HETATM  400  O   HOH T 399       3.814  42.219  25.306  1.00  0.48           O  
HETATM  401  O   HOH T 400      16.952  38.153  15.659  1.00  0.48           O  
HETATM  402  O   HOH T 401       3.242  29.931  33.256  1.00  0.48           O  
HETATM  403  O   HOH T 402       8.789  36.654  21.372  1.00  0.48           O  
HETATM  404  O   HOH T 403       4.951  65.141  11.305  1.00  0.48           O  
HETATM  405  O   HOH T 404      13.711  62.425   1.497  1.00  0.48           O  
HETATM  406  O   HOH T 405      13.862  33.151  -7.322  1.00  0.48           O  
HETATM  407  O   HOH T 406      -1.031  38.894  -6.450  1.00  0.48           O  
HETATM  408  O   HOH T 407       7.443  40.513   9.122  1.00  0.48           O  
HETATM  409  O   HOH T 408      -8.897  29.221  16.809  1.00  0.48           O  
HETATM  410  O   HOH T 409       3.695   2.697  26.054  1.00  0.48           O  
HETATM  411  O   HOH T 410      14.371  66.628  -2.447  1.00  0.48           O  
HETATM  412  O   HOH T 411       5.526   4.116  24.462  1.00  0.48           O  
HETATM  413  O   HOH T 412      22.170  39.058  23.238  1.00  0.48           O  
HETATM  414  O   HOH T 413       9.782  36.425  -7.324  1.00  0.48           O  
HETATM  415  O   HOH T 414      16.647  36.711  -9.132  1.00  0.49           O  
HETATM  416  O   HOH T 415       3.304  10.109  16.135  1.00  0.49           O  
HETATM  417  O   HOH T 416      -3.654  22.808  36.251  1.00  0.49           O  
HETATM  418  O   HOH T 417      29.280  46.941  13.763  1.00  0.49           O  
HETATM  419  O   HOH T 418      -5.360  17.546  27.891  1.00  0.49           O  
HETATM  420  O   HOH T 419       1.618  32.395  18.774  1.00  0.49           O  
HETATM  421  O   HOH T 420      25.051  43.688  15.578  1.00  0.49           O  
HETATM  422  O   HOH T 421      18.506  24.328   4.575  1.00  0.49           O  
HETATM  423  O   HOH T 422       3.305  63.301  10.369  1.00  0.49           O  
HETATM  424  O   HOH T 423      22.688  45.432  19.420  1.00  0.49           O  
HETATM  425  O   HOH T 424      -5.735  11.628  25.664  1.00  0.49           O  
HETATM  426  O   HOH T 425       6.625  44.507  39.592  1.00  0.49           O  
HETATM  427  O   HOH T 426       0.717  34.738  27.417  1.00  0.49           O  
HETATM  428  O   HOH T 427      -1.551  35.301  22.948  1.00  0.49           O  
HETATM  429  O   HOH T 428      17.044  50.056  38.413  1.00  0.49           O  
HETATM  430  O   HOH T 429      29.138  24.197  25.948  1.00  0.49           O  
HETATM  431  O   HOH T 430      16.598  49.662  -9.323  1.00  0.49           O  
HETATM  432  O   HOH T 431       0.113  71.024  16.001  1.00  0.49           O  
HETATM  433  O   HOH T 432      18.859  28.905  -0.735  1.00  0.49           O  
HETATM  434  O   HOH T 433       5.466   4.141  29.852  1.00  0.49           O  
HETATM  435  O   HOH T 434       2.176  44.821  23.224  1.00  0.49           O  
HETATM  436  O   HOH T 435      12.894   2.488  10.505  1.00  0.49           O  
HETATM  437  O   HOH T 436      -8.868  50.356   5.574  1.00  0.49           O  
HETATM  438  O   HOH T 437      34.761  31.647  -0.262  1.00  0.50           O  
HETATM  439  O   HOH T 438      20.128  40.307 -10.928  1.00  0.50           O  
HETATM  440  O   HOH T 439      -3.619  32.529   6.638  1.00  0.50           O  
HETATM  441  O   HOH T 440      18.014  58.937  19.213  1.00  0.50           O  
HETATM  442  O   HOH T 441      -2.561  23.626  40.729  1.00  0.50           O  
HETATM  443  O   HOH T 442      20.807  37.618 -11.325  1.00  0.50           O  
HETATM  444  O   HOH T 443      14.222  35.575  -8.413  1.00  0.50           O  
HETATM  445  O   HOH T 444       1.215  19.277  13.674  1.00  0.50           O  
HETATM  446  O   HOH T 445      23.185  64.193  17.928  1.00  0.50           O  
HETATM  447  O   HOH T 446       7.143  68.391   3.171  1.00  0.50           O  
HETATM  448  O   HOH T 447      15.322  58.316  -8.192  1.00  0.50           O  
HETATM  449  O   HOH T 448      10.783  68.901   4.757  1.00  0.50           O  
HETATM  450  O   HOH T 449      12.446  51.967  21.899  1.00  0.50           O  
HETATM  451  O   HOH T 450      27.419  11.445  26.424  1.00  0.50           O  
HETATM  452  O   HOH T 451      19.277  58.986  16.706  1.00  0.50           O  
HETATM  453  O   HOH T 452       8.389  36.968  -3.624  1.00  0.50           O  
HETATM  454  O   HOH T 453       3.289  40.568  27.315  1.00  0.50           O  
HETATM  455  O   HOH T 454      -2.284  35.083  15.867  1.00  0.50           O  
HETATM  456  O   HOH T 455      26.038  36.365  15.464  1.00  0.50           O  
HETATM  457  O   HOH T 456      12.026  43.799 -11.657  1.00  0.50           O  
HETATM  458  O   HOH T 457      23.341  41.421  15.465  1.00  0.50           O  
HETATM  459  O   HOH T 458      19.461  58.575  -3.868  1.00  0.50           O  
HETATM  460  O   HOH T 459      19.364  50.595  22.406  1.00  0.50           O  
HETATM  461  O   HOH T 460       3.964  55.053 -13.112  1.00  0.50           O  
HETATM  462  O   HOH T 461      -0.666  20.134  41.145  1.00  0.50           O  
HETATM  463  O   HOH T 462      -5.465   5.242  28.210  1.00  0.51           O  
HETATM  464  O   HOH T 463      26.373  45.955  40.879  1.00  0.51           O  
HETATM  465  O   HOH T 464      31.067  16.041  20.936  1.00  0.51           O  
HETATM  466  O   HOH T 465      -2.690  32.887  23.857  1.00  0.51           O  
HETATM  467  O   HOH T 466      26.864  24.945  27.505  1.00  0.51           O  
HETATM  468  O   HOH T 467      -3.167  44.829  -8.798  1.00  0.51           O  
HETATM  469  O   HOH T 468      -6.395  28.997  28.337  1.00  0.51           O  
HETATM  470  O   HOH T 469      25.859  20.143  17.673  1.00  0.51           O  
HETATM  471  O   HOH T 470      11.113  51.043  28.301  1.00  0.51           O  
HETATM  472  O   HOH T 471       4.410  42.737  29.018  1.00  0.51           O  
HETATM  473  O   HOH T 472      -1.031  55.917   7.830  1.00  0.51           O  
HETATM  474  O   HOH T 473      15.981  32.192  -8.906  1.00  0.51           O  
HETATM  475  O   HOH T 474       0.097  33.165  23.694  1.00  0.51           O  
HETATM  476  O   HOH T 475      12.447  52.853  29.743  1.00  0.51           O  
HETATM  477  O   HOH T 476      -3.263  38.937  16.475  1.00  0.51           O  
HETATM  478  O   HOH T 477       4.159  57.460 -14.457  1.00  0.51           O  
HETATM  479  O   HOH T 478      -0.810  60.750  -4.050  1.00  0.51           O  
HETATM  480  O   HOH T 479      20.366  23.603  29.066  1.00  0.51           O  
HETATM  481  O   HOH T 480      -0.140   6.543  28.240  1.00  0.51           O  
HETATM  482  O   HOH T 481       4.278  18.407  39.884  1.00  0.51           O  
HETATM  483  O   HOH T 482      23.528  32.531  35.629  1.00  0.51           O  
HETATM  484  O   HOH T 483       9.361   7.989  37.133  1.00  0.52           O  
HETATM  485  O   HOH T 484      17.071   6.641  35.796  1.00  0.52           O  
HETATM  486  O   HOH T 485      21.246  53.384  -4.822  1.00  0.52           O  
HETATM  487  O   HOH T 486       0.734  21.938  16.621  1.00  0.52           O  
HETATM  488  O   HOH T 487      14.425  42.932  17.926  1.00  0.52           O  
HETATM  489  O   HOH T 488       1.251  36.365  -2.397  1.00  0.52           O  
HETATM  490  O   HOH T 489       8.202  48.987 -15.401  1.00  0.52           O  
HETATM  491  O   HOH T 490      19.939  40.718  23.509  1.00  0.52           O  
HETATM  492  O   HOH T 491      -1.655  21.751  18.049  1.00  0.52           O  
HETATM  493  O   HOH T 492      21.547  39.396  34.199  1.00  0.52           O  
HETATM  494  O   HOH T 493      20.265  35.186  15.133  1.00  0.52           O  
HETATM  495  O   HOH T 494      11.996  66.407  -4.111  1.00  0.52           O  
HETATM  496  O   HOH T 495       9.300  12.076  38.314  1.00  0.52           O  
HETATM  497  O   HOH T 496      19.704  55.145  22.725  1.00  0.52           O  
HETATM  498  O   HOH T 497      26.208  33.984  14.163  1.00  0.52           O  
HETATM  499  O   HOH T 498       8.087  34.003  37.158  1.00  0.52           O  
HETATM  500  O   HOH T 499      -8.923  44.139  12.214  1.00  0.52           O  
HETATM  501  O   HOH T 500      22.192   9.024  23.048  1.00  0.52           O  
HETATM  502  O   HOH T 501       2.187  16.746  12.987  1.00  0.52           O  
HETATM  503  O   HOH T 502       4.614  22.077  10.407  1.00  0.52           O  
HETATM  504  O   HOH T 503       6.443   3.061   9.671  1.00  0.53           O  
HETATM  505  O   HOH T 504       4.873  67.046   4.065  1.00  0.53           O  
HETATM  506  O   HOH T 505       7.044   0.687  16.106  1.00  0.53           O  
HETATM  507  O   HOH T 506      24.162  24.836  28.262  1.00  0.53           O  
HETATM  508  O   HOH T 507      26.010  22.165  16.095  1.00  0.53           O  
HETATM  509  O   HOH T 508      26.684  34.135  27.769  1.00  0.53           O  
HETATM  510  O   HOH T 509      -5.685  44.311  -4.222  1.00  0.53           O  
HETATM  511  O   HOH T 510      -2.488  60.592  -1.588  1.00  0.53           O  
HETATM  512  O   HOH T 511      20.479  44.762  18.187  1.00  0.53           O  
HETATM  513  O   HOH T 512       9.747  68.092   2.286  1.00  0.53           O  
HETATM  514  O   HOH T 513      10.542  16.261  37.320  1.00  0.53           O  
HETATM  515  O   HOH T 514       7.443  53.507  27.410  1.00  0.53           O  
HETATM  516  O   HOH T 515      -2.335  25.292  11.304  1.00  0.53           O  
HETATM  517  O   HOH T 516      26.711  21.070  31.839  1.00  0.53           O  
HETATM  518  O   HOH T 517      12.776  29.927  38.182  1.00  0.53           O  
HETATM  519  O   HOH T 518      14.613  66.411  -5.092  1.00  0.53           O  
HETATM  520  O   HOH T 519      16.618   2.833  10.312  1.00  0.53           O  
HETATM  521  O   HOH T 520      23.412  22.099  24.200  1.00  0.53           O  
HETATM  522  O   HOH T 521      -1.233  48.624  15.470  1.00  0.53           O  
HETATM  523  O   HOH T 522       1.628  38.899  -6.524  1.00  0.54           O  
HETATM  524  O   HOH T 523      11.223  34.014  -6.684  1.00  0.54           O  
HETATM  525  O   HOH T 524      28.342  16.048  27.915  1.00  0.54           O  
HETATM  526  O   HOH T 525       1.274  41.180 -13.157  1.00  0.54           O  
HETATM  527  O   HOH T 526      26.032  28.417   4.471  1.00  0.54           O  
HETATM  528  O   HOH T 527      18.177  17.875  36.620  1.00  0.54           O  
HETATM  529  O   HOH T 528      18.395  42.809  15.526  1.00  0.54           O  
HETATM  530  O   HOH T 529      15.304  11.902  36.940  1.00  0.54           O  
HETATM  531  O   HOH T 530      -3.974  29.208  29.368  1.00  0.54           O  
HETATM  532  O   HOH T 531      -0.913  55.619 -13.486  1.00  0.54           O  
HETATM  533  O   HOH T 532       3.360  38.916  30.946  1.00  0.54           O  
HETATM  534  O   HOH T 533      10.611  63.673 -14.486  1.00  0.54           O  
HETATM  535  O   HOH T 534      22.018  22.408  32.430  1.00  0.54           O  
HETATM  536  O   HOH T 535      -3.303  47.050  -7.181  1.00  0.55           O  
HETATM  537  O   HOH T 536      -0.788  22.133  39.227  1.00  0.55           O  
HETATM  538  O   HOH T 537      18.550  65.214   7.920  1.00  0.55           O  
HETATM  539  O   HOH T 538      29.563   4.482  30.849  1.00  0.55           O  
HETATM  540  O   HOH T 539      -9.349  27.363  14.761  1.00  0.55           O  
HETATM  541  O   HOH T 540      28.989  19.614  31.548  1.00  0.55           O  
HETATM  542  O   HOH T 541       9.208   3.042   9.060  1.00  0.55           O  
HETATM  543  O   HOH T 542      10.560  40.527 -11.258  1.00  0.55           O  
HETATM  544  O   HOH T 543       9.594  35.957  36.752  1.00  0.55           O  
HETATM  545  O   HOH T 544      -2.453  56.072 -12.624  1.00  0.56           O  
HETATM  546  O   HOH T 545      25.897  38.943  16.189  1.00  0.56           O  
HETATM  547  O   HOH T 546       7.258  66.551   0.028  1.00  0.56           O  
HETATM  548  O   HOH T 547      13.281  68.066   4.115  1.00  0.56           O  
HETATM  549  O   HOH T 548      26.900  28.493  -4.738  1.00  0.56           O  
HETATM  550  O   HOH T 549       6.409  63.044 -13.104  1.00  0.56           O  
HETATM  551  O   HOH T 550      19.304  25.052  39.700  1.00  0.56           O  
HETATM  552  O   HOH T 551      -7.427  38.413  -0.614  1.00  0.56           O  
HETATM  553  O   HOH T 552       4.122   4.824  19.360  1.00  0.56           O  
HETATM  554  O   HOH T 553      11.109  25.994   5.449  1.00  0.56           O  
HETATM  555  O   HOH T 554       8.297  66.460  -3.214  1.00  0.56           O  
HETATM  556  O   HOH T 555      13.121  51.313  40.463  1.00  0.56           O  
HETATM  557  O   HOH T 556      25.812  31.580  15.432  1.00  0.56           O  
HETATM  558  O   HOH T 557      17.069  29.189  -8.003  1.00  0.56           O  
HETATM  559  O   HOH T 558       7.401  35.643  -5.886  1.00  0.56           O  
HETATM  560  O   HOH T 559      26.129  49.246   7.939  1.00  0.56           O  
HETATM  561  O   HOH T 560      21.778  37.356  15.562  1.00  0.57           O  
HETATM  562  O   HOH T 561      16.325  23.044   9.634  1.00  0.57           O  
HETATM  563  O   HOH T 562       2.532  31.804  24.122  1.00  0.57           O  
HETATM  564  O   HOH T 563      -5.774  25.898   9.787  1.00  0.57           O  
HETATM  565  O   HOH T 564      25.976  26.579  17.196  1.00  0.57           O  
HETATM  566  O   HOH T 565      22.631  34.128  34.062  1.00  0.57           O  
HETATM  567  O   HOH T 566       0.758  47.088  22.974  1.00  0.57           O  
HETATM  568  O   HOH T 567      -6.502  50.929  -4.637  1.00  0.57           O  
HETATM  569  O   HOH T 568      28.332  38.050  15.427  1.00  0.57           O  
HETATM  570  O   HOH T 569      26.431  25.894   3.150  1.00  0.58           O  
HETATM  571  O   HOH T 570      33.165  39.598  -8.332  1.00  0.58           O  
HETATM  572  O   HOH T 571      24.497  23.687  32.321  1.00  0.58           O  
HETATM  573  O   HOH T 572      19.617  29.093  -8.916  1.00  0.59           O  
HETATM  574  O   HOH T 573      29.118  48.580  24.490  1.00  0.59           O  
HETATM  575  O   HOH T 574      25.210  48.750  21.106  1.00  0.60           O  
HETATM  576  O   HOH T 575      18.690  40.228  16.412  1.00  0.61           O  
HETATM  577  O   HOH T 576      27.010   8.854  25.651  1.00  0.61           O  
HETATM  578  O   HOH T 577      16.205  67.288   0.827  1.00  0.63           O  
TER     579      HOH T 577 
