# Supplementary material for: Accurate Prediction of Hydration Sites of Proteins Using Energy Model With Atom Embedding
Source: Front Mol Biosci. 2021 Sep 20;8:756075. doi: 10.3389/fmolb.2021.756075 (PMC8488165; doi:10.3389/fmolb.2021.756075)
Supplement: Supplementary file 1 [file DataSheet1.ZIP › Data Sheet 1/Our_result_pdb/our_dataset_output/2WT8_watersite.pdb]

HEADER                                                        XXXX


JRNL        PMID   -1
HETATM    1  O   HOH T   0      77.377   6.737  -6.920  1.00  0.17           O  
HETATM    2  O   HOH T   1      41.986  -9.342   7.417  1.00  0.17           O  
HETATM    3  O   HOH T   2      61.361  -3.826  -8.268  1.00  0.19           O  
HETATM    4  O   HOH T   3      74.851  18.093  -6.457  1.00  0.20           O  
HETATM    5  O   HOH T   4      93.253  16.539  23.467  1.00  0.21           O  
HETATM    6  O   HOH T   5      49.437  16.965  24.832  1.00  0.21           O  
HETATM    7  O   HOH T   6      46.662  -9.633  18.010  1.00  0.22           O  
HETATM    8  O   HOH T   7      88.879  24.797  25.370  1.00  0.22           O  
HETATM    9  O   HOH T   8      84.690   7.437  42.247  1.00  0.23           O  
HETATM   10  O   HOH T   9     102.180  17.310  24.817  1.00  0.24           O  
HETATM   11  O   HOH T  10      57.960   9.011  37.787  1.00  0.24           O  
HETATM   12  O   HOH T  11      47.728  20.337  43.399  1.00  0.24           O  
HETATM   13  O   HOH T  12      66.783  27.639 -14.543  1.00  0.24           O  
HETATM   14  O   HOH T  13      59.798  18.143  32.134  1.00  0.24           O  
HETATM   15  O   HOH T  14      67.075  21.929 -21.787  1.00  0.24           O  
HETATM   16  O   HOH T  15      59.959  14.297  -9.033  1.00  0.24           O  
HETATM   17  O   HOH T  16      45.505   1.926   7.160  1.00  0.25           O  
HETATM   18  O   HOH T  17      60.913  13.405  -6.613  1.00  0.25           O  
HETATM   19  O   HOH T  18      46.837   1.457 -25.461  1.00  0.25           O  
HETATM   20  O   HOH T  19      58.883  -3.950   9.163  1.00  0.25           O  
HETATM   21  O   HOH T  20      52.946  -3.270  20.648  1.00  0.25           O  
HETATM   22  O   HOH T  21      63.530   0.934  -6.549  1.00  0.25           O  
HETATM   23  O   HOH T  22      59.414  -3.195  11.783  1.00  0.26           O  
HETATM   24  O   HOH T  23      57.625   2.639  16.552  1.00  0.26           O  
HETATM   25  O   HOH T  24      44.352  25.738  28.110  1.00  0.26           O  
HETATM   26  O   HOH T  25      59.726   2.879  -6.551  1.00  0.26           O  
HETATM   27  O   HOH T  26      39.701  10.195  38.719  1.00  0.26           O  
HETATM   28  O   HOH T  27      38.965   4.885  33.030  1.00  0.26           O  
HETATM   29  O   HOH T  28      34.935  12.840  29.792  1.00  0.26           O  
HETATM   30  O   HOH T  29      68.528   1.662 -14.041  1.00  0.26           O  
HETATM   31  O   HOH T  30      61.619  15.884  -4.086  1.00  0.27           O  
HETATM   32  O   HOH T  31      57.037  10.894   4.164  1.00  0.27           O  
HETATM   33  O   HOH T  32      82.316  11.942  31.994  1.00  0.27           O  
HETATM   34  O   HOH T  33      99.700  20.921  36.457  1.00  0.27           O  
HETATM   35  O   HOH T  34      68.166  19.574 -20.954  1.00  0.27           O  
HETATM   36  O   HOH T  35      57.183   7.914  -8.706  1.00  0.27           O  
HETATM   37  O   HOH T  36      38.220   2.386   5.767  1.00  0.27           O  
HETATM   38  O   HOH T  37      95.733  24.571  28.673  1.00  0.27           O  
HETATM   39  O   HOH T  38      57.681  18.231  27.260  1.00  0.28           O  
HETATM   40  O   HOH T  39      80.952  24.496   0.516  1.00  0.28           O  
HETATM   41  O   HOH T  40      43.852  -2.641  43.472  1.00  0.28           O  
HETATM   42  O   HOH T  41      60.045   3.649   0.494  1.00  0.28           O  
HETATM   43  O   HOH T  42      37.864 -14.386   5.718  1.00  0.28           O  
HETATM   44  O   HOH T  43      95.074   4.647  45.269  1.00  0.28           O  
HETATM   45  O   HOH T  44      61.219   9.651  11.140  1.00  0.28           O  
HETATM   46  O   HOH T  45     100.485   2.588  14.167  1.00  0.28           O  
HETATM   47  O   HOH T  46      55.330 -10.828   3.096  1.00  0.28           O  
HETATM   48  O   HOH T  47      51.180   5.442  23.069  1.00  0.28           O  
HETATM   49  O   HOH T  48      85.182  10.597  38.638  1.00  0.28           O  
HETATM   50  O   HOH T  49      69.458  26.526  -7.063  1.00  0.28           O  
HETATM   51  O   HOH T  50      54.988   2.213 -11.348  1.00  0.29           O  
HETATM   52  O   HOH T  51      57.071   9.233  43.857  1.00  0.29           O  
HETATM   53  O   HOH T  52      40.570   6.387  44.200  1.00  0.29           O  
HETATM   54  O   HOH T  53      80.308  19.292   0.436  1.00  0.29           O  
HETATM   55  O   HOH T  54      39.708 -13.877   0.712  1.00  0.29           O  
HETATM   56  O   HOH T  55      41.505   3.015  -3.467  1.00  0.29           O  
HETATM   57  O   HOH T  56      59.211  18.239  29.504  1.00  0.29           O  
HETATM   58  O   HOH T  57      39.556  -8.499   0.278  1.00  0.29           O  
HETATM   59  O   HOH T  58      37.737  12.312  32.571  1.00  0.29           O  
HETATM   60  O   HOH T  59     103.355   9.499  41.362  1.00  0.29           O  
HETATM   61  O   HOH T  60      44.370  -5.206 -18.379  1.00  0.29           O  
HETATM   62  O   HOH T  61      52.899  11.879  15.802  1.00  0.29           O  
HETATM   63  O   HOH T  62      61.558  -6.139   3.253  1.00  0.30           O  
HETATM   64  O   HOH T  63      41.540   4.481  33.462  1.00  0.30           O  
HETATM   65  O   HOH T  64      71.467   6.483 -16.570  1.00  0.30           O  
HETATM   66  O   HOH T  65      32.876  12.133  31.543  1.00  0.30           O  
HETATM   67  O   HOH T  66      66.679  28.574 -11.940  1.00  0.30           O  
HETATM   68  O   HOH T  67      82.249  17.741  -6.190  1.00  0.30           O  
HETATM   69  O   HOH T  68      85.472   5.591  33.227  1.00  0.30           O  
HETATM   70  O   HOH T  69     104.859  17.061  29.303  1.00  0.30           O  
HETATM   71  O   HOH T  70      93.544  -1.829  21.712  1.00  0.30           O  
HETATM   72  O   HOH T  71      41.745  -2.694  -6.538  1.00  0.30           O  
HETATM   73  O   HOH T  72      61.712   1.413   0.780  1.00  0.30           O  
HETATM   74  O   HOH T  73      33.653  33.234  30.271  1.00  0.31           O  
HETATM   75  O   HOH T  74      52.553   4.919  -6.009  1.00  0.31           O  
HETATM   76  O   HOH T  75      49.049  -5.316 -13.865  1.00  0.31           O  
HETATM   77  O   HOH T  76      50.226  -4.163  20.601  1.00  0.31           O  
HETATM   78  O   HOH T  77      56.301  -5.643 -29.638  1.00  0.31           O  
HETATM   79  O   HOH T  78      65.791  -6.456   0.459  1.00  0.31           O  
HETATM   80  O   HOH T  79      34.539  26.765  30.780  1.00  0.31           O  
HETATM   81  O   HOH T  80      62.059  11.825  32.449  1.00  0.31           O  
HETATM   82  O   HOH T  81      70.032  27.031   1.549  1.00  0.31           O  
HETATM   83  O   HOH T  82      45.655  -8.520  -5.053  1.00  0.31           O  
HETATM   84  O   HOH T  83      60.919  20.102   2.734  1.00  0.31           O  
HETATM   85  O   HOH T  84      78.442   6.253   3.248  1.00  0.31           O  
HETATM   86  O   HOH T  85      82.446   1.819  -5.791  1.00  0.31           O  
HETATM   87  O   HOH T  86      52.269   7.648  -5.724  1.00  0.31           O  
HETATM   88  O   HOH T  87      36.226   5.311  33.324  1.00  0.32           O  
HETATM   89  O   HOH T  88      68.463   2.655  -5.971  1.00  0.32           O  
HETATM   90  O   HOH T  89      60.280  23.164   9.013  1.00  0.32           O  
HETATM   91  O   HOH T  90      61.580  13.702 -13.811  1.00  0.32           O  
HETATM   92  O   HOH T  91      57.804  -5.454 -14.335  1.00  0.32           O  
HETATM   93  O   HOH T  92      36.605   9.207  36.929  1.00  0.32           O  
HETATM   94  O   HOH T  93      89.526  19.334  36.902  1.00  0.32           O  
HETATM   95  O   HOH T  94      47.451  -6.809  -8.152  1.00  0.32           O  
HETATM   96  O   HOH T  95      80.055  26.792  29.513  1.00  0.32           O  
HETATM   97  O   HOH T  96      98.772  15.367  18.540  1.00  0.32           O  
HETATM   98  O   HOH T  97      64.686  25.134   0.257  1.00  0.33           O  
HETATM   99  O   HOH T  98      42.732  26.982  35.859  1.00  0.33           O  
HETATM  100  O   HOH T  99      92.056  20.279  36.817  1.00  0.33           O  
HETATM  101  O   HOH T 100      81.416   1.924  -3.228  1.00  0.33           O  
HETATM  102  O   HOH T 101      43.231  15.323  43.224  1.00  0.33           O  
HETATM  103  O   HOH T 102      32.538  28.622  30.195  1.00  0.33           O  
HETATM  104  O   HOH T 103      83.314   1.315  31.335  1.00  0.33           O  
HETATM  105  O   HOH T 104      74.701   9.887   9.243  1.00  0.33           O  
HETATM  106  O   HOH T 105      95.017   7.378  45.283  1.00  0.33           O  
HETATM  107  O   HOH T 106      55.595  16.417  20.611  1.00  0.33           O  
HETATM  108  O   HOH T 107      52.812  10.375   6.170  1.00  0.33           O  
HETATM  109  O   HOH T 108      40.392  -8.062  -2.375  1.00  0.33           O  
HETATM  110  O   HOH T 109      38.092   0.578   7.858  1.00  0.33           O  
HETATM  111  O   HOH T 110      78.521  11.824  27.322  1.00  0.33           O  
HETATM  112  O   HOH T 111      79.329  10.709  18.661  1.00  0.33           O  
HETATM  113  O   HOH T 112      50.155   5.661  45.309  1.00  0.33           O  
HETATM  114  O   HOH T 113      73.760  12.090  14.755  1.00  0.33           O  
HETATM  115  O   HOH T 114      50.346  -5.903 -11.407  1.00  0.33           O  
HETATM  116  O   HOH T 115      75.251   1.178 -22.560  1.00  0.34           O  
HETATM  117  O   HOH T 116      58.459  -7.360 -12.347  1.00  0.34           O  
HETATM  118  O   HOH T 117      62.305  13.979  34.141  1.00  0.34           O  
HETATM  119  O   HOH T 118      89.241   2.285  17.044  1.00  0.34           O  
HETATM  120  O   HOH T 119      51.015  12.069  50.661  1.00  0.34           O  
HETATM  121  O   HOH T 120      81.824  16.078  -8.386  1.00  0.34           O  
HETATM  122  O   HOH T 121      76.431  26.082   0.410  1.00  0.34           O  
HETATM  123  O   HOH T 122      45.284  21.789  43.568  1.00  0.34           O  
HETATM  124  O   HOH T 123      78.727  20.395  -4.542  1.00  0.34           O  
HETATM  125  O   HOH T 124      37.713   6.196  44.309  1.00  0.34           O  
HETATM  126  O   HOH T 125      54.174  14.678  19.130  1.00  0.34           O  
HETATM  127  O   HOH T 126      77.676  16.481  16.093  1.00  0.34           O  
HETATM  128  O   HOH T 127      59.717  -3.676 -14.832  1.00  0.34           O  
HETATM  129  O   HOH T 128      42.341  -9.890  -2.884  1.00  0.34           O  
HETATM  130  O   HOH T 129      60.672  16.810  12.927  1.00  0.34           O  
HETATM  131  O   HOH T 130      70.551  10.345  14.040  1.00  0.34           O  
HETATM  132  O   HOH T 131      66.628  -4.845  -1.654  1.00  0.35           O  
HETATM  133  O   HOH T 132      59.449  12.365  31.541  1.00  0.35           O  
HETATM  134  O   HOH T 133     101.120   4.017  18.625  1.00  0.35           O  
HETATM  135  O   HOH T 134      78.884  10.735  24.891  1.00  0.35           O  
HETATM  136  O   HOH T 135      96.461  -3.936  18.833  1.00  0.35           O  
HETATM  137  O   HOH T 136      42.713 -13.655   6.132  1.00  0.35           O  
HETATM  138  O   HOH T 137      36.538  17.010  40.645  1.00  0.35           O  
HETATM  139  O   HOH T 138      95.511   2.178  44.111  1.00  0.35           O  
HETATM  140  O   HOH T 139      64.623  22.846   6.110  1.00  0.35           O  
HETATM  141  O   HOH T 140      43.869   1.616  28.492  1.00  0.35           O  
HETATM  142  O   HOH T 141      91.896  17.487  43.886  1.00  0.35           O  
HETATM  143  O   HOH T 142      75.946  14.460 -12.827  1.00  0.35           O  
HETATM  144  O   HOH T 143      79.445  13.307   4.735  1.00  0.36           O  
HETATM  145  O   HOH T 144      74.969  22.865  -5.589  1.00  0.36           O  
HETATM  146  O   HOH T 145      91.000  -0.377  41.513  1.00  0.36           O  
HETATM  147  O   HOH T 146      58.545  -1.598   6.535  1.00  0.36           O  
HETATM  148  O   HOH T 147      39.153  11.354  42.993  1.00  0.36           O  
HETATM  149  O   HOH T 148     104.491  11.368  43.073  1.00  0.36           O  
HETATM  150  O   HOH T 149      63.124   7.137  14.970  1.00  0.36           O  
HETATM  151  O   HOH T 150      52.154  -1.677 -14.777  1.00  0.36           O  
HETATM  152  O   HOH T 151      71.439  -1.622 -17.396  1.00  0.36           O  
HETATM  153  O   HOH T 152      57.872  -3.814  15.623  1.00  0.36           O  
HETATM  154  O   HOH T 153      80.299   8.044   2.263  1.00  0.36           O  
HETATM  155  O   HOH T 154      71.401  19.670 -10.254  1.00  0.36           O  
HETATM  156  O   HOH T 155      88.002   1.343  28.271  1.00  0.36           O  
HETATM  157  O   HOH T 156      82.222  10.827  36.347  1.00  0.36           O  
HETATM  158  O   HOH T 157      97.832  25.134  26.947  1.00  0.36           O  
HETATM  159  O   HOH T 158      41.569 -11.170   5.440  1.00  0.36           O  
HETATM  160  O   HOH T 159     101.552   5.300  24.300  1.00  0.36           O  
HETATM  161  O   HOH T 160      59.807  -1.932  16.426  1.00  0.36           O  
HETATM  162  O   HOH T 161     100.949   6.536  42.185  1.00  0.36           O  
HETATM  163  O   HOH T 162      45.609  -1.734  39.419  1.00  0.37           O  
HETATM  164  O   HOH T 163      56.581  -9.666 -12.080  1.00  0.37           O  
HETATM  165  O   HOH T 164      94.735   2.729  28.376  1.00  0.37           O  
HETATM  166  O   HOH T 165      66.271  28.864  -9.168  1.00  0.37           O  
HETATM  167  O   HOH T 166      52.441 -11.203  -7.314  1.00  0.37           O  
HETATM  168  O   HOH T 167      48.593  -9.853  20.050  1.00  0.37           O  
HETATM  169  O   HOH T 168      59.233  15.343 -13.925  1.00  0.37           O  
HETATM  170  O   HOH T 169      49.226   4.089  21.910  1.00  0.37           O  
HETATM  171  O   HOH T 170      65.911   2.739 -14.031  1.00  0.37           O  
HETATM  172  O   HOH T 171      78.088   4.929  -4.964  1.00  0.37           O  
HETATM  173  O   HOH T 172     101.517   6.376  32.483  1.00  0.37           O  
HETATM  174  O   HOH T 173      80.722  13.380   7.074  1.00  0.37           O  
HETATM  175  O   HOH T 174     101.795   4.354  29.033  1.00  0.37           O  
HETATM  176  O   HOH T 175     104.162  17.081  26.685  1.00  0.37           O  
HETATM  177  O   HOH T 176      50.403  23.639  44.372  1.00  0.38           O  
HETATM  178  O   HOH T 177      40.300  20.036  46.598  1.00  0.38           O  
HETATM  179  O   HOH T 178      35.242  19.299  39.844  1.00  0.38           O  
HETATM  180  O   HOH T 179      68.116  12.318 -18.927  1.00  0.38           O  
HETATM  181  O   HOH T 180      48.649  21.395  25.779  1.00  0.38           O  
HETATM  182  O   HOH T 181      51.867  -8.060 -11.690  1.00  0.38           O  
HETATM  183  O   HOH T 182      61.398  -1.837 -13.747  1.00  0.38           O  
HETATM  184  O   HOH T 183      58.020   3.825  -1.292  1.00  0.38           O  
HETATM  185  O   HOH T 184      62.318   3.153 -11.343  1.00  0.38           O  
HETATM  186  O   HOH T 185      77.544   3.230  28.342  1.00  0.38           O  
HETATM  187  O   HOH T 186     101.796  16.633  22.114  1.00  0.38           O  
HETATM  188  O   HOH T 187      87.214   9.669  18.953  1.00  0.38           O  
HETATM  189  O   HOH T 188      89.048   2.667  35.159  1.00  0.38           O  
HETATM  190  O   HOH T 189     102.788   5.742  26.797  1.00  0.38           O  
HETATM  191  O   HOH T 190      77.985  18.134  25.921  1.00  0.38           O  
HETATM  192  O   HOH T 191     106.393   9.549  44.137  1.00  0.38           O  
HETATM  193  O   HOH T 192      54.744  -4.336 -31.516  1.00  0.38           O  
HETATM  194  O   HOH T 193      48.689  19.231  20.050  1.00  0.38           O  
HETATM  195  O   HOH T 194      43.908   3.033  30.754  1.00  0.38           O  
HETATM  196  O   HOH T 195      47.210  22.646  41.812  1.00  0.38           O  
HETATM  197  O   HOH T 196      84.514  26.837  26.830  1.00  0.38           O  
HETATM  198  O   HOH T 197      38.918   1.508  -7.956  1.00  0.38           O  
HETATM  199  O   HOH T 198      81.338  19.613  -4.316  1.00  0.38           O  
HETATM  200  O   HOH T 199      48.727   3.891  11.064  1.00  0.38           O  
HETATM  201  O   HOH T 200      47.586  19.064  24.835  1.00  0.38           O  
HETATM  202  O   HOH T 201      51.708   3.346  29.900  1.00  0.39           O  
HETATM  203  O   HOH T 202      69.834   0.544 -16.386  1.00  0.39           O  
HETATM  204  O   HOH T 203      73.174  10.373 -14.019  1.00  0.39           O  
HETATM  205  O   HOH T 204      89.972  -3.572  20.332  1.00  0.39           O  
HETATM  206  O   HOH T 205      52.100   6.632  47.110  1.00  0.39           O  
HETATM  207  O   HOH T 206      53.264  11.902  13.002  1.00  0.39           O  
HETATM  208  O   HOH T 207      49.384   1.026 -24.498  1.00  0.39           O  
HETATM  209  O   HOH T 208      61.257  11.830  13.095  1.00  0.39           O  
HETATM  210  O   HOH T 209      63.693   6.999  -0.372  1.00  0.39           O  
HETATM  211  O   HOH T 210      61.478  -1.557   4.158  1.00  0.39           O  
HETATM  212  O   HOH T 211      77.866   4.706  30.674  1.00  0.39           O  
HETATM  213  O   HOH T 212      41.397   4.628   1.626  1.00  0.39           O  
HETATM  214  O   HOH T 213      63.872  32.254 -12.444  1.00  0.39           O  
HETATM  215  O   HOH T 214      46.377  -3.857  16.502  1.00  0.39           O  
HETATM  216  O   HOH T 215      37.224   9.486  39.697  1.00  0.39           O  
HETATM  217  O   HOH T 216      50.956   9.889   8.237  1.00  0.39           O  
HETATM  218  O   HOH T 217      62.800   9.442  13.375  1.00  0.40           O  
HETATM  219  O   HOH T 218      75.699  17.014  27.497  1.00  0.40           O  
HETATM  220  O   HOH T 219      94.926  26.202  30.717  1.00  0.40           O  
HETATM  221  O   HOH T 220      90.330   0.370  34.226  1.00  0.40           O  
HETATM  222  O   HOH T 221      64.111  22.855   3.385  1.00  0.40           O  
HETATM  223  O   HOH T 222      62.846   6.972  -4.047  1.00  0.40           O  
HETATM  224  O   HOH T 223      57.267  -1.752  17.481  1.00  0.40           O  
HETATM  225  O   HOH T 224      60.236  14.304  14.220  1.00  0.40           O  
HETATM  226  O   HOH T 225      75.710  10.184  11.817  1.00  0.40           O  
HETATM  227  O   HOH T 226      96.553   3.744  30.175  1.00  0.40           O  
HETATM  228  O   HOH T 227      96.524  20.467  23.213  1.00  0.40           O  
HETATM  229  O   HOH T 228      46.719   3.617   9.110  1.00  0.40           O  
HETATM  230  O   HOH T 229      65.758  -0.185  -3.462  1.00  0.40           O  
HETATM  231  O   HOH T 230      73.610  22.785  30.896  1.00  0.40           O  
HETATM  232  O   HOH T 231      39.516  14.275  33.937  1.00  0.40           O  
HETATM  233  O   HOH T 232      55.236   9.674  -9.499  1.00  0.40           O  
HETATM  234  O   HOH T 233      50.538   1.081  26.069  1.00  0.40           O  
HETATM  235  O   HOH T 234      73.569  14.756  15.762  1.00  0.40           O  
HETATM  236  O   HOH T 235      65.491  18.734 -20.999  1.00  0.40           O  
HETATM  237  O   HOH T 236      97.063  13.734  17.167  1.00  0.40           O  
HETATM  238  O   HOH T 237      59.988   2.310 -12.719  1.00  0.40           O  
HETATM  239  O   HOH T 238      79.186  12.615  30.013  1.00  0.41           O  
HETATM  240  O   HOH T 239      98.188  18.776  21.799  1.00  0.41           O  
HETATM  241  O   HOH T 240      60.873   3.564  -8.950  1.00  0.41           O  
HETATM  242  O   HOH T 241      45.369  -0.681  42.016  1.00  0.41           O  
HETATM  243  O   HOH T 242      29.418  24.731  33.543  1.00  0.41           O  
HETATM  244  O   HOH T 243      87.583  26.280  33.345  1.00  0.41           O  
HETATM  245  O   HOH T 244      68.861  -5.781 -10.242  1.00  0.41           O  
HETATM  246  O   HOH T 245      78.977  22.883  -0.758  1.00  0.41           O  
HETATM  247  O   HOH T 246      76.088  19.444  34.366  1.00  0.41           O  
HETATM  248  O   HOH T 247      47.982  -6.701 -16.206  1.00  0.41           O  
HETATM  249  O   HOH T 248      87.274  26.773  26.671  1.00  0.41           O  
HETATM  250  O   HOH T 249      54.461 -11.327  -9.122  1.00  0.41           O  
HETATM  251  O   HOH T 250      55.259  21.723   8.190  1.00  0.41           O  
HETATM  252  O   HOH T 251      66.366  -0.006 -14.462  1.00  0.41           O  
HETATM  253  O   HOH T 252      94.698  19.936  37.499  1.00  0.41           O  
HETATM  254  O   HOH T 253      90.965  17.828  22.393  1.00  0.41           O  
HETATM  255  O   HOH T 254      60.384  23.897  11.792  1.00  0.41           O  
HETATM  256  O   HOH T 255      53.012   3.785  24.395  1.00  0.41           O  
HETATM  257  O   HOH T 256      71.065  28.392  -8.400  1.00  0.41           O  
HETATM  258  O   HOH T 257      35.657   0.973  30.801  1.00  0.42           O  
HETATM  259  O   HOH T 258      54.102  19.439  23.788  1.00  0.42           O  
HETATM  260  O   HOH T 259      38.092  21.901  43.486  1.00  0.42           O  
HETATM  261  O   HOH T 260     100.477  18.802  23.342  1.00  0.42           O  
HETATM  262  O   HOH T 261      59.742  13.643 -11.728  1.00  0.42           O  
HETATM  263  O   HOH T 262      59.842  17.278   5.751  1.00  0.42           O  
HETATM  264  O   HOH T 263      68.948  15.553  17.910  1.00  0.42           O  
HETATM  265  O   HOH T 264      42.553   3.002  35.491  1.00  0.42           O  
HETATM  266  O   HOH T 265      92.245  20.331  22.641  1.00  0.42           O  
HETATM  267  O   HOH T 266      55.061  -1.981  19.238  1.00  0.42           O  
HETATM  268  O   HOH T 267      77.597  27.363  28.609  1.00  0.42           O  
HETATM  269  O   HOH T 268      84.342   3.892  31.333  1.00  0.42           O  
HETATM  270  O   HOH T 269      96.849  27.020  28.809  1.00  0.42           O  
HETATM  271  O   HOH T 270      54.592  11.909  10.588  1.00  0.42           O  
HETATM  272  O   HOH T 271      75.005  25.498  -1.911  1.00  0.42           O  
HETATM  273  O   HOH T 272      63.091  -3.967   4.252  1.00  0.42           O  
HETATM  274  O   HOH T 273      87.766  28.567  31.763  1.00  0.42           O  
HETATM  275  O   HOH T 274      31.792  14.651  31.459  1.00  0.42           O  
HETATM  276  O   HOH T 275      56.025  19.612  25.691  1.00  0.42           O  
HETATM  277  O   HOH T 276      94.456   0.486  22.807  1.00  0.42           O  
HETATM  278  O   HOH T 277      95.795  24.445  25.144  1.00  0.42           O  
HETATM  279  O   HOH T 278      75.903  20.222  -9.918  1.00  0.43           O  
HETATM  280  O   HOH T 279      37.849   0.778  -5.582  1.00  0.43           O  
HETATM  281  O   HOH T 280      37.585 -13.409   8.180  1.00  0.43           O  
HETATM  282  O   HOH T 281      72.126  -2.629 -11.160  1.00  0.43           O  
HETATM  283  O   HOH T 282      50.461 -14.016   7.953  1.00  0.43           O  
HETATM  284  O   HOH T 283      60.721   6.911  36.460  1.00  0.43           O  
HETATM  285  O   HOH T 284      67.518   0.316  -7.168  1.00  0.43           O  
HETATM  286  O   HOH T 285      53.428  21.019  38.699  1.00  0.43           O  
HETATM  287  O   HOH T 286      85.650  27.219  24.366  1.00  0.43           O  
HETATM  288  O   HOH T 287      55.295   7.089  43.982  1.00  0.43           O  
HETATM  289  O   HOH T 288      72.045  -4.369 -18.005  1.00  0.43           O  
HETATM  290  O   HOH T 289      94.145  23.367  45.402  1.00  0.43           O  
HETATM  291  O   HOH T 290      41.361  -3.656  -3.916  1.00  0.43           O  
HETATM  292  O   HOH T 291      70.278  19.604 -12.814  1.00  0.43           O  
HETATM  293  O   HOH T 292     100.086  11.258  20.369  1.00  0.43           O  
HETATM  294  O   HOH T 293      55.685  -4.965  16.998  1.00  0.43           O  
HETATM  295  O   HOH T 294      60.007   4.708 -11.348  1.00  0.43           O  
HETATM  296  O   HOH T 295      39.519   9.083  41.335  1.00  0.43           O  
HETATM  297  O   HOH T 296      60.871  12.317  15.916  1.00  0.43           O  
HETATM  298  O   HOH T 297     100.493   1.989  16.875  1.00  0.43           O  
HETATM  299  O   HOH T 298      66.858  21.243   5.813  1.00  0.43           O  
HETATM  300  O   HOH T 299      59.247   7.126  28.933  1.00  0.43           O  
HETATM  301  O   HOH T 300      48.481   0.934 -11.327  1.00  0.43           O  
HETATM  302  O   HOH T 301      47.676  -3.164  20.839  1.00  0.43           O  
HETATM  303  O   HOH T 302      95.734   2.962  25.642  1.00  0.43           O  
HETATM  304  O   HOH T 303      69.190   8.030  12.957  1.00  0.43           O  
HETATM  305  O   HOH T 304      51.359  -4.025 -13.282  1.00  0.43           O  
HETATM  306  O   HOH T 305      69.678  32.862  -7.230  1.00  0.43           O  
HETATM  307  O   HOH T 306     100.961   2.728  25.159  1.00  0.43           O  
HETATM  308  O   HOH T 307      73.473  13.007 -12.990  1.00  0.43           O  
HETATM  309  O   HOH T 308      73.330  -0.467 -21.653  1.00  0.44           O  
HETATM  310  O   HOH T 309      92.557   0.207  39.265  1.00  0.44           O  
HETATM  311  O   HOH T 310      89.861  16.189  42.172  1.00  0.44           O  
HETATM  312  O   HOH T 311      74.777  17.752  12.131  1.00  0.44           O  
HETATM  313  O   HOH T 312      61.878  -4.213  12.604  1.00  0.44           O  
HETATM  314  O   HOH T 313      62.815   0.635   5.408  1.00  0.44           O  
HETATM  315  O   HOH T 314     106.890   9.099  37.987  1.00  0.44           O  
HETATM  316  O   HOH T 315      75.462  17.749  24.803  1.00  0.44           O  
HETATM  317  O   HOH T 316      71.566  25.426 -16.111  1.00  0.44           O  
HETATM  318  O   HOH T 317      99.953  23.572  35.387  1.00  0.44           O  
HETATM  319  O   HOH T 318      44.966  28.469  36.686  1.00  0.44           O  
HETATM  320  O   HOH T 319      69.998  29.031  -5.926  1.00  0.44           O  
HETATM  321  O   HOH T 320      99.790  17.187  20.204  1.00  0.44           O  
HETATM  322  O   HOH T 321      76.824   2.537  -5.645  1.00  0.44           O  
HETATM  323  O   HOH T 322      37.157   2.801  32.389  1.00  0.44           O  
HETATM  324  O   HOH T 323      50.613   0.673  23.428  1.00  0.44           O  
HETATM  325  O   HOH T 324      68.181  -0.726 -12.363  1.00  0.44           O  
HETATM  326  O   HOH T 325      49.289 -12.347  20.778  1.00  0.44           O  
HETATM  327  O   HOH T 326      71.831  -3.450 -15.346  1.00  0.44           O  
HETATM  328  O   HOH T 327      77.064  11.671  31.555  1.00  0.44           O  
HETATM  329  O   HOH T 328      44.651  24.527  25.675  1.00  0.44           O  
HETATM  330  O   HOH T 329      50.404  11.242   1.418  1.00  0.44           O  
HETATM  331  O   HOH T 330      44.247   3.721  33.338  1.00  0.44           O  
HETATM  332  O   HOH T 331      76.312  20.421  -5.931  1.00  0.44           O  
HETATM  333  O   HOH T 332      61.699  -5.618   6.079  1.00  0.44           O  
HETATM  334  O   HOH T 333      62.325  11.554 -15.472  1.00  0.44           O  
HETATM  335  O   HOH T 334      62.716  -8.021   4.953  1.00  0.44           O  
HETATM  336  O   HOH T 335      51.952 -10.416 -10.026  1.00  0.45           O  
HETATM  337  O   HOH T 336      90.645  11.074  16.178  1.00  0.45           O  
HETATM  338  O   HOH T 337      82.588  15.021  -5.957  1.00  0.45           O  
HETATM  339  O   HOH T 338      38.914   0.933  22.336  1.00  0.45           O  
HETATM  340  O   HOH T 339      92.557  22.600  21.022  1.00  0.45           O  
HETATM  341  O   HOH T 340      73.767   8.259  11.301  1.00  0.45           O  
HETATM  342  O   HOH T 341      68.281  -5.090   0.636  1.00  0.45           O  
HETATM  343  O   HOH T 342      48.603  17.849  17.697  1.00  0.45           O  
HETATM  344  O   HOH T 343      63.339   0.139   2.700  1.00  0.45           O  
HETATM  345  O   HOH T 344      93.776  -0.572  41.690  1.00  0.45           O  
HETATM  346  O   HOH T 345      45.398 -12.094  17.144  1.00  0.45           O  
HETATM  347  O   HOH T 346      50.259  -0.129 -26.801  1.00  0.45           O  
HETATM  348  O   HOH T 347      47.097  -3.164  23.473  1.00  0.45           O  
HETATM  349  O   HOH T 348      53.197  10.774  51.849  1.00  0.45           O  
HETATM  350  O   HOH T 349      46.722  19.858  18.132  1.00  0.45           O  
HETATM  351  O   HOH T 350      71.951   8.097  13.342  1.00  0.45           O  
HETATM  352  O   HOH T 351      49.385  -1.779  22.646  1.00  0.45           O  
HETATM  353  O   HOH T 352      34.501  14.299  32.154  1.00  0.45           O  
HETATM  354  O   HOH T 353      65.640   2.319  12.783  1.00  0.45           O  
HETATM  355  O   HOH T 354      50.869  -3.307 -24.432  1.00  0.45           O  
HETATM  356  O   HOH T 355      45.365  -4.014  19.418  1.00  0.45           O  
HETATM  357  O   HOH T 356      99.125  21.191  22.631  1.00  0.45           O  
HETATM  358  O   HOH T 357      40.459   1.730  -5.681  1.00  0.45           O  
HETATM  359  O   HOH T 358      42.996  -1.452  13.241  1.00  0.45           O  
HETATM  360  O   HOH T 359      58.895  11.663   0.053  1.00  0.45           O  
HETATM  361  O   HOH T 360      44.429 -10.901  -4.394  1.00  0.45           O  
HETATM  362  O   HOH T 361      30.690  21.005  32.871  1.00  0.45           O  
HETATM  363  O   HOH T 362      42.132  -0.784  -8.676  1.00  0.45           O  
HETATM  364  O   HOH T 363      81.669  22.614  -1.308  1.00  0.45           O  
HETATM  365  O   HOH T 364      73.199   8.499 -16.069  1.00  0.45           O  
HETATM  366  O   HOH T 365     101.387   7.666  44.779  1.00  0.45           O  
HETATM  367  O   HOH T 366      72.165  12.636 -15.449  1.00  0.45           O  
HETATM  368  O   HOH T 367      71.088  20.826 -15.296  1.00  0.45           O  
HETATM  369  O   HOH T 368      90.060  21.939  21.992  1.00  0.45           O  
HETATM  370  O   HOH T 369      64.008  26.805   2.448  1.00  0.45           O  
HETATM  371  O   HOH T 370      92.116  18.854  18.802  1.00  0.46           O  
HETATM  372  O   HOH T 371      53.579  12.734  49.901  1.00  0.46           O  
HETATM  373  O   HOH T 372     104.928  26.159  38.421  1.00  0.46           O  
HETATM  374  O   HOH T 373      39.341   1.734   0.626  1.00  0.46           O  
HETATM  375  O   HOH T 374      52.653   6.311  44.481  1.00  0.46           O  
HETATM  376  O   HOH T 375      81.947   3.479   2.048  1.00  0.46           O  
HETATM  377  O   HOH T 376      73.004  10.628  12.603  1.00  0.46           O  
HETATM  378  O   HOH T 377      49.595  19.267  15.623  1.00  0.46           O  
HETATM  379  O   HOH T 378      77.739  25.152  -1.852  1.00  0.46           O  
HETATM  380  O   HOH T 379      64.656   0.733 -12.458  1.00  0.46           O  
HETATM  381  O   HOH T 380      75.903   7.404   2.937  1.00  0.46           O  
HETATM  382  O   HOH T 381      56.389   7.978  46.313  1.00  0.46           O  
HETATM  383  O   HOH T 382      60.767   0.552  17.235  1.00  0.46           O  
HETATM  384  O   HOH T 383      57.578   3.424 -11.661  1.00  0.46           O  
HETATM  385  O   HOH T 384     103.750   8.881  44.015  1.00  0.46           O  
HETATM  386  O   HOH T 385      35.810  13.201  34.390  1.00  0.46           O  
HETATM  387  O   HOH T 386      98.305   2.003  25.066  1.00  0.46           O  
HETATM  388  O   HOH T 387      70.530  28.869  -3.184  1.00  0.46           O  
HETATM  389  O   HOH T 388      74.403  17.956 -15.477  1.00  0.46           O  
HETATM  390  O   HOH T 389      52.860   9.681  -0.721  1.00  0.46           O  
HETATM  391  O   HOH T 390      71.198  16.163  16.438  1.00  0.46           O  
HETATM  392  O   HOH T 391      94.509  18.747  22.470  1.00  0.46           O  
HETATM  393  O   HOH T 392      53.561 -12.296   4.789  1.00  0.46           O  
HETATM  394  O   HOH T 393      52.616   6.529  -8.204  1.00  0.46           O  
HETATM  395  O   HOH T 394      47.130  15.800  18.843  1.00  0.47           O  
HETATM  396  O   HOH T 395      69.222  26.646 -15.252  1.00  0.47           O  
HETATM  397  O   HOH T 396      87.621  -4.811  21.119  1.00  0.47           O  
HETATM  398  O   HOH T 397      70.601  -1.913 -13.302  1.00  0.47           O  
HETATM  399  O   HOH T 398      29.853  22.428  35.010  1.00  0.47           O  
HETATM  400  O   HOH T 399      75.142  16.967  14.825  1.00  0.47           O  
HETATM  401  O   HOH T 400      51.838   2.941  22.043  1.00  0.47           O  
HETATM  402  O   HOH T 401      37.877   8.945  43.651  1.00  0.47           O  
HETATM  403  O   HOH T 402      62.313   4.645  -0.788  1.00  0.47           O  
HETATM  404  O   HOH T 403      46.908  13.098  18.543  1.00  0.47           O  
HETATM  405  O   HOH T 404      86.084   2.478  38.217  1.00  0.47           O  
HETATM  406  O   HOH T 405      66.136   4.590  -3.208  1.00  0.47           O  
HETATM  407  O   HOH T 406      99.364   3.068  29.834  1.00  0.47           O  
HETATM  408  O   HOH T 407      75.279  16.259  17.477  1.00  0.47           O  
HETATM  409  O   HOH T 408      57.765  17.695  24.524  1.00  0.47           O  
HETATM  410  O   HOH T 409     108.293   9.057  42.160  1.00  0.47           O  
HETATM  411  O   HOH T 410     107.146   7.351  40.274  1.00  0.47           O  
HETATM  412  O   HOH T 411      68.020  29.173  -4.093  1.00  0.47           O  
HETATM  413  O   HOH T 412     104.711   6.124  34.212  1.00  0.47           O  
HETATM  414  O   HOH T 413      99.826   5.171  39.906  1.00  0.47           O  
HETATM  415  O   HOH T 414      59.216  14.569  -4.716  1.00  0.47           O  
HETATM  416  O   HOH T 415      67.170   3.761   4.139  1.00  0.47           O  
HETATM  417  O   HOH T 416      65.828  -0.540   1.497  1.00  0.47           O  
HETATM  418  O   HOH T 417      88.197  21.434  35.814  1.00  0.47           O  
HETATM  419  O   HOH T 418      77.780  17.745  33.046  1.00  0.47           O  
HETATM  420  O   HOH T 419      75.442  17.179 -13.054  1.00  0.47           O  
HETATM  421  O   HOH T 420      43.744  -4.114  21.788  1.00  0.47           O  
HETATM  422  O   HOH T 421      83.639  26.283  22.577  1.00  0.47           O  
HETATM  423  O   HOH T 422      81.353   8.066  36.752  1.00  0.47           O  
HETATM  424  O   HOH T 423      61.019  -0.642   6.839  1.00  0.47           O  
HETATM  425  O   HOH T 424      93.064  25.916  32.673  1.00  0.47           O  
HETATM  426  O   HOH T 425      93.837  20.280  20.313  1.00  0.47           O  
HETATM  427  O   HOH T 426      81.993  18.720  -1.741  1.00  0.47           O  
HETATM  428  O   HOH T 427      63.124  -4.102   7.991  1.00  0.47           O  
HETATM  429  O   HOH T 428      39.758  27.154  23.741  1.00  0.48           O  
HETATM  430  O   HOH T 429      57.803   6.349  26.597  1.00  0.48           O  
HETATM  431  O   HOH T 430      37.670  -0.194   5.194  1.00  0.48           O  
HETATM  432  O   HOH T 431      49.450  -0.865  42.124  1.00  0.48           O  
HETATM  433  O   HOH T 432      57.503  15.641  22.583  1.00  0.48           O  
HETATM  434  O   HOH T 433      56.780  23.813   7.225  1.00  0.48           O  
HETATM  435  O   HOH T 434      76.228  24.945  -4.191  1.00  0.48           O  
HETATM  436  O   HOH T 435      61.465  -3.065  10.003  1.00  0.48           O  
HETATM  437  O   HOH T 436      47.049 -10.381  -3.499  1.00  0.48           O  
HETATM  438  O   HOH T 437      73.677  19.141  -8.760  1.00  0.48           O  
HETATM  439  O   HOH T 438      54.365  20.316  44.574  1.00  0.48           O  
HETATM  440  O   HOH T 439      65.037  20.428 -23.061  1.00  0.48           O  
HETATM  441  O   HOH T 440      59.086  18.253  11.350  1.00  0.48           O  
HETATM  442  O   HOH T 441      75.629  22.017  35.153  1.00  0.48           O  
HETATM  443  O   HOH T 442      46.046   9.013   0.217  1.00  0.48           O  
HETATM  444  O   HOH T 443      48.528  18.018  22.447  1.00  0.48           O  
HETATM  445  O   HOH T 444      50.803   1.212  28.644  1.00  0.48           O  
HETATM  446  O   HOH T 445      50.207  19.546  24.212  1.00  0.48           O  
HETATM  447  O   HOH T 446     103.173   8.319  35.535  1.00  0.48           O  
HETATM  448  O   HOH T 447      51.697  24.395  28.524  1.00  0.48           O  
HETATM  449  O   HOH T 448      45.284   3.027  35.757  1.00  0.48           O  
HETATM  450  O   HOH T 449      44.980  -9.082  -2.314  1.00  0.48           O  
HETATM  451  O   HOH T 450      39.994  22.544  41.762  1.00  0.49           O  
HETATM  452  O   HOH T 451     105.306   7.309  36.728  1.00  0.49           O  
HETATM  453  O   HOH T 452      69.456   6.457 -18.482  1.00  0.49           O  
HETATM  454  O   HOH T 453      33.147  16.533  33.054  1.00  0.49           O  
HETATM  455  O   HOH T 454      52.720  22.387  45.082  1.00  0.49           O  
HETATM  456  O   HOH T 455      30.691  10.297  25.709  1.00  0.49           O  
HETATM  457  O   HOH T 456      55.062  12.130   2.660  1.00  0.49           O  
HETATM  458  O   HOH T 457      39.498  -0.689   1.958  1.00  0.49           O  
HETATM  459  O   HOH T 458      45.371  -1.875  14.769  1.00  0.49           O  
HETATM  460  O   HOH T 459      64.047  30.519  -8.938  1.00  0.49           O  
HETATM  461  O   HOH T 460      54.839   6.966  -9.771  1.00  0.49           O  
HETATM  462  O   HOH T 461      54.683   8.140  -7.246  1.00  0.49           O  
HETATM  463  O   HOH T 462     103.773  10.593  27.708  1.00  0.49           O  
HETATM  464  O   HOH T 463      81.066  11.657  16.871  1.00  0.49           O  
HETATM  465  O   HOH T 464      38.481   1.586   3.171  1.00  0.49           O  
HETATM  466  O   HOH T 465      61.605  14.352  31.404  1.00  0.49           O  
HETATM  467  O   HOH T 466      68.566  -3.541 -12.014  1.00  0.49           O  
HETATM  468  O   HOH T 467      52.741  12.114   4.026  1.00  0.49           O  
HETATM  469  O   HOH T 468      46.785 -11.936  19.552  1.00  0.49           O  
HETATM  470  O   HOH T 469      45.675  26.454  38.481  1.00  0.49           O  
HETATM  471  O   HOH T 470      74.946   2.887  -3.700  1.00  0.49           O  
HETATM  472  O   HOH T 471      42.149  27.470  25.141  1.00  0.49           O  
HETATM  473  O   HOH T 472      64.827   3.430  -0.967  1.00  0.50           O  
HETATM  474  O   HOH T 473      40.565   5.756  17.833  1.00  0.50           O  
HETATM  475  O   HOH T 474      71.297  12.974  15.439  1.00  0.50           O  
HETATM  476  O   HOH T 475      53.584  25.607 -13.894  1.00  0.50           O  
HETATM  477  O   HOH T 476      63.936  -4.042  10.659  1.00  0.50           O  
HETATM  478  O   HOH T 477      52.614  -4.283 -15.629  1.00  0.50           O  
HETATM  479  O   HOH T 478      80.739  17.117  36.831  1.00  0.50           O  
HETATM  480  O   HOH T 479      75.470   3.232  30.264  1.00  0.50           O  
HETATM  481  O   HOH T 480      54.461  -2.429 -16.102  1.00  0.50           O  
HETATM  482  O   HOH T 481      46.317   2.551 -10.430  1.00  0.50           O  
HETATM  483  O   HOH T 482      79.369  18.631  17.005  1.00  0.50           O  
HETATM  484  O   HOH T 483      99.592   2.948  22.760  1.00  0.50           O  
HETATM  485  O   HOH T 484      51.917   3.311  27.020  1.00  0.50           O  
HETATM  486  O   HOH T 485      62.414   3.505  -6.544  1.00  0.50           O  
HETATM  487  O   HOH T 486      44.879  27.392  25.859  1.00  0.50           O  
HETATM  488  O   HOH T 487      51.245 -16.354   9.222  1.00  0.50           O  
HETATM  489  O   HOH T 488      98.966   5.513  32.794  1.00  0.50           O  
HETATM  490  O   HOH T 489      40.141 -11.190   0.708  1.00  0.50           O  
HETATM  491  O   HOH T 490      73.885  18.853 -11.505  1.00  0.50           O  
HETATM  492  O   HOH T 491      60.349   9.744  14.677  1.00  0.50           O  
HETATM  493  O   HOH T 492      31.827  26.003  30.254  1.00  0.50           O  
HETATM  494  O   HOH T 493      80.544  15.439   8.835  1.00  0.51           O  
HETATM  495  O   HOH T 494      35.535  -7.125   9.767  1.00  0.51           O  
HETATM  496  O   HOH T 495      73.924   4.478  -1.491  1.00  0.51           O  
HETATM  497  O   HOH T 496      42.435  -4.205 -16.666  1.00  0.51           O  
HETATM  498  O   HOH T 497      44.921  -4.338  39.082  1.00  0.51           O  
HETATM  499  O   HOH T 498      66.425   3.796   1.350  1.00  0.51           O  
HETATM  500  O   HOH T 499      63.773   3.042  10.909  1.00  0.51           O  
HETATM  501  O   HOH T 500      88.828  19.474  21.447  1.00  0.51           O  
HETATM  502  O   HOH T 501      70.502  22.026   7.435  1.00  0.51           O  
HETATM  503  O   HOH T 502      67.082  -3.026   2.182  1.00  0.51           O  
HETATM  504  O   HOH T 503      62.507 -10.294   7.503  1.00  0.51           O  
HETATM  505  O   HOH T 504      40.674  21.035  44.017  1.00  0.51           O  
HETATM  506  O   HOH T 505      53.312  23.638  38.175  1.00  0.51           O  
HETATM  507  O   HOH T 506      51.792 -12.201  -4.938  1.00  0.51           O  
HETATM  508  O   HOH T 507      34.108  -6.425   7.361  1.00  0.51           O  
HETATM  509  O   HOH T 508      82.618   0.139  21.957  1.00  0.51           O  
HETATM  510  O   HOH T 509      91.586  -0.013  31.774  1.00  0.51           O  
HETATM  511  O   HOH T 510      56.090  18.099  22.455  1.00  0.51           O  
HETATM  512  O   HOH T 511      58.309  12.258  -3.399  1.00  0.51           O  
HETATM  513  O   HOH T 512      92.386  -1.588  29.711  1.00  0.51           O  
HETATM  514  O   HOH T 513      56.179  13.749  20.916  1.00  0.51           O  
HETATM  515  O   HOH T 514      60.851   6.349  21.987  1.00  0.51           O  
HETATM  516  O   HOH T 515      73.596  20.631  -6.590  1.00  0.51           O  
HETATM  517  O   HOH T 516      87.568  25.731  23.021  1.00  0.51           O  
HETATM  518  O   HOH T 517      76.134   9.392  16.980  1.00  0.52           O  
HETATM  519  O   HOH T 518      54.974  12.090   5.579  1.00  0.52           O  
HETATM  520  O   HOH T 519      76.728  12.894  29.019  1.00  0.52           O  
HETATM  521  O   HOH T 520      87.384  -1.360  27.630  1.00  0.52           O  
HETATM  522  O   HOH T 521      64.019  -6.595   7.173  1.00  0.52           O  
HETATM  523  O   HOH T 522      77.349  17.760  18.634  1.00  0.52           O  
HETATM  524  O   HOH T 523      42.885  -3.080  26.145  1.00  0.52           O  
HETATM  525  O   HOH T 524      55.923 -11.541   5.700  1.00  0.52           O  
HETATM  526  O   HOH T 525      52.133  -1.594  22.748  1.00  0.52           O  
HETATM  527  O   HOH T 526      84.032   4.846  17.740  1.00  0.52           O  
HETATM  528  O   HOH T 527      64.034  15.379  17.791  1.00  0.52           O  
HETATM  529  O   HOH T 528      45.847  -3.484  41.629  1.00  0.52           O  
HETATM  530  O   HOH T 529      44.013   1.119  34.192  1.00  0.52           O  
HETATM  531  O   HOH T 530      77.894  25.830   9.700  1.00  0.52           O  
HETATM  532  O   HOH T 531     105.409  16.082  36.635  1.00  0.52           O  
HETATM  533  O   HOH T 532      58.583  13.959  16.414  1.00  0.52           O  
HETATM  534  O   HOH T 533      71.838  18.367 -14.569  1.00  0.52           O  
HETATM  535  O   HOH T 534      54.174 -11.100 -13.132  1.00  0.52           O  
HETATM  536  O   HOH T 535      30.423  15.776  29.336  1.00  0.52           O  
HETATM  537  O   HOH T 536      72.339  27.890  -1.344  1.00  0.52           O  
HETATM  538  O   HOH T 537     100.435  12.137  47.169  1.00  0.52           O  
HETATM  539  O   HOH T 538      58.585   9.724  41.492  1.00  0.52           O  
HETATM  540  O   HOH T 539      66.450  16.952  17.882  1.00  0.52           O  
HETATM  541  O   HOH T 540      43.993  18.834  23.573  1.00  0.53           O  
HETATM  542  O   HOH T 541      98.151  -2.332  17.306  1.00  0.53           O  
HETATM  543  O   HOH T 542      73.588  17.636  29.423  1.00  0.53           O  
HETATM  544  O   HOH T 543      29.144  25.858  31.059  1.00  0.53           O  
HETATM  545  O   HOH T 544      57.480  17.615 -13.839  1.00  0.53           O  
HETATM  546  O   HOH T 545      57.198  22.474 -18.954  1.00  0.53           O  
HETATM  547  O   HOH T 546      97.194  23.125  23.202  1.00  0.53           O  
HETATM  548  O   HOH T 547      59.949  18.663   8.977  1.00  0.53           O  
HETATM  549  O   HOH T 548      65.030  -1.879   3.728  1.00  0.53           O  
HETATM  550  O   HOH T 549      55.148   5.645  41.661  1.00  0.53           O  
HETATM  551  O   HOH T 550      57.204  20.350   4.822  1.00  0.53           O  
HETATM  552  O   HOH T 551      58.927  19.807 -16.989  1.00  0.53           O  
HETATM  553  O   HOH T 552      63.401   0.656  12.166  1.00  0.53           O  
HETATM  554  O   HOH T 553      96.182  -1.094  21.276  1.00  0.53           O  
HETATM  555  O   HOH T 554      69.136  20.317  13.044  1.00  0.53           O  
HETATM  556  O   HOH T 555      58.041   6.660  36.323  1.00  0.53           O  
HETATM  557  O   HOH T 556      63.967  17.925  17.097  1.00  0.53           O  
HETATM  558  O   HOH T 557      55.156   4.883 -11.524  1.00  0.53           O  
HETATM  559  O   HOH T 558     101.467  18.683  41.257  1.00  0.53           O  
HETATM  560  O   HOH T 559      41.234  -1.471  27.631  1.00  0.53           O  
HETATM  561  O   HOH T 560      99.780   1.656  27.421  1.00  0.54           O  
HETATM  562  O   HOH T 561     100.594  14.549  20.668  1.00  0.54           O  
HETATM  563  O   HOH T 562      58.238   5.309  30.678  1.00  0.54           O  
HETATM  564  O   HOH T 563      57.220  12.995  23.413  1.00  0.54           O  
HETATM  565  O   HOH T 564      74.637  15.201  24.116  1.00  0.54           O  
HETATM  566  O   HOH T 565      56.057  23.946  32.404  1.00  0.54           O  
HETATM  567  O   HOH T 566      88.472  -4.861  18.413  1.00  0.54           O  
HETATM  568  O   HOH T 567      41.295   6.610   3.465  1.00  0.54           O  
HETATM  569  O   HOH T 568      33.081  30.952  28.784  1.00  0.54           O  
HETATM  570  O   HOH T 569      49.367 -11.530  -3.615  1.00  0.54           O  
HETATM  571  O   HOH T 570      44.739  30.000  24.413  1.00  0.54           O  
HETATM  572  O   HOH T 571      69.564   6.464  10.658  1.00  0.54           O  
HETATM  573  O   HOH T 572      49.358  25.777  34.745  1.00  0.54           O  
HETATM  574  O   HOH T 573      59.076   2.156  18.832  1.00  0.54           O  
HETATM  575  O   HOH T 574      57.790  21.735   9.083  1.00  0.54           O  
HETATM  576  O   HOH T 575      37.058   2.410  24.036  1.00  0.54           O  
HETATM  577  O   HOH T 576      99.861   5.792  30.322  1.00  0.54           O  
HETATM  578  O   HOH T 577      54.886  -3.330 -29.039  1.00  0.54           O  
HETATM  579  O   HOH T 578      61.560  17.001  30.186  1.00  0.54           O  
HETATM  580  O   HOH T 579      93.050   0.026  34.101  1.00  0.54           O  
HETATM  581  O   HOH T 580      71.560  30.873  -7.219  1.00  0.54           O  
HETATM  582  O   HOH T 581      65.759  33.251 -10.621  1.00  0.55           O  
HETATM  583  O   HOH T 582      43.008   4.665  11.221  1.00  0.55           O  
HETATM  584  O   HOH T 583      77.028  15.499  25.601  1.00  0.55           O  
HETATM  585  O   HOH T 584      42.963  -1.026  28.011  1.00  0.55           O  
HETATM  586  O   HOH T 585      84.542  -0.953  30.344  1.00  0.55           O  
HETATM  587  O   HOH T 586     100.420  14.553  48.540  1.00  0.55           O  
HETATM  588  O   HOH T 587      45.403  -7.440 -17.095  1.00  0.55           O  
HETATM  589  O   HOH T 588      65.932   1.690  -5.527  1.00  0.55           O  
HETATM  590  O   HOH T 589      69.570  -1.938  -9.962  1.00  0.55           O  
HETATM  591  O   HOH T 590      51.857  12.215  -0.711  1.00  0.56           O  
HETATM  592  O   HOH T 591      30.495  11.255  23.196  1.00  0.56           O  
HETATM  593  O   HOH T 592      87.477  28.351  29.055  1.00  0.56           O  
HETATM  594  O   HOH T 593     103.003   5.690  36.421  1.00  0.56           O  
HETATM  595  O   HOH T 594      67.260  -2.521  -3.090  1.00  0.56           O  
HETATM  596  O   HOH T 595      51.858  12.113  10.570  1.00  0.56           O  
HETATM  597  O   HOH T 596     100.465  24.319  27.514  1.00  0.56           O  
HETATM  598  O   HOH T 597      99.971  22.990  38.003  1.00  0.56           O  
HETATM  599  O   HOH T 598      44.088   4.131   9.860  1.00  0.56           O  
HETATM  600  O   HOH T 599      73.004  26.535  28.855  1.00  0.56           O  
HETATM  601  O   HOH T 600      59.110 -16.977  -3.938  1.00  0.56           O  
HETATM  602  O   HOH T 601      42.864   1.767 -10.334  1.00  0.56           O  
HETATM  603  O   HOH T 602      32.497  -6.244   5.165  1.00  0.57           O  
HETATM  604  O   HOH T 603      53.675  13.995  14.439  1.00  0.57           O  
HETATM  605  O   HOH T 604      94.028  -1.675  27.609  1.00  0.57           O  
HETATM  606  O   HOH T 605      46.129 -12.114   2.401  1.00  0.57           O  
HETATM  607  O   HOH T 606      63.746  20.211   2.757  1.00  0.57           O  
HETATM  608  O   HOH T 607      85.021  11.332  18.443  1.00  0.57           O  
HETATM  609  O   HOH T 608      54.148  -9.322 -11.080  1.00  0.57           O  
HETATM  610  O   HOH T 609      85.230  10.274  -7.561  1.00  0.57           O  
HETATM  611  O   HOH T 610      89.853   0.854  30.214  1.00  0.57           O  
HETATM  612  O   HOH T 611      82.618  11.372   7.343  1.00  0.57           O  
HETATM  613  O   HOH T 612      87.252  12.402  19.214  1.00  0.57           O  
HETATM  614  O   HOH T 613      80.821  18.498   8.893  1.00  0.57           O  
HETATM  615  O   HOH T 614      37.221  -7.066   0.072  1.00  0.57           O  
HETATM  616  O   HOH T 615      68.916  12.869  17.230  1.00  0.58           O  
HETATM  617  O   HOH T 616      34.091  10.564  37.142  1.00  0.58           O  
HETATM  618  O   HOH T 617      80.241  14.264  33.852  1.00  0.59           O  
HETATM  619  O   HOH T 618      61.293   4.842  -3.328  1.00  0.59           O  
HETATM  620  O   HOH T 619      36.459   7.060  38.856  1.00  0.60           O  
HETATM  621  O   HOH T 620      73.682  18.741  33.161  1.00  0.60           O  
TER     622      HOH T 620 
