# Supplementary material for: Accurate Prediction of Hydration Sites of Proteins Using Energy Model With Atom Embedding
Source: Front Mol Biosci. 2021 Sep 20;8:756075. doi: 10.3389/fmolb.2021.756075 (PMC8488165; doi:10.3389/fmolb.2021.756075)
Supplement: Supplementary file 1 [file DataSheet1.ZIP › Data Sheet 1/Our_result_pdb/our_dataset_output/2X9V_watersite.pdb]

HEADER                                                        XXXX


JRNL        PMID   -1
HETATM    1  O   HOH T   0     -11.243 -10.185   3.692  1.00  0.16           O  
HETATM    2  O   HOH T   1       9.626  -8.614  25.213  1.00  0.16           O  
HETATM    3  O   HOH T   2       9.677  14.930  24.697  1.00  0.17           O  
HETATM    4  O   HOH T   3     -25.363  14.638  11.455  1.00  0.17           O  
HETATM    5  O   HOH T   4      -1.297  17.591  18.301  1.00  0.18           O  
HETATM    6  O   HOH T   5       4.492  14.666   7.936  1.00  0.18           O  
HETATM    7  O   HOH T   6     -25.838  -8.939  13.313  1.00  0.18           O  
HETATM    8  O   HOH T   7      -7.303  27.447  -6.768  1.00  0.18           O  
HETATM    9  O   HOH T   8      -5.098  -8.623  34.769  1.00  0.18           O  
HETATM   10  O   HOH T   9     -20.194  15.983  28.128  1.00  0.18           O  
HETATM   11  O   HOH T  10     -11.595  22.139  -2.197  1.00  0.18           O  
HETATM   12  O   HOH T  11       8.504 -14.128   1.341  1.00  0.19           O  
HETATM   13  O   HOH T  12       6.334  -9.612  29.602  1.00  0.19           O  
HETATM   14  O   HOH T  13      -1.729  17.508  23.310  1.00  0.19           O  
HETATM   15  O   HOH T  14     -34.424   3.406  -0.393  1.00  0.20           O  
HETATM   16  O   HOH T  15     -21.525  31.141  -1.692  1.00  0.20           O  
HETATM   17  O   HOH T  16      -8.863  18.014  30.225  1.00  0.20           O  
HETATM   18  O   HOH T  17      -2.313  15.736  28.001  1.00  0.20           O  
HETATM   19  O   HOH T  18      -6.639  -3.074  43.758  1.00  0.20           O  
HETATM   20  O   HOH T  19      -9.599  -5.505  -5.735  1.00  0.21           O  
HETATM   21  O   HOH T  20     -22.651 -10.350   8.970  1.00  0.21           O  
HETATM   22  O   HOH T  21       8.510 -12.421  -0.650  1.00  0.21           O  
HETATM   23  O   HOH T  22     -39.340  13.654  26.189  1.00  0.21           O  
HETATM   24  O   HOH T  23     -12.503  -4.742  20.381  1.00  0.21           O  
HETATM   25  O   HOH T  24     -15.247 -10.796  29.505  1.00  0.21           O  
HETATM   26  O   HOH T  25     -13.479 -11.709  15.589  1.00  0.21           O  
HETATM   27  O   HOH T  26     -17.029  -2.762  37.337  1.00  0.21           O  
HETATM   28  O   HOH T  27     -24.961  11.273  36.499  1.00  0.21           O  
HETATM   29  O   HOH T  28      14.616 -15.886  11.521  1.00  0.21           O  
HETATM   30  O   HOH T  29      -7.382  15.943  33.137  1.00  0.21           O  
HETATM   31  O   HOH T  30     -27.209  -8.191  -6.876  1.00  0.22           O  
HETATM   32  O   HOH T  31     -12.686  10.743  38.113  1.00  0.22           O  
HETATM   33  O   HOH T  32     -14.426  17.838  17.682  1.00  0.22           O  
HETATM   34  O   HOH T  33      -5.314  11.107  22.112  1.00  0.22           O  
HETATM   35  O   HOH T  34       8.886   9.170   0.016  1.00  0.22           O  
HETATM   36  O   HOH T  35     -10.447  10.668  14.498  1.00  0.22           O  
HETATM   37  O   HOH T  36       9.878  15.815  19.117  1.00  0.22           O  
HETATM   38  O   HOH T  37      -6.823   0.076   9.894  1.00  0.22           O  
HETATM   39  O   HOH T  38       7.732   4.060  -4.125  1.00  0.22           O  
HETATM   40  O   HOH T  39      -6.090  -3.414  47.530  1.00  0.22           O  
HETATM   41  O   HOH T  40     -44.885   7.576  33.885  1.00  0.23           O  
HETATM   42  O   HOH T  41      -4.206   2.049  56.876  1.00  0.23           O  
HETATM   43  O   HOH T  42      -2.741  10.740   6.428  1.00  0.23           O  
HETATM   44  O   HOH T  43     -45.252  -9.478  37.423  1.00  0.23           O  
HETATM   45  O   HOH T  44     -15.104 -22.714  30.640  1.00  0.23           O  
HETATM   46  O   HOH T  45      -2.518  11.377  10.311  1.00  0.23           O  
HETATM   47  O   HOH T  46      -9.096  -5.404  28.557  1.00  0.23           O  
HETATM   48  O   HOH T  47     -13.779   6.596  43.012  1.00  0.23           O  
HETATM   49  O   HOH T  48      -4.526   4.824   8.506  1.00  0.23           O  
HETATM   50  O   HOH T  49       3.300  17.290  50.185  1.00  0.23           O  
HETATM   51  O   HOH T  50      -2.944 -11.748  23.442  1.00  0.23           O  
HETATM   52  O   HOH T  51     -16.873 -12.404  37.362  1.00  0.23           O  
HETATM   53  O   HOH T  52     -35.233   7.310  45.361  1.00  0.23           O  
HETATM   54  O   HOH T  53     -47.736   3.729  12.620  1.00  0.23           O  
HETATM   55  O   HOH T  54     -18.065  -8.556  30.613  1.00  0.23           O  
HETATM   56  O   HOH T  55       2.217  14.345  40.869  1.00  0.23           O  
HETATM   57  O   HOH T  56      -2.227   4.072  -5.843  1.00  0.23           O  
HETATM   58  O   HOH T  57      -7.230  -6.374   9.614  1.00  0.23           O  
HETATM   59  O   HOH T  58     -13.267  12.315  26.140  1.00  0.23           O  
HETATM   60  O   HOH T  59     -18.270  12.309  -4.571  1.00  0.24           O  
HETATM   61  O   HOH T  60      19.200   3.918  -8.667  1.00  0.24           O  
HETATM   62  O   HOH T  61     -13.088  12.105  30.089  1.00  0.24           O  
HETATM   63  O   HOH T  62      -3.417  18.289  -1.340  1.00  0.24           O  
HETATM   64  O   HOH T  63      -4.679  -6.001   6.705  1.00  0.24           O  
HETATM   65  O   HOH T  64     -25.055  17.724 -20.877  1.00  0.24           O  
HETATM   66  O   HOH T  65      -8.476  14.370   3.053  1.00  0.24           O  
HETATM   67  O   HOH T  66     -17.332  27.735  39.952  1.00  0.24           O  
HETATM   68  O   HOH T  67      14.279  15.152  54.604  1.00  0.24           O  
HETATM   69  O   HOH T  68     -37.361  -8.594  36.886  1.00  0.24           O  
HETATM   70  O   HOH T  69     -18.906  -9.058  23.374  1.00  0.24           O  
HETATM   71  O   HOH T  70     -29.788  20.185  28.119  1.00  0.24           O  
HETATM   72  O   HOH T  71      10.063  -7.226  -2.419  1.00  0.24           O  
HETATM   73  O   HOH T  72       2.558  -0.466  -3.773  1.00  0.24           O  
HETATM   74  O   HOH T  73      11.610   9.506  -2.720  1.00  0.24           O  
HETATM   75  O   HOH T  74      13.727   8.381  51.673  1.00  0.25           O  
HETATM   76  O   HOH T  75     -31.368   2.245  24.727  1.00  0.25           O  
HETATM   77  O   HOH T  76      -6.485  20.001  42.869  1.00  0.25           O  
HETATM   78  O   HOH T  77     -28.291  13.288  -3.268  1.00  0.25           O  
HETATM   79  O   HOH T  78      -3.310   8.662  -1.600  1.00  0.25           O  
HETATM   80  O   HOH T  79     -13.918  13.060  37.523  1.00  0.25           O  
HETATM   81  O   HOH T  80     -46.281  -0.933  30.708  1.00  0.25           O  
HETATM   82  O   HOH T  81      -3.646  -5.062  17.766  1.00  0.25           O  
HETATM   83  O   HOH T  82     -11.785   1.078  28.491  1.00  0.25           O  
HETATM   84  O   HOH T  83      -2.656  17.386  45.354  1.00  0.25           O  
HETATM   85  O   HOH T  84       6.421   4.867  38.431  1.00  0.25           O  
HETATM   86  O   HOH T  85      -1.287 -11.988   9.344  1.00  0.25           O  
HETATM   87  O   HOH T  86      17.928   5.110  40.711  1.00  0.25           O  
HETATM   88  O   HOH T  87       1.130 -15.504  22.919  1.00  0.25           O  
HETATM   89  O   HOH T  88     -16.337 -11.294  19.582  1.00  0.25           O  
HETATM   90  O   HOH T  89     -11.632  -4.972  31.531  1.00  0.25           O  
HETATM   91  O   HOH T  90       1.683  -9.802   8.024  1.00  0.25           O  
HETATM   92  O   HOH T  91      15.503   1.332  12.417  1.00  0.25           O  
HETATM   93  O   HOH T  92     -19.493  -9.369  12.637  1.00  0.25           O  
HETATM   94  O   HOH T  93     -15.449  -4.871  37.365  1.00  0.26           O  
HETATM   95  O   HOH T  94     -25.839  15.795   2.293  1.00  0.26           O  
HETATM   96  O   HOH T  95     -12.341  20.443  37.358  1.00  0.26           O  
HETATM   97  O   HOH T  96      -9.575  17.447  -6.963  1.00  0.26           O  
HETATM   98  O   HOH T  97      -2.027  10.792  -0.592  1.00  0.26           O  
HETATM   99  O   HOH T  98      14.539  -7.949   7.926  1.00  0.26           O  
HETATM  100  O   HOH T  99       3.332  25.201  39.698  1.00  0.26           O  
HETATM  101  O   HOH T 100     -30.832  -6.115  30.183  1.00  0.26           O  
HETATM  102  O   HOH T 101     -37.308  -7.825  22.842  1.00  0.26           O  
HETATM  103  O   HOH T 102       0.268  34.769  38.754  1.00  0.26           O  
HETATM  104  O   HOH T 103     -28.658  20.242  30.696  1.00  0.26           O  
HETATM  105  O   HOH T 104      -4.268   0.161   8.957  1.00  0.26           O  
HETATM  106  O   HOH T 105     -27.451  12.042  39.170  1.00  0.26           O  
HETATM  107  O   HOH T 106      18.395   4.882  37.865  1.00  0.26           O  
HETATM  108  O   HOH T 107       5.139  15.122  20.118  1.00  0.26           O  
HETATM  109  O   HOH T 108     -13.608 -21.366  32.414  1.00  0.26           O  
HETATM  110  O   HOH T 109     -46.800  -4.874  28.254  1.00  0.26           O  
HETATM  111  O   HOH T 110     -25.443  16.110  16.829  1.00  0.27           O  
HETATM  112  O   HOH T 111      18.335  14.264   0.919  1.00  0.27           O  
HETATM  113  O   HOH T 112       2.657  15.174  24.064  1.00  0.27           O  
HETATM  114  O   HOH T 113     -39.060  15.169  13.470  1.00  0.27           O  
HETATM  115  O   HOH T 114      22.876  15.329  22.453  1.00  0.27           O  
HETATM  116  O   HOH T 115      10.185 -10.495  38.137  1.00  0.27           O  
HETATM  117  O   HOH T 116       9.887  17.030  33.814  1.00  0.27           O  
HETATM  118  O   HOH T 117     -42.228   1.960  19.347  1.00  0.27           O  
HETATM  119  O   HOH T 118     -34.061   4.742   8.797  1.00  0.27           O  
HETATM  120  O   HOH T 119      19.504  12.127  33.985  1.00  0.27           O  
HETATM  121  O   HOH T 120     -19.694  -9.139  -7.102  1.00  0.27           O  
HETATM  122  O   HOH T 121      28.797   5.242   2.625  1.00  0.27           O  
HETATM  123  O   HOH T 122     -42.605   4.870  24.580  1.00  0.27           O  
HETATM  124  O   HOH T 123       3.975  21.861  22.273  1.00  0.27           O  
HETATM  125  O   HOH T 124      -6.813  16.759   5.756  1.00  0.27           O  
HETATM  126  O   HOH T 125       0.796  -4.629   0.665  1.00  0.27           O  
HETATM  127  O   HOH T 126     -33.249  -5.699  -7.149  1.00  0.27           O  
HETATM  128  O   HOH T 127     -22.679  15.430  35.123  1.00  0.27           O  
HETATM  129  O   HOH T 128      -5.944  36.330  37.204  1.00  0.27           O  
HETATM  130  O   HOH T 129     -12.658   5.577  26.109  1.00  0.27           O  
HETATM  131  O   HOH T 130     -42.039   9.502  15.694  1.00  0.27           O  
HETATM  132  O   HOH T 131       3.576   7.383  63.164  1.00  0.27           O  
HETATM  133  O   HOH T 132     -23.618   6.679  41.461  1.00  0.27           O  
HETATM  134  O   HOH T 133     -25.190  18.331  35.572  1.00  0.27           O  
HETATM  135  O   HOH T 134     -38.052  14.768  21.915  1.00  0.27           O  
HETATM  136  O   HOH T 135     -33.671   8.033  47.590  1.00  0.27           O  
HETATM  137  O   HOH T 136     -31.884  17.948  15.094  1.00  0.28           O  
HETATM  138  O   HOH T 137     -22.665  16.145  17.567  1.00  0.28           O  
HETATM  139  O   HOH T 138     -10.206  -6.261  -9.591  1.00  0.28           O  
HETATM  140  O   HOH T 139       6.334  16.185  17.794  1.00  0.28           O  
HETATM  141  O   HOH T 140      24.056   2.450 -12.298  1.00  0.28           O  
HETATM  142  O   HOH T 141       2.579  -9.661  15.264  1.00  0.28           O  
HETATM  143  O   HOH T 142      23.496  -8.793  29.549  1.00  0.28           O  
HETATM  144  O   HOH T 143     -39.203  -5.432  15.494  1.00  0.28           O  
HETATM  145  O   HOH T 144       6.878  13.360   0.939  1.00  0.28           O  
HETATM  146  O   HOH T 145     -48.414   9.571  20.681  1.00  0.28           O  
HETATM  147  O   HOH T 146     -10.691   1.949  46.434  1.00  0.28           O  
HETATM  148  O   HOH T 147     -18.429  24.401  27.563  1.00  0.28           O  
HETATM  149  O   HOH T 148       9.444  16.058   0.370  1.00  0.28           O  
HETATM  150  O   HOH T 149     -33.048  11.012 -15.118  1.00  0.28           O  
HETATM  151  O   HOH T 150     -12.033  -1.587 -19.134  1.00  0.28           O  
HETATM  152  O   HOH T 151       2.382  31.379  35.396  1.00  0.28           O  
HETATM  153  O   HOH T 152     -11.254 -17.566   6.262  1.00  0.28           O  
HETATM  154  O   HOH T 153     -36.137  -4.036  -0.655  1.00  0.28           O  
HETATM  155  O   HOH T 154       2.938  19.015  47.954  1.00  0.28           O  
HETATM  156  O   HOH T 155      -7.640  -7.436  41.685  1.00  0.28           O  
HETATM  157  O   HOH T 156      12.227 -11.338  32.302  1.00  0.28           O  
HETATM  158  O   HOH T 157      20.795 -11.506   1.700  1.00  0.28           O  
HETATM  159  O   HOH T 158       3.237  -8.904  25.894  1.00  0.28           O  
HETATM  160  O   HOH T 159     -25.063 -16.554  33.497  1.00  0.28           O  
HETATM  161  O   HOH T 160     -15.528  20.764  34.567  1.00  0.29           O  
HETATM  162  O   HOH T 161      28.872   1.538 -16.808  1.00  0.29           O  
HETATM  163  O   HOH T 162      13.457  20.542  26.787  1.00  0.29           O  
HETATM  164  O   HOH T 163      -8.759  -9.640  -3.270  1.00  0.29           O  
HETATM  165  O   HOH T 164     -18.524  36.157   4.785  1.00  0.29           O  
HETATM  166  O   HOH T 165      26.171   3.873  27.186  1.00  0.29           O  
HETATM  167  O   HOH T 166      10.683   5.440  55.038  1.00  0.29           O  
HETATM  168  O   HOH T 167     -34.175   3.363  -3.185  1.00  0.29           O  
HETATM  169  O   HOH T 168     -21.558   0.063  42.409  1.00  0.29           O  
HETATM  170  O   HOH T 169      -7.856  16.891  17.956  1.00  0.29           O  
HETATM  171  O   HOH T 170      19.733   6.736  27.046  1.00  0.29           O  
HETATM  172  O   HOH T 171     -21.297   5.111   1.475  1.00  0.29           O  
HETATM  173  O   HOH T 172     -30.773 -16.920  30.906  1.00  0.29           O  
HETATM  174  O   HOH T 173      30.624  -6.375   9.708  1.00  0.29           O  
HETATM  175  O   HOH T 174     -26.918  -0.577  24.499  1.00  0.29           O  
HETATM  176  O   HOH T 175     -20.580  15.033  16.060  1.00  0.29           O  
HETATM  177  O   HOH T 176     -17.186 -15.648  15.967  1.00  0.29           O  
HETATM  178  O   HOH T 177     -25.619 -16.664  -5.014  1.00  0.29           O  
HETATM  179  O   HOH T 178     -19.265  14.437 -14.102  1.00  0.29           O  
HETATM  180  O   HOH T 179     -19.425   1.613  41.569  1.00  0.29           O  
HETATM  181  O   HOH T 180      16.835   2.589  27.199  1.00  0.29           O  
HETATM  182  O   HOH T 181     -18.863 -10.853  10.337  1.00  0.29           O  
HETATM  183  O   HOH T 182     -20.990   6.408 -31.163  1.00  0.29           O  
HETATM  184  O   HOH T 183     -13.713  14.788  -9.653  1.00  0.29           O  
HETATM  185  O   HOH T 184      25.944   1.570  18.183  1.00  0.29           O  
HETATM  186  O   HOH T 185     -19.662  21.833  13.240  1.00  0.29           O  
HETATM  187  O   HOH T 186      23.142  -5.597  22.419  1.00  0.29           O  
HETATM  188  O   HOH T 187      -8.408   0.514  51.993  1.00  0.29           O  
HETATM  189  O   HOH T 188      -0.600 -12.303  42.634  1.00  0.30           O  
HETATM  190  O   HOH T 189      29.921  -2.961   6.889  1.00  0.30           O  
HETATM  191  O   HOH T 190      -8.166 -10.888  19.325  1.00  0.30           O  
HETATM  192  O   HOH T 191      -7.447  30.471  32.972  1.00  0.30           O  
HETATM  193  O   HOH T 192       3.864 -15.730  23.585  1.00  0.30           O  
HETATM  194  O   HOH T 193     -27.647  -4.886  41.123  1.00  0.30           O  
HETATM  195  O   HOH T 194      23.500  12.223   9.702  1.00  0.30           O  
HETATM  196  O   HOH T 195      15.646 -10.657  18.416  1.00  0.30           O  
HETATM  197  O   HOH T 196      15.555  15.940  20.630  1.00  0.30           O  
HETATM  198  O   HOH T 197      -9.281  25.430  35.290  1.00  0.30           O  
HETATM  199  O   HOH T 198     -29.298   0.704  23.628  1.00  0.30           O  
HETATM  200  O   HOH T 199      -0.050  -8.010  -2.669  1.00  0.30           O  
HETATM  201  O   HOH T 200      20.176  -5.284  34.610  1.00  0.30           O  
HETATM  202  O   HOH T 201      18.860  -0.143  29.629  1.00  0.30           O  
HETATM  203  O   HOH T 202      -4.097  16.557  51.960  1.00  0.30           O  
HETATM  204  O   HOH T 203     -18.934   6.430   2.113  1.00  0.30           O  
HETATM  205  O   HOH T 204      11.861   2.004  56.704  1.00  0.30           O  
HETATM  206  O   HOH T 205       4.118  16.478  41.162  1.00  0.30           O  
HETATM  207  O   HOH T 206     -21.793   7.047 -23.478  1.00  0.30           O  
HETATM  208  O   HOH T 207     -11.350   6.004  28.505  1.00  0.30           O  
HETATM  209  O   HOH T 208     -19.739   2.904 -26.073  1.00  0.30           O  
HETATM  210  O   HOH T 209     -25.695   4.107 -18.929  1.00  0.30           O  
HETATM  211  O   HOH T 210      -5.790  24.586  -1.280  1.00  0.30           O  
HETATM  212  O   HOH T 211       3.448  -9.144  20.389  1.00  0.30           O  
HETATM  213  O   HOH T 212     -20.060  -9.099  17.753  1.00  0.30           O  
HETATM  214  O   HOH T 213      15.042   2.752  45.483  1.00  0.30           O  
HETATM  215  O   HOH T 214      -9.197   1.198  27.563  1.00  0.30           O  
HETATM  216  O   HOH T 215     -13.474  14.809   8.052  1.00  0.30           O  
HETATM  217  O   HOH T 216     -20.086  14.449  -5.084  1.00  0.30           O  
HETATM  218  O   HOH T 217      12.840  -8.791  31.542  1.00  0.30           O  
HETATM  219  O   HOH T 218     -32.164  -8.553  29.446  1.00  0.30           O  
HETATM  220  O   HOH T 219     -10.791   8.174  50.032  1.00  0.30           O  
HETATM  221  O   HOH T 220      27.978 -12.254  -3.549  1.00  0.30           O  
HETATM  222  O   HOH T 221      -3.008  17.932  -6.543  1.00  0.30           O  
HETATM  223  O   HOH T 222       2.527 -10.120  28.254  1.00  0.30           O  
HETATM  224  O   HOH T 223     -26.449 -19.776  31.673  1.00  0.30           O  
HETATM  225  O   HOH T 224      16.819  13.910  49.968  1.00  0.31           O  
HETATM  226  O   HOH T 225      -3.315  33.302  40.044  1.00  0.31           O  
HETATM  227  O   HOH T 226     -34.969  -1.093   8.004  1.00  0.31           O  
HETATM  228  O   HOH T 227      -6.517 -17.172  34.019  1.00  0.31           O  
HETATM  229  O   HOH T 228     -17.492  14.878  11.611  1.00  0.31           O  
HETATM  230  O   HOH T 229      20.032  -2.462  38.913  1.00  0.31           O  
HETATM  231  O   HOH T 230      18.580  11.426  36.472  1.00  0.31           O  
HETATM  232  O   HOH T 231     -12.809  13.246 -11.842  1.00  0.31           O  
HETATM  233  O   HOH T 232     -17.525 -10.709 -17.789  1.00  0.31           O  
HETATM  234  O   HOH T 233      28.408 -12.541   0.747  1.00  0.31           O  
HETATM  235  O   HOH T 234     -43.732   0.790  21.276  1.00  0.31           O  
HETATM  236  O   HOH T 235      12.376  14.994  39.568  1.00  0.31           O  
HETATM  237  O   HOH T 236     -19.020  16.384 -11.984  1.00  0.31           O  
HETATM  238  O   HOH T 237      21.529  -9.189  -9.907  1.00  0.31           O  
HETATM  239  O   HOH T 238     -20.502 -31.567  34.278  1.00  0.31           O  
HETATM  240  O   HOH T 239     -25.176 -11.482  37.878  1.00  0.31           O  
HETATM  241  O   HOH T 240     -28.778   8.895  44.499  1.00  0.31           O  
HETATM  242  O   HOH T 241      21.212  -8.570  15.500  1.00  0.31           O  
HETATM  243  O   HOH T 242     -39.583  -9.308   8.944  1.00  0.31           O  
HETATM  244  O   HOH T 243      29.892  -0.335   7.887  1.00  0.31           O  
HETATM  245  O   HOH T 244      -3.259   4.722  10.981  1.00  0.31           O  
HETATM  246  O   HOH T 245      27.992  -6.519  -7.938  1.00  0.31           O  
HETATM  247  O   HOH T 246     -17.720 -11.193 -10.840  1.00  0.31           O  
HETATM  248  O   HOH T 247       3.561  -9.224  -3.208  1.00  0.32           O  
HETATM  249  O   HOH T 248     -10.359 -12.253  -5.088  1.00  0.32           O  
HETATM  250  O   HOH T 249     -26.821 -10.278  -5.061  1.00  0.32           O  
HETATM  251  O   HOH T 250       6.123  18.115  40.349  1.00  0.32           O  
HETATM  252  O   HOH T 251       0.972  19.579  46.023  1.00  0.32           O  
HETATM  253  O   HOH T 252      18.459  -0.008  32.378  1.00  0.32           O  
HETATM  254  O   HOH T 253      -3.920  27.226   4.626  1.00  0.32           O  
HETATM  255  O   HOH T 254     -35.872  -0.567  -4.713  1.00  0.32           O  
HETATM  256  O   HOH T 255      17.843   4.954  28.087  1.00  0.32           O  
HETATM  257  O   HOH T 256     -22.084   3.631  -0.713  1.00  0.32           O  
HETATM  258  O   HOH T 257      21.442 -11.128  14.488  1.00  0.32           O  
HETATM  259  O   HOH T 258     -26.174 -27.231  25.551  1.00  0.32           O  
HETATM  260  O   HOH T 259      -9.684  32.490   7.018  1.00  0.32           O  
HETATM  261  O   HOH T 260     -12.907  34.837   1.216  1.00  0.32           O  
HETATM  262  O   HOH T 261      28.398  -4.880  -4.015  1.00  0.32           O  
HETATM  263  O   HOH T 262     -22.289 -15.265   5.341  1.00  0.32           O  
HETATM  264  O   HOH T 263     -43.703   3.849  52.201  1.00  0.32           O  
HETATM  265  O   HOH T 264      10.770  -1.668  13.032  1.00  0.33           O  
HETATM  266  O   HOH T 265      30.314  -5.382   5.488  1.00  0.33           O  
HETATM  267  O   HOH T 266       6.523 -14.822  42.383  1.00  0.33           O  
HETATM  268  O   HOH T 267       1.247  -8.142  48.897  1.00  0.33           O  
HETATM  269  O   HOH T 268     -33.908   4.327  -5.754  1.00  0.33           O  
HETATM  270  O   HOH T 269     -15.853 -15.432  -4.013  1.00  0.33           O  
HETATM  271  O   HOH T 270     -19.488 -13.285  22.774  1.00  0.33           O  
HETATM  272  O   HOH T 271      -4.544  20.569  -2.431  1.00  0.33           O  
HETATM  273  O   HOH T 272       0.564 -14.542   1.751  1.00  0.33           O  
HETATM  274  O   HOH T 273      14.031 -14.125  25.952  1.00  0.33           O  
HETATM  275  O   HOH T 274     -30.226 -14.687  12.974  1.00  0.33           O  
HETATM  276  O   HOH T 275      25.352 -12.262  -4.163  1.00  0.33           O  
HETATM  277  O   HOH T 276      -9.455 -16.505  11.513  1.00  0.33           O  
HETATM  278  O   HOH T 277      -9.990  12.990 -11.662  1.00  0.33           O  
HETATM  279  O   HOH T 278       2.025 -12.455  41.402  1.00  0.33           O  
HETATM  280  O   HOH T 279     -13.161   6.421   9.744  1.00  0.33           O  
HETATM  281  O   HOH T 280      24.474   0.174  20.146  1.00  0.33           O  
HETATM  282  O   HOH T 281     -29.065  -9.562   6.764  1.00  0.33           O  
HETATM  283  O   HOH T 282     -40.431  12.882  14.445  1.00  0.33           O  
HETATM  284  O   HOH T 283     -40.078  18.629  10.037  1.00  0.33           O  
HETATM  285  O   HOH T 284      -0.123  18.647   0.970  1.00  0.33           O  
HETATM  286  O   HOH T 285      11.885  -8.353  54.378  1.00  0.33           O  
HETATM  287  O   HOH T 286     -28.238 -10.665  -7.422  1.00  0.33           O  
HETATM  288  O   HOH T 287      -9.962 -11.298  21.457  1.00  0.33           O  
HETATM  289  O   HOH T 288     -28.690  -9.426  -3.080  1.00  0.34           O  
HETATM  290  O   HOH T 289     -26.937   0.510 -15.223  1.00  0.34           O  
HETATM  291  O   HOH T 290     -47.061   0.060  16.303  1.00  0.34           O  
HETATM  292  O   HOH T 291     -16.764 -16.290   7.170  1.00  0.34           O  
HETATM  293  O   HOH T 292     -17.633  29.857  -5.182  1.00  0.34           O  
HETATM  294  O   HOH T 293     -33.206 -10.449  27.709  1.00  0.34           O  
HETATM  295  O   HOH T 294      -3.395  24.716  38.674  1.00  0.34           O  
HETATM  296  O   HOH T 295     -46.104   1.428  29.216  1.00  0.34           O  
HETATM  297  O   HOH T 296     -22.084  16.211  -4.454  1.00  0.34           O  
HETATM  298  O   HOH T 297      22.204  13.786  13.722  1.00  0.34           O  
HETATM  299  O   HOH T 298     -28.610 -12.213   6.507  1.00  0.34           O  
HETATM  300  O   HOH T 299      14.566 -10.072  15.985  1.00  0.34           O  
HETATM  301  O   HOH T 300      21.929   2.762  43.327  1.00  0.34           O  
HETATM  302  O   HOH T 301     -12.263  17.393   8.200  1.00  0.34           O  
HETATM  303  O   HOH T 302     -34.114   0.829   9.720  1.00  0.34           O  
HETATM  304  O   HOH T 303     -34.075  16.546  34.826  1.00  0.34           O  
HETATM  305  O   HOH T 304      -6.311 -11.896  16.754  1.00  0.34           O  
HETATM  306  O   HOH T 305      20.433   9.968  32.474  1.00  0.34           O  
HETATM  307  O   HOH T 306      -0.591  -6.889   0.466  1.00  0.34           O  
HETATM  308  O   HOH T 307     -23.168  -4.011 -26.637  1.00  0.34           O  
HETATM  309  O   HOH T 308      23.802   3.515  33.825  1.00  0.34           O  
HETATM  310  O   HOH T 309     -29.555   5.046 -14.385  1.00  0.34           O  
HETATM  311  O   HOH T 310      -4.992  14.157  55.742  1.00  0.34           O  
HETATM  312  O   HOH T 311      16.829 -11.793  10.486  1.00  0.34           O  
HETATM  313  O   HOH T 312     -10.806  -9.884 -10.439  1.00  0.34           O  
HETATM  314  O   HOH T 313      17.627   1.741  46.096  1.00  0.34           O  
HETATM  315  O   HOH T 314     -12.939   8.481  44.783  1.00  0.34           O  
HETATM  316  O   HOH T 315      17.149  -8.727   7.938  1.00  0.34           O  
HETATM  317  O   HOH T 316       7.099   0.576  66.470  1.00  0.34           O  
HETATM  318  O   HOH T 317     -51.949   8.944  29.099  1.00  0.34           O  
HETATM  319  O   HOH T 318     -22.005  32.701   2.189  1.00  0.34           O  
HETATM  320  O   HOH T 319     -27.666  15.595  -4.637  1.00  0.34           O  
HETATM  321  O   HOH T 320      13.275  -0.222  13.326  1.00  0.34           O  
HETATM  322  O   HOH T 321      15.774  13.850  52.581  1.00  0.34           O  
HETATM  323  O   HOH T 322      -4.080  19.532  44.210  1.00  0.34           O  
HETATM  324  O   HOH T 323      -7.725  17.552  20.681  1.00  0.34           O  
HETATM  325  O   HOH T 324     -12.146  26.816  -8.049  1.00  0.35           O  
HETATM  326  O   HOH T 325      21.012  10.287  15.647  1.00  0.35           O  
HETATM  327  O   HOH T 326     -35.675  -7.529   1.302  1.00  0.35           O  
HETATM  328  O   HOH T 327     -20.747 -16.415  15.071  1.00  0.35           O  
HETATM  329  O   HOH T 328     -43.986  11.415  21.972  1.00  0.35           O  
HETATM  330  O   HOH T 329     -43.837   6.526  41.311  1.00  0.35           O  
HETATM  331  O   HOH T 330      -6.795  -3.090  -9.463  1.00  0.35           O  
HETATM  332  O   HOH T 331       2.867   7.834  34.829  1.00  0.35           O  
HETATM  333  O   HOH T 332     -28.619  -7.404  40.914  1.00  0.35           O  
HETATM  334  O   HOH T 333     -21.641  -0.855 -21.834  1.00  0.35           O  
HETATM  335  O   HOH T 334      -7.184   0.347 -23.962  1.00  0.35           O  
HETATM  336  O   HOH T 335       5.955  18.438  34.096  1.00  0.35           O  
HETATM  337  O   HOH T 336      12.334  20.536  15.708  1.00  0.35           O  
HETATM  338  O   HOH T 337     -29.949 -11.888  21.721  1.00  0.35           O  
HETATM  339  O   HOH T 338     -25.340 -21.730  36.953  1.00  0.35           O  
HETATM  340  O   HOH T 339      13.913 -12.439  17.062  1.00  0.35           O  
HETATM  341  O   HOH T 340       5.886  18.269  58.417  1.00  0.35           O  
HETATM  342  O   HOH T 341     -11.731  28.693  30.343  1.00  0.35           O  
HETATM  343  O   HOH T 342     -30.784  -7.617  39.261  1.00  0.35           O  
HETATM  344  O   HOH T 343      20.676   1.284  31.221  1.00  0.35           O  
HETATM  345  O   HOH T 344      15.554  14.523  47.487  1.00  0.35           O  
HETATM  346  O   HOH T 345     -36.392   6.524  14.006  1.00  0.35           O  
HETATM  347  O   HOH T 346      -1.715 -14.867  42.886  1.00  0.35           O  
HETATM  348  O   HOH T 347     -44.121   4.986  33.122  1.00  0.35           O  
HETATM  349  O   HOH T 348     -16.463  29.731  -7.647  1.00  0.35           O  
HETATM  350  O   HOH T 349       3.827   5.680  66.534  1.00  0.35           O  
HETATM  351  O   HOH T 350     -14.998  19.863  37.142  1.00  0.35           O  
HETATM  352  O   HOH T 351      -7.486  27.422  11.227  1.00  0.35           O  
HETATM  353  O   HOH T 352     -28.612  16.780 -13.518  1.00  0.35           O  
HETATM  354  O   HOH T 353     -31.712  15.274  14.397  1.00  0.35           O  
HETATM  355  O   HOH T 354      24.801  14.636   9.546  1.00  0.36           O  
HETATM  356  O   HOH T 355     -35.874  12.344  20.253  1.00  0.36           O  
HETATM  357  O   HOH T 356     -47.788  10.764  26.923  1.00  0.36           O  
HETATM  358  O   HOH T 357     -13.849  17.120  12.632  1.00  0.36           O  
HETATM  359  O   HOH T 358      -9.407  -2.274 -19.863  1.00  0.36           O  
HETATM  360  O   HOH T 359     -37.645 -10.138  24.374  1.00  0.36           O  
HETATM  361  O   HOH T 360      17.637   4.297 -10.915  1.00  0.36           O  
HETATM  362  O   HOH T 361      28.987  -3.836  -0.197  1.00  0.36           O  
HETATM  363  O   HOH T 362     -15.325   2.282  43.590  1.00  0.36           O  
HETATM  364  O   HOH T 363     -19.627  17.794  35.668  1.00  0.36           O  
HETATM  365  O   HOH T 364      -7.614  17.588  14.657  1.00  0.36           O  
HETATM  366  O   HOH T 365      29.059 -10.129  11.585  1.00  0.36           O  
HETATM  367  O   HOH T 366     -24.402   5.855 -23.816  1.00  0.36           O  
HETATM  368  O   HOH T 367     -20.860 -17.239   4.181  1.00  0.36           O  
HETATM  369  O   HOH T 368      23.353  15.128  29.621  1.00  0.36           O  
HETATM  370  O   HOH T 369       0.903  13.124  24.301  1.00  0.36           O  
HETATM  371  O   HOH T 370       4.033  15.418  -0.082  1.00  0.36           O  
HETATM  372  O   HOH T 371      29.825   6.482  -3.930  1.00  0.36           O  
HETATM  373  O   HOH T 372       3.014  23.028   8.222  1.00  0.36           O  
HETATM  374  O   HOH T 373     -10.854  11.374  20.395  1.00  0.36           O  
HETATM  375  O   HOH T 374      -3.814  15.318  -7.053  1.00  0.36           O  
HETATM  376  O   HOH T 375     -29.355 -24.201  23.882  1.00  0.36           O  
HETATM  377  O   HOH T 376     -23.331  11.127  -7.822  1.00  0.36           O  
HETATM  378  O   HOH T 377      -7.334  16.619 -13.968  1.00  0.36           O  
HETATM  379  O   HOH T 378     -27.457 -23.844  27.952  1.00  0.36           O  
HETATM  380  O   HOH T 379      24.289 -11.207  30.686  1.00  0.36           O  
HETATM  381  O   HOH T 380      31.521  -9.902  -2.513  1.00  0.36           O  
HETATM  382  O   HOH T 381     -13.790  34.440  -1.380  1.00  0.36           O  
HETATM  383  O   HOH T 382      28.535   4.051  -3.459  1.00  0.36           O  
HETATM  384  O   HOH T 383     -45.901   3.288  34.327  1.00  0.36           O  
HETATM  385  O   HOH T 384     -45.285  -1.411  42.138  1.00  0.37           O  
HETATM  386  O   HOH T 385     -41.312   4.720  51.250  1.00  0.37           O  
HETATM  387  O   HOH T 386      -8.664  19.799  -5.640  1.00  0.37           O  
HETATM  388  O   HOH T 387     -45.644  -8.622  39.972  1.00  0.37           O  
HETATM  389  O   HOH T 388      -2.986  12.605  -6.953  1.00  0.37           O  
HETATM  390  O   HOH T 389      31.776   9.933   9.114  1.00  0.37           O  
HETATM  391  O   HOH T 390       2.168  17.916  57.594  1.00  0.37           O  
HETATM  392  O   HOH T 391       2.124  34.407  32.765  1.00  0.37           O  
HETATM  393  O   HOH T 392     -10.041  -8.747  41.018  1.00  0.37           O  
HETATM  394  O   HOH T 393      -9.986  17.430 -11.000  1.00  0.37           O  
HETATM  395  O   HOH T 394     -20.725 -18.683  20.792  1.00  0.37           O  
HETATM  396  O   HOH T 395      20.934   7.570  33.838  1.00  0.37           O  
HETATM  397  O   HOH T 396     -16.266  15.092   8.983  1.00  0.37           O  
HETATM  398  O   HOH T 397      -0.670  17.891  -1.593  1.00  0.37           O  
HETATM  399  O   HOH T 398     -18.059 -11.044  21.745  1.00  0.37           O  
HETATM  400  O   HOH T 399     -11.412  26.772  -3.401  1.00  0.37           O  
HETATM  401  O   HOH T 400      11.680  17.452  40.631  1.00  0.37           O  
HETATM  402  O   HOH T 401      -5.800  11.344  16.828  1.00  0.37           O  
HETATM  403  O   HOH T 402      -8.837  -5.594  16.771  1.00  0.37           O  
HETATM  404  O   HOH T 403       7.103  16.227  64.314  1.00  0.37           O  
HETATM  405  O   HOH T 404      -7.446  -5.376  21.408  1.00  0.37           O  
HETATM  406  O   HOH T 405      -8.173   9.435  13.308  1.00  0.37           O  
HETATM  407  O   HOH T 406      22.521  -1.458 -15.383  1.00  0.37           O  
HETATM  408  O   HOH T 407     -23.479 -15.343  -9.152  1.00  0.37           O  
HETATM  409  O   HOH T 408     -21.250  12.574  -6.819  1.00  0.37           O  
HETATM  410  O   HOH T 409     -47.116   0.315  25.206  1.00  0.37           O  
HETATM  411  O   HOH T 410     -23.511  14.963   0.863  1.00  0.37           O  
HETATM  412  O   HOH T 411      -1.341   1.715  -6.878  1.00  0.37           O  
HETATM  413  O   HOH T 412     -41.362   9.626  44.607  1.00  0.37           O  
HETATM  414  O   HOH T 413     -31.726 -22.828  23.865  1.00  0.37           O  
HETATM  415  O   HOH T 414     -17.563  32.489   6.037  1.00  0.37           O  
HETATM  416  O   HOH T 415       8.163   2.822  61.355  1.00  0.37           O  
HETATM  417  O   HOH T 416      -3.409 -14.883   1.622  1.00  0.38           O  
HETATM  418  O   HOH T 417      -8.313 -12.418  -3.338  1.00  0.38           O  
HETATM  419  O   HOH T 418     -31.510 -12.758  19.652  1.00  0.38           O  
HETATM  420  O   HOH T 419     -33.403  -9.133  21.247  1.00  0.38           O  
HETATM  421  O   HOH T 420       0.403  15.878  27.298  1.00  0.38           O  
HETATM  422  O   HOH T 421      -0.063  31.139  24.005  1.00  0.38           O  
HETATM  423  O   HOH T 422      -6.746  -1.397  38.837  1.00  0.38           O  
HETATM  424  O   HOH T 423     -22.566 -14.478  36.453  1.00  0.38           O  
HETATM  425  O   HOH T 424     -38.453  15.587  24.474  1.00  0.38           O  
HETATM  426  O   HOH T 425       8.956   6.405  -4.956  1.00  0.38           O  
HETATM  427  O   HOH T 426     -33.051   1.130  50.907  1.00  0.38           O  
HETATM  428  O   HOH T 427     -12.937  -1.371  47.748  1.00  0.38           O  
HETATM  429  O   HOH T 428       4.171  -9.620  17.645  1.00  0.38           O  
HETATM  430  O   HOH T 429      29.894   0.118   2.611  1.00  0.38           O  
HETATM  431  O   HOH T 430     -10.697  27.364  33.773  1.00  0.38           O  
HETATM  432  O   HOH T 431     -36.439   7.712  47.773  1.00  0.38           O  
HETATM  433  O   HOH T 432      -7.651  22.330  -6.213  1.00  0.38           O  
HETATM  434  O   HOH T 433     -22.749 -18.729  37.087  1.00  0.38           O  
HETATM  435  O   HOH T 434       5.978  24.272   5.018  1.00  0.38           O  
HETATM  436  O   HOH T 435     -17.589   3.478  42.367  1.00  0.38           O  
HETATM  437  O   HOH T 436     -18.304  15.444 -16.607  1.00  0.38           O  
HETATM  438  O   HOH T 437      -5.906 -10.014  43.813  1.00  0.38           O  
HETATM  439  O   HOH T 438       6.937  14.013  62.821  1.00  0.38           O  
HETATM  440  O   HOH T 439     -22.403  18.247  35.186  1.00  0.38           O  
HETATM  441  O   HOH T 440      16.450  18.650  20.139  1.00  0.38           O  
HETATM  442  O   HOH T 441     -25.019   9.133  41.409  1.00  0.38           O  
HETATM  443  O   HOH T 442      -9.535  -3.304  -0.985  1.00  0.38           O  
HETATM  444  O   HOH T 443     -18.655  30.705   4.222  1.00  0.38           O  
HETATM  445  O   HOH T 444      14.880  19.557  24.464  1.00  0.38           O  
HETATM  446  O   HOH T 445     -40.199   1.685  17.578  1.00  0.38           O  
HETATM  447  O   HOH T 446     -20.304 -29.020  33.045  1.00  0.39           O  
HETATM  448  O   HOH T 447       5.777   6.230  36.222  1.00  0.39           O  
HETATM  449  O   HOH T 448     -36.506  -5.371  29.459  1.00  0.39           O  
HETATM  450  O   HOH T 449       5.772   7.451   3.800  1.00  0.39           O  
HETATM  451  O   HOH T 450      30.801   2.015 -14.766  1.00  0.39           O  
HETATM  452  O   HOH T 451       9.984  -9.312  -4.274  1.00  0.39           O  
HETATM  453  O   HOH T 452       5.206  14.791  43.140  1.00  0.39           O  
HETATM  454  O   HOH T 453     -17.135  21.517  14.518  1.00  0.39           O  
HETATM  455  O   HOH T 454     -12.818 -11.810 -10.679  1.00  0.39           O  
HETATM  456  O   HOH T 455      19.599  -7.551   8.684  1.00  0.39           O  
HETATM  457  O   HOH T 456      22.311  14.421  10.946  1.00  0.39           O  
HETATM  458  O   HOH T 457     -35.688  -6.459  18.577  1.00  0.39           O  
HETATM  459  O   HOH T 458       9.140 -24.442  17.089  1.00  0.39           O  
HETATM  460  O   HOH T 459      18.413  16.775  15.045  1.00  0.39           O  
HETATM  461  O   HOH T 460       6.626  16.200   0.709  1.00  0.39           O  
HETATM  462  O   HOH T 461     -30.807  -9.342  22.544  1.00  0.39           O  
HETATM  463  O   HOH T 462      31.144  -7.139  -2.446  1.00  0.39           O  
HETATM  464  O   HOH T 463      28.842  -1.657  -8.858  1.00  0.39           O  
HETATM  465  O   HOH T 464      27.688  -2.174  20.266  1.00  0.39           O  
HETATM  466  O   HOH T 465       5.364  33.187  37.460  1.00  0.39           O  
HETATM  467  O   HOH T 466       1.490  21.584  21.027  1.00  0.39           O  
HETATM  468  O   HOH T 467      11.117  -6.024  46.237  1.00  0.39           O  
HETATM  469  O   HOH T 468     -45.743  12.719  30.228  1.00  0.39           O  
HETATM  470  O   HOH T 469      10.471  -6.804  -5.040  1.00  0.39           O  
HETATM  471  O   HOH T 470      -1.971  24.558  41.083  1.00  0.39           O  
HETATM  472  O   HOH T 471       0.536  30.918  37.468  1.00  0.39           O  
HETATM  473  O   HOH T 472      -7.503  23.207  39.667  1.00  0.39           O  
HETATM  474  O   HOH T 473     -46.295  11.384  20.405  1.00  0.39           O  
HETATM  475  O   HOH T 474     -14.687  -1.594 -26.591  1.00  0.39           O  
HETATM  476  O   HOH T 475     -15.690  -2.613 -24.243  1.00  0.39           O  
HETATM  477  O   HOH T 476     -20.622   7.422 -25.968  1.00  0.39           O  
HETATM  478  O   HOH T 477     -20.185  -9.330  20.766  1.00  0.39           O  
HETATM  479  O   HOH T 478      -7.605 -13.886  -1.091  1.00  0.40           O  
HETATM  480  O   HOH T 479      -7.738  34.185  36.820  1.00  0.40           O  
HETATM  481  O   HOH T 480     -43.625   8.368  48.481  1.00  0.40           O  
HETATM  482  O   HOH T 481       7.474  16.294  34.973  1.00  0.40           O  
HETATM  483  O   HOH T 482     -17.965   4.736 -27.318  1.00  0.40           O  
HETATM  484  O   HOH T 483     -21.815   9.178  32.972  1.00  0.40           O  
HETATM  485  O   HOH T 484       9.859  -1.400  58.962  1.00  0.40           O  
HETATM  486  O   HOH T 485       2.359  18.528  52.547  1.00  0.40           O  
HETATM  487  O   HOH T 486      -7.977 -10.317  42.109  1.00  0.40           O  
HETATM  488  O   HOH T 487     -25.805  18.502   3.042  1.00  0.40           O  
HETATM  489  O   HOH T 488     -12.680   6.436  48.976  1.00  0.40           O  
HETATM  490  O   HOH T 489     -20.581 -29.751  29.262  1.00  0.40           O  
HETATM  491  O   HOH T 490       7.204   4.820  -6.637  1.00  0.40           O  
HETATM  492  O   HOH T 491     -20.495  19.493  -0.165  1.00  0.40           O  
HETATM  493  O   HOH T 492     -31.324  22.512 -19.247  1.00  0.40           O  
HETATM  494  O   HOH T 493      30.101  -3.269  21.323  1.00  0.40           O  
HETATM  495  O   HOH T 494      25.119  -0.857 -14.553  1.00  0.40           O  
HETATM  496  O   HOH T 495     -45.929   2.202  17.612  1.00  0.40           O  
HETATM  497  O   HOH T 496     -45.656   1.419  36.415  1.00  0.40           O  
HETATM  498  O   HOH T 497     -44.478 -10.806  30.024  1.00  0.40           O  
HETATM  499  O   HOH T 498     -17.128  18.901  35.683  1.00  0.40           O  
HETATM  500  O   HOH T 499      -1.001  20.125  27.494  1.00  0.40           O  
HETATM  501  O   HOH T 500     -44.697  11.610  24.668  1.00  0.40           O  
HETATM  502  O   HOH T 501     -20.180  28.333   3.935  1.00  0.40           O  
HETATM  503  O   HOH T 502     -11.549  -2.016 -21.728  1.00  0.40           O  
HETATM  504  O   HOH T 503     -22.846 -30.699  30.488  1.00  0.40           O  
HETATM  505  O   HOH T 504     -47.166  13.890  36.542  1.00  0.40           O  
HETATM  506  O   HOH T 505     -21.603  -3.234 -28.730  1.00  0.40           O  
HETATM  507  O   HOH T 506     -34.063  17.356  20.904  1.00  0.40           O  
HETATM  508  O   HOH T 507      15.845  -0.372  14.401  1.00  0.40           O  
HETATM  509  O   HOH T 508     -12.426   1.404  52.628  1.00  0.40           O  
HETATM  510  O   HOH T 509     -21.599   1.888 -22.210  1.00  0.40           O  
HETATM  511  O   HOH T 510      -5.878   7.095  64.242  1.00  0.40           O  
HETATM  512  O   HOH T 511     -48.689  -6.200  33.096  1.00  0.40           O  
HETATM  513  O   HOH T 512      -9.851  -0.629  24.005  1.00  0.40           O  
HETATM  514  O   HOH T 513      22.285  -3.257  35.212  1.00  0.40           O  
HETATM  515  O   HOH T 514      25.163 -13.153   7.161  1.00  0.40           O  
HETATM  516  O   HOH T 515       2.899 -16.205   1.965  1.00  0.40           O  
HETATM  517  O   HOH T 516     -35.519   1.501  52.080  1.00  0.40           O  
HETATM  518  O   HOH T 517     -23.366 -17.824   5.318  1.00  0.40           O  
HETATM  519  O   HOH T 518      19.643   1.334  42.584  1.00  0.40           O  
HETATM  520  O   HOH T 519      -8.256  -3.965 -18.025  1.00  0.41           O  
HETATM  521  O   HOH T 520     -43.681   3.383  22.421  1.00  0.41           O  
HETATM  522  O   HOH T 521      -9.500  -0.518  47.298  1.00  0.41           O  
HETATM  523  O   HOH T 522      -8.979   3.873  26.648  1.00  0.41           O  
HETATM  524  O   HOH T 523     -31.694   9.813  46.966  1.00  0.41           O  
HETATM  525  O   HOH T 524     -31.396 -12.245  26.698  1.00  0.41           O  
HETATM  526  O   HOH T 525      29.147   1.574   9.734  1.00  0.41           O  
HETATM  527  O   HOH T 526       5.752   3.468  60.169  1.00  0.41           O  
HETATM  528  O   HOH T 527     -16.284 -22.010  33.073  1.00  0.41           O  
HETATM  529  O   HOH T 528       5.420  19.727  38.296  1.00  0.41           O  
HETATM  530  O   HOH T 529      -9.418 -16.869   3.083  1.00  0.41           O  
HETATM  531  O   HOH T 530     -26.798  -5.896 -20.988  1.00  0.41           O  
HETATM  532  O   HOH T 531     -28.747  15.484  39.311  1.00  0.41           O  
HETATM  533  O   HOH T 532      -2.259  25.507  -0.825  1.00  0.41           O  
HETATM  534  O   HOH T 533     -51.291   5.454  46.013  1.00  0.41           O  
HETATM  535  O   HOH T 534     -12.986   2.371 -28.118  1.00  0.41           O  
HETATM  536  O   HOH T 535     -17.280  -4.659  39.488  1.00  0.41           O  
HETATM  537  O   HOH T 536     -11.592  -3.404  22.612  1.00  0.41           O  
HETATM  538  O   HOH T 537      -2.153  10.585  -3.342  1.00  0.41           O  
HETATM  539  O   HOH T 538     -25.972  16.633 -12.761  1.00  0.41           O  
HETATM  540  O   HOH T 539     -38.380  -9.323  39.346  1.00  0.41           O  
HETATM  541  O   HOH T 540       7.424  31.539  38.497  1.00  0.41           O  
HETATM  542  O   HOH T 541      23.121   1.073 -14.486  1.00  0.41           O  
HETATM  543  O   HOH T 542      28.234  12.049   4.722  1.00  0.41           O  
HETATM  544  O   HOH T 543      -0.280  -9.878  -4.761  1.00  0.41           O  
HETATM  545  O   HOH T 544      15.308 -13.344  12.222  1.00  0.41           O  
HETATM  546  O   HOH T 545      -7.721   2.303  59.968  1.00  0.41           O  
HETATM  547  O   HOH T 546     -30.705   1.866  49.576  1.00  0.41           O  
HETATM  548  O   HOH T 547       4.946  20.166   3.373  1.00  0.41           O  
HETATM  549  O   HOH T 548       8.772 -11.823  -4.478  1.00  0.41           O  
HETATM  550  O   HOH T 549      12.925   5.728  -7.740  1.00  0.41           O  
HETATM  551  O   HOH T 550      30.087   3.875   8.441  1.00  0.41           O  
HETATM  552  O   HOH T 551      -3.271 -19.574   1.170  1.00  0.41           O  
HETATM  553  O   HOH T 552      25.558  -1.554  22.030  1.00  0.41           O  
HETATM  554  O   HOH T 553     -41.361 -11.247  31.683  1.00  0.41           O  
HETATM  555  O   HOH T 554     -23.535  17.407   2.193  1.00  0.41           O  
HETATM  556  O   HOH T 555      -5.360  -0.835  -8.907  1.00  0.41           O  
HETATM  557  O   HOH T 556     -47.925  11.442  37.468  1.00  0.41           O  
HETATM  558  O   HOH T 557     -46.232  -3.077  32.377  1.00  0.41           O  
HETATM  559  O   HOH T 558      22.658 -14.521  33.344  1.00  0.41           O  
HETATM  560  O   HOH T 559     -40.498  17.234  12.388  1.00  0.41           O  
HETATM  561  O   HOH T 560     -31.485   1.674 -15.361  1.00  0.41           O  
HETATM  562  O   HOH T 561      -9.053 -19.634   3.157  1.00  0.41           O  
HETATM  563  O   HOH T 562     -48.611   5.085  45.905  1.00  0.41           O  
HETATM  564  O   HOH T 563     -31.124 -11.262   5.881  1.00  0.41           O  
HETATM  565  O   HOH T 564     -36.480  20.226  10.718  1.00  0.41           O  
HETATM  566  O   HOH T 565     -17.541  -5.761  42.000  1.00  0.41           O  
HETATM  567  O   HOH T 566     -17.141  29.663  37.811  1.00  0.41           O  
HETATM  568  O   HOH T 567     -49.570   7.480  45.043  1.00  0.41           O  
HETATM  569  O   HOH T 568      -7.037 -15.452  36.224  1.00  0.42           O  
HETATM  570  O   HOH T 569     -44.366   3.786  41.687  1.00  0.42           O  
HETATM  571  O   HOH T 570     -47.535   7.802  34.751  1.00  0.42           O  
HETATM  572  O   HOH T 571       7.238  13.405  44.337  1.00  0.42           O  
HETATM  573  O   HOH T 572     -26.799 -12.181   0.770  1.00  0.42           O  
HETATM  574  O   HOH T 573      25.851   5.999  -7.399  1.00  0.42           O  
HETATM  575  O   HOH T 574       1.988   3.743  -5.418  1.00  0.42           O  
HETATM  576  O   HOH T 575     -37.134  22.040  25.742  1.00  0.42           O  
HETATM  577  O   HOH T 576      -0.105  22.519  41.232  1.00  0.42           O  
HETATM  578  O   HOH T 577     -46.673   2.370  14.863  1.00  0.42           O  
HETATM  579  O   HOH T 578     -33.061 -10.841  24.965  1.00  0.42           O  
HETATM  580  O   HOH T 579      -7.676  -1.466  22.593  1.00  0.42           O  
HETATM  581  O   HOH T 580      -9.419  21.895  -4.023  1.00  0.42           O  
HETATM  582  O   HOH T 581     -22.397   5.393 -25.649  1.00  0.42           O  
HETATM  583  O   HOH T 582     -11.263   4.880  55.842  1.00  0.42           O  
HETATM  584  O   HOH T 583      10.340 -11.042  -2.166  1.00  0.42           O  
HETATM  585  O   HOH T 584     -35.642  -6.762  -1.401  1.00  0.42           O  
HETATM  586  O   HOH T 585      16.200  21.232  18.882  1.00  0.42           O  
HETATM  587  O   HOH T 586      32.551  -7.451   1.303  1.00  0.42           O  
HETATM  588  O   HOH T 587      -3.380   6.454  65.179  1.00  0.42           O  
HETATM  589  O   HOH T 588     -32.365  21.049 -21.300  1.00  0.42           O  
HETATM  590  O   HOH T 589     -24.307  30.593  -1.694  1.00  0.42           O  
HETATM  591  O   HOH T 590     -34.212  19.256   9.936  1.00  0.42           O  
HETATM  592  O   HOH T 591      21.487   0.344  28.698  1.00  0.42           O  
HETATM  593  O   HOH T 592     -45.311  -9.784  27.483  1.00  0.42           O  
HETATM  594  O   HOH T 593      19.051  -6.454  19.584  1.00  0.42           O  
HETATM  595  O   HOH T 594      -5.391  15.619  58.073  1.00  0.42           O  
HETATM  596  O   HOH T 595      -0.865 -13.550  45.105  1.00  0.42           O  
HETATM  597  O   HOH T 596      -6.335  -2.214  17.734  1.00  0.42           O  
HETATM  598  O   HOH T 597     -23.095  -3.151 -21.541  1.00  0.42           O  
HETATM  599  O   HOH T 598       3.990  -2.436  -4.886  1.00  0.42           O  
HETATM  600  O   HOH T 599      29.146  -0.181 -14.746  1.00  0.42           O  
HETATM  601  O   HOH T 600       3.648  21.242   5.504  1.00  0.42           O  
HETATM  602  O   HOH T 601     -13.784  28.880  -6.996  1.00  0.42           O  
HETATM  603  O   HOH T 602     -35.102  -9.576  23.507  1.00  0.42           O  
HETATM  604  O   HOH T 603     -41.403  -8.675  42.914  1.00  0.42           O  
HETATM  605  O   HOH T 604      18.545 -13.352  32.564  1.00  0.42           O  
HETATM  606  O   HOH T 605      25.864  12.230  19.573  1.00  0.42           O  
HETATM  607  O   HOH T 606     -17.093   2.782  16.808  1.00  0.43           O  
HETATM  608  O   HOH T 607      19.930  -2.547 -15.313  1.00  0.43           O  
HETATM  609  O   HOH T 608       0.284   3.330  22.874  1.00  0.43           O  
HETATM  610  O   HOH T 609     -45.773   3.021   6.028  1.00  0.43           O  
HETATM  611  O   HOH T 610     -19.464  21.917  -4.160  1.00  0.43           O  
HETATM  612  O   HOH T 611     -34.102  16.569  14.188  1.00  0.43           O  
HETATM  613  O   HOH T 612      -8.720 -15.696   0.710  1.00  0.43           O  
HETATM  614  O   HOH T 613      32.593  -9.164   3.556  1.00  0.43           O  
HETATM  615  O   HOH T 614     -30.083 -13.815  10.302  1.00  0.43           O  
HETATM  616  O   HOH T 615     -18.845   5.978  42.229  1.00  0.43           O  
HETATM  617  O   HOH T 616      -8.510   7.955  17.718  1.00  0.43           O  
HETATM  618  O   HOH T 617      20.503  13.018  15.749  1.00  0.43           O  
HETATM  619  O   HOH T 618      -2.789 -21.415   3.316  1.00  0.43           O  
HETATM  620  O   HOH T 619     -43.107   8.985  42.487  1.00  0.43           O  
HETATM  621  O   HOH T 620     -17.319  -9.184 -20.100  1.00  0.43           O  
HETATM  622  O   HOH T 621     -23.565 -16.566  -6.744  1.00  0.43           O  
HETATM  623  O   HOH T 622      22.815  10.636  31.379  1.00  0.43           O  
HETATM  624  O   HOH T 623     -47.281  -8.978  35.796  1.00  0.43           O  
HETATM  625  O   HOH T 624     -41.201   8.288  47.085  1.00  0.43           O  
HETATM  626  O   HOH T 625     -17.699  -2.260 -29.131  1.00  0.43           O  
HETATM  627  O   HOH T 626     -11.190   9.504  22.278  1.00  0.43           O  
HETATM  628  O   HOH T 627     -34.323  -6.811  30.149  1.00  0.43           O  
HETATM  629  O   HOH T 628      17.347   4.001  44.493  1.00  0.43           O  
HETATM  630  O   HOH T 629       8.974  18.074  40.540  1.00  0.43           O  
HETATM  631  O   HOH T 630       1.589  34.411  29.785  1.00  0.43           O  
HETATM  632  O   HOH T 631     -11.108 -19.226  37.976  1.00  0.43           O  
HETATM  633  O   HOH T 632     -46.163   6.796  39.764  1.00  0.43           O  
HETATM  634  O   HOH T 633      -9.933  29.560  32.245  1.00  0.43           O  
HETATM  635  O   HOH T 634     -45.842   9.144  21.986  1.00  0.43           O  
HETATM  636  O   HOH T 635      10.958  22.025  13.756  1.00  0.43           O  
HETATM  637  O   HOH T 636     -34.854  -7.367  -5.569  1.00  0.43           O  
HETATM  638  O   HOH T 637      -5.921 -15.324   0.409  1.00  0.43           O  
HETATM  639  O   HOH T 638      28.331  -2.517  -2.452  1.00  0.43           O  
HETATM  640  O   HOH T 639     -19.539  -5.687 -21.508  1.00  0.43           O  
HETATM  641  O   HOH T 640     -35.824   6.550   9.780  1.00  0.43           O  
HETATM  642  O   HOH T 641      14.306 -15.508   4.326  1.00  0.43           O  
HETATM  643  O   HOH T 642     -10.889   7.357  11.091  1.00  0.43           O  
HETATM  644  O   HOH T 643     -21.619 -28.979  26.829  1.00  0.43           O  
HETATM  645  O   HOH T 644      17.438 -12.933  30.047  1.00  0.43           O  
HETATM  646  O   HOH T 645     -26.015  14.875  -2.514  1.00  0.43           O  
HETATM  647  O   HOH T 646     -13.973   2.238  50.479  1.00  0.43           O  
HETATM  648  O   HOH T 647      -3.261  15.381  59.713  1.00  0.44           O  
HETATM  649  O   HOH T 648     -23.726  16.595  -2.232  1.00  0.44           O  
HETATM  650  O   HOH T 649     -24.216 -23.958  31.853  1.00  0.44           O  
HETATM  651  O   HOH T 650      22.946  -8.332  36.923  1.00  0.44           O  
HETATM  652  O   HOH T 651     -26.630   8.812  46.227  1.00  0.44           O  
HETATM  653  O   HOH T 652       1.747  -8.046  -4.747  1.00  0.44           O  
HETATM  654  O   HOH T 653     -12.905   7.394  51.618  1.00  0.44           O  
HETATM  655  O   HOH T 654      25.828  12.399  16.783  1.00  0.44           O  
HETATM  656  O   HOH T 655       1.017 -14.510  43.164  1.00  0.44           O  
HETATM  657  O   HOH T 656      13.952  14.093  37.411  1.00  0.44           O  
HETATM  658  O   HOH T 657     -32.480   8.645 -13.754  1.00  0.44           O  
HETATM  659  O   HOH T 658      32.422  -2.342 -15.099  1.00  0.44           O  
HETATM  660  O   HOH T 659      26.600   8.194  -6.003  1.00  0.44           O  
HETATM  661  O   HOH T 660      -7.920 -15.370  38.922  1.00  0.44           O  
HETATM  662  O   HOH T 661       4.717 -15.147  31.652  1.00  0.44           O  
HETATM  663  O   HOH T 662       4.912   0.598  64.768  1.00  0.44           O  
HETATM  664  O   HOH T 663     -43.685  14.460  30.782  1.00  0.44           O  
HETATM  665  O   HOH T 664     -18.741 -16.213   5.438  1.00  0.44           O  
HETATM  666  O   HOH T 665     -35.537 -10.628  26.131  1.00  0.44           O  
HETATM  667  O   HOH T 666       2.294  -0.985  -6.525  1.00  0.44           O  
HETATM  668  O   HOH T 667      -0.780  11.847  -5.460  1.00  0.44           O  
HETATM  669  O   HOH T 668      17.955  -7.916 -10.772  1.00  0.44           O  
HETATM  670  O   HOH T 669     -18.795  29.080  -8.968  1.00  0.44           O  
HETATM  671  O   HOH T 670     -17.566  -3.924 -22.521  1.00  0.44           O  
HETATM  672  O   HOH T 671     -20.216  21.681  31.987  1.00  0.44           O  
HETATM  673  O   HOH T 672      30.113  -0.681   5.224  1.00  0.44           O  
HETATM  674  O   HOH T 673      -2.051   5.934  -7.794  1.00  0.44           O  
HETATM  675  O   HOH T 674      -8.016 -18.116  36.160  1.00  0.44           O  
HETATM  676  O   HOH T 675       9.831  19.357  48.568  1.00  0.44           O  
HETATM  677  O   HOH T 676     -45.122  -5.797  26.214  1.00  0.44           O  
HETATM  678  O   HOH T 677      -2.613  27.171  37.636  1.00  0.44           O  
HETATM  679  O   HOH T 678     -46.265   5.654  42.254  1.00  0.44           O  
HETATM  680  O   HOH T 679      21.769   8.762  -9.784  1.00  0.44           O  
HETATM  681  O   HOH T 680      -9.808  -4.185  14.600  1.00  0.44           O  
HETATM  682  O   HOH T 681     -20.465 -14.403  38.187  1.00  0.44           O  
HETATM  683  O   HOH T 682     -13.743   4.100  48.414  1.00  0.44           O  
HETATM  684  O   HOH T 683      29.031  -7.309  11.733  1.00  0.44           O  
HETATM  685  O   HOH T 684     -43.652   0.013   0.004  1.00  0.44           O  
HETATM  686  O   HOH T 685     -41.480   6.832  49.495  1.00  0.44           O  
HETATM  687  O   HOH T 686     -29.161  -9.832  39.647  1.00  0.44           O  
HETATM  688  O   HOH T 687      25.346 -11.416  33.250  1.00  0.44           O  
HETATM  689  O   HOH T 688       7.291   1.607  63.800  1.00  0.44           O  
HETATM  690  O   HOH T 689       8.940 -14.774  43.825  1.00  0.44           O  
HETATM  691  O   HOH T 690     -11.383 -20.229   1.633  1.00  0.44           O  
HETATM  692  O   HOH T 691      17.502 -10.937  33.244  1.00  0.44           O  
HETATM  693  O   HOH T 692      -7.356  19.749  48.331  1.00  0.44           O  
HETATM  694  O   HOH T 693      -8.216   5.174 -19.642  1.00  0.44           O  
HETATM  695  O   HOH T 694     -45.340   4.175  24.527  1.00  0.44           O  
HETATM  696  O   HOH T 695      10.397  18.545   1.276  1.00  0.45           O  
HETATM  697  O   HOH T 696       5.683  14.024  65.348  1.00  0.45           O  
HETATM  698  O   HOH T 697      15.879  -7.042  -9.168  1.00  0.45           O  
HETATM  699  O   HOH T 698     -14.175  16.590  10.001  1.00  0.45           O  
HETATM  700  O   HOH T 699     -22.088  25.952  37.311  1.00  0.45           O  
HETATM  701  O   HOH T 700       6.591 -14.607  45.270  1.00  0.45           O  
HETATM  702  O   HOH T 701      24.651 -10.039  35.626  1.00  0.45           O  
HETATM  703  O   HOH T 702     -41.777  14.905  13.132  1.00  0.45           O  
HETATM  704  O   HOH T 703     -10.283   0.203  53.968  1.00  0.45           O  
HETATM  705  O   HOH T 704     -12.909   5.700  53.754  1.00  0.45           O  
HETATM  706  O   HOH T 705     -18.640  14.262 -21.561  1.00  0.45           O  
HETATM  707  O   HOH T 706      -7.322  13.281  47.110  1.00  0.45           O  
HETATM  708  O   HOH T 707      20.870  16.692  21.205  1.00  0.45           O  
HETATM  709  O   HOH T 708      18.622 -13.836  27.609  1.00  0.45           O  
HETATM  710  O   HOH T 709     -29.138  -5.681  -1.061  1.00  0.45           O  
HETATM  711  O   HOH T 710     -24.952  16.277  -4.735  1.00  0.45           O  
HETATM  712  O   HOH T 711     -37.894  -5.101  48.179  1.00  0.45           O  
HETATM  713  O   HOH T 712      -6.123 -11.636  -1.830  1.00  0.45           O  
HETATM  714  O   HOH T 713     -19.251 -27.871  27.796  1.00  0.45           O  
HETATM  715  O   HOH T 714      -1.624  17.604  26.124  1.00  0.45           O  
HETATM  716  O   HOH T 715     -12.486   8.350  54.274  1.00  0.45           O  
HETATM  717  O   HOH T 716      -3.472 -12.958  46.007  1.00  0.45           O  
HETATM  718  O   HOH T 717     -20.156  17.558 -16.349  1.00  0.45           O  
HETATM  719  O   HOH T 718      13.076  18.961  49.450  1.00  0.45           O  
HETATM  720  O   HOH T 719      -4.185 -21.946  15.405  1.00  0.45           O  
HETATM  721  O   HOH T 720      12.190  -7.846  40.770  1.00  0.45           O  
HETATM  722  O   HOH T 721     -19.562  -4.976 -24.196  1.00  0.45           O  
HETATM  723  O   HOH T 722     -47.154   9.006  38.558  1.00  0.45           O  
HETATM  724  O   HOH T 723     -26.769  11.306  41.830  1.00  0.45           O  
HETATM  725  O   HOH T 724     -19.292  22.819  29.721  1.00  0.45           O  
HETATM  726  O   HOH T 725      -2.967 -22.798   7.338  1.00  0.45           O  
HETATM  727  O   HOH T 726      20.368   3.963 -11.252  1.00  0.45           O  
HETATM  728  O   HOH T 727       2.642  12.958  62.313  1.00  0.45           O  
HETATM  729  O   HOH T 728     -46.983  -7.503  27.275  1.00  0.45           O  
HETATM  730  O   HOH T 729     -34.276  22.521  26.044  1.00  0.45           O  
HETATM  731  O   HOH T 730      29.965  -2.483 -13.597  1.00  0.45           O  
HETATM  732  O   HOH T 731       0.976   1.157  -5.383  1.00  0.45           O  
HETATM  733  O   HOH T 732     -26.844 -17.191  35.543  1.00  0.45           O  
HETATM  734  O   HOH T 733     -38.263  -4.687   0.514  1.00  0.45           O  
HETATM  735  O   HOH T 734     -18.486 -18.016  15.219  1.00  0.45           O  
HETATM  736  O   HOH T 735     -29.071   9.021  47.277  1.00  0.45           O  
HETATM  737  O   HOH T 736     -29.910  18.114 -18.623  1.00  0.45           O  
HETATM  738  O   HOH T 737       0.838   9.487  64.984  1.00  0.45           O  
HETATM  739  O   HOH T 738      -7.096  16.985  48.642  1.00  0.45           O  
HETATM  740  O   HOH T 739     -32.120   6.105 -14.773  1.00  0.45           O  
HETATM  741  O   HOH T 740      19.521  -7.682  -8.431  1.00  0.45           O  
HETATM  742  O   HOH T 741      22.929   4.744 -11.376  1.00  0.45           O  
HETATM  743  O   HOH T 742       6.409   7.433  -7.109  1.00  0.45           O  
HETATM  744  O   HOH T 743      22.688  -2.702  42.867  1.00  0.45           O  
HETATM  745  O   HOH T 744     -24.215 -26.793  23.482  1.00  0.45           O  
HETATM  746  O   HOH T 745     -32.964   0.159  47.124  1.00  0.45           O  
HETATM  747  O   HOH T 746      -0.493  25.838   1.264  1.00  0.45           O  
HETATM  748  O   HOH T 747      -5.409   4.912 -11.512  1.00  0.45           O  
HETATM  749  O   HOH T 748       6.319 -12.581  -4.043  1.00  0.45           O  
HETATM  750  O   HOH T 749      -8.381   6.955  12.137  1.00  0.45           O  
HETATM  751  O   HOH T 750       0.715  25.044  40.599  1.00  0.46           O  
HETATM  752  O   HOH T 751     -38.986  15.195   6.245  1.00  0.46           O  
HETATM  753  O   HOH T 752      33.420  11.937   8.195  1.00  0.46           O  
HETATM  754  O   HOH T 753      31.690  -2.998   4.865  1.00  0.46           O  
HETATM  755  O   HOH T 754     -35.503  -9.874   3.069  1.00  0.46           O  
HETATM  756  O   HOH T 755       5.969 -14.202  33.729  1.00  0.46           O  
HETATM  757  O   HOH T 756      24.362  13.055  21.736  1.00  0.46           O  
HETATM  758  O   HOH T 757      -8.023   3.328  62.448  1.00  0.46           O  
HETATM  759  O   HOH T 758      -8.797 -18.004  38.826  1.00  0.46           O  
HETATM  760  O   HOH T 759     -43.886  -3.834  18.601  1.00  0.46           O  
HETATM  761  O   HOH T 760      -3.179  26.909  40.301  1.00  0.46           O  
HETATM  762  O   HOH T 761      22.712  -5.907  35.582  1.00  0.46           O  
HETATM  763  O   HOH T 762      25.273  -1.757  39.857  1.00  0.46           O  
HETATM  764  O   HOH T 763     -16.367 -25.456  25.180  1.00  0.46           O  
HETATM  765  O   HOH T 764      28.574  -6.264  -1.484  1.00  0.46           O  
HETATM  766  O   HOH T 765     -24.388 -21.334  32.695  1.00  0.46           O  
HETATM  767  O   HOH T 766      -5.779  23.493  16.998  1.00  0.46           O  
HETATM  768  O   HOH T 767     -42.961 -10.776  42.005  1.00  0.46           O  
HETATM  769  O   HOH T 768       3.699  20.875  52.840  1.00  0.46           O  
HETATM  770  O   HOH T 769     -41.037  15.734  25.351  1.00  0.46           O  
HETATM  771  O   HOH T 770      16.104  17.698  22.663  1.00  0.46           O  
HETATM  772  O   HOH T 771       4.857  21.616  55.256  1.00  0.46           O  
HETATM  773  O   HOH T 772     -33.691  12.270 -12.682  1.00  0.46           O  
HETATM  774  O   HOH T 773     -45.545   2.064  12.379  1.00  0.46           O  
HETATM  775  O   HOH T 774     -16.169   3.059  14.246  1.00  0.46           O  
HETATM  776  O   HOH T 775     -24.341 -23.302  34.698  1.00  0.46           O  
HETATM  777  O   HOH T 776      19.220  16.618   2.172  1.00  0.46           O  
HETATM  778  O   HOH T 777     -44.408   9.002  13.958  1.00  0.46           O  
HETATM  779  O   HOH T 778     -44.024  11.384  15.377  1.00  0.46           O  
HETATM  780  O   HOH T 779     -10.675  -3.161  47.462  1.00  0.46           O  
HETATM  781  O   HOH T 780       9.595  17.100  36.550  1.00  0.46           O  
HETATM  782  O   HOH T 781       4.991  20.351  35.765  1.00  0.46           O  
HETATM  783  O   HOH T 782     -37.668  12.222  46.190  1.00  0.46           O  
HETATM  784  O   HOH T 783     -45.444  -8.331  25.129  1.00  0.46           O  
HETATM  785  O   HOH T 784     -39.009   8.006  48.700  1.00  0.46           O  
HETATM  786  O   HOH T 785     -21.268  23.808  -2.857  1.00  0.46           O  
HETATM  787  O   HOH T 786      -9.231  -3.198 -22.471  1.00  0.46           O  
HETATM  788  O   HOH T 787      27.593  10.189  24.316  1.00  0.46           O  
HETATM  789  O   HOH T 788      32.200  -9.960   6.267  1.00  0.46           O  
HETATM  790  O   HOH T 789      28.329   5.417  28.167  1.00  0.46           O  
HETATM  791  O   HOH T 790       0.061  15.791  24.583  1.00  0.46           O  
HETATM  792  O   HOH T 791      32.462   3.105   9.792  1.00  0.46           O  
HETATM  793  O   HOH T 792      -6.213 -17.372  38.047  1.00  0.46           O  
HETATM  794  O   HOH T 793      -6.441  -3.809  23.420  1.00  0.46           O  
HETATM  795  O   HOH T 794       3.487  18.802  59.840  1.00  0.46           O  
HETATM  796  O   HOH T 795      -9.155  26.643  -4.990  1.00  0.46           O  
HETATM  797  O   HOH T 796      -7.084  -4.106  13.902  1.00  0.46           O  
HETATM  798  O   HOH T 797     -46.501  -2.562  39.768  1.00  0.46           O  
HETATM  799  O   HOH T 798     -27.018 -12.892  -6.094  1.00  0.46           O  
HETATM  800  O   HOH T 799     -35.359  18.154  12.244  1.00  0.47           O  
HETATM  801  O   HOH T 800       4.015 -11.955  -2.708  1.00  0.47           O  
HETATM  802  O   HOH T 801      20.639   9.951  35.275  1.00  0.47           O  
HETATM  803  O   HOH T 802       7.162 -10.693  49.421  1.00  0.47           O  
HETATM  804  O   HOH T 803      24.695  -0.764  42.413  1.00  0.47           O  
HETATM  805  O   HOH T 804       8.992   6.405  -7.849  1.00  0.47           O  
HETATM  806  O   HOH T 805      -1.182 -16.287   0.664  1.00  0.47           O  
HETATM  807  O   HOH T 806      10.250  19.538  32.779  1.00  0.47           O  
HETATM  808  O   HOH T 807     -33.813   0.666 -14.642  1.00  0.47           O  
HETATM  809  O   HOH T 808     -16.935  -3.278 -26.665  1.00  0.47           O  
HETATM  810  O   HOH T 809     -24.202 -16.625  36.069  1.00  0.47           O  
HETATM  811  O   HOH T 810       7.096  30.712  41.088  1.00  0.47           O  
HETATM  812  O   HOH T 811      24.719 -13.738  31.774  1.00  0.47           O  
HETATM  813  O   HOH T 812      13.063  -4.057  39.575  1.00  0.47           O  
HETATM  814  O   HOH T 813      21.706 -11.897  33.549  1.00  0.47           O  
HETATM  815  O   HOH T 814      -7.309  -3.992 -20.723  1.00  0.47           O  
HETATM  816  O   HOH T 815       0.041   4.065  -7.568  1.00  0.47           O  
HETATM  817  O   HOH T 816      19.417 -10.590  16.270  1.00  0.47           O  
HETATM  818  O   HOH T 817       8.234  21.568  13.181  1.00  0.47           O  
HETATM  819  O   HOH T 818      -6.720  27.528  -3.926  1.00  0.47           O  
HETATM  820  O   HOH T 819     -40.705  -9.812  11.304  1.00  0.47           O  
HETATM  821  O   HOH T 820      28.465  -9.878  14.360  1.00  0.47           O  
HETATM  822  O   HOH T 821      -5.810  -6.029  48.586  1.00  0.47           O  
HETATM  823  O   HOH T 822     -44.658   4.860  30.406  1.00  0.47           O  
HETATM  824  O   HOH T 823      27.708 -13.139   8.275  1.00  0.47           O  
HETATM  825  O   HOH T 824     -49.394  -7.262  35.609  1.00  0.47           O  
HETATM  826  O   HOH T 825     -32.353  -6.461  -9.605  1.00  0.47           O  
HETATM  827  O   HOH T 826     -32.134  21.652  27.749  1.00  0.47           O  
HETATM  828  O   HOH T 827      23.396  16.139  12.941  1.00  0.47           O  
HETATM  829  O   HOH T 828      15.256 -13.148  19.343  1.00  0.47           O  
HETATM  830  O   HOH T 829      19.633   0.037  45.021  1.00  0.47           O  
HETATM  831  O   HOH T 830       4.400   0.653  67.453  1.00  0.47           O  
HETATM  832  O   HOH T 831      21.121  -7.613  18.168  1.00  0.47           O  
HETATM  833  O   HOH T 832      21.852   3.415 -13.596  1.00  0.47           O  
HETATM  834  O   HOH T 833       1.469  16.659  -0.206  1.00  0.47           O  
HETATM  835  O   HOH T 834     -14.596   1.477 -30.254  1.00  0.47           O  
HETATM  836  O   HOH T 835       0.889 -15.350  32.390  1.00  0.47           O  
HETATM  837  O   HOH T 836      19.343  -8.075  35.192  1.00  0.47           O  
HETATM  838  O   HOH T 837     -21.320  24.184  39.305  1.00  0.47           O  
HETATM  839  O   HOH T 838     -48.574  -4.509  40.162  1.00  0.47           O  
HETATM  840  O   HOH T 839     -27.854 -21.264  21.601  1.00  0.47           O  
HETATM  841  O   HOH T 840     -22.565  10.542  43.657  1.00  0.47           O  
HETATM  842  O   HOH T 841     -46.181  11.384  39.611  1.00  0.47           O  
HETATM  843  O   HOH T 842     -30.182  22.396  29.726  1.00  0.47           O  
HETATM  844  O   HOH T 843      -4.434  25.789   0.953  1.00  0.47           O  
HETATM  845  O   HOH T 844     -12.979   1.452  47.994  1.00  0.47           O  
HETATM  846  O   HOH T 845       6.866 -26.673  15.628  1.00  0.47           O  
HETATM  847  O   HOH T 846      28.000 -12.200  12.880  1.00  0.47           O  
HETATM  848  O   HOH T 847     -13.919  19.479   7.303  1.00  0.47           O  
HETATM  849  O   HOH T 848      -3.751 -17.079  -0.018  1.00  0.48           O  
HETATM  850  O   HOH T 849      32.446 -10.638   8.958  1.00  0.48           O  
HETATM  851  O   HOH T 850     -22.694  16.552 -21.240  1.00  0.48           O  
HETATM  852  O   HOH T 851     -23.525  18.355 -23.180  1.00  0.48           O  
HETATM  853  O   HOH T 852      22.689   5.737  32.581  1.00  0.48           O  
HETATM  854  O   HOH T 853      -4.867 -12.578  43.578  1.00  0.48           O  
HETATM  855  O   HOH T 854       6.364  15.397  -1.860  1.00  0.48           O  
HETATM  856  O   HOH T 855      31.050  -5.574  -0.214  1.00  0.48           O  
HETATM  857  O   HOH T 856     -18.491 -17.177  17.875  1.00  0.48           O  
HETATM  858  O   HOH T 857     -20.720 -18.537  16.815  1.00  0.48           O  
HETATM  859  O   HOH T 858     -34.891 -12.987  34.849  1.00  0.48           O  
HETATM  860  O   HOH T 859      25.276  -5.900  20.658  1.00  0.48           O  
HETATM  861  O   HOH T 860      26.219   1.170  27.518  1.00  0.48           O  
HETATM  862  O   HOH T 861     -37.757  -2.721  52.819  1.00  0.48           O  
HETATM  863  O   HOH T 862      -2.483  27.343   2.366  1.00  0.48           O  
HETATM  864  O   HOH T 863      10.585  -8.521  43.097  1.00  0.48           O  
HETATM  865  O   HOH T 864      -3.660   9.724  16.074  1.00  0.48           O  
HETATM  866  O   HOH T 865      18.175  16.599  21.037  1.00  0.48           O  
HETATM  867  O   HOH T 866     -35.599  -9.126  19.447  1.00  0.48           O  
HETATM  868  O   HOH T 867      14.812 -10.571  32.538  1.00  0.48           O  
HETATM  869  O   HOH T 868     -12.792 -16.068   8.123  1.00  0.48           O  
HETATM  870  O   HOH T 869     -13.744  22.003  -3.903  1.00  0.48           O  
HETATM  871  O   HOH T 870     -42.832  12.381  13.050  1.00  0.48           O  
HETATM  872  O   HOH T 871     -46.744  11.538  14.958  1.00  0.48           O  
HETATM  873  O   HOH T 872     -23.482 -20.655  35.192  1.00  0.48           O  
HETATM  874  O   HOH T 873     -15.387   7.419  45.173  1.00  0.48           O  
HETATM  875  O   HOH T 874      18.676  -8.862  18.329  1.00  0.48           O  
HETATM  876  O   HOH T 875     -21.998  22.632  33.860  1.00  0.48           O  
HETATM  877  O   HOH T 876      -7.290  32.826  34.415  1.00  0.48           O  
HETATM  878  O   HOH T 877      28.541   2.505   3.280  1.00  0.48           O  
HETATM  879  O   HOH T 878     -11.287  28.212  -5.838  1.00  0.48           O  
HETATM  880  O   HOH T 879      20.625   5.059  30.697  1.00  0.48           O  
HETATM  881  O   HOH T 880      29.577  -4.376  -8.865  1.00  0.48           O  
HETATM  882  O   HOH T 881     -21.120 -19.662   0.723  1.00  0.48           O  
HETATM  883  O   HOH T 882      23.226  13.224  16.309  1.00  0.48           O  
HETATM  884  O   HOH T 883      -8.439  -2.603  48.881  1.00  0.48           O  
HETATM  885  O   HOH T 884     -29.187  20.262   8.885  1.00  0.48           O  
HETATM  886  O   HOH T 885      -4.011   2.398   7.283  1.00  0.48           O  
HETATM  887  O   HOH T 886     -47.126   3.776  36.674  1.00  0.48           O  
HETATM  888  O   HOH T 887     -46.258  10.451  12.428  1.00  0.48           O  
HETATM  889  O   HOH T 888      -9.919   7.304  23.511  1.00  0.48           O  
HETATM  890  O   HOH T 889     -21.328  25.851  29.960  1.00  0.48           O  
HETATM  891  O   HOH T 890      23.698  -1.145  44.966  1.00  0.48           O  
HETATM  892  O   HOH T 891     -29.366 -14.864  32.464  1.00  0.48           O  
HETATM  893  O   HOH T 892     -16.210   0.842  45.722  1.00  0.48           O  
HETATM  894  O   HOH T 893     -35.866   2.267  -5.174  1.00  0.48           O  
HETATM  895  O   HOH T 894     -45.298   2.440  45.405  1.00  0.48           O  
HETATM  896  O   HOH T 895       4.021  20.040  57.414  1.00  0.48           O  
HETATM  897  O   HOH T 896     -17.045  17.175  -9.935  1.00  0.49           O  
HETATM  898  O   HOH T 897      -9.895  -0.529  50.054  1.00  0.49           O  
HETATM  899  O   HOH T 898     -31.836 -17.433  28.283  1.00  0.49           O  
HETATM  900  O   HOH T 899     -11.640   2.189  55.175  1.00  0.49           O  
HETATM  901  O   HOH T 900      -3.243  19.987  -4.828  1.00  0.49           O  
HETATM  902  O   HOH T 901      -7.756   9.957  62.352  1.00  0.49           O  
HETATM  903  O   HOH T 902      16.116  17.166  46.811  1.00  0.49           O  
HETATM  904  O   HOH T 903      12.940  19.403   3.931  1.00  0.49           O  
HETATM  905  O   HOH T 904     -18.075   7.225  44.583  1.00  0.49           O  
HETATM  906  O   HOH T 905     -20.287  -3.253 -22.083  1.00  0.49           O  
HETATM  907  O   HOH T 906     -30.490 -11.568  24.244  1.00  0.49           O  
HETATM  908  O   HOH T 907     -49.612  12.221  28.462  1.00  0.49           O  
HETATM  909  O   HOH T 908     -40.575  -3.167  52.860  1.00  0.49           O  
HETATM  910  O   HOH T 909      16.906 -15.462  13.008  1.00  0.49           O  
HETATM  911  O   HOH T 910     -34.087 -14.344   7.435  1.00  0.49           O  
HETATM  912  O   HOH T 911      -1.727   9.523  64.857  1.00  0.49           O  
HETATM  913  O   HOH T 912       6.796  22.240   3.249  1.00  0.49           O  
HETATM  914  O   HOH T 913      30.780  11.444   7.150  1.00  0.49           O  
HETATM  915  O   HOH T 914     -10.755   7.550  56.404  1.00  0.49           O  
HETATM  916  O   HOH T 915       4.010  28.509  28.726  1.00  0.49           O  
HETATM  917  O   HOH T 916      23.590   0.684  26.929  1.00  0.49           O  
HETATM  918  O   HOH T 917      13.354  22.926  14.884  1.00  0.49           O  
HETATM  919  O   HOH T 918     -11.349   3.532  27.934  1.00  0.49           O  
HETATM  920  O   HOH T 919     -10.587 -11.990 -12.257  1.00  0.49           O  
HETATM  921  O   HOH T 920     -11.264  15.121 -10.689  1.00  0.49           O  
HETATM  922  O   HOH T 921      13.322 -18.891   5.510  1.00  0.49           O  
HETATM  923  O   HOH T 922       4.884 -12.168  -6.341  1.00  0.49           O  
HETATM  924  O   HOH T 923     -25.900 -15.275  -7.486  1.00  0.49           O  
HETATM  925  O   HOH T 924     -40.865  -5.750  17.634  1.00  0.49           O  
HETATM  926  O   HOH T 925     -37.235  -0.015  53.447  1.00  0.49           O  
HETATM  927  O   HOH T 926     -47.802  -4.705  30.862  1.00  0.49           O  
HETATM  928  O   HOH T 927     -38.957  18.937  31.177  1.00  0.49           O  
HETATM  929  O   HOH T 928     -14.509   2.991  46.113  1.00  0.49           O  
HETATM  930  O   HOH T 929     -26.544 -24.662  30.314  1.00  0.49           O  
HETATM  931  O   HOH T 930     -37.429  10.264  48.105  1.00  0.49           O  
HETATM  932  O   HOH T 931     -44.847  -8.845  42.569  1.00  0.49           O  
HETATM  933  O   HOH T 932      -5.406  34.012  38.386  1.00  0.49           O  
HETATM  934  O   HOH T 933     -39.661   2.463   4.019  1.00  0.49           O  
HETATM  935  O   HOH T 934      27.822   5.770  -5.469  1.00  0.49           O  
HETATM  936  O   HOH T 935      30.118   4.242  -5.682  1.00  0.49           O  
HETATM  937  O   HOH T 936     -18.743  -7.450  19.400  1.00  0.50           O  
HETATM  938  O   HOH T 937       2.384  -0.205  59.963  1.00  0.50           O  
HETATM  939  O   HOH T 938     -42.149  -7.275   5.593  1.00  0.50           O  
HETATM  940  O   HOH T 939      10.412  23.520   5.508  1.00  0.50           O  
HETATM  941  O   HOH T 940      -6.027  15.795  53.779  1.00  0.50           O  
HETATM  942  O   HOH T 941       5.225  21.488  50.602  1.00  0.50           O  
HETATM  943  O   HOH T 942      12.640  12.196  -3.234  1.00  0.50           O  
HETATM  944  O   HOH T 943     -37.567 -12.841  35.025  1.00  0.50           O  
HETATM  945  O   HOH T 944     -52.697   6.391  28.698  1.00  0.50           O  
HETATM  946  O   HOH T 945       5.505  25.277  38.101  1.00  0.50           O  
HETATM  947  O   HOH T 946      20.770   6.667  22.910  1.00  0.50           O  
HETATM  948  O   HOH T 947     -51.195  -4.963  33.008  1.00  0.50           O  
HETATM  949  O   HOH T 948     -25.073 -21.113  21.754  1.00  0.50           O  
HETATM  950  O   HOH T 949     -22.691  22.101  21.799  1.00  0.50           O  
HETATM  951  O   HOH T 950      13.063  19.519   1.207  1.00  0.50           O  
HETATM  952  O   HOH T 951     -16.426 -15.815  -6.622  1.00  0.50           O  
HETATM  953  O   HOH T 952       4.001  -0.039  62.220  1.00  0.50           O  
HETATM  954  O   HOH T 953      -1.527 -13.665  -0.012  1.00  0.50           O  
HETATM  955  O   HOH T 954       3.813 -13.984  42.641  1.00  0.50           O  
HETATM  956  O   HOH T 955      26.258  -3.882 -12.907  1.00  0.50           O  
HETATM  957  O   HOH T 956       1.216  18.554  55.067  1.00  0.50           O  
HETATM  958  O   HOH T 957     -20.299 -31.325  31.514  1.00  0.50           O  
HETATM  959  O   HOH T 958      -2.338  12.115  65.915  1.00  0.50           O  
HETATM  960  O   HOH T 959      -1.295  19.712  44.469  1.00  0.50           O  
HETATM  961  O   HOH T 960     -37.988  -8.019  18.687  1.00  0.50           O  
HETATM  962  O   HOH T 961       5.086 -14.586  -5.028  1.00  0.50           O  
HETATM  963  O   HOH T 962     -20.267 -17.922  36.302  1.00  0.50           O  
HETATM  964  O   HOH T 963     -42.930  -8.142  20.320  1.00  0.50           O  
HETATM  965  O   HOH T 964     -46.845   5.668  33.173  1.00  0.50           O  
HETATM  966  O   HOH T 965     -47.015  13.240  27.887  1.00  0.50           O  
HETATM  967  O   HOH T 966     -28.581 -10.827  42.075  1.00  0.50           O  
HETATM  968  O   HOH T 967     -28.964 -28.762  23.000  1.00  0.50           O  
HETATM  969  O   HOH T 968      19.391   1.679  27.600  1.00  0.50           O  
HETATM  970  O   HOH T 969     -22.179  17.290   0.008  1.00  0.50           O  
HETATM  971  O   HOH T 970      21.968  17.878  23.484  1.00  0.50           O  
HETATM  972  O   HOH T 971      33.403  -7.201  10.334  1.00  0.50           O  
HETATM  973  O   HOH T 972      -7.959  14.261 -12.824  1.00  0.50           O  
HETATM  974  O   HOH T 973      26.619  -6.471 -13.939  1.00  0.50           O  
HETATM  975  O   HOH T 974      -4.268  26.682  -2.537  1.00  0.50           O  
HETATM  976  O   HOH T 975     -19.378  25.266  37.642  1.00  0.50           O  
HETATM  977  O   HOH T 976     -19.352  23.217  34.231  1.00  0.50           O  
HETATM  978  O   HOH T 977      19.610 -12.496  11.224  1.00  0.50           O  
HETATM  979  O   HOH T 978       4.206  22.887   3.326  1.00  0.50           O  
HETATM  980  O   HOH T 979      11.116   7.483  -6.582  1.00  0.50           O  
HETATM  981  O   HOH T 980      13.091   3.344  51.071  1.00  0.50           O  
HETATM  982  O   HOH T 981     -21.273  18.052  -2.491  1.00  0.50           O  
HETATM  983  O   HOH T 982      -8.157  10.086  15.989  1.00  0.50           O  
HETATM  984  O   HOH T 983     -29.236  17.387 -10.836  1.00  0.50           O  
HETATM  985  O   HOH T 984     -23.567   8.115  43.736  1.00  0.50           O  
HETATM  986  O   HOH T 985     -33.721 -12.240   5.574  1.00  0.50           O  
HETATM  987  O   HOH T 986       4.829   9.702  62.653  1.00  0.50           O  
HETATM  988  O   HOH T 987     -12.528  -0.113  50.253  1.00  0.50           O  
HETATM  989  O   HOH T 988       0.447   2.753  20.305  1.00  0.50           O  
HETATM  990  O   HOH T 989       2.447  22.886  40.653  1.00  0.50           O  
HETATM  991  O   HOH T 990     -22.618 -18.852   2.919  1.00  0.50           O  
HETATM  992  O   HOH T 991      -1.685  21.768  12.159  1.00  0.50           O  
HETATM  993  O   HOH T 992     -38.100  18.509  11.962  1.00  0.50           O  
HETATM  994  O   HOH T 993      -0.461  -3.368  -7.982  1.00  0.50           O  
HETATM  995  O   HOH T 994      24.425  12.971  31.072  1.00  0.50           O  
HETATM  996  O   HOH T 995      -3.298 -24.790  15.336  1.00  0.51           O  
HETATM  997  O   HOH T 996      -2.252  32.429  22.863  1.00  0.51           O  
HETATM  998  O   HOH T 997     -21.230  20.891  -2.410  1.00  0.51           O  
HETATM  999  O   HOH T 998     -47.929  -7.181  40.494  1.00  0.51           O  
HETATM 1000  O   HOH T 999     -24.145  12.199  42.016  1.00  0.51           O  
HETATM 1001  O   HOH T1000      -0.036 -11.374  19.172  1.00  0.51           O  
HETATM 1002  O   HOH T1001     -46.990   6.573  37.153  1.00  0.51           O  
HETATM 1003  O   HOH T1002      21.911 -10.723  35.915  1.00  0.51           O  
HETATM 1004  O   HOH T1003      -9.022   0.624 -26.059  1.00  0.51           O  
HETATM 1005  O   HOH T1004      16.300  13.696  -8.814  1.00  0.51           O  
HETATM 1006  O   HOH T1005     -17.952 -14.467  38.997  1.00  0.51           O  
HETATM 1007  O   HOH T1006      28.232  -4.354 -14.883  1.00  0.51           O  
HETATM 1008  O   HOH T1007     -19.172   9.610  44.117  1.00  0.51           O  
HETATM 1009  O   HOH T1008     -36.998  -7.338  -3.781  1.00  0.51           O  
HETATM 1010  O   HOH T1009      11.191  19.237  13.669  1.00  0.51           O  
HETATM 1011  O   HOH T1010     -14.016  22.542  23.122  1.00  0.51           O  
HETATM 1012  O   HOH T1011     -25.964   6.546  47.791  1.00  0.51           O  
HETATM 1013  O   HOH T1012     -25.762  -8.025 -22.449  1.00  0.51           O  
HETATM 1014  O   HOH T1013     -27.943 -23.064  32.047  1.00  0.51           O  
HETATM 1015  O   HOH T1014     -34.117  -0.940   5.472  1.00  0.51           O  
HETATM 1016  O   HOH T1015     -25.997   6.394 -20.679  1.00  0.51           O  
HETATM 1017  O   HOH T1016     -29.093 -14.070  20.242  1.00  0.51           O  
HETATM 1018  O   HOH T1017     -17.162 -19.906  44.225  1.00  0.51           O  
HETATM 1019  O   HOH T1018     -22.154  -4.083 -24.047  1.00  0.51           O  
HETATM 1020  O   HOH T1019     -11.177   4.665  10.681  1.00  0.51           O  
HETATM 1021  O   HOH T1020     -16.769  12.267  11.459  1.00  0.51           O  
HETATM 1022  O   HOH T1021     -39.765  -8.916   1.667  1.00  0.51           O  
HETATM 1023  O   HOH T1022     -14.225 -24.336  28.684  1.00  0.51           O  
HETATM 1024  O   HOH T1023      -7.507  10.372  18.689  1.00  0.51           O  
HETATM 1025  O   HOH T1024     -43.660 -11.616  37.499  1.00  0.51           O  
HETATM 1026  O   HOH T1025     -44.211  -6.422  23.580  1.00  0.51           O  
HETATM 1027  O   HOH T1026     -30.081 -22.636  21.775  1.00  0.51           O  
HETATM 1028  O   HOH T1027      -3.220  -4.108  -9.840  1.00  0.51           O  
HETATM 1029  O   HOH T1028      22.670   3.267  31.280  1.00  0.51           O  
HETATM 1030  O   HOH T1029     -20.159  -6.447  42.176  1.00  0.51           O  
HETATM 1031  O   HOH T1030      16.583  16.551  49.287  1.00  0.51           O  
HETATM 1032  O   HOH T1031      -3.007  20.998  46.284  1.00  0.51           O  
HETATM 1033  O   HOH T1032     -39.673  -0.631  52.914  1.00  0.51           O  
HETATM 1034  O   HOH T1033     -49.501 -13.880  34.591  1.00  0.51           O  
HETATM 1035  O   HOH T1034      -9.115   1.807  24.874  1.00  0.51           O  
HETATM 1036  O   HOH T1035     -13.665  -6.463 -21.202  1.00  0.51           O  
HETATM 1037  O   HOH T1036      24.006  -2.634  37.427  1.00  0.51           O  
HETATM 1038  O   HOH T1037      23.117  16.817  10.250  1.00  0.51           O  
HETATM 1039  O   HOH T1038     -19.393 -16.904  38.815  1.00  0.51           O  
HETATM 1040  O   HOH T1039     -18.693   9.239 -25.885  1.00  0.51           O  
HETATM 1041  O   HOH T1040       9.563   1.042  57.686  1.00  0.51           O  
HETATM 1042  O   HOH T1041      -7.289  -3.331  63.103  1.00  0.51           O  
HETATM 1043  O   HOH T1042      20.307  -8.447 -12.198  1.00  0.51           O  
HETATM 1044  O   HOH T1043      20.969   6.719 -11.505  1.00  0.51           O  
HETATM 1045  O   HOH T1044      28.278  -7.041  14.372  1.00  0.51           O  
HETATM 1046  O   HOH T1045      -0.543  -0.817  -6.681  1.00  0.51           O  
HETATM 1047  O   HOH T1046     -20.417  30.403   2.086  1.00  0.51           O  
HETATM 1048  O   HOH T1047       0.721 -25.292   3.446  1.00  0.51           O  
HETATM 1049  O   HOH T1048      13.844 -13.059  28.562  1.00  0.52           O  
HETATM 1050  O   HOH T1049      11.358  19.998  -0.871  1.00  0.52           O  
HETATM 1051  O   HOH T1050     -17.022  24.568   8.822  1.00  0.52           O  
HETATM 1052  O   HOH T1051     -33.687  19.750   7.322  1.00  0.52           O  
HETATM 1053  O   HOH T1052      -2.522   3.189  63.230  1.00  0.52           O  
HETATM 1054  O   HOH T1053     -17.202  14.802 -19.187  1.00  0.52           O  
HETATM 1055  O   HOH T1054     -28.032  13.681  41.291  1.00  0.52           O  
HETATM 1056  O   HOH T1055     -50.169  -6.255  30.637  1.00  0.52           O  
HETATM 1057  O   HOH T1056     -38.035  -4.433  50.713  1.00  0.52           O  
HETATM 1058  O   HOH T1057       3.322  24.138   5.722  1.00  0.52           O  
HETATM 1059  O   HOH T1058     -19.504  30.678   6.890  1.00  0.52           O  
HETATM 1060  O   HOH T1059      21.131  -5.067 -15.577  1.00  0.52           O  
HETATM 1061  O   HOH T1060       4.092 -19.458  18.843  1.00  0.52           O  
HETATM 1062  O   HOH T1061     -29.329  21.200 -17.895  1.00  0.52           O  
HETATM 1063  O   HOH T1062     -49.863   8.751  30.758  1.00  0.52           O  
HETATM 1064  O   HOH T1063      16.881 -14.741  10.332  1.00  0.52           O  
HETATM 1065  O   HOH T1064     -42.057  -3.382   2.352  1.00  0.52           O  
HETATM 1066  O   HOH T1065      -9.782  -4.054  20.535  1.00  0.52           O  
HETATM 1067  O   HOH T1066     -32.035   3.324   9.921  1.00  0.52           O  
HETATM 1068  O   HOH T1067      -6.199  -4.685  16.524  1.00  0.52           O  
HETATM 1069  O   HOH T1068     -11.367  31.409  30.771  1.00  0.52           O  
HETATM 1070  O   HOH T1069     -38.161  -5.738  -1.815  1.00  0.52           O  
HETATM 1071  O   HOH T1070     -27.992 -15.464  -5.749  1.00  0.52           O  
HETATM 1072  O   HOH T1071      -5.131  32.747  26.492  1.00  0.52           O  
HETATM 1073  O   HOH T1072      -9.186  -3.432  24.028  1.00  0.52           O  
HETATM 1074  O   HOH T1073     -25.885   0.792  44.566  1.00  0.52           O  
HETATM 1075  O   HOH T1074      -7.577 -12.032  44.427  1.00  0.52           O  
HETATM 1076  O   HOH T1075     -19.198   4.226 -31.394  1.00  0.52           O  
HETATM 1077  O   HOH T1076     -20.618  20.185  34.312  1.00  0.52           O  
HETATM 1078  O   HOH T1077     -44.663  11.272  41.928  1.00  0.52           O  
HETATM 1079  O   HOH T1078      -5.340  31.478  39.375  1.00  0.52           O  
HETATM 1080  O   HOH T1079      -4.707  16.973  47.235  1.00  0.52           O  
HETATM 1081  O   HOH T1080       3.373 -16.130  33.945  1.00  0.52           O  
HETATM 1082  O   HOH T1081      -0.809 -22.763   5.605  1.00  0.52           O  
HETATM 1083  O   HOH T1082      -7.470  12.908  55.700  1.00  0.52           O  
HETATM 1084  O   HOH T1083      19.426  17.046  23.512  1.00  0.52           O  
HETATM 1085  O   HOH T1084      -0.860  20.379  47.975  1.00  0.52           O  
HETATM 1086  O   HOH T1085     -19.129 -19.585  18.810  1.00  0.52           O  
HETATM 1087  O   HOH T1086      -9.819 -18.330   0.734  1.00  0.52           O  
HETATM 1088  O   HOH T1087      10.512  18.705  42.705  1.00  0.52           O  
HETATM 1089  O   HOH T1088      29.846 -11.972  -1.602  1.00  0.52           O  
HETATM 1090  O   HOH T1089     -22.846  30.372   0.694  1.00  0.52           O  
HETATM 1091  O   HOH T1090     -17.114  37.238   6.924  1.00  0.52           O  
HETATM 1092  O   HOH T1091       4.750  31.281  33.892  1.00  0.52           O  
HETATM 1093  O   HOH T1092     -30.653  19.511  11.256  1.00  0.52           O  
HETATM 1094  O   HOH T1093     -18.770  -4.178  43.905  1.00  0.52           O  
HETATM 1095  O   HOH T1094      -6.568  -1.407  13.842  1.00  0.53           O  
HETATM 1096  O   HOH T1095     -41.344   4.047  54.945  1.00  0.53           O  
HETATM 1097  O   HOH T1096     -33.927 -11.312  19.566  1.00  0.53           O  
HETATM 1098  O   HOH T1097     -10.717   7.183  20.885  1.00  0.53           O  
HETATM 1099  O   HOH T1098      23.627  -8.024  21.257  1.00  0.53           O  
HETATM 1100  O   HOH T1099     -47.827  -2.673  42.152  1.00  0.53           O  
HETATM 1101  O   HOH T1100     -10.507   5.507  13.137  1.00  0.53           O  
HETATM 1102  O   HOH T1101     -48.388  -2.295  35.675  1.00  0.53           O  
HETATM 1103  O   HOH T1102      18.573  19.483  25.895  1.00  0.53           O  
HETATM 1104  O   HOH T1103     -43.923  10.627  44.530  1.00  0.53           O  
HETATM 1105  O   HOH T1104       2.583  25.809  27.762  1.00  0.53           O  
HETATM 1106  O   HOH T1105     -31.692  -0.762  49.407  1.00  0.53           O  
HETATM 1107  O   HOH T1106      -6.399  -7.932  55.093  1.00  0.53           O  
HETATM 1108  O   HOH T1107     -16.875 -11.938 -20.205  1.00  0.53           O  
HETATM 1109  O   HOH T1108      31.399  11.174  -0.805  1.00  0.53           O  
HETATM 1110  O   HOH T1109       9.854   8.162  12.582  1.00  0.53           O  
HETATM 1111  O   HOH T1110      -5.913   6.371  13.208  1.00  0.53           O  
HETATM 1112  O   HOH T1111     -33.339 -22.652  26.057  1.00  0.53           O  
HETATM 1113  O   HOH T1112     -40.297  -3.308   0.142  1.00  0.53           O  
HETATM 1114  O   HOH T1113       1.923  -1.876  34.710  1.00  0.53           O  
HETATM 1115  O   HOH T1114     -10.449 -20.176   5.528  1.00  0.53           O  
HETATM 1116  O   HOH T1115     -18.775 -22.788  31.991  1.00  0.53           O  
HETATM 1117  O   HOH T1116       1.726  31.816  28.175  1.00  0.53           O  
HETATM 1118  O   HOH T1117      -7.405   8.170  20.231  1.00  0.53           O  
HETATM 1119  O   HOH T1118      -5.117  28.288   2.359  1.00  0.53           O  
HETATM 1120  O   HOH T1119     -35.907  15.319  20.311  1.00  0.53           O  
HETATM 1121  O   HOH T1120      -6.957 -15.751  27.626  1.00  0.54           O  
HETATM 1122  O   HOH T1121     -25.780   8.995  24.187  1.00  0.54           O  
HETATM 1123  O   HOH T1122     -34.163 -14.275  10.272  1.00  0.54           O  
HETATM 1124  O   HOH T1123      -5.708 -16.125  40.423  1.00  0.54           O  
HETATM 1125  O   HOH T1124       5.437  32.650  40.184  1.00  0.54           O  
HETATM 1126  O   HOH T1125      -5.905  10.673  55.934  1.00  0.54           O  
HETATM 1127  O   HOH T1126      16.747  -4.399  -8.996  1.00  0.54           O  
HETATM 1128  O   HOH T1127       3.105  -6.595  19.424  1.00  0.54           O  
HETATM 1129  O   HOH T1128      -4.050 -18.930  37.470  1.00  0.54           O  
HETATM 1130  O   HOH T1129     -16.832 -27.787  29.096  1.00  0.54           O  
HETATM 1131  O   HOH T1130     -34.029  -1.967 -13.817  1.00  0.54           O  
HETATM 1132  O   HOH T1131       3.141   8.259  65.777  1.00  0.54           O  
HETATM 1133  O   HOH T1132       8.370  24.339   4.055  1.00  0.54           O  
HETATM 1134  O   HOH T1133      -4.949  28.299  -0.281  1.00  0.54           O  
HETATM 1135  O   HOH T1134     -23.675   3.483 -21.218  1.00  0.54           O  
HETATM 1136  O   HOH T1135     -21.205 -16.808  -8.116  1.00  0.54           O  
HETATM 1137  O   HOH T1136       6.797 -16.053   1.880  1.00  0.54           O  
HETATM 1138  O   HOH T1137      33.049  -9.767  -0.205  1.00  0.54           O  
HETATM 1139  O   HOH T1138     -45.219   1.528  23.509  1.00  0.54           O  
HETATM 1140  O   HOH T1139      -4.019  -3.038  16.095  1.00  0.54           O  
HETATM 1141  O   HOH T1140     -44.545  -3.216  46.045  1.00  0.54           O  
HETATM 1142  O   HOH T1141      30.684 -11.936  -4.217  1.00  0.54           O  
HETATM 1143  O   HOH T1142     -18.244  -3.224   3.147  1.00  0.54           O  
HETATM 1144  O   HOH T1143     -12.144 -20.594  23.651  1.00  0.54           O  
HETATM 1145  O   HOH T1144      -9.000  -1.615 -24.661  1.00  0.54           O  
HETATM 1146  O   HOH T1145      18.830 -11.447  13.749  1.00  0.54           O  
HETATM 1147  O   HOH T1146      -5.408  -7.222  -9.686  1.00  0.54           O  
HETATM 1148  O   HOH T1147     -44.589  14.748  37.359  1.00  0.54           O  
HETATM 1149  O   HOH T1148      -6.528  -5.807  53.426  1.00  0.54           O  
HETATM 1150  O   HOH T1149      -5.664  29.260  11.898  1.00  0.54           O  
HETATM 1151  O   HOH T1150      -5.702 -24.248  14.281  1.00  0.54           O  
HETATM 1152  O   HOH T1151     -20.059  -1.532  44.109  1.00  0.54           O  
HETATM 1153  O   HOH T1152       9.672  -2.164  -7.360  1.00  0.54           O  
HETATM 1154  O   HOH T1153     -16.258   5.715  43.152  1.00  0.54           O  
HETATM 1155  O   HOH T1154      26.625  -0.955  33.098  1.00  0.54           O  
HETATM 1156  O   HOH T1155     -10.388 -11.432 -16.860  1.00  0.54           O  
HETATM 1157  O   HOH T1156       6.528  22.725  21.853  1.00  0.54           O  
HETATM 1158  O   HOH T1157      12.429 -15.174  27.845  1.00  0.54           O  
HETATM 1159  O   HOH T1158       3.119   6.458  -7.314  1.00  0.54           O  
HETATM 1160  O   HOH T1159      16.077  12.353  36.985  1.00  0.55           O  
HETATM 1161  O   HOH T1160     -35.918  22.292  28.190  1.00  0.55           O  
HETATM 1162  O   HOH T1161      31.221  -8.854  10.679  1.00  0.55           O  
HETATM 1163  O   HOH T1162       0.989   8.280  67.501  1.00  0.55           O  
HETATM 1164  O   HOH T1163     -12.037 -16.980  10.668  1.00  0.55           O  
HETATM 1165  O   HOH T1164      30.825   2.415   1.599  1.00  0.55           O  
HETATM 1166  O   HOH T1165       1.327  -6.655  57.790  1.00  0.55           O  
HETATM 1167  O   HOH T1166      -8.615  28.027  23.492  1.00  0.55           O  
HETATM 1168  O   HOH T1167     -33.149  11.306  -8.205  1.00  0.55           O  
HETATM 1169  O   HOH T1168     -34.911  10.522   2.315  1.00  0.55           O  
HETATM 1170  O   HOH T1169     -20.993  28.416   6.516  1.00  0.55           O  
HETATM 1171  O   HOH T1170      -6.513   9.736  64.818  1.00  0.55           O  
HETATM 1172  O   HOH T1171     -40.498  21.040   8.827  1.00  0.55           O  
HETATM 1173  O   HOH T1172      20.526   4.195  27.996  1.00  0.55           O  
HETATM 1174  O   HOH T1173     -45.998   2.460  26.626  1.00  0.55           O  
HETATM 1175  O   HOH T1174      10.553  19.455  59.790  1.00  0.55           O  
HETATM 1176  O   HOH T1175      -8.155  25.854  40.078  1.00  0.55           O  
HETATM 1177  O   HOH T1176       3.264 -16.251  21.136  1.00  0.55           O  
HETATM 1178  O   HOH T1177       6.167 -16.028  33.841  1.00  0.55           O  
HETATM 1179  O   HOH T1178      30.717   3.916   4.090  1.00  0.55           O  
HETATM 1180  O   HOH T1179     -10.014   7.110 -18.771  1.00  0.55           O  
HETATM 1181  O   HOH T1180     -32.334  17.074  44.565  1.00  0.55           O  
HETATM 1182  O   HOH T1181      25.260 -15.636  -0.766  1.00  0.55           O  
HETATM 1183  O   HOH T1182     -19.477  25.951  34.816  1.00  0.55           O  
HETATM 1184  O   HOH T1183      -7.549  -5.680  -9.162  1.00  0.55           O  
HETATM 1185  O   HOH T1184       4.732  33.495  32.296  1.00  0.55           O  
HETATM 1186  O   HOH T1185      28.534  11.678  -1.817  1.00  0.55           O  
HETATM 1187  O   HOH T1186       8.819 -13.073  46.054  1.00  0.56           O  
HETATM 1188  O   HOH T1187     -40.699  -8.302  18.656  1.00  0.56           O  
HETATM 1189  O   HOH T1188      28.633  -6.191 -10.645  1.00  0.56           O  
HETATM 1190  O   HOH T1189     -43.550  -1.720  16.980  1.00  0.56           O  
HETATM 1191  O   HOH T1190      -8.947  -2.103  18.799  1.00  0.56           O  
HETATM 1192  O   HOH T1191      25.151   4.126  38.057  1.00  0.56           O  
HETATM 1193  O   HOH T1192      31.003  11.494   4.366  1.00  0.56           O  
HETATM 1194  O   HOH T1193     -32.614  -7.466  43.000  1.00  0.56           O  
HETATM 1195  O   HOH T1194     -12.909  11.403 -23.369  1.00  0.56           O  
HETATM 1196  O   HOH T1195      19.528 -10.412  -8.506  1.00  0.56           O  
HETATM 1197  O   HOH T1196       2.668  25.898   8.053  1.00  0.56           O  
HETATM 1198  O   HOH T1197      15.281  11.581  -7.467  1.00  0.56           O  
HETATM 1199  O   HOH T1198     -24.292  -8.947 -20.267  1.00  0.56           O  
HETATM 1200  O   HOH T1199      -4.790   4.695  63.539  1.00  0.56           O  
HETATM 1201  O   HOH T1200      12.168  16.224  37.136  1.00  0.56           O  
HETATM 1202  O   HOH T1201     -21.893  22.915  14.435  1.00  0.56           O  
HETATM 1203  O   HOH T1202     -20.056  18.452 -13.701  1.00  0.56           O  
HETATM 1204  O   HOH T1203     -12.027  13.266 -15.779  1.00  0.56           O  
HETATM 1205  O   HOH T1204      17.708  -1.707 -13.918  1.00  0.56           O  
HETATM 1206  O   HOH T1205      16.843 -12.135  26.641  1.00  0.56           O  
HETATM 1207  O   HOH T1206      14.591  23.093  17.334  1.00  0.56           O  
HETATM 1208  O   HOH T1207      -3.721   3.410 -12.990  1.00  0.56           O  
HETATM 1209  O   HOH T1208     -28.278   0.862  49.502  1.00  0.56           O  
HETATM 1210  O   HOH T1209     -27.339  -4.902  43.895  1.00  0.56           O  
HETATM 1211  O   HOH T1210     -28.566 -15.776  11.165  1.00  0.56           O  
HETATM 1212  O   HOH T1211      -7.236   2.573  10.604  1.00  0.56           O  
HETATM 1213  O   HOH T1212       0.056  14.506  -4.959  1.00  0.56           O  
HETATM 1214  O   HOH T1213      -7.361   9.649  23.426  1.00  0.56           O  
HETATM 1215  O   HOH T1214      31.571  -2.734  -0.118  1.00  0.56           O  
HETATM 1216  O   HOH T1215       9.573  22.094   3.262  1.00  0.56           O  
HETATM 1217  O   HOH T1216      -3.398   0.735  11.568  1.00  0.56           O  
HETATM 1218  O   HOH T1217      -8.995  13.822  49.292  1.00  0.56           O  
HETATM 1219  O   HOH T1218     -22.586  18.639 -15.404  1.00  0.56           O  
HETATM 1220  O   HOH T1219      27.556   1.568  -4.464  1.00  0.56           O  
HETATM 1221  O   HOH T1220       9.785 -21.792  17.964  1.00  0.56           O  
HETATM 1222  O   HOH T1221      -9.097 -12.411  46.803  1.00  0.56           O  
HETATM 1223  O   HOH T1222     -24.286  20.115   4.770  1.00  0.57           O  
HETATM 1224  O   HOH T1223      -7.839  -3.120 -14.477  1.00  0.57           O  
HETATM 1225  O   HOH T1224     -18.602 -12.907 -13.081  1.00  0.57           O  
HETATM 1226  O   HOH T1225     -11.362 -10.657  39.712  1.00  0.57           O  
HETATM 1227  O   HOH T1226      -8.255 -22.064  10.540  1.00  0.57           O  
HETATM 1228  O   HOH T1227      -3.218  22.750  17.770  1.00  0.57           O  
HETATM 1229  O   HOH T1228     -27.420  17.217  -8.699  1.00  0.57           O  
HETATM 1230  O   HOH T1229      12.853  -9.898  38.690  1.00  0.57           O  
HETATM 1231  O   HOH T1230     -22.882  24.399  31.816  1.00  0.57           O  
HETATM 1232  O   HOH T1231      22.758  18.627   4.863  1.00  0.57           O  
HETATM 1233  O   HOH T1232       5.005 -16.600  25.847  1.00  0.57           O  
HETATM 1234  O   HOH T1233     -34.024  -9.718   0.755  1.00  0.57           O  
HETATM 1235  O   HOH T1234       7.200  18.559  36.513  1.00  0.57           O  
HETATM 1236  O   HOH T1235     -16.750  25.094  39.055  1.00  0.57           O  
HETATM 1237  O   HOH T1236     -12.010  -5.542  47.088  1.00  0.57           O  
HETATM 1238  O   HOH T1237      19.501 -12.088  34.967  1.00  0.57           O  
HETATM 1239  O   HOH T1238     -35.894  -5.597  -7.425  1.00  0.57           O  
HETATM 1240  O   HOH T1239      -8.805  29.843  11.639  1.00  0.58           O  
HETATM 1241  O   HOH T1240       4.696  21.133  47.925  1.00  0.58           O  
HETATM 1242  O   HOH T1241       5.749  17.876  61.038  1.00  0.58           O  
HETATM 1243  O   HOH T1242      29.218 -15.389   0.566  1.00  0.58           O  
HETATM 1244  O   HOH T1243     -32.369  20.107  16.947  1.00  0.58           O  
HETATM 1245  O   HOH T1244     -43.561 -11.924  27.676  1.00  0.58           O  
HETATM 1246  O   HOH T1245     -19.413 -16.955   8.158  1.00  0.58           O  
HETATM 1247  O   HOH T1246     -27.522  21.732 -15.999  1.00  0.59           O  
HETATM 1248  O   HOH T1247      -8.126   5.837  63.195  1.00  0.59           O  
HETATM 1249  O   HOH T1248      16.148  20.210  26.853  1.00  0.59           O  
HETATM 1250  O   HOH T1249     -30.172 -17.102  33.554  1.00  0.59           O  
HETATM 1251  O   HOH T1250      21.781  -4.099  40.564  1.00  0.59           O  
HETATM 1252  O   HOH T1251      22.691  -5.863  19.713  1.00  0.59           O  
HETATM 1253  O   HOH T1252     -44.676  -5.872  20.304  1.00  0.59           O  
HETATM 1254  O   HOH T1253     -28.495 -18.569  21.855  1.00  0.60           O  
HETATM 1255  O   HOH T1254       8.048  20.645  31.672  1.00  0.60           O  
HETATM 1256  O   HOH T1255     -28.641 -15.344  36.608  1.00  0.61           O  
HETATM 1257  O   HOH T1256     -46.902  -3.264  22.784  1.00  0.62           O  
HETATM 1258  O   HOH T1257     -38.232  -5.275  18.083  1.00  0.66           O  
TER    1259      HOH T1257 
