# Supplementary material for: Accurate Prediction of Hydration Sites of Proteins Using Energy Model With Atom Embedding
Source: Front Mol Biosci. 2021 Sep 20;8:756075. doi: 10.3389/fmolb.2021.756075 (PMC8488165; doi:10.3389/fmolb.2021.756075)
Supplement: Supplementary file 1 [file DataSheet1.ZIP › Data Sheet 1/Our_result_pdb/our_dataset_output/2X46_watersite.pdb]

HEADER                                                        XXXX


JRNL        PMID   -1
HETATM    1  O   HOH T   0      29.089  17.854  10.833  1.00  0.17           O  
HETATM    2  O   HOH T   1      13.405  22.366   1.115  1.00  0.18           O  
HETATM    3  O   HOH T   2       4.680  30.894   7.130  1.00  0.19           O  
HETATM    4  O   HOH T   3      24.650  28.648  18.162  1.00  0.21           O  
HETATM    5  O   HOH T   4      14.762  22.622   7.963  1.00  0.21           O  
HETATM    6  O   HOH T   5       2.506  28.354   5.241  1.00  0.22           O  
HETATM    7  O   HOH T   6      15.404  31.832   0.910  1.00  0.22           O  
HETATM    8  O   HOH T   7      18.530  31.550  27.316  1.00  0.23           O  
HETATM    9  O   HOH T   8      31.245  17.361  -0.829  1.00  0.23           O  
HETATM   10  O   HOH T   9       7.955  40.810   3.949  1.00  0.24           O  
HETATM   11  O   HOH T  10       4.088  26.609  13.644  1.00  0.24           O  
HETATM   12  O   HOH T  11      27.335  21.257  16.405  1.00  0.24           O  
HETATM   13  O   HOH T  12       2.940  27.694  -0.269  1.00  0.25           O  
HETATM   14  O   HOH T  13      32.393  34.842  -0.894  1.00  0.25           O  
HETATM   15  O   HOH T  14       9.766  40.022  -2.901  1.00  0.26           O  
HETATM   16  O   HOH T  15      13.742  41.215  13.648  1.00  0.26           O  
HETATM   17  O   HOH T  16      10.986  34.165  16.110  1.00  0.26           O  
HETATM   18  O   HOH T  17      20.995  19.853  20.570  1.00  0.27           O  
HETATM   19  O   HOH T  18       5.166  29.706  -3.564  1.00  0.27           O  
HETATM   20  O   HOH T  19       8.588  25.306  26.127  1.00  0.27           O  
HETATM   21  O   HOH T  20       0.120  44.100  -1.605  1.00  0.27           O  
HETATM   22  O   HOH T  21      17.285  36.371  15.685  1.00  0.28           O  
HETATM   23  O   HOH T  22      25.085  32.828   0.681  1.00  0.28           O  
HETATM   24  O   HOH T  23      17.593  33.889  14.036  1.00  0.28           O  
HETATM   25  O   HOH T  24      33.529  24.121  10.930  1.00  0.28           O  
HETATM   26  O   HOH T  25      47.594  24.117  11.665  1.00  0.29           O  
HETATM   27  O   HOH T  26      10.037  12.271   4.832  1.00  0.29           O  
HETATM   28  O   HOH T  27      15.942  18.588  -7.303  1.00  0.29           O  
HETATM   29  O   HOH T  28      26.669  14.663   9.945  1.00  0.29           O  
HETATM   30  O   HOH T  29      22.326  31.281  29.252  1.00  0.29           O  
HETATM   31  O   HOH T  30       1.103  40.452   1.218  1.00  0.30           O  
HETATM   32  O   HOH T  31      -0.573  40.890  -7.492  1.00  0.30           O  
HETATM   33  O   HOH T  32      27.581  34.979  12.933  1.00  0.30           O  
HETATM   34  O   HOH T  33      23.266  43.366  21.161  1.00  0.30           O  
HETATM   35  O   HOH T  34      17.619  26.595  -9.366  1.00  0.30           O  
HETATM   36  O   HOH T  35      24.285  27.917  11.917  1.00  0.30           O  
HETATM   37  O   HOH T  36      16.847  23.997   9.402  1.00  0.30           O  
HETATM   38  O   HOH T  37      12.664  24.499  -5.580  1.00  0.31           O  
HETATM   39  O   HOH T  38      36.995  24.411   9.623  1.00  0.31           O  
HETATM   40  O   HOH T  39       4.655  25.078  18.063  1.00  0.31           O  
HETATM   41  O   HOH T  40      19.469  30.654  -3.815  1.00  0.31           O  
HETATM   42  O   HOH T  41       1.602  34.779  -7.231  1.00  0.31           O  
HETATM   43  O   HOH T  42      10.588  17.911  -4.797  1.00  0.32           O  
HETATM   44  O   HOH T  43       9.359  24.115  28.485  1.00  0.32           O  
HETATM   45  O   HOH T  44      21.838  39.709   9.793  1.00  0.32           O  
HETATM   46  O   HOH T  45      20.676  39.760   1.202  1.00  0.32           O  
HETATM   47  O   HOH T  46      26.051  34.890  22.421  1.00  0.32           O  
HETATM   48  O   HOH T  47       1.568  34.709   7.562  1.00  0.32           O  
HETATM   49  O   HOH T  48      15.684  40.503  11.690  1.00  0.33           O  
HETATM   50  O   HOH T  49      18.320  14.485   0.012  1.00  0.33           O  
HETATM   51  O   HOH T  50       6.330  16.492  -2.411  1.00  0.33           O  
HETATM   52  O   HOH T  51      19.108  12.530  14.679  1.00  0.33           O  
HETATM   53  O   HOH T  52      11.254  19.103  25.507  1.00  0.33           O  
HETATM   54  O   HOH T  53      22.960  14.127  12.740  1.00  0.33           O  
HETATM   55  O   HOH T  54       0.673  45.307   2.680  1.00  0.33           O  
HETATM   56  O   HOH T  55       3.773  28.310   7.705  1.00  0.33           O  
HETATM   57  O   HOH T  56      25.925  22.450  30.129  1.00  0.34           O  
HETATM   58  O   HOH T  57      11.156  42.277  -2.034  1.00  0.34           O  
HETATM   59  O   HOH T  58       4.428  24.489  15.351  1.00  0.34           O  
HETATM   60  O   HOH T  59      26.573  30.677  -4.173  1.00  0.34           O  
HETATM   61  O   HOH T  60      -0.421  29.291  10.850  1.00  0.34           O  
HETATM   62  O   HOH T  61       8.886  26.792   2.256  1.00  0.34           O  
HETATM   63  O   HOH T  62       9.668  31.817  28.969  1.00  0.34           O  
HETATM   64  O   HOH T  63      12.057  24.265  -8.339  1.00  0.34           O  
HETATM   65  O   HOH T  64      13.156  13.095  15.982  1.00  0.35           O  
HETATM   66  O   HOH T  65      25.491  37.508  17.959  1.00  0.35           O  
HETATM   67  O   HOH T  66      19.319  39.478  18.658  1.00  0.35           O  
HETATM   68  O   HOH T  67      17.109  12.158  12.773  1.00  0.35           O  
HETATM   69  O   HOH T  68      24.323  31.453  -9.292  1.00  0.35           O  
HETATM   70  O   HOH T  69      28.135  32.484  -2.570  1.00  0.35           O  
HETATM   71  O   HOH T  70      -2.770  37.425  -8.110  1.00  0.35           O  
HETATM   72  O   HOH T  71      15.355  32.098  31.255  1.00  0.35           O  
HETATM   73  O   HOH T  72      27.130  17.128  17.376  1.00  0.35           O  
HETATM   74  O   HOH T  73      16.131  15.030  -1.453  1.00  0.35           O  
HETATM   75  O   HOH T  74       6.469  45.399   1.794  1.00  0.36           O  
HETATM   76  O   HOH T  75      21.771  18.374  27.019  1.00  0.36           O  
HETATM   77  O   HOH T  76       0.319  35.650   5.210  1.00  0.36           O  
HETATM   78  O   HOH T  77      20.598  13.785 -11.275  1.00  0.36           O  
HETATM   79  O   HOH T  78       6.906  43.290   0.073  1.00  0.36           O  
HETATM   80  O   HOH T  79      18.566  21.266  28.377  1.00  0.36           O  
HETATM   81  O   HOH T  80      22.978  37.927  19.333  1.00  0.37           O  
HETATM   82  O   HOH T  81      15.114  27.235  -8.397  1.00  0.37           O  
HETATM   83  O   HOH T  82       1.384  36.135  10.008  1.00  0.37           O  
HETATM   84  O   HOH T  83      32.372  32.419   7.412  1.00  0.37           O  
HETATM   85  O   HOH T  84      23.134  32.316  26.787  1.00  0.37           O  
HETATM   86  O   HOH T  85      40.685  18.160   5.540  1.00  0.37           O  
HETATM   87  O   HOH T  86      27.637  22.609  18.846  1.00  0.38           O  
HETATM   88  O   HOH T  87      26.840  38.657   2.919  1.00  0.38           O  
HETATM   89  O   HOH T  88      -1.303  40.555  -0.079  1.00  0.38           O  
HETATM   90  O   HOH T  89      17.985  13.188  -2.461  1.00  0.38           O  
HETATM   91  O   HOH T  90      22.635  35.026  26.981  1.00  0.38           O  
HETATM   92  O   HOH T  91      18.585  11.681  -7.482  1.00  0.38           O  
HETATM   93  O   HOH T  92      15.566  29.563  30.006  1.00  0.38           O  
HETATM   94  O   HOH T  93      32.328  20.879  -4.936  1.00  0.38           O  
HETATM   95  O   HOH T  94       2.462  48.554   6.643  1.00  0.38           O  
HETATM   96  O   HOH T  95      10.499  14.332  16.103  1.00  0.38           O  
HETATM   97  O   HOH T  96      10.713  23.430  26.157  1.00  0.39           O  
HETATM   98  O   HOH T  97      13.001  44.808   3.042  1.00  0.39           O  
HETATM   99  O   HOH T  98      -0.372  38.190  -6.798  1.00  0.39           O  
HETATM  100  O   HOH T  99       4.712  24.381   5.682  1.00  0.39           O  
HETATM  101  O   HOH T 100      21.696  15.601  27.169  1.00  0.39           O  
HETATM  102  O   HOH T 101       1.691  32.389  13.730  1.00  0.39           O  
HETATM  103  O   HOH T 102      23.693  42.398  18.521  1.00  0.39           O  
HETATM  104  O   HOH T 103       7.437  36.638  15.580  1.00  0.40           O  
HETATM  105  O   HOH T 104      42.177  16.499   7.168  1.00  0.40           O  
HETATM  106  O   HOH T 105      21.815   9.997  -4.901  1.00  0.40           O  
HETATM  107  O   HOH T 106      32.807  17.468   4.665  1.00  0.40           O  
HETATM  108  O   HOH T 107       9.621  22.390   2.091  1.00  0.40           O  
HETATM  109  O   HOH T 108      13.823  15.400   8.662  1.00  0.40           O  
HETATM  110  O   HOH T 109      14.394  39.854  21.990  1.00  0.40           O  
HETATM  111  O   HOH T 110      11.899  25.414   7.857  1.00  0.40           O  
HETATM  112  O   HOH T 111       8.141  21.654  18.841  1.00  0.40           O  
HETATM  113  O   HOH T 112      -0.906  41.584   2.631  1.00  0.40           O  
HETATM  114  O   HOH T 113       6.898  16.282  18.448  1.00  0.40           O  
HETATM  115  O   HOH T 114      10.804  32.661  26.480  1.00  0.41           O  
HETATM  116  O   HOH T 115      26.048  18.756  -9.055  1.00  0.41           O  
HETATM  117  O   HOH T 116      26.379  30.752  18.078  1.00  0.41           O  
HETATM  118  O   HOH T 117      22.608  35.408  -2.461  1.00  0.41           O  
HETATM  119  O   HOH T 118      20.258  33.476  14.844  1.00  0.41           O  
HETATM  120  O   HOH T 119       0.623  31.723   9.922  1.00  0.41           O  
HETATM  121  O   HOH T 120      24.271  15.555  28.351  1.00  0.42           O  
HETATM  122  O   HOH T 121       9.754  38.883  -5.484  1.00  0.42           O  
HETATM  123  O   HOH T 122      17.898  37.476  20.053  1.00  0.42           O  
HETATM  124  O   HOH T 123      17.795  30.868  14.033  1.00  0.42           O  
HETATM  125  O   HOH T 124      24.101  43.713  16.027  1.00  0.42           O  
HETATM  126  O   HOH T 125       8.144  29.149  21.861  1.00  0.42           O  
HETATM  127  O   HOH T 126       9.234  17.331  24.913  1.00  0.42           O  
HETATM  128  O   HOH T 127       2.222  37.299   3.983  1.00  0.42           O  
HETATM  129  O   HOH T 128      19.335  41.000   9.962  1.00  0.42           O  
HETATM  130  O   HOH T 129      16.030  19.961  -9.698  1.00  0.43           O  
HETATM  131  O   HOH T 130      24.296  31.718  24.310  1.00  0.43           O  
HETATM  132  O   HOH T 131      12.247  32.855  28.825  1.00  0.43           O  
HETATM  133  O   HOH T 132       5.687  26.753   6.410  1.00  0.43           O  
HETATM  134  O   HOH T 133       4.991  26.272  22.769  1.00  0.43           O  
HETATM  135  O   HOH T 134       9.471  34.917  25.843  1.00  0.43           O  
HETATM  136  O   HOH T 135      11.036  39.782  17.509  1.00  0.43           O  
HETATM  137  O   HOH T 136       9.167  35.809  17.695  1.00  0.43           O  
HETATM  138  O   HOH T 137      18.784  32.233  -6.062  1.00  0.43           O  
HETATM  139  O   HOH T 138      25.503  41.801  20.494  1.00  0.43           O  
HETATM  140  O   HOH T 139      24.041  29.860  -5.181  1.00  0.43           O  
HETATM  141  O   HOH T 140      14.246  33.368  26.914  1.00  0.43           O  
HETATM  142  O   HOH T 141       9.191  16.698  -2.589  1.00  0.43           O  
HETATM  143  O   HOH T 142       4.630  28.059  24.900  1.00  0.44           O  
HETATM  144  O   HOH T 143      17.390  37.442  -6.772  1.00  0.44           O  
HETATM  145  O   HOH T 144      10.353  37.567  21.121  1.00  0.44           O  
HETATM  146  O   HOH T 145      14.445  13.326  18.325  1.00  0.44           O  
HETATM  147  O   HOH T 146      29.036  19.286  17.465  1.00  0.44           O  
HETATM  148  O   HOH T 147      22.811  16.205  -9.013  1.00  0.44           O  
HETATM  149  O   HOH T 148      10.208  36.669  15.354  1.00  0.44           O  
HETATM  150  O   HOH T 149       5.759  38.176  21.285  1.00  0.44           O  
HETATM  151  O   HOH T 150       8.895  38.762  -8.104  1.00  0.44           O  
HETATM  152  O   HOH T 151      20.799  22.032 -10.211  1.00  0.44           O  
HETATM  153  O   HOH T 152      26.251  41.295  17.861  1.00  0.44           O  
HETATM  154  O   HOH T 153      27.783  13.850   7.468  1.00  0.44           O  
HETATM  155  O   HOH T 154      12.588  21.557  25.557  1.00  0.45           O  
HETATM  156  O   HOH T 155      23.492  12.634  15.133  1.00  0.45           O  
HETATM  157  O   HOH T 156       4.247  24.156  20.758  1.00  0.45           O  
HETATM  158  O   HOH T 157       1.423  29.722  14.583  1.00  0.45           O  
HETATM  159  O   HOH T 158      18.575  36.596  22.545  1.00  0.45           O  
HETATM  160  O   HOH T 159       7.853  36.453  21.843  1.00  0.45           O  
HETATM  161  O   HOH T 160       1.936  42.138  -7.401  1.00  0.45           O  
HETATM  162  O   HOH T 161       8.068  44.088  -3.744  1.00  0.45           O  
HETATM  163  O   HOH T 162      29.341  15.085  10.613  1.00  0.45           O  
HETATM  164  O   HOH T 163      16.087  35.445  23.389  1.00  0.45           O  
HETATM  165  O   HOH T 164      19.410  40.454   5.071  1.00  0.46           O  
HETATM  166  O   HOH T 165      13.079  37.296  22.036  1.00  0.46           O  
HETATM  167  O   HOH T 166       0.765  43.231   0.885  1.00  0.46           O  
HETATM  168  O   HOH T 167       9.602  42.001  12.193  1.00  0.46           O  
HETATM  169  O   HOH T 168      31.633  24.201  12.928  1.00  0.46           O  
HETATM  170  O   HOH T 169      15.003  11.341  14.481  1.00  0.46           O  
HETATM  171  O   HOH T 170      22.918  29.190 -10.184  1.00  0.46           O  
HETATM  172  O   HOH T 171      -0.969  38.323  -1.607  1.00  0.46           O  
HETATM  173  O   HOH T 172      10.911  37.318  12.903  1.00  0.46           O  
HETATM  174  O   HOH T 173      24.044  41.386   9.942  1.00  0.46           O  
HETATM  175  O   HOH T 174      22.354  26.480  -9.209  1.00  0.46           O  
HETATM  176  O   HOH T 175      11.009  27.839   6.978  1.00  0.47           O  
HETATM  177  O   HOH T 176       7.781  16.656  -0.192  1.00  0.47           O  
HETATM  178  O   HOH T 177      -0.249  37.050   2.838  1.00  0.47           O  
HETATM  179  O   HOH T 178      29.923  22.154  -5.437  1.00  0.47           O  
HETATM  180  O   HOH T 179       9.638  16.713   1.815  1.00  0.47           O  
HETATM  181  O   HOH T 180      25.172  33.377  20.324  1.00  0.47           O  
HETATM  182  O   HOH T 181      19.339  20.989 -12.329  1.00  0.47           O  
HETATM  183  O   HOH T 182      35.478  17.986   5.448  1.00  0.47           O  
HETATM  184  O   HOH T 183      15.187  37.956  20.182  1.00  0.47           O  
HETATM  185  O   HOH T 184      30.743  33.860  20.966  1.00  0.47           O  
HETATM  186  O   HOH T 185      15.724  13.464   9.210  1.00  0.47           O  
HETATM  187  O   HOH T 186       7.115  26.947  24.490  1.00  0.47           O  
HETATM  188  O   HOH T 187      13.065  16.698  -4.964  1.00  0.48           O  
HETATM  189  O   HOH T 188       9.027  14.458  18.470  1.00  0.48           O  
HETATM  190  O   HOH T 189       6.400  39.968   6.245  1.00  0.48           O  
HETATM  191  O   HOH T 190      14.248  25.136   9.271  1.00  0.48           O  
HETATM  192  O   HOH T 191       7.489  23.511   0.599  1.00  0.48           O  
HETATM  193  O   HOH T 192      12.109  14.190  -4.849  1.00  0.48           O  
HETATM  194  O   HOH T 193      31.601  35.203  13.835  1.00  0.48           O  
HETATM  195  O   HOH T 194      19.905  10.580  -9.711  1.00  0.48           O  
HETATM  196  O   HOH T 195       6.847  42.302  -5.624  1.00  0.48           O  
HETATM  197  O   HOH T 196      31.755  19.588  -2.515  1.00  0.48           O  
HETATM  198  O   HOH T 197      30.056  35.114  11.443  1.00  0.48           O  
HETATM  199  O   HOH T 198       4.131  26.821  20.140  1.00  0.49           O  
HETATM  200  O   HOH T 199      25.594  12.539   8.341  1.00  0.49           O  
HETATM  201  O   HOH T 200      29.370  37.878   3.045  1.00  0.49           O  
HETATM  202  O   HOH T 201       2.337  46.786   4.445  1.00  0.49           O  
HETATM  203  O   HOH T 202      27.470  40.911   6.153  1.00  0.49           O  
HETATM  204  O   HOH T 203      16.082  31.933  28.521  1.00  0.49           O  
HETATM  205  O   HOH T 204      23.742  44.107  10.415  1.00  0.49           O  
HETATM  206  O   HOH T 205      28.021  24.885  20.283  1.00  0.50           O  
HETATM  207  O   HOH T 206      30.193  26.540  20.529  1.00  0.50           O  
HETATM  208  O   HOH T 207      26.454  32.013  22.409  1.00  0.50           O  
HETATM  209  O   HOH T 208      29.843  21.989  17.472  1.00  0.50           O  
HETATM  210  O   HOH T 209       3.191  29.976  17.990  1.00  0.50           O  
HETATM  211  O   HOH T 210      18.652  31.583  -8.934  1.00  0.50           O  
HETATM  212  O   HOH T 211      23.456  20.427  27.892  1.00  0.50           O  
HETATM  213  O   HOH T 212      29.839  23.705  15.292  1.00  0.51           O  
HETATM  214  O   HOH T 213      19.525  15.616  23.579  1.00  0.51           O  
HETATM  215  O   HOH T 214      11.887  23.632   3.205  1.00  0.51           O  
HETATM  216  O   HOH T 215      14.257  12.998   6.425  1.00  0.51           O  
HETATM  217  O   HOH T 216       6.299  25.838   3.866  1.00  0.51           O  
HETATM  218  O   HOH T 217      20.818  11.875   8.749  1.00  0.51           O  
HETATM  219  O   HOH T 218      26.655  37.289  11.635  1.00  0.51           O  
HETATM  220  O   HOH T 219       1.569  30.800   4.543  1.00  0.51           O  
HETATM  221  O   HOH T 220       3.100  26.654  16.228  1.00  0.51           O  
HETATM  222  O   HOH T 221      21.264  37.286  -4.020  1.00  0.51           O  
HETATM  223  O   HOH T 222      33.230  16.254  -2.399  1.00  0.51           O  
HETATM  224  O   HOH T 223      28.022  17.959  -7.294  1.00  0.51           O  
HETATM  225  O   HOH T 224       8.975  12.284   7.504  1.00  0.51           O  
HETATM  226  O   HOH T 225      23.649  39.561  11.938  1.00  0.52           O  
HETATM  227  O   HOH T 226       5.518  29.180  19.578  1.00  0.52           O  
HETATM  228  O   HOH T 227      13.031  30.744  30.483  1.00  0.52           O  
HETATM  229  O   HOH T 228      10.140  41.399   5.614  1.00  0.52           O  
HETATM  230  O   HOH T 229       9.413  21.547 -10.274  1.00  0.52           O  
HETATM  231  O   HOH T 230      22.006  31.436  -4.322  1.00  0.52           O  
HETATM  232  O   HOH T 231      25.046  13.744  17.060  1.00  0.52           O  
HETATM  233  O   HOH T 232      23.307  11.696  17.786  1.00  0.52           O  
HETATM  234  O   HOH T 233      28.298  17.548 -10.092  1.00  0.53           O  
HETATM  235  O   HOH T 234      12.936  41.779  -4.164  1.00  0.53           O  
HETATM  236  O   HOH T 235       5.443  43.571  -3.713  1.00  0.53           O  
HETATM  237  O   HOH T 236      -0.442  33.183  11.990  1.00  0.53           O  
HETATM  238  O   HOH T 237      27.594  35.214  10.214  1.00  0.53           O  
HETATM  239  O   HOH T 238       6.670  18.155  20.487  1.00  0.53           O  
HETATM  240  O   HOH T 239      11.605  13.247  23.453  1.00  0.53           O  
HETATM  241  O   HOH T 240      26.048  42.018   8.184  1.00  0.53           O  
HETATM  242  O   HOH T 241      11.207  18.680   3.044  1.00  0.53           O  
HETATM  243  O   HOH T 242      26.642  35.093  18.742  1.00  0.54           O  
HETATM  244  O   HOH T 243      24.481  13.115  10.729  1.00  0.54           O  
HETATM  245  O   HOH T 244      28.280  37.070  17.742  1.00  0.54           O  
HETATM  246  O   HOH T 245       4.230  31.670  19.756  1.00  0.54           O  
HETATM  247  O   HOH T 246      31.566  28.107  14.561  1.00  0.54           O  
HETATM  248  O   HOH T 247      29.171  15.357  17.834  1.00  0.54           O  
HETATM  249  O   HOH T 248      16.041  28.409 -10.665  1.00  0.54           O  
HETATM  250  O   HOH T 249      11.497  16.806  -7.247  1.00  0.54           O  
HETATM  251  O   HOH T 250      40.755  23.777   4.087  1.00  0.55           O  
HETATM  252  O   HOH T 251      10.591  24.290   5.572  1.00  0.55           O  
HETATM  253  O   HOH T 252      23.508  21.919  22.887  1.00  0.55           O  
HETATM  254  O   HOH T 253       1.606  35.015  12.606  1.00  0.55           O  
HETATM  255  O   HOH T 254      -0.516  34.303   9.451  1.00  0.56           O  
HETATM  256  O   HOH T 255       9.762  24.294  -9.766  1.00  0.56           O  
HETATM  257  O   HOH T 256      33.808  18.466  -1.006  1.00  0.56           O  
HETATM  258  O   HOH T 257      11.597  36.566  25.222  1.00  0.56           O  
HETATM  259  O   HOH T 258       1.528  34.821  15.281  1.00  0.56           O  
HETATM  260  O   HOH T 259       5.675  19.238  -3.122  1.00  0.56           O  
HETATM  261  O   HOH T 260      28.401  29.017  17.150  1.00  0.57           O  
HETATM  262  O   HOH T 261       5.374  36.663  13.783  1.00  0.63           O  
TER     263      HOH T 261 
