# Supplementary material for: Accurate Prediction of Hydration Sites of Proteins Using Energy Model With Atom Embedding
Source: Front Mol Biosci. 2021 Sep 20;8:756075. doi: 10.3389/fmolb.2021.756075 (PMC8488165; doi:10.3389/fmolb.2021.756075)
Supplement: Supplementary file 1 [file DataSheet1.ZIP › Data Sheet 1/Our_result_pdb/our_dataset_output/2XGI_watersite.pdb]

HEADER                                                        XXXX


JRNL        PMID   -1
HETATM    1  O   HOH T   0       8.458   7.598  26.944  1.00  0.12           O  
HETATM    2  O   HOH T   1      12.721   8.048  31.365  1.00  0.12           O  
HETATM    3  O   HOH T   2      16.354  15.301  14.912  1.00  0.14           O  
HETATM    4  O   HOH T   3      10.875  18.636  25.728  1.00  0.15           O  
HETATM    5  O   HOH T   4       1.838  15.861  47.848  1.00  0.16           O  
HETATM    6  O   HOH T   5      11.289   6.420  30.780  1.00  0.16           O  
HETATM    7  O   HOH T   6      -2.211  19.113  36.862  1.00  0.16           O  
HETATM    8  O   HOH T   7       7.485   6.935  49.318  1.00  0.17           O  
HETATM    9  O   HOH T   8       9.445  20.960   1.212  1.00  0.17           O  
HETATM   10  O   HOH T   9      31.721   6.921  19.212  1.00  0.17           O  
HETATM   11  O   HOH T  10       9.992   9.788  12.158  1.00  0.17           O  
HETATM   12  O   HOH T  11      21.227  27.572   9.378  1.00  0.17           O  
HETATM   13  O   HOH T  12      35.598  24.263  22.009  1.00  0.18           O  
HETATM   14  O   HOH T  13      14.570  11.570  -0.287  1.00  0.18           O  
HETATM   15  O   HOH T  14      15.602  12.358   8.525  1.00  0.19           O  
HETATM   16  O   HOH T  15      -1.020  23.493  41.287  1.00  0.20           O  
HETATM   17  O   HOH T  16       4.422  16.662  20.963  1.00  0.20           O  
HETATM   18  O   HOH T  17      17.812  33.303  24.953  1.00  0.20           O  
HETATM   19  O   HOH T  18      11.133   7.203  11.756  1.00  0.20           O  
HETATM   20  O   HOH T  19      -0.121   8.378   9.419  1.00  0.20           O  
HETATM   21  O   HOH T  20      -0.437   6.276  29.036  1.00  0.21           O  
HETATM   22  O   HOH T  21      25.909  19.863  10.143  1.00  0.21           O  
HETATM   23  O   HOH T  22      -0.682  18.107  25.046  1.00  0.21           O  
HETATM   24  O   HOH T  23      10.818   4.050  29.236  1.00  0.21           O  
HETATM   25  O   HOH T  24      -2.036  11.081  43.146  1.00  0.21           O  
HETATM   26  O   HOH T  25      15.750  29.126  31.294  1.00  0.22           O  
HETATM   27  O   HOH T  26      10.959  21.600  49.282  1.00  0.22           O  
HETATM   28  O   HOH T  27      13.863   3.601  50.012  1.00  0.22           O  
HETATM   29  O   HOH T  28      14.935   8.080  34.593  1.00  0.22           O  
HETATM   30  O   HOH T  29      -3.081  13.211  15.768  1.00  0.22           O  
HETATM   31  O   HOH T  30       4.477  38.138  25.247  1.00  0.22           O  
HETATM   32  O   HOH T  31       2.263  29.088  20.932  1.00  0.22           O  
HETATM   33  O   HOH T  32       3.300  26.299   0.183  1.00  0.22           O  
HETATM   34  O   HOH T  33      37.050  18.763  19.730  1.00  0.22           O  
HETATM   35  O   HOH T  34      14.644   4.687  -0.533  1.00  0.23           O  
HETATM   36  O   HOH T  35       6.141   8.355  25.925  1.00  0.23           O  
HETATM   37  O   HOH T  36      29.252  15.860  15.723  1.00  0.23           O  
HETATM   38  O   HOH T  37       7.983  31.722  40.671  1.00  0.23           O  
HETATM   39  O   HOH T  38      12.854   9.655  -7.225  1.00  0.23           O  
HETATM   40  O   HOH T  39      22.535  24.839  12.037  1.00  0.23           O  
HETATM   41  O   HOH T  40       6.277   0.753  49.785  1.00  0.23           O  
HETATM   42  O   HOH T  41       0.512  14.428  27.818  1.00  0.23           O  
HETATM   43  O   HOH T  42      13.050  -0.843  15.908  1.00  0.24           O  
HETATM   44  O   HOH T  43      16.900   1.376   4.706  1.00  0.24           O  
HETATM   45  O   HOH T  44      25.927   4.826  20.184  1.00  0.24           O  
HETATM   46  O   HOH T  45       0.273  24.151  18.148  1.00  0.24           O  
HETATM   47  O   HOH T  46      25.085  15.275  53.598  1.00  0.24           O  
HETATM   48  O   HOH T  47      36.528   2.253  22.485  1.00  0.24           O  
HETATM   49  O   HOH T  48       8.943  32.174  21.049  1.00  0.24           O  
HETATM   50  O   HOH T  49      30.062   0.232  25.024  1.00  0.24           O  
HETATM   51  O   HOH T  50       5.524   2.571  20.480  1.00  0.25           O  
HETATM   52  O   HOH T  51      24.201   5.353   7.279  1.00  0.25           O  
HETATM   53  O   HOH T  52      17.763  31.430  35.278  1.00  0.25           O  
HETATM   54  O   HOH T  53       0.707  25.010  12.276  1.00  0.25           O  
HETATM   55  O   HOH T  54      34.827  27.576  46.997  1.00  0.25           O  
HETATM   56  O   HOH T  55      13.797   6.177  30.019  1.00  0.25           O  
HETATM   57  O   HOH T  56      38.458  19.978  24.298  1.00  0.25           O  
HETATM   58  O   HOH T  57       1.967  29.237  34.330  1.00  0.25           O  
HETATM   59  O   HOH T  58      24.367   1.769  32.717  1.00  0.25           O  
HETATM   60  O   HOH T  59       6.422  40.656  19.203  1.00  0.25           O  
HETATM   61  O   HOH T  60      29.115  20.861  40.239  1.00  0.25           O  
HETATM   62  O   HOH T  61      31.671   3.201  31.036  1.00  0.25           O  
HETATM   63  O   HOH T  62      -5.023  20.140  45.339  1.00  0.25           O  
HETATM   64  O   HOH T  63      -6.125  23.187  21.633  1.00  0.26           O  
HETATM   65  O   HOH T  64       2.286  36.053  18.121  1.00  0.26           O  
HETATM   66  O   HOH T  65      10.479  24.955  11.168  1.00  0.26           O  
HETATM   67  O   HOH T  66      43.546  34.068  39.330  1.00  0.26           O  
HETATM   68  O   HOH T  67     -10.798   3.502  34.575  1.00  0.26           O  
HETATM   69  O   HOH T  68      15.837   4.523  43.472  1.00  0.26           O  
HETATM   70  O   HOH T  69      14.407  15.909  -3.858  1.00  0.26           O  
HETATM   71  O   HOH T  70      37.042  12.378  19.606  1.00  0.26           O  
HETATM   72  O   HOH T  71       6.517  33.334  20.503  1.00  0.26           O  
HETATM   73  O   HOH T  72     -11.809  10.998  34.317  1.00  0.26           O  
HETATM   74  O   HOH T  73      11.476   3.761  44.380  1.00  0.26           O  
HETATM   75  O   HOH T  74      15.359  18.418  -0.179  1.00  0.26           O  
HETATM   76  O   HOH T  75       9.262   4.366  19.701  1.00  0.26           O  
HETATM   77  O   HOH T  76      36.582  16.162  38.284  1.00  0.27           O  
HETATM   78  O   HOH T  77      29.211  23.157  32.047  1.00  0.27           O  
HETATM   79  O   HOH T  78       3.755  18.563  27.953  1.00  0.27           O  
HETATM   80  O   HOH T  79      17.073  -0.233   2.480  1.00  0.27           O  
HETATM   81  O   HOH T  80       0.644   1.986   8.623  1.00  0.27           O  
HETATM   82  O   HOH T  81      -8.708  22.399  16.199  1.00  0.27           O  
HETATM   83  O   HOH T  82      25.887  30.129  34.007  1.00  0.27           O  
HETATM   84  O   HOH T  83     -12.389   4.880  30.579  1.00  0.27           O  
HETATM   85  O   HOH T  84     -13.328  15.266  31.606  1.00  0.27           O  
HETATM   86  O   HOH T  85      24.569  -2.253  14.515  1.00  0.27           O  
HETATM   87  O   HOH T  86      16.136   6.995  -0.108  1.00  0.27           O  
HETATM   88  O   HOH T  87       2.483   3.280  37.418  1.00  0.27           O  
HETATM   89  O   HOH T  88     -10.353  16.425  42.024  1.00  0.27           O  
HETATM   90  O   HOH T  89       1.174  21.342  -4.948  1.00  0.27           O  
HETATM   91  O   HOH T  90      11.521  33.339  21.024  1.00  0.27           O  
HETATM   92  O   HOH T  91     -10.908   2.619  24.291  1.00  0.27           O  
HETATM   93  O   HOH T  92      26.014  25.807  25.124  1.00  0.28           O  
HETATM   94  O   HOH T  93      11.034   6.307  -6.198  1.00  0.28           O  
HETATM   95  O   HOH T  94       6.709  -1.802  35.198  1.00  0.28           O  
HETATM   96  O   HOH T  95      -0.511  12.205   5.648  1.00  0.28           O  
HETATM   97  O   HOH T  96       9.765   5.763  28.668  1.00  0.28           O  
HETATM   98  O   HOH T  97      -5.569  26.664  12.241  1.00  0.28           O  
HETATM   99  O   HOH T  98      -3.148   6.504  37.195  1.00  0.28           O  
HETATM  100  O   HOH T  99      16.207  10.953  20.386  1.00  0.28           O  
HETATM  101  O   HOH T 100      12.810  41.389  23.364  1.00  0.28           O  
HETATM  102  O   HOH T 101      -9.707  19.278  36.162  1.00  0.29           O  
HETATM  103  O   HOH T 102     -13.715  12.459  19.637  1.00  0.29           O  
HETATM  104  O   HOH T 103      24.944  22.031  33.099  1.00  0.29           O  
HETATM  105  O   HOH T 104       8.020  25.064   9.942  1.00  0.29           O  
HETATM  106  O   HOH T 105      22.462  15.527   4.476  1.00  0.29           O  
HETATM  107  O   HOH T 106       3.206   6.982  -2.928  1.00  0.29           O  
HETATM  108  O   HOH T 107      26.833  24.809  40.448  1.00  0.29           O  
HETATM  109  O   HOH T 108       5.919  11.299  44.857  1.00  0.29           O  
HETATM  110  O   HOH T 109      19.055  29.093   8.813  1.00  0.29           O  
HETATM  111  O   HOH T 110       6.269  38.231  27.413  1.00  0.29           O  
HETATM  112  O   HOH T 111      27.828  12.686  17.679  1.00  0.29           O  
HETATM  113  O   HOH T 112      10.484   6.483  38.692  1.00  0.30           O  
HETATM  114  O   HOH T 113     -13.542  20.862  -0.623  1.00  0.30           O  
HETATM  115  O   HOH T 114       4.735  34.227  37.437  1.00  0.30           O  
HETATM  116  O   HOH T 115      -0.596  13.494  -1.661  1.00  0.30           O  
HETATM  117  O   HOH T 116      -0.993  21.023  48.473  1.00  0.30           O  
HETATM  118  O   HOH T 117      24.873   3.517  29.414  1.00  0.30           O  
HETATM  119  O   HOH T 118       3.146  29.274  51.142  1.00  0.30           O  
HETATM  120  O   HOH T 119      -8.587  35.268   5.729  1.00  0.30           O  
HETATM  121  O   HOH T 120       8.826  25.277   2.758  1.00  0.30           O  
HETATM  122  O   HOH T 121      10.394  -2.548  21.780  1.00  0.30           O  
HETATM  123  O   HOH T 122       7.055  -7.348  26.525  1.00  0.30           O  
HETATM  124  O   HOH T 123      44.554  23.859  23.989  1.00  0.30           O  
HETATM  125  O   HOH T 124       6.201  26.673  48.919  1.00  0.30           O  
HETATM  126  O   HOH T 125      24.543  18.949   7.918  1.00  0.30           O  
HETATM  127  O   HOH T 126      19.470  29.093  26.561  1.00  0.30           O  
HETATM  128  O   HOH T 127      15.743   9.329  -1.517  1.00  0.31           O  
HETATM  129  O   HOH T 128       4.943  -0.092   7.425  1.00  0.31           O  
HETATM  130  O   HOH T 129     -14.079  19.302  30.679  1.00  0.31           O  
HETATM  131  O   HOH T 130      24.356  24.062  10.192  1.00  0.31           O  
HETATM  132  O   HOH T 131      19.506  20.851  29.297  1.00  0.31           O  
HETATM  133  O   HOH T 132       8.867  -5.290  34.923  1.00  0.31           O  
HETATM  134  O   HOH T 133      11.539  40.061  30.777  1.00  0.31           O  
HETATM  135  O   HOH T 134      23.389   2.219  50.996  1.00  0.31           O  
HETATM  136  O   HOH T 135      28.798  27.605  24.188  1.00  0.31           O  
HETATM  137  O   HOH T 136      -1.502   2.019  12.391  1.00  0.31           O  
HETATM  138  O   HOH T 137      -9.080  -1.670  38.445  1.00  0.31           O  
HETATM  139  O   HOH T 138      27.059  29.248   5.600  1.00  0.31           O  
HETATM  140  O   HOH T 139       4.019  -1.210  35.539  1.00  0.31           O  
HETATM  141  O   HOH T 140      27.557  20.295  45.351  1.00  0.32           O  
HETATM  142  O   HOH T 141      12.998   9.159  20.725  1.00  0.32           O  
HETATM  143  O   HOH T 142      14.986   9.235  18.711  1.00  0.32           O  
HETATM  144  O   HOH T 143      -7.483   8.365   7.882  1.00  0.32           O  
HETATM  145  O   HOH T 144      22.979  18.600  31.331  1.00  0.32           O  
HETATM  146  O   HOH T 145      19.282   4.240  25.058  1.00  0.32           O  
HETATM  147  O   HOH T 146       6.689  12.605  -6.745  1.00  0.32           O  
HETATM  148  O   HOH T 147      16.069   2.608  41.370  1.00  0.32           O  
HETATM  149  O   HOH T 148      27.589  29.179  49.287  1.00  0.32           O  
HETATM  150  O   HOH T 149      35.752   8.843  19.429  1.00  0.32           O  
HETATM  151  O   HOH T 150      25.160  30.425  23.001  1.00  0.32           O  
HETATM  152  O   HOH T 151      -7.476  13.759   6.653  1.00  0.33           O  
HETATM  153  O   HOH T 152      -0.535  23.532  -5.079  1.00  0.33           O  
HETATM  154  O   HOH T 153      21.865  32.648  34.261  1.00  0.33           O  
HETATM  155  O   HOH T 154      -8.778  21.826   4.233  1.00  0.33           O  
HETATM  156  O   HOH T 155      11.153   0.562  30.760  1.00  0.33           O  
HETATM  157  O   HOH T 156      21.597  24.852  35.753  1.00  0.33           O  
HETATM  158  O   HOH T 157     -22.979   9.296  25.131  1.00  0.33           O  
HETATM  159  O   HOH T 158      13.128   1.908  -8.493  1.00  0.33           O  
HETATM  160  O   HOH T 159      22.714  29.046  40.627  1.00  0.33           O  
HETATM  161  O   HOH T 160      24.152   0.534  22.578  1.00  0.33           O  
HETATM  162  O   HOH T 161       3.437   1.629   1.958  1.00  0.33           O  
HETATM  163  O   HOH T 162      11.076  22.392  11.996  1.00  0.33           O  
HETATM  164  O   HOH T 163      31.157  29.202  36.345  1.00  0.33           O  
HETATM  165  O   HOH T 164      14.783  39.729  22.535  1.00  0.33           O  
HETATM  166  O   HOH T 165       1.429   2.670  46.417  1.00  0.33           O  
HETATM  167  O   HOH T 166      26.380   4.751  17.413  1.00  0.34           O  
HETATM  168  O   HOH T 167      17.189  26.737  42.258  1.00  0.34           O  
HETATM  169  O   HOH T 168     -10.957  18.591   7.344  1.00  0.34           O  
HETATM  170  O   HOH T 169      -5.338  12.671   2.424  1.00  0.34           O  
HETATM  171  O   HOH T 170      11.886  -1.047   7.216  1.00  0.34           O  
HETATM  172  O   HOH T 171       1.861   5.888  -0.706  1.00  0.34           O  
HETATM  173  O   HOH T 172      -4.709   3.030  33.702  1.00  0.34           O  
HETATM  174  O   HOH T 173      29.704  -3.765  34.374  1.00  0.34           O  
HETATM  175  O   HOH T 174      37.705  17.431  25.110  1.00  0.34           O  
HETATM  176  O   HOH T 175      24.646   5.582   4.578  1.00  0.34           O  
HETATM  177  O   HOH T 176      24.301  25.249  35.825  1.00  0.34           O  
HETATM  178  O   HOH T 177       4.818   8.613   6.092  1.00  0.34           O  
HETATM  179  O   HOH T 178      31.623  21.112  11.589  1.00  0.34           O  
HETATM  180  O   HOH T 179      40.809   8.738  35.495  1.00  0.34           O  
HETATM  181  O   HOH T 180     -12.134   8.913  35.953  1.00  0.34           O  
HETATM  182  O   HOH T 181      16.293  29.266  43.146  1.00  0.34           O  
HETATM  183  O   HOH T 182      -1.698  27.690  26.055  1.00  0.34           O  
HETATM  184  O   HOH T 183      28.621   2.463  48.025  1.00  0.34           O  
HETATM  185  O   HOH T 184     -10.182  17.769   4.803  1.00  0.35           O  
HETATM  186  O   HOH T 185      43.761  13.688  27.510  1.00  0.35           O  
HETATM  187  O   HOH T 186      11.383   8.986  38.640  1.00  0.35           O  
HETATM  188  O   HOH T 187      -8.085  22.154  18.856  1.00  0.35           O  
HETATM  189  O   HOH T 188       1.688  14.904  -1.890  1.00  0.35           O  
HETATM  190  O   HOH T 189      37.196  18.238  22.461  1.00  0.35           O  
HETATM  191  O   HOH T 190      19.475  23.178  30.597  1.00  0.35           O  
HETATM  192  O   HOH T 191      26.420   6.584   8.410  1.00  0.35           O  
HETATM  193  O   HOH T 192       3.383   9.206  33.416  1.00  0.35           O  
HETATM  194  O   HOH T 193      21.713  27.382  12.076  1.00  0.35           O  
HETATM  195  O   HOH T 194      16.438   3.042   0.691  1.00  0.35           O  
HETATM  196  O   HOH T 195      23.327  18.896  47.564  1.00  0.35           O  
HETATM  197  O   HOH T 196      27.676  -5.902  40.581  1.00  0.35           O  
HETATM  198  O   HOH T 197      10.311  -1.364  38.453  1.00  0.35           O  
HETATM  199  O   HOH T 198      -0.739   6.445  35.841  1.00  0.35           O  
HETATM  200  O   HOH T 199       9.174  40.185  29.372  1.00  0.35           O  
HETATM  201  O   HOH T 200      -9.389  17.528  -1.810  1.00  0.35           O  
HETATM  202  O   HOH T 201      10.558  23.535   1.472  1.00  0.35           O  
HETATM  203  O   HOH T 202      -2.899  29.502   7.406  1.00  0.35           O  
HETATM  204  O   HOH T 203      13.860  36.367  18.404  1.00  0.35           O  
HETATM  205  O   HOH T 204      32.776  28.780  30.076  1.00  0.36           O  
HETATM  206  O   HOH T 205       0.447  37.650  16.869  1.00  0.36           O  
HETATM  207  O   HOH T 206      19.253  10.666  24.676  1.00  0.36           O  
HETATM  208  O   HOH T 207       1.530   9.516   7.435  1.00  0.36           O  
HETATM  209  O   HOH T 208      -9.041  10.671  14.523  1.00  0.36           O  
HETATM  210  O   HOH T 209      21.337  26.985  39.512  1.00  0.36           O  
HETATM  211  O   HOH T 210      -3.568  22.701  16.460  1.00  0.36           O  
HETATM  212  O   HOH T 211      13.995  33.046   6.118  1.00  0.36           O  
HETATM  213  O   HOH T 212       2.404  29.329  39.162  1.00  0.36           O  
HETATM  214  O   HOH T 213      -0.401  26.658   8.314  1.00  0.36           O  
HETATM  215  O   HOH T 214      -3.251  22.930  -5.222  1.00  0.36           O  
HETATM  216  O   HOH T 215      22.187  17.080  29.055  1.00  0.36           O  
HETATM  217  O   HOH T 216      32.419  -3.148  34.033  1.00  0.36           O  
HETATM  218  O   HOH T 217      -1.773  29.012  23.595  1.00  0.36           O  
HETATM  219  O   HOH T 218      19.100  31.869   8.640  1.00  0.36           O  
HETATM  220  O   HOH T 219      27.852   4.188   8.389  1.00  0.36           O  
HETATM  221  O   HOH T 220      -9.179   7.796  42.318  1.00  0.36           O  
HETATM  222  O   HOH T 221      18.706  30.177  45.910  1.00  0.37           O  
HETATM  223  O   HOH T 222      -0.887   9.570   6.038  1.00  0.37           O  
HETATM  224  O   HOH T 223      12.021  17.510  27.955  1.00  0.37           O  
HETATM  225  O   HOH T 224      27.539   0.974  50.213  1.00  0.37           O  
HETATM  226  O   HOH T 225      19.177  21.861   7.223  1.00  0.37           O  
HETATM  227  O   HOH T 226      23.181   6.366  -2.194  1.00  0.37           O  
HETATM  228  O   HOH T 227      20.213   0.439  39.005  1.00  0.37           O  
HETATM  229  O   HOH T 228       1.321  18.518  -4.266  1.00  0.37           O  
HETATM  230  O   HOH T 229      -1.908  17.188  47.150  1.00  0.37           O  
HETATM  231  O   HOH T 230      32.236  32.755  21.689  1.00  0.37           O  
HETATM  232  O   HOH T 231      34.174  20.303  11.000  1.00  0.37           O  
HETATM  233  O   HOH T 232      33.391  26.219  32.840  1.00  0.37           O  
HETATM  234  O   HOH T 233      24.618  12.629  53.913  1.00  0.37           O  
HETATM  235  O   HOH T 234      16.135  15.604  28.628  1.00  0.37           O  
HETATM  236  O   HOH T 235      -0.773  26.928  37.608  1.00  0.37           O  
HETATM  237  O   HOH T 236      26.613  22.479  43.965  1.00  0.37           O  
HETATM  238  O   HOH T 237       0.067  29.155  27.558  1.00  0.37           O  
HETATM  239  O   HOH T 238      -9.990  19.823   2.888  1.00  0.37           O  
HETATM  240  O   HOH T 239       9.572   5.017  27.019  1.00  0.37           O  
HETATM  241  O   HOH T 240      33.706  12.119  48.317  1.00  0.37           O  
HETATM  242  O   HOH T 241       5.627  -2.602  28.119  1.00  0.37           O  
HETATM  243  O   HOH T 242     -11.534   5.508  17.958  1.00  0.37           O  
HETATM  244  O   HOH T 243      43.466  34.052  34.221  1.00  0.37           O  
HETATM  245  O   HOH T 244      -5.263  17.857  -1.164  1.00  0.38           O  
HETATM  246  O   HOH T 245      -7.447  26.334  14.169  1.00  0.38           O  
HETATM  247  O   HOH T 246      11.529   1.534  42.637  1.00  0.38           O  
HETATM  248  O   HOH T 247     -14.653   9.939  28.369  1.00  0.38           O  
HETATM  249  O   HOH T 248      -1.218  17.674   0.575  1.00  0.38           O  
HETATM  250  O   HOH T 249      18.979  28.041   2.350  1.00  0.38           O  
HETATM  251  O   HOH T 250       9.488   5.614  50.907  1.00  0.38           O  
HETATM  252  O   HOH T 251      27.744  -3.088  40.505  1.00  0.38           O  
HETATM  253  O   HOH T 252      15.557  35.113   6.925  1.00  0.38           O  
HETATM  254  O   HOH T 253       2.218  32.944   7.020  1.00  0.38           O  
HETATM  255  O   HOH T 254       5.783  27.407   0.703  1.00  0.38           O  
HETATM  256  O   HOH T 255      16.397   0.495  39.425  1.00  0.38           O  
HETATM  257  O   HOH T 256      13.058   8.018  36.616  1.00  0.38           O  
HETATM  258  O   HOH T 257      23.314  22.692  35.285  1.00  0.38           O  
HETATM  259  O   HOH T 258      37.551  32.710  17.389  1.00  0.38           O  
HETATM  260  O   HOH T 259      10.740  -2.535  15.883  1.00  0.38           O  
HETATM  261  O   HOH T 260      -2.264  26.547  45.186  1.00  0.38           O  
HETATM  262  O   HOH T 261       1.344  31.175  29.069  1.00  0.38           O  
HETATM  263  O   HOH T 262      23.221  -0.787  32.344  1.00  0.38           O  
HETATM  264  O   HOH T 263      31.019  29.998  38.991  1.00  0.38           O  
HETATM  265  O   HOH T 264     -10.528   5.389  36.599  1.00  0.38           O  
HETATM  266  O   HOH T 265      24.189   3.114  16.501  1.00  0.39           O  
HETATM  267  O   HOH T 266      -7.049   8.476  10.659  1.00  0.39           O  
HETATM  268  O   HOH T 267      -0.503  35.678  33.298  1.00  0.39           O  
HETATM  269  O   HOH T 268      13.793  33.922  30.701  1.00  0.39           O  
HETATM  270  O   HOH T 269      -1.839  29.100  -4.089  1.00  0.39           O  
HETATM  271  O   HOH T 270       2.353   7.265  47.190  1.00  0.39           O  
HETATM  272  O   HOH T 271      31.117  24.169   8.179  1.00  0.39           O  
HETATM  273  O   HOH T 272      25.131  -0.979  24.665  1.00  0.39           O  
HETATM  274  O   HOH T 273       1.693  29.407  -1.571  1.00  0.39           O  
HETATM  275  O   HOH T 274      -2.389   6.487  42.011  1.00  0.39           O  
HETATM  276  O   HOH T 275      39.646   6.212  35.770  1.00  0.39           O  
HETATM  277  O   HOH T 276      -8.640  14.581  42.882  1.00  0.39           O  
HETATM  278  O   HOH T 277      27.887  26.773  26.843  1.00  0.39           O  
HETATM  279  O   HOH T 278     -23.852  11.200  26.974  1.00  0.39           O  
HETATM  280  O   HOH T 279      36.792  23.231  15.646  1.00  0.39           O  
HETATM  281  O   HOH T 280      33.722  30.364  12.158  1.00  0.39           O  
HETATM  282  O   HOH T 281      33.642  -2.197  24.459  1.00  0.39           O  
HETATM  283  O   HOH T 282      34.747  35.199  16.593  1.00  0.39           O  
HETATM  284  O   HOH T 283      -9.005   5.811  26.609  1.00  0.39           O  
HETATM  285  O   HOH T 284      39.262  29.853  31.762  1.00  0.39           O  
HETATM  286  O   HOH T 285      17.667  30.203  32.924  1.00  0.39           O  
HETATM  287  O   HOH T 286      41.491  33.464  26.425  1.00  0.39           O  
HETATM  288  O   HOH T 287      18.055   9.847  22.229  1.00  0.39           O  
HETATM  289  O   HOH T 288      38.268   9.946  18.934  1.00  0.39           O  
HETATM  290  O   HOH T 289      -5.597   8.047   5.918  1.00  0.39           O  
HETATM  291  O   HOH T 290      17.750  18.757  -1.545  1.00  0.39           O  
HETATM  292  O   HOH T 291      29.625  10.867   6.877  1.00  0.39           O  
HETATM  293  O   HOH T 292      26.676  33.098  12.910  1.00  0.40           O  
HETATM  294  O   HOH T 293      40.933  16.653  15.683  1.00  0.40           O  
HETATM  295  O   HOH T 294      -1.952  25.733  39.864  1.00  0.40           O  
HETATM  296  O   HOH T 295      28.384  18.936   9.617  1.00  0.40           O  
HETATM  297  O   HOH T 296       2.288   0.862  36.188  1.00  0.40           O  
HETATM  298  O   HOH T 297      32.987  -1.509  27.115  1.00  0.40           O  
HETATM  299  O   HOH T 298      -1.524  35.762  20.944  1.00  0.40           O  
HETATM  300  O   HOH T 299      17.791  34.237   8.252  1.00  0.40           O  
HETATM  301  O   HOH T 300      32.154  28.453  25.304  1.00  0.40           O  
HETATM  302  O   HOH T 301       0.479   3.984  22.576  1.00  0.40           O  
HETATM  303  O   HOH T 302       0.839  35.605  12.964  1.00  0.40           O  
HETATM  304  O   HOH T 303      -4.066  24.886  20.917  1.00  0.40           O  
HETATM  305  O   HOH T 304       4.943   2.773  -0.154  1.00  0.40           O  
HETATM  306  O   HOH T 305      -2.257  25.497  -5.751  1.00  0.40           O  
HETATM  307  O   HOH T 306      -1.800   2.629  21.662  1.00  0.40           O  
HETATM  308  O   HOH T 307      14.930  37.294  23.733  1.00  0.40           O  
HETATM  309  O   HOH T 308      34.392  13.688  12.834  1.00  0.40           O  
HETATM  310  O   HOH T 309     -12.291   2.577  29.225  1.00  0.40           O  
HETATM  311  O   HOH T 310      17.946   2.642  43.479  1.00  0.40           O  
HETATM  312  O   HOH T 311      18.402   2.209   2.380  1.00  0.40           O  
HETATM  313  O   HOH T 312      43.042  23.308  21.766  1.00  0.40           O  
HETATM  314  O   HOH T 313      21.863  28.181   2.179  1.00  0.40           O  
HETATM  315  O   HOH T 314      12.586   1.343   6.153  1.00  0.40           O  
HETATM  316  O   HOH T 315      17.672  27.667  29.891  1.00  0.40           O  
HETATM  317  O   HOH T 316      36.900  -0.240  23.624  1.00  0.41           O  
HETATM  318  O   HOH T 317      -9.596  24.594  14.585  1.00  0.41           O  
HETATM  319  O   HOH T 318     -12.008  14.304  41.335  1.00  0.41           O  
HETATM  320  O   HOH T 319      38.201   7.528  20.182  1.00  0.41           O  
HETATM  321  O   HOH T 320      -3.957  32.310  21.832  1.00  0.41           O  
HETATM  322  O   HOH T 321      35.684  13.189  46.572  1.00  0.41           O  
HETATM  323  O   HOH T 322       7.870   7.637  17.877  1.00  0.41           O  
HETATM  324  O   HOH T 323      11.583  -3.267  36.846  1.00  0.41           O  
HETATM  325  O   HOH T 324       8.039  18.196   9.620  1.00  0.41           O  
HETATM  326  O   HOH T 325      29.031  -0.017  46.665  1.00  0.41           O  
HETATM  327  O   HOH T 326      11.266  20.272  51.594  1.00  0.41           O  
HETATM  328  O   HOH T 327      11.415  -1.732  24.124  1.00  0.41           O  
HETATM  329  O   HOH T 328       4.964  31.982  18.942  1.00  0.41           O  
HETATM  330  O   HOH T 329      -9.283  15.123   4.947  1.00  0.41           O  
HETATM  331  O   HOH T 330       6.416  14.823  27.819  1.00  0.41           O  
HETATM  332  O   HOH T 331     -11.614  11.930  42.690  1.00  0.41           O  
HETATM  333  O   HOH T 332      28.736   0.721   9.940  1.00  0.41           O  
HETATM  334  O   HOH T 333       4.283  28.347  -1.403  1.00  0.41           O  
HETATM  335  O   HOH T 334      16.478  20.930  -0.347  1.00  0.41           O  
HETATM  336  O   HOH T 335       4.981  -4.605  48.610  1.00  0.41           O  
HETATM  337  O   HOH T 336       4.934   5.275  20.637  1.00  0.41           O  
HETATM  338  O   HOH T 337      20.338  18.597  30.521  1.00  0.41           O  
HETATM  339  O   HOH T 338      -4.037  30.281  26.695  1.00  0.41           O  
HETATM  340  O   HOH T 339      22.151  -0.502  19.044  1.00  0.41           O  
HETATM  341  O   HOH T 340      18.521   1.216  41.148  1.00  0.42           O  
HETATM  342  O   HOH T 341      15.421  18.315  -2.967  1.00  0.42           O  
HETATM  343  O   HOH T 342       2.247   8.727  49.566  1.00  0.42           O  
HETATM  344  O   HOH T 343       0.743  27.658   0.342  1.00  0.42           O  
HETATM  345  O   HOH T 344      23.918  29.987   3.246  1.00  0.42           O  
HETATM  346  O   HOH T 345      28.201  29.410   8.295  1.00  0.42           O  
HETATM  347  O   HOH T 346      21.479  28.767  43.116  1.00  0.42           O  
HETATM  348  O   HOH T 347       7.036  15.204  -7.614  1.00  0.42           O  
HETATM  349  O   HOH T 348     -14.823  18.690  -2.023  1.00  0.42           O  
HETATM  350  O   HOH T 349      12.224  36.039  20.594  1.00  0.42           O  
HETATM  351  O   HOH T 350      23.070  -3.063  35.974  1.00  0.42           O  
HETATM  352  O   HOH T 351      32.235  26.488   9.278  1.00  0.42           O  
HETATM  353  O   HOH T 352      12.912   4.523  -7.363  1.00  0.42           O  
HETATM  354  O   HOH T 353      -1.919  33.792   5.604  1.00  0.42           O  
HETATM  355  O   HOH T 354      28.354  13.013   5.689  1.00  0.42           O  
HETATM  356  O   HOH T 355      35.450  -0.759  25.968  1.00  0.42           O  
HETATM  357  O   HOH T 356      28.227  29.695  32.700  1.00  0.42           O  
HETATM  358  O   HOH T 357      28.293  29.306  29.913  1.00  0.42           O  
HETATM  359  O   HOH T 358      24.253  21.655   8.712  1.00  0.42           O  
HETATM  360  O   HOH T 359      29.064  26.641  29.400  1.00  0.42           O  
HETATM  361  O   HOH T 360      21.826  25.316   1.921  1.00  0.42           O  
HETATM  362  O   HOH T 361       1.576  25.964   6.588  1.00  0.42           O  
HETATM  363  O   HOH T 362      41.328  25.323  20.916  1.00  0.42           O  
HETATM  364  O   HOH T 363       5.783  -1.832  46.086  1.00  0.42           O  
HETATM  365  O   HOH T 364      -9.688  21.113  -5.893  1.00  0.42           O  
HETATM  366  O   HOH T 365      16.218   2.251  54.271  1.00  0.42           O  
HETATM  367  O   HOH T 366      -6.074  21.673  17.065  1.00  0.42           O  
HETATM  368  O   HOH T 367       3.244  34.405  25.108  1.00  0.42           O  
HETATM  369  O   HOH T 368       2.755  30.958  22.927  1.00  0.42           O  
HETATM  370  O   HOH T 369      19.896  31.831  26.136  1.00  0.43           O  
HETATM  371  O   HOH T 370      16.661   4.482  25.908  1.00  0.43           O  
HETATM  372  O   HOH T 371      12.926  40.361  25.926  1.00  0.43           O  
HETATM  373  O   HOH T 372       1.597   3.692  19.300  1.00  0.43           O  
HETATM  374  O   HOH T 373      13.809  11.581  -8.931  1.00  0.43           O  
HETATM  375  O   HOH T 374      22.577  31.602  26.777  1.00  0.43           O  
HETATM  376  O   HOH T 375       3.854  -0.924   9.774  1.00  0.43           O  
HETATM  377  O   HOH T 376      13.512  15.516  28.867  1.00  0.43           O  
HETATM  378  O   HOH T 377      37.481   7.670  17.517  1.00  0.43           O  
HETATM  379  O   HOH T 378      29.149  29.541  53.252  1.00  0.43           O  
HETATM  380  O   HOH T 379      21.600   0.024  21.777  1.00  0.43           O  
HETATM  381  O   HOH T 380     -13.127  18.277   0.117  1.00  0.43           O  
HETATM  382  O   HOH T 381      15.542   4.700  28.421  1.00  0.43           O  
HETATM  383  O   HOH T 382      32.586   5.559  46.541  1.00  0.43           O  
HETATM  384  O   HOH T 383      -0.090   7.163  40.563  1.00  0.43           O  
HETATM  385  O   HOH T 384      22.317   1.708  12.347  1.00  0.43           O  
HETATM  386  O   HOH T 385      31.624  28.106  33.849  1.00  0.43           O  
HETATM  387  O   HOH T 386      23.542  -1.448  29.562  1.00  0.43           O  
HETATM  388  O   HOH T 387      27.625  -0.174  23.941  1.00  0.43           O  
HETATM  389  O   HOH T 388      13.750  -1.993   9.056  1.00  0.43           O  
HETATM  390  O   HOH T 389     -11.743  23.798  10.884  1.00  0.43           O  
HETATM  391  O   HOH T 390     -12.208  11.462  37.047  1.00  0.43           O  
HETATM  392  O   HOH T 391      22.622  21.898   4.245  1.00  0.43           O  
HETATM  393  O   HOH T 392      37.437  33.223  24.883  1.00  0.43           O  
HETATM  394  O   HOH T 393      33.174  28.466  39.742  1.00  0.43           O  
HETATM  395  O   HOH T 394      29.486  21.497  -0.081  1.00  0.43           O  
HETATM  396  O   HOH T 395       3.961  -3.372  21.522  1.00  0.44           O  
HETATM  397  O   HOH T 396      -0.705   0.288  10.366  1.00  0.44           O  
HETATM  398  O   HOH T 397      34.909  27.664   5.555  1.00  0.44           O  
HETATM  399  O   HOH T 398      -0.402  38.039  31.741  1.00  0.44           O  
HETATM  400  O   HOH T 399      16.181  25.824  51.162  1.00  0.44           O  
HETATM  401  O   HOH T 400      28.754  32.014  11.385  1.00  0.44           O  
HETATM  402  O   HOH T 401      24.383   0.418  13.755  1.00  0.44           O  
HETATM  403  O   HOH T 402      -8.963  12.085  43.809  1.00  0.44           O  
HETATM  404  O   HOH T 403       0.237  35.503  30.582  1.00  0.44           O  
HETATM  405  O   HOH T 404      27.838  29.884  22.834  1.00  0.44           O  
HETATM  406  O   HOH T 405      25.318  27.604   3.924  1.00  0.44           O  
HETATM  407  O   HOH T 406      39.643   1.011  28.961  1.00  0.44           O  
HETATM  408  O   HOH T 407      15.983  30.758  45.508  1.00  0.44           O  
HETATM  409  O   HOH T 408     -12.455   2.947  26.594  1.00  0.44           O  
HETATM  410  O   HOH T 409      27.160  15.473   5.230  1.00  0.44           O  
HETATM  411  O   HOH T 410       7.436   6.381  20.299  1.00  0.44           O  
HETATM  412  O   HOH T 411      26.186  -5.466  36.207  1.00  0.44           O  
HETATM  413  O   HOH T 412      20.440   7.353  -1.861  1.00  0.44           O  
HETATM  414  O   HOH T 413       3.077  -3.521   1.790  1.00  0.44           O  
HETATM  415  O   HOH T 414       2.370  19.548  50.145  1.00  0.44           O  
HETATM  416  O   HOH T 415       3.720  26.731  50.134  1.00  0.44           O  
HETATM  417  O   HOH T 416      18.078   2.832  56.317  1.00  0.44           O  
HETATM  418  O   HOH T 417      30.702  14.720  42.876  1.00  0.44           O  
HETATM  419  O   HOH T 418      19.926  26.950  41.798  1.00  0.44           O  
HETATM  420  O   HOH T 419      25.488  24.436  38.150  1.00  0.44           O  
HETATM  421  O   HOH T 420     -14.487  18.431   2.530  1.00  0.44           O  
HETATM  422  O   HOH T 421      -2.015  -1.940   9.240  1.00  0.44           O  
HETATM  423  O   HOH T 422      32.388   8.349  11.474  1.00  0.44           O  
HETATM  424  O   HOH T 423      27.626  27.526  54.424  1.00  0.44           O  
HETATM  425  O   HOH T 424      35.413  12.707  43.839  1.00  0.44           O  
HETATM  426  O   HOH T 425      36.070  13.561  37.596  1.00  0.45           O  
HETATM  427  O   HOH T 426      10.620   2.599  26.670  1.00  0.45           O  
HETATM  428  O   HOH T 427      26.721  32.457  35.175  1.00  0.45           O  
HETATM  429  O   HOH T 428      44.809  30.560  24.936  1.00  0.45           O  
HETATM  430  O   HOH T 429      45.838  33.808  22.674  1.00  0.45           O  
HETATM  431  O   HOH T 430       2.509  17.439  -1.840  1.00  0.45           O  
HETATM  432  O   HOH T 431      31.018  11.907   9.028  1.00  0.45           O  
HETATM  433  O   HOH T 432       7.189  -6.725  33.172  1.00  0.45           O  
HETATM  434  O   HOH T 433       8.801  -2.991  36.684  1.00  0.45           O  
HETATM  435  O   HOH T 434      16.873  35.943  25.090  1.00  0.45           O  
HETATM  436  O   HOH T 435      16.692  -2.349  12.959  1.00  0.45           O  
HETATM  437  O   HOH T 436      -9.742  32.977   0.980  1.00  0.45           O  
HETATM  438  O   HOH T 437      17.761   7.276  21.941  1.00  0.45           O  
HETATM  439  O   HOH T 438      -7.536  33.949   2.143  1.00  0.45           O  
HETATM  440  O   HOH T 439      27.671  23.555  -0.015  1.00  0.45           O  
HETATM  441  O   HOH T 440      42.124  10.991  34.471  1.00  0.45           O  
HETATM  442  O   HOH T 441      42.992  33.246  36.827  1.00  0.45           O  
HETATM  443  O   HOH T 442      17.811   9.420  18.784  1.00  0.45           O  
HETATM  444  O   HOH T 443      -0.737   8.600  42.862  1.00  0.45           O  
HETATM  445  O   HOH T 444       0.012  31.150  23.421  1.00  0.45           O  
HETATM  446  O   HOH T 445      11.596   0.972  24.731  1.00  0.45           O  
HETATM  447  O   HOH T 446       0.762  31.445  35.556  1.00  0.45           O  
HETATM  448  O   HOH T 447       1.746  33.286  14.504  1.00  0.45           O  
HETATM  449  O   HOH T 448      37.553  -0.145  27.572  1.00  0.45           O  
HETATM  450  O   HOH T 449      16.597  -4.533   7.882  1.00  0.45           O  
HETATM  451  O   HOH T 450      12.476  12.871  28.726  1.00  0.45           O  
HETATM  452  O   HOH T 451     -21.086  10.712  26.542  1.00  0.45           O  
HETATM  453  O   HOH T 452      -1.376  11.033  -4.716  1.00  0.45           O  
HETATM  454  O   HOH T 453      29.923   0.033  12.274  1.00  0.45           O  
HETATM  455  O   HOH T 454      -0.423  29.461  21.233  1.00  0.45           O  
HETATM  456  O   HOH T 455     -14.656   1.879  25.238  1.00  0.45           O  
HETATM  457  O   HOH T 456      29.346  18.300   7.100  1.00  0.46           O  
HETATM  458  O   HOH T 457       0.847   5.358  45.956  1.00  0.46           O  
HETATM  459  O   HOH T 458       9.755  17.095  -9.087  1.00  0.46           O  
HETATM  460  O   HOH T 459      12.118   4.038  19.442  1.00  0.46           O  
HETATM  461  O   HOH T 460      11.136  22.127  -0.678  1.00  0.46           O  
HETATM  462  O   HOH T 461       3.280  35.008   5.529  1.00  0.46           O  
HETATM  463  O   HOH T 462      32.468  31.227  25.378  1.00  0.46           O  
HETATM  464  O   HOH T 463      -0.999  28.264  43.544  1.00  0.46           O  
HETATM  465  O   HOH T 464       2.713  31.826  20.354  1.00  0.46           O  
HETATM  466  O   HOH T 465      28.653  -0.179  14.806  1.00  0.46           O  
HETATM  467  O   HOH T 466       3.118   2.468  24.252  1.00  0.46           O  
HETATM  468  O   HOH T 467       5.374  29.440  18.436  1.00  0.46           O  
HETATM  469  O   HOH T 468      13.334  37.522  26.084  1.00  0.46           O  
HETATM  470  O   HOH T 469      27.227  -2.277  13.704  1.00  0.46           O  
HETATM  471  O   HOH T 470      35.038  31.401  14.438  1.00  0.46           O  
HETATM  472  O   HOH T 471      15.792   3.917  52.073  1.00  0.46           O  
HETATM  473  O   HOH T 472     -11.227  34.849   5.116  1.00  0.46           O  
HETATM  474  O   HOH T 473      -3.112  23.048  19.144  1.00  0.46           O  
HETATM  475  O   HOH T 474      -2.738  27.353  35.760  1.00  0.46           O  
HETATM  476  O   HOH T 475      20.990   2.320   1.275  1.00  0.46           O  
HETATM  477  O   HOH T 476      26.624  17.997   6.308  1.00  0.46           O  
HETATM  478  O   HOH T 477      -3.252   5.140  32.904  1.00  0.46           O  
HETATM  479  O   HOH T 478      11.431  -5.897  35.933  1.00  0.46           O  
HETATM  480  O   HOH T 479     -10.191  12.562  12.961  1.00  0.46           O  
HETATM  481  O   HOH T 480       6.300  -2.868  15.295  1.00  0.46           O  
HETATM  482  O   HOH T 481      32.122  18.741  10.193  1.00  0.46           O  
HETATM  483  O   HOH T 482      32.866  27.211   3.681  1.00  0.46           O  
HETATM  484  O   HOH T 483       0.673  10.115  22.051  1.00  0.46           O  
HETATM  485  O   HOH T 484      13.341  -3.543  15.608  1.00  0.46           O  
HETATM  486  O   HOH T 485      16.593  -7.448  43.810  1.00  0.47           O  
HETATM  487  O   HOH T 486       7.613  -4.375  49.342  1.00  0.47           O  
HETATM  488  O   HOH T 487      -1.448  31.702   7.286  1.00  0.47           O  
HETATM  489  O   HOH T 488      25.039  30.620  25.836  1.00  0.47           O  
HETATM  490  O   HOH T 489      13.942  21.945  -0.786  1.00  0.47           O  
HETATM  491  O   HOH T 490      -3.250   7.183  -1.658  1.00  0.47           O  
HETATM  492  O   HOH T 491       2.242  35.385  27.498  1.00  0.47           O  
HETATM  493  O   HOH T 492      18.853  28.350  43.895  1.00  0.47           O  
HETATM  494  O   HOH T 493      25.332   8.902  48.149  1.00  0.47           O  
HETATM  495  O   HOH T 494      23.533  -5.533  37.217  1.00  0.47           O  
HETATM  496  O   HOH T 495      15.464  10.736  33.721  1.00  0.47           O  
HETATM  497  O   HOH T 496      -9.976  11.475  48.433  1.00  0.47           O  
HETATM  498  O   HOH T 497      38.183  31.086  23.132  1.00  0.47           O  
HETATM  499  O   HOH T 498       6.775  -4.960  27.672  1.00  0.47           O  
HETATM  500  O   HOH T 499      -0.481   1.788  19.394  1.00  0.47           O  
HETATM  501  O   HOH T 500      -9.328   7.561  11.927  1.00  0.47           O  
HETATM  502  O   HOH T 501      27.789  31.639   6.562  1.00  0.47           O  
HETATM  503  O   HOH T 502      -7.471  13.487   3.920  1.00  0.47           O  
HETATM  504  O   HOH T 503      31.066  26.919  31.404  1.00  0.47           O  
HETATM  505  O   HOH T 504      44.537  27.568  23.394  1.00  0.47           O  
HETATM  506  O   HOH T 505      46.892   8.202  27.398  1.00  0.47           O  
HETATM  507  O   HOH T 506      -0.498  -1.713   7.005  1.00  0.47           O  
HETATM  508  O   HOH T 507       3.707  31.023  16.793  1.00  0.47           O  
HETATM  509  O   HOH T 508       8.480   4.814  22.419  1.00  0.47           O  
HETATM  510  O   HOH T 509       9.013  21.525  14.738  1.00  0.47           O  
HETATM  511  O   HOH T 510      23.065  22.702  46.885  1.00  0.47           O  
HETATM  512  O   HOH T 511      26.293  31.443   4.113  1.00  0.47           O  
HETATM  513  O   HOH T 512      16.145   2.404  34.117  1.00  0.47           O  
HETATM  514  O   HOH T 513     -11.210  26.778  13.867  1.00  0.47           O  
HETATM  515  O   HOH T 514      10.414  23.117  -3.208  1.00  0.47           O  
HETATM  516  O   HOH T 515      -4.911  15.371  -2.350  1.00  0.47           O  
HETATM  517  O   HOH T 516     -12.212  24.250  13.592  1.00  0.48           O  
HETATM  518  O   HOH T 517      14.949   0.410  55.808  1.00  0.48           O  
HETATM  519  O   HOH T 518      24.177  33.302  25.346  1.00  0.48           O  
HETATM  520  O   HOH T 519      38.370   5.269  18.619  1.00  0.48           O  
HETATM  521  O   HOH T 520       4.830   7.664  50.127  1.00  0.48           O  
HETATM  522  O   HOH T 521      17.918  32.812  45.480  1.00  0.48           O  
HETATM  523  O   HOH T 522       2.248  37.594   8.783  1.00  0.48           O  
HETATM  524  O   HOH T 523     -12.132  18.601   9.920  1.00  0.48           O  
HETATM  525  O   HOH T 524      34.564  29.902   7.173  1.00  0.48           O  
HETATM  526  O   HOH T 525      -2.834  19.759  46.925  1.00  0.48           O  
HETATM  527  O   HOH T 526       3.115   3.516  21.650  1.00  0.48           O  
HETATM  528  O   HOH T 527      20.352  19.354   7.396  1.00  0.48           O  
HETATM  529  O   HOH T 528      -1.319  33.225  22.126  1.00  0.48           O  
HETATM  530  O   HOH T 529      22.251  23.597  52.407  1.00  0.48           O  
HETATM  531  O   HOH T 530      40.530  26.040  18.451  1.00  0.48           O  
HETATM  532  O   HOH T 531      36.420  29.128  15.327  1.00  0.48           O  
HETATM  533  O   HOH T 532      22.694  26.610  41.953  1.00  0.48           O  
HETATM  534  O   HOH T 533      -0.881  29.249  34.700  1.00  0.48           O  
HETATM  535  O   HOH T 534       5.793  28.388  51.048  1.00  0.48           O  
HETATM  536  O   HOH T 535       3.245  22.749  -6.503  1.00  0.48           O  
HETATM  537  O   HOH T 536      30.822  16.261  10.207  1.00  0.48           O  
HETATM  538  O   HOH T 537      -1.080  29.204  -1.360  1.00  0.48           O  
HETATM  539  O   HOH T 538       0.863  -2.519   3.059  1.00  0.48           O  
HETATM  540  O   HOH T 539      44.651  25.908  34.122  1.00  0.48           O  
HETATM  541  O   HOH T 540      40.180  17.952  13.112  1.00  0.48           O  
HETATM  542  O   HOH T 541       1.267  26.876  10.429  1.00  0.48           O  
HETATM  543  O   HOH T 542      32.120  14.929  12.185  1.00  0.48           O  
HETATM  544  O   HOH T 543      29.616  -0.698  19.576  1.00  0.49           O  
HETATM  545  O   HOH T 544       9.221  42.707   7.921  1.00  0.49           O  
HETATM  546  O   HOH T 545      25.727  30.393  29.697  1.00  0.49           O  
HETATM  547  O   HOH T 546     -10.449   9.983  41.032  1.00  0.49           O  
HETATM  548  O   HOH T 547      -8.310   6.378   9.462  1.00  0.49           O  
HETATM  549  O   HOH T 548      29.749  31.635  21.805  1.00  0.49           O  
HETATM  550  O   HOH T 549      25.783  -6.478  38.644  1.00  0.49           O  
HETATM  551  O   HOH T 550      27.169   0.578  19.934  1.00  0.49           O  
HETATM  552  O   HOH T 551       0.584   0.685  41.158  1.00  0.49           O  
HETATM  553  O   HOH T 552     -12.218  17.660  12.716  1.00  0.49           O  
HETATM  554  O   HOH T 553      34.177  -3.230  40.537  1.00  0.49           O  
HETATM  555  O   HOH T 554      45.069   9.545  29.174  1.00  0.49           O  
HETATM  556  O   HOH T 555      19.692  34.337  23.218  1.00  0.49           O  
HETATM  557  O   HOH T 556      23.616  19.290   4.002  1.00  0.49           O  
HETATM  558  O   HOH T 557      18.423  -1.395  40.333  1.00  0.49           O  
HETATM  559  O   HOH T 558       4.798  -3.460  34.067  1.00  0.49           O  
HETATM  560  O   HOH T 559      15.925  32.659  43.469  1.00  0.49           O  
HETATM  561  O   HOH T 560       4.455  29.055  48.733  1.00  0.49           O  
HETATM  562  O   HOH T 561      22.813  12.999  56.084  1.00  0.49           O  
HETATM  563  O   HOH T 562      -8.721   0.888  37.954  1.00  0.49           O  
HETATM  564  O   HOH T 563      31.900  -5.817  40.779  1.00  0.49           O  
HETATM  565  O   HOH T 564      13.210  -1.436  30.097  1.00  0.49           O  
HETATM  566  O   HOH T 565      40.323  15.826  41.851  1.00  0.49           O  
HETATM  567  O   HOH T 566      22.951  20.370  45.282  1.00  0.49           O  
HETATM  568  O   HOH T 567       2.955  33.354  18.103  1.00  0.49           O  
HETATM  569  O   HOH T 568       0.765  -2.603  16.456  1.00  0.49           O  
HETATM  570  O   HOH T 569      31.701  29.753  27.722  1.00  0.49           O  
HETATM  571  O   HOH T 570      -4.955  10.509   4.268  1.00  0.49           O  
HETATM  572  O   HOH T 571      37.403  -4.824  34.914  1.00  0.49           O  
HETATM  573  O   HOH T 572      12.194   5.291  51.441  1.00  0.50           O  
HETATM  574  O   HOH T 573      21.843  34.804  24.927  1.00  0.50           O  
HETATM  575  O   HOH T 574      26.805  23.972  32.997  1.00  0.50           O  
HETATM  576  O   HOH T 575      41.445   7.832  24.104  1.00  0.50           O  
HETATM  577  O   HOH T 576       7.989   7.021  24.177  1.00  0.50           O  
HETATM  578  O   HOH T 577      -0.913   5.885  -0.819  1.00  0.50           O  
HETATM  579  O   HOH T 578      12.168  18.407  -8.305  1.00  0.50           O  
HETATM  580  O   HOH T 579     -12.197  32.423   4.087  1.00  0.50           O  
HETATM  581  O   HOH T 580       7.965  17.796  -6.960  1.00  0.50           O  
HETATM  582  O   HOH T 581       1.401   4.925  41.168  1.00  0.50           O  
HETATM  583  O   HOH T 582       5.518  32.486  39.662  1.00  0.50           O  
HETATM  584  O   HOH T 583      -8.873  10.330  11.800  1.00  0.50           O  
HETATM  585  O   HOH T 584     -11.279  16.240   8.627  1.00  0.50           O  
HETATM  586  O   HOH T 585       1.673  31.698  40.363  1.00  0.50           O  
HETATM  587  O   HOH T 586      46.068  33.070  25.303  1.00  0.50           O  
HETATM  588  O   HOH T 587       2.829  12.813  51.862  1.00  0.50           O  
HETATM  589  O   HOH T 588      30.260  30.033  24.002  1.00  0.50           O  
HETATM  590  O   HOH T 589      39.164  15.617  37.378  1.00  0.50           O  
HETATM  591  O   HOH T 590      33.787  28.968  14.696  1.00  0.50           O  
HETATM  592  O   HOH T 591      -3.152   8.636   4.932  1.00  0.50           O  
HETATM  593  O   HOH T 592      -1.789  25.820  12.884  1.00  0.50           O  
HETATM  594  O   HOH T 593     -10.666  28.994  15.486  1.00  0.50           O  
HETATM  595  O   HOH T 594      44.375  36.023  28.580  1.00  0.50           O  
HETATM  596  O   HOH T 595      42.398  26.449  35.555  1.00  0.50           O  
HETATM  597  O   HOH T 596      21.105  17.932   4.013  1.00  0.50           O  
HETATM  598  O   HOH T 597      -2.740  31.555  -0.921  1.00  0.51           O  
HETATM  599  O   HOH T 598       7.589  -2.790  12.696  1.00  0.51           O  
HETATM  600  O   HOH T 599      11.385  39.170  34.988  1.00  0.51           O  
HETATM  601  O   HOH T 600      13.762   4.705  25.855  1.00  0.51           O  
HETATM  602  O   HOH T 601      26.770  29.191  27.566  1.00  0.51           O  
HETATM  603  O   HOH T 602     -14.615  12.499  27.101  1.00  0.51           O  
HETATM  604  O   HOH T 603       9.478  14.421 -10.081  1.00  0.51           O  
HETATM  605  O   HOH T 604      12.796   2.431  28.392  1.00  0.51           O  
HETATM  606  O   HOH T 605      -2.815   6.903   0.939  1.00  0.51           O  
HETATM  607  O   HOH T 606       2.155   3.088  -0.131  1.00  0.51           O  
HETATM  608  O   HOH T 607      34.818  32.498  24.346  1.00  0.51           O  
HETATM  609  O   HOH T 608      30.469   0.100  16.958  1.00  0.51           O  
HETATM  610  O   HOH T 609       6.799   5.540  26.309  1.00  0.51           O  
HETATM  611  O   HOH T 610      -7.117  19.015  -2.629  1.00  0.51           O  
HETATM  612  O   HOH T 611      30.336  -2.083  26.316  1.00  0.51           O  
HETATM  613  O   HOH T 612      -7.565  11.405  -2.489  1.00  0.51           O  
HETATM  614  O   HOH T 613      22.581   2.670  30.782  1.00  0.51           O  
HETATM  615  O   HOH T 614      44.821  21.429  22.675  1.00  0.51           O  
HETATM  616  O   HOH T 615      -1.922  25.654  42.681  1.00  0.51           O  
HETATM  617  O   HOH T 616      17.433   5.045  23.304  1.00  0.51           O  
HETATM  618  O   HOH T 617     -11.411  23.408  16.172  1.00  0.51           O  
HETATM  619  O   HOH T 618       8.208  26.745   5.049  1.00  0.51           O  
HETATM  620  O   HOH T 619      -3.149  16.230  -0.375  1.00  0.51           O  
HETATM  621  O   HOH T 620       9.710  19.531  -8.098  1.00  0.51           O  
HETATM  622  O   HOH T 621      15.589  -6.078  46.100  1.00  0.51           O  
HETATM  623  O   HOH T 622      17.164  35.039  44.045  1.00  0.51           O  
HETATM  624  O   HOH T 623      33.754  -6.407  42.922  1.00  0.51           O  
HETATM  625  O   HOH T 624      33.038  29.159   9.574  1.00  0.51           O  
HETATM  626  O   HOH T 625      33.614   3.155  46.453  1.00  0.51           O  
HETATM  627  O   HOH T 626      -2.258  24.930  17.223  1.00  0.51           O  
HETATM  628  O   HOH T 627      39.001   5.039  21.291  1.00  0.52           O  
HETATM  629  O   HOH T 628       7.336  30.802  44.674  1.00  0.52           O  
HETATM  630  O   HOH T 629       2.415  37.328  11.584  1.00  0.52           O  
HETATM  631  O   HOH T 630       5.797  28.508  45.364  1.00  0.52           O  
HETATM  632  O   HOH T 631      21.879   2.578  -1.326  1.00  0.52           O  
HETATM  633  O   HOH T 632      -2.565  28.741  28.489  1.00  0.52           O  
HETATM  634  O   HOH T 633      25.685   2.490  18.723  1.00  0.52           O  
HETATM  635  O   HOH T 634       4.185  39.476   8.483  1.00  0.52           O  
HETATM  636  O   HOH T 635       8.309  17.159  53.129  1.00  0.52           O  
HETATM  637  O   HOH T 636       4.471  -0.021  47.759  1.00  0.52           O  
HETATM  638  O   HOH T 637      -0.132  29.278   7.307  1.00  0.52           O  
HETATM  639  O   HOH T 638      19.325  32.425  33.186  1.00  0.52           O  
HETATM  640  O   HOH T 639       3.366  24.034  49.467  1.00  0.52           O  
HETATM  641  O   HOH T 640      29.295  30.676  41.308  1.00  0.52           O  
HETATM  642  O   HOH T 641       0.746  33.083  27.347  1.00  0.52           O  
HETATM  643  O   HOH T 642       1.057  -3.357   5.721  1.00  0.52           O  
HETATM  644  O   HOH T 643      36.646   0.108  38.451  1.00  0.52           O  
HETATM  645  O   HOH T 644      21.161  21.043  31.566  1.00  0.52           O  
HETATM  646  O   HOH T 645      -1.358  21.031   2.194  1.00  0.52           O  
HETATM  647  O   HOH T 646       8.937  21.863  50.916  1.00  0.52           O  
HETATM  648  O   HOH T 647      30.917   1.687   8.772  1.00  0.53           O  
HETATM  649  O   HOH T 648       1.728  24.522  30.840  1.00  0.53           O  
HETATM  650  O   HOH T 649      24.936  16.832   4.334  1.00  0.53           O  
HETATM  651  O   HOH T 650      -2.251  34.083   8.442  1.00  0.53           O  
HETATM  652  O   HOH T 651      28.071  34.682  11.179  1.00  0.53           O  
HETATM  653  O   HOH T 652      37.179   6.149  46.974  1.00  0.53           O  
HETATM  654  O   HOH T 653      14.566  35.596  42.950  1.00  0.53           O  
HETATM  655  O   HOH T 654      13.115  -5.774  42.184  1.00  0.53           O  
HETATM  656  O   HOH T 655     -12.502  20.314   1.924  1.00  0.53           O  
HETATM  657  O   HOH T 656      -3.414  27.544  38.407  1.00  0.53           O  
HETATM  658  O   HOH T 657      -0.032  19.323  -6.556  1.00  0.53           O  
HETATM  659  O   HOH T 658       1.914  -5.026   3.910  1.00  0.53           O  
HETATM  660  O   HOH T 659      12.891  -7.241  29.132  1.00  0.53           O  
HETATM  661  O   HOH T 660       8.093  12.853  51.643  1.00  0.53           O  
HETATM  662  O   HOH T 661      27.755   3.539   5.742  1.00  0.53           O  
HETATM  663  O   HOH T 662      -0.219   3.944  36.861  1.00  0.54           O  
HETATM  664  O   HOH T 663       0.836  33.934   4.872  1.00  0.54           O  
HETATM  665  O   HOH T 664       8.071   8.123  -9.751  1.00  0.54           O  
HETATM  666  O   HOH T 665      26.856  26.816   1.793  1.00  0.54           O  
HETATM  667  O   HOH T 666      12.282  37.255  12.965  1.00  0.54           O  
HETATM  668  O   HOH T 667       0.204  30.752  -3.402  1.00  0.54           O  
HETATM  669  O   HOH T 668      -3.057  31.337  29.295  1.00  0.54           O  
HETATM  670  O   HOH T 669       5.385  -2.669   8.150  1.00  0.54           O  
HETATM  671  O   HOH T 670      -6.596  25.607  20.187  1.00  0.54           O  
HETATM  672  O   HOH T 671      11.295  -5.042  14.637  1.00  0.54           O  
HETATM  673  O   HOH T 672      37.276  34.792  31.687  1.00  0.54           O  
HETATM  674  O   HOH T 673       6.295  26.342   3.240  1.00  0.54           O  
HETATM  675  O   HOH T 674      -2.285  17.688  -6.366  1.00  0.54           O  
HETATM  676  O   HOH T 675      28.965  30.825   4.228  1.00  0.54           O  
HETATM  677  O   HOH T 676      23.344  31.608  41.173  1.00  0.54           O  
HETATM  678  O   HOH T 677      -0.086  19.379  13.718  1.00  0.54           O  
HETATM  679  O   HOH T 678      19.426   1.146  36.348  1.00  0.54           O  
HETATM  680  O   HOH T 679      38.691  35.407  23.773  1.00  0.54           O  
HETATM  681  O   HOH T 680      -3.144  -1.749   6.598  1.00  0.54           O  
HETATM  682  O   HOH T 681      -0.212   6.172   3.099  1.00  0.54           O  
HETATM  683  O   HOH T 682      15.395  10.535  51.767  1.00  0.54           O  
HETATM  684  O   HOH T 683       0.855  29.033  36.919  1.00  0.54           O  
HETATM  685  O   HOH T 684      21.088  13.050  -3.205  1.00  0.55           O  
HETATM  686  O   HOH T 685       9.570  41.850  31.577  1.00  0.55           O  
HETATM  687  O   HOH T 686     -14.617  15.422  29.193  1.00  0.55           O  
HETATM  688  O   HOH T 687      17.827  37.687  36.428  1.00  0.55           O  
HETATM  689  O   HOH T 688      -3.989  16.191  -4.798  1.00  0.55           O  
HETATM  690  O   HOH T 689      -9.472  33.011   3.928  1.00  0.55           O  
HETATM  691  O   HOH T 690      43.912  34.809  26.028  1.00  0.55           O  
HETATM  692  O   HOH T 691       4.912  -6.317  34.766  1.00  0.55           O  
HETATM  693  O   HOH T 692      29.938  30.863  49.368  1.00  0.55           O  
HETATM  694  O   HOH T 693      10.774   0.224  22.230  1.00  0.55           O  
HETATM  695  O   HOH T 694      13.717  27.545  51.250  1.00  0.55           O  
HETATM  696  O   HOH T 695     -13.709  25.045  31.608  1.00  0.55           O  
HETATM  697  O   HOH T 696      37.294  28.395  17.876  1.00  0.56           O  
HETATM  698  O   HOH T 697      30.897  28.487   7.933  1.00  0.56           O  
HETATM  699  O   HOH T 698      11.397  34.076   6.423  1.00  0.56           O  
HETATM  700  O   HOH T 699      -7.473   6.981  40.333  1.00  0.56           O  
HETATM  701  O   HOH T 700       4.050  37.412   6.570  1.00  0.56           O  
HETATM  702  O   HOH T 701     -14.960  21.950  30.153  1.00  0.56           O  
HETATM  703  O   HOH T 702       1.400  17.634   0.855  1.00  0.56           O  
HETATM  704  O   HOH T 703      34.896  25.183  36.784  1.00  0.56           O  
HETATM  705  O   HOH T 704       0.017   3.422  44.252  1.00  0.56           O  
HETATM  706  O   HOH T 705      24.189  33.449  35.518  1.00  0.56           O  
HETATM  707  O   HOH T 706      39.640  -1.690  28.356  1.00  0.56           O  
HETATM  708  O   HOH T 707      10.478   5.590  24.309  1.00  0.56           O  
HETATM  709  O   HOH T 708       2.652  13.525  49.185  1.00  0.56           O  
HETATM  710  O   HOH T 709      15.570  -1.871  15.595  1.00  0.57           O  
HETATM  711  O   HOH T 710     -14.403  10.509  35.653  1.00  0.57           O  
HETATM  712  O   HOH T 711      39.897  24.039  16.767  1.00  0.57           O  
HETATM  713  O   HOH T 712       4.686   2.503  -3.807  1.00  0.57           O  
HETATM  714  O   HOH T 713     -14.454   6.626  30.830  1.00  0.57           O  
HETATM  715  O   HOH T 714       4.787  -5.804  25.931  1.00  0.57           O  
HETATM  716  O   HOH T 715     -17.092   4.997  24.656  1.00  0.57           O  
HETATM  717  O   HOH T 716      32.204  14.082   9.511  1.00  0.57           O  
HETATM  718  O   HOH T 717      24.195  24.983   3.317  1.00  0.58           O  
HETATM  719  O   HOH T 718       1.101  35.471   7.246  1.00  0.58           O  
HETATM  720  O   HOH T 719       8.632   4.172  53.316  1.00  0.58           O  
HETATM  721  O   HOH T 720       6.050  -1.984  48.969  1.00  0.58           O  
HETATM  722  O   HOH T 721      38.985   1.600  23.322  1.00  0.58           O  
HETATM  723  O   HOH T 722      12.820  -7.308  33.930  1.00  0.58           O  
HETATM  724  O   HOH T 723      37.439  27.665  21.102  1.00  0.58           O  
HETATM  725  O   HOH T 724      30.829  23.321   5.574  1.00  0.59           O  
HETATM  726  O   HOH T 725     -12.151  30.173   7.594  1.00  0.59           O  
HETATM  727  O   HOH T 726       0.837   0.796  31.363  1.00  0.60           O  
HETATM  728  O   HOH T 727      13.008   6.387  21.051  1.00  0.60           O  
HETATM  729  O   HOH T 728       2.426   1.491  48.756  1.00  0.60           O  
HETATM  730  O   HOH T 729       0.977   0.858   0.923  1.00  0.61           O  
HETATM  731  O   HOH T 730      19.395  16.126  -5.099  1.00  0.61           O  
HETATM  732  O   HOH T 731      30.973  31.892  17.226  1.00  0.61           O  
TER     733      HOH T 731 
