# Supplementary material for: Accurate Prediction of Hydration Sites of Proteins Using Energy Model With Atom Embedding
Source: Front Mol Biosci. 2021 Sep 20;8:756075. doi: 10.3389/fmolb.2021.756075 (PMC8488165; doi:10.3389/fmolb.2021.756075)
Supplement: Supplementary file 1 [file DataSheet1.ZIP › Data Sheet 1/Our_result_pdb/our_dataset_output/2XRH_watersite.pdb]

HEADER                                                        XXXX


JRNL        PMID   -1
HETATM    1  O   HOH T   0       4.035  20.077  -5.680  1.00  0.20           O  
HETATM    2  O   HOH T   1       4.157   1.660  -3.790  1.00  0.21           O  
HETATM    3  O   HOH T   2       2.406  26.052  -3.174  1.00  0.21           O  
HETATM    4  O   HOH T   3      -4.153  22.111 -19.487  1.00  0.22           O  
HETATM    5  O   HOH T   4      -2.946   8.796   8.872  1.00  0.22           O  
HETATM    6  O   HOH T   5      11.333  -0.555  -2.933  1.00  0.22           O  
HETATM    7  O   HOH T   6      -5.042   2.662   2.388  1.00  0.23           O  
HETATM    8  O   HOH T   7       5.361   3.964  -2.954  1.00  0.23           O  
HETATM    9  O   HOH T   8      -5.940  12.291   3.773  1.00  0.24           O  
HETATM   10  O   HOH T   9      -6.252  20.568   2.080  1.00  0.25           O  
HETATM   11  O   HOH T  10     -15.982  32.803 -14.513  1.00  0.25           O  
HETATM   12  O   HOH T  11       5.633  -0.682  -3.425  1.00  0.25           O  
HETATM   13  O   HOH T  12       5.127  39.351  13.640  1.00  0.26           O  
HETATM   14  O   HOH T  13       7.621  10.444  -9.256  1.00  0.27           O  
HETATM   15  O   HOH T  14     -16.515   7.181  -9.482  1.00  0.28           O  
HETATM   16  O   HOH T  15      -1.566  -1.555  -1.281  1.00  0.28           O  
HETATM   17  O   HOH T  16     -15.481  31.083 -11.249  1.00  0.28           O  
HETATM   18  O   HOH T  17       1.710  13.206   0.470  1.00  0.29           O  
HETATM   19  O   HOH T  18     -10.292  27.607  -6.703  1.00  0.29           O  
HETATM   20  O   HOH T  19      -2.509  27.293  10.729  1.00  0.30           O  
HETATM   21  O   HOH T  20     -13.848   4.528   7.509  1.00  0.30           O  
HETATM   22  O   HOH T  21     -22.002  22.079  -9.944  1.00  0.31           O  
HETATM   23  O   HOH T  22      -3.125  15.240   4.827  1.00  0.32           O  
HETATM   24  O   HOH T  23     -17.264  20.262 -13.672  1.00  0.32           O  
HETATM   25  O   HOH T  24     -18.707   6.349  -8.063  1.00  0.32           O  
HETATM   26  O   HOH T  25     -21.013   6.895  -0.088  1.00  0.32           O  
HETATM   27  O   HOH T  26      10.864  -3.961  -4.549  1.00  0.32           O  
HETATM   28  O   HOH T  27       7.948  13.143  -9.000  1.00  0.33           O  
HETATM   29  O   HOH T  28     -18.261  11.244  -1.354  1.00  0.33           O  
HETATM   30  O   HOH T  29     -16.028  30.187  -3.736  1.00  0.33           O  
HETATM   31  O   HOH T  30      -1.223  28.184  -9.211  1.00  0.34           O  
HETATM   32  O   HOH T  31      -0.812   4.611 -22.452  1.00  0.34           O  
HETATM   33  O   HOH T  32     -11.473   2.372 -10.382  1.00  0.34           O  
HETATM   34  O   HOH T  33      -5.911   3.818   4.650  1.00  0.34           O  
HETATM   35  O   HOH T  34     -11.669   3.499  -6.293  1.00  0.34           O  
HETATM   36  O   HOH T  35      -0.894  23.853   2.053  1.00  0.34           O  
HETATM   37  O   HOH T  36      -2.986  28.902  -7.148  1.00  0.35           O  
HETATM   38  O   HOH T  37      -1.042   7.973 -18.789  1.00  0.35           O  
HETATM   39  O   HOH T  38       1.299  33.441   5.718  1.00  0.35           O  
HETATM   40  O   HOH T  39       0.720  21.893   5.057  1.00  0.36           O  
HETATM   41  O   HOH T  40       3.208  36.069  11.058  1.00  0.37           O  
HETATM   42  O   HOH T  41       4.295   7.743  -6.519  1.00  0.37           O  
HETATM   43  O   HOH T  42     -17.855  13.202 -10.466  1.00  0.37           O  
HETATM   44  O   HOH T  43      12.031  -2.964 -13.012  1.00  0.37           O  
HETATM   45  O   HOH T  44       4.526  38.436  11.135  1.00  0.37           O  
HETATM   46  O   HOH T  45     -10.872  29.893  -0.000  1.00  0.38           O  
HETATM   47  O   HOH T  46       2.833   6.956 -20.502  1.00  0.38           O  
HETATM   48  O   HOH T  47       0.915  25.229   6.549  1.00  0.38           O  
HETATM   49  O   HOH T  48       5.826  11.385  -2.825  1.00  0.38           O  
HETATM   50  O   HOH T  49       3.862  23.915  -2.401  1.00  0.38           O  
HETATM   51  O   HOH T  50     -12.236  -1.707   8.073  1.00  0.38           O  
HETATM   52  O   HOH T  51      -8.413  28.316  -8.592  1.00  0.39           O  
HETATM   53  O   HOH T  52      -3.204  24.482 -18.760  1.00  0.39           O  
HETATM   54  O   HOH T  53      -4.893  -1.048   6.577  1.00  0.39           O  
HETATM   55  O   HOH T  54     -12.832   0.749   8.940  1.00  0.39           O  
HETATM   56  O   HOH T  55      -2.742  31.377  12.746  1.00  0.39           O  
HETATM   57  O   HOH T  56     -13.114   2.321  -8.260  1.00  0.39           O  
HETATM   58  O   HOH T  57     -12.925  30.849 -10.242  1.00  0.40           O  
HETATM   59  O   HOH T  58       2.043  19.446   0.605  1.00  0.40           O  
HETATM   60  O   HOH T  59      -1.510  26.706  13.267  1.00  0.40           O  
HETATM   61  O   HOH T  60      -5.909  25.394   6.677  1.00  0.40           O  
HETATM   62  O   HOH T  61      -5.687  33.792  13.441  1.00  0.40           O  
HETATM   63  O   HOH T  62       4.059   7.060   0.004  1.00  0.40           O  
HETATM   64  O   HOH T  63       5.356  13.729 -20.866  1.00  0.40           O  
HETATM   65  O   HOH T  64     -13.164  13.071 -12.853  1.00  0.40           O  
HETATM   66  O   HOH T  65     -17.066   4.887   8.985  1.00  0.41           O  
HETATM   67  O   HOH T  66      10.776  -0.356  -5.711  1.00  0.41           O  
HETATM   68  O   HOH T  67     -13.817   5.810  -2.851  1.00  0.41           O  
HETATM   69  O   HOH T  68     -13.325   0.174   6.279  1.00  0.41           O  
HETATM   70  O   HOH T  69     -19.389   8.716  -1.382  1.00  0.41           O  
HETATM   71  O   HOH T  70      -3.697  27.790   8.281  1.00  0.41           O  
HETATM   72  O   HOH T  71       3.288   5.772   2.292  1.00  0.42           O  
HETATM   73  O   HOH T  72      -8.294  38.738  12.897  1.00  0.42           O  
HETATM   74  O   HOH T  73       1.740  24.236   0.954  1.00  0.42           O  
HETATM   75  O   HOH T  74       6.528   8.235  -8.196  1.00  0.42           O  
HETATM   76  O   HOH T  75      -8.184  12.790   5.508  1.00  0.42           O  
HETATM   77  O   HOH T  76       1.267   4.030   1.884  1.00  0.43           O  
HETATM   78  O   HOH T  77     -18.819  11.536   1.394  1.00  0.43           O  
HETATM   79  O   HOH T  78      -0.837  30.270   0.052  1.00  0.43           O  
HETATM   80  O   HOH T  79      -4.466  26.710 -19.729  1.00  0.43           O  
HETATM   81  O   HOH T  80       5.137   9.030  -4.071  1.00  0.43           O  
HETATM   82  O   HOH T  81      -0.770  -3.956  -2.582  1.00  0.43           O  
HETATM   83  O   HOH T  82     -15.384  24.985  -3.211  1.00  0.43           O  
HETATM   84  O   HOH T  83      -3.251  33.175  14.834  1.00  0.43           O  
HETATM   85  O   HOH T  84      -2.188  11.701 -18.873  1.00  0.43           O  
HETATM   86  O   HOH T  85      -2.244  32.461   8.127  1.00  0.44           O  
HETATM   87  O   HOH T  86       0.084  -6.479  -1.796  1.00  0.44           O  
HETATM   88  O   HOH T  87     -10.183  37.025  15.860  1.00  0.44           O  
HETATM   89  O   HOH T  88      -4.043  -1.610   0.119  1.00  0.44           O  
HETATM   90  O   HOH T  89     -10.843   9.910  -8.824  1.00  0.44           O  
HETATM   91  O   HOH T  90     -10.356  14.489   5.591  1.00  0.44           O  
HETATM   92  O   HOH T  91       0.967  19.743   3.244  1.00  0.44           O  
HETATM   93  O   HOH T  92      -0.773  29.379  -2.541  1.00  0.44           O  
HETATM   94  O   HOH T  93      -3.195  -3.878  -1.234  1.00  0.44           O  
HETATM   95  O   HOH T  94      -3.404  10.665  10.852  1.00  0.45           O  
HETATM   96  O   HOH T  95      -5.133  26.584  10.424  1.00  0.45           O  
HETATM   97  O   HOH T  96     -15.637  33.299 -17.310  1.00  0.45           O  
HETATM   98  O   HOH T  97     -10.997  38.356  13.353  1.00  0.45           O  
HETATM   99  O   HOH T  98      12.819  -2.305  -5.805  1.00  0.45           O  
HETATM  100  O   HOH T  99     -22.056  20.917  -7.353  1.00  0.45           O  
HETATM  101  O   HOH T 100       3.893  12.214  -1.012  1.00  0.45           O  
HETATM  102  O   HOH T 101      10.773   1.036 -13.168  1.00  0.46           O  
HETATM  103  O   HOH T 102     -10.960   0.797   2.970  1.00  0.46           O  
HETATM  104  O   HOH T 103       3.944  33.128   4.924  1.00  0.46           O  
HETATM  105  O   HOH T 104      -6.445  27.588   8.223  1.00  0.46           O  
HETATM  106  O   HOH T 105       1.405   5.145 -23.955  1.00  0.47           O  
HETATM  107  O   HOH T 106     -19.499  25.141  -6.746  1.00  0.47           O  
HETATM  108  O   HOH T 107      -9.641  17.972 -19.282  1.00  0.47           O  
HETATM  109  O   HOH T 108      -2.275  27.959  15.584  1.00  0.47           O  
HETATM  110  O   HOH T 109      -9.881  11.510 -18.069  1.00  0.47           O  
HETATM  111  O   HOH T 110      -9.153  -1.178   3.912  1.00  0.47           O  
HETATM  112  O   HOH T 111     -20.139   9.127   1.189  1.00  0.47           O  
HETATM  113  O   HOH T 112       1.724  28.319  -1.844  1.00  0.47           O  
HETATM  114  O   HOH T 113      -8.350  18.869   2.388  1.00  0.47           O  
HETATM  115  O   HOH T 114     -12.049  17.756 -17.706  1.00  0.47           O  
HETATM  116  O   HOH T 115      -3.041  37.794  15.780  1.00  0.48           O  
HETATM  117  O   HOH T 116      -5.925  -3.392  -0.959  1.00  0.48           O  
HETATM  118  O   HOH T 117       2.561   8.119  -3.113  1.00  0.48           O  
HETATM  119  O   HOH T 118       4.296  19.712  -0.859  1.00  0.48           O  
HETATM  120  O   HOH T 119      -1.128  28.553 -11.984  1.00  0.48           O  
HETATM  121  O   HOH T 120       5.591  21.845  -7.142  1.00  0.49           O  
HETATM  122  O   HOH T 121     -21.429  11.232   2.511  1.00  0.49           O  
HETATM  123  O   HOH T 122      -4.704  24.308 -21.146  1.00  0.49           O  
HETATM  124  O   HOH T 123      -5.919  16.259   8.107  1.00  0.49           O  
HETATM  125  O   HOH T 124      -3.390  25.029  12.013  1.00  0.49           O  
HETATM  126  O   HOH T 125       0.659  35.904   4.544  1.00  0.49           O  
HETATM  127  O   HOH T 126      -0.891  10.552   8.168  1.00  0.49           O  
HETATM  128  O   HOH T 127     -10.534   8.630 -11.213  1.00  0.49           O  
HETATM  129  O   HOH T 128       3.989  21.321  -3.059  1.00  0.50           O  
HETATM  130  O   HOH T 129       8.571  -3.435  -6.042  1.00  0.50           O  
HETATM  131  O   HOH T 130      -2.438   7.960 -11.303  1.00  0.50           O  
HETATM  132  O   HOH T 131      -3.208  16.285   7.405  1.00  0.50           O  
HETATM  133  O   HOH T 132     -10.008  -1.484   6.540  1.00  0.50           O  
HETATM  134  O   HOH T 133     -16.319   4.795  -2.584  1.00  0.50           O  
HETATM  135  O   HOH T 134      -9.724  24.262 -21.224  1.00  0.50           O  
HETATM  136  O   HOH T 135      -1.013  24.254   4.922  1.00  0.50           O  
HETATM  137  O   HOH T 136       1.562  29.171   0.784  1.00  0.50           O  
HETATM  138  O   HOH T 137      -3.997  17.867   9.451  1.00  0.51           O  
HETATM  139  O   HOH T 138      -3.638  30.347  15.104  1.00  0.51           O  
HETATM  140  O   HOH T 139     -18.067  29.871  -1.778  1.00  0.51           O  
HETATM  141  O   HOH T 140      -1.475  12.008  -5.951  1.00  0.52           O  
HETATM  142  O   HOH T 141      -4.798  35.541  15.313  1.00  0.52           O  
HETATM  143  O   HOH T 142     -19.336   4.815   2.338  1.00  0.52           O  
HETATM  144  O   HOH T 143       3.292  13.802   9.711  1.00  0.53           O  
HETATM  145  O   HOH T 144      -7.715  38.192  15.624  1.00  0.53           O  
HETATM  146  O   HOH T 145      -2.480  21.023  11.368  1.00  0.53           O  
HETATM  147  O   HOH T 146     -14.011  19.428  -1.395  1.00  0.53           O  
HETATM  148  O   HOH T 147       3.046  26.711   6.540  1.00  0.53           O  
HETATM  149  O   HOH T 148       4.983  18.712  -3.398  1.00  0.53           O  
HETATM  150  O   HOH T 149      -3.377  12.900   6.105  1.00  0.53           O  
HETATM  151  O   HOH T 150      -9.182  30.929  -8.390  1.00  0.53           O  
HETATM  152  O   HOH T 151      -4.738  11.125 -19.460  1.00  0.54           O  
HETATM  153  O   HOH T 152       4.391   9.496  -1.417  1.00  0.54           O  
HETATM  154  O   HOH T 153       1.727  22.924 -19.227  1.00  0.54           O  
HETATM  155  O   HOH T 154     -17.515  26.180  -4.819  1.00  0.54           O  
HETATM  156  O   HOH T 155       0.378  12.404   6.655  1.00  0.54           O  
HETATM  157  O   HOH T 156     -12.341   1.349 -12.851  1.00  0.54           O  
HETATM  158  O   HOH T 157      -8.225  14.753   7.420  1.00  0.54           O  
HETATM  159  O   HOH T 158      -2.440  29.996  -4.682  1.00  0.55           O  
HETATM  160  O   HOH T 159       2.617  22.016  -0.585  1.00  0.56           O  
HETATM  161  O   HOH T 160     -21.475  22.720  -5.284  1.00  0.56           O  
HETATM  162  O   HOH T 161      -6.546   9.736 -20.425  1.00  0.56           O  
HETATM  163  O   HOH T 162       0.770  21.660   1.464  1.00  0.56           O  
HETATM  164  O   HOH T 163      -5.651  29.952 -14.619  1.00  0.57           O  
HETATM  165  O   HOH T 164     -13.206  11.778   4.873  1.00  0.57           O  
HETATM  166  O   HOH T 165     -16.230  12.145  -3.042  1.00  0.57           O  
HETATM  167  O   HOH T 166      12.166  -0.781  -8.086  1.00  0.58           O  
HETATM  168  O   HOH T 167      13.162   8.248 -19.649  1.00  0.59           O  
HETATM  169  O   HOH T 168      -3.779   7.291 -19.447  1.00  0.59           O  
HETATM  170  O   HOH T 169     -12.134   2.297 -15.435  1.00  0.59           O  
HETATM  171  O   HOH T 170      12.983  -2.286 -10.481  1.00  0.60           O  
TER     172      HOH T 170 
