# Supplementary material for: Accurate Prediction of Hydration Sites of Proteins Using Energy Model With Atom Embedding
Source: Front Mol Biosci. 2021 Sep 20;8:756075. doi: 10.3389/fmolb.2021.756075 (PMC8488165; doi:10.3389/fmolb.2021.756075)
Supplement: Supplementary file 1 [file DataSheet1.ZIP › Data Sheet 1/Our_result_pdb/our_dataset_output/2Y6X_watersite.pdb]

HEADER                                                        XXXX


JRNL        PMID   -1
HETATM    1  O   HOH T   0      -5.708   4.852  18.137  1.00  0.19           O  
HETATM    2  O   HOH T   1       0.197   4.064  -6.217  1.00  0.19           O  
HETATM    3  O   HOH T   2      10.060   6.540  10.961  1.00  0.20           O  
HETATM    4  O   HOH T   3      15.392 -15.203   1.334  1.00  0.21           O  
HETATM    5  O   HOH T   4       9.086  -7.845   5.761  1.00  0.21           O  
HETATM    6  O   HOH T   5       4.906   7.944  17.101  1.00  0.21           O  
HETATM    7  O   HOH T   6      13.318 -13.586  -4.981  1.00  0.21           O  
HETATM    8  O   HOH T   7      -4.909   8.073  12.226  1.00  0.22           O  
HETATM    9  O   HOH T   8      13.973  10.420   6.886  1.00  0.22           O  
HETATM   10  O   HOH T   9      -2.426  -5.158   3.053  1.00  0.23           O  
HETATM   11  O   HOH T  10     -12.527  -8.743  -2.231  1.00  0.23           O  
HETATM   12  O   HOH T  11      10.346   5.127   8.585  1.00  0.25           O  
HETATM   13  O   HOH T  12       0.129   7.580  16.592  1.00  0.25           O  
HETATM   14  O   HOH T  13      15.529   0.829 -13.787  1.00  0.26           O  
HETATM   15  O   HOH T  14      -1.033   0.241  -5.650  1.00  0.26           O  
HETATM   16  O   HOH T  15      23.061  -3.459   1.458  1.00  0.26           O  
HETATM   17  O   HOH T  16      11.821   0.671   8.460  1.00  0.27           O  
HETATM   18  O   HOH T  17      -1.545  -7.158   6.978  1.00  0.27           O  
HETATM   19  O   HOH T  18     -15.562  10.566  -5.793  1.00  0.28           O  
HETATM   20  O   HOH T  19     -13.063  -4.037  -1.111  1.00  0.28           O  
HETATM   21  O   HOH T  20      -9.720  13.046  -2.639  1.00  0.29           O  
HETATM   22  O   HOH T  21      -4.385   5.043   4.248  1.00  0.29           O  
HETATM   23  O   HOH T  22      -4.615 -15.559  -0.618  1.00  0.30           O  
HETATM   24  O   HOH T  23      16.349  -1.627 -13.284  1.00  0.30           O  
HETATM   25  O   HOH T  24      22.797  -6.557  -1.528  1.00  0.30           O  
HETATM   26  O   HOH T  25      -6.520  -1.705   7.704  1.00  0.30           O  
HETATM   27  O   HOH T  26       9.165  -8.257  -7.673  1.00  0.31           O  
HETATM   28  O   HOH T  27      -7.878  -1.854 -10.463  1.00  0.31           O  
HETATM   29  O   HOH T  28      -8.162  -8.061   1.791  1.00  0.31           O  
HETATM   30  O   HOH T  29      -7.996   0.559   7.504  1.00  0.31           O  
HETATM   31  O   HOH T  30       9.938   3.316  -2.344  1.00  0.31           O  
HETATM   32  O   HOH T  31     -13.021  -2.214  -3.097  1.00  0.31           O  
HETATM   33  O   HOH T  32      -8.348   6.449   5.986  1.00  0.32           O  
HETATM   34  O   HOH T  33      11.290   8.240  -7.092  1.00  0.32           O  
HETATM   35  O   HOH T  34       8.893  -5.494  -6.983  1.00  0.32           O  
HETATM   36  O   HOH T  35      18.267  -7.057  -0.818  1.00  0.33           O  
HETATM   37  O   HOH T  36      -5.119  10.298  14.005  1.00  0.33           O  
HETATM   38  O   HOH T  37       6.173   3.649  -8.266  1.00  0.33           O  
HETATM   39  O   HOH T  38       1.149  -6.427  15.981  1.00  0.33           O  
HETATM   40  O   HOH T  39      -9.376   4.977  19.673  1.00  0.34           O  
HETATM   41  O   HOH T  40       7.264  11.607   8.583  1.00  0.34           O  
HETATM   42  O   HOH T  41       6.345   6.630  15.096  1.00  0.34           O  
HETATM   43  O   HOH T  42     -12.653   2.073  -4.953  1.00  0.34           O  
HETATM   44  O   HOH T  43       1.052  11.615   4.347  1.00  0.34           O  
HETATM   45  O   HOH T  44      13.197 -14.819  -2.471  1.00  0.35           O  
HETATM   46  O   HOH T  45      -7.331  -6.408  -5.110  1.00  0.35           O  
HETATM   47  O   HOH T  46      18.343  14.592 -10.517  1.00  0.35           O  
HETATM   48  O   HOH T  47       0.683 -12.728   2.141  1.00  0.35           O  
HETATM   49  O   HOH T  48      -0.446  -6.165   4.572  1.00  0.35           O  
HETATM   50  O   HOH T  49       2.245 -15.739  -1.250  1.00  0.35           O  
HETATM   51  O   HOH T  50      -5.239   0.863   7.941  1.00  0.35           O  
HETATM   52  O   HOH T  51      12.639 -15.739 -11.547  1.00  0.35           O  
HETATM   53  O   HOH T  52       9.124   9.876  -7.099  1.00  0.35           O  
HETATM   54  O   HOH T  53       6.663  -5.446  -8.726  1.00  0.36           O  
HETATM   55  O   HOH T  54      22.963   7.162  10.988  1.00  0.36           O  
HETATM   56  O   HOH T  55      17.750  16.649   4.005  1.00  0.36           O  
HETATM   57  O   HOH T  56       6.472  12.095   1.010  1.00  0.36           O  
HETATM   58  O   HOH T  57      -3.736  -2.722  23.373  1.00  0.36           O  
HETATM   59  O   HOH T  58      -6.447  13.180  -7.699  1.00  0.36           O  
HETATM   60  O   HOH T  59      20.423  -2.619   1.538  1.00  0.37           O  
HETATM   61  O   HOH T  60      -1.966  -1.011  -3.346  1.00  0.37           O  
HETATM   62  O   HOH T  61     -13.708   2.268   2.924  1.00  0.37           O  
HETATM   63  O   HOH T  62       3.409  -9.304  13.482  1.00  0.37           O  
HETATM   64  O   HOH T  63      21.560   0.082   1.736  1.00  0.37           O  
HETATM   65  O   HOH T  64       3.646  14.864   3.135  1.00  0.37           O  
HETATM   66  O   HOH T  65      19.653 -11.855  -9.685  1.00  0.37           O  
HETATM   67  O   HOH T  66      19.263  -3.323  -0.940  1.00  0.37           O  
HETATM   68  O   HOH T  67       4.801 -10.060   8.432  1.00  0.37           O  
HETATM   69  O   HOH T  68     -12.386   4.323   1.278  1.00  0.37           O  
HETATM   70  O   HOH T  69       5.452  10.043  -2.936  1.00  0.37           O  
HETATM   71  O   HOH T  70      23.964   6.419  -8.305  1.00  0.38           O  
HETATM   72  O   HOH T  71      13.964   0.687  10.054  1.00  0.38           O  
HETATM   73  O   HOH T  72      22.580  14.833  -0.795  1.00  0.38           O  
HETATM   74  O   HOH T  73      -9.379   2.046   9.505  1.00  0.38           O  
HETATM   75  O   HOH T  74       0.278  -3.333  -8.111  1.00  0.38           O  
HETATM   76  O   HOH T  75       9.635   3.308 -14.668  1.00  0.38           O  
HETATM   77  O   HOH T  76      16.106   0.768  13.921  1.00  0.38           O  
HETATM   78  O   HOH T  77       6.700  -8.459   7.126  1.00  0.38           O  
HETATM   79  O   HOH T  78      23.051   7.133  -5.725  1.00  0.38           O  
HETATM   80  O   HOH T  79      -6.446  13.250   9.804  1.00  0.38           O  
HETATM   81  O   HOH T  80       4.666 -16.769  -0.239  1.00  0.38           O  
HETATM   82  O   HOH T  81     -16.204  10.510   6.485  1.00  0.39           O  
HETATM   83  O   HOH T  82      -4.855 -14.281  -2.994  1.00  0.39           O  
HETATM   84  O   HOH T  83      21.131  -4.379  -4.566  1.00  0.39           O  
HETATM   85  O   HOH T  84      11.204 -17.234  -9.731  1.00  0.39           O  
HETATM   86  O   HOH T  85      -9.372  11.336  -4.777  1.00  0.40           O  
HETATM   87  O   HOH T  86       4.483  -7.944  10.238  1.00  0.40           O  
HETATM   88  O   HOH T  87      -5.196  -4.166  25.217  1.00  0.40           O  
HETATM   89  O   HOH T  88       5.440  -3.033  -9.445  1.00  0.40           O  
HETATM   90  O   HOH T  89      21.234  -4.899   2.923  1.00  0.40           O  
HETATM   91  O   HOH T  90     -17.257   8.322   0.905  1.00  0.40           O  
HETATM   92  O   HOH T  91      -2.787  11.774  14.468  1.00  0.40           O  
HETATM   93  O   HOH T  92      -5.430  -6.993   6.375  1.00  0.40           O  
HETATM   94  O   HOH T  93      21.439  16.942   0.571  1.00  0.40           O  
HETATM   95  O   HOH T  94       4.922  13.259  13.947  1.00  0.40           O  
HETATM   96  O   HOH T  95      11.617  11.084  -7.293  1.00  0.41           O  
HETATM   97  O   HOH T  96       8.170  -9.820  -9.729  1.00  0.41           O  
HETATM   98  O   HOH T  97      -7.630   3.864   6.383  1.00  0.41           O  
HETATM   99  O   HOH T  98      20.237  -5.624  -2.233  1.00  0.41           O  
HETATM  100  O   HOH T  99       7.932  -3.566 -12.790  1.00  0.41           O  
HETATM  101  O   HOH T 100      -7.554   6.966  18.652  1.00  0.41           O  
HETATM  102  O   HOH T 101      13.046 -15.391  -8.776  1.00  0.41           O  
HETATM  103  O   HOH T 102      16.634   6.603  14.538  1.00  0.41           O  
HETATM  104  O   HOH T 103      -8.136  -7.443   5.856  1.00  0.41           O  
HETATM  105  O   HOH T 104       9.855   2.387   9.040  1.00  0.41           O  
HETATM  106  O   HOH T 105      15.705  12.210   5.670  1.00  0.42           O  
HETATM  107  O   HOH T 106     -11.427  -2.709   5.874  1.00  0.42           O  
HETATM  108  O   HOH T 107       2.764   0.980  10.624  1.00  0.42           O  
HETATM  109  O   HOH T 108      19.738  -5.619   5.157  1.00  0.42           O  
HETATM  110  O   HOH T 109      20.182  -2.099  -3.253  1.00  0.42           O  
HETATM  111  O   HOH T 110      -8.428 -10.415   0.285  1.00  0.42           O  
HETATM  112  O   HOH T 111     -14.120  12.427   6.150  1.00  0.42           O  
HETATM  113  O   HOH T 112      -5.974   7.275   9.686  1.00  0.43           O  
HETATM  114  O   HOH T 113      24.599 -13.181  -3.230  1.00  0.43           O  
HETATM  115  O   HOH T 114     -10.837   1.941  11.885  1.00  0.43           O  
HETATM  116  O   HOH T 115       7.057  -5.110  12.628  1.00  0.43           O  
HETATM  117  O   HOH T 116       9.308  12.531   6.983  1.00  0.43           O  
HETATM  118  O   HOH T 117      26.719   5.961  -8.305  1.00  0.43           O  
HETATM  119  O   HOH T 118      23.165  12.758   3.393  1.00  0.43           O  
HETATM  120  O   HOH T 119      -9.381   4.136  11.256  1.00  0.43           O  
HETATM  121  O   HOH T 120     -18.473  12.041   5.890  1.00  0.44           O  
HETATM  122  O   HOH T 121      -7.381  -5.922   8.070  1.00  0.44           O  
HETATM  123  O   HOH T 122      -3.693   1.116  -5.691  1.00  0.44           O  
HETATM  124  O   HOH T 123      -4.783   3.345   6.517  1.00  0.44           O  
HETATM  125  O   HOH T 124       7.278   4.302 -13.499  1.00  0.44           O  
HETATM  126  O   HOH T 125      20.807  -1.027  -0.786  1.00  0.44           O  
HETATM  127  O   HOH T 126       3.493   4.024  -9.108  1.00  0.44           O  
HETATM  128  O   HOH T 127      16.724   8.940  13.001  1.00  0.44           O  
HETATM  129  O   HOH T 128       7.651   8.597  16.670  1.00  0.44           O  
HETATM  130  O   HOH T 129      23.633  -0.189   3.750  1.00  0.44           O  
HETATM  131  O   HOH T 130     -16.068   6.441   9.392  1.00  0.44           O  
HETATM  132  O   HOH T 131      -1.672  12.586   8.925  1.00  0.45           O  
HETATM  133  O   HOH T 132      -9.884   6.325  17.308  1.00  0.45           O  
HETATM  134  O   HOH T 133      -8.088   8.933  -4.625  1.00  0.45           O  
HETATM  135  O   HOH T 134      14.522  13.114 -10.600  1.00  0.45           O  
HETATM  136  O   HOH T 135      -5.294  -0.447  23.743  1.00  0.45           O  
HETATM  137  O   HOH T 136       2.749  12.413   2.357  1.00  0.45           O  
HETATM  138  O   HOH T 137     -17.775   0.746  18.353  1.00  0.45           O  
HETATM  139  O   HOH T 138      11.107  14.605   6.582  1.00  0.45           O  
HETATM  140  O   HOH T 139     -11.542   5.775  -5.980  1.00  0.46           O  
HETATM  141  O   HOH T 140      -3.208 -12.089  -3.352  1.00  0.46           O  
HETATM  142  O   HOH T 141     -16.192   8.830  10.702  1.00  0.46           O  
HETATM  143  O   HOH T 142      15.686  18.476   4.245  1.00  0.46           O  
HETATM  144  O   HOH T 143      -1.193 -10.724  14.899  1.00  0.46           O  
HETATM  145  O   HOH T 144      -5.313 -11.865  -1.633  1.00  0.46           O  
HETATM  146  O   HOH T 145      16.905   8.320   9.099  1.00  0.46           O  
HETATM  147  O   HOH T 146      -7.575   9.498   9.994  1.00  0.46           O  
HETATM  148  O   HOH T 147      14.452  -5.620   8.770  1.00  0.46           O  
HETATM  149  O   HOH T 148       1.478   2.637 -10.556  1.00  0.47           O  
HETATM  150  O   HOH T 149      -3.053   5.525   6.565  1.00  0.47           O  
HETATM  151  O   HOH T 150      -8.053  -3.491   9.279  1.00  0.47           O  
HETATM  152  O   HOH T 151       3.071  -3.924  -8.322  1.00  0.47           O  
HETATM  153  O   HOH T 152      -0.447  -6.518 -10.498  1.00  0.47           O  
HETATM  154  O   HOH T 153      13.187  11.203 -12.116  1.00  0.47           O  
HETATM  155  O   HOH T 154      -6.401  -9.607   6.196  1.00  0.47           O  
HETATM  156  O   HOH T 155      -6.565 -12.389   0.820  1.00  0.47           O  
HETATM  157  O   HOH T 156      10.531 -14.122   2.360  1.00  0.48           O  
HETATM  158  O   HOH T 157       7.225   3.372 -10.859  1.00  0.48           O  
HETATM  159  O   HOH T 158      12.204   5.704  -9.044  1.00  0.48           O  
HETATM  160  O   HOH T 159       0.873  -8.861  14.641  1.00  0.48           O  
HETATM  161  O   HOH T 160       5.657  -0.285  -9.161  1.00  0.48           O  
HETATM  162  O   HOH T 161      17.580   0.110  16.116  1.00  0.48           O  
HETATM  163  O   HOH T 162      22.939   4.583   9.957  1.00  0.48           O  
HETATM  164  O   HOH T 163       1.057  -9.022  11.926  1.00  0.48           O  
HETATM  165  O   HOH T 164     -12.106  -5.146  11.377  1.00  0.48           O  
HETATM  166  O   HOH T 165      18.158  12.438  -6.160  1.00  0.48           O  
HETATM  167  O   HOH T 166       8.232   1.812 -12.785  1.00  0.48           O  
HETATM  168  O   HOH T 167      -1.623  -6.570  13.716  1.00  0.48           O  
HETATM  169  O   HOH T 168     -13.011   9.714  -5.048  1.00  0.48           O  
HETATM  170  O   HOH T 169       2.664  12.030  14.811  1.00  0.48           O  
HETATM  171  O   HOH T 170     -17.493  -1.689  16.995  1.00  0.48           O  
HETATM  172  O   HOH T 171      19.602  13.277  -8.403  1.00  0.48           O  
HETATM  173  O   HOH T 172       3.322 -11.761  10.040  1.00  0.48           O  
HETATM  174  O   HOH T 173       0.759  10.230  15.843  1.00  0.48           O  
HETATM  175  O   HOH T 174      22.666   1.820  10.670  1.00  0.49           O  
HETATM  176  O   HOH T 175     -13.361  -4.267  13.627  1.00  0.49           O  
HETATM  177  O   HOH T 176      15.244 -15.512  -4.149  1.00  0.49           O  
HETATM  178  O   HOH T 177       3.377 -12.516   2.429  1.00  0.49           O  
HETATM  179  O   HOH T 178      15.210  15.781   4.537  1.00  0.49           O  
HETATM  180  O   HOH T 179      19.577   8.575   8.168  1.00  0.49           O  
HETATM  181  O   HOH T 180      16.725  10.534   7.476  1.00  0.49           O  
HETATM  182  O   HOH T 181       7.215  -6.424  14.995  1.00  0.49           O  
HETATM  183  O   HOH T 182      -2.489   4.765  -5.937  1.00  0.49           O  
HETATM  184  O   HOH T 183     -11.311   4.124   9.305  1.00  0.49           O  
HETATM  185  O   HOH T 184      -5.769   9.748  -3.382  1.00  0.49           O  
HETATM  186  O   HOH T 185      -3.078  -7.203   4.729  1.00  0.49           O  
HETATM  187  O   HOH T 186       3.331   9.368  15.280  1.00  0.50           O  
HETATM  188  O   HOH T 187       3.936  12.136   8.009  1.00  0.50           O  
HETATM  189  O   HOH T 188      10.710   3.832  11.035  1.00  0.50           O  
HETATM  190  O   HOH T 189      -0.184  -8.011  -8.183  1.00  0.50           O  
HETATM  191  O   HOH T 190       9.877  -2.310 -11.244  1.00  0.50           O  
HETATM  192  O   HOH T 191      14.944 -14.476 -10.590  1.00  0.50           O  
HETATM  193  O   HOH T 192       4.951  -0.570 -12.672  1.00  0.51           O  
HETATM  194  O   HOH T 193       2.352 -15.538  -4.066  1.00  0.51           O  
HETATM  195  O   HOH T 194      19.218 -14.610  -9.918  1.00  0.51           O  
HETATM  196  O   HOH T 195      21.300  11.623  -9.853  1.00  0.51           O  
HETATM  197  O   HOH T 196      -5.281  13.005  14.631  1.00  0.51           O  
HETATM  198  O   HOH T 197       9.592   4.168 -11.982  1.00  0.51           O  
HETATM  199  O   HOH T 198     -13.784  -9.839   2.687  1.00  0.51           O  
HETATM  200  O   HOH T 199      21.545  14.399   1.783  1.00  0.51           O  
HETATM  201  O   HOH T 200     -11.983   5.608  18.939  1.00  0.52           O  
HETATM  202  O   HOH T 201      -2.598  -7.383  -9.067  1.00  0.52           O  
HETATM  203  O   HOH T 202      17.293  14.540   5.893  1.00  0.52           O  
HETATM  204  O   HOH T 203       8.994   0.188  10.541  1.00  0.52           O  
HETATM  205  O   HOH T 204      -9.910  -9.434  -1.791  1.00  0.52           O  
HETATM  206  O   HOH T 205       3.567   0.744 -10.530  1.00  0.52           O  
HETATM  207  O   HOH T 206     -15.271  -7.306   4.119  1.00  0.52           O  
HETATM  208  O   HOH T 207      -5.787   5.886   6.860  1.00  0.53           O  
HETATM  209  O   HOH T 208       8.765 -12.871   4.094  1.00  0.53           O  
HETATM  210  O   HOH T 209      25.378 -11.228  -5.638  1.00  0.53           O  
HETATM  211  O   HOH T 210      -1.885  -4.778  -8.902  1.00  0.53           O  
HETATM  212  O   HOH T 211      -7.917  15.619   9.491  1.00  0.53           O  
HETATM  213  O   HOH T 212       8.702   5.124  15.021  1.00  0.53           O  
HETATM  214  O   HOH T 213       8.369  -7.183 -10.200  1.00  0.53           O  
HETATM  215  O   HOH T 214       2.323   5.620  -7.307  1.00  0.54           O  
HETATM  216  O   HOH T 215      27.734 -14.734  -5.773  1.00  0.54           O  
HETATM  217  O   HOH T 216      15.422 -11.235   5.127  1.00  0.55           O  
HETATM  218  O   HOH T 217     -10.619   3.805  -1.024  1.00  0.55           O  
HETATM  219  O   HOH T 218       1.933  10.827  12.382  1.00  0.55           O  
HETATM  220  O   HOH T 219      -8.815   8.871  17.021  1.00  0.55           O  
HETATM  221  O   HOH T 220      25.264 -14.091  -6.897  1.00  0.56           O  
HETATM  222  O   HOH T 221      16.232  10.730  20.235  1.00  0.57           O  
HETATM  223  O   HOH T 222     -16.361  11.152   9.199  1.00  0.57           O  
HETATM  224  O   HOH T 223      -1.510  -9.120  12.951  1.00  0.58           O  
HETATM  225  O   HOH T 224      21.683  10.665   2.413  1.00  0.60           O  
TER     226      HOH T 224 
