# Supplementary material for: Accurate Prediction of Hydration Sites of Proteins Using Energy Model With Atom Embedding
Source: Front Mol Biosci. 2021 Sep 20;8:756075. doi: 10.3389/fmolb.2021.756075 (PMC8488165; doi:10.3389/fmolb.2021.756075)
Supplement: Supplementary file 1 [file DataSheet1.ZIP › Data Sheet 1/Our_result_pdb/our_dataset_output/2YZY_watersite.pdb]

HEADER                                                        XXXX


JRNL        PMID   -1
HETATM    1  O   HOH T   0      31.523   2.910  -2.049  1.00  0.19           O  
HETATM    2  O   HOH T   1      29.275   7.791  20.498  1.00  0.20           O  
HETATM    3  O   HOH T   2      11.435 -22.406 -12.140  1.00  0.22           O  
HETATM    4  O   HOH T   3       3.672 -14.261 -17.163  1.00  0.22           O  
HETATM    5  O   HOH T   4      22.071 -13.774 -11.163  1.00  0.23           O  
HETATM    6  O   HOH T   5      24.073  -9.501  -0.680  1.00  0.24           O  
HETATM    7  O   HOH T   6      31.534   6.677  -2.549  1.00  0.25           O  
HETATM    8  O   HOH T   7      10.364  -1.651 -15.634  1.00  0.25           O  
HETATM    9  O   HOH T   8       6.008 -16.651 -10.976  1.00  0.25           O  
HETATM   10  O   HOH T   9      14.999  -8.312 -18.435  1.00  0.25           O  
HETATM   11  O   HOH T  10      24.917 -15.772  -0.818  1.00  0.25           O  
HETATM   12  O   HOH T  11      18.526  20.831  14.466  1.00  0.26           O  
HETATM   13  O   HOH T  12       8.638 -14.648   0.913  1.00  0.26           O  
HETATM   14  O   HOH T  13      10.531 -15.745   8.510  1.00  0.27           O  
HETATM   15  O   HOH T  14      22.640  -8.957 -12.663  1.00  0.27           O  
HETATM   16  O   HOH T  15       6.209  -8.716 -17.116  1.00  0.27           O  
HETATM   17  O   HOH T  16      28.785  12.457  -7.442  1.00  0.28           O  
HETATM   18  O   HOH T  17      25.772 -11.966 -10.321  1.00  0.28           O  
HETATM   19  O   HOH T  18       0.342  -6.477 -12.009  1.00  0.28           O  
HETATM   20  O   HOH T  19       9.093   0.988  20.651  1.00  0.28           O  
HETATM   21  O   HOH T  20      14.418  20.585   9.609  1.00  0.29           O  
HETATM   22  O   HOH T  21       4.072 -13.510   7.624  1.00  0.29           O  
HETATM   23  O   HOH T  22      20.635  -0.177  17.303  1.00  0.29           O  
HETATM   24  O   HOH T  23       9.442  18.822  12.486  1.00  0.29           O  
HETATM   25  O   HOH T  24       3.502  15.460  23.856  1.00  0.29           O  
HETATM   26  O   HOH T  25      28.315  -5.688  13.860  1.00  0.30           O  
HETATM   27  O   HOH T  26      10.501  -3.238  -8.291  1.00  0.30           O  
HETATM   28  O   HOH T  27       7.390 -13.903  -1.389  1.00  0.30           O  
HETATM   29  O   HOH T  28      23.277   2.295  -9.587  1.00  0.31           O  
HETATM   30  O   HOH T  29      16.264 -12.785   1.759  1.00  0.31           O  
HETATM   31  O   HOH T  30       3.933 -17.003  -9.191  1.00  0.32           O  
HETATM   32  O   HOH T  31       3.474  -4.892 -14.771  1.00  0.32           O  
HETATM   33  O   HOH T  32      27.467   4.934  -9.536  1.00  0.32           O  
HETATM   34  O   HOH T  33      35.429 -11.166   5.375  1.00  0.33           O  
HETATM   35  O   HOH T  34       2.621 -15.703 -14.949  1.00  0.33           O  
HETATM   36  O   HOH T  35       3.230   2.868  21.426  1.00  0.33           O  
HETATM   37  O   HOH T  36      11.169  -7.997  -2.493  1.00  0.34           O  
HETATM   38  O   HOH T  37      16.093  10.314  24.497  1.00  0.34           O  
HETATM   39  O   HOH T  38       4.395  -6.485 -16.896  1.00  0.34           O  
HETATM   40  O   HOH T  39      26.008   0.639 -10.779  1.00  0.34           O  
HETATM   41  O   HOH T  40      24.570  -0.955  14.802  1.00  0.35           O  
HETATM   42  O   HOH T  41      37.040  10.650  -8.657  1.00  0.35           O  
HETATM   43  O   HOH T  42      31.094   2.526   5.142  1.00  0.35           O  
HETATM   44  O   HOH T  43      25.911   4.689   2.287  1.00  0.35           O  
HETATM   45  O   HOH T  44       6.082  15.368  24.840  1.00  0.35           O  
HETATM   46  O   HOH T  45      31.742  -9.265   4.262  1.00  0.35           O  
HETATM   47  O   HOH T  46      24.378   1.878  10.852  1.00  0.35           O  
HETATM   48  O   HOH T  47      26.649   7.422   2.276  1.00  0.35           O  
HETATM   49  O   HOH T  48      15.210  -2.954 -17.042  1.00  0.35           O  
HETATM   50  O   HOH T  49      21.075   9.108  28.194  1.00  0.35           O  
HETATM   51  O   HOH T  50      21.602 -10.719 -16.488  1.00  0.35           O  
HETATM   52  O   HOH T  51      16.384  -4.798 -15.168  1.00  0.35           O  
HETATM   53  O   HOH T  52      16.205 -15.387  -2.399  1.00  0.36           O  
HETATM   54  O   HOH T  53       4.936  -2.214  15.425  1.00  0.36           O  
HETATM   55  O   HOH T  54      23.154 -12.264   2.834  1.00  0.36           O  
HETATM   56  O   HOH T  55      17.622  -2.749  -9.415  1.00  0.36           O  
HETATM   57  O   HOH T  56      27.209 -17.689 -13.004  1.00  0.36           O  
HETATM   58  O   HOH T  57      12.703  -0.388 -14.793  1.00  0.37           O  
HETATM   59  O   HOH T  58      16.436 -15.548  10.069  1.00  0.37           O  
HETATM   60  O   HOH T  59       3.073 -10.868   6.910  1.00  0.37           O  
HETATM   61  O   HOH T  60      23.991  21.245  17.844  1.00  0.38           O  
HETATM   62  O   HOH T  61      14.285 -25.389  -9.115  1.00  0.38           O  
HETATM   63  O   HOH T  62      27.702  -1.492 -10.797  1.00  0.38           O  
HETATM   64  O   HOH T  63      10.564   1.611 -19.721  1.00  0.38           O  
HETATM   65  O   HOH T  64      27.368  17.422  14.105  1.00  0.38           O  
HETATM   66  O   HOH T  65      23.142  -7.399  17.850  1.00  0.38           O  
HETATM   67  O   HOH T  66       0.564  -7.796   9.469  1.00  0.38           O  
HETATM   68  O   HOH T  67      15.983  13.187  27.307  1.00  0.38           O  
HETATM   69  O   HOH T  68      16.999 -17.602  -3.865  1.00  0.38           O  
HETATM   70  O   HOH T  69      15.357  -0.974  22.045  1.00  0.39           O  
HETATM   71  O   HOH T  70       5.112 -19.667 -17.013  1.00  0.39           O  
HETATM   72  O   HOH T  71      32.008  10.436  -5.231  1.00  0.39           O  
HETATM   73  O   HOH T  72      23.132  -4.753  18.626  1.00  0.39           O  
HETATM   74  O   HOH T  73      21.218  -6.521  19.579  1.00  0.39           O  
HETATM   75  O   HOH T  74       9.664  -7.967  -0.085  1.00  0.39           O  
HETATM   76  O   HOH T  75      29.630   7.447  -7.308  1.00  0.39           O  
HETATM   77  O   HOH T  76      20.276   0.847  19.930  1.00  0.39           O  
HETATM   78  O   HOH T  77      29.939   6.966  23.064  1.00  0.40           O  
HETATM   79  O   HOH T  78      33.578   4.785  -2.000  1.00  0.40           O  
HETATM   80  O   HOH T  79      17.591  -9.099 -14.153  1.00  0.40           O  
HETATM   81  O   HOH T  80       3.145 -15.409  -0.962  1.00  0.40           O  
HETATM   82  O   HOH T  81      15.387  -5.702 -17.695  1.00  0.40           O  
HETATM   83  O   HOH T  82      29.126 -11.478  16.504  1.00  0.40           O  
HETATM   84  O   HOH T  83      -0.743 -10.152  10.098  1.00  0.40           O  
HETATM   85  O   HOH T  84       4.518 -12.961  11.872  1.00  0.41           O  
HETATM   86  O   HOH T  85      34.259  -0.324   3.412  1.00  0.41           O  
HETATM   87  O   HOH T  86      18.033 -19.556  -2.143  1.00  0.41           O  
HETATM   88  O   HOH T  87       5.620  14.477  22.202  1.00  0.41           O  
HETATM   89  O   HOH T  88      33.370  10.481   2.340  1.00  0.41           O  
HETATM   90  O   HOH T  89      29.895   5.132  20.996  1.00  0.41           O  
HETATM   91  O   HOH T  90      17.105 -13.554  -0.621  1.00  0.41           O  
HETATM   92  O   HOH T  91      30.268  -1.975  -9.989  1.00  0.42           O  
HETATM   93  O   HOH T  92      24.136  -7.733   6.166  1.00  0.42           O  
HETATM   94  O   HOH T  93      13.668  -2.274  23.857  1.00  0.42           O  
HETATM   95  O   HOH T  94      33.256  -2.432  10.564  1.00  0.42           O  
HETATM   96  O   HOH T  95      21.009  14.003  27.220  1.00  0.42           O  
HETATM   97  O   HOH T  96       1.803  12.759   7.973  1.00  0.42           O  
HETATM   98  O   HOH T  97      26.653  -2.428  15.469  1.00  0.42           O  
HETATM   99  O   HOH T  98      35.834   3.056   5.264  1.00  0.43           O  
HETATM  100  O   HOH T  99      18.926  21.720  18.442  1.00  0.43           O  
HETATM  101  O   HOH T 100      14.708  14.480   6.342  1.00  0.43           O  
HETATM  102  O   HOH T 101      27.677  -9.551  14.926  1.00  0.43           O  
HETATM  103  O   HOH T 102      13.488 -16.742  14.512  1.00  0.43           O  
HETATM  104  O   HOH T 103      -0.049  -8.290  12.106  1.00  0.43           O  
HETATM  105  O   HOH T 104      22.278  11.631  27.740  1.00  0.43           O  
HETATM  106  O   HOH T 105       5.326 -14.722   9.899  1.00  0.43           O  
HETATM  107  O   HOH T 106      13.880 -18.936  -7.889  1.00  0.43           O  
HETATM  108  O   HOH T 107      21.474  -2.529  18.527  1.00  0.44           O  
HETATM  109  O   HOH T 108       1.194  -3.339 -14.249  1.00  0.44           O  
HETATM  110  O   HOH T 109      -0.225   6.776  22.753  1.00  0.44           O  
HETATM  111  O   HOH T 110      19.453  13.915  29.409  1.00  0.44           O  
HETATM  112  O   HOH T 111      17.570 -15.386  12.619  1.00  0.44           O  
HETATM  113  O   HOH T 112       1.652 -13.871   9.124  1.00  0.44           O  
HETATM  114  O   HOH T 113      12.488  21.370   6.321  1.00  0.44           O  
HETATM  115  O   HOH T 114      38.361  -7.179   2.796  1.00  0.44           O  
HETATM  116  O   HOH T 115      29.158  -3.179  14.644  1.00  0.44           O  
HETATM  117  O   HOH T 116      12.416  -2.437 -17.369  1.00  0.45           O  
HETATM  118  O   HOH T 117       4.709 -13.396  -1.915  1.00  0.45           O  
HETATM  119  O   HOH T 118      20.809  -1.663  20.933  1.00  0.45           O  
HETATM  120  O   HOH T 119      25.415  21.396  15.501  1.00  0.45           O  
HETATM  121  O   HOH T 120      23.458 -11.460 -11.751  1.00  0.45           O  
HETATM  122  O   HOH T 121      16.967  21.519  16.700  1.00  0.45           O  
HETATM  123  O   HOH T 122       1.529  15.215   9.174  1.00  0.45           O  
HETATM  124  O   HOH T 123      11.763  -3.252  22.119  1.00  0.45           O  
HETATM  125  O   HOH T 124      28.676  12.558  -4.668  1.00  0.45           O  
HETATM  126  O   HOH T 125       3.681  -2.811 -16.764  1.00  0.46           O  
HETATM  127  O   HOH T 126      16.085 -11.375 -14.481  1.00  0.46           O  
HETATM  128  O   HOH T 127      21.365  -8.269 -15.100  1.00  0.46           O  
HETATM  129  O   HOH T 128      25.576   3.360 -10.861  1.00  0.46           O  
HETATM  130  O   HOH T 129      26.138  12.677  27.928  1.00  0.46           O  
HETATM  131  O   HOH T 130      23.788   1.681 -12.177  1.00  0.46           O  
HETATM  132  O   HOH T 131      37.269  -5.043   4.250  1.00  0.46           O  
HETATM  133  O   HOH T 132      30.824   8.047  -4.849  1.00  0.46           O  
HETATM  134  O   HOH T 133      18.996 -11.121 -17.222  1.00  0.47           O  
HETATM  135  O   HOH T 134      25.121  19.109  14.253  1.00  0.47           O  
HETATM  136  O   HOH T 135      19.241 -15.926  10.450  1.00  0.47           O  
HETATM  137  O   HOH T 136      11.332 -25.138 -12.303  1.00  0.47           O  
HETATM  138  O   HOH T 137       9.894  17.840   2.998  1.00  0.47           O  
HETATM  139  O   HOH T 138      33.851   4.947   5.750  1.00  0.48           O  
HETATM  140  O   HOH T 139       5.484  17.092  22.866  1.00  0.48           O  
HETATM  141  O   HOH T 140      31.714  -4.024  -8.672  1.00  0.48           O  
HETATM  142  O   HOH T 141      22.267 -16.268  -6.518  1.00  0.48           O  
HETATM  143  O   HOH T 142      15.168 -12.043 -16.889  1.00  0.49           O  
HETATM  144  O   HOH T 143      14.572 -16.450   8.101  1.00  0.49           O  
HETATM  145  O   HOH T 144      -0.783  10.425  11.231  1.00  0.49           O  
HETATM  146  O   HOH T 145      11.294  -3.085  -1.493  1.00  0.49           O  
HETATM  147  O   HOH T 146      29.912   6.137  -9.711  1.00  0.49           O  
HETATM  148  O   HOH T 147      30.247   1.770  14.526  1.00  0.50           O  
HETATM  149  O   HOH T 148      28.105   7.651  -4.999  1.00  0.50           O  
HETATM  150  O   HOH T 149      25.275  -3.219  19.497  1.00  0.50           O  
HETATM  151  O   HOH T 150      10.593  -5.667  -1.050  1.00  0.50           O  
HETATM  152  O   HOH T 151      -0.360  -3.828 -12.042  1.00  0.50           O  
HETATM  153  O   HOH T 152       2.537  -1.446  14.413  1.00  0.50           O  
HETATM  154  O   HOH T 153      36.364  -3.994   6.649  1.00  0.50           O  
HETATM  155  O   HOH T 154      18.805  -5.631 -16.091  1.00  0.50           O  
HETATM  156  O   HOH T 155       2.242  -0.217  12.060  1.00  0.50           O  
HETATM  157  O   HOH T 156      19.382  20.252  20.561  1.00  0.50           O  
HETATM  158  O   HOH T 157      27.573  -4.849  16.239  1.00  0.50           O  
HETATM  159  O   HOH T 158      25.777   6.566  -3.875  1.00  0.51           O  
HETATM  160  O   HOH T 159       3.194   0.020  19.396  1.00  0.51           O  
HETATM  161  O   HOH T 160      15.368   5.588 -14.504  1.00  0.51           O  
HETATM  162  O   HOH T 161       0.683   4.012  22.401  1.00  0.51           O  
HETATM  163  O   HOH T 162      14.748  17.063   7.363  1.00  0.51           O  
HETATM  164  O   HOH T 163      13.064 -18.490  12.455  1.00  0.51           O  
HETATM  165  O   HOH T 164      31.786  12.205   8.230  1.00  0.51           O  
HETATM  166  O   HOH T 165      19.584  23.437  14.563  1.00  0.52           O  
HETATM  167  O   HOH T 166       0.200  12.920  10.265  1.00  0.52           O  
HETATM  168  O   HOH T 167      36.292   5.010   7.176  1.00  0.52           O  
HETATM  169  O   HOH T 168      37.731   8.660 -10.483  1.00  0.52           O  
HETATM  170  O   HOH T 169      13.035  12.014   5.816  1.00  0.52           O  
HETATM  171  O   HOH T 170      28.299  14.830  -6.062  1.00  0.52           O  
HETATM  172  O   HOH T 171      27.426  17.840  18.516  1.00  0.52           O  
HETATM  173  O   HOH T 172      12.832  -2.463  17.714  1.00  0.52           O  
HETATM  174  O   HOH T 173       7.206 -13.904  11.739  1.00  0.53           O  
HETATM  175  O   HOH T 174      28.232   9.635 -10.671  1.00  0.53           O  
HETATM  176  O   HOH T 175      16.547  -9.747 -16.704  1.00  0.53           O  
HETATM  177  O   HOH T 176      13.012 -23.711 -14.002  1.00  0.53           O  
HETATM  178  O   HOH T 177      16.247 -10.024  20.659  1.00  0.53           O  
HETATM  179  O   HOH T 178      25.380  18.973  16.935  1.00  0.53           O  
HETATM  180  O   HOH T 179      22.698  11.171   5.583  1.00  0.53           O  
HETATM  181  O   HOH T 180      37.075  -9.152   4.312  1.00  0.53           O  
HETATM  182  O   HOH T 181      35.649  -6.971   3.179  1.00  0.54           O  
HETATM  183  O   HOH T 182      25.302  -9.521 -11.590  1.00  0.54           O  
HETATM  184  O   HOH T 183      27.551  -2.654  18.038  1.00  0.54           O  
HETATM  185  O   HOH T 184      19.787 -12.404   4.092  1.00  0.54           O  
HETATM  186  O   HOH T 185      28.887  17.905   8.725  1.00  0.54           O  
HETATM  187  O   HOH T 186      34.408   7.140   7.194  1.00  0.54           O  
HETATM  188  O   HOH T 187      15.722 -10.829 -19.325  1.00  0.54           O  
HETATM  189  O   HOH T 188       6.095 -11.707  -0.267  1.00  0.54           O  
HETATM  190  O   HOH T 189      11.373  -3.891  19.509  1.00  0.54           O  
HETATM  191  O   HOH T 190       2.879  -1.716 -19.090  1.00  0.54           O  
HETATM  192  O   HOH T 191      34.306  -8.673   4.745  1.00  0.55           O  
HETATM  193  O   HOH T 192       1.515  -6.146  11.498  1.00  0.55           O  
HETATM  194  O   HOH T 193      28.254   8.879   0.602  1.00  0.55           O  
HETATM  195  O   HOH T 194      11.420  18.017  21.027  1.00  0.55           O  
HETATM  196  O   HOH T 195      15.270  12.805  24.541  1.00  0.55           O  
HETATM  197  O   HOH T 196      23.457   3.231 -14.472  1.00  0.55           O  
HETATM  198  O   HOH T 197      35.462  -6.354   5.944  1.00  0.55           O  
HETATM  199  O   HOH T 198      19.545  -0.840 -13.083  1.00  0.55           O  
HETATM  200  O   HOH T 199      14.382   2.454 -15.313  1.00  0.55           O  
HETATM  201  O   HOH T 200      19.627 -13.033  -1.564  1.00  0.55           O  
HETATM  202  O   HOH T 201      34.070   7.457  -1.541  1.00  0.56           O  
HETATM  203  O   HOH T 202      18.910  -8.371 -16.548  1.00  0.56           O  
HETATM  204  O   HOH T 203      -0.750  13.867   8.085  1.00  0.56           O  
HETATM  205  O   HOH T 204      21.069 -20.289 -16.166  1.00  0.56           O  
HETATM  206  O   HOH T 205      34.802   8.882   0.809  1.00  0.56           O  
HETATM  207  O   HOH T 206      -6.324   8.929  16.959  1.00  0.56           O  
HETATM  208  O   HOH T 207      13.651 -23.833 -11.333  1.00  0.56           O  
HETATM  209  O   HOH T 208      -0.769  14.621  17.001  1.00  0.57           O  
HETATM  210  O   HOH T 209      22.072   4.074 -15.295  1.00  0.57           O  
HETATM  211  O   HOH T 210      15.438   6.022 -11.933  1.00  0.57           O  
HETATM  212  O   HOH T 211      21.044   2.461  -4.818  1.00  0.57           O  
HETATM  213  O   HOH T 212      29.535   1.438  19.172  1.00  0.57           O  
HETATM  214  O   HOH T 213       1.568  20.074  10.452  1.00  0.57           O  
HETATM  215  O   HOH T 214      19.546  -1.359 -17.870  1.00  0.58           O  
HETATM  216  O   HOH T 215      14.520  -3.488  21.653  1.00  0.59           O  
HETATM  217  O   HOH T 216      29.143  17.333  16.205  1.00  0.60           O  
HETATM  218  O   HOH T 217       0.830  16.986  11.308  1.00  0.62           O  
TER     219      HOH T 217 
