# Supplementary material for: Accurate Prediction of Hydration Sites of Proteins Using Energy Model With Atom Embedding
Source: Front Mol Biosci. 2021 Sep 20;8:756075. doi: 10.3389/fmolb.2021.756075 (PMC8488165; doi:10.3389/fmolb.2021.756075)
Supplement: Supplementary file 1 [file DataSheet1.ZIP › Data Sheet 1/Our_result_pdb/our_dataset_output/2ZAB_watersite.pdb]

HEADER                                                        XXXX


JRNL        PMID   -1
HETATM    1  O   HOH T   0     -10.365   5.352  21.732  1.00  0.15           O  
HETATM    2  O   HOH T   1     -10.938  14.523  -3.627  1.00  0.17           O  
HETATM    3  O   HOH T   2      -3.454  17.130   4.075  1.00  0.18           O  
HETATM    4  O   HOH T   3     -19.420  13.949  12.014  1.00  0.19           O  
HETATM    5  O   HOH T   4       6.493   6.853  28.795  1.00  0.20           O  
HETATM    6  O   HOH T   5     -13.541   2.448  11.027  1.00  0.21           O  
HETATM    7  O   HOH T   6      14.730   2.449  11.127  1.00  0.22           O  
HETATM    8  O   HOH T   7       6.987   6.014  19.062  1.00  0.22           O  
HETATM    9  O   HOH T   8      -2.664  -8.467  -8.602  1.00  0.22           O  
HETATM   10  O   HOH T   9     -10.885  11.741  22.265  1.00  0.22           O  
HETATM   11  O   HOH T  10      -7.481   7.411  28.163  1.00  0.22           O  
HETATM   12  O   HOH T  11      -4.859  -5.297  20.458  1.00  0.23           O  
HETATM   13  O   HOH T  12      -7.910  -2.675 -12.216  1.00  0.24           O  
HETATM   14  O   HOH T  13     -22.575  10.821  18.511  1.00  0.24           O  
HETATM   15  O   HOH T  14       2.030 -17.058  18.704  1.00  0.24           O  
HETATM   16  O   HOH T  15     -13.029  10.178  16.401  1.00  0.24           O  
HETATM   17  O   HOH T  16      -3.911  11.265   7.953  1.00  0.25           O  
HETATM   18  O   HOH T  17       8.516   4.874  17.006  1.00  0.25           O  
HETATM   19  O   HOH T  18     -10.951   2.041  11.987  1.00  0.25           O  
HETATM   20  O   HOH T  19     -13.864   0.402  17.943  1.00  0.26           O  
HETATM   21  O   HOH T  20     -10.477  -2.929  13.373  1.00  0.26           O  
HETATM   22  O   HOH T  21     -13.728  11.330   1.959  1.00  0.26           O  
HETATM   23  O   HOH T  22      11.260   5.513  -8.098  1.00  0.26           O  
HETATM   24  O   HOH T  23       3.302 -13.928   2.368  1.00  0.26           O  
HETATM   25  O   HOH T  24     -10.778 -14.632  20.787  1.00  0.26           O  
HETATM   26  O   HOH T  25       3.180  22.627   9.777  1.00  0.27           O  
HETATM   27  O   HOH T  26      14.646  20.745  13.447  1.00  0.27           O  
HETATM   28  O   HOH T  27       6.128  -0.022  21.240  1.00  0.27           O  
HETATM   29  O   HOH T  28      -5.804 -12.761  25.742  1.00  0.27           O  
HETATM   30  O   HOH T  29     -13.692  -2.462  24.112  1.00  0.28           O  
HETATM   31  O   HOH T  30     -16.336   2.903  27.289  1.00  0.28           O  
HETATM   32  O   HOH T  31       0.087 -16.037   1.096  1.00  0.28           O  
HETATM   33  O   HOH T  32      -2.494  -9.862  15.010  1.00  0.28           O  
HETATM   34  O   HOH T  33      -7.646  -6.487  10.364  1.00  0.28           O  
HETATM   35  O   HOH T  34      -3.527 -13.707   3.923  1.00  0.29           O  
HETATM   36  O   HOH T  35      -7.365  -6.104  23.252  1.00  0.29           O  
HETATM   37  O   HOH T  36       9.359 -15.503   7.690  1.00  0.29           O  
HETATM   38  O   HOH T  37      -3.375  22.933   8.770  1.00  0.29           O  
HETATM   39  O   HOH T  38     -10.711  -5.061  28.705  1.00  0.29           O  
HETATM   40  O   HOH T  39      -7.583  -3.780  11.144  1.00  0.29           O  
HETATM   41  O   HOH T  40       8.368  23.712   9.892  1.00  0.29           O  
HETATM   42  O   HOH T  41      24.314  -4.930  -2.181  1.00  0.29           O  
HETATM   43  O   HOH T  42      10.260  -1.593  19.628  1.00  0.29           O  
HETATM   44  O   HOH T  43      11.362  11.196  -2.913  1.00  0.29           O  
HETATM   45  O   HOH T  44      -1.844  19.466  29.006  1.00  0.29           O  
HETATM   46  O   HOH T  45      -3.015   8.732   8.926  1.00  0.30           O  
HETATM   47  O   HOH T  46       5.750  13.265   0.102  1.00  0.30           O  
HETATM   48  O   HOH T  47       3.923 -12.924  11.468  1.00  0.30           O  
HETATM   49  O   HOH T  48       1.909  13.520  -9.493  1.00  0.31           O  
HETATM   50  O   HOH T  49       2.959 -10.993  -7.840  1.00  0.31           O  
HETATM   51  O   HOH T  50       6.398  10.525  27.790  1.00  0.31           O  
HETATM   52  O   HOH T  51       9.784  -5.273  16.055  1.00  0.31           O  
HETATM   53  O   HOH T  52      -6.124  15.446  -1.598  1.00  0.31           O  
HETATM   54  O   HOH T  53      12.624   7.344  25.081  1.00  0.31           O  
HETATM   55  O   HOH T  54       7.226  -5.759  11.544  1.00  0.32           O  
HETATM   56  O   HOH T  55      14.587  -8.036   9.131  1.00  0.32           O  
HETATM   57  O   HOH T  56       7.617  -6.908  15.350  1.00  0.32           O  
HETATM   58  O   HOH T  57     -17.582  -0.657  19.643  1.00  0.32           O  
HETATM   59  O   HOH T  58       1.408  18.734  -9.788  1.00  0.32           O  
HETATM   60  O   HOH T  59      -8.232  -7.888  -5.877  1.00  0.32           O  
HETATM   61  O   HOH T  60      -5.153   0.937  -3.865  1.00  0.32           O  
HETATM   62  O   HOH T  61     -14.363   4.073   8.892  1.00  0.32           O  
HETATM   63  O   HOH T  62       3.500  10.798  27.978  1.00  0.33           O  
HETATM   64  O   HOH T  63      -5.421  17.850  -2.614  1.00  0.33           O  
HETATM   65  O   HOH T  64     -14.269  11.209   4.665  1.00  0.33           O  
HETATM   66  O   HOH T  65      -8.302  22.031   1.615  1.00  0.33           O  
HETATM   67  O   HOH T  66      -5.095  24.506   7.274  1.00  0.33           O  
HETATM   68  O   HOH T  67     -23.432   3.651  24.637  1.00  0.33           O  
HETATM   69  O   HOH T  68     -15.525   6.854  11.368  1.00  0.34           O  
HETATM   70  O   HOH T  69     -18.031   7.210  10.137  1.00  0.34           O  
HETATM   71  O   HOH T  70      -0.350  22.229  17.474  1.00  0.34           O  
HETATM   72  O   HOH T  71      -2.182  -8.228  11.810  1.00  0.34           O  
HETATM   73  O   HOH T  72     -15.995   1.191  21.024  1.00  0.34           O  
HETATM   74  O   HOH T  73      15.029  -0.305  10.661  1.00  0.34           O  
HETATM   75  O   HOH T  74     -15.682   8.084  24.602  1.00  0.34           O  
HETATM   76  O   HOH T  75      17.304  20.454  17.218  1.00  0.34           O  
HETATM   77  O   HOH T  76      -9.543  -7.294  22.115  1.00  0.34           O  
HETATM   78  O   HOH T  77      12.469  -3.037   9.366  1.00  0.35           O  
HETATM   79  O   HOH T  78       9.590 -17.476  -2.729  1.00  0.35           O  
HETATM   80  O   HOH T  79      -7.604  13.633  24.984  1.00  0.35           O  
HETATM   81  O   HOH T  80      20.143  -7.948  -1.640  1.00  0.35           O  
HETATM   82  O   HOH T  81      -1.120   6.223  27.315  1.00  0.35           O  
HETATM   83  O   HOH T  82      -6.954  -0.728  -5.172  1.00  0.35           O  
HETATM   84  O   HOH T  83       5.506   8.722  -9.657  1.00  0.35           O  
HETATM   85  O   HOH T  84      -2.478  14.359  -7.295  1.00  0.35           O  
HETATM   86  O   HOH T  85      17.821  -8.222   5.948  1.00  0.35           O  
HETATM   87  O   HOH T  86       9.011   5.218  -9.687  1.00  0.36           O  
HETATM   88  O   HOH T  87       5.664   3.507  19.401  1.00  0.36           O  
HETATM   89  O   HOH T  88      -3.913  -8.243 -13.570  1.00  0.36           O  
HETATM   90  O   HOH T  89     -13.570  23.651  15.364  1.00  0.36           O  
HETATM   91  O   HOH T  90     -14.955  -7.168   4.329  1.00  0.36           O  
HETATM   92  O   HOH T  91       7.373  21.743   8.111  1.00  0.36           O  
HETATM   93  O   HOH T  92      14.005  12.289   5.031  1.00  0.36           O  
HETATM   94  O   HOH T  93     -16.957  21.931  19.618  1.00  0.36           O  
HETATM   95  O   HOH T  94      -5.284 -15.820  15.500  1.00  0.36           O  
HETATM   96  O   HOH T  95      -1.627  -5.444 -12.104  1.00  0.37           O  
HETATM   97  O   HOH T  96     -12.701 -15.435   1.183  1.00  0.37           O  
HETATM   98  O   HOH T  97     -11.137  -2.335  -2.861  1.00  0.37           O  
HETATM   99  O   HOH T  98      -8.128  18.329  21.720  1.00  0.37           O  
HETATM  100  O   HOH T  99       4.837  -3.350 -11.362  1.00  0.37           O  
HETATM  101  O   HOH T 100      15.609 -10.684  -0.407  1.00  0.37           O  
HETATM  102  O   HOH T 101      19.330 -11.332   1.428  1.00  0.37           O  
HETATM  103  O   HOH T 102      15.413   7.467  18.912  1.00  0.37           O  
HETATM  104  O   HOH T 103       4.728 -15.761   3.902  1.00  0.37           O  
HETATM  105  O   HOH T 104      -4.214  11.967  -6.924  1.00  0.37           O  
HETATM  106  O   HOH T 105     -12.841  -9.283  24.878  1.00  0.37           O  
HETATM  107  O   HOH T 106     -16.259  16.699  17.933  1.00  0.37           O  
HETATM  108  O   HOH T 107      -5.478   3.388   2.635  1.00  0.37           O  
HETATM  109  O   HOH T 108     -12.143   5.636   3.127  1.00  0.37           O  
HETATM  110  O   HOH T 109     -11.317  -8.697   6.921  1.00  0.37           O  
HETATM  111  O   HOH T 110     -16.871  14.069  17.310  1.00  0.37           O  
HETATM  112  O   HOH T 111     -11.272  14.512  22.406  1.00  0.37           O  
HETATM  113  O   HOH T 112     -10.511  -0.247  10.408  1.00  0.38           O  
HETATM  114  O   HOH T 113      -0.855 -15.474   6.680  1.00  0.38           O  
HETATM  115  O   HOH T 114     -18.690   1.832  20.429  1.00  0.38           O  
HETATM  116  O   HOH T 115      -7.358  -8.873  22.892  1.00  0.38           O  
HETATM  117  O   HOH T 116     -13.306  -0.076   9.761  1.00  0.38           O  
HETATM  118  O   HOH T 117     -16.967  -1.049  15.713  1.00  0.38           O  
HETATM  119  O   HOH T 118      -9.947  -7.464   0.639  1.00  0.38           O  
HETATM  120  O   HOH T 119      -9.703  14.223  26.766  1.00  0.38           O  
HETATM  121  O   HOH T 120       3.230  10.002 -10.514  1.00  0.38           O  
HETATM  122  O   HOH T 121      -0.339  20.495  -8.394  1.00  0.38           O  
HETATM  123  O   HOH T 122      13.339 -10.221   5.331  1.00  0.39           O  
HETATM  124  O   HOH T 123     -10.973  -1.169   3.176  1.00  0.39           O  
HETATM  125  O   HOH T 124      14.984   4.247  -0.868  1.00  0.39           O  
HETATM  126  O   HOH T 125     -13.843  -0.767   3.082  1.00  0.39           O  
HETATM  127  O   HOH T 126      -0.462  16.711  -9.906  1.00  0.39           O  
HETATM  128  O   HOH T 127       8.861   0.266  29.222  1.00  0.39           O  
HETATM  129  O   HOH T 128     -10.652  11.763  -3.540  1.00  0.39           O  
HETATM  130  O   HOH T 129     -20.695  12.561  19.200  1.00  0.39           O  
HETATM  131  O   HOH T 130     -14.845  -2.045  17.166  1.00  0.39           O  
HETATM  132  O   HOH T 131      13.735   4.977  11.270  1.00  0.39           O  
HETATM  133  O   HOH T 132      15.332 -13.083  -1.808  1.00  0.39           O  
HETATM  134  O   HOH T 133       8.731 -22.034   4.574  1.00  0.39           O  
HETATM  135  O   HOH T 134      12.455  -7.850  15.866  1.00  0.40           O  
HETATM  136  O   HOH T 135     -10.778  -4.262  -4.851  1.00  0.40           O  
HETATM  137  O   HOH T 136      -4.253  -6.013 -11.771  1.00  0.40           O  
HETATM  138  O   HOH T 137     -14.659   3.269   6.272  1.00  0.41           O  
HETATM  139  O   HOH T 138       4.840  -7.572  18.953  1.00  0.41           O  
HETATM  140  O   HOH T 139      -0.952  17.597  27.144  1.00  0.41           O  
HETATM  141  O   HOH T 140       4.824  22.804   7.501  1.00  0.41           O  
HETATM  142  O   HOH T 141     -10.679  14.294  -0.890  1.00  0.41           O  
HETATM  143  O   HOH T 142       3.928   4.836 -10.926  1.00  0.41           O  
HETATM  144  O   HOH T 143      -2.434  -7.800  22.237  1.00  0.41           O  
HETATM  145  O   HOH T 144     -15.184  17.642  20.265  1.00  0.41           O  
HETATM  146  O   HOH T 145      14.983  -8.185  11.858  1.00  0.41           O  
HETATM  147  O   HOH T 146      -5.561 -19.837  -7.085  1.00  0.41           O  
HETATM  148  O   HOH T 147       0.757  -9.549  21.023  1.00  0.41           O  
HETATM  149  O   HOH T 148      -6.716 -12.903  -6.547  1.00  0.41           O  
HETATM  150  O   HOH T 149      15.015 -10.744  -6.742  1.00  0.41           O  
HETATM  151  O   HOH T 150       1.098  -6.672  20.714  1.00  0.41           O  
HETATM  152  O   HOH T 151      15.269  -8.066  -6.420  1.00  0.41           O  
HETATM  153  O   HOH T 152      15.367  -0.850   4.026  1.00  0.42           O  
HETATM  154  O   HOH T 153      -9.792  -0.297  30.751  1.00  0.42           O  
HETATM  155  O   HOH T 154      13.218   0.215  22.760  1.00  0.42           O  
HETATM  156  O   HOH T 155     -11.437  -5.036   9.459  1.00  0.42           O  
HETATM  157  O   HOH T 156       8.848 -12.073  17.832  1.00  0.42           O  
HETATM  158  O   HOH T 157      20.573  -9.060   2.421  1.00  0.42           O  
HETATM  159  O   HOH T 158      10.929   1.762  22.545  1.00  0.42           O  
HETATM  160  O   HOH T 159     -10.157  -9.603  -4.872  1.00  0.42           O  
HETATM  161  O   HOH T 160     -19.566  15.664   8.593  1.00  0.42           O  
HETATM  162  O   HOH T 161      10.277 -12.814  -8.341  1.00  0.42           O  
HETATM  163  O   HOH T 162       8.847  14.282  23.976  1.00  0.42           O  
HETATM  164  O   HOH T 163      18.583  -0.256   1.572  1.00  0.42           O  
HETATM  165  O   HOH T 164       9.740  -8.058  16.640  1.00  0.42           O  
HETATM  166  O   HOH T 165     -11.708  -9.204  27.422  1.00  0.42           O  
HETATM  167  O   HOH T 166       7.448 -19.120  -1.813  1.00  0.42           O  
HETATM  168  O   HOH T 167     -14.727  -2.512  10.055  1.00  0.42           O  
HETATM  169  O   HOH T 168      13.031   3.413  -7.760  1.00  0.42           O  
HETATM  170  O   HOH T 169      22.758  -7.026  -1.100  1.00  0.42           O  
HETATM  171  O   HOH T 170      21.340  16.015  21.534  1.00  0.42           O  
HETATM  172  O   HOH T 171      14.825  -7.125  14.430  1.00  0.43           O  
HETATM  173  O   HOH T 172      14.081   5.084  -3.377  1.00  0.43           O  
HETATM  174  O   HOH T 173      -7.202  23.326  -0.601  1.00  0.43           O  
HETATM  175  O   HOH T 174      -8.399 -14.561  -8.111  1.00  0.43           O  
HETATM  176  O   HOH T 175      -9.900  -7.227   8.875  1.00  0.43           O  
HETATM  177  O   HOH T 176      10.919  -4.050  18.365  1.00  0.43           O  
HETATM  178  O   HOH T 177      -2.431 -22.447  -3.424  1.00  0.43           O  
HETATM  179  O   HOH T 178     -11.389   8.166  28.168  1.00  0.43           O  
HETATM  180  O   HOH T 179      -4.701  10.242  28.753  1.00  0.43           O  
HETATM  181  O   HOH T 180      12.440  13.856   6.878  1.00  0.43           O  
HETATM  182  O   HOH T 181       7.660  12.498  29.046  1.00  0.43           O  
HETATM  183  O   HOH T 182     -19.836   3.581  18.469  1.00  0.43           O  
HETATM  184  O   HOH T 183      15.800  -0.168   1.127  1.00  0.43           O  
HETATM  185  O   HOH T 184       0.609  18.467  29.395  1.00  0.43           O  
HETATM  186  O   HOH T 185      -8.279 -14.945  19.612  1.00  0.43           O  
HETATM  187  O   HOH T 186      10.405 -21.765  -1.398  1.00  0.43           O  
HETATM  188  O   HOH T 187      14.588   9.603  -2.428  1.00  0.43           O  
HETATM  189  O   HOH T 188      -6.690  13.634  30.465  1.00  0.43           O  
HETATM  190  O   HOH T 189      -6.095 -15.067  -4.881  1.00  0.43           O  
HETATM  191  O   HOH T 190       1.635  -0.912  26.691  1.00  0.43           O  
HETATM  192  O   HOH T 191       9.497  16.914  24.526  1.00  0.44           O  
HETATM  193  O   HOH T 192       4.169 -18.432  12.468  1.00  0.44           O  
HETATM  194  O   HOH T 193       1.312  13.006 -12.133  1.00  0.44           O  
HETATM  195  O   HOH T 194     -10.920  -6.536  19.804  1.00  0.44           O  
HETATM  196  O   HOH T 195       5.547  13.524  24.940  1.00  0.44           O  
HETATM  197  O   HOH T 196      -2.337 -15.334   1.998  1.00  0.44           O  
HETATM  198  O   HOH T 197       8.919 -19.418   3.348  1.00  0.44           O  
HETATM  199  O   HOH T 198     -13.050  13.780  24.446  1.00  0.44           O  
HETATM  200  O   HOH T 199      14.860   4.334  -5.966  1.00  0.44           O  
HETATM  201  O   HOH T 200      15.358  -8.914   6.589  1.00  0.44           O  
HETATM  202  O   HOH T 201     -20.870   9.036  23.218  1.00  0.44           O  
HETATM  203  O   HOH T 202       6.564  -2.342  22.742  1.00  0.44           O  
HETATM  204  O   HOH T 203     -12.436   3.320   4.716  1.00  0.44           O  
HETATM  205  O   HOH T 204      13.934  -5.379   9.762  1.00  0.44           O  
HETATM  206  O   HOH T 205      -3.178 -14.806   8.164  1.00  0.44           O  
HETATM  207  O   HOH T 206      -8.067 -12.206  20.173  1.00  0.44           O  
HETATM  208  O   HOH T 207     -10.683 -11.307  -2.749  1.00  0.44           O  
HETATM  209  O   HOH T 208     -14.471  -3.840  26.371  1.00  0.44           O  
HETATM  210  O   HOH T 209      12.980  16.432   5.194  1.00  0.44           O  
HETATM  211  O   HOH T 210       4.020 -17.012  16.804  1.00  0.44           O  
HETATM  212  O   HOH T 211      -9.542  -1.779  -5.013  1.00  0.44           O  
HETATM  213  O   HOH T 212      15.459  -5.444  12.204  1.00  0.45           O  
HETATM  214  O   HOH T 213      13.426 -13.009   5.270  1.00  0.45           O  
HETATM  215  O   HOH T 214     -18.062  12.089  18.751  1.00  0.45           O  
HETATM  216  O   HOH T 215      12.916  19.837   5.494  1.00  0.45           O  
HETATM  217  O   HOH T 216      12.652  10.328  -0.598  1.00  0.45           O  
HETATM  218  O   HOH T 217      -9.718  -9.930   9.046  1.00  0.45           O  
HETATM  219  O   HOH T 218      -7.614   1.499  -6.636  1.00  0.45           O  
HETATM  220  O   HOH T 219      11.255   3.525  -9.949  1.00  0.45           O  
HETATM  221  O   HOH T 220       3.467 -16.366  14.141  1.00  0.45           O  
HETATM  222  O   HOH T 221     -14.469 -13.728   2.440  1.00  0.45           O  
HETATM  223  O   HOH T 222     -20.463   6.953  21.294  1.00  0.45           O  
HETATM  224  O   HOH T 223       7.075  -8.571  17.434  1.00  0.45           O  
HETATM  225  O   HOH T 224       3.749   2.381  29.861  1.00  0.45           O  
HETATM  226  O   HOH T 225     -20.317   4.081  21.161  1.00  0.45           O  
HETATM  227  O   HOH T 226      13.897 -13.038  -5.605  1.00  0.45           O  
HETATM  228  O   HOH T 227      -4.672  13.080  28.534  1.00  0.45           O  
HETATM  229  O   HOH T 228      -7.309  13.205  27.754  1.00  0.46           O  
HETATM  230  O   HOH T 229     -17.011  -3.594  27.301  1.00  0.46           O  
HETATM  231  O   HOH T 230     -10.367   5.743   0.849  1.00  0.46           O  
HETATM  232  O   HOH T 231      -2.471  25.327   7.584  1.00  0.46           O  
HETATM  233  O   HOH T 232      -5.951  -5.247  27.039  1.00  0.46           O  
HETATM  234  O   HOH T 233      15.965  -7.357 -13.122  1.00  0.46           O  
HETATM  235  O   HOH T 234     -17.478  20.487  14.383  1.00  0.46           O  
HETATM  236  O   HOH T 235      -3.982  -0.949  26.731  1.00  0.46           O  
HETATM  237  O   HOH T 236      10.661  -1.820  28.730  1.00  0.46           O  
HETATM  238  O   HOH T 237       6.373   1.366  30.173  1.00  0.46           O  
HETATM  239  O   HOH T 238      13.964   2.620   8.529  1.00  0.46           O  
HETATM  240  O   HOH T 239     -11.854 -13.772   3.311  1.00  0.46           O  
HETATM  241  O   HOH T 240      -9.341  -2.973  29.926  1.00  0.46           O  
HETATM  242  O   HOH T 241       7.438  -6.832  19.628  1.00  0.46           O  
HETATM  243  O   HOH T 242      -0.515  -9.373  23.526  1.00  0.46           O  
HETATM  244  O   HOH T 243       4.224   2.277 -10.021  1.00  0.46           O  
HETATM  245  O   HOH T 244      13.967  23.364  12.960  1.00  0.46           O  
HETATM  246  O   HOH T 245     -17.008   3.941  -0.961  1.00  0.46           O  
HETATM  247  O   HOH T 246      -6.760   2.714  28.116  1.00  0.46           O  
HETATM  248  O   HOH T 247     -21.072  10.585  20.948  1.00  0.47           O  
HETATM  249  O   HOH T 248     -19.632   6.671  23.948  1.00  0.47           O  
HETATM  250  O   HOH T 249       3.660   7.444 -11.255  1.00  0.47           O  
HETATM  251  O   HOH T 250      18.967   5.051  -3.186  1.00  0.47           O  
HETATM  252  O   HOH T 251     -12.302  -9.008  -3.039  1.00  0.47           O  
HETATM  253  O   HOH T 252      -8.997 -10.683  11.656  1.00  0.47           O  
HETATM  254  O   HOH T 253       5.446   1.741  27.684  1.00  0.47           O  
HETATM  255  O   HOH T 254     -13.898  19.727  26.211  1.00  0.47           O  
HETATM  256  O   HOH T 255      -1.861  10.442  29.066  1.00  0.47           O  
HETATM  257  O   HOH T 256     -13.740  -4.289   8.069  1.00  0.47           O  
HETATM  258  O   HOH T 257      10.483 -18.623  -5.189  1.00  0.47           O  
HETATM  259  O   HOH T 258     -14.631  13.845   5.597  1.00  0.47           O  
HETATM  260  O   HOH T 259     -11.174  -9.442  22.708  1.00  0.47           O  
HETATM  261  O   HOH T 260      10.378 -16.316  11.178  1.00  0.47           O  
HETATM  262  O   HOH T 261       1.542  16.341  27.576  1.00  0.47           O  
HETATM  263  O   HOH T 262      -3.921  -6.792  25.900  1.00  0.47           O  
HETATM  264  O   HOH T 263       3.750  -5.571  20.830  1.00  0.47           O  
HETATM  265  O   HOH T 264       9.875 -20.958  -6.537  1.00  0.47           O  
HETATM  266  O   HOH T 265       2.316   1.122 -12.029  1.00  0.48           O  
HETATM  267  O   HOH T 266      16.511   6.065  -2.372  1.00  0.48           O  
HETATM  268  O   HOH T 267     -15.321  20.173  21.189  1.00  0.48           O  
HETATM  269  O   HOH T 268       6.387   4.167  -9.810  1.00  0.48           O  
HETATM  270  O   HOH T 269       3.180  14.448  26.013  1.00  0.48           O  
HETATM  271  O   HOH T 270      -3.024  -9.050  24.597  1.00  0.48           O  
HETATM  272  O   HOH T 271     -17.354   0.949  14.003  1.00  0.48           O  
HETATM  273  O   HOH T 272      12.444 -12.797   2.694  1.00  0.48           O  
HETATM  274  O   HOH T 273     -21.981   5.389  23.017  1.00  0.48           O  
HETATM  275  O   HOH T 274      -7.269 -11.470  27.742  1.00  0.48           O  
HETATM  276  O   HOH T 275       5.637 -18.249  14.766  1.00  0.48           O  
HETATM  277  O   HOH T 276     -12.092  15.625  26.263  1.00  0.48           O  
HETATM  278  O   HOH T 277       2.188 -16.389   2.882  1.00  0.48           O  
HETATM  279  O   HOH T 278      16.991 -10.759   5.210  1.00  0.48           O  
HETATM  280  O   HOH T 279     -17.884   2.933  15.800  1.00  0.48           O  
HETATM  281  O   HOH T 280       7.315   3.130  32.011  1.00  0.48           O  
HETATM  282  O   HOH T 281      10.398 -14.337  17.584  1.00  0.48           O  
HETATM  283  O   HOH T 282       3.746 -18.388   4.089  1.00  0.48           O  
HETATM  284  O   HOH T 283      10.008  -3.827  21.044  1.00  0.48           O  
HETATM  285  O   HOH T 284      -2.600  17.854  18.677  1.00  0.48           O  
HETATM  286  O   HOH T 285       8.813 -17.802   5.792  1.00  0.49           O  
HETATM  287  O   HOH T 286     -11.393  19.886  14.111  1.00  0.49           O  
HETATM  288  O   HOH T 287     -10.706  19.498   9.300  1.00  0.49           O  
HETATM  289  O   HOH T 288      -9.774  -7.319  27.633  1.00  0.49           O  
HETATM  290  O   HOH T 289       8.247   3.945  34.543  1.00  0.49           O  
HETATM  291  O   HOH T 290       6.842  16.018  24.697  1.00  0.49           O  
HETATM  292  O   HOH T 291      -6.650  -6.521  29.393  1.00  0.49           O  
HETATM  293  O   HOH T 292     -18.983  -0.518  22.059  1.00  0.49           O  
HETATM  294  O   HOH T 293     -17.505  -2.774  17.778  1.00  0.49           O  
HETATM  295  O   HOH T 294     -12.724  10.466  -4.857  1.00  0.49           O  
HETATM  296  O   HOH T 295      -5.484 -17.867  -8.933  1.00  0.49           O  
HETATM  297  O   HOH T 296      -9.121  -4.844 -10.940  1.00  0.49           O  
HETATM  298  O   HOH T 297      11.107 -21.050  -4.044  1.00  0.49           O  
HETATM  299  O   HOH T 298       5.092  -0.931  24.661  1.00  0.49           O  
HETATM  300  O   HOH T 299      18.732  24.586  16.438  1.00  0.49           O  
HETATM  301  O   HOH T 300      -2.952  20.946  -9.365  1.00  0.49           O  
HETATM  302  O   HOH T 301      -9.838   4.573  -8.901  1.00  0.49           O  
HETATM  303  O   HOH T 302     -17.803   9.179   8.123  1.00  0.49           O  
HETATM  304  O   HOH T 303       5.514 -22.720  -6.219  1.00  0.49           O  
HETATM  305  O   HOH T 304      -7.393 -10.583  25.064  1.00  0.50           O  
HETATM  306  O   HOH T 305      -1.066   2.372 -15.024  1.00  0.50           O  
HETATM  307  O   HOH T 306       5.809  22.778  10.040  1.00  0.50           O  
HETATM  308  O   HOH T 307     -15.156  13.042  26.131  1.00  0.50           O  
HETATM  309  O   HOH T 308      -4.001 -12.247  -9.613  1.00  0.50           O  
HETATM  310  O   HOH T 309     -14.739  22.868  21.089  1.00  0.50           O  
HETATM  311  O   HOH T 310      -0.977  22.537  -6.488  1.00  0.50           O  
HETATM  312  O   HOH T 311      -3.097 -18.741   0.527  1.00  0.50           O  
HETATM  313  O   HOH T 312     -15.562  -7.323  27.040  1.00  0.50           O  
HETATM  314  O   HOH T 313      -4.974  -7.576  23.457  1.00  0.50           O  
HETATM  315  O   HOH T 314      19.666  -9.922   4.934  1.00  0.50           O  
HETATM  316  O   HOH T 315     -13.292  -6.608   6.491  1.00  0.50           O  
HETATM  317  O   HOH T 316     -14.721  10.539  25.178  1.00  0.50           O  
HETATM  318  O   HOH T 317      -2.789  12.428  -9.163  1.00  0.50           O  
HETATM  319  O   HOH T 318     -13.224  -5.893  27.738  1.00  0.50           O  
HETATM  320  O   HOH T 319       5.154  11.736  29.968  1.00  0.50           O  
HETATM  321  O   HOH T 320       0.165   8.838 -13.992  1.00  0.50           O  
HETATM  322  O   HOH T 321     -10.233  -2.996  10.663  1.00  0.50           O  
HETATM  323  O   HOH T 322      -7.563  -1.793  31.711  1.00  0.50           O  
HETATM  324  O   HOH T 323      12.738 -15.386  18.867  1.00  0.50           O  
HETATM  325  O   HOH T 324      -2.341  22.127  19.432  1.00  0.50           O  
HETATM  326  O   HOH T 325      -5.695 -15.322  -7.711  1.00  0.51           O  
HETATM  327  O   HOH T 326       0.027 -21.166  -0.036  1.00  0.51           O  
HETATM  328  O   HOH T 327     -14.733   4.729   3.899  1.00  0.51           O  
HETATM  329  O   HOH T 328      17.131   5.751  -5.137  1.00  0.51           O  
HETATM  330  O   HOH T 329     -21.820   4.966  26.585  1.00  0.51           O  
HETATM  331  O   HOH T 330       3.273  -8.326  21.017  1.00  0.51           O  
HETATM  332  O   HOH T 331       2.857  10.344  30.601  1.00  0.51           O  
HETATM  333  O   HOH T 332      -2.974   7.977  28.685  1.00  0.51           O  
HETATM  334  O   HOH T 333     -15.054   2.518  -2.390  1.00  0.51           O  
HETATM  335  O   HOH T 334     -15.474   2.127   0.353  1.00  0.51           O  
HETATM  336  O   HOH T 335      -9.686 -15.255  -0.866  1.00  0.51           O  
HETATM  337  O   HOH T 336      -9.235   7.149  -3.688  1.00  0.52           O  
HETATM  338  O   HOH T 337       4.501  23.038  12.329  1.00  0.52           O  
HETATM  339  O   HOH T 338      -3.312  24.561   5.100  1.00  0.52           O  
HETATM  340  O   HOH T 339      17.054  -5.615  14.608  1.00  0.52           O  
HETATM  341  O   HOH T 340     -12.191  -4.786  12.104  1.00  0.52           O  
HETATM  342  O   HOH T 341      12.082 -17.714  -7.291  1.00  0.52           O  
HETATM  343  O   HOH T 342      18.233  -0.800   4.216  1.00  0.52           O  
HETATM  344  O   HOH T 343      12.885 -12.925  17.688  1.00  0.52           O  
HETATM  345  O   HOH T 344      11.680   0.724  28.684  1.00  0.52           O  
HETATM  346  O   HOH T 345      -0.457 -16.448   3.950  1.00  0.52           O  
HETATM  347  O   HOH T 346      19.757  -5.718  -3.360  1.00  0.52           O  
HETATM  348  O   HOH T 347      -7.394   9.930  29.260  1.00  0.52           O  
HETATM  349  O   HOH T 348      -4.887 -13.773   6.425  1.00  0.52           O  
HETATM  350  O   HOH T 349       5.140  -4.744  23.074  1.00  0.52           O  
HETATM  351  O   HOH T 350      -5.946  18.774  16.106  1.00  0.52           O  
HETATM  352  O   HOH T 351     -13.611  21.637  13.397  1.00  0.53           O  
HETATM  353  O   HOH T 352       1.208 -13.012  -8.464  1.00  0.53           O  
HETATM  354  O   HOH T 353      -9.442  20.424  19.927  1.00  0.53           O  
HETATM  355  O   HOH T 354       1.261   6.283   9.888  1.00  0.53           O  
HETATM  356  O   HOH T 355      -0.884   8.832  26.998  1.00  0.53           O  
HETATM  357  O   HOH T 356       7.538 -21.722  -7.745  1.00  0.53           O  
HETATM  358  O   HOH T 357       4.303  -0.786  27.205  1.00  0.53           O  
HETATM  359  O   HOH T 358      17.764   0.199  -6.269  1.00  0.53           O  
HETATM  360  O   HOH T 359      13.761  -2.438  22.941  1.00  0.53           O  
HETATM  361  O   HOH T 360     -16.325   9.645   5.793  1.00  0.53           O  
HETATM  362  O   HOH T 361     -16.509  -5.098  12.186  1.00  0.53           O  
HETATM  363  O   HOH T 362     -17.291   7.168   6.202  1.00  0.53           O  
HETATM  364  O   HOH T 363       9.436   2.199 -11.604  1.00  0.53           O  
HETATM  365  O   HOH T 364       1.352  11.255 -14.304  1.00  0.54           O  
HETATM  366  O   HOH T 365      14.662 -12.878   0.891  1.00  0.54           O  
HETATM  367  O   HOH T 366      17.314   3.452  -6.844  1.00  0.54           O  
HETATM  368  O   HOH T 367      11.157  -1.590  22.296  1.00  0.54           O  
HETATM  369  O   HOH T 368     -17.750   3.328  12.913  1.00  0.54           O  
HETATM  370  O   HOH T 369       2.833   7.032  29.057  1.00  0.54           O  
HETATM  371  O   HOH T 370      -4.789  -9.657  -9.874  1.00  0.54           O  
HETATM  372  O   HOH T 371      -7.517 -15.920  17.066  1.00  0.54           O  
HETATM  373  O   HOH T 372      12.238 -17.055  -1.620  1.00  0.54           O  
HETATM  374  O   HOH T 373      16.509   1.586   9.154  1.00  0.54           O  
HETATM  375  O   HOH T 374       2.355 -19.512   0.181  1.00  0.54           O  
HETATM  376  O   HOH T 375      12.949   1.651   6.315  1.00  0.55           O  
HETATM  377  O   HOH T 376       0.990 -18.642   4.036  1.00  0.56           O  
HETATM  378  O   HOH T 377      -2.387  -5.006  21.907  1.00  0.56           O  
HETATM  379  O   HOH T 378     -13.795   4.156   1.448  1.00  0.56           O  
HETATM  380  O   HOH T 379     -16.442   4.862   7.290  1.00  0.56           O  
HETATM  381  O   HOH T 380      14.636  -0.000   7.866  1.00  0.56           O  
HETATM  382  O   HOH T 381      -9.100  -1.907  -9.770  1.00  0.57           O  
HETATM  383  O   HOH T 382     -16.081  -4.879   9.453  1.00  0.57           O  
HETATM  384  O   HOH T 383      -1.498  24.377   9.908  1.00  0.57           O  
HETATM  385  O   HOH T 384     -14.263  17.133  25.535  1.00  0.58           O  
HETATM  386  O   HOH T 385      -9.863  -3.225  -7.345  1.00  0.58           O  
HETATM  387  O   HOH T 386      -3.269  -4.799  27.608  1.00  0.58           O  
HETATM  388  O   HOH T 387       5.689 -19.445   5.701  1.00  0.58           O  
HETATM  389  O   HOH T 388     -11.467  12.787  28.411  1.00  0.59           O  
HETATM  390  O   HOH T 389      11.412   5.768   8.727  1.00  0.60           O  
TER     391      HOH T 389 
