# Supplementary material for: Accurate Prediction of Hydration Sites of Proteins Using Energy Model With Atom Embedding
Source: Front Mol Biosci. 2021 Sep 20;8:756075. doi: 10.3389/fmolb.2021.756075 (PMC8488165; doi:10.3389/fmolb.2021.756075)
Supplement: Supplementary file 1 [file DataSheet1.ZIP › Data Sheet 1/Our_result_pdb/our_dataset_output/2ZMU_watersite.pdb]

HEADER                                                        XXXX


JRNL        PMID   -1
HETATM    1  O   HOH T   0       1.841  58.171   2.813  1.00  0.18           O  
HETATM    2  O   HOH T   1     -23.394  56.668   2.521  1.00  0.19           O  
HETATM    3  O   HOH T   2     -17.553  65.863  15.972  1.00  0.20           O  
HETATM    4  O   HOH T   3     -11.498  60.982  13.506  1.00  0.20           O  
HETATM    5  O   HOH T   4     -17.506  52.610  42.556  1.00  0.20           O  
HETATM    6  O   HOH T   5     -13.378  63.967  17.900  1.00  0.21           O  
HETATM    7  O   HOH T   6     -18.750  40.872  18.823  1.00  0.21           O  
HETATM    8  O   HOH T   7     -12.545  57.739  32.916  1.00  0.22           O  
HETATM    9  O   HOH T   8     -23.980  53.281  39.561  1.00  0.22           O  
HETATM   10  O   HOH T   9     -22.050  40.961   3.427  1.00  0.22           O  
HETATM   11  O   HOH T  10     -14.643  38.992   8.828  1.00  0.22           O  
HETATM   12  O   HOH T  11      -9.424  59.048  25.127  1.00  0.23           O  
HETATM   13  O   HOH T  12     -11.225  42.549   3.932  1.00  0.23           O  
HETATM   14  O   HOH T  13     -23.331  58.885   3.999  1.00  0.24           O  
HETATM   15  O   HOH T  14      -3.946  46.508  35.846  1.00  0.25           O  
HETATM   16  O   HOH T  15     -12.277  58.540  12.559  1.00  0.25           O  
HETATM   17  O   HOH T  16     -18.302  41.662   3.253  1.00  0.25           O  
HETATM   18  O   HOH T  17      -8.469  60.415  34.808  1.00  0.26           O  
HETATM   19  O   HOH T  18     -24.448  46.111  41.563  1.00  0.26           O  
HETATM   20  O   HOH T  19     -30.399  51.177  27.893  1.00  0.26           O  
HETATM   21  O   HOH T  20     -25.390  47.428  27.653  1.00  0.26           O  
HETATM   22  O   HOH T  21     -13.994  42.711  34.019  1.00  0.26           O  
HETATM   23  O   HOH T  22      -9.127  50.658   7.599  1.00  0.26           O  
HETATM   24  O   HOH T  23      -5.610  42.197  20.187  1.00  0.27           O  
HETATM   25  O   HOH T  24     -27.003  45.764  22.159  1.00  0.27           O  
HETATM   26  O   HOH T  25      -7.650  69.329   6.680  1.00  0.27           O  
HETATM   27  O   HOH T  26      -8.517  55.302  39.476  1.00  0.27           O  
HETATM   28  O   HOH T  27     -29.095  60.898  32.477  1.00  0.27           O  
HETATM   29  O   HOH T  28     -19.013  48.529  38.085  1.00  0.28           O  
HETATM   30  O   HOH T  29     -31.703  55.226  20.851  1.00  0.28           O  
HETATM   31  O   HOH T  30     -23.471  46.932  25.813  1.00  0.28           O  
HETATM   32  O   HOH T  31     -28.599  59.194  17.982  1.00  0.28           O  
HETATM   33  O   HOH T  32     -13.675  70.324  36.730  1.00  0.28           O  
HETATM   34  O   HOH T  33     -21.997  46.668  32.353  1.00  0.28           O  
HETATM   35  O   HOH T  34     -25.270  62.321   1.728  1.00  0.28           O  
HETATM   36  O   HOH T  35      -6.105  63.015  19.719  1.00  0.28           O  
HETATM   37  O   HOH T  36     -22.888  60.212  23.118  1.00  0.28           O  
HETATM   38  O   HOH T  37     -26.954  64.560  35.965  1.00  0.29           O  
HETATM   39  O   HOH T  38     -11.340  64.978  16.373  1.00  0.29           O  
HETATM   40  O   HOH T  39     -23.149  57.720  44.611  1.00  0.29           O  
HETATM   41  O   HOH T  40     -24.064  43.701  12.597  1.00  0.29           O  
HETATM   42  O   HOH T  41     -17.953  60.160  35.372  1.00  0.29           O  
HETATM   43  O   HOH T  42     -16.340  53.046  26.985  1.00  0.30           O  
HETATM   44  O   HOH T  43     -11.927  38.727  12.700  1.00  0.30           O  
HETATM   45  O   HOH T  44      -8.007  67.972  39.561  1.00  0.30           O  
HETATM   46  O   HOH T  45      -2.649  54.541  17.022  1.00  0.31           O  
HETATM   47  O   HOH T  46       2.974  56.593  31.695  1.00  0.31           O  
HETATM   48  O   HOH T  47     -12.466  53.520   5.054  1.00  0.31           O  
HETATM   49  O   HOH T  48     -29.187  54.380  -1.621  1.00  0.31           O  
HETATM   50  O   HOH T  49     -18.032  59.046  24.846  1.00  0.31           O  
HETATM   51  O   HOH T  50     -19.974  51.314  -0.912  1.00  0.32           O  
HETATM   52  O   HOH T  51     -24.328  59.363   6.442  1.00  0.32           O  
HETATM   53  O   HOH T  52       5.092  52.612  32.385  1.00  0.32           O  
HETATM   54  O   HOH T  53     -11.998  62.392  39.674  1.00  0.32           O  
HETATM   55  O   HOH T  54     -10.044  64.427  13.979  1.00  0.32           O  
HETATM   56  O   HOH T  55     -30.437  59.348  10.389  1.00  0.32           O  
HETATM   57  O   HOH T  56     -16.427  42.558  32.925  1.00  0.32           O  
HETATM   58  O   HOH T  57     -23.254  69.737  37.317  1.00  0.33           O  
HETATM   59  O   HOH T  58     -10.161  59.390  38.004  1.00  0.33           O  
HETATM   60  O   HOH T  59     -14.800  46.175  19.970  1.00  0.33           O  
HETATM   61  O   HOH T  60      -3.393  64.516  29.151  1.00  0.33           O  
HETATM   62  O   HOH T  61      -3.985  39.216  26.119  1.00  0.34           O  
HETATM   63  O   HOH T  62      -5.207  57.818   4.551  1.00  0.34           O  
HETATM   64  O   HOH T  63     -22.513  64.857   3.093  1.00  0.34           O  
HETATM   65  O   HOH T  64      -7.920  41.982  18.717  1.00  0.34           O  
HETATM   66  O   HOH T  65       0.455  57.612  32.447  1.00  0.34           O  
HETATM   67  O   HOH T  66     -13.698  50.643  41.455  1.00  0.34           O  
HETATM   68  O   HOH T  67     -18.541  63.971   0.686  1.00  0.34           O  
HETATM   69  O   HOH T  68      -6.956  65.026  36.251  1.00  0.34           O  
HETATM   70  O   HOH T  69      -8.809  42.756   5.318  1.00  0.34           O  
HETATM   71  O   HOH T  70      -0.876  49.822  12.221  1.00  0.34           O  
HETATM   72  O   HOH T  71     -15.133  47.048  -1.689  1.00  0.35           O  
HETATM   73  O   HOH T  72     -29.843  61.457  26.967  1.00  0.35           O  
HETATM   74  O   HOH T  73      -8.584  65.855  10.031  1.00  0.35           O  
HETATM   75  O   HOH T  74      -3.212  52.747   9.010  1.00  0.35           O  
HETATM   76  O   HOH T  75      -9.309  47.956  41.844  1.00  0.35           O  
HETATM   77  O   HOH T  76     -30.223  51.413  36.331  1.00  0.36           O  
HETATM   78  O   HOH T  77     -14.708  63.373  42.605  1.00  0.36           O  
HETATM   79  O   HOH T  78      -7.392  40.773  36.590  1.00  0.36           O  
HETATM   80  O   HOH T  79      -7.850  66.811   7.608  1.00  0.36           O  
HETATM   81  O   HOH T  80      -6.520  62.291  35.670  1.00  0.36           O  
HETATM   82  O   HOH T  81     -12.281  41.691  35.873  1.00  0.37           O  
HETATM   83  O   HOH T  82     -21.314  69.147   3.364  1.00  0.37           O  
HETATM   84  O   HOH T  83     -14.354  44.498  -0.922  1.00  0.37           O  
HETATM   85  O   HOH T  84     -20.849  69.816  17.945  1.00  0.37           O  
HETATM   86  O   HOH T  85     -24.693  48.686  37.785  1.00  0.37           O  
HETATM   87  O   HOH T  86     -13.591  72.085  34.704  1.00  0.37           O  
HETATM   88  O   HOH T  87      -7.190  60.485   3.762  1.00  0.37           O  
HETATM   89  O   HOH T  88       4.040  41.857  26.398  1.00  0.37           O  
HETATM   90  O   HOH T  89     -19.017  42.974  33.512  1.00  0.37           O  
HETATM   91  O   HOH T  90     -32.331  57.261  22.647  1.00  0.37           O  
HETATM   92  O   HOH T  91      -0.935  51.649  10.152  1.00  0.38           O  
HETATM   93  O   HOH T  92       0.513  50.199  27.789  1.00  0.38           O  
HETATM   94  O   HOH T  93     -32.517  57.611   9.829  1.00  0.38           O  
HETATM   95  O   HOH T  94     -31.063  51.917  33.800  1.00  0.38           O  
HETATM   96  O   HOH T  95     -21.020  68.040  38.041  1.00  0.38           O  
HETATM   97  O   HOH T  96     -18.565  50.111  42.087  1.00  0.38           O  
HETATM   98  O   HOH T  97     -22.999  67.814  23.729  1.00  0.39           O  
HETATM   99  O   HOH T  98      -0.357  47.596  20.324  1.00  0.39           O  
HETATM  100  O   HOH T  99     -27.561  58.251  38.881  1.00  0.39           O  
HETATM  101  O   HOH T 100     -33.114  53.797  33.986  1.00  0.39           O  
HETATM  102  O   HOH T 101     -10.576  41.876  11.125  1.00  0.39           O  
HETATM  103  O   HOH T 102      -1.475  49.668  18.950  1.00  0.40           O  
HETATM  104  O   HOH T 103     -30.454  62.994  31.272  1.00  0.40           O  
HETATM  105  O   HOH T 104     -23.153  42.242   1.306  1.00  0.40           O  
HETATM  106  O   HOH T 105     -18.823  68.074  17.114  1.00  0.40           O  
HETATM  107  O   HOH T 106     -11.478  51.101   1.444  1.00  0.40           O  
HETATM  108  O   HOH T 107     -22.930  67.266   4.367  1.00  0.40           O  
HETATM  109  O   HOH T 108     -27.754  52.368  -0.250  1.00  0.40           O  
HETATM  110  O   HOH T 109     -20.991  70.428  21.969  1.00  0.41           O  
HETATM  111  O   HOH T 110     -19.502  69.029  20.165  1.00  0.41           O  
HETATM  112  O   HOH T 111     -13.945  51.946  -0.013  1.00  0.41           O  
HETATM  113  O   HOH T 112     -22.760  68.461  21.039  1.00  0.41           O  
HETATM  114  O   HOH T 113     -23.260  62.445  -3.326  1.00  0.41           O  
HETATM  115  O   HOH T 114     -26.482  63.485  28.473  1.00  0.42           O  
HETATM  116  O   HOH T 115     -24.594  51.084  36.454  1.00  0.42           O  
HETATM  117  O   HOH T 116       0.486  53.435   8.548  1.00  0.42           O  
HETATM  118  O   HOH T 117     -15.005  46.299  43.991  1.00  0.42           O  
HETATM  119  O   HOH T 118      -6.373  58.407   7.058  1.00  0.42           O  
HETATM  120  O   HOH T 119       5.160  55.059  30.925  1.00  0.42           O  
HETATM  121  O   HOH T 120      -7.198  36.519  34.816  1.00  0.42           O  
HETATM  122  O   HOH T 121     -16.346  53.235  -0.993  1.00  0.42           O  
HETATM  123  O   HOH T 122      -4.014  63.376  26.685  1.00  0.42           O  
HETATM  124  O   HOH T 123     -25.612  41.393  14.879  1.00  0.42           O  
HETATM  125  O   HOH T 124     -26.209  67.260  38.146  1.00  0.42           O  
HETATM  126  O   HOH T 125     -28.045  65.489  27.669  1.00  0.42           O  
HETATM  127  O   HOH T 126      -5.867  47.144  46.144  1.00  0.42           O  
HETATM  128  O   HOH T 127      -9.730  45.407  43.006  1.00  0.42           O  
HETATM  129  O   HOH T 128       1.941  44.928  30.201  1.00  0.42           O  
HETATM  130  O   HOH T 129     -12.022  69.686  34.414  1.00  0.42           O  
HETATM  131  O   HOH T 130       0.865  52.655  19.169  1.00  0.42           O  
HETATM  132  O   HOH T 131     -21.753  70.101  24.638  1.00  0.42           O  
HETATM  133  O   HOH T 132     -10.569  57.219  39.727  1.00  0.42           O  
HETATM  134  O   HOH T 133      -5.355  65.431  20.631  1.00  0.42           O  
HETATM  135  O   HOH T 134     -28.039  59.831  25.593  1.00  0.42           O  
HETATM  136  O   HOH T 135       3.073  44.427  32.478  1.00  0.42           O  
HETATM  137  O   HOH T 136     -13.798  59.140  41.172  1.00  0.42           O  
HETATM  138  O   HOH T 137     -18.243  44.062   1.544  1.00  0.43           O  
HETATM  139  O   HOH T 138     -20.838  71.273   5.005  1.00  0.43           O  
HETATM  140  O   HOH T 139     -15.302  69.657   8.471  1.00  0.43           O  
HETATM  141  O   HOH T 140     -23.151  40.104  14.943  1.00  0.43           O  
HETATM  142  O   HOH T 141      -4.537  58.239  14.120  1.00  0.43           O  
HETATM  143  O   HOH T 142     -25.141  69.792  20.326  1.00  0.43           O  
HETATM  144  O   HOH T 143     -21.203  64.698   0.697  1.00  0.43           O  
HETATM  145  O   HOH T 144      -7.593  55.887   1.158  1.00  0.44           O  
HETATM  146  O   HOH T 145     -17.970  44.175  31.247  1.00  0.44           O  
HETATM  147  O   HOH T 146      -1.330  46.582  22.721  1.00  0.44           O  
HETATM  148  O   HOH T 147     -20.724  44.298  31.728  1.00  0.44           O  
HETATM  149  O   HOH T 148     -13.307  37.420  10.672  1.00  0.44           O  
HETATM  150  O   HOH T 149     -20.460  42.523   1.714  1.00  0.44           O  
HETATM  151  O   HOH T 150      -9.679  42.137  36.661  1.00  0.44           O  
HETATM  152  O   HOH T 151     -24.443  44.676   1.015  1.00  0.44           O  
HETATM  153  O   HOH T 152      -9.413  50.318  44.489  1.00  0.44           O  
HETATM  154  O   HOH T 153     -17.058  45.335  -0.716  1.00  0.44           O  
HETATM  155  O   HOH T 154       2.223  53.300  24.328  1.00  0.44           O  
HETATM  156  O   HOH T 155     -23.187  62.682  34.801  1.00  0.44           O  
HETATM  157  O   HOH T 156       0.192  54.215  25.778  1.00  0.45           O  
HETATM  158  O   HOH T 157      -5.773  38.783  35.711  1.00  0.45           O  
HETATM  159  O   HOH T 158     -26.714  49.455  39.615  1.00  0.45           O  
HETATM  160  O   HOH T 159     -22.250  67.143   1.618  1.00  0.45           O  
HETATM  161  O   HOH T 160     -31.468  56.076  33.584  1.00  0.45           O  
HETATM  162  O   HOH T 161     -25.319  64.764   3.257  1.00  0.45           O  
HETATM  163  O   HOH T 162     -31.254  52.527  13.221  1.00  0.45           O  
HETATM  164  O   HOH T 163      -6.656  63.878  27.086  1.00  0.45           O  
HETATM  165  O   HOH T 164     -16.281  42.847   0.115  1.00  0.45           O  
HETATM  166  O   HOH T 165       1.723  52.406  21.736  1.00  0.45           O  
HETATM  167  O   HOH T 166     -29.509  64.093  34.883  1.00  0.45           O  
HETATM  168  O   HOH T 167       2.638  51.089  26.036  1.00  0.46           O  
HETATM  169  O   HOH T 168      -8.259  38.131  36.773  1.00  0.46           O  
HETATM  170  O   HOH T 169     -28.403  51.165  38.351  1.00  0.46           O  
HETATM  171  O   HOH T 170     -29.139  63.784  37.529  1.00  0.46           O  
HETATM  172  O   HOH T 171     -10.441  55.392   4.583  1.00  0.47           O  
HETATM  173  O   HOH T 172     -12.164  62.217  42.420  1.00  0.47           O  
HETATM  174  O   HOH T 173      -8.659  54.039   2.933  1.00  0.47           O  
HETATM  175  O   HOH T 174     -23.628  55.039  45.398  1.00  0.47           O  
HETATM  176  O   HOH T 175     -30.309  60.736  24.383  1.00  0.47           O  
HETATM  177  O   HOH T 176      -9.646  39.370  11.070  1.00  0.47           O  
HETATM  178  O   HOH T 177     -17.098  48.714  40.095  1.00  0.47           O  
HETATM  179  O   HOH T 178     -25.223  46.088  38.903  1.00  0.47           O  
HETATM  180  O   HOH T 179     -32.904  51.687  35.854  1.00  0.47           O  
HETATM  181  O   HOH T 180       5.036  54.265  28.245  1.00  0.48           O  
HETATM  182  O   HOH T 181      -2.066  53.999  -0.886  1.00  0.48           O  
HETATM  183  O   HOH T 182       1.984  56.429   4.875  1.00  0.48           O  
HETATM  184  O   HOH T 183     -27.578  46.912  29.275  1.00  0.48           O  
HETATM  185  O   HOH T 184      -9.976  47.705  44.475  1.00  0.48           O  
HETATM  186  O   HOH T 185     -10.235  51.983   3.886  1.00  0.48           O  
HETATM  187  O   HOH T 186       6.735  42.680  26.315  1.00  0.48           O  
HETATM  188  O   HOH T 187       4.287  55.004   4.820  1.00  0.48           O  
HETATM  189  O   HOH T 188      -9.834  59.716   4.280  1.00  0.48           O  
HETATM  190  O   HOH T 189     -19.620  65.750  39.056  1.00  0.48           O  
HETATM  191  O   HOH T 190     -26.911  64.610  38.788  1.00  0.48           O  
HETATM  192  O   HOH T 191     -22.674  70.825  19.696  1.00  0.48           O  
HETATM  193  O   HOH T 192     -23.359  44.756  30.928  1.00  0.48           O  
HETATM  194  O   HOH T 193     -14.103  37.064  13.310  1.00  0.48           O  
HETATM  195  O   HOH T 194      -1.494  54.398  10.301  1.00  0.48           O  
HETATM  196  O   HOH T 195     -28.762  63.885  21.649  1.00  0.49           O  
HETATM  197  O   HOH T 196     -21.535  62.342  -1.077  1.00  0.49           O  
HETATM  198  O   HOH T 197      -6.294  39.744  14.593  1.00  0.49           O  
HETATM  199  O   HOH T 198      -8.153  48.585  46.310  1.00  0.49           O  
HETATM  200  O   HOH T 199     -24.703  54.314  42.039  1.00  0.49           O  
HETATM  201  O   HOH T 200      -8.976  70.430  40.688  1.00  0.49           O  
HETATM  202  O   HOH T 201       0.256  48.402  29.781  1.00  0.49           O  
HETATM  203  O   HOH T 202       4.594  44.524  25.966  1.00  0.49           O  
HETATM  204  O   HOH T 203     -12.934  68.760  21.791  1.00  0.49           O  
HETATM  205  O   HOH T 204     -22.696  55.929  47.811  1.00  0.49           O  
HETATM  206  O   HOH T 205     -13.072  59.394  -1.286  1.00  0.49           O  
HETATM  207  O   HOH T 206     -13.010  71.070   8.565  1.00  0.49           O  
HETATM  208  O   HOH T 207     -16.155  67.224   0.382  1.00  0.49           O  
HETATM  209  O   HOH T 208     -13.886  49.450  -1.020  1.00  0.49           O  
HETATM  210  O   HOH T 209     -13.776  36.433   8.099  1.00  0.49           O  
HETATM  211  O   HOH T 210     -21.333  53.110  -2.583  1.00  0.50           O  
HETATM  212  O   HOH T 211     -14.678  35.693   5.535  1.00  0.50           O  
HETATM  213  O   HOH T 212     -25.973  67.317  21.107  1.00  0.50           O  
HETATM  214  O   HOH T 213     -26.438  60.943  -0.417  1.00  0.50           O  
HETATM  215  O   HOH T 214     -16.839  48.039  42.849  1.00  0.50           O  
HETATM  216  O   HOH T 215     -18.067  54.429  25.464  1.00  0.50           O  
HETATM  217  O   HOH T 216       0.987  50.070  20.315  1.00  0.50           O  
HETATM  218  O   HOH T 217     -32.267  59.085  38.853  1.00  0.50           O  
HETATM  219  O   HOH T 218     -23.401  43.688  22.700  1.00  0.50           O  
HETATM  220  O   HOH T 219     -13.508  44.226  42.914  1.00  0.50           O  
HETATM  221  O   HOH T 220     -30.890  57.528   3.871  1.00  0.51           O  
HETATM  222  O   HOH T 221     -21.120  60.819  -4.057  1.00  0.51           O  
HETATM  223  O   HOH T 222      -7.063  63.182  38.211  1.00  0.51           O  
HETATM  224  O   HOH T 223     -21.748  58.457  46.960  1.00  0.51           O  
HETATM  225  O   HOH T 224     -33.041  53.817  14.826  1.00  0.51           O  
HETATM  226  O   HOH T 225       5.122  51.622  28.840  1.00  0.51           O  
HETATM  227  O   HOH T 226     -14.972  54.937  -2.728  1.00  0.52           O  
HETATM  228  O   HOH T 227      -9.276  70.901  37.987  1.00  0.52           O  
HETATM  229  O   HOH T 228      -9.404  40.350   1.698  1.00  0.52           O  
HETATM  230  O   HOH T 229     -29.207  63.306  28.838  1.00  0.52           O  
HETATM  231  O   HOH T 230      -7.243  40.660  12.174  1.00  0.52           O  
HETATM  232  O   HOH T 231      -8.223  45.867  45.400  1.00  0.52           O  
HETATM  233  O   HOH T 232     -13.266  56.711  -2.023  1.00  0.52           O  
HETATM  234  O   HOH T 233     -27.902  49.347  42.047  1.00  0.52           O  
HETATM  235  O   HOH T 234      -9.811  66.267  24.356  1.00  0.52           O  
HETATM  236  O   HOH T 235     -23.562  69.075   8.712  1.00  0.53           O  
HETATM  237  O   HOH T 236     -23.714  44.040  39.889  1.00  0.53           O  
HETATM  238  O   HOH T 237     -22.828  61.698  44.101  1.00  0.53           O  
HETATM  239  O   HOH T 238     -15.292  53.437  43.891  1.00  0.53           O  
HETATM  240  O   HOH T 239     -20.161  42.497  23.670  1.00  0.53           O  
HETATM  241  O   HOH T 240      -6.426  65.790  38.812  1.00  0.53           O  
HETATM  242  O   HOH T 241       1.507  55.631   7.479  1.00  0.53           O  
HETATM  243  O   HOH T 242      -8.095  57.490  41.035  1.00  0.53           O  
HETATM  244  O   HOH T 243     -14.375  60.763  43.310  1.00  0.53           O  
HETATM  245  O   HOH T 244      -5.523  46.740   3.125  1.00  0.53           O  
HETATM  246  O   HOH T 245     -31.720  62.319  28.928  1.00  0.53           O  
HETATM  247  O   HOH T 246     -17.017  34.859   4.837  1.00  0.53           O  
HETATM  248  O   HOH T 247      -7.251  43.694   7.405  1.00  0.53           O  
HETATM  249  O   HOH T 248     -24.258  62.423  -0.860  1.00  0.53           O  
HETATM  250  O   HOH T 249       3.531  51.051  23.412  1.00  0.53           O  
HETATM  251  O   HOH T 250       4.945  45.690  33.930  1.00  0.53           O  
HETATM  252  O   HOH T 251     -26.053  69.850  37.275  1.00  0.54           O  
HETATM  253  O   HOH T 252     -15.409  42.114  26.788  1.00  0.54           O  
HETATM  254  O   HOH T 253      -0.806  63.948  28.347  1.00  0.54           O  
HETATM  255  O   HOH T 254      -7.264  69.060  42.026  1.00  0.54           O  
HETATM  256  O   HOH T 255      -5.816  37.150  26.010  1.00  0.54           O  
HETATM  257  O   HOH T 256     -27.591  51.876  40.832  1.00  0.54           O  
HETATM  258  O   HOH T 257     -11.266  71.473  36.317  1.00  0.55           O  
HETATM  259  O   HOH T 258      -6.657  64.694  11.543  1.00  0.55           O  
HETATM  260  O   HOH T 259       0.845  48.575  17.928  1.00  0.55           O  
HETATM  261  O   HOH T 260      -8.137  59.892  39.837  1.00  0.55           O  
HETATM  262  O   HOH T 261     -11.119  59.954  40.570  1.00  0.55           O  
HETATM  263  O   HOH T 262      -2.480  41.437  26.787  1.00  0.55           O  
HETATM  264  O   HOH T 263      -0.018  51.095  16.999  1.00  0.55           O  
HETATM  265  O   HOH T 264      -8.887  42.934   2.534  1.00  0.55           O  
HETATM  266  O   HOH T 265     -25.056  37.309  18.492  1.00  0.55           O  
HETATM  267  O   HOH T 266     -12.261  46.551  43.664  1.00  0.56           O  
HETATM  268  O   HOH T 267     -11.100  66.585  12.762  1.00  0.56           O  
HETATM  269  O   HOH T 268     -11.633  49.262  42.980  1.00  0.56           O  
HETATM  270  O   HOH T 269     -14.093  48.112  42.152  1.00  0.56           O  
HETATM  271  O   HOH T 270     -10.438  69.670  43.014  1.00  0.56           O  
HETATM  272  O   HOH T 271      -3.075  44.602  23.677  1.00  0.56           O  
HETATM  273  O   HOH T 272      -3.033  62.603  35.162  1.00  0.56           O  
HETATM  274  O   HOH T 273     -16.946  64.030  -1.447  1.00  0.56           O  
HETATM  275  O   HOH T 274     -30.003  59.127  39.775  1.00  0.56           O  
HETATM  276  O   HOH T 275     -26.880  47.012  41.067  1.00  0.56           O  
HETATM  277  O   HOH T 276     -17.633  43.361  43.135  1.00  0.57           O  
HETATM  278  O   HOH T 277     -27.518  64.151  12.126  1.00  0.57           O  
HETATM  279  O   HOH T 278     -27.882  68.333  35.836  1.00  0.57           O  
HETATM  280  O   HOH T 279     -22.697  68.883  39.757  1.00  0.58           O  
HETATM  281  O   HOH T 280       2.617  48.566  32.418  1.00  0.58           O  
HETATM  282  O   HOH T 281     -25.944  66.359  40.711  1.00  0.59           O  
HETATM  283  O   HOH T 282      -7.108  62.285  40.725  1.00  0.61           O  
TER     284      HOH T 282 
