# Supplementary material for: Accurate Prediction of Hydration Sites of Proteins Using Energy Model With Atom Embedding
Source: Front Mol Biosci. 2021 Sep 20;8:756075. doi: 10.3389/fmolb.2021.756075 (PMC8488165; doi:10.3389/fmolb.2021.756075)
Supplement: Supplementary file 1 [file DataSheet1.ZIP › Data Sheet 1/Our_result_pdb/our_dataset_output/3A0A_watersite.pdb]

HEADER                                                        XXXX


JRNL        PMID   -1
HETATM    1  O   HOH T   0      14.393  17.081  12.781  1.00  0.22           O  
HETATM    2  O   HOH T   1      11.432   6.052  42.198  1.00  0.22           O  
HETATM    3  O   HOH T   2       3.748  14.171  30.736  1.00  0.23           O  
HETATM    4  O   HOH T   3      -1.737  -3.125  42.017  1.00  0.24           O  
HETATM    5  O   HOH T   4       1.761  10.080  17.900  1.00  0.24           O  
HETATM    6  O   HOH T   5       5.737  12.409  64.805  1.00  0.25           O  
HETATM    7  O   HOH T   6       5.223  13.399  49.310  1.00  0.26           O  
HETATM    8  O   HOH T   7       4.236  13.584  46.666  1.00  0.26           O  
HETATM    9  O   HOH T   8       6.198   8.048  17.800  1.00  0.27           O  
HETATM   10  O   HOH T   9       7.735   0.719  39.144  1.00  0.27           O  
HETATM   11  O   HOH T  10      -2.834   5.990  24.940  1.00  0.27           O  
HETATM   12  O   HOH T  11       4.429  -3.535  30.732  1.00  0.28           O  
HETATM   13  O   HOH T  12      -1.064  -3.725  22.552  1.00  0.28           O  
HETATM   14  O   HOH T  13      16.804  12.437  39.252  1.00  0.28           O  
HETATM   15  O   HOH T  14       5.142   6.012  16.176  1.00  0.28           O  
HETATM   16  O   HOH T  15      13.368   6.204  36.106  1.00  0.28           O  
HETATM   17  O   HOH T  16       0.161  10.132  62.146  1.00  0.28           O  
HETATM   18  O   HOH T  17       1.727  -3.785  31.538  1.00  0.29           O  
HETATM   19  O   HOH T  18       7.080   1.271  54.968  1.00  0.29           O  
HETATM   20  O   HOH T  19       7.114   8.161  53.198  1.00  0.29           O  
HETATM   21  O   HOH T  20       6.675   5.711  68.534  1.00  0.29           O  
HETATM   22  O   HOH T  21       7.991   7.342  46.080  1.00  0.29           O  
HETATM   23  O   HOH T  22       8.822  -0.217  36.900  1.00  0.29           O  
HETATM   24  O   HOH T  23      12.021  16.524  60.124  1.00  0.29           O  
HETATM   25  O   HOH T  24      16.475  12.910  19.206  1.00  0.30           O  
HETATM   26  O   HOH T  25      10.377  20.347  45.335  1.00  0.30           O  
HETATM   27  O   HOH T  26       5.839  12.051  25.062  1.00  0.31           O  
HETATM   28  O   HOH T  27       1.563   8.012  16.258  1.00  0.31           O  
HETATM   29  O   HOH T  28       8.801  17.222  40.317  1.00  0.31           O  
HETATM   30  O   HOH T  29      -2.502   4.982  40.758  1.00  0.31           O  
HETATM   31  O   HOH T  30       5.636   5.460  63.396  1.00  0.31           O  
HETATM   32  O   HOH T  31       9.190   4.715  43.215  1.00  0.32           O  
HETATM   33  O   HOH T  32       8.722  16.345  56.151  1.00  0.32           O  
HETATM   34  O   HOH T  33      14.890  18.540  53.378  1.00  0.32           O  
HETATM   35  O   HOH T  34       4.227  14.079  66.460  1.00  0.32           O  
HETATM   36  O   HOH T  35      18.885  14.558  64.797  1.00  0.32           O  
HETATM   37  O   HOH T  36      10.028   0.446  48.648  1.00  0.32           O  
HETATM   38  O   HOH T  37       9.598  -0.209  21.236  1.00  0.32           O  
HETATM   39  O   HOH T  38      10.423   3.786  40.910  1.00  0.32           O  
HETATM   40  O   HOH T  39      -4.136   9.612  29.609  1.00  0.32           O  
HETATM   41  O   HOH T  40       0.182  -4.248  29.229  1.00  0.32           O  
HETATM   42  O   HOH T  41      -4.551  -1.312  44.380  1.00  0.33           O  
HETATM   43  O   HOH T  42      16.354  15.576  49.454  1.00  0.33           O  
HETATM   44  O   HOH T  43      18.012  16.996  24.152  1.00  0.33           O  
HETATM   45  O   HOH T  44      18.815  14.264  45.102  1.00  0.33           O  
HETATM   46  O   HOH T  45      -1.418   7.800  33.221  1.00  0.33           O  
HETATM   47  O   HOH T  46      -2.799  -1.066  60.754  1.00  0.33           O  
HETATM   48  O   HOH T  47       1.543   7.540  52.594  1.00  0.33           O  
HETATM   49  O   HOH T  48      10.038   0.441  28.584  1.00  0.33           O  
HETATM   50  O   HOH T  49       2.804  12.500  39.201  1.00  0.34           O  
HETATM   51  O   HOH T  50       8.819   0.016  56.641  1.00  0.34           O  
HETATM   52  O   HOH T  51       4.193  13.517  26.596  1.00  0.34           O  
HETATM   53  O   HOH T  52       1.150  -4.609  58.905  1.00  0.34           O  
HETATM   54  O   HOH T  53       6.527  -3.912  42.043  1.00  0.34           O  
HETATM   55  O   HOH T  54       0.796   7.252  44.356  1.00  0.34           O  
HETATM   56  O   HOH T  55       8.422  15.739  68.912  1.00  0.35           O  
HETATM   57  O   HOH T  56      11.479   5.909  61.907  1.00  0.35           O  
HETATM   58  O   HOH T  57      -5.020  -3.289  14.389  1.00  0.35           O  
HETATM   59  O   HOH T  58       4.276  -2.830  26.323  1.00  0.35           O  
HETATM   60  O   HOH T  59       0.394  -6.012  14.613  1.00  0.35           O  
HETATM   61  O   HOH T  60       5.800  10.724  17.044  1.00  0.35           O  
HETATM   62  O   HOH T  61      -1.205  -5.901  46.385  1.00  0.35           O  
HETATM   63  O   HOH T  62       5.746  -1.955  58.356  1.00  0.35           O  
HETATM   64  O   HOH T  63      10.147   3.621  60.689  1.00  0.36           O  
HETATM   65  O   HOH T  64      -3.288  -2.585  58.389  1.00  0.36           O  
HETATM   66  O   HOH T  65      11.966  18.470  58.235  1.00  0.36           O  
HETATM   67  O   HOH T  66       1.742   7.804  55.466  1.00  0.36           O  
HETATM   68  O   HOH T  67      -3.499   9.705  33.360  1.00  0.36           O  
HETATM   69  O   HOH T  68      -3.321  -4.445  47.468  1.00  0.36           O  
HETATM   70  O   HOH T  69       9.568   2.235  50.782  1.00  0.37           O  
HETATM   71  O   HOH T  70      14.422  17.500  59.309  1.00  0.37           O  
HETATM   72  O   HOH T  71      11.436  17.202  39.522  1.00  0.37           O  
HETATM   73  O   HOH T  72       2.245  -5.436  39.458  1.00  0.37           O  
HETATM   74  O   HOH T  73      16.520  18.011  57.552  1.00  0.37           O  
HETATM   75  O   HOH T  74      15.884   7.339  15.162  1.00  0.37           O  
HETATM   76  O   HOH T  75       8.088  17.021  60.698  1.00  0.37           O  
HETATM   77  O   HOH T  76       5.542  -3.803  44.765  1.00  0.37           O  
HETATM   78  O   HOH T  77       6.759   5.768  48.126  1.00  0.37           O  
HETATM   79  O   HOH T  78       4.742   7.506  43.727  1.00  0.37           O  
HETATM   80  O   HOH T  79       7.521  -2.271  60.574  1.00  0.37           O  
HETATM   81  O   HOH T  80      -2.752  -0.991  20.544  1.00  0.37           O  
HETATM   82  O   HOH T  81       2.550   9.689  51.100  1.00  0.38           O  
HETATM   83  O   HOH T  82      -0.635   7.262  26.136  1.00  0.38           O  
HETATM   84  O   HOH T  83      -4.783   0.602  42.262  1.00  0.38           O  
HETATM   85  O   HOH T  84       5.189  12.977  68.778  1.00  0.38           O  
HETATM   86  O   HOH T  85       7.066  15.307  50.241  1.00  0.38           O  
HETATM   87  O   HOH T  86       7.590   0.060  59.060  1.00  0.38           O  
HETATM   88  O   HOH T  87      17.443  15.704  62.688  1.00  0.38           O  
HETATM   89  O   HOH T  88      16.388  18.525  25.785  1.00  0.38           O  
HETATM   90  O   HOH T  89      14.988  16.426  51.681  1.00  0.38           O  
HETATM   91  O   HOH T  90      17.023  15.655  21.831  1.00  0.39           O  
HETATM   92  O   HOH T  91      -6.490   9.143  17.639  1.00  0.39           O  
HETATM   93  O   HOH T  92       5.029  -0.083  68.799  1.00  0.39           O  
HETATM   94  O   HOH T  93       9.888   2.183  19.913  1.00  0.39           O  
HETATM   95  O   HOH T  94      -4.291  -5.351  16.046  1.00  0.39           O  
HETATM   96  O   HOH T  95       7.604  -1.919  35.096  1.00  0.39           O  
HETATM   97  O   HOH T  96      -1.473  -5.030  16.407  1.00  0.39           O  
HETATM   98  O   HOH T  97      -4.571  -6.425  42.750  1.00  0.39           O  
HETATM   99  O   HOH T  98      12.178   3.325  51.167  1.00  0.39           O  
HETATM  100  O   HOH T  99      -4.829   7.616  15.916  1.00  0.39           O  
HETATM  101  O   HOH T 100       9.480  19.315  36.036  1.00  0.39           O  
HETATM  102  O   HOH T 101       7.095   2.560  26.835  1.00  0.39           O  
HETATM  103  O   HOH T 102       6.652  15.836  37.336  1.00  0.40           O  
HETATM  104  O   HOH T 103       2.313  -7.472  19.049  1.00  0.40           O  
HETATM  105  O   HOH T 104      12.109   6.487  54.379  1.00  0.40           O  
HETATM  106  O   HOH T 105       4.687  16.432  39.173  1.00  0.40           O  
HETATM  107  O   HOH T 106      20.312   9.580  59.205  1.00  0.40           O  
HETATM  108  O   HOH T 107      13.787  16.597  49.133  1.00  0.40           O  
HETATM  109  O   HOH T 108      -4.310  -2.600  17.001  1.00  0.41           O  
HETATM  110  O   HOH T 109      -3.580  -3.119  39.776  1.00  0.41           O  
HETATM  111  O   HOH T 110      12.785  19.678  46.725  1.00  0.41           O  
HETATM  112  O   HOH T 111       8.479   2.855  45.144  1.00  0.41           O  
HETATM  113  O   HOH T 112      18.331  10.842  64.560  1.00  0.41           O  
HETATM  114  O   HOH T 113       2.737  -7.183  15.283  1.00  0.41           O  
HETATM  115  O   HOH T 114      -1.419   8.405  60.404  1.00  0.41           O  
HETATM  116  O   HOH T 115      -1.205  -4.262  57.377  1.00  0.41           O  
HETATM  117  O   HOH T 116       6.291   7.821  57.385  1.00  0.41           O  
HETATM  118  O   HOH T 117      17.219  13.026  63.246  1.00  0.41           O  
HETATM  119  O   HOH T 118      -0.981  -5.934  66.578  1.00  0.42           O  
HETATM  120  O   HOH T 119       8.467   3.983  49.137  1.00  0.42           O  
HETATM  121  O   HOH T 120       6.073   7.473  66.354  1.00  0.42           O  
HETATM  122  O   HOH T 121      19.977   4.488  17.768  1.00  0.42           O  
HETATM  123  O   HOH T 122      11.034   3.154  48.518  1.00  0.42           O  
HETATM  124  O   HOH T 123      -3.501   7.629  31.452  1.00  0.42           O  
HETATM  125  O   HOH T 124       7.267   8.167  13.154  1.00  0.42           O  
HETATM  126  O   HOH T 125      11.275  19.788  25.146  1.00  0.42           O  
HETATM  127  O   HOH T 126      11.883  18.798  37.346  1.00  0.42           O  
HETATM  128  O   HOH T 127      10.565  14.949  70.378  1.00  0.43           O  
HETATM  129  O   HOH T 128       4.445   6.788  55.307  1.00  0.43           O  
HETATM  130  O   HOH T 129       4.534  -8.163  41.288  1.00  0.43           O  
HETATM  131  O   HOH T 130      -5.253   7.125  37.018  1.00  0.43           O  
HETATM  132  O   HOH T 131       5.465   8.438  46.178  1.00  0.43           O  
HETATM  133  O   HOH T 132       5.711  16.403  66.178  1.00  0.43           O  
HETATM  134  O   HOH T 133       4.232  -2.245  19.029  1.00  0.43           O  
HETATM  135  O   HOH T 134      11.651  18.431  48.989  1.00  0.43           O  
HETATM  136  O   HOH T 135       8.049  17.087  48.421  1.00  0.43           O  
HETATM  137  O   HOH T 136      -6.038   4.492  36.701  1.00  0.43           O  
HETATM  138  O   HOH T 137       7.715   0.522  19.333  1.00  0.43           O  
HETATM  139  O   HOH T 138       5.939  12.474  44.683  1.00  0.43           O  
HETATM  140  O   HOH T 139       3.637  16.353  68.041  1.00  0.43           O  
HETATM  141  O   HOH T 140       6.573  17.416  46.159  1.00  0.43           O  
HETATM  142  O   HOH T 141      -5.103   6.937  18.644  1.00  0.43           O  
HETATM  143  O   HOH T 142      17.493  11.206  51.480  1.00  0.43           O  
HETATM  144  O   HOH T 143      14.812  19.429  55.923  1.00  0.44           O  
HETATM  145  O   HOH T 144       7.146   6.247  55.228  1.00  0.44           O  
HETATM  146  O   HOH T 145       6.770   1.661  67.421  1.00  0.44           O  
HETATM  147  O   HOH T 146       8.328  19.452  47.016  1.00  0.44           O  
HETATM  148  O   HOH T 147       6.333  -3.984  24.909  1.00  0.44           O  
HETATM  149  O   HOH T 148       5.077  17.064  70.267  1.00  0.44           O  
HETATM  150  O   HOH T 149       4.315   8.275  52.749  1.00  0.45           O  
HETATM  151  O   HOH T 150       5.626   9.162  38.566  1.00  0.45           O  
HETATM  152  O   HOH T 151      13.865   5.279  52.549  1.00  0.45           O  
HETATM  153  O   HOH T 152      14.750  18.585  33.535  1.00  0.45           O  
HETATM  154  O   HOH T 153      10.550  20.807  48.099  1.00  0.45           O  
HETATM  155  O   HOH T 154      18.428  13.324  52.794  1.00  0.45           O  
HETATM  156  O   HOH T 155      18.190  11.192  59.818  1.00  0.45           O  
HETATM  157  O   HOH T 156       9.339   4.542  63.221  1.00  0.45           O  
HETATM  158  O   HOH T 157       6.475  -1.424  37.734  1.00  0.45           O  
HETATM  159  O   HOH T 158      -3.802  -6.085  45.290  1.00  0.45           O  
HETATM  160  O   HOH T 159       7.082   2.274  47.480  1.00  0.46           O  
HETATM  161  O   HOH T 160       7.915  17.125  35.275  1.00  0.46           O  
HETATM  162  O   HOH T 161      16.839  10.508  62.201  1.00  0.46           O  
HETATM  163  O   HOH T 162       1.614  -3.831  51.691  1.00  0.46           O  
HETATM  164  O   HOH T 163       8.280   2.975  65.405  1.00  0.46           O  
HETATM  165  O   HOH T 164       2.672  -8.143  57.844  1.00  0.46           O  
HETATM  166  O   HOH T 165      -0.154   8.828  42.277  1.00  0.46           O  
HETATM  167  O   HOH T 166      15.424  18.925  14.564  1.00  0.46           O  
HETATM  168  O   HOH T 167       6.469  14.667  70.591  1.00  0.47           O  
HETATM  169  O   HOH T 168       3.266  -5.546  57.326  1.00  0.47           O  
HETATM  170  O   HOH T 169      -5.499   9.156  20.189  1.00  0.47           O  
HETATM  171  O   HOH T 170      -5.220   2.556  54.644  1.00  0.47           O  
HETATM  172  O   HOH T 171      19.617   5.445  15.172  1.00  0.47           O  
HETATM  173  O   HOH T 172      -1.657   7.004  45.507  1.00  0.48           O  
HETATM  174  O   HOH T 173       4.922  -5.545  40.344  1.00  0.48           O  
HETATM  175  O   HOH T 174      18.516   7.987  15.323  1.00  0.48           O  
HETATM  176  O   HOH T 175       4.669  13.207  57.679  1.00  0.48           O  
HETATM  177  O   HOH T 176      12.486  19.456  64.246  1.00  0.48           O  
HETATM  178  O   HOH T 177       2.537   9.079  42.863  1.00  0.48           O  
HETATM  179  O   HOH T 178       4.429  10.951  27.314  1.00  0.48           O  
HETATM  180  O   HOH T 179      15.699   6.003  50.611  1.00  0.48           O  
HETATM  181  O   HOH T 180      -0.879  -3.396  50.213  1.00  0.49           O  
HETATM  182  O   HOH T 181      -3.847  -3.898  43.648  1.00  0.49           O  
HETATM  183  O   HOH T 182       7.829  17.845  67.185  1.00  0.50           O  
HETATM  184  O   HOH T 183       6.491  14.998  47.546  1.00  0.50           O  
HETATM  185  O   HOH T 184      -3.675   1.345   9.801  1.00  0.50           O  
HETATM  186  O   HOH T 185      17.922   8.911  53.091  1.00  0.50           O  
HETATM  187  O   HOH T 186      18.729   8.104  57.477  1.00  0.50           O  
HETATM  188  O   HOH T 187       1.201  -5.595  17.190  1.00  0.50           O  
HETATM  189  O   HOH T 188       3.183  11.595  29.780  1.00  0.51           O  
HETATM  190  O   HOH T 189      -0.667   6.976  23.397  1.00  0.51           O  
HETATM  191  O   HOH T 190      -3.147   4.008  53.558  1.00  0.51           O  
HETATM  192  O   HOH T 191      18.784   9.651  49.445  1.00  0.51           O  
HETATM  193  O   HOH T 192       9.674  19.324  38.817  1.00  0.51           O  
HETATM  194  O   HOH T 193       5.894   2.088  69.941  1.00  0.52           O  
HETATM  195  O   HOH T 194      -4.013   7.411  59.759  1.00  0.52           O  
HETATM  196  O   HOH T 195      12.787   4.188  60.039  1.00  0.53           O  
HETATM  197  O   HOH T 196      -4.858  -1.830  24.632  1.00  0.53           O  
HETATM  198  O   HOH T 197       7.959   6.403  64.658  1.00  0.53           O  
HETATM  199  O   HOH T 198      -4.840  -0.031  62.469  1.00  0.53           O  
HETATM  200  O   HOH T 199       9.739  16.864  58.593  1.00  0.53           O  
HETATM  201  O   HOH T 200       9.426  18.736  26.986  1.00  0.53           O  
HETATM  202  O   HOH T 201      -4.876   2.436   7.499  1.00  0.53           O  
HETATM  203  O   HOH T 202       0.868  10.434  20.386  1.00  0.53           O  
HETATM  204  O   HOH T 203       9.741  18.833  56.618  1.00  0.53           O  
HETATM  205  O   HOH T 204      10.269   1.516  66.690  1.00  0.54           O  
HETATM  206  O   HOH T 205       5.621   8.619  15.217  1.00  0.54           O  
HETATM  207  O   HOH T 206       9.008   4.629  67.694  1.00  0.54           O  
HETATM  208  O   HOH T 207       8.655  15.661  29.021  1.00  0.54           O  
HETATM  209  O   HOH T 208      -1.676   9.755  31.146  1.00  0.54           O  
HETATM  210  O   HOH T 209       3.786  13.790  11.162  1.00  0.55           O  
HETATM  211  O   HOH T 210      -0.844  -0.994  71.433  1.00  0.55           O  
HETATM  212  O   HOH T 211       5.810   5.714  45.583  1.00  0.55           O  
HETATM  213  O   HOH T 212       6.120   6.613   7.984  1.00  0.56           O  
HETATM  214  O   HOH T 213       5.962  -3.323  28.408  1.00  0.56           O  
HETATM  215  O   HOH T 214       9.472  16.932  37.464  1.00  0.56           O  
HETATM  216  O   HOH T 215      -4.014   2.323  51.819  1.00  0.57           O  
HETATM  217  O   HOH T 216       5.679  16.168  30.761  1.00  0.57           O  
HETATM  218  O   HOH T 217      18.092  10.237  40.484  1.00  0.57           O  
HETATM  219  O   HOH T 218       6.499  -1.456  17.829  1.00  0.57           O  
HETATM  220  O   HOH T 219       7.153  17.255  26.960  1.00  0.57           O  
HETATM  221  O   HOH T 220      15.374   7.854  52.582  1.00  0.58           O  
HETATM  222  O   HOH T 221       4.159  -5.173  37.579  1.00  0.58           O  
HETATM  223  O   HOH T 222      -2.781  -1.649  23.082  1.00  0.58           O  
HETATM  224  O   HOH T 223      16.222   9.731  22.702  1.00  0.59           O  
HETATM  225  O   HOH T 224      -3.454  -5.856  65.518  1.00  0.59           O  
HETATM  226  O   HOH T 225       5.156  -6.415  24.190  1.00  0.60           O  
HETATM  227  O   HOH T 226      -3.935   5.852  44.438  1.00  0.60           O  
HETATM  228  O   HOH T 227      17.931  17.065  55.399  1.00  0.61           O  
HETATM  229  O   HOH T 228       5.658   5.593  23.409  1.00  0.67           O  
TER     230      HOH T 228 
