# Supplementary material for: Accurate Prediction of Hydration Sites of Proteins Using Energy Model With Atom Embedding
Source: Front Mol Biosci. 2021 Sep 20;8:756075. doi: 10.3389/fmolb.2021.756075 (PMC8488165; doi:10.3389/fmolb.2021.756075)
Supplement: Supplementary file 1 [file DataSheet1.ZIP › Data Sheet 1/Our_result_pdb/our_dataset_output/3A0N_watersite.pdb]

HEADER                                                        XXXX


JRNL        PMID   -1
HETATM    1  O   HOH T   0       8.181  -8.960   3.093  1.00  0.16           O  
HETATM    2  O   HOH T   1     -19.551 -17.528 -17.117  1.00  0.18           O  
HETATM    3  O   HOH T   2      10.855  -8.674 -13.135  1.00  0.18           O  
HETATM    4  O   HOH T   3       0.988 -10.969  -8.785  1.00  0.19           O  
HETATM    5  O   HOH T   4     -15.603 -12.376 -21.854  1.00  0.19           O  
HETATM    6  O   HOH T   5      -3.518  -7.897  -2.876  1.00  0.19           O  
HETATM    7  O   HOH T   6       3.463   1.795  -1.818  1.00  0.20           O  
HETATM    8  O   HOH T   7      -2.269 -26.885 -21.729  1.00  0.21           O  
HETATM    9  O   HOH T   8     -12.127 -10.003 -24.952  1.00  0.21           O  
HETATM   10  O   HOH T   9       3.147 -16.621 -12.182  1.00  0.21           O  
HETATM   11  O   HOH T  10      12.685 -19.081 -24.892  1.00  0.22           O  
HETATM   12  O   HOH T  11       1.954 -11.362  -0.000  1.00  0.23           O  
HETATM   13  O   HOH T  12       0.405 -16.767 -12.749  1.00  0.23           O  
HETATM   14  O   HOH T  13       1.810 -17.917  -4.254  1.00  0.23           O  
HETATM   15  O   HOH T  14       5.661  -1.536   7.601  1.00  0.24           O  
HETATM   16  O   HOH T  15      -6.898 -21.481 -18.722  1.00  0.25           O  
HETATM   17  O   HOH T  16      -3.816   3.272 -16.060  1.00  0.26           O  
HETATM   18  O   HOH T  17     -16.125 -21.962 -20.758  1.00  0.26           O  
HETATM   19  O   HOH T  18      14.697   1.113  -4.703  1.00  0.26           O  
HETATM   20  O   HOH T  19      12.801 -30.135 -22.718  1.00  0.26           O  
HETATM   21  O   HOH T  20      -5.053  -7.103 -33.779  1.00  0.26           O  
HETATM   22  O   HOH T  21      -6.823 -19.418  -1.593  1.00  0.27           O  
HETATM   23  O   HOH T  22       2.176  -4.438   1.793  1.00  0.27           O  
HETATM   24  O   HOH T  23     -12.440 -27.821 -11.297  1.00  0.27           O  
HETATM   25  O   HOH T  24       4.494 -33.157 -25.957  1.00  0.27           O  
HETATM   26  O   HOH T  25       8.123  -9.700   0.397  1.00  0.27           O  
HETATM   27  O   HOH T  26      16.860 -13.940 -27.145  1.00  0.27           O  
HETATM   28  O   HOH T  27       6.636 -30.283 -24.675  1.00  0.28           O  
HETATM   29  O   HOH T  28      17.027 -16.488  -5.864  1.00  0.28           O  
HETATM   30  O   HOH T  29       7.417 -15.495  -2.707  1.00  0.28           O  
HETATM   31  O   HOH T  30      -4.771 -20.319  -3.237  1.00  0.28           O  
HETATM   32  O   HOH T  31      16.910  -2.457  -5.667  1.00  0.28           O  
HETATM   33  O   HOH T  32      -6.947  -1.802  -5.034  1.00  0.28           O  
HETATM   34  O   HOH T  33      18.245  -4.410  -1.043  1.00  0.28           O  
HETATM   35  O   HOH T  34     -10.653  -8.015 -16.272  1.00  0.29           O  
HETATM   36  O   HOH T  35     -11.897   5.930 -21.947  1.00  0.29           O  
HETATM   37  O   HOH T  36       0.502  -2.861 -29.283  1.00  0.29           O  
HETATM   38  O   HOH T  37      -7.202   4.294 -22.394  1.00  0.29           O  
HETATM   39  O   HOH T  38       4.134   5.377 -21.815  1.00  0.29           O  
HETATM   40  O   HOH T  39      11.252 -14.435 -19.513  1.00  0.29           O  
HETATM   41  O   HOH T  40      12.231 -21.992  -8.801  1.00  0.29           O  
HETATM   42  O   HOH T  41     -22.335 -22.116 -21.063  1.00  0.29           O  
HETATM   43  O   HOH T  42      15.724 -23.388  -9.552  1.00  0.30           O  
HETATM   44  O   HOH T  43       1.463  -1.640 -26.911  1.00  0.30           O  
HETATM   45  O   HOH T  44       3.174 -29.514 -32.651  1.00  0.30           O  
HETATM   46  O   HOH T  45      19.488  -0.323   1.471  1.00  0.30           O  
HETATM   47  O   HOH T  46      13.778  -3.370 -20.184  1.00  0.30           O  
HETATM   48  O   HOH T  47      -8.585 -25.138 -15.039  1.00  0.31           O  
HETATM   49  O   HOH T  48      13.905 -20.977 -26.683  1.00  0.31           O  
HETATM   50  O   HOH T  49      -9.924 -31.440  -8.258  1.00  0.31           O  
HETATM   51  O   HOH T  50      -7.387  -3.765  -7.054  1.00  0.31           O  
HETATM   52  O   HOH T  51      15.159   4.022   9.705  1.00  0.31           O  
HETATM   53  O   HOH T  52     -11.257  -7.272 -10.374  1.00  0.32           O  
HETATM   54  O   HOH T  53       8.052   1.575   4.878  1.00  0.32           O  
HETATM   55  O   HOH T  54      -6.597 -16.138 -10.579  1.00  0.32           O  
HETATM   56  O   HOH T  55       7.808 -20.492  -8.303  1.00  0.32           O  
HETATM   57  O   HOH T  56     -18.723 -11.598  -7.358  1.00  0.32           O  
HETATM   58  O   HOH T  57     -16.251 -15.145 -22.241  1.00  0.32           O  
HETATM   59  O   HOH T  58      11.185 -11.509 -25.369  1.00  0.32           O  
HETATM   60  O   HOH T  59       4.083   5.716  -8.271  1.00  0.32           O  
HETATM   61  O   HOH T  60      -4.916 -16.425 -37.490  1.00  0.32           O  
HETATM   62  O   HOH T  61       5.950 -23.886 -11.172  1.00  0.32           O  
HETATM   63  O   HOH T  62      -2.839 -21.895 -34.348  1.00  0.32           O  
HETATM   64  O   HOH T  63     -18.852 -22.687 -20.883  1.00  0.32           O  
HETATM   65  O   HOH T  64       0.061 -25.303 -34.112  1.00  0.32           O  
HETATM   66  O   HOH T  65       2.807 -25.235 -34.278  1.00  0.32           O  
HETATM   67  O   HOH T  66      -6.803 -12.855   0.244  1.00  0.32           O  
HETATM   68  O   HOH T  67     -11.584 -19.230 -11.700  1.00  0.32           O  
HETATM   69  O   HOH T  68       4.391 -12.203  14.279  1.00  0.33           O  
HETATM   70  O   HOH T  69      -8.515  -3.998 -24.277  1.00  0.33           O  
HETATM   71  O   HOH T  70      18.520 -27.775  -6.063  1.00  0.33           O  
HETATM   72  O   HOH T  71      12.953 -28.413 -16.004  1.00  0.33           O  
HETATM   73  O   HOH T  72     -15.579 -17.499 -20.826  1.00  0.33           O  
HETATM   74  O   HOH T  73      -4.944 -29.906 -33.352  1.00  0.33           O  
HETATM   75  O   HOH T  74      -3.702 -14.757  -8.406  1.00  0.33           O  
HETATM   76  O   HOH T  75     -10.830 -18.621 -14.492  1.00  0.33           O  
HETATM   77  O   HOH T  76     -11.671 -31.746 -14.557  1.00  0.33           O  
HETATM   78  O   HOH T  77     -11.467 -13.202 -15.475  1.00  0.33           O  
HETATM   79  O   HOH T  78       5.867  -8.437 -34.054  1.00  0.33           O  
HETATM   80  O   HOH T  79       2.419 -20.393 -10.033  1.00  0.34           O  
HETATM   81  O   HOH T  80     -17.700 -18.334 -19.224  1.00  0.34           O  
HETATM   82  O   HOH T  81      -9.478 -28.778  -8.984  1.00  0.34           O  
HETATM   83  O   HOH T  82       0.037  -4.055   4.817  1.00  0.35           O  
HETATM   84  O   HOH T  83      10.155 -29.780 -13.140  1.00  0.35           O  
HETATM   85  O   HOH T  84      -2.599 -10.003   4.494  1.00  0.35           O  
HETATM   86  O   HOH T  85      16.461  -3.990 -20.327  1.00  0.35           O  
HETATM   87  O   HOH T  86      -6.212 -24.296 -16.425  1.00  0.35           O  
HETATM   88  O   HOH T  87      -8.732  -4.086 -21.596  1.00  0.35           O  
HETATM   89  O   HOH T  88      -2.484 -17.152  -9.235  1.00  0.35           O  
HETATM   90  O   HOH T  89      11.118  -7.268 -25.634  1.00  0.35           O  
HETATM   91  O   HOH T  90       9.847 -15.765   8.262  1.00  0.35           O  
HETATM   92  O   HOH T  91      -5.184  -2.558 -19.770  1.00  0.35           O  
HETATM   93  O   HOH T  92       6.001 -15.812  12.047  1.00  0.35           O  
HETATM   94  O   HOH T  93      -2.980  -1.508   2.921  1.00  0.36           O  
HETATM   95  O   HOH T  94       3.605 -25.081 -36.906  1.00  0.36           O  
HETATM   96  O   HOH T  95      17.529   4.399   1.162  1.00  0.36           O  
HETATM   97  O   HOH T  96     -11.300  -9.920 -11.180  1.00  0.36           O  
HETATM   98  O   HOH T  97      20.248 -14.962  -7.681  1.00  0.36           O  
HETATM   99  O   HOH T  98      11.513 -29.242 -24.939  1.00  0.36           O  
HETATM  100  O   HOH T  99      -8.966 -12.034 -15.707  1.00  0.36           O  
HETATM  101  O   HOH T 100      -4.774   0.081  -8.516  1.00  0.36           O  
HETATM  102  O   HOH T 101      -9.998  -9.280 -28.857  1.00  0.36           O  
HETATM  103  O   HOH T 102      21.010   0.856   6.390  1.00  0.36           O  
HETATM  104  O   HOH T 103      -1.538 -23.184 -16.253  1.00  0.37           O  
HETATM  105  O   HOH T 104       6.391  -5.730 -30.888  1.00  0.37           O  
HETATM  106  O   HOH T 105      20.828   2.291   4.106  1.00  0.37           O  
HETATM  107  O   HOH T 106     -10.040  -2.399 -25.870  1.00  0.37           O  
HETATM  108  O   HOH T 107      -7.248  -5.427  -1.500  1.00  0.37           O  
HETATM  109  O   HOH T 108     -17.126 -28.084 -13.131  1.00  0.37           O  
HETATM  110  O   HOH T 109      -5.967  -7.023 -31.107  1.00  0.37           O  
HETATM  111  O   HOH T 110       8.217  -2.416   7.997  1.00  0.37           O  
HETATM  112  O   HOH T 111       4.470 -18.036  -3.617  1.00  0.37           O  
HETATM  113  O   HOH T 112      12.613 -33.941 -20.319  1.00  0.37           O  
HETATM  114  O   HOH T 113     -15.102 -26.986 -11.501  1.00  0.38           O  
HETATM  115  O   HOH T 114      12.107 -19.395 -28.289  1.00  0.38           O  
HETATM  116  O   HOH T 115     -10.751   7.647 -13.182  1.00  0.38           O  
HETATM  117  O   HOH T 116      19.469  -1.384   6.276  1.00  0.38           O  
HETATM  118  O   HOH T 117      21.283 -16.135  -9.965  1.00  0.38           O  
HETATM  119  O   HOH T 118      19.297 -15.180 -27.361  1.00  0.38           O  
HETATM  120  O   HOH T 119      -4.825 -22.145   0.582  1.00  0.38           O  
HETATM  121  O   HOH T 120     -11.206 -14.524  -8.851  1.00  0.38           O  
HETATM  122  O   HOH T 121      14.611   3.418  -6.030  1.00  0.38           O  
HETATM  123  O   HOH T 122     -17.301 -10.393 -12.029  1.00  0.38           O  
HETATM  124  O   HOH T 123     -18.173 -20.178 -24.330  1.00  0.38           O  
HETATM  125  O   HOH T 124      17.462   5.442   9.120  1.00  0.38           O  
HETATM  126  O   HOH T 125      -6.962 -18.026 -36.681  1.00  0.38           O  
HETATM  127  O   HOH T 126     -10.910  -3.172 -23.282  1.00  0.39           O  
HETATM  128  O   HOH T 127       1.561 -31.672 -22.787  1.00  0.39           O  
HETATM  129  O   HOH T 128      19.495   2.485   1.685  1.00  0.39           O  
HETATM  130  O   HOH T 129      -3.402  -8.321  12.963  1.00  0.39           O  
HETATM  131  O   HOH T 130     -17.921 -13.995  -8.642  1.00  0.39           O  
HETATM  132  O   HOH T 131      -7.883 -12.392 -11.661  1.00  0.39           O  
HETATM  133  O   HOH T 132       5.532 -15.340   5.980  1.00  0.39           O  
HETATM  134  O   HOH T 133      -8.829 -22.092  -7.639  1.00  0.39           O  
HETATM  135  O   HOH T 134     -12.853 -15.796  -3.288  1.00  0.39           O  
HETATM  136  O   HOH T 135       0.223   1.645   4.659  1.00  0.39           O  
HETATM  137  O   HOH T 136     -17.002 -11.080 -14.632  1.00  0.39           O  
HETATM  138  O   HOH T 137     -11.368 -11.422 -27.412  1.00  0.39           O  
HETATM  139  O   HOH T 138      18.962 -28.573 -18.801  1.00  0.39           O  
HETATM  140  O   HOH T 139       2.915 -14.899   6.715  1.00  0.39           O  
HETATM  141  O   HOH T 140       6.448   4.605 -22.874  1.00  0.39           O  
HETATM  142  O   HOH T 141      -4.923   2.521   0.110  1.00  0.39           O  
HETATM  143  O   HOH T 142      -5.675   8.510 -12.655  1.00  0.39           O  
HETATM  144  O   HOH T 143      -9.408   4.924 -21.072  1.00  0.39           O  
HETATM  145  O   HOH T 144       9.452  -9.288 -25.142  1.00  0.39           O  
HETATM  146  O   HOH T 145      12.250   4.476  -6.767  1.00  0.40           O  
HETATM  147  O   HOH T 146      -6.710 -17.824  -8.363  1.00  0.40           O  
HETATM  148  O   HOH T 147       4.647 -13.350  11.706  1.00  0.40           O  
HETATM  149  O   HOH T 148      15.416   6.232   1.007  1.00  0.40           O  
HETATM  150  O   HOH T 149       5.050   5.998 -10.853  1.00  0.40           O  
HETATM  151  O   HOH T 150       4.874 -31.672 -17.028  1.00  0.40           O  
HETATM  152  O   HOH T 151      20.670 -14.560 -24.969  1.00  0.40           O  
HETATM  153  O   HOH T 152      -8.689 -27.759 -14.169  1.00  0.40           O  
HETATM  154  O   HOH T 153      -4.802   0.938 -11.104  1.00  0.40           O  
HETATM  155  O   HOH T 154      -7.146  -2.830  -2.545  1.00  0.40           O  
HETATM  156  O   HOH T 155      -0.472   5.591 -20.928  1.00  0.40           O  
HETATM  157  O   HOH T 156      -2.417 -16.341 -23.127  1.00  0.40           O  
HETATM  158  O   HOH T 157     -10.490   1.561 -27.573  1.00  0.40           O  
HETATM  159  O   HOH T 158      -2.472   7.158 -19.626  1.00  0.41           O  
HETATM  160  O   HOH T 159     -20.765 -19.471 -25.084  1.00  0.41           O  
HETATM  161  O   HOH T 160     -11.139 -10.424 -15.105  1.00  0.41           O  
HETATM  162  O   HOH T 161      -0.776 -13.132   5.693  1.00  0.41           O  
HETATM  163  O   HOH T 162       5.897 -18.980  -7.048  1.00  0.41           O  
HETATM  164  O   HOH T 163       7.174 -23.294 -38.807  1.00  0.41           O  
HETATM  165  O   HOH T 164      -0.674 -12.027 -31.831  1.00  0.41           O  
HETATM  166  O   HOH T 165       3.101   0.112 -28.423  1.00  0.41           O  
HETATM  167  O   HOH T 166      -3.209 -14.542   5.616  1.00  0.41           O  
HETATM  168  O   HOH T 167       7.896 -31.407 -13.057  1.00  0.41           O  
HETATM  169  O   HOH T 168      15.253 -27.063  -8.034  1.00  0.41           O  
HETATM  170  O   HOH T 169      -4.646 -21.865 -12.818  1.00  0.41           O  
HETATM  171  O   HOH T 170      -6.766 -17.603   0.590  1.00  0.42           O  
HETATM  172  O   HOH T 171      -6.448  -2.023  -8.990  1.00  0.42           O  
HETATM  173  O   HOH T 172      -0.819  -8.864  12.182  1.00  0.42           O  
HETATM  174  O   HOH T 173       7.973 -33.827 -20.854  1.00  0.42           O  
HETATM  175  O   HOH T 174     -17.197 -19.868 -26.998  1.00  0.42           O  
HETATM  176  O   HOH T 175       2.190   4.131 -12.182  1.00  0.42           O  
HETATM  177  O   HOH T 176      19.005  -6.332 -13.684  1.00  0.42           O  
HETATM  178  O   HOH T 177     -13.423 -14.551 -31.381  1.00  0.42           O  
HETATM  179  O   HOH T 178      15.087   6.276  -1.725  1.00  0.42           O  
HETATM  180  O   HOH T 179       7.055 -31.884 -15.520  1.00  0.42           O  
HETATM  181  O   HOH T 180       1.670 -18.770  -7.848  1.00  0.42           O  
HETATM  182  O   HOH T 181      -4.816 -11.246   3.204  1.00  0.42           O  
HETATM  183  O   HOH T 182      18.320 -16.357   7.305  1.00  0.42           O  
HETATM  184  O   HOH T 183      -6.332 -20.083 -30.830  1.00  0.43           O  
HETATM  185  O   HOH T 184      -7.779  -6.284  -5.877  1.00  0.43           O  
HETATM  186  O   HOH T 185      -6.496 -15.116  -8.014  1.00  0.43           O  
HETATM  187  O   HOH T 186      -7.348 -30.525  -8.801  1.00  0.43           O  
HETATM  188  O   HOH T 187       4.255 -31.467 -23.651  1.00  0.43           O  
HETATM  189  O   HOH T 188      17.413  -2.642  -2.953  1.00  0.43           O  
HETATM  190  O   HOH T 189      -8.201 -32.204 -25.310  1.00  0.43           O  
HETATM  191  O   HOH T 190      21.685 -20.252 -10.395  1.00  0.43           O  
HETATM  192  O   HOH T 191      -8.914   6.625 -14.979  1.00  0.43           O  
HETATM  193  O   HOH T 192      18.649 -15.816   9.951  1.00  0.43           O  
HETATM  194  O   HOH T 193      -9.571 -30.320 -13.826  1.00  0.44           O  
HETATM  195  O   HOH T 194      -3.163 -18.217   3.224  1.00  0.44           O  
HETATM  196  O   HOH T 195      -2.970 -15.493   3.122  1.00  0.44           O  
HETATM  197  O   HOH T 196      13.996 -23.429  -7.266  1.00  0.44           O  
HETATM  198  O   HOH T 197       9.915 -27.006 -38.986  1.00  0.44           O  
HETATM  199  O   HOH T 198      -8.869 -17.222   2.326  1.00  0.44           O  
HETATM  200  O   HOH T 199       3.893 -25.915 -11.835  1.00  0.44           O  
HETATM  201  O   HOH T 200     -12.841 -18.594  -7.394  1.00  0.44           O  
HETATM  202  O   HOH T 201      -4.651 -13.652   1.835  1.00  0.44           O  
HETATM  203  O   HOH T 202      -4.641 -16.919   5.130  1.00  0.44           O  
HETATM  204  O   HOH T 203       3.875 -34.275 -23.591  1.00  0.44           O  
HETATM  205  O   HOH T 204       4.244 -21.769 -11.730  1.00  0.44           O  
HETATM  206  O   HOH T 205      -2.237 -23.016   0.713  1.00  0.44           O  
HETATM  207  O   HOH T 206      13.852   5.228   7.543  1.00  0.44           O  
HETATM  208  O   HOH T 207     -12.943  -8.082 -12.415  1.00  0.44           O  
HETATM  209  O   HOH T 208      -5.919  -6.301   6.629  1.00  0.45           O  
HETATM  210  O   HOH T 209      12.905   6.498  -0.030  1.00  0.45           O  
HETATM  211  O   HOH T 210     -14.805 -10.080 -13.174  1.00  0.45           O  
HETATM  212  O   HOH T 211      -1.029 -22.542  -1.716  1.00  0.45           O  
HETATM  213  O   HOH T 212      -2.303 -23.181 -13.578  1.00  0.45           O  
HETATM  214  O   HOH T 213       3.991 -22.717 -38.320  1.00  0.45           O  
HETATM  215  O   HOH T 214       5.092 -10.508 -35.804  1.00  0.45           O  
HETATM  216  O   HOH T 215      16.837 -14.774   5.584  1.00  0.45           O  
HETATM  217  O   HOH T 216       6.043  -4.108   8.429  1.00  0.45           O  
HETATM  218  O   HOH T 217      -0.663  -8.729  14.951  1.00  0.45           O  
HETATM  219  O   HOH T 218      -1.853   4.705 -14.855  1.00  0.45           O  
HETATM  220  O   HOH T 219      -9.644  -3.651 -15.197  1.00  0.46           O  
HETATM  221  O   HOH T 220       3.464 -19.493  -5.807  1.00  0.46           O  
HETATM  222  O   HOH T 221      -6.133 -22.393  -8.610  1.00  0.46           O  
HETATM  223  O   HOH T 222     -14.671 -25.101 -27.642  1.00  0.46           O  
HETATM  224  O   HOH T 223     -13.190 -12.792 -29.220  1.00  0.46           O  
HETATM  225  O   HOH T 224      -8.118   7.145 -12.296  1.00  0.46           O  
HETATM  226  O   HOH T 225      13.029  -7.466 -27.665  1.00  0.46           O  
HETATM  227  O   HOH T 226      -0.786 -13.958   9.431  1.00  0.46           O  
HETATM  228  O   HOH T 227     -18.136 -20.088 -21.467  1.00  0.46           O  
HETATM  229  O   HOH T 228      -2.599 -22.030 -11.041  1.00  0.46           O  
HETATM  230  O   HOH T 229       9.785 -31.582 -15.137  1.00  0.46           O  
HETATM  231  O   HOH T 230      -1.155 -23.532 -35.903  1.00  0.47           O  
HETATM  232  O   HOH T 231      20.802  -0.536   3.956  1.00  0.47           O  
HETATM  233  O   HOH T 232      -0.264  -1.799   3.325  1.00  0.47           O  
HETATM  234  O   HOH T 233      -8.636  -3.927  -4.642  1.00  0.47           O  
HETATM  235  O   HOH T 234     -16.801 -14.625 -24.923  1.00  0.47           O  
HETATM  236  O   HOH T 235     -15.511 -12.141 -24.705  1.00  0.47           O  
HETATM  237  O   HOH T 236      16.631 -14.696  -3.820  1.00  0.47           O  
HETATM  238  O   HOH T 237       8.288 -32.391 -24.945  1.00  0.47           O  
HETATM  239  O   HOH T 238      -5.208 -26.836 -16.023  1.00  0.47           O  
HETATM  240  O   HOH T 239      -9.829   2.645 -19.543  1.00  0.47           O  
HETATM  241  O   HOH T 240      10.629 -31.652 -23.752  1.00  0.47           O  
HETATM  242  O   HOH T 241      -0.614 -18.644  -3.408  1.00  0.47           O  
HETATM  243  O   HOH T 242       4.350  -6.996 -32.182  1.00  0.48           O  
HETATM  244  O   HOH T 243      16.226 -26.034 -10.512  1.00  0.48           O  
HETATM  245  O   HOH T 244      -7.532 -11.359   2.361  1.00  0.48           O  
HETATM  246  O   HOH T 245      -1.785   2.528 -12.944  1.00  0.48           O  
HETATM  247  O   HOH T 246      -3.397  -5.537   5.811  1.00  0.48           O  
HETATM  248  O   HOH T 247     -11.407 -17.369  -9.484  1.00  0.48           O  
HETATM  249  O   HOH T 248      -2.718 -24.612 -33.913  1.00  0.48           O  
HETATM  250  O   HOH T 249       8.112 -19.461  -1.504  1.00  0.48           O  
HETATM  251  O   HOH T 250      -5.655 -14.748 -39.698  1.00  0.48           O  
HETATM  252  O   HOH T 251      17.570 -22.623  -7.702  1.00  0.48           O  
HETATM  253  O   HOH T 252       9.829 -22.188  -7.348  1.00  0.48           O  
HETATM  254  O   HOH T 253     -12.486  -5.398 -12.101  1.00  0.48           O  
HETATM  255  O   HOH T 254     -10.703   4.078 -17.306  1.00  0.49           O  
HETATM  256  O   HOH T 255      -7.254 -16.460   4.423  1.00  0.49           O  
HETATM  257  O   HOH T 256       9.477 -24.371 -39.736  1.00  0.49           O  
HETATM  258  O   HOH T 257      -9.026  -2.265 -11.111  1.00  0.49           O  
HETATM  259  O   HOH T 258      10.452 -33.421 -16.996  1.00  0.49           O  
HETATM  260  O   HOH T 259      19.543 -18.002 -27.445  1.00  0.49           O  
HETATM  261  O   HOH T 260      10.152 -34.837 -19.415  1.00  0.49           O  
HETATM  262  O   HOH T 261      -8.928 -16.190  -8.996  1.00  0.49           O  
HETATM  263  O   HOH T 262      12.851 -21.051  -6.262  1.00  0.49           O  
HETATM  264  O   HOH T 263      19.669  -6.257   0.491  1.00  0.49           O  
HETATM  265  O   HOH T 264       4.580  -5.006  -2.954  1.00  0.49           O  
HETATM  266  O   HOH T 265      -4.004   1.043   2.320  1.00  0.49           O  
HETATM  267  O   HOH T 266      15.789  -2.220 -18.445  1.00  0.49           O  
HETATM  268  O   HOH T 267     -17.767 -10.391 -25.159  1.00  0.49           O  
HETATM  269  O   HOH T 268     -13.053 -28.491 -21.943  1.00  0.49           O  
HETATM  270  O   HOH T 269       6.739 -32.020 -22.617  1.00  0.50           O  
HETATM  271  O   HOH T 270       2.284   6.091 -10.298  1.00  0.50           O  
HETATM  272  O   HOH T 271       7.318 -26.142 -39.002  1.00  0.50           O  
HETATM  273  O   HOH T 272      19.898 -23.988  -8.000  1.00  0.50           O  
HETATM  274  O   HOH T 273      -4.857 -28.939 -35.998  1.00  0.50           O  
HETATM  275  O   HOH T 274     -16.181 -20.897  -9.254  1.00  0.50           O  
HETATM  276  O   HOH T 275     -12.586  -9.159 -27.675  1.00  0.50           O  
HETATM  277  O   HOH T 276       1.512 -17.772 -10.441  1.00  0.50           O  
HETATM  278  O   HOH T 277      -1.578   2.089   2.693  1.00  0.50           O  
HETATM  279  O   HOH T 278      13.781 -21.098 -34.999  1.00  0.50           O  
HETATM  280  O   HOH T 279      -8.437  -3.323  -0.196  1.00  0.50           O  
HETATM  281  O   HOH T 280     -20.378 -21.082 -22.778  1.00  0.50           O  
HETATM  282  O   HOH T 281      -9.232  -7.905  -4.083  1.00  0.50           O  
HETATM  283  O   HOH T 282       3.060 -18.720   2.688  1.00  0.50           O  
HETATM  284  O   HOH T 283     -10.102 -12.185 -10.094  1.00  0.50           O  
HETATM  285  O   HOH T 284     -13.824 -17.878  -4.850  1.00  0.50           O  
HETATM  286  O   HOH T 285      12.217 -15.900   6.773  1.00  0.51           O  
HETATM  287  O   HOH T 286      13.636 -20.278 -32.456  1.00  0.51           O  
HETATM  288  O   HOH T 287      11.319  -9.625 -27.232  1.00  0.51           O  
HETATM  289  O   HOH T 288      12.051   2.032 -13.753  1.00  0.51           O  
HETATM  290  O   HOH T 289      -3.122  -7.476 -35.891  1.00  0.51           O  
HETATM  291  O   HOH T 290       7.823   0.195   7.206  1.00  0.51           O  
HETATM  292  O   HOH T 291      19.067  -1.772  -0.873  1.00  0.51           O  
HETATM  293  O   HOH T 292       2.292  -9.690  14.610  1.00  0.51           O  
HETATM  294  O   HOH T 293       4.018  -0.746 -30.874  1.00  0.51           O  
HETATM  295  O   HOH T 294     -18.664 -17.891 -25.857  1.00  0.51           O  
HETATM  296  O   HOH T 295      -2.718 -30.419 -34.947  1.00  0.52           O  
HETATM  297  O   HOH T 296     -15.406 -17.782 -27.720  1.00  0.52           O  
HETATM  298  O   HOH T 297     -10.916  -3.121 -12.820  1.00  0.52           O  
HETATM  299  O   HOH T 298      21.845  -8.014  -6.313  1.00  0.52           O  
HETATM  300  O   HOH T 299     -10.563 -11.733 -34.115  1.00  0.52           O  
HETATM  301  O   HOH T 300     -13.757 -11.552 -15.247  1.00  0.52           O  
HETATM  302  O   HOH T 301      15.658   5.071  -4.107  1.00  0.52           O  
HETATM  303  O   HOH T 302      -2.316   1.405   0.098  1.00  0.52           O  
HETATM  304  O   HOH T 303       1.167 -33.995 -24.354  1.00  0.52           O  
HETATM  305  O   HOH T 304     -19.235  -7.889 -25.457  1.00  0.52           O  
HETATM  306  O   HOH T 305      -4.012  -3.126   4.816  1.00  0.52           O  
HETATM  307  O   HOH T 306     -18.693 -28.340 -15.392  1.00  0.52           O  
HETATM  308  O   HOH T 307      16.899   4.928  11.678  1.00  0.52           O  
HETATM  309  O   HOH T 308      -7.385  -3.293 -17.967  1.00  0.53           O  
HETATM  310  O   HOH T 309      15.872 -27.419  -5.277  1.00  0.53           O  
HETATM  311  O   HOH T 310      -0.436 -30.420 -33.490  1.00  0.53           O  
HETATM  312  O   HOH T 311     -12.900 -23.751 -30.100  1.00  0.53           O  
HETATM  313  O   HOH T 312      18.808 -25.954  -9.614  1.00  0.53           O  
HETATM  314  O   HOH T 313      12.043  -8.978 -29.824  1.00  0.53           O  
HETATM  315  O   HOH T 314      -7.168 -16.846 -39.115  1.00  0.53           O  
HETATM  316  O   HOH T 315     -13.105 -12.764 -33.465  1.00  0.53           O  
HETATM  317  O   HOH T 316       7.898  -8.891 -32.304  1.00  0.54           O  
HETATM  318  O   HOH T 317       1.792 -32.768 -19.353  1.00  0.54           O  
HETATM  319  O   HOH T 318       6.526 -35.847 -19.593  1.00  0.54           O  
HETATM  320  O   HOH T 319      10.483 -29.897  -9.779  1.00  0.54           O  
HETATM  321  O   HOH T 320       6.313 -30.175 -11.217  1.00  0.54           O  
HETATM  322  O   HOH T 321      -4.132   2.521  -7.454  1.00  0.55           O  
HETATM  323  O   HOH T 322     -16.961 -11.473  -9.506  1.00  0.55           O  
HETATM  324  O   HOH T 323       5.555   1.060 -29.459  1.00  0.55           O  
HETATM  325  O   HOH T 324       0.699 -36.210 -21.342  1.00  0.55           O  
HETATM  326  O   HOH T 325      -3.309  -0.313 -28.241  1.00  0.55           O  
HETATM  327  O   HOH T 326      10.343  -4.695 -25.726  1.00  0.55           O  
HETATM  328  O   HOH T 327     -12.164 -29.330 -24.307  1.00  0.55           O  
HETATM  329  O   HOH T 328      18.589 -26.683 -28.273  1.00  0.55           O  
HETATM  330  O   HOH T 329      -6.286 -20.075   1.030  1.00  0.55           O  
HETATM  331  O   HOH T 330       5.630 -33.202 -19.419  1.00  0.56           O  
HETATM  332  O   HOH T 331     -12.174 -14.639  -0.843  1.00  0.56           O  
HETATM  333  O   HOH T 332      -7.262   0.921   0.005  1.00  0.56           O  
HETATM  334  O   HOH T 333       0.903 -13.793 -39.001  1.00  0.56           O  
HETATM  335  O   HOH T 334      -7.974  -4.893   5.719  1.00  0.57           O  
HETATM  336  O   HOH T 335      13.193 -18.451 -35.653  1.00  0.57           O  
HETATM  337  O   HOH T 336     -11.265  -3.926 -10.237  1.00  0.57           O  
HETATM  338  O   HOH T 337      -9.374   1.529 -17.035  1.00  0.57           O  
HETATM  339  O   HOH T 338     -11.862 -30.392 -12.148  1.00  0.57           O  
HETATM  340  O   HOH T 339     -12.051 -10.569 -30.076  1.00  0.58           O  
HETATM  341  O   HOH T 340     -11.514  -0.806 -24.317  1.00  0.59           O  
HETATM  342  O   HOH T 341      -9.635 -33.028 -12.975  1.00  0.60           O  
HETATM  343  O   HOH T 342      15.408  -7.206 -26.181  1.00  0.61           O  
HETATM  344  O   HOH T 343     -11.408 -12.749 -31.390  1.00  0.66           O  
TER     345      HOH T 343 
