# Supplementary material for: Accurate Prediction of Hydration Sites of Proteins Using Energy Model With Atom Embedding
Source: Front Mol Biosci. 2021 Sep 20;8:756075. doi: 10.3389/fmolb.2021.756075 (PMC8488165; doi:10.3389/fmolb.2021.756075)
Supplement: Supplementary file 1 [file DataSheet1.ZIP › Data Sheet 1/Our_result_pdb/our_dataset_output/3A0S_watersite.pdb]

HEADER                                                        XXXX


JRNL        PMID   -1
HETATM    1  O   HOH T   0      -2.350   8.552  51.162  1.00  0.19           O  
HETATM    2  O   HOH T   1      19.037   9.434  29.455  1.00  0.19           O  
HETATM    3  O   HOH T   2      22.809   5.868  36.331  1.00  0.23           O  
HETATM    4  O   HOH T   3      17.903   3.657  32.843  1.00  0.25           O  
HETATM    5  O   HOH T   4      10.404  13.398  53.266  1.00  0.25           O  
HETATM    6  O   HOH T   5       0.288  19.559  41.981  1.00  0.25           O  
HETATM    7  O   HOH T   6      10.276   4.087  56.100  1.00  0.26           O  
HETATM    8  O   HOH T   7       4.253  -1.601  29.134  1.00  0.26           O  
HETATM    9  O   HOH T   8      -2.113  10.507  40.157  1.00  0.26           O  
HETATM   10  O   HOH T   9      -0.518  19.307  36.200  1.00  0.26           O  
HETATM   11  O   HOH T  10      -6.015  18.766  44.901  1.00  0.26           O  
HETATM   12  O   HOH T  11      10.452  18.592  43.902  1.00  0.28           O  
HETATM   13  O   HOH T  12      15.115   2.802  61.131  1.00  0.29           O  
HETATM   14  O   HOH T  13       1.800  -5.543  45.812  1.00  0.30           O  
HETATM   15  O   HOH T  14      -6.844   5.094  47.166  1.00  0.30           O  
HETATM   16  O   HOH T  15       1.321   2.389  37.898  1.00  0.30           O  
HETATM   17  O   HOH T  16      15.179   2.786  18.565  1.00  0.30           O  
HETATM   18  O   HOH T  17       0.974   1.235  54.584  1.00  0.30           O  
HETATM   19  O   HOH T  18      14.554  -7.078  37.270  1.00  0.31           O  
HETATM   20  O   HOH T  19      16.764   0.211  28.672  1.00  0.31           O  
HETATM   21  O   HOH T  20      -3.067  23.479  40.425  1.00  0.32           O  
HETATM   22  O   HOH T  21      -4.479  13.093  38.879  1.00  0.32           O  
HETATM   23  O   HOH T  22      -3.738  10.601  37.935  1.00  0.32           O  
HETATM   24  O   HOH T  23      12.390  15.229  46.901  1.00  0.33           O  
HETATM   25  O   HOH T  24      22.722  -1.611  55.032  1.00  0.33           O  
HETATM   26  O   HOH T  25      25.810   7.248  55.440  1.00  0.33           O  
HETATM   27  O   HOH T  26      14.125  16.552  45.164  1.00  0.33           O  
HETATM   28  O   HOH T  27      -1.907  -0.838  44.409  1.00  0.34           O  
HETATM   29  O   HOH T  28       1.177  -1.428  32.563  1.00  0.34           O  
HETATM   30  O   HOH T  29      -0.940  16.140  30.757  1.00  0.34           O  
HETATM   31  O   HOH T  30      -1.743   1.795  37.889  1.00  0.34           O  
HETATM   32  O   HOH T  31      -9.490  10.398  32.635  1.00  0.35           O  
HETATM   33  O   HOH T  32      -3.983   0.977  44.954  1.00  0.35           O  
HETATM   34  O   HOH T  33      -7.598   3.760  43.620  1.00  0.35           O  
HETATM   35  O   HOH T  34      16.414   8.644  29.842  1.00  0.35           O  
HETATM   36  O   HOH T  35       0.580  11.185  28.282  1.00  0.35           O  
HETATM   37  O   HOH T  36       7.845   4.453  57.389  1.00  0.35           O  
HETATM   38  O   HOH T  37       5.044  19.023  33.173  1.00  0.36           O  
HETATM   39  O   HOH T  38       5.601  -3.349  27.352  1.00  0.37           O  
HETATM   40  O   HOH T  39      17.706  -8.230  41.745  1.00  0.37           O  
HETATM   41  O   HOH T  40      -6.378  15.963  29.002  1.00  0.38           O  
HETATM   42  O   HOH T  41      24.687   0.222  55.882  1.00  0.38           O  
HETATM   43  O   HOH T  42       7.969  13.581  54.545  1.00  0.38           O  
HETATM   44  O   HOH T  43      -5.335  14.976  31.476  1.00  0.38           O  
HETATM   45  O   HOH T  44      -2.115  12.813  35.040  1.00  0.38           O  
HETATM   46  O   HOH T  45      21.902  -2.294  65.288  1.00  0.39           O  
HETATM   47  O   HOH T  46       4.749  10.283  56.693  1.00  0.39           O  
HETATM   48  O   HOH T  47      -5.269   9.577  34.643  1.00  0.40           O  
HETATM   49  O   HOH T  48      -5.773   3.056  45.514  1.00  0.40           O  
HETATM   50  O   HOH T  49       8.283   6.526  59.349  1.00  0.40           O  
HETATM   51  O   HOH T  50      24.189   3.087  53.258  1.00  0.40           O  
HETATM   52  O   HOH T  51      -2.302  18.680  41.375  1.00  0.40           O  
HETATM   53  O   HOH T  52      -6.157   6.917  54.886  1.00  0.41           O  
HETATM   54  O   HOH T  53      12.829   3.191  20.007  1.00  0.41           O  
HETATM   55  O   HOH T  54      12.235  -7.366  35.745  1.00  0.41           O  
HETATM   56  O   HOH T  55       8.021  -3.918  32.029  1.00  0.42           O  
HETATM   57  O   HOH T  56       3.532  -3.018  25.456  1.00  0.42           O  
HETATM   58  O   HOH T  57      10.418  -5.161  31.368  1.00  0.42           O  
HETATM   59  O   HOH T  58      19.328   6.914  40.603  1.00  0.42           O  
HETATM   60  O   HOH T  59       9.805  -5.098  28.656  1.00  0.42           O  
HETATM   61  O   HOH T  60      14.629   5.471  60.270  1.00  0.43           O  
HETATM   62  O   HOH T  61      16.306  -7.915  39.300  1.00  0.43           O  
HETATM   63  O   HOH T  62      -1.826   2.428  33.535  1.00  0.43           O  
HETATM   64  O   HOH T  63      -3.268  12.709  41.315  1.00  0.43           O  
HETATM   65  O   HOH T  64      10.754  14.724  33.732  1.00  0.43           O  
HETATM   66  O   HOH T  65       0.569  12.054  35.634  1.00  0.43           O  
HETATM   67  O   HOH T  66      15.036  -9.146  41.411  1.00  0.43           O  
HETATM   68  O   HOH T  67       8.945   9.584  56.629  1.00  0.43           O  
HETATM   69  O   HOH T  68       0.879   3.149  33.141  1.00  0.43           O  
HETATM   70  O   HOH T  69      20.827   3.936  35.720  1.00  0.43           O  
HETATM   71  O   HOH T  70      18.655   7.264  43.309  1.00  0.44           O  
HETATM   72  O   HOH T  71       1.965  14.421  33.079  1.00  0.44           O  
HETATM   73  O   HOH T  72      -2.902  19.392  43.966  1.00  0.44           O  
HETATM   74  O   HOH T  73      16.958  -2.468  28.930  1.00  0.44           O  
HETATM   75  O   HOH T  74      19.226  -3.120  48.248  1.00  0.44           O  
HETATM   76  O   HOH T  75       0.958  12.628  25.953  1.00  0.44           O  
HETATM   77  O   HOH T  76       7.250  22.069  43.837  1.00  0.44           O  
HETATM   78  O   HOH T  77      -0.410   2.431  56.686  1.00  0.44           O  
HETATM   79  O   HOH T  78       8.092  21.001  47.692  1.00  0.45           O  
HETATM   80  O   HOH T  79       2.590  -0.510  56.011  1.00  0.45           O  
HETATM   81  O   HOH T  80      -9.016   8.355  34.465  1.00  0.45           O  
HETATM   82  O   HOH T  81      -5.572   9.678  31.871  1.00  0.45           O  
HETATM   83  O   HOH T  82      -9.713   7.138  36.813  1.00  0.46           O  
HETATM   84  O   HOH T  83       0.081  -1.494  46.188  1.00  0.46           O  
HETATM   85  O   HOH T  84      18.640   2.214  35.077  1.00  0.46           O  
HETATM   86  O   HOH T  85      -0.828  13.322  37.452  1.00  0.46           O  
HETATM   87  O   HOH T  86      15.187   3.416  35.551  1.00  0.46           O  
HETATM   88  O   HOH T  87       1.323  20.941  34.786  1.00  0.46           O  
HETATM   89  O   HOH T  88      -0.795   4.818  34.611  1.00  0.47           O  
HETATM   90  O   HOH T  89       3.595  13.528  26.207  1.00  0.47           O  
HETATM   91  O   HOH T  90      -3.959  16.884  44.549  1.00  0.47           O  
HETATM   92  O   HOH T  91      22.500   1.220  54.477  1.00  0.47           O  
HETATM   93  O   HOH T  92       7.282  18.717  31.609  1.00  0.47           O  
HETATM   94  O   HOH T  93      11.757  -6.462  33.314  1.00  0.47           O  
HETATM   95  O   HOH T  94      12.264  -8.218  43.965  1.00  0.47           O  
HETATM   96  O   HOH T  95      -2.469  -2.469  46.699  1.00  0.47           O  
HETATM   97  O   HOH T  96       1.243   4.045  55.097  1.00  0.47           O  
HETATM   98  O   HOH T  97       9.540  20.919  45.242  1.00  0.47           O  
HETATM   99  O   HOH T  98      -3.171  16.598  32.308  1.00  0.48           O  
HETATM  100  O   HOH T  99       7.584  16.136  55.753  1.00  0.48           O  
HETATM  101  O   HOH T 100       9.497  20.637  38.421  1.00  0.48           O  
HETATM  102  O   HOH T 101      -0.299  12.598  32.930  1.00  0.48           O  
HETATM  103  O   HOH T 102       0.269  20.878  38.392  1.00  0.48           O  
HETATM  104  O   HOH T 103      21.577   6.169  58.389  1.00  0.48           O  
HETATM  105  O   HOH T 104       8.065  23.215  46.120  1.00  0.48           O  
HETATM  106  O   HOH T 105       6.332  14.681  29.909  1.00  0.48           O  
HETATM  107  O   HOH T 106     -10.912  14.879  26.356  1.00  0.48           O  
HETATM  108  O   HOH T 107       8.893   5.742  24.217  1.00  0.48           O  
HETATM  109  O   HOH T 108      -1.532  21.091  40.433  1.00  0.48           O  
HETATM  110  O   HOH T 109      22.814  -0.881  63.137  1.00  0.48           O  
HETATM  111  O   HOH T 110      -2.266  22.113  44.107  1.00  0.48           O  
HETATM  112  O   HOH T 111      25.933   0.847  58.287  1.00  0.48           O  
HETATM  113  O   HOH T 112      17.011 -10.876  42.095  1.00  0.48           O  
HETATM  114  O   HOH T 113      24.718   0.177  61.588  1.00  0.48           O  
HETATM  115  O   HOH T 114      -1.067  10.250  34.392  1.00  0.48           O  
HETATM  116  O   HOH T 115      -6.815   7.621  36.104  1.00  0.48           O  
HETATM  117  O   HOH T 116      -1.706  16.980  37.221  1.00  0.48           O  
HETATM  118  O   HOH T 117      25.980   6.722  58.235  1.00  0.48           O  
HETATM  119  O   HOH T 118      -1.403   0.019  34.910  1.00  0.49           O  
HETATM  120  O   HOH T 119       5.067  19.993  30.612  1.00  0.49           O  
HETATM  121  O   HOH T 120      -0.724  -0.592  26.877  1.00  0.49           O  
HETATM  122  O   HOH T 121      13.908  -9.216  38.875  1.00  0.49           O  
HETATM  123  O   HOH T 122      20.318  -7.888  42.842  1.00  0.49           O  
HETATM  124  O   HOH T 123      17.611  -1.334  26.539  1.00  0.49           O  
HETATM  125  O   HOH T 124      -0.635  -4.332  45.814  1.00  0.50           O  
HETATM  126  O   HOH T 125      -3.571   4.548  34.276  1.00  0.50           O  
HETATM  127  O   HOH T 126      23.610   8.180  58.233  1.00  0.50           O  
HETATM  128  O   HOH T 127      -0.526  23.413  39.362  1.00  0.51           O  
HETATM  129  O   HOH T 128      14.592  17.116  47.732  1.00  0.51           O  
HETATM  130  O   HOH T 129      24.379   1.676  63.975  1.00  0.51           O  
HETATM  131  O   HOH T 130      -5.696   4.843  36.489  1.00  0.51           O  
HETATM  132  O   HOH T 131      -0.242  17.951  32.646  1.00  0.51           O  
HETATM  133  O   HOH T 132       2.819  -5.592  26.408  1.00  0.51           O  
HETATM  134  O   HOH T 133      20.401   0.055  65.633  1.00  0.51           O  
HETATM  135  O   HOH T 134      -2.955  13.784  32.517  1.00  0.52           O  
HETATM  136  O   HOH T 135      -0.120   2.449  35.702  1.00  0.52           O  
HETATM  137  O   HOH T 136      -5.148   7.210  33.166  1.00  0.53           O  
HETATM  138  O   HOH T 137       6.104  24.484  44.439  1.00  0.53           O  
HETATM  139  O   HOH T 138      -7.870  10.409  30.427  1.00  0.53           O  
HETATM  140  O   HOH T 139      20.983  -7.261  45.481  1.00  0.53           O  
HETATM  141  O   HOH T 140      -5.776  12.279  30.891  1.00  0.53           O  
HETATM  142  O   HOH T 141       1.715   3.305  48.485  1.00  0.54           O  
HETATM  143  O   HOH T 142      14.401  14.515  27.453  1.00  0.54           O  
HETATM  144  O   HOH T 143       9.695  -8.786  43.634  1.00  0.54           O  
HETATM  145  O   HOH T 144      -3.605   6.185  54.344  1.00  0.54           O  
HETATM  146  O   HOH T 145      -6.457   0.985  43.744  1.00  0.56           O  
HETATM  147  O   HOH T 146       7.325  -4.130  29.420  1.00  0.56           O  
HETATM  148  O   HOH T 147      25.123  -2.392  62.395  1.00  0.56           O  
HETATM  149  O   HOH T 148      15.715  -0.080  24.870  1.00  0.56           O  
HETATM  150  O   HOH T 149      14.863  18.640  37.369  1.00  0.56           O  
HETATM  151  O   HOH T 150       4.124   4.489  24.163  1.00  0.57           O  
HETATM  152  O   HOH T 151      -1.215  -4.261  48.525  1.00  0.57           O  
HETATM  153  O   HOH T 152      -4.233   2.443  37.116  1.00  0.57           O  
HETATM  154  O   HOH T 153      27.112   4.734  55.561  1.00  0.58           O  
TER     155      HOH T 153 
