# Supplementary material for: Accurate Prediction of Hydration Sites of Proteins Using Energy Model With Atom Embedding
Source: Front Mol Biosci. 2021 Sep 20;8:756075. doi: 10.3389/fmolb.2021.756075 (PMC8488165; doi:10.3389/fmolb.2021.756075)
Supplement: Supplementary file 1 [file DataSheet1.ZIP › Data Sheet 1/Our_result_pdb/our_dataset_output/3A0Y_watersite.pdb]

HEADER                                                        XXXX


JRNL        PMID   -1
HETATM    1  O   HOH T   0      69.069  60.421  32.552  1.00  0.17           O  
HETATM    2  O   HOH T   1      51.865  49.414   5.702  1.00  0.18           O  
HETATM    3  O   HOH T   2      85.996  65.569   9.713  1.00  0.18           O  
HETATM    4  O   HOH T   3      64.105  58.735  23.055  1.00  0.19           O  
HETATM    5  O   HOH T   4      78.678  80.475   9.956  1.00  0.20           O  
HETATM    6  O   HOH T   5      52.718  45.098  12.072  1.00  0.21           O  
HETATM    7  O   HOH T   6      50.059  62.487 -12.081  1.00  0.22           O  
HETATM    8  O   HOH T   7      81.346  55.894   1.728  1.00  0.22           O  
HETATM    9  O   HOH T   8      76.245  57.022  28.221  1.00  0.23           O  
HETATM   10  O   HOH T   9      46.876  36.102   7.585  1.00  0.23           O  
HETATM   11  O   HOH T  10      94.153  43.456  27.828  1.00  0.23           O  
HETATM   12  O   HOH T  11      74.736  53.358  21.689  1.00  0.23           O  
HETATM   13  O   HOH T  12      85.645  78.364  13.699  1.00  0.23           O  
HETATM   14  O   HOH T  13      91.199  57.815  15.417  1.00  0.23           O  
HETATM   15  O   HOH T  14      68.222  62.303  39.347  1.00  0.24           O  
HETATM   16  O   HOH T  15      62.482  36.949   2.264  1.00  0.24           O  
HETATM   17  O   HOH T  16      37.173  55.055   6.480  1.00  0.24           O  
HETATM   18  O   HOH T  17      70.938  46.776  23.047  1.00  0.24           O  
HETATM   19  O   HOH T  18      78.604  80.189   3.968  1.00  0.24           O  
HETATM   20  O   HOH T  19      51.924  66.824 -16.594  1.00  0.25           O  
HETATM   21  O   HOH T  20      71.005  58.084  10.034  1.00  0.25           O  
HETATM   22  O   HOH T  21      58.650  59.953  -8.840  1.00  0.26           O  
HETATM   23  O   HOH T  22      67.160  71.440  20.253  1.00  0.27           O  
HETATM   24  O   HOH T  23      73.422  60.893  42.404  1.00  0.27           O  
HETATM   25  O   HOH T  24      86.308  64.944  21.116  1.00  0.27           O  
HETATM   26  O   HOH T  25      93.169  42.431  25.354  1.00  0.27           O  
HETATM   27  O   HOH T  26      83.575  44.275  12.003  1.00  0.28           O  
HETATM   28  O   HOH T  27      74.944  73.477  12.952  1.00  0.28           O  
HETATM   29  O   HOH T  28      51.002  43.128  -5.276  1.00  0.28           O  
HETATM   30  O   HOH T  29      59.859  59.437   6.200  1.00  0.28           O  
HETATM   31  O   HOH T  30      59.092  45.803  16.099  1.00  0.28           O  
HETATM   32  O   HOH T  31      48.160  60.327 -11.984  1.00  0.28           O  
HETATM   33  O   HOH T  32      74.504  41.542  20.436  1.00  0.28           O  
HETATM   34  O   HOH T  33      52.864  50.127   8.181  1.00  0.28           O  
HETATM   35  O   HOH T  34      67.487  62.396  -7.575  1.00  0.29           O  
HETATM   36  O   HOH T  35      56.791  74.418   2.727  1.00  0.29           O  
HETATM   37  O   HOH T  36      62.846  64.880   9.081  1.00  0.29           O  
HETATM   38  O   HOH T  37      59.978  44.703   8.665  1.00  0.29           O  
HETATM   39  O   HOH T  38      77.287  79.031   7.952  1.00  0.29           O  
HETATM   40  O   HOH T  39      81.990  48.536   3.151  1.00  0.29           O  
HETATM   41  O   HOH T  40      54.538  37.944  12.644  1.00  0.29           O  
HETATM   42  O   HOH T  41      71.650  67.496  29.793  1.00  0.29           O  
HETATM   43  O   HOH T  42      66.878  54.185  41.057  1.00  0.30           O  
HETATM   44  O   HOH T  43      40.444  59.176  12.226  1.00  0.30           O  
HETATM   45  O   HOH T  44      89.951  50.163  20.226  1.00  0.30           O  
HETATM   46  O   HOH T  45      66.414  56.714  -9.980  1.00  0.30           O  
HETATM   47  O   HOH T  46      43.905  47.778  23.747  1.00  0.30           O  
HETATM   48  O   HOH T  47      76.538  73.602  30.837  1.00  0.30           O  
HETATM   49  O   HOH T  48      87.103  66.503  16.752  1.00  0.30           O  
HETATM   50  O   HOH T  49      53.501  42.751  -9.282  1.00  0.30           O  
HETATM   51  O   HOH T  50      86.751  67.262   7.602  1.00  0.30           O  
HETATM   52  O   HOH T  51      69.191  58.073   2.789  1.00  0.30           O  
HETATM   53  O   HOH T  52      55.877  51.638  20.136  1.00  0.30           O  
HETATM   54  O   HOH T  53      60.414  57.343  28.499  1.00  0.30           O  
HETATM   55  O   HOH T  54      73.841  53.569  34.101  1.00  0.31           O  
HETATM   56  O   HOH T  55      84.545  54.921  -4.334  1.00  0.31           O  
HETATM   57  O   HOH T  56      88.789  59.987   9.036  1.00  0.31           O  
HETATM   58  O   HOH T  57      64.908  66.890   5.744  1.00  0.31           O  
HETATM   59  O   HOH T  58      68.105  72.951   9.830  1.00  0.31           O  
HETATM   60  O   HOH T  59      73.750  51.135  23.127  1.00  0.31           O  
HETATM   61  O   HOH T  60      85.481  43.432  13.946  1.00  0.31           O  
HETATM   62  O   HOH T  61      66.715  75.049  34.095  1.00  0.31           O  
HETATM   63  O   HOH T  62      50.176  41.330  -3.296  1.00  0.31           O  
HETATM   64  O   HOH T  63      70.325  64.330   0.261  1.00  0.32           O  
HETATM   65  O   HOH T  64      89.470  67.402  23.292  1.00  0.32           O  
HETATM   66  O   HOH T  65      44.195  66.724   0.832  1.00  0.32           O  
HETATM   67  O   HOH T  66      64.743  61.518  23.150  1.00  0.32           O  
HETATM   68  O   HOH T  67      66.161  63.855  23.779  1.00  0.32           O  
HETATM   69  O   HOH T  68      47.804  41.989  14.181  1.00  0.32           O  
HETATM   70  O   HOH T  69      78.876  59.144  32.270  1.00  0.32           O  
HETATM   71  O   HOH T  70      90.571  58.422  10.476  1.00  0.32           O  
HETATM   72  O   HOH T  71      82.611  73.502  23.055  1.00  0.32           O  
HETATM   73  O   HOH T  72      41.253  57.602  16.332  1.00  0.32           O  
HETATM   74  O   HOH T  73      53.852  41.155  -2.507  1.00  0.33           O  
HETATM   75  O   HOH T  74      86.881  73.180  25.849  1.00  0.33           O  
HETATM   76  O   HOH T  75      49.343  69.574  -5.124  1.00  0.33           O  
HETATM   77  O   HOH T  76      65.844  68.117  -6.134  1.00  0.33           O  
HETATM   78  O   HOH T  77      39.716  50.574  25.058  1.00  0.33           O  
HETATM   79  O   HOH T  78      70.174  76.256  11.252  1.00  0.33           O  
HETATM   80  O   HOH T  79      91.742  41.281  16.999  1.00  0.33           O  
HETATM   81  O   HOH T  80      73.677  51.918  19.562  1.00  0.33           O  
HETATM   82  O   HOH T  81      64.751  43.193   2.844  1.00  0.33           O  
HETATM   83  O   HOH T  82      79.689  48.949   5.848  1.00  0.33           O  
HETATM   84  O   HOH T  83      90.695  61.208  10.671  1.00  0.34           O  
HETATM   85  O   HOH T  84      64.852  63.706  28.069  1.00  0.34           O  
HETATM   86  O   HOH T  85      68.642  53.113  39.232  1.00  0.34           O  
HETATM   87  O   HOH T  86      64.599  38.329   3.263  1.00  0.34           O  
HETATM   88  O   HOH T  87      73.700  75.737  24.790  1.00  0.34           O  
HETATM   89  O   HOH T  88      72.466  52.646  12.177  1.00  0.34           O  
HETATM   90  O   HOH T  89      65.561  52.308  22.474  1.00  0.34           O  
HETATM   91  O   HOH T  90      49.437  66.407  10.185  1.00  0.34           O  
HETATM   92  O   HOH T  91      77.631  68.352   2.378  1.00  0.34           O  
HETATM   93  O   HOH T  92      80.302  79.248  23.439  1.00  0.34           O  
HETATM   94  O   HOH T  93      89.198  75.703   1.612  1.00  0.34           O  
HETATM   95  O   HOH T  94      64.838  67.401  -8.598  1.00  0.34           O  
HETATM   96  O   HOH T  95      46.079  42.972   0.086  1.00  0.34           O  
HETATM   97  O   HOH T  96      88.079  73.237   2.254  1.00  0.35           O  
HETATM   98  O   HOH T  97      82.901  72.483  25.648  1.00  0.35           O  
HETATM   99  O   HOH T  98      64.514  45.619  19.334  1.00  0.35           O  
HETATM  100  O   HOH T  99      42.796  59.987  13.507  1.00  0.35           O  
HETATM  101  O   HOH T 100      77.168  39.453  23.423  1.00  0.35           O  
HETATM  102  O   HOH T 101      43.519  66.978  -8.567  1.00  0.35           O  
HETATM  103  O   HOH T 102      38.878  57.269  17.904  1.00  0.35           O  
HETATM  104  O   HOH T 103      59.974  48.542  21.429  1.00  0.35           O  
HETATM  105  O   HOH T 104      55.366  65.014 -17.081  1.00  0.35           O  
HETATM  106  O   HOH T 105      36.400  57.795   6.107  1.00  0.36           O  
HETATM  107  O   HOH T 106      89.565  76.089  14.293  1.00  0.36           O  
HETATM  108  O   HOH T 107      67.358  56.362  11.672  1.00  0.36           O  
HETATM  109  O   HOH T 108      51.268  40.998  -7.037  1.00  0.36           O  
HETATM  110  O   HOH T 109      71.296  75.079   8.852  1.00  0.36           O  
HETATM  111  O   HOH T 110      72.343  74.852   6.266  1.00  0.36           O  
HETATM  112  O   HOH T 111      57.249  37.686  12.987  1.00  0.36           O  
HETATM  113  O   HOH T 112      76.946  72.270   5.999  1.00  0.36           O  
HETATM  114  O   HOH T 113      77.070  70.771   3.593  1.00  0.36           O  
HETATM  115  O   HOH T 114      59.892  62.298  31.597  1.00  0.37           O  
HETATM  116  O   HOH T 115      58.003  50.499  21.599  1.00  0.37           O  
HETATM  117  O   HOH T 116      51.737  47.561   7.742  1.00  0.37           O  
HETATM  118  O   HOH T 117      86.328  44.063  11.387  1.00  0.37           O  
HETATM  119  O   HOH T 118      73.474  74.599  15.037  1.00  0.37           O  
HETATM  120  O   HOH T 119      73.606  81.558  10.310  1.00  0.37           O  
HETATM  121  O   HOH T 120      53.984  37.207  15.263  1.00  0.37           O  
HETATM  122  O   HOH T 121      48.646  50.568 -15.385  1.00  0.37           O  
HETATM  123  O   HOH T 122      86.750  80.353  15.126  1.00  0.37           O  
HETATM  124  O   HOH T 123      71.615  49.413  23.484  1.00  0.37           O  
HETATM  125  O   HOH T 124      38.501  51.021  22.595  1.00  0.37           O  
HETATM  126  O   HOH T 125      42.250  24.777   6.901  1.00  0.37           O  
HETATM  127  O   HOH T 126      68.819  60.942  -4.086  1.00  0.37           O  
HETATM  128  O   HOH T 127      60.778  59.469 -10.567  1.00  0.37           O  
HETATM  129  O   HOH T 128      67.602  77.391  11.359  1.00  0.37           O  
HETATM  130  O   HOH T 129      72.305  71.291   1.963  1.00  0.37           O  
HETATM  131  O   HOH T 130      42.507  26.532   1.847  1.00  0.37           O  
HETATM  132  O   HOH T 131      58.985  57.616  30.844  1.00  0.37           O  
HETATM  133  O   HOH T 132      63.487  45.463   4.126  1.00  0.38           O  
HETATM  134  O   HOH T 133      77.234  53.593  29.446  1.00  0.38           O  
HETATM  135  O   HOH T 134      91.591  51.013  17.817  1.00  0.38           O  
HETATM  136  O   HOH T 135      58.462  58.275  26.779  1.00  0.38           O  
HETATM  137  O   HOH T 136      87.054  39.738  14.882  1.00  0.38           O  
HETATM  138  O   HOH T 137      70.802  52.219  40.700  1.00  0.38           O  
HETATM  139  O   HOH T 138      54.940  68.173  10.783  1.00  0.38           O  
HETATM  140  O   HOH T 139      46.398  46.895   1.299  1.00  0.38           O  
HETATM  141  O   HOH T 140      64.263  53.938  41.834  1.00  0.39           O  
HETATM  142  O   HOH T 141      87.439  71.430  13.675  1.00  0.39           O  
HETATM  143  O   HOH T 142      66.493  60.528  40.609  1.00  0.39           O  
HETATM  144  O   HOH T 143      66.718  62.236  42.826  1.00  0.39           O  
HETATM  145  O   HOH T 144      43.726  59.068  15.995  1.00  0.39           O  
HETATM  146  O   HOH T 145      57.379  43.600  -7.368  1.00  0.39           O  
HETATM  147  O   HOH T 146      46.938  37.929   1.311  1.00  0.39           O  
HETATM  148  O   HOH T 147      85.203  71.024  24.899  1.00  0.39           O  
HETATM  149  O   HOH T 148      70.253  76.322  25.906  1.00  0.39           O  
HETATM  150  O   HOH T 149      64.771  45.412   7.878  1.00  0.39           O  
HETATM  151  O   HOH T 150      53.804  39.038  17.400  1.00  0.40           O  
HETATM  152  O   HOH T 151      88.088  47.772   9.849  1.00  0.40           O  
HETATM  153  O   HOH T 152      65.367  46.777   5.623  1.00  0.40           O  
HETATM  154  O   HOH T 153      69.599  54.688  41.378  1.00  0.40           O  
HETATM  155  O   HOH T 154      87.564  65.409  23.514  1.00  0.40           O  
HETATM  156  O   HOH T 155      45.919  66.337  -9.968  1.00  0.40           O  
HETATM  157  O   HOH T 156      85.377  56.985  -2.504  1.00  0.40           O  
HETATM  158  O   HOH T 157      45.115  37.189   5.692  1.00  0.40           O  
HETATM  159  O   HOH T 158      60.320  45.995  18.602  1.00  0.40           O  
HETATM  160  O   HOH T 159      49.124  64.764  12.379  1.00  0.40           O  
HETATM  161  O   HOH T 160      33.511  53.264  17.169  1.00  0.40           O  
HETATM  162  O   HOH T 161      51.972  66.542   8.904  1.00  0.40           O  
HETATM  163  O   HOH T 162      54.700  66.164 -19.398  1.00  0.40           O  
HETATM  164  O   HOH T 163      82.994  50.749  30.687  1.00  0.41           O  
HETATM  165  O   HOH T 164      69.569  61.983   1.277  1.00  0.41           O  
HETATM  166  O   HOH T 165      66.709  41.547   5.911  1.00  0.41           O  
HETATM  167  O   HOH T 166      80.408  61.537  32.556  1.00  0.41           O  
HETATM  168  O   HOH T 167      66.073  40.610   3.390  1.00  0.41           O  
HETATM  169  O   HOH T 168      67.020  75.779   6.334  1.00  0.41           O  
HETATM  170  O   HOH T 169      84.590  66.180   1.934  1.00  0.41           O  
HETATM  171  O   HOH T 170      87.603  37.061  15.447  1.00  0.41           O  
HETATM  172  O   HOH T 171      64.884  53.380  44.444  1.00  0.41           O  
HETATM  173  O   HOH T 172      44.359  67.235  -1.785  1.00  0.41           O  
HETATM  174  O   HOH T 173      82.749  52.856  32.384  1.00  0.41           O  
HETATM  175  O   HOH T 174      50.988  44.838   7.400  1.00  0.41           O  
HETATM  176  O   HOH T 175      62.102  43.564  16.345  1.00  0.41           O  
HETATM  177  O   HOH T 176      59.785  68.103  -8.096  1.00  0.42           O  
HETATM  178  O   HOH T 177      64.207  69.814  -1.840  1.00  0.42           O  
HETATM  179  O   HOH T 178      52.599  46.267  19.473  1.00  0.42           O  
HETATM  180  O   HOH T 179      46.850  42.039   2.558  1.00  0.42           O  
HETATM  181  O   HOH T 180      76.383  40.436  11.384  1.00  0.42           O  
HETATM  182  O   HOH T 181      34.898  45.251  16.976  1.00  0.42           O  
HETATM  183  O   HOH T 182      61.454  58.272   8.144  1.00  0.42           O  
HETATM  184  O   HOH T 183      64.380  62.542  25.682  1.00  0.42           O  
HETATM  185  O   HOH T 184      56.921  44.036  16.228  1.00  0.42           O  
HETATM  186  O   HOH T 185      33.275  56.028  16.676  1.00  0.42           O  
HETATM  187  O   HOH T 186      66.577  41.348  12.941  1.00  0.42           O  
HETATM  188  O   HOH T 187      43.220  23.663   4.524  1.00  0.43           O  
HETATM  189  O   HOH T 188      48.280  44.103   7.254  1.00  0.43           O  
HETATM  190  O   HOH T 189      58.601  35.296  13.286  1.00  0.43           O  
HETATM  191  O   HOH T 190      58.155  60.118  31.669  1.00  0.43           O  
HETATM  192  O   HOH T 191      78.001  73.651  28.470  1.00  0.43           O  
HETATM  193  O   HOH T 192      62.516  68.930  -7.931  1.00  0.43           O  
HETATM  194  O   HOH T 193      64.512  55.683   8.078  1.00  0.43           O  
HETATM  195  O   HOH T 194      63.137  70.449   6.450  1.00  0.43           O  
HETATM  196  O   HOH T 195      88.883  43.195  10.552  1.00  0.44           O  
HETATM  197  O   HOH T 196      59.422  66.916  29.676  1.00  0.44           O  
HETATM  198  O   HOH T 197      88.621  67.219  18.951  1.00  0.44           O  
HETATM  199  O   HOH T 198      81.950  53.226  29.762  1.00  0.44           O  
HETATM  200  O   HOH T 199      70.279  47.835  25.440  1.00  0.44           O  
HETATM  201  O   HOH T 200      65.718  69.981  -4.106  1.00  0.44           O  
HETATM  202  O   HOH T 201      71.969  73.113   4.082  1.00  0.44           O  
HETATM  203  O   HOH T 202      71.892  55.068   2.078  1.00  0.44           O  
HETATM  204  O   HOH T 203      66.238  74.646   8.689  1.00  0.44           O  
HETATM  205  O   HOH T 204      76.344  39.564  20.960  1.00  0.45           O  
HETATM  206  O   HOH T 205      40.330  59.791  14.910  1.00  0.45           O  
HETATM  207  O   HOH T 206      70.041  79.304  23.874  1.00  0.45           O  
HETATM  208  O   HOH T 207      66.104  38.870   5.578  1.00  0.45           O  
HETATM  209  O   HOH T 208      88.105  72.430  -0.387  1.00  0.45           O  
HETATM  210  O   HOH T 209      90.028  74.756  16.716  1.00  0.45           O  
HETATM  211  O   HOH T 210      76.964  78.442   5.321  1.00  0.45           O  
HETATM  212  O   HOH T 211      78.904  72.810   4.042  1.00  0.45           O  
HETATM  213  O   HOH T 212      52.831  64.520 -17.967  1.00  0.45           O  
HETATM  214  O   HOH T 213      89.958  45.783  10.156  1.00  0.45           O  
HETATM  215  O   HOH T 214      74.014  55.175  23.626  1.00  0.45           O  
HETATM  216  O   HOH T 215      75.236  68.343   1.000  1.00  0.46           O  
HETATM  217  O   HOH T 216      47.255  58.937   5.025  1.00  0.46           O  
HETATM  218  O   HOH T 217      34.731  57.688  18.207  1.00  0.46           O  
HETATM  219  O   HOH T 218      68.839  76.696  13.733  1.00  0.46           O  
HETATM  220  O   HOH T 219      45.545  44.508   2.465  1.00  0.46           O  
HETATM  221  O   HOH T 220      63.224  43.138  18.823  1.00  0.46           O  
HETATM  222  O   HOH T 221      87.798  72.643   8.848  1.00  0.46           O  
HETATM  223  O   HOH T 222      57.398  75.611  -1.683  1.00  0.46           O  
HETATM  224  O   HOH T 223      71.179  76.192  20.108  1.00  0.46           O  
HETATM  225  O   HOH T 224      72.329  56.665   4.300  1.00  0.46           O  
HETATM  226  O   HOH T 225      65.480  43.974   5.519  1.00  0.46           O  
HETATM  227  O   HOH T 226      88.141  69.070  17.005  1.00  0.46           O  
HETATM  228  O   HOH T 227      62.147  45.135  20.491  1.00  0.46           O  
HETATM  229  O   HOH T 228      52.694  41.695  18.017  1.00  0.46           O  
HETATM  230  O   HOH T 229      36.047  59.759   3.973  1.00  0.47           O  
HETATM  231  O   HOH T 230      40.063  26.555   6.714  1.00  0.47           O  
HETATM  232  O   HOH T 231      64.736  40.324  14.710  1.00  0.47           O  
HETATM  233  O   HOH T 232      62.216  58.001  21.130  1.00  0.47           O  
HETATM  234  O   HOH T 233      61.002  39.662  15.560  1.00  0.47           O  
HETATM  235  O   HOH T 234      40.815  63.958  12.101  1.00  0.47           O  
HETATM  236  O   HOH T 235      66.101  44.493  21.240  1.00  0.47           O  
HETATM  237  O   HOH T 236      62.313  36.564  12.661  1.00  0.47           O  
HETATM  238  O   HOH T 237      34.015  55.131  19.231  1.00  0.47           O  
HETATM  239  O   HOH T 238      78.291  57.397  30.092  1.00  0.47           O  
HETATM  240  O   HOH T 239      39.556  61.713  13.089  1.00  0.47           O  
HETATM  241  O   HOH T 240      60.525  50.584 -15.599  1.00  0.47           O  
HETATM  242  O   HOH T 241      49.940  48.117 -15.103  1.00  0.47           O  
HETATM  243  O   HOH T 242      57.515  74.116   5.543  1.00  0.47           O  
HETATM  244  O   HOH T 243      90.291  68.116  20.877  1.00  0.47           O  
HETATM  245  O   HOH T 244      84.135  61.040   3.888  1.00  0.47           O  
HETATM  246  O   HOH T 245      89.762  73.085   7.032  1.00  0.47           O  
HETATM  247  O   HOH T 246      44.636  61.515  14.746  1.00  0.47           O  
HETATM  248  O   HOH T 247      65.639  72.144  -2.326  1.00  0.48           O  
HETATM  249  O   HOH T 248      63.137  45.226   1.450  1.00  0.48           O  
HETATM  250  O   HOH T 249      78.680  54.999  31.473  1.00  0.48           O  
HETATM  251  O   HOH T 250      56.902  33.211  12.793  1.00  0.48           O  
HETATM  252  O   HOH T 251      49.037  72.037  -6.328  1.00  0.48           O  
HETATM  253  O   HOH T 252      55.104  42.869  17.901  1.00  0.48           O  
HETATM  254  O   HOH T 253      64.773  69.246   4.374  1.00  0.48           O  
HETATM  255  O   HOH T 254      71.421  64.817  -2.285  1.00  0.48           O  
HETATM  256  O   HOH T 255      72.167  77.151  15.739  1.00  0.48           O  
HETATM  257  O   HOH T 256      64.389  51.771  -8.745  1.00  0.48           O  
HETATM  258  O   HOH T 257      36.651  55.912  18.835  1.00  0.48           O  
HETATM  259  O   HOH T 258      46.898  53.407  21.204  1.00  0.49           O  
HETATM  260  O   HOH T 259      44.620  49.370  25.928  1.00  0.49           O  
HETATM  261  O   HOH T 260      59.030  62.071  -7.074  1.00  0.49           O  
HETATM  262  O   HOH T 261      64.254  70.439  -6.350  1.00  0.49           O  
HETATM  263  O   HOH T 262      91.661  54.313  21.036  1.00  0.49           O  
HETATM  264  O   HOH T 263      59.387  42.264  -5.883  1.00  0.49           O  
HETATM  265  O   HOH T 264      58.433  63.884   8.996  1.00  0.49           O  
HETATM  266  O   HOH T 265      69.765  75.355   6.398  1.00  0.49           O  
HETATM  267  O   HOH T 266      66.742  61.764 -10.163  1.00  0.49           O  
HETATM  268  O   HOH T 267      60.112  43.740  -8.091  1.00  0.49           O  
HETATM  269  O   HOH T 268      88.079  67.364   9.961  1.00  0.49           O  
HETATM  270  O   HOH T 269      88.654  71.512  18.314  1.00  0.49           O  
HETATM  271  O   HOH T 270      67.562  73.633  22.074  1.00  0.49           O  
HETATM  272  O   HOH T 271      49.960  46.487  21.193  1.00  0.49           O  
HETATM  273  O   HOH T 272      90.209  75.836   7.020  1.00  0.49           O  
HETATM  274  O   HOH T 273      54.345  60.946 -17.839  1.00  0.49           O  
HETATM  275  O   HOH T 274      46.994  70.206  -3.881  1.00  0.49           O  
HETATM  276  O   HOH T 275      90.938  41.821   9.199  1.00  0.49           O  
HETATM  277  O   HOH T 276      45.893  50.654  -3.334  1.00  0.49           O  
HETATM  278  O   HOH T 277      52.476  47.211   3.970  1.00  0.49           O  
HETATM  279  O   HOH T 278      84.106  55.675   1.394  1.00  0.49           O  
HETATM  280  O   HOH T 279      89.331  73.333  14.411  1.00  0.50           O  
HETATM  281  O   HOH T 280      60.989  70.153  -9.768  1.00  0.50           O  
HETATM  282  O   HOH T 281      77.530  39.112  13.620  1.00  0.50           O  
HETATM  283  O   HOH T 282      45.324  40.339   1.106  1.00  0.50           O  
HETATM  284  O   HOH T 283      58.956  48.612  28.404  1.00  0.50           O  
HETATM  285  O   HOH T 284      47.800  47.774  19.944  1.00  0.50           O  
HETATM  286  O   HOH T 285      63.419  71.592  -3.901  1.00  0.50           O  
HETATM  287  O   HOH T 286      61.216  55.536  20.534  1.00  0.50           O  
HETATM  288  O   HOH T 287      73.435  55.344  -0.159  1.00  0.50           O  
HETATM  289  O   HOH T 288      57.957  76.551  -8.668  1.00  0.50           O  
HETATM  290  O   HOH T 289      71.983  81.757   8.136  1.00  0.50           O  
HETATM  291  O   HOH T 290      82.473  60.881  24.966  1.00  0.50           O  
HETATM  292  O   HOH T 291      63.220  62.639  41.546  1.00  0.50           O  
HETATM  293  O   HOH T 292      60.697  46.142  22.646  1.00  0.50           O  
HETATM  294  O   HOH T 293      30.263  62.283   8.195  1.00  0.50           O  
HETATM  295  O   HOH T 294      56.845  54.142  19.285  1.00  0.50           O  
HETATM  296  O   HOH T 295      61.270  47.949  24.965  1.00  0.50           O  
HETATM  297  O   HOH T 296      64.728  56.694  10.753  1.00  0.50           O  
HETATM  298  O   HOH T 297      68.827  57.552  -9.019  1.00  0.50           O  
HETATM  299  O   HOH T 298      94.085  42.611  16.088  1.00  0.50           O  
HETATM  300  O   HOH T 299      73.026  78.376  19.956  1.00  0.51           O  
HETATM  301  O   HOH T 300      36.357  60.698   6.458  1.00  0.51           O  
HETATM  302  O   HOH T 301      44.721  69.843  -2.445  1.00  0.51           O  
HETATM  303  O   HOH T 302      80.161  39.722  25.950  1.00  0.51           O  
HETATM  304  O   HOH T 303      82.450  55.400  14.412  1.00  0.51           O  
HETATM  305  O   HOH T 304      79.478  43.766  26.916  1.00  0.51           O  
HETATM  306  O   HOH T 305      77.624  46.190   4.685  1.00  0.51           O  
HETATM  307  O   HOH T 306      89.066  65.600  21.173  1.00  0.51           O  
HETATM  308  O   HOH T 307      62.297  64.099  25.108  1.00  0.51           O  
HETATM  309  O   HOH T 308      45.778  60.712  17.089  1.00  0.51           O  
HETATM  310  O   HOH T 309      57.480  53.138  21.540  1.00  0.51           O  
HETATM  311  O   HOH T 310      65.881  53.407   7.490  1.00  0.51           O  
HETATM  312  O   HOH T 311      34.598  50.788  18.113  1.00  0.51           O  
HETATM  313  O   HOH T 312      61.429  39.703  12.730  1.00  0.51           O  
HETATM  314  O   HOH T 313      63.121  40.998  16.962  1.00  0.51           O  
HETATM  315  O   HOH T 314      88.183  63.128  22.033  1.00  0.51           O  
HETATM  316  O   HOH T 315      86.653  71.365  11.055  1.00  0.51           O  
HETATM  317  O   HOH T 316      73.696  66.548  31.468  1.00  0.51           O  
HETATM  318  O   HOH T 317      67.105  77.273   8.688  1.00  0.51           O  
HETATM  319  O   HOH T 318      71.258  53.394  33.129  1.00  0.51           O  
HETATM  320  O   HOH T 319      51.214  51.043 -14.407  1.00  0.52           O  
HETATM  321  O   HOH T 320      88.826  49.313  28.135  1.00  0.52           O  
HETATM  322  O   HOH T 321      47.715  48.805  -9.302  1.00  0.52           O  
HETATM  323  O   HOH T 322      51.186  69.078   8.158  1.00  0.52           O  
HETATM  324  O   HOH T 323      69.427  61.962  -9.434  1.00  0.52           O  
HETATM  325  O   HOH T 324      33.076  59.837   9.462  1.00  0.52           O  
HETATM  326  O   HOH T 325      85.709  46.385   9.962  1.00  0.52           O  
HETATM  327  O   HOH T 326      59.038  49.304 -17.653  1.00  0.52           O  
HETATM  328  O   HOH T 327      69.316  55.967   9.771  1.00  0.52           O  
HETATM  329  O   HOH T 328      79.408  52.495  30.775  1.00  0.52           O  
HETATM  330  O   HOH T 329      36.369  55.895   2.370  1.00  0.52           O  
HETATM  331  O   HOH T 330      67.940  74.555  15.396  1.00  0.52           O  
HETATM  332  O   HOH T 331      44.729  55.923  -6.738  1.00  0.52           O  
HETATM  333  O   HOH T 332      35.072  53.349   7.237  1.00  0.52           O  
HETATM  334  O   HOH T 333      42.893  58.248  18.496  1.00  0.52           O  
HETATM  335  O   HOH T 334      67.709  55.783   2.436  1.00  0.52           O  
HETATM  336  O   HOH T 335      56.092  77.829  -2.796  1.00  0.53           O  
HETATM  337  O   HOH T 336      70.323  53.452  10.492  1.00  0.53           O  
HETATM  338  O   HOH T 337      74.769  70.587  -0.615  1.00  0.53           O  
HETATM  339  O   HOH T 338      61.708  71.293   8.725  1.00  0.53           O  
HETATM  340  O   HOH T 339      61.841  41.208  -2.802  1.00  0.53           O  
HETATM  341  O   HOH T 340      66.330  55.159 -12.201  1.00  0.53           O  
HETATM  342  O   HOH T 341      79.249  73.990   1.474  1.00  0.53           O  
HETATM  343  O   HOH T 342      78.476  37.143  23.571  1.00  0.53           O  
HETATM  344  O   HOH T 343      41.441  25.791   4.416  1.00  0.53           O  
HETATM  345  O   HOH T 344      75.520  50.388  26.801  1.00  0.53           O  
HETATM  346  O   HOH T 345      58.814  56.203  24.928  1.00  0.53           O  
HETATM  347  O   HOH T 346      62.586  51.855 -14.455  1.00  0.54           O  
HETATM  348  O   HOH T 347      47.146  38.723   6.537  1.00  0.54           O  
HETATM  349  O   HOH T 348      56.589  56.529  10.116  1.00  0.54           O  
HETATM  350  O   HOH T 349      43.050  42.636  10.522  1.00  0.54           O  
HETATM  351  O   HOH T 350      73.256  76.328  18.213  1.00  0.54           O  
HETATM  352  O   HOH T 351      35.810  57.332   3.332  1.00  0.54           O  
HETATM  353  O   HOH T 352      89.839  40.020  15.481  1.00  0.54           O  
HETATM  354  O   HOH T 353      88.274  76.128  20.223  1.00  0.54           O  
HETATM  355  O   HOH T 354      36.889  49.302  18.492  1.00  0.54           O  
HETATM  356  O   HOH T 355      55.956  54.453   3.248  1.00  0.54           O  
HETATM  357  O   HOH T 356      69.925  49.657  40.898  1.00  0.54           O  
HETATM  358  O   HOH T 357      73.497  44.422  26.919  1.00  0.54           O  
HETATM  359  O   HOH T 358      83.475  80.143  21.921  1.00  0.54           O  
HETATM  360  O   HOH T 359      73.898  63.685  -1.901  1.00  0.54           O  
HETATM  361  O   HOH T 360      65.467  69.054  20.383  1.00  0.54           O  
HETATM  362  O   HOH T 361      78.578  62.240  26.656  1.00  0.54           O  
HETATM  363  O   HOH T 362      55.203  76.574  -0.648  1.00  0.55           O  
HETATM  364  O   HOH T 363      47.745  67.233   8.087  1.00  0.55           O  
HETATM  365  O   HOH T 364      64.750  65.423  25.803  1.00  0.55           O  
HETATM  366  O   HOH T 365      38.751  45.266  14.471  1.00  0.55           O  
HETATM  367  O   HOH T 366      62.380  41.718  14.387  1.00  0.56           O  
HETATM  368  O   HOH T 367      66.814  56.827   9.005  1.00  0.56           O  
HETATM  369  O   HOH T 368      78.562  45.323  29.046  1.00  0.56           O  
HETATM  370  O   HOH T 369      68.182  42.882  11.320  1.00  0.56           O  
HETATM  371  O   HOH T 370      49.506  47.741  -4.511  1.00  0.56           O  
HETATM  372  O   HOH T 371      75.580  68.053  -1.795  1.00  0.56           O  
HETATM  373  O   HOH T 372      60.778  71.956  -4.780  1.00  0.56           O  
HETATM  374  O   HOH T 373      46.966  63.133  13.074  1.00  0.56           O  
HETATM  375  O   HOH T 374      40.224  61.623  -0.100  1.00  0.57           O  
HETATM  376  O   HOH T 375      64.569  48.509  12.305  1.00  0.57           O  
HETATM  377  O   HOH T 376      85.108  65.718  -0.826  1.00  0.57           O  
HETATM  378  O   HOH T 377      53.572  46.233  22.045  1.00  0.57           O  
HETATM  379  O   HOH T 378      89.886  73.736  19.448  1.00  0.57           O  
HETATM  380  O   HOH T 379      57.462  67.391  11.982  1.00  0.57           O  
HETATM  381  O   HOH T 380      63.881  41.266  12.154  1.00  0.57           O  
HETATM  382  O   HOH T 381      65.097  68.443 -11.211  1.00  0.57           O  
HETATM  383  O   HOH T 382      59.278  49.410  23.811  1.00  0.58           O  
HETATM  384  O   HOH T 383      67.917  74.742  12.033  1.00  0.58           O  
HETATM  385  O   HOH T 384      37.333  53.770   3.999  1.00  0.58           O  
HETATM  386  O   HOH T 385      81.637  64.108  32.373  1.00  0.59           O  
HETATM  387  O   HOH T 386      58.970  59.704  29.128  1.00  0.59           O  
HETATM  388  O   HOH T 387      63.910  72.045  -0.147  1.00  0.60           O  
HETATM  389  O   HOH T 388      53.254  65.813  15.774  1.00  0.65           O  
TER     390      HOH T 388 
