# Supplementary material for: Accurate Prediction of Hydration Sites of Proteins Using Energy Model With Atom Embedding
Source: Front Mol Biosci. 2021 Sep 20;8:756075. doi: 10.3389/fmolb.2021.756075 (PMC8488165; doi:10.3389/fmolb.2021.756075)
Supplement: Supplementary file 1 [file DataSheet1.ZIP › Data Sheet 1/Our_result_pdb/our_dataset_output/3A6R_watersite.pdb]

HEADER                                                        XXXX


JRNL        PMID   -1
HETATM    1  O   HOH T   0       6.948  15.352  46.134  1.00  0.18           O  
HETATM    2  O   HOH T   1       0.810   4.777  53.898  1.00  0.18           O  
HETATM    3  O   HOH T   2      16.134  21.708 -10.636  1.00  0.18           O  
HETATM    4  O   HOH T   3      12.860  23.991  28.738  1.00  0.19           O  
HETATM    5  O   HOH T   4       5.715   1.533  49.333  1.00  0.19           O  
HETATM    6  O   HOH T   5      10.244  12.883   6.590  1.00  0.19           O  
HETATM    7  O   HOH T   6      -1.765  14.147  -2.923  1.00  0.19           O  
HETATM    8  O   HOH T   7       2.115  11.793  41.704  1.00  0.20           O  
HETATM    9  O   HOH T   8       6.157  -6.320  32.149  1.00  0.20           O  
HETATM   10  O   HOH T   9       5.469   9.314   2.198  1.00  0.20           O  
HETATM   11  O   HOH T  10      17.062   5.005  43.595  1.00  0.20           O  
HETATM   12  O   HOH T  11      20.518   2.532   3.927  1.00  0.20           O  
HETATM   13  O   HOH T  12      14.604   8.870  24.861  1.00  0.20           O  
HETATM   14  O   HOH T  13      -5.079  16.626  36.601  1.00  0.20           O  
HETATM   15  O   HOH T  14       4.409   2.139  14.311  1.00  0.21           O  
HETATM   16  O   HOH T  15      -7.726   5.987  26.491  1.00  0.21           O  
HETATM   17  O   HOH T  16      -7.307 -18.128  47.489  1.00  0.21           O  
HETATM   18  O   HOH T  17       9.301  -1.014   9.587  1.00  0.21           O  
HETATM   19  O   HOH T  18       4.038  21.146  -7.597  1.00  0.21           O  
HETATM   20  O   HOH T  19      17.753  -8.932  29.309  1.00  0.21           O  
HETATM   21  O   HOH T  20      17.692  -7.360   6.079  1.00  0.22           O  
HETATM   22  O   HOH T  21      10.908  -1.832  43.046  1.00  0.22           O  
HETATM   23  O   HOH T  22       4.153  -5.296  -4.503  1.00  0.22           O  
HETATM   24  O   HOH T  23       8.841 -20.974  11.326  1.00  0.22           O  
HETATM   25  O   HOH T  24     -14.425  -5.790  43.996  1.00  0.22           O  
HETATM   26  O   HOH T  25       0.770  -2.923  35.177  1.00  0.23           O  
HETATM   27  O   HOH T  26       5.429  22.076  40.118  1.00  0.23           O  
HETATM   28  O   HOH T  27       5.827 -18.667  51.369  1.00  0.23           O  
HETATM   29  O   HOH T  28      -1.736   8.011  -0.743  1.00  0.23           O  
HETATM   30  O   HOH T  29      -0.998 -20.320  47.431  1.00  0.23           O  
HETATM   31  O   HOH T  30      16.021  -3.313   7.295  1.00  0.23           O  
HETATM   32  O   HOH T  31      -1.737   0.636  23.712  1.00  0.23           O  
HETATM   33  O   HOH T  32      14.334  -4.394   3.162  1.00  0.23           O  
HETATM   34  O   HOH T  33      -5.536  24.906  34.644  1.00  0.23           O  
HETATM   35  O   HOH T  34      -4.504  10.424  39.034  1.00  0.23           O  
HETATM   36  O   HOH T  35       4.765 -16.340  57.027  1.00  0.23           O  
HETATM   37  O   HOH T  36     -10.997  -8.196   4.232  1.00  0.23           O  
HETATM   38  O   HOH T  37      17.752  17.658 -16.739  1.00  0.24           O  
HETATM   39  O   HOH T  38       2.319  -3.121  58.494  1.00  0.24           O  
HETATM   40  O   HOH T  39      12.933  -0.920  47.266  1.00  0.24           O  
HETATM   41  O   HOH T  40      10.810  -0.026  21.597  1.00  0.24           O  
HETATM   42  O   HOH T  41       7.160  -0.359  33.248  1.00  0.24           O  
HETATM   43  O   HOH T  42      -2.378  19.030  -7.444  1.00  0.24           O  
HETATM   44  O   HOH T  43      10.483  -2.779  -6.351  1.00  0.24           O  
HETATM   45  O   HOH T  44       1.841  -2.148  29.258  1.00  0.24           O  
HETATM   46  O   HOH T  45      11.724  11.414   8.459  1.00  0.24           O  
HETATM   47  O   HOH T  46       5.101  -4.759 -10.718  1.00  0.24           O  
HETATM   48  O   HOH T  47      10.800 -23.509   4.950  1.00  0.24           O  
HETATM   49  O   HOH T  48       8.492  13.931  47.976  1.00  0.24           O  
HETATM   50  O   HOH T  49      -3.020   6.688  36.579  1.00  0.24           O  
HETATM   51  O   HOH T  50      14.711   3.814  10.068  1.00  0.25           O  
HETATM   52  O   HOH T  51      15.549 -11.151  39.166  1.00  0.25           O  
HETATM   53  O   HOH T  52       9.792  10.211  19.310  1.00  0.25           O  
HETATM   54  O   HOH T  53       8.594  19.608   0.774  1.00  0.25           O  
HETATM   55  O   HOH T  54      14.578   3.256 -13.071  1.00  0.25           O  
HETATM   56  O   HOH T  55      -2.310  22.525  -4.717  1.00  0.25           O  
HETATM   57  O   HOH T  56      -0.220  12.188  56.387  1.00  0.25           O  
HETATM   58  O   HOH T  57     -12.846 -15.926  45.732  1.00  0.25           O  
HETATM   59  O   HOH T  58       0.405   4.157  -2.954  1.00  0.26           O  
HETATM   60  O   HOH T  59       5.794   2.640  61.906  1.00  0.26           O  
HETATM   61  O   HOH T  60      14.228  19.452  22.507  1.00  0.26           O  
HETATM   62  O   HOH T  61       8.233 -18.920  17.146  1.00  0.26           O  
HETATM   63  O   HOH T  62      -9.483 -18.321   5.755  1.00  0.26           O  
HETATM   64  O   HOH T  63       3.924  -2.549  33.067  1.00  0.26           O  
HETATM   65  O   HOH T  64     -15.318   5.833  25.783  1.00  0.26           O  
HETATM   66  O   HOH T  65      13.168 -11.773  37.949  1.00  0.26           O  
HETATM   67  O   HOH T  66      -3.130 -11.469  38.845  1.00  0.27           O  
HETATM   68  O   HOH T  67      14.353  -4.750  45.889  1.00  0.27           O  
HETATM   69  O   HOH T  68      19.012 -13.579  -0.691  1.00  0.27           O  
HETATM   70  O   HOH T  69       0.277 -13.723  -0.898  1.00  0.27           O  
HETATM   71  O   HOH T  70      11.267   6.330  49.801  1.00  0.27           O  
HETATM   72  O   HOH T  71      14.270  18.082  37.247  1.00  0.27           O  
HETATM   73  O   HOH T  72      -7.356   4.023   8.294  1.00  0.27           O  
HETATM   74  O   HOH T  73       4.072 -11.470 -11.588  1.00  0.27           O  
HETATM   75  O   HOH T  74       9.587  -8.615  -7.550  1.00  0.27           O  
HETATM   76  O   HOH T  75       7.089  -3.149  60.780  1.00  0.27           O  
HETATM   77  O   HOH T  76       9.584 -12.390  33.468  1.00  0.27           O  
HETATM   78  O   HOH T  77      -6.533 -20.780  58.449  1.00  0.27           O  
HETATM   79  O   HOH T  78       2.289 -15.912  20.241  1.00  0.28           O  
HETATM   80  O   HOH T  79      -8.909   4.976  43.628  1.00  0.28           O  
HETATM   81  O   HOH T  80       3.327  15.183  16.472  1.00  0.28           O  
HETATM   82  O   HOH T  81       4.740  11.341  14.091  1.00  0.28           O  
HETATM   83  O   HOH T  82      -7.306   4.979  57.503  1.00  0.28           O  
HETATM   84  O   HOH T  83       7.264  -4.903  -6.694  1.00  0.28           O  
HETATM   85  O   HOH T  84       3.332   5.833  57.396  1.00  0.28           O  
HETATM   86  O   HOH T  85       9.203  -5.776  58.089  1.00  0.28           O  
HETATM   87  O   HOH T  86      21.062   0.045  39.953  1.00  0.28           O  
HETATM   88  O   HOH T  87      -7.395  -8.733  28.752  1.00  0.28           O  
HETATM   89  O   HOH T  88      -6.439  10.334  34.667  1.00  0.28           O  
HETATM   90  O   HOH T  89       6.091  -7.944  19.841  1.00  0.28           O  
HETATM   91  O   HOH T  90       8.518  13.116  22.844  1.00  0.28           O  
HETATM   92  O   HOH T  91      -9.872  -4.399  26.150  1.00  0.28           O  
HETATM   93  O   HOH T  92      -7.764 -16.580  50.876  1.00  0.29           O  
HETATM   94  O   HOH T  93      19.008  -7.581  31.548  1.00  0.29           O  
HETATM   95  O   HOH T  94      -8.969  -6.877  27.412  1.00  0.29           O  
HETATM   96  O   HOH T  95     -14.523   4.873  41.707  1.00  0.29           O  
HETATM   97  O   HOH T  96      -4.310   4.273 -13.027  1.00  0.29           O  
HETATM   98  O   HOH T  97      -4.746 -24.264  16.416  1.00  0.29           O  
HETATM   99  O   HOH T  98      -4.593 -19.063  11.002  1.00  0.29           O  
HETATM  100  O   HOH T  99       4.718  -8.752 -11.045  1.00  0.29           O  
HETATM  101  O   HOH T 100      -3.023   7.918  -4.832  1.00  0.29           O  
HETATM  102  O   HOH T 101       9.069  -3.224  58.880  1.00  0.29           O  
HETATM  103  O   HOH T 102      12.384   3.881  13.428  1.00  0.29           O  
HETATM  104  O   HOH T 103      20.563   1.396   6.430  1.00  0.30           O  
HETATM  105  O   HOH T 104      22.586  -9.933  -8.184  1.00  0.30           O  
HETATM  106  O   HOH T 105      12.690  17.856 -19.921  1.00  0.30           O  
HETATM  107  O   HOH T 106       8.674  10.751  24.183  1.00  0.30           O  
HETATM  108  O   HOH T 107       6.451  -2.475 -16.925  1.00  0.30           O  
HETATM  109  O   HOH T 108       3.325  -7.882  19.559  1.00  0.30           O  
HETATM  110  O   HOH T 109       7.449 -21.034  44.908  1.00  0.30           O  
HETATM  111  O   HOH T 110      12.764  -8.390  17.975  1.00  0.30           O  
HETATM  112  O   HOH T 111      24.430  -3.060   0.069  1.00  0.31           O  
HETATM  113  O   HOH T 112       7.868  25.823  44.066  1.00  0.31           O  
HETATM  114  O   HOH T 113       1.941  19.749  -1.711  1.00  0.31           O  
HETATM  115  O   HOH T 114      -1.167 -13.284  60.163  1.00  0.31           O  
HETATM  116  O   HOH T 115      16.995   3.838  46.146  1.00  0.31           O  
HETATM  117  O   HOH T 116      14.516  -2.429   5.191  1.00  0.31           O  
HETATM  118  O   HOH T 117      17.572  15.757  -2.106  1.00  0.31           O  
HETATM  119  O   HOH T 118      25.572   6.567  -6.444  1.00  0.31           O  
HETATM  120  O   HOH T 119      -6.532  -4.814  54.237  1.00  0.31           O  
HETATM  121  O   HOH T 120     -12.834  -8.906  32.969  1.00  0.31           O  
HETATM  122  O   HOH T 121      -3.750   3.943  59.734  1.00  0.31           O  
HETATM  123  O   HOH T 122      -0.822   2.965 -16.123  1.00  0.32           O  
HETATM  124  O   HOH T 123      -3.198   7.990  39.018  1.00  0.32           O  
HETATM  125  O   HOH T 124       7.479 -20.652  52.191  1.00  0.32           O  
HETATM  126  O   HOH T 125      16.561 -13.979  -1.825  1.00  0.32           O  
HETATM  127  O   HOH T 126      -9.953   9.018  35.843  1.00  0.32           O  
HETATM  128  O   HOH T 127       2.464  -3.227  20.499  1.00  0.32           O  
HETATM  129  O   HOH T 128      16.048 -23.646  12.311  1.00  0.32           O  
HETATM  130  O   HOH T 129      -2.173  -2.484  58.824  1.00  0.32           O  
HETATM  131  O   HOH T 130       0.405 -23.388  17.675  1.00  0.32           O  
HETATM  132  O   HOH T 131      -5.326   4.830  25.788  1.00  0.32           O  
HETATM  133  O   HOH T 132      18.015   5.994 -14.090  1.00  0.32           O  
HETATM  134  O   HOH T 133       0.715   7.509  10.323  1.00  0.32           O  
HETATM  135  O   HOH T 134      -3.213 -23.255  18.496  1.00  0.32           O  
HETATM  136  O   HOH T 135      14.529   5.252  16.950  1.00  0.32           O  
HETATM  137  O   HOH T 136      13.863  21.318  34.311  1.00  0.32           O  
HETATM  138  O   HOH T 137       4.944  23.954  38.140  1.00  0.32           O  
HETATM  139  O   HOH T 138       5.005  -5.790  -8.142  1.00  0.32           O  
HETATM  140  O   HOH T 139      22.958 -11.506  38.717  1.00  0.32           O  
HETATM  141  O   HOH T 140      25.908   1.150   2.999  1.00  0.33           O  
HETATM  142  O   HOH T 141      10.531   9.758  48.686  1.00  0.33           O  
HETATM  143  O   HOH T 142      -9.106 -18.142  45.432  1.00  0.33           O  
HETATM  144  O   HOH T 143       3.548  11.518 -20.153  1.00  0.33           O  
HETATM  145  O   HOH T 144      -2.648 -22.385  49.997  1.00  0.33           O  
HETATM  146  O   HOH T 145      11.286   9.250   6.707  1.00  0.33           O  
HETATM  147  O   HOH T 146       4.907  16.363  14.483  1.00  0.33           O  
HETATM  148  O   HOH T 147      16.461  19.558  -5.150  1.00  0.33           O  
HETATM  149  O   HOH T 148      15.376   2.477  25.119  1.00  0.33           O  
HETATM  150  O   HOH T 149     -11.292  -2.436  27.720  1.00  0.33           O  
HETATM  151  O   HOH T 150       5.783  21.156  -5.492  1.00  0.33           O  
HETATM  152  O   HOH T 151      25.686  -1.146   1.513  1.00  0.33           O  
HETATM  153  O   HOH T 152      12.122 -26.005   4.853  1.00  0.33           O  
HETATM  154  O   HOH T 153     -14.877  -7.975  45.675  1.00  0.33           O  
HETATM  155  O   HOH T 154      12.896   6.266 -15.590  1.00  0.33           O  
HETATM  156  O   HOH T 155      -3.228 -10.911 -12.246  1.00  0.33           O  
HETATM  157  O   HOH T 156      12.192   8.922 -15.039  1.00  0.33           O  
HETATM  158  O   HOH T 157      12.267 -13.755  50.227  1.00  0.34           O  
HETATM  159  O   HOH T 158      17.249  20.000  26.842  1.00  0.34           O  
HETATM  160  O   HOH T 159      -4.348  -8.832 -13.750  1.00  0.34           O  
HETATM  161  O   HOH T 160      22.207   2.323  38.843  1.00  0.34           O  
HETATM  162  O   HOH T 161     -14.525   8.813  33.062  1.00  0.34           O  
HETATM  163  O   HOH T 162      17.371   8.927  24.958  1.00  0.34           O  
HETATM  164  O   HOH T 163      28.233  -0.985 -10.853  1.00  0.34           O  
HETATM  165  O   HOH T 164       1.388   7.387 -12.012  1.00  0.34           O  
HETATM  166  O   HOH T 165      19.967  18.040  -5.364  1.00  0.34           O  
HETATM  167  O   HOH T 166       8.045 -16.231  41.902  1.00  0.34           O  
HETATM  168  O   HOH T 167       7.894   5.261  18.237  1.00  0.34           O  
HETATM  169  O   HOH T 168      10.683   2.101  23.454  1.00  0.34           O  
HETATM  170  O   HOH T 169       5.719   7.259  22.444  1.00  0.34           O  
HETATM  171  O   HOH T 170       1.688   4.894 -13.189  1.00  0.34           O  
HETATM  172  O   HOH T 171      -8.099 -21.735  56.331  1.00  0.34           O  
HETATM  173  O   HOH T 172      15.595   2.263  48.058  1.00  0.34           O  
HETATM  174  O   HOH T 173       4.952  12.852  61.144  1.00  0.34           O  
HETATM  175  O   HOH T 174      25.712   2.586   0.721  1.00  0.34           O  
HETATM  176  O   HOH T 175      11.880 -14.268  37.652  1.00  0.34           O  
HETATM  177  O   HOH T 176      15.891 -17.562  10.710  1.00  0.34           O  
HETATM  178  O   HOH T 177       8.716  16.360  20.656  1.00  0.34           O  
HETATM  179  O   HOH T 178      16.437  21.663  -0.802  1.00  0.34           O  
HETATM  180  O   HOH T 179      -1.593   3.087  24.931  1.00  0.34           O  
HETATM  181  O   HOH T 180      -5.459  26.971  36.524  1.00  0.34           O  
HETATM  182  O   HOH T 181      -7.323  -9.534  14.497  1.00  0.34           O  
HETATM  183  O   HOH T 182      11.195  -0.072  45.250  1.00  0.34           O  
HETATM  184  O   HOH T 183       9.801   8.190  24.127  1.00  0.34           O  
HETATM  185  O   HOH T 184      -1.682  17.589  47.910  1.00  0.35           O  
HETATM  186  O   HOH T 185      12.910   3.602  18.556  1.00  0.35           O  
HETATM  187  O   HOH T 186      10.792  20.180  -0.579  1.00  0.35           O  
HETATM  188  O   HOH T 187       8.833 -23.597  44.738  1.00  0.35           O  
HETATM  189  O   HOH T 188      -9.771 -15.387  52.422  1.00  0.35           O  
HETATM  190  O   HOH T 189       0.334  16.347 -10.794  1.00  0.35           O  
HETATM  191  O   HOH T 190      -0.740   6.994  53.170  1.00  0.35           O  
HETATM  192  O   HOH T 191      -4.610  -0.936  17.931  1.00  0.35           O  
HETATM  193  O   HOH T 192      -6.807 -13.265  41.364  1.00  0.35           O  
HETATM  194  O   HOH T 193      -1.559 -17.117  16.957  1.00  0.35           O  
HETATM  195  O   HOH T 194       3.174 -14.735  -8.953  1.00  0.35           O  
HETATM  196  O   HOH T 195       1.636  -3.405  31.680  1.00  0.35           O  
HETATM  197  O   HOH T 196      -3.250  10.772  46.552  1.00  0.35           O  
HETATM  198  O   HOH T 197      -2.225  24.586  -2.771  1.00  0.35           O  
HETATM  199  O   HOH T 198       9.640  31.414 -13.170  1.00  0.35           O  
HETATM  200  O   HOH T 199      26.959   9.065   3.334  1.00  0.35           O  
HETATM  201  O   HOH T 200     -13.806  -3.689  29.847  1.00  0.35           O  
HETATM  202  O   HOH T 201       4.486  18.269  48.394  1.00  0.35           O  
HETATM  203  O   HOH T 202      13.012 -14.594  -6.529  1.00  0.36           O  
HETATM  204  O   HOH T 203       8.331  12.977 -24.680  1.00  0.36           O  
HETATM  205  O   HOH T 204      14.112 -14.569   4.659  1.00  0.36           O  
HETATM  206  O   HOH T 205      -4.750   5.841  58.002  1.00  0.36           O  
HETATM  207  O   HOH T 206       5.626 -22.086  18.082  1.00  0.36           O  
HETATM  208  O   HOH T 207      -2.161   2.624 -13.728  1.00  0.36           O  
HETATM  209  O   HOH T 208       9.594   5.466  56.638  1.00  0.36           O  
HETATM  210  O   HOH T 209      16.052   6.652  25.841  1.00  0.36           O  
HETATM  211  O   HOH T 210      12.764 -15.416  -9.049  1.00  0.36           O  
HETATM  212  O   HOH T 211       4.237  10.195  60.986  1.00  0.36           O  
HETATM  213  O   HOH T 212      13.287 -23.596  12.211  1.00  0.36           O  
HETATM  214  O   HOH T 213      -5.231   2.587   4.160  1.00  0.36           O  
HETATM  215  O   HOH T 214      -4.974 -14.552  56.857  1.00  0.36           O  
HETATM  216  O   HOH T 215      10.651   5.796  25.558  1.00  0.36           O  
HETATM  217  O   HOH T 216      -0.751  18.802  55.302  1.00  0.36           O  
HETATM  218  O   HOH T 217      10.749   8.483  54.092  1.00  0.36           O  
HETATM  219  O   HOH T 218     -15.736   9.018  30.615  1.00  0.36           O  
HETATM  220  O   HOH T 219       5.623  15.793   9.815  1.00  0.36           O  
HETATM  221  O   HOH T 220      24.480   6.751  -8.971  1.00  0.36           O  
HETATM  222  O   HOH T 221       7.246  -5.353  25.155  1.00  0.36           O  
HETATM  223  O   HOH T 222      -1.730  17.025  -9.080  1.00  0.36           O  
HETATM  224  O   HOH T 223       8.329   9.448 -19.394  1.00  0.37           O  
HETATM  225  O   HOH T 224       2.529 -13.298  -5.438  1.00  0.37           O  
HETATM  226  O   HOH T 225      20.439  -0.691  26.794  1.00  0.37           O  
HETATM  227  O   HOH T 226      -2.676   5.484  61.691  1.00  0.37           O  
HETATM  228  O   HOH T 227      14.648 -21.160  12.183  1.00  0.37           O  
HETATM  229  O   HOH T 228      -1.923 -11.523  16.941  1.00  0.37           O  
HETATM  230  O   HOH T 229      -6.713 -17.993   5.132  1.00  0.37           O  
HETATM  231  O   HOH T 230     -14.121   4.966  38.986  1.00  0.37           O  
HETATM  232  O   HOH T 231      -1.855   7.458  60.051  1.00  0.37           O  
HETATM  233  O   HOH T 232       1.865  -5.550  19.150  1.00  0.37           O  
HETATM  234  O   HOH T 233      -6.527   6.497  -3.871  1.00  0.37           O  
HETATM  235  O   HOH T 234      10.722 -22.765  12.264  1.00  0.37           O  
HETATM  236  O   HOH T 235      22.076  26.054 -12.192  1.00  0.37           O  
HETATM  237  O   HOH T 236      13.648  -7.242  26.163  1.00  0.37           O  
HETATM  238  O   HOH T 237      25.247 -10.402   5.918  1.00  0.38           O  
HETATM  239  O   HOH T 238      20.401 -12.948   2.480  1.00  0.38           O  
HETATM  240  O   HOH T 239      10.231 -15.005  -2.931  1.00  0.38           O  
HETATM  241  O   HOH T 240      22.210  -9.362  35.282  1.00  0.38           O  
HETATM  242  O   HOH T 241       0.027   5.914  -0.830  1.00  0.38           O  
HETATM  243  O   HOH T 242      13.583  11.981  45.046  1.00  0.38           O  
HETATM  244  O   HOH T 243       8.250  21.389  -1.280  1.00  0.38           O  
HETATM  245  O   HOH T 244       1.827   4.852  13.290  1.00  0.38           O  
HETATM  246  O   HOH T 245      11.779 -20.724  46.721  1.00  0.38           O  
HETATM  247  O   HOH T 246      -0.994 -11.098  34.481  1.00  0.38           O  
HETATM  248  O   HOH T 247       5.575 -12.317  36.975  1.00  0.38           O  
HETATM  249  O   HOH T 248      14.793 -18.442  36.284  1.00  0.38           O  
HETATM  250  O   HOH T 249      16.742 -13.673  -8.848  1.00  0.39           O  
HETATM  251  O   HOH T 250      -5.247   6.285 -11.225  1.00  0.39           O  
HETATM  252  O   HOH T 251       4.812 -14.248  -6.759  1.00  0.39           O  
HETATM  253  O   HOH T 252       4.803 -21.223  51.659  1.00  0.39           O  
HETATM  254  O   HOH T 253      -4.849  -5.534  22.611  1.00  0.39           O  
HETATM  255  O   HOH T 254      13.041  21.023  40.728  1.00  0.39           O  
HETATM  256  O   HOH T 255      -6.464 -17.708  12.484  1.00  0.39           O  
HETATM  257  O   HOH T 256      -6.191  -6.528 -13.971  1.00  0.39           O  
HETATM  258  O   HOH T 257       3.978   4.918  22.725  1.00  0.39           O  
HETATM  259  O   HOH T 258      13.733 -21.749  45.112  1.00  0.39           O  
HETATM  260  O   HOH T 259       9.643  11.595  46.807  1.00  0.39           O  
HETATM  261  O   HOH T 260      -4.935  -2.047  58.313  1.00  0.39           O  
HETATM  262  O   HOH T 261      23.697  -3.181 -12.951  1.00  0.39           O  
HETATM  263  O   HOH T 262      12.993 -15.401   2.238  1.00  0.39           O  
HETATM  264  O   HOH T 263       9.016  24.050  37.132  1.00  0.39           O  
HETATM  265  O   HOH T 264       1.716  18.298  48.445  1.00  0.39           O  
HETATM  266  O   HOH T 265     -12.904   2.454  28.938  1.00  0.39           O  
HETATM  267  O   HOH T 266      11.995  -1.023 -14.215  1.00  0.39           O  
HETATM  268  O   HOH T 267      -5.830  -4.145  59.899  1.00  0.39           O  
HETATM  269  O   HOH T 268      21.138 -11.038 -10.498  1.00  0.39           O  
HETATM  270  O   HOH T 269       3.109 -22.915  17.750  1.00  0.39           O  
HETATM  271  O   HOH T 270       6.246  -3.671  31.856  1.00  0.39           O  
HETATM  272  O   HOH T 271      11.664  24.605  37.770  1.00  0.39           O  
HETATM  273  O   HOH T 272      -1.840   9.281  26.007  1.00  0.39           O  
HETATM  274  O   HOH T 273      -3.848  -2.436  20.227  1.00  0.39           O  
HETATM  275  O   HOH T 274      19.184  25.899  24.349  1.00  0.39           O  
HETATM  276  O   HOH T 275      -2.453   9.782  50.152  1.00  0.39           O  
HETATM  277  O   HOH T 276     -15.242  11.660  30.972  1.00  0.39           O  
HETATM  278  O   HOH T 277      14.290 -18.408  12.852  1.00  0.40           O  
HETATM  279  O   HOH T 278      -3.134  -7.394  14.564  1.00  0.40           O  
HETATM  280  O   HOH T 279       9.652   2.768  56.464  1.00  0.40           O  
HETATM  281  O   HOH T 280       5.992  13.837  14.004  1.00  0.40           O  
HETATM  282  O   HOH T 281       9.712 -13.765  35.931  1.00  0.40           O  
HETATM  283  O   HOH T 282      -2.170 -10.211 -14.690  1.00  0.40           O  
HETATM  284  O   HOH T 283       6.767   9.285  61.789  1.00  0.40           O  
HETATM  285  O   HOH T 284      -9.563   0.306  -2.042  1.00  0.40           O  
HETATM  286  O   HOH T 285      -1.501   8.325  28.577  1.00  0.40           O  
HETATM  287  O   HOH T 286      15.474  16.269   8.992  1.00  0.40           O  
HETATM  288  O   HOH T 287      -8.423 -15.136  42.773  1.00  0.40           O  
HETATM  289  O   HOH T 288      19.884  -7.763  35.556  1.00  0.40           O  
HETATM  290  O   HOH T 289     -16.316 -11.729  44.620  1.00  0.40           O  
HETATM  291  O   HOH T 290       0.052 -15.023  -3.168  1.00  0.40           O  
HETATM  292  O   HOH T 291      25.232 -19.026  -4.186  1.00  0.40           O  
HETATM  293  O   HOH T 292     -10.557   8.184 -10.696  1.00  0.40           O  
HETATM  294  O   HOH T 293      12.243  18.833  48.195  1.00  0.40           O  
HETATM  295  O   HOH T 294      -2.223   1.835  10.849  1.00  0.40           O  
HETATM  296  O   HOH T 295      18.885  15.166 -16.561  1.00  0.40           O  
HETATM  297  O   HOH T 296       7.141   9.590 -22.108  1.00  0.40           O  
HETATM  298  O   HOH T 297     -10.094 -15.596  45.022  1.00  0.40           O  
HETATM  299  O   HOH T 298      -8.403   8.361  27.700  1.00  0.40           O  
HETATM  300  O   HOH T 299      -2.323  -6.728  62.232  1.00  0.40           O  
HETATM  301  O   HOH T 300      15.525  16.987  22.793  1.00  0.40           O  
HETATM  302  O   HOH T 301     -14.316   2.419  42.552  1.00  0.40           O  
HETATM  303  O   HOH T 302      -1.973   4.576  10.771  1.00  0.41           O  
HETATM  304  O   HOH T 303      12.004  14.846  21.192  1.00  0.41           O  
HETATM  305  O   HOH T 304      15.357 -16.383  -2.117  1.00  0.41           O  
HETATM  306  O   HOH T 305      -2.938 -20.797  57.560  1.00  0.41           O  
HETATM  307  O   HOH T 306       4.743   8.160  57.589  1.00  0.41           O  
HETATM  308  O   HOH T 307      -5.696  -7.624  24.150  1.00  0.41           O  
HETATM  309  O   HOH T 308      24.142  12.182  30.448  1.00  0.41           O  
HETATM  310  O   HOH T 309       9.790  22.893  -3.004  1.00  0.41           O  
HETATM  311  O   HOH T 310      26.102   0.430 -11.984  1.00  0.41           O  
HETATM  312  O   HOH T 311      -5.251 -19.526  41.769  1.00  0.41           O  
HETATM  313  O   HOH T 312      -1.839   1.904  60.139  1.00  0.41           O  
HETATM  314  O   HOH T 313      22.801 -19.421   0.109  1.00  0.41           O  
HETATM  315  O   HOH T 314      12.249  21.723  -2.274  1.00  0.41           O  
HETATM  316  O   HOH T 315       7.262  -1.815  -2.082  1.00  0.41           O  
HETATM  317  O   HOH T 316       6.576  25.251  36.292  1.00  0.41           O  
HETATM  318  O   HOH T 317     -14.115  -2.558  50.576  1.00  0.41           O  
HETATM  319  O   HOH T 318     -12.531   0.017  27.508  1.00  0.41           O  
HETATM  320  O   HOH T 319      -1.641   8.586  11.396  1.00  0.41           O  
HETATM  321  O   HOH T 320      12.872 -12.840   1.289  1.00  0.41           O  
HETATM  322  O   HOH T 321     -18.388 -12.623  48.714  1.00  0.41           O  
HETATM  323  O   HOH T 322      -7.101   5.733  19.796  1.00  0.41           O  
HETATM  324  O   HOH T 323      13.818   0.547  49.455  1.00  0.41           O  
HETATM  325  O   HOH T 324      12.300 -17.287  -7.145  1.00  0.41           O  
HETATM  326  O   HOH T 325     -15.771  -5.513  30.885  1.00  0.41           O  
HETATM  327  O   HOH T 326      18.800 -13.358  34.969  1.00  0.42           O  
HETATM  328  O   HOH T 327      22.591  10.451  28.860  1.00  0.42           O  
HETATM  329  O   HOH T 328     -10.594 -14.796   4.234  1.00  0.42           O  
HETATM  330  O   HOH T 329      -9.159   9.867  -8.948  1.00  0.42           O  
HETATM  331  O   HOH T 330      14.466  18.637   8.001  1.00  0.42           O  
HETATM  332  O   HOH T 331      21.961   1.647  27.007  1.00  0.42           O  
HETATM  333  O   HOH T 332       8.699   1.190  25.199  1.00  0.42           O  
HETATM  334  O   HOH T 333       9.653  -5.899  -7.981  1.00  0.42           O  
HETATM  335  O   HOH T 334      -8.832   3.947  59.616  1.00  0.42           O  
HETATM  336  O   HOH T 335      12.402  11.269  47.465  1.00  0.42           O  
HETATM  337  O   HOH T 336      -7.815  -4.766 -12.355  1.00  0.42           O  
HETATM  338  O   HOH T 337       1.741   7.186 -14.807  1.00  0.42           O  
HETATM  339  O   HOH T 338       8.087 -23.686  11.788  1.00  0.42           O  
HETATM  340  O   HOH T 339      -3.386  10.056  -0.012  1.00  0.42           O  
HETATM  341  O   HOH T 340      -2.543  -4.347  21.794  1.00  0.42           O  
HETATM  342  O   HOH T 341      19.365 -10.385 -12.609  1.00  0.42           O  
HETATM  343  O   HOH T 342      18.801  13.282 -18.745  1.00  0.42           O  
HETATM  344  O   HOH T 343      10.923   8.723  51.274  1.00  0.42           O  
HETATM  345  O   HOH T 344      24.549  -5.571 -12.139  1.00  0.43           O  
HETATM  346  O   HOH T 345      -0.029  -4.328  58.848  1.00  0.43           O  
HETATM  347  O   HOH T 346       8.904  -5.230  60.804  1.00  0.43           O  
HETATM  348  O   HOH T 347     -15.274 -14.770   9.086  1.00  0.43           O  
HETATM  349  O   HOH T 348      -2.392  15.086  47.135  1.00  0.43           O  
HETATM  350  O   HOH T 349      -7.772   8.640  -2.660  1.00  0.43           O  
HETATM  351  O   HOH T 350       2.404   4.108  25.012  1.00  0.43           O  
HETATM  352  O   HOH T 351      21.930  16.522  -4.185  1.00  0.43           O  
HETATM  353  O   HOH T 352       2.582  -2.343 -18.371  1.00  0.43           O  
HETATM  354  O   HOH T 353       3.999   0.753  37.322  1.00  0.43           O  
HETATM  355  O   HOH T 354      14.357   5.518  12.281  1.00  0.43           O  
HETATM  356  O   HOH T 355      22.125  -5.395   7.843  1.00  0.43           O  
HETATM  357  O   HOH T 356      23.266 -12.148   6.840  1.00  0.43           O  
HETATM  358  O   HOH T 357      -3.385   6.888 -13.260  1.00  0.43           O  
HETATM  359  O   HOH T 358      -6.575  10.950  37.266  1.00  0.43           O  
HETATM  360  O   HOH T 359      15.572 -15.297   6.991  1.00  0.43           O  
HETATM  361  O   HOH T 360     -13.096 -14.129   4.850  1.00  0.43           O  
HETATM  362  O   HOH T 361       9.389 -25.908   5.296  1.00  0.43           O  
HETATM  363  O   HOH T 362      -7.031 -15.951   1.965  1.00  0.43           O  
HETATM  364  O   HOH T 363      -5.001 -17.485   2.885  1.00  0.43           O  
HETATM  365  O   HOH T 364       9.534  -7.373 -12.424  1.00  0.43           O  
HETATM  366  O   HOH T 365      -8.916 -13.990   2.264  1.00  0.43           O  
HETATM  367  O   HOH T 366      17.184  -9.415 -13.744  1.00  0.43           O  
HETATM  368  O   HOH T 367      23.467 -21.975  -0.995  1.00  0.43           O  
HETATM  369  O   HOH T 368     -14.777  -0.254  49.485  1.00  0.44           O  
HETATM  370  O   HOH T 369      13.245   6.636  25.709  1.00  0.44           O  
HETATM  371  O   HOH T 370       9.700 -13.977  42.193  1.00  0.44           O  
HETATM  372  O   HOH T 371       0.229 -10.734  60.647  1.00  0.44           O  
HETATM  373  O   HOH T 372      11.430 -17.189  -1.810  1.00  0.44           O  
HETATM  374  O   HOH T 373      -0.072   7.250  22.198  1.00  0.44           O  
HETATM  375  O   HOH T 374      -5.684   4.328  50.448  1.00  0.44           O  
HETATM  376  O   HOH T 375       6.861   0.455  63.271  1.00  0.44           O  
HETATM  377  O   HOH T 376      12.844 -14.126  -3.683  1.00  0.44           O  
HETATM  378  O   HOH T 377      12.241  20.258   3.403  1.00  0.44           O  
HETATM  379  O   HOH T 378      -0.069   9.082 -13.645  1.00  0.44           O  
HETATM  380  O   HOH T 379     -15.376  -5.565   5.185  1.00  0.44           O  
HETATM  381  O   HOH T 380      -4.626   9.544  25.819  1.00  0.44           O  
HETATM  382  O   HOH T 381       8.184   7.832  19.337  1.00  0.44           O  
HETATM  383  O   HOH T 382       9.746 -25.070  13.344  1.00  0.44           O  
HETATM  384  O   HOH T 383      16.364  19.920  37.076  1.00  0.44           O  
HETATM  385  O   HOH T 384      -9.316 -20.902  58.599  1.00  0.44           O  
HETATM  386  O   HOH T 385      21.933 -13.583 -11.315  1.00  0.44           O  
HETATM  387  O   HOH T 386      -3.333 -15.577   1.465  1.00  0.44           O  
HETATM  388  O   HOH T 387      -3.274  10.457  28.039  1.00  0.44           O  
HETATM  389  O   HOH T 388      13.142 -11.583  27.347  1.00  0.44           O  
HETATM  390  O   HOH T 389       7.333 -15.592  57.482  1.00  0.44           O  
HETATM  391  O   HOH T 390      -4.948  16.125  51.091  1.00  0.44           O  
HETATM  392  O   HOH T 391      14.586 -18.588  50.789  1.00  0.44           O  
HETATM  393  O   HOH T 392     -14.361   3.446  24.892  1.00  0.44           O  
HETATM  394  O   HOH T 393      -5.992   7.356  24.808  1.00  0.44           O  
HETATM  395  O   HOH T 394      18.084  18.215  -3.368  1.00  0.44           O  
HETATM  396  O   HOH T 395      10.440 -16.435  36.477  1.00  0.44           O  
HETATM  397  O   HOH T 396      27.553   3.319   2.599  1.00  0.44           O  
HETATM  398  O   HOH T 397      -3.574  -9.434  16.342  1.00  0.44           O  
HETATM  399  O   HOH T 398      15.490  14.503 -21.792  1.00  0.44           O  
HETATM  400  O   HOH T 399      21.126  -3.290  27.618  1.00  0.44           O  
HETATM  401  O   HOH T 400       6.541  11.134  59.698  1.00  0.44           O  
HETATM  402  O   HOH T 401      18.562 -12.357   4.408  1.00  0.45           O  
HETATM  403  O   HOH T 402       1.293  11.154  10.273  1.00  0.45           O  
HETATM  404  O   HOH T 403      17.965  -3.979   9.114  1.00  0.45           O  
HETATM  405  O   HOH T 404      -3.028   3.304  20.118  1.00  0.45           O  
HETATM  406  O   HOH T 405      20.013  20.476  27.251  1.00  0.45           O  
HETATM  407  O   HOH T 406      13.416   2.956  15.881  1.00  0.45           O  
HETATM  408  O   HOH T 407      25.220  11.732  -1.279  1.00  0.45           O  
HETATM  409  O   HOH T 408      25.272  10.056  28.962  1.00  0.45           O  
HETATM  410  O   HOH T 409       9.506 -11.946  40.293  1.00  0.45           O  
HETATM  411  O   HOH T 410      12.819 -16.430  51.077  1.00  0.45           O  
HETATM  412  O   HOH T 411       1.362  -8.040  60.544  1.00  0.45           O  
HETATM  413  O   HOH T 412     -16.652  -9.873  46.615  1.00  0.45           O  
HETATM  414  O   HOH T 413      -0.811   5.676  24.299  1.00  0.45           O  
HETATM  415  O   HOH T 414       8.341  15.597 -23.854  1.00  0.45           O  
HETATM  416  O   HOH T 415      15.715 -15.411   2.466  1.00  0.45           O  
HETATM  417  O   HOH T 416      -2.644   5.659  18.837  1.00  0.45           O  
HETATM  418  O   HOH T 417      14.739  -4.730  25.648  1.00  0.45           O  
HETATM  419  O   HOH T 418      20.288 -14.781  36.889  1.00  0.45           O  
HETATM  420  O   HOH T 419       1.667  14.983   8.722  1.00  0.45           O  
HETATM  421  O   HOH T 420      10.586 -17.386  52.588  1.00  0.45           O  
HETATM  422  O   HOH T 421      24.733   9.369  -8.587  1.00  0.45           O  
HETATM  423  O   HOH T 422       9.981  28.721 -12.599  1.00  0.45           O  
HETATM  424  O   HOH T 423       0.893   1.269 -17.412  1.00  0.45           O  
HETATM  425  O   HOH T 424       9.716 -11.328  43.028  1.00  0.45           O  
HETATM  426  O   HOH T 425       0.996 -16.410   0.289  1.00  0.46           O  
HETATM  427  O   HOH T 426       1.652 -17.083  -2.368  1.00  0.46           O  
HETATM  428  O   HOH T 427       8.443  13.047  14.857  1.00  0.46           O  
HETATM  429  O   HOH T 428      -6.562  14.646  38.029  1.00  0.46           O  
HETATM  430  O   HOH T 429      -0.729   3.605  18.709  1.00  0.46           O  
HETATM  431  O   HOH T 430       5.992  -6.081  27.420  1.00  0.46           O  
HETATM  432  O   HOH T 431      17.334 -16.913   8.362  1.00  0.46           O  
HETATM  433  O   HOH T 432      14.836 -10.523   7.715  1.00  0.46           O  
HETATM  434  O   HOH T 433      25.307 -10.402  -8.185  1.00  0.46           O  
HETATM  435  O   HOH T 434      15.277 -20.015  40.657  1.00  0.46           O  
HETATM  436  O   HOH T 435      -0.734  -1.684   7.421  1.00  0.46           O  
HETATM  437  O   HOH T 436       5.975  18.421 -18.718  1.00  0.46           O  
HETATM  438  O   HOH T 437      11.503  -7.905  24.439  1.00  0.46           O  
HETATM  439  O   HOH T 438      15.689  18.930   1.743  1.00  0.46           O  
HETATM  440  O   HOH T 439      -1.746 -14.820  37.792  1.00  0.46           O  
HETATM  441  O   HOH T 440      -7.868   7.590 -10.795  1.00  0.46           O  
HETATM  442  O   HOH T 441      11.523 -22.943  43.808  1.00  0.46           O  
HETATM  443  O   HOH T 442      -3.502  -6.690  17.146  1.00  0.46           O  
HETATM  444  O   HOH T 443      -6.514  -2.369  16.351  1.00  0.46           O  
HETATM  445  O   HOH T 444       4.107  -8.109  27.686  1.00  0.46           O  
HETATM  446  O   HOH T 445      20.699 -11.465  34.306  1.00  0.46           O  
HETATM  447  O   HOH T 446      14.485 -14.793  -0.035  1.00  0.46           O  
HETATM  448  O   HOH T 447     -10.437  -5.888  -9.891  1.00  0.46           O  
HETATM  449  O   HOH T 448      -2.530   4.991 -15.181  1.00  0.46           O  
HETATM  450  O   HOH T 449       9.687  10.533  14.989  1.00  0.46           O  
HETATM  451  O   HOH T 450      15.735  21.313  41.219  1.00  0.46           O  
HETATM  452  O   HOH T 451      16.748 -18.156  -0.559  1.00  0.46           O  
HETATM  453  O   HOH T 452      -0.959  -6.614  59.919  1.00  0.46           O  
HETATM  454  O   HOH T 453      16.960   4.586  24.278  1.00  0.46           O  
HETATM  455  O   HOH T 454       4.957 -24.233  16.237  1.00  0.46           O  
HETATM  456  O   HOH T 455      18.168  -6.901 -14.281  1.00  0.47           O  
HETATM  457  O   HOH T 456       8.071 -13.010  38.096  1.00  0.47           O  
HETATM  458  O   HOH T 457      -7.500   5.530   2.972  1.00  0.47           O  
HETATM  459  O   HOH T 458      15.687 -10.664  28.277  1.00  0.47           O  
HETATM  460  O   HOH T 459      18.451  23.198  -1.584  1.00  0.47           O  
HETATM  461  O   HOH T 460      -0.036  13.735  19.333  1.00  0.47           O  
HETATM  462  O   HOH T 461      -8.015  -6.835 -10.676  1.00  0.47           O  
HETATM  463  O   HOH T 462      16.905   9.442   5.610  1.00  0.47           O  
HETATM  464  O   HOH T 463      17.025   3.343 -14.530  1.00  0.47           O  
HETATM  465  O   HOH T 464      10.583  -7.141 -14.810  1.00  0.47           O  
HETATM  466  O   HOH T 465      -0.247   9.926  22.652  1.00  0.47           O  
HETATM  467  O   HOH T 466      21.628  18.884  -7.421  1.00  0.47           O  
HETATM  468  O   HOH T 467      -5.117   6.422   4.130  1.00  0.47           O  
HETATM  469  O   HOH T 468      13.332   1.012  17.720  1.00  0.47           O  
HETATM  470  O   HOH T 469      15.218  -9.967 -15.591  1.00  0.47           O  
HETATM  471  O   HOH T 470      14.605   6.613   9.674  1.00  0.47           O  
HETATM  472  O   HOH T 471       0.621  -1.431  21.356  1.00  0.47           O  
HETATM  473  O   HOH T 472       6.836  31.143  26.912  1.00  0.47           O  
HETATM  474  O   HOH T 473      -7.021  -4.010  23.339  1.00  0.47           O  
HETATM  475  O   HOH T 474     -19.411  -1.501  49.038  1.00  0.47           O  
HETATM  476  O   HOH T 475     -18.799  -3.186  44.797  1.00  0.47           O  
HETATM  477  O   HOH T 476      12.572 -12.288  52.563  1.00  0.47           O  
HETATM  478  O   HOH T 477      17.840   1.986  24.253  1.00  0.47           O  
HETATM  479  O   HOH T 478      15.527 -16.918   4.794  1.00  0.47           O  
HETATM  480  O   HOH T 479       2.519   5.301  20.284  1.00  0.47           O  
HETATM  481  O   HOH T 480      -2.305 -14.076  40.338  1.00  0.47           O  
HETATM  482  O   HOH T 481       7.289  -5.271  29.730  1.00  0.47           O  
HETATM  483  O   HOH T 482       0.620  -4.384  28.238  1.00  0.47           O  
HETATM  484  O   HOH T 483      -2.651  14.587  -0.233  1.00  0.47           O  
HETATM  485  O   HOH T 484       0.609  -9.625  28.232  1.00  0.47           O  
HETATM  486  O   HOH T 485      -0.456   6.223  12.421  1.00  0.47           O  
HETATM  487  O   HOH T 486       4.715  -4.204 -18.276  1.00  0.47           O  
HETATM  488  O   HOH T 487      19.250 -12.863 -11.465  1.00  0.48           O  
HETATM  489  O   HOH T 488       6.137 -23.520  45.176  1.00  0.48           O  
HETATM  490  O   HOH T 489      -5.863  17.046  39.316  1.00  0.48           O  
HETATM  491  O   HOH T 490      24.367  -7.807  -8.834  1.00  0.48           O  
HETATM  492  O   HOH T 491      23.657 -12.039  -9.737  1.00  0.48           O  
HETATM  493  O   HOH T 492       6.659 -17.242  55.195  1.00  0.48           O  
HETATM  494  O   HOH T 493      25.288  13.872  -2.992  1.00  0.48           O  
HETATM  495  O   HOH T 494      -3.427  12.346  -1.617  1.00  0.48           O  
HETATM  496  O   HOH T 495      16.319 -11.340   5.629  1.00  0.48           O  
HETATM  497  O   HOH T 496      13.692  17.149  20.875  1.00  0.48           O  
HETATM  498  O   HOH T 497      10.005  23.653  39.726  1.00  0.48           O  
HETATM  499  O   HOH T 498      -7.972  -6.126  24.981  1.00  0.48           O  
HETATM  500  O   HOH T 499      17.893  17.930  23.518  1.00  0.48           O  
HETATM  501  O   HOH T 500      11.275  21.165  47.146  1.00  0.48           O  
HETATM  502  O   HOH T 501      -7.020  -5.055  62.221  1.00  0.48           O  
HETATM  503  O   HOH T 502      17.055  15.530 -18.522  1.00  0.48           O  
HETATM  504  O   HOH T 503      20.516   1.236  24.691  1.00  0.48           O  
HETATM  505  O   HOH T 504      24.875  -1.002 -14.096  1.00  0.48           O  
HETATM  506  O   HOH T 505       7.865 -18.571  43.467  1.00  0.48           O  
HETATM  507  O   HOH T 506     -13.015  -8.093  43.646  1.00  0.48           O  
HETATM  508  O   HOH T 507      -1.987  -1.709  22.197  1.00  0.48           O  
HETATM  509  O   HOH T 508      -6.081   9.815  -0.819  1.00  0.48           O  
HETATM  510  O   HOH T 509      18.955  20.379  24.590  1.00  0.48           O  
HETATM  511  O   HOH T 510      -5.793  -5.076  16.584  1.00  0.48           O  
HETATM  512  O   HOH T 511       6.609  24.624  40.271  1.00  0.48           O  
HETATM  513  O   HOH T 512      19.341  -0.053   8.458  1.00  0.48           O  
HETATM  514  O   HOH T 513     -10.565 -13.652  41.886  1.00  0.48           O  
HETATM  515  O   HOH T 514      23.493  13.018 -14.097  1.00  0.48           O  
HETATM  516  O   HOH T 515       2.525  -5.515  59.867  1.00  0.48           O  
HETATM  517  O   HOH T 516       6.294  -5.300  19.549  1.00  0.48           O  
HETATM  518  O   HOH T 517       8.808  24.397  42.010  1.00  0.48           O  
HETATM  519  O   HOH T 518      10.599  -7.610  -9.948  1.00  0.48           O  
HETATM  520  O   HOH T 519      23.139 -11.272 -12.338  1.00  0.49           O  
HETATM  521  O   HOH T 520       3.959 -14.666  37.057  1.00  0.49           O  
HETATM  522  O   HOH T 521      -2.081 -24.263  51.896  1.00  0.49           O  
HETATM  523  O   HOH T 522      14.575  -9.807  25.918  1.00  0.49           O  
HETATM  524  O   HOH T 523       7.302 -24.390  14.521  1.00  0.49           O  
HETATM  525  O   HOH T 524       8.820  -9.541 -10.919  1.00  0.49           O  
HETATM  526  O   HOH T 525      -4.558   5.591  20.839  1.00  0.49           O  
HETATM  527  O   HOH T 526       8.495   9.257  17.075  1.00  0.49           O  
HETATM  528  O   HOH T 527      17.323  17.191   0.242  1.00  0.49           O  
HETATM  529  O   HOH T 528     -15.589   2.343  49.443  1.00  0.49           O  
HETATM  530  O   HOH T 529      11.317 -14.705  52.552  1.00  0.49           O  
HETATM  531  O   HOH T 530      -9.186  -1.486 -13.511  1.00  0.49           O  
HETATM  532  O   HOH T 531     -16.754  -2.026  49.719  1.00  0.49           O  
HETATM  533  O   HOH T 532      -9.688  -4.534  23.414  1.00  0.49           O  
HETATM  534  O   HOH T 533       6.495  33.870  26.419  1.00  0.49           O  
HETATM  535  O   HOH T 534       5.782  -7.628  29.711  1.00  0.49           O  
HETATM  536  O   HOH T 535      18.762   6.584  24.967  1.00  0.49           O  
HETATM  537  O   HOH T 536      -9.646 -10.484   3.881  1.00  0.49           O  
HETATM  538  O   HOH T 537      -8.187 -11.484  35.622  1.00  0.49           O  
HETATM  539  O   HOH T 538      26.973  -8.456  -9.280  1.00  0.50           O  
HETATM  540  O   HOH T 539       0.874  11.769 -18.653  1.00  0.50           O  
HETATM  541  O   HOH T 540      14.950 -14.899 -10.424  1.00  0.50           O  
HETATM  542  O   HOH T 541      -2.238   6.547  26.508  1.00  0.50           O  
HETATM  543  O   HOH T 542      26.208   7.045   5.180  1.00  0.50           O  
HETATM  544  O   HOH T 543       6.604 -10.494 -12.192  1.00  0.50           O  
HETATM  545  O   HOH T 544     -14.720  -5.835  28.306  1.00  0.50           O  
HETATM  546  O   HOH T 545      -4.510  -2.741  22.988  1.00  0.50           O  
HETATM  547  O   HOH T 546      -4.244   0.760  47.032  1.00  0.50           O  
HETATM  548  O   HOH T 547      12.181  26.567  29.744  1.00  0.50           O  
HETATM  549  O   HOH T 548      10.636 -17.841  17.858  1.00  0.50           O  
HETATM  550  O   HOH T 549       3.653 -13.487  20.799  1.00  0.50           O  
HETATM  551  O   HOH T 550       5.814  27.494  43.856  1.00  0.50           O  
HETATM  552  O   HOH T 551       9.677 -19.391  45.452  1.00  0.50           O  
HETATM  553  O   HOH T 552      -0.621  -4.969  63.489  1.00  0.50           O  
HETATM  554  O   HOH T 553       9.051   5.627  63.887  1.00  0.50           O  
HETATM  555  O   HOH T 554      15.500   7.373   1.002  1.00  0.50           O  
HETATM  556  O   HOH T 555      -2.890  14.700  49.811  1.00  0.50           O  
HETATM  557  O   HOH T 556      14.567 -17.844  39.014  1.00  0.50           O  
HETATM  558  O   HOH T 557      20.275  14.662  25.085  1.00  0.50           O  
HETATM  559  O   HOH T 558      12.970  -5.858  18.930  1.00  0.50           O  
HETATM  560  O   HOH T 559      18.062  23.603 -10.418  1.00  0.50           O  
HETATM  561  O   HOH T 560      -5.079   4.280  18.413  1.00  0.50           O  
HETATM  562  O   HOH T 561      -6.732   6.712   8.078  1.00  0.50           O  
HETATM  563  O   HOH T 562      13.801  -6.854 -16.964  1.00  0.50           O  
HETATM  564  O   HOH T 563      17.728  21.013  -3.177  1.00  0.50           O  
HETATM  565  O   HOH T 564      -4.701   1.693  17.152  1.00  0.50           O  
HETATM  566  O   HOH T 565      12.673  10.667  50.205  1.00  0.50           O  
HETATM  567  O   HOH T 566      13.600 -18.260  -3.105  1.00  0.50           O  
HETATM  568  O   HOH T 567     -11.124 -15.232   1.446  1.00  0.50           O  
HETATM  569  O   HOH T 568      11.229  17.141  19.901  1.00  0.51           O  
HETATM  570  O   HOH T 569     -12.418 -11.658  41.927  1.00  0.51           O  
HETATM  571  O   HOH T 570      -4.328  -4.793  62.186  1.00  0.51           O  
HETATM  572  O   HOH T 571      -1.462  15.121 -12.561  1.00  0.51           O  
HETATM  573  O   HOH T 572      12.642  -5.059  52.181  1.00  0.51           O  
HETATM  574  O   HOH T 573     -14.466 -12.643  10.597  1.00  0.51           O  
HETATM  575  O   HOH T 574      10.583 -14.480  17.925  1.00  0.51           O  
HETATM  576  O   HOH T 575     -14.664  -4.968  51.424  1.00  0.51           O  
HETATM  577  O   HOH T 576      -4.078  16.930  48.574  1.00  0.51           O  
HETATM  578  O   HOH T 577       8.215  18.114 -24.991  1.00  0.51           O  
HETATM  579  O   HOH T 578       4.904 -25.223  13.679  1.00  0.51           O  
HETATM  580  O   HOH T 579      -6.551  12.299  39.683  1.00  0.51           O  
HETATM  581  O   HOH T 580      -8.930 -11.282  -7.259  1.00  0.51           O  
HETATM  582  O   HOH T 581      16.476 -12.040 -14.304  1.00  0.51           O  
HETATM  583  O   HOH T 582       9.113  20.139  19.445  1.00  0.51           O  
HETATM  584  O   HOH T 583      18.408  19.254   1.759  1.00  0.51           O  
HETATM  585  O   HOH T 584      19.668   3.946  24.611  1.00  0.51           O  
HETATM  586  O   HOH T 585     -15.492 -17.408   9.734  1.00  0.51           O  
HETATM  587  O   HOH T 586      25.093 -15.105  38.101  1.00  0.51           O  
HETATM  588  O   HOH T 587      11.387   4.859  62.707  1.00  0.51           O  
HETATM  589  O   HOH T 588      16.019   5.087  14.549  1.00  0.51           O  
HETATM  590  O   HOH T 589      18.977  17.961  25.967  1.00  0.51           O  
HETATM  591  O   HOH T 590      12.123   9.785  40.510  1.00  0.51           O  
HETATM  592  O   HOH T 591       4.613 -10.068  20.687  1.00  0.51           O  
HETATM  593  O   HOH T 592     -14.672 -10.523   8.924  1.00  0.51           O  
HETATM  594  O   HOH T 593     -17.954  -3.094  47.406  1.00  0.51           O  
HETATM  595  O   HOH T 594      12.337  24.289 -15.933  1.00  0.51           O  
HETATM  596  O   HOH T 595       5.641   9.823 -19.860  1.00  0.51           O  
HETATM  597  O   HOH T 596      -3.257   8.522   4.007  1.00  0.51           O  
HETATM  598  O   HOH T 597      -6.428   7.368  21.913  1.00  0.52           O  
HETATM  599  O   HOH T 598      21.016  -7.921   8.209  1.00  0.52           O  
HETATM  600  O   HOH T 599      -5.833  -7.755  16.079  1.00  0.52           O  
HETATM  601  O   HOH T 600       7.407  15.612  15.445  1.00  0.52           O  
HETATM  602  O   HOH T 601      -4.923  13.299  50.823  1.00  0.52           O  
HETATM  603  O   HOH T 602      -2.452  14.292  20.777  1.00  0.52           O  
HETATM  604  O   HOH T 603      18.735  -9.887   5.483  1.00  0.52           O  
HETATM  605  O   HOH T 604      13.173 -14.183  54.510  1.00  0.52           O  
HETATM  606  O   HOH T 605      19.545  16.937 -14.617  1.00  0.52           O  
HETATM  607  O   HOH T 606      12.488 -19.646  49.193  1.00  0.52           O  
HETATM  608  O   HOH T 607     -17.813  -5.565  45.986  1.00  0.52           O  
HETATM  609  O   HOH T 608       0.933 -15.589  -5.806  1.00  0.52           O  
HETATM  610  O   HOH T 609      -5.539 -11.292  15.699  1.00  0.52           O  
HETATM  611  O   HOH T 610      15.579  18.924  24.827  1.00  0.52           O  
HETATM  612  O   HOH T 611      17.898 -19.836  -2.359  1.00  0.52           O  
HETATM  613  O   HOH T 612     -11.919   3.271 -13.877  1.00  0.52           O  
HETATM  614  O   HOH T 613     -14.470 -13.216  40.742  1.00  0.52           O  
HETATM  615  O   HOH T 614      14.853  18.550  47.313  1.00  0.53           O  
HETATM  616  O   HOH T 615      19.540  23.155  24.276  1.00  0.53           O  
HETATM  617  O   HOH T 616       9.750  27.440  23.480  1.00  0.53           O  
HETATM  618  O   HOH T 617     -11.187  11.283  37.100  1.00  0.53           O  
HETATM  619  O   HOH T 618      12.816  19.664   6.038  1.00  0.53           O  
HETATM  620  O   HOH T 619      -1.646  -8.771 -16.887  1.00  0.53           O  
HETATM  621  O   HOH T 620     -21.443  -2.478  47.358  1.00  0.53           O  
HETATM  622  O   HOH T 621      18.048  16.219   8.088  1.00  0.53           O  
HETATM  623  O   HOH T 622       8.066   2.979  63.485  1.00  0.53           O  
HETATM  624  O   HOH T 623      25.117 -12.503  37.260  1.00  0.53           O  
HETATM  625  O   HOH T 624      -7.115   5.185   5.729  1.00  0.53           O  
HETATM  626  O   HOH T 625      -6.998  -3.259  13.678  1.00  0.53           O  
HETATM  627  O   HOH T 626      11.362 -18.646   1.681  1.00  0.53           O  
HETATM  628  O   HOH T 627      12.053 -18.480  35.588  1.00  0.53           O  
HETATM  629  O   HOH T 628      -2.639 -12.605  36.271  1.00  0.53           O  
HETATM  630  O   HOH T 629      -0.878 -23.037  47.946  1.00  0.53           O  
HETATM  631  O   HOH T 630     -16.763 -16.559   7.405  1.00  0.53           O  
HETATM  632  O   HOH T 631      16.995 -10.538  42.337  1.00  0.53           O  
HETATM  633  O   HOH T 632      12.943   9.667  52.834  1.00  0.53           O  
HETATM  634  O   HOH T 633     -13.737 -12.151  44.289  1.00  0.54           O  
HETATM  635  O   HOH T 634      19.355  10.548 -19.382  1.00  0.54           O  
HETATM  636  O   HOH T 635      13.220 -11.246  31.245  1.00  0.54           O  
HETATM  637  O   HOH T 636      25.285  -8.121 -11.451  1.00  0.54           O  
HETATM  638  O   HOH T 637       4.691  -6.747  25.208  1.00  0.54           O  
HETATM  639  O   HOH T 638     -10.544 -12.394  34.628  1.00  0.54           O  
HETATM  640  O   HOH T 639      11.947  11.731  16.254  1.00  0.54           O  
HETATM  641  O   HOH T 640      -8.873   7.643  43.189  1.00  0.54           O  
HETATM  642  O   HOH T 641       4.582  21.236   5.867  1.00  0.54           O  
HETATM  643  O   HOH T 642     -11.346   1.675 -14.566  1.00  0.54           O  
HETATM  644  O   HOH T 643      24.276 -17.909  -1.714  1.00  0.54           O  
HETATM  645  O   HOH T 644      -8.851   9.662  30.074  1.00  0.54           O  
HETATM  646  O   HOH T 645      18.009   6.264  16.091  1.00  0.54           O  
HETATM  647  O   HOH T 646      12.857   1.479  20.414  1.00  0.54           O  
HETATM  648  O   HOH T 647       1.153   4.791  22.563  1.00  0.54           O  
HETATM  649  O   HOH T 648      -3.260   6.518  12.263  1.00  0.54           O  
HETATM  650  O   HOH T 649      -5.160  -8.911  56.681  1.00  0.54           O  
HETATM  651  O   HOH T 650      13.332  15.268 -20.177  1.00  0.54           O  
HETATM  652  O   HOH T 651      -4.080   8.483  -2.262  1.00  0.54           O  
HETATM  653  O   HOH T 652       5.385  -4.913  62.056  1.00  0.54           O  
HETATM  654  O   HOH T 653       0.818  19.654   0.834  1.00  0.54           O  
HETATM  655  O   HOH T 654       1.500  23.772  45.314  1.00  0.54           O  
HETATM  656  O   HOH T 655      -6.324   5.019  60.139  1.00  0.55           O  
HETATM  657  O   HOH T 656       4.041 -25.946   2.426  1.00  0.55           O  
HETATM  658  O   HOH T 657      17.246  -2.374  11.271  1.00  0.55           O  
HETATM  659  O   HOH T 658       3.266  12.050  19.401  1.00  0.55           O  
HETATM  660  O   HOH T 659       2.115 -15.516  38.936  1.00  0.55           O  
HETATM  661  O   HOH T 660      21.116 -11.319   4.855  1.00  0.55           O  
HETATM  662  O   HOH T 661      23.285 -10.031  -4.313  1.00  0.55           O  
HETATM  663  O   HOH T 662      29.344   8.127   2.406  1.00  0.55           O  
HETATM  664  O   HOH T 663       0.758 -23.531  42.154  1.00  0.55           O  
HETATM  665  O   HOH T 664      16.240 -12.962  13.756  1.00  0.55           O  
HETATM  666  O   HOH T 665      13.201   8.152  63.893  1.00  0.55           O  
HETATM  667  O   HOH T 666      -4.004  12.217  25.974  1.00  0.55           O  
HETATM  668  O   HOH T 667       7.448 -20.325  19.447  1.00  0.55           O  
HETATM  669  O   HOH T 668      16.333 -12.922   8.183  1.00  0.56           O  
HETATM  670  O   HOH T 669      -8.813   8.171  -6.680  1.00  0.56           O  
HETATM  671  O   HOH T 670      10.490  12.461  21.001  1.00  0.56           O  
HETATM  672  O   HOH T 671      17.112   7.532   8.121  1.00  0.56           O  
HETATM  673  O   HOH T 672       8.891  26.279  39.915  1.00  0.56           O  
HETATM  674  O   HOH T 673      -0.610   6.387 -13.743  1.00  0.56           O  
HETATM  675  O   HOH T 674       8.920 -12.184  18.604  1.00  0.56           O  
HETATM  676  O   HOH T 675      19.483  -5.626   7.366  1.00  0.56           O  
HETATM  677  O   HOH T 676       0.906 -16.392  -8.821  1.00  0.56           O  
HETATM  678  O   HOH T 677      16.188  12.982 -19.572  1.00  0.56           O  
HETATM  679  O   HOH T 678      -4.853 -13.849  -4.069  1.00  0.56           O  
HETATM  680  O   HOH T 679       1.298  11.932 -21.709  1.00  0.56           O  
HETATM  681  O   HOH T 680      13.183  28.545  28.205  1.00  0.56           O  
HETATM  682  O   HOH T 681      -9.145   5.830   7.190  1.00  0.56           O  
HETATM  683  O   HOH T 682       9.724  24.183   5.705  1.00  0.56           O  
HETATM  684  O   HOH T 683      11.989 -16.571  -4.539  1.00  0.56           O  
HETATM  685  O   HOH T 684      16.317   0.728  50.323  1.00  0.57           O  
HETATM  686  O   HOH T 685     -17.813 -10.515  50.254  1.00  0.57           O  
HETATM  687  O   HOH T 686      -5.644 -20.691  55.909  1.00  0.57           O  
HETATM  688  O   HOH T 687      -5.792   7.072  49.662  1.00  0.57           O  
HETATM  689  O   HOH T 688      14.632  12.351  15.349  1.00  0.57           O  
HETATM  690  O   HOH T 689      -8.883 -15.489  -0.071  1.00  0.57           O  
HETATM  691  O   HOH T 690      12.063 -10.591  25.002  1.00  0.57           O  
HETATM  692  O   HOH T 691      22.734  -9.396   6.499  1.00  0.57           O  
HETATM  693  O   HOH T 692      -4.123  -9.051  25.791  1.00  0.57           O  
HETATM  694  O   HOH T 693      -3.100   5.840 -17.813  1.00  0.57           O  
HETATM  695  O   HOH T 694      -6.453  14.654  40.753  1.00  0.57           O  
HETATM  696  O   HOH T 695      13.481 -15.436  39.779  1.00  0.57           O  
HETATM  697  O   HOH T 696       2.395 -13.779 -11.376  1.00  0.57           O  
HETATM  698  O   HOH T 697      13.787  20.143 -21.076  1.00  0.58           O  
HETATM  699  O   HOH T 698      -4.053  13.202  46.124  1.00  0.58           O  
HETATM  700  O   HOH T 699     -13.927 -11.964  36.052  1.00  0.58           O  
HETATM  701  O   HOH T 700       3.343   7.861  20.980  1.00  0.58           O  
HETATM  702  O   HOH T 701       4.893  -6.515 -12.965  1.00  0.58           O  
HETATM  703  O   HOH T 702       9.041  14.581  17.039  1.00  0.59           O  
HETATM  704  O   HOH T 703      20.182 -13.634  32.527  1.00  0.59           O  
HETATM  705  O   HOH T 704       9.782 -17.856  34.149  1.00  0.59           O  
HETATM  706  O   HOH T 705      12.154 -12.879  42.816  1.00  0.59           O  
HETATM  707  O   HOH T 706      18.722   0.121 -14.660  1.00  0.59           O  
HETATM  708  O   HOH T 707      -9.073 -12.343  40.094  1.00  0.60           O  
HETATM  709  O   HOH T 708      14.954  23.594  33.046  1.00  0.60           O  
HETATM  710  O   HOH T 709       2.164  10.901  17.067  1.00  0.60           O  
HETATM  711  O   HOH T 710      20.308  -9.669  30.446  1.00  0.61           O  
HETATM  712  O   HOH T 711       0.624  15.590  15.788  1.00  0.63           O  
TER     713      HOH T 711 
