# Supplementary material for: Accurate Prediction of Hydration Sites of Proteins Using Energy Model With Atom Embedding
Source: Front Mol Biosci. 2021 Sep 20;8:756075. doi: 10.3389/fmolb.2021.756075 (PMC8488165; doi:10.3389/fmolb.2021.756075)
Supplement: Supplementary file 1 [file DataSheet1.ZIP › Data Sheet 1/Our_result_pdb/our_dataset_output/3A57_watersite.pdb]

HEADER                                                        XXXX


JRNL        PMID   -1
HETATM    1  O   HOH T   0      12.221  25.018  29.675  1.00  0.21           O  
HETATM    2  O   HOH T   1      38.058  16.265  34.268  1.00  0.22           O  
HETATM    3  O   HOH T   2      31.454  20.939  31.369  1.00  0.22           O  
HETATM    4  O   HOH T   3      20.286  27.884  46.914  1.00  0.23           O  
HETATM    5  O   HOH T   4      10.868  10.193  42.922  1.00  0.23           O  
HETATM    6  O   HOH T   5      29.279   3.817  38.849  1.00  0.23           O  
HETATM    7  O   HOH T   6      15.763  21.806  60.473  1.00  0.23           O  
HETATM    8  O   HOH T   7      18.133  21.274  29.318  1.00  0.23           O  
HETATM    9  O   HOH T   8      10.783  20.806  39.630  1.00  0.24           O  
HETATM   10  O   HOH T   9      19.729   5.370  57.778  1.00  0.24           O  
HETATM   11  O   HOH T  10      25.799  22.258  49.694  1.00  0.25           O  
HETATM   12  O   HOH T  11      15.246   7.187  28.755  1.00  0.25           O  
HETATM   13  O   HOH T  12      22.796  27.606  50.036  1.00  0.26           O  
HETATM   14  O   HOH T  13      10.171  19.027  51.066  1.00  0.26           O  
HETATM   15  O   HOH T  14      25.054   5.280  51.476  1.00  0.26           O  
HETATM   16  O   HOH T  15      16.202  12.210  22.961  1.00  0.27           O  
HETATM   17  O   HOH T  16      27.045  12.220  31.216  1.00  0.27           O  
HETATM   18  O   HOH T  17      30.183  10.588  55.525  1.00  0.27           O  
HETATM   19  O   HOH T  18      10.566  19.061  63.407  1.00  0.27           O  
HETATM   20  O   HOH T  19      12.832   4.876  37.823  1.00  0.27           O  
HETATM   21  O   HOH T  20      13.348  28.344  43.102  1.00  0.27           O  
HETATM   22  O   HOH T  21      23.876  15.919  19.587  1.00  0.27           O  
HETATM   23  O   HOH T  22       9.327  24.547  38.093  1.00  0.28           O  
HETATM   24  O   HOH T  23       9.240  18.481  40.034  1.00  0.28           O  
HETATM   25  O   HOH T  24      28.018   9.801  43.180  1.00  0.28           O  
HETATM   26  O   HOH T  25      10.815  26.688  52.147  1.00  0.28           O  
HETATM   27  O   HOH T  26       9.089   8.169  57.358  1.00  0.29           O  
HETATM   28  O   HOH T  27       8.318  17.024  44.198  1.00  0.29           O  
HETATM   29  O   HOH T  28      28.395  22.983  49.348  1.00  0.29           O  
HETATM   30  O   HOH T  29      15.344  18.789  27.766  1.00  0.29           O  
HETATM   31  O   HOH T  30      37.149   9.703  30.291  1.00  0.29           O  
HETATM   32  O   HOH T  31      26.766  21.768  26.722  1.00  0.29           O  
HETATM   33  O   HOH T  32      20.104   6.399  55.201  1.00  0.30           O  
HETATM   34  O   HOH T  33      16.089   7.453  24.844  1.00  0.30           O  
HETATM   35  O   HOH T  34      29.506  11.790  29.679  1.00  0.30           O  
HETATM   36  O   HOH T  35      11.402   5.280  35.462  1.00  0.30           O  
HETATM   37  O   HOH T  36      20.921  29.557  29.460  1.00  0.30           O  
HETATM   38  O   HOH T  37      18.101   7.114  59.147  1.00  0.31           O  
HETATM   39  O   HOH T  38      32.441  16.052  23.850  1.00  0.31           O  
HETATM   40  O   HOH T  39      24.891   8.042  23.349  1.00  0.32           O  
HETATM   41  O   HOH T  40      20.982   1.404  29.293  1.00  0.32           O  
HETATM   42  O   HOH T  41      17.900  32.660  39.594  1.00  0.33           O  
HETATM   43  O   HOH T  42      21.053  26.786  29.947  1.00  0.33           O  
HETATM   44  O   HOH T  43      20.019   3.094  34.968  1.00  0.33           O  
HETATM   45  O   HOH T  44      33.714  20.268  24.710  1.00  0.33           O  
HETATM   46  O   HOH T  45      17.782  25.574  57.106  1.00  0.33           O  
HETATM   47  O   HOH T  46      25.029  13.424  20.053  1.00  0.34           O  
HETATM   48  O   HOH T  47      12.481  20.167  61.781  1.00  0.34           O  
HETATM   49  O   HOH T  48      25.859   5.417  23.585  1.00  0.34           O  
HETATM   50  O   HOH T  49      19.092  25.081  23.243  1.00  0.34           O  
HETATM   51  O   HOH T  50      15.217   0.654  37.271  1.00  0.34           O  
HETATM   52  O   HOH T  51      28.674   9.991  31.746  1.00  0.34           O  
HETATM   53  O   HOH T  52      20.133  22.538  20.741  1.00  0.34           O  
HETATM   54  O   HOH T  53      21.789  11.275  14.434  1.00  0.34           O  
HETATM   55  O   HOH T  54      26.468   3.712  62.640  1.00  0.34           O  
HETATM   56  O   HOH T  55      30.229  14.584  35.943  1.00  0.35           O  
HETATM   57  O   HOH T  56      25.011   1.475  25.178  1.00  0.35           O  
HETATM   58  O   HOH T  57       5.466  10.803  47.818  1.00  0.35           O  
HETATM   59  O   HOH T  58      25.486   7.002  65.005  1.00  0.35           O  
HETATM   60  O   HOH T  59      30.650  18.142  34.174  1.00  0.35           O  
HETATM   61  O   HOH T  60      25.458   9.009  43.782  1.00  0.35           O  
HETATM   62  O   HOH T  61      11.749  14.062  30.697  1.00  0.35           O  
HETATM   63  O   HOH T  62      28.267   6.883  45.894  1.00  0.35           O  
HETATM   64  O   HOH T  63      23.010   3.177  40.537  1.00  0.36           O  
HETATM   65  O   HOH T  64      23.889   0.876  21.428  1.00  0.36           O  
HETATM   66  O   HOH T  65      29.595   3.213  56.460  1.00  0.36           O  
HETATM   67  O   HOH T  66      33.174   6.639  42.861  1.00  0.36           O  
HETATM   68  O   HOH T  67      17.027  -0.642  23.317  1.00  0.36           O  
HETATM   69  O   HOH T  68      13.788  20.426  29.309  1.00  0.36           O  
HETATM   70  O   HOH T  69      24.976  26.684  48.662  1.00  0.36           O  
HETATM   71  O   HOH T  70      23.508  29.913  45.271  1.00  0.37           O  
HETATM   72  O   HOH T  71      10.664  28.038  42.122  1.00  0.37           O  
HETATM   73  O   HOH T  72      24.043  10.196  21.739  1.00  0.37           O  
HETATM   74  O   HOH T  73      16.986   0.424  39.404  1.00  0.37           O  
HETATM   75  O   HOH T  74      33.843   6.344  40.244  1.00  0.37           O  
HETATM   76  O   HOH T  75      22.469  -0.632  19.725  1.00  0.38           O  
HETATM   77  O   HOH T  76      28.236  14.558  37.752  1.00  0.38           O  
HETATM   78  O   HOH T  77      11.926  24.226  59.964  1.00  0.38           O  
HETATM   79  O   HOH T  78      24.224   5.199  61.886  1.00  0.38           O  
HETATM   80  O   HOH T  79      26.424  24.401  48.155  1.00  0.38           O  
HETATM   81  O   HOH T  80      29.053  20.801  20.156  1.00  0.38           O  
HETATM   82  O   HOH T  81       7.032  10.927  45.435  1.00  0.38           O  
HETATM   83  O   HOH T  82      38.969   8.310  34.265  1.00  0.38           O  
HETATM   84  O   HOH T  83      22.004  29.237  26.902  1.00  0.38           O  
HETATM   85  O   HOH T  84      32.147  22.789  42.844  1.00  0.39           O  
HETATM   86  O   HOH T  85      22.722   2.087  19.211  1.00  0.39           O  
HETATM   87  O   HOH T  86       8.142   9.855  43.133  1.00  0.39           O  
HETATM   88  O   HOH T  87      10.579   4.456  32.925  1.00  0.39           O  
HETATM   89  O   HOH T  88      22.566  13.649  13.139  1.00  0.39           O  
HETATM   90  O   HOH T  89      32.805  10.907  56.482  1.00  0.40           O  
HETATM   91  O   HOH T  90      22.319  13.618  15.927  1.00  0.40           O  
HETATM   92  O   HOH T  91      34.197   8.372  49.478  1.00  0.40           O  
HETATM   93  O   HOH T  92      19.685  31.667  53.817  1.00  0.40           O  
HETATM   94  O   HOH T  93      10.705  24.254  53.413  1.00  0.40           O  
HETATM   95  O   HOH T  94      21.705  27.953  44.536  1.00  0.40           O  
HETATM   96  O   HOH T  95      18.135   7.614  61.859  1.00  0.40           O  
HETATM   97  O   HOH T  96      21.478   4.805  62.246  1.00  0.40           O  
HETATM   98  O   HOH T  97      21.505  24.029  57.694  1.00  0.40           O  
HETATM   99  O   HOH T  98      22.799  23.349  64.236  1.00  0.41           O  
HETATM  100  O   HOH T  99       8.298   5.568  31.705  1.00  0.41           O  
HETATM  101  O   HOH T 100      31.905   4.684  39.285  1.00  0.41           O  
HETATM  102  O   HOH T 101       9.412  14.491  23.441  1.00  0.41           O  
HETATM  103  O   HOH T 102      28.435  18.569  35.804  1.00  0.41           O  
HETATM  104  O   HOH T 103      25.431  17.570  12.442  1.00  0.41           O  
HETATM  105  O   HOH T 104      29.190  21.739  30.112  1.00  0.41           O  
HETATM  106  O   HOH T 105      29.681  14.652  57.758  1.00  0.41           O  
HETATM  107  O   HOH T 106       6.878  27.630  35.690  1.00  0.41           O  
HETATM  108  O   HOH T 107      14.611  17.262  22.738  1.00  0.42           O  
HETATM  109  O   HOH T 108      19.544  25.273  59.219  1.00  0.42           O  
HETATM  110  O   HOH T 109       7.486  17.317  38.087  1.00  0.42           O  
HETATM  111  O   HOH T 110      15.878  21.529  27.734  1.00  0.42           O  
HETATM  112  O   HOH T 111      33.064   7.942  71.921  1.00  0.42           O  
HETATM  113  O   HOH T 112      30.995  18.874  20.803  1.00  0.42           O  
HETATM  114  O   HOH T 113      26.563  17.325  63.764  1.00  0.42           O  
HETATM  115  O   HOH T 114      26.969   1.727  48.827  1.00  0.42           O  
HETATM  116  O   HOH T 115       6.069  17.107  33.659  1.00  0.43           O  
HETATM  117  O   HOH T 116      24.958   1.014  53.556  1.00  0.43           O  
HETATM  118  O   HOH T 117       8.195  16.629  35.389  1.00  0.43           O  
HETATM  119  O   HOH T 118      35.580  12.722  40.446  1.00  0.43           O  
HETATM  120  O   HOH T 119      28.530  17.823  60.123  1.00  0.43           O  
HETATM  121  O   HOH T 120      31.538  20.377  38.953  1.00  0.43           O  
HETATM  122  O   HOH T 121      27.607  16.461  57.808  1.00  0.43           O  
HETATM  123  O   HOH T 122      10.451  12.287  29.290  1.00  0.43           O  
HETATM  124  O   HOH T 123      26.646  19.293  61.613  1.00  0.44           O  
HETATM  125  O   HOH T 124       7.968  20.900  39.764  1.00  0.44           O  
HETATM  126  O   HOH T 125      35.177   8.360  24.159  1.00  0.44           O  
HETATM  127  O   HOH T 126      26.680   2.347  65.066  1.00  0.44           O  
HETATM  128  O   HOH T 127      37.909   7.558  31.816  1.00  0.44           O  
HETATM  129  O   HOH T 128       9.054  28.910  52.199  1.00  0.44           O  
HETATM  130  O   HOH T 129      10.430  30.793  53.742  1.00  0.44           O  
HETATM  131  O   HOH T 130      14.728  14.432  22.617  1.00  0.44           O  
HETATM  132  O   HOH T 131      24.379   2.482  51.138  1.00  0.44           O  
HETATM  133  O   HOH T 132       7.858  28.282  38.200  1.00  0.44           O  
HETATM  134  O   HOH T 133      27.236  20.852  24.180  1.00  0.44           O  
HETATM  135  O   HOH T 134      13.793   6.537  26.377  1.00  0.44           O  
HETATM  136  O   HOH T 135      37.579   8.556  22.714  1.00  0.45           O  
HETATM  137  O   HOH T 136      15.996   5.638  22.681  1.00  0.45           O  
HETATM  138  O   HOH T 137      10.844  12.145  23.783  1.00  0.45           O  
HETATM  139  O   HOH T 138      33.883   9.658  22.019  1.00  0.45           O  
HETATM  140  O   HOH T 139       5.534  16.568  36.310  1.00  0.45           O  
HETATM  141  O   HOH T 140      28.861  16.279  65.058  1.00  0.45           O  
HETATM  142  O   HOH T 141      28.935  13.824  66.634  1.00  0.45           O  
HETATM  143  O   HOH T 142       6.357  14.657  38.135  1.00  0.45           O  
HETATM  144  O   HOH T 143      24.508   3.077  22.973  1.00  0.45           O  
HETATM  145  O   HOH T 144       7.960  18.774  46.206  1.00  0.45           O  
HETATM  146  O   HOH T 145      14.295   0.367  39.812  1.00  0.45           O  
HETATM  147  O   HOH T 146      18.712   0.898  47.955  1.00  0.46           O  
HETATM  148  O   HOH T 147       8.479  20.986  50.269  1.00  0.46           O  
HETATM  149  O   HOH T 148       9.412  19.052  48.402  1.00  0.46           O  
HETATM  150  O   HOH T 149      39.648  12.881  23.067  1.00  0.46           O  
HETATM  151  O   HOH T 150       9.600   9.921  24.777  1.00  0.46           O  
HETATM  152  O   HOH T 151      31.609  18.789  23.595  1.00  0.46           O  
HETATM  153  O   HOH T 152      25.998   5.385  46.436  1.00  0.46           O  
HETATM  154  O   HOH T 153      21.111   3.431  37.493  1.00  0.46           O  
HETATM  155  O   HOH T 154       5.415  11.227  54.792  1.00  0.46           O  
HETATM  156  O   HOH T 155      10.333   4.456  30.193  1.00  0.47           O  
HETATM  157  O   HOH T 156      27.023  21.857  57.480  1.00  0.47           O  
HETATM  158  O   HOH T 157      29.178  20.600  37.512  1.00  0.47           O  
HETATM  159  O   HOH T 158      11.415   7.989  25.675  1.00  0.47           O  
HETATM  160  O   HOH T 159       8.139  24.937  41.932  1.00  0.47           O  
HETATM  161  O   HOH T 160      13.901  21.007  23.909  1.00  0.47           O  
HETATM  162  O   HOH T 161      16.921   9.782  62.873  1.00  0.47           O  
HETATM  163  O   HOH T 162      29.217   5.620  43.701  1.00  0.47           O  
HETATM  164  O   HOH T 163      31.850  13.047  57.967  1.00  0.47           O  
HETATM  165  O   HOH T 164      13.043   2.142  38.143  1.00  0.47           O  
HETATM  166  O   HOH T 165      32.736  13.073  61.666  1.00  0.47           O  
HETATM  167  O   HOH T 166      31.503  10.942  21.245  1.00  0.47           O  
HETATM  168  O   HOH T 167      39.456  10.219  23.794  1.00  0.47           O  
HETATM  169  O   HOH T 168      30.958  18.547  36.927  1.00  0.47           O  
HETATM  170  O   HOH T 169      35.672   7.555  26.837  1.00  0.47           O  
HETATM  171  O   HOH T 170      30.497   5.184  46.217  1.00  0.48           O  
HETATM  172  O   HOH T 171      31.652   4.638  43.829  1.00  0.48           O  
HETATM  173  O   HOH T 172      30.693   8.817  70.831  1.00  0.48           O  
HETATM  174  O   HOH T 173      12.110   5.357  28.384  1.00  0.48           O  
HETATM  175  O   HOH T 174      17.399  24.109  60.691  1.00  0.48           O  
HETATM  176  O   HOH T 175      25.269   4.053  48.852  1.00  0.48           O  
HETATM  177  O   HOH T 176      28.945  18.099  62.832  1.00  0.48           O  
HETATM  178  O   HOH T 177      14.911  18.682  25.014  1.00  0.48           O  
HETATM  179  O   HOH T 178       7.207  22.356  41.928  1.00  0.48           O  
HETATM  180  O   HOH T 179      31.803  16.266  20.051  1.00  0.48           O  
HETATM  181  O   HOH T 180      23.029  28.142  47.256  1.00  0.49           O  
HETATM  182  O   HOH T 181      13.069  21.751  59.525  1.00  0.49           O  
HETATM  183  O   HOH T 182      25.738   4.601  66.396  1.00  0.49           O  
HETATM  184  O   HOH T 183      26.130  22.118  61.754  1.00  0.49           O  
HETATM  185  O   HOH T 184      30.176   4.417  41.451  1.00  0.49           O  
HETATM  186  O   HOH T 185      34.940  16.991  23.127  1.00  0.49           O  
HETATM  187  O   HOH T 186      35.685   8.357  40.734  1.00  0.49           O  
HETATM  188  O   HOH T 187      13.932  23.131  28.471  1.00  0.49           O  
HETATM  189  O   HOH T 188      25.841   2.626  46.384  1.00  0.49           O  
HETATM  190  O   HOH T 189      20.987   9.495  19.364  1.00  0.49           O  
HETATM  191  O   HOH T 190      25.121  22.026  18.512  1.00  0.49           O  
HETATM  192  O   HOH T 191      11.694  21.890  25.236  1.00  0.49           O  
HETATM  193  O   HOH T 192      30.104   9.644  23.171  1.00  0.49           O  
HETATM  194  O   HOH T 193      33.921  13.881  64.757  1.00  0.50           O  
HETATM  195  O   HOH T 194      26.959   7.749  32.013  1.00  0.50           O  
HETATM  196  O   HOH T 195      24.136   2.715  38.086  1.00  0.50           O  
HETATM  197  O   HOH T 196      22.009   1.131  38.834  1.00  0.50           O  
HETATM  198  O   HOH T 197      25.205   6.303  43.986  1.00  0.50           O  
HETATM  199  O   HOH T 198      32.382   8.442  24.039  1.00  0.50           O  
HETATM  200  O   HOH T 199      11.342   3.236  42.852  1.00  0.50           O  
HETATM  201  O   HOH T 200      23.549  12.267  17.979  1.00  0.50           O  
HETATM  202  O   HOH T 201      29.413   7.693  30.580  1.00  0.50           O  
HETATM  203  O   HOH T 202       7.853  19.383  52.531  1.00  0.50           O  
HETATM  204  O   HOH T 203      20.985  11.433  17.126  1.00  0.50           O  
HETATM  205  O   HOH T 204       4.219  12.296  52.632  1.00  0.51           O  
HETATM  206  O   HOH T 205      35.093   7.949  29.492  1.00  0.51           O  
HETATM  207  O   HOH T 206      32.123  10.573  59.185  1.00  0.51           O  
HETATM  208  O   HOH T 207      17.515   4.850  24.732  1.00  0.51           O  
HETATM  209  O   HOH T 208      17.167   4.515  58.784  1.00  0.51           O  
HETATM  210  O   HOH T 209      26.574  16.888  66.494  1.00  0.51           O  
HETATM  211  O   HOH T 210      26.987  21.893  21.647  1.00  0.51           O  
HETATM  212  O   HOH T 211      10.398  12.022  26.518  1.00  0.51           O  
HETATM  213  O   HOH T 212      29.081  10.682  69.774  1.00  0.51           O  
HETATM  214  O   HOH T 213      29.136  19.793  22.677  1.00  0.52           O  
HETATM  215  O   HOH T 214      17.432  22.778  24.105  1.00  0.52           O  
HETATM  216  O   HOH T 215      12.970   3.382  49.518  1.00  0.52           O  
HETATM  217  O   HOH T 216      28.158   3.957  45.654  1.00  0.52           O  
HETATM  218  O   HOH T 217      14.400   4.864  58.282  1.00  0.52           O  
HETATM  219  O   HOH T 218      16.950   7.203  19.165  1.00  0.52           O  
HETATM  220  O   HOH T 219       7.755  21.103  47.648  1.00  0.52           O  
HETATM  221  O   HOH T 220       9.486  10.556  39.590  1.00  0.52           O  
HETATM  222  O   HOH T 221      32.901  13.895  35.870  1.00  0.52           O  
HETATM  223  O   HOH T 222      11.364  23.260  27.618  1.00  0.52           O  
HETATM  224  O   HOH T 223      29.164  20.197  57.583  1.00  0.52           O  
HETATM  225  O   HOH T 224      27.646   2.183  37.318  1.00  0.52           O  
HETATM  226  O   HOH T 225      20.295  26.391  56.739  1.00  0.52           O  
HETATM  227  O   HOH T 226      28.246   4.074  24.236  1.00  0.52           O  
HETATM  228  O   HOH T 227       9.311   6.550  34.117  1.00  0.53           O  
HETATM  229  O   HOH T 228      17.608  33.363  54.608  1.00  0.53           O  
HETATM  230  O   HOH T 229      32.287   7.032  69.353  1.00  0.53           O  
HETATM  231  O   HOH T 230       9.492  23.093  40.472  1.00  0.53           O  
HETATM  232  O   HOH T 231      16.078   1.050  21.423  1.00  0.53           O  
HETATM  233  O   HOH T 232      10.277   8.234  59.844  1.00  0.53           O  
HETATM  234  O   HOH T 233      26.804   0.039  26.677  1.00  0.53           O  
HETATM  235  O   HOH T 234      12.872  28.270  53.064  1.00  0.53           O  
HETATM  236  O   HOH T 235      21.928  25.237  62.456  1.00  0.53           O  
HETATM  237  O   HOH T 236      37.372  10.497  40.456  1.00  0.53           O  
HETATM  238  O   HOH T 237      29.771  26.021  52.716  1.00  0.53           O  
HETATM  239  O   HOH T 238      12.079   6.553  60.864  1.00  0.53           O  
HETATM  240  O   HOH T 239       8.697  14.135  34.071  1.00  0.53           O  
HETATM  241  O   HOH T 240      24.947  14.617  11.946  1.00  0.53           O  
HETATM  242  O   HOH T 241       9.489   6.126  26.003  1.00  0.53           O  
HETATM  243  O   HOH T 242       7.123  25.045  36.511  1.00  0.54           O  
HETATM  244  O   HOH T 243      23.366  28.342  29.206  1.00  0.54           O  
HETATM  245  O   HOH T 244      26.719  11.383  68.850  1.00  0.54           O  
HETATM  246  O   HOH T 245      21.150  27.024  23.392  1.00  0.54           O  
HETATM  247  O   HOH T 246      19.379   0.600  37.927  1.00  0.55           O  
HETATM  248  O   HOH T 247      13.726   6.708  21.723  1.00  0.55           O  
HETATM  249  O   HOH T 248      25.844  16.269  16.158  1.00  0.56           O  
HETATM  250  O   HOH T 249      34.050   5.635  28.290  1.00  0.56           O  
HETATM  251  O   HOH T 250      27.668   2.989  67.538  1.00  0.56           O  
HETATM  252  O   HOH T 251       4.036   8.794  46.979  1.00  0.56           O  
HETATM  253  O   HOH T 252      25.884   0.115  50.937  1.00  0.56           O  
HETATM  254  O   HOH T 253      21.004   0.860  49.435  1.00  0.56           O  
HETATM  255  O   HOH T 254      13.710  28.684  38.152  1.00  0.56           O  
HETATM  256  O   HOH T 255       6.554   9.082  57.366  1.00  0.56           O  
HETATM  257  O   HOH T 256      10.353  23.013  55.914  1.00  0.57           O  
HETATM  258  O   HOH T 257      31.680   3.886  58.239  1.00  0.57           O  
HETATM  259  O   HOH T 258      33.800  14.948  21.554  1.00  0.57           O  
HETATM  260  O   HOH T 259      24.603  24.385  62.350  1.00  0.57           O  
HETATM  261  O   HOH T 260       6.588  19.371  32.244  1.00  0.58           O  
HETATM  262  O   HOH T 261      30.995   5.681  26.745  1.00  0.59           O  
HETATM  263  O   HOH T 262      11.153  17.784  28.544  1.00  0.61           O  
HETATM  264  O   HOH T 263      21.898   1.499  33.827  1.00  0.61           O  
TER     265      HOH T 263 
