# Supplementary material for: Accurate Prediction of Hydration Sites of Proteins Using Energy Model With Atom Embedding
Source: Front Mol Biosci. 2021 Sep 20;8:756075. doi: 10.3389/fmolb.2021.756075 (PMC8488165; doi:10.3389/fmolb.2021.756075)
Supplement: Supplementary file 1 [file DataSheet1.ZIP › Data Sheet 1/Our_result_pdb/our_dataset_output/3ABN_watersite.pdb]

HEADER                                                        XXXX


JRNL        PMID   -1
HETATM    1  O   HOH T   0      11.365   8.275 -12.137  1.00  0.24           O  
HETATM    2  O   HOH T   1      10.353   5.791  29.581  1.00  0.26           O  
HETATM    3  O   HOH T   2      -0.157  -9.002 -39.906  1.00  0.26           O  
HETATM    4  O   HOH T   3       9.792  -5.917  15.678  1.00  0.27           O  
HETATM    5  O   HOH T   4       0.547   5.716 -16.631  1.00  0.29           O  
HETATM    6  O   HOH T   5      13.176   4.717 -24.471  1.00  0.29           O  
HETATM    7  O   HOH T   6      17.085  -5.974  -2.258  1.00  0.29           O  
HETATM    8  O   HOH T   7      10.602  -4.830  -2.254  1.00  0.29           O  
HETATM    9  O   HOH T   8      15.207  -3.270  -6.764  1.00  0.30           O  
HETATM   10  O   HOH T   9       0.773  -3.308 -28.958  1.00  0.30           O  
HETATM   11  O   HOH T  10      11.477  -6.447 -21.389  1.00  0.30           O  
HETATM   12  O   HOH T  11       1.219  -5.971 -22.646  1.00  0.30           O  
HETATM   13  O   HOH T  12      27.901   1.381  28.059  1.00  0.30           O  
HETATM   14  O   HOH T  13      17.698  -8.314  18.291  1.00  0.30           O  
HETATM   15  O   HOH T  14      12.461   6.779   2.712  1.00  0.30           O  
HETATM   16  O   HOH T  15       4.883  -2.287 -10.515  1.00  0.30           O  
HETATM   17  O   HOH T  16       7.201   0.182   9.022  1.00  0.30           O  
HETATM   18  O   HOH T  17       8.656  -8.295 -20.179  1.00  0.31           O  
HETATM   19  O   HOH T  18       0.386   0.531 -25.381  1.00  0.32           O  
HETATM   20  O   HOH T  19       8.259   5.207 -24.486  1.00  0.32           O  
HETATM   21  O   HOH T  20      11.839   4.501  11.600  1.00  0.32           O  
HETATM   22  O   HOH T  21      16.174  -7.798  21.587  1.00  0.32           O  
HETATM   23  O   HOH T  22      26.803   3.909  27.635  1.00  0.32           O  
HETATM   24  O   HOH T  23       5.851   8.106 -19.671  1.00  0.33           O  
HETATM   25  O   HOH T  24      13.725  -7.896  -0.934  1.00  0.33           O  
HETATM   26  O   HOH T  25       4.811   6.999 -24.907  1.00  0.33           O  
HETATM   27  O   HOH T  26       6.313  -5.621 -29.453  1.00  0.33           O  
HETATM   28  O   HOH T  27      10.779   3.603  24.855  1.00  0.34           O  
HETATM   29  O   HOH T  28       3.304   7.199 -19.861  1.00  0.34           O  
HETATM   30  O   HOH T  29      11.303  -2.949 -23.742  1.00  0.35           O  
HETATM   31  O   HOH T  30       7.921  -8.805 -32.826  1.00  0.35           O  
HETATM   32  O   HOH T  31      22.452   5.078  30.152  1.00  0.35           O  
HETATM   33  O   HOH T  32      13.963  -2.137  28.057  1.00  0.35           O  
HETATM   34  O   HOH T  33      22.462   4.522  14.706  1.00  0.36           O  
HETATM   35  O   HOH T  34       8.932   7.714 -23.587  1.00  0.36           O  
HETATM   36  O   HOH T  35      -1.740  -0.448 -23.829  1.00  0.36           O  
HETATM   37  O   HOH T  36      -0.006  -3.906 -21.125  1.00  0.36           O  
HETATM   38  O   HOH T  37       3.785   5.167 -26.834  1.00  0.36           O  
HETATM   39  O   HOH T  38       0.078   0.966 -13.856  1.00  0.36           O  
HETATM   40  O   HOH T  39      18.526   6.705  21.954  1.00  0.36           O  
HETATM   41  O   HOH T  40      10.729   3.910  27.540  1.00  0.36           O  
HETATM   42  O   HOH T  41      11.587  -2.603 -26.438  1.00  0.37           O  
HETATM   43  O   HOH T  42      19.156   1.632 -10.296  1.00  0.37           O  
HETATM   44  O   HOH T  43       7.449   5.616  -7.934  1.00  0.37           O  
HETATM   45  O   HOH T  44      18.022   2.362   5.076  1.00  0.37           O  
HETATM   46  O   HOH T  45      20.813  -4.748  24.951  1.00  0.37           O  
HETATM   47  O   HOH T  46      11.613  -4.254  17.109  1.00  0.37           O  
HETATM   48  O   HOH T  47       3.878  -8.262 -20.722  1.00  0.37           O  
HETATM   49  O   HOH T  48       1.564   3.323 -13.555  1.00  0.37           O  
HETATM   50  O   HOH T  49      11.897   1.675  20.370  1.00  0.37           O  
HETATM   51  O   HOH T  50      11.342   2.116 -32.508  1.00  0.38           O  
HETATM   52  O   HOH T  51      16.977 -10.074  23.055  1.00  0.38           O  
HETATM   53  O   HOH T  52      17.206   5.196  13.983  1.00  0.38           O  
HETATM   54  O   HOH T  53      21.875   5.486   9.801  1.00  0.38           O  
HETATM   55  O   HOH T  54      16.942  -2.920  -8.945  1.00  0.38           O  
HETATM   56  O   HOH T  55      25.967  -4.775  28.944  1.00  0.38           O  
HETATM   57  O   HOH T  56      15.294  -5.238   6.298  1.00  0.38           O  
HETATM   58  O   HOH T  57      17.848  -4.509   5.645  1.00  0.38           O  
HETATM   59  O   HOH T  58       9.890   6.140  10.461  1.00  0.39           O  
HETATM   60  O   HOH T  59      18.681  -7.896  34.786  1.00  0.39           O  
HETATM   61  O   HOH T  60       4.580   7.668 -22.153  1.00  0.39           O  
HETATM   62  O   HOH T  61       5.533  -4.992 -10.321  1.00  0.39           O  
HETATM   63  O   HOH T  62       9.990   2.440  12.104  1.00  0.39           O  
HETATM   64  O   HOH T  63      10.882   5.520  22.818  1.00  0.39           O  
HETATM   65  O   HOH T  64      25.983  -0.277  26.865  1.00  0.39           O  
HETATM   66  O   HOH T  65       4.589   1.590  -8.180  1.00  0.40           O  
HETATM   67  O   HOH T  66       4.648   8.425  -2.924  1.00  0.40           O  
HETATM   68  O   HOH T  67      17.317  -0.336  -9.980  1.00  0.40           O  
HETATM   69  O   HOH T  68       3.955  -2.348  -7.962  1.00  0.40           O  
HETATM   70  O   HOH T  69      11.441   3.877 -26.519  1.00  0.40           O  
HETATM   71  O   HOH T  70      21.979  -4.147  16.637  1.00  0.40           O  
HETATM   72  O   HOH T  71      19.358   6.735  14.020  1.00  0.40           O  
HETATM   73  O   HOH T  72      -0.109  -2.051 -16.468  1.00  0.40           O  
HETATM   74  O   HOH T  73       8.735   1.923 -33.469  1.00  0.41           O  
HETATM   75  O   HOH T  74       4.178  -4.654 -38.072  1.00  0.41           O  
HETATM   76  O   HOH T  75       1.865 -10.109 -32.953  1.00  0.41           O  
HETATM   77  O   HOH T  76      20.390   2.518  12.037  1.00  0.41           O  
HETATM   78  O   HOH T  77      24.060  -4.331  14.799  1.00  0.41           O  
HETATM   79  O   HOH T  78      16.540   6.739  23.929  1.00  0.41           O  
HETATM   80  O   HOH T  79      22.753   4.270  34.060  1.00  0.41           O  
HETATM   81  O   HOH T  80       1.959   8.132  -2.246  1.00  0.42           O  
HETATM   82  O   HOH T  81      16.005   1.436  -5.927  1.00  0.42           O  
HETATM   83  O   HOH T  82      -0.049  -3.002 -34.172  1.00  0.42           O  
HETATM   84  O   HOH T  83      17.132   8.376  26.152  1.00  0.42           O  
HETATM   85  O   HOH T  84      12.160   4.080 -16.801  1.00  0.42           O  
HETATM   86  O   HOH T  85      16.230  -1.642  -2.352  1.00  0.42           O  
HETATM   87  O   HOH T  86       8.402  -4.260 -32.583  1.00  0.43           O  
HETATM   88  O   HOH T  87       8.827  -6.457 -22.493  1.00  0.43           O  
HETATM   89  O   HOH T  88      21.173   1.451   9.629  1.00  0.43           O  
HETATM   90  O   HOH T  89      24.665   4.501  31.962  1.00  0.43           O  
HETATM   91  O   HOH T  90      11.246  -6.741  -0.376  1.00  0.43           O  
HETATM   92  O   HOH T  91      15.982  -0.743  -7.585  1.00  0.43           O  
HETATM   93  O   HOH T  92      13.583   1.870  30.804  1.00  0.44           O  
HETATM   94  O   HOH T  93      -1.615  -0.489 -29.862  1.00  0.44           O  
HETATM   95  O   HOH T  94      14.626  -6.709  -3.234  1.00  0.44           O  
HETATM   96  O   HOH T  95       7.141   5.803   9.826  1.00  0.44           O  
HETATM   97  O   HOH T  96       6.813   9.016 -24.887  1.00  0.44           O  
HETATM   98  O   HOH T  97      20.217  -5.198   7.158  1.00  0.44           O  
HETATM   99  O   HOH T  98      12.696   2.489 -30.127  1.00  0.44           O  
HETATM  100  O   HOH T  99      12.982   2.014 -25.070  1.00  0.45           O  
HETATM  101  O   HOH T 100      15.186  -5.983  34.347  1.00  0.45           O  
HETATM  102  O   HOH T 101      16.160  -7.765  24.333  1.00  0.45           O  
HETATM  103  O   HOH T 102      12.415  -3.657  19.770  1.00  0.45           O  
HETATM  104  O   HOH T 103      20.972   2.879   7.296  1.00  0.46           O  
HETATM  105  O   HOH T 104       8.879   1.981 -36.248  1.00  0.46           O  
HETATM  106  O   HOH T 105       7.411  -3.022 -34.956  1.00  0.46           O  
HETATM  107  O   HOH T 106      15.967   8.656  28.786  1.00  0.46           O  
HETATM  108  O   HOH T 107       8.769  -9.248 -22.741  1.00  0.46           O  
HETATM  109  O   HOH T 108      -0.374  -1.172 -27.499  1.00  0.46           O  
HETATM  110  O   HOH T 109      16.405  -3.779   3.242  1.00  0.46           O  
HETATM  111  O   HOH T 110      15.108  -8.176  19.096  1.00  0.46           O  
HETATM  112  O   HOH T 111      12.762   3.971  21.451  1.00  0.46           O  
HETATM  113  O   HOH T 112      -2.069  -4.101 -32.519  1.00  0.46           O  
HETATM  114  O   HOH T 113      10.003   7.637   1.643  1.00  0.47           O  
HETATM  115  O   HOH T 114      24.311  -0.493  31.878  1.00  0.48           O  
HETATM  116  O   HOH T 115      -4.004   0.037 -25.430  1.00  0.48           O  
HETATM  117  O   HOH T 116       8.082  -0.332 -34.858  1.00  0.48           O  
HETATM  118  O   HOH T 117      17.748   9.041  23.420  1.00  0.48           O  
HETATM  119  O   HOH T 118      12.634   4.167  29.620  1.00  0.48           O  
HETATM  120  O   HOH T 119      14.398   6.481  29.660  1.00  0.48           O  
HETATM  121  O   HOH T 120      25.830  -2.658  30.888  1.00  0.48           O  
HETATM  122  O   HOH T 121       3.986  -6.418 -22.848  1.00  0.49           O  
HETATM  123  O   HOH T 122      -4.390   0.788 -32.914  1.00  0.49           O  
HETATM  124  O   HOH T 123      11.278  -1.977  34.228  1.00  0.49           O  
HETATM  125  O   HOH T 124      -0.215   3.162 -25.247  1.00  0.49           O  
HETATM  126  O   HOH T 125       1.935   5.015 -18.984  1.00  0.49           O  
HETATM  127  O   HOH T 126       7.780   6.551   2.777  1.00  0.49           O  
HETATM  128  O   HOH T 127      19.946   5.996  29.139  1.00  0.49           O  
HETATM  129  O   HOH T 128      20.271  -3.487   4.866  1.00  0.50           O  
HETATM  130  O   HOH T 129       6.105  -8.264 -19.161  1.00  0.50           O  
HETATM  131  O   HOH T 130      13.374   1.566  39.667  1.00  0.50           O  
HETATM  132  O   HOH T 131      20.832  -2.198  14.888  1.00  0.50           O  
HETATM  133  O   HOH T 132      23.758  -4.185  31.949  1.00  0.50           O  
HETATM  134  O   HOH T 133       5.340   6.280  -1.210  1.00  0.50           O  
HETATM  135  O   HOH T 134       1.832  -1.233 -33.095  1.00  0.50           O  
HETATM  136  O   HOH T 135       9.823  -3.173  18.843  1.00  0.50           O  
HETATM  137  O   HOH T 136       9.808  -7.933  -4.654  1.00  0.50           O  
HETATM  138  O   HOH T 137      -2.921  -1.489 -32.202  1.00  0.51           O  
HETATM  139  O   HOH T 138      20.217  -8.023  37.145  1.00  0.51           O  
HETATM  140  O   HOH T 139      10.356   3.743 -34.678  1.00  0.51           O  
HETATM  141  O   HOH T 140       5.257   1.419  10.796  1.00  0.51           O  
HETATM  142  O   HOH T 141      -4.649  -0.254 -35.435  1.00  0.51           O  
HETATM  143  O   HOH T 142      18.109   0.882  -4.228  1.00  0.51           O  
HETATM  144  O   HOH T 143       8.691  -7.686 -11.003  1.00  0.52           O  
HETATM  145  O   HOH T 144       6.656   5.577 -26.560  1.00  0.52           O  
HETATM  146  O   HOH T 145      12.637  -3.735  29.738  1.00  0.52           O  
HETATM  147  O   HOH T 146      15.386   5.720  12.144  1.00  0.53           O  
HETATM  148  O   HOH T 147      16.009  -6.486  16.999  1.00  0.53           O  
HETATM  149  O   HOH T 148      12.169   6.429 -15.566  1.00  0.54           O  
HETATM  150  O   HOH T 149       8.468   5.846   0.029  1.00  0.55           O  
HETATM  151  O   HOH T 150      17.218   6.494  29.953  1.00  0.55           O  
HETATM  152  O   HOH T 151      -1.754  -2.678 -25.548  1.00  0.56           O  
HETATM  153  O   HOH T 152       8.596   0.037  11.401  1.00  0.56           O  
HETATM  154  O   HOH T 153       2.114  -2.323 -10.169  1.00  0.56           O  
HETATM  155  O   HOH T 154      21.083   5.150  12.470  1.00  0.56           O  
HETATM  156  O   HOH T 155      15.481   3.184  32.349  1.00  0.56           O  
HETATM  157  O   HOH T 156      14.174   0.786 -13.757  1.00  0.56           O  
HETATM  158  O   HOH T 157      11.912  -7.160  -3.044  1.00  0.56           O  
HETATM  159  O   HOH T 158      16.841   1.406 -12.086  1.00  0.56           O  
HETATM  160  O   HOH T 159      20.047  -3.326  37.371  1.00  0.57           O  
HETATM  161  O   HOH T 160      21.164  -3.042   0.963  1.00  0.59           O  
TER     162      HOH T 160 
