# Supplementary material for: Accurate Prediction of Hydration Sites of Proteins Using Energy Model With Atom Embedding
Source: Front Mol Biosci. 2021 Sep 20;8:756075. doi: 10.3389/fmolb.2021.756075 (PMC8488165; doi:10.3389/fmolb.2021.756075)
Supplement: Supplementary file 1 [file DataSheet1.ZIP › Data Sheet 1/Our_result_pdb/our_dataset_output/3ACW_watersite.pdb]

HEADER                                                        XXXX


JRNL        PMID   -1
HETATM    1  O   HOH T   0      59.572  -1.375  41.610  1.00  0.17           O  
HETATM    2  O   HOH T   1      39.520   2.679  52.690  1.00  0.18           O  
HETATM    3  O   HOH T   2      55.358   2.853  36.203  1.00  0.18           O  
HETATM    4  O   HOH T   3      60.052   2.313  43.728  1.00  0.19           O  
HETATM    5  O   HOH T   4      71.965   2.623  54.780  1.00  0.19           O  
HETATM    6  O   HOH T   5      66.838   0.630  49.773  1.00  0.20           O  
HETATM    7  O   HOH T   6      71.004  17.173  39.535  1.00  0.20           O  
HETATM    8  O   HOH T   7      44.277   4.258  57.785  1.00  0.21           O  
HETATM    9  O   HOH T   8      50.579  16.485  72.932  1.00  0.22           O  
HETATM   10  O   HOH T   9      66.718   7.128  55.936  1.00  0.23           O  
HETATM   11  O   HOH T  10      47.052   7.116  41.774  1.00  0.23           O  
HETATM   12  O   HOH T  11      33.947  12.950  67.109  1.00  0.23           O  
HETATM   13  O   HOH T  12      55.983   6.347  67.345  1.00  0.24           O  
HETATM   14  O   HOH T  13      38.302   0.609  54.187  1.00  0.24           O  
HETATM   15  O   HOH T  14      38.563  19.620  67.584  1.00  0.24           O  
HETATM   16  O   HOH T  15      72.878   6.029  64.907  1.00  0.24           O  
HETATM   17  O   HOH T  16      73.820   2.360  52.691  1.00  0.24           O  
HETATM   18  O   HOH T  17      37.199  -7.203  54.622  1.00  0.24           O  
HETATM   19  O   HOH T  18      73.151   4.972  57.793  1.00  0.25           O  
HETATM   20  O   HOH T  19      50.657  11.397  51.762  1.00  0.25           O  
HETATM   21  O   HOH T  20      67.990   0.324  43.579  1.00  0.25           O  
HETATM   22  O   HOH T  21      54.163  20.486  40.821  1.00  0.25           O  
HETATM   23  O   HOH T  22      31.780  26.752  61.558  1.00  0.26           O  
HETATM   24  O   HOH T  23      51.983  27.875  43.550  1.00  0.26           O  
HETATM   25  O   HOH T  24      36.966  26.051  55.055  1.00  0.26           O  
HETATM   26  O   HOH T  25      48.913   5.149  41.485  1.00  0.26           O  
HETATM   27  O   HOH T  26      62.979 -10.574  55.513  1.00  0.27           O  
HETATM   28  O   HOH T  27      48.958  24.272  66.568  1.00  0.27           O  
HETATM   29  O   HOH T  28      41.429  26.093  57.593  1.00  0.27           O  
HETATM   30  O   HOH T  29      66.660  -5.616  33.411  1.00  0.27           O  
HETATM   31  O   HOH T  30      51.215   3.999  44.987  1.00  0.27           O  
HETATM   32  O   HOH T  31      65.647  15.999  66.518  1.00  0.27           O  
HETATM   33  O   HOH T  32      60.140  34.813  59.086  1.00  0.27           O  
HETATM   34  O   HOH T  33      46.857  30.556  51.384  1.00  0.27           O  
HETATM   35  O   HOH T  34      59.620  -5.817  35.313  1.00  0.28           O  
HETATM   36  O   HOH T  35      60.111  -3.240  34.655  1.00  0.28           O  
HETATM   37  O   HOH T  36      34.434  18.024  66.657  1.00  0.28           O  
HETATM   38  O   HOH T  37      66.626  30.161  61.752  1.00  0.28           O  
HETATM   39  O   HOH T  38      61.753   5.967  59.171  1.00  0.28           O  
HETATM   40  O   HOH T  39      80.418  17.569  60.084  1.00  0.28           O  
HETATM   41  O   HOH T  40      65.411  -0.978  46.467  1.00  0.28           O  
HETATM   42  O   HOH T  41      68.761   0.453  47.792  1.00  0.28           O  
HETATM   43  O   HOH T  42      64.245  26.949  64.245  1.00  0.28           O  
HETATM   44  O   HOH T  43      39.235  22.164  68.448  1.00  0.28           O  
HETATM   45  O   HOH T  44      55.457  23.380  42.563  1.00  0.29           O  
HETATM   46  O   HOH T  45      72.337  11.352  39.343  1.00  0.29           O  
HETATM   47  O   HOH T  46      64.974   4.105  65.717  1.00  0.29           O  
HETATM   48  O   HOH T  47      76.831   7.111  59.250  1.00  0.29           O  
HETATM   49  O   HOH T  48      62.602  25.894  66.248  1.00  0.29           O  
HETATM   50  O   HOH T  49      75.062  21.886  66.568  1.00  0.29           O  
HETATM   51  O   HOH T  50      30.052  24.398  72.718  1.00  0.29           O  
HETATM   52  O   HOH T  51      56.699  28.408  60.551  1.00  0.29           O  
HETATM   53  O   HOH T  52      46.271  23.593  66.647  1.00  0.29           O  
HETATM   54  O   HOH T  53      50.885  15.624  33.264  1.00  0.29           O  
HETATM   55  O   HOH T  54      59.685   1.389  41.136  1.00  0.30           O  
HETATM   56  O   HOH T  55      48.012  -9.894  47.394  1.00  0.30           O  
HETATM   57  O   HOH T  56      52.541  15.905  35.556  1.00  0.30           O  
HETATM   58  O   HOH T  57      59.070  -0.280  29.244  1.00  0.30           O  
HETATM   59  O   HOH T  58      65.337  27.916  42.742  1.00  0.30           O  
HETATM   60  O   HOH T  59      32.589  -4.960  58.707  1.00  0.30           O  
HETATM   61  O   HOH T  60      54.114  14.125  71.793  1.00  0.30           O  
HETATM   62  O   HOH T  61      69.964  22.382  62.334  1.00  0.30           O  
HETATM   63  O   HOH T  62      28.596  15.175  63.168  1.00  0.30           O  
HETATM   64  O   HOH T  63      58.748  29.198  43.321  1.00  0.30           O  
HETATM   65  O   HOH T  64      41.528  -2.988  42.069  1.00  0.30           O  
HETATM   66  O   HOH T  65      68.043  10.099  29.101  1.00  0.30           O  
HETATM   67  O   HOH T  66      50.402   1.289  31.515  1.00  0.30           O  
HETATM   68  O   HOH T  67      72.692  11.689  48.786  1.00  0.30           O  
HETATM   69  O   HOH T  68      53.816 -10.267  49.596  1.00  0.30           O  
HETATM   70  O   HOH T  69      55.990  32.998  52.104  1.00  0.30           O  
HETATM   71  O   HOH T  70      45.529   2.693  47.086  1.00  0.30           O  
HETATM   72  O   HOH T  71      46.098  -2.859  39.521  1.00  0.31           O  
HETATM   73  O   HOH T  72      60.577  -2.591  32.147  1.00  0.31           O  
HETATM   74  O   HOH T  73      43.232   2.921  60.091  1.00  0.31           O  
HETATM   75  O   HOH T  74      70.896   2.162  29.527  1.00  0.31           O  
HETATM   76  O   HOH T  75      45.098   8.257  75.494  1.00  0.31           O  
HETATM   77  O   HOH T  76      72.680   4.293  29.660  1.00  0.31           O  
HETATM   78  O   HOH T  77      45.441   2.951  51.065  1.00  0.31           O  
HETATM   79  O   HOH T  78      58.569   9.889  29.673  1.00  0.31           O  
HETATM   80  O   HOH T  79      48.511  34.368  52.113  1.00  0.31           O  
HETATM   81  O   HOH T  80      65.219   4.970  55.112  1.00  0.32           O  
HETATM   82  O   HOH T  81      72.231   8.377  34.062  1.00  0.32           O  
HETATM   83  O   HOH T  82      56.911  36.650  55.600  1.00  0.32           O  
HETATM   84  O   HOH T  83      48.316   4.001  37.517  1.00  0.32           O  
HETATM   85  O   HOH T  84      43.642  -2.906  43.924  1.00  0.32           O  
HETATM   86  O   HOH T  85      70.105  -5.466  43.875  1.00  0.32           O  
HETATM   87  O   HOH T  86      45.767  27.051  49.383  1.00  0.32           O  
HETATM   88  O   HOH T  87      54.207  34.197  36.326  1.00  0.32           O  
HETATM   89  O   HOH T  88      56.352   3.864  68.344  1.00  0.33           O  
HETATM   90  O   HOH T  89      57.395  33.072  55.306  1.00  0.33           O  
HETATM   91  O   HOH T  90      48.775  29.936  43.652  1.00  0.33           O  
HETATM   92  O   HOH T  91      38.540  23.048  49.167  1.00  0.33           O  
HETATM   93  O   HOH T  92      25.088  21.457  67.236  1.00  0.33           O  
HETATM   94  O   HOH T  93      53.364  31.448  37.508  1.00  0.33           O  
HETATM   95  O   HOH T  94      72.704  -5.886  42.955  1.00  0.33           O  
HETATM   96  O   HOH T  95      27.786  21.367  66.585  1.00  0.33           O  
HETATM   97  O   HOH T  96      54.952   5.544  45.889  1.00  0.33           O  
HETATM   98  O   HOH T  97      66.512   9.882  55.522  1.00  0.33           O  
HETATM   99  O   HOH T  98      67.865  27.397  41.695  1.00  0.33           O  
HETATM  100  O   HOH T  99      41.165  25.434  51.702  1.00  0.33           O  
HETATM  101  O   HOH T 100      28.380  21.480  70.539  1.00  0.33           O  
HETATM  102  O   HOH T 101      35.510  16.590  72.911  1.00  0.34           O  
HETATM  103  O   HOH T 102      62.022   8.324  57.587  1.00  0.34           O  
HETATM  104  O   HOH T 103      57.393   4.364  46.318  1.00  0.34           O  
HETATM  105  O   HOH T 104      62.359  15.827  42.206  1.00  0.34           O  
HETATM  106  O   HOH T 105      66.242  31.123  59.165  1.00  0.34           O  
HETATM  107  O   HOH T 106      41.229  27.084  55.022  1.00  0.35           O  
HETATM  108  O   HOH T 107      40.203  16.847  72.480  1.00  0.35           O  
HETATM  109  O   HOH T 108      38.966  13.415  47.212  1.00  0.35           O  
HETATM  110  O   HOH T 109      38.191  -5.690  48.299  1.00  0.35           O  
HETATM  111  O   HOH T 110      43.228  26.153  45.693  1.00  0.35           O  
HETATM  112  O   HOH T 111      45.558   8.877  72.865  1.00  0.35           O  
HETATM  113  O   HOH T 112      69.701   4.842  63.886  1.00  0.35           O  
HETATM  114  O   HOH T 113      45.773  21.127  75.176  1.00  0.35           O  
HETATM  115  O   HOH T 114      48.541   2.586  29.881  1.00  0.36           O  
HETATM  116  O   HOH T 115      48.240   5.703  59.349  1.00  0.36           O  
HETATM  117  O   HOH T 116      38.650  -0.358  43.306  1.00  0.36           O  
HETATM  118  O   HOH T 117      35.755  19.535  75.829  1.00  0.36           O  
HETATM  119  O   HOH T 118      60.364  17.915  42.625  1.00  0.36           O  
HETATM  120  O   HOH T 119      51.294  10.670  29.614  1.00  0.36           O  
HETATM  121  O   HOH T 120      57.711   3.876  48.992  1.00  0.36           O  
HETATM  122  O   HOH T 121      46.080  33.155  51.686  1.00  0.36           O  
HETATM  123  O   HOH T 122      33.966  10.182  66.678  1.00  0.36           O  
HETATM  124  O   HOH T 123      57.695  15.638  40.335  1.00  0.36           O  
HETATM  125  O   HOH T 124      45.897  -0.245  56.861  1.00  0.36           O  
HETATM  126  O   HOH T 125      50.314  28.782  41.624  1.00  0.37           O  
HETATM  127  O   HOH T 126      32.406   4.698  54.255  1.00  0.37           O  
HETATM  128  O   HOH T 127      41.081  24.383  49.061  1.00  0.37           O  
HETATM  129  O   HOH T 128      66.338  23.488  64.824  1.00  0.37           O  
HETATM  130  O   HOH T 129      61.951  13.104  32.987  1.00  0.37           O  
HETATM  131  O   HOH T 130      72.908  14.687  68.801  1.00  0.37           O  
HETATM  132  O   HOH T 131      63.712  37.031  53.172  1.00  0.37           O  
HETATM  133  O   HOH T 132      29.025  12.891  61.788  1.00  0.37           O  
HETATM  134  O   HOH T 133      48.526  10.577  78.211  1.00  0.37           O  
HETATM  135  O   HOH T 134      40.374   5.171  39.416  1.00  0.37           O  
HETATM  136  O   HOH T 135      68.720  -4.158  32.174  1.00  0.37           O  
HETATM  137  O   HOH T 136      50.975  -4.638  39.142  1.00  0.37           O  
HETATM  138  O   HOH T 137      39.053  26.595  58.977  1.00  0.37           O  
HETATM  139  O   HOH T 138      52.415   9.815  50.416  1.00  0.37           O  
HETATM  140  O   HOH T 139      69.885  27.814  53.896  1.00  0.38           O  
HETATM  141  O   HOH T 140      70.530   1.403  26.835  1.00  0.38           O  
HETATM  142  O   HOH T 141      79.440  22.748  60.781  1.00  0.38           O  
HETATM  143  O   HOH T 142      50.260  36.447  51.861  1.00  0.38           O  
HETATM  144  O   HOH T 143      63.349  22.816  69.138  1.00  0.38           O  
HETATM  145  O   HOH T 144      59.165 -10.402  44.708  1.00  0.38           O  
HETATM  146  O   HOH T 145      46.954  20.085  72.805  1.00  0.38           O  
HETATM  147  O   HOH T 146      73.664   1.736  30.087  1.00  0.38           O  
HETATM  148  O   HOH T 147      79.408   5.629  63.288  1.00  0.38           O  
HETATM  149  O   HOH T 148      69.134  -9.917  43.037  1.00  0.38           O  
HETATM  150  O   HOH T 149      60.957  17.823  38.268  1.00  0.38           O  
HETATM  151  O   HOH T 150      60.632  21.852  69.564  1.00  0.39           O  
HETATM  152  O   HOH T 151      73.032  13.934  50.436  1.00  0.39           O  
HETATM  153  O   HOH T 152      54.905  18.449  73.397  1.00  0.39           O  
HETATM  154  O   HOH T 153      58.253  19.332  41.399  1.00  0.39           O  
HETATM  155  O   HOH T 154      55.188  -0.838  48.128  1.00  0.39           O  
HETATM  156  O   HOH T 155      53.041  -8.003  48.193  1.00  0.39           O  
HETATM  157  O   HOH T 156      59.192  13.817  41.664  1.00  0.39           O  
HETATM  158  O   HOH T 157      68.602  -7.206  42.609  1.00  0.39           O  
HETATM  159  O   HOH T 158      71.238  -2.598  57.085  1.00  0.39           O  
HETATM  160  O   HOH T 159      55.336  30.824  60.543  1.00  0.39           O  
HETATM  161  O   HOH T 160      52.377   9.653  53.162  1.00  0.40           O  
HETATM  162  O   HOH T 161      47.037  -4.753  49.517  1.00  0.40           O  
HETATM  163  O   HOH T 162      64.404   8.715  66.299  1.00  0.40           O  
HETATM  164  O   HOH T 163      78.382  24.157  58.589  1.00  0.40           O  
HETATM  165  O   HOH T 164      52.568  -0.700  47.373  1.00  0.40           O  
HETATM  166  O   HOH T 165      56.436  10.441  74.942  1.00  0.40           O  
HETATM  167  O   HOH T 166      71.595   9.093  31.466  1.00  0.40           O  
HETATM  168  O   HOH T 167      47.896   2.978  59.660  1.00  0.40           O  
HETATM  169  O   HOH T 168      66.536  -2.430  56.088  1.00  0.40           O  
HETATM  170  O   HOH T 169      70.448  -6.509  49.983  1.00  0.40           O  
HETATM  171  O   HOH T 170      73.235  16.408  41.022  1.00  0.40           O  
HETATM  172  O   HOH T 171      74.571  19.148  67.060  1.00  0.40           O  
HETATM  173  O   HOH T 172      46.186   0.574  52.113  1.00  0.40           O  
HETATM  174  O   HOH T 173      43.418  27.109  50.914  1.00  0.41           O  
HETATM  175  O   HOH T 174      51.316  21.030  73.844  1.00  0.41           O  
HETATM  176  O   HOH T 175      67.159   4.005  23.886  1.00  0.41           O  
HETATM  177  O   HOH T 176      62.580  26.815  39.025  1.00  0.41           O  
HETATM  178  O   HOH T 177      69.132   4.907  25.500  1.00  0.41           O  
HETATM  179  O   HOH T 178      41.039  16.604  82.476  1.00  0.41           O  
HETATM  180  O   HOH T 179      38.066  20.212  72.300  1.00  0.41           O  
HETATM  181  O   HOH T 180      43.566  25.448  48.529  1.00  0.41           O  
HETATM  182  O   HOH T 181      54.370   1.396  46.745  1.00  0.41           O  
HETATM  183  O   HOH T 182      75.643   5.832  57.066  1.00  0.41           O  
HETATM  184  O   HOH T 183      82.809  14.568  60.689  1.00  0.41           O  
HETATM  185  O   HOH T 184      33.226  20.857  52.809  1.00  0.41           O  
HETATM  186  O   HOH T 185      55.005  27.686  69.763  1.00  0.41           O  
HETATM  187  O   HOH T 186      60.355   7.290  54.233  1.00  0.41           O  
HETATM  188  O   HOH T 187      53.310  32.583  61.075  1.00  0.41           O  
HETATM  189  O   HOH T 188      67.172  22.124  62.419  1.00  0.42           O  
HETATM  190  O   HOH T 189      68.732  24.598  65.828  1.00  0.42           O  
HETATM  191  O   HOH T 190      66.096   6.591  66.524  1.00  0.42           O  
HETATM  192  O   HOH T 191      53.210  12.547  29.003  1.00  0.42           O  
HETATM  193  O   HOH T 192      64.637  18.576  38.654  1.00  0.42           O  
HETATM  194  O   HOH T 193      40.237  21.242  73.707  1.00  0.42           O  
HETATM  195  O   HOH T 194      46.519   8.263  28.052  1.00  0.42           O  
HETATM  196  O   HOH T 195      48.853   7.243  29.220  1.00  0.42           O  
HETATM  197  O   HOH T 196      50.938  -3.054  36.892  1.00  0.42           O  
HETATM  198  O   HOH T 197      47.833  23.020  68.818  1.00  0.42           O  
HETATM  199  O   HOH T 198      48.654  -3.309  38.467  1.00  0.42           O  
HETATM  200  O   HOH T 199      37.278  25.048  57.623  1.00  0.42           O  
HETATM  201  O   HOH T 200      30.622  -5.700  60.476  1.00  0.42           O  
HETATM  202  O   HOH T 201      61.788  35.424  54.298  1.00  0.42           O  
HETATM  203  O   HOH T 202      69.507   6.859  27.450  1.00  0.42           O  
HETATM  204  O   HOH T 203      55.488  -8.913  43.222  1.00  0.42           O  
HETATM  205  O   HOH T 204      45.968   3.108  36.220  1.00  0.43           O  
HETATM  206  O   HOH T 205      46.571  22.276  71.271  1.00  0.43           O  
HETATM  207  O   HOH T 206      71.681  24.002  41.012  1.00  0.43           O  
HETATM  208  O   HOH T 207      45.655   7.154  37.661  1.00  0.43           O  
HETATM  209  O   HOH T 208      37.439  -5.839  50.997  1.00  0.43           O  
HETATM  210  O   HOH T 209      61.510  -5.748  50.926  1.00  0.43           O  
HETATM  211  O   HOH T 210      53.295  16.197  73.400  1.00  0.43           O  
HETATM  212  O   HOH T 211      61.716  12.418  66.628  1.00  0.43           O  
HETATM  213  O   HOH T 212      64.001  13.882  67.373  1.00  0.43           O  
HETATM  214  O   HOH T 213      73.394  13.914  39.699  1.00  0.43           O  
HETATM  215  O   HOH T 214      44.345  29.534  52.071  1.00  0.43           O  
HETATM  216  O   HOH T 215      67.670 -12.126  43.442  1.00  0.43           O  
HETATM  217  O   HOH T 216      60.148   4.524  61.033  1.00  0.43           O  
HETATM  218  O   HOH T 217      48.844  11.447  30.722  1.00  0.43           O  
HETATM  219  O   HOH T 218      31.008  27.283  58.860  1.00  0.43           O  
HETATM  220  O   HOH T 219      50.817   2.681  73.974  1.00  0.43           O  
HETATM  221  O   HOH T 220      64.610  -0.944  49.175  1.00  0.43           O  
HETATM  222  O   HOH T 221      59.338  21.371  39.974  1.00  0.43           O  
HETATM  223  O   HOH T 222      39.250   7.469  38.648  1.00  0.44           O  
HETATM  224  O   HOH T 223      66.955   1.334  45.951  1.00  0.44           O  
HETATM  225  O   HOH T 224      66.723   6.786  58.647  1.00  0.44           O  
HETATM  226  O   HOH T 225      64.478  21.556  39.020  1.00  0.44           O  
HETATM  227  O   HOH T 226      38.725  25.726  48.486  1.00  0.44           O  
HETATM  228  O   HOH T 227      62.958  -7.952  29.730  1.00  0.44           O  
HETATM  229  O   HOH T 228      58.103  34.537  50.856  1.00  0.44           O  
HETATM  230  O   HOH T 229      45.965  -2.528  42.358  1.00  0.44           O  
HETATM  231  O   HOH T 230      46.740   1.739  31.814  1.00  0.44           O  
HETATM  232  O   HOH T 231      31.512  13.006  60.666  1.00  0.44           O  
HETATM  233  O   HOH T 232      47.358   9.097  30.568  1.00  0.44           O  
HETATM  234  O   HOH T 233      72.982  -6.927  31.679  1.00  0.44           O  
HETATM  235  O   HOH T 234      47.732  -7.254  48.277  1.00  0.44           O  
HETATM  236  O   HOH T 235      50.757  31.166  57.340  1.00  0.44           O  
HETATM  237  O   HOH T 236      61.818  22.426  39.235  1.00  0.45           O  
HETATM  238  O   HOH T 237      57.305  -6.130  50.495  1.00  0.45           O  
HETATM  239  O   HOH T 238      52.806   5.352  61.424  1.00  0.45           O  
HETATM  240  O   HOH T 239      41.308   6.526  37.129  1.00  0.45           O  
HETATM  241  O   HOH T 240      42.950  24.057  81.243  1.00  0.45           O  
HETATM  242  O   HOH T 241      44.554  22.716  73.227  1.00  0.45           O  
HETATM  243  O   HOH T 242      30.029  15.341  60.696  1.00  0.45           O  
HETATM  244  O   HOH T 243      64.079  -1.591  25.914  1.00  0.45           O  
HETATM  245  O   HOH T 244      68.797  26.188  52.019  1.00  0.45           O  
HETATM  246  O   HOH T 245      52.312  18.698  72.625  1.00  0.45           O  
HETATM  247  O   HOH T 246      53.154   7.123  52.122  1.00  0.45           O  
HETATM  248  O   HOH T 247      63.290  -6.201  48.697  1.00  0.45           O  
HETATM  249  O   HOH T 248      33.723  -4.879  54.875  1.00  0.45           O  
HETATM  250  O   HOH T 249      59.194   2.438  62.620  1.00  0.45           O  
HETATM  251  O   HOH T 250      46.734   8.569  79.150  1.00  0.45           O  
HETATM  252  O   HOH T 251      64.048   8.984  71.690  1.00  0.45           O  
HETATM  253  O   HOH T 252      65.549  32.007  49.308  1.00  0.45           O  
HETATM  254  O   HOH T 253      67.128  23.101  67.535  1.00  0.45           O  
HETATM  255  O   HOH T 254      55.980  15.996  72.732  1.00  0.45           O  
HETATM  256  O   HOH T 255      50.074   5.551  74.769  1.00  0.46           O  
HETATM  257  O   HOH T 256      59.179  34.535  53.448  1.00  0.46           O  
HETATM  258  O   HOH T 257      35.557   1.980  57.462  1.00  0.46           O  
HETATM  259  O   HOH T 258      56.026  10.039  68.922  1.00  0.46           O  
HETATM  260  O   HOH T 259      38.033  15.150  72.973  1.00  0.46           O  
HETATM  261  O   HOH T 260      71.033  -8.010  43.832  1.00  0.46           O  
HETATM  262  O   HOH T 261      37.309  27.822  57.170  1.00  0.46           O  
HETATM  263  O   HOH T 262      41.643  22.640  41.145  1.00  0.46           O  
HETATM  264  O   HOH T 263      58.340  22.411  71.263  1.00  0.46           O  
HETATM  265  O   HOH T 264      50.782  -2.070  34.237  1.00  0.46           O  
HETATM  266  O   HOH T 265      48.546   9.728  75.525  1.00  0.46           O  
HETATM  267  O   HOH T 266      70.873  22.552  38.864  1.00  0.46           O  
HETATM  268  O   HOH T 267      68.286  28.640  63.598  1.00  0.46           O  
HETATM  269  O   HOH T 268      82.864  16.732  58.969  1.00  0.47           O  
HETATM  270  O   HOH T 269      29.155  23.028  68.215  1.00  0.47           O  
HETATM  271  O   HOH T 270      62.929  -4.007  52.700  1.00  0.47           O  
HETATM  272  O   HOH T 271      69.711  25.325  42.257  1.00  0.47           O  
HETATM  273  O   HOH T 272      76.308  23.650  64.942  1.00  0.47           O  
HETATM  274  O   HOH T 273      37.941  17.788  73.609  1.00  0.47           O  
HETATM  275  O   HOH T 274      50.927   5.216  59.525  1.00  0.47           O  
HETATM  276  O   HOH T 275      72.883  12.538  46.277  1.00  0.47           O  
HETATM  277  O   HOH T 276      25.322  19.473  57.334  1.00  0.47           O  
HETATM  278  O   HOH T 277      42.949   4.720  38.432  1.00  0.47           O  
HETATM  279  O   HOH T 278      45.745   4.527  38.651  1.00  0.47           O  
HETATM  280  O   HOH T 279      74.355  -3.019  31.620  1.00  0.47           O  
HETATM  281  O   HOH T 280      49.320   4.790  34.916  1.00  0.47           O  
HETATM  282  O   HOH T 281      44.676  23.067  47.514  1.00  0.47           O  
HETATM  283  O   HOH T 282      80.456  25.191  60.255  1.00  0.47           O  
HETATM  284  O   HOH T 283      42.157  15.368  42.559  1.00  0.47           O  
HETATM  285  O   HOH T 284      67.823   5.723  60.949  1.00  0.47           O  
HETATM  286  O   HOH T 285      58.236  11.463  73.164  1.00  0.48           O  
HETATM  287  O   HOH T 286      55.899   1.723  49.116  1.00  0.48           O  
HETATM  288  O   HOH T 287      61.671 -10.912  39.636  1.00  0.48           O  
HETATM  289  O   HOH T 288      64.755  24.283  67.106  1.00  0.48           O  
HETATM  290  O   HOH T 289      77.717   1.782  43.952  1.00  0.48           O  
HETATM  291  O   HOH T 290      60.280   6.189  56.754  1.00  0.48           O  
HETATM  292  O   HOH T 291      52.704  29.999  60.163  1.00  0.48           O  
HETATM  293  O   HOH T 292      53.379   7.011  47.716  1.00  0.48           O  
HETATM  294  O   HOH T 293      44.859  -1.938  37.112  1.00  0.48           O  
HETATM  295  O   HOH T 294      55.175   4.575  27.335  1.00  0.48           O  
HETATM  296  O   HOH T 295      73.761  12.100  68.208  1.00  0.48           O  
HETATM  297  O   HOH T 296      55.179   7.114  49.945  1.00  0.48           O  
HETATM  298  O   HOH T 297      62.650  20.185  69.931  1.00  0.48           O  
HETATM  299  O   HOH T 298      70.954  27.660  64.158  1.00  0.48           O  
HETATM  300  O   HOH T 299      61.632  13.927  68.868  1.00  0.48           O  
HETATM  301  O   HOH T 300      43.958  22.584  83.394  1.00  0.48           O  
HETATM  302  O   HOH T 301      36.788  29.583  59.296  1.00  0.48           O  
HETATM  303  O   HOH T 302      50.614  13.358  29.759  1.00  0.48           O  
HETATM  304  O   HOH T 303      59.134  37.819  54.506  1.00  0.48           O  
HETATM  305  O   HOH T 304      75.954   3.137  54.318  1.00  0.48           O  
HETATM  306  O   HOH T 305      57.810 -10.005  49.428  1.00  0.48           O  
HETATM  307  O   HOH T 306      48.864   3.395  32.537  1.00  0.49           O  
HETATM  308  O   HOH T 307      57.107  12.404  29.985  1.00  0.49           O  
HETATM  309  O   HOH T 308      47.274  16.436  51.115  1.00  0.49           O  
HETATM  310  O   HOH T 309      64.180 -11.202  53.029  1.00  0.49           O  
HETATM  311  O   HOH T 310      30.844  15.441  55.890  1.00  0.49           O  
HETATM  312  O   HOH T 311      65.690 -16.290  38.790  1.00  0.49           O  
HETATM  313  O   HOH T 312      37.235  20.883  69.750  1.00  0.49           O  
HETATM  314  O   HOH T 313      73.228  16.227  38.224  1.00  0.49           O  
HETATM  315  O   HOH T 314      69.124   2.255  24.639  1.00  0.49           O  
HETATM  316  O   HOH T 315      58.322   0.041  61.514  1.00  0.49           O  
HETATM  317  O   HOH T 316      31.586   8.922  65.726  1.00  0.49           O  
HETATM  318  O   HOH T 317      46.273   0.211  46.244  1.00  0.49           O  
HETATM  319  O   HOH T 318      77.051  11.351  51.702  1.00  0.49           O  
HETATM  320  O   HOH T 319      53.138  -3.119  38.577  1.00  0.49           O  
HETATM  321  O   HOH T 320      61.419  34.137  56.707  1.00  0.49           O  
HETATM  322  O   HOH T 321      68.959  23.053  40.903  1.00  0.50           O  
HETATM  323  O   HOH T 322      25.895  25.104  67.217  1.00  0.50           O  
HETATM  324  O   HOH T 323      35.513  -5.750  52.976  1.00  0.50           O  
HETATM  325  O   HOH T 324      62.444  20.128  37.799  1.00  0.50           O  
HETATM  326  O   HOH T 325      46.645   8.863  39.693  1.00  0.50           O  
HETATM  327  O   HOH T 326      70.672   9.029  28.779  1.00  0.50           O  
HETATM  328  O   HOH T 327      41.418  29.480  60.835  1.00  0.50           O  
HETATM  329  O   HOH T 328      75.983   2.742  34.895  1.00  0.50           O  
HETATM  330  O   HOH T 329      47.010  -5.433  39.105  1.00  0.50           O  
HETATM  331  O   HOH T 330      72.940   2.483  27.555  1.00  0.50           O  
HETATM  332  O   HOH T 331      57.457  22.033  38.148  1.00  0.50           O  
HETATM  333  O   HOH T 332      70.119  11.209  30.471  1.00  0.50           O  
HETATM  334  O   HOH T 333      45.473   1.888  58.676  1.00  0.50           O  
HETATM  335  O   HOH T 334      66.139   0.058  57.079  1.00  0.50           O  
HETATM  336  O   HOH T 335      61.473   4.953  25.246  1.00  0.50           O  
HETATM  337  O   HOH T 336      47.808   6.326  39.166  1.00  0.50           O  
HETATM  338  O   HOH T 337      70.853  25.164  46.323  1.00  0.50           O  
HETATM  339  O   HOH T 338      53.019  29.345  41.360  1.00  0.50           O  
HETATM  340  O   HOH T 339      55.922   6.374  52.545  1.00  0.51           O  
HETATM  341  O   HOH T 340      68.768  24.631  38.687  1.00  0.51           O  
HETATM  342  O   HOH T 341      61.770  25.105  68.819  1.00  0.51           O  
HETATM  343  O   HOH T 342      57.454   3.503  57.554  1.00  0.51           O  
HETATM  344  O   HOH T 343      63.046   5.826  56.658  1.00  0.51           O  
HETATM  345  O   HOH T 344      69.569  25.150  63.167  1.00  0.51           O  
HETATM  346  O   HOH T 345      69.223  -2.105  55.270  1.00  0.51           O  
HETATM  347  O   HOH T 346      65.410  16.305  49.585  1.00  0.51           O  
HETATM  348  O   HOH T 347      57.372 -10.784  42.725  1.00  0.51           O  
HETATM  349  O   HOH T 348      63.332  28.652  41.028  1.00  0.51           O  
HETATM  350  O   HOH T 349      77.144  -0.162  42.249  1.00  0.52           O  
HETATM  351  O   HOH T 350      56.036  26.830  38.954  1.00  0.52           O  
HETATM  352  O   HOH T 351      64.014  -3.580  48.804  1.00  0.52           O  
HETATM  353  O   HOH T 352      67.244 -14.482  42.071  1.00  0.52           O  
HETATM  354  O   HOH T 353      28.608  17.756  60.646  1.00  0.52           O  
HETATM  355  O   HOH T 354      29.837  27.606  63.290  1.00  0.52           O  
HETATM  356  O   HOH T 355      45.699  -4.175  56.918  1.00  0.52           O  
HETATM  357  O   HOH T 356      60.694 -12.114  46.272  1.00  0.52           O  
HETATM  358  O   HOH T 357      64.192  -8.825  27.541  1.00  0.52           O  
HETATM  359  O   HOH T 358      42.929  -0.980  32.163  1.00  0.52           O  
HETATM  360  O   HOH T 359      55.639  -8.178  49.383  1.00  0.52           O  
HETATM  361  O   HOH T 360      74.330  -8.026  39.133  1.00  0.52           O  
HETATM  362  O   HOH T 361      58.216   0.157  49.457  1.00  0.52           O  
HETATM  363  O   HOH T 362      48.129   4.719  49.430  1.00  0.52           O  
HETATM  364  O   HOH T 363      51.815  34.761  60.181  1.00  0.52           O  
HETATM  365  O   HOH T 364      60.378  16.098  40.391  1.00  0.52           O  
HETATM  366  O   HOH T 365      66.573  -3.253  59.651  1.00  0.52           O  
HETATM  367  O   HOH T 366      54.733  22.437  38.749  1.00  0.52           O  
HETATM  368  O   HOH T 367      59.004  34.924  61.638  1.00  0.52           O  
HETATM  369  O   HOH T 368      29.081  10.142  62.545  1.00  0.53           O  
HETATM  370  O   HOH T 369      49.215   4.572  61.605  1.00  0.53           O  
HETATM  371  O   HOH T 370      32.235  -2.741  53.931  1.00  0.53           O  
HETATM  372  O   HOH T 371      58.364   2.508  60.054  1.00  0.53           O  
HETATM  373  O   HOH T 372      51.621   1.741  46.519  1.00  0.53           O  
HETATM  374  O   HOH T 373      56.541  25.645  60.943  1.00  0.53           O  
HETATM  375  O   HOH T 374      47.357   7.443  76.691  1.00  0.53           O  
HETATM  376  O   HOH T 375      61.363  -1.870  29.731  1.00  0.53           O  
HETATM  377  O   HOH T 376      72.062   6.622  28.393  1.00  0.53           O  
HETATM  378  O   HOH T 377      72.921   7.214  67.355  1.00  0.53           O  
HETATM  379  O   HOH T 378      44.557  -3.850  48.758  1.00  0.53           O  
HETATM  380  O   HOH T 379      30.745  22.852  70.515  1.00  0.53           O  
HETATM  381  O   HOH T 380      37.159   1.793  44.058  1.00  0.53           O  
HETATM  382  O   HOH T 381      56.679  21.624  40.731  1.00  0.54           O  
HETATM  383  O   HOH T 382      41.943  23.434  73.928  1.00  0.54           O  
HETATM  384  O   HOH T 383      46.354   1.081  49.139  1.00  0.54           O  
HETATM  385  O   HOH T 384      30.899   4.794  51.901  1.00  0.54           O  
HETATM  386  O   HOH T 385      69.920  28.487  51.076  1.00  0.54           O  
HETATM  387  O   HOH T 386      47.170  25.312  64.787  1.00  0.54           O  
HETATM  388  O   HOH T 387      49.938   8.071  73.711  1.00  0.54           O  
HETATM  389  O   HOH T 388      32.433  -3.185  56.598  1.00  0.54           O  
HETATM  390  O   HOH T 389      70.414  13.756  67.985  1.00  0.54           O  
HETATM  391  O   HOH T 390      30.715  26.983  55.917  1.00  0.54           O  
HETATM  392  O   HOH T 391      44.997   1.885  33.932  1.00  0.54           O  
HETATM  393  O   HOH T 392      46.023  -2.439  45.216  1.00  0.54           O  
HETATM  394  O   HOH T 393      47.836 -11.597  39.612  1.00  0.55           O  
HETATM  395  O   HOH T 394      47.711   5.135  30.656  1.00  0.55           O  
HETATM  396  O   HOH T 395      63.009  18.022  36.353  1.00  0.55           O  
HETATM  397  O   HOH T 396      78.760  26.909  59.071  1.00  0.55           O  
HETATM  398  O   HOH T 397      43.733  22.785  75.938  1.00  0.55           O  
HETATM  399  O   HOH T 398      24.784  21.776  56.060  1.00  0.55           O  
HETATM  400  O   HOH T 399      77.759   4.762  55.678  1.00  0.55           O  
HETATM  401  O   HOH T 400      58.513  25.201  71.456  1.00  0.55           O  
HETATM  402  O   HOH T 401      38.796  30.731  60.842  1.00  0.55           O  
HETATM  403  O   HOH T 402      63.817  -6.607  52.265  1.00  0.55           O  
HETATM  404  O   HOH T 403      50.234   5.718  46.910  1.00  0.55           O  
HETATM  405  O   HOH T 404      58.959   4.917  54.567  1.00  0.55           O  
HETATM  406  O   HOH T 405      52.228  12.228  55.910  1.00  0.55           O  
HETATM  407  O   HOH T 406      57.527  26.798  71.340  1.00  0.55           O  
HETATM  408  O   HOH T 407      25.713  23.542  62.999  1.00  0.55           O  
HETATM  409  O   HOH T 408      46.957  -4.718  43.825  1.00  0.56           O  
HETATM  410  O   HOH T 409      65.599  29.225  64.059  1.00  0.56           O  
HETATM  411  O   HOH T 410      39.592  30.853  65.626  1.00  0.56           O  
HETATM  412  O   HOH T 411      75.393  -5.618  31.492  1.00  0.56           O  
HETATM  413  O   HOH T 412      64.828  -0.087  24.017  1.00  0.56           O  
HETATM  414  O   HOH T 413      25.884  25.982  55.901  1.00  0.56           O  
HETATM  415  O   HOH T 414      73.782  -5.780  29.234  1.00  0.56           O  
HETATM  416  O   HOH T 415      76.336  30.969  57.402  1.00  0.56           O  
HETATM  417  O   HOH T 416      73.599  -4.419  45.468  1.00  0.57           O  
HETATM  418  O   HOH T 417      70.506 -16.105  37.285  1.00  0.57           O  
HETATM  419  O   HOH T 418      75.619  13.733  50.995  1.00  0.57           O  
HETATM  420  O   HOH T 419      38.876   6.492  41.296  1.00  0.57           O  
HETATM  421  O   HOH T 420      67.692  -0.687  59.521  1.00  0.57           O  
HETATM  422  O   HOH T 421      74.629   7.329  34.868  1.00  0.57           O  
HETATM  423  O   HOH T 422      80.943  21.196  58.924  1.00  0.57           O  
HETATM  424  O   HOH T 423      48.298  11.151  39.685  1.00  0.57           O  
HETATM  425  O   HOH T 424      57.663   4.087  51.734  1.00  0.57           O  
HETATM  426  O   HOH T 425      68.678  -2.609  57.896  1.00  0.57           O  
HETATM  427  O   HOH T 426      71.366  -7.268  47.600  1.00  0.58           O  
HETATM  428  O   HOH T 427      30.635   6.575  62.436  1.00  0.58           O  
HETATM  429  O   HOH T 428      57.874  -1.734  31.328  1.00  0.58           O  
HETATM  430  O   HOH T 429      24.222  23.454  65.494  1.00  0.58           O  
HETATM  431  O   HOH T 430      33.052  -4.791  52.224  1.00  0.58           O  
HETATM  432  O   HOH T 431      38.818  28.598  60.923  1.00  0.58           O  
HETATM  433  O   HOH T 432      68.069  17.467  66.677  1.00  0.59           O  
HETATM  434  O   HOH T 433      67.015  26.101  64.282  1.00  0.59           O  
HETATM  435  O   HOH T 434      49.535  19.018  73.022  1.00  0.59           O  
HETATM  436  O   HOH T 435      44.817   0.796  61.048  1.00  0.59           O  
TER     437      HOH T 435 
