# Supplementary material for: Accurate Prediction of Hydration Sites of Proteins Using Energy Model With Atom Embedding
Source: Front Mol Biosci. 2021 Sep 20;8:756075. doi: 10.3389/fmolb.2021.756075 (PMC8488165; doi:10.3389/fmolb.2021.756075)
Supplement: Supplementary file 1 [file DataSheet1.ZIP › Data Sheet 1/Our_result_pdb/our_dataset_output/3AK0_watersite.pdb]

HEADER                                                        XXXX


JRNL        PMID   -1
HETATM    1  O   HOH T   0      15.945 -15.752  -4.638  1.00  0.18           O  
HETATM    2  O   HOH T   1      15.619 -25.219  15.006  1.00  0.18           O  
HETATM    3  O   HOH T   2       5.318 -13.907  -7.636  1.00  0.21           O  
HETATM    4  O   HOH T   3      21.742  -0.011   8.531  1.00  0.21           O  
HETATM    5  O   HOH T   4      16.526 -27.372  25.877  1.00  0.22           O  
HETATM    6  O   HOH T   5      11.589  23.740  25.955  1.00  0.23           O  
HETATM    7  O   HOH T   6      28.885   9.703  10.788  1.00  0.23           O  
HETATM    8  O   HOH T   7      17.518  24.356   3.296  1.00  0.23           O  
HETATM    9  O   HOH T   8      19.114 -20.923  25.245  1.00  0.24           O  
HETATM   10  O   HOH T   9       7.442 -18.492  22.873  1.00  0.24           O  
HETATM   11  O   HOH T  10      -9.551 -10.967   6.126  1.00  0.24           O  
HETATM   12  O   HOH T  11       4.525   4.127  11.464  1.00  0.24           O  
HETATM   13  O   HOH T  12      13.916  -6.955   4.641  1.00  0.24           O  
HETATM   14  O   HOH T  13       6.506  -5.013  -1.267  1.00  0.24           O  
HETATM   15  O   HOH T  14      12.780  -1.669   5.845  1.00  0.25           O  
HETATM   16  O   HOH T  15      17.756 -24.331  17.818  1.00  0.25           O  
HETATM   17  O   HOH T  16       3.464   8.823   2.119  1.00  0.25           O  
HETATM   18  O   HOH T  17      18.240 -16.360  -7.756  1.00  0.25           O  
HETATM   19  O   HOH T  18      20.167  15.900  11.655  1.00  0.25           O  
HETATM   20  O   HOH T  19      26.028   0.044  14.404  1.00  0.25           O  
HETATM   21  O   HOH T  20      10.619   8.773  -0.959  1.00  0.25           O  
HETATM   22  O   HOH T  21       1.659 -14.612  -5.752  1.00  0.25           O  
HETATM   23  O   HOH T  22      21.715 -15.486   6.210  1.00  0.26           O  
HETATM   24  O   HOH T  23      19.655 -19.394  -5.544  1.00  0.26           O  
HETATM   25  O   HOH T  24      19.143 -26.222   1.959  1.00  0.26           O  
HETATM   26  O   HOH T  25      20.965  -5.312  13.501  1.00  0.27           O  
HETATM   27  O   HOH T  26       6.567  -0.359   5.127  1.00  0.27           O  
HETATM   28  O   HOH T  27      10.399 -33.302  18.008  1.00  0.27           O  
HETATM   29  O   HOH T  28      24.338 -11.151  11.447  1.00  0.27           O  
HETATM   30  O   HOH T  29      31.255  13.724  21.379  1.00  0.27           O  
HETATM   31  O   HOH T  30      13.422  -5.238  22.654  1.00  0.27           O  
HETATM   32  O   HOH T  31      15.582 -11.150  -3.634  1.00  0.27           O  
HETATM   33  O   HOH T  32      22.986 -22.120  14.449  1.00  0.28           O  
HETATM   34  O   HOH T  33      20.179  22.398  24.290  1.00  0.28           O  
HETATM   35  O   HOH T  34      -0.088  13.135  12.567  1.00  0.28           O  
HETATM   36  O   HOH T  35       4.806 -18.137  23.632  1.00  0.28           O  
HETATM   37  O   HOH T  36      22.732   7.475  20.957  1.00  0.28           O  
HETATM   38  O   HOH T  37      25.522  11.458  -1.487  1.00  0.28           O  
HETATM   39  O   HOH T  38      21.969 -22.454  -0.087  1.00  0.29           O  
HETATM   40  O   HOH T  39      -2.370 -22.755  -0.119  1.00  0.29           O  
HETATM   41  O   HOH T  40      -2.357 -12.000   4.294  1.00  0.29           O  
HETATM   42  O   HOH T  41      15.134 -26.536  -8.127  1.00  0.29           O  
HETATM   43  O   HOH T  42      19.566 -18.292  24.461  1.00  0.29           O  
HETATM   44  O   HOH T  43      16.938  20.217  31.302  1.00  0.30           O  
HETATM   45  O   HOH T  44      22.230  -9.622  18.985  1.00  0.30           O  
HETATM   46  O   HOH T  45       8.175   9.404  35.177  1.00  0.30           O  
HETATM   47  O   HOH T  46      21.018   8.918  38.909  1.00  0.30           O  
HETATM   48  O   HOH T  47       3.289   7.093  17.726  1.00  0.30           O  
HETATM   49  O   HOH T  48       2.521 -19.276  17.367  1.00  0.30           O  
HETATM   50  O   HOH T  49      14.431 -13.443  -4.626  1.00  0.30           O  
HETATM   51  O   HOH T  50       0.760 -11.624   0.411  1.00  0.30           O  
HETATM   52  O   HOH T  51       5.640   6.294  29.239  1.00  0.31           O  
HETATM   53  O   HOH T  52      16.214   2.993  -3.339  1.00  0.31           O  
HETATM   54  O   HOH T  53       3.407  18.697  24.503  1.00  0.31           O  
HETATM   55  O   HOH T  54      10.712 -21.463 -10.640  1.00  0.31           O  
HETATM   56  O   HOH T  55      25.050  16.105  12.086  1.00  0.31           O  
HETATM   57  O   HOH T  56      29.697  17.193  10.129  1.00  0.31           O  
HETATM   58  O   HOH T  57      11.911 -32.245   7.791  1.00  0.31           O  
HETATM   59  O   HOH T  58      16.844  -4.154   3.548  1.00  0.31           O  
HETATM   60  O   HOH T  59      26.624  16.126  23.929  1.00  0.31           O  
HETATM   61  O   HOH T  60      13.728  -0.285  36.444  1.00  0.31           O  
HETATM   62  O   HOH T  61       7.990 -28.277  -9.537  1.00  0.31           O  
HETATM   63  O   HOH T  62      10.425   0.709   3.618  1.00  0.31           O  
HETATM   64  O   HOH T  63      -4.761 -25.130   1.556  1.00  0.32           O  
HETATM   65  O   HOH T  64       2.687  -0.219   8.091  1.00  0.32           O  
HETATM   66  O   HOH T  65      22.757  -7.165  12.420  1.00  0.32           O  
HETATM   67  O   HOH T  66      20.976  12.169  37.433  1.00  0.32           O  
HETATM   68  O   HOH T  67      -1.231 -25.270   7.734  1.00  0.32           O  
HETATM   69  O   HOH T  68      14.862  -2.976  23.246  1.00  0.32           O  
HETATM   70  O   HOH T  69      23.192  -3.725  13.878  1.00  0.32           O  
HETATM   71  O   HOH T  70      10.307  -1.599   4.963  1.00  0.32           O  
HETATM   72  O   HOH T  71       3.925  -3.598  23.635  1.00  0.32           O  
HETATM   73  O   HOH T  72       7.801  22.161   7.401  1.00  0.32           O  
HETATM   74  O   HOH T  73      24.765  13.048  12.085  1.00  0.32           O  
HETATM   75  O   HOH T  74      22.310   7.196  31.443  1.00  0.32           O  
HETATM   76  O   HOH T  75       6.370  12.665  12.767  1.00  0.32           O  
HETATM   77  O   HOH T  76      12.921  -8.568   2.689  1.00  0.32           O  
HETATM   78  O   HOH T  77      14.190 -18.935  29.451  1.00  0.32           O  
HETATM   79  O   HOH T  78      21.023 -22.365  -3.782  1.00  0.33           O  
HETATM   80  O   HOH T  79       1.215 -10.178  25.325  1.00  0.33           O  
HETATM   81  O   HOH T  80       9.437   6.425  15.922  1.00  0.33           O  
HETATM   82  O   HOH T  81       2.773  18.976  11.572  1.00  0.33           O  
HETATM   83  O   HOH T  82       8.916   6.800   0.086  1.00  0.33           O  
HETATM   84  O   HOH T  83      -2.983  14.666  24.309  1.00  0.33           O  
HETATM   85  O   HOH T  84      25.778 -21.913  14.503  1.00  0.33           O  
HETATM   86  O   HOH T  85       2.646 -35.321  18.234  1.00  0.33           O  
HETATM   87  O   HOH T  86      18.426 -24.840  15.115  1.00  0.34           O  
HETATM   88  O   HOH T  87      -1.623  -7.076  14.123  1.00  0.34           O  
HETATM   89  O   HOH T  88      -1.779  -8.763  -5.815  1.00  0.34           O  
HETATM   90  O   HOH T  89       8.400  11.745  33.740  1.00  0.34           O  
HETATM   91  O   HOH T  90      15.152 -32.021  13.462  1.00  0.34           O  
HETATM   92  O   HOH T  91       2.744   6.496   0.800  1.00  0.34           O  
HETATM   93  O   HOH T  92       7.648  14.762   7.027  1.00  0.35           O  
HETATM   94  O   HOH T  93      -5.089 -14.189   8.180  1.00  0.35           O  
HETATM   95  O   HOH T  94      11.405 -30.782  10.199  1.00  0.35           O  
HETATM   96  O   HOH T  95      33.694  13.133   9.600  1.00  0.35           O  
HETATM   97  O   HOH T  96       4.534 -34.309  20.000  1.00  0.35           O  
HETATM   98  O   HOH T  97      16.094  19.846  33.953  1.00  0.35           O  
HETATM   99  O   HOH T  98      -0.832 -11.334  26.765  1.00  0.35           O  
HETATM  100  O   HOH T  99      16.624 -30.284  -4.116  1.00  0.35           O  
HETATM  101  O   HOH T 100      22.965 -10.883  16.679  1.00  0.35           O  
HETATM  102  O   HOH T 101       8.914  23.399   3.897  1.00  0.35           O  
HETATM  103  O   HOH T 102       8.981  22.903  25.879  1.00  0.35           O  
HETATM  104  O   HOH T 103      26.242 -19.193   0.547  1.00  0.35           O  
HETATM  105  O   HOH T 104      -6.744 -11.373   6.063  1.00  0.35           O  
HETATM  106  O   HOH T 105      13.577 -32.289  11.232  1.00  0.35           O  
HETATM  107  O   HOH T 106      21.069  -7.381   5.561  1.00  0.36           O  
HETATM  108  O   HOH T 107      24.311  19.014  31.697  1.00  0.36           O  
HETATM  109  O   HOH T 108       1.566  16.148  27.649  1.00  0.36           O  
HETATM  110  O   HOH T 109       0.894  -2.259   7.302  1.00  0.36           O  
HETATM  111  O   HOH T 110      -4.641 -26.644  10.317  1.00  0.36           O  
HETATM  112  O   HOH T 111      20.465  24.975  17.035  1.00  0.36           O  
HETATM  113  O   HOH T 112      29.121   2.752  18.638  1.00  0.36           O  
HETATM  114  O   HOH T 113      11.945  -3.651   4.152  1.00  0.36           O  
HETATM  115  O   HOH T 114      -0.642 -10.982  -7.314  1.00  0.36           O  
HETATM  116  O   HOH T 115      17.673  -0.005   3.572  1.00  0.36           O  
HETATM  117  O   HOH T 116      26.903 -17.106   2.220  1.00  0.36           O  
HETATM  118  O   HOH T 117      16.740  -1.209  29.727  1.00  0.36           O  
HETATM  119  O   HOH T 118      25.854   2.176  21.006  1.00  0.36           O  
HETATM  120  O   HOH T 119      20.542 -23.367  13.886  1.00  0.36           O  
HETATM  121  O   HOH T 120       6.561 -26.809  -5.802  1.00  0.37           O  
HETATM  122  O   HOH T 121       4.029  17.141  26.724  1.00  0.37           O  
HETATM  123  O   HOH T 122      26.392   4.796  20.113  1.00  0.37           O  
HETATM  124  O   HOH T 123      11.158 -25.113 -12.540  1.00  0.37           O  
HETATM  125  O   HOH T 124      20.729 -13.699  -0.003  1.00  0.37           O  
HETATM  126  O   HOH T 125      -5.370  12.748  26.966  1.00  0.37           O  
HETATM  127  O   HOH T 126      29.534  19.478  30.861  1.00  0.37           O  
HETATM  128  O   HOH T 127      25.149  20.403  33.985  1.00  0.37           O  
HETATM  129  O   HOH T 128      18.202  24.169  23.521  1.00  0.37           O  
HETATM  130  O   HOH T 129      11.485  -6.164  24.293  1.00  0.37           O  
HETATM  131  O   HOH T 130      19.723  25.243  -0.336  1.00  0.37           O  
HETATM  132  O   HOH T 131      20.322  11.269   0.915  1.00  0.37           O  
HETATM  133  O   HOH T 132      30.665  17.217  26.103  1.00  0.38           O  
HETATM  134  O   HOH T 133      20.523 -30.674  19.773  1.00  0.38           O  
HETATM  135  O   HOH T 134      20.390 -22.357  27.290  1.00  0.38           O  
HETATM  136  O   HOH T 135       9.630 -33.489  21.917  1.00  0.38           O  
HETATM  137  O   HOH T 136      -0.516  -1.916  14.933  1.00  0.38           O  
HETATM  138  O   HOH T 137      20.882  14.646   9.078  1.00  0.38           O  
HETATM  139  O   HOH T 138       4.618  -4.950  -3.331  1.00  0.38           O  
HETATM  140  O   HOH T 139       0.452   8.121  21.756  1.00  0.38           O  
HETATM  141  O   HOH T 140      29.193  16.447   7.515  1.00  0.38           O  
HETATM  142  O   HOH T 141       4.567   7.927  27.161  1.00  0.38           O  
HETATM  143  O   HOH T 142      -2.544 -13.692   0.268  1.00  0.38           O  
HETATM  144  O   HOH T 143      11.625  22.820   3.977  1.00  0.38           O  
HETATM  145  O   HOH T 144      20.356   8.695   2.187  1.00  0.38           O  
HETATM  146  O   HOH T 145      15.949 -27.703 -10.468  1.00  0.38           O  
HETATM  147  O   HOH T 146      18.232 -10.970  27.534  1.00  0.38           O  
HETATM  148  O   HOH T 147       9.699 -32.835   9.299  1.00  0.38           O  
HETATM  149  O   HOH T 148      15.228 -31.570  16.193  1.00  0.38           O  
HETATM  150  O   HOH T 149       5.269  18.079  12.508  1.00  0.39           O  
HETATM  151  O   HOH T 150      20.738 -19.634  15.934  1.00  0.39           O  
HETATM  152  O   HOH T 151       1.138 -17.050  -4.437  1.00  0.39           O  
HETATM  153  O   HOH T 152      24.778   2.610   6.125  1.00  0.39           O  
HETATM  154  O   HOH T 153       9.751  19.322  31.511  1.00  0.39           O  
HETATM  155  O   HOH T 154      28.601  18.958  34.463  1.00  0.39           O  
HETATM  156  O   HOH T 155      20.986  20.418   6.256  1.00  0.39           O  
HETATM  157  O   HOH T 156      -6.273 -21.909  12.460  1.00  0.39           O  
HETATM  158  O   HOH T 157      24.409 -27.513   3.857  1.00  0.39           O  
HETATM  159  O   HOH T 158      16.706 -13.610  -3.008  1.00  0.39           O  
HETATM  160  O   HOH T 159      -0.531 -13.158   2.410  1.00  0.39           O  
HETATM  161  O   HOH T 160      -3.002  16.903  27.493  1.00  0.39           O  
HETATM  162  O   HOH T 161      12.306  22.769  21.795  1.00  0.39           O  
HETATM  163  O   HOH T 162      -2.744  21.248  21.671  1.00  0.39           O  
HETATM  164  O   HOH T 163      -0.018  -0.013  16.969  1.00  0.39           O  
HETATM  165  O   HOH T 164      22.922 -19.262   2.772  1.00  0.40           O  
HETATM  166  O   HOH T 165      24.703  -8.984   7.163  1.00  0.40           O  
HETATM  167  O   HOH T 166      23.653   5.435  22.515  1.00  0.40           O  
HETATM  168  O   HOH T 167      17.440   2.770   3.848  1.00  0.40           O  
HETATM  169  O   HOH T 168       7.148  -6.431  26.501  1.00  0.40           O  
HETATM  170  O   HOH T 169       0.428  -9.788  16.837  1.00  0.40           O  
HETATM  171  O   HOH T 170      21.044   7.283  41.155  1.00  0.40           O  
HETATM  172  O   HOH T 171      17.366  -9.468   1.513  1.00  0.40           O  
HETATM  173  O   HOH T 172       3.207   9.456  19.184  1.00  0.40           O  
HETATM  174  O   HOH T 173       8.128  -8.980  26.786  1.00  0.40           O  
HETATM  175  O   HOH T 174      22.893  -2.217  20.948  1.00  0.40           O  
HETATM  176  O   HOH T 175      -1.920  -4.216  13.634  1.00  0.40           O  
HETATM  177  O   HOH T 176      11.597 -18.683  30.443  1.00  0.40           O  
HETATM  178  O   HOH T 177      10.764  -1.572  30.308  1.00  0.40           O  
HETATM  179  O   HOH T 178      -1.545  -2.990   4.068  1.00  0.40           O  
HETATM  180  O   HOH T 179       0.739  15.055  10.756  1.00  0.40           O  
HETATM  181  O   HOH T 180       1.725  11.091  12.983  1.00  0.41           O  
HETATM  182  O   HOH T 181      14.510 -26.342  -4.181  1.00  0.41           O  
HETATM  183  O   HOH T 182      -5.583 -26.945   6.761  1.00  0.41           O  
HETATM  184  O   HOH T 183      25.011 -17.800   4.130  1.00  0.41           O  
HETATM  185  O   HOH T 184       4.149  19.897  26.908  1.00  0.41           O  
HETATM  186  O   HOH T 185       4.540   6.335   2.921  1.00  0.41           O  
HETATM  187  O   HOH T 186      26.049 -11.291   6.585  1.00  0.41           O  
HETATM  188  O   HOH T 187      16.173  -5.468  23.341  1.00  0.41           O  
HETATM  189  O   HOH T 188      16.644  14.764  41.350  1.00  0.41           O  
HETATM  190  O   HOH T 189       7.064 -21.850  26.864  1.00  0.41           O  
HETATM  191  O   HOH T 190       2.357 -17.060  -6.915  1.00  0.41           O  
HETATM  192  O   HOH T 191       4.846  -4.917  26.008  1.00  0.41           O  
HETATM  193  O   HOH T 192      19.863 -26.830  13.714  1.00  0.42           O  
HETATM  194  O   HOH T 193      24.979 -15.058  19.662  1.00  0.42           O  
HETATM  195  O   HOH T 194      11.929 -31.327  19.318  1.00  0.42           O  
HETATM  196  O   HOH T 195      21.438 -29.518  -2.427  1.00  0.42           O  
HETATM  197  O   HOH T 196      13.432   3.286  -3.855  1.00  0.42           O  
HETATM  198  O   HOH T 197       3.222  -2.661  26.145  1.00  0.42           O  
HETATM  199  O   HOH T 198      30.398  18.856   6.782  1.00  0.42           O  
HETATM  200  O   HOH T 199      27.987  17.787  25.594  1.00  0.42           O  
HETATM  201  O   HOH T 200       8.877 -12.811 -14.591  1.00  0.42           O  
HETATM  202  O   HOH T 201      -1.119 -20.038  -2.988  1.00  0.42           O  
HETATM  203  O   HOH T 202      10.520  -8.782 -12.166  1.00  0.42           O  
HETATM  204  O   HOH T 203      26.664  -1.989  16.140  1.00  0.42           O  
HETATM  205  O   HOH T 204      -7.885 -21.010   4.864  1.00  0.42           O  
HETATM  206  O   HOH T 205      -0.050  -5.607  22.958  1.00  0.42           O  
HETATM  207  O   HOH T 206      24.557 -23.380  -0.520  1.00  0.42           O  
HETATM  208  O   HOH T 207       8.431 -24.315  -9.889  1.00  0.42           O  
HETATM  209  O   HOH T 208      19.698  -0.536  26.697  1.00  0.42           O  
HETATM  210  O   HOH T 209      12.479 -26.123 -14.720  1.00  0.42           O  
HETATM  211  O   HOH T 210       3.116   9.007  30.154  1.00  0.42           O  
HETATM  212  O   HOH T 211       0.492 -26.354  17.024  1.00  0.42           O  
HETATM  213  O   HOH T 212       6.683 -13.661  13.193  1.00  0.43           O  
HETATM  214  O   HOH T 213      -1.418  -4.643  -0.823  1.00  0.43           O  
HETATM  215  O   HOH T 214      18.628  20.379   4.804  1.00  0.43           O  
HETATM  216  O   HOH T 215      24.300  20.813  27.704  1.00  0.43           O  
HETATM  217  O   HOH T 216      18.150  -0.193  31.812  1.00  0.43           O  
HETATM  218  O   HOH T 217       8.975  -7.353  24.591  1.00  0.43           O  
HETATM  219  O   HOH T 218       5.604  -8.469  27.680  1.00  0.43           O  
HETATM  220  O   HOH T 219      23.647 -26.443  20.679  1.00  0.43           O  
HETATM  221  O   HOH T 220      24.564   2.992  23.313  1.00  0.43           O  
HETATM  222  O   HOH T 221       1.117 -26.295   6.484  1.00  0.43           O  
HETATM  223  O   HOH T 222      12.139 -10.429  27.212  1.00  0.43           O  
HETATM  224  O   HOH T 223      13.152 -20.877  31.114  1.00  0.43           O  
HETATM  225  O   HOH T 224      25.930   7.876  23.926  1.00  0.43           O  
HETATM  226  O   HOH T 225      -2.067  -4.310  24.302  1.00  0.43           O  
HETATM  227  O   HOH T 226      -1.562 -16.130  -4.069  1.00  0.44           O  
HETATM  228  O   HOH T 227      14.733  -2.428   3.979  1.00  0.44           O  
HETATM  229  O   HOH T 228      14.906  12.893  42.464  1.00  0.44           O  
HETATM  230  O   HOH T 229       6.386   5.678   0.839  1.00  0.44           O  
HETATM  231  O   HOH T 230      22.320 -13.146   4.547  1.00  0.44           O  
HETATM  232  O   HOH T 231       0.021 -27.678  14.696  1.00  0.44           O  
HETATM  233  O   HOH T 232      -1.826 -26.780  10.055  1.00  0.44           O  
HETATM  234  O   HOH T 233      26.333 -12.867  10.675  1.00  0.44           O  
HETATM  235  O   HOH T 234      33.354  12.172  20.484  1.00  0.44           O  
HETATM  236  O   HOH T 235      27.582   0.597  19.610  1.00  0.44           O  
HETATM  237  O   HOH T 236       9.570 -29.939  26.766  1.00  0.44           O  
HETATM  238  O   HOH T 237      24.907  -7.343  10.654  1.00  0.44           O  
HETATM  239  O   HOH T 238      26.993 -16.343  14.786  1.00  0.44           O  
HETATM  240  O   HOH T 239      21.948 -28.578   0.217  1.00  0.44           O  
HETATM  241  O   HOH T 240      11.370  -1.577   2.277  1.00  0.44           O  
HETATM  242  O   HOH T 241      31.079  14.629  25.253  1.00  0.44           O  
HETATM  243  O   HOH T 242      28.882 -21.947   4.170  1.00  0.44           O  
HETATM  244  O   HOH T 243       0.875  10.606  20.129  1.00  0.44           O  
HETATM  245  O   HOH T 244      -2.675 -12.841  -7.792  1.00  0.44           O  
HETATM  246  O   HOH T 245      19.507 -13.778   2.621  1.00  0.44           O  
HETATM  247  O   HOH T 246      25.484  -4.308  19.645  1.00  0.44           O  
HETATM  248  O   HOH T 247       8.462 -21.395 -12.323  1.00  0.45           O  
HETATM  249  O   HOH T 248      27.536 -20.042  13.688  1.00  0.45           O  
HETATM  250  O   HOH T 249      12.015  -2.201  34.848  1.00  0.45           O  
HETATM  251  O   HOH T 250      -5.140 -24.393  11.938  1.00  0.45           O  
HETATM  252  O   HOH T 251       9.827 -30.625  17.613  1.00  0.45           O  
HETATM  253  O   HOH T 252       3.956 -12.067  -9.166  1.00  0.45           O  
HETATM  254  O   HOH T 253      13.853 -30.522  22.705  1.00  0.45           O  
HETATM  255  O   HOH T 254       6.521 -29.392  23.390  1.00  0.45           O  
HETATM  256  O   HOH T 255      20.205   6.109  26.862  1.00  0.45           O  
HETATM  257  O   HOH T 256      30.206   5.708  21.317  1.00  0.45           O  
HETATM  258  O   HOH T 257      -4.676 -13.625  -1.598  1.00  0.45           O  
HETATM  259  O   HOH T 258      -4.235 -16.933  10.254  1.00  0.45           O  
HETATM  260  O   HOH T 259      25.001 -13.098   4.864  1.00  0.45           O  
HETATM  261  O   HOH T 260       3.997 -32.017  16.919  1.00  0.45           O  
HETATM  262  O   HOH T 261      31.631  16.243  20.272  1.00  0.45           O  
HETATM  263  O   HOH T 262       6.943   2.346   4.646  1.00  0.46           O  
HETATM  264  O   HOH T 263      21.885  -9.769  21.664  1.00  0.46           O  
HETATM  265  O   HOH T 264       2.411   6.576  26.036  1.00  0.46           O  
HETATM  266  O   HOH T 265      12.010 -30.413 -11.302  1.00  0.46           O  
HETATM  267  O   HOH T 266      -3.687 -21.043   1.587  1.00  0.46           O  
HETATM  268  O   HOH T 267      10.511   0.635   0.839  1.00  0.46           O  
HETATM  269  O   HOH T 268      17.281   2.930  35.361  1.00  0.46           O  
HETATM  270  O   HOH T 269      24.116 -21.181   1.183  1.00  0.46           O  
HETATM  271  O   HOH T 270       5.804  10.793  34.361  1.00  0.46           O  
HETATM  272  O   HOH T 271      -6.192 -13.868   2.195  1.00  0.46           O  
HETATM  273  O   HOH T 272      30.956  10.979  21.333  1.00  0.46           O  
HETATM  274  O   HOH T 273       8.831  -6.653  -7.686  1.00  0.46           O  
HETATM  275  O   HOH T 274      20.752   3.059  35.881  1.00  0.46           O  
HETATM  276  O   HOH T 275      -4.112 -14.826  -4.142  1.00  0.46           O  
HETATM  277  O   HOH T 276       1.201 -12.151  -9.136  1.00  0.46           O  
HETATM  278  O   HOH T 277      -3.194 -27.405   7.842  1.00  0.46           O  
HETATM  279  O   HOH T 278       1.434   8.700  32.301  1.00  0.46           O  
HETATM  280  O   HOH T 279      15.300 -30.221  -1.540  1.00  0.46           O  
HETATM  281  O   HOH T 280      16.318 -25.830  28.251  1.00  0.46           O  
HETATM  282  O   HOH T 281      24.995  -5.601  12.896  1.00  0.46           O  
HETATM  283  O   HOH T 282      -0.558  17.217  26.179  1.00  0.46           O  
HETATM  284  O   HOH T 283      25.953  21.031  22.544  1.00  0.47           O  
HETATM  285  O   HOH T 284      -5.721 -24.978  18.264  1.00  0.47           O  
HETATM  286  O   HOH T 285      -4.123 -20.406  13.487  1.00  0.47           O  
HETATM  287  O   HOH T 286      18.105 -24.379  31.143  1.00  0.47           O  
HETATM  288  O   HOH T 287      18.618   3.543  37.739  1.00  0.47           O  
HETATM  289  O   HOH T 288       1.804 -23.783   5.380  1.00  0.47           O  
HETATM  290  O   HOH T 289      21.176   7.811  24.988  1.00  0.47           O  
HETATM  291  O   HOH T 290      15.226  -0.123  -1.284  1.00  0.47           O  
HETATM  292  O   HOH T 291      29.025  12.693  25.203  1.00  0.47           O  
HETATM  293  O   HOH T 292      25.895 -28.096  20.597  1.00  0.47           O  
HETATM  294  O   HOH T 293      24.216   3.876  25.967  1.00  0.47           O  
HETATM  295  O   HOH T 294      31.368  12.283  23.794  1.00  0.47           O  
HETATM  296  O   HOH T 295       0.017 -27.635  11.920  1.00  0.47           O  
HETATM  297  O   HOH T 296      28.344   7.202  22.629  1.00  0.47           O  
HETATM  298  O   HOH T 297       8.975 -26.540 -11.537  1.00  0.47           O  
HETATM  299  O   HOH T 298      -2.426 -15.223  -6.446  1.00  0.47           O  
HETATM  300  O   HOH T 299      14.074 -28.790 -12.117  1.00  0.47           O  
HETATM  301  O   HOH T 300       1.982  11.315  29.186  1.00  0.47           O  
HETATM  302  O   HOH T 301       4.183 -24.586  23.657  1.00  0.47           O  
HETATM  303  O   HOH T 302      22.629 -20.650  17.774  1.00  0.47           O  
HETATM  304  O   HOH T 303       7.983 -29.624  14.672  1.00  0.47           O  
HETATM  305  O   HOH T 304      16.380   4.576   9.820  1.00  0.48           O  
HETATM  306  O   HOH T 305       7.677   3.317  37.526  1.00  0.48           O  
HETATM  307  O   HOH T 306       6.374  18.635  29.955  1.00  0.48           O  
HETATM  308  O   HOH T 307      20.524   9.691  -2.264  1.00  0.48           O  
HETATM  309  O   HOH T 308      23.210 -26.361   1.554  1.00  0.48           O  
HETATM  310  O   HOH T 309       4.982 -22.011  22.669  1.00  0.48           O  
HETATM  311  O   HOH T 310      29.423  16.366  23.770  1.00  0.48           O  
HETATM  312  O   HOH T 311       3.320  -6.998  27.028  1.00  0.48           O  
HETATM  313  O   HOH T 312      16.307 -27.860  -5.642  1.00  0.48           O  
HETATM  314  O   HOH T 313      25.396   6.054  27.207  1.00  0.48           O  
HETATM  315  O   HOH T 314      12.685  -0.838  -0.151  1.00  0.48           O  
HETATM  316  O   HOH T 315       4.241   4.792  -0.739  1.00  0.48           O  
HETATM  317  O   HOH T 316      28.247   9.408  24.155  1.00  0.48           O  
HETATM  318  O   HOH T 317       0.668  13.619  28.392  1.00  0.48           O  
HETATM  319  O   HOH T 318      25.880 -10.540   9.183  1.00  0.49           O  
HETATM  320  O   HOH T 319      21.198  10.902  -4.795  1.00  0.49           O  
HETATM  321  O   HOH T 320      17.232  -1.503  27.025  1.00  0.49           O  
HETATM  322  O   HOH T 321      12.473  -6.469  -0.693  1.00  0.49           O  
HETATM  323  O   HOH T 322      22.531  -9.689   5.505  1.00  0.49           O  
HETATM  324  O   HOH T 323      -6.290 -22.311  18.283  1.00  0.49           O  
HETATM  325  O   HOH T 324      -4.944 -14.306  11.044  1.00  0.49           O  
HETATM  326  O   HOH T 325      10.628  -7.902  -9.426  1.00  0.49           O  
HETATM  327  O   HOH T 326       0.770 -24.165  -2.860  1.00  0.49           O  
HETATM  328  O   HOH T 327       2.517  13.210  11.477  1.00  0.49           O  
HETATM  329  O   HOH T 328      33.303   9.547  21.178  1.00  0.49           O  
HETATM  330  O   HOH T 329       7.281  -4.192  -5.671  1.00  0.49           O  
HETATM  331  O   HOH T 330       9.871 -25.082  26.873  1.00  0.49           O  
HETATM  332  O   HOH T 331      19.570 -22.285  30.063  1.00  0.49           O  
HETATM  333  O   HOH T 332       7.989 -28.218  25.389  1.00  0.49           O  
HETATM  334  O   HOH T 333      16.079 -29.628  24.241  1.00  0.49           O  
HETATM  335  O   HOH T 334      -5.050 -13.038   4.531  1.00  0.49           O  
HETATM  336  O   HOH T 335      16.819  -3.564  25.220  1.00  0.49           O  
HETATM  337  O   HOH T 336      25.076  -0.447  20.551  1.00  0.49           O  
HETATM  338  O   HOH T 337       6.457 -20.302  29.079  1.00  0.49           O  
HETATM  339  O   HOH T 338       7.916  25.148  12.054  1.00  0.49           O  
HETATM  340  O   HOH T 339      12.951   1.515  -1.702  1.00  0.49           O  
HETATM  341  O   HOH T 340      14.190  -4.790   2.924  1.00  0.49           O  
HETATM  342  O   HOH T 341      31.742  16.339  17.522  1.00  0.49           O  
HETATM  343  O   HOH T 342      23.743 -10.988   3.400  1.00  0.49           O  
HETATM  344  O   HOH T 343      14.524 -31.286   0.890  1.00  0.49           O  
HETATM  345  O   HOH T 344      -0.014   0.022  22.818  1.00  0.49           O  
HETATM  346  O   HOH T 345      25.139 -19.416  17.226  1.00  0.50           O  
HETATM  347  O   HOH T 346      -4.032 -25.805  20.244  1.00  0.50           O  
HETATM  348  O   HOH T 347      18.630 -24.356  28.406  1.00  0.50           O  
HETATM  349  O   HOH T 348       5.670   3.796   2.828  1.00  0.50           O  
HETATM  350  O   HOH T 349      28.754  10.333  26.690  1.00  0.50           O  
HETATM  351  O   HOH T 350      26.694  -1.906  18.932  1.00  0.50           O  
HETATM  352  O   HOH T 351      21.913   0.722  25.903  1.00  0.50           O  
HETATM  353  O   HOH T 352      -5.172 -22.871   0.009  1.00  0.50           O  
HETATM  354  O   HOH T 353       9.573 -29.273 -11.475  1.00  0.50           O  
HETATM  355  O   HOH T 354      -2.405 -17.752  -1.881  1.00  0.50           O  
HETATM  356  O   HOH T 355      16.838   0.336   0.909  1.00  0.50           O  
HETATM  357  O   HOH T 356      17.684 -17.786   1.959  1.00  0.50           O  
HETATM  358  O   HOH T 357      33.656  12.825  15.268  1.00  0.50           O  
HETATM  359  O   HOH T 358       7.144 -34.151  20.742  1.00  0.50           O  
HETATM  360  O   HOH T 359      23.649   6.496  25.029  1.00  0.50           O  
HETATM  361  O   HOH T 360      -0.046  -2.814  22.871  1.00  0.50           O  
HETATM  362  O   HOH T 361      19.072   0.962  36.638  1.00  0.50           O  
HETATM  363  O   HOH T 362      23.499  12.036  -3.477  1.00  0.50           O  
HETATM  364  O   HOH T 363      18.609 -28.480  24.353  1.00  0.50           O  
HETATM  365  O   HOH T 364      28.847   5.564  18.926  1.00  0.51           O  
HETATM  366  O   HOH T 365      25.221  21.398  25.226  1.00  0.51           O  
HETATM  367  O   HOH T 366      23.458  23.504  22.685  1.00  0.51           O  
HETATM  368  O   HOH T 367      -5.679 -23.831  14.635  1.00  0.51           O  
HETATM  369  O   HOH T 368      30.859   8.255  21.856  1.00  0.51           O  
HETATM  370  O   HOH T 369      26.380  -3.728  11.369  1.00  0.51           O  
HETATM  371  O   HOH T 370      27.065  19.458  32.159  1.00  0.51           O  
HETATM  372  O   HOH T 371       7.323 -31.929  22.407  1.00  0.51           O  
HETATM  373  O   HOH T 372      -0.768  -3.264   1.499  1.00  0.51           O  
HETATM  374  O   HOH T 373       5.142  -2.677  -1.853  1.00  0.51           O  
HETATM  375  O   HOH T 374       6.356   5.808  37.346  1.00  0.51           O  
HETATM  376  O   HOH T 375       2.595 -14.481  -8.330  1.00  0.51           O  
HETATM  377  O   HOH T 376      -7.948 -13.355   4.363  1.00  0.51           O  
HETATM  378  O   HOH T 377      30.301  18.735  28.371  1.00  0.52           O  
HETATM  379  O   HOH T 378       7.612  20.944  31.110  1.00  0.52           O  
HETATM  380  O   HOH T 379      -1.026   2.426  18.073  1.00  0.52           O  
HETATM  381  O   HOH T 380       1.449   1.448  30.687  1.00  0.52           O  
HETATM  382  O   HOH T 381       0.861   8.093  18.816  1.00  0.52           O  
HETATM  383  O   HOH T 382       6.449 -31.612  25.011  1.00  0.52           O  
HETATM  384  O   HOH T 383      12.820  13.991  36.831  1.00  0.52           O  
HETATM  385  O   HOH T 384      -1.778  -8.817  27.704  1.00  0.52           O  
HETATM  386  O   HOH T 385      16.928   0.564  34.102  1.00  0.52           O  
HETATM  387  O   HOH T 386      -6.620 -23.258   2.348  1.00  0.52           O  
HETATM  388  O   HOH T 387      -3.572 -14.741   2.683  1.00  0.52           O  
HETATM  389  O   HOH T 388      14.592  24.488  18.795  1.00  0.52           O  
HETATM  390  O   HOH T 389      -3.208  12.104  25.296  1.00  0.52           O  
HETATM  391  O   HOH T 390      11.983  16.992   1.191  1.00  0.52           O  
HETATM  392  O   HOH T 391      -4.904  22.622  25.324  1.00  0.52           O  
HETATM  393  O   HOH T 392       4.535 -20.558  26.989  1.00  0.52           O  
HETATM  394  O   HOH T 393      30.755 -21.003   2.468  1.00  0.52           O  
HETATM  395  O   HOH T 394      35.200  13.181  11.944  1.00  0.52           O  
HETATM  396  O   HOH T 395      -3.407 -10.313  -7.230  1.00  0.52           O  
HETATM  397  O   HOH T 396      19.058 -11.648   0.860  1.00  0.53           O  
HETATM  398  O   HOH T 397      20.848  24.517  22.556  1.00  0.53           O  
HETATM  399  O   HOH T 398      12.141  20.553   2.776  1.00  0.53           O  
HETATM  400  O   HOH T 399      -1.588 -25.848  18.887  1.00  0.53           O  
HETATM  401  O   HOH T 400       6.517  15.443  32.389  1.00  0.53           O  
HETATM  402  O   HOH T 401       4.172 -18.803  29.145  1.00  0.53           O  
HETATM  403  O   HOH T 402      -5.189 -18.723   1.419  1.00  0.53           O  
HETATM  404  O   HOH T 403       4.137 -26.721  -4.390  1.00  0.53           O  
HETATM  405  O   HOH T 404       8.889 -27.500  27.862  1.00  0.53           O  
HETATM  406  O   HOH T 405      -3.350  20.457  24.368  1.00  0.53           O  
HETATM  407  O   HOH T 406      14.751  20.289  18.765  1.00  0.53           O  
HETATM  408  O   HOH T 407       3.308  -9.784  26.935  1.00  0.53           O  
HETATM  409  O   HOH T 408       7.624 -27.731  -3.426  1.00  0.54           O  
HETATM  410  O   HOH T 409       6.449 -26.212 -10.575  1.00  0.54           O  
HETATM  411  O   HOH T 410       4.185  12.021  32.419  1.00  0.54           O  
HETATM  412  O   HOH T 411      12.918 -32.587  17.126  1.00  0.54           O  
HETATM  413  O   HOH T 412      25.005 -26.831  18.312  1.00  0.54           O  
HETATM  414  O   HOH T 413       4.197  14.549  31.417  1.00  0.54           O  
HETATM  415  O   HOH T 414      14.082  14.501  40.454  1.00  0.54           O  
HETATM  416  O   HOH T 415      27.002  21.081  27.385  1.00  0.54           O  
HETATM  417  O   HOH T 416      -0.159 -13.842  -7.561  1.00  0.54           O  
HETATM  418  O   HOH T 417      18.942 -28.972   2.076  1.00  0.55           O  
HETATM  419  O   HOH T 418      25.131 -28.328   6.508  1.00  0.55           O  
HETATM  420  O   HOH T 419       6.204 -20.284  24.669  1.00  0.55           O  
HETATM  421  O   HOH T 420      28.212 -19.490   2.766  1.00  0.55           O  
HETATM  422  O   HOH T 421      -3.054 -20.220  -1.073  1.00  0.55           O  
HETATM  423  O   HOH T 422       4.002 -14.553  28.442  1.00  0.55           O  
HETATM  424  O   HOH T 423      13.000  16.124  38.781  1.00  0.55           O  
HETATM  425  O   HOH T 424       0.785  -1.688   4.596  1.00  0.55           O  
HETATM  426  O   HOH T 425      20.940  17.788   0.977  1.00  0.55           O  
HETATM  427  O   HOH T 426      13.003 -31.514  -9.022  1.00  0.56           O  
HETATM  428  O   HOH T 427      19.299  -3.313  26.642  1.00  0.56           O  
HETATM  429  O   HOH T 428      13.812  -8.228  10.331  1.00  0.56           O  
HETATM  430  O   HOH T 429       1.326  -1.380   1.830  1.00  0.56           O  
HETATM  431  O   HOH T 430      13.206  -7.427  -3.333  1.00  0.56           O  
HETATM  432  O   HOH T 431      17.161 -30.496   0.566  1.00  0.56           O  
HETATM  433  O   HOH T 432      22.675  14.829  11.234  1.00  0.56           O  
HETATM  434  O   HOH T 433      22.397 -16.819   3.883  1.00  0.56           O  
HETATM  435  O   HOH T 434      15.711  -7.972   0.047  1.00  0.56           O  
HETATM  436  O   HOH T 435      23.496 -33.949   8.871  1.00  0.56           O  
HETATM  437  O   HOH T 436      27.372  -4.132  17.762  1.00  0.57           O  
HETATM  438  O   HOH T 437      16.118  -5.661   1.310  1.00  0.57           O  
HETATM  439  O   HOH T 438      -0.835   1.554  25.130  1.00  0.58           O  
HETATM  440  O   HOH T 439       1.704  18.589  26.620  1.00  0.58           O  
HETATM  441  O   HOH T 440      30.131 -20.121  13.026  1.00  0.58           O  
HETATM  442  O   HOH T 441      -4.864 -16.375  -1.879  1.00  0.58           O  
HETATM  443  O   HOH T 442       1.291   4.343  28.549  1.00  0.59           O  
TER     444      HOH T 442 
