# Supplementary material for: Accurate Prediction of Hydration Sites of Proteins Using Energy Model With Atom Embedding
Source: Front Mol Biosci. 2021 Sep 20;8:756075. doi: 10.3389/fmolb.2021.756075 (PMC8488165; doi:10.3389/fmolb.2021.756075)
Supplement: Supplementary file 1 [file DataSheet1.ZIP › Data Sheet 1/Our_result_pdb/our_dataset_output/3AKT_watersite.pdb]

HEADER                                                        XXXX


JRNL        PMID   -1
HETATM    1  O   HOH T   0     -23.951  -1.580   4.890  1.00  0.18           O  
HETATM    2  O   HOH T   1       1.017  20.724  35.810  1.00  0.18           O  
HETATM    3  O   HOH T   2      -0.131   2.906   3.983  1.00  0.19           O  
HETATM    4  O   HOH T   3      -3.599   5.513   8.785  1.00  0.20           O  
HETATM    5  O   HOH T   4      21.511  13.768  31.958  1.00  0.20           O  
HETATM    6  O   HOH T   5      12.777  19.270  54.969  1.00  0.21           O  
HETATM    7  O   HOH T   6      -5.630  22.790  38.875  1.00  0.21           O  
HETATM    8  O   HOH T   7      -5.914  26.750  46.045  1.00  0.21           O  
HETATM    9  O   HOH T   8      24.881  16.432  36.783  1.00  0.21           O  
HETATM   10  O   HOH T   9     -30.650  -3.630   1.641  1.00  0.21           O  
HETATM   11  O   HOH T  10     -18.691  14.218  15.555  1.00  0.21           O  
HETATM   12  O   HOH T  11       5.757  35.532  35.498  1.00  0.21           O  
HETATM   13  O   HOH T  12     -25.964  11.843   5.421  1.00  0.22           O  
HETATM   14  O   HOH T  13       6.528   5.063  25.089  1.00  0.22           O  
HETATM   15  O   HOH T  14       8.856   9.590  39.574  1.00  0.22           O  
HETATM   16  O   HOH T  15      15.370  14.193  21.548  1.00  0.23           O  
HETATM   17  O   HOH T  16      -9.721   5.299  19.103  1.00  0.23           O  
HETATM   18  O   HOH T  17      16.776  18.005  25.914  1.00  0.23           O  
HETATM   19  O   HOH T  18      19.402  22.870  50.232  1.00  0.24           O  
HETATM   20  O   HOH T  19      12.986  15.498  50.098  1.00  0.24           O  
HETATM   21  O   HOH T  20      -8.306   1.353  14.894  1.00  0.24           O  
HETATM   22  O   HOH T  21     -22.833 -16.354  -1.312  1.00  0.24           O  
HETATM   23  O   HOH T  22     -15.794  -4.731  17.092  1.00  0.24           O  
HETATM   24  O   HOH T  23       9.258  24.097  23.963  1.00  0.24           O  
HETATM   25  O   HOH T  24       1.653   2.967   8.516  1.00  0.24           O  
HETATM   26  O   HOH T  25     -12.427   3.823  -9.018  1.00  0.24           O  
HETATM   27  O   HOH T  26     -26.694   3.251  13.843  1.00  0.24           O  
HETATM   28  O   HOH T  27      -6.382   5.620   4.618  1.00  0.25           O  
HETATM   29  O   HOH T  28     -16.227   9.519   1.154  1.00  0.25           O  
HETATM   30  O   HOH T  29     -19.427  23.079   5.377  1.00  0.25           O  
HETATM   31  O   HOH T  30      12.897  14.693  12.424  1.00  0.25           O  
HETATM   32  O   HOH T  31     -29.010  11.201   3.614  1.00  0.25           O  
HETATM   33  O   HOH T  32     -16.630   5.611  28.910  1.00  0.25           O  
HETATM   34  O   HOH T  33      13.571   5.962  29.605  1.00  0.25           O  
HETATM   35  O   HOH T  34     -30.620   9.341  -1.645  1.00  0.26           O  
HETATM   36  O   HOH T  35       4.858  19.998  15.570  1.00  0.26           O  
HETATM   37  O   HOH T  36      24.815  28.593  48.440  1.00  0.26           O  
HETATM   38  O   HOH T  37      -8.981  15.996  39.170  1.00  0.26           O  
HETATM   39  O   HOH T  38      10.600  19.195  43.749  1.00  0.26           O  
HETATM   40  O   HOH T  39      26.660  16.263  32.366  1.00  0.26           O  
HETATM   41  O   HOH T  40     -11.594  13.319  11.012  1.00  0.26           O  
HETATM   42  O   HOH T  41      18.001  25.569  21.434  1.00  0.26           O  
HETATM   43  O   HOH T  42      24.373   8.954  37.971  1.00  0.26           O  
HETATM   44  O   HOH T  43     -13.239   8.406   4.733  1.00  0.26           O  
HETATM   45  O   HOH T  44     -15.800  16.971   2.246  1.00  0.26           O  
HETATM   46  O   HOH T  45     -13.758   3.483  28.254  1.00  0.27           O  
HETATM   47  O   HOH T  46     -14.679   0.387  -2.709  1.00  0.27           O  
HETATM   48  O   HOH T  47      -7.100  -6.017  19.567  1.00  0.27           O  
HETATM   49  O   HOH T  48     -23.614 -12.897  11.149  1.00  0.27           O  
HETATM   50  O   HOH T  49      25.862  21.416  47.555  1.00  0.27           O  
HETATM   51  O   HOH T  50      -2.822  27.332  44.246  1.00  0.28           O  
HETATM   52  O   HOH T  51      -5.551  -3.308  -9.215  1.00  0.28           O  
HETATM   53  O   HOH T  52       5.696   7.354   3.596  1.00  0.28           O  
HETATM   54  O   HOH T  53       1.484  14.206  18.035  1.00  0.28           O  
HETATM   55  O   HOH T  54     -15.960  10.458  -1.395  1.00  0.28           O  
HETATM   56  O   HOH T  55       0.504  -8.958  -2.458  1.00  0.28           O  
HETATM   57  O   HOH T  56      19.258  31.395  44.424  1.00  0.28           O  
HETATM   58  O   HOH T  57       3.487  -1.567   8.888  1.00  0.28           O  
HETATM   59  O   HOH T  58     -17.940 -10.533  17.136  1.00  0.28           O  
HETATM   60  O   HOH T  59      15.762  20.425  16.713  1.00  0.28           O  
HETATM   61  O   HOH T  60     -18.348   0.808  -4.927  1.00  0.28           O  
HETATM   62  O   HOH T  61      17.191   7.788  44.223  1.00  0.28           O  
HETATM   63  O   HOH T  62     -23.411   5.625  22.482  1.00  0.28           O  
HETATM   64  O   HOH T  63     -22.290  12.759  22.280  1.00  0.28           O  
HETATM   65  O   HOH T  64      22.080   8.611  27.340  1.00  0.28           O  
HETATM   66  O   HOH T  65     -31.489  -2.982   5.277  1.00  0.28           O  
HETATM   67  O   HOH T  66      18.683  13.500  36.312  1.00  0.28           O  
HETATM   68  O   HOH T  67      14.273  18.618  35.156  1.00  0.28           O  
HETATM   69  O   HOH T  68       0.815  -2.210  -6.679  1.00  0.29           O  
HETATM   70  O   HOH T  69     -31.087   9.595  -4.348  1.00  0.29           O  
HETATM   71  O   HOH T  70     -10.680   0.622   5.650  1.00  0.29           O  
HETATM   72  O   HOH T  71     -26.875  12.766   2.923  1.00  0.29           O  
HETATM   73  O   HOH T  72     -23.759 -18.410   0.413  1.00  0.29           O  
HETATM   74  O   HOH T  73       0.024  -9.435  -7.867  1.00  0.29           O  
HETATM   75  O   HOH T  74     -15.753 -19.944   0.375  1.00  0.29           O  
HETATM   76  O   HOH T  75      20.560  34.848  32.424  1.00  0.29           O  
HETATM   77  O   HOH T  76      19.918  13.674  46.928  1.00  0.29           O  
HETATM   78  O   HOH T  77      -3.133  10.922  13.202  1.00  0.29           O  
HETATM   79  O   HOH T  78      -5.120  25.913  29.960  1.00  0.30           O  
HETATM   80  O   HOH T  79     -13.819  15.848  20.812  1.00  0.30           O  
HETATM   81  O   HOH T  80     -24.450  15.253   5.544  1.00  0.30           O  
HETATM   82  O   HOH T  81       5.077   9.925  47.585  1.00  0.30           O  
HETATM   83  O   HOH T  82       9.506  16.117  42.112  1.00  0.30           O  
HETATM   84  O   HOH T  83     -26.838 -10.917  -0.732  1.00  0.30           O  
HETATM   85  O   HOH T  84      -5.094   5.502  -6.207  1.00  0.30           O  
HETATM   86  O   HOH T  85       7.871  -7.949   3.515  1.00  0.30           O  
HETATM   87  O   HOH T  86      24.186  11.233  51.747  1.00  0.30           O  
HETATM   88  O   HOH T  87       9.248  41.256  38.580  1.00  0.30           O  
HETATM   89  O   HOH T  88      -4.968  25.762  43.576  1.00  0.30           O  
HETATM   90  O   HOH T  89     -32.671  13.834   6.477  1.00  0.30           O  
HETATM   91  O   HOH T  90      -0.921   7.693  29.749  1.00  0.30           O  
HETATM   92  O   HOH T  91     -19.822  23.420  -6.478  1.00  0.30           O  
HETATM   93  O   HOH T  92      18.634  36.145  37.521  1.00  0.30           O  
HETATM   94  O   HOH T  93       6.336  29.812  51.185  1.00  0.31           O  
HETATM   95  O   HOH T  94      -5.705  26.514  34.860  1.00  0.31           O  
HETATM   96  O   HOH T  95      -1.148  -0.822  11.271  1.00  0.31           O  
HETATM   97  O   HOH T  96     -21.980  -5.073  -8.154  1.00  0.31           O  
HETATM   98  O   HOH T  97     -12.486 -14.617   8.150  1.00  0.31           O  
HETATM   99  O   HOH T  98     -20.156 -10.538 -10.445  1.00  0.31           O  
HETATM  100  O   HOH T  99       2.858   6.673  18.320  1.00  0.31           O  
HETATM  101  O   HOH T 100      -4.968  10.641  39.839  1.00  0.31           O  
HETATM  102  O   HOH T 101      26.072  10.954  37.049  1.00  0.31           O  
HETATM  103  O   HOH T 102      14.603  23.517  57.813  1.00  0.31           O  
HETATM  104  O   HOH T 103       9.805  18.116  52.063  1.00  0.31           O  
HETATM  105  O   HOH T 104       4.036   7.010 -11.032  1.00  0.31           O  
HETATM  106  O   HOH T 105     -18.212  13.957  -6.756  1.00  0.31           O  
HETATM  107  O   HOH T 106      -2.969  -7.971  -4.975  1.00  0.31           O  
HETATM  108  O   HOH T 107      -9.798  12.610   8.967  1.00  0.31           O  
HETATM  109  O   HOH T 108      11.949  10.863  36.152  1.00  0.31           O  
HETATM  110  O   HOH T 109       9.191  39.083  40.184  1.00  0.31           O  
HETATM  111  O   HOH T 110      -0.399   2.669  45.729  1.00  0.31           O  
HETATM  112  O   HOH T 111      15.331   6.678  31.642  1.00  0.32           O  
HETATM  113  O   HOH T 112      -3.735 -17.033   8.219  1.00  0.32           O  
HETATM  114  O   HOH T 113     -17.175 -14.720  15.333  1.00  0.32           O  
HETATM  115  O   HOH T 114       6.638   5.225  47.373  1.00  0.32           O  
HETATM  116  O   HOH T 115      22.060  27.199  45.693  1.00  0.32           O  
HETATM  117  O   HOH T 116     -20.021   6.525  25.749  1.00  0.32           O  
HETATM  118  O   HOH T 117      21.550  18.124  50.503  1.00  0.32           O  
HETATM  119  O   HOH T 118     -16.960  15.798  14.007  1.00  0.32           O  
HETATM  120  O   HOH T 119      -1.176  -8.608 -10.254  1.00  0.32           O  
HETATM  121  O   HOH T 120      23.972  16.492  26.947  1.00  0.32           O  
HETATM  122  O   HOH T 121      30.066  23.107  41.981  1.00  0.33           O  
HETATM  123  O   HOH T 122       2.443   4.751  -7.989  1.00  0.33           O  
HETATM  124  O   HOH T 123      -5.536  -0.612  -9.721  1.00  0.33           O  
HETATM  125  O   HOH T 124      -9.821   7.732  17.719  1.00  0.33           O  
HETATM  126  O   HOH T 125       1.281  32.038  29.863  1.00  0.33           O  
HETATM  127  O   HOH T 126      -6.063   9.414  44.734  1.00  0.33           O  
HETATM  128  O   HOH T 127       9.175   9.519  42.345  1.00  0.33           O  
HETATM  129  O   HOH T 128     -29.366  -2.467  -0.689  1.00  0.33           O  
HETATM  130  O   HOH T 129       9.105  37.645  37.767  1.00  0.33           O  
HETATM  131  O   HOH T 130     -26.210  -7.048  -7.365  1.00  0.33           O  
HETATM  132  O   HOH T 131       1.395   7.167  20.449  1.00  0.33           O  
HETATM  133  O   HOH T 132       0.589   3.900  35.000  1.00  0.33           O  
HETATM  134  O   HOH T 133     -26.740 -10.852   9.718  1.00  0.33           O  
HETATM  135  O   HOH T 134     -16.633  16.836   9.447  1.00  0.33           O  
HETATM  136  O   HOH T 135       9.724  21.209  54.680  1.00  0.33           O  
HETATM  137  O   HOH T 136     -18.869   4.816  27.513  1.00  0.33           O  
HETATM  138  O   HOH T 137      12.489  34.035  32.725  1.00  0.34           O  
HETATM  139  O   HOH T 138      22.860  29.765  52.727  1.00  0.34           O  
HETATM  140  O   HOH T 139      -8.010  18.141  40.838  1.00  0.34           O  
HETATM  141  O   HOH T 140      -4.973  -8.941 -14.376  1.00  0.34           O  
HETATM  142  O   HOH T 141      30.994  14.608  33.995  1.00  0.34           O  
HETATM  143  O   HOH T 142      28.377  20.764  31.791  1.00  0.34           O  
HETATM  144  O   HOH T 143      16.238  29.976  23.383  1.00  0.34           O  
HETATM  145  O   HOH T 144      12.661   7.493  31.723  1.00  0.34           O  
HETATM  146  O   HOH T 145     -13.182 -10.446  18.159  1.00  0.34           O  
HETATM  147  O   HOH T 146      -9.214  -0.753  24.175  1.00  0.35           O  
HETATM  148  O   HOH T 147      -1.139   2.778  13.899  1.00  0.35           O  
HETATM  149  O   HOH T 148     -16.059  15.750  22.346  1.00  0.35           O  
HETATM  150  O   HOH T 149      15.276  11.709  22.874  1.00  0.35           O  
HETATM  151  O   HOH T 150     -12.482  11.763   8.929  1.00  0.35           O  
HETATM  152  O   HOH T 151     -22.499 -14.775  -6.998  1.00  0.35           O  
HETATM  153  O   HOH T 152      -0.766 -11.044  -3.711  1.00  0.35           O  
HETATM  154  O   HOH T 153      -1.680  16.040  26.784  1.00  0.35           O  
HETATM  155  O   HOH T 154     -12.293 -10.621  -9.704  1.00  0.35           O  
HETATM  156  O   HOH T 155      15.451  13.775  11.293  1.00  0.35           O  
HETATM  157  O   HOH T 156     -16.115 -20.090  -2.365  1.00  0.35           O  
HETATM  158  O   HOH T 157      15.347  17.941  13.636  1.00  0.35           O  
HETATM  159  O   HOH T 158     -33.150   7.865  10.582  1.00  0.35           O  
HETATM  160  O   HOH T 159     -15.011  16.029   4.661  1.00  0.35           O  
HETATM  161  O   HOH T 160      -8.075  -6.022  22.165  1.00  0.35           O  
HETATM  162  O   HOH T 161      17.620   7.303  49.152  1.00  0.35           O  
HETATM  163  O   HOH T 162       3.099  21.784  47.652  1.00  0.35           O  
HETATM  164  O   HOH T 163      12.807  22.814  14.490  1.00  0.35           O  
HETATM  165  O   HOH T 164     -17.027  -1.482  31.661  1.00  0.35           O  
HETATM  166  O   HOH T 165       3.141  24.292  48.882  1.00  0.35           O  
HETATM  167  O   HOH T 166     -15.356  16.643  11.888  1.00  0.35           O  
HETATM  168  O   HOH T 167     -26.667  11.341  11.288  1.00  0.36           O  
HETATM  169  O   HOH T 168      15.790  25.177  55.874  1.00  0.36           O  
HETATM  170  O   HOH T 169      18.850  29.484  24.184  1.00  0.36           O  
HETATM  171  O   HOH T 170      -4.586  21.612  41.199  1.00  0.36           O  
HETATM  172  O   HOH T 171       9.638  26.720  16.379  1.00  0.36           O  
HETATM  173  O   HOH T 172      -4.881  18.508   1.888  1.00  0.36           O  
HETATM  174  O   HOH T 173     -15.029   1.448  -8.385  1.00  0.36           O  
HETATM  175  O   HOH T 174      11.338   0.684  44.355  1.00  0.36           O  
HETATM  176  O   HOH T 175      23.982  27.907  50.978  1.00  0.36           O  
HETATM  177  O   HOH T 176       6.697  25.072  13.560  1.00  0.36           O  
HETATM  178  O   HOH T 177      -1.879 -10.314  -6.258  1.00  0.36           O  
HETATM  179  O   HOH T 178      -5.674  16.112  28.466  1.00  0.36           O  
HETATM  180  O   HOH T 179      14.454   3.142  22.704  1.00  0.36           O  
HETATM  181  O   HOH T 180      17.002  25.495  18.857  1.00  0.36           O  
HETATM  182  O   HOH T 181     -13.568  18.593  -3.496  1.00  0.36           O  
HETATM  183  O   HOH T 182      14.650   9.084  32.846  1.00  0.36           O  
HETATM  184  O   HOH T 183      11.355   3.466  20.031  1.00  0.37           O  
HETATM  185  O   HOH T 184       0.881  33.027  50.183  1.00  0.37           O  
HETATM  186  O   HOH T 185     -11.836  15.334  33.684  1.00  0.37           O  
HETATM  187  O   HOH T 186       9.852   5.308  34.322  1.00  0.37           O  
HETATM  188  O   HOH T 187      11.845  29.877  22.856  1.00  0.37           O  
HETATM  189  O   HOH T 188       8.183   3.328  26.570  1.00  0.37           O  
HETATM  190  O   HOH T 189      12.197  30.647  50.067  1.00  0.37           O  
HETATM  191  O   HOH T 190     -25.200  -9.280  16.166  1.00  0.37           O  
HETATM  192  O   HOH T 191      -3.118 -12.563  -3.171  1.00  0.37           O  
HETATM  193  O   HOH T 192       4.760   3.387  29.548  1.00  0.37           O  
HETATM  194  O   HOH T 193      19.664  21.926  52.878  1.00  0.37           O  
HETATM  195  O   HOH T 194      -3.445   1.143  -9.646  1.00  0.37           O  
HETATM  196  O   HOH T 195     -10.487  10.167   7.823  1.00  0.37           O  
HETATM  197  O   HOH T 196      -0.109  28.614  24.656  1.00  0.37           O  
HETATM  198  O   HOH T 197      14.763  14.398  51.762  1.00  0.37           O  
HETATM  199  O   HOH T 198       1.482  20.417  18.806  1.00  0.38           O  
HETATM  200  O   HOH T 199      -6.924   9.744   5.144  1.00  0.38           O  
HETATM  201  O   HOH T 200       0.924  24.867  47.277  1.00  0.38           O  
HETATM  202  O   HOH T 201     -12.442   1.510  29.634  1.00  0.38           O  
HETATM  203  O   HOH T 202     -21.376 -14.446  10.985  1.00  0.38           O  
HETATM  204  O   HOH T 203     -20.389 -13.001   8.733  1.00  0.38           O  
HETATM  205  O   HOH T 204       9.237   3.105  32.606  1.00  0.38           O  
HETATM  206  O   HOH T 205     -30.767  -7.409   5.487  1.00  0.38           O  
HETATM  207  O   HOH T 206      -5.558   9.953  42.210  1.00  0.38           O  
HETATM  208  O   HOH T 207      -8.820 -10.577  17.774  1.00  0.38           O  
HETATM  209  O   HOH T 208      25.706   7.619  50.554  1.00  0.38           O  
HETATM  210  O   HOH T 209       8.139  23.327  11.832  1.00  0.38           O  
HETATM  211  O   HOH T 210     -17.760 -13.241  17.513  1.00  0.38           O  
HETATM  212  O   HOH T 211      18.004   9.435  35.613  1.00  0.38           O  
HETATM  213  O   HOH T 212       4.472  32.372  32.266  1.00  0.38           O  
HETATM  214  O   HOH T 213      -7.350   4.125  18.177  1.00  0.38           O  
HETATM  215  O   HOH T 214       2.313  33.833  47.873  1.00  0.38           O  
HETATM  216  O   HOH T 215      -4.034   9.921  50.858  1.00  0.39           O  
HETATM  217  O   HOH T 216     -26.546   9.700  -9.586  1.00  0.39           O  
HETATM  218  O   HOH T 217     -25.951 -11.637  14.777  1.00  0.39           O  
HETATM  219  O   HOH T 218      10.116   3.247  36.160  1.00  0.39           O  
HETATM  220  O   HOH T 219     -30.181   3.127  12.877  1.00  0.39           O  
HETATM  221  O   HOH T 220     -26.288 -13.678   3.723  1.00  0.39           O  
HETATM  222  O   HOH T 221      27.420  27.052  44.814  1.00  0.39           O  
HETATM  223  O   HOH T 222     -25.099  10.461  26.001  1.00  0.39           O  
HETATM  224  O   HOH T 223      19.533  20.090  50.733  1.00  0.39           O  
HETATM  225  O   HOH T 224     -16.368   7.901  -2.666  1.00  0.39           O  
HETATM  226  O   HOH T 225       8.140  39.620  33.600  1.00  0.39           O  
HETATM  227  O   HOH T 226       8.923   0.179  42.792  1.00  0.39           O  
HETATM  228  O   HOH T 227      -5.296  28.534  30.951  1.00  0.39           O  
HETATM  229  O   HOH T 228     -30.707  11.382  13.991  1.00  0.39           O  
HETATM  230  O   HOH T 229       3.464  -2.457  -5.936  1.00  0.40           O  
HETATM  231  O   HOH T 230      23.649   7.213  33.827  1.00  0.40           O  
HETATM  232  O   HOH T 231       0.461  11.466 -10.225  1.00  0.40           O  
HETATM  233  O   HOH T 232       1.682  -7.325  -7.285  1.00  0.40           O  
HETATM  234  O   HOH T 233     -10.308  14.224  35.639  1.00  0.40           O  
HETATM  235  O   HOH T 234     -30.185  -5.009   4.095  1.00  0.40           O  
HETATM  236  O   HOH T 235      13.760  12.203  13.021  1.00  0.40           O  
HETATM  237  O   HOH T 236      17.800  15.351  22.557  1.00  0.40           O  
HETATM  238  O   HOH T 237     -16.161  22.515  -8.532  1.00  0.40           O  
HETATM  239  O   HOH T 238     -17.062  18.460   7.187  1.00  0.40           O  
HETATM  240  O   HOH T 239      26.991  10.289  34.442  1.00  0.40           O  
HETATM  241  O   HOH T 240      -8.927  16.863  43.110  1.00  0.41           O  
HETATM  242  O   HOH T 241       3.948  13.301  17.512  1.00  0.41           O  
HETATM  243  O   HOH T 242      -1.715   4.811  44.612  1.00  0.41           O  
HETATM  244  O   HOH T 243     -21.990 -17.176  -5.830  1.00  0.41           O  
HETATM  245  O   HOH T 244     -26.382  19.428   0.014  1.00  0.41           O  
HETATM  246  O   HOH T 245     -14.975 -17.073   3.860  1.00  0.41           O  
HETATM  247  O   HOH T 246     -12.321   1.832   3.756  1.00  0.41           O  
HETATM  248  O   HOH T 247     -26.960   8.486  25.923  1.00  0.41           O  
HETATM  249  O   HOH T 248      17.782  15.555  11.879  1.00  0.41           O  
HETATM  250  O   HOH T 249      -5.290  18.916  40.531  1.00  0.41           O  
HETATM  251  O   HOH T 250     -15.535  13.921   6.347  1.00  0.41           O  
HETATM  252  O   HOH T 251       5.046  13.062  15.040  1.00  0.41           O  
HETATM  253  O   HOH T 252     -20.336  15.534  11.323  1.00  0.41           O  
HETATM  254  O   HOH T 253      -8.789  13.109  28.466  1.00  0.41           O  
HETATM  255  O   HOH T 254      -0.020   4.529  49.916  1.00  0.41           O  
HETATM  256  O   HOH T 255      26.646  10.039  51.529  1.00  0.41           O  
HETATM  257  O   HOH T 256      -3.149   8.812  31.042  1.00  0.41           O  
HETATM  258  O   HOH T 257      -5.104  11.793  24.416  1.00  0.41           O  
HETATM  259  O   HOH T 258      13.682   8.999  40.391  1.00  0.41           O  
HETATM  260  O   HOH T 259       8.820  33.106  50.565  1.00  0.41           O  
HETATM  261  O   HOH T 260      23.831  19.228  27.275  1.00  0.41           O  
HETATM  262  O   HOH T 261      14.594   5.734  23.446  1.00  0.42           O  
HETATM  263  O   HOH T 262       3.305  34.202  39.505  1.00  0.42           O  
HETATM  264  O   HOH T 263      -4.139  19.636  42.985  1.00  0.42           O  
HETATM  265  O   HOH T 264     -30.666  -4.934   6.919  1.00  0.42           O  
HETATM  266  O   HOH T 265      18.354   7.009  46.543  1.00  0.42           O  
HETATM  267  O   HOH T 266       7.633  11.811  42.770  1.00  0.42           O  
HETATM  268  O   HOH T 267      20.015  33.874  29.827  1.00  0.42           O  
HETATM  269  O   HOH T 268      14.025   7.717  20.153  1.00  0.42           O  
HETATM  270  O   HOH T 269      -0.326  -1.117  38.046  1.00  0.42           O  
HETATM  271  O   HOH T 270      -5.096  15.691   1.558  1.00  0.42           O  
HETATM  272  O   HOH T 271       6.043  37.895  34.002  1.00  0.42           O  
HETATM  273  O   HOH T 272       6.480  18.624  45.780  1.00  0.42           O  
HETATM  274  O   HOH T 273       1.962  -3.472  10.051  1.00  0.42           O  
HETATM  275  O   HOH T 274       8.897  15.150  44.624  1.00  0.42           O  
HETATM  276  O   HOH T 275      32.193  20.389  39.400  1.00  0.42           O  
HETATM  277  O   HOH T 276       8.838  29.547  52.166  1.00  0.42           O  
HETATM  278  O   HOH T 277      21.751  31.721  29.217  1.00  0.42           O  
HETATM  279  O   HOH T 278      17.566   5.258  42.867  1.00  0.43           O  
HETATM  280  O   HOH T 279      24.524  22.781  29.760  1.00  0.43           O  
HETATM  281  O   HOH T 280       8.787   1.890  -2.416  1.00  0.43           O  
HETATM  282  O   HOH T 281      11.437  28.928  51.891  1.00  0.43           O  
HETATM  283  O   HOH T 282      -1.492   6.680  27.212  1.00  0.43           O  
HETATM  284  O   HOH T 283       6.090   2.464  -2.825  1.00  0.43           O  
HETATM  285  O   HOH T 284      12.698  17.376  37.061  1.00  0.43           O  
HETATM  286  O   HOH T 285      16.370  10.882  37.351  1.00  0.43           O  
HETATM  287  O   HOH T 286       1.403  -5.612  -9.621  1.00  0.43           O  
HETATM  288  O   HOH T 287      31.521  17.376  33.635  1.00  0.44           O  
HETATM  289  O   HOH T 288       2.246  19.500  16.300  1.00  0.44           O  
HETATM  290  O   HOH T 289      -4.173 -15.097  10.159  1.00  0.44           O  
HETATM  291  O   HOH T 290      23.917  20.136  29.671  1.00  0.44           O  
HETATM  292  O   HOH T 291      29.608  24.209  38.152  1.00  0.44           O  
HETATM  293  O   HOH T 292     -11.241   9.999   0.722  1.00  0.44           O  
HETATM  294  O   HOH T 293       7.324   2.538  47.132  1.00  0.44           O  
HETATM  295  O   HOH T 294      -4.897   7.395  29.415  1.00  0.44           O  
HETATM  296  O   HOH T 295       8.129  35.623  49.389  1.00  0.44           O  
HETATM  297  O   HOH T 296      25.515   6.475  28.194  1.00  0.44           O  
HETATM  298  O   HOH T 297      -4.285  -9.615  15.189  1.00  0.44           O  
HETATM  299  O   HOH T 298     -15.178  19.638  18.908  1.00  0.44           O  
HETATM  300  O   HOH T 299      -9.637  16.860  34.595  1.00  0.44           O  
HETATM  301  O   HOH T 300     -24.032  12.209  24.257  1.00  0.44           O  
HETATM  302  O   HOH T 301      -5.043   7.906  26.733  1.00  0.44           O  
HETATM  303  O   HOH T 302      -0.243   8.087  -9.918  1.00  0.44           O  
HETATM  304  O   HOH T 303      21.070   6.276  34.240  1.00  0.44           O  
HETATM  305  O   HOH T 304      22.893  27.546  54.462  1.00  0.44           O  
HETATM  306  O   HOH T 305      -2.299   8.629  14.684  1.00  0.44           O  
HETATM  307  O   HOH T 306       0.701  12.222   0.620  1.00  0.44           O  
HETATM  308  O   HOH T 307       6.638  13.581  44.671  1.00  0.44           O  
HETATM  309  O   HOH T 308      -4.637  16.290  -1.665  1.00  0.44           O  
HETATM  310  O   HOH T 309      -0.693   6.464  14.001  1.00  0.44           O  
HETATM  311  O   HOH T 310       1.640  -0.869  10.904  1.00  0.44           O  
HETATM  312  O   HOH T 311       3.813  34.354  34.018  1.00  0.45           O  
HETATM  313  O   HOH T 312       8.644   0.818  45.492  1.00  0.45           O  
HETATM  314  O   HOH T 313     -26.708  12.313 -10.649  1.00  0.45           O  
HETATM  315  O   HOH T 314      18.662   3.343  30.813  1.00  0.45           O  
HETATM  316  O   HOH T 315     -23.702 -14.068  -9.325  1.00  0.45           O  
HETATM  317  O   HOH T 316     -21.734  21.495   5.459  1.00  0.45           O  
HETATM  318  O   HOH T 317     -29.013   8.100  23.950  1.00  0.45           O  
HETATM  319  O   HOH T 318      26.555  20.876  29.687  1.00  0.45           O  
HETATM  320  O   HOH T 319      -5.532  23.921  33.613  1.00  0.45           O  
HETATM  321  O   HOH T 320      -3.371   0.056  19.260  1.00  0.45           O  
HETATM  322  O   HOH T 321     -24.371  -6.045  -9.190  1.00  0.45           O  
HETATM  323  O   HOH T 322      21.952  22.678  51.442  1.00  0.45           O  
HETATM  324  O   HOH T 323       4.106  -6.364  -6.414  1.00  0.45           O  
HETATM  325  O   HOH T 324      23.125   4.523  33.495  1.00  0.45           O  
HETATM  326  O   HOH T 325      17.570  11.912  11.619  1.00  0.45           O  
HETATM  327  O   HOH T 326     -29.131  10.078  12.066  1.00  0.45           O  
HETATM  328  O   HOH T 327      -9.032 -17.144   9.061  1.00  0.45           O  
HETATM  329  O   HOH T 328      -6.281 -16.630   9.084  1.00  0.45           O  
HETATM  330  O   HOH T 329       7.263   9.085  14.511  1.00  0.45           O  
HETATM  331  O   HOH T 330       3.296  33.659  30.121  1.00  0.45           O  
HETATM  332  O   HOH T 331      11.517  27.546  14.479  1.00  0.45           O  
HETATM  333  O   HOH T 332       3.958  17.359  15.859  1.00  0.45           O  
HETATM  334  O   HOH T 333      -2.036   6.551  16.520  1.00  0.45           O  
HETATM  335  O   HOH T 334     -17.556  16.676  -6.455  1.00  0.45           O  
HETATM  336  O   HOH T 335     -16.047 -13.831  -9.805  1.00  0.45           O  
HETATM  337  O   HOH T 336      -1.274  13.490 -10.860  1.00  0.45           O  
HETATM  338  O   HOH T 337       8.492  39.863  36.326  1.00  0.46           O  
HETATM  339  O   HOH T 338     -27.032  14.443   5.129  1.00  0.46           O  
HETATM  340  O   HOH T 339      -6.593  12.351  41.427  1.00  0.46           O  
HETATM  341  O   HOH T 340     -10.647   9.097   5.379  1.00  0.46           O  
HETATM  342  O   HOH T 341      16.903   4.195  23.494  1.00  0.46           O  
HETATM  343  O   HOH T 342      17.003  18.535  59.165  1.00  0.46           O  
HETATM  344  O   HOH T 343     -32.441   3.914  11.551  1.00  0.46           O  
HETATM  345  O   HOH T 344      21.794  19.437  21.710  1.00  0.46           O  
HETATM  346  O   HOH T 345     -31.147  -7.439   8.198  1.00  0.46           O  
HETATM  347  O   HOH T 346      20.924  28.470  25.809  1.00  0.46           O  
HETATM  348  O   HOH T 347     -13.362 -13.019 -10.525  1.00  0.46           O  
HETATM  349  O   HOH T 348      -7.467  14.900  26.719  1.00  0.46           O  
HETATM  350  O   HOH T 349       6.554  -7.172   5.773  1.00  0.46           O  
HETATM  351  O   HOH T 350     -24.300 -14.417   1.934  1.00  0.46           O  
HETATM  352  O   HOH T 351      -9.481 -18.806   6.825  1.00  0.46           O  
HETATM  353  O   HOH T 352     -13.035  15.931  -3.753  1.00  0.46           O  
HETATM  354  O   HOH T 353       1.059  -7.879 -11.489  1.00  0.46           O  
HETATM  355  O   HOH T 354     -17.100   2.539  -6.772  1.00  0.46           O  
HETATM  356  O   HOH T 355      -1.200  -4.771  11.324  1.00  0.46           O  
HETATM  357  O   HOH T 356      17.981  18.170  12.802  1.00  0.46           O  
HETATM  358  O   HOH T 357      -9.653 -19.506   4.153  1.00  0.46           O  
HETATM  359  O   HOH T 358      23.892  31.744  31.015  1.00  0.46           O  
HETATM  360  O   HOH T 359      -6.282 -10.771  16.622  1.00  0.46           O  
HETATM  361  O   HOH T 360     -15.633  15.790  -4.781  1.00  0.46           O  
HETATM  362  O   HOH T 361      -9.777  11.241  -1.365  1.00  0.47           O  
HETATM  363  O   HOH T 362      -6.623  13.874  -2.481  1.00  0.47           O  
HETATM  364  O   HOH T 363      22.829   5.887  27.652  1.00  0.47           O  
HETATM  365  O   HOH T 364      -2.884   8.908  28.245  1.00  0.47           O  
HETATM  366  O   HOH T 365     -12.194 -21.470  -1.447  1.00  0.47           O  
HETATM  367  O   HOH T 366      -2.775  11.279  48.853  1.00  0.47           O  
HETATM  368  O   HOH T 367      13.723   3.167  29.815  1.00  0.47           O  
HETATM  369  O   HOH T 368       4.681  16.534  46.646  1.00  0.47           O  
HETATM  370  O   HOH T 369      -6.506  16.468  -3.670  1.00  0.47           O  
HETATM  371  O   HOH T 370      -7.236  21.721  32.820  1.00  0.47           O  
HETATM  372  O   HOH T 371      27.360  18.462  30.829  1.00  0.47           O  
HETATM  373  O   HOH T 372     -10.216  14.396  17.000  1.00  0.47           O  
HETATM  374  O   HOH T 373       9.186  12.428  44.965  1.00  0.47           O  
HETATM  375  O   HOH T 374      13.031  23.321  11.738  1.00  0.47           O  
HETATM  376  O   HOH T 375      -8.314  11.425   3.401  1.00  0.47           O  
HETATM  377  O   HOH T 376     -11.286  16.904  17.842  1.00  0.47           O  
HETATM  378  O   HOH T 377     -11.403  16.092  10.653  1.00  0.47           O  
HETATM  379  O   HOH T 378     -15.454  -6.545  24.659  1.00  0.47           O  
HETATM  380  O   HOH T 379      11.470  36.314  37.458  1.00  0.47           O  
HETATM  381  O   HOH T 380     -29.344   6.944  -1.475  1.00  0.47           O  
HETATM  382  O   HOH T 381      13.116   5.197  21.278  1.00  0.47           O  
HETATM  383  O   HOH T 382      13.998  34.401  47.925  1.00  0.48           O  
HETATM  384  O   HOH T 383     -17.950   7.433  27.278  1.00  0.48           O  
HETATM  385  O   HOH T 384     -18.472   7.214  -6.496  1.00  0.48           O  
HETATM  386  O   HOH T 385      29.809  20.351  42.576  1.00  0.48           O  
HETATM  387  O   HOH T 386       7.304  -0.777  -5.591  1.00  0.48           O  
HETATM  388  O   HOH T 387      33.220  15.582  32.508  1.00  0.48           O  
HETATM  389  O   HOH T 388     -11.592   7.450 -10.017  1.00  0.48           O  
HETATM  390  O   HOH T 389      -9.111   7.098 -13.753  1.00  0.48           O  
HETATM  391  O   HOH T 390     -17.769  18.346  14.588  1.00  0.48           O  
HETATM  392  O   HOH T 391       2.179   3.012  11.255  1.00  0.48           O  
HETATM  393  O   HOH T 392     -22.895 -14.071   8.692  1.00  0.48           O  
HETATM  394  O   HOH T 393     -25.164   6.469  25.821  1.00  0.48           O  
HETATM  395  O   HOH T 394     -12.597 -11.037 -12.401  1.00  0.48           O  
HETATM  396  O   HOH T 395     -15.078  18.262  21.369  1.00  0.48           O  
HETATM  397  O   HOH T 396       7.725   1.790  -4.999  1.00  0.48           O  
HETATM  398  O   HOH T 397     -34.848   4.266  -1.022  1.00  0.48           O  
HETATM  399  O   HOH T 398     -26.130 -12.191  12.064  1.00  0.48           O  
HETATM  400  O   HOH T 399     -22.519  12.912  -9.794  1.00  0.48           O  
HETATM  401  O   HOH T 400      -2.465   1.521 -12.224  1.00  0.48           O  
HETATM  402  O   HOH T 401       9.194   3.695  18.309  1.00  0.48           O  
HETATM  403  O   HOH T 402       3.320   1.049   9.724  1.00  0.48           O  
HETATM  404  O   HOH T 403       1.872   6.523  50.316  1.00  0.48           O  
HETATM  405  O   HOH T 404      -9.612   9.004   2.751  1.00  0.48           O  
HETATM  406  O   HOH T 405     -13.604  18.506  16.876  1.00  0.48           O  
HETATM  407  O   HOH T 406     -17.468 -10.019 -10.652  1.00  0.48           O  
HETATM  408  O   HOH T 407      -3.380   8.934  17.241  1.00  0.48           O  
HETATM  409  O   HOH T 408     -14.773 -10.552 -10.854  1.00  0.48           O  
HETATM  410  O   HOH T 409      -2.153 -10.336 -12.209  1.00  0.49           O  
HETATM  411  O   HOH T 410     -12.757 -17.948   2.553  1.00  0.49           O  
HETATM  412  O   HOH T 411      13.107   8.754  37.594  1.00  0.49           O  
HETATM  413  O   HOH T 412       7.081  17.883  52.583  1.00  0.49           O  
HETATM  414  O   HOH T 413      10.652  31.625  52.127  1.00  0.49           O  
HETATM  415  O   HOH T 414     -24.287  10.897 -10.468  1.00  0.49           O  
HETATM  416  O   HOH T 415       0.271   1.201  12.264  1.00  0.49           O  
HETATM  417  O   HOH T 416       5.351  27.781  52.730  1.00  0.49           O  
HETATM  418  O   HOH T 417      15.554   8.128  22.479  1.00  0.49           O  
HETATM  419  O   HOH T 418      -7.563  15.424  16.667  1.00  0.49           O  
HETATM  420  O   HOH T 419      -2.243  -5.725  13.873  1.00  0.49           O  
HETATM  421  O   HOH T 420      -0.901   0.006 -10.508  1.00  0.49           O  
HETATM  422  O   HOH T 421     -13.902  16.420   9.586  1.00  0.49           O  
HETATM  423  O   HOH T 422      29.329  17.129  32.045  1.00  0.49           O  
HETATM  424  O   HOH T 423      -7.354   7.995  28.313  1.00  0.49           O  
HETATM  425  O   HOH T 424       0.155   2.151 -11.783  1.00  0.50           O  
HETATM  426  O   HOH T 425      -5.634  -4.709 -13.032  1.00  0.50           O  
HETATM  427  O   HOH T 426     -10.625   0.596  31.485  1.00  0.50           O  
HETATM  428  O   HOH T 427     -25.438  20.217   2.546  1.00  0.50           O  
HETATM  429  O   HOH T 428     -19.346  -1.727 -10.496  1.00  0.50           O  
HETATM  430  O   HOH T 429       2.032  -4.577  -7.086  1.00  0.50           O  
HETATM  431  O   HOH T 430     -18.451 -12.717 -10.971  1.00  0.50           O  
HETATM  432  O   HOH T 431     -28.367  12.530  13.096  1.00  0.50           O  
HETATM  433  O   HOH T 432     -11.247  -0.953  29.236  1.00  0.50           O  
HETATM  434  O   HOH T 433      23.068  20.098  51.856  1.00  0.50           O  
HETATM  435  O   HOH T 434      22.050  35.672  30.283  1.00  0.50           O  
HETATM  436  O   HOH T 435       5.642   4.098  18.593  1.00  0.50           O  
HETATM  437  O   HOH T 436     -26.853   0.665  26.093  1.00  0.50           O  
HETATM  438  O   HOH T 437      24.537  13.748  26.585  1.00  0.50           O  
HETATM  439  O   HOH T 438      -3.353   6.120  25.222  1.00  0.50           O  
HETATM  440  O   HOH T 439      -5.573  10.878  48.810  1.00  0.50           O  
HETATM  441  O   HOH T 440       4.957   7.915  15.333  1.00  0.50           O  
HETATM  442  O   HOH T 441       4.936   3.591  26.820  1.00  0.50           O  
HETATM  443  O   HOH T 442      -6.503   1.650 -11.264  1.00  0.50           O  
HETATM  444  O   HOH T 443      14.480   9.911  35.436  1.00  0.50           O  
HETATM  445  O   HOH T 444     -28.309  10.223   9.371  1.00  0.50           O  
HETATM  446  O   HOH T 445      -9.931  12.457   1.260  1.00  0.50           O  
HETATM  447  O   HOH T 446       1.599  19.478  45.194  1.00  0.51           O  
HETATM  448  O   HOH T 447       6.443  12.194  47.072  1.00  0.51           O  
HETATM  449  O   HOH T 448     -35.471   6.330  10.533  1.00  0.51           O  
HETATM  450  O   HOH T 449      14.687   8.508  43.092  1.00  0.51           O  
HETATM  451  O   HOH T 450     -25.956  -8.172  -9.920  1.00  0.51           O  
HETATM  452  O   HOH T 451       8.401  17.747  44.093  1.00  0.51           O  
HETATM  453  O   HOH T 452      -7.608  14.466  42.989  1.00  0.51           O  
HETATM  454  O   HOH T 453      -2.617  13.610  12.284  1.00  0.51           O  
HETATM  455  O   HOH T 454      -7.067  13.709  24.222  1.00  0.51           O  
HETATM  456  O   HOH T 455      -4.780  24.190  45.846  1.00  0.51           O  
HETATM  457  O   HOH T 456       4.153  24.260  12.955  1.00  0.51           O  
HETATM  458  O   HOH T 457      24.301  17.762  52.532  1.00  0.51           O  
HETATM  459  O   HOH T 458       5.649   7.409  48.701  1.00  0.51           O  
HETATM  460  O   HOH T 459      15.978   8.231  37.212  1.00  0.51           O  
HETATM  461  O   HOH T 460      -0.921  30.950  25.773  1.00  0.51           O  
HETATM  462  O   HOH T 461     -18.552  -7.439  21.973  1.00  0.51           O  
HETATM  463  O   HOH T 462     -16.558  18.377   4.581  1.00  0.51           O  
HETATM  464  O   HOH T 463      17.927  28.347  21.843  1.00  0.52           O  
HETATM  465  O   HOH T 464      22.136  11.280  53.572  1.00  0.52           O  
HETATM  466  O   HOH T 465     -31.998   9.938  12.050  1.00  0.52           O  
HETATM  467  O   HOH T 466      20.159  16.160  21.149  1.00  0.52           O  
HETATM  468  O   HOH T 467       1.834  33.213  32.414  1.00  0.52           O  
HETATM  469  O   HOH T 468       9.225   4.492  47.922  1.00  0.52           O  
HETATM  470  O   HOH T 469      -1.635 -13.761  10.533  1.00  0.52           O  
HETATM  471  O   HOH T 470      -4.440  -5.596  19.994  1.00  0.52           O  
HETATM  472  O   HOH T 471     -10.577   4.891 -10.730  1.00  0.52           O  
HETATM  473  O   HOH T 472      -4.930   3.244  19.394  1.00  0.52           O  
HETATM  474  O   HOH T 473      23.932   5.304  30.077  1.00  0.52           O  
HETATM  475  O   HOH T 474     -29.323  13.078  15.527  1.00  0.52           O  
HETATM  476  O   HOH T 475     -13.060  18.092  19.519  1.00  0.52           O  
HETATM  477  O   HOH T 476     -24.988 -16.124   3.904  1.00  0.52           O  
HETATM  478  O   HOH T 477      18.725  12.162  54.982  1.00  0.52           O  
HETATM  479  O   HOH T 478       0.119   8.148  16.129  1.00  0.52           O  
HETATM  480  O   HOH T 479     -18.058  17.247  11.874  1.00  0.53           O  
HETATM  481  O   HOH T 480      16.531  27.131  16.744  1.00  0.53           O  
HETATM  482  O   HOH T 481      14.929   7.638  49.444  1.00  0.53           O  
HETATM  483  O   HOH T 482     -11.597 -17.256   7.952  1.00  0.53           O  
HETATM  484  O   HOH T 483      -2.400  -3.969  19.503  1.00  0.53           O  
HETATM  485  O   HOH T 484      -8.685  13.848  -0.652  1.00  0.53           O  
HETATM  486  O   HOH T 485     -11.380  14.625   0.031  1.00  0.53           O  
HETATM  487  O   HOH T 486      -5.861  12.089  44.033  1.00  0.53           O  
HETATM  488  O   HOH T 487       6.556  27.460  19.379  1.00  0.53           O  
HETATM  489  O   HOH T 488       3.909  19.213  46.809  1.00  0.53           O  
HETATM  490  O   HOH T 489       1.741  16.399  47.202  1.00  0.53           O  
HETATM  491  O   HOH T 490      30.714  14.791  31.282  1.00  0.53           O  
HETATM  492  O   HOH T 491     -15.326 -11.183  19.774  1.00  0.53           O  
HETATM  493  O   HOH T 492     -24.552 -13.825  13.635  1.00  0.53           O  
HETATM  494  O   HOH T 493      -3.120  -0.632 -13.763  1.00  0.53           O  
HETATM  495  O   HOH T 494      30.535  17.095  50.475  1.00  0.53           O  
HETATM  496  O   HOH T 495      -8.595  -7.508  24.409  1.00  0.53           O  
HETATM  497  O   HOH T 496      -7.992 -12.973  16.342  1.00  0.53           O  
HETATM  498  O   HOH T 497      13.687  16.878  55.908  1.00  0.53           O  
HETATM  499  O   HOH T 498     -15.669  14.779  -7.345  1.00  0.53           O  
HETATM  500  O   HOH T 499      17.432  36.424  35.008  1.00  0.53           O  
HETATM  501  O   HOH T 500     -16.095  -0.040  -6.365  1.00  0.53           O  
HETATM  502  O   HOH T 501      20.979  13.703  54.210  1.00  0.53           O  
HETATM  503  O   HOH T 502     -10.459   8.932 -12.053  1.00  0.53           O  
HETATM  504  O   HOH T 503     -28.654   1.546  14.563  1.00  0.54           O  
HETATM  505  O   HOH T 504      -8.946  19.372  33.230  1.00  0.54           O  
HETATM  506  O   HOH T 505      17.351  18.743  15.400  1.00  0.54           O  
HETATM  507  O   HOH T 506       8.039   6.444  49.529  1.00  0.54           O  
HETATM  508  O   HOH T 507      -4.799  11.334  17.090  1.00  0.54           O  
HETATM  509  O   HOH T 508      11.471  24.977  13.353  1.00  0.54           O  
HETATM  510  O   HOH T 509      21.622  31.898  43.276  1.00  0.54           O  
HETATM  511  O   HOH T 510      -1.492  26.024  47.743  1.00  0.54           O  
HETATM  512  O   HOH T 511      23.295  11.120  26.622  1.00  0.54           O  
HETATM  513  O   HOH T 512     -17.802  20.761   5.831  1.00  0.54           O  
HETATM  514  O   HOH T 513     -18.532  23.861  -9.161  1.00  0.54           O  
HETATM  515  O   HOH T 514     -11.796   5.436  28.249  1.00  0.54           O  
HETATM  516  O   HOH T 515       9.728  30.628  21.199  1.00  0.54           O  
HETATM  517  O   HOH T 516     -24.326  12.721  20.312  1.00  0.54           O  
HETATM  518  O   HOH T 517     -25.388  -4.045  21.139  1.00  0.54           O  
HETATM  519  O   HOH T 518       7.948  34.199  25.601  1.00  0.55           O  
HETATM  520  O   HOH T 519      10.409  15.640  51.035  1.00  0.55           O  
HETATM  521  O   HOH T 520     -26.380  17.143   4.944  1.00  0.55           O  
HETATM  522  O   HOH T 521      16.279   2.222  30.040  1.00  0.55           O  
HETATM  523  O   HOH T 522      18.753   8.474  51.200  1.00  0.55           O  
HETATM  524  O   HOH T 523      12.217  33.946  51.778  1.00  0.55           O  
HETATM  525  O   HOH T 524      18.625   2.686  43.663  1.00  0.55           O  
HETATM  526  O   HOH T 525       5.306  34.146  28.640  1.00  0.55           O  
HETATM  527  O   HOH T 526      20.484   3.974  32.765  1.00  0.55           O  
HETATM  528  O   HOH T 527      21.928  23.532  21.024  1.00  0.55           O  
HETATM  529  O   HOH T 528      10.592  22.320  12.780  1.00  0.55           O  
HETATM  530  O   HOH T 529     -30.040   7.448  -5.823  1.00  0.55           O  
HETATM  531  O   HOH T 530      -9.765 -22.632  -1.643  1.00  0.55           O  
HETATM  532  O   HOH T 531     -21.946  19.433  -7.462  1.00  0.55           O  
HETATM  533  O   HOH T 532       3.146  26.699  51.792  1.00  0.56           O  
HETATM  534  O   HOH T 533       6.181  34.024  50.145  1.00  0.56           O  
HETATM  535  O   HOH T 534       6.847   0.810  -0.807  1.00  0.56           O  
HETATM  536  O   HOH T 535       6.633   6.246  16.833  1.00  0.56           O  
HETATM  537  O   HOH T 536      -3.680 -12.150  13.856  1.00  0.56           O  
HETATM  538  O   HOH T 537     -24.271  20.345   4.957  1.00  0.56           O  
HETATM  539  O   HOH T 538      12.852  40.618  42.077  1.00  0.56           O  
HETATM  540  O   HOH T 539      29.800  21.743  39.586  1.00  0.56           O  
HETATM  541  O   HOH T 540      -8.993  12.903  25.837  1.00  0.57           O  
HETATM  542  O   HOH T 541      -3.150   7.299 -13.128  1.00  0.57           O  
HETATM  543  O   HOH T 542      13.627  12.010  51.126  1.00  0.57           O  
HETATM  544  O   HOH T 543     -22.064 -14.701   5.959  1.00  0.57           O  
HETATM  545  O   HOH T 544      -0.833  31.487  28.409  1.00  0.57           O  
HETATM  546  O   HOH T 545       4.656  13.907  47.784  1.00  0.57           O  
HETATM  547  O   HOH T 546     -18.680  19.500  16.910  1.00  0.57           O  
HETATM  548  O   HOH T 547     -19.386 -15.386  16.975  1.00  0.57           O  
HETATM  549  O   HOH T 548      -1.660  -3.203 -10.517  1.00  0.57           O  
HETATM  550  O   HOH T 549      21.150   6.609  25.662  1.00  0.57           O  
HETATM  551  O   HOH T 550      -6.500  12.407   5.340  1.00  0.58           O  
HETATM  552  O   HOH T 551      16.117  41.639  42.864  1.00  0.58           O  
HETATM  553  O   HOH T 552      -1.001  20.239  45.379  1.00  0.58           O  
HETATM  554  O   HOH T 553     -28.423  17.807   3.210  1.00  0.59           O  
HETATM  555  O   HOH T 554       3.111   3.922  18.696  1.00  0.59           O  
HETATM  556  O   HOH T 555       6.520   0.009  31.451  1.00  0.61           O  
HETATM  557  O   HOH T 556      15.471  30.312  55.107  1.00  0.61           O  
TER     558      HOH T 556 
