# Supplementary material for: Accurate Prediction of Hydration Sites of Proteins Using Energy Model With Atom Embedding
Source: Front Mol Biosci. 2021 Sep 20;8:756075. doi: 10.3389/fmolb.2021.756075 (PMC8488165; doi:10.3389/fmolb.2021.756075)
Supplement: Supplementary file 1 [file DataSheet1.ZIP › Data Sheet 1/Our_result_pdb/our_dataset_output/3AP6_watersite.pdb]

HEADER                                                        XXXX


JRNL        PMID   -1
HETATM    1  O   HOH T   0     -13.607   4.293  57.097  1.00  0.16           O  
HETATM    2  O   HOH T   1       8.741  29.267  11.741  1.00  0.17           O  
HETATM    3  O   HOH T   2      -7.337   0.308  59.969  1.00  0.17           O  
HETATM    4  O   HOH T   3      11.148  25.949  24.790  1.00  0.18           O  
HETATM    5  O   HOH T   4      -7.791  46.897  42.116  1.00  0.19           O  
HETATM    6  O   HOH T   5      -2.179  -0.354   2.646  1.00  0.19           O  
HETATM    7  O   HOH T   6       6.118  25.440  19.570  1.00  0.19           O  
HETATM    8  O   HOH T   7     -11.339  -1.654  -0.873  1.00  0.20           O  
HETATM    9  O   HOH T   8      -3.113 -11.556   5.894  1.00  0.20           O  
HETATM   10  O   HOH T   9      -0.555  11.188  63.938  1.00  0.20           O  
HETATM   11  O   HOH T  10     -15.289   6.459   9.587  1.00  0.21           O  
HETATM   12  O   HOH T  11       2.043  33.174  13.082  1.00  0.21           O  
HETATM   13  O   HOH T  12     -17.041  39.798  53.688  1.00  0.22           O  
HETATM   14  O   HOH T  13      13.577  -0.663  41.135  1.00  0.22           O  
HETATM   15  O   HOH T  14       7.211   8.279  50.014  1.00  0.22           O  
HETATM   16  O   HOH T  15      26.862  41.149  14.713  1.00  0.22           O  
HETATM   17  O   HOH T  16      -8.563   3.131   2.323  1.00  0.22           O  
HETATM   18  O   HOH T  17      -1.509  22.522  60.796  1.00  0.22           O  
HETATM   19  O   HOH T  18     -12.965  47.533  47.399  1.00  0.23           O  
HETATM   20  O   HOH T  19      -0.194  -4.017  61.874  1.00  0.23           O  
HETATM   21  O   HOH T  20      -1.989  15.068   4.666  1.00  0.23           O  
HETATM   22  O   HOH T  21      25.008  38.699   5.110  1.00  0.23           O  
HETATM   23  O   HOH T  22       8.039  36.219  28.416  1.00  0.23           O  
HETATM   24  O   HOH T  23       5.536  11.861  42.095  1.00  0.23           O  
HETATM   25  O   HOH T  24      12.611  21.917  45.558  1.00  0.23           O  
HETATM   26  O   HOH T  25      -3.206   2.567  33.982  1.00  0.23           O  
HETATM   27  O   HOH T  26     -15.277  20.239  45.924  1.00  0.24           O  
HETATM   28  O   HOH T  27      24.490  48.285  14.045  1.00  0.24           O  
HETATM   29  O   HOH T  28       7.986  12.528  20.183  1.00  0.24           O  
HETATM   30  O   HOH T  29      18.714  47.122  25.978  1.00  0.24           O  
HETATM   31  O   HOH T  30      -0.353  25.795  40.760  1.00  0.24           O  
HETATM   32  O   HOH T  31      -8.001  -4.094   5.784  1.00  0.24           O  
HETATM   33  O   HOH T  32      -2.070  -1.340   8.698  1.00  0.24           O  
HETATM   34  O   HOH T  33      -3.601  -6.736  41.764  1.00  0.24           O  
HETATM   35  O   HOH T  34       5.711  30.501  41.314  1.00  0.25           O  
HETATM   36  O   HOH T  35       8.047  -4.980  -7.216  1.00  0.25           O  
HETATM   37  O   HOH T  36     -16.092   1.357  58.267  1.00  0.25           O  
HETATM   38  O   HOH T  37      10.639  28.450  55.447  1.00  0.25           O  
HETATM   39  O   HOH T  38       8.902   5.478  34.624  1.00  0.25           O  
HETATM   40  O   HOH T  39     -10.521  12.973  38.152  1.00  0.25           O  
HETATM   41  O   HOH T  40       3.802  -0.971  24.467  1.00  0.25           O  
HETATM   42  O   HOH T  41       3.767  52.672  21.009  1.00  0.25           O  
HETATM   43  O   HOH T  42      -9.112   8.398  27.164  1.00  0.25           O  
HETATM   44  O   HOH T  43      19.847  24.203  25.110  1.00  0.25           O  
HETATM   45  O   HOH T  44      16.667  26.463   9.967  1.00  0.25           O  
HETATM   46  O   HOH T  45       4.946  11.669  27.238  1.00  0.25           O  
HETATM   47  O   HOH T  46      -2.499  46.302  56.568  1.00  0.26           O  
HETATM   48  O   HOH T  47       0.948  -5.814   8.153  1.00  0.26           O  
HETATM   49  O   HOH T  48       5.912  34.727  61.421  1.00  0.26           O  
HETATM   50  O   HOH T  49       9.052   4.924  61.548  1.00  0.26           O  
HETATM   51  O   HOH T  50     -15.220  15.544   4.270  1.00  0.26           O  
HETATM   52  O   HOH T  51      13.357  29.351  -3.938  1.00  0.26           O  
HETATM   53  O   HOH T  52     -10.210 -12.128  12.469  1.00  0.26           O  
HETATM   54  O   HOH T  53      16.553  46.462   5.455  1.00  0.26           O  
HETATM   55  O   HOH T  54      11.920  17.841  19.338  1.00  0.26           O  
HETATM   56  O   HOH T  55       5.520  24.486  52.505  1.00  0.27           O  
HETATM   57  O   HOH T  56      -2.399   9.934  30.761  1.00  0.27           O  
HETATM   58  O   HOH T  57       0.947  48.851  41.718  1.00  0.27           O  
HETATM   59  O   HOH T  58     -13.379  50.141  52.637  1.00  0.27           O  
HETATM   60  O   HOH T  59       8.038  31.814  51.983  1.00  0.27           O  
HETATM   61  O   HOH T  60       6.240  32.280   0.289  1.00  0.27           O  
HETATM   62  O   HOH T  61      -9.325  10.481   6.851  1.00  0.27           O  
HETATM   63  O   HOH T  62     -10.733  -5.945  18.123  1.00  0.27           O  
HETATM   64  O   HOH T  63     -10.130  43.704  54.959  1.00  0.27           O  
HETATM   65  O   HOH T  64      -2.554  -0.767  28.963  1.00  0.27           O  
HETATM   66  O   HOH T  65       2.283  15.204  39.860  1.00  0.27           O  
HETATM   67  O   HOH T  66      30.928  46.129  16.737  1.00  0.27           O  
HETATM   68  O   HOH T  67      -4.998  -7.452  12.317  1.00  0.28           O  
HETATM   69  O   HOH T  68       5.694  -1.787  32.993  1.00  0.28           O  
HETATM   70  O   HOH T  69     -18.671  20.830  52.887  1.00  0.28           O  
HETATM   71  O   HOH T  70       8.129  46.786  26.786  1.00  0.28           O  
HETATM   72  O   HOH T  71      -9.009  16.851  48.635  1.00  0.28           O  
HETATM   73  O   HOH T  72     -20.716   1.989  46.692  1.00  0.28           O  
HETATM   74  O   HOH T  73      21.149  33.961   2.299  1.00  0.28           O  
HETATM   75  O   HOH T  74       8.712   3.613  32.468  1.00  0.28           O  
HETATM   76  O   HOH T  75     -15.295   4.945  11.956  1.00  0.28           O  
HETATM   77  O   HOH T  76       7.832  21.390  13.426  1.00  0.28           O  
HETATM   78  O   HOH T  77      30.969  37.411  17.798  1.00  0.28           O  
HETATM   79  O   HOH T  78       8.812  14.563   4.177  1.00  0.28           O  
HETATM   80  O   HOH T  79      -6.071  39.051  42.541  1.00  0.29           O  
HETATM   81  O   HOH T  80      -6.995  10.736   5.526  1.00  0.29           O  
HETATM   82  O   HOH T  81     -11.634  51.235  44.746  1.00  0.29           O  
HETATM   83  O   HOH T  82      -2.115  30.490  66.399  1.00  0.29           O  
HETATM   84  O   HOH T  83       9.679  -1.655  46.534  1.00  0.29           O  
HETATM   85  O   HOH T  84      -1.681  37.483   8.152  1.00  0.29           O  
HETATM   86  O   HOH T  85     -18.260   3.287  27.508  1.00  0.29           O  
HETATM   87  O   HOH T  86      -4.693  22.596  43.191  1.00  0.29           O  
HETATM   88  O   HOH T  87      -8.019  45.187  53.766  1.00  0.29           O  
HETATM   89  O   HOH T  88      -7.206  55.095  47.401  1.00  0.29           O  
HETATM   90  O   HOH T  89      12.036  32.364  57.931  1.00  0.29           O  
HETATM   91  O   HOH T  90       2.098  38.932  64.257  1.00  0.29           O  
HETATM   92  O   HOH T  91       1.632  54.512  14.477  1.00  0.29           O  
HETATM   93  O   HOH T  92      -0.007  34.834   2.352  1.00  0.29           O  
HETATM   94  O   HOH T  93      -7.105   7.864  64.414  1.00  0.29           O  
HETATM   95  O   HOH T  94      -1.528  15.421  37.148  1.00  0.29           O  
HETATM   96  O   HOH T  95       1.769  35.675  14.437  1.00  0.29           O  
HETATM   97  O   HOH T  96      -5.083  16.119  66.349  1.00  0.29           O  
HETATM   98  O   HOH T  97       7.874   8.131  65.562  1.00  0.29           O  
HETATM   99  O   HOH T  98       3.784  15.570  12.338  1.00  0.29           O  
HETATM  100  O   HOH T  99       5.108  -9.888  48.579  1.00  0.30           O  
HETATM  101  O   HOH T 100       6.661  -0.911  39.404  1.00  0.30           O  
HETATM  102  O   HOH T 101     -15.157  41.469  59.853  1.00  0.30           O  
HETATM  103  O   HOH T 102       7.562  21.883  21.884  1.00  0.30           O  
HETATM  104  O   HOH T 103       7.319  49.390  26.630  1.00  0.30           O  
HETATM  105  O   HOH T 104      -8.886   3.047  66.804  1.00  0.30           O  
HETATM  106  O   HOH T 105      30.398  44.327  14.704  1.00  0.30           O  
HETATM  107  O   HOH T 106     -20.354  -4.297  50.900  1.00  0.30           O  
HETATM  108  O   HOH T 107      -2.167  25.266  67.037  1.00  0.30           O  
HETATM  109  O   HOH T 108      29.340  45.571  28.176  1.00  0.30           O  
HETATM  110  O   HOH T 109      -0.473  12.055  57.920  1.00  0.30           O  
HETATM  111  O   HOH T 110     -15.371  13.368   8.786  1.00  0.30           O  
HETATM  112  O   HOH T 111      -0.779  45.182  59.672  1.00  0.30           O  
HETATM  113  O   HOH T 112     -12.938  -4.177  18.609  1.00  0.30           O  
HETATM  114  O   HOH T 113       3.286  20.775  18.037  1.00  0.30           O  
HETATM  115  O   HOH T 114      27.923  30.126  19.027  1.00  0.30           O  
HETATM  116  O   HOH T 115      29.672  44.754  10.793  1.00  0.30           O  
HETATM  117  O   HOH T 116      -9.049   3.467  -5.247  1.00  0.31           O  
HETATM  118  O   HOH T 117      11.335   9.122  46.211  1.00  0.31           O  
HETATM  119  O   HOH T 118       9.207  -6.742  59.521  1.00  0.31           O  
HETATM  120  O   HOH T 119      -8.377  16.814  59.604  1.00  0.31           O  
HETATM  121  O   HOH T 120       5.107  23.319  14.363  1.00  0.31           O  
HETATM  122  O   HOH T 121       0.649  52.735  16.440  1.00  0.31           O  
HETATM  123  O   HOH T 122       2.258  -8.713  43.974  1.00  0.31           O  
HETATM  124  O   HOH T 123      -6.340  -5.413  20.755  1.00  0.31           O  
HETATM  125  O   HOH T 124     -11.222  15.169  48.224  1.00  0.31           O  
HETATM  126  O   HOH T 125      -1.054  -0.057  10.926  1.00  0.31           O  
HETATM  127  O   HOH T 126      -7.344  -1.093   3.618  1.00  0.31           O  
HETATM  128  O   HOH T 127     -21.913   7.336  18.576  1.00  0.32           O  
HETATM  129  O   HOH T 128       8.280  10.771   2.859  1.00  0.32           O  
HETATM  130  O   HOH T 129      -6.624  15.003  60.849  1.00  0.32           O  
HETATM  131  O   HOH T 130      -2.820  32.932  65.321  1.00  0.32           O  
HETATM  132  O   HOH T 131     -12.704  14.647   3.640  1.00  0.32           O  
HETATM  133  O   HOH T 132      14.376  30.005  55.420  1.00  0.32           O  
HETATM  134  O   HOH T 133       3.106  43.637  20.261  1.00  0.32           O  
HETATM  135  O   HOH T 134      15.973  -1.924  50.193  1.00  0.32           O  
HETATM  136  O   HOH T 135      -2.521  26.323  60.683  1.00  0.32           O  
HETATM  137  O   HOH T 136     -18.664   4.966   6.319  1.00  0.32           O  
HETATM  138  O   HOH T 137      11.123  28.025  12.511  1.00  0.32           O  
HETATM  139  O   HOH T 138      -0.345   1.030  35.801  1.00  0.32           O  
HETATM  140  O   HOH T 139      31.255  40.499   8.937  1.00  0.32           O  
HETATM  141  O   HOH T 140      -4.741   0.189  61.086  1.00  0.32           O  
HETATM  142  O   HOH T 141       5.521  -4.710  54.324  1.00  0.32           O  
HETATM  143  O   HOH T 142     -20.348   3.685  48.728  1.00  0.32           O  
HETATM  144  O   HOH T 143      12.750  11.160  16.871  1.00  0.32           O  
HETATM  145  O   HOH T 144     -10.773  20.339  40.367  1.00  0.32           O  
HETATM  146  O   HOH T 145      22.915  43.455   5.316  1.00  0.32           O  
HETATM  147  O   HOH T 146      -7.264   2.394  39.337  1.00  0.32           O  
HETATM  148  O   HOH T 147      -5.754  32.149  62.308  1.00  0.32           O  
HETATM  149  O   HOH T 148      26.927  27.569  11.468  1.00  0.32           O  
HETATM  150  O   HOH T 149      14.429  50.261  23.394  1.00  0.32           O  
HETATM  151  O   HOH T 150      10.579  -8.319  57.746  1.00  0.32           O  
HETATM  152  O   HOH T 151       0.389  52.068  13.793  1.00  0.33           O  
HETATM  153  O   HOH T 152      21.468  32.468   4.650  1.00  0.33           O  
HETATM  154  O   HOH T 153      23.914  48.869  11.361  1.00  0.33           O  
HETATM  155  O   HOH T 154      -9.922  -5.748   7.003  1.00  0.33           O  
HETATM  156  O   HOH T 155     -14.503  -0.890  58.667  1.00  0.33           O  
HETATM  157  O   HOH T 156       9.600  10.904  53.450  1.00  0.33           O  
HETATM  158  O   HOH T 157      -0.343  51.853  51.663  1.00  0.33           O  
HETATM  159  O   HOH T 158      22.826  33.337  10.941  1.00  0.33           O  
HETATM  160  O   HOH T 159      -9.168  -8.222   1.329  1.00  0.33           O  
HETATM  161  O   HOH T 160     -18.724  29.608  45.396  1.00  0.33           O  
HETATM  162  O   HOH T 161     -10.807  51.072  52.052  1.00  0.33           O  
HETATM  163  O   HOH T 162     -14.652   4.502  65.852  1.00  0.33           O  
HETATM  164  O   HOH T 163     -19.358  -4.866  55.072  1.00  0.33           O  
HETATM  165  O   HOH T 164      -3.615  18.358  54.241  1.00  0.33           O  
HETATM  166  O   HOH T 165     -21.971   5.429  12.221  1.00  0.33           O  
HETATM  167  O   HOH T 166      15.051  49.656  27.575  1.00  0.33           O  
HETATM  168  O   HOH T 167       2.545  -5.741  56.600  1.00  0.33           O  
HETATM  169  O   HOH T 168      11.632  31.925  25.002  1.00  0.33           O  
HETATM  170  O   HOH T 169     -16.140  29.296  46.134  1.00  0.33           O  
HETATM  171  O   HOH T 170      -8.895  17.600   2.585  1.00  0.33           O  
HETATM  172  O   HOH T 171     -18.063  30.661  42.883  1.00  0.33           O  
HETATM  173  O   HOH T 172       0.826  10.933  55.743  1.00  0.33           O  
HETATM  174  O   HOH T 173     -16.035  20.271  16.263  1.00  0.33           O  
HETATM  175  O   HOH T 174      -7.152  -7.389  63.983  1.00  0.33           O  
HETATM  176  O   HOH T 175     -15.710  18.276  18.148  1.00  0.33           O  
HETATM  177  O   HOH T 176     -16.152  11.825  51.981  1.00  0.33           O  
HETATM  178  O   HOH T 177      34.284  43.719  18.676  1.00  0.33           O  
HETATM  179  O   HOH T 178       4.610  28.273   6.031  1.00  0.33           O  
HETATM  180  O   HOH T 179      -1.558  20.048  53.494  1.00  0.33           O  
HETATM  181  O   HOH T 180      -1.136  -6.403  15.979  1.00  0.34           O  
HETATM  182  O   HOH T 181      -0.090   3.160  -3.461  1.00  0.34           O  
HETATM  183  O   HOH T 182      -5.497   6.663  66.390  1.00  0.34           O  
HETATM  184  O   HOH T 183       7.376  23.892  55.825  1.00  0.34           O  
HETATM  185  O   HOH T 184      13.021  34.097  24.097  1.00  0.34           O  
HETATM  186  O   HOH T 185       0.963  -4.001  26.720  1.00  0.34           O  
HETATM  187  O   HOH T 186     -11.462  24.435  40.352  1.00  0.34           O  
HETATM  188  O   HOH T 187       1.017  20.199  25.344  1.00  0.34           O  
HETATM  189  O   HOH T 188       5.665  30.850  32.534  1.00  0.34           O  
HETATM  190  O   HOH T 189      -4.808  16.427  41.969  1.00  0.34           O  
HETATM  191  O   HOH T 190      20.805  38.943  23.556  1.00  0.34           O  
HETATM  192  O   HOH T 191      17.018   8.735  14.812  1.00  0.34           O  
HETATM  193  O   HOH T 192      -8.533  22.987  54.339  1.00  0.34           O  
HETATM  194  O   HOH T 193      11.766 -10.486  56.471  1.00  0.34           O  
HETATM  195  O   HOH T 194       7.109  44.241  26.939  1.00  0.34           O  
HETATM  196  O   HOH T 195       0.844  16.826   9.900  1.00  0.34           O  
HETATM  197  O   HOH T 196      28.354  29.057   9.570  1.00  0.34           O  
HETATM  198  O   HOH T 197     -16.541   7.497  39.124  1.00  0.34           O  
HETATM  199  O   HOH T 198     -15.681   2.614   7.052  1.00  0.34           O  
HETATM  200  O   HOH T 199     -13.764  16.963  54.499  1.00  0.34           O  
HETATM  201  O   HOH T 200     -17.308  37.275  52.352  1.00  0.34           O  
HETATM  202  O   HOH T 201       1.658   4.504  65.807  1.00  0.34           O  
HETATM  203  O   HOH T 202      -7.152  19.451   3.446  1.00  0.34           O  
HETATM  204  O   HOH T 203      23.403  26.926  21.167  1.00  0.34           O  
HETATM  205  O   HOH T 204     -13.440  42.258  34.164  1.00  0.35           O  
HETATM  206  O   HOH T 205     -16.439  -0.866  18.787  1.00  0.35           O  
HETATM  207  O   HOH T 206      -2.422  42.748  68.224  1.00  0.35           O  
HETATM  208  O   HOH T 207      -2.335  44.724  39.601  1.00  0.35           O  
HETATM  209  O   HOH T 208       0.345  17.118  50.848  1.00  0.35           O  
HETATM  210  O   HOH T 209      -7.037   1.888  -3.900  1.00  0.35           O  
HETATM  211  O   HOH T 210       4.639  24.946  62.713  1.00  0.35           O  
HETATM  212  O   HOH T 211       6.554  19.130  42.780  1.00  0.35           O  
HETATM  213  O   HOH T 212      11.626  26.823  49.982  1.00  0.35           O  
HETATM  214  O   HOH T 213     -13.207  24.448  42.476  1.00  0.35           O  
HETATM  215  O   HOH T 214       0.863  42.286  23.684  1.00  0.35           O  
HETATM  216  O   HOH T 215       0.809  52.481  44.468  1.00  0.35           O  
HETATM  217  O   HOH T 216       9.816  13.231  22.169  1.00  0.35           O  
HETATM  218  O   HOH T 217      12.855  21.474  48.249  1.00  0.35           O  
HETATM  219  O   HOH T 218      16.717  50.008   1.132  1.00  0.35           O  
HETATM  220  O   HOH T 219      14.594   2.382  30.196  1.00  0.35           O  
HETATM  221  O   HOH T 220       1.069  -4.431  -5.153  1.00  0.35           O  
HETATM  222  O   HOH T 221     -10.055  -2.476  64.549  1.00  0.35           O  
HETATM  223  O   HOH T 222     -19.449  14.022  15.219  1.00  0.35           O  
HETATM  224  O   HOH T 223      24.462  54.898  12.460  1.00  0.35           O  
HETATM  225  O   HOH T 224     -18.987  22.080  48.749  1.00  0.35           O  
HETATM  226  O   HOH T 225      -0.757  11.042  36.221  1.00  0.35           O  
HETATM  227  O   HOH T 226       0.784  -2.943  -2.927  1.00  0.36           O  
HETATM  228  O   HOH T 227     -13.048   1.096  19.590  1.00  0.36           O  
HETATM  229  O   HOH T 228       8.182  30.198  60.444  1.00  0.36           O  
HETATM  230  O   HOH T 229      -3.173  16.756  44.293  1.00  0.36           O  
HETATM  231  O   HOH T 230       6.074  31.928  60.989  1.00  0.36           O  
HETATM  232  O   HOH T 231      -6.493   5.903  34.013  1.00  0.36           O  
HETATM  233  O   HOH T 232      -3.047  -9.184  13.242  1.00  0.36           O  
HETATM  234  O   HOH T 233       3.685  42.358   4.061  1.00  0.36           O  
HETATM  235  O   HOH T 234      -3.003  22.924  68.159  1.00  0.36           O  
HETATM  236  O   HOH T 235       5.918  49.371  24.283  1.00  0.36           O  
HETATM  237  O   HOH T 236      -9.844  48.085  40.852  1.00  0.36           O  
HETATM  238  O   HOH T 237       0.630  19.740  22.629  1.00  0.36           O  
HETATM  239  O   HOH T 238      11.367  17.239   8.269  1.00  0.36           O  
HETATM  240  O   HOH T 239      -3.701  49.645  47.323  1.00  0.36           O  
HETATM  241  O   HOH T 240     -15.681  -3.504  18.640  1.00  0.36           O  
HETATM  242  O   HOH T 241      -8.272  40.742  42.069  1.00  0.36           O  
HETATM  243  O   HOH T 242       2.059  -1.420  26.727  1.00  0.37           O  
HETATM  244  O   HOH T 243       2.774  14.551  25.863  1.00  0.37           O  
HETATM  245  O   HOH T 244       1.624  -6.701   4.399  1.00  0.37           O  
HETATM  246  O   HOH T 245     -10.681  -3.103  30.225  1.00  0.37           O  
HETATM  247  O   HOH T 246       4.141  46.103  45.268  1.00  0.37           O  
HETATM  248  O   HOH T 247     -12.461  28.759  40.313  1.00  0.37           O  
HETATM  249  O   HOH T 248      -2.473  14.835  56.720  1.00  0.37           O  
HETATM  250  O   HOH T 249      14.421  13.185  16.470  1.00  0.37           O  
HETATM  251  O   HOH T 250     -21.155  35.564  58.094  1.00  0.37           O  
HETATM  252  O   HOH T 251       5.667   2.504  16.579  1.00  0.37           O  
HETATM  253  O   HOH T 252     -18.217  20.062  50.296  1.00  0.37           O  
HETATM  254  O   HOH T 253       5.340  51.721  23.119  1.00  0.37           O  
HETATM  255  O   HOH T 254       2.701  44.247  40.535  1.00  0.37           O  
HETATM  256  O   HOH T 255       4.884  -3.693  34.775  1.00  0.37           O  
HETATM  257  O   HOH T 256     -17.105  -0.986  59.351  1.00  0.37           O  
HETATM  258  O   HOH T 257      -0.200   9.302   1.088  1.00  0.37           O  
HETATM  259  O   HOH T 258       0.061   6.505   0.704  1.00  0.37           O  
HETATM  260  O   HOH T 259     -10.932  37.021  38.869  1.00  0.37           O  
HETATM  261  O   HOH T 260      -2.339  22.951  65.469  1.00  0.37           O  
HETATM  262  O   HOH T 261     -14.289  11.032  53.967  1.00  0.37           O  
HETATM  263  O   HOH T 262     -14.595   1.451  21.840  1.00  0.37           O  
HETATM  264  O   HOH T 263       2.307  -6.012  25.460  1.00  0.37           O  
HETATM  265  O   HOH T 264     -13.044   8.457  65.657  1.00  0.37           O  
HETATM  266  O   HOH T 265      11.669  10.208   8.913  1.00  0.37           O  
HETATM  267  O   HOH T 266      13.026  33.770  55.659  1.00  0.37           O  
HETATM  268  O   HOH T 267      -9.810   9.729  47.958  1.00  0.37           O  
HETATM  269  O   HOH T 268     -19.621   5.785  19.112  1.00  0.37           O  
HETATM  270  O   HOH T 269      -4.754  -6.274  64.706  1.00  0.37           O  
HETATM  271  O   HOH T 270      -5.615   3.364  34.830  1.00  0.37           O  
HETATM  272  O   HOH T 271      12.593  23.216  50.438  1.00  0.38           O  
HETATM  273  O   HOH T 272       7.968  16.842   6.837  1.00  0.38           O  
HETATM  274  O   HOH T 273      -2.330  30.751  38.859  1.00  0.38           O  
HETATM  275  O   HOH T 274      24.748  24.180  17.421  1.00  0.38           O  
HETATM  276  O   HOH T 275      -7.018   4.119  -7.065  1.00  0.38           O  
HETATM  277  O   HOH T 276      10.824  -5.691  42.763  1.00  0.38           O  
HETATM  278  O   HOH T 277     -18.853  11.864  17.012  1.00  0.38           O  
HETATM  279  O   HOH T 278      -3.832  51.871  45.673  1.00  0.38           O  
HETATM  280  O   HOH T 279      15.355  29.410  47.680  1.00  0.38           O  
HETATM  281  O   HOH T 280      -1.209  17.327  53.159  1.00  0.38           O  
HETATM  282  O   HOH T 281       6.026   2.434   1.413  1.00  0.38           O  
HETATM  283  O   HOH T 282     -21.775  35.642  60.734  1.00  0.38           O  
HETATM  284  O   HOH T 283     -11.743  18.840  54.384  1.00  0.38           O  
HETATM  285  O   HOH T 284      -0.516  -5.762  10.584  1.00  0.38           O  
HETATM  286  O   HOH T 285     -12.311  -1.860  28.352  1.00  0.38           O  
HETATM  287  O   HOH T 286       9.334  16.467  23.808  1.00  0.38           O  
HETATM  288  O   HOH T 287     -25.117  11.211  22.824  1.00  0.38           O  
HETATM  289  O   HOH T 288      -5.716  37.211  14.620  1.00  0.38           O  
HETATM  290  O   HOH T 289      27.450  43.763  27.456  1.00  0.38           O  
HETATM  291  O   HOH T 290       7.377   5.921   5.141  1.00  0.38           O  
HETATM  292  O   HOH T 291      10.030   1.483  31.200  1.00  0.38           O  
HETATM  293  O   HOH T 292     -15.397  26.032  43.116  1.00  0.38           O  
HETATM  294  O   HOH T 293      -6.756  18.644  53.056  1.00  0.38           O  
HETATM  295  O   HOH T 294      25.522  25.475  19.952  1.00  0.38           O  
HETATM  296  O   HOH T 295     -15.455  30.579  62.627  1.00  0.38           O  
HETATM  297  O   HOH T 296     -14.765   8.305  54.366  1.00  0.38           O  
HETATM  298  O   HOH T 297      12.321  54.127  13.779  1.00  0.38           O  
HETATM  299  O   HOH T 298      17.155  -7.584  44.559  1.00  0.38           O  
HETATM  300  O   HOH T 299     -11.387  12.911  60.658  1.00  0.39           O  
HETATM  301  O   HOH T 300      12.589  -2.408  42.992  1.00  0.39           O  
HETATM  302  O   HOH T 301      -5.878  38.691  68.384  1.00  0.39           O  
HETATM  303  O   HOH T 302      12.738  18.012  21.988  1.00  0.39           O  
HETATM  304  O   HOH T 303      -0.297  11.280  38.925  1.00  0.39           O  
HETATM  305  O   HOH T 304       8.780  59.049  20.880  1.00  0.39           O  
HETATM  306  O   HOH T 305      31.774  50.236  16.431  1.00  0.39           O  
HETATM  307  O   HOH T 306      -6.901   7.355  31.624  1.00  0.39           O  
HETATM  308  O   HOH T 307      12.434  12.524  22.787  1.00  0.39           O  
HETATM  309  O   HOH T 308       9.103  44.021  56.770  1.00  0.39           O  
HETATM  310  O   HOH T 309       9.331  54.453  25.908  1.00  0.39           O  
HETATM  311  O   HOH T 310     -15.399   9.930  38.809  1.00  0.39           O  
HETATM  312  O   HOH T 311      24.182  52.824  10.578  1.00  0.39           O  
HETATM  313  O   HOH T 312     -17.614  18.271  52.414  1.00  0.39           O  
HETATM  314  O   HOH T 313       9.551  11.265  58.520  1.00  0.39           O  
HETATM  315  O   HOH T 314       5.648  48.170  44.117  1.00  0.39           O  
HETATM  316  O   HOH T 315     -18.644  12.527   7.027  1.00  0.39           O  
HETATM  317  O   HOH T 316      -5.082  21.045  61.627  1.00  0.39           O  
HETATM  318  O   HOH T 317     -22.422   2.829  44.565  1.00  0.39           O  
HETATM  319  O   HOH T 318     -16.934  41.931  57.761  1.00  0.39           O  
HETATM  320  O   HOH T 319     -13.076  -3.697   8.182  1.00  0.39           O  
HETATM  321  O   HOH T 320      -5.755 -14.605   3.660  1.00  0.39           O  
HETATM  322  O   HOH T 321      13.531  36.327  15.037  1.00  0.39           O  
HETATM  323  O   HOH T 322      -6.809  -3.900   3.275  1.00  0.39           O  
HETATM  324  O   HOH T 323     -14.090   0.818   5.655  1.00  0.39           O  
HETATM  325  O   HOH T 324     -16.733   2.570  12.164  1.00  0.39           O  
HETATM  326  O   HOH T 325     -13.335  -7.621  12.222  1.00  0.40           O  
HETATM  327  O   HOH T 326       2.564  21.471  23.427  1.00  0.40           O  
HETATM  328  O   HOH T 327      -4.002  25.505  62.880  1.00  0.40           O  
HETATM  329  O   HOH T 328      13.691   0.342  54.723  1.00  0.40           O  
HETATM  330  O   HOH T 329     -15.375  14.543  49.138  1.00  0.40           O  
HETATM  331  O   HOH T 330      -7.934  36.986  13.051  1.00  0.40           O  
HETATM  332  O   HOH T 331      13.174   1.067  57.463  1.00  0.40           O  
HETATM  333  O   HOH T 332     -16.451  10.912   7.776  1.00  0.40           O  
HETATM  334  O   HOH T 333       8.751  42.447  47.851  1.00  0.40           O  
HETATM  335  O   HOH T 334       7.397  10.815  60.022  1.00  0.40           O  
HETATM  336  O   HOH T 335     -23.739  29.613  52.105  1.00  0.40           O  
HETATM  337  O   HOH T 336       3.788  39.596  55.695  1.00  0.40           O  
HETATM  338  O   HOH T 337     -10.930   8.007  29.179  1.00  0.40           O  
HETATM  339  O   HOH T 338      13.478  26.132   3.745  1.00  0.40           O  
HETATM  340  O   HOH T 339      15.265  48.772  30.153  1.00  0.40           O  
HETATM  341  O   HOH T 340       0.148   8.218  -1.436  1.00  0.40           O  
HETATM  342  O   HOH T 341      -3.863  23.866  37.960  1.00  0.40           O  
HETATM  343  O   HOH T 342       0.745  -0.621  -4.464  1.00  0.40           O  
HETATM  344  O   HOH T 343     -16.371  -0.106  25.210  1.00  0.40           O  
HETATM  345  O   HOH T 344       3.907  18.044  27.082  1.00  0.40           O  
HETATM  346  O   HOH T 345      15.710   3.293  37.094  1.00  0.40           O  
HETATM  347  O   HOH T 346       4.127  44.654   2.511  1.00  0.40           O  
HETATM  348  O   HOH T 347      -8.846  14.214  36.334  1.00  0.40           O  
HETATM  349  O   HOH T 348     -23.262   7.903  12.395  1.00  0.40           O  
HETATM  350  O   HOH T 349      17.531   3.532  61.879  1.00  0.40           O  
HETATM  351  O   HOH T 350      16.467  49.972  25.132  1.00  0.40           O  
HETATM  352  O   HOH T 351      -5.012   8.901  67.935  1.00  0.40           O  
HETATM  353  O   HOH T 352       4.609  15.292  41.303  1.00  0.40           O  
HETATM  354  O   HOH T 353       5.289  -8.148  23.695  1.00  0.41           O  
HETATM  355  O   HOH T 354     -18.002  -4.195  43.546  1.00  0.41           O  
HETATM  356  O   HOH T 355      11.256   7.989   2.221  1.00  0.41           O  
HETATM  357  O   HOH T 356       6.399  -9.991  44.796  1.00  0.41           O  
HETATM  358  O   HOH T 357       0.612  43.503  21.225  1.00  0.41           O  
HETATM  359  O   HOH T 358      -4.351   8.562  32.075  1.00  0.41           O  
HETATM  360  O   HOH T 359     -11.429  43.835  68.217  1.00  0.41           O  
HETATM  361  O   HOH T 360      -4.402  22.719  40.378  1.00  0.41           O  
HETATM  362  O   HOH T 361       0.716  26.985  38.625  1.00  0.41           O  
HETATM  363  O   HOH T 362      10.576   5.218   2.246  1.00  0.41           O  
HETATM  364  O   HOH T 363     -18.572   0.048  13.906  1.00  0.41           O  
HETATM  365  O   HOH T 364     -12.239   9.580  46.691  1.00  0.41           O  
HETATM  366  O   HOH T 365      -6.298  -7.172  47.661  1.00  0.41           O  
HETATM  367  O   HOH T 366      -4.382  40.959  67.498  1.00  0.41           O  
HETATM  368  O   HOH T 367     -10.691  41.214  67.970  1.00  0.41           O  
HETATM  369  O   HOH T 368       6.598   4.709  -0.083  1.00  0.41           O  
HETATM  370  O   HOH T 369      11.395   4.210  62.899  1.00  0.41           O  
HETATM  371  O   HOH T 370      -1.525  28.361  37.748  1.00  0.41           O  
HETATM  372  O   HOH T 371      -1.813  10.143  -1.018  1.00  0.41           O  
HETATM  373  O   HOH T 372       9.833   8.701  63.450  1.00  0.41           O  
HETATM  374  O   HOH T 373       9.901  16.337  -0.226  1.00  0.41           O  
HETATM  375  O   HOH T 374     -10.033  39.421  40.085  1.00  0.41           O  
HETATM  376  O   HOH T 375     -13.752   5.736  54.729  1.00  0.41           O  
HETATM  377  O   HOH T 376       4.886  25.051  55.167  1.00  0.41           O  
HETATM  378  O   HOH T 377       6.132  27.281  23.578  1.00  0.41           O  
HETATM  379  O   HOH T 378       0.040  21.249  27.772  1.00  0.41           O  
HETATM  380  O   HOH T 379      -2.691  -6.509  13.692  1.00  0.41           O  
HETATM  381  O   HOH T 380      -2.342  -4.069   9.239  1.00  0.41           O  
HETATM  382  O   HOH T 381       2.337  50.418  43.669  1.00  0.41           O  
HETATM  383  O   HOH T 382       1.802  33.901  42.967  1.00  0.41           O  
HETATM  384  O   HOH T 383      -0.842  47.105  40.256  1.00  0.41           O  
HETATM  385  O   HOH T 384     -13.843  21.097  43.695  1.00  0.41           O  
HETATM  386  O   HOH T 385     -16.756  11.718   5.145  1.00  0.41           O  
HETATM  387  O   HOH T 386      -8.082  17.984  19.079  1.00  0.42           O  
HETATM  388  O   HOH T 387       9.843   0.107  63.831  1.00  0.42           O  
HETATM  389  O   HOH T 388      -7.073  -5.071  65.334  1.00  0.42           O  
HETATM  390  O   HOH T 389       3.795  47.787  23.571  1.00  0.42           O  
HETATM  391  O   HOH T 390      24.764  42.248  25.382  1.00  0.42           O  
HETATM  392  O   HOH T 391       3.697 -10.864  44.986  1.00  0.42           O  
HETATM  393  O   HOH T 392      -9.656  17.938  41.095  1.00  0.42           O  
HETATM  394  O   HOH T 393       7.429  47.857  52.703  1.00  0.42           O  
HETATM  395  O   HOH T 394       7.154  43.678  58.643  1.00  0.42           O  
HETATM  396  O   HOH T 395      29.756  44.911   8.017  1.00  0.42           O  
HETATM  397  O   HOH T 396       7.420  45.537  55.085  1.00  0.42           O  
HETATM  398  O   HOH T 397     -23.158   0.218  44.065  1.00  0.42           O  
HETATM  399  O   HOH T 398     -20.494  21.621  50.987  1.00  0.42           O  
HETATM  400  O   HOH T 399     -11.645  14.640  58.514  1.00  0.42           O  
HETATM  401  O   HOH T 400       9.717   9.260  60.607  1.00  0.42           O  
HETATM  402  O   HOH T 401       3.349  17.858  10.704  1.00  0.42           O  
HETATM  403  O   HOH T 402      17.155  47.776  28.382  1.00  0.42           O  
HETATM  404  O   HOH T 403       6.990  11.061  52.699  1.00  0.42           O  
HETATM  405  O   HOH T 404     -17.418  19.992  47.692  1.00  0.42           O  
HETATM  406  O   HOH T 405      11.718  52.978  26.015  1.00  0.42           O  
HETATM  407  O   HOH T 406     -13.926  18.500  44.237  1.00  0.42           O  
HETATM  408  O   HOH T 407      13.736  53.518   2.737  1.00  0.42           O  
HETATM  409  O   HOH T 408       4.947  20.826  22.032  1.00  0.42           O  
HETATM  410  O   HOH T 409      28.215  32.470   7.415  1.00  0.42           O  
HETATM  411  O   HOH T 410       5.882  42.159  28.236  1.00  0.42           O  
HETATM  412  O   HOH T 411      11.577  15.353  22.580  1.00  0.42           O  
HETATM  413  O   HOH T 412       5.031  39.617  60.795  1.00  0.42           O  
HETATM  414  O   HOH T 413      -9.910  14.981  43.497  1.00  0.42           O  
HETATM  415  O   HOH T 414     -20.370   8.243  52.867  1.00  0.42           O  
HETATM  416  O   HOH T 415       0.304  24.698  21.214  1.00  0.42           O  
HETATM  417  O   HOH T 416     -19.551   2.260  12.406  1.00  0.42           O  
HETATM  418  O   HOH T 417       6.583  24.771  58.415  1.00  0.42           O  
HETATM  419  O   HOH T 418     -20.232  12.962  22.677  1.00  0.42           O  
HETATM  420  O   HOH T 419      10.571  56.183  13.542  1.00  0.42           O  
HETATM  421  O   HOH T 420       4.886  13.977  47.079  1.00  0.42           O  
HETATM  422  O   HOH T 421      15.096   0.863  50.141  1.00  0.42           O  
HETATM  423  O   HOH T 422      24.867  25.840  10.389  1.00  0.42           O  
HETATM  424  O   HOH T 423       5.163  54.361  22.716  1.00  0.43           O  
HETATM  425  O   HOH T 424     -13.057  -2.556  12.110  1.00  0.43           O  
HETATM  426  O   HOH T 425      13.678  40.769   4.423  1.00  0.43           O  
HETATM  427  O   HOH T 426       0.441  20.435  11.122  1.00  0.43           O  
HETATM  428  O   HOH T 427       3.983  18.485  66.320  1.00  0.43           O  
HETATM  429  O   HOH T 428     -14.847  28.538  41.816  1.00  0.43           O  
HETATM  430  O   HOH T 429     -19.065   1.657  52.727  1.00  0.43           O  
HETATM  431  O   HOH T 430      -2.514  26.712  35.777  1.00  0.43           O  
HETATM  432  O   HOH T 431       8.984  18.742   8.664  1.00  0.43           O  
HETATM  433  O   HOH T 432      -2.970  12.670  -1.110  1.00  0.43           O  
HETATM  434  O   HOH T 433      41.227  33.571  14.779  1.00  0.43           O  
HETATM  435  O   HOH T 434       3.883  40.473  27.509  1.00  0.43           O  
HETATM  436  O   HOH T 435      -9.442   8.073  31.466  1.00  0.43           O  
HETATM  437  O   HOH T 436      15.203  17.025  22.724  1.00  0.43           O  
HETATM  438  O   HOH T 437     -13.985   8.014  59.140  1.00  0.43           O  
HETATM  439  O   HOH T 438      -0.599  52.018  11.186  1.00  0.43           O  
HETATM  440  O   HOH T 439      10.577  36.115  27.648  1.00  0.43           O  
HETATM  441  O   HOH T 440     -16.439  14.192   6.359  1.00  0.43           O  
HETATM  442  O   HOH T 441      31.743  43.579  12.267  1.00  0.43           O  
HETATM  443  O   HOH T 442       6.613  20.978  11.048  1.00  0.43           O  
HETATM  444  O   HOH T 443      16.429  46.335  30.735  1.00  0.43           O  
HETATM  445  O   HOH T 444      -8.215  14.361  38.991  1.00  0.43           O  
HETATM  446  O   HOH T 445      12.632   0.564  30.981  1.00  0.43           O  
HETATM  447  O   HOH T 446     -23.046  33.742  59.107  1.00  0.43           O  
HETATM  448  O   HOH T 447       2.659  -7.374  23.090  1.00  0.43           O  
HETATM  449  O   HOH T 448      35.301  35.449  16.824  1.00  0.43           O  
HETATM  450  O   HOH T 449      13.259   6.134   2.062  1.00  0.43           O  
HETATM  451  O   HOH T 450       0.895  16.571  37.813  1.00  0.43           O  
HETATM  452  O   HOH T 451     -18.630  -6.382  51.499  1.00  0.43           O  
HETATM  453  O   HOH T 452      -0.606  -2.125  27.679  1.00  0.43           O  
HETATM  454  O   HOH T 453      41.383  31.369  16.571  1.00  0.43           O  
HETATM  455  O   HOH T 454     -17.002   0.705  27.840  1.00  0.43           O  
HETATM  456  O   HOH T 455     -25.344  33.187  57.638  1.00  0.43           O  
HETATM  457  O   HOH T 456     -19.068  41.496  50.265  1.00  0.43           O  
HETATM  458  O   HOH T 457       4.840  14.344  27.701  1.00  0.43           O  
HETATM  459  O   HOH T 458       6.810  28.778  -4.023  1.00  0.43           O  
HETATM  460  O   HOH T 459     -20.585  41.652  52.665  1.00  0.43           O  
HETATM  461  O   HOH T 460      15.965  -4.652  50.553  1.00  0.43           O  
HETATM  462  O   HOH T 461      11.968  -6.439  59.298  1.00  0.43           O  
HETATM  463  O   HOH T 462     -20.494   4.476  26.227  1.00  0.44           O  
HETATM  464  O   HOH T 463       9.109  32.068  35.968  1.00  0.44           O  
HETATM  465  O   HOH T 464       9.747  45.039  48.159  1.00  0.44           O  
HETATM  466  O   HOH T 465     -12.003  15.307  55.864  1.00  0.44           O  
HETATM  467  O   HOH T 466     -14.789  44.673  34.675  1.00  0.44           O  
HETATM  468  O   HOH T 467       8.078  48.699  45.465  1.00  0.44           O  
HETATM  469  O   HOH T 468      23.186  31.424   8.867  1.00  0.44           O  
HETATM  470  O   HOH T 469       5.170  -3.197  40.014  1.00  0.44           O  
HETATM  471  O   HOH T 470      14.446  -7.248  44.822  1.00  0.44           O  
HETATM  472  O   HOH T 471     -18.460  52.679  55.482  1.00  0.44           O  
HETATM  473  O   HOH T 472      30.243  42.353   7.113  1.00  0.44           O  
HETATM  474  O   HOH T 473       6.717  18.764  45.434  1.00  0.44           O  
HETATM  475  O   HOH T 474     -10.972  11.892  46.815  1.00  0.44           O  
HETATM  476  O   HOH T 475       1.498  34.855  25.747  1.00  0.44           O  
HETATM  477  O   HOH T 476     -13.071  45.458  42.949  1.00  0.44           O  
HETATM  478  O   HOH T 477      -2.302  37.315   5.483  1.00  0.44           O  
HETATM  479  O   HOH T 478      28.177  46.124  30.593  1.00  0.44           O  
HETATM  480  O   HOH T 479      13.877  14.340  10.673  1.00  0.44           O  
HETATM  481  O   HOH T 480      13.965   0.027  59.926  1.00  0.44           O  
HETATM  482  O   HOH T 481       6.423  32.554  39.530  1.00  0.44           O  
HETATM  483  O   HOH T 482      39.685  31.323  14.495  1.00  0.44           O  
HETATM  484  O   HOH T 483     -18.564   3.008  10.101  1.00  0.44           O  
HETATM  485  O   HOH T 484      -0.001  15.872  57.428  1.00  0.44           O  
HETATM  486  O   HOH T 485      -0.098  57.803  42.932  1.00  0.44           O  
HETATM  487  O   HOH T 486      -0.762   8.801  34.597  1.00  0.44           O  
HETATM  488  O   HOH T 487      14.441   3.571  49.260  1.00  0.44           O  
HETATM  489  O   HOH T 488     -13.460  17.118   2.608  1.00  0.44           O  
HETATM  490  O   HOH T 489     -16.317  30.703  40.695  1.00  0.44           O  
HETATM  491  O   HOH T 490      -2.292   3.283  -4.923  1.00  0.44           O  
HETATM  492  O   HOH T 491      10.537  -4.793  60.981  1.00  0.44           O  
HETATM  493  O   HOH T 492       2.712  42.318  25.740  1.00  0.44           O  
HETATM  494  O   HOH T 493     -14.761  -0.592  29.027  1.00  0.44           O  
HETATM  495  O   HOH T 494      -1.669  25.642  38.233  1.00  0.44           O  
HETATM  496  O   HOH T 495       2.232  21.338  13.978  1.00  0.44           O  
HETATM  497  O   HOH T 496     -13.360  -6.372  65.134  1.00  0.44           O  
HETATM  498  O   HOH T 497      13.486  23.919   6.946  1.00  0.44           O  
HETATM  499  O   HOH T 498      11.341  20.061   8.061  1.00  0.44           O  
HETATM  500  O   HOH T 499      -4.148  16.546  37.373  1.00  0.44           O  
HETATM  501  O   HOH T 500      13.848   0.921  62.544  1.00  0.44           O  
HETATM  502  O   HOH T 501      11.264  24.850   5.480  1.00  0.44           O  
HETATM  503  O   HOH T 502       8.507  25.630   5.813  1.00  0.44           O  
HETATM  504  O   HOH T 503      10.892  30.325  59.570  1.00  0.44           O  
HETATM  505  O   HOH T 504     -14.743  -5.138  12.607  1.00  0.44           O  
HETATM  506  O   HOH T 505      27.446  55.797  22.544  1.00  0.44           O  
HETATM  507  O   HOH T 506       5.045  28.269  -1.898  1.00  0.45           O  
HETATM  508  O   HOH T 507      11.964  31.808  -1.483  1.00  0.45           O  
HETATM  509  O   HOH T 508      -3.059  -0.115  68.254  1.00  0.45           O  
HETATM  510  O   HOH T 509       6.140   2.484  33.054  1.00  0.45           O  
HETATM  511  O   HOH T 510       5.823  36.749  29.879  1.00  0.45           O  
HETATM  512  O   HOH T 511      -5.514  53.849  49.179  1.00  0.45           O  
HETATM  513  O   HOH T 512      -5.540  -1.114  68.382  1.00  0.45           O  
HETATM  514  O   HOH T 513      -4.942  14.289   0.081  1.00  0.45           O  
HETATM  515  O   HOH T 514       0.578  46.208   5.000  1.00  0.45           O  
HETATM  516  O   HOH T 515      10.494  -0.845  32.356  1.00  0.45           O  
HETATM  517  O   HOH T 516      13.821  46.925  31.483  1.00  0.45           O  
HETATM  518  O   HOH T 517      14.124  -2.502  54.323  1.00  0.45           O  
HETATM  519  O   HOH T 518      10.831  33.352  28.430  1.00  0.45           O  
HETATM  520  O   HOH T 519       0.998  53.553  49.921  1.00  0.45           O  
HETATM  521  O   HOH T 520      -5.407  32.090  65.002  1.00  0.45           O  
HETATM  522  O   HOH T 521     -14.603  43.014  40.789  1.00  0.45           O  
HETATM  523  O   HOH T 522      -6.610  37.547  10.648  1.00  0.45           O  
HETATM  524  O   HOH T 523      17.551  -9.884  48.484  1.00  0.45           O  
HETATM  525  O   HOH T 524      -9.891  -3.178  27.625  1.00  0.45           O  
HETATM  526  O   HOH T 525      29.637  28.446  11.936  1.00  0.45           O  
HETATM  527  O   HOH T 526      14.587   9.612   5.029  1.00  0.45           O  
HETATM  528  O   HOH T 527      -8.146  40.101  38.115  1.00  0.45           O  
HETATM  529  O   HOH T 528      14.272   7.917  15.021  1.00  0.45           O  
HETATM  530  O   HOH T 529     -14.394  -1.589  26.541  1.00  0.45           O  
HETATM  531  O   HOH T 530      14.028   7.381  29.590  1.00  0.45           O  
HETATM  532  O   HOH T 531       4.947  35.627  63.983  1.00  0.45           O  
HETATM  533  O   HOH T 532      15.510  -9.924  53.400  1.00  0.45           O  
HETATM  534  O   HOH T 533       7.636   6.139  67.621  1.00  0.45           O  
HETATM  535  O   HOH T 534      -2.707  21.146  41.866  1.00  0.45           O  
HETATM  536  O   HOH T 535     -14.793  11.274  41.162  1.00  0.45           O  
HETATM  537  O   HOH T 536      32.546  43.833  16.495  1.00  0.45           O  
HETATM  538  O   HOH T 537     -17.570  33.100  41.584  1.00  0.45           O  
HETATM  539  O   HOH T 538       2.532  16.838  58.302  1.00  0.45           O  
HETATM  540  O   HOH T 539     -22.879  12.788  22.807  1.00  0.45           O  
HETATM  541  O   HOH T 540      23.674  33.802   5.660  1.00  0.45           O  
HETATM  542  O   HOH T 541      -0.557  15.143  54.768  1.00  0.45           O  
HETATM  543  O   HOH T 542       1.224  13.600  56.302  1.00  0.45           O  
HETATM  544  O   HOH T 543      -0.608  -4.681  28.985  1.00  0.45           O  
HETATM  545  O   HOH T 544      32.207  38.788  11.068  1.00  0.45           O  
HETATM  546  O   HOH T 545       0.086  50.385  17.737  1.00  0.45           O  
HETATM  547  O   HOH T 546     -10.421  27.016  39.518  1.00  0.46           O  
HETATM  548  O   HOH T 547      11.681  11.549  25.308  1.00  0.46           O  
HETATM  549  O   HOH T 548       8.092  32.855  -1.710  1.00  0.46           O  
HETATM  550  O   HOH T 549      -3.259  22.807  62.822  1.00  0.46           O  
HETATM  551  O   HOH T 550      -2.743  58.442  43.334  1.00  0.46           O  
HETATM  552  O   HOH T 551      16.824  42.195  27.881  1.00  0.46           O  
HETATM  553  O   HOH T 552     -13.258  13.354  47.666  1.00  0.46           O  
HETATM  554  O   HOH T 553      -4.118  18.981  42.945  1.00  0.46           O  
HETATM  555  O   HOH T 554      28.301  34.879   5.846  1.00  0.46           O  
HETATM  556  O   HOH T 555     -13.153  -1.804   6.110  1.00  0.46           O  
HETATM  557  O   HOH T 556     -12.958  52.066  42.453  1.00  0.46           O  
HETATM  558  O   HOH T 557      -7.287  34.849  14.562  1.00  0.46           O  
HETATM  559  O   HOH T 558     -17.176  35.682  40.330  1.00  0.46           O  
HETATM  560  O   HOH T 559     -16.982   5.691  65.069  1.00  0.46           O  
HETATM  561  O   HOH T 560      31.882  50.323  21.669  1.00  0.46           O  
HETATM  562  O   HOH T 561      -5.788  18.724  40.758  1.00  0.46           O  
HETATM  563  O   HOH T 562      -5.594  36.601  51.563  1.00  0.46           O  
HETATM  564  O   HOH T 563     -16.964  28.237  43.711  1.00  0.46           O  
HETATM  565  O   HOH T 564       7.364   8.895  35.484  1.00  0.46           O  
HETATM  566  O   HOH T 565       1.180  41.120  57.425  1.00  0.46           O  
HETATM  567  O   HOH T 566      15.138  21.048  21.021  1.00  0.46           O  
HETATM  568  O   HOH T 567      -6.238   8.671  33.985  1.00  0.46           O  
HETATM  569  O   HOH T 568       8.921  -0.780  29.980  1.00  0.46           O  
HETATM  570  O   HOH T 569       2.085  32.291  26.933  1.00  0.46           O  
HETATM  571  O   HOH T 570     -19.438   4.299  46.147  1.00  0.46           O  
HETATM  572  O   HOH T 571       9.620   1.701  20.276  1.00  0.46           O  
HETATM  573  O   HOH T 572     -12.431  -4.682  22.913  1.00  0.46           O  
HETATM  574  O   HOH T 573       1.683  37.250  26.868  1.00  0.46           O  
HETATM  575  O   HOH T 574       2.609  20.380  20.782  1.00  0.46           O  
HETATM  576  O   HOH T 575     -22.823  -5.529  51.358  1.00  0.46           O  
HETATM  577  O   HOH T 576       7.679  29.101  39.832  1.00  0.46           O  
HETATM  578  O   HOH T 577     -11.256  18.604   1.664  1.00  0.46           O  
HETATM  579  O   HOH T 578       8.906  34.061  26.664  1.00  0.46           O  
HETATM  580  O   HOH T 579      -2.213  12.853  65.241  1.00  0.46           O  
HETATM  581  O   HOH T 580      12.743   7.306  17.373  1.00  0.46           O  
HETATM  582  O   HOH T 581     -20.453  16.581  15.299  1.00  0.46           O  
HETATM  583  O   HOH T 582       8.054  52.035  26.342  1.00  0.46           O  
HETATM  584  O   HOH T 583      18.311 -10.058  53.448  1.00  0.46           O  
HETATM  585  O   HOH T 584       5.068   5.728  -2.233  1.00  0.46           O  
HETATM  586  O   HOH T 585       2.647  36.953  24.269  1.00  0.46           O  
HETATM  587  O   HOH T 586      15.440  23.227  19.226  1.00  0.46           O  
HETATM  588  O   HOH T 587      -0.019  37.269   3.727  1.00  0.46           O  
HETATM  589  O   HOH T 588     -16.774  51.629  52.790  1.00  0.46           O  
HETATM  590  O   HOH T 589       1.690  51.327  19.835  1.00  0.46           O  
HETATM  591  O   HOH T 590       3.303 -10.960  -0.924  1.00  0.46           O  
HETATM  592  O   HOH T 591       9.618  42.403  58.891  1.00  0.46           O  
HETATM  593  O   HOH T 592       1.435  -9.441  21.688  1.00  0.46           O  
HETATM  594  O   HOH T 593       5.766  39.526  29.358  1.00  0.46           O  
HETATM  595  O   HOH T 594     -21.471  -4.067  53.372  1.00  0.46           O  
HETATM  596  O   HOH T 595      -4.558  14.155  64.429  1.00  0.46           O  
HETATM  597  O   HOH T 596      -8.947  20.158   1.440  1.00  0.46           O  
HETATM  598  O   HOH T 597       5.623  29.954  35.188  1.00  0.47           O  
HETATM  599  O   HOH T 598      -6.579 -10.120   5.082  1.00  0.47           O  
HETATM  600  O   HOH T 599       5.753  48.687  49.353  1.00  0.47           O  
HETATM  601  O   HOH T 600     -14.559  45.372  60.783  1.00  0.47           O  
HETATM  602  O   HOH T 601       7.437  10.529  67.020  1.00  0.47           O  
HETATM  603  O   HOH T 602       5.610  17.682  53.601  1.00  0.47           O  
HETATM  604  O   HOH T 603       4.025  20.372  11.889  1.00  0.47           O  
HETATM  605  O   HOH T 604     -11.999 -12.322  54.483  1.00  0.47           O  
HETATM  606  O   HOH T 605       2.985  51.674  46.023  1.00  0.47           O  
HETATM  607  O   HOH T 606     -16.991  44.702  58.349  1.00  0.47           O  
HETATM  608  O   HOH T 607     -17.316  -9.260  48.555  1.00  0.47           O  
HETATM  609  O   HOH T 608     -14.550  11.052  47.328  1.00  0.47           O  
HETATM  610  O   HOH T 609     -12.966  40.574  66.470  1.00  0.47           O  
HETATM  611  O   HOH T 610     -12.002  -4.275   5.658  1.00  0.47           O  
HETATM  612  O   HOH T 611      -9.014  -3.805  66.796  1.00  0.47           O  
HETATM  613  O   HOH T 612     -18.063  48.525  45.347  1.00  0.47           O  
HETATM  614  O   HOH T 613     -11.383  -7.102  66.930  1.00  0.47           O  
HETATM  615  O   HOH T 614      -4.518  -6.126  22.647  1.00  0.47           O  
HETATM  616  O   HOH T 615      12.962  22.136   9.013  1.00  0.47           O  
HETATM  617  O   HOH T 616       9.149  25.055  57.632  1.00  0.47           O  
HETATM  618  O   HOH T 617      -6.967  18.736  38.239  1.00  0.47           O  
HETATM  619  O   HOH T 618       5.895  47.685  46.814  1.00  0.47           O  
HETATM  620  O   HOH T 619      -4.944  -8.318  62.725  1.00  0.47           O  
HETATM  621  O   HOH T 620     -21.014  22.215  53.681  1.00  0.47           O  
HETATM  622  O   HOH T 621     -11.263  -7.895  64.081  1.00  0.47           O  
HETATM  623  O   HOH T 622     -17.060   3.216   4.763  1.00  0.47           O  
HETATM  624  O   HOH T 623      -3.398  -5.637  11.113  1.00  0.47           O  
HETATM  625  O   HOH T 624      -6.404  -8.042  21.912  1.00  0.47           O  
HETATM  626  O   HOH T 625      -4.875 -11.936   3.751  1.00  0.47           O  
HETATM  627  O   HOH T 626      18.309  27.642   7.010  1.00  0.47           O  
HETATM  628  O   HOH T 627      26.017  24.168  13.841  1.00  0.47           O  
HETATM  629  O   HOH T 628     -17.546  -8.064  53.340  1.00  0.47           O  
HETATM  630  O   HOH T 629     -14.687  28.320  64.119  1.00  0.47           O  
HETATM  631  O   HOH T 630      -6.525  49.001  64.085  1.00  0.47           O  
HETATM  632  O   HOH T 631     -10.962  15.850   1.894  1.00  0.47           O  
HETATM  633  O   HOH T 632       5.692  10.928  34.990  1.00  0.47           O  
HETATM  634  O   HOH T 633      -7.560   3.568  32.963  1.00  0.47           O  
HETATM  635  O   HOH T 634      -0.752  60.405  43.591  1.00  0.47           O  
HETATM  636  O   HOH T 635       3.366  13.015  33.474  1.00  0.47           O  
HETATM  637  O   HOH T 636     -14.501  52.055  54.287  1.00  0.47           O  
HETATM  638  O   HOH T 637       9.054  32.619  38.672  1.00  0.47           O  
HETATM  639  O   HOH T 638      -2.373  21.662  39.077  1.00  0.47           O  
HETATM  640  O   HOH T 639       7.933  17.970  25.206  1.00  0.47           O  
HETATM  641  O   HOH T 640      -4.139  12.097  30.919  1.00  0.47           O  
HETATM  642  O   HOH T 641       4.761  30.989   5.995  1.00  0.48           O  
HETATM  643  O   HOH T 642      24.531  39.328   2.403  1.00  0.48           O  
HETATM  644  O   HOH T 643     -19.109   5.903  28.098  1.00  0.48           O  
HETATM  645  O   HOH T 644       9.617   7.017   4.070  1.00  0.48           O  
HETATM  646  O   HOH T 645       7.204   8.227   3.480  1.00  0.48           O  
HETATM  647  O   HOH T 646      16.237  23.336  16.256  1.00  0.48           O  
HETATM  648  O   HOH T 647      19.065  -8.099  50.202  1.00  0.48           O  
HETATM  649  O   HOH T 648     -20.561  17.991  12.886  1.00  0.48           O  
HETATM  650  O   HOH T 649       8.867  10.462  50.752  1.00  0.48           O  
HETATM  651  O   HOH T 650       3.471  23.016  12.073  1.00  0.48           O  
HETATM  652  O   HOH T 651      -5.881  -7.593  40.499  1.00  0.48           O  
HETATM  653  O   HOH T 652     -16.863  41.188  39.786  1.00  0.48           O  
HETATM  654  O   HOH T 653      20.465  31.748   9.161  1.00  0.48           O  
HETATM  655  O   HOH T 654     -14.393  -3.996  21.052  1.00  0.48           O  
HETATM  656  O   HOH T 655      14.866  -1.158  43.498  1.00  0.48           O  
HETATM  657  O   HOH T 656      18.046  21.606  14.835  1.00  0.48           O  
HETATM  658  O   HOH T 657       4.182  28.479  32.349  1.00  0.48           O  
HETATM  659  O   HOH T 658       4.819  -0.635  26.965  1.00  0.48           O  
HETATM  660  O   HOH T 659     -13.781  30.819  64.789  1.00  0.48           O  
HETATM  661  O   HOH T 660      12.190  29.831  57.163  1.00  0.48           O  
HETATM  662  O   HOH T 661     -10.811  26.675  20.337  1.00  0.48           O  
HETATM  663  O   HOH T 662       3.864  12.840  40.150  1.00  0.48           O  
HETATM  664  O   HOH T 663       2.901  47.056  40.672  1.00  0.48           O  
HETATM  665  O   HOH T 664     -18.790  42.235  59.856  1.00  0.48           O  
HETATM  666  O   HOH T 665     -16.866   6.547  60.849  1.00  0.48           O  
HETATM  667  O   HOH T 666      15.003  10.604  15.448  1.00  0.48           O  
HETATM  668  O   HOH T 667     -15.472  -7.282  48.406  1.00  0.48           O  
HETATM  669  O   HOH T 668     -13.087  17.702  -0.243  1.00  0.48           O  
HETATM  670  O   HOH T 669      -3.833  50.069  57.897  1.00  0.48           O  
HETATM  671  O   HOH T 670     -19.274  34.702  59.943  1.00  0.48           O  
HETATM  672  O   HOH T 671      -1.470  48.793  57.060  1.00  0.48           O  
HETATM  673  O   HOH T 672      -8.111   2.572  35.641  1.00  0.48           O  
HETATM  674  O   HOH T 673     -15.041  12.175  58.322  1.00  0.48           O  
HETATM  675  O   HOH T 674      -2.365  25.490  21.973  1.00  0.48           O  
HETATM  676  O   HOH T 675     -13.135  -1.972  30.895  1.00  0.48           O  
HETATM  677  O   HOH T 676     -11.396  49.811  42.271  1.00  0.48           O  
HETATM  678  O   HOH T 677      -6.071  39.029  39.706  1.00  0.48           O  
HETATM  679  O   HOH T 678      -5.679  47.025  65.757  1.00  0.48           O  
HETATM  680  O   HOH T 679      -5.045   3.541  -5.101  1.00  0.48           O  
HETATM  681  O   HOH T 680       1.100  36.411  22.004  1.00  0.49           O  
HETATM  682  O   HOH T 681      16.757 -10.036  55.805  1.00  0.49           O  
HETATM  683  O   HOH T 682      20.954  22.387  23.319  1.00  0.49           O  
HETATM  684  O   HOH T 683     -12.219 -10.237  12.212  1.00  0.49           O  
HETATM  685  O   HOH T 684      -2.319  50.162  12.230  1.00  0.49           O  
HETATM  686  O   HOH T 685      18.828  22.641  27.077  1.00  0.49           O  
HETATM  687  O   HOH T 686      -0.031  23.050  13.370  1.00  0.49           O  
HETATM  688  O   HOH T 687       8.202  -2.405  32.079  1.00  0.49           O  
HETATM  689  O   HOH T 688       5.361  42.168   1.827  1.00  0.49           O  
HETATM  690  O   HOH T 689      -7.363   0.882  67.750  1.00  0.49           O  
HETATM  691  O   HOH T 690      -1.532   3.176  -7.624  1.00  0.49           O  
HETATM  692  O   HOH T 691       3.242  17.686  62.280  1.00  0.49           O  
HETATM  693  O   HOH T 692       3.315  -3.188  18.650  1.00  0.49           O  
HETATM  694  O   HOH T 693      24.287  41.306   4.280  1.00  0.49           O  
HETATM  695  O   HOH T 694     -17.990  36.685  44.728  1.00  0.49           O  
HETATM  696  O   HOH T 695     -15.622  23.265  43.329  1.00  0.49           O  
HETATM  697  O   HOH T 696      -4.794  20.353  38.774  1.00  0.49           O  
HETATM  698  O   HOH T 697       0.481  13.890  38.318  1.00  0.49           O  
HETATM  699  O   HOH T 698     -14.715   6.814  64.126  1.00  0.49           O  
HETATM  700  O   HOH T 699       4.032  41.415  57.639  1.00  0.49           O  
HETATM  701  O   HOH T 700      -2.353  46.905  38.025  1.00  0.49           O  
HETATM  702  O   HOH T 701     -10.562   8.053  -0.089  1.00  0.49           O  
HETATM  703  O   HOH T 702      22.209  56.766  12.444  1.00  0.49           O  
HETATM  704  O   HOH T 703     -11.943  16.633  44.168  1.00  0.49           O  
HETATM  705  O   HOH T 704      27.060  29.928   7.406  1.00  0.49           O  
HETATM  706  O   HOH T 705       6.094  -5.567  -5.302  1.00  0.49           O  
HETATM  707  O   HOH T 706      25.160  55.062  21.207  1.00  0.49           O  
HETATM  708  O   HOH T 707      -8.243 -10.806   1.896  1.00  0.49           O  
HETATM  709  O   HOH T 708     -10.912  -4.239  11.546  1.00  0.49           O  
HETATM  710  O   HOH T 709     -21.051  15.492  12.132  1.00  0.49           O  
HETATM  711  O   HOH T 710     -12.776  22.023  41.194  1.00  0.49           O  
HETATM  712  O   HOH T 711       0.158  38.356   6.240  1.00  0.49           O  
HETATM  713  O   HOH T 712     -13.029  25.039  20.162  1.00  0.49           O  
HETATM  714  O   HOH T 713     -22.452  28.860  54.463  1.00  0.49           O  
HETATM  715  O   HOH T 714      -9.833  16.377  57.267  1.00  0.49           O  
HETATM  716  O   HOH T 715       9.048   2.755  63.358  1.00  0.49           O  
HETATM  717  O   HOH T 716      -8.127  21.975   3.290  1.00  0.49           O  
HETATM  718  O   HOH T 717     -10.078   1.095  68.395  1.00  0.49           O  
HETATM  719  O   HOH T 718      13.067  -8.938  58.485  1.00  0.49           O  
HETATM  720  O   HOH T 719      -1.580   0.849  30.948  1.00  0.49           O  
HETATM  721  O   HOH T 720      14.527  -6.547  58.326  1.00  0.49           O  
HETATM  722  O   HOH T 721      25.705  28.212   9.140  1.00  0.49           O  
HETATM  723  O   HOH T 722      -6.370  38.131  37.137  1.00  0.49           O  
HETATM  724  O   HOH T 723       3.671  37.882  28.590  1.00  0.49           O  
HETATM  725  O   HOH T 724       5.319  23.571  21.493  1.00  0.50           O  
HETATM  726  O   HOH T 725       0.827   1.894  32.417  1.00  0.50           O  
HETATM  727  O   HOH T 726     -24.948  28.299  50.002  1.00  0.50           O  
HETATM  728  O   HOH T 727      -1.588  18.589   6.416  1.00  0.50           O  
HETATM  729  O   HOH T 728       9.242  56.353   9.348  1.00  0.50           O  
HETATM  730  O   HOH T 729      26.530  46.245  32.519  1.00  0.50           O  
HETATM  731  O   HOH T 730       2.486   6.720  -1.958  1.00  0.50           O  
HETATM  732  O   HOH T 731       4.686  44.330  25.390  1.00  0.50           O  
HETATM  733  O   HOH T 732     -14.803   8.062  61.702  1.00  0.50           O  
HETATM  734  O   HOH T 733     -15.115   6.978  66.811  1.00  0.50           O  
HETATM  735  O   HOH T 734      -9.728  18.659  38.436  1.00  0.50           O  
HETATM  736  O   HOH T 735       8.765  25.105  25.520  1.00  0.50           O  
HETATM  737  O   HOH T 736     -13.849  -1.636  19.632  1.00  0.50           O  
HETATM  738  O   HOH T 737     -18.676  11.308  24.298  1.00  0.50           O  
HETATM  739  O   HOH T 738     -19.221  39.357  52.006  1.00  0.50           O  
HETATM  740  O   HOH T 739      11.655  12.367  30.032  1.00  0.50           O  
HETATM  741  O   HOH T 740     -13.112  -3.351  58.251  1.00  0.50           O  
HETATM  742  O   HOH T 741      -8.243  37.416  39.084  1.00  0.50           O  
HETATM  743  O   HOH T 742      11.580  35.110  48.833  1.00  0.50           O  
HETATM  744  O   HOH T 743       6.336  48.316  55.230  1.00  0.50           O  
HETATM  745  O   HOH T 744      -6.972  45.390  34.246  1.00  0.50           O  
HETATM  746  O   HOH T 745     -18.515   0.068  23.503  1.00  0.50           O  
HETATM  747  O   HOH T 746       4.026  16.323  -5.511  1.00  0.50           O  
HETATM  748  O   HOH T 747      -6.678 -10.673  25.716  1.00  0.50           O  
HETATM  749  O   HOH T 748     -16.607  43.628  60.947  1.00  0.50           O  
HETATM  750  O   HOH T 749       2.297  -7.858   6.713  1.00  0.50           O  
HETATM  751  O   HOH T 750       2.082  12.285  -0.191  1.00  0.50           O  
HETATM  752  O   HOH T 751      23.542  35.204   3.192  1.00  0.50           O  
HETATM  753  O   HOH T 752       8.187   3.834   2.157  1.00  0.50           O  
HETATM  754  O   HOH T 753     -18.884   6.699  40.835  1.00  0.50           O  
HETATM  755  O   HOH T 754       5.703  33.035  63.483  1.00  0.50           O  
HETATM  756  O   HOH T 755       0.179  -7.467  60.158  1.00  0.50           O  
HETATM  757  O   HOH T 756      15.037   1.968  52.739  1.00  0.51           O  
HETATM  758  O   HOH T 757       8.172  -0.752  27.343  1.00  0.51           O  
HETATM  759  O   HOH T 758      26.587  51.881  25.969  1.00  0.51           O  
HETATM  760  O   HOH T 759       9.626  10.183  48.050  1.00  0.51           O  
HETATM  761  O   HOH T 760      17.023  22.707  29.124  1.00  0.51           O  
HETATM  762  O   HOH T 761      15.935  -5.264  43.590  1.00  0.51           O  
HETATM  763  O   HOH T 762      -8.849   0.793   0.962  1.00  0.51           O  
HETATM  764  O   HOH T 763       1.755  -6.084  28.205  1.00  0.51           O  
HETATM  765  O   HOH T 764       1.329  46.342  61.125  1.00  0.51           O  
HETATM  766  O   HOH T 765       6.500  17.704  27.473  1.00  0.51           O  
HETATM  767  O   HOH T 766     -25.224  35.819  56.643  1.00  0.51           O  
HETATM  768  O   HOH T 767      -5.052  16.138  46.235  1.00  0.51           O  
HETATM  769  O   HOH T 768      -6.082  -5.866  24.990  1.00  0.51           O  
HETATM  770  O   HOH T 769      16.214   1.246  61.036  1.00  0.51           O  
HETATM  771  O   HOH T 770     -16.403  35.278  42.907  1.00  0.51           O  
HETATM  772  O   HOH T 771      13.647  18.564   8.849  1.00  0.51           O  
HETATM  773  O   HOH T 772     -10.838  -5.152  65.046  1.00  0.51           O  
HETATM  774  O   HOH T 773      27.537  43.596  31.635  1.00  0.51           O  
HETATM  775  O   HOH T 774      13.209  -4.916  43.981  1.00  0.51           O  
HETATM  776  O   HOH T 775       5.838  19.537  68.139  1.00  0.51           O  
HETATM  777  O   HOH T 776      -5.571 -10.621  61.611  1.00  0.51           O  
HETATM  778  O   HOH T 777      13.543   3.131  64.313  1.00  0.51           O  
HETATM  779  O   HOH T 778     -12.900  12.497  39.412  1.00  0.51           O  
HETATM  780  O   HOH T 779      28.617  27.500  18.555  1.00  0.51           O  
HETATM  781  O   HOH T 780       8.645  42.708  28.704  1.00  0.51           O  
HETATM  782  O   HOH T 781      22.724  55.190  10.283  1.00  0.51           O  
HETATM  783  O   HOH T 782      26.725  47.861   8.042  1.00  0.51           O  
HETATM  784  O   HOH T 783      16.495  -3.792  55.238  1.00  0.51           O  
HETATM  785  O   HOH T 784       7.146  30.736  37.401  1.00  0.51           O  
HETATM  786  O   HOH T 785       6.654  30.512  -1.824  1.00  0.51           O  
HETATM  787  O   HOH T 786       0.783  52.857  47.240  1.00  0.51           O  
HETATM  788  O   HOH T 787     -11.663  14.266  45.584  1.00  0.51           O  
HETATM  789  O   HOH T 788       4.197  17.857  42.021  1.00  0.51           O  
HETATM  790  O   HOH T 789      -6.459  39.708   8.971  1.00  0.51           O  
HETATM  791  O   HOH T 790     -19.653   6.766  55.107  1.00  0.51           O  
HETATM  792  O   HOH T 791     -23.515  38.992  58.251  1.00  0.51           O  
HETATM  793  O   HOH T 792      32.293  52.669  17.813  1.00  0.51           O  
HETATM  794  O   HOH T 793      10.464  12.883   5.602  1.00  0.51           O  
HETATM  795  O   HOH T 794      -8.166  15.585  41.458  1.00  0.51           O  
HETATM  796  O   HOH T 795       5.408  47.216  25.928  1.00  0.51           O  
HETATM  797  O   HOH T 796       8.683  16.695  45.273  1.00  0.51           O  
HETATM  798  O   HOH T 797     -18.698  11.437  51.023  1.00  0.51           O  
HETATM  799  O   HOH T 798       6.623  13.114  66.445  1.00  0.51           O  
HETATM  800  O   HOH T 799       3.230  -0.871  67.181  1.00  0.52           O  
HETATM  801  O   HOH T 800      16.519  31.407  45.216  1.00  0.52           O  
HETATM  802  O   HOH T 801       4.613  29.870  25.983  1.00  0.52           O  
HETATM  803  O   HOH T 802      10.004  53.828  12.179  1.00  0.52           O  
HETATM  804  O   HOH T 803     -17.120  27.533  49.237  1.00  0.52           O  
HETATM  805  O   HOH T 804      10.463  34.014  45.298  1.00  0.52           O  
HETATM  806  O   HOH T 805      35.713  42.209   9.744  1.00  0.52           O  
HETATM  807  O   HOH T 806      22.378  24.524  24.448  1.00  0.52           O  
HETATM  808  O   HOH T 807       9.733  30.038  37.906  1.00  0.52           O  
HETATM  809  O   HOH T 808      -9.907  16.557  54.520  1.00  0.52           O  
HETATM  810  O   HOH T 809     -17.381  37.800  42.228  1.00  0.52           O  
HETATM  811  O   HOH T 810      -7.685  30.990  64.123  1.00  0.52           O  
HETATM  812  O   HOH T 811     -15.456  20.321   9.748  1.00  0.52           O  
HETATM  813  O   HOH T 812      22.910  24.293  20.385  1.00  0.52           O  
HETATM  814  O   HOH T 813       9.463  30.424  -1.529  1.00  0.52           O  
HETATM  815  O   HOH T 814      16.781  -9.424  51.073  1.00  0.52           O  
HETATM  816  O   HOH T 815      15.353   7.354   3.394  1.00  0.52           O  
HETATM  817  O   HOH T 816      20.918  29.860   4.018  1.00  0.52           O  
HETATM  818  O   HOH T 817       1.961   5.814  68.248  1.00  0.52           O  
HETATM  819  O   HOH T 818      -5.587  12.012  -1.588  1.00  0.52           O  
HETATM  820  O   HOH T 819      14.191  23.587  47.057  1.00  0.52           O  
HETATM  821  O   HOH T 820       1.518 -12.826  53.317  1.00  0.52           O  
HETATM  822  O   HOH T 821      14.289  36.378  52.846  1.00  0.52           O  
HETATM  823  O   HOH T 822     -12.212  -2.325   3.598  1.00  0.52           O  
HETATM  824  O   HOH T 823      -2.502  -0.024  34.471  1.00  0.52           O  
HETATM  825  O   HOH T 824      12.324  27.726  32.340  1.00  0.52           O  
HETATM  826  O   HOH T 825       9.978  -3.460  63.369  1.00  0.52           O  
HETATM  827  O   HOH T 826      13.680  28.856  49.865  1.00  0.52           O  
HETATM  828  O   HOH T 827       0.502  54.339  11.984  1.00  0.52           O  
HETATM  829  O   HOH T 828      11.071  30.806  -3.995  1.00  0.52           O  
HETATM  830  O   HOH T 829      -6.347  51.031  57.133  1.00  0.52           O  
HETATM  831  O   HOH T 830      13.156   9.886  30.774  1.00  0.52           O  
HETATM  832  O   HOH T 831      32.713  50.273  18.920  1.00  0.52           O  
HETATM  833  O   HOH T 832      10.498  21.552  10.244  1.00  0.52           O  
HETATM  834  O   HOH T 833      -1.132  42.329  19.434  1.00  0.52           O  
HETATM  835  O   HOH T 834      -1.600 -14.593  44.512  1.00  0.52           O  
HETATM  836  O   HOH T 835      23.792  21.711  17.959  1.00  0.52           O  
HETATM  837  O   HOH T 836       6.484  16.201  46.748  1.00  0.52           O  
HETATM  838  O   HOH T 837      23.587  46.147   5.084  1.00  0.52           O  
HETATM  839  O   HOH T 838      10.419  15.678   6.101  1.00  0.53           O  
HETATM  840  O   HOH T 839       1.629  19.189   8.846  1.00  0.53           O  
HETATM  841  O   HOH T 840       6.309  19.632   8.661  1.00  0.53           O  
HETATM  842  O   HOH T 841      28.961  47.097   9.399  1.00  0.53           O  
HETATM  843  O   HOH T 842      25.369  32.045   7.051  1.00  0.53           O  
HETATM  844  O   HOH T 843     -20.626  -0.168  15.498  1.00  0.53           O  
HETATM  845  O   HOH T 844     -13.759  20.322  -0.806  1.00  0.53           O  
HETATM  846  O   HOH T 845       6.304  -4.384  32.508  1.00  0.53           O  
HETATM  847  O   HOH T 846      17.021   3.292  59.167  1.00  0.53           O  
HETATM  848  O   HOH T 847       4.726 -12.315  47.093  1.00  0.53           O  
HETATM  849  O   HOH T 848       2.540  46.854   3.256  1.00  0.53           O  
HETATM  850  O   HOH T 849     -10.660  29.829  38.545  1.00  0.53           O  
HETATM  851  O   HOH T 850      -5.201  16.834  25.245  1.00  0.53           O  
HETATM  852  O   HOH T 851      27.475  37.208   2.380  1.00  0.53           O  
HETATM  853  O   HOH T 852      16.198   4.787  63.936  1.00  0.53           O  
HETATM  854  O   HOH T 853      13.338  12.269   8.768  1.00  0.53           O  
HETATM  855  O   HOH T 854      -4.618  10.474  -1.576  1.00  0.53           O  
HETATM  856  O   HOH T 855      12.983  33.564  26.838  1.00  0.53           O  
HETATM  857  O   HOH T 856       4.578  27.211  61.347  1.00  0.53           O  
HETATM  858  O   HOH T 857      33.236  37.118  16.031  1.00  0.53           O  
HETATM  859  O   HOH T 858       9.112  12.286  55.890  1.00  0.53           O  
HETATM  860  O   HOH T 859      32.749  47.461  18.381  1.00  0.53           O  
HETATM  861  O   HOH T 860      10.208  12.759   2.675  1.00  0.53           O  
HETATM  862  O   HOH T 861     -21.315   3.289  10.622  1.00  0.53           O  
HETATM  863  O   HOH T 862      35.126  42.356  20.969  1.00  0.53           O  
HETATM  864  O   HOH T 863      13.213  27.561  55.870  1.00  0.53           O  
HETATM  865  O   HOH T 864     -20.573   3.112  54.678  1.00  0.53           O  
HETATM  866  O   HOH T 865     -16.967   0.143  21.247  1.00  0.53           O  
HETATM  867  O   HOH T 866      29.781  42.937  28.824  1.00  0.53           O  
HETATM  868  O   HOH T 867     -14.606  30.831  47.721  1.00  0.53           O  
HETATM  869  O   HOH T 868     -12.911   7.376  30.979  1.00  0.53           O  
HETATM  870  O   HOH T 869      -6.497  12.965  32.339  1.00  0.53           O  
HETATM  871  O   HOH T 870      29.399  38.862  21.329  1.00  0.53           O  
HETATM  872  O   HOH T 871     -14.120  25.138  17.662  1.00  0.53           O  
HETATM  873  O   HOH T 872       6.240  -0.372  29.217  1.00  0.54           O  
HETATM  874  O   HOH T 873       2.234  42.072  38.889  1.00  0.54           O  
HETATM  875  O   HOH T 874     -15.940   9.628  58.131  1.00  0.54           O  
HETATM  876  O   HOH T 875      11.400  46.295  46.260  1.00  0.54           O  
HETATM  877  O   HOH T 876       3.116  14.787  31.460  1.00  0.54           O  
HETATM  878  O   HOH T 877     -19.626  27.363  59.959  1.00  0.54           O  
HETATM  879  O   HOH T 878     -14.609  22.732  16.190  1.00  0.54           O  
HETATM  880  O   HOH T 879     -25.230   6.403  13.660  1.00  0.54           O  
HETATM  881  O   HOH T 880       2.941  45.141  22.615  1.00  0.54           O  
HETATM  882  O   HOH T 881       4.101  19.224  44.268  1.00  0.54           O  
HETATM  883  O   HOH T 882      -8.997  19.158  54.522  1.00  0.54           O  
HETATM  884  O   HOH T 883      -8.997   4.236  -0.176  1.00  0.54           O  
HETATM  885  O   HOH T 884     -13.364  46.760  70.224  1.00  0.54           O  
HETATM  886  O   HOH T 885       8.568  46.327  50.368  1.00  0.54           O  
HETATM  887  O   HOH T 886      -3.236  -9.688  60.797  1.00  0.54           O  
HETATM  888  O   HOH T 887     -10.551  21.365  54.581  1.00  0.54           O  
HETATM  889  O   HOH T 888      22.103  21.688  20.053  1.00  0.54           O  
HETATM  890  O   HOH T 889      10.618  27.550  38.848  1.00  0.54           O  
HETATM  891  O   HOH T 890       0.692  -0.705  31.591  1.00  0.54           O  
HETATM  892  O   HOH T 891      18.550  -1.913  54.519  1.00  0.54           O  
HETATM  893  O   HOH T 892     -16.237  11.384  55.962  1.00  0.54           O  
HETATM  894  O   HOH T 893      13.876  25.907  48.660  1.00  0.54           O  
HETATM  895  O   HOH T 894      11.286   6.473  64.542  1.00  0.54           O  
HETATM  896  O   HOH T 895       4.657  26.555  34.390  1.00  0.54           O  
HETATM  897  O   HOH T 896      30.733  45.522  24.258  1.00  0.54           O  
HETATM  898  O   HOH T 897       7.117  53.531  24.394  1.00  0.54           O  
HETATM  899  O   HOH T 898      33.277  36.139  18.546  1.00  0.54           O  
HETATM  900  O   HOH T 899       5.696  25.807   5.688  1.00  0.54           O  
HETATM  901  O   HOH T 900     -12.050 -11.543  57.329  1.00  0.54           O  
HETATM  902  O   HOH T 901      10.415  45.248  30.142  1.00  0.54           O  
HETATM  903  O   HOH T 902      10.580  10.572  55.984  1.00  0.54           O  
HETATM  904  O   HOH T 903      30.023  25.061  24.383  1.00  0.54           O  
HETATM  905  O   HOH T 904       3.100  44.632  59.805  1.00  0.55           O  
HETATM  906  O   HOH T 905       2.537  20.299  27.603  1.00  0.55           O  
HETATM  907  O   HOH T 906     -18.026   4.835  62.623  1.00  0.55           O  
HETATM  908  O   HOH T 907     -19.101  38.145  64.191  1.00  0.55           O  
HETATM  909  O   HOH T 908      -6.212  16.313  39.431  1.00  0.55           O  
HETATM  910  O   HOH T 909      13.351   9.960  44.334  1.00  0.55           O  
HETATM  911  O   HOH T 910      -5.056   1.580  68.815  1.00  0.55           O  
HETATM  912  O   HOH T 911      27.610  23.879  22.641  1.00  0.55           O  
HETATM  913  O   HOH T 912      -3.952   8.296  13.898  1.00  0.55           O  
HETATM  914  O   HOH T 913     -13.191  -3.947  61.569  1.00  0.55           O  
HETATM  915  O   HOH T 914     -14.836  32.092  38.902  1.00  0.55           O  
HETATM  916  O   HOH T 915       5.736  -3.409  -6.975  1.00  0.55           O  
HETATM  917  O   HOH T 916      15.439  -0.623  52.631  1.00  0.55           O  
HETATM  918  O   HOH T 917     -24.544  30.724  56.603  1.00  0.55           O  
HETATM  919  O   HOH T 918     -21.878   4.645  17.834  1.00  0.55           O  
HETATM  920  O   HOH T 919      -6.336  15.018  36.999  1.00  0.55           O  
HETATM  921  O   HOH T 920      20.879  29.142  26.247  1.00  0.55           O  
HETATM  922  O   HOH T 921      -4.714  25.102  35.532  1.00  0.55           O  
HETATM  923  O   HOH T 922       4.808  20.272  56.678  1.00  0.55           O  
HETATM  924  O   HOH T 923      -3.837 -10.345  48.193  1.00  0.55           O  
HETATM  925  O   HOH T 924      -2.400  35.734   3.311  1.00  0.55           O  
HETATM  926  O   HOH T 925       4.941  25.152  65.373  1.00  0.56           O  
HETATM  927  O   HOH T 926     -10.480  15.536  60.877  1.00  0.56           O  
HETATM  928  O   HOH T 927      24.345  23.649  11.872  1.00  0.56           O  
HETATM  929  O   HOH T 928       4.059  37.526  65.721  1.00  0.56           O  
HETATM  930  O   HOH T 929       2.444  -9.883  38.120  1.00  0.56           O  
HETATM  931  O   HOH T 930      -8.229  17.522  51.121  1.00  0.56           O  
HETATM  932  O   HOH T 931       8.046  48.778  42.757  1.00  0.56           O  
HETATM  933  O   HOH T 932      12.004  10.106   3.946  1.00  0.56           O  
HETATM  934  O   HOH T 933       3.302  -8.120  57.801  1.00  0.56           O  
HETATM  935  O   HOH T 934      -9.018  15.294  52.065  1.00  0.56           O  
HETATM  936  O   HOH T 935      17.207  15.253  22.831  1.00  0.56           O  
HETATM  937  O   HOH T 936     -15.484   8.297  36.411  1.00  0.56           O  
HETATM  938  O   HOH T 937       9.877  39.737  47.889  1.00  0.56           O  
HETATM  939  O   HOH T 938     -17.036   4.521   8.570  1.00  0.56           O  
HETATM  940  O   HOH T 939       5.973  12.383  63.770  1.00  0.56           O  
HETATM  941  O   HOH T 940      -0.863  20.283  30.100  1.00  0.56           O  
HETATM  942  O   HOH T 941     -21.103  -3.182  56.038  1.00  0.56           O  
HETATM  943  O   HOH T 942       5.631  16.794  67.798  1.00  0.56           O  
HETATM  944  O   HOH T 943      -4.862  -7.458  37.968  1.00  0.56           O  
HETATM  945  O   HOH T 944      17.143  25.436  28.685  1.00  0.56           O  
HETATM  946  O   HOH T 945       8.095  34.732  40.424  1.00  0.56           O  
HETATM  947  O   HOH T 946      15.403  16.979  10.449  1.00  0.57           O  
HETATM  948  O   HOH T 947      21.167   9.551  17.990  1.00  0.57           O  
HETATM  949  O   HOH T 948     -15.628  -5.605  43.731  1.00  0.57           O  
HETATM  950  O   HOH T 949      28.345  55.070  25.049  1.00  0.57           O  
HETATM  951  O   HOH T 950      -5.594  21.263  18.422  1.00  0.57           O  
HETATM  952  O   HOH T 951      12.300  12.000  11.268  1.00  0.57           O  
HETATM  953  O   HOH T 952     -16.160  14.661  51.862  1.00  0.57           O  
HETATM  954  O   HOH T 953      31.090  27.610  22.747  1.00  0.57           O  
HETATM  955  O   HOH T 954      -5.811  23.575  62.496  1.00  0.57           O  
HETATM  956  O   HOH T 955     -18.928   8.162  20.354  1.00  0.57           O  
HETATM  957  O   HOH T 956      11.240  49.948   6.117  1.00  0.57           O  
HETATM  958  O   HOH T 957     -20.566   8.074  50.082  1.00  0.57           O  
HETATM  959  O   HOH T 958       0.167  43.234  40.134  1.00  0.57           O  
HETATM  960  O   HOH T 959       1.474   5.247  -4.061  1.00  0.58           O  
HETATM  961  O   HOH T 960      -7.566 -12.616   3.988  1.00  0.58           O  
HETATM  962  O   HOH T 961       9.610  23.598   7.378  1.00  0.58           O  
HETATM  963  O   HOH T 962     -24.125   8.692  22.389  1.00  0.58           O  
HETATM  964  O   HOH T 963     -11.338  10.635  65.420  1.00  0.58           O  
HETATM  965  O   HOH T 964      -4.706  16.353   2.076  1.00  0.58           O  
HETATM  966  O   HOH T 965      -0.890  40.492  24.954  1.00  0.58           O  
HETATM  967  O   HOH T 966       3.006  25.013  22.035  1.00  0.58           O  
HETATM  968  O   HOH T 967      34.299  43.789  11.406  1.00  0.59           O  
HETATM  969  O   HOH T 968      -6.882   7.106  68.709  1.00  0.59           O  
HETATM  970  O   HOH T 969      15.465  37.909  58.296  1.00  0.59           O  
HETATM  971  O   HOH T 970     -11.899 -10.583  63.334  1.00  0.60           O  
HETATM  972  O   HOH T 971       3.824  12.914  -2.313  1.00  0.62           O  
HETATM  973  O   HOH T 972      14.396  35.797  50.403  1.00  0.66           O  
TER     974      HOH T 972 
