# Supplementary material for: Accurate Prediction of Hydration Sites of Proteins Using Energy Model With Atom Embedding
Source: Front Mol Biosci. 2021 Sep 20;8:756075. doi: 10.3389/fmolb.2021.756075 (PMC8488165; doi:10.3389/fmolb.2021.756075)
Supplement: Supplementary file 1 [file DataSheet1.ZIP › Data Sheet 1/Our_result_pdb/our_dataset_output/3B0F_watersite.pdb]

HEADER                                                        XXXX


JRNL        PMID   -1
HETATM    1  O   HOH T   0     -10.023  -9.480  -4.485  1.00  0.19           O  
HETATM    2  O   HOH T   1     -25.086 -18.952 -13.911  1.00  0.23           O  
HETATM    3  O   HOH T   2     -12.232 -15.966   4.047  1.00  0.24           O  
HETATM    4  O   HOH T   3      11.319 -21.934  -5.557  1.00  0.24           O  
HETATM    5  O   HOH T   4      -8.352 -28.482 -12.084  1.00  0.24           O  
HETATM    6  O   HOH T   5       6.753 -20.614   7.429  1.00  0.25           O  
HETATM    7  O   HOH T   6     -16.908 -28.413  -2.885  1.00  0.25           O  
HETATM    8  O   HOH T   7     -11.419 -32.728  -4.047  1.00  0.25           O  
HETATM    9  O   HOH T   8       0.081 -21.015 -12.039  1.00  0.26           O  
HETATM   10  O   HOH T   9      -6.698 -22.704   3.020  1.00  0.26           O  
HETATM   11  O   HOH T  10       0.121 -21.633   7.762  1.00  0.27           O  
HETATM   12  O   HOH T  11     -15.050 -19.625 -18.699  1.00  0.28           O  
HETATM   13  O   HOH T  12      -6.645 -30.325   0.478  1.00  0.30           O  
HETATM   14  O   HOH T  13      -7.933  -7.518  -4.205  1.00  0.30           O  
HETATM   15  O   HOH T  14      -4.467 -15.469   2.776  1.00  0.30           O  
HETATM   16  O   HOH T  15      14.669 -15.572  -2.809  1.00  0.30           O  
HETATM   17  O   HOH T  16      -1.650 -20.333   6.013  1.00  0.30           O  
HETATM   18  O   HOH T  17     -22.704 -12.380  -4.042  1.00  0.30           O  
HETATM   19  O   HOH T  18      10.164 -12.911   1.156  1.00  0.32           O  
HETATM   20  O   HOH T  19     -10.486 -30.008  -0.734  1.00  0.32           O  
HETATM   21  O   HOH T  20      -1.902 -26.669  -4.081  1.00  0.32           O  
HETATM   22  O   HOH T  21      -1.798 -16.961 -12.245  1.00  0.33           O  
HETATM   23  O   HOH T  22     -23.151 -17.464 -17.135  1.00  0.33           O  
HETATM   24  O   HOH T  23      -8.579 -12.794 -17.184  1.00  0.33           O  
HETATM   25  O   HOH T  24     -22.007 -19.914 -17.679  1.00  0.34           O  
HETATM   26  O   HOH T  25     -19.522 -23.230   0.941  1.00  0.35           O  
HETATM   27  O   HOH T  26      -5.949 -11.706 -16.898  1.00  0.36           O  
HETATM   28  O   HOH T  27      14.039 -21.491 -10.654  1.00  0.36           O  
HETATM   29  O   HOH T  28       4.358 -20.054   8.782  1.00  0.36           O  
HETATM   30  O   HOH T  29      -9.718  -1.804  -6.881  1.00  0.37           O  
HETATM   31  O   HOH T  30      12.193 -23.548 -11.212  1.00  0.37           O  
HETATM   32  O   HOH T  31     -10.156  -5.925  -5.136  1.00  0.39           O  
HETATM   33  O   HOH T  32      -6.438 -24.253 -16.482  1.00  0.39           O  
HETATM   34  O   HOH T  33     -16.160 -28.116   4.107  1.00  0.39           O  
HETATM   35  O   HOH T  34      -7.839 -16.974   6.683  1.00  0.41           O  
HETATM   36  O   HOH T  35       5.419  -4.664   2.592  1.00  0.41           O  
HETATM   37  O   HOH T  36       2.547  -8.042   4.350  1.00  0.41           O  
HETATM   38  O   HOH T  37      -4.267 -16.090 -11.833  1.00  0.42           O  
HETATM   39  O   HOH T  38      -9.465 -32.312  -2.051  1.00  0.42           O  
HETATM   40  O   HOH T  39       5.018 -26.769  -9.671  1.00  0.42           O  
HETATM   41  O   HOH T  40      -5.314 -22.315 -14.865  1.00  0.42           O  
HETATM   42  O   HOH T  41     -10.558 -16.177   6.440  1.00  0.43           O  
HETATM   43  O   HOH T  42      -8.068  -6.520  -6.791  1.00  0.44           O  
HETATM   44  O   HOH T  43      -2.348 -18.038 -14.741  1.00  0.44           O  
HETATM   45  O   HOH T  44     -16.490 -29.812   2.038  1.00  0.44           O  
HETATM   46  O   HOH T  45      -5.711 -12.969  -9.978  1.00  0.44           O  
HETATM   47  O   HOH T  46      -2.511 -13.600   7.480  1.00  0.44           O  
HETATM   48  O   HOH T  47     -10.376 -27.224 -15.481  1.00  0.44           O  
HETATM   49  O   HOH T  48     -13.099 -10.943 -13.969  1.00  0.44           O  
HETATM   50  O   HOH T  49       2.873 -22.146   7.948  1.00  0.45           O  
HETATM   51  O   HOH T  50       5.690 -19.523 -12.874  1.00  0.45           O  
HETATM   52  O   HOH T  51     -12.182  -4.397  -9.000  1.00  0.46           O  
HETATM   53  O   HOH T  52      -8.940 -10.374 -12.511  1.00  0.46           O  
HETATM   54  O   HOH T  53       4.498 -25.759  -7.125  1.00  0.46           O  
HETATM   55  O   HOH T  54      14.644  -3.114  -2.432  1.00  0.47           O  
HETATM   56  O   HOH T  55     -21.916 -22.552 -18.565  1.00  0.47           O  
HETATM   57  O   HOH T  56      -9.135 -29.665   1.674  1.00  0.47           O  
HETATM   58  O   HOH T  57       4.044 -28.381  -8.316  1.00  0.47           O  
HETATM   59  O   HOH T  58     -11.105  -6.906  -9.316  1.00  0.47           O  
HETATM   60  O   HOH T  59      -4.098 -14.713   5.472  1.00  0.47           O  
HETATM   61  O   HOH T  60     -10.434  -8.140  -6.961  1.00  0.47           O  
HETATM   62  O   HOH T  61      -7.365 -15.253 -17.483  1.00  0.48           O  
HETATM   63  O   HOH T  62      -4.343 -10.224 -15.295  1.00  0.48           O  
HETATM   64  O   HOH T  63      -8.998 -24.626   5.681  1.00  0.48           O  
HETATM   65  O   HOH T  64      -8.484 -22.018   4.935  1.00  0.49           O  
HETATM   66  O   HOH T  65      -3.193 -26.730   4.108  1.00  0.49           O  
HETATM   67  O   HOH T  66      -1.673 -10.313 -14.923  1.00  0.49           O  
HETATM   68  O   HOH T  67      -1.844 -20.693 -14.030  1.00  0.49           O  
HETATM   69  O   HOH T  68       1.686 -20.114   9.460  1.00  0.49           O  
HETATM   70  O   HOH T  69      -8.174 -27.758 -17.054  1.00  0.49           O  
HETATM   71  O   HOH T  70      -7.329 -10.646 -10.306  1.00  0.49           O  
HETATM   72  O   HOH T  71     -10.820 -22.608   6.380  1.00  0.49           O  
HETATM   73  O   HOH T  72      -5.695 -17.124   4.836  1.00  0.50           O  
HETATM   74  O   HOH T  73      -7.083 -10.565 -14.580  1.00  0.51           O  
HETATM   75  O   HOH T  74     -16.237 -10.148 -10.457  1.00  0.51           O  
HETATM   76  O   HOH T  75      -9.172 -25.132 -17.004  1.00  0.51           O  
HETATM   77  O   HOH T  76     -25.149 -19.579  -7.129  1.00  0.52           O  
HETATM   78  O   HOH T  77      -6.649  -7.952  -9.863  1.00  0.52           O  
HETATM   79  O   HOH T  78     -18.813 -11.245  -9.703  1.00  0.52           O  
HETATM   80  O   HOH T  79       0.814 -20.709 -14.711  1.00  0.52           O  
HETATM   81  O   HOH T  80      -6.686 -30.201 -13.615  1.00  0.52           O  
HETATM   82  O   HOH T  81      -4.357 -19.472   5.805  1.00  0.52           O  
HETATM   83  O   HOH T  82     -12.191 -12.180 -16.270  1.00  0.53           O  
HETATM   84  O   HOH T  83      -4.026 -30.596  -0.600  1.00  0.53           O  
HETATM   85  O   HOH T  84     -12.166 -32.251  -1.381  1.00  0.53           O  
HETATM   86  O   HOH T  85      -7.054 -19.555   5.717  1.00  0.53           O  
HETATM   87  O   HOH T  86      -7.132  -2.530  -7.402  1.00  0.53           O  
HETATM   88  O   HOH T  87      -9.079 -20.666   7.270  1.00  0.53           O  
HETATM   89  O   HOH T  88       7.956  -5.402  -4.264  1.00  0.53           O  
HETATM   90  O   HOH T  89     -27.656 -13.522  -4.283  1.00  0.53           O  
HETATM   91  O   HOH T  90     -14.293 -14.881   5.614  1.00  0.54           O  
HETATM   92  O   HOH T  91       8.081 -10.709   5.864  1.00  0.54           O  
HETATM   93  O   HOH T  92       3.956  -5.690  -1.149  1.00  0.54           O  
HETATM   94  O   HOH T  93      -5.060 -24.519   4.337  1.00  0.54           O  
HETATM   95  O   HOH T  94       3.002  -5.516   3.349  1.00  0.54           O  
HETATM   96  O   HOH T  95     -11.145 -20.200 -17.028  1.00  0.55           O  
HETATM   97  O   HOH T  96      -1.640 -27.483 -12.192  1.00  0.55           O  
HETATM   98  O   HOH T  97     -12.023 -24.928 -16.205  1.00  0.55           O  
HETATM   99  O   HOH T  98     -26.669 -12.116 -11.963  1.00  0.56           O  
HETATM  100  O   HOH T  99      -2.289 -29.371  -3.583  1.00  0.56           O  
HETATM  101  O   HOH T 100      17.001  -4.840  -2.357  1.00  0.57           O  
HETATM  102  O   HOH T 101      -2.951  -5.691  -3.085  1.00  0.57           O  
HETATM  103  O   HOH T 102     -11.324  -3.821  -6.543  1.00  0.57           O  
HETATM  104  O   HOH T 103       2.511 -25.942   8.132  1.00  0.57           O  
HETATM  105  O   HOH T 104      -0.002  -8.013   7.300  1.00  0.57           O  
HETATM  106  O   HOH T 105      -5.837  -0.775  -5.748  1.00  0.58           O  
HETATM  107  O   HOH T 106       6.545 -26.929  -7.980  1.00  0.59           O  
HETATM  108  O   HOH T 107      -0.430  -6.321   3.088  1.00  0.61           O  
TER     109      HOH T 107 
