# Supplementary material for: Accurate Prediction of Hydration Sites of Proteins Using Energy Model With Atom Embedding
Source: Front Mol Biosci. 2021 Sep 20;8:756075. doi: 10.3389/fmolb.2021.756075 (PMC8488165; doi:10.3389/fmolb.2021.756075)
Supplement: Supplementary file 1 [file DataSheet1.ZIP › Data Sheet 1/Our_result_pdb/our_dataset_output/3B0S_watersite.pdb]

HEADER                                                        XXXX


JRNL        PMID   -1
HETATM    1  O   HOH T   0      -7.982  -1.544  41.109  1.00  0.24           O  
HETATM    2  O   HOH T   1       5.845   3.346   0.144  1.00  0.25           O  
HETATM    3  O   HOH T   2     -10.228  10.767  22.972  1.00  0.26           O  
HETATM    4  O   HOH T   3      23.239  18.665 -35.488  1.00  0.26           O  
HETATM    5  O   HOH T   4       1.630  16.546  16.213  1.00  0.26           O  
HETATM    6  O   HOH T   5      10.262   8.803 -19.691  1.00  0.26           O  
HETATM    7  O   HOH T   6      10.037  -8.003  -3.418  1.00  0.26           O  
HETATM    8  O   HOH T   7      12.587   8.485   7.315  1.00  0.26           O  
HETATM    9  O   HOH T   8      -1.909  10.846   4.817  1.00  0.27           O  
HETATM   10  O   HOH T   9      25.741   9.989 -16.035  1.00  0.27           O  
HETATM   11  O   HOH T  10       1.931  -7.688  14.117  1.00  0.27           O  
HETATM   12  O   HOH T  11      25.129  17.196 -34.028  1.00  0.28           O  
HETATM   13  O   HOH T  12      -7.303 -10.713  25.923  1.00  0.28           O  
HETATM   14  O   HOH T  13       0.800 -10.636   8.195  1.00  0.28           O  
HETATM   15  O   HOH T  14      12.667  -9.792  -9.270  1.00  0.28           O  
HETATM   16  O   HOH T  15       4.610  -9.708   8.969  1.00  0.28           O  
HETATM   17  O   HOH T  16      20.816  -2.110 -14.208  1.00  0.28           O  
HETATM   18  O   HOH T  17      -4.667  -3.082  34.066  1.00  0.28           O  
HETATM   19  O   HOH T  18      20.123  -3.110 -20.127  1.00  0.29           O  
HETATM   20  O   HOH T  19      -3.794  16.567  26.700  1.00  0.29           O  
HETATM   21  O   HOH T  20      17.242  -8.941 -16.303  1.00  0.29           O  
HETATM   22  O   HOH T  21      19.384  20.342 -32.783  1.00  0.29           O  
HETATM   23  O   HOH T  22      21.120  -9.887 -27.546  1.00  0.29           O  
HETATM   24  O   HOH T  23       4.253   8.554  25.669  1.00  0.29           O  
HETATM   25  O   HOH T  24      16.602   4.901 -24.030  1.00  0.29           O  
HETATM   26  O   HOH T  25      -2.129  -3.992   1.780  1.00  0.29           O  
HETATM   27  O   HOH T  26      17.961   3.288 -25.840  1.00  0.30           O  
HETATM   28  O   HOH T  27      11.210   6.147 -12.114  1.00  0.30           O  
HETATM   29  O   HOH T  28       6.176  10.009  24.222  1.00  0.30           O  
HETATM   30  O   HOH T  29      16.890  10.947  -3.900  1.00  0.30           O  
HETATM   31  O   HOH T  30      -6.312  -9.615  33.775  1.00  0.30           O  
HETATM   32  O   HOH T  31       9.106  17.124   1.607  1.00  0.31           O  
HETATM   33  O   HOH T  32      -1.179  -9.397  15.919  1.00  0.31           O  
HETATM   34  O   HOH T  33       8.376  -4.269  10.654  1.00  0.31           O  
HETATM   35  O   HOH T  34       3.438  10.218  -6.450  1.00  0.31           O  
HETATM   36  O   HOH T  35      -9.047 -11.810  35.550  1.00  0.31           O  
HETATM   37  O   HOH T  36      21.873   6.192 -33.275  1.00  0.31           O  
HETATM   38  O   HOH T  37       4.134  -2.418  22.002  1.00  0.31           O  
HETATM   39  O   HOH T  38       9.738  -2.488   4.837  1.00  0.31           O  
HETATM   40  O   HOH T  39       1.425   3.979   7.192  1.00  0.31           O  
HETATM   41  O   HOH T  40      17.718   4.032 -28.556  1.00  0.31           O  
HETATM   42  O   HOH T  41      -1.447   3.140   3.183  1.00  0.32           O  
HETATM   43  O   HOH T  42      14.511   4.753 -15.975  1.00  0.32           O  
HETATM   44  O   HOH T  43       7.723  18.851  -4.730  1.00  0.32           O  
HETATM   45  O   HOH T  44       3.158   5.860   6.329  1.00  0.32           O  
HETATM   46  O   HOH T  45       0.897   1.219  -0.898  1.00  0.32           O  
HETATM   47  O   HOH T  46      19.600  15.558  -0.769  1.00  0.32           O  
HETATM   48  O   HOH T  47      -8.284  -7.154  31.348  1.00  0.33           O  
HETATM   49  O   HOH T  48      -5.319  14.396  22.337  1.00  0.33           O  
HETATM   50  O   HOH T  49      14.471  -6.591 -12.363  1.00  0.33           O  
HETATM   51  O   HOH T  50       9.002 -10.679  -9.793  1.00  0.33           O  
HETATM   52  O   HOH T  51      17.067  -6.683 -22.919  1.00  0.33           O  
HETATM   53  O   HOH T  52      -5.456   3.959  29.087  1.00  0.33           O  
HETATM   54  O   HOH T  53      -6.130  -2.428  13.030  1.00  0.33           O  
HETATM   55  O   HOH T  54       7.443  -7.046   2.706  1.00  0.33           O  
HETATM   56  O   HOH T  55      -6.906  -8.337  29.133  1.00  0.33           O  
HETATM   57  O   HOH T  56      -2.179   6.154  21.287  1.00  0.33           O  
HETATM   58  O   HOH T  57       0.294  -3.918  22.104  1.00  0.33           O  
HETATM   59  O   HOH T  58      17.824  -9.622 -19.044  1.00  0.33           O  
HETATM   60  O   HOH T  59       7.138   9.929  -7.027  1.00  0.33           O  
HETATM   61  O   HOH T  60      26.260  14.177 -26.079  1.00  0.33           O  
HETATM   62  O   HOH T  61      10.348  -9.292  -7.772  1.00  0.33           O  
HETATM   63  O   HOH T  62      -5.733  -7.275  32.445  1.00  0.34           O  
HETATM   64  O   HOH T  63      -7.399  12.920  21.128  1.00  0.34           O  
HETATM   65  O   HOH T  64       3.833   6.469  27.477  1.00  0.34           O  
HETATM   66  O   HOH T  65     -13.946  -2.230  37.612  1.00  0.34           O  
HETATM   67  O   HOH T  66      11.472   7.191   5.050  1.00  0.34           O  
HETATM   68  O   HOH T  67       8.214   5.656  -5.132  1.00  0.34           O  
HETATM   69  O   HOH T  68       1.679   3.164  -9.040  1.00  0.34           O  
HETATM   70  O   HOH T  69     -13.104  -5.879  33.805  1.00  0.34           O  
HETATM   71  O   HOH T  70      16.296   3.515 -19.185  1.00  0.34           O  
HETATM   72  O   HOH T  71      20.995  -6.940 -29.699  1.00  0.34           O  
HETATM   73  O   HOH T  72      22.040  10.248 -15.208  1.00  0.34           O  
HETATM   74  O   HOH T  73      -2.270   3.245  18.472  1.00  0.34           O  
HETATM   75  O   HOH T  74     -10.023   9.774  29.818  1.00  0.34           O  
HETATM   76  O   HOH T  75      24.117   2.891 -26.328  1.00  0.34           O  
HETATM   77  O   HOH T  76       8.646   3.570  -7.137  1.00  0.35           O  
HETATM   78  O   HOH T  77      -7.661   4.966  30.628  1.00  0.35           O  
HETATM   79  O   HOH T  78       2.224  -7.579  -9.642  1.00  0.35           O  
HETATM   80  O   HOH T  79      -2.346  -6.046  -1.967  1.00  0.35           O  
HETATM   81  O   HOH T  80      -4.304   6.031  23.174  1.00  0.35           O  
HETATM   82  O   HOH T  81      -8.044   3.459  28.380  1.00  0.35           O  
HETATM   83  O   HOH T  82     -13.902   4.090  25.872  1.00  0.35           O  
HETATM   84  O   HOH T  83      30.689  10.407 -29.676  1.00  0.35           O  
HETATM   85  O   HOH T  84      13.252  -0.497  -5.447  1.00  0.35           O  
HETATM   86  O   HOH T  85      25.162  16.442 -17.705  1.00  0.35           O  
HETATM   87  O   HOH T  86      18.040   2.298 -17.445  1.00  0.35           O  
HETATM   88  O   HOH T  87       0.669   4.645  12.172  1.00  0.35           O  
HETATM   89  O   HOH T  88       1.622   6.549  14.073  1.00  0.35           O  
HETATM   90  O   HOH T  89      23.749   1.630 -30.940  1.00  0.36           O  
HETATM   91  O   HOH T  90       9.931  -9.513  -1.012  1.00  0.36           O  
HETATM   92  O   HOH T  91      -8.934   8.627  24.116  1.00  0.36           O  
HETATM   93  O   HOH T  92       9.885  -0.009   6.152  1.00  0.36           O  
HETATM   94  O   HOH T  93      -7.520  10.325  22.276  1.00  0.36           O  
HETATM   95  O   HOH T  94      -5.570   8.328  22.273  1.00  0.36           O  
HETATM   96  O   HOH T  95      -8.840  -2.437  13.777  1.00  0.36           O  
HETATM   97  O   HOH T  96      12.273   3.245  -0.214  1.00  0.36           O  
HETATM   98  O   HOH T  97      19.771   1.242 -10.714  1.00  0.36           O  
HETATM   99  O   HOH T  98     -12.803  10.125  29.828  1.00  0.36           O  
HETATM  100  O   HOH T  99      -1.229   1.373  23.415  1.00  0.36           O  
HETATM  101  O   HOH T 100      15.519   4.202 -13.417  1.00  0.36           O  
HETATM  102  O   HOH T 101      13.908   4.820   1.553  1.00  0.36           O  
HETATM  103  O   HOH T 102      27.301   1.750 -28.084  1.00  0.36           O  
HETATM  104  O   HOH T 103     -15.245   2.990  28.093  1.00  0.37           O  
HETATM  105  O   HOH T 104      18.916  -9.649 -26.004  1.00  0.37           O  
HETATM  106  O   HOH T 105      -4.328  -6.935  15.323  1.00  0.37           O  
HETATM  107  O   HOH T 106       5.978   5.302   2.137  1.00  0.37           O  
HETATM  108  O   HOH T 107       3.960  -3.429 -15.273  1.00  0.37           O  
HETATM  109  O   HOH T 108      14.925   6.234  -6.415  1.00  0.37           O  
HETATM  110  O   HOH T 109       9.791   4.169 -10.634  1.00  0.37           O  
HETATM  111  O   HOH T 110      17.821  -0.016 -12.029  1.00  0.37           O  
HETATM  112  O   HOH T 111      31.801  12.897 -29.169  1.00  0.37           O  
HETATM  113  O   HOH T 112      10.723  -4.207   2.866  1.00  0.37           O  
HETATM  114  O   HOH T 113      -4.834  10.213  11.814  1.00  0.37           O  
HETATM  115  O   HOH T 114      17.008  -0.235 -32.838  1.00  0.37           O  
HETATM  116  O   HOH T 115       3.158  14.639   4.396  1.00  0.37           O  
HETATM  117  O   HOH T 116       7.703  19.652   6.809  1.00  0.38           O  
HETATM  118  O   HOH T 117      -2.316  10.607  34.100  1.00  0.38           O  
HETATM  119  O   HOH T 118      -9.061  14.116  19.169  1.00  0.38           O  
HETATM  120  O   HOH T 119      24.425  12.687 -12.636  1.00  0.38           O  
HETATM  121  O   HOH T 120     -12.801  -0.069  36.337  1.00  0.38           O  
HETATM  122  O   HOH T 121      24.939  10.515 -32.638  1.00  0.38           O  
HETATM  123  O   HOH T 122      11.148 -11.707 -13.835  1.00  0.38           O  
HETATM  124  O   HOH T 123      13.346   6.038  14.709  1.00  0.38           O  
HETATM  125  O   HOH T 124       0.124  15.128  32.724  1.00  0.38           O  
HETATM  126  O   HOH T 125      12.366  -8.065 -11.290  1.00  0.38           O  
HETATM  127  O   HOH T 126      -3.431   2.875   1.217  1.00  0.38           O  
HETATM  128  O   HOH T 127      18.589  14.664 -33.493  1.00  0.38           O  
HETATM  129  O   HOH T 128      -1.524   2.421  28.485  1.00  0.38           O  
HETATM  130  O   HOH T 129      18.189  -2.451 -13.455  1.00  0.39           O  
HETATM  131  O   HOH T 130      11.859  -3.015  -2.122  1.00  0.39           O  
HETATM  132  O   HOH T 131      18.670  -8.066 -21.194  1.00  0.39           O  
HETATM  133  O   HOH T 132       5.706  -7.070   4.893  1.00  0.39           O  
HETATM  134  O   HOH T 133      15.493  -2.583  -2.455  1.00  0.39           O  
HETATM  135  O   HOH T 134      12.652  14.244 -19.698  1.00  0.39           O  
HETATM  136  O   HOH T 135      -9.780   1.640  23.692  1.00  0.39           O  
HETATM  137  O   HOH T 136       0.319  -4.695  28.995  1.00  0.39           O  
HETATM  138  O   HOH T 137      10.536   8.376 -13.747  1.00  0.39           O  
HETATM  139  O   HOH T 138      -5.936  16.100  17.773  1.00  0.39           O  
HETATM  140  O   HOH T 139       1.750   2.549  18.999  1.00  0.39           O  
HETATM  141  O   HOH T 140     -11.581  -3.998  23.401  1.00  0.39           O  
HETATM  142  O   HOH T 141      -1.322   8.320  32.622  1.00  0.39           O  
HETATM  143  O   HOH T 142      15.725   1.402 -13.225  1.00  0.39           O  
HETATM  144  O   HOH T 143      -5.566  16.009  38.428  1.00  0.39           O  
HETATM  145  O   HOH T 144      -0.889   8.597   6.295  1.00  0.40           O  
HETATM  146  O   HOH T 145      -1.100   0.650  -2.763  1.00  0.40           O  
HETATM  147  O   HOH T 146     -12.467   6.130  30.729  1.00  0.40           O  
HETATM  148  O   HOH T 147       7.475   6.477 -21.593  1.00  0.40           O  
HETATM  149  O   HOH T 148      28.289   5.654 -26.255  1.00  0.40           O  
HETATM  150  O   HOH T 149      -5.774  -0.148   3.334  1.00  0.40           O  
HETATM  151  O   HOH T 150      19.868   4.746 -36.740  1.00  0.40           O  
HETATM  152  O   HOH T 151      12.005   6.164   8.841  1.00  0.40           O  
HETATM  153  O   HOH T 152       2.776   5.628  29.934  1.00  0.40           O  
HETATM  154  O   HOH T 153       0.715  11.196   3.885  1.00  0.40           O  
HETATM  155  O   HOH T 154      -4.674  -4.852  38.228  1.00  0.40           O  
HETATM  156  O   HOH T 155       3.673  -8.764   4.515  1.00  0.40           O  
HETATM  157  O   HOH T 156     -13.001   4.643  28.474  1.00  0.40           O  
HETATM  158  O   HOH T 157      23.791  -6.754 -29.661  1.00  0.40           O  
HETATM  159  O   HOH T 158       0.018  -5.801  24.192  1.00  0.41           O  
HETATM  160  O   HOH T 159      13.331   5.878 -13.822  1.00  0.41           O  
HETATM  161  O   HOH T 160      18.328   4.388  -9.206  1.00  0.41           O  
HETATM  162  O   HOH T 161      13.158  12.307 -21.623  1.00  0.41           O  
HETATM  163  O   HOH T 162      -1.771   9.802  11.685  1.00  0.41           O  
HETATM  164  O   HOH T 163      -2.450  -4.230  -4.116  1.00  0.41           O  
HETATM  165  O   HOH T 164       7.614  17.163  -2.466  1.00  0.41           O  
HETATM  166  O   HOH T 165      -7.992   6.675  14.466  1.00  0.41           O  
HETATM  167  O   HOH T 166      16.298  -4.599 -13.216  1.00  0.41           O  
HETATM  168  O   HOH T 167       3.508   4.960  15.503  1.00  0.41           O  
HETATM  169  O   HOH T 168      -8.609   6.037  32.982  1.00  0.41           O  
HETATM  170  O   HOH T 169      15.217   2.866 -29.007  1.00  0.41           O  
HETATM  171  O   HOH T 170       0.509  -8.062   1.087  1.00  0.41           O  
HETATM  172  O   HOH T 171      15.611   4.430 -26.669  1.00  0.41           O  
HETATM  173  O   HOH T 172       2.702  -4.522  20.756  1.00  0.41           O  
HETATM  174  O   HOH T 173      12.708   9.590 -20.916  1.00  0.41           O  
HETATM  175  O   HOH T 174     -13.084   2.604  36.098  1.00  0.41           O  
HETATM  176  O   HOH T 175      -5.880   2.196  13.587  1.00  0.41           O  
HETATM  177  O   HOH T 176      15.846   1.680 -31.420  1.00  0.41           O  
HETATM  178  O   HOH T 177      10.606  -6.408  12.668  1.00  0.42           O  
HETATM  179  O   HOH T 178      14.429   8.979 -23.115  1.00  0.42           O  
HETATM  180  O   HOH T 179      -3.718  -7.494  24.822  1.00  0.42           O  
HETATM  181  O   HOH T 180      -7.398  -9.703  36.369  1.00  0.42           O  
HETATM  182  O   HOH T 181      -8.727   4.134  34.978  1.00  0.42           O  
HETATM  183  O   HOH T 182      -5.038   5.425  31.478  1.00  0.42           O  
HETATM  184  O   HOH T 183      -4.748   6.356  20.456  1.00  0.42           O  
HETATM  185  O   HOH T 184      24.098  12.065 -15.300  1.00  0.42           O  
HETATM  186  O   HOH T 185      -9.728  -8.230  29.149  1.00  0.42           O  
HETATM  187  O   HOH T 186      12.414  -6.643 -22.796  1.00  0.42           O  
HETATM  188  O   HOH T 187      -2.271   6.614   5.046  1.00  0.42           O  
HETATM  189  O   HOH T 188      23.196  18.501 -20.528  1.00  0.42           O  
HETATM  190  O   HOH T 189       7.434   5.552  11.711  1.00  0.42           O  
HETATM  191  O   HOH T 190      -1.555   1.777   5.617  1.00  0.42           O  
HETATM  192  O   HOH T 191     -18.706   1.406  30.699  1.00  0.42           O  
HETATM  193  O   HOH T 192       6.400   7.137  -6.709  1.00  0.43           O  
HETATM  194  O   HOH T 193       8.397  -7.392 -17.098  1.00  0.43           O  
HETATM  195  O   HOH T 194      25.152  16.361 -20.485  1.00  0.43           O  
HETATM  196  O   HOH T 195      -9.307  -0.079  15.235  1.00  0.43           O  
HETATM  197  O   HOH T 196      12.185  14.431   3.247  1.00  0.43           O  
HETATM  198  O   HOH T 197       3.179   7.130  23.524  1.00  0.43           O  
HETATM  199  O   HOH T 198      19.394  -4.274 -15.253  1.00  0.43           O  
HETATM  200  O   HOH T 199      -1.857  -8.192  11.269  1.00  0.43           O  
HETATM  201  O   HOH T 200       0.064   3.921   9.493  1.00  0.43           O  
HETATM  202  O   HOH T 201      24.222   5.663 -34.773  1.00  0.43           O  
HETATM  203  O   HOH T 202      -1.132   6.114  29.981  1.00  0.43           O  
HETATM  204  O   HOH T 203      -5.789   3.938  11.451  1.00  0.43           O  
HETATM  205  O   HOH T 204      20.246  14.883 -15.188  1.00  0.44           O  
HETATM  206  O   HOH T 205       6.512   4.866  -8.428  1.00  0.44           O  
HETATM  207  O   HOH T 206      -2.055  -6.925  22.575  1.00  0.44           O  
HETATM  208  O   HOH T 207      -6.252   9.049  16.653  1.00  0.44           O  
HETATM  209  O   HOH T 208       8.876   1.862   7.993  1.00  0.44           O  
HETATM  210  O   HOH T 209       5.682   9.907  21.482  1.00  0.44           O  
HETATM  211  O   HOH T 210      -3.757   1.782   3.822  1.00  0.44           O  
HETATM  212  O   HOH T 211      -2.964   4.021  30.307  1.00  0.44           O  
HETATM  213  O   HOH T 212      -7.408  -5.225  38.756  1.00  0.44           O  
HETATM  214  O   HOH T 213      -6.267  -9.152  21.756  1.00  0.44           O  
HETATM  215  O   HOH T 214       7.199   3.198 -10.638  1.00  0.44           O  
HETATM  216  O   HOH T 215      11.286  -7.846 -20.723  1.00  0.44           O  
HETATM  217  O   HOH T 216      17.598  17.003 -34.677  1.00  0.44           O  
HETATM  218  O   HOH T 217      -3.369  -3.251  31.577  1.00  0.44           O  
HETATM  219  O   HOH T 218      -8.829   3.298  25.654  1.00  0.44           O  
HETATM  220  O   HOH T 219      16.352   2.533  -5.626  1.00  0.44           O  
HETATM  221  O   HOH T 220      11.642  16.216   1.308  1.00  0.44           O  
HETATM  222  O   HOH T 221     -11.225   6.843  33.162  1.00  0.45           O  
HETATM  223  O   HOH T 222     -13.057  -3.474  32.436  1.00  0.45           O  
HETATM  224  O   HOH T 223     -13.290  -1.889  24.290  1.00  0.45           O  
HETATM  225  O   HOH T 224      15.960  -8.614 -20.995  1.00  0.45           O  
HETATM  226  O   HOH T 225      12.357   0.572   2.998  1.00  0.45           O  
HETATM  227  O   HOH T 226      13.513  -0.821  -2.702  1.00  0.45           O  
HETATM  228  O   HOH T 227       0.778   4.002  28.778  1.00  0.45           O  
HETATM  229  O   HOH T 228      -7.497  17.797  19.358  1.00  0.45           O  
HETATM  230  O   HOH T 229      -2.478  -8.903   6.494  1.00  0.45           O  
HETATM  231  O   HOH T 230     -10.703   2.541  21.203  1.00  0.45           O  
HETATM  232  O   HOH T 231      24.671  17.934 -22.750  1.00  0.45           O  
HETATM  233  O   HOH T 232       6.719  -2.315  11.656  1.00  0.45           O  
HETATM  234  O   HOH T 233      17.185   1.901 -10.001  1.00  0.45           O  
HETATM  235  O   HOH T 234      14.508  -8.996 -30.657  1.00  0.45           O  
HETATM  236  O   HOH T 235     -13.335  -1.623  40.283  1.00  0.45           O  
HETATM  237  O   HOH T 236      23.498   3.982 -32.526  1.00  0.45           O  
HETATM  238  O   HOH T 237       3.481  -5.013 -13.015  1.00  0.45           O  
HETATM  239  O   HOH T 238      -5.266  -1.721  40.753  1.00  0.45           O  
HETATM  240  O   HOH T 239      22.691  17.794 -17.857  1.00  0.45           O  
HETATM  241  O   HOH T 240      -4.977  10.440  35.041  1.00  0.45           O  
HETATM  242  O   HOH T 241      28.007  -0.225 -31.662  1.00  0.46           O  
HETATM  243  O   HOH T 242       3.954  11.051  -2.618  1.00  0.46           O  
HETATM  244  O   HOH T 243      17.060  16.741  -7.417  1.00  0.46           O  
HETATM  245  O   HOH T 244       1.294   1.749  -6.586  1.00  0.46           O  
HETATM  246  O   HOH T 245     -15.946   1.651  30.358  1.00  0.46           O  
HETATM  247  O   HOH T 246       9.972   4.270   8.938  1.00  0.46           O  
HETATM  248  O   HOH T 247      16.093   1.344 -36.390  1.00  0.46           O  
HETATM  249  O   HOH T 248       8.317   1.824   3.020  1.00  0.46           O  
HETATM  250  O   HOH T 249      -3.281   5.057   7.120  1.00  0.46           O  
HETATM  251  O   HOH T 250      29.590  12.859 -33.985  1.00  0.46           O  
HETATM  252  O   HOH T 251       1.383   8.750  33.412  1.00  0.46           O  
HETATM  253  O   HOH T 252      26.109   9.873 -35.012  1.00  0.46           O  
HETATM  254  O   HOH T 253      -6.004  -6.484  13.140  1.00  0.46           O  
HETATM  255  O   HOH T 254      -2.818  -1.077  33.268  1.00  0.46           O  
HETATM  256  O   HOH T 255      19.514   5.762 -29.911  1.00  0.46           O  
HETATM  257  O   HOH T 256      -5.163  -9.792  24.237  1.00  0.46           O  
HETATM  258  O   HOH T 257       3.115  -0.785 -12.131  1.00  0.46           O  
HETATM  259  O   HOH T 258      -9.189   8.705  32.426  1.00  0.46           O  
HETATM  260  O   HOH T 259      17.382  16.290  -2.405  1.00  0.46           O  
HETATM  261  O   HOH T 260     -11.619 -12.119  36.633  1.00  0.46           O  
HETATM  262  O   HOH T 261      12.415   1.298   5.787  1.00  0.46           O  
HETATM  263  O   HOH T 262      25.940   0.269 -30.020  1.00  0.46           O  
HETATM  264  O   HOH T 263       0.830   6.612  31.806  1.00  0.46           O  
HETATM  265  O   HOH T 264      -8.714   4.530  21.061  1.00  0.47           O  
HETATM  266  O   HOH T 265      25.242  14.130 -23.516  1.00  0.47           O  
HETATM  267  O   HOH T 266      -9.838  -9.969  26.951  1.00  0.47           O  
HETATM  268  O   HOH T 267      -2.932  15.395  39.127  1.00  0.47           O  
HETATM  269  O   HOH T 268       9.460   3.608  11.645  1.00  0.47           O  
HETATM  270  O   HOH T 269       5.032  19.275  -5.326  1.00  0.47           O  
HETATM  271  O   HOH T 270      27.621  -5.757 -25.954  1.00  0.47           O  
HETATM  272  O   HOH T 271       7.532   1.439   5.622  1.00  0.47           O  
HETATM  273  O   HOH T 272     -10.884 -13.308  34.073  1.00  0.47           O  
HETATM  274  O   HOH T 273       8.047  -6.887  11.635  1.00  0.47           O  
HETATM  275  O   HOH T 274       8.364   6.466  21.757  1.00  0.47           O  
HETATM  276  O   HOH T 275       7.469   5.913 -10.831  1.00  0.48           O  
HETATM  277  O   HOH T 276     -16.997  -0.244  32.097  1.00  0.48           O  
HETATM  278  O   HOH T 277      -0.043   3.402  17.014  1.00  0.48           O  
HETATM  279  O   HOH T 278      -6.334   4.366  26.384  1.00  0.48           O  
HETATM  280  O   HOH T 279      13.490   5.962   6.496  1.00  0.48           O  
HETATM  281  O   HOH T 280      20.007  -9.421 -30.014  1.00  0.48           O  
HETATM  282  O   HOH T 281      -0.763  -7.597  13.704  1.00  0.48           O  
HETATM  283  O   HOH T 282       3.479   4.975  12.636  1.00  0.48           O  
HETATM  284  O   HOH T 283      13.882   6.492   3.786  1.00  0.48           O  
HETATM  285  O   HOH T 284      -4.346  -5.106   4.932  1.00  0.48           O  
HETATM  286  O   HOH T 285      -2.985  -3.355  36.486  1.00  0.48           O  
HETATM  287  O   HOH T 286       0.944  -7.942  11.437  1.00  0.48           O  
HETATM  288  O   HOH T 287       3.104  16.049   6.794  1.00  0.48           O  
HETATM  289  O   HOH T 288      -9.723   6.154  23.002  1.00  0.48           O  
HETATM  290  O   HOH T 289      -9.488  13.444  22.873  1.00  0.48           O  
HETATM  291  O   HOH T 290     -14.881   6.744  31.733  1.00  0.49           O  
HETATM  292  O   HOH T 291      -1.453   0.651  31.646  1.00  0.49           O  
HETATM  293  O   HOH T 292      11.226  -8.828 -13.741  1.00  0.49           O  
HETATM  294  O   HOH T 293      15.000  -2.591  -6.312  1.00  0.49           O  
HETATM  295  O   HOH T 294       0.107   1.840  21.137  1.00  0.49           O  
HETATM  296  O   HOH T 295       0.620  -6.487   3.378  1.00  0.49           O  
HETATM  297  O   HOH T 296      14.422   1.297  -7.166  1.00  0.49           O  
HETATM  298  O   HOH T 297      -8.706  -6.717  13.310  1.00  0.49           O  
HETATM  299  O   HOH T 298      24.996  16.423 -25.062  1.00  0.49           O  
HETATM  300  O   HOH T 299      -4.793   8.889  37.381  1.00  0.49           O  
HETATM  301  O   HOH T 300      -1.764  -6.530   0.617  1.00  0.49           O  
HETATM  302  O   HOH T 301      19.972  -9.103 -17.149  1.00  0.49           O  
HETATM  303  O   HOH T 302      -8.631  -4.217  40.918  1.00  0.49           O  
HETATM  304  O   HOH T 303       0.261  -9.190  28.332  1.00  0.49           O  
HETATM  305  O   HOH T 304      22.005  19.739 -33.302  1.00  0.49           O  
HETATM  306  O   HOH T 305       3.609   4.932   0.565  1.00  0.50           O  
HETATM  307  O   HOH T 306      14.598  -0.891 -31.548  1.00  0.50           O  
HETATM  308  O   HOH T 307      -5.585   7.158  39.575  1.00  0.50           O  
HETATM  309  O   HOH T 308      14.730  -7.938 -23.429  1.00  0.50           O  
HETATM  310  O   HOH T 309       9.956   7.369 -22.017  1.00  0.50           O  
HETATM  311  O   HOH T 310      26.001   4.515 -25.156  1.00  0.50           O  
HETATM  312  O   HOH T 311       4.222   6.607   3.986  1.00  0.50           O  
HETATM  313  O   HOH T 312      -9.613 -10.455  24.324  1.00  0.50           O  
HETATM  314  O   HOH T 313      -0.367  17.305  31.014  1.00  0.50           O  
HETATM  315  O   HOH T 314      12.352   4.932  -2.333  1.00  0.50           O  
HETATM  316  O   HOH T 315     -11.193   4.680  26.412  1.00  0.50           O  
HETATM  317  O   HOH T 316      -1.565   6.296  12.232  1.00  0.50           O  
HETATM  318  O   HOH T 317      -0.835   4.049  22.546  1.00  0.51           O  
HETATM  319  O   HOH T 318      18.316  12.743 -38.098  1.00  0.51           O  
HETATM  320  O   HOH T 319      -1.778  -5.464   4.101  1.00  0.51           O  
HETATM  321  O   HOH T 320       7.195   3.976   4.240  1.00  0.51           O  
HETATM  322  O   HOH T 321       8.284  -7.979   9.159  1.00  0.51           O  
HETATM  323  O   HOH T 322      -8.435   2.152  38.561  1.00  0.51           O  
HETATM  324  O   HOH T 323      31.674  14.672 -34.053  1.00  0.51           O  
HETATM  325  O   HOH T 324      -7.279  -0.091  13.568  1.00  0.51           O  
HETATM  326  O   HOH T 325       7.877   5.560  15.453  1.00  0.51           O  
HETATM  327  O   HOH T 326      -5.880   4.913  13.952  1.00  0.51           O  
HETATM  328  O   HOH T 327      -3.109  -2.679  39.217  1.00  0.52           O  
HETATM  329  O   HOH T 328     -15.569  -9.166  37.132  1.00  0.52           O  
HETATM  330  O   HOH T 329       9.818  18.826   5.268  1.00  0.52           O  
HETATM  331  O   HOH T 330       6.138   1.274  10.736  1.00  0.52           O  
HETATM  332  O   HOH T 331      -0.648   5.838   7.327  1.00  0.52           O  
HETATM  333  O   HOH T 332       2.496  -6.435  28.457  1.00  0.52           O  
HETATM  334  O   HOH T 333       5.594   6.139  13.869  1.00  0.52           O  
HETATM  335  O   HOH T 334      22.237   8.339 -13.135  1.00  0.52           O  
HETATM  336  O   HOH T 335      18.383  14.933 -36.319  1.00  0.52           O  
HETATM  337  O   HOH T 336     -14.027  -8.460  33.733  1.00  0.52           O  
HETATM  338  O   HOH T 337       8.365  19.170  14.295  1.00  0.53           O  
HETATM  339  O   HOH T 338     -10.666  10.027  34.581  1.00  0.53           O  
HETATM  340  O   HOH T 339       8.456  -4.967   4.457  1.00  0.53           O  
HETATM  341  O   HOH T 340     -11.677   4.651  34.923  1.00  0.53           O  
HETATM  342  O   HOH T 341      17.254   4.886  -6.693  1.00  0.53           O  
HETATM  343  O   HOH T 342      21.209  -3.986 -22.478  1.00  0.53           O  
HETATM  344  O   HOH T 343      -3.195   4.108  33.094  1.00  0.53           O  
HETATM  345  O   HOH T 344      18.070   6.262 -22.064  1.00  0.53           O  
HETATM  346  O   HOH T 345     -12.986  -2.417  35.026  1.00  0.53           O  
HETATM  347  O   HOH T 346      -5.210   7.145  14.982  1.00  0.54           O  
HETATM  348  O   HOH T 347      17.129  18.850 -32.776  1.00  0.54           O  
HETATM  349  O   HOH T 348     -14.738  -1.395  33.038  1.00  0.54           O  
HETATM  350  O   HOH T 349       7.454   2.178  13.002  1.00  0.54           O  
HETATM  351  O   HOH T 350     -11.287  11.598  31.624  1.00  0.55           O  
HETATM  352  O   HOH T 351       1.759  -9.628  18.834  1.00  0.55           O  
HETATM  353  O   HOH T 352     -13.767 -10.687  35.406  1.00  0.55           O  
HETATM  354  O   HOH T 353      -4.592  16.290  41.091  1.00  0.55           O  
HETATM  355  O   HOH T 354      16.078   2.512 -15.534  1.00  0.55           O  
HETATM  356  O   HOH T 355     -10.442   2.992  36.895  1.00  0.55           O  
HETATM  357  O   HOH T 356      -2.495  13.006  14.729  1.00  0.56           O  
HETATM  358  O   HOH T 357       9.675   5.668  13.331  1.00  0.56           O  
HETATM  359  O   HOH T 358       9.729   5.026  -2.815  1.00  0.57           O  
HETATM  360  O   HOH T 359      27.668  11.328 -23.017  1.00  0.57           O  
HETATM  361  O   HOH T 360      -3.983  -9.671  15.826  1.00  0.57           O  
HETATM  362  O   HOH T 361       2.404   2.453  -4.145  1.00  0.57           O  
HETATM  363  O   HOH T 362       1.509  16.526   3.161  1.00  0.57           O  
HETATM  364  O   HOH T 363     -10.324   3.992  39.545  1.00  0.57           O  
HETATM  365  O   HOH T 364       5.637  10.487  -4.713  1.00  0.57           O  
HETATM  366  O   HOH T 365       7.014  -7.196 -19.458  1.00  0.57           O  
HETATM  367  O   HOH T 366      -6.572   3.190   8.959  1.00  0.58           O  
HETATM  368  O   HOH T 367      11.084 -10.472 -11.501  1.00  0.59           O  
HETATM  369  O   HOH T 368      26.821   6.361 -37.379  1.00  0.60           O  
HETATM  370  O   HOH T 369       0.077  14.766  30.045  1.00  0.60           O  
TER     371      HOH T 369 
