# Supplementary material for: Accurate Prediction of Hydration Sites of Proteins Using Energy Model With Atom Embedding
Source: Front Mol Biosci. 2021 Sep 20;8:756075. doi: 10.3389/fmolb.2021.756075 (PMC8488165; doi:10.3389/fmolb.2021.756075)
Supplement: Supplementary file 1 [file DataSheet1.ZIP › Data Sheet 1/Our_result_pdb/our_dataset_output/3B27_watersite.pdb]

HEADER                                                        XXXX


JRNL        PMID   -1
HETATM    1  O   HOH T   0       9.929   7.769  10.552  1.00  0.13           O  
HETATM    2  O   HOH T   1     -11.850 -14.650  22.181  1.00  0.18           O  
HETATM    3  O   HOH T   2      15.308  -7.229  13.787  1.00  0.18           O  
HETATM    4  O   HOH T   3       1.777   6.314  22.274  1.00  0.19           O  
HETATM    5  O   HOH T   4      12.021  -9.138  32.626  1.00  0.20           O  
HETATM    6  O   HOH T   5      14.756   5.213   3.039  1.00  0.20           O  
HETATM    7  O   HOH T   6      11.375 -19.618  15.169  1.00  0.20           O  
HETATM    8  O   HOH T   7      14.403  -5.589  22.204  1.00  0.21           O  
HETATM    9  O   HOH T   8      14.823  10.814  22.891  1.00  0.21           O  
HETATM   10  O   HOH T   9      15.949  11.280   7.498  1.00  0.21           O  
HETATM   11  O   HOH T  10      12.923  -6.441  15.015  1.00  0.22           O  
HETATM   12  O   HOH T  11      -9.943   7.999   6.726  1.00  0.22           O  
HETATM   13  O   HOH T  12      14.624  20.948  15.253  1.00  0.23           O  
HETATM   14  O   HOH T  13      -3.034  -8.949  27.960  1.00  0.23           O  
HETATM   15  O   HOH T  14       2.891  11.209  -3.091  1.00  0.23           O  
HETATM   16  O   HOH T  15       5.671 -20.849   7.850  1.00  0.24           O  
HETATM   17  O   HOH T  16      16.902 -13.223   6.965  1.00  0.24           O  
HETATM   18  O   HOH T  17       5.481  19.445  15.481  1.00  0.25           O  
HETATM   19  O   HOH T  18      -8.719  -9.146  23.009  1.00  0.25           O  
HETATM   20  O   HOH T  19       7.229  16.993   6.923  1.00  0.25           O  
HETATM   21  O   HOH T  20      -1.108  15.561  12.125  1.00  0.25           O  
HETATM   22  O   HOH T  21     -14.100  -2.794   7.476  1.00  0.25           O  
HETATM   23  O   HOH T  22      19.573  10.502  17.582  1.00  0.26           O  
HETATM   24  O   HOH T  23       9.038  -1.211  22.133  1.00  0.26           O  
HETATM   25  O   HOH T  24      15.286 -11.543  18.894  1.00  0.26           O  
HETATM   26  O   HOH T  25      12.109  -3.236  -8.264  1.00  0.26           O  
HETATM   27  O   HOH T  26      13.626  -2.910  16.167  1.00  0.26           O  
HETATM   28  O   HOH T  27      13.750  11.816   2.875  1.00  0.26           O  
HETATM   29  O   HOH T  28     -12.492  16.137  28.531  1.00  0.27           O  
HETATM   30  O   HOH T  29       9.948   9.166  -1.535  1.00  0.27           O  
HETATM   31  O   HOH T  30      -3.139   2.380  22.449  1.00  0.27           O  
HETATM   32  O   HOH T  31      10.001  -2.634  -6.494  1.00  0.27           O  
HETATM   33  O   HOH T  32      15.488  17.963  24.904  1.00  0.27           O  
HETATM   34  O   HOH T  33     -15.035  -3.255   1.108  1.00  0.27           O  
HETATM   35  O   HOH T  34       9.673  -2.606  18.226  1.00  0.27           O  
HETATM   36  O   HOH T  35      21.368 -10.958  15.293  1.00  0.28           O  
HETATM   37  O   HOH T  36       4.911   4.060  13.935  1.00  0.28           O  
HETATM   38  O   HOH T  37       7.870  -5.743   0.415  1.00  0.28           O  
HETATM   39  O   HOH T  38       7.975 -13.262   2.861  1.00  0.28           O  
HETATM   40  O   HOH T  39      18.137  12.980   8.242  1.00  0.29           O  
HETATM   41  O   HOH T  40      19.012  25.161  15.472  1.00  0.29           O  
HETATM   42  O   HOH T  41     -16.478   3.364  25.527  1.00  0.29           O  
HETATM   43  O   HOH T  42      18.209   2.575  -2.649  1.00  0.29           O  
HETATM   44  O   HOH T  43      12.082 -17.352  10.549  1.00  0.29           O  
HETATM   45  O   HOH T  44      -1.725   9.111  27.806  1.00  0.29           O  
HETATM   46  O   HOH T  45       6.099 -16.505  13.281  1.00  0.29           O  
HETATM   47  O   HOH T  46       6.754 -14.518  11.576  1.00  0.30           O  
HETATM   48  O   HOH T  47       2.188  10.073  -5.553  1.00  0.30           O  
HETATM   49  O   HOH T  48       5.907  10.636   5.904  1.00  0.30           O  
HETATM   50  O   HOH T  49      12.202   6.552  -3.617  1.00  0.30           O  
HETATM   51  O   HOH T  50     -15.540  -0.702  12.061  1.00  0.30           O  
HETATM   52  O   HOH T  51       2.347  -7.268 -19.401  1.00  0.30           O  
HETATM   53  O   HOH T  52     -17.012   4.933  23.249  1.00  0.31           O  
HETATM   54  O   HOH T  53       5.726  20.670  12.957  1.00  0.31           O  
HETATM   55  O   HOH T  54      20.448  -8.000   8.366  1.00  0.31           O  
HETATM   56  O   HOH T  55     -13.247  -5.301  16.772  1.00  0.31           O  
HETATM   57  O   HOH T  56      -4.166 -13.696  15.371  1.00  0.31           O  
HETATM   58  O   HOH T  57       5.400  -1.497  27.748  1.00  0.31           O  
HETATM   59  O   HOH T  58      -5.692   3.066   6.038  1.00  0.31           O  
HETATM   60  O   HOH T  59      12.809   9.412  21.536  1.00  0.31           O  
HETATM   61  O   HOH T  60      14.182  10.160  25.559  1.00  0.31           O  
HETATM   62  O   HOH T  61      -6.007  19.443  11.422  1.00  0.32           O  
HETATM   63  O   HOH T  62       1.655   9.717  26.007  1.00  0.32           O  
HETATM   64  O   HOH T  63      -3.597 -12.296  20.016  1.00  0.32           O  
HETATM   65  O   HOH T  64      -3.020   5.125  21.953  1.00  0.32           O  
HETATM   66  O   HOH T  65       9.998  23.366   0.105  1.00  0.32           O  
HETATM   67  O   HOH T  66       8.441  14.840   5.603  1.00  0.32           O  
HETATM   68  O   HOH T  67     -15.360  -1.543   9.512  1.00  0.33           O  
HETATM   69  O   HOH T  68       7.945   7.414  22.307  1.00  0.33           O  
HETATM   70  O   HOH T  69     -13.095   4.694   6.556  1.00  0.33           O  
HETATM   71  O   HOH T  70      -4.643 -11.246  28.392  1.00  0.33           O  
HETATM   72  O   HOH T  71      -2.062   3.512   3.683  1.00  0.33           O  
HETATM   73  O   HOH T  72      10.388  22.056  11.716  1.00  0.33           O  
HETATM   74  O   HOH T  73       6.753   1.460  20.925  1.00  0.33           O  
HETATM   75  O   HOH T  74     -14.713  -6.784  13.858  1.00  0.34           O  
HETATM   76  O   HOH T  75      16.084  -4.791  -3.555  1.00  0.34           O  
HETATM   77  O   HOH T  76       0.789   5.476  27.969  1.00  0.34           O  
HETATM   78  O   HOH T  77      -2.138  16.343   9.636  1.00  0.34           O  
HETATM   79  O   HOH T  78       2.244   7.273  24.783  1.00  0.34           O  
HETATM   80  O   HOH T  79       6.333   1.590  14.265  1.00  0.35           O  
HETATM   81  O   HOH T  80      -7.595  -6.172   6.431  1.00  0.35           O  
HETATM   82  O   HOH T  81      -9.858 -11.206  18.553  1.00  0.35           O  
HETATM   83  O   HOH T  82      -1.706 -11.641  13.228  1.00  0.35           O  
HETATM   84  O   HOH T  83      -8.657  -6.365  23.363  1.00  0.35           O  
HETATM   85  O   HOH T  84      17.938 -13.483  11.022  1.00  0.35           O  
HETATM   86  O   HOH T  85      16.843 -14.766   4.785  1.00  0.35           O  
HETATM   87  O   HOH T  86     -15.328  -7.991   9.699  1.00  0.35           O  
HETATM   88  O   HOH T  87       4.967  13.079   2.437  1.00  0.35           O  
HETATM   89  O   HOH T  88       3.463   4.495  -0.437  1.00  0.35           O  
HETATM   90  O   HOH T  89      11.852  -4.328  17.908  1.00  0.35           O  
HETATM   91  O   HOH T  90      17.877  27.012  13.672  1.00  0.36           O  
HETATM   92  O   HOH T  91     -10.179  -3.468  -0.796  1.00  0.36           O  
HETATM   93  O   HOH T  92     -14.776   3.856  21.930  1.00  0.36           O  
HETATM   94  O   HOH T  93       6.258  19.401   5.805  1.00  0.36           O  
HETATM   95  O   HOH T  94      20.749   8.715  15.887  1.00  0.36           O  
HETATM   96  O   HOH T  95       7.390   5.250  -3.718  1.00  0.36           O  
HETATM   97  O   HOH T  96      21.938   7.253   7.247  1.00  0.36           O  
HETATM   98  O   HOH T  97       4.876   0.924  26.508  1.00  0.36           O  
HETATM   99  O   HOH T  98     -12.094   6.969   7.997  1.00  0.36           O  
HETATM  100  O   HOH T  99       4.399   5.565  11.571  1.00  0.36           O  
HETATM  101  O   HOH T 100      10.761  -4.724  14.164  1.00  0.37           O  
HETATM  102  O   HOH T 101      -0.083 -15.583   7.014  1.00  0.37           O  
HETATM  103  O   HOH T 102       9.203   9.997  21.941  1.00  0.37           O  
HETATM  104  O   HOH T 103     -13.090 -13.853  19.833  1.00  0.37           O  
HETATM  105  O   HOH T 104       5.486  -2.943  -5.673  1.00  0.37           O  
HETATM  106  O   HOH T 105      17.285 -13.194   2.497  1.00  0.37           O  
HETATM  107  O   HOH T 106      10.816   4.137  -4.010  1.00  0.37           O  
HETATM  108  O   HOH T 107       8.118 -15.992   2.053  1.00  0.37           O  
HETATM  109  O   HOH T 108       2.334 -10.921   3.278  1.00  0.37           O  
HETATM  110  O   HOH T 109      12.297  -3.696  -5.616  1.00  0.37           O  
HETATM  111  O   HOH T 110      17.960  -4.790  20.375  1.00  0.37           O  
HETATM  112  O   HOH T 111      19.448   8.843  10.775  1.00  0.37           O  
HETATM  113  O   HOH T 112       5.410 -12.214  34.088  1.00  0.37           O  
HETATM  114  O   HOH T 113       8.768   3.400  21.057  1.00  0.37           O  
HETATM  115  O   HOH T 114      11.211  -3.335 -14.745  1.00  0.37           O  
HETATM  116  O   HOH T 115      -9.510  13.291  16.742  1.00  0.38           O  
HETATM  117  O   HOH T 116       4.029  -0.816  -1.510  1.00  0.38           O  
HETATM  118  O   HOH T 117       7.121 -19.992   5.713  1.00  0.38           O  
HETATM  119  O   HOH T 118      -1.718  13.178  21.709  1.00  0.38           O  
HETATM  120  O   HOH T 119       4.316  12.877  -4.791  1.00  0.38           O  
HETATM  121  O   HOH T 120     -10.612   6.813   2.191  1.00  0.38           O  
HETATM  122  O   HOH T 121      13.965  -5.896  -3.373  1.00  0.38           O  
HETATM  123  O   HOH T 122       2.276   4.843  -7.228  1.00  0.38           O  
HETATM  124  O   HOH T 123       6.708  12.825   4.539  1.00  0.39           O  
HETATM  125  O   HOH T 124       5.488  -0.933  -3.856  1.00  0.39           O  
HETATM  126  O   HOH T 125      15.250  22.459  13.007  1.00  0.39           O  
HETATM  127  O   HOH T 126      -4.327   4.716   4.399  1.00  0.39           O  
HETATM  128  O   HOH T 127       4.138 -12.743   4.235  1.00  0.39           O  
HETATM  129  O   HOH T 128       7.169 -12.045  -3.330  1.00  0.39           O  
HETATM  130  O   HOH T 129      21.443  -8.494  18.603  1.00  0.40           O  
HETATM  131  O   HOH T 130      -3.309  17.743  15.072  1.00  0.40           O  
HETATM  132  O   HOH T 131       1.539  21.134  12.666  1.00  0.40           O  
HETATM  133  O   HOH T 132     -12.088  -8.120  29.733  1.00  0.40           O  
HETATM  134  O   HOH T 133      11.321  22.043   3.975  1.00  0.40           O  
HETATM  135  O   HOH T 134       2.359  12.361   9.548  1.00  0.40           O  
HETATM  136  O   HOH T 135      -5.678  13.644  22.312  1.00  0.40           O  
HETATM  137  O   HOH T 136      -6.498  19.784  18.564  1.00  0.40           O  
HETATM  138  O   HOH T 137      -8.035  -5.129   1.873  1.00  0.41           O  
HETATM  139  O   HOH T 138      20.450   1.337   3.122  1.00  0.41           O  
HETATM  140  O   HOH T 139      -4.062  19.540   8.080  1.00  0.41           O  
HETATM  141  O   HOH T 140      10.350  -2.105 -12.393  1.00  0.41           O  
HETATM  142  O   HOH T 141       7.007 -18.849  12.502  1.00  0.41           O  
HETATM  143  O   HOH T 142      -1.043 -13.764   8.919  1.00  0.41           O  
HETATM  144  O   HOH T 143       3.983   5.164  25.196  1.00  0.41           O  
HETATM  145  O   HOH T 144      10.868   3.500  19.059  1.00  0.41           O  
HETATM  146  O   HOH T 145       6.572 -20.712  10.480  1.00  0.41           O  
HETATM  147  O   HOH T 146      14.944  23.480   6.909  1.00  0.41           O  
HETATM  148  O   HOH T 147     -17.051   5.676  15.602  1.00  0.41           O  
HETATM  149  O   HOH T 148       6.243 -11.096   3.586  1.00  0.41           O  
HETATM  150  O   HOH T 149      19.071   1.006  -0.733  1.00  0.41           O  
HETATM  151  O   HOH T 150     -13.030   6.465  11.548  1.00  0.41           O  
HETATM  152  O   HOH T 151      -2.592 -14.397   6.797  1.00  0.42           O  
HETATM  153  O   HOH T 152      -4.806   8.169  30.634  1.00  0.42           O  
HETATM  154  O   HOH T 153      14.372  -2.394  -6.773  1.00  0.42           O  
HETATM  155  O   HOH T 154      -2.246 -13.086  34.657  1.00  0.42           O  
HETATM  156  O   HOH T 155       3.018   1.702  -1.285  1.00  0.42           O  
HETATM  157  O   HOH T 156      19.284 -13.760  21.042  1.00  0.42           O  
HETATM  158  O   HOH T 157       8.770  -6.360 -21.310  1.00  0.42           O  
HETATM  159  O   HOH T 158      -3.965  -8.273  32.766  1.00  0.42           O  
HETATM  160  O   HOH T 159      -0.061  15.289  20.964  1.00  0.42           O  
HETATM  161  O   HOH T 160      -8.179  11.357  21.748  1.00  0.42           O  
HETATM  162  O   HOH T 161      20.431  -9.170  21.097  1.00  0.43           O  
HETATM  163  O   HOH T 162     -15.244   1.621  23.614  1.00  0.43           O  
HETATM  164  O   HOH T 163     -17.259   8.069   2.067  1.00  0.43           O  
HETATM  165  O   HOH T 164       1.976  12.862   6.863  1.00  0.43           O  
HETATM  166  O   HOH T 165       1.467   2.861   0.589  1.00  0.43           O  
HETATM  167  O   HOH T 166      -4.799  10.700  29.374  1.00  0.43           O  
HETATM  168  O   HOH T 167      -0.978   3.973  29.123  1.00  0.43           O  
HETATM  169  O   HOH T 168      -5.664 -11.470  31.078  1.00  0.43           O  
HETATM  170  O   HOH T 169      -4.055  12.851  31.063  1.00  0.43           O  
HETATM  171  O   HOH T 170     -14.675  -3.535   3.779  1.00  0.43           O  
HETATM  172  O   HOH T 171      12.874   4.866  -5.764  1.00  0.43           O  
HETATM  173  O   HOH T 172      21.253 -11.809  20.997  1.00  0.43           O  
HETATM  174  O   HOH T 173      -0.826  18.288  11.272  1.00  0.43           O  
HETATM  175  O   HOH T 174       4.343   2.541  24.278  1.00  0.43           O  
HETATM  176  O   HOH T 175      -8.464  -3.635  23.551  1.00  0.43           O  
HETATM  177  O   HOH T 176     -11.929  -9.225  18.728  1.00  0.43           O  
HETATM  178  O   HOH T 177       6.006 -16.358   5.662  1.00  0.43           O  
HETATM  179  O   HOH T 178      -3.876 -11.148  35.632  1.00  0.43           O  
HETATM  180  O   HOH T 179      10.605  -6.304 -17.747  1.00  0.44           O  
HETATM  181  O   HOH T 180       6.534   4.120  24.948  1.00  0.44           O  
HETATM  182  O   HOH T 181      -2.876  16.997  17.788  1.00  0.44           O  
HETATM  183  O   HOH T 182      -3.948 -21.180  18.556  1.00  0.44           O  
HETATM  184  O   HOH T 183      17.046  -2.057  -3.418  1.00  0.44           O  
HETATM  185  O   HOH T 184     -11.005   9.453  28.582  1.00  0.44           O  
HETATM  186  O   HOH T 185      -4.111  21.200  10.387  1.00  0.44           O  
HETATM  187  O   HOH T 186      -1.703  15.557  23.196  1.00  0.44           O  
HETATM  188  O   HOH T 187     -15.300   6.489   9.908  1.00  0.44           O  
HETATM  189  O   HOH T 188     -15.522   7.110   0.254  1.00  0.44           O  
HETATM  190  O   HOH T 189      10.918   4.501  16.402  1.00  0.44           O  
HETATM  191  O   HOH T 190      -3.262 -21.173  21.246  1.00  0.44           O  
HETATM  192  O   HOH T 191      -8.945 -12.190   9.674  1.00  0.45           O  
HETATM  193  O   HOH T 192     -13.130   4.785   9.342  1.00  0.45           O  
HETATM  194  O   HOH T 193       3.425  19.520  13.570  1.00  0.45           O  
HETATM  195  O   HOH T 194     -15.584   4.713   5.507  1.00  0.45           O  
HETATM  196  O   HOH T 195       7.561 -17.917   3.976  1.00  0.45           O  
HETATM  197  O   HOH T 196      -8.937   8.350  32.067  1.00  0.45           O  
HETATM  198  O   HOH T 197      13.899  23.167   4.451  1.00  0.45           O  
HETATM  199  O   HOH T 198      21.901  22.915   7.097  1.00  0.45           O  
HETATM  200  O   HOH T 199      18.944 -15.327  18.919  1.00  0.45           O  
HETATM  201  O   HOH T 200      12.963  12.929   0.331  1.00  0.45           O  
HETATM  202  O   HOH T 201     -12.215  -4.809   3.286  1.00  0.45           O  
HETATM  203  O   HOH T 202      -9.092   8.124   4.119  1.00  0.45           O  
HETATM  204  O   HOH T 203       9.588   6.684  -4.455  1.00  0.45           O  
HETATM  205  O   HOH T 204      18.709 -11.269  21.920  1.00  0.45           O  
HETATM  206  O   HOH T 205      -9.768  -6.565  25.938  1.00  0.46           O  
HETATM  207  O   HOH T 206      -4.741 -21.259  23.658  1.00  0.46           O  
HETATM  208  O   HOH T 207     -10.217  -6.015   0.303  1.00  0.46           O  
HETATM  209  O   HOH T 208      -1.626  -0.986   1.384  1.00  0.46           O  
HETATM  210  O   HOH T 209      18.840  -5.539  17.814  1.00  0.46           O  
HETATM  211  O   HOH T 210      20.321   5.793   8.970  1.00  0.46           O  
HETATM  212  O   HOH T 211       1.253 -16.689   9.127  1.00  0.46           O  
HETATM  213  O   HOH T 212      18.072 -17.650  17.901  1.00  0.46           O  
HETATM  214  O   HOH T 213     -18.010   2.315  23.461  1.00  0.46           O  
HETATM  215  O   HOH T 214      20.151   9.640  13.334  1.00  0.46           O  
HETATM  216  O   HOH T 215      -0.765   4.112   1.429  1.00  0.46           O  
HETATM  217  O   HOH T 216      18.018  13.718   0.874  1.00  0.46           O  
HETATM  218  O   HOH T 217     -11.638  -8.583  27.033  1.00  0.46           O  
HETATM  219  O   HOH T 218      21.017 -13.775  15.662  1.00  0.46           O  
HETATM  220  O   HOH T 219      -7.025   6.690  31.130  1.00  0.46           O  
HETATM  221  O   HOH T 220      -8.217  -0.163  -4.386  1.00  0.46           O  
HETATM  222  O   HOH T 221      -4.289   1.931   4.028  1.00  0.46           O  
HETATM  223  O   HOH T 222      18.435 -16.223  11.102  1.00  0.46           O  
HETATM  224  O   HOH T 223      10.927  11.701  -1.019  1.00  0.46           O  
HETATM  225  O   HOH T 224       2.562  15.427   6.051  1.00  0.46           O  
HETATM  226  O   HOH T 225     -13.609   3.831   3.519  1.00  0.47           O  
HETATM  227  O   HOH T 226      -4.222  15.141  24.152  1.00  0.47           O  
HETATM  228  O   HOH T 227       9.101  24.409  10.885  1.00  0.47           O  
HETATM  229  O   HOH T 228       2.041 -18.735  13.553  1.00  0.47           O  
HETATM  230  O   HOH T 229      17.582  23.963  13.402  1.00  0.47           O  
HETATM  231  O   HOH T 230       9.737  -0.208  19.638  1.00  0.47           O  
HETATM  232  O   HOH T 231     -10.437  -0.885  -1.540  1.00  0.47           O  
HETATM  233  O   HOH T 232       5.542 -12.947   1.678  1.00  0.47           O  
HETATM  234  O   HOH T 233      -4.202  -0.057   2.090  1.00  0.47           O  
HETATM  235  O   HOH T 234       4.651  17.204   5.979  1.00  0.47           O  
HETATM  236  O   HOH T 235       2.226   0.147  -5.563  1.00  0.47           O  
HETATM  237  O   HOH T 236     -16.330  -3.998   8.728  1.00  0.48           O  
HETATM  238  O   HOH T 237       0.647 -17.085  11.750  1.00  0.48           O  
HETATM  239  O   HOH T 238      22.719   9.710  14.312  1.00  0.48           O  
HETATM  240  O   HOH T 239      -8.979 -13.553  17.176  1.00  0.48           O  
HETATM  241  O   HOH T 240     -14.511  -6.325  20.899  1.00  0.48           O  
HETATM  242  O   HOH T 241      16.270 -12.979  29.862  1.00  0.48           O  
HETATM  243  O   HOH T 242     -16.432  -2.567  13.947  1.00  0.48           O  
HETATM  244  O   HOH T 243       4.041  -3.141  -3.209  1.00  0.48           O  
HETATM  245  O   HOH T 244     -15.755   6.454  -2.464  1.00  0.48           O  
HETATM  246  O   HOH T 245      -6.879  14.993  24.411  1.00  0.48           O  
HETATM  247  O   HOH T 246      -0.165 -12.217  10.953  1.00  0.48           O  
HETATM  248  O   HOH T 247      -2.442 -13.695  11.339  1.00  0.48           O  
HETATM  249  O   HOH T 248       6.717  10.556  23.233  1.00  0.48           O  
HETATM  250  O   HOH T 249       8.267  21.129  13.016  1.00  0.48           O  
HETATM  251  O   HOH T 250      11.488   2.766  21.598  1.00  0.48           O  
HETATM  252  O   HOH T 251       3.166   3.250  -9.339  1.00  0.48           O  
HETATM  253  O   HOH T 252     -16.391 -10.607  16.094  1.00  0.49           O  
HETATM  254  O   HOH T 253      -6.320   8.707  32.942  1.00  0.49           O  
HETATM  255  O   HOH T 254       4.646  14.861  -2.853  1.00  0.49           O  
HETATM  256  O   HOH T 255      11.626 -17.020  25.944  1.00  0.49           O  
HETATM  257  O   HOH T 256      20.360 -12.498  13.378  1.00  0.49           O  
HETATM  258  O   HOH T 257       1.510  -7.455  33.856  1.00  0.49           O  
HETATM  259  O   HOH T 258      21.337 -13.946  19.228  1.00  0.49           O  
HETATM  260  O   HOH T 259       7.212  16.199   3.424  1.00  0.49           O  
HETATM  261  O   HOH T 260      -1.327   6.763  29.411  1.00  0.49           O  
HETATM  262  O   HOH T 261       9.886 -10.458  33.871  1.00  0.49           O  
HETATM  263  O   HOH T 262      16.674   5.151  10.698  1.00  0.49           O  
HETATM  264  O   HOH T 263       5.800 -12.845  -1.075  1.00  0.49           O  
HETATM  265  O   HOH T 264       3.859 -20.872   9.857  1.00  0.49           O  
HETATM  266  O   HOH T 265       8.935  -4.329  32.183  1.00  0.49           O  
HETATM  267  O   HOH T 266       9.086  11.363  -5.730  1.00  0.50           O  
HETATM  268  O   HOH T 267     -16.369  -8.253  12.174  1.00  0.50           O  
HETATM  269  O   HOH T 268      21.893   7.965   9.799  1.00  0.50           O  
HETATM  270  O   HOH T 269      22.696  16.789  12.210  1.00  0.50           O  
HETATM  271  O   HOH T 270     -14.289  -5.533   7.454  1.00  0.50           O  
HETATM  272  O   HOH T 271      -5.834  -0.361  28.190  1.00  0.50           O  
HETATM  273  O   HOH T 272       2.230 -18.909  10.608  1.00  0.50           O  
HETATM  274  O   HOH T 273       0.109  -3.250   1.525  1.00  0.50           O  
HETATM  275  O   HOH T 274       7.372 -18.219  31.633  1.00  0.50           O  
HETATM  276  O   HOH T 275      22.686 -12.304  17.289  1.00  0.50           O  
HETATM  277  O   HOH T 276       6.103   6.723  24.245  1.00  0.50           O  
HETATM  278  O   HOH T 277      -8.372   8.248   1.426  1.00  0.50           O  
HETATM  279  O   HOH T 278      16.049 -17.628  11.455  1.00  0.50           O  
HETATM  280  O   HOH T 279      -7.849  -5.066  -0.874  1.00  0.50           O  
HETATM  281  O   HOH T 280       0.850   8.108  28.173  1.00  0.50           O  
HETATM  282  O   HOH T 281       3.934  12.302   4.899  1.00  0.51           O  
HETATM  283  O   HOH T 282     -16.513   6.303   7.467  1.00  0.51           O  
HETATM  284  O   HOH T 283      -8.830  -6.297   4.059  1.00  0.51           O  
HETATM  285  O   HOH T 284      -0.953   1.540   0.282  1.00  0.51           O  
HETATM  286  O   HOH T 285       9.118 -20.296  13.619  1.00  0.51           O  
HETATM  287  O   HOH T 286      14.846  -4.168  -1.537  1.00  0.51           O  
HETATM  288  O   HOH T 287      -7.977 -10.997  16.786  1.00  0.51           O  
HETATM  289  O   HOH T 288      22.870  -6.593   8.797  1.00  0.51           O  
HETATM  290  O   HOH T 289       8.419  13.763  21.995  1.00  0.51           O  
HETATM  291  O   HOH T 290     -13.684   9.046  29.400  1.00  0.51           O  
HETATM  292  O   HOH T 291      13.158  18.799  23.634  1.00  0.51           O  
HETATM  293  O   HOH T 292     -16.964  -3.030  11.322  1.00  0.51           O  
HETATM  294  O   HOH T 293      -0.614 -22.714  14.410  1.00  0.51           O  
HETATM  295  O   HOH T 294      -7.875   0.118  -1.367  1.00  0.51           O  
HETATM  296  O   HOH T 295     -16.681  -5.790  10.886  1.00  0.51           O  
HETATM  297  O   HOH T 296       5.782   4.105  -9.083  1.00  0.51           O  
HETATM  298  O   HOH T 297     -16.466   9.775   0.062  1.00  0.51           O  
HETATM  299  O   HOH T 298     -18.538 -11.735  17.517  1.00  0.51           O  
HETATM  300  O   HOH T 299     -18.036   8.965  16.858  1.00  0.52           O  
HETATM  301  O   HOH T 300      23.500  21.212   5.507  1.00  0.52           O  
HETATM  302  O   HOH T 301      -3.149  20.436  14.800  1.00  0.52           O  
HETATM  303  O   HOH T 302      -5.750 -10.321  33.630  1.00  0.52           O  
HETATM  304  O   HOH T 303       4.977   0.740  29.269  1.00  0.52           O  
HETATM  305  O   HOH T 304      15.364  13.742   1.502  1.00  0.52           O  
HETATM  306  O   HOH T 305      15.989  16.502   3.802  1.00  0.52           O  
HETATM  307  O   HOH T 306      16.532  11.792  -0.194  1.00  0.52           O  
HETATM  308  O   HOH T 307      10.492   0.768  23.385  1.00  0.52           O  
HETATM  309  O   HOH T 308      16.470   0.238  -4.927  1.00  0.52           O  
HETATM  310  O   HOH T 309      19.586  -9.854  25.255  1.00  0.52           O  
HETATM  311  O   HOH T 310     -18.979  -9.777  15.658  1.00  0.52           O  
HETATM  312  O   HOH T 311       8.693 -16.469  -0.632  1.00  0.52           O  
HETATM  313  O   HOH T 312      -4.073  19.472  17.158  1.00  0.52           O  
HETATM  314  O   HOH T 313      17.372 -15.060   8.895  1.00  0.52           O  
HETATM  315  O   HOH T 314       4.782  14.973   4.371  1.00  0.52           O  
HETATM  316  O   HOH T 315      -3.192   4.775  30.303  1.00  0.52           O  
HETATM  317  O   HOH T 316      16.968 -18.755   6.545  1.00  0.52           O  
HETATM  318  O   HOH T 317      18.612 -10.355  -0.008  1.00  0.53           O  
HETATM  319  O   HOH T 318       1.558 -16.173  26.580  1.00  0.53           O  
HETATM  320  O   HOH T 319      -3.046 -11.904  17.359  1.00  0.53           O  
HETATM  321  O   HOH T 320      -4.954 -13.820  18.073  1.00  0.53           O  
HETATM  322  O   HOH T 321      -3.593  18.440  10.658  1.00  0.53           O  
HETATM  323  O   HOH T 322       2.491  -0.311  -8.179  1.00  0.53           O  
HETATM  324  O   HOH T 323      20.322 -12.219  10.597  1.00  0.53           O  
HETATM  325  O   HOH T 324       4.919  -9.069   0.632  1.00  0.53           O  
HETATM  326  O   HOH T 325       0.094  21.863   7.207  1.00  0.53           O  
HETATM  327  O   HOH T 326      -3.338  -9.933  30.545  1.00  0.53           O  
HETATM  328  O   HOH T 327     -14.859  -5.852   0.007  1.00  0.53           O  
HETATM  329  O   HOH T 328      -9.873  15.146  28.813  1.00  0.53           O  
HETATM  330  O   HOH T 329      11.518 -19.473  12.344  1.00  0.53           O  
HETATM  331  O   HOH T 330      21.165  10.630   9.596  1.00  0.53           O  
HETATM  332  O   HOH T 331     -11.603  12.220  28.392  1.00  0.54           O  
HETATM  333  O   HOH T 332       3.402  19.605   5.654  1.00  0.54           O  
HETATM  334  O   HOH T 333      23.633  12.171  15.027  1.00  0.54           O  
HETATM  335  O   HOH T 334       7.121   5.116  -6.531  1.00  0.54           O  
HETATM  336  O   HOH T 335       1.490   2.181  -7.353  1.00  0.54           O  
HETATM  337  O   HOH T 336      14.598   6.736  -6.661  1.00  0.54           O  
HETATM  338  O   HOH T 337      13.094 -18.994  27.109  1.00  0.54           O  
HETATM  339  O   HOH T 338      13.092  -1.718  18.644  1.00  0.55           O  
HETATM  340  O   HOH T 339       8.921   7.112  -7.187  1.00  0.55           O  
HETATM  341  O   HOH T 340      19.470 -16.148  16.095  1.00  0.55           O  
HETATM  342  O   HOH T 341     -16.233 -12.141  13.838  1.00  0.55           O  
HETATM  343  O   HOH T 342      -2.446  -0.820  29.273  1.00  0.55           O  
HETATM  344  O   HOH T 343      25.111  23.534  13.687  1.00  0.55           O  
HETATM  345  O   HOH T 344      15.300  25.098   9.021  1.00  0.55           O  
HETATM  346  O   HOH T 345      13.973 -19.484  11.375  1.00  0.55           O  
HETATM  347  O   HOH T 346       8.104  18.554  20.267  1.00  0.55           O  
HETATM  348  O   HOH T 347      -5.663   2.321   1.662  1.00  0.55           O  
HETATM  349  O   HOH T 348      -4.599  16.527   4.706  1.00  0.55           O  
HETATM  350  O   HOH T 349      17.063  -8.710 -13.722  1.00  0.56           O  
HETATM  351  O   HOH T 350      -6.662  -7.932   4.497  1.00  0.56           O  
HETATM  352  O   HOH T 351      11.467   2.670  29.285  1.00  0.56           O  
HETATM  353  O   HOH T 352       6.321 -19.469  19.511  1.00  0.56           O  
HETATM  354  O   HOH T 353       5.008  19.403  18.183  1.00  0.56           O  
HETATM  355  O   HOH T 354     -13.224  15.422  17.622  1.00  0.56           O  
HETATM  356  O   HOH T 355      12.233   0.992  19.437  1.00  0.56           O  
HETATM  357  O   HOH T 356     -16.352 -10.430  10.457  1.00  0.56           O  
HETATM  358  O   HOH T 357      -2.401 -15.296  33.214  1.00  0.56           O  
HETATM  359  O   HOH T 358      21.166  -5.689   6.950  1.00  0.57           O  
HETATM  360  O   HOH T 359       6.430  12.982  -1.749  1.00  0.57           O  
HETATM  361  O   HOH T 360      17.771  24.255   4.035  1.00  0.57           O  
HETATM  362  O   HOH T 361       8.102  -0.835 -11.320  1.00  0.57           O  
HETATM  363  O   HOH T 362      20.160  -6.495  20.124  1.00  0.57           O  
HETATM  364  O   HOH T 363      -1.565   0.765 -14.812  1.00  0.57           O  
HETATM  365  O   HOH T 364     -15.408  -5.065  18.518  1.00  0.57           O  
HETATM  366  O   HOH T 365      13.569  -4.076 -13.660  1.00  0.58           O  
HETATM  367  O   HOH T 366       6.427   7.894  -8.209  1.00  0.59           O  
HETATM  368  O   HOH T 367     -12.561  -4.340   0.484  1.00  0.59           O  
HETATM  369  O   HOH T 368      12.243 -22.010  16.207  1.00  0.59           O  
HETATM  370  O   HOH T 369      14.447  -3.128  -4.102  1.00  0.59           O  
HETATM  371  O   HOH T 370       8.988  -3.272 -18.705  1.00  0.61           O  
HETATM  372  O   HOH T 371     -11.468 -11.480   6.425  1.00  0.62           O  
TER     373      HOH T 371 
