# Supplementary material for: Accurate Prediction of Hydration Sites of Proteins Using Energy Model With Atom Embedding
Source: Front Mol Biosci. 2021 Sep 20;8:756075. doi: 10.3389/fmolb.2021.756075 (PMC8488165; doi:10.3389/fmolb.2021.756075)
Supplement: Supplementary file 1 [file DataSheet1.ZIP › Data Sheet 1/Our_result_pdb/our_dataset_output/3BCJ_watersite.pdb]

HEADER                                                        XXXX


JRNL        PMID   -1
HETATM    1  O   HOH T   0      15.771  12.251  25.739  1.00  0.17           O  
HETATM    2  O   HOH T   1      11.950   1.183  26.571  1.00  0.19           O  
HETATM    3  O   HOH T   2       7.959  12.957  24.861  1.00  0.20           O  
HETATM    4  O   HOH T   3      10.555 -15.358  42.694  1.00  0.20           O  
HETATM    5  O   HOH T   4      -0.748  -8.468  34.479  1.00  0.21           O  
HETATM    6  O   HOH T   5      -0.192 -14.728  38.710  1.00  0.21           O  
HETATM    7  O   HOH T   6      29.024  -8.757  30.299  1.00  0.21           O  
HETATM    8  O   HOH T   7      15.100 -20.808  28.360  1.00  0.21           O  
HETATM    9  O   HOH T   8      15.758  -9.331  31.365  1.00  0.21           O  
HETATM   10  O   HOH T   9      11.585   3.235  24.814  1.00  0.22           O  
HETATM   11  O   HOH T  10      -7.867   1.534  33.991  1.00  0.22           O  
HETATM   12  O   HOH T  11      17.299  10.987  32.268  1.00  0.22           O  
HETATM   13  O   HOH T  12      17.386 -21.213  26.716  1.00  0.22           O  
HETATM   14  O   HOH T  13       2.453   6.789  28.469  1.00  0.23           O  
HETATM   15  O   HOH T  14      10.466  -1.549  47.467  1.00  0.23           O  
HETATM   16  O   HOH T  15      19.055 -10.051   3.359  1.00  0.23           O  
HETATM   17  O   HOH T  16       8.859   0.604   5.548  1.00  0.23           O  
HETATM   18  O   HOH T  17      20.891  -5.877  13.913  1.00  0.23           O  
HETATM   19  O   HOH T  18      31.097  -2.733  23.363  1.00  0.24           O  
HETATM   20  O   HOH T  19      23.074  10.780  15.900  1.00  0.24           O  
HETATM   21  O   HOH T  20      -2.816  -3.104  31.910  1.00  0.24           O  
HETATM   22  O   HOH T  21      13.750   5.153  36.766  1.00  0.24           O  
HETATM   23  O   HOH T  22      19.115   5.791   5.764  1.00  0.24           O  
HETATM   24  O   HOH T  23       8.791  -2.564  13.059  1.00  0.24           O  
HETATM   25  O   HOH T  24      30.633  -3.570  35.376  1.00  0.24           O  
HETATM   26  O   HOH T  25      33.484  18.614  35.564  1.00  0.24           O  
HETATM   27  O   HOH T  26       0.736 -15.499  35.079  1.00  0.25           O  
HETATM   28  O   HOH T  27      16.789 -17.698  24.576  1.00  0.25           O  
HETATM   29  O   HOH T  28       6.573 -12.970   6.807  1.00  0.25           O  
HETATM   30  O   HOH T  29      12.789  -5.492   3.281  1.00  0.25           O  
HETATM   31  O   HOH T  30      10.857  15.497  32.677  1.00  0.25           O  
HETATM   32  O   HOH T  31      11.418 -16.589   4.679  1.00  0.25           O  
HETATM   33  O   HOH T  32      21.343  12.448   7.969  1.00  0.25           O  
HETATM   34  O   HOH T  33      12.293   1.872  37.075  1.00  0.26           O  
HETATM   35  O   HOH T  34       3.928  -6.154  19.323  1.00  0.26           O  
HETATM   36  O   HOH T  35     -12.715   4.629  21.283  1.00  0.26           O  
HETATM   37  O   HOH T  36      23.761  -5.806  13.736  1.00  0.26           O  
HETATM   38  O   HOH T  37      35.589  17.880  37.283  1.00  0.26           O  
HETATM   39  O   HOH T  38      16.703 -14.840  35.818  1.00  0.26           O  
HETATM   40  O   HOH T  39      -5.276   5.687  25.204  1.00  0.26           O  
HETATM   41  O   HOH T  40      20.365  22.687  18.212  1.00  0.27           O  
HETATM   42  O   HOH T  41      36.508   0.005  37.409  1.00  0.27           O  
HETATM   43  O   HOH T  42      21.025   7.272  10.193  1.00  0.27           O  
HETATM   44  O   HOH T  43      21.889   0.812  15.888  1.00  0.27           O  
HETATM   45  O   HOH T  44       2.994 -11.138  10.075  1.00  0.28           O  
HETATM   46  O   HOH T  45      25.786   3.916  27.713  1.00  0.28           O  
HETATM   47  O   HOH T  46      -5.413  -3.223  12.683  1.00  0.28           O  
HETATM   48  O   HOH T  47      39.340  -0.292  25.264  1.00  0.28           O  
HETATM   49  O   HOH T  48      20.725 -12.872  14.698  1.00  0.28           O  
HETATM   50  O   HOH T  49       6.514 -12.993  22.664  1.00  0.28           O  
HETATM   51  O   HOH T  50      19.561   2.263  16.706  1.00  0.28           O  
HETATM   52  O   HOH T  51       9.942  -9.055  25.645  1.00  0.28           O  
HETATM   53  O   HOH T  52       2.690   9.382  21.527  1.00  0.29           O  
HETATM   54  O   HOH T  53      -5.313  -8.745  24.179  1.00  0.29           O  
HETATM   55  O   HOH T  54      15.441 -13.229  19.376  1.00  0.29           O  
HETATM   56  O   HOH T  55       6.464 -15.853  24.949  1.00  0.29           O  
HETATM   57  O   HOH T  56      22.344 -13.980  23.707  1.00  0.29           O  
HETATM   58  O   HOH T  57      34.913 -16.109  22.146  1.00  0.29           O  
HETATM   59  O   HOH T  58       4.391  -5.124   7.282  1.00  0.29           O  
HETATM   60  O   HOH T  59       2.379  -4.061   1.920  1.00  0.29           O  
HETATM   61  O   HOH T  60       4.237 -11.459  22.125  1.00  0.29           O  
HETATM   62  O   HOH T  61      -9.762  -4.680  30.826  1.00  0.29           O  
HETATM   63  O   HOH T  62       1.588   5.564  30.744  1.00  0.30           O  
HETATM   64  O   HOH T  63       8.564  -6.642  18.008  1.00  0.30           O  
HETATM   65  O   HOH T  64      16.397  -0.120  44.886  1.00  0.30           O  
HETATM   66  O   HOH T  65      31.013  18.998  36.787  1.00  0.30           O  
HETATM   67  O   HOH T  66      43.578  -6.004  13.340  1.00  0.30           O  
HETATM   68  O   HOH T  67      -4.801   3.303   9.981  1.00  0.30           O  
HETATM   69  O   HOH T  68      34.799  10.644  19.259  1.00  0.30           O  
HETATM   70  O   HOH T  69      21.261  17.768  15.769  1.00  0.31           O  
HETATM   71  O   HOH T  70      38.372   7.921  21.631  1.00  0.31           O  
HETATM   72  O   HOH T  71     -12.366   1.794  20.935  1.00  0.31           O  
HETATM   73  O   HOH T  72      18.784  -5.806   1.870  1.00  0.31           O  
HETATM   74  O   HOH T  73       6.465  -0.334  -2.644  1.00  0.32           O  
HETATM   75  O   HOH T  74      27.168   8.404  16.982  1.00  0.32           O  
HETATM   76  O   HOH T  75      14.285  12.157  35.432  1.00  0.32           O  
HETATM   77  O   HOH T  76       7.921 -17.236  16.021  1.00  0.32           O  
HETATM   78  O   HOH T  77      25.655  14.859  23.808  1.00  0.32           O  
HETATM   79  O   HOH T  78      27.122   3.925  12.829  1.00  0.32           O  
HETATM   80  O   HOH T  79      30.594  -4.178  26.830  1.00  0.32           O  
HETATM   81  O   HOH T  80      21.302  -6.124   3.245  1.00  0.32           O  
HETATM   82  O   HOH T  81      21.147  15.487  25.738  1.00  0.32           O  
HETATM   83  O   HOH T  82      10.648  15.882  29.934  1.00  0.32           O  
HETATM   84  O   HOH T  83      37.251   2.258  43.278  1.00  0.32           O  
HETATM   85  O   HOH T  84      33.532  14.853  23.859  1.00  0.33           O  
HETATM   86  O   HOH T  85      14.556 -10.703  18.672  1.00  0.33           O  
HETATM   87  O   HOH T  86      22.734  15.527  21.560  1.00  0.33           O  
HETATM   88  O   HOH T  87       6.480   0.787   6.887  1.00  0.33           O  
HETATM   89  O   HOH T  88      24.034 -12.572  28.734  1.00  0.33           O  
HETATM   90  O   HOH T  89      30.854  -9.747  23.410  1.00  0.33           O  
HETATM   91  O   HOH T  90     -12.545   8.684  19.564  1.00  0.33           O  
HETATM   92  O   HOH T  91      20.240   4.832  15.803  1.00  0.33           O  
HETATM   93  O   HOH T  92      -3.444   1.816  35.557  1.00  0.33           O  
HETATM   94  O   HOH T  93      21.943  16.604  29.655  1.00  0.33           O  
HETATM   95  O   HOH T  94      38.533  14.766  24.419  1.00  0.34           O  
HETATM   96  O   HOH T  95      30.526 -11.259  25.692  1.00  0.34           O  
HETATM   97  O   HOH T  96      22.370  -7.139  11.867  1.00  0.34           O  
HETATM   98  O   HOH T  97      33.861  17.482  39.470  1.00  0.34           O  
HETATM   99  O   HOH T  98      22.540 -17.226  13.342  1.00  0.34           O  
HETATM  100  O   HOH T  99      33.370   2.024  14.577  1.00  0.34           O  
HETATM  101  O   HOH T 100      -1.538  -4.720  42.160  1.00  0.34           O  
HETATM  102  O   HOH T 101       0.645   2.499  33.952  1.00  0.34           O  
HETATM  103  O   HOH T 102      11.801 -17.615  -0.542  1.00  0.34           O  
HETATM  104  O   HOH T 103      19.440  -8.212  10.021  1.00  0.34           O  
HETATM  105  O   HOH T 104      28.327  19.537  43.260  1.00  0.34           O  
HETATM  106  O   HOH T 105       0.981  14.847  20.300  1.00  0.34           O  
HETATM  107  O   HOH T 106       0.704  16.900  16.722  1.00  0.34           O  
HETATM  108  O   HOH T 107      -4.321  -0.105  14.830  1.00  0.34           O  
HETATM  109  O   HOH T 108      10.357  11.704  38.879  1.00  0.34           O  
HETATM  110  O   HOH T 109      -2.596  -6.493  34.069  1.00  0.34           O  
HETATM  111  O   HOH T 110      16.961   4.127   3.226  1.00  0.34           O  
HETATM  112  O   HOH T 111      12.384  18.754  10.977  1.00  0.35           O  
HETATM  113  O   HOH T 112      15.139  14.507  27.100  1.00  0.35           O  
HETATM  114  O   HOH T 113      33.357  20.514  23.363  1.00  0.35           O  
HETATM  115  O   HOH T 114       4.849  -7.296   1.222  1.00  0.35           O  
HETATM  116  O   HOH T 115      38.995  13.132  41.328  1.00  0.35           O  
HETATM  117  O   HOH T 116       2.412  -9.288  19.369  1.00  0.35           O  
HETATM  118  O   HOH T 117       6.418   4.486  37.348  1.00  0.35           O  
HETATM  119  O   HOH T 118      20.293 -14.704  43.446  1.00  0.35           O  
HETATM  120  O   HOH T 119      30.005  15.426  39.945  1.00  0.35           O  
HETATM  121  O   HOH T 120      10.364  -2.844  44.875  1.00  0.35           O  
HETATM  122  O   HOH T 121      25.616  11.760  15.660  1.00  0.35           O  
HETATM  123  O   HOH T 122      -7.229  -4.294  26.287  1.00  0.35           O  
HETATM  124  O   HOH T 123      12.471 -17.637  35.400  1.00  0.35           O  
HETATM  125  O   HOH T 124      35.057  17.317  23.559  1.00  0.35           O  
HETATM  126  O   HOH T 125      17.546 -11.098  13.599  1.00  0.35           O  
HETATM  127  O   HOH T 126     -11.890  11.394  19.910  1.00  0.35           O  
HETATM  128  O   HOH T 127      10.110 -16.942  39.047  1.00  0.35           O  
HETATM  129  O   HOH T 128       8.674 -16.082   4.499  1.00  0.35           O  
HETATM  130  O   HOH T 129      38.430  12.616  26.157  1.00  0.35           O  
HETATM  131  O   HOH T 130      18.129   5.842  14.383  1.00  0.36           O  
HETATM  132  O   HOH T 131      -4.072  -8.855  44.639  1.00  0.36           O  
HETATM  133  O   HOH T 132       5.541   5.458  35.025  1.00  0.36           O  
HETATM  134  O   HOH T 133      18.314   1.081   1.274  1.00  0.36           O  
HETATM  135  O   HOH T 134       7.893  -1.024  48.733  1.00  0.36           O  
HETATM  136  O   HOH T 135      24.205 -15.003  30.011  1.00  0.36           O  
HETATM  137  O   HOH T 136      32.560  -6.368  22.189  1.00  0.36           O  
HETATM  138  O   HOH T 137      29.894  10.665  41.984  1.00  0.36           O  
HETATM  139  O   HOH T 138      -6.701  13.807  20.247  1.00  0.36           O  
HETATM  140  O   HOH T 139      -9.297  -4.177  21.698  1.00  0.36           O  
HETATM  141  O   HOH T 140      34.746  -3.341  34.166  1.00  0.37           O  
HETATM  142  O   HOH T 141       5.351   1.739  -1.194  1.00  0.37           O  
HETATM  143  O   HOH T 142      34.990  -0.076  39.692  1.00  0.37           O  
HETATM  144  O   HOH T 143      34.786 -10.134  26.179  1.00  0.37           O  
HETATM  145  O   HOH T 144      27.628  11.366  17.754  1.00  0.37           O  
HETATM  146  O   HOH T 145       1.535  18.987   8.620  1.00  0.37           O  
HETATM  147  O   HOH T 146      20.093 -16.974  38.585  1.00  0.37           O  
HETATM  148  O   HOH T 147      12.264  13.990   6.124  1.00  0.37           O  
HETATM  149  O   HOH T 148     -10.521  -1.779  20.861  1.00  0.37           O  
HETATM  150  O   HOH T 149      32.526  -9.005  21.272  1.00  0.37           O  
HETATM  151  O   HOH T 150       4.520  -7.220  16.704  1.00  0.37           O  
HETATM  152  O   HOH T 151      -1.689  -0.861   4.961  1.00  0.37           O  
HETATM  153  O   HOH T 152      -2.061  16.823  16.387  1.00  0.37           O  
HETATM  154  O   HOH T 153      11.968 -19.194  11.287  1.00  0.37           O  
HETATM  155  O   HOH T 154      12.246   1.776  -4.460  1.00  0.37           O  
HETATM  156  O   HOH T 155      29.155  -6.581  16.903  1.00  0.37           O  
HETATM  157  O   HOH T 156       6.444   3.753  39.911  1.00  0.38           O  
HETATM  158  O   HOH T 157     -10.549  14.781  14.736  1.00  0.38           O  
HETATM  159  O   HOH T 158       9.748  22.759  24.377  1.00  0.38           O  
HETATM  160  O   HOH T 159      27.569  -2.550  12.912  1.00  0.38           O  
HETATM  161  O   HOH T 160      20.874   6.598  13.742  1.00  0.38           O  
HETATM  162  O   HOH T 161       9.964  20.064  24.561  1.00  0.38           O  
HETATM  163  O   HOH T 162      19.165 -17.709   4.915  1.00  0.38           O  
HETATM  164  O   HOH T 163       5.101 -12.026  11.752  1.00  0.38           O  
HETATM  165  O   HOH T 164       6.600  17.080  21.654  1.00  0.38           O  
HETATM  166  O   HOH T 165      43.618  18.888  31.799  1.00  0.38           O  
HETATM  167  O   HOH T 166      -2.453  11.607  26.747  1.00  0.38           O  
HETATM  168  O   HOH T 167      41.828  17.119  33.125  1.00  0.39           O  
HETATM  169  O   HOH T 168       2.219   8.970  34.402  1.00  0.39           O  
HETATM  170  O   HOH T 169       6.437 -15.783   6.190  1.00  0.39           O  
HETATM  171  O   HOH T 170      19.905  20.733  24.874  1.00  0.39           O  
HETATM  172  O   HOH T 171      14.020 -22.267  34.234  1.00  0.39           O  
HETATM  173  O   HOH T 172      -4.206  -9.467  28.601  1.00  0.39           O  
HETATM  174  O   HOH T 173      30.152  13.371  41.843  1.00  0.39           O  
HETATM  175  O   HOH T 174      18.971 -15.862  24.704  1.00  0.39           O  
HETATM  176  O   HOH T 175      10.553  14.692  35.265  1.00  0.39           O  
HETATM  177  O   HOH T 176      34.976  -7.914  21.836  1.00  0.39           O  
HETATM  178  O   HOH T 177      20.938  16.885  23.289  1.00  0.39           O  
HETATM  179  O   HOH T 178       0.409  18.909  23.630  1.00  0.39           O  
HETATM  180  O   HOH T 179      15.566   5.441   5.305  1.00  0.39           O  
HETATM  181  O   HOH T 180      18.899  19.315  15.734  1.00  0.39           O  
HETATM  182  O   HOH T 181      22.462 -13.713  -1.605  1.00  0.39           O  
HETATM  183  O   HOH T 182      33.325  -2.970  36.533  1.00  0.40           O  
HETATM  184  O   HOH T 183      20.375  -9.604  -4.187  1.00  0.40           O  
HETATM  185  O   HOH T 184      29.392  -0.582  13.519  1.00  0.40           O  
HETATM  186  O   HOH T 185      -1.741  -3.377  44.573  1.00  0.40           O  
HETATM  187  O   HOH T 186       2.664  17.681  24.621  1.00  0.40           O  
HETATM  188  O   HOH T 187       2.448  12.088  21.990  1.00  0.40           O  
HETATM  189  O   HOH T 188      29.404   3.230  11.369  1.00  0.40           O  
HETATM  190  O   HOH T 189      15.358  -5.877   2.415  1.00  0.40           O  
HETATM  191  O   HOH T 190     -10.392  12.690  18.066  1.00  0.40           O  
HETATM  192  O   HOH T 191      -4.800  -7.412  32.677  1.00  0.40           O  
HETATM  193  O   HOH T 192     -10.740  -6.567  21.330  1.00  0.40           O  
HETATM  194  O   HOH T 193      35.123 -13.371  22.551  1.00  0.40           O  
HETATM  195  O   HOH T 194       5.527 -17.359  38.117  1.00  0.40           O  
HETATM  196  O   HOH T 195      37.376  -2.335  24.800  1.00  0.40           O  
HETATM  197  O   HOH T 196      -9.134  -4.875  28.145  1.00  0.40           O  
HETATM  198  O   HOH T 197       9.084  17.889  26.079  1.00  0.40           O  
HETATM  199  O   HOH T 198      18.890  -3.957  34.162  1.00  0.41           O  
HETATM  200  O   HOH T 199       2.635   3.378  47.574  1.00  0.41           O  
HETATM  201  O   HOH T 200     -11.557  -0.150  22.921  1.00  0.41           O  
HETATM  202  O   HOH T 201       8.679 -13.560  43.684  1.00  0.41           O  
HETATM  203  O   HOH T 202      30.452  -8.256  15.252  1.00  0.41           O  
HETATM  204  O   HOH T 203      -3.455  -9.105  34.378  1.00  0.41           O  
HETATM  205  O   HOH T 204      13.712   0.331  45.363  1.00  0.41           O  
HETATM  206  O   HOH T 205      10.378 -16.132  -2.412  1.00  0.41           O  
HETATM  207  O   HOH T 206      31.848  -6.399  25.849  1.00  0.41           O  
HETATM  208  O   HOH T 207      12.943   6.127   5.157  1.00  0.42           O  
HETATM  209  O   HOH T 208       8.645  16.911  28.529  1.00  0.42           O  
HETATM  210  O   HOH T 209      14.531   4.883  -5.916  1.00  0.42           O  
HETATM  211  O   HOH T 210       2.267  18.543  15.147  1.00  0.42           O  
HETATM  212  O   HOH T 211      29.482  -5.698  36.774  1.00  0.42           O  
HETATM  213  O   HOH T 212       3.880 -17.266   6.261  1.00  0.42           O  
HETATM  214  O   HOH T 213       3.012   6.753  32.979  1.00  0.42           O  
HETATM  215  O   HOH T 214      40.678  12.961  39.178  1.00  0.42           O  
HETATM  216  O   HOH T 215      -1.824   9.031  27.437  1.00  0.42           O  
HETATM  217  O   HOH T 216      -7.034  -0.079  14.658  1.00  0.42           O  
HETATM  218  O   HOH T 217       6.955 -16.252  -5.160  1.00  0.42           O  
HETATM  219  O   HOH T 218      21.116   4.189  43.861  1.00  0.42           O  
HETATM  220  O   HOH T 219      23.561  12.138  43.890  1.00  0.42           O  
HETATM  221  O   HOH T 220       6.758  -1.728  46.335  1.00  0.42           O  
HETATM  222  O   HOH T 221      11.799 -17.762   2.142  1.00  0.42           O  
HETATM  223  O   HOH T 222      27.705  -8.048  39.551  1.00  0.43           O  
HETATM  224  O   HOH T 223      42.406  16.832  30.411  1.00  0.43           O  
HETATM  225  O   HOH T 224      16.066 -17.599  36.360  1.00  0.43           O  
HETATM  226  O   HOH T 225       0.381  18.439  13.154  1.00  0.43           O  
HETATM  227  O   HOH T 226      18.172  18.939  27.998  1.00  0.43           O  
HETATM  228  O   HOH T 227       8.775  15.109  26.438  1.00  0.43           O  
HETATM  229  O   HOH T 228       9.656 -17.046  -4.918  1.00  0.43           O  
HETATM  230  O   HOH T 229      23.035  12.119   5.620  1.00  0.43           O  
HETATM  231  O   HOH T 230      17.476 -16.152  38.202  1.00  0.43           O  
HETATM  232  O   HOH T 231      21.022 -12.111  -0.229  1.00  0.43           O  
HETATM  233  O   HOH T 232      32.320  17.976  23.107  1.00  0.43           O  
HETATM  234  O   HOH T 233      -3.684  -3.428   5.441  1.00  0.43           O  
HETATM  235  O   HOH T 234      -1.576 -15.821  36.645  1.00  0.43           O  
HETATM  236  O   HOH T 235      28.978  20.653  40.806  1.00  0.43           O  
HETATM  237  O   HOH T 236      24.808  -8.241  12.733  1.00  0.43           O  
HETATM  238  O   HOH T 237      -4.021 -12.184  29.000  1.00  0.43           O  
HETATM  239  O   HOH T 238      -1.492  15.369  21.433  1.00  0.44           O  
HETATM  240  O   HOH T 239      26.228  -4.626  13.979  1.00  0.44           O  
HETATM  241  O   HOH T 240      30.153 -10.667  28.509  1.00  0.44           O  
HETATM  242  O   HOH T 241      33.224 -11.663  21.458  1.00  0.44           O  
HETATM  243  O   HOH T 242      39.726  14.926  26.961  1.00  0.44           O  
HETATM  244  O   HOH T 243      18.458 -20.635  35.263  1.00  0.44           O  
HETATM  245  O   HOH T 244      23.415  -9.467  10.667  1.00  0.44           O  
HETATM  246  O   HOH T 245      -6.971   2.343  36.469  1.00  0.44           O  
HETATM  247  O   HOH T 246       8.714   4.817  38.795  1.00  0.44           O  
HETATM  248  O   HOH T 247      13.284 -13.927  17.720  1.00  0.44           O  
HETATM  249  O   HOH T 248      15.386  12.866  32.998  1.00  0.44           O  
HETATM  250  O   HOH T 249      26.810  11.991  13.044  1.00  0.44           O  
HETATM  251  O   HOH T 250      20.067  -9.710  45.654  1.00  0.44           O  
HETATM  252  O   HOH T 251      19.109  -9.771  48.289  1.00  0.44           O  
HETATM  253  O   HOH T 252      10.356 -19.450  34.910  1.00  0.44           O  
HETATM  254  O   HOH T 253      -0.179  11.171  22.692  1.00  0.45           O  
HETATM  255  O   HOH T 254      -0.716   7.204  31.008  1.00  0.45           O  
HETATM  256  O   HOH T 255      -5.534  -7.986  26.845  1.00  0.45           O  
HETATM  257  O   HOH T 256      -6.116   5.699  10.764  1.00  0.45           O  
HETATM  258  O   HOH T 257      -3.230  -2.451  40.454  1.00  0.45           O  
HETATM  259  O   HOH T 258      20.618  17.617  27.489  1.00  0.45           O  
HETATM  260  O   HOH T 259      30.253  -5.491  23.679  1.00  0.45           O  
HETATM  261  O   HOH T 260      40.489   8.511  28.466  1.00  0.45           O  
HETATM  262  O   HOH T 261      -9.544  -2.799  26.332  1.00  0.45           O  
HETATM  263  O   HOH T 262      37.401  -9.508  25.324  1.00  0.45           O  
HETATM  264  O   HOH T 263      15.327  18.752  28.666  1.00  0.45           O  
HETATM  265  O   HOH T 264      37.602  -1.037  39.770  1.00  0.45           O  
HETATM  266  O   HOH T 265      12.226   4.086  38.861  1.00  0.45           O  
HETATM  267  O   HOH T 266      18.824  10.582  42.266  1.00  0.45           O  
HETATM  268  O   HOH T 267      38.964   8.082  30.887  1.00  0.45           O  
HETATM  269  O   HOH T 268      20.770  17.768  31.965  1.00  0.45           O  
HETATM  270  O   HOH T 269      11.581  11.219  41.299  1.00  0.46           O  
HETATM  271  O   HOH T 270      26.277  -7.038  41.664  1.00  0.46           O  
HETATM  272  O   HOH T 271      25.051  16.971  22.086  1.00  0.46           O  
HETATM  273  O   HOH T 272      32.356  -9.101  25.570  1.00  0.46           O  
HETATM  274  O   HOH T 273      -2.582  11.284  11.397  1.00  0.46           O  
HETATM  275  O   HOH T 274       8.139   4.895   4.664  1.00  0.46           O  
HETATM  276  O   HOH T 275      -0.116  -0.924   2.263  1.00  0.46           O  
HETATM  277  O   HOH T 276      27.061   1.791  11.083  1.00  0.46           O  
HETATM  278  O   HOH T 277      31.977  -5.062  37.294  1.00  0.46           O  
HETATM  279  O   HOH T 278      -6.684  -6.493  24.858  1.00  0.46           O  
HETATM  280  O   HOH T 279      -0.639  -2.376  -0.059  1.00  0.46           O  
HETATM  281  O   HOH T 280      24.327   8.106  26.428  1.00  0.46           O  
HETATM  282  O   HOH T 281      -8.425  -0.071  36.119  1.00  0.46           O  
HETATM  283  O   HOH T 282      11.192 -18.895  37.506  1.00  0.46           O  
HETATM  284  O   HOH T 283      36.413  -0.052  42.074  1.00  0.46           O  
HETATM  285  O   HOH T 284      20.355 -16.014  35.956  1.00  0.46           O  
HETATM  286  O   HOH T 285       6.685 -13.927  19.991  1.00  0.46           O  
HETATM  287  O   HOH T 286      42.807   7.658  26.948  1.00  0.46           O  
HETATM  288  O   HOH T 287      -3.489  -6.820  42.843  1.00  0.47           O  
HETATM  289  O   HOH T 288      -5.036  -5.160  34.305  1.00  0.47           O  
HETATM  290  O   HOH T 289      16.697 -22.213  33.851  1.00  0.47           O  
HETATM  291  O   HOH T 290      -1.792   9.837  24.661  1.00  0.47           O  
HETATM  292  O   HOH T 291       4.797  17.898  14.449  1.00  0.47           O  
HETATM  293  O   HOH T 292      -5.396  -0.258  12.382  1.00  0.47           O  
HETATM  294  O   HOH T 293      18.526  -8.479  12.933  1.00  0.47           O  
HETATM  295  O   HOH T 294      23.865 -14.730  21.693  1.00  0.47           O  
HETATM  296  O   HOH T 295      -4.779  -2.385  33.980  1.00  0.47           O  
HETATM  297  O   HOH T 296      14.292   3.424  -3.602  1.00  0.47           O  
HETATM  298  O   HOH T 297      -5.755   9.558  25.144  1.00  0.47           O  
HETATM  299  O   HOH T 298      22.656  16.318  33.389  1.00  0.47           O  
HETATM  300  O   HOH T 299       4.042  18.152  22.140  1.00  0.47           O  
HETATM  301  O   HOH T 300      31.933 -14.253  15.951  1.00  0.47           O  
HETATM  302  O   HOH T 301      11.116  16.331  27.178  1.00  0.47           O  
HETATM  303  O   HOH T 302      -8.112  -2.459  13.608  1.00  0.47           O  
HETATM  304  O   HOH T 303      21.329 -12.282   7.616  1.00  0.47           O  
HETATM  305  O   HOH T 304      -7.352   7.549  24.287  1.00  0.48           O  
HETATM  306  O   HOH T 305      15.205  -4.420   0.133  1.00  0.48           O  
HETATM  307  O   HOH T 306      38.770  -1.584  37.281  1.00  0.48           O  
HETATM  308  O   HOH T 307       2.656 -13.242  11.916  1.00  0.48           O  
HETATM  309  O   HOH T 308       0.467  13.942  22.888  1.00  0.48           O  
HETATM  310  O   HOH T 309      -6.487  11.261  23.080  1.00  0.48           O  
HETATM  311  O   HOH T 310      19.718  -6.431  -0.570  1.00  0.48           O  
HETATM  312  O   HOH T 311      18.746 -10.653  11.178  1.00  0.48           O  
HETATM  313  O   HOH T 312      12.986  14.110  33.957  1.00  0.48           O  
HETATM  314  O   HOH T 313      -9.950  10.826  24.242  1.00  0.48           O  
HETATM  315  O   HOH T 314      16.345  20.403  15.996  1.00  0.48           O  
HETATM  316  O   HOH T 315      40.986  15.898  24.622  1.00  0.48           O  
HETATM  317  O   HOH T 316      -5.737   3.069  28.001  1.00  0.48           O  
HETATM  318  O   HOH T 317       3.097   4.213  34.080  1.00  0.48           O  
HETATM  319  O   HOH T 318      -0.902  11.736   6.267  1.00  0.48           O  
HETATM  320  O   HOH T 319      -8.495  -6.573  22.821  1.00  0.48           O  
HETATM  321  O   HOH T 320      -1.590  12.708  24.399  1.00  0.48           O  
HETATM  322  O   HOH T 321      13.426 -20.041   9.015  1.00  0.48           O  
HETATM  323  O   HOH T 322      -0.939  16.336  18.892  1.00  0.48           O  
HETATM  324  O   HOH T 323      22.666  11.085  41.572  1.00  0.48           O  
HETATM  325  O   HOH T 324      20.926 -11.494   4.963  1.00  0.48           O  
HETATM  326  O   HOH T 325      16.426  16.981  27.003  1.00  0.49           O  
HETATM  327  O   HOH T 326       0.141   2.477  48.320  1.00  0.49           O  
HETATM  328  O   HOH T 327       4.305 -14.217  21.398  1.00  0.49           O  
HETATM  329  O   HOH T 328      -8.519   9.351  22.417  1.00  0.49           O  
HETATM  330  O   HOH T 329      19.357  -1.869  -3.715  1.00  0.49           O  
HETATM  331  O   HOH T 330      11.027  -0.159  44.979  1.00  0.49           O  
HETATM  332  O   HOH T 331      -2.351   6.354  33.109  1.00  0.49           O  
HETATM  333  O   HOH T 332       8.617 -19.368  17.695  1.00  0.49           O  
HETATM  334  O   HOH T 333      16.200   4.861   0.711  1.00  0.49           O  
HETATM  335  O   HOH T 334      15.610 -20.345  35.613  1.00  0.49           O  
HETATM  336  O   HOH T 335      -1.809   3.932  34.496  1.00  0.49           O  
HETATM  337  O   HOH T 336     -12.758  15.831  14.049  1.00  0.49           O  
HETATM  338  O   HOH T 337       5.726  13.804   6.157  1.00  0.49           O  
HETATM  339  O   HOH T 338      -0.759 -15.406  26.043  1.00  0.49           O  
HETATM  340  O   HOH T 339      -4.045  11.526  24.446  1.00  0.49           O  
HETATM  341  O   HOH T 340       9.770 -18.566   3.960  1.00  0.49           O  
HETATM  342  O   HOH T 341      19.663  18.055  13.499  1.00  0.49           O  
HETATM  343  O   HOH T 342      21.452 -14.715  12.826  1.00  0.49           O  
HETATM  344  O   HOH T 343      41.990  -3.535  34.849  1.00  0.49           O  
HETATM  345  O   HOH T 344      23.824  14.933  25.822  1.00  0.49           O  
HETATM  346  O   HOH T 345      14.888  18.922  25.948  1.00  0.49           O  
HETATM  347  O   HOH T 346      -4.986 -14.452  40.497  1.00  0.49           O  
HETATM  348  O   HOH T 347      -8.297  -0.054  12.178  1.00  0.50           O  
HETATM  349  O   HOH T 348      36.285  -2.527  36.381  1.00  0.50           O  
HETATM  350  O   HOH T 349      19.643 -16.238   2.727  1.00  0.50           O  
HETATM  351  O   HOH T 350      15.328   4.716  43.063  1.00  0.50           O  
HETATM  352  O   HOH T 351       0.625  18.641  18.829  1.00  0.50           O  
HETATM  353  O   HOH T 352      30.337  12.100  17.727  1.00  0.50           O  
HETATM  354  O   HOH T 353      31.088   1.461  12.765  1.00  0.50           O  
HETATM  355  O   HOH T 354      15.293   2.514  44.835  1.00  0.50           O  
HETATM  356  O   HOH T 355      -1.198   1.410   3.367  1.00  0.50           O  
HETATM  357  O   HOH T 356      29.305  10.753  15.479  1.00  0.50           O  
HETATM  358  O   HOH T 357      -3.149   3.877   7.957  1.00  0.50           O  
HETATM  359  O   HOH T 358       4.633 -19.635  36.518  1.00  0.50           O  
HETATM  360  O   HOH T 359       0.249   7.256  33.569  1.00  0.50           O  
HETATM  361  O   HOH T 360      26.712  17.596  42.235  1.00  0.50           O  
HETATM  362  O   HOH T 361      12.809 -20.380  35.901  1.00  0.51           O  
HETATM  363  O   HOH T 362      25.206   6.197   8.666  1.00  0.51           O  
HETATM  364  O   HOH T 363      31.832  13.358  39.766  1.00  0.51           O  
HETATM  365  O   HOH T 364      12.786  22.204  17.494  1.00  0.51           O  
HETATM  366  O   HOH T 365      26.282   7.665  10.683  1.00  0.51           O  
HETATM  367  O   HOH T 366      -4.965   0.823  37.686  1.00  0.51           O  
HETATM  368  O   HOH T 367      28.883  -8.361  37.090  1.00  0.51           O  
HETATM  369  O   HOH T 368      31.181  17.815  39.218  1.00  0.51           O  
HETATM  370  O   HOH T 369      24.215  -6.598  43.472  1.00  0.51           O  
HETATM  371  O   HOH T 370      -5.450   7.329  12.922  1.00  0.51           O  
HETATM  372  O   HOH T 371      24.252  18.552  19.957  1.00  0.51           O  
HETATM  373  O   HOH T 372       1.656 -13.663  14.505  1.00  0.51           O  
HETATM  374  O   HOH T 373      27.374  16.412  35.523  1.00  0.52           O  
HETATM  375  O   HOH T 374      41.524  -4.736  12.001  1.00  0.52           O  
HETATM  376  O   HOH T 375      19.610  14.358  33.384  1.00  0.52           O  
HETATM  377  O   HOH T 376      15.064  19.010  10.397  1.00  0.52           O  
HETATM  378  O   HOH T 377      17.802 -12.130   8.991  1.00  0.52           O  
HETATM  379  O   HOH T 378      20.949  11.542  43.708  1.00  0.52           O  
HETATM  380  O   HOH T 379      40.537   5.681  38.275  1.00  0.52           O  
HETATM  381  O   HOH T 380      21.202 -12.040  -3.041  1.00  0.52           O  
HETATM  382  O   HOH T 381      23.508   7.989  13.140  1.00  0.52           O  
HETATM  383  O   HOH T 382      -5.754   0.132  35.112  1.00  0.53           O  
HETATM  384  O   HOH T 383      -4.996  -3.471  36.529  1.00  0.53           O  
HETATM  385  O   HOH T 384       0.329   0.361  -0.312  1.00  0.53           O  
HETATM  386  O   HOH T 385      -4.951  -9.012  42.030  1.00  0.53           O  
HETATM  387  O   HOH T 386      25.414   4.056  10.678  1.00  0.53           O  
HETATM  388  O   HOH T 387      25.508   2.219   8.857  1.00  0.53           O  
HETATM  389  O   HOH T 388      -4.197 -10.645  18.493  1.00  0.53           O  
HETATM  390  O   HOH T 389      19.354   7.345   3.286  1.00  0.53           O  
HETATM  391  O   HOH T 390      40.772  15.014  42.457  1.00  0.53           O  
HETATM  392  O   HOH T 391      35.506   0.905  44.660  1.00  0.53           O  
HETATM  393  O   HOH T 392      22.092  19.565  13.807  1.00  0.53           O  
HETATM  394  O   HOH T 393      25.047   8.981  15.274  1.00  0.53           O  
HETATM  395  O   HOH T 394      22.855 -10.017   7.957  1.00  0.53           O  
HETATM  396  O   HOH T 395      10.543   5.613  40.633  1.00  0.53           O  
HETATM  397  O   HOH T 396      30.781   8.204  43.726  1.00  0.53           O  
HETATM  398  O   HOH T 397      21.078 -10.508   9.767  1.00  0.53           O  
HETATM  399  O   HOH T 398       7.552  11.257  39.185  1.00  0.53           O  
HETATM  400  O   HOH T 399      -1.713  -8.936  13.536  1.00  0.53           O  
HETATM  401  O   HOH T 400      18.605  19.219  30.883  1.00  0.53           O  
HETATM  402  O   HOH T 401      41.669  -6.637  15.342  1.00  0.53           O  
HETATM  403  O   HOH T 402       7.476  18.693  18.001  1.00  0.54           O  
HETATM  404  O   HOH T 403      -7.978  -6.445   9.803  1.00  0.54           O  
HETATM  405  O   HOH T 404      22.753 -15.345  44.616  1.00  0.54           O  
HETATM  406  O   HOH T 405      18.674   2.720  43.264  1.00  0.54           O  
HETATM  407  O   HOH T 406       9.792  21.104  21.953  1.00  0.54           O  
HETATM  408  O   HOH T 407      24.884 -13.014  -1.315  1.00  0.54           O  
HETATM  409  O   HOH T 408       0.536  16.468  26.051  1.00  0.55           O  
HETATM  410  O   HOH T 409      34.045  -8.836  30.747  1.00  0.55           O  
HETATM  411  O   HOH T 410      14.266 -17.875   0.786  1.00  0.55           O  
HETATM  412  O   HOH T 411      23.621   6.310  10.743  1.00  0.55           O  
HETATM  413  O   HOH T 412       4.849 -16.074  19.512  1.00  0.55           O  
HETATM  414  O   HOH T 413      38.128   8.930  43.793  1.00  0.55           O  
HETATM  415  O   HOH T 414      18.591  21.986  16.151  1.00  0.55           O  
HETATM  416  O   HOH T 415       6.294 -13.575  42.376  1.00  0.55           O  
HETATM  417  O   HOH T 416       9.189  13.202  37.048  1.00  0.55           O  
HETATM  418  O   HOH T 417      -3.363  -8.984  39.735  1.00  0.55           O  
HETATM  419  O   HOH T 418      34.843   4.056  13.756  1.00  0.55           O  
HETATM  420  O   HOH T 419       4.084 -17.893  40.499  1.00  0.55           O  
HETATM  421  O   HOH T 420      18.741  18.606  23.969  1.00  0.55           O  
HETATM  422  O   HOH T 421       4.995 -19.629   6.432  1.00  0.56           O  
HETATM  423  O   HOH T 422      -8.117   7.348  15.481  1.00  0.56           O  
HETATM  424  O   HOH T 423       1.824 -10.208  16.785  1.00  0.56           O  
HETATM  425  O   HOH T 424      13.672   5.817   0.683  1.00  0.56           O  
HETATM  426  O   HOH T 425      29.143  -0.680  42.862  1.00  0.57           O  
HETATM  427  O   HOH T 426      23.819  -5.744   3.798  1.00  0.57           O  
HETATM  428  O   HOH T 427      18.718 -17.981  36.350  1.00  0.57           O  
HETATM  429  O   HOH T 428      -3.228   5.778  35.666  1.00  0.58           O  
HETATM  430  O   HOH T 429      28.996  -6.562  41.521  1.00  0.60           O  
HETATM  431  O   HOH T 430      32.463  -5.731  39.786  1.00  0.61           O  
TER     432      HOH T 430 
