# Supplementary material for: Accurate Prediction of Hydration Sites of Proteins Using Energy Model With Atom Embedding
Source: Front Mol Biosci. 2021 Sep 20;8:756075. doi: 10.3389/fmolb.2021.756075 (PMC8488165; doi:10.3389/fmolb.2021.756075)
Supplement: Supplementary file 1 [file DataSheet1.ZIP › Data Sheet 1/Our_result_pdb/our_dataset_output/3BEX_watersite.pdb]

HEADER                                                        XXXX


JRNL        PMID   -1
HETATM    1  O   HOH T   0       8.318 -11.869  40.219  1.00  0.15           O  
HETATM    2  O   HOH T   1      28.097 -14.228  37.236  1.00  0.15           O  
HETATM    3  O   HOH T   2       4.157   8.307  18.486  1.00  0.15           O  
HETATM    4  O   HOH T   3      32.367  11.928  23.217  1.00  0.15           O  
HETATM    5  O   HOH T   4      13.330  -8.096  12.004  1.00  0.16           O  
HETATM    6  O   HOH T   5      22.965  14.173  40.788  1.00  0.17           O  
HETATM    7  O   HOH T   6      10.514  37.284  42.489  1.00  0.17           O  
HETATM    8  O   HOH T   7      34.573 -19.655  -8.007  1.00  0.17           O  
HETATM    9  O   HOH T   8     -21.773  19.592  31.956  1.00  0.18           O  
HETATM   10  O   HOH T   9       2.469  -9.722  30.058  1.00  0.19           O  
HETATM   11  O   HOH T  10      10.667  30.905  47.750  1.00  0.19           O  
HETATM   12  O   HOH T  11       1.554 -30.594  30.879  1.00  0.19           O  
HETATM   13  O   HOH T  12      14.438 -16.509  20.546  1.00  0.19           O  
HETATM   14  O   HOH T  13      19.786 -21.947   6.498  1.00  0.20           O  
HETATM   15  O   HOH T  14      24.614  10.242  14.027  1.00  0.20           O  
HETATM   16  O   HOH T  15     -10.267  13.827  10.255  1.00  0.20           O  
HETATM   17  O   HOH T  16      38.407 -34.417  24.734  1.00  0.20           O  
HETATM   18  O   HOH T  17      33.968  -3.742  38.023  1.00  0.20           O  
HETATM   19  O   HOH T  18      16.774  11.301  22.841  1.00  0.20           O  
HETATM   20  O   HOH T  19      13.314  -8.618   5.488  1.00  0.20           O  
HETATM   21  O   HOH T  20      11.808  16.650  22.497  1.00  0.20           O  
HETATM   22  O   HOH T  21      24.124 -16.238  31.546  1.00  0.21           O  
HETATM   23  O   HOH T  22      16.033  15.404  52.849  1.00  0.21           O  
HETATM   24  O   HOH T  23      26.602 -21.404  49.551  1.00  0.21           O  
HETATM   25  O   HOH T  24      45.169  -6.392  53.587  1.00  0.21           O  
HETATM   26  O   HOH T  25      14.579  20.316  17.739  1.00  0.21           O  
HETATM   27  O   HOH T  26      32.712   3.408  63.313  1.00  0.21           O  
HETATM   28  O   HOH T  27       9.102 -19.978  21.718  1.00  0.21           O  
HETATM   29  O   HOH T  28      13.447   7.307  12.321  1.00  0.21           O  
HETATM   30  O   HOH T  29       8.616 -20.217   8.663  1.00  0.21           O  
HETATM   31  O   HOH T  30      12.573   8.109  41.307  1.00  0.21           O  
HETATM   32  O   HOH T  31      38.312 -14.239  45.942  1.00  0.22           O  
HETATM   33  O   HOH T  32      27.341  25.831   3.174  1.00  0.22           O  
HETATM   34  O   HOH T  33      24.958  15.539  32.195  1.00  0.22           O  
HETATM   35  O   HOH T  34      19.214  23.774  44.793  1.00  0.22           O  
HETATM   36  O   HOH T  35      34.899 -10.063  57.804  1.00  0.22           O  
HETATM   37  O   HOH T  36      -3.210  22.127  22.619  1.00  0.22           O  
HETATM   38  O   HOH T  37       0.409 -21.242  52.557  1.00  0.22           O  
HETATM   39  O   HOH T  38      -2.084 -20.102  38.150  1.00  0.22           O  
HETATM   40  O   HOH T  39      -9.616 -25.131  25.912  1.00  0.22           O  
HETATM   41  O   HOH T  40      23.879 -10.000  17.836  1.00  0.22           O  
HETATM   42  O   HOH T  41      17.887  -2.669  11.698  1.00  0.22           O  
HETATM   43  O   HOH T  42      10.338 -13.691  -4.283  1.00  0.22           O  
HETATM   44  O   HOH T  43      33.949  20.355  12.873  1.00  0.22           O  
HETATM   45  O   HOH T  44       4.326  -7.095  18.779  1.00  0.22           O  
HETATM   46  O   HOH T  45      35.169  -1.596  44.235  1.00  0.22           O  
HETATM   47  O   HOH T  46       2.264   2.782  22.694  1.00  0.22           O  
HETATM   48  O   HOH T  47      34.920  18.285  47.045  1.00  0.22           O  
HETATM   49  O   HOH T  48      21.700  15.515  11.832  1.00  0.22           O  
HETATM   50  O   HOH T  49       3.711 -32.334  16.877  1.00  0.22           O  
HETATM   51  O   HOH T  50      53.494   6.537  19.581  1.00  0.22           O  
HETATM   52  O   HOH T  51      23.030  17.639  25.704  1.00  0.22           O  
HETATM   53  O   HOH T  52      31.962  -8.097  27.521  1.00  0.22           O  
HETATM   54  O   HOH T  53      30.048 -20.429  37.902  1.00  0.22           O  
HETATM   55  O   HOH T  54     -17.001  10.431  24.765  1.00  0.23           O  
HETATM   56  O   HOH T  55      27.659  14.160  53.499  1.00  0.23           O  
HETATM   57  O   HOH T  56      32.324  10.519  17.930  1.00  0.23           O  
HETATM   58  O   HOH T  57      23.277   3.140  39.427  1.00  0.23           O  
HETATM   59  O   HOH T  58      28.315   6.123  68.134  1.00  0.23           O  
HETATM   60  O   HOH T  59      33.616  25.940  21.777  1.00  0.23           O  
HETATM   61  O   HOH T  60      -6.735   9.490  18.708  1.00  0.23           O  
HETATM   62  O   HOH T  61      34.264   6.552  27.486  1.00  0.23           O  
HETATM   63  O   HOH T  62       4.147  13.034  21.119  1.00  0.23           O  
HETATM   64  O   HOH T  63     -24.174  12.065  24.328  1.00  0.23           O  
HETATM   65  O   HOH T  64      16.424  15.942  55.565  1.00  0.23           O  
HETATM   66  O   HOH T  65      21.775   3.628  46.725  1.00  0.23           O  
HETATM   67  O   HOH T  66     -13.888  -1.843  59.855  1.00  0.23           O  
HETATM   68  O   HOH T  67      44.048 -15.930  36.275  1.00  0.23           O  
HETATM   69  O   HOH T  68      58.312   1.895   8.857  1.00  0.23           O  
HETATM   70  O   HOH T  69       4.441  -0.702  36.795  1.00  0.23           O  
HETATM   71  O   HOH T  70      30.780   8.910  29.970  1.00  0.23           O  
HETATM   72  O   HOH T  71      37.731  13.446   9.176  1.00  0.23           O  
HETATM   73  O   HOH T  72      48.329   0.869  44.208  1.00  0.23           O  
HETATM   74  O   HOH T  73      23.357   4.691  50.717  1.00  0.23           O  
HETATM   75  O   HOH T  74       5.968  10.009  30.427  1.00  0.24           O  
HETATM   76  O   HOH T  75      26.046  13.111  11.174  1.00  0.24           O  
HETATM   77  O   HOH T  76      12.847 -20.059  18.498  1.00  0.24           O  
HETATM   78  O   HOH T  77      15.788 -12.831  12.854  1.00  0.24           O  
HETATM   79  O   HOH T  78      28.344  18.853  40.025  1.00  0.24           O  
HETATM   80  O   HOH T  79      13.804  18.477  -0.254  1.00  0.24           O  
HETATM   81  O   HOH T  80      35.335  21.457  43.545  1.00  0.24           O  
HETATM   82  O   HOH T  81      19.219 -30.518   8.628  1.00  0.24           O  
HETATM   83  O   HOH T  82      40.514 -15.287   3.916  1.00  0.24           O  
HETATM   84  O   HOH T  83      38.304  11.057  18.416  1.00  0.24           O  
HETATM   85  O   HOH T  84      32.013   7.815  38.136  1.00  0.24           O  
HETATM   86  O   HOH T  85      26.245 -10.437  -5.808  1.00  0.24           O  
HETATM   87  O   HOH T  86       2.622  20.508  12.904  1.00  0.24           O  
HETATM   88  O   HOH T  87      43.115 -14.830  38.747  1.00  0.24           O  
HETATM   89  O   HOH T  88      15.305 -32.667  19.618  1.00  0.24           O  
HETATM   90  O   HOH T  89      26.534  29.072  51.098  1.00  0.24           O  
HETATM   91  O   HOH T  90      14.633  27.029   2.010  1.00  0.24           O  
HETATM   92  O   HOH T  91      -7.690 -11.249  42.309  1.00  0.24           O  
HETATM   93  O   HOH T  92      26.678  -2.990  37.089  1.00  0.24           O  
HETATM   94  O   HOH T  93      19.324 -15.451  36.157  1.00  0.24           O  
HETATM   95  O   HOH T  94       1.668  30.727  56.696  1.00  0.24           O  
HETATM   96  O   HOH T  95      -1.311  22.367  20.567  1.00  0.24           O  
HETATM   97  O   HOH T  96      28.989  35.919  19.194  1.00  0.24           O  
HETATM   98  O   HOH T  97      25.127  25.283   1.603  1.00  0.24           O  
HETATM   99  O   HOH T  98      43.215  12.011  21.988  1.00  0.24           O  
HETATM  100  O   HOH T  99      10.476  20.303  20.272  1.00  0.24           O  
HETATM  101  O   HOH T 100      14.544  20.478   1.396  1.00  0.24           O  
HETATM  102  O   HOH T 101      22.723  -0.958  62.317  1.00  0.24           O  
HETATM  103  O   HOH T 102      18.603  15.870  35.502  1.00  0.24           O  
HETATM  104  O   HOH T 103      33.117 -12.186  36.454  1.00  0.24           O  
HETATM  105  O   HOH T 104      11.372  32.560  10.549  1.00  0.24           O  
HETATM  106  O   HOH T 105      -4.136  20.229  49.685  1.00  0.24           O  
HETATM  107  O   HOH T 106       7.289  -6.545  33.277  1.00  0.24           O  
HETATM  108  O   HOH T 107       3.435 -10.487  38.149  1.00  0.25           O  
HETATM  109  O   HOH T 108      22.605  -7.895  44.902  1.00  0.25           O  
HETATM  110  O   HOH T 109      20.589  12.085  45.134  1.00  0.25           O  
HETATM  111  O   HOH T 110      42.308   2.707  51.236  1.00  0.25           O  
HETATM  112  O   HOH T 111      30.692  17.253   6.601  1.00  0.25           O  
HETATM  113  O   HOH T 112      13.795 -17.616  32.169  1.00  0.25           O  
HETATM  114  O   HOH T 113      10.526  10.472  24.351  1.00  0.25           O  
HETATM  115  O   HOH T 114      27.039  24.415  45.135  1.00  0.25           O  
HETATM  116  O   HOH T 115      17.747   7.065  57.924  1.00  0.25           O  
HETATM  117  O   HOH T 116      -2.301  -6.553  58.972  1.00  0.25           O  
HETATM  118  O   HOH T 117       4.921  23.445  67.469  1.00  0.25           O  
HETATM  119  O   HOH T 118      33.139  -8.183  58.912  1.00  0.25           O  
HETATM  120  O   HOH T 119      -1.990  -3.754  16.680  1.00  0.25           O  
HETATM  121  O   HOH T 120      28.273  30.137  53.063  1.00  0.25           O  
HETATM  122  O   HOH T 121      39.725  11.310   8.824  1.00  0.25           O  
HETATM  123  O   HOH T 122       1.958   6.111  11.919  1.00  0.25           O  
HETATM  124  O   HOH T 123      -3.920 -22.037  12.400  1.00  0.25           O  
HETATM  125  O   HOH T 124      16.794  -3.655  50.338  1.00  0.25           O  
HETATM  126  O   HOH T 125      23.271   0.609  40.524  1.00  0.25           O  
HETATM  127  O   HOH T 126      40.897 -33.736  25.653  1.00  0.25           O  
HETATM  128  O   HOH T 127      25.080  -8.899   9.676  1.00  0.25           O  
HETATM  129  O   HOH T 128      41.530   3.119  35.345  1.00  0.25           O  
HETATM  130  O   HOH T 129      11.056  16.167  42.275  1.00  0.25           O  
HETATM  131  O   HOH T 130       7.340 -19.964  52.471  1.00  0.25           O  
HETATM  132  O   HOH T 131      19.286  27.530   6.430  1.00  0.26           O  
HETATM  133  O   HOH T 132      47.426  22.084  19.543  1.00  0.26           O  
HETATM  134  O   HOH T 133      11.309   0.598  12.965  1.00  0.26           O  
HETATM  135  O   HOH T 134      45.684  -3.619  53.590  1.00  0.26           O  
HETATM  136  O   HOH T 135      14.606   9.806  21.929  1.00  0.26           O  
HETATM  137  O   HOH T 136       0.181 -29.041  54.956  1.00  0.26           O  
HETATM  138  O   HOH T 137     -12.128 -14.875  24.068  1.00  0.26           O  
HETATM  139  O   HOH T 138      17.263  -9.453   1.572  1.00  0.26           O  
HETATM  140  O   HOH T 139      27.126   1.670  49.955  1.00  0.26           O  
HETATM  141  O   HOH T 140      -1.824  12.781  20.505  1.00  0.26           O  
HETATM  142  O   HOH T 141      31.648   4.510  22.274  1.00  0.26           O  
HETATM  143  O   HOH T 142      37.919  -5.148  60.844  1.00  0.26           O  
HETATM  144  O   HOH T 143      35.429  25.530  25.877  1.00  0.26           O  
HETATM  145  O   HOH T 144       3.833  27.827  36.216  1.00  0.26           O  
HETATM  146  O   HOH T 145      37.225  -4.761  40.934  1.00  0.26           O  
HETATM  147  O   HOH T 146      16.347  24.316  61.118  1.00  0.26           O  
HETATM  148  O   HOH T 147      -8.776 -25.593  28.533  1.00  0.26           O  
HETATM  149  O   HOH T 148      -8.994   8.656  51.824  1.00  0.26           O  
HETATM  150  O   HOH T 149      -1.431 -24.209  53.865  1.00  0.26           O  
HETATM  151  O   HOH T 150       0.914   9.148   4.240  1.00  0.26           O  
HETATM  152  O   HOH T 151      -0.917 -13.002  30.224  1.00  0.26           O  
HETATM  153  O   HOH T 152      29.373   0.440   9.253  1.00  0.26           O  
HETATM  154  O   HOH T 153      26.130  13.734  -2.065  1.00  0.26           O  
HETATM  155  O   HOH T 154      11.820  -6.720  43.415  1.00  0.26           O  
HETATM  156  O   HOH T 155       1.106 -12.933   6.331  1.00  0.26           O  
HETATM  157  O   HOH T 156      45.689  28.319  23.100  1.00  0.26           O  
HETATM  158  O   HOH T 157      30.783  11.014  31.969  1.00  0.26           O  
HETATM  159  O   HOH T 158      16.443  11.293  39.021  1.00  0.27           O  
HETATM  160  O   HOH T 159      -2.921  -1.234  25.743  1.00  0.27           O  
HETATM  161  O   HOH T 160     -15.299  -3.028  52.258  1.00  0.27           O  
HETATM  162  O   HOH T 161       3.368 -12.031  50.139  1.00  0.27           O  
HETATM  163  O   HOH T 162      25.481 -21.392  10.499  1.00  0.27           O  
HETATM  164  O   HOH T 163      18.931 -20.995  26.706  1.00  0.27           O  
HETATM  165  O   HOH T 164      23.129  -2.404  12.458  1.00  0.27           O  
HETATM  166  O   HOH T 165       9.000   3.665  17.690  1.00  0.27           O  
HETATM  167  O   HOH T 166       8.320 -15.642  -6.732  1.00  0.27           O  
HETATM  168  O   HOH T 167     -12.106  15.703   7.375  1.00  0.27           O  
HETATM  169  O   HOH T 168      30.960 -36.176  45.339  1.00  0.27           O  
HETATM  170  O   HOH T 169     -15.352  15.307  12.916  1.00  0.27           O  
HETATM  171  O   HOH T 170      -6.657 -17.045   7.175  1.00  0.27           O  
HETATM  172  O   HOH T 171      23.788   8.505   8.134  1.00  0.27           O  
HETATM  173  O   HOH T 172      32.965  28.538  -3.598  1.00  0.27           O  
HETATM  174  O   HOH T 173      34.641  17.608  27.011  1.00  0.27           O  
HETATM  175  O   HOH T 174      25.040 -29.108   2.654  1.00  0.27           O  
HETATM  176  O   HOH T 175     -14.473   4.442  21.883  1.00  0.27           O  
HETATM  177  O   HOH T 176      38.202  10.728  35.547  1.00  0.27           O  
HETATM  178  O   HOH T 177      21.324 -13.814  53.499  1.00  0.27           O  
HETATM  179  O   HOH T 178      -3.224 -33.955   2.162  1.00  0.27           O  
HETATM  180  O   HOH T 179      28.158  -0.035  42.739  1.00  0.27           O  
HETATM  181  O   HOH T 180      40.082  10.294  54.481  1.00  0.27           O  
HETATM  182  O   HOH T 181       7.208   4.870  40.235  1.00  0.27           O  
HETATM  183  O   HOH T 182      18.410  13.642  17.969  1.00  0.27           O  
HETATM  184  O   HOH T 183      38.689   9.642  10.833  1.00  0.27           O  
HETATM  185  O   HOH T 184       3.549 -30.891  14.421  1.00  0.27           O  
HETATM  186  O   HOH T 185      10.901  -3.322  16.303  1.00  0.27           O  
HETATM  187  O   HOH T 186       9.906  -8.811  29.408  1.00  0.27           O  
HETATM  188  O   HOH T 187      -2.911 -10.357  36.654  1.00  0.27           O  
HETATM  189  O   HOH T 188      18.070 -10.879  50.007  1.00  0.27           O  
HETATM  190  O   HOH T 189       6.373 -14.159  46.114  1.00  0.27           O  
HETATM  191  O   HOH T 190      52.044  -6.096  51.075  1.00  0.27           O  
HETATM  192  O   HOH T 191       8.166 -13.513  25.175  1.00  0.27           O  
HETATM  193  O   HOH T 192      17.898  30.088  14.360  1.00  0.27           O  
HETATM  194  O   HOH T 193      21.451  -0.176   5.930  1.00  0.28           O  
HETATM  195  O   HOH T 194       9.036  31.147   9.743  1.00  0.28           O  
HETATM  196  O   HOH T 195      36.650   5.675  61.730  1.00  0.28           O  
HETATM  197  O   HOH T 196      51.558 -42.439  24.412  1.00  0.28           O  
HETATM  198  O   HOH T 197      -6.843 -20.223  16.524  1.00  0.28           O  
HETATM  199  O   HOH T 198       3.404 -31.435  29.037  1.00  0.28           O  
HETATM  200  O   HOH T 199       3.997  19.396  22.972  1.00  0.28           O  
HETATM  201  O   HOH T 200       7.967  -5.748   7.469  1.00  0.28           O  
HETATM  202  O   HOH T 201      49.346 -24.199  37.721  1.00  0.28           O  
HETATM  203  O   HOH T 202      50.971   7.633  26.038  1.00  0.28           O  
HETATM  204  O   HOH T 203       5.758   1.109  19.743  1.00  0.28           O  
HETATM  205  O   HOH T 204      27.899   9.313   4.244  1.00  0.28           O  
HETATM  206  O   HOH T 205     -11.479  27.745  20.186  1.00  0.28           O  
HETATM  207  O   HOH T 206     -19.554  31.304  30.420  1.00  0.28           O  
HETATM  208  O   HOH T 207     -17.995  12.901  16.883  1.00  0.28           O  
HETATM  209  O   HOH T 208      17.246  28.560   7.750  1.00  0.28           O  
HETATM  210  O   HOH T 209      42.763  16.448  50.964  1.00  0.28           O  
HETATM  211  O   HOH T 210       7.633 -36.618  12.444  1.00  0.28           O  
HETATM  212  O   HOH T 211      51.712 -23.424  26.042  1.00  0.28           O  
HETATM  213  O   HOH T 212       4.824  -7.753  58.698  1.00  0.28           O  
HETATM  214  O   HOH T 213      34.232  -5.952  22.647  1.00  0.28           O  
HETATM  215  O   HOH T 214      -2.016   8.782  16.248  1.00  0.28           O  
HETATM  216  O   HOH T 215      39.527  -8.136  -1.746  1.00  0.28           O  
HETATM  217  O   HOH T 216      19.531   8.491  19.274  1.00  0.28           O  
HETATM  218  O   HOH T 217      37.631  14.736  73.140  1.00  0.28           O  
HETATM  219  O   HOH T 218      15.455  25.197  -0.000  1.00  0.28           O  
HETATM  220  O   HOH T 219      29.088   8.247  12.077  1.00  0.29           O  
HETATM  221  O   HOH T 220      16.206  21.028  28.886  1.00  0.29           O  
HETATM  222  O   HOH T 221      58.877 -25.863  42.267  1.00  0.29           O  
HETATM  223  O   HOH T 222      18.286   6.720  49.389  1.00  0.29           O  
HETATM  224  O   HOH T 223      23.836  15.077  -1.362  1.00  0.29           O  
HETATM  225  O   HOH T 224      32.381  10.018  11.369  1.00  0.29           O  
HETATM  226  O   HOH T 225       1.295   3.737  27.428  1.00  0.29           O  
HETATM  227  O   HOH T 226      28.305 -11.403  30.832  1.00  0.29           O  
HETATM  228  O   HOH T 227       8.422 -10.085 -10.454  1.00  0.29           O  
HETATM  229  O   HOH T 228      23.673   1.128   9.902  1.00  0.29           O  
HETATM  230  O   HOH T 229      13.240  29.989  40.311  1.00  0.29           O  
HETATM  231  O   HOH T 230       6.619 -25.807  40.819  1.00  0.29           O  
HETATM  232  O   HOH T 231      26.084 -16.702  22.639  1.00  0.29           O  
HETATM  233  O   HOH T 232      10.867   2.410  47.040  1.00  0.29           O  
HETATM  234  O   HOH T 233       1.232 -15.214  26.225  1.00  0.29           O  
HETATM  235  O   HOH T 234      13.922  31.028  25.861  1.00  0.29           O  
HETATM  236  O   HOH T 235      35.345 -21.885  -6.701  1.00  0.29           O  
HETATM  237  O   HOH T 236       3.250  -0.599  28.245  1.00  0.29           O  
HETATM  238  O   HOH T 237      -6.202 -20.902  20.424  1.00  0.29           O  
HETATM  239  O   HOH T 238      -2.885 -14.326  59.846  1.00  0.29           O  
HETATM  240  O   HOH T 239      16.273 -38.060  20.716  1.00  0.29           O  
HETATM  241  O   HOH T 240      25.572 -23.346  -8.437  1.00  0.30           O  
HETATM  242  O   HOH T 241     -15.265 -15.055  48.574  1.00  0.30           O  
HETATM  243  O   HOH T 242       4.862  26.033  -7.615  1.00  0.30           O  
HETATM  244  O   HOH T 243     -16.914  10.190   4.064  1.00  0.30           O  
HETATM  245  O   HOH T 244     -30.290  20.019  26.501  1.00  0.30           O  
HETATM  246  O   HOH T 245      48.359  24.698  18.618  1.00  0.30           O  
HETATM  247  O   HOH T 246      17.165 -22.291   7.538  1.00  0.30           O  
HETATM  248  O   HOH T 247      -6.336  22.259  39.508  1.00  0.30           O  
HETATM  249  O   HOH T 248      -0.344  13.614  55.323  1.00  0.30           O  
HETATM  250  O   HOH T 249      25.424 -21.872  21.636  1.00  0.30           O  
HETATM  251  O   HOH T 250      29.689   2.260  49.216  1.00  0.30           O  
HETATM  252  O   HOH T 251      18.819 -19.071  28.703  1.00  0.30           O  
HETATM  253  O   HOH T 252      58.292  -1.417  13.566  1.00  0.30           O  
HETATM  254  O   HOH T 253      33.606 -31.481  33.345  1.00  0.30           O  
HETATM  255  O   HOH T 254      -9.744  18.273  -4.893  1.00  0.30           O  
HETATM  256  O   HOH T 255      -5.992  -7.066  65.126  1.00  0.30           O  
HETATM  257  O   HOH T 256      19.416  -6.981  15.360  1.00  0.30           O  
HETATM  258  O   HOH T 257      15.381  -8.426  45.871  1.00  0.30           O  
HETATM  259  O   HOH T 258      -4.099 -18.253  -9.166  1.00  0.30           O  
HETATM  260  O   HOH T 259      -2.319 -38.046   5.714  1.00  0.30           O  
HETATM  261  O   HOH T 260      13.204  -8.187   1.315  1.00  0.30           O  
HETATM  262  O   HOH T 261      32.335   0.222  29.636  1.00  0.30           O  
HETATM  263  O   HOH T 262      41.131   8.257  53.225  1.00  0.30           O  
HETATM  264  O   HOH T 263      49.814  -0.666  42.551  1.00  0.30           O  
HETATM  265  O   HOH T 264       9.615 -25.589  43.962  1.00  0.30           O  
HETATM  266  O   HOH T 265      21.670   8.908  20.985  1.00  0.30           O  
HETATM  267  O   HOH T 266      48.591  14.915   6.664  1.00  0.30           O  
HETATM  268  O   HOH T 267      10.705   6.498  40.065  1.00  0.30           O  
HETATM  269  O   HOH T 268       6.169  10.427  35.683  1.00  0.30           O  
HETATM  270  O   HOH T 269      42.235 -13.055  11.474  1.00  0.30           O  
HETATM  271  O   HOH T 270      -5.273 -21.298  14.602  1.00  0.30           O  
HETATM  272  O   HOH T 271      16.974 -30.596  23.672  1.00  0.30           O  
HETATM  273  O   HOH T 272     -15.810  -1.214  57.967  1.00  0.30           O  
HETATM  274  O   HOH T 273      38.334  -7.047  35.761  1.00  0.30           O  
HETATM  275  O   HOH T 274       7.309  18.745  33.108  1.00  0.30           O  
HETATM  276  O   HOH T 275      31.411  -2.765  59.000  1.00  0.30           O  
HETATM  277  O   HOH T 276      41.314  19.423  23.831  1.00  0.30           O  
HETATM  278  O   HOH T 277       7.996  26.031  25.780  1.00  0.30           O  
HETATM  279  O   HOH T 278      13.140 -11.259  25.238  1.00  0.31           O  
HETATM  280  O   HOH T 279      30.621 -24.505  42.559  1.00  0.31           O  
HETATM  281  O   HOH T 280      29.197 -26.957  -2.765  1.00  0.31           O  
HETATM  282  O   HOH T 281      29.585 -18.434  50.537  1.00  0.31           O  
HETATM  283  O   HOH T 282       1.291  -0.574  19.747  1.00  0.31           O  
HETATM  284  O   HOH T 283       3.139  -2.082  45.140  1.00  0.31           O  
HETATM  285  O   HOH T 284       0.607  -3.907  22.592  1.00  0.31           O  
HETATM  286  O   HOH T 285      49.587 -13.689  20.138  1.00  0.31           O  
HETATM  287  O   HOH T 286      18.019   4.279  44.636  1.00  0.31           O  
HETATM  288  O   HOH T 287       0.869  -0.799  66.531  1.00  0.31           O  
HETATM  289  O   HOH T 288      31.673 -33.931  44.029  1.00  0.31           O  
HETATM  290  O   HOH T 289      -0.188  29.923  49.891  1.00  0.31           O  
HETATM  291  O   HOH T 290      -2.404 -13.072  40.412  1.00  0.31           O  
HETATM  292  O   HOH T 291      29.213 -26.305   7.390  1.00  0.31           O  
HETATM  293  O   HOH T 292      19.207  14.821  55.444  1.00  0.31           O  
HETATM  294  O   HOH T 293      51.529   3.183   4.483  1.00  0.31           O  
HETATM  295  O   HOH T 294      -3.325   8.544  31.128  1.00  0.31           O  
HETATM  296  O   HOH T 295      53.390  26.258  24.863  1.00  0.31           O  
HETATM  297  O   HOH T 296      12.174  -1.032  19.654  1.00  0.31           O  
HETATM  298  O   HOH T 297      53.425 -17.965  33.481  1.00  0.31           O  
HETATM  299  O   HOH T 298      10.440   4.259  49.000  1.00  0.31           O  
HETATM  300  O   HOH T 299      54.227 -23.364  44.517  1.00  0.31           O  
HETATM  301  O   HOH T 300      -0.594  33.188  46.184  1.00  0.31           O  
HETATM  302  O   HOH T 301      21.160 -14.359  34.267  1.00  0.31           O  
HETATM  303  O   HOH T 302      31.255  35.629  17.512  1.00  0.31           O  
HETATM  304  O   HOH T 303      47.976  14.861   3.860  1.00  0.31           O  
HETATM  305  O   HOH T 304      48.865  28.999  20.511  1.00  0.31           O  
HETATM  306  O   HOH T 305      -2.273 -39.098  38.639  1.00  0.31           O  
HETATM  307  O   HOH T 306      13.940  13.334  31.167  1.00  0.31           O  
HETATM  308  O   HOH T 307      -5.314  -9.799  42.096  1.00  0.31           O  
HETATM  309  O   HOH T 308      14.501  -0.346  42.162  1.00  0.31           O  
HETATM  310  O   HOH T 309     -13.185 -31.309  45.255  1.00  0.31           O  
HETATM  311  O   HOH T 310     -15.655 -23.462  29.220  1.00  0.31           O  
HETATM  312  O   HOH T 311       5.733 -19.579  48.707  1.00  0.31           O  
HETATM  313  O   HOH T 312     -11.217  20.463   2.458  1.00  0.31           O  
HETATM  314  O   HOH T 313       2.751  12.980   5.133  1.00  0.31           O  
HETATM  315  O   HOH T 314      27.438  -0.266  37.291  1.00  0.31           O  
HETATM  316  O   HOH T 315      12.933  -9.315  23.390  1.00  0.31           O  
HETATM  317  O   HOH T 316       2.898   7.095   6.602  1.00  0.31           O  
HETATM  318  O   HOH T 317      35.215 -14.004  23.679  1.00  0.31           O  
HETATM  319  O   HOH T 318       4.142 -30.405  -1.427  1.00  0.31           O  
HETATM  320  O   HOH T 319      19.550 -12.618  -9.463  1.00  0.31           O  
HETATM  321  O   HOH T 320      37.644   0.261  58.113  1.00  0.31           O  
HETATM  322  O   HOH T 321      15.899  22.829  63.435  1.00  0.31           O  
HETATM  323  O   HOH T 322      22.772  -4.446  -4.113  1.00  0.31           O  
HETATM  324  O   HOH T 323      25.289 -14.843  24.595  1.00  0.31           O  
HETATM  325  O   HOH T 324      15.281  -9.107  41.218  1.00  0.31           O  
HETATM  326  O   HOH T 325      28.633 -11.670 -12.744  1.00  0.32           O  
HETATM  327  O   HOH T 326       1.158   3.717  41.039  1.00  0.32           O  
HETATM  328  O   HOH T 327      17.631  -4.571  47.838  1.00  0.32           O  
HETATM  329  O   HOH T 328       3.926  22.768  31.724  1.00  0.32           O  
HETATM  330  O   HOH T 329      23.624 -20.898  25.820  1.00  0.32           O  
HETATM  331  O   HOH T 330      43.616  -8.394  25.717  1.00  0.32           O  
HETATM  332  O   HOH T 331       6.946  -3.666  60.305  1.00  0.32           O  
HETATM  333  O   HOH T 332      31.997 -30.954  28.481  1.00  0.32           O  
HETATM  334  O   HOH T 333      16.874  11.785  63.184  1.00  0.32           O  
HETATM  335  O   HOH T 334     -15.262  26.853  28.798  1.00  0.32           O  
HETATM  336  O   HOH T 335      39.809  -0.739  37.783  1.00  0.32           O  
HETATM  337  O   HOH T 336      19.003 -25.957  14.977  1.00  0.32           O  
HETATM  338  O   HOH T 337       6.111 -32.733  22.554  1.00  0.32           O  
HETATM  339  O   HOH T 338      27.392   0.251  11.206  1.00  0.32           O  
HETATM  340  O   HOH T 339      -5.402 -34.422   3.848  1.00  0.32           O  
HETATM  341  O   HOH T 340       6.244  17.243  -1.943  1.00  0.32           O  
HETATM  342  O   HOH T 341      18.503  21.188   3.016  1.00  0.32           O  
HETATM  343  O   HOH T 342      -6.742 -13.573  40.511  1.00  0.32           O  
HETATM  344  O   HOH T 343      21.310  -8.951  18.409  1.00  0.32           O  
HETATM  345  O   HOH T 344      30.862 -16.536  59.288  1.00  0.32           O  
HETATM  346  O   HOH T 345      -3.311 -27.112  21.898  1.00  0.32           O  
HETATM  347  O   HOH T 346     -14.825  -9.058  58.296  1.00  0.32           O  
HETATM  348  O   HOH T 347      36.505 -22.148   9.045  1.00  0.32           O  
HETATM  349  O   HOH T 348      11.505  -4.216  50.069  1.00  0.32           O  
HETATM  350  O   HOH T 349       7.364  18.206  24.672  1.00  0.32           O  
HETATM  351  O   HOH T 350      52.616 -19.488  50.279  1.00  0.32           O  
HETATM  352  O   HOH T 351     -13.178   4.947  44.045  1.00  0.32           O  
HETATM  353  O   HOH T 352      13.663  -0.721  13.787  1.00  0.32           O  
HETATM  354  O   HOH T 353       9.093  -9.463   1.060  1.00  0.32           O  
HETATM  355  O   HOH T 354       0.682 -10.450  -4.425  1.00  0.32           O  
HETATM  356  O   HOH T 355       5.412  -0.383  17.287  1.00  0.32           O  
HETATM  357  O   HOH T 356     -15.265   0.778  25.141  1.00  0.32           O  
HETATM  358  O   HOH T 357       4.885   7.229  25.960  1.00  0.32           O  
HETATM  359  O   HOH T 358      45.854  -6.928  37.917  1.00  0.32           O  
HETATM  360  O   HOH T 359      20.498   5.265  41.219  1.00  0.32           O  
HETATM  361  O   HOH T 360      -7.181   0.806  37.538  1.00  0.32           O  
HETATM  362  O   HOH T 361      -5.159 -18.162   3.406  1.00  0.32           O  
HETATM  363  O   HOH T 362      25.780  27.417  27.946  1.00  0.32           O  
HETATM  364  O   HOH T 363      22.792  14.181  33.301  1.00  0.32           O  
HETATM  365  O   HOH T 364      42.067  29.762   4.689  1.00  0.32           O  
HETATM  366  O   HOH T 365      -1.125  37.570  38.058  1.00  0.32           O  
HETATM  367  O   HOH T 366      38.993  13.167  71.272  1.00  0.32           O  
HETATM  368  O   HOH T 367      17.828 -18.622  16.649  1.00  0.32           O  
HETATM  369  O   HOH T 368      54.747  14.064  19.295  1.00  0.32           O  
HETATM  370  O   HOH T 369       7.452 -22.640  52.669  1.00  0.33           O  
HETATM  371  O   HOH T 370      27.907 -25.866  -9.991  1.00  0.33           O  
HETATM  372  O   HOH T 371     -30.465  22.719  26.545  1.00  0.33           O  
HETATM  373  O   HOH T 372      33.538 -35.990  44.339  1.00  0.33           O  
HETATM  374  O   HOH T 373       2.454  -6.892   6.796  1.00  0.33           O  
HETATM  375  O   HOH T 374       4.012 -29.224  52.549  1.00  0.33           O  
HETATM  376  O   HOH T 375      28.307  -2.292  18.163  1.00  0.33           O  
HETATM  377  O   HOH T 376      -3.164  27.432  44.016  1.00  0.33           O  
HETATM  378  O   HOH T 377      57.191   1.384   6.377  1.00  0.33           O  
HETATM  379  O   HOH T 378      17.074 -12.729   7.084  1.00  0.33           O  
HETATM  380  O   HOH T 379      -5.758   5.745   5.016  1.00  0.33           O  
HETATM  381  O   HOH T 380       6.972   8.440  51.691  1.00  0.33           O  
HETATM  382  O   HOH T 381     -17.530 -21.276  47.325  1.00  0.33           O  
HETATM  383  O   HOH T 382      39.875  33.049  54.669  1.00  0.33           O  
HETATM  384  O   HOH T 383       5.893  -1.355  28.183  1.00  0.33           O  
HETATM  385  O   HOH T 384      36.297 -28.610  43.306  1.00  0.33           O  
HETATM  386  O   HOH T 385      34.033 -10.881  38.742  1.00  0.33           O  
HETATM  387  O   HOH T 386      51.649   6.561   2.823  1.00  0.33           O  
HETATM  388  O   HOH T 387      25.173   7.847  15.253  1.00  0.33           O  
HETATM  389  O   HOH T 388      13.804  -8.797  43.616  1.00  0.33           O  
HETATM  390  O   HOH T 389      46.770 -25.935  57.959  1.00  0.33           O  
HETATM  391  O   HOH T 390      -8.837 -21.282  21.318  1.00  0.33           O  
HETATM  392  O   HOH T 391      -6.167 -20.146  -9.808  1.00  0.33           O  
HETATM  393  O   HOH T 392      30.509  33.719  19.404  1.00  0.33           O  
HETATM  394  O   HOH T 393      40.541  13.803  40.044  1.00  0.33           O  
HETATM  395  O   HOH T 394      24.660  10.808  34.643  1.00  0.33           O  
HETATM  396  O   HOH T 395      18.014 -36.211  17.952  1.00  0.33           O  
HETATM  397  O   HOH T 396      16.966 -11.341  42.100  1.00  0.33           O  
HETATM  398  O   HOH T 397      35.600  -5.490  62.399  1.00  0.33           O  
HETATM  399  O   HOH T 398      21.890 -11.209  37.629  1.00  0.33           O  
HETATM  400  O   HOH T 399       7.387 -12.998 -13.877  1.00  0.33           O  
HETATM  401  O   HOH T 400      25.857   0.846   1.513  1.00  0.33           O  
HETATM  402  O   HOH T 401      -3.819  -0.307  32.635  1.00  0.33           O  
HETATM  403  O   HOH T 402     -12.010  25.050  19.608  1.00  0.33           O  
HETATM  404  O   HOH T 403      22.756 -13.820  25.521  1.00  0.33           O  
HETATM  405  O   HOH T 404      29.285 -10.277  28.659  1.00  0.33           O  
HETATM  406  O   HOH T 405      40.463   4.229  29.642  1.00  0.33           O  
HETATM  407  O   HOH T 406     -21.897  33.431  21.356  1.00  0.33           O  
HETATM  408  O   HOH T 407      51.890 -29.891  36.310  1.00  0.33           O  
HETATM  409  O   HOH T 408      39.257  -9.674  36.252  1.00  0.33           O  
HETATM  410  O   HOH T 409      13.329  18.499  68.880  1.00  0.33           O  
HETATM  411  O   HOH T 410      14.447 -11.514  37.172  1.00  0.33           O  
HETATM  412  O   HOH T 411      38.981   8.995  31.875  1.00  0.33           O  
HETATM  413  O   HOH T 412      23.785  40.255  24.303  1.00  0.33           O  
HETATM  414  O   HOH T 413       5.500  15.750  19.152  1.00  0.33           O  
HETATM  415  O   HOH T 414      36.317  13.186  13.435  1.00  0.33           O  
HETATM  416  O   HOH T 415      19.155  17.775  46.553  1.00  0.33           O  
HETATM  417  O   HOH T 416      -0.730 -29.900  22.140  1.00  0.33           O  
HETATM  418  O   HOH T 417      31.495  -6.454  25.333  1.00  0.33           O  
HETATM  419  O   HOH T 418      16.140  17.818  12.445  1.00  0.33           O  
HETATM  420  O   HOH T 419       8.858  -8.391  26.869  1.00  0.33           O  
HETATM  421  O   HOH T 420      36.409   4.480  34.556  1.00  0.33           O  
HETATM  422  O   HOH T 421      38.155   4.357   7.727  1.00  0.33           O  
HETATM  423  O   HOH T 422      31.699  15.291  14.440  1.00  0.34           O  
HETATM  424  O   HOH T 423      10.603  -7.173   1.109  1.00  0.34           O  
HETATM  425  O   HOH T 424      -0.613  -1.737  21.393  1.00  0.34           O  
HETATM  426  O   HOH T 425      43.974   1.610  56.491  1.00  0.34           O  
HETATM  427  O   HOH T 426       1.057  -9.000   4.302  1.00  0.34           O  
HETATM  428  O   HOH T 427      51.703   3.715  28.781  1.00  0.34           O  
HETATM  429  O   HOH T 428      -5.335  13.271  53.806  1.00  0.34           O  
HETATM  430  O   HOH T 429     -17.592  -6.912  51.841  1.00  0.34           O  
HETATM  431  O   HOH T 430      37.471  12.969   0.649  1.00  0.34           O  
HETATM  432  O   HOH T 431      38.249 -10.497  -1.629  1.00  0.34           O  
HETATM  433  O   HOH T 432      44.708 -12.691  10.235  1.00  0.34           O  
HETATM  434  O   HOH T 433      24.268  11.445  49.787  1.00  0.34           O  
HETATM  435  O   HOH T 434       4.071  -9.072   6.320  1.00  0.34           O  
HETATM  436  O   HOH T 435     -21.705  14.156  33.981  1.00  0.34           O  
HETATM  437  O   HOH T 436      11.890 -17.418  12.179  1.00  0.34           O  
HETATM  438  O   HOH T 437      30.419  23.526  28.867  1.00  0.34           O  
HETATM  439  O   HOH T 438     -20.312  -7.089  55.884  1.00  0.34           O  
HETATM  440  O   HOH T 439      19.672  20.447  32.460  1.00  0.34           O  
HETATM  441  O   HOH T 440      19.752 -24.570  25.388  1.00  0.34           O  
HETATM  442  O   HOH T 441      33.074 -23.922  34.825  1.00  0.34           O  
HETATM  443  O   HOH T 442     -12.701 -14.862  49.934  1.00  0.34           O  
HETATM  444  O   HOH T 443      18.044  19.478  30.391  1.00  0.34           O  
HETATM  445  O   HOH T 444      29.874 -10.307  15.016  1.00  0.34           O  
HETATM  446  O   HOH T 445      35.347  11.160   6.797  1.00  0.34           O  
HETATM  447  O   HOH T 446      -1.417   9.524  29.577  1.00  0.34           O  
HETATM  448  O   HOH T 447     -12.512  15.470  10.112  1.00  0.34           O  
HETATM  449  O   HOH T 448      13.891  -9.457  27.313  1.00  0.34           O  
HETATM  450  O   HOH T 449      49.072  -8.410  10.812  1.00  0.34           O  
HETATM  451  O   HOH T 450       0.811   8.965   6.926  1.00  0.34           O  
HETATM  452  O   HOH T 451      38.081  -3.052  28.183  1.00  0.34           O  
HETATM  453  O   HOH T 452       2.707 -30.317  -3.805  1.00  0.34           O  
HETATM  454  O   HOH T 453      31.618  10.724   4.118  1.00  0.34           O  
HETATM  455  O   HOH T 454     -22.859  23.926  24.150  1.00  0.34           O  
HETATM  456  O   HOH T 455      42.046  20.491  62.301  1.00  0.34           O  
HETATM  457  O   HOH T 456      52.729  15.876  19.657  1.00  0.34           O  
HETATM  458  O   HOH T 457      41.940 -15.303  34.615  1.00  0.34           O  
HETATM  459  O   HOH T 458      10.329 -16.063  -8.679  1.00  0.34           O  
HETATM  460  O   HOH T 459      19.594  -8.272  35.595  1.00  0.34           O  
HETATM  461  O   HOH T 460      31.904 -26.477  -2.332  1.00  0.34           O  
HETATM  462  O   HOH T 461      -2.605  20.345  56.837  1.00  0.34           O  
HETATM  463  O   HOH T 462       1.624 -33.649   8.136  1.00  0.34           O  
HETATM  464  O   HOH T 463      45.271   5.044  58.452  1.00  0.34           O  
HETATM  465  O   HOH T 464       6.843   9.583  33.066  1.00  0.34           O  
HETATM  466  O   HOH T 465       6.499 -29.393  51.393  1.00  0.34           O  
HETATM  467  O   HOH T 466       8.651  14.896  60.592  1.00  0.34           O  
HETATM  468  O   HOH T 467      48.858 -21.213  53.936  1.00  0.34           O  
HETATM  469  O   HOH T 468      -4.904   9.887  13.070  1.00  0.34           O  
HETATM  470  O   HOH T 469       0.836  19.505  -3.771  1.00  0.34           O  
HETATM  471  O   HOH T 470      -6.079  -2.600  63.396  1.00  0.34           O  
HETATM  472  O   HOH T 471     -18.140 -22.770  38.281  1.00  0.35           O  
HETATM  473  O   HOH T 472      -1.674  -4.967  23.771  1.00  0.35           O  
HETATM  474  O   HOH T 473      17.839 -28.178  24.768  1.00  0.35           O  
HETATM  475  O   HOH T 474      66.178   6.785   8.673  1.00  0.35           O  
HETATM  476  O   HOH T 475      35.740  -3.607  17.054  1.00  0.35           O  
HETATM  477  O   HOH T 476      38.036  -0.826  17.484  1.00  0.35           O  
HETATM  478  O   HOH T 477      -7.590 -18.174  14.838  1.00  0.35           O  
HETATM  479  O   HOH T 478     -13.671  26.033  -5.498  1.00  0.35           O  
HETATM  480  O   HOH T 479       7.416  34.286  48.899  1.00  0.35           O  
HETATM  481  O   HOH T 480      29.104 -11.216  19.848  1.00  0.35           O  
HETATM  482  O   HOH T 481     -13.447   9.962  44.802  1.00  0.35           O  
HETATM  483  O   HOH T 482      14.362  29.793  62.982  1.00  0.35           O  
HETATM  484  O   HOH T 483      60.238  15.840   8.400  1.00  0.35           O  
HETATM  485  O   HOH T 484      34.760 -17.842  35.516  1.00  0.35           O  
HETATM  486  O   HOH T 485       2.908  -8.862  60.440  1.00  0.35           O  
HETATM  487  O   HOH T 486      16.845  -9.800  -8.579  1.00  0.35           O  
HETATM  488  O   HOH T 487      14.439  -9.048  -7.284  1.00  0.35           O  
HETATM  489  O   HOH T 488       3.177 -33.085  10.373  1.00  0.35           O  
HETATM  490  O   HOH T 489      -9.339   1.541  61.419  1.00  0.35           O  
HETATM  491  O   HOH T 490      19.778 -24.998  -2.795  1.00  0.35           O  
HETATM  492  O   HOH T 491     -12.608  15.372  41.346  1.00  0.35           O  
HETATM  493  O   HOH T 492       2.491  37.629   0.888  1.00  0.35           O  
HETATM  494  O   HOH T 493      -1.415  -0.003  31.390  1.00  0.35           O  
HETATM  495  O   HOH T 494      11.032 -15.698  -6.048  1.00  0.35           O  
HETATM  496  O   HOH T 495      12.944  18.523  32.201  1.00  0.35           O  
HETATM  497  O   HOH T 496      38.002   1.348  19.425  1.00  0.35           O  
HETATM  498  O   HOH T 497       2.430  16.899  16.139  1.00  0.35           O  
HETATM  499  O   HOH T 498      20.568   5.208   8.141  1.00  0.35           O  
HETATM  500  O   HOH T 499      -2.331 -30.085  54.199  1.00  0.35           O  
HETATM  501  O   HOH T 500      28.962  16.257  39.444  1.00  0.35           O  
HETATM  502  O   HOH T 501      22.374  -4.643  13.844  1.00  0.35           O  
HETATM  503  O   HOH T 502      42.817   7.077  51.564  1.00  0.35           O  
HETATM  504  O   HOH T 503      -2.541  11.995  56.123  1.00  0.35           O  
HETATM  505  O   HOH T 504      18.237   9.944  51.135  1.00  0.35           O  
HETATM  506  O   HOH T 505       8.298  16.707  26.772  1.00  0.35           O  
HETATM  507  O   HOH T 506       9.788  17.879  63.996  1.00  0.35           O  
HETATM  508  O   HOH T 507      -1.474 -10.424  -2.681  1.00  0.35           O  
HETATM  509  O   HOH T 508      47.903 -31.946  18.120  1.00  0.35           O  
HETATM  510  O   HOH T 509      12.775 -30.708  48.728  1.00  0.35           O  
HETATM  511  O   HOH T 510      10.627  21.942   2.387  1.00  0.35           O  
HETATM  512  O   HOH T 511     -17.654   5.748  18.486  1.00  0.35           O  
HETATM  513  O   HOH T 512      37.198  32.969  65.643  1.00  0.35           O  
HETATM  514  O   HOH T 513      31.954 -12.558 -10.470  1.00  0.35           O  
HETATM  515  O   HOH T 514     -18.019  -2.828  58.542  1.00  0.35           O  
HETATM  516  O   HOH T 515      50.563  -3.184  49.218  1.00  0.35           O  
HETATM  517  O   HOH T 516      31.500  -5.510  22.703  1.00  0.35           O  
HETATM  518  O   HOH T 517       6.460  36.261  14.401  1.00  0.35           O  
HETATM  519  O   HOH T 518       6.870  24.186  62.661  1.00  0.35           O  
HETATM  520  O   HOH T 519      18.617  11.480  66.785  1.00  0.35           O  
HETATM  521  O   HOH T 520     -12.269 -30.122  33.118  1.00  0.35           O  
HETATM  522  O   HOH T 521      13.203  15.564  35.345  1.00  0.35           O  
HETATM  523  O   HOH T 522      12.039 -17.420   8.280  1.00  0.35           O  
HETATM  524  O   HOH T 523      54.033 -24.102  29.522  1.00  0.35           O  
HETATM  525  O   HOH T 524       3.284 -35.597  37.145  1.00  0.35           O  
HETATM  526  O   HOH T 525     -22.030  15.568  22.547  1.00  0.35           O  
HETATM  527  O   HOH T 526      12.270 -19.096  42.280  1.00  0.35           O  
HETATM  528  O   HOH T 527      36.191   7.833  14.313  1.00  0.35           O  
HETATM  529  O   HOH T 528      31.538 -17.728  24.818  1.00  0.35           O  
HETATM  530  O   HOH T 529      28.232   7.067   2.660  1.00  0.35           O  
HETATM  531  O   HOH T 530       5.303  20.558  32.778  1.00  0.35           O  
HETATM  532  O   HOH T 531      19.130  31.252  46.078  1.00  0.35           O  
HETATM  533  O   HOH T 532      45.386 -20.276  14.591  1.00  0.35           O  
HETATM  534  O   HOH T 533      33.084 -17.623  60.512  1.00  0.36           O  
HETATM  535  O   HOH T 534      -1.876  12.326  42.360  1.00  0.36           O  
HETATM  536  O   HOH T 535       8.232 -17.928  50.876  1.00  0.36           O  
HETATM  537  O   HOH T 536      17.096  -9.730  19.579  1.00  0.36           O  
HETATM  538  O   HOH T 537     -14.641   7.055  42.865  1.00  0.36           O  
HETATM  539  O   HOH T 538      -0.834  31.521  57.539  1.00  0.36           O  
HETATM  540  O   HOH T 539      22.315  10.842  46.923  1.00  0.36           O  
HETATM  541  O   HOH T 540       5.197   4.419  35.207  1.00  0.36           O  
HETATM  542  O   HOH T 541      14.469 -20.739  41.568  1.00  0.36           O  
HETATM  543  O   HOH T 542      18.579  -3.668  57.002  1.00  0.36           O  
HETATM  544  O   HOH T 543      15.818  -6.955  -4.171  1.00  0.36           O  
HETATM  545  O   HOH T 544      41.419  20.140  52.812  1.00  0.36           O  
HETATM  546  O   HOH T 545      18.663  38.547  24.082  1.00  0.36           O  
HETATM  547  O   HOH T 546      19.886 -15.832  19.636  1.00  0.36           O  
HETATM  548  O   HOH T 547      10.924  30.978  60.750  1.00  0.36           O  
HETATM  549  O   HOH T 548      31.456  -2.591  49.020  1.00  0.36           O  
HETATM  550  O   HOH T 549      14.902 -27.471  35.541  1.00  0.36           O  
HETATM  551  O   HOH T 550      27.530  -4.867  18.839  1.00  0.36           O  
HETATM  552  O   HOH T 551      35.133 -11.679  21.998  1.00  0.36           O  
HETATM  553  O   HOH T 552      -9.968  20.985  -0.078  1.00  0.36           O  
HETATM  554  O   HOH T 553      34.629  23.495  21.078  1.00  0.36           O  
HETATM  555  O   HOH T 554       2.393  20.658  67.875  1.00  0.36           O  
HETATM  556  O   HOH T 555       3.764  37.251  -1.637  1.00  0.36           O  
HETATM  557  O   HOH T 556      22.681  22.768  31.074  1.00  0.36           O  
HETATM  558  O   HOH T 557      35.693  -6.959  34.755  1.00  0.36           O  
HETATM  559  O   HOH T 558      19.338  -3.001  59.695  1.00  0.36           O  
HETATM  560  O   HOH T 559      14.681   0.334   9.620  1.00  0.36           O  
HETATM  561  O   HOH T 560      29.563 -19.863  14.924  1.00  0.36           O  
HETATM  562  O   HOH T 561      51.759 -22.756  38.120  1.00  0.36           O  
HETATM  563  O   HOH T 562      66.429   8.516   6.516  1.00  0.36           O  
HETATM  564  O   HOH T 563       7.138   5.645  57.017  1.00  0.36           O  
HETATM  565  O   HOH T 564      34.066  16.282  15.406  1.00  0.36           O  
HETATM  566  O   HOH T 565      22.038 -14.856  57.362  1.00  0.36           O  
HETATM  567  O   HOH T 566      30.728  16.259  30.293  1.00  0.36           O  
HETATM  568  O   HOH T 567      -9.422 -10.642  33.196  1.00  0.36           O  
HETATM  569  O   HOH T 568      24.396  14.125  50.081  1.00  0.36           O  
HETATM  570  O   HOH T 569       9.915  33.263  59.316  1.00  0.36           O  
HETATM  571  O   HOH T 570      18.878 -25.785  17.851  1.00  0.36           O  
HETATM  572  O   HOH T 571     -17.113 -28.825  32.187  1.00  0.36           O  
HETATM  573  O   HOH T 572      32.586   6.142  62.430  1.00  0.36           O  
HETATM  574  O   HOH T 573      -3.567 -21.778  -3.443  1.00  0.36           O  
HETATM  575  O   HOH T 574      30.634   0.685  18.278  1.00  0.36           O  
HETATM  576  O   HOH T 575      -5.924   8.247  14.952  1.00  0.36           O  
HETATM  577  O   HOH T 576      51.532 -14.907  30.160  1.00  0.36           O  
HETATM  578  O   HOH T 577      -0.537 -15.801  28.100  1.00  0.36           O  
HETATM  579  O   HOH T 578       6.670   2.310  13.599  1.00  0.36           O  
HETATM  580  O   HOH T 579      -6.763 -29.166  26.720  1.00  0.36           O  
HETATM  581  O   HOH T 580       0.330 -36.616  29.373  1.00  0.36           O  
HETATM  582  O   HOH T 581      42.821   5.465  59.897  1.00  0.36           O  
HETATM  583  O   HOH T 582      -0.344  35.123  39.268  1.00  0.36           O  
HETATM  584  O   HOH T 583      25.795  -9.362  19.650  1.00  0.36           O  
HETATM  585  O   HOH T 584      24.184 -11.160  32.099  1.00  0.36           O  
HETATM  586  O   HOH T 585     -13.921   8.799  16.261  1.00  0.36           O  
HETATM  587  O   HOH T 586      17.108  28.359   4.918  1.00  0.36           O  
HETATM  588  O   HOH T 587      20.656   0.591  63.112  1.00  0.36           O  
HETATM  589  O   HOH T 588      -6.612  33.401  10.343  1.00  0.36           O  
HETATM  590  O   HOH T 589      42.434  -7.032   2.554  1.00  0.36           O  
HETATM  591  O   HOH T 590       7.257   8.894  28.270  1.00  0.36           O  
HETATM  592  O   HOH T 591      -3.068 -23.086  55.853  1.00  0.36           O  
HETATM  593  O   HOH T 592       4.701  26.535  24.363  1.00  0.36           O  
HETATM  594  O   HOH T 593       6.355  10.611  42.270  1.00  0.36           O  
HETATM  595  O   HOH T 594      53.636 -15.410  61.583  1.00  0.36           O  
HETATM  596  O   HOH T 595      33.810  23.207  27.002  1.00  0.36           O  
HETATM  597  O   HOH T 596      34.645  -8.284  19.186  1.00  0.36           O  
HETATM  598  O   HOH T 597      43.279  -4.748   4.047  1.00  0.36           O  
HETATM  599  O   HOH T 598      16.895  -8.828  34.998  1.00  0.37           O  
HETATM  600  O   HOH T 599     -14.112   7.002  18.368  1.00  0.37           O  
HETATM  601  O   HOH T 600       9.158  -6.257  38.993  1.00  0.37           O  
HETATM  602  O   HOH T 601       0.264  18.606  20.308  1.00  0.37           O  
HETATM  603  O   HOH T 602     -13.540 -13.627  25.988  1.00  0.37           O  
HETATM  604  O   HOH T 603      24.618   9.269  28.958  1.00  0.37           O  
HETATM  605  O   HOH T 604      16.658  13.449  31.878  1.00  0.37           O  
HETATM  606  O   HOH T 605     -15.935  -4.150  49.791  1.00  0.37           O  
HETATM  607  O   HOH T 606      19.974  37.894  21.761  1.00  0.37           O  
HETATM  608  O   HOH T 607      45.479  10.006  57.195  1.00  0.37           O  
HETATM  609  O   HOH T 608      43.877  14.792  41.880  1.00  0.37           O  
HETATM  610  O   HOH T 609      21.459  -7.466  33.601  1.00  0.37           O  
HETATM  611  O   HOH T 610      -1.519  10.374  32.226  1.00  0.37           O  
HETATM  612  O   HOH T 611      -0.029 -15.269 -12.442  1.00  0.37           O  
HETATM  613  O   HOH T 612       6.662  -3.260  35.477  1.00  0.37           O  
HETATM  614  O   HOH T 613       0.566  31.416  47.787  1.00  0.37           O  
HETATM  615  O   HOH T 614     -16.869  17.286  14.135  1.00  0.37           O  
HETATM  616  O   HOH T 615      28.980 -24.944  40.383  1.00  0.37           O  
HETATM  617  O   HOH T 616       0.578   3.526  43.774  1.00  0.37           O  
HETATM  618  O   HOH T 617      63.501   7.438   9.584  1.00  0.37           O  
HETATM  619  O   HOH T 618      15.450  -1.309  11.681  1.00  0.37           O  
HETATM  620  O   HOH T 619      28.954  -4.426  16.570  1.00  0.37           O  
HETATM  621  O   HOH T 620     -12.352 -30.085  42.902  1.00  0.37           O  
HETATM  622  O   HOH T 621      21.838   7.542  33.469  1.00  0.37           O  
HETATM  623  O   HOH T 622      19.035  10.306  38.356  1.00  0.37           O  
HETATM  624  O   HOH T 623      20.178 -27.655  -1.949  1.00  0.37           O  
HETATM  625  O   HOH T 624      12.087   0.590  10.349  1.00  0.37           O  
HETATM  626  O   HOH T 625      34.864   9.045  31.465  1.00  0.37           O  
HETATM  627  O   HOH T 626      -3.765   5.185  61.974  1.00  0.37           O  
HETATM  628  O   HOH T 627      14.958  21.466  65.640  1.00  0.37           O  
HETATM  629  O   HOH T 628      -4.064   9.905  57.276  1.00  0.37           O  
HETATM  630  O   HOH T 629      44.063  -5.782  33.683  1.00  0.37           O  
HETATM  631  O   HOH T 630      35.905  -1.494  62.420  1.00  0.37           O  
HETATM  632  O   HOH T 631      31.998  17.405  26.669  1.00  0.37           O  
HETATM  633  O   HOH T 632     -20.296 -14.983  48.474  1.00  0.37           O  
HETATM  634  O   HOH T 633     -20.567  22.672  25.250  1.00  0.37           O  
HETATM  635  O   HOH T 634      30.841  18.177  39.003  1.00  0.37           O  
HETATM  636  O   HOH T 635       4.984   1.811  35.769  1.00  0.37           O  
HETATM  637  O   HOH T 636       1.460  22.683  26.890  1.00  0.37           O  
HETATM  638  O   HOH T 637      17.607   3.353  56.459  1.00  0.37           O  
HETATM  639  O   HOH T 638      -9.777  31.272  25.266  1.00  0.37           O  
HETATM  640  O   HOH T 639      36.027 -11.572  41.814  1.00  0.37           O  
HETATM  641  O   HOH T 640     -17.907   9.204   7.540  1.00  0.37           O  
HETATM  642  O   HOH T 641      49.596   4.706   3.261  1.00  0.37           O  
HETATM  643  O   HOH T 642      34.645 -21.654  60.247  1.00  0.37           O  
HETATM  644  O   HOH T 643     -12.975   3.636  41.607  1.00  0.37           O  
HETATM  645  O   HOH T 644     -17.794 -16.093  36.615  1.00  0.37           O  
HETATM  646  O   HOH T 645      21.612  23.347   0.277  1.00  0.37           O  
HETATM  647  O   HOH T 646       0.343  16.020  24.984  1.00  0.37           O  
HETATM  648  O   HOH T 647      35.277 -13.978  36.646  1.00  0.37           O  
HETATM  649  O   HOH T 648      14.077   5.756  54.282  1.00  0.37           O  
HETATM  650  O   HOH T 649      53.581 -12.933  44.308  1.00  0.37           O  
HETATM  651  O   HOH T 650     -16.190 -17.674  39.937  1.00  0.37           O  
HETATM  652  O   HOH T 651      54.335 -35.779  27.846  1.00  0.37           O  
HETATM  653  O   HOH T 652       1.726 -11.062  44.154  1.00  0.37           O  
HETATM  654  O   HOH T 653      25.196 -29.207 -11.476  1.00  0.37           O  
HETATM  655  O   HOH T 654      20.453   5.718   2.435  1.00  0.37           O  
HETATM  656  O   HOH T 655      -4.845  10.605  -0.188  1.00  0.37           O  
HETATM  657  O   HOH T 656      25.854   6.750  19.689  1.00  0.37           O  
HETATM  658  O   HOH T 657      -2.150 -21.537  53.780  1.00  0.38           O  
HETATM  659  O   HOH T 658      38.772   3.011  34.986  1.00  0.38           O  
HETATM  660  O   HOH T 659      42.450 -31.959  51.387  1.00  0.38           O  
HETATM  661  O   HOH T 660      57.207 -24.277  31.367  1.00  0.38           O  
HETATM  662  O   HOH T 661     -17.779 -14.520  47.259  1.00  0.38           O  
HETATM  663  O   HOH T 662      18.853  -0.477   4.817  1.00  0.38           O  
HETATM  664  O   HOH T 663      41.203   2.603   2.810  1.00  0.38           O  
HETATM  665  O   HOH T 664      10.602 -24.212  51.344  1.00  0.38           O  
HETATM  666  O   HOH T 665      25.784  27.491  41.739  1.00  0.38           O  
HETATM  667  O   HOH T 666     -15.376  10.278   6.341  1.00  0.38           O  
HETATM  668  O   HOH T 667      11.622 -23.175  42.699  1.00  0.38           O  
HETATM  669  O   HOH T 668       6.234 -32.406  25.301  1.00  0.38           O  
HETATM  670  O   HOH T 669     -13.626 -11.628  58.205  1.00  0.38           O  
HETATM  671  O   HOH T 670       0.354  14.134  21.067  1.00  0.38           O  
HETATM  672  O   HOH T 671      41.283  -8.507   0.370  1.00  0.38           O  
HETATM  673  O   HOH T 672     -16.445  26.590  19.828  1.00  0.38           O  
HETATM  674  O   HOH T 673     -19.872  20.025  39.911  1.00  0.38           O  
HETATM  675  O   HOH T 674      25.588 -17.835  20.102  1.00  0.38           O  
HETATM  676  O   HOH T 675      54.574 -37.692  17.781  1.00  0.38           O  
HETATM  677  O   HOH T 676      13.795   2.994   6.206  1.00  0.38           O  
HETATM  678  O   HOH T 677      44.591  -0.315   1.421  1.00  0.38           O  
HETATM  679  O   HOH T 678       1.155  24.115  23.402  1.00  0.38           O  
HETATM  680  O   HOH T 679      30.892 -18.542  48.131  1.00  0.38           O  
HETATM  681  O   HOH T 680      22.611  14.675  71.614  1.00  0.38           O  
HETATM  682  O   HOH T 681     -17.136 -18.512  37.512  1.00  0.38           O  
HETATM  683  O   HOH T 682     -11.937   7.121  15.374  1.00  0.38           O  
HETATM  684  O   HOH T 683       7.513  -4.215  39.682  1.00  0.38           O  
HETATM  685  O   HOH T 684     -14.339  32.059  30.445  1.00  0.38           O  
HETATM  686  O   HOH T 685      19.163 -34.551  11.425  1.00  0.38           O  
HETATM  687  O   HOH T 686      28.298  -8.804  18.686  1.00  0.38           O  
HETATM  688  O   HOH T 687       1.760 -34.263  50.025  1.00  0.38           O  
HETATM  689  O   HOH T 688      16.294 -14.477  10.593  1.00  0.38           O  
HETATM  690  O   HOH T 689      -5.280   1.606  62.489  1.00  0.38           O  
HETATM  691  O   HOH T 690      19.521  27.576   3.778  1.00  0.38           O  
HETATM  692  O   HOH T 691      10.789  -6.522  25.794  1.00  0.38           O  
HETATM  693  O   HOH T 692      37.327 -13.792  38.429  1.00  0.38           O  
HETATM  694  O   HOH T 693       7.623 -30.777  49.200  1.00  0.38           O  
HETATM  695  O   HOH T 694      40.379 -30.191  52.064  1.00  0.38           O  
HETATM  696  O   HOH T 695      32.180  18.612  47.294  1.00  0.38           O  
HETATM  697  O   HOH T 696       7.782  18.389  -3.893  1.00  0.38           O  
HETATM  698  O   HOH T 697      37.330  27.742  47.079  1.00  0.38           O  
HETATM  699  O   HOH T 698       2.374 -14.123  57.297  1.00  0.38           O  
HETATM  700  O   HOH T 699      -7.533  21.338  44.242  1.00  0.38           O  
HETATM  701  O   HOH T 700       4.817  17.638  17.118  1.00  0.38           O  
HETATM  702  O   HOH T 701       1.488 -11.295  39.928  1.00  0.38           O  
HETATM  703  O   HOH T 702       1.752   1.607  29.121  1.00  0.38           O  
HETATM  704  O   HOH T 703      21.873  -7.505  16.159  1.00  0.38           O  
HETATM  705  O   HOH T 704       6.540  13.847  59.189  1.00  0.38           O  
HETATM  706  O   HOH T 705      30.703  27.208   1.170  1.00  0.38           O  
HETATM  707  O   HOH T 706      14.068  27.405  -0.755  1.00  0.38           O  
HETATM  708  O   HOH T 707      -7.270  30.490   3.262  1.00  0.38           O  
HETATM  709  O   HOH T 708      35.711  21.130  39.594  1.00  0.38           O  
HETATM  710  O   HOH T 709       5.520  35.286  50.592  1.00  0.39           O  
HETATM  711  O   HOH T 710      13.017 -23.046  51.698  1.00  0.39           O  
HETATM  712  O   HOH T 711      43.867  29.228  24.993  1.00  0.39           O  
HETATM  713  O   HOH T 712       7.920  34.890  55.800  1.00  0.39           O  
HETATM  714  O   HOH T 713      22.674  -5.608  -6.673  1.00  0.39           O  
HETATM  715  O   HOH T 714      10.066  36.580  55.267  1.00  0.39           O  
HETATM  716  O   HOH T 715     -21.520 -21.058  43.181  1.00  0.39           O  
HETATM  717  O   HOH T 716      -6.379  25.052  36.253  1.00  0.39           O  
HETATM  718  O   HOH T 717      20.961  12.949  67.250  1.00  0.39           O  
HETATM  719  O   HOH T 718       0.799   0.732  43.469  1.00  0.39           O  
HETATM  720  O   HOH T 719       2.528  10.001  38.703  1.00  0.39           O  
HETATM  721  O   HOH T 720      33.154  18.364  44.825  1.00  0.39           O  
HETATM  722  O   HOH T 721      14.642 -34.303   6.396  1.00  0.39           O  
HETATM  723  O   HOH T 722       5.444   4.983  24.338  1.00  0.39           O  
HETATM  724  O   HOH T 723       4.782 -12.322 -13.394  1.00  0.39           O  
HETATM  725  O   HOH T 724     -17.167   9.056  38.397  1.00  0.39           O  
HETATM  726  O   HOH T 725      -4.558   1.160  20.970  1.00  0.39           O  
HETATM  727  O   HOH T 726      36.783   7.203  31.814  1.00  0.39           O  
HETATM  728  O   HOH T 727       4.967  38.080  54.617  1.00  0.39           O  
HETATM  729  O   HOH T 728      27.805 -23.802 -11.813  1.00  0.39           O  
HETATM  730  O   HOH T 729      -9.746 -27.962  29.495  1.00  0.39           O  
HETATM  731  O   HOH T 730      16.458  34.912  52.356  1.00  0.39           O  
HETATM  732  O   HOH T 731      -7.274 -11.773  38.473  1.00  0.39           O  
HETATM  733  O   HOH T 732      33.407  -7.169  16.926  1.00  0.39           O  
HETATM  734  O   HOH T 733       5.219 -33.660  36.732  1.00  0.39           O  
HETATM  735  O   HOH T 734       7.629  26.058  -7.698  1.00  0.39           O  
HETATM  736  O   HOH T 735       9.951  31.410  39.426  1.00  0.39           O  
HETATM  737  O   HOH T 736      31.300 -23.573  40.159  1.00  0.39           O  
HETATM  738  O   HOH T 737      34.769  -4.401  35.418  1.00  0.39           O  
HETATM  739  O   HOH T 738      33.288 -16.339  26.608  1.00  0.39           O  
HETATM  740  O   HOH T 739      27.513  11.532  27.983  1.00  0.39           O  
HETATM  741  O   HOH T 740      18.079  12.315  55.687  1.00  0.39           O  
HETATM  742  O   HOH T 741      -9.043 -18.144   7.912  1.00  0.39           O  
HETATM  743  O   HOH T 742      41.675   0.157  57.426  1.00  0.39           O  
HETATM  744  O   HOH T 743      19.185  21.130  15.410  1.00  0.39           O  
HETATM  745  O   HOH T 744      20.920   0.705   3.332  1.00  0.39           O  
HETATM  746  O   HOH T 745      29.362  15.921  35.474  1.00  0.39           O  
HETATM  747  O   HOH T 746      25.758  25.282  40.028  1.00  0.39           O  
HETATM  748  O   HOH T 747      14.482 -23.470  42.157  1.00  0.39           O  
HETATM  749  O   HOH T 748      43.752  13.099  24.409  1.00  0.39           O  
HETATM  750  O   HOH T 749       5.037 -35.839  34.963  1.00  0.39           O  
HETATM  751  O   HOH T 750       1.467  -2.054  13.362  1.00  0.39           O  
HETATM  752  O   HOH T 751      35.112  29.362  47.808  1.00  0.39           O  
HETATM  753  O   HOH T 752      29.972 -29.358  51.372  1.00  0.39           O  
HETATM  754  O   HOH T 753       3.003 -34.073  40.674  1.00  0.39           O  
HETATM  755  O   HOH T 754      17.122 -15.980  19.965  1.00  0.39           O  
HETATM  756  O   HOH T 755      35.768 -14.282  41.809  1.00  0.39           O  
HETATM  757  O   HOH T 756      44.062 -15.076  11.463  1.00  0.39           O  
HETATM  758  O   HOH T 757      35.986  29.196  57.900  1.00  0.39           O  
HETATM  759  O   HOH T 758      39.121 -12.442  -5.748  1.00  0.39           O  
HETATM  760  O   HOH T 759       8.931  11.396  54.749  1.00  0.39           O  
HETATM  761  O   HOH T 760     -20.078 -12.867  46.831  1.00  0.39           O  
HETATM  762  O   HOH T 761      52.650 -15.054  42.913  1.00  0.39           O  
HETATM  763  O   HOH T 762      11.528   3.240   7.895  1.00  0.39           O  
HETATM  764  O   HOH T 763      28.626 -20.448  33.705  1.00  0.39           O  
HETATM  765  O   HOH T 764      23.427 -17.860  41.276  1.00  0.39           O  
HETATM  766  O   HOH T 765      -7.248  -0.196  62.355  1.00  0.39           O  
HETATM  767  O   HOH T 766       7.424  -6.107  10.152  1.00  0.40           O  
HETATM  768  O   HOH T 767     -13.525  13.676   0.462  1.00  0.40           O  
HETATM  769  O   HOH T 768      37.768   3.359  32.395  1.00  0.40           O  
HETATM  770  O   HOH T 769      43.374  17.624  68.178  1.00  0.40           O  
HETATM  771  O   HOH T 770      13.858  12.994  36.349  1.00  0.40           O  
HETATM  772  O   HOH T 771      31.581   6.471   5.798  1.00  0.40           O  
HETATM  773  O   HOH T 772      53.743  -5.761  48.844  1.00  0.40           O  
HETATM  774  O   HOH T 773      24.481   8.510  33.061  1.00  0.40           O  
HETATM  775  O   HOH T 774      25.218  -7.402  -8.533  1.00  0.40           O  
HETATM  776  O   HOH T 775       4.629   6.164  12.112  1.00  0.40           O  
HETATM  777  O   HOH T 776      21.041 -18.600  32.505  1.00  0.40           O  
HETATM  778  O   HOH T 777      14.720  -5.635  33.177  1.00  0.40           O  
HETATM  779  O   HOH T 778      16.777  25.350  63.664  1.00  0.40           O  
HETATM  780  O   HOH T 779      41.383 -11.385   0.695  1.00  0.40           O  
HETATM  781  O   HOH T 780      13.943  21.048  32.656  1.00  0.40           O  
HETATM  782  O   HOH T 781      43.714  31.902   5.341  1.00  0.40           O  
HETATM  783  O   HOH T 782       4.728  19.496  -2.613  1.00  0.40           O  
HETATM  784  O   HOH T 783      30.489  -3.996  35.680  1.00  0.40           O  
HETATM  785  O   HOH T 784      -8.748  29.134  26.635  1.00  0.40           O  
HETATM  786  O   HOH T 785      16.910 -12.085  21.153  1.00  0.40           O  
HETATM  787  O   HOH T 786      20.126  13.951  47.136  1.00  0.40           O  
HETATM  788  O   HOH T 787       1.265  36.422  37.345  1.00  0.40           O  
HETATM  789  O   HOH T 788      -0.029  23.592  29.157  1.00  0.40           O  
HETATM  790  O   HOH T 789      26.582   9.336  27.310  1.00  0.40           O  
HETATM  791  O   HOH T 790      37.558 -10.470  -4.379  1.00  0.40           O  
HETATM  792  O   HOH T 791       9.611  -1.688  41.272  1.00  0.40           O  
HETATM  793  O   HOH T 792      30.127   6.301  23.627  1.00  0.40           O  
HETATM  794  O   HOH T 793     -23.806   6.399  29.530  1.00  0.40           O  
HETATM  795  O   HOH T 794      32.887  -9.774  17.585  1.00  0.40           O  
HETATM  796  O   HOH T 795     -24.645  14.731  23.403  1.00  0.40           O  
HETATM  797  O   HOH T 796     -21.633  -8.781  54.192  1.00  0.40           O  
HETATM  798  O   HOH T 797       8.863 -22.903  42.802  1.00  0.40           O  
HETATM  799  O   HOH T 798      24.219  30.172  54.249  1.00  0.40           O  
HETATM  800  O   HOH T 799      15.736 -17.941   8.777  1.00  0.40           O  
HETATM  801  O   HOH T 800       0.148 -15.982  38.952  1.00  0.40           O  
HETATM  802  O   HOH T 801     -19.773  21.193  21.244  1.00  0.40           O  
HETATM  803  O   HOH T 802      22.390 -29.271   1.570  1.00  0.40           O  
HETATM  804  O   HOH T 803      38.872  30.799  29.963  1.00  0.40           O  
HETATM  805  O   HOH T 804     -13.982 -27.840  42.091  1.00  0.40           O  
HETATM  806  O   HOH T 805      20.870  30.731  58.129  1.00  0.40           O  
HETATM  807  O   HOH T 806      53.251   8.926  24.921  1.00  0.40           O  
HETATM  808  O   HOH T 807       5.436   6.722  28.663  1.00  0.40           O  
HETATM  809  O   HOH T 808      26.028  30.672  13.840  1.00  0.40           O  
HETATM  810  O   HOH T 809      27.723   7.382  14.377  1.00  0.40           O  
HETATM  811  O   HOH T 810      36.482   2.886   6.116  1.00  0.40           O  
HETATM  812  O   HOH T 811      14.727  -3.165  41.712  1.00  0.40           O  
HETATM  813  O   HOH T 812      30.413  -2.042  61.516  1.00  0.40           O  
HETATM  814  O   HOH T 813      29.144   6.480   9.838  1.00  0.40           O  
HETATM  815  O   HOH T 814      10.730  16.832  31.923  1.00  0.40           O  
HETATM  816  O   HOH T 815      42.063  32.981  24.305  1.00  0.40           O  
HETATM  817  O   HOH T 816     -14.696  -3.316  42.294  1.00  0.40           O  
HETATM  818  O   HOH T 817      31.381 -32.697  26.271  1.00  0.40           O  
HETATM  819  O   HOH T 818      18.259  33.483  53.950  1.00  0.40           O  
HETATM  820  O   HOH T 819      19.137  -9.375  53.266  1.00  0.40           O  
HETATM  821  O   HOH T 820      21.828 -12.717  32.123  1.00  0.40           O  
HETATM  822  O   HOH T 821      13.061  16.031  30.867  1.00  0.40           O  
HETATM  823  O   HOH T 822      22.083 -16.905  44.822  1.00  0.40           O  
HETATM  824  O   HOH T 823       2.816 -16.360  58.898  1.00  0.40           O  
HETATM  825  O   HOH T 824      37.633   1.359  30.461  1.00  0.40           O  
HETATM  826  O   HOH T 825      41.459 -21.292   9.639  1.00  0.40           O  
HETATM  827  O   HOH T 826       3.229  -3.874   9.311  1.00  0.40           O  
HETATM  828  O   HOH T 827      44.805 -31.822  40.599  1.00  0.40           O  
HETATM  829  O   HOH T 828       7.567   2.339  21.618  1.00  0.40           O  
HETATM  830  O   HOH T 829      11.197  30.463   6.439  1.00  0.40           O  
HETATM  831  O   HOH T 830     -19.916  14.657   6.172  1.00  0.40           O  
HETATM  832  O   HOH T 831       4.254  38.177  10.135  1.00  0.40           O  
HETATM  833  O   HOH T 832      31.488  -6.344  60.171  1.00  0.40           O  
HETATM  834  O   HOH T 833     -18.207  15.375  15.536  1.00  0.40           O  
HETATM  835  O   HOH T 834       0.811  33.363  -2.957  1.00  0.40           O  
HETATM  836  O   HOH T 835       3.550   5.443   9.649  1.00  0.40           O  
HETATM  837  O   HOH T 836      23.453 -17.073  21.841  1.00  0.40           O  
HETATM  838  O   HOH T 837      39.714 -14.436  37.200  1.00  0.40           O  
HETATM  839  O   HOH T 838      22.805  20.737  42.999  1.00  0.40           O  
HETATM  840  O   HOH T 839      14.511 -34.180   3.557  1.00  0.40           O  
HETATM  841  O   HOH T 840      34.358  -0.414  27.869  1.00  0.40           O  
HETATM  842  O   HOH T 841      51.088 -13.856  27.587  1.00  0.40           O  
HETATM  843  O   HOH T 842      19.275  -2.448  14.089  1.00  0.40           O  
HETATM  844  O   HOH T 843      37.381 -15.458  43.673  1.00  0.41           O  
HETATM  845  O   HOH T 844       6.580 -23.029  41.220  1.00  0.41           O  
HETATM  846  O   HOH T 845      31.515  21.242  65.835  1.00  0.41           O  
HETATM  847  O   HOH T 846      27.083   3.191  11.755  1.00  0.41           O  
HETATM  848  O   HOH T 847      21.836   5.637   4.820  1.00  0.41           O  
HETATM  849  O   HOH T 848       2.969  -7.162  31.114  1.00  0.41           O  
HETATM  850  O   HOH T 849      -1.390  30.511  45.877  1.00  0.41           O  
HETATM  851  O   HOH T 850      13.082  -3.101  18.029  1.00  0.41           O  
HETATM  852  O   HOH T 851      39.584  -3.452  -1.487  1.00  0.41           O  
HETATM  853  O   HOH T 852      30.519  -6.712  31.871  1.00  0.41           O  
HETATM  854  O   HOH T 853      17.800 -13.309  40.359  1.00  0.41           O  
HETATM  855  O   HOH T 854      53.111 -28.867  23.549  1.00  0.41           O  
HETATM  856  O   HOH T 855     -16.308   8.137  40.901  1.00  0.41           O  
HETATM  857  O   HOH T 856      26.499   6.923   4.891  1.00  0.41           O  
HETATM  858  O   HOH T 857      18.680 -23.485  10.557  1.00  0.41           O  
HETATM  859  O   HOH T 858       0.766 -38.285  52.694  1.00  0.41           O  
HETATM  860  O   HOH T 859      19.442  20.441  40.251  1.00  0.41           O  
HETATM  861  O   HOH T 860       4.873   0.078  26.063  1.00  0.41           O  
HETATM  862  O   HOH T 861      14.403  -0.876  46.570  1.00  0.41           O  
HETATM  863  O   HOH T 862      31.656   3.014  29.658  1.00  0.41           O  
HETATM  864  O   HOH T 863       3.279  -4.891  -0.691  1.00  0.41           O  
HETATM  865  O   HOH T 864      39.159  -5.662  -2.977  1.00  0.41           O  
HETATM  866  O   HOH T 865      53.725 -22.762  24.243  1.00  0.41           O  
HETATM  867  O   HOH T 866       5.454 -20.968  25.209  1.00  0.41           O  
HETATM  868  O   HOH T 867     -14.519 -20.564  26.895  1.00  0.41           O  
HETATM  869  O   HOH T 868      32.958 -32.296  30.808  1.00  0.41           O  
HETATM  870  O   HOH T 869      46.233  -7.610  55.899  1.00  0.41           O  
HETATM  871  O   HOH T 870      38.409  20.712  39.296  1.00  0.41           O  
HETATM  872  O   HOH T 871      21.921 -20.330 -14.539  1.00  0.41           O  
HETATM  873  O   HOH T 872      33.170  16.210  28.988  1.00  0.41           O  
HETATM  874  O   HOH T 873      19.417 -27.367  -4.468  1.00  0.41           O  
HETATM  875  O   HOH T 874      43.466   2.203   1.235  1.00  0.41           O  
HETATM  876  O   HOH T 875      14.778 -11.273  22.869  1.00  0.41           O  
HETATM  877  O   HOH T 876      -0.222 -20.362  -6.633  1.00  0.41           O  
HETATM  878  O   HOH T 877      -2.235  19.780  23.802  1.00  0.41           O  
HETATM  879  O   HOH T 878       3.050   1.504  20.352  1.00  0.41           O  
HETATM  880  O   HOH T 879      31.713 -23.820  -1.627  1.00  0.41           O  
HETATM  881  O   HOH T 880      20.718  39.239  25.864  1.00  0.41           O  
HETATM  882  O   HOH T 881      29.043  -5.784  34.111  1.00  0.41           O  
HETATM  883  O   HOH T 882      18.696   7.177  40.513  1.00  0.41           O  
HETATM  884  O   HOH T 883      34.443  18.501  39.616  1.00  0.41           O  
HETATM  885  O   HOH T 884      42.069   2.272  32.865  1.00  0.41           O  
HETATM  886  O   HOH T 885       0.004 -14.728  36.525  1.00  0.41           O  
HETATM  887  O   HOH T 886      10.680  16.170  61.978  1.00  0.41           O  
HETATM  888  O   HOH T 887      31.717 -15.062  24.820  1.00  0.41           O  
HETATM  889  O   HOH T 888      17.693  25.893  71.415  1.00  0.41           O  
HETATM  890  O   HOH T 889      40.457 -11.310  12.533  1.00  0.41           O  
HETATM  891  O   HOH T 890      -6.642   5.793  57.872  1.00  0.41           O  
HETATM  892  O   HOH T 891     -11.778 -27.874  31.408  1.00  0.41           O  
HETATM  893  O   HOH T 892     -22.910  16.186  25.118  1.00  0.41           O  
HETATM  894  O   HOH T 893      -5.670  30.451   5.510  1.00  0.41           O  
HETATM  895  O   HOH T 894      10.359  -0.133  43.404  1.00  0.41           O  
HETATM  896  O   HOH T 895      31.466   0.151  49.618  1.00  0.41           O  
HETATM  897  O   HOH T 896      -3.555 -20.476 -10.653  1.00  0.41           O  
HETATM  898  O   HOH T 897      24.480 -36.296  14.781  1.00  0.41           O  
HETATM  899  O   HOH T 898       8.127   7.474  39.858  1.00  0.41           O  
HETATM  900  O   HOH T 899      48.303 -35.703  31.397  1.00  0.41           O  
HETATM  901  O   HOH T 900       5.380  -5.344   8.491  1.00  0.41           O  
HETATM  902  O   HOH T 901      31.363 -15.588  61.829  1.00  0.41           O  
HETATM  903  O   HOH T 902      21.690 -21.233  31.703  1.00  0.41           O  
HETATM  904  O   HOH T 903      51.658 -25.304  38.907  1.00  0.41           O  
HETATM  905  O   HOH T 904      49.900 -13.105  15.253  1.00  0.41           O  
HETATM  906  O   HOH T 905      29.288 -28.390  42.276  1.00  0.41           O  
HETATM  907  O   HOH T 906      36.182   0.475   4.743  1.00  0.41           O  
HETATM  908  O   HOH T 907      14.429  -8.921  36.304  1.00  0.41           O  
HETATM  909  O   HOH T 908      -9.711  32.539  14.754  1.00  0.41           O  
HETATM  910  O   HOH T 909      19.644  22.775  33.934  1.00  0.41           O  
HETATM  911  O   HOH T 910      -2.806  -0.611  19.986  1.00  0.41           O  
HETATM  912  O   HOH T 911      24.257   2.983  11.900  1.00  0.41           O  
HETATM  913  O   HOH T 912      56.400 -31.887  26.702  1.00  0.41           O  
HETATM  914  O   HOH T 913       8.595  -3.679   9.259  1.00  0.41           O  
HETATM  915  O   HOH T 914      25.897 -23.502  16.677  1.00  0.41           O  
HETATM  916  O   HOH T 915      16.970  -6.643  16.459  1.00  0.41           O  
HETATM  917  O   HOH T 916     -10.002 -13.617  62.186  1.00  0.41           O  
HETATM  918  O   HOH T 917      -1.422  -9.730  19.514  1.00  0.41           O  
HETATM  919  O   HOH T 918      38.152  20.347  65.878  1.00  0.41           O  
HETATM  920  O   HOH T 919      27.354  -7.481   8.934  1.00  0.41           O  
HETATM  921  O   HOH T 920       3.661 -17.568  21.241  1.00  0.41           O  
HETATM  922  O   HOH T 921      37.720   6.411  40.579  1.00  0.41           O  
HETATM  923  O   HOH T 922      35.015  -0.758   7.781  1.00  0.41           O  
HETATM  924  O   HOH T 923      45.306  -4.922  55.897  1.00  0.41           O  
HETATM  925  O   HOH T 924      54.397 -23.439  26.826  1.00  0.41           O  
HETATM  926  O   HOH T 925      34.084   7.885  64.004  1.00  0.41           O  
HETATM  927  O   HOH T 926      20.515  32.654  51.036  1.00  0.41           O  
HETATM  928  O   HOH T 927     -15.073   7.439  13.245  1.00  0.42           O  
HETATM  929  O   HOH T 928      25.115  29.195   4.552  1.00  0.42           O  
HETATM  930  O   HOH T 929      45.076   2.103  51.194  1.00  0.42           O  
HETATM  931  O   HOH T 930      -4.861  23.627  47.475  1.00  0.42           O  
HETATM  932  O   HOH T 931     -11.649  28.876   8.984  1.00  0.42           O  
HETATM  933  O   HOH T 932      39.531 -32.127  40.043  1.00  0.42           O  
HETATM  934  O   HOH T 933      -5.808 -33.008   1.594  1.00  0.42           O  
HETATM  935  O   HOH T 934      14.925  34.943  13.899  1.00  0.42           O  
HETATM  936  O   HOH T 935      17.212 -12.211  46.088  1.00  0.42           O  
HETATM  937  O   HOH T 936       5.844 -35.016  21.123  1.00  0.42           O  
HETATM  938  O   HOH T 937      21.859 -16.053  24.045  1.00  0.42           O  
HETATM  939  O   HOH T 938     -15.640   3.378  40.789  1.00  0.42           O  
HETATM  940  O   HOH T 939       1.819  16.311  20.640  1.00  0.42           O  
HETATM  941  O   HOH T 940      21.188  16.278  34.365  1.00  0.42           O  
HETATM  942  O   HOH T 941      -1.496 -30.061  56.924  1.00  0.42           O  
HETATM  943  O   HOH T 942      33.446  11.382  32.184  1.00  0.42           O  
HETATM  944  O   HOH T 943      39.677 -34.954  22.272  1.00  0.42           O  
HETATM  945  O   HOH T 944      46.551 -33.984  32.635  1.00  0.42           O  
HETATM  946  O   HOH T 945      28.866  -9.042  21.488  1.00  0.42           O  
HETATM  947  O   HOH T 946      10.324 -36.569  11.709  1.00  0.42           O  
HETATM  948  O   HOH T 947      14.385  -4.489  53.738  1.00  0.42           O  
HETATM  949  O   HOH T 948      25.299 -27.737   4.913  1.00  0.42           O  
HETATM  950  O   HOH T 949      -3.984 -21.856  -6.185  1.00  0.42           O  
HETATM  951  O   HOH T 950      58.494   3.007   4.563  1.00  0.42           O  
HETATM  952  O   HOH T 951      33.039   9.624  65.728  1.00  0.42           O  
HETATM  953  O   HOH T 952      37.531  32.631  28.288  1.00  0.42           O  
HETATM  954  O   HOH T 953      31.038  12.400  16.364  1.00  0.42           O  
HETATM  955  O   HOH T 954       4.561 -33.984  19.006  1.00  0.42           O  
HETATM  956  O   HOH T 955      36.116  36.095  17.699  1.00  0.42           O  
HETATM  957  O   HOH T 956       7.002  13.266  42.729  1.00  0.42           O  
HETATM  958  O   HOH T 957      35.273  34.099  58.141  1.00  0.42           O  
HETATM  959  O   HOH T 958      19.968  15.105  65.825  1.00  0.42           O  
HETATM  960  O   HOH T 959      22.990 -18.126 -13.106  1.00  0.42           O  
HETATM  961  O   HOH T 960      39.489  22.782  -2.696  1.00  0.42           O  
HETATM  962  O   HOH T 961      10.675 -17.100  50.340  1.00  0.42           O  
HETATM  963  O   HOH T 962       0.910 -14.585  59.804  1.00  0.42           O  
HETATM  964  O   HOH T 963      54.593 -29.420  35.750  1.00  0.42           O  
HETATM  965  O   HOH T 964      -0.570 -30.324  14.840  1.00  0.42           O  
HETATM  966  O   HOH T 965      28.172 -23.114  -9.111  1.00  0.42           O  
HETATM  967  O   HOH T 966     -16.683  16.369  40.782  1.00  0.42           O  
HETATM  968  O   HOH T 967      42.542 -31.025  19.192  1.00  0.42           O  
HETATM  969  O   HOH T 968      22.969 -21.868  23.238  1.00  0.42           O  
HETATM  970  O   HOH T 969      31.774   1.724  22.521  1.00  0.42           O  
HETATM  971  O   HOH T 970      20.561 -11.155  30.199  1.00  0.42           O  
HETATM  972  O   HOH T 971      41.397 -12.982   2.836  1.00  0.42           O  
HETATM  973  O   HOH T 972      15.573  10.502  51.879  1.00  0.42           O  
HETATM  974  O   HOH T 973      27.041  -8.484  11.440  1.00  0.42           O  
HETATM  975  O   HOH T 974      24.289   7.934  17.827  1.00  0.42           O  
HETATM  976  O   HOH T 975      34.027   1.824  47.795  1.00  0.42           O  
HETATM  977  O   HOH T 976       9.716 -33.038  43.100  1.00  0.42           O  
HETATM  978  O   HOH T 977     -16.802   5.883  21.109  1.00  0.42           O  
HETATM  979  O   HOH T 978       5.648  23.398  28.393  1.00  0.42           O  
HETATM  980  O   HOH T 979      32.956  -5.645  62.424  1.00  0.42           O  
HETATM  981  O   HOH T 980       5.604 -13.558  51.259  1.00  0.42           O  
HETATM  982  O   HOH T 981      12.782  29.483  65.237  1.00  0.42           O  
HETATM  983  O   HOH T 982      33.670  -0.954  48.327  1.00  0.42           O  
HETATM  984  O   HOH T 983     -20.629 -21.682  38.100  1.00  0.42           O  
HETATM  985  O   HOH T 984      21.359 -19.298  29.800  1.00  0.42           O  
HETATM  986  O   HOH T 985     -24.107  21.001  31.706  1.00  0.42           O  
HETATM  987  O   HOH T 986       1.300  18.581  14.246  1.00  0.42           O  
HETATM  988  O   HOH T 987      13.938 -14.852  13.524  1.00  0.42           O  
HETATM  989  O   HOH T 988      16.413 -20.498   9.327  1.00  0.42           O  
HETATM  990  O   HOH T 989      21.796 -26.779  15.481  1.00  0.42           O  
HETATM  991  O   HOH T 990      57.468 -24.960  39.966  1.00  0.42           O  
HETATM  992  O   HOH T 991      19.902  11.996  51.661  1.00  0.42           O  
HETATM  993  O   HOH T 992      54.545 -29.964  25.742  1.00  0.42           O  
HETATM  994  O   HOH T 993      39.930  30.491  64.091  1.00  0.42           O  
HETATM  995  O   HOH T 994     -22.759  23.399  16.987  1.00  0.42           O  
HETATM  996  O   HOH T 995      32.209  28.262  41.858  1.00  0.42           O  
HETATM  997  O   HOH T 996      20.202  23.243  24.459  1.00  0.42           O  
HETATM  998  O   HOH T 997      29.323 -28.352   5.577  1.00  0.42           O  
HETATM  999  O   HOH T 998      22.874  -6.412  50.991  1.00  0.42           O  
HETATM 1000  O   HOH T 999       1.363  10.191  34.963  1.00  0.42           O  
HETATM 1001  O   HOH T1000      34.517  11.548  67.199  1.00  0.43           O  
HETATM 1002  O   HOH T1001      38.207 -24.467  58.388  1.00  0.43           O  
HETATM 1003  O   HOH T1002      39.081  30.976  49.209  1.00  0.43           O  
HETATM 1004  O   HOH T1003      41.488  11.513  24.212  1.00  0.43           O  
HETATM 1005  O   HOH T1004      -6.385 -37.929  42.931  1.00  0.43           O  
HETATM 1006  O   HOH T1005      29.786  -3.422  21.927  1.00  0.43           O  
HETATM 1007  O   HOH T1006      -5.168  25.964  42.762  1.00  0.43           O  
HETATM 1008  O   HOH T1007      30.536  -8.844  59.790  1.00  0.43           O  
HETATM 1009  O   HOH T1008      30.865 -25.279  35.823  1.00  0.43           O  
HETATM 1010  O   HOH T1009       5.806  -6.438  31.026  1.00  0.43           O  
HETATM 1011  O   HOH T1010      23.918  38.565  22.136  1.00  0.43           O  
HETATM 1012  O   HOH T1011      42.736   7.477   2.401  1.00  0.43           O  
HETATM 1013  O   HOH T1012      43.104  -5.584  57.446  1.00  0.43           O  
HETATM 1014  O   HOH T1013      41.844  24.095  29.365  1.00  0.43           O  
HETATM 1015  O   HOH T1014      22.181  38.010  20.122  1.00  0.43           O  
HETATM 1016  O   HOH T1015      51.839 -16.034  32.587  1.00  0.43           O  
HETATM 1017  O   HOH T1016      -2.793 -17.181  -4.938  1.00  0.43           O  
HETATM 1018  O   HOH T1017       1.842 -14.544 -10.503  1.00  0.43           O  
HETATM 1019  O   HOH T1018      -0.835  -8.119  33.406  1.00  0.43           O  
HETATM 1020  O   HOH T1019      -1.922  -0.687  66.256  1.00  0.43           O  
HETATM 1021  O   HOH T1020      38.174  -2.412  61.040  1.00  0.43           O  
HETATM 1022  O   HOH T1021       5.055  19.267  63.868  1.00  0.43           O  
HETATM 1023  O   HOH T1022      44.343  -2.922   2.238  1.00  0.43           O  
HETATM 1024  O   HOH T1023      -9.737  20.900  42.722  1.00  0.43           O  
HETATM 1025  O   HOH T1024      16.958  -5.843   6.151  1.00  0.43           O  
HETATM 1026  O   HOH T1025      19.870 -19.026  13.397  1.00  0.43           O  
HETATM 1027  O   HOH T1026      24.007  16.219  10.601  1.00  0.43           O  
HETATM 1028  O   HOH T1027     -19.377  23.469  22.996  1.00  0.43           O  
HETATM 1029  O   HOH T1028      -0.982 -34.326  50.442  1.00  0.43           O  
HETATM 1030  O   HOH T1029       8.575  35.440  16.130  1.00  0.43           O  
HETATM 1031  O   HOH T1030      35.080   0.026  30.462  1.00  0.43           O  
HETATM 1032  O   HOH T1031      18.167 -15.992  17.361  1.00  0.43           O  
HETATM 1033  O   HOH T1032      30.058 -25.796  -0.358  1.00  0.43           O  
HETATM 1034  O   HOH T1033      12.283  -4.668  41.567  1.00  0.43           O  
HETATM 1035  O   HOH T1034      11.275  -8.005  50.322  1.00  0.43           O  
HETATM 1036  O   HOH T1035      24.075 -13.582  30.711  1.00  0.43           O  
HETATM 1037  O   HOH T1036      -3.719   0.745  64.667  1.00  0.43           O  
HETATM 1038  O   HOH T1037      42.927   3.921  57.694  1.00  0.43           O  
HETATM 1039  O   HOH T1038       8.062 -32.810  55.719  1.00  0.43           O  
HETATM 1040  O   HOH T1039      39.189  10.050  25.002  1.00  0.43           O  
HETATM 1041  O   HOH T1040     -14.940  29.279  30.345  1.00  0.43           O  
HETATM 1042  O   HOH T1041      21.160  33.927  11.303  1.00  0.43           O  
HETATM 1043  O   HOH T1042      15.105   2.128  56.248  1.00  0.43           O  
HETATM 1044  O   HOH T1043      10.885 -17.291  44.198  1.00  0.43           O  
HETATM 1045  O   HOH T1044      15.314  19.325  30.960  1.00  0.43           O  
HETATM 1046  O   HOH T1045      -5.719   4.603  60.173  1.00  0.43           O  
HETATM 1047  O   HOH T1046      31.642 -27.258   6.523  1.00  0.43           O  
HETATM 1048  O   HOH T1047      19.189  13.855  49.770  1.00  0.43           O  
HETATM 1049  O   HOH T1048       3.454   0.385  43.996  1.00  0.43           O  
HETATM 1050  O   HOH T1049      29.170   2.615  19.742  1.00  0.43           O  
HETATM 1051  O   HOH T1050      18.387 -37.138  10.681  1.00  0.43           O  
HETATM 1052  O   HOH T1051      21.318   2.596  41.239  1.00  0.43           O  
HETATM 1053  O   HOH T1052       4.881 -33.922  52.486  1.00  0.43           O  
HETATM 1054  O   HOH T1053      20.508 -29.269   3.588  1.00  0.43           O  
HETATM 1055  O   HOH T1054      51.766 -14.488  21.603  1.00  0.43           O  
HETATM 1056  O   HOH T1055       3.990 -35.628  54.647  1.00  0.43           O  
HETATM 1057  O   HOH T1056      21.964 -24.142  16.236  1.00  0.43           O  
HETATM 1058  O   HOH T1057      38.047 -10.506  13.593  1.00  0.43           O  
HETATM 1059  O   HOH T1058       6.716 -37.342   9.855  1.00  0.43           O  
HETATM 1060  O   HOH T1059       7.844 -35.902  17.780  1.00  0.43           O  
HETATM 1061  O   HOH T1060     -14.590 -11.482  27.426  1.00  0.43           O  
HETATM 1062  O   HOH T1061      41.915   8.169  63.175  1.00  0.43           O  
HETATM 1063  O   HOH T1062      -0.134 -28.305  -5.796  1.00  0.43           O  
HETATM 1064  O   HOH T1063      34.055  12.065  12.155  1.00  0.43           O  
HETATM 1065  O   HOH T1064      19.780 -11.797  52.137  1.00  0.43           O  
HETATM 1066  O   HOH T1065       1.065 -34.660  47.348  1.00  0.43           O  
HETATM 1067  O   HOH T1066      37.140  32.741  55.318  1.00  0.43           O  
HETATM 1068  O   HOH T1067      -1.702  -7.886  40.393  1.00  0.43           O  
HETATM 1069  O   HOH T1068      14.602  32.565  60.220  1.00  0.43           O  
HETATM 1070  O   HOH T1069       1.088  -4.738   7.826  1.00  0.43           O  
HETATM 1071  O   HOH T1070      56.287 -34.568  26.321  1.00  0.43           O  
HETATM 1072  O   HOH T1071     -20.464  11.251  25.588  1.00  0.43           O  
HETATM 1073  O   HOH T1072      20.348 -14.678  40.369  1.00  0.43           O  
HETATM 1074  O   HOH T1073      15.484   1.620  47.046  1.00  0.43           O  
HETATM 1075  O   HOH T1074      32.430  29.217   1.758  1.00  0.43           O  
HETATM 1076  O   HOH T1075      21.992  -9.641  35.258  1.00  0.43           O  
HETATM 1077  O   HOH T1076      31.693  -4.967  17.159  1.00  0.44           O  
HETATM 1078  O   HOH T1077       7.288  24.356  66.319  1.00  0.44           O  
HETATM 1079  O   HOH T1078      29.801   6.034  26.419  1.00  0.44           O  
HETATM 1080  O   HOH T1079      23.194   5.635   2.457  1.00  0.44           O  
HETATM 1081  O   HOH T1080      38.433  14.159  23.413  1.00  0.44           O  
HETATM 1082  O   HOH T1081      10.364  16.244  24.909  1.00  0.44           O  
HETATM 1083  O   HOH T1082       7.531  -7.384  29.125  1.00  0.44           O  
HETATM 1084  O   HOH T1083      35.715 -10.488  -6.528  1.00  0.44           O  
HETATM 1085  O   HOH T1084      19.595 -33.272   8.966  1.00  0.44           O  
HETATM 1086  O   HOH T1085       4.021  27.666  33.465  1.00  0.44           O  
HETATM 1087  O   HOH T1086      -2.632   6.013  19.996  1.00  0.44           O  
HETATM 1088  O   HOH T1087       4.279  33.303   7.049  1.00  0.44           O  
HETATM 1089  O   HOH T1088      48.031  -9.645  55.071  1.00  0.44           O  
HETATM 1090  O   HOH T1089      36.473 -14.587  -7.389  1.00  0.44           O  
HETATM 1091  O   HOH T1090      31.479 -24.664   7.534  1.00  0.44           O  
HETATM 1092  O   HOH T1091      -5.525  22.564  50.039  1.00  0.44           O  
HETATM 1093  O   HOH T1092      39.315  -8.550  33.642  1.00  0.44           O  
HETATM 1094  O   HOH T1093      15.608  37.679  20.911  1.00  0.44           O  
HETATM 1095  O   HOH T1094       0.797   1.495  16.020  1.00  0.44           O  
HETATM 1096  O   HOH T1095       7.241   6.953  23.466  1.00  0.44           O  
HETATM 1097  O   HOH T1096      -5.522  26.765  54.948  1.00  0.44           O  
HETATM 1098  O   HOH T1097      53.880 -21.855  49.648  1.00  0.44           O  
HETATM 1099  O   HOH T1098      13.929 -35.984  10.202  1.00  0.44           O  
HETATM 1100  O   HOH T1099      27.959  -5.894  31.528  1.00  0.44           O  
HETATM 1101  O   HOH T1100      -7.282  10.642   1.258  1.00  0.44           O  
HETATM 1102  O   HOH T1101      12.804  -0.264  44.404  1.00  0.44           O  
HETATM 1103  O   HOH T1102      -8.648  -9.161  30.868  1.00  0.44           O  
HETATM 1104  O   HOH T1103      15.718  13.652  48.724  1.00  0.44           O  
HETATM 1105  O   HOH T1104      16.543  -3.987  17.061  1.00  0.44           O  
HETATM 1106  O   HOH T1105     -19.058 -17.515  32.357  1.00  0.44           O  
HETATM 1107  O   HOH T1106       2.583  -0.286  17.248  1.00  0.44           O  
HETATM 1108  O   HOH T1107      10.561  -0.148  46.165  1.00  0.44           O  
HETATM 1109  O   HOH T1108      15.385  -2.242  55.035  1.00  0.44           O  
HETATM 1110  O   HOH T1109      20.254 -18.726 -12.958  1.00  0.44           O  
HETATM 1111  O   HOH T1110      35.523   1.569  26.378  1.00  0.44           O  
HETATM 1112  O   HOH T1111      11.882  31.044  63.371  1.00  0.44           O  
HETATM 1113  O   HOH T1112       1.457 -12.429  37.320  1.00  0.44           O  
HETATM 1114  O   HOH T1113      12.078  14.538  32.948  1.00  0.44           O  
HETATM 1115  O   HOH T1114      32.711  20.823  43.584  1.00  0.44           O  
HETATM 1116  O   HOH T1115      35.562 -26.718  57.657  1.00  0.44           O  
HETATM 1117  O   HOH T1116      20.031  13.867  34.026  1.00  0.44           O  
HETATM 1118  O   HOH T1117      50.112 -14.461  17.596  1.00  0.44           O  
HETATM 1119  O   HOH T1118      -2.586 -31.846  25.283  1.00  0.44           O  
HETATM 1120  O   HOH T1119       8.292   8.654  35.280  1.00  0.44           O  
HETATM 1121  O   HOH T1120      17.069 -34.077   8.058  1.00  0.44           O  
HETATM 1122  O   HOH T1121      -8.049  21.448  -2.119  1.00  0.44           O  
HETATM 1123  O   HOH T1122      21.148 -16.098  55.162  1.00  0.44           O  
HETATM 1124  O   HOH T1123      16.263   9.846   7.182  1.00  0.44           O  
HETATM 1125  O   HOH T1124      41.679  27.565   2.873  1.00  0.44           O  
HETATM 1126  O   HOH T1125      52.005 -17.572  52.118  1.00  0.44           O  
HETATM 1127  O   HOH T1126      37.087  -3.496  44.597  1.00  0.44           O  
HETATM 1128  O   HOH T1127      -6.641  15.182  47.835  1.00  0.44           O  
HETATM 1129  O   HOH T1128      -3.186   7.413  60.561  1.00  0.44           O  
HETATM 1130  O   HOH T1129      27.571 -12.458  28.253  1.00  0.44           O  
HETATM 1131  O   HOH T1130      -4.378  -7.383  62.866  1.00  0.44           O  
HETATM 1132  O   HOH T1131      32.442  -4.570  33.930  1.00  0.44           O  
HETATM 1133  O   HOH T1132      -1.590  28.014  48.366  1.00  0.44           O  
HETATM 1134  O   HOH T1133      -8.821  33.356  12.168  1.00  0.44           O  
HETATM 1135  O   HOH T1134      32.952   1.963  27.507  1.00  0.44           O  
HETATM 1136  O   HOH T1135      11.899 -17.505  47.959  1.00  0.44           O  
HETATM 1137  O   HOH T1136      48.974 -11.757  56.735  1.00  0.44           O  
HETATM 1138  O   HOH T1137      44.105 -28.801  18.322  1.00  0.44           O  
HETATM 1139  O   HOH T1138      54.010 -35.902  15.668  1.00  0.44           O  
HETATM 1140  O   HOH T1139      23.782 -23.342   4.880  1.00  0.44           O  
HETATM 1141  O   HOH T1140      12.937  11.509  23.497  1.00  0.44           O  
HETATM 1142  O   HOH T1141     -19.029 -21.117  23.590  1.00  0.44           O  
HETATM 1143  O   HOH T1142      21.910  31.742  53.318  1.00  0.44           O  
HETATM 1144  O   HOH T1143      36.072  10.854  16.896  1.00  0.44           O  
HETATM 1145  O   HOH T1144      50.148  16.309   4.656  1.00  0.44           O  
HETATM 1146  O   HOH T1145       2.630   0.186  14.485  1.00  0.44           O  
HETATM 1147  O   HOH T1146      25.474  -6.451  32.535  1.00  0.44           O  
HETATM 1148  O   HOH T1147      17.395 -11.179  23.722  1.00  0.44           O  
HETATM 1149  O   HOH T1148      57.070 -28.622  29.472  1.00  0.44           O  
HETATM 1150  O   HOH T1149     -10.361   8.970  54.348  1.00  0.44           O  
HETATM 1151  O   HOH T1150      25.954  34.895   5.342  1.00  0.44           O  
HETATM 1152  O   HOH T1151      34.716 -33.743  29.251  1.00  0.44           O  
HETATM 1153  O   HOH T1152      52.183  -4.143  47.258  1.00  0.44           O  
HETATM 1154  O   HOH T1153     -16.982 -19.106  45.567  1.00  0.44           O  
HETATM 1155  O   HOH T1154      35.210  18.544  14.326  1.00  0.44           O  
HETATM 1156  O   HOH T1155      42.931   8.044   6.544  1.00  0.44           O  
HETATM 1157  O   HOH T1156       4.028   0.073  46.664  1.00  0.45           O  
HETATM 1158  O   HOH T1157      36.534  34.181  47.744  1.00  0.45           O  
HETATM 1159  O   HOH T1158      15.861  -3.294  57.558  1.00  0.45           O  
HETATM 1160  O   HOH T1159       8.924  -1.844  36.291  1.00  0.45           O  
HETATM 1161  O   HOH T1160       3.597  18.775  66.162  1.00  0.45           O  
HETATM 1162  O   HOH T1161      40.185  -3.943  59.826  1.00  0.45           O  
HETATM 1163  O   HOH T1162      16.161   8.258  50.321  1.00  0.45           O  
HETATM 1164  O   HOH T1163      14.049  -3.593  51.059  1.00  0.45           O  
HETATM 1165  O   HOH T1164      -0.910   0.744  28.884  1.00  0.45           O  
HETATM 1166  O   HOH T1165       8.919  17.309  40.794  1.00  0.45           O  
HETATM 1167  O   HOH T1166       8.850  30.895  -5.689  1.00  0.45           O  
HETATM 1168  O   HOH T1167      23.282  30.514  56.789  1.00  0.45           O  
HETATM 1169  O   HOH T1168      25.945   5.471   2.576  1.00  0.45           O  
HETATM 1170  O   HOH T1169      18.355 -14.733  46.234  1.00  0.45           O  
HETATM 1171  O   HOH T1170      11.945  14.198  23.979  1.00  0.45           O  
HETATM 1172  O   HOH T1171      27.263 -29.524   4.249  1.00  0.45           O  
HETATM 1173  O   HOH T1172      50.917  -1.635  40.294  1.00  0.45           O  
HETATM 1174  O   HOH T1173      24.821  -0.894  37.127  1.00  0.45           O  
HETATM 1175  O   HOH T1174      43.716 -12.340  37.654  1.00  0.45           O  
HETATM 1176  O   HOH T1175      41.408  30.485  25.415  1.00  0.45           O  
HETATM 1177  O   HOH T1176      55.052 -30.314  28.546  1.00  0.45           O  
HETATM 1178  O   HOH T1177       8.969  34.764  53.375  1.00  0.45           O  
HETATM 1179  O   HOH T1178      21.661  18.595  33.132  1.00  0.45           O  
HETATM 1180  O   HOH T1179     -23.579 -12.502  64.553  1.00  0.45           O  
HETATM 1181  O   HOH T1180      41.471  -0.947  40.019  1.00  0.45           O  
HETATM 1182  O   HOH T1181     -13.149  25.789  30.132  1.00  0.45           O  
HETATM 1183  O   HOH T1182      -5.719 -31.071  12.211  1.00  0.45           O  
HETATM 1184  O   HOH T1183      17.122 -19.246  12.865  1.00  0.45           O  
HETATM 1185  O   HOH T1184       4.767 -14.399  56.055  1.00  0.45           O  
HETATM 1186  O   HOH T1185      -3.911  -2.598  27.961  1.00  0.45           O  
HETATM 1187  O   HOH T1186      34.773 -23.607  10.497  1.00  0.45           O  
HETATM 1188  O   HOH T1187      31.541   7.314  10.933  1.00  0.45           O  
HETATM 1189  O   HOH T1188     -21.961  35.838  20.038  1.00  0.45           O  
HETATM 1190  O   HOH T1189       7.928  -6.227  59.960  1.00  0.45           O  
HETATM 1191  O   HOH T1190      -4.990   7.125  12.683  1.00  0.45           O  
HETATM 1192  O   HOH T1191      -6.522 -35.731   1.673  1.00  0.45           O  
HETATM 1193  O   HOH T1192      39.015  23.527  64.070  1.00  0.45           O  
HETATM 1194  O   HOH T1193       9.821   3.288  20.263  1.00  0.45           O  
HETATM 1195  O   HOH T1194      27.004  17.247  35.557  1.00  0.45           O  
HETATM 1196  O   HOH T1195      55.408 -19.489  46.695  1.00  0.45           O  
HETATM 1197  O   HOH T1196     -27.477  20.060  26.252  1.00  0.45           O  
HETATM 1198  O   HOH T1197      -9.105 -27.707  26.807  1.00  0.45           O  
HETATM 1199  O   HOH T1198      24.068   6.489   6.261  1.00  0.45           O  
HETATM 1200  O   HOH T1199      53.204 -30.923  34.098  1.00  0.45           O  
HETATM 1201  O   HOH T1200      10.606  16.324  34.595  1.00  0.45           O  
HETATM 1202  O   HOH T1201     -18.917 -22.076  42.977  1.00  0.45           O  
HETATM 1203  O   HOH T1202      36.947  -0.799  27.026  1.00  0.45           O  
HETATM 1204  O   HOH T1203      21.725 -22.397 -10.334  1.00  0.45           O  
HETATM 1205  O   HOH T1204       8.682 -27.677  57.498  1.00  0.45           O  
HETATM 1206  O   HOH T1205       0.106 -16.988  58.617  1.00  0.45           O  
HETATM 1207  O   HOH T1206      12.345 -32.422  46.660  1.00  0.45           O  
HETATM 1208  O   HOH T1207      19.696  36.738  25.969  1.00  0.45           O  
HETATM 1209  O   HOH T1208      30.329   8.629  70.331  1.00  0.45           O  
HETATM 1210  O   HOH T1209      12.328   2.276  49.401  1.00  0.45           O  
HETATM 1211  O   HOH T1210     -21.786  23.564  34.123  1.00  0.45           O  
HETATM 1212  O   HOH T1211      17.676  11.815  36.621  1.00  0.45           O  
HETATM 1213  O   HOH T1212      -6.931 -15.177  60.559  1.00  0.45           O  
HETATM 1214  O   HOH T1213       6.285  21.971  60.943  1.00  0.45           O  
HETATM 1215  O   HOH T1214      39.877  -5.836  33.710  1.00  0.45           O  
HETATM 1216  O   HOH T1215      20.112 -24.573  12.713  1.00  0.45           O  
HETATM 1217  O   HOH T1216       9.243  33.615  50.942  1.00  0.45           O  
HETATM 1218  O   HOH T1217      -1.562 -38.445  51.097  1.00  0.45           O  
HETATM 1219  O   HOH T1218       9.809 -35.054  41.194  1.00  0.45           O  
HETATM 1220  O   HOH T1219       9.261 -21.436  19.402  1.00  0.45           O  
HETATM 1221  O   HOH T1220      29.130 -25.860  16.076  1.00  0.45           O  
HETATM 1222  O   HOH T1221      26.570  22.668  39.342  1.00  0.45           O  
HETATM 1223  O   HOH T1222      27.628   7.989  70.033  1.00  0.45           O  
HETATM 1224  O   HOH T1223      -5.583  25.571  33.519  1.00  0.45           O  
HETATM 1225  O   HOH T1224       6.380   5.645   5.642  1.00  0.45           O  
HETATM 1226  O   HOH T1225     -18.106  11.753   8.763  1.00  0.45           O  
HETATM 1227  O   HOH T1226      45.458  -8.762  35.975  1.00  0.45           O  
HETATM 1228  O   HOH T1227      14.496  -5.823   2.001  1.00  0.45           O  
HETATM 1229  O   HOH T1228       3.124 -11.405   7.355  1.00  0.45           O  
HETATM 1230  O   HOH T1229      23.470 -22.466  12.166  1.00  0.45           O  
HETATM 1231  O   HOH T1230      39.862  31.326  27.539  1.00  0.45           O  
HETATM 1232  O   HOH T1231       2.534  11.163   7.237  1.00  0.45           O  
HETATM 1233  O   HOH T1232      -3.273 -38.440  41.241  1.00  0.45           O  
HETATM 1234  O   HOH T1233      -2.039 -14.950  -6.276  1.00  0.45           O  
HETATM 1235  O   HOH T1234      34.577  34.037  18.561  1.00  0.45           O  
HETATM 1236  O   HOH T1235      26.489 -20.734  15.986  1.00  0.45           O  
HETATM 1237  O   HOH T1236       6.240 -30.682  55.925  1.00  0.45           O  
HETATM 1238  O   HOH T1237       0.182  23.433  34.039  1.00  0.45           O  
HETATM 1239  O   HOH T1238      48.205 -10.916  29.835  1.00  0.45           O  
HETATM 1240  O   HOH T1239       0.471 -36.723  50.455  1.00  0.45           O  
HETATM 1241  O   HOH T1240      16.194  32.520  14.531  1.00  0.45           O  
HETATM 1242  O   HOH T1241      22.632 -16.743  33.986  1.00  0.45           O  
HETATM 1243  O   HOH T1242      20.364 -17.924  35.195  1.00  0.45           O  
HETATM 1244  O   HOH T1243      17.075 -11.153  52.581  1.00  0.45           O  
HETATM 1245  O   HOH T1244      60.317   0.756  22.490  1.00  0.45           O  
HETATM 1246  O   HOH T1245      25.681   6.391  68.812  1.00  0.46           O  
HETATM 1247  O   HOH T1246       5.866 -32.413  29.013  1.00  0.46           O  
HETATM 1248  O   HOH T1247       2.717   2.513  17.739  1.00  0.46           O  
HETATM 1249  O   HOH T1248       3.231  25.306  32.273  1.00  0.46           O  
HETATM 1250  O   HOH T1249       6.702 -14.634  48.881  1.00  0.46           O  
HETATM 1251  O   HOH T1250      -6.528 -34.823  28.233  1.00  0.46           O  
HETATM 1252  O   HOH T1251       3.429 -20.300  -7.730  1.00  0.46           O  
HETATM 1253  O   HOH T1252      22.701 -18.364  36.406  1.00  0.46           O  
HETATM 1254  O   HOH T1253      23.661  12.508  -2.395  1.00  0.46           O  
HETATM 1255  O   HOH T1254      24.285 -28.409  -8.967  1.00  0.46           O  
HETATM 1256  O   HOH T1255      -6.406   2.467  19.435  1.00  0.46           O  
HETATM 1257  O   HOH T1256      39.444 -22.122   2.285  1.00  0.46           O  
HETATM 1258  O   HOH T1257     -22.776  11.545  28.458  1.00  0.46           O  
HETATM 1259  O   HOH T1258      29.662 -32.126  51.119  1.00  0.46           O  
HETATM 1260  O   HOH T1259     -15.550 -27.088  39.891  1.00  0.46           O  
HETATM 1261  O   HOH T1260      28.955   1.870  22.430  1.00  0.46           O  
HETATM 1262  O   HOH T1261      15.870 -15.434  40.414  1.00  0.46           O  
HETATM 1263  O   HOH T1262       1.133 -13.662 -14.329  1.00  0.46           O  
HETATM 1264  O   HOH T1263      11.192  -6.525  35.714  1.00  0.46           O  
HETATM 1265  O   HOH T1264      42.081  15.190  68.396  1.00  0.46           O  
HETATM 1266  O   HOH T1265      14.327   9.467  39.612  1.00  0.46           O  
HETATM 1267  O   HOH T1266       6.479 -10.029  59.032  1.00  0.46           O  
HETATM 1268  O   HOH T1267      11.467  -2.837  39.609  1.00  0.46           O  
HETATM 1269  O   HOH T1268      -0.012  31.497  -0.969  1.00  0.46           O  
HETATM 1270  O   HOH T1269      -3.992   3.460  64.132  1.00  0.46           O  
HETATM 1271  O   HOH T1270      26.037  22.036  41.968  1.00  0.46           O  
HETATM 1272  O   HOH T1271       8.435  -4.415  37.153  1.00  0.46           O  
HETATM 1273  O   HOH T1272      28.715  17.874  33.531  1.00  0.46           O  
HETATM 1274  O   HOH T1273       2.632  25.029  25.719  1.00  0.46           O  
HETATM 1275  O   HOH T1274     -17.028   4.735  38.787  1.00  0.46           O  
HETATM 1276  O   HOH T1275      44.604  -7.081   4.198  1.00  0.46           O  
HETATM 1277  O   HOH T1276      26.938   3.551  51.923  1.00  0.46           O  
HETATM 1278  O   HOH T1277      21.069   1.648  17.091  1.00  0.46           O  
HETATM 1279  O   HOH T1278      18.297   6.257  46.643  1.00  0.46           O  
HETATM 1280  O   HOH T1279       0.506  -2.976  15.715  1.00  0.46           O  
HETATM 1281  O   HOH T1280      40.421  17.462  -0.139  1.00  0.46           O  
HETATM 1282  O   HOH T1281     -13.867   0.461  32.348  1.00  0.46           O  
HETATM 1283  O   HOH T1282      -4.252 -30.291  52.062  1.00  0.46           O  
HETATM 1284  O   HOH T1283       6.350   3.493  58.474  1.00  0.46           O  
HETATM 1285  O   HOH T1284      34.073 -16.574  24.200  1.00  0.46           O  
HETATM 1286  O   HOH T1285      -7.447  23.568  48.263  1.00  0.46           O  
HETATM 1287  O   HOH T1286      18.033  36.267  54.125  1.00  0.46           O  
HETATM 1288  O   HOH T1287      33.379   8.418  29.289  1.00  0.46           O  
HETATM 1289  O   HOH T1288      28.380  28.172   2.343  1.00  0.46           O  
HETATM 1290  O   HOH T1289      51.472 -21.897  53.238  1.00  0.46           O  
HETATM 1291  O   HOH T1290      26.829 -10.300  32.935  1.00  0.46           O  
HETATM 1292  O   HOH T1291      46.055  11.406  -0.093  1.00  0.46           O  
HETATM 1293  O   HOH T1292      13.548 -23.178  29.205  1.00  0.46           O  
HETATM 1294  O   HOH T1293      53.599  -6.114  53.442  1.00  0.46           O  
HETATM 1295  O   HOH T1294      -4.959  18.885  56.427  1.00  0.46           O  
HETATM 1296  O   HOH T1295       0.711  -5.720  32.402  1.00  0.46           O  
HETATM 1297  O   HOH T1296      42.996  17.792  53.297  1.00  0.46           O  
HETATM 1298  O   HOH T1297      -0.063  38.090  12.971  1.00  0.46           O  
HETATM 1299  O   HOH T1298      46.377  -6.221  35.260  1.00  0.46           O  
HETATM 1300  O   HOH T1299      12.041   1.825  19.654  1.00  0.46           O  
HETATM 1301  O   HOH T1300      16.893  -8.838  -5.938  1.00  0.46           O  
HETATM 1302  O   HOH T1301      42.968   0.586   3.455  1.00  0.46           O  
HETATM 1303  O   HOH T1302      32.229   4.658  27.308  1.00  0.46           O  
HETATM 1304  O   HOH T1303      43.694  29.300   2.448  1.00  0.46           O  
HETATM 1305  O   HOH T1304      39.689  -0.139  21.083  1.00  0.46           O  
HETATM 1306  O   HOH T1305     -20.966  23.743  20.677  1.00  0.46           O  
HETATM 1307  O   HOH T1306      36.592  19.170  37.954  1.00  0.46           O  
HETATM 1308  O   HOH T1307      -2.513 -29.112  20.171  1.00  0.46           O  
HETATM 1309  O   HOH T1308      -2.204   7.185  13.082  1.00  0.46           O  
HETATM 1310  O   HOH T1309      16.880   3.904  47.132  1.00  0.46           O  
HETATM 1311  O   HOH T1310      44.846  -7.754  29.757  1.00  0.46           O  
HETATM 1312  O   HOH T1311      45.646  -9.129  27.514  1.00  0.46           O  
HETATM 1313  O   HOH T1312      29.123 -27.629  53.328  1.00  0.46           O  
HETATM 1314  O   HOH T1313      19.253  35.025  51.922  1.00  0.46           O  
HETATM 1315  O   HOH T1314      42.228  15.358  24.043  1.00  0.46           O  
HETATM 1316  O   HOH T1315      23.532  25.800  41.543  1.00  0.46           O  
HETATM 1317  O   HOH T1316      12.452  32.037  58.892  1.00  0.46           O  
HETATM 1318  O   HOH T1317      39.125 -21.868   8.237  1.00  0.46           O  
HETATM 1319  O   HOH T1318      16.646  -4.700  55.287  1.00  0.46           O  
HETATM 1320  O   HOH T1319       6.722 -10.457 -12.749  1.00  0.46           O  
HETATM 1321  O   HOH T1320      -9.902  20.045  -6.977  1.00  0.46           O  
HETATM 1322  O   HOH T1321      51.167 -11.525  38.864  1.00  0.46           O  
HETATM 1323  O   HOH T1322      12.654  20.708  67.282  1.00  0.46           O  
HETATM 1324  O   HOH T1323      25.501  13.333  33.816  1.00  0.46           O  
HETATM 1325  O   HOH T1324     -17.106  -8.195  44.631  1.00  0.46           O  
HETATM 1326  O   HOH T1325     -20.196  28.173  28.122  1.00  0.46           O  
HETATM 1327  O   HOH T1326      -5.616 -27.414   0.433  1.00  0.46           O  
HETATM 1328  O   HOH T1327      24.095 -23.670 -10.814  1.00  0.46           O  
HETATM 1329  O   HOH T1328     -14.645 -12.998  37.377  1.00  0.46           O  
HETATM 1330  O   HOH T1329      -0.855  10.620  44.113  1.00  0.46           O  
HETATM 1331  O   HOH T1330      28.054 -19.287  48.225  1.00  0.46           O  
HETATM 1332  O   HOH T1331     -13.900  27.341  18.794  1.00  0.46           O  
HETATM 1333  O   HOH T1332      36.186   5.688   6.330  1.00  0.46           O  
HETATM 1334  O   HOH T1333      35.820  11.877  34.861  1.00  0.46           O  
HETATM 1335  O   HOH T1334      11.517  -8.005   3.532  1.00  0.46           O  
HETATM 1336  O   HOH T1335      -5.732 -26.821  16.358  1.00  0.46           O  
HETATM 1337  O   HOH T1336       1.339 -32.233  15.370  1.00  0.46           O  
HETATM 1338  O   HOH T1337      25.020  -1.268  10.615  1.00  0.46           O  
HETATM 1339  O   HOH T1338      -1.812  -7.814  -1.804  1.00  0.46           O  
HETATM 1340  O   HOH T1339      14.781   6.331   3.915  1.00  0.47           O  
HETATM 1341  O   HOH T1340      44.592 -22.696  60.458  1.00  0.47           O  
HETATM 1342  O   HOH T1341     -10.628  32.571  10.343  1.00  0.47           O  
HETATM 1343  O   HOH T1342       3.483  28.396  -7.199  1.00  0.47           O  
HETATM 1344  O   HOH T1343      20.137  -1.976  62.164  1.00  0.47           O  
HETATM 1345  O   HOH T1344      39.056  32.918  47.238  1.00  0.47           O  
HETATM 1346  O   HOH T1345      45.214  15.555  51.954  1.00  0.47           O  
HETATM 1347  O   HOH T1346      49.465  17.071  24.611  1.00  0.47           O  
HETATM 1348  O   HOH T1347      36.926  32.502  62.966  1.00  0.47           O  
HETATM 1349  O   HOH T1348       8.802   8.707  53.869  1.00  0.47           O  
HETATM 1350  O   HOH T1349      43.847   9.046  49.923  1.00  0.47           O  
HETATM 1351  O   HOH T1350      34.114 -30.000  12.988  1.00  0.47           O  
HETATM 1352  O   HOH T1351      -6.102   8.151  56.557  1.00  0.47           O  
HETATM 1353  O   HOH T1352      56.315  -5.833   6.456  1.00  0.47           O  
HETATM 1354  O   HOH T1353       6.418   4.986  26.861  1.00  0.47           O  
HETATM 1355  O   HOH T1354     -11.440  27.462   6.650  1.00  0.47           O  
HETATM 1356  O   HOH T1355      31.879 -11.207  19.728  1.00  0.47           O  
HETATM 1357  O   HOH T1356      34.809 -24.186  -8.116  1.00  0.47           O  
HETATM 1358  O   HOH T1357      31.519  21.117  29.760  1.00  0.47           O  
HETATM 1359  O   HOH T1358     -10.000  -7.987  33.081  1.00  0.47           O  
HETATM 1360  O   HOH T1359       5.963 -12.011  49.222  1.00  0.47           O  
HETATM 1361  O   HOH T1360      16.839  -0.510  53.376  1.00  0.47           O  
HETATM 1362  O   HOH T1361      16.982  20.228  13.874  1.00  0.47           O  
HETATM 1363  O   HOH T1362      10.194 -31.462  48.224  1.00  0.47           O  
HETATM 1364  O   HOH T1363       7.320  11.021  56.894  1.00  0.47           O  
HETATM 1365  O   HOH T1364      56.186 -37.573  15.500  1.00  0.47           O  
HETATM 1366  O   HOH T1365      14.652  13.767  33.793  1.00  0.47           O  
HETATM 1367  O   HOH T1366      58.148  14.068   7.777  1.00  0.47           O  
HETATM 1368  O   HOH T1367     -10.593  22.328  40.460  1.00  0.47           O  
HETATM 1369  O   HOH T1368      37.921 -13.604  33.100  1.00  0.47           O  
HETATM 1370  O   HOH T1369      22.637  10.543  -0.811  1.00  0.47           O  
HETATM 1371  O   HOH T1370      21.158 -20.975  12.049  1.00  0.47           O  
HETATM 1372  O   HOH T1371      31.640   0.915  64.268  1.00  0.47           O  
HETATM 1373  O   HOH T1372      37.890 -29.935  45.400  1.00  0.47           O  
HETATM 1374  O   HOH T1373      37.864  34.480  26.164  1.00  0.47           O  
HETATM 1375  O   HOH T1374      -6.590   5.125  18.593  1.00  0.47           O  
HETATM 1376  O   HOH T1375      50.288   5.157   0.676  1.00  0.47           O  
HETATM 1377  O   HOH T1376      25.124  -2.430  34.833  1.00  0.47           O  
HETATM 1378  O   HOH T1377      10.911 -26.709  52.550  1.00  0.47           O  
HETATM 1379  O   HOH T1378      21.823  32.408   8.971  1.00  0.47           O  
HETATM 1380  O   HOH T1379      15.645 -10.722  44.501  1.00  0.47           O  
HETATM 1381  O   HOH T1380      -1.244  30.611  22.864  1.00  0.47           O  
HETATM 1382  O   HOH T1381      50.220 -13.845  32.427  1.00  0.47           O  
HETATM 1383  O   HOH T1382       9.629  35.649  57.766  1.00  0.47           O  
HETATM 1384  O   HOH T1383     -18.760  15.157   9.499  1.00  0.47           O  
HETATM 1385  O   HOH T1384      -1.318  -3.111  27.028  1.00  0.47           O  
HETATM 1386  O   HOH T1385      24.580  15.018  69.634  1.00  0.47           O  
HETATM 1387  O   HOH T1386       6.334  18.598  66.237  1.00  0.47           O  
HETATM 1388  O   HOH T1387     -16.385 -18.730  27.885  1.00  0.47           O  
HETATM 1389  O   HOH T1388      50.221  -3.420  27.453  1.00  0.47           O  
HETATM 1390  O   HOH T1389      -5.790 -32.505  51.342  1.00  0.47           O  
HETATM 1391  O   HOH T1390     -14.702   1.774  42.819  1.00  0.47           O  
HETATM 1392  O   HOH T1391     -15.674   9.666  43.046  1.00  0.47           O  
HETATM 1393  O   HOH T1392      -0.931  34.207  -0.870  1.00  0.47           O  
HETATM 1394  O   HOH T1393      12.336  21.870  17.083  1.00  0.47           O  
HETATM 1395  O   HOH T1394      37.987  -1.680  -2.806  1.00  0.47           O  
HETATM 1396  O   HOH T1395      -3.181  12.195  44.902  1.00  0.47           O  
HETATM 1397  O   HOH T1396      50.281 -19.688  51.976  1.00  0.47           O  
HETATM 1398  O   HOH T1397      -4.787 -16.385  59.225  1.00  0.47           O  
HETATM 1399  O   HOH T1398      42.255 -32.229  39.743  1.00  0.47           O  
HETATM 1400  O   HOH T1399      44.148   4.756  50.873  1.00  0.47           O  
HETATM 1401  O   HOH T1400      36.638   7.364  63.927  1.00  0.47           O  
HETATM 1402  O   HOH T1401      42.210  -4.588   1.415  1.00  0.47           O  
HETATM 1403  O   HOH T1402      25.048 -20.097  41.157  1.00  0.47           O  
HETATM 1404  O   HOH T1403      -0.941 -18.395  39.858  1.00  0.47           O  
HETATM 1405  O   HOH T1404      29.130 -24.337  13.729  1.00  0.47           O  
HETATM 1406  O   HOH T1405      32.690  23.670  66.591  1.00  0.47           O  
HETATM 1407  O   HOH T1406      54.379 -17.205  42.909  1.00  0.47           O  
HETATM 1408  O   HOH T1407      20.168 -19.439   7.571  1.00  0.47           O  
HETATM 1409  O   HOH T1408      18.707  32.425  19.352  1.00  0.47           O  
HETATM 1410  O   HOH T1409      46.797 -24.348  60.308  1.00  0.47           O  
HETATM 1411  O   HOH T1410       7.161 -28.142  55.127  1.00  0.47           O  
HETATM 1412  O   HOH T1411      32.410  23.424  30.785  1.00  0.47           O  
HETATM 1413  O   HOH T1412      42.846  -8.125  62.408  1.00  0.47           O  
HETATM 1414  O   HOH T1413      17.061  31.526  44.055  1.00  0.47           O  
HETATM 1415  O   HOH T1414      23.542  20.283  34.415  1.00  0.47           O  
HETATM 1416  O   HOH T1415      -6.513 -19.504   1.462  1.00  0.47           O  
HETATM 1417  O   HOH T1416      21.656  -9.897  32.437  1.00  0.47           O  
HETATM 1418  O   HOH T1417      51.382 -35.350  15.179  1.00  0.47           O  
HETATM 1419  O   HOH T1418      -4.182 -40.729  40.005  1.00  0.47           O  
HETATM 1420  O   HOH T1419      26.814   3.177  21.272  1.00  0.47           O  
HETATM 1421  O   HOH T1420      56.057   7.619  20.106  1.00  0.47           O  
HETATM 1422  O   HOH T1421      57.127 -17.926  42.181  1.00  0.47           O  
HETATM 1423  O   HOH T1422      30.083 -25.380   9.843  1.00  0.47           O  
HETATM 1424  O   HOH T1423      37.346  16.092  -2.614  1.00  0.47           O  
HETATM 1425  O   HOH T1424      15.532  -6.534  -6.927  1.00  0.48           O  
HETATM 1426  O   HOH T1425      -4.029   7.980  -0.007  1.00  0.48           O  
HETATM 1427  O   HOH T1426      25.693  27.794   2.302  1.00  0.48           O  
HETATM 1428  O   HOH T1427      -3.267  -1.356  17.302  1.00  0.48           O  
HETATM 1429  O   HOH T1428     -16.607  13.303  14.465  1.00  0.48           O  
HETATM 1430  O   HOH T1429      13.785 -20.469  51.858  1.00  0.48           O  
HETATM 1431  O   HOH T1430      42.637   4.748   2.080  1.00  0.48           O  
HETATM 1432  O   HOH T1431      13.872  -6.307  35.650  1.00  0.48           O  
HETATM 1433  O   HOH T1432      38.751 -29.977  56.820  1.00  0.48           O  
HETATM 1434  O   HOH T1433      17.145  36.373  56.916  1.00  0.48           O  
HETATM 1435  O   HOH T1434       7.813  -9.934  47.083  1.00  0.48           O  
HETATM 1436  O   HOH T1435      13.041   7.133  38.751  1.00  0.48           O  
HETATM 1437  O   HOH T1436      35.616 -36.335  28.583  1.00  0.48           O  
HETATM 1438  O   HOH T1437      18.479   4.251   9.881  1.00  0.48           O  
HETATM 1439  O   HOH T1438     -13.748  22.269  39.702  1.00  0.48           O  
HETATM 1440  O   HOH T1439      34.128  -3.358  63.481  1.00  0.48           O  
HETATM 1441  O   HOH T1440       3.119  18.601  20.602  1.00  0.48           O  
HETATM 1442  O   HOH T1441     -15.390 -16.397  51.015  1.00  0.48           O  
HETATM 1443  O   HOH T1442      41.683  31.833  50.048  1.00  0.48           O  
HETATM 1444  O   HOH T1443       8.035  27.212  28.320  1.00  0.48           O  
HETATM 1445  O   HOH T1444     -24.788  16.185  27.128  1.00  0.48           O  
HETATM 1446  O   HOH T1445      30.113  -4.117  19.222  1.00  0.48           O  
HETATM 1447  O   HOH T1446      39.797  -1.268  59.059  1.00  0.48           O  
HETATM 1448  O   HOH T1447       4.981  30.126  -5.614  1.00  0.48           O  
HETATM 1449  O   HOH T1448      56.493 -20.748  36.409  1.00  0.48           O  
HETATM 1450  O   HOH T1449      15.219   4.876  56.616  1.00  0.48           O  
HETATM 1451  O   HOH T1450      23.364   5.763   8.840  1.00  0.48           O  
HETATM 1452  O   HOH T1451      58.509   0.057  15.918  1.00  0.48           O  
HETATM 1453  O   HOH T1452      33.065 -20.018  58.553  1.00  0.48           O  
HETATM 1454  O   HOH T1453      22.925  13.008  69.280  1.00  0.48           O  
HETATM 1455  O   HOH T1454      20.934  22.853  42.814  1.00  0.48           O  
HETATM 1456  O   HOH T1455      15.582  11.399  34.863  1.00  0.48           O  
HETATM 1457  O   HOH T1456       7.056  -2.454  11.233  1.00  0.48           O  
HETATM 1458  O   HOH T1457      48.890 -23.599  55.496  1.00  0.48           O  
HETATM 1459  O   HOH T1458       4.176   2.473  24.604  1.00  0.48           O  
HETATM 1460  O   HOH T1459       0.635  -1.524  28.267  1.00  0.48           O  
HETATM 1461  O   HOH T1460      13.936   1.640  51.589  1.00  0.48           O  
HETATM 1462  O   HOH T1461     -12.804 -32.946  43.046  1.00  0.48           O  
HETATM 1463  O   HOH T1462     -17.854  -4.129  51.857  1.00  0.48           O  
HETATM 1464  O   HOH T1463      25.171 -13.617  27.116  1.00  0.48           O  
HETATM 1465  O   HOH T1464      -3.205 -28.221  -0.613  1.00  0.48           O  
HETATM 1466  O   HOH T1465      10.114  13.585  37.194  1.00  0.48           O  
HETATM 1467  O   HOH T1466      14.647  24.347  29.167  1.00  0.48           O  
HETATM 1468  O   HOH T1467       7.288 -17.311  48.334  1.00  0.48           O  
HETATM 1469  O   HOH T1468      19.497 -16.480  44.420  1.00  0.48           O  
HETATM 1470  O   HOH T1469      36.817  31.804  57.920  1.00  0.48           O  
HETATM 1471  O   HOH T1470      20.984 -30.087  -0.769  1.00  0.48           O  
HETATM 1472  O   HOH T1471      42.757 -11.258  35.371  1.00  0.48           O  
HETATM 1473  O   HOH T1472      16.382  12.701  53.479  1.00  0.48           O  
HETATM 1474  O   HOH T1473      14.941  -4.603  48.552  1.00  0.48           O  
HETATM 1475  O   HOH T1474       1.936 -32.252  12.681  1.00  0.48           O  
HETATM 1476  O   HOH T1475      52.683 -21.875  28.264  1.00  0.48           O  
HETATM 1477  O   HOH T1476      -2.741   9.679  42.211  1.00  0.48           O  
HETATM 1478  O   HOH T1477     -10.309  31.438  22.580  1.00  0.48           O  
HETATM 1479  O   HOH T1478     -11.309 -10.519  22.919  1.00  0.48           O  
HETATM 1480  O   HOH T1479      43.844  20.232  67.291  1.00  0.48           O  
HETATM 1481  O   HOH T1480     -12.891 -14.335  58.532  1.00  0.48           O  
HETATM 1482  O   HOH T1481      27.466  28.478  43.703  1.00  0.48           O  
HETATM 1483  O   HOH T1482      21.862   7.370  18.590  1.00  0.48           O  
HETATM 1484  O   HOH T1483      17.187  20.381   0.773  1.00  0.48           O  
HETATM 1485  O   HOH T1484     -22.009  18.394  18.440  1.00  0.48           O  
HETATM 1486  O   HOH T1485     -16.431 -26.633  30.667  1.00  0.48           O  
HETATM 1487  O   HOH T1486      16.577  -5.827  19.122  1.00  0.48           O  
HETATM 1488  O   HOH T1487       4.472  37.316  52.012  1.00  0.48           O  
HETATM 1489  O   HOH T1488      18.779 -22.853  33.610  1.00  0.48           O  
HETATM 1490  O   HOH T1489      42.111 -21.879   3.385  1.00  0.48           O  
HETATM 1491  O   HOH T1490     -15.590 -13.586  58.380  1.00  0.48           O  
HETATM 1492  O   HOH T1491      50.090  -8.139   3.959  1.00  0.48           O  
HETATM 1493  O   HOH T1492       9.774   6.117  23.940  1.00  0.48           O  
HETATM 1494  O   HOH T1493      29.105  13.185  32.359  1.00  0.48           O  
HETATM 1495  O   HOH T1494      26.722 -31.571  -3.560  1.00  0.48           O  
HETATM 1496  O   HOH T1495     -12.694   8.627  12.016  1.00  0.48           O  
HETATM 1497  O   HOH T1496      41.315  22.805  31.776  1.00  0.48           O  
HETATM 1498  O   HOH T1497      33.674 -28.019 -17.862  1.00  0.48           O  
HETATM 1499  O   HOH T1498      23.626  23.320  42.781  1.00  0.48           O  
HETATM 1500  O   HOH T1499      13.097  -1.953  10.398  1.00  0.49           O  
HETATM 1501  O   HOH T1500      50.376 -25.806  13.975  1.00  0.49           O  
HETATM 1502  O   HOH T1501      13.309  -2.375  48.667  1.00  0.49           O  
HETATM 1503  O   HOH T1502     -18.494  -5.236  49.426  1.00  0.49           O  
HETATM 1504  O   HOH T1503       4.278  14.415  57.699  1.00  0.49           O  
HETATM 1505  O   HOH T1504      15.364  -3.153  21.886  1.00  0.49           O  
HETATM 1506  O   HOH T1505      57.509 -25.920  44.587  1.00  0.49           O  
HETATM 1507  O   HOH T1506      -2.410  36.538  12.202  1.00  0.49           O  
HETATM 1508  O   HOH T1507      23.411  17.656  35.220  1.00  0.49           O  
HETATM 1509  O   HOH T1508      25.205 -18.375  43.339  1.00  0.49           O  
HETATM 1510  O   HOH T1509      42.442  18.262  26.133  1.00  0.49           O  
HETATM 1511  O   HOH T1510      34.864   5.173  63.725  1.00  0.49           O  
HETATM 1512  O   HOH T1511      14.566 -20.454  49.170  1.00  0.49           O  
HETATM 1513  O   HOH T1512     -14.814 -29.429  44.089  1.00  0.49           O  
HETATM 1514  O   HOH T1513      14.704  -2.130  15.927  1.00  0.49           O  
HETATM 1515  O   HOH T1514     -13.576  21.991  42.990  1.00  0.49           O  
HETATM 1516  O   HOH T1515     -11.213  23.253  -1.014  1.00  0.49           O  
HETATM 1517  O   HOH T1516     -24.770  22.632  18.678  1.00  0.49           O  
HETATM 1518  O   HOH T1517      37.078  10.768   8.879  1.00  0.49           O  
HETATM 1519  O   HOH T1518      34.139  -5.699  64.817  1.00  0.49           O  
HETATM 1520  O   HOH T1519      33.161   8.504   4.663  1.00  0.49           O  
HETATM 1521  O   HOH T1520      45.806  35.943  20.496  1.00  0.49           O  
HETATM 1522  O   HOH T1521      -9.064 -37.421  42.134  1.00  0.49           O  
HETATM 1523  O   HOH T1522      23.533 -19.292  38.945  1.00  0.49           O  
HETATM 1524  O   HOH T1523     -13.978  -0.849  43.166  1.00  0.49           O  
HETATM 1525  O   HOH T1524      42.079  16.165  40.340  1.00  0.49           O  
HETATM 1526  O   HOH T1525      10.818  35.839  14.589  1.00  0.49           O  
HETATM 1527  O   HOH T1526      10.335  39.984  11.565  1.00  0.49           O  
HETATM 1528  O   HOH T1527      -7.716  13.920  45.612  1.00  0.49           O  
HETATM 1529  O   HOH T1528      12.232  -1.951  42.168  1.00  0.49           O  
HETATM 1530  O   HOH T1529      21.988 -12.945  59.299  1.00  0.49           O  
HETATM 1531  O   HOH T1530       6.008  20.183  -4.982  1.00  0.49           O  
HETATM 1532  O   HOH T1531      -3.519 -29.860  22.639  1.00  0.49           O  
HETATM 1533  O   HOH T1532     -16.456 -17.599  31.513  1.00  0.49           O  
HETATM 1534  O   HOH T1533      27.147   7.025  26.114  1.00  0.49           O  
HETATM 1535  O   HOH T1534      21.745  34.357  18.518  1.00  0.49           O  
HETATM 1536  O   HOH T1535       7.243   8.316  56.099  1.00  0.49           O  
HETATM 1537  O   HOH T1536      28.967 -22.095  39.842  1.00  0.49           O  
HETATM 1538  O   HOH T1537      -1.444 -12.490  37.736  1.00  0.49           O  
HETATM 1539  O   HOH T1538       5.388 -33.271  55.226  1.00  0.49           O  
HETATM 1540  O   HOH T1539      21.818   1.730   7.947  1.00  0.49           O  
HETATM 1541  O   HOH T1540      16.595  -7.289   3.095  1.00  0.49           O  
HETATM 1542  O   HOH T1541      11.486   1.570   5.703  1.00  0.49           O  
HETATM 1543  O   HOH T1542      -4.314   0.984  18.178  1.00  0.49           O  
HETATM 1544  O   HOH T1543      -9.230  -1.036  37.746  1.00  0.49           O  
HETATM 1545  O   HOH T1544      14.604   6.436  51.647  1.00  0.49           O  
HETATM 1546  O   HOH T1545       6.825   5.756  33.376  1.00  0.49           O  
HETATM 1547  O   HOH T1546      35.622   8.459   5.957  1.00  0.49           O  
HETATM 1548  O   HOH T1547      27.952  27.666  29.458  1.00  0.49           O  
HETATM 1549  O   HOH T1548      -5.739  -5.688  24.351  1.00  0.49           O  
HETATM 1550  O   HOH T1549      55.849  -8.033   7.916  1.00  0.49           O  
HETATM 1551  O   HOH T1550      33.895  -0.665  64.123  1.00  0.49           O  
HETATM 1552  O   HOH T1551      -6.113  23.607  25.926  1.00  0.49           O  
HETATM 1553  O   HOH T1552      38.602 -16.174  -8.115  1.00  0.49           O  
HETATM 1554  O   HOH T1553       6.447  34.784  42.082  1.00  0.49           O  
HETATM 1555  O   HOH T1554      12.403  17.263  57.520  1.00  0.49           O  
HETATM 1556  O   HOH T1555      40.807  -5.874  -0.750  1.00  0.49           O  
HETATM 1557  O   HOH T1556      45.459 -10.451  30.026  1.00  0.49           O  
HETATM 1558  O   HOH T1557       3.247  20.248  -4.908  1.00  0.49           O  
HETATM 1559  O   HOH T1558      30.223  15.659  32.848  1.00  0.49           O  
HETATM 1560  O   HOH T1559      26.645   3.164  66.106  1.00  0.49           O  
HETATM 1561  O   HOH T1560      -5.071 -30.583  24.903  1.00  0.49           O  
HETATM 1562  O   HOH T1561      30.096 -27.738  17.682  1.00  0.49           O  
HETATM 1563  O   HOH T1562      28.907  -1.826  35.693  1.00  0.49           O  
HETATM 1564  O   HOH T1563      18.636 -32.297   6.510  1.00  0.49           O  
HETATM 1565  O   HOH T1564     -16.855  31.103  31.118  1.00  0.49           O  
HETATM 1566  O   HOH T1565      31.342 -12.367 -13.166  1.00  0.49           O  
HETATM 1567  O   HOH T1566      20.686 -15.934  10.611  1.00  0.49           O  
HETATM 1568  O   HOH T1567      19.558 -26.982  26.618  1.00  0.49           O  
HETATM 1569  O   HOH T1568     -15.754   8.218  50.738  1.00  0.49           O  
HETATM 1570  O   HOH T1569      -2.578 -20.380  -8.079  1.00  0.49           O  
HETATM 1571  O   HOH T1570      43.581   6.090  62.516  1.00  0.49           O  
HETATM 1572  O   HOH T1571      20.886 -13.836  37.872  1.00  0.49           O  
HETATM 1573  O   HOH T1572      51.919  23.503   6.541  1.00  0.49           O  
HETATM 1574  O   HOH T1573      -4.666  -1.587  65.650  1.00  0.49           O  
HETATM 1575  O   HOH T1574      20.604  -0.740  15.808  1.00  0.49           O  
HETATM 1576  O   HOH T1575       9.926   3.590  22.946  1.00  0.49           O  
HETATM 1577  O   HOH T1576     -15.345   5.552  51.002  1.00  0.49           O  
HETATM 1578  O   HOH T1577      49.275  13.787  25.929  1.00  0.49           O  
HETATM 1579  O   HOH T1578     -10.919  -2.239  39.527  1.00  0.49           O  
HETATM 1580  O   HOH T1579      16.902   8.621  38.956  1.00  0.49           O  
HETATM 1581  O   HOH T1580     -13.388   9.124  47.356  1.00  0.49           O  
HETATM 1582  O   HOH T1581      20.573   3.941  43.649  1.00  0.49           O  
HETATM 1583  O   HOH T1582      52.004 -18.741  15.350  1.00  0.50           O  
HETATM 1584  O   HOH T1583       8.967  28.411  -7.027  1.00  0.50           O  
HETATM 1585  O   HOH T1584       8.638  -5.569  30.961  1.00  0.50           O  
HETATM 1586  O   HOH T1585      47.675  30.422  15.411  1.00  0.50           O  
HETATM 1587  O   HOH T1586      26.300  40.224  25.480  1.00  0.50           O  
HETATM 1588  O   HOH T1587      26.035  15.458  51.871  1.00  0.50           O  
HETATM 1589  O   HOH T1588      15.865   1.438   7.274  1.00  0.50           O  
HETATM 1590  O   HOH T1589       6.457  13.811  -1.058  1.00  0.50           O  
HETATM 1591  O   HOH T1590      16.834   2.191  54.057  1.00  0.50           O  
HETATM 1592  O   HOH T1591      -1.614 -41.477  35.650  1.00  0.50           O  
HETATM 1593  O   HOH T1592      29.545 -11.218 -10.109  1.00  0.50           O  
HETATM 1594  O   HOH T1593      44.498  -3.236  37.354  1.00  0.50           O  
HETATM 1595  O   HOH T1594      41.383 -29.882  57.531  1.00  0.50           O  
HETATM 1596  O   HOH T1595     -13.695   7.196  45.491  1.00  0.50           O  
HETATM 1597  O   HOH T1596      40.698   7.815  30.069  1.00  0.50           O  
HETATM 1598  O   HOH T1597      30.495 -35.676  22.071  1.00  0.50           O  
HETATM 1599  O   HOH T1598      15.789 -11.513  39.620  1.00  0.50           O  
HETATM 1600  O   HOH T1599      21.019 -20.847  24.973  1.00  0.50           O  
HETATM 1601  O   HOH T1600      35.293   7.276   8.455  1.00  0.50           O  
HETATM 1602  O   HOH T1601      34.304  35.824  48.095  1.00  0.50           O  
HETATM 1603  O   HOH T1602      44.839   8.167   0.851  1.00  0.50           O  
HETATM 1604  O   HOH T1603      16.069 -13.349  43.820  1.00  0.50           O  
HETATM 1605  O   HOH T1604      39.817   1.521  59.089  1.00  0.50           O  
HETATM 1606  O   HOH T1605      16.509 -35.158  10.670  1.00  0.50           O  
HETATM 1607  O   HOH T1606      -6.484  25.927  46.982  1.00  0.50           O  
HETATM 1608  O   HOH T1607      24.174  25.921  29.544  1.00  0.50           O  
HETATM 1609  O   HOH T1608      34.880 -26.851 -15.608  1.00  0.50           O  
HETATM 1610  O   HOH T1609      34.232  24.101  23.782  1.00  0.50           O  
HETATM 1611  O   HOH T1610       5.875  26.741  66.141  1.00  0.50           O  
HETATM 1612  O   HOH T1611     -15.505   4.016  17.809  1.00  0.50           O  
HETATM 1613  O   HOH T1612      -7.384 -19.498   6.096  1.00  0.50           O  
HETATM 1614  O   HOH T1613       2.411   7.344  61.842  1.00  0.50           O  
HETATM 1615  O   HOH T1614      -7.511   8.899  54.275  1.00  0.50           O  
HETATM 1616  O   HOH T1615       5.673 -31.327  53.252  1.00  0.50           O  
HETATM 1617  O   HOH T1616      18.516   0.997  16.343  1.00  0.50           O  
HETATM 1618  O   HOH T1617     -16.212   0.187  44.452  1.00  0.50           O  
HETATM 1619  O   HOH T1618     -11.156  25.433  -4.729  1.00  0.50           O  
HETATM 1620  O   HOH T1619      26.865  -4.089  33.240  1.00  0.50           O  
HETATM 1621  O   HOH T1620       2.939  23.532  63.122  1.00  0.50           O  
HETATM 1622  O   HOH T1621     -24.302   9.019  28.416  1.00  0.50           O  
HETATM 1623  O   HOH T1622       9.466 -16.893  46.641  1.00  0.50           O  
HETATM 1624  O   HOH T1623     -13.487  -1.512  40.495  1.00  0.50           O  
HETATM 1625  O   HOH T1624      54.356 -18.953  35.790  1.00  0.50           O  
HETATM 1626  O   HOH T1625       8.965  14.586  41.321  1.00  0.50           O  
HETATM 1627  O   HOH T1626      21.836 -22.004  17.861  1.00  0.50           O  
HETATM 1628  O   HOH T1627     -12.176 -15.401  62.603  1.00  0.50           O  
HETATM 1629  O   HOH T1628      31.680  28.176  39.050  1.00  0.50           O  
HETATM 1630  O   HOH T1629      25.343  19.433  36.331  1.00  0.50           O  
HETATM 1631  O   HOH T1630      12.760   3.248  23.545  1.00  0.50           O  
HETATM 1632  O   HOH T1631      41.267 -20.488   7.111  1.00  0.50           O  
HETATM 1633  O   HOH T1632      34.793 -26.792 -10.613  1.00  0.50           O  
HETATM 1634  O   HOH T1633      33.698 -25.210 -17.638  1.00  0.50           O  
HETATM 1635  O   HOH T1634      27.647 -28.614 -10.322  1.00  0.50           O  
HETATM 1636  O   HOH T1635      -5.026  15.923  53.999  1.00  0.50           O  
HETATM 1637  O   HOH T1636      34.969 -21.926  -9.565  1.00  0.50           O  
HETATM 1638  O   HOH T1637     -18.008 -23.252  45.328  1.00  0.50           O  
HETATM 1639  O   HOH T1638      16.506 -32.766   2.166  1.00  0.50           O  
HETATM 1640  O   HOH T1639      38.504  -3.400  16.655  1.00  0.50           O  
HETATM 1641  O   HOH T1640     -21.407  18.094  15.705  1.00  0.50           O  
HETATM 1642  O   HOH T1641      28.042 -21.847  13.776  1.00  0.50           O  
HETATM 1643  O   HOH T1642      29.003 -10.243  12.351  1.00  0.50           O  
HETATM 1644  O   HOH T1643     -10.937  -8.327  44.423  1.00  0.50           O  
HETATM 1645  O   HOH T1644      -1.878  34.336  18.014  1.00  0.50           O  
HETATM 1646  O   HOH T1645       7.058   1.089  34.042  1.00  0.50           O  
HETATM 1647  O   HOH T1646     -19.448  10.060  23.409  1.00  0.50           O  
HETATM 1648  O   HOH T1647     -11.253  22.917  -3.810  1.00  0.50           O  
HETATM 1649  O   HOH T1648      38.250   0.823  33.188  1.00  0.50           O  
HETATM 1650  O   HOH T1649      27.491  15.352  33.426  1.00  0.50           O  
HETATM 1651  O   HOH T1650      39.550  24.240  57.465  1.00  0.50           O  
HETATM 1652  O   HOH T1651      -4.823  31.906   8.853  1.00  0.50           O  
HETATM 1653  O   HOH T1652      14.470 -16.674  11.259  1.00  0.50           O  
HETATM 1654  O   HOH T1653      18.696   8.796  67.403  1.00  0.50           O  
HETATM 1655  O   HOH T1654     -21.092  -8.063  51.565  1.00  0.50           O  
HETATM 1656  O   HOH T1655      30.171 -23.500  33.809  1.00  0.50           O  
HETATM 1657  O   HOH T1656      30.353  -1.645  64.191  1.00  0.50           O  
HETATM 1658  O   HOH T1657      19.887 -22.465  19.647  1.00  0.50           O  
HETATM 1659  O   HOH T1658      40.192  17.106  24.952  1.00  0.50           O  
HETATM 1660  O   HOH T1659      -4.441  28.044  47.923  1.00  0.51           O  
HETATM 1661  O   HOH T1660      53.529 -16.131  58.882  1.00  0.51           O  
HETATM 1662  O   HOH T1661      24.320  20.530  31.824  1.00  0.51           O  
HETATM 1663  O   HOH T1662      15.608 -27.655  38.010  1.00  0.51           O  
HETATM 1664  O   HOH T1663      27.087   3.051   2.524  1.00  0.51           O  
HETATM 1665  O   HOH T1664     -18.520   1.767  36.444  1.00  0.51           O  
HETATM 1666  O   HOH T1665      20.077  33.935  13.878  1.00  0.51           O  
HETATM 1667  O   HOH T1666      32.485 -30.775  35.772  1.00  0.51           O  
HETATM 1668  O   HOH T1667      17.064  -1.214  16.948  1.00  0.51           O  
HETATM 1669  O   HOH T1668       8.788 -32.388  37.310  1.00  0.51           O  
HETATM 1670  O   HOH T1669      19.360  31.961  15.772  1.00  0.51           O  
HETATM 1671  O   HOH T1670      36.134  18.598  66.695  1.00  0.51           O  
HETATM 1672  O   HOH T1671     -16.357  10.816  40.498  1.00  0.51           O  
HETATM 1673  O   HOH T1672      49.944 -12.724  25.141  1.00  0.51           O  
HETATM 1674  O   HOH T1673     -21.295  12.633  36.384  1.00  0.51           O  
HETATM 1675  O   HOH T1674     -11.431 -22.160  21.437  1.00  0.51           O  
HETATM 1676  O   HOH T1675      21.143 -20.019  19.635  1.00  0.51           O  
HETATM 1677  O   HOH T1676      40.496 -14.453  -7.162  1.00  0.51           O  
HETATM 1678  O   HOH T1677      14.477  25.332  -2.564  1.00  0.51           O  
HETATM 1679  O   HOH T1678     -24.963  11.314  26.920  1.00  0.51           O  
HETATM 1680  O   HOH T1679       8.221  15.787  63.164  1.00  0.51           O  
HETATM 1681  O   HOH T1680       5.701 -24.728  52.705  1.00  0.51           O  
HETATM 1682  O   HOH T1681       7.309  19.281  27.451  1.00  0.51           O  
HETATM 1683  O   HOH T1682      -5.393  12.078  56.274  1.00  0.51           O  
HETATM 1684  O   HOH T1683      32.360  18.510  30.493  1.00  0.51           O  
HETATM 1685  O   HOH T1684      45.645  12.981  42.666  1.00  0.51           O  
HETATM 1686  O   HOH T1685      28.578  34.307  46.798  1.00  0.51           O  
HETATM 1687  O   HOH T1686      12.135  19.071  64.828  1.00  0.51           O  
HETATM 1688  O   HOH T1687      32.911  19.683  27.996  1.00  0.51           O  
HETATM 1689  O   HOH T1688      33.361   2.221  24.743  1.00  0.51           O  
HETATM 1690  O   HOH T1689      49.673 -11.498  27.600  1.00  0.51           O  
HETATM 1691  O   HOH T1690      42.808 -29.193  51.223  1.00  0.51           O  
HETATM 1692  O   HOH T1691      33.339  29.940  57.334  1.00  0.51           O  
HETATM 1693  O   HOH T1692      -6.759  28.808  53.553  1.00  0.51           O  
HETATM 1694  O   HOH T1693      41.935  -5.929  31.897  1.00  0.51           O  
HETATM 1695  O   HOH T1694       9.479   0.576  35.043  1.00  0.51           O  
HETATM 1696  O   HOH T1695       6.411 -33.276  49.293  1.00  0.51           O  
HETATM 1697  O   HOH T1696     -14.712  11.347  -0.639  1.00  0.51           O  
HETATM 1698  O   HOH T1697      -9.730  30.487   4.260  1.00  0.51           O  
HETATM 1699  O   HOH T1698      -4.815  -4.378  65.096  1.00  0.51           O  
HETATM 1700  O   HOH T1699      17.619  13.625  65.221  1.00  0.51           O  
HETATM 1701  O   HOH T1700       3.236  19.150  25.488  1.00  0.51           O  
HETATM 1702  O   HOH T1701       5.243  22.015  63.507  1.00  0.51           O  
HETATM 1703  O   HOH T1702      27.713   4.910  19.177  1.00  0.51           O  
HETATM 1704  O   HOH T1703      -0.162  38.183   7.759  1.00  0.51           O  
HETATM 1705  O   HOH T1704      -7.324   7.367  17.018  1.00  0.51           O  
HETATM 1706  O   HOH T1705      -4.942   7.275  18.522  1.00  0.51           O  
HETATM 1707  O   HOH T1706       6.797  -0.441  13.079  1.00  0.51           O  
HETATM 1708  O   HOH T1707     -12.210  22.648   3.773  1.00  0.51           O  
HETATM 1709  O   HOH T1708     -16.601  -0.664  51.682  1.00  0.51           O  
HETATM 1710  O   HOH T1709      17.302  13.626  34.610  1.00  0.51           O  
HETATM 1711  O   HOH T1710      11.615  -9.035  26.015  1.00  0.51           O  
HETATM 1712  O   HOH T1711      46.142  30.812   4.955  1.00  0.51           O  
HETATM 1713  O   HOH T1712      55.637 -19.488  43.927  1.00  0.51           O  
HETATM 1714  O   HOH T1713       2.324  25.893  34.844  1.00  0.51           O  
HETATM 1715  O   HOH T1714      34.796 -12.463  -8.223  1.00  0.51           O  
HETATM 1716  O   HOH T1715     -15.611 -15.056  53.465  1.00  0.51           O  
HETATM 1717  O   HOH T1716     -16.563  10.593   1.411  1.00  0.51           O  
HETATM 1718  O   HOH T1717      21.201 -16.490  42.218  1.00  0.51           O  
HETATM 1719  O   HOH T1718       6.257  28.415  -7.289  1.00  0.51           O  
HETATM 1720  O   HOH T1719      53.077 -35.917  13.055  1.00  0.52           O  
HETATM 1721  O   HOH T1720      15.285   3.961  52.561  1.00  0.52           O  
HETATM 1722  O   HOH T1721      20.360  25.991  71.209  1.00  0.52           O  
HETATM 1723  O   HOH T1722      -0.915  38.121  10.379  1.00  0.52           O  
HETATM 1724  O   HOH T1723      27.670 -21.097  36.363  1.00  0.52           O  
HETATM 1725  O   HOH T1724      -2.663   6.334  17.331  1.00  0.52           O  
HETATM 1726  O   HOH T1725      18.156  33.826  46.341  1.00  0.52           O  
HETATM 1727  O   HOH T1726       1.642  39.065   9.631  1.00  0.52           O  
HETATM 1728  O   HOH T1727     -21.861 -10.335  65.452  1.00  0.52           O  
HETATM 1729  O   HOH T1728      -5.856  24.894  40.354  1.00  0.52           O  
HETATM 1730  O   HOH T1729       2.332 -12.357 -12.133  1.00  0.52           O  
HETATM 1731  O   HOH T1730      21.165  -7.984  60.032  1.00  0.52           O  
HETATM 1732  O   HOH T1731      39.780  14.716  -0.304  1.00  0.52           O  
HETATM 1733  O   HOH T1732      28.735   8.010  28.227  1.00  0.52           O  
HETATM 1734  O   HOH T1733     -23.247  16.107  35.455  1.00  0.52           O  
HETATM 1735  O   HOH T1734     -14.967  -7.752  43.040  1.00  0.52           O  
HETATM 1736  O   HOH T1735     -15.374 -13.627  22.656  1.00  0.52           O  
HETATM 1737  O   HOH T1736      34.125  32.912  48.604  1.00  0.52           O  
HETATM 1738  O   HOH T1737      10.423  17.660  66.622  1.00  0.52           O  
HETATM 1739  O   HOH T1738     -21.555  21.043  17.789  1.00  0.52           O  
HETATM 1740  O   HOH T1739      50.283 -12.270  22.409  1.00  0.52           O  
HETATM 1741  O   HOH T1740      44.477  18.038  65.678  1.00  0.52           O  
HETATM 1742  O   HOH T1741      -4.347  25.348  45.342  1.00  0.52           O  
HETATM 1743  O   HOH T1742      10.143  25.812  -6.687  1.00  0.52           O  
HETATM 1744  O   HOH T1743       9.596 -33.837  -2.341  1.00  0.52           O  
HETATM 1745  O   HOH T1744      27.628 -16.667  57.602  1.00  0.52           O  
HETATM 1746  O   HOH T1745      50.291  -5.442   4.536  1.00  0.52           O  
HETATM 1747  O   HOH T1746     -11.359 -38.166  34.857  1.00  0.52           O  
HETATM 1748  O   HOH T1747      52.708  15.286   4.996  1.00  0.52           O  
HETATM 1749  O   HOH T1748      31.535   5.907   8.510  1.00  0.52           O  
HETATM 1750  O   HOH T1749      10.336  26.680  34.823  1.00  0.52           O  
HETATM 1751  O   HOH T1750      31.561  31.425  48.134  1.00  0.52           O  
HETATM 1752  O   HOH T1751      -7.930  -6.314  33.216  1.00  0.52           O  
HETATM 1753  O   HOH T1752      20.779 -17.091  21.881  1.00  0.52           O  
HETATM 1754  O   HOH T1753      -4.560  23.741  38.195  1.00  0.52           O  
HETATM 1755  O   HOH T1754     -15.976   9.716  14.675  1.00  0.52           O  
HETATM 1756  O   HOH T1755     -18.196 -15.525  34.000  1.00  0.52           O  
HETATM 1757  O   HOH T1756      16.330 -32.584   4.896  1.00  0.52           O  
HETATM 1758  O   HOH T1757      39.555 -26.010  60.212  1.00  0.52           O  
HETATM 1759  O   HOH T1758      29.943 -22.699  36.380  1.00  0.52           O  
HETATM 1760  O   HOH T1759      49.702 -15.821  15.302  1.00  0.52           O  
HETATM 1761  O   HOH T1760      19.084  26.560   1.346  1.00  0.52           O  
HETATM 1762  O   HOH T1761      15.262 -30.019  36.588  1.00  0.52           O  
HETATM 1763  O   HOH T1762      13.507  -6.294  50.331  1.00  0.52           O  
HETATM 1764  O   HOH T1763      47.066 -30.224  40.618  1.00  0.52           O  
HETATM 1765  O   HOH T1764       3.952   4.340  28.010  1.00  0.52           O  
HETATM 1766  O   HOH T1765       2.573   5.490  34.931  1.00  0.52           O  
HETATM 1767  O   HOH T1766      14.713  -6.335   4.728  1.00  0.52           O  
HETATM 1768  O   HOH T1767      13.861  17.763  63.188  1.00  0.52           O  
HETATM 1769  O   HOH T1768       2.125 -34.873  56.782  1.00  0.52           O  
HETATM 1770  O   HOH T1769     -19.472  28.320  21.870  1.00  0.52           O  
HETATM 1771  O   HOH T1770      -3.699  21.239  -1.907  1.00  0.52           O  
HETATM 1772  O   HOH T1771      36.702 -29.104  58.465  1.00  0.52           O  
HETATM 1773  O   HOH T1772     -24.350  23.307  33.288  1.00  0.52           O  
HETATM 1774  O   HOH T1773      35.553  -5.881  20.156  1.00  0.52           O  
HETATM 1775  O   HOH T1774      -3.574 -41.320  37.541  1.00  0.52           O  
HETATM 1776  O   HOH T1775      28.475   1.857  -7.187  1.00  0.52           O  
HETATM 1777  O   HOH T1776       3.275   4.136  39.385  1.00  0.52           O  
HETATM 1778  O   HOH T1777      14.057   0.251  49.099  1.00  0.52           O  
HETATM 1779  O   HOH T1778      32.236 -22.698  59.378  1.00  0.53           O  
HETATM 1780  O   HOH T1779      47.273   6.624  57.521  1.00  0.53           O  
HETATM 1781  O   HOH T1780      -2.519 -10.407  39.466  1.00  0.53           O  
HETATM 1782  O   HOH T1781      15.502  34.811  58.767  1.00  0.53           O  
HETATM 1783  O   HOH T1782      47.774   3.030  40.613  1.00  0.53           O  
HETATM 1784  O   HOH T1783      39.819  26.603  54.528  1.00  0.53           O  
HETATM 1785  O   HOH T1784       7.126   0.197  36.567  1.00  0.53           O  
HETATM 1786  O   HOH T1785      19.986 -29.923   6.153  1.00  0.53           O  
HETATM 1787  O   HOH T1786      -3.271  -5.682  -0.818  1.00  0.53           O  
HETATM 1788  O   HOH T1787      40.681 -25.931  14.405  1.00  0.53           O  
HETATM 1789  O   HOH T1788     -13.955 -21.966  24.716  1.00  0.53           O  
HETATM 1790  O   HOH T1789      32.330 -11.606  22.425  1.00  0.53           O  
HETATM 1791  O   HOH T1790       2.486  37.001  55.208  1.00  0.53           O  
HETATM 1792  O   HOH T1791      36.659  31.583  47.890  1.00  0.53           O  
HETATM 1793  O   HOH T1792       4.836  16.698  64.854  1.00  0.53           O  
HETATM 1794  O   HOH T1793      49.400  29.017  12.288  1.00  0.53           O  
HETATM 1795  O   HOH T1794       8.826   0.763  14.444  1.00  0.53           O  
HETATM 1796  O   HOH T1795      57.609 -21.123  29.069  1.00  0.53           O  
HETATM 1797  O   HOH T1796       7.945 -34.932  22.865  1.00  0.53           O  
HETATM 1798  O   HOH T1797       5.464   6.985  40.378  1.00  0.53           O  
HETATM 1799  O   HOH T1798      12.854  34.351  12.192  1.00  0.53           O  
HETATM 1800  O   HOH T1799      15.427  -9.599  24.974  1.00  0.53           O  
HETATM 1801  O   HOH T1800      57.656  -1.638  17.730  1.00  0.53           O  
HETATM 1802  O   HOH T1801      -0.586   8.162  60.771  1.00  0.53           O  
HETATM 1803  O   HOH T1802      29.673  38.705  49.419  1.00  0.53           O  
HETATM 1804  O   HOH T1803      -8.245   4.791  61.401  1.00  0.53           O  
HETATM 1805  O   HOH T1804      14.637 -18.003  47.989  1.00  0.53           O  
HETATM 1806  O   HOH T1805      -2.416   6.449  -1.570  1.00  0.53           O  
HETATM 1807  O   HOH T1806      39.899  36.218  25.023  1.00  0.53           O  
HETATM 1808  O   HOH T1807      19.262  30.228  60.269  1.00  0.53           O  
HETATM 1809  O   HOH T1808      28.953   4.638  21.747  1.00  0.53           O  
HETATM 1810  O   HOH T1809       6.566  25.473  30.047  1.00  0.53           O  
HETATM 1811  O   HOH T1810      -2.413  -6.497  35.548  1.00  0.53           O  
HETATM 1812  O   HOH T1811      14.734  -8.206  48.572  1.00  0.53           O  
HETATM 1813  O   HOH T1812      26.784  30.009  28.498  1.00  0.53           O  
HETATM 1814  O   HOH T1813      36.470 -12.984  -5.236  1.00  0.53           O  
HETATM 1815  O   HOH T1814      12.896   3.764  55.835  1.00  0.53           O  
HETATM 1816  O   HOH T1815       7.208   0.084  10.345  1.00  0.53           O  
HETATM 1817  O   HOH T1816       8.060  21.921  27.754  1.00  0.53           O  
HETATM 1818  O   HOH T1817      34.071  38.260   3.087  1.00  0.53           O  
HETATM 1819  O   HOH T1818      23.377  35.658   5.684  1.00  0.53           O  
HETATM 1820  O   HOH T1819      17.871 -13.410  51.115  1.00  0.53           O  
HETATM 1821  O   HOH T1820     -15.649 -12.134  24.952  1.00  0.53           O  
HETATM 1822  O   HOH T1821      -2.418   9.627  59.361  1.00  0.53           O  
HETATM 1823  O   HOH T1822      51.552   0.747   3.271  1.00  0.53           O  
HETATM 1824  O   HOH T1823      43.846  31.759  25.985  1.00  0.53           O  
HETATM 1825  O   HOH T1824      24.104  -4.170  33.064  1.00  0.53           O  
HETATM 1826  O   HOH T1825      41.418  16.992  28.372  1.00  0.53           O  
HETATM 1827  O   HOH T1826      -5.775  29.488  22.700  1.00  0.53           O  
HETATM 1828  O   HOH T1827      13.922  -1.583  39.771  1.00  0.53           O  
HETATM 1829  O   HOH T1828      28.668  26.977  64.289  1.00  0.53           O  
HETATM 1830  O   HOH T1829       4.840  -0.838  11.296  1.00  0.53           O  
HETATM 1831  O   HOH T1830      25.805  24.867  42.730  1.00  0.53           O  
HETATM 1832  O   HOH T1831     -18.268 -30.948  30.817  1.00  0.53           O  
HETATM 1833  O   HOH T1832       0.952   2.325   4.585  1.00  0.53           O  
HETATM 1834  O   HOH T1833      40.022   9.855  37.588  1.00  0.53           O  
HETATM 1835  O   HOH T1834      12.256  -4.787  33.994  1.00  0.53           O  
HETATM 1836  O   HOH T1835      23.910 -37.090  18.245  1.00  0.53           O  
HETATM 1837  O   HOH T1836      22.691 -13.553  28.310  1.00  0.53           O  
HETATM 1838  O   HOH T1837      53.990 -11.320  42.043  1.00  0.53           O  
HETATM 1839  O   HOH T1838      10.492  32.598   7.914  1.00  0.53           O  
HETATM 1840  O   HOH T1839     -14.657  17.050  10.817  1.00  0.53           O  
HETATM 1841  O   HOH T1840      24.268  35.290  17.629  1.00  0.53           O  
HETATM 1842  O   HOH T1841      51.873 -15.128  24.270  1.00  0.53           O  
HETATM 1843  O   HOH T1842      25.641 -23.948  11.476  1.00  0.53           O  
HETATM 1844  O   HOH T1843     -19.381  24.338  35.100  1.00  0.54           O  
HETATM 1845  O   HOH T1844      -7.234 -30.840  14.529  1.00  0.54           O  
HETATM 1846  O   HOH T1845       3.907   2.428  13.685  1.00  0.54           O  
HETATM 1847  O   HOH T1846      12.170  10.126  -2.611  1.00  0.54           O  
HETATM 1848  O   HOH T1847       0.691  29.760  60.724  1.00  0.54           O  
HETATM 1849  O   HOH T1848      16.922  -5.805  57.792  1.00  0.54           O  
HETATM 1850  O   HOH T1849      42.731 -30.291  41.558  1.00  0.54           O  
HETATM 1851  O   HOH T1850       7.210  19.889  30.621  1.00  0.54           O  
HETATM 1852  O   HOH T1851      55.714   7.407  22.862  1.00  0.54           O  
HETATM 1853  O   HOH T1852      -3.752  -5.943  17.017  1.00  0.54           O  
HETATM 1854  O   HOH T1853      15.434  35.700  17.775  1.00  0.54           O  
HETATM 1855  O   HOH T1854      42.381  16.824  47.287  1.00  0.54           O  
HETATM 1856  O   HOH T1855      -8.874   3.827  19.470  1.00  0.54           O  
HETATM 1857  O   HOH T1856      41.272  -1.718  35.585  1.00  0.54           O  
HETATM 1858  O   HOH T1857      14.485 -15.398  42.882  1.00  0.54           O  
HETATM 1859  O   HOH T1858     -23.064  14.452  37.458  1.00  0.54           O  
HETATM 1860  O   HOH T1859      -8.666  29.338  23.648  1.00  0.54           O  
HETATM 1861  O   HOH T1860      17.630 -35.976  13.197  1.00  0.54           O  
HETATM 1862  O   HOH T1861      20.110 -18.016  18.063  1.00  0.54           O  
HETATM 1863  O   HOH T1862       2.311  18.268  -1.667  1.00  0.54           O  
HETATM 1864  O   HOH T1863      21.073  -3.453  15.947  1.00  0.54           O  
HETATM 1865  O   HOH T1864       6.445 -22.629  -9.072  1.00  0.54           O  
HETATM 1866  O   HOH T1865      55.280   2.020  31.044  1.00  0.54           O  
HETATM 1867  O   HOH T1866      20.868   4.943  33.956  1.00  0.54           O  
HETATM 1868  O   HOH T1867       9.351 -37.554   9.214  1.00  0.54           O  
HETATM 1869  O   HOH T1868      22.646   0.889  14.936  1.00  0.54           O  
HETATM 1870  O   HOH T1869      32.434  -0.415  -0.215  1.00  0.54           O  
HETATM 1871  O   HOH T1870     -18.731  25.032  19.412  1.00  0.54           O  
HETATM 1872  O   HOH T1871      -1.802  30.148  38.711  1.00  0.54           O  
HETATM 1873  O   HOH T1872       2.816  41.520  10.090  1.00  0.54           O  
HETATM 1874  O   HOH T1873     -20.079 -22.233  46.998  1.00  0.54           O  
HETATM 1875  O   HOH T1874     -13.092 -12.249  23.669  1.00  0.54           O  
HETATM 1876  O   HOH T1875     -19.382  33.223  20.035  1.00  0.54           O  
HETATM 1877  O   HOH T1876       0.089  25.068  26.859  1.00  0.54           O  
HETATM 1878  O   HOH T1877     -25.650  21.093  34.064  1.00  0.54           O  
HETATM 1879  O   HOH T1878      11.629  10.746  54.586  1.00  0.54           O  
HETATM 1880  O   HOH T1879      43.796  12.065   1.520  1.00  0.54           O  
HETATM 1881  O   HOH T1880      56.920  16.465   7.086  1.00  0.54           O  
HETATM 1882  O   HOH T1881      13.022 -18.527  50.277  1.00  0.54           O  
HETATM 1883  O   HOH T1882      -1.778   0.909  16.825  1.00  0.54           O  
HETATM 1884  O   HOH T1883      19.318  24.349  -0.084  1.00  0.54           O  
HETATM 1885  O   HOH T1884      -3.184 -27.555  -3.247  1.00  0.54           O  
HETATM 1886  O   HOH T1885     -16.823 -19.560  22.872  1.00  0.54           O  
HETATM 1887  O   HOH T1886      38.989 -10.612  16.113  1.00  0.54           O  
HETATM 1888  O   HOH T1887      18.140  23.239  36.144  1.00  0.54           O  
HETATM 1889  O   HOH T1888      30.440   8.134   4.070  1.00  0.54           O  
HETATM 1890  O   HOH T1889      49.400 -11.248  32.280  1.00  0.54           O  
HETATM 1891  O   HOH T1890      44.667  34.906   8.207  1.00  0.54           O  
HETATM 1892  O   HOH T1891       7.419 -33.274  44.609  1.00  0.54           O  
HETATM 1893  O   HOH T1892      -0.795  27.566  -3.208  1.00  0.54           O  
HETATM 1894  O   HOH T1893       6.566   0.755  23.744  1.00  0.54           O  
HETATM 1895  O   HOH T1894       4.664 -20.040  22.577  1.00  0.54           O  
HETATM 1896  O   HOH T1895     -13.005   4.957  16.908  1.00  0.54           O  
HETATM 1897  O   HOH T1896       1.639  28.408  34.770  1.00  0.54           O  
HETATM 1898  O   HOH T1897      51.962 -19.355  54.234  1.00  0.54           O  
HETATM 1899  O   HOH T1898      18.548  14.259  52.488  1.00  0.54           O  
HETATM 1900  O   HOH T1899      20.313 -16.268  52.615  1.00  0.54           O  
HETATM 1901  O   HOH T1900       4.739 -30.217  -5.677  1.00  0.54           O  
HETATM 1902  O   HOH T1901       9.824  -6.121  28.361  1.00  0.54           O  
HETATM 1903  O   HOH T1902      -6.503  23.561  42.873  1.00  0.54           O  
HETATM 1904  O   HOH T1903      35.588  -7.235  66.482  1.00  0.54           O  
HETATM 1905  O   HOH T1904      -5.646 -35.641  25.765  1.00  0.54           O  
HETATM 1906  O   HOH T1905     -12.232  31.715  13.812  1.00  0.54           O  
HETATM 1907  O   HOH T1906      23.475  13.698  -4.887  1.00  0.54           O  
HETATM 1908  O   HOH T1907      40.461 -12.157  -1.648  1.00  0.54           O  
HETATM 1909  O   HOH T1908      48.460  37.949  13.575  1.00  0.54           O  
HETATM 1910  O   HOH T1909      34.727  -1.618  -5.594  1.00  0.54           O  
HETATM 1911  O   HOH T1910      20.272  -2.431  64.877  1.00  0.54           O  
HETATM 1912  O   HOH T1911      51.725 -20.234  18.517  1.00  0.54           O  
HETATM 1913  O   HOH T1912      10.535  31.274   0.690  1.00  0.54           O  
HETATM 1914  O   HOH T1913      15.237 -32.460  28.325  1.00  0.54           O  
HETATM 1915  O   HOH T1914      20.799  10.222  68.059  1.00  0.54           O  
HETATM 1916  O   HOH T1915     -15.292   6.259  57.555  1.00  0.55           O  
HETATM 1917  O   HOH T1916      56.101  -3.390  25.984  1.00  0.55           O  
HETATM 1918  O   HOH T1917      48.640  -5.627  27.597  1.00  0.55           O  
HETATM 1919  O   HOH T1918      -4.153 -28.336 -12.138  1.00  0.55           O  
HETATM 1920  O   HOH T1919      31.609  41.544  12.195  1.00  0.55           O  
HETATM 1921  O   HOH T1920       2.538   4.952   4.749  1.00  0.55           O  
HETATM 1922  O   HOH T1921      54.417  -7.346  25.169  1.00  0.55           O  
HETATM 1923  O   HOH T1922      50.610 -12.312  30.018  1.00  0.55           O  
HETATM 1924  O   HOH T1923      13.420 -32.979  50.266  1.00  0.55           O  
HETATM 1925  O   HOH T1924      53.587  -7.312  17.743  1.00  0.55           O  
HETATM 1926  O   HOH T1925      -4.194  -7.283  12.933  1.00  0.55           O  
HETATM 1927  O   HOH T1926      21.742 -20.320  34.505  1.00  0.55           O  
HETATM 1928  O   HOH T1927      38.068 -17.060  67.255  1.00  0.55           O  
HETATM 1929  O   HOH T1928       1.674  -8.015 -10.428  1.00  0.55           O  
HETATM 1930  O   HOH T1929     -21.010  -9.672  56.771  1.00  0.55           O  
HETATM 1931  O   HOH T1930      -9.011  22.633  46.252  1.00  0.55           O  
HETATM 1932  O   HOH T1931      -9.021  -4.327  38.984  1.00  0.55           O  
HETATM 1933  O   HOH T1932      32.897  17.428  37.374  1.00  0.55           O  
HETATM 1934  O   HOH T1933       1.416 -21.943  -8.231  1.00  0.55           O  
HETATM 1935  O   HOH T1934      26.673 -20.396  19.390  1.00  0.55           O  
HETATM 1936  O   HOH T1935      37.562 -22.374   4.913  1.00  0.55           O  
HETATM 1937  O   HOH T1936     -11.550 -26.042   3.962  1.00  0.55           O  
HETATM 1938  O   HOH T1937      37.133  37.422  10.308  1.00  0.55           O  
HETATM 1939  O   HOH T1938      52.106 -30.035  21.282  1.00  0.55           O  
HETATM 1940  O   HOH T1939       9.725  32.471  26.246  1.00  0.55           O  
HETATM 1941  O   HOH T1940       7.315   7.068  -0.102  1.00  0.55           O  
HETATM 1942  O   HOH T1941       8.117  24.523  28.042  1.00  0.55           O  
HETATM 1943  O   HOH T1942      21.999 -25.844  -8.149  1.00  0.55           O  
HETATM 1944  O   HOH T1943      46.968   8.117  42.062  1.00  0.55           O  
HETATM 1945  O   HOH T1944      30.120  24.492  -5.795  1.00  0.55           O  
HETATM 1946  O   HOH T1945      23.774 -20.973  19.559  1.00  0.55           O  
HETATM 1947  O   HOH T1946      13.832   0.139   5.795  1.00  0.55           O  
HETATM 1948  O   HOH T1947      41.596  -6.166  63.868  1.00  0.55           O  
HETATM 1949  O   HOH T1948     -10.716 -11.129  17.797  1.00  0.55           O  
HETATM 1950  O   HOH T1949     -16.431 -20.336  24.486  1.00  0.55           O  
HETATM 1951  O   HOH T1950      26.071  26.016  65.685  1.00  0.55           O  
HETATM 1952  O   HOH T1951      23.552   5.670  26.781  1.00  0.55           O  
HETATM 1953  O   HOH T1952      21.108   7.367  67.270  1.00  0.55           O  
HETATM 1954  O   HOH T1953       8.981 -33.322  -0.715  1.00  0.55           O  
HETATM 1955  O   HOH T1954      42.334  19.789  64.984  1.00  0.55           O  
HETATM 1956  O   HOH T1955      -2.925  14.529  55.076  1.00  0.55           O  
HETATM 1957  O   HOH T1956      10.240   8.834  -1.541  1.00  0.55           O  
HETATM 1958  O   HOH T1957      -7.170  -7.253  62.508  1.00  0.55           O  
HETATM 1959  O   HOH T1958      -0.464 -32.868  -1.068  1.00  0.55           O  
HETATM 1960  O   HOH T1959      -4.174 -19.516  -4.851  1.00  0.56           O  
HETATM 1961  O   HOH T1960      21.189  22.620  -1.464  1.00  0.56           O  
HETATM 1962  O   HOH T1961      29.811  32.402  22.824  1.00  0.56           O  
HETATM 1963  O   HOH T1962      26.881  -5.691  60.799  1.00  0.56           O  
HETATM 1964  O   HOH T1963      32.428 -26.711   9.109  1.00  0.56           O  
HETATM 1965  O   HOH T1964      -6.463  28.499  45.942  1.00  0.56           O  
HETATM 1966  O   HOH T1965      67.116   7.249   4.094  1.00  0.56           O  
HETATM 1967  O   HOH T1966     -22.811  21.066  34.124  1.00  0.56           O  
HETATM 1968  O   HOH T1967      51.886   0.678  41.228  1.00  0.56           O  
HETATM 1969  O   HOH T1968       6.312 -31.825  -0.627  1.00  0.56           O  
HETATM 1970  O   HOH T1969     -15.405  26.810  11.346  1.00  0.56           O  
HETATM 1971  O   HOH T1970      50.220 -29.249  45.339  1.00  0.56           O  
HETATM 1972  O   HOH T1971      -5.110   3.032   5.691  1.00  0.56           O  
HETATM 1973  O   HOH T1972      54.303 -17.785  48.565  1.00  0.56           O  
HETATM 1974  O   HOH T1973      -6.570 -36.820   4.131  1.00  0.56           O  
HETATM 1975  O   HOH T1974      37.280  -3.415  30.820  1.00  0.56           O  
HETATM 1976  O   HOH T1975      55.050 -10.631   9.320  1.00  0.56           O  
HETATM 1977  O   HOH T1976      13.690  -8.982  51.049  1.00  0.56           O  
HETATM 1978  O   HOH T1977      19.040   0.482  51.671  1.00  0.56           O  
HETATM 1979  O   HOH T1978       8.181  -3.979  33.257  1.00  0.56           O  
HETATM 1980  O   HOH T1979      12.395  32.613  39.733  1.00  0.56           O  
HETATM 1981  O   HOH T1980      41.943  -3.872  33.801  1.00  0.56           O  
HETATM 1982  O   HOH T1981      12.954 -26.814  -8.839  1.00  0.56           O  
HETATM 1983  O   HOH T1982      24.309  32.675  26.685  1.00  0.56           O  
HETATM 1984  O   HOH T1983      35.520 -24.483   8.059  1.00  0.56           O  
HETATM 1985  O   HOH T1984      36.341 -24.314 -10.433  1.00  0.56           O  
HETATM 1986  O   HOH T1985      -8.312 -26.508  15.523  1.00  0.56           O  
HETATM 1987  O   HOH T1986      17.947 -20.539  35.736  1.00  0.56           O  
HETATM 1988  O   HOH T1987      15.650  14.494  62.408  1.00  0.56           O  
HETATM 1989  O   HOH T1988     -18.631 -18.534  24.381  1.00  0.56           O  
HETATM 1990  O   HOH T1989      30.857  29.146  -5.575  1.00  0.56           O  
HETATM 1991  O   HOH T1990      39.839  16.232  38.858  1.00  0.56           O  
HETATM 1992  O   HOH T1991      34.715  24.219  31.744  1.00  0.56           O  
HETATM 1993  O   HOH T1992       9.919  -1.596  55.709  1.00  0.56           O  
HETATM 1994  O   HOH T1993      47.824  17.095  60.159  1.00  0.56           O  
HETATM 1995  O   HOH T1994      12.117  12.350  25.817  1.00  0.56           O  
HETATM 1996  O   HOH T1995     -12.082  -0.206  34.227  1.00  0.56           O  
HETATM 1997  O   HOH T1996      27.464  20.348  38.033  1.00  0.56           O  
HETATM 1998  O   HOH T1997     -13.864 -22.701  53.045  1.00  0.56           O  
HETATM 1999  O   HOH T1998      36.816   9.865  33.166  1.00  0.56           O  
HETATM 2000  O   HOH T1999      29.962  38.062  17.885  1.00  0.56           O  
HETATM 2001  O   HOH T2000      55.802 -37.310  26.082  1.00  0.56           O  
HETATM 2002  O   HOH T2001     -17.143   2.012  38.950  1.00  0.56           O  
HETATM 2003  O   HOH T2002      13.061 -16.510  42.918  1.00  0.56           O  
HETATM 2004  O   HOH T2003      -9.775  20.146  45.455  1.00  0.56           O  
HETATM 2005  O   HOH T2004      29.860   3.971   8.858  1.00  0.56           O  
HETATM 2006  O   HOH T2005      -2.396  17.644  56.735  1.00  0.56           O  
HETATM 2007  O   HOH T2006       4.518   9.576  40.462  1.00  0.56           O  
HETATM 2008  O   HOH T2007      14.520  29.117   3.968  1.00  0.56           O  
HETATM 2009  O   HOH T2008      -4.980  26.556  38.116  1.00  0.56           O  
HETATM 2010  O   HOH T2009       0.381  30.923  -3.934  1.00  0.56           O  
HETATM 2011  O   HOH T2010      17.775  11.151  -2.006  1.00  0.56           O  
HETATM 2012  O   HOH T2011      17.122  -4.955   1.717  1.00  0.57           O  
HETATM 2013  O   HOH T2012       3.112   3.876  12.897  1.00  0.57           O  
HETATM 2014  O   HOH T2013      -1.995  -5.763  26.253  1.00  0.57           O  
HETATM 2015  O   HOH T2014      -1.016  32.625   1.415  1.00  0.57           O  
HETATM 2016  O   HOH T2015      24.009 -21.226  -9.406  1.00  0.57           O  
HETATM 2017  O   HOH T2016      22.675  29.254  64.059  1.00  0.57           O  
HETATM 2018  O   HOH T2017     -22.643  -8.003  63.150  1.00  0.57           O  
HETATM 2019  O   HOH T2018      -4.972 -11.865  40.050  1.00  0.57           O  
HETATM 2020  O   HOH T2019      18.572  11.467  31.589  1.00  0.57           O  
HETATM 2021  O   HOH T2020      -8.194  28.332  -0.251  1.00  0.57           O  
HETATM 2022  O   HOH T2021       1.652   7.419  39.517  1.00  0.57           O  
HETATM 2023  O   HOH T2022      26.740  19.966  68.459  1.00  0.57           O  
HETATM 2024  O   HOH T2023      23.454   4.053  67.247  1.00  0.57           O  
HETATM 2025  O   HOH T2024      51.413  20.855   6.345  1.00  0.57           O  
HETATM 2026  O   HOH T2025      17.731  17.046  -0.682  1.00  0.57           O  
HETATM 2027  O   HOH T2026      42.846  -6.459  28.406  1.00  0.57           O  
HETATM 2028  O   HOH T2027       7.325 -38.239   7.199  1.00  0.57           O  
HETATM 2029  O   HOH T2028      23.512   1.527  37.298  1.00  0.57           O  
HETATM 2030  O   HOH T2029      30.430 -11.296  63.278  1.00  0.57           O  
HETATM 2031  O   HOH T2030      52.561   3.221  44.461  1.00  0.57           O  
HETATM 2032  O   HOH T2031      24.207 -25.828  16.880  1.00  0.57           O  
HETATM 2033  O   HOH T2032      42.475   5.774  30.246  1.00  0.57           O  
HETATM 2034  O   HOH T2033      -2.341  -4.763   6.431  1.00  0.57           O  
HETATM 2035  O   HOH T2034      40.329  12.608   1.382  1.00  0.57           O  
HETATM 2036  O   HOH T2035      35.674  10.357  13.458  1.00  0.57           O  
HETATM 2037  O   HOH T2036     -12.117 -34.030  40.444  1.00  0.57           O  
HETATM 2038  O   HOH T2037      49.500   3.268  44.402  1.00  0.57           O  
HETATM 2039  O   HOH T2038      -7.893  30.898  21.781  1.00  0.57           O  
HETATM 2040  O   HOH T2039     -11.421  31.433   8.026  1.00  0.57           O  
HETATM 2041  O   HOH T2040      25.259 -22.566  14.206  1.00  0.57           O  
HETATM 2042  O   HOH T2041      51.775   2.579  42.928  1.00  0.58           O  
HETATM 2043  O   HOH T2042     -18.078 -18.264  34.870  1.00  0.58           O  
HETATM 2044  O   HOH T2043      -3.061  29.204  41.770  1.00  0.58           O  
HETATM 2045  O   HOH T2044      52.882 -23.606  51.675  1.00  0.58           O  
HETATM 2046  O   HOH T2045      21.085 -27.436  19.481  1.00  0.58           O  
HETATM 2047  O   HOH T2046      16.978   2.328  49.331  1.00  0.58           O  
HETATM 2048  O   HOH T2047     -11.425  33.160  12.956  1.00  0.58           O  
HETATM 2049  O   HOH T2048      39.445  -3.152  34.004  1.00  0.58           O  
HETATM 2050  O   HOH T2049      46.280  28.316   2.154  1.00  0.58           O  
HETATM 2051  O   HOH T2050      25.251   5.438  11.089  1.00  0.58           O  
HETATM 2052  O   HOH T2051      42.799 -29.523  59.864  1.00  0.58           O  
HETATM 2053  O   HOH T2052      18.682  -8.024  17.992  1.00  0.58           O  
HETATM 2054  O   HOH T2053      40.450 -12.815  34.929  1.00  0.58           O  
HETATM 2055  O   HOH T2054      -1.554 -34.932  45.416  1.00  0.58           O  
HETATM 2056  O   HOH T2055       8.727   9.061  25.891  1.00  0.58           O  
HETATM 2057  O   HOH T2056      -1.235  22.825  31.638  1.00  0.58           O  
HETATM 2058  O   HOH T2057      40.645  -0.024  32.450  1.00  0.58           O  
HETATM 2059  O   HOH T2058      29.021  -8.831  62.085  1.00  0.59           O  
HETATM 2060  O   HOH T2059      20.381  21.878  -0.011  1.00  0.59           O  
HETATM 2061  O   HOH T2060      21.715  25.845  28.635  1.00  0.59           O  
HETATM 2062  O   HOH T2061     -10.605 -20.283  19.429  1.00  0.59           O  
HETATM 2063  O   HOH T2062      -9.773  10.625   0.102  1.00  0.59           O  
HETATM 2064  O   HOH T2063      17.071   5.881  38.771  1.00  0.59           O  
HETATM 2065  O   HOH T2064      23.129   0.903   1.556  1.00  0.59           O  
HETATM 2066  O   HOH T2065      19.574  -9.497  -9.040  1.00  0.59           O  
HETATM 2067  O   HOH T2066      21.781   3.353   3.144  1.00  0.60           O  
HETATM 2068  O   HOH T2067       8.118  -0.888  29.885  1.00  0.61           O  
HETATM 2069  O   HOH T2068       4.141  28.297  27.906  1.00  0.62           O  
HETATM 2070  O   HOH T2069      55.944 -33.850  19.658  1.00  0.62           O  
HETATM 2071  O   HOH T2070      -4.595   5.841  56.033  1.00  0.63           O  
HETATM 2072  O   HOH T2071      39.770  28.628  48.022  1.00  0.64           O  
TER    2073      HOH T2071 
