# Supplementary material for: Accurate Prediction of Hydration Sites of Proteins Using Energy Model With Atom Embedding
Source: Front Mol Biosci. 2021 Sep 20;8:756075. doi: 10.3389/fmolb.2021.756075 (PMC8488165; doi:10.3389/fmolb.2021.756075)
Supplement: Supplementary file 1 [file DataSheet1.ZIP › Data Sheet 1/Our_result_pdb/our_dataset_output/3BKR_watersite.pdb]

HEADER                                                        XXXX


JRNL        PMID   -1
HETATM    1  O   HOH T   0      15.572 -18.438   4.323  1.00  0.19           O  
HETATM    2  O   HOH T   1      12.016  -6.375  -6.457  1.00  0.21           O  
HETATM    3  O   HOH T   2      13.573 -29.411   7.824  1.00  0.21           O  
HETATM    4  O   HOH T   3      27.646 -26.518 -12.078  1.00  0.23           O  
HETATM    5  O   HOH T   4      30.669 -10.335   9.031  1.00  0.23           O  
HETATM    6  O   HOH T   5      37.869 -12.933 -12.786  1.00  0.24           O  
HETATM    7  O   HOH T   6      23.606 -28.767   2.194  1.00  0.24           O  
HETATM    8  O   HOH T   7      37.610 -26.496   4.782  1.00  0.25           O  
HETATM    9  O   HOH T   8      22.133 -21.046   9.029  1.00  0.25           O  
HETATM   10  O   HOH T   9      11.563 -21.193 -17.043  1.00  0.26           O  
HETATM   11  O   HOH T  10      17.822 -33.428  -2.466  1.00  0.27           O  
HETATM   12  O   HOH T  11      36.290 -12.325   4.796  1.00  0.27           O  
HETATM   13  O   HOH T  12      37.267 -21.511  -0.960  1.00  0.28           O  
HETATM   14  O   HOH T  13      36.973 -15.089   4.828  1.00  0.28           O  
HETATM   15  O   HOH T  14      17.604 -15.787   9.840  1.00  0.28           O  
HETATM   16  O   HOH T  15       9.771 -12.203 -20.764  1.00  0.28           O  
HETATM   17  O   HOH T  16      28.977 -17.063   3.592  1.00  0.28           O  
HETATM   18  O   HOH T  17       7.431 -18.284  -1.979  1.00  0.29           O  
HETATM   19  O   HOH T  18      13.715 -17.048 -11.826  1.00  0.29           O  
HETATM   20  O   HOH T  19      18.112 -30.553   3.172  1.00  0.29           O  
HETATM   21  O   HOH T  20      25.769  -3.800  -7.974  1.00  0.30           O  
HETATM   22  O   HOH T  21      25.516  -9.806 -18.039  1.00  0.30           O  
HETATM   23  O   HOH T  22      15.422 -20.447 -16.156  1.00  0.30           O  
HETATM   24  O   HOH T  23      31.644  -6.766   7.499  1.00  0.31           O  
HETATM   25  O   HOH T  24       9.946 -17.455   5.041  1.00  0.31           O  
HETATM   26  O   HOH T  25       3.460 -11.880   4.854  1.00  0.31           O  
HETATM   27  O   HOH T  26      37.985 -13.010 -19.462  1.00  0.31           O  
HETATM   28  O   HOH T  27      28.609 -25.073   4.369  1.00  0.32           O  
HETATM   29  O   HOH T  28      15.478 -31.911  -3.367  1.00  0.32           O  
HETATM   30  O   HOH T  29      16.480 -27.733   1.543  1.00  0.32           O  
HETATM   31  O   HOH T  30       5.721  -9.301 -14.769  1.00  0.32           O  
HETATM   32  O   HOH T  31      24.936 -29.374 -11.047  1.00  0.32           O  
HETATM   33  O   HOH T  32      28.125 -17.840  -0.647  1.00  0.32           O  
HETATM   34  O   HOH T  33      16.864  -7.140 -15.842  1.00  0.32           O  
HETATM   35  O   HOH T  34      19.639  -1.952  -8.879  1.00  0.32           O  
HETATM   36  O   HOH T  35      10.383 -14.760   5.506  1.00  0.32           O  
HETATM   37  O   HOH T  36      20.170 -28.371  -9.543  1.00  0.33           O  
HETATM   38  O   HOH T  37      36.336 -20.988 -12.002  1.00  0.33           O  
HETATM   39  O   HOH T  38       6.699 -18.544   2.046  1.00  0.34           O  
HETATM   40  O   HOH T  39      17.186 -21.291 -14.183  1.00  0.34           O  
HETATM   41  O   HOH T  40      32.974  -0.717   3.283  1.00  0.34           O  
HETATM   42  O   HOH T  41      19.987 -19.325   9.156  1.00  0.34           O  
HETATM   43  O   HOH T  42      15.056 -16.143   8.746  1.00  0.35           O  
HETATM   44  O   HOH T  43      21.038  -6.134 -14.287  1.00  0.35           O  
HETATM   45  O   HOH T  44      28.664  -4.033 -14.375  1.00  0.35           O  
HETATM   46  O   HOH T  45      25.439  -4.918  -3.807  1.00  0.35           O  
HETATM   47  O   HOH T  46      15.910 -21.115 -11.758  1.00  0.35           O  
HETATM   48  O   HOH T  47      38.468  -1.845  -0.148  1.00  0.36           O  
HETATM   49  O   HOH T  48      39.161   1.794  -5.588  1.00  0.36           O  
HETATM   50  O   HOH T  49      26.192 -27.515   6.096  1.00  0.36           O  
HETATM   51  O   HOH T  50      43.659 -14.229   3.148  1.00  0.36           O  
HETATM   52  O   HOH T  51      26.238  -2.021   7.389  1.00  0.37           O  
HETATM   53  O   HOH T  52      11.804 -29.439  10.002  1.00  0.37           O  
HETATM   54  O   HOH T  53      26.074  -4.814   7.466  1.00  0.37           O  
HETATM   55  O   HOH T  54      17.967  -2.262 -11.303  1.00  0.37           O  
HETATM   56  O   HOH T  55      31.508 -10.546   4.100  1.00  0.37           O  
HETATM   57  O   HOH T  56      18.682  -4.053  -3.857  1.00  0.37           O  
HETATM   58  O   HOH T  57      26.855 -29.105  -0.128  1.00  0.38           O  
HETATM   59  O   HOH T  58      15.371  -6.441 -18.078  1.00  0.38           O  
HETATM   60  O   HOH T  59       8.484 -19.475   0.291  1.00  0.38           O  
HETATM   61  O   HOH T  60      31.948 -21.915   3.490  1.00  0.38           O  
HETATM   62  O   HOH T  61      15.473  -8.974 -24.548  1.00  0.38           O  
HETATM   63  O   HOH T  62      30.998  -4.692 -15.562  1.00  0.39           O  
HETATM   64  O   HOH T  63      30.922  -9.224   6.488  1.00  0.39           O  
HETATM   65  O   HOH T  64      38.656 -22.237 -12.837  1.00  0.39           O  
HETATM   66  O   HOH T  65      20.418 -12.501 -21.864  1.00  0.40           O  
HETATM   67  O   HOH T  66      40.361 -14.063 -12.344  1.00  0.40           O  
HETATM   68  O   HOH T  67      23.182 -28.838  -9.067  1.00  0.40           O  
HETATM   69  O   HOH T  68       2.918 -13.686   6.791  1.00  0.40           O  
HETATM   70  O   HOH T  69      32.361 -18.968 -17.170  1.00  0.40           O  
HETATM   71  O   HOH T  70      17.783 -27.253  -5.531  1.00  0.40           O  
HETATM   72  O   HOH T  71      12.356 -21.412 -11.292  1.00  0.40           O  
HETATM   73  O   HOH T  72      33.008  -6.502 -15.059  1.00  0.40           O  
HETATM   74  O   HOH T  73      13.384 -18.332  -6.854  1.00  0.40           O  
HETATM   75  O   HOH T  74      21.039 -14.526 -23.692  1.00  0.41           O  
HETATM   76  O   HOH T  75      12.311  -6.709 -18.164  1.00  0.41           O  
HETATM   77  O   HOH T  76      12.518 -17.892  -9.532  1.00  0.41           O  
HETATM   78  O   HOH T  77      12.718 -18.577 -13.859  1.00  0.41           O  
HETATM   79  O   HOH T  78      14.734 -11.280 -23.320  1.00  0.41           O  
HETATM   80  O   HOH T  79      38.254  -4.780 -10.833  1.00  0.41           O  
HETATM   81  O   HOH T  80      13.734 -12.172   6.835  1.00  0.42           O  
HETATM   82  O   HOH T  81      14.519 -28.792 -14.378  1.00  0.42           O  
HETATM   83  O   HOH T  82      15.417 -26.633  -0.731  1.00  0.42           O  
HETATM   84  O   HOH T  83      19.454 -31.777   5.159  1.00  0.42           O  
HETATM   85  O   HOH T  84      28.970 -25.474   9.581  1.00  0.42           O  
HETATM   86  O   HOH T  85      18.618  -6.197  -2.009  1.00  0.42           O  
HETATM   87  O   HOH T  86       3.266 -14.560   4.126  1.00  0.42           O  
HETATM   88  O   HOH T  87      15.248 -25.019   9.805  1.00  0.43           O  
HETATM   89  O   HOH T  88      31.722 -17.549   3.125  1.00  0.43           O  
HETATM   90  O   HOH T  89      42.874 -12.837 -20.318  1.00  0.43           O  
HETATM   91  O   HOH T  90      21.261  -4.039  -5.140  1.00  0.43           O  
HETATM   92  O   HOH T  91       6.585 -14.809  -4.578  1.00  0.43           O  
HETATM   93  O   HOH T  92      18.399  -5.775 -13.857  1.00  0.43           O  
HETATM   94  O   HOH T  93      24.104 -29.050  -0.526  1.00  0.43           O  
HETATM   95  O   HOH T  94       4.691 -13.030  -5.484  1.00  0.43           O  
HETATM   96  O   HOH T  95      42.536 -15.644 -20.299  1.00  0.43           O  
HETATM   97  O   HOH T  96      29.239 -25.036   0.573  1.00  0.43           O  
HETATM   98  O   HOH T  97      13.249 -26.603  -5.792  1.00  0.43           O  
HETATM   99  O   HOH T  98      17.709 -18.507  10.235  1.00  0.44           O  
HETATM  100  O   HOH T  99      28.826 -19.017   1.748  1.00  0.44           O  
HETATM  101  O   HOH T 100      16.332  -3.984 -13.126  1.00  0.44           O  
HETATM  102  O   HOH T 101      16.417 -26.654 -14.811  1.00  0.44           O  
HETATM  103  O   HOH T 102      28.040 -25.750   7.037  1.00  0.45           O  
HETATM  104  O   HOH T 103      13.792 -29.337  -6.007  1.00  0.45           O  
HETATM  105  O   HOH T 104      14.538  -6.662   7.315  1.00  0.45           O  
HETATM  106  O   HOH T 105      36.566  -2.321 -10.760  1.00  0.45           O  
HETATM  107  O   HOH T 106      39.597 -11.399  -8.778  1.00  0.45           O  
HETATM  108  O   HOH T 107      42.993 -13.166 -11.858  1.00  0.45           O  
HETATM  109  O   HOH T 108      41.428 -10.450 -20.750  1.00  0.45           O  
HETATM  110  O   HOH T 109      20.789 -31.084   2.759  1.00  0.46           O  
HETATM  111  O   HOH T 110       3.092 -11.096  -6.685  1.00  0.46           O  
HETATM  112  O   HOH T 111      16.920 -27.369  -2.911  1.00  0.46           O  
HETATM  113  O   HOH T 112      41.225  -6.494 -13.725  1.00  0.46           O  
HETATM  114  O   HOH T 113      30.802 -24.389   2.815  1.00  0.46           O  
HETATM  115  O   HOH T 114      18.734 -15.423 -25.095  1.00  0.46           O  
HETATM  116  O   HOH T 115      18.780  -2.985 -13.876  1.00  0.46           O  
HETATM  117  O   HOH T 116      40.324 -25.920   4.859  1.00  0.47           O  
HETATM  118  O   HOH T 117       8.778  -4.419  -8.794  1.00  0.47           O  
HETATM  119  O   HOH T 118      38.490 -24.388   6.342  1.00  0.47           O  
HETATM  120  O   HOH T 119      36.608  -2.040  -4.063  1.00  0.47           O  
HETATM  121  O   HOH T 120      19.084 -22.901 -15.264  1.00  0.47           O  
HETATM  122  O   HOH T 121      15.424 -18.912   8.757  1.00  0.47           O  
HETATM  123  O   HOH T 122      11.474 -21.139 -14.082  1.00  0.47           O  
HETATM  124  O   HOH T 123      18.703 -10.603 -22.960  1.00  0.47           O  
HETATM  125  O   HOH T 124      21.850  -0.560   0.533  1.00  0.48           O  
HETATM  126  O   HOH T 125      12.476 -12.864 -20.424  1.00  0.48           O  
HETATM  127  O   HOH T 126       9.517 -19.134  -6.251  1.00  0.48           O  
HETATM  128  O   HOH T 127      37.866  -0.377  -2.332  1.00  0.48           O  
HETATM  129  O   HOH T 128      38.950 -19.935   0.638  1.00  0.48           O  
HETATM  130  O   HOH T 129       9.967  -8.142 -17.976  1.00  0.48           O  
HETATM  131  O   HOH T 130      19.170 -12.781 -24.435  1.00  0.48           O  
HETATM  132  O   HOH T 131      12.799  -9.733 -24.474  1.00  0.48           O  
HETATM  133  O   HOH T 132      12.973  -6.385 -13.961  1.00  0.48           O  
HETATM  134  O   HOH T 133      32.098 -22.842   0.997  1.00  0.48           O  
HETATM  135  O   HOH T 134      25.837 -28.995   3.837  1.00  0.49           O  
HETATM  136  O   HOH T 135      11.070 -12.182   7.998  1.00  0.49           O  
HETATM  137  O   HOH T 136       5.355 -11.304  -3.394  1.00  0.49           O  
HETATM  138  O   HOH T 137      13.671 -20.345  10.384  1.00  0.49           O  
HETATM  139  O   HOH T 138      37.081  -0.258  -8.888  1.00  0.49           O  
HETATM  140  O   HOH T 139      13.846 -23.061  11.339  1.00  0.49           O  
HETATM  141  O   HOH T 140      24.006  -3.492  -5.810  1.00  0.50           O  
HETATM  142  O   HOH T 141      18.491  -2.173   6.611  1.00  0.50           O  
HETATM  143  O   HOH T 142      30.454 -25.604  -1.727  1.00  0.50           O  
HETATM  144  O   HOH T 143      13.952  -9.328   7.478  1.00  0.50           O  
HETATM  145  O   HOH T 144      25.045  -3.256   9.581  1.00  0.50           O  
HETATM  146  O   HOH T 145      21.889  -2.335  -7.235  1.00  0.51           O  
HETATM  147  O   HOH T 146       4.144 -16.099   0.146  1.00  0.51           O  
HETATM  148  O   HOH T 147      40.094 -23.246   4.391  1.00  0.51           O  
HETATM  149  O   HOH T 148      21.605  -6.188 -16.982  1.00  0.51           O  
HETATM  150  O   HOH T 149      42.223   0.422  -7.568  1.00  0.51           O  
HETATM  151  O   HOH T 150      30.015  -8.641   2.849  1.00  0.51           O  
HETATM  152  O   HOH T 151      17.735 -29.639  -4.287  1.00  0.52           O  
HETATM  153  O   HOH T 152      35.489 -26.718   3.085  1.00  0.52           O  
HETATM  154  O   HOH T 153      11.336  -4.117  -8.023  1.00  0.52           O  
HETATM  155  O   HOH T 154      13.916 -31.165   9.957  1.00  0.52           O  
HETATM  156  O   HOH T 155      37.686  -0.447  -6.251  1.00  0.52           O  
HETATM  157  O   HOH T 156      42.976  -5.990  -2.669  1.00  0.52           O  
HETATM  158  O   HOH T 157      37.426 -18.808  -1.505  1.00  0.52           O  
HETATM  159  O   HOH T 158      22.260  -2.215  -9.814  1.00  0.53           O  
HETATM  160  O   HOH T 159      15.626 -27.109 -11.307  1.00  0.53           O  
HETATM  161  O   HOH T 160       2.830 -10.995   7.429  1.00  0.53           O  
HETATM  162  O   HOH T 161      26.868 -10.420  -8.739  1.00  0.53           O  
HETATM  163  O   HOH T 162      19.590  -4.500 -16.092  1.00  0.53           O  
HETATM  164  O   HOH T 163      22.141  -6.870 -19.753  1.00  0.53           O  
HETATM  165  O   HOH T 164      39.112  -2.184  -8.063  1.00  0.53           O  
HETATM  166  O   HOH T 165      29.751  -4.904   7.464  1.00  0.53           O  
HETATM  167  O   HOH T 166      34.033  -5.393   0.622  1.00  0.53           O  
HETATM  168  O   HOH T 167      41.284 -13.326  -9.755  1.00  0.53           O  
HETATM  169  O   HOH T 168      20.346  -7.142 -22.025  1.00  0.54           O  
HETATM  170  O   HOH T 169      41.605  -6.229  -7.100  1.00  0.54           O  
HETATM  171  O   HOH T 170      29.182  -0.757  -7.433  1.00  0.54           O  
HETATM  172  O   HOH T 171      22.658 -31.008   0.753  1.00  0.54           O  
HETATM  173  O   HOH T 172      22.140 -28.944 -11.527  1.00  0.54           O  
HETATM  174  O   HOH T 173      36.513  -9.630  -4.654  1.00  0.54           O  
HETATM  175  O   HOH T 174      18.020 -32.283  -5.047  1.00  0.54           O  
HETATM  176  O   HOH T 175      19.455  -2.117  -5.940  1.00  0.54           O  
HETATM  177  O   HOH T 176      13.133 -12.476 -25.169  1.00  0.55           O  
HETATM  178  O   HOH T 177       4.879  -9.456 -12.171  1.00  0.55           O  
HETATM  179  O   HOH T 178      18.022  -8.044 -23.637  1.00  0.55           O  
HETATM  180  O   HOH T 179       7.857  -5.301  -2.304  1.00  0.55           O  
HETATM  181  O   HOH T 180      23.517 -26.750   8.957  1.00  0.55           O  
HETATM  182  O   HOH T 181      40.179 -12.905 -21.186  1.00  0.56           O  
HETATM  183  O   HOH T 182      28.042  -3.556   5.919  1.00  0.56           O  
HETATM  184  O   HOH T 183      10.679  -7.133 -15.558  1.00  0.56           O  
HETATM  185  O   HOH T 184       4.907  -6.388 -10.545  1.00  0.56           O  
HETATM  186  O   HOH T 185      17.041  -0.905   4.718  1.00  0.56           O  
HETATM  187  O   HOH T 186      40.834 -15.406 -22.644  1.00  0.56           O  
HETATM  188  O   HOH T 187       9.886 -17.063  -4.502  1.00  0.57           O  
HETATM  189  O   HOH T 188      12.904 -17.872   9.181  1.00  0.57           O  
HETATM  190  O   HOH T 189      30.878  -4.476 -12.724  1.00  0.57           O  
HETATM  191  O   HOH T 190      23.465  -8.073 -17.626  1.00  0.59           O  
HETATM  192  O   HOH T 191      16.184 -24.309  12.152  1.00  0.60           O  
HETATM  193  O   HOH T 192      42.295  -2.303  -6.539  1.00  0.60           O  
HETATM  194  O   HOH T 193      22.454  -0.564  -2.357  1.00  0.65           O  
TER     195      HOH T 193 
