# Supplementary material for: Accurate Prediction of Hydration Sites of Proteins Using Energy Model With Atom Embedding
Source: Front Mol Biosci. 2021 Sep 20;8:756075. doi: 10.3389/fmolb.2021.756075 (PMC8488165; doi:10.3389/fmolb.2021.756075)
Supplement: Supplementary file 1 [file DataSheet1.ZIP › Data Sheet 1/Our_result_pdb/our_dataset_output/3BU3_watersite.pdb]

HEADER                                                        XXXX


JRNL        PMID   -1
HETATM    1  O   HOH T   0      15.636  -1.224  19.319  1.00  0.17           O  
HETATM    2  O   HOH T   1      18.587  -7.714  36.501  1.00  0.17           O  
HETATM    3  O   HOH T   2      -6.755   6.171  10.576  1.00  0.18           O  
HETATM    4  O   HOH T   3      12.324   0.104  25.745  1.00  0.19           O  
HETATM    5  O   HOH T   4       9.367 -20.445  13.810  1.00  0.19           O  
HETATM    6  O   HOH T   5       2.502  -1.334  29.586  1.00  0.20           O  
HETATM    7  O   HOH T   6      12.321  -8.845  34.537  1.00  0.20           O  
HETATM    8  O   HOH T   7      11.586 -19.433  22.660  1.00  0.20           O  
HETATM    9  O   HOH T   8      -9.047   9.939   3.543  1.00  0.20           O  
HETATM   10  O   HOH T   9      11.970  -4.878  34.140  1.00  0.21           O  
HETATM   11  O   HOH T  10       9.167   6.157  22.847  1.00  0.21           O  
HETATM   12  O   HOH T  11       6.703  -3.329   7.049  1.00  0.21           O  
HETATM   13  O   HOH T  12     -19.701  -6.534  32.430  1.00  0.21           O  
HETATM   14  O   HOH T  13       9.819  25.920  31.085  1.00  0.22           O  
HETATM   15  O   HOH T  14      -1.882  10.425   4.787  1.00  0.22           O  
HETATM   16  O   HOH T  15      -1.552   3.567  26.157  1.00  0.22           O  
HETATM   17  O   HOH T  16      -2.101  20.945  19.986  1.00  0.22           O  
HETATM   18  O   HOH T  17      -7.348  -0.101  13.339  1.00  0.23           O  
HETATM   19  O   HOH T  18       4.691   2.933   9.731  1.00  0.23           O  
HETATM   20  O   HOH T  19       5.989 -15.963   8.391  1.00  0.23           O  
HETATM   21  O   HOH T  20      -5.831  27.294  10.765  1.00  0.23           O  
HETATM   22  O   HOH T  21       8.004 -11.293  39.557  1.00  0.23           O  
HETATM   23  O   HOH T  22      17.083  11.967  19.247  1.00  0.23           O  
HETATM   24  O   HOH T  23       1.460  -4.095  32.728  1.00  0.24           O  
HETATM   25  O   HOH T  24       5.987   2.226  37.919  1.00  0.24           O  
HETATM   26  O   HOH T  25      -1.581  -9.946  16.286  1.00  0.25           O  
HETATM   27  O   HOH T  26      13.087  -2.770  35.486  1.00  0.25           O  
HETATM   28  O   HOH T  27       7.435   1.475  35.801  1.00  0.25           O  
HETATM   29  O   HOH T  28      18.158  -5.547  17.932  1.00  0.25           O  
HETATM   30  O   HOH T  29      22.891 -20.579  26.001  1.00  0.25           O  
HETATM   31  O   HOH T  30       6.812 -21.565  31.475  1.00  0.25           O  
HETATM   32  O   HOH T  31       3.991  -8.775  39.454  1.00  0.26           O  
HETATM   33  O   HOH T  32      17.635   0.629  18.754  1.00  0.26           O  
HETATM   34  O   HOH T  33      21.679  -0.767  26.924  1.00  0.26           O  
HETATM   35  O   HOH T  34      -5.012  24.377   8.037  1.00  0.26           O  
HETATM   36  O   HOH T  35      17.745  -6.544  15.184  1.00  0.26           O  
HETATM   37  O   HOH T  36      10.666  23.224  18.992  1.00  0.26           O  
HETATM   38  O   HOH T  37     -17.141   4.143  20.250  1.00  0.26           O  
HETATM   39  O   HOH T  38      11.362 -16.107  35.597  1.00  0.27           O  
HETATM   40  O   HOH T  39       0.821  13.491  23.195  1.00  0.27           O  
HETATM   41  O   HOH T  40      10.397  20.500  18.854  1.00  0.27           O  
HETATM   42  O   HOH T  41      14.939 -12.540  40.093  1.00  0.27           O  
HETATM   43  O   HOH T  42      15.866   1.431  25.656  1.00  0.27           O  
HETATM   44  O   HOH T  43       4.974   6.900  10.237  1.00  0.27           O  
HETATM   45  O   HOH T  44      -9.237  -2.863  23.723  1.00  0.27           O  
HETATM   46  O   HOH T  45      -2.329 -12.420  17.330  1.00  0.27           O  
HETATM   47  O   HOH T  46     -16.001 -16.166  22.629  1.00  0.27           O  
HETATM   48  O   HOH T  47      23.307  -4.684  32.974  1.00  0.28           O  
HETATM   49  O   HOH T  48       7.993  -8.028   3.335  1.00  0.28           O  
HETATM   50  O   HOH T  49     -11.749 -13.872  27.751  1.00  0.28           O  
HETATM   51  O   HOH T  50      18.331   9.817  43.780  1.00  0.28           O  
HETATM   52  O   HOH T  51     -12.244   4.935   8.347  1.00  0.28           O  
HETATM   53  O   HOH T  52       8.796  13.195  22.369  1.00  0.28           O  
HETATM   54  O   HOH T  53       0.953   0.848  10.182  1.00  0.29           O  
HETATM   55  O   HOH T  54      12.366  14.996  16.049  1.00  0.29           O  
HETATM   56  O   HOH T  55     -16.146 -10.894  32.460  1.00  0.29           O  
HETATM   57  O   HOH T  56      27.544 -19.142  27.159  1.00  0.29           O  
HETATM   58  O   HOH T  57      -1.115 -16.011  33.346  1.00  0.29           O  
HETATM   59  O   HOH T  58      19.219  -9.791  34.723  1.00  0.29           O  
HETATM   60  O   HOH T  59       7.437  10.017  31.675  1.00  0.29           O  
HETATM   61  O   HOH T  60     -10.380  -4.467  32.067  1.00  0.30           O  
HETATM   62  O   HOH T  61     -15.492   7.455   9.576  1.00  0.30           O  
HETATM   63  O   HOH T  62      19.549   3.884   9.588  1.00  0.30           O  
HETATM   64  O   HOH T  63      12.641   9.776  11.372  1.00  0.30           O  
HETATM   65  O   HOH T  64     -11.444 -15.970  29.586  1.00  0.30           O  
HETATM   66  O   HOH T  65     -18.589  -5.525  28.622  1.00  0.30           O  
HETATM   67  O   HOH T  66      10.254  -5.453  -0.013  1.00  0.30           O  
HETATM   68  O   HOH T  67       5.074 -23.339  24.884  1.00  0.30           O  
HETATM   69  O   HOH T  68      24.534  -3.178  39.103  1.00  0.30           O  
HETATM   70  O   HOH T  69      -6.790   1.659  24.586  1.00  0.30           O  
HETATM   71  O   HOH T  70      18.620  -6.300  20.671  1.00  0.30           O  
HETATM   72  O   HOH T  71       3.330   9.429  35.525  1.00  0.30           O  
HETATM   73  O   HOH T  72     -10.021 -13.842  20.917  1.00  0.30           O  
HETATM   74  O   HOH T  73      22.120 -11.392  19.944  1.00  0.30           O  
HETATM   75  O   HOH T  74      -2.200 -10.388  13.646  1.00  0.30           O  
HETATM   76  O   HOH T  75      14.555  -9.648   3.981  1.00  0.30           O  
HETATM   77  O   HOH T  76      -9.912   4.258   9.798  1.00  0.30           O  
HETATM   78  O   HOH T  77       3.384 -16.619   3.066  1.00  0.31           O  
HETATM   79  O   HOH T  78       0.697  18.544   2.096  1.00  0.31           O  
HETATM   80  O   HOH T  79       7.163  -8.694  43.045  1.00  0.31           O  
HETATM   81  O   HOH T  80      -2.575   6.191  16.597  1.00  0.31           O  
HETATM   82  O   HOH T  81      19.253  14.875  38.085  1.00  0.31           O  
HETATM   83  O   HOH T  82      -5.681 -10.257  19.486  1.00  0.31           O  
HETATM   84  O   HOH T  83      -8.194 -15.758  21.411  1.00  0.31           O  
HETATM   85  O   HOH T  84       7.292 -31.228  26.424  1.00  0.32           O  
HETATM   86  O   HOH T  85       1.468  25.891  27.383  1.00  0.32           O  
HETATM   87  O   HOH T  86      -0.747   0.063  35.294  1.00  0.32           O  
HETATM   88  O   HOH T  87       4.705 -13.568  37.018  1.00  0.32           O  
HETATM   89  O   HOH T  88      -5.145  18.659   3.010  1.00  0.32           O  
HETATM   90  O   HOH T  89      24.254 -12.136  30.642  1.00  0.32           O  
HETATM   91  O   HOH T  90      -2.577  -6.321   9.186  1.00  0.32           O  
HETATM   92  O   HOH T  91      16.416   6.800   9.919  1.00  0.32           O  
HETATM   93  O   HOH T  92       6.962  -7.940  45.666  1.00  0.32           O  
HETATM   94  O   HOH T  93      -1.730  14.026  22.399  1.00  0.32           O  
HETATM   95  O   HOH T  94      -5.099 -22.703  35.375  1.00  0.32           O  
HETATM   96  O   HOH T  95       5.014 -18.516   9.197  1.00  0.32           O  
HETATM   97  O   HOH T  96      -4.801  18.449  24.946  1.00  0.33           O  
HETATM   98  O   HOH T  97       8.607   1.016  28.911  1.00  0.33           O  
HETATM   99  O   HOH T  98       0.878   6.582  29.994  1.00  0.33           O  
HETATM  100  O   HOH T  99      -3.956   4.756  -0.136  1.00  0.33           O  
HETATM  101  O   HOH T 100      24.274  -2.821  34.846  1.00  0.33           O  
HETATM  102  O   HOH T 101      20.217 -14.369  23.727  1.00  0.33           O  
HETATM  103  O   HOH T 102      11.623 -22.058  23.472  1.00  0.33           O  
HETATM  104  O   HOH T 103      14.730  13.301  27.170  1.00  0.33           O  
HETATM  105  O   HOH T 104     -13.993  15.475   8.397  1.00  0.33           O  
HETATM  106  O   HOH T 105      18.081  -3.100   7.024  1.00  0.33           O  
HETATM  107  O   HOH T 106      -0.734 -16.845  29.397  1.00  0.33           O  
HETATM  108  O   HOH T 107      12.880  14.098  13.413  1.00  0.33           O  
HETATM  109  O   HOH T 108      -2.132 -14.447  29.008  1.00  0.33           O  
HETATM  110  O   HOH T 109      22.574  -8.132  22.454  1.00  0.33           O  
HETATM  111  O   HOH T 110      11.259   0.631  28.262  1.00  0.33           O  
HETATM  112  O   HOH T 111     -16.144  18.324  16.230  1.00  0.33           O  
HETATM  113  O   HOH T 112     -11.192   7.254  -4.037  1.00  0.33           O  
HETATM  114  O   HOH T 113      -6.995  18.948  23.462  1.00  0.33           O  
HETATM  115  O   HOH T 114      22.785  -2.738  37.101  1.00  0.34           O  
HETATM  116  O   HOH T 115      -0.055   4.574  28.297  1.00  0.34           O  
HETATM  117  O   HOH T 116      10.792  12.309  26.035  1.00  0.34           O  
HETATM  118  O   HOH T 117     -13.590   8.273  -3.015  1.00  0.34           O  
HETATM  119  O   HOH T 118      21.159  13.225  27.331  1.00  0.34           O  
HETATM  120  O   HOH T 119      -5.075   6.650  33.928  1.00  0.34           O  
HETATM  121  O   HOH T 120      22.666 -13.139  32.584  1.00  0.34           O  
HETATM  122  O   HOH T 121       1.433  -8.997  10.643  1.00  0.34           O  
HETATM  123  O   HOH T 122      17.281  -4.330  13.593  1.00  0.34           O  
HETATM  124  O   HOH T 123      12.064 -16.467  38.165  1.00  0.34           O  
HETATM  125  O   HOH T 124     -13.994   7.172   2.753  1.00  0.34           O  
HETATM  126  O   HOH T 125      -9.804 -11.078  21.311  1.00  0.35           O  
HETATM  127  O   HOH T 126       5.000   6.102   6.045  1.00  0.35           O  
HETATM  128  O   HOH T 127      20.306 -11.450  36.577  1.00  0.35           O  
HETATM  129  O   HOH T 128     -10.660   5.181  24.312  1.00  0.35           O  
HETATM  130  O   HOH T 129      19.696 -16.408  16.117  1.00  0.35           O  
HETATM  131  O   HOH T 130      18.497   7.633  12.804  1.00  0.35           O  
HETATM  132  O   HOH T 131      16.294   1.622   5.740  1.00  0.35           O  
HETATM  133  O   HOH T 132      11.245 -22.041  18.701  1.00  0.35           O  
HETATM  134  O   HOH T 133      17.079  11.309  45.661  1.00  0.35           O  
HETATM  135  O   HOH T 134       9.617  23.241  30.338  1.00  0.35           O  
HETATM  136  O   HOH T 135       8.979  -1.648   6.958  1.00  0.35           O  
HETATM  137  O   HOH T 136      -1.968  22.945  21.950  1.00  0.36           O  
HETATM  138  O   HOH T 137      24.710  -5.792  39.934  1.00  0.36           O  
HETATM  139  O   HOH T 138       9.490  -0.014   4.848  1.00  0.36           O  
HETATM  140  O   HOH T 139      23.647 -17.678  14.331  1.00  0.36           O  
HETATM  141  O   HOH T 140      20.794  -0.121  10.324  1.00  0.36           O  
HETATM  142  O   HOH T 141     -19.443   6.628  12.134  1.00  0.36           O  
HETATM  143  O   HOH T 142      23.988   8.444  18.018  1.00  0.36           O  
HETATM  144  O   HOH T 143      11.514  10.563  43.528  1.00  0.36           O  
HETATM  145  O   HOH T 144     -15.319 -14.434  20.517  1.00  0.36           O  
HETATM  146  O   HOH T 145       6.723   8.779  41.209  1.00  0.36           O  
HETATM  147  O   HOH T 146      -0.762   8.212  27.209  1.00  0.36           O  
HETATM  148  O   HOH T 147      16.935   9.135  30.906  1.00  0.37           O  
HETATM  149  O   HOH T 148      -3.185   4.118   7.128  1.00  0.37           O  
HETATM  150  O   HOH T 149       5.629 -23.355   8.802  1.00  0.37           O  
HETATM  151  O   HOH T 150     -11.218   9.712  -2.696  1.00  0.37           O  
HETATM  152  O   HOH T 151      -5.012   4.829  -7.589  1.00  0.37           O  
HETATM  153  O   HOH T 152      -0.368  14.322  29.165  1.00  0.37           O  
HETATM  154  O   HOH T 153      -8.802  23.930  15.654  1.00  0.37           O  
HETATM  155  O   HOH T 154     -20.708  -9.172  21.089  1.00  0.37           O  
HETATM  156  O   HOH T 155      -5.562  15.934   3.404  1.00  0.37           O  
HETATM  157  O   HOH T 156       6.738  -2.322  48.658  1.00  0.37           O  
HETATM  158  O   HOH T 157     -10.712   0.385  21.284  1.00  0.37           O  
HETATM  159  O   HOH T 158      -3.034  16.858   2.760  1.00  0.37           O  
HETATM  160  O   HOH T 159       4.066 -24.693  27.336  1.00  0.37           O  
HETATM  161  O   HOH T 160       0.716 -11.391   9.640  1.00  0.37           O  
HETATM  162  O   HOH T 161     -15.719 -21.010  24.910  1.00  0.37           O  
HETATM  163  O   HOH T 162       9.542 -27.005  10.429  1.00  0.37           O  
HETATM  164  O   HOH T 163      16.224  -8.168   2.403  1.00  0.37           O  
HETATM  165  O   HOH T 164      -2.418   4.231  -7.402  1.00  0.37           O  
HETATM  166  O   HOH T 165      10.618  -2.539   4.877  1.00  0.37           O  
HETATM  167  O   HOH T 166     -12.407  -4.704  34.188  1.00  0.37           O  
HETATM  168  O   HOH T 167     -10.937  -4.972  24.314  1.00  0.38           O  
HETATM  169  O   HOH T 168       4.124  26.991  21.887  1.00  0.38           O  
HETATM  170  O   HOH T 169      16.309   2.656  45.240  1.00  0.38           O  
HETATM  171  O   HOH T 170       2.959  12.333  30.106  1.00  0.38           O  
HETATM  172  O   HOH T 171       9.892 -17.859  37.343  1.00  0.38           O  
HETATM  173  O   HOH T 172      21.826  -0.004  19.987  1.00  0.38           O  
HETATM  174  O   HOH T 173      -5.274 -21.165  37.641  1.00  0.38           O  
HETATM  175  O   HOH T 174      -9.306  -3.048  29.902  1.00  0.38           O  
HETATM  176  O   HOH T 175       0.418   8.980   5.619  1.00  0.38           O  
HETATM  177  O   HOH T 176       8.354 -16.587   7.275  1.00  0.38           O  
HETATM  178  O   HOH T 177       2.649   5.665  28.148  1.00  0.38           O  
HETATM  179  O   HOH T 178      -5.191   0.622  11.875  1.00  0.38           O  
HETATM  180  O   HOH T 179       9.951  22.251  16.578  1.00  0.38           O  
HETATM  181  O   HOH T 180      22.530  12.078  25.160  1.00  0.38           O  
HETATM  182  O   HOH T 181     -18.104  16.293  16.029  1.00  0.38           O  
HETATM  183  O   HOH T 182      -4.207   4.075  34.319  1.00  0.38           O  
HETATM  184  O   HOH T 183      -5.571  21.187  27.730  1.00  0.38           O  
HETATM  185  O   HOH T 184      19.102  -8.278   2.473  1.00  0.38           O  
HETATM  186  O   HOH T 185     -18.332 -11.799  31.060  1.00  0.38           O  
HETATM  187  O   HOH T 186      -3.285  23.502   4.052  1.00  0.38           O  
HETATM  188  O   HOH T 187      -3.962  -9.440  11.769  1.00  0.38           O  
HETATM  189  O   HOH T 188      26.810  -3.469  35.819  1.00  0.38           O  
HETATM  190  O   HOH T 189       0.006  25.426  15.778  1.00  0.38           O  
HETATM  191  O   HOH T 190       9.841  11.438  31.321  1.00  0.39           O  
HETATM  192  O   HOH T 191      10.368  19.566  16.205  1.00  0.39           O  
HETATM  193  O   HOH T 192       7.051   7.923   6.133  1.00  0.39           O  
HETATM  194  O   HOH T 193      18.118  -4.641   9.251  1.00  0.39           O  
HETATM  195  O   HOH T 194     -16.079  -9.706  37.392  1.00  0.39           O  
HETATM  196  O   HOH T 195       6.013 -15.439  41.687  1.00  0.39           O  
HETATM  197  O   HOH T 196       2.038 -12.860  36.668  1.00  0.39           O  
HETATM  198  O   HOH T 197       0.511   4.760  24.688  1.00  0.39           O  
HETATM  199  O   HOH T 198      12.748 -14.018  39.244  1.00  0.39           O  
HETATM  200  O   HOH T 199       5.676   8.924  25.785  1.00  0.39           O  
HETATM  201  O   HOH T 200       0.506  24.309  25.440  1.00  0.39           O  
HETATM  202  O   HOH T 201      -2.330   7.757  25.011  1.00  0.39           O  
HETATM  203  O   HOH T 202      10.407 -22.495  29.639  1.00  0.39           O  
HETATM  204  O   HOH T 203     -14.203  17.859   7.229  1.00  0.39           O  
HETATM  205  O   HOH T 204       5.663  -7.317   0.038  1.00  0.40           O  
HETATM  206  O   HOH T 205      21.389  -6.030  21.213  1.00  0.40           O  
HETATM  207  O   HOH T 206      29.197   8.930   5.868  1.00  0.40           O  
HETATM  208  O   HOH T 207      24.597  -4.997  23.557  1.00  0.40           O  
HETATM  209  O   HOH T 208      -5.085  25.480  21.673  1.00  0.40           O  
HETATM  210  O   HOH T 209      -3.517 -27.563  37.431  1.00  0.40           O  
HETATM  211  O   HOH T 210      19.273 -12.618  34.249  1.00  0.40           O  
HETATM  212  O   HOH T 211       0.828  28.328  11.484  1.00  0.40           O  
HETATM  213  O   HOH T 212      -2.711 -14.540  31.798  1.00  0.40           O  
HETATM  214  O   HOH T 213     -15.815 -13.532  37.444  1.00  0.40           O  
HETATM  215  O   HOH T 214      -3.399  -4.044  10.495  1.00  0.40           O  
HETATM  216  O   HOH T 215     -12.265  -1.694  20.249  1.00  0.40           O  
HETATM  217  O   HOH T 216       2.666   7.409   5.348  1.00  0.40           O  
HETATM  218  O   HOH T 217      13.679 -24.139  21.344  1.00  0.40           O  
HETATM  219  O   HOH T 218      10.839  10.678  19.446  1.00  0.40           O  
HETATM  220  O   HOH T 219      -5.031 -12.144  17.616  1.00  0.40           O  
HETATM  221  O   HOH T 220       1.575  22.953  33.602  1.00  0.41           O  
HETATM  222  O   HOH T 221       9.829 -28.772  29.416  1.00  0.41           O  
HETATM  223  O   HOH T 222      -0.023  13.889   4.734  1.00  0.41           O  
HETATM  224  O   HOH T 223       9.104   4.320  45.401  1.00  0.41           O  
HETATM  225  O   HOH T 224     -15.717   7.144   4.870  1.00  0.41           O  
HETATM  226  O   HOH T 225       0.021   7.262  23.471  1.00  0.41           O  
HETATM  227  O   HOH T 226      10.852  14.795  10.266  1.00  0.41           O  
HETATM  228  O   HOH T 227       8.162  14.649  29.280  1.00  0.41           O  
HETATM  229  O   HOH T 228      28.472  -7.835  21.374  1.00  0.41           O  
HETATM  230  O   HOH T 229      -6.699 -12.443  15.407  1.00  0.41           O  
HETATM  231  O   HOH T 230      -5.491   4.517   8.852  1.00  0.41           O  
HETATM  232  O   HOH T 231       2.500  13.045   3.626  1.00  0.41           O  
HETATM  233  O   HOH T 232     -11.330  -3.393  22.106  1.00  0.41           O  
HETATM  234  O   HOH T 233     -13.978  -8.143  38.076  1.00  0.41           O  
HETATM  235  O   HOH T 234       6.435 -18.539  38.653  1.00  0.41           O  
HETATM  236  O   HOH T 235      -4.051  21.869  30.051  1.00  0.41           O  
HETATM  237  O   HOH T 236      26.098  -6.418  21.655  1.00  0.42           O  
HETATM  238  O   HOH T 237      -2.478   8.861   0.721  1.00  0.42           O  
HETATM  239  O   HOH T 238      -9.139  -6.213  33.778  1.00  0.42           O  
HETATM  240  O   HOH T 239      -3.953  14.433   1.703  1.00  0.42           O  
HETATM  241  O   HOH T 240      15.672  12.352  32.961  1.00  0.42           O  
HETATM  242  O   HOH T 241      24.446  -1.552  26.664  1.00  0.42           O  
HETATM  243  O   HOH T 242     -13.763   3.935  14.585  1.00  0.42           O  
HETATM  244  O   HOH T 243      18.083  -8.620  42.922  1.00  0.42           O  
HETATM  245  O   HOH T 244       1.494   9.698  23.649  1.00  0.42           O  
HETATM  246  O   HOH T 245      19.148   6.527  10.303  1.00  0.42           O  
HETATM  247  O   HOH T 246      -2.941  23.356   6.740  1.00  0.42           O  
HETATM  248  O   HOH T 247      -2.371   6.238   1.466  1.00  0.42           O  
HETATM  249  O   HOH T 248      12.854 -21.403  20.991  1.00  0.42           O  
HETATM  250  O   HOH T 249      -2.300  12.844   3.335  1.00  0.42           O  
HETATM  251  O   HOH T 250      26.144   7.354  34.144  1.00  0.42           O  
HETATM  252  O   HOH T 251      20.659  -0.945  13.049  1.00  0.42           O  
HETATM  253  O   HOH T 252      19.371   0.124   7.950  1.00  0.42           O  
HETATM  254  O   HOH T 253      13.671   7.421   7.774  1.00  0.42           O  
HETATM  255  O   HOH T 254       0.835  16.179   0.559  1.00  0.42           O  
HETATM  256  O   HOH T 255      12.220  17.691  15.529  1.00  0.42           O  
HETATM  257  O   HOH T 256       0.974   9.248  29.132  1.00  0.42           O  
HETATM  258  O   HOH T 257       2.298  20.824  31.977  1.00  0.43           O  
HETATM  259  O   HOH T 258      14.836  11.454  11.138  1.00  0.43           O  
HETATM  260  O   HOH T 259      17.638  10.465  33.293  1.00  0.43           O  
HETATM  261  O   HOH T 260      21.768  13.828  31.647  1.00  0.43           O  
HETATM  262  O   HOH T 261     -10.533  20.899  12.494  1.00  0.43           O  
HETATM  263  O   HOH T 262     -16.187   5.986  18.493  1.00  0.43           O  
HETATM  264  O   HOH T 263       4.745 -16.569  39.483  1.00  0.43           O  
HETATM  265  O   HOH T 264      13.192  11.212   8.959  1.00  0.43           O  
HETATM  266  O   HOH T 265      33.713  -4.082  25.912  1.00  0.43           O  
HETATM  267  O   HOH T 266       2.033 -19.292   7.126  1.00  0.43           O  
HETATM  268  O   HOH T 267       4.831 -21.821  33.304  1.00  0.43           O  
HETATM  269  O   HOH T 268      15.869   0.520  29.451  1.00  0.43           O  
HETATM  270  O   HOH T 269      -4.805  12.322   0.166  1.00  0.43           O  
HETATM  271  O   HOH T 270     -14.263  19.711  17.884  1.00  0.43           O  
HETATM  272  O   HOH T 271     -19.626  -4.237  30.784  1.00  0.43           O  
HETATM  273  O   HOH T 272      -1.486  24.187  13.711  1.00  0.43           O  
HETATM  274  O   HOH T 273       7.262   6.805  24.874  1.00  0.43           O  
HETATM  275  O   HOH T 274     -13.107 -21.905  25.419  1.00  0.43           O  
HETATM  276  O   HOH T 275      19.822  -6.736   8.633  1.00  0.44           O  
HETATM  277  O   HOH T 276       3.790 -24.017  29.981  1.00  0.44           O  
HETATM  278  O   HOH T 277      26.730  -4.649  38.349  1.00  0.44           O  
HETATM  279  O   HOH T 278      18.001   2.577   7.705  1.00  0.44           O  
HETATM  280  O   HOH T 279     -12.600   7.080  25.125  1.00  0.44           O  
HETATM  281  O   HOH T 280      -3.047   3.745   2.328  1.00  0.44           O  
HETATM  282  O   HOH T 281     -16.095 -14.014  40.181  1.00  0.44           O  
HETATM  283  O   HOH T 282       3.723   7.669   7.943  1.00  0.44           O  
HETATM  284  O   HOH T 283      -6.342   2.911   3.964  1.00  0.44           O  
HETATM  285  O   HOH T 284       6.204  15.541  31.192  1.00  0.44           O  
HETATM  286  O   HOH T 285       2.977 -20.510   9.478  1.00  0.44           O  
HETATM  287  O   HOH T 286     -17.346 -14.407  18.500  1.00  0.44           O  
HETATM  288  O   HOH T 287      10.473   2.374   5.306  1.00  0.44           O  
HETATM  289  O   HOH T 288      -2.369 -21.847  20.042  1.00  0.44           O  
HETATM  290  O   HOH T 289      17.890  17.736  24.440  1.00  0.44           O  
HETATM  291  O   HOH T 290      -0.611  28.792  23.885  1.00  0.44           O  
HETATM  292  O   HOH T 291       1.791  15.996  29.783  1.00  0.44           O  
HETATM  293  O   HOH T 292      24.431   8.548  32.576  1.00  0.44           O  
HETATM  294  O   HOH T 293       4.229  14.786  29.575  1.00  0.44           O  
HETATM  295  O   HOH T 294      11.936 -20.312  12.285  1.00  0.45           O  
HETATM  296  O   HOH T 295       3.753   8.568  38.142  1.00  0.45           O  
HETATM  297  O   HOH T 296      -0.345  16.100   2.997  1.00  0.45           O  
HETATM  298  O   HOH T 297      23.688 -10.372  21.733  1.00  0.45           O  
HETATM  299  O   HOH T 298       6.319  10.981  27.558  1.00  0.45           O  
HETATM  300  O   HOH T 299     -11.145  19.010  14.364  1.00  0.45           O  
HETATM  301  O   HOH T 300       1.265  -8.415  39.168  1.00  0.45           O  
HETATM  302  O   HOH T 301       2.365 -21.942  36.416  1.00  0.45           O  
HETATM  303  O   HOH T 302      -7.494   9.595  29.570  1.00  0.45           O  
HETATM  304  O   HOH T 303     -15.587  12.227  24.498  1.00  0.45           O  
HETATM  305  O   HOH T 304       2.894  11.880  22.467  1.00  0.45           O  
HETATM  306  O   HOH T 305      24.906 -18.713  26.365  1.00  0.45           O  
HETATM  307  O   HOH T 306      21.303  15.475  36.283  1.00  0.45           O  
HETATM  308  O   HOH T 307      26.075 -18.605  23.849  1.00  0.45           O  
HETATM  309  O   HOH T 308      21.872 -13.216  35.195  1.00  0.45           O  
HETATM  310  O   HOH T 309     -10.770  23.444  13.773  1.00  0.45           O  
HETATM  311  O   HOH T 310      31.067  -4.642  25.554  1.00  0.45           O  
HETATM  312  O   HOH T 311       7.397 -17.986   5.067  1.00  0.45           O  
HETATM  313  O   HOH T 312       0.191  11.799  30.046  1.00  0.45           O  
HETATM  314  O   HOH T 313     -16.141  -7.219  36.564  1.00  0.45           O  
HETATM  315  O   HOH T 314      23.866  -2.516  24.179  1.00  0.45           O  
HETATM  316  O   HOH T 315       8.102  27.119  32.823  1.00  0.45           O  
HETATM  317  O   HOH T 316      -3.868  -8.284  19.233  1.00  0.45           O  
HETATM  318  O   HOH T 317      -8.185   2.076   5.716  1.00  0.45           O  
HETATM  319  O   HOH T 318       3.758   0.958  39.135  1.00  0.46           O  
HETATM  320  O   HOH T 319       3.509 -18.820   4.791  1.00  0.46           O  
HETATM  321  O   HOH T 320       9.235   1.679   2.839  1.00  0.46           O  
HETATM  322  O   HOH T 321      -9.036   1.911  12.631  1.00  0.46           O  
HETATM  323  O   HOH T 322       3.309   3.278  40.534  1.00  0.46           O  
HETATM  324  O   HOH T 323      11.494  -3.135   1.240  1.00  0.46           O  
HETATM  325  O   HOH T 324       6.468  -5.879   2.322  1.00  0.46           O  
HETATM  326  O   HOH T 325      -5.773  24.697   3.810  1.00  0.46           O  
HETATM  327  O   HOH T 326      -1.516  25.258   5.080  1.00  0.46           O  
HETATM  328  O   HOH T 327       9.429   6.550   5.460  1.00  0.46           O  
HETATM  329  O   HOH T 328      -7.963   3.387   8.115  1.00  0.46           O  
HETATM  330  O   HOH T 329       1.630 -15.282   1.556  1.00  0.46           O  
HETATM  331  O   HOH T 330      17.863  13.729  34.042  1.00  0.46           O  
HETATM  332  O   HOH T 331      17.822   5.339   8.111  1.00  0.46           O  
HETATM  333  O   HOH T 332      12.843  11.113  27.344  1.00  0.46           O  
HETATM  334  O   HOH T 333      18.755  15.476  20.440  1.00  0.46           O  
HETATM  335  O   HOH T 334      17.843  -0.749   5.701  1.00  0.46           O  
HETATM  336  O   HOH T 335      -7.006 -11.754  21.269  1.00  0.46           O  
HETATM  337  O   HOH T 336       8.635  -9.908   1.353  1.00  0.46           O  
HETATM  338  O   HOH T 337      -0.871  -6.606  39.019  1.00  0.46           O  
HETATM  339  O   HOH T 338     -18.103   7.066  -4.377  1.00  0.46           O  
HETATM  340  O   HOH T 339       8.473  12.627  27.473  1.00  0.46           O  
HETATM  341  O   HOH T 340      24.240  11.407  30.812  1.00  0.46           O  
HETATM  342  O   HOH T 341      -4.106 -13.443  15.378  1.00  0.47           O  
HETATM  343  O   HOH T 342      21.064  15.864  26.874  1.00  0.47           O  
HETATM  344  O   HOH T 343       4.946  -3.321   4.870  1.00  0.47           O  
HETATM  345  O   HOH T 344      17.965  -6.689   0.725  1.00  0.47           O  
HETATM  346  O   HOH T 345      16.306  18.138  22.125  1.00  0.47           O  
HETATM  347  O   HOH T 346      22.451   8.985  20.182  1.00  0.47           O  
HETATM  348  O   HOH T 347      12.276  22.538  33.488  1.00  0.47           O  
HETATM  349  O   HOH T 348       4.780  -9.611  42.073  1.00  0.47           O  
HETATM  350  O   HOH T 349      14.767   9.055   9.729  1.00  0.47           O  
HETATM  351  O   HOH T 350      13.653  15.635  25.801  1.00  0.47           O  
HETATM  352  O   HOH T 351      -0.774 -22.524  29.217  1.00  0.47           O  
HETATM  353  O   HOH T 352     -12.383   5.219   5.699  1.00  0.47           O  
HETATM  354  O   HOH T 353     -14.394   6.483   7.182  1.00  0.47           O  
HETATM  355  O   HOH T 354      13.039  12.334  19.883  1.00  0.47           O  
HETATM  356  O   HOH T 355      -3.070 -21.890  22.795  1.00  0.47           O  
HETATM  357  O   HOH T 356      25.665 -15.499  32.784  1.00  0.47           O  
HETATM  358  O   HOH T 357      21.105  -5.677  13.160  1.00  0.47           O  
HETATM  359  O   HOH T 358      -9.866  21.316  15.250  1.00  0.47           O  
HETATM  360  O   HOH T 359      20.121  -7.926  14.435  1.00  0.47           O  
HETATM  361  O   HOH T 360       0.070 -14.814  36.525  1.00  0.47           O  
HETATM  362  O   HOH T 361      22.727  10.078  38.221  1.00  0.48           O  
HETATM  363  O   HOH T 362      21.312  -3.236  14.493  1.00  0.48           O  
HETATM  364  O   HOH T 363       6.441   3.491  44.257  1.00  0.48           O  
HETATM  365  O   HOH T 364       2.063   8.113  26.786  1.00  0.48           O  
HETATM  366  O   HOH T 365       3.233  14.302  18.525  1.00  0.48           O  
HETATM  367  O   HOH T 366     -16.227   8.069  -2.457  1.00  0.48           O  
HETATM  368  O   HOH T 367      20.237  -5.446  15.875  1.00  0.48           O  
HETATM  369  O   HOH T 368       2.277  13.787   0.864  1.00  0.48           O  
HETATM  370  O   HOH T 369      18.082  -1.217   3.063  1.00  0.48           O  
HETATM  371  O   HOH T 370     -13.549  -6.387  36.121  1.00  0.48           O  
HETATM  372  O   HOH T 371       4.525 -20.373  35.792  1.00  0.48           O  
HETATM  373  O   HOH T 372      11.288  13.078  33.095  1.00  0.48           O  
HETATM  374  O   HOH T 373      -3.920  -1.347  10.440  1.00  0.48           O  
HETATM  375  O   HOH T 374     -15.420  20.246   6.560  1.00  0.48           O  
HETATM  376  O   HOH T 375       4.676 -13.807  39.838  1.00  0.48           O  
HETATM  377  O   HOH T 376      24.609  12.163  26.844  1.00  0.48           O  
HETATM  378  O   HOH T 377      22.352 -17.824  26.279  1.00  0.48           O  
HETATM  379  O   HOH T 378       5.293 -11.155  39.819  1.00  0.48           O  
HETATM  380  O   HOH T 379      21.869  11.433  44.113  1.00  0.49           O  
HETATM  381  O   HOH T 380     -14.262   4.133  19.426  1.00  0.49           O  
HETATM  382  O   HOH T 381      20.469  -4.755  10.603  1.00  0.49           O  
HETATM  383  O   HOH T 382       1.624   6.371  17.958  1.00  0.49           O  
HETATM  384  O   HOH T 383       0.450   8.465  31.754  1.00  0.49           O  
HETATM  385  O   HOH T 384       6.907   8.274  28.112  1.00  0.49           O  
HETATM  386  O   HOH T 385      14.706   0.350   7.593  1.00  0.49           O  
HETATM  387  O   HOH T 386       8.129 -28.968  31.660  1.00  0.49           O  
HETATM  388  O   HOH T 387      23.411 -16.758  33.690  1.00  0.49           O  
HETATM  389  O   HOH T 388     -17.465  13.803  11.362  1.00  0.49           O  
HETATM  390  O   HOH T 389       8.255   5.802   2.914  1.00  0.49           O  
HETATM  391  O   HOH T 390      15.511  17.268  19.687  1.00  0.49           O  
HETATM  392  O   HOH T 391      26.330  10.504  25.736  1.00  0.49           O  
HETATM  393  O   HOH T 392       3.282  11.255  37.638  1.00  0.49           O  
HETATM  394  O   HOH T 393       5.495 -26.043  25.623  1.00  0.49           O  
HETATM  395  O   HOH T 394       3.941 -17.187   7.025  1.00  0.49           O  
HETATM  396  O   HOH T 395       6.738 -12.852  41.518  1.00  0.49           O  
HETATM  397  O   HOH T 396     -17.525   3.869   8.829  1.00  0.49           O  
HETATM  398  O   HOH T 397       9.526 -25.785   7.905  1.00  0.49           O  
HETATM  399  O   HOH T 398      10.457  -0.872   2.551  1.00  0.49           O  
HETATM  400  O   HOH T 399       3.637 -18.766  38.190  1.00  0.49           O  
HETATM  401  O   HOH T 400       7.436 -28.984  27.954  1.00  0.49           O  
HETATM  402  O   HOH T 401      12.167  10.572  29.983  1.00  0.49           O  
HETATM  403  O   HOH T 402      -6.356 -10.994  11.471  1.00  0.49           O  
HETATM  404  O   HOH T 403      14.549  17.750  27.632  1.00  0.49           O  
HETATM  405  O   HOH T 404      -4.824 -11.280  13.721  1.00  0.49           O  
HETATM  406  O   HOH T 405     -12.746   1.448  17.849  1.00  0.49           O  
HETATM  407  O   HOH T 406       5.043 -24.225  21.031  1.00  0.49           O  
HETATM  408  O   HOH T 407     -14.317 -15.508  38.721  1.00  0.49           O  
HETATM  409  O   HOH T 408      17.692 -12.722  40.176  1.00  0.49           O  
HETATM  410  O   HOH T 409      13.556  15.345  28.566  1.00  0.49           O  
HETATM  411  O   HOH T 410       4.781  -4.043  49.429  1.00  0.49           O  
HETATM  412  O   HOH T 411     -15.747  17.674  18.900  1.00  0.49           O  
HETATM  413  O   HOH T 412      22.513 -16.208  16.454  1.00  0.50           O  
HETATM  414  O   HOH T 413       1.500 -24.200  28.469  1.00  0.50           O  
HETATM  415  O   HOH T 414       7.228 -21.802   7.237  1.00  0.50           O  
HETATM  416  O   HOH T 415      20.287 -12.918  38.848  1.00  0.50           O  
HETATM  417  O   HOH T 416      20.035  -2.500   8.891  1.00  0.50           O  
HETATM  418  O   HOH T 417       7.264  10.753  43.022  1.00  0.50           O  
HETATM  419  O   HOH T 418      10.493   4.141   3.159  1.00  0.50           O  
HETATM  420  O   HOH T 419     -13.108  -1.338  17.679  1.00  0.50           O  
HETATM  421  O   HOH T 420      -6.348 -15.175  15.484  1.00  0.50           O  
HETATM  422  O   HOH T 421      11.430 -23.040  12.584  1.00  0.50           O  
HETATM  423  O   HOH T 422     -19.410  12.958  17.848  1.00  0.50           O  
HETATM  424  O   HOH T 423      26.288  -3.387  25.211  1.00  0.50           O  
HETATM  425  O   HOH T 424     -20.711  -4.025  33.199  1.00  0.50           O  
HETATM  426  O   HOH T 425     -17.908 -15.087  20.997  1.00  0.50           O  
HETATM  427  O   HOH T 426     -12.494  20.635  16.047  1.00  0.50           O  
HETATM  428  O   HOH T 427      16.396  15.320  21.893  1.00  0.50           O  
HETATM  429  O   HOH T 428       5.742  -6.506  49.229  1.00  0.50           O  
HETATM  430  O   HOH T 429       4.991  10.523  39.711  1.00  0.50           O  
HETATM  431  O   HOH T 430      -7.336   3.396  10.833  1.00  0.50           O  
HETATM  432  O   HOH T 431      19.993   5.518  41.180  1.00  0.50           O  
HETATM  433  O   HOH T 432     -15.291   3.899  16.815  1.00  0.50           O  
HETATM  434  O   HOH T 433      32.516  10.211  25.941  1.00  0.50           O  
HETATM  435  O   HOH T 434     -17.584  10.416  -1.665  1.00  0.50           O  
HETATM  436  O   HOH T 435     -17.890  -8.705  32.534  1.00  0.50           O  
HETATM  437  O   HOH T 436      20.334  14.948  33.719  1.00  0.50           O  
HETATM  438  O   HOH T 437      12.274 -24.474  29.443  1.00  0.50           O  
HETATM  439  O   HOH T 438     -15.140   4.350  12.192  1.00  0.50           O  
HETATM  440  O   HOH T 439      12.317  12.557  11.121  1.00  0.50           O  
HETATM  441  O   HOH T 440      10.081 -17.875   5.478  1.00  0.51           O  
HETATM  442  O   HOH T 441      24.169  -9.790  19.075  1.00  0.51           O  
HETATM  443  O   HOH T 442     -19.344  10.567   7.259  1.00  0.51           O  
HETATM  444  O   HOH T 443       6.408 -25.110  23.253  1.00  0.51           O  
HETATM  445  O   HOH T 444       1.532  28.289   8.722  1.00  0.51           O  
HETATM  446  O   HOH T 445      18.152  -7.293  45.311  1.00  0.51           O  
HETATM  447  O   HOH T 446       0.222 -19.794   9.197  1.00  0.51           O  
HETATM  448  O   HOH T 447      14.582  -4.032  46.190  1.00  0.51           O  
HETATM  449  O   HOH T 448       8.431  10.377  29.149  1.00  0.51           O  
HETATM  450  O   HOH T 449      28.438   6.594   4.720  1.00  0.51           O  
HETATM  451  O   HOH T 450      -2.600  11.020  -0.946  1.00  0.51           O  
HETATM  452  O   HOH T 451       7.878  -4.742  49.277  1.00  0.51           O  
HETATM  453  O   HOH T 452      -7.340 -21.101  35.772  1.00  0.51           O  
HETATM  454  O   HOH T 453       3.868  -2.487  43.721  1.00  0.51           O  
HETATM  455  O   HOH T 454      13.730  14.796  21.049  1.00  0.51           O  
HETATM  456  O   HOH T 455       5.035  11.281  31.571  1.00  0.51           O  
HETATM  457  O   HOH T 456      25.102   9.021  21.950  1.00  0.51           O  
HETATM  458  O   HOH T 457       1.698  27.626  16.360  1.00  0.51           O  
HETATM  459  O   HOH T 458       2.573 -14.529  -0.891  1.00  0.51           O  
HETATM  460  O   HOH T 459      -8.407   7.180  28.429  1.00  0.51           O  
HETATM  461  O   HOH T 460      -8.381  24.517   2.883  1.00  0.51           O  
HETATM  462  O   HOH T 461       5.413 -24.392  11.339  1.00  0.51           O  
HETATM  463  O   HOH T 462      10.521 -11.409  40.698  1.00  0.51           O  
HETATM  464  O   HOH T 463     -17.549 -11.679  36.198  1.00  0.51           O  
HETATM  465  O   HOH T 464      20.972  -2.476  43.635  1.00  0.51           O  
HETATM  466  O   HOH T 465      21.590  -7.217  10.780  1.00  0.52           O  
HETATM  467  O   HOH T 466     -10.695   6.195  27.005  1.00  0.52           O  
HETATM  468  O   HOH T 467      -6.299  17.022  28.358  1.00  0.52           O  
HETATM  469  O   HOH T 468       5.419  -9.982  44.702  1.00  0.52           O  
HETATM  470  O   HOH T 469      14.780  13.801  15.440  1.00  0.52           O  
HETATM  471  O   HOH T 470      17.242 -14.023  32.676  1.00  0.52           O  
HETATM  472  O   HOH T 471      12.103 -12.088   1.577  1.00  0.52           O  
HETATM  473  O   HOH T 472      25.154   9.678  34.937  1.00  0.52           O  
HETATM  474  O   HOH T 473      -7.234  -1.097  24.209  1.00  0.52           O  
HETATM  475  O   HOH T 474     -18.654 -11.043  33.731  1.00  0.52           O  
HETATM  476  O   HOH T 475      -9.818 -12.309  35.605  1.00  0.52           O  
HETATM  477  O   HOH T 476      -8.477   5.013  25.943  1.00  0.52           O  
HETATM  478  O   HOH T 477     -11.351  17.840  25.108  1.00  0.52           O  
HETATM  479  O   HOH T 478      28.330  11.342  27.519  1.00  0.53           O  
HETATM  480  O   HOH T 479      27.142   4.423  10.540  1.00  0.53           O  
HETATM  481  O   HOH T 480     -10.844  -6.385  35.820  1.00  0.53           O  
HETATM  482  O   HOH T 481     -17.191   5.686  10.842  1.00  0.53           O  
HETATM  483  O   HOH T 482      -5.659   2.851   6.663  1.00  0.53           O  
HETATM  484  O   HOH T 483       3.047  19.448   8.260  1.00  0.53           O  
HETATM  485  O   HOH T 484     -18.574  15.301  18.671  1.00  0.53           O  
HETATM  486  O   HOH T 485      26.051  -0.832  24.455  1.00  0.53           O  
HETATM  487  O   HOH T 486     -14.914   4.745   9.444  1.00  0.53           O  
HETATM  488  O   HOH T 487     -12.251  -4.926  14.727  1.00  0.53           O  
HETATM  489  O   HOH T 488      11.097  14.542  29.410  1.00  0.53           O  
HETATM  490  O   HOH T 489       2.464  28.424  23.617  1.00  0.53           O  
HETATM  491  O   HOH T 490      24.209 -12.315  36.378  1.00  0.53           O  
HETATM  492  O   HOH T 491     -13.688 -19.460  24.275  1.00  0.53           O  
HETATM  493  O   HOH T 492       7.481  17.738   4.107  1.00  0.53           O  
HETATM  494  O   HOH T 493       6.491  18.563  14.353  1.00  0.54           O  
HETATM  495  O   HOH T 494      12.156   7.400   5.541  1.00  0.54           O  
HETATM  496  O   HOH T 495      12.837  -9.867   0.183  1.00  0.54           O  
HETATM  497  O   HOH T 496       3.044  -7.169  -0.203  1.00  0.54           O  
HETATM  498  O   HOH T 497     -16.325  -9.319  20.312  1.00  0.54           O  
HETATM  499  O   HOH T 498       5.411   6.273  12.874  1.00  0.54           O  
HETATM  500  O   HOH T 499       2.212 -20.940  38.921  1.00  0.54           O  
HETATM  501  O   HOH T 500       2.545   2.004   8.186  1.00  0.54           O  
HETATM  502  O   HOH T 501      -6.437   5.522  31.801  1.00  0.54           O  
HETATM  503  O   HOH T 502       4.674   5.501  40.022  1.00  0.55           O  
HETATM  504  O   HOH T 503      15.436 -11.321   6.364  1.00  0.55           O  
HETATM  505  O   HOH T 504       9.022 -23.208  13.978  1.00  0.55           O  
HETATM  506  O   HOH T 505     -15.461 -11.503  39.386  1.00  0.55           O  
HETATM  507  O   HOH T 506      -3.699   2.632   4.814  1.00  0.55           O  
HETATM  508  O   HOH T 507       0.678 -17.213  31.702  1.00  0.55           O  
HETATM  509  O   HOH T 508       7.391  -4.421   4.558  1.00  0.55           O  
HETATM  510  O   HOH T 509     -13.743  14.005   0.797  1.00  0.55           O  
HETATM  511  O   HOH T 510      14.716  10.818  30.893  1.00  0.55           O  
HETATM  512  O   HOH T 511      12.827 -15.569  33.265  1.00  0.55           O  
HETATM  513  O   HOH T 512       7.536 -25.182   9.727  1.00  0.55           O  
HETATM  514  O   HOH T 513      -4.149   5.707  36.442  1.00  0.55           O  
HETATM  515  O   HOH T 514      -4.134  25.743   5.732  1.00  0.55           O  
HETATM  516  O   HOH T 515       0.770  26.371  23.567  1.00  0.55           O  
HETATM  517  O   HOH T 516       8.229  -7.219   0.658  1.00  0.56           O  
HETATM  518  O   HOH T 517      26.748  -7.283  38.900  1.00  0.56           O  
HETATM  519  O   HOH T 518      25.860   6.392   4.856  1.00  0.56           O  
HETATM  520  O   HOH T 519      -2.509  -0.015  37.262  1.00  0.56           O  
HETATM  521  O   HOH T 520      17.985 -17.763  29.114  1.00  0.56           O  
HETATM  522  O   HOH T 521      -7.920 -18.776  24.363  1.00  0.56           O  
HETATM  523  O   HOH T 522       8.957  12.182   5.577  1.00  0.56           O  
HETATM  524  O   HOH T 523     -10.506   3.082  22.070  1.00  0.56           O  
HETATM  525  O   HOH T 524      -9.718 -12.155  18.669  1.00  0.56           O  
HETATM  526  O   HOH T 525       0.135 -24.410  30.849  1.00  0.56           O  
HETATM  527  O   HOH T 526      10.726 -20.316   6.408  1.00  0.56           O  
HETATM  528  O   HOH T 527      -1.107 -19.553  29.106  1.00  0.56           O  
HETATM  529  O   HOH T 528      26.990   4.151  36.496  1.00  0.56           O  
HETATM  530  O   HOH T 529     -10.675   2.380  19.450  1.00  0.56           O  
HETATM  531  O   HOH T 530     -13.736  18.662  20.414  1.00  0.56           O  
HETATM  532  O   HOH T 531      10.554  -8.341  -0.002  1.00  0.56           O  
HETATM  533  O   HOH T 532      15.457   2.512   3.238  1.00  0.56           O  
HETATM  534  O   HOH T 533      -0.771   5.092  18.577  1.00  0.57           O  
HETATM  535  O   HOH T 534       4.272 -14.531   1.355  1.00  0.57           O  
HETATM  536  O   HOH T 535     -18.471  12.709   9.146  1.00  0.57           O  
HETATM  537  O   HOH T 536      -0.233  20.934  33.058  1.00  0.57           O  
HETATM  538  O   HOH T 537      19.205  17.803  26.875  1.00  0.57           O  
HETATM  539  O   HOH T 538       5.588  25.920  32.589  1.00  0.57           O  
HETATM  540  O   HOH T 539       0.127  27.706  28.605  1.00  0.57           O  
HETATM  541  O   HOH T 540      27.458   4.238   5.718  1.00  0.57           O  
HETATM  542  O   HOH T 541      13.170   3.887   4.062  1.00  0.57           O  
HETATM  543  O   HOH T 542      11.257  14.402  22.116  1.00  0.57           O  
HETATM  544  O   HOH T 543      26.033  12.203  29.042  1.00  0.57           O  
HETATM  545  O   HOH T 544      -0.874  -9.348   8.394  1.00  0.57           O  
HETATM  546  O   HOH T 545      -0.807  10.715  32.350  1.00  0.57           O  
HETATM  547  O   HOH T 546       5.599 -18.081   3.095  1.00  0.57           O  
HETATM  548  O   HOH T 547       8.339 -19.270   7.246  1.00  0.58           O  
HETATM  549  O   HOH T 548     -19.322  12.951   6.428  1.00  0.58           O  
HETATM  550  O   HOH T 549      11.010 -23.397  21.066  1.00  0.58           O  
HETATM  551  O   HOH T 550       4.095  13.841  32.216  1.00  0.58           O  
HETATM  552  O   HOH T 551     -18.891  10.299  10.649  1.00  0.59           O  
HETATM  553  O   HOH T 552       3.144  27.232  10.548  1.00  0.59           O  
HETATM  554  O   HOH T 553      19.753  -9.072   4.992  1.00  0.59           O  
HETATM  555  O   HOH T 554      27.082  -9.877  35.913  1.00  0.60           O  
HETATM  556  O   HOH T 555     -15.424   2.256  21.115  1.00  0.60           O  
HETATM  557  O   HOH T 556      19.762  15.508  31.080  1.00  0.61           O  
HETATM  558  O   HOH T 557      22.187  12.871  22.598  1.00  0.61           O  
TER     559      HOH T 557 
