# Supplementary material for: Accurate Prediction of Hydration Sites of Proteins Using Energy Model With Atom Embedding
Source: Front Mol Biosci. 2021 Sep 20;8:756075. doi: 10.3389/fmolb.2021.756075 (PMC8488165; doi:10.3389/fmolb.2021.756075)
Supplement: Supplementary file 1 [file DataSheet1.ZIP › Data Sheet 1/Our_result_pdb/our_dataset_output/3BUW_watersite.pdb]

HEADER                                                        XXXX


JRNL        PMID   -1
HETATM    1  O   HOH T   0      -3.612  -1.217   6.695  1.00  0.15           O  
HETATM    2  O   HOH T   1     -28.061  -0.054  19.713  1.00  0.18           O  
HETATM    3  O   HOH T   2     -35.189  -2.894   2.185  1.00  0.18           O  
HETATM    4  O   HOH T   3     -36.155  -0.908   9.983  1.00  0.19           O  
HETATM    5  O   HOH T   4       3.444  -4.708  24.146  1.00  0.20           O  
HETATM    6  O   HOH T   5       4.395  -2.914  16.522  1.00  0.21           O  
HETATM    7  O   HOH T   6       6.003   8.472  30.575  1.00  0.21           O  
HETATM    8  O   HOH T   7      -4.712 -24.404  37.797  1.00  0.21           O  
HETATM    9  O   HOH T   8       3.752   2.523  -3.561  1.00  0.22           O  
HETATM   10  O   HOH T   9     -28.380  13.061  25.126  1.00  0.22           O  
HETATM   11  O   HOH T  10     -41.616 -17.260  -4.506  1.00  0.22           O  
HETATM   12  O   HOH T  11     -34.721  -1.156  -1.116  1.00  0.22           O  
HETATM   13  O   HOH T  12     -28.661 -23.146 -11.305  1.00  0.22           O  
HETATM   14  O   HOH T  13     -38.502   3.625   4.454  1.00  0.23           O  
HETATM   15  O   HOH T  14     -35.802  -7.825  10.391  1.00  0.24           O  
HETATM   16  O   HOH T  15     -41.492  -3.050   1.798  1.00  0.24           O  
HETATM   17  O   HOH T  16       3.434  -9.671  16.034  1.00  0.24           O  
HETATM   18  O   HOH T  17     -31.891  -2.976  -7.462  1.00  0.24           O  
HETATM   19  O   HOH T  18     -35.751 -21.844  23.496  1.00  0.24           O  
HETATM   20  O   HOH T  19     -37.994 -11.991  21.205  1.00  0.24           O  
HETATM   21  O   HOH T  20     -37.124   1.273  31.596  1.00  0.24           O  
HETATM   22  O   HOH T  21     -36.687 -34.903   2.147  1.00  0.25           O  
HETATM   23  O   HOH T  22     -24.338  -6.904  32.889  1.00  0.25           O  
HETATM   24  O   HOH T  23       3.294  -2.993  27.436  1.00  0.25           O  
HETATM   25  O   HOH T  24       5.862 -11.194  -3.415  1.00  0.25           O  
HETATM   26  O   HOH T  25      19.318  15.613   2.409  1.00  0.25           O  
HETATM   27  O   HOH T  26     -11.815 -15.346  26.171  1.00  0.25           O  
HETATM   28  O   HOH T  27     -40.817 -10.658  -4.248  1.00  0.25           O  
HETATM   29  O   HOH T  28     -24.457  -8.867  11.313  1.00  0.25           O  
HETATM   30  O   HOH T  29     -44.001  -3.624  23.914  1.00  0.25           O  
HETATM   31  O   HOH T  30     -36.418  10.393  -4.012  1.00  0.25           O  
HETATM   32  O   HOH T  31     -10.370 -20.562   2.934  1.00  0.26           O  
HETATM   33  O   HOH T  32     -35.023   4.421  29.731  1.00  0.26           O  
HETATM   34  O   HOH T  33       4.688 -23.303  36.077  1.00  0.26           O  
HETATM   35  O   HOH T  34     -27.679 -23.465   4.261  1.00  0.26           O  
HETATM   36  O   HOH T  35     -49.290  18.703  24.121  1.00  0.26           O  
HETATM   37  O   HOH T  36       5.583  -0.826  -5.085  1.00  0.26           O  
HETATM   38  O   HOH T  37      -9.429 -11.173  20.467  1.00  0.26           O  
HETATM   39  O   HOH T  38       8.341 -13.012  30.629  1.00  0.26           O  
HETATM   40  O   HOH T  39     -26.660  -7.967  34.312  1.00  0.26           O  
HETATM   41  O   HOH T  40     -25.828 -15.935  38.751  1.00  0.26           O  
HETATM   42  O   HOH T  41     -38.794 -14.423   9.278  1.00  0.26           O  
HETATM   43  O   HOH T  42     -10.766 -13.385  19.134  1.00  0.26           O  
HETATM   44  O   HOH T  43      10.267  -7.155  -6.783  1.00  0.27           O  
HETATM   45  O   HOH T  44      -4.117  -7.365  14.478  1.00  0.27           O  
HETATM   46  O   HOH T  45     -35.014 -17.984  12.896  1.00  0.27           O  
HETATM   47  O   HOH T  46       5.584 -16.737  17.036  1.00  0.27           O  
HETATM   48  O   HOH T  47       9.776  -5.654  24.498  1.00  0.27           O  
HETATM   49  O   HOH T  48     -21.928 -12.806   7.306  1.00  0.27           O  
HETATM   50  O   HOH T  49     -32.734   6.005   1.667  1.00  0.27           O  
HETATM   51  O   HOH T  50       3.255  10.598  36.317  1.00  0.27           O  
HETATM   52  O   HOH T  51      -0.136   3.875   8.473  1.00  0.27           O  
HETATM   53  O   HOH T  52     -23.013 -21.760   8.154  1.00  0.27           O  
HETATM   54  O   HOH T  53     -30.098   5.746   0.707  1.00  0.27           O  
HETATM   55  O   HOH T  54     -37.554 -16.407  -1.012  1.00  0.27           O  
HETATM   56  O   HOH T  55       2.039 -19.681  13.386  1.00  0.27           O  
HETATM   57  O   HOH T  56       7.281   1.487  21.856  1.00  0.27           O  
HETATM   58  O   HOH T  57     -43.115 -19.570   4.730  1.00  0.27           O  
HETATM   59  O   HOH T  58      13.941  -8.154  -3.038  1.00  0.28           O  
HETATM   60  O   HOH T  59     -10.530 -14.482  21.794  1.00  0.28           O  
HETATM   61  O   HOH T  60      17.070 -21.167  27.657  1.00  0.28           O  
HETATM   62  O   HOH T  61       5.239 -14.126   5.120  1.00  0.28           O  
HETATM   63  O   HOH T  62     -23.007 -10.480   5.870  1.00  0.28           O  
HETATM   64  O   HOH T  63     -44.717  -6.613  -0.069  1.00  0.28           O  
HETATM   65  O   HOH T  64      -5.986 -24.480  22.160  1.00  0.28           O  
HETATM   66  O   HOH T  65       1.866   4.220  24.661  1.00  0.28           O  
HETATM   67  O   HOH T  66       6.622 -22.071  34.439  1.00  0.28           O  
HETATM   68  O   HOH T  67      10.624 -14.979  24.190  1.00  0.28           O  
HETATM   69  O   HOH T  68       9.731 -21.953  21.807  1.00  0.28           O  
HETATM   70  O   HOH T  69     -38.237 -18.554   2.796  1.00  0.28           O  
HETATM   71  O   HOH T  70      -5.129 -28.108  21.538  1.00  0.29           O  
HETATM   72  O   HOH T  71       4.552 -18.311  27.457  1.00  0.29           O  
HETATM   73  O   HOH T  72       7.054  -7.408  -2.893  1.00  0.29           O  
HETATM   74  O   HOH T  73      -4.794   6.433   4.262  1.00  0.29           O  
HETATM   75  O   HOH T  74     -42.002 -17.906  23.316  1.00  0.29           O  
HETATM   76  O   HOH T  75      -6.967 -16.378 -11.997  1.00  0.29           O  
HETATM   77  O   HOH T  76     -39.686 -14.265 -16.457  1.00  0.29           O  
HETATM   78  O   HOH T  77       6.072  18.704  24.301  1.00  0.29           O  
HETATM   79  O   HOH T  78      11.972  -6.253   2.539  1.00  0.29           O  
HETATM   80  O   HOH T  79       5.557  18.252  21.680  1.00  0.29           O  
HETATM   81  O   HOH T  80     -23.406 -23.199  15.233  1.00  0.29           O  
HETATM   82  O   HOH T  81     -33.039 -17.997  38.682  1.00  0.29           O  
HETATM   83  O   HOH T  82       0.067 -19.536  40.487  1.00  0.29           O  
HETATM   84  O   HOH T  83     -28.881  19.043  -8.384  1.00  0.29           O  
HETATM   85  O   HOH T  84      -8.221  -7.685  -6.517  1.00  0.29           O  
HETATM   86  O   HOH T  85     -25.703 -26.278  -3.297  1.00  0.29           O  
HETATM   87  O   HOH T  86     -43.529 -12.228   2.159  1.00  0.29           O  
HETATM   88  O   HOH T  87       6.624 -16.429  -9.937  1.00  0.30           O  
HETATM   89  O   HOH T  88     -26.092   7.487  22.268  1.00  0.30           O  
HETATM   90  O   HOH T  89     -25.925 -21.393  21.794  1.00  0.30           O  
HETATM   91  O   HOH T  90     -26.539 -10.416 -15.025  1.00  0.30           O  
HETATM   92  O   HOH T  91       8.452 -19.527  30.825  1.00  0.30           O  
HETATM   93  O   HOH T  92     -30.872   5.340  17.973  1.00  0.30           O  
HETATM   94  O   HOH T  93      -8.012  14.827  28.557  1.00  0.30           O  
HETATM   95  O   HOH T  94     -30.295 -23.369   1.584  1.00  0.30           O  
HETATM   96  O   HOH T  95      -6.622 -22.808  -3.451  1.00  0.30           O  
HETATM   97  O   HOH T  96      11.926  -7.500  24.743  1.00  0.30           O  
HETATM   98  O   HOH T  97      -1.704  -5.312  18.086  1.00  0.30           O  
HETATM   99  O   HOH T  98       3.115 -36.376  24.316  1.00  0.30           O  
HETATM  100  O   HOH T  99       2.014 -23.756   2.936  1.00  0.30           O  
HETATM  101  O   HOH T 100      14.226  19.001  -0.665  1.00  0.30           O  
HETATM  102  O   HOH T 101     -21.386 -13.543   2.103  1.00  0.30           O  
HETATM  103  O   HOH T 102       4.184 -15.096  -9.789  1.00  0.30           O  
HETATM  104  O   HOH T 103       1.763   0.554  -3.993  1.00  0.30           O  
HETATM  105  O   HOH T 104     -37.343 -14.256  34.530  1.00  0.30           O  
HETATM  106  O   HOH T 105      11.337 -23.757  20.477  1.00  0.31           O  
HETATM  107  O   HOH T 106     -40.767  -8.539  28.186  1.00  0.31           O  
HETATM  108  O   HOH T 107     -25.511 -28.621   0.791  1.00  0.31           O  
HETATM  109  O   HOH T 108     -38.863   2.394  10.345  1.00  0.31           O  
HETATM  110  O   HOH T 109     -34.909   7.682  12.296  1.00  0.31           O  
HETATM  111  O   HOH T 110       6.670  16.028  15.690  1.00  0.31           O  
HETATM  112  O   HOH T 111      -1.711  11.852   1.418  1.00  0.31           O  
HETATM  113  O   HOH T 112     -41.922  -7.926  12.325  1.00  0.31           O  
HETATM  114  O   HOH T 113     -38.211 -21.241  -9.722  1.00  0.31           O  
HETATM  115  O   HOH T 114       0.543 -11.026 -12.041  1.00  0.31           O  
HETATM  116  O   HOH T 115       2.640   3.869  28.387  1.00  0.31           O  
HETATM  117  O   HOH T 116     -22.287 -13.737   4.590  1.00  0.32           O  
HETATM  118  O   HOH T 117     -10.889 -15.304 -14.215  1.00  0.32           O  
HETATM  119  O   HOH T 118     -50.248 -18.000  -1.183  1.00  0.32           O  
HETATM  120  O   HOH T 119     -43.589  -5.641  22.043  1.00  0.32           O  
HETATM  121  O   HOH T 120      -7.687   6.748   0.951  1.00  0.32           O  
HETATM  122  O   HOH T 121      -8.083 -27.171  29.806  1.00  0.32           O  
HETATM  123  O   HOH T 122     -49.839   9.756  17.664  1.00  0.32           O  
HETATM  124  O   HOH T 123     -38.254  -8.879  30.078  1.00  0.32           O  
HETATM  125  O   HOH T 124     -37.100 -19.812  22.025  1.00  0.32           O  
HETATM  126  O   HOH T 125     -35.230  14.971  -6.433  1.00  0.32           O  
HETATM  127  O   HOH T 126     -41.612   5.397   8.035  1.00  0.32           O  
HETATM  128  O   HOH T 127       5.220  13.552  32.613  1.00  0.32           O  
HETATM  129  O   HOH T 128     -45.019 -17.664  25.943  1.00  0.32           O  
HETATM  130  O   HOH T 129       8.154 -10.666  -1.749  1.00  0.32           O  
HETATM  131  O   HOH T 130     -29.974  15.135  14.656  1.00  0.32           O  
HETATM  132  O   HOH T 131       5.572  -5.134  -2.663  1.00  0.32           O  
HETATM  133  O   HOH T 132     -33.253   2.241  30.341  1.00  0.33           O  
HETATM  134  O   HOH T 133     -23.250   7.574  25.578  1.00  0.33           O  
HETATM  135  O   HOH T 134      -7.518 -22.127   4.609  1.00  0.33           O  
HETATM  136  O   HOH T 135     -23.282 -19.667  23.501  1.00  0.33           O  
HETATM  137  O   HOH T 136       9.402  -8.088  12.252  1.00  0.33           O  
HETATM  138  O   HOH T 137     -41.386 -16.907  10.150  1.00  0.33           O  
HETATM  139  O   HOH T 138       9.551 -10.364  13.921  1.00  0.33           O  
HETATM  140  O   HOH T 139     -31.903 -29.327  -8.981  1.00  0.33           O  
HETATM  141  O   HOH T 140      -5.603 -11.678  41.508  1.00  0.33           O  
HETATM  142  O   HOH T 141     -42.026  -4.831  33.061  1.00  0.33           O  
HETATM  143  O   HOH T 142     -21.492   1.413   4.383  1.00  0.33           O  
HETATM  144  O   HOH T 143       5.048 -20.448  23.649  1.00  0.33           O  
HETATM  145  O   HOH T 144      -0.627  -1.354  28.368  1.00  0.34           O  
HETATM  146  O   HOH T 145     -35.212 -10.544  39.581  1.00  0.34           O  
HETATM  147  O   HOH T 146     -34.570  21.309   4.725  1.00  0.34           O  
HETATM  148  O   HOH T 147      -5.731 -30.802  21.081  1.00  0.34           O  
HETATM  149  O   HOH T 148     -30.363  -5.959   6.319  1.00  0.34           O  
HETATM  150  O   HOH T 149       1.928  17.864  29.237  1.00  0.34           O  
HETATM  151  O   HOH T 150     -26.414  -2.510  -4.837  1.00  0.34           O  
HETATM  152  O   HOH T 151     -45.614  -3.629  26.152  1.00  0.34           O  
HETATM  153  O   HOH T 152      -3.396 -24.758  24.763  1.00  0.34           O  
HETATM  154  O   HOH T 153       2.189  21.626  17.378  1.00  0.34           O  
HETATM  155  O   HOH T 154       4.140   4.239  -5.786  1.00  0.34           O  
HETATM  156  O   HOH T 155      -6.537 -35.061  18.876  1.00  0.34           O  
HETATM  157  O   HOH T 156     -41.350  16.666  34.643  1.00  0.34           O  
HETATM  158  O   HOH T 157      -4.763  -9.484  42.948  1.00  0.34           O  
HETATM  159  O   HOH T 158     -38.565 -16.634  10.654  1.00  0.34           O  
HETATM  160  O   HOH T 159       6.640   8.091  -7.339  1.00  0.34           O  
HETATM  161  O   HOH T 160      17.182   1.512   1.292  1.00  0.34           O  
HETATM  162  O   HOH T 161     -40.760   3.896   0.724  1.00  0.34           O  
HETATM  163  O   HOH T 162     -10.377 -28.798  27.450  1.00  0.34           O  
HETATM  164  O   HOH T 163     -30.653   0.434  -1.496  1.00  0.34           O  
HETATM  165  O   HOH T 164     -40.580 -17.112   2.800  1.00  0.34           O  
HETATM  166  O   HOH T 165       1.548 -28.405  15.252  1.00  0.34           O  
HETATM  167  O   HOH T 166       8.368 -19.305  15.968  1.00  0.34           O  
HETATM  168  O   HOH T 167      19.598   9.539  12.755  1.00  0.34           O  
HETATM  169  O   HOH T 168     -37.345  15.041  37.967  1.00  0.34           O  
HETATM  170  O   HOH T 169     -43.525 -13.818   8.599  1.00  0.35           O  
HETATM  171  O   HOH T 170     -49.201  12.330  16.831  1.00  0.35           O  
HETATM  172  O   HOH T 171      -5.374  -0.125  28.146  1.00  0.35           O  
HETATM  173  O   HOH T 172     -20.732 -18.760  21.137  1.00  0.35           O  
HETATM  174  O   HOH T 173     -23.081   2.265  -3.762  1.00  0.35           O  
HETATM  175  O   HOH T 174     -21.000 -15.161   0.013  1.00  0.35           O  
HETATM  176  O   HOH T 175     -23.939  -2.603  14.295  1.00  0.35           O  
HETATM  177  O   HOH T 176     -24.495 -15.290  36.304  1.00  0.35           O  
HETATM  178  O   HOH T 177     -43.872  14.827   6.556  1.00  0.35           O  
HETATM  179  O   HOH T 178       6.256  -3.598  30.822  1.00  0.35           O  
HETATM  180  O   HOH T 179      15.350  -1.309  30.815  1.00  0.35           O  
HETATM  181  O   HOH T 180     -35.715  -8.592  37.678  1.00  0.35           O  
HETATM  182  O   HOH T 181      12.002  -4.586   4.903  1.00  0.35           O  
HETATM  183  O   HOH T 182      -1.664  -0.311   4.993  1.00  0.35           O  
HETATM  184  O   HOH T 183     -46.377   5.559  17.996  1.00  0.35           O  
HETATM  185  O   HOH T 184      -8.462 -22.205   1.972  1.00  0.35           O  
HETATM  186  O   HOH T 185      16.021  -6.432  -3.480  1.00  0.35           O  
HETATM  187  O   HOH T 186     -31.233   7.946  17.150  1.00  0.35           O  
HETATM  188  O   HOH T 187      -9.141 -17.336 -13.498  1.00  0.35           O  
HETATM  189  O   HOH T 188       7.357  19.225  26.751  1.00  0.35           O  
HETATM  190  O   HOH T 189     -33.070  -9.343  38.340  1.00  0.35           O  
HETATM  191  O   HOH T 190     -32.596  12.040  -4.826  1.00  0.35           O  
HETATM  192  O   HOH T 191     -43.766  11.449   3.280  1.00  0.35           O  
HETATM  193  O   HOH T 192      11.364  -8.182   4.283  1.00  0.35           O  
HETATM  194  O   HOH T 193     -43.792  -1.500   7.818  1.00  0.36           O  
HETATM  195  O   HOH T 194       3.225 -10.539 -11.331  1.00  0.36           O  
HETATM  196  O   HOH T 195       0.571   6.430   9.251  1.00  0.36           O  
HETATM  197  O   HOH T 196     -32.565 -11.510   0.703  1.00  0.36           O  
HETATM  198  O   HOH T 197       6.079  -7.671   7.695  1.00  0.36           O  
HETATM  199  O   HOH T 198      -9.019   1.481   0.853  1.00  0.36           O  
HETATM  200  O   HOH T 199     -44.019   7.510   5.260  1.00  0.36           O  
HETATM  201  O   HOH T 200       6.465  -0.563  20.279  1.00  0.36           O  
HETATM  202  O   HOH T 201       7.024 -22.020  22.369  1.00  0.36           O  
HETATM  203  O   HOH T 202      16.050   7.348  10.532  1.00  0.36           O  
HETATM  204  O   HOH T 203     -42.039  -0.150  16.187  1.00  0.36           O  
HETATM  205  O   HOH T 204      -6.000 -27.578  14.272  1.00  0.36           O  
HETATM  206  O   HOH T 205      -3.066 -26.246  36.425  1.00  0.36           O  
HETATM  207  O   HOH T 206     -35.887  10.678  -6.647  1.00  0.36           O  
HETATM  208  O   HOH T 207      -2.498   3.984  27.640  1.00  0.36           O  
HETATM  209  O   HOH T 208     -39.994 -19.830  -8.125  1.00  0.36           O  
HETATM  210  O   HOH T 209      10.211 -13.589  -0.712  1.00  0.36           O  
HETATM  211  O   HOH T 210     -44.663 -11.348   7.903  1.00  0.36           O  
HETATM  212  O   HOH T 211      -0.484 -20.135  12.585  1.00  0.36           O  
HETATM  213  O   HOH T 212       2.592   6.031  -7.012  1.00  0.36           O  
HETATM  214  O   HOH T 213     -46.276  -1.350  27.388  1.00  0.36           O  
HETATM  215  O   HOH T 214       6.302  20.870  11.637  1.00  0.36           O  
HETATM  216  O   HOH T 215     -27.588 -27.596   2.391  1.00  0.36           O  
HETATM  217  O   HOH T 216     -31.776   3.518   0.960  1.00  0.36           O  
HETATM  218  O   HOH T 217     -44.348  -2.196  -4.741  1.00  0.37           O  
HETATM  219  O   HOH T 218     -31.573  19.587  -2.830  1.00  0.37           O  
HETATM  220  O   HOH T 219     -28.786 -26.886   4.769  1.00  0.37           O  
HETATM  221  O   HOH T 220     -40.745   0.830  -3.532  1.00  0.37           O  
HETATM  222  O   HOH T 221       7.302  16.577  20.331  1.00  0.37           O  
HETATM  223  O   HOH T 222      -8.404 -29.443  25.701  1.00  0.37           O  
HETATM  224  O   HOH T 223      -2.964  -9.898  18.996  1.00  0.37           O  
HETATM  225  O   HOH T 224     -33.558  12.310  -9.976  1.00  0.37           O  
HETATM  226  O   HOH T 225     -41.548 -22.554  -0.594  1.00  0.37           O  
HETATM  227  O   HOH T 226     -26.505 -25.325  12.261  1.00  0.37           O  
HETATM  228  O   HOH T 227     -22.056  15.562  -2.194  1.00  0.37           O  
HETATM  229  O   HOH T 228      11.227  14.218  -8.258  1.00  0.37           O  
HETATM  230  O   HOH T 229     -41.247 -20.010  -4.165  1.00  0.37           O  
HETATM  231  O   HOH T 230     -40.848 -14.440  30.132  1.00  0.37           O  
HETATM  232  O   HOH T 231     -43.543 -16.444  -6.314  1.00  0.37           O  
HETATM  233  O   HOH T 232      12.128  -3.437   2.359  1.00  0.37           O  
HETATM  234  O   HOH T 233     -17.391 -20.623  24.442  1.00  0.37           O  
HETATM  235  O   HOH T 234      -8.381 -16.316  -9.682  1.00  0.37           O  
HETATM  236  O   HOH T 235     -24.886 -18.505 -14.419  1.00  0.37           O  
HETATM  237  O   HOH T 236     -39.399  -5.700  15.962  1.00  0.37           O  
HETATM  238  O   HOH T 237     -43.687  12.100   5.967  1.00  0.37           O  
HETATM  239  O   HOH T 238     -47.489 -12.867   2.540  1.00  0.37           O  
HETATM  240  O   HOH T 239     -25.800   0.850  -1.454  1.00  0.37           O  
HETATM  241  O   HOH T 240     -29.093  -4.903  10.759  1.00  0.38           O  
HETATM  242  O   HOH T 241      -3.562   7.231  34.743  1.00  0.38           O  
HETATM  243  O   HOH T 242      -6.551 -29.257  30.829  1.00  0.38           O  
HETATM  244  O   HOH T 243       8.886   6.419  -4.874  1.00  0.38           O  
HETATM  245  O   HOH T 244     -30.112   1.072  21.199  1.00  0.38           O  
HETATM  246  O   HOH T 245     -23.457 -16.523  39.955  1.00  0.38           O  
HETATM  247  O   HOH T 246     -25.689  13.447  24.778  1.00  0.38           O  
HETATM  248  O   HOH T 247      -7.222   5.324   4.833  1.00  0.38           O  
HETATM  249  O   HOH T 248      -1.374  21.441  36.669  1.00  0.38           O  
HETATM  250  O   HOH T 249     -37.618  -1.301  -4.597  1.00  0.38           O  
HETATM  251  O   HOH T 250     -32.562  -4.454   5.703  1.00  0.38           O  
HETATM  252  O   HOH T 251      -0.600   4.149  25.734  1.00  0.38           O  
HETATM  253  O   HOH T 252     -22.177 -21.006  20.231  1.00  0.38           O  
HETATM  254  O   HOH T 253     -48.364  -0.044  -5.257  1.00  0.38           O  
HETATM  255  O   HOH T 254     -20.297 -23.136  10.790  1.00  0.38           O  
HETATM  256  O   HOH T 255       8.909  17.552  15.954  1.00  0.38           O  
HETATM  257  O   HOH T 256     -35.515 -28.468  -7.525  1.00  0.38           O  
HETATM  258  O   HOH T 257     -26.273 -19.487 -19.228  1.00  0.38           O  
HETATM  259  O   HOH T 258     -36.482  18.401  28.493  1.00  0.38           O  
HETATM  260  O   HOH T 259     -21.883 -22.600  13.026  1.00  0.38           O  
HETATM  261  O   HOH T 260       0.623  -6.071  19.131  1.00  0.38           O  
HETATM  262  O   HOH T 261     -29.388  -8.488   7.380  1.00  0.38           O  
HETATM  263  O   HOH T 262     -55.662 -17.347  -3.321  1.00  0.38           O  
HETATM  264  O   HOH T 263     -44.802 -14.817  21.826  1.00  0.38           O  
HETATM  265  O   HOH T 264      10.770 -17.834  16.225  1.00  0.38           O  
HETATM  266  O   HOH T 265      -1.680  -7.336  20.138  1.00  0.38           O  
HETATM  267  O   HOH T 266     -22.376   2.074  25.714  1.00  0.38           O  
HETATM  268  O   HOH T 267     -31.090 -28.372   4.252  1.00  0.38           O  
HETATM  269  O   HOH T 268     -22.384  11.818  28.454  1.00  0.38           O  
HETATM  270  O   HOH T 269     -45.100 -17.177  28.643  1.00  0.39           O  
HETATM  271  O   HOH T 270       4.025   5.884  14.285  1.00  0.39           O  
HETATM  272  O   HOH T 271     -35.976  17.316  -5.123  1.00  0.39           O  
HETATM  273  O   HOH T 272     -28.546 -29.478   5.347  1.00  0.39           O  
HETATM  274  O   HOH T 273     -10.456 -23.716  11.447  1.00  0.39           O  
HETATM  275  O   HOH T 274       7.603 -19.535  23.562  1.00  0.39           O  
HETATM  276  O   HOH T 275       7.371   0.419  16.224  1.00  0.39           O  
HETATM  277  O   HOH T 276      -5.438 -27.089  37.598  1.00  0.39           O  
HETATM  278  O   HOH T 277     -35.066 -18.329  32.337  1.00  0.39           O  
HETATM  279  O   HOH T 278     -23.578   4.890  29.498  1.00  0.39           O  
HETATM  280  O   HOH T 279       4.203 -16.007  14.678  1.00  0.39           O  
HETATM  281  O   HOH T 280     -50.888  -9.315  26.745  1.00  0.39           O  
HETATM  282  O   HOH T 281     -43.865   3.942  31.293  1.00  0.39           O  
HETATM  283  O   HOH T 282      11.175 -25.021  17.954  1.00  0.39           O  
HETATM  284  O   HOH T 283      -3.044 -22.006  43.149  1.00  0.39           O  
HETATM  285  O   HOH T 284      -6.430 -28.567  23.943  1.00  0.39           O  
HETATM  286  O   HOH T 285      -3.108 -29.886  22.132  1.00  0.39           O  
HETATM  287  O   HOH T 286       2.523 -12.330 -13.356  1.00  0.39           O  
HETATM  288  O   HOH T 287       7.394  -7.878  10.214  1.00  0.39           O  
HETATM  289  O   HOH T 288     -40.481  20.216  33.313  1.00  0.39           O  
HETATM  290  O   HOH T 289     -43.154 -24.121  -2.245  1.00  0.39           O  
HETATM  291  O   HOH T 290      10.874 -17.703  23.901  1.00  0.39           O  
HETATM  292  O   HOH T 291     -44.878 -12.833  23.707  1.00  0.39           O  
HETATM  293  O   HOH T 292     -35.871  18.810  -7.422  1.00  0.39           O  
HETATM  294  O   HOH T 293       3.484 -21.819   4.266  1.00  0.39           O  
HETATM  295  O   HOH T 294      10.641   2.661  23.381  1.00  0.39           O  
HETATM  296  O   HOH T 295       1.535 -23.265  34.086  1.00  0.39           O  
HETATM  297  O   HOH T 296      -9.377 -31.163  16.491  1.00  0.39           O  
HETATM  298  O   HOH T 297      -5.784 -13.381  45.986  1.00  0.39           O  
HETATM  299  O   HOH T 298      11.150  19.743  12.094  1.00  0.39           O  
HETATM  300  O   HOH T 299     -39.024  -6.518  28.760  1.00  0.39           O  
HETATM  301  O   HOH T 300     -13.212 -22.320  26.480  1.00  0.40           O  
HETATM  302  O   HOH T 301      12.951   0.751  -4.823  1.00  0.40           O  
HETATM  303  O   HOH T 302     -27.258 -20.972 -17.104  1.00  0.40           O  
HETATM  304  O   HOH T 303     -43.716  21.732  26.976  1.00  0.40           O  
HETATM  305  O   HOH T 304     -52.295 -17.818   4.984  1.00  0.40           O  
HETATM  306  O   HOH T 305     -23.467 -13.173 -14.961  1.00  0.40           O  
HETATM  307  O   HOH T 306     -15.401  -9.764  14.325  1.00  0.40           O  
HETATM  308  O   HOH T 307      -0.461  22.237  18.306  1.00  0.40           O  
HETATM  309  O   HOH T 308     -26.828 -12.486 -19.780  1.00  0.40           O  
HETATM  310  O   HOH T 309      12.853   3.504  -4.950  1.00  0.40           O  
HETATM  311  O   HOH T 310     -28.071  -7.053  12.020  1.00  0.40           O  
HETATM  312  O   HOH T 311      -7.290  -9.720  35.640  1.00  0.40           O  
HETATM  313  O   HOH T 312     -17.002  -9.790  12.102  1.00  0.40           O  
HETATM  314  O   HOH T 313      -2.096 -32.396  14.776  1.00  0.40           O  
HETATM  315  O   HOH T 314       8.025 -20.509   3.204  1.00  0.40           O  
HETATM  316  O   HOH T 315      13.505 -24.114  18.838  1.00  0.40           O  
HETATM  317  O   HOH T 316     -50.722 -10.013  24.067  1.00  0.40           O  
HETATM  318  O   HOH T 317       9.769   1.482  25.711  1.00  0.40           O  
HETATM  319  O   HOH T 318       1.047 -34.712  18.104  1.00  0.40           O  
HETATM  320  O   HOH T 319     -50.234  11.148  21.544  1.00  0.40           O  
HETATM  321  O   HOH T 320     -44.542   6.599  30.807  1.00  0.40           O  
HETATM  322  O   HOH T 321     -45.158 -21.126   5.795  1.00  0.40           O  
HETATM  323  O   HOH T 322      -4.071   8.955  36.913  1.00  0.40           O  
HETATM  324  O   HOH T 323     -33.204 -24.362  -8.897  1.00  0.40           O  
HETATM  325  O   HOH T 324     -24.789 -26.073  10.246  1.00  0.40           O  
HETATM  326  O   HOH T 325     -47.434   8.218  17.812  1.00  0.40           O  
HETATM  327  O   HOH T 326     -30.404 -31.101   3.991  1.00  0.40           O  
HETATM  328  O   HOH T 327      -7.280 -25.878  12.635  1.00  0.40           O  
HETATM  329  O   HOH T 328     -43.427   0.648   3.307  1.00  0.40           O  
HETATM  330  O   HOH T 329     -25.072 -30.284  10.025  1.00  0.40           O  
HETATM  331  O   HOH T 330     -43.935  12.796   8.474  1.00  0.40           O  
HETATM  332  O   HOH T 331     -39.654  15.284  36.410  1.00  0.40           O  
HETATM  333  O   HOH T 332     -42.960 -17.340   1.236  1.00  0.40           O  
HETATM  334  O   HOH T 333     -38.144 -14.113  11.988  1.00  0.41           O  
HETATM  335  O   HOH T 334     -12.833 -21.664   3.034  1.00  0.41           O  
HETATM  336  O   HOH T 335     -23.514   7.475  21.179  1.00  0.41           O  
HETATM  337  O   HOH T 336     -42.384 -10.858  27.399  1.00  0.41           O  
HETATM  338  O   HOH T 337       6.670  13.346  16.417  1.00  0.41           O  
HETATM  339  O   HOH T 338     -37.211 -16.396  13.119  1.00  0.41           O  
HETATM  340  O   HOH T 339      -2.416 -32.544  21.966  1.00  0.41           O  
HETATM  341  O   HOH T 340     -44.546  -9.702  -6.576  1.00  0.41           O  
HETATM  342  O   HOH T 341     -38.909 -22.002  -0.154  1.00  0.41           O  
HETATM  343  O   HOH T 342     -12.130 -23.022  13.638  1.00  0.41           O  
HETATM  344  O   HOH T 343       5.648 -24.205  23.510  1.00  0.41           O  
HETATM  345  O   HOH T 344     -29.031  21.571  -9.648  1.00  0.41           O  
HETATM  346  O   HOH T 345     -39.600 -19.363  23.303  1.00  0.41           O  
HETATM  347  O   HOH T 346       0.760   1.762  25.560  1.00  0.41           O  
HETATM  348  O   HOH T 347      -8.392 -26.357  15.144  1.00  0.41           O  
HETATM  349  O   HOH T 348     -15.423  12.866  30.118  1.00  0.41           O  
HETATM  350  O   HOH T 349     -45.592 -10.197  23.200  1.00  0.41           O  
HETATM  351  O   HOH T 350     -29.132   3.922  -9.179  1.00  0.41           O  
HETATM  352  O   HOH T 351     -39.028  -7.299  -7.127  1.00  0.41           O  
HETATM  353  O   HOH T 352     -25.908   2.129  -3.919  1.00  0.41           O  
HETATM  354  O   HOH T 353     -43.803  -4.581   4.671  1.00  0.41           O  
HETATM  355  O   HOH T 354      -5.917 -29.455  33.584  1.00  0.41           O  
HETATM  356  O   HOH T 355      10.629 -18.961  32.704  1.00  0.41           O  
HETATM  357  O   HOH T 356     -30.843   3.409  19.780  1.00  0.41           O  
HETATM  358  O   HOH T 357     -34.010   3.248  -0.753  1.00  0.41           O  
HETATM  359  O   HOH T 358     -46.325 -15.232   3.342  1.00  0.41           O  
HETATM  360  O   HOH T 359     -42.857 -13.532  28.477  1.00  0.41           O  
HETATM  361  O   HOH T 360       2.441 -25.029  35.960  1.00  0.41           O  
HETATM  362  O   HOH T 361      -9.250 -22.774  -2.846  1.00  0.41           O  
HETATM  363  O   HOH T 362     -23.274  -6.391  10.728  1.00  0.41           O  
HETATM  364  O   HOH T 363     -18.495 -21.665   6.398  1.00  0.42           O  
HETATM  365  O   HOH T 364     -24.193 -27.907  -1.581  1.00  0.42           O  
HETATM  366  O   HOH T 365       5.573 -28.303  33.296  1.00  0.42           O  
HETATM  367  O   HOH T 366     -44.361  -8.217  21.690  1.00  0.42           O  
HETATM  368  O   HOH T 367     -29.995  -8.787  14.493  1.00  0.42           O  
HETATM  369  O   HOH T 368     -53.925 -16.152  -1.766  1.00  0.42           O  
HETATM  370  O   HOH T 369     -13.896 -19.849   4.739  1.00  0.42           O  
HETATM  371  O   HOH T 370     -44.313   5.847   7.347  1.00  0.42           O  
HETATM  372  O   HOH T 371     -43.960  -1.412  25.713  1.00  0.42           O  
HETATM  373  O   HOH T 372       5.040   1.709  -5.945  1.00  0.42           O  
HETATM  374  O   HOH T 373     -20.976 -20.983  22.718  1.00  0.42           O  
HETATM  375  O   HOH T 374     -44.769   1.338  30.741  1.00  0.42           O  
HETATM  376  O   HOH T 375     -29.678  -0.363  -3.980  1.00  0.42           O  
HETATM  377  O   HOH T 376     -26.809 -21.763  30.113  1.00  0.42           O  
HETATM  378  O   HOH T 377     -20.477  17.863  -1.506  1.00  0.42           O  
HETATM  379  O   HOH T 378      14.774  -7.626  -5.637  1.00  0.42           O  
HETATM  380  O   HOH T 379     -38.290  -6.369  31.471  1.00  0.42           O  
HETATM  381  O   HOH T 380       2.858 -21.180  44.445  1.00  0.42           O  
HETATM  382  O   HOH T 381     -24.710 -20.963  31.770  1.00  0.42           O  
HETATM  383  O   HOH T 382     -42.172  -1.070   9.865  1.00  0.42           O  
HETATM  384  O   HOH T 383      11.989 -10.738   4.715  1.00  0.42           O  
HETATM  385  O   HOH T 384      11.570 -16.209  18.296  1.00  0.42           O  
HETATM  386  O   HOH T 385     -31.519 -24.421  17.006  1.00  0.42           O  
HETATM  387  O   HOH T 386      -0.492   1.833   6.571  1.00  0.42           O  
HETATM  388  O   HOH T 387     -30.233  -4.014   8.443  1.00  0.42           O  
HETATM  389  O   HOH T 388      13.220   6.244  13.903  1.00  0.42           O  
HETATM  390  O   HOH T 389     -48.854 -14.223  27.162  1.00  0.42           O  
HETATM  391  O   HOH T 390      -7.857 -12.164  44.529  1.00  0.42           O  
HETATM  392  O   HOH T 391     -22.398  10.403  26.046  1.00  0.42           O  
HETATM  393  O   HOH T 392      -6.968  17.587  22.888  1.00  0.42           O  
HETATM  394  O   HOH T 393      -4.177 -28.757  35.738  1.00  0.42           O  
HETATM  395  O   HOH T 394       4.561 -13.005 -11.649  1.00  0.42           O  
HETATM  396  O   HOH T 395       6.454  20.249  14.380  1.00  0.42           O  
HETATM  397  O   HOH T 396       0.030 -13.095  25.615  1.00  0.42           O  
HETATM  398  O   HOH T 397      -0.280  15.442  38.288  1.00  0.43           O  
HETATM  399  O   HOH T 398     -36.853  16.332  26.579  1.00  0.43           O  
HETATM  400  O   HOH T 399     -44.542  -3.992   7.327  1.00  0.43           O  
HETATM  401  O   HOH T 400     -23.435  13.006  26.188  1.00  0.43           O  
HETATM  402  O   HOH T 401     -15.309 -20.562   2.432  1.00  0.43           O  
HETATM  403  O   HOH T 402      -8.623 -29.395  34.270  1.00  0.43           O  
HETATM  404  O   HOH T 403     -52.557   9.730  22.292  1.00  0.43           O  
HETATM  405  O   HOH T 404      15.843 -15.163  24.737  1.00  0.43           O  
HETATM  406  O   HOH T 405     -10.493 -22.229  18.528  1.00  0.43           O  
HETATM  407  O   HOH T 406      -7.947  -9.715  15.166  1.00  0.43           O  
HETATM  408  O   HOH T 407       8.973 -21.042  33.199  1.00  0.43           O  
HETATM  409  O   HOH T 408       3.088   1.409  27.228  1.00  0.43           O  
HETATM  410  O   HOH T 409     -28.529 -26.858  12.858  1.00  0.43           O  
HETATM  411  O   HOH T 410     -20.855   4.911 -10.914  1.00  0.43           O  
HETATM  412  O   HOH T 411     -18.792 -22.788  -2.974  1.00  0.43           O  
HETATM  413  O   HOH T 412     -38.477  -9.516  -5.457  1.00  0.43           O  
HETATM  414  O   HOH T 413     -43.639  -2.124   3.501  1.00  0.43           O  
HETATM  415  O   HOH T 414     -44.332   9.849  -1.106  1.00  0.43           O  
HETATM  416  O   HOH T 415     -34.179   6.299  -9.184  1.00  0.43           O  
HETATM  417  O   HOH T 416      -1.827  -1.659  30.851  1.00  0.43           O  
HETATM  418  O   HOH T 417     -42.681   8.549  31.141  1.00  0.43           O  
HETATM  419  O   HOH T 418     -28.346   3.241  -4.621  1.00  0.43           O  
HETATM  420  O   HOH T 419     -35.998 -19.338  34.699  1.00  0.43           O  
HETATM  421  O   HOH T 420       8.547 -21.057  28.361  1.00  0.43           O  
HETATM  422  O   HOH T 421     -33.627 -27.141  -9.058  1.00  0.43           O  
HETATM  423  O   HOH T 422     -34.951   6.414  32.617  1.00  0.43           O  
HETATM  424  O   HOH T 423     -29.776   6.067 -10.770  1.00  0.43           O  
HETATM  425  O   HOH T 424     -24.214 -22.032  29.318  1.00  0.43           O  
HETATM  426  O   HOH T 425     -36.884  21.200  28.050  1.00  0.43           O  
HETATM  427  O   HOH T 426      -1.670 -35.148  14.576  1.00  0.43           O  
HETATM  428  O   HOH T 427     -43.714 -15.325  10.215  1.00  0.43           O  
HETATM  429  O   HOH T 428     -26.672 -10.633 -17.754  1.00  0.43           O  
HETATM  430  O   HOH T 429     -23.461  12.883  30.778  1.00  0.43           O  
HETATM  431  O   HOH T 430      -5.688 -21.889  -5.945  1.00  0.44           O  
HETATM  432  O   HOH T 431      -0.183   3.484  30.925  1.00  0.44           O  
HETATM  433  O   HOH T 432     -47.293  -6.599   0.867  1.00  0.44           O  
HETATM  434  O   HOH T 433     -15.531 -17.506  18.574  1.00  0.44           O  
HETATM  435  O   HOH T 434     -28.367 -25.928 -11.362  1.00  0.44           O  
HETATM  436  O   HOH T 435     -47.411  17.294  15.585  1.00  0.44           O  
HETATM  437  O   HOH T 436     -43.744 -14.944   2.382  1.00  0.44           O  
HETATM  438  O   HOH T 437       6.717  -9.054  -7.357  1.00  0.44           O  
HETATM  439  O   HOH T 438      -2.212  -9.881  11.392  1.00  0.44           O  
HETATM  440  O   HOH T 439      -1.666   9.719  37.970  1.00  0.44           O  
HETATM  441  O   HOH T 440     -10.909 -25.131  15.015  1.00  0.44           O  
HETATM  442  O   HOH T 441       1.763 -20.132  -5.998  1.00  0.44           O  
HETATM  443  O   HOH T 442     -45.994 -11.257   0.886  1.00  0.44           O  
HETATM  444  O   HOH T 443       8.256 -22.222  30.774  1.00  0.44           O  
HETATM  445  O   HOH T 444     -40.525 -19.549   3.958  1.00  0.44           O  
HETATM  446  O   HOH T 445     -35.401  20.309  -2.254  1.00  0.44           O  
HETATM  447  O   HOH T 446      -5.659 -36.322  21.174  1.00  0.44           O  
HETATM  448  O   HOH T 447       8.139  17.777  22.664  1.00  0.44           O  
HETATM  449  O   HOH T 448     -25.871  -5.103  -4.188  1.00  0.44           O  
HETATM  450  O   HOH T 449      -4.966  20.914  29.189  1.00  0.44           O  
HETATM  451  O   HOH T 450     -42.968  -7.950  -8.117  1.00  0.44           O  
HETATM  452  O   HOH T 451     -39.020 -22.562   2.474  1.00  0.44           O  
HETATM  453  O   HOH T 452     -40.844 -13.519   8.096  1.00  0.44           O  
HETATM  454  O   HOH T 453     -35.964  17.808 -10.019  1.00  0.44           O  
HETATM  455  O   HOH T 454      -9.176  17.264  27.731  1.00  0.44           O  
HETATM  456  O   HOH T 455      -5.612 -33.866  24.018  1.00  0.44           O  
HETATM  457  O   HOH T 456     -28.918   6.536  -8.175  1.00  0.45           O  
HETATM  458  O   HOH T 457     -21.637 -18.891  18.535  1.00  0.45           O  
HETATM  459  O   HOH T 458      -5.671  16.237  28.785  1.00  0.45           O  
HETATM  460  O   HOH T 459     -22.029  10.456  30.870  1.00  0.45           O  
HETATM  461  O   HOH T 460      18.497   8.665  10.383  1.00  0.45           O  
HETATM  462  O   HOH T 461      -0.652 -30.045  14.615  1.00  0.45           O  
HETATM  463  O   HOH T 462     -24.376 -23.462  22.878  1.00  0.45           O  
HETATM  464  O   HOH T 463       7.238 -24.350  35.988  1.00  0.45           O  
HETATM  465  O   HOH T 464     -26.027 -24.159  14.780  1.00  0.45           O  
HETATM  466  O   HOH T 465     -40.822  -5.309  30.504  1.00  0.45           O  
HETATM  467  O   HOH T 466     -33.599   5.665  -1.911  1.00  0.45           O  
HETATM  468  O   HOH T 467     -49.405   7.653  16.000  1.00  0.45           O  
HETATM  469  O   HOH T 468     -24.832  -1.524  -2.679  1.00  0.45           O  
HETATM  470  O   HOH T 469      19.647 -21.647  26.763  1.00  0.45           O  
HETATM  471  O   HOH T 470     -14.577 -20.983  24.353  1.00  0.45           O  
HETATM  472  O   HOH T 471     -41.847 -15.436  32.526  1.00  0.45           O  
HETATM  473  O   HOH T 472     -50.777   3.515  22.592  1.00  0.45           O  
HETATM  474  O   HOH T 473      11.771   6.031  -4.856  1.00  0.45           O  
HETATM  475  O   HOH T 474     -26.818  21.986  -7.906  1.00  0.45           O  
HETATM  476  O   HOH T 475     -22.765 -24.353  11.227  1.00  0.45           O  
HETATM  477  O   HOH T 476     -45.599   1.525  33.436  1.00  0.45           O  
HETATM  478  O   HOH T 477     -40.715   2.756   8.248  1.00  0.45           O  
HETATM  479  O   HOH T 478      15.194 -17.494  23.430  1.00  0.45           O  
HETATM  480  O   HOH T 479     -21.132  -6.510   8.967  1.00  0.45           O  
HETATM  481  O   HOH T 480       5.331 -11.240  31.617  1.00  0.45           O  
HETATM  482  O   HOH T 481     -52.243  12.524  22.834  1.00  0.45           O  
HETATM  483  O   HOH T 482      -7.714  -3.550  12.367  1.00  0.45           O  
HETATM  484  O   HOH T 483       7.132  18.788  -1.624  1.00  0.45           O  
HETATM  485  O   HOH T 484       6.584  13.848  -0.135  1.00  0.45           O  
HETATM  486  O   HOH T 485     -38.802  -6.989  34.024  1.00  0.45           O  
HETATM  487  O   HOH T 486     -27.050   8.780  -8.283  1.00  0.45           O  
HETATM  488  O   HOH T 487     -31.348   2.486  -8.275  1.00  0.45           O  
HETATM  489  O   HOH T 488     -41.147  -3.178  11.434  1.00  0.45           O  
HETATM  490  O   HOH T 489       6.699 -15.799  13.478  1.00  0.46           O  
HETATM  491  O   HOH T 490      -4.598  -1.166  30.617  1.00  0.46           O  
HETATM  492  O   HOH T 491     -26.347 -31.384   0.649  1.00  0.46           O  
HETATM  493  O   HOH T 492      -0.376 -21.615  42.254  1.00  0.46           O  
HETATM  494  O   HOH T 493     -37.961   8.891  -5.806  1.00  0.46           O  
HETATM  495  O   HOH T 494      15.259   2.413   8.532  1.00  0.46           O  
HETATM  496  O   HOH T 495     -36.360   3.957  32.165  1.00  0.46           O  
HETATM  497  O   HOH T 496     -35.635 -21.094  -8.406  1.00  0.46           O  
HETATM  498  O   HOH T 497       9.928  -6.651   9.904  1.00  0.46           O  
HETATM  499  O   HOH T 498     -33.833  27.749  13.182  1.00  0.46           O  
HETATM  500  O   HOH T 499       8.979  -3.849  30.900  1.00  0.46           O  
HETATM  501  O   HOH T 500     -35.331  12.751  -4.752  1.00  0.46           O  
HETATM  502  O   HOH T 501       9.449  -1.517  29.623  1.00  0.46           O  
HETATM  503  O   HOH T 502     -28.133  -7.186   9.397  1.00  0.46           O  
HETATM  504  O   HOH T 503       6.104  16.517  -2.949  1.00  0.46           O  
HETATM  505  O   HOH T 504      10.347   0.105  31.769  1.00  0.46           O  
HETATM  506  O   HOH T 505     -45.288  -7.860   2.330  1.00  0.46           O  
HETATM  507  O   HOH T 506       4.765   8.936  32.933  1.00  0.46           O  
HETATM  508  O   HOH T 507       0.290  12.926 -14.075  1.00  0.46           O  
HETATM  509  O   HOH T 508     -46.282   7.751  12.880  1.00  0.46           O  
HETATM  510  O   HOH T 509     -14.818 -23.054  29.603  1.00  0.46           O  
HETATM  511  O   HOH T 510     -24.367  -9.239 -18.367  1.00  0.46           O  
HETATM  512  O   HOH T 511       3.023  12.256 -14.227  1.00  0.46           O  
HETATM  513  O   HOH T 512     -24.507   7.245 -10.954  1.00  0.46           O  
HETATM  514  O   HOH T 513      -6.375   6.370  37.437  1.00  0.46           O  
HETATM  515  O   HOH T 514      10.744  17.699  -7.043  1.00  0.46           O  
HETATM  516  O   HOH T 515       0.904  10.453 -14.716  1.00  0.46           O  
HETATM  517  O   HOH T 516     -11.315 -19.548  35.711  1.00  0.46           O  
HETATM  518  O   HOH T 517     -19.734 -12.976  31.746  1.00  0.46           O  
HETATM  519  O   HOH T 518     -41.526  -5.571  13.837  1.00  0.46           O  
HETATM  520  O   HOH T 519       3.326 -26.874  34.091  1.00  0.46           O  
HETATM  521  O   HOH T 520     -14.770   4.795  30.760  1.00  0.46           O  
HETATM  522  O   HOH T 521       5.753 -21.621  28.249  1.00  0.46           O  
HETATM  523  O   HOH T 522       8.939 -17.212  14.228  1.00  0.46           O  
HETATM  524  O   HOH T 523       8.907  19.265  13.717  1.00  0.46           O  
HETATM  525  O   HOH T 524     -53.638 -18.808   2.807  1.00  0.46           O  
HETATM  526  O   HOH T 525      -6.595  -2.398  29.189  1.00  0.46           O  
HETATM  527  O   HOH T 526     -24.749 -19.798 -16.942  1.00  0.46           O  
HETATM  528  O   HOH T 527     -27.232  17.927  27.746  1.00  0.46           O  
HETATM  529  O   HOH T 528     -42.395   3.071   2.942  1.00  0.46           O  
HETATM  530  O   HOH T 529     -43.142 -24.497   0.534  1.00  0.46           O  
HETATM  531  O   HOH T 530     -27.735   5.465  -0.791  1.00  0.47           O  
HETATM  532  O   HOH T 531       2.550  10.229  31.599  1.00  0.47           O  
HETATM  533  O   HOH T 532      20.179  14.101   0.276  1.00  0.47           O  
HETATM  534  O   HOH T 533      10.579  -5.640   7.272  1.00  0.47           O  
HETATM  535  O   HOH T 534     -43.015  15.226   9.200  1.00  0.47           O  
HETATM  536  O   HOH T 535     -41.331  12.696   2.845  1.00  0.47           O  
HETATM  537  O   HOH T 536     -21.855  17.657  -3.990  1.00  0.47           O  
HETATM  538  O   HOH T 537     -12.978 -12.982  -5.695  1.00  0.47           O  
HETATM  539  O   HOH T 538      -9.729 -13.761  40.675  1.00  0.47           O  
HETATM  540  O   HOH T 539     -43.178 -18.673  29.955  1.00  0.47           O  
HETATM  541  O   HOH T 540     -29.238  22.674   9.652  1.00  0.47           O  
HETATM  542  O   HOH T 541     -21.812   5.421  21.854  1.00  0.47           O  
HETATM  543  O   HOH T 542     -45.648   0.194  -5.243  1.00  0.47           O  
HETATM  544  O   HOH T 543     -11.290  18.813  27.072  1.00  0.47           O  
HETATM  545  O   HOH T 544      -2.827   0.208  29.028  1.00  0.47           O  
HETATM  546  O   HOH T 545     -46.419  -8.275  -5.085  1.00  0.47           O  
HETATM  547  O   HOH T 546     -47.973  14.702  16.396  1.00  0.47           O  
HETATM  548  O   HOH T 547     -36.394   0.863  -5.974  1.00  0.47           O  
HETATM  549  O   HOH T 548     -10.803 -21.146  -4.366  1.00  0.47           O  
HETATM  550  O   HOH T 549     -25.968 -32.747   9.106  1.00  0.47           O  
HETATM  551  O   HOH T 550     -28.255   1.436  -2.501  1.00  0.47           O  
HETATM  552  O   HOH T 551       4.258 -18.375  13.186  1.00  0.47           O  
HETATM  553  O   HOH T 552      -5.664  18.785  27.560  1.00  0.47           O  
HETATM  554  O   HOH T 553     -39.042  14.476   2.349  1.00  0.47           O  
HETATM  555  O   HOH T 554      -6.815 -29.147  36.281  1.00  0.47           O  
HETATM  556  O   HOH T 555     -49.160 -11.510   4.191  1.00  0.47           O  
HETATM  557  O   HOH T 556     -39.658 -19.552  29.085  1.00  0.47           O  
HETATM  558  O   HOH T 557     -49.679  15.441  28.396  1.00  0.47           O  
HETATM  559  O   HOH T 558      -5.617 -21.958  43.949  1.00  0.47           O  
HETATM  560  O   HOH T 559     -32.995 -20.317  37.131  1.00  0.47           O  
HETATM  561  O   HOH T 560     -43.235 -15.847  30.123  1.00  0.47           O  
HETATM  562  O   HOH T 561     -50.923   0.885  23.432  1.00  0.47           O  
HETATM  563  O   HOH T 562      -4.143  -8.450  16.935  1.00  0.47           O  
HETATM  564  O   HOH T 563      -6.992  -9.507  44.478  1.00  0.47           O  
HETATM  565  O   HOH T 564     -16.118   4.858  -4.104  1.00  0.47           O  
HETATM  566  O   HOH T 565     -37.273  -9.943 -11.246  1.00  0.47           O  
HETATM  567  O   HOH T 566     -34.070 -17.746  29.797  1.00  0.47           O  
HETATM  568  O   HOH T 567     -25.608  -0.678  -6.749  1.00  0.47           O  
HETATM  569  O   HOH T 568     -25.986 -21.058 -14.760  1.00  0.47           O  
HETATM  570  O   HOH T 569     -25.763 -31.719   3.301  1.00  0.47           O  
HETATM  571  O   HOH T 570      15.742   0.117  33.095  1.00  0.47           O  
HETATM  572  O   HOH T 571     -13.335 -15.084  28.418  1.00  0.47           O  
HETATM  573  O   HOH T 572       9.478  13.068  -9.985  1.00  0.47           O  
HETATM  574  O   HOH T 573     -37.154 -20.350  29.626  1.00  0.47           O  
HETATM  575  O   HOH T 574      -3.565 -20.675  45.457  1.00  0.47           O  
HETATM  576  O   HOH T 575      -2.088 -37.600  13.364  1.00  0.48           O  
HETATM  577  O   HOH T 576     -26.349  10.157 -10.662  1.00  0.48           O  
HETATM  578  O   HOH T 577     -18.888 -21.682  -5.787  1.00  0.48           O  
HETATM  579  O   HOH T 578     -15.206 -23.708  24.992  1.00  0.48           O  
HETATM  580  O   HOH T 579      -8.115 -29.706  28.545  1.00  0.48           O  
HETATM  581  O   HOH T 580       0.920 -19.463  -3.359  1.00  0.48           O  
HETATM  582  O   HOH T 581     -51.497 -20.595   2.579  1.00  0.48           O  
HETATM  583  O   HOH T 582     -38.240  -5.508  18.527  1.00  0.48           O  
HETATM  584  O   HOH T 583      -8.468 -33.815  17.155  1.00  0.48           O  
HETATM  585  O   HOH T 584     -25.662 -12.790  36.515  1.00  0.48           O  
HETATM  586  O   HOH T 585     -41.692  -4.142  16.113  1.00  0.48           O  
HETATM  587  O   HOH T 586     -38.501 -21.879  23.198  1.00  0.48           O  
HETATM  588  O   HOH T 587      -3.399 -32.259  12.274  1.00  0.48           O  
HETATM  589  O   HOH T 588       5.844 -23.605  26.210  1.00  0.48           O  
HETATM  590  O   HOH T 589     -10.496 -19.251  -7.996  1.00  0.48           O  
HETATM  591  O   HOH T 590       1.389  -6.152  21.653  1.00  0.48           O  
HETATM  592  O   HOH T 591       8.795  14.974  17.144  1.00  0.48           O  
HETATM  593  O   HOH T 592       7.827  21.173  20.357  1.00  0.48           O  
HETATM  594  O   HOH T 593     -52.277 -14.308   1.602  1.00  0.48           O  
HETATM  595  O   HOH T 594     -14.537   9.794  25.774  1.00  0.48           O  
HETATM  596  O   HOH T 595      18.669  -5.812  30.163  1.00  0.48           O  
HETATM  597  O   HOH T 596     -21.845 -26.753   6.486  1.00  0.48           O  
HETATM  598  O   HOH T 597     -22.697 -18.583 -18.479  1.00  0.48           O  
HETATM  599  O   HOH T 598     -38.839   6.453  -7.155  1.00  0.48           O  
HETATM  600  O   HOH T 599     -24.303  17.111  -2.389  1.00  0.48           O  
HETATM  601  O   HOH T 600     -41.187   2.262  11.979  1.00  0.48           O  
HETATM  602  O   HOH T 601      11.324  -2.437  31.319  1.00  0.48           O  
HETATM  603  O   HOH T 602     -29.940  -1.397  -8.584  1.00  0.48           O  
HETATM  604  O   HOH T 603     -42.238 -18.966  -6.602  1.00  0.48           O  
HETATM  605  O   HOH T 604     -43.418   3.287   7.615  1.00  0.48           O  
HETATM  606  O   HOH T 605     -37.405  -3.249  29.135  1.00  0.48           O  
HETATM  607  O   HOH T 606     -44.342 -22.303  -0.582  1.00  0.48           O  
HETATM  608  O   HOH T 607     -21.711  17.075   9.798  1.00  0.48           O  
HETATM  609  O   HOH T 608      17.696 -23.582  26.343  1.00  0.48           O  
HETATM  610  O   HOH T 609      -6.364 -33.645  21.331  1.00  0.48           O  
HETATM  611  O   HOH T 610       8.304 -16.623  16.886  1.00  0.48           O  
HETATM  612  O   HOH T 611     -43.908 -19.712   2.149  1.00  0.48           O  
HETATM  613  O   HOH T 612     -10.511 -12.028  22.836  1.00  0.49           O  
HETATM  614  O   HOH T 613     -33.855  24.920   9.691  1.00  0.49           O  
HETATM  615  O   HOH T 614       2.417 -32.240  18.442  1.00  0.49           O  
HETATM  616  O   HOH T 615      -4.390 -35.237  15.216  1.00  0.49           O  
HETATM  617  O   HOH T 616       9.047  18.692  20.191  1.00  0.49           O  
HETATM  618  O   HOH T 617     -12.541 -24.141  24.486  1.00  0.49           O  
HETATM  619  O   HOH T 618     -35.658  -3.167  37.286  1.00  0.49           O  
HETATM  620  O   HOH T 619     -14.298 -21.820  32.456  1.00  0.49           O  
HETATM  621  O   HOH T 620       8.061   4.074  33.326  1.00  0.49           O  
HETATM  622  O   HOH T 621     -37.634   1.510   6.015  1.00  0.49           O  
HETATM  623  O   HOH T 622       7.776  -7.217  -5.524  1.00  0.49           O  
HETATM  624  O   HOH T 623     -45.837 -10.866  -4.404  1.00  0.49           O  
HETATM  625  O   HOH T 624     -42.932   1.186  13.964  1.00  0.49           O  
HETATM  626  O   HOH T 625     -48.190  16.887  30.144  1.00  0.49           O  
HETATM  627  O   HOH T 626     -42.877  11.469   0.672  1.00  0.49           O  
HETATM  628  O   HOH T 627     -46.584   3.312  31.504  1.00  0.49           O  
HETATM  629  O   HOH T 628     -39.116   0.748  -5.812  1.00  0.49           O  
HETATM  630  O   HOH T 629      -7.479 -20.245  -7.441  1.00  0.49           O  
HETATM  631  O   HOH T 630      -8.344  16.288  16.286  1.00  0.49           O  
HETATM  632  O   HOH T 631     -13.014  19.562  25.101  1.00  0.49           O  
HETATM  633  O   HOH T 632     -40.687  17.820  37.063  1.00  0.49           O  
HETATM  634  O   HOH T 633      -8.232 -28.953  15.211  1.00  0.49           O  
HETATM  635  O   HOH T 634     -46.808  -2.189  -6.019  1.00  0.49           O  
HETATM  636  O   HOH T 635     -15.629  11.337  27.871  1.00  0.49           O  
HETATM  637  O   HOH T 636     -31.572  -7.344 -10.811  1.00  0.49           O  
HETATM  638  O   HOH T 637     -26.954 -23.165  23.678  1.00  0.49           O  
HETATM  639  O   HOH T 638     -33.527  -0.784  16.129  1.00  0.49           O  
HETATM  640  O   HOH T 639      13.075  -0.590  32.327  1.00  0.49           O  
HETATM  641  O   HOH T 640     -27.228  -1.468  -8.849  1.00  0.49           O  
HETATM  642  O   HOH T 641     -46.908   6.685  15.434  1.00  0.49           O  
HETATM  643  O   HOH T 642      -9.702   0.848  21.940  1.00  0.49           O  
HETATM  644  O   HOH T 643     -34.091 -16.412  21.114  1.00  0.49           O  
HETATM  645  O   HOH T 644     -28.315  -0.987  -6.312  1.00  0.49           O  
HETATM  646  O   HOH T 645     -31.474   5.414  -5.843  1.00  0.50           O  
HETATM  647  O   HOH T 646     -24.190  10.879  32.480  1.00  0.50           O  
HETATM  648  O   HOH T 647       2.273 -18.549   5.475  1.00  0.50           O  
HETATM  649  O   HOH T 648     -17.018  14.583  25.915  1.00  0.50           O  
HETATM  650  O   HOH T 649      -7.385  17.964  25.603  1.00  0.50           O  
HETATM  651  O   HOH T 650     -48.799 -14.358   4.418  1.00  0.50           O  
HETATM  652  O   HOH T 651     -44.173  12.353  -1.795  1.00  0.50           O  
HETATM  653  O   HOH T 652     -25.003 -21.332  24.432  1.00  0.50           O  
HETATM  654  O   HOH T 653     -43.030  -7.390  29.282  1.00  0.50           O  
HETATM  655  O   HOH T 654     -38.911 -33.270   6.134  1.00  0.50           O  
HETATM  656  O   HOH T 655     -44.372 -10.889  25.603  1.00  0.50           O  
HETATM  657  O   HOH T 656     -22.715  18.510   3.336  1.00  0.50           O  
HETATM  658  O   HOH T 657       3.978  -5.346 -10.925  1.00  0.50           O  
HETATM  659  O   HOH T 658     -42.960 -13.267  25.731  1.00  0.50           O  
HETATM  660  O   HOH T 659     -13.010 -23.759  16.186  1.00  0.50           O  
HETATM  661  O   HOH T 660     -24.211 -31.492  12.328  1.00  0.50           O  
HETATM  662  O   HOH T 661     -11.374 -17.933  38.039  1.00  0.50           O  
HETATM  663  O   HOH T 662     -40.623   5.021   3.348  1.00  0.50           O  
HETATM  664  O   HOH T 663       7.306  12.809 -11.385  1.00  0.50           O  
HETATM  665  O   HOH T 664      12.080 -16.050  22.040  1.00  0.50           O  
HETATM  666  O   HOH T 665      -5.768  12.397   0.933  1.00  0.50           O  
HETATM  667  O   HOH T 666     -21.919 -14.253 -12.983  1.00  0.50           O  
HETATM  668  O   HOH T 667       9.043  12.197  24.156  1.00  0.50           O  
HETATM  669  O   HOH T 668     -24.241  13.169  19.428  1.00  0.50           O  
HETATM  670  O   HOH T 669     -45.876  -0.514   3.070  1.00  0.50           O  
HETATM  671  O   HOH T 670      -7.240 -13.847  42.215  1.00  0.50           O  
HETATM  672  O   HOH T 671     -31.016 -30.850  13.850  1.00  0.50           O  
HETATM  673  O   HOH T 672      -5.924  20.172  31.689  1.00  0.50           O  
HETATM  674  O   HOH T 673      -3.271  15.431  -4.933  1.00  0.50           O  
HETATM  675  O   HOH T 674     -32.507 -30.281  11.378  1.00  0.50           O  
HETATM  676  O   HOH T 675      18.463  13.925  -3.998  1.00  0.50           O  
HETATM  677  O   HOH T 676       4.943 -25.977  36.476  1.00  0.50           O  
HETATM  678  O   HOH T 677       9.575  -9.607   5.662  1.00  0.50           O  
HETATM  679  O   HOH T 678       4.918  11.301  34.211  1.00  0.50           O  
HETATM  680  O   HOH T 679     -46.949 -21.332   7.815  1.00  0.50           O  
HETATM  681  O   HOH T 680      -8.108   1.440  30.157  1.00  0.50           O  
HETATM  682  O   HOH T 681     -32.014  -0.077  -7.371  1.00  0.50           O  
HETATM  683  O   HOH T 682     -21.453   5.680  26.568  1.00  0.50           O  
HETATM  684  O   HOH T 683     -22.879 -27.555   8.967  1.00  0.51           O  
HETATM  685  O   HOH T 684     -26.700  16.268  31.643  1.00  0.51           O  
HETATM  686  O   HOH T 685      -8.407 -21.818  -5.370  1.00  0.51           O  
HETATM  687  O   HOH T 686     -38.301 -20.341  19.490  1.00  0.51           O  
HETATM  688  O   HOH T 687      13.876 -11.871  26.035  1.00  0.51           O  
HETATM  689  O   HOH T 688      -5.965 -25.279  10.373  1.00  0.51           O  
HETATM  690  O   HOH T 689     -43.967  -1.692  21.828  1.00  0.51           O  
HETATM  691  O   HOH T 690     -21.004 -22.683   6.502  1.00  0.51           O  
HETATM  692  O   HOH T 691       7.226 -26.912  35.016  1.00  0.51           O  
HETATM  693  O   HOH T 692     -45.405  23.709  27.797  1.00  0.51           O  
HETATM  694  O   HOH T 693     -32.462   6.204 -11.276  1.00  0.51           O  
HETATM  695  O   HOH T 694     -22.381 -11.147   3.247  1.00  0.51           O  
HETATM  696  O   HOH T 695     -24.854  -8.911  -9.134  1.00  0.51           O  
HETATM  697  O   HOH T 696      16.123  20.917  -1.577  1.00  0.51           O  
HETATM  698  O   HOH T 697      -9.923 -32.454  13.982  1.00  0.51           O  
HETATM  699  O   HOH T 698     -21.743   3.351  28.096  1.00  0.51           O  
HETATM  700  O   HOH T 699     -43.444 -19.753  24.887  1.00  0.51           O  
HETATM  701  O   HOH T 700       9.646 -19.821   5.323  1.00  0.51           O  
HETATM  702  O   HOH T 701     -25.211 -22.164  26.822  1.00  0.51           O  
HETATM  703  O   HOH T 702       6.586   5.533  -6.341  1.00  0.51           O  
HETATM  704  O   HOH T 703      -0.375  -8.916  37.208  1.00  0.51           O  
HETATM  705  O   HOH T 704     -46.063 -14.526   8.892  1.00  0.51           O  
HETATM  706  O   HOH T 705     -37.351  10.469  33.997  1.00  0.51           O  
HETATM  707  O   HOH T 706       5.393 -12.127 -15.598  1.00  0.51           O  
HETATM  708  O   HOH T 707     -53.440 -16.796   0.898  1.00  0.51           O  
HETATM  709  O   HOH T 708     -31.494   5.311  -8.703  1.00  0.51           O  
HETATM  710  O   HOH T 709     -30.695 -24.748 -10.422  1.00  0.51           O  
HETATM  711  O   HOH T 710     -42.989  -4.930  19.479  1.00  0.51           O  
HETATM  712  O   HOH T 711     -18.125  19.330  -0.772  1.00  0.51           O  
HETATM  713  O   HOH T 712      10.119  -2.653  10.633  1.00  0.51           O  
HETATM  714  O   HOH T 713     -49.675  12.903  27.745  1.00  0.51           O  
HETATM  715  O   HOH T 714       1.854  -2.472  10.353  1.00  0.51           O  
HETATM  716  O   HOH T 715     -40.597  -9.063  -8.818  1.00  0.51           O  
HETATM  717  O   HOH T 716       5.623  -8.865  -4.875  1.00  0.51           O  
HETATM  718  O   HOH T 717     -34.020  12.555  -7.202  1.00  0.51           O  
HETATM  719  O   HOH T 718     -29.428  19.528  27.827  1.00  0.51           O  
HETATM  720  O   HOH T 719     -43.482  -7.370  14.530  1.00  0.51           O  
HETATM  721  O   HOH T 720      -9.695  -9.956  -7.598  1.00  0.51           O  
HETATM  722  O   HOH T 721      -8.173 -33.021  23.337  1.00  0.52           O  
HETATM  723  O   HOH T 722      -3.343 -30.058  13.878  1.00  0.52           O  
HETATM  724  O   HOH T 723      -2.492  17.064  -1.670  1.00  0.52           O  
HETATM  725  O   HOH T 724      12.355 -13.607  18.015  1.00  0.52           O  
HETATM  726  O   HOH T 725     -46.259   8.894  -2.670  1.00  0.52           O  
HETATM  727  O   HOH T 726     -21.689   7.841  23.222  1.00  0.52           O  
HETATM  728  O   HOH T 727     -36.447  17.996  10.583  1.00  0.52           O  
HETATM  729  O   HOH T 728     -30.593 -28.564  12.608  1.00  0.52           O  
HETATM  730  O   HOH T 729     -42.535  -2.361  17.983  1.00  0.52           O  
HETATM  731  O   HOH T 730       8.789   6.258  -7.631  1.00  0.52           O  
HETATM  732  O   HOH T 731      12.189  -8.355  -5.162  1.00  0.52           O  
HETATM  733  O   HOH T 732      -6.439 -35.807  13.612  1.00  0.52           O  
HETATM  734  O   HOH T 733      -9.900   4.987   4.826  1.00  0.52           O  
HETATM  735  O   HOH T 734       7.740  -4.837  15.525  1.00  0.52           O  
HETATM  736  O   HOH T 735     -42.071 -20.666  28.327  1.00  0.52           O  
HETATM  737  O   HOH T 736     -12.183 -27.550  20.254  1.00  0.52           O  
HETATM  738  O   HOH T 737       7.577 -10.820  -5.570  1.00  0.52           O  
HETATM  739  O   HOH T 738     -16.829  -6.534  22.644  1.00  0.52           O  
HETATM  740  O   HOH T 739     -49.200  -6.129  -1.097  1.00  0.52           O  
HETATM  741  O   HOH T 740     -45.993 -16.677  23.489  1.00  0.52           O  
HETATM  742  O   HOH T 741     -41.910  -7.280  20.695  1.00  0.52           O  
HETATM  743  O   HOH T 742      -5.728  -5.820  30.652  1.00  0.52           O  
HETATM  744  O   HOH T 743     -14.568  11.315  -0.818  1.00  0.52           O  
HETATM  745  O   HOH T 744     -50.942  -4.102  -0.335  1.00  0.52           O  
HETATM  746  O   HOH T 745     -20.266 -21.849  -0.086  1.00  0.52           O  
HETATM  747  O   HOH T 746     -40.822  -6.341  -8.986  1.00  0.52           O  
HETATM  748  O   HOH T 747     -25.626 -33.751  12.931  1.00  0.52           O  
HETATM  749  O   HOH T 748      10.448   3.192  18.562  1.00  0.52           O  
HETATM  750  O   HOH T 749     -41.602  -0.535  12.335  1.00  0.52           O  
HETATM  751  O   HOH T 750     -39.855   8.893  30.823  1.00  0.52           O  
HETATM  752  O   HOH T 751     -44.629 -13.824   6.676  1.00  0.53           O  
HETATM  753  O   HOH T 752     -41.314   2.475  -5.553  1.00  0.53           O  
HETATM  754  O   HOH T 753      -3.235  22.833  18.254  1.00  0.53           O  
HETATM  755  O   HOH T 754       8.882  -7.896   7.773  1.00  0.53           O  
HETATM  756  O   HOH T 755       7.512  -1.770  17.980  1.00  0.53           O  
HETATM  757  O   HOH T 756     -35.658  20.087   2.516  1.00  0.53           O  
HETATM  758  O   HOH T 757     -10.470 -28.379  32.447  1.00  0.53           O  
HETATM  759  O   HOH T 758     -14.512  -8.116  21.721  1.00  0.53           O  
HETATM  760  O   HOH T 759     -22.568   7.341  28.422  1.00  0.53           O  
HETATM  761  O   HOH T 760      13.191 -14.369  24.921  1.00  0.53           O  
HETATM  762  O   HOH T 761      10.529 -22.681  24.301  1.00  0.53           O  
HETATM  763  O   HOH T 762      -2.371  -5.674  15.541  1.00  0.53           O  
HETATM  764  O   HOH T 763     -29.217 -22.848  26.685  1.00  0.53           O  
HETATM  765  O   HOH T 764      -5.810  12.392   6.575  1.00  0.53           O  
HETATM  766  O   HOH T 765       8.988  21.461  11.972  1.00  0.53           O  
HETATM  767  O   HOH T 766     -19.481  10.589   8.036  1.00  0.53           O  
HETATM  768  O   HOH T 767     -16.466  11.847  25.288  1.00  0.53           O  
HETATM  769  O   HOH T 768       7.064 -20.956  25.879  1.00  0.53           O  
HETATM  770  O   HOH T 769       4.109 -23.368   9.618  1.00  0.53           O  
HETATM  771  O   HOH T 770      15.418   1.518  30.641  1.00  0.53           O  
HETATM  772  O   HOH T 771      -8.825 -34.947  14.642  1.00  0.53           O  
HETATM  773  O   HOH T 772     -43.008  -6.428  17.074  1.00  0.53           O  
HETATM  774  O   HOH T 773     -30.242   4.777  -3.474  1.00  0.53           O  
HETATM  775  O   HOH T 774      18.013 -19.600  29.780  1.00  0.53           O  
HETATM  776  O   HOH T 775       9.294   3.028  20.878  1.00  0.53           O  
HETATM  777  O   HOH T 776      -7.368   4.011  -3.158  1.00  0.53           O  
HETATM  778  O   HOH T 777     -45.526  -7.281  -7.521  1.00  0.53           O  
HETATM  779  O   HOH T 778     -37.055 -20.299  32.351  1.00  0.54           O  
HETATM  780  O   HOH T 779     -23.578  -2.234  20.785  1.00  0.54           O  
HETATM  781  O   HOH T 780       0.042   2.857  28.157  1.00  0.54           O  
HETATM  782  O   HOH T 781      14.616  16.153   6.503  1.00  0.54           O  
HETATM  783  O   HOH T 782     -34.778 -22.547 -16.205  1.00  0.54           O  
HETATM  784  O   HOH T 783       5.022  12.634 -16.230  1.00  0.54           O  
HETATM  785  O   HOH T 784     -35.296  14.216  -9.079  1.00  0.54           O  
HETATM  786  O   HOH T 785      -8.933   7.091   3.384  1.00  0.54           O  
HETATM  787  O   HOH T 786     -51.514 -15.318   4.156  1.00  0.54           O  
HETATM  788  O   HOH T 787     -38.461 -33.082   3.436  1.00  0.54           O  
HETATM  789  O   HOH T 788     -21.860 -23.388  21.786  1.00  0.54           O  
HETATM  790  O   HOH T 789      -8.148  -3.055   5.618  1.00  0.54           O  
HETATM  791  O   HOH T 790     -10.972  10.264  18.687  1.00  0.54           O  
HETATM  792  O   HOH T 791     -51.097 -20.369  -0.122  1.00  0.54           O  
HETATM  793  O   HOH T 792     -37.504 -21.248  16.997  1.00  0.54           O  
HETATM  794  O   HOH T 793     -50.217  14.568  22.664  1.00  0.54           O  
HETATM  795  O   HOH T 794       1.451   8.157  -8.348  1.00  0.54           O  
HETATM  796  O   HOH T 795      -9.667   3.984  37.866  1.00  0.54           O  
HETATM  797  O   HOH T 796     -35.691   1.779  33.917  1.00  0.54           O  
HETATM  798  O   HOH T 797     -29.928 -24.447  26.181  1.00  0.54           O  
HETATM  799  O   HOH T 798     -28.022 -32.324   4.961  1.00  0.54           O  
HETATM  800  O   HOH T 799      -2.589   2.277  30.877  1.00  0.54           O  
HETATM  801  O   HOH T 800      -4.073 -25.763   0.219  1.00  0.54           O  
HETATM  802  O   HOH T 801     -48.049 -10.641  24.321  1.00  0.54           O  
HETATM  803  O   HOH T 802     -50.278  17.014  26.089  1.00  0.54           O  
HETATM  804  O   HOH T 803      -7.182 -24.401   3.069  1.00  0.54           O  
HETATM  805  O   HOH T 804     -21.191   4.236  24.265  1.00  0.54           O  
HETATM  806  O   HOH T 805     -42.862 -16.565  21.032  1.00  0.54           O  
HETATM  807  O   HOH T 806     -30.207 -24.642   4.050  1.00  0.55           O  
HETATM  808  O   HOH T 807     -44.582  18.900  19.712  1.00  0.55           O  
HETATM  809  O   HOH T 808     -29.848   1.423  -6.162  1.00  0.55           O  
HETATM  810  O   HOH T 809     -14.631  12.935  -3.294  1.00  0.55           O  
HETATM  811  O   HOH T 810      12.805  -4.730  30.973  1.00  0.55           O  
HETATM  812  O   HOH T 811     -51.571 -15.583  -0.752  1.00  0.55           O  
HETATM  813  O   HOH T 812       7.260   6.663  32.387  1.00  0.55           O  
HETATM  814  O   HOH T 813     -48.408  -4.092   0.879  1.00  0.55           O  
HETATM  815  O   HOH T 814     -50.887 -13.106   5.577  1.00  0.55           O  
HETATM  816  O   HOH T 815     -16.053 -21.742  26.684  1.00  0.55           O  
HETATM  817  O   HOH T 816     -26.543  22.342 -10.627  1.00  0.55           O  
HETATM  818  O   HOH T 817      -0.013  -4.755  34.026  1.00  0.55           O  
HETATM  819  O   HOH T 818       4.904 -22.714   7.171  1.00  0.55           O  
HETATM  820  O   HOH T 819      -2.402 -25.947   9.625  1.00  0.55           O  
HETATM  821  O   HOH T 820     -37.952  -1.669  38.051  1.00  0.55           O  
HETATM  822  O   HOH T 821     -41.637   0.250   7.425  1.00  0.55           O  
HETATM  823  O   HOH T 822      13.841  18.554  15.287  1.00  0.55           O  
HETATM  824  O   HOH T 823     -12.412 -15.824  30.847  1.00  0.55           O  
HETATM  825  O   HOH T 824      13.634  17.018   0.983  1.00  0.55           O  
HETATM  826  O   HOH T 825     -34.729  -3.229  -7.267  1.00  0.55           O  
HETATM  827  O   HOH T 826       8.869 -17.887  -5.858  1.00  0.56           O  
HETATM  828  O   HOH T 827     -13.018  14.561   0.780  1.00  0.56           O  
HETATM  829  O   HOH T 828     -48.820   3.979  24.477  1.00  0.56           O  
HETATM  830  O   HOH T 829     -32.971 -19.203  -6.339  1.00  0.56           O  
HETATM  831  O   HOH T 830     -19.178   4.646  -8.745  1.00  0.56           O  
HETATM  832  O   HOH T 831     -16.369 -17.044  16.046  1.00  0.56           O  
HETATM  833  O   HOH T 832     -20.979   2.443 -11.310  1.00  0.56           O  
HETATM  834  O   HOH T 833     -44.168  -4.878   9.941  1.00  0.56           O  
HETATM  835  O   HOH T 834     -44.420   2.477  -6.033  1.00  0.56           O  
HETATM  836  O   HOH T 835      17.805 -24.084  23.677  1.00  0.56           O  
HETATM  837  O   HOH T 836     -21.894   0.816  17.694  1.00  0.56           O  
HETATM  838  O   HOH T 837     -21.784  -4.121  10.502  1.00  0.56           O  
HETATM  839  O   HOH T 838      14.389  -0.262   8.399  1.00  0.56           O  
HETATM  840  O   HOH T 839       6.260  -3.967 -11.562  1.00  0.56           O  
HETATM  841  O   HOH T 840      12.147  -1.764  23.218  1.00  0.56           O  
HETATM  842  O   HOH T 841     -18.680  -4.789  15.991  1.00  0.56           O  
HETATM  843  O   HOH T 842     -15.217  17.824  24.893  1.00  0.56           O  
HETATM  844  O   HOH T 843     -21.183  -8.818   7.235  1.00  0.56           O  
HETATM  845  O   HOH T 844      -6.575  -7.192  36.637  1.00  0.56           O  
HETATM  846  O   HOH T 845     -21.004  12.313  -9.985  1.00  0.57           O  
HETATM  847  O   HOH T 846     -21.828  -2.379  16.231  1.00  0.57           O  
HETATM  848  O   HOH T 847     -43.056  -1.437  34.893  1.00  0.57           O  
HETATM  849  O   HOH T 848     -21.677   3.339   6.340  1.00  0.57           O  
HETATM  850  O   HOH T 849      -9.235   3.111  -1.422  1.00  0.57           O  
HETATM  851  O   HOH T 850     -31.656 -25.939  19.393  1.00  0.57           O  
HETATM  852  O   HOH T 851       7.509 -34.394  20.301  1.00  0.57           O  
HETATM  853  O   HOH T 852     -33.953   3.986  33.387  1.00  0.57           O  
HETATM  854  O   HOH T 853     -39.518  16.446  38.980  1.00  0.57           O  
HETATM  855  O   HOH T 854      -4.534  18.396  30.070  1.00  0.58           O  
HETATM  856  O   HOH T 855     -34.840  16.073  38.584  1.00  0.58           O  
HETATM  857  O   HOH T 856       6.593  14.627  34.824  1.00  0.58           O  
HETATM  858  O   HOH T 857     -41.378  -6.420  35.080  1.00  0.58           O  
HETATM  859  O   HOH T 858     -42.104  19.429  35.532  1.00  0.58           O  
HETATM  860  O   HOH T 859     -38.004  -7.211  36.755  1.00  0.59           O  
HETATM  861  O   HOH T 860     -12.115 -19.503  -5.885  1.00  0.60           O  
HETATM  862  O   HOH T 861       4.060  -0.500  -7.372  1.00  0.60           O  
HETATM  863  O   HOH T 862     -30.076 -33.838  11.508  1.00  0.61           O  
HETATM  864  O   HOH T 863     -18.293 -22.989   8.855  1.00  0.61           O  
TER     865      HOH T 863 
