# Supplementary material for: Accurate Prediction of Hydration Sites of Proteins Using Energy Model With Atom Embedding
Source: Front Mol Biosci. 2021 Sep 20;8:756075. doi: 10.3389/fmolb.2021.756075 (PMC8488165; doi:10.3389/fmolb.2021.756075)
Supplement: Supplementary file 1 [file DataSheet1.ZIP › Data Sheet 1/Our_result_pdb/our_dataset_output/3C5A_watersite.pdb]

HEADER                                                        XXXX


JRNL        PMID   -1
HETATM    1  O   HOH T   0      -5.999 -12.152  21.149  1.00  0.15           O  
HETATM    2  O   HOH T   1      15.314  -1.902  10.748  1.00  0.18           O  
HETATM    3  O   HOH T   2       8.805  19.590  20.948  1.00  0.18           O  
HETATM    4  O   HOH T   3      20.744  16.600   0.095  1.00  0.19           O  
HETATM    5  O   HOH T   4      11.817  -6.392  12.945  1.00  0.20           O  
HETATM    6  O   HOH T   5       3.964  10.695   6.074  1.00  0.20           O  
HETATM    7  O   HOH T   6       4.815  16.333   2.714  1.00  0.21           O  
HETATM    8  O   HOH T   7       5.487  12.254   4.459  1.00  0.21           O  
HETATM    9  O   HOH T   8      12.469  -2.089  16.089  1.00  0.21           O  
HETATM   10  O   HOH T   9      -2.907   9.647  -2.225  1.00  0.21           O  
HETATM   11  O   HOH T  10      20.409  20.542  25.875  1.00  0.21           O  
HETATM   12  O   HOH T  11      -5.933  -1.438  24.273  1.00  0.21           O  
HETATM   13  O   HOH T  12       6.470  17.073   6.588  1.00  0.22           O  
HETATM   14  O   HOH T  13      18.833  17.550  -1.651  1.00  0.22           O  
HETATM   15  O   HOH T  14      -1.932  10.323  21.435  1.00  0.22           O  
HETATM   16  O   HOH T  15       6.934  -3.065   8.825  1.00  0.23           O  
HETATM   17  O   HOH T  16      15.470  -6.961  32.429  1.00  0.25           O  
HETATM   18  O   HOH T  17     -10.422  -9.101  16.265  1.00  0.25           O  
HETATM   19  O   HOH T  18      23.407   2.948  16.591  1.00  0.25           O  
HETATM   20  O   HOH T  19      24.686  15.135  29.509  1.00  0.26           O  
HETATM   21  O   HOH T  20       9.024  15.531  -1.445  1.00  0.26           O  
HETATM   22  O   HOH T  21       8.843  19.596   8.881  1.00  0.26           O  
HETATM   23  O   HOH T  22      16.982  24.406  29.137  1.00  0.26           O  
HETATM   24  O   HOH T  23      10.203  -9.759  27.646  1.00  0.26           O  
HETATM   25  O   HOH T  24     -20.674  -9.648  10.375  1.00  0.26           O  
HETATM   26  O   HOH T  25      14.334  22.712   4.526  1.00  0.26           O  
HETATM   27  O   HOH T  26     -12.469   1.603  13.846  1.00  0.26           O  
HETATM   28  O   HOH T  27      14.618  -5.728   9.725  1.00  0.26           O  
HETATM   29  O   HOH T  28      13.837   0.384  -2.905  1.00  0.26           O  
HETATM   30  O   HOH T  29      17.729  12.255  34.462  1.00  0.27           O  
HETATM   31  O   HOH T  30      18.281  10.848  32.081  1.00  0.27           O  
HETATM   32  O   HOH T  31      -4.137 -15.315   2.094  1.00  0.27           O  
HETATM   33  O   HOH T  32       4.241  16.095   5.469  1.00  0.27           O  
HETATM   34  O   HOH T  33      20.687   3.473   7.552  1.00  0.27           O  
HETATM   35  O   HOH T  34     -15.700 -12.057  15.387  1.00  0.27           O  
HETATM   36  O   HOH T  35      27.398  16.863  17.077  1.00  0.28           O  
HETATM   37  O   HOH T  36      11.020  21.227  20.477  1.00  0.28           O  
HETATM   38  O   HOH T  37      15.674   5.483  38.521  1.00  0.28           O  
HETATM   39  O   HOH T  38      16.692   8.104  10.265  1.00  0.28           O  
HETATM   40  O   HOH T  39      -4.928  -1.279  -2.532  1.00  0.28           O  
HETATM   41  O   HOH T  40       9.306  -9.652  18.706  1.00  0.29           O  
HETATM   42  O   HOH T  41     -10.679   9.832   3.706  1.00  0.29           O  
HETATM   43  O   HOH T  42      10.383  10.447  11.018  1.00  0.29           O  
HETATM   44  O   HOH T  43      18.253  23.662  26.910  1.00  0.29           O  
HETATM   45  O   HOH T  44      -0.031   9.792  16.817  1.00  0.30           O  
HETATM   46  O   HOH T  45      10.550  15.501   6.565  1.00  0.30           O  
HETATM   47  O   HOH T  46       2.475  -0.999  33.072  1.00  0.30           O  
HETATM   48  O   HOH T  47      14.297  14.327  28.120  1.00  0.30           O  
HETATM   49  O   HOH T  48     -13.476   6.287  11.585  1.00  0.30           O  
HETATM   50  O   HOH T  49      21.866  18.681   3.191  1.00  0.31           O  
HETATM   51  O   HOH T  50       2.567  11.224  28.431  1.00  0.31           O  
HETATM   52  O   HOH T  51      21.305  -0.306  13.909  1.00  0.31           O  
HETATM   53  O   HOH T  52     -13.974 -10.383  -1.664  1.00  0.31           O  
HETATM   54  O   HOH T  53      21.830  19.379   7.392  1.00  0.32           O  
HETATM   55  O   HOH T  54      16.767  11.331   0.492  1.00  0.32           O  
HETATM   56  O   HOH T  55      -3.118  -4.305  29.480  1.00  0.32           O  
HETATM   57  O   HOH T  56      -6.442  16.206   4.035  1.00  0.32           O  
HETATM   58  O   HOH T  57       8.797  17.758  25.784  1.00  0.32           O  
HETATM   59  O   HOH T  58       9.855  -9.787  14.772  1.00  0.32           O  
HETATM   60  O   HOH T  59      -2.378  -9.640  27.526  1.00  0.32           O  
HETATM   61  O   HOH T  60       9.153   9.314  -0.108  1.00  0.32           O  
HETATM   62  O   HOH T  61       9.044 -10.321  32.426  1.00  0.32           O  
HETATM   63  O   HOH T  62      21.998  -2.222  21.906  1.00  0.33           O  
HETATM   64  O   HOH T  63      19.336  19.552  33.195  1.00  0.33           O  
HETATM   65  O   HOH T  64      16.387  19.949  -1.271  1.00  0.33           O  
HETATM   66  O   HOH T  65       6.533  -3.392   1.633  1.00  0.33           O  
HETATM   67  O   HOH T  66       6.384  18.364  27.016  1.00  0.33           O  
HETATM   68  O   HOH T  67      13.310  20.434  14.292  1.00  0.33           O  
HETATM   69  O   HOH T  68      -7.742  13.119   5.812  1.00  0.33           O  
HETATM   70  O   HOH T  69      -6.503 -16.258   3.174  1.00  0.33           O  
HETATM   71  O   HOH T  70      21.790   0.706  26.509  1.00  0.34           O  
HETATM   72  O   HOH T  71      -7.115 -17.227   9.813  1.00  0.34           O  
HETATM   73  O   HOH T  72      20.732  19.561  13.689  1.00  0.34           O  
HETATM   74  O   HOH T  73      -1.888 -16.502  -4.466  1.00  0.34           O  
HETATM   75  O   HOH T  74      20.601  13.238   7.120  1.00  0.34           O  
HETATM   76  O   HOH T  75       4.125 -12.243  17.068  1.00  0.34           O  
HETATM   77  O   HOH T  76       9.118  14.630  29.689  1.00  0.34           O  
HETATM   78  O   HOH T  77      21.834  21.989  27.733  1.00  0.34           O  
HETATM   79  O   HOH T  78      -6.120  16.287   8.464  1.00  0.34           O  
HETATM   80  O   HOH T  79      22.222  12.213  -1.342  1.00  0.34           O  
HETATM   81  O   HOH T  80     -15.280 -12.139   0.095  1.00  0.35           O  
HETATM   82  O   HOH T  81      -6.930  13.672   8.385  1.00  0.35           O  
HETATM   83  O   HOH T  82      20.262   5.779   4.264  1.00  0.35           O  
HETATM   84  O   HOH T  83      -4.297  14.616  22.160  1.00  0.35           O  
HETATM   85  O   HOH T  84     -13.061   4.039  10.327  1.00  0.35           O  
HETATM   86  O   HOH T  85      17.080   8.288   2.982  1.00  0.35           O  
HETATM   87  O   HOH T  86      13.292   9.398  32.949  1.00  0.35           O  
HETATM   88  O   HOH T  87      16.144  14.700  26.120  1.00  0.35           O  
HETATM   89  O   HOH T  88       6.029 -11.541  10.209  1.00  0.35           O  
HETATM   90  O   HOH T  89       6.685   8.453  -5.034  1.00  0.35           O  
HETATM   91  O   HOH T  90      24.252  19.540  11.535  1.00  0.36           O  
HETATM   92  O   HOH T  91      -0.132 -11.484   6.142  1.00  0.36           O  
HETATM   93  O   HOH T  92      13.558  -9.610   9.651  1.00  0.36           O  
HETATM   94  O   HOH T  93      11.486  -7.210   6.125  1.00  0.36           O  
HETATM   95  O   HOH T  94     -12.241   4.241  19.569  1.00  0.36           O  
HETATM   96  O   HOH T  95      10.233  18.064  -2.234  1.00  0.36           O  
HETATM   97  O   HOH T  96       6.043 -17.507  -4.084  1.00  0.36           O  
HETATM   98  O   HOH T  97      -6.716 -11.257  -4.269  1.00  0.36           O  
HETATM   99  O   HOH T  98       8.088 -12.260  12.060  1.00  0.36           O  
HETATM  100  O   HOH T  99       0.566  14.594  -2.717  1.00  0.36           O  
HETATM  101  O   HOH T 100      28.465  13.146  11.124  1.00  0.36           O  
HETATM  102  O   HOH T 101      21.084  -6.257  22.410  1.00  0.36           O  
HETATM  103  O   HOH T 102      13.372 -13.757  26.744  1.00  0.37           O  
HETATM  104  O   HOH T 103      -8.339 -12.181  -6.214  1.00  0.37           O  
HETATM  105  O   HOH T 104       2.943  20.487  19.293  1.00  0.37           O  
HETATM  106  O   HOH T 105      12.049  -9.154  13.204  1.00  0.37           O  
HETATM  107  O   HOH T 106     -13.708   4.944  17.230  1.00  0.37           O  
HETATM  108  O   HOH T 107      16.021 -13.349  33.232  1.00  0.37           O  
HETATM  109  O   HOH T 108       1.774   9.739  -7.166  1.00  0.37           O  
HETATM  110  O   HOH T 109       9.969   6.676  -0.237  1.00  0.37           O  
HETATM  111  O   HOH T 110      -7.620 -13.098  23.241  1.00  0.37           O  
HETATM  112  O   HOH T 111       5.625 -13.645  19.014  1.00  0.37           O  
HETATM  113  O   HOH T 112       3.830  20.203  16.569  1.00  0.37           O  
HETATM  114  O   HOH T 113     -16.245  -9.146  19.466  1.00  0.37           O  
HETATM  115  O   HOH T 114       4.462   4.735   3.876  1.00  0.37           O  
HETATM  116  O   HOH T 115      -1.447  -2.147  -9.867  1.00  0.38           O  
HETATM  117  O   HOH T 116     -15.757   3.009   6.744  1.00  0.38           O  
HETATM  118  O   HOH T 117      -3.166  10.716  -4.770  1.00  0.38           O  
HETATM  119  O   HOH T 118       9.014  19.372  23.629  1.00  0.38           O  
HETATM  120  O   HOH T 119       8.336   5.628   1.643  1.00  0.38           O  
HETATM  121  O   HOH T 120      19.247   4.215   0.350  1.00  0.38           O  
HETATM  122  O   HOH T 121      17.369  -7.013  20.774  1.00  0.38           O  
HETATM  123  O   HOH T 122      22.493  11.303   6.370  1.00  0.38           O  
HETATM  124  O   HOH T 123       6.422  -0.600   1.890  1.00  0.38           O  
HETATM  125  O   HOH T 124     -11.416   3.215  22.134  1.00  0.38           O  
HETATM  126  O   HOH T 125       7.039  15.916  -3.343  1.00  0.38           O  
HETATM  127  O   HOH T 126       1.524   4.050  33.907  1.00  0.38           O  
HETATM  128  O   HOH T 127      22.959  -3.299  29.235  1.00  0.39           O  
HETATM  129  O   HOH T 128     -11.972  11.367  -0.800  1.00  0.39           O  
HETATM  130  O   HOH T 129       0.051  -5.950  26.086  1.00  0.39           O  
HETATM  131  O   HOH T 130      14.211  12.556  31.397  1.00  0.39           O  
HETATM  132  O   HOH T 131      14.139  16.778  29.362  1.00  0.39           O  
HETATM  133  O   HOH T 132     -12.541  -0.534  21.878  1.00  0.39           O  
HETATM  134  O   HOH T 133       8.874  -1.427  -5.760  1.00  0.39           O  
HETATM  135  O   HOH T 134      -1.541  20.058  11.526  1.00  0.39           O  
HETATM  136  O   HOH T 135     -10.971  -2.309   0.327  1.00  0.40           O  
HETATM  137  O   HOH T 136     -15.920   5.510  24.613  1.00  0.40           O  
HETATM  138  O   HOH T 137       3.062   0.892  38.138  1.00  0.40           O  
HETATM  139  O   HOH T 138       0.943   1.279  33.812  1.00  0.40           O  
HETATM  140  O   HOH T 139      -0.821   1.422  -7.708  1.00  0.40           O  
HETATM  141  O   HOH T 140     -11.650   8.926  23.978  1.00  0.40           O  
HETATM  142  O   HOH T 141      -3.347  20.682  16.375  1.00  0.41           O  
HETATM  143  O   HOH T 142     -13.801   9.500  22.388  1.00  0.41           O  
HETATM  144  O   HOH T 143       3.063  13.533  -2.488  1.00  0.41           O  
HETATM  145  O   HOH T 144      -5.904  17.775   6.211  1.00  0.41           O  
HETATM  146  O   HOH T 145      16.156 -10.652  34.040  1.00  0.41           O  
HETATM  147  O   HOH T 146     -15.978  -1.191   5.479  1.00  0.41           O  
HETATM  148  O   HOH T 147       4.653  11.148  13.068  1.00  0.41           O  
HETATM  149  O   HOH T 148     -13.482   2.304  18.061  1.00  0.41           O  
HETATM  150  O   HOH T 149      16.171 -10.543  20.634  1.00  0.41           O  
HETATM  151  O   HOH T 150       4.129  -9.061  24.946  1.00  0.41           O  
HETATM  152  O   HOH T 151       6.352  -6.251  30.700  1.00  0.41           O  
HETATM  153  O   HOH T 152      23.055  -5.858  30.390  1.00  0.41           O  
HETATM  154  O   HOH T 153      -2.329 -16.099  15.873  1.00  0.41           O  
HETATM  155  O   HOH T 154      12.851  -8.591  20.798  1.00  0.42           O  
HETATM  156  O   HOH T 155       4.597  10.962  33.122  1.00  0.42           O  
HETATM  157  O   HOH T 156       4.780 -13.811  14.800  1.00  0.42           O  
HETATM  158  O   HOH T 157      21.748  -8.064  24.406  1.00  0.42           O  
HETATM  159  O   HOH T 158     -13.423 -11.211  13.761  1.00  0.42           O  
HETATM  160  O   HOH T 159     -14.822  -9.525   0.803  1.00  0.42           O  
HETATM  161  O   HOH T 160      12.241 -11.954   8.868  1.00  0.42           O  
HETATM  162  O   HOH T 161      22.648  12.672   1.327  1.00  0.42           O  
HETATM  163  O   HOH T 162      22.536   4.249   9.473  1.00  0.42           O  
HETATM  164  O   HOH T 163      17.922  19.759  14.543  1.00  0.43           O  
HETATM  165  O   HOH T 164      19.525  -5.614  20.240  1.00  0.43           O  
HETATM  166  O   HOH T 165       6.586  13.525  29.842  1.00  0.43           O  
HETATM  167  O   HOH T 166      -7.451  -3.826  26.761  1.00  0.43           O  
HETATM  168  O   HOH T 167     -16.301  -9.665  16.720  1.00  0.43           O  
HETATM  169  O   HOH T 168       0.050  18.332  19.288  1.00  0.43           O  
HETATM  170  O   HOH T 169       6.298   8.106  -2.267  1.00  0.43           O  
HETATM  171  O   HOH T 170      -7.689 -11.495  25.600  1.00  0.43           O  
HETATM  172  O   HOH T 171      22.687  12.915   4.069  1.00  0.43           O  
HETATM  173  O   HOH T 172      17.847 -13.757  24.297  1.00  0.43           O  
HETATM  174  O   HOH T 173       4.119  12.278  30.638  1.00  0.43           O  
HETATM  175  O   HOH T 174      -0.955 -10.729  29.658  1.00  0.43           O  
HETATM  176  O   HOH T 175       6.227  18.528   8.919  1.00  0.43           O  
HETATM  177  O   HOH T 176      19.833   1.638   1.263  1.00  0.43           O  
HETATM  178  O   HOH T 177       9.374 -15.311  -4.370  1.00  0.43           O  
HETATM  179  O   HOH T 178      16.315  24.650   4.741  1.00  0.43           O  
HETATM  180  O   HOH T 179      -0.849  -5.523  28.615  1.00  0.43           O  
HETATM  181  O   HOH T 180     -17.115  -8.980   2.423  1.00  0.43           O  
HETATM  182  O   HOH T 181      11.603   6.440  38.118  1.00  0.43           O  
HETATM  183  O   HOH T 182      11.295 -11.266   6.367  1.00  0.44           O  
HETATM  184  O   HOH T 183       6.391  11.940  15.084  1.00  0.44           O  
HETATM  185  O   HOH T 184       1.504  -8.315  25.788  1.00  0.44           O  
HETATM  186  O   HOH T 185      14.207  -3.351  37.990  1.00  0.44           O  
HETATM  187  O   HOH T 186      12.219  17.680   6.865  1.00  0.44           O  
HETATM  188  O   HOH T 187      20.308  10.311  -1.005  1.00  0.44           O  
HETATM  189  O   HOH T 188      11.394  11.391  33.683  1.00  0.44           O  
HETATM  190  O   HOH T 189       5.296 -15.906  12.959  1.00  0.44           O  
HETATM  191  O   HOH T 190       2.659  -2.750  35.219  1.00  0.44           O  
HETATM  192  O   HOH T 191      21.298  -5.694  18.007  1.00  0.45           O  
HETATM  193  O   HOH T 192     -15.066   1.725  12.912  1.00  0.45           O  
HETATM  194  O   HOH T 193      27.689  15.685  10.253  1.00  0.45           O  
HETATM  195  O   HOH T 194      13.924  -6.467   7.124  1.00  0.45           O  
HETATM  196  O   HOH T 195      18.927   6.456   1.931  1.00  0.45           O  
HETATM  197  O   HOH T 196       8.042 -12.164  19.022  1.00  0.45           O  
HETATM  198  O   HOH T 197      22.801  -3.332  18.125  1.00  0.45           O  
HETATM  199  O   HOH T 198     -13.064   4.684   1.527  1.00  0.45           O  
HETATM  200  O   HOH T 199      -6.476   3.551  27.482  1.00  0.45           O  
HETATM  201  O   HOH T 200       5.522 -13.249  12.229  1.00  0.45           O  
HETATM  202  O   HOH T 201       2.444  18.253  17.776  1.00  0.45           O  
HETATM  203  O   HOH T 202      -4.938 -18.230   4.470  1.00  0.45           O  
HETATM  204  O   HOH T 203       8.415   1.098   1.001  1.00  0.45           O  
HETATM  205  O   HOH T 204      12.541  12.235 -10.810  1.00  0.45           O  
HETATM  206  O   HOH T 205      19.999  -1.371  26.031  1.00  0.46           O  
HETATM  207  O   HOH T 206      -2.777   0.076  -8.954  1.00  0.46           O  
HETATM  208  O   HOH T 207       7.367   3.531   0.279  1.00  0.46           O  
HETATM  209  O   HOH T 208      12.506  19.534  -3.084  1.00  0.46           O  
HETATM  210  O   HOH T 209      -5.820   0.765  -6.053  1.00  0.46           O  
HETATM  211  O   HOH T 210      24.289  12.130   8.190  1.00  0.46           O  
HETATM  212  O   HOH T 211      22.801  21.314  13.049  1.00  0.46           O  
HETATM  213  O   HOH T 212       4.040  11.529  -4.238  1.00  0.46           O  
HETATM  214  O   HOH T 213       9.316 -14.026  17.316  1.00  0.46           O  
HETATM  215  O   HOH T 214       5.058   3.344   1.652  1.00  0.46           O  
HETATM  216  O   HOH T 215      24.961  22.321  11.593  1.00  0.46           O  
HETATM  217  O   HOH T 216      18.257   8.951   0.554  1.00  0.47           O  
HETATM  218  O   HOH T 217      15.286  -2.256   8.029  1.00  0.47           O  
HETATM  219  O   HOH T 218     -16.919   8.653  24.297  1.00  0.47           O  
HETATM  220  O   HOH T 219     -10.371   9.818   0.901  1.00  0.47           O  
HETATM  221  O   HOH T 220     -11.680   1.482  20.081  1.00  0.47           O  
HETATM  222  O   HOH T 221       9.108 -12.266  26.881  1.00  0.47           O  
HETATM  223  O   HOH T 222      27.856  18.000  14.766  1.00  0.47           O  
HETATM  224  O   HOH T 223      11.626 -12.138  28.089  1.00  0.47           O  
HETATM  225  O   HOH T 224      10.561  -5.653   4.014  1.00  0.47           O  
HETATM  226  O   HOH T 225      11.468  16.054  29.873  1.00  0.47           O  
HETATM  227  O   HOH T 226      -1.502   6.339  -4.694  1.00  0.47           O  
HETATM  228  O   HOH T 227       4.301  16.023  -2.847  1.00  0.47           O  
HETATM  229  O   HOH T 228       2.765  12.287  -6.552  1.00  0.47           O  
HETATM  230  O   HOH T 229     -14.921  -3.445   6.344  1.00  0.47           O  
HETATM  231  O   HOH T 230      -5.719   6.631  -3.627  1.00  0.47           O  
HETATM  232  O   HOH T 231      20.106 -13.134  25.751  1.00  0.47           O  
HETATM  233  O   HOH T 232      18.813 -10.453  34.203  1.00  0.47           O  
HETATM  234  O   HOH T 233     -17.075  -2.428   7.856  1.00  0.47           O  
HETATM  235  O   HOH T 234      -0.846  -4.713 -10.772  1.00  0.47           O  
HETATM  236  O   HOH T 235       9.872  -7.806   2.433  1.00  0.47           O  
HETATM  237  O   HOH T 236       9.803  22.820   2.331  1.00  0.47           O  
HETATM  238  O   HOH T 237      25.788  14.495   8.560  1.00  0.48           O  
HETATM  239  O   HOH T 238      13.871 -10.651  22.248  1.00  0.48           O  
HETATM  240  O   HOH T 239     -14.873   5.857   9.304  1.00  0.48           O  
HETATM  241  O   HOH T 240      -0.307  13.987  -5.302  1.00  0.48           O  
HETATM  242  O   HOH T 241      10.483 -12.963  10.696  1.00  0.48           O  
HETATM  243  O   HOH T 242      15.309  13.568  33.796  1.00  0.48           O  
HETATM  244  O   HOH T 243     -21.430  -8.062  14.645  1.00  0.48           O  
HETATM  245  O   HOH T 244       5.425  13.853  -4.024  1.00  0.48           O  
HETATM  246  O   HOH T 245       1.696 -11.224  28.780  1.00  0.48           O  
HETATM  247  O   HOH T 246      17.824  -6.519  16.197  1.00  0.48           O  
HETATM  248  O   HOH T 247      24.081  20.941   7.328  1.00  0.48           O  
HETATM  249  O   HOH T 248      -6.494  14.699  23.863  1.00  0.48           O  
HETATM  250  O   HOH T 249      29.340  15.372  12.511  1.00  0.48           O  
HETATM  251  O   HOH T 250      21.996 -15.145  25.975  1.00  0.48           O  
HETATM  252  O   HOH T 251      20.645  20.398  18.343  1.00  0.48           O  
HETATM  253  O   HOH T 252      25.013  18.506  22.718  1.00  0.48           O  
HETATM  254  O   HOH T 253       8.752 -13.393  14.635  1.00  0.48           O  
HETATM  255  O   HOH T 254     -14.190   7.855  24.584  1.00  0.48           O  
HETATM  256  O   HOH T 255     -10.040  12.479   0.965  1.00  0.49           O  
HETATM  257  O   HOH T 256      -3.440   4.879  -3.629  1.00  0.49           O  
HETATM  258  O   HOH T 257     -13.817  -0.118  19.469  1.00  0.49           O  
HETATM  259  O   HOH T 258      13.761  23.513   1.885  1.00  0.49           O  
HETATM  260  O   HOH T 259      -5.672  -3.317  29.118  1.00  0.49           O  
HETATM  261  O   HOH T 260      22.158  -4.601  20.472  1.00  0.49           O  
HETATM  262  O   HOH T 261      16.872 -13.035  21.730  1.00  0.49           O  
HETATM  263  O   HOH T 262      22.608  -1.947  26.796  1.00  0.49           O  
HETATM  264  O   HOH T 263      22.559   8.541   6.712  1.00  0.49           O  
HETATM  265  O   HOH T 264      12.702 -11.337  11.585  1.00  0.49           O  
HETATM  266  O   HOH T 265      -2.938  20.603   5.160  1.00  0.50           O  
HETATM  267  O   HOH T 266      -4.200   1.037  -3.902  1.00  0.50           O  
HETATM  268  O   HOH T 267      21.835  -0.984  24.302  1.00  0.50           O  
HETATM  269  O   HOH T 268       7.537 -10.556  28.364  1.00  0.50           O  
HETATM  270  O   HOH T 269      -4.872   1.768  -8.286  1.00  0.50           O  
HETATM  271  O   HOH T 270       7.246  11.800  33.256  1.00  0.50           O  
HETATM  272  O   HOH T 271      -6.882 -11.391  -8.263  1.00  0.50           O  
HETATM  273  O   HOH T 272       2.266   5.546  31.623  1.00  0.50           O  
HETATM  274  O   HOH T 273       1.634   2.527  36.280  1.00  0.50           O  
HETATM  275  O   HOH T 274      14.508 -13.081  23.244  1.00  0.50           O  
HETATM  276  O   HOH T 275      14.921  -7.265  19.609  1.00  0.50           O  
HETATM  277  O   HOH T 276     -13.862  -8.949  -4.105  1.00  0.50           O  
HETATM  278  O   HOH T 277       6.806 -13.007  16.619  1.00  0.50           O  
HETATM  279  O   HOH T 278       2.498 -15.208  15.716  1.00  0.50           O  
HETATM  280  O   HOH T 279      13.139   0.010  36.591  1.00  0.50           O  
HETATM  281  O   HOH T 280       2.341 -10.862  26.117  1.00  0.51           O  
HETATM  282  O   HOH T 281      16.764   9.553  -1.748  1.00  0.51           O  
HETATM  283  O   HOH T 282     -15.033   2.692   1.274  1.00  0.51           O  
HETATM  284  O   HOH T 283      -2.600  21.057  13.787  1.00  0.51           O  
HETATM  285  O   HOH T 284     -14.142   9.182   5.862  1.00  0.51           O  
HETATM  286  O   HOH T 285     -15.465   2.484   3.985  1.00  0.51           O  
HETATM  287  O   HOH T 286      19.312  22.726  34.622  1.00  0.51           O  
HETATM  288  O   HOH T 287      -7.656  10.195  -2.698  1.00  0.51           O  
HETATM  289  O   HOH T 288       7.814 -16.236  -2.298  1.00  0.51           O  
HETATM  290  O   HOH T 289      26.643  11.968   9.460  1.00  0.51           O  
HETATM  291  O   HOH T 290      14.947  20.849  -3.559  1.00  0.51           O  
HETATM  292  O   HOH T 291       2.245 -10.769   7.586  1.00  0.51           O  
HETATM  293  O   HOH T 292       8.109  -7.692  32.338  1.00  0.52           O  
HETATM  294  O   HOH T 293     -11.639  11.182  22.214  1.00  0.52           O  
HETATM  295  O   HOH T 294      27.451  19.509  29.594  1.00  0.52           O  
HETATM  296  O   HOH T 295      15.275  -8.211  22.189  1.00  0.52           O  
HETATM  297  O   HOH T 296      23.025   0.330  15.926  1.00  0.52           O  
HETATM  298  O   HOH T 297     -11.295  12.822  10.407  1.00  0.52           O  
HETATM  299  O   HOH T 298     -17.181 -11.845   2.202  1.00  0.52           O  
HETATM  300  O   HOH T 299      -5.744 -17.088   0.665  1.00  0.52           O  
HETATM  301  O   HOH T 300      22.053   5.714   6.394  1.00  0.52           O  
HETATM  302  O   HOH T 301     -11.691  -6.461  27.068  1.00  0.52           O  
HETATM  303  O   HOH T 302      -5.284   9.376  -3.709  1.00  0.52           O  
HETATM  304  O   HOH T 303       9.038 -11.459  16.659  1.00  0.53           O  
HETATM  305  O   HOH T 304      13.913  23.943  18.068  1.00  0.53           O  
HETATM  306  O   HOH T 305      -3.664  17.213  13.577  1.00  0.53           O  
HETATM  307  O   HOH T 306      10.663   5.676  40.588  1.00  0.53           O  
HETATM  308  O   HOH T 307      25.122  11.412  21.148  1.00  0.53           O  
HETATM  309  O   HOH T 308      16.119  -4.773   7.421  1.00  0.53           O  
HETATM  310  O   HOH T 309     -13.075  14.589   4.985  1.00  0.53           O  
HETATM  311  O   HOH T 310      18.823   3.717   3.014  1.00  0.53           O  
HETATM  312  O   HOH T 311       5.936  -9.998  -8.048  1.00  0.53           O  
HETATM  313  O   HOH T 312      -9.137  -4.710  -6.464  1.00  0.53           O  
HETATM  314  O   HOH T 313      -7.367  18.751   8.198  1.00  0.53           O  
HETATM  315  O   HOH T 314      13.886  -2.451   3.606  1.00  0.53           O  
HETATM  316  O   HOH T 315     -13.710  10.530  16.172  1.00  0.53           O  
HETATM  317  O   HOH T 316       9.738 -13.192   5.162  1.00  0.53           O  
HETATM  318  O   HOH T 317     -15.447   4.184  11.575  1.00  0.53           O  
HETATM  319  O   HOH T 318      15.463 -14.814  25.241  1.00  0.54           O  
HETATM  320  O   HOH T 319      15.648  10.970  33.195  1.00  0.54           O  
HETATM  321  O   HOH T 320      -5.711  20.485   6.629  1.00  0.54           O  
HETATM  322  O   HOH T 321      21.629  22.194   7.386  1.00  0.54           O  
HETATM  323  O   HOH T 322       1.318  -7.172  28.241  1.00  0.54           O  
HETATM  324  O   HOH T 323       9.847 -13.141   7.922  1.00  0.54           O  
HETATM  325  O   HOH T 324     -15.968  -1.444  18.127  1.00  0.54           O  
HETATM  326  O   HOH T 325      12.207   1.941  38.118  1.00  0.54           O  
HETATM  327  O   HOH T 326      20.527   0.732   7.170  1.00  0.55           O  
HETATM  328  O   HOH T 327      -1.144   3.901  -5.086  1.00  0.55           O  
HETATM  329  O   HOH T 328       4.892  20.954   9.808  1.00  0.55           O  
HETATM  330  O   HOH T 329     -14.297   2.868  15.395  1.00  0.55           O  
HETATM  331  O   HOH T 330       3.810  10.865  -8.669  1.00  0.56           O  
HETATM  332  O   HOH T 331     -10.508  13.769  20.300  1.00  0.56           O  
HETATM  333  O   HOH T 332       6.435  -8.896  30.245  1.00  0.56           O  
HETATM  334  O   HOH T 333       2.404  -0.051  35.702  1.00  0.56           O  
HETATM  335  O   HOH T 334      20.227  -5.681  15.345  1.00  0.56           O  
HETATM  336  O   HOH T 335     -13.139  -9.812  -6.627  1.00  0.56           O  
HETATM  337  O   HOH T 336      17.719  -2.377   6.596  1.00  0.56           O  
HETATM  338  O   HOH T 337      -1.633   6.524  26.995  1.00  0.56           O  
HETATM  339  O   HOH T 338      21.771  -3.121  13.873  1.00  0.57           O  
HETATM  340  O   HOH T 339      29.998  16.982  16.253  1.00  0.57           O  
HETATM  341  O   HOH T 340      10.567  21.859   8.911  1.00  0.57           O  
HETATM  342  O   HOH T 341      -3.206  12.233  22.959  1.00  0.57           O  
HETATM  343  O   HOH T 342      27.772  17.667  12.037  1.00  0.58           O  
HETATM  344  O   HOH T 343     -13.319  -8.954  21.944  1.00  0.58           O  
HETATM  345  O   HOH T 344      -4.129   3.087  -5.791  1.00  0.59           O  
HETATM  346  O   HOH T 345      22.629 -11.166  21.786  1.00  0.60           O  
HETATM  347  O   HOH T 346      -4.040  -2.556  31.297  1.00  0.61           O  
HETATM  348  O   HOH T 347      -4.024   4.075  28.450  1.00  0.61           O  
HETATM  349  O   HOH T 348       9.336 -12.949  31.868  1.00  0.61           O  
TER     350      HOH T 348 
