# Supplementary material for: Accurate Prediction of Hydration Sites of Proteins Using Energy Model With Atom Embedding
Source: Front Mol Biosci. 2021 Sep 20;8:756075. doi: 10.3389/fmolb.2021.756075 (PMC8488165; doi:10.3389/fmolb.2021.756075)
Supplement: Supplementary file 1 [file DataSheet1.ZIP › Data Sheet 1/Our_result_pdb/our_dataset_output/3C36_watersite.pdb]

HEADER                                                        XXXX


JRNL        PMID   -1
HETATM    1  O   HOH T   0       6.786  15.881  48.782  1.00  0.15           O  
HETATM    2  O   HOH T   1      10.986  18.102  72.753  1.00  0.18           O  
HETATM    3  O   HOH T   2      15.016  19.462  50.849  1.00  0.18           O  
HETATM    4  O   HOH T   3       6.623  39.246  78.426  1.00  0.19           O  
HETATM    5  O   HOH T   4      10.567  36.488  72.143  1.00  0.20           O  
HETATM    6  O   HOH T   5      13.517  33.409  70.785  1.00  0.20           O  
HETATM    7  O   HOH T   6     -10.954  30.654  60.199  1.00  0.20           O  
HETATM    8  O   HOH T   7       8.961  39.146  37.946  1.00  0.21           O  
HETATM    9  O   HOH T   8       8.773  32.065  36.106  1.00  0.21           O  
HETATM   10  O   HOH T   9      -6.366  42.247  31.659  1.00  0.21           O  
HETATM   11  O   HOH T  10       0.722  19.547  82.452  1.00  0.21           O  
HETATM   12  O   HOH T  11       7.951  29.192  48.953  1.00  0.21           O  
HETATM   13  O   HOH T  12     -19.232  17.388  92.514  1.00  0.21           O  
HETATM   14  O   HOH T  13      -1.775  54.092  82.752  1.00  0.21           O  
HETATM   15  O   HOH T  14     -17.011  17.647  86.733  1.00  0.22           O  
HETATM   16  O   HOH T  15      -1.733  27.780  60.204  1.00  0.22           O  
HETATM   17  O   HOH T  16     -18.247  27.542  47.725  1.00  0.22           O  
HETATM   18  O   HOH T  17       7.408  21.707  83.674  1.00  0.22           O  
HETATM   19  O   HOH T  18       3.843  54.610  47.258  1.00  0.22           O  
HETATM   20  O   HOH T  19     -13.888  52.032  46.752  1.00  0.22           O  
HETATM   21  O   HOH T  20      -8.537  31.467  83.452  1.00  0.22           O  
HETATM   22  O   HOH T  21      -6.903  27.657  49.399  1.00  0.22           O  
HETATM   23  O   HOH T  22      -6.493  35.424  43.252  1.00  0.22           O  
HETATM   24  O   HOH T  23      -3.216  36.936  44.853  1.00  0.23           O  
HETATM   25  O   HOH T  24     -14.640  29.060  54.442  1.00  0.23           O  
HETATM   26  O   HOH T  25      -6.561   8.576  71.899  1.00  0.23           O  
HETATM   27  O   HOH T  26     -14.250  35.648  56.640  1.00  0.23           O  
HETATM   28  O   HOH T  27      10.973  40.912  61.136  1.00  0.23           O  
HETATM   29  O   HOH T  28      -5.129  32.679  48.932  1.00  0.23           O  
HETATM   30  O   HOH T  29      -0.887  45.483  89.696  1.00  0.23           O  
HETATM   31  O   HOH T  30       3.011  13.929  70.907  1.00  0.23           O  
HETATM   32  O   HOH T  31      -0.210  25.746  72.508  1.00  0.23           O  
HETATM   33  O   HOH T  32     -11.658  20.259  74.989  1.00  0.23           O  
HETATM   34  O   HOH T  33      17.678  45.440  38.704  1.00  0.24           O  
HETATM   35  O   HOH T  34       1.358  39.458  63.073  1.00  0.24           O  
HETATM   36  O   HOH T  35     -11.175  12.917  75.263  1.00  0.24           O  
HETATM   37  O   HOH T  36     -14.430  59.589  45.090  1.00  0.24           O  
HETATM   38  O   HOH T  37       7.116  22.020  35.653  1.00  0.24           O  
HETATM   39  O   HOH T  38      16.778  32.037  28.941  1.00  0.24           O  
HETATM   40  O   HOH T  39       9.158  23.541  60.909  1.00  0.24           O  
HETATM   41  O   HOH T  40      24.952  37.357  34.903  1.00  0.24           O  
HETATM   42  O   HOH T  41      14.603  42.911  67.269  1.00  0.24           O  
HETATM   43  O   HOH T  42       4.350  41.051  78.282  1.00  0.25           O  
HETATM   44  O   HOH T  43      12.303  24.513  39.073  1.00  0.25           O  
HETATM   45  O   HOH T  44     -15.669  37.177  28.807  1.00  0.25           O  
HETATM   46  O   HOH T  45      -4.965  21.815  44.476  1.00  0.25           O  
HETATM   47  O   HOH T  46      12.360  18.999  58.801  1.00  0.25           O  
HETATM   48  O   HOH T  47       5.953  32.848  65.426  1.00  0.25           O  
HETATM   49  O   HOH T  48       7.312  53.289  67.375  1.00  0.25           O  
HETATM   50  O   HOH T  49     -13.341  49.212  52.452  1.00  0.25           O  
HETATM   51  O   HOH T  50      17.736  45.196  73.825  1.00  0.25           O  
HETATM   52  O   HOH T  51     -18.200  40.835  54.035  1.00  0.26           O  
HETATM   53  O   HOH T  52      -0.717  25.845  86.078  1.00  0.26           O  
HETATM   54  O   HOH T  53      -6.348  23.789  50.843  1.00  0.26           O  
HETATM   55  O   HOH T  54       5.475  38.268  72.663  1.00  0.26           O  
HETATM   56  O   HOH T  55       5.043  21.144  56.890  1.00  0.26           O  
HETATM   57  O   HOH T  56      -2.982  27.016  85.314  1.00  0.26           O  
HETATM   58  O   HOH T  57      -2.383  25.102  38.065  1.00  0.26           O  
HETATM   59  O   HOH T  58     -12.932  48.347  38.627  1.00  0.26           O  
HETATM   60  O   HOH T  59     -22.890  37.851  43.280  1.00  0.26           O  
HETATM   61  O   HOH T  60      -1.497  29.116  56.091  1.00  0.26           O  
HETATM   62  O   HOH T  61      -3.813  30.686  36.619  1.00  0.26           O  
HETATM   63  O   HOH T  62      -8.051  50.202  71.245  1.00  0.26           O  
HETATM   64  O   HOH T  63       2.325  17.250  82.096  1.00  0.26           O  
HETATM   65  O   HOH T  64       6.411  27.928  31.552  1.00  0.27           O  
HETATM   66  O   HOH T  65       6.742  21.530  88.497  1.00  0.27           O  
HETATM   67  O   HOH T  66     -17.059  47.020  33.002  1.00  0.27           O  
HETATM   68  O   HOH T  67     -18.608  28.345  90.103  1.00  0.27           O  
HETATM   69  O   HOH T  68      -9.259  33.547  31.561  1.00  0.27           O  
HETATM   70  O   HOH T  69     -11.619  42.117  51.727  1.00  0.27           O  
HETATM   71  O   HOH T  70       6.437  46.960  39.988  1.00  0.27           O  
HETATM   72  O   HOH T  71     -13.569  36.462  30.482  1.00  0.27           O  
HETATM   73  O   HOH T  72      -6.610  32.450  43.081  1.00  0.27           O  
HETATM   74  O   HOH T  73      18.186  43.933  31.412  1.00  0.27           O  
HETATM   75  O   HOH T  74     -10.940  52.541  31.650  1.00  0.27           O  
HETATM   76  O   HOH T  75       5.824  43.741  93.816  1.00  0.27           O  
HETATM   77  O   HOH T  76      -3.421  36.860  58.383  1.00  0.28           O  
HETATM   78  O   HOH T  77      18.915  29.745  63.080  1.00  0.28           O  
HETATM   79  O   HOH T  78      -5.697  26.556  89.865  1.00  0.28           O  
HETATM   80  O   HOH T  79       0.974  38.316  36.969  1.00  0.28           O  
HETATM   81  O   HOH T  80       4.618  14.982  62.873  1.00  0.28           O  
HETATM   82  O   HOH T  81       4.850  54.030  43.525  1.00  0.28           O  
HETATM   83  O   HOH T  82      -3.434  53.356  45.986  1.00  0.28           O  
HETATM   84  O   HOH T  83     -14.437  43.096  33.947  1.00  0.28           O  
HETATM   85  O   HOH T  84       9.530  38.961  67.431  1.00  0.28           O  
HETATM   86  O   HOH T  85     -12.243  50.495  36.910  1.00  0.28           O  
HETATM   87  O   HOH T  86     -18.758  29.104  82.857  1.00  0.28           O  
HETATM   88  O   HOH T  87      -3.363  25.523  47.570  1.00  0.28           O  
HETATM   89  O   HOH T  88      -8.900  53.393  85.722  1.00  0.28           O  
HETATM   90  O   HOH T  89      26.114  38.754  32.861  1.00  0.28           O  
HETATM   91  O   HOH T  90     -16.433  27.128  55.190  1.00  0.28           O  
HETATM   92  O   HOH T  91      -4.525  27.843  54.362  1.00  0.29           O  
HETATM   93  O   HOH T  92       6.999  21.398  32.833  1.00  0.29           O  
HETATM   94  O   HOH T  93       2.207  49.183  69.811  1.00  0.29           O  
HETATM   95  O   HOH T  94      -9.749  30.239  85.637  1.00  0.29           O  
HETATM   96  O   HOH T  95       1.497  46.672  90.564  1.00  0.29           O  
HETATM   97  O   HOH T  96       5.792  21.959  85.863  1.00  0.29           O  
HETATM   98  O   HOH T  97      -4.018  17.097  48.792  1.00  0.29           O  
HETATM   99  O   HOH T  98     -22.167  34.293  54.968  1.00  0.29           O  
HETATM  100  O   HOH T  99      -8.789  42.158  58.731  1.00  0.29           O  
HETATM  101  O   HOH T 100     -18.615  54.264  77.962  1.00  0.29           O  
HETATM  102  O   HOH T 101      17.124  43.435  66.214  1.00  0.29           O  
HETATM  103  O   HOH T 102       5.317  60.464  86.206  1.00  0.29           O  
HETATM  104  O   HOH T 103      -6.791  21.978  42.399  1.00  0.29           O  
HETATM  105  O   HOH T 104       7.866  47.014  91.058  1.00  0.30           O  
HETATM  106  O   HOH T 105       1.807  56.621  88.436  1.00  0.30           O  
HETATM  107  O   HOH T 106     -19.059  42.674  77.754  1.00  0.30           O  
HETATM  108  O   HOH T 107       6.319  20.633  37.960  1.00  0.30           O  
HETATM  109  O   HOH T 108     -19.929  14.266  95.670  1.00  0.30           O  
HETATM  110  O   HOH T 109      -2.375  56.080  70.305  1.00  0.30           O  
HETATM  111  O   HOH T 110      10.838  31.070  76.086  1.00  0.30           O  
HETATM  112  O   HOH T 111      10.367  17.734  57.213  1.00  0.30           O  
HETATM  113  O   HOH T 112      -6.149  37.149  76.315  1.00  0.30           O  
HETATM  114  O   HOH T 113      -3.092   7.170  78.023  1.00  0.30           O  
HETATM  115  O   HOH T 114       8.882  47.020  64.916  1.00  0.31           O  
HETATM  116  O   HOH T 115      20.855  56.689  68.552  1.00  0.31           O  
HETATM  117  O   HOH T 116       3.812  21.180  60.852  1.00  0.31           O  
HETATM  118  O   HOH T 117      12.812  21.852  39.766  1.00  0.31           O  
HETATM  119  O   HOH T 118      -3.413  47.987  50.183  1.00  0.31           O  
HETATM  120  O   HOH T 119       0.482  36.340  38.827  1.00  0.31           O  
HETATM  121  O   HOH T 120      21.054  19.386  46.341  1.00  0.31           O  
HETATM  122  O   HOH T 121      20.016  41.834  31.064  1.00  0.31           O  
HETATM  123  O   HOH T 122      -5.998  35.618  82.463  1.00  0.31           O  
HETATM  124  O   HOH T 123     -23.751  23.955  88.089  1.00  0.31           O  
HETATM  125  O   HOH T 124      16.122  17.938  67.014  1.00  0.31           O  
HETATM  126  O   HOH T 125     -21.295  27.927  45.151  1.00  0.31           O  
HETATM  127  O   HOH T 126      -4.773  52.520  48.281  1.00  0.31           O  
HETATM  128  O   HOH T 127       6.153  35.755  84.965  1.00  0.32           O  
HETATM  129  O   HOH T 128       7.383  35.276  59.901  1.00  0.32           O  
HETATM  130  O   HOH T 129     -11.535  13.136  72.384  1.00  0.32           O  
HETATM  131  O   HOH T 130      10.780  39.662  35.870  1.00  0.32           O  
HETATM  132  O   HOH T 131      -3.326  36.415  73.545  1.00  0.32           O  
HETATM  133  O   HOH T 132       4.229  39.752  38.934  1.00  0.32           O  
HETATM  134  O   HOH T 133      20.018  30.476  38.702  1.00  0.32           O  
HETATM  135  O   HOH T 134     -17.531  45.017  77.800  1.00  0.32           O  
HETATM  136  O   HOH T 135     -15.318  22.853  69.562  1.00  0.32           O  
HETATM  137  O   HOH T 136      12.395  18.683  64.711  1.00  0.32           O  
HETATM  138  O   HOH T 137     -10.676  11.487  40.078  1.00  0.32           O  
HETATM  139  O   HOH T 138     -18.960  44.721  35.827  1.00  0.32           O  
HETATM  140  O   HOH T 139      17.731  25.375  75.029  1.00  0.32           O  
HETATM  141  O   HOH T 140     -13.265  43.025  30.173  1.00  0.32           O  
HETATM  142  O   HOH T 141       0.225  46.844  39.482  1.00  0.32           O  
HETATM  143  O   HOH T 142      -9.595   8.863  78.260  1.00  0.32           O  
HETATM  144  O   HOH T 143       4.724  56.610  85.618  1.00  0.32           O  
HETATM  145  O   HOH T 144      17.230  40.447  45.902  1.00  0.32           O  
HETATM  146  O   HOH T 145      -8.850  31.893  65.873  1.00  0.32           O  
HETATM  147  O   HOH T 146     -17.256  36.573  74.442  1.00  0.32           O  
HETATM  148  O   HOH T 147      21.127  35.844  57.692  1.00  0.32           O  
HETATM  149  O   HOH T 148      24.905  30.040  46.333  1.00  0.32           O  
HETATM  150  O   HOH T 149      14.156  41.158  69.363  1.00  0.33           O  
HETATM  151  O   HOH T 150      12.204  55.452  78.060  1.00  0.33           O  
HETATM  152  O   HOH T 151      18.722  48.462  82.670  1.00  0.33           O  
HETATM  153  O   HOH T 152       6.300  27.747  90.008  1.00  0.33           O  
HETATM  154  O   HOH T 153      -4.206  29.210  56.789  1.00  0.33           O  
HETATM  155  O   HOH T 154      -9.018  56.385  79.883  1.00  0.33           O  
HETATM  156  O   HOH T 155       0.472  32.929  60.135  1.00  0.33           O  
HETATM  157  O   HOH T 156       2.581  51.089  91.482  1.00  0.33           O  
HETATM  158  O   HOH T 157       5.171  13.616  49.087  1.00  0.33           O  
HETATM  159  O   HOH T 158     -11.593  46.318  71.728  1.00  0.33           O  
HETATM  160  O   HOH T 159     -17.258  37.949  33.440  1.00  0.33           O  
HETATM  161  O   HOH T 160      -8.861  16.144  56.995  1.00  0.33           O  
HETATM  162  O   HOH T 161       8.667  40.095  55.413  1.00  0.33           O  
HETATM  163  O   HOH T 162       5.002  51.793  67.715  1.00  0.33           O  
HETATM  164  O   HOH T 163       9.632  37.844  90.005  1.00  0.33           O  
HETATM  165  O   HOH T 164       4.114  39.132  57.551  1.00  0.33           O  
HETATM  166  O   HOH T 165       8.257  36.449  70.400  1.00  0.33           O  
HETATM  167  O   HOH T 166      14.702  16.871  46.289  1.00  0.33           O  
HETATM  168  O   HOH T 167     -11.782  50.123  74.954  1.00  0.33           O  
HETATM  169  O   HOH T 168      21.577  31.133  32.934  1.00  0.34           O  
HETATM  170  O   HOH T 169      -1.627  35.261  24.601  1.00  0.34           O  
HETATM  171  O   HOH T 170      -7.561  53.310  35.734  1.00  0.34           O  
HETATM  172  O   HOH T 171      -3.361  57.830  72.179  1.00  0.34           O  
HETATM  173  O   HOH T 172      -7.630  51.208  89.171  1.00  0.34           O  
HETATM  174  O   HOH T 173      -2.978  26.428  43.576  1.00  0.34           O  
HETATM  175  O   HOH T 174      -4.528  44.383  67.743  1.00  0.34           O  
HETATM  176  O   HOH T 175     -18.716  17.366  89.004  1.00  0.34           O  
HETATM  177  O   HOH T 176      -7.450  46.246  71.317  1.00  0.34           O  
HETATM  178  O   HOH T 177      11.877  12.794  77.121  1.00  0.34           O  
HETATM  179  O   HOH T 178      -6.873  47.257  94.497  1.00  0.34           O  
HETATM  180  O   HOH T 179      19.433  42.313  25.965  1.00  0.34           O  
HETATM  181  O   HOH T 180      26.250  35.252  36.040  1.00  0.34           O  
HETATM  182  O   HOH T 181     -11.886  12.096  69.684  1.00  0.34           O  
HETATM  183  O   HOH T 182      -6.092  59.265  80.124  1.00  0.34           O  
HETATM  184  O   HOH T 183       2.670  39.844  44.165  1.00  0.34           O  
HETATM  185  O   HOH T 184       7.516  50.467  67.255  1.00  0.34           O  
HETATM  186  O   HOH T 185     -12.395  27.247  51.909  1.00  0.34           O  
HETATM  187  O   HOH T 186       5.821  31.251  63.146  1.00  0.34           O  
HETATM  188  O   HOH T 187      -1.881  43.281  91.106  1.00  0.35           O  
HETATM  189  O   HOH T 188      -1.167  61.624  69.407  1.00  0.35           O  
HETATM  190  O   HOH T 189       0.604  38.917  76.386  1.00  0.35           O  
HETATM  191  O   HOH T 190      12.459  46.063  61.094  1.00  0.35           O  
HETATM  192  O   HOH T 191     -19.660  27.818  34.059  1.00  0.35           O  
HETATM  193  O   HOH T 192       5.107  12.800  75.192  1.00  0.35           O  
HETATM  194  O   HOH T 193       8.519  49.186  92.587  1.00  0.35           O  
HETATM  195  O   HOH T 194      -5.256  35.054  63.871  1.00  0.35           O  
HETATM  196  O   HOH T 195      -7.195  17.616  58.812  1.00  0.35           O  
HETATM  197  O   HOH T 196      -9.998  51.349  38.245  1.00  0.35           O  
HETATM  198  O   HOH T 197     -14.478  25.564  75.605  1.00  0.35           O  
HETATM  199  O   HOH T 198      20.919  30.634  64.890  1.00  0.35           O  
HETATM  200  O   HOH T 199      -0.818  32.855  37.307  1.00  0.35           O  
HETATM  201  O   HOH T 200      20.393  39.687  71.218  1.00  0.35           O  
HETATM  202  O   HOH T 201      -0.086  36.324  82.597  1.00  0.35           O  
HETATM  203  O   HOH T 202      25.375  32.683  51.397  1.00  0.35           O  
HETATM  204  O   HOH T 203       8.969  50.937  88.468  1.00  0.35           O  
HETATM  205  O   HOH T 204      -5.460   5.785  77.769  1.00  0.35           O  
HETATM  206  O   HOH T 205      10.768  33.881  76.266  1.00  0.36           O  
HETATM  207  O   HOH T 206       0.032  50.009  49.808  1.00  0.36           O  
HETATM  208  O   HOH T 207       1.540  33.845  38.507  1.00  0.36           O  
HETATM  209  O   HOH T 208       7.951  37.468  87.843  1.00  0.36           O  
HETATM  210  O   HOH T 209     -15.154  54.561  49.321  1.00  0.36           O  
HETATM  211  O   HOH T 210      -6.362  15.296  56.195  1.00  0.36           O  
HETATM  212  O   HOH T 211     -23.697  37.502  51.195  1.00  0.36           O  
HETATM  213  O   HOH T 212      23.182  24.306  59.137  1.00  0.36           O  
HETATM  214  O   HOH T 213      12.168  22.654  85.164  1.00  0.36           O  
HETATM  215  O   HOH T 214      18.509  46.514  87.252  1.00  0.36           O  
HETATM  216  O   HOH T 215       1.853  38.379  47.867  1.00  0.36           O  
HETATM  217  O   HOH T 216     -11.035  58.520  74.276  1.00  0.36           O  
HETATM  218  O   HOH T 217      -5.088  50.233  49.927  1.00  0.36           O  
HETATM  219  O   HOH T 218      -9.622  39.631  59.406  1.00  0.36           O  
HETATM  220  O   HOH T 219      -2.309  30.801  85.181  1.00  0.36           O  
HETATM  221  O   HOH T 220      20.480  45.509  38.176  1.00  0.36           O  
HETATM  222  O   HOH T 221     -15.013  28.325  88.357  1.00  0.36           O  
HETATM  223  O   HOH T 222       2.040  34.639  61.622  1.00  0.36           O  
HETATM  224  O   HOH T 223       9.855  62.515  80.294  1.00  0.36           O  
HETATM  225  O   HOH T 224     -15.455  41.482  53.689  1.00  0.36           O  
HETATM  226  O   HOH T 225      19.550  37.208  67.275  1.00  0.36           O  
HETATM  227  O   HOH T 226     -18.038  34.127  36.021  1.00  0.36           O  
HETATM  228  O   HOH T 227      -3.362  24.025  45.202  1.00  0.36           O  
HETATM  229  O   HOH T 228       9.115  32.525  77.987  1.00  0.36           O  
HETATM  230  O   HOH T 229      19.709  39.590  26.669  1.00  0.36           O  
HETATM  231  O   HOH T 230      14.715  52.148  66.456  1.00  0.36           O  
HETATM  232  O   HOH T 231      11.116  22.113  66.060  1.00  0.37           O  
HETATM  233  O   HOH T 232     -19.972  26.591  83.246  1.00  0.37           O  
HETATM  234  O   HOH T 233      25.665  42.761  34.063  1.00  0.37           O  
HETATM  235  O   HOH T 234       1.662  39.987  58.537  1.00  0.37           O  
HETATM  236  O   HOH T 235     -17.589  46.361  73.388  1.00  0.37           O  
HETATM  237  O   HOH T 236      26.745  37.144  27.117  1.00  0.37           O  
HETATM  238  O   HOH T 237     -16.958  44.653  80.495  1.00  0.37           O  
HETATM  239  O   HOH T 238     -17.692  26.649  35.681  1.00  0.37           O  
HETATM  240  O   HOH T 239      -4.943  16.264  59.962  1.00  0.37           O  
HETATM  241  O   HOH T 240      13.713  18.490  73.308  1.00  0.37           O  
HETATM  242  O   HOH T 241      22.552  23.481  56.732  1.00  0.37           O  
HETATM  243  O   HOH T 242      10.439  61.666  84.593  1.00  0.37           O  
HETATM  244  O   HOH T 243       8.504  34.871  68.032  1.00  0.37           O  
HETATM  245  O   HOH T 244      26.010  30.101  52.162  1.00  0.37           O  
HETATM  246  O   HOH T 245     -14.000  13.877  95.413  1.00  0.37           O  
HETATM  247  O   HOH T 246      25.387  41.415  36.553  1.00  0.37           O  
HETATM  248  O   HOH T 247     -14.922  22.956  74.752  1.00  0.37           O  
HETATM  249  O   HOH T 248      17.954  31.902  31.418  1.00  0.37           O  
HETATM  250  O   HOH T 249     -18.731  25.353  97.432  1.00  0.37           O  
HETATM  251  O   HOH T 250     -13.449  16.402  72.281  1.00  0.37           O  
HETATM  252  O   HOH T 251      -8.834  35.621  60.013  1.00  0.37           O  
HETATM  253  O   HOH T 252       7.456  16.211  64.498  1.00  0.37           O  
HETATM  254  O   HOH T 253      -9.749  33.101  59.419  1.00  0.37           O  
HETATM  255  O   HOH T 254     -22.135  42.424  35.366  1.00  0.37           O  
HETATM  256  O   HOH T 255       6.128  23.007  90.635  1.00  0.37           O  
HETATM  257  O   HOH T 256     -22.709  44.453  53.392  1.00  0.37           O  
HETATM  258  O   HOH T 257       5.616  33.987  36.142  1.00  0.37           O  
HETATM  259  O   HOH T 258      -4.264  25.739  36.152  1.00  0.38           O  
HETATM  260  O   HOH T 259     -10.409  55.144  41.494  1.00  0.38           O  
HETATM  261  O   HOH T 260       5.211  15.529  57.186  1.00  0.38           O  
HETATM  262  O   HOH T 261      13.810  48.502  55.127  1.00  0.38           O  
HETATM  263  O   HOH T 262     -17.365  34.051  75.379  1.00  0.38           O  
HETATM  264  O   HOH T 263       6.748  30.251  32.958  1.00  0.38           O  
HETATM  265  O   HOH T 264       4.037  12.139  72.752  1.00  0.38           O  
HETATM  266  O   HOH T 265       7.957  15.154  57.162  1.00  0.38           O  
HETATM  267  O   HOH T 266      10.764  49.323  93.939  1.00  0.38           O  
HETATM  268  O   HOH T 267      -6.096  32.541  63.190  1.00  0.38           O  
HETATM  269  O   HOH T 268     -15.405  16.139  31.718  1.00  0.38           O  
HETATM  270  O   HOH T 269      12.621  14.178  51.831  1.00  0.38           O  
HETATM  271  O   HOH T 270     -13.107  33.029  55.982  1.00  0.38           O  
HETATM  272  O   HOH T 271     -21.335  49.577  51.375  1.00  0.38           O  
HETATM  273  O   HOH T 272     -17.693  16.310  94.601  1.00  0.38           O  
HETATM  274  O   HOH T 273      10.001  41.768  63.736  1.00  0.38           O  
HETATM  275  O   HOH T 274       9.614  39.383  33.360  1.00  0.38           O  
HETATM  276  O   HOH T 275     -11.052  31.631  57.538  1.00  0.38           O  
HETATM  277  O   HOH T 276       4.356  47.645  71.147  1.00  0.38           O  
HETATM  278  O   HOH T 277     -19.689  33.683  73.852  1.00  0.38           O  
HETATM  279  O   HOH T 278     -23.973  27.981  53.663  1.00  0.38           O  
HETATM  280  O   HOH T 279     -17.821  43.808  70.255  1.00  0.39           O  
HETATM  281  O   HOH T 280      26.745  38.959  29.124  1.00  0.39           O  
HETATM  282  O   HOH T 281     -25.107  19.521  86.391  1.00  0.39           O  
HETATM  283  O   HOH T 282      13.673  57.766  77.869  1.00  0.39           O  
HETATM  284  O   HOH T 283     -15.623  24.898  53.889  1.00  0.39           O  
HETATM  285  O   HOH T 284      19.703  38.686  43.783  1.00  0.39           O  
HETATM  286  O   HOH T 285      19.758  28.227  65.380  1.00  0.39           O  
HETATM  287  O   HOH T 286       3.038  51.375  65.767  1.00  0.39           O  
HETATM  288  O   HOH T 287     -14.172  39.102  30.061  1.00  0.39           O  
HETATM  289  O   HOH T 288       6.832  39.015  57.082  1.00  0.39           O  
HETATM  290  O   HOH T 289      24.269  47.154  33.212  1.00  0.39           O  
HETATM  291  O   HOH T 290     -18.789  50.384  42.854  1.00  0.39           O  
HETATM  292  O   HOH T 291     -19.372  54.903  42.318  1.00  0.39           O  
HETATM  293  O   HOH T 292     -15.954  28.381  90.947  1.00  0.39           O  
HETATM  294  O   HOH T 293      19.745  44.616  40.541  1.00  0.39           O  
HETATM  295  O   HOH T 294      23.731  33.917  49.410  1.00  0.39           O  
HETATM  296  O   HOH T 295      -4.369  37.578  63.004  1.00  0.39           O  
HETATM  297  O   HOH T 296      -4.568  64.118  75.279  1.00  0.39           O  
HETATM  298  O   HOH T 297       4.934  36.068  95.773  1.00  0.39           O  
HETATM  299  O   HOH T 298       5.176  29.319  92.234  1.00  0.39           O  
HETATM  300  O   HOH T 299     -11.555  50.656  50.953  1.00  0.39           O  
HETATM  301  O   HOH T 300       4.533  10.592  76.847  1.00  0.39           O  
HETATM  302  O   HOH T 301      -2.651  39.765  63.758  1.00  0.39           O  
HETATM  303  O   HOH T 302     -23.584  29.841  38.921  1.00  0.40           O  
HETATM  304  O   HOH T 303     -15.981  58.229  43.137  1.00  0.40           O  
HETATM  305  O   HOH T 304      -5.464  29.526  50.935  1.00  0.40           O  
HETATM  306  O   HOH T 305       6.659  43.933  57.659  1.00  0.40           O  
HETATM  307  O   HOH T 306      14.563  31.867  78.402  1.00  0.40           O  
HETATM  308  O   HOH T 307       4.316  31.830  84.994  1.00  0.40           O  
HETATM  309  O   HOH T 308      14.470  55.820  79.626  1.00  0.40           O  
HETATM  310  O   HOH T 309      23.031  37.627  56.846  1.00  0.40           O  
HETATM  311  O   HOH T 310     -13.817  21.198  78.782  1.00  0.40           O  
HETATM  312  O   HOH T 311      23.560  21.987  53.408  1.00  0.40           O  
HETATM  313  O   HOH T 312       9.170  33.072  33.505  1.00  0.40           O  
HETATM  314  O   HOH T 313      24.436  30.776  39.683  1.00  0.40           O  
HETATM  315  O   HOH T 314      -7.413  38.035  82.772  1.00  0.40           O  
HETATM  316  O   HOH T 315       7.514  35.019  64.568  1.00  0.40           O  
HETATM  317  O   HOH T 316     -15.595  43.807  31.557  1.00  0.40           O  
HETATM  318  O   HOH T 317      -0.044  46.885  62.933  1.00  0.40           O  
HETATM  319  O   HOH T 318      24.715  23.962  55.081  1.00  0.40           O  
HETATM  320  O   HOH T 319      -0.862  40.488  61.724  1.00  0.40           O  
HETATM  321  O   HOH T 320       7.274  32.854  61.411  1.00  0.40           O  
HETATM  322  O   HOH T 321      -9.847  53.695  71.876  1.00  0.40           O  
HETATM  323  O   HOH T 322      11.734  51.761  90.766  1.00  0.40           O  
HETATM  324  O   HOH T 323      -7.294  56.858  72.958  1.00  0.40           O  
HETATM  325  O   HOH T 324      12.602  62.456  80.367  1.00  0.40           O  
HETATM  326  O   HOH T 325      -3.611  42.091  66.467  1.00  0.40           O  
HETATM  327  O   HOH T 326      13.967  11.709  38.206  1.00  0.40           O  
HETATM  328  O   HOH T 327      19.521  39.099  46.587  1.00  0.40           O  
HETATM  329  O   HOH T 328       2.619  47.072  62.323  1.00  0.40           O  
HETATM  330  O   HOH T 329      -7.292  36.115  84.831  1.00  0.40           O  
HETATM  331  O   HOH T 330       5.187  44.935  89.158  1.00  0.41           O  
HETATM  332  O   HOH T 331      15.813  20.798  67.099  1.00  0.41           O  
HETATM  333  O   HOH T 332       7.284  11.276  63.774  1.00  0.41           O  
HETATM  334  O   HOH T 333       6.987  34.857  33.791  1.00  0.41           O  
HETATM  335  O   HOH T 334     -11.830  58.837  76.946  1.00  0.41           O  
HETATM  336  O   HOH T 335     -22.911  29.169  55.870  1.00  0.41           O  
HETATM  337  O   HOH T 336      -3.153  15.346  46.845  1.00  0.41           O  
HETATM  338  O   HOH T 337      -3.964   8.420  67.898  1.00  0.41           O  
HETATM  339  O   HOH T 338       5.075  49.519  66.183  1.00  0.41           O  
HETATM  340  O   HOH T 339       3.328  12.981  61.352  1.00  0.41           O  
HETATM  341  O   HOH T 340      21.278  38.055  41.522  1.00  0.41           O  
HETATM  342  O   HOH T 341       2.437  40.551  55.882  1.00  0.41           O  
HETATM  343  O   HOH T 342       7.826  44.563  89.648  1.00  0.41           O  
HETATM  344  O   HOH T 343      -3.127  60.130  70.674  1.00  0.41           O  
HETATM  345  O   HOH T 344     -21.705  21.602  95.632  1.00  0.41           O  
HETATM  346  O   HOH T 345       2.754  32.890  83.039  1.00  0.41           O  
HETATM  347  O   HOH T 346       6.249  38.890  37.241  1.00  0.41           O  
HETATM  348  O   HOH T 347       6.100  49.171  91.373  1.00  0.41           O  
HETATM  349  O   HOH T 348     -27.169  47.826  55.795  1.00  0.41           O  
HETATM  350  O   HOH T 349      -4.877  39.253  79.665  1.00  0.41           O  
HETATM  351  O   HOH T 350     -10.144   3.545  77.128  1.00  0.41           O  
HETATM  352  O   HOH T 351       1.748  40.485  78.276  1.00  0.41           O  
HETATM  353  O   HOH T 352      -7.468  39.500  80.369  1.00  0.42           O  
HETATM  354  O   HOH T 353       6.679  58.183  86.818  1.00  0.42           O  
HETATM  355  O   HOH T 354      19.694  24.839  76.940  1.00  0.42           O  
HETATM  356  O   HOH T 355      25.041  30.553  49.586  1.00  0.42           O  
HETATM  357  O   HOH T 356       0.978  41.220  39.789  1.00  0.42           O  
HETATM  358  O   HOH T 357      -4.866  57.004  74.331  1.00  0.42           O  
HETATM  359  O   HOH T 358      13.189  20.346  37.276  1.00  0.42           O  
HETATM  360  O   HOH T 359      -1.942  25.210  91.019  1.00  0.42           O  
HETATM  361  O   HOH T 360      -5.454  10.393  66.664  1.00  0.42           O  
HETATM  362  O   HOH T 361      24.920  19.719  45.472  1.00  0.42           O  
HETATM  363  O   HOH T 362     -16.085  22.893  72.286  1.00  0.42           O  
HETATM  364  O   HOH T 363     -17.587  26.025  57.439  1.00  0.42           O  
HETATM  365  O   HOH T 364       4.143  16.944  85.513  1.00  0.42           O  
HETATM  366  O   HOH T 365     -10.683  37.269  58.843  1.00  0.42           O  
HETATM  367  O   HOH T 366      -8.904  48.763  88.625  1.00  0.42           O  
HETATM  368  O   HOH T 367     -15.177  51.841  49.225  1.00  0.42           O  
HETATM  369  O   HOH T 368      12.380  49.276  85.436  1.00  0.42           O  
HETATM  370  O   HOH T 369      -9.312   6.126  77.615  1.00  0.42           O  
HETATM  371  O   HOH T 370      26.563  41.644  25.444  1.00  0.42           O  
HETATM  372  O   HOH T 371       1.972  43.550  40.782  1.00  0.42           O  
HETATM  373  O   HOH T 372     -15.561  14.538  33.945  1.00  0.42           O  
HETATM  374  O   HOH T 373      -6.738  22.969  39.782  1.00  0.42           O  
HETATM  375  O   HOH T 374      19.486  45.030  89.408  1.00  0.42           O  
HETATM  376  O   HOH T 375      -9.538  47.953  70.948  1.00  0.42           O  
HETATM  377  O   HOH T 376       4.924  13.935  59.348  1.00  0.42           O  
HETATM  378  O   HOH T 377      -5.195  61.520  71.896  1.00  0.42           O  
HETATM  379  O   HOH T 378     -22.039  49.624  78.525  1.00  0.42           O  
HETATM  380  O   HOH T 379      -2.316  39.001  59.834  1.00  0.42           O  
HETATM  381  O   HOH T 380     -26.798  44.182  40.843  1.00  0.42           O  
HETATM  382  O   HOH T 381     -23.086  25.435  53.224  1.00  0.43           O  
HETATM  383  O   HOH T 382      22.334  29.085  39.258  1.00  0.43           O  
HETATM  384  O   HOH T 383      -6.313  29.904  53.576  1.00  0.43           O  
HETATM  385  O   HOH T 384      10.672  23.325  63.266  1.00  0.43           O  
HETATM  386  O   HOH T 385      17.461  18.305  50.410  1.00  0.43           O  
HETATM  387  O   HOH T 386      -7.248  24.656  41.962  1.00  0.43           O  
HETATM  388  O   HOH T 387     -24.120  33.959  42.883  1.00  0.43           O  
HETATM  389  O   HOH T 388     -13.106  18.460  76.494  1.00  0.43           O  
HETATM  390  O   HOH T 389     -23.483  29.754  34.262  1.00  0.43           O  
HETATM  391  O   HOH T 390     -23.562  23.615  96.058  1.00  0.43           O  
HETATM  392  O   HOH T 391     -16.284  30.240  83.532  1.00  0.43           O  
HETATM  393  O   HOH T 392       3.272  18.270  55.332  1.00  0.43           O  
HETATM  394  O   HOH T 393      20.436  42.961  75.934  1.00  0.43           O  
HETATM  395  O   HOH T 394       9.226  41.711  36.765  1.00  0.43           O  
HETATM  396  O   HOH T 395     -19.178  15.212  98.220  1.00  0.43           O  
HETATM  397  O   HOH T 396      -6.637  59.355  82.845  1.00  0.43           O  
HETATM  398  O   HOH T 397      19.817  48.193  85.266  1.00  0.43           O  
HETATM  399  O   HOH T 398      22.239  50.663  87.194  1.00  0.43           O  
HETATM  400  O   HOH T 399      -9.944  51.240  73.120  1.00  0.43           O  
HETATM  401  O   HOH T 400       1.892  15.817  55.185  1.00  0.43           O  
HETATM  402  O   HOH T 401      -2.458  50.513  50.695  1.00  0.43           O  
HETATM  403  O   HOH T 402       0.346  23.728  90.463  1.00  0.43           O  
HETATM  404  O   HOH T 403      -5.847  25.302  48.596  1.00  0.43           O  
HETATM  405  O   HOH T 404      -4.956  38.221  60.244  1.00  0.43           O  
HETATM  406  O   HOH T 405     -22.956  39.831  35.820  1.00  0.43           O  
HETATM  407  O   HOH T 406       9.111  12.917  49.982  1.00  0.44           O  
HETATM  408  O   HOH T 407     -12.737  29.615  89.509  1.00  0.44           O  
HETATM  409  O   HOH T 408     -18.186  24.046  45.487  1.00  0.44           O  
HETATM  410  O   HOH T 409       5.702  37.421  59.094  1.00  0.44           O  
HETATM  411  O   HOH T 410       9.727  10.893  41.815  1.00  0.44           O  
HETATM  412  O   HOH T 411     -22.711  31.900  56.394  1.00  0.44           O  
HETATM  413  O   HOH T 412      -5.469  37.181  65.616  1.00  0.44           O  
HETATM  414  O   HOH T 413       2.328  35.454  83.876  1.00  0.44           O  
HETATM  415  O   HOH T 414      -1.896  62.319  78.898  1.00  0.44           O  
HETATM  416  O   HOH T 415       3.303  49.154  64.017  1.00  0.44           O  
HETATM  417  O   HOH T 416      19.196  47.836  76.301  1.00  0.44           O  
HETATM  418  O   HOH T 417       2.842  61.132  84.909  1.00  0.44           O  
HETATM  419  O   HOH T 418      15.620  50.040  50.986  1.00  0.44           O  
HETATM  420  O   HOH T 419      16.680  26.752  72.789  1.00  0.44           O  
HETATM  421  O   HOH T 420      -4.069  39.438  66.087  1.00  0.44           O  
HETATM  422  O   HOH T 421       9.869  32.450  73.998  1.00  0.44           O  
HETATM  423  O   HOH T 422      16.182  53.839  78.784  1.00  0.44           O  
HETATM  424  O   HOH T 423       5.919  32.603  88.488  1.00  0.44           O  
HETATM  425  O   HOH T 424       2.365  47.089  41.175  1.00  0.44           O  
HETATM  426  O   HOH T 425      18.192  46.596  30.689  1.00  0.44           O  
HETATM  427  O   HOH T 426       6.172  30.443  90.034  1.00  0.44           O  
HETATM  428  O   HOH T 427      19.523  31.477  29.102  1.00  0.44           O  
HETATM  429  O   HOH T 428       9.450  22.772  85.295  1.00  0.44           O  
HETATM  430  O   HOH T 429      -7.173  14.824  58.899  1.00  0.44           O  
HETATM  431  O   HOH T 430      13.127  32.271  44.762  1.00  0.44           O  
HETATM  432  O   HOH T 431       6.627  33.115  85.953  1.00  0.44           O  
HETATM  433  O   HOH T 432      15.423  17.503  48.860  1.00  0.44           O  
HETATM  434  O   HOH T 433      -4.387  41.011  30.171  1.00  0.44           O  
HETATM  435  O   HOH T 434      13.863  13.682  40.247  1.00  0.44           O  
HETATM  436  O   HOH T 435     -19.734  23.640  95.421  1.00  0.44           O  
HETATM  437  O   HOH T 436       4.740  41.120  36.568  1.00  0.44           O  
HETATM  438  O   HOH T 437      15.327  21.109  38.917  1.00  0.44           O  
HETATM  439  O   HOH T 438      -1.049  36.814  75.249  1.00  0.44           O  
HETATM  440  O   HOH T 439      27.606  36.867  34.252  1.00  0.44           O  
HETATM  441  O   HOH T 440      -5.589  16.806  85.118  1.00  0.44           O  
HETATM  442  O   HOH T 441     -13.037  38.176  81.235  1.00  0.44           O  
HETATM  443  O   HOH T 442      18.326  21.386  88.061  1.00  0.44           O  
HETATM  444  O   HOH T 443      -4.133   9.472  37.456  1.00  0.44           O  
HETATM  445  O   HOH T 444       8.034  11.200  46.255  1.00  0.45           O  
HETATM  446  O   HOH T 445      21.981  49.848  84.512  1.00  0.45           O  
HETATM  447  O   HOH T 446     -16.615  55.561  42.322  1.00  0.45           O  
HETATM  448  O   HOH T 447      -7.522  34.084  64.982  1.00  0.45           O  
HETATM  449  O   HOH T 448      -2.394  19.529  38.220  1.00  0.45           O  
HETATM  450  O   HOH T 449     -13.928  23.180  52.754  1.00  0.45           O  
HETATM  451  O   HOH T 450       0.969  14.305  41.406  1.00  0.45           O  
HETATM  452  O   HOH T 451      -3.410  29.777  87.539  1.00  0.45           O  
HETATM  453  O   HOH T 452      24.362  32.310  44.767  1.00  0.45           O  
HETATM  454  O   HOH T 453      -5.482  25.567  44.092  1.00  0.45           O  
HETATM  455  O   HOH T 454      10.185  11.587  44.570  1.00  0.45           O  
HETATM  456  O   HOH T 455     -12.516  53.795  48.553  1.00  0.45           O  
HETATM  457  O   HOH T 456     -13.071  31.366  84.966  1.00  0.45           O  
HETATM  458  O   HOH T 457      -5.028  28.394  35.602  1.00  0.45           O  
HETATM  459  O   HOH T 458     -18.023  25.782  33.063  1.00  0.45           O  
HETATM  460  O   HOH T 459     -12.174  13.833  81.853  1.00  0.45           O  
HETATM  461  O   HOH T 460       6.460  44.398  62.176  1.00  0.45           O  
HETATM  462  O   HOH T 461       3.267  42.380  38.593  1.00  0.45           O  
HETATM  463  O   HOH T 462      24.035  28.620  41.434  1.00  0.45           O  
HETATM  464  O   HOH T 463      -8.382  30.569  88.331  1.00  0.45           O  
HETATM  465  O   HOH T 464      13.913  62.399  82.749  1.00  0.45           O  
HETATM  466  O   HOH T 465       9.064  44.507  63.469  1.00  0.45           O  
HETATM  467  O   HOH T 466     -21.183  52.371  51.122  1.00  0.45           O  
HETATM  468  O   HOH T 467      10.070  18.310  54.628  1.00  0.45           O  
HETATM  469  O   HOH T 468      14.558  19.572  87.454  1.00  0.45           O  
HETATM  470  O   HOH T 469       7.767  51.363  90.975  1.00  0.45           O  
HETATM  471  O   HOH T 470      -9.528  55.993  84.832  1.00  0.46           O  
HETATM  472  O   HOH T 471     -15.086  54.561  76.566  1.00  0.46           O  
HETATM  473  O   HOH T 472      14.671  32.896  81.054  1.00  0.46           O  
HETATM  474  O   HOH T 473       0.856  60.923  81.196  1.00  0.46           O  
HETATM  475  O   HOH T 474      -4.117   8.824  70.600  1.00  0.46           O  
HETATM  476  O   HOH T 475      -7.526  34.762  62.284  1.00  0.46           O  
HETATM  477  O   HOH T 476      -3.494  62.830  70.158  1.00  0.46           O  
HETATM  478  O   HOH T 477       3.123  19.938  58.463  1.00  0.46           O  
HETATM  479  O   HOH T 478      -2.626  37.072  84.284  1.00  0.46           O  
HETATM  480  O   HOH T 479      19.545  46.228  28.434  1.00  0.46           O  
HETATM  481  O   HOH T 480      15.775  14.941  47.910  1.00  0.46           O  
HETATM  482  O   HOH T 481      17.080  54.483  71.210  1.00  0.46           O  
HETATM  483  O   HOH T 482      19.863  43.139  42.816  1.00  0.46           O  
HETATM  484  O   HOH T 483     -19.699  26.208  39.125  1.00  0.46           O  
HETATM  485  O   HOH T 484      27.667  25.356  43.485  1.00  0.46           O  
HETATM  486  O   HOH T 485      14.336  15.503  50.195  1.00  0.46           O  
HETATM  487  O   HOH T 486      19.375  50.338  87.207  1.00  0.46           O  
HETATM  488  O   HOH T 487      -7.910  28.460  51.707  1.00  0.46           O  
HETATM  489  O   HOH T 488      -1.481  38.467  78.213  1.00  0.46           O  
HETATM  490  O   HOH T 489       7.576  11.264  43.511  1.00  0.46           O  
HETATM  491  O   HOH T 490      -6.809  15.232  83.413  1.00  0.46           O  
HETATM  492  O   HOH T 491      -3.520  62.496  83.710  1.00  0.46           O  
HETATM  493  O   HOH T 492      20.319  40.206  76.116  1.00  0.46           O  
HETATM  494  O   HOH T 493       8.305  41.129  61.654  1.00  0.46           O  
HETATM  495  O   HOH T 494     -21.253  28.480  38.866  1.00  0.46           O  
HETATM  496  O   HOH T 495     -28.506  49.375  53.993  1.00  0.46           O  
HETATM  497  O   HOH T 496      -3.833  26.977  87.971  1.00  0.46           O  
HETATM  498  O   HOH T 497      -0.923  38.029  43.599  1.00  0.46           O  
HETATM  499  O   HOH T 498     -16.053  21.654  80.330  1.00  0.46           O  
HETATM  500  O   HOH T 499       9.841  35.574  88.489  1.00  0.46           O  
HETATM  501  O   HOH T 500     -29.586  46.980  54.887  1.00  0.46           O  
HETATM  502  O   HOH T 501       0.614  39.998  42.313  1.00  0.46           O  
HETATM  503  O   HOH T 502     -10.673  32.867  84.672  1.00  0.46           O  
HETATM  504  O   HOH T 503      -7.404  54.659  70.998  1.00  0.46           O  
HETATM  505  O   HOH T 504      12.891  49.546  92.051  1.00  0.46           O  
HETATM  506  O   HOH T 505     -21.051  24.792  48.710  1.00  0.47           O  
HETATM  507  O   HOH T 506      -0.165  33.131  29.855  1.00  0.47           O  
HETATM  508  O   HOH T 507      19.768  35.081  46.417  1.00  0.47           O  
HETATM  509  O   HOH T 508      -9.160  14.495  82.085  1.00  0.47           O  
HETATM  510  O   HOH T 509      10.533  37.673  69.723  1.00  0.47           O  
HETATM  511  O   HOH T 510     -16.246  38.835  54.196  1.00  0.47           O  
HETATM  512  O   HOH T 511      19.169  47.782  89.581  1.00  0.47           O  
HETATM  513  O   HOH T 512       9.699  10.644  64.887  1.00  0.47           O  
HETATM  514  O   HOH T 513     -20.412  45.369  54.698  1.00  0.47           O  
HETATM  515  O   HOH T 514     -16.874  44.393  34.016  1.00  0.47           O  
HETATM  516  O   HOH T 515     -13.703  11.864  75.899  1.00  0.47           O  
HETATM  517  O   HOH T 516     -13.457  14.166  70.585  1.00  0.47           O  
HETATM  518  O   HOH T 517      11.980  52.888  66.184  1.00  0.47           O  
HETATM  519  O   HOH T 518       6.442  37.292  34.871  1.00  0.47           O  
HETATM  520  O   HOH T 519      -4.341  63.092  77.883  1.00  0.47           O  
HETATM  521  O   HOH T 520     -14.858  23.416  77.411  1.00  0.47           O  
HETATM  522  O   HOH T 521      -8.482  47.767  53.897  1.00  0.47           O  
HETATM  523  O   HOH T 522       7.929  29.219  91.777  1.00  0.47           O  
HETATM  524  O   HOH T 523      14.895  52.354  49.652  1.00  0.47           O  
HETATM  525  O   HOH T 524       7.315  39.627  59.765  1.00  0.47           O  
HETATM  526  O   HOH T 525      -7.853  27.272  42.291  1.00  0.47           O  
HETATM  527  O   HOH T 526     -14.387  43.638  55.851  1.00  0.47           O  
HETATM  528  O   HOH T 527       7.536  13.371  47.784  1.00  0.47           O  
HETATM  529  O   HOH T 528     -16.876  22.528  47.299  1.00  0.47           O  
HETATM  530  O   HOH T 529     -19.482  36.199  72.778  1.00  0.47           O  
HETATM  531  O   HOH T 530      19.859  43.651  73.306  1.00  0.47           O  
HETATM  532  O   HOH T 531       4.077  42.984  61.483  1.00  0.48           O  
HETATM  533  O   HOH T 532     -13.122  15.753  76.985  1.00  0.48           O  
HETATM  534  O   HOH T 533      -6.361   7.813  69.198  1.00  0.48           O  
HETATM  535  O   HOH T 534      13.798  14.533  76.080  1.00  0.48           O  
HETATM  536  O   HOH T 535     -15.384  49.461  81.636  1.00  0.48           O  
HETATM  537  O   HOH T 536      18.314  27.496  33.968  1.00  0.48           O  
HETATM  538  O   HOH T 537      -5.446  10.851  62.849  1.00  0.48           O  
HETATM  539  O   HOH T 538     -22.975  28.254  36.626  1.00  0.48           O  
HETATM  540  O   HOH T 539      18.669  41.306  67.232  1.00  0.48           O  
HETATM  541  O   HOH T 540     -14.678  47.622  70.183  1.00  0.48           O  
HETATM  542  O   HOH T 541     -23.072  26.404  55.789  1.00  0.48           O  
HETATM  543  O   HOH T 542     -20.847  27.233  41.354  1.00  0.48           O  
HETATM  544  O   HOH T 543      13.633  50.313  52.928  1.00  0.48           O  
HETATM  545  O   HOH T 544       1.742  44.755  38.260  1.00  0.48           O  
HETATM  546  O   HOH T 545       2.698  16.020  87.514  1.00  0.48           O  
HETATM  547  O   HOH T 546      18.695  42.745  46.817  1.00  0.48           O  
HETATM  548  O   HOH T 547      21.270  53.916  68.675  1.00  0.48           O  
HETATM  549  O   HOH T 548     -15.556  21.843  51.015  1.00  0.48           O  
HETATM  550  O   HOH T 549       8.904  56.654  87.448  1.00  0.48           O  
HETATM  551  O   HOH T 550     -17.384  19.246  79.807  1.00  0.48           O  
HETATM  552  O   HOH T 551      -3.867  37.032  78.083  1.00  0.48           O  
HETATM  553  O   HOH T 552      -5.277  36.480  80.120  1.00  0.48           O  
HETATM  554  O   HOH T 553      -3.945  60.694  79.373  1.00  0.48           O  
HETATM  555  O   HOH T 554       2.772  55.729  43.775  1.00  0.48           O  
HETATM  556  O   HOH T 555      -1.541   9.499  38.245  1.00  0.48           O  
HETATM  557  O   HOH T 556     -13.587  19.227  63.985  1.00  0.48           O  
HETATM  558  O   HOH T 557      -5.771  23.663  76.778  1.00  0.48           O  
HETATM  559  O   HOH T 558      11.226  63.466  82.578  1.00  0.48           O  
HETATM  560  O   HOH T 559      24.932  45.180  34.849  1.00  0.48           O  
HETATM  561  O   HOH T 560      14.792  15.326  35.311  1.00  0.48           O  
HETATM  562  O   HOH T 561       6.123  35.300  62.278  1.00  0.48           O  
HETATM  563  O   HOH T 562      26.051  27.445  42.913  1.00  0.48           O  
HETATM  564  O   HOH T 563     -22.558  45.132  34.767  1.00  0.48           O  
HETATM  565  O   HOH T 564       2.112  35.812  36.588  1.00  0.48           O  
HETATM  566  O   HOH T 565      -8.683  17.083  82.942  1.00  0.48           O  
HETATM  567  O   HOH T 566      20.211  45.632  75.102  1.00  0.48           O  
HETATM  568  O   HOH T 567      -1.031  28.676  86.366  1.00  0.49           O  
HETATM  569  O   HOH T 568      27.446  24.521  50.806  1.00  0.49           O  
HETATM  570  O   HOH T 569      -0.504  30.526  28.824  1.00  0.49           O  
HETATM  571  O   HOH T 570     -18.266  24.763  48.244  1.00  0.49           O  
HETATM  572  O   HOH T 571      -7.471   7.237  79.400  1.00  0.49           O  
HETATM  573  O   HOH T 572     -24.396  21.347  88.414  1.00  0.49           O  
HETATM  574  O   HOH T 573     -17.175  46.558  70.589  1.00  0.49           O  
HETATM  575  O   HOH T 574      -0.124  27.187  88.479  1.00  0.49           O  
HETATM  576  O   HOH T 575      19.003  52.752  72.125  1.00  0.49           O  
HETATM  577  O   HOH T 576      11.255  46.253  63.571  1.00  0.49           O  
HETATM  578  O   HOH T 577     -15.751  15.652  70.922  1.00  0.49           O  
HETATM  579  O   HOH T 578     -10.755  49.081  53.075  1.00  0.49           O  
HETATM  580  O   HOH T 579      12.446  49.271  95.924  1.00  0.49           O  
HETATM  581  O   HOH T 580       7.735  46.106  56.267  1.00  0.49           O  
HETATM  582  O   HOH T 581      -6.654  52.137  69.674  1.00  0.49           O  
HETATM  583  O   HOH T 582     -16.625  46.978  81.979  1.00  0.49           O  
HETATM  584  O   HOH T 583      17.951  31.013  86.712  1.00  0.49           O  
HETATM  585  O   HOH T 584      25.116  33.989  38.242  1.00  0.49           O  
HETATM  586  O   HOH T 585       5.476  11.552  47.242  1.00  0.49           O  
HETATM  587  O   HOH T 586      10.551  33.917  86.470  1.00  0.49           O  
HETATM  588  O   HOH T 587      -9.733  16.914  88.381  1.00  0.49           O  
HETATM  589  O   HOH T 588     -17.844  47.126  79.564  1.00  0.49           O  
HETATM  590  O   HOH T 589       1.644  59.080  50.108  1.00  0.49           O  
HETATM  591  O   HOH T 590     -10.137  35.626  62.443  1.00  0.49           O  
HETATM  592  O   HOH T 591      -4.843  37.758  42.780  1.00  0.49           O  
HETATM  593  O   HOH T 592      -8.209  50.128  52.585  1.00  0.49           O  
HETATM  594  O   HOH T 593     -18.416  31.613  75.052  1.00  0.49           O  
HETATM  595  O   HOH T 594      -6.154  46.742  91.773  1.00  0.49           O  
HETATM  596  O   HOH T 595     -22.819  26.128  95.213  1.00  0.49           O  
HETATM  597  O   HOH T 596     -18.750  17.627  96.912  1.00  0.49           O  
HETATM  598  O   HOH T 597      25.184  32.474  47.429  1.00  0.49           O  
HETATM  599  O   HOH T 598     -11.269  13.731  59.978  1.00  0.49           O  
HETATM  600  O   HOH T 599      -8.820   7.854  70.437  1.00  0.49           O  
HETATM  601  O   HOH T 600      -4.634  14.161  58.111  1.00  0.49           O  
HETATM  602  O   HOH T 601       3.921  41.411  59.224  1.00  0.49           O  
HETATM  603  O   HOH T 602      19.745  41.240  44.808  1.00  0.49           O  
HETATM  604  O   HOH T 603      26.046  45.101  32.327  1.00  0.50           O  
HETATM  605  O   HOH T 604      20.333  36.698  60.916  1.00  0.50           O  
HETATM  606  O   HOH T 605     -11.062  31.077  87.933  1.00  0.50           O  
HETATM  607  O   HOH T 606      11.104  48.769  64.671  1.00  0.50           O  
HETATM  608  O   HOH T 607     -13.770  47.735  72.793  1.00  0.50           O  
HETATM  609  O   HOH T 608       4.775  49.249  68.934  1.00  0.50           O  
HETATM  610  O   HOH T 609      -7.015  40.334  60.089  1.00  0.50           O  
HETATM  611  O   HOH T 610     -21.011  47.903  53.588  1.00  0.50           O  
HETATM  612  O   HOH T 611     -23.616  47.087  53.301  1.00  0.50           O  
HETATM  613  O   HOH T 612      13.761  17.843  62.463  1.00  0.50           O  
HETATM  614  O   HOH T 613     -17.792  26.547  91.874  1.00  0.50           O  
HETATM  615  O   HOH T 614      17.975  50.322  65.151  1.00  0.50           O  
HETATM  616  O   HOH T 615       0.120  28.345  58.239  1.00  0.50           O  
HETATM  617  O   HOH T 616      27.100  29.067  44.896  1.00  0.50           O  
HETATM  618  O   HOH T 617       0.050  36.811  46.109  1.00  0.50           O  
HETATM  619  O   HOH T 618      12.764  48.409  62.475  1.00  0.50           O  
HETATM  620  O   HOH T 619      -6.765  33.496  83.916  1.00  0.50           O  
HETATM  621  O   HOH T 620     -23.909  49.360  38.210  1.00  0.50           O  
HETATM  622  O   HOH T 621     -20.183  51.824  77.888  1.00  0.50           O  
HETATM  623  O   HOH T 622       4.677  63.075  85.759  1.00  0.50           O  
HETATM  624  O   HOH T 623      -4.175  51.319  68.162  1.00  0.50           O  
HETATM  625  O   HOH T 624       4.452  33.175  61.676  1.00  0.50           O  
HETATM  626  O   HOH T 625      20.296  47.981  37.078  1.00  0.50           O  
HETATM  627  O   HOH T 626      -1.030  61.174  83.287  1.00  0.51           O  
HETATM  628  O   HOH T 627      11.428  50.681  47.798  1.00  0.51           O  
HETATM  629  O   HOH T 628      -9.677  45.414  69.863  1.00  0.51           O  
HETATM  630  O   HOH T 629     -14.374  16.813  74.776  1.00  0.51           O  
HETATM  631  O   HOH T 630     -11.463  41.382  58.436  1.00  0.51           O  
HETATM  632  O   HOH T 631       0.170  10.570  65.499  1.00  0.51           O  
HETATM  633  O   HOH T 632       7.157  13.800  63.238  1.00  0.51           O  
HETATM  634  O   HOH T 633      -3.656  11.219  64.857  1.00  0.51           O  
HETATM  635  O   HOH T 634       1.730  41.402  61.008  1.00  0.51           O  
HETATM  636  O   HOH T 635      -0.091  55.851  40.408  1.00  0.51           O  
HETATM  637  O   HOH T 636      -0.921  44.627  35.530  1.00  0.51           O  
HETATM  638  O   HOH T 637      18.650  42.985  63.988  1.00  0.51           O  
HETATM  639  O   HOH T 638     -14.744  33.306  58.137  1.00  0.51           O  
HETATM  640  O   HOH T 639      -4.058  64.005  72.599  1.00  0.51           O  
HETATM  641  O   HOH T 640       2.219  48.649  38.959  1.00  0.51           O  
HETATM  642  O   HOH T 641      -0.746  12.957  53.513  1.00  0.51           O  
HETATM  643  O   HOH T 642      -2.416  54.633  67.936  1.00  0.51           O  
HETATM  644  O   HOH T 643       9.723  24.354  87.437  1.00  0.51           O  
HETATM  645  O   HOH T 644      26.948  39.270  35.520  1.00  0.51           O  
HETATM  646  O   HOH T 645       6.383  12.972  57.293  1.00  0.51           O  
HETATM  647  O   HOH T 646      24.884  29.825  43.710  1.00  0.51           O  
HETATM  648  O   HOH T 647      25.887  23.206  52.629  1.00  0.51           O  
HETATM  649  O   HOH T 648      15.093  44.675  37.676  1.00  0.51           O  
HETATM  650  O   HOH T 649      22.069  24.530  61.674  1.00  0.51           O  
HETATM  651  O   HOH T 650      19.802  29.835  31.389  1.00  0.51           O  
HETATM  652  O   HOH T 651      22.067  47.824  35.001  1.00  0.51           O  
HETATM  653  O   HOH T 652      27.607  34.704  26.119  1.00  0.51           O  
HETATM  654  O   HOH T 653     -23.419  19.443  84.252  1.00  0.51           O  
HETATM  655  O   HOH T 654     -20.018  48.709  80.144  1.00  0.51           O  
HETATM  656  O   HOH T 655      19.777  37.088  70.130  1.00  0.52           O  
HETATM  657  O   HOH T 656     -16.844  38.744  30.778  1.00  0.52           O  
HETATM  658  O   HOH T 657      20.505  38.603  73.880  1.00  0.52           O  
HETATM  659  O   HOH T 658     -18.315  12.792  97.322  1.00  0.52           O  
HETATM  660  O   HOH T 659      22.611  46.934  25.943  1.00  0.52           O  
HETATM  661  O   HOH T 660      17.985  44.279  85.787  1.00  0.52           O  
HETATM  662  O   HOH T 661       6.399  42.367  60.091  1.00  0.52           O  
HETATM  663  O   HOH T 662       7.522  16.967  61.653  1.00  0.52           O  
HETATM  664  O   HOH T 663     -19.462  47.760  55.879  1.00  0.52           O  
HETATM  665  O   HOH T 664      17.829  49.461  92.329  1.00  0.52           O  
HETATM  666  O   HOH T 665     -22.483  15.365  90.349  1.00  0.52           O  
HETATM  667  O   HOH T 666     -20.928  19.443  85.418  1.00  0.52           O  
HETATM  668  O   HOH T 667      11.744  34.105  72.803  1.00  0.52           O  
HETATM  669  O   HOH T 668      11.260  16.216  64.736  1.00  0.53           O  
HETATM  670  O   HOH T 669       9.724  30.943  83.393  1.00  0.53           O  
HETATM  671  O   HOH T 670      16.934  32.388  79.682  1.00  0.53           O  
HETATM  672  O   HOH T 671      25.166  43.924  25.802  1.00  0.53           O  
HETATM  673  O   HOH T 672      28.047  32.223  24.914  1.00  0.53           O  
HETATM  674  O   HOH T 673     -13.751  21.050  54.464  1.00  0.53           O  
HETATM  675  O   HOH T 674      13.430  12.034  74.914  1.00  0.53           O  
HETATM  676  O   HOH T 675      13.081  60.927  84.944  1.00  0.53           O  
HETATM  677  O   HOH T 676      16.848  18.658  60.570  1.00  0.53           O  
HETATM  678  O   HOH T 677       0.759  61.673  78.503  1.00  0.53           O  
HETATM  679  O   HOH T 678     -16.251  32.173  59.920  1.00  0.53           O  
HETATM  680  O   HOH T 679       5.025  48.908  38.664  1.00  0.53           O  
HETATM  681  O   HOH T 680     -16.943  26.747  59.985  1.00  0.53           O  
HETATM  682  O   HOH T 681      -4.874   7.182  80.105  1.00  0.53           O  
HETATM  683  O   HOH T 682      22.562  29.832  30.749  1.00  0.53           O  
HETATM  684  O   HOH T 683       6.375  46.957  63.403  1.00  0.53           O  
HETATM  685  O   HOH T 684      -6.392  42.804  85.875  1.00  0.53           O  
HETATM  686  O   HOH T 685     -22.910  25.287  85.747  1.00  0.53           O  
HETATM  687  O   HOH T 686       7.360   9.568  65.710  1.00  0.53           O  
HETATM  688  O   HOH T 687      -9.629  54.907  34.943  1.00  0.53           O  
HETATM  689  O   HOH T 688      -9.836  58.812  78.809  1.00  0.53           O  
HETATM  690  O   HOH T 689     -13.010  41.368  55.084  1.00  0.53           O  
HETATM  691  O   HOH T 690     -14.014  51.522  74.335  1.00  0.53           O  
HETATM  692  O   HOH T 691      21.859  39.720  58.031  1.00  0.53           O  
HETATM  693  O   HOH T 692      10.743  57.309  85.436  1.00  0.54           O  
HETATM  694  O   HOH T 693     -25.080  30.026  36.503  1.00  0.54           O  
HETATM  695  O   HOH T 694     -23.537  46.139  46.945  1.00  0.54           O  
HETATM  696  O   HOH T 695      -7.516  56.024  36.359  1.00  0.54           O  
HETATM  697  O   HOH T 696      -6.372  52.750  50.469  1.00  0.54           O  
HETATM  698  O   HOH T 697       8.113  57.338  48.620  1.00  0.54           O  
HETATM  699  O   HOH T 698       0.939  63.287  70.229  1.00  0.54           O  
HETATM  700  O   HOH T 699       6.116  31.507  35.331  1.00  0.54           O  
HETATM  701  O   HOH T 700     -20.759  46.851  36.045  1.00  0.54           O  
HETATM  702  O   HOH T 701     -20.389  27.060  36.562  1.00  0.54           O  
HETATM  703  O   HOH T 702      16.123  55.178  68.781  1.00  0.54           O  
HETATM  704  O   HOH T 703     -23.407  27.481  40.397  1.00  0.54           O  
HETATM  705  O   HOH T 704       1.679  55.859  49.429  1.00  0.54           O  
HETATM  706  O   HOH T 705       4.689  36.544  37.029  1.00  0.54           O  
HETATM  707  O   HOH T 706      20.067  47.873  92.233  1.00  0.54           O  
HETATM  708  O   HOH T 707       4.008  46.355  38.840  1.00  0.54           O  
HETATM  709  O   HOH T 708      19.386  39.601  52.045  1.00  0.54           O  
HETATM  710  O   HOH T 709       1.068  49.335  62.329  1.00  0.54           O  
HETATM  711  O   HOH T 710      -4.734  23.597  37.828  1.00  0.54           O  
HETATM  712  O   HOH T 711       5.564  10.273  74.278  1.00  0.54           O  
HETATM  713  O   HOH T 712     -14.987  18.674  78.607  1.00  0.54           O  
HETATM  714  O   HOH T 713     -19.359  52.427  41.187  1.00  0.54           O  
HETATM  715  O   HOH T 714       0.740  13.645  54.282  1.00  0.54           O  
HETATM  716  O   HOH T 715     -15.779  46.085  68.171  1.00  0.54           O  
HETATM  717  O   HOH T 716      13.636  27.096  83.332  1.00  0.55           O  
HETATM  718  O   HOH T 717      26.882  48.823  28.229  1.00  0.55           O  
HETATM  719  O   HOH T 718      25.189  23.481  57.662  1.00  0.55           O  
HETATM  720  O   HOH T 719     -20.007  25.870  46.388  1.00  0.55           O  
HETATM  721  O   HOH T 720      12.951  30.050  83.570  1.00  0.55           O  
HETATM  722  O   HOH T 721      12.387  35.723  87.400  1.00  0.55           O  
HETATM  723  O   HOH T 722       4.041  33.818  90.053  1.00  0.55           O  
HETATM  724  O   HOH T 723       1.609  13.763  82.784  1.00  0.55           O  
HETATM  725  O   HOH T 724     -22.722  26.079  46.831  1.00  0.55           O  
HETATM  726  O   HOH T 725       7.047  19.391  34.725  1.00  0.55           O  
HETATM  727  O   HOH T 726      -9.627  39.600  81.980  1.00  0.55           O  
HETATM  728  O   HOH T 727      -6.208  48.896  88.958  1.00  0.55           O  
HETATM  729  O   HOH T 728      -3.350  13.455  44.913  1.00  0.55           O  
HETATM  730  O   HOH T 729       9.963  46.252  44.348  1.00  0.55           O  
HETATM  731  O   HOH T 730      -0.939  59.039  50.343  1.00  0.55           O  
HETATM  732  O   HOH T 731      17.158  43.814  61.660  1.00  0.55           O  
HETATM  733  O   HOH T 732      14.360  24.325  85.096  1.00  0.55           O  
HETATM  734  O   HOH T 733      -6.612  16.944  47.871  1.00  0.55           O  
HETATM  735  O   HOH T 734     -18.704  33.023  66.437  1.00  0.55           O  
HETATM  736  O   HOH T 735      -0.896  12.965  43.004  1.00  0.55           O  
HETATM  737  O   HOH T 736     -16.799  42.196  56.026  1.00  0.56           O  
HETATM  738  O   HOH T 737      18.584  39.190  68.996  1.00  0.56           O  
HETATM  739  O   HOH T 738      17.623  32.456  83.259  1.00  0.56           O  
HETATM  740  O   HOH T 739       8.261  11.201  81.286  1.00  0.56           O  
HETATM  741  O   HOH T 740     -24.643  35.563  52.897  1.00  0.56           O  
HETATM  742  O   HOH T 741     -13.279  20.512  60.515  1.00  0.56           O  
HETATM  743  O   HOH T 742      13.733  41.340  88.924  1.00  0.56           O  
HETATM  744  O   HOH T 743     -25.051  30.889  49.445  1.00  0.56           O  
HETATM  745  O   HOH T 744      25.824  40.267  23.141  1.00  0.56           O  
HETATM  746  O   HOH T 745     -15.310  37.830  79.618  1.00  0.56           O  
HETATM  747  O   HOH T 746      15.794  48.795  53.483  1.00  0.56           O  
HETATM  748  O   HOH T 747       6.376  61.067  74.479  1.00  0.56           O  
HETATM  749  O   HOH T 748      20.739  41.276  73.678  1.00  0.56           O  
HETATM  750  O   HOH T 749       2.381  37.133  44.710  1.00  0.56           O  
HETATM  751  O   HOH T 750     -15.479  44.557  82.647  1.00  0.56           O  
HETATM  752  O   HOH T 751     -25.203  36.450  43.036  1.00  0.56           O  
HETATM  753  O   HOH T 752      20.771  39.510  66.276  1.00  0.56           O  
HETATM  754  O   HOH T 753     -21.809  31.457  29.082  1.00  0.56           O  
HETATM  755  O   HOH T 754      24.134  38.112  41.867  1.00  0.56           O  
HETATM  756  O   HOH T 755     -21.945  28.314  84.170  1.00  0.56           O  
HETATM  757  O   HOH T 756      14.582  16.984  64.884  1.00  0.56           O  
HETATM  758  O   HOH T 757      11.530  32.427  84.442  1.00  0.57           O  
HETATM  759  O   HOH T 758      -0.720   8.020  71.297  1.00  0.57           O  
HETATM  760  O   HOH T 759     -12.232  16.105  59.109  1.00  0.57           O  
HETATM  761  O   HOH T 760      19.755  27.588  86.910  1.00  0.57           O  
HETATM  762  O   HOH T 761     -12.974  38.052  57.644  1.00  0.57           O  
HETATM  763  O   HOH T 762     -14.435  27.402  32.381  1.00  0.57           O  
HETATM  764  O   HOH T 763       2.428  12.052  77.785  1.00  0.58           O  
HETATM  765  O   HOH T 764      15.492  17.090  37.291  1.00  0.59           O  
HETATM  766  O   HOH T 765      15.342  14.355  52.472  1.00  0.59           O  
HETATM  767  O   HOH T 766      18.685  24.928  33.249  1.00  0.59           O  
HETATM  768  O   HOH T 767     -17.993  22.805  70.367  1.00  0.60           O  
HETATM  769  O   HOH T 768     -21.148  42.877  79.587  1.00  0.64           O  
TER     770      HOH T 768 
