# Supplementary material for: Accurate Prediction of Hydration Sites of Proteins Using Energy Model With Atom Embedding
Source: Front Mol Biosci. 2021 Sep 20;8:756075. doi: 10.3389/fmolb.2021.756075 (PMC8488165; doi:10.3389/fmolb.2021.756075)
Supplement: Supplementary file 1 [file DataSheet1.ZIP › Data Sheet 1/Our_result_pdb/our_dataset_output/3CCD_watersite.pdb]

HEADER                                                        XXXX


JRNL        PMID   -1
HETATM    1  O   HOH T   0      -2.296  -3.817 -10.827  1.00  0.21           O  
HETATM    2  O   HOH T   1      24.297  -0.283   0.197  1.00  0.21           O  
HETATM    3  O   HOH T   2      12.594   2.946   9.593  1.00  0.22           O  
HETATM    4  O   HOH T   3      -4.932  34.610  21.395  1.00  0.23           O  
HETATM    5  O   HOH T   4       5.667  35.682  27.466  1.00  0.23           O  
HETATM    6  O   HOH T   5       4.974   7.543  -2.774  1.00  0.23           O  
HETATM    7  O   HOH T   6       0.763   5.805  -5.291  1.00  0.24           O  
HETATM    8  O   HOH T   7      20.532   7.605   4.933  1.00  0.24           O  
HETATM    9  O   HOH T   8      -6.043  24.315  24.413  1.00  0.25           O  
HETATM   10  O   HOH T   9      14.472  11.326   2.639  1.00  0.25           O  
HETATM   11  O   HOH T  10       7.313   4.035  -9.225  1.00  0.25           O  
HETATM   12  O   HOH T  11      13.214  -6.561   6.935  1.00  0.25           O  
HETATM   13  O   HOH T  12       2.433   3.535  13.102  1.00  0.25           O  
HETATM   14  O   HOH T  13      27.579  -3.334  -0.200  1.00  0.25           O  
HETATM   15  O   HOH T  14      13.365  27.667  16.697  1.00  0.26           O  
HETATM   16  O   HOH T  15     -14.501  30.952  26.750  1.00  0.26           O  
HETATM   17  O   HOH T  16       7.008 -13.173  -1.168  1.00  0.26           O  
HETATM   18  O   HOH T  17       0.762  15.164  29.433  1.00  0.26           O  
HETATM   19  O   HOH T  18      -1.709   7.043  -5.767  1.00  0.26           O  
HETATM   20  O   HOH T  19      -8.348  25.954  16.219  1.00  0.27           O  
HETATM   21  O   HOH T  20       9.369 -12.275  -2.315  1.00  0.27           O  
HETATM   22  O   HOH T  21      24.290  21.266  23.850  1.00  0.28           O  
HETATM   23  O   HOH T  22       6.861  34.266  25.349  1.00  0.28           O  
HETATM   24  O   HOH T  23      -0.349   1.459  17.106  1.00  0.28           O  
HETATM   25  O   HOH T  24      12.635  17.907  14.513  1.00  0.28           O  
HETATM   26  O   HOH T  25      -2.234  28.146  13.592  1.00  0.28           O  
HETATM   27  O   HOH T  26      10.098  10.520  -2.349  1.00  0.28           O  
HETATM   28  O   HOH T  27       5.790  10.049  -2.078  1.00  0.29           O  
HETATM   29  O   HOH T  28       9.278  26.996  11.138  1.00  0.29           O  
HETATM   30  O   HOH T  29      -5.760  -2.797  -5.305  1.00  0.29           O  
HETATM   31  O   HOH T  30     -13.572  27.660  27.959  1.00  0.30           O  
HETATM   32  O   HOH T  31      11.000  12.906  -3.717  1.00  0.30           O  
HETATM   33  O   HOH T  32      23.025  -1.047  -2.088  1.00  0.30           O  
HETATM   34  O   HOH T  33      11.416   8.699  23.077  1.00  0.30           O  
HETATM   35  O   HOH T  34      -4.322  -5.061  -6.106  1.00  0.30           O  
HETATM   36  O   HOH T  35      13.906 -12.769   2.400  1.00  0.30           O  
HETATM   37  O   HOH T  36      22.590  29.199  20.385  1.00  0.30           O  
HETATM   38  O   HOH T  37      -1.677  13.736  29.914  1.00  0.31           O  
HETATM   39  O   HOH T  38      -2.200  -7.180  10.376  1.00  0.31           O  
HETATM   40  O   HOH T  39      -3.989  18.623  19.535  1.00  0.31           O  
HETATM   41  O   HOH T  40      23.143  22.043  26.203  1.00  0.32           O  
HETATM   42  O   HOH T  41       9.364   9.514  15.131  1.00  0.32           O  
HETATM   43  O   HOH T  42      10.533  30.826  15.508  1.00  0.32           O  
HETATM   44  O   HOH T  43      12.823   6.657  11.909  1.00  0.32           O  
HETATM   45  O   HOH T  44       5.026  23.643   9.322  1.00  0.32           O  
HETATM   46  O   HOH T  45      -2.155  27.451  29.691  1.00  0.32           O  
HETATM   47  O   HOH T  46      13.546  13.834   3.616  1.00  0.32           O  
HETATM   48  O   HOH T  47      19.631  30.734  17.038  1.00  0.32           O  
HETATM   49  O   HOH T  48       2.965  14.690  34.232  1.00  0.33           O  
HETATM   50  O   HOH T  49       8.228   8.370  12.820  1.00  0.33           O  
HETATM   51  O   HOH T  50       5.410  22.816   6.682  1.00  0.33           O  
HETATM   52  O   HOH T  51      15.283  13.055  27.401  1.00  0.33           O  
HETATM   53  O   HOH T  52      -6.805  28.701  19.296  1.00  0.33           O  
HETATM   54  O   HOH T  53      10.711   0.214  -7.410  1.00  0.33           O  
HETATM   55  O   HOH T  54      -0.892  -6.427  -4.936  1.00  0.34           O  
HETATM   56  O   HOH T  55      13.931  33.789  21.757  1.00  0.34           O  
HETATM   57  O   HOH T  56       5.302   9.116  10.448  1.00  0.34           O  
HETATM   58  O   HOH T  57      11.442  12.368   1.109  1.00  0.34           O  
HETATM   59  O   HOH T  58      23.501  31.593  21.841  1.00  0.34           O  
HETATM   60  O   HOH T  59      -2.876   5.824  -7.957  1.00  0.34           O  
HETATM   61  O   HOH T  60       9.528  13.282  13.639  1.00  0.34           O  
HETATM   62  O   HOH T  61      -2.744  27.837   9.875  1.00  0.34           O  
HETATM   63  O   HOH T  62      13.137  34.609  28.922  1.00  0.34           O  
HETATM   64  O   HOH T  63       4.263  -2.102  -9.223  1.00  0.34           O  
HETATM   65  O   HOH T  64      -5.912  23.814  29.425  1.00  0.35           O  
HETATM   66  O   HOH T  65      22.994  14.371  18.419  1.00  0.35           O  
HETATM   67  O   HOH T  66      -2.116  -1.998   6.111  1.00  0.35           O  
HETATM   68  O   HOH T  67      -1.382   0.184  15.032  1.00  0.35           O  
HETATM   69  O   HOH T  68       5.042  -2.629  14.585  1.00  0.35           O  
HETATM   70  O   HOH T  69      -2.105  22.813  17.995  1.00  0.35           O  
HETATM   71  O   HOH T  70       2.064   4.682  -1.631  1.00  0.36           O  
HETATM   72  O   HOH T  71      26.865  -7.728   4.963  1.00  0.36           O  
HETATM   73  O   HOH T  72       2.094  16.316  25.769  1.00  0.36           O  
HETATM   74  O   HOH T  73       5.645 -14.548  -3.142  1.00  0.36           O  
HETATM   75  O   HOH T  74      16.263 -10.625  -5.056  1.00  0.36           O  
HETATM   76  O   HOH T  75      -4.816   1.462  -1.150  1.00  0.37           O  
HETATM   77  O   HOH T  76       0.746  -2.037  -7.320  1.00  0.37           O  
HETATM   78  O   HOH T  77      -1.604   6.632   9.004  1.00  0.37           O  
HETATM   79  O   HOH T  78      15.237   7.903  -3.293  1.00  0.37           O  
HETATM   80  O   HOH T  79      -1.575  14.361  15.157  1.00  0.37           O  
HETATM   81  O   HOH T  80      13.216  -4.635  10.303  1.00  0.37           O  
HETATM   82  O   HOH T  81       3.641 -10.439  10.734  1.00  0.37           O  
HETATM   83  O   HOH T  82      -6.494  24.908  20.040  1.00  0.38           O  
HETATM   84  O   HOH T  83      -0.156   6.253  14.622  1.00  0.38           O  
HETATM   85  O   HOH T  84       4.484  11.813  13.887  1.00  0.38           O  
HETATM   86  O   HOH T  85      17.315  19.408  39.129  1.00  0.38           O  
HETATM   87  O   HOH T  86      27.222  -3.965   4.184  1.00  0.38           O  
HETATM   88  O   HOH T  87       2.846 -12.811   9.307  1.00  0.38           O  
HETATM   89  O   HOH T  88      14.294  27.101  14.150  1.00  0.38           O  
HETATM   90  O   HOH T  89      -2.109  -0.494   8.426  1.00  0.38           O  
HETATM   91  O   HOH T  90      -4.128   1.963   4.646  1.00  0.39           O  
HETATM   92  O   HOH T  91      -3.441  29.830  11.768  1.00  0.39           O  
HETATM   93  O   HOH T  92       2.420  35.158  15.710  1.00  0.39           O  
HETATM   94  O   HOH T  93      -5.450  31.166  19.421  1.00  0.39           O  
HETATM   95  O   HOH T  94      12.663  25.254  12.882  1.00  0.39           O  
HETATM   96  O   HOH T  95      13.731  -6.567  12.216  1.00  0.39           O  
HETATM   97  O   HOH T  96      -1.349  16.231  31.078  1.00  0.39           O  
HETATM   98  O   HOH T  97       9.025 -16.149  -4.384  1.00  0.40           O  
HETATM   99  O   HOH T  98     -10.066  -3.291  -7.819  1.00  0.40           O  
HETATM  100  O   HOH T  99      21.157  28.402  16.958  1.00  0.40           O  
HETATM  101  O   HOH T 100       8.258  12.753  11.299  1.00  0.40           O  
HETATM  102  O   HOH T 101       7.687  11.306  -3.438  1.00  0.40           O  
HETATM  103  O   HOH T 102      14.137  14.824  29.133  1.00  0.40           O  
HETATM  104  O   HOH T 103      12.943   9.145  10.604  1.00  0.40           O  
HETATM  105  O   HOH T 104       7.259  -4.367  14.818  1.00  0.40           O  
HETATM  106  O   HOH T 105      -7.950   0.660  -7.197  1.00  0.41           O  
HETATM  107  O   HOH T 106       3.577  31.510  13.508  1.00  0.41           O  
HETATM  108  O   HOH T 107      -2.668  21.125  12.998  1.00  0.41           O  
HETATM  109  O   HOH T 108      -2.133  21.382  15.688  1.00  0.41           O  
HETATM  110  O   HOH T 109       9.371   9.747   8.186  1.00  0.41           O  
HETATM  111  O   HOH T 110       9.421  -2.213  -8.319  1.00  0.41           O  
HETATM  112  O   HOH T 111      -4.752  19.554  25.287  1.00  0.41           O  
HETATM  113  O   HOH T 112      -2.447  -5.051  -8.258  1.00  0.41           O  
HETATM  114  O   HOH T 113      10.459   7.965  11.231  1.00  0.41           O  
HETATM  115  O   HOH T 114      15.366   1.747  11.894  1.00  0.42           O  
HETATM  116  O   HOH T 115      -7.756  17.086  17.119  1.00  0.42           O  
HETATM  117  O   HOH T 116      22.999   6.038   8.366  1.00  0.42           O  
HETATM  118  O   HOH T 117      -8.354   5.513   7.055  1.00  0.42           O  
HETATM  119  O   HOH T 118      -1.805  26.138  32.134  1.00  0.42           O  
HETATM  120  O   HOH T 119       9.195  33.337  26.127  1.00  0.42           O  
HETATM  121  O   HOH T 120      -3.205  26.059  12.001  1.00  0.43           O  
HETATM  122  O   HOH T 121      -6.028  -8.886   7.400  1.00  0.43           O  
HETATM  123  O   HOH T 122       6.936  10.510  14.085  1.00  0.43           O  
HETATM  124  O   HOH T 123      13.288   1.734  13.792  1.00  0.43           O  
HETATM  125  O   HOH T 124      14.289  32.565  29.934  1.00  0.43           O  
HETATM  126  O   HOH T 125      13.065  31.736  16.156  1.00  0.43           O  
HETATM  127  O   HOH T 126      14.037   6.066  -4.998  1.00  0.44           O  
HETATM  128  O   HOH T 127      11.586  25.686  10.394  1.00  0.44           O  
HETATM  129  O   HOH T 128     -15.868  29.171  28.453  1.00  0.44           O  
HETATM  130  O   HOH T 129      -2.634  -0.224  11.066  1.00  0.44           O  
HETATM  131  O   HOH T 130      11.329   5.185  17.445  1.00  0.44           O  
HETATM  132  O   HOH T 131      -4.187  -0.139   6.542  1.00  0.44           O  
HETATM  133  O   HOH T 132      -5.765  32.014  22.122  1.00  0.45           O  
HETATM  134  O   HOH T 133      14.066  11.681  29.390  1.00  0.45           O  
HETATM  135  O   HOH T 134       7.989  -6.827  15.683  1.00  0.45           O  
HETATM  136  O   HOH T 135      -5.402   2.339   7.085  1.00  0.45           O  
HETATM  137  O   HOH T 136      16.659  31.606  29.242  1.00  0.45           O  
HETATM  138  O   HOH T 137      16.007  12.941   4.393  1.00  0.45           O  
HETATM  139  O   HOH T 138      -3.977  23.482  12.643  1.00  0.45           O  
HETATM  140  O   HOH T 139      21.414  12.668  16.892  1.00  0.45           O  
HETATM  141  O   HOH T 140      -3.380  18.044  15.371  1.00  0.45           O  
HETATM  142  O   HOH T 141       7.135  12.214  28.148  1.00  0.45           O  
HETATM  143  O   HOH T 142      -0.773  29.156  11.311  1.00  0.45           O  
HETATM  144  O   HOH T 143      21.503   8.179   7.482  1.00  0.45           O  
HETATM  145  O   HOH T 144      15.658  32.523  16.035  1.00  0.45           O  
HETATM  146  O   HOH T 145      -6.961   1.601  -2.908  1.00  0.45           O  
HETATM  147  O   HOH T 146      22.609  -5.725  -8.214  1.00  0.46           O  
HETATM  148  O   HOH T 147      -6.311  17.072  19.506  1.00  0.46           O  
HETATM  149  O   HOH T 148      18.187  27.079  36.302  1.00  0.46           O  
HETATM  150  O   HOH T 149       3.504  -4.752  15.356  1.00  0.46           O  
HETATM  151  O   HOH T 150      30.267   3.043   8.894  1.00  0.46           O  
HETATM  152  O   HOH T 151      -4.134  -2.553  11.128  1.00  0.46           O  
HETATM  153  O   HOH T 152       7.298  10.845   9.606  1.00  0.46           O  
HETATM  154  O   HOH T 153       3.818  12.625  35.975  1.00  0.46           O  
HETATM  155  O   HOH T 154      12.912  -7.285  -4.879  1.00  0.47           O  
HETATM  156  O   HOH T 155       5.838   4.115 -11.579  1.00  0.47           O  
HETATM  157  O   HOH T 156      -4.528  24.022  18.309  1.00  0.47           O  
HETATM  158  O   HOH T 157      10.618 -14.513  -5.767  1.00  0.47           O  
HETATM  159  O   HOH T 158      16.372  22.748  15.079  1.00  0.47           O  
HETATM  160  O   HOH T 159       9.175  -5.761  13.279  1.00  0.47           O  
HETATM  161  O   HOH T 160       9.261  25.056   9.096  1.00  0.47           O  
HETATM  162  O   HOH T 161       1.071  13.088  35.473  1.00  0.47           O  
HETATM  163  O   HOH T 162      -4.833  -8.031   9.773  1.00  0.47           O  
HETATM  164  O   HOH T 163      -6.426  21.124  29.054  1.00  0.48           O  
HETATM  165  O   HOH T 164      14.208  32.364  32.712  1.00  0.48           O  
HETATM  166  O   HOH T 165      -7.357  20.314  31.412  1.00  0.48           O  
HETATM  167  O   HOH T 166      13.494  -7.384   9.562  1.00  0.48           O  
HETATM  168  O   HOH T 167      25.910  30.754  20.792  1.00  0.48           O  
HETATM  169  O   HOH T 168      11.407  11.215   9.507  1.00  0.48           O  
HETATM  170  O   HOH T 169      14.611  -9.072  11.414  1.00  0.48           O  
HETATM  171  O   HOH T 170      17.614  20.152  36.452  1.00  0.49           O  
HETATM  172  O   HOH T 171       4.141  12.850  -5.462  1.00  0.49           O  
HETATM  173  O   HOH T 172       6.617  30.867  11.949  1.00  0.49           O  
HETATM  174  O   HOH T 173      25.875  -2.412   5.975  1.00  0.49           O  
HETATM  175  O   HOH T 174      -7.763   3.052   5.777  1.00  0.49           O  
HETATM  176  O   HOH T 175       7.884   8.192  10.043  1.00  0.49           O  
HETATM  177  O   HOH T 176      14.544  31.538  13.673  1.00  0.49           O  
HETATM  178  O   HOH T 177      12.041   9.760  14.531  1.00  0.50           O  
HETATM  179  O   HOH T 178      10.057   3.182  16.175  1.00  0.50           O  
HETATM  180  O   HOH T 179      -6.941  19.407  27.026  1.00  0.50           O  
HETATM  181  O   HOH T 180       0.014  -2.443  -9.822  1.00  0.50           O  
HETATM  182  O   HOH T 181      -5.177 -10.488  10.984  1.00  0.50           O  
HETATM  183  O   HOH T 182      -8.649  24.061  28.886  1.00  0.50           O  
HETATM  184  O   HOH T 183      27.375  -1.401   8.007  1.00  0.50           O  
HETATM  185  O   HOH T 184       6.777  18.674  37.798  1.00  0.50           O  
HETATM  186  O   HOH T 185      -1.781   4.237  13.653  1.00  0.50           O  
HETATM  187  O   HOH T 186       6.841  -3.204  -9.173  1.00  0.50           O  
HETATM  188  O   HOH T 187      15.408  -8.108  13.826  1.00  0.50           O  
HETATM  189  O   HOH T 188      -8.330  -1.957  -6.090  1.00  0.51           O  
HETATM  190  O   HOH T 189      13.498   3.958  12.077  1.00  0.51           O  
HETATM  191  O   HOH T 190      25.877  -4.799   7.475  1.00  0.51           O  
HETATM  192  O   HOH T 191       1.659  -8.567  13.557  1.00  0.51           O  
HETATM  193  O   HOH T 192      -5.438  18.511  17.227  1.00  0.51           O  
HETATM  194  O   HOH T 193      11.165  20.784  31.601  1.00  0.51           O  
HETATM  195  O   HOH T 194      17.271  20.240  30.129  1.00  0.52           O  
HETATM  196  O   HOH T 195      14.125   9.505  -5.140  1.00  0.52           O  
HETATM  197  O   HOH T 196      12.057  12.164  13.023  1.00  0.52           O  
HETATM  198  O   HOH T 197       2.876  16.279  36.574  1.00  0.52           O  
HETATM  199  O   HOH T 198      12.233   1.592  16.235  1.00  0.52           O  
HETATM  200  O   HOH T 199      25.679  -1.886  -1.665  1.00  0.52           O  
HETATM  201  O   HOH T 200      -6.565  -0.151  -4.974  1.00  0.52           O  
HETATM  202  O   HOH T 201      17.066   3.874  11.233  1.00  0.52           O  
HETATM  203  O   HOH T 202      16.272  32.463  20.997  1.00  0.52           O  
HETATM  204  O   HOH T 203       9.082  33.080  16.693  1.00  0.52           O  
HETATM  205  O   HOH T 204      12.909  28.334  29.081  1.00  0.53           O  
HETATM  206  O   HOH T 205      -8.492  28.547  17.087  1.00  0.53           O  
HETATM  207  O   HOH T 206      -6.227  24.268  16.107  1.00  0.53           O  
HETATM  208  O   HOH T 207      25.238  -7.461   7.222  1.00  0.53           O  
HETATM  209  O   HOH T 208      16.267 -11.470   3.150  1.00  0.53           O  
HETATM  210  O   HOH T 209      17.246   0.839  -5.938  1.00  0.53           O  
HETATM  211  O   HOH T 210       7.259  16.443  36.297  1.00  0.54           O  
HETATM  212  O   HOH T 211      -4.016   1.035  15.027  1.00  0.54           O  
HETATM  213  O   HOH T 212      19.604   9.768   8.753  1.00  0.54           O  
HETATM  214  O   HOH T 213      24.376  15.095  16.136  1.00  0.54           O  
HETATM  215  O   HOH T 214      23.292  27.651  15.320  1.00  0.54           O  
HETATM  216  O   HOH T 215      -7.940  23.368  26.280  1.00  0.54           O  
HETATM  217  O   HOH T 216      10.469  27.591   8.754  1.00  0.55           O  
HETATM  218  O   HOH T 217      22.814   1.732  -4.197  1.00  0.55           O  
HETATM  219  O   HOH T 218      12.363  13.815   9.903  1.00  0.55           O  
HETATM  220  O   HOH T 219      -2.229   1.593  13.016  1.00  0.56           O  
HETATM  221  O   HOH T 220       8.189  -1.632 -10.687  1.00  0.56           O  
HETATM  222  O   HOH T 221      10.660 -10.606  -4.224  1.00  0.56           O  
HETATM  223  O   HOH T 222       2.375  -3.380 -10.712  1.00  0.56           O  
HETATM  224  O   HOH T 223      13.008  29.525  14.651  1.00  0.56           O  
HETATM  225  O   HOH T 224       8.870   1.677  -9.005  1.00  0.56           O  
HETATM  226  O   HOH T 225      15.363  -8.103  -5.690  1.00  0.57           O  
HETATM  227  O   HOH T 226      22.502  13.868  28.296  1.00  0.57           O  
HETATM  228  O   HOH T 227       0.030   2.265  14.430  1.00  0.58           O  
HETATM  229  O   HOH T 228      26.793  21.639  16.208  1.00  0.58           O  
HETATM  230  O   HOH T 229      -0.731  14.522   7.163  1.00  0.59           O  
TER     231      HOH T 229 
