# Supplementary material for: Accurate Prediction of Hydration Sites of Proteins Using Energy Model With Atom Embedding
Source: Front Mol Biosci. 2021 Sep 20;8:756075. doi: 10.3389/fmolb.2021.756075 (PMC8488165; doi:10.3389/fmolb.2021.756075)
Supplement: Supplementary file 1 [file DataSheet1.ZIP › Data Sheet 1/Our_result_pdb/our_dataset_output/3CIM_watersite.pdb]

HEADER                                                        XXXX


JRNL        PMID   -1
HETATM    1  O   HOH T   0       0.002   0.001  -0.859  1.00  0.08           O  
HETATM    2  O   HOH T   1     -41.934  28.895  22.587  1.00  0.17           O  
HETATM    3  O   HOH T   2     -42.955  41.336  16.290  1.00  0.19           O  
HETATM    4  O   HOH T   3     -52.930  24.880   3.928  1.00  0.19           O  
HETATM    5  O   HOH T   4     -58.141  27.330   4.854  1.00  0.19           O  
HETATM    6  O   HOH T   5      -4.813  18.545  -6.041  1.00  0.20           O  
HETATM    7  O   HOH T   6     -51.853  22.017  13.714  1.00  0.20           O  
HETATM    8  O   HOH T   7     -45.620  22.577  15.972  1.00  0.20           O  
HETATM    9  O   HOH T   8      -7.754   9.768   4.767  1.00  0.20           O  
HETATM   10  O   HOH T   9     -42.617  18.333  -2.263  1.00  0.20           O  
HETATM   11  O   HOH T  10     -45.883  -0.246   8.301  1.00  0.20           O  
HETATM   12  O   HOH T  11     -52.903  33.219   4.720  1.00  0.20           O  
HETATM   13  O   HOH T  12     -65.378  23.431   3.833  1.00  0.20           O  
HETATM   14  O   HOH T  13     -30.573  35.786  -0.261  1.00  0.20           O  
HETATM   15  O   HOH T  14     -23.797  29.050   9.449  1.00  0.20           O  
HETATM   16  O   HOH T  15     -37.124  41.965  -2.215  1.00  0.21           O  
HETATM   17  O   HOH T  16      -7.534   1.461   5.535  1.00  0.21           O  
HETATM   18  O   HOH T  17     -16.743  24.682   0.636  1.00  0.21           O  
HETATM   19  O   HOH T  18     -54.683   3.893   3.913  1.00  0.21           O  
HETATM   20  O   HOH T  19       4.655  23.913  -1.307  1.00  0.22           O  
HETATM   21  O   HOH T  20     -30.761  24.233   4.148  1.00  0.22           O  
HETATM   22  O   HOH T  21     -45.288  35.916  13.716  1.00  0.22           O  
HETATM   23  O   HOH T  22      -6.887  30.742   4.837  1.00  0.22           O  
HETATM   24  O   HOH T  23     -14.967  11.747  17.178  1.00  0.23           O  
HETATM   25  O   HOH T  24     -48.383   3.583   0.563  1.00  0.24           O  
HETATM   26  O   HOH T  25     -61.051   8.437  -1.525  1.00  0.24           O  
HETATM   27  O   HOH T  26     -39.174  52.254  22.352  1.00  0.24           O  
HETATM   28  O   HOH T  27     -37.544   4.951   8.258  1.00  0.25           O  
HETATM   29  O   HOH T  28     -59.032   6.266   4.420  1.00  0.25           O  
HETATM   30  O   HOH T  29     -46.500  48.300  22.329  1.00  0.26           O  
HETATM   31  O   HOH T  30     -18.235  28.513  13.802  1.00  0.26           O  
HETATM   32  O   HOH T  31     -53.362  17.235  21.432  1.00  0.26           O  
HETATM   33  O   HOH T  32     -54.870   5.196  -0.779  1.00  0.26           O  
HETATM   34  O   HOH T  33     -34.500  25.157  -6.718  1.00  0.26           O  
HETATM   35  O   HOH T  34     -34.849  21.742   4.542  1.00  0.26           O  
HETATM   36  O   HOH T  35     -22.904  15.117  15.473  1.00  0.26           O  
HETATM   37  O   HOH T  36     -12.142  21.928  20.899  1.00  0.27           O  
HETATM   38  O   HOH T  37     -38.854  19.480  14.777  1.00  0.27           O  
HETATM   39  O   HOH T  38     -51.461  13.101  17.587  1.00  0.27           O  
HETATM   40  O   HOH T  39      -4.460  14.238  16.306  1.00  0.27           O  
HETATM   41  O   HOH T  40     -26.312  17.351   7.117  1.00  0.28           O  
HETATM   42  O   HOH T  41     -55.474  26.564  11.290  1.00  0.28           O  
HETATM   43  O   HOH T  42     -35.749  46.068  14.818  1.00  0.28           O  
HETATM   44  O   HOH T  43     -25.939  17.671  14.089  1.00  0.28           O  
HETATM   45  O   HOH T  44     -32.936  18.796  12.326  1.00  0.28           O  
HETATM   46  O   HOH T  45      -7.315  17.684  22.353  1.00  0.29           O  
HETATM   47  O   HOH T  46     -24.344  28.982   4.698  1.00  0.29           O  
HETATM   48  O   HOH T  47     -27.506  23.626  10.319  1.00  0.29           O  
HETATM   49  O   HOH T  48     -31.064  17.739  10.706  1.00  0.29           O  
HETATM   50  O   HOH T  49      -8.942  12.410  14.402  1.00  0.29           O  
HETATM   51  O   HOH T  50     -36.174  16.543  14.088  1.00  0.29           O  
HETATM   52  O   HOH T  51     -46.653   1.013   5.895  1.00  0.30           O  
HETATM   53  O   HOH T  52      -2.651  17.292  -7.468  1.00  0.30           O  
HETATM   54  O   HOH T  53       1.249  15.919  -1.213  1.00  0.30           O  
HETATM   55  O   HOH T  54     -38.351  22.967  -9.249  1.00  0.30           O  
HETATM   56  O   HOH T  55     -46.255  31.087  15.749  1.00  0.30           O  
HETATM   57  O   HOH T  56     -52.177   7.391  14.121  1.00  0.30           O  
HETATM   58  O   HOH T  57     -25.053  18.191   4.772  1.00  0.30           O  
HETATM   59  O   HOH T  58     -25.469  26.633   3.657  1.00  0.30           O  
HETATM   60  O   HOH T  59     -54.515  21.806  -8.725  1.00  0.30           O  
HETATM   61  O   HOH T  60     -48.032  33.331  -9.386  1.00  0.31           O  
HETATM   62  O   HOH T  61     -37.763  18.399   2.934  1.00  0.31           O  
HETATM   63  O   HOH T  62     -12.248  33.286   4.324  1.00  0.31           O  
HETATM   64  O   HOH T  63     -57.677  -3.197   7.178  1.00  0.31           O  
HETATM   65  O   HOH T  64     -29.130  13.886  12.864  1.00  0.31           O  
HETATM   66  O   HOH T  65     -32.718  28.356  14.383  1.00  0.31           O  
HETATM   67  O   HOH T  66     -41.871  31.526  21.618  1.00  0.31           O  
HETATM   68  O   HOH T  67     -64.431  20.490  -4.505  1.00  0.31           O  
HETATM   69  O   HOH T  68     -47.858  11.953  17.945  1.00  0.31           O  
HETATM   70  O   HOH T  69     -43.820  29.611  20.828  1.00  0.31           O  
HETATM   71  O   HOH T  70     -59.800  25.196  -6.931  1.00  0.31           O  
HETATM   72  O   HOH T  71     -28.104   5.729  14.838  1.00  0.32           O  
HETATM   73  O   HOH T  72     -51.656  29.919  -6.710  1.00  0.32           O  
HETATM   74  O   HOH T  73     -50.369  21.695  -7.702  1.00  0.32           O  
HETATM   75  O   HOH T  74     -44.377  36.416  -7.568  1.00  0.32           O  
HETATM   76  O   HOH T  75     -45.522  10.192  15.650  1.00  0.32           O  
HETATM   77  O   HOH T  76     -66.441  12.771  -8.719  1.00  0.32           O  
HETATM   78  O   HOH T  77       3.592  14.312  -3.847  1.00  0.33           O  
HETATM   79  O   HOH T  78     -47.309  46.369  20.780  1.00  0.33           O  
HETATM   80  O   HOH T  79     -34.727  46.226   2.932  1.00  0.33           O  
HETATM   81  O   HOH T  80     -28.416  13.077  15.481  1.00  0.33           O  
HETATM   82  O   HOH T  81     -61.677  11.678  -8.222  1.00  0.33           O  
HETATM   83  O   HOH T  82     -36.281  16.156   3.844  1.00  0.33           O  
HETATM   84  O   HOH T  83      -0.182  26.320  -0.611  1.00  0.33           O  
HETATM   85  O   HOH T  84     -42.867  24.136  22.047  1.00  0.33           O  
HETATM   86  O   HOH T  85      -2.267  28.451   5.154  1.00  0.33           O  
HETATM   87  O   HOH T  86      -1.019  23.870  -8.191  1.00  0.33           O  
HETATM   88  O   HOH T  87      -8.961   4.097  -5.950  1.00  0.34           O  
HETATM   89  O   HOH T  88     -25.103  41.904  10.344  1.00  0.34           O  
HETATM   90  O   HOH T  89      -6.324  12.984  21.467  1.00  0.34           O  
HETATM   91  O   HOH T  90      -8.189  34.556   6.562  1.00  0.34           O  
HETATM   92  O   HOH T  91     -23.541  16.277   3.404  1.00  0.34           O  
HETATM   93  O   HOH T  92     -45.327  42.729  16.836  1.00  0.34           O  
HETATM   94  O   HOH T  93     -27.327  29.825   0.580  1.00  0.35           O  
HETATM   95  O   HOH T  94     -45.442   7.799  14.356  1.00  0.35           O  
HETATM   96  O   HOH T  95     -58.690   3.869  14.925  1.00  0.35           O  
HETATM   97  O   HOH T  96     -44.591   9.618  -0.464  1.00  0.35           O  
HETATM   98  O   HOH T  97     -45.303  24.571  -8.289  1.00  0.35           O  
HETATM   99  O   HOH T  98     -50.897  35.110  11.229  1.00  0.35           O  
HETATM  100  O   HOH T  99     -34.143  42.167  -0.268  1.00  0.35           O  
HETATM  101  O   HOH T 100     -45.164  33.290  14.531  1.00  0.35           O  
HETATM  102  O   HOH T 101     -51.809  29.317  12.522  1.00  0.35           O  
HETATM  103  O   HOH T 102      -6.219  33.779  12.824  1.00  0.35           O  
HETATM  104  O   HOH T 103     -37.265  31.823  17.582  1.00  0.36           O  
HETATM  105  O   HOH T 104      -5.511   1.844  -3.056  1.00  0.36           O  
HETATM  106  O   HOH T 105     -61.785  21.033  -4.357  1.00  0.36           O  
HETATM  107  O   HOH T 106     -39.428  19.330  -7.610  1.00  0.36           O  
HETATM  108  O   HOH T 107     -58.627  36.106   2.552  1.00  0.36           O  
HETATM  109  O   HOH T 108     -36.265  24.686  -8.741  1.00  0.36           O  
HETATM  110  O   HOH T 109     -46.294  26.001  17.006  1.00  0.36           O  
HETATM  111  O   HOH T 110     -60.473   2.851  11.979  1.00  0.37           O  
HETATM  112  O   HOH T 111      -7.285  25.734  -6.604  1.00  0.37           O  
HETATM  113  O   HOH T 112     -29.766   9.060  18.120  1.00  0.37           O  
HETATM  114  O   HOH T 113     -46.196  19.483  20.404  1.00  0.37           O  
HETATM  115  O   HOH T 114      -8.955  19.974  21.949  1.00  0.37           O  
HETATM  116  O   HOH T 115     -40.699   4.350   2.166  1.00  0.37           O  
HETATM  117  O   HOH T 116      -8.479  32.237  12.173  1.00  0.37           O  
HETATM  118  O   HOH T 117     -41.093  15.857  -0.299  1.00  0.37           O  
HETATM  119  O   HOH T 118     -23.337  24.272  12.212  1.00  0.37           O  
HETATM  120  O   HOH T 119     -56.614  20.754 -13.445  1.00  0.37           O  
HETATM  121  O   HOH T 120      -8.658  14.164  22.435  1.00  0.37           O  
HETATM  122  O   HOH T 121     -45.350  27.287  -8.508  1.00  0.37           O  
HETATM  123  O   HOH T 122     -53.075   0.034   5.404  1.00  0.37           O  
HETATM  124  O   HOH T 123     -69.887  10.963  -1.608  1.00  0.38           O  
HETATM  125  O   HOH T 124     -32.110  46.415   3.953  1.00  0.38           O  
HETATM  126  O   HOH T 125      -8.082   7.334  14.517  1.00  0.38           O  
HETATM  127  O   HOH T 126     -23.043  40.426   3.172  1.00  0.38           O  
HETATM  128  O   HOH T 127     -34.757  27.920 -10.964  1.00  0.38           O  
HETATM  129  O   HOH T 128     -42.835   5.100  12.303  1.00  0.38           O  
HETATM  130  O   HOH T 129      -6.680  29.932  -7.268  1.00  0.38           O  
HETATM  131  O   HOH T 130     -46.094  29.371 -10.018  1.00  0.38           O  
HETATM  132  O   HOH T 131     -32.935  20.913  15.260  1.00  0.38           O  
HETATM  133  O   HOH T 132     -50.045  24.139  -4.487  1.00  0.38           O  
HETATM  134  O   HOH T 133     -15.392  25.672  15.911  1.00  0.38           O  
HETATM  135  O   HOH T 134     -31.742  34.984  -2.615  1.00  0.39           O  
HETATM  136  O   HOH T 135     -21.905  15.705  23.618  1.00  0.39           O  
HETATM  137  O   HOH T 136     -66.996  15.415  -8.573  1.00  0.39           O  
HETATM  138  O   HOH T 137     -14.746   9.049  17.797  1.00  0.39           O  
HETATM  139  O   HOH T 138     -24.126  43.061   3.498  1.00  0.39           O  
HETATM  140  O   HOH T 139     -29.799  28.462  12.395  1.00  0.39           O  
HETATM  141  O   HOH T 140     -15.119  24.499  18.442  1.00  0.39           O  
HETATM  142  O   HOH T 141     -49.631  32.902  12.090  1.00  0.39           O  
HETATM  143  O   HOH T 142     -24.388  26.919  11.407  1.00  0.39           O  
HETATM  144  O   HOH T 143       0.963  13.951  -3.290  1.00  0.39           O  
HETATM  145  O   HOH T 144     -32.275  43.805   0.834  1.00  0.39           O  
HETATM  146  O   HOH T 145     -35.327  33.429  18.578  1.00  0.39           O  
HETATM  147  O   HOH T 146     -32.212  46.946  13.964  1.00  0.39           O  
HETATM  148  O   HOH T 147     -13.615  15.053  21.537  1.00  0.39           O  
HETATM  149  O   HOH T 148     -52.467  19.842  -8.044  1.00  0.40           O  
HETATM  150  O   HOH T 149     -30.264  11.538  16.978  1.00  0.40           O  
HETATM  151  O   HOH T 150     -20.271  18.347   0.782  1.00  0.40           O  
HETATM  152  O   HOH T 151     -52.689  26.980  13.775  1.00  0.40           O  
HETATM  153  O   HOH T 152     -13.885  22.158  18.858  1.00  0.40           O  
HETATM  154  O   HOH T 153     -42.193  44.590  21.994  1.00  0.40           O  
HETATM  155  O   HOH T 154       0.822  22.322  -6.822  1.00  0.40           O  
HETATM  156  O   HOH T 155      -9.623  11.660  23.209  1.00  0.40           O  
HETATM  157  O   HOH T 156     -57.931  19.686 -10.113  1.00  0.40           O  
HETATM  158  O   HOH T 157     -57.328  25.158  -8.191  1.00  0.41           O  
HETATM  159  O   HOH T 158     -58.745  24.547  13.420  1.00  0.41           O  
HETATM  160  O   HOH T 159     -39.153  47.969  20.104  1.00  0.41           O  
HETATM  161  O   HOH T 160       8.226  26.144  -0.101  1.00  0.41           O  
HETATM  162  O   HOH T 161     -38.259  18.317  -5.304  1.00  0.41           O  
HETATM  163  O   HOH T 162     -15.428  24.091  -1.694  1.00  0.41           O  
HETATM  164  O   HOH T 163     -48.072  29.279  14.676  1.00  0.41           O  
HETATM  165  O   HOH T 164     -27.569  15.474  14.564  1.00  0.41           O  
HETATM  166  O   HOH T 165       0.087   9.981  13.094  1.00  0.41           O  
HETATM  167  O   HOH T 166     -54.989  32.730  -4.105  1.00  0.41           O  
HETATM  168  O   HOH T 167     -43.786  18.025  -9.190  1.00  0.41           O  
HETATM  169  O   HOH T 168      -0.906  33.224  10.855  1.00  0.41           O  
HETATM  170  O   HOH T 169     -47.367   5.953  15.049  1.00  0.42           O  
HETATM  171  O   HOH T 170     -48.640  24.638  17.688  1.00  0.42           O  
HETATM  172  O   HOH T 171     -32.505  22.390   3.125  1.00  0.42           O  
HETATM  173  O   HOH T 172     -55.931  38.460  -3.658  1.00  0.42           O  
HETATM  174  O   HOH T 173       5.521  21.895  -8.415  1.00  0.42           O  
HETATM  175  O   HOH T 174       3.560   8.330  11.653  1.00  0.42           O  
HETATM  176  O   HOH T 175     -27.229  27.150   1.576  1.00  0.42           O  
HETATM  177  O   HOH T 176     -26.129  35.174  12.439  1.00  0.42           O  
HETATM  178  O   HOH T 177     -34.276  18.479  14.718  1.00  0.42           O  
HETATM  179  O   HOH T 178     -25.282  44.475   9.063  1.00  0.42           O  
HETATM  180  O   HOH T 179     -58.258  33.916   4.104  1.00  0.42           O  
HETATM  181  O   HOH T 180     -33.865  35.227  20.058  1.00  0.42           O  
HETATM  182  O   HOH T 181     -49.064  26.778  -4.111  1.00  0.42           O  
HETATM  183  O   HOH T 182     -41.978  19.895  -8.089  1.00  0.42           O  
HETATM  184  O   HOH T 183     -45.614  34.140  -8.525  1.00  0.43           O  
HETATM  185  O   HOH T 184     -38.071  21.047  -1.548  1.00  0.43           O  
HETATM  186  O   HOH T 185     -50.154  30.959  13.980  1.00  0.43           O  
HETATM  187  O   HOH T 186     -25.397  16.051  16.210  1.00  0.43           O  
HETATM  188  O   HOH T 187     -60.796   5.753  -2.505  1.00  0.43           O  
HETATM  189  O   HOH T 188     -55.934  27.536  -8.270  1.00  0.43           O  
HETATM  190  O   HOH T 189     -15.794  20.452  -0.248  1.00  0.43           O  
HETATM  191  O   HOH T 190     -62.096  -1.734   4.653  1.00  0.43           O  
HETATM  192  O   HOH T 191     -41.384  53.372  21.200  1.00  0.43           O  
HETATM  193  O   HOH T 192       5.012  24.296  -9.686  1.00  0.43           O  
HETATM  194  O   HOH T 193     -35.690  43.962  -3.502  1.00  0.43           O  
HETATM  195  O   HOH T 194     -72.190   9.425  -1.472  1.00  0.43           O  
HETATM  196  O   HOH T 195     -35.139  27.267  -8.286  1.00  0.43           O  
HETATM  197  O   HOH T 196     -61.248  24.484  12.591  1.00  0.43           O  
HETATM  198  O   HOH T 197     -19.502  30.528   3.578  1.00  0.44           O  
HETATM  199  O   HOH T 198      -2.817  15.093  18.432  1.00  0.44           O  
HETATM  200  O   HOH T 199     -67.340  17.632  -7.065  1.00  0.44           O  
HETATM  201  O   HOH T 200     -47.044   7.446  19.015  1.00  0.44           O  
HETATM  202  O   HOH T 201     -45.922   9.946  18.435  1.00  0.44           O  
HETATM  203  O   HOH T 202     -10.632  29.131  13.241  1.00  0.44           O  
HETATM  204  O   HOH T 203     -11.541  11.996  21.263  1.00  0.44           O  
HETATM  205  O   HOH T 204     -31.680  24.811  18.089  1.00  0.44           O  
HETATM  206  O   HOH T 205     -16.338  33.157   7.081  1.00  0.44           O  
HETATM  207  O   HOH T 206     -48.663  27.237  16.530  1.00  0.44           O  
HETATM  208  O   HOH T 207      -5.470  11.874  15.165  1.00  0.44           O  
HETATM  209  O   HOH T 208     -57.003  35.874  -3.740  1.00  0.44           O  
HETATM  210  O   HOH T 209     -36.568  31.672  20.262  1.00  0.44           O  
HETATM  211  O   HOH T 210     -55.413  -0.610   3.994  1.00  0.44           O  
HETATM  212  O   HOH T 211     -57.360  26.954  13.280  1.00  0.44           O  
HETATM  213  O   HOH T 212     -58.603  31.872  -3.994  1.00  0.44           O  
HETATM  214  O   HOH T 213     -57.429  32.369  -7.966  1.00  0.44           O  
HETATM  215  O   HOH T 214     -30.913  23.878   1.446  1.00  0.44           O  
HETATM  216  O   HOH T 215     -47.315  24.463  -0.508  1.00  0.44           O  
HETATM  217  O   HOH T 216     -62.515   5.286  -4.680  1.00  0.44           O  
HETATM  218  O   HOH T 217     -11.442  26.057  -3.549  1.00  0.44           O  
HETATM  219  O   HOH T 218     -51.617  35.732  -8.234  1.00  0.45           O  
HETATM  220  O   HOH T 219     -56.105  24.494  13.037  1.00  0.45           O  
HETATM  221  O   HOH T 220     -42.199   2.474   3.363  1.00  0.45           O  
HETATM  222  O   HOH T 221     -44.858  40.985  -0.425  1.00  0.45           O  
HETATM  223  O   HOH T 222     -42.941  34.080  -7.963  1.00  0.45           O  
HETATM  224  O   HOH T 223     -56.583  34.988  -8.014  1.00  0.45           O  
HETATM  225  O   HOH T 224     -10.003   9.685  21.313  1.00  0.45           O  
HETATM  226  O   HOH T 225     -32.551  33.229  18.932  1.00  0.45           O  
HETATM  227  O   HOH T 226     -44.066   1.981   5.364  1.00  0.45           O  
HETATM  228  O   HOH T 227     -25.169  28.882   2.025  1.00  0.45           O  
HETATM  229  O   HOH T 228     -49.801  31.401  19.327  1.00  0.45           O  
HETATM  230  O   HOH T 229     -32.522  27.119  16.863  1.00  0.45           O  
HETATM  231  O   HOH T 230     -27.494  43.206  10.149  1.00  0.46           O  
HETATM  232  O   HOH T 231     -36.713   4.093  10.872  1.00  0.46           O  
HETATM  233  O   HOH T 232     -51.353   8.210  21.639  1.00  0.46           O  
HETATM  234  O   HOH T 233      -4.867   2.243  -7.370  1.00  0.46           O  
HETATM  235  O   HOH T 234     -37.291  18.577  -2.700  1.00  0.46           O  
HETATM  236  O   HOH T 235     -48.928  12.615  20.279  1.00  0.46           O  
HETATM  237  O   HOH T 236     -27.724  26.186  10.581  1.00  0.46           O  
HETATM  238  O   HOH T 237     -26.036  24.900  12.311  1.00  0.46           O  
HETATM  239  O   HOH T 238       3.075  20.811  -7.568  1.00  0.46           O  
HETATM  240  O   HOH T 239     -61.466   3.827  14.532  1.00  0.46           O  
HETATM  241  O   HOH T 240      -6.589  29.468  -0.408  1.00  0.46           O  
HETATM  242  O   HOH T 241     -24.238  26.149  14.027  1.00  0.46           O  
HETATM  243  O   HOH T 242     -60.674   3.373  -3.960  1.00  0.46           O  
HETATM  244  O   HOH T 243     -37.197  20.504  -8.778  1.00  0.46           O  
HETATM  245  O   HOH T 244     -39.146  32.032  21.157  1.00  0.46           O  
HETATM  246  O   HOH T 245     -34.912  12.082  13.793  1.00  0.46           O  
HETATM  247  O   HOH T 246      -7.076   8.269  -5.205  1.00  0.46           O  
HETATM  248  O   HOH T 247     -13.139   6.958  16.638  1.00  0.46           O  
HETATM  249  O   HOH T 248     -53.777  30.789  -8.328  1.00  0.46           O  
HETATM  250  O   HOH T 249     -21.612  34.687   7.304  1.00  0.46           O  
HETATM  251  O   HOH T 250     -57.197  33.755  -5.548  1.00  0.47           O  
HETATM  252  O   HOH T 251     -44.570  55.796  21.560  1.00  0.47           O  
HETATM  253  O   HOH T 252     -63.146   7.055  -2.658  1.00  0.47           O  
HETATM  254  O   HOH T 253     -25.172  21.057  12.895  1.00  0.47           O  
HETATM  255  O   HOH T 254     -49.512  24.107  20.353  1.00  0.47           O  
HETATM  256  O   HOH T 255     -49.727   7.320  19.533  1.00  0.47           O  
HETATM  257  O   HOH T 256     -64.382  14.613  -8.586  1.00  0.47           O  
HETATM  258  O   HOH T 257       9.707  23.593  -3.035  1.00  0.47           O  
HETATM  259  O   HOH T 258     -53.658   1.413   3.157  1.00  0.47           O  
HETATM  260  O   HOH T 259     -32.293  25.029  -8.427  1.00  0.47           O  
HETATM  261  O   HOH T 260     -49.184  25.639  -6.581  1.00  0.47           O  
HETATM  262  O   HOH T 261     -33.273  12.103   4.601  1.00  0.47           O  
HETATM  263  O   HOH T 262     -31.021  12.983  14.714  1.00  0.47           O  
HETATM  264  O   HOH T 263     -50.199  33.380  21.172  1.00  0.47           O  
HETATM  265  O   HOH T 264     -49.314  33.409 -11.744  1.00  0.47           O  
HETATM  266  O   HOH T 265     -50.509   2.097   1.447  1.00  0.47           O  
HETATM  267  O   HOH T 266     -41.351   1.429   5.911  1.00  0.48           O  
HETATM  268  O   HOH T 267     -50.628  28.377  14.883  1.00  0.48           O  
HETATM  269  O   HOH T 268     -30.483  44.310   2.990  1.00  0.48           O  
HETATM  270  O   HOH T 269     -62.636   5.872  -7.346  1.00  0.48           O  
HETATM  271  O   HOH T 270     -53.454  24.297  13.897  1.00  0.48           O  
HETATM  272  O   HOH T 271     -50.448   4.861  12.215  1.00  0.48           O  
HETATM  273  O   HOH T 272     -25.258  14.856   1.746  1.00  0.48           O  
HETATM  274  O   HOH T 273      -5.196  27.547  -6.825  1.00  0.48           O  
HETATM  275  O   HOH T 274     -13.248  11.001  19.279  1.00  0.48           O  
HETATM  276  O   HOH T 275     -37.117  57.039  12.878  1.00  0.48           O  
HETATM  277  O   HOH T 276     -26.203  45.241  11.601  1.00  0.48           O  
HETATM  278  O   HOH T 277     -40.440   2.221  11.344  1.00  0.48           O  
HETATM  279  O   HOH T 278      -7.423  10.038  14.102  1.00  0.48           O  
HETATM  280  O   HOH T 279     -58.218  36.392   5.208  1.00  0.48           O  
HETATM  281  O   HOH T 280     -69.733   8.208  -1.067  1.00  0.48           O  
HETATM  282  O   HOH T 281     -38.710  16.369  -1.770  1.00  0.48           O  
HETATM  283  O   HOH T 282      -4.252  30.161   4.137  1.00  0.48           O  
HETATM  284  O   HOH T 283     -56.103   4.678   1.607  1.00  0.48           O  
HETATM  285  O   HOH T 284     -17.594  22.607  -0.866  1.00  0.48           O  
HETATM  286  O   HOH T 285     -32.055  24.839  -0.816  1.00  0.48           O  
HETATM  287  O   HOH T 286     -39.048  50.678  20.128  1.00  0.48           O  
HETATM  288  O   HOH T 287     -44.117  42.767  20.950  1.00  0.48           O  
HETATM  289  O   HOH T 288     -51.610  12.841  20.400  1.00  0.49           O  
HETATM  290  O   HOH T 289     -10.041   1.925  -7.291  1.00  0.49           O  
HETATM  291  O   HOH T 290     -39.995  18.329  -3.161  1.00  0.49           O  
HETATM  292  O   HOH T 291     -49.902  36.981  -6.474  1.00  0.49           O  
HETATM  293  O   HOH T 292     -27.684  45.125   3.025  1.00  0.49           O  
HETATM  294  O   HOH T 293     -34.158  46.901  19.142  1.00  0.49           O  
HETATM  295  O   HOH T 294     -35.137  10.918   3.012  1.00  0.49           O  
HETATM  296  O   HOH T 295      -4.253  12.908  19.583  1.00  0.49           O  
HETATM  297  O   HOH T 296     -51.209  27.371  -5.806  1.00  0.49           O  
HETATM  298  O   HOH T 297     -51.394   2.548  10.829  1.00  0.49           O  
HETATM  299  O   HOH T 298     -57.386   4.027   3.976  1.00  0.49           O  
HETATM  300  O   HOH T 299     -32.959  53.398  12.984  1.00  0.49           O  
HETATM  301  O   HOH T 300     -22.159  13.615  21.682  1.00  0.49           O  
HETATM  302  O   HOH T 301     -27.393   4.472  23.503  1.00  0.50           O  
HETATM  303  O   HOH T 302     -65.686   6.815  -1.716  1.00  0.50           O  
HETATM  304  O   HOH T 303     -34.649  17.280   5.570  1.00  0.50           O  
HETATM  305  O   HOH T 304     -12.960  30.780   1.620  1.00  0.50           O  
HETATM  306  O   HOH T 305     -49.801   0.918  12.443  1.00  0.50           O  
HETATM  307  O   HOH T 306     -23.474  42.083   0.948  1.00  0.50           O  
HETATM  308  O   HOH T 307     -60.992   7.453  -8.807  1.00  0.50           O  
HETATM  309  O   HOH T 308     -12.763   9.539  21.611  1.00  0.50           O  
HETATM  310  O   HOH T 309     -38.710  15.338   0.769  1.00  0.50           O  
HETATM  311  O   HOH T 310     -18.580  32.037   5.697  1.00  0.50           O  
HETATM  312  O   HOH T 311     -25.896  43.583   1.424  1.00  0.50           O  
HETATM  313  O   HOH T 312     -36.725  18.388  16.064  1.00  0.50           O  
HETATM  314  O   HOH T 313     -37.645  59.331  14.334  1.00  0.50           O  
HETATM  315  O   HOH T 314     -56.490  21.943 -10.836  1.00  0.51           O  
HETATM  316  O   HOH T 315      -8.190  33.148   4.071  1.00  0.51           O  
HETATM  317  O   HOH T 316     -48.651   5.702  17.525  1.00  0.51           O  
HETATM  318  O   HOH T 317      -6.337  30.114   2.234  1.00  0.51           O  
HETATM  319  O   HOH T 318      -1.624  28.566  -0.162  1.00  0.51           O  
HETATM  320  O   HOH T 319      -7.415  10.374  22.091  1.00  0.51           O  
HETATM  321  O   HOH T 320     -10.472  32.434   2.372  1.00  0.51           O  
HETATM  322  O   HOH T 321     -61.632  23.349  -5.915  1.00  0.51           O  
HETATM  323  O   HOH T 322     -34.947  13.731   3.037  1.00  0.51           O  
HETATM  324  O   HOH T 323      -7.413   1.021  -7.387  1.00  0.51           O  
HETATM  325  O   HOH T 324     -28.856  44.541  12.200  1.00  0.52           O  
HETATM  326  O   HOH T 325     -50.132   5.678  14.974  1.00  0.52           O  
HETATM  327  O   HOH T 326     -50.549   3.183  -1.101  1.00  0.52           O  
HETATM  328  O   HOH T 327     -60.127  26.915  12.976  1.00  0.52           O  
HETATM  329  O   HOH T 328       4.102  26.404  -8.049  1.00  0.52           O  
HETATM  330  O   HOH T 329     -26.556  14.758   6.073  1.00  0.52           O  
HETATM  331  O   HOH T 330      -8.792  28.159  -7.016  1.00  0.52           O  
HETATM  332  O   HOH T 331     -55.037  40.033  -7.535  1.00  0.52           O  
HETATM  333  O   HOH T 332     -20.407  16.288  -3.263  1.00  0.52           O  
HETATM  334  O   HOH T 333     -10.099  32.477  14.542  1.00  0.52           O  
HETATM  335  O   HOH T 334     -59.895  -3.031   5.518  1.00  0.52           O  
HETATM  336  O   HOH T 335       2.931  24.211  -6.742  1.00  0.52           O  
HETATM  337  O   HOH T 336     -48.324   9.810  19.771  1.00  0.52           O  
HETATM  338  O   HOH T 337     -50.185   5.752  -7.417  1.00  0.53           O  
HETATM  339  O   HOH T 338     -28.525  24.759   2.444  1.00  0.53           O  
HETATM  340  O   HOH T 339     -27.606  19.094   5.326  1.00  0.53           O  
HETATM  341  O   HOH T 340      -2.114   0.982   3.221  1.00  0.53           O  
HETATM  342  O   HOH T 341     -41.242  53.634  18.402  1.00  0.53           O  
HETATM  343  O   HOH T 342     -32.128  35.877  18.019  1.00  0.53           O  
HETATM  344  O   HOH T 343      -2.214   3.094  -7.414  1.00  0.53           O  
HETATM  345  O   HOH T 344     -10.739  35.158   2.875  1.00  0.53           O  
HETATM  346  O   HOH T 345       6.350   8.399  12.186  1.00  0.53           O  
HETATM  347  O   HOH T 346     -36.838  18.385 -10.489  1.00  0.53           O  
HETATM  348  O   HOH T 347       7.398  23.967  -1.580  1.00  0.53           O  
HETATM  349  O   HOH T 348     -22.877  18.126   1.546  1.00  0.53           O  
HETATM  350  O   HOH T 349     -54.893  32.951  -6.967  1.00  0.54           O  
HETATM  351  O   HOH T 350     -33.846  47.335  16.347  1.00  0.54           O  
HETATM  352  O   HOH T 351     -31.473   9.208  15.940  1.00  0.54           O  
HETATM  353  O   HOH T 352     -13.438  34.680   2.318  1.00  0.54           O  
HETATM  354  O   HOH T 353     -28.370   6.663  17.446  1.00  0.54           O  
HETATM  355  O   HOH T 354     -24.248  34.991   2.492  1.00  0.54           O  
HETATM  356  O   HOH T 355     -11.906   8.936  18.085  1.00  0.54           O  
HETATM  357  O   HOH T 356     -41.336  16.066  16.982  1.00  0.54           O  
HETATM  358  O   HOH T 357     -30.745  29.197  16.314  1.00  0.54           O  
HETATM  359  O   HOH T 358     -12.207  29.288  15.475  1.00  0.54           O  
HETATM  360  O   HOH T 359     -23.484  17.867  15.368  1.00  0.54           O  
HETATM  361  O   HOH T 360     -32.466  49.520  22.702  1.00  0.55           O  
HETATM  362  O   HOH T 361      -8.134  25.376  18.693  1.00  0.55           O  
HETATM  363  O   HOH T 362     -22.181  31.088  10.733  1.00  0.55           O  
HETATM  364  O   HOH T 363     -56.474   5.035  -3.089  1.00  0.55           O  
HETATM  365  O   HOH T 364     -46.242  23.500 -10.699  1.00  0.55           O  
HETATM  366  O   HOH T 365     -63.332   2.298   4.548  1.00  0.55           O  
HETATM  367  O   HOH T 366     -38.665   2.674   9.313  1.00  0.55           O  
HETATM  368  O   HOH T 367     -47.841  21.816  20.339  1.00  0.55           O  
HETATM  369  O   HOH T 368       0.116  17.915  -7.590  1.00  0.56           O  
HETATM  370  O   HOH T 369     -42.883   3.215   0.830  1.00  0.56           O  
HETATM  371  O   HOH T 370     -48.923  42.734  14.794  1.00  0.56           O  
HETATM  372  O   HOH T 371      -3.704   1.142  -5.078  1.00  0.56           O  
HETATM  373  O   HOH T 372     -18.894  34.162   7.365  1.00  0.56           O  
HETATM  374  O   HOH T 373     -49.439  37.273  13.802  1.00  0.56           O  
HETATM  375  O   HOH T 374     -46.017  10.215  -2.515  1.00  0.56           O  
HETATM  376  O   HOH T 375      -2.414  29.283   2.455  1.00  0.56           O  
HETATM  377  O   HOH T 376      -4.061  29.332  -1.674  1.00  0.56           O  
HETATM  378  O   HOH T 377     -46.325  43.067  19.377  1.00  0.56           O  
HETATM  379  O   HOH T 378      -0.119  12.127  14.803  1.00  0.56           O  
HETATM  380  O   HOH T 379     -42.906   0.763  11.407  1.00  0.57           O  
HETATM  381  O   HOH T 380     -14.548  23.516  21.051  1.00  0.57           O  
HETATM  382  O   HOH T 381      -5.481   6.408  -8.039  1.00  0.57           O  
HETATM  383  O   HOH T 382     -16.275  28.358  15.741  1.00  0.57           O  
HETATM  384  O   HOH T 383     -47.283  31.675 -10.955  1.00  0.58           O  
HETATM  385  O   HOH T 384     -57.586   4.714  -0.729  1.00  0.58           O  
HETATM  386  O   HOH T 385     -28.577  28.246  14.705  1.00  0.59           O  
HETATM  387  O   HOH T 386     -31.671  30.667  18.586  1.00  0.59           O  
HETATM  388  O   HOH T 387     -70.466   8.969  -3.518  1.00  0.59           O  
HETATM  389  O   HOH T 388     -11.336  31.480  17.000  1.00  0.59           O  
HETATM  390  O   HOH T 389      -0.801   2.226  -1.710  1.00  0.70           O  
HETATM  391  O   HOH T 390      -1.226   1.403   0.725  1.00  0.74           O  
HETATM  392  O   HOH T 391     -62.275  -1.839  10.190  1.00  0.81           O  
TER     393      HOH T 391 
