# Supplementary material for: Accurate Prediction of Hydration Sites of Proteins Using Energy Model With Atom Embedding
Source: Front Mol Biosci. 2021 Sep 20;8:756075. doi: 10.3389/fmolb.2021.756075 (PMC8488165; doi:10.3389/fmolb.2021.756075)
Supplement: Supplementary file 1 [file DataSheet1.ZIP › Data Sheet 1/Our_result_pdb/our_dataset_output/3CKM_watersite.pdb]

HEADER                                                        XXXX


JRNL        PMID   -1
HETATM    1  O   HOH T   0      45.786  56.252  30.485  1.00  0.18           O  
HETATM    2  O   HOH T   1      24.034  29.648   5.998  1.00  0.19           O  
HETATM    3  O   HOH T   2      31.938  43.327   8.884  1.00  0.19           O  
HETATM    4  O   HOH T   3      23.284  55.140  10.163  1.00  0.20           O  
HETATM    5  O   HOH T   4      30.235  55.702  10.708  1.00  0.21           O  
HETATM    6  O   HOH T   5      13.771  58.567  15.761  1.00  0.21           O  
HETATM    7  O   HOH T   6      30.600  55.471  30.978  1.00  0.22           O  
HETATM    8  O   HOH T   7      58.167  53.465   2.660  1.00  0.22           O  
HETATM    9  O   HOH T   8      27.482  35.370  -8.285  1.00  0.23           O  
HETATM   10  O   HOH T   9      50.236  62.422  26.609  1.00  0.23           O  
HETATM   11  O   HOH T  10      39.023  36.554   5.859  1.00  0.23           O  
HETATM   12  O   HOH T  11      60.533  52.036   2.863  1.00  0.23           O  
HETATM   13  O   HOH T  12      59.586  56.987  35.152  1.00  0.24           O  
HETATM   14  O   HOH T  13      36.511  56.780  27.235  1.00  0.24           O  
HETATM   15  O   HOH T  14       9.996  36.766   7.774  1.00  0.25           O  
HETATM   16  O   HOH T  15      32.730  45.369  22.635  1.00  0.25           O  
HETATM   17  O   HOH T  16      12.818  35.546  10.410  1.00  0.25           O  
HETATM   18  O   HOH T  17      18.734  32.878   7.322  1.00  0.25           O  
HETATM   19  O   HOH T  18      29.159  42.688  12.576  1.00  0.25           O  
HETATM   20  O   HOH T  19      52.078  57.016   5.467  1.00  0.25           O  
HETATM   21  O   HOH T  20      44.694  36.283  23.384  1.00  0.25           O  
HETATM   22  O   HOH T  21      13.701  31.999   2.608  1.00  0.26           O  
HETATM   23  O   HOH T  22      21.537  35.110  -8.535  1.00  0.26           O  
HETATM   24  O   HOH T  23      62.736  51.588  23.343  1.00  0.26           O  
HETATM   25  O   HOH T  24      43.671  43.237  13.710  1.00  0.26           O  
HETATM   26  O   HOH T  25      29.186  39.140  19.063  1.00  0.26           O  
HETATM   27  O   HOH T  26      31.420  19.860  15.539  1.00  0.26           O  
HETATM   28  O   HOH T  27      17.994  46.196  21.906  1.00  0.26           O  
HETATM   29  O   HOH T  28      53.288  38.099  13.880  1.00  0.27           O  
HETATM   30  O   HOH T  29      47.642  40.287   9.469  1.00  0.28           O  
HETATM   31  O   HOH T  30      10.384  24.496   7.928  1.00  0.28           O  
HETATM   32  O   HOH T  31      51.806  55.089   9.416  1.00  0.28           O  
HETATM   33  O   HOH T  32      54.927  42.886   1.285  1.00  0.28           O  
HETATM   34  O   HOH T  33      44.263  57.816   3.339  1.00  0.28           O  
HETATM   35  O   HOH T  34      18.102  44.566  24.151  1.00  0.28           O  
HETATM   36  O   HOH T  35      35.892  46.666  26.249  1.00  0.28           O  
HETATM   37  O   HOH T  36      11.728  44.711   6.065  1.00  0.28           O  
HETATM   38  O   HOH T  37      28.501  30.037   0.926  1.00  0.28           O  
HETATM   39  O   HOH T  38      26.256  63.047  23.070  1.00  0.28           O  
HETATM   40  O   HOH T  39      32.353  28.503   1.060  1.00  0.29           O  
HETATM   41  O   HOH T  40      37.174  33.976  11.142  1.00  0.29           O  
HETATM   42  O   HOH T  41      37.074  37.473  16.592  1.00  0.29           O  
HETATM   43  O   HOH T  42      67.083  60.280   7.668  1.00  0.29           O  
HETATM   44  O   HOH T  43      33.206  46.801   5.428  1.00  0.29           O  
HETATM   45  O   HOH T  44      37.217  54.668  11.612  1.00  0.30           O  
HETATM   46  O   HOH T  45      24.278  41.127 -10.065  1.00  0.30           O  
HETATM   47  O   HOH T  46      61.486  59.603  33.059  1.00  0.30           O  
HETATM   48  O   HOH T  47      47.029  64.641  16.785  1.00  0.30           O  
HETATM   49  O   HOH T  48      57.796  40.683  22.472  1.00  0.30           O  
HETATM   50  O   HOH T  49      54.958  50.910  -0.002  1.00  0.30           O  
HETATM   51  O   HOH T  50      33.160  49.475  14.520  1.00  0.30           O  
HETATM   52  O   HOH T  51      24.613  60.808  15.555  1.00  0.30           O  
HETATM   53  O   HOH T  52      45.844  51.852   3.830  1.00  0.30           O  
HETATM   54  O   HOH T  53      60.964  62.066  14.275  1.00  0.30           O  
HETATM   55  O   HOH T  54      50.636  59.120  35.307  1.00  0.30           O  
HETATM   56  O   HOH T  55      54.385  64.778  36.530  1.00  0.30           O  
HETATM   57  O   HOH T  56       9.624  44.353   7.900  1.00  0.31           O  
HETATM   58  O   HOH T  57      29.205  54.274   7.319  1.00  0.31           O  
HETATM   59  O   HOH T  58      25.617  24.761   5.412  1.00  0.31           O  
HETATM   60  O   HOH T  59      57.722  42.598  -2.073  1.00  0.31           O  
HETATM   61  O   HOH T  60      67.799  64.037  13.685  1.00  0.32           O  
HETATM   62  O   HOH T  61      36.793  48.117  31.086  1.00  0.32           O  
HETATM   63  O   HOH T  62      23.344  26.764  10.367  1.00  0.32           O  
HETATM   64  O   HOH T  63      31.895  45.954   7.807  1.00  0.32           O  
HETATM   65  O   HOH T  64      10.279  44.474  -2.718  1.00  0.32           O  
HETATM   66  O   HOH T  65      27.272  47.372   7.314  1.00  0.32           O  
HETATM   67  O   HOH T  66      26.711  35.123  -4.788  1.00  0.32           O  
HETATM   68  O   HOH T  67      72.040  54.987   8.916  1.00  0.32           O  
HETATM   69  O   HOH T  68      11.098  26.013  -0.009  1.00  0.32           O  
HETATM   70  O   HOH T  69      52.449  35.164  20.272  1.00  0.33           O  
HETATM   71  O   HOH T  70      25.312  44.586  23.286  1.00  0.33           O  
HETATM   72  O   HOH T  71      49.419  41.791   7.819  1.00  0.33           O  
HETATM   73  O   HOH T  72      13.573  51.024   4.053  1.00  0.33           O  
HETATM   74  O   HOH T  73      38.225  62.271  31.890  1.00  0.33           O  
HETATM   75  O   HOH T  74      44.471  53.203  26.804  1.00  0.33           O  
HETATM   76  O   HOH T  75      28.950  67.441  21.161  1.00  0.33           O  
HETATM   77  O   HOH T  76      35.803  49.974  14.622  1.00  0.33           O  
HETATM   78  O   HOH T  77      59.259  62.153  -0.645  1.00  0.33           O  
HETATM   79  O   HOH T  78      53.395  31.862   9.602  1.00  0.33           O  
HETATM   80  O   HOH T  79      52.634  65.984  40.214  1.00  0.33           O  
HETATM   81  O   HOH T  80      37.034  32.014  13.100  1.00  0.33           O  
HETATM   82  O   HOH T  81      26.932  62.483  15.345  1.00  0.33           O  
HETATM   83  O   HOH T  82      37.784  55.101  29.215  1.00  0.33           O  
HETATM   84  O   HOH T  83      37.408  66.024  26.952  1.00  0.33           O  
HETATM   85  O   HOH T  84      41.950  36.446  19.409  1.00  0.33           O  
HETATM   86  O   HOH T  85      15.442  42.550  11.944  1.00  0.33           O  
HETATM   87  O   HOH T  86      19.466  31.951   4.635  1.00  0.33           O  
HETATM   88  O   HOH T  87      15.167  60.930  15.372  1.00  0.33           O  
HETATM   89  O   HOH T  88      61.106  57.600  21.732  1.00  0.34           O  
HETATM   90  O   HOH T  89      20.474  32.440  -0.640  1.00  0.34           O  
HETATM   91  O   HOH T  90      28.202  47.927  -0.827  1.00  0.34           O  
HETATM   92  O   HOH T  91      43.123  49.173  31.784  1.00  0.34           O  
HETATM   93  O   HOH T  92      19.524  56.161  22.639  1.00  0.34           O  
HETATM   94  O   HOH T  93       3.648  37.417  11.324  1.00  0.34           O  
HETATM   95  O   HOH T  94      50.080  39.649   4.820  1.00  0.34           O  
HETATM   96  O   HOH T  95      29.961  58.124  30.281  1.00  0.34           O  
HETATM   97  O   HOH T  96      26.183  59.147   6.237  1.00  0.34           O  
HETATM   98  O   HOH T  97      19.185  57.202  20.100  1.00  0.34           O  
HETATM   99  O   HOH T  98      56.040  32.536   9.693  1.00  0.34           O  
HETATM  100  O   HOH T  99      35.050  39.265  16.773  1.00  0.34           O  
HETATM  101  O   HOH T 100      14.520  45.075  11.058  1.00  0.34           O  
HETATM  102  O   HOH T 101      29.105  44.789  -5.758  1.00  0.34           O  
HETATM  103  O   HOH T 102      25.224  48.481  -4.257  1.00  0.34           O  
HETATM  104  O   HOH T 103      71.076  53.631   3.386  1.00  0.35           O  
HETATM  105  O   HOH T 104      49.378  67.933   4.957  1.00  0.35           O  
HETATM  106  O   HOH T 105      33.369  38.328  18.777  1.00  0.35           O  
HETATM  107  O   HOH T 106      24.611  55.675   3.332  1.00  0.35           O  
HETATM  108  O   HOH T 107      41.538  35.801   8.910  1.00  0.35           O  
HETATM  109  O   HOH T 108      15.304  63.564  12.329  1.00  0.35           O  
HETATM  110  O   HOH T 109      53.459  58.790  34.947  1.00  0.35           O  
HETATM  111  O   HOH T 110      49.334  48.642  -0.277  1.00  0.35           O  
HETATM  112  O   HOH T 111       4.140  36.338   8.920  1.00  0.35           O  
HETATM  113  O   HOH T 112      67.462  50.589  19.151  1.00  0.35           O  
HETATM  114  O   HOH T 113      10.137  34.882  14.523  1.00  0.35           O  
HETATM  115  O   HOH T 114      30.795  54.540  26.510  1.00  0.35           O  
HETATM  116  O   HOH T 115      43.796  46.247   7.913  1.00  0.35           O  
HETATM  117  O   HOH T 116      65.092  50.870  24.370  1.00  0.35           O  
HETATM  118  O   HOH T 117      46.098  35.783  11.724  1.00  0.35           O  
HETATM  119  O   HOH T 118      35.605  62.530  38.111  1.00  0.36           O  
HETATM  120  O   HOH T 119      54.857  60.300  27.634  1.00  0.36           O  
HETATM  121  O   HOH T 120      11.266  40.538  -6.294  1.00  0.36           O  
HETATM  122  O   HOH T 121      43.482  43.697   4.921  1.00  0.36           O  
HETATM  123  O   HOH T 122      13.002  52.650  15.223  1.00  0.36           O  
HETATM  124  O   HOH T 123      24.843  27.654   7.743  1.00  0.36           O  
HETATM  125  O   HOH T 124      26.563  60.108  19.928  1.00  0.36           O  
HETATM  126  O   HOH T 125      63.103  58.700   4.007  1.00  0.36           O  
HETATM  127  O   HOH T 126      25.117  36.079  -6.864  1.00  0.36           O  
HETATM  128  O   HOH T 127      27.084  38.073  -7.424  1.00  0.36           O  
HETATM  129  O   HOH T 128      16.126  33.191  13.599  1.00  0.36           O  
HETATM  130  O   HOH T 129      52.453  35.108  17.423  1.00  0.37           O  
HETATM  131  O   HOH T 130      12.645  49.442   6.141  1.00  0.37           O  
HETATM  132  O   HOH T 131      67.300  43.788   6.369  1.00  0.37           O  
HETATM  133  O   HOH T 132      28.349  61.634  18.641  1.00  0.37           O  
HETATM  134  O   HOH T 133      31.356  51.892  27.246  1.00  0.37           O  
HETATM  135  O   HOH T 134      33.508  38.965  -8.858  1.00  0.37           O  
HETATM  136  O   HOH T 135      45.300  31.980  23.170  1.00  0.37           O  
HETATM  137  O   HOH T 136      18.702  47.866  -5.703  1.00  0.37           O  
HETATM  138  O   HOH T 137      28.948  51.072   0.676  1.00  0.37           O  
HETATM  139  O   HOH T 138      65.999  53.402  24.816  1.00  0.37           O  
HETATM  140  O   HOH T 139      34.732  34.606   0.757  1.00  0.37           O  
HETATM  141  O   HOH T 140      37.964  53.784   6.658  1.00  0.37           O  
HETATM  142  O   HOH T 141      54.521  44.320  27.918  1.00  0.37           O  
HETATM  143  O   HOH T 142      61.646  40.331  15.736  1.00  0.37           O  
HETATM  144  O   HOH T 143      54.357  36.512  15.897  1.00  0.37           O  
HETATM  145  O   HOH T 144      56.633  36.569  22.516  1.00  0.38           O  
HETATM  146  O   HOH T 145      59.830  63.464  16.269  1.00  0.38           O  
HETATM  147  O   HOH T 146      16.776  41.659 -11.965  1.00  0.38           O  
HETATM  148  O   HOH T 147      21.679  56.382  20.974  1.00  0.38           O  
HETATM  149  O   HOH T 148      42.072  50.085  11.299  1.00  0.38           O  
HETATM  150  O   HOH T 149      34.827  47.803  10.292  1.00  0.38           O  
HETATM  151  O   HOH T 150      24.833  56.795  25.084  1.00  0.38           O  
HETATM  152  O   HOH T 151      58.526  51.707  26.120  1.00  0.38           O  
HETATM  153  O   HOH T 152      13.517  43.557  -4.799  1.00  0.38           O  
HETATM  154  O   HOH T 153      42.642  64.829  13.748  1.00  0.38           O  
HETATM  155  O   HOH T 154      11.308  33.064   1.946  1.00  0.38           O  
HETATM  156  O   HOH T 155      56.757  38.730  24.246  1.00  0.38           O  
HETATM  157  O   HOH T 156      39.136  65.107  18.039  1.00  0.39           O  
HETATM  158  O   HOH T 157      16.823  35.535  14.977  1.00  0.39           O  
HETATM  159  O   HOH T 158      47.943  37.974  11.115  1.00  0.39           O  
HETATM  160  O   HOH T 159      12.260  56.896  14.259  1.00  0.39           O  
HETATM  161  O   HOH T 160      43.747  66.573   9.075  1.00  0.39           O  
HETATM  162  O   HOH T 161      63.808  39.748   5.801  1.00  0.39           O  
HETATM  163  O   HOH T 162      32.433  33.199   0.134  1.00  0.39           O  
HETATM  164  O   HOH T 163      26.738  58.667   3.495  1.00  0.39           O  
HETATM  165  O   HOH T 164      44.827  64.799  22.051  1.00  0.39           O  
HETATM  166  O   HOH T 165      51.156  31.077  11.127  1.00  0.39           O  
HETATM  167  O   HOH T 166      30.741  70.105  11.491  1.00  0.39           O  
HETATM  168  O   HOH T 167      11.361  49.230  10.158  1.00  0.39           O  
HETATM  169  O   HOH T 168      40.721  43.274   4.808  1.00  0.39           O  
HETATM  170  O   HOH T 169      17.213  58.554  18.624  1.00  0.39           O  
HETATM  171  O   HOH T 170      10.207  48.713   4.860  1.00  0.39           O  
HETATM  172  O   HOH T 171      42.531  58.885  28.103  1.00  0.39           O  
HETATM  173  O   HOH T 172      49.604  41.871   3.275  1.00  0.40           O  
HETATM  174  O   HOH T 173      41.587  41.659  12.326  1.00  0.40           O  
HETATM  175  O   HOH T 174      23.566  54.370  24.242  1.00  0.40           O  
HETATM  176  O   HOH T 175      71.995  58.338  16.244  1.00  0.40           O  
HETATM  177  O   HOH T 176      18.864  50.158  -4.238  1.00  0.40           O  
HETATM  178  O   HOH T 177      19.496  32.459   1.841  1.00  0.40           O  
HETATM  179  O   HOH T 178      46.193  62.710  32.099  1.00  0.40           O  
HETATM  180  O   HOH T 179      45.273  50.527   8.980  1.00  0.40           O  
HETATM  181  O   HOH T 180      58.677  49.030  25.380  1.00  0.40           O  
HETATM  182  O   HOH T 181      46.474  36.913   9.227  1.00  0.40           O  
HETATM  183  O   HOH T 182      33.534  50.788   7.270  1.00  0.40           O  
HETATM  184  O   HOH T 183      28.290  53.443  -0.488  1.00  0.41           O  
HETATM  185  O   HOH T 184      42.646  36.889  13.118  1.00  0.41           O  
HETATM  186  O   HOH T 185       8.978  40.835  -4.644  1.00  0.41           O  
HETATM  187  O   HOH T 186      47.406  35.839  23.906  1.00  0.41           O  
HETATM  188  O   HOH T 187      39.729  50.201   9.756  1.00  0.41           O  
HETATM  189  O   HOH T 188      55.970  48.630  25.254  1.00  0.41           O  
HETATM  190  O   HOH T 189      11.993  42.204  10.483  1.00  0.41           O  
HETATM  191  O   HOH T 190      28.303  55.819   1.012  1.00  0.41           O  
HETATM  192  O   HOH T 191      53.408  52.282  31.301  1.00  0.41           O  
HETATM  193  O   HOH T 192      27.485  64.006  17.715  1.00  0.41           O  
HETATM  194  O   HOH T 193      56.511  55.841   4.792  1.00  0.41           O  
HETATM  195  O   HOH T 194      57.443  32.414  11.965  1.00  0.41           O  
HETATM  196  O   HOH T 195      57.779  46.725  24.236  1.00  0.41           O  
HETATM  197  O   HOH T 196      44.730  46.070   5.277  1.00  0.41           O  
HETATM  198  O   HOH T 197      38.351  39.206  21.583  1.00  0.41           O  
HETATM  199  O   HOH T 198      48.859  44.793   0.688  1.00  0.41           O  
HETATM  200  O   HOH T 199      35.757  30.123   4.119  1.00  0.41           O  
HETATM  201  O   HOH T 200      64.289  59.124  20.611  1.00  0.42           O  
HETATM  202  O   HOH T 201      15.943  33.303  18.834  1.00  0.42           O  
HETATM  203  O   HOH T 202      53.549  61.640  21.925  1.00  0.42           O  
HETATM  204  O   HOH T 203      17.899  26.469  -1.123  1.00  0.42           O  
HETATM  205  O   HOH T 204      24.791  57.924   1.562  1.00  0.42           O  
HETATM  206  O   HOH T 205       4.242  39.155   9.342  1.00  0.42           O  
HETATM  207  O   HOH T 206      23.247  53.370  26.769  1.00  0.42           O  
HETATM  208  O   HOH T 207      28.384  56.631  32.003  1.00  0.42           O  
HETATM  209  O   HOH T 208      24.385  30.744  -5.593  1.00  0.42           O  
HETATM  210  O   HOH T 209      42.268  51.930  25.839  1.00  0.42           O  
HETATM  211  O   HOH T 210      41.504  68.077   9.848  1.00  0.42           O  
HETATM  212  O   HOH T 211      34.674  53.594  10.951  1.00  0.42           O  
HETATM  213  O   HOH T 212      32.486  20.792  13.244  1.00  0.43           O  
HETATM  214  O   HOH T 213      23.413  56.822  18.834  1.00  0.43           O  
HETATM  215  O   HOH T 214      67.767  51.362  24.015  1.00  0.43           O  
HETATM  216  O   HOH T 215      22.723  43.495  -9.681  1.00  0.43           O  
HETATM  217  O   HOH T 216      47.220  43.149   2.475  1.00  0.43           O  
HETATM  218  O   HOH T 217      60.626  46.309   1.739  1.00  0.43           O  
HETATM  219  O   HOH T 218      22.720  24.485   8.941  1.00  0.43           O  
HETATM  220  O   HOH T 219      35.077  50.593  26.092  1.00  0.43           O  
HETATM  221  O   HOH T 220      20.795  54.240  24.110  1.00  0.43           O  
HETATM  222  O   HOH T 221      51.021  65.628  14.579  1.00  0.43           O  
HETATM  223  O   HOH T 222      64.074  46.962   3.986  1.00  0.43           O  
HETATM  224  O   HOH T 223      43.934  53.436   5.076  1.00  0.43           O  
HETATM  225  O   HOH T 224      25.803  28.571  -4.528  1.00  0.43           O  
HETATM  226  O   HOH T 225      39.696  39.350  12.699  1.00  0.43           O  
HETATM  227  O   HOH T 226      58.362  55.638   0.961  1.00  0.43           O  
HETATM  228  O   HOH T 227      17.448  42.056  13.825  1.00  0.43           O  
HETATM  229  O   HOH T 228      10.975  46.735  11.285  1.00  0.43           O  
HETATM  230  O   HOH T 229      47.761  63.466  27.469  1.00  0.43           O  
HETATM  231  O   HOH T 230      30.008  68.192  16.249  1.00  0.43           O  
HETATM  232  O   HOH T 231      37.038  49.553  10.279  1.00  0.43           O  
HETATM  233  O   HOH T 232      38.671  55.760   8.426  1.00  0.44           O  
HETATM  234  O   HOH T 233      47.744  39.044   0.897  1.00  0.44           O  
HETATM  235  O   HOH T 234      30.777  38.908 -11.895  1.00  0.44           O  
HETATM  236  O   HOH T 235      24.161  61.745  24.503  1.00  0.44           O  
HETATM  237  O   HOH T 236       7.793  46.430   8.263  1.00  0.44           O  
HETATM  238  O   HOH T 237      26.566  32.382  -5.547  1.00  0.44           O  
HETATM  239  O   HOH T 238      33.197  62.168  36.809  1.00  0.44           O  
HETATM  240  O   HOH T 239      43.007  41.366  -4.949  1.00  0.44           O  
HETATM  241  O   HOH T 240      25.130  40.009  -7.603  1.00  0.44           O  
HETATM  242  O   HOH T 241      44.161  50.111   2.450  1.00  0.44           O  
HETATM  243  O   HOH T 242      24.766  59.169  17.895  1.00  0.44           O  
HETATM  244  O   HOH T 243      19.146  42.845 -12.718  1.00  0.44           O  
HETATM  245  O   HOH T 244      24.695  23.456  13.006  1.00  0.44           O  
HETATM  246  O   HOH T 245      47.944  32.016  22.519  1.00  0.44           O  
HETATM  247  O   HOH T 246      49.779  35.703  19.913  1.00  0.44           O  
HETATM  248  O   HOH T 247      52.220  61.580  19.589  1.00  0.45           O  
HETATM  249  O   HOH T 248      27.736  49.339  -3.222  1.00  0.45           O  
HETATM  250  O   HOH T 249      35.487  61.105  35.738  1.00  0.45           O  
HETATM  251  O   HOH T 250      42.590  43.739  -3.542  1.00  0.45           O  
HETATM  252  O   HOH T 251      28.449  31.838  19.324  1.00  0.45           O  
HETATM  253  O   HOH T 252      40.667  55.261  29.215  1.00  0.45           O  
HETATM  254  O   HOH T 253      31.150  30.917   0.608  1.00  0.45           O  
HETATM  255  O   HOH T 254      72.954  51.628   2.571  1.00  0.45           O  
HETATM  256  O   HOH T 255      49.992  45.434   4.327  1.00  0.45           O  
HETATM  257  O   HOH T 256      48.879  62.930  -1.325  1.00  0.45           O  
HETATM  258  O   HOH T 257      27.845  42.132  21.925  1.00  0.45           O  
HETATM  259  O   HOH T 258      16.501  26.704  -3.526  1.00  0.45           O  
HETATM  260  O   HOH T 259      14.847  59.875  17.914  1.00  0.46           O  
HETATM  261  O   HOH T 260      27.535  46.896  -4.634  1.00  0.46           O  
HETATM  262  O   HOH T 261      33.910  52.817  26.866  1.00  0.46           O  
HETATM  263  O   HOH T 262      24.302  55.734  27.683  1.00  0.46           O  
HETATM  264  O   HOH T 263      27.169  65.662  19.865  1.00  0.46           O  
HETATM  265  O   HOH T 264      72.327  60.307  20.423  1.00  0.46           O  
HETATM  266  O   HOH T 265      58.442  51.881  31.577  1.00  0.46           O  
HETATM  267  O   HOH T 266      35.871  51.259  12.085  1.00  0.46           O  
HETATM  268  O   HOH T 267      43.684  66.730  11.940  1.00  0.46           O  
HETATM  269  O   HOH T 268      56.389  40.882  -0.158  1.00  0.46           O  
HETATM  270  O   HOH T 269      33.846  23.114  13.493  1.00  0.46           O  
HETATM  271  O   HOH T 270      60.382  41.384  23.181  1.00  0.46           O  
HETATM  272  O   HOH T 271      58.737  34.614  10.660  1.00  0.46           O  
HETATM  273  O   HOH T 272      36.519  54.104   8.955  1.00  0.46           O  
HETATM  274  O   HOH T 273      53.357  57.565   3.080  1.00  0.46           O  
HETATM  275  O   HOH T 274      58.386  63.315  18.633  1.00  0.46           O  
HETATM  276  O   HOH T 275      15.911  31.589   1.233  1.00  0.46           O  
HETATM  277  O   HOH T 276      55.576  49.833  27.775  1.00  0.47           O  
HETATM  278  O   HOH T 277      17.298  60.851  17.102  1.00  0.47           O  
HETATM  279  O   HOH T 278       7.213  25.643   0.858  1.00  0.47           O  
HETATM  280  O   HOH T 279      38.980  49.333   3.200  1.00  0.47           O  
HETATM  281  O   HOH T 280      34.163  23.472  16.179  1.00  0.47           O  
HETATM  282  O   HOH T 281      45.375  51.739   6.610  1.00  0.47           O  
HETATM  283  O   HOH T 282      61.848  58.628   1.632  1.00  0.47           O  
HETATM  284  O   HOH T 283      20.372  29.913  -4.621  1.00  0.47           O  
HETATM  285  O   HOH T 284      52.585  66.706  37.466  1.00  0.47           O  
HETATM  286  O   HOH T 285      42.968  33.600   8.113  1.00  0.47           O  
HETATM  287  O   HOH T 286      14.909  42.293  14.717  1.00  0.47           O  
HETATM  288  O   HOH T 287      44.447  32.879  20.616  1.00  0.47           O  
HETATM  289  O   HOH T 288      35.198  54.751  28.269  1.00  0.47           O  
HETATM  290  O   HOH T 289      31.234  53.496   9.218  1.00  0.47           O  
HETATM  291  O   HOH T 290      41.062  32.903  23.343  1.00  0.47           O  
HETATM  292  O   HOH T 291      59.798  60.474   1.480  1.00  0.47           O  
HETATM  293  O   HOH T 292      49.529  33.972  23.627  1.00  0.47           O  
HETATM  294  O   HOH T 293      15.254  50.176   6.080  1.00  0.47           O  
HETATM  295  O   HOH T 294      41.331  56.634  26.852  1.00  0.47           O  
HETATM  296  O   HOH T 295      50.928  58.890   3.596  1.00  0.47           O  
HETATM  297  O   HOH T 296      13.230  41.305  12.783  1.00  0.47           O  
HETATM  298  O   HOH T 297      31.731  22.694  15.264  1.00  0.47           O  
HETATM  299  O   HOH T 298      10.814  42.913  -4.928  1.00  0.47           O  
HETATM  300  O   HOH T 299      65.842  48.740  18.039  1.00  0.47           O  
HETATM  301  O   HOH T 300      13.566  61.984   8.819  1.00  0.47           O  
HETATM  302  O   HOH T 301      40.317  33.933  28.292  1.00  0.48           O  
HETATM  303  O   HOH T 302      41.372  65.533  19.411  1.00  0.48           O  
HETATM  304  O   HOH T 303      50.756  52.573  30.697  1.00  0.48           O  
HETATM  305  O   HOH T 304      37.330  45.736  -2.365  1.00  0.48           O  
HETATM  306  O   HOH T 305      25.272  64.595  14.431  1.00  0.48           O  
HETATM  307  O   HOH T 306      33.024  61.055  32.395  1.00  0.48           O  
HETATM  308  O   HOH T 307      41.016  34.660   6.397  1.00  0.48           O  
HETATM  309  O   HOH T 308      19.145  27.672  -3.386  1.00  0.48           O  
HETATM  310  O   HOH T 309      47.451  48.485  -2.359  1.00  0.48           O  
HETATM  311  O   HOH T 310      34.619  49.957  30.829  1.00  0.48           O  
HETATM  312  O   HOH T 311      42.251  34.135  13.683  1.00  0.48           O  
HETATM  313  O   HOH T 312      20.602  41.912 -10.515  1.00  0.48           O  
HETATM  314  O   HOH T 313      38.299  31.781  15.567  1.00  0.48           O  
HETATM  315  O   HOH T 314      13.534  33.093  14.887  1.00  0.48           O  
HETATM  316  O   HOH T 315      55.055  34.834  21.172  1.00  0.48           O  
HETATM  317  O   HOH T 316      11.727  36.308  12.827  1.00  0.48           O  
HETATM  318  O   HOH T 317      39.319  34.852  24.124  1.00  0.48           O  
HETATM  319  O   HOH T 318      38.908  34.005  13.729  1.00  0.48           O  
HETATM  320  O   HOH T 319      63.927  39.572  17.006  1.00  0.48           O  
HETATM  321  O   HOH T 320      42.028  33.759  19.660  1.00  0.49           O  
HETATM  322  O   HOH T 321      42.097  35.400  24.084  1.00  0.49           O  
HETATM  323  O   HOH T 322      46.160  30.691  20.878  1.00  0.49           O  
HETATM  324  O   HOH T 323      18.229  29.518   4.638  1.00  0.49           O  
HETATM  325  O   HOH T 324      30.103  47.404  -5.784  1.00  0.49           O  
HETATM  326  O   HOH T 325      37.503  44.548  -5.739  1.00  0.49           O  
HETATM  327  O   HOH T 326      10.187  46.868   6.970  1.00  0.49           O  
HETATM  328  O   HOH T 327      41.293  65.693  24.539  1.00  0.49           O  
HETATM  329  O   HOH T 328      27.529  65.087  12.918  1.00  0.49           O  
HETATM  330  O   HOH T 329      59.946  39.061   0.802  1.00  0.49           O  
HETATM  331  O   HOH T 330      58.974  38.069  22.626  1.00  0.49           O  
HETATM  332  O   HOH T 331      48.457  55.752  30.600  1.00  0.49           O  
HETATM  333  O   HOH T 332       8.076  48.673   6.614  1.00  0.49           O  
HETATM  334  O   HOH T 333      44.370  42.618   2.489  1.00  0.50           O  
HETATM  335  O   HOH T 334      47.693  33.250   8.184  1.00  0.50           O  
HETATM  336  O   HOH T 335      51.196  56.774   1.547  1.00  0.50           O  
HETATM  337  O   HOH T 336       2.558  39.818  11.606  1.00  0.50           O  
HETATM  338  O   HOH T 337      45.372  34.379   9.273  1.00  0.50           O  
HETATM  339  O   HOH T 338      46.094  41.295   0.715  1.00  0.50           O  
HETATM  340  O   HOH T 339      33.128  40.352 -11.313  1.00  0.50           O  
HETATM  341  O   HOH T 340      24.752  61.212  21.802  1.00  0.50           O  
HETATM  342  O   HOH T 341      32.478  50.998   9.810  1.00  0.50           O  
HETATM  343  O   HOH T 342      55.592  52.541   2.124  1.00  0.50           O  
HETATM  344  O   HOH T 343      62.138  36.363  -1.716  1.00  0.50           O  
HETATM  345  O   HOH T 344       4.014  38.702  13.743  1.00  0.50           O  
HETATM  346  O   HOH T 345      62.363  59.949  22.372  1.00  0.50           O  
HETATM  347  O   HOH T 346      14.442  29.510  -6.605  1.00  0.50           O  
HETATM  348  O   HOH T 347      36.525  62.069  24.749  1.00  0.50           O  
HETATM  349  O   HOH T 348      37.969  52.198  10.423  1.00  0.50           O  
HETATM  350  O   HOH T 349      29.279  46.951   1.539  1.00  0.50           O  
HETATM  351  O   HOH T 350      40.537  37.114  11.239  1.00  0.50           O  
HETATM  352  O   HOH T 351      49.206  30.381  13.098  1.00  0.51           O  
HETATM  353  O   HOH T 352       7.443  43.894   9.323  1.00  0.51           O  
HETATM  354  O   HOH T 353      40.693  35.172  21.626  1.00  0.51           O  
HETATM  355  O   HOH T 354      32.547  47.600  -0.277  1.00  0.51           O  
HETATM  356  O   HOH T 355      39.724  34.114   1.604  1.00  0.51           O  
HETATM  357  O   HOH T 356      43.556  48.444   9.536  1.00  0.51           O  
HETATM  358  O   HOH T 357      41.391  49.795  29.647  1.00  0.51           O  
HETATM  359  O   HOH T 358      42.655  68.371   7.259  1.00  0.51           O  
HETATM  360  O   HOH T 359      31.711  68.902  26.670  1.00  0.51           O  
HETATM  361  O   HOH T 360      18.625  24.860  -3.369  1.00  0.51           O  
HETATM  362  O   HOH T 361      12.746  31.779  -0.029  1.00  0.51           O  
HETATM  363  O   HOH T 362      38.344  69.940  15.860  1.00  0.51           O  
HETATM  364  O   HOH T 363      67.263  44.547  12.278  1.00  0.51           O  
HETATM  365  O   HOH T 364      50.703  59.430   0.957  1.00  0.51           O  
HETATM  366  O   HOH T 365      52.472  38.236   5.562  1.00  0.51           O  
HETATM  367  O   HOH T 366      23.217  25.780   6.479  1.00  0.51           O  
HETATM  368  O   HOH T 367      45.733  55.881   2.059  1.00  0.51           O  
HETATM  369  O   HOH T 368      30.663  44.029  23.852  1.00  0.51           O  
HETATM  370  O   HOH T 369      13.425  28.982  -3.974  1.00  0.51           O  
HETATM  371  O   HOH T 370      33.900  52.776   5.442  1.00  0.51           O  
HETATM  372  O   HOH T 371      37.476  48.697   5.546  1.00  0.51           O  
HETATM  373  O   HOH T 372       8.999  48.516   2.326  1.00  0.51           O  
HETATM  374  O   HOH T 373      22.738  30.326  -3.270  1.00  0.51           O  
HETATM  375  O   HOH T 374       6.301  35.051  10.213  1.00  0.52           O  
HETATM  376  O   HOH T 375      28.352  67.897  18.536  1.00  0.52           O  
HETATM  377  O   HOH T 376      52.823  31.329  25.696  1.00  0.52           O  
HETATM  378  O   HOH T 377      34.774  49.121   5.416  1.00  0.52           O  
HETATM  379  O   HOH T 378      44.302  48.720   4.832  1.00  0.52           O  
HETATM  380  O   HOH T 379      54.389  33.814  18.782  1.00  0.52           O  
HETATM  381  O   HOH T 380      40.337  69.785   8.238  1.00  0.52           O  
HETATM  382  O   HOH T 381      16.810  46.959  24.289  1.00  0.52           O  
HETATM  383  O   HOH T 382      47.788  34.583  21.464  1.00  0.52           O  
HETATM  384  O   HOH T 383      60.869  50.651  25.003  1.00  0.52           O  
HETATM  385  O   HOH T 384      26.334  62.943  20.155  1.00  0.52           O  
HETATM  386  O   HOH T 385      17.237  44.060  -0.503  1.00  0.52           O  
HETATM  387  O   HOH T 386      58.743  51.694  28.874  1.00  0.52           O  
HETATM  388  O   HOH T 387      17.958  27.544  17.003  1.00  0.52           O  
HETATM  389  O   HOH T 388      11.449  27.497  -2.404  1.00  0.52           O  
HETATM  390  O   HOH T 389      43.798  66.515  20.156  1.00  0.52           O  
HETATM  391  O   HOH T 390      62.335  45.177  21.442  1.00  0.52           O  
HETATM  392  O   HOH T 391      71.121  50.202   4.147  1.00  0.53           O  
HETATM  393  O   HOH T 392      62.361  56.549  -0.141  1.00  0.53           O  
HETATM  394  O   HOH T 393      30.103  41.429  23.393  1.00  0.53           O  
HETATM  395  O   HOH T 394      57.952  37.367  20.114  1.00  0.53           O  
HETATM  396  O   HOH T 395      32.055  48.021   9.812  1.00  0.53           O  
HETATM  397  O   HOH T 396      17.095  35.515  17.657  1.00  0.53           O  
HETATM  398  O   HOH T 397      38.588  49.507  29.317  1.00  0.53           O  
HETATM  399  O   HOH T 398      17.607  26.884   5.257  1.00  0.53           O  
HETATM  400  O   HOH T 399      40.636  35.580   3.792  1.00  0.53           O  
HETATM  401  O   HOH T 400      55.282  30.637  11.375  1.00  0.53           O  
HETATM  402  O   HOH T 401      36.585  27.062  10.453  1.00  0.53           O  
HETATM  403  O   HOH T 402       3.996  40.494  -0.011  1.00  0.53           O  
HETATM  404  O   HOH T 403      17.871  43.798 -10.548  1.00  0.53           O  
HETATM  405  O   HOH T 404      39.769  67.291  26.151  1.00  0.54           O  
HETATM  406  O   HOH T 405      51.809  32.445  23.405  1.00  0.54           O  
HETATM  407  O   HOH T 406      50.213  66.608  12.040  1.00  0.54           O  
HETATM  408  O   HOH T 407      25.272  52.019  27.984  1.00  0.54           O  
HETATM  409  O   HOH T 408      39.802  32.620  25.838  1.00  0.54           O  
HETATM  410  O   HOH T 409      61.649  40.514  12.966  1.00  0.54           O  
HETATM  411  O   HOH T 410      29.168  76.119  18.767  1.00  0.54           O  
HETATM  412  O   HOH T 411      53.471  64.829   3.379  1.00  0.54           O  
HETATM  413  O   HOH T 412      22.562  24.424  11.696  1.00  0.54           O  
HETATM  414  O   HOH T 413      57.358  39.018   1.690  1.00  0.54           O  
HETATM  415  O   HOH T 414      44.705  31.651  15.443  1.00  0.54           O  
HETATM  416  O   HOH T 415      49.556  37.996   2.727  1.00  0.54           O  
HETATM  417  O   HOH T 416      12.005  30.361  -2.239  1.00  0.55           O  
HETATM  418  O   HOH T 417      42.674  51.890  28.472  1.00  0.55           O  
HETATM  419  O   HOH T 418      31.648  52.900   3.758  1.00  0.55           O  
HETATM  420  O   HOH T 419      17.511  38.007  16.232  1.00  0.55           O  
HETATM  421  O   HOH T 420      33.588  41.587  -9.050  1.00  0.55           O  
HETATM  422  O   HOH T 421      23.246  28.377  19.688  1.00  0.55           O  
HETATM  423  O   HOH T 422      48.553  66.356  15.403  1.00  0.55           O  
HETATM  424  O   HOH T 423      41.163  36.495   1.342  1.00  0.55           O  
HETATM  425  O   HOH T 424      30.857  52.589  -0.796  1.00  0.55           O  
HETATM  426  O   HOH T 425      19.503  59.222  17.167  1.00  0.55           O  
HETATM  427  O   HOH T 426      36.386  48.975  27.657  1.00  0.55           O  
HETATM  428  O   HOH T 427      17.653  43.404  21.758  1.00  0.55           O  
HETATM  429  O   HOH T 428      55.744  46.081  26.133  1.00  0.56           O  
HETATM  430  O   HOH T 429      50.132  32.395   8.880  1.00  0.56           O  
HETATM  431  O   HOH T 430      45.279  54.169  29.172  1.00  0.56           O  
HETATM  432  O   HOH T 431      35.636  70.082  20.981  1.00  0.56           O  
HETATM  433  O   HOH T 432       8.935  47.759  12.824  1.00  0.56           O  
HETATM  434  O   HOH T 433       3.255  42.188  -3.234  1.00  0.56           O  
HETATM  435  O   HOH T 434      19.337  48.691  26.080  1.00  0.56           O  
HETATM  436  O   HOH T 435      43.524  32.082  18.046  1.00  0.56           O  
HETATM  437  O   HOH T 436      54.232  39.676  32.215  1.00  0.56           O  
HETATM  438  O   HOH T 437      66.398  58.564  21.973  1.00  0.56           O  
HETATM  439  O   HOH T 438      39.665  39.398  -1.649  1.00  0.56           O  
HETATM  440  O   HOH T 439      18.690  58.224   0.830  1.00  0.56           O  
HETATM  441  O   HOH T 440      10.469  55.917   7.887  1.00  0.57           O  
HETATM  442  O   HOH T 441      66.519  62.440  15.487  1.00  0.57           O  
HETATM  443  O   HOH T 442       9.112  46.290  -0.813  1.00  0.57           O  
HETATM  444  O   HOH T 443      40.569  33.286  16.102  1.00  0.57           O  
HETATM  445  O   HOH T 444      54.299  32.205  27.630  1.00  0.57           O  
HETATM  446  O   HOH T 445      25.220  46.140  25.349  1.00  0.57           O  
HETATM  447  O   HOH T 446      65.905  47.809   5.991  1.00  0.57           O  
HETATM  448  O   HOH T 447      44.464  41.308  25.015  1.00  0.57           O  
HETATM  449  O   HOH T 448      43.854  66.399  24.196  1.00  0.57           O  
HETATM  450  O   HOH T 449      31.205  38.171  20.487  1.00  0.57           O  
HETATM  451  O   HOH T 450      46.612  58.595  31.038  1.00  0.57           O  
HETATM  452  O   HOH T 451      24.805  64.952  28.441  1.00  0.58           O  
HETATM  453  O   HOH T 452      23.307  61.501  17.819  1.00  0.58           O  
HETATM  454  O   HOH T 453      45.485  64.785  26.840  1.00  0.58           O  
HETATM  455  O   HOH T 454      39.137  67.897  14.413  1.00  0.58           O  
HETATM  456  O   HOH T 455      61.488  38.876  23.527  1.00  0.59           O  
HETATM  457  O   HOH T 456      47.971  60.995  -3.134  1.00  0.59           O  
HETATM  458  O   HOH T 457      59.266  36.248   8.517  1.00  0.59           O  
HETATM  459  O   HOH T 458      62.650  39.375   3.401  1.00  0.59           O  
HETATM  460  O   HOH T 459      27.560  38.072  21.077  1.00  0.59           O  
HETATM  461  O   HOH T 460      32.553  50.350  -0.817  1.00  0.60           O  
HETATM  462  O   HOH T 461      33.712  48.113   7.759  1.00  0.60           O  
HETATM  463  O   HOH T 462      18.422  55.930  -1.582  1.00  0.60           O  
TER     464      HOH T 462 
