# Supplementary material for: Accurate Prediction of Hydration Sites of Proteins Using Energy Model With Atom Embedding
Source: Front Mol Biosci. 2021 Sep 20;8:756075. doi: 10.3389/fmolb.2021.756075 (PMC8488165; doi:10.3389/fmolb.2021.756075)
Supplement: Supplementary file 1 [file DataSheet1.ZIP › Data Sheet 1/Our_result_pdb/our_dataset_output/3COV_watersite.pdb]

HEADER                                                        XXXX


JRNL        PMID   -1
HETATM    1  O   HOH T   0       5.396 -11.549  49.255  1.00  0.17           O  
HETATM    2  O   HOH T   1       3.630 -10.096  55.942  1.00  0.17           O  
HETATM    3  O   HOH T   2      22.319   6.942  -9.808  1.00  0.17           O  
HETATM    4  O   HOH T   3      22.648  -0.934  10.586  1.00  0.17           O  
HETATM    5  O   HOH T   4       4.118  -5.183  36.035  1.00  0.18           O  
HETATM    6  O   HOH T   5     -13.021  -1.331  12.524  1.00  0.18           O  
HETATM    7  O   HOH T   6      10.170  -9.922  16.450  1.00  0.19           O  
HETATM    8  O   HOH T   7      23.748  24.776   6.707  1.00  0.19           O  
HETATM    9  O   HOH T   8      15.665  -8.418   9.013  1.00  0.20           O  
HETATM   10  O   HOH T   9       5.724 -12.557  51.760  1.00  0.20           O  
HETATM   11  O   HOH T  10      20.032  -6.382  59.604  1.00  0.20           O  
HETATM   12  O   HOH T  11      23.772   7.298 -12.126  1.00  0.20           O  
HETATM   13  O   HOH T  12      -5.016  -4.001  43.946  1.00  0.21           O  
HETATM   14  O   HOH T  13      -8.969  -3.176  41.374  1.00  0.21           O  
HETATM   15  O   HOH T  14      -8.810  21.934   9.648  1.00  0.21           O  
HETATM   16  O   HOH T  15       6.527 -12.726  47.036  1.00  0.21           O  
HETATM   17  O   HOH T  16      16.023  -8.699  30.913  1.00  0.21           O  
HETATM   18  O   HOH T  17       9.631 -22.707  57.593  1.00  0.21           O  
HETATM   19  O   HOH T  18     -15.889  -4.903  29.115  1.00  0.21           O  
HETATM   20  O   HOH T  19      19.847  -0.756  48.444  1.00  0.21           O  
HETATM   21  O   HOH T  20       9.442  -6.974  37.409  1.00  0.22           O  
HETATM   22  O   HOH T  21      10.182 -15.222  63.539  1.00  0.22           O  
HETATM   23  O   HOH T  22      19.833   3.016  45.309  1.00  0.22           O  
HETATM   24  O   HOH T  23      13.269 -11.634   1.162  1.00  0.22           O  
HETATM   25  O   HOH T  24      14.342  11.898  10.978  1.00  0.22           O  
HETATM   26  O   HOH T  25      16.158  -7.759  28.334  1.00  0.22           O  
HETATM   27  O   HOH T  26      13.765  -5.221  10.985  1.00  0.22           O  
HETATM   28  O   HOH T  27      13.866 -11.755  24.493  1.00  0.23           O  
HETATM   29  O   HOH T  28      21.766   6.350 -17.034  1.00  0.23           O  
HETATM   30  O   HOH T  29      22.833   9.792  -6.304  1.00  0.23           O  
HETATM   31  O   HOH T  30      31.878  -7.464 -16.785  1.00  0.23           O  
HETATM   32  O   HOH T  31      21.488  -1.471   0.529  1.00  0.23           O  
HETATM   33  O   HOH T  32      18.841   2.000   2.558  1.00  0.23           O  
HETATM   34  O   HOH T  33      12.549 -16.834  11.805  1.00  0.23           O  
HETATM   35  O   HOH T  34      21.216  -1.394  12.990  1.00  0.23           O  
HETATM   36  O   HOH T  35      10.540   9.578   3.377  1.00  0.24           O  
HETATM   37  O   HOH T  36      12.033  13.348  10.136  1.00  0.24           O  
HETATM   38  O   HOH T  37      -0.639 -18.449  24.355  1.00  0.24           O  
HETATM   39  O   HOH T  38      14.167  19.539  13.102  1.00  0.24           O  
HETATM   40  O   HOH T  39      19.115   4.977  59.035  1.00  0.24           O  
HETATM   41  O   HOH T  40      -1.705  -8.219  42.223  1.00  0.24           O  
HETATM   42  O   HOH T  41      -1.013  -6.872  33.215  1.00  0.24           O  
HETATM   43  O   HOH T  42      34.559  -2.203 -18.818  1.00  0.24           O  
HETATM   44  O   HOH T  43       5.349  23.633  18.147  1.00  0.24           O  
HETATM   45  O   HOH T  44     -10.449 -13.847  15.787  1.00  0.24           O  
HETATM   46  O   HOH T  45      -9.930  10.590   9.283  1.00  0.24           O  
HETATM   47  O   HOH T  46       6.866 -11.977  13.246  1.00  0.25           O  
HETATM   48  O   HOH T  47       4.632 -14.647  46.019  1.00  0.25           O  
HETATM   49  O   HOH T  48      -0.772 -14.327  33.716  1.00  0.25           O  
HETATM   50  O   HOH T  49      13.275  10.031  -5.393  1.00  0.25           O  
HETATM   51  O   HOH T  50      19.065  18.815   6.938  1.00  0.25           O  
HETATM   52  O   HOH T  51      15.982   2.708  36.243  1.00  0.25           O  
HETATM   53  O   HOH T  52       8.448   9.035  -8.261  1.00  0.25           O  
HETATM   54  O   HOH T  53      23.069 -16.822 -13.803  1.00  0.25           O  
HETATM   55  O   HOH T  54       5.818  -9.965  11.594  1.00  0.25           O  
HETATM   56  O   HOH T  55      17.540 -11.520  -0.522  1.00  0.25           O  
HETATM   57  O   HOH T  56      18.250 -13.331  -2.532  1.00  0.25           O  
HETATM   58  O   HOH T  57      12.519   8.590   1.821  1.00  0.25           O  
HETATM   59  O   HOH T  58      -9.241   2.617  37.131  1.00  0.26           O  
HETATM   60  O   HOH T  59      14.618  -6.306 -15.547  1.00  0.26           O  
HETATM   61  O   HOH T  60      -0.629 -16.503  36.766  1.00  0.26           O  
HETATM   62  O   HOH T  61      27.223 -18.346 -13.907  1.00  0.26           O  
HETATM   63  O   HOH T  62      13.293  -6.159  40.147  1.00  0.26           O  
HETATM   64  O   HOH T  63      -7.392  -1.513  17.567  1.00  0.26           O  
HETATM   65  O   HOH T  64     -15.156  12.103  31.823  1.00  0.26           O  
HETATM   66  O   HOH T  65      -0.901 -16.895  44.948  1.00  0.26           O  
HETATM   67  O   HOH T  66      -6.386  16.964  19.333  1.00  0.26           O  
HETATM   68  O   HOH T  67      17.637  23.473  18.856  1.00  0.26           O  
HETATM   69  O   HOH T  68      20.238  -0.537  26.818  1.00  0.27           O  
HETATM   70  O   HOH T  69     -11.215  17.250  16.020  1.00  0.27           O  
HETATM   71  O   HOH T  70       8.217  -7.954  16.887  1.00  0.27           O  
HETATM   72  O   HOH T  71       7.079 -28.657  55.085  1.00  0.27           O  
HETATM   73  O   HOH T  72      13.585   4.476   1.923  1.00  0.27           O  
HETATM   74  O   HOH T  73      -9.586   6.351  29.181  1.00  0.27           O  
HETATM   75  O   HOH T  74      30.924   5.953  12.749  1.00  0.27           O  
HETATM   76  O   HOH T  75      13.736   0.786  28.500  1.00  0.27           O  
HETATM   77  O   HOH T  76      15.952  14.153   3.564  1.00  0.27           O  
HETATM   78  O   HOH T  77       7.318   5.681  47.012  1.00  0.27           O  
HETATM   79  O   HOH T  78      19.899 -15.863  -4.409  1.00  0.27           O  
HETATM   80  O   HOH T  79       3.783  -7.518  57.226  1.00  0.27           O  
HETATM   81  O   HOH T  80      20.457  -4.737  50.889  1.00  0.27           O  
HETATM   82  O   HOH T  81      -1.234  12.415  16.518  1.00  0.27           O  
HETATM   83  O   HOH T  82      17.305   7.866  51.187  1.00  0.28           O  
HETATM   84  O   HOH T  83      11.126   8.490  -4.447  1.00  0.28           O  
HETATM   85  O   HOH T  84      14.048 -17.314  63.305  1.00  0.28           O  
HETATM   86  O   HOH T  85      17.735  20.959   5.854  1.00  0.28           O  
HETATM   87  O   HOH T  86      -1.560   0.595  15.877  1.00  0.28           O  
HETATM   88  O   HOH T  87       2.138  29.511   4.134  1.00  0.28           O  
HETATM   89  O   HOH T  88      11.549   9.682  26.786  1.00  0.28           O  
HETATM   90  O   HOH T  89       9.649 -24.349  46.178  1.00  0.28           O  
HETATM   91  O   HOH T  90      21.868   6.580  46.227  1.00  0.28           O  
HETATM   92  O   HOH T  91      27.610   0.610  21.922  1.00  0.28           O  
HETATM   93  O   HOH T  92      20.436  -7.684  29.487  1.00  0.28           O  
HETATM   94  O   HOH T  93       1.864  -3.065  45.284  1.00  0.28           O  
HETATM   95  O   HOH T  94      11.748  29.893   3.633  1.00  0.28           O  
HETATM   96  O   HOH T  95      35.038  10.261 -10.653  1.00  0.29           O  
HETATM   97  O   HOH T  96       3.868  28.258  11.307  1.00  0.29           O  
HETATM   98  O   HOH T  97       6.541 -13.553  44.427  1.00  0.29           O  
HETATM   99  O   HOH T  98       4.719  -3.985   6.344  1.00  0.29           O  
HETATM  100  O   HOH T  99      19.135   1.102  -2.264  1.00  0.29           O  
HETATM  101  O   HOH T 100      26.644   2.460  12.753  1.00  0.29           O  
HETATM  102  O   HOH T 101       2.569  18.779  -3.707  1.00  0.29           O  
HETATM  103  O   HOH T 102       0.585  -6.995  41.235  1.00  0.29           O  
HETATM  104  O   HOH T 103     -26.549 -10.898  25.177  1.00  0.29           O  
HETATM  105  O   HOH T 104     -16.005  17.024   9.743  1.00  0.29           O  
HETATM  106  O   HOH T 105      35.097   0.214  -8.866  1.00  0.30           O  
HETATM  107  O   HOH T 106     -11.275  31.099   5.664  1.00  0.30           O  
HETATM  108  O   HOH T 107     -25.478  -9.083  23.430  1.00  0.30           O  
HETATM  109  O   HOH T 108      20.221  15.285  -6.284  1.00  0.30           O  
HETATM  110  O   HOH T 109      25.573  -7.545   2.377  1.00  0.30           O  
HETATM  111  O   HOH T 110      16.922   3.639  -7.028  1.00  0.30           O  
HETATM  112  O   HOH T 111       0.162  -4.573  48.241  1.00  0.30           O  
HETATM  113  O   HOH T 112      -0.915  28.326  18.453  1.00  0.30           O  
HETATM  114  O   HOH T 113       1.257  -3.880  10.467  1.00  0.30           O  
HETATM  115  O   HOH T 114      -1.556  19.233   3.236  1.00  0.30           O  
HETATM  116  O   HOH T 115      20.901  -6.611  12.453  1.00  0.30           O  
HETATM  117  O   HOH T 116       7.029 -27.837  44.036  1.00  0.30           O  
HETATM  118  O   HOH T 117       2.171  -1.237   4.936  1.00  0.30           O  
HETATM  119  O   HOH T 118       0.530   4.600  20.861  1.00  0.30           O  
HETATM  120  O   HOH T 119      22.037   3.438  25.644  1.00  0.30           O  
HETATM  121  O   HOH T 120       0.780   7.059  19.408  1.00  0.30           O  
HETATM  122  O   HOH T 121      16.508 -14.232  29.746  1.00  0.30           O  
HETATM  123  O   HOH T 122       0.693 -21.150  19.610  1.00  0.30           O  
HETATM  124  O   HOH T 123      33.378  -3.220   7.848  1.00  0.31           O  
HETATM  125  O   HOH T 124      -4.607   7.400  26.497  1.00  0.31           O  
HETATM  126  O   HOH T 125       6.306 -16.976  28.717  1.00  0.31           O  
HETATM  127  O   HOH T 126      -2.913  14.416  20.706  1.00  0.31           O  
HETATM  128  O   HOH T 127      21.760   3.713  16.515  1.00  0.31           O  
HETATM  129  O   HOH T 128       1.871  25.598   2.026  1.00  0.31           O  
HETATM  130  O   HOH T 129      27.650   8.216  10.147  1.00  0.31           O  
HETATM  131  O   HOH T 130      22.848   8.143  -4.136  1.00  0.31           O  
HETATM  132  O   HOH T 131      15.885   9.711  -4.598  1.00  0.31           O  
HETATM  133  O   HOH T 132      -1.563 -19.781  30.544  1.00  0.31           O  
HETATM  134  O   HOH T 133      10.777 -15.417  60.816  1.00  0.31           O  
HETATM  135  O   HOH T 134      18.701   8.082  55.286  1.00  0.31           O  
HETATM  136  O   HOH T 135       4.654   1.668  51.932  1.00  0.31           O  
HETATM  137  O   HOH T 136      10.525  12.205  46.286  1.00  0.31           O  
HETATM  138  O   HOH T 137      34.162  -5.766 -16.765  1.00  0.31           O  
HETATM  139  O   HOH T 138      15.022   6.827  -0.446  1.00  0.32           O  
HETATM  140  O   HOH T 139     -11.800  28.223   9.633  1.00  0.32           O  
HETATM  141  O   HOH T 140      -5.835  30.036   6.329  1.00  0.32           O  
HETATM  142  O   HOH T 141      19.386  28.519   4.290  1.00  0.32           O  
HETATM  143  O   HOH T 142      -7.873  24.963  23.852  1.00  0.32           O  
HETATM  144  O   HOH T 143       6.609  -8.052 -14.436  1.00  0.32           O  
HETATM  145  O   HOH T 144     -20.110  -6.131  12.637  1.00  0.32           O  
HETATM  146  O   HOH T 145      35.449  14.003  -2.439  1.00  0.32           O  
HETATM  147  O   HOH T 146       1.512   6.551  30.920  1.00  0.32           O  
HETATM  148  O   HOH T 147      14.395  -8.112 -17.468  1.00  0.32           O  
HETATM  149  O   HOH T 148       9.365  13.319  20.803  1.00  0.32           O  
HETATM  150  O   HOH T 149      20.140   0.179  45.798  1.00  0.32           O  
HETATM  151  O   HOH T 150      12.777 -17.735  -4.154  1.00  0.32           O  
HETATM  152  O   HOH T 151      11.247 -18.072  60.156  1.00  0.32           O  
HETATM  153  O   HOH T 152      -1.920  -5.751  40.939  1.00  0.32           O  
HETATM  154  O   HOH T 153       2.621  -7.864  38.624  1.00  0.32           O  
HETATM  155  O   HOH T 154      13.088   9.250   4.562  1.00  0.33           O  
HETATM  156  O   HOH T 155      -5.059  -8.654  49.409  1.00  0.33           O  
HETATM  157  O   HOH T 156      19.796   2.366  39.710  1.00  0.33           O  
HETATM  158  O   HOH T 157       4.730  -5.845  45.483  1.00  0.33           O  
HETATM  159  O   HOH T 158      20.170   1.079  20.320  1.00  0.33           O  
HETATM  160  O   HOH T 159      13.825   7.707  -4.020  1.00  0.33           O  
HETATM  161  O   HOH T 160     -11.324  -8.562  10.920  1.00  0.33           O  
HETATM  162  O   HOH T 161      -3.155 -17.325  23.475  1.00  0.33           O  
HETATM  163  O   HOH T 162      32.272   7.496   1.253  1.00  0.33           O  
HETATM  164  O   HOH T 163      18.765 -14.686  28.331  1.00  0.33           O  
HETATM  165  O   HOH T 164     -12.309  10.193  10.491  1.00  0.33           O  
HETATM  166  O   HOH T 165      16.592   1.588  31.074  1.00  0.33           O  
HETATM  167  O   HOH T 166      19.898  -5.544  14.734  1.00  0.33           O  
HETATM  168  O   HOH T 167       4.316   8.748  25.676  1.00  0.33           O  
HETATM  169  O   HOH T 168     -20.114  -6.579  30.870  1.00  0.33           O  
HETATM  170  O   HOH T 169      23.290   5.753  17.636  1.00  0.33           O  
HETATM  171  O   HOH T 170      20.827  -5.874  53.379  1.00  0.33           O  
HETATM  172  O   HOH T 171     -17.804   3.790  36.433  1.00  0.33           O  
HETATM  173  O   HOH T 172       4.254   1.744  -3.020  1.00  0.33           O  
HETATM  174  O   HOH T 173      -0.177   5.094  12.065  1.00  0.33           O  
HETATM  175  O   HOH T 174       0.461 -19.018  32.398  1.00  0.33           O  
HETATM  176  O   HOH T 175      -1.084 -10.819  27.066  1.00  0.33           O  
HETATM  177  O   HOH T 176     -18.883 -16.047  25.970  1.00  0.33           O  
HETATM  178  O   HOH T 177     -21.445  -5.030  10.537  1.00  0.33           O  
HETATM  179  O   HOH T 178       1.852 -18.933  23.122  1.00  0.33           O  
HETATM  180  O   HOH T 179     -14.714   0.981  12.476  1.00  0.33           O  
HETATM  181  O   HOH T 180     -18.607 -11.259  30.453  1.00  0.33           O  
HETATM  182  O   HOH T 181      -6.738   4.482  21.124  1.00  0.33           O  
HETATM  183  O   HOH T 182      17.576 -14.711  62.737  1.00  0.34           O  
HETATM  184  O   HOH T 183      20.311  -9.102  40.134  1.00  0.34           O  
HETATM  185  O   HOH T 184      34.030  -1.344 -11.029  1.00  0.34           O  
HETATM  186  O   HOH T 185      22.183  -8.844  33.120  1.00  0.34           O  
HETATM  187  O   HOH T 186       2.549 -10.563  39.208  1.00  0.34           O  
HETATM  188  O   HOH T 187      20.203  10.789   4.014  1.00  0.34           O  
HETATM  189  O   HOH T 188      17.936   9.108  41.232  1.00  0.34           O  
HETATM  190  O   HOH T 189      35.336   2.232 -12.023  1.00  0.34           O  
HETATM  191  O   HOH T 190      23.356   7.202  -7.245  1.00  0.34           O  
HETATM  192  O   HOH T 191       3.304   2.336  40.791  1.00  0.34           O  
HETATM  193  O   HOH T 192      -8.803  -1.715  12.787  1.00  0.34           O  
HETATM  194  O   HOH T 193       7.299   5.208  57.470  1.00  0.34           O  
HETATM  195  O   HOH T 194      12.823 -26.654  55.891  1.00  0.34           O  
HETATM  196  O   HOH T 195     -26.586  -6.160  21.046  1.00  0.34           O  
HETATM  197  O   HOH T 196      35.713  10.988 -13.250  1.00  0.34           O  
HETATM  198  O   HOH T 197      18.709 -10.205   4.951  1.00  0.34           O  
HETATM  199  O   HOH T 198      14.490 -27.296  52.489  1.00  0.34           O  
HETATM  200  O   HOH T 199     -14.748   8.148  37.370  1.00  0.35           O  
HETATM  201  O   HOH T 200      -2.742   3.241  22.660  1.00  0.35           O  
HETATM  202  O   HOH T 201      29.327   3.167   4.897  1.00  0.35           O  
HETATM  203  O   HOH T 202      12.984   3.438  -7.964  1.00  0.35           O  
HETATM  204  O   HOH T 203      18.700  -0.939  19.196  1.00  0.35           O  
HETATM  205  O   HOH T 204     -12.415   7.884  32.554  1.00  0.35           O  
HETATM  206  O   HOH T 205      36.369   7.120  -6.005  1.00  0.35           O  
HETATM  207  O   HOH T 206      18.852 -12.575  54.310  1.00  0.35           O  
HETATM  208  O   HOH T 207     -10.897 -17.627  19.263  1.00  0.35           O  
HETATM  209  O   HOH T 208      29.225  12.057  13.224  1.00  0.35           O  
HETATM  210  O   HOH T 209     -15.123   0.870   9.761  1.00  0.35           O  
HETATM  211  O   HOH T 210      11.423  25.023  12.273  1.00  0.35           O  
HETATM  212  O   HOH T 211      21.584   4.389  60.229  1.00  0.35           O  
HETATM  213  O   HOH T 212       0.279 -10.215  15.440  1.00  0.35           O  
HETATM  214  O   HOH T 213      -6.190  20.161  13.673  1.00  0.35           O  
HETATM  215  O   HOH T 214      36.202  18.165  -5.663  1.00  0.35           O  
HETATM  216  O   HOH T 215      -1.334   3.708  38.732  1.00  0.35           O  
HETATM  217  O   HOH T 216      -3.964   6.938  11.509  1.00  0.36           O  
HETATM  218  O   HOH T 217      29.407   8.219  19.457  1.00  0.36           O  
HETATM  219  O   HOH T 218      17.385 -18.090  54.554  1.00  0.36           O  
HETATM  220  O   HOH T 219      14.507 -14.367  25.273  1.00  0.36           O  
HETATM  221  O   HOH T 220       8.189  -9.682  34.174  1.00  0.36           O  
HETATM  222  O   HOH T 221      -3.578   2.822   7.148  1.00  0.36           O  
HETATM  223  O   HOH T 222      29.479  14.797  13.353  1.00  0.36           O  
HETATM  224  O   HOH T 223       4.438  -2.500   4.052  1.00  0.36           O  
HETATM  225  O   HOH T 224     -15.084  12.940  15.388  1.00  0.36           O  
HETATM  226  O   HOH T 225      13.021 -23.900  55.032  1.00  0.36           O  
HETATM  227  O   HOH T 226      14.384 -18.468   5.049  1.00  0.36           O  
HETATM  228  O   HOH T 227      28.364  -4.026   2.655  1.00  0.36           O  
HETATM  229  O   HOH T 228      24.042   4.885  14.016  1.00  0.36           O  
HETATM  230  O   HOH T 229      20.347   6.125  56.793  1.00  0.36           O  
HETATM  231  O   HOH T 230       9.921  -5.786   4.251  1.00  0.36           O  
HETATM  232  O   HOH T 231      24.068   9.371  -1.973  1.00  0.36           O  
HETATM  233  O   HOH T 232     -18.991   0.771  28.763  1.00  0.36           O  
HETATM  234  O   HOH T 233       6.354 -15.366  42.278  1.00  0.36           O  
HETATM  235  O   HOH T 234      14.321  29.373  -0.584  1.00  0.36           O  
HETATM  236  O   HOH T 235      -0.110 -20.354  43.299  1.00  0.36           O  
HETATM  237  O   HOH T 236      17.442 -15.182  54.141  1.00  0.36           O  
HETATM  238  O   HOH T 237      -6.784  30.396   9.865  1.00  0.36           O  
HETATM  239  O   HOH T 238      20.459  -6.891  41.810  1.00  0.36           O  
HETATM  240  O   HOH T 239      16.886  22.102  -0.041  1.00  0.36           O  
HETATM  241  O   HOH T 240      15.736  -7.839  16.726  1.00  0.36           O  
HETATM  242  O   HOH T 241     -10.112  11.917   4.057  1.00  0.36           O  
HETATM  243  O   HOH T 242       3.619  29.627   6.474  1.00  0.36           O  
HETATM  244  O   HOH T 243      19.985  17.125  -4.243  1.00  0.36           O  
HETATM  245  O   HOH T 244      27.438   4.718  11.221  1.00  0.36           O  
HETATM  246  O   HOH T 245      12.264 -25.908  53.276  1.00  0.36           O  
HETATM  247  O   HOH T 246       9.008  28.664  10.403  1.00  0.36           O  
HETATM  248  O   HOH T 247     -11.352   4.338  37.211  1.00  0.36           O  
HETATM  249  O   HOH T 248      19.391   9.740  43.493  1.00  0.36           O  
HETATM  250  O   HOH T 249      22.736 -14.594  -8.625  1.00  0.37           O  
HETATM  251  O   HOH T 250      18.360  14.983   2.660  1.00  0.37           O  
HETATM  252  O   HOH T 251      20.386  -9.177  60.085  1.00  0.37           O  
HETATM  253  O   HOH T 252      22.268 -14.636  33.455  1.00  0.37           O  
HETATM  254  O   HOH T 253      -8.823  15.694  -1.738  1.00  0.37           O  
HETATM  255  O   HOH T 254     -21.240  -2.122  21.258  1.00  0.37           O  
HETATM  256  O   HOH T 255      11.015 -26.654  40.030  1.00  0.37           O  
HETATM  257  O   HOH T 256      -4.212  17.331  -0.765  1.00  0.37           O  
HETATM  258  O   HOH T 257      15.055   6.680  38.186  1.00  0.37           O  
HETATM  259  O   HOH T 258      20.725 -16.165  46.475  1.00  0.37           O  
HETATM  260  O   HOH T 259      19.482 -15.442  52.122  1.00  0.37           O  
HETATM  261  O   HOH T 260      13.966 -23.082  39.397  1.00  0.37           O  
HETATM  262  O   HOH T 261      32.991  13.593  -3.845  1.00  0.37           O  
HETATM  263  O   HOH T 262      -2.727  -2.605  14.423  1.00  0.37           O  
HETATM  264  O   HOH T 263       3.654 -11.601  33.666  1.00  0.37           O  
HETATM  265  O   HOH T 264      17.598  20.379   8.636  1.00  0.37           O  
HETATM  266  O   HOH T 265       0.417 -16.787  34.184  1.00  0.37           O  
HETATM  267  O   HOH T 266      12.112  -8.748   4.014  1.00  0.37           O  
HETATM  268  O   HOH T 267      21.419  25.905   7.328  1.00  0.37           O  
HETATM  269  O   HOH T 268      -3.611   7.284  19.702  1.00  0.37           O  
HETATM  270  O   HOH T 269      14.482  31.495   1.159  1.00  0.37           O  
HETATM  271  O   HOH T 270      -5.942  28.562  18.167  1.00  0.37           O  
HETATM  272  O   HOH T 271      21.135 -17.003  34.443  1.00  0.37           O  
HETATM  273  O   HOH T 272      23.888   8.212   8.544  1.00  0.38           O  
HETATM  274  O   HOH T 273     -18.046   6.102  37.938  1.00  0.38           O  
HETATM  275  O   HOH T 274      19.092  17.888  -1.743  1.00  0.38           O  
HETATM  276  O   HOH T 275      -2.274   8.884  26.384  1.00  0.38           O  
HETATM  277  O   HOH T 276      19.698   0.658   0.299  1.00  0.38           O  
HETATM  278  O   HOH T 277      15.479 -10.590  16.240  1.00  0.38           O  
HETATM  279  O   HOH T 278      -0.361  -1.854   4.038  1.00  0.38           O  
HETATM  280  O   HOH T 279      21.737   0.761  -3.245  1.00  0.38           O  
HETATM  281  O   HOH T 280      34.545  21.870  -8.295  1.00  0.38           O  
HETATM  282  O   HOH T 281       4.929 -21.192  21.217  1.00  0.38           O  
HETATM  283  O   HOH T 282      -4.762  27.322  20.356  1.00  0.38           O  
HETATM  284  O   HOH T 283      12.814   4.931  35.004  1.00  0.38           O  
HETATM  285  O   HOH T 284      23.162   3.233  18.866  1.00  0.38           O  
HETATM  286  O   HOH T 285       7.409   4.088  39.048  1.00  0.38           O  
HETATM  287  O   HOH T 286     -17.798   1.894  14.884  1.00  0.38           O  
HETATM  288  O   HOH T 287     -16.251  -7.342  37.735  1.00  0.38           O  
HETATM  289  O   HOH T 288      -7.350  24.730  21.123  1.00  0.38           O  
HETATM  290  O   HOH T 289      29.072  19.638  -9.620  1.00  0.38           O  
HETATM  291  O   HOH T 290       3.404 -17.912  55.746  1.00  0.38           O  
HETATM  292  O   HOH T 291      34.494  -4.877 -19.371  1.00  0.38           O  
HETATM  293  O   HOH T 292      12.412 -11.491   3.879  1.00  0.38           O  
HETATM  294  O   HOH T 293       1.097 -11.261  32.567  1.00  0.38           O  
HETATM  295  O   HOH T 294       0.002  10.967  18.597  1.00  0.38           O  
HETATM  296  O   HOH T 295      12.021  10.354  44.718  1.00  0.38           O  
HETATM  297  O   HOH T 296      21.383   8.762  47.981  1.00  0.38           O  
HETATM  298  O   HOH T 297      12.798 -19.555  -6.323  1.00  0.38           O  
HETATM  299  O   HOH T 298      32.560  12.459   8.071  1.00  0.38           O  
HETATM  300  O   HOH T 299      22.052 -12.761  49.599  1.00  0.38           O  
HETATM  301  O   HOH T 300       9.140  -9.661  36.829  1.00  0.38           O  
HETATM  302  O   HOH T 301      22.523  17.307  -3.397  1.00  0.39           O  
HETATM  303  O   HOH T 302       7.307 -26.374  59.085  1.00  0.39           O  
HETATM  304  O   HOH T 303      -0.217   5.257  36.689  1.00  0.39           O  
HETATM  305  O   HOH T 304      -0.669   8.249  -3.392  1.00  0.39           O  
HETATM  306  O   HOH T 305      -0.226 -10.278  43.361  1.00  0.39           O  
HETATM  307  O   HOH T 306      12.861  12.236  62.872  1.00  0.39           O  
HETATM  308  O   HOH T 307      12.753 -11.622   6.685  1.00  0.39           O  
HETATM  309  O   HOH T 308       6.932 -31.229  54.330  1.00  0.39           O  
HETATM  310  O   HOH T 309      -8.654  22.452   6.956  1.00  0.39           O  
HETATM  311  O   HOH T 310      -3.098   0.325   8.206  1.00  0.39           O  
HETATM  312  O   HOH T 311       8.189   5.017  54.780  1.00  0.39           O  
HETATM  313  O   HOH T 312      12.914   8.336 -12.414  1.00  0.39           O  
HETATM  314  O   HOH T 313      17.941   3.828  63.475  1.00  0.39           O  
HETATM  315  O   HOH T 314       2.736   3.361  14.509  1.00  0.39           O  
HETATM  316  O   HOH T 315      31.063   7.586 -18.319  1.00  0.39           O  
HETATM  317  O   HOH T 316     -10.359  29.980   8.043  1.00  0.39           O  
HETATM  318  O   HOH T 317      20.281   1.921  47.858  1.00  0.39           O  
HETATM  319  O   HOH T 318      15.502   9.868  60.742  1.00  0.39           O  
HETATM  320  O   HOH T 319      27.867  -8.316   1.236  1.00  0.39           O  
HETATM  321  O   HOH T 320      -6.905  22.628  14.828  1.00  0.39           O  
HETATM  322  O   HOH T 321      36.835   6.846  -3.327  1.00  0.39           O  
HETATM  323  O   HOH T 322      17.200  13.953  47.998  1.00  0.39           O  
HETATM  324  O   HOH T 323      13.520 -13.253  -5.882  1.00  0.39           O  
HETATM  325  O   HOH T 324      21.630  15.625  -8.771  1.00  0.39           O  
HETATM  326  O   HOH T 325     -23.911 -12.119  29.190  1.00  0.39           O  
HETATM  327  O   HOH T 326       1.368  31.175   6.224  1.00  0.39           O  
HETATM  328  O   HOH T 327      27.198  18.034  -8.253  1.00  0.39           O  
HETATM  329  O   HOH T 328      18.077   4.483  35.969  1.00  0.39           O  
HETATM  330  O   HOH T 329      35.707  18.740 -14.612  1.00  0.39           O  
HETATM  331  O   HOH T 330      24.028 -13.083  -1.992  1.00  0.39           O  
HETATM  332  O   HOH T 331      13.549 -10.584 -18.133  1.00  0.39           O  
HETATM  333  O   HOH T 332      36.906   9.293  -7.443  1.00  0.40           O  
HETATM  334  O   HOH T 333       0.110   2.423  44.409  1.00  0.40           O  
HETATM  335  O   HOH T 334      -1.881  -1.140   6.225  1.00  0.40           O  
HETATM  336  O   HOH T 335       6.399   3.682  43.630  1.00  0.40           O  
HETATM  337  O   HOH T 336     -21.654  -8.852  31.254  1.00  0.40           O  
HETATM  338  O   HOH T 337       0.034   2.573  22.749  1.00  0.40           O  
HETATM  339  O   HOH T 338     -11.534  16.850   1.760  1.00  0.40           O  
HETATM  340  O   HOH T 339      -2.645  23.645   0.766  1.00  0.40           O  
HETATM  341  O   HOH T 340      16.672  18.947  12.008  1.00  0.40           O  
HETATM  342  O   HOH T 341       6.519 -10.346 -16.210  1.00  0.40           O  
HETATM  343  O   HOH T 342      25.442  10.604  16.136  1.00  0.40           O  
HETATM  344  O   HOH T 343      10.607  -6.238  39.837  1.00  0.40           O  
HETATM  345  O   HOH T 344     -18.697  -6.499   1.621  1.00  0.40           O  
HETATM  346  O   HOH T 345       6.406  29.445  11.248  1.00  0.40           O  
HETATM  347  O   HOH T 346      -9.063  26.141  -0.382  1.00  0.40           O  
HETATM  348  O   HOH T 347       0.576 -11.379  40.898  1.00  0.40           O  
HETATM  349  O   HOH T 348      12.541 -14.006  11.835  1.00  0.40           O  
HETATM  350  O   HOH T 349       0.503   8.450  29.275  1.00  0.40           O  
HETATM  351  O   HOH T 350     -13.623  -9.229   9.553  1.00  0.40           O  
HETATM  352  O   HOH T 351      10.242 -11.359  -1.048  1.00  0.40           O  
HETATM  353  O   HOH T 352       0.217  27.185  16.070  1.00  0.40           O  
HETATM  354  O   HOH T 353      -7.347  22.369   4.513  1.00  0.40           O  
HETATM  355  O   HOH T 354     -14.612  -9.000   7.011  1.00  0.40           O  
HETATM  356  O   HOH T 355       0.176  27.096  13.214  1.00  0.40           O  
HETATM  357  O   HOH T 356     -16.146   4.142  38.594  1.00  0.40           O  
HETATM  358  O   HOH T 357       1.616 -25.978  47.996  1.00  0.41           O  
HETATM  359  O   HOH T 358      20.691   3.963   2.937  1.00  0.41           O  
HETATM  360  O   HOH T 359       7.121 -12.265  39.554  1.00  0.41           O  
HETATM  361  O   HOH T 360      -7.142 -18.983  20.832  1.00  0.41           O  
HETATM  362  O   HOH T 361      17.253 -16.688  64.692  1.00  0.41           O  
HETATM  363  O   HOH T 362      -1.350  -8.054  39.517  1.00  0.41           O  
HETATM  364  O   HOH T 363      32.337  16.970  12.887  1.00  0.41           O  
HETATM  365  O   HOH T 364      21.464   9.087  45.153  1.00  0.41           O  
HETATM  366  O   HOH T 365      22.663 -10.562   8.820  1.00  0.41           O  
HETATM  367  O   HOH T 366       2.389  26.063  20.530  1.00  0.41           O  
HETATM  368  O   HOH T 367       8.889   7.295  56.669  1.00  0.41           O  
HETATM  369  O   HOH T 368     -12.864  -6.588   9.646  1.00  0.41           O  
HETATM  370  O   HOH T 369      18.932 -13.819   0.097  1.00  0.41           O  
HETATM  371  O   HOH T 370      22.652   9.815  20.943  1.00  0.41           O  
HETATM  372  O   HOH T 371      -8.929  -9.406  43.196  1.00  0.41           O  
HETATM  373  O   HOH T 372       1.927  -6.839  35.448  1.00  0.41           O  
HETATM  374  O   HOH T 373       4.293 -13.887  35.089  1.00  0.41           O  
HETATM  375  O   HOH T 374      21.886  11.596   1.907  1.00  0.41           O  
HETATM  376  O   HOH T 375     -24.236  -8.224  18.700  1.00  0.41           O  
HETATM  377  O   HOH T 376       8.086  -8.088 -16.816  1.00  0.41           O  
HETATM  378  O   HOH T 377       2.914  27.134  13.721  1.00  0.41           O  
HETATM  379  O   HOH T 378       3.524   0.137  -0.940  1.00  0.41           O  
HETATM  380  O   HOH T 379      32.409  -9.873 -18.179  1.00  0.41           O  
HETATM  381  O   HOH T 380      -8.696  30.062   5.792  1.00  0.41           O  
HETATM  382  O   HOH T 381       1.546  -0.770   2.351  1.00  0.41           O  
HETATM  383  O   HOH T 382       1.619   9.714  20.502  1.00  0.41           O  
HETATM  384  O   HOH T 383     -17.268  -1.750  33.208  1.00  0.41           O  
HETATM  385  O   HOH T 384      15.371  11.646   2.601  1.00  0.41           O  
HETATM  386  O   HOH T 385       5.515  28.144  13.561  1.00  0.41           O  
HETATM  387  O   HOH T 386       6.513  -9.629  15.390  1.00  0.41           O  
HETATM  388  O   HOH T 387       4.847 -16.863  37.847  1.00  0.41           O  
HETATM  389  O   HOH T 388     -20.760 -11.380  32.159  1.00  0.41           O  
HETATM  390  O   HOH T 389      33.507  15.941  -2.463  1.00  0.41           O  
HETATM  391  O   HOH T 390      25.607   6.313   9.752  1.00  0.41           O  
HETATM  392  O   HOH T 391      17.309   8.189  38.764  1.00  0.41           O  
HETATM  393  O   HOH T 392      37.493   1.532  -8.777  1.00  0.41           O  
HETATM  394  O   HOH T 393      -1.993   6.209  34.880  1.00  0.41           O  
HETATM  395  O   HOH T 394       1.209 -11.995  27.477  1.00  0.41           O  
HETATM  396  O   HOH T 395      18.198  26.977   2.527  1.00  0.41           O  
HETATM  397  O   HOH T 396     -21.282  -4.940  17.574  1.00  0.41           O  
HETATM  398  O   HOH T 397     -11.793   7.180  -0.605  1.00  0.41           O  
HETATM  399  O   HOH T 398       0.244   2.302  14.757  1.00  0.41           O  
HETATM  400  O   HOH T 399      -3.401  10.773  16.944  1.00  0.41           O  
HETATM  401  O   HOH T 400      11.137  10.459 -12.224  1.00  0.42           O  
HETATM  402  O   HOH T 401     -12.967  10.560   5.860  1.00  0.42           O  
HETATM  403  O   HOH T 402      26.773   2.181   4.545  1.00  0.42           O  
HETATM  404  O   HOH T 403      26.550   8.039   7.683  1.00  0.42           O  
HETATM  405  O   HOH T 404      -2.439  -3.813  48.154  1.00  0.42           O  
HETATM  406  O   HOH T 405      20.335   3.931  37.465  1.00  0.42           O  
HETATM  407  O   HOH T 406      -9.512  27.192  10.817  1.00  0.42           O  
HETATM  408  O   HOH T 407      -8.896 -10.378  45.806  1.00  0.42           O  
HETATM  409  O   HOH T 408      15.026 -11.067   8.225  1.00  0.42           O  
HETATM  410  O   HOH T 409       8.970  -6.039  41.819  1.00  0.42           O  
HETATM  411  O   HOH T 410      -9.205  21.830  16.310  1.00  0.42           O  
HETATM  412  O   HOH T 411      11.776  -7.855  43.086  1.00  0.42           O  
HETATM  413  O   HOH T 412      -6.926   8.252  25.380  1.00  0.42           O  
HETATM  414  O   HOH T 413       4.367 -33.639  46.286  1.00  0.42           O  
HETATM  415  O   HOH T 414      -0.855  -9.593  33.949  1.00  0.42           O  
HETATM  416  O   HOH T 415      -9.831  22.547   3.268  1.00  0.42           O  
HETATM  417  O   HOH T 416       5.555   6.691  30.523  1.00  0.42           O  
HETATM  418  O   HOH T 417       9.052  16.232  23.541  1.00  0.42           O  
HETATM  419  O   HOH T 418      37.444   2.438 -13.774  1.00  0.42           O  
HETATM  420  O   HOH T 419      21.125  -4.248  55.551  1.00  0.42           O  
HETATM  421  O   HOH T 420      34.367  12.105 -15.384  1.00  0.42           O  
HETATM  422  O   HOH T 421     -10.756  -1.606  10.910  1.00  0.42           O  
HETATM  423  O   HOH T 422      -8.438  -7.671  45.321  1.00  0.42           O  
HETATM  424  O   HOH T 423     -17.497   1.658  12.273  1.00  0.42           O  
HETATM  425  O   HOH T 424       9.699  11.183  25.308  1.00  0.42           O  
HETATM  426  O   HOH T 425      13.219 -25.679  38.392  1.00  0.42           O  
HETATM  427  O   HOH T 426     -13.848 -13.886  38.212  1.00  0.42           O  
HETATM  428  O   HOH T 427      11.277 -26.419  45.261  1.00  0.42           O  
HETATM  429  O   HOH T 428       1.263  -6.545  11.244  1.00  0.43           O  
HETATM  430  O   HOH T 429      12.177  23.759  14.617  1.00  0.43           O  
HETATM  431  O   HOH T 430      24.003  -4.411  15.012  1.00  0.43           O  
HETATM  432  O   HOH T 431     -14.695  -2.567  38.881  1.00  0.43           O  
HETATM  433  O   HOH T 432      24.723   6.012   7.097  1.00  0.43           O  
HETATM  434  O   HOH T 433      34.113  -1.631   0.184  1.00  0.43           O  
HETATM  435  O   HOH T 434      -9.288   7.223  -1.587  1.00  0.43           O  
HETATM  436  O   HOH T 435     -15.355  15.940   7.228  1.00  0.43           O  
HETATM  437  O   HOH T 436     -17.636 -12.258  12.740  1.00  0.43           O  
HETATM  438  O   HOH T 437     -23.801   8.213  16.972  1.00  0.43           O  
HETATM  439  O   HOH T 438      10.916 -13.524  38.326  1.00  0.43           O  
HETATM  440  O   HOH T 439     -18.053  -0.278  31.124  1.00  0.43           O  
HETATM  441  O   HOH T 440       7.245  26.349  14.846  1.00  0.43           O  
HETATM  442  O   HOH T 441      19.140   6.648   6.507  1.00  0.43           O  
HETATM  443  O   HOH T 442     -16.250  -9.916   9.057  1.00  0.43           O  
HETATM  444  O   HOH T 443      -6.368 -22.731  36.550  1.00  0.43           O  
HETATM  445  O   HOH T 444      -9.953  -6.760  43.196  1.00  0.43           O  
HETATM  446  O   HOH T 445       3.625   0.006  47.913  1.00  0.43           O  
HETATM  447  O   HOH T 446       3.351  25.531  17.926  1.00  0.43           O  
HETATM  448  O   HOH T 447       1.279 -21.093  16.846  1.00  0.43           O  
HETATM  449  O   HOH T 448       7.037  10.676  25.033  1.00  0.43           O  
HETATM  450  O   HOH T 449       8.970 -10.349  14.063  1.00  0.43           O  
HETATM  451  O   HOH T 450      17.527 -11.622   7.019  1.00  0.43           O  
HETATM  452  O   HOH T 451      -8.870  20.985  13.657  1.00  0.43           O  
HETATM  453  O   HOH T 452       6.657 -15.274   7.313  1.00  0.43           O  
HETATM  454  O   HOH T 453      -9.096 -24.707  31.602  1.00  0.43           O  
HETATM  455  O   HOH T 454      38.355   5.569  -7.267  1.00  0.43           O  
HETATM  456  O   HOH T 455      28.469  19.964  -6.823  1.00  0.43           O  
HETATM  457  O   HOH T 456      28.082   7.071  17.284  1.00  0.43           O  
HETATM  458  O   HOH T 457       7.484  -6.397   3.116  1.00  0.43           O  
HETATM  459  O   HOH T 458     -22.201 -12.976  12.971  1.00  0.43           O  
HETATM  460  O   HOH T 459      27.880   7.538   3.555  1.00  0.43           O  
HETATM  461  O   HOH T 460      20.015 -13.865   2.577  1.00  0.43           O  
HETATM  462  O   HOH T 461       5.526   4.027  41.103  1.00  0.43           O  
HETATM  463  O   HOH T 462      -0.774   6.352  -1.337  1.00  0.43           O  
HETATM  464  O   HOH T 463      20.981  -1.496  20.722  1.00  0.43           O  
HETATM  465  O   HOH T 464      21.294   8.067   7.598  1.00  0.43           O  
HETATM  466  O   HOH T 465       8.198  28.413  13.120  1.00  0.43           O  
HETATM  467  O   HOH T 466      13.634  27.633   9.594  1.00  0.44           O  
HETATM  468  O   HOH T 467      -4.598  13.895  22.886  1.00  0.44           O  
HETATM  469  O   HOH T 468      22.348   2.317  21.399  1.00  0.44           O  
HETATM  470  O   HOH T 469      11.187 -28.492  42.175  1.00  0.44           O  
HETATM  471  O   HOH T 470      11.065 -12.867 -14.362  1.00  0.44           O  
HETATM  472  O   HOH T 471     -18.632  -9.711  10.423  1.00  0.44           O  
HETATM  473  O   HOH T 472      -4.014   0.538   5.624  1.00  0.44           O  
HETATM  474  O   HOH T 473      31.582  13.740   0.230  1.00  0.44           O  
HETATM  475  O   HOH T 474       5.390  12.079  23.402  1.00  0.44           O  
HETATM  476  O   HOH T 475      -4.157   4.282  10.516  1.00  0.44           O  
HETATM  477  O   HOH T 476      -5.677   3.994   8.155  1.00  0.44           O  
HETATM  478  O   HOH T 477      10.622  29.787   6.372  1.00  0.44           O  
HETATM  479  O   HOH T 478       0.651   5.162  14.722  1.00  0.44           O  
HETATM  480  O   HOH T 479      -4.331 -16.998  16.560  1.00  0.44           O  
HETATM  481  O   HOH T 480      23.687   3.639  23.407  1.00  0.44           O  
HETATM  482  O   HOH T 481     -20.827 -14.659  27.586  1.00  0.44           O  
HETATM  483  O   HOH T 482       1.117   0.730   0.174  1.00  0.44           O  
HETATM  484  O   HOH T 483     -11.173 -16.175  16.927  1.00  0.44           O  
HETATM  485  O   HOH T 484      20.193  10.301  22.145  1.00  0.44           O  
HETATM  486  O   HOH T 485       7.857 -13.999  32.247  1.00  0.44           O  
HETATM  487  O   HOH T 486      23.741 -12.676  -4.858  1.00  0.44           O  
HETATM  488  O   HOH T 487      11.240 -11.511  36.480  1.00  0.44           O  
HETATM  489  O   HOH T 488      -4.604   9.713  25.091  1.00  0.44           O  
HETATM  490  O   HOH T 489      -7.471   3.749  35.282  1.00  0.44           O  
HETATM  491  O   HOH T 490      -7.634  -3.274  43.773  1.00  0.44           O  
HETATM  492  O   HOH T 491      -4.192   5.449  21.713  1.00  0.44           O  
HETATM  493  O   HOH T 492       3.206 -16.935   8.843  1.00  0.44           O  
HETATM  494  O   HOH T 493     -24.836  -1.695  19.381  1.00  0.44           O  
HETATM  495  O   HOH T 494      34.164  10.168   8.358  1.00  0.44           O  
HETATM  496  O   HOH T 495       8.763  10.178 -10.753  1.00  0.44           O  
HETATM  497  O   HOH T 496     -22.070   3.063  22.191  1.00  0.44           O  
HETATM  498  O   HOH T 497      -1.376   2.509  20.363  1.00  0.44           O  
HETATM  499  O   HOH T 498     -27.203 -14.689  26.768  1.00  0.44           O  
HETATM  500  O   HOH T 499      18.438  20.606  -1.696  1.00  0.44           O  
HETATM  501  O   HOH T 500      13.257  28.956   7.244  1.00  0.44           O  
HETATM  502  O   HOH T 501      -9.677 -18.814  21.449  1.00  0.44           O  
HETATM  503  O   HOH T 502      22.013  -2.438  15.526  1.00  0.44           O  
HETATM  504  O   HOH T 503      17.660  11.857   4.094  1.00  0.45           O  
HETATM  505  O   HOH T 504      30.371   7.794  10.682  1.00  0.45           O  
HETATM  506  O   HOH T 505      20.784 -10.919  42.193  1.00  0.45           O  
HETATM  507  O   HOH T 506     -16.277  -2.629  30.803  1.00  0.45           O  
HETATM  508  O   HOH T 507     -21.334  -9.757   9.795  1.00  0.45           O  
HETATM  509  O   HOH T 508      23.445  24.220  -0.088  1.00  0.45           O  
HETATM  510  O   HOH T 509      23.218 -15.528  30.939  1.00  0.45           O  
HETATM  511  O   HOH T 510      24.798   3.946   5.201  1.00  0.45           O  
HETATM  512  O   HOH T 511      21.681 -14.518  -2.665  1.00  0.45           O  
HETATM  513  O   HOH T 512      19.326  10.653  54.296  1.00  0.45           O  
HETATM  514  O   HOH T 513       6.471   3.410  53.074  1.00  0.45           O  
HETATM  515  O   HOH T 514      39.299   2.956  -7.297  1.00  0.45           O  
HETATM  516  O   HOH T 515      -5.975  -6.578  47.813  1.00  0.45           O  
HETATM  517  O   HOH T 516      29.315  -8.422   3.484  1.00  0.45           O  
HETATM  518  O   HOH T 517      22.031   7.822  51.750  1.00  0.45           O  
HETATM  519  O   HOH T 518       5.750   8.016  46.975  1.00  0.45           O  
HETATM  520  O   HOH T 519      21.871   9.771  53.684  1.00  0.45           O  
HETATM  521  O   HOH T 520       1.189 -24.480  53.934  1.00  0.45           O  
HETATM  522  O   HOH T 521      29.994   5.767   4.114  1.00  0.45           O  
HETATM  523  O   HOH T 522       9.703  26.477  16.180  1.00  0.45           O  
HETATM  524  O   HOH T 523     -27.660  -9.036  27.003  1.00  0.45           O  
HETATM  525  O   HOH T 524     -22.258  -2.493  18.685  1.00  0.45           O  
HETATM  526  O   HOH T 525     -11.003  19.935  15.210  1.00  0.45           O  
HETATM  527  O   HOH T 526       9.941 -19.254  26.683  1.00  0.45           O  
HETATM  528  O   HOH T 527      18.630 -11.276  40.436  1.00  0.45           O  
HETATM  529  O   HOH T 528      21.206   7.130  54.354  1.00  0.45           O  
HETATM  530  O   HOH T 529      15.544  11.832  62.666  1.00  0.45           O  
HETATM  531  O   HOH T 530     -27.192 -16.012  29.182  1.00  0.45           O  
HETATM  532  O   HOH T 531      -7.371  28.477  11.865  1.00  0.45           O  
HETATM  533  O   HOH T 532      -3.400  -6.379  48.816  1.00  0.45           O  
HETATM  534  O   HOH T 533       8.343 -20.933  25.271  1.00  0.45           O  
HETATM  535  O   HOH T 534       2.551  -9.070  33.757  1.00  0.45           O  
HETATM  536  O   HOH T 535     -15.951  12.271  25.072  1.00  0.45           O  
HETATM  537  O   HOH T 536      -7.967  25.768  12.669  1.00  0.45           O  
HETATM  538  O   HOH T 537      19.828   7.584  50.017  1.00  0.45           O  
HETATM  539  O   HOH T 538       9.698  -5.710   1.382  1.00  0.46           O  
HETATM  540  O   HOH T 539      10.444   7.990 -11.274  1.00  0.46           O  
HETATM  541  O   HOH T 540      11.563 -17.089  27.257  1.00  0.46           O  
HETATM  542  O   HOH T 541     -10.870  17.399  -0.881  1.00  0.46           O  
HETATM  543  O   HOH T 542     -25.935  -8.863  20.729  1.00  0.46           O  
HETATM  544  O   HOH T 543      21.054  -1.948  17.993  1.00  0.46           O  
HETATM  545  O   HOH T 544      18.578   1.951  37.097  1.00  0.46           O  
HETATM  546  O   HOH T 545      11.994  25.200  17.001  1.00  0.46           O  
HETATM  547  O   HOH T 546      15.270   2.177 -10.350  1.00  0.46           O  
HETATM  548  O   HOH T 547      30.506   8.301   3.200  1.00  0.46           O  
HETATM  549  O   HOH T 548      -1.075  -5.416  10.169  1.00  0.46           O  
HETATM  550  O   HOH T 549      20.638  -4.767  40.056  1.00  0.46           O  
HETATM  551  O   HOH T 550      -4.951  16.217  21.506  1.00  0.46           O  
HETATM  552  O   HOH T 551      -6.868  -5.384  45.443  1.00  0.46           O  
HETATM  553  O   HOH T 552      13.662  25.038  10.579  1.00  0.46           O  
HETATM  554  O   HOH T 553       2.375 -24.858  51.365  1.00  0.46           O  
HETATM  555  O   HOH T 554       4.764  11.310  -6.949  1.00  0.46           O  
HETATM  556  O   HOH T 555      38.809   4.422 -12.459  1.00  0.46           O  
HETATM  557  O   HOH T 556      -6.657  25.912  18.800  1.00  0.46           O  
HETATM  558  O   HOH T 557     -19.475  -5.709  15.369  1.00  0.46           O  
HETATM  559  O   HOH T 558      21.816 -16.962 -21.158  1.00  0.46           O  
HETATM  560  O   HOH T 559     -21.943   6.908  22.199  1.00  0.46           O  
HETATM  561  O   HOH T 560      10.002 -20.231  40.215  1.00  0.46           O  
HETATM  562  O   HOH T 561      19.516  -8.180  14.212  1.00  0.46           O  
HETATM  563  O   HOH T 562      -7.120  -1.288  41.850  1.00  0.46           O  
HETATM  564  O   HOH T 563      38.130  -0.113 -13.754  1.00  0.46           O  
HETATM  565  O   HOH T 564      19.538  13.215  46.668  1.00  0.46           O  
HETATM  566  O   HOH T 565      -5.451  25.840  22.646  1.00  0.46           O  
HETATM  567  O   HOH T 566      -5.050 -16.068  52.193  1.00  0.46           O  
HETATM  568  O   HOH T 567     -25.118  -7.573  29.863  1.00  0.46           O  
HETATM  569  O   HOH T 568      18.549  16.925 -14.816  1.00  0.46           O  
HETATM  570  O   HOH T 569      -6.598  17.525   0.676  1.00  0.46           O  
HETATM  571  O   HOH T 570      27.081  -8.394   7.395  1.00  0.46           O  
HETATM  572  O   HOH T 571      -5.135  -2.041  13.167  1.00  0.46           O  
HETATM  573  O   HOH T 572      -8.896   8.307  27.312  1.00  0.46           O  
HETATM  574  O   HOH T 573      21.048  -6.558  47.059  1.00  0.46           O  
HETATM  575  O   HOH T 574       8.856 -17.113  28.033  1.00  0.47           O  
HETATM  576  O   HOH T 575     -13.617  16.303  17.104  1.00  0.47           O  
HETATM  577  O   HOH T 576     -24.854 -14.663  28.311  1.00  0.47           O  
HETATM  578  O   HOH T 577      40.356   3.097  -4.761  1.00  0.47           O  
HETATM  579  O   HOH T 578     -22.728  -0.132  20.160  1.00  0.47           O  
HETATM  580  O   HOH T 579      -8.767   4.575  -0.834  1.00  0.47           O  
HETATM  581  O   HOH T 580     -21.885  -7.226  16.224  1.00  0.47           O  
HETATM  582  O   HOH T 581      19.122 -13.467  64.710  1.00  0.47           O  
HETATM  583  O   HOH T 582      35.920  -1.837  -5.773  1.00  0.47           O  
HETATM  584  O   HOH T 583       0.427 -26.531  52.031  1.00  0.47           O  
HETATM  585  O   HOH T 584      14.274 -14.610  28.066  1.00  0.47           O  
HETATM  586  O   HOH T 585      11.330 -23.932  39.329  1.00  0.47           O  
HETATM  587  O   HOH T 586     -15.724   6.631  39.437  1.00  0.47           O  
HETATM  588  O   HOH T 587      13.282   0.108 -10.456  1.00  0.47           O  
HETATM  589  O   HOH T 588     -25.975 -12.327  27.414  1.00  0.47           O  
HETATM  590  O   HOH T 589      15.434   5.334  35.831  1.00  0.47           O  
HETATM  591  O   HOH T 590     -12.786  12.867   4.270  1.00  0.47           O  
HETATM  592  O   HOH T 591      -6.830  29.601   3.858  1.00  0.47           O  
HETATM  593  O   HOH T 592     -13.070  -2.584   9.947  1.00  0.47           O  
HETATM  594  O   HOH T 593       9.593  11.439  43.874  1.00  0.47           O  
HETATM  595  O   HOH T 594      23.638  -4.984  29.045  1.00  0.47           O  
HETATM  596  O   HOH T 595      27.785  -0.292   3.600  1.00  0.47           O  
HETATM  597  O   HOH T 596      34.162   8.967   2.497  1.00  0.47           O  
HETATM  598  O   HOH T 597      -9.080 -19.741  18.865  1.00  0.47           O  
HETATM  599  O   HOH T 598      -4.038 -26.607  28.567  1.00  0.47           O  
HETATM  600  O   HOH T 599     -19.482 -10.017   5.794  1.00  0.47           O  
HETATM  601  O   HOH T 600      -1.932  -3.379  11.881  1.00  0.47           O  
HETATM  602  O   HOH T 601       8.387 -13.546  34.891  1.00  0.47           O  
HETATM  603  O   HOH T 602      38.385   4.025  -9.639  1.00  0.47           O  
HETATM  604  O   HOH T 603      19.544   8.575  52.638  1.00  0.47           O  
HETATM  605  O   HOH T 604     -22.829 -10.467  11.995  1.00  0.47           O  
HETATM  606  O   HOH T 605       7.806  -4.300  -1.857  1.00  0.48           O  
HETATM  607  O   HOH T 606       9.629 -24.503  41.411  1.00  0.48           O  
HETATM  608  O   HOH T 607      30.225  10.520   4.781  1.00  0.48           O  
HETATM  609  O   HOH T 608       3.694   6.032  32.345  1.00  0.48           O  
HETATM  610  O   HOH T 609      24.325  10.386  18.769  1.00  0.48           O  
HETATM  611  O   HOH T 610      25.520   4.042  17.664  1.00  0.48           O  
HETATM  612  O   HOH T 611     -13.900   5.514  37.551  1.00  0.48           O  
HETATM  613  O   HOH T 612      10.688  27.642  12.314  1.00  0.48           O  
HETATM  614  O   HOH T 613     -18.008  -4.766  31.012  1.00  0.48           O  
HETATM  615  O   HOH T 614     -16.992 -15.463  21.920  1.00  0.48           O  
HETATM  616  O   HOH T 615       9.705  13.880  24.545  1.00  0.48           O  
HETATM  617  O   HOH T 616      23.584 -12.772   1.851  1.00  0.48           O  
HETATM  618  O   HOH T 617      27.799   2.077  15.061  1.00  0.48           O  
HETATM  619  O   HOH T 618      13.087  12.023 -13.086  1.00  0.48           O  
HETATM  620  O   HOH T 619      12.219 -28.970  44.754  1.00  0.48           O  
HETATM  621  O   HOH T 620      26.730  -8.693   4.636  1.00  0.48           O  
HETATM  622  O   HOH T 621      20.310  10.496  19.417  1.00  0.48           O  
HETATM  623  O   HOH T 622      -0.034   6.921  33.084  1.00  0.48           O  
HETATM  624  O   HOH T 623      -3.321  11.913  24.047  1.00  0.48           O  
HETATM  625  O   HOH T 624       0.855 -23.527  38.424  1.00  0.48           O  
HETATM  626  O   HOH T 625      35.301  -0.714  -2.169  1.00  0.48           O  
HETATM  627  O   HOH T 626     -23.704 -11.272  14.571  1.00  0.48           O  
HETATM  628  O   HOH T 627     -13.525  18.716  15.807  1.00  0.48           O  
HETATM  629  O   HOH T 628      10.521 -11.395   1.729  1.00  0.48           O  
HETATM  630  O   HOH T 629     -13.589  -0.701   8.057  1.00  0.48           O  
HETATM  631  O   HOH T 630       7.231 -19.387  27.397  1.00  0.48           O  
HETATM  632  O   HOH T 631      15.732  22.045   7.355  1.00  0.48           O  
HETATM  633  O   HOH T 632      21.936 -15.395  48.811  1.00  0.48           O  
HETATM  634  O   HOH T 633       1.726  27.723  18.435  1.00  0.48           O  
HETATM  635  O   HOH T 634      -5.166   5.112  19.074  1.00  0.48           O  
HETATM  636  O   HOH T 635      -9.666   4.062  39.449  1.00  0.48           O  
HETATM  637  O   HOH T 636      13.156  12.349  46.293  1.00  0.48           O  
HETATM  638  O   HOH T 637       9.700  -2.616  -0.831  1.00  0.48           O  
HETATM  639  O   HOH T 638      -2.352   9.604  19.151  1.00  0.48           O  
HETATM  640  O   HOH T 639      24.926  10.946 -20.240  1.00  0.48           O  
HETATM  641  O   HOH T 640       9.132 -14.079   7.022  1.00  0.48           O  
HETATM  642  O   HOH T 641      10.764 -19.863  24.242  1.00  0.48           O  
HETATM  643  O   HOH T 642     -21.109 -12.433  29.573  1.00  0.48           O  
HETATM  644  O   HOH T 643      -7.033  -3.198  11.350  1.00  0.48           O  
HETATM  645  O   HOH T 644      18.149  -7.894  26.471  1.00  0.49           O  
HETATM  646  O   HOH T 645     -26.175  -6.682  27.445  1.00  0.49           O  
HETATM  647  O   HOH T 646      13.167 -20.814  -2.080  1.00  0.49           O  
HETATM  648  O   HOH T 647      10.314  -5.450  -1.494  1.00  0.49           O  
HETATM  649  O   HOH T 648      -0.727  24.711   2.301  1.00  0.49           O  
HETATM  650  O   HOH T 649      -6.691 -20.201  37.493  1.00  0.49           O  
HETATM  651  O   HOH T 650      26.030  17.860  16.232  1.00  0.49           O  
HETATM  652  O   HOH T 651     -15.263 -20.740  29.853  1.00  0.49           O  
HETATM  653  O   HOH T 652      -3.022  -1.173   3.708  1.00  0.49           O  
HETATM  654  O   HOH T 653      14.264  10.310   0.462  1.00  0.49           O  
HETATM  655  O   HOH T 654       6.324   9.007  44.481  1.00  0.49           O  
HETATM  656  O   HOH T 655      -6.426   5.866  11.150  1.00  0.49           O  
HETATM  657  O   HOH T 656       1.599   1.498  -2.434  1.00  0.49           O  
HETATM  658  O   HOH T 657      11.802 -28.217  51.845  1.00  0.49           O  
HETATM  659  O   HOH T 658     -16.830 -10.559   6.412  1.00  0.49           O  
HETATM  660  O   HOH T 659      26.709  21.935   6.426  1.00  0.49           O  
HETATM  661  O   HOH T 660      20.729 -16.333  31.885  1.00  0.49           O  
HETATM  662  O   HOH T 661      -7.331   5.527   6.460  1.00  0.49           O  
HETATM  663  O   HOH T 662      33.855 -11.306 -16.257  1.00  0.49           O  
HETATM  664  O   HOH T 663      12.916  31.081   5.812  1.00  0.49           O  
HETATM  665  O   HOH T 664     -12.079  10.486  33.478  1.00  0.49           O  
HETATM  666  O   HOH T 665       3.690  31.710   4.785  1.00  0.49           O  
HETATM  667  O   HOH T 666      21.587  -3.303  52.983  1.00  0.49           O  
HETATM  668  O   HOH T 667     -22.843  -6.337  30.824  1.00  0.49           O  
HETATM  669  O   HOH T 668      38.327  19.827  -5.056  1.00  0.49           O  
HETATM  670  O   HOH T 669       8.861 -30.890  50.124  1.00  0.49           O  
HETATM  671  O   HOH T 670      -6.087  15.390  -1.024  1.00  0.49           O  
HETATM  672  O   HOH T 671      -4.874 -11.344  12.037  1.00  0.49           O  
HETATM  673  O   HOH T 672     -11.576   9.540   3.641  1.00  0.49           O  
HETATM  674  O   HOH T 673     -16.244  -5.603   2.393  1.00  0.49           O  
HETATM  675  O   HOH T 674      -8.037   5.022   9.080  1.00  0.49           O  
HETATM  676  O   HOH T 675     -19.666 -14.048  12.947  1.00  0.49           O  
HETATM  677  O   HOH T 676      -2.860   5.648  37.462  1.00  0.49           O  
HETATM  678  O   HOH T 677       5.037  -5.182   3.898  1.00  0.49           O  
HETATM  679  O   HOH T 678      21.380  14.988 -16.042  1.00  0.49           O  
HETATM  680  O   HOH T 679      11.327 -20.160  -4.037  1.00  0.49           O  
HETATM  681  O   HOH T 680     -17.855  -3.919   0.829  1.00  0.49           O  
HETATM  682  O   HOH T 681     -18.135 -18.059  34.770  1.00  0.50           O  
HETATM  683  O   HOH T 682      -2.281 -26.100  33.368  1.00  0.50           O  
HETATM  684  O   HOH T 683      37.407  12.058  -7.366  1.00  0.50           O  
HETATM  685  O   HOH T 684       5.825  18.711  23.016  1.00  0.50           O  
HETATM  686  O   HOH T 685      -8.897  22.908  22.303  1.00  0.50           O  
HETATM  687  O   HOH T 686      31.045  12.939   5.737  1.00  0.50           O  
HETATM  688  O   HOH T 687      30.665  21.294  -8.141  1.00  0.50           O  
HETATM  689  O   HOH T 688      12.689  31.598  -0.966  1.00  0.50           O  
HETATM  690  O   HOH T 689      22.018   9.786  -0.181  1.00  0.50           O  
HETATM  691  O   HOH T 690       2.875   9.107  28.029  1.00  0.50           O  
HETATM  692  O   HOH T 691      26.186  22.526  -4.095  1.00  0.50           O  
HETATM  693  O   HOH T 692     -27.563  -7.160  23.496  1.00  0.50           O  
HETATM  694  O   HOH T 693      10.616  11.918  22.802  1.00  0.50           O  
HETATM  695  O   HOH T 694      -2.315 -27.145  30.698  1.00  0.50           O  
HETATM  696  O   HOH T 695      -2.486  21.653  -0.940  1.00  0.50           O  
HETATM  697  O   HOH T 696      19.248   5.680 -16.421  1.00  0.50           O  
HETATM  698  O   HOH T 697      -1.180   2.002  42.134  1.00  0.50           O  
HETATM  699  O   HOH T 698       1.648 -17.142  57.735  1.00  0.50           O  
HETATM  700  O   HOH T 699     -21.978 -11.349   5.527  1.00  0.50           O  
HETATM  701  O   HOH T 700      24.799   7.895  -9.530  1.00  0.50           O  
HETATM  702  O   HOH T 701      15.788 -18.337 -15.595  1.00  0.50           O  
HETATM  703  O   HOH T 702      26.728  13.081   6.486  1.00  0.50           O  
HETATM  704  O   HOH T 703      30.107  -8.723 -11.192  1.00  0.50           O  
HETATM  705  O   HOH T 704       4.052  -9.173  13.699  1.00  0.50           O  
HETATM  706  O   HOH T 705     -20.239 -11.662  11.560  1.00  0.50           O  
HETATM  707  O   HOH T 706       4.751   3.378  38.640  1.00  0.50           O  
HETATM  708  O   HOH T 707      25.043  24.799   3.090  1.00  0.50           O  
HETATM  709  O   HOH T 708      -0.369 -20.211  22.082  1.00  0.51           O  
HETATM  710  O   HOH T 709     -19.634   4.728  15.799  1.00  0.51           O  
HETATM  711  O   HOH T 710       6.491  10.678  -9.160  1.00  0.51           O  
HETATM  712  O   HOH T 711      -4.297  -4.849  46.547  1.00  0.51           O  
HETATM  713  O   HOH T 712       0.166  -8.051  37.210  1.00  0.51           O  
HETATM  714  O   HOH T 713      -3.452  29.432  19.192  1.00  0.51           O  
HETATM  715  O   HOH T 714      17.935   7.301   4.155  1.00  0.51           O  
HETATM  716  O   HOH T 715       1.605 -14.726  59.324  1.00  0.51           O  
HETATM  717  O   HOH T 716      10.621 -28.479  46.990  1.00  0.51           O  
HETATM  718  O   HOH T 717     -10.964  23.397   5.616  1.00  0.51           O  
HETATM  719  O   HOH T 718      -8.046  28.653   0.538  1.00  0.51           O  
HETATM  720  O   HOH T 719      18.617 -17.930  34.887  1.00  0.51           O  
HETATM  721  O   HOH T 720       6.949  11.378  43.044  1.00  0.51           O  
HETATM  722  O   HOH T 721      13.653   4.684 -10.793  1.00  0.51           O  
HETATM  723  O   HOH T 722      -7.798  11.196  15.671  1.00  0.51           O  
HETATM  724  O   HOH T 723      12.382 -30.857  42.704  1.00  0.51           O  
HETATM  725  O   HOH T 724      22.562   0.761  26.017  1.00  0.51           O  
HETATM  726  O   HOH T 725       3.851  -2.588  47.079  1.00  0.51           O  
HETATM  727  O   HOH T 726      33.447   8.956 -18.496  1.00  0.51           O  
HETATM  728  O   HOH T 727      23.262   4.970   3.236  1.00  0.51           O  
HETATM  729  O   HOH T 728       0.536   8.504  26.539  1.00  0.51           O  
HETATM  730  O   HOH T 729       5.617 -17.681   8.066  1.00  0.51           O  
HETATM  731  O   HOH T 730      17.174 -16.416 -16.889  1.00  0.51           O  
HETATM  732  O   HOH T 731       7.992 -17.035   9.017  1.00  0.52           O  
HETATM  733  O   HOH T 732      32.521  10.578   6.110  1.00  0.52           O  
HETATM  734  O   HOH T 733      21.261 -10.211  48.600  1.00  0.52           O  
HETATM  735  O   HOH T 734      32.333   5.180 -19.133  1.00  0.52           O  
HETATM  736  O   HOH T 735      21.352 -11.430  39.635  1.00  0.52           O  
HETATM  737  O   HOH T 736     -11.212   9.776  27.666  1.00  0.52           O  
HETATM  738  O   HOH T 737      -0.233  15.584  -6.006  1.00  0.52           O  
HETATM  739  O   HOH T 738       9.593 -28.460  44.489  1.00  0.52           O  
HETATM  740  O   HOH T 739       9.689  -8.130   2.857  1.00  0.52           O  
HETATM  741  O   HOH T 740      -1.932   4.041  13.931  1.00  0.52           O  
HETATM  742  O   HOH T 741       4.010   4.027  45.218  1.00  0.52           O  
HETATM  743  O   HOH T 742      21.977  -4.134  13.300  1.00  0.52           O  
HETATM  744  O   HOH T 743      19.421  -3.889  29.133  1.00  0.52           O  
HETATM  745  O   HOH T 744      11.810 -15.297   9.526  1.00  0.52           O  
HETATM  746  O   HOH T 745      24.260 -12.088   7.264  1.00  0.52           O  
HETATM  747  O   HOH T 746      32.968   6.966  11.189  1.00  0.52           O  
HETATM  748  O   HOH T 747      15.105   9.161  -1.936  1.00  0.52           O  
HETATM  749  O   HOH T 748      -2.521  17.254   1.457  1.00  0.52           O  
HETATM  750  O   HOH T 749       6.081 -14.869  39.399  1.00  0.52           O  
HETATM  751  O   HOH T 750      -5.739   5.648   4.081  1.00  0.52           O  
HETATM  752  O   HOH T 751       2.455   1.623  45.580  1.00  0.52           O  
HETATM  753  O   HOH T 752      16.064  18.725  -7.181  1.00  0.52           O  
HETATM  754  O   HOH T 753      19.488  23.471  10.712  1.00  0.52           O  
HETATM  755  O   HOH T 754      20.598  -7.405  62.030  1.00  0.52           O  
HETATM  756  O   HOH T 755       7.563 -23.678  59.248  1.00  0.52           O  
HETATM  757  O   HOH T 756      12.871 -19.309  61.889  1.00  0.52           O  
HETATM  758  O   HOH T 757       8.951  12.192  41.269  1.00  0.52           O  
HETATM  759  O   HOH T 758     -22.667  -6.326  13.713  1.00  0.52           O  
HETATM  760  O   HOH T 759     -11.106   8.422  30.197  1.00  0.52           O  
HETATM  761  O   HOH T 760     -12.237   5.027  39.736  1.00  0.52           O  
HETATM  762  O   HOH T 761      11.432  29.575   9.224  1.00  0.52           O  
HETATM  763  O   HOH T 762      -2.280 -16.348  54.187  1.00  0.53           O  
HETATM  764  O   HOH T 763      21.425   7.130   0.082  1.00  0.53           O  
HETATM  765  O   HOH T 764      13.147  32.265   3.436  1.00  0.53           O  
HETATM  766  O   HOH T 765      -6.429 -16.289  43.724  1.00  0.53           O  
HETATM  767  O   HOH T 766       2.024 -20.644  30.770  1.00  0.53           O  
HETATM  768  O   HOH T 767      13.647 -15.450  30.665  1.00  0.53           O  
HETATM  769  O   HOH T 768      17.373  21.597  11.181  1.00  0.53           O  
HETATM  770  O   HOH T 769      19.079   8.864   2.363  1.00  0.53           O  
HETATM  771  O   HOH T 770      22.413 -12.078  46.964  1.00  0.53           O  
HETATM  772  O   HOH T 771      29.960 -17.786 -13.711  1.00  0.53           O  
HETATM  773  O   HOH T 772       1.648  27.814   0.473  1.00  0.53           O  
HETATM  774  O   HOH T 773      -3.698  11.791  21.240  1.00  0.53           O  
HETATM  775  O   HOH T 774      19.669  -8.123  21.171  1.00  0.53           O  
HETATM  776  O   HOH T 775      12.359 -16.064  38.128  1.00  0.53           O  
HETATM  777  O   HOH T 776      11.326  12.267  52.607  1.00  0.53           O  
HETATM  778  O   HOH T 777       4.732 -18.198  10.528  1.00  0.53           O  
HETATM  779  O   HOH T 778      -0.964 -17.986  47.531  1.00  0.53           O  
HETATM  780  O   HOH T 779       5.603   6.196  44.861  1.00  0.53           O  
HETATM  781  O   HOH T 780      11.367  10.633  41.941  1.00  0.53           O  
HETATM  782  O   HOH T 781      14.413 -12.282  10.633  1.00  0.53           O  
HETATM  783  O   HOH T 782       7.448  29.104  -1.665  1.00  0.53           O  
HETATM  784  O   HOH T 783      11.196 -29.372  49.488  1.00  0.53           O  
HETATM  785  O   HOH T 784      12.828 -20.511  39.722  1.00  0.53           O  
HETATM  786  O   HOH T 785       2.330   3.447  43.200  1.00  0.53           O  
HETATM  787  O   HOH T 786      -7.053 -20.516  35.015  1.00  0.53           O  
HETATM  788  O   HOH T 787      32.182   7.937  19.783  1.00  0.53           O  
HETATM  789  O   HOH T 788      38.876  17.960  -3.070  1.00  0.53           O  
HETATM  790  O   HOH T 789      11.763 -24.546  57.432  1.00  0.53           O  
HETATM  791  O   HOH T 790       6.774 -31.641  48.513  1.00  0.54           O  
HETATM  792  O   HOH T 791      38.965  10.214  -8.975  1.00  0.54           O  
HETATM  793  O   HOH T 792      19.509 -19.507  51.925  1.00  0.54           O  
HETATM  794  O   HOH T 793      21.109  -3.235  48.612  1.00  0.54           O  
HETATM  795  O   HOH T 794      29.233  17.221 -14.916  1.00  0.54           O  
HETATM  796  O   HOH T 795       4.033 -22.530  23.476  1.00  0.54           O  
HETATM  797  O   HOH T 796      35.040  -3.904 -10.268  1.00  0.54           O  
HETATM  798  O   HOH T 797      18.719  -4.111  26.569  1.00  0.54           O  
HETATM  799  O   HOH T 798      29.464  -1.462   1.817  1.00  0.54           O  
HETATM  800  O   HOH T 799     -15.771  -8.084  40.370  1.00  0.54           O  
HETATM  801  O   HOH T 800     -11.373  23.473  17.073  1.00  0.54           O  
HETATM  802  O   HOH T 801      -9.489   4.999  -3.529  1.00  0.54           O  
HETATM  803  O   HOH T 802      23.539 -10.965  34.139  1.00  0.54           O  
HETATM  804  O   HOH T 803      12.939 -16.626  24.884  1.00  0.54           O  
HETATM  805  O   HOH T 804      -9.190   2.376  -2.475  1.00  0.54           O  
HETATM  806  O   HOH T 805      14.478  11.830  -1.887  1.00  0.54           O  
HETATM  807  O   HOH T 806      34.761   6.600 -19.223  1.00  0.54           O  
HETATM  808  O   HOH T 807      -7.170   7.479  29.267  1.00  0.54           O  
HETATM  809  O   HOH T 808      13.499  -3.894 -14.733  1.00  0.54           O  
HETATM  810  O   HOH T 809      -0.981 -12.011  12.619  1.00  0.54           O  
HETATM  811  O   HOH T 810       0.202  27.608  20.849  1.00  0.54           O  
HETATM  812  O   HOH T 811      15.599  10.246  42.138  1.00  0.54           O  
HETATM  813  O   HOH T 812      10.385 -16.655   7.621  1.00  0.54           O  
HETATM  814  O   HOH T 813      27.305   4.966   4.355  1.00  0.54           O  
HETATM  815  O   HOH T 814      -5.849 -26.985  30.725  1.00  0.54           O  
HETATM  816  O   HOH T 815      11.961  26.571  14.545  1.00  0.54           O  
HETATM  817  O   HOH T 816       7.433  13.984  22.836  1.00  0.54           O  
HETATM  818  O   HOH T 817      21.504   4.190  47.265  1.00  0.54           O  
HETATM  819  O   HOH T 818      -4.596   4.863  13.183  1.00  0.54           O  
HETATM  820  O   HOH T 819      15.211  -5.227 -22.956  1.00  0.54           O  
HETATM  821  O   HOH T 820       6.481 -15.391  34.186  1.00  0.54           O  
HETATM  822  O   HOH T 821      37.667  10.571 -11.343  1.00  0.54           O  
HETATM  823  O   HOH T 822       9.838 -25.012  59.357  1.00  0.54           O  
HETATM  824  O   HOH T 823       5.650 -21.078  25.192  1.00  0.55           O  
HETATM  825  O   HOH T 824     -23.648   6.124  24.245  1.00  0.55           O  
HETATM  826  O   HOH T 825       8.200  22.998  -4.384  1.00  0.55           O  
HETATM  827  O   HOH T 826      17.897  12.911  36.828  1.00  0.55           O  
HETATM  828  O   HOH T 827     -14.568  13.876  17.899  1.00  0.55           O  
HETATM  829  O   HOH T 828     -20.203 -14.724  23.955  1.00  0.55           O  
HETATM  830  O   HOH T 829      -0.467  21.224  21.871  1.00  0.55           O  
HETATM  831  O   HOH T 830       5.732 -13.020  37.275  1.00  0.55           O  
HETATM  832  O   HOH T 831     -19.124   3.781  13.201  1.00  0.55           O  
HETATM  833  O   HOH T 832      15.449  -7.318  21.611  1.00  0.55           O  
HETATM  834  O   HOH T 833      16.232  -9.665  18.727  1.00  0.55           O  
HETATM  835  O   HOH T 834     -18.545 -18.971  32.241  1.00  0.55           O  
HETATM  836  O   HOH T 835       3.183 -22.537  19.535  1.00  0.55           O  
HETATM  837  O   HOH T 836      -5.121  32.017   8.228  1.00  0.56           O  
HETATM  838  O   HOH T 837     -15.569 -16.245  19.550  1.00  0.56           O  
HETATM  839  O   HOH T 838      31.721  -9.591 -13.650  1.00  0.56           O  
HETATM  840  O   HOH T 839       2.418  -3.316  49.391  1.00  0.56           O  
HETATM  841  O   HOH T 840      16.266  24.233  11.377  1.00  0.56           O  
HETATM  842  O   HOH T 841      13.778  20.607  -5.654  1.00  0.56           O  
HETATM  843  O   HOH T 842     -21.155   4.907  24.013  1.00  0.56           O  
HETATM  844  O   HOH T 843       5.851 -33.208  48.472  1.00  0.56           O  
HETATM  845  O   HOH T 844     -24.235  -8.942  16.114  1.00  0.56           O  
HETATM  846  O   HOH T 845       4.814  14.612  23.539  1.00  0.56           O  
HETATM  847  O   HOH T 846      -9.641  11.297  37.159  1.00  0.56           O  
HETATM  848  O   HOH T 847       2.227 -21.274  21.802  1.00  0.56           O  
HETATM  849  O   HOH T 848      16.964  21.049  -3.979  1.00  0.56           O  
HETATM  850  O   HOH T 849     -21.112   2.097  27.653  1.00  0.57           O  
HETATM  851  O   HOH T 850       9.007  11.013  51.082  1.00  0.57           O  
HETATM  852  O   HOH T 851       1.459  -9.847  13.071  1.00  0.57           O  
HETATM  853  O   HOH T 852     -13.201  -1.808  41.271  1.00  0.57           O  
HETATM  854  O   HOH T 853      -6.512  -0.759   9.769  1.00  0.57           O  
HETATM  855  O   HOH T 854     -20.399 -13.005  38.155  1.00  0.57           O  
HETATM  856  O   HOH T 855     -12.107   6.570  18.496  1.00  0.57           O  
HETATM  857  O   HOH T 856       9.075 -25.865  43.791  1.00  0.57           O  
HETATM  858  O   HOH T 857      23.342  22.129  -4.089  1.00  0.57           O  
HETATM  859  O   HOH T 858      36.661  -1.314 -11.800  1.00  0.58           O  
HETATM  860  O   HOH T 859       8.603 -12.240  37.302  1.00  0.58           O  
HETATM  861  O   HOH T 860       4.111 -19.515  37.083  1.00  0.58           O  
HETATM  862  O   HOH T 861      18.302   9.827  60.776  1.00  0.58           O  
HETATM  863  O   HOH T 862     -13.227   2.654  10.948  1.00  0.59           O  
HETATM  864  O   HOH T 863       4.035   2.467  54.411  1.00  0.59           O  
HETATM  865  O   HOH T 864      13.729  22.736   9.060  1.00  0.59           O  
HETATM  866  O   HOH T 865      19.433  28.067   0.637  1.00  0.59           O  
HETATM  867  O   HOH T 866       8.881  -3.398  -9.010  1.00  0.59           O  
HETATM  868  O   HOH T 867      31.585 -12.846 -13.609  1.00  0.60           O  
HETATM  869  O   HOH T 868      17.919 -18.741  32.256  1.00  0.60           O  
HETATM  870  O   HOH T 869      17.717   5.705 -23.552  1.00  0.60           O  
HETATM  871  O   HOH T 870      34.150  -1.677   5.593  1.00  0.60           O  
HETATM  872  O   HOH T 871      27.261  -5.909   0.797  1.00  0.60           O  
HETATM  873  O   HOH T 872      -7.384   6.597  -6.553  1.00  0.64           O  
TER     874      HOH T 872 
