# Supplementary material for: Accurate Prediction of Hydration Sites of Proteins Using Energy Model With Atom Embedding
Source: Front Mol Biosci. 2021 Sep 20;8:756075. doi: 10.3389/fmolb.2021.756075 (PMC8488165; doi:10.3389/fmolb.2021.756075)
Supplement: Supplementary file 1 [file DataSheet1.ZIP › Data Sheet 1/Our_result_pdb/our_dataset_output/3CWR_watersite.pdb]

HEADER                                                        XXXX


JRNL        PMID   -1
HETATM    1  O   HOH T   0      19.070  10.344 -16.331  1.00  0.15           O  
HETATM    2  O   HOH T   1      22.040   8.691  39.561  1.00  0.17           O  
HETATM    3  O   HOH T   2       9.468   1.267  -2.444  1.00  0.20           O  
HETATM    4  O   HOH T   3       8.146   8.247  26.545  1.00  0.21           O  
HETATM    5  O   HOH T   4      21.030   4.342 -13.319  1.00  0.21           O  
HETATM    6  O   HOH T   5      -8.900  29.995   3.843  1.00  0.21           O  
HETATM    7  O   HOH T   6      -8.760  24.968  14.530  1.00  0.21           O  
HETATM    8  O   HOH T   7      23.453  12.932  43.592  1.00  0.21           O  
HETATM    9  O   HOH T   8       1.542   5.596  14.730  1.00  0.22           O  
HETATM   10  O   HOH T   9      18.870  14.202  36.719  1.00  0.22           O  
HETATM   11  O   HOH T  10      -5.633   2.032   3.964  1.00  0.22           O  
HETATM   12  O   HOH T  11      25.383  12.162 -11.875  1.00  0.22           O  
HETATM   13  O   HOH T  12       9.680  17.712  15.609  1.00  0.22           O  
HETATM   14  O   HOH T  13      22.433   5.040   5.457  1.00  0.22           O  
HETATM   15  O   HOH T  14      23.547 -13.253  13.209  1.00  0.23           O  
HETATM   16  O   HOH T  15       3.460  -0.718   9.295  1.00  0.23           O  
HETATM   17  O   HOH T  16      18.711  12.136  20.157  1.00  0.24           O  
HETATM   18  O   HOH T  17      10.738  15.387  27.226  1.00  0.24           O  
HETATM   19  O   HOH T  18      13.147   5.117  13.372  1.00  0.24           O  
HETATM   20  O   HOH T  19       6.431   6.153   2.439  1.00  0.24           O  
HETATM   21  O   HOH T  20      30.887  -1.141  15.716  1.00  0.24           O  
HETATM   22  O   HOH T  21      25.852  18.706 -11.530  1.00  0.24           O  
HETATM   23  O   HOH T  22      -3.805  15.639   4.282  1.00  0.24           O  
HETATM   24  O   HOH T  23      -8.155  30.014  18.627  1.00  0.24           O  
HETATM   25  O   HOH T  24     -14.702  25.001  18.326  1.00  0.24           O  
HETATM   26  O   HOH T  25      14.161  16.163  32.354  1.00  0.25           O  
HETATM   27  O   HOH T  26      25.876  31.223   4.502  1.00  0.25           O  
HETATM   28  O   HOH T  27      12.844  13.003   6.626  1.00  0.25           O  
HETATM   29  O   HOH T  28      10.257  16.845  33.671  1.00  0.25           O  
HETATM   30  O   HOH T  29      11.720   7.696  10.112  1.00  0.25           O  
HETATM   31  O   HOH T  30      10.436   7.218  27.805  1.00  0.25           O  
HETATM   32  O   HOH T  31      -7.345  25.579   5.853  1.00  0.26           O  
HETATM   33  O   HOH T  32       1.855  26.938  19.857  1.00  0.26           O  
HETATM   34  O   HOH T  33      -0.246  -3.528 -11.100  1.00  0.26           O  
HETATM   35  O   HOH T  34      18.756  15.833  15.095  1.00  0.26           O  
HETATM   36  O   HOH T  35      10.852  14.250  -1.540  1.00  0.26           O  
HETATM   37  O   HOH T  36      16.443  -3.834 -10.028  1.00  0.26           O  
HETATM   38  O   HOH T  37      26.570  15.586  19.438  1.00  0.26           O  
HETATM   39  O   HOH T  38      34.634  24.345   4.002  1.00  0.26           O  
HETATM   40  O   HOH T  39       9.133 -21.888  10.132  1.00  0.27           O  
HETATM   41  O   HOH T  40      39.040  10.240  25.212  1.00  0.27           O  
HETATM   42  O   HOH T  41      25.976  -7.999  16.603  1.00  0.27           O  
HETATM   43  O   HOH T  42      10.769   4.503   0.562  1.00  0.27           O  
HETATM   44  O   HOH T  43       0.050  29.084  25.637  1.00  0.27           O  
HETATM   45  O   HOH T  44     -10.140  15.728  26.675  1.00  0.27           O  
HETATM   46  O   HOH T  45       0.460  -2.668  21.222  1.00  0.27           O  
HETATM   47  O   HOH T  46       8.645  -3.361 -10.065  1.00  0.28           O  
HETATM   48  O   HOH T  47       5.657   5.964   9.915  1.00  0.28           O  
HETATM   49  O   HOH T  48      33.362  21.457  -2.013  1.00  0.28           O  
HETATM   50  O   HOH T  49       9.104   4.200  25.461  1.00  0.28           O  
HETATM   51  O   HOH T  50      19.514  14.675  17.652  1.00  0.28           O  
HETATM   52  O   HOH T  51       6.321   9.309  38.964  1.00  0.28           O  
HETATM   53  O   HOH T  52      15.912  -2.053  -3.487  1.00  0.28           O  
HETATM   54  O   HOH T  53       9.321  15.552  38.733  1.00  0.28           O  
HETATM   55  O   HOH T  54      14.860  17.582  43.900  1.00  0.28           O  
HETATM   56  O   HOH T  55      25.120  25.734 -16.433  1.00  0.28           O  
HETATM   57  O   HOH T  56      20.910  -0.792  18.552  1.00  0.29           O  
HETATM   58  O   HOH T  57      -2.904   9.638  12.378  1.00  0.29           O  
HETATM   59  O   HOH T  58       7.711   9.024  43.734  1.00  0.29           O  
HETATM   60  O   HOH T  59      -4.784  14.381   6.577  1.00  0.29           O  
HETATM   61  O   HOH T  60      24.158 -17.616   8.296  1.00  0.29           O  
HETATM   62  O   HOH T  61       8.354  -0.687 -14.955  1.00  0.29           O  
HETATM   63  O   HOH T  62      15.690  -5.159  24.066  1.00  0.29           O  
HETATM   64  O   HOH T  63      34.748   2.195  25.634  1.00  0.29           O  
HETATM   65  O   HOH T  64      11.431  -3.232  11.315  1.00  0.29           O  
HETATM   66  O   HOH T  65      -1.388  15.730   5.389  1.00  0.29           O  
HETATM   67  O   HOH T  66      23.693   3.821  13.502  1.00  0.29           O  
HETATM   68  O   HOH T  67      25.057  25.766  -4.105  1.00  0.30           O  
HETATM   69  O   HOH T  68      26.506   8.103   0.643  1.00  0.30           O  
HETATM   70  O   HOH T  69      10.953  23.256  14.427  1.00  0.30           O  
HETATM   71  O   HOH T  70      17.025  22.443   7.338  1.00  0.30           O  
HETATM   72  O   HOH T  71     -11.515  22.444  11.711  1.00  0.30           O  
HETATM   73  O   HOH T  72     -10.014  18.517   7.098  1.00  0.30           O  
HETATM   74  O   HOH T  73      14.739  -5.304  14.555  1.00  0.30           O  
HETATM   75  O   HOH T  74       5.070  30.630  16.593  1.00  0.30           O  
HETATM   76  O   HOH T  75      20.945  15.866  37.510  1.00  0.30           O  
HETATM   77  O   HOH T  76     -11.363  13.655  20.964  1.00  0.30           O  
HETATM   78  O   HOH T  77      23.071   3.870   7.940  1.00  0.30           O  
HETATM   79  O   HOH T  78      -9.070  23.244  12.523  1.00  0.30           O  
HETATM   80  O   HOH T  79     -15.074  23.596  16.063  1.00  0.30           O  
HETATM   81  O   HOH T  80       4.100  -5.302  -7.276  1.00  0.30           O  
HETATM   82  O   HOH T  81      11.369 -19.922  22.849  1.00  0.30           O  
HETATM   83  O   HOH T  82      -4.029   8.764  14.766  1.00  0.30           O  
HETATM   84  O   HOH T  83      10.871  19.327   3.507  1.00  0.30           O  
HETATM   85  O   HOH T  84       4.922  -7.729  19.302  1.00  0.30           O  
HETATM   86  O   HOH T  85      35.208  17.021  14.455  1.00  0.31           O  
HETATM   87  O   HOH T  86      23.526  25.000   7.193  1.00  0.31           O  
HETATM   88  O   HOH T  87       8.093   2.383  14.419  1.00  0.31           O  
HETATM   89  O   HOH T  88     -12.859   8.072  24.838  1.00  0.31           O  
HETATM   90  O   HOH T  89      23.849  12.345   7.048  1.00  0.31           O  
HETATM   91  O   HOH T  90      18.037  17.063  27.469  1.00  0.31           O  
HETATM   92  O   HOH T  91      20.695  -1.262 -19.418  1.00  0.31           O  
HETATM   93  O   HOH T  92       2.653  -6.537  11.741  1.00  0.31           O  
HETATM   94  O   HOH T  93      34.112  -0.484  25.979  1.00  0.31           O  
HETATM   95  O   HOH T  94      18.030  -1.819 -20.118  1.00  0.31           O  
HETATM   96  O   HOH T  95      13.209   2.462 -19.525  1.00  0.31           O  
HETATM   97  O   HOH T  96      31.342  21.508  -5.435  1.00  0.31           O  
HETATM   98  O   HOH T  97      24.466   6.214   8.636  1.00  0.31           O  
HETATM   99  O   HOH T  98      -1.663   2.584   9.018  1.00  0.32           O  
HETATM  100  O   HOH T  99      36.701   0.349  26.525  1.00  0.32           O  
HETATM  101  O   HOH T 100      14.339 -23.886   7.414  1.00  0.32           O  
HETATM  102  O   HOH T 101      24.340  10.424  10.361  1.00  0.32           O  
HETATM  103  O   HOH T 102      30.096  14.750  21.697  1.00  0.32           O  
HETATM  104  O   HOH T 103      13.376  16.491 -19.295  1.00  0.32           O  
HETATM  105  O   HOH T 104      23.456  28.498   2.635  1.00  0.32           O  
HETATM  106  O   HOH T 105      11.011   5.142  -4.740  1.00  0.33           O  
HETATM  107  O   HOH T 106      12.212  27.002   8.546  1.00  0.33           O  
HETATM  108  O   HOH T 107      -8.163   0.289  24.094  1.00  0.33           O  
HETATM  109  O   HOH T 108      12.682  17.357   4.436  1.00  0.33           O  
HETATM  110  O   HOH T 109      17.308  -4.115   8.080  1.00  0.33           O  
HETATM  111  O   HOH T 110      10.266  -5.519  -1.989  1.00  0.33           O  
HETATM  112  O   HOH T 111      15.264  -3.439 -14.522  1.00  0.33           O  
HETATM  113  O   HOH T 112      15.339  16.092   8.511  1.00  0.33           O  
HETATM  114  O   HOH T 113       7.595  18.381  35.732  1.00  0.33           O  
HETATM  115  O   HOH T 114      17.963  16.082   9.082  1.00  0.33           O  
HETATM  116  O   HOH T 115      32.175  -1.655  18.120  1.00  0.33           O  
HETATM  117  O   HOH T 116      26.178  28.792   3.228  1.00  0.33           O  
HETATM  118  O   HOH T 117      -9.381  19.213  20.832  1.00  0.33           O  
HETATM  119  O   HOH T 118      -6.006  30.258  16.865  1.00  0.33           O  
HETATM  120  O   HOH T 119      26.741  29.159   8.564  1.00  0.33           O  
HETATM  121  O   HOH T 120      -1.254  -5.335  -3.624  1.00  0.34           O  
HETATM  122  O   HOH T 121      10.777  -8.026  17.529  1.00  0.34           O  
HETATM  123  O   HOH T 122      -5.916   6.912  13.984  1.00  0.34           O  
HETATM  124  O   HOH T 123      33.027  -2.386  27.542  1.00  0.34           O  
HETATM  125  O   HOH T 124      26.021   6.073  41.887  1.00  0.34           O  
HETATM  126  O   HOH T 125      19.632  26.541  -6.275  1.00  0.34           O  
HETATM  127  O   HOH T 126       3.465 -25.080   8.171  1.00  0.34           O  
HETATM  128  O   HOH T 127      -7.589  -3.951   0.624  1.00  0.34           O  
HETATM  129  O   HOH T 128     -13.079  14.748  19.139  1.00  0.34           O  
HETATM  130  O   HOH T 129       5.473  16.812  -0.045  1.00  0.34           O  
HETATM  131  O   HOH T 130      12.510   1.658  43.182  1.00  0.34           O  
HETATM  132  O   HOH T 131      19.055  24.313   7.088  1.00  0.35           O  
HETATM  133  O   HOH T 132       7.272  -8.261  -5.060  1.00  0.35           O  
HETATM  134  O   HOH T 133      39.522  14.700  -5.154  1.00  0.35           O  
HETATM  135  O   HOH T 134      35.970  -1.382  19.096  1.00  0.35           O  
HETATM  136  O   HOH T 135      27.468  11.614  34.648  1.00  0.35           O  
HETATM  137  O   HOH T 136      36.906   8.714  13.873  1.00  0.35           O  
HETATM  138  O   HOH T 137      27.090   1.197  14.516  1.00  0.35           O  
HETATM  139  O   HOH T 138      28.965  15.347  24.350  1.00  0.35           O  
HETATM  140  O   HOH T 139      12.460  24.232   8.237  1.00  0.35           O  
HETATM  141  O   HOH T 140      17.373  -8.307  17.998  1.00  0.35           O  
HETATM  142  O   HOH T 141       7.133  -4.288  16.648  1.00  0.35           O  
HETATM  143  O   HOH T 142       4.617  11.417  34.110  1.00  0.35           O  
HETATM  144  O   HOH T 143       6.712  28.561  17.349  1.00  0.35           O  
HETATM  145  O   HOH T 144       7.099  18.697  25.170  1.00  0.36           O  
HETATM  146  O   HOH T 145       2.332 -10.537  11.289  1.00  0.36           O  
HETATM  147  O   HOH T 146      34.353  -4.388  28.583  1.00  0.36           O  
HETATM  148  O   HOH T 147      38.362  18.001   1.698  1.00  0.36           O  
HETATM  149  O   HOH T 148       0.803  -9.114  -2.522  1.00  0.36           O  
HETATM  150  O   HOH T 149      29.912   6.268  12.457  1.00  0.36           O  
HETATM  151  O   HOH T 150      33.970  -6.042  35.164  1.00  0.36           O  
HETATM  152  O   HOH T 151      42.287   9.020  19.972  1.00  0.36           O  
HETATM  153  O   HOH T 152      42.353   2.752  22.315  1.00  0.36           O  
HETATM  154  O   HOH T 153       9.022   5.143   2.585  1.00  0.36           O  
HETATM  155  O   HOH T 154      -7.650  -0.436  18.021  1.00  0.36           O  
HETATM  156  O   HOH T 155      -5.558   0.935  -3.300  1.00  0.36           O  
HETATM  157  O   HOH T 156      -7.852  15.536  10.324  1.00  0.36           O  
HETATM  158  O   HOH T 157      34.283   1.875  14.636  1.00  0.36           O  
HETATM  159  O   HOH T 158       3.881  14.176  26.158  1.00  0.37           O  
HETATM  160  O   HOH T 159      24.664  23.643 -18.264  1.00  0.37           O  
HETATM  161  O   HOH T 160      -7.929  11.857  26.903  1.00  0.37           O  
HETATM  162  O   HOH T 161       5.195  10.665  36.741  1.00  0.37           O  
HETATM  163  O   HOH T 162      24.375 -13.163   6.257  1.00  0.37           O  
HETATM  164  O   HOH T 163      12.547  11.827  13.629  1.00  0.37           O  
HETATM  165  O   HOH T 164       2.181  15.602  29.328  1.00  0.37           O  
HETATM  166  O   HOH T 165      29.067  28.345   9.744  1.00  0.38           O  
HETATM  167  O   HOH T 166      -6.494  13.063  10.657  1.00  0.38           O  
HETATM  168  O   HOH T 167      12.282  -0.909  20.913  1.00  0.38           O  
HETATM  169  O   HOH T 168       9.409  29.083  17.287  1.00  0.38           O  
HETATM  170  O   HOH T 169      13.743  15.543   6.372  1.00  0.38           O  
HETATM  171  O   HOH T 170       7.012   1.306  12.191  1.00  0.38           O  
HETATM  172  O   HOH T 171      18.509  29.117  -6.179  1.00  0.38           O  
HETATM  173  O   HOH T 172       9.087   3.896  -3.173  1.00  0.38           O  
HETATM  174  O   HOH T 173      21.946   2.216 -14.942  1.00  0.38           O  
HETATM  175  O   HOH T 174      27.769  17.308 -13.073  1.00  0.38           O  
HETATM  176  O   HOH T 175      17.702  -3.272  12.215  1.00  0.38           O  
HETATM  177  O   HOH T 176      -9.543   6.596  19.878  1.00  0.38           O  
HETATM  178  O   HOH T 177       2.253  12.416 -19.038  1.00  0.38           O  
HETATM  179  O   HOH T 178      31.489   4.660   7.993  1.00  0.38           O  
HETATM  180  O   HOH T 179      -4.770  -3.880   7.505  1.00  0.38           O  
HETATM  181  O   HOH T 180       0.620  13.593  28.416  1.00  0.39           O  
HETATM  182  O   HOH T 181      10.407  28.075   5.800  1.00  0.39           O  
HETATM  183  O   HOH T 182      -2.090   5.086  33.168  1.00  0.39           O  
HETATM  184  O   HOH T 183      -3.150   6.280  13.680  1.00  0.39           O  
HETATM  185  O   HOH T 184      20.106  26.834   4.090  1.00  0.39           O  
HETATM  186  O   HOH T 185      12.345  12.334  -0.198  1.00  0.39           O  
HETATM  187  O   HOH T 186      -8.057  13.276  14.880  1.00  0.39           O  
HETATM  188  O   HOH T 187      -6.519  27.034  22.105  1.00  0.39           O  
HETATM  189  O   HOH T 188       1.343   5.756  11.959  1.00  0.39           O  
HETATM  190  O   HOH T 189      22.241   1.916  14.817  1.00  0.39           O  
HETATM  191  O   HOH T 190      29.354   9.194   6.618  1.00  0.39           O  
HETATM  192  O   HOH T 191      10.944  11.624  -2.542  1.00  0.39           O  
HETATM  193  O   HOH T 192      29.904  12.705   0.886  1.00  0.39           O  
HETATM  194  O   HOH T 193       4.995  12.131 -18.763  1.00  0.39           O  
HETATM  195  O   HOH T 194       0.584  -2.341  11.541  1.00  0.39           O  
HETATM  196  O   HOH T 195      -6.651  -1.696  -6.318  1.00  0.39           O  
HETATM  197  O   HOH T 196      -7.154  24.458  21.101  1.00  0.39           O  
HETATM  198  O   HOH T 197      14.632  17.631  24.967  1.00  0.39           O  
HETATM  199  O   HOH T 198      26.685   5.315   9.855  1.00  0.39           O  
HETATM  200  O   HOH T 199      -0.066 -12.267  -1.908  1.00  0.39           O  
HETATM  201  O   HOH T 200      32.385   7.572   5.239  1.00  0.39           O  
HETATM  202  O   HOH T 201      14.205  -6.021  17.185  1.00  0.39           O  
HETATM  203  O   HOH T 202      14.659  25.751   9.080  1.00  0.40           O  
HETATM  204  O   HOH T 203      -0.023   0.286  12.127  1.00  0.40           O  
HETATM  205  O   HOH T 204      10.933  17.844  38.683  1.00  0.40           O  
HETATM  206  O   HOH T 205      18.745  -0.210  -8.954  1.00  0.40           O  
HETATM  207  O   HOH T 206       4.874  -9.674  -5.492  1.00  0.40           O  
HETATM  208  O   HOH T 207      22.754  -9.922  20.065  1.00  0.40           O  
HETATM  209  O   HOH T 208     -12.095  18.735  20.243  1.00  0.40           O  
HETATM  210  O   HOH T 209       1.638  12.180   6.935  1.00  0.40           O  
HETATM  211  O   HOH T 210      28.709  13.736   7.076  1.00  0.40           O  
HETATM  212  O   HOH T 211       0.686  -4.874  10.654  1.00  0.40           O  
HETATM  213  O   HOH T 212      28.834   7.551  39.729  1.00  0.40           O  
HETATM  214  O   HOH T 213     -15.626  17.837  14.532  1.00  0.40           O  
HETATM  215  O   HOH T 214      19.175  -4.123 -15.975  1.00  0.40           O  
HETATM  216  O   HOH T 215       2.115  -9.374  -5.010  1.00  0.40           O  
HETATM  217  O   HOH T 216       9.758  -8.194  -6.464  1.00  0.41           O  
HETATM  218  O   HOH T 217       8.009  -3.534  37.302  1.00  0.41           O  
HETATM  219  O   HOH T 218      15.285  17.665  27.704  1.00  0.41           O  
HETATM  220  O   HOH T 219       5.087  -5.965  12.899  1.00  0.41           O  
HETATM  221  O   HOH T 220      11.228  18.940  41.185  1.00  0.41           O  
HETATM  222  O   HOH T 221      35.083  -5.435  19.062  1.00  0.41           O  
HETATM  223  O   HOH T 222      25.715   5.926 -14.817  1.00  0.41           O  
HETATM  224  O   HOH T 223      26.443   5.642  -0.790  1.00  0.41           O  
HETATM  225  O   HOH T 224      37.813   9.315  27.566  1.00  0.41           O  
HETATM  226  O   HOH T 225       9.338  -6.664  -4.211  1.00  0.41           O  
HETATM  227  O   HOH T 226      26.117  13.781   7.326  1.00  0.41           O  
HETATM  228  O   HOH T 227       4.852 -27.376   7.562  1.00  0.41           O  
HETATM  229  O   HOH T 228      18.343  16.426  38.210  1.00  0.41           O  
HETATM  230  O   HOH T 229      24.765  13.076   9.672  1.00  0.41           O  
HETATM  231  O   HOH T 230      12.073  -8.232  -8.175  1.00  0.41           O  
HETATM  232  O   HOH T 231       4.766  -2.836  17.268  1.00  0.41           O  
HETATM  233  O   HOH T 232      33.236  18.051  16.045  1.00  0.41           O  
HETATM  234  O   HOH T 233      -0.556 -14.713  -3.159  1.00  0.41           O  
HETATM  235  O   HOH T 234      25.208  -9.086  19.139  1.00  0.41           O  
HETATM  236  O   HOH T 235      18.196   0.968  24.812  1.00  0.41           O  
HETATM  237  O   HOH T 236      33.523  14.662  -4.543  1.00  0.42           O  
HETATM  238  O   HOH T 237     -10.010  11.663  16.045  1.00  0.42           O  
HETATM  239  O   HOH T 238      23.370  15.831 -17.090  1.00  0.42           O  
HETATM  240  O   HOH T 239      -8.281   6.761  24.464  1.00  0.42           O  
HETATM  241  O   HOH T 240      12.131  17.987  43.575  1.00  0.42           O  
HETATM  242  O   HOH T 241       7.531  31.116  17.933  1.00  0.42           O  
HETATM  243  O   HOH T 242      -7.691  24.576   0.068  1.00  0.42           O  
HETATM  244  O   HOH T 243      -0.736  10.531  11.180  1.00  0.42           O  
HETATM  245  O   HOH T 244       3.201  19.531  30.526  1.00  0.42           O  
HETATM  246  O   HOH T 245       9.784   2.064  12.146  1.00  0.42           O  
HETATM  247  O   HOH T 246      25.113  15.643  21.833  1.00  0.42           O  
HETATM  248  O   HOH T 247      23.644   4.273 -14.339  1.00  0.42           O  
HETATM  249  O   HOH T 248      -2.583  29.278  24.651  1.00  0.42           O  
HETATM  250  O   HOH T 249      19.902   6.311   3.155  1.00  0.42           O  
HETATM  251  O   HOH T 250      13.654  -1.580  10.561  1.00  0.42           O  
HETATM  252  O   HOH T 251      26.263  16.320  24.306  1.00  0.42           O  
HETATM  253  O   HOH T 252      42.723   0.015  22.665  1.00  0.42           O  
HETATM  254  O   HOH T 253      37.220  -4.810  20.715  1.00  0.42           O  
HETATM  255  O   HOH T 254      -5.054   4.348  13.310  1.00  0.42           O  
HETATM  256  O   HOH T 255      23.509  17.065  23.676  1.00  0.42           O  
HETATM  257  O   HOH T 256      -9.986  21.287   6.506  1.00  0.42           O  
HETATM  258  O   HOH T 257      19.702  17.918  29.534  1.00  0.42           O  
HETATM  259  O   HOH T 258      38.771  20.858  -4.305  1.00  0.42           O  
HETATM  260  O   HOH T 259      -8.414  27.298   3.963  1.00  0.42           O  
HETATM  261  O   HOH T 260     -10.362   9.144  17.128  1.00  0.42           O  
HETATM  262  O   HOH T 261      21.950   1.598  17.552  1.00  0.43           O  
HETATM  263  O   HOH T 262       5.772  10.164  12.743  1.00  0.43           O  
HETATM  264  O   HOH T 263      -1.411  34.602  17.919  1.00  0.43           O  
HETATM  265  O   HOH T 264      21.619  27.669  -7.886  1.00  0.43           O  
HETATM  266  O   HOH T 265      -5.603  10.137  27.209  1.00  0.43           O  
HETATM  267  O   HOH T 266       2.004   9.372 -17.357  1.00  0.43           O  
HETATM  268  O   HOH T 267      29.093   6.435  -3.582  1.00  0.43           O  
HETATM  269  O   HOH T 268      26.237  15.955 -16.924  1.00  0.43           O  
HETATM  270  O   HOH T 269       2.477   8.352  11.923  1.00  0.43           O  
HETATM  271  O   HOH T 270      12.946  29.010   6.666  1.00  0.43           O  
HETATM  272  O   HOH T 271      23.169 -16.354  19.954  1.00  0.43           O  
HETATM  273  O   HOH T 272       2.271  -7.052  19.662  1.00  0.43           O  
HETATM  274  O   HOH T 273       5.407  30.585   5.531  1.00  0.43           O  
HETATM  275  O   HOH T 274       2.493   3.569 -22.989  1.00  0.43           O  
HETATM  276  O   HOH T 275      42.358   6.503  23.727  1.00  0.43           O  
HETATM  277  O   HOH T 276      -6.675   3.819   2.107  1.00  0.43           O  
HETATM  278  O   HOH T 277      16.981  -4.202  21.882  1.00  0.43           O  
HETATM  279  O   HOH T 278       0.384  -0.015  16.529  1.00  0.43           O  
HETATM  280  O   HOH T 279      13.638   0.659  12.207  1.00  0.43           O  
HETATM  281  O   HOH T 280      13.583   3.320  11.290  1.00  0.43           O  
HETATM  282  O   HOH T 281      11.511   0.521  30.952  1.00  0.43           O  
HETATM  283  O   HOH T 282       9.770  20.387  16.511  1.00  0.43           O  
HETATM  284  O   HOH T 283      11.423  15.141  10.284  1.00  0.43           O  
HETATM  285  O   HOH T 284      12.118  21.489   7.874  1.00  0.43           O  
HETATM  286  O   HOH T 285      11.793 -25.103   7.369  1.00  0.43           O  
HETATM  287  O   HOH T 286      38.222   0.302  18.667  1.00  0.43           O  
HETATM  288  O   HOH T 287      -1.432   7.466   6.387  1.00  0.44           O  
HETATM  289  O   HOH T 288      27.215  12.253   5.268  1.00  0.44           O  
HETATM  290  O   HOH T 289     -11.099   9.060  22.813  1.00  0.44           O  
HETATM  291  O   HOH T 290      22.256  20.599  19.466  1.00  0.44           O  
HETATM  292  O   HOH T 291      18.979  13.106  15.416  1.00  0.44           O  
HETATM  293  O   HOH T 292      12.255  18.571  12.291  1.00  0.44           O  
HETATM  294  O   HOH T 293      12.236  21.042  15.459  1.00  0.44           O  
HETATM  295  O   HOH T 294      -3.685  -5.850  -5.035  1.00  0.44           O  
HETATM  296  O   HOH T 295      25.163  27.354  -6.409  1.00  0.44           O  
HETATM  297  O   HOH T 296      20.211 -18.125  14.057  1.00  0.44           O  
HETATM  298  O   HOH T 297      24.651  27.392   8.201  1.00  0.44           O  
HETATM  299  O   HOH T 298      32.292   7.164  33.610  1.00  0.44           O  
HETATM  300  O   HOH T 299      -6.921   3.044  30.126  1.00  0.44           O  
HETATM  301  O   HOH T 300     -12.534  16.033  16.709  1.00  0.44           O  
HETATM  302  O   HOH T 301      36.446  14.342  -1.568  1.00  0.44           O  
HETATM  303  O   HOH T 302      31.591  10.985   7.306  1.00  0.44           O  
HETATM  304  O   HOH T 303      -7.447   1.806  16.352  1.00  0.44           O  
HETATM  305  O   HOH T 304      35.156  -8.151  19.964  1.00  0.44           O  
HETATM  306  O   HOH T 305       4.445   9.832  40.986  1.00  0.44           O  
HETATM  307  O   HOH T 306      -6.605   2.839  32.869  1.00  0.44           O  
HETATM  308  O   HOH T 307      19.602  -3.615 -18.684  1.00  0.44           O  
HETATM  309  O   HOH T 308      21.455   3.941  10.175  1.00  0.44           O  
HETATM  310  O   HOH T 309       1.354  15.259  33.296  1.00  0.44           O  
HETATM  311  O   HOH T 310       7.310  10.700   5.043  1.00  0.45           O  
HETATM  312  O   HOH T 311      40.648  20.438  -2.368  1.00  0.45           O  
HETATM  313  O   HOH T 312       7.436 -24.145  10.167  1.00  0.45           O  
HETATM  314  O   HOH T 313       8.114 -11.040  -8.593  1.00  0.45           O  
HETATM  315  O   HOH T 314      17.295  21.615  38.723  1.00  0.45           O  
HETATM  316  O   HOH T 315      12.851  16.656  28.605  1.00  0.45           O  
HETATM  317  O   HOH T 316      17.315  -5.515  13.742  1.00  0.45           O  
HETATM  318  O   HOH T 317      12.308  22.444  10.427  1.00  0.45           O  
HETATM  319  O   HOH T 318      24.992 -17.087  21.956  1.00  0.45           O  
HETATM  320  O   HOH T 319      41.499   1.063  20.304  1.00  0.45           O  
HETATM  321  O   HOH T 320      35.381  -4.014  33.755  1.00  0.45           O  
HETATM  322  O   HOH T 321      12.265  18.221  32.281  1.00  0.45           O  
HETATM  323  O   HOH T 322      20.266   0.713  13.292  1.00  0.45           O  
HETATM  324  O   HOH T 323      21.146  14.686  14.436  1.00  0.45           O  
HETATM  325  O   HOH T 324     -10.657  17.134  15.100  1.00  0.45           O  
HETATM  326  O   HOH T 325      42.903   1.677  24.830  1.00  0.45           O  
HETATM  327  O   HOH T 326       9.349  -5.790  16.861  1.00  0.45           O  
HETATM  328  O   HOH T 327      28.066   4.381  42.518  1.00  0.45           O  
HETATM  329  O   HOH T 328     -13.051  18.333  15.197  1.00  0.45           O  
HETATM  330  O   HOH T 329       8.502  -2.478 -12.783  1.00  0.45           O  
HETATM  331  O   HOH T 330       5.000  10.644   6.663  1.00  0.45           O  
HETATM  332  O   HOH T 331       2.895   6.715   9.760  1.00  0.45           O  
HETATM  333  O   HOH T 332       4.944   8.882  43.491  1.00  0.45           O  
HETATM  334  O   HOH T 333      16.510  -4.954 -16.518  1.00  0.45           O  
HETATM  335  O   HOH T 334      32.978  21.174   7.824  1.00  0.45           O  
HETATM  336  O   HOH T 335      -2.759  33.204  15.976  1.00  0.45           O  
HETATM  337  O   HOH T 336       7.576  23.501  20.641  1.00  0.45           O  
HETATM  338  O   HOH T 337      15.589  -6.493 -12.257  1.00  0.45           O  
HETATM  339  O   HOH T 338      36.234   0.007  15.291  1.00  0.45           O  
HETATM  340  O   HOH T 339       0.040   9.830   7.189  1.00  0.45           O  
HETATM  341  O   HOH T 340      16.084  16.113  11.198  1.00  0.45           O  
HETATM  342  O   HOH T 341      13.454   4.155  43.754  1.00  0.45           O  
HETATM  343  O   HOH T 342      32.666  -5.605  17.517  1.00  0.45           O  
HETATM  344  O   HOH T 343      -6.389  16.121   5.003  1.00  0.46           O  
HETATM  345  O   HOH T 344      39.732  18.770  -5.805  1.00  0.46           O  
HETATM  346  O   HOH T 345      14.063   6.566  44.982  1.00  0.46           O  
HETATM  347  O   HOH T 346      35.781  -2.147  27.487  1.00  0.46           O  
HETATM  348  O   HOH T 347      14.630  28.527   8.795  1.00  0.46           O  
HETATM  349  O   HOH T 348      13.878  -4.191 -16.812  1.00  0.46           O  
HETATM  350  O   HOH T 349       9.961  17.204  11.435  1.00  0.46           O  
HETATM  351  O   HOH T 350       4.813  11.901  39.148  1.00  0.46           O  
HETATM  352  O   HOH T 351      36.249  19.800   2.385  1.00  0.46           O  
HETATM  353  O   HOH T 352      41.197  12.148  27.591  1.00  0.46           O  
HETATM  354  O   HOH T 353      16.998  27.160   8.424  1.00  0.46           O  
HETATM  355  O   HOH T 354      -0.003  -1.704  18.703  1.00  0.46           O  
HETATM  356  O   HOH T 355       9.909  30.691   4.789  1.00  0.46           O  
HETATM  357  O   HOH T 356      32.416  27.665  -1.902  1.00  0.46           O  
HETATM  358  O   HOH T 357      36.471  21.072  -0.038  1.00  0.46           O  
HETATM  359  O   HOH T 358      -1.330  -0.475  14.379  1.00  0.46           O  
HETATM  360  O   HOH T 359      -3.053  -7.370  -2.791  1.00  0.46           O  
HETATM  361  O   HOH T 360       2.609  -0.439  11.876  1.00  0.46           O  
HETATM  362  O   HOH T 361     -10.366  14.404  15.951  1.00  0.46           O  
HETATM  363  O   HOH T 362      44.668   8.785  21.397  1.00  0.46           O  
HETATM  364  O   HOH T 363      41.552  20.629  -5.017  1.00  0.46           O  
HETATM  365  O   HOH T 364       3.037  17.729  17.393  1.00  0.46           O  
HETATM  366  O   HOH T 365      35.824  21.053   8.299  1.00  0.46           O  
HETATM  367  O   HOH T 366      27.831   3.167  12.871  1.00  0.46           O  
HETATM  368  O   HOH T 367     -17.144  23.841  18.029  1.00  0.46           O  
HETATM  369  O   HOH T 368      -8.429  13.667  12.334  1.00  0.46           O  
HETATM  370  O   HOH T 369      34.160  12.133   6.637  1.00  0.46           O  
HETATM  371  O   HOH T 370      15.854   4.453  45.115  1.00  0.46           O  
HETATM  372  O   HOH T 371     -10.662  15.963  29.406  1.00  0.46           O  
HETATM  373  O   HOH T 372       8.239 -19.397  -2.473  1.00  0.46           O  
HETATM  374  O   HOH T 373       1.555  17.923  34.039  1.00  0.46           O  
HETATM  375  O   HOH T 374      24.201   4.151  10.637  1.00  0.46           O  
HETATM  376  O   HOH T 375      -4.083   4.224   3.179  1.00  0.46           O  
HETATM  377  O   HOH T 376      38.710  17.932  20.992  1.00  0.47           O  
HETATM  378  O   HOH T 377      14.497  17.351  13.224  1.00  0.47           O  
HETATM  379  O   HOH T 378      20.370  19.826  23.105  1.00  0.47           O  
HETATM  380  O   HOH T 379      -6.655  -1.034  26.711  1.00  0.47           O  
HETATM  381  O   HOH T 380      18.089  -5.678 -11.304  1.00  0.47           O  
HETATM  382  O   HOH T 381      12.008   0.504  15.783  1.00  0.47           O  
HETATM  383  O   HOH T 382      13.704 -22.607   9.829  1.00  0.47           O  
HETATM  384  O   HOH T 383      10.211  -6.882  37.052  1.00  0.47           O  
HETATM  385  O   HOH T 384      27.774   3.767   0.722  1.00  0.47           O  
HETATM  386  O   HOH T 385      -7.835   9.109  25.991  1.00  0.47           O  
HETATM  387  O   HOH T 386       4.799  -5.609  17.385  1.00  0.47           O  
HETATM  388  O   HOH T 387      -4.968   5.478   0.753  1.00  0.47           O  
HETATM  389  O   HOH T 388       9.321  17.257  28.611  1.00  0.47           O  
HETATM  390  O   HOH T 389      21.059  25.749   8.365  1.00  0.47           O  
HETATM  391  O   HOH T 390      -1.035  -2.416  16.253  1.00  0.47           O  
HETATM  392  O   HOH T 391      32.183  10.431  -0.082  1.00  0.47           O  
HETATM  393  O   HOH T 392      13.529  19.431  23.255  1.00  0.47           O  
HETATM  394  O   HOH T 393      -3.935  31.653  17.964  1.00  0.47           O  
HETATM  395  O   HOH T 394       5.537  12.911  12.633  1.00  0.47           O  
HETATM  396  O   HOH T 395      32.138  23.368  -3.501  1.00  0.47           O  
HETATM  397  O   HOH T 396      21.183  29.424   3.713  1.00  0.47           O  
HETATM  398  O   HOH T 397      14.437  18.204  30.384  1.00  0.47           O  
HETATM  399  O   HOH T 398      -8.107  22.921   2.306  1.00  0.47           O  
HETATM  400  O   HOH T 399       1.795  -4.268  13.143  1.00  0.47           O  
HETATM  401  O   HOH T 400      12.634  -8.530   6.501  1.00  0.47           O  
HETATM  402  O   HOH T 401      25.153  18.692  25.196  1.00  0.47           O  
HETATM  403  O   HOH T 402      39.136  20.187   0.028  1.00  0.47           O  
HETATM  404  O   HOH T 403      27.354  -1.579  15.004  1.00  0.47           O  
HETATM  405  O   HOH T 404      10.821   6.500  22.538  1.00  0.47           O  
HETATM  406  O   HOH T 405      43.492  13.501  28.215  1.00  0.47           O  
HETATM  407  O   HOH T 406      -2.583   9.870   6.677  1.00  0.47           O  
HETATM  408  O   HOH T 407     -12.260   2.216  15.151  1.00  0.47           O  
HETATM  409  O   HOH T 408      19.243  27.080   6.721  1.00  0.48           O  
HETATM  410  O   HOH T 409       5.578 -11.182  -7.722  1.00  0.48           O  
HETATM  411  O   HOH T 410       6.641   0.101  14.661  1.00  0.48           O  
HETATM  412  O   HOH T 411      17.133  24.444   9.143  1.00  0.48           O  
HETATM  413  O   HOH T 412      -0.884  16.949  33.066  1.00  0.48           O  
HETATM  414  O   HOH T 413      36.052  23.794   0.062  1.00  0.48           O  
HETATM  415  O   HOH T 414      21.090  19.705 -18.833  1.00  0.48           O  
HETATM  416  O   HOH T 415      17.437  -5.101 -13.923  1.00  0.48           O  
HETATM  417  O   HOH T 416      21.138 -13.372  15.853  1.00  0.48           O  
HETATM  418  O   HOH T 417      25.614  28.857   5.983  1.00  0.48           O  
HETATM  419  O   HOH T 418      -7.555   0.808  28.624  1.00  0.48           O  
HETATM  420  O   HOH T 419      11.584   5.074  26.556  1.00  0.48           O  
HETATM  421  O   HOH T 420       2.991  27.604   5.636  1.00  0.48           O  
HETATM  422  O   HOH T 421      14.539  15.252 -21.333  1.00  0.48           O  
HETATM  423  O   HOH T 422      -9.054  16.872   5.020  1.00  0.48           O  
HETATM  424  O   HOH T 423      -9.622   1.615  14.575  1.00  0.48           O  
HETATM  425  O   HOH T 424       2.429  17.127  31.496  1.00  0.48           O  
HETATM  426  O   HOH T 425       5.479  28.174   7.091  1.00  0.48           O  
HETATM  427  O   HOH T 426      33.938  24.244  -1.622  1.00  0.48           O  
HETATM  428  O   HOH T 427      12.751  19.646   9.843  1.00  0.48           O  
HETATM  429  O   HOH T 428       9.496  -3.934 -15.543  1.00  0.48           O  
HETATM  430  O   HOH T 429      12.749  17.016   8.637  1.00  0.48           O  
HETATM  431  O   HOH T 430      -3.983  15.175  30.354  1.00  0.48           O  
HETATM  432  O   HOH T 431      37.857  22.357   9.802  1.00  0.48           O  
HETATM  433  O   HOH T 432       1.303  -4.848  -7.343  1.00  0.48           O  
HETATM  434  O   HOH T 433      38.549  11.086  14.407  1.00  0.48           O  
HETATM  435  O   HOH T 434       7.806  -2.422 -17.036  1.00  0.48           O  
HETATM  436  O   HOH T 435       7.015  20.880  32.079  1.00  0.48           O  
HETATM  437  O   HOH T 436      32.762  -3.222  15.982  1.00  0.48           O  
HETATM  438  O   HOH T 437      -1.014   4.852  10.618  1.00  0.48           O  
HETATM  439  O   HOH T 438      35.905  18.936  16.353  1.00  0.48           O  
HETATM  440  O   HOH T 439      24.545   1.167  13.580  1.00  0.49           O  
HETATM  441  O   HOH T 440      13.151 -10.089  -6.576  1.00  0.49           O  
HETATM  442  O   HOH T 441      12.475  18.337  14.989  1.00  0.49           O  
HETATM  443  O   HOH T 442      30.261   5.857  41.450  1.00  0.49           O  
HETATM  444  O   HOH T 443      -6.347   0.555  31.180  1.00  0.49           O  
HETATM  445  O   HOH T 444      15.565 -21.357   2.125  1.00  0.49           O  
HETATM  446  O   HOH T 445      11.648  -5.437  18.182  1.00  0.49           O  
HETATM  447  O   HOH T 446      13.065  23.551  16.252  1.00  0.49           O  
HETATM  448  O   HOH T 447     -12.124  17.468  27.626  1.00  0.49           O  
HETATM  449  O   HOH T 448      17.051  18.886  29.382  1.00  0.49           O  
HETATM  450  O   HOH T 449       0.056  -7.578  -4.714  1.00  0.49           O  
HETATM  451  O   HOH T 450      -1.566   2.479  11.697  1.00  0.49           O  
HETATM  452  O   HOH T 451      36.889  24.949   2.418  1.00  0.49           O  
HETATM  453  O   HOH T 452      12.116   2.528  13.671  1.00  0.49           O  
HETATM  454  O   HOH T 453      -7.189   6.549  27.011  1.00  0.49           O  
HETATM  455  O   HOH T 454       5.774  -2.532  14.822  1.00  0.49           O  
HETATM  456  O   HOH T 455      41.872  20.715   0.062  1.00  0.49           O  
HETATM  457  O   HOH T 456      34.653  15.656  26.643  1.00  0.49           O  
HETATM  458  O   HOH T 457      -4.096 -15.326   1.704  1.00  0.49           O  
HETATM  459  O   HOH T 458      31.088   7.315   7.896  1.00  0.49           O  
HETATM  460  O   HOH T 459      39.876  16.199  29.866  1.00  0.49           O  
HETATM  461  O   HOH T 460      28.208  12.185 -12.002  1.00  0.49           O  
HETATM  462  O   HOH T 461       9.093  12.144  11.642  1.00  0.49           O  
HETATM  463  O   HOH T 462      10.253 -21.079  20.502  1.00  0.49           O  
HETATM  464  O   HOH T 463      17.690  31.367  -5.132  1.00  0.49           O  
HETATM  465  O   HOH T 464      20.360  21.700  21.048  1.00  0.50           O  
HETATM  466  O   HOH T 465      38.560  16.066   3.651  1.00  0.50           O  
HETATM  467  O   HOH T 466      22.848  21.937 -19.627  1.00  0.50           O  
HETATM  468  O   HOH T 467      29.527   5.687   9.715  1.00  0.50           O  
HETATM  469  O   HOH T 468      18.156  11.359  17.511  1.00  0.50           O  
HETATM  470  O   HOH T 469      31.064  25.945  -3.550  1.00  0.50           O  
HETATM  471  O   HOH T 470       6.616   7.572  12.098  1.00  0.50           O  
HETATM  472  O   HOH T 471      -1.510  21.993  29.319  1.00  0.50           O  
HETATM  473  O   HOH T 472       7.171  17.308   2.240  1.00  0.50           O  
HETATM  474  O   HOH T 473      30.426   8.735  -2.720  1.00  0.50           O  
HETATM  475  O   HOH T 474      -8.736  20.161  23.319  1.00  0.50           O  
HETATM  476  O   HOH T 475      29.226   5.726  -0.843  1.00  0.50           O  
HETATM  477  O   HOH T 476     -11.115  12.900  18.249  1.00  0.50           O  
HETATM  478  O   HOH T 477      35.969  11.217  14.999  1.00  0.50           O  
HETATM  479  O   HOH T 478      19.250   6.306   8.315  1.00  0.50           O  
HETATM  480  O   HOH T 479      35.902  22.449  -2.354  1.00  0.50           O  
HETATM  481  O   HOH T 480      11.042 -25.815   4.784  1.00  0.50           O  
HETATM  482  O   HOH T 481      11.166  -0.058  13.242  1.00  0.50           O  
HETATM  483  O   HOH T 482     -11.533  18.536  17.483  1.00  0.50           O  
HETATM  484  O   HOH T 483       6.260   3.996  11.784  1.00  0.50           O  
HETATM  485  O   HOH T 484      -7.915  -2.351  -1.634  1.00  0.50           O  
HETATM  486  O   HOH T 485      12.283  29.525   4.064  1.00  0.50           O  
HETATM  487  O   HOH T 486      10.721   9.852  11.427  1.00  0.50           O  
HETATM  488  O   HOH T 487      10.338  10.021 -20.134  1.00  0.50           O  
HETATM  489  O   HOH T 488       9.691   1.453  47.529  1.00  0.50           O  
HETATM  490  O   HOH T 489      -6.797  24.872  23.837  1.00  0.50           O  
HETATM  491  O   HOH T 490      11.543 -15.340  -5.070  1.00  0.50           O  
HETATM  492  O   HOH T 491       3.082 -11.480  -6.537  1.00  0.51           O  
HETATM  493  O   HOH T 492      38.888   0.676  15.990  1.00  0.51           O  
HETATM  494  O   HOH T 493      20.745  -0.244  15.793  1.00  0.51           O  
HETATM  495  O   HOH T 494      33.019   4.092  21.114  1.00  0.51           O  
HETATM  496  O   HOH T 495      16.192  13.342 -22.153  1.00  0.51           O  
HETATM  497  O   HOH T 496       3.786 -12.379  14.452  1.00  0.51           O  
HETATM  498  O   HOH T 497      28.535  -9.037  17.432  1.00  0.51           O  
HETATM  499  O   HOH T 498      12.287  -4.850  13.310  1.00  0.51           O  
HETATM  500  O   HOH T 499      23.012 -15.394   7.071  1.00  0.51           O  
HETATM  501  O   HOH T 500       5.288  -0.936  12.493  1.00  0.51           O  
HETATM  502  O   HOH T 501       2.461   8.356  42.305  1.00  0.51           O  
HETATM  503  O   HOH T 502      -3.826   6.405   5.117  1.00  0.51           O  
HETATM  504  O   HOH T 503      -7.385  -3.220  -4.087  1.00  0.51           O  
HETATM  505  O   HOH T 504      11.336  -2.940  19.373  1.00  0.51           O  
HETATM  506  O   HOH T 505     -12.155  21.032  18.684  1.00  0.51           O  
HETATM  507  O   HOH T 506      14.442  14.617  12.911  1.00  0.51           O  
HETATM  508  O   HOH T 507      -9.381  24.761   4.097  1.00  0.51           O  
HETATM  509  O   HOH T 508      36.403  17.417  24.641  1.00  0.51           O  
HETATM  510  O   HOH T 509       0.086  -6.422  12.861  1.00  0.51           O  
HETATM  511  O   HOH T 510       9.573  -8.824  -9.164  1.00  0.51           O  
HETATM  512  O   HOH T 511      38.967   2.445  20.217  1.00  0.51           O  
HETATM  513  O   HOH T 512      22.552  19.449  24.813  1.00  0.51           O  
HETATM  514  O   HOH T 513      26.904   9.862 -11.276  1.00  0.51           O  
HETATM  515  O   HOH T 514      39.975   2.995  12.735  1.00  0.51           O  
HETATM  516  O   HOH T 515      27.518   0.978   0.747  1.00  0.51           O  
HETATM  517  O   HOH T 516      28.418   1.650   3.200  1.00  0.51           O  
HETATM  518  O   HOH T 517      33.541  -0.428  16.069  1.00  0.51           O  
HETATM  519  O   HOH T 518      -6.836  14.013   8.210  1.00  0.51           O  
HETATM  520  O   HOH T 519      16.248  -6.677  -9.551  1.00  0.51           O  
HETATM  521  O   HOH T 520      16.430  -4.323  -4.826  1.00  0.51           O  
HETATM  522  O   HOH T 521      10.573  -1.599  17.019  1.00  0.52           O  
HETATM  523  O   HOH T 522      -7.425   3.098  13.884  1.00  0.52           O  
HETATM  524  O   HOH T 523       7.954   9.719  11.155  1.00  0.52           O  
HETATM  525  O   HOH T 524      15.494  -6.656  -1.666  1.00  0.52           O  
HETATM  526  O   HOH T 525      26.800   9.956   6.725  1.00  0.52           O  
HETATM  527  O   HOH T 526      18.010   2.329  16.310  1.00  0.52           O  
HETATM  528  O   HOH T 527      -0.120   9.665  31.564  1.00  0.52           O  
HETATM  529  O   HOH T 528      -4.175  -1.161  30.554  1.00  0.52           O  
HETATM  530  O   HOH T 529      37.442  18.579  18.711  1.00  0.52           O  
HETATM  531  O   HOH T 530       7.562  14.610   1.722  1.00  0.52           O  
HETATM  532  O   HOH T 531       8.372  18.665  33.063  1.00  0.52           O  
HETATM  533  O   HOH T 532       1.504 -13.443   4.730  1.00  0.52           O  
HETATM  534  O   HOH T 533      -2.380  -2.430  20.931  1.00  0.52           O  
HETATM  535  O   HOH T 534      29.454  10.467  -0.725  1.00  0.52           O  
HETATM  536  O   HOH T 535      30.768   8.019  10.577  1.00  0.52           O  
HETATM  537  O   HOH T 536      25.900  -6.721  13.962  1.00  0.52           O  
HETATM  538  O   HOH T 537      29.908  23.780  -4.750  1.00  0.52           O  
HETATM  539  O   HOH T 538      17.786  -5.583  18.308  1.00  0.52           O  
HETATM  540  O   HOH T 539      41.215  13.689  29.912  1.00  0.52           O  
HETATM  541  O   HOH T 540       9.926  16.864   4.084  1.00  0.52           O  
HETATM  542  O   HOH T 541      26.743  19.763 -13.884  1.00  0.53           O  
HETATM  543  O   HOH T 542      -2.389   7.168  11.216  1.00  0.53           O  
HETATM  544  O   HOH T 543      -1.617  13.813  30.055  1.00  0.53           O  
HETATM  545  O   HOH T 544      28.232   8.741 -13.500  1.00  0.53           O  
HETATM  546  O   HOH T 545       6.552  33.034  16.239  1.00  0.53           O  
HETATM  547  O   HOH T 546     -10.114  23.112   0.260  1.00  0.53           O  
HETATM  548  O   HOH T 547      26.632  14.789  16.913  1.00  0.53           O  
HETATM  549  O   HOH T 548      40.561  15.501  -0.596  1.00  0.53           O  
HETATM  550  O   HOH T 549      20.229 -10.490   2.353  1.00  0.53           O  
HETATM  551  O   HOH T 550       0.957   8.822   9.567  1.00  0.53           O  
HETATM  552  O   HOH T 551       9.995   6.805  25.125  1.00  0.53           O  
HETATM  553  O   HOH T 552      26.111  29.084  -4.435  1.00  0.53           O  
HETATM  554  O   HOH T 553      24.464  21.991   0.966  1.00  0.53           O  
HETATM  555  O   HOH T 554       8.825  14.787  11.317  1.00  0.53           O  
HETATM  556  O   HOH T 555       0.820  -5.715  -9.881  1.00  0.53           O  
HETATM  557  O   HOH T 556      -9.625   4.258  24.320  1.00  0.53           O  
HETATM  558  O   HOH T 557      -4.091   3.606   5.620  1.00  0.53           O  
HETATM  559  O   HOH T 558      25.295  10.600  15.393  1.00  0.54           O  
HETATM  560  O   HOH T 559      24.283  12.188  12.496  1.00  0.54           O  
HETATM  561  O   HOH T 560      20.990  -0.765  -1.495  1.00  0.54           O  
HETATM  562  O   HOH T 561      37.302  15.600  30.896  1.00  0.54           O  
HETATM  563  O   HOH T 562      27.557   7.934  -1.966  1.00  0.54           O  
HETATM  564  O   HOH T 563      25.347  17.867  20.221  1.00  0.54           O  
HETATM  565  O   HOH T 564      -1.240  -5.850  -6.407  1.00  0.54           O  
HETATM  566  O   HOH T 565       8.629 -19.603  22.175  1.00  0.54           O  
HETATM  567  O   HOH T 566     -17.095  21.715  16.190  1.00  0.54           O  
HETATM  568  O   HOH T 567     -15.469  21.780  13.895  1.00  0.54           O  
HETATM  569  O   HOH T 568      28.292   3.161  10.207  1.00  0.54           O  
HETATM  570  O   HOH T 569      -0.853   5.004   7.929  1.00  0.54           O  
HETATM  571  O   HOH T 570      -7.335  -3.084   6.706  1.00  0.55           O  
HETATM  572  O   HOH T 571      19.580 -21.147  12.233  1.00  0.55           O  
HETATM  573  O   HOH T 572      36.448   1.473  12.929  1.00  0.55           O  
HETATM  574  O   HOH T 573      -7.297  -0.874  -2.457  1.00  0.55           O  
HETATM  575  O   HOH T 574      14.066  -0.105  41.845  1.00  0.55           O  
HETATM  576  O   HOH T 575      42.187   6.501  13.788  1.00  0.55           O  
HETATM  577  O   HOH T 576      30.938 -12.039  16.503  1.00  0.55           O  
HETATM  578  O   HOH T 577      27.469  26.789  -5.027  1.00  0.55           O  
HETATM  579  O   HOH T 578      38.880  12.960   0.000  1.00  0.55           O  
HETATM  580  O   HOH T 579      17.477  20.355  -8.028  1.00  0.55           O  
HETATM  581  O   HOH T 580      36.557  22.405   3.413  1.00  0.55           O  
HETATM  582  O   HOH T 581      34.079  12.917  -0.912  1.00  0.56           O  
HETATM  583  O   HOH T 582      22.718  19.309  22.007  1.00  0.56           O  
HETATM  584  O   HOH T 583      21.720  -3.553   4.178  1.00  0.56           O  
HETATM  585  O   HOH T 584      17.892  -0.682  13.006  1.00  0.56           O  
HETATM  586  O   HOH T 585      37.146  -7.396  21.860  1.00  0.56           O  
HETATM  587  O   HOH T 586      18.709  29.055   4.844  1.00  0.56           O  
HETATM  588  O   HOH T 587      -8.226  -0.691  15.288  1.00  0.56           O  
HETATM  589  O   HOH T 588      29.949  14.890  31.035  1.00  0.56           O  
HETATM  590  O   HOH T 589       5.533  27.950   4.575  1.00  0.56           O  
HETATM  591  O   HOH T 590      10.783   1.889  -0.074  1.00  0.56           O  
HETATM  592  O   HOH T 591      12.979  20.455  19.343  1.00  0.56           O  
HETATM  593  O   HOH T 592      -0.282  13.043  32.571  1.00  0.56           O  
HETATM  594  O   HOH T 593       9.203  21.932  18.719  1.00  0.57           O  
HETATM  595  O   HOH T 594      17.042  33.086   0.015  1.00  0.57           O  
HETATM  596  O   HOH T 595       9.340  -2.088  12.887  1.00  0.57           O  
HETATM  597  O   HOH T 596      -3.413   2.221  13.501  1.00  0.57           O  
HETATM  598  O   HOH T 597       0.858  -4.596  24.865  1.00  0.57           O  
HETATM  599  O   HOH T 598       7.775  29.235   5.585  1.00  0.57           O  
HETATM  600  O   HOH T 599      22.261   2.087  -3.234  1.00  0.57           O  
HETATM  601  O   HOH T 600      12.877  21.018  21.055  1.00  0.57           O  
HETATM  602  O   HOH T 601      42.085   9.771  14.454  1.00  0.57           O  
HETATM  603  O   HOH T 602       8.859  17.804  40.460  1.00  0.57           O  
HETATM  604  O   HOH T 603      39.769  13.887   2.538  1.00  0.58           O  
HETATM  605  O   HOH T 604     -10.415  -0.009  18.141  1.00  0.58           O  
HETATM  606  O   HOH T 605      38.262  -2.209  20.328  1.00  0.58           O  
HETATM  607  O   HOH T 606      16.358  21.866   9.989  1.00  0.58           O  
HETATM  608  O   HOH T 607      29.847  12.184   9.061  1.00  0.58           O  
HETATM  609  O   HOH T 608      32.771   4.641   5.517  1.00  0.58           O  
HETATM  610  O   HOH T 609      39.546   8.909  12.982  1.00  0.58           O  
HETATM  611  O   HOH T 610       2.496  18.788  36.537  1.00  0.59           O  
HETATM  612  O   HOH T 611       5.610  -7.164  -8.808  1.00  0.59           O  
HETATM  613  O   HOH T 612       9.767 -21.948  12.828  1.00  0.59           O  
HETATM  614  O   HOH T 613       9.013  19.446  26.853  1.00  0.59           O  
HETATM  615  O   HOH T 614      20.343   1.434  10.725  1.00  0.59           O  
HETATM  616  O   HOH T 615      11.279  12.855   8.874  1.00  0.60           O  
HETATM  617  O   HOH T 616      30.081  17.228  22.621  1.00  0.60           O  
HETATM  618  O   HOH T 617      31.250  -8.066  16.831  1.00  0.60           O  
TER     619      HOH T 617 
