# Supplementary material for: Accurate Prediction of Hydration Sites of Proteins Using Energy Model With Atom Embedding
Source: Front Mol Biosci. 2021 Sep 20;8:756075. doi: 10.3389/fmolb.2021.756075 (PMC8488165; doi:10.3389/fmolb.2021.756075)
Supplement: Supplementary file 1 [file DataSheet1.ZIP › Data Sheet 1/Our_result_pdb/our_dataset_output/3DI8_watersite.pdb]

HEADER                                                        XXXX


JRNL        PMID   -1
HETATM    1  O   HOH T   0      16.053  19.001  11.717  1.00  0.17           O  
HETATM    2  O   HOH T   1      27.572  30.956  36.961  1.00  0.20           O  
HETATM    3  O   HOH T   2      26.909   3.238  22.693  1.00  0.21           O  
HETATM    4  O   HOH T   3      28.541  13.299  15.409  1.00  0.22           O  
HETATM    5  O   HOH T   4      16.300  25.789  13.645  1.00  0.22           O  
HETATM    6  O   HOH T   5      15.152  35.073  12.533  1.00  0.23           O  
HETATM    7  O   HOH T   6      18.106  13.141  11.874  1.00  0.23           O  
HETATM    8  O   HOH T   7      27.102  10.980  29.098  1.00  0.24           O  
HETATM    9  O   HOH T   8      16.290  28.165  32.048  1.00  0.24           O  
HETATM   10  O   HOH T   9      25.506  17.997  46.291  1.00  0.25           O  
HETATM   11  O   HOH T  10      22.569  18.572   9.573  1.00  0.26           O  
HETATM   12  O   HOH T  11      13.709  26.900  21.263  1.00  0.26           O  
HETATM   13  O   HOH T  12      10.480  32.628  18.011  1.00  0.26           O  
HETATM   14  O   HOH T  13      16.443  36.481  10.452  1.00  0.27           O  
HETATM   15  O   HOH T  14      26.948   0.411  22.431  1.00  0.27           O  
HETATM   16  O   HOH T  15      12.863  13.577  35.657  1.00  0.29           O  
HETATM   17  O   HOH T  16      29.798  11.305  29.158  1.00  0.29           O  
HETATM   18  O   HOH T  17      31.965  17.016  23.632  1.00  0.29           O  
HETATM   19  O   HOH T  18      33.907  23.518  24.140  1.00  0.29           O  
HETATM   20  O   HOH T  19      29.066   4.734  33.196  1.00  0.29           O  
HETATM   21  O   HOH T  20      31.296   1.629  27.580  1.00  0.30           O  
HETATM   22  O   HOH T  21      29.728  15.657  14.339  1.00  0.30           O  
HETATM   23  O   HOH T  22      20.687   8.411  27.839  1.00  0.31           O  
HETATM   24  O   HOH T  23      22.380   6.772  39.690  1.00  0.31           O  
HETATM   25  O   HOH T  24      32.023  19.525  42.543  1.00  0.31           O  
HETATM   26  O   HOH T  25      20.373   2.151  20.183  1.00  0.32           O  
HETATM   27  O   HOH T  26      13.866  35.423  10.059  1.00  0.32           O  
HETATM   28  O   HOH T  27      20.241  30.781  35.052  1.00  0.32           O  
HETATM   29  O   HOH T  28      25.248  20.256  12.125  1.00  0.32           O  
HETATM   30  O   HOH T  29      34.969  15.850  34.228  1.00  0.32           O  
HETATM   31  O   HOH T  30      35.639  14.320  29.237  1.00  0.33           O  
HETATM   32  O   HOH T  31      38.415  20.845  17.412  1.00  0.33           O  
HETATM   33  O   HOH T  32       8.078  21.883   8.209  1.00  0.33           O  
HETATM   34  O   HOH T  33      25.710  12.549  11.736  1.00  0.33           O  
HETATM   35  O   HOH T  34      26.422  16.869   7.627  1.00  0.33           O  
HETATM   36  O   HOH T  35      29.455   3.512  23.863  1.00  0.34           O  
HETATM   37  O   HOH T  36      17.187  13.041  28.536  1.00  0.34           O  
HETATM   38  O   HOH T  37      19.458  33.200  16.201  1.00  0.34           O  
HETATM   39  O   HOH T  38       7.304  13.652  14.506  1.00  0.34           O  
HETATM   40  O   HOH T  39      30.116  28.335  25.512  1.00  0.34           O  
HETATM   41  O   HOH T  40      27.062   8.663  21.090  1.00  0.36           O  
HETATM   42  O   HOH T  41      23.954  24.180  41.552  1.00  0.36           O  
HETATM   43  O   HOH T  42      34.228  18.264  24.712  1.00  0.36           O  
HETATM   44  O   HOH T  43      36.256  17.616  27.623  1.00  0.36           O  
HETATM   45  O   HOH T  44      29.088   1.689  26.049  1.00  0.36           O  
HETATM   46  O   HOH T  45      11.897   8.162  16.168  1.00  0.36           O  
HETATM   47  O   HOH T  46      13.663   9.959  15.106  1.00  0.36           O  
HETATM   48  O   HOH T  47      37.545  22.877  13.180  1.00  0.36           O  
HETATM   49  O   HOH T  48       8.955   7.039  10.380  1.00  0.36           O  
HETATM   50  O   HOH T  49      35.111  24.334  16.925  1.00  0.36           O  
HETATM   51  O   HOH T  50      11.956  25.688  35.595  1.00  0.36           O  
HETATM   52  O   HOH T  51      23.034  32.868  19.437  1.00  0.37           O  
HETATM   53  O   HOH T  52      11.607  13.154  45.420  1.00  0.37           O  
HETATM   54  O   HOH T  53      14.011  24.257  32.027  1.00  0.37           O  
HETATM   55  O   HOH T  54      20.022   3.298  24.314  1.00  0.38           O  
HETATM   56  O   HOH T  55      35.684  19.797  34.233  1.00  0.38           O  
HETATM   57  O   HOH T  56       4.084  21.001  14.598  1.00  0.38           O  
HETATM   58  O   HOH T  57      29.282  19.649  17.308  1.00  0.38           O  
HETATM   59  O   HOH T  58      20.494   9.994  45.629  1.00  0.38           O  
HETATM   60  O   HOH T  59      19.984  12.399  10.086  1.00  0.38           O  
HETATM   61  O   HOH T  60      31.669  25.091  23.454  1.00  0.38           O  
HETATM   62  O   HOH T  61      14.166  22.136  30.123  1.00  0.38           O  
HETATM   63  O   HOH T  62      24.112  -0.557  18.896  1.00  0.38           O  
HETATM   64  O   HOH T  63       9.042  12.742  44.556  1.00  0.38           O  
HETATM   65  O   HOH T  64       5.570  27.405  12.891  1.00  0.39           O  
HETATM   66  O   HOH T  65      17.566  30.341   6.405  1.00  0.39           O  
HETATM   67  O   HOH T  66       1.431  21.766  14.634  1.00  0.39           O  
HETATM   68  O   HOH T  67      20.248  11.223  27.565  1.00  0.39           O  
HETATM   69  O   HOH T  68       7.235  15.159  16.945  1.00  0.39           O  
HETATM   70  O   HOH T  69      37.671  20.644  14.766  1.00  0.39           O  
HETATM   71  O   HOH T  70      10.212  33.267  15.307  1.00  0.39           O  
HETATM   72  O   HOH T  71      24.197   4.685  39.265  1.00  0.39           O  
HETATM   73  O   HOH T  72      30.676  22.586  14.620  1.00  0.40           O  
HETATM   74  O   HOH T  73      40.639  24.175  17.470  1.00  0.40           O  
HETATM   75  O   HOH T  74      17.244  32.953  26.215  1.00  0.40           O  
HETATM   76  O   HOH T  75      25.859  -1.530  24.082  1.00  0.40           O  
HETATM   77  O   HOH T  76      13.158  36.550  23.469  1.00  0.40           O  
HETATM   78  O   HOH T  77      31.598  18.576  18.485  1.00  0.40           O  
HETATM   79  O   HOH T  78      15.322  13.673  32.962  1.00  0.40           O  
HETATM   80  O   HOH T  79      12.987  26.896  23.928  1.00  0.41           O  
HETATM   81  O   HOH T  80      15.242  13.725  30.183  1.00  0.41           O  
HETATM   82  O   HOH T  81      16.620  10.425  36.998  1.00  0.41           O  
HETATM   83  O   HOH T  82      10.689  10.580  45.158  1.00  0.41           O  
HETATM   84  O   HOH T  83      10.617  29.186  12.532  1.00  0.42           O  
HETATM   85  O   HOH T  84      38.874  22.949  15.651  1.00  0.42           O  
HETATM   86  O   HOH T  85      21.394  18.592  48.303  1.00  0.42           O  
HETATM   87  O   HOH T  86      12.929  23.161  36.500  1.00  0.42           O  
HETATM   88  O   HOH T  87      22.330  11.363  44.037  1.00  0.42           O  
HETATM   89  O   HOH T  88      18.801  35.428  34.867  1.00  0.42           O  
HETATM   90  O   HOH T  89      35.056   2.031  31.028  1.00  0.42           O  
HETATM   91  O   HOH T  90      13.635  14.327   7.271  1.00  0.43           O  
HETATM   92  O   HOH T  91      32.976   5.380  27.507  1.00  0.43           O  
HETATM   93  O   HOH T  92      14.528  19.359   9.447  1.00  0.43           O  
HETATM   94  O   HOH T  93      35.661  21.790  22.771  1.00  0.43           O  
HETATM   95  O   HOH T  94      15.888  14.376   8.768  1.00  0.43           O  
HETATM   96  O   HOH T  95      29.166  30.233  18.733  1.00  0.43           O  
HETATM   97  O   HOH T  96      26.791  24.366  14.556  1.00  0.43           O  
HETATM   98  O   HOH T  97      35.919  19.963  16.733  1.00  0.43           O  
HETATM   99  O   HOH T  98      24.134   8.228   9.540  1.00  0.43           O  
HETATM  100  O   HOH T  99      20.687  21.182  52.083  1.00  0.43           O  
HETATM  101  O   HOH T 100      19.205  12.824   7.474  1.00  0.44           O  
HETATM  102  O   HOH T 101       2.569  20.721  12.237  1.00  0.44           O  
HETATM  103  O   HOH T 102      17.142  19.490   9.221  1.00  0.44           O  
HETATM  104  O   HOH T 103      15.744  16.983   9.819  1.00  0.44           O  
HETATM  105  O   HOH T 104      12.962  19.606   7.395  1.00  0.44           O  
HETATM  106  O   HOH T 105      34.998  13.135  33.452  1.00  0.44           O  
HETATM  107  O   HOH T 106      22.821   7.848  42.206  1.00  0.44           O  
HETATM  108  O   HOH T 107      26.801   4.560  40.216  1.00  0.45           O  
HETATM  109  O   HOH T 108      32.857  24.315  15.118  1.00  0.45           O  
HETATM  110  O   HOH T 109      25.676   1.967  33.522  1.00  0.45           O  
HETATM  111  O   HOH T 110      35.693  23.578  20.682  1.00  0.45           O  
HETATM  112  O   HOH T 111      28.035  17.160  45.865  1.00  0.45           O  
HETATM  113  O   HOH T 112       9.992  26.534  11.858  1.00  0.45           O  
HETATM  114  O   HOH T 113      37.706  15.991  34.178  1.00  0.45           O  
HETATM  115  O   HOH T 114      36.063  22.172  18.362  1.00  0.45           O  
HETATM  116  O   HOH T 115      21.959   0.101  26.028  1.00  0.46           O  
HETATM  117  O   HOH T 116      15.836  15.420  27.929  1.00  0.46           O  
HETATM  118  O   HOH T 117      22.355  32.641  37.513  1.00  0.46           O  
HETATM  119  O   HOH T 118      19.697   4.819  20.253  1.00  0.46           O  
HETATM  120  O   HOH T 119      26.373   0.415  35.709  1.00  0.46           O  
HETATM  121  O   HOH T 120      29.176   5.613  40.784  1.00  0.46           O  
HETATM  122  O   HOH T 121      31.760  29.357  18.423  1.00  0.47           O  
HETATM  123  O   HOH T 122      30.044  29.292  28.255  1.00  0.47           O  
HETATM  124  O   HOH T 123      31.544   3.807  29.179  1.00  0.47           O  
HETATM  125  O   HOH T 124      28.864  23.725  12.785  1.00  0.47           O  
HETATM  126  O   HOH T 125      22.055  33.948  17.028  1.00  0.47           O  
HETATM  127  O   HOH T 126      11.273   6.604   9.022  1.00  0.47           O  
HETATM  128  O   HOH T 127      29.268  30.981  25.113  1.00  0.47           O  
HETATM  129  O   HOH T 128      33.447   9.295  31.109  1.00  0.47           O  
HETATM  130  O   HOH T 129      34.005  25.329  21.975  1.00  0.47           O  
HETATM  131  O   HOH T 130      26.238  32.967  38.307  1.00  0.47           O  
HETATM  132  O   HOH T 131      28.338   1.948  34.440  1.00  0.48           O  
HETATM  133  O   HOH T 132       5.720  15.282  12.960  1.00  0.48           O  
HETATM  134  O   HOH T 133      16.270   7.633  42.935  1.00  0.48           O  
HETATM  135  O   HOH T 134      21.329  30.350   9.071  1.00  0.48           O  
HETATM  136  O   HOH T 135      21.566   4.040  18.416  1.00  0.48           O  
HETATM  137  O   HOH T 136      24.135  20.491  50.184  1.00  0.48           O  
HETATM  138  O   HOH T 137      17.566  11.023  26.719  1.00  0.48           O  
HETATM  139  O   HOH T 138      22.111  34.093  39.855  1.00  0.48           O  
HETATM  140  O   HOH T 139      15.062  34.518  22.693  1.00  0.49           O  
HETATM  141  O   HOH T 140      32.762   1.863  32.638  1.00  0.49           O  
HETATM  142  O   HOH T 141      15.375   9.501   7.920  1.00  0.49           O  
HETATM  143  O   HOH T 142      23.990  32.092  39.816  1.00  0.49           O  
HETATM  144  O   HOH T 143      12.964  16.771  31.104  1.00  0.49           O  
HETATM  145  O   HOH T 144      23.498  13.710   8.514  1.00  0.49           O  
HETATM  146  O   HOH T 145      30.076   2.270  32.488  1.00  0.49           O  
HETATM  147  O   HOH T 146      32.716   1.321  29.862  1.00  0.49           O  
HETATM  148  O   HOH T 147      14.527  11.909   8.560  1.00  0.49           O  
HETATM  149  O   HOH T 148      19.428   7.306  35.911  1.00  0.49           O  
HETATM  150  O   HOH T 149      17.332  32.394   4.556  1.00  0.49           O  
HETATM  151  O   HOH T 150       5.712  28.976  10.559  1.00  0.50           O  
HETATM  152  O   HOH T 151      25.113  25.856  12.917  1.00  0.50           O  
HETATM  153  O   HOH T 152      32.734  29.255  25.270  1.00  0.50           O  
HETATM  154  O   HOH T 153      24.316  11.243   9.727  1.00  0.50           O  
HETATM  155  O   HOH T 154      18.642  35.659  32.177  1.00  0.50           O  
HETATM  156  O   HOH T 155      26.979  15.431  14.464  1.00  0.50           O  
HETATM  157  O   HOH T 156      36.633  14.992  26.698  1.00  0.50           O  
HETATM  158  O   HOH T 157      15.666  12.624  35.492  1.00  0.50           O  
HETATM  159  O   HOH T 158      28.295  17.547  15.757  1.00  0.50           O  
HETATM  160  O   HOH T 159       8.016  12.660  17.937  1.00  0.50           O  
HETATM  161  O   HOH T 160      31.093  24.843  31.706  1.00  0.50           O  
HETATM  162  O   HOH T 161       3.655  30.578  11.821  1.00  0.50           O  
HETATM  163  O   HOH T 162      14.735  17.955  29.188  1.00  0.51           O  
HETATM  164  O   HOH T 163      18.492   3.044  21.960  1.00  0.51           O  
HETATM  165  O   HOH T 164      20.182  33.383  35.890  1.00  0.51           O  
HETATM  166  O   HOH T 165      33.492  27.329  23.616  1.00  0.51           O  
HETATM  167  O   HOH T 166      21.698  13.108   6.489  1.00  0.51           O  
HETATM  168  O   HOH T 167      18.739   9.859  47.769  1.00  0.51           O  
HETATM  169  O   HOH T 168      16.902  13.559  25.772  1.00  0.51           O  
HETATM  170  O   HOH T 169      25.155  22.844  13.037  1.00  0.51           O  
HETATM  171  O   HOH T 170      24.316  24.276  51.170  1.00  0.51           O  
HETATM  172  O   HOH T 171      23.850  -1.193  16.238  1.00  0.51           O  
HETATM  173  O   HOH T 172      13.480  17.008  26.905  1.00  0.52           O  
HETATM  174  O   HOH T 173      26.699  33.042  35.556  1.00  0.52           O  
HETATM  175  O   HOH T 174       8.023  17.759  38.853  1.00  0.52           O  
HETATM  176  O   HOH T 175      22.483  26.444  41.373  1.00  0.52           O  
HETATM  177  O   HOH T 176      12.185  15.331  33.390  1.00  0.52           O  
HETATM  178  O   HOH T 177      24.187  16.407   9.115  1.00  0.53           O  
HETATM  179  O   HOH T 178      38.040  15.815  28.841  1.00  0.53           O  
HETATM  180  O   HOH T 179      15.427  20.587  28.124  1.00  0.53           O  
HETATM  181  O   HOH T 180      17.846  10.498   7.257  1.00  0.54           O  
HETATM  182  O   HOH T 181      34.291  24.922  26.462  1.00  0.54           O  
HETATM  183  O   HOH T 182      19.123  31.986   9.597  1.00  0.54           O  
HETATM  184  O   HOH T 183      27.391  19.354  13.811  1.00  0.55           O  
HETATM  185  O   HOH T 184      13.720  17.089   6.274  1.00  0.55           O  
HETATM  186  O   HOH T 185       5.669  22.732   7.148  1.00  0.55           O  
HETATM  187  O   HOH T 186      20.946   2.526  26.772  1.00  0.55           O  
HETATM  188  O   HOH T 187      27.501  32.366  26.680  1.00  0.55           O  
HETATM  189  O   HOH T 188      31.683   5.849  39.680  1.00  0.55           O  
HETATM  190  O   HOH T 189      13.920   6.362  15.679  1.00  0.55           O  
HETATM  191  O   HOH T 190       4.034  22.663   7.936  1.00  0.55           O  
HETATM  192  O   HOH T 191      22.275   6.522  10.519  1.00  0.56           O  
HETATM  193  O   HOH T 192      16.894   8.092  35.543  1.00  0.56           O  
HETATM  194  O   HOH T 193      13.054  14.706   4.822  1.00  0.56           O  
HETATM  195  O   HOH T 194      17.320  12.114   9.338  1.00  0.56           O  
HETATM  196  O   HOH T 195      36.717  21.207  30.835  1.00  0.57           O  
HETATM  197  O   HOH T 196      12.902   8.908  44.639  1.00  0.57           O  
HETATM  198  O   HOH T 197      28.312  29.114  16.302  1.00  0.57           O  
HETATM  199  O   HOH T 198      22.740  16.239   4.870  1.00  0.57           O  
HETATM  200  O   HOH T 199      24.410   9.605  43.912  1.00  0.57           O  
HETATM  201  O   HOH T 200       7.070   8.949  11.374  1.00  0.58           O  
TER     202      HOH T 200 
