# Supplementary material for: Accurate Prediction of Hydration Sites of Proteins Using Energy Model With Atom Embedding
Source: Front Mol Biosci. 2021 Sep 20;8:756075. doi: 10.3389/fmolb.2021.756075 (PMC8488165; doi:10.3389/fmolb.2021.756075)
Supplement: Supplementary file 1 [file DataSheet1.ZIP › Data Sheet 1/Our_result_pdb/our_dataset_output/3E5T_watersite.pdb]

HEADER                                                        XXXX


JRNL        PMID   -1
HETATM    1  O   HOH T   0     -34.808   4.593  -7.623  1.00  0.15           O  
HETATM    2  O   HOH T   1     -29.722 -13.702   3.632  1.00  0.17           O  
HETATM    3  O   HOH T   2     -16.520 -12.456  -3.075  1.00  0.18           O  
HETATM    4  O   HOH T   3     -45.504   8.893 -19.066  1.00  0.18           O  
HETATM    5  O   HOH T   4     -29.956  18.742  -7.535  1.00  0.19           O  
HETATM    6  O   HOH T   5     -29.472   0.792  -1.628  1.00  0.20           O  
HETATM    7  O   HOH T   6     -32.973  12.726 -16.659  1.00  0.20           O  
HETATM    8  O   HOH T   7     -10.581  -9.620  -1.266  1.00  0.21           O  
HETATM    9  O   HOH T   8     -31.723 -13.150   1.796  1.00  0.21           O  
HETATM   10  O   HOH T   9     -13.614   8.264 -20.885  1.00  0.21           O  
HETATM   11  O   HOH T  10     -23.608  -8.883 -10.257  1.00  0.21           O  
HETATM   12  O   HOH T  11     -26.779   1.785 -18.462  1.00  0.21           O  
HETATM   13  O   HOH T  12     -33.835 -14.785   1.117  1.00  0.22           O  
HETATM   14  O   HOH T  13     -42.293 -16.783  -9.207  1.00  0.22           O  
HETATM   15  O   HOH T  14     -52.231   9.888 -17.636  1.00  0.22           O  
HETATM   16  O   HOH T  15     -22.400   7.964 -13.962  1.00  0.22           O  
HETATM   17  O   HOH T  16     -31.838  -8.219 -15.532  1.00  0.23           O  
HETATM   18  O   HOH T  17     -36.980 -20.537  -4.744  1.00  0.23           O  
HETATM   19  O   HOH T  18     -61.852  14.032 -20.160  1.00  0.23           O  
HETATM   20  O   HOH T  19     -56.197   9.241 -12.447  1.00  0.24           O  
HETATM   21  O   HOH T  20     -47.685   6.700 -11.156  1.00  0.24           O  
HETATM   22  O   HOH T  21     -28.247  -4.483  -5.947  1.00  0.24           O  
HETATM   23  O   HOH T  22     -17.624 -16.938  -8.724  1.00  0.24           O  
HETATM   24  O   HOH T  23     -36.198  19.474  -8.117  1.00  0.24           O  
HETATM   25  O   HOH T  24     -29.242  -3.925  -2.555  1.00  0.25           O  
HETATM   26  O   HOH T  25     -28.606  21.012  -8.471  1.00  0.25           O  
HETATM   27  O   HOH T  26     -23.216   7.447 -11.340  1.00  0.25           O  
HETATM   28  O   HOH T  27     -27.926  12.917  -3.868  1.00  0.25           O  
HETATM   29  O   HOH T  28     -23.569 -19.158   8.536  1.00  0.26           O  
HETATM   30  O   HOH T  29     -16.239  10.802  -7.425  1.00  0.26           O  
HETATM   31  O   HOH T  30     -23.158   6.414 -26.698  1.00  0.26           O  
HETATM   32  O   HOH T  31     -23.325  25.511 -11.249  1.00  0.26           O  
HETATM   33  O   HOH T  32     -22.967  -3.480   8.158  1.00  0.26           O  
HETATM   34  O   HOH T  33     -42.317  -0.007 -12.134  1.00  0.26           O  
HETATM   35  O   HOH T  34     -20.768  22.705  -7.539  1.00  0.26           O  
HETATM   36  O   HOH T  35     -27.696  18.360 -13.657  1.00  0.26           O  
HETATM   37  O   HOH T  36     -36.059  13.025  -2.893  1.00  0.27           O  
HETATM   38  O   HOH T  37     -38.754  -0.787 -10.509  1.00  0.27           O  
HETATM   39  O   HOH T  38     -56.906   5.827 -19.167  1.00  0.27           O  
HETATM   40  O   HOH T  39     -24.661 -12.878  -6.360  1.00  0.27           O  
HETATM   41  O   HOH T  40     -26.310 -13.770 -14.676  1.00  0.28           O  
HETATM   42  O   HOH T  41     -44.902  12.433 -17.766  1.00  0.28           O  
HETATM   43  O   HOH T  42     -14.105  18.026 -16.725  1.00  0.28           O  
HETATM   44  O   HOH T  43     -19.476  19.117 -28.414  1.00  0.28           O  
HETATM   45  O   HOH T  44     -23.123 -11.056 -22.954  1.00  0.28           O  
HETATM   46  O   HOH T  45     -10.676  -9.851  -6.406  1.00  0.28           O  
HETATM   47  O   HOH T  46     -14.882 -14.522 -15.521  1.00  0.29           O  
HETATM   48  O   HOH T  47     -32.768  -4.511 -13.696  1.00  0.29           O  
HETATM   49  O   HOH T  48     -18.777 -13.850  -2.566  1.00  0.29           O  
HETATM   50  O   HOH T  49     -21.713   3.870  -8.656  1.00  0.29           O  
HETATM   51  O   HOH T  50     -40.529  18.107  -3.128  1.00  0.30           O  
HETATM   52  O   HOH T  51     -35.093 -15.433   3.431  1.00  0.30           O  
HETATM   53  O   HOH T  52     -29.306   9.262 -25.362  1.00  0.30           O  
HETATM   54  O   HOH T  53     -24.775 -15.283   8.756  1.00  0.30           O  
HETATM   55  O   HOH T  54     -56.895  11.534 -13.960  1.00  0.30           O  
HETATM   56  O   HOH T  55     -25.233 -17.543   6.938  1.00  0.30           O  
HETATM   57  O   HOH T  56     -33.009  22.577 -13.487  1.00  0.31           O  
HETATM   58  O   HOH T  57     -26.762  -2.224  -4.435  1.00  0.31           O  
HETATM   59  O   HOH T  58     -38.541  18.985 -18.443  1.00  0.31           O  
HETATM   60  O   HOH T  59     -31.175 -19.901   1.947  1.00  0.31           O  
HETATM   61  O   HOH T  60     -26.094 -12.727 -10.522  1.00  0.31           O  
HETATM   62  O   HOH T  61     -12.364   2.173 -17.021  1.00  0.32           O  
HETATM   63  O   HOH T  62     -16.347  -3.483 -21.939  1.00  0.32           O  
HETATM   64  O   HOH T  63     -35.342 -18.161  -9.371  1.00  0.32           O  
HETATM   65  O   HOH T  64     -15.903  16.344 -11.774  1.00  0.32           O  
HETATM   66  O   HOH T  65     -27.115 -19.263  -6.602  1.00  0.32           O  
HETATM   67  O   HOH T  66     -60.603   9.810 -29.552  1.00  0.32           O  
HETATM   68  O   HOH T  67     -42.326   0.019  -3.453  1.00  0.33           O  
HETATM   69  O   HOH T  68     -55.770   5.864 -21.665  1.00  0.33           O  
HETATM   70  O   HOH T  69     -39.251  14.879 -18.624  1.00  0.33           O  
HETATM   71  O   HOH T  70     -20.822   0.274   6.235  1.00  0.34           O  
HETATM   72  O   HOH T  71     -43.487  14.613 -17.718  1.00  0.34           O  
HETATM   73  O   HOH T  72     -41.118 -12.953  -3.450  1.00  0.34           O  
HETATM   74  O   HOH T  73     -27.671   9.902 -18.137  1.00  0.34           O  
HETATM   75  O   HOH T  74     -14.388   8.599 -26.355  1.00  0.34           O  
HETATM   76  O   HOH T  75     -24.412   3.584   4.072  1.00  0.34           O  
HETATM   77  O   HOH T  76     -57.747   7.030 -30.677  1.00  0.34           O  
HETATM   78  O   HOH T  77     -15.886 -20.156   2.158  1.00  0.34           O  
HETATM   79  O   HOH T  78     -18.287  22.198  -8.779  1.00  0.34           O  
HETATM   80  O   HOH T  79     -29.052   3.703 -14.594  1.00  0.34           O  
HETATM   81  O   HOH T  80     -23.930  24.107 -20.503  1.00  0.34           O  
HETATM   82  O   HOH T  81     -63.220   9.319 -29.649  1.00  0.35           O  
HETATM   83  O   HOH T  82     -12.349  15.854 -17.284  1.00  0.35           O  
HETATM   84  O   HOH T  83     -44.160   1.837 -21.225  1.00  0.35           O  
HETATM   85  O   HOH T  84     -27.944  26.050  -6.791  1.00  0.36           O  
HETATM   86  O   HOH T  85     -27.823   0.587  -4.729  1.00  0.36           O  
HETATM   87  O   HOH T  86     -38.017  20.296  -6.089  1.00  0.36           O  
HETATM   88  O   HOH T  87     -24.043   0.501 -27.306  1.00  0.36           O  
HETATM   89  O   HOH T  88     -16.748  16.664 -27.229  1.00  0.36           O  
HETATM   90  O   HOH T  89     -40.605  -2.186 -12.060  1.00  0.36           O  
HETATM   91  O   HOH T  90     -31.107  -9.211  14.731  1.00  0.36           O  
HETATM   92  O   HOH T  91     -41.597  10.529   1.775  1.00  0.36           O  
HETATM   93  O   HOH T  92     -28.918  10.256 -22.855  1.00  0.37           O  
HETATM   94  O   HOH T  93     -15.682 -15.832 -17.876  1.00  0.37           O  
HETATM   95  O   HOH T  94     -30.547  16.940 -21.705  1.00  0.37           O  
HETATM   96  O   HOH T  95     -32.009  13.611   0.094  1.00  0.37           O  
HETATM   97  O   HOH T  96     -27.730  -4.205 -23.580  1.00  0.37           O  
HETATM   98  O   HOH T  97     -46.891  10.542 -17.255  1.00  0.37           O  
HETATM   99  O   HOH T  98     -26.044  21.934 -17.971  1.00  0.37           O  
HETATM  100  O   HOH T  99     -36.637  22.379 -10.857  1.00  0.37           O  
HETATM  101  O   HOH T 100     -57.691  10.131 -26.405  1.00  0.37           O  
HETATM  102  O   HOH T 101     -26.407  15.100 -23.288  1.00  0.37           O  
HETATM  103  O   HOH T 102     -41.452  16.586 -22.055  1.00  0.37           O  
HETATM  104  O   HOH T 103     -34.911  13.086 -27.389  1.00  0.37           O  
HETATM  105  O   HOH T 104     -37.289  22.150 -16.327  1.00  0.37           O  
HETATM  106  O   HOH T 105     -39.439  20.339 -16.233  1.00  0.38           O  
HETATM  107  O   HOH T 106      -9.537  16.519 -14.333  1.00  0.38           O  
HETATM  108  O   HOH T 107     -19.450   8.230  -1.664  1.00  0.38           O  
HETATM  109  O   HOH T 108      -7.085  -7.127   1.250  1.00  0.38           O  
HETATM  110  O   HOH T 109      -9.333 -11.105   0.781  1.00  0.38           O  
HETATM  111  O   HOH T 110      -6.581  -7.616  -2.580  1.00  0.38           O  
HETATM  112  O   HOH T 111     -13.866   8.687 -23.620  1.00  0.38           O  
HETATM  113  O   HOH T 112     -26.301  17.069 -21.385  1.00  0.38           O  
HETATM  114  O   HOH T 113     -47.558  -0.852 -22.706  1.00  0.38           O  
HETATM  115  O   HOH T 114     -26.935   3.545 -16.335  1.00  0.39           O  
HETATM  116  O   HOH T 115     -36.668   1.509   0.282  1.00  0.39           O  
HETATM  117  O   HOH T 116     -42.270   5.659 -24.487  1.00  0.39           O  
HETATM  118  O   HOH T 117     -31.311   9.107 -27.306  1.00  0.39           O  
HETATM  119  O   HOH T 118     -28.354 -12.203  15.821  1.00  0.39           O  
HETATM  120  O   HOH T 119     -21.536  14.599 -26.321  1.00  0.39           O  
HETATM  121  O   HOH T 120     -19.127  -0.228   8.374  1.00  0.39           O  
HETATM  122  O   HOH T 121     -33.698 -20.441  -9.665  1.00  0.39           O  
HETATM  123  O   HOH T 122     -35.592  22.229  -8.275  1.00  0.39           O  
HETATM  124  O   HOH T 123     -37.002  -7.324 -24.645  1.00  0.40           O  
HETATM  125  O   HOH T 124     -15.181  -8.900 -19.563  1.00  0.40           O  
HETATM  126  O   HOH T 125     -59.563   4.910 -30.878  1.00  0.40           O  
HETATM  127  O   HOH T 126     -41.199   8.713  -0.349  1.00  0.40           O  
HETATM  128  O   HOH T 127     -35.969  -4.752   4.699  1.00  0.40           O  
HETATM  129  O   HOH T 128     -10.456 -12.015   3.146  1.00  0.40           O  
HETATM  130  O   HOH T 129     -22.722 -10.343   5.660  1.00  0.40           O  
HETATM  131  O   HOH T 130     -60.448  10.099 -26.834  1.00  0.40           O  
HETATM  132  O   HOH T 131     -38.993  21.064 -11.501  1.00  0.41           O  
HETATM  133  O   HOH T 132      -8.603  -9.555  -3.195  1.00  0.41           O  
HETATM  134  O   HOH T 133     -53.432  12.461 -13.939  1.00  0.41           O  
HETATM  135  O   HOH T 134     -12.434 -19.473  -0.688  1.00  0.41           O  
HETATM  136  O   HOH T 135     -20.040  -1.461 -22.469  1.00  0.41           O  
HETATM  137  O   HOH T 136     -38.985   2.332  -1.296  1.00  0.41           O  
HETATM  138  O   HOH T 137     -34.790  13.399 -24.540  1.00  0.41           O  
HETATM  139  O   HOH T 138     -19.161  15.424  -2.889  1.00  0.41           O  
HETATM  140  O   HOH T 139     -29.059  10.655 -27.815  1.00  0.42           O  
HETATM  141  O   HOH T 140     -34.648  13.289  -0.538  1.00  0.42           O  
HETATM  142  O   HOH T 141     -20.517  13.228  -2.180  1.00  0.42           O  
HETATM  143  O   HOH T 142     -33.705   9.983 -16.714  1.00  0.42           O  
HETATM  144  O   HOH T 143      -6.021  -5.578  -0.800  1.00  0.42           O  
HETATM  145  O   HOH T 144     -26.720 -13.222   8.757  1.00  0.42           O  
HETATM  146  O   HOH T 145     -55.986   8.119 -27.003  1.00  0.42           O  
HETATM  147  O   HOH T 146     -51.076  15.761 -26.047  1.00  0.42           O  
HETATM  148  O   HOH T 147     -54.671  10.128 -14.635  1.00  0.42           O  
HETATM  149  O   HOH T 148     -18.749  14.866 -26.660  1.00  0.42           O  
HETATM  150  O   HOH T 149     -40.357  -6.008  -1.180  1.00  0.42           O  
HETATM  151  O   HOH T 150     -33.534  25.808  -2.502  1.00  0.42           O  
HETATM  152  O   HOH T 151     -18.332  -0.237 -24.367  1.00  0.43           O  
HETATM  153  O   HOH T 152      -7.895  14.818 -12.702  1.00  0.43           O  
HETATM  154  O   HOH T 153     -30.671  -3.269  -4.962  1.00  0.43           O  
HETATM  155  O   HOH T 154     -19.702  -2.373   9.956  1.00  0.43           O  
HETATM  156  O   HOH T 155     -14.966  17.719 -13.975  1.00  0.43           O  
HETATM  157  O   HOH T 156     -41.212   2.498  -3.061  1.00  0.43           O  
HETATM  158  O   HOH T 157     -40.188 -20.194 -11.369  1.00  0.43           O  
HETATM  159  O   HOH T 158     -11.888  -4.127 -11.204  1.00  0.43           O  
HETATM  160  O   HOH T 159     -12.995  10.709 -22.114  1.00  0.43           O  
HETATM  161  O   HOH T 160     -28.916 -14.804  14.850  1.00  0.43           O  
HETATM  162  O   HOH T 161     -24.591 -24.283   1.355  1.00  0.43           O  
HETATM  163  O   HOH T 162     -44.175   5.187  -5.465  1.00  0.43           O  
HETATM  164  O   HOH T 163     -21.554  24.410  -9.380  1.00  0.43           O  
HETATM  165  O   HOH T 164     -62.861  10.256 -25.456  1.00  0.44           O  
HETATM  166  O   HOH T 165     -29.164  15.378 -23.542  1.00  0.44           O  
HETATM  167  O   HOH T 166     -33.343 -21.318   4.967  1.00  0.44           O  
HETATM  168  O   HOH T 167     -28.342  20.339  -5.913  1.00  0.44           O  
HETATM  169  O   HOH T 168     -41.849  15.965 -19.424  1.00  0.44           O  
HETATM  170  O   HOH T 169     -12.297   0.615 -19.327  1.00  0.44           O  
HETATM  171  O   HOH T 170     -33.232  11.096   0.315  1.00  0.44           O  
HETATM  172  O   HOH T 171     -41.603 -17.870 -11.592  1.00  0.44           O  
HETATM  173  O   HOH T 172     -33.992   9.026  -1.322  1.00  0.44           O  
HETATM  174  O   HOH T 173     -34.531  23.339  -3.195  1.00  0.44           O  
HETATM  175  O   HOH T 174     -25.968 -17.946  -8.851  1.00  0.44           O  
HETATM  176  O   HOH T 175     -34.722  -8.857 -24.164  1.00  0.44           O  
HETATM  177  O   HOH T 176     -39.754  19.488 -13.733  1.00  0.44           O  
HETATM  178  O   HOH T 177     -42.688   8.791   3.538  1.00  0.44           O  
HETATM  179  O   HOH T 178     -44.804   7.210 -24.707  1.00  0.44           O  
HETATM  180  O   HOH T 179     -34.775  23.497 -15.469  1.00  0.44           O  
HETATM  181  O   HOH T 180     -21.317 -13.008 -22.161  1.00  0.44           O  
HETATM  182  O   HOH T 181     -13.574 -13.785   3.270  1.00  0.44           O  
HETATM  183  O   HOH T 182     -21.291  -6.129 -22.131  1.00  0.45           O  
HETATM  184  O   HOH T 183     -20.463  -5.649 -24.763  1.00  0.45           O  
HETATM  185  O   HOH T 184     -20.450  10.666  -1.160  1.00  0.45           O  
HETATM  186  O   HOH T 185     -28.592   0.095   5.749  1.00  0.45           O  
HETATM  187  O   HOH T 186     -39.486  -3.665   0.117  1.00  0.45           O  
HETATM  188  O   HOH T 187     -31.737  14.649 -22.796  1.00  0.45           O  
HETATM  189  O   HOH T 188     -16.958  20.034 -29.095  1.00  0.45           O  
HETATM  190  O   HOH T 189     -33.321 -20.232  -2.417  1.00  0.45           O  
HETATM  191  O   HOH T 190     -39.511 -21.785  -4.840  1.00  0.45           O  
HETATM  192  O   HOH T 191     -29.870  27.301  -5.607  1.00  0.46           O  
HETATM  193  O   HOH T 192     -16.079 -14.634   4.139  1.00  0.46           O  
HETATM  194  O   HOH T 193     -15.091  -1.158   4.104  1.00  0.46           O  
HETATM  195  O   HOH T 194     -25.754 -15.920  -4.970  1.00  0.46           O  
HETATM  196  O   HOH T 195     -40.694  19.459  -5.522  1.00  0.46           O  
HETATM  197  O   HOH T 196     -32.839  23.583  -5.540  1.00  0.46           O  
HETATM  198  O   HOH T 197     -29.317  -1.303  -3.431  1.00  0.46           O  
HETATM  199  O   HOH T 198     -43.039  18.449  -4.180  1.00  0.46           O  
HETATM  200  O   HOH T 199     -39.505 -16.803  -3.204  1.00  0.46           O  
HETATM  201  O   HOH T 200     -30.907  11.411 -25.964  1.00  0.46           O  
HETATM  202  O   HOH T 201     -40.075 -22.467  -7.436  1.00  0.46           O  
HETATM  203  O   HOH T 202     -27.768  -6.283 -25.300  1.00  0.46           O  
HETATM  204  O   HOH T 203     -13.072 -13.576 -19.566  1.00  0.46           O  
HETATM  205  O   HOH T 204     -41.455   4.247 -26.740  1.00  0.46           O  
HETATM  206  O   HOH T 205     -22.892  -1.477 -25.984  1.00  0.47           O  
HETATM  207  O   HOH T 206     -16.180  -8.951  -7.717  1.00  0.47           O  
HETATM  208  O   HOH T 207     -20.297 -10.632 -23.062  1.00  0.47           O  
HETATM  209  O   HOH T 208     -24.925   6.251   4.932  1.00  0.47           O  
HETATM  210  O   HOH T 209     -18.529   1.808   6.636  1.00  0.47           O  
HETATM  211  O   HOH T 210     -64.716   9.294 -27.458  1.00  0.47           O  
HETATM  212  O   HOH T 211     -39.033  22.116 -14.122  1.00  0.47           O  
HETATM  213  O   HOH T 212     -23.278   5.784   2.822  1.00  0.47           O  
HETATM  214  O   HOH T 213     -39.191  20.457  -3.494  1.00  0.47           O  
HETATM  215  O   HOH T 214     -29.938 -13.845  11.049  1.00  0.47           O  
HETATM  216  O   HOH T 215     -16.097   0.868   5.725  1.00  0.47           O  
HETATM  217  O   HOH T 216     -39.668   6.293 -25.729  1.00  0.47           O  
HETATM  218  O   HOH T 217     -17.825  -4.029  11.305  1.00  0.47           O  
HETATM  219  O   HOH T 218     -39.132 -19.509  -3.238  1.00  0.47           O  
HETATM  220  O   HOH T 219     -38.192  21.279  -8.789  1.00  0.47           O  
HETATM  221  O   HOH T 220     -35.608  23.796 -12.920  1.00  0.47           O  
HETATM  222  O   HOH T 221     -25.477 -22.552  -0.671  1.00  0.47           O  
HETATM  223  O   HOH T 222     -40.684   3.171 -24.380  1.00  0.47           O  
HETATM  224  O   HOH T 223     -43.914  16.349 -13.732  1.00  0.47           O  
HETATM  225  O   HOH T 224     -43.486   4.135  -3.028  1.00  0.48           O  
HETATM  226  O   HOH T 225     -28.955 -14.049 -13.746  1.00  0.48           O  
HETATM  227  O   HOH T 226     -27.619 -14.463  12.526  1.00  0.48           O  
HETATM  228  O   HOH T 227     -37.212 -17.633 -11.222  1.00  0.48           O  
HETATM  229  O   HOH T 228     -33.867 -19.477   2.828  1.00  0.48           O  
HETATM  230  O   HOH T 229     -16.717  -2.432 -24.472  1.00  0.48           O  
HETATM  231  O   HOH T 230     -16.351 -19.452  -8.242  1.00  0.48           O  
HETATM  232  O   HOH T 231     -41.437 -20.300  -6.271  1.00  0.48           O  
HETATM  233  O   HOH T 232      -6.336  -2.962   0.002  1.00  0.48           O  
HETATM  234  O   HOH T 233     -39.532  17.151 -20.202  1.00  0.48           O  
HETATM  235  O   HOH T 234     -48.615  15.341 -19.534  1.00  0.48           O  
HETATM  236  O   HOH T 235     -32.233  26.118  -6.486  1.00  0.48           O  
HETATM  237  O   HOH T 236     -24.428 -21.483   1.598  1.00  0.49           O  
HETATM  238  O   HOH T 237     -26.296 -17.164 -11.515  1.00  0.49           O  
HETATM  239  O   HOH T 238     -37.410  19.335   0.724  1.00  0.49           O  
HETATM  240  O   HOH T 239     -26.352  -8.921 -10.640  1.00  0.49           O  
HETATM  241  O   HOH T 240     -24.988  16.689  -5.580  1.00  0.49           O  
HETATM  242  O   HOH T 241     -17.761  11.331 -29.143  1.00  0.49           O  
HETATM  243  O   HOH T 242     -38.995 -14.648  -1.182  1.00  0.49           O  
HETATM  244  O   HOH T 243     -33.199 -19.497   0.145  1.00  0.49           O  
HETATM  245  O   HOH T 244      -7.239  -8.081  -5.170  1.00  0.49           O  
HETATM  246  O   HOH T 245     -58.256   2.986 -29.340  1.00  0.49           O  
HETATM  247  O   HOH T 246     -25.896 -14.395  -8.326  1.00  0.49           O  
HETATM  248  O   HOH T 247     -24.984  -2.078   9.769  1.00  0.49           O  
HETATM  249  O   HOH T 248     -38.098   2.244 -24.911  1.00  0.49           O  
HETATM  250  O   HOH T 249     -24.069   4.243   6.726  1.00  0.49           O  
HETATM  251  O   HOH T 250     -47.637  13.200 -17.909  1.00  0.49           O  
HETATM  252  O   HOH T 251     -30.803  12.840 -28.241  1.00  0.49           O  
HETATM  253  O   HOH T 252     -18.610  -6.605 -22.938  1.00  0.50           O  
HETATM  254  O   HOH T 253     -39.615  19.422  -0.866  1.00  0.50           O  
HETATM  255  O   HOH T 254     -29.867 -11.055  10.394  1.00  0.50           O  
HETATM  256  O   HOH T 255     -12.978 -11.356 -17.959  1.00  0.50           O  
HETATM  257  O   HOH T 256     -52.007  17.731 -24.176  1.00  0.50           O  
HETATM  258  O   HOH T 257     -10.340 -15.405 -12.264  1.00  0.50           O  
HETATM  259  O   HOH T 258     -51.054  11.343 -25.063  1.00  0.50           O  
HETATM  260  O   HOH T 259     -44.870  -0.923 -23.130  1.00  0.50           O  
HETATM  261  O   HOH T 260     -12.218 -10.236   5.910  1.00  0.51           O  
HETATM  262  O   HOH T 261     -26.785   2.814 -13.658  1.00  0.51           O  
HETATM  263  O   HOH T 262     -30.040  20.114 -27.163  1.00  0.51           O  
HETATM  264  O   HOH T 263     -30.810 -21.511   4.191  1.00  0.51           O  
HETATM  265  O   HOH T 264     -12.320  17.255 -14.756  1.00  0.51           O  
HETATM  266  O   HOH T 265     -17.161  -8.102 -21.295  1.00  0.51           O  
HETATM  267  O   HOH T 266     -32.390 -22.765  -8.954  1.00  0.51           O  
HETATM  268  O   HOH T 267     -25.385  19.598 -21.128  1.00  0.51           O  
HETATM  269  O   HOH T 268     -30.029 -16.556 -13.389  1.00  0.51           O  
HETATM  270  O   HOH T 269     -46.079   4.121 -27.565  1.00  0.51           O  
HETATM  271  O   HOH T 270     -16.341   8.932 -28.277  1.00  0.51           O  
HETATM  272  O   HOH T 271     -30.038  -9.259  12.253  1.00  0.51           O  
HETATM  273  O   HOH T 272     -36.644 -16.371 -13.613  1.00  0.52           O  
HETATM  274  O   HOH T 273     -14.643  14.465 -20.646  1.00  0.52           O  
HETATM  275  O   HOH T 274     -37.414 -14.787 -15.633  1.00  0.52           O  
HETATM  276  O   HOH T 275     -26.576  24.193 -19.552  1.00  0.52           O  
HETATM  277  O   HOH T 276     -38.983 -24.339  -5.688  1.00  0.52           O  
HETATM  278  O   HOH T 277     -17.658   2.342 -25.121  1.00  0.52           O  
HETATM  279  O   HOH T 278     -43.904   5.576 -26.779  1.00  0.52           O  
HETATM  280  O   HOH T 279     -20.120  -1.378 -26.287  1.00  0.52           O  
HETATM  281  O   HOH T 280     -33.992 -10.372   8.396  1.00  0.52           O  
HETATM  282  O   HOH T 281     -33.051  11.246 -27.678  1.00  0.52           O  
HETATM  283  O   HOH T 282     -23.724 -16.298  -8.414  1.00  0.52           O  
HETATM  284  O   HOH T 283     -11.421   1.194  -9.542  1.00  0.52           O  
HETATM  285  O   HOH T 284     -35.590  23.527  -5.760  1.00  0.53           O  
HETATM  286  O   HOH T 285     -34.927 -17.847   4.843  1.00  0.53           O  
HETATM  287  O   HOH T 286      -8.117 -10.597  -5.804  1.00  0.53           O  
HETATM  288  O   HOH T 287     -21.721 -18.025 -13.580  1.00  0.53           O  
HETATM  289  O   HOH T 288      -9.391 -14.809   0.794  1.00  0.53           O  
HETATM  290  O   HOH T 289     -35.306 -20.259   6.470  1.00  0.53           O  
HETATM  291  O   HOH T 290     -28.521 -21.099   7.525  1.00  0.53           O  
HETATM  292  O   HOH T 291     -33.905  -9.108  14.610  1.00  0.53           O  
HETATM  293  O   HOH T 292     -21.903  -0.823 -28.501  1.00  0.53           O  
HETATM  294  O   HOH T 293     -12.670 -13.734 -16.844  1.00  0.54           O  
HETATM  295  O   HOH T 294     -12.379  -9.056 -19.406  1.00  0.54           O  
HETATM  296  O   HOH T 295     -38.027 -25.987  -7.304  1.00  0.54           O  
HETATM  297  O   HOH T 296     -32.341   6.713 -13.159  1.00  0.54           O  
HETATM  298  O   HOH T 297     -34.850  -5.047   8.865  1.00  0.54           O  
HETATM  299  O   HOH T 298     -41.499 -11.442   3.950  1.00  0.54           O  
HETATM  300  O   HOH T 299     -35.301  15.533 -26.176  1.00  0.54           O  
HETATM  301  O   HOH T 300     -63.279   3.055 -24.330  1.00  0.54           O  
HETATM  302  O   HOH T 301     -43.188  22.121  -9.840  1.00  0.54           O  
HETATM  303  O   HOH T 302     -18.787  -3.888 -23.346  1.00  0.54           O  
HETATM  304  O   HOH T 303     -10.732  -4.819 -13.755  1.00  0.54           O  
HETATM  305  O   HOH T 304     -43.012  19.420  -9.090  1.00  0.55           O  
HETATM  306  O   HOH T 305     -39.903   4.969  -0.598  1.00  0.55           O  
HETATM  307  O   HOH T 306     -12.232   0.685 -22.063  1.00  0.55           O  
HETATM  308  O   HOH T 307      -5.513  -4.880   1.806  1.00  0.55           O  
HETATM  309  O   HOH T 308     -26.317 -21.443  -4.855  1.00  0.55           O  
HETATM  310  O   HOH T 309     -49.046  14.747 -24.381  1.00  0.55           O  
HETATM  311  O   HOH T 310     -28.056 -18.481 -13.130  1.00  0.55           O  
HETATM  312  O   HOH T 311     -45.364   3.080 -17.005  1.00  0.55           O  
HETATM  313  O   HOH T 312     -38.772 -13.985   1.573  1.00  0.56           O  
HETATM  314  O   HOH T 313     -16.048   1.309 -12.948  1.00  0.56           O  
HETATM  315  O   HOH T 314      -7.356  12.003 -12.836  1.00  0.56           O  
HETATM  316  O   HOH T 315     -37.282   9.567 -28.810  1.00  0.56           O  
HETATM  317  O   HOH T 316      -7.310  16.249 -18.637  1.00  0.56           O  
HETATM  318  O   HOH T 317     -39.092 -23.595  -9.833  1.00  0.56           O  
HETATM  319  O   HOH T 318     -42.185  14.687 -25.211  1.00  0.56           O  
HETATM  320  O   HOH T 319     -32.626   7.204  -0.003  1.00  0.56           O  
HETATM  321  O   HOH T 320     -29.889  13.896 -25.736  1.00  0.56           O  
HETATM  322  O   HOH T 321      -9.673   9.818 -13.712  1.00  0.57           O  
HETATM  323  O   HOH T 322     -38.924   2.496   1.432  1.00  0.57           O  
HETATM  324  O   HOH T 323     -36.413 -15.638   0.971  1.00  0.57           O  
HETATM  325  O   HOH T 324     -22.742   8.011   4.194  1.00  0.58           O  
HETATM  326  O   HOH T 325     -22.504  -1.490  10.057  1.00  0.58           O  
HETATM  327  O   HOH T 326     -44.419  17.094 -18.783  1.00  0.58           O  
HETATM  328  O   HOH T 327     -40.470  -1.451   1.407  1.00  0.59           O  
HETATM  329  O   HOH T 328     -40.664   0.798   2.959  1.00  0.60           O  
HETATM  330  O   HOH T 329     -17.585   2.789   4.302  1.00  0.60           O  
HETATM  331  O   HOH T 330     -30.665  23.292 -20.990  1.00  0.60           O  
HETATM  332  O   HOH T 331     -43.066   0.550 -18.640  1.00  0.61           O  
HETATM  333  O   HOH T 332     -39.639  17.794   1.426  1.00  0.61           O  
TER     334      HOH T 332 
