# Supplementary material for: Accurate Prediction of Hydration Sites of Proteins Using Energy Model With Atom Embedding
Source: Front Mol Biosci. 2021 Sep 20;8:756075. doi: 10.3389/fmolb.2021.756075 (PMC8488165; doi:10.3389/fmolb.2021.756075)
Supplement: Supplementary file 1 [file DataSheet1.ZIP › Data Sheet 1/Our_result_pdb/our_dataset_output/3E10_watersite.pdb]

HEADER                                                        XXXX


JRNL        PMID   -1
HETATM    1  O   HOH T   0      16.248  22.428  75.267  1.00  0.19           O  
HETATM    2  O   HOH T   1      18.681  -5.640  72.899  1.00  0.19           O  
HETATM    3  O   HOH T   2      35.451  16.375  74.850  1.00  0.19           O  
HETATM    4  O   HOH T   3      23.247  10.338  55.210  1.00  0.19           O  
HETATM    5  O   HOH T   4      11.790  12.286  68.775  1.00  0.20           O  
HETATM    6  O   HOH T   5      17.773  19.191  86.727  1.00  0.21           O  
HETATM    7  O   HOH T   6      35.753  12.344  69.336  1.00  0.21           O  
HETATM    8  O   HOH T   7      44.859  19.905  49.755  1.00  0.21           O  
HETATM    9  O   HOH T   8      15.496  -3.707  64.054  1.00  0.21           O  
HETATM   10  O   HOH T   9      20.111  -2.515  79.009  1.00  0.21           O  
HETATM   11  O   HOH T  10      35.436  10.220  77.400  1.00  0.21           O  
HETATM   12  O   HOH T  11      35.504  30.249  63.467  1.00  0.21           O  
HETATM   13  O   HOH T  12      27.545   7.834  59.719  1.00  0.21           O  
HETATM   14  O   HOH T  13      23.656  30.064  58.611  1.00  0.21           O  
HETATM   15  O   HOH T  14       6.088  21.981  69.626  1.00  0.21           O  
HETATM   16  O   HOH T  15      28.590   9.094  51.498  1.00  0.22           O  
HETATM   17  O   HOH T  16      41.108  34.092  62.033  1.00  0.22           O  
HETATM   18  O   HOH T  17      14.738  13.130  87.101  1.00  0.22           O  
HETATM   19  O   HOH T  18      14.297  25.402  87.921  1.00  0.22           O  
HETATM   20  O   HOH T  19      49.388  19.428  55.158  1.00  0.22           O  
HETATM   21  O   HOH T  20      29.026  26.650  63.486  1.00  0.23           O  
HETATM   22  O   HOH T  21      37.403  20.637  65.970  1.00  0.23           O  
HETATM   23  O   HOH T  22      41.225  22.141  71.195  1.00  0.24           O  
HETATM   24  O   HOH T  23      17.228  17.336  68.986  1.00  0.24           O  
HETATM   25  O   HOH T  24      31.874  21.644  81.208  1.00  0.24           O  
HETATM   26  O   HOH T  25      46.300  23.448  48.641  1.00  0.24           O  
HETATM   27  O   HOH T  26      16.641  -2.586  80.332  1.00  0.24           O  
HETATM   28  O   HOH T  27      31.303  31.099  45.533  1.00  0.25           O  
HETATM   29  O   HOH T  28      42.688  16.107  63.805  1.00  0.25           O  
HETATM   30  O   HOH T  29      33.300   3.955  57.205  1.00  0.25           O  
HETATM   31  O   HOH T  30      34.119   4.621  73.896  1.00  0.25           O  
HETATM   32  O   HOH T  31      29.833   6.939  50.181  1.00  0.25           O  
HETATM   33  O   HOH T  32      47.405  22.186  66.425  1.00  0.25           O  
HETATM   34  O   HOH T  33      23.846  12.909  51.023  1.00  0.26           O  
HETATM   35  O   HOH T  34      18.482  16.609  50.366  1.00  0.26           O  
HETATM   36  O   HOH T  35      52.157  14.906  59.474  1.00  0.26           O  
HETATM   37  O   HOH T  36      22.792   1.688  64.872  1.00  0.26           O  
HETATM   38  O   HOH T  37      36.479   5.074  67.473  1.00  0.26           O  
HETATM   39  O   HOH T  38      26.157   6.019  58.136  1.00  0.27           O  
HETATM   40  O   HOH T  39      11.494   5.890  67.077  1.00  0.27           O  
HETATM   41  O   HOH T  40      41.613  28.257  63.633  1.00  0.27           O  
HETATM   42  O   HOH T  41      37.407   6.451  76.001  1.00  0.27           O  
HETATM   43  O   HOH T  42      13.198   9.438  86.106  1.00  0.27           O  
HETATM   44  O   HOH T  43      35.544  31.202  45.956  1.00  0.27           O  
HETATM   45  O   HOH T  44      34.997  18.976  74.018  1.00  0.27           O  
HETATM   46  O   HOH T  45      21.035  11.467  56.514  1.00  0.27           O  
HETATM   47  O   HOH T  46      38.109  12.973  70.604  1.00  0.27           O  
HETATM   48  O   HOH T  47      23.579  -4.625  63.069  1.00  0.27           O  
HETATM   49  O   HOH T  48      40.558  22.776  43.096  1.00  0.28           O  
HETATM   50  O   HOH T  49       6.705   7.809  70.291  1.00  0.28           O  
HETATM   51  O   HOH T  50      26.995  38.897  72.301  1.00  0.28           O  
HETATM   52  O   HOH T  51      14.833 -10.877  72.255  1.00  0.28           O  
HETATM   53  O   HOH T  52      20.389   3.063  84.365  1.00  0.28           O  
HETATM   54  O   HOH T  53      33.246  -3.397  65.354  1.00  0.28           O  
HETATM   55  O   HOH T  54      48.787  12.123  64.927  1.00  0.28           O  
HETATM   56  O   HOH T  55      46.319  30.637  44.055  1.00  0.29           O  
HETATM   57  O   HOH T  56      27.623  38.959  65.051  1.00  0.29           O  
HETATM   58  O   HOH T  57      20.009 -12.845  69.708  1.00  0.29           O  
HETATM   59  O   HOH T  58      15.168 -11.858  68.378  1.00  0.29           O  
HETATM   60  O   HOH T  59      38.992  22.348  45.359  1.00  0.29           O  
HETATM   61  O   HOH T  60       4.313  11.623  81.221  1.00  0.29           O  
HETATM   62  O   HOH T  61      11.221  12.538  55.536  1.00  0.29           O  
HETATM   63  O   HOH T  62      35.599   6.892  73.817  1.00  0.29           O  
HETATM   64  O   HOH T  63      40.045  16.546  63.896  1.00  0.29           O  
HETATM   65  O   HOH T  64      22.874   4.418  64.960  1.00  0.29           O  
HETATM   66  O   HOH T  65      44.288  17.288  46.148  1.00  0.30           O  
HETATM   67  O   HOH T  66      24.674  29.970  46.695  1.00  0.30           O  
HETATM   68  O   HOH T  67      47.988  27.317  61.141  1.00  0.30           O  
HETATM   69  O   HOH T  68      23.927  25.624  68.488  1.00  0.30           O  
HETATM   70  O   HOH T  69      18.626  23.635  63.569  1.00  0.31           O  
HETATM   71  O   HOH T  70      44.326   3.286  64.909  1.00  0.31           O  
HETATM   72  O   HOH T  71      47.128  26.770  45.718  1.00  0.31           O  
HETATM   73  O   HOH T  72      50.575  14.052  64.239  1.00  0.31           O  
HETATM   74  O   HOH T  73      34.837   8.004  54.157  1.00  0.31           O  
HETATM   75  O   HOH T  74      44.481  11.975  79.006  1.00  0.31           O  
HETATM   76  O   HOH T  75      55.746  21.079  55.781  1.00  0.31           O  
HETATM   77  O   HOH T  76      21.538  -6.678  62.839  1.00  0.32           O  
HETATM   78  O   HOH T  77      35.497  14.408  46.014  1.00  0.32           O  
HETATM   79  O   HOH T  78      25.953  -1.466  50.373  1.00  0.32           O  
HETATM   80  O   HOH T  79      26.715  14.518  89.230  1.00  0.32           O  
HETATM   81  O   HOH T  80       6.354  22.565  82.490  1.00  0.32           O  
HETATM   82  O   HOH T  81      37.852   5.317  69.842  1.00  0.32           O  
HETATM   83  O   HOH T  82      10.262  22.764  56.162  1.00  0.32           O  
HETATM   84  O   HOH T  83      14.818  -5.401  77.763  1.00  0.32           O  
HETATM   85  O   HOH T  84      37.159   8.154  78.128  1.00  0.32           O  
HETATM   86  O   HOH T  85      12.773  -5.666  72.984  1.00  0.32           O  
HETATM   87  O   HOH T  86       7.942  23.598  68.332  1.00  0.32           O  
HETATM   88  O   HOH T  87      21.147  -8.477  67.357  1.00  0.32           O  
HETATM   89  O   HOH T  88      33.775  15.475  78.448  1.00  0.32           O  
HETATM   90  O   HOH T  89      10.040   7.394  63.864  1.00  0.33           O  
HETATM   91  O   HOH T  90      15.618  13.735  89.660  1.00  0.33           O  
HETATM   92  O   HOH T  91      12.254  25.505  85.939  1.00  0.33           O  
HETATM   93  O   HOH T  92       3.302   8.362  66.564  1.00  0.33           O  
HETATM   94  O   HOH T  93      38.943  12.125  82.676  1.00  0.33           O  
HETATM   95  O   HOH T  94      27.333  -3.075  54.532  1.00  0.33           O  
HETATM   96  O   HOH T  95      25.737  20.866  41.848  1.00  0.33           O  
HETATM   97  O   HOH T  96      47.898  16.966  70.086  1.00  0.33           O  
HETATM   98  O   HOH T  97      19.112  -1.713  58.357  1.00  0.33           O  
HETATM   99  O   HOH T  98      18.505  22.711  66.182  1.00  0.33           O  
HETATM  100  O   HOH T  99      30.087  31.141  43.019  1.00  0.34           O  
HETATM  101  O   HOH T 100      38.330  14.506  45.834  1.00  0.34           O  
HETATM  102  O   HOH T 101      43.770   4.968  60.990  1.00  0.34           O  
HETATM  103  O   HOH T 102       4.148  12.981  72.161  1.00  0.34           O  
HETATM  104  O   HOH T 103      46.381  28.252  53.564  1.00  0.34           O  
HETATM  105  O   HOH T 104      19.596 -11.841  72.295  1.00  0.34           O  
HETATM  106  O   HOH T 105      23.801  -9.612  56.500  1.00  0.34           O  
HETATM  107  O   HOH T 106      15.902  17.175  51.243  1.00  0.34           O  
HETATM  108  O   HOH T 107      41.272   4.143  71.488  1.00  0.34           O  
HETATM  109  O   HOH T 108      17.103  -7.598  58.960  1.00  0.34           O  
HETATM  110  O   HOH T 109       6.823   5.635  62.256  1.00  0.35           O  
HETATM  111  O   HOH T 110      16.208   6.650  56.417  1.00  0.35           O  
HETATM  112  O   HOH T 111      14.521  25.856  80.988  1.00  0.35           O  
HETATM  113  O   HOH T 112      11.449  24.821  74.103  1.00  0.35           O  
HETATM  114  O   HOH T 113      39.783  19.550  45.385  1.00  0.35           O  
HETATM  115  O   HOH T 114      27.380  32.816  74.804  1.00  0.35           O  
HETATM  116  O   HOH T 115      30.996  17.718  86.064  1.00  0.35           O  
HETATM  117  O   HOH T 116      11.121  21.381  86.485  1.00  0.35           O  
HETATM  118  O   HOH T 117      18.180  24.249  68.516  1.00  0.35           O  
HETATM  119  O   HOH T 118      11.431  25.940  71.480  1.00  0.35           O  
HETATM  120  O   HOH T 119      34.952  35.738  65.396  1.00  0.35           O  
HETATM  121  O   HOH T 120      35.276  10.395  86.011  1.00  0.35           O  
HETATM  122  O   HOH T 121       2.574  11.456  73.738  1.00  0.36           O  
HETATM  123  O   HOH T 122      27.411  10.773  43.428  1.00  0.36           O  
HETATM  124  O   HOH T 123      22.220  34.165  40.796  1.00  0.36           O  
HETATM  125  O   HOH T 124      23.011 -12.857  71.829  1.00  0.36           O  
HETATM  126  O   HOH T 125      10.410  -1.819  84.637  1.00  0.36           O  
HETATM  127  O   HOH T 126      30.799  33.472  78.113  1.00  0.36           O  
HETATM  128  O   HOH T 127      25.814  37.192  66.286  1.00  0.36           O  
HETATM  129  O   HOH T 128      26.509  25.605  42.016  1.00  0.36           O  
HETATM  130  O   HOH T 129      18.957  -5.443  55.986  1.00  0.36           O  
HETATM  131  O   HOH T 130      10.251  22.482  59.158  1.00  0.36           O  
HETATM  132  O   HOH T 131       9.233   9.849  57.425  1.00  0.36           O  
HETATM  133  O   HOH T 132      26.816   8.249  44.657  1.00  0.36           O  
HETATM  134  O   HOH T 133      42.403  31.698  65.378  1.00  0.36           O  
HETATM  135  O   HOH T 134      14.383  -3.274  58.937  1.00  0.36           O  
HETATM  136  O   HOH T 135       8.671   6.229  66.033  1.00  0.36           O  
HETATM  137  O   HOH T 136      45.443   8.783  65.979  1.00  0.37           O  
HETATM  138  O   HOH T 137      28.359  -2.852  63.178  1.00  0.37           O  
HETATM  139  O   HOH T 138      27.493  14.362  39.991  1.00  0.37           O  
HETATM  140  O   HOH T 139      22.531  34.990  63.115  1.00  0.37           O  
HETATM  141  O   HOH T 140      11.563  -5.991  69.002  1.00  0.37           O  
HETATM  142  O   HOH T 141      54.369  12.411  55.219  1.00  0.37           O  
HETATM  143  O   HOH T 142      41.516  19.205  77.222  1.00  0.37           O  
HETATM  144  O   HOH T 143      51.282  25.107  60.109  1.00  0.37           O  
HETATM  145  O   HOH T 144      22.875  20.109  87.360  1.00  0.37           O  
HETATM  146  O   HOH T 145       9.458  20.180  60.948  1.00  0.37           O  
HETATM  147  O   HOH T 146      41.728  17.473  44.885  1.00  0.37           O  
HETATM  148  O   HOH T 147      13.125  -9.742  59.389  1.00  0.37           O  
HETATM  149  O   HOH T 148      10.139  14.710  56.767  1.00  0.37           O  
HETATM  150  O   HOH T 149      47.184  11.955  62.638  1.00  0.37           O  
HETATM  151  O   HOH T 150       4.235   9.629  64.322  1.00  0.37           O  
HETATM  152  O   HOH T 151       9.765  23.463  75.935  1.00  0.37           O  
HETATM  153  O   HOH T 152      38.861  18.502  65.302  1.00  0.38           O  
HETATM  154  O   HOH T 153      36.519  16.874  45.765  1.00  0.38           O  
HETATM  155  O   HOH T 154      20.203   8.173  90.473  1.00  0.38           O  
HETATM  156  O   HOH T 155      45.246   6.298  57.507  1.00  0.38           O  
HETATM  157  O   HOH T 156      16.970 -11.938  76.367  1.00  0.38           O  
HETATM  158  O   HOH T 157      23.386   8.874  89.166  1.00  0.38           O  
HETATM  159  O   HOH T 158      10.339  24.996  57.835  1.00  0.38           O  
HETATM  160  O   HOH T 159       3.127  12.906  76.015  1.00  0.38           O  
HETATM  161  O   HOH T 160      41.982  36.211  67.460  1.00  0.38           O  
HETATM  162  O   HOH T 161      47.029   8.687  72.297  1.00  0.38           O  
HETATM  163  O   HOH T 162      37.563  10.304  84.323  1.00  0.38           O  
HETATM  164  O   HOH T 163      21.709  23.620  47.051  1.00  0.38           O  
HETATM  165  O   HOH T 164      55.753  17.933  62.893  1.00  0.38           O  
HETATM  166  O   HOH T 165      20.332  24.700  66.911  1.00  0.39           O  
HETATM  167  O   HOH T 166      10.043   1.470  66.123  1.00  0.39           O  
HETATM  168  O   HOH T 167      15.237  24.287  77.060  1.00  0.39           O  
HETATM  169  O   HOH T 168      46.564  33.767  41.303  1.00  0.39           O  
HETATM  170  O   HOH T 169      19.808   8.227  64.296  1.00  0.39           O  
HETATM  171  O   HOH T 170      16.726   5.719  59.005  1.00  0.39           O  
HETATM  172  O   HOH T 171      41.157  29.743  67.145  1.00  0.39           O  
HETATM  173  O   HOH T 172      14.700  -1.186  63.027  1.00  0.39           O  
HETATM  174  O   HOH T 173      21.689  31.883  76.766  1.00  0.39           O  
HETATM  175  O   HOH T 174       8.727  20.125  85.967  1.00  0.39           O  
HETATM  176  O   HOH T 175       5.181  19.723  68.231  1.00  0.39           O  
HETATM  177  O   HOH T 176       1.931   9.383  68.716  1.00  0.39           O  
HETATM  178  O   HOH T 177      18.073   3.109  58.968  1.00  0.39           O  
HETATM  179  O   HOH T 178      35.805   2.984  56.308  1.00  0.39           O  
HETATM  180  O   HOH T 179       7.086  -3.242  73.270  1.00  0.39           O  
HETATM  181  O   HOH T 180      35.576   5.098  71.561  1.00  0.39           O  
HETATM  182  O   HOH T 181      31.591 -10.694  66.681  1.00  0.39           O  
HETATM  183  O   HOH T 182      22.101  31.840  73.984  1.00  0.39           O  
HETATM  184  O   HOH T 183      40.508  39.189  60.016  1.00  0.40           O  
HETATM  185  O   HOH T 184       2.783   9.304  86.175  1.00  0.40           O  
HETATM  186  O   HOH T 185      52.208  14.664  62.178  1.00  0.40           O  
HETATM  187  O   HOH T 186      16.759  26.877  79.683  1.00  0.40           O  
HETATM  188  O   HOH T 187      58.920  17.455  57.662  1.00  0.40           O  
HETATM  189  O   HOH T 188      24.215  29.847  42.795  1.00  0.40           O  
HETATM  190  O   HOH T 189      18.256   0.407  59.983  1.00  0.40           O  
HETATM  191  O   HOH T 190      43.159   5.808  72.119  1.00  0.40           O  
HETATM  192  O   HOH T 191       3.681  14.331  81.607  1.00  0.40           O  
HETATM  193  O   HOH T 192      27.310  23.076  41.186  1.00  0.40           O  
HETATM  194  O   HOH T 193      12.178  -7.691  71.101  1.00  0.40           O  
HETATM  195  O   HOH T 194      28.913   6.589  45.520  1.00  0.40           O  
HETATM  196  O   HOH T 195      35.048   0.251  72.886  1.00  0.40           O  
HETATM  197  O   HOH T 196      47.125  27.949  63.832  1.00  0.40           O  
HETATM  198  O   HOH T 197      24.508  17.905  87.197  1.00  0.40           O  
HETATM  199  O   HOH T 198      22.189  32.836  52.527  1.00  0.41           O  
HETATM  200  O   HOH T 199      19.599   1.444  86.492  1.00  0.41           O  
HETATM  201  O   HOH T 200      24.200  32.955  76.892  1.00  0.41           O  
HETATM  202  O   HOH T 201      33.260  37.540  63.984  1.00  0.41           O  
HETATM  203  O   HOH T 202      42.867  13.749  80.322  1.00  0.41           O  
HETATM  204  O   HOH T 203      22.599  34.336  60.479  1.00  0.41           O  
HETATM  205  O   HOH T 204      28.297  18.447  86.220  1.00  0.41           O  
HETATM  206  O   HOH T 205      56.100  24.619  61.280  1.00  0.41           O  
HETATM  207  O   HOH T 206      24.885  34.871  67.455  1.00  0.41           O  
HETATM  208  O   HOH T 207      17.715  37.218  51.747  1.00  0.41           O  
HETATM  209  O   HOH T 208      42.299  26.134  73.497  1.00  0.41           O  
HETATM  210  O   HOH T 209       9.070  -5.437  68.139  1.00  0.41           O  
HETATM  211  O   HOH T 210      55.237  12.772  52.596  1.00  0.41           O  
HETATM  212  O   HOH T 211      16.015  17.269  87.728  1.00  0.41           O  
HETATM  213  O   HOH T 212      36.943  13.035  44.037  1.00  0.41           O  
HETATM  214  O   HOH T 213      17.264 -11.044  73.622  1.00  0.41           O  
HETATM  215  O   HOH T 214      11.604  22.046  83.941  1.00  0.41           O  
HETATM  216  O   HOH T 215      26.048  -3.972  64.165  1.00  0.41           O  
HETATM  217  O   HOH T 216      35.910   3.237  69.585  1.00  0.42           O  
HETATM  218  O   HOH T 217      23.556  23.544  44.842  1.00  0.42           O  
HETATM  219  O   HOH T 218       8.862  21.606  83.507  1.00  0.42           O  
HETATM  220  O   HOH T 219      53.826  24.180  56.980  1.00  0.42           O  
HETATM  221  O   HOH T 220      27.547  36.380  73.378  1.00  0.42           O  
HETATM  222  O   HOH T 221      25.184  -5.407  60.998  1.00  0.42           O  
HETATM  223  O   HOH T 222      22.330  31.760  56.944  1.00  0.42           O  
HETATM  224  O   HOH T 223      25.027   7.263  46.524  1.00  0.42           O  
HETATM  225  O   HOH T 224      21.979  25.817  45.396  1.00  0.42           O  
HETATM  226  O   HOH T 225      42.926  24.149  43.575  1.00  0.42           O  
HETATM  227  O   HOH T 226       4.326   6.371  72.962  1.00  0.42           O  
HETATM  228  O   HOH T 227      45.572  24.069  70.478  1.00  0.42           O  
HETATM  229  O   HOH T 228      33.385  32.931  46.002  1.00  0.42           O  
HETATM  230  O   HOH T 229      29.667  -5.665  81.171  1.00  0.42           O  
HETATM  231  O   HOH T 230      24.397  -5.823  65.436  1.00  0.42           O  
HETATM  232  O   HOH T 231      25.490  16.987  89.608  1.00  0.42           O  
HETATM  233  O   HOH T 232       7.980  22.455  60.772  1.00  0.42           O  
HETATM  234  O   HOH T 233      11.365  26.315  68.664  1.00  0.42           O  
HETATM  235  O   HOH T 234      14.157   5.530  57.943  1.00  0.42           O  
HETATM  236  O   HOH T 235      43.825  30.046  68.079  1.00  0.42           O  
HETATM  237  O   HOH T 236      32.107  24.351  80.879  1.00  0.43           O  
HETATM  238  O   HOH T 237      53.010  14.131  56.927  1.00  0.43           O  
HETATM  239  O   HOH T 238      51.435  28.116  68.095  1.00  0.43           O  
HETATM  240  O   HOH T 239      21.096  10.434  89.189  1.00  0.43           O  
HETATM  241  O   HOH T 240       6.838  -1.786  75.574  1.00  0.43           O  
HETATM  242  O   HOH T 241      24.812  -7.587  67.342  1.00  0.43           O  
HETATM  243  O   HOH T 242       9.598  -8.380  59.755  1.00  0.43           O  
HETATM  244  O   HOH T 243      29.661  18.120  88.466  1.00  0.43           O  
HETATM  245  O   HOH T 244       8.052  11.333  59.463  1.00  0.43           O  
HETATM  246  O   HOH T 245      46.258  21.439  46.536  1.00  0.43           O  
HETATM  247  O   HOH T 246      31.438  16.845  42.062  1.00  0.43           O  
HETATM  248  O   HOH T 247       2.778  10.937  70.890  1.00  0.43           O  
HETATM  249  O   HOH T 248      24.945  30.461  90.027  1.00  0.43           O  
HETATM  250  O   HOH T 249      43.203  24.055  71.759  1.00  0.43           O  
HETATM  251  O   HOH T 250      16.779  -3.431  82.985  1.00  0.43           O  
HETATM  252  O   HOH T 251      58.484  21.149  63.870  1.00  0.43           O  
HETATM  253  O   HOH T 252      47.637  10.282  74.603  1.00  0.43           O  
HETATM  254  O   HOH T 253      57.737  18.625  61.020  1.00  0.43           O  
HETATM  255  O   HOH T 254       3.003   5.651  70.529  1.00  0.43           O  
HETATM  256  O   HOH T 255      12.841  25.519  76.417  1.00  0.43           O  
HETATM  257  O   HOH T 256      25.045  13.330  91.155  1.00  0.43           O  
HETATM  258  O   HOH T 257      30.232  40.268  58.538  1.00  0.44           O  
HETATM  259  O   HOH T 258       5.378  21.600  87.544  1.00  0.44           O  
HETATM  260  O   HOH T 259      15.663  24.661  90.275  1.00  0.44           O  
HETATM  261  O   HOH T 260      16.290  -4.827  55.058  1.00  0.44           O  
HETATM  262  O   HOH T 261      22.719  25.179  42.825  1.00  0.44           O  
HETATM  263  O   HOH T 262      21.633  29.222  73.495  1.00  0.44           O  
HETATM  264  O   HOH T 263      14.604  -0.884  87.340  1.00  0.44           O  
HETATM  265  O   HOH T 264      29.479  18.766  41.952  1.00  0.44           O  
HETATM  266  O   HOH T 265      45.339  22.734  68.058  1.00  0.44           O  
HETATM  267  O   HOH T 266      21.858  31.825  59.693  1.00  0.44           O  
HETATM  268  O   HOH T 267      43.404  29.105  65.490  1.00  0.44           O  
HETATM  269  O   HOH T 268      15.785   0.626  61.112  1.00  0.44           O  
HETATM  270  O   HOH T 269      38.199  38.212  61.145  1.00  0.44           O  
HETATM  271  O   HOH T 270      12.192  24.680  55.773  1.00  0.44           O  
HETATM  272  O   HOH T 271      28.159  16.713  90.360  1.00  0.44           O  
HETATM  273  O   HOH T 272      22.248  28.276  70.956  1.00  0.44           O  
HETATM  274  O   HOH T 273      32.242  -7.977  66.637  1.00  0.45           O  
HETATM  275  O   HOH T 274      10.163  26.204  76.139  1.00  0.45           O  
HETATM  276  O   HOH T 275      56.148  24.245  64.068  1.00  0.45           O  
HETATM  277  O   HOH T 276      49.657  23.454  53.968  1.00  0.45           O  
HETATM  278  O   HOH T 277       5.400   3.080  81.348  1.00  0.45           O  
HETATM  279  O   HOH T 278      10.944  -6.228  79.338  1.00  0.45           O  
HETATM  280  O   HOH T 279      10.267   2.151  63.376  1.00  0.45           O  
HETATM  281  O   HOH T 280      48.708   9.661  68.604  1.00  0.45           O  
HETATM  282  O   HOH T 281       9.503   4.828  62.712  1.00  0.45           O  
HETATM  283  O   HOH T 282      30.613  -3.460  64.578  1.00  0.45           O  
HETATM  284  O   HOH T 283      14.730 -11.402  74.994  1.00  0.45           O  
HETATM  285  O   HOH T 284       6.170  21.975  66.852  1.00  0.45           O  
HETATM  286  O   HOH T 285       8.326  21.680  80.815  1.00  0.45           O  
HETATM  287  O   HOH T 286      50.602  16.431  70.502  1.00  0.45           O  
HETATM  288  O   HOH T 287       8.284  23.359  65.543  1.00  0.45           O  
HETATM  289  O   HOH T 288      34.727  25.115  39.922  1.00  0.45           O  
HETATM  290  O   HOH T 289       7.917  -5.846  72.616  1.00  0.45           O  
HETATM  291  O   HOH T 290      34.191   6.579  56.535  1.00  0.45           O  
HETATM  292  O   HOH T 291      51.905  26.700  62.299  1.00  0.45           O  
HETATM  293  O   HOH T 292      38.345   8.142  82.654  1.00  0.46           O  
HETATM  294  O   HOH T 293      44.686  22.820  78.042  1.00  0.46           O  
HETATM  295  O   HOH T 294      32.540  39.815  54.245  1.00  0.46           O  
HETATM  296  O   HOH T 295      12.696 -13.133  63.625  1.00  0.46           O  
HETATM  297  O   HOH T 296       9.306  -4.379  74.473  1.00  0.46           O  
HETATM  298  O   HOH T 297      31.446  20.403  41.167  1.00  0.46           O  
HETATM  299  O   HOH T 298      11.983  -4.439  75.391  1.00  0.46           O  
HETATM  300  O   HOH T 299       9.079  13.327  61.324  1.00  0.46           O  
HETATM  301  O   HOH T 300       0.116  15.546  79.598  1.00  0.46           O  
HETATM  302  O   HOH T 301      19.515  28.084  70.375  1.00  0.46           O  
HETATM  303  O   HOH T 302      25.151  39.836  66.160  1.00  0.46           O  
HETATM  304  O   HOH T 303      53.861  24.347  59.603  1.00  0.46           O  
HETATM  305  O   HOH T 304      20.357  33.327  39.012  1.00  0.46           O  
HETATM  306  O   HOH T 305      25.241  -7.279  56.058  1.00  0.46           O  
HETATM  307  O   HOH T 306      13.324  29.452  84.418  1.00  0.46           O  
HETATM  308  O   HOH T 307      47.987   9.794  65.971  1.00  0.47           O  
HETATM  309  O   HOH T 308      34.041   3.621  67.610  1.00  0.47           O  
HETATM  310  O   HOH T 309      52.782  15.428  64.720  1.00  0.47           O  
HETATM  311  O   HOH T 310       8.240  18.645  58.947  1.00  0.47           O  
HETATM  312  O   HOH T 311      26.850  -9.818  70.659  1.00  0.47           O  
HETATM  313  O   HOH T 312      34.055  -3.953  67.957  1.00  0.47           O  
HETATM  314  O   HOH T 313      10.698  -1.242  68.220  1.00  0.47           O  
HETATM  315  O   HOH T 314      13.210 -12.201  70.449  1.00  0.47           O  
HETATM  316  O   HOH T 315      18.507  26.865  72.563  1.00  0.47           O  
HETATM  317  O   HOH T 316      49.358  25.109  46.559  1.00  0.47           O  
HETATM  318  O   HOH T 317      32.257  33.817  75.826  1.00  0.47           O  
HETATM  319  O   HOH T 318       4.634  -0.404  74.813  1.00  0.47           O  
HETATM  320  O   HOH T 319      38.638   7.961  47.736  1.00  0.47           O  
HETATM  321  O   HOH T 320      10.323  24.257  67.217  1.00  0.47           O  
HETATM  322  O   HOH T 321      29.997  33.660  74.270  1.00  0.47           O  
HETATM  323  O   HOH T 322      43.460   4.312  58.281  1.00  0.47           O  
HETATM  324  O   HOH T 323      24.474  23.565  87.035  1.00  0.47           O  
HETATM  325  O   HOH T 324      17.463  -9.261  61.268  1.00  0.47           O  
HETATM  326  O   HOH T 325      42.902  36.061  59.356  1.00  0.47           O  
HETATM  327  O   HOH T 326      53.529  25.200  63.986  1.00  0.48           O  
HETATM  328  O   HOH T 327      21.681  31.008  71.335  1.00  0.48           O  
HETATM  329  O   HOH T 328      37.519   5.083  55.416  1.00  0.48           O  
HETATM  330  O   HOH T 329      11.664  -4.237  83.994  1.00  0.48           O  
HETATM  331  O   HOH T 330      23.511   1.618  49.122  1.00  0.48           O  
HETATM  332  O   HOH T 331      59.005  21.155  61.137  1.00  0.48           O  
HETATM  333  O   HOH T 332       1.757   6.668  68.213  1.00  0.48           O  
HETATM  334  O   HOH T 333      23.329  18.701  89.595  1.00  0.48           O  
HETATM  335  O   HOH T 334      34.239  12.777  44.250  1.00  0.48           O  
HETATM  336  O   HOH T 335       3.232  12.133  78.659  1.00  0.48           O  
HETATM  337  O   HOH T 336      43.357   8.165  64.319  1.00  0.48           O  
HETATM  338  O   HOH T 337      44.613  31.941  42.241  1.00  0.48           O  
HETATM  339  O   HOH T 338      47.101   5.746  62.403  1.00  0.48           O  
HETATM  340  O   HOH T 339      58.362  18.376  63.721  1.00  0.48           O  
HETATM  341  O   HOH T 340      32.013  -5.818  64.838  1.00  0.48           O  
HETATM  342  O   HOH T 341       3.731   9.573  79.608  1.00  0.48           O  
HETATM  343  O   HOH T 342      45.402   9.798  63.347  1.00  0.48           O  
HETATM  344  O   HOH T 343      20.658  -4.904  52.413  1.00  0.48           O  
HETATM  345  O   HOH T 344      24.645  -7.917  60.003  1.00  0.48           O  
HETATM  346  O   HOH T 345      37.998  39.932  59.153  1.00  0.48           O  
HETATM  347  O   HOH T 346      18.207  -5.912  53.288  1.00  0.48           O  
HETATM  348  O   HOH T 347      14.141  32.738  82.364  1.00  0.48           O  
HETATM  349  O   HOH T 348      32.245   7.336  54.732  1.00  0.48           O  
HETATM  350  O   HOH T 349      39.089  16.933  45.049  1.00  0.48           O  
HETATM  351  O   HOH T 350      12.424  -6.633  77.026  1.00  0.48           O  
HETATM  352  O   HOH T 351      46.605  25.304  68.251  1.00  0.48           O  
HETATM  353  O   HOH T 352      26.905  -6.149  81.977  1.00  0.48           O  
HETATM  354  O   HOH T 353      23.593  11.649  89.434  1.00  0.48           O  
HETATM  355  O   HOH T 354       9.453  -6.976  70.508  1.00  0.48           O  
HETATM  356  O   HOH T 355      25.251  31.705  44.596  1.00  0.48           O  
HETATM  357  O   HOH T 356      16.643  -5.693  84.553  1.00  0.49           O  
HETATM  358  O   HOH T 357       6.525   4.855  64.817  1.00  0.49           O  
HETATM  359  O   HOH T 358      45.832  13.927  44.588  1.00  0.49           O  
HETATM  360  O   HOH T 359      38.739  28.933  46.080  1.00  0.49           O  
HETATM  361  O   HOH T 360      13.713  28.350  81.947  1.00  0.49           O  
HETATM  362  O   HOH T 361      51.327  24.509  55.972  1.00  0.49           O  
HETATM  363  O   HOH T 362      22.421  27.855  43.481  1.00  0.49           O  
HETATM  364  O   HOH T 363      21.126  29.804  68.859  1.00  0.49           O  
HETATM  365  O   HOH T 364      28.145  21.039  42.887  1.00  0.49           O  
HETATM  366  O   HOH T 365      29.971  18.821  91.101  1.00  0.49           O  
HETATM  367  O   HOH T 366       3.902   3.338  79.249  1.00  0.49           O  
HETATM  368  O   HOH T 367       4.486  16.378  60.032  1.00  0.49           O  
HETATM  369  O   HOH T 368      12.214  11.893  86.793  1.00  0.49           O  
HETATM  370  O   HOH T 369      21.889  32.417  62.364  1.00  0.49           O  
HETATM  371  O   HOH T 370      10.599  27.415  73.700  1.00  0.49           O  
HETATM  372  O   HOH T 371      45.341  14.544  79.348  1.00  0.49           O  
HETATM  373  O   HOH T 372      42.942  21.363  43.268  1.00  0.49           O  
HETATM  374  O   HOH T 373      24.670  19.996  85.343  1.00  0.49           O  
HETATM  375  O   HOH T 374      41.050   0.041  60.111  1.00  0.49           O  
HETATM  376  O   HOH T 375      42.338  36.505  64.818  1.00  0.49           O  
HETATM  377  O   HOH T 376      30.023  -6.626  70.386  1.00  0.49           O  
HETATM  378  O   HOH T 377       5.344  15.404  72.110  1.00  0.49           O  
HETATM  379  O   HOH T 378      50.187  28.331  65.702  1.00  0.49           O  
HETATM  380  O   HOH T 379      25.324  -5.844  58.338  1.00  0.49           O  
HETATM  381  O   HOH T 380      19.459  27.613  63.125  1.00  0.50           O  
HETATM  382  O   HOH T 381      42.266  33.499  67.463  1.00  0.50           O  
HETATM  383  O   HOH T 382      12.304  -2.451  62.252  1.00  0.50           O  
HETATM  384  O   HOH T 383      44.813   7.272  62.225  1.00  0.50           O  
HETATM  385  O   HOH T 384       4.123   4.167  76.622  1.00  0.50           O  
HETATM  386  O   HOH T 385      42.948  36.386  62.182  1.00  0.50           O  
HETATM  387  O   HOH T 386      47.739  26.868  42.975  1.00  0.50           O  
HETATM  388  O   HOH T 387      15.096  23.271  81.938  1.00  0.50           O  
HETATM  389  O   HOH T 388      12.130  -1.589  88.455  1.00  0.50           O  
HETATM  390  O   HOH T 389      37.544  -0.496  71.808  1.00  0.50           O  
HETATM  391  O   HOH T 390      16.934  16.077  90.064  1.00  0.50           O  
HETATM  392  O   HOH T 391      43.811  18.692  43.722  1.00  0.50           O  
HETATM  393  O   HOH T 392      26.542  35.934  69.426  1.00  0.50           O  
HETATM  394  O   HOH T 393      18.481   0.802  57.301  1.00  0.50           O  
HETATM  395  O   HOH T 394      38.903   3.879  64.897  1.00  0.50           O  
HETATM  396  O   HOH T 395      21.897  17.078  44.851  1.00  0.50           O  
HETATM  397  O   HOH T 396       7.115  -5.590  70.017  1.00  0.50           O  
HETATM  398  O   HOH T 397      46.363  13.129  77.271  1.00  0.50           O  
HETATM  399  O   HOH T 398       9.839  -5.631  76.811  1.00  0.50           O  
HETATM  400  O   HOH T 399      25.955  12.773  41.851  1.00  0.50           O  
HETATM  401  O   HOH T 400      27.508  31.199  77.076  1.00  0.50           O  
HETATM  402  O   HOH T 401      48.345  30.033  61.135  1.00  0.50           O  
HETATM  403  O   HOH T 402      41.476  12.977  82.521  1.00  0.50           O  
HETATM  404  O   HOH T 403      44.786  32.511  66.897  1.00  0.51           O  
HETATM  405  O   HOH T 404      23.410  36.002  65.506  1.00  0.51           O  
HETATM  406  O   HOH T 405      45.279  22.634  44.138  1.00  0.51           O  
HETATM  407  O   HOH T 406      30.771  40.895  55.882  1.00  0.51           O  
HETATM  408  O   HOH T 407       8.930  25.585  63.966  1.00  0.51           O  
HETATM  409  O   HOH T 408      38.123   1.462  56.506  1.00  0.51           O  
HETATM  410  O   HOH T 409      42.232  21.687  78.167  1.00  0.51           O  
HETATM  411  O   HOH T 410      18.268   4.757  56.805  1.00  0.51           O  
HETATM  412  O   HOH T 411      35.635  -2.508  72.296  1.00  0.51           O  
HETATM  413  O   HOH T 412      13.769 -10.588  64.111  1.00  0.51           O  
HETATM  414  O   HOH T 413      25.052  36.561  45.983  1.00  0.51           O  
HETATM  415  O   HOH T 414      22.565   3.955  47.705  1.00  0.51           O  
HETATM  416  O   HOH T 415      13.525 -12.305  66.160  1.00  0.51           O  
HETATM  417  O   HOH T 416       2.134  14.627  77.932  1.00  0.51           O  
HETATM  418  O   HOH T 417      31.748   5.758  51.724  1.00  0.51           O  
HETATM  419  O   HOH T 418      45.689   6.433  71.729  1.00  0.51           O  
HETATM  420  O   HOH T 419      48.659  26.768  53.195  1.00  0.51           O  
HETATM  421  O   HOH T 420      24.784  23.423  42.295  1.00  0.51           O  
HETATM  422  O   HOH T 421       9.817  -0.909  87.130  1.00  0.51           O  
HETATM  423  O   HOH T 422      23.280  -1.944  51.004  1.00  0.51           O  
HETATM  424  O   HOH T 423      58.049  16.022  59.944  1.00  0.51           O  
HETATM  425  O   HOH T 424      31.946  -5.073  69.204  1.00  0.51           O  
HETATM  426  O   HOH T 425      15.951  36.524  49.703  1.00  0.51           O  
HETATM  427  O   HOH T 426      36.618  -4.520  67.173  1.00  0.52           O  
HETATM  428  O   HOH T 427       4.249  14.731  62.326  1.00  0.52           O  
HETATM  429  O   HOH T 428      45.645   3.358  62.407  1.00  0.52           O  
HETATM  430  O   HOH T 429      49.424  12.201  60.836  1.00  0.52           O  
HETATM  431  O   HOH T 430      48.990  26.667  67.639  1.00  0.52           O  
HETATM  432  O   HOH T 431      27.549  -4.043  60.775  1.00  0.52           O  
HETATM  433  O   HOH T 432       3.263   1.883  75.426  1.00  0.52           O  
HETATM  434  O   HOH T 433      55.858  23.753  54.971  1.00  0.52           O  
HETATM  435  O   HOH T 434      33.166  14.844  94.625  1.00  0.52           O  
HETATM  436  O   HOH T 435      39.694  24.531  77.817  1.00  0.52           O  
HETATM  437  O   HOH T 436      14.396  26.671  78.291  1.00  0.52           O  
HETATM  438  O   HOH T 437      42.285  34.784  69.808  1.00  0.53           O  
HETATM  439  O   HOH T 438      20.182  34.230  53.775  1.00  0.53           O  
HETATM  440  O   HOH T 439       6.763  22.050  85.163  1.00  0.53           O  
HETATM  441  O   HOH T 440      47.030   7.856  56.106  1.00  0.53           O  
HETATM  442  O   HOH T 441      10.645  26.644  65.940  1.00  0.53           O  
HETATM  443  O   HOH T 442      22.753  -3.979  81.769  1.00  0.53           O  
HETATM  444  O   HOH T 443      46.677  27.610  66.636  1.00  0.53           O  
HETATM  445  O   HOH T 444      42.412  24.445  77.822  1.00  0.53           O  
HETATM  446  O   HOH T 445      39.206  19.442  78.753  1.00  0.53           O  
HETATM  447  O   HOH T 446      11.188  28.779  82.972  1.00  0.53           O  
HETATM  448  O   HOH T 447      36.036  -4.105  70.005  1.00  0.53           O  
HETATM  449  O   HOH T 448      58.355  23.530  62.457  1.00  0.53           O  
HETATM  450  O   HOH T 449      45.284  35.546  50.319  1.00  0.53           O  
HETATM  451  O   HOH T 450      40.616   1.465  55.675  1.00  0.53           O  
HETATM  452  O   HOH T 451      38.419  25.542  72.865  1.00  0.53           O  
HETATM  453  O   HOH T 452       4.605   8.918  71.667  1.00  0.53           O  
HETATM  454  O   HOH T 453      50.362  15.303  49.371  1.00  0.53           O  
HETATM  455  O   HOH T 454      49.770  28.422  62.930  1.00  0.54           O  
HETATM  456  O   HOH T 455      10.282   4.014  65.352  1.00  0.54           O  
HETATM  457  O   HOH T 456      26.817  -9.250  67.977  1.00  0.54           O  
HETATM  458  O   HOH T 457      17.021  15.345  76.051  1.00  0.54           O  
HETATM  459  O   HOH T 458      33.085  23.418  38.760  1.00  0.54           O  
HETATM  460  O   HOH T 459      13.765  -1.059  60.442  1.00  0.54           O  
HETATM  461  O   HOH T 460      55.473  11.836  68.794  1.00  0.54           O  
HETATM  462  O   HOH T 461      22.336  13.736  38.799  1.00  0.54           O  
HETATM  463  O   HOH T 462      46.456   9.661  76.914  1.00  0.54           O  
HETATM  464  O   HOH T 463      39.701  38.106  53.389  1.00  0.54           O  
HETATM  465  O   HOH T 464      27.530   0.949  82.832  1.00  0.54           O  
HETATM  466  O   HOH T 465      25.860  28.221  41.301  1.00  0.54           O  
HETATM  467  O   HOH T 466      29.952  27.644  56.456  1.00  0.55           O  
HETATM  468  O   HOH T 467      17.145  -0.002  85.989  1.00  0.55           O  
HETATM  469  O   HOH T 468       7.932   2.459  64.829  1.00  0.55           O  
HETATM  470  O   HOH T 469      23.473  -8.800  77.859  1.00  0.55           O  
HETATM  471  O   HOH T 470      27.654  -3.266  51.665  1.00  0.55           O  
HETATM  472  O   HOH T 471      33.651  -0.051  79.594  1.00  0.55           O  
HETATM  473  O   HOH T 472      12.847  13.477  89.096  1.00  0.55           O  
HETATM  474  O   HOH T 473      22.765   1.799  83.656  1.00  0.55           O  
HETATM  475  O   HOH T 474      13.869  -0.118  90.001  1.00  0.55           O  
HETATM  476  O   HOH T 475      34.265  37.995  61.505  1.00  0.55           O  
HETATM  477  O   HOH T 476      48.656  32.207  54.513  1.00  0.55           O  
HETATM  478  O   HOH T 477      20.853  29.278  66.270  1.00  0.55           O  
HETATM  479  O   HOH T 478      46.822  24.078  45.937  1.00  0.56           O  
HETATM  480  O   HOH T 479      25.283  -2.765  52.685  1.00  0.56           O  
HETATM  481  O   HOH T 480      39.155  -2.944  62.568  1.00  0.56           O  
HETATM  482  O   HOH T 481      19.276  26.608  45.292  1.00  0.56           O  
HETATM  483  O   HOH T 482       4.125   7.711  69.169  1.00  0.56           O  
HETATM  484  O   HOH T 483      38.766   6.000  78.512  1.00  0.56           O  
HETATM  485  O   HOH T 484      34.104  12.148  87.887  1.00  0.56           O  
HETATM  486  O   HOH T 485      27.567   9.038  88.137  1.00  0.56           O  
HETATM  487  O   HOH T 486      42.842   0.030  69.666  1.00  0.56           O  
HETATM  488  O   HOH T 487      18.045   6.390  90.527  1.00  0.57           O  
HETATM  489  O   HOH T 488      14.089  12.767  53.215  1.00  0.57           O  
HETATM  490  O   HOH T 489      27.101  23.343  86.126  1.00  0.57           O  
HETATM  491  O   HOH T 490      52.611  17.107  72.184  1.00  0.57           O  
HETATM  492  O   HOH T 491      21.872  20.150  45.286  1.00  0.57           O  
HETATM  493  O   HOH T 492      35.944   7.160  47.730  1.00  0.57           O  
HETATM  494  O   HOH T 493      32.482  16.972  80.250  1.00  0.57           O  
HETATM  495  O   HOH T 494      20.168  27.329  67.846  1.00  0.57           O  
HETATM  496  O   HOH T 495      46.973  26.621  75.506  1.00  0.58           O  
HETATM  497  O   HOH T 496      29.152  36.638  69.055  1.00  0.58           O  
HETATM  498  O   HOH T 497      17.044  25.886  63.122  1.00  0.59           O  
HETATM  499  O   HOH T 498      47.766   4.869  59.909  1.00  0.59           O  
HETATM  500  O   HOH T 499      40.542  36.591  60.983  1.00  0.59           O  
HETATM  501  O   HOH T 500      10.250  12.383  58.189  1.00  0.60           O  
HETATM  502  O   HOH T 501      22.742 -12.850  69.001  1.00  0.61           O  
HETATM  503  O   HOH T 502      43.859   3.012  71.411  1.00  0.64           O  
TER     504      HOH T 502 
