# Supplementary material for: Accurate Prediction of Hydration Sites of Proteins Using Energy Model With Atom Embedding
Source: Front Mol Biosci. 2021 Sep 20;8:756075. doi: 10.3389/fmolb.2021.756075 (PMC8488165; doi:10.3389/fmolb.2021.756075)
Supplement: Supplementary file 1 [file DataSheet1.ZIP › Data Sheet 1/Our_result_pdb/our_dataset_output/3EDQ_watersite.pdb]

HEADER                                                        XXXX


JRNL        PMID   -1
HETATM    1  O   HOH T   0      -6.433  13.063  40.485  1.00  0.15           O  
HETATM    2  O   HOH T   1     -11.553  -9.039  18.951  1.00  0.16           O  
HETATM    3  O   HOH T   2       6.353  13.529  24.674  1.00  0.16           O  
HETATM    4  O   HOH T   3      11.666  -9.375  45.458  1.00  0.17           O  
HETATM    5  O   HOH T   4      19.341   2.702  22.820  1.00  0.17           O  
HETATM    6  O   HOH T   5     -19.301   2.229  41.796  1.00  0.17           O  
HETATM    7  O   HOH T   6      -1.930   2.098  24.092  1.00  0.17           O  
HETATM    8  O   HOH T   7       1.987   1.764  40.576  1.00  0.18           O  
HETATM    9  O   HOH T   8     -11.106  12.163  34.725  1.00  0.19           O  
HETATM   10  O   HOH T   9       8.051  -9.763  35.224  1.00  0.20           O  
HETATM   11  O   HOH T  10       3.725  -4.507  48.360  1.00  0.20           O  
HETATM   12  O   HOH T  11      25.699   5.225  23.399  1.00  0.20           O  
HETATM   13  O   HOH T  12     -25.537   4.721  41.241  1.00  0.21           O  
HETATM   14  O   HOH T  13      -2.367  -5.852  52.710  1.00  0.21           O  
HETATM   15  O   HOH T  14      -9.874  -5.401  30.713  1.00  0.21           O  
HETATM   16  O   HOH T  15      11.798  -1.863  53.072  1.00  0.21           O  
HETATM   17  O   HOH T  16       9.807  -5.396  33.651  1.00  0.21           O  
HETATM   18  O   HOH T  17       0.623  -0.624  39.953  1.00  0.21           O  
HETATM   19  O   HOH T  18       2.359  -5.256  11.669  1.00  0.21           O  
HETATM   20  O   HOH T  19       0.593  14.703  29.436  1.00  0.22           O  
HETATM   21  O   HOH T  20      -0.580  -0.277  24.629  1.00  0.22           O  
HETATM   22  O   HOH T  21      -3.681  -3.958  16.176  1.00  0.22           O  
HETATM   23  O   HOH T  22      -8.072  -6.261  23.210  1.00  0.22           O  
HETATM   24  O   HOH T  23      18.888  -1.887  31.735  1.00  0.22           O  
HETATM   25  O   HOH T  24       7.187  11.349  15.204  1.00  0.23           O  
HETATM   26  O   HOH T  25       3.070 -17.045   6.353  1.00  0.23           O  
HETATM   27  O   HOH T  26     -13.062 -17.001  55.961  1.00  0.23           O  
HETATM   28  O   HOH T  27      11.070  12.359  30.237  1.00  0.23           O  
HETATM   29  O   HOH T  28     -19.375  10.479  46.209  1.00  0.23           O  
HETATM   30  O   HOH T  29     -16.737   8.204  34.273  1.00  0.23           O  
HETATM   31  O   HOH T  30       8.121  -6.571  41.226  1.00  0.23           O  
HETATM   32  O   HOH T  31       7.685   8.942  44.049  1.00  0.24           O  
HETATM   33  O   HOH T  32      12.003  -2.005  46.158  1.00  0.24           O  
HETATM   34  O   HOH T  33       7.236 -17.295  39.668  1.00  0.24           O  
HETATM   35  O   HOH T  34     -11.612  -1.373  11.466  1.00  0.24           O  
HETATM   36  O   HOH T  35     -10.338  -7.191  24.418  1.00  0.24           O  
HETATM   37  O   HOH T  36     -11.845  -1.735  18.261  1.00  0.24           O  
HETATM   38  O   HOH T  37      10.436  -7.399  39.912  1.00  0.24           O  
HETATM   39  O   HOH T  38      -0.646  14.533  35.638  1.00  0.24           O  
HETATM   40  O   HOH T  39      15.700   4.984   4.666  1.00  0.24           O  
HETATM   41  O   HOH T  40       7.044  11.232  38.117  1.00  0.24           O  
HETATM   42  O   HOH T  41      19.339 -13.383  60.631  1.00  0.25           O  
HETATM   43  O   HOH T  42       9.750   5.075   6.577  1.00  0.25           O  
HETATM   44  O   HOH T  43      15.843  -1.944  36.113  1.00  0.25           O  
HETATM   45  O   HOH T  44      -7.198 -14.585  36.092  1.00  0.25           O  
HETATM   46  O   HOH T  45     -15.788   4.223  59.959  1.00  0.25           O  
HETATM   47  O   HOH T  46       4.498  10.630  37.475  1.00  0.25           O  
HETATM   48  O   HOH T  47      -5.613   7.325  32.168  1.00  0.25           O  
HETATM   49  O   HOH T  48      16.469  -8.129   8.253  1.00  0.25           O  
HETATM   50  O   HOH T  49       2.777  -6.192   4.131  1.00  0.25           O  
HETATM   51  O   HOH T  50     -18.825  -2.015  32.901  1.00  0.25           O  
HETATM   52  O   HOH T  51      14.401 -10.923  67.400  1.00  0.26           O  
HETATM   53  O   HOH T  52      12.505  -5.941  67.793  1.00  0.26           O  
HETATM   54  O   HOH T  53       5.550   7.439  32.741  1.00  0.26           O  
HETATM   55  O   HOH T  54      14.655  14.712  24.101  1.00  0.26           O  
HETATM   56  O   HOH T  55      -4.472  10.821  27.526  1.00  0.26           O  
HETATM   57  O   HOH T  56      11.693   6.932   7.393  1.00  0.26           O  
HETATM   58  O   HOH T  57       6.996 -23.219   4.933  1.00  0.26           O  
HETATM   59  O   HOH T  58      -7.138  10.791  49.581  1.00  0.26           O  
HETATM   60  O   HOH T  59     -12.316  -4.988  -3.294  1.00  0.26           O  
HETATM   61  O   HOH T  60      16.838   8.431  30.444  1.00  0.27           O  
HETATM   62  O   HOH T  61     -12.049  -9.546  32.940  1.00  0.27           O  
HETATM   63  O   HOH T  62      -0.541 -15.617  53.222  1.00  0.27           O  
HETATM   64  O   HOH T  63      -7.143  10.765  27.118  1.00  0.27           O  
HETATM   65  O   HOH T  64      16.732   9.327  33.136  1.00  0.27           O  
HETATM   66  O   HOH T  65     -17.537 -14.028  36.313  1.00  0.27           O  
HETATM   67  O   HOH T  66     -15.819  -1.839  28.366  1.00  0.27           O  
HETATM   68  O   HOH T  67      18.485  12.387  23.810  1.00  0.27           O  
HETATM   69  O   HOH T  68      -7.258 -16.976  24.368  1.00  0.27           O  
HETATM   70  O   HOH T  69      -9.639   4.116  58.206  1.00  0.27           O  
HETATM   71  O   HOH T  70     -13.668   6.335  25.735  1.00  0.28           O  
HETATM   72  O   HOH T  71      -4.243  15.322  27.311  1.00  0.28           O  
HETATM   73  O   HOH T  72     -17.236  -0.651  55.662  1.00  0.28           O  
HETATM   74  O   HOH T  73       4.247  15.234  37.866  1.00  0.28           O  
HETATM   75  O   HOH T  74      14.736 -11.315  39.306  1.00  0.28           O  
HETATM   76  O   HOH T  75       4.750   3.969  35.664  1.00  0.28           O  
HETATM   77  O   HOH T  76      12.028  -9.329  31.353  1.00  0.28           O  
HETATM   78  O   HOH T  77      -3.223 -17.897  57.911  1.00  0.28           O  
HETATM   79  O   HOH T  78       2.040 -12.018  22.058  1.00  0.28           O  
HETATM   80  O   HOH T  79      17.491  -0.631  47.894  1.00  0.29           O  
HETATM   81  O   HOH T  80     -16.654   9.178  31.624  1.00  0.29           O  
HETATM   82  O   HOH T  81       6.296 -24.260  13.850  1.00  0.29           O  
HETATM   83  O   HOH T  82       2.559 -17.050  44.385  1.00  0.29           O  
HETATM   84  O   HOH T  83     -18.588  11.868  40.975  1.00  0.29           O  
HETATM   85  O   HOH T  84       4.137  -7.375  30.574  1.00  0.29           O  
HETATM   86  O   HOH T  85      -8.013  -9.721  29.119  1.00  0.29           O  
HETATM   87  O   HOH T  86       0.976 -20.251  46.259  1.00  0.29           O  
HETATM   88  O   HOH T  87      -8.578 -10.148  35.615  1.00  0.29           O  
HETATM   89  O   HOH T  88      -8.104 -25.224  51.187  1.00  0.29           O  
HETATM   90  O   HOH T  89     -14.611  -7.736  -2.605  1.00  0.29           O  
HETATM   91  O   HOH T  90       2.441 -17.821  39.841  1.00  0.29           O  
HETATM   92  O   HOH T  91      14.005  -3.945  60.049  1.00  0.29           O  
HETATM   93  O   HOH T  92       0.039 -17.035   3.738  1.00  0.29           O  
HETATM   94  O   HOH T  93       0.835 -17.533  60.293  1.00  0.29           O  
HETATM   95  O   HOH T  94      -8.239  -2.373  59.232  1.00  0.30           O  
HETATM   96  O   HOH T  95     -22.149  -8.985  36.343  1.00  0.30           O  
HETATM   97  O   HOH T  96     -16.353   0.374  29.824  1.00  0.30           O  
HETATM   98  O   HOH T  97       0.333  18.306  20.402  1.00  0.30           O  
HETATM   99  O   HOH T  98      -7.298   9.350  20.371  1.00  0.30           O  
HETATM  100  O   HOH T  99       1.407 -17.583  52.824  1.00  0.30           O  
HETATM  101  O   HOH T 100     -10.502   3.619  11.684  1.00  0.30           O  
HETATM  102  O   HOH T 101      -9.691 -18.009  23.444  1.00  0.30           O  
HETATM  103  O   HOH T 102       0.046  17.837  48.685  1.00  0.30           O  
HETATM  104  O   HOH T 103     -25.079  -2.444  35.779  1.00  0.30           O  
HETATM  105  O   HOH T 104      -0.990  -1.616   1.482  1.00  0.30           O  
HETATM  106  O   HOH T 105      -4.745   4.104  29.082  1.00  0.31           O  
HETATM  107  O   HOH T 106       7.507  -0.698  55.254  1.00  0.31           O  
HETATM  108  O   HOH T 107      20.034 -11.784  13.837  1.00  0.31           O  
HETATM  109  O   HOH T 108     -22.885   3.240  31.625  1.00  0.31           O  
HETATM  110  O   HOH T 109      -2.480  15.573  33.716  1.00  0.31           O  
HETATM  111  O   HOH T 110       3.758 -10.888  27.631  1.00  0.31           O  
HETATM  112  O   HOH T 111      11.821 -17.344  55.875  1.00  0.31           O  
HETATM  113  O   HOH T 112     -21.711  -6.397   7.956  1.00  0.31           O  
HETATM  114  O   HOH T 113     -24.546   6.361  34.170  1.00  0.31           O  
HETATM  115  O   HOH T 114       0.904 -28.861   4.037  1.00  0.31           O  
HETATM  116  O   HOH T 115       0.094  -7.804  42.763  1.00  0.31           O  
HETATM  117  O   HOH T 116      14.620  -8.081  67.317  1.00  0.32           O  
HETATM  118  O   HOH T 117       1.466  18.525  18.125  1.00  0.32           O  
HETATM  119  O   HOH T 118       4.489  15.772  17.844  1.00  0.32           O  
HETATM  120  O   HOH T 119      -1.319 -11.614  37.973  1.00  0.32           O  
HETATM  121  O   HOH T 120      -1.712  -8.158  32.531  1.00  0.32           O  
HETATM  122  O   HOH T 121       1.490 -11.339  26.052  1.00  0.32           O  
HETATM  123  O   HOH T 122       9.693  -2.367  54.740  1.00  0.32           O  
HETATM  124  O   HOH T 123     -19.322 -12.550  34.658  1.00  0.32           O  
HETATM  125  O   HOH T 124       7.422 -14.583  28.105  1.00  0.33           O  
HETATM  126  O   HOH T 125       8.467 -12.293  59.534  1.00  0.33           O  
HETATM  127  O   HOH T 126      -6.498  -8.891  37.071  1.00  0.33           O  
HETATM  128  O   HOH T 127      10.559   3.235  52.874  1.00  0.33           O  
HETATM  129  O   HOH T 128       8.167  -1.490   5.215  1.00  0.33           O  
HETATM  130  O   HOH T 129     -25.846  -5.136  33.304  1.00  0.33           O  
HETATM  131  O   HOH T 130       6.378  11.402  12.462  1.00  0.33           O  
HETATM  132  O   HOH T 131     -15.941 -15.431  34.618  1.00  0.33           O  
HETATM  133  O   HOH T 132     -13.530 -11.504  29.621  1.00  0.33           O  
HETATM  134  O   HOH T 133      20.311  -8.724  40.299  1.00  0.33           O  
HETATM  135  O   HOH T 134      -8.935  14.606  44.575  1.00  0.34           O  
HETATM  136  O   HOH T 135      24.446   6.524  30.465  1.00  0.34           O  
HETATM  137  O   HOH T 136      24.269  14.293  19.570  1.00  0.34           O  
HETATM  138  O   HOH T 137      11.136  -7.781  64.518  1.00  0.34           O  
HETATM  139  O   HOH T 138      -0.147 -19.894  17.428  1.00  0.34           O  
HETATM  140  O   HOH T 139      17.152   0.016   8.821  1.00  0.34           O  
HETATM  141  O   HOH T 140      -9.529  -1.921   9.628  1.00  0.34           O  
HETATM  142  O   HOH T 141      -9.228  -7.861  19.696  1.00  0.34           O  
HETATM  143  O   HOH T 142      17.104   3.427  44.479  1.00  0.34           O  
HETATM  144  O   HOH T 143       0.146  -7.473  21.431  1.00  0.34           O  
HETATM  145  O   HOH T 144      -7.727   0.117   9.037  1.00  0.34           O  
HETATM  146  O   HOH T 145      -7.954 -17.559  13.860  1.00  0.34           O  
HETATM  147  O   HOH T 146     -26.293   9.760  36.822  1.00  0.34           O  
HETATM  148  O   HOH T 147      -4.231  15.504  47.266  1.00  0.35           O  
HETATM  149  O   HOH T 148      16.308   7.934  35.492  1.00  0.35           O  
HETATM  150  O   HOH T 149      -9.214 -12.381   7.834  1.00  0.35           O  
HETATM  151  O   HOH T 150     -28.728  -5.685  37.855  1.00  0.35           O  
HETATM  152  O   HOH T 151     -19.389   0.442  54.344  1.00  0.35           O  
HETATM  153  O   HOH T 152      -2.327 -17.720  24.337  1.00  0.35           O  
HETATM  154  O   HOH T 153       9.295  -8.228  44.605  1.00  0.36           O  
HETATM  155  O   HOH T 154       2.426 -15.298  59.505  1.00  0.36           O  
HETATM  156  O   HOH T 155     -16.260   7.766  29.230  1.00  0.36           O  
HETATM  157  O   HOH T 156       8.622   4.975  51.846  1.00  0.36           O  
HETATM  158  O   HOH T 157     -11.406 -10.926   7.230  1.00  0.36           O  
HETATM  159  O   HOH T 158     -24.719   4.668  46.774  1.00  0.36           O  
HETATM  160  O   HOH T 159      13.136   4.284  52.947  1.00  0.36           O  
HETATM  161  O   HOH T 160      -3.140  19.470  35.226  1.00  0.36           O  
HETATM  162  O   HOH T 161      13.757   6.219  38.891  1.00  0.36           O  
HETATM  163  O   HOH T 162     -13.510  13.107  44.266  1.00  0.36           O  
HETATM  164  O   HOH T 163      -7.409   2.772   8.360  1.00  0.36           O  
HETATM  165  O   HOH T 164     -15.753  13.769  29.887  1.00  0.36           O  
HETATM  166  O   HOH T 165      -6.140  12.671  51.275  1.00  0.36           O  
HETATM  167  O   HOH T 166      -6.785 -12.150  34.758  1.00  0.36           O  
HETATM  168  O   HOH T 167      -0.682   1.192  54.256  1.00  0.36           O  
HETATM  169  O   HOH T 168      27.703   2.560  21.254  1.00  0.36           O  
HETATM  170  O   HOH T 169     -10.631 -18.233  18.381  1.00  0.36           O  
HETATM  171  O   HOH T 170       0.739   1.844  10.499  1.00  0.36           O  
HETATM  172  O   HOH T 171      -8.630 -13.219  10.413  1.00  0.36           O  
HETATM  173  O   HOH T 172      22.565  -7.180  40.561  1.00  0.37           O  
HETATM  174  O   HOH T 173      -1.377 -28.874   2.531  1.00  0.37           O  
HETATM  175  O   HOH T 174      21.050   9.493  17.175  1.00  0.37           O  
HETATM  176  O   HOH T 175       1.180  18.732  27.953  1.00  0.37           O  
HETATM  177  O   HOH T 176     -13.128  15.506  36.333  1.00  0.37           O  
HETATM  178  O   HOH T 177       2.336  15.616  31.378  1.00  0.37           O  
HETATM  179  O   HOH T 178      22.315   1.719  12.991  1.00  0.37           O  
HETATM  180  O   HOH T 179      16.454   0.331  34.838  1.00  0.37           O  
HETATM  181  O   HOH T 180     -12.923 -13.103  27.406  1.00  0.37           O  
HETATM  182  O   HOH T 181      12.478 -12.981  58.348  1.00  0.37           O  
HETATM  183  O   HOH T 182     -14.230   3.680  26.417  1.00  0.37           O  
HETATM  184  O   HOH T 183     -19.950 -26.979  45.003  1.00  0.37           O  
HETATM  185  O   HOH T 184      -3.109 -13.123   8.440  1.00  0.37           O  
HETATM  186  O   HOH T 185      -4.141  -7.438  33.770  1.00  0.37           O  
HETATM  187  O   HOH T 186      24.665  -8.975  29.929  1.00  0.37           O  
HETATM  188  O   HOH T 187       0.763  -4.909  62.269  1.00  0.37           O  
HETATM  189  O   HOH T 188      -5.336  14.792  49.706  1.00  0.38           O  
HETATM  190  O   HOH T 189      15.696  -9.700   6.133  1.00  0.38           O  
HETATM  191  O   HOH T 190      -4.703   9.141  52.544  1.00  0.38           O  
HETATM  192  O   HOH T 191      -8.963  -9.334  57.715  1.00  0.38           O  
HETATM  193  O   HOH T 192     -14.245  -0.644  11.109  1.00  0.38           O  
HETATM  194  O   HOH T 193     -11.574  -4.693  54.170  1.00  0.38           O  
HETATM  195  O   HOH T 194       8.623  -9.807  28.456  1.00  0.38           O  
HETATM  196  O   HOH T 195      -2.009 -12.352   3.470  1.00  0.38           O  
HETATM  197  O   HOH T 196      -2.530  -6.362  60.508  1.00  0.38           O  
HETATM  198  O   HOH T 197      14.433  -0.930  53.361  1.00  0.38           O  
HETATM  199  O   HOH T 198      19.708  -8.394  46.675  1.00  0.38           O  
HETATM  200  O   HOH T 199       0.192  -8.027  30.453  1.00  0.38           O  
HETATM  201  O   HOH T 200     -17.027   5.181  18.005  1.00  0.38           O  
HETATM  202  O   HOH T 201       8.736  15.079  20.697  1.00  0.38           O  
HETATM  203  O   HOH T 202     -23.034  -2.378  11.235  1.00  0.39           O  
HETATM  204  O   HOH T 203      -0.659  -7.320  62.170  1.00  0.39           O  
HETATM  205  O   HOH T 204       2.919 -13.560  56.226  1.00  0.39           O  
HETATM  206  O   HOH T 205     -17.242  -3.073  56.971  1.00  0.39           O  
HETATM  207  O   HOH T 206      -2.117 -12.403  42.500  1.00  0.39           O  
HETATM  208  O   HOH T 207       6.479  11.508  44.291  1.00  0.39           O  
HETATM  209  O   HOH T 208      10.567 -12.571  54.419  1.00  0.39           O  
HETATM  210  O   HOH T 209     -25.168  -6.441  27.401  1.00  0.39           O  
HETATM  211  O   HOH T 210       7.421  15.526  18.181  1.00  0.39           O  
HETATM  212  O   HOH T 211     -24.805   1.839  50.901  1.00  0.39           O  
HETATM  213  O   HOH T 212     -27.029  -4.675  26.355  1.00  0.39           O  
HETATM  214  O   HOH T 213       3.425   8.612  34.094  1.00  0.39           O  
HETATM  215  O   HOH T 214      -6.496  12.003  20.647  1.00  0.39           O  
HETATM  216  O   HOH T 215       5.826 -14.733  53.505  1.00  0.39           O  
HETATM  217  O   HOH T 216      26.563  10.398  18.861  1.00  0.39           O  
HETATM  218  O   HOH T 217      -9.712  15.062  50.039  1.00  0.39           O  
HETATM  219  O   HOH T 218      13.971 -15.424  41.382  1.00  0.39           O  
HETATM  220  O   HOH T 219      24.501   0.819  35.536  1.00  0.39           O  
HETATM  221  O   HOH T 220       8.855  17.083  33.151  1.00  0.39           O  
HETATM  222  O   HOH T 221       6.497  -6.164  63.021  1.00  0.39           O  
HETATM  223  O   HOH T 222      18.430   4.956  42.513  1.00  0.39           O  
HETATM  224  O   HOH T 223     -13.420  14.994  28.958  1.00  0.39           O  
HETATM  225  O   HOH T 224      18.673 -18.533  53.489  1.00  0.39           O  
HETATM  226  O   HOH T 225      -1.792 -26.857  55.412  1.00  0.40           O  
HETATM  227  O   HOH T 226      13.034 -16.955  43.663  1.00  0.40           O  
HETATM  228  O   HOH T 227      -3.347 -17.003   9.967  1.00  0.40           O  
HETATM  229  O   HOH T 228      13.528 -16.207   8.528  1.00  0.40           O  
HETATM  230  O   HOH T 229       3.788  -9.107  63.372  1.00  0.40           O  
HETATM  231  O   HOH T 230     -18.762 -17.922  10.933  1.00  0.40           O  
HETATM  232  O   HOH T 231       2.299 -12.459  29.469  1.00  0.40           O  
HETATM  233  O   HOH T 232     -11.327  13.988  45.713  1.00  0.40           O  
HETATM  234  O   HOH T 233      14.511  15.024  33.204  1.00  0.40           O  
HETATM  235  O   HOH T 234     -13.840 -15.454  58.089  1.00  0.40           O  
HETATM  236  O   HOH T 235      10.940  -2.909   7.436  1.00  0.40           O  
HETATM  237  O   HOH T 236      28.431  -0.085  21.189  1.00  0.40           O  
HETATM  238  O   HOH T 237      -2.220  16.921  36.187  1.00  0.40           O  
HETATM  239  O   HOH T 238      -3.551   8.643  30.842  1.00  0.40           O  
HETATM  240  O   HOH T 239       1.217 -13.628  52.472  1.00  0.40           O  
HETATM  241  O   HOH T 240      -4.723 -11.011  36.253  1.00  0.40           O  
HETATM  242  O   HOH T 241      22.529 -10.729  29.350  1.00  0.40           O  
HETATM  243  O   HOH T 242      14.411   3.574  38.267  1.00  0.40           O  
HETATM  244  O   HOH T 243       8.927  -5.143  66.980  1.00  0.41           O  
HETATM  245  O   HOH T 244      19.019 -12.444  29.469  1.00  0.41           O  
HETATM  246  O   HOH T 245      12.486  13.761  19.946  1.00  0.41           O  
HETATM  247  O   HOH T 246     -11.290   8.293  18.912  1.00  0.41           O  
HETATM  248  O   HOH T 247      12.012  14.620  28.331  1.00  0.41           O  
HETATM  249  O   HOH T 248      -0.082 -24.053   7.132  1.00  0.41           O  
HETATM  250  O   HOH T 249      23.369  10.423  15.998  1.00  0.41           O  
HETATM  251  O   HOH T 250      -8.860 -19.955  17.073  1.00  0.41           O  
HETATM  252  O   HOH T 251       6.640  -8.357  27.205  1.00  0.41           O  
HETATM  253  O   HOH T 252      12.692  -2.700  57.878  1.00  0.41           O  
HETATM  254  O   HOH T 253      17.444 -13.951  27.902  1.00  0.41           O  
HETATM  255  O   HOH T 254      21.787  15.276  20.223  1.00  0.41           O  
HETATM  256  O   HOH T 255     -15.565 -15.903  55.960  1.00  0.41           O  
HETATM  257  O   HOH T 256     -16.474 -10.719  23.726  1.00  0.41           O  
HETATM  258  O   HOH T 257     -28.619  -0.823  43.134  1.00  0.41           O  
HETATM  259  O   HOH T 258      12.239 -18.674   8.077  1.00  0.41           O  
HETATM  260  O   HOH T 259     -18.888  -9.836  24.722  1.00  0.41           O  
HETATM  261  O   HOH T 260      12.135  15.104  17.505  1.00  0.41           O  
HETATM  262  O   HOH T 261     -15.609  -7.462  57.662  1.00  0.42           O  
HETATM  263  O   HOH T 262     -19.790  -7.621  17.773  1.00  0.42           O  
HETATM  264  O   HOH T 263      -6.304  13.488  18.333  1.00  0.42           O  
HETATM  265  O   HOH T 264       6.379  13.696  13.990  1.00  0.42           O  
HETATM  266  O   HOH T 265      -4.036 -16.389  25.989  1.00  0.42           O  
HETATM  267  O   HOH T 266      14.196 -14.558   6.348  1.00  0.42           O  
HETATM  268  O   HOH T 267      22.463  -8.192  28.257  1.00  0.42           O  
HETATM  269  O   HOH T 268      15.689   1.019  49.198  1.00  0.42           O  
HETATM  270  O   HOH T 269       2.742 -19.837   6.574  1.00  0.42           O  
HETATM  271  O   HOH T 270     -26.662   8.069  34.675  1.00  0.42           O  
HETATM  272  O   HOH T 271      -6.623 -18.781  15.908  1.00  0.42           O  
HETATM  273  O   HOH T 272     -17.412   0.098  16.421  1.00  0.42           O  
HETATM  274  O   HOH T 273      13.445   8.041  44.402  1.00  0.42           O  
HETATM  275  O   HOH T 274     -29.418  -3.266  38.802  1.00  0.42           O  
HETATM  276  O   HOH T 275      10.559  -0.348   6.153  1.00  0.42           O  
HETATM  277  O   HOH T 276     -19.400 -16.121  36.507  1.00  0.42           O  
HETATM  278  O   HOH T 277      13.456  14.931  35.785  1.00  0.42           O  
HETATM  279  O   HOH T 278     -22.202   1.105  51.382  1.00  0.42           O  
HETATM  280  O   HOH T 279      11.348 -18.556  45.379  1.00  0.43           O  
HETATM  281  O   HOH T 280     -12.063   0.009  59.807  1.00  0.43           O  
HETATM  282  O   HOH T 281      11.890  17.293  29.350  1.00  0.43           O  
HETATM  283  O   HOH T 282      -7.665  13.459  49.117  1.00  0.43           O  
HETATM  284  O   HOH T 283       6.052  13.562  16.720  1.00  0.43           O  
HETATM  285  O   HOH T 284       2.213  14.841  35.954  1.00  0.43           O  
HETATM  286  O   HOH T 285       8.670  16.328  35.766  1.00  0.43           O  
HETATM  287  O   HOH T 286      12.204 -12.194  35.711  1.00  0.43           O  
HETATM  288  O   HOH T 287     -19.325 -17.101   8.214  1.00  0.43           O  
HETATM  289  O   HOH T 288       0.727 -21.493   7.140  1.00  0.43           O  
HETATM  290  O   HOH T 289     -17.331 -26.675  44.160  1.00  0.43           O  
HETATM  291  O   HOH T 290     -12.878  -3.811  58.671  1.00  0.43           O  
HETATM  292  O   HOH T 291      13.952   7.398  46.980  1.00  0.43           O  
HETATM  293  O   HOH T 292      -5.640  17.800  19.484  1.00  0.43           O  
HETATM  294  O   HOH T 293       5.051 -11.014  61.811  1.00  0.43           O  
HETATM  295  O   HOH T 294      -5.923  16.645  29.120  1.00  0.43           O  
HETATM  296  O   HOH T 295     -25.943  -7.902  33.226  1.00  0.43           O  
HETATM  297  O   HOH T 296     -13.059  -2.561   9.376  1.00  0.43           O  
HETATM  298  O   HOH T 297      11.359  16.684  36.241  1.00  0.43           O  
HETATM  299  O   HOH T 298     -25.779  -6.580  30.944  1.00  0.43           O  
HETATM  300  O   HOH T 299       4.272 -16.268  46.378  1.00  0.43           O  
HETATM  301  O   HOH T 300      15.472 -12.178   7.218  1.00  0.43           O  
HETATM  302  O   HOH T 301     -11.158  17.453  36.806  1.00  0.43           O  
HETATM  303  O   HOH T 302      15.255   5.627  36.565  1.00  0.43           O  
HETATM  304  O   HOH T 303       9.595 -18.633  40.532  1.00  0.43           O  
HETATM  305  O   HOH T 304     -13.907   7.911  17.938  1.00  0.44           O  
HETATM  306  O   HOH T 305      -5.185   7.190  54.506  1.00  0.44           O  
HETATM  307  O   HOH T 306       8.158  -3.858  63.489  1.00  0.44           O  
HETATM  308  O   HOH T 307       0.687   5.604  53.488  1.00  0.44           O  
HETATM  309  O   HOH T 308      17.182   4.702  46.894  1.00  0.44           O  
HETATM  310  O   HOH T 309     -14.520  17.843  35.578  1.00  0.44           O  
HETATM  311  O   HOH T 310      -4.150   9.653  55.243  1.00  0.44           O  
HETATM  312  O   HOH T 311      10.951   5.971  52.764  1.00  0.44           O  
HETATM  313  O   HOH T 312     -10.932 -18.929  21.108  1.00  0.44           O  
HETATM  314  O   HOH T 313      -2.588   7.870  53.865  1.00  0.44           O  
HETATM  315  O   HOH T 314       4.423 -15.370  49.157  1.00  0.44           O  
HETATM  316  O   HOH T 315       7.119 -19.425  48.109  1.00  0.44           O  
HETATM  317  O   HOH T 316     -19.803 -11.394  14.067  1.00  0.44           O  
HETATM  318  O   HOH T 317      -8.980 -24.964  48.569  1.00  0.44           O  
HETATM  319  O   HOH T 318      12.901 -20.352  50.150  1.00  0.44           O  
HETATM  320  O   HOH T 319       2.540 -11.325  32.014  1.00  0.44           O  
HETATM  321  O   HOH T 320      -0.744   6.338  11.329  1.00  0.44           O  
HETATM  322  O   HOH T 321      11.745   0.440  60.059  1.00  0.44           O  
HETATM  323  O   HOH T 322     -15.284  15.417  34.586  1.00  0.44           O  
HETATM  324  O   HOH T 323      -8.317 -23.291  59.987  1.00  0.44           O  
HETATM  325  O   HOH T 324       6.527  -8.957  62.934  1.00  0.44           O  
HETATM  326  O   HOH T 325       6.080  21.187  27.778  1.00  0.44           O  
HETATM  327  O   HOH T 326       1.887  -7.160  63.174  1.00  0.44           O  
HETATM  328  O   HOH T 327       3.721  19.753  27.439  1.00  0.45           O  
HETATM  329  O   HOH T 328       2.716 -11.664  63.179  1.00  0.45           O  
HETATM  330  O   HOH T 329      21.688  -7.117  45.211  1.00  0.45           O  
HETATM  331  O   HOH T 330       3.491 -18.993  46.128  1.00  0.45           O  
HETATM  332  O   HOH T 331      -5.494   5.186  13.722  1.00  0.45           O  
HETATM  333  O   HOH T 332     -16.947   3.789  20.307  1.00  0.45           O  
HETATM  334  O   HOH T 333       5.903 -20.694   4.271  1.00  0.45           O  
HETATM  335  O   HOH T 334      18.398  -2.306   9.682  1.00  0.45           O  
HETATM  336  O   HOH T 335      -8.013  17.513  27.452  1.00  0.45           O  
HETATM  337  O   HOH T 336      -9.802   2.000   9.472  1.00  0.45           O  
HETATM  338  O   HOH T 337     -27.475  -5.893  28.825  1.00  0.45           O  
HETATM  339  O   HOH T 338      15.524   5.778  48.741  1.00  0.45           O  
HETATM  340  O   HOH T 339      21.102  -3.221  52.631  1.00  0.45           O  
HETATM  341  O   HOH T 340      13.830  16.162  19.375  1.00  0.45           O  
HETATM  342  O   HOH T 341      -8.321 -15.377  12.131  1.00  0.45           O  
HETATM  343  O   HOH T 342     -15.213  -2.261  58.713  1.00  0.45           O  
HETATM  344  O   HOH T 343      -3.037 -13.561   5.698  1.00  0.45           O  
HETATM  345  O   HOH T 344     -13.401   8.310  20.629  1.00  0.45           O  
HETATM  346  O   HOH T 345       3.269 -12.876  60.705  1.00  0.45           O  
HETATM  347  O   HOH T 346      26.000  -4.769  30.837  1.00  0.45           O  
HETATM  348  O   HOH T 347      -3.270  17.474  28.705  1.00  0.45           O  
HETATM  349  O   HOH T 348     -25.327   2.477  48.314  1.00  0.46           O  
HETATM  350  O   HOH T 349      13.089  17.164  34.152  1.00  0.46           O  
HETATM  351  O   HOH T 350     -18.136 -25.814  46.675  1.00  0.46           O  
HETATM  352  O   HOH T 351      24.732  -6.670  28.167  1.00  0.46           O  
HETATM  353  O   HOH T 352       2.713  18.219  48.680  1.00  0.46           O  
HETATM  354  O   HOH T 353      10.487   1.442   4.010  1.00  0.46           O  
HETATM  355  O   HOH T 354      26.732  13.156  19.318  1.00  0.46           O  
HETATM  356  O   HOH T 355     -17.678  -5.817  56.861  1.00  0.46           O  
HETATM  357  O   HOH T 356     -11.528 -19.543  40.313  1.00  0.46           O  
HETATM  358  O   HOH T 357      -5.727  19.863  34.227  1.00  0.46           O  
HETATM  359  O   HOH T 358     -14.339  15.103  31.753  1.00  0.46           O  
HETATM  360  O   HOH T 359     -12.636 -12.188   5.081  1.00  0.46           O  
HETATM  361  O   HOH T 360      23.761 -13.052  26.744  1.00  0.46           O  
HETATM  362  O   HOH T 361     -11.716  10.379  20.774  1.00  0.46           O  
HETATM  363  O   HOH T 362      18.664 -17.868  56.136  1.00  0.46           O  
HETATM  364  O   HOH T 363       9.947   7.590   5.323  1.00  0.46           O  
HETATM  365  O   HOH T 364     -15.414   6.279  16.125  1.00  0.46           O  
HETATM  366  O   HOH T 365      -2.364 -12.246  35.451  1.00  0.46           O  
HETATM  367  O   HOH T 366      -8.925   9.624  18.203  1.00  0.46           O  
HETATM  368  O   HOH T 367       7.309   1.798  56.521  1.00  0.46           O  
HETATM  369  O   HOH T 368     -15.130   5.689  28.074  1.00  0.46           O  
HETATM  370  O   HOH T 369      12.917  20.222  23.228  1.00  0.47           O  
HETATM  371  O   HOH T 370      -9.072  -4.781  58.530  1.00  0.47           O  
HETATM  372  O   HOH T 371      -8.315  -7.738  31.134  1.00  0.47           O  
HETATM  373  O   HOH T 372      -3.309  18.552  18.511  1.00  0.47           O  
HETATM  374  O   HOH T 373       7.231 -12.024  33.873  1.00  0.47           O  
HETATM  375  O   HOH T 374     -25.193  -5.235  36.028  1.00  0.47           O  
HETATM  376  O   HOH T 375      -0.592  17.236  29.544  1.00  0.47           O  
HETATM  377  O   HOH T 376      -0.420  15.614  31.806  1.00  0.47           O  
HETATM  378  O   HOH T 377     -16.214  -9.833  56.471  1.00  0.47           O  
HETATM  379  O   HOH T 378       7.354 -14.701  55.835  1.00  0.47           O  
HETATM  380  O   HOH T 379     -20.140   0.052  15.376  1.00  0.47           O  
HETATM  381  O   HOH T 380      -7.166  20.814  43.851  1.00  0.47           O  
HETATM  382  O   HOH T 381     -15.569   1.684  14.899  1.00  0.47           O  
HETATM  383  O   HOH T 382     -18.847  -0.108  11.283  1.00  0.47           O  
HETATM  384  O   HOH T 383       3.959  22.469  26.785  1.00  0.47           O  
HETATM  385  O   HOH T 384      17.144 -10.480  40.346  1.00  0.47           O  
HETATM  386  O   HOH T 385      17.022   1.923  46.867  1.00  0.47           O  
HETATM  387  O   HOH T 386       4.093  18.004  46.345  1.00  0.47           O  
HETATM  388  O   HOH T 387       9.980   4.133   3.949  1.00  0.47           O  
HETATM  389  O   HOH T 388      15.394  -2.543  58.027  1.00  0.47           O  
HETATM  390  O   HOH T 389      -5.712  11.417  53.722  1.00  0.47           O  
HETATM  391  O   HOH T 390     -12.969   4.962  11.851  1.00  0.48           O  
HETATM  392  O   HOH T 391       4.887 -18.014   4.317  1.00  0.48           O  
HETATM  393  O   HOH T 392      -9.463  -8.866  33.428  1.00  0.48           O  
HETATM  394  O   HOH T 393       4.567 -18.154  48.529  1.00  0.48           O  
HETATM  395  O   HOH T 394      -9.535 -20.656  19.612  1.00  0.48           O  
HETATM  396  O   HOH T 395      -1.489 -25.155  57.632  1.00  0.48           O  
HETATM  397  O   HOH T 396      22.669  -5.692  42.934  1.00  0.48           O  
HETATM  398  O   HOH T 397      22.743   3.401  32.685  1.00  0.48           O  
HETATM  399  O   HOH T 398     -29.950  -5.587  40.381  1.00  0.48           O  
HETATM  400  O   HOH T 399     -14.235 -14.486  22.842  1.00  0.48           O  
HETATM  401  O   HOH T 400     -27.648   1.820  43.408  1.00  0.48           O  
HETATM  402  O   HOH T 401       8.008 -16.217  52.502  1.00  0.48           O  
HETATM  403  O   HOH T 402     -10.394  -1.268  57.863  1.00  0.48           O  
HETATM  404  O   HOH T 403     -10.881  -3.796  56.684  1.00  0.48           O  
HETATM  405  O   HOH T 404       6.305  16.538  34.204  1.00  0.48           O  
HETATM  406  O   HOH T 405     -17.432 -14.578  17.171  1.00  0.48           O  
HETATM  407  O   HOH T 406       3.851 -25.003  14.957  1.00  0.48           O  
HETATM  408  O   HOH T 407      25.384  -2.316  28.707  1.00  0.48           O  
HETATM  409  O   HOH T 408      -3.044  -9.884  34.272  1.00  0.48           O  
HETATM  410  O   HOH T 409      27.593   8.951  20.971  1.00  0.48           O  
HETATM  411  O   HOH T 410      24.660  12.171  17.744  1.00  0.48           O  
HETATM  412  O   HOH T 411      25.035 -11.406  28.585  1.00  0.48           O  
HETATM  413  O   HOH T 412      16.304 -13.951  42.036  1.00  0.48           O  
HETATM  414  O   HOH T 413      -8.889 -12.149  48.591  1.00  0.48           O  
HETATM  415  O   HOH T 414     -13.559  14.654  55.900  1.00  0.48           O  
HETATM  416  O   HOH T 415      -9.199  11.383  20.349  1.00  0.49           O  
HETATM  417  O   HOH T 416      13.881  -0.168  58.389  1.00  0.49           O  
HETATM  418  O   HOH T 417       8.803  -6.341  64.566  1.00  0.49           O  
HETATM  419  O   HOH T 418     -29.473  -3.092  41.573  1.00  0.49           O  
HETATM  420  O   HOH T 419       5.039 -12.581  32.279  1.00  0.49           O  
HETATM  421  O   HOH T 420      10.846 -19.662  42.792  1.00  0.49           O  
HETATM  422  O   HOH T 421      11.988 -15.855  58.307  1.00  0.49           O  
HETATM  423  O   HOH T 422     -24.492   1.755  29.618  1.00  0.49           O  
HETATM  424  O   HOH T 423       8.807  -2.510  65.710  1.00  0.49           O  
HETATM  425  O   HOH T 424      23.757   1.492  38.081  1.00  0.49           O  
HETATM  426  O   HOH T 425      17.084  -2.155   7.250  1.00  0.49           O  
HETATM  427  O   HOH T 426      11.303   9.798  44.317  1.00  0.49           O  
HETATM  428  O   HOH T 427      11.336   7.675  46.009  1.00  0.49           O  
HETATM  429  O   HOH T 428       6.207  12.969  46.711  1.00  0.49           O  
HETATM  430  O   HOH T 429      -9.164  14.895  47.309  1.00  0.49           O  
HETATM  431  O   HOH T 430      17.328  -5.586   7.664  1.00  0.49           O  
HETATM  432  O   HOH T 431     -28.638   8.378  36.531  1.00  0.49           O  
HETATM  433  O   HOH T 432      17.146   6.256  44.599  1.00  0.49           O  
HETATM  434  O   HOH T 433     -16.251   5.352  25.527  1.00  0.49           O  
HETATM  435  O   HOH T 434      -4.130  17.812  33.140  1.00  0.49           O  
HETATM  436  O   HOH T 435      10.517 -14.147  60.028  1.00  0.49           O  
HETATM  437  O   HOH T 436       5.200  20.520  25.163  1.00  0.49           O  
HETATM  438  O   HOH T 437       8.744  -0.114  57.732  1.00  0.49           O  
HETATM  439  O   HOH T 438     -13.792 -24.133  48.719  1.00  0.49           O  
HETATM  440  O   HOH T 439     -11.379  16.286  34.331  1.00  0.49           O  
HETATM  441  O   HOH T 440      -0.621  -4.167   2.336  1.00  0.49           O  
HETATM  442  O   HOH T 441      22.634 -10.975  13.687  1.00  0.49           O  
HETATM  443  O   HOH T 442      -9.103   1.136   6.927  1.00  0.50           O  
HETATM  444  O   HOH T 443     -19.462   0.186  57.138  1.00  0.50           O  
HETATM  445  O   HOH T 444     -13.058  18.911  42.461  1.00  0.50           O  
HETATM  446  O   HOH T 445       1.179 -21.799  15.701  1.00  0.50           O  
HETATM  447  O   HOH T 446      12.918   0.693   4.964  1.00  0.50           O  
HETATM  448  O   HOH T 447      -3.483  16.157  51.214  1.00  0.50           O  
HETATM  449  O   HOH T 448       9.518 -16.187  54.926  1.00  0.50           O  
HETATM  450  O   HOH T 449     -16.971   4.031  15.496  1.00  0.50           O  
HETATM  451  O   HOH T 450     -10.610  16.779  28.338  1.00  0.50           O  
HETATM  452  O   HOH T 451     -28.142   3.989  41.892  1.00  0.50           O  
HETATM  453  O   HOH T 452     -19.694  -9.692  16.099  1.00  0.50           O  
HETATM  454  O   HOH T 453       4.870 -16.279  58.464  1.00  0.50           O  
HETATM  455  O   HOH T 454       9.243   9.288  46.327  1.00  0.50           O  
HETATM  456  O   HOH T 455       0.943  -2.398  63.153  1.00  0.50           O  
HETATM  457  O   HOH T 456      13.290 -23.334  15.434  1.00  0.51           O  
HETATM  458  O   HOH T 457      15.627 -16.180  43.521  1.00  0.51           O  
HETATM  459  O   HOH T 458      -6.818 -20.998  60.110  1.00  0.51           O  
HETATM  460  O   HOH T 459      13.800 -16.882  38.978  1.00  0.51           O  
HETATM  461  O   HOH T 460      22.956  -8.931  15.519  1.00  0.51           O  
HETATM  462  O   HOH T 461      22.524  -9.671  39.055  1.00  0.51           O  
HETATM  463  O   HOH T 462     -23.433   1.696  19.618  1.00  0.51           O  
HETATM  464  O   HOH T 463      11.207  16.105  20.178  1.00  0.51           O  
HETATM  465  O   HOH T 464       9.485  -8.836  30.604  1.00  0.51           O  
HETATM  466  O   HOH T 465     -17.929   0.589  13.796  1.00  0.51           O  
HETATM  467  O   HOH T 466       2.034 -15.465  54.489  1.00  0.51           O  
HETATM  468  O   HOH T 467     -11.456 -24.904  49.876  1.00  0.51           O  
HETATM  469  O   HOH T 468       0.105  18.261  16.307  1.00  0.51           O  
HETATM  470  O   HOH T 469      11.540  -3.854  10.085  1.00  0.51           O  
HETATM  471  O   HOH T 470      17.227  14.748  23.131  1.00  0.51           O  
HETATM  472  O   HOH T 471      -7.297  17.978  35.586  1.00  0.51           O  
HETATM  473  O   HOH T 472      28.273  11.524  20.837  1.00  0.51           O  
HETATM  474  O   HOH T 473      24.657  -0.249  11.757  1.00  0.51           O  
HETATM  475  O   HOH T 474       2.848  17.542  16.142  1.00  0.51           O  
HETATM  476  O   HOH T 475      13.812 -14.029  38.838  1.00  0.52           O  
HETATM  477  O   HOH T 476       1.670  21.479  28.045  1.00  0.52           O  
HETATM  478  O   HOH T 477     -21.855  -1.292  13.513  1.00  0.52           O  
HETATM  479  O   HOH T 478     -12.071  -7.154  -1.671  1.00  0.52           O  
HETATM  480  O   HOH T 479      28.294   4.519  23.179  1.00  0.52           O  
HETATM  481  O   HOH T 480       9.652  15.309  16.621  1.00  0.52           O  
HETATM  482  O   HOH T 481      21.295  17.302  24.846  1.00  0.52           O  
HETATM  483  O   HOH T 482      19.542   9.573  33.293  1.00  0.52           O  
HETATM  484  O   HOH T 483       2.468 -15.593  50.968  1.00  0.52           O  
HETATM  485  O   HOH T 484      26.599   0.775  19.364  1.00  0.52           O  
HETATM  486  O   HOH T 485      15.583  16.863  22.705  1.00  0.52           O  
HETATM  487  O   HOH T 486      10.334  -1.822  59.179  1.00  0.52           O  
HETATM  488  O   HOH T 487       1.863   0.964  60.915  1.00  0.52           O  
HETATM  489  O   HOH T 488      -2.419  17.011  48.803  1.00  0.52           O  
HETATM  490  O   HOH T 489       0.267 -19.478   5.251  1.00  0.52           O  
HETATM  491  O   HOH T 490     -19.469   8.920  31.605  1.00  0.52           O  
HETATM  492  O   HOH T 491      17.031   3.428  49.274  1.00  0.52           O  
HETATM  493  O   HOH T 492       4.328  15.519  13.688  1.00  0.52           O  
HETATM  494  O   HOH T 493     -11.938 -17.054   8.833  1.00  0.52           O  
HETATM  495  O   HOH T 494      11.295 -19.422  24.239  1.00  0.52           O  
HETATM  496  O   HOH T 495       9.176  11.334  44.395  1.00  0.52           O  
HETATM  497  O   HOH T 496     -12.442 -20.369  42.906  1.00  0.53           O  
HETATM  498  O   HOH T 497      17.715 -10.561   7.887  1.00  0.53           O  
HETATM  499  O   HOH T 498     -20.254  -2.510  11.576  1.00  0.53           O  
HETATM  500  O   HOH T 499       3.565 -17.780  60.349  1.00  0.53           O  
HETATM  501  O   HOH T 500      23.284 -10.273  26.638  1.00  0.53           O  
HETATM  502  O   HOH T 501      12.341 -17.904  41.085  1.00  0.53           O  
HETATM  503  O   HOH T 502       7.482  -9.640  32.464  1.00  0.53           O  
HETATM  504  O   HOH T 503      -3.201 -23.508  49.301  1.00  0.53           O  
HETATM  505  O   HOH T 504       4.911 -18.577  38.898  1.00  0.53           O  
HETATM  506  O   HOH T 505      15.390  -4.050   6.480  1.00  0.53           O  
HETATM  507  O   HOH T 506      -1.590 -18.750  59.934  1.00  0.53           O  
HETATM  508  O   HOH T 507       9.021  -4.042   5.622  1.00  0.53           O  
HETATM  509  O   HOH T 508     -27.051  -3.573  37.224  1.00  0.53           O  
HETATM  510  O   HOH T 509     -19.387 -13.687  15.422  1.00  0.53           O  
HETATM  511  O   HOH T 510      -7.983  -8.929  60.159  1.00  0.53           O  
HETATM  512  O   HOH T 511      12.060 -16.277   6.458  1.00  0.53           O  
HETATM  513  O   HOH T 512     -23.170  -6.541  10.312  1.00  0.53           O  
HETATM  514  O   HOH T 513      25.061  -6.570  37.140  1.00  0.53           O  
HETATM  515  O   HOH T 514      -8.449  22.645  33.189  1.00  0.53           O  
HETATM  516  O   HOH T 515     -17.192   2.507  17.859  1.00  0.53           O  
HETATM  517  O   HOH T 516      16.347   0.347  51.870  1.00  0.53           O  
HETATM  518  O   HOH T 517      26.706   8.116  30.109  1.00  0.53           O  
HETATM  519  O   HOH T 518       8.085  20.212  21.949  1.00  0.53           O  
HETATM  520  O   HOH T 519       7.870   5.789   4.762  1.00  0.53           O  
HETATM  521  O   HOH T 520       0.971  -7.580  33.089  1.00  0.53           O  
HETATM  522  O   HOH T 521      -3.273 -28.783  54.222  1.00  0.53           O  
HETATM  523  O   HOH T 522     -24.471 -13.693  44.795  1.00  0.53           O  
HETATM  524  O   HOH T 523      -4.972 -18.551  24.428  1.00  0.53           O  
HETATM  525  O   HOH T 524     -20.469 -12.761  49.635  1.00  0.54           O  
HETATM  526  O   HOH T 525     -13.820  -2.969   4.800  1.00  0.54           O  
HETATM  527  O   HOH T 526      -0.830 -19.487  13.652  1.00  0.54           O  
HETATM  528  O   HOH T 527       3.750   3.277   5.697  1.00  0.54           O  
HETATM  529  O   HOH T 528     -10.530 -14.600   8.894  1.00  0.54           O  
HETATM  530  O   HOH T 529      23.987 -13.062  19.543  1.00  0.54           O  
HETATM  531  O   HOH T 530      20.997  15.680  22.722  1.00  0.54           O  
HETATM  532  O   HOH T 531      10.678  15.984  13.860  1.00  0.54           O  
HETATM  533  O   HOH T 532      -0.817 -18.944  38.701  1.00  0.54           O  
HETATM  534  O   HOH T 533      11.598 -14.526  56.025  1.00  0.54           O  
HETATM  535  O   HOH T 534      11.342  17.212  32.030  1.00  0.54           O  
HETATM  536  O   HOH T 535     -21.245 -14.590  34.922  1.00  0.54           O  
HETATM  537  O   HOH T 536     -10.607   6.373  11.958  1.00  0.54           O  
HETATM  538  O   HOH T 537       4.838  -9.927  31.454  1.00  0.54           O  
HETATM  539  O   HOH T 538     -26.949  -6.481  43.809  1.00  0.54           O  
HETATM  540  O   HOH T 539      15.247  21.753  24.332  1.00  0.54           O  
HETATM  541  O   HOH T 540      -7.213  12.094  55.873  1.00  0.54           O  
HETATM  542  O   HOH T 541     -28.525  -3.329  28.237  1.00  0.54           O  
HETATM  543  O   HOH T 542       3.767  -5.566   1.456  1.00  0.55           O  
HETATM  544  O   HOH T 543       8.956 -11.563  15.743  1.00  0.55           O  
HETATM  545  O   HOH T 544      -1.782   3.201   7.338  1.00  0.55           O  
HETATM  546  O   HOH T 545      -3.118  12.266  14.529  1.00  0.55           O  
HETATM  547  O   HOH T 546      22.699   1.691  45.029  1.00  0.55           O  
HETATM  548  O   HOH T 547     -15.302  -4.836  57.907  1.00  0.55           O  
HETATM  549  O   HOH T 548       8.177 -14.677  58.486  1.00  0.55           O  
HETATM  550  O   HOH T 549      20.168  13.153  19.304  1.00  0.55           O  
HETATM  551  O   HOH T 550     -14.871 -13.019  57.830  1.00  0.55           O  
HETATM  552  O   HOH T 551      12.150   6.424  25.177  1.00  0.55           O  
HETATM  553  O   HOH T 552     -13.882 -12.589  24.815  1.00  0.55           O  
HETATM  554  O   HOH T 553       3.103  11.764  50.476  1.00  0.55           O  
HETATM  555  O   HOH T 554       0.800 -18.762  25.915  1.00  0.55           O  
HETATM  556  O   HOH T 555      30.668   4.045  28.347  1.00  0.55           O  
HETATM  557  O   HOH T 556      -3.788   2.575  58.642  1.00  0.55           O  
HETATM  558  O   HOH T 557      -1.887 -15.051   3.366  1.00  0.55           O  
HETATM  559  O   HOH T 558     -25.715   0.279  46.716  1.00  0.55           O  
HETATM  560  O   HOH T 559      20.191 -17.245  18.812  1.00  0.56           O  
HETATM  561  O   HOH T 560      -5.357  17.832  26.775  1.00  0.56           O  
HETATM  562  O   HOH T 561     -24.352  -5.597  46.306  1.00  0.56           O  
HETATM  563  O   HOH T 562      -1.521   1.010   2.284  1.00  0.56           O  
HETATM  564  O   HOH T 563      -9.675  17.111  32.381  1.00  0.56           O  
HETATM  565  O   HOH T 564      -6.354 -24.232  49.261  1.00  0.56           O  
HETATM  566  O   HOH T 565      -2.633 -16.442  19.483  1.00  0.56           O  
HETATM  567  O   HOH T 566      -4.092 -10.613   3.006  1.00  0.56           O  
HETATM  568  O   HOH T 567     -24.322   8.121  32.061  1.00  0.56           O  
HETATM  569  O   HOH T 568       8.434  -9.119  15.334  1.00  0.56           O  
HETATM  570  O   HOH T 569      21.062 -11.398  35.966  1.00  0.56           O  
HETATM  571  O   HOH T 570     -21.896 -11.371  34.825  1.00  0.56           O  
HETATM  572  O   HOH T 571     -16.247 -19.541  11.266  1.00  0.56           O  
HETATM  573  O   HOH T 572      21.028 -12.222  51.818  1.00  0.56           O  
HETATM  574  O   HOH T 573      24.303   8.118  32.599  1.00  0.56           O  
HETATM  575  O   HOH T 574       1.752   2.378  57.430  1.00  0.56           O  
HETATM  576  O   HOH T 575      17.000  16.213  32.447  1.00  0.56           O  
HETATM  577  O   HOH T 576      -2.771 -18.547  12.109  1.00  0.56           O  
HETATM  578  O   HOH T 577      16.293  15.447  20.345  1.00  0.56           O  
HETATM  579  O   HOH T 578      11.547 -18.737  38.676  1.00  0.56           O  
HETATM  580  O   HOH T 579     -22.622   3.692  29.040  1.00  0.56           O  
HETATM  581  O   HOH T 580     -16.721 -15.503  32.198  1.00  0.56           O  
HETATM  582  O   HOH T 581       7.815 -17.846  50.249  1.00  0.56           O  
HETATM  583  O   HOH T 582     -21.705  -9.653  24.468  1.00  0.56           O  
HETATM  584  O   HOH T 583      -8.093  16.214  21.939  1.00  0.56           O  
HETATM  585  O   HOH T 584      26.247   9.929  28.256  1.00  0.56           O  
HETATM  586  O   HOH T 585       5.860  17.282  44.510  1.00  0.56           O  
HETATM  587  O   HOH T 586      -1.546 -19.341   3.219  1.00  0.56           O  
HETATM  588  O   HOH T 587      23.668  15.744  25.114  1.00  0.57           O  
HETATM  589  O   HOH T 588     -21.060  -4.860  49.410  1.00  0.57           O  
HETATM  590  O   HOH T 589      27.062  -5.718  20.794  1.00  0.57           O  
HETATM  591  O   HOH T 590       5.742  -4.053   0.717  1.00  0.57           O  
HETATM  592  O   HOH T 591       8.313  -7.636   5.491  1.00  0.57           O  
HETATM  593  O   HOH T 592     -12.176  22.651  39.826  1.00  0.57           O  
HETATM  594  O   HOH T 593     -21.068 -11.485  28.236  1.00  0.57           O  
HETATM  595  O   HOH T 594      -8.844 -17.802  11.309  1.00  0.57           O  
HETATM  596  O   HOH T 595      -0.763  18.738  17.820  1.00  0.57           O  
HETATM  597  O   HOH T 596       6.624  -8.516  30.021  1.00  0.57           O  
HETATM  598  O   HOH T 597       2.400 -19.830  48.620  1.00  0.57           O  
HETATM  599  O   HOH T 598       2.542  -9.596  29.821  1.00  0.57           O  
HETATM  600  O   HOH T 599      14.620   1.894  53.209  1.00  0.58           O  
HETATM  601  O   HOH T 600       2.072  -3.770   3.107  1.00  0.58           O  
HETATM  602  O   HOH T 601      11.083 -13.112  64.883  1.00  0.58           O  
HETATM  603  O   HOH T 602       0.030 -25.256  12.138  1.00  0.58           O  
HETATM  604  O   HOH T 603       5.639 -13.921  29.998  1.00  0.59           O  
HETATM  605  O   HOH T 604      -6.462 -14.567  33.405  1.00  0.59           O  
HETATM  606  O   HOH T 605      12.351 -18.913  47.993  1.00  0.59           O  
HETATM  607  O   HOH T 606       3.916 -19.554  41.349  1.00  0.59           O  
HETATM  608  O   HOH T 607      -7.271  15.964  18.519  1.00  0.60           O  
HETATM  609  O   HOH T 608     -18.693 -15.216  33.999  1.00  0.60           O  
HETATM  610  O   HOH T 609       6.369  16.871  37.054  1.00  0.61           O  
HETATM  611  O   HOH T 610     -26.800  -9.017  35.684  1.00  0.63           O  
HETATM  612  O   HOH T 611       9.317 -13.026  56.835  1.00  0.63           O  
TER     613      HOH T 611 
