# Supplementary material for: Accurate Prediction of Hydration Sites of Proteins Using Energy Model With Atom Embedding
Source: Front Mol Biosci. 2021 Sep 20;8:756075. doi: 10.3389/fmolb.2021.756075 (PMC8488165; doi:10.3389/fmolb.2021.756075)
Supplement: Supplementary file 1 [file DataSheet1.ZIP › Data Sheet 1/Our_result_pdb/our_dataset_output/3EQY_watersite.pdb]

HEADER                                                        XXXX


JRNL        PMID   -1
HETATM    1  O   HOH T   0     -13.778  40.146  15.469  1.00  0.19           O  
HETATM    2  O   HOH T   1     -18.572  47.202   0.465  1.00  0.19           O  
HETATM    3  O   HOH T   2      -9.939  10.110   9.571  1.00  0.19           O  
HETATM    4  O   HOH T   3     -17.698  22.059  11.920  1.00  0.19           O  
HETATM    5  O   HOH T   4       3.673  20.230  10.917  1.00  0.19           O  
HETATM    6  O   HOH T   5     -19.404  61.917  18.073  1.00  0.19           O  
HETATM    7  O   HOH T   6     -27.999  39.357  17.711  1.00  0.20           O  
HETATM    8  O   HOH T   7     -15.395   4.056  -4.572  1.00  0.22           O  
HETATM    9  O   HOH T   8     -13.063  52.819  22.336  1.00  0.22           O  
HETATM   10  O   HOH T   9     -27.160  55.546  17.911  1.00  0.22           O  
HETATM   11  O   HOH T  10     -24.717  56.366   4.726  1.00  0.22           O  
HETATM   12  O   HOH T  11      -3.288  29.426  11.981  1.00  0.22           O  
HETATM   13  O   HOH T  12     -12.943  57.935  16.863  1.00  0.22           O  
HETATM   14  O   HOH T  13     -15.464  56.891  16.964  1.00  0.23           O  
HETATM   15  O   HOH T  14     -11.580  38.427  15.629  1.00  0.23           O  
HETATM   16  O   HOH T  15     -17.116  56.102  14.553  1.00  0.24           O  
HETATM   17  O   HOH T  16     -11.279  32.422   1.298  1.00  0.25           O  
HETATM   18  O   HOH T  17     -23.500  18.721   9.686  1.00  0.25           O  
HETATM   19  O   HOH T  18       0.261  15.174  11.931  1.00  0.26           O  
HETATM   20  O   HOH T  19     -12.632  26.155  11.545  1.00  0.27           O  
HETATM   21  O   HOH T  20     -17.202  58.800  13.785  1.00  0.27           O  
HETATM   22  O   HOH T  21     -10.394   7.330   9.832  1.00  0.27           O  
HETATM   23  O   HOH T  22     -16.709   6.340  -5.587  1.00  0.27           O  
HETATM   24  O   HOH T  23     -17.049  24.287   7.416  1.00  0.27           O  
HETATM   25  O   HOH T  24     -21.515  28.042  19.105  1.00  0.27           O  
HETATM   26  O   HOH T  25     -21.513   2.340   5.580  1.00  0.28           O  
HETATM   27  O   HOH T  26     -23.103  50.081  21.669  1.00  0.28           O  
HETATM   28  O   HOH T  27      -2.325  14.351  -7.296  1.00  0.29           O  
HETATM   29  O   HOH T  28     -21.870  63.280  18.590  1.00  0.29           O  
HETATM   30  O   HOH T  29     -29.247  40.964  13.395  1.00  0.29           O  
HETATM   31  O   HOH T  30       2.121  21.084   8.667  1.00  0.30           O  
HETATM   32  O   HOH T  31     -11.106  41.900  21.307  1.00  0.30           O  
HETATM   33  O   HOH T  32     -25.127  13.436   3.735  1.00  0.30           O  
HETATM   34  O   HOH T  33     -31.533  47.135   0.850  1.00  0.30           O  
HETATM   35  O   HOH T  34     -11.783  22.479  16.169  1.00  0.30           O  
HETATM   36  O   HOH T  35     -13.047  51.570  17.835  1.00  0.31           O  
HETATM   37  O   HOH T  36     -24.718  51.268  -0.282  1.00  0.31           O  
HETATM   38  O   HOH T  37     -26.813  32.129   2.365  1.00  0.31           O  
HETATM   39  O   HOH T  38     -17.905  22.588  -3.142  1.00  0.31           O  
HETATM   40  O   HOH T  39     -14.577  59.143   4.014  1.00  0.31           O  
HETATM   41  O   HOH T  40       1.599  30.799  -2.599  1.00  0.31           O  
HETATM   42  O   HOH T  41     -13.805  32.256   0.342  1.00  0.31           O  
HETATM   43  O   HOH T  42      -8.102  45.022  16.362  1.00  0.32           O  
HETATM   44  O   HOH T  43       6.721  24.681   7.970  1.00  0.32           O  
HETATM   45  O   HOH T  44     -24.898  20.363  -1.619  1.00  0.32           O  
HETATM   46  O   HOH T  45     -24.197  10.834  13.395  1.00  0.32           O  
HETATM   47  O   HOH T  46     -12.770  29.081  -4.949  1.00  0.32           O  
HETATM   48  O   HOH T  47     -18.102   7.821  -2.138  1.00  0.32           O  
HETATM   49  O   HOH T  48     -16.242  51.242  21.295  1.00  0.32           O  
HETATM   50  O   HOH T  49     -20.436  10.054  -0.461  1.00  0.32           O  
HETATM   51  O   HOH T  50       2.414  19.539  -3.561  1.00  0.33           O  
HETATM   52  O   HOH T  51       1.569  17.914  -1.432  1.00  0.33           O  
HETATM   53  O   HOH T  52       6.042  28.604  12.756  1.00  0.33           O  
HETATM   54  O   HOH T  53     -21.566  57.939   3.626  1.00  0.33           O  
HETATM   55  O   HOH T  54     -21.398   4.469   7.359  1.00  0.34           O  
HETATM   56  O   HOH T  55     -24.235  58.366   2.843  1.00  0.34           O  
HETATM   57  O   HOH T  56     -14.140  14.322  15.953  1.00  0.34           O  
HETATM   58  O   HOH T  57     -13.640  50.850  20.428  1.00  0.34           O  
HETATM   59  O   HOH T  58     -12.044  12.644  16.573  1.00  0.34           O  
HETATM   60  O   HOH T  59     -14.671  53.907   4.396  1.00  0.34           O  
HETATM   61  O   HOH T  60     -18.893  31.028   5.315  1.00  0.34           O  
HETATM   62  O   HOH T  61     -24.419  29.863   9.096  1.00  0.34           O  
HETATM   63  O   HOH T  62     -27.135  61.229   0.920  1.00  0.34           O  
HETATM   64  O   HOH T  63     -15.855  31.894   3.687  1.00  0.34           O  
HETATM   65  O   HOH T  64     -24.735  43.828  19.631  1.00  0.34           O  
HETATM   66  O   HOH T  65     -14.528  27.323  13.171  1.00  0.34           O  
HETATM   67  O   HOH T  66     -25.136  52.424  -9.277  1.00  0.35           O  
HETATM   68  O   HOH T  67       4.096  28.825   4.425  1.00  0.35           O  
HETATM   69  O   HOH T  68     -13.586  32.461   5.189  1.00  0.35           O  
HETATM   70  O   HOH T  69     -12.117  21.585  13.808  1.00  0.35           O  
HETATM   71  O   HOH T  70     -23.503  17.765  -3.620  1.00  0.35           O  
HETATM   72  O   HOH T  71     -10.390  55.886  12.959  1.00  0.35           O  
HETATM   73  O   HOH T  72     -31.780  55.289   6.668  1.00  0.35           O  
HETATM   74  O   HOH T  73      -3.452  13.822  -4.769  1.00  0.35           O  
HETATM   75  O   HOH T  74      -5.927  33.223   0.802  1.00  0.35           O  
HETATM   76  O   HOH T  75      -2.967  10.476   5.493  1.00  0.35           O  
HETATM   77  O   HOH T  76     -20.563  50.009  -3.799  1.00  0.35           O  
HETATM   78  O   HOH T  77     -34.934  41.997  13.613  1.00  0.35           O  
HETATM   79  O   HOH T  78     -25.927  60.531   3.225  1.00  0.36           O  
HETATM   80  O   HOH T  79     -25.086   3.841   6.853  1.00  0.36           O  
HETATM   81  O   HOH T  80     -10.650  30.629  -5.491  1.00  0.36           O  
HETATM   82  O   HOH T  81     -12.622  56.646   8.188  1.00  0.36           O  
HETATM   83  O   HOH T  82     -32.222  51.059  17.103  1.00  0.36           O  
HETATM   84  O   HOH T  83     -34.500  38.304  14.794  1.00  0.36           O  
HETATM   85  O   HOH T  84     -34.862  48.181  11.080  1.00  0.36           O  
HETATM   86  O   HOH T  85     -12.172  10.692  18.490  1.00  0.36           O  
HETATM   87  O   HOH T  86     -12.336  59.979   2.418  1.00  0.37           O  
HETATM   88  O   HOH T  87     -19.618  38.774  21.808  1.00  0.37           O  
HETATM   89  O   HOH T  88       6.013  31.647   0.012  1.00  0.37           O  
HETATM   90  O   HOH T  89     -13.076   8.051  18.638  1.00  0.37           O  
HETATM   91  O   HOH T  90     -22.572  33.214   1.472  1.00  0.37           O  
HETATM   92  O   HOH T  91     -10.458  34.169  12.688  1.00  0.37           O  
HETATM   93  O   HOH T  92     -10.791  47.880  18.473  1.00  0.37           O  
HETATM   94  O   HOH T  93     -11.909  18.711  20.584  1.00  0.38           O  
HETATM   95  O   HOH T  94     -21.697  26.448   8.949  1.00  0.38           O  
HETATM   96  O   HOH T  95     -10.930  46.941  -4.504  1.00  0.38           O  
HETATM   97  O   HOH T  96     -24.436  44.552  24.090  1.00  0.38           O  
HETATM   98  O   HOH T  97     -23.634  24.547   8.187  1.00  0.38           O  
HETATM   99  O   HOH T  98     -15.592   8.701  -6.502  1.00  0.38           O  
HETATM  100  O   HOH T  99       8.203  26.518   6.518  1.00  0.38           O  
HETATM  101  O   HOH T 100     -21.878  64.813  13.371  1.00  0.38           O  
HETATM  102  O   HOH T 101     -28.236  39.412   2.544  1.00  0.38           O  
HETATM  103  O   HOH T 102     -23.751  64.088  15.325  1.00  0.38           O  
HETATM  104  O   HOH T 103     -22.461  28.880   7.843  1.00  0.39           O  
HETATM  105  O   HOH T 104     -18.613  38.583  24.402  1.00  0.39           O  
HETATM  106  O   HOH T 105     -30.666  42.257  15.444  1.00  0.39           O  
HETATM  107  O   HOH T 106     -10.541  46.142  11.327  1.00  0.39           O  
HETATM  108  O   HOH T 107     -15.427  20.483  -7.267  1.00  0.39           O  
HETATM  109  O   HOH T 108     -20.861   8.034  -2.344  1.00  0.39           O  
HETATM  110  O   HOH T 109     -20.524  23.711   4.738  1.00  0.39           O  
HETATM  111  O   HOH T 110     -28.309  53.147  19.141  1.00  0.39           O  
HETATM  112  O   HOH T 111     -16.271  25.746   9.687  1.00  0.39           O  
HETATM  113  O   HOH T 112     -28.284  32.608  15.845  1.00  0.39           O  
HETATM  114  O   HOH T 113     -29.539  32.103   6.759  1.00  0.39           O  
HETATM  115  O   HOH T 114     -31.578  49.796   0.413  1.00  0.39           O  
HETATM  116  O   HOH T 115     -24.438  46.559  19.887  1.00  0.40           O  
HETATM  117  O   HOH T 116     -29.139  41.974  -1.148  1.00  0.40           O  
HETATM  118  O   HOH T 117     -19.226  21.005  -4.983  1.00  0.40           O  
HETATM  119  O   HOH T 118     -16.273  31.718  -0.858  1.00  0.40           O  
HETATM  120  O   HOH T 119     -11.415   3.574   4.944  1.00  0.40           O  
HETATM  121  O   HOH T 120     -25.598  51.133  -2.869  1.00  0.40           O  
HETATM  122  O   HOH T 121     -30.038  32.364   4.021  1.00  0.40           O  
HETATM  123  O   HOH T 122     -13.641  48.824  -1.302  1.00  0.41           O  
HETATM  124  O   HOH T 123     -27.848  30.194  14.584  1.00  0.41           O  
HETATM  125  O   HOH T 124     -11.100  16.157  19.855  1.00  0.41           O  
HETATM  126  O   HOH T 125     -11.001  38.754   2.904  1.00  0.41           O  
HETATM  127  O   HOH T 126      11.056  27.435   2.380  1.00  0.41           O  
HETATM  128  O   HOH T 127     -29.677  40.321   0.666  1.00  0.41           O  
HETATM  129  O   HOH T 128     -15.941  23.893  12.917  1.00  0.41           O  
HETATM  130  O   HOH T 129      -8.823  35.512  10.862  1.00  0.41           O  
HETATM  131  O   HOH T 130      -2.426  33.573  -6.826  1.00  0.41           O  
HETATM  132  O   HOH T 131     -15.263  34.304  -0.646  1.00  0.41           O  
HETATM  133  O   HOH T 132      -5.874  29.242  13.292  1.00  0.41           O  
HETATM  134  O   HOH T 133     -27.819  31.349   8.746  1.00  0.42           O  
HETATM  135  O   HOH T 134       4.786  30.530   2.317  1.00  0.42           O  
HETATM  136  O   HOH T 135       2.089  33.907   9.613  1.00  0.42           O  
HETATM  137  O   HOH T 136     -26.645  62.285  12.961  1.00  0.42           O  
HETATM  138  O   HOH T 137     -24.220  61.220  12.074  1.00  0.42           O  
HETATM  139  O   HOH T 138     -22.337   8.885  13.925  1.00  0.42           O  
HETATM  140  O   HOH T 139     -17.025  39.580  22.350  1.00  0.42           O  
HETATM  141  O   HOH T 140      -5.652  39.321   7.371  1.00  0.42           O  
HETATM  142  O   HOH T 141     -24.539  19.503   4.967  1.00  0.42           O  
HETATM  143  O   HOH T 142     -27.101  46.494  18.978  1.00  0.42           O  
HETATM  144  O   HOH T 143     -14.659  44.730  -2.559  1.00  0.42           O  
HETATM  145  O   HOH T 144     -18.983  28.912  19.986  1.00  0.42           O  
HETATM  146  O   HOH T 145     -30.439  60.313   4.192  1.00  0.42           O  
HETATM  147  O   HOH T 146       7.361  29.177   6.802  1.00  0.43           O  
HETATM  148  O   HOH T 147     -25.544  48.830  19.034  1.00  0.43           O  
HETATM  149  O   HOH T 148     -27.173  52.889  -4.352  1.00  0.43           O  
HETATM  150  O   HOH T 149     -21.082  31.651  25.227  1.00  0.43           O  
HETATM  151  O   HOH T 150       3.725  32.256  -1.486  1.00  0.43           O  
HETATM  152  O   HOH T 151     -21.065  28.237  21.759  1.00  0.43           O  
HETATM  153  O   HOH T 152     -21.400  19.292  -4.656  1.00  0.43           O  
HETATM  154  O   HOH T 153      -6.708  35.744  -4.779  1.00  0.43           O  
HETATM  155  O   HOH T 154     -17.352  29.596   3.473  1.00  0.43           O  
HETATM  156  O   HOH T 155     -26.004  17.488   9.495  1.00  0.43           O  
HETATM  157  O   HOH T 156     -24.583  17.819   2.773  1.00  0.43           O  
HETATM  158  O   HOH T 157      -3.336  34.614  -0.484  1.00  0.44           O  
HETATM  159  O   HOH T 158     -31.609  58.098   5.389  1.00  0.44           O  
HETATM  160  O   HOH T 159     -26.974  43.902  17.914  1.00  0.44           O  
HETATM  161  O   HOH T 160     -24.751  51.931  -5.342  1.00  0.44           O  
HETATM  162  O   HOH T 161     -21.778  21.884  -5.603  1.00  0.44           O  
HETATM  163  O   HOH T 162     -15.882  38.039  24.319  1.00  0.44           O  
HETATM  164  O   HOH T 163       3.366  29.639  13.050  1.00  0.44           O  
HETATM  165  O   HOH T 164      -9.661  41.046   2.543  1.00  0.44           O  
HETATM  166  O   HOH T 165      -4.810   8.709   4.628  1.00  0.44           O  
HETATM  167  O   HOH T 166      -7.330  36.293  -2.140  1.00  0.44           O  
HETATM  168  O   HOH T 167     -10.649  31.577  11.763  1.00  0.44           O  
HETATM  169  O   HOH T 168     -24.236  31.091   1.981  1.00  0.44           O  
HETATM  170  O   HOH T 169      -7.087   8.651  15.473  1.00  0.44           O  
HETATM  171  O   HOH T 170     -31.916  38.280  15.834  1.00  0.44           O  
HETATM  172  O   HOH T 171      -6.671  44.567  18.647  1.00  0.44           O  
HETATM  173  O   HOH T 172     -19.789  23.734  -4.876  1.00  0.45           O  
HETATM  174  O   HOH T 173     -26.439  47.673  21.441  1.00  0.45           O  
HETATM  175  O   HOH T 174     -15.491  31.755  -3.490  1.00  0.45           O  
HETATM  176  O   HOH T 175     -18.001  25.266  -3.342  1.00  0.45           O  
HETATM  177  O   HOH T 176     -28.256  62.313  15.246  1.00  0.45           O  
HETATM  178  O   HOH T 177     -12.792  20.314  -8.218  1.00  0.45           O  
HETATM  179  O   HOH T 178     -13.441   4.067   6.774  1.00  0.45           O  
HETATM  180  O   HOH T 179      -9.381  44.327   1.069  1.00  0.45           O  
HETATM  181  O   HOH T 180      -5.723  35.897   0.102  1.00  0.45           O  
HETATM  182  O   HOH T 181      -6.472  19.231  -9.751  1.00  0.45           O  
HETATM  183  O   HOH T 182      -7.605  45.412  21.088  1.00  0.45           O  
HETATM  184  O   HOH T 183      -6.380  38.670   4.774  1.00  0.45           O  
HETATM  185  O   HOH T 184     -10.739  35.106   0.523  1.00  0.46           O  
HETATM  186  O   HOH T 185     -12.923  54.431   6.480  1.00  0.46           O  
HETATM  187  O   HOH T 186     -32.907  57.008   8.516  1.00  0.46           O  
HETATM  188  O   HOH T 187     -36.917  58.434  13.101  1.00  0.46           O  
HETATM  189  O   HOH T 188     -30.245  58.395  -0.964  1.00  0.46           O  
HETATM  190  O   HOH T 189     -14.812  12.877  20.542  1.00  0.46           O  
HETATM  191  O   HOH T 190     -10.576  24.827  12.966  1.00  0.46           O  
HETATM  192  O   HOH T 191     -21.924  43.114  26.587  1.00  0.46           O  
HETATM  193  O   HOH T 192     -19.000  25.599   5.945  1.00  0.46           O  
HETATM  194  O   HOH T 193     -28.689  65.016  19.154  1.00  0.46           O  
HETATM  195  O   HOH T 194      -2.328  34.828  -3.033  1.00  0.46           O  
HETATM  196  O   HOH T 195      -3.946  31.716  13.181  1.00  0.47           O  
HETATM  197  O   HOH T 196     -18.909  29.521   7.642  1.00  0.47           O  
HETATM  198  O   HOH T 197     -12.157  41.997  23.933  1.00  0.47           O  
HETATM  199  O   HOH T 198     -18.625  19.955  18.369  1.00  0.47           O  
HETATM  200  O   HOH T 199      -9.729  43.766  10.499  1.00  0.47           O  
HETATM  201  O   HOH T 200     -11.922  45.308  -2.467  1.00  0.47           O  
HETATM  202  O   HOH T 201     -13.779  39.783  24.394  1.00  0.47           O  
HETATM  203  O   HOH T 202     -23.514  45.312  26.635  1.00  0.47           O  
HETATM  204  O   HOH T 203     -20.046  29.103   3.618  1.00  0.47           O  
HETATM  205  O   HOH T 204     -26.635  37.328  24.264  1.00  0.47           O  
HETATM  206  O   HOH T 205     -24.365  27.148   8.409  1.00  0.48           O  
HETATM  207  O   HOH T 206     -18.875  26.050   8.710  1.00  0.48           O  
HETATM  208  O   HOH T 207     -29.192  38.842  15.235  1.00  0.48           O  
HETATM  209  O   HOH T 208       3.039  29.921   6.663  1.00  0.48           O  
HETATM  210  O   HOH T 209     -25.218  19.209   7.559  1.00  0.48           O  
HETATM  211  O   HOH T 210     -11.150  56.746  10.499  1.00  0.48           O  
HETATM  212  O   HOH T 211     -16.267  24.355  -6.838  1.00  0.48           O  
HETATM  213  O   HOH T 212     -26.794  52.450  -7.055  1.00  0.49           O  
HETATM  214  O   HOH T 213      -9.135  36.781  -4.180  1.00  0.49           O  
HETATM  215  O   HOH T 214     -18.501  30.750  24.391  1.00  0.49           O  
HETATM  216  O   HOH T 215      -8.865  39.666  -1.815  1.00  0.49           O  
HETATM  217  O   HOH T 216      -9.078  16.682  18.063  1.00  0.49           O  
HETATM  218  O   HOH T 217     -29.596  56.189  18.962  1.00  0.49           O  
HETATM  219  O   HOH T 218     -24.835  19.887   1.018  1.00  0.49           O  
HETATM  220  O   HOH T 219     -14.530  10.163  19.785  1.00  0.49           O  
HETATM  221  O   HOH T 220       4.588  19.889   8.290  1.00  0.49           O  
HETATM  222  O   HOH T 221     -12.773  56.978  12.688  1.00  0.49           O  
HETATM  223  O   HOH T 222      -8.999  34.450  -5.630  1.00  0.49           O  
HETATM  224  O   HOH T 223     -22.964  24.496   5.501  1.00  0.49           O  
HETATM  225  O   HOH T 224     -20.267  22.005  17.984  1.00  0.49           O  
HETATM  226  O   HOH T 225      -0.570  33.572  -4.655  1.00  0.49           O  
HETATM  227  O   HOH T 226       9.122  27.007   0.458  1.00  0.49           O  
HETATM  228  O   HOH T 227     -29.144  37.090  23.717  1.00  0.49           O  
HETATM  229  O   HOH T 228     -35.024  35.683  13.957  1.00  0.49           O  
HETATM  230  O   HOH T 229     -10.410  25.006  15.681  1.00  0.49           O  
HETATM  231  O   HOH T 230     -31.012  38.820  13.191  1.00  0.49           O  
HETATM  232  O   HOH T 231     -11.488  39.473  22.866  1.00  0.49           O  
HETATM  233  O   HOH T 232     -16.793  11.494  19.009  1.00  0.49           O  
HETATM  234  O   HOH T 233      -5.032  35.108   2.697  1.00  0.49           O  
HETATM  235  O   HOH T 234      -9.111  17.952  20.609  1.00  0.49           O  
HETATM  236  O   HOH T 235      -9.577  38.928   0.685  1.00  0.50           O  
HETATM  237  O   HOH T 236     -13.105  23.565  18.259  1.00  0.50           O  
HETATM  238  O   HOH T 237     -29.575  59.932   1.458  1.00  0.50           O  
HETATM  239  O   HOH T 238      -9.441  47.456  20.863  1.00  0.50           O  
HETATM  240  O   HOH T 239     -28.455  61.907   3.275  1.00  0.50           O  
HETATM  241  O   HOH T 240      -9.420   7.928  17.027  1.00  0.50           O  
HETATM  242  O   HOH T 241       2.926  16.642   0.662  1.00  0.50           O  
HETATM  243  O   HOH T 242     -20.691  29.117  24.389  1.00  0.50           O  
HETATM  244  O   HOH T 243     -30.761  40.609   2.687  1.00  0.51           O  
HETATM  245  O   HOH T 244     -21.701  31.249   3.008  1.00  0.51           O  
HETATM  246  O   HOH T 245     -32.756  40.556  14.489  1.00  0.51           O  
HETATM  247  O   HOH T 246      -9.925  37.050  -1.443  1.00  0.51           O  
HETATM  248  O   HOH T 247     -31.274  42.352   0.590  1.00  0.51           O  
HETATM  249  O   HOH T 248     -15.663  55.469   2.297  1.00  0.51           O  
HETATM  250  O   HOH T 249       6.763  29.368   3.971  1.00  0.51           O  
HETATM  251  O   HOH T 250      -4.185  37.372   3.971  1.00  0.51           O  
HETATM  252  O   HOH T 251     -25.771  62.650  16.680  1.00  0.51           O  
HETATM  253  O   HOH T 252     -29.196  33.360   1.622  1.00  0.51           O  
HETATM  254  O   HOH T 253     -27.497  40.007  -0.066  1.00  0.51           O  
HETATM  255  O   HOH T 254       8.631  31.441   0.857  1.00  0.51           O  
HETATM  256  O   HOH T 255     -24.441  63.937  12.685  1.00  0.51           O  
HETATM  257  O   HOH T 256     -14.456  12.264  17.871  1.00  0.51           O  
HETATM  258  O   HOH T 257     -23.663  20.527  -4.032  1.00  0.51           O  
HETATM  259  O   HOH T 258      -2.621   7.728  10.639  1.00  0.52           O  
HETATM  260  O   HOH T 259       0.504  35.842  -5.740  1.00  0.52           O  
HETATM  261  O   HOH T 260      -8.171  46.184  13.011  1.00  0.52           O  
HETATM  262  O   HOH T 261     -22.214  63.000  11.381  1.00  0.52           O  
HETATM  263  O   HOH T 262     -11.482  21.356  18.660  1.00  0.52           O  
HETATM  264  O   HOH T 263     -14.273  24.062  10.725  1.00  0.52           O  
HETATM  265  O   HOH T 264     -14.400  22.779  -8.266  1.00  0.52           O  
HETATM  266  O   HOH T 265     -13.181  62.285   5.578  1.00  0.52           O  
HETATM  267  O   HOH T 266     -31.886  58.580   2.627  1.00  0.52           O  
HETATM  268  O   HOH T 267     -25.817  50.378  21.306  1.00  0.53           O  
HETATM  269  O   HOH T 268      -4.182  34.946  -5.048  1.00  0.53           O  
HETATM  270  O   HOH T 269     -25.924  19.128  -3.879  1.00  0.53           O  
HETATM  271  O   HOH T 270      -2.142   8.490   7.240  1.00  0.53           O  
HETATM  272  O   HOH T 271     -24.270  52.649  21.006  1.00  0.53           O  
HETATM  273  O   HOH T 272     -40.427  52.149   2.886  1.00  0.53           O  
HETATM  274  O   HOH T 273     -33.923  56.759   5.886  1.00  0.53           O  
HETATM  275  O   HOH T 274      11.568  28.541  -0.073  1.00  0.53           O  
HETATM  276  O   HOH T 275     -26.743  15.249   2.432  1.00  0.54           O  
HETATM  277  O   HOH T 276     -29.143  32.234  11.072  1.00  0.54           O  
HETATM  278  O   HOH T 277     -12.987  39.581  -3.234  1.00  0.54           O  
HETATM  279  O   HOH T 278     -17.846   7.860  -7.685  1.00  0.54           O  
HETATM  280  O   HOH T 279     -25.146  33.274   0.528  1.00  0.54           O  
HETATM  281  O   HOH T 280     -11.228  57.789  14.707  1.00  0.54           O  
HETATM  282  O   HOH T 281      -5.016  42.102   4.913  1.00  0.55           O  
HETATM  283  O   HOH T 282     -27.652  27.983  13.013  1.00  0.55           O  
HETATM  284  O   HOH T 283     -17.109  33.827  -2.511  1.00  0.55           O  
HETATM  285  O   HOH T 284     -25.255  40.497  -1.604  1.00  0.55           O  
HETATM  286  O   HOH T 285     -27.432  16.266   7.305  1.00  0.55           O  
HETATM  287  O   HOH T 286      -8.011  42.130  -0.821  1.00  0.55           O  
HETATM  288  O   HOH T 287     -13.305  62.472   2.722  1.00  0.55           O  
HETATM  289  O   HOH T 288      -1.583  36.565   3.178  1.00  0.55           O  
HETATM  290  O   HOH T 289     -11.405   4.778  11.072  1.00  0.56           O  
HETATM  291  O   HOH T 290     -32.367  56.712   0.669  1.00  0.56           O  
HETATM  292  O   HOH T 291     -17.210  29.673  22.173  1.00  0.56           O  
HETATM  293  O   HOH T 292     -10.218  36.279  16.759  1.00  0.56           O  
HETATM  294  O   HOH T 293     -15.370  26.773  -5.725  1.00  0.56           O  
HETATM  295  O   HOH T 294     -21.149  36.485   1.524  1.00  0.56           O  
HETATM  296  O   HOH T 295      -5.656  42.938   7.306  1.00  0.56           O  
HETATM  297  O   HOH T 296     -31.720  33.225   5.734  1.00  0.56           O  
HETATM  298  O   HOH T 297      -7.407   3.043  -1.051  1.00  0.56           O  
HETATM  299  O   HOH T 298     -21.856  28.339   5.419  1.00  0.57           O  
HETATM  300  O   HOH T 299      -9.508  43.866  -2.602  1.00  0.57           O  
HETATM  301  O   HOH T 300      -9.838  20.468  21.002  1.00  0.57           O  
HETATM  302  O   HOH T 301     -14.628   5.592  13.850  1.00  0.57           O  
HETATM  303  O   HOH T 302     -20.257  14.442  -4.261  1.00  0.57           O  
HETATM  304  O   HOH T 303       9.061  24.294   4.935  1.00  0.57           O  
HETATM  305  O   HOH T 304     -13.554   5.758  17.050  1.00  0.58           O  
HETATM  306  O   HOH T 305     -22.723  62.651   8.660  1.00  0.58           O  
HETATM  307  O   HOH T 306     -13.950  25.783  16.850  1.00  0.58           O  
HETATM  308  O   HOH T 307     -25.129  46.973  25.224  1.00  0.58           O  
HETATM  309  O   HOH T 308     -13.163  15.120  21.184  1.00  0.58           O  
HETATM  310  O   HOH T 309     -18.155  20.957   9.423  1.00  0.60           O  
HETATM  311  O   HOH T 310     -20.992  24.607   7.424  1.00  0.60           O  
HETATM  312  O   HOH T 311      -8.571  42.964  21.944  1.00  0.61           O  
HETATM  313  O   HOH T 312       0.779  13.828   0.935  1.00  0.63           O  
TER     314      HOH T 312 
