# Supplementary material for: Accurate Prediction of Hydration Sites of Proteins Using Energy Model With Atom Embedding
Source: Front Mol Biosci. 2021 Sep 20;8:756075. doi: 10.3389/fmolb.2021.756075 (PMC8488165; doi:10.3389/fmolb.2021.756075)
Supplement: Supplementary file 1 [file DataSheet1.ZIP › Data Sheet 1/Our_result_pdb/our_dataset_output/3ESS_watersite.pdb]

HEADER                                                        XXXX


JRNL        PMID   -1
HETATM    1  O   HOH T   0       1.982  -8.170  -7.876  1.00  0.15           O  
HETATM    2  O   HOH T   1       5.460   7.654 -25.856  1.00  0.16           O  
HETATM    3  O   HOH T   2       0.188  -0.732   0.628  1.00  0.16           O  
HETATM    4  O   HOH T   3      12.361  13.916 -19.860  1.00  0.18           O  
HETATM    5  O   HOH T   4      11.553  22.033 -19.894  1.00  0.19           O  
HETATM    6  O   HOH T   5       3.296  -6.554 -12.294  1.00  0.21           O  
HETATM    7  O   HOH T   6      11.259   5.682  -4.644  1.00  0.21           O  
HETATM    8  O   HOH T   7      -7.797   0.726 -17.185  1.00  0.21           O  
HETATM    9  O   HOH T   8      11.464  24.510 -24.244  1.00  0.21           O  
HETATM   10  O   HOH T   9      -5.021  27.970 -25.731  1.00  0.21           O  
HETATM   11  O   HOH T  10      -3.975  19.134 -26.568  1.00  0.22           O  
HETATM   12  O   HOH T  11       5.071  19.149 -20.095  1.00  0.22           O  
HETATM   13  O   HOH T  12       8.816  15.989 -16.446  1.00  0.22           O  
HETATM   14  O   HOH T  13       4.072  -0.137   1.340  1.00  0.22           O  
HETATM   15  O   HOH T  14      -3.078   6.005 -16.583  1.00  0.23           O  
HETATM   16  O   HOH T  15     -18.937   0.804  -5.538  1.00  0.23           O  
HETATM   17  O   HOH T  16       3.308   5.418  -2.159  1.00  0.23           O  
HETATM   18  O   HOH T  17      -2.346 -14.040 -12.172  1.00  0.23           O  
HETATM   19  O   HOH T  18      14.543  19.809 -26.255  1.00  0.23           O  
HETATM   20  O   HOH T  19      -1.342  -3.797 -26.934  1.00  0.23           O  
HETATM   21  O   HOH T  20      -0.469  -7.550 -15.291  1.00  0.24           O  
HETATM   22  O   HOH T  21      10.401   8.189 -21.257  1.00  0.24           O  
HETATM   23  O   HOH T  22      23.619  -1.462 -22.550  1.00  0.24           O  
HETATM   24  O   HOH T  23     -17.798   1.934 -10.438  1.00  0.24           O  
HETATM   25  O   HOH T  24      11.818  -6.005 -26.825  1.00  0.25           O  
HETATM   26  O   HOH T  25       4.232   4.992  -7.186  1.00  0.25           O  
HETATM   27  O   HOH T  26      19.296   7.132 -16.117  1.00  0.25           O  
HETATM   28  O   HOH T  27       8.616 -10.088 -16.679  1.00  0.25           O  
HETATM   29  O   HOH T  28     -13.971  -1.201  -8.672  1.00  0.25           O  
HETATM   30  O   HOH T  29      -4.499   0.159  -5.736  1.00  0.25           O  
HETATM   31  O   HOH T  30      15.378  -9.157 -16.453  1.00  0.25           O  
HETATM   32  O   HOH T  31       4.460  14.614 -11.574  1.00  0.25           O  
HETATM   33  O   HOH T  32       9.833 -10.315 -21.522  1.00  0.26           O  
HETATM   34  O   HOH T  33      12.550   6.725 -20.388  1.00  0.26           O  
HETATM   35  O   HOH T  34       3.319 -11.542   3.811  1.00  0.26           O  
HETATM   36  O   HOH T  35       4.245  17.183 -10.903  1.00  0.27           O  
HETATM   37  O   HOH T  36      22.287   0.973 -38.120  1.00  0.27           O  
HETATM   38  O   HOH T  37      17.418   8.102  -4.720  1.00  0.27           O  
HETATM   39  O   HOH T  38      -5.635  -6.094 -21.624  1.00  0.27           O  
HETATM   40  O   HOH T  39      -1.705 -16.695   1.777  1.00  0.27           O  
HETATM   41  O   HOH T  40       6.479  -8.906   4.370  1.00  0.28           O  
HETATM   42  O   HOH T  41      16.788 -12.871 -13.756  1.00  0.28           O  
HETATM   43  O   HOH T  42       2.098  19.282 -24.567  1.00  0.28           O  
HETATM   44  O   HOH T  43      -0.074 -18.703 -16.783  1.00  0.28           O  
HETATM   45  O   HOH T  44      -4.650 -16.204  -4.797  1.00  0.28           O  
HETATM   46  O   HOH T  45     -13.837   1.273 -10.156  1.00  0.28           O  
HETATM   47  O   HOH T  46      -5.736  -3.207   6.374  1.00  0.28           O  
HETATM   48  O   HOH T  47       0.291  -4.094 -13.535  1.00  0.28           O  
HETATM   49  O   HOH T  48      12.151 -15.742   2.284  1.00  0.29           O  
HETATM   50  O   HOH T  49      -0.642  12.204 -14.554  1.00  0.29           O  
HETATM   51  O   HOH T  50     -14.066   1.454 -14.538  1.00  0.29           O  
HETATM   52  O   HOH T  51      14.452  25.607 -18.838  1.00  0.29           O  
HETATM   53  O   HOH T  52     -17.207  -4.181  -5.758  1.00  0.29           O  
HETATM   54  O   HOH T  53       1.786  -2.309 -23.130  1.00  0.29           O  
HETATM   55  O   HOH T  54      -8.867  -0.806  -8.234  1.00  0.30           O  
HETATM   56  O   HOH T  55      12.726  -9.900 -16.962  1.00  0.30           O  
HETATM   57  O   HOH T  56      -6.919 -22.838  -6.515  1.00  0.30           O  
HETATM   58  O   HOH T  57      12.967  -4.969   3.150  1.00  0.30           O  
HETATM   59  O   HOH T  58      19.421 -12.807 -24.216  1.00  0.30           O  
HETATM   60  O   HOH T  59      11.588  -5.571 -30.904  1.00  0.30           O  
HETATM   61  O   HOH T  60       0.473   0.089 -23.957  1.00  0.30           O  
HETATM   62  O   HOH T  61      18.473  13.983 -14.477  1.00  0.31           O  
HETATM   63  O   HOH T  62      -9.086  -0.060   0.900  1.00  0.31           O  
HETATM   64  O   HOH T  63      10.458  11.770 -23.627  1.00  0.31           O  
HETATM   65  O   HOH T  64       7.204   8.755  -8.936  1.00  0.31           O  
HETATM   66  O   HOH T  65      -1.654  -2.812 -16.878  1.00  0.31           O  
HETATM   67  O   HOH T  66       1.756   6.154 -31.599  1.00  0.31           O  
HETATM   68  O   HOH T  67      28.320  -6.137 -15.270  1.00  0.31           O  
HETATM   69  O   HOH T  68      -1.909   7.423 -25.743  1.00  0.31           O  
HETATM   70  O   HOH T  69      16.038  17.654 -25.454  1.00  0.31           O  
HETATM   71  O   HOH T  70      -6.580  37.299  -8.407  1.00  0.31           O  
HETATM   72  O   HOH T  71       1.385  -3.776   7.284  1.00  0.31           O  
HETATM   73  O   HOH T  72      10.934  22.499 -26.217  1.00  0.31           O  
HETATM   74  O   HOH T  73       2.662  21.578 -23.165  1.00  0.31           O  
HETATM   75  O   HOH T  74       8.896  -6.432   5.523  1.00  0.32           O  
HETATM   76  O   HOH T  75       3.985 -12.820   1.556  1.00  0.32           O  
HETATM   77  O   HOH T  76      17.106 -10.836 -20.804  1.00  0.32           O  
HETATM   78  O   HOH T  77     -18.151  -1.756  -4.732  1.00  0.32           O  
HETATM   79  O   HOH T  78     -11.438  -2.873  -0.425  1.00  0.33           O  
HETATM   80  O   HOH T  79      11.706  11.554 -21.215  1.00  0.33           O  
HETATM   81  O   HOH T  80      -2.435 -20.344 -16.690  1.00  0.33           O  
HETATM   82  O   HOH T  81       6.213  -6.213 -30.912  1.00  0.33           O  
HETATM   83  O   HOH T  82      13.695 -17.829  -7.085  1.00  0.33           O  
HETATM   84  O   HOH T  83      -4.376   3.630  -8.156  1.00  0.33           O  
HETATM   85  O   HOH T  84      -0.982   6.495 -29.248  1.00  0.33           O  
HETATM   86  O   HOH T  85      -2.364   0.985   7.972  1.00  0.33           O  
HETATM   87  O   HOH T  86      -1.153   8.301 -21.613  1.00  0.33           O  
HETATM   88  O   HOH T  87      15.960  14.815 -13.766  1.00  0.33           O  
HETATM   89  O   HOH T  88      -6.047 -16.002   2.353  1.00  0.33           O  
HETATM   90  O   HOH T  89     -11.815  -0.599 -18.806  1.00  0.33           O  
HETATM   91  O   HOH T  90      -0.943 -16.379 -11.706  1.00  0.34           O  
HETATM   92  O   HOH T  91      13.884   6.751 -26.979  1.00  0.34           O  
HETATM   93  O   HOH T  92      26.057  -7.782 -15.460  1.00  0.34           O  
HETATM   94  O   HOH T  93       1.654  -9.208 -32.959  1.00  0.34           O  
HETATM   95  O   HOH T  94       6.521  -1.741   3.233  1.00  0.34           O  
HETATM   96  O   HOH T  95      12.611  10.110 -23.491  1.00  0.34           O  
HETATM   97  O   HOH T  96       6.486  -2.486 -24.259  1.00  0.34           O  
HETATM   98  O   HOH T  97       4.743  10.302 -25.432  1.00  0.34           O  
HETATM   99  O   HOH T  98      -2.745 -14.166  -4.367  1.00  0.34           O  
HETATM  100  O   HOH T  99      22.914  14.044 -24.351  1.00  0.34           O  
HETATM  101  O   HOH T 100     -12.347  -6.577   0.065  1.00  0.35           O  
HETATM  102  O   HOH T 101      13.501   7.204  -4.183  1.00  0.35           O  
HETATM  103  O   HOH T 102      -0.244   0.095 -26.633  1.00  0.35           O  
HETATM  104  O   HOH T 103      23.452   3.376  -4.448  1.00  0.35           O  
HETATM  105  O   HOH T 104       7.943  -8.199 -30.239  1.00  0.35           O  
HETATM  106  O   HOH T 105       3.054  -3.967 -13.200  1.00  0.35           O  
HETATM  107  O   HOH T 106      -6.922  -9.995   7.233  1.00  0.35           O  
HETATM  108  O   HOH T 107      -3.175  25.887 -25.484  1.00  0.35           O  
HETATM  109  O   HOH T 108       3.881 -16.305  -0.850  1.00  0.35           O  
HETATM  110  O   HOH T 109       3.984   9.828 -11.371  1.00  0.35           O  
HETATM  111  O   HOH T 110      -3.301  -4.812 -17.937  1.00  0.35           O  
HETATM  112  O   HOH T 111      -1.503  -6.369  10.929  1.00  0.35           O  
HETATM  113  O   HOH T 112      10.514  31.573 -21.164  1.00  0.35           O  
HETATM  114  O   HOH T 113     -11.418 -14.500  -8.774  1.00  0.36           O  
HETATM  115  O   HOH T 114     -14.634  -7.299  -3.531  1.00  0.36           O  
HETATM  116  O   HOH T 115      11.598  24.437 -21.438  1.00  0.36           O  
HETATM  117  O   HOH T 116       4.616  -1.395   5.124  1.00  0.36           O  
HETATM  118  O   HOH T 117       6.398  16.499 -17.759  1.00  0.36           O  
HETATM  119  O   HOH T 118      16.652   2.035  -7.957  1.00  0.36           O  
HETATM  120  O   HOH T 119      25.375  -4.100 -28.654  1.00  0.36           O  
HETATM  121  O   HOH T 120       7.393 -15.336   2.728  1.00  0.36           O  
HETATM  122  O   HOH T 121      -8.244 -21.282 -13.804  1.00  0.37           O  
HETATM  123  O   HOH T 122      17.395  -1.542   0.056  1.00  0.37           O  
HETATM  124  O   HOH T 123      13.870  -9.415   7.063  1.00  0.37           O  
HETATM  125  O   HOH T 124      -6.618   2.384  -9.023  1.00  0.37           O  
HETATM  126  O   HOH T 125      -8.953 -13.565  -8.515  1.00  0.37           O  
HETATM  127  O   HOH T 126      -0.275 -18.365  -9.829  1.00  0.37           O  
HETATM  128  O   HOH T 127      20.171   9.847 -16.031  1.00  0.37           O  
HETATM  129  O   HOH T 128      -4.397   2.546  -4.370  1.00  0.38           O  
HETATM  130  O   HOH T 129      -0.579  -5.036 -21.969  1.00  0.38           O  
HETATM  131  O   HOH T 130      -4.377   5.030 -14.358  1.00  0.38           O  
HETATM  132  O   HOH T 131      -6.743   1.048  -4.095  1.00  0.38           O  
HETATM  133  O   HOH T 132      -8.962  -6.346   5.579  1.00  0.38           O  
HETATM  134  O   HOH T 133      12.990  27.931 -17.932  1.00  0.38           O  
HETATM  135  O   HOH T 134     -13.681 -14.435   2.969  1.00  0.38           O  
HETATM  136  O   HOH T 135      16.109  13.741  -8.806  1.00  0.38           O  
HETATM  137  O   HOH T 136       0.922 -15.471 -13.630  1.00  0.38           O  
HETATM  138  O   HOH T 137     -12.482  -8.433  -2.059  1.00  0.38           O  
HETATM  139  O   HOH T 138      -4.088 -22.579 -16.463  1.00  0.39           O  
HETATM  140  O   HOH T 139      21.130  15.338 -22.768  1.00  0.39           O  
HETATM  141  O   HOH T 140       0.732 -15.633   1.140  1.00  0.39           O  
HETATM  142  O   HOH T 141      -7.180  -5.864 -19.257  1.00  0.39           O  
HETATM  143  O   HOH T 142       7.898 -12.517 -17.819  1.00  0.39           O  
HETATM  144  O   HOH T 143       4.256  19.761 -10.046  1.00  0.39           O  
HETATM  145  O   HOH T 144      -0.903  -5.905 -19.323  1.00  0.39           O  
HETATM  146  O   HOH T 145      -3.557   0.214 -31.817  1.00  0.39           O  
HETATM  147  O   HOH T 146       4.461   6.063  -4.646  1.00  0.39           O  
HETATM  148  O   HOH T 147      19.966   7.781 -28.198  1.00  0.39           O  
HETATM  149  O   HOH T 148      -2.444  -4.168  12.335  1.00  0.39           O  
HETATM  150  O   HOH T 149      -2.543  16.963 -13.768  1.00  0.39           O  
HETATM  151  O   HOH T 150      17.935   8.428 -26.426  1.00  0.39           O  
HETATM  152  O   HOH T 151      17.079   0.855  -1.341  1.00  0.40           O  
HETATM  153  O   HOH T 152     -10.386 -20.287 -12.377  1.00  0.40           O  
HETATM  154  O   HOH T 153     -12.674 -13.627   0.515  1.00  0.40           O  
HETATM  155  O   HOH T 154      12.441 -13.453 -16.143  1.00  0.40           O  
HETATM  156  O   HOH T 155     -14.049  -9.331  -7.825  1.00  0.40           O  
HETATM  157  O   HOH T 156      -7.014   0.760  -6.842  1.00  0.40           O  
HETATM  158  O   HOH T 157      -8.139 -13.236  -5.899  1.00  0.41           O  
HETATM  159  O   HOH T 158      -7.698  -7.473   7.650  1.00  0.41           O  
HETATM  160  O   HOH T 159      17.180  16.173 -15.744  1.00  0.41           O  
HETATM  161  O   HOH T 160       9.655 -15.562   1.150  1.00  0.41           O  
HETATM  162  O   HOH T 161      -2.636 -17.652 -15.966  1.00  0.41           O  
HETATM  163  O   HOH T 162      20.179  -5.110 -29.084  1.00  0.41           O  
HETATM  164  O   HOH T 163      -0.411 -17.311  -3.400  1.00  0.41           O  
HETATM  165  O   HOH T 164      -2.896  17.776 -11.129  1.00  0.41           O  
HETATM  166  O   HOH T 165       8.139  30.598 -17.756  1.00  0.41           O  
HETATM  167  O   HOH T 166      15.717   2.817   0.073  1.00  0.41           O  
HETATM  168  O   HOH T 167      -5.379 -13.606  -5.288  1.00  0.41           O  
HETATM  169  O   HOH T 168     -12.379 -10.599  -3.718  1.00  0.41           O  
HETATM  170  O   HOH T 169      -0.647  -8.842 -23.185  1.00  0.42           O  
HETATM  171  O   HOH T 170      -3.375   5.856 -19.359  1.00  0.42           O  
HETATM  172  O   HOH T 171     -14.353   3.782 -11.273  1.00  0.42           O  
HETATM  173  O   HOH T 172      15.873   7.295 -25.091  1.00  0.42           O  
HETATM  174  O   HOH T 173      -2.653  12.253 -16.345  1.00  0.42           O  
HETATM  175  O   HOH T 174      -7.391 -14.201 -14.229  1.00  0.42           O  
HETATM  176  O   HOH T 175      12.230   8.293 -25.596  1.00  0.42           O  
HETATM  177  O   HOH T 176     -12.762 -21.137 -10.706  1.00  0.42           O  
HETATM  178  O   HOH T 177      18.445  10.574  -5.490  1.00  0.42           O  
HETATM  179  O   HOH T 178       6.483  12.378 -25.992  1.00  0.42           O  
HETATM  180  O   HOH T 179      -4.644 -11.591   7.784  1.00  0.42           O  
HETATM  181  O   HOH T 180      17.838  21.068 -20.118  1.00  0.42           O  
HETATM  182  O   HOH T 181      -4.393   2.968 -32.012  1.00  0.43           O  
HETATM  183  O   HOH T 182       9.818  -6.609 -28.958  1.00  0.43           O  
HETATM  184  O   HOH T 183       3.480  -1.892   7.687  1.00  0.43           O  
HETATM  185  O   HOH T 184      18.743  16.968 -25.715  1.00  0.43           O  
HETATM  186  O   HOH T 185     -12.332 -18.538 -11.395  1.00  0.43           O  
HETATM  187  O   HOH T 186      -3.167  -5.274 -20.893  1.00  0.43           O  
HETATM  188  O   HOH T 187      17.053   2.323 -31.084  1.00  0.43           O  
HETATM  189  O   HOH T 188      13.754  22.855 -18.472  1.00  0.43           O  
HETATM  190  O   HOH T 189      14.696 -11.812 -15.798  1.00  0.43           O  
HETATM  191  O   HOH T 190      -4.282  26.580 -13.076  1.00  0.43           O  
HETATM  192  O   HOH T 191      -9.292  -9.133   6.031  1.00  0.43           O  
HETATM  193  O   HOH T 192       4.718  20.171 -24.421  1.00  0.43           O  
HETATM  194  O   HOH T 193      -9.155  -0.175 -19.424  1.00  0.43           O  
HETATM  195  O   HOH T 194      -0.845 -17.022  -0.765  1.00  0.44           O  
HETATM  196  O   HOH T 195       7.927  31.844 -24.040  1.00  0.44           O  
HETATM  197  O   HOH T 196       4.136  -9.648   8.560  1.00  0.44           O  
HETATM  198  O   HOH T 197     -12.322 -15.405 -13.877  1.00  0.44           O  
HETATM  199  O   HOH T 198     -10.147 -11.612  -4.769  1.00  0.44           O  
HETATM  200  O   HOH T 199      -3.178  17.310 -20.093  1.00  0.44           O  
HETATM  201  O   HOH T 200       8.109   8.900  -6.372  1.00  0.44           O  
HETATM  202  O   HOH T 201       5.071 -14.979  -8.824  1.00  0.44           O  
HETATM  203  O   HOH T 202      18.411  -9.022 -30.247  1.00  0.44           O  
HETATM  204  O   HOH T 203      -5.072   4.097 -16.874  1.00  0.44           O  
HETATM  205  O   HOH T 204     -11.428  -1.234   1.818  1.00  0.44           O  
HETATM  206  O   HOH T 205      -1.965   2.363 -26.171  1.00  0.44           O  
HETATM  207  O   HOH T 206      -4.593   3.275 -10.928  1.00  0.45           O  
HETATM  208  O   HOH T 207      22.724  11.159 -16.287  1.00  0.45           O  
HETATM  209  O   HOH T 208      17.017 -13.062  -6.234  1.00  0.45           O  
HETATM  210  O   HOH T 209      16.890 -12.243 -23.243  1.00  0.45           O  
HETATM  211  O   HOH T 210      23.763   8.974 -17.676  1.00  0.45           O  
HETATM  212  O   HOH T 211     -11.886   2.893 -15.559  1.00  0.45           O  
HETATM  213  O   HOH T 212       8.882  -5.884 -31.501  1.00  0.45           O  
HETATM  214  O   HOH T 213       5.803  31.090 -19.318  1.00  0.45           O  
HETATM  215  O   HOH T 214     -12.617   4.736 -17.546  1.00  0.45           O  
HETATM  216  O   HOH T 215      15.539 -13.406   2.179  1.00  0.45           O  
HETATM  217  O   HOH T 216     -16.161   2.133 -12.657  1.00  0.45           O  
HETATM  218  O   HOH T 217      22.724 -13.332 -10.670  1.00  0.45           O  
HETATM  219  O   HOH T 218      -3.240   9.848 -24.863  1.00  0.45           O  
HETATM  220  O   HOH T 219      21.089   8.086 -14.200  1.00  0.46           O  
HETATM  221  O   HOH T 220      -1.631  10.724 -22.700  1.00  0.46           O  
HETATM  222  O   HOH T 221      19.917  -9.028  -5.537  1.00  0.46           O  
HETATM  223  O   HOH T 222      -2.049  18.412 -28.399  1.00  0.46           O  
HETATM  224  O   HOH T 223       2.370  -3.255   9.753  1.00  0.46           O  
HETATM  225  O   HOH T 224       9.700 -13.894 -16.031  1.00  0.46           O  
HETATM  226  O   HOH T 225      12.250   7.302 -23.109  1.00  0.46           O  
HETATM  227  O   HOH T 226       0.645  -7.493 -21.186  1.00  0.46           O  
HETATM  228  O   HOH T 227     -14.895  -5.669  -1.290  1.00  0.46           O  
HETATM  229  O   HOH T 228      -6.660 -15.632   6.761  1.00  0.47           O  
HETATM  230  O   HOH T 229       1.830  -0.575   9.636  1.00  0.47           O  
HETATM  231  O   HOH T 230      20.187  17.917 -23.534  1.00  0.47           O  
HETATM  232  O   HOH T 231      -4.798   5.872  -9.734  1.00  0.47           O  
HETATM  233  O   HOH T 232      16.999   0.819   1.437  1.00  0.47           O  
HETATM  234  O   HOH T 233      18.747  -9.664  -8.042  1.00  0.47           O  
HETATM  235  O   HOH T 234       2.904  -4.204 -24.715  1.00  0.47           O  
HETATM  236  O   HOH T 235       4.453   8.809  -8.854  1.00  0.47           O  
HETATM  237  O   HOH T 236      21.947 -15.200 -19.252  1.00  0.47           O  
HETATM  238  O   HOH T 237      12.096  -7.844  -1.858  1.00  0.47           O  
HETATM  239  O   HOH T 238     -13.081 -17.740  -8.825  1.00  0.48           O  
HETATM  240  O   HOH T 239      13.093  26.792 -15.298  1.00  0.48           O  
HETATM  241  O   HOH T 240      10.962   8.226  -3.446  1.00  0.48           O  
HETATM  242  O   HOH T 241      15.248 -16.116 -18.044  1.00  0.48           O  
HETATM  243  O   HOH T 242      -3.207  14.591 -26.961  1.00  0.48           O  
HETATM  244  O   HOH T 243      -2.728   4.589 -30.346  1.00  0.48           O  
HETATM  245  O   HOH T 244       4.652 -10.294   5.868  1.00  0.48           O  
HETATM  246  O   HOH T 245      -1.097   6.355 -31.910  1.00  0.48           O  
HETATM  247  O   HOH T 246      -4.691  17.802 -28.914  1.00  0.48           O  
HETATM  248  O   HOH T 247       0.219  29.187  -8.348  1.00  0.48           O  
HETATM  249  O   HOH T 248      -3.389  12.647 -25.057  1.00  0.49           O  
HETATM  250  O   HOH T 249       8.392  22.494 -11.380  1.00  0.49           O  
HETATM  251  O   HOH T 250      -0.225  -2.410   9.108  1.00  0.49           O  
HETATM  252  O   HOH T 251      -2.597  -1.205   9.666  1.00  0.49           O  
HETATM  253  O   HOH T 252      17.299  12.926  -6.426  1.00  0.49           O  
HETATM  254  O   HOH T 253      -4.389   5.171   4.939  1.00  0.49           O  
HETATM  255  O   HOH T 254      22.714   4.749  -6.677  1.00  0.49           O  
HETATM  256  O   HOH T 255       8.168  -1.146 -33.336  1.00  0.49           O  
HETATM  257  O   HOH T 256       9.212  32.879 -19.020  1.00  0.49           O  
HETATM  258  O   HOH T 257      20.985 -10.074 -29.956  1.00  0.49           O  
HETATM  259  O   HOH T 258      21.140   2.516  -5.839  1.00  0.49           O  
HETATM  260  O   HOH T 259       6.621  18.753 -10.995  1.00  0.49           O  
HETATM  261  O   HOH T 260      -2.891 -16.371  -2.606  1.00  0.49           O  
HETATM  262  O   HOH T 261       5.891  21.448 -11.310  1.00  0.49           O  
HETATM  263  O   HOH T 262       1.238 -17.898 -12.192  1.00  0.49           O  
HETATM  264  O   HOH T 263      -7.577 -15.558 -16.658  1.00  0.49           O  
HETATM  265  O   HOH T 264     -15.261  -0.028  -6.660  1.00  0.49           O  
HETATM  266  O   HOH T 265      -1.514 -19.419  -4.803  1.00  0.49           O  
HETATM  267  O   HOH T 266      -0.923  23.838 -10.289  1.00  0.50           O  
HETATM  268  O   HOH T 267     -17.143  -2.345  -2.295  1.00  0.50           O  
HETATM  269  O   HOH T 268       8.879  25.094 -10.628  1.00  0.50           O  
HETATM  270  O   HOH T 269      11.507  29.732 -19.302  1.00  0.50           O  
HETATM  271  O   HOH T 270      20.191  10.615 -27.834  1.00  0.50           O  
HETATM  272  O   HOH T 271      21.976  14.098 -26.997  1.00  0.50           O  
HETATM  273  O   HOH T 272      -4.366  26.904 -23.227  1.00  0.50           O  
HETATM  274  O   HOH T 273       4.790  16.344 -28.812  1.00  0.50           O  
HETATM  275  O   HOH T 274       0.168 -13.303   9.983  1.00  0.50           O  
HETATM  276  O   HOH T 275       4.857  13.580 -28.834  1.00  0.50           O  
HETATM  277  O   HOH T 276      11.515  -6.989   4.389  1.00  0.51           O  
HETATM  278  O   HOH T 277       7.314  14.428 -27.694  1.00  0.51           O  
HETATM  279  O   HOH T 278      12.241 -11.306 -22.220  1.00  0.51           O  
HETATM  280  O   HOH T 279       0.838  -5.193 -26.141  1.00  0.51           O  
HETATM  281  O   HOH T 280      18.669  -6.422 -30.904  1.00  0.51           O  
HETATM  282  O   HOH T 281      -9.160   2.424 -15.485  1.00  0.51           O  
HETATM  283  O   HOH T 282      -2.185  -6.629  13.540  1.00  0.51           O  
HETATM  284  O   HOH T 283      -2.228 -23.789 -14.850  1.00  0.51           O  
HETATM  285  O   HOH T 284      20.426  12.621 -15.930  1.00  0.51           O  
HETATM  286  O   HOH T 285      24.403  -0.694 -28.465  1.00  0.51           O  
HETATM  287  O   HOH T 286      12.311  -4.844   5.865  1.00  0.51           O  
HETATM  288  O   HOH T 287      -2.314 -21.902  -5.015  1.00  0.52           O  
HETATM  289  O   HOH T 288     -10.359   1.049  -1.352  1.00  0.52           O  
HETATM  290  O   HOH T 289      14.673 -13.798 -19.650  1.00  0.52           O  
HETATM  291  O   HOH T 290       4.786 -15.435   1.637  1.00  0.52           O  
HETATM  292  O   HOH T 291      16.191  -7.359 -30.716  1.00  0.52           O  
HETATM  293  O   HOH T 292      -0.024   1.560   9.536  1.00  0.52           O  
HETATM  294  O   HOH T 293      -3.213  -0.093 -26.378  1.00  0.52           O  
HETATM  295  O   HOH T 294      10.634 -11.764 -17.494  1.00  0.52           O  
HETATM  296  O   HOH T 295       5.124  32.372 -21.598  1.00  0.52           O  
HETATM  297  O   HOH T 296      -2.352   5.174   0.733  1.00  0.52           O  
HETATM  298  O   HOH T 297       7.797  31.940 -21.222  1.00  0.53           O  
HETATM  299  O   HOH T 298      -8.820  -9.782 -13.738  1.00  0.53           O  
HETATM  300  O   HOH T 299      17.775 -16.274  -3.842  1.00  0.53           O  
HETATM  301  O   HOH T 300      10.391  26.902 -14.664  1.00  0.53           O  
HETATM  302  O   HOH T 301      11.838 -10.418 -19.572  1.00  0.53           O  
HETATM  303  O   HOH T 302      -0.170  31.866  -7.861  1.00  0.53           O  
HETATM  304  O   HOH T 303       8.941   6.427  -5.791  1.00  0.53           O  
HETATM  305  O   HOH T 304      25.942  -1.840 -30.410  1.00  0.53           O  
HETATM  306  O   HOH T 305      24.997   6.491 -17.847  1.00  0.53           O  
HETATM  307  O   HOH T 306     -11.513 -14.645  -1.805  1.00  0.53           O  
HETATM  308  O   HOH T 307       5.713   7.398  -6.840  1.00  0.53           O  
HETATM  309  O   HOH T 308      -3.657   8.353 -20.273  1.00  0.54           O  
HETATM  310  O   HOH T 309      -3.460   1.957 -29.723  1.00  0.54           O  
HETATM  311  O   HOH T 310       9.637 -12.415 -25.144  1.00  0.54           O  
HETATM  312  O   HOH T 311      -4.174  11.399 -22.691  1.00  0.54           O  
HETATM  313  O   HOH T 312       2.646  -7.154 -31.039  1.00  0.54           O  
HETATM  314  O   HOH T 313       0.594  -2.505 -25.453  1.00  0.54           O  
HETATM  315  O   HOH T 314      -0.894  33.346  -8.589  1.00  0.54           O  
HETATM  316  O   HOH T 315      -1.587  16.504  -8.886  1.00  0.54           O  
HETATM  317  O   HOH T 316       2.191 -11.341   9.686  1.00  0.54           O  
HETATM  318  O   HOH T 317      12.103  -8.078 -29.955  1.00  0.54           O  
HETATM  319  O   HOH T 318       4.921  -8.050 -23.510  1.00  0.54           O  
HETATM  320  O   HOH T 319      17.948 -15.312 -12.186  1.00  0.54           O  
HETATM  321  O   HOH T 320      13.091  -9.303   4.493  1.00  0.55           O  
HETATM  322  O   HOH T 321      -5.649 -25.131  -7.285  1.00  0.55           O  
HETATM  323  O   HOH T 322      -5.362  -6.499 -17.220  1.00  0.55           O  
HETATM  324  O   HOH T 323       2.464   3.265   3.370  1.00  0.55           O  
HETATM  325  O   HOH T 324      -5.480   6.421 -21.067  1.00  0.55           O  
HETATM  326  O   HOH T 325     -13.688   4.177 -13.904  1.00  0.55           O  
HETATM  327  O   HOH T 326      -2.719  20.531 -12.125  1.00  0.55           O  
HETATM  328  O   HOH T 327      -2.318  -9.838 -15.534  1.00  0.56           O  
HETATM  329  O   HOH T 328      21.758  -1.434  -1.367  1.00  0.56           O  
HETATM  330  O   HOH T 329      14.324 -11.239 -20.391  1.00  0.56           O  
HETATM  331  O   HOH T 330       6.762  -9.936 -28.449  1.00  0.56           O  
HETATM  332  O   HOH T 331      21.159 -14.734 -12.229  1.00  0.56           O  
HETATM  333  O   HOH T 332       0.741  18.631 -28.450  1.00  0.56           O  
HETATM  334  O   HOH T 333      -1.598  23.528 -21.091  1.00  0.56           O  
HETATM  335  O   HOH T 334      12.251   7.393   2.555  1.00  0.56           O  
HETATM  336  O   HOH T 335      12.046 -18.577  -8.886  1.00  0.56           O  
HETATM  337  O   HOH T 336       9.798  -0.210 -35.638  1.00  0.57           O  
HETATM  338  O   HOH T 337      -5.048   8.172 -11.268  1.00  0.57           O  
HETATM  339  O   HOH T 338      -0.036  -4.745  13.615  1.00  0.57           O  
HETATM  340  O   HOH T 339      17.255 -15.547 -14.811  1.00  0.57           O  
HETATM  341  O   HOH T 340      -4.349  15.646 -18.338  1.00  0.57           O  
HETATM  342  O   HOH T 341     -13.974 -11.264  -5.822  1.00  0.57           O  
HETATM  343  O   HOH T 342      16.469  22.540 -18.170  1.00  0.57           O  
HETATM  344  O   HOH T 343      12.138   5.682 -28.672  1.00  0.58           O  
HETATM  345  O   HOH T 344      -2.658   5.198 -27.523  1.00  0.58           O  
HETATM  346  O   HOH T 345       5.401   0.870   3.639  1.00  0.58           O  
HETATM  347  O   HOH T 346       2.109 -13.793   8.250  1.00  0.58           O  
HETATM  348  O   HOH T 347     -12.227 -16.176  -6.630  1.00  0.58           O  
HETATM  349  O   HOH T 348      12.960  24.086 -14.486  1.00  0.58           O  
HETATM  350  O   HOH T 349      -4.048   4.919   1.464  1.00  0.59           O  
HETATM  351  O   HOH T 350      -1.599 -13.907 -14.832  1.00  0.59           O  
HETATM  352  O   HOH T 351     -17.031  -7.333  -2.211  1.00  0.59           O  
HETATM  353  O   HOH T 352       6.535   9.632 -30.684  1.00  0.59           O  
HETATM  354  O   HOH T 353      21.517  16.218 -25.358  1.00  0.60           O  
HETATM  355  O   HOH T 354      21.919   0.010   0.825  1.00  0.60           O  
HETATM  356  O   HOH T 355       3.181  -7.325   9.834  1.00  0.60           O  
HETATM  357  O   HOH T 356      -2.765  13.091 -29.105  1.00  0.62           O  
HETATM  358  O   HOH T 357      22.052   7.240 -16.756  1.00  0.62           O  
HETATM  359  O   HOH T 358      -1.043  15.972 -27.665  1.00  0.66           O  
TER     360      HOH T 358 
