# Supplementary material for: Accurate Prediction of Hydration Sites of Proteins Using Energy Model With Atom Embedding
Source: Front Mol Biosci. 2021 Sep 20;8:756075. doi: 10.3389/fmolb.2021.756075 (PMC8488165; doi:10.3389/fmolb.2021.756075)
Supplement: Supplementary file 1 [file DataSheet1.ZIP › Data Sheet 1/Our_result_pdb/our_dataset_output/3EWX_watersite.pdb]

HEADER                                                        XXXX


JRNL        PMID   -1
HETATM    1  O   HOH T   0      -1.191   3.012  34.743  1.00  0.13           O  
HETATM    2  O   HOH T   1      14.735  -6.532  17.548  1.00  0.16           O  
HETATM    3  O   HOH T   2       7.021  26.703  20.222  1.00  0.18           O  
HETATM    4  O   HOH T   3      20.171  26.631  42.808  1.00  0.19           O  
HETATM    5  O   HOH T   4       7.305  10.444  21.640  1.00  0.20           O  
HETATM    6  O   HOH T   5      22.985  22.964  13.040  1.00  0.20           O  
HETATM    7  O   HOH T   6      14.390  -7.537  29.005  1.00  0.20           O  
HETATM    8  O   HOH T   7      17.986  18.642  17.244  1.00  0.21           O  
HETATM    9  O   HOH T   8       2.154  -2.293  37.464  1.00  0.21           O  
HETATM   10  O   HOH T   9      25.123  26.918  22.584  1.00  0.21           O  
HETATM   11  O   HOH T  10      20.342   3.265  42.428  1.00  0.21           O  
HETATM   12  O   HOH T  11      -5.601  23.527  38.493  1.00  0.21           O  
HETATM   13  O   HOH T  12       0.880  -0.360  35.846  1.00  0.21           O  
HETATM   14  O   HOH T  13       5.307  -0.864  34.947  1.00  0.21           O  
HETATM   15  O   HOH T  14      12.712  17.112  43.237  1.00  0.21           O  
HETATM   16  O   HOH T  15      19.608  25.924  45.511  1.00  0.22           O  
HETATM   17  O   HOH T  16      -8.406  11.170  39.523  1.00  0.22           O  
HETATM   18  O   HOH T  17       8.276   3.434   9.681  1.00  0.22           O  
HETATM   19  O   HOH T  18      26.913   4.132  20.282  1.00  0.22           O  
HETATM   20  O   HOH T  19      11.269  -1.294  26.977  1.00  0.22           O  
HETATM   21  O   HOH T  20      14.487  15.700  40.092  1.00  0.22           O  
HETATM   22  O   HOH T  21      30.714   9.851  21.864  1.00  0.23           O  
HETATM   23  O   HOH T  22      17.656   4.123  42.556  1.00  0.23           O  
HETATM   24  O   HOH T  23      14.014  30.916  42.853  1.00  0.24           O  
HETATM   25  O   HOH T  24       8.749 -11.950  19.721  1.00  0.25           O  
HETATM   26  O   HOH T  25      -5.683  23.033  41.254  1.00  0.25           O  
HETATM   27  O   HOH T  26      12.537  13.832  47.238  1.00  0.25           O  
HETATM   28  O   HOH T  27      20.862  13.586  36.529  1.00  0.25           O  
HETATM   29  O   HOH T  28       8.921  32.312  43.062  1.00  0.25           O  
HETATM   30  O   HOH T  29      20.885   4.291  29.082  1.00  0.25           O  
HETATM   31  O   HOH T  30      20.778  22.334  51.709  1.00  0.25           O  
HETATM   32  O   HOH T  31       3.701   9.897   8.594  1.00  0.25           O  
HETATM   33  O   HOH T  32      -0.066   3.612  41.015  1.00  0.25           O  
HETATM   34  O   HOH T  33      14.159 -10.241  29.452  1.00  0.25           O  
HETATM   35  O   HOH T  34      14.514   2.768  12.063  1.00  0.26           O  
HETATM   36  O   HOH T  35      24.956  -0.224  42.369  1.00  0.26           O  
HETATM   37  O   HOH T  36      19.992  11.530  34.874  1.00  0.26           O  
HETATM   38  O   HOH T  37      22.543  16.979  14.601  1.00  0.26           O  
HETATM   39  O   HOH T  38      34.025  33.278  18.858  1.00  0.26           O  
HETATM   40  O   HOH T  39      15.305  36.407  30.016  1.00  0.26           O  
HETATM   41  O   HOH T  40      29.291  10.044  32.448  1.00  0.26           O  
HETATM   42  O   HOH T  41       9.524  12.914  11.411  1.00  0.26           O  
HETATM   43  O   HOH T  42      23.468  16.671  37.865  1.00  0.26           O  
HETATM   44  O   HOH T  43      20.989  27.833  25.292  1.00  0.27           O  
HETATM   45  O   HOH T  44       2.595  19.396  23.510  1.00  0.27           O  
HETATM   46  O   HOH T  45       5.826  15.434  18.388  1.00  0.27           O  
HETATM   47  O   HOH T  46      10.429  13.059  14.012  1.00  0.27           O  
HETATM   48  O   HOH T  47      27.948   6.505  39.053  1.00  0.27           O  
HETATM   49  O   HOH T  48       2.344  10.217  37.288  1.00  0.27           O  
HETATM   50  O   HOH T  49      25.343   8.204  35.786  1.00  0.27           O  
HETATM   51  O   HOH T  50       9.267   7.510   8.497  1.00  0.27           O  
HETATM   52  O   HOH T  51      29.653  15.781  21.208  1.00  0.27           O  
HETATM   53  O   HOH T  52      -6.216  10.437  23.445  1.00  0.28           O  
HETATM   54  O   HOH T  53      17.703  33.742  26.149  1.00  0.28           O  
HETATM   55  O   HOH T  54      18.185  15.900  16.592  1.00  0.28           O  
HETATM   56  O   HOH T  55       7.088  30.638  32.561  1.00  0.29           O  
HETATM   57  O   HOH T  56      16.941  27.544   8.737  1.00  0.29           O  
HETATM   58  O   HOH T  57      20.651  29.946  14.867  1.00  0.29           O  
HETATM   59  O   HOH T  58      33.107  31.726  16.762  1.00  0.29           O  
HETATM   60  O   HOH T  59       2.067  28.309  36.136  1.00  0.29           O  
HETATM   61  O   HOH T  60      -2.799  12.746  18.893  1.00  0.29           O  
HETATM   62  O   HOH T  61      13.743  21.456  11.875  1.00  0.29           O  
HETATM   63  O   HOH T  62     -13.590  10.797  22.049  1.00  0.29           O  
HETATM   64  O   HOH T  63      25.222  30.158  35.717  1.00  0.29           O  
HETATM   65  O   HOH T  64      22.230  11.598  12.528  1.00  0.29           O  
HETATM   66  O   HOH T  65      26.637  27.230  20.397  1.00  0.29           O  
HETATM   67  O   HOH T  66       6.889  -5.358  29.032  1.00  0.30           O  
HETATM   68  O   HOH T  67      31.959   4.445  24.142  1.00  0.30           O  
HETATM   69  O   HOH T  68      22.661  36.541  41.701  1.00  0.30           O  
HETATM   70  O   HOH T  69      10.515  -4.724  28.083  1.00  0.30           O  
HETATM   71  O   HOH T  70      29.473  30.676  30.815  1.00  0.30           O  
HETATM   72  O   HOH T  71      14.362  24.249  53.604  1.00  0.31           O  
HETATM   73  O   HOH T  72      17.046  17.432  48.772  1.00  0.31           O  
HETATM   74  O   HOH T  73      -8.029   4.107  27.460  1.00  0.32           O  
HETATM   75  O   HOH T  74      13.862  14.484  11.429  1.00  0.32           O  
HETATM   76  O   HOH T  75      14.586  37.601  13.051  1.00  0.32           O  
HETATM   77  O   HOH T  76       4.060  31.621  30.804  1.00  0.32           O  
HETATM   78  O   HOH T  77      22.783  29.045  13.202  1.00  0.33           O  
HETATM   79  O   HOH T  78      26.148  27.422  46.716  1.00  0.33           O  
HETATM   80  O   HOH T  79      30.183  23.553  21.075  1.00  0.33           O  
HETATM   81  O   HOH T  80       9.625  15.398  12.808  1.00  0.33           O  
HETATM   82  O   HOH T  81      30.989  11.761  23.995  1.00  0.33           O  
HETATM   83  O   HOH T  82      11.855  21.800  47.069  1.00  0.34           O  
HETATM   84  O   HOH T  83      19.480  -6.295  12.528  1.00  0.34           O  
HETATM   85  O   HOH T  84      -9.481   9.759  44.332  1.00  0.34           O  
HETATM   86  O   HOH T  85      24.470   4.596  16.595  1.00  0.34           O  
HETATM   87  O   HOH T  86       9.014  31.579  47.481  1.00  0.34           O  
HETATM   88  O   HOH T  87       5.833  17.122  16.251  1.00  0.34           O  
HETATM   89  O   HOH T  88      24.049  14.788  45.438  1.00  0.34           O  
HETATM   90  O   HOH T  89      19.949  -2.636  14.623  1.00  0.34           O  
HETATM   91  O   HOH T  90      -6.587  -2.269  35.914  1.00  0.35           O  
HETATM   92  O   HOH T  91      21.437   2.924  44.886  1.00  0.35           O  
HETATM   93  O   HOH T  92      -3.045   0.491  40.965  1.00  0.35           O  
HETATM   94  O   HOH T  93      14.641   0.327  10.741  1.00  0.35           O  
HETATM   95  O   HOH T  94      12.615   4.332  10.866  1.00  0.35           O  
HETATM   96  O   HOH T  95       6.016  28.973  21.465  1.00  0.35           O  
HETATM   97  O   HOH T  96       7.249  12.109  35.784  1.00  0.35           O  
HETATM   98  O   HOH T  97      23.532  26.973  24.680  1.00  0.35           O  
HETATM   99  O   HOH T  98      17.155  13.872  51.776  1.00  0.35           O  
HETATM  100  O   HOH T  99      25.427  10.767  36.709  1.00  0.36           O  
HETATM  101  O   HOH T 100      29.647   3.654  36.994  1.00  0.36           O  
HETATM  102  O   HOH T 101      22.639  16.011  47.564  1.00  0.36           O  
HETATM  103  O   HOH T 102      -7.873  11.887  21.634  1.00  0.36           O  
HETATM  104  O   HOH T 103      -7.347   2.978  29.988  1.00  0.36           O  
HETATM  105  O   HOH T 104      12.979  27.424  34.440  1.00  0.36           O  
HETATM  106  O   HOH T 105      -2.043  10.992  43.359  1.00  0.36           O  
HETATM  107  O   HOH T 106       2.289  -8.352  19.355  1.00  0.36           O  
HETATM  108  O   HOH T 107       4.633  26.489  21.610  1.00  0.36           O  
HETATM  109  O   HOH T 108      -0.681  14.008  20.072  1.00  0.37           O  
HETATM  110  O   HOH T 109      27.137  33.360  25.153  1.00  0.37           O  
HETATM  111  O   HOH T 110      21.884   6.995  47.942  1.00  0.37           O  
HETATM  112  O   HOH T 111      13.752  33.752  43.030  1.00  0.37           O  
HETATM  113  O   HOH T 112      23.170  12.633  41.009  1.00  0.37           O  
HETATM  114  O   HOH T 113       9.054  -8.229  19.901  1.00  0.37           O  
HETATM  115  O   HOH T 114      -1.879  12.909  15.048  1.00  0.37           O  
HETATM  116  O   HOH T 115      20.312  16.704  12.880  1.00  0.37           O  
HETATM  117  O   HOH T 116      -8.815  19.193  44.238  1.00  0.37           O  
HETATM  118  O   HOH T 117      11.470  -1.318  29.946  1.00  0.37           O  
HETATM  119  O   HOH T 118      31.126   2.691  31.020  1.00  0.38           O  
HETATM  120  O   HOH T 119      30.493  32.653  16.990  1.00  0.38           O  
HETATM  121  O   HOH T 120      24.362  30.780  38.181  1.00  0.38           O  
HETATM  122  O   HOH T 121      27.663  23.597  22.194  1.00  0.38           O  
HETATM  123  O   HOH T 122      10.502   5.552  49.378  1.00  0.38           O  
HETATM  124  O   HOH T 123       8.988  10.081   7.422  1.00  0.38           O  
HETATM  125  O   HOH T 124     -13.831  12.878  43.223  1.00  0.38           O  
HETATM  126  O   HOH T 125      23.336  21.948  27.422  1.00  0.38           O  
HETATM  127  O   HOH T 126      19.412  30.682  40.898  1.00  0.38           O  
HETATM  128  O   HOH T 127      20.390  19.906  45.827  1.00  0.39           O  
HETATM  129  O   HOH T 128      29.647  25.862  33.442  1.00  0.39           O  
HETATM  130  O   HOH T 129      19.575   9.883  51.022  1.00  0.39           O  
HETATM  131  O   HOH T 130      21.582  14.910  41.148  1.00  0.39           O  
HETATM  132  O   HOH T 131      29.243   0.893  27.442  1.00  0.39           O  
HETATM  133  O   HOH T 132       1.519  29.758  29.076  1.00  0.39           O  
HETATM  134  O   HOH T 133      29.301   1.120  32.461  1.00  0.40           O  
HETATM  135  O   HOH T 134       2.331  30.343  26.493  1.00  0.40           O  
HETATM  136  O   HOH T 135      -8.815  13.895  43.435  1.00  0.40           O  
HETATM  137  O   HOH T 136       5.243  12.057  44.075  1.00  0.40           O  
HETATM  138  O   HOH T 137      19.941   8.900  48.512  1.00  0.40           O  
HETATM  139  O   HOH T 138       9.922  23.727  46.697  1.00  0.40           O  
HETATM  140  O   HOH T 139       6.730  17.303   7.871  1.00  0.40           O  
HETATM  141  O   HOH T 140     -10.972   7.522  38.680  1.00  0.40           O  
HETATM  142  O   HOH T 141      21.481  10.982  47.965  1.00  0.40           O  
HETATM  143  O   HOH T 142      -2.387  28.310  35.335  1.00  0.40           O  
HETATM  144  O   HOH T 143       9.556  21.724  48.456  1.00  0.41           O  
HETATM  145  O   HOH T 144      33.952   3.300  30.989  1.00  0.41           O  
HETATM  146  O   HOH T 145      30.039  11.131  19.490  1.00  0.41           O  
HETATM  147  O   HOH T 146      26.784  34.869  43.685  1.00  0.41           O  
HETATM  148  O   HOH T 147      -1.088  10.782  13.467  1.00  0.41           O  
HETATM  149  O   HOH T 148      16.822  -1.444  11.045  1.00  0.41           O  
HETATM  150  O   HOH T 149      10.169   5.481  10.182  1.00  0.41           O  
HETATM  151  O   HOH T 150      19.746  10.638  11.541  1.00  0.41           O  
HETATM  152  O   HOH T 151      24.983  20.571  23.557  1.00  0.42           O  
HETATM  153  O   HOH T 152      14.505  34.949  13.943  1.00  0.42           O  
HETATM  154  O   HOH T 153       3.915   5.175  13.144  1.00  0.42           O  
HETATM  155  O   HOH T 154      -5.143   1.496  23.657  1.00  0.42           O  
HETATM  156  O   HOH T 155      25.920   7.362  40.489  1.00  0.42           O  
HETATM  157  O   HOH T 156       8.146  16.978  14.583  1.00  0.42           O  
HETATM  158  O   HOH T 157      -9.586  11.495  42.116  1.00  0.42           O  
HETATM  159  O   HOH T 158      28.791  29.796  28.221  1.00  0.42           O  
HETATM  160  O   HOH T 159      17.790  16.849  13.953  1.00  0.42           O  
HETATM  161  O   HOH T 160      29.711  32.384  24.605  1.00  0.42           O  
HETATM  162  O   HOH T 161       5.702  31.656  34.789  1.00  0.42           O  
HETATM  163  O   HOH T 162       7.090  -6.978  14.322  1.00  0.43           O  
HETATM  164  O   HOH T 163     -15.652  15.087  42.990  1.00  0.43           O  
HETATM  165  O   HOH T 164      24.727  20.633  47.944  1.00  0.43           O  
HETATM  166  O   HOH T 165      16.464  35.689  27.611  1.00  0.43           O  
HETATM  167  O   HOH T 166       4.595  -0.368  32.373  1.00  0.43           O  
HETATM  168  O   HOH T 167     -13.695   5.069  37.585  1.00  0.43           O  
HETATM  169  O   HOH T 168       9.696   6.181  51.924  1.00  0.43           O  
HETATM  170  O   HOH T 169      23.495  29.449  28.860  1.00  0.43           O  
HETATM  171  O   HOH T 170      17.311   8.251  53.521  1.00  0.43           O  
HETATM  172  O   HOH T 171      14.872   9.663  53.148  1.00  0.43           O  
HETATM  173  O   HOH T 172      19.215  22.011  21.648  1.00  0.43           O  
HETATM  174  O   HOH T 173      -1.543   2.021  42.795  1.00  0.43           O  
HETATM  175  O   HOH T 174      16.967  16.709  51.514  1.00  0.43           O  
HETATM  176  O   HOH T 175      22.845  13.245  47.367  1.00  0.43           O  
HETATM  177  O   HOH T 176      -5.144  -1.022  22.659  1.00  0.43           O  
HETATM  178  O   HOH T 177      25.217  25.286  42.948  1.00  0.43           O  
HETATM  179  O   HOH T 178      23.783   1.470  44.175  1.00  0.43           O  
HETATM  180  O   HOH T 179      14.422  21.174  48.182  1.00  0.44           O  
HETATM  181  O   HOH T 180       6.214  33.133  31.546  1.00  0.44           O  
HETATM  182  O   HOH T 181       3.868  15.005  16.376  1.00  0.44           O  
HETATM  183  O   HOH T 182       6.429  33.397  42.256  1.00  0.44           O  
HETATM  184  O   HOH T 183      -8.823   2.423  37.316  1.00  0.44           O  
HETATM  185  O   HOH T 184      14.007   8.128   7.940  1.00  0.44           O  
HETATM  186  O   HOH T 185      20.884  16.488  38.985  1.00  0.44           O  
HETATM  187  O   HOH T 186      -8.032  19.802  29.366  1.00  0.44           O  
HETATM  188  O   HOH T 187       2.699  32.256  28.495  1.00  0.44           O  
HETATM  189  O   HOH T 188      10.632  30.258  49.314  1.00  0.44           O  
HETATM  190  O   HOH T 189      25.460  22.010  13.069  1.00  0.44           O  
HETATM  191  O   HOH T 190      22.928  18.685  46.704  1.00  0.45           O  
HETATM  192  O   HOH T 191       5.261  13.700  46.211  1.00  0.45           O  
HETATM  193  O   HOH T 192      -8.242  -0.016  36.234  1.00  0.45           O  
HETATM  194  O   HOH T 193      -0.627  30.164  48.168  1.00  0.45           O  
HETATM  195  O   HOH T 194      21.328  -4.430  12.921  1.00  0.45           O  
HETATM  196  O   HOH T 195      11.486   9.136   8.111  1.00  0.45           O  
HETATM  197  O   HOH T 196      24.325  14.756  14.988  1.00  0.45           O  
HETATM  198  O   HOH T 197      17.906   5.493  53.588  1.00  0.46           O  
HETATM  199  O   HOH T 198      25.381  -2.806  43.276  1.00  0.46           O  
HETATM  200  O   HOH T 199      27.367  25.803  23.882  1.00  0.46           O  
HETATM  201  O   HOH T 200      11.613  32.271  43.719  1.00  0.46           O  
HETATM  202  O   HOH T 201       7.578  -9.418  15.530  1.00  0.46           O  
HETATM  203  O   HOH T 202      16.067   6.566  55.380  1.00  0.46           O  
HETATM  204  O   HOH T 203      30.870  13.639  20.027  1.00  0.46           O  
HETATM  205  O   HOH T 204      31.336  33.760  19.391  1.00  0.46           O  
HETATM  206  O   HOH T 205      30.676  14.572  23.538  1.00  0.46           O  
HETATM  207  O   HOH T 206      -1.031  30.077  29.748  1.00  0.47           O  
HETATM  208  O   HOH T 207      14.922  12.191  51.961  1.00  0.47           O  
HETATM  209  O   HOH T 208      15.957  12.050   8.025  1.00  0.47           O  
HETATM  210  O   HOH T 209      -5.799  25.567  40.412  1.00  0.47           O  
HETATM  211  O   HOH T 210      -0.382  30.130  27.117  1.00  0.47           O  
HETATM  212  O   HOH T 211      28.151   2.634  18.318  1.00  0.47           O  
HETATM  213  O   HOH T 212      19.995  17.554  15.565  1.00  0.47           O  
HETATM  214  O   HOH T 213      13.599   7.843  54.915  1.00  0.47           O  
HETATM  215  O   HOH T 214      30.519  31.684  27.172  1.00  0.47           O  
HETATM  216  O   HOH T 215      -8.239   1.357  27.959  1.00  0.47           O  
HETATM  217  O   HOH T 216      -7.912  -1.891  38.274  1.00  0.47           O  
HETATM  218  O   HOH T 217      16.573   3.089  52.929  1.00  0.47           O  
HETATM  219  O   HOH T 218      30.049   1.660  35.109  1.00  0.48           O  
HETATM  220  O   HOH T 219      20.205  29.318  12.155  1.00  0.48           O  
HETATM  221  O   HOH T 220      31.910  31.461  29.629  1.00  0.48           O  
HETATM  222  O   HOH T 221      25.416  32.540  44.391  1.00  0.48           O  
HETATM  223  O   HOH T 222      27.060   6.729  42.956  1.00  0.48           O  
HETATM  224  O   HOH T 223      -7.812   5.789  42.842  1.00  0.48           O  
HETATM  225  O   HOH T 224      26.741  32.731  41.913  1.00  0.48           O  
HETATM  226  O   HOH T 225      22.782  21.405  46.055  1.00  0.48           O  
HETATM  227  O   HOH T 226      26.649   3.013  16.046  1.00  0.49           O  
HETATM  228  O   HOH T 227      11.642   7.962  48.851  1.00  0.49           O  
HETATM  229  O   HOH T 228      29.192  19.318  31.417  1.00  0.49           O  
HETATM  230  O   HOH T 229      26.743   8.784  38.133  1.00  0.49           O  
HETATM  231  O   HOH T 230      13.813  36.427  27.674  1.00  0.49           O  
HETATM  232  O   HOH T 231      -6.645  -1.523  20.311  1.00  0.49           O  
HETATM  233  O   HOH T 232      16.024  25.383   7.175  1.00  0.49           O  
HETATM  234  O   HOH T 233      11.856  34.940  12.915  1.00  0.49           O  
HETATM  235  O   HOH T 234     -15.538  14.605  21.760  1.00  0.49           O  
HETATM  236  O   HOH T 235      30.284  12.805  26.583  1.00  0.49           O  
HETATM  237  O   HOH T 236      12.958  28.582  14.239  1.00  0.50           O  
HETATM  238  O   HOH T 237      13.718  25.267   8.744  1.00  0.50           O  
HETATM  239  O   HOH T 238       9.051  -1.809   9.152  1.00  0.50           O  
HETATM  240  O   HOH T 239      28.829   4.067  39.674  1.00  0.50           O  
HETATM  241  O   HOH T 240      10.946 -10.249  19.636  1.00  0.50           O  
HETATM  242  O   HOH T 241       8.098   0.662   9.791  1.00  0.50           O  
HETATM  243  O   HOH T 242      13.002  15.555   8.966  1.00  0.50           O  
HETATM  244  O   HOH T 243       0.010   4.750  15.454  1.00  0.50           O  
HETATM  245  O   HOH T 244       0.308   9.586  44.006  1.00  0.50           O  
HETATM  246  O   HOH T 245      11.769   6.385   7.999  1.00  0.50           O  
HETATM  247  O   HOH T 246      14.267   5.600   9.061  1.00  0.50           O  
HETATM  248  O   HOH T 247      23.436  12.538  36.932  1.00  0.50           O  
HETATM  249  O   HOH T 248       2.960  10.402  44.089  1.00  0.50           O  
HETATM  250  O   HOH T 249     -13.650  13.289  23.447  1.00  0.51           O  
HETATM  251  O   HOH T 250      11.737  -2.608   9.097  1.00  0.51           O  
HETATM  252  O   HOH T 251      16.219  -5.778  27.976  1.00  0.51           O  
HETATM  253  O   HOH T 252     -13.082   9.016  41.633  1.00  0.51           O  
HETATM  254  O   HOH T 253      19.482  20.144  52.934  1.00  0.51           O  
HETATM  255  O   HOH T 254       1.942  11.793  35.104  1.00  0.51           O  
HETATM  256  O   HOH T 255       7.683  -8.058  22.350  1.00  0.51           O  
HETATM  257  O   HOH T 256      34.316   5.542  24.959  1.00  0.51           O  
HETATM  258  O   HOH T 257       3.429  -0.180  12.838  1.00  0.51           O  
HETATM  259  O   HOH T 258      -7.899  23.464  36.927  1.00  0.51           O  
HETATM  260  O   HOH T 259      14.066  -2.452   7.455  1.00  0.51           O  
HETATM  261  O   HOH T 260       1.098   4.165  12.585  1.00  0.51           O  
HETATM  262  O   HOH T 261      19.684   7.860  11.787  1.00  0.51           O  
HETATM  263  O   HOH T 262      29.376  33.066  29.332  1.00  0.51           O  
HETATM  264  O   HOH T 263      27.329  34.076  22.449  1.00  0.51           O  
HETATM  265  O   HOH T 264      -3.172  12.261  45.510  1.00  0.51           O  
HETATM  266  O   HOH T 265      29.080  14.502  33.951  1.00  0.51           O  
HETATM  267  O   HOH T 266      29.506  15.559  31.241  1.00  0.52           O  
HETATM  268  O   HOH T 267      31.623   9.195  33.805  1.00  0.52           O  
HETATM  269  O   HOH T 268       3.103  19.485  20.802  1.00  0.52           O  
HETATM  270  O   HOH T 269      10.450  32.285  21.122  1.00  0.52           O  
HETATM  271  O   HOH T 270     -10.012   3.101  29.126  1.00  0.52           O  
HETATM  272  O   HOH T 271      -0.934  29.599  37.200  1.00  0.52           O  
HETATM  273  O   HOH T 272      14.298  -2.421  10.202  1.00  0.52           O  
HETATM  274  O   HOH T 273       4.774  33.860  29.341  1.00  0.53           O  
HETATM  275  O   HOH T 274       3.316  30.830  35.931  1.00  0.53           O  
HETATM  276  O   HOH T 275      31.699  24.717  34.984  1.00  0.53           O  
HETATM  277  O   HOH T 276       1.485  -5.891  20.287  1.00  0.53           O  
HETATM  278  O   HOH T 277      24.925  13.876  42.907  1.00  0.53           O  
HETATM  279  O   HOH T 278      19.314   7.271  51.901  1.00  0.53           O  
HETATM  280  O   HOH T 279      32.546   3.786  33.289  1.00  0.53           O  
HETATM  281  O   HOH T 280      27.229   0.229  40.921  1.00  0.53           O  
HETATM  282  O   HOH T 281      28.648  26.421  46.229  1.00  0.53           O  
HETATM  283  O   HOH T 282      -4.789  27.719  34.081  1.00  0.53           O  
HETATM  284  O   HOH T 283      -0.000  15.277  46.350  1.00  0.53           O  
HETATM  285  O   HOH T 284      31.628  -0.038  28.398  1.00  0.54           O  
HETATM  286  O   HOH T 285       8.787  22.904  15.152  1.00  0.54           O  
HETATM  287  O   HOH T 286      28.852  25.943  21.499  1.00  0.54           O  
HETATM  288  O   HOH T 287      26.654  22.636  48.574  1.00  0.54           O  
HETATM  289  O   HOH T 288      22.616  36.577  34.723  1.00  0.54           O  
HETATM  290  O   HOH T 289      -1.888  30.227  43.751  1.00  0.54           O  
HETATM  291  O   HOH T 290      32.409  15.404  21.622  1.00  0.54           O  
HETATM  292  O   HOH T 291      25.356  35.471  25.070  1.00  0.54           O  
HETATM  293  O   HOH T 292     -14.720  16.930  20.291  1.00  0.54           O  
HETATM  294  O   HOH T 293      29.869  24.559  23.585  1.00  0.54           O  
HETATM  295  O   HOH T 294      34.142   0.023  27.507  1.00  0.54           O  
HETATM  296  O   HOH T 295      26.460  24.597  46.424  1.00  0.54           O  
HETATM  297  O   HOH T 296      24.465  34.302  42.132  1.00  0.54           O  
HETATM  298  O   HOH T 297     -10.476   6.600  26.751  1.00  0.54           O  
HETATM  299  O   HOH T 298     -11.495   3.311  37.303  1.00  0.54           O  
HETATM  300  O   HOH T 299      31.819   9.887  29.265  1.00  0.55           O  
HETATM  301  O   HOH T 300      24.166   2.351  14.959  1.00  0.55           O  
HETATM  302  O   HOH T 301     -12.186  13.741  28.515  1.00  0.55           O  
HETATM  303  O   HOH T 302      10.488  15.236  10.187  1.00  0.55           O  
HETATM  304  O   HOH T 303     -10.501  19.479  38.062  1.00  0.55           O  
HETATM  305  O   HOH T 304       6.830 -13.787  19.118  1.00  0.55           O  
HETATM  306  O   HOH T 305       4.073  30.661  20.405  1.00  0.56           O  
HETATM  307  O   HOH T 306      22.477  14.190  38.750  1.00  0.56           O  
HETATM  308  O   HOH T 307      27.554  29.202  34.784  1.00  0.56           O  
HETATM  309  O   HOH T 308       6.582  26.059  17.504  1.00  0.56           O  
HETATM  310  O   HOH T 309       1.992  22.046  23.338  1.00  0.56           O  
HETATM  311  O   HOH T 310      22.749  -2.802  14.467  1.00  0.56           O  
HETATM  312  O   HOH T 311       0.821  15.406  21.885  1.00  0.56           O  
HETATM  313  O   HOH T 312      22.603  36.560  29.867  1.00  0.56           O  
HETATM  314  O   HOH T 313       4.896  -0.881  16.230  1.00  0.56           O  
HETATM  315  O   HOH T 314      11.378  32.446  17.812  1.00  0.56           O  
HETATM  316  O   HOH T 315      26.695  22.678  15.366  1.00  0.56           O  
HETATM  317  O   HOH T 316      -0.747   7.388  45.381  1.00  0.57           O  
HETATM  318  O   HOH T 317       6.442   0.019  12.961  1.00  0.57           O  
HETATM  319  O   HOH T 318       9.704   9.015  52.025  1.00  0.58           O  
HETATM  320  O   HOH T 319      22.695  21.307  24.883  1.00  0.58           O  
HETATM  321  O   HOH T 320      33.155  10.486  22.733  1.00  0.58           O  
HETATM  322  O   HOH T 321       7.543  34.332  44.518  1.00  0.58           O  
HETATM  323  O   HOH T 322      -3.934   9.595  46.191  1.00  0.58           O  
HETATM  324  O   HOH T 323      19.334  12.175  52.569  1.00  0.59           O  
HETATM  325  O   HOH T 324      11.236  15.593  48.733  1.00  0.60           O  
HETATM  326  O   HOH T 325       7.917  34.085  47.087  1.00  0.61           O  
TER     327      HOH T 325 
