# Supplementary material for: Accurate Prediction of Hydration Sites of Proteins Using Energy Model With Atom Embedding
Source: Front Mol Biosci. 2021 Sep 20;8:756075. doi: 10.3389/fmolb.2021.756075 (PMC8488165; doi:10.3389/fmolb.2021.756075)
Supplement: Supplementary file 1 [file DataSheet1.ZIP › Data Sheet 1/Our_result_pdb/our_dataset_output/3EYE_watersite.pdb]

HEADER                                                        XXXX


JRNL        PMID   -1
HETATM    1  O   HOH T   0      19.655  25.118  12.646  1.00  0.19           O  
HETATM    2  O   HOH T   1      15.271  36.568  17.799  1.00  0.19           O  
HETATM    3  O   HOH T   2       8.924  20.777  31.940  1.00  0.19           O  
HETATM    4  O   HOH T   3       6.492  35.044  25.198  1.00  0.20           O  
HETATM    5  O   HOH T   4       4.656  24.638  36.754  1.00  0.20           O  
HETATM    6  O   HOH T   5      11.597  23.170  27.651  1.00  0.21           O  
HETATM    7  O   HOH T   6       3.057  17.341  26.058  1.00  0.21           O  
HETATM    8  O   HOH T   7      22.983   7.674  19.672  1.00  0.22           O  
HETATM    9  O   HOH T   8     -11.463  20.370  29.424  1.00  0.23           O  
HETATM   10  O   HOH T   9      -1.231  33.321  37.326  1.00  0.23           O  
HETATM   11  O   HOH T  10      -0.993  20.160   7.480  1.00  0.23           O  
HETATM   12  O   HOH T  11      20.610  31.646  15.991  1.00  0.23           O  
HETATM   13  O   HOH T  12     -17.483  33.542  19.188  1.00  0.23           O  
HETATM   14  O   HOH T  13      12.513  31.692  29.788  1.00  0.24           O  
HETATM   15  O   HOH T  14       6.472  15.420  20.248  1.00  0.24           O  
HETATM   16  O   HOH T  15       1.743  35.096  13.664  1.00  0.24           O  
HETATM   17  O   HOH T  16       5.422  40.754  29.764  1.00  0.25           O  
HETATM   18  O   HOH T  17      11.340  25.920  21.060  1.00  0.25           O  
HETATM   19  O   HOH T  18      12.183  23.485   2.920  1.00  0.25           O  
HETATM   20  O   HOH T  19       9.604  19.564  34.348  1.00  0.26           O  
HETATM   21  O   HOH T  20      20.638   7.786  12.751  1.00  0.26           O  
HETATM   22  O   HOH T  21      22.794  26.796   9.858  1.00  0.26           O  
HETATM   23  O   HOH T  22       8.873  30.660  43.159  1.00  0.27           O  
HETATM   24  O   HOH T  23     -13.572  24.467  14.094  1.00  0.27           O  
HETATM   25  O   HOH T  24      29.229  13.826  16.166  1.00  0.27           O  
HETATM   26  O   HOH T  25       2.626   5.178  22.463  1.00  0.27           O  
HETATM   27  O   HOH T  26      -1.039  16.431  29.963  1.00  0.28           O  
HETATM   28  O   HOH T  27      22.426  11.698  21.363  1.00  0.28           O  
HETATM   29  O   HOH T  28      -6.703  22.111  11.498  1.00  0.28           O  
HETATM   30  O   HOH T  29      18.905  29.762  12.116  1.00  0.28           O  
HETATM   31  O   HOH T  30      -3.045  17.020   3.339  1.00  0.29           O  
HETATM   32  O   HOH T  31       4.901  12.293  21.016  1.00  0.29           O  
HETATM   33  O   HOH T  32      17.054  25.579  13.602  1.00  0.29           O  
HETATM   34  O   HOH T  33      -0.394  12.915  32.502  1.00  0.29           O  
HETATM   35  O   HOH T  34     -11.374  19.367  17.240  1.00  0.29           O  
HETATM   36  O   HOH T  35      13.648  12.931  14.873  1.00  0.29           O  
HETATM   37  O   HOH T  36      -1.012  26.982  10.617  1.00  0.29           O  
HETATM   38  O   HOH T  37      16.082  34.231   4.975  1.00  0.29           O  
HETATM   39  O   HOH T  38      -6.506  25.052  16.174  1.00  0.29           O  
HETATM   40  O   HOH T  39      20.171   8.380  15.465  1.00  0.30           O  
HETATM   41  O   HOH T  40      -3.479  17.579   7.205  1.00  0.30           O  
HETATM   42  O   HOH T  41       5.170  22.894   0.575  1.00  0.30           O  
HETATM   43  O   HOH T  42      17.483  25.754  16.308  1.00  0.30           O  
HETATM   44  O   HOH T  43      15.879  25.354  27.571  1.00  0.30           O  
HETATM   45  O   HOH T  44       1.409  25.935  11.071  1.00  0.30           O  
HETATM   46  O   HOH T  45      22.770  28.141  21.745  1.00  0.30           O  
HETATM   47  O   HOH T  46       7.656  28.145  40.662  1.00  0.31           O  
HETATM   48  O   HOH T  47      -0.022  38.043  29.919  1.00  0.31           O  
HETATM   49  O   HOH T  48       9.413  23.930   2.637  1.00  0.31           O  
HETATM   50  O   HOH T  49      19.492  22.202   5.372  1.00  0.32           O  
HETATM   51  O   HOH T  50     -11.047  27.115  15.336  1.00  0.32           O  
HETATM   52  O   HOH T  51      21.755  10.583   8.747  1.00  0.32           O  
HETATM   53  O   HOH T  52      28.712  18.408  13.817  1.00  0.32           O  
HETATM   54  O   HOH T  53       5.431  41.369  12.132  1.00  0.33           O  
HETATM   55  O   HOH T  54       6.662  11.672  23.070  1.00  0.33           O  
HETATM   56  O   HOH T  55      20.253  34.390  16.231  1.00  0.33           O  
HETATM   57  O   HOH T  56       8.020  34.849  12.926  1.00  0.33           O  
HETATM   58  O   HOH T  57      -9.162  18.921  15.451  1.00  0.33           O  
HETATM   59  O   HOH T  58     -15.478  34.114  23.996  1.00  0.33           O  
HETATM   60  O   HOH T  59       6.209  39.261  13.920  1.00  0.33           O  
HETATM   61  O   HOH T  60      11.753  26.118  35.853  1.00  0.34           O  
HETATM   62  O   HOH T  61      16.539  32.815  22.789  1.00  0.34           O  
HETATM   63  O   HOH T  62      22.406  35.263  17.739  1.00  0.34           O  
HETATM   64  O   HOH T  63       6.625  10.311  37.507  1.00  0.34           O  
HETATM   65  O   HOH T  64      -0.220  35.645  26.467  1.00  0.34           O  
HETATM   66  O   HOH T  65      27.204  15.369   9.653  1.00  0.34           O  
HETATM   67  O   HOH T  66      13.947  15.697  23.219  1.00  0.34           O  
HETATM   68  O   HOH T  67     -12.878  14.748  17.902  1.00  0.34           O  
HETATM   69  O   HOH T  68      10.625   2.736  12.016  1.00  0.34           O  
HETATM   70  O   HOH T  69      26.611  14.420  12.190  1.00  0.35           O  
HETATM   71  O   HOH T  70      26.829  10.604  12.149  1.00  0.35           O  
HETATM   72  O   HOH T  71      -4.806  10.760  24.269  1.00  0.35           O  
HETATM   73  O   HOH T  72       7.363  37.424  26.332  1.00  0.35           O  
HETATM   74  O   HOH T  73      13.503  33.418  31.707  1.00  0.35           O  
HETATM   75  O   HOH T  74      -0.622   8.741  31.698  1.00  0.35           O  
HETATM   76  O   HOH T  75       9.891   8.246  28.744  1.00  0.35           O  
HETATM   77  O   HOH T  76      26.722  16.933   7.322  1.00  0.35           O  
HETATM   78  O   HOH T  77       6.782   9.008  16.373  1.00  0.36           O  
HETATM   79  O   HOH T  78      15.831  39.085  18.892  1.00  0.36           O  
HETATM   80  O   HOH T  79       0.293  23.893  -4.236  1.00  0.36           O  
HETATM   81  O   HOH T  80      -3.367  14.397  26.383  1.00  0.36           O  
HETATM   82  O   HOH T  81       3.465  19.380  36.435  1.00  0.36           O  
HETATM   83  O   HOH T  82      -8.264  19.990  10.855  1.00  0.36           O  
HETATM   84  O   HOH T  83       3.770   8.283  26.753  1.00  0.36           O  
HETATM   85  O   HOH T  84      24.386  16.494   5.762  1.00  0.36           O  
HETATM   86  O   HOH T  85       1.308  26.134   3.554  1.00  0.36           O  
HETATM   87  O   HOH T  86      -4.809  26.275   9.571  1.00  0.36           O  
HETATM   88  O   HOH T  87      16.106  37.874   8.693  1.00  0.37           O  
HETATM   89  O   HOH T  88       5.767  38.341  28.329  1.00  0.37           O  
HETATM   90  O   HOH T  89      12.250   4.681  10.791  1.00  0.37           O  
HETATM   91  O   HOH T  90       1.705  27.558  33.485  1.00  0.37           O  
HETATM   92  O   HOH T  91       0.716  11.692  34.726  1.00  0.37           O  
HETATM   93  O   HOH T  92       9.875  38.130  20.680  1.00  0.38           O  
HETATM   94  O   HOH T  93      20.334  20.982  18.126  1.00  0.38           O  
HETATM   95  O   HOH T  94      14.890  26.170  30.020  1.00  0.38           O  
HETATM   96  O   HOH T  95      -7.956  29.379  32.246  1.00  0.38           O  
HETATM   97  O   HOH T  96       2.300  40.208  19.227  1.00  0.38           O  
HETATM   98  O   HOH T  97       1.714  33.093  11.733  1.00  0.38           O  
HETATM   99  O   HOH T  98      20.142  30.518   9.714  1.00  0.39           O  
HETATM  100  O   HOH T  99     -11.609  26.404  22.615  1.00  0.39           O  
HETATM  101  O   HOH T 100       8.968  11.263  38.542  1.00  0.39           O  
HETATM  102  O   HOH T 101      -1.778  37.199  21.595  1.00  0.40           O  
HETATM  103  O   HOH T 102      -8.420  20.973  13.468  1.00  0.40           O  
HETATM  104  O   HOH T 103       6.395  32.767  11.935  1.00  0.40           O  
HETATM  105  O   HOH T 104     -16.672  25.558  20.731  1.00  0.40           O  
HETATM  106  O   HOH T 105      -0.868  18.651  34.061  1.00  0.40           O  
HETATM  107  O   HOH T 106      -9.787  14.946  24.740  1.00  0.40           O  
HETATM  108  O   HOH T 107     -12.505  14.820  24.984  1.00  0.40           O  
HETATM  109  O   HOH T 108      -7.365  23.611  13.870  1.00  0.40           O  
HETATM  110  O   HOH T 109       5.675  11.394  17.245  1.00  0.40           O  
HETATM  111  O   HOH T 110      15.295  30.085   2.747  1.00  0.40           O  
HETATM  112  O   HOH T 111       9.370  30.134  40.564  1.00  0.40           O  
HETATM  113  O   HOH T 112      16.961  32.384   3.134  1.00  0.40           O  
HETATM  114  O   HOH T 113      11.067  27.434  33.448  1.00  0.40           O  
HETATM  115  O   HOH T 114      14.930  15.008  16.396  1.00  0.41           O  
HETATM  116  O   HOH T 115       9.819  40.027  18.621  1.00  0.41           O  
HETATM  117  O   HOH T 116     -15.104  32.545  26.229  1.00  0.41           O  
HETATM  118  O   HOH T 117      12.117  25.367  38.494  1.00  0.41           O  
HETATM  119  O   HOH T 118     -15.716  27.962  21.824  1.00  0.41           O  
HETATM  120  O   HOH T 119      28.495  16.420  11.884  1.00  0.41           O  
HETATM  121  O   HOH T 120      18.676  26.771   2.431  1.00  0.42           O  
HETATM  122  O   HOH T 121       3.352  39.144  21.688  1.00  0.42           O  
HETATM  123  O   HOH T 122      -1.726  24.431  31.856  1.00  0.42           O  
HETATM  124  O   HOH T 123      11.189  25.606  28.836  1.00  0.42           O  
HETATM  125  O   HOH T 124     -11.043  17.763  29.255  1.00  0.42           O  
HETATM  126  O   HOH T 125       9.438   8.543  22.825  1.00  0.42           O  
HETATM  127  O   HOH T 126      10.266  30.991  33.826  1.00  0.42           O  
HETATM  128  O   HOH T 127      -8.911  13.013  22.961  1.00  0.42           O  
HETATM  129  O   HOH T 128      -5.611  31.558  24.688  1.00  0.42           O  
HETATM  130  O   HOH T 129      15.900  35.184  21.676  1.00  0.42           O  
HETATM  131  O   HOH T 130      -9.098  25.209  15.463  1.00  0.42           O  
HETATM  132  O   HOH T 131       6.568   8.283  35.707  1.00  0.42           O  
HETATM  133  O   HOH T 132      12.040  29.895  37.604  1.00  0.42           O  
HETATM  134  O   HOH T 133     -17.393  15.622  19.732  1.00  0.43           O  
HETATM  135  O   HOH T 134     -12.921  15.642  20.554  1.00  0.43           O  
HETATM  136  O   HOH T 135      23.721   5.022  19.813  1.00  0.43           O  
HETATM  137  O   HOH T 136       9.993  42.380  17.055  1.00  0.43           O  
HETATM  138  O   HOH T 137      22.150  30.038  17.686  1.00  0.43           O  
HETATM  139  O   HOH T 138      26.806  23.750  14.579  1.00  0.43           O  
HETATM  140  O   HOH T 139       3.799  37.836  39.480  1.00  0.43           O  
HETATM  141  O   HOH T 140       1.239  28.644  10.320  1.00  0.43           O  
HETATM  142  O   HOH T 141      -0.414  30.572  33.915  1.00  0.44           O  
HETATM  143  O   HOH T 142      10.745   7.359  13.715  1.00  0.44           O  
HETATM  144  O   HOH T 143      -6.418   5.269  21.152  1.00  0.44           O  
HETATM  145  O   HOH T 144      -3.123   9.844  27.519  1.00  0.44           O  
HETATM  146  O   HOH T 145      17.817  36.329   4.171  1.00  0.44           O  
HETATM  147  O   HOH T 146       3.968  31.780  11.275  1.00  0.44           O  
HETATM  148  O   HOH T 147      11.444  15.533  27.658  1.00  0.44           O  
HETATM  149  O   HOH T 148      27.192  12.621  10.366  1.00  0.44           O  
HETATM  150  O   HOH T 149       9.604   7.016  25.088  1.00  0.44           O  
HETATM  151  O   HOH T 150      19.640  24.532   3.856  1.00  0.44           O  
HETATM  152  O   HOH T 151      -7.161   4.467  23.746  1.00  0.44           O  
HETATM  153  O   HOH T 152      -0.965  10.176  20.983  1.00  0.44           O  
HETATM  154  O   HOH T 153      -1.835  21.858   5.430  1.00  0.45           O  
HETATM  155  O   HOH T 154      15.263  24.557  32.208  1.00  0.45           O  
HETATM  156  O   HOH T 155       1.388  20.274  34.785  1.00  0.45           O  
HETATM  157  O   HOH T 156     -10.202  30.939  31.741  1.00  0.45           O  
HETATM  158  O   HOH T 157      -2.781  19.654   2.592  1.00  0.45           O  
HETATM  159  O   HOH T 158       4.103  34.416  12.237  1.00  0.45           O  
HETATM  160  O   HOH T 159      -9.538  29.192  29.731  1.00  0.45           O  
HETATM  161  O   HOH T 160       2.917  22.534  33.969  1.00  0.45           O  
HETATM  162  O   HOH T 161     -14.291  25.454  22.240  1.00  0.45           O  
HETATM  163  O   HOH T 162     -15.083  14.198  19.468  1.00  0.45           O  
HETATM  164  O   HOH T 163       4.813   4.834  26.763  1.00  0.45           O  
HETATM  165  O   HOH T 164      -4.048  10.472   6.519  1.00  0.45           O  
HETATM  166  O   HOH T 165      18.158   7.182  13.939  1.00  0.45           O  
HETATM  167  O   HOH T 166       2.388  28.619   4.449  1.00  0.45           O  
HETATM  168  O   HOH T 167       3.886  39.479  31.675  1.00  0.46           O  
HETATM  169  O   HOH T 168      -4.165  36.085  26.975  1.00  0.46           O  
HETATM  170  O   HOH T 169       4.745  20.773  43.258  1.00  0.46           O  
HETATM  171  O   HOH T 170      13.273   8.147  14.327  1.00  0.46           O  
HETATM  172  O   HOH T 171      -0.026  35.132  11.445  1.00  0.46           O  
HETATM  173  O   HOH T 172       4.813   7.788  24.153  1.00  0.46           O  
HETATM  174  O   HOH T 173       9.876   5.349  12.109  1.00  0.46           O  
HETATM  175  O   HOH T 174      11.370  40.045  16.262  1.00  0.46           O  
HETATM  176  O   HOH T 175      -3.047  14.263  36.055  1.00  0.46           O  
HETATM  177  O   HOH T 176      -0.618  32.454  10.633  1.00  0.46           O  
HETATM  178  O   HOH T 177       2.602  36.262  34.391  1.00  0.46           O  
HETATM  179  O   HOH T 178      -2.476  26.966  30.794  1.00  0.47           O  
HETATM  180  O   HOH T 179      25.078  21.141  18.109  1.00  0.47           O  
HETATM  181  O   HOH T 180      -2.459  28.987  32.753  1.00  0.47           O  
HETATM  182  O   HOH T 181      -2.473  12.512  28.254  1.00  0.47           O  
HETATM  183  O   HOH T 182      19.501   7.292   8.179  1.00  0.47           O  
HETATM  184  O   HOH T 183      11.815  29.744  31.813  1.00  0.47           O  
HETATM  185  O   HOH T 184      10.170  26.582   2.958  1.00  0.47           O  
HETATM  186  O   HOH T 185      -3.142   8.579  24.972  1.00  0.47           O  
HETATM  187  O   HOH T 186      -4.754  11.986  26.804  1.00  0.47           O  
HETATM  188  O   HOH T 187      -2.232  19.011   5.233  1.00  0.47           O  
HETATM  189  O   HOH T 188      -9.632  18.573  12.768  1.00  0.48           O  
HETATM  190  O   HOH T 189      -2.155   6.136  25.695  1.00  0.48           O  
HETATM  191  O   HOH T 190       0.626  34.788  38.827  1.00  0.48           O  
HETATM  192  O   HOH T 191      27.576  14.340   7.122  1.00  0.48           O  
HETATM  193  O   HOH T 192      -3.363  28.502  10.519  1.00  0.48           O  
HETATM  194  O   HOH T 193      11.920   6.544  27.668  1.00  0.48           O  
HETATM  195  O   HOH T 194       0.663  38.447  22.194  1.00  0.48           O  
HETATM  196  O   HOH T 195      14.575  38.160  28.299  1.00  0.48           O  
HETATM  197  O   HOH T 196      21.098  33.979  10.488  1.00  0.48           O  
HETATM  198  O   HOH T 197      -9.675  34.040  15.300  1.00  0.48           O  
HETATM  199  O   HOH T 198      13.143  11.865  20.943  1.00  0.49           O  
HETATM  200  O   HOH T 199      14.646  41.808  13.944  1.00  0.49           O  
HETATM  201  O   HOH T 200      20.270  36.548   5.361  1.00  0.49           O  
HETATM  202  O   HOH T 201       0.480   8.972  34.171  1.00  0.49           O  
HETATM  203  O   HOH T 202      -4.202  23.963   3.437  1.00  0.49           O  
HETATM  204  O   HOH T 203      14.522   5.979   6.453  1.00  0.49           O  
HETATM  205  O   HOH T 204       2.191   6.644  28.417  1.00  0.49           O  
HETATM  206  O   HOH T 205     -10.540  16.608  14.532  1.00  0.50           O  
HETATM  207  O   HOH T 206     -11.302  17.236  25.573  1.00  0.50           O  
HETATM  208  O   HOH T 207      21.974  21.293   4.465  1.00  0.50           O  
HETATM  209  O   HOH T 208      -8.600  16.024  12.568  1.00  0.50           O  
HETATM  210  O   HOH T 209      17.851  29.572   2.461  1.00  0.50           O  
HETATM  211  O   HOH T 210       7.659  12.839  20.664  1.00  0.50           O  
HETATM  212  O   HOH T 211       0.059  29.055  31.629  1.00  0.50           O  
HETATM  213  O   HOH T 212      -2.248  10.588  12.799  1.00  0.50           O  
HETATM  214  O   HOH T 213       9.188  11.082  21.999  1.00  0.50           O  
HETATM  215  O   HOH T 214      12.127   6.857   5.644  1.00  0.50           O  
HETATM  216  O   HOH T 215      19.991   6.154  10.648  1.00  0.50           O  
HETATM  217  O   HOH T 216      -5.072  33.543  26.663  1.00  0.50           O  
HETATM  218  O   HOH T 217      16.581  38.426  16.267  1.00  0.50           O  
HETATM  219  O   HOH T 218      12.158  12.870  27.289  1.00  0.50           O  
HETATM  220  O   HOH T 219     -12.702  17.084  16.317  1.00  0.50           O  
HETATM  221  O   HOH T 220     -12.816  18.921  27.309  1.00  0.50           O  
HETATM  222  O   HOH T 221       4.829  40.990  20.253  1.00  0.50           O  
HETATM  223  O   HOH T 222      -3.036  31.271  11.335  1.00  0.51           O  
HETATM  224  O   HOH T 223      -2.322  34.028  27.406  1.00  0.51           O  
HETATM  225  O   HOH T 224      14.263   4.452   8.826  1.00  0.51           O  
HETATM  226  O   HOH T 225       5.769  36.591  13.011  1.00  0.51           O  
HETATM  227  O   HOH T 226      -4.228  21.702   1.585  1.00  0.51           O  
HETATM  228  O   HOH T 227      26.085  21.360  15.590  1.00  0.51           O  
HETATM  229  O   HOH T 228       2.606  34.737  36.829  1.00  0.51           O  
HETATM  230  O   HOH T 229      13.332  34.254   4.558  1.00  0.51           O  
HETATM  231  O   HOH T 230      20.246  11.762   6.813  1.00  0.51           O  
HETATM  232  O   HOH T 231       1.590  30.890   5.708  1.00  0.51           O  
HETATM  233  O   HOH T 232     -15.048  22.844  23.191  1.00  0.52           O  
HETATM  234  O   HOH T 233      25.653  23.633  17.006  1.00  0.52           O  
HETATM  235  O   HOH T 234      -5.643  26.650  12.296  1.00  0.52           O  
HETATM  236  O   HOH T 235       8.807  11.912   1.946  1.00  0.52           O  
HETATM  237  O   HOH T 236      -4.853  28.545   8.119  1.00  0.52           O  
HETATM  238  O   HOH T 237      13.859  38.822  16.924  1.00  0.52           O  
HETATM  239  O   HOH T 238       5.999  31.112   9.628  1.00  0.52           O  
HETATM  240  O   HOH T 239      -1.689  12.996  -0.665  1.00  0.52           O  
HETATM  241  O   HOH T 240       3.416  40.027  10.867  1.00  0.52           O  
HETATM  242  O   HOH T 241       3.228   8.793  34.162  1.00  0.52           O  
HETATM  243  O   HOH T 242      14.680  10.474   3.225  1.00  0.53           O  
HETATM  244  O   HOH T 243      -3.845   6.309  23.426  1.00  0.53           O  
HETATM  245  O   HOH T 244      -1.781  38.363  19.178  1.00  0.53           O  
HETATM  246  O   HOH T 245      12.368   4.267   6.757  1.00  0.53           O  
HETATM  247  O   HOH T 246      -1.602  10.670  33.517  1.00  0.53           O  
HETATM  248  O   HOH T 247       4.119  25.472   1.265  1.00  0.53           O  
HETATM  249  O   HOH T 248      -3.983  30.770  31.177  1.00  0.54           O  
HETATM  250  O   HOH T 249      -2.651  34.173  11.069  1.00  0.54           O  
HETATM  251  O   HOH T 250       4.155  11.246  -3.850  1.00  0.54           O  
HETATM  252  O   HOH T 251       3.196  24.296  -0.987  1.00  0.54           O  
HETATM  253  O   HOH T 252      -3.301  30.667   8.726  1.00  0.54           O  
HETATM  254  O   HOH T 253      20.376  27.440  11.293  1.00  0.54           O  
HETATM  255  O   HOH T 254       4.703  37.928  34.896  1.00  0.54           O  
HETATM  256  O   HOH T 255      -1.854  36.649  28.349  1.00  0.54           O  
HETATM  257  O   HOH T 256      -0.826  26.737  32.962  1.00  0.55           O  
HETATM  258  O   HOH T 257       1.501   8.563   5.489  1.00  0.55           O  
HETATM  259  O   HOH T 258       9.611   4.193   7.135  1.00  0.55           O  
HETATM  260  O   HOH T 259      -1.783  21.793  31.001  1.00  0.55           O  
HETATM  261  O   HOH T 260      13.776  12.910  23.357  1.00  0.55           O  
HETATM  262  O   HOH T 261      12.079  39.601  20.180  1.00  0.55           O  
HETATM  263  O   HOH T 262       1.502  25.960   0.628  1.00  0.55           O  
HETATM  264  O   HOH T 263       2.746  37.543  36.879  1.00  0.55           O  
HETATM  265  O   HOH T 264      26.838  15.646   4.862  1.00  0.55           O  
HETATM  266  O   HOH T 265      -5.773   8.152  24.370  1.00  0.56           O  
HETATM  267  O   HOH T 266       8.016  26.019   1.335  1.00  0.56           O  
HETATM  268  O   HOH T 267       1.002  11.955  37.485  1.00  0.56           O  
HETATM  269  O   HOH T 268      -7.112  11.328  17.378  1.00  0.56           O  
HETATM  270  O   HOH T 269       4.067  30.894   4.712  1.00  0.56           O  
HETATM  271  O   HOH T 270      10.626  34.853   4.769  1.00  0.57           O  
HETATM  272  O   HOH T 271      -8.193  38.161  22.695  1.00  0.57           O  
HETATM  273  O   HOH T 272       8.296  17.164  -0.665  1.00  0.57           O  
HETATM  274  O   HOH T 273     -11.341  33.243  28.409  1.00  0.57           O  
HETATM  275  O   HOH T 274      24.171  24.215  20.311  1.00  0.59           O  
HETATM  276  O   HOH T 275     -10.356  31.926  13.692  1.00  0.60           O  
HETATM  277  O   HOH T 276       4.207  12.884  -5.765  1.00  0.63           O  
TER     278      HOH T 276 
