# Supplementary material for: Accurate Prediction of Hydration Sites of Proteins Using Energy Model With Atom Embedding
Source: Front Mol Biosci. 2021 Sep 20;8:756075. doi: 10.3389/fmolb.2021.756075 (PMC8488165; doi:10.3389/fmolb.2021.756075)
Supplement: Supplementary file 1 [file DataSheet1.ZIP › Data Sheet 1/Our_result_pdb/our_dataset_output/3EYI_watersite.pdb]

HEADER                                                        XXXX


JRNL        PMID   -1
HETATM    1  O   HOH T   0      26.717  38.941   5.889  1.00  0.21           O  
HETATM    2  O   HOH T   1      18.774  23.167   0.313  1.00  0.21           O  
HETATM    3  O   HOH T   2      42.283  26.977   1.683  1.00  0.21           O  
HETATM    4  O   HOH T   3      42.293  19.003 -21.947  1.00  0.21           O  
HETATM    5  O   HOH T   4      30.545  26.063  -7.839  1.00  0.22           O  
HETATM    6  O   HOH T   5      21.361  34.329  10.572  1.00  0.22           O  
HETATM    7  O   HOH T   6      20.195  55.984   6.001  1.00  0.23           O  
HETATM    8  O   HOH T   7      24.516  38.127  22.634  1.00  0.23           O  
HETATM    9  O   HOH T   8      40.071  26.916  15.793  1.00  0.23           O  
HETATM   10  O   HOH T   9      38.392  35.072  -8.476  1.00  0.23           O  
HETATM   11  O   HOH T  10      34.969  14.501  -8.613  1.00  0.23           O  
HETATM   12  O   HOH T  11      31.269  17.888 -24.778  1.00  0.23           O  
HETATM   13  O   HOH T  12      38.145  24.286  -0.773  1.00  0.24           O  
HETATM   14  O   HOH T  13      36.019  16.152 -18.843  1.00  0.24           O  
HETATM   15  O   HOH T  14      24.118  55.583   9.934  1.00  0.24           O  
HETATM   16  O   HOH T  15      39.353  31.222 -18.400  1.00  0.25           O  
HETATM   17  O   HOH T  16      32.961  20.576   1.259  1.00  0.25           O  
HETATM   18  O   HOH T  17      19.975  30.096   0.828  1.00  0.25           O  
HETATM   19  O   HOH T  18      36.221  30.813   1.917  1.00  0.26           O  
HETATM   20  O   HOH T  19      12.328  31.313  17.597  1.00  0.26           O  
HETATM   21  O   HOH T  20      19.525  35.500  -5.274  1.00  0.26           O  
HETATM   22  O   HOH T  21      30.600  16.021   8.226  1.00  0.26           O  
HETATM   23  O   HOH T  22      16.034  50.834  17.570  1.00  0.27           O  
HETATM   24  O   HOH T  23      22.694  54.368  25.984  1.00  0.27           O  
HETATM   25  O   HOH T  24      40.743  23.791   0.269  1.00  0.27           O  
HETATM   26  O   HOH T  25      18.620  33.551  10.574  1.00  0.27           O  
HETATM   27  O   HOH T  26      26.136  49.702  17.987  1.00  0.27           O  
HETATM   28  O   HOH T  27      45.443  20.082   5.708  1.00  0.28           O  
HETATM   29  O   HOH T  28      19.228  34.061   2.694  1.00  0.28           O  
HETATM   30  O   HOH T  29      21.039  57.041   8.380  1.00  0.28           O  
HETATM   31  O   HOH T  30      17.758  33.460   7.684  1.00  0.28           O  
HETATM   32  O   HOH T  31       5.598  40.455  11.887  1.00  0.29           O  
HETATM   33  O   HOH T  32       9.760  36.624   4.825  1.00  0.29           O  
HETATM   34  O   HOH T  33      10.110  31.491  21.075  1.00  0.29           O  
HETATM   35  O   HOH T  34      46.769  16.695  -8.401  1.00  0.30           O  
HETATM   36  O   HOH T  35      40.974  34.328  10.906  1.00  0.30           O  
HETATM   37  O   HOH T  36      28.606  38.300   3.990  1.00  0.30           O  
HETATM   38  O   HOH T  37      21.613  23.577   8.361  1.00  0.30           O  
HETATM   39  O   HOH T  38      11.302  35.356  22.802  1.00  0.30           O  
HETATM   40  O   HOH T  39      41.984  31.389   2.246  1.00  0.30           O  
HETATM   41  O   HOH T  40      13.847  25.339  20.895  1.00  0.31           O  
HETATM   42  O   HOH T  41      21.088  21.597   0.792  1.00  0.31           O  
HETATM   43  O   HOH T  42      34.695  18.337 -17.827  1.00  0.31           O  
HETATM   44  O   HOH T  43      31.368  43.540  11.658  1.00  0.31           O  
HETATM   45  O   HOH T  44      29.967  39.800  12.221  1.00  0.31           O  
HETATM   46  O   HOH T  45      21.448  27.596  13.903  1.00  0.32           O  
HETATM   47  O   HOH T  46      23.052  31.567  18.687  1.00  0.32           O  
HETATM   48  O   HOH T  47      24.230  50.242  22.899  1.00  0.32           O  
HETATM   49  O   HOH T  48      36.759  28.548   3.445  1.00  0.32           O  
HETATM   50  O   HOH T  49      10.282  42.762  21.671  1.00  0.32           O  
HETATM   51  O   HOH T  50      25.791  41.509   6.172  1.00  0.32           O  
HETATM   52  O   HOH T  51      16.550  62.193  37.915  1.00  0.33           O  
HETATM   53  O   HOH T  52       9.172  46.352   6.405  1.00  0.33           O  
HETATM   54  O   HOH T  53      26.128  35.893  22.323  1.00  0.33           O  
HETATM   55  O   HOH T  54      41.751  25.582   9.778  1.00  0.33           O  
HETATM   56  O   HOH T  55      19.315  56.449   3.417  1.00  0.33           O  
HETATM   57  O   HOH T  56      41.408  32.793 -19.411  1.00  0.33           O  
HETATM   58  O   HOH T  57      18.235  61.958  35.737  1.00  0.33           O  
HETATM   59  O   HOH T  58      33.198  40.374   0.916  1.00  0.33           O  
HETATM   60  O   HOH T  59      17.461  53.442  21.444  1.00  0.34           O  
HETATM   61  O   HOH T  60      18.427  37.692  -3.911  1.00  0.34           O  
HETATM   62  O   HOH T  61      20.198  32.382   7.082  1.00  0.34           O  
HETATM   63  O   HOH T  62      27.323  46.235  16.324  1.00  0.34           O  
HETATM   64  O   HOH T  63      29.501  53.974  12.345  1.00  0.34           O  
HETATM   65  O   HOH T  64      25.173  25.642  -7.522  1.00  0.34           O  
HETATM   66  O   HOH T  65      38.567  32.334   1.585  1.00  0.34           O  
HETATM   67  O   HOH T  66      35.273  28.343  12.407  1.00  0.34           O  
HETATM   68  O   HOH T  67       8.180  43.852   5.735  1.00  0.35           O  
HETATM   69  O   HOH T  68      34.479  22.654 -17.365  1.00  0.35           O  
HETATM   70  O   HOH T  69       6.766  42.974  19.839  1.00  0.35           O  
HETATM   71  O   HOH T  70      27.431  29.626  10.978  1.00  0.35           O  
HETATM   72  O   HOH T  71      22.647  45.407   6.617  1.00  0.35           O  
HETATM   73  O   HOH T  72      33.728  36.632  11.781  1.00  0.35           O  
HETATM   74  O   HOH T  73      39.676  25.960   1.775  1.00  0.35           O  
HETATM   75  O   HOH T  74      15.313  29.051   5.818  1.00  0.35           O  
HETATM   76  O   HOH T  75      21.931  34.797   2.102  1.00  0.35           O  
HETATM   77  O   HOH T  76      22.123  64.978  23.662  1.00  0.36           O  
HETATM   78  O   HOH T  77      17.733  45.464  -5.073  1.00  0.36           O  
HETATM   79  O   HOH T  78      10.755  47.206   8.508  1.00  0.36           O  
HETATM   80  O   HOH T  79      24.406  22.544   2.473  1.00  0.36           O  
HETATM   81  O   HOH T  80      18.458  49.158   0.872  1.00  0.36           O  
HETATM   82  O   HOH T  81      21.356  39.569  -1.335  1.00  0.36           O  
HETATM   83  O   HOH T  82      13.131  44.012   0.566  1.00  0.36           O  
HETATM   84  O   HOH T  83      27.618  30.804  13.545  1.00  0.36           O  
HETATM   85  O   HOH T  84      44.838  15.147 -18.390  1.00  0.37           O  
HETATM   86  O   HOH T  85      28.452  22.250 -10.660  1.00  0.37           O  
HETATM   87  O   HOH T  86      17.853  26.712  20.198  1.00  0.37           O  
HETATM   88  O   HOH T  87      34.813  21.301   3.176  1.00  0.37           O  
HETATM   89  O   HOH T  88      15.425  44.038  -4.275  1.00  0.37           O  
HETATM   90  O   HOH T  89      20.335  44.556  -5.619  1.00  0.37           O  
HETATM   91  O   HOH T  90      18.263  58.366  20.219  1.00  0.37           O  
HETATM   92  O   HOH T  91      55.193  24.952  -4.861  1.00  0.37           O  
HETATM   93  O   HOH T  92      13.767  50.059  19.027  1.00  0.37           O  
HETATM   94  O   HOH T  93      30.534  30.933   2.607  1.00  0.37           O  
HETATM   95  O   HOH T  94      39.276  21.179 -22.718  1.00  0.37           O  
HETATM   96  O   HOH T  95      35.674  32.888   3.711  1.00  0.37           O  
HETATM   97  O   HOH T  96      29.174  55.363  14.716  1.00  0.38           O  
HETATM   98  O   HOH T  97      17.095  57.412  17.829  1.00  0.38           O  
HETATM   99  O   HOH T  98      43.219  31.650 -17.509  1.00  0.38           O  
HETATM  100  O   HOH T  99      16.454  19.830   3.042  1.00  0.38           O  
HETATM  101  O   HOH T 100      25.984  21.857   4.690  1.00  0.38           O  
HETATM  102  O   HOH T 101      35.594  15.174   6.755  1.00  0.38           O  
HETATM  103  O   HOH T 102       8.635  35.110   1.346  1.00  0.38           O  
HETATM  104  O   HOH T 103      37.672  13.008   3.756  1.00  0.38           O  
HETATM  105  O   HOH T 104      19.539  45.407  -3.007  1.00  0.38           O  
HETATM  106  O   HOH T 105       5.094  44.879  18.630  1.00  0.38           O  
HETATM  107  O   HOH T 106      27.023  31.096   2.195  1.00  0.38           O  
HETATM  108  O   HOH T 107      29.617  48.523   8.675  1.00  0.38           O  
HETATM  109  O   HOH T 108      15.929  51.178  20.476  1.00  0.38           O  
HETATM  110  O   HOH T 109      43.562  21.844   6.366  1.00  0.38           O  
HETATM  111  O   HOH T 110      29.197  40.168   2.039  1.00  0.39           O  
HETATM  112  O   HOH T 111      23.131  30.748   5.172  1.00  0.39           O  
HETATM  113  O   HOH T 112      42.015  25.237 -21.622  1.00  0.39           O  
HETATM  114  O   HOH T 113      46.952  38.936  -9.836  1.00  0.39           O  
HETATM  115  O   HOH T 114      40.023  31.794   6.039  1.00  0.39           O  
HETATM  116  O   HOH T 115       8.894  41.136  19.714  1.00  0.39           O  
HETATM  117  O   HOH T 116      31.457  37.328  -5.454  1.00  0.39           O  
HETATM  118  O   HOH T 117      38.154  29.737   5.413  1.00  0.39           O  
HETATM  119  O   HOH T 118      16.743  22.602   6.575  1.00  0.39           O  
HETATM  120  O   HOH T 119      52.202  24.653 -12.052  1.00  0.39           O  
HETATM  121  O   HOH T 120      28.141  56.353  12.365  1.00  0.39           O  
HETATM  122  O   HOH T 121      23.322  23.678  10.638  1.00  0.39           O  
HETATM  123  O   HOH T 122      52.285  35.438  -0.475  1.00  0.39           O  
HETATM  124  O   HOH T 123      23.307  33.455   5.278  1.00  0.40           O  
HETATM  125  O   HOH T 124      41.256  14.447 -16.206  1.00  0.40           O  
HETATM  126  O   HOH T 125      37.260  29.160  14.580  1.00  0.40           O  
HETATM  127  O   HOH T 126      58.336  21.284 -13.157  1.00  0.40           O  
HETATM  128  O   HOH T 127      14.522  31.593  21.783  1.00  0.40           O  
HETATM  129  O   HOH T 128      25.195  50.503   7.519  1.00  0.40           O  
HETATM  130  O   HOH T 129      18.010  34.802  24.294  1.00  0.40           O  
HETATM  131  O   HOH T 130      23.706  51.941  24.998  1.00  0.40           O  
HETATM  132  O   HOH T 131      37.128  13.042   1.057  1.00  0.40           O  
HETATM  133  O   HOH T 132      15.233  53.214  30.483  1.00  0.40           O  
HETATM  134  O   HOH T 133      13.927  38.737  -5.943  1.00  0.40           O  
HETATM  135  O   HOH T 134      20.506  35.843  27.709  1.00  0.40           O  
HETATM  136  O   HOH T 135      33.468  20.456 -18.673  1.00  0.40           O  
HETATM  137  O   HOH T 136      29.072  17.758   9.710  1.00  0.40           O  
HETATM  138  O   HOH T 137      18.937  24.111  20.229  1.00  0.40           O  
HETATM  139  O   HOH T 138      30.776  31.596  -3.044  1.00  0.40           O  
HETATM  140  O   HOH T 139      18.043  52.249   6.499  1.00  0.40           O  
HETATM  141  O   HOH T 140      41.534  16.358 -27.454  1.00  0.40           O  
HETATM  142  O   HOH T 141      23.980  40.030  -0.566  1.00  0.40           O  
HETATM  143  O   HOH T 142      20.677  53.184   6.217  1.00  0.41           O  
HETATM  144  O   HOH T 143      55.838  21.176  -6.241  1.00  0.41           O  
HETATM  145  O   HOH T 144      37.004  14.242  10.134  1.00  0.41           O  
HETATM  146  O   HOH T 145      11.981  49.142   6.882  1.00  0.41           O  
HETATM  147  O   HOH T 146      18.315  20.618   1.111  1.00  0.41           O  
HETATM  148  O   HOH T 147      22.397  30.325   2.388  1.00  0.41           O  
HETATM  149  O   HOH T 148      34.159  23.546 -14.654  1.00  0.41           O  
HETATM  150  O   HOH T 149      31.634  40.430  14.449  1.00  0.41           O  
HETATM  151  O   HOH T 150      32.964  32.179   3.823  1.00  0.41           O  
HETATM  152  O   HOH T 151      45.408  21.802 -23.402  1.00  0.41           O  
HETATM  153  O   HOH T 152       7.922  44.177  21.991  1.00  0.41           O  
HETATM  154  O   HOH T 153      40.450  30.024   3.942  1.00  0.41           O  
HETATM  155  O   HOH T 154       7.509  35.274   3.936  1.00  0.41           O  
HETATM  156  O   HOH T 155      29.082  32.497   0.813  1.00  0.41           O  
HETATM  157  O   HOH T 156      20.437  43.547  -1.216  1.00  0.41           O  
HETATM  158  O   HOH T 157      20.577  39.428  -4.123  1.00  0.41           O  
HETATM  159  O   HOH T 158      26.980  27.625  -8.250  1.00  0.41           O  
HETATM  160  O   HOH T 159      49.577  31.446   3.281  1.00  0.41           O  
HETATM  161  O   HOH T 160      18.254  32.606   4.954  1.00  0.41           O  
HETATM  162  O   HOH T 161      21.111  46.231  -0.818  1.00  0.42           O  
HETATM  163  O   HOH T 162      15.985  27.193   7.718  1.00  0.42           O  
HETATM  164  O   HOH T 163      28.381  48.797  16.543  1.00  0.42           O  
HETATM  165  O   HOH T 164      24.201  45.016   3.449  1.00  0.42           O  
HETATM  166  O   HOH T 165      31.149  23.075   5.101  1.00  0.42           O  
HETATM  167  O   HOH T 166      41.563   9.687   8.347  1.00  0.42           O  
HETATM  168  O   HOH T 167      13.139  49.253  11.400  1.00  0.42           O  
HETATM  169  O   HOH T 168      14.355  55.101  32.416  1.00  0.42           O  
HETATM  170  O   HOH T 169      24.237  28.187  13.832  1.00  0.43           O  
HETATM  171  O   HOH T 170      42.935  28.973   3.695  1.00  0.43           O  
HETATM  172  O   HOH T 171      23.093  23.744  -4.829  1.00  0.43           O  
HETATM  173  O   HOH T 172      33.868  15.791 -17.187  1.00  0.43           O  
HETATM  174  O   HOH T 173      51.256  26.166 -23.089  1.00  0.43           O  
HETATM  175  O   HOH T 174      29.429  34.764   2.311  1.00  0.43           O  
HETATM  176  O   HOH T 175      30.958  21.107   3.137  1.00  0.43           O  
HETATM  177  O   HOH T 176      53.461  32.483  -2.281  1.00  0.43           O  
HETATM  178  O   HOH T 177      53.734  16.218 -11.550  1.00  0.43           O  
HETATM  179  O   HOH T 178       8.119  46.134   8.980  1.00  0.43           O  
HETATM  180  O   HOH T 179      24.884  33.647  -0.008  1.00  0.43           O  
HETATM  181  O   HOH T 180      35.499  14.562  -2.291  1.00  0.43           O  
HETATM  182  O   HOH T 181      36.532  10.632   2.954  1.00  0.43           O  
HETATM  183  O   HOH T 182      31.172  38.513   0.929  1.00  0.44           O  
HETATM  184  O   HOH T 183      13.549  37.879  25.712  1.00  0.44           O  
HETATM  185  O   HOH T 184      46.265  12.753  -5.642  1.00  0.44           O  
HETATM  186  O   HOH T 185      24.375  33.844   2.826  1.00  0.44           O  
HETATM  187  O   HOH T 186      14.528  53.064  16.717  1.00  0.44           O  
HETATM  188  O   HOH T 187      31.057  33.425  -1.087  1.00  0.44           O  
HETATM  189  O   HOH T 188      23.710  31.035  -0.004  1.00  0.44           O  
HETATM  190  O   HOH T 189      18.574  25.217  13.084  1.00  0.44           O  
HETATM  191  O   HOH T 190      40.054  37.264  -1.701  1.00  0.45           O  
HETATM  192  O   HOH T 191      24.505  25.859  12.146  1.00  0.45           O  
HETATM  193  O   HOH T 192       9.476  42.919   1.748  1.00  0.45           O  
HETATM  194  O   HOH T 193      41.554  25.027   3.533  1.00  0.45           O  
HETATM  195  O   HOH T 194      17.040  51.521  -1.598  1.00  0.45           O  
HETATM  196  O   HOH T 195      39.059  13.742 -14.833  1.00  0.45           O  
HETATM  197  O   HOH T 196      24.998  22.558  -1.914  1.00  0.45           O  
HETATM  198  O   HOH T 197      28.498  36.932  17.171  1.00  0.45           O  
HETATM  199  O   HOH T 198      28.840  24.274  -8.971  1.00  0.45           O  
HETATM  200  O   HOH T 199       9.671  49.844   8.298  1.00  0.45           O  
HETATM  201  O   HOH T 200      54.203  18.182  -4.156  1.00  0.45           O  
HETATM  202  O   HOH T 201       9.540  34.091  20.913  1.00  0.45           O  
HETATM  203  O   HOH T 202      28.439  22.684   5.782  1.00  0.45           O  
HETATM  204  O   HOH T 203      41.170  11.609  10.506  1.00  0.45           O  
HETATM  205  O   HOH T 204      11.793  51.618   8.327  1.00  0.46           O  
HETATM  206  O   HOH T 205      20.296  29.136  21.154  1.00  0.46           O  
HETATM  207  O   HOH T 206       3.760  44.400  16.264  1.00  0.46           O  
HETATM  208  O   HOH T 207      25.137  44.250   5.990  1.00  0.46           O  
HETATM  209  O   HOH T 208      48.817  26.640 -13.840  1.00  0.46           O  
HETATM  210  O   HOH T 209      16.986  54.983  31.752  1.00  0.46           O  
HETATM  211  O   HOH T 210      15.838  49.639   1.713  1.00  0.46           O  
HETATM  212  O   HOH T 211      19.503  36.858  25.330  1.00  0.46           O  
HETATM  213  O   HOH T 212      26.140  49.700  20.844  1.00  0.47           O  
HETATM  214  O   HOH T 213      34.571  13.806  -5.939  1.00  0.47           O  
HETATM  215  O   HOH T 214      12.163  33.080  21.628  1.00  0.47           O  
HETATM  216  O   HOH T 215      23.635  60.014  29.140  1.00  0.47           O  
HETATM  217  O   HOH T 216      28.285  15.384 -10.458  1.00  0.47           O  
HETATM  218  O   HOH T 217      16.043  38.006  24.426  1.00  0.47           O  
HETATM  219  O   HOH T 218      13.813  36.678  23.225  1.00  0.47           O  
HETATM  220  O   HOH T 219      32.397  14.527  -7.427  1.00  0.47           O  
HETATM  221  O   HOH T 220       8.717  37.703   0.377  1.00  0.47           O  
HETATM  222  O   HOH T 221       6.769  43.765   8.050  1.00  0.47           O  
HETATM  223  O   HOH T 222      26.909  33.922   1.841  1.00  0.47           O  
HETATM  224  O   HOH T 223      24.134  48.962   5.451  1.00  0.47           O  
HETATM  225  O   HOH T 224      51.411  36.351  -8.215  1.00  0.47           O  
HETATM  226  O   HOH T 225      33.068  30.040  12.409  1.00  0.47           O  
HETATM  227  O   HOH T 226      13.816  39.531  23.543  1.00  0.47           O  
HETATM  228  O   HOH T 227      21.695  37.250  -5.554  1.00  0.47           O  
HETATM  229  O   HOH T 228       8.033  45.350   1.993  1.00  0.48           O  
HETATM  230  O   HOH T 229      16.935  23.247  13.750  1.00  0.48           O  
HETATM  231  O   HOH T 230      40.373  18.846 -23.928  1.00  0.48           O  
HETATM  232  O   HOH T 231       3.265  41.422  10.603  1.00  0.48           O  
HETATM  233  O   HOH T 232      22.710  52.164  27.592  1.00  0.48           O  
HETATM  234  O   HOH T 233      23.821  47.013  -0.645  1.00  0.48           O  
HETATM  235  O   HOH T 234      55.559  20.823 -16.606  1.00  0.48           O  
HETATM  236  O   HOH T 235      24.658  43.940   0.985  1.00  0.48           O  
HETATM  237  O   HOH T 236      15.997  38.315  28.780  1.00  0.48           O  
HETATM  238  O   HOH T 237      27.463  43.088   4.860  1.00  0.48           O  
HETATM  239  O   HOH T 238      26.553  48.982   4.103  1.00  0.48           O  
HETATM  240  O   HOH T 239      18.960  24.046   7.520  1.00  0.48           O  
HETATM  241  O   HOH T 240      10.376  48.217   4.712  1.00  0.48           O  
HETATM  242  O   HOH T 241      10.713  42.868  24.395  1.00  0.48           O  
HETATM  243  O   HOH T 242       4.380  44.619  12.139  1.00  0.48           O  
HETATM  244  O   HOH T 243      37.323  12.461  -1.694  1.00  0.48           O  
HETATM  245  O   HOH T 244      12.959  42.211  -6.493  1.00  0.49           O  
HETATM  246  O   HOH T 245      10.677  46.216   2.700  1.00  0.49           O  
HETATM  247  O   HOH T 246      34.561  13.558   8.981  1.00  0.49           O  
HETATM  248  O   HOH T 247      24.607  21.037  -4.159  1.00  0.49           O  
HETATM  249  O   HOH T 248      42.852  13.810 -13.885  1.00  0.49           O  
HETATM  250  O   HOH T 249       7.869  36.713  -2.100  1.00  0.49           O  
HETATM  251  O   HOH T 250      16.200  53.402  18.853  1.00  0.49           O  
HETATM  252  O   HOH T 251      15.348  46.787  -4.693  1.00  0.49           O  
HETATM  253  O   HOH T 252      17.092  55.827  20.081  1.00  0.50           O  
HETATM  254  O   HOH T 253      45.388  12.734 -19.647  1.00  0.50           O  
HETATM  255  O   HOH T 254      24.140  25.732 -10.058  1.00  0.50           O  
HETATM  256  O   HOH T 255      44.013  33.639 -19.336  1.00  0.50           O  
HETATM  257  O   HOH T 256      41.493  34.970   4.671  1.00  0.50           O  
HETATM  258  O   HOH T 257      29.407  28.942  12.842  1.00  0.50           O  
HETATM  259  O   HOH T 258      43.643  24.025 -23.578  1.00  0.50           O  
HETATM  260  O   HOH T 259      21.005  51.601   4.003  1.00  0.50           O  
HETATM  261  O   HOH T 260      21.405  21.872  11.529  1.00  0.50           O  
HETATM  262  O   HOH T 261      45.545  32.776 -17.017  1.00  0.50           O  
HETATM  263  O   HOH T 262      42.641  12.290   8.213  1.00  0.50           O  
HETATM  264  O   HOH T 263      32.631  39.121  12.139  1.00  0.50           O  
HETATM  265  O   HOH T 264      37.447  36.254  -6.231  1.00  0.51           O  
HETATM  266  O   HOH T 265      12.480  39.978  -8.022  1.00  0.51           O  
HETATM  267  O   HOH T 266      31.550  27.694  11.595  1.00  0.51           O  
HETATM  268  O   HOH T 267      29.073  24.135  -6.256  1.00  0.51           O  
HETATM  269  O   HOH T 268      31.377  19.586  -5.783  1.00  0.51           O  
HETATM  270  O   HOH T 269      47.788  17.930   1.600  1.00  0.51           O  
HETATM  271  O   HOH T 270       5.513  45.549   9.799  1.00  0.51           O  
HETATM  272  O   HOH T 271      19.403  44.486  23.819  1.00  0.52           O  
HETATM  273  O   HOH T 272      35.381  17.963   6.509  1.00  0.52           O  
HETATM  274  O   HOH T 273      24.435  30.024  20.414  1.00  0.52           O  
HETATM  275  O   HOH T 274      46.055  36.621 -11.226  1.00  0.52           O  
HETATM  276  O   HOH T 275      50.928  24.787 -14.454  1.00  0.52           O  
HETATM  277  O   HOH T 276      16.148  33.610  22.643  1.00  0.52           O  
HETATM  278  O   HOH T 277      49.680  17.635  -0.596  1.00  0.52           O  
HETATM  279  O   HOH T 278      45.437  23.536 -25.598  1.00  0.52           O  
HETATM  280  O   HOH T 279      10.997  50.304   3.133  1.00  0.53           O  
HETATM  281  O   HOH T 280      42.847  24.224   7.593  1.00  0.53           O  
HETATM  282  O   HOH T 281      12.682  51.338  24.239  1.00  0.53           O  
HETATM  283  O   HOH T 282      23.870  21.046   0.169  1.00  0.53           O  
HETATM  284  O   HOH T 283      29.831  50.059  13.421  1.00  0.53           O  
HETATM  285  O   HOH T 284      26.255  46.762  23.616  1.00  0.53           O  
HETATM  286  O   HOH T 285      10.948  52.949  21.358  1.00  0.53           O  
HETATM  287  O   HOH T 286      13.239  51.370  21.466  1.00  0.53           O  
HETATM  288  O   HOH T 287      13.803  32.826  19.431  1.00  0.53           O  
HETATM  289  O   HOH T 288      52.759  26.638 -20.807  1.00  0.54           O  
HETATM  290  O   HOH T 289      20.819  40.599  30.559  1.00  0.54           O  
HETATM  291  O   HOH T 290      18.518  57.677  15.423  1.00  0.54           O  
HETATM  292  O   HOH T 291      16.444  24.640  21.436  1.00  0.54           O  
HETATM  293  O   HOH T 292      28.418  21.785  -7.857  1.00  0.54           O  
HETATM  294  O   HOH T 293      36.621  12.297 -15.294  1.00  0.54           O  
HETATM  295  O   HOH T 294       5.546  42.809  10.282  1.00  0.54           O  
HETATM  296  O   HOH T 295      18.449  32.303  23.419  1.00  0.54           O  
HETATM  297  O   HOH T 296      28.891  27.281  10.802  1.00  0.54           O  
HETATM  298  O   HOH T 297      21.818  25.912  11.600  1.00  0.54           O  
HETATM  299  O   HOH T 298      18.356  30.825   8.358  1.00  0.54           O  
HETATM  300  O   HOH T 299      30.566  34.731  -4.896  1.00  0.54           O  
HETATM  301  O   HOH T 300      28.250  21.725   3.158  1.00  0.55           O  
HETATM  302  O   HOH T 301      46.191  14.467 -16.134  1.00  0.55           O  
HETATM  303  O   HOH T 302      30.863  38.084   5.398  1.00  0.55           O  
HETATM  304  O   HOH T 303      42.852  21.615 -22.531  1.00  0.55           O  
HETATM  305  O   HOH T 304      28.484  49.678  19.292  1.00  0.55           O  
HETATM  306  O   HOH T 305      33.781   9.693  -8.028  1.00  0.55           O  
HETATM  307  O   HOH T 306      26.656  33.272  -9.724  1.00  0.55           O  
HETATM  308  O   HOH T 307      55.825  20.464 -13.870  1.00  0.56           O  
HETATM  309  O   HOH T 308      48.573  15.382   0.102  1.00  0.56           O  
HETATM  310  O   HOH T 309      25.873  29.879  15.417  1.00  0.56           O  
HETATM  311  O   HOH T 310      12.825  42.860  26.016  1.00  0.56           O  
HETATM  312  O   HOH T 311      27.517  22.544  -0.759  1.00  0.56           O  
HETATM  313  O   HOH T 312      14.350  47.070  23.865  1.00  0.56           O  
HETATM  314  O   HOH T 313      37.314  23.970  14.349  1.00  0.57           O  
HETATM  315  O   HOH T 314      25.083  44.607  25.976  1.00  0.57           O  
HETATM  316  O   HOH T 315      26.625  25.636  10.440  1.00  0.57           O  
HETATM  317  O   HOH T 316      13.785  51.936  12.148  1.00  0.57           O  
HETATM  318  O   HOH T 317      46.838  29.824 -19.425  1.00  0.57           O  
HETATM  319  O   HOH T 318      21.671  44.756  25.317  1.00  0.57           O  
HETATM  320  O   HOH T 319      35.360  26.015  14.201  1.00  0.58           O  
HETATM  321  O   HOH T 320      29.339  33.444   4.759  1.00  0.58           O  
HETATM  322  O   HOH T 321      21.825  34.922  -3.969  1.00  0.59           O  
HETATM  323  O   HOH T 322       4.685  40.487  15.498  1.00  0.61           O  
HETATM  324  O   HOH T 323      47.806  14.281  -7.312  1.00  0.61           O  
HETATM  325  O   HOH T 324      27.706  53.448  21.777  1.00  0.61           O  
HETATM  326  O   HOH T 325      22.216  66.446  27.638  1.00  0.65           O  
TER     327      HOH T 325 
