# Supplementary material for: Accurate Prediction of Hydration Sites of Proteins Using Energy Model With Atom Embedding
Source: Front Mol Biosci. 2021 Sep 20;8:756075. doi: 10.3389/fmolb.2021.756075 (PMC8488165; doi:10.3389/fmolb.2021.756075)
Supplement: Supplementary file 1 [file DataSheet1.ZIP › Data Sheet 1/Our_result_pdb/our_dataset_output/3F0M_watersite.pdb]

HEADER                                                        XXXX


JRNL        PMID   -1
HETATM    1  O   HOH T   0      -0.414 -13.436  28.262  1.00  0.16           O  
HETATM    2  O   HOH T   1       7.182 -43.056  26.381  1.00  0.17           O  
HETATM    3  O   HOH T   2      -2.516 -43.778  15.405  1.00  0.17           O  
HETATM    4  O   HOH T   3      -9.569 -32.675  15.827  1.00  0.18           O  
HETATM    5  O   HOH T   4     -16.221 -23.602   5.649  1.00  0.18           O  
HETATM    6  O   HOH T   5     -10.585 -46.472  22.731  1.00  0.21           O  
HETATM    7  O   HOH T   6     -16.709 -23.297  32.013  1.00  0.21           O  
HETATM    8  O   HOH T   7       6.937 -15.508  20.004  1.00  0.21           O  
HETATM    9  O   HOH T   8      -2.644 -48.165  22.678  1.00  0.21           O  
HETATM   10  O   HOH T   9       4.358 -46.141  15.743  1.00  0.21           O  
HETATM   11  O   HOH T  10      -7.663 -21.518   7.954  1.00  0.22           O  
HETATM   12  O   HOH T  11       5.286 -25.715  14.989  1.00  0.22           O  
HETATM   13  O   HOH T  12      -9.332 -22.980  14.162  1.00  0.22           O  
HETATM   14  O   HOH T  13     -13.670 -17.872   5.820  1.00  0.22           O  
HETATM   15  O   HOH T  14       5.033 -39.053  12.868  1.00  0.23           O  
HETATM   16  O   HOH T  15     -13.768 -17.040  32.314  1.00  0.23           O  
HETATM   17  O   HOH T  16       9.264 -21.491  19.951  1.00  0.23           O  
HETATM   18  O   HOH T  17       4.367 -32.234  12.526  1.00  0.23           O  
HETATM   19  O   HOH T  18      10.130 -47.335  19.138  1.00  0.24           O  
HETATM   20  O   HOH T  19      -1.070 -20.453  34.319  1.00  0.24           O  
HETATM   21  O   HOH T  20      -6.209 -18.867  -0.186  1.00  0.24           O  
HETATM   22  O   HOH T  21     -12.518 -11.812  27.482  1.00  0.24           O  
HETATM   23  O   HOH T  22     -15.184 -42.922  18.067  1.00  0.24           O  
HETATM   24  O   HOH T  23       1.209 -19.518  33.006  1.00  0.24           O  
HETATM   25  O   HOH T  24     -10.601 -11.751  33.418  1.00  0.25           O  
HETATM   26  O   HOH T  25     -29.837 -21.485   8.627  1.00  0.25           O  
HETATM   27  O   HOH T  26     -12.360 -19.204  33.518  1.00  0.25           O  
HETATM   28  O   HOH T  27       1.302 -31.157  36.461  1.00  0.25           O  
HETATM   29  O   HOH T  28     -16.803 -25.111  12.388  1.00  0.25           O  
HETATM   30  O   HOH T  29     -31.571 -22.416  10.643  1.00  0.26           O  
HETATM   31  O   HOH T  30      -1.443 -28.571  15.116  1.00  0.26           O  
HETATM   32  O   HOH T  31     -25.179 -27.102  14.295  1.00  0.26           O  
HETATM   33  O   HOH T  32     -29.814 -34.755  16.927  1.00  0.26           O  
HETATM   34  O   HOH T  33     -23.403 -26.919  -2.451  1.00  0.26           O  
HETATM   35  O   HOH T  34     -21.128 -31.214  -9.234  1.00  0.27           O  
HETATM   36  O   HOH T  35      -6.993 -22.797   5.573  1.00  0.27           O  
HETATM   37  O   HOH T  36       2.755 -47.596  20.000  1.00  0.27           O  
HETATM   38  O   HOH T  37       1.830 -14.380  15.345  1.00  0.27           O  
HETATM   39  O   HOH T  38     -27.797 -23.454   9.103  1.00  0.27           O  
HETATM   40  O   HOH T  39       4.623 -41.875  32.808  1.00  0.28           O  
HETATM   41  O   HOH T  40     -22.307  -9.788  13.161  1.00  0.29           O  
HETATM   42  O   HOH T  41      -6.736 -26.870  42.455  1.00  0.29           O  
HETATM   43  O   HOH T  42     -16.484 -33.888   3.735  1.00  0.29           O  
HETATM   44  O   HOH T  43     -22.967 -14.499  15.591  1.00  0.29           O  
HETATM   45  O   HOH T  44     -10.648 -22.145  -1.629  1.00  0.29           O  
HETATM   46  O   HOH T  45      -9.841 -31.407   5.805  1.00  0.29           O  
HETATM   47  O   HOH T  46      -2.223 -16.143  11.305  1.00  0.29           O  
HETATM   48  O   HOH T  47      -9.031 -19.507   4.215  1.00  0.29           O  
HETATM   49  O   HOH T  48     -27.868 -25.524  26.494  1.00  0.29           O  
HETATM   50  O   HOH T  49       7.780 -46.933  18.068  1.00  0.30           O  
HETATM   51  O   HOH T  50     -22.254 -33.729   9.789  1.00  0.30           O  
HETATM   52  O   HOH T  51      -1.926 -30.060  17.431  1.00  0.30           O  
HETATM   53  O   HOH T  52      -4.382 -11.226  21.933  1.00  0.30           O  
HETATM   54  O   HOH T  53     -25.029 -14.122   8.777  1.00  0.30           O  
HETATM   55  O   HOH T  54     -14.759 -36.433  35.571  1.00  0.30           O  
HETATM   56  O   HOH T  55     -10.593 -39.879   9.532  1.00  0.30           O  
HETATM   57  O   HOH T  56      -5.365 -22.876  35.433  1.00  0.30           O  
HETATM   58  O   HOH T  57     -21.310 -13.565   6.871  1.00  0.30           O  
HETATM   59  O   HOH T  58     -28.449 -15.331   7.177  1.00  0.30           O  
HETATM   60  O   HOH T  59      -3.805 -19.714   3.407  1.00  0.31           O  
HETATM   61  O   HOH T  60       6.779 -31.855  22.111  1.00  0.31           O  
HETATM   62  O   HOH T  61     -11.070 -11.992   8.566  1.00  0.31           O  
HETATM   63  O   HOH T  62     -15.119 -46.044  13.717  1.00  0.31           O  
HETATM   64  O   HOH T  63      -9.609 -14.390   8.521  1.00  0.31           O  
HETATM   65  O   HOH T  64     -15.395 -12.243   3.956  1.00  0.31           O  
HETATM   66  O   HOH T  65     -11.204 -37.966   3.689  1.00  0.31           O  
HETATM   67  O   HOH T  66     -24.164 -19.456   4.838  1.00  0.31           O  
HETATM   68  O   HOH T  67     -13.083 -48.491  29.144  1.00  0.31           O  
HETATM   69  O   HOH T  68     -15.021 -26.068   5.182  1.00  0.31           O  
HETATM   70  O   HOH T  69       5.279 -35.563  32.532  1.00  0.31           O  
HETATM   71  O   HOH T  70     -19.300 -28.588  -4.418  1.00  0.31           O  
HETATM   72  O   HOH T  71     -18.586 -36.982  29.026  1.00  0.32           O  
HETATM   73  O   HOH T  72     -20.288 -13.664  21.870  1.00  0.32           O  
HETATM   74  O   HOH T  73     -11.619  -7.037  24.665  1.00  0.32           O  
HETATM   75  O   HOH T  74     -11.075 -15.763  14.827  1.00  0.32           O  
HETATM   76  O   HOH T  75      -8.852 -11.570  19.132  1.00  0.32           O  
HETATM   77  O   HOH T  76     -11.344 -21.433  -4.232  1.00  0.32           O  
HETATM   78  O   HOH T  77       6.635 -27.476  13.478  1.00  0.33           O  
HETATM   79  O   HOH T  78     -28.556 -29.907  27.039  1.00  0.33           O  
HETATM   80  O   HOH T  79      -0.918 -26.749  35.840  1.00  0.33           O  
HETATM   81  O   HOH T  80       0.108 -14.925  17.534  1.00  0.33           O  
HETATM   82  O   HOH T  81       1.706 -27.443  40.262  1.00  0.33           O  
HETATM   83  O   HOH T  82      -6.748 -37.632   6.259  1.00  0.34           O  
HETATM   84  O   HOH T  83      -5.210 -11.475  17.460  1.00  0.34           O  
HETATM   85  O   HOH T  84     -16.135 -17.900  30.986  1.00  0.34           O  
HETATM   86  O   HOH T  85     -12.525 -36.048  25.246  1.00  0.34           O  
HETATM   87  O   HOH T  86      -6.973 -32.297  -1.472  1.00  0.34           O  
HETATM   88  O   HOH T  87     -15.825 -19.552   6.559  1.00  0.34           O  
HETATM   89  O   HOH T  88       4.096 -26.229  40.760  1.00  0.34           O  
HETATM   90  O   HOH T  89       5.087 -20.651  28.176  1.00  0.34           O  
HETATM   91  O   HOH T  90     -13.761 -42.396  11.151  1.00  0.34           O  
HETATM   92  O   HOH T  91      -4.896  -8.602  21.371  1.00  0.35           O  
HETATM   93  O   HOH T  92     -26.173  -8.521  14.376  1.00  0.35           O  
HETATM   94  O   HOH T  93     -11.963 -37.321   6.366  1.00  0.35           O  
HETATM   95  O   HOH T  94     -12.942 -15.928  -1.154  1.00  0.35           O  
HETATM   96  O   HOH T  95     -12.930 -41.659  30.936  1.00  0.35           O  
HETATM   97  O   HOH T  96      -9.150  -2.860  23.616  1.00  0.36           O  
HETATM   98  O   HOH T  97     -11.779  -8.803  19.101  1.00  0.36           O  
HETATM   99  O   HOH T  98      -3.343 -13.123  16.065  1.00  0.36           O  
HETATM  100  O   HOH T  99     -16.312 -37.169  37.785  1.00  0.36           O  
HETATM  101  O   HOH T 100       4.754 -16.689  11.415  1.00  0.36           O  
HETATM  102  O   HOH T 101      -7.211 -30.698  -3.721  1.00  0.36           O  
HETATM  103  O   HOH T 102     -20.332  -9.055  19.092  1.00  0.36           O  
HETATM  104  O   HOH T 103       6.677 -13.795  22.062  1.00  0.36           O  
HETATM  105  O   HOH T 104       9.597 -44.798  18.163  1.00  0.36           O  
HETATM  106  O   HOH T 105     -15.453 -33.777  35.143  1.00  0.37           O  
HETATM  107  O   HOH T 106     -16.408 -20.708  30.927  1.00  0.37           O  
HETATM  108  O   HOH T 107     -12.673 -41.183  25.318  1.00  0.37           O  
HETATM  109  O   HOH T 108      -5.343 -14.344   8.676  1.00  0.37           O  
HETATM  110  O   HOH T 109     -12.777 -10.931  30.128  1.00  0.37           O  
HETATM  111  O   HOH T 110     -17.612 -29.516  -6.450  1.00  0.37           O  
HETATM  112  O   HOH T 111     -16.854 -17.106  -3.120  1.00  0.37           O  
HETATM  113  O   HOH T 112       4.889 -12.093  20.649  1.00  0.37           O  
HETATM  114  O   HOH T 113      -3.104 -14.385  13.445  1.00  0.38           O  
HETATM  115  O   HOH T 114       5.944 -23.902  10.394  1.00  0.38           O  
HETATM  116  O   HOH T 115     -17.258 -41.009  11.116  1.00  0.38           O  
HETATM  117  O   HOH T 116     -10.905  -4.450  24.839  1.00  0.38           O  
HETATM  118  O   HOH T 117     -15.008 -35.977   2.562  1.00  0.38           O  
HETATM  119  O   HOH T 118      -3.046 -13.546  21.347  1.00  0.38           O  
HETATM  120  O   HOH T 119       6.964 -17.617  12.738  1.00  0.38           O  
HETATM  121  O   HOH T 120      10.052 -42.831  24.303  1.00  0.38           O  
HETATM  122  O   HOH T 121      -6.086 -21.475  37.717  1.00  0.38           O  
HETATM  123  O   HOH T 122     -15.662 -41.306  22.435  1.00  0.38           O  
HETATM  124  O   HOH T 123     -12.328 -38.132  10.921  1.00  0.39           O  
HETATM  125  O   HOH T 124      -4.505 -36.125   6.513  1.00  0.39           O  
HETATM  126  O   HOH T 125     -20.235 -35.245   8.932  1.00  0.39           O  
HETATM  127  O   HOH T 126      -2.635 -22.399  35.563  1.00  0.39           O  
HETATM  128  O   HOH T 127     -15.954 -36.152   5.228  1.00  0.39           O  
HETATM  129  O   HOH T 128      -7.532 -12.682   9.121  1.00  0.39           O  
HETATM  130  O   HOH T 129       4.024 -15.015  13.515  1.00  0.39           O  
HETATM  131  O   HOH T 130     -11.497  -6.343  18.138  1.00  0.40           O  
HETATM  132  O   HOH T 131     -28.905 -12.678   6.282  1.00  0.40           O  
HETATM  133  O   HOH T 132      -2.512 -33.797  37.895  1.00  0.40           O  
HETATM  134  O   HOH T 133      -6.510  -7.935  19.295  1.00  0.40           O  
HETATM  135  O   HOH T 134     -15.640 -16.243  -0.839  1.00  0.40           O  
HETATM  136  O   HOH T 135     -15.279 -43.050  30.937  1.00  0.40           O  
HETATM  137  O   HOH T 136     -19.968 -38.103  31.234  1.00  0.40           O  
HETATM  138  O   HOH T 137     -10.455  -2.418  21.145  1.00  0.40           O  
HETATM  139  O   HOH T 138       7.558 -34.118  23.533  1.00  0.40           O  
HETATM  140  O   HOH T 139      -8.762  -6.946  27.879  1.00  0.40           O  
HETATM  141  O   HOH T 140      -2.907 -26.699   0.635  1.00  0.40           O  
HETATM  142  O   HOH T 141      -5.615 -16.868   7.701  1.00  0.40           O  
HETATM  143  O   HOH T 142      -4.477 -28.437  41.913  1.00  0.40           O  
HETATM  144  O   HOH T 143     -29.701  -7.875   6.734  1.00  0.40           O  
HETATM  145  O   HOH T 144     -25.740 -16.292   7.275  1.00  0.40           O  
HETATM  146  O   HOH T 145       3.950 -31.622  40.476  1.00  0.40           O  
HETATM  147  O   HOH T 146       0.405 -36.118   9.687  1.00  0.40           O  
HETATM  148  O   HOH T 147     -13.725 -43.089  33.203  1.00  0.40           O  
HETATM  149  O   HOH T 148      -9.192  -7.887  18.541  1.00  0.41           O  
HETATM  150  O   HOH T 149      -9.413 -38.242   5.723  1.00  0.41           O  
HETATM  151  O   HOH T 150     -14.834 -38.977  36.549  1.00  0.41           O  
HETATM  152  O   HOH T 151     -22.389  -9.281  17.294  1.00  0.41           O  
HETATM  153  O   HOH T 152     -28.693 -34.384  14.369  1.00  0.41           O  
HETATM  154  O   HOH T 153     -24.330  -7.935  12.373  1.00  0.41           O  
HETATM  155  O   HOH T 154      -5.644 -46.140  32.393  1.00  0.41           O  
HETATM  156  O   HOH T 155     -17.203 -29.342  -2.504  1.00  0.41           O  
HETATM  157  O   HOH T 156     -24.404 -16.727   4.926  1.00  0.42           O  
HETATM  158  O   HOH T 157     -15.132 -40.714  19.773  1.00  0.42           O  
HETATM  159  O   HOH T 158      -1.715  -7.893  24.336  1.00  0.42           O  
HETATM  160  O   HOH T 159     -20.069 -18.529   4.653  1.00  0.42           O  
HETATM  161  O   HOH T 160      -9.399 -42.283   8.832  1.00  0.42           O  
HETATM  162  O   HOH T 161     -23.200 -14.269   4.949  1.00  0.42           O  
HETATM  163  O   HOH T 162     -20.270 -30.015  -6.797  1.00  0.42           O  
HETATM  164  O   HOH T 163      -7.849 -19.826   1.795  1.00  0.42           O  
HETATM  165  O   HOH T 164       7.719 -23.907  24.668  1.00  0.42           O  
HETATM  166  O   HOH T 165     -20.879 -11.243  20.679  1.00  0.42           O  
HETATM  167  O   HOH T 166     -32.270 -20.751  12.807  1.00  0.42           O  
HETATM  168  O   HOH T 167       8.850 -22.605  26.963  1.00  0.43           O  
HETATM  169  O   HOH T 168      -8.819 -10.361   8.283  1.00  0.43           O  
HETATM  170  O   HOH T 169     -29.632 -10.391   7.694  1.00  0.43           O  
HETATM  171  O   HOH T 170     -17.991 -43.122  18.787  1.00  0.43           O  
HETATM  172  O   HOH T 171      -2.452 -26.918  38.206  1.00  0.43           O  
HETATM  173  O   HOH T 172      10.006 -40.418  25.771  1.00  0.43           O  
HETATM  174  O   HOH T 173       4.207 -38.386  25.211  1.00  0.43           O  
HETATM  175  O   HOH T 174       7.400 -37.493  27.189  1.00  0.43           O  
HETATM  176  O   HOH T 175     -10.860 -31.438  -2.719  1.00  0.43           O  
HETATM  177  O   HOH T 176     -29.624 -36.127  19.236  1.00  0.44           O  
HETATM  178  O   HOH T 177     -10.757 -46.997  28.571  1.00  0.44           O  
HETATM  179  O   HOH T 178       2.978 -32.590  38.006  1.00  0.44           O  
HETATM  180  O   HOH T 179       6.026 -22.465  26.268  1.00  0.44           O  
HETATM  181  O   HOH T 180      -6.609 -20.646  -2.267  1.00  0.44           O  
HETATM  182  O   HOH T 181       5.316 -21.521  30.894  1.00  0.44           O  
HETATM  183  O   HOH T 182      -4.886 -12.582  38.446  1.00  0.44           O  
HETATM  184  O   HOH T 183     -25.567 -26.051  -3.978  1.00  0.44           O  
HETATM  185  O   HOH T 184     -20.221 -14.974   1.531  1.00  0.44           O  
HETATM  186  O   HOH T 185       6.440 -26.692  10.822  1.00  0.44           O  
HETATM  187  O   HOH T 186      -2.259 -13.862  18.613  1.00  0.44           O  
HETATM  188  O   HOH T 187      -0.966 -40.589   7.055  1.00  0.44           O  
HETATM  189  O   HOH T 188     -21.848 -29.105  -3.310  1.00  0.44           O  
HETATM  190  O   HOH T 189     -18.550 -31.551  34.319  1.00  0.44           O  
HETATM  191  O   HOH T 190     -20.991 -30.170   3.433  1.00  0.45           O  
HETATM  192  O   HOH T 191      -4.868 -37.270   4.049  1.00  0.45           O  
HETATM  193  O   HOH T 192      -9.298 -29.203  -2.537  1.00  0.45           O  
HETATM  194  O   HOH T 193     -20.357 -22.417  26.744  1.00  0.45           O  
HETATM  195  O   HOH T 194       0.248 -33.299  37.959  1.00  0.45           O  
HETATM  196  O   HOH T 195       6.984 -24.857  12.875  1.00  0.45           O  
HETATM  197  O   HOH T 196      -3.536 -13.883  10.719  1.00  0.45           O  
HETATM  198  O   HOH T 197     -12.504 -46.922  11.192  1.00  0.45           O  
HETATM  199  O   HOH T 198     -11.436 -11.294  19.954  1.00  0.45           O  
HETATM  200  O   HOH T 199       9.780 -22.753  17.559  1.00  0.45           O  
HETATM  201  O   HOH T 200      -6.297 -10.616  19.946  1.00  0.45           O  
HETATM  202  O   HOH T 201      -3.465 -44.560  32.706  1.00  0.45           O  
HETATM  203  O   HOH T 202     -32.263 -26.150   9.619  1.00  0.45           O  
HETATM  204  O   HOH T 203     -16.729 -19.158  -7.330  1.00  0.45           O  
HETATM  205  O   HOH T 204       2.206 -17.573  11.059  1.00  0.45           O  
HETATM  206  O   HOH T 205     -27.764 -13.098   8.816  1.00  0.46           O  
HETATM  207  O   HOH T 206     -21.990 -22.842  -8.154  1.00  0.46           O  
HETATM  208  O   HOH T 207     -22.718 -14.273   2.287  1.00  0.46           O  
HETATM  209  O   HOH T 208       6.533 -37.461  37.444  1.00  0.46           O  
HETATM  210  O   HOH T 209     -11.902  -8.160  10.609  1.00  0.46           O  
HETATM  211  O   HOH T 210      -7.977 -22.657  -1.026  1.00  0.46           O  
HETATM  212  O   HOH T 211     -16.060 -36.613   8.004  1.00  0.46           O  
HETATM  213  O   HOH T 212     -17.806 -40.409  19.049  1.00  0.46           O  
HETATM  214  O   HOH T 213     -24.929 -24.296  -7.262  1.00  0.46           O  
HETATM  215  O   HOH T 214       6.947 -29.404  10.374  1.00  0.46           O  
HETATM  216  O   HOH T 215       5.414 -47.845  17.378  1.00  0.46           O  
HETATM  217  O   HOH T 216      -2.544 -31.387  36.437  1.00  0.47           O  
HETATM  218  O   HOH T 217     -20.379 -17.683   1.911  1.00  0.47           O  
HETATM  219  O   HOH T 218      -5.595 -39.742   4.776  1.00  0.47           O  
HETATM  220  O   HOH T 219     -13.803 -37.642   4.343  1.00  0.47           O  
HETATM  221  O   HOH T 220     -16.330 -43.555  11.131  1.00  0.47           O  
HETATM  222  O   HOH T 221     -25.152 -31.062   6.305  1.00  0.47           O  
HETATM  223  O   HOH T 222       5.284 -21.154  37.231  1.00  0.47           O  
HETATM  224  O   HOH T 223     -21.036 -38.075  25.009  1.00  0.47           O  
HETATM  225  O   HOH T 224     -24.206 -24.267  16.802  1.00  0.47           O  
HETATM  226  O   HOH T 225     -32.172 -37.917  17.546  1.00  0.47           O  
HETATM  227  O   HOH T 226      -8.663 -21.858  38.931  1.00  0.47           O  
HETATM  228  O   HOH T 227       1.535 -43.985   9.622  1.00  0.47           O  
HETATM  229  O   HOH T 228     -13.122 -44.679   9.726  1.00  0.47           O  
HETATM  230  O   HOH T 229     -14.654 -19.514  -5.501  1.00  0.47           O  
HETATM  231  O   HOH T 230     -10.766  -8.675  26.777  1.00  0.47           O  
HETATM  232  O   HOH T 231      -4.934 -18.629   5.695  1.00  0.48           O  
HETATM  233  O   HOH T 232     -17.706 -39.608  28.784  1.00  0.48           O  
HETATM  234  O   HOH T 233      -6.503 -12.967   6.541  1.00  0.48           O  
HETATM  235  O   HOH T 234      -5.397 -20.938   1.543  1.00  0.48           O  
HETATM  236  O   HOH T 235     -19.680 -41.368  12.237  1.00  0.48           O  
HETATM  237  O   HOH T 236     -23.452  -7.955  15.020  1.00  0.48           O  
HETATM  238  O   HOH T 237     -12.104 -14.411  -3.198  1.00  0.49           O  
HETATM  239  O   HOH T 238     -17.098 -19.394  -4.671  1.00  0.49           O  
HETATM  240  O   HOH T 239     -15.573 -31.319  36.450  1.00  0.49           O  
HETATM  241  O   HOH T 240     -21.082 -39.692  35.656  1.00  0.49           O  
HETATM  242  O   HOH T 241     -31.588 -18.677   1.423  1.00  0.49           O  
HETATM  243  O   HOH T 242      -0.654 -39.280  31.900  1.00  0.49           O  
HETATM  244  O   HOH T 243      -0.799 -35.724  37.048  1.00  0.49           O  
HETATM  245  O   HOH T 244     -18.715 -40.867  36.606  1.00  0.49           O  
HETATM  246  O   HOH T 245     -14.833 -10.524  26.566  1.00  0.49           O  
HETATM  247  O   HOH T 246       0.168 -26.054  38.327  1.00  0.49           O  
HETATM  248  O   HOH T 247      -6.421 -20.459   4.128  1.00  0.49           O  
HETATM  249  O   HOH T 248     -12.106 -42.244   8.892  1.00  0.49           O  
HETATM  250  O   HOH T 249     -27.217  -8.985   6.818  1.00  0.49           O  
HETATM  251  O   HOH T 250     -15.272 -12.714   1.306  1.00  0.49           O  
HETATM  252  O   HOH T 251      -0.000 -47.581  30.997  1.00  0.49           O  
HETATM  253  O   HOH T 252      -5.760 -24.343  -0.840  1.00  0.50           O  
HETATM  254  O   HOH T 253     -17.892 -19.283  -9.803  1.00  0.50           O  
HETATM  255  O   HOH T 254      -2.949 -15.223  39.692  1.00  0.50           O  
HETATM  256  O   HOH T 255       7.272 -40.200  26.521  1.00  0.50           O  
HETATM  257  O   HOH T 256      -6.683 -28.460  40.249  1.00  0.50           O  
HETATM  258  O   HOH T 257     -18.917 -21.637  31.602  1.00  0.50           O  
HETATM  259  O   HOH T 258     -15.418  -8.189  25.137  1.00  0.50           O  
HETATM  260  O   HOH T 259      -1.723 -24.444  37.194  1.00  0.50           O  
HETATM  261  O   HOH T 260     -18.950 -32.533   3.632  1.00  0.50           O  
HETATM  262  O   HOH T 261     -18.545 -38.675  38.243  1.00  0.50           O  
HETATM  263  O   HOH T 262     -25.051 -18.624  20.301  1.00  0.50           O  
HETATM  264  O   HOH T 263      -1.737 -20.296  36.993  1.00  0.50           O  
HETATM  265  O   HOH T 264       6.027 -36.273  25.207  1.00  0.50           O  
HETATM  266  O   HOH T 265     -17.415 -18.300   4.591  1.00  0.51           O  
HETATM  267  O   HOH T 266     -16.336 -43.449  33.404  1.00  0.51           O  
HETATM  268  O   HOH T 267       7.402 -25.769  22.736  1.00  0.51           O  
HETATM  269  O   HOH T 268     -12.128 -47.745  20.993  1.00  0.51           O  
HETATM  270  O   HOH T 269     -29.243 -21.120  -0.053  1.00  0.51           O  
HETATM  271  O   HOH T 270     -19.630 -30.732  -2.677  1.00  0.51           O  
HETATM  272  O   HOH T 271      -3.791 -26.072  40.553  1.00  0.51           O  
HETATM  273  O   HOH T 272     -13.772 -10.649   2.442  1.00  0.51           O  
HETATM  274  O   HOH T 273       9.718 -45.444  30.913  1.00  0.51           O  
HETATM  275  O   HOH T 274     -23.335 -11.899  16.653  1.00  0.51           O  
HETATM  276  O   HOH T 275     -19.629 -41.505  29.037  1.00  0.52           O  
HETATM  277  O   HOH T 276     -15.098 -19.412  -9.473  1.00  0.52           O  
HETATM  278  O   HOH T 277     -16.327 -49.865  18.834  1.00  0.52           O  
HETATM  279  O   HOH T 278     -25.279 -14.909   3.185  1.00  0.52           O  
HETATM  280  O   HOH T 279      -5.834 -32.879  24.254  1.00  0.52           O  
HETATM  281  O   HOH T 280     -18.587  -3.229  21.136  1.00  0.52           O  
HETATM  282  O   HOH T 281     -22.416 -12.113  22.818  1.00  0.52           O  
HETATM  283  O   HOH T 282       0.040 -13.721  20.008  1.00  0.52           O  
HETATM  284  O   HOH T 283     -11.532  -6.645  28.350  1.00  0.52           O  
HETATM  285  O   HOH T 284     -14.646 -15.474  -3.301  1.00  0.52           O  
HETATM  286  O   HOH T 285     -20.824  -3.044  14.336  1.00  0.52           O  
HETATM  287  O   HOH T 286       3.521 -11.276  32.462  1.00  0.52           O  
HETATM  288  O   HOH T 287     -25.897 -33.384  25.146  1.00  0.52           O  
HETATM  289  O   HOH T 288     -20.116 -20.337  24.681  1.00  0.52           O  
HETATM  290  O   HOH T 289     -14.230 -46.546  22.362  1.00  0.52           O  
HETATM  291  O   HOH T 290     -10.537 -44.696   8.903  1.00  0.53           O  
HETATM  292  O   HOH T 291      -7.101  -3.769  25.237  1.00  0.53           O  
HETATM  293  O   HOH T 292     -18.752 -38.235  26.612  1.00  0.53           O  
HETATM  294  O   HOH T 293      -3.230  -8.177  30.287  1.00  0.53           O  
HETATM  295  O   HOH T 294       1.631 -46.884  32.638  1.00  0.53           O  
HETATM  296  O   HOH T 295     -24.954 -23.549  22.657  1.00  0.53           O  
HETATM  297  O   HOH T 296     -16.988 -42.233  28.923  1.00  0.53           O  
HETATM  298  O   HOH T 297     -11.890  -2.275  23.474  1.00  0.53           O  
HETATM  299  O   HOH T 298      -3.547 -47.057  33.938  1.00  0.53           O  
HETATM  300  O   HOH T 299     -14.599 -48.523  20.508  1.00  0.53           O  
HETATM  301  O   HOH T 300     -27.033 -25.354  -1.785  1.00  0.53           O  
HETATM  302  O   HOH T 301      -7.432  -9.723  17.491  1.00  0.54           O  
HETATM  303  O   HOH T 302     -27.653 -30.056   6.382  1.00  0.54           O  
HETATM  304  O   HOH T 303     -12.034 -19.688  -6.253  1.00  0.54           O  
HETATM  305  O   HOH T 304      11.231 -38.104  33.228  1.00  0.54           O  
HETATM  306  O   HOH T 305       7.169 -35.228  28.773  1.00  0.54           O  
HETATM  307  O   HOH T 306      -5.386 -34.558  -1.643  1.00  0.54           O  
HETATM  308  O   HOH T 307     -22.689 -37.192  29.222  1.00  0.54           O  
HETATM  309  O   HOH T 308     -31.592 -40.384  13.850  1.00  0.54           O  
HETATM  310  O   HOH T 309       7.325 -23.299  21.146  1.00  0.55           O  
HETATM  311  O   HOH T 310       5.758 -12.881  13.739  1.00  0.55           O  
HETATM  312  O   HOH T 311     -13.164  -9.045  28.263  1.00  0.55           O  
HETATM  313  O   HOH T 312     -28.361 -17.791  18.723  1.00  0.55           O  
HETATM  314  O   HOH T 313     -17.882  -7.185   8.738  1.00  0.55           O  
HETATM  315  O   HOH T 314      -0.788 -43.033   8.115  1.00  0.55           O  
HETATM  316  O   HOH T 315      -9.750 -46.997  10.497  1.00  0.55           O  
HETATM  317  O   HOH T 316     -13.794 -33.208  37.287  1.00  0.55           O  
HETATM  318  O   HOH T 317     -12.208  -3.833  17.700  1.00  0.56           O  
HETATM  319  O   HOH T 318       0.836 -31.638   5.643  1.00  0.56           O  
HETATM  320  O   HOH T 319       8.123 -33.871  16.010  1.00  0.56           O  
HETATM  321  O   HOH T 320       8.125 -45.347  11.137  1.00  0.56           O  
HETATM  322  O   HOH T 321      -8.996 -46.991  30.800  1.00  0.56           O  
HETATM  323  O   HOH T 322     -26.595 -27.557  -6.516  1.00  0.56           O  
HETATM  324  O   HOH T 323     -16.030 -44.331  20.489  1.00  0.56           O  
HETATM  325  O   HOH T 324       5.902 -31.859  10.268  1.00  0.56           O  
HETATM  326  O   HOH T 325     -15.418 -40.628  25.180  1.00  0.56           O  
HETATM  327  O   HOH T 326     -13.003 -12.142  32.421  1.00  0.57           O  
HETATM  328  O   HOH T 327      -7.978 -11.048   1.379  1.00  0.57           O  
HETATM  329  O   HOH T 328       0.812 -15.486  38.122  1.00  0.57           O  
HETATM  330  O   HOH T 329     -16.988 -46.277  11.864  1.00  0.57           O  
HETATM  331  O   HOH T 330     -22.030 -21.780  21.949  1.00  0.58           O  
HETATM  332  O   HOH T 331      -8.193 -40.565   4.982  1.00  0.58           O  
HETATM  333  O   HOH T 332       3.456 -34.227  40.005  1.00  0.59           O  
HETATM  334  O   HOH T 333     -19.121 -16.227   3.692  1.00  0.60           O  
HETATM  335  O   HOH T 334      -6.374 -37.286   1.603  1.00  0.61           O  
HETATM  336  O   HOH T 335      -0.698 -17.878  37.525  1.00  0.62           O  
TER     337      HOH T 335 
