# Supplementary material for: Accurate Prediction of Hydration Sites of Proteins Using Energy Model With Atom Embedding
Source: Front Mol Biosci. 2021 Sep 20;8:756075. doi: 10.3389/fmolb.2021.756075 (PMC8488165; doi:10.3389/fmolb.2021.756075)
Supplement: Supplementary file 1 [file DataSheet1.ZIP › Data Sheet 1/Our_result_pdb/our_dataset_output/3F0U_watersite.pdb]

HEADER                                                        XXXX


JRNL        PMID   -1
HETATM    1  O   HOH T   0      -8.628  -8.561  37.756  1.00  0.20           O  
HETATM    2  O   HOH T   1     -24.768 -18.845  50.796  1.00  0.20           O  
HETATM    3  O   HOH T   2     -22.544 -17.759  25.063  1.00  0.21           O  
HETATM    4  O   HOH T   3     -24.297  -8.157  58.226  1.00  0.21           O  
HETATM    5  O   HOH T   4     -25.296 -10.067  56.488  1.00  0.21           O  
HETATM    6  O   HOH T   5     -35.788 -27.609  33.308  1.00  0.22           O  
HETATM    7  O   HOH T   6     -25.377   5.524  46.411  1.00  0.22           O  
HETATM    8  O   HOH T   7     -11.966 -17.623  36.234  1.00  0.23           O  
HETATM    9  O   HOH T   8     -29.052 -17.924  25.408  1.00  0.24           O  
HETATM   10  O   HOH T   9     -14.790 -16.222  45.313  1.00  0.24           O  
HETATM   11  O   HOH T  10     -30.037 -15.611  47.014  1.00  0.24           O  
HETATM   12  O   HOH T  11     -18.256  -7.550  54.438  1.00  0.26           O  
HETATM   13  O   HOH T  12     -11.461   4.818  26.520  1.00  0.26           O  
HETATM   14  O   HOH T  13     -31.753 -13.622  47.926  1.00  0.26           O  
HETATM   15  O   HOH T  14     -22.601   2.311  35.455  1.00  0.27           O  
HETATM   16  O   HOH T  15     -25.722 -29.864  29.172  1.00  0.27           O  
HETATM   17  O   HOH T  16     -35.996 -30.250  39.309  1.00  0.27           O  
HETATM   18  O   HOH T  17     -29.411 -14.344  25.153  1.00  0.28           O  
HETATM   19  O   HOH T  18     -26.583 -28.496  48.148  1.00  0.28           O  
HETATM   20  O   HOH T  19     -37.064   3.333  37.519  1.00  0.28           O  
HETATM   21  O   HOH T  20      -9.704  -3.886  42.934  1.00  0.28           O  
HETATM   22  O   HOH T  21     -16.901 -21.873  45.129  1.00  0.28           O  
HETATM   23  O   HOH T  22     -23.157 -30.964  29.002  1.00  0.28           O  
HETATM   24  O   HOH T  23     -41.384 -26.686  37.595  1.00  0.28           O  
HETATM   25  O   HOH T  24     -12.991 -10.428  51.890  1.00  0.28           O  
HETATM   26  O   HOH T  25     -21.906   8.846  39.903  1.00  0.29           O  
HETATM   27  O   HOH T  26     -33.136  -5.299  28.388  1.00  0.29           O  
HETATM   28  O   HOH T  27     -11.940 -17.523  48.691  1.00  0.29           O  
HETATM   29  O   HOH T  28     -29.633 -15.117  55.069  1.00  0.29           O  
HETATM   30  O   HOH T  29     -24.024 -21.139  49.323  1.00  0.29           O  
HETATM   31  O   HOH T  30     -23.403  -0.433  35.329  1.00  0.29           O  
HETATM   32  O   HOH T  31     -24.539   9.193  39.502  1.00  0.29           O  
HETATM   33  O   HOH T  32     -10.504   2.552  34.065  1.00  0.30           O  
HETATM   34  O   HOH T  33     -14.697 -24.904  35.558  1.00  0.30           O  
HETATM   35  O   HOH T  34     -10.581 -10.348  37.137  1.00  0.30           O  
HETATM   36  O   HOH T  35     -28.367   9.402  46.658  1.00  0.30           O  
HETATM   37  O   HOH T  36     -32.135  -0.645  51.859  1.00  0.30           O  
HETATM   38  O   HOH T  37     -24.089   5.661  32.464  1.00  0.31           O  
HETATM   39  O   HOH T  38     -20.091   9.293  37.858  1.00  0.31           O  
HETATM   40  O   HOH T  39     -28.402 -13.161  53.624  1.00  0.32           O  
HETATM   41  O   HOH T  40     -14.664 -16.339  26.945  1.00  0.32           O  
HETATM   42  O   HOH T  41     -13.687  -7.421  26.745  1.00  0.32           O  
HETATM   43  O   HOH T  42     -36.053  -3.427  53.469  1.00  0.32           O  
HETATM   44  O   HOH T  43     -14.181 -22.559  34.147  1.00  0.32           O  
HETATM   45  O   HOH T  44     -31.007 -32.155  34.212  1.00  0.32           O  
HETATM   46  O   HOH T  45      -7.431  -2.620  41.961  1.00  0.32           O  
HETATM   47  O   HOH T  46     -19.349 -29.984  34.360  1.00  0.32           O  
HETATM   48  O   HOH T  47     -27.977 -39.868  30.809  1.00  0.33           O  
HETATM   49  O   HOH T  48     -25.032 -40.420  33.044  1.00  0.33           O  
HETATM   50  O   HOH T  49     -14.111 -10.522  54.456  1.00  0.33           O  
HETATM   51  O   HOH T  50     -22.273  -5.595  27.749  1.00  0.34           O  
HETATM   52  O   HOH T  51     -32.407  -6.693  47.000  1.00  0.34           O  
HETATM   53  O   HOH T  52     -29.833  -5.874  55.052  1.00  0.34           O  
HETATM   54  O   HOH T  53     -36.122  -2.402  35.547  1.00  0.34           O  
HETATM   55  O   HOH T  54     -25.556  -2.544  28.934  1.00  0.35           O  
HETATM   56  O   HOH T  55     -29.995  -6.395  45.520  1.00  0.35           O  
HETATM   57  O   HOH T  56     -32.748 -27.796  29.040  1.00  0.35           O  
HETATM   58  O   HOH T  57     -23.543 -15.683  23.527  1.00  0.35           O  
HETATM   59  O   HOH T  58     -12.908  -6.347  48.736  1.00  0.36           O  
HETATM   60  O   HOH T  59     -34.701 -31.506  32.297  1.00  0.36           O  
HETATM   61  O   HOH T  60     -28.577  -5.122  28.424  1.00  0.36           O  
HETATM   62  O   HOH T  61     -17.669   1.590  44.391  1.00  0.36           O  
HETATM   63  O   HOH T  62     -37.137  -1.572  50.355  1.00  0.36           O  
HETATM   64  O   HOH T  63     -28.506  10.322  38.839  1.00  0.36           O  
HETATM   65  O   HOH T  64     -26.922   9.503  41.190  1.00  0.36           O  
HETATM   66  O   HOH T  65     -18.616   4.180  44.769  1.00  0.36           O  
HETATM   67  O   HOH T  66     -17.835 -27.682  33.716  1.00  0.36           O  
HETATM   68  O   HOH T  67     -35.342 -20.889  30.513  1.00  0.36           O  
HETATM   69  O   HOH T  68     -23.598  -2.368  37.225  1.00  0.36           O  
HETATM   70  O   HOH T  69     -38.219 -24.749  41.189  1.00  0.36           O  
HETATM   71  O   HOH T  70     -28.529 -26.698  49.002  1.00  0.36           O  
HETATM   72  O   HOH T  71     -13.336 -14.320  46.777  1.00  0.37           O  
HETATM   73  O   HOH T  72     -10.466 -11.905  34.911  1.00  0.38           O  
HETATM   74  O   HOH T  73     -23.942 -37.521  35.579  1.00  0.38           O  
HETATM   75  O   HOH T  74     -24.870  -5.270  39.120  1.00  0.38           O  
HETATM   76  O   HOH T  75     -16.123   4.793  40.563  1.00  0.38           O  
HETATM   77  O   HOH T  76     -12.031 -21.110  34.795  1.00  0.38           O  
HETATM   78  O   HOH T  77     -30.797 -29.776  29.313  1.00  0.38           O  
HETATM   79  O   HOH T  78     -18.363 -24.492  23.890  1.00  0.38           O  
HETATM   80  O   HOH T  79     -34.759 -10.089  23.047  1.00  0.38           O  
HETATM   81  O   HOH T  80     -24.268 -22.678  19.469  1.00  0.39           O  
HETATM   82  O   HOH T  81      -8.831   0.874  35.492  1.00  0.39           O  
HETATM   83  O   HOH T  82     -10.683   7.303  25.527  1.00  0.39           O  
HETATM   84  O   HOH T  83     -31.681 -38.787  40.006  1.00  0.39           O  
HETATM   85  O   HOH T  84     -13.813  -2.331  48.551  1.00  0.39           O  
HETATM   86  O   HOH T  85     -29.749 -11.763  23.994  1.00  0.39           O  
HETATM   87  O   HOH T  86     -29.517   6.304  37.836  1.00  0.40           O  
HETATM   88  O   HOH T  87     -10.264  -7.261  48.870  1.00  0.40           O  
HETATM   89  O   HOH T  88     -16.691 -27.420  31.088  1.00  0.40           O  
HETATM   90  O   HOH T  89     -30.861 -31.753  31.313  1.00  0.40           O  
HETATM   91  O   HOH T  90     -10.430   2.265  25.971  1.00  0.40           O  
HETATM   92  O   HOH T  91     -33.102 -18.550  49.848  1.00  0.40           O  
HETATM   93  O   HOH T  92     -41.410 -23.821  37.400  1.00  0.40           O  
HETATM   94  O   HOH T  93     -35.154  -4.010  29.795  1.00  0.40           O  
HETATM   95  O   HOH T  94     -26.741 -36.569  38.151  1.00  0.40           O  
HETATM   96  O   HOH T  95     -34.911 -27.817  30.769  1.00  0.40           O  
HETATM   97  O   HOH T  96     -33.187  -2.521  28.902  1.00  0.41           O  
HETATM   98  O   HOH T  97      -8.332 -10.272  35.560  1.00  0.41           O  
HETATM   99  O   HOH T  98     -30.843 -25.279  48.306  1.00  0.41           O  
HETATM  100  O   HOH T  99     -39.775 -28.689  38.986  1.00  0.41           O  
HETATM  101  O   HOH T 100     -27.834 -40.149  33.535  1.00  0.41           O  
HETATM  102  O   HOH T 101     -17.946 -13.681  24.556  1.00  0.41           O  
HETATM  103  O   HOH T 102     -23.995   2.964  33.182  1.00  0.41           O  
HETATM  104  O   HOH T 103     -36.771 -18.720  31.059  1.00  0.41           O  
HETATM  105  O   HOH T 104     -34.464   0.605  53.071  1.00  0.41           O  
HETATM  106  O   HOH T 105     -16.238   1.052  46.815  1.00  0.41           O  
HETATM  107  O   HOH T 106     -39.975 -23.067  39.669  1.00  0.41           O  
HETATM  108  O   HOH T 107     -36.895 -24.387  45.487  1.00  0.42           O  
HETATM  109  O   HOH T 108     -25.795  -5.382  28.884  1.00  0.42           O  
HETATM  110  O   HOH T 109     -31.900 -11.641  52.889  1.00  0.42           O  
HETATM  111  O   HOH T 110     -33.354 -33.575  33.538  1.00  0.42           O  
HETATM  112  O   HOH T 111     -27.502 -11.616  55.778  1.00  0.42           O  
HETATM  113  O   HOH T 112     -13.462 -10.071  25.729  1.00  0.43           O  
HETATM  114  O   HOH T 113     -25.595   7.241  48.569  1.00  0.43           O  
HETATM  115  O   HOH T 114      -9.933  -7.144  53.298  1.00  0.43           O  
HETATM  116  O   HOH T 115      -7.172  -7.162  31.227  1.00  0.43           O  
HETATM  117  O   HOH T 116     -16.211  -6.476  58.279  1.00  0.43           O  
HETATM  118  O   HOH T 117     -27.444   2.362  36.429  1.00  0.43           O  
HETATM  119  O   HOH T 118     -39.858   3.265  37.913  1.00  0.44           O  
HETATM  120  O   HOH T 119     -29.706   1.653  37.850  1.00  0.44           O  
HETATM  121  O   HOH T 120     -25.774 -20.411  19.542  1.00  0.44           O  
HETATM  122  O   HOH T 121     -20.172   6.790  40.716  1.00  0.44           O  
HETATM  123  O   HOH T 122     -38.074   8.079  47.033  1.00  0.44           O  
HETATM  124  O   HOH T 123     -19.850 -22.110  58.711  1.00  0.44           O  
HETATM  125  O   HOH T 124     -34.624  -1.843  51.602  1.00  0.44           O  
HETATM  126  O   HOH T 125     -38.609 -31.360  39.012  1.00  0.45           O  
HETATM  127  O   HOH T 126     -35.625   4.183  44.706  1.00  0.45           O  
HETATM  128  O   HOH T 127     -25.855  -1.120  34.021  1.00  0.45           O  
HETATM  129  O   HOH T 128     -38.211 -16.805  32.158  1.00  0.45           O  
HETATM  130  O   HOH T 129      -4.950  -3.782  42.675  1.00  0.45           O  
HETATM  131  O   HOH T 130     -41.501 -17.766  37.301  1.00  0.45           O  
HETATM  132  O   HOH T 131     -33.221  -8.407  49.135  1.00  0.45           O  
HETATM  133  O   HOH T 132     -32.635   9.877  46.787  1.00  0.46           O  
HETATM  134  O   HOH T 133     -35.357 -28.311  41.319  1.00  0.46           O  
HETATM  135  O   HOH T 134     -16.093 -13.907  26.689  1.00  0.46           O  
HETATM  136  O   HOH T 135      -4.843  -6.423  43.654  1.00  0.46           O  
HETATM  137  O   HOH T 136     -12.127  -8.672  53.895  1.00  0.46           O  
HETATM  138  O   HOH T 137     -21.188 -23.558  47.877  1.00  0.46           O  
HETATM  139  O   HOH T 138     -38.998 -24.250  43.711  1.00  0.46           O  
HETATM  140  O   HOH T 139     -39.965  -9.716  33.934  1.00  0.46           O  
HETATM  141  O   HOH T 140     -26.782 -11.327  58.463  1.00  0.46           O  
HETATM  142  O   HOH T 141     -11.210 -11.516  26.621  1.00  0.47           O  
HETATM  143  O   HOH T 142     -29.945 -22.768  47.436  1.00  0.47           O  
HETATM  144  O   HOH T 143     -26.217 -13.030  60.661  1.00  0.47           O  
HETATM  145  O   HOH T 144     -17.896  -8.267  57.013  1.00  0.47           O  
HETATM  146  O   HOH T 145     -30.382   8.368  39.535  1.00  0.47           O  
HETATM  147  O   HOH T 146     -19.536 -21.916  49.341  1.00  0.47           O  
HETATM  148  O   HOH T 147     -17.568 -29.948  32.185  1.00  0.47           O  
HETATM  149  O   HOH T 148     -32.455 -16.168  48.425  1.00  0.47           O  
HETATM  150  O   HOH T 149     -11.322 -13.518  28.655  1.00  0.47           O  
HETATM  151  O   HOH T 150     -30.905  -3.727  28.700  1.00  0.47           O  
HETATM  152  O   HOH T 151     -10.881 -17.746  38.820  1.00  0.47           O  
HETATM  153  O   HOH T 152     -16.991 -16.177  25.408  1.00  0.47           O  
HETATM  154  O   HOH T 153     -41.521 -15.476  30.873  1.00  0.48           O  
HETATM  155  O   HOH T 154     -19.276 -21.015  51.946  1.00  0.48           O  
HETATM  156  O   HOH T 155     -31.055  10.973  39.945  1.00  0.48           O  
HETATM  157  O   HOH T 156     -22.141 -17.792  22.396  1.00  0.48           O  
HETATM  158  O   HOH T 157     -30.365  10.598  47.974  1.00  0.48           O  
HETATM  159  O   HOH T 158     -14.936 -11.583  58.513  1.00  0.48           O  
HETATM  160  O   HOH T 159     -34.052 -14.105  49.389  1.00  0.48           O  
HETATM  161  O   HOH T 160     -33.215 -30.177  30.440  1.00  0.49           O  
HETATM  162  O   HOH T 161     -37.239 -15.272  39.800  1.00  0.49           O  
HETATM  163  O   HOH T 162     -24.029 -40.254  35.608  1.00  0.49           O  
HETATM  164  O   HOH T 163     -11.176 -20.026  37.241  1.00  0.49           O  
HETATM  165  O   HOH T 164      -9.631   3.266  36.561  1.00  0.49           O  
HETATM  166  O   HOH T 165     -12.975   5.382  33.011  1.00  0.49           O  
HETATM  167  O   HOH T 166     -12.397 -19.589  46.929  1.00  0.49           O  
HETATM  168  O   HOH T 167     -19.232 -22.007  46.521  1.00  0.49           O  
HETATM  169  O   HOH T 168     -35.727   8.079  45.502  1.00  0.50           O  
HETATM  170  O   HOH T 169     -16.474 -21.225  52.226  1.00  0.50           O  
HETATM  171  O   HOH T 170     -23.317  -1.680  27.770  1.00  0.50           O  
HETATM  172  O   HOH T 171     -11.240  -8.683  26.315  1.00  0.50           O  
HETATM  173  O   HOH T 172     -34.582 -12.825  23.584  1.00  0.50           O  
HETATM  174  O   HOH T 173     -24.428  -4.050  26.865  1.00  0.50           O  
HETATM  175  O   HOH T 174     -39.706   6.070  45.968  1.00  0.50           O  
HETATM  176  O   HOH T 175     -28.438   4.786  35.848  1.00  0.50           O  
HETATM  177  O   HOH T 176     -26.122  10.154  43.943  1.00  0.50           O  
HETATM  178  O   HOH T 177     -12.838  -2.369  51.042  1.00  0.51           O  
HETATM  179  O   HOH T 178     -31.802  -9.631  51.089  1.00  0.51           O  
HETATM  180  O   HOH T 179     -36.570 -26.034  29.400  1.00  0.51           O  
HETATM  181  O   HOH T 180     -39.017 -15.763  29.831  1.00  0.51           O  
HETATM  182  O   HOH T 181     -35.053 -16.750  49.373  1.00  0.51           O  
HETATM  183  O   HOH T 182      -3.760  -1.520  33.174  1.00  0.51           O  
HETATM  184  O   HOH T 183     -25.126 -15.301  19.435  1.00  0.51           O  
HETATM  185  O   HOH T 184     -19.410 -18.234  22.439  1.00  0.51           O  
HETATM  186  O   HOH T 185     -33.901  10.424  49.325  1.00  0.52           O  
HETATM  187  O   HOH T 186     -12.067  -4.986  51.000  1.00  0.52           O  
HETATM  188  O   HOH T 187     -32.291 -11.349  22.715  1.00  0.52           O  
HETATM  189  O   HOH T 188     -41.435 -29.263  33.793  1.00  0.52           O  
HETATM  190  O   HOH T 189     -36.420   9.828  50.290  1.00  0.52           O  
HETATM  191  O   HOH T 190     -32.208 -12.126  50.151  1.00  0.52           O  
HETATM  192  O   HOH T 191     -40.458 -25.374  30.437  1.00  0.52           O  
HETATM  193  O   HOH T 192     -12.816 -23.177  36.458  1.00  0.52           O  
HETATM  194  O   HOH T 193     -14.386 -17.783  47.601  1.00  0.53           O  
HETATM  195  O   HOH T 194     -23.644 -13.954  21.369  1.00  0.53           O  
HETATM  196  O   HOH T 195      -3.313  -5.612  41.437  1.00  0.53           O  
HETATM  197  O   HOH T 196     -29.867  -1.472  34.491  1.00  0.53           O  
HETATM  198  O   HOH T 197     -15.360 -22.136  41.379  1.00  0.53           O  
HETATM  199  O   HOH T 198     -15.259 -26.717  33.501  1.00  0.53           O  
HETATM  200  O   HOH T 199     -25.297   1.451  35.041  1.00  0.54           O  
HETATM  201  O   HOH T 200     -25.737 -38.971  37.261  1.00  0.54           O  
HETATM  202  O   HOH T 201     -17.592   5.819  42.769  1.00  0.54           O  
HETATM  203  O   HOH T 202     -13.585 -12.736  26.716  1.00  0.54           O  
HETATM  204  O   HOH T 203     -19.746 -31.705  32.425  1.00  0.54           O  
HETATM  205  O   HOH T 204     -30.970 -17.583  55.216  1.00  0.54           O  
HETATM  206  O   HOH T 205     -22.241 -30.634  26.495  1.00  0.54           O  
HETATM  207  O   HOH T 206     -30.050 -16.122  57.486  1.00  0.54           O  
HETATM  208  O   HOH T 207     -15.481   8.833  39.550  1.00  0.54           O  
HETATM  209  O   HOH T 208     -14.622  -4.692  47.322  1.00  0.54           O  
HETATM  210  O   HOH T 209     -14.686   5.748  38.297  1.00  0.54           O  
HETATM  211  O   HOH T 210     -37.308 -23.351  29.646  1.00  0.54           O  
HETATM  212  O   HOH T 211     -10.855 -16.226  28.585  1.00  0.54           O  
HETATM  213  O   HOH T 212     -36.475   1.666  44.492  1.00  0.54           O  
HETATM  214  O   HOH T 213     -25.789   8.240  45.993  1.00  0.55           O  
HETATM  215  O   HOH T 214     -40.773 -29.196  36.451  1.00  0.55           O  
HETATM  216  O   HOH T 215     -38.938  -7.785  32.312  1.00  0.55           O  
HETATM  217  O   HOH T 216      -7.301  -5.092  43.489  1.00  0.55           O  
HETATM  218  O   HOH T 217     -36.885  -0.817  52.988  1.00  0.55           O  
HETATM  219  O   HOH T 218     -38.210 -16.803  46.342  1.00  0.55           O  
HETATM  220  O   HOH T 219      -3.104  -7.434  36.536  1.00  0.56           O  
HETATM  221  O   HOH T 220     -40.627 -17.031  34.787  1.00  0.56           O  
HETATM  222  O   HOH T 221     -19.153   8.063  43.734  1.00  0.56           O  
HETATM  223  O   HOH T 222     -26.755  11.628  46.145  1.00  0.56           O  
HETATM  224  O   HOH T 223     -15.312 -23.456  43.747  1.00  0.56           O  
HETATM  225  O   HOH T 224     -14.561 -27.508  29.153  1.00  0.57           O  
HETATM  226  O   HOH T 225     -26.831 -29.009  26.736  1.00  0.57           O  
HETATM  227  O   HOH T 226     -26.832 -22.780  20.215  1.00  0.57           O  
HETATM  228  O   HOH T 227      -9.536 -13.960  41.856  1.00  0.57           O  
HETATM  229  O   HOH T 228     -25.828 -24.553  25.828  1.00  0.57           O  
HETATM  230  O   HOH T 229     -15.266 -12.940  24.146  1.00  0.57           O  
HETATM  231  O   HOH T 230     -16.020   3.307  45.442  1.00  0.58           O  
HETATM  232  O   HOH T 231     -12.258 -17.828  26.722  1.00  0.59           O  
HETATM  233  O   HOH T 232     -33.680 -14.700  25.738  1.00  0.59           O  
HETATM  234  O   HOH T 233     -29.913 -34.048  29.716  1.00  0.59           O  
HETATM  235  O   HOH T 234     -37.260  -3.240  33.210  1.00  0.60           O  
HETATM  236  O   HOH T 235     -35.026 -15.427  56.003  1.00  0.62           O  
TER     237      HOH T 235 
