# Supplementary material for: Accurate Prediction of Hydration Sites of Proteins Using Energy Model With Atom Embedding
Source: Front Mol Biosci. 2021 Sep 20;8:756075. doi: 10.3389/fmolb.2021.756075 (PMC8488165; doi:10.3389/fmolb.2021.756075)
Supplement: Supplementary file 1 [file DataSheet1.ZIP › Data Sheet 1/Our_result_pdb/our_dataset_output/3FCN_watersite.pdb]

HEADER                                                        XXXX


JRNL        PMID   -1
HETATM    1  O   HOH T   0      24.329  -2.482  42.338  1.00  0.20           O  
HETATM    2  O   HOH T   1      37.156  10.437  61.609  1.00  0.21           O  
HETATM    3  O   HOH T   2      14.510  12.601  27.288  1.00  0.21           O  
HETATM    4  O   HOH T   3      25.080  -7.379  54.643  1.00  0.22           O  
HETATM    5  O   HOH T   4      29.909  10.244   7.854  1.00  0.22           O  
HETATM    6  O   HOH T   5      28.743   9.895  12.159  1.00  0.22           O  
HETATM    7  O   HOH T   6      34.821   9.969  54.807  1.00  0.22           O  
HETATM    8  O   HOH T   7      28.003   3.427   5.855  1.00  0.23           O  
HETATM    9  O   HOH T   8      16.848  -7.189  38.443  1.00  0.23           O  
HETATM   10  O   HOH T   9      17.793   6.359   5.342  1.00  0.25           O  
HETATM   11  O   HOH T  10      29.500   1.643  10.913  1.00  0.25           O  
HETATM   12  O   HOH T  11       9.052  -3.433  29.290  1.00  0.25           O  
HETATM   13  O   HOH T  12      23.629  -1.295  54.916  1.00  0.25           O  
HETATM   14  O   HOH T  13      11.112   7.328  34.672  1.00  0.26           O  
HETATM   15  O   HOH T  14      19.260  -4.817   3.469  1.00  0.26           O  
HETATM   16  O   HOH T  15      23.761  -1.664   7.193  1.00  0.26           O  
HETATM   17  O   HOH T  16      21.392  14.084  28.496  1.00  0.27           O  
HETATM   18  O   HOH T  17      22.413  18.738  36.052  1.00  0.27           O  
HETATM   19  O   HOH T  18      11.258   9.745  19.236  1.00  0.27           O  
HETATM   20  O   HOH T  19      22.080  -6.071  45.718  1.00  0.27           O  
HETATM   21  O   HOH T  20      19.289  -9.918  10.150  1.00  0.28           O  
HETATM   22  O   HOH T  21      14.716   0.065   7.272  1.00  0.28           O  
HETATM   23  O   HOH T  22       9.677  12.798  28.622  1.00  0.28           O  
HETATM   24  O   HOH T  23       9.418  -3.727  26.508  1.00  0.28           O  
HETATM   25  O   HOH T  24      12.348  13.548  28.641  1.00  0.28           O  
HETATM   26  O   HOH T  25      24.082   4.013  58.319  1.00  0.28           O  
HETATM   27  O   HOH T  26      40.651   4.768  63.087  1.00  0.29           O  
HETATM   28  O   HOH T  27      24.178   4.812  47.338  1.00  0.29           O  
HETATM   29  O   HOH T  28      18.128  17.689  28.653  1.00  0.29           O  
HETATM   30  O   HOH T  29      15.551  -6.656  16.036  1.00  0.29           O  
HETATM   31  O   HOH T  30      13.538   8.660  35.125  1.00  0.30           O  
HETATM   32  O   HOH T  31      14.565   3.566  43.991  1.00  0.30           O  
HETATM   33  O   HOH T  32      20.439   7.990  35.881  1.00  0.30           O  
HETATM   34  O   HOH T  33      24.523   0.747   5.941  1.00  0.30           O  
HETATM   35  O   HOH T  34      12.129   6.409  27.041  1.00  0.30           O  
HETATM   36  O   HOH T  35      26.618 -13.333  50.249  1.00  0.30           O  
HETATM   37  O   HOH T  36      13.463  -9.399  28.866  1.00  0.31           O  
HETATM   38  O   HOH T  37      27.904  -5.733  11.950  1.00  0.31           O  
HETATM   39  O   HOH T  38      40.358   7.982  58.570  1.00  0.31           O  
HETATM   40  O   HOH T  39      11.303  12.066  30.756  1.00  0.31           O  
HETATM   41  O   HOH T  40      26.723   5.858  47.832  1.00  0.31           O  
HETATM   42  O   HOH T  41      22.927 -11.632  23.324  1.00  0.32           O  
HETATM   43  O   HOH T  42      18.099  -6.311  54.101  1.00  0.32           O  
HETATM   44  O   HOH T  43      15.390  -6.056  10.469  1.00  0.32           O  
HETATM   45  O   HOH T  44      36.746  10.118  66.954  1.00  0.32           O  
HETATM   46  O   HOH T  45      16.518  10.201  38.772  1.00  0.33           O  
HETATM   47  O   HOH T  46       9.994   3.906  13.461  1.00  0.33           O  
HETATM   48  O   HOH T  47      45.413   6.542  69.380  1.00  0.33           O  
HETATM   49  O   HOH T  48      14.558   2.784   7.360  1.00  0.33           O  
HETATM   50  O   HOH T  49      44.472   8.311  62.213  1.00  0.33           O  
HETATM   51  O   HOH T  50       5.093   8.220  24.619  1.00  0.33           O  
HETATM   52  O   HOH T  51      14.361  16.102  17.846  1.00  0.33           O  
HETATM   53  O   HOH T  52       7.286  -8.241  27.538  1.00  0.33           O  
HETATM   54  O   HOH T  53      37.878   7.790  65.840  1.00  0.33           O  
HETATM   55  O   HOH T  54      20.721 -13.254  23.227  1.00  0.34           O  
HETATM   56  O   HOH T  55      20.823  19.160  32.925  1.00  0.34           O  
HETATM   57  O   HOH T  56      11.370  10.333  21.916  1.00  0.34           O  
HETATM   58  O   HOH T  57      25.327 -10.037  29.299  1.00  0.35           O  
HETATM   59  O   HOH T  58      18.421  -2.411   4.428  1.00  0.35           O  
HETATM   60  O   HOH T  59      32.048   6.488  41.577  1.00  0.35           O  
HETATM   61  O   HOH T  60      21.119   0.386  60.689  1.00  0.35           O  
HETATM   62  O   HOH T  61      30.108  11.596  10.288  1.00  0.35           O  
HETATM   63  O   HOH T  62      20.752   9.857  39.623  1.00  0.35           O  
HETATM   64  O   HOH T  63      38.508   6.384  63.493  1.00  0.36           O  
HETATM   65  O   HOH T  64      45.197   1.487  69.218  1.00  0.36           O  
HETATM   66  O   HOH T  65      15.741   6.602   7.102  1.00  0.36           O  
HETATM   67  O   HOH T  66       9.747 -13.385  33.343  1.00  0.36           O  
HETATM   68  O   HOH T  67      31.162  -6.541  10.184  1.00  0.36           O  
HETATM   69  O   HOH T  68      20.447  17.198  34.833  1.00  0.36           O  
HETATM   70  O   HOH T  69      13.637  11.396  34.152  1.00  0.36           O  
HETATM   71  O   HOH T  70      47.746   8.283  69.693  1.00  0.36           O  
HETATM   72  O   HOH T  71      22.687  -8.860  45.194  1.00  0.36           O  
HETATM   73  O   HOH T  72      28.471  -1.196  71.783  1.00  0.37           O  
HETATM   74  O   HOH T  73      24.279  -0.034  58.258  1.00  0.37           O  
HETATM   75  O   HOH T  74       7.968   7.305  19.271  1.00  0.37           O  
HETATM   76  O   HOH T  75      20.046 -11.764  17.875  1.00  0.37           O  
HETATM   77  O   HOH T  76      28.081  -0.591  11.769  1.00  0.38           O  
HETATM   78  O   HOH T  77      18.470  15.945  41.476  1.00  0.38           O  
HETATM   79  O   HOH T  78      16.389  -4.507  57.704  1.00  0.38           O  
HETATM   80  O   HOH T  79      43.360  -3.305  70.880  1.00  0.38           O  
HETATM   81  O   HOH T  80      26.771  -9.664  36.629  1.00  0.38           O  
HETATM   82  O   HOH T  81       7.544  14.071  11.618  1.00  0.38           O  
HETATM   83  O   HOH T  82      46.568   6.306  56.927  1.00  0.38           O  
HETATM   84  O   HOH T  83       2.298   2.301  19.148  1.00  0.38           O  
HETATM   85  O   HOH T  84      28.678  -6.519   9.347  1.00  0.38           O  
HETATM   86  O   HOH T  85      10.200   8.594  10.210  1.00  0.39           O  
HETATM   87  O   HOH T  86       3.760   4.262  18.016  1.00  0.39           O  
HETATM   88  O   HOH T  87       8.721   9.531  12.245  1.00  0.39           O  
HETATM   89  O   HOH T  88      25.513 -10.642  17.686  1.00  0.39           O  
HETATM   90  O   HOH T  89      24.663  -7.387  46.148  1.00  0.39           O  
HETATM   91  O   HOH T  90      12.867  15.771  11.182  1.00  0.39           O  
HETATM   92  O   HOH T  91      23.581 -10.945  12.779  1.00  0.39           O  
HETATM   93  O   HOH T  92      25.482   6.633  45.529  1.00  0.40           O  
HETATM   94  O   HOH T  93      15.192 -11.065  27.383  1.00  0.40           O  
HETATM   95  O   HOH T  94       7.880   8.822  31.601  1.00  0.40           O  
HETATM   96  O   HOH T  95      35.299  -3.328  44.979  1.00  0.40           O  
HETATM   97  O   HOH T  96      12.732  15.216  14.739  1.00  0.40           O  
HETATM   98  O   HOH T  97      26.596   1.202  58.667  1.00  0.41           O  
HETATM   99  O   HOH T  98      12.905  -5.300  37.110  1.00  0.41           O  
HETATM  100  O   HOH T  99      14.284 -10.234  16.096  1.00  0.41           O  
HETATM  101  O   HOH T 100      10.147  -4.185  16.114  1.00  0.41           O  
HETATM  102  O   HOH T 101      19.282  -5.742  44.889  1.00  0.41           O  
HETATM  103  O   HOH T 102      18.818  -5.724  56.802  1.00  0.41           O  
HETATM  104  O   HOH T 103      11.678  16.143  17.167  1.00  0.41           O  
HETATM  105  O   HOH T 104      14.089  -6.997  38.958  1.00  0.42           O  
HETATM  106  O   HOH T 105      21.729   0.556  57.905  1.00  0.42           O  
HETATM  107  O   HOH T 106      31.024 -12.212  49.933  1.00  0.42           O  
HETATM  108  O   HOH T 107      26.362   6.525  32.940  1.00  0.42           O  
HETATM  109  O   HOH T 108      19.565   4.779   4.036  1.00  0.42           O  
HETATM  110  O   HOH T 109      17.512 -14.963  14.205  1.00  0.42           O  
HETATM  111  O   HOH T 110       6.252  10.409  23.386  1.00  0.42           O  
HETATM  112  O   HOH T 111      15.724  -3.163  41.132  1.00  0.42           O  
HETATM  113  O   HOH T 112      48.918  -0.077  63.449  1.00  0.42           O  
HETATM  114  O   HOH T 113      18.585  -6.702  40.523  1.00  0.42           O  
HETATM  115  O   HOH T 114      31.610 -10.155  47.993  1.00  0.43           O  
HETATM  116  O   HOH T 115       8.011  -5.642  27.778  1.00  0.43           O  
HETATM  117  O   HOH T 116       3.203   6.466  16.359  1.00  0.43           O  
HETATM  118  O   HOH T 117      26.707 -11.941  47.763  1.00  0.43           O  
HETATM  119  O   HOH T 118      42.702   7.984  64.286  1.00  0.43           O  
HETATM  120  O   HOH T 119      33.096   9.595  48.405  1.00  0.43           O  
HETATM  121  O   HOH T 120      16.251  -7.365   8.152  1.00  0.43           O  
HETATM  122  O   HOH T 121      24.495 -12.919  19.057  1.00  0.43           O  
HETATM  123  O   HOH T 122      12.340   5.544  10.867  1.00  0.43           O  
HETATM  124  O   HOH T 123      29.651   7.945  71.197  1.00  0.43           O  
HETATM  125  O   HOH T 124      14.508   6.621   9.526  1.00  0.44           O  
HETATM  126  O   HOH T 125       2.220   4.104  15.654  1.00  0.44           O  
HETATM  127  O   HOH T 126       5.130   5.907  28.282  1.00  0.44           O  
HETATM  128  O   HOH T 127      49.495   6.715  60.251  1.00  0.44           O  
HETATM  129  O   HOH T 128      19.601  -7.935  58.238  1.00  0.44           O  
HETATM  130  O   HOH T 129      13.140  -9.799  26.089  1.00  0.44           O  
HETATM  131  O   HOH T 130      34.115  -5.739  44.105  1.00  0.44           O  
HETATM  132  O   HOH T 131      18.577  -7.484  60.697  1.00  0.44           O  
HETATM  133  O   HOH T 132      42.294   6.612  61.851  1.00  0.45           O  
HETATM  134  O   HOH T 133      16.604  -0.896   2.800  1.00  0.45           O  
HETATM  135  O   HOH T 134      24.897 -10.227  46.378  1.00  0.45           O  
HETATM  136  O   HOH T 135      15.314  -8.266  27.035  1.00  0.45           O  
HETATM  137  O   HOH T 136      21.993 -10.157  10.587  1.00  0.45           O  
HETATM  138  O   HOH T 137      26.787 -10.260  15.136  1.00  0.45           O  
HETATM  139  O   HOH T 138      16.120  10.871  41.463  1.00  0.45           O  
HETATM  140  O   HOH T 139      15.038  12.870  10.348  1.00  0.45           O  
HETATM  141  O   HOH T 140      10.351   4.891  35.846  1.00  0.45           O  
HETATM  142  O   HOH T 141      10.415  -6.503  36.540  1.00  0.45           O  
HETATM  143  O   HOH T 142       2.985   3.652  21.426  1.00  0.45           O  
HETATM  144  O   HOH T 143      21.966  14.897  17.977  1.00  0.45           O  
HETATM  145  O   HOH T 144      16.768 -16.026  16.695  1.00  0.45           O  
HETATM  146  O   HOH T 145      21.963   4.161   2.820  1.00  0.45           O  
HETATM  147  O   HOH T 146      10.543  -1.876  36.010  1.00  0.46           O  
HETATM  148  O   HOH T 147      22.637   5.789  56.729  1.00  0.46           O  
HETATM  149  O   HOH T 148      26.457   0.597  13.656  1.00  0.46           O  
HETATM  150  O   HOH T 149      18.709  -9.037  53.515  1.00  0.46           O  
HETATM  151  O   HOH T 150      21.881 -13.736  18.531  1.00  0.46           O  
HETATM  152  O   HOH T 151      41.310   6.573  45.283  1.00  0.46           O  
HETATM  153  O   HOH T 152      15.996  14.042  17.044  1.00  0.46           O  
HETATM  154  O   HOH T 153      28.504  -9.321  13.187  1.00  0.46           O  
HETATM  155  O   HOH T 154       9.155  10.540  29.788  1.00  0.46           O  
HETATM  156  O   HOH T 155      21.008 -10.591  52.766  1.00  0.46           O  
HETATM  157  O   HOH T 156       8.819   8.688  34.226  1.00  0.46           O  
HETATM  158  O   HOH T 157      16.259  -8.894  14.680  1.00  0.46           O  
HETATM  159  O   HOH T 158       4.590   8.348  27.313  1.00  0.47           O  
HETATM  160  O   HOH T 159      14.439  11.420   8.183  1.00  0.47           O  
HETATM  161  O   HOH T 160      39.314   9.337  67.450  1.00  0.47           O  
HETATM  162  O   HOH T 161      14.297  -4.169  39.052  1.00  0.47           O  
HETATM  163  O   HOH T 162       9.747  10.622  32.529  1.00  0.47           O  
HETATM  164  O   HOH T 163       7.209  13.140  19.590  1.00  0.47           O  
HETATM  165  O   HOH T 164      23.426  -5.038  41.954  1.00  0.47           O  
HETATM  166  O   HOH T 165      32.371  12.900  68.520  1.00  0.47           O  
HETATM  167  O   HOH T 166       7.085  11.383  11.240  1.00  0.47           O  
HETATM  168  O   HOH T 167      24.303   7.463  47.816  1.00  0.47           O  
HETATM  169  O   HOH T 168       7.903  11.958  25.047  1.00  0.47           O  
HETATM  170  O   HOH T 169      29.544 -12.058  47.519  1.00  0.47           O  
HETATM  171  O   HOH T 170      17.773  -8.236  56.083  1.00  0.47           O  
HETATM  172  O   HOH T 171       7.226  12.228  16.945  1.00  0.47           O  
HETATM  173  O   HOH T 172      11.167  10.120  34.855  1.00  0.47           O  
HETATM  174  O   HOH T 173      24.335  13.692  17.135  1.00  0.48           O  
HETATM  175  O   HOH T 174      22.587   2.272  61.994  1.00  0.48           O  
HETATM  176  O   HOH T 175       9.035 -10.305  27.472  1.00  0.48           O  
HETATM  177  O   HOH T 176       9.880   1.692  15.006  1.00  0.48           O  
HETATM  178  O   HOH T 177      12.168   1.778  44.098  1.00  0.48           O  
HETATM  179  O   HOH T 178       6.386   7.999  29.387  1.00  0.48           O  
HETATM  180  O   HOH T 179      26.640   1.517  61.477  1.00  0.48           O  
HETATM  181  O   HOH T 180      16.550  -0.762   5.499  1.00  0.48           O  
HETATM  182  O   HOH T 181       8.808  11.024  18.801  1.00  0.48           O  
HETATM  183  O   HOH T 182      12.873   4.623   8.385  1.00  0.49           O  
HETATM  184  O   HOH T 183      14.271  13.967  12.784  1.00  0.49           O  
HETATM  185  O   HOH T 184      15.810  -4.910  55.048  1.00  0.49           O  
HETATM  186  O   HOH T 185      38.515   9.062  63.549  1.00  0.49           O  
HETATM  187  O   HOH T 186      15.242  -8.307  12.188  1.00  0.49           O  
HETATM  188  O   HOH T 187      16.917 -10.490  11.350  1.00  0.49           O  
HETATM  189  O   HOH T 188       5.681  10.544  26.068  1.00  0.49           O  
HETATM  190  O   HOH T 189      13.653   6.539  37.902  1.00  0.49           O  
HETATM  191  O   HOH T 190      25.672   9.630   6.041  1.00  0.49           O  
HETATM  192  O   HOH T 191      13.487   2.657  46.293  1.00  0.49           O  
HETATM  193  O   HOH T 192      16.786  -6.696  46.017  1.00  0.49           O  
HETATM  194  O   HOH T 193      15.402  -6.572   5.675  1.00  0.49           O  
HETATM  195  O   HOH T 194      28.125 -14.323  48.178  1.00  0.49           O  
HETATM  196  O   HOH T 195      31.676   9.753  71.457  1.00  0.49           O  
HETATM  197  O   HOH T 196      13.643  -8.042  14.451  1.00  0.49           O  
HETATM  198  O   HOH T 197       4.692  -3.398  20.386  1.00  0.49           O  
HETATM  199  O   HOH T 198      24.253   1.221  21.677  1.00  0.50           O  
HETATM  200  O   HOH T 199       4.640   5.572  20.210  1.00  0.50           O  
HETATM  201  O   HOH T 200      33.439  11.558  70.620  1.00  0.50           O  
HETATM  202  O   HOH T 201      16.884   1.739   6.514  1.00  0.50           O  
HETATM  203  O   HOH T 202      12.000  -0.868  38.079  1.00  0.50           O  
HETATM  204  O   HOH T 203      22.100  16.940  16.275  1.00  0.50           O  
HETATM  205  O   HOH T 204       3.667   1.934  16.683  1.00  0.50           O  
HETATM  206  O   HOH T 205      16.007  -0.761  48.857  1.00  0.50           O  
HETATM  207  O   HOH T 206      14.071   8.748   7.817  1.00  0.51           O  
HETATM  208  O   HOH T 207      29.061 -13.215  51.720  1.00  0.51           O  
HETATM  209  O   HOH T 208       7.359  -9.715  25.287  1.00  0.51           O  
HETATM  210  O   HOH T 209      18.482 -13.638  16.501  1.00  0.51           O  
HETATM  211  O   HOH T 210      36.262   5.673  72.381  1.00  0.51           O  
HETATM  212  O   HOH T 211      24.340 -11.387  15.368  1.00  0.51           O  
HETATM  213  O   HOH T 212      15.558  -9.226  39.917  1.00  0.51           O  
HETATM  214  O   HOH T 213      18.843  -8.275  46.005  1.00  0.51           O  
HETATM  215  O   HOH T 214      37.291   8.125  46.998  1.00  0.52           O  
HETATM  216  O   HOH T 215       2.891   5.866  13.633  1.00  0.52           O  
HETATM  217  O   HOH T 216      27.592   9.515   2.316  1.00  0.52           O  
HETATM  218  O   HOH T 217      28.790  -9.585  34.699  1.00  0.52           O  
HETATM  219  O   HOH T 218      20.976  -6.398  41.924  1.00  0.52           O  
HETATM  220  O   HOH T 219      27.445   7.320  18.183  1.00  0.52           O  
HETATM  221  O   HOH T 220      30.810   3.182  36.645  1.00  0.52           O  
HETATM  222  O   HOH T 221      44.788   5.790  59.031  1.00  0.52           O  
HETATM  223  O   HOH T 222       9.079   9.224  20.819  1.00  0.53           O  
HETATM  224  O   HOH T 223      11.039  18.526  16.198  1.00  0.53           O  
HETATM  225  O   HOH T 224      15.943  -5.734  40.701  1.00  0.53           O  
HETATM  226  O   HOH T 225      17.401  -7.901  10.669  1.00  0.53           O  
HETATM  227  O   HOH T 226      11.953   7.228   8.685  1.00  0.53           O  
HETATM  228  O   HOH T 227      25.807  -9.244  12.646  1.00  0.53           O  
HETATM  229  O   HOH T 228      26.256 -11.129  20.258  1.00  0.53           O  
HETATM  230  O   HOH T 229      26.779   1.970  16.014  1.00  0.53           O  
HETATM  231  O   HOH T 230      26.662   8.023  39.643  1.00  0.53           O  
HETATM  232  O   HOH T 231      38.786   7.388  44.554  1.00  0.54           O  
HETATM  233  O   HOH T 232      22.433   5.994  54.139  1.00  0.54           O  
HETATM  234  O   HOH T 233      39.006  13.065  52.633  1.00  0.54           O  
HETATM  235  O   HOH T 234      30.830   0.023  41.377  1.00  0.54           O  
HETATM  236  O   HOH T 235      26.920  11.403  24.036  1.00  0.54           O  
HETATM  237  O   HOH T 236      34.783  12.406  53.495  1.00  0.54           O  
HETATM  238  O   HOH T 237      16.962 -12.480  13.213  1.00  0.54           O  
HETATM  239  O   HOH T 238      17.491  -8.313   5.843  1.00  0.54           O  
HETATM  240  O   HOH T 239      39.461   9.024  60.973  1.00  0.54           O  
HETATM  241  O   HOH T 240       4.920   0.679  14.535  1.00  0.54           O  
HETATM  242  O   HOH T 241      20.077   7.443   4.110  1.00  0.55           O  
HETATM  243  O   HOH T 242      25.243   6.780  30.420  1.00  0.55           O  
HETATM  244  O   HOH T 243      34.035  13.820  66.327  1.00  0.55           O  
HETATM  245  O   HOH T 244      26.534  -7.589  28.961  1.00  0.55           O  
HETATM  246  O   HOH T 245       4.745   3.719  23.560  1.00  0.55           O  
HETATM  247  O   HOH T 246       8.125  15.549  18.719  1.00  0.55           O  
HETATM  248  O   HOH T 247      21.777  10.641   8.882  1.00  0.56           O  
HETATM  249  O   HOH T 248       6.411   8.906  21.077  1.00  0.56           O  
HETATM  250  O   HOH T 249      24.404  -9.011  56.739  1.00  0.56           O  
HETATM  251  O   HOH T 250      27.080 -12.347  35.788  1.00  0.56           O  
HETATM  252  O   HOH T 251      23.385   8.201  36.909  1.00  0.56           O  
HETATM  253  O   HOH T 252      14.541   1.607  48.654  1.00  0.57           O  
HETATM  254  O   HOH T 253       6.336  18.601  25.241  1.00  0.57           O  
HETATM  255  O   HOH T 254      14.593  11.514  37.168  1.00  0.57           O  
HETATM  256  O   HOH T 255      22.573 -13.347  21.149  1.00  0.57           O  
HETATM  257  O   HOH T 256      47.128   7.553  61.621  1.00  0.58           O  
HETATM  258  O   HOH T 257      12.725   9.203  40.258  1.00  0.58           O  
TER     259      HOH T 257 
