# Supplementary material for: Accurate Prediction of Hydration Sites of Proteins Using Energy Model With Atom Embedding
Source: Front Mol Biosci. 2021 Sep 20;8:756075. doi: 10.3389/fmolb.2021.756075 (PMC8488165; doi:10.3389/fmolb.2021.756075)
Supplement: Supplementary file 1 [file DataSheet1.ZIP › Data Sheet 1/Our_result_pdb/our_dataset_output/3FEV_watersite.pdb]

HEADER                                                        XXXX


JRNL        PMID   -1
HETATM    1  O   HOH T   0     -18.173   6.847  60.356  1.00  0.16           O  
HETATM    2  O   HOH T   1       7.387  14.052   7.633  1.00  0.17           O  
HETATM    3  O   HOH T   2     -26.251  25.826  39.805  1.00  0.18           O  
HETATM    4  O   HOH T   3     -12.967  15.555  50.006  1.00  0.19           O  
HETATM    5  O   HOH T   4      -8.145  20.636  44.269  1.00  0.19           O  
HETATM    6  O   HOH T   5     -19.821  19.631   8.386  1.00  0.20           O  
HETATM    7  O   HOH T   6      -0.427  22.488  16.648  1.00  0.21           O  
HETATM    8  O   HOH T   7     -11.178  -5.623  52.033  1.00  0.21           O  
HETATM    9  O   HOH T   8      -6.202  25.986  22.035  1.00  0.22           O  
HETATM   10  O   HOH T   9       7.566  11.548  43.322  1.00  0.22           O  
HETATM   11  O   HOH T  10      -0.747   7.237  33.204  1.00  0.22           O  
HETATM   12  O   HOH T  11     -10.325  26.005  22.452  1.00  0.22           O  
HETATM   13  O   HOH T  12       0.031  -0.218  -0.318  1.00  0.22           O  
HETATM   14  O   HOH T  13       3.450   8.786  26.688  1.00  0.22           O  
HETATM   15  O   HOH T  14     -13.934  28.548  43.736  1.00  0.23           O  
HETATM   16  O   HOH T  15      -5.683  11.315  10.951  1.00  0.23           O  
HETATM   17  O   HOH T  16     -18.139  -0.774  48.401  1.00  0.23           O  
HETATM   18  O   HOH T  17     -11.261   1.619  51.730  1.00  0.23           O  
HETATM   19  O   HOH T  18      18.712  32.831  26.755  1.00  0.23           O  
HETATM   20  O   HOH T  19       9.972   3.604  11.080  1.00  0.24           O  
HETATM   21  O   HOH T  20      -6.186  20.842  21.000  1.00  0.24           O  
HETATM   22  O   HOH T  21      -3.519  14.190  44.156  1.00  0.24           O  
HETATM   23  O   HOH T  22      -4.533   6.428  22.291  1.00  0.24           O  
HETATM   24  O   HOH T  23     -15.379  30.911  43.836  1.00  0.25           O  
HETATM   25  O   HOH T  24      19.141  16.712  -1.137  1.00  0.25           O  
HETATM   26  O   HOH T  25     -26.555  26.858  15.850  1.00  0.25           O  
HETATM   27  O   HOH T  26       8.498  30.103  19.640  1.00  0.25           O  
HETATM   28  O   HOH T  27      -7.605  38.964  22.277  1.00  0.26           O  
HETATM   29  O   HOH T  28      -1.793   8.076  27.839  1.00  0.27           O  
HETATM   30  O   HOH T  29      -6.521  23.999  23.844  1.00  0.27           O  
HETATM   31  O   HOH T  30     -11.525  23.678  42.118  1.00  0.27           O  
HETATM   32  O   HOH T  31     -10.335  31.810   3.243  1.00  0.27           O  
HETATM   33  O   HOH T  32      18.311   2.075  -2.867  1.00  0.27           O  
HETATM   34  O   HOH T  33     -24.898  30.410  16.918  1.00  0.27           O  
HETATM   35  O   HOH T  34     -12.978  15.614  13.868  1.00  0.28           O  
HETATM   36  O   HOH T  35      -2.015  37.967  26.466  1.00  0.28           O  
HETATM   37  O   HOH T  36      -8.364  -9.323  41.617  1.00  0.28           O  
HETATM   38  O   HOH T  37      -3.840  26.266  -0.813  1.00  0.28           O  
HETATM   39  O   HOH T  38     -13.367  -7.347  49.403  1.00  0.28           O  
HETATM   40  O   HOH T  39     -11.275  17.714  13.348  1.00  0.28           O  
HETATM   41  O   HOH T  40       1.686   4.903  -1.171  1.00  0.28           O  
HETATM   42  O   HOH T  41     -11.657  -1.769  45.045  1.00  0.28           O  
HETATM   43  O   HOH T  42     -11.198  18.805  47.603  1.00  0.28           O  
HETATM   44  O   HOH T  43     -11.226   7.866  38.275  1.00  0.29           O  
HETATM   45  O   HOH T  44     -11.153   8.756  20.679  1.00  0.29           O  
HETATM   46  O   HOH T  45     -13.324  15.439  17.956  1.00  0.29           O  
HETATM   47  O   HOH T  46      -3.008  33.924  35.034  1.00  0.29           O  
HETATM   48  O   HOH T  47     -33.683  10.020  54.101  1.00  0.29           O  
HETATM   49  O   HOH T  48      -8.604  10.939  29.549  1.00  0.29           O  
HETATM   50  O   HOH T  49     -15.547  30.621  37.521  1.00  0.29           O  
HETATM   51  O   HOH T  50     -18.207  10.362  21.113  1.00  0.29           O  
HETATM   52  O   HOH T  51      -5.294  21.670  14.454  1.00  0.29           O  
HETATM   53  O   HOH T  52      -8.629  19.669  20.227  1.00  0.30           O  
HETATM   54  O   HOH T  53     -12.875  36.459  26.701  1.00  0.30           O  
HETATM   55  O   HOH T  54      -6.472  26.610  -1.580  1.00  0.30           O  
HETATM   56  O   HOH T  55     -24.269  -3.240  49.903  1.00  0.30           O  
HETATM   57  O   HOH T  56      -9.105  22.001  16.842  1.00  0.31           O  
HETATM   58  O   HOH T  57     -10.548  16.888  49.582  1.00  0.31           O  
HETATM   59  O   HOH T  58     -11.086   3.094  49.310  1.00  0.31           O  
HETATM   60  O   HOH T  59     -28.116  34.728  15.975  1.00  0.31           O  
HETATM   61  O   HOH T  60      -8.622  31.886  12.503  1.00  0.31           O  
HETATM   62  O   HOH T  61      -6.631   2.557   5.973  1.00  0.32           O  
HETATM   63  O   HOH T  62      14.969  20.539  -3.700  1.00  0.32           O  
HETATM   64  O   HOH T  63      -3.366  21.229  34.177  1.00  0.32           O  
HETATM   65  O   HOH T  64      15.960   6.925   6.677  1.00  0.32           O  
HETATM   66  O   HOH T  65      18.145   7.989   3.163  1.00  0.32           O  
HETATM   67  O   HOH T  66      -6.401  32.435   5.649  1.00  0.32           O  
HETATM   68  O   HOH T  67      -4.561  38.436  25.331  1.00  0.32           O  
HETATM   69  O   HOH T  68      -1.929  17.063  14.609  1.00  0.32           O  
HETATM   70  O   HOH T  69     -15.949  32.705   2.063  1.00  0.32           O  
HETATM   71  O   HOH T  70     -24.283  26.479  17.413  1.00  0.32           O  
HETATM   72  O   HOH T  71     -26.691  11.656  55.622  1.00  0.32           O  
HETATM   73  O   HOH T  72     -21.306  26.966   1.840  1.00  0.32           O  
HETATM   74  O   HOH T  73     -16.157  22.146  36.371  1.00  0.33           O  
HETATM   75  O   HOH T  74     -26.557  -2.255  48.952  1.00  0.33           O  
HETATM   76  O   HOH T  75     -16.154  23.863  15.198  1.00  0.33           O  
HETATM   77  O   HOH T  76       3.110   6.758   1.879  1.00  0.33           O  
HETATM   78  O   HOH T  77     -17.432  32.546  20.226  1.00  0.33           O  
HETATM   79  O   HOH T  78     -20.823   2.018  48.872  1.00  0.33           O  
HETATM   80  O   HOH T  79      -1.782   9.596  30.122  1.00  0.33           O  
HETATM   81  O   HOH T  80      -8.876   2.039  47.941  1.00  0.33           O  
HETATM   82  O   HOH T  81     -14.862  25.923  43.401  1.00  0.33           O  
HETATM   83  O   HOH T  82     -18.528  34.090   7.572  1.00  0.33           O  
HETATM   84  O   HOH T  83      -2.432  28.072   0.522  1.00  0.34           O  
HETATM   85  O   HOH T  84      -4.100  13.695  11.150  1.00  0.34           O  
HETATM   86  O   HOH T  85      -0.069  24.684  12.831  1.00  0.34           O  
HETATM   87  O   HOH T  86      -5.851  17.963  16.309  1.00  0.34           O  
HETATM   88  O   HOH T  87     -13.829  24.814  41.025  1.00  0.34           O  
HETATM   89  O   HOH T  88      -7.248   6.233  15.807  1.00  0.34           O  
HETATM   90  O   HOH T  89     -11.595  37.578   7.806  1.00  0.34           O  
HETATM   91  O   HOH T  90     -16.655  36.964   5.048  1.00  0.34           O  
HETATM   92  O   HOH T  91      -2.584  -0.336  41.105  1.00  0.34           O  
HETATM   93  O   HOH T  92     -16.822   2.761  57.106  1.00  0.34           O  
HETATM   94  O   HOH T  93     -14.161  10.468  35.502  1.00  0.34           O  
HETATM   95  O   HOH T  94     -25.540  11.442  58.170  1.00  0.34           O  
HETATM   96  O   HOH T  95     -14.984  23.438  44.602  1.00  0.34           O  
HETATM   97  O   HOH T  96     -15.061  18.838  43.622  1.00  0.34           O  
HETATM   98  O   HOH T  97     -16.934  21.032   5.696  1.00  0.35           O  
HETATM   99  O   HOH T  98     -21.887  -2.992  59.580  1.00  0.35           O  
HETATM  100  O   HOH T  99     -18.093   4.841  58.487  1.00  0.35           O  
HETATM  101  O   HOH T 100     -11.072  42.456  29.899  1.00  0.35           O  
HETATM  102  O   HOH T 101      18.990  14.871   5.704  1.00  0.35           O  
HETATM  103  O   HOH T 102     -21.223  34.772  13.881  1.00  0.35           O  
HETATM  104  O   HOH T 103       1.850   4.898  39.324  1.00  0.35           O  
HETATM  105  O   HOH T 104      -9.813  15.903  45.889  1.00  0.35           O  
HETATM  106  O   HOH T 105      -2.433  40.240  21.409  1.00  0.36           O  
HETATM  107  O   HOH T 106      -5.625  16.069  14.262  1.00  0.36           O  
HETATM  108  O   HOH T 107     -15.352  21.083   3.343  1.00  0.36           O  
HETATM  109  O   HOH T 108     -28.140  10.028  61.457  1.00  0.36           O  
HETATM  110  O   HOH T 109     -24.114   9.409  50.825  1.00  0.36           O  
HETATM  111  O   HOH T 110      -5.442  16.122  11.578  1.00  0.36           O  
HETATM  112  O   HOH T 111     -12.050  24.342  21.099  1.00  0.36           O  
HETATM  113  O   HOH T 112     -10.141   6.083  54.922  1.00  0.36           O  
HETATM  114  O   HOH T 113     -10.583  29.194  37.975  1.00  0.36           O  
HETATM  115  O   HOH T 114      -7.378  12.702   4.241  1.00  0.37           O  
HETATM  116  O   HOH T 115      -7.435  13.110  27.973  1.00  0.37           O  
HETATM  117  O   HOH T 116      -8.621  -6.354  51.095  1.00  0.37           O  
HETATM  118  O   HOH T 117     -19.368  22.024  43.673  1.00  0.37           O  
HETATM  119  O   HOH T 118      -5.177  15.361   8.940  1.00  0.37           O  
HETATM  120  O   HOH T 119       6.411  15.425   5.484  1.00  0.37           O  
HETATM  121  O   HOH T 120      -5.129   8.863   9.898  1.00  0.37           O  
HETATM  122  O   HOH T 121      16.139  12.119  13.926  1.00  0.37           O  
HETATM  123  O   HOH T 122       9.710  16.993  -2.597  1.00  0.37           O  
HETATM  124  O   HOH T 123     -18.912  25.977  -1.027  1.00  0.37           O  
HETATM  125  O   HOH T 124      -5.920  21.775  45.411  1.00  0.37           O  
HETATM  126  O   HOH T 125     -23.672   4.031  46.525  1.00  0.37           O  
HETATM  127  O   HOH T 126     -10.927   7.055  13.552  1.00  0.37           O  
HETATM  128  O   HOH T 127      -0.762   4.592  33.876  1.00  0.37           O  
HETATM  129  O   HOH T 128      10.596  21.195  16.275  1.00  0.37           O  
HETATM  130  O   HOH T 129       5.546   8.882  17.598  1.00  0.37           O  
HETATM  131  O   HOH T 130     -21.671   9.895  44.189  1.00  0.37           O  
HETATM  132  O   HOH T 131     -22.222   3.319  50.968  1.00  0.37           O  
HETATM  133  O   HOH T 132      -6.308  37.198  20.700  1.00  0.37           O  
HETATM  134  O   HOH T 133      -4.721  -1.062   8.418  1.00  0.37           O  
HETATM  135  O   HOH T 134       5.481  31.837  30.819  1.00  0.38           O  
HETATM  136  O   HOH T 135     -23.381   8.040  45.458  1.00  0.38           O  
HETATM  137  O   HOH T 136     -13.099  30.152  38.548  1.00  0.38           O  
HETATM  138  O   HOH T 137       3.732   6.324  27.823  1.00  0.38           O  
HETATM  139  O   HOH T 138      -6.433  19.518   2.201  1.00  0.38           O  
HETATM  140  O   HOH T 139       4.148  32.335  26.930  1.00  0.38           O  
HETATM  141  O   HOH T 140      -0.730  36.285  24.792  1.00  0.38           O  
HETATM  142  O   HOH T 141     -10.925  34.352  26.632  1.00  0.38           O  
HETATM  143  O   HOH T 142       1.030  34.257  24.258  1.00  0.38           O  
HETATM  144  O   HOH T 143      14.837  32.263  31.457  1.00  0.38           O  
HETATM  145  O   HOH T 144       5.573   8.391   4.702  1.00  0.39           O  
HETATM  146  O   HOH T 145      -8.621   4.553  49.010  1.00  0.39           O  
HETATM  147  O   HOH T 146       5.084  38.918  31.473  1.00  0.39           O  
HETATM  148  O   HOH T 147     -14.062  18.121  13.410  1.00  0.39           O  
HETATM  149  O   HOH T 148       9.688  28.373  28.247  1.00  0.39           O  
HETATM  150  O   HOH T 149     -26.485  32.710  17.059  1.00  0.39           O  
HETATM  151  O   HOH T 150     -11.702   2.247  37.500  1.00  0.39           O  
HETATM  152  O   HOH T 151      -9.788   5.168  15.314  1.00  0.39           O  
HETATM  153  O   HOH T 152     -19.685  33.969   2.815  1.00  0.39           O  
HETATM  154  O   HOH T 153      -6.845  42.754  23.328  1.00  0.39           O  
HETATM  155  O   HOH T 154     -21.596   4.874  42.359  1.00  0.40           O  
HETATM  156  O   HOH T 155      11.465  27.472  30.172  1.00  0.40           O  
HETATM  157  O   HOH T 156      -4.915  14.213  26.818  1.00  0.40           O  
HETATM  158  O   HOH T 157       0.579   3.606  46.342  1.00  0.40           O  
HETATM  159  O   HOH T 158      -1.043  19.658  34.664  1.00  0.40           O  
HETATM  160  O   HOH T 159       3.782  35.204  32.050  1.00  0.40           O  
HETATM  161  O   HOH T 160     -26.131  10.453  63.408  1.00  0.40           O  
HETATM  162  O   HOH T 161     -11.995  28.277  40.233  1.00  0.40           O  
HETATM  163  O   HOH T 162      -2.251  19.089   4.810  1.00  0.40           O  
HETATM  164  O   HOH T 163     -11.168  39.291  19.797  1.00  0.40           O  
HETATM  165  O   HOH T 164      -8.360  12.568  21.899  1.00  0.40           O  
HETATM  166  O   HOH T 165      -6.135  -9.018  40.121  1.00  0.40           O  
HETATM  167  O   HOH T 166     -24.720  30.954  10.028  1.00  0.40           O  
HETATM  168  O   HOH T 167       3.690  22.262  10.944  1.00  0.40           O  
HETATM  169  O   HOH T 168      -9.637  -7.184  48.571  1.00  0.40           O  
HETATM  170  O   HOH T 169      -4.576  18.820  25.406  1.00  0.40           O  
HETATM  171  O   HOH T 170     -10.494   1.837  35.060  1.00  0.40           O  
HETATM  172  O   HOH T 171     -17.190  34.516   3.825  1.00  0.40           O  
HETATM  173  O   HOH T 172     -18.526  24.990  16.457  1.00  0.41           O  
HETATM  174  O   HOH T 173     -19.168  -3.118  58.955  1.00  0.41           O  
HETATM  175  O   HOH T 174      -0.824  22.117  33.419  1.00  0.41           O  
HETATM  176  O   HOH T 175      -0.526  21.202   4.723  1.00  0.41           O  
HETATM  177  O   HOH T 176      -4.123  23.287   4.731  1.00  0.41           O  
HETATM  178  O   HOH T 177     -12.220  15.624  56.122  1.00  0.41           O  
HETATM  179  O   HOH T 178     -22.022  37.607   9.876  1.00  0.41           O  
HETATM  180  O   HOH T 179      -0.643  11.913   4.009  1.00  0.41           O  
HETATM  181  O   HOH T 180       4.102  37.921  29.022  1.00  0.41           O  
HETATM  182  O   HOH T 181      15.029   9.635  13.708  1.00  0.41           O  
HETATM  183  O   HOH T 182      19.636  10.347   2.731  1.00  0.41           O  
HETATM  184  O   HOH T 183      -7.414  43.766  20.854  1.00  0.41           O  
HETATM  185  O   HOH T 184     -12.296  16.419  44.877  1.00  0.41           O  
HETATM  186  O   HOH T 185      -0.204   0.869  39.901  1.00  0.42           O  
HETATM  187  O   HOH T 186       2.649  11.043  36.414  1.00  0.42           O  
HETATM  188  O   HOH T 187      -1.684  22.847  11.582  1.00  0.42           O  
HETATM  189  O   HOH T 188     -25.940  24.534  37.331  1.00  0.42           O  
HETATM  190  O   HOH T 189     -13.488   7.424  14.660  1.00  0.42           O  
HETATM  191  O   HOH T 190      -7.244  20.329  15.866  1.00  0.42           O  
HETATM  192  O   HOH T 191       9.564   6.351  -4.051  1.00  0.42           O  
HETATM  193  O   HOH T 192     -18.326   4.833  39.433  1.00  0.42           O  
HETATM  194  O   HOH T 193      -5.809   4.070  15.592  1.00  0.42           O  
HETATM  195  O   HOH T 194     -15.125  17.440  18.580  1.00  0.42           O  
HETATM  196  O   HOH T 195     -21.014  27.753  -0.846  1.00  0.42           O  
HETATM  197  O   HOH T 196      -6.834  10.309   5.599  1.00  0.42           O  
HETATM  198  O   HOH T 197     -22.455  17.150  38.556  1.00  0.42           O  
HETATM  199  O   HOH T 198      -7.621  12.607   7.048  1.00  0.42           O  
HETATM  200  O   HOH T 199     -19.985  18.818  12.962  1.00  0.42           O  
HETATM  201  O   HOH T 200       7.883  19.813   2.382  1.00  0.42           O  
HETATM  202  O   HOH T 201      -9.076  10.563  20.242  1.00  0.42           O  
HETATM  203  O   HOH T 202     -23.032   0.874  50.081  1.00  0.42           O  
HETATM  204  O   HOH T 203     -23.460  10.872  62.548  1.00  0.42           O  
HETATM  205  O   HOH T 204       0.428   9.808   5.438  1.00  0.42           O  
HETATM  206  O   HOH T 205      -4.175   3.726   6.240  1.00  0.42           O  
HETATM  207  O   HOH T 206     -31.386  11.684  53.721  1.00  0.42           O  
HETATM  208  O   HOH T 207       4.846  12.591  36.703  1.00  0.42           O  
HETATM  209  O   HOH T 208     -24.569  27.498   8.949  1.00  0.42           O  
HETATM  210  O   HOH T 209      -4.958  -3.707  46.436  1.00  0.43           O  
HETATM  211  O   HOH T 210       6.516  24.221  31.600  1.00  0.43           O  
HETATM  212  O   HOH T 211      -2.984  21.098  13.173  1.00  0.43           O  
HETATM  213  O   HOH T 212     -23.213   2.076  44.521  1.00  0.43           O  
HETATM  214  O   HOH T 213      -8.033  15.548  10.747  1.00  0.43           O  
HETATM  215  O   HOH T 214       3.698   3.804  37.697  1.00  0.43           O  
HETATM  216  O   HOH T 215     -16.967  16.836  43.242  1.00  0.43           O  
HETATM  217  O   HOH T 216     -22.723  35.345  15.976  1.00  0.43           O  
HETATM  218  O   HOH T 217       6.254  30.987  28.200  1.00  0.43           O  
HETATM  219  O   HOH T 218      -8.112   3.962  17.110  1.00  0.43           O  
HETATM  220  O   HOH T 219      -5.426  11.382  27.602  1.00  0.43           O  
HETATM  221  O   HOH T 220      -1.476  23.690   3.991  1.00  0.43           O  
HETATM  222  O   HOH T 221     -20.641  24.978  19.448  1.00  0.43           O  
HETATM  223  O   HOH T 222     -14.083  22.511  16.475  1.00  0.43           O  
HETATM  224  O   HOH T 223       3.713  33.459  24.383  1.00  0.44           O  
HETATM  225  O   HOH T 224       4.350  18.859  12.861  1.00  0.44           O  
HETATM  226  O   HOH T 225      -1.743  25.342  10.540  1.00  0.44           O  
HETATM  227  O   HOH T 226     -10.807  18.712  15.841  1.00  0.44           O  
HETATM  228  O   HOH T 227      19.223  16.822  -3.959  1.00  0.44           O  
HETATM  229  O   HOH T 228      -4.259  16.923  27.521  1.00  0.44           O  
HETATM  230  O   HOH T 229      -4.277  18.411  30.983  1.00  0.44           O  
HETATM  231  O   HOH T 230      -4.094   4.080  20.924  1.00  0.44           O  
HETATM  232  O   HOH T 231     -17.069   6.714  38.052  1.00  0.44           O  
HETATM  233  O   HOH T 232       0.377  21.145  26.472  1.00  0.44           O  
HETATM  234  O   HOH T 233       8.874   3.386  -1.638  1.00  0.44           O  
HETATM  235  O   HOH T 234       2.259  17.317  11.425  1.00  0.44           O  
HETATM  236  O   HOH T 235      -2.330  15.029  27.990  1.00  0.44           O  
HETATM  237  O   HOH T 236     -15.117  32.206  -2.260  1.00  0.45           O  
HETATM  238  O   HOH T 237       4.222   3.817  40.394  1.00  0.45           O  
HETATM  239  O   HOH T 238      11.065   5.504  -1.899  1.00  0.45           O  
HETATM  240  O   HOH T 239     -17.147   8.042  18.167  1.00  0.45           O  
HETATM  241  O   HOH T 240     -10.360  34.296   1.996  1.00  0.45           O  
HETATM  242  O   HOH T 241      -3.837  38.275  20.012  1.00  0.45           O  
HETATM  243  O   HOH T 242      10.172  29.312  21.840  1.00  0.45           O  
HETATM  244  O   HOH T 243      -2.833  21.482   3.144  1.00  0.45           O  
HETATM  245  O   HOH T 244     -25.116  -0.794  50.832  1.00  0.45           O  
HETATM  246  O   HOH T 245     -17.781  34.964   1.118  1.00  0.45           O  
HETATM  247  O   HOH T 246     -14.675   7.228  17.174  1.00  0.45           O  
HETATM  248  O   HOH T 247     -22.138  21.695  13.383  1.00  0.45           O  
HETATM  249  O   HOH T 248      -8.891  18.603  46.111  1.00  0.45           O  
HETATM  250  O   HOH T 249     -27.643   9.934  57.581  1.00  0.45           O  
HETATM  251  O   HOH T 250       4.099   4.926  25.510  1.00  0.45           O  
HETATM  252  O   HOH T 251       4.806   2.810  22.193  1.00  0.46           O  
HETATM  253  O   HOH T 252       3.571   1.432  41.808  1.00  0.46           O  
HETATM  254  O   HOH T 253     -26.619  29.283   8.859  1.00  0.46           O  
HETATM  255  O   HOH T 254     -17.030  27.933  -1.194  1.00  0.46           O  
HETATM  256  O   HOH T 255      -7.135  33.825   7.947  1.00  0.46           O  
HETATM  257  O   HOH T 256      11.893  29.897  28.755  1.00  0.46           O  
HETATM  258  O   HOH T 257     -22.067   5.695  44.913  1.00  0.46           O  
HETATM  259  O   HOH T 258       0.775  10.509  30.692  1.00  0.46           O  
HETATM  260  O   HOH T 259      -8.136  26.563   0.650  1.00  0.46           O  
HETATM  261  O   HOH T 260     -24.453  -0.983  55.851  1.00  0.46           O  
HETATM  262  O   HOH T 261       0.057  13.135  30.217  1.00  0.46           O  
HETATM  263  O   HOH T 262      16.085  11.422  -4.418  1.00  0.46           O  
HETATM  264  O   HOH T 263      -0.030  15.554  31.583  1.00  0.46           O  
HETATM  265  O   HOH T 264      -1.961  19.871  25.748  1.00  0.46           O  
HETATM  266  O   HOH T 265      -6.853  -6.742  48.975  1.00  0.46           O  
HETATM  267  O   HOH T 266       0.349  17.996  13.383  1.00  0.46           O  
HETATM  268  O   HOH T 267     -14.221  17.011  15.959  1.00  0.46           O  
HETATM  269  O   HOH T 268      -6.251  -0.126   6.258  1.00  0.46           O  
HETATM  270  O   HOH T 269     -27.817   3.659  59.904  1.00  0.46           O  
HETATM  271  O   HOH T 270     -20.754  19.680  43.477  1.00  0.46           O  
HETATM  272  O   HOH T 271      -6.664  10.531   8.418  1.00  0.47           O  
HETATM  273  O   HOH T 272     -26.069  22.632  11.576  1.00  0.47           O  
HETATM  274  O   HOH T 273     -22.607  29.248   9.994  1.00  0.47           O  
HETATM  275  O   HOH T 274     -18.947   4.215  41.993  1.00  0.47           O  
HETATM  276  O   HOH T 275     -22.827  36.633  12.255  1.00  0.47           O  
HETATM  277  O   HOH T 276     -12.969   7.084  19.372  1.00  0.47           O  
HETATM  278  O   HOH T 277     -27.108   1.993  61.926  1.00  0.47           O  
HETATM  279  O   HOH T 278     -25.095   3.396  60.598  1.00  0.47           O  
HETATM  280  O   HOH T 279      -4.400  20.201  42.407  1.00  0.47           O  
HETATM  281  O   HOH T 280       3.245  19.581  10.402  1.00  0.47           O  
HETATM  282  O   HOH T 281      -7.814   5.534  31.280  1.00  0.47           O  
HETATM  283  O   HOH T 282     -25.751  11.590  60.958  1.00  0.47           O  
HETATM  284  O   HOH T 283      -9.084  37.561  20.377  1.00  0.47           O  
HETATM  285  O   HOH T 284       6.473   8.959  36.575  1.00  0.47           O  
HETATM  286  O   HOH T 285     -11.754  29.723  42.572  1.00  0.48           O  
HETATM  287  O   HOH T 286       6.804   6.047  -4.373  1.00  0.48           O  
HETATM  288  O   HOH T 287      -9.923  17.211  20.394  1.00  0.48           O  
HETATM  289  O   HOH T 288       3.944  32.460  33.088  1.00  0.48           O  
HETATM  290  O   HOH T 289      26.279  11.037   1.490  1.00  0.48           O  
HETATM  291  O   HOH T 290     -18.559  18.747  42.028  1.00  0.48           O  
HETATM  292  O   HOH T 291     -14.701  40.193  18.665  1.00  0.48           O  
HETATM  293  O   HOH T 292     -16.930  38.908  17.781  1.00  0.48           O  
HETATM  294  O   HOH T 293     -19.391  37.497   9.438  1.00  0.48           O  
HETATM  295  O   HOH T 294     -15.340  14.869  19.644  1.00  0.48           O  
HETATM  296  O   HOH T 295       2.247   2.131  39.411  1.00  0.48           O  
HETATM  297  O   HOH T 296      10.686   3.982  13.772  1.00  0.48           O  
HETATM  298  O   HOH T 297     -14.278  38.259  25.248  1.00  0.48           O  
HETATM  299  O   HOH T 298       5.417  26.569  24.158  1.00  0.48           O  
HETATM  300  O   HOH T 299      -2.542  29.033   6.345  1.00  0.48           O  
HETATM  301  O   HOH T 300       8.781  23.596  33.058  1.00  0.49           O  
HETATM  302  O   HOH T 301       5.970  14.825  37.471  1.00  0.49           O  
HETATM  303  O   HOH T 302     -11.559  21.304  16.326  1.00  0.49           O  
HETATM  304  O   HOH T 303     -17.884  29.522  36.461  1.00  0.49           O  
HETATM  305  O   HOH T 304      -1.629  17.639  30.742  1.00  0.49           O  
HETATM  306  O   HOH T 305     -15.128  29.400  -2.465  1.00  0.49           O  
HETATM  307  O   HOH T 306      -5.128  30.046   6.516  1.00  0.49           O  
HETATM  308  O   HOH T 307     -26.312  35.352  17.977  1.00  0.49           O  
HETATM  309  O   HOH T 308     -13.417  23.366  18.936  1.00  0.49           O  
HETATM  310  O   HOH T 309       3.201  17.691   3.500  1.00  0.49           O  
HETATM  311  O   HOH T 310       0.713  24.150  34.358  1.00  0.49           O  
HETATM  312  O   HOH T 311     -18.699  -0.286  44.015  1.00  0.49           O  
HETATM  313  O   HOH T 312       4.915  10.445  34.920  1.00  0.49           O  
HETATM  314  O   HOH T 313       2.308   8.278   3.999  1.00  0.49           O  
HETATM  315  O   HOH T 314      -2.536  19.941  29.528  1.00  0.49           O  
HETATM  316  O   HOH T 315       8.374  13.294  37.054  1.00  0.50           O  
HETATM  317  O   HOH T 316       0.593   6.530   0.717  1.00  0.50           O  
HETATM  318  O   HOH T 317      -1.641  17.868  27.911  1.00  0.50           O  
HETATM  319  O   HOH T 318      -5.682  43.206  18.692  1.00  0.50           O  
HETATM  320  O   HOH T 319      -2.980   2.924  33.800  1.00  0.50           O  
HETATM  321  O   HOH T 320      -7.640  23.851   1.052  1.00  0.50           O  
HETATM  322  O   HOH T 321       4.853  15.467   2.956  1.00  0.50           O  
HETATM  323  O   HOH T 322       3.986  33.829  29.318  1.00  0.50           O  
HETATM  324  O   HOH T 323     -13.239  40.655  20.926  1.00  0.50           O  
HETATM  325  O   HOH T 324      11.353  23.492  34.013  1.00  0.50           O  
HETATM  326  O   HOH T 325     -30.515  30.158   8.738  1.00  0.51           O  
HETATM  327  O   HOH T 326      -5.688  22.227   2.745  1.00  0.51           O  
HETATM  328  O   HOH T 327     -22.754  11.702  65.111  1.00  0.51           O  
HETATM  329  O   HOH T 328     -17.755  36.693   7.399  1.00  0.51           O  
HETATM  330  O   HOH T 329     -21.995  27.286   8.012  1.00  0.51           O  
HETATM  331  O   HOH T 330       2.516  34.463  26.721  1.00  0.51           O  
HETATM  332  O   HOH T 331     -24.265  -0.729  48.246  1.00  0.51           O  
HETATM  333  O   HOH T 332      -6.522  19.571  18.492  1.00  0.51           O  
HETATM  334  O   HOH T 333      -9.711  38.215   9.759  1.00  0.51           O  
HETATM  335  O   HOH T 334      18.486   7.998   5.885  1.00  0.51           O  
HETATM  336  O   HOH T 335     -28.988  27.776   8.824  1.00  0.51           O  
HETATM  337  O   HOH T 336     -23.676  28.791  18.770  1.00  0.51           O  
HETATM  338  O   HOH T 337      -6.289   1.280   8.551  1.00  0.52           O  
HETATM  339  O   HOH T 338       0.961  18.120  31.661  1.00  0.52           O  
HETATM  340  O   HOH T 339      12.911  -0.953   2.498  1.00  0.52           O  
HETATM  341  O   HOH T 340       4.179  -0.582  43.730  1.00  0.52           O  
HETATM  342  O   HOH T 341     -26.062  22.440  14.331  1.00  0.52           O  
HETATM  343  O   HOH T 342     -32.133  32.271   8.036  1.00  0.52           O  
HETATM  344  O   HOH T 343      -3.875  21.276  31.392  1.00  0.52           O  
HETATM  345  O   HOH T 344     -25.312  34.697  15.500  1.00  0.52           O  
HETATM  346  O   HOH T 345       4.742  27.593  35.956  1.00  0.52           O  
HETATM  347  O   HOH T 346     -12.821   8.035  35.963  1.00  0.52           O  
HETATM  348  O   HOH T 347       0.454   8.052  29.435  1.00  0.52           O  
HETATM  349  O   HOH T 348      24.207  12.619   2.536  1.00  0.52           O  
HETATM  350  O   HOH T 349      -1.444   5.155  31.437  1.00  0.52           O  
HETATM  351  O   HOH T 350     -21.020   0.584  45.367  1.00  0.52           O  
HETATM  352  O   HOH T 351     -14.936  16.643  45.104  1.00  0.53           O  
HETATM  353  O   HOH T 352     -13.945   4.667  14.672  1.00  0.53           O  
HETATM  354  O   HOH T 353     -21.312  20.375  10.637  1.00  0.53           O  
HETATM  355  O   HOH T 354      -8.133  38.002  13.787  1.00  0.53           O  
HETATM  356  O   HOH T 355      -3.994   4.080  23.609  1.00  0.53           O  
HETATM  357  O   HOH T 356     -16.993   3.965  37.187  1.00  0.54           O  
HETATM  358  O   HOH T 357      -7.141  19.898  25.895  1.00  0.54           O  
HETATM  359  O   HOH T 358      20.558  18.819  -2.346  1.00  0.54           O  
HETATM  360  O   HOH T 359       2.405  12.096  29.116  1.00  0.54           O  
HETATM  361  O   HOH T 360     -11.691   5.711  36.674  1.00  0.54           O  
HETATM  362  O   HOH T 361       7.258  28.343  25.437  1.00  0.54           O  
HETATM  363  O   HOH T 362     -19.083   2.299  58.552  1.00  0.54           O  
HETATM  364  O   HOH T 363      -9.729  14.921  22.044  1.00  0.55           O  
HETATM  365  O   HOH T 364     -20.076  33.256  21.134  1.00  0.55           O  
HETATM  366  O   HOH T 365       7.596   8.635  19.492  1.00  0.55           O  
HETATM  367  O   HOH T 366      -3.408   7.238  25.876  1.00  0.55           O  
HETATM  368  O   HOH T 367     -20.227  37.523  12.044  1.00  0.55           O  
HETATM  369  O   HOH T 368      12.963  18.573   3.429  1.00  0.56           O  
HETATM  370  O   HOH T 369      -8.750   2.435  50.727  1.00  0.56           O  
HETATM  371  O   HOH T 370      -8.928  37.399   7.253  1.00  0.56           O  
HETATM  372  O   HOH T 371      17.067  12.174  11.354  1.00  0.56           O  
HETATM  373  O   HOH T 372      11.519  22.938  22.550  1.00  0.56           O  
HETATM  374  O   HOH T 373      25.141  12.977  -0.049  1.00  0.57           O  
HETATM  375  O   HOH T 374      -6.432  21.945  27.599  1.00  0.57           O  
HETATM  376  O   HOH T 375      -8.953   6.395   8.107  1.00  0.57           O  
HETATM  377  O   HOH T 376     -18.780   1.356  41.892  1.00  0.58           O  
HETATM  378  O   HOH T 377     -17.086  -0.113  40.641  1.00  0.58           O  
HETATM  379  O   HOH T 378     -19.706   5.579  46.184  1.00  0.62           O  
TER     380      HOH T 378 
