# Supplementary material for: Accurate Prediction of Hydration Sites of Proteins Using Energy Model With Atom Embedding
Source: Front Mol Biosci. 2021 Sep 20;8:756075. doi: 10.3389/fmolb.2021.756075 (PMC8488165; doi:10.3389/fmolb.2021.756075)
Supplement: Supplementary file 1 [file DataSheet1.ZIP › Data Sheet 1/Our_result_pdb/our_dataset_output/3FVF_watersite.pdb]

HEADER                                                        XXXX


JRNL        PMID   -1
HETATM    1  O   HOH T   0      13.509  24.668 -19.419  1.00  0.15           O  
HETATM    2  O   HOH T   1       8.028  28.266   9.372  1.00  0.17           O  
HETATM    3  O   HOH T   2      18.850  25.124  22.207  1.00  0.17           O  
HETATM    4  O   HOH T   3      18.376  20.093  -4.499  1.00  0.17           O  
HETATM    5  O   HOH T   4      -3.342  34.333   9.124  1.00  0.18           O  
HETATM    6  O   HOH T   5       6.652  20.721  13.645  1.00  0.19           O  
HETATM    7  O   HOH T   6      22.746  31.406  16.558  1.00  0.19           O  
HETATM    8  O   HOH T   7      14.062  25.832  26.361  1.00  0.19           O  
HETATM    9  O   HOH T   8       7.081  36.612  -7.747  1.00  0.19           O  
HETATM   10  O   HOH T   9       3.920  19.823  -4.773  1.00  0.20           O  
HETATM   11  O   HOH T  10       7.430  21.813   2.094  1.00  0.21           O  
HETATM   12  O   HOH T  11      22.612  29.422  -0.195  1.00  0.22           O  
HETATM   13  O   HOH T  12      16.118  45.407  -5.983  1.00  0.22           O  
HETATM   14  O   HOH T  13      23.454  14.297   2.033  1.00  0.22           O  
HETATM   15  O   HOH T  14       9.053  27.059   7.058  1.00  0.22           O  
HETATM   16  O   HOH T  15      -0.709  20.001  -9.081  1.00  0.23           O  
HETATM   17  O   HOH T  16      -0.925  30.754   2.996  1.00  0.23           O  
HETATM   18  O   HOH T  17      10.472  34.772 -17.094  1.00  0.23           O  
HETATM   19  O   HOH T  18       5.045  19.088 -11.441  1.00  0.23           O  
HETATM   20  O   HOH T  19      -4.784  15.194   9.864  1.00  0.23           O  
HETATM   21  O   HOH T  20      16.799  26.124  26.951  1.00  0.24           O  
HETATM   22  O   HOH T  21       5.309   9.429  -0.897  1.00  0.24           O  
HETATM   23  O   HOH T  22      10.544  14.929 -10.073  1.00  0.24           O  
HETATM   24  O   HOH T  23      -0.184  27.321  -6.354  1.00  0.24           O  
HETATM   25  O   HOH T  24      22.429  13.202 -12.010  1.00  0.24           O  
HETATM   26  O   HOH T  25      21.099  35.287   3.250  1.00  0.24           O  
HETATM   27  O   HOH T  26       8.050  17.626  12.316  1.00  0.24           O  
HETATM   28  O   HOH T  27       9.762  43.949 -10.697  1.00  0.25           O  
HETATM   29  O   HOH T  28      18.742  12.038  -5.216  1.00  0.25           O  
HETATM   30  O   HOH T  29      15.504  43.048  -7.215  1.00  0.25           O  
HETATM   31  O   HOH T  30      14.901  22.914   5.635  1.00  0.25           O  
HETATM   32  O   HOH T  31       7.743  11.263  18.881  1.00  0.26           O  
HETATM   33  O   HOH T  32       1.432  18.516  -4.869  1.00  0.26           O  
HETATM   34  O   HOH T  33       3.773  29.508 -13.261  1.00  0.26           O  
HETATM   35  O   HOH T  34       3.632  34.242  11.153  1.00  0.26           O  
HETATM   36  O   HOH T  35       5.838  32.608  17.857  1.00  0.26           O  
HETATM   37  O   HOH T  36      21.675  33.608   1.072  1.00  0.26           O  
HETATM   38  O   HOH T  37      19.073  20.056  -7.250  1.00  0.26           O  
HETATM   39  O   HOH T  38      17.573  33.772  26.509  1.00  0.26           O  
HETATM   40  O   HOH T  39       1.518  44.785   6.207  1.00  0.26           O  
HETATM   41  O   HOH T  40      12.333  33.278   8.704  1.00  0.26           O  
HETATM   42  O   HOH T  41      -1.482  39.402  -2.769  1.00  0.26           O  
HETATM   43  O   HOH T  42       4.644  32.153 -13.359  1.00  0.27           O  
HETATM   44  O   HOH T  43       2.595  30.636   6.862  1.00  0.27           O  
HETATM   45  O   HOH T  44      33.950  21.078   4.593  1.00  0.27           O  
HETATM   46  O   HOH T  45       1.633  22.902  18.632  1.00  0.27           O  
HETATM   47  O   HOH T  46      27.112  31.720  -7.399  1.00  0.27           O  
HETATM   48  O   HOH T  47      24.553  33.307 -19.574  1.00  0.27           O  
HETATM   49  O   HOH T  48      36.830  11.597  12.765  1.00  0.27           O  
HETATM   50  O   HOH T  49       8.600  43.712  -8.180  1.00  0.28           O  
HETATM   51  O   HOH T  50      25.630  29.971  22.873  1.00  0.28           O  
HETATM   52  O   HOH T  51      26.821  18.190  -2.750  1.00  0.28           O  
HETATM   53  O   HOH T  52      15.817  26.854  24.492  1.00  0.28           O  
HETATM   54  O   HOH T  53      -1.934  34.687   2.289  1.00  0.28           O  
HETATM   55  O   HOH T  54      13.263  15.317 -10.152  1.00  0.28           O  
HETATM   56  O   HOH T  55       8.195  30.519  -3.255  1.00  0.29           O  
HETATM   57  O   HOH T  56       5.926  34.250  -6.533  1.00  0.29           O  
HETATM   58  O   HOH T  57       6.561  36.581  -5.079  1.00  0.29           O  
HETATM   59  O   HOH T  58      31.556  37.048   6.981  1.00  0.29           O  
HETATM   60  O   HOH T  59      30.140  13.949  17.588  1.00  0.29           O  
HETATM   61  O   HOH T  60      28.228  19.494  -0.685  1.00  0.29           O  
HETATM   62  O   HOH T  61      28.631  27.596  -0.609  1.00  0.30           O  
HETATM   63  O   HOH T  62      16.100  22.655  -9.589  1.00  0.30           O  
HETATM   64  O   HOH T  63       3.804  36.938 -17.049  1.00  0.30           O  
HETATM   65  O   HOH T  64       6.078  17.823 -13.655  1.00  0.30           O  
HETATM   66  O   HOH T  65      12.935   7.245  15.430  1.00  0.30           O  
HETATM   67  O   HOH T  66      -1.036  26.139  -3.845  1.00  0.30           O  
HETATM   68  O   HOH T  67      17.285  12.647   5.155  1.00  0.30           O  
HETATM   69  O   HOH T  68       7.050  26.483  17.976  1.00  0.31           O  
HETATM   70  O   HOH T  69       5.198  19.934  11.378  1.00  0.31           O  
HETATM   71  O   HOH T  70      -4.329  32.108   0.642  1.00  0.31           O  
HETATM   72  O   HOH T  71       2.649  11.788   8.037  1.00  0.31           O  
HETATM   73  O   HOH T  72      22.812  10.499  13.047  1.00  0.31           O  
HETATM   74  O   HOH T  73      26.483   7.815  16.509  1.00  0.31           O  
HETATM   75  O   HOH T  74      18.324  48.517 -11.547  1.00  0.31           O  
HETATM   76  O   HOH T  75      10.150  11.787  20.164  1.00  0.32           O  
HETATM   77  O   HOH T  76      11.292  35.441  11.336  1.00  0.32           O  
HETATM   78  O   HOH T  77      -1.693  16.370  17.062  1.00  0.32           O  
HETATM   79  O   HOH T  78      14.832  23.690 -11.759  1.00  0.32           O  
HETATM   80  O   HOH T  79      -0.708  19.336   0.143  1.00  0.32           O  
HETATM   81  O   HOH T  80      -6.054  34.862   8.878  1.00  0.32           O  
HETATM   82  O   HOH T  81       2.603  11.004  17.902  1.00  0.32           O  
HETATM   83  O   HOH T  82       0.085  21.410  16.925  1.00  0.32           O  
HETATM   84  O   HOH T  83      18.014  11.030   2.774  1.00  0.32           O  
HETATM   85  O   HOH T  84      33.195  12.752  15.296  1.00  0.32           O  
HETATM   86  O   HOH T  85       9.746   5.262  -5.773  1.00  0.33           O  
HETATM   87  O   HOH T  86       8.041  18.474  24.131  1.00  0.33           O  
HETATM   88  O   HOH T  87      19.625  41.872  -2.584  1.00  0.33           O  
HETATM   89  O   HOH T  88       5.075  12.092  18.591  1.00  0.33           O  
HETATM   90  O   HOH T  89       4.410  31.739  13.460  1.00  0.33           O  
HETATM   91  O   HOH T  90      21.250  36.967  21.655  1.00  0.33           O  
HETATM   92  O   HOH T  91      25.013  30.423  15.234  1.00  0.33           O  
HETATM   93  O   HOH T  92      18.602  26.666 -12.109  1.00  0.33           O  
HETATM   94  O   HOH T  93      21.757  36.235   9.880  1.00  0.33           O  
HETATM   95  O   HOH T  94       1.619  18.600  10.948  1.00  0.33           O  
HETATM   96  O   HOH T  95       1.168  18.953   8.168  1.00  0.33           O  
HETATM   97  O   HOH T  96      22.011  37.252  -3.311  1.00  0.34           O  
HETATM   98  O   HOH T  97      20.828  49.492 -12.282  1.00  0.34           O  
HETATM   99  O   HOH T  98      14.592  38.004   2.168  1.00  0.34           O  
HETATM  100  O   HOH T  99      23.786   5.521  15.642  1.00  0.34           O  
HETATM  101  O   HOH T 100      32.700  15.392   8.282  1.00  0.34           O  
HETATM  102  O   HOH T 101      -1.497  17.582 -10.086  1.00  0.34           O  
HETATM  103  O   HOH T 102      27.309  29.863  -5.356  1.00  0.34           O  
HETATM  104  O   HOH T 103      31.613  32.159   0.441  1.00  0.34           O  
HETATM  105  O   HOH T 104       1.473  40.679 -10.984  1.00  0.34           O  
HETATM  106  O   HOH T 105      10.977  31.767  25.964  1.00  0.34           O  
HETATM  107  O   HOH T 106      -1.992  42.570   3.661  1.00  0.35           O  
HETATM  108  O   HOH T 107       6.255   7.390  17.801  1.00  0.35           O  
HETATM  109  O   HOH T 108      31.784  22.639   8.180  1.00  0.35           O  
HETATM  110  O   HOH T 109      -2.470  21.106  15.873  1.00  0.35           O  
HETATM  111  O   HOH T 110      23.687  29.711  24.882  1.00  0.35           O  
HETATM  112  O   HOH T 111       6.382  30.136 -12.504  1.00  0.35           O  
HETATM  113  O   HOH T 112      21.929  13.046  22.466  1.00  0.35           O  
HETATM  114  O   HOH T 113      26.303  32.692  19.606  1.00  0.36           O  
HETATM  115  O   HOH T 114     -10.605  30.737  12.082  1.00  0.36           O  
HETATM  116  O   HOH T 115      13.007  35.946 -16.803  1.00  0.36           O  
HETATM  117  O   HOH T 116      12.711  38.716 -17.229  1.00  0.36           O  
HETATM  118  O   HOH T 117      -5.218   0.501   9.135  1.00  0.36           O  
HETATM  119  O   HOH T 118      29.770  30.697   7.850  1.00  0.36           O  
HETATM  120  O   HOH T 119      21.049  24.379  23.729  1.00  0.36           O  
HETATM  121  O   HOH T 120      -6.201  30.337  18.616  1.00  0.36           O  
HETATM  122  O   HOH T 121      27.824  22.570  -4.501  1.00  0.36           O  
HETATM  123  O   HOH T 122       2.077  40.198  -7.322  1.00  0.36           O  
HETATM  124  O   HOH T 123       0.575  25.827 -11.875  1.00  0.36           O  
HETATM  125  O   HOH T 124      24.653  30.717  11.128  1.00  0.36           O  
HETATM  126  O   HOH T 125      21.153  17.041   0.073  1.00  0.36           O  
HETATM  127  O   HOH T 126      -1.861  25.465  -1.116  1.00  0.36           O  
HETATM  128  O   HOH T 127       8.690  25.459  24.541  1.00  0.36           O  
HETATM  129  O   HOH T 128       4.783  22.704 -14.683  1.00  0.36           O  
HETATM  130  O   HOH T 129       6.265  43.563 -14.126  1.00  0.36           O  
HETATM  131  O   HOH T 130      28.234  34.198  -2.095  1.00  0.37           O  
HETATM  132  O   HOH T 131      -4.420  34.776   0.985  1.00  0.37           O  
HETATM  133  O   HOH T 132       2.430  23.516  26.071  1.00  0.37           O  
HETATM  134  O   HOH T 133      23.674  20.345  -7.006  1.00  0.37           O  
HETATM  135  O   HOH T 134      15.512  13.882  -9.627  1.00  0.37           O  
HETATM  136  O   HOH T 135      -5.789  21.851   9.167  1.00  0.37           O  
HETATM  137  O   HOH T 136      -2.105  36.771  -2.732  1.00  0.37           O  
HETATM  138  O   HOH T 137      27.569  27.288  16.259  1.00  0.37           O  
HETATM  139  O   HOH T 138      18.083  20.801  -9.771  1.00  0.37           O  
HETATM  140  O   HOH T 139      -2.101  41.247   1.129  1.00  0.37           O  
HETATM  141  O   HOH T 140      18.079  41.257 -16.982  1.00  0.37           O  
HETATM  142  O   HOH T 141      26.073  27.499  18.536  1.00  0.37           O  
HETATM  143  O   HOH T 142       4.001  17.450  11.797  1.00  0.37           O  
HETATM  144  O   HOH T 143       9.774  36.049  14.668  1.00  0.37           O  
HETATM  145  O   HOH T 144      25.596  38.018  23.404  1.00  0.37           O  
HETATM  146  O   HOH T 145      25.789  37.127  13.028  1.00  0.37           O  
HETATM  147  O   HOH T 146      15.612  36.057   3.948  1.00  0.37           O  
HETATM  148  O   HOH T 147     -12.237  33.644  15.255  1.00  0.37           O  
HETATM  149  O   HOH T 148      -7.348  35.649  16.465  1.00  0.37           O  
HETATM  150  O   HOH T 149      30.762  22.091   1.123  1.00  0.37           O  
HETATM  151  O   HOH T 150       3.289  46.369  -0.065  1.00  0.38           O  
HETATM  152  O   HOH T 151      -4.395  20.342   3.200  1.00  0.38           O  
HETATM  153  O   HOH T 152       0.031  42.756   1.775  1.00  0.38           O  
HETATM  154  O   HOH T 153       2.192  44.046   0.777  1.00  0.38           O  
HETATM  155  O   HOH T 154      27.112  25.017  17.782  1.00  0.38           O  
HETATM  156  O   HOH T 155      25.164  33.949 -12.946  1.00  0.38           O  
HETATM  157  O   HOH T 156      -3.463  16.920  21.935  1.00  0.38           O  
HETATM  158  O   HOH T 157      -5.637  19.425  10.626  1.00  0.38           O  
HETATM  159  O   HOH T 158      13.230  16.084 -16.171  1.00  0.38           O  
HETATM  160  O   HOH T 159      -0.088  23.276  -1.320  1.00  0.38           O  
HETATM  161  O   HOH T 160     -10.423  33.322  13.064  1.00  0.38           O  
HETATM  162  O   HOH T 161      32.244  16.597  10.796  1.00  0.38           O  
HETATM  163  O   HOH T 162      -4.599  19.492  -8.149  1.00  0.38           O  
HETATM  164  O   HOH T 163       1.289  40.957  11.998  1.00  0.38           O  
HETATM  165  O   HOH T 164      27.267  35.822 -12.804  1.00  0.39           O  
HETATM  166  O   HOH T 165      -2.577  34.358  -3.867  1.00  0.39           O  
HETATM  167  O   HOH T 166       0.814  17.680  13.504  1.00  0.39           O  
HETATM  168  O   HOH T 167       0.863  20.688  -1.699  1.00  0.39           O  
HETATM  169  O   HOH T 168      34.210  34.623  14.559  1.00  0.39           O  
HETATM  170  O   HOH T 169      -1.391  14.081   7.054  1.00  0.39           O  
HETATM  171  O   HOH T 170       1.516  42.497  -8.826  1.00  0.39           O  
HETATM  172  O   HOH T 171      26.438  24.701  -5.824  1.00  0.39           O  
HETATM  173  O   HOH T 172      25.371  11.227   6.727  1.00  0.40           O  
HETATM  174  O   HOH T 173      -3.449  15.233  25.431  1.00  0.40           O  
HETATM  175  O   HOH T 174      11.206  36.940 -18.706  1.00  0.40           O  
HETATM  176  O   HOH T 175       8.741  17.269 -14.101  1.00  0.40           O  
HETATM  177  O   HOH T 176       6.235  33.186  11.968  1.00  0.40           O  
HETATM  178  O   HOH T 177      20.171  39.584   0.672  1.00  0.40           O  
HETATM  179  O   HOH T 178      15.283  40.732  -2.547  1.00  0.40           O  
HETATM  180  O   HOH T 179      15.233  16.013 -14.241  1.00  0.40           O  
HETATM  181  O   HOH T 180      26.026  19.342  -5.925  1.00  0.40           O  
HETATM  182  O   HOH T 181      20.253  11.320  13.658  1.00  0.40           O  
HETATM  183  O   HOH T 182      25.319  30.753  26.866  1.00  0.40           O  
HETATM  184  O   HOH T 183      13.295  40.903 -18.895  1.00  0.41           O  
HETATM  185  O   HOH T 184       3.390  38.132  15.200  1.00  0.41           O  
HETATM  186  O   HOH T 185      14.510   7.337  17.816  1.00  0.41           O  
HETATM  187  O   HOH T 186      20.135  11.160   0.905  1.00  0.41           O  
HETATM  188  O   HOH T 187       2.554  33.919 -12.980  1.00  0.41           O  
HETATM  189  O   HOH T 188      -6.567  14.841   7.751  1.00  0.41           O  
HETATM  190  O   HOH T 189      19.308  38.859 -16.259  1.00  0.41           O  
HETATM  191  O   HOH T 190      25.372  12.994  -2.865  1.00  0.41           O  
HETATM  192  O   HOH T 191      20.717  39.342  -2.013  1.00  0.41           O  
HETATM  193  O   HOH T 192      25.873  40.794  24.049  1.00  0.41           O  
HETATM  194  O   HOH T 193       2.678  12.811   5.367  1.00  0.41           O  
HETATM  195  O   HOH T 194       0.391  17.812  16.213  1.00  0.42           O  
HETATM  196  O   HOH T 195       8.742  34.705  12.419  1.00  0.42           O  
HETATM  197  O   HOH T 196      16.062  14.190 -12.279  1.00  0.42           O  
HETATM  198  O   HOH T 197      13.984  37.206 -19.152  1.00  0.42           O  
HETATM  199  O   HOH T 198      -2.542  20.981  -7.251  1.00  0.42           O  
HETATM  200  O   HOH T 199      22.853  36.856   7.348  1.00  0.42           O  
HETATM  201  O   HOH T 200      -7.832  16.076   2.673  1.00  0.42           O  
HETATM  202  O   HOH T 201      28.558  23.550  -2.028  1.00  0.42           O  
HETATM  203  O   HOH T 202      10.858   5.826  21.537  1.00  0.42           O  
HETATM  204  O   HOH T 203       7.468  19.451 -17.204  1.00  0.43           O  
HETATM  205  O   HOH T 204      22.126  30.358 -19.133  1.00  0.43           O  
HETATM  206  O   HOH T 205      15.361  41.189 -16.958  1.00  0.43           O  
HETATM  207  O   HOH T 206      -5.135  21.875  21.745  1.00  0.43           O  
HETATM  208  O   HOH T 207       7.544  44.876 -12.050  1.00  0.43           O  
HETATM  209  O   HOH T 208      15.480  43.904 -19.506  1.00  0.43           O  
HETATM  210  O   HOH T 209      14.060  45.272  -4.156  1.00  0.43           O  
HETATM  211  O   HOH T 210      29.211  31.017  13.143  1.00  0.43           O  
HETATM  212  O   HOH T 211      -3.263  17.072  -8.025  1.00  0.43           O  
HETATM  213  O   HOH T 212       0.540  22.273  27.648  1.00  0.43           O  
HETATM  214  O   HOH T 213      22.186  10.749  20.867  1.00  0.43           O  
HETATM  215  O   HOH T 214      15.404  17.868 -16.386  1.00  0.43           O  
HETATM  216  O   HOH T 215      -4.455  18.478  19.959  1.00  0.43           O  
HETATM  217  O   HOH T 216      -4.939   8.900  11.711  1.00  0.43           O  
HETATM  218  O   HOH T 217       1.035  36.565 -16.937  1.00  0.43           O  
HETATM  219  O   HOH T 218      26.447  31.527  13.105  1.00  0.44           O  
HETATM  220  O   HOH T 219      -1.748  39.562  -5.561  1.00  0.44           O  
HETATM  221  O   HOH T 220      27.727  33.171 -12.157  1.00  0.44           O  
HETATM  222  O   HOH T 221       1.694  44.144   3.525  1.00  0.44           O  
HETATM  223  O   HOH T 222      -4.204  36.912   8.835  1.00  0.44           O  
HETATM  224  O   HOH T 223       3.269  16.964  23.378  1.00  0.44           O  
HETATM  225  O   HOH T 224       8.884  34.792  24.156  1.00  0.44           O  
HETATM  226  O   HOH T 225      -0.982  21.767  -3.453  1.00  0.44           O  
HETATM  227  O   HOH T 226      13.148   6.183  19.886  1.00  0.44           O  
HETATM  228  O   HOH T 227      16.863  27.461 -20.403  1.00  0.44           O  
HETATM  229  O   HOH T 228      14.455  34.870   7.587  1.00  0.44           O  
HETATM  230  O   HOH T 229      -4.839  19.334  22.617  1.00  0.44           O  
HETATM  231  O   HOH T 230      10.296   9.402   6.565  1.00  0.44           O  
HETATM  232  O   HOH T 231       5.963  33.061  20.519  1.00  0.44           O  
HETATM  233  O   HOH T 232      -3.803  14.253   7.556  1.00  0.44           O  
HETATM  234  O   HOH T 233      17.069  24.793 -13.128  1.00  0.44           O  
HETATM  235  O   HOH T 234      -2.043   8.260  16.292  1.00  0.44           O  
HETATM  236  O   HOH T 235      11.249  11.266 -11.645  1.00  0.44           O  
HETATM  237  O   HOH T 236      27.446  29.325  14.480  1.00  0.44           O  
HETATM  238  O   HOH T 237       0.755  38.130  16.113  1.00  0.44           O  
HETATM  239  O   HOH T 238      17.851  10.259  -0.050  1.00  0.44           O  
HETATM  240  O   HOH T 239      14.569  44.730 -16.941  1.00  0.44           O  
HETATM  241  O   HOH T 240      23.621  42.661 -11.148  1.00  0.44           O  
HETATM  242  O   HOH T 241      -0.026  10.627  22.723  1.00  0.44           O  
HETATM  243  O   HOH T 242      20.508  35.038 -15.467  1.00  0.44           O  
HETATM  244  O   HOH T 243      17.058  42.628  -3.253  1.00  0.45           O  
HETATM  245  O   HOH T 244       6.537  11.048   1.088  1.00  0.45           O  
HETATM  246  O   HOH T 245      -3.860   7.890  14.153  1.00  0.45           O  
HETATM  247  O   HOH T 246      14.674  37.369  21.237  1.00  0.45           O  
HETATM  248  O   HOH T 247      -5.794   8.680  19.742  1.00  0.45           O  
HETATM  249  O   HOH T 248       4.015  18.980  27.775  1.00  0.45           O  
HETATM  250  O   HOH T 249      21.569  40.763 -11.237  1.00  0.45           O  
HETATM  251  O   HOH T 250      23.262  10.252  24.930  1.00  0.45           O  
HETATM  252  O   HOH T 251       9.531  37.373  12.254  1.00  0.45           O  
HETATM  253  O   HOH T 252      24.436  36.458  10.654  1.00  0.45           O  
HETATM  254  O   HOH T 253       6.261  20.385 -14.815  1.00  0.45           O  
HETATM  255  O   HOH T 254       4.762  20.524  22.155  1.00  0.45           O  
HETATM  256  O   HOH T 255      31.200  33.121   7.828  1.00  0.45           O  
HETATM  257  O   HOH T 256      -4.191  35.224  -1.773  1.00  0.45           O  
HETATM  258  O   HOH T 257      33.296  34.980   7.646  1.00  0.45           O  
HETATM  259  O   HOH T 258       2.170   8.988  22.576  1.00  0.45           O  
HETATM  260  O   HOH T 259      35.176  23.523   4.188  1.00  0.46           O  
HETATM  261  O   HOH T 260      35.158  35.659   5.643  1.00  0.46           O  
HETATM  262  O   HOH T 261      23.159  33.961  10.637  1.00  0.46           O  
HETATM  263  O   HOH T 262      21.928  12.118   2.732  1.00  0.46           O  
HETATM  264  O   HOH T 263      33.147  21.311  -0.020  1.00  0.46           O  
HETATM  265  O   HOH T 264      -7.989  33.110  15.525  1.00  0.46           O  
HETATM  266  O   HOH T 265      -3.427  10.448  15.255  1.00  0.46           O  
HETATM  267  O   HOH T 266      25.782  32.056  24.565  1.00  0.46           O  
HETATM  268  O   HOH T 267       5.839  16.823  23.978  1.00  0.46           O  
HETATM  269  O   HOH T 268      -3.416  12.988  16.425  1.00  0.46           O  
HETATM  270  O   HOH T 269      24.668  12.785  -0.111  1.00  0.46           O  
HETATM  271  O   HOH T 270       2.342   7.979  15.945  1.00  0.46           O  
HETATM  272  O   HOH T 271       8.134  31.321 -14.423  1.00  0.46           O  
HETATM  273  O   HOH T 272      -2.605  27.837  -2.480  1.00  0.47           O  
HETATM  274  O   HOH T 273       7.061  31.010  24.060  1.00  0.47           O  
HETATM  275  O   HOH T 274      -2.474  35.776  16.106  1.00  0.47           O  
HETATM  276  O   HOH T 275       4.711   6.951  20.000  1.00  0.47           O  
HETATM  277  O   HOH T 276       9.089  47.352  -4.279  1.00  0.47           O  
HETATM  278  O   HOH T 277      30.663  33.353  13.223  1.00  0.47           O  
HETATM  279  O   HOH T 278      -5.970  10.562  21.781  1.00  0.47           O  
HETATM  280  O   HOH T 279       0.080  39.271 -17.200  1.00  0.47           O  
HETATM  281  O   HOH T 280      19.556  26.916 -20.732  1.00  0.47           O  
HETATM  282  O   HOH T 281       8.148   5.408  22.138  1.00  0.47           O  
HETATM  283  O   HOH T 282      14.430   9.504   3.914  1.00  0.47           O  
HETATM  284  O   HOH T 283      34.245  23.717   9.054  1.00  0.47           O  
HETATM  285  O   HOH T 284      16.263   8.991   1.910  1.00  0.47           O  
HETATM  286  O   HOH T 285      32.778  25.699   2.258  1.00  0.48           O  
HETATM  287  O   HOH T 286      13.666  12.902 -11.568  1.00  0.48           O  
HETATM  288  O   HOH T 287      20.502  42.498 -16.669  1.00  0.48           O  
HETATM  289  O   HOH T 288      18.412  39.920   2.723  1.00  0.48           O  
HETATM  290  O   HOH T 289      14.691  37.271   6.071  1.00  0.48           O  
HETATM  291  O   HOH T 290       6.587  25.081  22.829  1.00  0.48           O  
HETATM  292  O   HOH T 291      21.956  13.121   0.096  1.00  0.48           O  
HETATM  293  O   HOH T 292      -0.236  26.613  -9.202  1.00  0.48           O  
HETATM  294  O   HOH T 293      -9.152  17.336   4.813  1.00  0.48           O  
HETATM  295  O   HOH T 294      30.802  29.154   9.803  1.00  0.48           O  
HETATM  296  O   HOH T 295      -3.332  12.973  19.204  1.00  0.48           O  
HETATM  297  O   HOH T 296       7.359  27.841  26.871  1.00  0.48           O  
HETATM  298  O   HOH T 297      -4.688  31.091  20.842  1.00  0.48           O  
HETATM  299  O   HOH T 298       4.046  40.303  11.555  1.00  0.48           O  
HETATM  300  O   HOH T 299      11.244  45.705  -4.892  1.00  0.48           O  
HETATM  301  O   HOH T 300      26.803  34.931  21.037  1.00  0.48           O  
HETATM  302  O   HOH T 301      23.316  38.859  21.865  1.00  0.48           O  
HETATM  303  O   HOH T 302      17.977  23.552 -15.362  1.00  0.49           O  
HETATM  304  O   HOH T 303      -2.358  32.544  20.551  1.00  0.49           O  
HETATM  305  O   HOH T 304      -4.401  24.297  22.920  1.00  0.49           O  
HETATM  306  O   HOH T 305      14.628  42.426  -4.715  1.00  0.49           O  
HETATM  307  O   HOH T 306      28.002  26.193  -2.721  1.00  0.49           O  
HETATM  308  O   HOH T 307      -3.296  20.312  18.313  1.00  0.49           O  
HETATM  309  O   HOH T 308       4.629  26.996  19.490  1.00  0.49           O  
HETATM  310  O   HOH T 309      34.375  30.930   4.653  1.00  0.49           O  
HETATM  311  O   HOH T 310      -9.579  18.320   2.264  1.00  0.49           O  
HETATM  312  O   HOH T 311       5.647  30.316 -15.145  1.00  0.49           O  
HETATM  313  O   HOH T 312      19.373  39.301 -10.400  1.00  0.49           O  
HETATM  314  O   HOH T 313      30.137  25.432  -1.038  1.00  0.49           O  
HETATM  315  O   HOH T 314      32.255  22.699  10.779  1.00  0.49           O  
HETATM  316  O   HOH T 315      25.495   7.230   5.132  1.00  0.49           O  
HETATM  317  O   HOH T 316      11.989  37.140  13.471  1.00  0.49           O  
HETATM  318  O   HOH T 317      25.641   2.938   9.070  1.00  0.49           O  
HETATM  319  O   HOH T 318      18.869  25.991  -9.580  1.00  0.49           O  
HETATM  320  O   HOH T 319      11.116  46.865  -7.539  1.00  0.49           O  
HETATM  321  O   HOH T 320      -1.484   2.782   8.292  1.00  0.49           O  
HETATM  322  O   HOH T 321      13.892  10.159  22.652  1.00  0.50           O  
HETATM  323  O   HOH T 322       1.506  41.441 -16.195  1.00  0.50           O  
HETATM  324  O   HOH T 323      23.384  31.949 -17.421  1.00  0.50           O  
HETATM  325  O   HOH T 324      23.694   7.766  17.213  1.00  0.50           O  
HETATM  326  O   HOH T 325      36.350  35.152   2.407  1.00  0.50           O  
HETATM  327  O   HOH T 326       7.023   8.245   0.851  1.00  0.50           O  
HETATM  328  O   HOH T 327      17.034  38.441  22.491  1.00  0.50           O  
HETATM  329  O   HOH T 328      -9.341  30.786  21.270  1.00  0.50           O  
HETATM  330  O   HOH T 329       0.127  15.419  27.624  1.00  0.50           O  
HETATM  331  O   HOH T 330      -6.676  23.424   3.255  1.00  0.50           O  
HETATM  332  O   HOH T 331      14.402   5.386  14.032  1.00  0.50           O  
HETATM  333  O   HOH T 332      12.302   8.163   0.190  1.00  0.50           O  
HETATM  334  O   HOH T 333      14.749   8.449  20.490  1.00  0.50           O  
HETATM  335  O   HOH T 334      -2.531   9.896  12.634  1.00  0.50           O  
HETATM  336  O   HOH T 335      28.271  33.280  11.895  1.00  0.50           O  
HETATM  337  O   HOH T 336      -2.317  36.346  -0.005  1.00  0.50           O  
HETATM  338  O   HOH T 337      19.251  24.760 -19.043  1.00  0.51           O  
HETATM  339  O   HOH T 338       1.721  10.938  20.579  1.00  0.51           O  
HETATM  340  O   HOH T 339       9.654  34.018  26.737  1.00  0.51           O  
HETATM  341  O   HOH T 340       6.959   5.292  19.556  1.00  0.51           O  
HETATM  342  O   HOH T 341       0.309   9.565  17.103  1.00  0.51           O  
HETATM  343  O   HOH T 342      33.987  21.009   9.281  1.00  0.51           O  
HETATM  344  O   HOH T 343       5.763   9.528  19.668  1.00  0.51           O  
HETATM  345  O   HOH T 344      -0.292  38.937  -7.853  1.00  0.51           O  
HETATM  346  O   HOH T 345      -3.171   1.860  10.171  1.00  0.51           O  
HETATM  347  O   HOH T 346      32.559  30.749   8.322  1.00  0.51           O  
HETATM  348  O   HOH T 347      18.443  51.052 -12.581  1.00  0.51           O  
HETATM  349  O   HOH T 348      23.203   7.992  14.408  1.00  0.51           O  
HETATM  350  O   HOH T 349      31.519  35.010  15.304  1.00  0.51           O  
HETATM  351  O   HOH T 350       1.052  13.276  26.112  1.00  0.51           O  
HETATM  352  O   HOH T 351       4.202  43.082  11.381  1.00  0.52           O  
HETATM  353  O   HOH T 352      13.022  35.916  19.353  1.00  0.52           O  
HETATM  354  O   HOH T 353      21.850  26.655 -13.715  1.00  0.52           O  
HETATM  355  O   HOH T 354      -3.493  31.708  -4.058  1.00  0.52           O  
HETATM  356  O   HOH T 355      25.885  22.096  -6.584  1.00  0.52           O  
HETATM  357  O   HOH T 356      21.085  10.479  23.349  1.00  0.52           O  
HETATM  358  O   HOH T 357      27.764  27.081  -5.355  1.00  0.52           O  
HETATM  359  O   HOH T 358      14.860   8.554  -0.483  1.00  0.52           O  
HETATM  360  O   HOH T 359      -0.437  33.635  18.726  1.00  0.52           O  
HETATM  361  O   HOH T 360      -5.029  17.124  24.216  1.00  0.52           O  
HETATM  362  O   HOH T 361      28.435  32.435  18.570  1.00  0.53           O  
HETATM  363  O   HOH T 362      15.419  39.426  24.381  1.00  0.53           O  
HETATM  364  O   HOH T 363      -3.729  10.409  20.164  1.00  0.53           O  
HETATM  365  O   HOH T 364      32.270  12.233  17.927  1.00  0.53           O  
HETATM  366  O   HOH T 365      -2.331  18.373  15.367  1.00  0.53           O  
HETATM  367  O   HOH T 366       7.361  50.481  -7.396  1.00  0.53           O  
HETATM  368  O   HOH T 367      28.690  20.144  -3.366  1.00  0.53           O  
HETATM  369  O   HOH T 368      35.790  24.139   6.800  1.00  0.53           O  
HETATM  370  O   HOH T 369       7.296  40.762   6.848  1.00  0.53           O  
HETATM  371  O   HOH T 370      26.841  30.761 -11.291  1.00  0.53           O  
HETATM  372  O   HOH T 371      27.572  39.696  22.255  1.00  0.53           O  
HETATM  373  O   HOH T 372      27.759  17.741  16.896  1.00  0.53           O  
HETATM  374  O   HOH T 373       6.766  52.059  -9.589  1.00  0.53           O  
HETATM  375  O   HOH T 374      33.145  22.792   2.441  1.00  0.54           O  
HETATM  376  O   HOH T 375      -0.963  10.520  20.183  1.00  0.54           O  
HETATM  377  O   HOH T 376      -5.016  11.306  13.134  1.00  0.54           O  
HETATM  378  O   HOH T 377       4.716  11.943   3.168  1.00  0.54           O  
HETATM  379  O   HOH T 378      17.574  40.437  27.060  1.00  0.54           O  
HETATM  380  O   HOH T 379      32.428  24.016  -0.061  1.00  0.54           O  
HETATM  381  O   HOH T 380      24.117  28.012 -13.731  1.00  0.54           O  
HETATM  382  O   HOH T 381      30.789  24.965   9.787  1.00  0.54           O  
HETATM  383  O   HOH T 382      12.962  48.934  -7.097  1.00  0.54           O  
HETATM  384  O   HOH T 383      28.619  42.269   0.154  1.00  0.54           O  
HETATM  385  O   HOH T 384       6.626  34.239  15.704  1.00  0.54           O  
HETATM  386  O   HOH T 385      -9.887  35.037  15.379  1.00  0.54           O  
HETATM  387  O   HOH T 386      11.091  49.524  -8.615  1.00  0.55           O  
HETATM  388  O   HOH T 387      21.154   9.508   9.637  1.00  0.55           O  
HETATM  389  O   HOH T 388      32.444  26.723  -0.228  1.00  0.55           O  
HETATM  390  O   HOH T 389       3.237  13.792  24.327  1.00  0.55           O  
HETATM  391  O   HOH T 390      19.463  37.409   2.345  1.00  0.55           O  
HETATM  392  O   HOH T 391       7.210   6.483  12.170  1.00  0.55           O  
HETATM  393  O   HOH T 392      -8.049  20.322   9.719  1.00  0.56           O  
HETATM  394  O   HOH T 393      -3.393  19.442   0.749  1.00  0.56           O  
HETATM  395  O   HOH T 394      26.145  21.191  22.987  1.00  0.56           O  
HETATM  396  O   HOH T 395      20.192  42.079   1.951  1.00  0.56           O  
HETATM  397  O   HOH T 396       7.489  42.969   4.893  1.00  0.56           O  
HETATM  398  O   HOH T 397      -1.679  13.537  26.691  1.00  0.56           O  
HETATM  399  O   HOH T 398       2.562  42.912  13.626  1.00  0.56           O  
HETATM  400  O   HOH T 399      17.908  38.317  25.200  1.00  0.56           O  
HETATM  401  O   HOH T 400       4.054  47.046 -10.466  1.00  0.57           O  
HETATM  402  O   HOH T 401       0.056   6.637  17.035  1.00  0.57           O  
HETATM  403  O   HOH T 402      -6.657  22.516   5.885  1.00  0.57           O  
HETATM  404  O   HOH T 403      25.993  36.489   8.320  1.00  0.58           O  
HETATM  405  O   HOH T 404      28.574  32.284  -5.040  1.00  0.58           O  
HETATM  406  O   HOH T 405       5.871   9.814  22.689  1.00  0.58           O  
HETATM  407  O   HOH T 406       6.820  33.379  23.022  1.00  0.58           O  
HETATM  408  O   HOH T 407      26.159  32.482  21.821  1.00  0.59           O  
HETATM  409  O   HOH T 408      27.742  25.985  20.203  1.00  0.59           O  
HETATM  410  O   HOH T 409       4.903  29.955  18.023  1.00  0.60           O  
HETATM  411  O   HOH T 410      24.399  12.106  21.543  1.00  0.60           O  
HETATM  412  O   HOH T 411      18.685  20.465 -12.376  1.00  0.61           O  
HETATM  413  O   HOH T 412      14.708  41.514   0.063  1.00  0.62           O  
TER     414      HOH T 412 
