# Supplementary material for: Accurate Prediction of Hydration Sites of Proteins Using Energy Model With Atom Embedding
Source: Front Mol Biosci. 2021 Sep 20;8:756075. doi: 10.3389/fmolb.2021.756075 (PMC8488165; doi:10.3389/fmolb.2021.756075)
Supplement: Supplementary file 1 [file DataSheet1.ZIP › Data Sheet 1/Our_result_pdb/our_dataset_output/3FVO_watersite.pdb]

HEADER                                                        XXXX


JRNL        PMID   -1
HETATM    1  O   HOH T   0      28.425   1.519 -14.008  1.00  0.18           O  
HETATM    2  O   HOH T   1       7.713 -14.190  25.751  1.00  0.18           O  
HETATM    3  O   HOH T   2       3.231  -1.400 -16.348  1.00  0.18           O  
HETATM    4  O   HOH T   3       8.760 -36.599  23.095  1.00  0.19           O  
HETATM    5  O   HOH T   4     -14.965 -27.456 -15.035  1.00  0.19           O  
HETATM    6  O   HOH T   5     -11.559  -4.171  -6.696  1.00  0.19           O  
HETATM    7  O   HOH T   6     -11.572 -14.966  14.796  1.00  0.19           O  
HETATM    8  O   HOH T   7       7.570  -4.926 -17.417  1.00  0.19           O  
HETATM    9  O   HOH T   8      -6.318 -22.110   1.538  1.00  0.19           O  
HETATM   10  O   HOH T   9       3.098 -17.738  24.534  1.00  0.19           O  
HETATM   11  O   HOH T  10      -5.264 -30.894 -13.143  1.00  0.20           O  
HETATM   12  O   HOH T  11      35.659  -6.006  15.244  1.00  0.20           O  
HETATM   13  O   HOH T  12       8.138  -5.649  28.835  1.00  0.20           O  
HETATM   14  O   HOH T  13      26.852 -20.008  15.307  1.00  0.20           O  
HETATM   15  O   HOH T  14       9.184 -21.039   1.285  1.00  0.21           O  
HETATM   16  O   HOH T  15       6.706  -9.602   4.078  1.00  0.21           O  
HETATM   17  O   HOH T  16       9.232   1.797   6.875  1.00  0.21           O  
HETATM   18  O   HOH T  17      -8.742  -9.197  25.593  1.00  0.21           O  
HETATM   19  O   HOH T  18       4.379 -14.811   7.856  1.00  0.21           O  
HETATM   20  O   HOH T  19      -1.076   4.698  -9.400  1.00  0.22           O  
HETATM   21  O   HOH T  20      -7.014 -15.854  26.043  1.00  0.22           O  
HETATM   22  O   HOH T  21       6.978   6.930  -2.931  1.00  0.22           O  
HETATM   23  O   HOH T  22      10.049   4.902  30.587  1.00  0.22           O  
HETATM   24  O   HOH T  23      -5.440  11.656  21.019  1.00  0.22           O  
HETATM   25  O   HOH T  24       7.549 -20.738   9.785  1.00  0.22           O  
HETATM   26  O   HOH T  25      28.369 -20.695  22.048  1.00  0.22           O  
HETATM   27  O   HOH T  26       4.286   1.652  34.226  1.00  0.22           O  
HETATM   28  O   HOH T  27       8.164 -14.953 -22.975  1.00  0.22           O  
HETATM   29  O   HOH T  28      14.357 -18.976 -15.649  1.00  0.22           O  
HETATM   30  O   HOH T  29      26.973   0.704  -7.131  1.00  0.23           O  
HETATM   31  O   HOH T  30      19.915   1.408  -6.218  1.00  0.23           O  
HETATM   32  O   HOH T  31       3.418  -5.307   4.501  1.00  0.23           O  
HETATM   33  O   HOH T  32      19.746 -20.565  14.458  1.00  0.23           O  
HETATM   34  O   HOH T  33      -3.618 -30.718 -15.412  1.00  0.23           O  
HETATM   35  O   HOH T  34     -12.744 -24.279 -11.208  1.00  0.23           O  
HETATM   36  O   HOH T  35     -12.784   5.125  19.385  1.00  0.23           O  
HETATM   37  O   HOH T  36       0.144 -11.398  -8.341  1.00  0.23           O  
HETATM   38  O   HOH T  37      20.859 -23.821  11.879  1.00  0.24           O  
HETATM   39  O   HOH T  38      28.948 -16.043  27.398  1.00  0.24           O  
HETATM   40  O   HOH T  39     -13.906  -6.807  17.254  1.00  0.24           O  
HETATM   41  O   HOH T  40     -18.671  -3.391 -19.188  1.00  0.24           O  
HETATM   42  O   HOH T  41      10.712 -23.594 -22.370  1.00  0.24           O  
HETATM   43  O   HOH T  42      -1.641   8.444  33.656  1.00  0.24           O  
HETATM   44  O   HOH T  43      -5.813  -4.274 -20.190  1.00  0.25           O  
HETATM   45  O   HOH T  44       5.844 -23.402 -15.105  1.00  0.25           O  
HETATM   46  O   HOH T  45     -15.939 -31.935  -6.528  1.00  0.25           O  
HETATM   47  O   HOH T  46       0.959   6.265 -10.523  1.00  0.25           O  
HETATM   48  O   HOH T  47       0.081 -27.552 -32.150  1.00  0.25           O  
HETATM   49  O   HOH T  48       3.403 -13.763   3.743  1.00  0.25           O  
HETATM   50  O   HOH T  49       4.323  -4.409   0.422  1.00  0.25           O  
HETATM   51  O   HOH T  50       4.602  -0.786  -1.433  1.00  0.25           O  
HETATM   52  O   HOH T  51     -11.990 -13.175  -7.031  1.00  0.25           O  
HETATM   53  O   HOH T  52     -11.669 -13.742   0.901  1.00  0.25           O  
HETATM   54  O   HOH T  53       1.365   3.262  -2.720  1.00  0.25           O  
HETATM   55  O   HOH T  54       1.313 -20.778  17.919  1.00  0.25           O  
HETATM   56  O   HOH T  55       0.065  -7.800  16.572  1.00  0.25           O  
HETATM   57  O   HOH T  56      20.949   4.624  -3.733  1.00  0.25           O  
HETATM   58  O   HOH T  57     -13.800 -12.265  -9.047  1.00  0.25           O  
HETATM   59  O   HOH T  58       4.713 -20.854 -25.883  1.00  0.25           O  
HETATM   60  O   HOH T  59      31.692  -1.481 -12.979  1.00  0.25           O  
HETATM   61  O   HOH T  60     -11.678 -22.683  -5.034  1.00  0.26           O  
HETATM   62  O   HOH T  61       8.320  -1.044  -7.413  1.00  0.26           O  
HETATM   63  O   HOH T  62       1.812  -9.197  29.511  1.00  0.26           O  
HETATM   64  O   HOH T  63       1.411   1.744  -9.928  1.00  0.26           O  
HETATM   65  O   HOH T  64       1.287 -22.535  10.850  1.00  0.26           O  
HETATM   66  O   HOH T  65      -0.112 -20.925 -30.930  1.00  0.26           O  
HETATM   67  O   HOH T  66      -6.583   8.912   7.671  1.00  0.26           O  
HETATM   68  O   HOH T  67      19.808  -7.030  -4.912  1.00  0.26           O  
HETATM   69  O   HOH T  68      12.781   4.480 -24.536  1.00  0.26           O  
HETATM   70  O   HOH T  69      -5.599 -24.234 -20.895  1.00  0.26           O  
HETATM   71  O   HOH T  70       1.172 -20.402  15.073  1.00  0.27           O  
HETATM   72  O   HOH T  71      -6.096  -8.725  26.498  1.00  0.27           O  
HETATM   73  O   HOH T  72       6.532 -25.943  11.253  1.00  0.27           O  
HETATM   74  O   HOH T  73       0.005  -8.474 -22.003  1.00  0.27           O  
HETATM   75  O   HOH T  74      11.319  20.289 -17.971  1.00  0.27           O  
HETATM   76  O   HOH T  75       4.652 -18.413   9.525  1.00  0.27           O  
HETATM   77  O   HOH T  76     -17.918   2.501  16.463  1.00  0.27           O  
HETATM   78  O   HOH T  77      -6.039 -28.300   0.282  1.00  0.27           O  
HETATM   79  O   HOH T  78      -6.121 -14.914  28.400  1.00  0.27           O  
HETATM   80  O   HOH T  79       7.400  -0.073   0.753  1.00  0.27           O  
HETATM   81  O   HOH T  80       9.361 -19.530   6.420  1.00  0.27           O  
HETATM   82  O   HOH T  81       6.768   3.273  36.754  1.00  0.27           O  
HETATM   83  O   HOH T  82      -4.298   6.922   4.611  1.00  0.27           O  
HETATM   84  O   HOH T  83     -14.062  -3.308  -7.768  1.00  0.27           O  
HETATM   85  O   HOH T  84     -11.630  -5.504   7.154  1.00  0.27           O  
HETATM   86  O   HOH T  85       0.307  -1.903  36.355  1.00  0.27           O  
HETATM   87  O   HOH T  86      10.334  -0.153 -13.437  1.00  0.28           O  
HETATM   88  O   HOH T  87     -11.026  -3.783 -17.215  1.00  0.28           O  
HETATM   89  O   HOH T  88       7.960 -31.931  14.580  1.00  0.28           O  
HETATM   90  O   HOH T  89       8.229 -18.141  15.752  1.00  0.28           O  
HETATM   91  O   HOH T  90      -6.904  -3.128 -17.993  1.00  0.28           O  
HETATM   92  O   HOH T  91       1.530   7.867  27.442  1.00  0.28           O  
HETATM   93  O   HOH T  92     -12.379 -17.717  14.445  1.00  0.28           O  
HETATM   94  O   HOH T  93       6.983 -20.219  21.217  1.00  0.28           O  
HETATM   95  O   HOH T  94       3.421   0.546 -21.035  1.00  0.28           O  
HETATM   96  O   HOH T  95     -13.477   8.483 -14.700  1.00  0.28           O  
HETATM   97  O   HOH T  96       8.814 -28.701   8.461  1.00  0.28           O  
HETATM   98  O   HOH T  97       1.904  -7.798  33.910  1.00  0.28           O  
HETATM   99  O   HOH T  98      37.267   2.809 -12.476  1.00  0.28           O  
HETATM  100  O   HOH T  99       7.670   1.569  -1.534  1.00  0.29           O  
HETATM  101  O   HOH T 100     -11.577 -10.300   0.322  1.00  0.29           O  
HETATM  102  O   HOH T 101       4.939  -7.938 -20.651  1.00  0.29           O  
HETATM  103  O   HOH T 102      31.655 -17.677  21.115  1.00  0.29           O  
HETATM  104  O   HOH T 103      -9.018 -27.888 -18.869  1.00  0.29           O  
HETATM  105  O   HOH T 104      -5.999 -24.554 -15.086  1.00  0.29           O  
HETATM  106  O   HOH T 105      15.738  -6.883 -23.429  1.00  0.29           O  
HETATM  107  O   HOH T 106     -20.070   1.234  17.933  1.00  0.29           O  
HETATM  108  O   HOH T 107      -0.986 -23.717  17.495  1.00  0.29           O  
HETATM  109  O   HOH T 108     -13.600  -8.076  26.536  1.00  0.29           O  
HETATM  110  O   HOH T 109       7.713  -9.335  36.354  1.00  0.29           O  
HETATM  111  O   HOH T 110       4.123  -3.477 -17.998  1.00  0.29           O  
HETATM  112  O   HOH T 111     -16.585  -3.060  23.599  1.00  0.29           O  
HETATM  113  O   HOH T 112       6.489  15.214  -3.469  1.00  0.29           O  
HETATM  114  O   HOH T 113       3.100 -18.525  29.563  1.00  0.30           O  
HETATM  115  O   HOH T 114       9.868 -17.001 -23.668  1.00  0.30           O  
HETATM  116  O   HOH T 115      -6.904 -31.714  -1.055  1.00  0.30           O  
HETATM  117  O   HOH T 116      15.949  -8.960  -3.710  1.00  0.30           O  
HETATM  118  O   HOH T 117     -18.547 -13.514  19.508  1.00  0.30           O  
HETATM  119  O   HOH T 118     -14.818  -5.364  -6.045  1.00  0.30           O  
HETATM  120  O   HOH T 119      -3.866  -9.103   5.454  1.00  0.30           O  
HETATM  121  O   HOH T 120     -17.949 -21.784  -8.431  1.00  0.30           O  
HETATM  122  O   HOH T 121     -12.936 -29.226  20.820  1.00  0.30           O  
HETATM  123  O   HOH T 122      -4.364 -26.068   3.501  1.00  0.30           O  
HETATM  124  O   HOH T 123      22.797  -8.159  -9.125  1.00  0.30           O  
HETATM  125  O   HOH T 124     -14.866 -13.841  14.131  1.00  0.30           O  
HETATM  126  O   HOH T 125       4.731 -24.286   9.932  1.00  0.30           O  
HETATM  127  O   HOH T 126     -16.607 -22.595 -15.584  1.00  0.30           O  
HETATM  128  O   HOH T 127       8.966 -36.059   8.009  1.00  0.30           O  
HETATM  129  O   HOH T 128      -3.659  -9.850   2.802  1.00  0.31           O  
HETATM  130  O   HOH T 129      -4.253   0.461  29.330  1.00  0.31           O  
HETATM  131  O   HOH T 130       3.362 -30.802  33.041  1.00  0.31           O  
HETATM  132  O   HOH T 131      10.664  -9.254  26.787  1.00  0.31           O  
HETATM  133  O   HOH T 132      18.152  -7.581 -26.647  1.00  0.31           O  
HETATM  134  O   HOH T 133       6.782  -6.080   6.531  1.00  0.31           O  
HETATM  135  O   HOH T 134       5.960 -15.685   1.591  1.00  0.31           O  
HETATM  136  O   HOH T 135      12.345 -24.384   8.093  1.00  0.31           O  
HETATM  137  O   HOH T 136       4.952 -11.362  28.953  1.00  0.31           O  
HETATM  138  O   HOH T 137      10.029   1.776 -24.308  1.00  0.31           O  
HETATM  139  O   HOH T 138       8.036 -16.357  34.160  1.00  0.31           O  
HETATM  140  O   HOH T 139       9.090   1.863  37.204  1.00  0.31           O  
HETATM  141  O   HOH T 140     -12.298   7.803 -12.253  1.00  0.31           O  
HETATM  142  O   HOH T 141      34.363 -11.127 -18.508  1.00  0.32           O  
HETATM  143  O   HOH T 142       5.919  -3.473   6.594  1.00  0.32           O  
HETATM  144  O   HOH T 143      21.127   7.395  -3.127  1.00  0.32           O  
HETATM  145  O   HOH T 144     -17.754  -9.158  22.137  1.00  0.32           O  
HETATM  146  O   HOH T 145       9.637 -17.394  -3.599  1.00  0.32           O  
HETATM  147  O   HOH T 146       5.840 -25.569  -7.458  1.00  0.32           O  
HETATM  148  O   HOH T 147     -11.969 -26.901  19.649  1.00  0.32           O  
HETATM  149  O   HOH T 148      32.318 -25.662  15.670  1.00  0.32           O  
HETATM  150  O   HOH T 149      -6.460 -11.801 -22.400  1.00  0.32           O  
HETATM  151  O   HOH T 150      11.373  -7.607  30.324  1.00  0.32           O  
HETATM  152  O   HOH T 151     -16.461   3.263  23.905  1.00  0.32           O  
HETATM  153  O   HOH T 152       3.901 -16.084  28.933  1.00  0.32           O  
HETATM  154  O   HOH T 153     -10.639  -3.957   0.904  1.00  0.32           O  
HETATM  155  O   HOH T 154       6.802 -13.084   1.718  1.00  0.32           O  
HETATM  156  O   HOH T 155      15.621 -12.078  31.481  1.00  0.33           O  
HETATM  157  O   HOH T 156      28.754 -20.960  27.364  1.00  0.33           O  
HETATM  158  O   HOH T 157      -0.918 -18.732  31.930  1.00  0.33           O  
HETATM  159  O   HOH T 158       3.192   9.899  -1.209  1.00  0.33           O  
HETATM  160  O   HOH T 159      10.768  -9.911 -18.543  1.00  0.33           O  
HETATM  161  O   HOH T 160       8.167  -4.030  31.083  1.00  0.33           O  
HETATM  162  O   HOH T 161      30.002 -18.534  28.159  1.00  0.33           O  
HETATM  163  O   HOH T 162       3.340  -6.531   1.994  1.00  0.33           O  
HETATM  164  O   HOH T 163       2.246  16.741  46.037  1.00  0.33           O  
HETATM  165  O   HOH T 164       6.007 -22.713  30.739  1.00  0.33           O  
HETATM  166  O   HOH T 165      26.448  -9.926  22.285  1.00  0.33           O  
HETATM  167  O   HOH T 166      19.316 -12.096  38.348  1.00  0.33           O  
HETATM  168  O   HOH T 167      15.523   5.251  -0.021  1.00  0.33           O  
HETATM  169  O   HOH T 168      37.209 -21.994  20.349  1.00  0.33           O  
HETATM  170  O   HOH T 169      -6.638  -3.882   2.875  1.00  0.33           O  
HETATM  171  O   HOH T 170      21.120 -26.591  11.196  1.00  0.34           O  
HETATM  172  O   HOH T 171     -19.217  -2.987  18.499  1.00  0.34           O  
HETATM  173  O   HOH T 172      19.994  -3.261  19.248  1.00  0.34           O  
HETATM  174  O   HOH T 173     -19.976 -20.405  -9.793  1.00  0.34           O  
HETATM  175  O   HOH T 174      -5.376  10.371  -9.044  1.00  0.34           O  
HETATM  176  O   HOH T 175     -18.604  -5.868 -11.250  1.00  0.34           O  
HETATM  177  O   HOH T 176      11.156  -9.417  -9.613  1.00  0.34           O  
HETATM  178  O   HOH T 177     -20.293 -20.828 -13.858  1.00  0.34           O  
HETATM  179  O   HOH T 178       9.700  -1.771  11.805  1.00  0.34           O  
HETATM  180  O   HOH T 179       0.415  11.170  38.050  1.00  0.34           O  
HETATM  181  O   HOH T 180      19.738 -14.782  38.132  1.00  0.34           O  
HETATM  182  O   HOH T 181      -9.328  -1.680   0.236  1.00  0.34           O  
HETATM  183  O   HOH T 182      -0.784 -26.590 -26.520  1.00  0.34           O  
HETATM  184  O   HOH T 183      -0.288   6.702 -15.258  1.00  0.34           O  
HETATM  185  O   HOH T 184     -16.616 -16.166 -15.521  1.00  0.34           O  
HETATM  186  O   HOH T 185      17.964  -6.994  26.129  1.00  0.34           O  
HETATM  187  O   HOH T 186      -6.739 -15.511   5.352  1.00  0.34           O  
HETATM  188  O   HOH T 187       5.922  -7.067 -18.159  1.00  0.34           O  
HETATM  189  O   HOH T 188       1.304 -32.752 -22.719  1.00  0.34           O  
HETATM  190  O   HOH T 189       8.736   3.546   0.231  1.00  0.34           O  
HETATM  191  O   HOH T 190      -0.006 -26.722  21.369  1.00  0.35           O  
HETATM  192  O   HOH T 191      37.290 -21.422  23.127  1.00  0.35           O  
HETATM  193  O   HOH T 192       8.969  -7.251 -20.498  1.00  0.35           O  
HETATM  194  O   HOH T 193      22.825 -17.889 -15.047  1.00  0.35           O  
HETATM  195  O   HOH T 194      20.512  -2.384   0.311  1.00  0.35           O  
HETATM  196  O   HOH T 195     -21.202  -9.239 -13.741  1.00  0.35           O  
HETATM  197  O   HOH T 196      16.402   2.426  21.770  1.00  0.35           O  
HETATM  198  O   HOH T 197      18.523  -0.874   1.633  1.00  0.35           O  
HETATM  199  O   HOH T 198      -6.391 -19.395  28.443  1.00  0.35           O  
HETATM  200  O   HOH T 199       8.509   9.781   0.121  1.00  0.35           O  
HETATM  201  O   HOH T 200      -0.250 -27.626  -3.836  1.00  0.35           O  
HETATM  202  O   HOH T 201      16.287  -3.095  27.346  1.00  0.35           O  
HETATM  203  O   HOH T 202      20.061 -10.345  29.349  1.00  0.35           O  
HETATM  204  O   HOH T 203       8.159 -13.437 -20.671  1.00  0.35           O  
HETATM  205  O   HOH T 204       9.737 -16.824   3.339  1.00  0.35           O  
HETATM  206  O   HOH T 205       5.503 -32.698  13.561  1.00  0.35           O  
HETATM  207  O   HOH T 206     -17.272  10.455  11.552  1.00  0.35           O  
HETATM  208  O   HOH T 207     -10.329   2.461 -15.303  1.00  0.35           O  
HETATM  209  O   HOH T 208      11.038  -9.822  17.916  1.00  0.35           O  
HETATM  210  O   HOH T 209       1.604 -26.879 -19.318  1.00  0.35           O  
HETATM  211  O   HOH T 210      16.477 -24.932 -12.053  1.00  0.35           O  
HETATM  212  O   HOH T 211     -14.029 -25.232 -13.587  1.00  0.35           O  
HETATM  213  O   HOH T 212     -13.103  -0.148  25.130  1.00  0.35           O  
HETATM  214  O   HOH T 213       9.724   0.358   1.944  1.00  0.35           O  
HETATM  215  O   HOH T 214      -8.263   5.541  25.353  1.00  0.35           O  
HETATM  216  O   HOH T 215       3.648 -26.254  -8.964  1.00  0.35           O  
HETATM  217  O   HOH T 216     -11.818 -23.141  -2.314  1.00  0.36           O  
HETATM  218  O   HOH T 217       0.976 -13.079  36.077  1.00  0.36           O  
HETATM  219  O   HOH T 218      24.994 -12.273  18.475  1.00  0.36           O  
HETATM  220  O   HOH T 219      -0.027 -22.974 -14.235  1.00  0.36           O  
HETATM  221  O   HOH T 220       7.054 -18.863   7.804  1.00  0.36           O  
HETATM  222  O   HOH T 221      -5.042 -33.734  -1.127  1.00  0.36           O  
HETATM  223  O   HOH T 222      -5.645  13.071  -8.783  1.00  0.36           O  
HETATM  224  O   HOH T 223      25.035  -6.938 -10.251  1.00  0.36           O  
HETATM  225  O   HOH T 224      22.525 -22.079  10.529  1.00  0.36           O  
HETATM  226  O   HOH T 225      -3.718  -8.809  32.387  1.00  0.36           O  
HETATM  227  O   HOH T 226      19.900  -8.844  26.932  1.00  0.36           O  
HETATM  228  O   HOH T 227      -3.278   5.086  42.397  1.00  0.36           O  
HETATM  229  O   HOH T 228      -6.191   5.368  23.377  1.00  0.36           O  
HETATM  230  O   HOH T 229      11.306 -13.241  -0.650  1.00  0.36           O  
HETATM  231  O   HOH T 230       9.257 -25.953 -23.058  1.00  0.36           O  
HETATM  232  O   HOH T 231      24.222  -2.766  27.650  1.00  0.36           O  
HETATM  233  O   HOH T 232      22.691  -1.486  22.427  1.00  0.36           O  
HETATM  234  O   HOH T 233       2.423 -11.751  30.200  1.00  0.36           O  
HETATM  235  O   HOH T 234     -15.989   0.889 -11.572  1.00  0.36           O  
HETATM  236  O   HOH T 235     -17.669 -10.000 -14.038  1.00  0.36           O  
HETATM  237  O   HOH T 236       0.806 -14.909  32.837  1.00  0.36           O  
HETATM  238  O   HOH T 237      -0.675 -25.588 -18.393  1.00  0.36           O  
HETATM  239  O   HOH T 238      -8.880 -25.622  16.097  1.00  0.36           O  
HETATM  240  O   HOH T 239      27.913  -2.212  -9.998  1.00  0.36           O  
HETATM  241  O   HOH T 240      -4.139 -19.499 -21.269  1.00  0.36           O  
HETATM  242  O   HOH T 241       3.767   4.947  24.974  1.00  0.36           O  
HETATM  243  O   HOH T 242     -12.585 -18.888 -17.140  1.00  0.36           O  
HETATM  244  O   HOH T 243      11.206 -11.809 -22.584  1.00  0.37           O  
HETATM  245  O   HOH T 244     -14.099   6.018  21.764  1.00  0.37           O  
HETATM  246  O   HOH T 245       5.706   3.943  22.964  1.00  0.37           O  
HETATM  247  O   HOH T 246     -21.597 -21.581 -11.571  1.00  0.37           O  
HETATM  248  O   HOH T 247      14.504  14.582   1.182  1.00  0.37           O  
HETATM  249  O   HOH T 248      -0.717   6.449  26.373  1.00  0.37           O  
HETATM  250  O   HOH T 249      -6.350  -6.551   3.640  1.00  0.37           O  
HETATM  251  O   HOH T 250      -0.105  -4.391  35.107  1.00  0.37           O  
HETATM  252  O   HOH T 251      -9.382 -17.492   7.885  1.00  0.37           O  
HETATM  253  O   HOH T 252       0.096   7.542 -12.769  1.00  0.37           O  
HETATM  254  O   HOH T 253      20.797 -31.518  23.836  1.00  0.37           O  
HETATM  255  O   HOH T 254      -7.880  -4.105   0.263  1.00  0.37           O  
HETATM  256  O   HOH T 255       4.518  14.219 -13.983  1.00  0.37           O  
HETATM  257  O   HOH T 256       4.478 -38.460  22.111  1.00  0.37           O  
HETATM  258  O   HOH T 257     -14.056 -15.874  15.823  1.00  0.37           O  
HETATM  259  O   HOH T 258      -4.067 -12.825  34.884  1.00  0.37           O  
HETATM  260  O   HOH T 259     -11.024 -15.262  25.127  1.00  0.37           O  
HETATM  261  O   HOH T 260      -1.191   4.997  44.070  1.00  0.37           O  
HETATM  262  O   HOH T 261       5.782   9.981  -0.283  1.00  0.37           O  
HETATM  263  O   HOH T 262      -2.361   5.891  -7.286  1.00  0.37           O  
HETATM  264  O   HOH T 263       7.330   1.125 -12.928  1.00  0.37           O  
HETATM  265  O   HOH T 264       6.841 -11.806  35.227  1.00  0.37           O  
HETATM  266  O   HOH T 265      12.352  -9.609   4.992  1.00  0.37           O  
HETATM  267  O   HOH T 266       9.370   7.724  -1.465  1.00  0.37           O  
HETATM  268  O   HOH T 267       3.851 -24.199 -16.974  1.00  0.37           O  
HETATM  269  O   HOH T 268     -15.195 -28.462  -8.974  1.00  0.37           O  
HETATM  270  O   HOH T 269      10.251 -18.994  21.855  1.00  0.37           O  
HETATM  271  O   HOH T 270      16.932 -32.341   9.269  1.00  0.37           O  
HETATM  272  O   HOH T 271      -7.284 -24.082  14.549  1.00  0.37           O  
HETATM  273  O   HOH T 272       1.878   1.434  -7.268  1.00  0.37           O  
HETATM  274  O   HOH T 273      23.638 -16.519 -19.579  1.00  0.38           O  
HETATM  275  O   HOH T 274      10.722 -11.674   3.968  1.00  0.38           O  
HETATM  276  O   HOH T 275       3.912  -0.872 -18.855  1.00  0.38           O  
HETATM  277  O   HOH T 276      21.613 -34.894  27.679  1.00  0.38           O  
HETATM  278  O   HOH T 277       7.298 -24.609   8.803  1.00  0.38           O  
HETATM  279  O   HOH T 278      26.719 -12.830 -20.341  1.00  0.38           O  
HETATM  280  O   HOH T 279      -1.741 -24.449 -15.933  1.00  0.38           O  
HETATM  281  O   HOH T 280       5.947 -12.143  26.533  1.00  0.38           O  
HETATM  282  O   HOH T 281       8.922  16.889  -0.052  1.00  0.38           O  
HETATM  283  O   HOH T 282       2.530  -9.274 -21.328  1.00  0.38           O  
HETATM  284  O   HOH T 283      -7.924 -24.249   0.646  1.00  0.38           O  
HETATM  285  O   HOH T 284      18.666 -27.790  10.905  1.00  0.38           O  
HETATM  286  O   HOH T 285      12.616   5.340  -0.015  1.00  0.38           O  
HETATM  287  O   HOH T 286       5.036   5.169  -1.853  1.00  0.38           O  
HETATM  288  O   HOH T 287      22.691 -39.819  23.913  1.00  0.38           O  
HETATM  289  O   HOH T 288      29.386 -25.121  11.168  1.00  0.38           O  
HETATM  290  O   HOH T 289      -5.678  -2.644  30.977  1.00  0.38           O  
HETATM  291  O   HOH T 290      18.760   8.850  -2.692  1.00  0.38           O  
HETATM  292  O   HOH T 291     -17.636  -4.700  17.046  1.00  0.38           O  
HETATM  293  O   HOH T 292     -11.956   4.006  13.766  1.00  0.38           O  
HETATM  294  O   HOH T 293       8.388 -26.242 -20.486  1.00  0.38           O  
HETATM  295  O   HOH T 294      -4.686 -23.796  23.881  1.00  0.39           O  
HETATM  296  O   HOH T 295       8.217  10.435  36.038  1.00  0.39           O  
HETATM  297  O   HOH T 296       6.187   3.577 -22.562  1.00  0.39           O  
HETATM  298  O   HOH T 297      -5.842  -7.326  31.269  1.00  0.39           O  
HETATM  299  O   HOH T 298      -7.907 -15.072   7.898  1.00  0.39           O  
HETATM  300  O   HOH T 299      16.418 -21.507 -13.653  1.00  0.39           O  
HETATM  301  O   HOH T 300      -0.516 -27.457 -29.329  1.00  0.39           O  
HETATM  302  O   HOH T 301      19.681 -19.455   7.101  1.00  0.39           O  
HETATM  303  O   HOH T 302      22.729 -11.244  17.440  1.00  0.39           O  
HETATM  304  O   HOH T 303     -10.677 -12.051  28.622  1.00  0.39           O  
HETATM  305  O   HOH T 304     -11.600  -8.752   7.759  1.00  0.39           O  
HETATM  306  O   HOH T 305     -16.139 -20.090  19.673  1.00  0.39           O  
HETATM  307  O   HOH T 306      15.349  -7.614  26.875  1.00  0.39           O  
HETATM  308  O   HOH T 307      13.865 -32.377   5.708  1.00  0.39           O  
HETATM  309  O   HOH T 308     -15.507   0.661  24.326  1.00  0.39           O  
HETATM  310  O   HOH T 309      15.162 -24.414   8.179  1.00  0.39           O  
HETATM  311  O   HOH T 310     -20.189  -4.204  16.109  1.00  0.39           O  
HETATM  312  O   HOH T 311     -12.894 -12.201   7.119  1.00  0.39           O  
HETATM  313  O   HOH T 312      29.126 -21.091  16.472  1.00  0.39           O  
HETATM  314  O   HOH T 313     -16.588 -15.493  19.387  1.00  0.39           O  
HETATM  315  O   HOH T 314       4.232  10.534  35.347  1.00  0.39           O  
HETATM  316  O   HOH T 315      17.640  -1.025 -28.205  1.00  0.39           O  
HETATM  317  O   HOH T 316      -5.926   4.945  29.021  1.00  0.39           O  
HETATM  318  O   HOH T 317     -15.083   2.071  16.777  1.00  0.39           O  
HETATM  319  O   HOH T 318      -0.455 -26.039  18.781  1.00  0.39           O  
HETATM  320  O   HOH T 319      -6.279 -27.445 -17.832  1.00  0.39           O  
HETATM  321  O   HOH T 320      20.242 -16.891   7.916  1.00  0.40           O  
HETATM  322  O   HOH T 321       3.280 -29.300   9.177  1.00  0.40           O  
HETATM  323  O   HOH T 322       9.018   9.256  33.599  1.00  0.40           O  
HETATM  324  O   HOH T 323      -2.690   9.083  20.564  1.00  0.40           O  
HETATM  325  O   HOH T 324       3.293 -12.827   6.311  1.00  0.40           O  
HETATM  326  O   HOH T 325       9.903 -21.979   5.191  1.00  0.40           O  
HETATM  327  O   HOH T 326     -17.844 -14.761  -9.134  1.00  0.40           O  
HETATM  328  O   HOH T 327     -16.472   2.765  -9.582  1.00  0.40           O  
HETATM  329  O   HOH T 328       9.672 -23.726   7.422  1.00  0.40           O  
HETATM  330  O   HOH T 329     -13.800 -25.009  23.466  1.00  0.40           O  
HETATM  331  O   HOH T 330      31.978 -11.923 -17.467  1.00  0.40           O  
HETATM  332  O   HOH T 331     -21.313  12.418  16.263  1.00  0.40           O  
HETATM  333  O   HOH T 332     -13.868 -22.075  -6.779  1.00  0.40           O  
HETATM  334  O   HOH T 333      -6.527 -24.359   3.034  1.00  0.40           O  
HETATM  335  O   HOH T 334      10.628 -19.401 -25.066  1.00  0.40           O  
HETATM  336  O   HOH T 335       9.837   7.563  31.493  1.00  0.40           O  
HETATM  337  O   HOH T 336      23.542  -1.785  25.046  1.00  0.40           O  
HETATM  338  O   HOH T 337      35.392 -20.171  21.631  1.00  0.40           O  
HETATM  339  O   HOH T 338      10.149 -18.464   1.160  1.00  0.40           O  
HETATM  340  O   HOH T 339     -13.924  -2.524   6.379  1.00  0.40           O  
HETATM  341  O   HOH T 340      -1.868 -19.872 -28.960  1.00  0.40           O  
HETATM  342  O   HOH T 341       1.568  -0.809 -22.819  1.00  0.40           O  
HETATM  343  O   HOH T 342      26.120  -4.477  27.282  1.00  0.40           O  
HETATM  344  O   HOH T 343     -11.290 -16.471   0.914  1.00  0.40           O  
HETATM  345  O   HOH T 344      20.599 -32.487  26.505  1.00  0.40           O  
HETATM  346  O   HOH T 345      17.118   1.444 -26.986  1.00  0.40           O  
HETATM  347  O   HOH T 346     -17.718 -27.261 -15.392  1.00  0.40           O  
HETATM  348  O   HOH T 347     -13.036  10.376 -12.722  1.00  0.41           O  
HETATM  349  O   HOH T 348      -9.431 -22.434  25.455  1.00  0.41           O  
HETATM  350  O   HOH T 349     -12.874 -15.217   4.766  1.00  0.41           O  
HETATM  351  O   HOH T 350     -15.173  -0.933   8.102  1.00  0.41           O  
HETATM  352  O   HOH T 351     -13.745 -27.794  23.051  1.00  0.41           O  
HETATM  353  O   HOH T 352      -7.619   3.654  27.262  1.00  0.41           O  
HETATM  354  O   HOH T 353      13.522  -0.906  36.152  1.00  0.41           O  
HETATM  355  O   HOH T 354     -12.426  -3.559   2.969  1.00  0.41           O  
HETATM  356  O   HOH T 355       9.897 -15.541  -1.532  1.00  0.41           O  
HETATM  357  O   HOH T 356      24.588 -17.000 -17.042  1.00  0.41           O  
HETATM  358  O   HOH T 357      13.845  10.744  39.771  1.00  0.41           O  
HETATM  359  O   HOH T 358       4.570  12.243 -16.001  1.00  0.41           O  
HETATM  360  O   HOH T 359      16.494 -17.096  37.436  1.00  0.41           O  
HETATM  361  O   HOH T 360     -13.763   5.833 -15.443  1.00  0.41           O  
HETATM  362  O   HOH T 361      16.261   5.186  21.416  1.00  0.41           O  
HETATM  363  O   HOH T 362      10.060   4.670 -23.871  1.00  0.41           O  
HETATM  364  O   HOH T 363      27.513 -34.013  23.372  1.00  0.41           O  
HETATM  365  O   HOH T 364      -1.759 -15.350  33.905  1.00  0.41           O  
HETATM  366  O   HOH T 365      21.975 -29.021  29.969  1.00  0.41           O  
HETATM  367  O   HOH T 366     -18.273 -31.260  -5.445  1.00  0.41           O  
HETATM  368  O   HOH T 367      18.037 -25.466  32.277  1.00  0.41           O  
HETATM  369  O   HOH T 368      21.186   2.343 -29.627  1.00  0.41           O  
HETATM  370  O   HOH T 369      -3.944 -23.456   2.574  1.00  0.41           O  
HETATM  371  O   HOH T 370     -18.503 -18.700  20.381  1.00  0.41           O  
HETATM  372  O   HOH T 371      25.522   0.617 -25.681  1.00  0.41           O  
HETATM  373  O   HOH T 372     -12.185 -17.592   3.364  1.00  0.41           O  
HETATM  374  O   HOH T 373     -16.245   2.102  14.235  1.00  0.41           O  
HETATM  375  O   HOH T 374     -10.142 -25.429 -18.658  1.00  0.42           O  
HETATM  376  O   HOH T 375      -4.139 -25.744 -16.887  1.00  0.42           O  
HETATM  377  O   HOH T 376      16.122   0.149  23.389  1.00  0.42           O  
HETATM  378  O   HOH T 377      11.470  -6.258   8.675  1.00  0.42           O  
HETATM  379  O   HOH T 378      -2.008  10.457 -11.868  1.00  0.42           O  
HETATM  380  O   HOH T 379       9.362 -11.909  29.081  1.00  0.42           O  
HETATM  381  O   HOH T 380      19.443 -11.384  15.311  1.00  0.42           O  
HETATM  382  O   HOH T 381       3.895  -5.607 -21.488  1.00  0.42           O  
HETATM  383  O   HOH T 382       9.647 -13.125   1.701  1.00  0.42           O  
HETATM  384  O   HOH T 383       2.566 -20.990 -30.101  1.00  0.42           O  
HETATM  385  O   HOH T 384      -6.408 -12.823   4.893  1.00  0.42           O  
HETATM  386  O   HOH T 385      -6.638   2.806   6.611  1.00  0.42           O  
HETATM  387  O   HOH T 386       9.914  15.790   2.331  1.00  0.42           O  
HETATM  388  O   HOH T 387      -3.607   6.029  24.220  1.00  0.42           O  
HETATM  389  O   HOH T 388      17.069  -0.855  25.877  1.00  0.42           O  
HETATM  390  O   HOH T 389       5.606  -8.127  34.878  1.00  0.42           O  
HETATM  391  O   HOH T 390     -15.750  -9.602 -19.035  1.00  0.42           O  
HETATM  392  O   HOH T 391      -6.964   7.822  24.410  1.00  0.42           O  
HETATM  393  O   HOH T 392      15.558  -1.482 -30.023  1.00  0.42           O  
HETATM  394  O   HOH T 393      -2.135 -28.951 -19.744  1.00  0.42           O  
HETATM  395  O   HOH T 394      20.988  12.919 -17.756  1.00  0.42           O  
HETATM  396  O   HOH T 395     -12.400  -1.480  -6.453  1.00  0.42           O  
HETATM  397  O   HOH T 396      35.655   0.827 -13.773  1.00  0.42           O  
HETATM  398  O   HOH T 397      20.119 -34.951  25.400  1.00  0.42           O  
HETATM  399  O   HOH T 398       1.478  -6.491  36.268  1.00  0.42           O  
HETATM  400  O   HOH T 399      18.656 -30.210   9.396  1.00  0.42           O  
HETATM  401  O   HOH T 400       6.337  -7.011  37.391  1.00  0.42           O  
HETATM  402  O   HOH T 401       7.418   5.903  -0.492  1.00  0.42           O  
HETATM  403  O   HOH T 402     -11.993  -1.369   4.707  1.00  0.42           O  
HETATM  404  O   HOH T 403     -16.085 -26.816 -17.533  1.00  0.42           O  
HETATM  405  O   HOH T 404     -12.183  -9.749  28.290  1.00  0.42           O  
HETATM  406  O   HOH T 405      -1.089  10.126  35.876  1.00  0.42           O  
HETATM  407  O   HOH T 406      -6.276   5.706   3.208  1.00  0.43           O  
HETATM  408  O   HOH T 407     -20.537 -30.923 -11.417  1.00  0.43           O  
HETATM  409  O   HOH T 408      10.491   2.175  30.830  1.00  0.43           O  
HETATM  410  O   HOH T 409      12.036   1.024   3.356  1.00  0.43           O  
HETATM  411  O   HOH T 410      -4.965 -29.906  -1.842  1.00  0.43           O  
HETATM  412  O   HOH T 411       7.385 -21.999  33.079  1.00  0.43           O  
HETATM  413  O   HOH T 412     -14.446   3.543  12.621  1.00  0.43           O  
HETATM  414  O   HOH T 413      -1.336   7.433  -9.412  1.00  0.43           O  
HETATM  415  O   HOH T 414      30.076 -26.825  14.706  1.00  0.43           O  
HETATM  416  O   HOH T 415      -7.052  -8.493  29.163  1.00  0.43           O  
HETATM  417  O   HOH T 416     -11.671   7.194   9.885  1.00  0.43           O  
HETATM  418  O   HOH T 417     -18.659   1.604  -8.515  1.00  0.43           O  
HETATM  419  O   HOH T 418     -10.830  -7.828  26.794  1.00  0.43           O  
HETATM  420  O   HOH T 419     -11.066 -14.689  27.728  1.00  0.43           O  
HETATM  421  O   HOH T 420     -19.701  -6.544  17.294  1.00  0.43           O  
HETATM  422  O   HOH T 421      20.544 -31.426  29.119  1.00  0.43           O  
HETATM  423  O   HOH T 422     -15.253  -9.972  13.746  1.00  0.43           O  
HETATM  424  O   HOH T 423      19.386 -20.271 -15.702  1.00  0.43           O  
HETATM  425  O   HOH T 424      24.165 -20.281  37.576  1.00  0.43           O  
HETATM  426  O   HOH T 425      -8.882   3.906   7.694  1.00  0.43           O  
HETATM  427  O   HOH T 426      12.868  -9.052 -20.320  1.00  0.43           O  
HETATM  428  O   HOH T 427     -14.315  -7.534  14.681  1.00  0.43           O  
HETATM  429  O   HOH T 428      12.546   3.269   1.776  1.00  0.43           O  
HETATM  430  O   HOH T 429       5.162 -14.844  26.807  1.00  0.43           O  
HETATM  431  O   HOH T 430      -8.269  -1.699  30.784  1.00  0.43           O  
HETATM  432  O   HOH T 431       0.836 -19.577 -28.761  1.00  0.43           O  
HETATM  433  O   HOH T 432       1.697   8.068   2.023  1.00  0.44           O  
HETATM  434  O   HOH T 433     -14.869   4.386  25.941  1.00  0.44           O  
HETATM  435  O   HOH T 434       4.480 -22.669 -29.437  1.00  0.44           O  
HETATM  436  O   HOH T 435     -19.802 -23.331 -12.621  1.00  0.44           O  
HETATM  437  O   HOH T 436       2.206   9.914 -20.181  1.00  0.44           O  
HETATM  438  O   HOH T 437      27.581  14.591 -15.251  1.00  0.44           O  
HETATM  439  O   HOH T 438     -22.949  -9.440  18.238  1.00  0.44           O  
HETATM  440  O   HOH T 439      -8.276 -24.599 -16.755  1.00  0.44           O  
HETATM  441  O   HOH T 440     -13.910 -18.693  26.341  1.00  0.44           O  
HETATM  442  O   HOH T 441      -4.225 -27.513 -27.504  1.00  0.44           O  
HETATM  443  O   HOH T 442       9.866  -0.921   7.106  1.00  0.44           O  
HETATM  444  O   HOH T 443      10.887   9.997  35.532  1.00  0.44           O  
HETATM  445  O   HOH T 444      -4.171 -20.116 -27.310  1.00  0.44           O  
HETATM  446  O   HOH T 445       9.572 -19.957 -27.547  1.00  0.44           O  
HETATM  447  O   HOH T 446      11.213 -32.780   5.532  1.00  0.44           O  
HETATM  448  O   HOH T 447      18.620   1.221 -29.335  1.00  0.44           O  
HETATM  449  O   HOH T 448     -10.451   0.827   0.615  1.00  0.44           O  
HETATM  450  O   HOH T 449     -19.711 -12.670  -9.408  1.00  0.44           O  
HETATM  451  O   HOH T 450     -19.818 -30.954  -8.735  1.00  0.44           O  
HETATM  452  O   HOH T 451      27.278  -8.350  19.106  1.00  0.44           O  
HETATM  453  O   HOH T 452      27.624  -3.771  25.792  1.00  0.44           O  
HETATM  454  O   HOH T 453      16.239  -8.313  -0.988  1.00  0.44           O  
HETATM  455  O   HOH T 454      20.267  -5.074   0.024  1.00  0.44           O  
HETATM  456  O   HOH T 455     -20.326   1.753  21.888  1.00  0.44           O  
HETATM  457  O   HOH T 456     -11.038   4.600   9.192  1.00  0.44           O  
HETATM  458  O   HOH T 457     -17.732 -20.430 -16.896  1.00  0.44           O  
HETATM  459  O   HOH T 458     -13.955  -0.283  10.399  1.00  0.44           O  
HETATM  460  O   HOH T 459      13.824  -8.911   0.154  1.00  0.45           O  
HETATM  461  O   HOH T 460      17.338 -29.072   7.182  1.00  0.45           O  
HETATM  462  O   HOH T 461      20.580  -6.717  -2.213  1.00  0.45           O  
HETATM  463  O   HOH T 462      10.236  -9.631 -21.218  1.00  0.45           O  
HETATM  464  O   HOH T 463      22.898 -11.042  -8.987  1.00  0.45           O  
HETATM  465  O   HOH T 464      18.747  -7.345  -0.148  1.00  0.45           O  
HETATM  466  O   HOH T 465     -15.340   9.487  17.086  1.00  0.45           O  
HETATM  467  O   HOH T 466       5.525 -28.163  -8.160  1.00  0.45           O  
HETATM  468  O   HOH T 467      12.065  13.929   2.392  1.00  0.45           O  
HETATM  469  O   HOH T 468     -20.436 -17.272 -17.884  1.00  0.45           O  
HETATM  470  O   HOH T 469      -0.264   8.371  11.911  1.00  0.45           O  
HETATM  471  O   HOH T 470     -15.894 -17.114  17.333  1.00  0.45           O  
HETATM  472  O   HOH T 471      22.715   4.393 -28.612  1.00  0.45           O  
HETATM  473  O   HOH T 472      -9.546   6.572   8.200  1.00  0.45           O  
HETATM  474  O   HOH T 473      -3.051 -28.529 -29.880  1.00  0.45           O  
HETATM  475  O   HOH T 474      -2.541 -28.332 -32.665  1.00  0.45           O  
HETATM  476  O   HOH T 475     -12.067   3.434  11.179  1.00  0.45           O  
HETATM  477  O   HOH T 476      20.811 -33.951  30.183  1.00  0.45           O  
HETATM  478  O   HOH T 477      36.447 -25.868  17.187  1.00  0.45           O  
HETATM  479  O   HOH T 478       1.613 -24.169 -18.574  1.00  0.45           O  
HETATM  480  O   HOH T 479       3.980  11.385 -18.628  1.00  0.45           O  
HETATM  481  O   HOH T 480      19.437 -18.802 -17.959  1.00  0.45           O  
HETATM  482  O   HOH T 481      22.724   2.968  -2.517  1.00  0.45           O  
HETATM  483  O   HOH T 482      20.214   1.030   0.564  1.00  0.45           O  
HETATM  484  O   HOH T 483      17.787 -23.850   8.661  1.00  0.45           O  
HETATM  485  O   HOH T 484      12.007  -0.944   5.313  1.00  0.45           O  
HETATM  486  O   HOH T 485      14.109  -5.913   2.782  1.00  0.45           O  
HETATM  487  O   HOH T 486      14.124   3.579  22.701  1.00  0.45           O  
HETATM  488  O   HOH T 487      -9.014   8.586   6.348  1.00  0.45           O  
HETATM  489  O   HOH T 488      20.119   2.676  -1.751  1.00  0.45           O  
HETATM  490  O   HOH T 489     -18.979   3.836  23.099  1.00  0.45           O  
HETATM  491  O   HOH T 490       6.784 -20.250 -27.643  1.00  0.45           O  
HETATM  492  O   HOH T 491      10.755  -7.445   4.249  1.00  0.45           O  
HETATM  493  O   HOH T 492      19.375 -15.652 -10.981  1.00  0.45           O  
HETATM  494  O   HOH T 493      25.798 -28.572  11.491  1.00  0.46           O  
HETATM  495  O   HOH T 494     -10.387 -20.110   7.551  1.00  0.46           O  
HETATM  496  O   HOH T 495      16.113 -16.044 -19.083  1.00  0.46           O  
HETATM  497  O   HOH T 496      24.516 -19.713 -16.306  1.00  0.46           O  
HETATM  498  O   HOH T 497     -13.217 -16.076  26.541  1.00  0.46           O  
HETATM  499  O   HOH T 498      -1.379  -7.637 -24.189  1.00  0.46           O  
HETATM  500  O   HOH T 499      16.687  -5.597  28.186  1.00  0.46           O  
HETATM  501  O   HOH T 500      15.548 -27.010   7.101  1.00  0.46           O  
HETATM  502  O   HOH T 501      12.291  16.172   0.842  1.00  0.46           O  
HETATM  503  O   HOH T 502     -17.859  -0.829  24.507  1.00  0.46           O  
HETATM  504  O   HOH T 503      15.369 -19.536  -3.181  1.00  0.46           O  
HETATM  505  O   HOH T 504      10.609 -23.643  32.462  1.00  0.46           O  
HETATM  506  O   HOH T 505      11.912   8.040  37.209  1.00  0.46           O  
HETATM  507  O   HOH T 506       8.851   6.991  28.950  1.00  0.46           O  
HETATM  508  O   HOH T 507     -10.392 -16.996  29.218  1.00  0.46           O  
HETATM  509  O   HOH T 508      22.324 -18.516   7.163  1.00  0.46           O  
HETATM  510  O   HOH T 509       3.666 -33.330  18.634  1.00  0.46           O  
HETATM  511  O   HOH T 510      -6.731 -18.994 -21.115  1.00  0.46           O  
HETATM  512  O   HOH T 511     -11.376 -14.428   7.030  1.00  0.46           O  
HETATM  513  O   HOH T 512      13.819 -11.369 -23.102  1.00  0.46           O  
HETATM  514  O   HOH T 513     -18.365 -15.839 -17.577  1.00  0.46           O  
HETATM  515  O   HOH T 514      12.706 -34.589   7.133  1.00  0.46           O  
HETATM  516  O   HOH T 515      12.020 -18.442   3.224  1.00  0.46           O  
HETATM  517  O   HOH T 516       7.242 -26.861   7.202  1.00  0.46           O  
HETATM  518  O   HOH T 517      21.719 -21.049   8.082  1.00  0.46           O  
HETATM  519  O   HOH T 518      18.248 -12.609  32.042  1.00  0.46           O  
HETATM  520  O   HOH T 519       7.160 -22.351 -29.451  1.00  0.46           O  
HETATM  521  O   HOH T 520     -11.247  -2.700   7.092  1.00  0.46           O  
HETATM  522  O   HOH T 521      -3.967 -20.355  29.123  1.00  0.46           O  
HETATM  523  O   HOH T 522      27.031 -11.988  20.480  1.00  0.46           O  
HETATM  524  O   HOH T 523       0.245 -16.061 -14.092  1.00  0.46           O  
HETATM  525  O   HOH T 524     -14.640 -18.666  15.545  1.00  0.47           O  
HETATM  526  O   HOH T 525      -5.786 -23.664  12.231  1.00  0.47           O  
HETATM  527  O   HOH T 526       9.660   0.403   4.672  1.00  0.47           O  
HETATM  528  O   HOH T 527     -10.758  -4.692 -19.824  1.00  0.47           O  
HETATM  529  O   HOH T 528      -0.809  -0.822 -24.222  1.00  0.47           O  
HETATM  530  O   HOH T 529      11.608   0.776  37.345  1.00  0.47           O  
HETATM  531  O   HOH T 530      -6.982 -23.558  25.399  1.00  0.47           O  
HETATM  532  O   HOH T 531     -14.563   1.711  26.700  1.00  0.47           O  
HETATM  533  O   HOH T 532      13.389 -17.848  -1.936  1.00  0.47           O  
HETATM  534  O   HOH T 533      27.008 -26.269  12.089  1.00  0.47           O  
HETATM  535  O   HOH T 534      20.026 -22.598   9.577  1.00  0.47           O  
HETATM  536  O   HOH T 535      -1.295 -26.287 -34.154  1.00  0.47           O  
HETATM  537  O   HOH T 536      19.312  -6.566  28.521  1.00  0.47           O  
HETATM  538  O   HOH T 537      21.208 -17.815 -19.895  1.00  0.47           O  
HETATM  539  O   HOH T 538     -16.434  -9.850  24.536  1.00  0.47           O  
HETATM  540  O   HOH T 539      18.062 -23.567 -13.929  1.00  0.47           O  
HETATM  541  O   HOH T 540      17.979  -8.314 -24.030  1.00  0.47           O  
HETATM  542  O   HOH T 541      26.875 -24.130  10.363  1.00  0.47           O  
HETATM  543  O   HOH T 542      -2.927  11.812 -15.515  1.00  0.47           O  
HETATM  544  O   HOH T 543       7.968  -6.782  35.136  1.00  0.47           O  
HETATM  545  O   HOH T 544     -19.004 -27.655  -7.176  1.00  0.47           O  
HETATM  546  O   HOH T 545      18.000 -10.390  33.624  1.00  0.47           O  
HETATM  547  O   HOH T 546      14.588 -18.974  34.330  1.00  0.47           O  
HETATM  548  O   HOH T 547      20.222  12.227 -20.343  1.00  0.47           O  
HETATM  549  O   HOH T 548     -15.228 -24.227 -17.251  1.00  0.47           O  
HETATM  550  O   HOH T 549      21.721   9.582 -22.111  1.00  0.47           O  
HETATM  551  O   HOH T 550     -12.105 -25.845  -1.829  1.00  0.47           O  
HETATM  552  O   HOH T 551      29.033 -21.155  19.200  1.00  0.48           O  
HETATM  553  O   HOH T 552      -6.904 -21.676 -20.419  1.00  0.48           O  
HETATM  554  O   HOH T 553     -19.937   4.191  20.545  1.00  0.48           O  
HETATM  555  O   HOH T 554     -16.493 -21.149  -6.315  1.00  0.48           O  
HETATM  556  O   HOH T 555      -7.813 -17.083  28.392  1.00  0.48           O  
HETATM  557  O   HOH T 556       1.532 -17.316  31.579  1.00  0.48           O  
HETATM  558  O   HOH T 557     -12.167 -21.881  17.974  1.00  0.48           O  
HETATM  559  O   HOH T 558      13.791 -17.649  36.819  1.00  0.48           O  
HETATM  560  O   HOH T 559      -3.063 -26.848 -25.001  1.00  0.48           O  
HETATM  561  O   HOH T 560       0.089  10.543  33.317  1.00  0.48           O  
HETATM  562  O   HOH T 561     -12.951 -15.986  29.304  1.00  0.48           O  
HETATM  563  O   HOH T 562      10.925 -14.525 -22.987  1.00  0.48           O  
HETATM  564  O   HOH T 563     -15.338 -20.852  -8.870  1.00  0.48           O  
HETATM  565  O   HOH T 564       9.915   6.036   0.791  1.00  0.48           O  
HETATM  566  O   HOH T 565      -1.764 -13.795  36.320  1.00  0.48           O  
HETATM  567  O   HOH T 566      10.482  -3.236   5.697  1.00  0.48           O  
HETATM  568  O   HOH T 567      23.407   1.135  22.263  1.00  0.48           O  
HETATM  569  O   HOH T 568      26.975  -2.040  -7.413  1.00  0.48           O  
HETATM  570  O   HOH T 569       1.610   5.170  26.724  1.00  0.48           O  
HETATM  571  O   HOH T 570      17.637 -10.162  30.844  1.00  0.48           O  
HETATM  572  O   HOH T 571       4.922 -33.490  16.176  1.00  0.48           O  
HETATM  573  O   HOH T 572       9.891  -1.829  31.634  1.00  0.48           O  
HETATM  574  O   HOH T 573     -13.423  -2.877 -18.300  1.00  0.48           O  
HETATM  575  O   HOH T 574       9.600  -5.918   6.517  1.00  0.48           O  
HETATM  576  O   HOH T 575      25.967 -16.065  32.461  1.00  0.48           O  
HETATM  577  O   HOH T 576      25.134   2.482  18.618  1.00  0.48           O  
HETATM  578  O   HOH T 577     -15.285 -14.408  -8.201  1.00  0.49           O  
HETATM  579  O   HOH T 578      -9.038 -19.443  29.236  1.00  0.49           O  
HETATM  580  O   HOH T 579      27.663  -1.314  25.755  1.00  0.49           O  
HETATM  581  O   HOH T 580      -7.969 -23.968 -19.449  1.00  0.49           O  
HETATM  582  O   HOH T 581     -16.311 -12.214   0.136  1.00  0.49           O  
HETATM  583  O   HOH T 582       9.601 -19.625   3.651  1.00  0.49           O  
HETATM  584  O   HOH T 583     -13.389  -4.967   5.109  1.00  0.49           O  
HETATM  585  O   HOH T 584      25.435  -8.475 -23.378  1.00  0.49           O  
HETATM  586  O   HOH T 585      -5.209 -10.472  34.012  1.00  0.49           O  
HETATM  587  O   HOH T 586      22.628   7.256 -25.261  1.00  0.49           O  
HETATM  588  O   HOH T 587     -20.359 -19.735 -16.457  1.00  0.49           O  
HETATM  589  O   HOH T 588      -0.791  11.000 -17.223  1.00  0.49           O  
HETATM  590  O   HOH T 589      28.596  -4.321  28.238  1.00  0.49           O  
HETATM  591  O   HOH T 590      15.281 -23.897 -14.277  1.00  0.49           O  
HETATM  592  O   HOH T 591      12.532 -15.144  -2.177  1.00  0.49           O  
HETATM  593  O   HOH T 592      21.427  -0.036  24.341  1.00  0.49           O  
HETATM  594  O   HOH T 593     -14.054 -16.834   1.549  1.00  0.49           O  
HETATM  595  O   HOH T 594      12.656  -6.354   0.523  1.00  0.49           O  
HETATM  596  O   HOH T 595      22.632 -26.669  33.327  1.00  0.49           O  
HETATM  597  O   HOH T 596      -4.786  10.869  10.268  1.00  0.49           O  
HETATM  598  O   HOH T 597     -15.942  -9.528  27.267  1.00  0.49           O  
HETATM  599  O   HOH T 598      22.153 -20.563 -14.954  1.00  0.49           O  
HETATM  600  O   HOH T 599       4.112 -28.196  32.326  1.00  0.49           O  
HETATM  601  O   HOH T 600       2.955  12.187  -2.553  1.00  0.49           O  
HETATM  602  O   HOH T 601       6.507  10.309  33.957  1.00  0.49           O  
HETATM  603  O   HOH T 602       6.052 -36.841  23.694  1.00  0.49           O  
HETATM  604  O   HOH T 603      24.245 -20.418  -8.022  1.00  0.49           O  
HETATM  605  O   HOH T 604      19.224  14.284 -24.172  1.00  0.49           O  
HETATM  606  O   HOH T 605      25.887 -29.319  30.760  1.00  0.50           O  
HETATM  607  O   HOH T 606       5.676  16.332 -17.771  1.00  0.50           O  
HETATM  608  O   HOH T 607     -13.049 -25.006  -4.154  1.00  0.50           O  
HETATM  609  O   HOH T 608     -13.776 -11.986   1.201  1.00  0.50           O  
HETATM  610  O   HOH T 609      24.622 -10.603 -25.059  1.00  0.50           O  
HETATM  611  O   HOH T 610     -13.560  -9.748   6.042  1.00  0.50           O  
HETATM  612  O   HOH T 611       3.687  10.049   1.490  1.00  0.50           O  
HETATM  613  O   HOH T 612      23.556   4.008 -13.131  1.00  0.50           O  
HETATM  614  O   HOH T 613       8.258 -24.535  33.758  1.00  0.50           O  
HETATM  615  O   HOH T 614      26.590  -6.302  28.429  1.00  0.50           O  
HETATM  616  O   HOH T 615     -12.369 -20.413  15.486  1.00  0.50           O  
HETATM  617  O   HOH T 616      13.158 -12.399  -2.560  1.00  0.50           O  
HETATM  618  O   HOH T 617      15.553  -9.310  29.149  1.00  0.50           O  
HETATM  619  O   HOH T 618      -7.857  11.467  -8.443  1.00  0.50           O  
HETATM  620  O   HOH T 619      29.150   1.801 -11.234  1.00  0.50           O  
HETATM  621  O   HOH T 620      27.550 -17.855  16.837  1.00  0.50           O  
HETATM  622  O   HOH T 621     -19.051  -8.498 -12.070  1.00  0.50           O  
HETATM  623  O   HOH T 622      12.043   5.849   2.626  1.00  0.50           O  
HETATM  624  O   HOH T 623     -17.383 -29.847  -7.779  1.00  0.50           O  
HETATM  625  O   HOH T 624       5.151 -10.462  33.436  1.00  0.50           O  
HETATM  626  O   HOH T 625       8.250 -29.120 -29.006  1.00  0.50           O  
HETATM  627  O   HOH T 626      -4.310   2.057  35.582  1.00  0.50           O  
HETATM  628  O   HOH T 627      -2.799 -25.017  25.440  1.00  0.50           O  
HETATM  629  O   HOH T 628      13.832 -25.160   5.869  1.00  0.50           O  
HETATM  630  O   HOH T 629      18.057 -35.644  22.289  1.00  0.50           O  
HETATM  631  O   HOH T 630      34.663 -24.532  20.837  1.00  0.50           O  
HETATM  632  O   HOH T 631     -15.144 -17.293  28.265  1.00  0.50           O  
HETATM  633  O   HOH T 632       1.827   5.320   1.442  1.00  0.50           O  
HETATM  634  O   HOH T 633     -13.992 -21.862  20.144  1.00  0.50           O  
HETATM  635  O   HOH T 634       4.040  -4.017 -23.539  1.00  0.50           O  
HETATM  636  O   HOH T 635      26.848  12.170  -9.855  1.00  0.50           O  
HETATM  637  O   HOH T 636      11.118   3.404  38.113  1.00  0.51           O  
HETATM  638  O   HOH T 637     -13.073   6.001  12.169  1.00  0.51           O  
HETATM  639  O   HOH T 638      10.751 -20.744 -22.621  1.00  0.51           O  
HETATM  640  O   HOH T 639      13.995   6.726  14.609  1.00  0.51           O  
HETATM  641  O   HOH T 640      26.757 -31.410  17.874  1.00  0.51           O  
HETATM  642  O   HOH T 641      -6.857   7.089   5.572  1.00  0.51           O  
HETATM  643  O   HOH T 642       5.919 -29.069   8.145  1.00  0.51           O  
HETATM  644  O   HOH T 643      -5.215   3.533  43.584  1.00  0.51           O  
HETATM  645  O   HOH T 644      18.143  -7.755  -2.808  1.00  0.51           O  
HETATM  646  O   HOH T 645       1.556  10.973  35.629  1.00  0.51           O  
HETATM  647  O   HOH T 646     -11.302 -10.558   3.198  1.00  0.51           O  
HETATM  648  O   HOH T 647      16.528 -31.643   6.456  1.00  0.51           O  
HETATM  649  O   HOH T 648       9.084  -8.175  28.779  1.00  0.51           O  
HETATM  650  O   HOH T 649      14.292 -25.894  -6.471  1.00  0.51           O  
HETATM  651  O   HOH T 650     -19.489 -25.788 -13.834  1.00  0.51           O  
HETATM  652  O   HOH T 651       0.509  -3.123  22.363  1.00  0.51           O  
HETATM  653  O   HOH T 652      12.820  -8.368   2.521  1.00  0.51           O  
HETATM  654  O   HOH T 653      13.804  -5.740 -26.141  1.00  0.51           O  
HETATM  655  O   HOH T 654      29.877  -3.193 -11.650  1.00  0.51           O  
HETATM  656  O   HOH T 655      -1.189 -25.279  23.267  1.00  0.51           O  
HETATM  657  O   HOH T 656      35.878   5.115 -11.457  1.00  0.51           O  
HETATM  658  O   HOH T 657      22.640 -18.605  39.110  1.00  0.51           O  
HETATM  659  O   HOH T 658      12.385   8.468  30.813  1.00  0.51           O  
HETATM  660  O   HOH T 659      -9.395  -9.676  28.305  1.00  0.51           O  
HETATM  661  O   HOH T 660       1.878  14.534  44.339  1.00  0.52           O  
HETATM  662  O   HOH T 661      -7.988   0.905  30.974  1.00  0.52           O  
HETATM  663  O   HOH T 662      19.438 -10.932  35.886  1.00  0.52           O  
HETATM  664  O   HOH T 663       6.557 -26.519  34.802  1.00  0.52           O  
HETATM  665  O   HOH T 664      -6.585 -30.784  24.536  1.00  0.52           O  
HETATM  666  O   HOH T 665      18.613  -7.696  33.935  1.00  0.52           O  
HETATM  667  O   HOH T 666      -1.180 -25.794  15.439  1.00  0.52           O  
HETATM  668  O   HOH T 667      26.965 -15.193  16.872  1.00  0.52           O  
HETATM  669  O   HOH T 668      16.999 -18.901 -16.548  1.00  0.52           O  
HETATM  670  O   HOH T 669      26.574   9.812 -21.961  1.00  0.52           O  
HETATM  671  O   HOH T 670     -21.279   6.630  20.199  1.00  0.52           O  
HETATM  672  O   HOH T 671       9.505 -34.875   5.651  1.00  0.52           O  
HETATM  673  O   HOH T 672      -0.378   6.642 -18.033  1.00  0.52           O  
HETATM  674  O   HOH T 673      -0.278   9.010 -19.142  1.00  0.52           O  
HETATM  675  O   HOH T 674      24.913  -9.758 -10.079  1.00  0.52           O  
HETATM  676  O   HOH T 675       3.645 -17.285  27.126  1.00  0.52           O  
HETATM  677  O   HOH T 676       4.014 -13.925  29.263  1.00  0.52           O  
HETATM  678  O   HOH T 677       1.735  13.873 -13.596  1.00  0.52           O  
HETATM  679  O   HOH T 678      18.822  -3.850  28.387  1.00  0.52           O  
HETATM  680  O   HOH T 679      24.871  -4.628  29.643  1.00  0.52           O  
HETATM  681  O   HOH T 680      25.312   3.334 -25.065  1.00  0.52           O  
HETATM  682  O   HOH T 681      23.481 -23.243  21.183  1.00  0.52           O  
HETATM  683  O   HOH T 682      -4.431 -11.345 -24.027  1.00  0.52           O  
HETATM  684  O   HOH T 683     -12.680   0.044  27.796  1.00  0.52           O  
HETATM  685  O   HOH T 684     -20.419 -10.699 -11.235  1.00  0.52           O  
HETATM  686  O   HOH T 685       7.739 -25.849 -17.835  1.00  0.52           O  
HETATM  687  O   HOH T 686      12.473  -5.085   4.778  1.00  0.52           O  
HETATM  688  O   HOH T 687      14.703 -35.861  27.394  1.00  0.52           O  
HETATM  689  O   HOH T 688     -11.367  -8.413   4.986  1.00  0.53           O  
HETATM  690  O   HOH T 689     -19.519 -24.995  -7.319  1.00  0.53           O  
HETATM  691  O   HOH T 690     -10.779 -19.559   4.814  1.00  0.53           O  
HETATM  692  O   HOH T 691      -1.423 -32.523 -22.049  1.00  0.53           O  
HETATM  693  O   HOH T 692      18.756   0.805  24.307  1.00  0.53           O  
HETATM  694  O   HOH T 693      26.781 -10.464 -21.822  1.00  0.53           O  
HETATM  695  O   HOH T 694      17.990 -26.651   8.453  1.00  0.53           O  
HETATM  696  O   HOH T 695       0.460 -30.394 -21.733  1.00  0.53           O  
HETATM  697  O   HOH T 696     -18.783   8.652  15.431  1.00  0.53           O  
HETATM  698  O   HOH T 697      -3.216  -7.307 -26.149  1.00  0.53           O  
HETATM  699  O   HOH T 698       0.156 -17.310  34.049  1.00  0.53           O  
HETATM  700  O   HOH T 699      -4.298   5.123 -15.514  1.00  0.53           O  
HETATM  701  O   HOH T 700     -13.933  -7.157   6.800  1.00  0.53           O  
HETATM  702  O   HOH T 701       1.456 -19.567  33.189  1.00  0.53           O  
HETATM  703  O   HOH T 702      34.260 -24.183  16.960  1.00  0.53           O  
HETATM  704  O   HOH T 703      13.051  -8.766  28.260  1.00  0.53           O  
HETATM  705  O   HOH T 704       6.522   6.548  22.741  1.00  0.53           O  
HETATM  706  O   HOH T 705      18.693  -3.622   1.836  1.00  0.53           O  
HETATM  707  O   HOH T 706      12.797   5.675   7.373  1.00  0.53           O  
HETATM  708  O   HOH T 707     -17.709  -0.925 -20.030  1.00  0.53           O  
HETATM  709  O   HOH T 708      24.632 -29.985   9.496  1.00  0.53           O  
HETATM  710  O   HOH T 709     -20.909 -20.206  -7.121  1.00  0.53           O  
HETATM  711  O   HOH T 710      21.836 -15.369 -21.049  1.00  0.53           O  
HETATM  712  O   HOH T 711      14.767 -21.693 -15.916  1.00  0.53           O  
HETATM  713  O   HOH T 712      13.313  -7.080  10.609  1.00  0.53           O  
HETATM  714  O   HOH T 713       1.462  -0.863 -25.701  1.00  0.53           O  
HETATM  715  O   HOH T 714     -11.643 -17.631 -19.454  1.00  0.54           O  
HETATM  716  O   HOH T 715       9.146  -2.737   9.133  1.00  0.54           O  
HETATM  717  O   HOH T 716      25.000  -3.110  -5.655  1.00  0.54           O  
HETATM  718  O   HOH T 717     -11.282 -17.045   5.967  1.00  0.54           O  
HETATM  719  O   HOH T 718      15.445 -30.552  32.246  1.00  0.54           O  
HETATM  720  O   HOH T 719      -0.241  13.837 -11.504  1.00  0.54           O  
HETATM  721  O   HOH T 720      -1.266  -0.114  37.891  1.00  0.54           O  
HETATM  722  O   HOH T 721      -4.793 -26.526  26.916  1.00  0.54           O  
HETATM  723  O   HOH T 722      12.723 -17.547   0.724  1.00  0.54           O  
HETATM  724  O   HOH T 723       2.721  11.383  33.172  1.00  0.54           O  
HETATM  725  O   HOH T 724     -17.682  -9.779  -0.091  1.00  0.54           O  
HETATM  726  O   HOH T 725      35.413   4.010 -13.987  1.00  0.54           O  
HETATM  727  O   HOH T 726      -3.018 -30.172 -22.069  1.00  0.54           O  
HETATM  728  O   HOH T 727      13.024  -1.019  38.797  1.00  0.54           O  
HETATM  729  O   HOH T 728       3.098 -31.698  10.633  1.00  0.54           O  
HETATM  730  O   HOH T 729      27.917 -23.420  28.417  1.00  0.54           O  
HETATM  731  O   HOH T 730      18.566 -16.994 -19.733  1.00  0.54           O  
HETATM  732  O   HOH T 731     -17.151   8.779   9.401  1.00  0.54           O  
HETATM  733  O   HOH T 732       6.571 -10.637  31.084  1.00  0.54           O  
HETATM  734  O   HOH T 733      31.375 -14.520 -17.776  1.00  0.54           O  
HETATM  735  O   HOH T 734      -3.112 -30.875  24.383  1.00  0.55           O  
HETATM  736  O   HOH T 735      -3.552 -27.834   1.535  1.00  0.55           O  
HETATM  737  O   HOH T 736      25.119 -31.780  30.426  1.00  0.55           O  
HETATM  738  O   HOH T 737     -10.635 -24.330  -0.066  1.00  0.55           O  
HETATM  739  O   HOH T 738      20.304 -34.096  22.754  1.00  0.55           O  
HETATM  740  O   HOH T 739     -20.986   9.676  16.872  1.00  0.55           O  
HETATM  741  O   HOH T 740      13.783  -3.825  32.151  1.00  0.55           O  
HETATM  742  O   HOH T 741       7.856   6.110  25.062  1.00  0.55           O  
HETATM  743  O   HOH T 742     -17.787   8.122  12.969  1.00  0.55           O  
HETATM  744  O   HOH T 743      10.713   0.708  28.511  1.00  0.55           O  
HETATM  745  O   HOH T 744      18.419   4.068  22.713  1.00  0.55           O  
HETATM  746  O   HOH T 745     -10.544  -7.316 -20.282  1.00  0.55           O  
HETATM  747  O   HOH T 746     -16.361  -9.368 -16.480  1.00  0.55           O  
HETATM  748  O   HOH T 747      21.870 -21.870  38.070  1.00  0.55           O  
HETATM  749  O   HOH T 748      -4.709 -23.738  26.824  1.00  0.55           O  
HETATM  750  O   HOH T 749      -2.291  11.458  11.247  1.00  0.55           O  
HETATM  751  O   HOH T 750      22.694  14.584  -3.238  1.00  0.55           O  
HETATM  752  O   HOH T 751      15.585  -9.908 -19.746  1.00  0.55           O  
HETATM  753  O   HOH T 752      12.821 -21.899  33.318  1.00  0.56           O  
HETATM  754  O   HOH T 753      16.993  -2.884  14.468  1.00  0.56           O  
HETATM  755  O   HOH T 754      19.577 -12.237  12.933  1.00  0.56           O  
HETATM  756  O   HOH T 755       3.497   7.140  16.984  1.00  0.56           O  
HETATM  757  O   HOH T 756      24.400 -17.751   8.897  1.00  0.56           O  
HETATM  758  O   HOH T 757       7.975 -38.039  25.242  1.00  0.56           O  
HETATM  759  O   HOH T 758      27.696   5.602 -19.374  1.00  0.56           O  
HETATM  760  O   HOH T 759       9.150 -17.205  36.600  1.00  0.56           O  
HETATM  761  O   HOH T 760      31.566 -25.098  13.042  1.00  0.56           O  
HETATM  762  O   HOH T 761      -0.498 -15.151 -26.004  1.00  0.56           O  
HETATM  763  O   HOH T 762      18.250 -36.468  26.721  1.00  0.56           O  
HETATM  764  O   HOH T 763      -3.171  12.064  -9.700  1.00  0.56           O  
HETATM  765  O   HOH T 764      -8.375  -4.680 -20.921  1.00  0.56           O  
HETATM  766  O   HOH T 765      -4.911   6.546  -4.905  1.00  0.56           O  
HETATM  767  O   HOH T 766     -12.121 -31.468  19.479  1.00  0.56           O  
HETATM  768  O   HOH T 767      17.735 -13.864  -6.400  1.00  0.56           O  
HETATM  769  O   HOH T 768      12.893 -24.637   0.925  1.00  0.56           O  
HETATM  770  O   HOH T 769      25.819 -26.497   9.523  1.00  0.56           O  
HETATM  771  O   HOH T 770      -6.606  11.995 -15.803  1.00  0.57           O  
HETATM  772  O   HOH T 771       5.096   4.772 -24.898  1.00  0.57           O  
HETATM  773  O   HOH T 772      21.118   6.696 -28.428  1.00  0.57           O  
HETATM  774  O   HOH T 773      32.305   6.454  -7.363  1.00  0.57           O  
HETATM  775  O   HOH T 774      -5.858   4.350  -4.740  1.00  0.57           O  
HETATM  776  O   HOH T 775       6.589  17.093  -1.540  1.00  0.57           O  
HETATM  777  O   HOH T 776     -10.547  -0.035  30.884  1.00  0.57           O  
HETATM  778  O   HOH T 777      20.302  -3.242  16.344  1.00  0.57           O  
HETATM  779  O   HOH T 778      26.691 -18.619  33.207  1.00  0.57           O  
HETATM  780  O   HOH T 779      -8.129   3.421  29.984  1.00  0.57           O  
HETATM  781  O   HOH T 780     -10.641   0.886   3.414  1.00  0.57           O  
HETATM  782  O   HOH T 781      20.257 -27.494  31.565  1.00  0.57           O  
HETATM  783  O   HOH T 782       4.126 -28.367 -10.536  1.00  0.57           O  
HETATM  784  O   HOH T 783      15.387 -33.793   7.463  1.00  0.57           O  
HETATM  785  O   HOH T 784      18.655   3.093   0.646  1.00  0.58           O  
HETATM  786  O   HOH T 785      -4.060 -22.728  28.226  1.00  0.58           O  
HETATM  787  O   HOH T 786     -18.609 -26.106  -4.953  1.00  0.58           O  
HETATM  788  O   HOH T 787      -0.615  12.430 -13.955  1.00  0.58           O  
HETATM  789  O   HOH T 788      -9.683 -21.914  28.177  1.00  0.59           O  
HETATM  790  O   HOH T 789      28.190 -15.242 -19.778  1.00  0.59           O  
HETATM  791  O   HOH T 790       7.274 -22.810  35.657  1.00  0.59           O  
HETATM  792  O   HOH T 791     -19.340 -12.792  16.929  1.00  0.60           O  
HETATM  793  O   HOH T 792      25.999 -19.316  10.606  1.00  0.64           O  
HETATM  794  O   HOH T 793      29.821  -3.255  25.921  1.00  0.64           O  
TER     795      HOH T 793 
