# Supplementary material for: Accurate Prediction of Hydration Sites of Proteins Using Energy Model With Atom Embedding
Source: Front Mol Biosci. 2021 Sep 20;8:756075. doi: 10.3389/fmolb.2021.756075 (PMC8488165; doi:10.3389/fmolb.2021.756075)
Supplement: Supplementary file 1 [file DataSheet1.ZIP › Data Sheet 1/Our_result_pdb/our_dataset_output/3GEN_watersite.pdb]

HEADER                                                        XXXX


JRNL        PMID   -1
HETATM    1  O   HOH T   0     -18.419  15.400  -5.345  1.00  0.19           O  
HETATM    2  O   HOH T   1     -22.572  28.213  -1.554  1.00  0.20           O  
HETATM    3  O   HOH T   2     -13.043 -11.129 -16.886  1.00  0.20           O  
HETATM    4  O   HOH T   3     -17.445  38.742 -17.994  1.00  0.20           O  
HETATM    5  O   HOH T   4     -11.765  -6.594  -5.641  1.00  0.20           O  
HETATM    6  O   HOH T   5     -13.342  33.679 -20.086  1.00  0.21           O  
HETATM    7  O   HOH T   6     -15.259   5.376   6.138  1.00  0.21           O  
HETATM    8  O   HOH T   7     -14.700   5.537 -21.807  1.00  0.21           O  
HETATM    9  O   HOH T   8     -10.862  -0.230  -2.130  1.00  0.22           O  
HETATM   10  O   HOH T   9     -16.907  33.388 -13.837  1.00  0.22           O  
HETATM   11  O   HOH T  10     -10.051   3.134  -0.773  1.00  0.22           O  
HETATM   12  O   HOH T  11     -15.332  29.977 -11.285  1.00  0.22           O  
HETATM   13  O   HOH T  12     -12.139  24.764   1.660  1.00  0.23           O  
HETATM   14  O   HOH T  13     -30.065   7.453 -13.154  1.00  0.23           O  
HETATM   15  O   HOH T  14     -38.007  24.479 -15.661  1.00  0.23           O  
HETATM   16  O   HOH T  15     -20.803   1.319 -32.114  1.00  0.24           O  
HETATM   17  O   HOH T  16     -20.216 -11.237 -17.130  1.00  0.24           O  
HETATM   18  O   HOH T  17     -24.883  39.579  -6.437  1.00  0.24           O  
HETATM   19  O   HOH T  18     -15.185  29.118 -30.820  1.00  0.24           O  
HETATM   20  O   HOH T  19     -38.223  24.094 -30.245  1.00  0.24           O  
HETATM   21  O   HOH T  20     -22.118   7.947   4.584  1.00  0.24           O  
HETATM   22  O   HOH T  21     -18.350 -11.569 -22.079  1.00  0.25           O  
HETATM   23  O   HOH T  22     -16.409  29.329 -28.258  1.00  0.25           O  
HETATM   24  O   HOH T  23     -31.073  12.743  -1.719  1.00  0.25           O  
HETATM   25  O   HOH T  24     -18.099  23.676 -32.785  1.00  0.25           O  
HETATM   26  O   HOH T  25     -15.762   3.975 -24.025  1.00  0.25           O  
HETATM   27  O   HOH T  26     -18.706  24.969  -6.732  1.00  0.26           O  
HETATM   28  O   HOH T  27     -21.670  22.170  -3.979  1.00  0.26           O  
HETATM   29  O   HOH T  28     -27.604  19.584  -6.476  1.00  0.26           O  
HETATM   30  O   HOH T  29      -9.108  24.526 -10.446  1.00  0.26           O  
HETATM   31  O   HOH T  30     -28.344   2.324 -17.024  1.00  0.26           O  
HETATM   32  O   HOH T  31     -22.149  40.422 -23.591  1.00  0.27           O  
HETATM   33  O   HOH T  32     -29.809  32.362 -28.668  1.00  0.27           O  
HETATM   34  O   HOH T  33     -26.736  -3.994  -6.568  1.00  0.27           O  
HETATM   35  O   HOH T  34     -35.737  10.515 -15.685  1.00  0.27           O  
HETATM   36  O   HOH T  35     -16.031  -3.313   2.809  1.00  0.27           O  
HETATM   37  O   HOH T  36     -30.503  26.563  -6.223  1.00  0.28           O  
HETATM   38  O   HOH T  37     -27.817   4.920   3.560  1.00  0.28           O  
HETATM   39  O   HOH T  38      -3.734  24.567  -6.820  1.00  0.28           O  
HETATM   40  O   HOH T  39     -23.143   4.205 -24.014  1.00  0.28           O  
HETATM   41  O   HOH T  40     -16.985  13.937  -7.280  1.00  0.28           O  
HETATM   42  O   HOH T  41     -25.805  17.251 -28.069  1.00  0.28           O  
HETATM   43  O   HOH T  42     -26.773  37.345 -16.773  1.00  0.28           O  
HETATM   44  O   HOH T  43     -28.485  22.034  -5.828  1.00  0.28           O  
HETATM   45  O   HOH T  44     -25.105  29.943 -28.661  1.00  0.29           O  
HETATM   46  O   HOH T  45     -14.451  31.151 -27.156  1.00  0.29           O  
HETATM   47  O   HOH T  46      -7.527  25.115 -22.313  1.00  0.29           O  
HETATM   48  O   HOH T  47     -19.805  13.833 -34.097  1.00  0.29           O  
HETATM   49  O   HOH T  48     -21.333  16.184 -33.959  1.00  0.29           O  
HETATM   50  O   HOH T  49     -29.345   0.765 -10.453  1.00  0.29           O  
HETATM   51  O   HOH T  50      -9.971  31.095 -20.234  1.00  0.29           O  
HETATM   52  O   HOH T  51     -21.559  10.799 -29.869  1.00  0.29           O  
HETATM   53  O   HOH T  52     -20.577  21.392  -7.837  1.00  0.29           O  
HETATM   54  O   HOH T  53     -26.503  15.941 -25.704  1.00  0.29           O  
HETATM   55  O   HOH T  54      -9.539  14.287 -35.362  1.00  0.29           O  
HETATM   56  O   HOH T  55     -26.843  27.751 -28.421  1.00  0.29           O  
HETATM   57  O   HOH T  56     -23.341  39.894  -8.687  1.00  0.29           O  
HETATM   58  O   HOH T  57     -24.451  26.511 -34.795  1.00  0.30           O  
HETATM   59  O   HOH T  58     -25.601  38.219 -22.478  1.00  0.30           O  
HETATM   60  O   HOH T  59     -34.655  23.626  -8.819  1.00  0.30           O  
HETATM   61  O   HOH T  60      -0.845  34.220  -7.156  1.00  0.30           O  
HETATM   62  O   HOH T  61     -24.726   0.031 -19.507  1.00  0.30           O  
HETATM   63  O   HOH T  62      -9.226  29.743  -1.034  1.00  0.30           O  
HETATM   64  O   HOH T  63     -21.128 -15.689 -11.486  1.00  0.31           O  
HETATM   65  O   HOH T  64     -39.001  30.960 -26.072  1.00  0.31           O  
HETATM   66  O   HOH T  65      -8.466   0.580   1.320  1.00  0.31           O  
HETATM   67  O   HOH T  66     -11.377   3.385   3.994  1.00  0.31           O  
HETATM   68  O   HOH T  67     -14.105  -8.097  -5.949  1.00  0.31           O  
HETATM   69  O   HOH T  68     -30.797   1.541  -1.495  1.00  0.31           O  
HETATM   70  O   HOH T  69     -12.260  15.626 -38.965  1.00  0.31           O  
HETATM   71  O   HOH T  70     -29.941  -0.747  -2.739  1.00  0.31           O  
HETATM   72  O   HOH T  71     -16.722  21.478 -32.530  1.00  0.31           O  
HETATM   73  O   HOH T  72      -9.062  -8.481  -2.188  1.00  0.31           O  
HETATM   74  O   HOH T  73     -27.752 -14.849 -15.910  1.00  0.32           O  
HETATM   75  O   HOH T  74     -21.795  40.067 -30.036  1.00  0.32           O  
HETATM   76  O   HOH T  75     -15.977  10.343 -28.629  1.00  0.32           O  
HETATM   77  O   HOH T  76     -21.791  10.358  -3.346  1.00  0.32           O  
HETATM   78  O   HOH T  77     -30.871  -3.317  -5.883  1.00  0.32           O  
HETATM   79  O   HOH T  78     -15.295  20.162 -30.775  1.00  0.32           O  
HETATM   80  O   HOH T  79     -12.026   5.175 -22.765  1.00  0.32           O  
HETATM   81  O   HOH T  80     -18.122  40.923   3.224  1.00  0.32           O  
HETATM   82  O   HOH T  81     -26.322  -3.697 -22.178  1.00  0.32           O  
HETATM   83  O   HOH T  82     -40.623  31.597 -28.310  1.00  0.33           O  
HETATM   84  O   HOH T  83     -36.430  10.503 -12.942  1.00  0.33           O  
HETATM   85  O   HOH T  84     -20.211  34.868  -2.389  1.00  0.33           O  
HETATM   86  O   HOH T  85     -23.329  15.401  -1.740  1.00  0.33           O  
HETATM   87  O   HOH T  86     -23.355   0.549 -32.795  1.00  0.33           O  
HETATM   88  O   HOH T  87     -27.002  25.579 -34.080  1.00  0.33           O  
HETATM   89  O   HOH T  88     -29.221  -1.875  -9.618  1.00  0.33           O  
HETATM   90  O   HOH T  89     -28.890  14.603 -25.560  1.00  0.33           O  
HETATM   91  O   HOH T  90     -35.136  16.987 -13.978  1.00  0.33           O  
HETATM   92  O   HOH T  91     -30.795  23.366 -29.127  1.00  0.34           O  
HETATM   93  O   HOH T  92     -20.519  39.992 -25.717  1.00  0.34           O  
HETATM   94  O   HOH T  93      -4.660  26.407 -19.026  1.00  0.34           O  
HETATM   95  O   HOH T  94     -39.029  22.552 -17.354  1.00  0.34           O  
HETATM   96  O   HOH T  95      -5.093  24.685 -21.064  1.00  0.34           O  
HETATM   97  O   HOH T  96     -36.989  18.653 -22.959  1.00  0.34           O  
HETATM   98  O   HOH T  97     -19.653  -7.847  -3.481  1.00  0.34           O  
HETATM   99  O   HOH T  98     -11.783  37.327 -17.623  1.00  0.34           O  
HETATM  100  O   HOH T  99     -32.869  31.074  -6.547  1.00  0.34           O  
HETATM  101  O   HOH T 100     -15.762  -7.388  -3.764  1.00  0.34           O  
HETATM  102  O   HOH T 101     -15.661  21.359 -42.279  1.00  0.34           O  
HETATM  103  O   HOH T 102     -26.408  -2.307 -19.676  1.00  0.35           O  
HETATM  104  O   HOH T 103     -36.202  32.631 -20.072  1.00  0.35           O  
HETATM  105  O   HOH T 104      -8.708  39.669 -18.984  1.00  0.35           O  
HETATM  106  O   HOH T 105      -9.717  -8.344  -4.892  1.00  0.35           O  
HETATM  107  O   HOH T 106     -12.894   9.741 -22.059  1.00  0.35           O  
HETATM  108  O   HOH T 107     -36.083   8.706  -9.044  1.00  0.35           O  
HETATM  109  O   HOH T 108      -8.474  28.623  -3.389  1.00  0.35           O  
HETATM  110  O   HOH T 109     -14.405  -5.415  -5.387  1.00  0.35           O  
HETATM  111  O   HOH T 110     -30.577  25.918 -30.218  1.00  0.35           O  
HETATM  112  O   HOH T 111     -16.684   3.173 -26.553  1.00  0.35           O  
HETATM  113  O   HOH T 112     -14.253  30.844 -24.295  1.00  0.35           O  
HETATM  114  O   HOH T 113     -37.758  30.920 -18.381  1.00  0.36           O  
HETATM  115  O   HOH T 114     -34.441  19.071 -27.011  1.00  0.36           O  
HETATM  116  O   HOH T 115     -27.485   7.386   4.889  1.00  0.36           O  
HETATM  117  O   HOH T 116      -4.660  33.308  -4.181  1.00  0.36           O  
HETATM  118  O   HOH T 117     -26.889  -6.238 -23.571  1.00  0.36           O  
HETATM  119  O   HOH T 118     -14.303  33.292 -22.734  1.00  0.36           O  
HETATM  120  O   HOH T 119     -29.217 -12.331 -27.487  1.00  0.36           O  
HETATM  121  O   HOH T 120     -13.623  30.240  -9.128  1.00  0.36           O  
HETATM  122  O   HOH T 121     -12.382 -11.159 -19.638  1.00  0.36           O  
HETATM  123  O   HOH T 122     -21.372  37.543 -12.232  1.00  0.36           O  
HETATM  124  O   HOH T 123     -20.449  40.142 -12.175  1.00  0.37           O  
HETATM  125  O   HOH T 124     -36.235  33.765 -32.215  1.00  0.37           O  
HETATM  126  O   HOH T 125     -36.147  19.822 -29.069  1.00  0.37           O  
HETATM  127  O   HOH T 126     -12.754  14.023 -12.714  1.00  0.37           O  
HETATM  128  O   HOH T 127      -9.286  38.168 -16.701  1.00  0.37           O  
HETATM  129  O   HOH T 128     -33.960  32.343 -21.667  1.00  0.37           O  
HETATM  130  O   HOH T 129     -24.954  42.403 -16.216  1.00  0.37           O  
HETATM  131  O   HOH T 130     -14.751  11.150 -26.349  1.00  0.37           O  
HETATM  132  O   HOH T 131     -19.176  37.189  -1.512  1.00  0.37           O  
HETATM  133  O   HOH T 132     -22.882   1.979 -30.434  1.00  0.37           O  
HETATM  134  O   HOH T 133     -33.018  24.665 -30.453  1.00  0.37           O  
HETATM  135  O   HOH T 134     -36.016  19.861 -20.632  1.00  0.37           O  
HETATM  136  O   HOH T 135      -9.370  17.695   6.472  1.00  0.37           O  
HETATM  137  O   HOH T 136      -3.148  27.184  -1.512  1.00  0.38           O  
HETATM  138  O   HOH T 137     -39.356  27.490 -20.496  1.00  0.38           O  
HETATM  139  O   HOH T 138     -27.911  -7.452  -4.823  1.00  0.38           O  
HETATM  140  O   HOH T 139     -38.903  22.095 -14.598  1.00  0.38           O  
HETATM  141  O   HOH T 140     -24.336  38.820 -30.202  1.00  0.38           O  
HETATM  142  O   HOH T 141     -20.460  10.015   5.669  1.00  0.38           O  
HETATM  143  O   HOH T 142     -13.717  19.883 -16.291  1.00  0.38           O  
HETATM  144  O   HOH T 143      -9.385   3.171   1.990  1.00  0.38           O  
HETATM  145  O   HOH T 144     -23.801  15.294 -28.153  1.00  0.38           O  
HETATM  146  O   HOH T 145      -6.915  -6.830  -1.627  1.00  0.38           O  
HETATM  147  O   HOH T 146     -17.785 -12.354   1.707  1.00  0.38           O  
HETATM  148  O   HOH T 147     -16.554  23.906 -43.206  1.00  0.38           O  
HETATM  149  O   HOH T 148      -6.374  23.747  -6.173  1.00  0.38           O  
HETATM  150  O   HOH T 149     -29.106  11.435 -29.981  1.00  0.38           O  
HETATM  151  O   HOH T 150      -5.652  37.421 -10.448  1.00  0.39           O  
HETATM  152  O   HOH T 151     -29.260  12.837   0.353  1.00  0.39           O  
HETATM  153  O   HOH T 152     -13.761  21.635   2.208  1.00  0.39           O  
HETATM  154  O   HOH T 153     -20.489 -10.782 -23.657  1.00  0.39           O  
HETATM  155  O   HOH T 154     -28.648  27.450  -0.977  1.00  0.39           O  
HETATM  156  O   HOH T 155     -28.633  19.703 -38.216  1.00  0.39           O  
HETATM  157  O   HOH T 156     -29.178  -5.518  -6.408  1.00  0.39           O  
HETATM  158  O   HOH T 157     -28.255   5.696  -9.608  1.00  0.39           O  
HETATM  159  O   HOH T 158      -0.018  37.246 -10.536  1.00  0.39           O  
HETATM  160  O   HOH T 159     -35.447  32.320 -34.362  1.00  0.39           O  
HETATM  161  O   HOH T 160     -24.961  43.911 -13.822  1.00  0.39           O  
HETATM  162  O   HOH T 161     -28.328  13.049 -27.858  1.00  0.39           O  
HETATM  163  O   HOH T 162     -31.711   5.161 -13.005  1.00  0.39           O  
HETATM  164  O   HOH T 163     -29.106  -7.782 -24.478  1.00  0.39           O  
HETATM  165  O   HOH T 164     -21.657   8.108 -30.686  1.00  0.39           O  
HETATM  166  O   HOH T 165      -4.401  27.015 -16.433  1.00  0.39           O  
HETATM  167  O   HOH T 166     -40.556  29.020 -24.903  1.00  0.40           O  
HETATM  168  O   HOH T 167     -18.811  40.233  -8.006  1.00  0.40           O  
HETATM  169  O   HOH T 168     -14.657  11.405 -16.703  1.00  0.40           O  
HETATM  170  O   HOH T 169     -15.452  38.046  -3.087  1.00  0.40           O  
HETATM  171  O   HOH T 170     -31.933  17.142 -22.527  1.00  0.40           O  
HETATM  172  O   HOH T 171      -5.910  28.563  -4.747  1.00  0.40           O  
HETATM  173  O   HOH T 172     -32.329  33.686  -6.642  1.00  0.40           O  
HETATM  174  O   HOH T 173      -6.456  22.098  -8.543  1.00  0.40           O  
HETATM  175  O   HOH T 174     -10.592  15.940 -33.371  1.00  0.40           O  
HETATM  176  O   HOH T 175     -29.274   3.184  -9.092  1.00  0.40           O  
HETATM  177  O   HOH T 176     -12.236  27.508   1.527  1.00  0.40           O  
HETATM  178  O   HOH T 177      -1.674  23.761  -2.406  1.00  0.40           O  
HETATM  179  O   HOH T 178     -29.039   7.028 -16.746  1.00  0.40           O  
HETATM  180  O   HOH T 179     -21.721  11.802   3.905  1.00  0.40           O  
HETATM  181  O   HOH T 180     -37.019  17.925 -17.640  1.00  0.40           O  
HETATM  182  O   HOH T 181     -28.158  27.271 -30.917  1.00  0.41           O  
HETATM  183  O   HOH T 182     -14.047  -1.468   3.690  1.00  0.41           O  
HETATM  184  O   HOH T 183     -26.908  38.968 -14.578  1.00  0.41           O  
HETATM  185  O   HOH T 184     -25.936  15.000  -1.055  1.00  0.41           O  
HETATM  186  O   HOH T 185      -3.877  26.130 -23.101  1.00  0.41           O  
HETATM  187  O   HOH T 186     -13.638  -3.044   1.443  1.00  0.41           O  
HETATM  188  O   HOH T 187     -35.659  24.616 -31.484  1.00  0.41           O  
HETATM  189  O   HOH T 188     -22.534  41.360 -32.484  1.00  0.41           O  
HETATM  190  O   HOH T 189     -14.521  14.624  -8.366  1.00  0.41           O  
HETATM  191  O   HOH T 190     -10.995  10.635 -30.656  1.00  0.42           O  
HETATM  192  O   HOH T 191      -8.300  12.773 -33.366  1.00  0.42           O  
HETATM  193  O   HOH T 192     -13.571   3.143   5.932  1.00  0.42           O  
HETATM  194  O   HOH T 193     -24.304  -9.553  -9.368  1.00  0.42           O  
HETATM  195  O   HOH T 194     -25.102   1.863 -21.371  1.00  0.42           O  
HETATM  196  O   HOH T 195     -10.634  33.589 -19.241  1.00  0.42           O  
HETATM  197  O   HOH T 196     -25.532   4.528 -21.356  1.00  0.42           O  
HETATM  198  O   HOH T 197      -4.640  28.907   0.152  1.00  0.42           O  
HETATM  199  O   HOH T 198     -31.603  21.142  -2.989  1.00  0.42           O  
HETATM  200  O   HOH T 199      -0.908  34.761 -17.636  1.00  0.42           O  
HETATM  201  O   HOH T 200     -29.022  22.340 -38.888  1.00  0.43           O  
HETATM  202  O   HOH T 201     -22.726  35.218  -1.463  1.00  0.43           O  
HETATM  203  O   HOH T 202     -12.317   8.204   7.126  1.00  0.43           O  
HETATM  204  O   HOH T 203     -35.973  22.393 -29.921  1.00  0.43           O  
HETATM  205  O   HOH T 204     -14.055  12.869 -10.505  1.00  0.43           O  
HETATM  206  O   HOH T 205     -32.471  32.335  -4.067  1.00  0.43           O  
HETATM  207  O   HOH T 206     -39.523  27.064 -23.278  1.00  0.43           O  
HETATM  208  O   HOH T 207      -5.469  30.871  -3.255  1.00  0.43           O  
HETATM  209  O   HOH T 208     -35.331  21.034  -8.232  1.00  0.43           O  
HETATM  210  O   HOH T 209     -26.180  36.699 -30.093  1.00  0.43           O  
HETATM  211  O   HOH T 210     -34.922  14.493 -18.573  1.00  0.43           O  
HETATM  212  O   HOH T 211     -29.249  19.963  -4.152  1.00  0.43           O  
HETATM  213  O   HOH T 212      -8.854  34.627 -22.617  1.00  0.44           O  
HETATM  214  O   HOH T 213     -25.413  15.625 -30.313  1.00  0.44           O  
HETATM  215  O   HOH T 214     -30.080   4.476 -17.025  1.00  0.44           O  
HETATM  216  O   HOH T 215     -19.593 -14.335  -1.752  1.00  0.44           O  
HETATM  217  O   HOH T 216     -24.858  40.660 -23.421  1.00  0.44           O  
HETATM  218  O   HOH T 217     -28.017  15.300   0.691  1.00  0.44           O  
HETATM  219  O   HOH T 218     -24.215   0.232 -23.558  1.00  0.44           O  
HETATM  220  O   HOH T 219     -28.555  24.882 -38.200  1.00  0.44           O  
HETATM  221  O   HOH T 220     -24.410  31.220 -30.965  1.00  0.44           O  
HETATM  222  O   HOH T 221     -18.680  41.524 -10.491  1.00  0.44           O  
HETATM  223  O   HOH T 222     -13.537   7.334 -23.551  1.00  0.44           O  
HETATM  224  O   HOH T 223     -24.882   8.088   4.079  1.00  0.44           O  
HETATM  225  O   HOH T 224     -24.383   0.353  -4.399  1.00  0.44           O  
HETATM  226  O   HOH T 225     -20.711  12.721   6.366  1.00  0.44           O  
HETATM  227  O   HOH T 226     -15.362 -12.989  -5.536  1.00  0.44           O  
HETATM  228  O   HOH T 227     -12.010  22.707 -18.691  1.00  0.44           O  
HETATM  229  O   HOH T 228     -26.518  12.881   0.784  1.00  0.45           O  
HETATM  230  O   HOH T 229     -38.223  29.996 -37.921  1.00  0.45           O  
HETATM  231  O   HOH T 230     -30.864  25.921  -1.330  1.00  0.45           O  
HETATM  232  O   HOH T 231     -32.112   0.431  -5.987  1.00  0.45           O  
HETATM  233  O   HOH T 232     -30.153  -0.506   0.130  1.00  0.45           O  
HETATM  234  O   HOH T 233     -13.691  39.785  -1.712  1.00  0.45           O  
HETATM  235  O   HOH T 234     -24.145  37.368 -12.275  1.00  0.45           O  
HETATM  236  O   HOH T 235     -33.227  22.089 -29.337  1.00  0.45           O  
HETATM  237  O   HOH T 236      -5.776  25.788  -4.218  1.00  0.46           O  
HETATM  238  O   HOH T 237      -1.881  25.091   0.012  1.00  0.46           O  
HETATM  239  O   HOH T 238      -3.278   2.446  -3.340  1.00  0.46           O  
HETATM  240  O   HOH T 239      -3.406  29.033  -3.597  1.00  0.46           O  
HETATM  241  O   HOH T 240     -25.844 -16.262 -12.127  1.00  0.46           O  
HETATM  242  O   HOH T 241     -21.849  25.644 -34.142  1.00  0.46           O  
HETATM  243  O   HOH T 242      -2.818  31.685  -3.050  1.00  0.46           O  
HETATM  244  O   HOH T 243     -17.731  38.745 -23.138  1.00  0.46           O  
HETATM  245  O   HOH T 244      -6.558  -1.354   2.127  1.00  0.46           O  
HETATM  246  O   HOH T 245      -8.702  31.872 -22.612  1.00  0.46           O  
HETATM  247  O   HOH T 246     -28.935  24.275 -35.498  1.00  0.46           O  
HETATM  248  O   HOH T 247     -11.343  37.315 -28.156  1.00  0.46           O  
HETATM  249  O   HOH T 248     -37.806  12.063 -14.732  1.00  0.46           O  
HETATM  250  O   HOH T 249      -6.462  38.546 -23.570  1.00  0.46           O  
HETATM  251  O   HOH T 250     -12.704  12.648 -15.169  1.00  0.46           O  
HETATM  252  O   HOH T 251     -19.565  -9.226 -25.953  1.00  0.47           O  
HETATM  253  O   HOH T 252     -19.248  22.986  -4.965  1.00  0.47           O  
HETATM  254  O   HOH T 253     -19.898  31.764   4.963  1.00  0.47           O  
HETATM  255  O   HOH T 254     -28.947  -9.523 -26.799  1.00  0.47           O  
HETATM  256  O   HOH T 255      -7.498   9.754  -2.222  1.00  0.47           O  
HETATM  257  O   HOH T 256     -28.353  11.420   2.471  1.00  0.47           O  
HETATM  258  O   HOH T 257     -20.960   3.916 -30.768  1.00  0.47           O  
HETATM  259  O   HOH T 258     -26.808  -6.809  -7.155  1.00  0.47           O  
HETATM  260  O   HOH T 259     -32.160  -2.515   0.669  1.00  0.47           O  
HETATM  261  O   HOH T 260      -6.538  35.847 -23.573  1.00  0.47           O  
HETATM  262  O   HOH T 261     -29.120  19.510 -35.520  1.00  0.47           O  
HETATM  263  O   HOH T 262     -33.581  13.000  -0.672  1.00  0.47           O  
HETATM  264  O   HOH T 263     -26.992  13.311 -30.189  1.00  0.47           O  
HETATM  265  O   HOH T 264      -6.713  23.951 -11.952  1.00  0.47           O  
HETATM  266  O   HOH T 265     -28.394  39.632 -16.891  1.00  0.47           O  
HETATM  267  O   HOH T 266     -33.382   2.416  -7.450  1.00  0.47           O  
HETATM  268  O   HOH T 267      -7.743  33.526 -18.935  1.00  0.47           O  
HETATM  269  O   HOH T 268      -4.793  39.541  -8.871  1.00  0.47           O  
HETATM  270  O   HOH T 269     -29.308   9.488 -33.652  1.00  0.47           O  
HETATM  271  O   HOH T 270      -7.907  -2.458 -22.764  1.00  0.47           O  
HETATM  272  O   HOH T 271     -14.656   7.067 -29.952  1.00  0.47           O  
HETATM  273  O   HOH T 272     -35.415  17.152 -28.807  1.00  0.48           O  
HETATM  274  O   HOH T 273     -28.886  36.252 -28.514  1.00  0.48           O  
HETATM  275  O   HOH T 274      -2.120  37.556 -22.483  1.00  0.48           O  
HETATM  276  O   HOH T 275     -28.296  26.835   1.751  1.00  0.48           O  
HETATM  277  O   HOH T 276     -31.412  -1.454  -7.909  1.00  0.48           O  
HETATM  278  O   HOH T 277     -11.325   4.681  -9.747  1.00  0.48           O  
HETATM  279  O   HOH T 278      -4.468  13.072   2.686  1.00  0.48           O  
HETATM  280  O   HOH T 279      -3.555  27.116  -5.532  1.00  0.48           O  
HETATM  281  O   HOH T 280      -9.499  35.705 -17.954  1.00  0.48           O  
HETATM  282  O   HOH T 281     -31.375  14.935 -24.295  1.00  0.48           O  
HETATM  283  O   HOH T 282     -34.216   9.528  -5.483  1.00  0.48           O  
HETATM  284  O   HOH T 283     -15.350 -11.361  -3.324  1.00  0.48           O  
HETATM  285  O   HOH T 284     -31.854   8.789  -2.920  1.00  0.48           O  
HETATM  286  O   HOH T 285     -25.167  38.553 -18.683  1.00  0.48           O  
HETATM  287  O   HOH T 286     -11.704   9.238 -28.362  1.00  0.49           O  
HETATM  288  O   HOH T 287     -12.362  28.301   4.228  1.00  0.49           O  
HETATM  289  O   HOH T 288     -28.798 -12.366 -16.676  1.00  0.49           O  
HETATM  290  O   HOH T 289      -5.618  29.196   2.704  1.00  0.49           O  
HETATM  291  O   HOH T 290     -36.018  15.754 -16.348  1.00  0.49           O  
HETATM  292  O   HOH T 291     -31.538  33.945 -21.861  1.00  0.49           O  
HETATM  293  O   HOH T 292     -30.246   9.063 -30.969  1.00  0.49           O  
HETATM  294  O   HOH T 293     -30.714  -4.890   0.997  1.00  0.49           O  
HETATM  295  O   HOH T 294      -4.837  -0.055  -4.883  1.00  0.49           O  
HETATM  296  O   HOH T 295     -26.810  15.152 -17.549  1.00  0.49           O  
HETATM  297  O   HOH T 296     -32.416  10.497  -0.815  1.00  0.49           O  
HETATM  298  O   HOH T 297     -13.695   9.871 -14.612  1.00  0.49           O  
HETATM  299  O   HOH T 298     -25.915  40.861  -8.474  1.00  0.49           O  
HETATM  300  O   HOH T 299     -10.002  -9.798 -19.338  1.00  0.50           O  
HETATM  301  O   HOH T 300      -7.069  -8.181  -4.086  1.00  0.50           O  
HETATM  302  O   HOH T 301      -2.258  27.724   1.005  1.00  0.50           O  
HETATM  303  O   HOH T 302     -14.321  33.896 -26.221  1.00  0.50           O  
HETATM  304  O   HOH T 303     -20.342   6.104 -29.355  1.00  0.50           O  
HETATM  305  O   HOH T 304      -7.919  27.721   3.308  1.00  0.50           O  
HETATM  306  O   HOH T 305       2.109  35.810 -11.578  1.00  0.50           O  
HETATM  307  O   HOH T 306     -30.036  28.406 -29.239  1.00  0.50           O  
HETATM  308  O   HOH T 307     -22.058  32.342   6.505  1.00  0.50           O  
HETATM  309  O   HOH T 308     -20.224 -13.041   0.607  1.00  0.50           O  
HETATM  310  O   HOH T 309     -36.049  30.347 -36.213  1.00  0.50           O  
HETATM  311  O   HOH T 310     -12.263  32.771 -24.588  1.00  0.50           O  
HETATM  312  O   HOH T 311     -15.105  11.998  -8.050  1.00  0.50           O  
HETATM  313  O   HOH T 312     -31.407   6.346 -15.377  1.00  0.51           O  
HETATM  314  O   HOH T 313     -30.453  32.308 -16.254  1.00  0.51           O  
HETATM  315  O   HOH T 314     -21.827  41.443 -27.548  1.00  0.51           O  
HETATM  316  O   HOH T 315     -31.877   3.897  -9.222  1.00  0.51           O  
HETATM  317  O   HOH T 316     -36.521  12.967 -17.024  1.00  0.51           O  
HETATM  318  O   HOH T 317     -27.668   9.663 -31.562  1.00  0.51           O  
HETATM  319  O   HOH T 318     -32.261  -1.558  -4.145  1.00  0.51           O  
HETATM  320  O   HOH T 319     -34.331  21.386  -2.752  1.00  0.51           O  
HETATM  321  O   HOH T 320     -11.907  37.692 -30.895  1.00  0.51           O  
HETATM  322  O   HOH T 321      -9.878  11.404 -28.239  1.00  0.52           O  
HETATM  323  O   HOH T 322      -7.399  28.674   0.696  1.00  0.52           O  
HETATM  324  O   HOH T 323      -8.053   7.507 -11.403  1.00  0.52           O  
HETATM  325  O   HOH T 324     -29.858  16.888   2.021  1.00  0.52           O  
HETATM  326  O   HOH T 325     -28.006  30.288 -28.922  1.00  0.52           O  
HETATM  327  O   HOH T 326     -36.692  30.649 -15.851  1.00  0.52           O  
HETATM  328  O   HOH T 327     -39.838  33.582 -26.665  1.00  0.52           O  
HETATM  329  O   HOH T 328     -27.042  -7.482 -26.137  1.00  0.52           O  
HETATM  330  O   HOH T 329     -13.707  27.009 -31.868  1.00  0.52           O  
HETATM  331  O   HOH T 330     -37.096   8.267 -11.498  1.00  0.52           O  
HETATM  332  O   HOH T 331     -31.106   1.304  -8.399  1.00  0.52           O  
HETATM  333  O   HOH T 332      -8.695  -0.083 -23.875  1.00  0.52           O  
HETATM  334  O   HOH T 333     -41.451  21.081 -14.507  1.00  0.52           O  
HETATM  335  O   HOH T 334      -9.510  33.223 -24.954  1.00  0.52           O  
HETATM  336  O   HOH T 335     -26.723  36.181  -0.760  1.00  0.52           O  
HETATM  337  O   HOH T 336      -5.885  -5.784  -3.900  1.00  0.52           O  
HETATM  338  O   HOH T 337      -8.163   0.876  -9.671  1.00  0.52           O  
HETATM  339  O   HOH T 338     -18.118 -13.415  -4.998  1.00  0.52           O  
HETATM  340  O   HOH T 339     -32.386  -0.830  -1.496  1.00  0.52           O  
HETATM  341  O   HOH T 340     -35.881   7.360  -4.784  1.00  0.53           O  
HETATM  342  O   HOH T 341     -11.251   7.460 -21.865  1.00  0.53           O  
HETATM  343  O   HOH T 342     -25.326  17.940 -35.852  1.00  0.53           O  
HETATM  344  O   HOH T 343     -25.314  41.194 -13.752  1.00  0.53           O  
HETATM  345  O   HOH T 344      -7.141  -3.976   1.497  1.00  0.53           O  
HETATM  346  O   HOH T 345      -4.481   4.996  -3.265  1.00  0.53           O  
HETATM  347  O   HOH T 346     -35.696   4.971  -6.405  1.00  0.53           O  
HETATM  348  O   HOH T 347     -13.517  10.315  -9.586  1.00  0.53           O  
HETATM  349  O   HOH T 348     -18.629  -6.410 -25.908  1.00  0.53           O  
HETATM  350  O   HOH T 349     -33.252   3.227 -11.587  1.00  0.53           O  
HETATM  351  O   HOH T 350     -13.113  30.955   6.411  1.00  0.54           O  
HETATM  352  O   HOH T 351     -27.840  -4.202  -9.918  1.00  0.54           O  
HETATM  353  O   HOH T 352     -29.114  37.453 -15.392  1.00  0.54           O  
HETATM  354  O   HOH T 353     -31.871  25.966  -3.930  1.00  0.54           O  
HETATM  355  O   HOH T 354     -26.159  -0.791 -21.854  1.00  0.54           O  
HETATM  356  O   HOH T 355     -16.625  21.954  -8.269  1.00  0.54           O  
HETATM  357  O   HOH T 356      -4.905   6.520   3.224  1.00  0.54           O  
HETATM  358  O   HOH T 357     -14.701   3.095 -28.467  1.00  0.54           O  
HETATM  359  O   HOH T 358     -43.050  21.850 -12.278  1.00  0.54           O  
HETATM  360  O   HOH T 359     -14.235   7.563 -13.036  1.00  0.55           O  
HETATM  361  O   HOH T 360      -5.654   8.911  -0.086  1.00  0.55           O  
HETATM  362  O   HOH T 361     -27.426  39.822 -19.542  1.00  0.55           O  
HETATM  363  O   HOH T 362     -33.340  34.828  -3.182  1.00  0.55           O  
HETATM  364  O   HOH T 363      -8.090  25.020   4.101  1.00  0.55           O  
HETATM  365  O   HOH T 364      -4.165  37.233 -24.325  1.00  0.55           O  
HETATM  366  O   HOH T 365     -15.321  -9.658   3.200  1.00  0.55           O  
HETATM  367  O   HOH T 366     -23.571  15.357   2.484  1.00  0.55           O  
HETATM  368  O   HOH T 367     -11.935  34.095  -3.596  1.00  0.55           O  
HETATM  369  O   HOH T 368     -21.700  -3.994   2.491  1.00  0.55           O  
HETATM  370  O   HOH T 369     -10.090  15.203 -26.839  1.00  0.55           O  
HETATM  371  O   HOH T 370     -24.221  -6.549   1.635  1.00  0.55           O  
HETATM  372  O   HOH T 371     -30.743  21.110   0.928  1.00  0.55           O  
HETATM  373  O   HOH T 372     -15.171 -10.766 -29.169  1.00  0.56           O  
HETATM  374  O   HOH T 373     -30.846  20.697 -29.847  1.00  0.56           O  
HETATM  375  O   HOH T 374      -8.888   7.418 -20.396  1.00  0.56           O  
HETATM  376  O   HOH T 375      -4.898  40.069  -6.298  1.00  0.56           O  
HETATM  377  O   HOH T 376      -2.475  38.105  -9.577  1.00  0.56           O  
HETATM  378  O   HOH T 377     -12.156  10.514 -25.859  1.00  0.56           O  
HETATM  379  O   HOH T 378      -8.911  20.218 -29.196  1.00  0.57           O  
HETATM  380  O   HOH T 379     -25.975   3.971 -24.074  1.00  0.57           O  
HETATM  381  O   HOH T 380     -27.505  41.267 -24.192  1.00  0.57           O  
HETATM  382  O   HOH T 381     -10.502  34.773 -28.403  1.00  0.57           O  
HETATM  383  O   HOH T 382     -18.408  41.551 -13.390  1.00  0.58           O  
HETATM  384  O   HOH T 383     -20.925  39.100  -0.770  1.00  0.58           O  
HETATM  385  O   HOH T 384     -14.624  11.961 -13.054  1.00  0.60           O  
HETATM  386  O   HOH T 385     -29.339   3.060   4.854  1.00  0.60           O  
HETATM  387  O   HOH T 386     -28.431  31.577 -30.947  1.00  0.63           O  
TER     388      HOH T 386 
