# Supplementary material for: Accurate Prediction of Hydration Sites of Proteins Using Energy Model With Atom Embedding
Source: Front Mol Biosci. 2021 Sep 20;8:756075. doi: 10.3389/fmolb.2021.756075 (PMC8488165; doi:10.3389/fmolb.2021.756075)
Supplement: Supplementary file 1 [file DataSheet1.ZIP › Data Sheet 1/Our_result_pdb/our_dataset_output/3GPK_watersite.pdb]

HEADER                                                        XXXX


JRNL        PMID   -1
HETATM    1  O   HOH T   0      31.928   8.168   7.454  1.00  0.16           O  
HETATM    2  O   HOH T   1      25.263  19.870  29.170  1.00  0.18           O  
HETATM    3  O   HOH T   2      24.330  25.348  24.135  1.00  0.20           O  
HETATM    4  O   HOH T   3      36.741  -3.813  20.513  1.00  0.21           O  
HETATM    5  O   HOH T   4      -0.486  -0.776   2.629  1.00  0.21           O  
HETATM    6  O   HOH T   5       7.726   9.931  -4.890  1.00  0.21           O  
HETATM    7  O   HOH T   6      16.983   2.351  -2.978  1.00  0.21           O  
HETATM    8  O   HOH T   7      26.723   7.322  16.726  1.00  0.22           O  
HETATM    9  O   HOH T   8      18.594 -10.581  15.064  1.00  0.22           O  
HETATM   10  O   HOH T   9      19.410  16.057  31.663  1.00  0.22           O  
HETATM   11  O   HOH T  10      36.052   9.442   1.950  1.00  0.23           O  
HETATM   12  O   HOH T  11      43.408  25.025   2.245  1.00  0.23           O  
HETATM   13  O   HOH T  12      25.145  16.265  34.312  1.00  0.24           O  
HETATM   14  O   HOH T  13      40.910  16.730  -0.965  1.00  0.24           O  
HETATM   15  O   HOH T  14      26.317  22.025  30.620  1.00  0.25           O  
HETATM   16  O   HOH T  15      44.405  -0.723  20.236  1.00  0.25           O  
HETATM   17  O   HOH T  16      24.657  14.516  10.023  1.00  0.25           O  
HETATM   18  O   HOH T  17      28.440   4.612  12.211  1.00  0.25           O  
HETATM   19  O   HOH T  18      35.505   9.954  18.238  1.00  0.25           O  
HETATM   20  O   HOH T  19      31.696  17.827  31.563  1.00  0.26           O  
HETATM   21  O   HOH T  20       9.785  -4.977  -7.758  1.00  0.26           O  
HETATM   22  O   HOH T  21       3.063  -7.395  -0.724  1.00  0.26           O  
HETATM   23  O   HOH T  22       3.018  20.509   1.922  1.00  0.26           O  
HETATM   24  O   HOH T  23      46.524   7.048  17.933  1.00  0.27           O  
HETATM   25  O   HOH T  24      19.389   8.984  29.101  1.00  0.27           O  
HETATM   26  O   HOH T  25      37.130  24.667  26.083  1.00  0.27           O  
HETATM   27  O   HOH T  26      31.170   0.988  18.652  1.00  0.27           O  
HETATM   28  O   HOH T  27       9.822  -4.440  13.895  1.00  0.27           O  
HETATM   29  O   HOH T  28       3.338  -7.187  11.530  1.00  0.27           O  
HETATM   30  O   HOH T  29       5.315   8.659  -4.242  1.00  0.28           O  
HETATM   31  O   HOH T  30      39.826  35.108  10.904  1.00  0.28           O  
HETATM   32  O   HOH T  31      22.618  16.058  37.202  1.00  0.28           O  
HETATM   33  O   HOH T  32       7.155  16.037  -6.071  1.00  0.28           O  
HETATM   34  O   HOH T  33      44.849   7.897  11.271  1.00  0.28           O  
HETATM   35  O   HOH T  34      40.723  15.089  18.873  1.00  0.28           O  
HETATM   36  O   HOH T  35      29.741   7.897  11.526  1.00  0.28           O  
HETATM   37  O   HOH T  36      45.979  19.456  11.604  1.00  0.28           O  
HETATM   38  O   HOH T  37      44.969  23.378  11.214  1.00  0.29           O  
HETATM   39  O   HOH T  38      20.264  16.433   6.933  1.00  0.29           O  
HETATM   40  O   HOH T  39       7.955 -10.824  -3.616  1.00  0.29           O  
HETATM   41  O   HOH T  40      14.785   5.739  15.344  1.00  0.30           O  
HETATM   42  O   HOH T  41      52.954  13.851   9.723  1.00  0.30           O  
HETATM   43  O   HOH T  42      12.200   1.911  -8.613  1.00  0.30           O  
HETATM   44  O   HOH T  43       5.792  21.285  -6.212  1.00  0.30           O  
HETATM   45  O   HOH T  44       2.313  -1.516  -3.230  1.00  0.30           O  
HETATM   46  O   HOH T  45      19.958   9.475  17.114  1.00  0.31           O  
HETATM   47  O   HOH T  46      29.358  -3.182   2.069  1.00  0.31           O  
HETATM   48  O   HOH T  47      23.046  16.085   7.260  1.00  0.31           O  
HETATM   49  O   HOH T  48      10.736  12.313   9.908  1.00  0.31           O  
HETATM   50  O   HOH T  49      15.596  10.922  12.979  1.00  0.31           O  
HETATM   51  O   HOH T  50      26.762   9.815  42.715  1.00  0.31           O  
HETATM   52  O   HOH T  51      38.786  12.109  26.214  1.00  0.31           O  
HETATM   53  O   HOH T  52      37.022  -5.589  18.435  1.00  0.31           O  
HETATM   54  O   HOH T  53       8.720  -2.158 -11.792  1.00  0.32           O  
HETATM   55  O   HOH T  54      -1.109   6.253   3.957  1.00  0.32           O  
HETATM   56  O   HOH T  55      44.684  23.752   0.192  1.00  0.32           O  
HETATM   57  O   HOH T  56      11.465  18.702  -1.305  1.00  0.32           O  
HETATM   58  O   HOH T  57      46.750  14.526  14.919  1.00  0.32           O  
HETATM   59  O   HOH T  58      41.206 -13.338  13.803  1.00  0.32           O  
HETATM   60  O   HOH T  59      41.260  17.432  24.023  1.00  0.33           O  
HETATM   61  O   HOH T  60      20.510   8.100  -5.666  1.00  0.33           O  
HETATM   62  O   HOH T  61      47.127   8.807  10.198  1.00  0.33           O  
HETATM   63  O   HOH T  62      22.683   5.715  39.267  1.00  0.33           O  
HETATM   64  O   HOH T  63      43.931  31.799   4.827  1.00  0.33           O  
HETATM   65  O   HOH T  64      32.416  -1.943  12.687  1.00  0.33           O  
HETATM   66  O   HOH T  65      27.188  21.799  10.421  1.00  0.33           O  
HETATM   67  O   HOH T  66      15.219   4.400  -8.898  1.00  0.34           O  
HETATM   68  O   HOH T  67      30.859   1.084   7.014  1.00  0.34           O  
HETATM   69  O   HOH T  68       8.304  24.139  -4.970  1.00  0.34           O  
HETATM   70  O   HOH T  69      12.764  10.743  -8.466  1.00  0.34           O  
HETATM   71  O   HOH T  70      39.926  31.911  24.908  1.00  0.34           O  
HETATM   72  O   HOH T  71      31.138  21.083   5.988  1.00  0.34           O  
HETATM   73  O   HOH T  72      25.278  11.850   9.678  1.00  0.34           O  
HETATM   74  O   HOH T  73       5.864   6.031  -4.924  1.00  0.34           O  
HETATM   75  O   HOH T  74      18.037  15.721   4.463  1.00  0.34           O  
HETATM   76  O   HOH T  75      30.726  -0.821   2.332  1.00  0.34           O  
HETATM   77  O   HOH T  76       8.211   5.742  -6.506  1.00  0.34           O  
HETATM   78  O   HOH T  77      26.176  21.977  40.416  1.00  0.35           O  
HETATM   79  O   HOH T  78      17.355   9.751  -5.800  1.00  0.35           O  
HETATM   80  O   HOH T  79      32.489  34.370   8.289  1.00  0.35           O  
HETATM   81  O   HOH T  80      -2.226  -7.854  -0.918  1.00  0.35           O  
HETATM   82  O   HOH T  81       8.893  -7.659   5.766  1.00  0.35           O  
HETATM   83  O   HOH T  82      24.556   3.521  -1.504  1.00  0.35           O  
HETATM   84  O   HOH T  83      17.675  14.466  13.028  1.00  0.35           O  
HETATM   85  O   HOH T  84      29.560  23.040   7.246  1.00  0.35           O  
HETATM   86  O   HOH T  85      35.393  -3.016  22.757  1.00  0.35           O  
HETATM   87  O   HOH T  86      11.333  16.135  -5.727  1.00  0.35           O  
HETATM   88  O   HOH T  87      26.375   3.364   0.520  1.00  0.36           O  
HETATM   89  O   HOH T  88       5.451  19.690   3.124  1.00  0.36           O  
HETATM   90  O   HOH T  89      23.539   4.471  18.657  1.00  0.36           O  
HETATM   91  O   HOH T  90      30.949   4.665  13.342  1.00  0.36           O  
HETATM   92  O   HOH T  91      39.759 -12.096  11.821  1.00  0.36           O  
HETATM   93  O   HOH T  92       3.600   2.190  10.322  1.00  0.37           O  
HETATM   94  O   HOH T  93      33.050   8.894   9.826  1.00  0.37           O  
HETATM   95  O   HOH T  94      37.124   7.827  18.851  1.00  0.37           O  
HETATM   96  O   HOH T  95      -0.442   2.385   8.221  1.00  0.37           O  
HETATM   97  O   HOH T  96      12.516  -0.412  20.560  1.00  0.37           O  
HETATM   98  O   HOH T  97      34.011  30.038  24.314  1.00  0.37           O  
HETATM   99  O   HOH T  98       9.169  -1.481 -14.492  1.00  0.37           O  
HETATM  100  O   HOH T  99       8.636  24.434  -2.208  1.00  0.37           O  
HETATM  101  O   HOH T 100      19.103  18.309  10.244  1.00  0.37           O  
HETATM  102  O   HOH T 101      21.181   6.010  37.013  1.00  0.37           O  
HETATM  103  O   HOH T 102      26.325 -15.190   4.421  1.00  0.37           O  
HETATM  104  O   HOH T 103      28.777   8.014  42.565  1.00  0.37           O  
HETATM  105  O   HOH T 104      31.644   9.840  12.091  1.00  0.37           O  
HETATM  106  O   HOH T 105      41.321  33.943  23.543  1.00  0.38           O  
HETATM  107  O   HOH T 106      23.144   2.501  16.879  1.00  0.38           O  
HETATM  108  O   HOH T 107      38.060  27.088  27.234  1.00  0.38           O  
HETATM  109  O   HOH T 108      34.257   6.533  12.173  1.00  0.38           O  
HETATM  110  O   HOH T 109      33.905  11.742  30.816  1.00  0.38           O  
HETATM  111  O   HOH T 110      22.613  24.766  17.022  1.00  0.38           O  
HETATM  112  O   HOH T 111      10.310  -9.542   7.141  1.00  0.38           O  
HETATM  113  O   HOH T 112      33.127 -11.210  16.747  1.00  0.38           O  
HETATM  114  O   HOH T 113      20.205  15.808  35.917  1.00  0.38           O  
HETATM  115  O   HOH T 114      34.374   5.511   1.551  1.00  0.38           O  
HETATM  116  O   HOH T 115      34.721   7.290  17.657  1.00  0.38           O  
HETATM  117  O   HOH T 116      27.266  27.064  16.748  1.00  0.38           O  
HETATM  118  O   HOH T 117      25.403  13.660  35.074  1.00  0.38           O  
HETATM  119  O   HOH T 118       8.613   2.121   9.993  1.00  0.39           O  
HETATM  120  O   HOH T 119      15.363  21.297  34.536  1.00  0.39           O  
HETATM  121  O   HOH T 120      -3.370   6.810   2.432  1.00  0.39           O  
HETATM  122  O   HOH T 121      26.927   4.701  15.628  1.00  0.39           O  
HETATM  123  O   HOH T 122       7.269  -3.684  12.822  1.00  0.39           O  
HETATM  124  O   HOH T 123      34.034   7.015  14.947  1.00  0.39           O  
HETATM  125  O   HOH T 124      17.242  15.008  42.048  1.00  0.39           O  
HETATM  126  O   HOH T 125      27.624  -9.764   9.769  1.00  0.39           O  
HETATM  127  O   HOH T 126       3.176  21.863  -6.936  1.00  0.39           O  
HETATM  128  O   HOH T 127      21.129   8.990  -9.646  1.00  0.40           O  
HETATM  129  O   HOH T 128      10.238  -1.927  12.818  1.00  0.40           O  
HETATM  130  O   HOH T 129       8.551   4.128  11.903  1.00  0.40           O  
HETATM  131  O   HOH T 130      30.359  17.721   3.037  1.00  0.40           O  
HETATM  132  O   HOH T 131      31.782   3.032   5.433  1.00  0.40           O  
HETATM  133  O   HOH T 132      24.777  18.747  11.210  1.00  0.40           O  
HETATM  134  O   HOH T 133      34.386  -3.091  13.837  1.00  0.40           O  
HETATM  135  O   HOH T 134      27.413  22.364  37.938  1.00  0.40           O  
HETATM  136  O   HOH T 135      22.675  -6.724  -1.910  1.00  0.40           O  
HETATM  137  O   HOH T 136      21.868  20.178  14.733  1.00  0.40           O  
HETATM  138  O   HOH T 137       2.777  -7.249   2.069  1.00  0.40           O  
HETATM  139  O   HOH T 138      46.114  40.065  11.612  1.00  0.40           O  
HETATM  140  O   HOH T 139      17.091  16.806  11.445  1.00  0.40           O  
HETATM  141  O   HOH T 140      21.141   0.988  15.585  1.00  0.40           O  
HETATM  142  O   HOH T 141      36.651  15.479  27.680  1.00  0.40           O  
HETATM  143  O   HOH T 142      32.492   2.954  11.902  1.00  0.40           O  
HETATM  144  O   HOH T 143      24.002   3.375  -6.456  1.00  0.41           O  
HETATM  145  O   HOH T 144      12.499   4.577  -9.472  1.00  0.41           O  
HETATM  146  O   HOH T 145      20.923  -1.663  16.703  1.00  0.41           O  
HETATM  147  O   HOH T 146      34.734  32.904  17.954  1.00  0.41           O  
HETATM  148  O   HOH T 147      34.797   3.462  25.059  1.00  0.41           O  
HETATM  149  O   HOH T 148      39.395   4.459  21.189  1.00  0.41           O  
HETATM  150  O   HOH T 149       7.790  18.630   8.222  1.00  0.41           O  
HETATM  151  O   HOH T 150      33.452  15.661  30.877  1.00  0.41           O  
HETATM  152  O   HOH T 151      22.328  -8.666   3.138  1.00  0.41           O  
HETATM  153  O   HOH T 152      17.095  18.236  -1.799  1.00  0.41           O  
HETATM  154  O   HOH T 153      16.108  13.015  14.693  1.00  0.41           O  
HETATM  155  O   HOH T 154      45.329   5.524  10.024  1.00  0.41           O  
HETATM  156  O   HOH T 155       9.348  14.539  -6.961  1.00  0.41           O  
HETATM  157  O   HOH T 156      41.435  33.735  26.300  1.00  0.41           O  
HETATM  158  O   HOH T 157      42.382   5.925  18.047  1.00  0.41           O  
HETATM  159  O   HOH T 158      18.604   1.583  -9.491  1.00  0.41           O  
HETATM  160  O   HOH T 159      44.089   5.234  21.267  1.00  0.42           O  
HETATM  161  O   HOH T 160       7.149 -11.039   0.980  1.00  0.42           O  
HETATM  162  O   HOH T 161      47.775  23.451  17.196  1.00  0.42           O  
HETATM  163  O   HOH T 162       9.613   9.873  10.719  1.00  0.42           O  
HETATM  164  O   HOH T 163       0.057  15.698  -4.736  1.00  0.42           O  
HETATM  165  O   HOH T 164      40.083   3.821  10.529  1.00  0.42           O  
HETATM  166  O   HOH T 165      33.967  -3.975  11.374  1.00  0.42           O  
HETATM  167  O   HOH T 166      46.121  24.384   2.428  1.00  0.42           O  
HETATM  168  O   HOH T 167      25.581 -10.457  11.663  1.00  0.42           O  
HETATM  169  O   HOH T 168      13.078 -10.422  -2.943  1.00  0.42           O  
HETATM  170  O   HOH T 169      46.494  12.903  21.156  1.00  0.42           O  
HETATM  171  O   HOH T 170       1.664 -11.190   7.978  1.00  0.42           O  
HETATM  172  O   HOH T 171      30.443   4.884  28.021  1.00  0.42           O  
HETATM  173  O   HOH T 172      42.584  -9.625  10.191  1.00  0.42           O  
HETATM  174  O   HOH T 173       8.932 -11.333   5.372  1.00  0.42           O  
HETATM  175  O   HOH T 174      27.117  -8.187  12.020  1.00  0.42           O  
HETATM  176  O   HOH T 175      14.745   9.034  -9.494  1.00  0.42           O  
HETATM  177  O   HOH T 176      36.794   9.056  -0.704  1.00  0.42           O  
HETATM  178  O   HOH T 177       1.656   0.790   9.066  1.00  0.42           O  
HETATM  179  O   HOH T 178       7.609 -12.704   3.289  1.00  0.43           O  
HETATM  180  O   HOH T 179      10.253   6.306   1.351  1.00  0.43           O  
HETATM  181  O   HOH T 180      43.407  34.488   4.567  1.00  0.43           O  
HETATM  182  O   HOH T 181      24.481   8.205  42.739  1.00  0.43           O  
HETATM  183  O   HOH T 182      28.414  24.268   9.462  1.00  0.43           O  
HETATM  184  O   HOH T 183      24.353  11.003  32.719  1.00  0.43           O  
HETATM  185  O   HOH T 184      43.134   4.066  23.639  1.00  0.43           O  
HETATM  186  O   HOH T 185      12.913  20.562  -0.096  1.00  0.43           O  
HETATM  187  O   HOH T 186      37.412  28.810  25.152  1.00  0.43           O  
HETATM  188  O   HOH T 187      37.791 -11.622   9.946  1.00  0.43           O  
HETATM  189  O   HOH T 188      28.512   0.602   1.511  1.00  0.43           O  
HETATM  190  O   HOH T 189       2.499 -11.885  11.840  1.00  0.43           O  
HETATM  191  O   HOH T 190      29.999  -8.328   9.159  1.00  0.43           O  
HETATM  192  O   HOH T 191      16.707   8.776  29.839  1.00  0.43           O  
HETATM  193  O   HOH T 192      24.006  21.821  15.072  1.00  0.43           O  
HETATM  194  O   HOH T 193      34.940  13.835  29.194  1.00  0.43           O  
HETATM  195  O   HOH T 194      36.204   1.816  13.538  1.00  0.43           O  
HETATM  196  O   HOH T 195      -0.897  -0.152   9.505  1.00  0.44           O  
HETATM  197  O   HOH T 196      12.608  23.250   0.171  1.00  0.44           O  
HETATM  198  O   HOH T 197      38.148   9.549  25.456  1.00  0.44           O  
HETATM  199  O   HOH T 198      18.624   7.430  31.284  1.00  0.44           O  
HETATM  200  O   HOH T 199      -0.414  23.516  -3.490  1.00  0.44           O  
HETATM  201  O   HOH T 200      29.324  19.940   4.219  1.00  0.44           O  
HETATM  202  O   HOH T 201      40.540 -16.049  13.800  1.00  0.44           O  
HETATM  203  O   HOH T 202       9.154   1.894  15.108  1.00  0.44           O  
HETATM  204  O   HOH T 203      19.362  16.497  43.293  1.00  0.44           O  
HETATM  205  O   HOH T 204       2.231  -9.302   3.769  1.00  0.44           O  
HETATM  206  O   HOH T 205      18.719  13.897  43.547  1.00  0.44           O  
HETATM  207  O   HOH T 206      15.608   7.811  19.476  1.00  0.44           O  
HETATM  208  O   HOH T 207      22.778   6.504  20.396  1.00  0.44           O  
HETATM  209  O   HOH T 208      43.873  22.368   8.802  1.00  0.44           O  
HETATM  210  O   HOH T 209      21.075   2.538 -10.584  1.00  0.44           O  
HETATM  211  O   HOH T 210      41.170  36.413  22.182  1.00  0.44           O  
HETATM  212  O   HOH T 211      29.960  34.171   9.210  1.00  0.44           O  
HETATM  213  O   HOH T 212      34.378 -10.088  18.876  1.00  0.45           O  
HETATM  214  O   HOH T 213       5.659   5.598  -7.575  1.00  0.45           O  
HETATM  215  O   HOH T 214      20.184   6.433  19.571  1.00  0.45           O  
HETATM  216  O   HOH T 215      23.026   0.742  -7.024  1.00  0.45           O  
HETATM  217  O   HOH T 216      11.143   0.182  14.361  1.00  0.45           O  
HETATM  218  O   HOH T 217      19.077  -5.930  -1.481  1.00  0.45           O  
HETATM  219  O   HOH T 218      17.098   9.435  32.508  1.00  0.45           O  
HETATM  220  O   HOH T 219      32.525  -1.050  19.731  1.00  0.45           O  
HETATM  221  O   HOH T 220      13.420   3.383  15.110  1.00  0.45           O  
HETATM  222  O   HOH T 221      40.536   6.716  28.981  1.00  0.45           O  
HETATM  223  O   HOH T 222      29.262  18.213  -0.841  1.00  0.45           O  
HETATM  224  O   HOH T 223      30.875  15.123  32.043  1.00  0.45           O  
HETATM  225  O   HOH T 224      39.363  18.556  22.225  1.00  0.45           O  
HETATM  226  O   HOH T 225      47.098  24.422   9.739  1.00  0.45           O  
HETATM  227  O   HOH T 226      23.355   2.450  -9.033  1.00  0.45           O  
HETATM  228  O   HOH T 227       5.187   0.453  14.280  1.00  0.45           O  
HETATM  229  O   HOH T 228      17.293   8.936  17.558  1.00  0.45           O  
HETATM  230  O   HOH T 229      30.080   2.764  30.306  1.00  0.45           O  
HETATM  231  O   HOH T 230      44.426  30.045  17.005  1.00  0.45           O  
HETATM  232  O   HOH T 231      46.486   4.708  16.385  1.00  0.45           O  
HETATM  233  O   HOH T 232      25.517   3.214  -4.066  1.00  0.45           O  
HETATM  234  O   HOH T 233      12.270   5.675  14.010  1.00  0.46           O  
HETATM  235  O   HOH T 234      15.903  10.478  15.742  1.00  0.46           O  
HETATM  236  O   HOH T 235       7.875  19.766   4.655  1.00  0.46           O  
HETATM  237  O   HOH T 236       6.974  13.344  -6.092  1.00  0.46           O  
HETATM  238  O   HOH T 237      29.076   5.876  16.854  1.00  0.46           O  
HETATM  239  O   HOH T 238      31.816   7.310  13.285  1.00  0.46           O  
HETATM  240  O   HOH T 239      20.113  -9.783  17.220  1.00  0.46           O  
HETATM  241  O   HOH T 240      25.496  22.374  12.746  1.00  0.46           O  
HETATM  242  O   HOH T 241      -0.754   7.441   6.410  1.00  0.46           O  
HETATM  243  O   HOH T 242      11.708  14.693  33.042  1.00  0.46           O  
HETATM  244  O   HOH T 243      37.347  -0.669  14.127  1.00  0.46           O  
HETATM  245  O   HOH T 244      29.028  27.711  12.916  1.00  0.46           O  
HETATM  246  O   HOH T 245      19.940   5.001  39.347  1.00  0.46           O  
HETATM  247  O   HOH T 246      37.023  -3.328  13.870  1.00  0.46           O  
HETATM  248  O   HOH T 247      26.019 -13.191  11.129  1.00  0.46           O  
HETATM  249  O   HOH T 248      14.195   1.829  17.294  1.00  0.46           O  
HETATM  250  O   HOH T 249      47.033  26.723  11.328  1.00  0.47           O  
HETATM  251  O   HOH T 250      36.971   1.462  24.949  1.00  0.47           O  
HETATM  252  O   HOH T 251      14.713   8.121  16.811  1.00  0.47           O  
HETATM  253  O   HOH T 252       1.636  19.763  -5.918  1.00  0.47           O  
HETATM  254  O   HOH T 253      32.384   9.572  31.819  1.00  0.47           O  
HETATM  255  O   HOH T 254      19.322  17.802  40.765  1.00  0.47           O  
HETATM  256  O   HOH T 255      -0.269  -2.940   9.770  1.00  0.47           O  
HETATM  257  O   HOH T 256      29.955  26.487  10.511  1.00  0.47           O  
HETATM  258  O   HOH T 257      29.062   4.118   0.888  1.00  0.47           O  
HETATM  259  O   HOH T 258      35.868   4.963  22.992  1.00  0.47           O  
HETATM  260  O   HOH T 259      12.182   2.007  19.236  1.00  0.47           O  
HETATM  261  O   HOH T 260      32.670  -3.757  20.434  1.00  0.47           O  
HETATM  262  O   HOH T 261      37.923   3.401  12.031  1.00  0.47           O  
HETATM  263  O   HOH T 262      27.485  24.032  12.041  1.00  0.47           O  
HETATM  264  O   HOH T 263      14.190  13.100  -7.885  1.00  0.47           O  
HETATM  265  O   HOH T 264      27.846 -11.915   5.894  1.00  0.47           O  
HETATM  266  O   HOH T 265      20.261  16.023  38.743  1.00  0.47           O  
HETATM  267  O   HOH T 266      46.966  16.340  18.711  1.00  0.47           O  
HETATM  268  O   HOH T 267      29.391  -1.543   0.005  1.00  0.47           O  
HETATM  269  O   HOH T 268      27.398  25.860  14.170  1.00  0.47           O  
HETATM  270  O   HOH T 269      28.710  -5.833   1.559  1.00  0.47           O  
HETATM  271  O   HOH T 270      32.449 -11.852  19.444  1.00  0.48           O  
HETATM  272  O   HOH T 271      21.447  25.279  19.546  1.00  0.48           O  
HETATM  273  O   HOH T 272      33.948  -8.035  10.561  1.00  0.48           O  
HETATM  274  O   HOH T 273      27.687  17.786   3.951  1.00  0.48           O  
HETATM  275  O   HOH T 274      46.600  31.156   4.927  1.00  0.48           O  
HETATM  276  O   HOH T 275      29.941  -6.770  16.135  1.00  0.48           O  
HETATM  277  O   HOH T 276       3.816 -12.063   9.445  1.00  0.48           O  
HETATM  278  O   HOH T 277      37.960  37.182  14.394  1.00  0.48           O  
HETATM  279  O   HOH T 278       2.116  -3.184  11.199  1.00  0.48           O  
HETATM  280  O   HOH T 279      34.656   1.319  11.241  1.00  0.48           O  
HETATM  281  O   HOH T 280      16.434  15.211  -3.987  1.00  0.48           O  
HETATM  282  O   HOH T 281      11.517   1.961  16.556  1.00  0.48           O  
HETATM  283  O   HOH T 282      23.749 -14.812  11.158  1.00  0.48           O  
HETATM  284  O   HOH T 283      20.854   6.760  29.732  1.00  0.48           O  
HETATM  285  O   HOH T 284      16.383  14.028  39.629  1.00  0.48           O  
HETATM  286  O   HOH T 285      30.812   7.313  -0.708  1.00  0.48           O  
HETATM  287  O   HOH T 286       7.712  16.000   9.301  1.00  0.48           O  
HETATM  288  O   HOH T 287      31.727   4.772   1.634  1.00  0.48           O  
HETATM  289  O   HOH T 288      27.561  15.252  35.439  1.00  0.48           O  
HETATM  290  O   HOH T 289      15.317  17.765  -3.923  1.00  0.48           O  
HETATM  291  O   HOH T 290      41.612  36.886  18.061  1.00  0.48           O  
HETATM  292  O   HOH T 291      31.726  12.381  32.216  1.00  0.49           O  
HETATM  293  O   HOH T 292      46.455  22.706  19.427  1.00  0.49           O  
HETATM  294  O   HOH T 293      37.600  35.112  12.577  1.00  0.49           O  
HETATM  295  O   HOH T 294      22.301   9.596  -7.365  1.00  0.49           O  
HETATM  296  O   HOH T 295       6.627   1.929  16.149  1.00  0.49           O  
HETATM  297  O   HOH T 296      29.155  18.717   8.886  1.00  0.49           O  
HETATM  298  O   HOH T 297      32.158  33.098  17.033  1.00  0.49           O  
HETATM  299  O   HOH T 298       9.499 -10.846   2.647  1.00  0.49           O  
HETATM  300  O   HOH T 299      25.030   0.888  -5.268  1.00  0.49           O  
HETATM  301  O   HOH T 300      -1.629  16.114  -0.069  1.00  0.49           O  
HETATM  302  O   HOH T 301      34.628  -6.490  17.539  1.00  0.49           O  
HETATM  303  O   HOH T 302      26.475  19.327   9.288  1.00  0.49           O  
HETATM  304  O   HOH T 303      -0.062 -12.992   6.672  1.00  0.49           O  
HETATM  305  O   HOH T 304      32.207  -6.074  18.885  1.00  0.49           O  
HETATM  306  O   HOH T 305      20.518  -8.210  -0.738  1.00  0.50           O  
HETATM  307  O   HOH T 306      31.162  33.631  19.597  1.00  0.50           O  
HETATM  308  O   HOH T 307      18.683  18.484  12.983  1.00  0.50           O  
HETATM  309  O   HOH T 308      38.177   3.376  23.380  1.00  0.50           O  
HETATM  310  O   HOH T 309      33.228  36.594  20.668  1.00  0.50           O  
HETATM  311  O   HOH T 310      26.780   5.830  42.635  1.00  0.50           O  
HETATM  312  O   HOH T 311      47.221  21.793  10.569  1.00  0.50           O  
HETATM  313  O   HOH T 312      33.349 -10.632   9.811  1.00  0.50           O  
HETATM  314  O   HOH T 313      46.171   3.131  10.865  1.00  0.50           O  
HETATM  315  O   HOH T 314      19.542  23.294   3.479  1.00  0.50           O  
HETATM  316  O   HOH T 315      28.056  -8.014  14.542  1.00  0.50           O  
HETATM  317  O   HOH T 316      22.970  -8.068   0.512  1.00  0.50           O  
HETATM  318  O   HOH T 317      25.383  16.837   8.756  1.00  0.50           O  
HETATM  319  O   HOH T 318      20.933  20.101   0.526  1.00  0.50           O  
HETATM  320  O   HOH T 319      47.789  17.150  11.718  1.00  0.50           O  
HETATM  321  O   HOH T 320      18.015  -3.481   1.339  1.00  0.51           O  
HETATM  322  O   HOH T 321       7.485  22.524   3.990  1.00  0.51           O  
HETATM  323  O   HOH T 322      47.039   2.337  13.393  1.00  0.51           O  
HETATM  324  O   HOH T 323      12.728  20.082   2.585  1.00  0.51           O  
HETATM  325  O   HOH T 324      17.792   7.155  21.062  1.00  0.51           O  
HETATM  326  O   HOH T 325      31.523  -8.951  11.295  1.00  0.51           O  
HETATM  327  O   HOH T 326      37.555  12.985  28.576  1.00  0.51           O  
HETATM  328  O   HOH T 327      37.808  31.675   7.584  1.00  0.51           O  
HETATM  329  O   HOH T 328      10.951  -6.423   4.517  1.00  0.51           O  
HETATM  330  O   HOH T 329      14.493  -0.840  -9.772  1.00  0.51           O  
HETATM  331  O   HOH T 330      21.283   4.111  20.293  1.00  0.51           O  
HETATM  332  O   HOH T 331      47.514  17.103  14.448  1.00  0.51           O  
HETATM  333  O   HOH T 332      36.715   4.608   5.575  1.00  0.51           O  
HETATM  334  O   HOH T 333      47.413  13.567  23.632  1.00  0.51           O  
HETATM  335  O   HOH T 334      28.107   4.975  29.422  1.00  0.51           O  
HETATM  336  O   HOH T 335      15.168  10.579  -7.183  1.00  0.51           O  
HETATM  337  O   HOH T 336       8.835 -13.656   6.978  1.00  0.51           O  
HETATM  338  O   HOH T 337      34.900  -7.354   8.063  1.00  0.52           O  
HETATM  339  O   HOH T 338      40.159  37.929  15.948  1.00  0.52           O  
HETATM  340  O   HOH T 339      27.418   0.077  -1.058  1.00  0.52           O  
HETATM  341  O   HOH T 340      27.145  19.484   0.374  1.00  0.52           O  
HETATM  342  O   HOH T 341      44.545  36.550   5.607  1.00  0.52           O  
HETATM  343  O   HOH T 342      13.641  14.905  31.007  1.00  0.52           O  
HETATM  344  O   HOH T 343      48.333  20.423  19.444  1.00  0.52           O  
HETATM  345  O   HOH T 344      28.861  32.327  19.449  1.00  0.52           O  
HETATM  346  O   HOH T 345      19.329  16.219  14.588  1.00  0.52           O  
HETATM  347  O   HOH T 346      35.380 -12.168   8.829  1.00  0.52           O  
HETATM  348  O   HOH T 347      47.150  11.252  16.796  1.00  0.52           O  
HETATM  349  O   HOH T 348      24.418  12.233  44.649  1.00  0.52           O  
HETATM  350  O   HOH T 349      25.075   0.940  -2.418  1.00  0.52           O  
HETATM  351  O   HOH T 350      51.295  33.462  13.126  1.00  0.52           O  
HETATM  352  O   HOH T 351      35.997  -9.538   9.551  1.00  0.52           O  
HETATM  353  O   HOH T 352      11.116  17.435  32.909  1.00  0.52           O  
HETATM  354  O   HOH T 353      35.910  25.919  28.359  1.00  0.53           O  
HETATM  355  O   HOH T 354      17.039  -4.933 -10.415  1.00  0.53           O  
HETATM  356  O   HOH T 355      33.583   3.839   3.595  1.00  0.53           O  
HETATM  357  O   HOH T 356      45.562  20.279   8.821  1.00  0.53           O  
HETATM  358  O   HOH T 357       3.923 -12.169   6.677  1.00  0.53           O  
HETATM  359  O   HOH T 358      33.592   9.415  16.421  1.00  0.53           O  
HETATM  360  O   HOH T 359      28.381  16.944   1.352  1.00  0.54           O  
HETATM  361  O   HOH T 360      10.609  20.229   4.870  1.00  0.54           O  
HETATM  362  O   HOH T 361       9.237  13.111  12.159  1.00  0.54           O  
HETATM  363  O   HOH T 362       2.258   3.227  -1.829  1.00  0.54           O  
HETATM  364  O   HOH T 363      -4.533  11.204  -1.753  1.00  0.54           O  
HETATM  365  O   HOH T 364      25.319  -1.673  -1.799  1.00  0.54           O  
HETATM  366  O   HOH T 365       6.631   8.072  -6.668  1.00  0.54           O  
HETATM  367  O   HOH T 366      26.903  -4.704  -0.279  1.00  0.54           O  
HETATM  368  O   HOH T 367      25.314  15.635  36.991  1.00  0.54           O  
HETATM  369  O   HOH T 368      18.492  14.619  33.949  1.00  0.54           O  
HETATM  370  O   HOH T 369      45.138  24.872  20.921  1.00  0.54           O  
HETATM  371  O   HOH T 370      35.163   3.961  12.016  1.00  0.54           O  
HETATM  372  O   HOH T 371      33.865  33.878  20.496  1.00  0.54           O  
HETATM  373  O   HOH T 372      27.112  -9.612   6.991  1.00  0.54           O  
HETATM  374  O   HOH T 373      18.606  19.436  37.417  1.00  0.55           O  
HETATM  375  O   HOH T 374       0.201  18.361  -3.942  1.00  0.55           O  
HETATM  376  O   HOH T 375       5.072 -12.091   2.389  1.00  0.55           O  
HETATM  377  O   HOH T 376       9.881  17.691   9.736  1.00  0.55           O  
HETATM  378  O   HOH T 377      18.446  20.419  40.058  1.00  0.55           O  
HETATM  379  O   HOH T 378      44.891   4.886  18.620  1.00  0.55           O  
HETATM  380  O   HOH T 379      34.954  -3.256   8.911  1.00  0.55           O  
HETATM  381  O   HOH T 380      16.283  16.828  34.807  1.00  0.56           O  
HETATM  382  O   HOH T 381      15.263  17.931   9.783  1.00  0.56           O  
HETATM  383  O   HOH T 382      45.966  35.618   4.960  1.00  0.56           O  
HETATM  384  O   HOH T 383      46.329  25.471  18.505  1.00  0.56           O  
HETATM  385  O   HOH T 384      37.717  18.884  -2.582  1.00  0.56           O  
HETATM  386  O   HOH T 385      13.708  18.558  27.449  1.00  0.56           O  
HETATM  387  O   HOH T 386      18.652   4.644  21.132  1.00  0.57           O  
HETATM  388  O   HOH T 387      -2.396   6.500  -0.147  1.00  0.57           O  
HETATM  389  O   HOH T 388      -4.853  -0.060   7.251  1.00  0.57           O  
HETATM  390  O   HOH T 389      40.513   4.846  23.631  1.00  0.57           O  
HETATM  391  O   HOH T 390      -0.558  -2.242  12.995  1.00  0.57           O  
HETATM  392  O   HOH T 391      -3.961  -4.943   7.351  1.00  0.57           O  
HETATM  393  O   HOH T 392      -2.432  14.615  -4.166  1.00  0.58           O  
HETATM  394  O   HOH T 393      43.027   1.570  12.949  1.00  0.59           O  
HETATM  395  O   HOH T 394      47.793  26.920   8.906  1.00  0.59           O  
HETATM  396  O   HOH T 395       9.738  22.347  -6.535  1.00  0.59           O  
HETATM  397  O   HOH T 396      12.159  16.316   9.002  1.00  0.62           O  
HETATM  398  O   HOH T 397      33.097   8.172  -1.999  1.00  0.64           O  
HETATM  399  O   HOH T 398      12.493   8.104  12.478  1.00  0.65           O  
TER     400      HOH T 398 
