# Supplementary material for: Accurate Prediction of Hydration Sites of Proteins Using Energy Model With Atom Embedding
Source: Front Mol Biosci. 2021 Sep 20;8:756075. doi: 10.3389/fmolb.2021.756075 (PMC8488165; doi:10.3389/fmolb.2021.756075)
Supplement: Supplementary file 1 [file DataSheet1.ZIP › Data Sheet 1/Our_result_pdb/our_dataset_output/3GUJ_watersite.pdb]

HEADER                                                        XXXX


JRNL        PMID   -1
HETATM    1  O   HOH T   0       8.947 -17.709  60.108  1.00  0.16           O  
HETATM    2  O   HOH T   1      10.601 -20.621  51.653  1.00  0.18           O  
HETATM    3  O   HOH T   2      23.038 -31.782  52.031  1.00  0.18           O  
HETATM    4  O   HOH T   3      22.719 -28.078  36.790  1.00  0.21           O  
HETATM    5  O   HOH T   4      27.599 -39.628  41.472  1.00  0.21           O  
HETATM    6  O   HOH T   5      23.203 -32.098  59.204  1.00  0.22           O  
HETATM    7  O   HOH T   6      20.616 -23.330  48.701  1.00  0.23           O  
HETATM    8  O   HOH T   7      23.540 -29.027  52.256  1.00  0.23           O  
HETATM    9  O   HOH T   8      27.555  -3.833  57.584  1.00  0.24           O  
HETATM   10  O   HOH T   9      29.633 -29.633  32.085  1.00  0.25           O  
HETATM   11  O   HOH T  10      23.033 -18.815  45.123  1.00  0.26           O  
HETATM   12  O   HOH T  11      30.332  -9.183  48.311  1.00  0.26           O  
HETATM   13  O   HOH T  12      10.104 -21.813  43.442  1.00  0.26           O  
HETATM   14  O   HOH T  13      34.161 -17.102  61.306  1.00  0.27           O  
HETATM   15  O   HOH T  14      18.399 -35.544  37.966  1.00  0.27           O  
HETATM   16  O   HOH T  15      19.780 -12.140  43.734  1.00  0.27           O  
HETATM   17  O   HOH T  16      32.209 -31.445  44.004  1.00  0.27           O  
HETATM   18  O   HOH T  17      17.434 -30.652  48.568  1.00  0.27           O  
HETATM   19  O   HOH T  18      28.745 -25.510  37.299  1.00  0.28           O  
HETATM   20  O   HOH T  19       6.248 -17.297  54.022  1.00  0.28           O  
HETATM   21  O   HOH T  20      18.576   5.713  57.370  1.00  0.29           O  
HETATM   22  O   HOH T  21      15.314 -18.832  46.036  1.00  0.29           O  
HETATM   23  O   HOH T  22      32.671 -32.543  37.511  1.00  0.29           O  
HETATM   24  O   HOH T  23      21.959 -33.999  60.844  1.00  0.29           O  
HETATM   25  O   HOH T  24       6.821 -37.726  44.260  1.00  0.30           O  
HETATM   26  O   HOH T  25      31.804 -42.283  39.208  1.00  0.30           O  
HETATM   27  O   HOH T  26      17.030 -28.263  68.290  1.00  0.30           O  
HETATM   28  O   HOH T  27      19.247  -5.518  63.326  1.00  0.30           O  
HETATM   29  O   HOH T  28      19.216 -38.095  38.843  1.00  0.30           O  
HETATM   30  O   HOH T  29      25.031  -9.546  45.323  1.00  0.31           O  
HETATM   31  O   HOH T  30      10.181  -1.019  57.185  1.00  0.31           O  
HETATM   32  O   HOH T  31      19.380 -22.581  42.579  1.00  0.31           O  
HETATM   33  O   HOH T  32       7.838  -5.317  42.255  1.00  0.31           O  
HETATM   34  O   HOH T  33      31.682 -29.824  33.973  1.00  0.32           O  
HETATM   35  O   HOH T  34      34.109 -45.685  45.404  1.00  0.32           O  
HETATM   36  O   HOH T  35       7.871 -35.232  43.826  1.00  0.32           O  
HETATM   37  O   HOH T  36      17.071 -18.347  42.896  1.00  0.32           O  
HETATM   38  O   HOH T  37      25.109  -2.438  57.281  1.00  0.32           O  
HETATM   39  O   HOH T  38      30.059 -29.211  36.134  1.00  0.32           O  
HETATM   40  O   HOH T  39      20.440 -39.700  40.725  1.00  0.33           O  
HETATM   41  O   HOH T  40      26.040 -17.945  65.143  1.00  0.33           O  
HETATM   42  O   HOH T  41      27.377 -22.655  52.545  1.00  0.33           O  
HETATM   43  O   HOH T  42      10.048  -2.024  62.822  1.00  0.33           O  
HETATM   44  O   HOH T  43      13.689 -25.905  47.585  1.00  0.33           O  
HETATM   45  O   HOH T  44      18.063  -3.926  47.748  1.00  0.33           O  
HETATM   46  O   HOH T  45      11.942 -34.364  51.430  1.00  0.33           O  
HETATM   47  O   HOH T  46      27.772 -15.652  46.726  1.00  0.33           O  
HETATM   48  O   HOH T  47      10.691 -23.313  39.004  1.00  0.33           O  
HETATM   49  O   HOH T  48      23.330 -20.694  34.949  1.00  0.34           O  
HETATM   50  O   HOH T  49      32.077 -10.668  44.556  1.00  0.34           O  
HETATM   51  O   HOH T  50      29.203 -29.728  51.691  1.00  0.34           O  
HETATM   52  O   HOH T  51      20.050 -25.970  44.405  1.00  0.34           O  
HETATM   53  O   HOH T  52      29.995 -38.920  35.753  1.00  0.34           O  
HETATM   54  O   HOH T  53      22.503 -43.085  56.119  1.00  0.34           O  
HETATM   55  O   HOH T  54      30.259 -16.231  47.848  1.00  0.34           O  
HETATM   56  O   HOH T  55       9.510  -9.131  41.964  1.00  0.35           O  
HETATM   57  O   HOH T  56      21.025 -21.364  67.237  1.00  0.35           O  
HETATM   58  O   HOH T  57       4.865  -6.284  58.505  1.00  0.35           O  
HETATM   59  O   HOH T  58      14.004 -13.502  67.618  1.00  0.35           O  
HETATM   60  O   HOH T  59      23.710 -16.105  44.654  1.00  0.35           O  
HETATM   61  O   HOH T  60      33.405 -41.417  50.643  1.00  0.35           O  
HETATM   62  O   HOH T  61      16.053 -34.031  37.858  1.00  0.35           O  
HETATM   63  O   HOH T  62       7.337  -5.810  59.765  1.00  0.35           O  
HETATM   64  O   HOH T  63      26.864 -20.194  51.614  1.00  0.36           O  
HETATM   65  O   HOH T  64      29.334 -42.426  40.098  1.00  0.36           O  
HETATM   66  O   HOH T  65      12.291 -29.779  58.818  1.00  0.36           O  
HETATM   67  O   HOH T  66       7.614  -4.862  63.813  1.00  0.36           O  
HETATM   68  O   HOH T  67      17.812 -25.751  46.050  1.00  0.36           O  
HETATM   69  O   HOH T  68      32.699 -13.271  64.985  1.00  0.36           O  
HETATM   70  O   HOH T  69      17.861  -3.170  72.099  1.00  0.36           O  
HETATM   71  O   HOH T  70      32.506 -32.167  50.476  1.00  0.36           O  
HETATM   72  O   HOH T  71      34.940 -48.963  46.259  1.00  0.37           O  
HETATM   73  O   HOH T  72      14.693 -28.362  46.629  1.00  0.37           O  
HETATM   74  O   HOH T  73      16.237   6.021  55.913  1.00  0.37           O  
HETATM   75  O   HOH T  74      30.656 -49.231  40.008  1.00  0.37           O  
HETATM   76  O   HOH T  75       7.046 -15.684  60.144  1.00  0.37           O  
HETATM   77  O   HOH T  76      27.620 -26.359  46.658  1.00  0.38           O  
HETATM   78  O   HOH T  77      26.379 -35.374  59.861  1.00  0.38           O  
HETATM   79  O   HOH T  78      21.023 -16.908  44.701  1.00  0.38           O  
HETATM   80  O   HOH T  79       8.992  -2.457  59.246  1.00  0.38           O  
HETATM   81  O   HOH T  80      25.968 -20.898  34.653  1.00  0.38           O  
HETATM   82  O   HOH T  81       8.269 -21.191  36.787  1.00  0.38           O  
HETATM   83  O   HOH T  82      30.271  -3.128  58.129  1.00  0.38           O  
HETATM   84  O   HOH T  83      20.112  -4.528  67.710  1.00  0.38           O  
HETATM   85  O   HOH T  84      29.082  -8.871  45.970  1.00  0.38           O  
HETATM   86  O   HOH T  85      14.432 -19.865  37.664  1.00  0.38           O  
HETATM   87  O   HOH T  86      25.650 -44.542  46.113  1.00  0.38           O  
HETATM   88  O   HOH T  87      17.085 -19.462  37.047  1.00  0.38           O  
HETATM   89  O   HOH T  88      10.262 -36.131  56.059  1.00  0.38           O  
HETATM   90  O   HOH T  89      22.378 -16.374  71.555  1.00  0.39           O  
HETATM   91  O   HOH T  90      15.447   3.037  61.048  1.00  0.39           O  
HETATM   92  O   HOH T  91      30.358 -24.041  38.990  1.00  0.39           O  
HETATM   93  O   HOH T  92      14.025 -30.523  70.323  1.00  0.39           O  
HETATM   94  O   HOH T  93       4.223 -20.601  55.808  1.00  0.39           O  
HETATM   95  O   HOH T  94      27.961 -46.396  42.828  1.00  0.39           O  
HETATM   96  O   HOH T  95      19.471 -22.808  65.337  1.00  0.39           O  
HETATM   97  O   HOH T  96       7.579 -25.732  45.515  1.00  0.40           O  
HETATM   98  O   HOH T  97      20.800  -3.933  48.205  1.00  0.40           O  
HETATM   99  O   HOH T  98      31.150 -42.293  52.201  1.00  0.40           O  
HETATM  100  O   HOH T  99      12.828   3.510  61.185  1.00  0.40           O  
HETATM  101  O   HOH T 100      11.996 -35.358  54.046  1.00  0.40           O  
HETATM  102  O   HOH T 101      34.512 -29.066  41.991  1.00  0.40           O  
HETATM  103  O   HOH T 102      24.343 -44.140  48.541  1.00  0.40           O  
HETATM  104  O   HOH T 103      37.064 -33.575  47.149  1.00  0.40           O  
HETATM  105  O   HOH T 104      20.652 -21.788  46.382  1.00  0.40           O  
HETATM  106  O   HOH T 105      10.722 -21.140  40.727  1.00  0.41           O  
HETATM  107  O   HOH T 106      39.177 -34.890  45.786  1.00  0.41           O  
HETATM  108  O   HOH T 107      24.916 -44.517  56.644  1.00  0.41           O  
HETATM  109  O   HOH T 108       7.042 -26.904  50.200  1.00  0.42           O  
HETATM  110  O   HOH T 109      14.931 -39.061  47.801  1.00  0.42           O  
HETATM  111  O   HOH T 110      13.798 -30.898  47.663  1.00  0.42           O  
HETATM  112  O   HOH T 111      21.583 -14.274  44.159  1.00  0.42           O  
HETATM  113  O   HOH T 112      16.924  -7.350  65.581  1.00  0.42           O  
HETATM  114  O   HOH T 113       3.979 -17.846  55.543  1.00  0.42           O  
HETATM  115  O   HOH T 114      33.223 -30.737  48.076  1.00  0.42           O  
HETATM  116  O   HOH T 115      29.907 -29.751  43.572  1.00  0.42           O  
HETATM  117  O   HOH T 116      29.074 -34.716  59.776  1.00  0.42           O  
HETATM  118  O   HOH T 117      31.628 -44.997  51.962  1.00  0.42           O  
HETATM  119  O   HOH T 118      13.543 -22.125  36.282  1.00  0.43           O  
HETATM  120  O   HOH T 119      15.219 -42.979  53.330  1.00  0.43           O  
HETATM  121  O   HOH T 120      21.415 -23.494  44.310  1.00  0.43           O  
HETATM  122  O   HOH T 121      11.786 -29.194  48.449  1.00  0.43           O  
HETATM  123  O   HOH T 122      29.141 -17.972  46.004  1.00  0.43           O  
HETATM  124  O   HOH T 123      26.666 -29.738  29.182  1.00  0.43           O  
HETATM  125  O   HOH T 124       8.310 -21.780  39.511  1.00  0.43           O  
HETATM  126  O   HOH T 125      19.839 -18.383  42.733  1.00  0.43           O  
HETATM  127  O   HOH T 126      13.063 -36.892  52.023  1.00  0.43           O  
HETATM  128  O   HOH T 127      20.454 -15.803  42.134  1.00  0.43           O  
HETATM  129  O   HOH T 128      25.913   0.837  51.913  1.00  0.44           O  
HETATM  130  O   HOH T 129      31.052 -46.993  38.370  1.00  0.44           O  
HETATM  131  O   HOH T 130      12.214 -21.142  38.405  1.00  0.44           O  
HETATM  132  O   HOH T 131      24.351 -22.918  33.614  1.00  0.44           O  
HETATM  133  O   HOH T 132      12.021   0.909  61.663  1.00  0.44           O  
HETATM  134  O   HOH T 133      22.632  -1.912  47.745  1.00  0.44           O  
HETATM  135  O   HOH T 134       7.078 -11.483  53.259  1.00  0.44           O  
HETATM  136  O   HOH T 135      12.041 -11.615  67.021  1.00  0.44           O  
HETATM  137  O   HOH T 136      27.580 -19.681  39.516  1.00  0.44           O  
HETATM  138  O   HOH T 137      18.658 -21.201  35.592  1.00  0.44           O  
HETATM  139  O   HOH T 138      10.904 -32.094  52.581  1.00  0.44           O  
HETATM  140  O   HOH T 139       9.437  -6.946  43.562  1.00  0.44           O  
HETATM  141  O   HOH T 140      21.402 -26.918  34.564  1.00  0.44           O  
HETATM  142  O   HOH T 141      24.109 -48.201  49.767  1.00  0.44           O  
HETATM  143  O   HOH T 142       7.159 -28.852  58.546  1.00  0.45           O  
HETATM  144  O   HOH T 143      20.691 -40.260  58.989  1.00  0.45           O  
HETATM  145  O   HOH T 144      28.640 -22.711  37.133  1.00  0.45           O  
HETATM  146  O   HOH T 145       2.791 -20.456  58.161  1.00  0.45           O  
HETATM  147  O   HOH T 146      22.128 -24.582  33.227  1.00  0.45           O  
HETATM  148  O   HOH T 147      25.214   0.144  58.309  1.00  0.45           O  
HETATM  149  O   HOH T 148      14.487  -7.415  66.912  1.00  0.45           O  
HETATM  150  O   HOH T 149      15.543  -5.890  68.961  1.00  0.45           O  
HETATM  151  O   HOH T 150      15.883  -3.542  70.201  1.00  0.45           O  
HETATM  152  O   HOH T 151      28.207 -22.475  39.866  1.00  0.46           O  
HETATM  153  O   HOH T 152      36.212 -28.515  44.088  1.00  0.46           O  
HETATM  154  O   HOH T 153      33.934 -42.908  37.576  1.00  0.46           O  
HETATM  155  O   HOH T 154      19.382  -9.804  42.101  1.00  0.46           O  
HETATM  156  O   HOH T 155      11.499 -32.809  55.061  1.00  0.46           O  
HETATM  157  O   HOH T 156      37.106 -36.256  47.222  1.00  0.46           O  
HETATM  158  O   HOH T 157      14.096 -33.023  39.411  1.00  0.46           O  
HETATM  159  O   HOH T 158      32.174 -48.836  46.912  1.00  0.46           O  
HETATM  160  O   HOH T 159      11.509 -30.696  46.145  1.00  0.46           O  
HETATM  161  O   HOH T 160       9.205 -26.839  67.115  1.00  0.46           O  
HETATM  162  O   HOH T 161      33.182 -20.599  56.037  1.00  0.46           O  
HETATM  163  O   HOH T 162      21.474 -25.083  46.615  1.00  0.47           O  
HETATM  164  O   HOH T 163       4.018 -11.237  51.890  1.00  0.47           O  
HETATM  165  O   HOH T 164      20.522 -18.597  38.039  1.00  0.47           O  
HETATM  166  O   HOH T 165      37.303 -29.162  41.544  1.00  0.47           O  
HETATM  167  O   HOH T 166      16.568 -30.889  69.302  1.00  0.47           O  
HETATM  168  O   HOH T 167      15.154 -25.902  45.311  1.00  0.47           O  
HETATM  169  O   HOH T 168      11.850 -36.934  46.259  1.00  0.47           O  
HETATM  170  O   HOH T 169      26.681   0.024  48.593  1.00  0.48           O  
HETATM  171  O   HOH T 170       5.018 -26.851  45.374  1.00  0.48           O  
HETATM  172  O   HOH T 171      26.451 -37.779  58.898  1.00  0.48           O  
HETATM  173  O   HOH T 172      14.009 -34.049  34.159  1.00  0.48           O  
HETATM  174  O   HOH T 173      30.010 -18.511  50.153  1.00  0.48           O  
HETATM  175  O   HOH T 174      20.383   5.001  50.490  1.00  0.48           O  
HETATM  176  O   HOH T 175      34.094 -33.396  39.635  1.00  0.48           O  
HETATM  177  O   HOH T 176       3.968 -24.288  45.367  1.00  0.48           O  
HETATM  178  O   HOH T 177      25.085 -46.680  47.756  1.00  0.48           O  
HETATM  179  O   HOH T 178      10.436   1.641  58.066  1.00  0.48           O  
HETATM  180  O   HOH T 179      36.146 -19.038  61.183  1.00  0.48           O  
HETATM  181  O   HOH T 180      11.213 -32.398  58.968  1.00  0.48           O  
HETATM  182  O   HOH T 181       8.417  -7.381  62.978  1.00  0.48           O  
HETATM  183  O   HOH T 182      26.983  -7.836  44.362  1.00  0.48           O  
HETATM  184  O   HOH T 183      24.182 -39.675  62.898  1.00  0.48           O  
HETATM  185  O   HOH T 184       3.983 -22.807  57.435  1.00  0.48           O  
HETATM  186  O   HOH T 185       4.790 -12.832  53.958  1.00  0.49           O  
HETATM  187  O   HOH T 186       8.829  -6.086  46.053  1.00  0.49           O  
HETATM  188  O   HOH T 187      35.428 -43.856  43.732  1.00  0.49           O  
HETATM  189  O   HOH T 188      32.982 -27.787  59.169  1.00  0.49           O  
HETATM  190  O   HOH T 189      34.001 -38.660  38.029  1.00  0.49           O  
HETATM  191  O   HOH T 190      27.650 -20.074  36.721  1.00  0.49           O  
HETATM  192  O   HOH T 191      15.982 -44.281  50.935  1.00  0.49           O  
HETATM  193  O   HOH T 192      17.816   2.493  51.039  1.00  0.49           O  
HETATM  194  O   HOH T 193       8.381 -24.111  43.376  1.00  0.49           O  
HETATM  195  O   HOH T 194      19.498 -16.198  39.399  1.00  0.50           O  
HETATM  196  O   HOH T 195      26.808 -43.757  54.516  1.00  0.50           O  
HETATM  197  O   HOH T 196      26.062 -19.993  31.956  1.00  0.50           O  
HETATM  198  O   HOH T 197      21.312 -20.617  41.984  1.00  0.50           O  
HETATM  199  O   HOH T 198       9.551 -37.407  44.669  1.00  0.50           O  
HETATM  200  O   HOH T 199      32.942 -33.510  52.887  1.00  0.51           O  
HETATM  201  O   HOH T 200      19.498 -28.434  33.563  1.00  0.51           O  
HETATM  202  O   HOH T 201      34.165 -29.975  45.509  1.00  0.51           O  
HETATM  203  O   HOH T 202       5.997 -25.963  47.836  1.00  0.51           O  
HETATM  204  O   HOH T 203       7.891  -3.479  61.490  1.00  0.51           O  
HETATM  205  O   HOH T 204      27.188  -1.559  59.024  1.00  0.51           O  
HETATM  206  O   HOH T 205      32.958  -5.397  61.010  1.00  0.51           O  
HETATM  207  O   HOH T 206       7.979 -17.747  66.797  1.00  0.51           O  
HETATM  208  O   HOH T 207      30.324 -32.360  57.779  1.00  0.51           O  
HETATM  209  O   HOH T 208      10.444 -24.583  67.986  1.00  0.51           O  
HETATM  210  O   HOH T 209      20.798 -20.866  33.917  1.00  0.51           O  
HETATM  211  O   HOH T 210      13.035  -9.384  68.307  1.00  0.51           O  
HETATM  212  O   HOH T 211      16.983 -12.240  70.435  1.00  0.51           O  
HETATM  213  O   HOH T 212      29.964  -5.670  50.265  1.00  0.51           O  
HETATM  214  O   HOH T 213       6.825 -25.534  66.628  1.00  0.51           O  
HETATM  215  O   HOH T 214      14.249 -37.844  44.908  1.00  0.51           O  
HETATM  216  O   HOH T 215      31.423 -39.859  38.092  1.00  0.51           O  
HETATM  217  O   HOH T 216      16.590  -5.389  45.988  1.00  0.52           O  
HETATM  218  O   HOH T 217       6.127  -9.884  64.560  1.00  0.52           O  
HETATM  219  O   HOH T 218      29.189 -27.212  44.456  1.00  0.52           O  
HETATM  220  O   HOH T 219      29.231 -48.844  42.366  1.00  0.52           O  
HETATM  221  O   HOH T 220      29.479 -20.938  51.610  1.00  0.52           O  
HETATM  222  O   HOH T 221       3.091 -13.866  52.041  1.00  0.52           O  
HETATM  223  O   HOH T 222       4.145 -15.512  54.040  1.00  0.52           O  
HETATM  224  O   HOH T 223      12.822   1.728  51.141  1.00  0.52           O  
HETATM  225  O   HOH T 224      26.049  -4.853  65.734  1.00  0.53           O  
HETATM  226  O   HOH T 225      21.479 -42.919  37.271  1.00  0.53           O  
HETATM  227  O   HOH T 226      31.457 -29.793  45.997  1.00  0.53           O  
HETATM  228  O   HOH T 227      12.210 -19.740  36.030  1.00  0.53           O  
HETATM  229  O   HOH T 228      35.215 -13.618  64.194  1.00  0.53           O  
HETATM  230  O   HOH T 229      22.712   0.852  59.024  1.00  0.53           O  
HETATM  231  O   HOH T 230       4.754 -19.501  53.424  1.00  0.53           O  
HETATM  232  O   HOH T 231      26.995   2.540  53.701  1.00  0.53           O  
HETATM  233  O   HOH T 232      36.418 -28.431  38.856  1.00  0.53           O  
HETATM  234  O   HOH T 233      20.355  -9.671  53.466  1.00  0.53           O  
HETATM  235  O   HOH T 234      18.119  -6.540  68.085  1.00  0.54           O  
HETATM  236  O   HOH T 235      21.081 -45.304  55.561  1.00  0.54           O  
HETATM  237  O   HOH T 236      30.680 -27.699  42.138  1.00  0.54           O  
HETATM  238  O   HOH T 237      29.127 -44.372  52.848  1.00  0.54           O  
HETATM  239  O   HOH T 238       2.633 -20.517  49.767  1.00  0.54           O  
HETATM  240  O   HOH T 239      29.930 -35.674  29.957  1.00  0.55           O  
HETATM  241  O   HOH T 240      19.216 -34.160  60.572  1.00  0.55           O  
HETATM  242  O   HOH T 241      12.841 -30.722  38.876  1.00  0.55           O  
HETATM  243  O   HOH T 242       8.241 -34.190  60.612  1.00  0.55           O  
HETATM  244  O   HOH T 243      18.566 -36.604  61.456  1.00  0.56           O  
HETATM  245  O   HOH T 244      26.813 -43.803  58.366  1.00  0.56           O  
HETATM  246  O   HOH T 245      29.262 -47.526  44.822  1.00  0.56           O  
HETATM  247  O   HOH T 246      30.833 -30.381  49.487  1.00  0.56           O  
HETATM  248  O   HOH T 247      32.535 -32.345  34.737  1.00  0.56           O  
HETATM  249  O   HOH T 248      30.226 -32.868  61.420  1.00  0.57           O  
HETATM  250  O   HOH T 249       9.404 -32.369  56.771  1.00  0.57           O  
HETATM  251  O   HOH T 250      13.828 -12.870  37.964  1.00  0.57           O  
HETATM  252  O   HOH T 251      28.342 -34.767  27.937  1.00  0.57           O  
HETATM  253  O   HOH T 252      12.800 -19.376  52.606  1.00  0.57           O  
HETATM  254  O   HOH T 253       1.732 -20.969  60.685  1.00  0.57           O  
HETATM  255  O   HOH T 254      11.290 -24.933  46.703  1.00  0.59           O  
HETATM  256  O   HOH T 255      31.662 -34.303  33.124  1.00  0.61           O  
TER     257      HOH T 255 
