# Supplementary material for: Accurate Prediction of Hydration Sites of Proteins Using Energy Model With Atom Embedding
Source: Front Mol Biosci. 2021 Sep 20;8:756075. doi: 10.3389/fmolb.2021.756075 (PMC8488165; doi:10.3389/fmolb.2021.756075)
Supplement: Supplementary file 1 [file DataSheet1.ZIP › Data Sheet 1/Our_result_pdb/our_dataset_output/3H4X_watersite.pdb]

HEADER                                                        XXXX


JRNL        PMID   -1
HETATM    1  O   HOH T   0      44.456  24.758  27.698  1.00  0.15           O  
HETATM    2  O   HOH T   1      46.230  15.930  27.955  1.00  0.16           O  
HETATM    3  O   HOH T   2      27.185  23.296  27.686  1.00  0.17           O  
HETATM    4  O   HOH T   3      30.571  48.859  18.176  1.00  0.19           O  
HETATM    5  O   HOH T   4      52.784   9.481  16.044  1.00  0.19           O  
HETATM    6  O   HOH T   5      23.621  28.750  18.954  1.00  0.20           O  
HETATM    7  O   HOH T   6      33.974  24.358  28.747  1.00  0.20           O  
HETATM    8  O   HOH T   7      14.142  15.670  27.106  1.00  0.21           O  
HETATM    9  O   HOH T   8      39.253  19.144  42.343  1.00  0.21           O  
HETATM   10  O   HOH T   9      38.277   2.962  27.743  1.00  0.21           O  
HETATM   11  O   HOH T  10      45.104  11.215  19.551  1.00  0.21           O  
HETATM   12  O   HOH T  11      33.899  37.328  15.420  1.00  0.21           O  
HETATM   13  O   HOH T  12      54.633  33.852  23.569  1.00  0.21           O  
HETATM   14  O   HOH T  13      59.228  15.084  31.780  1.00  0.22           O  
HETATM   15  O   HOH T  14      35.065  47.849  13.493  1.00  0.22           O  
HETATM   16  O   HOH T  15      17.356  23.347  26.304  1.00  0.22           O  
HETATM   17  O   HOH T  16      24.436  12.357  34.779  1.00  0.23           O  
HETATM   18  O   HOH T  17      21.384  -0.848  26.112  1.00  0.23           O  
HETATM   19  O   HOH T  18      58.975  25.434  23.904  1.00  0.23           O  
HETATM   20  O   HOH T  19      31.052  43.077  21.356  1.00  0.23           O  
HETATM   21  O   HOH T  20      31.433  13.081  37.979  1.00  0.23           O  
HETATM   22  O   HOH T  21      30.557  39.482  31.557  1.00  0.23           O  
HETATM   23  O   HOH T  22      56.282  26.054  24.325  1.00  0.24           O  
HETATM   24  O   HOH T  23      51.380  41.079  22.317  1.00  0.24           O  
HETATM   25  O   HOH T  24      28.852  -4.663  27.745  1.00  0.24           O  
HETATM   26  O   HOH T  25      35.317  13.076  37.845  1.00  0.24           O  
HETATM   27  O   HOH T  26      57.654  16.076  20.286  1.00  0.24           O  
HETATM   28  O   HOH T  27      38.674  24.963   1.047  1.00  0.25           O  
HETATM   29  O   HOH T  28      41.528  41.145  20.019  1.00  0.25           O  
HETATM   30  O   HOH T  29      17.609  11.475  22.673  1.00  0.26           O  
HETATM   31  O   HOH T  30      37.118   0.557  28.732  1.00  0.26           O  
HETATM   32  O   HOH T  31      50.637  21.868  42.789  1.00  0.26           O  
HETATM   33  O   HOH T  32      48.105  10.570  -0.132  1.00  0.26           O  
HETATM   34  O   HOH T  33      56.826  30.427  31.505  1.00  0.26           O  
HETATM   35  O   HOH T  34      54.938  31.429  29.705  1.00  0.26           O  
HETATM   36  O   HOH T  35      22.038  12.151  33.266  1.00  0.26           O  
HETATM   37  O   HOH T  36      33.771  16.421  33.101  1.00  0.26           O  
HETATM   38  O   HOH T  37      40.276  43.493  23.774  1.00  0.26           O  
HETATM   39  O   HOH T  38      52.223   8.972  10.068  1.00  0.27           O  
HETATM   40  O   HOH T  39      37.914  44.831  24.066  1.00  0.27           O  
HETATM   41  O   HOH T  40      32.153  10.695  16.223  1.00  0.27           O  
HETATM   42  O   HOH T  41      40.099  27.826   2.905  1.00  0.27           O  
HETATM   43  O   HOH T  42      44.478  24.648  39.399  1.00  0.27           O  
HETATM   44  O   HOH T  43      49.512  26.567   7.161  1.00  0.27           O  
HETATM   45  O   HOH T  44      52.267  16.388  13.494  1.00  0.27           O  
HETATM   46  O   HOH T  45      36.503   4.003  17.869  1.00  0.27           O  
HETATM   47  O   HOH T  46      35.744  26.180   6.114  1.00  0.28           O  
HETATM   48  O   HOH T  47      40.240  32.577   1.590  1.00  0.28           O  
HETATM   49  O   HOH T  48      32.434  22.514  30.295  1.00  0.28           O  
HETATM   50  O   HOH T  49      11.192  19.583  21.890  1.00  0.28           O  
HETATM   51  O   HOH T  50      36.027   6.817  17.935  1.00  0.28           O  
HETATM   52  O   HOH T  51      43.807  10.207  15.043  1.00  0.29           O  
HETATM   53  O   HOH T  52      50.041  28.772   5.649  1.00  0.29           O  
HETATM   54  O   HOH T  53      46.089   9.617   1.353  1.00  0.29           O  
HETATM   55  O   HOH T  54      49.719   8.609   8.852  1.00  0.29           O  
HETATM   56  O   HOH T  55      51.303  29.188  28.938  1.00  0.29           O  
HETATM   57  O   HOH T  56      38.676   6.183  24.364  1.00  0.29           O  
HETATM   58  O   HOH T  57      48.231  20.976   4.234  1.00  0.29           O  
HETATM   59  O   HOH T  58      51.581  13.839  10.981  1.00  0.29           O  
HETATM   60  O   HOH T  59      51.043  25.650  31.042  1.00  0.29           O  
HETATM   61  O   HOH T  60      46.528  17.076  42.301  1.00  0.29           O  
HETATM   62  O   HOH T  61      51.135  43.753  21.955  1.00  0.29           O  
HETATM   63  O   HOH T  62      37.646  19.525   8.422  1.00  0.29           O  
HETATM   64  O   HOH T  63      43.237  50.488  19.406  1.00  0.29           O  
HETATM   65  O   HOH T  64      48.792  26.069   0.376  1.00  0.30           O  
HETATM   66  O   HOH T  65      40.693   7.571  23.203  1.00  0.30           O  
HETATM   67  O   HOH T  66      35.915  11.503  18.089  1.00  0.30           O  
HETATM   68  O   HOH T  67      51.960  -0.049  22.647  1.00  0.30           O  
HETATM   69  O   HOH T  68      25.789  20.310  19.288  1.00  0.30           O  
HETATM   70  O   HOH T  69      41.209   9.654  -0.803  1.00  0.31           O  
HETATM   71  O   HOH T  70      55.391  20.303  38.012  1.00  0.31           O  
HETATM   72  O   HOH T  71      37.158  42.405  31.347  1.00  0.31           O  
HETATM   73  O   HOH T  72      25.765   2.548  20.912  1.00  0.31           O  
HETATM   74  O   HOH T  73      50.917  27.656  33.038  1.00  0.31           O  
HETATM   75  O   HOH T  74      25.891  27.257  30.727  1.00  0.32           O  
HETATM   76  O   HOH T  75      32.265  19.711  30.703  1.00  0.32           O  
HETATM   77  O   HOH T  76      29.267  14.592  38.940  1.00  0.32           O  
HETATM   78  O   HOH T  77      21.989   4.313  23.022  1.00  0.32           O  
HETATM   79  O   HOH T  78      25.552  41.509  13.705  1.00  0.32           O  
HETATM   80  O   HOH T  79      44.768  18.438  40.627  1.00  0.32           O  
HETATM   81  O   HOH T  80      34.482  23.013   3.138  1.00  0.32           O  
HETATM   82  O   HOH T  81      19.101   9.622  24.230  1.00  0.32           O  
HETATM   83  O   HOH T  82      35.621  -0.326  21.513  1.00  0.33           O  
HETATM   84  O   HOH T  83      29.180   8.146  38.882  1.00  0.33           O  
HETATM   85  O   HOH T  84      30.303  10.660  38.497  1.00  0.33           O  
HETATM   86  O   HOH T  85      51.225  13.976   8.199  1.00  0.33           O  
HETATM   87  O   HOH T  86      22.442  27.480   8.591  1.00  0.33           O  
HETATM   88  O   HOH T  87      40.970  45.554  13.544  1.00  0.33           O  
HETATM   89  O   HOH T  88      58.269   8.045  12.957  1.00  0.33           O  
HETATM   90  O   HOH T  89      47.208  31.816  11.934  1.00  0.33           O  
HETATM   91  O   HOH T  90      11.414  15.734  27.485  1.00  0.33           O  
HETATM   92  O   HOH T  91      37.339  37.153  33.220  1.00  0.33           O  
HETATM   93  O   HOH T  92      30.417   2.482  29.741  1.00  0.34           O  
HETATM   94  O   HOH T  93      49.059  25.859  38.967  1.00  0.34           O  
HETATM   95  O   HOH T  94      23.765  31.526  13.689  1.00  0.34           O  
HETATM   96  O   HOH T  95      21.962  23.464  32.526  1.00  0.34           O  
HETATM   97  O   HOH T  96      31.428  40.828  22.997  1.00  0.34           O  
HETATM   98  O   HOH T  97      33.627  17.708  18.536  1.00  0.34           O  
HETATM   99  O   HOH T  98      41.392  48.208  14.646  1.00  0.34           O  
HETATM  100  O   HOH T  99      30.173  39.183  21.088  1.00  0.34           O  
HETATM  101  O   HOH T 100      47.731   7.978  17.793  1.00  0.34           O  
HETATM  102  O   HOH T 101      24.229  39.917  24.873  1.00  0.34           O  
HETATM  103  O   HOH T 102      16.900  22.138  16.174  1.00  0.34           O  
HETATM  104  O   HOH T 103      55.642   7.368  13.243  1.00  0.34           O  
HETATM  105  O   HOH T 104      32.325  22.865   4.856  1.00  0.35           O  
HETATM  106  O   HOH T 105      50.012   2.404  18.219  1.00  0.35           O  
HETATM  107  O   HOH T 106      19.437   7.136  22.937  1.00  0.35           O  
HETATM  108  O   HOH T 107      37.788  39.767  30.808  1.00  0.35           O  
HETATM  109  O   HOH T 108      50.199   8.682  16.789  1.00  0.35           O  
HETATM  110  O   HOH T 109      29.651  35.529  28.516  1.00  0.35           O  
HETATM  111  O   HOH T 110      31.123  26.282  29.976  1.00  0.36           O  
HETATM  112  O   HOH T 111      49.380  15.303   6.566  1.00  0.36           O  
HETATM  113  O   HOH T 112      32.088  39.840   7.213  1.00  0.36           O  
HETATM  114  O   HOH T 113      47.180  30.068  33.234  1.00  0.36           O  
HETATM  115  O   HOH T 114      12.828  22.052  19.190  1.00  0.36           O  
HETATM  116  O   HOH T 115      58.488  28.256  31.046  1.00  0.36           O  
HETATM  117  O   HOH T 116      49.937  31.432   3.633  1.00  0.36           O  
HETATM  118  O   HOH T 117      25.353  34.900  25.110  1.00  0.36           O  
HETATM  119  O   HOH T 118      42.265  34.920  33.342  1.00  0.36           O  
HETATM  120  O   HOH T 119      23.486  24.158  34.701  1.00  0.36           O  
HETATM  121  O   HOH T 120      41.311  41.110  10.366  1.00  0.36           O  
HETATM  122  O   HOH T 121      43.857  34.195   3.456  1.00  0.36           O  
HETATM  123  O   HOH T 122      12.866  18.052  27.496  1.00  0.37           O  
HETATM  124  O   HOH T 123      36.448  16.465  13.767  1.00  0.37           O  
HETATM  125  O   HOH T 124      43.671   0.959  20.273  1.00  0.37           O  
HETATM  126  O   HOH T 125      56.061  18.978  12.911  1.00  0.37           O  
HETATM  127  O   HOH T 126      57.466  20.100   9.558  1.00  0.37           O  
HETATM  128  O   HOH T 127      41.124  13.002  13.027  1.00  0.37           O  
HETATM  129  O   HOH T 128      55.993  28.779   7.222  1.00  0.37           O  
HETATM  130  O   HOH T 129      34.196  45.741  26.412  1.00  0.37           O  
HETATM  131  O   HOH T 130      37.021  25.124  44.527  1.00  0.37           O  
HETATM  132  O   HOH T 131      46.281  14.865  20.647  1.00  0.37           O  
HETATM  133  O   HOH T 132      47.251   5.082  15.231  1.00  0.37           O  
HETATM  134  O   HOH T 133      35.908  47.647  22.785  1.00  0.37           O  
HETATM  135  O   HOH T 134      47.322  18.614   3.027  1.00  0.37           O  
HETATM  136  O   HOH T 135      16.663   9.446  21.057  1.00  0.37           O  
HETATM  137  O   HOH T 136      53.283  22.867  36.377  1.00  0.37           O  
HETATM  138  O   HOH T 137      33.787  27.839   7.004  1.00  0.37           O  
HETATM  139  O   HOH T 138      16.589  27.897  16.043  1.00  0.38           O  
HETATM  140  O   HOH T 139      53.183  33.943  16.818  1.00  0.38           O  
HETATM  141  O   HOH T 140      43.570  37.773  28.042  1.00  0.38           O  
HETATM  142  O   HOH T 141      49.671  32.582  12.914  1.00  0.38           O  
HETATM  143  O   HOH T 142      16.200  29.513  21.136  1.00  0.38           O  
HETATM  144  O   HOH T 143      55.100  19.008   8.787  1.00  0.38           O  
HETATM  145  O   HOH T 144      58.480  19.597  35.767  1.00  0.38           O  
HETATM  146  O   HOH T 145      51.271   4.857  18.883  1.00  0.38           O  
HETATM  147  O   HOH T 146      54.672   7.346  15.822  1.00  0.38           O  
HETATM  148  O   HOH T 147      48.024  28.179  37.877  1.00  0.38           O  
HETATM  149  O   HOH T 148      57.604  14.699  34.123  1.00  0.38           O  
HETATM  150  O   HOH T 149      57.378  13.116  31.879  1.00  0.38           O  
HETATM  151  O   HOH T 150      27.994  24.367   8.641  1.00  0.38           O  
HETATM  152  O   HOH T 151      44.711  29.994  34.126  1.00  0.38           O  
HETATM  153  O   HOH T 152      36.944   9.184  41.735  1.00  0.38           O  
HETATM  154  O   HOH T 153      35.902  18.892  10.429  1.00  0.38           O  
HETATM  155  O   HOH T 154      46.101   7.193   2.398  1.00  0.39           O  
HETATM  156  O   HOH T 155      15.833  14.513  15.287  1.00  0.39           O  
HETATM  157  O   HOH T 156      57.458  26.352  34.051  1.00  0.39           O  
HETATM  158  O   HOH T 157      39.103  41.263   8.726  1.00  0.39           O  
HETATM  159  O   HOH T 158      30.518  16.000  16.910  1.00  0.39           O  
HETATM  160  O   HOH T 159      12.836  12.808  23.290  1.00  0.39           O  
HETATM  161  O   HOH T 160      23.136  30.135   8.401  1.00  0.39           O  
HETATM  162  O   HOH T 161      21.181  -1.602  17.490  1.00  0.39           O  
HETATM  163  O   HOH T 162      26.450  43.169  30.823  1.00  0.39           O  
HETATM  164  O   HOH T 163      39.496   8.268  42.055  1.00  0.39           O  
HETATM  165  O   HOH T 164      60.012  28.850  14.507  1.00  0.39           O  
HETATM  166  O   HOH T 165      25.220   6.476  35.474  1.00  0.39           O  
HETATM  167  O   HOH T 166      51.561  16.592   7.488  1.00  0.39           O  
HETATM  168  O   HOH T 167      14.235   8.636  22.069  1.00  0.39           O  
HETATM  169  O   HOH T 168      51.933  33.254  14.408  1.00  0.39           O  
HETATM  170  O   HOH T 169      51.735  11.556   9.475  1.00  0.39           O  
HETATM  171  O   HOH T 170      40.248  18.011  44.716  1.00  0.39           O  
HETATM  172  O   HOH T 171      60.350  26.029  14.073  1.00  0.39           O  
HETATM  173  O   HOH T 172      64.045  33.053  11.488  1.00  0.40           O  
HETATM  174  O   HOH T 173      31.654  25.390  40.403  1.00  0.40           O  
HETATM  175  O   HOH T 174      46.292  30.527   0.088  1.00  0.40           O  
HETATM  176  O   HOH T 175      14.185  21.992  16.830  1.00  0.40           O  
HETATM  177  O   HOH T 176      46.741  22.586   2.655  1.00  0.40           O  
HETATM  178  O   HOH T 177      22.698  17.337  10.321  1.00  0.41           O  
HETATM  179  O   HOH T 178      58.591  30.115   9.949  1.00  0.41           O  
HETATM  180  O   HOH T 179      42.968  43.070  24.333  1.00  0.41           O  
HETATM  181  O   HOH T 180      45.991  40.067  22.773  1.00  0.41           O  
HETATM  182  O   HOH T 181      41.716  -0.857  21.078  1.00  0.41           O  
HETATM  183  O   HOH T 182      10.904  22.290  21.165  1.00  0.41           O  
HETATM  184  O   HOH T 183      48.474  23.305  41.912  1.00  0.42           O  
HETATM  185  O   HOH T 184      30.084  20.159  11.882  1.00  0.42           O  
HETATM  186  O   HOH T 185      59.975  15.876  34.263  1.00  0.42           O  
HETATM  187  O   HOH T 186      48.358  17.531  29.199  1.00  0.42           O  
HETATM  188  O   HOH T 187      46.161  38.033  29.112  1.00  0.42           O  
HETATM  189  O   HOH T 188      38.224  32.728  -3.841  1.00  0.42           O  
HETATM  190  O   HOH T 189      15.841   7.192  15.144  1.00  0.42           O  
HETATM  191  O   HOH T 190      47.694   3.744  17.668  1.00  0.42           O  
HETATM  192  O   HOH T 191      55.596  15.508  13.085  1.00  0.42           O  
HETATM  193  O   HOH T 192      45.883  29.035  -2.134  1.00  0.42           O  
HETATM  194  O   HOH T 193      10.375  23.713  24.862  1.00  0.42           O  
HETATM  195  O   HOH T 194      54.830   6.426  21.740  1.00  0.42           O  
HETATM  196  O   HOH T 195      62.739  15.244  20.859  1.00  0.42           O  
HETATM  197  O   HOH T 196      39.160   3.977  17.811  1.00  0.42           O  
HETATM  198  O   HOH T 197      51.913  39.639  28.147  1.00  0.42           O  
HETATM  199  O   HOH T 198      42.759  35.464   5.666  1.00  0.42           O  
HETATM  200  O   HOH T 199      45.171  40.727  18.331  1.00  0.42           O  
HETATM  201  O   HOH T 200      55.742  18.626  35.815  1.00  0.42           O  
HETATM  202  O   HOH T 201      53.774   4.608  19.765  1.00  0.43           O  
HETATM  203  O   HOH T 202      28.620  26.872  31.039  1.00  0.43           O  
HETATM  204  O   HOH T 203      48.257   6.729   7.544  1.00  0.43           O  
HETATM  205  O   HOH T 204      11.123  21.435  23.873  1.00  0.43           O  
HETATM  206  O   HOH T 205      64.570  13.659  25.970  1.00  0.43           O  
HETATM  207  O   HOH T 206      36.666  10.141  13.582  1.00  0.43           O  
HETATM  208  O   HOH T 207      42.817  41.098  29.241  1.00  0.43           O  
HETATM  209  O   HOH T 208      28.332  -6.384  29.787  1.00  0.43           O  
HETATM  210  O   HOH T 209      31.446  44.483  28.785  1.00  0.43           O  
HETATM  211  O   HOH T 210      22.805  19.527   8.635  1.00  0.43           O  
HETATM  212  O   HOH T 211      36.187  -2.432  19.885  1.00  0.43           O  
HETATM  213  O   HOH T 212      33.050  46.675  28.698  1.00  0.43           O  
HETATM  214  O   HOH T 213      22.183  -0.014  28.619  1.00  0.43           O  
HETATM  215  O   HOH T 214      22.644  14.544  34.508  1.00  0.43           O  
HETATM  216  O   HOH T 215       9.455  20.280  19.820  1.00  0.43           O  
HETATM  217  O   HOH T 216       8.807  21.569  25.499  1.00  0.43           O  
HETATM  218  O   HOH T 217      57.933  16.805  35.911  1.00  0.44           O  
HETATM  219  O   HOH T 218      28.714  43.525  10.334  1.00  0.44           O  
HETATM  220  O   HOH T 219      29.230   4.362  28.128  1.00  0.44           O  
HETATM  221  O   HOH T 220      17.467   2.362  17.646  1.00  0.44           O  
HETATM  222  O   HOH T 221      40.299  46.111  24.681  1.00  0.44           O  
HETATM  223  O   HOH T 222      17.072  29.074  18.490  1.00  0.44           O  
HETATM  224  O   HOH T 223      38.060  18.117  46.364  1.00  0.44           O  
HETATM  225  O   HOH T 224      33.976  10.039  12.983  1.00  0.44           O  
HETATM  226  O   HOH T 225      46.359  27.657   0.159  1.00  0.44           O  
HETATM  227  O   HOH T 226      23.987  21.787   9.749  1.00  0.44           O  
HETATM  228  O   HOH T 227      20.106  26.553   9.708  1.00  0.44           O  
HETATM  229  O   HOH T 228      46.150  33.219   6.539  1.00  0.44           O  
HETATM  230  O   HOH T 229      39.222  31.462  -0.771  1.00  0.44           O  
HETATM  231  O   HOH T 230      40.288  49.202  17.162  1.00  0.44           O  
HETATM  232  O   HOH T 231      44.003   3.090  22.160  1.00  0.44           O  
HETATM  233  O   HOH T 232      24.371  39.663  11.872  1.00  0.44           O  
HETATM  234  O   HOH T 233      40.512  50.879  15.035  1.00  0.44           O  
HETATM  235  O   HOH T 234      52.256   6.843  17.092  1.00  0.44           O  
HETATM  236  O   HOH T 235      29.206  33.160  29.857  1.00  0.44           O  
HETATM  237  O   HOH T 236      28.458  45.872   8.845  1.00  0.44           O  
HETATM  238  O   HOH T 237      60.828  31.331   9.035  1.00  0.44           O  
HETATM  239  O   HOH T 238      24.716  42.365  11.282  1.00  0.45           O  
HETATM  240  O   HOH T 239      27.509  41.182  29.307  1.00  0.45           O  
HETATM  241  O   HOH T 240      30.712  39.231   4.797  1.00  0.45           O  
HETATM  242  O   HOH T 241      48.123  29.021  30.912  1.00  0.45           O  
HETATM  243  O   HOH T 242      18.800  -2.188  16.237  1.00  0.45           O  
HETATM  244  O   HOH T 243      27.308  41.748  26.649  1.00  0.45           O  
HETATM  245  O   HOH T 244      18.941  23.538  28.535  1.00  0.45           O  
HETATM  246  O   HOH T 245      23.026  32.210  22.847  1.00  0.45           O  
HETATM  247  O   HOH T 246      36.632  32.404  -1.651  1.00  0.45           O  
HETATM  248  O   HOH T 247      44.104  40.478  20.798  1.00  0.45           O  
HETATM  249  O   HOH T 248      12.223  10.510  21.892  1.00  0.45           O  
HETATM  250  O   HOH T 249      63.472  30.999   9.657  1.00  0.45           O  
HETATM  251  O   HOH T 250      29.314  25.029   6.351  1.00  0.45           O  
HETATM  252  O   HOH T 251      14.875  11.392  21.946  1.00  0.45           O  
HETATM  253  O   HOH T 252      65.674  24.939  32.321  1.00  0.45           O  
HETATM  254  O   HOH T 253      48.831  13.567   4.467  1.00  0.45           O  
HETATM  255  O   HOH T 254      46.110  31.768  -2.485  1.00  0.45           O  
HETATM  256  O   HOH T 255      59.512  27.437  35.581  1.00  0.45           O  
HETATM  257  O   HOH T 256      31.499   9.279  14.022  1.00  0.45           O  
HETATM  258  O   HOH T 257      34.912  10.065  15.766  1.00  0.45           O  
HETATM  259  O   HOH T 258      38.735  11.864  12.853  1.00  0.45           O  
HETATM  260  O   HOH T 259      17.763  31.929  21.142  1.00  0.46           O  
HETATM  261  O   HOH T 260      12.651  24.425  20.542  1.00  0.46           O  
HETATM  262  O   HOH T 261      16.481  -0.031  18.742  1.00  0.46           O  
HETATM  263  O   HOH T 262      58.140  13.634  12.309  1.00  0.46           O  
HETATM  264  O   HOH T 263      13.750  10.333  24.232  1.00  0.46           O  
HETATM  265  O   HOH T 264      43.454   7.775  16.264  1.00  0.46           O  
HETATM  266  O   HOH T 265      33.563  -1.472  20.076  1.00  0.46           O  
HETATM  267  O   HOH T 266      38.522  50.900  18.877  1.00  0.46           O  
HETATM  268  O   HOH T 267      50.881   0.415  19.989  1.00  0.46           O  
HETATM  269  O   HOH T 268      38.880  15.444   5.723  1.00  0.46           O  
HETATM  270  O   HOH T 269      26.764  41.722   9.510  1.00  0.46           O  
HETATM  271  O   HOH T 270      45.804  24.070  41.834  1.00  0.46           O  
HETATM  272  O   HOH T 271      28.279   8.845  17.879  1.00  0.46           O  
HETATM  273  O   HOH T 272      27.494  25.948  28.743  1.00  0.46           O  
HETATM  274  O   HOH T 273      45.432   9.444  17.342  1.00  0.46           O  
HETATM  275  O   HOH T 274      59.050  30.005  34.987  1.00  0.46           O  
HETATM  276  O   HOH T 275      14.450  28.715  17.609  1.00  0.46           O  
HETATM  277  O   HOH T 276      43.975  36.083   8.148  1.00  0.46           O  
HETATM  278  O   HOH T 277      48.673  40.649  22.705  1.00  0.46           O  
HETATM  279  O   HOH T 278      62.463  30.147  14.412  1.00  0.46           O  
HETATM  280  O   HOH T 279      58.479  10.718  12.292  1.00  0.47           O  
HETATM  281  O   HOH T 280      49.432  40.497  29.179  1.00  0.47           O  
HETATM  282  O   HOH T 281      37.371  44.542   7.270  1.00  0.47           O  
HETATM  283  O   HOH T 282      30.900   2.496  32.546  1.00  0.47           O  
HETATM  284  O   HOH T 283      13.538  24.426  17.841  1.00  0.47           O  
HETATM  285  O   HOH T 284      39.012  38.157  35.077  1.00  0.47           O  
HETATM  286  O   HOH T 285      42.930  42.147  12.299  1.00  0.47           O  
HETATM  287  O   HOH T 286      43.288  42.047  16.753  1.00  0.47           O  
HETATM  288  O   HOH T 287      28.094  22.737  37.918  1.00  0.47           O  
HETATM  289  O   HOH T 288      30.738   7.464  12.165  1.00  0.47           O  
HETATM  290  O   HOH T 289      25.060  33.931  13.581  1.00  0.47           O  
HETATM  291  O   HOH T 290      28.200  25.581  34.841  1.00  0.47           O  
HETATM  292  O   HOH T 291      53.386  33.988   3.294  1.00  0.47           O  
HETATM  293  O   HOH T 292      50.113  34.031   4.710  1.00  0.47           O  
HETATM  294  O   HOH T 293      41.208  10.315   7.853  1.00  0.47           O  
HETATM  295  O   HOH T 294      57.341  18.442  38.045  1.00  0.47           O  
HETATM  296  O   HOH T 295      23.977  25.688  32.387  1.00  0.47           O  
HETATM  297  O   HOH T 296      59.603  30.115  17.071  1.00  0.47           O  
HETATM  298  O   HOH T 297      37.763   5.657  16.077  1.00  0.48           O  
HETATM  299  O   HOH T 298      49.814  30.006  34.182  1.00  0.48           O  
HETATM  300  O   HOH T 299      22.821  31.736  16.268  1.00  0.48           O  
HETATM  301  O   HOH T 300      55.819  27.729   1.704  1.00  0.48           O  
HETATM  302  O   HOH T 301      63.990  29.815  16.695  1.00  0.48           O  
HETATM  303  O   HOH T 302      21.795  14.485  10.938  1.00  0.48           O  
HETATM  304  O   HOH T 303      23.257  30.081  11.267  1.00  0.48           O  
HETATM  305  O   HOH T 304       9.550  17.686  21.011  1.00  0.48           O  
HETATM  306  O   HOH T 305      36.801   8.141  15.560  1.00  0.48           O  
HETATM  307  O   HOH T 306      40.435  10.764   1.503  1.00  0.48           O  
HETATM  308  O   HOH T 307      33.167  25.425   5.672  1.00  0.48           O  
HETATM  309  O   HOH T 308      24.911  31.603   9.830  1.00  0.48           O  
HETATM  310  O   HOH T 309      19.069   0.176  17.668  1.00  0.48           O  
HETATM  311  O   HOH T 310      29.967  27.328  33.385  1.00  0.49           O  
HETATM  312  O   HOH T 311      30.766  20.920   8.905  1.00  0.49           O  
HETATM  313  O   HOH T 312      47.276   6.547  35.403  1.00  0.49           O  
HETATM  314  O   HOH T 313      23.502  31.572  18.917  1.00  0.49           O  
HETATM  315  O   HOH T 314      41.123  15.363   3.946  1.00  0.49           O  
HETATM  316  O   HOH T 315      52.774  36.707  17.217  1.00  0.49           O  
HETATM  317  O   HOH T 316      53.109  31.310  16.091  1.00  0.49           O  
HETATM  318  O   HOH T 317      21.891  22.045   7.936  1.00  0.49           O  
HETATM  319  O   HOH T 318      39.628  42.013  30.332  1.00  0.49           O  
HETATM  320  O   HOH T 319      36.434  37.187  30.613  1.00  0.49           O  
HETATM  321  O   HOH T 320       6.985  17.844  21.838  1.00  0.49           O  
HETATM  322  O   HOH T 321      34.621  45.381   7.426  1.00  0.49           O  
HETATM  323  O   HOH T 322      50.419  27.411  37.002  1.00  0.49           O  
HETATM  324  O   HOH T 323      50.083  32.506  31.017  1.00  0.49           O  
HETATM  325  O   HOH T 324      19.469  30.125  17.483  1.00  0.49           O  
HETATM  326  O   HOH T 325      42.918  43.642  14.465  1.00  0.49           O  
HETATM  327  O   HOH T 326      25.520  25.953  34.680  1.00  0.49           O  
HETATM  328  O   HOH T 327      40.934  52.054  19.592  1.00  0.49           O  
HETATM  329  O   HOH T 328      64.161  30.434  12.276  1.00  0.50           O  
HETATM  330  O   HOH T 329      48.453   6.497   3.175  1.00  0.50           O  
HETATM  331  O   HOH T 330      53.815  41.587  15.009  1.00  0.50           O  
HETATM  332  O   HOH T 331      56.715  10.537  31.778  1.00  0.50           O  
HETATM  333  O   HOH T 332      37.098  -1.532  33.526  1.00  0.50           O  
HETATM  334  O   HOH T 333      26.787   7.208  39.875  1.00  0.50           O  
HETATM  335  O   HOH T 334      44.910  31.682  -4.984  1.00  0.50           O  
HETATM  336  O   HOH T 335      60.632  17.879  35.843  1.00  0.50           O  
HETATM  337  O   HOH T 336      57.392   6.710  15.244  1.00  0.50           O  
HETATM  338  O   HOH T 337      36.534  14.606   7.079  1.00  0.50           O  
HETATM  339  O   HOH T 338      33.211   6.431  37.607  1.00  0.50           O  
HETATM  340  O   HOH T 339      27.436  20.351  36.527  1.00  0.50           O  
HETATM  341  O   HOH T 340      57.167  13.400  20.295  1.00  0.50           O  
HETATM  342  O   HOH T 341      47.438  31.722  31.356  1.00  0.50           O  
HETATM  343  O   HOH T 342      53.659  21.075   3.405  1.00  0.50           O  
HETATM  344  O   HOH T 343      32.909  40.924   4.703  1.00  0.51           O  
HETATM  345  O   HOH T 344      62.355  13.642  24.308  1.00  0.51           O  
HETATM  346  O   HOH T 345      37.029  16.294  11.131  1.00  0.51           O  
HETATM  347  O   HOH T 346      21.845  12.266  12.542  1.00  0.51           O  
HETATM  348  O   HOH T 347      45.708  32.273   4.149  1.00  0.51           O  
HETATM  349  O   HOH T 348      43.118  43.646  27.040  1.00  0.51           O  
HETATM  350  O   HOH T 349      43.680  42.853  19.436  1.00  0.51           O  
HETATM  351  O   HOH T 350       8.107  15.284  21.535  1.00  0.51           O  
HETATM  352  O   HOH T 351      37.355  35.961   1.735  1.00  0.51           O  
HETATM  353  O   HOH T 352      20.238  25.919  29.161  1.00  0.51           O  
HETATM  354  O   HOH T 353      44.479   5.648  14.767  1.00  0.51           O  
HETATM  355  O   HOH T 354      15.179  24.172  15.460  1.00  0.52           O  
HETATM  356  O   HOH T 355      42.925  -1.657  26.327  1.00  0.52           O  
HETATM  357  O   HOH T 356      18.634   4.655  15.108  1.00  0.52           O  
HETATM  358  O   HOH T 357      48.181  20.649  42.726  1.00  0.52           O  
HETATM  359  O   HOH T 358      28.137   8.059  11.763  1.00  0.52           O  
HETATM  360  O   HOH T 359      61.459  25.699  36.557  1.00  0.52           O  
HETATM  361  O   HOH T 360      29.952  -2.648  29.202  1.00  0.52           O  
HETATM  362  O   HOH T 361      37.749  33.412   0.668  1.00  0.52           O  
HETATM  363  O   HOH T 362      62.375  29.877   7.338  1.00  0.52           O  
HETATM  364  O   HOH T 363      25.144   5.622  38.148  1.00  0.52           O  
HETATM  365  O   HOH T 364      46.389  32.373  34.058  1.00  0.52           O  
HETATM  366  O   HOH T 365      54.564  34.877  21.075  1.00  0.53           O  
HETATM  367  O   HOH T 366      28.901  42.077  22.897  1.00  0.53           O  
HETATM  368  O   HOH T 367      51.053  33.352   2.182  1.00  0.53           O  
HETATM  369  O   HOH T 368      46.162   6.061   9.499  1.00  0.53           O  
HETATM  370  O   HOH T 369      37.327  38.049   3.836  1.00  0.53           O  
HETATM  371  O   HOH T 370      23.675  34.921  22.879  1.00  0.53           O  
HETATM  372  O   HOH T 371      36.328  16.023  46.081  1.00  0.53           O  
HETATM  373  O   HOH T 372      55.847  28.305   4.453  1.00  0.53           O  
HETATM  374  O   HOH T 373      32.404  29.746  35.174  1.00  0.53           O  
HETATM  375  O   HOH T 374      18.777  32.472  16.152  1.00  0.54           O  
HETATM  376  O   HOH T 375      18.339  10.393  28.657  1.00  0.54           O  
HETATM  377  O   HOH T 376      21.975  25.823   6.410  1.00  0.54           O  
HETATM  378  O   HOH T 377      35.641   3.148  37.295  1.00  0.54           O  
HETATM  379  O   HOH T 378      27.219  33.165  25.967  1.00  0.54           O  
HETATM  380  O   HOH T 379      50.136  34.755  32.659  1.00  0.54           O  
HETATM  381  O   HOH T 380      48.260   7.933   0.782  1.00  0.54           O  
HETATM  382  O   HOH T 381      20.292  17.635  29.072  1.00  0.54           O  
HETATM  383  O   HOH T 382      45.160   4.004  16.763  1.00  0.55           O  
HETATM  384  O   HOH T 383      38.454   0.915  31.155  1.00  0.55           O  
HETATM  385  O   HOH T 384      50.801  29.873  31.544  1.00  0.55           O  
HETATM  386  O   HOH T 385      48.717  31.598  27.571  1.00  0.55           O  
HETATM  387  O   HOH T 386      27.327   6.779  37.296  1.00  0.55           O  
HETATM  388  O   HOH T 387      32.348  24.980  44.427  1.00  0.55           O  
HETATM  389  O   HOH T 388      21.641  22.003  34.892  1.00  0.55           O  
HETATM  390  O   HOH T 389      28.245  20.920  10.066  1.00  0.55           O  
HETATM  391  O   HOH T 390      30.200  27.656   5.961  1.00  0.55           O  
HETATM  392  O   HOH T 391      35.857  -4.411  25.087  1.00  0.55           O  
HETATM  393  O   HOH T 392      27.620  39.828  31.690  1.00  0.55           O  
HETATM  394  O   HOH T 393      58.128   7.435   6.202  1.00  0.56           O  
HETATM  395  O   HOH T 394      44.225  -1.760  20.115  1.00  0.56           O  
HETATM  396  O   HOH T 395      17.917  18.476  30.413  1.00  0.56           O  
HETATM  397  O   HOH T 396      36.500  37.417  35.939  1.00  0.56           O  
HETATM  398  O   HOH T 397      40.606  36.632   4.202  1.00  0.56           O  
HETATM  399  O   HOH T 398      66.045  27.238  33.935  1.00  0.57           O  
HETATM  400  O   HOH T 399      26.880  13.052  39.024  1.00  0.57           O  
HETATM  401  O   HOH T 400      41.445  37.075  34.887  1.00  0.57           O  
HETATM  402  O   HOH T 401      53.327   5.580  31.733  1.00  0.57           O  
HETATM  403  O   HOH T 402      30.631  39.691  34.358  1.00  0.57           O  
HETATM  404  O   HOH T 403      35.387  16.316   9.023  1.00  0.57           O  
HETATM  405  O   HOH T 404      27.397  36.895  29.350  1.00  0.58           O  
HETATM  406  O   HOH T 405      38.029  35.502  35.225  1.00  0.58           O  
HETATM  407  O   HOH T 406      56.605  30.846  34.101  1.00  0.59           O  
HETATM  408  O   HOH T 407      32.227  18.625   9.123  1.00  0.59           O  
HETATM  409  O   HOH T 408      42.348  35.967   1.935  1.00  0.59           O  
HETATM  410  O   HOH T 409      61.066  30.555  30.453  1.00  0.60           O  
HETATM  411  O   HOH T 410      48.007  35.064   6.319  1.00  0.60           O  
HETATM  412  O   HOH T 411      18.430  25.031   8.179  1.00  0.61           O  
HETATM  413  O   HOH T 412      19.255  22.534   7.177  1.00  0.61           O  
HETATM  414  O   HOH T 413      24.932  19.272  10.329  1.00  0.63           O  
TER     415      HOH T 413 
