# Supplementary material for: Accurate Prediction of Hydration Sites of Proteins Using Energy Model With Atom Embedding
Source: Front Mol Biosci. 2021 Sep 20;8:756075. doi: 10.3389/fmolb.2021.756075 (PMC8488165; doi:10.3389/fmolb.2021.756075)
Supplement: Supplementary file 1 [file DataSheet1.ZIP › Data Sheet 1/Our_result_pdb/our_dataset_output/3H6C_watersite.pdb]

HEADER                                                        XXXX


JRNL        PMID   -1
HETATM    1  O   HOH T   0       8.387  23.053  18.259  1.00  0.20           O  
HETATM    2  O   HOH T   1      -0.494  14.982  17.615  1.00  0.22           O  
HETATM    3  O   HOH T   2      -1.245   9.788   7.195  1.00  0.22           O  
HETATM    4  O   HOH T   3      -0.129  -2.248  21.958  1.00  0.23           O  
HETATM    5  O   HOH T   4       9.641  -1.777  16.453  1.00  0.23           O  
HETATM    6  O   HOH T   5      13.453   3.495  -2.151  1.00  0.25           O  
HETATM    7  O   HOH T   6      -6.151   2.930  17.040  1.00  0.26           O  
HETATM    8  O   HOH T   7      11.326   9.206  17.181  1.00  0.26           O  
HETATM    9  O   HOH T   8       2.443  -0.062   1.928  1.00  0.26           O  
HETATM   10  O   HOH T   9      10.517   6.619   0.339  1.00  0.26           O  
HETATM   11  O   HOH T  10      15.859  -0.983  15.743  1.00  0.28           O  
HETATM   12  O   HOH T  11       6.414  10.440  -0.432  1.00  0.29           O  
HETATM   13  O   HOH T  12      21.871  -1.956   7.983  1.00  0.30           O  
HETATM   14  O   HOH T  13       1.415  24.292  13.727  1.00  0.30           O  
HETATM   15  O   HOH T  14      14.384   2.086   0.149  1.00  0.32           O  
HETATM   16  O   HOH T  15      -2.483   6.415   6.859  1.00  0.32           O  
HETATM   17  O   HOH T  16       9.571  20.458  17.726  1.00  0.33           O  
HETATM   18  O   HOH T  17       4.178  13.261   1.353  1.00  0.33           O  
HETATM   19  O   HOH T  18       4.549  14.807   3.716  1.00  0.34           O  
HETATM   20  O   HOH T  19      -1.738  25.441   8.477  1.00  0.35           O  
HETATM   21  O   HOH T  20      23.201   7.108  15.322  1.00  0.35           O  
HETATM   22  O   HOH T  21      -1.656  12.581  18.607  1.00  0.36           O  
HETATM   23  O   HOH T  22      14.807   3.813  20.003  1.00  0.37           O  
HETATM   24  O   HOH T  23      10.992  22.171   7.633  1.00  0.37           O  
HETATM   25  O   HOH T  24       4.168  -4.329  32.179  1.00  0.37           O  
HETATM   26  O   HOH T  25      14.646  -1.087  18.232  1.00  0.37           O  
HETATM   27  O   HOH T  26      12.123  19.202  14.319  1.00  0.38           O  
HETATM   28  O   HOH T  27      13.613   8.226  21.812  1.00  0.38           O  
HETATM   29  O   HOH T  28      12.015   9.807   3.828  1.00  0.38           O  
HETATM   30  O   HOH T  29       2.484  -2.607  24.265  1.00  0.38           O  
HETATM   31  O   HOH T  30      -5.434   6.778  11.903  1.00  0.38           O  
HETATM   32  O   HOH T  31      -1.779   8.759  21.041  1.00  0.39           O  
HETATM   33  O   HOH T  32      20.226   1.099  16.930  1.00  0.39           O  
HETATM   34  O   HOH T  33      18.867  10.348  10.712  1.00  0.40           O  
HETATM   35  O   HOH T  34      21.415   3.867   0.759  1.00  0.40           O  
HETATM   36  O   HOH T  35      10.181   8.950   1.939  1.00  0.40           O  
HETATM   37  O   HOH T  36      14.450  18.677  15.738  1.00  0.41           O  
HETATM   38  O   HOH T  37       0.942   8.801  -4.554  1.00  0.42           O  
HETATM   39  O   HOH T  38      -1.988  16.925  11.565  1.00  0.42           O  
HETATM   40  O   HOH T  39      16.928  15.471  17.610  1.00  0.42           O  
HETATM   41  O   HOH T  40      17.099  15.682  14.850  1.00  0.42           O  
HETATM   42  O   HOH T  41      15.372  -2.596  -0.337  1.00  0.43           O  
HETATM   43  O   HOH T  42      -1.520   7.707   9.072  1.00  0.43           O  
HETATM   44  O   HOH T  43      10.321  17.979  22.601  1.00  0.43           O  
HETATM   45  O   HOH T  44      -3.284  14.565  17.414  1.00  0.43           O  
HETATM   46  O   HOH T  45      -5.077   5.009  15.558  1.00  0.43           O  
HETATM   47  O   HOH T  46      21.886   0.753   7.240  1.00  0.43           O  
HETATM   48  O   HOH T  47      15.524   6.433  20.814  1.00  0.43           O  
HETATM   49  O   HOH T  48      17.015   6.658  23.202  1.00  0.43           O  
HETATM   50  O   HOH T  49      -2.745   6.550  11.160  1.00  0.43           O  
HETATM   51  O   HOH T  50      -0.915   7.323  18.395  1.00  0.44           O  
HETATM   52  O   HOH T  51      -3.038  14.338  11.601  1.00  0.44           O  
HETATM   53  O   HOH T  52      10.646  -5.065   1.061  1.00  0.44           O  
HETATM   54  O   HOH T  53      15.410   0.988  19.963  1.00  0.44           O  
HETATM   55  O   HOH T  54       9.481  18.985  13.818  1.00  0.44           O  
HETATM   56  O   HOH T  55      16.103   0.078  -0.788  1.00  0.44           O  
HETATM   57  O   HOH T  56       9.357   9.774  21.685  1.00  0.44           O  
HETATM   58  O   HOH T  57      13.032  14.155   9.452  1.00  0.44           O  
HETATM   59  O   HOH T  58       3.062  14.146  -1.068  1.00  0.44           O  
HETATM   60  O   HOH T  59      13.013  11.951  20.314  1.00  0.44           O  
HETATM   61  O   HOH T  60      12.232  -3.614   2.863  1.00  0.44           O  
HETATM   62  O   HOH T  61      17.842   4.021  -1.589  1.00  0.44           O  
HETATM   63  O   HOH T  62      12.937   5.356  -0.131  1.00  0.45           O  
HETATM   64  O   HOH T  63       5.523  15.207  -0.158  1.00  0.45           O  
HETATM   65  O   HOH T  64      17.891  18.784   6.504  1.00  0.45           O  
HETATM   66  O   HOH T  65      13.552  -0.854  20.727  1.00  0.45           O  
HETATM   67  O   HOH T  66       8.321  21.087  12.387  1.00  0.45           O  
HETATM   68  O   HOH T  67      10.096  20.008  24.466  1.00  0.45           O  
HETATM   69  O   HOH T  68       8.013  14.594  -1.324  1.00  0.46           O  
HETATM   70  O   HOH T  69       9.170  -4.190   5.368  1.00  0.46           O  
HETATM   71  O   HOH T  70       6.712  14.181  26.844  1.00  0.46           O  
HETATM   72  O   HOH T  71      17.721  -1.575   0.697  1.00  0.46           O  
HETATM   73  O   HOH T  72       7.505  -1.877  14.739  1.00  0.46           O  
HETATM   74  O   HOH T  73      15.796   9.150  20.315  1.00  0.47           O  
HETATM   75  O   HOH T  74      10.365  11.008   5.730  1.00  0.47           O  
HETATM   76  O   HOH T  75      26.784   3.323   1.402  1.00  0.47           O  
HETATM   77  O   HOH T  76      10.703  22.098  19.494  1.00  0.48           O  
HETATM   78  O   HOH T  77      -3.707   8.883   6.176  1.00  0.48           O  
HETATM   79  O   HOH T  78      -3.372   5.189   0.334  1.00  0.48           O  
HETATM   80  O   HOH T  79      -4.318  12.985  19.405  1.00  0.48           O  
HETATM   81  O   HOH T  80      10.767  10.552  19.525  1.00  0.48           O  
HETATM   82  O   HOH T  81      11.320   8.732  -1.409  1.00  0.48           O  
HETATM   83  O   HOH T  82       0.029   0.007   3.226  1.00  0.49           O  
HETATM   84  O   HOH T  83      13.159   9.372  19.325  1.00  0.49           O  
HETATM   85  O   HOH T  84      10.616  12.290  21.610  1.00  0.49           O  
HETATM   86  O   HOH T  85       3.429  -5.705  13.530  1.00  0.49           O  
HETATM   87  O   HOH T  86      11.040  20.838  12.339  1.00  0.49           O  
HETATM   88  O   HOH T  87      17.161   2.314   0.543  1.00  0.49           O  
HETATM   89  O   HOH T  88      19.941  17.399   7.772  1.00  0.49           O  
HETATM   90  O   HOH T  89      -4.986   3.531  -1.166  1.00  0.49           O  
HETATM   91  O   HOH T  90      -4.382  16.833   8.182  1.00  0.49           O  
HETATM   92  O   HOH T  91      -3.529   8.492  12.980  1.00  0.49           O  
HETATM   93  O   HOH T  92      -5.940  16.863   5.905  1.00  0.49           O  
HETATM   94  O   HOH T  93       7.794  -6.352   6.558  1.00  0.49           O  
HETATM   95  O   HOH T  94      21.473   7.043  17.560  1.00  0.50           O  
HETATM   96  O   HOH T  95      10.769  -5.800   3.770  1.00  0.50           O  
HETATM   97  O   HOH T  96       9.646  21.817  10.076  1.00  0.50           O  
HETATM   98  O   HOH T  97       7.370  -4.236  27.893  1.00  0.50           O  
HETATM   99  O   HOH T  98      19.468   2.563  19.131  1.00  0.51           O  
HETATM  100  O   HOH T  99       9.189  13.488   3.124  1.00  0.51           O  
HETATM  101  O   HOH T 100      15.164  11.252  18.749  1.00  0.51           O  
HETATM  102  O   HOH T 101      -5.092   6.470   5.933  1.00  0.51           O  
HETATM  103  O   HOH T 102      -3.930  18.840   6.278  1.00  0.51           O  
HETATM  104  O   HOH T 103      16.801  12.138   3.868  1.00  0.52           O  
HETATM  105  O   HOH T 104       8.152  11.904  -1.985  1.00  0.52           O  
HETATM  106  O   HOH T 105       8.187  12.414   0.618  1.00  0.52           O  
HETATM  107  O   HOH T 106      19.572   2.310  -0.181  1.00  0.53           O  
HETATM  108  O   HOH T 107      19.968  15.419   5.839  1.00  0.53           O  
HETATM  109  O   HOH T 108      -2.286  15.425   9.250  1.00  0.54           O  
HETATM  110  O   HOH T 109      18.192   5.742  20.896  1.00  0.54           O  
HETATM  111  O   HOH T 110      15.097   7.190   0.472  1.00  0.55           O  
HETATM  112  O   HOH T 111      17.554  14.699   4.889  1.00  0.56           O  
HETATM  113  O   HOH T 112       6.384  -3.045   8.418  1.00  0.56           O  
HETATM  114  O   HOH T 113       1.566  25.228  23.606  1.00  0.56           O  
HETATM  115  O   HOH T 114       0.739  14.712   4.052  1.00  0.56           O  
HETATM  116  O   HOH T 115       8.099  -3.986  25.235  1.00  0.58           O  
HETATM  117  O   HOH T 116       6.410  -3.995   5.798  1.00  0.58           O  
TER     118      HOH T 116 
