# Supplementary material for: Accurate Prediction of Hydration Sites of Proteins Using Energy Model With Atom Embedding
Source: Front Mol Biosci. 2021 Sep 20;8:756075. doi: 10.3389/fmolb.2021.756075 (PMC8488165; doi:10.3389/fmolb.2021.756075)
Supplement: Supplementary file 1 [file DataSheet1.ZIP › Data Sheet 1/Our_result_pdb/our_dataset_output/3H74_watersite.pdb]

HEADER                                                        XXXX


JRNL        PMID   -1
HETATM    1  O   HOH T   0      14.870  36.928  32.838  1.00  0.16           O  
HETATM    2  O   HOH T   1      23.564  22.829   3.378  1.00  0.18           O  
HETATM    3  O   HOH T   2      25.849  21.353   3.969  1.00  0.19           O  
HETATM    4  O   HOH T   3      18.197  37.416  22.073  1.00  0.20           O  
HETATM    5  O   HOH T   4      44.647  44.497  26.202  1.00  0.20           O  
HETATM    6  O   HOH T   5      21.987  15.066  29.868  1.00  0.21           O  
HETATM    7  O   HOH T   6      36.409  35.692  10.505  1.00  0.21           O  
HETATM    8  O   HOH T   7      23.483  36.776  18.658  1.00  0.22           O  
HETATM    9  O   HOH T   8      17.979  16.599  -2.506  1.00  0.22           O  
HETATM   10  O   HOH T   9      26.630  23.743  34.014  1.00  0.22           O  
HETATM   11  O   HOH T  10      20.675  42.781   6.634  1.00  0.23           O  
HETATM   12  O   HOH T  11      28.305  42.866  25.829  1.00  0.23           O  
HETATM   13  O   HOH T  12      16.867  33.911  27.606  1.00  0.23           O  
HETATM   14  O   HOH T  13      39.341  47.835  18.362  1.00  0.23           O  
HETATM   15  O   HOH T  14      25.790  30.841  30.699  1.00  0.23           O  
HETATM   16  O   HOH T  15      24.761  31.631  23.226  1.00  0.24           O  
HETATM   17  O   HOH T  16      45.755  35.577  19.704  1.00  0.24           O  
HETATM   18  O   HOH T  17      27.282  26.599  23.290  1.00  0.24           O  
HETATM   19  O   HOH T  18      11.337  10.553  36.165  1.00  0.25           O  
HETATM   20  O   HOH T  19      18.436  41.481   4.188  1.00  0.25           O  
HETATM   21  O   HOH T  20      11.927  30.336   7.209  1.00  0.25           O  
HETATM   22  O   HOH T  21      24.162  27.561  -4.154  1.00  0.25           O  
HETATM   23  O   HOH T  22      13.941  24.598   7.442  1.00  0.25           O  
HETATM   24  O   HOH T  23      13.068  22.840  23.472  1.00  0.26           O  
HETATM   25  O   HOH T  24       4.798  29.309   6.468  1.00  0.26           O  
HETATM   26  O   HOH T  25      16.775  14.484   3.356  1.00  0.26           O  
HETATM   27  O   HOH T  26      18.808  43.578  31.062  1.00  0.26           O  
HETATM   28  O   HOH T  27      46.223  16.380  20.861  1.00  0.27           O  
HETATM   29  O   HOH T  28      12.222  30.144  30.663  1.00  0.27           O  
HETATM   30  O   HOH T  29      13.223  47.994  29.757  1.00  0.28           O  
HETATM   31  O   HOH T  30      23.505  30.338  32.062  1.00  0.28           O  
HETATM   32  O   HOH T  31      18.454  31.329  18.420  1.00  0.28           O  
HETATM   33  O   HOH T  32      11.629  21.428   2.337  1.00  0.28           O  
HETATM   34  O   HOH T  33      38.584  17.280  30.866  1.00  0.28           O  
HETATM   35  O   HOH T  34      17.386   8.262  28.540  1.00  0.28           O  
HETATM   36  O   HOH T  35      24.441  46.526  17.810  1.00  0.28           O  
HETATM   37  O   HOH T  36      41.931  23.203  34.106  1.00  0.28           O  
HETATM   38  O   HOH T  37      48.163  35.455  18.533  1.00  0.28           O  
HETATM   39  O   HOH T  38      27.101  34.146  16.442  1.00  0.28           O  
HETATM   40  O   HOH T  39      26.079  42.854  27.459  1.00  0.28           O  
HETATM   41  O   HOH T  40      12.983  28.943  13.831  1.00  0.28           O  
HETATM   42  O   HOH T  41      14.140  23.742  33.961  1.00  0.29           O  
HETATM   43  O   HOH T  42      50.119  37.214  18.002  1.00  0.29           O  
HETATM   44  O   HOH T  43      11.613   6.391  17.873  1.00  0.29           O  
HETATM   45  O   HOH T  44      24.369   8.620  29.266  1.00  0.29           O  
HETATM   46  O   HOH T  45      10.914  33.712  19.826  1.00  0.29           O  
HETATM   47  O   HOH T  46      15.437  22.907  30.416  1.00  0.29           O  
HETATM   48  O   HOH T  47      10.377  11.065  32.313  1.00  0.29           O  
HETATM   49  O   HOH T  48       6.468  35.438   5.744  1.00  0.29           O  
HETATM   50  O   HOH T  49      33.672  47.860  35.103  1.00  0.29           O  
HETATM   51  O   HOH T  50      19.878  25.174  17.067  1.00  0.30           O  
HETATM   52  O   HOH T  51      26.607  27.907  -5.355  1.00  0.30           O  
HETATM   53  O   HOH T  52      11.304  40.060  12.671  1.00  0.30           O  
HETATM   54  O   HOH T  53      39.798  29.346  31.441  1.00  0.30           O  
HETATM   55  O   HOH T  54       8.244  26.233  36.686  1.00  0.30           O  
HETATM   56  O   HOH T  55      12.011  23.126   5.934  1.00  0.30           O  
HETATM   57  O   HOH T  56      27.720   8.278  36.207  1.00  0.30           O  
HETATM   58  O   HOH T  57      34.046  34.935   9.197  1.00  0.30           O  
HETATM   59  O   HOH T  58       8.917  16.935  33.799  1.00  0.30           O  
HETATM   60  O   HOH T  59      17.919  10.873  29.415  1.00  0.30           O  
HETATM   61  O   HOH T  60      11.244  18.573  34.302  1.00  0.30           O  
HETATM   62  O   HOH T  61      42.684  28.166   8.838  1.00  0.30           O  
HETATM   63  O   HOH T  62      14.525  39.292  -0.180  1.00  0.31           O  
HETATM   64  O   HOH T  63      26.048  28.430  21.661  1.00  0.31           O  
HETATM   65  O   HOH T  64      13.268  27.838   0.520  1.00  0.31           O  
HETATM   66  O   HOH T  65      15.188  23.485  37.495  1.00  0.31           O  
HETATM   67  O   HOH T  66      20.179  27.558  23.659  1.00  0.31           O  
HETATM   68  O   HOH T  67      35.779   9.688  20.164  1.00  0.31           O  
HETATM   69  O   HOH T  68      35.975  30.424  -0.491  1.00  0.31           O  
HETATM   70  O   HOH T  69      12.051  35.502  17.993  1.00  0.32           O  
HETATM   71  O   HOH T  70      34.283   5.032  22.011  1.00  0.32           O  
HETATM   72  O   HOH T  71      16.023  29.489  43.056  1.00  0.32           O  
HETATM   73  O   HOH T  72      16.551  26.101  23.802  1.00  0.32           O  
HETATM   74  O   HOH T  73      12.605  20.857  41.242  1.00  0.32           O  
HETATM   75  O   HOH T  74      41.696  28.133  28.926  1.00  0.32           O  
HETATM   76  O   HOH T  75      45.244  29.793  23.463  1.00  0.32           O  
HETATM   77  O   HOH T  76      16.820  30.474  21.407  1.00  0.32           O  
HETATM   78  O   HOH T  77      18.718  19.454  15.691  1.00  0.32           O  
HETATM   79  O   HOH T  78      21.910  34.566  29.134  1.00  0.32           O  
HETATM   80  O   HOH T  79      29.893  13.420   6.593  1.00  0.32           O  
HETATM   81  O   HOH T  80      38.809   8.156  22.887  1.00  0.32           O  
HETATM   82  O   HOH T  81      29.921  26.917   1.075  1.00  0.32           O  
HETATM   83  O   HOH T  82       4.408  24.743   7.178  1.00  0.32           O  
HETATM   84  O   HOH T  83      10.085  37.431   7.143  1.00  0.32           O  
HETATM   85  O   HOH T  84      44.256  27.554  29.541  1.00  0.33           O  
HETATM   86  O   HOH T  85       9.794  25.741  11.618  1.00  0.33           O  
HETATM   87  O   HOH T  86       9.368  35.157  17.991  1.00  0.33           O  
HETATM   88  O   HOH T  87      16.850  37.980  -0.447  1.00  0.33           O  
HETATM   89  O   HOH T  88      19.599  11.850   5.392  1.00  0.33           O  
HETATM   90  O   HOH T  89      13.765  42.703  16.860  1.00  0.33           O  
HETATM   91  O   HOH T  90      31.393  24.752  -1.758  1.00  0.33           O  
HETATM   92  O   HOH T  91      16.697  24.425  20.271  1.00  0.33           O  
HETATM   93  O   HOH T  92      13.904  20.773  19.402  1.00  0.33           O  
HETATM   94  O   HOH T  93       4.344  12.759  34.170  1.00  0.33           O  
HETATM   95  O   HOH T  94      10.644  28.212  12.487  1.00  0.34           O  
HETATM   96  O   HOH T  95      27.305  13.137  34.697  1.00  0.34           O  
HETATM   97  O   HOH T  96      38.349  27.361  10.265  1.00  0.34           O  
HETATM   98  O   HOH T  97      11.302  41.479  16.286  1.00  0.34           O  
HETATM   99  O   HOH T  98      22.943  39.848  26.691  1.00  0.34           O  
HETATM  100  O   HOH T  99      22.197  21.455  -3.886  1.00  0.34           O  
HETATM  101  O   HOH T 100      12.100  27.291  26.198  1.00  0.34           O  
HETATM  102  O   HOH T 101      11.237  34.561  39.987  1.00  0.34           O  
HETATM  103  O   HOH T 102       5.384  26.827   5.559  1.00  0.34           O  
HETATM  104  O   HOH T 103      32.479  18.843   1.430  1.00  0.35           O  
HETATM  105  O   HOH T 104      19.300  18.117  -4.352  1.00  0.35           O  
HETATM  106  O   HOH T 105      34.007  28.514  -7.417  1.00  0.35           O  
HETATM  107  O   HOH T 106      17.026  39.543   5.665  1.00  0.35           O  
HETATM  108  O   HOH T 107      31.419  46.034  35.401  1.00  0.35           O  
HETATM  109  O   HOH T 108      16.894  21.497  38.463  1.00  0.35           O  
HETATM  110  O   HOH T 109      28.505  45.143  10.171  1.00  0.35           O  
HETATM  111  O   HOH T 110      46.159  23.689  22.027  1.00  0.35           O  
HETATM  112  O   HOH T 111      28.243  49.553  23.941  1.00  0.35           O  
HETATM  113  O   HOH T 112       9.296  11.771  34.726  1.00  0.35           O  
HETATM  114  O   HOH T 113      31.194  48.302  27.127  1.00  0.35           O  
HETATM  115  O   HOH T 114      33.400  12.326  23.861  1.00  0.35           O  
HETATM  116  O   HOH T 115      12.021  39.051   3.396  1.00  0.35           O  
HETATM  117  O   HOH T 116      10.500  28.504  15.241  1.00  0.35           O  
HETATM  118  O   HOH T 117      10.490  27.758   0.350  1.00  0.35           O  
HETATM  119  O   HOH T 118      25.609  25.919  35.469  1.00  0.36           O  
HETATM  120  O   HOH T 119      10.485  23.652  13.599  1.00  0.36           O  
HETATM  121  O   HOH T 120      16.918  16.111  17.583  1.00  0.36           O  
HETATM  122  O   HOH T 121      18.255  43.346  37.426  1.00  0.36           O  
HETATM  123  O   HOH T 122       9.966  28.408  36.452  1.00  0.36           O  
HETATM  124  O   HOH T 123       5.916  33.895  12.626  1.00  0.36           O  
HETATM  125  O   HOH T 124      13.493  30.571  43.265  1.00  0.36           O  
HETATM  126  O   HOH T 125      17.135  24.652  16.581  1.00  0.36           O  
HETATM  127  O   HOH T 126      10.270  20.272   7.407  1.00  0.36           O  
HETATM  128  O   HOH T 127      12.739  36.540   6.907  1.00  0.36           O  
HETATM  129  O   HOH T 128      44.679  28.515  25.952  1.00  0.36           O  
HETATM  130  O   HOH T 129       5.608  25.167   3.364  1.00  0.36           O  
HETATM  131  O   HOH T 130      33.513  33.571   2.381  1.00  0.36           O  
HETATM  132  O   HOH T 131      12.470  37.690  31.492  1.00  0.37           O  
HETATM  133  O   HOH T 132      32.003  47.280  33.033  1.00  0.37           O  
HETATM  134  O   HOH T 133       4.625  21.976   7.222  1.00  0.37           O  
HETATM  135  O   HOH T 134      11.592  24.304  30.283  1.00  0.37           O  
HETATM  136  O   HOH T 135      10.346  32.785   1.525  1.00  0.37           O  
HETATM  137  O   HOH T 136      34.472  13.455  21.427  1.00  0.37           O  
HETATM  138  O   HOH T 137       8.146  23.308  28.382  1.00  0.37           O  
HETATM  139  O   HOH T 138      28.024  17.693   3.737  1.00  0.37           O  
HETATM  140  O   HOH T 139      20.945  28.655  19.567  1.00  0.37           O  
HETATM  141  O   HOH T 140      17.534  10.257  11.619  1.00  0.37           O  
HETATM  142  O   HOH T 141       4.595  14.584  28.889  1.00  0.37           O  
HETATM  143  O   HOH T 142      18.332  40.024  21.072  1.00  0.37           O  
HETATM  144  O   HOH T 143      46.572  25.841  12.819  1.00  0.37           O  
HETATM  145  O   HOH T 144      37.697  29.964   9.522  1.00  0.37           O  
HETATM  146  O   HOH T 145      29.083  37.474   3.698  1.00  0.37           O  
HETATM  147  O   HOH T 146      14.676  25.900  17.166  1.00  0.37           O  
HETATM  148  O   HOH T 147      25.935   7.704  23.544  1.00  0.37           O  
HETATM  149  O   HOH T 148      12.141  32.416  41.608  1.00  0.37           O  
HETATM  150  O   HOH T 149      39.942   9.219  25.159  1.00  0.37           O  
HETATM  151  O   HOH T 150      27.909  15.315   5.501  1.00  0.37           O  
HETATM  152  O   HOH T 151      27.369  35.439   4.599  1.00  0.38           O  
HETATM  153  O   HOH T 152       7.236  23.367   2.139  1.00  0.38           O  
HETATM  154  O   HOH T 153      40.971  31.259  11.487  1.00  0.38           O  
HETATM  155  O   HOH T 154      22.898  22.701  -7.482  1.00  0.38           O  
HETATM  156  O   HOH T 155      14.208  25.278  30.511  1.00  0.38           O  
HETATM  157  O   HOH T 156      19.517  46.555  20.445  1.00  0.38           O  
HETATM  158  O   HOH T 157       8.236  23.008   9.572  1.00  0.38           O  
HETATM  159  O   HOH T 158       9.093  20.525  34.797  1.00  0.38           O  
HETATM  160  O   HOH T 159      35.549  16.853  11.728  1.00  0.38           O  
HETATM  161  O   HOH T 160      23.379  41.606  24.478  1.00  0.39           O  
HETATM  162  O   HOH T 161      12.464  33.456  22.129  1.00  0.39           O  
HETATM  163  O   HOH T 162       6.477  24.377  37.961  1.00  0.39           O  
HETATM  164  O   HOH T 163      46.096  37.010  17.415  1.00  0.39           O  
HETATM  165  O   HOH T 164      25.677  23.339  36.585  1.00  0.39           O  
HETATM  166  O   HOH T 165       7.968  20.298   8.790  1.00  0.39           O  
HETATM  167  O   HOH T 166      40.115  15.373  29.367  1.00  0.39           O  
HETATM  168  O   HOH T 167      47.979  31.425  13.260  1.00  0.39           O  
HETATM  169  O   HOH T 168      11.117  20.562  19.805  1.00  0.39           O  
HETATM  170  O   HOH T 169      13.572  22.765  39.612  1.00  0.39           O  
HETATM  171  O   HOH T 170      20.583  33.827  25.833  1.00  0.40           O  
HETATM  172  O   HOH T 171      18.784  22.491  -5.061  1.00  0.40           O  
HETATM  173  O   HOH T 172       6.840  12.553  35.365  1.00  0.40           O  
HETATM  174  O   HOH T 173      22.592  25.206  17.757  1.00  0.40           O  
HETATM  175  O   HOH T 174       6.397  33.697   3.571  1.00  0.40           O  
HETATM  176  O   HOH T 175      11.789  30.977   4.535  1.00  0.40           O  
HETATM  177  O   HOH T 176      24.167   9.962  34.031  1.00  0.40           O  
HETATM  178  O   HOH T 177      44.564  24.990  11.240  1.00  0.40           O  
HETATM  179  O   HOH T 178      10.360   7.586  13.308  1.00  0.40           O  
HETATM  180  O   HOH T 179       8.955  32.869  35.429  1.00  0.40           O  
HETATM  181  O   HOH T 180       7.733  33.261   1.330  1.00  0.40           O  
HETATM  182  O   HOH T 181      17.578  21.160  17.484  1.00  0.40           O  
HETATM  183  O   HOH T 182       7.596  17.224  28.704  1.00  0.40           O  
HETATM  184  O   HOH T 183      11.064  28.153  -2.373  1.00  0.40           O  
HETATM  185  O   HOH T 184      43.503  21.654  32.179  1.00  0.40           O  
HETATM  186  O   HOH T 185      19.260  39.530  23.605  1.00  0.40           O  
HETATM  187  O   HOH T 186      18.830  45.336  35.571  1.00  0.40           O  
HETATM  188  O   HOH T 187      12.906  34.836   9.195  1.00  0.40           O  
HETATM  189  O   HOH T 188      28.678  28.040  -3.438  1.00  0.40           O  
HETATM  190  O   HOH T 189      30.183  24.181   0.518  1.00  0.41           O  
HETATM  191  O   HOH T 190      10.357  25.998  -4.012  1.00  0.41           O  
HETATM  192  O   HOH T 191      26.944  41.523  23.894  1.00  0.41           O  
HETATM  193  O   HOH T 192      11.498  24.276   8.621  1.00  0.41           O  
HETATM  194  O   HOH T 193      47.177  16.992  23.441  1.00  0.41           O  
HETATM  195  O   HOH T 194      49.777  15.135  25.655  1.00  0.41           O  
HETATM  196  O   HOH T 195      21.602  42.553  22.423  1.00  0.41           O  
HETATM  197  O   HOH T 196       7.497  26.011   1.471  1.00  0.41           O  
HETATM  198  O   HOH T 197      20.465  46.069  37.741  1.00  0.41           O  
HETATM  199  O   HOH T 198      11.440  40.306  31.667  1.00  0.41           O  
HETATM  200  O   HOH T 199       5.263  31.751   5.233  1.00  0.41           O  
HETATM  201  O   HOH T 200      46.092  30.698  15.244  1.00  0.41           O  
HETATM  202  O   HOH T 201      29.045  44.030   7.641  1.00  0.41           O  
HETATM  203  O   HOH T 202       9.009  20.088  21.619  1.00  0.41           O  
HETATM  204  O   HOH T 203      47.828  28.362  28.667  1.00  0.41           O  
HETATM  205  O   HOH T 204      22.665  11.990  34.984  1.00  0.42           O  
HETATM  206  O   HOH T 205      12.779  37.105  26.816  1.00  0.42           O  
HETATM  207  O   HOH T 206      19.385  35.228  27.961  1.00  0.42           O  
HETATM  208  O   HOH T 207      12.900  34.576  25.438  1.00  0.42           O  
HETATM  209  O   HOH T 208       8.435  18.192   6.926  1.00  0.42           O  
HETATM  210  O   HOH T 209      47.250  35.871  10.552  1.00  0.42           O  
HETATM  211  O   HOH T 210      35.950  36.587   7.981  1.00  0.42           O  
HETATM  212  O   HOH T 211      20.454  40.823  27.492  1.00  0.42           O  
HETATM  213  O   HOH T 212      10.716  22.315  21.964  1.00  0.42           O  
HETATM  214  O   HOH T 213      20.232  21.842  -7.352  1.00  0.42           O  
HETATM  215  O   HOH T 214      13.109  45.487  31.081  1.00  0.42           O  
HETATM  216  O   HOH T 215       9.880  32.534  22.167  1.00  0.42           O  
HETATM  217  O   HOH T 216      50.132  43.268  18.740  1.00  0.42           O  
HETATM  218  O   HOH T 217      25.938  45.780  10.012  1.00  0.42           O  
HETATM  219  O   HOH T 218      23.431  45.731  20.318  1.00  0.42           O  
HETATM  220  O   HOH T 219      22.030  24.175  28.454  1.00  0.42           O  
HETATM  221  O   HOH T 220      12.306  24.376  17.305  1.00  0.42           O  
HETATM  222  O   HOH T 221      36.437  13.875  23.395  1.00  0.42           O  
HETATM  223  O   HOH T 222      19.445   7.928  35.106  1.00  0.42           O  
HETATM  224  O   HOH T 223      18.615  23.442  18.617  1.00  0.43           O  
HETATM  225  O   HOH T 224      20.412  29.813  17.029  1.00  0.43           O  
HETATM  226  O   HOH T 225       9.809  29.892  31.960  1.00  0.43           O  
HETATM  227  O   HOH T 226      45.243  34.217   9.535  1.00  0.43           O  
HETATM  228  O   HOH T 227      19.299  10.459  13.777  1.00  0.43           O  
HETATM  229  O   HOH T 228       6.697  21.617  37.807  1.00  0.43           O  
HETATM  230  O   HOH T 229      33.231   3.214  26.741  1.00  0.43           O  
HETATM  231  O   HOH T 230      14.216  27.931  20.530  1.00  0.43           O  
HETATM  232  O   HOH T 231      11.295  21.137  33.209  1.00  0.43           O  
HETATM  233  O   HOH T 232      26.770   8.172  21.014  1.00  0.43           O  
HETATM  234  O   HOH T 233      14.703  22.713  21.238  1.00  0.43           O  
HETATM  235  O   HOH T 234       8.783  30.177  34.531  1.00  0.43           O  
HETATM  236  O   HOH T 235      18.516   4.184  15.972  1.00  0.43           O  
HETATM  237  O   HOH T 236      31.035  46.701  38.057  1.00  0.43           O  
HETATM  238  O   HOH T 237      47.303  33.165  15.344  1.00  0.43           O  
HETATM  239  O   HOH T 238      12.999   8.128  16.265  1.00  0.43           O  
HETATM  240  O   HOH T 239      19.641  20.557  -3.208  1.00  0.43           O  
HETATM  241  O   HOH T 240      39.060  19.458  29.211  1.00  0.43           O  
HETATM  242  O   HOH T 241       8.813  37.480   9.623  1.00  0.44           O  
HETATM  243  O   HOH T 242      45.502  26.820  15.086  1.00  0.44           O  
HETATM  244  O   HOH T 243      11.196  20.606   4.897  1.00  0.44           O  
HETATM  245  O   HOH T 244      11.353  38.121  10.610  1.00  0.44           O  
HETATM  246  O   HOH T 245      30.915  19.848  -0.753  1.00  0.44           O  
HETATM  247  O   HOH T 246      45.134  31.620   8.763  1.00  0.44           O  
HETATM  248  O   HOH T 247       7.167  19.077   4.619  1.00  0.44           O  
HETATM  249  O   HOH T 248      14.480   9.060  18.567  1.00  0.44           O  
HETATM  250  O   HOH T 249      30.801  50.436  23.238  1.00  0.44           O  
HETATM  251  O   HOH T 250      32.122   6.536  17.599  1.00  0.44           O  
HETATM  252  O   HOH T 251       9.536  41.922  35.642  1.00  0.44           O  
HETATM  253  O   HOH T 252      45.877  25.912  20.402  1.00  0.44           O  
HETATM  254  O   HOH T 253      14.253  30.692  20.582  1.00  0.44           O  
HETATM  255  O   HOH T 254      26.987  47.707  18.354  1.00  0.44           O  
HETATM  256  O   HOH T 255      20.985  45.489   6.096  1.00  0.44           O  
HETATM  257  O   HOH T 256      41.916  23.640  31.380  1.00  0.44           O  
HETATM  258  O   HOH T 257       4.845  20.627   4.793  1.00  0.44           O  
HETATM  259  O   HOH T 258       9.213  20.109   2.995  1.00  0.44           O  
HETATM  260  O   HOH T 259      47.827  13.532  26.728  1.00  0.44           O  
HETATM  261  O   HOH T 260      11.716  42.639  13.776  1.00  0.44           O  
HETATM  262  O   HOH T 261      31.164  18.892  -3.386  1.00  0.44           O  
HETATM  263  O   HOH T 262      19.630  43.262  28.416  1.00  0.44           O  
HETATM  264  O   HOH T 263      23.602  17.970  21.261  1.00  0.44           O  
HETATM  265  O   HOH T 264      38.307  34.119   9.287  1.00  0.44           O  
HETATM  266  O   HOH T 265      47.048  11.925  22.072  1.00  0.44           O  
HETATM  267  O   HOH T 266      26.315  20.853  -1.997  1.00  0.44           O  
HETATM  268  O   HOH T 267      30.295  33.539   0.071  1.00  0.45           O  
HETATM  269  O   HOH T 268       9.308  39.999  10.735  1.00  0.45           O  
HETATM  270  O   HOH T 269      16.614  18.755  38.755  1.00  0.45           O  
HETATM  271  O   HOH T 270      51.040  46.063  16.444  1.00  0.45           O  
HETATM  272  O   HOH T 271      35.194  28.389  -4.904  1.00  0.45           O  
HETATM  273  O   HOH T 272      40.019  12.745  18.024  1.00  0.45           O  
HETATM  274  O   HOH T 273      22.401   2.627  23.529  1.00  0.45           O  
HETATM  275  O   HOH T 274       5.356  33.558   7.399  1.00  0.45           O  
HETATM  276  O   HOH T 275      11.641  29.393  28.019  1.00  0.45           O  
HETATM  277  O   HOH T 276       6.714  25.145  40.493  1.00  0.45           O  
HETATM  278  O   HOH T 277      28.979  20.295  -2.823  1.00  0.45           O  
HETATM  279  O   HOH T 278       6.488  20.751   2.555  1.00  0.45           O  
HETATM  280  O   HOH T 279       6.918  35.900  10.911  1.00  0.45           O  
HETATM  281  O   HOH T 280      47.790  14.562  22.256  1.00  0.45           O  
HETATM  282  O   HOH T 281      33.980   5.174  19.257  1.00  0.45           O  
HETATM  283  O   HOH T 282      14.422  40.236   6.509  1.00  0.45           O  
HETATM  284  O   HOH T 283      37.070  32.341   1.176  1.00  0.45           O  
HETATM  285  O   HOH T 284      25.502  48.735  35.341  1.00  0.45           O  
HETATM  286  O   HOH T 285      26.559  10.665  35.341  1.00  0.45           O  
HETATM  287  O   HOH T 286      39.952  46.372  31.150  1.00  0.45           O  
HETATM  288  O   HOH T 287      21.711  36.196  26.779  1.00  0.45           O  
HETATM  289  O   HOH T 288      28.605  12.916   4.217  1.00  0.45           O  
HETATM  290  O   HOH T 289      22.693  44.328  18.091  1.00  0.45           O  
HETATM  291  O   HOH T 290      52.611  37.537  16.947  1.00  0.45           O  
HETATM  292  O   HOH T 291       4.088  23.306   4.813  1.00  0.45           O  
HETATM  293  O   HOH T 292      24.288  30.350  20.820  1.00  0.46           O  
HETATM  294  O   HOH T 293       2.948  12.536  29.907  1.00  0.46           O  
HETATM  295  O   HOH T 294      46.487  26.390  17.729  1.00  0.46           O  
HETATM  296  O   HOH T 295      35.719   6.914  20.660  1.00  0.46           O  
HETATM  297  O   HOH T 296       9.250  40.567  33.314  1.00  0.46           O  
HETATM  298  O   HOH T 297      33.440  47.031  15.708  1.00  0.46           O  
HETATM  299  O   HOH T 298      25.036  12.827  36.322  1.00  0.46           O  
HETATM  300  O   HOH T 299      34.693  32.839  -0.039  1.00  0.46           O  
HETATM  301  O   HOH T 300      31.302  42.399   2.935  1.00  0.46           O  
HETATM  302  O   HOH T 301       5.165  11.674  31.577  1.00  0.46           O  
HETATM  303  O   HOH T 302      20.491  44.983  16.465  1.00  0.46           O  
HETATM  304  O   HOH T 303      19.923   7.972  29.782  1.00  0.46           O  
HETATM  305  O   HOH T 304      17.745  26.496  41.205  1.00  0.46           O  
HETATM  306  O   HOH T 305       9.616  29.717  22.126  1.00  0.46           O  
HETATM  307  O   HOH T 306      38.401  32.082  11.119  1.00  0.46           O  
HETATM  308  O   HOH T 307      23.518  23.701  -4.991  1.00  0.46           O  
HETATM  309  O   HOH T 308      13.572  12.738  39.047  1.00  0.46           O  
HETATM  310  O   HOH T 309      33.469  46.896  20.401  1.00  0.46           O  
HETATM  311  O   HOH T 310      28.551  24.457  -1.621  1.00  0.46           O  
HETATM  312  O   HOH T 311      19.140  36.152  25.368  1.00  0.46           O  
HETATM  313  O   HOH T 312      28.547   7.394  24.299  1.00  0.46           O  
HETATM  314  O   HOH T 313      15.091  20.491  40.264  1.00  0.46           O  
HETATM  315  O   HOH T 314      34.325  47.993  18.080  1.00  0.46           O  
HETATM  316  O   HOH T 315      10.381  26.351  17.041  1.00  0.46           O  
HETATM  317  O   HOH T 316      19.791  44.772  22.674  1.00  0.46           O  
HETATM  318  O   HOH T 317       8.334  46.319  20.377  1.00  0.47           O  
HETATM  319  O   HOH T 318      21.961  46.942  15.104  1.00  0.47           O  
HETATM  320  O   HOH T 319      12.539  26.679  18.772  1.00  0.47           O  
HETATM  321  O   HOH T 320       6.860  18.540  21.022  1.00  0.47           O  
HETATM  322  O   HOH T 321      22.615   5.416  22.871  1.00  0.47           O  
HETATM  323  O   HOH T 322      13.730  41.313   8.910  1.00  0.47           O  
HETATM  324  O   HOH T 323      31.789  44.731   4.440  1.00  0.47           O  
HETATM  325  O   HOH T 324      21.506   4.540  20.500  1.00  0.47           O  
HETATM  326  O   HOH T 325      29.967  50.489  25.883  1.00  0.47           O  
HETATM  327  O   HOH T 326      47.218  16.186  26.116  1.00  0.47           O  
HETATM  328  O   HOH T 327      13.456  44.834  18.448  1.00  0.47           O  
HETATM  329  O   HOH T 328      30.788  38.309   1.612  1.00  0.47           O  
HETATM  330  O   HOH T 329      11.485  28.054  20.947  1.00  0.47           O  
HETATM  331  O   HOH T 330      16.353  43.178  23.859  1.00  0.47           O  
HETATM  332  O   HOH T 331       9.437  19.229  32.348  1.00  0.48           O  
HETATM  333  O   HOH T 332      32.327  15.456   6.534  1.00  0.48           O  
HETATM  334  O   HOH T 333       4.022  36.355  23.549  1.00  0.48           O  
HETATM  335  O   HOH T 334      26.068  13.833   4.149  1.00  0.48           O  
HETATM  336  O   HOH T 335       6.880  34.984  16.751  1.00  0.48           O  
HETATM  337  O   HOH T 336      14.212  48.565  20.158  1.00  0.48           O  
HETATM  338  O   HOH T 337      32.402  41.061   5.144  1.00  0.48           O  
HETATM  339  O   HOH T 338      18.865   5.968  28.089  1.00  0.48           O  
HETATM  340  O   HOH T 339       7.214  27.402  30.223  1.00  0.48           O  
HETATM  341  O   HOH T 340      15.456  46.264  29.801  1.00  0.48           O  
HETATM  342  O   HOH T 341      47.969  36.552  13.037  1.00  0.48           O  
HETATM  343  O   HOH T 342      10.423  44.550  20.234  1.00  0.48           O  
HETATM  344  O   HOH T 343      30.144  11.971  16.229  1.00  0.48           O  
HETATM  345  O   HOH T 344      12.659  30.163   2.075  1.00  0.48           O  
HETATM  346  O   HOH T 345      11.355  39.180  25.729  1.00  0.48           O  
HETATM  347  O   HOH T 346      26.686   9.004  14.638  1.00  0.49           O  
HETATM  348  O   HOH T 347       6.475  16.743   8.340  1.00  0.49           O  
HETATM  349  O   HOH T 348      21.028  49.426  13.984  1.00  0.49           O  
HETATM  350  O   HOH T 349       9.638  31.032  24.506  1.00  0.49           O  
HETATM  351  O   HOH T 350      40.327   5.125  20.779  1.00  0.49           O  
HETATM  352  O   HOH T 351      29.910  28.748  -0.989  1.00  0.49           O  
HETATM  353  O   HOH T 352      14.861  37.665   5.552  1.00  0.49           O  
HETATM  354  O   HOH T 353      17.747  14.500  -0.887  1.00  0.49           O  
HETATM  355  O   HOH T 354       8.922  33.176  26.037  1.00  0.49           O  
HETATM  356  O   HOH T 355      17.786  28.303  22.719  1.00  0.49           O  
HETATM  357  O   HOH T 356      40.374  29.167   9.642  1.00  0.49           O  
HETATM  358  O   HOH T 357      25.782  25.331  -4.552  1.00  0.49           O  
HETATM  359  O   HOH T 358      38.355  29.994   6.798  1.00  0.49           O  
HETATM  360  O   HOH T 359      32.536  36.095   1.573  1.00  0.49           O  
HETATM  361  O   HOH T 360      40.595   6.774  26.060  1.00  0.49           O  
HETATM  362  O   HOH T 361       7.405  19.333  36.580  1.00  0.49           O  
HETATM  363  O   HOH T 362      43.980  29.769   7.070  1.00  0.49           O  
HETATM  364  O   HOH T 363      33.778  43.410   5.904  1.00  0.49           O  
HETATM  365  O   HOH T 364       8.082  23.692  12.244  1.00  0.49           O  
HETATM  366  O   HOH T 365      17.073  10.552   8.921  1.00  0.49           O  
HETATM  367  O   HOH T 366      31.997  18.563  33.033  1.00  0.49           O  
HETATM  368  O   HOH T 367      35.616  11.179  22.507  1.00  0.49           O  
HETATM  369  O   HOH T 368       3.070  27.193   6.977  1.00  0.49           O  
HETATM  370  O   HOH T 369      13.736  44.388  14.600  1.00  0.50           O  
HETATM  371  O   HOH T 370      10.452  40.159  18.547  1.00  0.50           O  
HETATM  372  O   HOH T 371      29.799  18.879   1.683  1.00  0.50           O  
HETATM  373  O   HOH T 372      39.654  20.855  14.414  1.00  0.50           O  
HETATM  374  O   HOH T 373      37.735  11.427  19.266  1.00  0.50           O  
HETATM  375  O   HOH T 374      30.273  16.635   4.965  1.00  0.50           O  
HETATM  376  O   HOH T 375      28.865  14.388   1.875  1.00  0.50           O  
HETATM  377  O   HOH T 376      49.091  44.035  16.204  1.00  0.50           O  
HETATM  378  O   HOH T 377      35.085  35.811   2.605  1.00  0.50           O  
HETATM  379  O   HOH T 378       9.828  23.617  16.310  1.00  0.50           O  
HETATM  380  O   HOH T 379       7.038  24.856  31.252  1.00  0.50           O  
HETATM  381  O   HOH T 380      10.343  34.115  28.184  1.00  0.50           O  
HETATM  382  O   HOH T 381       5.708  22.700  40.142  1.00  0.50           O  
HETATM  383  O   HOH T 382      18.595  47.904  10.684  1.00  0.50           O  
HETATM  384  O   HOH T 383      20.485  38.541  25.962  1.00  0.50           O  
HETATM  385  O   HOH T 384       9.218  25.540  29.634  1.00  0.50           O  
HETATM  386  O   HOH T 385       5.170  33.269  15.190  1.00  0.50           O  
HETATM  387  O   HOH T 386      40.452  21.775  30.034  1.00  0.51           O  
HETATM  388  O   HOH T 387       5.499  20.262  22.579  1.00  0.51           O  
HETATM  389  O   HOH T 388      15.183  27.596  41.183  1.00  0.51           O  
HETATM  390  O   HOH T 389      11.361  36.675  29.094  1.00  0.51           O  
HETATM  391  O   HOH T 390      52.914  31.433  22.008  1.00  0.51           O  
HETATM  392  O   HOH T 391      18.691  42.167  22.738  1.00  0.51           O  
HETATM  393  O   HOH T 392      37.346  27.554   1.624  1.00  0.51           O  
HETATM  394  O   HOH T 393      42.105  11.023  24.998  1.00  0.51           O  
HETATM  395  O   HOH T 394       7.951  19.511  30.124  1.00  0.51           O  
HETATM  396  O   HOH T 395      42.425  30.991   9.063  1.00  0.51           O  
HETATM  397  O   HOH T 396      16.971  47.819  20.284  1.00  0.51           O  
HETATM  398  O   HOH T 397      15.380  46.213  10.718  1.00  0.51           O  
HETATM  399  O   HOH T 398       8.971  42.319  19.470  1.00  0.51           O  
HETATM  400  O   HOH T 399      12.106  39.161   8.010  1.00  0.52           O  
HETATM  401  O   HOH T 400      18.726   6.856  16.579  1.00  0.52           O  
HETATM  402  O   HOH T 401      11.653  26.630  28.773  1.00  0.52           O  
HETATM  403  O   HOH T 402      18.738  14.395  38.864  1.00  0.52           O  
HETATM  404  O   HOH T 403      17.058  11.161   6.329  1.00  0.52           O  
HETATM  405  O   HOH T 404       9.330  41.989  12.624  1.00  0.52           O  
HETATM  406  O   HOH T 405      44.687  11.459  20.544  1.00  0.52           O  
HETATM  407  O   HOH T 406      12.913  20.640  22.010  1.00  0.52           O  
HETATM  408  O   HOH T 407       9.188   9.488  11.732  1.00  0.52           O  
HETATM  409  O   HOH T 408      11.317  45.412  22.677  1.00  0.52           O  
HETATM  410  O   HOH T 409       7.444  31.371  22.849  1.00  0.52           O  
HETATM  411  O   HOH T 410      34.809   6.554  17.097  1.00  0.52           O  
HETATM  412  O   HOH T 411      47.235  33.260  11.296  1.00  0.52           O  
HETATM  413  O   HOH T 412      13.098  22.922  31.998  1.00  0.52           O  
HETATM  414  O   HOH T 413      48.038  27.231  21.428  1.00  0.52           O  
HETATM  415  O   HOH T 414      11.170  31.761  26.695  1.00  0.52           O  
HETATM  416  O   HOH T 415       8.895  30.804  37.241  1.00  0.52           O  
HETATM  417  O   HOH T 416      21.872  35.853  -0.027  1.00  0.52           O  
HETATM  418  O   HOH T 417      34.018  20.301   3.146  1.00  0.53           O  
HETATM  419  O   HOH T 418      10.201  35.563  25.802  1.00  0.53           O  
HETATM  420  O   HOH T 419       6.420  41.849  20.339  1.00  0.53           O  
HETATM  421  O   HOH T 420      18.041  45.427  28.917  1.00  0.53           O  
HETATM  422  O   HOH T 421      30.698   7.132  30.992  1.00  0.53           O  
HETATM  423  O   HOH T 422      45.993  26.662  27.560  1.00  0.53           O  
HETATM  424  O   HOH T 423      30.956  45.519   8.911  1.00  0.53           O  
HETATM  425  O   HOH T 424       7.138  29.264  32.382  1.00  0.53           O  
HETATM  426  O   HOH T 425      18.278  12.231   2.961  1.00  0.53           O  
HETATM  427  O   HOH T 426       5.775  17.589  11.387  1.00  0.53           O  
HETATM  428  O   HOH T 427      16.355  18.740  16.972  1.00  0.53           O  
HETATM  429  O   HOH T 428      15.027  11.235  11.970  1.00  0.53           O  
HETATM  430  O   HOH T 429      54.511  34.782  23.877  1.00  0.54           O  
HETATM  431  O   HOH T 430      38.305  30.584   2.809  1.00  0.54           O  
HETATM  432  O   HOH T 431      44.969  22.522  24.222  1.00  0.54           O  
HETATM  433  O   HOH T 432      29.037   6.456  34.494  1.00  0.54           O  
HETATM  434  O   HOH T 433      28.308  20.465  -0.089  1.00  0.54           O  
HETATM  435  O   HOH T 434      42.116  40.588  11.154  1.00  0.54           O  
HETATM  436  O   HOH T 435      21.117  44.263  20.344  1.00  0.54           O  
HETATM  437  O   HOH T 436      24.653   8.964  19.518  1.00  0.54           O  
HETATM  438  O   HOH T 437      23.257   8.097  23.426  1.00  0.54           O  
HETATM  439  O   HOH T 438      24.295  12.017  -2.448  1.00  0.54           O  
HETATM  440  O   HOH T 439      21.020   9.517  15.794  1.00  0.54           O  
HETATM  441  O   HOH T 440      26.168  25.604  25.681  1.00  0.54           O  
HETATM  442  O   HOH T 441       4.804  34.371  10.015  1.00  0.54           O  
HETATM  443  O   HOH T 442      38.212  12.116  21.908  1.00  0.55           O  
HETATM  444  O   HOH T 443      30.169  42.754   5.432  1.00  0.55           O  
HETATM  445  O   HOH T 444       4.025  34.137   4.955  1.00  0.56           O  
HETATM  446  O   HOH T 445      40.483  21.862   8.920  1.00  0.56           O  
HETATM  447  O   HOH T 446      24.978   8.855  36.504  1.00  0.56           O  
HETATM  448  O   HOH T 447      26.020  23.633  -2.508  1.00  0.56           O  
HETATM  449  O   HOH T 448      20.767   7.610  32.586  1.00  0.56           O  
HETATM  450  O   HOH T 449      22.080   4.799  17.739  1.00  0.56           O  
HETATM  451  O   HOH T 450      34.806   1.363  25.982  1.00  0.56           O  
HETATM  452  O   HOH T 451      49.440  30.003  11.367  1.00  0.56           O  
HETATM  453  O   HOH T 452      19.507   4.834  18.492  1.00  0.56           O  
HETATM  454  O   HOH T 453      25.069  15.321  -7.664  1.00  0.57           O  
HETATM  455  O   HOH T 454      34.820  24.200   5.594  1.00  0.57           O  
HETATM  456  O   HOH T 455      11.216  41.162   5.065  1.00  0.57           O  
HETATM  457  O   HOH T 456      31.642  30.306   5.599  1.00  0.57           O  
HETATM  458  O   HOH T 457       6.574  16.147  32.442  1.00  0.57           O  
HETATM  459  O   HOH T 458      17.168  45.634  23.465  1.00  0.57           O  
HETATM  460  O   HOH T 459      32.002  15.549  33.037  1.00  0.58           O  
HETATM  461  O   HOH T 460      49.375  34.886  14.667  1.00  0.58           O  
HETATM  462  O   HOH T 461      33.924   3.254  24.069  1.00  0.59           O  
HETATM  463  O   HOH T 462      45.533  23.227  13.079  1.00  0.59           O  
HETATM  464  O   HOH T 463      23.520  43.600  26.446  1.00  0.59           O  
TER     465      HOH T 463 
