# Supplementary material for: Accurate Prediction of Hydration Sites of Proteins Using Energy Model With Atom Embedding
Source: Front Mol Biosci. 2021 Sep 20;8:756075. doi: 10.3389/fmolb.2021.756075 (PMC8488165; doi:10.3389/fmolb.2021.756075)
Supplement: Supplementary file 1 [file DataSheet1.ZIP › Data Sheet 1/Our_result_pdb/our_dataset_output/3H82_watersite.pdb]

HEADER                                                        XXXX


JRNL        PMID   -1
HETATM    1  O   HOH T   0      -1.648   3.390  20.107  1.00  0.21           O  
HETATM    2  O   HOH T   1      -8.019   0.786   4.110  1.00  0.21           O  
HETATM    3  O   HOH T   2       2.952  -7.199  18.580  1.00  0.22           O  
HETATM    4  O   HOH T   3       6.795   1.553  21.682  1.00  0.22           O  
HETATM    5  O   HOH T   4      12.602   0.504 -11.399  1.00  0.23           O  
HETATM    6  O   HOH T   5      16.750   6.503  13.595  1.00  0.23           O  
HETATM    7  O   HOH T   6     -18.032   9.911   8.131  1.00  0.23           O  
HETATM    8  O   HOH T   7      14.329   5.644  -0.847  1.00  0.23           O  
HETATM    9  O   HOH T   8       7.284  -3.548  12.790  1.00  0.24           O  
HETATM   10  O   HOH T   9       6.363   0.231  36.931  1.00  0.24           O  
HETATM   11  O   HOH T  10     -15.226 -16.205   0.862  1.00  0.24           O  
HETATM   12  O   HOH T  11     -15.894 -11.153   6.242  1.00  0.24           O  
HETATM   13  O   HOH T  12       9.719  12.237  17.620  1.00  0.25           O  
HETATM   14  O   HOH T  13      11.787   5.952  -3.494  1.00  0.25           O  
HETATM   15  O   HOH T  14      -7.478  -0.659  21.987  1.00  0.25           O  
HETATM   16  O   HOH T  15      -9.225  19.005   6.625  1.00  0.26           O  
HETATM   17  O   HOH T  16       1.311   0.590  -1.082  1.00  0.26           O  
HETATM   18  O   HOH T  17     -13.457  -0.893   9.019  1.00  0.26           O  
HETATM   19  O   HOH T  18     -23.852  10.692   3.998  1.00  0.27           O  
HETATM   20  O   HOH T  19      -9.716  11.152  27.567  1.00  0.27           O  
HETATM   21  O   HOH T  20      -2.918  -1.077  24.934  1.00  0.27           O  
HETATM   22  O   HOH T  21     -13.795  -3.632  17.711  1.00  0.28           O  
HETATM   23  O   HOH T  22      17.328   3.492   7.290  1.00  0.28           O  
HETATM   24  O   HOH T  23      -6.882  -3.786  11.093  1.00  0.28           O  
HETATM   25  O   HOH T  24      14.548   7.933  14.211  1.00  0.28           O  
HETATM   26  O   HOH T  25      22.087 -12.170  10.482  1.00  0.28           O  
HETATM   27  O   HOH T  26      11.185  -7.559 -11.378  1.00  0.28           O  
HETATM   28  O   HOH T  27      -9.069 -15.676  19.860  1.00  0.28           O  
HETATM   29  O   HOH T  28     -14.933 -14.728   4.695  1.00  0.28           O  
HETATM   30  O   HOH T  29      16.303 -21.009   1.581  1.00  0.28           O  
HETATM   31  O   HOH T  30     -18.617   7.449   6.925  1.00  0.29           O  
HETATM   32  O   HOH T  31      -7.854  -4.426  15.687  1.00  0.29           O  
HETATM   33  O   HOH T  32      19.554 -16.007   5.966  1.00  0.29           O  
HETATM   34  O   HOH T  33       6.356 -19.165   8.769  1.00  0.29           O  
HETATM   35  O   HOH T  34       7.221 -16.056  -8.330  1.00  0.29           O  
HETATM   36  O   HOH T  35       0.552 -13.634  15.741  1.00  0.29           O  
HETATM   37  O   HOH T  36     -23.585  11.247   6.653  1.00  0.30           O  
HETATM   38  O   HOH T  37       8.436   0.534  35.266  1.00  0.30           O  
HETATM   39  O   HOH T  38      14.677 -13.653  13.058  1.00  0.30           O  
HETATM   40  O   HOH T  39      -2.672  -4.034  18.345  1.00  0.30           O  
HETATM   41  O   HOH T  40      -1.728   3.823   0.025  1.00  0.30           O  
HETATM   42  O   HOH T  41      11.153 -19.797  -1.822  1.00  0.30           O  
HETATM   43  O   HOH T  42     -10.997  -9.396   7.967  1.00  0.30           O  
HETATM   44  O   HOH T  43     -10.847 -14.595  21.639  1.00  0.30           O  
HETATM   45  O   HOH T  44      -3.131  21.009   4.689  1.00  0.30           O  
HETATM   46  O   HOH T  45      14.524   8.759  21.048  1.00  0.30           O  
HETATM   47  O   HOH T  46      10.843   3.336  29.353  1.00  0.30           O  
HETATM   48  O   HOH T  47     -13.963   3.071  -0.089  1.00  0.30           O  
HETATM   49  O   HOH T  48       0.057   5.863   0.344  1.00  0.31           O  
HETATM   50  O   HOH T  49     -14.692  -4.117  15.241  1.00  0.31           O  
HETATM   51  O   HOH T  50       2.444 -14.786   1.110  1.00  0.31           O  
HETATM   52  O   HOH T  51     -17.770   4.186   9.395  1.00  0.31           O  
HETATM   53  O   HOH T  52     -20.735   4.681  19.929  1.00  0.31           O  
HETATM   54  O   HOH T  53     -13.634  -9.334   8.430  1.00  0.31           O  
HETATM   55  O   HOH T  54      -5.403  -0.653  14.086  1.00  0.31           O  
HETATM   56  O   HOH T  55       4.816  -5.474  21.122  1.00  0.31           O  
HETATM   57  O   HOH T  56     -24.021  12.176  11.379  1.00  0.31           O  
HETATM   58  O   HOH T  57       3.493  -3.159  30.602  1.00  0.31           O  
HETATM   59  O   HOH T  58     -14.356   4.521   2.247  1.00  0.31           O  
HETATM   60  O   HOH T  59     -12.990  -7.104   1.402  1.00  0.31           O  
HETATM   61  O   HOH T  60      -3.818  -3.907  -0.590  1.00  0.31           O  
HETATM   62  O   HOH T  61     -12.160   6.283  23.976  1.00  0.32           O  
HETATM   63  O   HOH T  62       8.744  11.321  12.032  1.00  0.32           O  
HETATM   64  O   HOH T  63      -6.410  -7.528  25.195  1.00  0.32           O  
HETATM   65  O   HOH T  64      15.613  -0.458  16.394  1.00  0.32           O  
HETATM   66  O   HOH T  65     -10.777 -10.548   0.951  1.00  0.32           O  
HETATM   67  O   HOH T  66     -17.001 -17.794   2.345  1.00  0.32           O  
HETATM   68  O   HOH T  67      24.088   5.280   2.696  1.00  0.32           O  
HETATM   69  O   HOH T  68      -9.806  19.949  17.339  1.00  0.33           O  
HETATM   70  O   HOH T  69     -11.146  19.899  22.622  1.00  0.33           O  
HETATM   71  O   HOH T  70     -12.143  -1.802   3.980  1.00  0.33           O  
HETATM   72  O   HOH T  71     -13.927  -6.472   8.500  1.00  0.33           O  
HETATM   73  O   HOH T  72     -10.176  14.055  27.489  1.00  0.33           O  
HETATM   74  O   HOH T  73       3.098   2.486  -7.154  1.00  0.33           O  
HETATM   75  O   HOH T  74     -11.250   3.803  24.849  1.00  0.33           O  
HETATM   76  O   HOH T  75      -0.533  21.018   8.799  1.00  0.33           O  
HETATM   77  O   HOH T  76      13.993   4.567   9.838  1.00  0.33           O  
HETATM   78  O   HOH T  77      -5.671 -16.759  14.661  1.00  0.33           O  
HETATM   79  O   HOH T  78      -3.181 -12.099  -3.999  1.00  0.33           O  
HETATM   80  O   HOH T  79     -10.768  14.139  -1.791  1.00  0.33           O  
HETATM   81  O   HOH T  80       1.207  -0.105  13.943  1.00  0.34           O  
HETATM   82  O   HOH T  81       1.669 -16.556  21.052  1.00  0.34           O  
HETATM   83  O   HOH T  82     -13.886   3.960   7.455  1.00  0.34           O  
HETATM   84  O   HOH T  83       3.136  -4.901  23.361  1.00  0.34           O  
HETATM   85  O   HOH T  84     -13.777 -10.416  -4.368  1.00  0.34           O  
HETATM   86  O   HOH T  85      -1.674   6.253  20.242  1.00  0.34           O  
HETATM   87  O   HOH T  86       5.966  -4.195  29.531  1.00  0.34           O  
HETATM   88  O   HOH T  87     -20.622  11.186  20.067  1.00  0.34           O  
HETATM   89  O   HOH T  88      -3.339  18.349  22.552  1.00  0.34           O  
HETATM   90  O   HOH T  89      10.299   4.371  22.829  1.00  0.34           O  
HETATM   91  O   HOH T  90       5.627 -18.242   6.271  1.00  0.34           O  
HETATM   92  O   HOH T  91      10.100  14.581  22.067  1.00  0.34           O  
HETATM   93  O   HOH T  92      19.314   1.601   6.814  1.00  0.34           O  
HETATM   94  O   HOH T  93      11.968   2.855  21.014  1.00  0.34           O  
HETATM   95  O   HOH T  94      -6.872  -7.516   8.881  1.00  0.35           O  
HETATM   96  O   HOH T  95     -18.610  -5.719  10.742  1.00  0.35           O  
HETATM   97  O   HOH T  96      15.589  12.721  13.794  1.00  0.35           O  
HETATM   98  O   HOH T  97       0.336   8.018  31.206  1.00  0.35           O  
HETATM   99  O   HOH T  98       4.368  12.222  24.338  1.00  0.35           O  
HETATM  100  O   HOH T  99      17.062  13.238  16.111  1.00  0.35           O  
HETATM  101  O   HOH T 100      17.353 -20.018   3.998  1.00  0.35           O  
HETATM  102  O   HOH T 101      -5.239   2.015  25.696  1.00  0.35           O  
HETATM  103  O   HOH T 102       2.772   1.748  32.790  1.00  0.36           O  
HETATM  104  O   HOH T 103     -13.969  -3.697   3.239  1.00  0.36           O  
HETATM  105  O   HOH T 104     -10.643  10.139  -4.844  1.00  0.36           O  
HETATM  106  O   HOH T 105      23.329   4.479   0.106  1.00  0.36           O  
HETATM  107  O   HOH T 106      13.805  10.604  13.751  1.00  0.36           O  
HETATM  108  O   HOH T 107     -13.952  18.363   7.531  1.00  0.36           O  
HETATM  109  O   HOH T 108      11.426 -17.149  -1.092  1.00  0.36           O  
HETATM  110  O   HOH T 109       9.647   4.845   8.584  1.00  0.36           O  
HETATM  111  O   HOH T 110     -10.424  -9.737  15.040  1.00  0.37           O  
HETATM  112  O   HOH T 111       2.672   5.712   0.919  1.00  0.37           O  
HETATM  113  O   HOH T 112      -2.973 -17.371  14.300  1.00  0.37           O  
HETATM  114  O   HOH T 113     -13.592  -9.715   0.141  1.00  0.37           O  
HETATM  115  O   HOH T 114      -9.420  20.055  14.582  1.00  0.37           O  
HETATM  116  O   HOH T 115      24.973  -0.941  -6.742  1.00  0.38           O  
HETATM  117  O   HOH T 116       5.077   6.773   0.263  1.00  0.38           O  
HETATM  118  O   HOH T 117       3.205 -17.580   5.010  1.00  0.38           O  
HETATM  119  O   HOH T 118     -12.786  -2.819  10.931  1.00  0.38           O  
HETATM  120  O   HOH T 119      -8.365 -10.256   2.231  1.00  0.38           O  
HETATM  121  O   HOH T 120       1.791  13.106  25.106  1.00  0.38           O  
HETATM  122  O   HOH T 121      13.423   7.847  -2.258  1.00  0.38           O  
HETATM  123  O   HOH T 122       6.660   4.241  -6.570  1.00  0.38           O  
HETATM  124  O   HOH T 123      10.149   3.291 -12.851  1.00  0.38           O  
HETATM  125  O   HOH T 124     -11.326   8.871  26.837  1.00  0.38           O  
HETATM  126  O   HOH T 125     -12.824  12.221   0.854  1.00  0.38           O  
HETATM  127  O   HOH T 126      -7.333  20.406  12.783  1.00  0.38           O  
HETATM  128  O   HOH T 127       2.825   2.416  30.121  1.00  0.38           O  
HETATM  129  O   HOH T 128      21.889   0.522   6.947  1.00  0.39           O  
HETATM  130  O   HOH T 129       9.859 -13.800   6.675  1.00  0.39           O  
HETATM  131  O   HOH T 130      -7.557 -13.084  12.775  1.00  0.39           O  
HETATM  132  O   HOH T 131      -3.309  12.779  -2.333  1.00  0.39           O  
HETATM  133  O   HOH T 132       2.889   7.177  31.542  1.00  0.39           O  
HETATM  134  O   HOH T 133     -16.027  -4.625   8.290  1.00  0.39           O  
HETATM  135  O   HOH T 134      19.300 -14.282   8.170  1.00  0.39           O  
HETATM  136  O   HOH T 135      10.260  14.298  19.372  1.00  0.39           O  
HETATM  137  O   HOH T 136      -2.083   7.514  14.285  1.00  0.39           O  
HETATM  138  O   HOH T 137      -0.996  -9.477  -6.853  1.00  0.39           O  
HETATM  139  O   HOH T 138     -20.164  11.704   1.611  1.00  0.39           O  
HETATM  140  O   HOH T 139     -11.446   1.029  25.043  1.00  0.39           O  
HETATM  141  O   HOH T 140      -0.135  -5.784  -7.632  1.00  0.39           O  
HETATM  142  O   HOH T 141     -20.320  17.177  13.684  1.00  0.40           O  
HETATM  143  O   HOH T 142     -13.874  -1.959  -0.300  1.00  0.40           O  
HETATM  144  O   HOH T 143     -20.309  14.645  14.871  1.00  0.40           O  
HETATM  145  O   HOH T 144     -11.868  19.993   6.440  1.00  0.40           O  
HETATM  146  O   HOH T 145      -5.439  11.942  -3.900  1.00  0.40           O  
HETATM  147  O   HOH T 146       5.534  -6.778 -11.254  1.00  0.40           O  
HETATM  148  O   HOH T 147       7.300  17.705  23.497  1.00  0.40           O  
HETATM  149  O   HOH T 148     -25.055   8.322  11.722  1.00  0.40           O  
HETATM  150  O   HOH T 149      -0.290  19.394   5.492  1.00  0.40           O  
HETATM  151  O   HOH T 150       9.702  13.802  12.893  1.00  0.40           O  
HETATM  152  O   HOH T 151      21.052 -21.060   2.442  1.00  0.40           O  
HETATM  153  O   HOH T 152     -13.726  10.654  29.071  1.00  0.41           O  
HETATM  154  O   HOH T 153      12.959  -8.606  -9.409  1.00  0.41           O  
HETATM  155  O   HOH T 154     -13.339   2.489  23.673  1.00  0.41           O  
HETATM  156  O   HOH T 155      -3.362   0.479  27.182  1.00  0.41           O  
HETATM  157  O   HOH T 156      17.672  -4.305  14.901  1.00  0.41           O  
HETATM  158  O   HOH T 157      11.101  10.750  10.687  1.00  0.41           O  
HETATM  159  O   HOH T 158      -3.850 -11.044   1.557  1.00  0.41           O  
HETATM  160  O   HOH T 159      -9.125 -12.829   1.678  1.00  0.41           O  
HETATM  161  O   HOH T 160     -12.611  17.960  10.011  1.00  0.41           O  
HETATM  162  O   HOH T 161      16.638  -9.791  -8.385  1.00  0.41           O  
HETATM  163  O   HOH T 162       3.330  -0.282  30.777  1.00  0.41           O  
HETATM  164  O   HOH T 163      -4.704 -11.386   7.412  1.00  0.41           O  
HETATM  165  O   HOH T 164      -7.520 -11.187  10.761  1.00  0.41           O  
HETATM  166  O   HOH T 165      -8.792  -9.043   6.326  1.00  0.41           O  
HETATM  167  O   HOH T 166      -7.468  -4.193   5.430  1.00  0.41           O  
HETATM  168  O   HOH T 167      -4.793  -8.113   6.936  1.00  0.42           O  
HETATM  169  O   HOH T 168       9.048   0.382  32.620  1.00  0.42           O  
HETATM  170  O   HOH T 169     -16.512 -21.919   0.597  1.00  0.42           O  
HETATM  171  O   HOH T 170      -0.903  20.442   3.078  1.00  0.42           O  
HETATM  172  O   HOH T 171      -4.342  -2.464   1.615  1.00  0.42           O  
HETATM  173  O   HOH T 172      24.623   1.009   2.468  1.00  0.42           O  
HETATM  174  O   HOH T 173      16.457   4.472  -8.066  1.00  0.42           O  
HETATM  175  O   HOH T 174      -3.068  -6.544  -1.053  1.00  0.42           O  
HETATM  176  O   HOH T 175      -6.406  -3.221  13.727  1.00  0.42           O  
HETATM  177  O   HOH T 176       8.500  -0.759  28.588  1.00  0.42           O  
HETATM  178  O   HOH T 177      -1.218 -16.477  -3.505  1.00  0.42           O  
HETATM  179  O   HOH T 178      -2.560  -8.978   0.124  1.00  0.42           O  
HETATM  180  O   HOH T 179     -21.629  16.980  19.042  1.00  0.43           O  
HETATM  181  O   HOH T 180       3.177 -17.136   2.362  1.00  0.43           O  
HETATM  182  O   HOH T 181     -12.205  -5.015  15.861  1.00  0.43           O  
HETATM  183  O   HOH T 182       8.493  -3.265  29.417  1.00  0.43           O  
HETATM  184  O   HOH T 183      14.400   7.248   9.637  1.00  0.43           O  
HETATM  185  O   HOH T 184      27.248   1.802   2.380  1.00  0.43           O  
HETATM  186  O   HOH T 185      15.425 -21.718  -1.027  1.00  0.43           O  
HETATM  187  O   HOH T 186     -14.270  -2.472   5.684  1.00  0.43           O  
HETATM  188  O   HOH T 187     -17.722  15.838  25.471  1.00  0.43           O  
HETATM  189  O   HOH T 188      14.439  11.278   3.058  1.00  0.43           O  
HETATM  190  O   HOH T 189       9.957   0.910  30.140  1.00  0.43           O  
HETATM  191  O   HOH T 190     -10.283  -3.823  21.834  1.00  0.43           O  
HETATM  192  O   HOH T 191       3.196   4.013  -1.242  1.00  0.43           O  
HETATM  193  O   HOH T 192     -15.915  -4.727  12.913  1.00  0.43           O  
HETATM  194  O   HOH T 193      19.475 -24.347   0.783  1.00  0.44           O  
HETATM  195  O   HOH T 194      -1.968  20.152  21.129  1.00  0.44           O  
HETATM  196  O   HOH T 195      22.828   4.744  -2.567  1.00  0.44           O  
HETATM  197  O   HOH T 196      -8.854 -14.634   3.801  1.00  0.44           O  
HETATM  198  O   HOH T 197      21.969 -13.619   8.059  1.00  0.44           O  
HETATM  199  O   HOH T 198     -12.901  20.558   8.943  1.00  0.44           O  
HETATM  200  O   HOH T 199      -2.088  -0.164  -0.053  1.00  0.44           O  
HETATM  201  O   HOH T 200     -22.131  15.262  12.959  1.00  0.44           O  
HETATM  202  O   HOH T 201     -22.033  12.320  18.156  1.00  0.44           O  
HETATM  203  O   HOH T 202     -16.407 -18.639   4.904  1.00  0.44           O  
HETATM  204  O   HOH T 203      -6.508  -3.752  26.510  1.00  0.44           O  
HETATM  205  O   HOH T 204       0.448  -5.186  22.512  1.00  0.44           O  
HETATM  206  O   HOH T 205       9.858  -1.008  17.699  1.00  0.44           O  
HETATM  207  O   HOH T 206      12.169   6.050   8.431  1.00  0.44           O  
HETATM  208  O   HOH T 207       5.569 -20.620   4.885  1.00  0.44           O  
HETATM  209  O   HOH T 208      11.550  -5.962 -13.618  1.00  0.44           O  
HETATM  210  O   HOH T 209      -1.822  -3.514  -7.362  1.00  0.44           O  
HETATM  211  O   HOH T 210      -1.674 -10.020  21.785  1.00  0.44           O  
HETATM  212  O   HOH T 211      21.118   2.418   8.677  1.00  0.44           O  
HETATM  213  O   HOH T 212      -1.019   1.791  -1.692  1.00  0.44           O  
HETATM  214  O   HOH T 213      21.649 -14.209   5.275  1.00  0.45           O  
HETATM  215  O   HOH T 214      15.455 -13.674   9.182  1.00  0.45           O  
HETATM  216  O   HOH T 215     -13.110  -9.549  -2.034  1.00  0.45           O  
HETATM  217  O   HOH T 216       3.068  -7.298 -10.052  1.00  0.45           O  
HETATM  218  O   HOH T 217      -7.962   5.585   0.374  1.00  0.45           O  
HETATM  219  O   HOH T 218     -10.136  13.088   0.674  1.00  0.45           O  
HETATM  220  O   HOH T 219     -10.374  12.562  -4.034  1.00  0.45           O  
HETATM  221  O   HOH T 220      18.810  -6.158 -15.536  1.00  0.45           O  
HETATM  222  O   HOH T 221       1.220   8.066   1.427  1.00  0.45           O  
HETATM  223  O   HOH T 222     -23.123  10.737  20.270  1.00  0.45           O  
HETATM  224  O   HOH T 223      -7.203 -11.303   6.224  1.00  0.45           O  
HETATM  225  O   HOH T 224     -15.761  11.507  -1.019  1.00  0.45           O  
HETATM  226  O   HOH T 225      -7.147   0.407  24.595  1.00  0.45           O  
HETATM  227  O   HOH T 226      -4.705  -3.114  24.455  1.00  0.45           O  
HETATM  228  O   HOH T 227      20.783 -21.534  14.611  1.00  0.46           O  
HETATM  229  O   HOH T 228      11.973   8.653   9.282  1.00  0.46           O  
HETATM  230  O   HOH T 229      21.833 -18.828   3.966  1.00  0.46           O  
HETATM  231  O   HOH T 230     -13.198  10.272  -1.203  1.00  0.46           O  
HETATM  232  O   HOH T 231      -4.155  -7.194  23.494  1.00  0.46           O  
HETATM  233  O   HOH T 232      -9.549 -11.161  12.743  1.00  0.46           O  
HETATM  234  O   HOH T 233      -8.958 -11.129   8.272  1.00  0.46           O  
HETATM  235  O   HOH T 234      13.654   2.389  -9.388  1.00  0.46           O  
HETATM  236  O   HOH T 235     -17.988  16.098  14.812  1.00  0.46           O  
HETATM  237  O   HOH T 236      -9.826  -3.430  24.470  1.00  0.46           O  
HETATM  238  O   HOH T 237     -17.173   1.616   8.707  1.00  0.47           O  
HETATM  239  O   HOH T 238      -1.734  -4.466  21.001  1.00  0.47           O  
HETATM  240  O   HOH T 239     -11.850  -1.691  25.068  1.00  0.47           O  
HETATM  241  O   HOH T 240      19.184  -0.100  18.771  1.00  0.47           O  
HETATM  242  O   HOH T 241       7.280   8.174  28.401  1.00  0.47           O  
HETATM  243  O   HOH T 242      16.139   7.517  -1.910  1.00  0.47           O  
HETATM  244  O   HOH T 243       2.391  -6.683  21.302  1.00  0.47           O  
HETATM  245  O   HOH T 244       5.726  15.477  23.554  1.00  0.47           O  
HETATM  246  O   HOH T 245     -12.556  20.644  20.343  1.00  0.47           O  
HETATM  247  O   HOH T 246      13.603   9.484  23.444  1.00  0.47           O  
HETATM  248  O   HOH T 247       2.551   3.990  -4.876  1.00  0.47           O  
HETATM  249  O   HOH T 248      10.730  13.336  15.360  1.00  0.47           O  
HETATM  250  O   HOH T 249      16.162  10.416  22.608  1.00  0.47           O  
HETATM  251  O   HOH T 250     -17.126 -20.535   2.969  1.00  0.47           O  
HETATM  252  O   HOH T 251       7.760  -6.894  -9.779  1.00  0.47           O  
HETATM  253  O   HOH T 252      16.992   1.371  17.796  1.00  0.48           O  
HETATM  254  O   HOH T 253      -9.798  15.709  29.775  1.00  0.48           O  
HETATM  255  O   HOH T 254     -17.950  18.686  13.757  1.00  0.48           O  
HETATM  256  O   HOH T 255       9.968   2.965  31.994  1.00  0.48           O  
HETATM  257  O   HOH T 256      22.765   1.155   4.381  1.00  0.48           O  
HETATM  258  O   HOH T 257      -5.467  -3.195  16.378  1.00  0.48           O  
HETATM  259  O   HOH T 258      -1.696  -7.128  21.970  1.00  0.48           O  
HETATM  260  O   HOH T 259      -2.667 -12.456  20.686  1.00  0.48           O  
HETATM  261  O   HOH T 260      12.904   9.470   1.807  1.00  0.48           O  
HETATM  262  O   HOH T 261     -13.126  -4.434  13.117  1.00  0.48           O  
HETATM  263  O   HOH T 262      17.818   1.736  20.375  1.00  0.48           O  
HETATM  264  O   HOH T 263       8.509 -19.513  18.657  1.00  0.48           O  
HETATM  265  O   HOH T 264      -1.998  -8.832  24.185  1.00  0.48           O  
HETATM  266  O   HOH T 265      -7.349 -12.349   3.689  1.00  0.48           O  
HETATM  267  O   HOH T 266     -17.894  -1.723  22.815  1.00  0.48           O  
HETATM  268  O   HOH T 267       7.405   1.100  39.248  1.00  0.48           O  
HETATM  269  O   HOH T 268     -19.263  11.046  22.253  1.00  0.48           O  
HETATM  270  O   HOH T 269     -13.945  -0.049  24.387  1.00  0.48           O  
HETATM  271  O   HOH T 270       8.968 -11.322  -7.915  1.00  0.48           O  
HETATM  272  O   HOH T 271      11.235  11.502  13.335  1.00  0.48           O  
HETATM  273  O   HOH T 272     -11.275  -8.186  -0.586  1.00  0.49           O  
HETATM  274  O   HOH T 273      13.534  -1.322  17.936  1.00  0.49           O  
HETATM  275  O   HOH T 274     -14.022 -16.349  -1.670  1.00  0.49           O  
HETATM  276  O   HOH T 275       6.013   2.911  36.118  1.00  0.49           O  
HETATM  277  O   HOH T 276      11.220 -21.017  13.827  1.00  0.49           O  
HETATM  278  O   HOH T 277      17.154 -15.479  -5.398  1.00  0.49           O  
HETATM  279  O   HOH T 278      11.853   0.735  18.849  1.00  0.49           O  
HETATM  280  O   HOH T 279     -17.768  12.716   2.612  1.00  0.49           O  
HETATM  281  O   HOH T 280     -12.199  12.893  29.287  1.00  0.49           O  
HETATM  282  O   HOH T 281     -17.062  18.909  17.230  1.00  0.49           O  
HETATM  283  O   HOH T 282     -25.220  10.393   9.725  1.00  0.49           O  
HETATM  284  O   HOH T 283     -14.628 -15.323   7.427  1.00  0.49           O  
HETATM  285  O   HOH T 284       4.024  14.458  25.953  1.00  0.49           O  
HETATM  286  O   HOH T 285      14.639 -11.434  16.501  1.00  0.49           O  
HETATM  287  O   HOH T 286      10.909   9.929  22.767  1.00  0.49           O  
HETATM  288  O   HOH T 287       1.742  11.205   3.394  1.00  0.49           O  
HETATM  289  O   HOH T 288      14.887  13.623   1.639  1.00  0.50           O  
HETATM  290  O   HOH T 289     -12.616  -4.242   0.894  1.00  0.50           O  
HETATM  291  O   HOH T 290      -2.358  19.716   7.120  1.00  0.50           O  
HETATM  292  O   HOH T 291     -10.826  17.678  18.525  1.00  0.50           O  
HETATM  293  O   HOH T 292      17.551 -25.133   2.448  1.00  0.50           O  
HETATM  294  O   HOH T 293      -4.961 -18.639  12.705  1.00  0.50           O  
HETATM  295  O   HOH T 294       0.489   4.114  -1.657  1.00  0.50           O  
HETATM  296  O   HOH T 295      -6.655  -1.666   4.234  1.00  0.50           O  
HETATM  297  O   HOH T 296       2.422   9.864  31.361  1.00  0.50           O  
HETATM  298  O   HOH T 297      11.325 -10.113  -7.928  1.00  0.50           O  
HETATM  299  O   HOH T 298       5.132   7.303  29.932  1.00  0.50           O  
HETATM  300  O   HOH T 299     -13.763  20.051  11.532  1.00  0.50           O  
HETATM  301  O   HOH T 300      -8.979  10.342  -3.153  1.00  0.50           O  
HETATM  302  O   HOH T 301      24.241 -12.124   8.767  1.00  0.50           O  
HETATM  303  O   HOH T 302      -8.675  -4.643  13.049  1.00  0.51           O  
HETATM  304  O   HOH T 303      24.215   5.397   7.160  1.00  0.51           O  
HETATM  305  O   HOH T 304     -18.141  10.762  19.793  1.00  0.51           O  
HETATM  306  O   HOH T 305      15.521 -16.964  10.881  1.00  0.51           O  
HETATM  307  O   HOH T 306      -9.428  -1.593   3.719  1.00  0.51           O  
HETATM  308  O   HOH T 307     -12.431  -3.749  -1.778  1.00  0.51           O  
HETATM  309  O   HOH T 308     -21.431   2.583  18.231  1.00  0.51           O  
HETATM  310  O   HOH T 309     -14.084 -17.167   5.515  1.00  0.51           O  
HETATM  311  O   HOH T 310       4.081   5.034  -6.749  1.00  0.51           O  
HETATM  312  O   HOH T 311      -3.430 -13.940   5.580  1.00  0.51           O  
HETATM  313  O   HOH T 312      27.997  -7.187  -6.457  1.00  0.51           O  
HETATM  314  O   HOH T 313      21.965   1.028   1.599  1.00  0.51           O  
HETATM  315  O   HOH T 314      -7.026  -6.883   6.105  1.00  0.51           O  
HETATM  316  O   HOH T 315       3.506 -19.765   3.237  1.00  0.51           O  
HETATM  317  O   HOH T 316       9.790  -8.146 -13.880  1.00  0.51           O  
HETATM  318  O   HOH T 317      24.186 -13.794   6.503  1.00  0.51           O  
HETATM  319  O   HOH T 318     -14.083   8.896  26.943  1.00  0.52           O  
HETATM  320  O   HOH T 319      15.645  13.065  23.514  1.00  0.52           O  
HETATM  321  O   HOH T 320      25.907   1.483   4.902  1.00  0.52           O  
HETATM  322  O   HOH T 321      -8.225   8.729  -5.088  1.00  0.52           O  
HETATM  323  O   HOH T 322     -12.197  15.538  28.357  1.00  0.52           O  
HETATM  324  O   HOH T 323     -13.883   4.651  25.288  1.00  0.52           O  
HETATM  325  O   HOH T 324       9.811  13.149  10.203  1.00  0.52           O  
HETATM  326  O   HOH T 325     -14.614  -4.691  10.614  1.00  0.52           O  
HETATM  327  O   HOH T 326      10.084  -6.311  16.002  1.00  0.52           O  
HETATM  328  O   HOH T 327       0.031 -12.255  21.214  1.00  0.52           O  
HETATM  329  O   HOH T 328      -1.025 -13.732  -4.501  1.00  0.52           O  
HETATM  330  O   HOH T 329      -3.468   5.942  27.040  1.00  0.52           O  
HETATM  331  O   HOH T 330      -9.759  20.231  20.175  1.00  0.53           O  
HETATM  332  O   HOH T 331     -14.715   1.268   7.706  1.00  0.53           O  
HETATM  333  O   HOH T 332       1.552  20.556   7.012  1.00  0.53           O  
HETATM  334  O   HOH T 333      -5.590  -4.901   1.264  1.00  0.53           O  
HETATM  335  O   HOH T 334      20.951 -14.681  10.403  1.00  0.53           O  
HETATM  336  O   HOH T 335       0.925   6.517  19.537  1.00  0.53           O  
HETATM  337  O   HOH T 336       8.374  15.234  24.120  1.00  0.53           O  
HETATM  338  O   HOH T 337       4.583  -8.261  20.637  1.00  0.53           O  
HETATM  339  O   HOH T 338     -22.680   4.050  21.870  1.00  0.53           O  
HETATM  340  O   HOH T 339      25.631   4.369   4.975  1.00  0.53           O  
HETATM  341  O   HOH T 340       9.876  17.187  22.794  1.00  0.53           O  
HETATM  342  O   HOH T 341     -16.268   9.782  28.359  1.00  0.53           O  
HETATM  343  O   HOH T 342       6.690   5.991   5.137  1.00  0.53           O  
HETATM  344  O   HOH T 343      -7.291  -2.249  24.284  1.00  0.53           O  
HETATM  345  O   HOH T 344      -9.528  -0.675  23.943  1.00  0.53           O  
HETATM  346  O   HOH T 345      11.179 -23.642  13.043  1.00  0.53           O  
HETATM  347  O   HOH T 346      -5.199  -4.019   3.843  1.00  0.54           O  
HETATM  348  O   HOH T 347      23.333  -6.132  -1.829  1.00  0.54           O  
HETATM  349  O   HOH T 348     -15.572  20.264  13.638  1.00  0.54           O  
HETATM  350  O   HOH T 349       5.756 -17.963  22.681  1.00  0.54           O  
HETATM  351  O   HOH T 350      10.814   1.706  34.252  1.00  0.54           O  
HETATM  352  O   HOH T 351      12.980  -0.993  20.601  1.00  0.54           O  
HETATM  353  O   HOH T 352      10.504 -26.776   6.433  1.00  0.54           O  
HETATM  354  O   HOH T 353       2.259 -13.823  21.956  1.00  0.54           O  
HETATM  355  O   HOH T 354       3.339  21.103  12.988  1.00  0.54           O  
HETATM  356  O   HOH T 355      17.149  10.550  -0.616  1.00  0.54           O  
HETATM  357  O   HOH T 356      -0.058  23.709   8.440  1.00  0.55           O  
HETATM  358  O   HOH T 357      -4.601  -5.540  25.708  1.00  0.55           O  
HETATM  359  O   HOH T 358      -0.145  10.762  31.107  1.00  0.55           O  
HETATM  360  O   HOH T 359      16.316  14.610  21.132  1.00  0.55           O  
HETATM  361  O   HOH T 360      -3.228  -2.425  -9.582  1.00  0.55           O  
HETATM  362  O   HOH T 361       3.240  21.870  11.340  1.00  0.55           O  
HETATM  363  O   HOH T 362      19.426 -11.700  -9.843  1.00  0.55           O  
HETATM  364  O   HOH T 363      -7.337  17.031  29.938  1.00  0.55           O  
HETATM  365  O   HOH T 364       9.599 -23.535  15.486  1.00  0.55           O  
HETATM  366  O   HOH T 365       4.840   8.881  -1.559  1.00  0.55           O  
HETATM  367  O   HOH T 366       6.755 -23.390  15.442  1.00  0.55           O  
HETATM  368  O   HOH T 367      -4.773 -13.112   3.326  1.00  0.55           O  
HETATM  369  O   HOH T 368       9.590   6.660  -4.919  1.00  0.55           O  
HETATM  370  O   HOH T 369     -24.394  12.962   8.731  1.00  0.56           O  
HETATM  371  O   HOH T 370     -13.002  -8.875  25.147  1.00  0.56           O  
HETATM  372  O   HOH T 371      13.677 -15.560  14.596  1.00  0.56           O  
HETATM  373  O   HOH T 372      29.022   4.026  -1.709  1.00  0.56           O  
HETATM  374  O   HOH T 373      10.309  -3.394  16.403  1.00  0.57           O  
HETATM  375  O   HOH T 374      -0.734 -15.470  13.868  1.00  0.57           O  
HETATM  376  O   HOH T 375     -20.430  13.151  21.993  1.00  0.57           O  
HETATM  377  O   HOH T 376      14.640  11.239   0.249  1.00  0.57           O  
HETATM  378  O   HOH T 377      -8.641 -17.019   2.612  1.00  0.57           O  
HETATM  379  O   HOH T 378     -16.201 -13.342  -2.177  1.00  0.58           O  
HETATM  380  O   HOH T 379      -1.666 -11.972  -6.292  1.00  0.58           O  
HETATM  381  O   HOH T 380      22.825  12.964   0.037  1.00  0.63           O  
TER     382      HOH T 380 
