# Supplementary material for: Accurate Prediction of Hydration Sites of Proteins Using Energy Model With Atom Embedding
Source: Front Mol Biosci. 2021 Sep 20;8:756075. doi: 10.3389/fmolb.2021.756075 (PMC8488165; doi:10.3389/fmolb.2021.756075)
Supplement: Supplementary file 1 [file DataSheet1.ZIP › Data Sheet 1/Our_result_pdb/our_dataset_output/3HH7_watersite.pdb]

HEADER                                                        XXXX


JRNL        PMID   -1
HETATM    1  O   HOH T   0      -2.364  -8.459  44.451  1.00  0.18           O  
HETATM    2  O   HOH T   1      -0.675  -1.555  52.953  1.00  0.21           O  
HETATM    3  O   HOH T   2     -13.873  -6.566  30.590  1.00  0.21           O  
HETATM    4  O   HOH T   3      -7.987   2.171  23.870  1.00  0.21           O  
HETATM    5  O   HOH T   4     -18.295   9.846  38.205  1.00  0.21           O  
HETATM    6  O   HOH T   5       0.947 -11.314  44.451  1.00  0.23           O  
HETATM    7  O   HOH T   6      -4.872  19.478  27.103  1.00  0.23           O  
HETATM    8  O   HOH T   7      12.233  -0.986  51.731  1.00  0.23           O  
HETATM    9  O   HOH T   8       0.381   3.816  62.143  1.00  0.23           O  
HETATM   10  O   HOH T   9     -14.109  -3.316  48.530  1.00  0.24           O  
HETATM   11  O   HOH T  10      -8.703   8.959  38.225  1.00  0.24           O  
HETATM   12  O   HOH T  11      -9.870  -5.993  31.369  1.00  0.24           O  
HETATM   13  O   HOH T  12       3.355   6.345  39.773  1.00  0.25           O  
HETATM   14  O   HOH T  13       6.319 -15.266  45.354  1.00  0.25           O  
HETATM   15  O   HOH T  14       6.985   7.764  37.522  1.00  0.26           O  
HETATM   16  O   HOH T  15     -12.951  16.803  33.927  1.00  0.26           O  
HETATM   17  O   HOH T  16       0.612   5.903  43.158  1.00  0.26           O  
HETATM   18  O   HOH T  17       4.342 -10.747  37.854  1.00  0.26           O  
HETATM   19  O   HOH T  18      -3.458  -7.374  30.753  1.00  0.26           O  
HETATM   20  O   HOH T  19       4.755   4.544  63.121  1.00  0.27           O  
HETATM   21  O   HOH T  20      -0.008  -2.361  31.280  1.00  0.27           O  
HETATM   22  O   HOH T  21     -28.594  -4.068  39.323  1.00  0.27           O  
HETATM   23  O   HOH T  22       2.882 -15.801  38.088  1.00  0.27           O  
HETATM   24  O   HOH T  23     -15.170  -7.137  41.178  1.00  0.27           O  
HETATM   25  O   HOH T  24     -11.850  -6.036  57.877  1.00  0.28           O  
HETATM   26  O   HOH T  25      -0.359  -5.119  31.432  1.00  0.28           O  
HETATM   27  O   HOH T  26     -14.336   1.067  61.406  1.00  0.28           O  
HETATM   28  O   HOH T  27      -1.507   7.642  16.365  1.00  0.28           O  
HETATM   29  O   HOH T  28       1.363   6.999  30.440  1.00  0.29           O  
HETATM   30  O   HOH T  29      -2.096 -20.055  43.667  1.00  0.29           O  
HETATM   31  O   HOH T  30       1.651   8.512  51.807  1.00  0.29           O  
HETATM   32  O   HOH T  31      -1.101   7.524  19.135  1.00  0.30           O  
HETATM   33  O   HOH T  32      -7.573  14.899  22.424  1.00  0.30           O  
HETATM   34  O   HOH T  33      -9.611  -1.061  45.215  1.00  0.30           O  
HETATM   35  O   HOH T  34     -12.717  14.972  27.950  1.00  0.30           O  
HETATM   36  O   HOH T  35      11.453  -5.073  53.081  1.00  0.30           O  
HETATM   37  O   HOH T  36       3.747  -9.560  35.418  1.00  0.31           O  
HETATM   38  O   HOH T  37       7.387  -5.761  24.431  1.00  0.31           O  
HETATM   39  O   HOH T  38     -19.849   4.729  58.958  1.00  0.31           O  
HETATM   40  O   HOH T  39       0.940   8.518  54.511  1.00  0.31           O  
HETATM   41  O   HOH T  40     -19.638  -6.081  47.424  1.00  0.31           O  
HETATM   42  O   HOH T  41       6.522   8.254  65.116  1.00  0.32           O  
HETATM   43  O   HOH T  42     -12.058 -12.963  34.299  1.00  0.32           O  
HETATM   44  O   HOH T  43       8.042  -7.370  50.191  1.00  0.32           O  
HETATM   45  O   HOH T  44       9.080   5.350  53.660  1.00  0.32           O  
HETATM   46  O   HOH T  45       0.568  -0.083  57.361  1.00  0.32           O  
HETATM   47  O   HOH T  46     -18.932   6.245  36.663  1.00  0.32           O  
HETATM   48  O   HOH T  47     -26.640  -6.769  41.771  1.00  0.32           O  
HETATM   49  O   HOH T  48     -24.948   0.753  39.423  1.00  0.33           O  
HETATM   50  O   HOH T  49     -27.940  -5.742  33.563  1.00  0.33           O  
HETATM   51  O   HOH T  50      -3.661  13.064  18.399  1.00  0.33           O  
HETATM   52  O   HOH T  51     -19.487   0.071  25.786  1.00  0.33           O  
HETATM   53  O   HOH T  52      -6.165   7.916  34.483  1.00  0.33           O  
HETATM   54  O   HOH T  53      14.009   2.603  45.445  1.00  0.33           O  
HETATM   55  O   HOH T  54     -16.192  -1.084  61.614  1.00  0.33           O  
HETATM   56  O   HOH T  55     -17.892   7.346  51.954  1.00  0.33           O  
HETATM   57  O   HOH T  56     -29.003   7.586  56.809  1.00  0.34           O  
HETATM   58  O   HOH T  57     -18.002   8.817  54.499  1.00  0.34           O  
HETATM   59  O   HOH T  58     -23.918  14.880  28.330  1.00  0.34           O  
HETATM   60  O   HOH T  59      12.130  -1.940  40.262  1.00  0.35           O  
HETATM   61  O   HOH T  60       9.809   0.678  55.763  1.00  0.35           O  
HETATM   62  O   HOH T  61     -22.932   2.729  31.844  1.00  0.35           O  
HETATM   63  O   HOH T  62      10.562  -3.283  34.408  1.00  0.35           O  
HETATM   64  O   HOH T  63      -4.288   5.115  61.327  1.00  0.35           O  
HETATM   65  O   HOH T  64     -17.060  -5.769  37.726  1.00  0.35           O  
HETATM   66  O   HOH T  65       9.847  -7.158  52.252  1.00  0.35           O  
HETATM   67  O   HOH T  66     -10.681   6.628  56.705  1.00  0.36           O  
HETATM   68  O   HOH T  67      -4.537   5.750  58.595  1.00  0.36           O  
HETATM   69  O   HOH T  68     -27.523   6.620  60.267  1.00  0.36           O  
HETATM   70  O   HOH T  69     -21.911  -2.324  46.581  1.00  0.36           O  
HETATM   71  O   HOH T  70     -26.338  13.461  28.769  1.00  0.36           O  
HETATM   72  O   HOH T  71       4.431  -9.128  28.859  1.00  0.36           O  
HETATM   73  O   HOH T  72     -27.202  -6.193  39.330  1.00  0.36           O  
HETATM   74  O   HOH T  73     -17.058   1.415  44.498  1.00  0.37           O  
HETATM   75  O   HOH T  74      -3.361  -3.625  28.053  1.00  0.37           O  
HETATM   76  O   HOH T  75      -8.352   5.039  56.267  1.00  0.37           O  
HETATM   77  O   HOH T  76       6.259   2.979  61.377  1.00  0.37           O  
HETATM   78  O   HOH T  77      11.514  -0.077  32.262  1.00  0.37           O  
HETATM   79  O   HOH T  78     -21.170   5.675  38.216  1.00  0.37           O  
HETATM   80  O   HOH T  79       9.748  -4.839  25.229  1.00  0.37           O  
HETATM   81  O   HOH T  80     -24.261  -6.378  45.216  1.00  0.37           O  
HETATM   82  O   HOH T  81     -10.418   1.160  23.448  1.00  0.37           O  
HETATM   83  O   HOH T  82      -0.124  10.593  56.049  1.00  0.37           O  
HETATM   84  O   HOH T  83      -1.046 -13.273  44.915  1.00  0.37           O  
HETATM   85  O   HOH T  84      -9.424   9.284  42.787  1.00  0.38           O  
HETATM   86  O   HOH T  85       9.050 -14.927  45.850  1.00  0.38           O  
HETATM   87  O   HOH T  86      -6.787   5.359  60.282  1.00  0.38           O  
HETATM   88  O   HOH T  87      -1.564  11.161  58.345  1.00  0.38           O  
HETATM   89  O   HOH T  88       8.835   8.020  52.732  1.00  0.38           O  
HETATM   90  O   HOH T  89     -22.268  -1.799  43.890  1.00  0.38           O  
HETATM   91  O   HOH T  90       4.638  -5.963  24.806  1.00  0.38           O  
HETATM   92  O   HOH T  91      -5.715  12.889  23.217  1.00  0.38           O  
HETATM   93  O   HOH T  92     -10.539   9.415  40.173  1.00  0.38           O  
HETATM   94  O   HOH T  93       8.277 -18.859  42.351  1.00  0.38           O  
HETATM   95  O   HOH T  94      -6.242  -0.109  54.673  1.00  0.38           O  
HETATM   96  O   HOH T  95       0.980   9.976  58.495  1.00  0.38           O  
HETATM   97  O   HOH T  96       3.130 -12.578  47.160  1.00  0.38           O  
HETATM   98  O   HOH T  97     -25.058  -6.633  37.937  1.00  0.38           O  
HETATM   99  O   HOH T  98     -22.424  -4.368  44.855  1.00  0.38           O  
HETATM  100  O   HOH T  99     -19.499   7.886  42.805  1.00  0.38           O  
HETATM  101  O   HOH T 100     -10.733  -0.715  25.523  1.00  0.39           O  
HETATM  102  O   HOH T 101     -19.971  -1.581  42.414  1.00  0.39           O  
HETATM  103  O   HOH T 102       7.662  -1.565  32.255  1.00  0.39           O  
HETATM  104  O   HOH T 103     -17.891  -3.262  38.841  1.00  0.39           O  
HETATM  105  O   HOH T 104      -8.517  11.026  36.582  1.00  0.39           O  
HETATM  106  O   HOH T 105     -14.484  12.450  21.181  1.00  0.39           O  
HETATM  107  O   HOH T 106     -12.794   6.062  40.858  1.00  0.39           O  
HETATM  108  O   HOH T 107      -5.250  10.546  34.391  1.00  0.39           O  
HETATM  109  O   HOH T 108       3.788   2.939  27.496  1.00  0.39           O  
HETATM  110  O   HOH T 109      -2.494   2.858  64.818  1.00  0.39           O  
HETATM  111  O   HOH T 110     -15.156  16.086  32.237  1.00  0.39           O  
HETATM  112  O   HOH T 111      -4.663   8.393  46.989  1.00  0.40           O  
HETATM  113  O   HOH T 112       6.373  -9.770  36.411  1.00  0.40           O  
HETATM  114  O   HOH T 113      10.609 -15.364  48.142  1.00  0.40           O  
HETATM  115  O   HOH T 114      -9.086   7.321  47.809  1.00  0.40           O  
HETATM  116  O   HOH T 115      -2.498  -4.853  25.799  1.00  0.40           O  
HETATM  117  O   HOH T 116       5.588 -15.065  38.053  1.00  0.40           O  
HETATM  118  O   HOH T 117       8.119  -1.703  55.907  1.00  0.40           O  
HETATM  119  O   HOH T 118       2.290 -10.340  27.642  1.00  0.40           O  
HETATM  120  O   HOH T 119     -16.087  -4.718  40.270  1.00  0.40           O  
HETATM  121  O   HOH T 120       3.122   6.945  28.317  1.00  0.40           O  
HETATM  122  O   HOH T 121       1.493  -3.963  21.584  1.00  0.41           O  
HETATM  123  O   HOH T 122      -0.362   9.098  30.467  1.00  0.41           O  
HETATM  124  O   HOH T 123     -15.270   7.187  52.072  1.00  0.41           O  
HETATM  125  O   HOH T 124     -21.683   1.212  37.620  1.00  0.41           O  
HETATM  126  O   HOH T 125       0.152   2.188  64.326  1.00  0.41           O  
HETATM  127  O   HOH T 126     -13.628   7.155  43.282  1.00  0.41           O  
HETATM  128  O   HOH T 127     -13.349  -1.167  26.353  1.00  0.42           O  
HETATM  129  O   HOH T 128     -22.260   0.271  25.431  1.00  0.42           O  
HETATM  130  O   HOH T 129       4.455 -11.952  28.501  1.00  0.42           O  
HETATM  131  O   HOH T 130     -28.484   8.303  29.872  1.00  0.42           O  
HETATM  132  O   HOH T 131      -6.091  17.359  25.643  1.00  0.42           O  
HETATM  133  O   HOH T 132      -1.721  -5.906  23.384  1.00  0.42           O  
HETATM  134  O   HOH T 133       4.559 -18.817  45.798  1.00  0.42           O  
HETATM  135  O   HOH T 134      -1.253  10.004  17.829  1.00  0.42           O  
HETATM  136  O   HOH T 135     -23.158  -5.985  36.066  1.00  0.42           O  
HETATM  137  O   HOH T 136      -5.601  -8.958  31.640  1.00  0.43           O  
HETATM  138  O   HOH T 137     -16.102   5.951  42.907  1.00  0.43           O  
HETATM  139  O   HOH T 138      -2.745  12.655  47.184  1.00  0.43           O  
HETATM  140  O   HOH T 139      -0.004  -5.480  26.859  1.00  0.43           O  
HETATM  141  O   HOH T 140       5.743  -6.838  22.466  1.00  0.43           O  
HETATM  142  O   HOH T 141      -0.984   8.208  52.557  1.00  0.43           O  
HETATM  143  O   HOH T 142     -11.258   8.870  46.860  1.00  0.43           O  
HETATM  144  O   HOH T 143     -23.255   5.341  40.003  1.00  0.43           O  
HETATM  145  O   HOH T 144       4.154  13.260  47.212  1.00  0.43           O  
HETATM  146  O   HOH T 145     -18.486  14.130  31.069  1.00  0.43           O  
HETATM  147  O   HOH T 146     -17.309 -13.362  36.815  1.00  0.43           O  
HETATM  148  O   HOH T 147      10.034  -9.295  50.616  1.00  0.43           O  
HETATM  149  O   HOH T 148     -18.535   5.734  41.412  1.00  0.44           O  
HETATM  150  O   HOH T 149      16.957  -6.991  49.947  1.00  0.44           O  
HETATM  151  O   HOH T 150      -7.686  16.727  27.790  1.00  0.44           O  
HETATM  152  O   HOH T 151       7.054   5.609  35.869  1.00  0.44           O  
HETATM  153  O   HOH T 152      -9.067  11.575  41.260  1.00  0.44           O  
HETATM  154  O   HOH T 153      -5.556  12.065  25.929  1.00  0.44           O  
HETATM  155  O   HOH T 154     -18.698  -5.675  39.977  1.00  0.44           O  
HETATM  156  O   HOH T 155     -10.074   7.512  59.352  1.00  0.44           O  
HETATM  157  O   HOH T 156       2.588  -5.702  27.837  1.00  0.44           O  
HETATM  158  O   HOH T 157       0.557  -2.626  58.584  1.00  0.44           O  
HETATM  159  O   HOH T 158     -22.047   3.117  42.992  1.00  0.44           O  
HETATM  160  O   HOH T 159     -21.049   2.774  57.405  1.00  0.45           O  
HETATM  161  O   HOH T 160      -0.998   9.217  60.251  1.00  0.45           O  
HETATM  162  O   HOH T 161     -17.945   2.601  37.387  1.00  0.45           O  
HETATM  163  O   HOH T 162      -5.157  -4.869  19.276  1.00  0.45           O  
HETATM  164  O   HOH T 163      -9.258 -10.956  32.249  1.00  0.45           O  
HETATM  165  O   HOH T 164       7.133 -14.352  47.841  1.00  0.45           O  
HETATM  166  O   HOH T 165      -0.132   7.699  38.133  1.00  0.45           O  
HETATM  167  O   HOH T 166      14.209  -1.485  53.672  1.00  0.45           O  
HETATM  168  O   HOH T 167      -0.774  -9.903  46.191  1.00  0.45           O  
HETATM  169  O   HOH T 168      -4.196  -4.858  23.595  1.00  0.45           O  
HETATM  170  O   HOH T 169       7.329   0.785  34.078  1.00  0.45           O  
HETATM  171  O   HOH T 170     -20.484  -7.515  38.823  1.00  0.45           O  
HETATM  172  O   HOH T 171      -4.280  10.807  42.875  1.00  0.46           O  
HETATM  173  O   HOH T 172      10.487  -3.236  29.014  1.00  0.46           O  
HETATM  174  O   HOH T 173       2.652 -14.813  35.523  1.00  0.46           O  
HETATM  175  O   HOH T 174       0.600 -12.692  37.851  1.00  0.46           O  
HETATM  176  O   HOH T 175     -25.513   3.518  32.271  1.00  0.46           O  
HETATM  177  O   HOH T 176     -19.096  -7.214  36.503  1.00  0.46           O  
HETATM  178  O   HOH T 177       7.601   5.705  58.775  1.00  0.46           O  
HETATM  179  O   HOH T 178      18.811   0.703  23.294  1.00  0.46           O  
HETATM  180  O   HOH T 179     -19.671   3.224  41.617  1.00  0.46           O  
HETATM  181  O   HOH T 180     -20.662  -0.956  23.515  1.00  0.47           O  
HETATM  182  O   HOH T 181      -9.783   5.903  50.164  1.00  0.47           O  
HETATM  183  O   HOH T 182      -6.730   7.454  56.666  1.00  0.47           O  
HETATM  184  O   HOH T 183       0.123   9.637  42.514  1.00  0.47           O  
HETATM  185  O   HOH T 184       6.165   6.744  39.901  1.00  0.47           O  
HETATM  186  O   HOH T 185     -22.132   3.715  36.421  1.00  0.47           O  
HETATM  187  O   HOH T 186       2.514   8.119  25.906  1.00  0.47           O  
HETATM  188  O   HOH T 187      -1.695   9.664  25.957  1.00  0.47           O  
HETATM  189  O   HOH T 188      15.960  -8.425  53.761  1.00  0.47           O  
HETATM  190  O   HOH T 189       0.959  -7.936  27.459  1.00  0.47           O  
HETATM  191  O   HOH T 190      -3.942  10.642  45.633  1.00  0.47           O  
HETATM  192  O   HOH T 191     -11.565  -5.780  29.300  1.00  0.47           O  
HETATM  193  O   HOH T 192     -15.565  -2.384  59.232  1.00  0.47           O  
HETATM  194  O   HOH T 193      -8.845   6.330  61.645  1.00  0.47           O  
HETATM  195  O   HOH T 194     -26.141   7.655  28.723  1.00  0.47           O  
HETATM  196  O   HOH T 195     -26.469   7.229  57.740  1.00  0.47           O  
HETATM  197  O   HOH T 196     -18.812  -8.390  46.242  1.00  0.47           O  
HETATM  198  O   HOH T 197      12.671  -8.964  49.784  1.00  0.47           O  
HETATM  199  O   HOH T 198     -16.813   9.156  21.815  1.00  0.47           O  
HETATM  200  O   HOH T 199     -24.857   1.390  28.550  1.00  0.47           O  
HETATM  201  O   HOH T 200     -13.376  13.753  25.514  1.00  0.47           O  
HETATM  202  O   HOH T 201     -15.573   7.654  45.139  1.00  0.48           O  
HETATM  203  O   HOH T 202     -18.709  -6.687  57.718  1.00  0.48           O  
HETATM  204  O   HOH T 203      -6.212  14.702  26.664  1.00  0.48           O  
HETATM  205  O   HOH T 204       2.683   2.504  63.093  1.00  0.48           O  
HETATM  206  O   HOH T 205      -8.397  -8.356  31.321  1.00  0.48           O  
HETATM  207  O   HOH T 206       5.983   7.094  62.664  1.00  0.48           O  
HETATM  208  O   HOH T 207      -4.180  11.288  28.280  1.00  0.48           O  
HETATM  209  O   HOH T 208     -23.545   5.546  31.938  1.00  0.48           O  
HETATM  210  O   HOH T 209       3.308  -3.003  57.928  1.00  0.49           O  
HETATM  211  O   HOH T 210     -22.643  -5.891  38.900  1.00  0.49           O  
HETATM  212  O   HOH T 211     -21.834   0.232  45.648  1.00  0.49           O  
HETATM  213  O   HOH T 212      14.709  -7.900  51.307  1.00  0.49           O  
HETATM  214  O   HOH T 213      -5.310   8.617  44.231  1.00  0.49           O  
HETATM  215  O   HOH T 214     -12.575  -4.786  60.326  1.00  0.49           O  
HETATM  216  O   HOH T 215      -3.865  -9.777  38.295  1.00  0.49           O  
HETATM  217  O   HOH T 216      10.585   3.127  54.466  1.00  0.49           O  
HETATM  218  O   HOH T 217       3.070   5.296  26.142  1.00  0.49           O  
HETATM  219  O   HOH T 218      -0.071  -9.246  22.224  1.00  0.49           O  
HETATM  220  O   HOH T 219       3.445  -8.036  26.365  1.00  0.49           O  
HETATM  221  O   HOH T 220      13.842  -4.195  54.388  1.00  0.49           O  
HETATM  222  O   HOH T 221       3.230 -17.194  49.066  1.00  0.49           O  
HETATM  223  O   HOH T 222       5.584  -1.508  57.087  1.00  0.49           O  
HETATM  224  O   HOH T 223      -3.699   8.776  15.024  1.00  0.49           O  
HETATM  225  O   HOH T 224       0.786  -6.547  22.420  1.00  0.49           O  
HETATM  226  O   HOH T 225     -21.078  -5.660  53.761  1.00  0.49           O  
HETATM  227  O   HOH T 226      -5.580  -4.027  54.217  1.00  0.50           O  
HETATM  228  O   HOH T 227      -3.133   7.383  60.307  1.00  0.50           O  
HETATM  229  O   HOH T 228     -10.543  -7.918  59.395  1.00  0.50           O  
HETATM  230  O   HOH T 229      -3.264  11.212  16.323  1.00  0.50           O  
HETATM  231  O   HOH T 230       3.737 -14.342  27.246  1.00  0.50           O  
HETATM  232  O   HOH T 231      -3.130   6.563  41.326  1.00  0.50           O  
HETATM  233  O   HOH T 232     -16.288   9.010  50.320  1.00  0.50           O  
HETATM  234  O   HOH T 233      -2.910  -4.603  30.646  1.00  0.50           O  
HETATM  235  O   HOH T 234     -11.483  16.249  30.114  1.00  0.50           O  
HETATM  236  O   HOH T 235     -25.100   5.518  59.368  1.00  0.50           O  
HETATM  237  O   HOH T 236      11.502  -3.238  26.426  1.00  0.50           O  
HETATM  238  O   HOH T 237       3.752   8.696  23.539  1.00  0.51           O  
HETATM  239  O   HOH T 238     -17.002  16.063  30.188  1.00  0.51           O  
HETATM  240  O   HOH T 239     -20.092  -1.816  39.754  1.00  0.51           O  
HETATM  241  O   HOH T 240       9.063  -8.843  36.213  1.00  0.51           O  
HETATM  242  O   HOH T 241      -1.724  13.826  20.267  1.00  0.51           O  
HETATM  243  O   HOH T 242       1.412  -2.416  56.039  1.00  0.51           O  
HETATM  244  O   HOH T 243     -20.856  -3.001  54.296  1.00  0.51           O  
HETATM  245  O   HOH T 244     -10.987 -11.326  36.302  1.00  0.51           O  
HETATM  246  O   HOH T 245      -5.882  11.772  36.768  1.00  0.51           O  
HETATM  247  O   HOH T 246      10.117 -16.662  42.100  1.00  0.51           O  
HETATM  248  O   HOH T 247      13.781   5.065  44.207  1.00  0.51           O  
HETATM  249  O   HOH T 248      13.230 -10.202  52.207  1.00  0.52           O  
HETATM  250  O   HOH T 249     -23.853   7.689  30.270  1.00  0.52           O  
HETATM  251  O   HOH T 250       4.724   9.840  44.290  1.00  0.52           O  
HETATM  252  O   HOH T 251      -6.688  10.239  57.112  1.00  0.52           O  
HETATM  253  O   HOH T 252      -2.413   9.277  41.466  1.00  0.52           O  
HETATM  254  O   HOH T 253      10.173  -2.500  31.702  1.00  0.52           O  
HETATM  255  O   HOH T 254     -17.961   4.067  43.656  1.00  0.52           O  
HETATM  256  O   HOH T 255       4.879   9.749  56.661  1.00  0.52           O  
HETATM  257  O   HOH T 256     -13.285  17.876  31.287  1.00  0.52           O  
HETATM  258  O   HOH T 257     -12.940   0.287  24.183  1.00  0.52           O  
HETATM  259  O   HOH T 258      11.694  -2.433  54.126  1.00  0.52           O  
HETATM  260  O   HOH T 259      -1.431   7.073  35.562  1.00  0.52           O  
HETATM  261  O   HOH T 260      -4.366  11.265  58.369  1.00  0.53           O  
HETATM  262  O   HOH T 261      12.317  -4.867  24.328  1.00  0.53           O  
HETATM  263  O   HOH T 262     -21.041   7.000  40.726  1.00  0.53           O  
HETATM  264  O   HOH T 263       5.362   6.565  23.442  1.00  0.53           O  
HETATM  265  O   HOH T 264       4.538   7.664  42.020  1.00  0.53           O  
HETATM  266  O   HOH T 265     -17.335  -3.563  60.961  1.00  0.53           O  
HETATM  267  O   HOH T 266     -15.210  12.286  23.879  1.00  0.53           O  
HETATM  268  O   HOH T 267      11.282 -10.849  36.353  1.00  0.53           O  
HETATM  269  O   HOH T 268       9.510   4.760  23.583  1.00  0.53           O  
HETATM  270  O   HOH T 269      -3.543   8.340  34.119  1.00  0.53           O  
HETATM  271  O   HOH T 270     -23.618   3.281  58.344  1.00  0.53           O  
HETATM  272  O   HOH T 271     -17.034  13.997  25.185  1.00  0.53           O  
HETATM  273  O   HOH T 272     -20.229   0.812  50.985  1.00  0.53           O  
HETATM  274  O   HOH T 273      -0.438   7.388  41.000  1.00  0.54           O  
HETATM  275  O   HOH T 274     -22.445   5.447  59.553  1.00  0.54           O  
HETATM  276  O   HOH T 275     -13.813  -4.819  28.423  1.00  0.54           O  
HETATM  277  O   HOH T 276     -22.035  -6.659  29.678  1.00  0.54           O  
HETATM  278  O   HOH T 277     -11.243  17.681  23.810  1.00  0.54           O  
HETATM  279  O   HOH T 278      20.523   2.257  21.844  1.00  0.54           O  
HETATM  280  O   HOH T 279      -4.798  -5.803  28.924  1.00  0.54           O  
HETATM  281  O   HOH T 280      14.161  -6.861  55.197  1.00  0.54           O  
HETATM  282  O   HOH T 281       0.027  -4.169  52.474  1.00  0.55           O  
HETATM  283  O   HOH T 282      -1.194  13.319  44.745  1.00  0.55           O  
HETATM  284  O   HOH T 283     -21.089  -6.352  41.253  1.00  0.55           O  
HETATM  285  O   HOH T 284     -27.972   5.657  29.228  1.00  0.55           O  
HETATM  286  O   HOH T 285       9.589   5.035  56.445  1.00  0.55           O  
HETATM  287  O   HOH T 286       3.457  12.446  44.678  1.00  0.55           O  
HETATM  288  O   HOH T 287     -26.077  -0.859  27.746  1.00  0.55           O  
HETATM  289  O   HOH T 288     -14.048  -4.387  57.973  1.00  0.56           O  
HETATM  290  O   HOH T 289     -24.010  12.537  29.765  1.00  0.56           O  
HETATM  291  O   HOH T 290      -1.007   8.404  33.146  1.00  0.56           O  
HETATM  292  O   HOH T 291     -19.283   0.831  43.054  1.00  0.56           O  
HETATM  293  O   HOH T 292      -8.157  -5.001  54.388  1.00  0.56           O  
HETATM  294  O   HOH T 293     -22.613  -3.354  39.837  1.00  0.57           O  
HETATM  295  O   HOH T 294     -15.645   8.420  47.770  1.00  0.57           O  
HETATM  296  O   HOH T 295       9.599  -4.086  55.116  1.00  0.58           O  
HETATM  297  O   HOH T 296       4.829  -7.404  19.997  1.00  0.58           O  
HETATM  298  O   HOH T 297     -22.692  -2.448  24.539  1.00  0.58           O  
HETATM  299  O   HOH T 298       3.251  -0.457  56.776  1.00  0.59           O  
TER     300      HOH T 298 
