# Supplementary material for: Accurate Prediction of Hydration Sites of Proteins Using Energy Model With Atom Embedding
Source: Front Mol Biosci. 2021 Sep 20;8:756075. doi: 10.3389/fmolb.2021.756075 (PMC8488165; doi:10.3389/fmolb.2021.756075)
Supplement: Supplementary file 1 [file DataSheet1.ZIP › Data Sheet 1/Our_result_pdb/our_dataset_output/3HRV_watersite.pdb]

HEADER                                                        XXXX


JRNL        PMID   -1
HETATM    1  O   HOH T   0      -5.797  34.415  52.609  1.00  0.19           O  
HETATM    2  O   HOH T   1      10.068  36.096  60.250  1.00  0.19           O  
HETATM    3  O   HOH T   2      11.047  27.085  96.192  1.00  0.19           O  
HETATM    4  O   HOH T   3      -2.765   2.402 129.618  1.00  0.20           O  
HETATM    5  O   HOH T   4       9.901  39.187  46.764  1.00  0.21           O  
HETATM    6  O   HOH T   5       3.507  41.882  77.992  1.00  0.22           O  
HETATM    7  O   HOH T   6      17.399  49.219  45.789  1.00  0.22           O  
HETATM    8  O   HOH T   7       5.240  54.557  30.072  1.00  0.23           O  
HETATM    9  O   HOH T   8      -1.686  53.092  67.689  1.00  0.23           O  
HETATM   10  O   HOH T   9      -6.990  24.935  55.523  1.00  0.23           O  
HETATM   11  O   HOH T  10       9.957  45.177  47.202  1.00  0.23           O  
HETATM   12  O   HOH T  11      -0.172  30.739  40.379  1.00  0.24           O  
HETATM   13  O   HOH T  12       7.635  30.300  39.912  1.00  0.24           O  
HETATM   14  O   HOH T  13      14.318  44.148  66.863  1.00  0.24           O  
HETATM   15  O   HOH T  14       4.665  20.441 107.747  1.00  0.24           O  
HETATM   16  O   HOH T  15       6.551  -2.985 104.053  1.00  0.24           O  
HETATM   17  O   HOH T  16       6.770  51.909  34.292  1.00  0.24           O  
HETATM   18  O   HOH T  17       2.036  33.327  38.547  1.00  0.25           O  
HETATM   19  O   HOH T  18      20.343  46.714  62.134  1.00  0.26           O  
HETATM   20  O   HOH T  19      20.495  38.924  62.047  1.00  0.26           O  
HETATM   21  O   HOH T  20      -6.757   0.464 108.015  1.00  0.26           O  
HETATM   22  O   HOH T  21       0.426  11.292  94.495  1.00  0.26           O  
HETATM   23  O   HOH T  22      12.101   7.267 107.281  1.00  0.26           O  
HETATM   24  O   HOH T  23      -3.258  55.103  48.401  1.00  0.26           O  
HETATM   25  O   HOH T  24      -6.375   1.374 103.781  1.00  0.26           O  
HETATM   26  O   HOH T  25       1.507  56.304  35.869  1.00  0.27           O  
HETATM   27  O   HOH T  26      -3.521  38.834  75.923  1.00  0.27           O  
HETATM   28  O   HOH T  27       3.819  37.226  64.390  1.00  0.27           O  
HETATM   29  O   HOH T  28       6.075  16.456  97.136  1.00  0.27           O  
HETATM   30  O   HOH T  29      17.483  -3.101 104.268  1.00  0.27           O  
HETATM   31  O   HOH T  30      -8.984   5.384 125.187  1.00  0.27           O  
HETATM   32  O   HOH T  31      -7.703   6.801 107.571  1.00  0.27           O  
HETATM   33  O   HOH T  32     -10.192  -4.146 111.749  1.00  0.28           O  
HETATM   34  O   HOH T  33      -2.848  47.072  60.160  1.00  0.28           O  
HETATM   35  O   HOH T  34       5.895  48.798  31.910  1.00  0.28           O  
HETATM   36  O   HOH T  35      11.635  28.725  99.446  1.00  0.28           O  
HETATM   37  O   HOH T  36       0.791  -8.696 116.991  1.00  0.28           O  
HETATM   38  O   HOH T  37     -15.215  45.778  47.547  1.00  0.28           O  
HETATM   39  O   HOH T  38       5.058  34.658  74.781  1.00  0.28           O  
HETATM   40  O   HOH T  39       3.044  51.549  57.096  1.00  0.28           O  
HETATM   41  O   HOH T  40      16.987  10.851 104.009  1.00  0.28           O  
HETATM   42  O   HOH T  41       1.268   5.247  94.708  1.00  0.29           O  
HETATM   43  O   HOH T  42       4.306   0.204 126.928  1.00  0.29           O  
HETATM   44  O   HOH T  43      -1.285   4.558  93.797  1.00  0.29           O  
HETATM   45  O   HOH T  44       7.648  53.081  39.572  1.00  0.29           O  
HETATM   46  O   HOH T  45      18.219   2.487 100.066  1.00  0.29           O  
HETATM   47  O   HOH T  46     -12.184   7.336 123.993  1.00  0.29           O  
HETATM   48  O   HOH T  47      16.782  15.349 101.041  1.00  0.29           O  
HETATM   49  O   HOH T  48      -7.065  52.063  40.953  1.00  0.29           O  
HETATM   50  O   HOH T  49       5.525  59.721  52.617  1.00  0.29           O  
HETATM   51  O   HOH T  50     -13.737  15.785 104.450  1.00  0.30           O  
HETATM   52  O   HOH T  51      10.187   7.313  96.270  1.00  0.30           O  
HETATM   53  O   HOH T  52      -6.275  53.094  38.603  1.00  0.30           O  
HETATM   54  O   HOH T  53       0.949  -8.824 104.552  1.00  0.30           O  
HETATM   55  O   HOH T  54      17.002  37.471  55.196  1.00  0.30           O  
HETATM   56  O   HOH T  55     -13.617   9.752 101.694  1.00  0.30           O  
HETATM   57  O   HOH T  56      -4.954  23.486  54.287  1.00  0.30           O  
HETATM   58  O   HOH T  57      12.018  32.526  55.298  1.00  0.30           O  
HETATM   59  O   HOH T  58      12.144  -4.100 103.759  1.00  0.30           O  
HETATM   60  O   HOH T  59       6.602  40.936  31.925  1.00  0.31           O  
HETATM   61  O   HOH T  60      22.543  -1.208 110.691  1.00  0.31           O  
HETATM   62  O   HOH T  61      -5.709  21.967  47.708  1.00  0.31           O  
HETATM   63  O   HOH T  62       9.409  -6.800 120.860  1.00  0.31           O  
HETATM   64  O   HOH T  63       4.882 -11.429 102.869  1.00  0.31           O  
HETATM   65  O   HOH T  64      10.702   4.751  97.113  1.00  0.31           O  
HETATM   66  O   HOH T  65      13.887  36.896  38.300  1.00  0.31           O  
HETATM   67  O   HOH T  66      22.617  43.482  53.901  1.00  0.31           O  
HETATM   68  O   HOH T  67      -2.489  18.654  45.412  1.00  0.32           O  
HETATM   69  O   HOH T  68      -4.694  43.592  32.147  1.00  0.32           O  
HETATM   70  O   HOH T  69      11.788   1.595 116.157  1.00  0.32           O  
HETATM   71  O   HOH T  70       3.380  31.450  89.686  1.00  0.32           O  
HETATM   72  O   HOH T  71      14.734   2.436  97.565  1.00  0.32           O  
HETATM   73  O   HOH T  72       2.760  55.517  29.626  1.00  0.32           O  
HETATM   74  O   HOH T  73       1.397  28.062  56.099  1.00  0.32           O  
HETATM   75  O   HOH T  74       0.973  34.909  74.244  1.00  0.32           O  
HETATM   76  O   HOH T  75       2.028  29.264  58.449  1.00  0.32           O  
HETATM   77  O   HOH T  76      -7.212  33.195  63.456  1.00  0.32           O  
HETATM   78  O   HOH T  77      -2.632  45.864  62.632  1.00  0.32           O  
HETATM   79  O   HOH T  78       8.106   5.464  96.200  1.00  0.32           O  
HETATM   80  O   HOH T  79      -5.774  -8.990 108.517  1.00  0.33           O  
HETATM   81  O   HOH T  80      17.696  46.800  53.262  1.00  0.33           O  
HETATM   82  O   HOH T  81      -9.404  35.179  41.324  1.00  0.33           O  
HETATM   83  O   HOH T  82     -14.435  38.320  41.186  1.00  0.33           O  
HETATM   84  O   HOH T  83      -1.735  -9.016 111.178  1.00  0.33           O  
HETATM   85  O   HOH T  84      11.470  56.650  50.240  1.00  0.33           O  
HETATM   86  O   HOH T  85      -1.428  52.220  59.874  1.00  0.33           O  
HETATM   87  O   HOH T  86      20.100   4.502  99.687  1.00  0.33           O  
HETATM   88  O   HOH T  87      15.494  46.423  65.687  1.00  0.33           O  
HETATM   89  O   HOH T  88      13.513  55.559  48.541  1.00  0.33           O  
HETATM   90  O   HOH T  89      -0.847  26.125  97.844  1.00  0.33           O  
HETATM   91  O   HOH T  90     -12.965  12.217 102.706  1.00  0.33           O  
HETATM   92  O   HOH T  91      12.356  46.074  41.893  1.00  0.33           O  
HETATM   93  O   HOH T  92      -8.502  42.974  54.700  1.00  0.33           O  
HETATM   94  O   HOH T  93     -15.508  12.981 110.888  1.00  0.33           O  
HETATM   95  O   HOH T  94       7.442  52.030  36.985  1.00  0.34           O  
HETATM   96  O   HOH T  95      -5.383  52.577  42.970  1.00  0.34           O  
HETATM   97  O   HOH T  96       3.493  -5.699 109.718  1.00  0.34           O  
HETATM   98  O   HOH T  97     -10.538  -4.994 116.351  1.00  0.34           O  
HETATM   99  O   HOH T  98      -8.687  29.907 105.323  1.00  0.34           O  
HETATM  100  O   HOH T  99     -10.393  33.650  34.381  1.00  0.34           O  
HETATM  101  O   HOH T 100     -12.002  29.124  52.857  1.00  0.34           O  
HETATM  102  O   HOH T 101       2.129  36.576  32.141  1.00  0.34           O  
HETATM  103  O   HOH T 102     -10.901  -3.246 114.243  1.00  0.35           O  
HETATM  104  O   HOH T 103      -8.657  29.479  63.291  1.00  0.35           O  
HETATM  105  O   HOH T 104      13.699  32.102  53.206  1.00  0.35           O  
HETATM  106  O   HOH T 105       4.231  20.252 110.442  1.00  0.35           O  
HETATM  107  O   HOH T 106     -11.687  32.521  56.960  1.00  0.35           O  
HETATM  108  O   HOH T 107       9.598  32.598  56.589  1.00  0.35           O  
HETATM  109  O   HOH T 108       3.580  59.396  50.617  1.00  0.35           O  
HETATM  110  O   HOH T 109     -10.700  35.486  32.248  1.00  0.35           O  
HETATM  111  O   HOH T 110      -4.977  37.835  34.069  1.00  0.36           O  
HETATM  112  O   HOH T 111       1.160  56.542  59.307  1.00  0.36           O  
HETATM  113  O   HOH T 112      -7.283  36.580  56.670  1.00  0.36           O  
HETATM  114  O   HOH T 113      -5.306   2.114 106.241  1.00  0.36           O  
HETATM  115  O   HOH T 114       7.274  -5.439 103.037  1.00  0.36           O  
HETATM  116  O   HOH T 115      -0.928  10.469 122.926  1.00  0.36           O  
HETATM  117  O   HOH T 116     -10.756   7.879  91.424  1.00  0.36           O  
HETATM  118  O   HOH T 117      -3.629  10.634 123.750  1.00  0.36           O  
HETATM  119  O   HOH T 118     -15.293  36.989  32.574  1.00  0.36           O  
HETATM  120  O   HOH T 119      19.822  13.298 100.432  1.00  0.36           O  
HETATM  121  O   HOH T 120      15.316  17.763 101.108  1.00  0.36           O  
HETATM  122  O   HOH T 121      10.561  34.795  57.878  1.00  0.36           O  
HETATM  123  O   HOH T 122     -11.610   6.209 115.928  1.00  0.36           O  
HETATM  124  O   HOH T 123      -0.602  58.888  32.124  1.00  0.36           O  
HETATM  125  O   HOH T 124      -3.667  23.795  47.741  1.00  0.36           O  
HETATM  126  O   HOH T 125       3.494  -1.049  95.428  1.00  0.36           O  
HETATM  127  O   HOH T 126      20.837  40.742  58.597  1.00  0.37           O  
HETATM  128  O   HOH T 127      -7.453  39.070  73.326  1.00  0.37           O  
HETATM  129  O   HOH T 128       2.704  23.429 108.303  1.00  0.37           O  
HETATM  130  O   HOH T 129      -6.933  19.257  41.540  1.00  0.37           O  
HETATM  131  O   HOH T 130      -4.083  57.305  34.609  1.00  0.37           O  
HETATM  132  O   HOH T 131      13.178  34.878  40.844  1.00  0.37           O  
HETATM  133  O   HOH T 132       8.564   4.097 126.485  1.00  0.37           O  
HETATM  134  O   HOH T 133      -8.142  32.212  58.944  1.00  0.37           O  
HETATM  135  O   HOH T 134     -18.840  39.879  33.649  1.00  0.37           O  
HETATM  136  O   HOH T 135      15.016   6.307  94.162  1.00  0.37           O  
HETATM  137  O   HOH T 136      -0.648  26.490  41.013  1.00  0.37           O  
HETATM  138  O   HOH T 137      -7.572   3.777  93.344  1.00  0.37           O  
HETATM  139  O   HOH T 138      -8.276  25.848  53.299  1.00  0.37           O  
HETATM  140  O   HOH T 139       4.939  61.224  54.910  1.00  0.38           O  
HETATM  141  O   HOH T 140      -1.690  -8.926 103.661  1.00  0.38           O  
HETATM  142  O   HOH T 141       9.566  40.739  44.414  1.00  0.38           O  
HETATM  143  O   HOH T 142       2.587   3.289  98.349  1.00  0.38           O  
HETATM  144  O   HOH T 143      13.645  27.475 101.037  1.00  0.38           O  
HETATM  145  O   HOH T 144      14.699  36.083  42.891  1.00  0.38           O  
HETATM  146  O   HOH T 145      -9.898  33.752  43.615  1.00  0.38           O  
HETATM  147  O   HOH T 146      11.793  46.740  45.794  1.00  0.38           O  
HETATM  148  O   HOH T 147       7.305  -8.472  99.654  1.00  0.38           O  
HETATM  149  O   HOH T 148     -10.165  29.200  61.103  1.00  0.38           O  
HETATM  150  O   HOH T 149       3.002  57.308  48.771  1.00  0.38           O  
HETATM  151  O   HOH T 150      -7.195  -9.911 106.205  1.00  0.38           O  
HETATM  152  O   HOH T 151      20.709   0.809 109.917  1.00  0.38           O  
HETATM  153  O   HOH T 152      23.417  42.833  59.512  1.00  0.38           O  
HETATM  154  O   HOH T 153      -4.976   1.298  96.374  1.00  0.38           O  
HETATM  155  O   HOH T 154     -16.086  13.133 108.170  1.00  0.38           O  
HETATM  156  O   HOH T 155      13.318  -8.640 111.913  1.00  0.38           O  
HETATM  157  O   HOH T 156      14.250  41.236  51.619  1.00  0.38           O  
HETATM  158  O   HOH T 157      -9.405  27.429 104.627  1.00  0.38           O  
HETATM  159  O   HOH T 158       0.225   7.766  94.170  1.00  0.38           O  
HETATM  160  O   HOH T 159       3.768  59.105  37.978  1.00  0.39           O  
HETATM  161  O   HOH T 160      -4.649  22.949 110.070  1.00  0.39           O  
HETATM  162  O   HOH T 161      -9.625  38.375  48.915  1.00  0.39           O  
HETATM  163  O   HOH T 162       2.434   3.750 126.738  1.00  0.39           O  
HETATM  164  O   HOH T 163      11.591  38.898  44.653  1.00  0.39           O  
HETATM  165  O   HOH T 164      12.140  -7.356 114.122  1.00  0.39           O  
HETATM  166  O   HOH T 165      -1.753  47.772  64.472  1.00  0.39           O  
HETATM  167  O   HOH T 166       2.955  26.171  44.343  1.00  0.39           O  
HETATM  168  O   HOH T 167      12.905   4.931  95.415  1.00  0.39           O  
HETATM  169  O   HOH T 168       3.924  29.272  56.471  1.00  0.39           O  
HETATM  170  O   HOH T 169      14.570  46.818  40.348  1.00  0.39           O  
HETATM  171  O   HOH T 170      -5.842  40.222  75.393  1.00  0.39           O  
HETATM  172  O   HOH T 171     -14.213  36.897  38.912  1.00  0.39           O  
HETATM  173  O   HOH T 172      -7.329  23.906 109.906  1.00  0.39           O  
HETATM  174  O   HOH T 173       8.002  32.636  54.307  1.00  0.39           O  
HETATM  175  O   HOH T 174      11.064  57.445  56.767  1.00  0.39           O  
HETATM  176  O   HOH T 175      -4.612  20.810  42.054  1.00  0.39           O  
HETATM  177  O   HOH T 176      11.970  33.144  69.861  1.00  0.39           O  
HETATM  178  O   HOH T 177       9.563  -8.176 114.401  1.00  0.40           O  
HETATM  179  O   HOH T 178      -8.988  44.594  52.438  1.00  0.40           O  
HETATM  180  O   HOH T 179      13.607  43.007  38.172  1.00  0.40           O  
HETATM  181  O   HOH T 180       0.128  17.865  92.448  1.00  0.40           O  
HETATM  182  O   HOH T 181      17.797  13.053 102.393  1.00  0.40           O  
HETATM  183  O   HOH T 182      18.857  -0.882 111.194  1.00  0.40           O  
HETATM  184  O   HOH T 183       0.852  53.835  59.790  1.00  0.40           O  
HETATM  185  O   HOH T 184     -15.325  11.047 103.387  1.00  0.40           O  
HETATM  186  O   HOH T 185      13.920  33.213  67.907  1.00  0.40           O  
HETATM  187  O   HOH T 186      19.486  45.559  57.672  1.00  0.40           O  
HETATM  188  O   HOH T 187      14.637  34.146  50.191  1.00  0.40           O  
HETATM  189  O   HOH T 188      16.991  37.258  48.674  1.00  0.40           O  
HETATM  190  O   HOH T 189      16.317  32.560  54.033  1.00  0.40           O  
HETATM  191  O   HOH T 190      -8.241   6.121 100.216  1.00  0.40           O  
HETATM  192  O   HOH T 191      12.853  29.049  96.912  1.00  0.40           O  
HETATM  193  O   HOH T 192      -4.962 -10.117 113.907  1.00  0.41           O  
HETATM  194  O   HOH T 193       2.662  24.478  42.059  1.00  0.41           O  
HETATM  195  O   HOH T 194      20.616  38.022  55.278  1.00  0.41           O  
HETATM  196  O   HOH T 195      -9.888  -2.033 106.790  1.00  0.41           O  
HETATM  197  O   HOH T 196      20.879  34.056  56.437  1.00  0.41           O  
HETATM  198  O   HOH T 197       2.938  -3.253  97.059  1.00  0.41           O  
HETATM  199  O   HOH T 198      19.891  51.395  53.488  1.00  0.41           O  
HETATM  200  O   HOH T 199      13.783  41.210  40.072  1.00  0.41           O  
HETATM  201  O   HOH T 200     -12.466  47.195  35.919  1.00  0.41           O  
HETATM  202  O   HOH T 201      11.252  31.639  39.543  1.00  0.41           O  
HETATM  203  O   HOH T 202      18.451  15.299  98.888  1.00  0.41           O  
HETATM  204  O   HOH T 203      -5.619   5.761 114.645  1.00  0.41           O  
HETATM  205  O   HOH T 204      -9.668  -3.790 104.542  1.00  0.41           O  
HETATM  206  O   HOH T 205      -7.265  -0.667 102.059  1.00  0.42           O  
HETATM  207  O   HOH T 206      -2.392  10.895 126.234  1.00  0.42           O  
HETATM  208  O   HOH T 207      13.735   0.787 114.524  1.00  0.42           O  
HETATM  209  O   HOH T 208      11.773  23.794  93.101  1.00  0.42           O  
HETATM  210  O   HOH T 209     -18.311   8.456 108.569  1.00  0.42           O  
HETATM  211  O   HOH T 210     -11.314  -4.285 106.773  1.00  0.42           O  
HETATM  212  O   HOH T 211       4.572  59.622  40.674  1.00  0.42           O  
HETATM  213  O   HOH T 212      17.206  51.247  52.694  1.00  0.42           O  
HETATM  214  O   HOH T 213     -12.413  31.011  54.794  1.00  0.42           O  
HETATM  215  O   HOH T 214      13.537  -0.627 100.290  1.00  0.42           O  
HETATM  216  O   HOH T 215      -1.211   9.671  92.726  1.00  0.42           O  
HETATM  217  O   HOH T 216       9.158  -1.599 128.231  1.00  0.42           O  
HETATM  218  O   HOH T 217      -7.950   7.524  91.335  1.00  0.42           O  
HETATM  219  O   HOH T 218       1.668  30.687  38.402  1.00  0.42           O  
HETATM  220  O   HOH T 219      -0.517  -9.279 114.662  1.00  0.43           O  
HETATM  221  O   HOH T 220      11.508  54.076  38.193  1.00  0.43           O  
HETATM  222  O   HOH T 221       9.042  -6.693 123.715  1.00  0.43           O  
HETATM  223  O   HOH T 222       1.895  27.132  41.962  1.00  0.43           O  
HETATM  224  O   HOH T 223      13.063  -8.974 109.181  1.00  0.43           O  
HETATM  225  O   HOH T 224      21.800   3.229 101.459  1.00  0.43           O  
HETATM  226  O   HOH T 225       3.252  38.590  30.687  1.00  0.43           O  
HETATM  227  O   HOH T 226      10.815  19.247 110.984  1.00  0.43           O  
HETATM  228  O   HOH T 227      -3.915  21.903  49.726  1.00  0.43           O  
HETATM  229  O   HOH T 228     -14.416  21.087 109.162  1.00  0.43           O  
HETATM  230  O   HOH T 229     -12.374  -2.938 116.583  1.00  0.43           O  
HETATM  231  O   HOH T 230      20.129  40.159  50.722  1.00  0.43           O  
HETATM  232  O   HOH T 231      18.938   3.376  95.822  1.00  0.43           O  
HETATM  233  O   HOH T 232     -13.766   6.518 113.857  1.00  0.43           O  
HETATM  234  O   HOH T 233     -10.503  25.029 104.556  1.00  0.43           O  
HETATM  235  O   HOH T 234       9.979  46.396  34.335  1.00  0.43           O  
HETATM  236  O   HOH T 235      -0.476  21.669  92.394  1.00  0.43           O  
HETATM  237  O   HOH T 236      16.829   0.800  98.523  1.00  0.43           O  
HETATM  238  O   HOH T 237      11.386   0.201  98.720  1.00  0.43           O  
HETATM  239  O   HOH T 238      -9.728  43.931  33.030  1.00  0.44           O  
HETATM  240  O   HOH T 239       3.097  58.529  46.190  1.00  0.44           O  
HETATM  241  O   HOH T 240      18.019  38.436  50.981  1.00  0.44           O  
HETATM  242  O   HOH T 241      -1.592  56.810  46.870  1.00  0.44           O  
HETATM  243  O   HOH T 242      15.436  39.034  39.606  1.00  0.44           O  
HETATM  244  O   HOH T 243      14.669  17.377  98.504  1.00  0.44           O  
HETATM  245  O   HOH T 244       2.502  28.089  52.624  1.00  0.44           O  
HETATM  246  O   HOH T 245      11.434  -9.996 113.438  1.00  0.44           O  
HETATM  247  O   HOH T 246      -4.263 -12.516 115.167  1.00  0.44           O  
HETATM  248  O   HOH T 247       6.423  36.352  76.592  1.00  0.44           O  
HETATM  249  O   HOH T 248     -15.245  35.488  34.873  1.00  0.44           O  
HETATM  250  O   HOH T 249     -16.625   7.077 105.629  1.00  0.44           O  
HETATM  251  O   HOH T 250       4.909  -9.170 104.613  1.00  0.44           O  
HETATM  252  O   HOH T 251      12.430  45.179  34.151  1.00  0.44           O  
HETATM  253  O   HOH T 252      -8.918  31.654  61.537  1.00  0.44           O  
HETATM  254  O   HOH T 253      -2.634  24.784  39.959  1.00  0.44           O  
HETATM  255  O   HOH T 254       2.506  12.331 126.245  1.00  0.44           O  
HETATM  256  O   HOH T 255      14.910  53.712  49.699  1.00  0.44           O  
HETATM  257  O   HOH T 256      15.193   3.542  94.857  1.00  0.44           O  
HETATM  258  O   HOH T 257     -13.077   9.758 122.679  1.00  0.44           O  
HETATM  259  O   HOH T 258      14.697  59.507  41.356  1.00  0.44           O  
HETATM  260  O   HOH T 259      13.912  46.444  36.073  1.00  0.44           O  
HETATM  261  O   HOH T 260     -10.900  -3.056 109.252  1.00  0.44           O  
HETATM  262  O   HOH T 261     -15.320   8.255 103.417  1.00  0.45           O  
HETATM  263  O   HOH T 262      12.092 -10.918 110.916  1.00  0.45           O  
HETATM  264  O   HOH T 263      10.232  51.796  37.131  1.00  0.45           O  
HETATM  265  O   HOH T 264      16.993  33.979  51.703  1.00  0.45           O  
HETATM  266  O   HOH T 265      -0.440 -11.233 104.569  1.00  0.45           O  
HETATM  267  O   HOH T 266     -15.935  44.954  36.335  1.00  0.45           O  
HETATM  268  O   HOH T 267      14.008  -5.872 102.774  1.00  0.45           O  
HETATM  269  O   HOH T 268     -14.346  17.901  99.232  1.00  0.45           O  
HETATM  270  O   HOH T 269      10.013  -5.759 102.680  1.00  0.45           O  
HETATM  271  O   HOH T 270      -7.365  -7.741 111.918  1.00  0.45           O  
HETATM  272  O   HOH T 271     -15.395   8.845 114.016  1.00  0.45           O  
HETATM  273  O   HOH T 272       0.876 -11.370 113.444  1.00  0.45           O  
HETATM  274  O   HOH T 273     -13.332  35.100  32.883  1.00  0.45           O  
HETATM  275  O   HOH T 274      -9.836  -6.809 112.549  1.00  0.45           O  
HETATM  276  O   HOH T 275       5.658  35.016  33.778  1.00  0.45           O  
HETATM  277  O   HOH T 276      -3.380  32.337  34.411  1.00  0.45           O  
HETATM  278  O   HOH T 277     -12.187  21.110 107.553  1.00  0.45           O  
HETATM  279  O   HOH T 278      -1.768  25.066  46.139  1.00  0.45           O  
HETATM  280  O   HOH T 279       9.077  57.592  51.472  1.00  0.45           O  
HETATM  281  O   HOH T 280       7.274 -10.202 103.807  1.00  0.45           O  
HETATM  282  O   HOH T 281     -12.342  22.968 104.265  1.00  0.45           O  
HETATM  283  O   HOH T 282       4.896   2.813 127.703  1.00  0.45           O  
HETATM  284  O   HOH T 283      16.572  -8.048 109.531  1.00  0.45           O  
HETATM  285  O   HOH T 284       5.869  29.371  60.317  1.00  0.45           O  
HETATM  286  O   HOH T 285       1.263  24.365  94.772  1.00  0.46           O  
HETATM  287  O   HOH T 286      -8.246  14.621  92.396  1.00  0.46           O  
HETATM  288  O   HOH T 287     -12.698  38.073  46.385  1.00  0.46           O  
HETATM  289  O   HOH T 288      13.768  45.437  44.307  1.00  0.46           O  
HETATM  290  O   HOH T 289      -5.658  -9.798 111.212  1.00  0.46           O  
HETATM  291  O   HOH T 290      13.174  12.161 106.883  1.00  0.46           O  
HETATM  292  O   HOH T 291      11.597  -8.158 106.966  1.00  0.46           O  
HETATM  293  O   HOH T 292      -7.155  50.438  38.581  1.00  0.46           O  
HETATM  294  O   HOH T 293      21.659  48.708  63.553  1.00  0.46           O  
HETATM  295  O   HOH T 294      12.330   7.497 113.731  1.00  0.46           O  
HETATM  296  O   HOH T 295      11.662  41.277  46.142  1.00  0.46           O  
HETATM  297  O   HOH T 296      -3.922  21.796  52.410  1.00  0.46           O  
HETATM  298  O   HOH T 297      15.761  33.944  41.415  1.00  0.46           O  
HETATM  299  O   HOH T 298      12.082  42.945  35.852  1.00  0.46           O  
HETATM  300  O   HOH T 299      18.074  -9.769 107.887  1.00  0.46           O  
HETATM  301  O   HOH T 300       1.017  28.312  39.646  1.00  0.46           O  
HETATM  302  O   HOH T 301      15.272  -9.600 107.605  1.00  0.46           O  
HETATM  303  O   HOH T 302       1.534  26.127  51.048  1.00  0.46           O  
HETATM  304  O   HOH T 303      -1.636 -11.865 114.462  1.00  0.46           O  
HETATM  305  O   HOH T 304      -4.820  34.162  32.927  1.00  0.46           O  
HETATM  306  O   HOH T 305       8.928  54.287  37.366  1.00  0.46           O  
HETATM  307  O   HOH T 306     -14.560  15.278 111.698  1.00  0.46           O  
HETATM  308  O   HOH T 307      -6.694   4.000 104.645  1.00  0.46           O  
HETATM  309  O   HOH T 308       0.489 -11.385 116.245  1.00  0.46           O  
HETATM  310  O   HOH T 309      -1.960  52.074  57.177  1.00  0.46           O  
HETATM  311  O   HOH T 310       7.041  -5.717 109.146  1.00  0.47           O  
HETATM  312  O   HOH T 311      16.064  46.753  45.383  1.00  0.47           O  
HETATM  313  O   HOH T 312     -14.776  34.587  37.447  1.00  0.47           O  
HETATM  314  O   HOH T 313      -7.423  -5.476 104.667  1.00  0.47           O  
HETATM  315  O   HOH T 314     -14.671  10.766 115.982  1.00  0.47           O  
HETATM  316  O   HOH T 315      -3.992  50.238  57.519  1.00  0.47           O  
HETATM  317  O   HOH T 316      20.187  49.867  45.812  1.00  0.47           O  
HETATM  318  O   HOH T 317       8.221  -5.909 100.432  1.00  0.47           O  
HETATM  319  O   HOH T 318       5.656  -8.958 101.911  1.00  0.47           O  
HETATM  320  O   HOH T 319      -6.399  55.984  33.902  1.00  0.47           O  
HETATM  321  O   HOH T 320     -11.153  -9.415 116.696  1.00  0.47           O  
HETATM  322  O   HOH T 321       1.372   8.514 124.833  1.00  0.47           O  
HETATM  323  O   HOH T 322       3.978  57.605  35.706  1.00  0.47           O  
HETATM  324  O   HOH T 323      12.092  41.378  43.414  1.00  0.47           O  
HETATM  325  O   HOH T 324     -13.813  40.231  47.788  1.00  0.47           O  
HETATM  326  O   HOH T 325      -0.682  59.123  45.534  1.00  0.47           O  
HETATM  327  O   HOH T 326      -7.691   6.498  93.979  1.00  0.47           O  
HETATM  328  O   HOH T 327      10.580  59.919  58.357  1.00  0.47           O  
HETATM  329  O   HOH T 328       1.668  59.250  43.887  1.00  0.47           O  
HETATM  330  O   HOH T 329      20.123  47.955  56.431  1.00  0.47           O  
HETATM  331  O   HOH T 330      18.983   1.831 111.787  1.00  0.47           O  
HETATM  332  O   HOH T 331       8.189   0.845 128.819  1.00  0.47           O  
HETATM  333  O   HOH T 332     -12.571  28.995  59.958  1.00  0.47           O  
HETATM  334  O   HOH T 333       7.786  -8.548 122.057  1.00  0.48           O  
HETATM  335  O   HOH T 334      19.634  49.412  61.786  1.00  0.48           O  
HETATM  336  O   HOH T 335      -4.838  25.430  38.340  1.00  0.48           O  
HETATM  337  O   HOH T 336      -9.134   3.539 116.412  1.00  0.48           O  
HETATM  338  O   HOH T 337      -4.674  10.768  87.385  1.00  0.48           O  
HETATM  339  O   HOH T 338       0.732  58.114  47.590  1.00  0.48           O  
HETATM  340  O   HOH T 339      -1.447  24.855  55.080  1.00  0.48           O  
HETATM  341  O   HOH T 340      18.136  33.160  56.071  1.00  0.48           O  
HETATM  342  O   HOH T 341      -7.059  42.896  30.710  1.00  0.48           O  
HETATM  343  O   HOH T 342       9.717  30.015  38.039  1.00  0.48           O  
HETATM  344  O   HOH T 343     -11.455  44.991  34.927  1.00  0.48           O  
HETATM  345  O   HOH T 344      -1.154  25.666  51.104  1.00  0.48           O  
HETATM  346  O   HOH T 345      -2.991  -8.132 113.910  1.00  0.48           O  
HETATM  347  O   HOH T 346      14.931  34.292  38.722  1.00  0.48           O  
HETATM  348  O   HOH T 347      18.108  36.305  52.838  1.00  0.48           O  
HETATM  349  O   HOH T 348      -4.762  30.454  35.688  1.00  0.48           O  
HETATM  350  O   HOH T 349      10.877  -3.530 127.259  1.00  0.48           O  
HETATM  351  O   HOH T 350       2.973  -9.417 102.714  1.00  0.48           O  
HETATM  352  O   HOH T 351      11.940  44.795  68.082  1.00  0.48           O  
HETATM  353  O   HOH T 352      -6.554  29.152  37.256  1.00  0.48           O  
HETATM  354  O   HOH T 353      15.841  48.954  53.268  1.00  0.48           O  
HETATM  355  O   HOH T 354     -16.357   3.973 118.687  1.00  0.49           O  
HETATM  356  O   HOH T 355      -4.685  42.015  65.827  1.00  0.49           O  
HETATM  357  O   HOH T 356      -5.067  41.148  30.749  1.00  0.49           O  
HETATM  358  O   HOH T 357      -8.194  42.243  57.416  1.00  0.49           O  
HETATM  359  O   HOH T 358      13.315  55.642  39.447  1.00  0.49           O  
HETATM  360  O   HOH T 359       9.697   2.368  98.199  1.00  0.49           O  
HETATM  361  O   HOH T 360      -6.733   4.246 107.417  1.00  0.49           O  
HETATM  362  O   HOH T 361      -9.582  44.515  58.224  1.00  0.49           O  
HETATM  363  O   HOH T 362       4.573  37.609  33.065  1.00  0.49           O  
HETATM  364  O   HOH T 363       0.252  11.032 125.468  1.00  0.49           O  
HETATM  365  O   HOH T 364      17.086  17.055  97.152  1.00  0.49           O  
HETATM  366  O   HOH T 365      20.347  43.055  56.832  1.00  0.49           O  
HETATM  367  O   HOH T 366      11.870  -6.772 104.461  1.00  0.49           O  
HETATM  368  O   HOH T 367     -11.251   2.588 107.173  1.00  0.49           O  
HETATM  369  O   HOH T 368      -1.925  16.116 119.850  1.00  0.49           O  
HETATM  370  O   HOH T 369     -14.938  15.407 106.984  1.00  0.49           O  
HETATM  371  O   HOH T 370      11.274  45.454  36.703  1.00  0.49           O  
HETATM  372  O   HOH T 371     -13.059  33.815  35.322  1.00  0.49           O  
HETATM  373  O   HOH T 372      -8.299  40.654  29.459  1.00  0.50           O  
HETATM  374  O   HOH T 373      24.019   4.607 100.504  1.00  0.50           O  
HETATM  375  O   HOH T 374      15.667  34.888  47.781  1.00  0.50           O  
HETATM  376  O   HOH T 375      14.469  31.461  55.800  1.00  0.50           O  
HETATM  377  O   HOH T 376      10.716  18.475 106.929  1.00  0.50           O  
HETATM  378  O   HOH T 377       7.436  -3.303  99.564  1.00  0.50           O  
HETATM  379  O   HOH T 378       2.929  60.291  53.245  1.00  0.50           O  
HETATM  380  O   HOH T 379       9.359  22.257 112.703  1.00  0.50           O  
HETATM  381  O   HOH T 380      19.053  44.953  55.032  1.00  0.50           O  
HETATM  382  O   HOH T 381       0.321 -10.114 102.148  1.00  0.50           O  
HETATM  383  O   HOH T 382      15.762  38.528  42.302  1.00  0.50           O  
HETATM  384  O   HOH T 383      -8.290  49.317  50.271  1.00  0.50           O  
HETATM  385  O   HOH T 384       0.011  23.672  97.221  1.00  0.50           O  
HETATM  386  O   HOH T 385      11.183 -10.647 108.261  1.00  0.51           O  
HETATM  387  O   HOH T 386     -17.817   9.665 106.075  1.00  0.51           O  
HETATM  388  O   HOH T 387     -15.155  47.414  49.857  1.00  0.51           O  
HETATM  389  O   HOH T 388      10.961  17.054 109.419  1.00  0.51           O  
HETATM  390  O   HOH T 389     -16.134  38.905  38.954  1.00  0.51           O  
HETATM  391  O   HOH T 390      11.392  31.515  36.353  1.00  0.51           O  
HETATM  392  O   HOH T 391      14.246  30.110 101.978  1.00  0.51           O  
HETATM  393  O   HOH T 392      -8.348  -3.306 102.025  1.00  0.51           O  
HETATM  394  O   HOH T 393      -1.466  25.078  43.378  1.00  0.51           O  
HETATM  395  O   HOH T 394      -5.802  34.778  65.721  1.00  0.51           O  
HETATM  396  O   HOH T 395      -7.411  -6.151 118.803  1.00  0.51           O  
HETATM  397  O   HOH T 396     -11.321  26.821  61.359  1.00  0.51           O  
HETATM  398  O   HOH T 397      -9.564   5.367  92.130  1.00  0.51           O  
HETATM  399  O   HOH T 398      21.143  11.483 102.215  1.00  0.51           O  
HETATM  400  O   HOH T 399      -3.226  24.431 100.725  1.00  0.51           O  
HETATM  401  O   HOH T 400      -9.654  25.098  50.962  1.00  0.52           O  
HETATM  402  O   HOH T 401       8.212  -7.962 102.326  1.00  0.52           O  
HETATM  403  O   HOH T 402       0.787  25.866  57.586  1.00  0.52           O  
HETATM  404  O   HOH T 403      19.727  52.188  41.503  1.00  0.52           O  
HETATM  405  O   HOH T 404      -9.722   4.512  94.803  1.00  0.52           O  
HETATM  406  O   HOH T 405      -8.754  34.839  58.205  1.00  0.52           O  
HETATM  407  O   HOH T 406      15.585  47.700  37.868  1.00  0.52           O  
HETATM  408  O   HOH T 407     -15.432   9.778 118.325  1.00  0.52           O  
HETATM  409  O   HOH T 408      -7.321  31.021  65.068  1.00  0.52           O  
HETATM  410  O   HOH T 409     -10.750   0.223 108.274  1.00  0.52           O  
HETATM  411  O   HOH T 410      18.974  35.669  55.399  1.00  0.52           O  
HETATM  412  O   HOH T 411     -15.718  32.836  35.513  1.00  0.52           O  
HETATM  413  O   HOH T 412      14.695  21.055  98.575  1.00  0.52           O  
HETATM  414  O   HOH T 413      -4.722  24.848  62.497  1.00  0.52           O  
HETATM  415  O   HOH T 414     -11.603  26.630  51.924  1.00  0.53           O  
HETATM  416  O   HOH T 415      14.851  -3.115 103.221  1.00  0.53           O  
HETATM  417  O   HOH T 416     -10.778  36.390  43.480  1.00  0.53           O  
HETATM  418  O   HOH T 417      -1.747  57.557  64.906  1.00  0.53           O  
HETATM  419  O   HOH T 418     -13.558  28.573  55.102  1.00  0.53           O  
HETATM  420  O   HOH T 419      15.658  36.442  40.363  1.00  0.53           O  
HETATM  421  O   HOH T 420      -8.753  23.810 106.160  1.00  0.53           O  
HETATM  422  O   HOH T 421      -3.413  58.296  32.132  1.00  0.53           O  
HETATM  423  O   HOH T 422       0.922  23.098 110.424  1.00  0.53           O  
HETATM  424  O   HOH T 423      18.094  -1.889 113.728  1.00  0.53           O  
HETATM  425  O   HOH T 424     -14.789  23.784 109.788  1.00  0.53           O  
HETATM  426  O   HOH T 425      -8.261  -4.587 120.856  1.00  0.53           O  
HETATM  427  O   HOH T 426       8.138  31.403  51.883  1.00  0.53           O  
HETATM  428  O   HOH T 427      -8.751   2.412 108.515  1.00  0.53           O  
HETATM  429  O   HOH T 428     -10.793  31.157  59.299  1.00  0.53           O  
HETATM  430  O   HOH T 429      -5.029  37.878  73.856  1.00  0.53           O  
HETATM  431  O   HOH T 430      13.868  -0.801 126.455  1.00  0.53           O  
HETATM  432  O   HOH T 431      -9.741   6.727 105.701  1.00  0.53           O  
HETATM  433  O   HOH T 432     -10.502  42.163  52.914  1.00  0.53           O  
HETATM  434  O   HOH T 433      -5.477  25.046 111.744  1.00  0.54           O  
HETATM  435  O   HOH T 434      -3.011  27.663  62.728  1.00  0.54           O  
HETATM  436  O   HOH T 435       2.506  24.903 111.836  1.00  0.54           O  
HETATM  437  O   HOH T 436       1.768  29.438  90.544  1.00  0.54           O  
HETATM  438  O   HOH T 437     -15.297  11.513 113.326  1.00  0.54           O  
HETATM  439  O   HOH T 438      -4.162  54.952  51.018  1.00  0.54           O  
HETATM  440  O   HOH T 439       0.672 -10.437 110.781  1.00  0.54           O  
HETATM  441  O   HOH T 440      -0.054  21.184 112.176  1.00  0.54           O  
HETATM  442  O   HOH T 441      -2.364  59.931  30.227  1.00  0.54           O  
HETATM  443  O   HOH T 442       3.505  30.754  60.201  1.00  0.54           O  
HETATM  444  O   HOH T 443       9.692  30.881  64.782  1.00  0.54           O  
HETATM  445  O   HOH T 444      -3.630 -10.486 109.651  1.00  0.54           O  
HETATM  446  O   HOH T 445       6.451   4.955 128.039  1.00  0.54           O  
HETATM  447  O   HOH T 446      -9.549  37.650  39.920  1.00  0.55           O  
HETATM  448  O   HOH T 447       6.690  14.797 115.459  1.00  0.55           O  
HETATM  449  O   HOH T 448      -9.779  46.860  50.894  1.00  0.55           O  
HETATM  450  O   HOH T 449      -7.494  23.247  53.364  1.00  0.55           O  
HETATM  451  O   HOH T 450      -4.096  55.676  32.336  1.00  0.55           O  
HETATM  452  O   HOH T 451      -0.269  55.802  61.495  1.00  0.55           O  
HETATM  453  O   HOH T 452      15.372  19.252  96.535  1.00  0.55           O  
HETATM  454  O   HOH T 453      13.605  31.933  37.895  1.00  0.55           O  
HETATM  455  O   HOH T 454      12.935  -1.618 127.767  1.00  0.56           O  
HETATM  456  O   HOH T 455      -1.635  43.791  60.998  1.00  0.56           O  
HETATM  457  O   HOH T 456      -5.631  31.542  33.273  1.00  0.56           O  
HETATM  458  O   HOH T 457      17.282   1.811  94.192  1.00  0.56           O  
HETATM  459  O   HOH T 458       0.764  13.735 124.701  1.00  0.56           O  
HETATM  460  O   HOH T 459       6.410  -0.973 128.145  1.00  0.56           O  
HETATM  461  O   HOH T 460      -4.802  39.067  61.636  1.00  0.56           O  
HETATM  462  O   HOH T 461       6.008   1.010  98.502  1.00  0.56           O  
HETATM  463  O   HOH T 462     -12.348  29.884  57.316  1.00  0.56           O  
HETATM  464  O   HOH T 463      -4.165  34.763  69.607  1.00  0.56           O  
HETATM  465  O   HOH T 464      -4.886  26.711  64.545  1.00  0.56           O  
HETATM  466  O   HOH T 465     -11.496  13.132 115.440  1.00  0.56           O  
HETATM  467  O   HOH T 466      16.277  -6.527 114.272  1.00  0.56           O  
HETATM  468  O   HOH T 467      -9.630  47.127  58.321  1.00  0.56           O  
HETATM  469  O   HOH T 468      15.663  12.120 106.119  1.00  0.56           O  
HETATM  470  O   HOH T 469      13.069   2.334 119.836  1.00  0.56           O  
HETATM  471  O   HOH T 470      -3.477  54.472  42.029  1.00  0.57           O  
HETATM  472  O   HOH T 471      10.501  55.019  66.419  1.00  0.57           O  
HETATM  473  O   HOH T 472       0.243  -0.733 103.731  1.00  0.57           O  
HETATM  474  O   HOH T 473     -12.032  10.458  91.599  1.00  0.57           O  
HETATM  475  O   HOH T 474       9.988  40.732  72.661  1.00  0.57           O  
HETATM  476  O   HOH T 475      -0.751  24.204  99.910  1.00  0.57           O  
HETATM  477  O   HOH T 476      13.198  21.883  91.516  1.00  0.57           O  
HETATM  478  O   HOH T 477       7.913   1.923 124.837  1.00  0.57           O  
HETATM  479  O   HOH T 478     -11.651   4.702 124.820  1.00  0.57           O  
HETATM  480  O   HOH T 479       0.422  41.565  72.976  1.00  0.58           O  
HETATM  481  O   HOH T 480      12.910  58.191  51.885  1.00  0.58           O  
HETATM  482  O   HOH T 481       6.665  59.934  63.362  1.00  0.58           O  
HETATM  483  O   HOH T 482     -10.650  50.437  49.434  1.00  0.58           O  
HETATM  484  O   HOH T 483       5.645   4.014  95.593  1.00  0.58           O  
HETATM  485  O   HOH T 484       8.694  -0.064  97.995  1.00  0.59           O  
HETATM  486  O   HOH T 485      12.223  51.381  64.855  1.00  0.59           O  
HETATM  487  O   HOH T 486      13.666  18.132 103.099  1.00  0.60           O  
HETATM  488  O   HOH T 487       9.714   3.185 128.842  1.00  0.60           O  
HETATM  489  O   HOH T 488       1.436  32.243  73.864  1.00  0.60           O  
TER     490      HOH T 488 
