# Supplementary material for: Accurate Prediction of Hydration Sites of Proteins Using Energy Model With Atom Embedding
Source: Front Mol Biosci. 2021 Sep 20;8:756075. doi: 10.3389/fmolb.2021.756075 (PMC8488165; doi:10.3389/fmolb.2021.756075)
Supplement: Supplementary file 1 [file DataSheet1.ZIP › Data Sheet 1/Our_result_pdb/our_dataset_output/3HUK_watersite.pdb]

HEADER                                                        XXXX


JRNL        PMID   -1
HETATM    1  O   HOH T   0      20.207 -12.790  19.830  1.00  0.17           O  
HETATM    2  O   HOH T   1      24.295 -27.220  15.807  1.00  0.17           O  
HETATM    3  O   HOH T   2      30.312 -18.432  -0.251  1.00  0.20           O  
HETATM    4  O   HOH T   3      19.141  -2.035   0.665  1.00  0.21           O  
HETATM    5  O   HOH T   4      36.895   5.354  -0.086  1.00  0.21           O  
HETATM    6  O   HOH T   5      22.323 -12.286  18.114  1.00  0.21           O  
HETATM    7  O   HOH T   6      34.807   1.516  -1.212  1.00  0.22           O  
HETATM    8  O   HOH T   7      23.496  -1.474  20.883  1.00  0.22           O  
HETATM    9  O   HOH T   8      38.641  -7.871  -8.060  1.00  0.23           O  
HETATM   10  O   HOH T   9      12.428 -25.185  31.159  1.00  0.23           O  
HETATM   11  O   HOH T  10      28.316 -19.898  24.856  1.00  0.24           O  
HETATM   12  O   HOH T  11      17.667 -16.057   2.060  1.00  0.24           O  
HETATM   13  O   HOH T  12      40.784  -7.719  -1.609  1.00  0.24           O  
HETATM   14  O   HOH T  13      12.357 -15.490   0.646  1.00  0.25           O  
HETATM   15  O   HOH T  14      31.720  -0.854  19.663  1.00  0.25           O  
HETATM   16  O   HOH T  15      24.192 -18.720   2.664  1.00  0.25           O  
HETATM   17  O   HOH T  16      43.317  -4.581  11.411  1.00  0.25           O  
HETATM   18  O   HOH T  17      22.883 -19.300  13.356  1.00  0.25           O  
HETATM   19  O   HOH T  18      11.966  -9.740  27.757  1.00  0.25           O  
HETATM   20  O   HOH T  19      19.946 -23.950  27.810  1.00  0.26           O  
HETATM   21  O   HOH T  20      40.191 -11.545   1.052  1.00  0.26           O  
HETATM   22  O   HOH T  21      15.765 -15.858  14.911  1.00  0.26           O  
HETATM   23  O   HOH T  22      27.149 -13.789  26.397  1.00  0.27           O  
HETATM   24  O   HOH T  23      32.336  -8.910 -11.557  1.00  0.27           O  
HETATM   25  O   HOH T  24      21.147  -5.300  25.819  1.00  0.27           O  
HETATM   26  O   HOH T  25      30.495 -25.815  17.852  1.00  0.27           O  
HETATM   27  O   HOH T  26      35.182  -8.931  18.033  1.00  0.27           O  
HETATM   28  O   HOH T  27      14.428 -20.090  30.597  1.00  0.27           O  
HETATM   29  O   HOH T  28      37.093 -13.744  -4.950  1.00  0.27           O  
HETATM   30  O   HOH T  29      27.018 -21.237  32.971  1.00  0.28           O  
HETATM   31  O   HOH T  30      12.134 -29.505  32.836  1.00  0.28           O  
HETATM   32  O   HOH T  31      30.748   8.179  10.219  1.00  0.29           O  
HETATM   33  O   HOH T  32      39.217 -10.335  13.164  1.00  0.29           O  
HETATM   34  O   HOH T  33      40.403   2.488   3.646  1.00  0.29           O  
HETATM   35  O   HOH T  34      19.972  -5.499  20.376  1.00  0.29           O  
HETATM   36  O   HOH T  35      20.878  -7.697  -5.395  1.00  0.29           O  
HETATM   37  O   HOH T  36      18.614  -6.353  26.324  1.00  0.29           O  
HETATM   38  O   HOH T  37      31.014  -2.191  17.398  1.00  0.29           O  
HETATM   39  O   HOH T  38      18.731  -4.778  30.266  1.00  0.30           O  
HETATM   40  O   HOH T  39      26.682 -10.828  29.048  1.00  0.30           O  
HETATM   41  O   HOH T  40      27.441   1.306 -10.133  1.00  0.30           O  
HETATM   42  O   HOH T  41      37.658   1.826  -9.706  1.00  0.31           O  
HETATM   43  O   HOH T  42      34.136 -14.636   5.641  1.00  0.31           O  
HETATM   44  O   HOH T  43      36.024   2.263 -11.928  1.00  0.31           O  
HETATM   45  O   HOH T  44      26.838 -18.708  22.789  1.00  0.32           O  
HETATM   46  O   HOH T  45       9.718 -17.111  19.962  1.00  0.32           O  
HETATM   47  O   HOH T  46      33.928  -2.521  19.993  1.00  0.33           O  
HETATM   48  O   HOH T  47      14.684   0.004  16.074  1.00  0.33           O  
HETATM   49  O   HOH T  48      25.144  -5.646  30.846  1.00  0.33           O  
HETATM   50  O   HOH T  49      31.482 -13.150  24.002  1.00  0.33           O  
HETATM   51  O   HOH T  50      25.717 -15.710  15.698  1.00  0.34           O  
HETATM   52  O   HOH T  51      23.590 -29.249  28.505  1.00  0.34           O  
HETATM   53  O   HOH T  52      12.393 -21.445  18.180  1.00  0.34           O  
HETATM   54  O   HOH T  53      42.407  -5.438   1.879  1.00  0.34           O  
HETATM   55  O   HOH T  54      17.494  -0.012  16.090  1.00  0.34           O  
HETATM   56  O   HOH T  55      40.547 -18.739   6.523  1.00  0.34           O  
HETATM   57  O   HOH T  56      26.792 -26.164   7.198  1.00  0.35           O  
HETATM   58  O   HOH T  57      27.466  -7.490  28.026  1.00  0.35           O  
HETATM   59  O   HOH T  58      33.539   2.471 -10.712  1.00  0.35           O  
HETATM   60  O   HOH T  59       9.295 -25.635  28.242  1.00  0.35           O  
HETATM   61  O   HOH T  60      19.785 -21.040  -5.327  1.00  0.35           O  
HETATM   62  O   HOH T  61      33.924 -12.012   6.537  1.00  0.35           O  
HETATM   63  O   HOH T  62      23.241 -20.455   4.750  1.00  0.35           O  
HETATM   64  O   HOH T  63      16.936 -13.717   5.804  1.00  0.36           O  
HETATM   65  O   HOH T  64      24.583 -11.468   4.898  1.00  0.36           O  
HETATM   66  O   HOH T  65      40.456  -7.075   1.168  1.00  0.36           O  
HETATM   67  O   HOH T  66      33.178 -17.058   6.453  1.00  0.36           O  
HETATM   68  O   HOH T  67      27.459 -16.877  18.057  1.00  0.36           O  
HETATM   69  O   HOH T  68      21.001 -26.689   5.201  1.00  0.36           O  
HETATM   70  O   HOH T  69      10.915 -14.442  14.048  1.00  0.36           O  
HETATM   71  O   HOH T  70      16.661  -4.720  25.389  1.00  0.36           O  
HETATM   72  O   HOH T  71      25.936 -29.195  30.141  1.00  0.36           O  
HETATM   73  O   HOH T  72      16.549  -3.559  31.587  1.00  0.36           O  
HETATM   74  O   HOH T  73      18.233 -22.667   0.341  1.00  0.37           O  
HETATM   75  O   HOH T  74      18.263   4.496  13.628  1.00  0.37           O  
HETATM   76  O   HOH T  75      24.387 -21.630  33.975  1.00  0.37           O  
HETATM   77  O   HOH T  76      41.736  -9.317   0.443  1.00  0.37           O  
HETATM   78  O   HOH T  77      20.430  -6.071  28.402  1.00  0.37           O  
HETATM   79  O   HOH T  78      27.793 -22.375  -9.637  1.00  0.37           O  
HETATM   80  O   HOH T  79      42.939 -11.803   0.475  1.00  0.37           O  
HETATM   81  O   HOH T  80      44.396  -9.096  11.075  1.00  0.37           O  
HETATM   82  O   HOH T  81      20.324 -33.182  19.248  1.00  0.37           O  
HETATM   83  O   HOH T  82      18.623 -18.741  10.649  1.00  0.37           O  
HETATM   84  O   HOH T  83      14.587  -8.317  31.569  1.00  0.38           O  
HETATM   85  O   HOH T  84      44.670  -5.539   3.403  1.00  0.38           O  
HETATM   86  O   HOH T  85      34.876 -16.835  11.755  1.00  0.38           O  
HETATM   87  O   HOH T  86      31.543 -12.201  14.476  1.00  0.38           O  
HETATM   88  O   HOH T  87      27.599 -21.001  10.905  1.00  0.38           O  
HETATM   89  O   HOH T  88      37.529  -9.871  17.023  1.00  0.38           O  
HETATM   90  O   HOH T  89      12.518  -9.860  30.472  1.00  0.38           O  
HETATM   91  O   HOH T  90      10.403 -11.941  26.784  1.00  0.38           O  
HETATM   92  O   HOH T  91      20.989 -17.570  11.998  1.00  0.38           O  
HETATM   93  O   HOH T  92       9.475 -16.391  17.226  1.00  0.38           O  
HETATM   94  O   HOH T  93      28.869 -26.955  21.777  1.00  0.38           O  
HETATM   95  O   HOH T  94      32.722 -16.199   3.887  1.00  0.38           O  
HETATM   96  O   HOH T  95      24.905 -24.282  34.658  1.00  0.38           O  
HETATM   97  O   HOH T  96      39.966 -16.880   4.530  1.00  0.39           O  
HETATM   98  O   HOH T  97      22.735 -27.051  30.075  1.00  0.39           O  
HETATM   99  O   HOH T  98      15.025 -10.977  30.903  1.00  0.39           O  
HETATM  100  O   HOH T  99      30.102   1.770  -9.526  1.00  0.39           O  
HETATM  101  O   HOH T 100      24.445 -27.412   6.406  1.00  0.39           O  
HETATM  102  O   HOH T 101      28.088 -30.988  25.897  1.00  0.39           O  
HETATM  103  O   HOH T 102      25.295   0.725  -8.584  1.00  0.40           O  
HETATM  104  O   HOH T 103      14.677 -16.965  12.637  1.00  0.40           O  
HETATM  105  O   HOH T 104      25.341   2.894  -6.858  1.00  0.40           O  
HETATM  106  O   HOH T 105      24.897 -17.215  10.779  1.00  0.40           O  
HETATM  107  O   HOH T 106      22.304 -29.119   5.721  1.00  0.40           O  
HETATM  108  O   HOH T 107      30.191 -19.715   8.212  1.00  0.41           O  
HETATM  109  O   HOH T 108      37.624 -24.294   4.757  1.00  0.41           O  
HETATM  110  O   HOH T 109      45.043  -6.676  12.077  1.00  0.41           O  
HETATM  111  O   HOH T 110      26.036 -30.271  27.628  1.00  0.41           O  
HETATM  112  O   HOH T 111      38.118   3.556  -4.864  1.00  0.41           O  
HETATM  113  O   HOH T 112      10.874 -12.259  12.353  1.00  0.41           O  
HETATM  114  O   HOH T 113      22.717 -29.221  14.609  1.00  0.41           O  
HETATM  115  O   HOH T 114      42.375  -4.253  18.454  1.00  0.41           O  
HETATM  116  O   HOH T 115      29.408 -11.648  16.079  1.00  0.41           O  
HETATM  117  O   HOH T 116      16.707   3.219  11.847  1.00  0.42           O  
HETATM  118  O   HOH T 117      19.367 -18.648  -6.648  1.00  0.42           O  
HETATM  119  O   HOH T 118      13.625  -6.460   3.527  1.00  0.42           O  
HETATM  120  O   HOH T 119      14.756 -32.840  34.755  1.00  0.42           O  
HETATM  121  O   HOH T 120      27.577 -14.927  13.896  1.00  0.42           O  
HETATM  122  O   HOH T 121      15.816 -14.319   3.332  1.00  0.42           O  
HETATM  123  O   HOH T 122      25.184 -21.078   9.766  1.00  0.42           O  
HETATM  124  O   HOH T 123      28.634 -18.524  10.189  1.00  0.42           O  
HETATM  125  O   HOH T 124      10.792 -19.678  19.436  1.00  0.42           O  
HETATM  126  O   HOH T 125      28.767 -16.208  11.778  1.00  0.43           O  
HETATM  127  O   HOH T 126      10.190 -14.586  19.274  1.00  0.43           O  
HETATM  128  O   HOH T 127      33.554 -18.129   9.577  1.00  0.43           O  
HETATM  129  O   HOH T 128      17.067 -17.002  -6.718  1.00  0.43           O  
HETATM  130  O   HOH T 129      25.088 -18.615   8.326  1.00  0.43           O  
HETATM  131  O   HOH T 130      20.789 -32.425  15.815  1.00  0.43           O  
HETATM  132  O   HOH T 131      33.764 -10.586  13.779  1.00  0.44           O  
HETATM  133  O   HOH T 132      42.756  -3.566  15.747  1.00  0.44           O  
HETATM  134  O   HOH T 133      37.389 -11.556  14.873  1.00  0.44           O  
HETATM  135  O   HOH T 134      25.328 -19.649  12.093  1.00  0.44           O  
HETATM  136  O   HOH T 135      28.534  -3.450  -4.818  1.00  0.44           O  
HETATM  137  O   HOH T 136      13.613 -14.332  -5.482  1.00  0.44           O  
HETATM  138  O   HOH T 137      30.021 -19.424  -8.863  1.00  0.45           O  
HETATM  139  O   HOH T 138      30.167 -24.927  20.423  1.00  0.45           O  
HETATM  140  O   HOH T 139      11.883  -4.997   1.992  1.00  0.45           O  
HETATM  141  O   HOH T 140      25.015 -15.523  12.982  1.00  0.45           O  
HETATM  142  O   HOH T 141      20.159 -15.991  -9.521  1.00  0.45           O  
HETATM  143  O   HOH T 142      40.115 -16.075   7.226  1.00  0.45           O  
HETATM  144  O   HOH T 143      35.291   9.779  -6.540  1.00  0.45           O  
HETATM  145  O   HOH T 144      35.049 -10.890  16.233  1.00  0.46           O  
HETATM  146  O   HOH T 145       9.654 -21.724  17.854  1.00  0.46           O  
HETATM  147  O   HOH T 146      22.565 -17.070 -10.451  1.00  0.46           O  
HETATM  148  O   HOH T 147      29.808 -20.163   2.070  1.00  0.46           O  
HETATM  149  O   HOH T 148      13.351 -13.480   2.401  1.00  0.46           O  
HETATM  150  O   HOH T 149      44.418  -7.314  14.653  1.00  0.46           O  
HETATM  151  O   HOH T 150      21.098 -21.822   3.569  1.00  0.46           O  
HETATM  152  O   HOH T 151      34.551   8.557  11.532  1.00  0.46           O  
HETATM  153  O   HOH T 152      39.755 -13.595   8.091  1.00  0.46           O  
HETATM  154  O   HOH T 153      15.202 -15.161  -7.631  1.00  0.46           O  
HETATM  155  O   HOH T 154      16.329 -16.959  -9.447  1.00  0.46           O  
HETATM  156  O   HOH T 155      40.404  -2.887  17.161  1.00  0.46           O  
HETATM  157  O   HOH T 156      29.909 -13.835  12.834  1.00  0.47           O  
HETATM  158  O   HOH T 157       9.520 -19.191  16.956  1.00  0.47           O  
HETATM  159  O   HOH T 158      44.498  -4.694  13.911  1.00  0.47           O  
HETATM  160  O   HOH T 159      23.350 -29.537  31.228  1.00  0.47           O  
HETATM  161  O   HOH T 160      16.847  -5.136  28.180  1.00  0.47           O  
HETATM  162  O   HOH T 161      22.748 -20.047   8.955  1.00  0.47           O  
HETATM  163  O   HOH T 162      11.455  -4.981   4.900  1.00  0.47           O  
HETATM  164  O   HOH T 163      25.110 -30.054  13.576  1.00  0.48           O  
HETATM  165  O   HOH T 164      37.937   3.480  -1.975  1.00  0.48           O  
HETATM  166  O   HOH T 165      43.038  -3.132   0.610  1.00  0.48           O  
HETATM  167  O   HOH T 166      32.480 -11.743 -11.331  1.00  0.48           O  
HETATM  168  O   HOH T 167      12.719 -14.208  -8.224  1.00  0.48           O  
HETATM  169  O   HOH T 168      25.206 -19.324  37.604  1.00  0.48           O  
HETATM  170  O   HOH T 169      28.181 -18.402  20.335  1.00  0.48           O  
HETATM  171  O   HOH T 170      16.328  -6.215  30.763  1.00  0.48           O  
HETATM  172  O   HOH T 171      25.567   5.190  -2.565  1.00  0.48           O  
HETATM  173  O   HOH T 172      10.256 -11.120  29.433  1.00  0.48           O  
HETATM  174  O   HOH T 173      37.434   8.488  -7.288  1.00  0.48           O  
HETATM  175  O   HOH T 174      25.974 -16.870  36.285  1.00  0.48           O  
HETATM  176  O   HOH T 175      22.765 -18.523   6.678  1.00  0.48           O  
HETATM  177  O   HOH T 176      22.735 -24.102   3.275  1.00  0.48           O  
HETATM  178  O   HOH T 177      16.106   2.302  15.639  1.00  0.48           O  
HETATM  179  O   HOH T 178      29.222 -22.258   8.902  1.00  0.49           O  
HETATM  180  O   HOH T 179      33.607  -1.108  17.644  1.00  0.49           O  
HETATM  181  O   HOH T 180      41.583  -3.491  21.069  1.00  0.49           O  
HETATM  182  O   HOH T 181      26.020 -19.361  34.791  1.00  0.49           O  
HETATM  183  O   HOH T 182      10.319 -15.187  -7.349  1.00  0.49           O  
HETATM  184  O   HOH T 183      22.440 -19.267  38.010  1.00  0.49           O  
HETATM  185  O   HOH T 184      43.111  -2.471  13.246  1.00  0.49           O  
HETATM  186  O   HOH T 185      39.018 -20.927   5.950  1.00  0.49           O  
HETATM  187  O   HOH T 186       8.853 -17.742  14.807  1.00  0.49           O  
HETATM  188  O   HOH T 187      28.780 -19.287  17.880  1.00  0.50           O  
HETATM  189  O   HOH T 188      14.540 -30.213  34.189  1.00  0.50           O  
HETATM  190  O   HOH T 189      31.674 -11.471   4.997  1.00  0.50           O  
HETATM  191  O   HOH T 190      20.342 -23.722   1.767  1.00  0.50           O  
HETATM  192  O   HOH T 191      33.689 -19.352  12.105  1.00  0.50           O  
HETATM  193  O   HOH T 192      30.709 -27.662  19.800  1.00  0.50           O  
HETATM  194  O   HOH T 193      12.031 -25.811  28.478  1.00  0.50           O  
HETATM  195  O   HOH T 194      18.430 -16.543  12.215  1.00  0.50           O  
HETATM  196  O   HOH T 195      12.244  -3.417  -0.265  1.00  0.50           O  
HETATM  197  O   HOH T 196      11.919 -10.667   8.177  1.00  0.50           O  
HETATM  198  O   HOH T 197      30.263 -14.788  22.113  1.00  0.50           O  
HETATM  199  O   HOH T 198      39.855 -10.634  15.855  1.00  0.50           O  
HETATM  200  O   HOH T 199      29.248 -25.030   7.972  1.00  0.51           O  
HETATM  201  O   HOH T 200      29.949   6.089   8.704  1.00  0.51           O  
HETATM  202  O   HOH T 201      40.186   2.569  -3.441  1.00  0.51           O  
HETATM  203  O   HOH T 202      32.790   6.517  10.976  1.00  0.51           O  
HETATM  204  O   HOH T 203      20.214 -16.961   9.199  1.00  0.51           O  
HETATM  205  O   HOH T 204      23.456 -19.349  -9.401  1.00  0.51           O  
HETATM  206  O   HOH T 205      25.090 -12.337  27.423  1.00  0.51           O  
HETATM  207  O   HOH T 206      21.090 -34.157  21.694  1.00  0.51           O  
HETATM  208  O   HOH T 207      15.231 -21.082  34.642  1.00  0.51           O  
HETATM  209  O   HOH T 208      22.558  -5.892  -6.648  1.00  0.51           O  
HETATM  210  O   HOH T 209      34.913   4.736  10.805  1.00  0.52           O  
HETATM  211  O   HOH T 210      33.353   8.570   9.066  1.00  0.52           O  
HETATM  212  O   HOH T 211      16.427 -16.934  10.454  1.00  0.52           O  
HETATM  213  O   HOH T 212      24.343 -14.624  35.799  1.00  0.52           O  
HETATM  214  O   HOH T 213      26.567 -13.056 -10.802  1.00  0.52           O  
HETATM  215  O   HOH T 214      21.215  -5.859  30.975  1.00  0.52           O  
HETATM  216  O   HOH T 215      36.718 -21.054   4.347  1.00  0.52           O  
HETATM  217  O   HOH T 216      23.474  -0.107 -10.484  1.00  0.52           O  
HETATM  218  O   HOH T 217      14.535 -13.097   7.072  1.00  0.52           O  
HETATM  219  O   HOH T 218      31.385 -18.960  10.537  1.00  0.53           O  
HETATM  220  O   HOH T 219      42.213  -0.433 -13.180  1.00  0.53           O  
HETATM  221  O   HOH T 220      13.523 -17.693  29.552  1.00  0.53           O  
HETATM  222  O   HOH T 221      38.957  -5.537  -9.602  1.00  0.53           O  
HETATM  223  O   HOH T 222      15.150 -14.946   8.928  1.00  0.53           O  
HETATM  224  O   HOH T 223      24.093 -18.599  40.184  1.00  0.53           O  
HETATM  225  O   HOH T 224      41.380  -5.074  -0.670  1.00  0.53           O  
HETATM  226  O   HOH T 225      13.753  -4.705  11.971  1.00  0.53           O  
HETATM  227  O   HOH T 226      41.939   1.588 -11.316  1.00  0.54           O  
HETATM  228  O   HOH T 227      12.818 -11.083  10.745  1.00  0.54           O  
HETATM  229  O   HOH T 228      40.383   2.475  -6.292  1.00  0.54           O  
HETATM  230  O   HOH T 229      34.248  -7.464 -13.137  1.00  0.54           O  
HETATM  231  O   HOH T 230      29.581 -26.238  -1.678  1.00  0.54           O  
HETATM  232  O   HOH T 231      22.885 -27.387  36.522  1.00  0.54           O  
HETATM  233  O   HOH T 232      15.389 -10.513  -1.763  1.00  0.55           O  
HETATM  234  O   HOH T 233      13.565 -25.415  21.277  1.00  0.55           O  
HETATM  235  O   HOH T 234      12.049  -0.743  -1.623  1.00  0.55           O  
HETATM  236  O   HOH T 235      40.382   1.801  -8.998  1.00  0.55           O  
HETATM  237  O   HOH T 236      21.101 -30.313  12.120  1.00  0.55           O  
HETATM  238  O   HOH T 237      44.081 -14.299  -0.024  1.00  0.55           O  
HETATM  239  O   HOH T 238      29.989 -22.087  20.869  1.00  0.56           O  
HETATM  240  O   HOH T 239      45.550  -3.969   5.601  1.00  0.56           O  
HETATM  241  O   HOH T 240      13.730  -6.504  -0.854  1.00  0.56           O  
HETATM  242  O   HOH T 241      21.013 -34.815  17.074  1.00  0.57           O  
HETATM  243  O   HOH T 242      27.510 -20.234  -7.991  1.00  0.57           O  
HETATM  244  O   HOH T 243      31.550 -18.081   2.217  1.00  0.57           O  
HETATM  245  O   HOH T 244      31.540 -28.279  17.122  1.00  0.57           O  
HETATM  246  O   HOH T 245      42.896 -10.638  12.286  1.00  0.58           O  
HETATM  247  O   HOH T 246      40.620 -12.109  11.496  1.00  0.58           O  
HETATM  248  O   HOH T 247      33.399 -13.068  12.723  1.00  0.58           O  
TER     249      HOH T 247 
