# Supplementary material for: Accurate Prediction of Hydration Sites of Proteins Using Energy Model With Atom Embedding
Source: Front Mol Biosci. 2021 Sep 20;8:756075. doi: 10.3389/fmolb.2021.756075 (PMC8488165; doi:10.3389/fmolb.2021.756075)
Supplement: Supplementary file 1 [file DataSheet1.ZIP › Data Sheet 1/Our_result_pdb/our_dataset_output/3HUQ_watersite.pdb]

HEADER                                                        XXXX


JRNL        PMID   -1
HETATM    1  O   HOH T   0      38.828 -11.586   3.426  1.00  0.19           O  
HETATM    2  O   HOH T   1      48.734 -15.808 -15.473  1.00  0.20           O  
HETATM    3  O   HOH T   2      46.271 -34.828 -16.139  1.00  0.21           O  
HETATM    4  O   HOH T   3      35.644 -16.649 -26.997  1.00  0.22           O  
HETATM    5  O   HOH T   4      38.082 -13.632   1.670  1.00  0.22           O  
HETATM    6  O   HOH T   5      47.816 -36.111 -18.035  1.00  0.22           O  
HETATM    7  O   HOH T   6      44.045 -31.082 -17.301  1.00  0.22           O  
HETATM    8  O   HOH T   7      37.791 -22.863   5.836  1.00  0.23           O  
HETATM    9  O   HOH T   8      24.202  -7.521  -0.724  1.00  0.23           O  
HETATM   10  O   HOH T   9      28.231 -17.276 -10.122  1.00  0.24           O  
HETATM   11  O   HOH T  10      40.608  -3.020 -15.461  1.00  0.25           O  
HETATM   12  O   HOH T  11      29.178  -5.459  11.415  1.00  0.25           O  
HETATM   13  O   HOH T  12      31.781 -11.610 -13.717  1.00  0.25           O  
HETATM   14  O   HOH T  13      29.754 -25.129 -20.581  1.00  0.26           O  
HETATM   15  O   HOH T  14      56.237 -19.653 -10.634  1.00  0.26           O  
HETATM   16  O   HOH T  15      29.242 -17.147 -16.742  1.00  0.26           O  
HETATM   17  O   HOH T  16      38.308  -5.934  -1.332  1.00  0.26           O  
HETATM   18  O   HOH T  17      46.888 -13.686   2.382  1.00  0.27           O  
HETATM   19  O   HOH T  18      29.717 -28.347 -15.069  1.00  0.27           O  
HETATM   20  O   HOH T  19      40.470 -14.020 -22.271  1.00  0.27           O  
HETATM   21  O   HOH T  20      31.742 -10.469  -2.930  1.00  0.28           O  
HETATM   22  O   HOH T  21      55.082 -17.975 -14.508  1.00  0.28           O  
HETATM   23  O   HOH T  22      34.493 -17.037  10.294  1.00  0.29           O  
HETATM   24  O   HOH T  23      29.605 -28.640   8.075  1.00  0.30           O  
HETATM   25  O   HOH T  24      52.398 -24.736 -14.767  1.00  0.30           O  
HETATM   26  O   HOH T  25      28.591 -19.913 -23.746  1.00  0.30           O  
HETATM   27  O   HOH T  26      30.690 -13.959 -12.600  1.00  0.30           O  
HETATM   28  O   HOH T  27      34.116 -24.383  -3.207  1.00  0.30           O  
HETATM   29  O   HOH T  28      29.714  -2.098  -6.550  1.00  0.31           O  
HETATM   30  O   HOH T  29      45.726 -30.316 -26.685  1.00  0.31           O  
HETATM   31  O   HOH T  30      37.184 -17.736  12.838  1.00  0.31           O  
HETATM   32  O   HOH T  31      27.540 -19.487 -14.363  1.00  0.31           O  
HETATM   33  O   HOH T  32      22.871  -5.787  12.217  1.00  0.31           O  
HETATM   34  O   HOH T  33      30.674 -25.566 -30.597  1.00  0.32           O  
HETATM   35  O   HOH T  34      35.840 -16.774   6.129  1.00  0.32           O  
HETATM   36  O   HOH T  35      52.824 -21.742 -21.442  1.00  0.32           O  
HETATM   37  O   HOH T  36      54.589 -19.722  -8.467  1.00  0.32           O  
HETATM   38  O   HOH T  37      46.167 -31.689  -4.502  1.00  0.32           O  
HETATM   39  O   HOH T  38      37.867 -13.262  14.518  1.00  0.32           O  
HETATM   40  O   HOH T  39      27.782 -21.171  -5.537  1.00  0.32           O  
HETATM   41  O   HOH T  40      25.788  -8.603  16.086  1.00  0.33           O  
HETATM   42  O   HOH T  41      35.010 -20.147  -0.068  1.00  0.33           O  
HETATM   43  O   HOH T  42      26.500  -4.490 -10.356  1.00  0.33           O  
HETATM   44  O   HOH T  43      38.846 -10.855  15.683  1.00  0.33           O  
HETATM   45  O   HOH T  44      43.028  -7.917  14.535  1.00  0.33           O  
HETATM   46  O   HOH T  45      44.301 -32.346 -27.931  1.00  0.33           O  
HETATM   47  O   HOH T  46      43.578  -1.791   1.778  1.00  0.33           O  
HETATM   48  O   HOH T  47      52.760 -15.190  -0.576  1.00  0.33           O  
HETATM   49  O   HOH T  48      39.613 -20.233  11.847  1.00  0.33           O  
HETATM   50  O   HOH T  49      36.316  -7.925  -4.060  1.00  0.34           O  
HETATM   51  O   HOH T  50      28.976 -11.561  -6.483  1.00  0.34           O  
HETATM   52  O   HOH T  51      34.257 -19.584   2.606  1.00  0.34           O  
HETATM   53  O   HOH T  52      38.262 -24.419  10.709  1.00  0.34           O  
HETATM   54  O   HOH T  53      33.209 -17.234  18.409  1.00  0.34           O  
HETATM   55  O   HOH T  54      21.777 -12.129 -20.402  1.00  0.34           O  
HETATM   56  O   HOH T  55      44.376 -24.780   5.673  1.00  0.35           O  
HETATM   57  O   HOH T  56      36.579 -11.267  17.305  1.00  0.35           O  
HETATM   58  O   HOH T  57      37.099   0.011   2.944  1.00  0.35           O  
HETATM   59  O   HOH T  58      37.860 -15.754 -11.357  1.00  0.35           O  
HETATM   60  O   HOH T  59      30.707  -9.737 -11.809  1.00  0.35           O  
HETATM   61  O   HOH T  60      29.297 -16.718 -27.692  1.00  0.35           O  
HETATM   62  O   HOH T  61      37.918  -3.167  13.112  1.00  0.35           O  
HETATM   63  O   HOH T  62      27.070  -1.657  -6.208  1.00  0.35           O  
HETATM   64  O   HOH T  63      28.187   0.770  -1.452  1.00  0.35           O  
HETATM   65  O   HOH T  64      33.851 -14.758  19.525  1.00  0.35           O  
HETATM   66  O   HOH T  65      28.626  -0.857   0.814  1.00  0.36           O  
HETATM   67  O   HOH T  66      46.827 -20.202   4.686  1.00  0.36           O  
HETATM   68  O   HOH T  67      48.358 -29.477 -16.441  1.00  0.37           O  
HETATM   69  O   HOH T  68      25.796  -2.466  -8.561  1.00  0.37           O  
HETATM   70  O   HOH T  69      39.770   0.031   3.693  1.00  0.37           O  
HETATM   71  O   HOH T  70      34.254  -9.845  -4.105  1.00  0.37           O  
HETATM   72  O   HOH T  71      55.757 -17.302  -9.177  1.00  0.37           O  
HETATM   73  O   HOH T  72      43.012 -14.334 -21.509  1.00  0.37           O  
HETATM   74  O   HOH T  73      36.845 -14.970  12.597  1.00  0.37           O  
HETATM   75  O   HOH T  74      33.397  -5.366  19.510  1.00  0.38           O  
HETATM   76  O   HOH T  75      34.589 -12.584  -3.850  1.00  0.38           O  
HETATM   77  O   HOH T  76      27.999 -14.428   5.694  1.00  0.38           O  
HETATM   78  O   HOH T  77      35.282  -2.696  14.091  1.00  0.38           O  
HETATM   79  O   HOH T  78      30.162 -27.171  -9.755  1.00  0.38           O  
HETATM   80  O   HOH T  79      38.306  -3.363  -7.759  1.00  0.39           O  
HETATM   81  O   HOH T  80      33.126  -0.002  16.181  1.00  0.39           O  
HETATM   82  O   HOH T  81      40.695 -16.741 -26.138  1.00  0.39           O  
HETATM   83  O   HOH T  82      41.980 -36.402 -12.751  1.00  0.39           O  
HETATM   84  O   HOH T  83      21.649  -7.789  13.839  1.00  0.39           O  
HETATM   85  O   HOH T  84      20.255  -1.359   3.252  1.00  0.39           O  
HETATM   86  O   HOH T  85      36.621  -4.830  -9.203  1.00  0.40           O  
HETATM   87  O   HOH T  86      33.898 -33.381 -14.830  1.00  0.40           O  
HETATM   88  O   HOH T  87      26.587 -26.889 -17.587  1.00  0.40           O  
HETATM   89  O   HOH T  88      24.120 -10.515  -9.279  1.00  0.40           O  
HETATM   90  O   HOH T  89      27.164 -28.929 -14.549  1.00  0.40           O  
HETATM   91  O   HOH T  90      44.733 -15.796 -22.900  1.00  0.40           O  
HETATM   92  O   HOH T  91      29.695 -22.467  -3.954  1.00  0.40           O  
HETATM   93  O   HOH T  92      45.089  -9.736  15.218  1.00  0.41           O  
HETATM   94  O   HOH T  93      27.931 -18.007 -25.637  1.00  0.41           O  
HETATM   95  O   HOH T  94      21.948  -6.869  -2.478  1.00  0.41           O  
HETATM   96  O   HOH T  95      20.203  -9.860  -6.646  1.00  0.41           O  
HETATM   97  O   HOH T  96      40.466 -12.487  14.028  1.00  0.41           O  
HETATM   98  O   HOH T  97      29.070 -15.486   3.260  1.00  0.41           O  
HETATM   99  O   HOH T  98      41.593  -2.489  -2.289  1.00  0.42           O  
HETATM  100  O   HOH T  99      30.425 -12.447  -4.343  1.00  0.42           O  
HETATM  101  O   HOH T 100      19.824 -10.413  -3.960  1.00  0.42           O  
HETATM  102  O   HOH T 101      35.231 -21.809   6.627  1.00  0.42           O  
HETATM  103  O   HOH T 102      27.800  -4.370  14.527  1.00  0.42           O  
HETATM  104  O   HOH T 103      50.493 -28.722 -18.028  1.00  0.42           O  
HETATM  105  O   HOH T 104      36.436 -23.512 -27.727  1.00  0.42           O  
HETATM  106  O   HOH T 105      24.263 -23.543 -11.390  1.00  0.42           O  
HETATM  107  O   HOH T 106      31.476 -29.280  -3.119  1.00  0.42           O  
HETATM  108  O   HOH T 107      45.413  -5.803  11.517  1.00  0.42           O  
HETATM  109  O   HOH T 108      35.111  -9.807  -9.522  1.00  0.43           O  
HETATM  110  O   HOH T 109      44.343 -34.777 -20.877  1.00  0.43           O  
HETATM  111  O   HOH T 110      27.591  -5.912 -12.470  1.00  0.43           O  
HETATM  112  O   HOH T 111      29.706 -16.050  -6.120  1.00  0.43           O  
HETATM  113  O   HOH T 112      43.913  -3.502  -3.507  1.00  0.43           O  
HETATM  114  O   HOH T 113      44.496 -22.244   6.593  1.00  0.43           O  
HETATM  115  O   HOH T 114      21.833  -2.291  -0.792  1.00  0.43           O  
HETATM  116  O   HOH T 115      40.075  -1.744  -6.475  1.00  0.43           O  
HETATM  117  O   HOH T 116      39.612 -16.167 -23.694  1.00  0.43           O  
HETATM  118  O   HOH T 117      37.981 -25.549   5.019  1.00  0.43           O  
HETATM  119  O   HOH T 118      42.613 -10.672  14.324  1.00  0.44           O  
HETATM  120  O   HOH T 119      30.877  -9.789  -7.511  1.00  0.44           O  
HETATM  121  O   HOH T 120      36.501   2.247   1.424  1.00  0.44           O  
HETATM  122  O   HOH T 121      44.635  -5.224  -8.245  1.00  0.44           O  
HETATM  123  O   HOH T 122      32.340 -21.638   2.549  1.00  0.44           O  
HETATM  124  O   HOH T 123      31.621   1.891  12.230  1.00  0.44           O  
HETATM  125  O   HOH T 124      26.749  -8.051  18.619  1.00  0.44           O  
HETATM  126  O   HOH T 125      42.828 -27.401 -31.579  1.00  0.44           O  
HETATM  127  O   HOH T 126      40.427  -4.504  -6.433  1.00  0.45           O  
HETATM  128  O   HOH T 127      26.659   1.105   0.841  1.00  0.45           O  
HETATM  129  O   HOH T 128      30.677   0.737   4.909  1.00  0.45           O  
HETATM  130  O   HOH T 129      23.427  -4.716  -1.541  1.00  0.45           O  
HETATM  131  O   HOH T 130      41.220  -0.369   1.308  1.00  0.45           O  
HETATM  132  O   HOH T 131      33.694 -14.715 -27.744  1.00  0.45           O  
HETATM  133  O   HOH T 132      44.045  -5.427  -5.598  1.00  0.45           O  
HETATM  134  O   HOH T 133      35.348 -26.152   4.468  1.00  0.45           O  
HETATM  135  O   HOH T 134      20.837 -12.297  -5.532  1.00  0.45           O  
HETATM  136  O   HOH T 135      36.279 -14.043 -26.902  1.00  0.45           O  
HETATM  137  O   HOH T 136      40.968  -9.082  16.057  1.00  0.45           O  
HETATM  138  O   HOH T 137      33.914 -22.211 -27.576  1.00  0.45           O  
HETATM  139  O   HOH T 138      25.887 -18.715  -9.623  1.00  0.45           O  
HETATM  140  O   HOH T 139      33.228 -20.357  -3.704  1.00  0.45           O  
HETATM  141  O   HOH T 140      42.936 -13.452  14.777  1.00  0.45           O  
HETATM  142  O   HOH T 141      31.467   1.956  15.086  1.00  0.46           O  
HETATM  143  O   HOH T 142      42.895 -35.975 -28.233  1.00  0.46           O  
HETATM  144  O   HOH T 143      31.690 -17.046  -4.514  1.00  0.46           O  
HETATM  145  O   HOH T 144      45.548 -14.580   4.558  1.00  0.46           O  
HETATM  146  O   HOH T 145      36.886  -8.075 -23.588  1.00  0.46           O  
HETATM  147  O   HOH T 146      30.134 -21.497 -28.721  1.00  0.46           O  
HETATM  148  O   HOH T 147      29.034 -19.823  -3.410  1.00  0.46           O  
HETATM  149  O   HOH T 148      43.905  -2.589  -0.820  1.00  0.46           O  
HETATM  150  O   HOH T 149      34.526 -26.251   1.796  1.00  0.46           O  
HETATM  151  O   HOH T 150      40.642   0.076  -1.381  1.00  0.46           O  
HETATM  152  O   HOH T 151      48.880  -9.761  -4.158  1.00  0.46           O  
HETATM  153  O   HOH T 152      34.698   0.146   1.872  1.00  0.46           O  
HETATM  154  O   HOH T 153      31.889 -13.210 -24.519  1.00  0.46           O  
HETATM  155  O   HOH T 154      45.351 -34.870 -28.667  1.00  0.46           O  
HETATM  156  O   HOH T 155      24.311   0.661   2.206  1.00  0.46           O  
HETATM  157  O   HOH T 156      20.904  -7.196  -6.889  1.00  0.47           O  
HETATM  158  O   HOH T 157      21.425 -13.002   4.147  1.00  0.47           O  
HETATM  159  O   HOH T 158      22.335  -7.097 -12.125  1.00  0.47           O  
HETATM  160  O   HOH T 159      44.482  -3.279  10.501  1.00  0.47           O  
HETATM  161  O   HOH T 160      31.390 -13.904  20.073  1.00  0.47           O  
HETATM  162  O   HOH T 161      42.967 -23.160 -20.980  1.00  0.47           O  
HETATM  163  O   HOH T 162      20.131  -6.326  -4.360  1.00  0.47           O  
HETATM  164  O   HOH T 163      42.214 -15.400 -24.075  1.00  0.47           O  
HETATM  165  O   HOH T 164      38.428  -6.202  -7.511  1.00  0.47           O  
HETATM  166  O   HOH T 165      33.940 -10.500 -26.527  1.00  0.47           O  
HETATM  167  O   HOH T 166      37.219 -30.714 -26.869  1.00  0.47           O  
HETATM  168  O   HOH T 167      32.398 -10.771  -9.757  1.00  0.47           O  
HETATM  169  O   HOH T 168      38.787   0.861   0.745  1.00  0.47           O  
HETATM  170  O   HOH T 169      54.381 -22.630 -14.772  1.00  0.47           O  
HETATM  171  O   HOH T 170      30.116 -24.139 -28.202  1.00  0.47           O  
HETATM  172  O   HOH T 171      38.623 -22.779   8.476  1.00  0.47           O  
HETATM  173  O   HOH T 172      31.724  -7.312  20.595  1.00  0.47           O  
HETATM  174  O   HOH T 173      42.436 -27.459 -35.399  1.00  0.48           O  
HETATM  175  O   HOH T 174      37.115  -8.663  -7.959  1.00  0.48           O  
HETATM  176  O   HOH T 175      33.098 -31.633 -18.301  1.00  0.48           O  
HETATM  177  O   HOH T 176      43.260  -8.088 -17.943  1.00  0.48           O  
HETATM  178  O   HOH T 177      29.153 -17.019  -3.481  1.00  0.48           O  
HETATM  179  O   HOH T 178      45.489 -11.995 -19.471  1.00  0.48           O  
HETATM  180  O   HOH T 179      32.602 -13.096  -5.758  1.00  0.48           O  
HETATM  181  O   HOH T 180      30.594 -28.260 -12.381  1.00  0.48           O  
HETATM  182  O   HOH T 181      49.391 -10.534   3.431  1.00  0.48           O  
HETATM  183  O   HOH T 182      48.815 -12.990   4.282  1.00  0.48           O  
HETATM  184  O   HOH T 183      36.999 -28.079   5.642  1.00  0.48           O  
HETATM  185  O   HOH T 184      24.402  -1.022  -6.509  1.00  0.48           O  
HETATM  186  O   HOH T 185      39.790  -6.475  16.294  1.00  0.48           O  
HETATM  187  O   HOH T 186      38.010 -12.059 -26.158  1.00  0.48           O  
HETATM  188  O   HOH T 187      36.623  -9.646 -25.974  1.00  0.48           O  
HETATM  189  O   HOH T 188      25.355 -20.770 -15.338  1.00  0.48           O  
HETATM  190  O   HOH T 189      38.280 -15.930 -27.470  1.00  0.48           O  
HETATM  191  O   HOH T 190      30.058 -12.123 -10.579  1.00  0.49           O  
HETATM  192  O   HOH T 191      46.746 -13.826 -22.895  1.00  0.49           O  
HETATM  193  O   HOH T 192      55.228 -16.826  -0.036  1.00  0.49           O  
HETATM  194  O   HOH T 193      33.331 -17.858  -2.614  1.00  0.49           O  
HETATM  195  O   HOH T 194      31.547 -25.498 -26.216  1.00  0.49           O  
HETATM  196  O   HOH T 195      45.053 -12.409  16.241  1.00  0.49           O  
HETATM  197  O   HOH T 196      41.996 -38.071  -4.036  1.00  0.49           O  
HETATM  198  O   HOH T 197      41.862  -4.918 -13.775  1.00  0.49           O  
HETATM  199  O   HOH T 198      35.598 -35.577 -15.472  1.00  0.49           O  
HETATM  200  O   HOH T 199      25.949   2.498  -1.350  1.00  0.49           O  
HETATM  201  O   HOH T 200      42.466  -0.374   3.820  1.00  0.50           O  
HETATM  202  O   HOH T 201      26.018   2.602   3.105  1.00  0.50           O  
HETATM  203  O   HOH T 202      23.314  -3.249  -7.595  1.00  0.50           O  
HETATM  204  O   HOH T 203      34.798  -9.739  -6.794  1.00  0.50           O  
HETATM  205  O   HOH T 204      44.164 -34.784 -18.024  1.00  0.50           O  
HETATM  206  O   HOH T 205      42.315 -36.198 -19.587  1.00  0.50           O  
HETATM  207  O   HOH T 206      47.113  -8.944 -16.932  1.00  0.50           O  
HETATM  208  O   HOH T 207      21.890  -4.823  -5.902  1.00  0.50           O  
HETATM  209  O   HOH T 208      31.979 -19.461   4.215  1.00  0.50           O  
HETATM  210  O   HOH T 209      23.923 -27.375 -18.175  1.00  0.50           O  
HETATM  211  O   HOH T 210      30.596   1.074   1.361  1.00  0.50           O  
HETATM  212  O   HOH T 211      55.973 -17.270 -11.991  1.00  0.50           O  
HETATM  213  O   HOH T 212      29.952 -33.946  -5.388  1.00  0.51           O  
HETATM  214  O   HOH T 213      23.349 -14.466 -12.962  1.00  0.51           O  
HETATM  215  O   HOH T 214      54.689 -24.765 -22.376  1.00  0.51           O  
HETATM  216  O   HOH T 215      53.693 -22.690 -23.962  1.00  0.51           O  
HETATM  217  O   HOH T 216      31.839 -29.312   6.457  1.00  0.51           O  
HETATM  218  O   HOH T 217      27.184 -30.959 -16.522  1.00  0.52           O  
HETATM  219  O   HOH T 218      24.783  -5.820 -11.999  1.00  0.52           O  
HETATM  220  O   HOH T 219      37.069 -34.079   1.436  1.00  0.52           O  
HETATM  221  O   HOH T 220      29.632 -14.821 -10.201  1.00  0.52           O  
HETATM  222  O   HOH T 221      36.394  -2.662  17.743  1.00  0.52           O  
HETATM  223  O   HOH T 222      30.119 -20.093   2.298  1.00  0.53           O  
HETATM  224  O   HOH T 223      26.400  -2.541  13.289  1.00  0.53           O  
HETATM  225  O   HOH T 224      28.057 -18.373  -5.638  1.00  0.53           O  
HETATM  226  O   HOH T 225      36.359 -26.078   9.652  1.00  0.53           O  
HETATM  227  O   HOH T 226      26.680   2.348  16.290  1.00  0.53           O  
HETATM  228  O   HOH T 227      40.948 -28.197  -4.565  1.00  0.53           O  
HETATM  229  O   HOH T 228      35.102 -33.375 -17.241  1.00  0.53           O  
HETATM  230  O   HOH T 229      46.958  -9.683   2.490  1.00  0.53           O  
HETATM  231  O   HOH T 230      28.290 -13.864  -5.257  1.00  0.53           O  
HETATM  232  O   HOH T 231      23.439  -9.542 -11.663  1.00  0.54           O  
HETATM  233  O   HOH T 232      33.934  -2.615  16.552  1.00  0.54           O  
HETATM  234  O   HOH T 233      42.232 -19.012 -26.682  1.00  0.54           O  
HETATM  235  O   HOH T 234      33.662 -22.022  -1.671  1.00  0.54           O  
HETATM  236  O   HOH T 235      27.843 -10.565  18.841  1.00  0.54           O  
HETATM  237  O   HOH T 236      50.673 -10.901   5.801  1.00  0.54           O  
HETATM  238  O   HOH T 237      34.205 -37.605  -9.682  1.00  0.54           O  
HETATM  239  O   HOH T 238      47.724  -6.529   1.650  1.00  0.55           O  
HETATM  240  O   HOH T 239      42.808  -6.498  -9.940  1.00  0.55           O  
HETATM  241  O   HOH T 240      16.993  -4.060   8.952  1.00  0.55           O  
HETATM  242  O   HOH T 241      38.136  -7.336 -25.920  1.00  0.56           O  
HETATM  243  O   HOH T 242      38.857  -5.669  18.697  1.00  0.56           O  
HETATM  244  O   HOH T 243      45.830 -37.651 -19.347  1.00  0.56           O  
HETATM  245  O   HOH T 244      21.345  -4.082  -3.211  1.00  0.56           O  
HETATM  246  O   HOH T 245      35.584 -33.091 -26.658  1.00  0.56           O  
HETATM  247  O   HOH T 246      36.267  -4.765  19.457  1.00  0.56           O  
HETATM  248  O   HOH T 247      55.294 -15.293 -15.311  1.00  0.56           O  
HETATM  249  O   HOH T 248      32.089 -24.203 -20.425  1.00  0.56           O  
HETATM  250  O   HOH T 249      29.227 -32.482  -8.883  1.00  0.56           O  
HETATM  251  O   HOH T 250      44.529 -12.075 -21.907  1.00  0.56           O  
HETATM  252  O   HOH T 251      19.502  -1.286   0.595  1.00  0.56           O  
HETATM  253  O   HOH T 252      54.202 -10.607 -17.098  1.00  0.56           O  
HETATM  254  O   HOH T 253      49.443 -10.611  -1.526  1.00  0.57           O  
HETATM  255  O   HOH T 254      45.252  -7.254 -16.187  1.00  0.57           O  
HETATM  256  O   HOH T 255      34.034 -34.896   2.403  1.00  0.57           O  
HETATM  257  O   HOH T 256      56.269 -17.122 -17.884  1.00  0.58           O  
HETATM  258  O   HOH T 257      37.372  -1.589  15.373  1.00  0.58           O  
HETATM  259  O   HOH T 258      33.170   3.521  10.635  1.00  0.58           O  
HETATM  260  O   HOH T 259      28.003   1.862   4.806  1.00  0.58           O  
HETATM  261  O   HOH T 260      33.728 -16.494   7.805  1.00  0.59           O  
TER     262      HOH T 260 
