# Supplementary material for: Accurate Prediction of Hydration Sites of Proteins Using Energy Model With Atom Embedding
Source: Front Mol Biosci. 2021 Sep 20;8:756075. doi: 10.3389/fmolb.2021.756075 (PMC8488165; doi:10.3389/fmolb.2021.756075)
Supplement: Supplementary file 1 [file DataSheet1.ZIP › Data Sheet 1/Our_result_pdb/our_dataset_output/3HYN_watersite.pdb]

HEADER                                                        XXXX


JRNL        PMID   -1
HETATM    1  O   HOH T   0       7.931  53.898  25.939  1.00  0.15           O  
HETATM    2  O   HOH T   1       5.118  57.681  18.252  1.00  0.17           O  
HETATM    3  O   HOH T   2       1.475  56.009  11.097  1.00  0.18           O  
HETATM    4  O   HOH T   3       2.302  44.892   6.644  1.00  0.19           O  
HETATM    5  O   HOH T   4       6.007  38.577  17.883  1.00  0.20           O  
HETATM    6  O   HOH T   5       2.249  45.860   4.028  1.00  0.20           O  
HETATM    7  O   HOH T   6       5.441  58.473  31.830  1.00  0.21           O  
HETATM    8  O   HOH T   7       8.252  60.689  24.055  1.00  0.22           O  
HETATM    9  O   HOH T   8      14.220  56.717   6.278  1.00  0.23           O  
HETATM   10  O   HOH T   9      -0.121  59.412   4.087  1.00  0.24           O  
HETATM   11  O   HOH T  10       4.625  57.615  -0.087  1.00  0.24           O  
HETATM   12  O   HOH T  11      14.194  61.068  39.384  1.00  0.25           O  
HETATM   13  O   HOH T  12      -7.853  71.105  34.202  1.00  0.25           O  
HETATM   14  O   HOH T  13      21.231  62.819  34.503  1.00  0.25           O  
HETATM   15  O   HOH T  14       4.532  47.554  26.578  1.00  0.25           O  
HETATM   16  O   HOH T  15      -0.344  47.362  31.878  1.00  0.25           O  
HETATM   17  O   HOH T  16      14.939  45.621   9.985  1.00  0.26           O  
HETATM   18  O   HOH T  17      -5.312  53.751   5.787  1.00  0.26           O  
HETATM   19  O   HOH T  18      12.209  35.606  22.805  1.00  0.26           O  
HETATM   20  O   HOH T  19      18.851  49.201  34.529  1.00  0.26           O  
HETATM   21  O   HOH T  20       5.973  42.653  -2.218  1.00  0.26           O  
HETATM   22  O   HOH T  21      -8.338  43.807  12.336  1.00  0.26           O  
HETATM   23  O   HOH T  22      13.014  35.098   7.480  1.00  0.27           O  
HETATM   24  O   HOH T  23      19.862  32.154   9.123  1.00  0.27           O  
HETATM   25  O   HOH T  24      22.029  48.286  15.519  1.00  0.27           O  
HETATM   26  O   HOH T  25       5.468  38.913  20.525  1.00  0.27           O  
HETATM   27  O   HOH T  26      -9.975  43.249  23.755  1.00  0.27           O  
HETATM   28  O   HOH T  27      15.164  53.630  37.921  1.00  0.28           O  
HETATM   29  O   HOH T  28      -5.682  39.321   0.533  1.00  0.28           O  
HETATM   30  O   HOH T  29      -2.059  34.816  12.492  1.00  0.28           O  
HETATM   31  O   HOH T  30       3.329  38.563  22.174  1.00  0.28           O  
HETATM   32  O   HOH T  31      -2.682  67.687  26.667  1.00  0.28           O  
HETATM   33  O   HOH T  32      -1.322  57.849   2.071  1.00  0.28           O  
HETATM   34  O   HOH T  33       8.938  64.627  24.291  1.00  0.28           O  
HETATM   35  O   HOH T  34      13.971  38.205  25.989  1.00  0.28           O  
HETATM   36  O   HOH T  35      -2.185  33.737  15.570  1.00  0.28           O  
HETATM   37  O   HOH T  36       9.339  66.761  20.911  1.00  0.28           O  
HETATM   38  O   HOH T  37       3.374  38.569  24.957  1.00  0.28           O  
HETATM   39  O   HOH T  38       1.410  55.265  37.071  1.00  0.28           O  
HETATM   40  O   HOH T  39      22.929  33.399  23.273  1.00  0.28           O  
HETATM   41  O   HOH T  40       3.392  58.675   7.059  1.00  0.29           O  
HETATM   42  O   HOH T  41      -5.264  41.910  -0.423  1.00  0.29           O  
HETATM   43  O   HOH T  42     -11.789  46.149  29.903  1.00  0.29           O  
HETATM   44  O   HOH T  43      -4.869  53.592  14.352  1.00  0.29           O  
HETATM   45  O   HOH T  44      16.984  62.328  16.836  1.00  0.29           O  
HETATM   46  O   HOH T  45      -3.417  58.554   7.255  1.00  0.30           O  
HETATM   47  O   HOH T  46      -5.026  45.553   3.684  1.00  0.30           O  
HETATM   48  O   HOH T  47      -4.768  35.820  20.665  1.00  0.30           O  
HETATM   49  O   HOH T  48       0.868  70.223  35.019  1.00  0.30           O  
HETATM   50  O   HOH T  49      20.296  38.065  10.539  1.00  0.30           O  
HETATM   51  O   HOH T  50      19.763  48.045   5.635  1.00  0.30           O  
HETATM   52  O   HOH T  51      12.168  38.076  33.585  1.00  0.31           O  
HETATM   53  O   HOH T  52      16.897  45.282   8.025  1.00  0.31           O  
HETATM   54  O   HOH T  53      12.971  62.170  27.337  1.00  0.31           O  
HETATM   55  O   HOH T  54      11.039  33.455   8.627  1.00  0.31           O  
HETATM   56  O   HOH T  55     -19.474  40.216  27.309  1.00  0.31           O  
HETATM   57  O   HOH T  56      20.246  59.741  21.504  1.00  0.31           O  
HETATM   58  O   HOH T  57      16.756  65.682  22.926  1.00  0.32           O  
HETATM   59  O   HOH T  58      18.874  64.401  34.267  1.00  0.32           O  
HETATM   60  O   HOH T  59      -7.128  55.470  25.228  1.00  0.32           O  
HETATM   61  O   HOH T  60       5.613  61.850   4.094  1.00  0.32           O  
HETATM   62  O   HOH T  61       0.385  55.748  -0.667  1.00  0.32           O  
HETATM   63  O   HOH T  62      11.491  33.337  21.417  1.00  0.32           O  
HETATM   64  O   HOH T  63      -4.287  46.833   1.281  1.00  0.32           O  
HETATM   65  O   HOH T  64       8.411  67.352  24.652  1.00  0.33           O  
HETATM   66  O   HOH T  65      -2.482  58.322  14.354  1.00  0.33           O  
HETATM   67  O   HOH T  66      -6.864  49.847  -3.535  1.00  0.33           O  
HETATM   68  O   HOH T  67      -7.011  47.591   0.616  1.00  0.33           O  
HETATM   69  O   HOH T  68       3.098  38.475   3.182  1.00  0.33           O  
HETATM   70  O   HOH T  69     -10.542  47.656  17.086  1.00  0.33           O  
HETATM   71  O   HOH T  70       0.608  50.193  -2.337  1.00  0.34           O  
HETATM   72  O   HOH T  71      23.125  52.826  10.441  1.00  0.34           O  
HETATM   73  O   HOH T  72      15.376  44.995   4.640  1.00  0.34           O  
HETATM   74  O   HOH T  73       5.048  60.618   6.357  1.00  0.34           O  
HETATM   75  O   HOH T  74      16.621  59.521  17.141  1.00  0.34           O  
HETATM   76  O   HOH T  75      11.407  60.753  39.746  1.00  0.34           O  
HETATM   77  O   HOH T  76       2.106  35.265  21.294  1.00  0.34           O  
HETATM   78  O   HOH T  77      15.620  37.835   5.749  1.00  0.34           O  
HETATM   79  O   HOH T  78      18.736  59.961  23.865  1.00  0.34           O  
HETATM   80  O   HOH T  79      15.680  30.119  21.491  1.00  0.35           O  
HETATM   81  O   HOH T  80      18.243  31.822  28.143  1.00  0.35           O  
HETATM   82  O   HOH T  81      15.475  62.648  31.979  1.00  0.35           O  
HETATM   83  O   HOH T  82      -0.450  33.504   6.748  1.00  0.35           O  
HETATM   84  O   HOH T  83      -3.296  56.042  31.752  1.00  0.35           O  
HETATM   85  O   HOH T  84      11.057  31.861  14.857  1.00  0.35           O  
HETATM   86  O   HOH T  85     -15.468  40.515  23.843  1.00  0.36           O  
HETATM   87  O   HOH T  86      18.906  52.681   7.886  1.00  0.36           O  
HETATM   88  O   HOH T  87      -0.771  59.855  15.957  1.00  0.36           O  
HETATM   89  O   HOH T  88      -1.881  63.980  30.202  1.00  0.36           O  
HETATM   90  O   HOH T  89      -5.504  40.460  31.118  1.00  0.36           O  
HETATM   91  O   HOH T  90      -4.137  40.811  -2.606  1.00  0.37           O  
HETATM   92  O   HOH T  91      12.902  63.175  32.307  1.00  0.37           O  
HETATM   93  O   HOH T  92      -0.339  61.039  13.409  1.00  0.37           O  
HETATM   94  O   HOH T  93       3.139  58.243  34.744  1.00  0.37           O  
HETATM   95  O   HOH T  94      14.336  65.245  24.186  1.00  0.37           O  
HETATM   96  O   HOH T  95      -2.493  35.540  26.555  1.00  0.37           O  
HETATM   97  O   HOH T  96      10.833  62.309  30.825  1.00  0.37           O  
HETATM   98  O   HOH T  97      18.667  66.807  39.807  1.00  0.37           O  
HETATM   99  O   HOH T  98       7.467  68.717  16.753  1.00  0.37           O  
HETATM  100  O   HOH T  99      -3.790  45.271  -2.858  1.00  0.38           O  
HETATM  101  O   HOH T 100      19.203  38.854   6.413  1.00  0.38           O  
HETATM  102  O   HOH T 101      10.531  66.374  36.129  1.00  0.38           O  
HETATM  103  O   HOH T 102      -3.226  67.515  32.810  1.00  0.38           O  
HETATM  104  O   HOH T 103      11.952  62.484   5.689  1.00  0.38           O  
HETATM  105  O   HOH T 104      -4.576  44.013   1.323  1.00  0.38           O  
HETATM  106  O   HOH T 105      10.552  68.443  33.121  1.00  0.38           O  
HETATM  107  O   HOH T 106      -5.532  56.210  14.349  1.00  0.38           O  
HETATM  108  O   HOH T 107      18.809  58.178  43.148  1.00  0.39           O  
HETATM  109  O   HOH T 108      -3.915  37.650   8.960  1.00  0.39           O  
HETATM  110  O   HOH T 109      10.740  51.564  -9.717  1.00  0.39           O  
HETATM  111  O   HOH T 110      14.570  61.421  17.770  1.00  0.39           O  
HETATM  112  O   HOH T 111      22.172  55.548  38.130  1.00  0.39           O  
HETATM  113  O   HOH T 112      22.591  41.897  14.526  1.00  0.39           O  
HETATM  114  O   HOH T 113      -7.306  68.362  34.246  1.00  0.39           O  
HETATM  115  O   HOH T 114      -5.250  53.196  11.621  1.00  0.39           O  
HETATM  116  O   HOH T 115      -3.405  52.147   0.529  1.00  0.39           O  
HETATM  117  O   HOH T 116       3.123  50.240  -6.789  1.00  0.39           O  
HETATM  118  O   HOH T 117      -4.947  58.539   9.591  1.00  0.40           O  
HETATM  119  O   HOH T 118       9.035  43.493  -7.397  1.00  0.40           O  
HETATM  120  O   HOH T 119      -5.304  47.649  -2.621  1.00  0.40           O  
HETATM  121  O   HOH T 120       5.846  45.113 -10.757  1.00  0.40           O  
HETATM  122  O   HOH T 121     -17.233  40.603  28.627  1.00  0.40           O  
HETATM  123  O   HOH T 122       5.109  68.638  26.944  1.00  0.40           O  
HETATM  124  O   HOH T 123      20.710  65.834  41.272  1.00  0.40           O  
HETATM  125  O   HOH T 124      19.978  57.565  23.194  1.00  0.40           O  
HETATM  126  O   HOH T 125       2.255  40.677  -9.850  1.00  0.40           O  
HETATM  127  O   HOH T 126       5.611  39.670   2.575  1.00  0.40           O  
HETATM  128  O   HOH T 127       9.427  44.969  32.454  1.00  0.40           O  
HETATM  129  O   HOH T 128      20.010  35.488  11.541  1.00  0.41           O  
HETATM  130  O   HOH T 129      -2.093  65.257  27.778  1.00  0.41           O  
HETATM  131  O   HOH T 130      11.702  64.202  10.125  1.00  0.41           O  
HETATM  132  O   HOH T 131       1.219  41.392  -7.270  1.00  0.41           O  
HETATM  133  O   HOH T 132      17.009  59.771  41.920  1.00  0.41           O  
HETATM  134  O   HOH T 133      20.649  55.452  40.430  1.00  0.41           O  
HETATM  135  O   HOH T 134      12.565  28.059  10.864  1.00  0.41           O  
HETATM  136  O   HOH T 135      10.982  67.232  16.993  1.00  0.41           O  
HETATM  137  O   HOH T 136      23.398  34.520   7.668  1.00  0.41           O  
HETATM  138  O   HOH T 137     -11.524  43.641  16.467  1.00  0.41           O  
HETATM  139  O   HOH T 138      22.809  44.392  19.238  1.00  0.41           O  
HETATM  140  O   HOH T 139      -1.777  62.336  15.374  1.00  0.41           O  
HETATM  141  O   HOH T 140      22.623  48.793  30.782  1.00  0.41           O  
HETATM  142  O   HOH T 141      10.321  63.060   7.903  1.00  0.41           O  
HETATM  143  O   HOH T 142      13.977  40.315  33.371  1.00  0.41           O  
HETATM  144  O   HOH T 143      -8.279  60.620  28.694  1.00  0.41           O  
HETATM  145  O   HOH T 144      -8.172  47.710  15.483  1.00  0.42           O  
HETATM  146  O   HOH T 145      -5.108  59.140  33.232  1.00  0.42           O  
HETATM  147  O   HOH T 146      20.651  60.281  25.926  1.00  0.42           O  
HETATM  148  O   HOH T 147      -0.040  43.111  29.387  1.00  0.42           O  
HETATM  149  O   HOH T 148      -0.223  51.514  34.477  1.00  0.42           O  
HETATM  150  O   HOH T 149       3.840  56.346  38.259  1.00  0.42           O  
HETATM  151  O   HOH T 150      -4.102  59.189  12.216  1.00  0.42           O  
HETATM  152  O   HOH T 151     -13.282  41.269  30.228  1.00  0.42           O  
HETATM  153  O   HOH T 152       9.160  68.576  18.919  1.00  0.42           O  
HETATM  154  O   HOH T 153       3.612  42.318  32.324  1.00  0.42           O  
HETATM  155  O   HOH T 154      -1.074  48.871  34.149  1.00  0.42           O  
HETATM  156  O   HOH T 155      21.953  62.565  37.146  1.00  0.42           O  
HETATM  157  O   HOH T 156      13.103  66.759  34.996  1.00  0.42           O  
HETATM  158  O   HOH T 157     -11.714  54.356  27.553  1.00  0.42           O  
HETATM  159  O   HOH T 158      14.885  52.808   3.020  1.00  0.42           O  
HETATM  160  O   HOH T 159       5.828  45.931  35.262  1.00  0.42           O  
HETATM  161  O   HOH T 160      -8.636  48.919  22.864  1.00  0.43           O  
HETATM  162  O   HOH T 161      10.390  35.455  25.958  1.00  0.43           O  
HETATM  163  O   HOH T 162       4.088  44.529  -2.553  1.00  0.43           O  
HETATM  164  O   HOH T 163     -10.884  43.670  11.228  1.00  0.43           O  
HETATM  165  O   HOH T 164      22.417  65.605  44.839  1.00  0.43           O  
HETATM  166  O   HOH T 165      26.650  60.654  31.569  1.00  0.43           O  
HETATM  167  O   HOH T 166      22.902  57.177  40.217  1.00  0.43           O  
HETATM  168  O   HOH T 167      20.692  40.098  13.678  1.00  0.43           O  
HETATM  169  O   HOH T 168      -0.206  47.702  -3.132  1.00  0.43           O  
HETATM  170  O   HOH T 169      -1.513  38.862   5.931  1.00  0.43           O  
HETATM  171  O   HOH T 170       9.808  28.518  11.471  1.00  0.43           O  
HETATM  172  O   HOH T 171      15.616  54.843   4.753  1.00  0.43           O  
HETATM  173  O   HOH T 172       4.757  58.682  36.955  1.00  0.43           O  
HETATM  174  O   HOH T 173      15.695  64.065  15.010  1.00  0.43           O  
HETATM  175  O   HOH T 174       0.163  52.230  -4.201  1.00  0.44           O  
HETATM  176  O   HOH T 175      18.733  53.670  39.465  1.00  0.44           O  
HETATM  177  O   HOH T 176      20.218  36.845  16.132  1.00  0.44           O  
HETATM  178  O   HOH T 177      -8.952  55.219  23.154  1.00  0.44           O  
HETATM  179  O   HOH T 178     -13.853  46.742  31.672  1.00  0.44           O  
HETATM  180  O   HOH T 179      24.918  41.442  15.821  1.00  0.44           O  
HETATM  181  O   HOH T 180     -13.833  65.017  36.062  1.00  0.44           O  
HETATM  182  O   HOH T 181      23.045  37.007  16.427  1.00  0.44           O  
HETATM  183  O   HOH T 182      15.381  50.121  37.136  1.00  0.44           O  
HETATM  184  O   HOH T 183      11.189  45.145  -6.192  1.00  0.44           O  
HETATM  185  O   HOH T 184       8.280  71.566  30.504  1.00  0.44           O  
HETATM  186  O   HOH T 185      13.288  54.386  39.820  1.00  0.45           O  
HETATM  187  O   HOH T 186      -8.912  57.650  24.526  1.00  0.45           O  
HETATM  188  O   HOH T 187      17.070  57.008  41.298  1.00  0.45           O  
HETATM  189  O   HOH T 188      15.362  68.601  19.765  1.00  0.45           O  
HETATM  190  O   HOH T 189      12.735  64.328   7.580  1.00  0.45           O  
HETATM  191  O   HOH T 190      -4.067  34.168  28.604  1.00  0.45           O  
HETATM  192  O   HOH T 191       9.642  69.018  35.673  1.00  0.45           O  
HETATM  193  O   HOH T 192      12.936  32.887  12.959  1.00  0.45           O  
HETATM  194  O   HOH T 193       8.199  62.883   0.996  1.00  0.45           O  
HETATM  195  O   HOH T 194      18.650  35.614  25.131  1.00  0.46           O  
HETATM  196  O   HOH T 195      21.285  57.334  42.362  1.00  0.46           O  
HETATM  197  O   HOH T 196     -10.200  35.340  23.796  1.00  0.46           O  
HETATM  198  O   HOH T 197       9.620  56.121  -2.480  1.00  0.46           O  
HETATM  199  O   HOH T 198      17.904  46.239   4.283  1.00  0.46           O  
HETATM  200  O   HOH T 199       8.249  47.099  34.846  1.00  0.46           O  
HETATM  201  O   HOH T 200      22.083  55.796  33.990  1.00  0.46           O  
HETATM  202  O   HOH T 201      19.592  51.073  38.998  1.00  0.46           O  
HETATM  203  O   HOH T 202      -5.579  56.937  11.776  1.00  0.46           O  
HETATM  204  O   HOH T 203       2.783  56.604  -1.814  1.00  0.46           O  
HETATM  205  O   HOH T 204      -6.820  53.488  23.385  1.00  0.46           O  
HETATM  206  O   HOH T 205       0.741  49.925  32.388  1.00  0.46           O  
HETATM  207  O   HOH T 206      -9.275  46.000  13.829  1.00  0.47           O  
HETATM  208  O   HOH T 207      -9.828  55.339  25.800  1.00  0.47           O  
HETATM  209  O   HOH T 208      12.464  59.358   3.845  1.00  0.47           O  
HETATM  210  O   HOH T 209       1.684  36.489  25.220  1.00  0.47           O  
HETATM  211  O   HOH T 210       5.050  41.070  -9.452  1.00  0.47           O  
HETATM  212  O   HOH T 211       9.762  51.931  37.426  1.00  0.47           O  
HETATM  213  O   HOH T 212      10.386  53.656  -2.286  1.00  0.47           O  
HETATM  214  O   HOH T 213      -1.749  61.901  11.222  1.00  0.47           O  
HETATM  215  O   HOH T 214      -0.176  35.109   8.996  1.00  0.47           O  
HETATM  216  O   HOH T 215      -5.536  43.818   6.957  1.00  0.47           O  
HETATM  217  O   HOH T 216      -9.787  38.941  16.884  1.00  0.47           O  
HETATM  218  O   HOH T 217      17.221  47.695   6.615  1.00  0.47           O  
HETATM  219  O   HOH T 218      -5.579  41.193   7.431  1.00  0.48           O  
HETATM  220  O   HOH T 219      -0.999  66.361  31.597  1.00  0.48           O  
HETATM  221  O   HOH T 220      17.332  52.731   4.225  1.00  0.48           O  
HETATM  222  O   HOH T 221      -0.459  37.501  26.504  1.00  0.48           O  
HETATM  223  O   HOH T 222      -2.838  35.207   9.807  1.00  0.48           O  
HETATM  224  O   HOH T 223      13.108  60.376  19.983  1.00  0.48           O  
HETATM  225  O   HOH T 224      12.553  52.405  38.050  1.00  0.48           O  
HETATM  226  O   HOH T 225     -10.518  37.243  29.207  1.00  0.48           O  
HETATM  227  O   HOH T 226      24.053  36.965   8.933  1.00  0.48           O  
HETATM  228  O   HOH T 227     -15.898  38.219  29.095  1.00  0.48           O  
HETATM  229  O   HOH T 228     -15.755  40.390  30.910  1.00  0.48           O  
HETATM  230  O   HOH T 229      17.065  51.776   1.766  1.00  0.48           O  
HETATM  231  O   HOH T 230      21.881  40.423  23.081  1.00  0.48           O  
HETATM  232  O   HOH T 231      14.320  59.374  41.564  1.00  0.48           O  
HETATM  233  O   HOH T 232       8.923  38.771  31.586  1.00  0.48           O  
HETATM  234  O   HOH T 233      21.395  53.137  38.930  1.00  0.49           O  
HETATM  235  O   HOH T 234      13.157  35.637  26.524  1.00  0.49           O  
HETATM  236  O   HOH T 235      17.833  34.493  27.516  1.00  0.49           O  
HETATM  237  O   HOH T 236      -0.495  39.840  37.759  1.00  0.49           O  
HETATM  238  O   HOH T 237      18.046  49.601  37.246  1.00  0.49           O  
HETATM  239  O   HOH T 238       6.113  43.422  -8.308  1.00  0.49           O  
HETATM  240  O   HOH T 239      11.954  60.810  17.511  1.00  0.49           O  
HETATM  241  O   HOH T 240      10.034  33.972  23.607  1.00  0.49           O  
HETATM  242  O   HOH T 241      -5.047  65.812  35.764  1.00  0.49           O  
HETATM  243  O   HOH T 242      -3.487  55.720  -4.900  1.00  0.49           O  
HETATM  244  O   HOH T 243      14.657  43.092  33.968  1.00  0.49           O  
HETATM  245  O   HOH T 244      -4.208  38.980   6.534  1.00  0.49           O  
HETATM  246  O   HOH T 245      16.364  52.587  -0.787  1.00  0.49           O  
HETATM  247  O   HOH T 246      12.136  58.262  -2.417  1.00  0.50           O  
HETATM  248  O   HOH T 247      -8.261  42.087  33.121  1.00  0.50           O  
HETATM  249  O   HOH T 248       2.582  34.314  23.843  1.00  0.50           O  
HETATM  250  O   HOH T 249      19.558  61.918  11.393  1.00  0.50           O  
HETATM  251  O   HOH T 250      25.112  50.979  10.362  1.00  0.50           O  
HETATM  252  O   HOH T 251      21.508  63.764  43.016  1.00  0.50           O  
HETATM  253  O   HOH T 252      21.626  34.163   9.760  1.00  0.50           O  
HETATM  254  O   HOH T 253      20.199  39.519  21.047  1.00  0.51           O  
HETATM  255  O   HOH T 254     -13.127  44.006  31.028  1.00  0.51           O  
HETATM  256  O   HOH T 255       5.165  66.387  35.157  1.00  0.51           O  
HETATM  257  O   HOH T 256      -6.743  51.822  13.461  1.00  0.51           O  
HETATM  258  O   HOH T 257      13.887  31.226  14.931  1.00  0.51           O  
HETATM  259  O   HOH T 258      -5.692  59.098  37.305  1.00  0.51           O  
HETATM  260  O   HOH T 259      -5.706  45.506  -0.819  1.00  0.51           O  
HETATM  261  O   HOH T 260      16.226  66.082   8.427  1.00  0.51           O  
HETATM  262  O   HOH T 261      18.034  54.634   6.065  1.00  0.51           O  
HETATM  263  O   HOH T 262       5.752  43.742  33.389  1.00  0.52           O  
HETATM  264  O   HOH T 263      21.105  35.405  24.072  1.00  0.52           O  
HETATM  265  O   HOH T 264      10.413  69.873  30.823  1.00  0.52           O  
HETATM  266  O   HOH T 265      -9.009  34.701  28.257  1.00  0.52           O  
HETATM  267  O   HOH T 266     -12.748  45.944  17.003  1.00  0.52           O  
HETATM  268  O   HOH T 267      11.269  49.459  36.278  1.00  0.53           O  
HETATM  269  O   HOH T 268      -8.138  40.374  30.824  1.00  0.53           O  
HETATM  270  O   HOH T 269      20.280  33.731  28.616  1.00  0.53           O  
HETATM  271  O   HOH T 270      21.153  59.280  44.169  1.00  0.54           O  
HETATM  272  O   HOH T 271      19.695  64.584  10.627  1.00  0.54           O  
HETATM  273  O   HOH T 272     -11.946  61.645  30.824  1.00  0.54           O  
HETATM  274  O   HOH T 273      23.379  59.090  42.276  1.00  0.54           O  
HETATM  275  O   HOH T 274      11.612  30.680  11.483  1.00  0.54           O  
HETATM  276  O   HOH T 275      -9.732  69.279  35.273  1.00  0.54           O  
HETATM  277  O   HOH T 276       1.552  40.576  31.735  1.00  0.54           O  
HETATM  278  O   HOH T 277      10.017  68.170  26.795  1.00  0.54           O  
HETATM  279  O   HOH T 278      10.680  53.443  39.640  1.00  0.54           O  
HETATM  280  O   HOH T 279     -10.792  40.309  31.048  1.00  0.54           O  
HETATM  281  O   HOH T 280      20.353  37.421  13.327  1.00  0.55           O  
HETATM  282  O   HOH T 281      19.581  40.585  17.259  1.00  0.55           O  
HETATM  283  O   HOH T 282      -7.213  39.592  33.218  1.00  0.55           O  
HETATM  284  O   HOH T 283       4.101  53.816  -5.706  1.00  0.55           O  
HETATM  285  O   HOH T 284       9.623  38.782  34.153  1.00  0.56           O  
HETATM  286  O   HOH T 285       6.471  27.400  20.350  1.00  0.56           O  
HETATM  287  O   HOH T 286      -0.713  68.258  33.776  1.00  0.56           O  
HETATM  288  O   HOH T 287      -0.201  52.864  36.780  1.00  0.56           O  
HETATM  289  O   HOH T 288      21.291  49.315  33.082  1.00  0.56           O  
HETATM  290  O   HOH T 289       6.386  42.785  -4.942  1.00  0.56           O  
HETATM  291  O   HOH T 290      -7.292  33.225  30.773  1.00  0.56           O  
HETATM  292  O   HOH T 291      -6.690  60.512  35.047  1.00  0.57           O  
HETATM  293  O   HOH T 292       6.529  40.454  -0.840  1.00  0.57           O  
HETATM  294  O   HOH T 293       6.508  55.961  39.132  1.00  0.57           O  
HETATM  295  O   HOH T 294       3.274  67.299  33.290  1.00  0.57           O  
HETATM  296  O   HOH T 295      22.142  39.887  11.389  1.00  0.57           O  
HETATM  297  O   HOH T 296      23.943  53.391  13.009  1.00  0.57           O  
HETATM  298  O   HOH T 297      -4.927  52.728  -1.594  1.00  0.58           O  
HETATM  299  O   HOH T 298      10.389  45.408  34.865  1.00  0.58           O  
HETATM  300  O   HOH T 299      21.638  42.473  10.370  1.00  0.59           O  
HETATM  301  O   HOH T 300      12.936  31.645  25.110  1.00  0.59           O  
HETATM  302  O   HOH T 301      -0.828  64.014   9.797  1.00  0.60           O  
TER     303      HOH T 301 
