# Supplementary material for: Accurate Prediction of Hydration Sites of Proteins Using Energy Model With Atom Embedding
Source: Front Mol Biosci. 2021 Sep 20;8:756075. doi: 10.3389/fmolb.2021.756075 (PMC8488165; doi:10.3389/fmolb.2021.756075)
Supplement: Supplementary file 1 [file DataSheet1.ZIP › Data Sheet 1/Our_result_pdb/our_dataset_output/3I8U_watersite.pdb]

HEADER                                                        XXXX


JRNL        PMID   -1
HETATM    1  O   HOH T   0     -10.723   1.079   1.219  1.00  0.17           O  
HETATM    2  O   HOH T   1       0.505 -34.133   7.082  1.00  0.17           O  
HETATM    3  O   HOH T   2      -4.441  -1.398  -5.472  1.00  0.18           O  
HETATM    4  O   HOH T   3      -7.171  -4.640   5.127  1.00  0.18           O  
HETATM    5  O   HOH T   4      16.818 -22.712  -8.902  1.00  0.20           O  
HETATM    6  O   HOH T   5      16.231 -24.221 -15.776  1.00  0.20           O  
HETATM    7  O   HOH T   6      -4.862 -21.585  -5.759  1.00  0.20           O  
HETATM    8  O   HOH T   7      20.588 -17.988 -18.910  1.00  0.21           O  
HETATM    9  O   HOH T   8       7.624 -26.156 -13.329  1.00  0.21           O  
HETATM   10  O   HOH T   9      -5.152  -8.442  -8.602  1.00  0.21           O  
HETATM   11  O   HOH T  10      28.402 -15.543   1.173  1.00  0.22           O  
HETATM   12  O   HOH T  11      -2.460  -0.645   1.542  1.00  0.22           O  
HETATM   13  O   HOH T  12       2.206 -16.843  -3.951  1.00  0.23           O  
HETATM   14  O   HOH T  13      13.500 -29.908 -15.559  1.00  0.23           O  
HETATM   15  O   HOH T  14       2.677  -3.875  -5.895  1.00  0.23           O  
HETATM   16  O   HOH T  15      12.440 -12.053   4.070  1.00  0.23           O  
HETATM   17  O   HOH T  16      20.180 -27.396   3.154  1.00  0.23           O  
HETATM   18  O   HOH T  17       9.627 -14.823  -5.621  1.00  0.25           O  
HETATM   19  O   HOH T  18      -6.365 -20.332  -7.715  1.00  0.25           O  
HETATM   20  O   HOH T  19      -4.086 -22.217  11.513  1.00  0.25           O  
HETATM   21  O   HOH T  20      -4.309  -5.751  11.511  1.00  0.25           O  
HETATM   22  O   HOH T  21      -4.193  -9.165   3.944  1.00  0.25           O  
HETATM   23  O   HOH T  22      -9.385 -26.159  -1.678  1.00  0.26           O  
HETATM   24  O   HOH T  23       1.602 -18.994  -5.627  1.00  0.26           O  
HETATM   25  O   HOH T  24      11.998 -38.803  -2.037  1.00  0.26           O  
HETATM   26  O   HOH T  25      -6.555 -16.286   0.612  1.00  0.26           O  
HETATM   27  O   HOH T  26       6.918  -9.857 -15.143  1.00  0.26           O  
HETATM   28  O   HOH T  27      -4.899 -14.362  16.334  1.00  0.26           O  
HETATM   29  O   HOH T  28      14.810 -11.656 -28.483  1.00  0.26           O  
HETATM   30  O   HOH T  29       8.062   2.264 -10.240  1.00  0.26           O  
HETATM   31  O   HOH T  30      15.100  -4.603  -3.388  1.00  0.26           O  
HETATM   32  O   HOH T  31      12.604 -31.875  20.192  1.00  0.26           O  
HETATM   33  O   HOH T  32      12.415 -35.624   6.350  1.00  0.26           O  
HETATM   34  O   HOH T  33      -4.450 -15.381  -8.976  1.00  0.27           O  
HETATM   35  O   HOH T  34       9.366 -24.729  -7.187  1.00  0.27           O  
HETATM   36  O   HOH T  35      30.295 -20.647  -6.631  1.00  0.27           O  
HETATM   37  O   HOH T  36      23.071 -28.768 -16.450  1.00  0.27           O  
HETATM   38  O   HOH T  37      -0.764 -28.186  11.750  1.00  0.28           O  
HETATM   39  O   HOH T  38      25.417 -21.172   6.798  1.00  0.28           O  
HETATM   40  O   HOH T  39      11.248 -21.892 -26.922  1.00  0.28           O  
HETATM   41  O   HOH T  40       1.127 -26.808  13.278  1.00  0.28           O  
HETATM   42  O   HOH T  41       5.360 -29.921 -14.691  1.00  0.28           O  
HETATM   43  O   HOH T  42      -7.635 -14.142   1.852  1.00  0.29           O  
HETATM   44  O   HOH T  43      11.612 -41.385  -3.099  1.00  0.29           O  
HETATM   45  O   HOH T  44      -1.628 -33.231  -5.677  1.00  0.29           O  
HETATM   46  O   HOH T  45      10.481 -45.064   0.241  1.00  0.29           O  
HETATM   47  O   HOH T  46       6.693 -24.648 -15.458  1.00  0.29           O  
HETATM   48  O   HOH T  47      28.550 -28.011 -21.274  1.00  0.29           O  
HETATM   49  O   HOH T  48       5.957 -28.817 -21.572  1.00  0.29           O  
HETATM   50  O   HOH T  49      25.994 -29.051 -21.791  1.00  0.29           O  
HETATM   51  O   HOH T  50      22.223 -37.997  -7.989  1.00  0.30           O  
HETATM   52  O   HOH T  51      -9.586 -33.477  -3.616  1.00  0.30           O  
HETATM   53  O   HOH T  52      26.346 -13.253  -7.406  1.00  0.30           O  
HETATM   54  O   HOH T  53     -10.252  -6.743  10.632  1.00  0.30           O  
HETATM   55  O   HOH T  54      10.575 -35.533  12.813  1.00  0.30           O  
HETATM   56  O   HOH T  55       1.827 -39.861   3.305  1.00  0.30           O  
HETATM   57  O   HOH T  56      20.729 -19.404   9.208  1.00  0.30           O  
HETATM   58  O   HOH T  57      -4.658 -12.505  11.898  1.00  0.31           O  
HETATM   59  O   HOH T  58      11.028 -35.617 -12.622  1.00  0.31           O  
HETATM   60  O   HOH T  59      23.392 -21.205 -23.987  1.00  0.31           O  
HETATM   61  O   HOH T  60       4.641 -27.978 -16.449  1.00  0.31           O  
HETATM   62  O   HOH T  61      -5.442  -9.668  13.885  1.00  0.31           O  
HETATM   63  O   HOH T  62      15.170 -21.692 -16.243  1.00  0.31           O  
HETATM   64  O   HOH T  63      -2.660   0.107  -1.154  1.00  0.31           O  
HETATM   65  O   HOH T  64       7.288  -5.437  11.438  1.00  0.31           O  
HETATM   66  O   HOH T  65      11.931 -10.374 -15.096  1.00  0.31           O  
HETATM   67  O   HOH T  66      24.657 -31.026 -15.786  1.00  0.31           O  
HETATM   68  O   HOH T  67      22.260 -15.905 -12.452  1.00  0.32           O  
HETATM   69  O   HOH T  68      18.617  -9.556   6.380  1.00  0.32           O  
HETATM   70  O   HOH T  69       2.497 -34.099   0.023  1.00  0.32           O  
HETATM   71  O   HOH T  70       5.476 -24.727  14.479  1.00  0.32           O  
HETATM   72  O   HOH T  71      -6.334 -21.296  12.885  1.00  0.32           O  
HETATM   73  O   HOH T  72       9.476 -33.352 -12.755  1.00  0.32           O  
HETATM   74  O   HOH T  73      11.090 -31.901  -6.455  1.00  0.32           O  
HETATM   75  O   HOH T  74      23.524 -30.604 -12.028  1.00  0.33           O  
HETATM   76  O   HOH T  75      28.757 -13.937  -0.909  1.00  0.33           O  
HETATM   77  O   HOH T  76      25.327 -16.770 -14.882  1.00  0.33           O  
HETATM   78  O   HOH T  77      19.843 -11.901 -12.086  1.00  0.33           O  
HETATM   79  O   HOH T  78      11.307  -9.141  -9.021  1.00  0.33           O  
HETATM   80  O   HOH T  79      29.835 -13.099  -4.252  1.00  0.33           O  
HETATM   81  O   HOH T  80       8.766 -28.192 -17.065  1.00  0.33           O  
HETATM   82  O   HOH T  81      11.609 -14.709 -23.088  1.00  0.33           O  
HETATM   83  O   HOH T  82      16.475 -24.574  10.841  1.00  0.34           O  
HETATM   84  O   HOH T  83       8.027 -28.128  15.128  1.00  0.34           O  
HETATM   85  O   HOH T  84      -6.246  -7.387   4.987  1.00  0.34           O  
HETATM   86  O   HOH T  85      -9.935  -4.906   3.194  1.00  0.34           O  
HETATM   87  O   HOH T  86      12.936  -6.242   9.844  1.00  0.34           O  
HETATM   88  O   HOH T  87      11.232   1.321   0.034  1.00  0.34           O  
HETATM   89  O   HOH T  88      -0.390 -11.521 -11.613  1.00  0.34           O  
HETATM   90  O   HOH T  89      11.209 -41.952  -5.803  1.00  0.34           O  
HETATM   91  O   HOH T  90       0.933  -7.218 -14.552  1.00  0.34           O  
HETATM   92  O   HOH T  91      18.141  -8.729   0.353  1.00  0.34           O  
HETATM   93  O   HOH T  92      10.366 -26.086 -21.044  1.00  0.34           O  
HETATM   94  O   HOH T  93      17.769 -15.873  13.351  1.00  0.35           O  
HETATM   95  O   HOH T  94     -10.431  -7.280   4.583  1.00  0.35           O  
HETATM   96  O   HOH T  95      -2.705 -30.223  12.051  1.00  0.35           O  
HETATM   97  O   HOH T  96      10.169   1.554  -2.487  1.00  0.35           O  
HETATM   98  O   HOH T  97      12.535 -16.436 -25.018  1.00  0.35           O  
HETATM   99  O   HOH T  98      13.758  -6.386 -10.175  1.00  0.35           O  
HETATM  100  O   HOH T  99      24.629 -23.598 -28.563  1.00  0.35           O  
HETATM  101  O   HOH T 100      22.298 -46.667  -7.862  1.00  0.35           O  
HETATM  102  O   HOH T 101      -9.262 -26.470 -14.077  1.00  0.35           O  
HETATM  103  O   HOH T 102       9.988 -16.166 -15.379  1.00  0.35           O  
HETATM  104  O   HOH T 103     -10.509 -27.168   6.875  1.00  0.36           O  
HETATM  105  O   HOH T 104      27.015 -27.067 -23.438  1.00  0.36           O  
HETATM  106  O   HOH T 105      11.375 -24.512 -26.138  1.00  0.36           O  
HETATM  107  O   HOH T 106      17.704  -8.730   8.917  1.00  0.36           O  
HETATM  108  O   HOH T 107       1.727 -11.520  15.971  1.00  0.36           O  
HETATM  109  O   HOH T 108      -5.786   0.906 -11.772  1.00  0.36           O  
HETATM  110  O   HOH T 109      -3.679 -36.390  10.846  1.00  0.36           O  
HETATM  111  O   HOH T 110      20.314 -15.542 -32.512  1.00  0.36           O  
HETATM  112  O   HOH T 111      17.647  -6.966  -9.895  1.00  0.36           O  
HETATM  113  O   HOH T 112     -10.372 -33.987  -6.384  1.00  0.36           O  
HETATM  114  O   HOH T 113       5.638 -10.427  19.984  1.00  0.36           O  
HETATM  115  O   HOH T 114       2.737 -24.908  14.488  1.00  0.36           O  
HETATM  116  O   HOH T 115      -6.217 -15.025  13.949  1.00  0.36           O  
HETATM  117  O   HOH T 116      14.575  -1.414  -8.080  1.00  0.36           O  
HETATM  118  O   HOH T 117      -5.740 -25.983  17.028  1.00  0.36           O  
HETATM  119  O   HOH T 118      -5.852 -23.735 -10.487  1.00  0.37           O  
HETATM  120  O   HOH T 119      16.480  -7.253   2.095  1.00  0.37           O  
HETATM  121  O   HOH T 120      15.653 -28.404 -14.600  1.00  0.37           O  
HETATM  122  O   HOH T 121      25.117 -38.023 -10.989  1.00  0.37           O  
HETATM  123  O   HOH T 122      10.536 -25.266 -23.645  1.00  0.38           O  
HETATM  124  O   HOH T 123       9.775 -44.419   2.811  1.00  0.38           O  
HETATM  125  O   HOH T 124      24.802 -18.387  10.675  1.00  0.38           O  
HETATM  126  O   HOH T 125       9.489 -25.730  14.924  1.00  0.38           O  
HETATM  127  O   HOH T 126      -9.965 -23.742  -0.479  1.00  0.38           O  
HETATM  128  O   HOH T 127      27.642 -24.014 -12.269  1.00  0.38           O  
HETATM  129  O   HOH T 128       3.075 -13.388 -18.832  1.00  0.38           O  
HETATM  130  O   HOH T 129      11.596 -18.587 -23.448  1.00  0.38           O  
HETATM  131  O   HOH T 130      10.679 -27.998  15.868  1.00  0.38           O  
HETATM  132  O   HOH T 131      29.517 -23.580 -10.329  1.00  0.38           O  
HETATM  133  O   HOH T 132       5.647 -38.534  -1.803  1.00  0.38           O  
HETATM  134  O   HOH T 133       0.948 -20.643  14.107  1.00  0.38           O  
HETATM  135  O   HOH T 134       4.414 -38.838   0.640  1.00  0.38           O  
HETATM  136  O   HOH T 135      28.118 -35.546  -3.363  1.00  0.38           O  
HETATM  137  O   HOH T 136       5.302 -14.833 -21.717  1.00  0.39           O  
HETATM  138  O   HOH T 137      26.830 -22.729 -22.717  1.00  0.39           O  
HETATM  139  O   HOH T 138       3.845 -41.227   2.045  1.00  0.39           O  
HETATM  140  O   HOH T 139      -7.120 -18.056   2.580  1.00  0.39           O  
HETATM  141  O   HOH T 140      16.162  -4.806  13.838  1.00  0.39           O  
HETATM  142  O   HOH T 141     -12.468  -7.237   6.509  1.00  0.39           O  
HETATM  143  O   HOH T 142       0.067 -32.561  -3.574  1.00  0.39           O  
HETATM  144  O   HOH T 143       2.304 -40.558  11.433  1.00  0.39           O  
HETATM  145  O   HOH T 144      31.953  -9.694  -3.642  1.00  0.39           O  
HETATM  146  O   HOH T 145      -8.582  -8.459   6.368  1.00  0.39           O  
HETATM  147  O   HOH T 146       7.231 -44.313   3.317  1.00  0.39           O  
HETATM  148  O   HOH T 147       7.954 -37.336  -2.493  1.00  0.39           O  
HETATM  149  O   HOH T 148      14.776  -6.396   0.077  1.00  0.40           O  
HETATM  150  O   HOH T 149       8.742 -34.772  17.528  1.00  0.40           O  
HETATM  151  O   HOH T 150      23.258 -18.565   8.385  1.00  0.40           O  
HETATM  152  O   HOH T 151       5.617 -36.209  -3.419  1.00  0.40           O  
HETATM  153  O   HOH T 152      -1.088 -35.632  15.291  1.00  0.40           O  
HETATM  154  O   HOH T 153       4.595 -39.004  11.808  1.00  0.40           O  
HETATM  155  O   HOH T 154      16.065  -4.915 -10.700  1.00  0.40           O  
HETATM  156  O   HOH T 155       1.433 -29.446  13.030  1.00  0.40           O  
HETATM  157  O   HOH T 156      14.681 -44.704  -1.674  1.00  0.40           O  
HETATM  158  O   HOH T 157      11.747 -40.293   3.432  1.00  0.40           O  
HETATM  159  O   HOH T 158       9.492  -9.264 -15.773  1.00  0.40           O  
HETATM  160  O   HOH T 159      -4.143  -3.316 -12.572  1.00  0.40           O  
HETATM  161  O   HOH T 160     -13.833  -2.690  -5.818  1.00  0.41           O  
HETATM  162  O   HOH T 161       9.438 -39.652  -2.597  1.00  0.41           O  
HETATM  163  O   HOH T 162      18.546  -7.336  -2.218  1.00  0.41           O  
HETATM  164  O   HOH T 163       8.106 -26.085 -22.673  1.00  0.41           O  
HETATM  165  O   HOH T 164      -6.097 -22.240 -12.851  1.00  0.41           O  
HETATM  166  O   HOH T 165      19.362 -43.744   0.228  1.00  0.41           O  
HETATM  167  O   HOH T 166       6.963 -25.087 -20.344  1.00  0.41           O  
HETATM  168  O   HOH T 167       7.669 -39.233  -6.590  1.00  0.41           O  
HETATM  169  O   HOH T 168       4.714 -12.904  19.062  1.00  0.41           O  
HETATM  170  O   HOH T 169      15.988   1.989   1.885  1.00  0.41           O  
HETATM  171  O   HOH T 170      20.186  -6.503  -8.904  1.00  0.41           O  
HETATM  172  O   HOH T 171      -4.905 -37.935   8.662  1.00  0.42           O  
HETATM  173  O   HOH T 172      11.337  -9.591 -17.719  1.00  0.42           O  
HETATM  174  O   HOH T 173      20.298  -8.556   8.194  1.00  0.42           O  
HETATM  175  O   HOH T 174      12.577  -0.701 -10.129  1.00  0.42           O  
HETATM  176  O   HOH T 175      -4.718 -14.738 -11.634  1.00  0.42           O  
HETATM  177  O   HOH T 176       0.034 -33.831  -1.215  1.00  0.42           O  
HETATM  178  O   HOH T 177      22.149 -16.040 -34.493  1.00  0.42           O  
HETATM  179  O   HOH T 178      10.002 -37.976 -13.197  1.00  0.42           O  
HETATM  180  O   HOH T 179     -12.206 -13.874   5.199  1.00  0.42           O  
HETATM  181  O   HOH T 180       7.668  -9.548 -17.791  1.00  0.42           O  
HETATM  182  O   HOH T 181      -6.401 -20.942 -10.398  1.00  0.42           O  
HETATM  183  O   HOH T 182       6.179 -32.398 -13.865  1.00  0.42           O  
HETATM  184  O   HOH T 183      13.906 -10.451 -18.451  1.00  0.43           O  
HETATM  185  O   HOH T 184      15.824  -7.039  -2.451  1.00  0.43           O  
HETATM  186  O   HOH T 185       9.913  -7.900  16.526  1.00  0.43           O  
HETATM  187  O   HOH T 186       8.688 -40.689   6.728  1.00  0.43           O  
HETATM  188  O   HOH T 187       4.789 -34.988  17.276  1.00  0.43           O  
HETATM  189  O   HOH T 188       5.201 -11.866 -14.411  1.00  0.43           O  
HETATM  190  O   HOH T 189      17.427 -14.829 -26.921  1.00  0.43           O  
HETATM  191  O   HOH T 190     -10.042 -24.919   5.660  1.00  0.43           O  
HETATM  192  O   HOH T 191      20.512 -16.512 -29.934  1.00  0.43           O  
HETATM  193  O   HOH T 192      -7.837 -26.455   6.570  1.00  0.43           O  
HETATM  194  O   HOH T 193       9.770 -35.475  -1.857  1.00  0.43           O  
HETATM  195  O   HOH T 194       9.196  -3.330  11.208  1.00  0.43           O  
HETATM  196  O   HOH T 195       0.741 -16.542  -6.384  1.00  0.43           O  
HETATM  197  O   HOH T 196       0.626 -18.157  12.894  1.00  0.43           O  
HETATM  198  O   HOH T 197       2.527 -20.235  16.389  1.00  0.43           O  
HETATM  199  O   HOH T 198      -4.741   4.345  11.647  1.00  0.43           O  
HETATM  200  O   HOH T 199      20.253 -25.550   5.302  1.00  0.43           O  
HETATM  201  O   HOH T 200       7.847  -3.149  -5.583  1.00  0.43           O  
HETATM  202  O   HOH T 201      16.043 -11.398 -26.036  1.00  0.43           O  
HETATM  203  O   HOH T 202     -10.700  -8.356   8.426  1.00  0.44           O  
HETATM  204  O   HOH T 203       9.433 -37.385  17.006  1.00  0.44           O  
HETATM  205  O   HOH T 204       7.379 -16.922 -25.403  1.00  0.44           O  
HETATM  206  O   HOH T 205      26.391 -35.535 -10.500  1.00  0.44           O  
HETATM  207  O   HOH T 206      21.578 -42.388  -0.738  1.00  0.44           O  
HETATM  208  O   HOH T 207     -14.938   2.235   2.527  1.00  0.44           O  
HETATM  209  O   HOH T 208     -10.365 -18.427   0.886  1.00  0.44           O  
HETATM  210  O   HOH T 209      18.653 -19.183 -25.274  1.00  0.44           O  
HETATM  211  O   HOH T 210      -7.356 -24.903  -0.462  1.00  0.44           O  
HETATM  212  O   HOH T 211      25.097 -13.115  -9.944  1.00  0.44           O  
HETATM  213  O   HOH T 212      11.500  -5.728  15.896  1.00  0.44           O  
HETATM  214  O   HOH T 213      24.328 -36.457  -8.860  1.00  0.45           O  
HETATM  215  O   HOH T 214      15.503 -16.598  14.842  1.00  0.45           O  
HETATM  216  O   HOH T 215       4.431 -11.035 -18.531  1.00  0.45           O  
HETATM  217  O   HOH T 216       2.290 -34.006  -2.714  1.00  0.45           O  
HETATM  218  O   HOH T 217      -7.940 -23.020   1.430  1.00  0.45           O  
HETATM  219  O   HOH T 218      29.229 -22.489  -4.863  1.00  0.45           O  
HETATM  220  O   HOH T 219      26.368 -32.539 -14.126  1.00  0.45           O  
HETATM  221  O   HOH T 220       2.455 -20.838 -20.350  1.00  0.45           O  
HETATM  222  O   HOH T 221      21.325 -34.693 -14.947  1.00  0.45           O  
HETATM  223  O   HOH T 222      16.123 -11.043 -13.463  1.00  0.45           O  
HETATM  224  O   HOH T 223      -6.439  -4.243 -11.386  1.00  0.45           O  
HETATM  225  O   HOH T 224       2.221 -41.519   8.861  1.00  0.45           O  
HETATM  226  O   HOH T 225       2.998 -13.776  16.961  1.00  0.45           O  
HETATM  227  O   HOH T 226       4.424 -19.435 -21.634  1.00  0.45           O  
HETATM  228  O   HOH T 227      15.564 -14.186  13.839  1.00  0.45           O  
HETATM  229  O   HOH T 228      10.935  -2.085 -11.785  1.00  0.45           O  
HETATM  230  O   HOH T 229      -0.011  -0.003   6.730  1.00  0.45           O  
HETATM  231  O   HOH T 230       2.824 -27.749 -18.435  1.00  0.45           O  
HETATM  232  O   HOH T 231      22.219 -49.469  -7.311  1.00  0.45           O  
HETATM  233  O   HOH T 232      21.758 -24.922 -29.630  1.00  0.45           O  
HETATM  234  O   HOH T 233       6.171 -34.788 -15.054  1.00  0.46           O  
HETATM  235  O   HOH T 234      10.683 -32.880  18.364  1.00  0.46           O  
HETATM  236  O   HOH T 235      -7.193   1.270  10.916  1.00  0.46           O  
HETATM  237  O   HOH T 236      -6.428  -1.710 -12.462  1.00  0.46           O  
HETATM  238  O   HOH T 237      27.826 -13.135  -9.768  1.00  0.46           O  
HETATM  239  O   HOH T 238      -5.232 -29.682  13.179  1.00  0.46           O  
HETATM  240  O   HOH T 239       5.606 -24.854 -22.686  1.00  0.46           O  
HETATM  241  O   HOH T 240       2.844 -16.290  15.338  1.00  0.46           O  
HETATM  242  O   HOH T 241      16.108  -4.557   1.620  1.00  0.46           O  
HETATM  243  O   HOH T 242      26.149 -36.594  -5.089  1.00  0.46           O  
HETATM  244  O   HOH T 243       8.891 -42.997   5.091  1.00  0.46           O  
HETATM  245  O   HOH T 244      22.896 -14.743 -32.187  1.00  0.47           O  
HETATM  246  O   HOH T 245       9.725 -27.744  13.108  1.00  0.47           O  
HETATM  247  O   HOH T 246       7.982   0.049  -3.067  1.00  0.47           O  
HETATM  248  O   HOH T 247     -11.601  -3.136  -4.122  1.00  0.47           O  
HETATM  249  O   HOH T 248      27.885 -36.603  -7.331  1.00  0.47           O  
HETATM  250  O   HOH T 249      14.464   1.372  -8.140  1.00  0.47           O  
HETATM  251  O   HOH T 250      20.952 -44.431  -7.040  1.00  0.47           O  
HETATM  252  O   HOH T 251      10.137   0.459 -10.911  1.00  0.47           O  
HETATM  253  O   HOH T 252      12.930 -46.215  -0.171  1.00  0.47           O  
HETATM  254  O   HOH T 253      26.406 -24.486  -3.981  1.00  0.47           O  
HETATM  255  O   HOH T 254      -8.534 -20.296   1.793  1.00  0.47           O  
HETATM  256  O   HOH T 255     -10.774   0.559   7.277  1.00  0.47           O  
HETATM  257  O   HOH T 256      18.648 -10.855 -25.369  1.00  0.47           O  
HETATM  258  O   HOH T 257      29.347 -11.400  -1.998  1.00  0.47           O  
HETATM  259  O   HOH T 258       9.122  -4.144 -12.280  1.00  0.47           O  
HETATM  260  O   HOH T 259      12.715  -8.249  15.998  1.00  0.48           O  
HETATM  261  O   HOH T 260      -3.234 -34.079  14.591  1.00  0.48           O  
HETATM  262  O   HOH T 261      20.512 -38.661  -2.332  1.00  0.48           O  
HETATM  263  O   HOH T 262      -3.096 -36.660  13.627  1.00  0.48           O  
HETATM  264  O   HOH T 263       9.745 -40.615 -12.928  1.00  0.48           O  
HETATM  265  O   HOH T 264      19.389 -34.803 -17.143  1.00  0.48           O  
HETATM  266  O   HOH T 265       9.910  -7.244 -12.254  1.00  0.48           O  
HETATM  267  O   HOH T 266       8.265  -1.642 -11.071  1.00  0.48           O  
HETATM  268  O   HOH T 267      -1.488  -3.296 -11.619  1.00  0.48           O  
HETATM  269  O   HOH T 268      -6.374 -12.327   9.625  1.00  0.48           O  
HETATM  270  O   HOH T 269       7.358 -25.947 -17.756  1.00  0.48           O  
HETATM  271  O   HOH T 270      -9.940  -5.434  -0.372  1.00  0.48           O  
HETATM  272  O   HOH T 271      -9.709   0.828   9.897  1.00  0.48           O  
HETATM  273  O   HOH T 272      -0.763 -17.340  15.043  1.00  0.48           O  
HETATM  274  O   HOH T 273       2.304 -42.462   4.017  1.00  0.48           O  
HETATM  275  O   HOH T 274      11.526   3.802   1.193  1.00  0.48           O  
HETATM  276  O   HOH T 275      22.047 -27.791   5.119  1.00  0.48           O  
HETATM  277  O   HOH T 276       7.086 -34.642 -12.354  1.00  0.48           O  
HETATM  278  O   HOH T 277      27.851 -33.853 -16.027  1.00  0.49           O  
HETATM  279  O   HOH T 278      27.647  -9.005  -2.384  1.00  0.49           O  
HETATM  280  O   HOH T 279       7.523 -15.869 -22.898  1.00  0.49           O  
HETATM  281  O   HOH T 280      17.968 -17.577 -27.327  1.00  0.49           O  
HETATM  282  O   HOH T 281      12.607  -8.597 -11.384  1.00  0.49           O  
HETATM  283  O   HOH T 282       4.568 -33.581 -11.956  1.00  0.49           O  
HETATM  284  O   HOH T 283      12.287 -45.349   2.362  1.00  0.49           O  
HETATM  285  O   HOH T 284       4.728 -41.270  10.176  1.00  0.49           O  
HETATM  286  O   HOH T 285      23.855 -11.180   6.997  1.00  0.49           O  
HETATM  287  O   HOH T 286      -3.313   1.132  -5.685  1.00  0.49           O  
HETATM  288  O   HOH T 287      11.916  -3.828  10.784  1.00  0.49           O  
HETATM  289  O   HOH T 288      -9.987 -23.963  -3.319  1.00  0.49           O  
HETATM  290  O   HOH T 289       7.809 -39.026 -13.993  1.00  0.49           O  
HETATM  291  O   HOH T 290      22.288 -30.547 -14.504  1.00  0.49           O  
HETATM  292  O   HOH T 291       9.351   4.186  -2.736  1.00  0.49           O  
HETATM  293  O   HOH T 292       6.520 -10.395 -20.130  1.00  0.49           O  
HETATM  294  O   HOH T 293      13.762   2.398   0.289  1.00  0.50           O  
HETATM  295  O   HOH T 294       3.389  -6.438 -14.594  1.00  0.50           O  
HETATM  296  O   HOH T 295      24.662 -28.384 -24.139  1.00  0.50           O  
HETATM  297  O   HOH T 296       5.439 -27.318 -19.221  1.00  0.50           O  
HETATM  298  O   HOH T 297      17.056 -45.018  -0.471  1.00  0.50           O  
HETATM  299  O   HOH T 298      24.932 -33.939 -12.179  1.00  0.50           O  
HETATM  300  O   HOH T 299      13.894 -43.268   3.320  1.00  0.50           O  
HETATM  301  O   HOH T 300      26.630 -13.722 -12.230  1.00  0.50           O  
HETATM  302  O   HOH T 301      -7.541 -29.662  14.848  1.00  0.50           O  
HETATM  303  O   HOH T 302      -9.489  -1.990   9.747  1.00  0.50           O  
HETATM  304  O   HOH T 303      24.190 -14.393 -13.711  1.00  0.50           O  
HETATM  305  O   HOH T 304     -11.958 -11.284   4.330  1.00  0.50           O  
HETATM  306  O   HOH T 305       2.250 -31.529  -9.937  1.00  0.50           O  
HETATM  307  O   HOH T 306      13.918  -6.073  14.677  1.00  0.50           O  
HETATM  308  O   HOH T 307       1.499 -22.808  15.810  1.00  0.50           O  
HETATM  309  O   HOH T 308      22.588 -38.868  -4.131  1.00  0.50           O  
HETATM  310  O   HOH T 309      21.923 -26.262   1.204  1.00  0.50           O  
HETATM  311  O   HOH T 310      25.667 -22.442 -25.206  1.00  0.51           O  
HETATM  312  O   HOH T 311       4.607 -43.643   3.226  1.00  0.51           O  
HETATM  313  O   HOH T 312      16.416  -4.361  11.152  1.00  0.51           O  
HETATM  314  O   HOH T 313       3.355 -28.302 -20.992  1.00  0.51           O  
HETATM  315  O   HOH T 314       2.978 -32.574  18.582  1.00  0.51           O  
HETATM  316  O   HOH T 315      -8.695 -23.898 -10.437  1.00  0.51           O  
HETATM  317  O   HOH T 316      12.965  -6.519   4.034  1.00  0.51           O  
HETATM  318  O   HOH T 317      11.278 -35.661  18.240  1.00  0.51           O  
HETATM  319  O   HOH T 318      21.383 -13.543 -13.632  1.00  0.51           O  
HETATM  320  O   HOH T 319      -1.550 -34.731  -3.314  1.00  0.51           O  
HETATM  321  O   HOH T 320       4.298 -27.201  19.536  1.00  0.52           O  
HETATM  322  O   HOH T 321      13.829 -30.750  11.148  1.00  0.52           O  
HETATM  323  O   HOH T 322       3.416 -39.122   9.267  1.00  0.52           O  
HETATM  324  O   HOH T 323       9.897 -16.612 -24.129  1.00  0.52           O  
HETATM  325  O   HOH T 324      -4.218  -7.222  13.982  1.00  0.52           O  
HETATM  326  O   HOH T 325       0.312 -13.097  17.542  1.00  0.52           O  
HETATM  327  O   HOH T 326      -3.938  -0.618 -13.071  1.00  0.52           O  
HETATM  328  O   HOH T 327      24.477 -20.899   9.426  1.00  0.52           O  
HETATM  329  O   HOH T 328       0.778  -8.141  10.720  1.00  0.52           O  
HETATM  330  O   HOH T 329      14.863 -36.647   5.534  1.00  0.52           O  
HETATM  331  O   HOH T 330      22.133 -17.462 -32.054  1.00  0.52           O  
HETATM  332  O   HOH T 331      -5.777 -12.382  14.500  1.00  0.52           O  
HETATM  333  O   HOH T 332      14.820 -44.854   1.186  1.00  0.53           O  
HETATM  334  O   HOH T 333       4.778  -3.028  -4.217  1.00  0.53           O  
HETATM  335  O   HOH T 334       3.963 -22.697 -21.971  1.00  0.53           O  
HETATM  336  O   HOH T 335     -13.760   3.238   4.821  1.00  0.53           O  
HETATM  337  O   HOH T 336      15.874 -39.254   3.613  1.00  0.53           O  
HETATM  338  O   HOH T 337      16.960 -45.374  -3.243  1.00  0.53           O  
HETATM  339  O   HOH T 338      14.431  -9.517 -24.852  1.00  0.53           O  
HETATM  340  O   HOH T 339      -8.236 -24.051 -13.212  1.00  0.54           O  
HETATM  341  O   HOH T 340      -6.648 -10.002   4.970  1.00  0.54           O  
HETATM  342  O   HOH T 341      16.261  -6.379  16.092  1.00  0.54           O  
HETATM  343  O   HOH T 342      -6.830 -18.377 -11.263  1.00  0.54           O  
HETATM  344  O   HOH T 343      11.831 -42.245  -8.467  1.00  0.54           O  
HETATM  345  O   HOH T 344     -10.257 -24.136  -8.272  1.00  0.54           O  
HETATM  346  O   HOH T 345      16.897  -8.825  16.974  1.00  0.54           O  
HETATM  347  O   HOH T 346     -10.508 -25.378 -11.961  1.00  0.54           O  
HETATM  348  O   HOH T 347     -15.640   2.370  -0.053  1.00  0.54           O  
HETATM  349  O   HOH T 348      18.468 -16.859 -20.231  1.00  0.54           O  
HETATM  350  O   HOH T 349      15.425 -35.151 -17.366  1.00  0.54           O  
HETATM  351  O   HOH T 350      11.383 -39.064 -11.127  1.00  0.54           O  
HETATM  352  O   HOH T 351       4.503 -12.216 -20.981  1.00  0.54           O  
HETATM  353  O   HOH T 352      18.910  -4.675 -10.696  1.00  0.54           O  
HETATM  354  O   HOH T 353      -4.808   1.652  12.187  1.00  0.54           O  
HETATM  355  O   HOH T 354      10.584 -35.443  15.505  1.00  0.54           O  
HETATM  356  O   HOH T 355      14.009  -4.931  12.103  1.00  0.55           O  
HETATM  357  O   HOH T 356       3.775 -37.359  -6.486  1.00  0.55           O  
HETATM  358  O   HOH T 357      14.669 -10.194 -15.742  1.00  0.55           O  
HETATM  359  O   HOH T 358      16.403 -42.944   2.429  1.00  0.55           O  
HETATM  360  O   HOH T 359      12.139 -37.144 -22.530  1.00  0.55           O  
HETATM  361  O   HOH T 360      17.826 -40.523 -12.872  1.00  0.55           O  
HETATM  362  O   HOH T 361      -7.288 -14.520 -10.632  1.00  0.56           O  
HETATM  363  O   HOH T 362      26.030 -20.274 -24.145  1.00  0.56           O  
HETATM  364  O   HOH T 363      31.581  -7.281  -7.313  1.00  0.56           O  
HETATM  365  O   HOH T 364       3.215 -22.538  17.854  1.00  0.56           O  
HETATM  366  O   HOH T 365      -5.697 -24.243 -14.623  1.00  0.56           O  
HETATM  367  O   HOH T 366       3.733 -34.422  -6.577  1.00  0.56           O  
HETATM  368  O   HOH T 367      11.957   1.806  -9.217  1.00  0.56           O  
HETATM  369  O   HOH T 368       1.714  -4.951 -13.123  1.00  0.57           O  
HETATM  370  O   HOH T 369       4.886 -38.937  -6.473  1.00  0.57           O  
HETATM  371  O   HOH T 370      24.527 -11.816   4.343  1.00  0.57           O  
HETATM  372  O   HOH T 371      20.198  -7.287  -0.044  1.00  0.57           O  
HETATM  373  O   HOH T 372       4.167 -18.039  17.027  1.00  0.57           O  
HETATM  374  O   HOH T 373       9.422 -41.191  -7.522  1.00  0.57           O  
HETATM  375  O   HOH T 374      12.821 -34.752  14.532  1.00  0.58           O  
HETATM  376  O   HOH T 375      -3.383 -27.433  16.394  1.00  0.58           O  
HETATM  377  O   HOH T 376      -5.244 -27.316  14.597  1.00  0.59           O  
HETATM  378  O   HOH T 377       2.207 -11.452 -17.072  1.00  0.59           O  
HETATM  379  O   HOH T 378      11.332 -38.152   5.610  1.00  0.60           O  
HETATM  380  O   HOH T 379      29.969  -7.845  -3.253  1.00  0.60           O  
TER     381      HOH T 379 
