# Supplementary material for: Accurate Prediction of Hydration Sites of Proteins Using Energy Model With Atom Embedding
Source: Front Mol Biosci. 2021 Sep 20;8:756075. doi: 10.3389/fmolb.2021.756075 (PMC8488165; doi:10.3389/fmolb.2021.756075)
Supplement: Supplementary file 1 [file DataSheet1.ZIP › Data Sheet 1/Our_result_pdb/our_dataset_output/3IHS_watersite.pdb]

HEADER                                                        XXXX


JRNL        PMID   -1
HETATM    1  O   HOH T   0      12.735  40.402  -4.903  1.00  0.18           O  
HETATM    2  O   HOH T   1      -5.565  44.749 -10.999  1.00  0.18           O  
HETATM    3  O   HOH T   2      12.397  30.528  28.200  1.00  0.18           O  
HETATM    4  O   HOH T   3      -4.931  37.449  29.352  1.00  0.21           O  
HETATM    5  O   HOH T   4      -3.774  29.973  14.153  1.00  0.22           O  
HETATM    6  O   HOH T   5      -4.321  23.208  11.404  1.00  0.23           O  
HETATM    7  O   HOH T   6       1.309  33.521  12.776  1.00  0.23           O  
HETATM    8  O   HOH T   7      17.332  51.830   3.330  1.00  0.23           O  
HETATM    9  O   HOH T   8      -4.424  47.852  11.607  1.00  0.24           O  
HETATM   10  O   HOH T   9      -5.577  26.491  34.561  1.00  0.24           O  
HETATM   11  O   HOH T  10      -5.025  25.195  28.003  1.00  0.25           O  
HETATM   12  O   HOH T  11      21.593  50.989   4.343  1.00  0.25           O  
HETATM   13  O   HOH T  12      12.932  26.850  -3.420  1.00  0.26           O  
HETATM   14  O   HOH T  13      -4.919  30.053  26.478  1.00  0.26           O  
HETATM   15  O   HOH T  14      10.782  48.204   6.329  1.00  0.26           O  
HETATM   16  O   HOH T  15       0.898  37.483  10.475  1.00  0.26           O  
HETATM   17  O   HOH T  16      18.295  27.608  24.808  1.00  0.27           O  
HETATM   18  O   HOH T  17      -1.703  36.896   3.914  1.00  0.27           O  
HETATM   19  O   HOH T  18       9.869  51.326  -4.086  1.00  0.28           O  
HETATM   20  O   HOH T  19       7.219  24.257   7.582  1.00  0.28           O  
HETATM   21  O   HOH T  20      -7.592  23.288  17.340  1.00  0.28           O  
HETATM   22  O   HOH T  21       9.732  19.562  27.341  1.00  0.28           O  
HETATM   23  O   HOH T  22       8.955  31.771   7.513  1.00  0.29           O  
HETATM   24  O   HOH T  23      -2.470  51.316  -3.267  1.00  0.29           O  
HETATM   25  O   HOH T  24      -6.533  29.018  17.639  1.00  0.29           O  
HETATM   26  O   HOH T  25      12.265  18.691  27.650  1.00  0.29           O  
HETATM   27  O   HOH T  26      18.158  29.902  18.622  1.00  0.30           O  
HETATM   28  O   HOH T  27       9.035  35.306  10.472  1.00  0.30           O  
HETATM   29  O   HOH T  28      16.493  23.282  27.351  1.00  0.30           O  
HETATM   30  O   HOH T  29      18.607  42.970  -0.938  1.00  0.30           O  
HETATM   31  O   HOH T  30      13.609  39.482  27.683  1.00  0.31           O  
HETATM   32  O   HOH T  31      -5.063  51.732  13.783  1.00  0.31           O  
HETATM   33  O   HOH T  32      18.161  41.248   5.055  1.00  0.31           O  
HETATM   34  O   HOH T  33       4.209  18.483  22.257  1.00  0.31           O  
HETATM   35  O   HOH T  34       5.983  32.827  11.338  1.00  0.32           O  
HETATM   36  O   HOH T  35      -5.777  31.751  20.483  1.00  0.32           O  
HETATM   37  O   HOH T  36      12.616  41.996 -15.343  1.00  0.32           O  
HETATM   38  O   HOH T  37       6.253  53.530  -6.640  1.00  0.33           O  
HETATM   39  O   HOH T  38       5.854  17.331  29.567  1.00  0.33           O  
HETATM   40  O   HOH T  39      -6.958  47.551  10.339  1.00  0.33           O  
HETATM   41  O   HOH T  40       0.119  27.955  32.391  1.00  0.33           O  
HETATM   42  O   HOH T  41      -2.657  21.380  10.096  1.00  0.33           O  
HETATM   43  O   HOH T  42       1.795  53.603   0.339  1.00  0.33           O  
HETATM   44  O   HOH T  43       8.622  51.876 -10.429  1.00  0.33           O  
HETATM   45  O   HOH T  44      11.655  50.225  10.016  1.00  0.34           O  
HETATM   46  O   HOH T  45       8.489  32.616  10.105  1.00  0.34           O  
HETATM   47  O   HOH T  46      10.818  40.298  14.363  1.00  0.34           O  
HETATM   48  O   HOH T  47       4.298  52.519   0.874  1.00  0.34           O  
HETATM   49  O   HOH T  48       2.998  41.523  17.836  1.00  0.34           O  
HETATM   50  O   HOH T  49      17.801  38.735   3.926  1.00  0.34           O  
HETATM   51  O   HOH T  50      10.306  36.534  12.684  1.00  0.34           O  
HETATM   52  O   HOH T  51      11.837  26.700  10.217  1.00  0.35           O  
HETATM   53  O   HOH T  52      -0.431  48.179  15.949  1.00  0.35           O  
HETATM   54  O   HOH T  53      -6.748  23.448  12.835  1.00  0.35           O  
HETATM   55  O   HOH T  54      -8.237  51.637   8.061  1.00  0.35           O  
HETATM   56  O   HOH T  55      18.690  36.508  -4.108  1.00  0.35           O  
HETATM   57  O   HOH T  56      11.314  29.109   8.842  1.00  0.36           O  
HETATM   58  O   HOH T  57       8.911  39.570  16.142  1.00  0.36           O  
HETATM   59  O   HOH T  58       7.395  14.579   4.865  1.00  0.36           O  
HETATM   60  O   HOH T  59       2.705  38.523 -13.040  1.00  0.36           O  
HETATM   61  O   HOH T  60      12.869  11.995   5.681  1.00  0.36           O  
HETATM   62  O   HOH T  61      -6.852  27.346  27.943  1.00  0.36           O  
HETATM   63  O   HOH T  62       7.066  31.117  34.009  1.00  0.36           O  
HETATM   64  O   HOH T  63       1.775  35.681 -15.695  1.00  0.37           O  
HETATM   65  O   HOH T  64      -0.220  37.784  12.997  1.00  0.37           O  
HETATM   66  O   HOH T  65      15.434  31.623  -4.015  1.00  0.37           O  
HETATM   67  O   HOH T  66       2.413  37.968  14.190  1.00  0.37           O  
HETATM   68  O   HOH T  67      -3.910  35.814  32.974  1.00  0.37           O  
HETATM   69  O   HOH T  68      -1.364  14.368  30.435  1.00  0.38           O  
HETATM   70  O   HOH T  69      14.446  18.688  26.029  1.00  0.38           O  
HETATM   71  O   HOH T  70      -4.122  23.257   8.645  1.00  0.38           O  
HETATM   72  O   HOH T  71      18.452  21.402  14.599  1.00  0.38           O  
HETATM   73  O   HOH T  72      11.654  34.773  11.261  1.00  0.38           O  
HETATM   74  O   HOH T  73       2.598  43.963  16.659  1.00  0.38           O  
HETATM   75  O   HOH T  74      21.484  53.718   4.870  1.00  0.38           O  
HETATM   76  O   HOH T  75       5.449  26.309   8.070  1.00  0.38           O  
HETATM   77  O   HOH T  76      15.105  50.111  -5.431  1.00  0.38           O  
HETATM   78  O   HOH T  77       7.227  54.057  -9.161  1.00  0.38           O  
HETATM   79  O   HOH T  78      -3.251  46.057  -6.814  1.00  0.39           O  
HETATM   80  O   HOH T  79      16.245  44.948   8.361  1.00  0.39           O  
HETATM   81  O   HOH T  80      -8.252  25.580  18.545  1.00  0.39           O  
HETATM   82  O   HOH T  81      -7.320  48.541   3.166  1.00  0.39           O  
HETATM   83  O   HOH T  82      19.115  26.700  27.357  1.00  0.39           O  
HETATM   84  O   HOH T  83      14.208  26.847  11.507  1.00  0.39           O  
HETATM   85  O   HOH T  84      -0.589  57.507   9.911  1.00  0.39           O  
HETATM   86  O   HOH T  85       0.598  50.765  16.227  1.00  0.39           O  
HETATM   87  O   HOH T  86       7.151  47.340  15.842  1.00  0.40           O  
HETATM   88  O   HOH T  87      14.853  51.555  -3.084  1.00  0.40           O  
HETATM   89  O   HOH T  88       0.513  38.067 -14.708  1.00  0.40           O  
HETATM   90  O   HOH T  89      -4.103  55.838   6.431  1.00  0.40           O  
HETATM   91  O   HOH T  90       7.346  50.145  15.718  1.00  0.40           O  
HETATM   92  O   HOH T  91      15.534  25.210  13.163  1.00  0.40           O  
HETATM   93  O   HOH T  92      19.269  50.856  -5.367  1.00  0.41           O  
HETATM   94  O   HOH T  93      -0.982  17.172  30.561  1.00  0.41           O  
HETATM   95  O   HOH T  94      -3.146  19.413  24.258  1.00  0.41           O  
HETATM   96  O   HOH T  95      15.468  42.215   8.429  1.00  0.41           O  
HETATM   97  O   HOH T  96      -1.703  18.694  10.059  1.00  0.41           O  
HETATM   98  O   HOH T  97      -1.094  50.091  14.090  1.00  0.41           O  
HETATM   99  O   HOH T  98      12.922  48.889   7.805  1.00  0.41           O  
HETATM  100  O   HOH T  99      17.759  32.384  19.611  1.00  0.41           O  
HETATM  101  O   HOH T 100      13.529  26.800  -0.720  1.00  0.41           O  
HETATM  102  O   HOH T 101       5.717  38.679  11.550  1.00  0.41           O  
HETATM  103  O   HOH T 102      17.390  30.133   0.016  1.00  0.41           O  
HETATM  104  O   HOH T 103      11.920   9.646   4.535  1.00  0.42           O  
HETATM  105  O   HOH T 104      15.214  21.238  28.615  1.00  0.42           O  
HETATM  106  O   HOH T 105      -3.121  19.726  27.016  1.00  0.42           O  
HETATM  107  O   HOH T 106      -7.774  50.218  10.405  1.00  0.42           O  
HETATM  108  O   HOH T 107       1.671  17.343  22.650  1.00  0.42           O  
HETATM  109  O   HOH T 108      -5.271  30.852  33.603  1.00  0.43           O  
HETATM  110  O   HOH T 109      -5.554  35.222  30.855  1.00  0.43           O  
HETATM  111  O   HOH T 110      17.490  36.652  23.359  1.00  0.43           O  
HETATM  112  O   HOH T 111      13.193  43.165  26.674  1.00  0.44           O  
HETATM  113  O   HOH T 112      18.587  32.155  -0.015  1.00  0.44           O  
HETATM  114  O   HOH T 113      15.302  18.168  18.952  1.00  0.44           O  
HETATM  115  O   HOH T 114      -5.273  19.426   9.298  1.00  0.44           O  
HETATM  116  O   HOH T 115      13.900  28.282   9.105  1.00  0.44           O  
HETATM  117  O   HOH T 116       3.236  32.085  11.417  1.00  0.44           O  
HETATM  118  O   HOH T 117       1.601  51.265  -6.532  1.00  0.44           O  
HETATM  119  O   HOH T 118      16.267  26.769  15.306  1.00  0.44           O  
HETATM  120  O   HOH T 119      -8.258  48.756  -1.452  1.00  0.44           O  
HETATM  121  O   HOH T 120      15.694  50.566   9.140  1.00  0.44           O  
HETATM  122  O   HOH T 121       0.448  15.587  28.743  1.00  0.45           O  
HETATM  123  O   HOH T 122      19.689  38.643  -2.702  1.00  0.45           O  
HETATM  124  O   HOH T 123      17.784  39.104  24.870  1.00  0.45           O  
HETATM  125  O   HOH T 124      -1.315  36.012  10.997  1.00  0.45           O  
HETATM  126  O   HOH T 125      15.333  52.951   4.322  1.00  0.45           O  
HETATM  127  O   HOH T 126       6.867  28.293   6.188  1.00  0.45           O  
HETATM  128  O   HOH T 127       0.846  57.747  12.241  1.00  0.46           O  
HETATM  129  O   HOH T 128      -3.402  15.928  16.795  1.00  0.46           O  
HETATM  130  O   HOH T 129      -5.617  30.934  15.909  1.00  0.46           O  
HETATM  131  O   HOH T 130      -8.255  20.701  22.714  1.00  0.46           O  
HETATM  132  O   HOH T 131       9.761  46.246  15.691  1.00  0.46           O  
HETATM  133  O   HOH T 132      -2.357  57.653   7.743  1.00  0.46           O  
HETATM  134  O   HOH T 133       5.201  21.291   4.752  1.00  0.46           O  
HETATM  135  O   HOH T 134      16.039  28.579  17.460  1.00  0.46           O  
HETATM  136  O   HOH T 135       4.255  51.755  -7.168  1.00  0.46           O  
HETATM  137  O   HOH T 136       3.020  38.217 -15.801  1.00  0.46           O  
HETATM  138  O   HOH T 137       0.380  54.985  -3.449  1.00  0.46           O  
HETATM  139  O   HOH T 138      -3.544  36.890 -16.953  1.00  0.46           O  
HETATM  140  O   HOH T 139      15.418  27.687  -2.578  1.00  0.47           O  
HETATM  141  O   HOH T 140       3.349  37.248  11.643  1.00  0.47           O  
HETATM  142  O   HOH T 141      19.628  50.322   6.227  1.00  0.47           O  
HETATM  143  O   HOH T 142      19.421  49.062  -7.490  1.00  0.47           O  
HETATM  144  O   HOH T 143      18.081  36.756  -1.435  1.00  0.47           O  
HETATM  145  O   HOH T 144       5.128  30.182   3.073  1.00  0.47           O  
HETATM  146  O   HOH T 145      -4.178  20.085  29.612  1.00  0.47           O  
HETATM  147  O   HOH T 146      -6.447  30.269  13.392  1.00  0.47           O  
HETATM  148  O   HOH T 147      18.701  36.631  25.893  1.00  0.47           O  
HETATM  149  O   HOH T 148       2.882  54.397  18.741  1.00  0.49           O  
HETATM  150  O   HOH T 149      18.621  36.715   2.169  1.00  0.49           O  
HETATM  151  O   HOH T 150      22.173  36.296  19.022  1.00  0.49           O  
HETATM  152  O   HOH T 151       8.155  37.593  11.950  1.00  0.49           O  
HETATM  153  O   HOH T 152       4.958  53.167  17.186  1.00  0.49           O  
HETATM  154  O   HOH T 153      -5.463  33.157  35.180  1.00  0.49           O  
HETATM  155  O   HOH T 154      -3.500  46.021  -9.541  1.00  0.49           O  
HETATM  156  O   HOH T 155      18.303  25.913  16.990  1.00  0.49           O  
HETATM  157  O   HOH T 156       7.967  16.868   6.535  1.00  0.49           O  
HETATM  158  O   HOH T 157      10.275  26.788   8.010  1.00  0.49           O  
HETATM  159  O   HOH T 158      17.753  34.354   0.730  1.00  0.50           O  
HETATM  160  O   HOH T 159      22.707  37.047  21.581  1.00  0.50           O  
HETATM  161  O   HOH T 160      18.348  45.240   6.612  1.00  0.50           O  
HETATM  162  O   HOH T 161      11.238   7.064   5.218  1.00  0.50           O  
HETATM  163  O   HOH T 162       3.953  16.227   4.689  1.00  0.51           O  
HETATM  164  O   HOH T 163      -9.006  47.861   1.008  1.00  0.51           O  
HETATM  165  O   HOH T 164      16.016  27.696   0.003  1.00  0.51           O  
HETATM  166  O   HOH T 165      17.271  50.779  -7.133  1.00  0.51           O  
HETATM  167  O   HOH T 166      13.760  28.088   1.762  1.00  0.51           O  
HETATM  168  O   HOH T 167      -5.923  20.083  24.189  1.00  0.51           O  
HETATM  169  O   HOH T 168       9.550  48.732  16.403  1.00  0.51           O  
HETATM  170  O   HOH T 169      -9.059  28.159  18.321  1.00  0.51           O  
HETATM  171  O   HOH T 170      17.014  29.444  14.901  1.00  0.51           O  
HETATM  172  O   HOH T 171      13.850  30.009  -5.695  1.00  0.51           O  
HETATM  173  O   HOH T 172      11.320  27.477   2.513  1.00  0.52           O  
HETATM  174  O   HOH T 173       5.383  24.794   5.650  1.00  0.52           O  
HETATM  175  O   HOH T 174      17.322  36.336  -6.462  1.00  0.52           O  
HETATM  176  O   HOH T 175      -9.653  47.067  10.984  1.00  0.52           O  
HETATM  177  O   HOH T 176       0.102  55.484  -0.767  1.00  0.52           O  
HETATM  178  O   HOH T 177      12.593   9.657  11.058  1.00  0.52           O  
HETATM  179  O   HOH T 178       2.992  58.449  13.332  1.00  0.52           O  
HETATM  180  O   HOH T 179      14.364  40.239 -16.483  1.00  0.52           O  
HETATM  181  O   HOH T 180      11.228  43.540  20.977  1.00  0.52           O  
HETATM  182  O   HOH T 181      -5.004  22.760  29.414  1.00  0.52           O  
HETATM  183  O   HOH T 182      21.162  42.140  -0.911  1.00  0.52           O  
HETATM  184  O   HOH T 183      16.434  22.677  13.108  1.00  0.53           O  
HETATM  185  O   HOH T 184      16.118  39.589  26.809  1.00  0.53           O  
HETATM  186  O   HOH T 185      16.358  33.764  -5.670  1.00  0.53           O  
HETATM  187  O   HOH T 186       3.313  19.641   6.014  1.00  0.53           O  
HETATM  188  O   HOH T 187      12.238  33.103  -7.993  1.00  0.53           O  
HETATM  189  O   HOH T 188      20.610  29.089  24.653  1.00  0.53           O  
HETATM  190  O   HOH T 189      19.714  41.418  -3.024  1.00  0.53           O  
HETATM  191  O   HOH T 190      -7.042  28.837  34.339  1.00  0.53           O  
HETATM  192  O   HOH T 191      14.140  50.245  11.367  1.00  0.53           O  
HETATM  193  O   HOH T 192      12.056  38.059  31.523  1.00  0.54           O  
HETATM  194  O   HOH T 193      13.790  39.826  -7.460  1.00  0.54           O  
HETATM  195  O   HOH T 194       4.863  18.744   3.795  1.00  0.54           O  
HETATM  196  O   HOH T 195      -0.542  46.440  -7.315  1.00  0.54           O  
HETATM  197  O   HOH T 196      11.583  42.339 -17.848  1.00  0.55           O  
HETATM  198  O   HOH T 197      12.243  27.505  -5.939  1.00  0.55           O  
HETATM  199  O   HOH T 198      10.640  50.760  17.876  1.00  0.55           O  
HETATM  200  O   HOH T 199      17.975  41.374   7.832  1.00  0.55           O  
HETATM  201  O   HOH T 200      -8.961  23.471  22.650  1.00  0.55           O  
HETATM  202  O   HOH T 201      -2.801  51.230  12.284  1.00  0.55           O  
HETATM  203  O   HOH T 202       8.092  56.020  17.792  1.00  0.56           O  
HETATM  204  O   HOH T 203      -0.914  36.401 -16.213  1.00  0.56           O  
HETATM  205  O   HOH T 204      15.515  22.118   8.642  1.00  0.56           O  
HETATM  206  O   HOH T 205       7.801  19.538   6.961  1.00  0.56           O  
HETATM  207  O   HOH T 206       9.967  31.687 -11.182  1.00  0.56           O  
HETATM  208  O   HOH T 207      17.774  43.085   9.872  1.00  0.56           O  
HETATM  209  O   HOH T 208      17.969  32.527  -4.024  1.00  0.57           O  
HETATM  210  O   HOH T 209      19.471  34.746   4.051  1.00  0.57           O  
HETATM  211  O   HOH T 210      11.467  43.714 -13.621  1.00  0.58           O  
HETATM  212  O   HOH T 211      19.281  49.040   8.667  1.00  0.59           O  
HETATM  213  O   HOH T 212      -9.027  49.353   6.642  1.00  0.59           O  
HETATM  214  O   HOH T 213       5.487  17.932   6.403  1.00  0.59           O  
HETATM  215  O   HOH T 214       5.837  41.226 -12.225  1.00  0.60           O  
HETATM  216  O   HOH T 215      -5.845  39.745 -11.413  1.00  0.60           O  
HETATM  217  O   HOH T 216      -8.910  22.680  24.300  1.00  0.61           O  
TER     218      HOH T 216 
