# Supplementary material for: Accurate Prediction of Hydration Sites of Proteins Using Energy Model With Atom Embedding
Source: Front Mol Biosci. 2021 Sep 20;8:756075. doi: 10.3389/fmolb.2021.756075 (PMC8488165; doi:10.3389/fmolb.2021.756075)
Supplement: Supplementary file 1 [file DataSheet1.ZIP › Data Sheet 1/Our_result_pdb/our_dataset_output/3IOS_watersite.pdb]

HEADER                                                        XXXX


JRNL        PMID   -1
HETATM    1  O   HOH T   0      79.433  44.041  29.832  1.00  0.21           O  
HETATM    2  O   HOH T   1      67.785  70.786  29.197  1.00  0.22           O  
HETATM    3  O   HOH T   2      75.326  78.664  12.702  1.00  0.22           O  
HETATM    4  O   HOH T   3      90.943  54.985   2.333  1.00  0.25           O  
HETATM    5  O   HOH T   4      84.253  62.713  14.100  1.00  0.25           O  
HETATM    6  O   HOH T   5      69.787  57.642  28.947  1.00  0.25           O  
HETATM    7  O   HOH T   6      74.675  55.926  12.549  1.00  0.26           O  
HETATM    8  O   HOH T   7      94.078  47.627  25.128  1.00  0.26           O  
HETATM    9  O   HOH T   8      83.746  60.429  35.048  1.00  0.26           O  
HETATM   10  O   HOH T   9      92.957  62.722  14.149  1.00  0.26           O  
HETATM   11  O   HOH T  10      94.261  44.870  25.066  1.00  0.26           O  
HETATM   12  O   HOH T  11      83.714  50.490  12.920  1.00  0.26           O  
HETATM   13  O   HOH T  12      73.039  63.176  25.495  1.00  0.27           O  
HETATM   14  O   HOH T  13      87.056  63.012  14.476  1.00  0.27           O  
HETATM   15  O   HOH T  14      85.406  54.920  14.602  1.00  0.27           O  
HETATM   16  O   HOH T  15      98.532  62.398  19.148  1.00  0.28           O  
HETATM   17  O   HOH T  16      82.876  51.309  36.189  1.00  0.28           O  
HETATM   18  O   HOH T  17      80.903  67.500  36.154  1.00  0.29           O  
HETATM   19  O   HOH T  18      81.564  53.580  35.461  1.00  0.29           O  
HETATM   20  O   HOH T  19      78.678  59.902  34.938  1.00  0.29           O  
HETATM   21  O   HOH T  20      69.918  70.816  11.799  1.00  0.29           O  
HETATM   22  O   HOH T  21      84.619  48.243  14.222  1.00  0.30           O  
HETATM   23  O   HOH T  22      80.842  73.153  28.334  1.00  0.30           O  
HETATM   24  O   HOH T  23      66.539  65.016  25.747  1.00  0.31           O  
HETATM   25  O   HOH T  24      68.689  52.632  27.836  1.00  0.31           O  
HETATM   26  O   HOH T  25      89.973  73.463  19.600  1.00  0.32           O  
HETATM   27  O   HOH T  26      86.223  56.633  12.626  1.00  0.32           O  
HETATM   28  O   HOH T  27      69.968  65.797  13.413  1.00  0.32           O  
HETATM   29  O   HOH T  28      76.205  68.066   7.162  1.00  0.33           O  
HETATM   30  O   HOH T  29      81.289  65.363  13.930  1.00  0.33           O  
HETATM   31  O   HOH T  30      66.601  57.477  24.202  1.00  0.33           O  
HETATM   32  O   HOH T  31      96.315  59.075  29.641  1.00  0.33           O  
HETATM   33  O   HOH T  32      85.153  70.946  14.532  1.00  0.33           O  
HETATM   34  O   HOH T  33      80.920  60.739   8.710  1.00  0.33           O  
HETATM   35  O   HOH T  34      77.607  66.193  11.327  1.00  0.34           O  
HETATM   36  O   HOH T  35      88.057  47.679  12.514  1.00  0.34           O  
HETATM   37  O   HOH T  36     104.329  76.436  19.194  1.00  0.34           O  
HETATM   38  O   HOH T  37      88.584  48.418  16.615  1.00  0.34           O  
HETATM   39  O   HOH T  38     103.816  61.785  13.602  1.00  0.34           O  
HETATM   40  O   HOH T  39      83.962  38.396  19.278  1.00  0.34           O  
HETATM   41  O   HOH T  40      66.093  67.846  25.798  1.00  0.34           O  
HETATM   42  O   HOH T  41      67.929  70.511  21.269  1.00  0.34           O  
HETATM   43  O   HOH T  42     100.378  63.148  21.021  1.00  0.35           O  
HETATM   44  O   HOH T  43      74.040  61.670   5.644  1.00  0.35           O  
HETATM   45  O   HOH T  44      69.493  52.631  15.498  1.00  0.36           O  
HETATM   46  O   HOH T  45      68.421  54.259  22.785  1.00  0.36           O  
HETATM   47  O   HOH T  46     101.096  61.535  13.776  1.00  0.36           O  
HETATM   48  O   HOH T  47      92.539  53.426  21.202  1.00  0.36           O  
HETATM   49  O   HOH T  48      76.375  43.739  16.091  1.00  0.36           O  
HETATM   50  O   HOH T  49      88.178  51.776  38.102  1.00  0.36           O  
HETATM   51  O   HOH T  50      72.989  79.345  21.372  1.00  0.36           O  
HETATM   52  O   HOH T  51      85.894  71.237  33.288  1.00  0.36           O  
HETATM   53  O   HOH T  52      70.232  60.009  30.111  1.00  0.37           O  
HETATM   54  O   HOH T  53      98.589  76.445  27.233  1.00  0.37           O  
HETATM   55  O   HOH T  54      90.840  64.427  13.223  1.00  0.37           O  
HETATM   56  O   HOH T  55      73.685  60.649  11.451  1.00  0.37           O  
HETATM   57  O   HOH T  56      91.746  47.017   9.254  1.00  0.37           O  
HETATM   58  O   HOH T  57      76.359  41.559  14.100  1.00  0.38           O  
HETATM   59  O   HOH T  58      73.773  59.486  34.226  1.00  0.38           O  
HETATM   60  O   HOH T  59     106.971  76.944  19.921  1.00  0.38           O  
HETATM   61  O   HOH T  60      68.238  69.410  13.466  1.00  0.38           O  
HETATM   62  O   HOH T  61      69.821  62.341  29.043  1.00  0.38           O  
HETATM   63  O   HOH T  62      92.931  46.206  23.061  1.00  0.38           O  
HETATM   64  O   HOH T  63      90.572  41.172  28.025  1.00  0.38           O  
HETATM   65  O   HOH T  64     102.838  68.096  27.661  1.00  0.38           O  
HETATM   66  O   HOH T  65      83.389  71.227  34.476  1.00  0.39           O  
HETATM   67  O   HOH T  66      80.689  43.057  17.420  1.00  0.39           O  
HETATM   68  O   HOH T  67     100.172  54.599  15.653  1.00  0.39           O  
HETATM   69  O   HOH T  68      97.564  54.731  25.056  1.00  0.40           O  
HETATM   70  O   HOH T  69      68.784  52.631  18.098  1.00  0.40           O  
HETATM   71  O   HOH T  70      75.529  59.870  14.569  1.00  0.40           O  
HETATM   72  O   HOH T  71      75.568  66.365   9.374  1.00  0.40           O  
HETATM   73  O   HOH T  72      78.626  66.585   7.198  1.00  0.40           O  
HETATM   74  O   HOH T  73      70.404  62.247  26.317  1.00  0.40           O  
HETATM   75  O   HOH T  74      85.662  60.958  36.844  1.00  0.41           O  
HETATM   76  O   HOH T  75      88.356  70.450  32.045  1.00  0.41           O  
HETATM   77  O   HOH T  76      72.809  59.943  13.998  1.00  0.41           O  
HETATM   78  O   HOH T  77      77.588  53.207  37.067  1.00  0.41           O  
HETATM   79  O   HOH T  78      77.905  77.715  12.715  1.00  0.41           O  
HETATM   80  O   HOH T  79      78.471  63.934   8.096  1.00  0.41           O  
HETATM   81  O   HOH T  80      68.568  55.077  29.144  1.00  0.41           O  
HETATM   82  O   HOH T  81      73.452  68.557   7.149  1.00  0.41           O  
HETATM   83  O   HOH T  82      80.023  74.620  26.075  1.00  0.41           O  
HETATM   84  O   HOH T  83      86.938  47.151  14.977  1.00  0.42           O  
HETATM   85  O   HOH T  84      88.741  53.798  31.342  1.00  0.42           O  
HETATM   86  O   HOH T  85      81.174  60.389  36.062  1.00  0.42           O  
HETATM   87  O   HOH T  86      67.284  59.814  25.369  1.00  0.42           O  
HETATM   88  O   HOH T  87      86.715  54.013  37.431  1.00  0.42           O  
HETATM   89  O   HOH T  88      96.605  57.525  17.165  1.00  0.42           O  
HETATM   90  O   HOH T  89      67.927  52.706  25.109  1.00  0.43           O  
HETATM   91  O   HOH T  90      78.157  57.493  36.289  1.00  0.43           O  
HETATM   92  O   HOH T  91      91.717  49.530  21.468  1.00  0.43           O  
HETATM   93  O   HOH T  92      97.328  59.155  32.280  1.00  0.43           O  
HETATM   94  O   HOH T  93      80.305  63.088   9.996  1.00  0.43           O  
HETATM   95  O   HOH T  94      90.123  67.263  12.913  1.00  0.43           O  
HETATM   96  O   HOH T  95      67.903  54.445  20.080  1.00  0.44           O  
HETATM   97  O   HOH T  96      89.245  50.835   4.332  1.00  0.44           O  
HETATM   98  O   HOH T  97      87.408  59.106  11.989  1.00  0.44           O  
HETATM   99  O   HOH T  98      85.119  73.005  12.568  1.00  0.44           O  
HETATM  100  O   HOH T  99      66.393  72.817  21.216  1.00  0.44           O  
HETATM  101  O   HOH T 100      88.798  61.026  13.392  1.00  0.44           O  
HETATM  102  O   HOH T 101      82.724  74.616  26.968  1.00  0.44           O  
HETATM  103  O   HOH T 102      90.642  52.203   2.420  1.00  0.44           O  
HETATM  104  O   HOH T 103      67.959  69.699  18.529  1.00  0.44           O  
HETATM  105  O   HOH T 104      65.938  64.000  23.183  1.00  0.44           O  
HETATM  106  O   HOH T 105      99.587  55.877  19.370  1.00  0.44           O  
HETATM  107  O   HOH T 106      93.207  54.173  23.803  1.00  0.44           O  
HETATM  108  O   HOH T 107     100.056  59.691  32.519  1.00  0.44           O  
HETATM  109  O   HOH T 108     101.061  58.185  19.558  1.00  0.45           O  
HETATM  110  O   HOH T 109      79.988  72.997  32.631  1.00  0.45           O  
HETATM  111  O   HOH T 110      69.653  63.772  11.482  1.00  0.45           O  
HETATM  112  O   HOH T 111      91.936  66.016  11.251  1.00  0.45           O  
HETATM  113  O   HOH T 112      75.959  76.146  13.600  1.00  0.45           O  
HETATM  114  O   HOH T 113      89.742  68.126  32.812  1.00  0.45           O  
HETATM  115  O   HOH T 114      81.062  69.947  34.977  1.00  0.45           O  
HETATM  116  O   HOH T 115      93.339  51.103  23.587  1.00  0.45           O  
HETATM  117  O   HOH T 116      90.548  72.008  31.098  1.00  0.46           O  
HETATM  118  O   HOH T 117      73.976  78.328  23.912  1.00  0.46           O  
HETATM  119  O   HOH T 118     104.163  69.443  25.604  1.00  0.46           O  
HETATM  120  O   HOH T 119     101.209  76.763  27.778  1.00  0.46           O  
HETATM  121  O   HOH T 120      68.858  60.120  27.655  1.00  0.47           O  
HETATM  122  O   HOH T 121      83.619  68.932  12.270  1.00  0.47           O  
HETATM  123  O   HOH T 122      85.294  56.530   9.805  1.00  0.47           O  
HETATM  124  O   HOH T 123      79.350  71.387  36.647  1.00  0.47           O  
HETATM  125  O   HOH T 124      84.352  53.908  38.952  1.00  0.47           O  
HETATM  126  O   HOH T 125      87.715  61.774  38.271  1.00  0.47           O  
HETATM  127  O   HOH T 126      79.144  66.890  13.690  1.00  0.47           O  
HETATM  128  O   HOH T 127      94.176  53.391   9.248  1.00  0.47           O  
HETATM  129  O   HOH T 128      71.119  61.501  12.334  1.00  0.48           O  
HETATM  130  O   HOH T 129      66.224  54.777  24.446  1.00  0.48           O  
HETATM  131  O   HOH T 130      95.630  55.196  23.117  1.00  0.48           O  
HETATM  132  O   HOH T 131      68.957  78.516  24.377  1.00  0.48           O  
HETATM  133  O   HOH T 132      85.140  69.193  35.164  1.00  0.48           O  
HETATM  134  O   HOH T 133      69.092  50.139  25.056  1.00  0.48           O  
HETATM  135  O   HOH T 134      66.763  54.369  27.095  1.00  0.49           O  
HETATM  136  O   HOH T 135      65.203  70.318  28.359  1.00  0.49           O  
HETATM  137  O   HOH T 136      85.486  74.446  25.985  1.00  0.49           O  
HETATM  138  O   HOH T 137      91.629  66.169  32.132  1.00  0.49           O  
HETATM  139  O   HOH T 138      76.891  59.764   6.953  1.00  0.49           O  
HETATM  140  O   HOH T 139      90.721  47.063  11.967  1.00  0.49           O  
HETATM  141  O   HOH T 140      71.908  52.786  14.258  1.00  0.49           O  
HETATM  142  O   HOH T 141      79.364  43.703  27.143  1.00  0.49           O  
HETATM  143  O   HOH T 142      74.367  46.132  30.789  1.00  0.49           O  
HETATM  144  O   HOH T 143      72.954  53.847  11.857  1.00  0.49           O  
HETATM  145  O   HOH T 144      87.422  54.083  34.817  1.00  0.49           O  
HETATM  146  O   HOH T 145      67.458  64.692  12.882  1.00  0.50           O  
HETATM  147  O   HOH T 146      81.423  67.307  12.105  1.00  0.50           O  
HETATM  148  O   HOH T 147      89.021  63.881  37.415  1.00  0.50           O  
HETATM  149  O   HOH T 148      80.194  41.079  19.268  1.00  0.50           O  
HETATM  150  O   HOH T 149      91.487  39.801  25.762  1.00  0.50           O  
HETATM  151  O   HOH T 150      65.977  62.282  25.311  1.00  0.50           O  
HETATM  152  O   HOH T 151      95.265  75.860  32.736  1.00  0.50           O  
HETATM  153  O   HOH T 152      92.538  68.503  12.094  1.00  0.50           O  
HETATM  154  O   HOH T 153      90.774  49.537   9.119  1.00  0.50           O  
HETATM  155  O   HOH T 154     105.583  67.794  27.242  1.00  0.50           O  
HETATM  156  O   HOH T 155      72.651  47.887  29.742  1.00  0.50           O  
HETATM  157  O   HOH T 156      89.412  56.005   4.320  1.00  0.50           O  
HETATM  158  O   HOH T 157      82.825  60.032  40.621  1.00  0.50           O  
HETATM  159  O   HOH T 158      93.334  49.224  10.301  1.00  0.51           O  
HETATM  160  O   HOH T 159      80.177  53.666  37.930  1.00  0.51           O  
HETATM  161  O   HOH T 160      97.989  55.174  17.226  1.00  0.51           O  
HETATM  162  O   HOH T 161      74.726  54.997   9.962  1.00  0.51           O  
HETATM  163  O   HOH T 162      87.902  56.757  10.525  1.00  0.51           O  
HETATM  164  O   HOH T 163      99.806  78.601  26.130  1.00  0.51           O  
HETATM  165  O   HOH T 164      69.682  60.017  16.239  1.00  0.51           O  
HETATM  166  O   HOH T 165      97.593  55.444  21.153  1.00  0.52           O  
HETATM  167  O   HOH T 166      76.204  62.415   7.377  1.00  0.52           O  
HETATM  168  O   HOH T 167      76.856  57.606  38.772  1.00  0.52           O  
HETATM  169  O   HOH T 168      97.838  77.209  24.626  1.00  0.52           O  
HETATM  170  O   HOH T 169      79.336  64.211  12.338  1.00  0.52           O  
HETATM  171  O   HOH T 170      74.780  53.399  13.842  1.00  0.53           O  
HETATM  172  O   HOH T 171      64.563  66.141  24.264  1.00  0.53           O  
HETATM  173  O   HOH T 172      92.794  51.228   8.508  1.00  0.53           O  
HETATM  174  O   HOH T 173      89.892  42.922  20.241  1.00  0.53           O  
HETATM  175  O   HOH T 174      68.651  50.100  16.096  1.00  0.54           O  
HETATM  176  O   HOH T 175      71.457  58.840  11.875  1.00  0.54           O  
HETATM  177  O   HOH T 176      66.156  55.731  21.887  1.00  0.54           O  
HETATM  178  O   HOH T 177      85.952  70.399  11.953  1.00  0.54           O  
HETATM  179  O   HOH T 178      75.492  79.735  22.105  1.00  0.54           O  
HETATM  180  O   HOH T 179      79.139  55.016  35.677  1.00  0.54           O  
HETATM  181  O   HOH T 180      68.837  62.332  13.643  1.00  0.54           O  
HETATM  182  O   HOH T 181      74.476  77.825  26.623  1.00  0.55           O  
HETATM  183  O   HOH T 182     105.149  76.158  21.881  1.00  0.55           O  
HETATM  184  O   HOH T 183      94.660  50.010  12.768  1.00  0.55           O  
HETATM  185  O   HOH T 184      73.322  74.413  28.402  1.00  0.56           O  
HETATM  186  O   HOH T 185      97.469  49.139  29.141  1.00  0.56           O  
HETATM  187  O   HOH T 186      73.777  64.304  35.488  1.00  0.56           O  
HETATM  188  O   HOH T 187      96.569  52.669  30.035  1.00  0.57           O  
HETATM  189  O   HOH T 188      94.072  48.651  22.595  1.00  0.57           O  
HETATM  190  O   HOH T 189      89.607  74.609  30.936  1.00  0.57           O  
HETATM  191  O   HOH T 190      85.064  61.468  39.542  1.00  0.57           O  
HETATM  192  O   HOH T 191      76.095  52.842  34.715  1.00  0.58           O  
TER     193      HOH T 191 
