# Supplementary material for: Accurate Prediction of Hydration Sites of Proteins Using Energy Model With Atom Embedding
Source: Front Mol Biosci. 2021 Sep 20;8:756075. doi: 10.3389/fmolb.2021.756075 (PMC8488165; doi:10.3389/fmolb.2021.756075)
Supplement: Supplementary file 1 [file DataSheet1.ZIP › Data Sheet 1/Our_result_pdb/our_dataset_output/3IQL_watersite.pdb]

HEADER                                                        XXXX


JRNL        PMID   -1
HETATM    1  O   HOH T   0     -21.794   2.247  20.091  1.00  0.18           O  
HETATM    2  O   HOH T   1     -35.961   9.418  30.033  1.00  0.19           O  
HETATM    3  O   HOH T   2     -18.411   9.262  10.266  1.00  0.19           O  
HETATM    4  O   HOH T   3     -20.056  -8.088   6.330  1.00  0.20           O  
HETATM    5  O   HOH T   4     -26.003   2.580  37.313  1.00  0.20           O  
HETATM    6  O   HOH T   5     -39.171  19.318  13.772  1.00  0.21           O  
HETATM    7  O   HOH T   6     -22.374  13.259  -2.744  1.00  0.21           O  
HETATM    8  O   HOH T   7     -15.292   7.171  -1.130  1.00  0.21           O  
HETATM    9  O   HOH T   8     -24.894  -8.619  10.331  1.00  0.21           O  
HETATM   10  O   HOH T   9     -25.611   4.380  31.246  1.00  0.22           O  
HETATM   11  O   HOH T  10     -18.941  15.231  31.385  1.00  0.22           O  
HETATM   12  O   HOH T  11     -22.928  27.825  12.740  1.00  0.24           O  
HETATM   13  O   HOH T  12     -12.951  -2.170  -5.565  1.00  0.24           O  
HETATM   14  O   HOH T  13      -8.136  -0.804   6.320  1.00  0.24           O  
HETATM   15  O   HOH T  14     -19.215  21.834  21.574  1.00  0.25           O  
HETATM   16  O   HOH T  15     -26.666   8.313  10.593  1.00  0.26           O  
HETATM   17  O   HOH T  16     -23.808  17.839  15.449  1.00  0.26           O  
HETATM   18  O   HOH T  17     -34.865   4.713  19.085  1.00  0.26           O  
HETATM   19  O   HOH T  18     -18.742  -9.424  -1.988  1.00  0.27           O  
HETATM   20  O   HOH T  19     -28.748  -4.773  16.413  1.00  0.27           O  
HETATM   21  O   HOH T  20     -30.157   2.727  26.827  1.00  0.27           O  
HETATM   22  O   HOH T  21     -27.769  -0.571  17.793  1.00  0.27           O  
HETATM   23  O   HOH T  22     -24.878  11.955   8.531  1.00  0.28           O  
HETATM   24  O   HOH T  23     -24.852  -7.562   0.598  1.00  0.28           O  
HETATM   25  O   HOH T  24     -26.489  13.432  36.351  1.00  0.28           O  
HETATM   26  O   HOH T  25     -19.618  15.502  10.234  1.00  0.28           O  
HETATM   27  O   HOH T  26     -17.296 -11.271  23.233  1.00  0.28           O  
HETATM   28  O   HOH T  27     -15.726   8.460   9.797  1.00  0.28           O  
HETATM   29  O   HOH T  28     -32.181  -6.757  -0.033  1.00  0.28           O  
HETATM   30  O   HOH T  29     -26.066  -9.239  21.489  1.00  0.28           O  
HETATM   31  O   HOH T  30     -34.077   2.538   7.200  1.00  0.29           O  
HETATM   32  O   HOH T  31     -26.793  20.150  16.393  1.00  0.29           O  
HETATM   33  O   HOH T  32     -42.692   7.234  36.131  1.00  0.29           O  
HETATM   34  O   HOH T  33     -24.401  -8.209  14.280  1.00  0.29           O  
HETATM   35  O   HOH T  34     -27.825   3.432  15.181  1.00  0.29           O  
HETATM   36  O   HOH T  35     -14.806   0.087  17.273  1.00  0.30           O  
HETATM   37  O   HOH T  36     -35.896  -6.072   2.432  1.00  0.30           O  
HETATM   38  O   HOH T  37     -29.004  20.899  29.922  1.00  0.30           O  
HETATM   39  O   HOH T  38     -25.313   8.737  -2.285  1.00  0.30           O  
HETATM   40  O   HOH T  39     -16.739   6.716 -10.539  1.00  0.30           O  
HETATM   41  O   HOH T  40     -32.332  11.175  33.355  1.00  0.30           O  
HETATM   42  O   HOH T  41     -18.355  -3.086  -7.152  1.00  0.30           O  
HETATM   43  O   HOH T  42     -14.532  11.301  16.538  1.00  0.30           O  
HETATM   44  O   HOH T  43     -10.534  -7.155  -1.499  1.00  0.30           O  
HETATM   45  O   HOH T  44     -19.680   2.939  21.866  1.00  0.31           O  
HETATM   46  O   HOH T  45     -31.015   8.800  -6.101  1.00  0.31           O  
HETATM   47  O   HOH T  46     -31.704  14.636  34.286  1.00  0.31           O  
HETATM   48  O   HOH T  47     -13.262   2.292  17.122  1.00  0.31           O  
HETATM   49  O   HOH T  48     -25.991   5.786   9.576  1.00  0.32           O  
HETATM   50  O   HOH T  49     -32.652  18.937  24.373  1.00  0.32           O  
HETATM   51  O   HOH T  50     -24.238  19.643  13.331  1.00  0.32           O  
HETATM   52  O   HOH T  51     -31.543   5.678  16.828  1.00  0.32           O  
HETATM   53  O   HOH T  52     -30.702   0.092  21.033  1.00  0.32           O  
HETATM   54  O   HOH T  53     -28.631   5.862  16.364  1.00  0.32           O  
HETATM   55  O   HOH T  54     -16.695  -6.321  27.747  1.00  0.32           O  
HETATM   56  O   HOH T  55     -17.981  -7.557  17.943  1.00  0.32           O  
HETATM   57  O   HOH T  56     -29.214  13.492  35.167  1.00  0.32           O  
HETATM   58  O   HOH T  57     -15.730  -1.967  -6.428  1.00  0.32           O  
HETATM   59  O   HOH T  58     -31.236  22.458  20.863  1.00  0.33           O  
HETATM   60  O   HOH T  59     -32.286  23.577  18.665  1.00  0.33           O  
HETATM   61  O   HOH T  60     -28.225  -4.208  -5.665  1.00  0.33           O  
HETATM   62  O   HOH T  61     -22.574  -4.014  19.539  1.00  0.33           O  
HETATM   63  O   HOH T  62     -20.677  20.322  10.773  1.00  0.33           O  
HETATM   64  O   HOH T  63     -33.856   6.888  17.877  1.00  0.33           O  
HETATM   65  O   HOH T  64     -10.876   3.676  -6.541  1.00  0.34           O  
HETATM   66  O   HOH T  65     -29.409 -11.030  22.799  1.00  0.34           O  
HETATM   67  O   HOH T  66     -17.008  14.665  10.366  1.00  0.34           O  
HETATM   68  O   HOH T  67     -21.595   1.352  -8.143  1.00  0.34           O  
HETATM   69  O   HOH T  68     -31.131   0.097  26.754  1.00  0.35           O  
HETATM   70  O   HOH T  69     -14.641  18.894  15.876  1.00  0.35           O  
HETATM   71  O   HOH T  70     -23.367  -8.769  18.578  1.00  0.35           O  
HETATM   72  O   HOH T  71     -29.124   6.744   6.222  1.00  0.35           O  
HETATM   73  O   HOH T  72     -28.717  14.841  11.073  1.00  0.35           O  
HETATM   74  O   HOH T  73     -26.672  16.334   9.578  1.00  0.35           O  
HETATM   75  O   HOH T  74     -27.702  11.449  38.116  1.00  0.35           O  
HETATM   76  O   HOH T  75     -25.195  11.327   4.062  1.00  0.35           O  
HETATM   77  O   HOH T  76     -18.412   5.078  23.229  1.00  0.35           O  
HETATM   78  O   HOH T  77     -21.125  -9.667  -3.345  1.00  0.36           O  
HETATM   79  O   HOH T  78     -12.822   2.209  24.358  1.00  0.36           O  
HETATM   80  O   HOH T  79     -27.553 -11.153   8.455  1.00  0.36           O  
HETATM   81  O   HOH T  80     -19.203   7.883 -11.329  1.00  0.37           O  
HETATM   82  O   HOH T  81     -36.441   1.151  24.404  1.00  0.37           O  
HETATM   83  O   HOH T  82     -16.141  18.928  28.564  1.00  0.37           O  
HETATM   84  O   HOH T  83     -16.631   5.792   9.820  1.00  0.37           O  
HETATM   85  O   HOH T  84     -13.976   6.332   9.600  1.00  0.37           O  
HETATM   86  O   HOH T  85      -9.744  -5.748   0.681  1.00  0.38           O  
HETATM   87  O   HOH T  86      -8.494   2.842  11.629  1.00  0.38           O  
HETATM   88  O   HOH T  87     -26.404  18.212  14.426  1.00  0.38           O  
HETATM   89  O   HOH T  88     -30.535  -7.632  24.272  1.00  0.38           O  
HETATM   90  O   HOH T  89     -41.143   5.104  33.059  1.00  0.38           O  
HETATM   91  O   HOH T  90     -38.244  -0.578   4.988  1.00  0.38           O  
HETATM   92  O   HOH T  91     -13.694   8.773  17.427  1.00  0.38           O  
HETATM   93  O   HOH T  92     -28.559  -5.285  13.736  1.00  0.38           O  
HETATM   94  O   HOH T  93     -10.561  -8.467   0.881  1.00  0.39           O  
HETATM   95  O   HOH T  94     -13.022 -11.762  10.356  1.00  0.39           O  
HETATM   96  O   HOH T  95     -32.520   6.763   2.120  1.00  0.39           O  
HETATM   97  O   HOH T  96      -8.770   2.115  -1.689  1.00  0.39           O  
HETATM   98  O   HOH T  97     -20.433   5.691  21.532  1.00  0.39           O  
HETATM   99  O   HOH T  98     -19.577   0.182  -6.666  1.00  0.40           O  
HETATM  100  O   HOH T  99     -16.978  19.496  14.513  1.00  0.40           O  
HETATM  101  O   HOH T 100     -11.232   4.779  21.095  1.00  0.40           O  
HETATM  102  O   HOH T 101     -31.761   6.710   7.324  1.00  0.40           O  
HETATM  103  O   HOH T 102     -12.032   6.432  17.081  1.00  0.41           O  
HETATM  104  O   HOH T 103     -35.027   1.977  28.419  1.00  0.41           O  
HETATM  105  O   HOH T 104     -17.795  -3.690  27.284  1.00  0.41           O  
HETATM  106  O   HOH T 105     -33.872  13.713  11.332  1.00  0.41           O  
HETATM  107  O   HOH T 106     -33.781   2.521  20.257  1.00  0.41           O  
HETATM  108  O   HOH T 107     -12.553  17.253  22.140  1.00  0.41           O  
HETATM  109  O   HOH T 108     -24.093 -11.808   3.492  1.00  0.41           O  
HETATM  110  O   HOH T 109     -13.418  18.218  24.678  1.00  0.41           O  
HETATM  111  O   HOH T 110      -9.279   0.487  -3.945  1.00  0.41           O  
HETATM  112  O   HOH T 111     -39.506   3.141  31.993  1.00  0.41           O  
HETATM  113  O   HOH T 112     -21.850  22.713  15.181  1.00  0.42           O  
HETATM  114  O   HOH T 113     -29.267   7.356   3.544  1.00  0.42           O  
HETATM  115  O   HOH T 114     -40.634   7.540  34.245  1.00  0.42           O  
HETATM  116  O   HOH T 115     -16.762   7.021  26.809  1.00  0.42           O  
HETATM  117  O   HOH T 116      -7.994   1.681   7.334  1.00  0.42           O  
HETATM  118  O   HOH T 117     -10.657   4.581   7.540  1.00  0.42           O  
HETATM  119  O   HOH T 118     -11.050   1.595  18.611  1.00  0.42           O  
HETATM  120  O   HOH T 119     -22.557  11.108  36.994  1.00  0.42           O  
HETATM  121  O   HOH T 120     -39.756  15.380  16.128  1.00  0.43           O  
HETATM  122  O   HOH T 121     -12.313  -0.861  18.001  1.00  0.43           O  
HETATM  123  O   HOH T 122     -27.014 -10.339  10.990  1.00  0.43           O  
HETATM  124  O   HOH T 123     -37.272   1.472  26.997  1.00  0.43           O  
HETATM  125  O   HOH T 124     -39.269  21.829  19.516  1.00  0.43           O  
HETATM  126  O   HOH T 125     -34.808  16.962  24.424  1.00  0.44           O  
HETATM  127  O   HOH T 126     -21.744  22.384  12.421  1.00  0.44           O  
HETATM  128  O   HOH T 127     -31.465  10.384   4.969  1.00  0.44           O  
HETATM  129  O   HOH T 128     -27.569  18.810   8.873  1.00  0.44           O  
HETATM  130  O   HOH T 129     -24.023  11.424   1.507  1.00  0.44           O  
HETATM  131  O   HOH T 130     -25.562  -9.736   2.224  1.00  0.44           O  
HETATM  132  O   HOH T 131     -31.501  14.893  10.413  1.00  0.44           O  
HETATM  133  O   HOH T 132     -33.101   4.323   0.761  1.00  0.44           O  
HETATM  134  O   HOH T 133     -26.745  13.593   9.643  1.00  0.44           O  
HETATM  135  O   HOH T 134      -8.787   5.965  21.299  1.00  0.44           O  
HETATM  136  O   HOH T 135     -30.128   7.504  -8.395  1.00  0.44           O  
HETATM  137  O   HOH T 136     -21.748 -10.810  17.878  1.00  0.44           O  
HETATM  138  O   HOH T 137     -21.045  -2.144  -6.690  1.00  0.44           O  
HETATM  139  O   HOH T 138     -27.265  10.881   9.583  1.00  0.44           O  
HETATM  140  O   HOH T 139     -28.733   8.999  37.250  1.00  0.45           O  
HETATM  141  O   HOH T 140     -12.317   4.125  18.748  1.00  0.45           O  
HETATM  142  O   HOH T 141      -9.674   7.834  17.155  1.00  0.45           O  
HETATM  143  O   HOH T 142     -19.487 -10.747  13.724  1.00  0.45           O  
HETATM  144  O   HOH T 143     -32.138  24.754  27.349  1.00  0.45           O  
HETATM  145  O   HOH T 144     -29.524  -7.356  15.442  1.00  0.45           O  
HETATM  146  O   HOH T 145     -26.921   8.963   1.766  1.00  0.45           O  
HETATM  147  O   HOH T 146     -10.500 -11.881   9.130  1.00  0.45           O  
HETATM  148  O   HOH T 147     -27.378   4.291  33.314  1.00  0.45           O  
HETATM  149  O   HOH T 148     -33.037  10.264  35.850  1.00  0.45           O  
HETATM  150  O   HOH T 149     -15.030   6.633  24.561  1.00  0.45           O  
HETATM  151  O   HOH T 150     -13.050   4.817  25.265  1.00  0.45           O  
HETATM  152  O   HOH T 151     -20.179  -6.664  19.121  1.00  0.45           O  
HETATM  153  O   HOH T 152     -32.884  21.145  22.618  1.00  0.45           O  
HETATM  154  O   HOH T 153     -39.728  21.969  13.286  1.00  0.45           O  
HETATM  155  O   HOH T 154     -27.455 -12.195   5.009  1.00  0.45           O  
HETATM  156  O   HOH T 155     -32.821  11.880  -2.649  1.00  0.45           O  
HETATM  157  O   HOH T 156     -34.573   0.948   3.368  1.00  0.46           O  
HETATM  158  O   HOH T 157     -14.933   2.895  25.958  1.00  0.46           O  
HETATM  159  O   HOH T 158     -28.579   5.623  13.615  1.00  0.46           O  
HETATM  160  O   HOH T 159     -16.752  20.267  17.058  1.00  0.46           O  
HETATM  161  O   HOH T 160     -24.828  15.615   3.317  1.00  0.46           O  
HETATM  162  O   HOH T 161     -13.478   3.596  -7.416  1.00  0.46           O  
HETATM  163  O   HOH T 162     -27.353  -6.733  -4.859  1.00  0.46           O  
HETATM  164  O   HOH T 163     -22.805  -9.110  12.179  1.00  0.46           O  
HETATM  165  O   HOH T 164      -7.184  -0.599   8.817  1.00  0.47           O  
HETATM  166  O   HOH T 165      -7.848   7.448  19.182  1.00  0.47           O  
HETATM  167  O   HOH T 166     -20.913  24.092  21.457  1.00  0.47           O  
HETATM  168  O   HOH T 167     -15.491   7.140  -3.867  1.00  0.47           O  
HETATM  169  O   HOH T 168     -30.794  -4.084  12.601  1.00  0.48           O  
HETATM  170  O   HOH T 169     -24.489   1.520  -5.819  1.00  0.48           O  
HETATM  171  O   HOH T 170     -12.349   7.297  24.239  1.00  0.48           O  
HETATM  172  O   HOH T 171     -15.257  -7.334  17.825  1.00  0.48           O  
HETATM  173  O   HOH T 172     -29.335  -1.848  19.631  1.00  0.48           O  
HETATM  174  O   HOH T 173     -12.251  12.828  17.246  1.00  0.48           O  
HETATM  175  O   HOH T 174     -28.304  -8.555  22.958  1.00  0.48           O  
HETATM  176  O   HOH T 175      -9.634   5.157  11.273  1.00  0.48           O  
HETATM  177  O   HOH T 176     -35.932   0.808   5.873  1.00  0.48           O  
HETATM  178  O   HOH T 177     -26.974  -7.494  14.357  1.00  0.48           O  
HETATM  179  O   HOH T 178     -29.052   0.070  15.572  1.00  0.48           O  
HETATM  180  O   HOH T 179     -35.381   3.295  25.942  1.00  0.48           O  
HETATM  181  O   HOH T 180     -17.699  17.205  11.312  1.00  0.48           O  
HETATM  182  O   HOH T 181     -17.518   3.154  24.965  1.00  0.48           O  
HETATM  183  O   HOH T 182     -36.575  14.281  11.804  1.00  0.49           O  
HETATM  184  O   HOH T 183     -32.908   2.231  26.538  1.00  0.49           O  
HETATM  185  O   HOH T 184     -29.085  10.763   1.785  1.00  0.49           O  
HETATM  186  O   HOH T 185     -12.235  15.647  24.292  1.00  0.49           O  
HETATM  187  O   HOH T 186     -15.386  12.186  29.139  1.00  0.49           O  
HETATM  188  O   HOH T 187     -35.763  -3.140   8.213  1.00  0.49           O  
HETATM  189  O   HOH T 188      -8.750   8.868  12.049  1.00  0.49           O  
HETATM  190  O   HOH T 189     -35.726  -8.636   3.228  1.00  0.49           O  
HETATM  191  O   HOH T 190     -30.674   4.913  -8.548  1.00  0.50           O  
HETATM  192  O   HOH T 191     -31.191   9.145   2.545  1.00  0.50           O  
HETATM  193  O   HOH T 192     -17.723  -4.212  24.557  1.00  0.50           O  
HETATM  194  O   HOH T 193      -9.263   6.655  14.659  1.00  0.50           O  
HETATM  195  O   HOH T 194      -9.806   5.482  18.714  1.00  0.50           O  
HETATM  196  O   HOH T 195     -18.759   5.444  27.936  1.00  0.50           O  
HETATM  197  O   HOH T 196     -32.880   3.337  17.751  1.00  0.50           O  
HETATM  198  O   HOH T 197     -38.122   0.057   7.600  1.00  0.50           O  
HETATM  199  O   HOH T 198     -31.214   2.414  24.220  1.00  0.50           O  
HETATM  200  O   HOH T 199     -28.591  -2.597  14.648  1.00  0.50           O  
HETATM  201  O   HOH T 200      -9.782   3.130  -4.027  1.00  0.50           O  
HETATM  202  O   HOH T 201     -20.551  -3.025  21.164  1.00  0.50           O  
HETATM  203  O   HOH T 202     -13.022  17.757  17.791  1.00  0.50           O  
HETATM  204  O   HOH T 203     -45.976   1.646  20.162  1.00  0.51           O  
HETATM  205  O   HOH T 204     -28.059  21.844   2.282  1.00  0.51           O  
HETATM  206  O   HOH T 205      -8.330   3.931   9.056  1.00  0.51           O  
HETATM  207  O   HOH T 206     -25.936  13.314   2.229  1.00  0.51           O  
HETATM  208  O   HOH T 207     -16.981   3.321  27.740  1.00  0.51           O  
HETATM  209  O   HOH T 208     -24.469 -12.570  15.360  1.00  0.51           O  
HETATM  210  O   HOH T 209     -27.825  21.691  14.303  1.00  0.52           O  
HETATM  211  O   HOH T 210      -8.818   0.055  17.866  1.00  0.52           O  
HETATM  212  O   HOH T 211     -31.239 -10.315  24.838  1.00  0.52           O  
HETATM  213  O   HOH T 212     -23.088 -13.566  -2.182  1.00  0.53           O  
HETATM  214  O   HOH T 213     -30.648  22.751  16.607  1.00  0.53           O  
HETATM  215  O   HOH T 214     -38.976   3.881  34.623  1.00  0.53           O  
HETATM  216  O   HOH T 215     -17.342  21.314  19.553  1.00  0.53           O  
HETATM  217  O   HOH T 216     -23.691  10.790  -3.135  1.00  0.53           O  
HETATM  218  O   HOH T 217     -35.715   9.694  35.669  1.00  0.53           O  
HETATM  219  O   HOH T 218     -28.648  -6.468  -7.255  1.00  0.53           O  
HETATM  220  O   HOH T 219     -19.403  22.903  16.444  1.00  0.53           O  
HETATM  221  O   HOH T 220     -12.229  -2.556  15.753  1.00  0.54           O  
HETATM  222  O   HOH T 221     -36.928   2.825  33.011  1.00  0.54           O  
HETATM  223  O   HOH T 222     -42.018   0.012  27.633  1.00  0.55           O  
HETATM  224  O   HOH T 223      -9.522  -7.122   6.548  1.00  0.55           O  
HETATM  225  O   HOH T 224      -9.957   5.771   5.280  1.00  0.55           O  
HETATM  226  O   HOH T 225     -32.678   2.592   9.697  1.00  0.55           O  
HETATM  227  O   HOH T 226     -28.473  17.569  11.188  1.00  0.56           O  
HETATM  228  O   HOH T 227     -35.109   0.733  21.952  1.00  0.56           O  
HETATM  229  O   HOH T 228     -39.764   1.632  28.295  1.00  0.56           O  
HETATM  230  O   HOH T 229     -27.492  21.056  10.419  1.00  0.56           O  
HETATM  231  O   HOH T 230     -31.592  -2.487  21.041  1.00  0.57           O  
HETATM  232  O   HOH T 231     -29.245 -12.530  -0.064  1.00  0.57           O  
HETATM  233  O   HOH T 232     -16.862   0.957  26.277  1.00  0.57           O  
HETATM  234  O   HOH T 233     -30.100   3.623  12.240  1.00  0.57           O  
HETATM  235  O   HOH T 234     -28.419  -9.794  14.537  1.00  0.57           O  
HETATM  236  O   HOH T 235     -16.860  -8.356  15.597  1.00  0.57           O  
HETATM  237  O   HOH T 236     -23.415  -0.651  -7.394  1.00  0.58           O  
HETATM  238  O   HOH T 237     -32.391   9.002  38.138  1.00  0.58           O  
HETATM  239  O   HOH T 238     -43.003   5.681  23.388  1.00  0.59           O  
HETATM  240  O   HOH T 239     -14.670  22.662  22.346  1.00  0.60           O  
HETATM  241  O   HOH T 240     -16.770  16.227  35.568  1.00  0.61           O  
TER     242      HOH T 240 
