# Supplementary material for: Accurate Prediction of Hydration Sites of Proteins Using Energy Model With Atom Embedding
Source: Front Mol Biosci. 2021 Sep 20;8:756075. doi: 10.3389/fmolb.2021.756075 (PMC8488165; doi:10.3389/fmolb.2021.756075)
Supplement: Supplementary file 1 [file DataSheet1.ZIP › Data Sheet 1/Our_result_pdb/our_dataset_output/3IU5_watersite.pdb]

HEADER                                                        XXXX


JRNL        PMID   -1
HETATM    1  O   HOH T   0       1.613  51.919  25.371  1.00  0.19           O  
HETATM    2  O   HOH T   1      -6.670  39.666  37.326  1.00  0.20           O  
HETATM    3  O   HOH T   2     -22.512  47.436  17.490  1.00  0.21           O  
HETATM    4  O   HOH T   3       5.096  33.109  36.610  1.00  0.21           O  
HETATM    5  O   HOH T   4     -18.130  60.719  19.111  1.00  0.22           O  
HETATM    6  O   HOH T   5       5.714  45.717  18.482  1.00  0.23           O  
HETATM    7  O   HOH T   6      -8.727  48.782   8.716  1.00  0.23           O  
HETATM    8  O   HOH T   7      -2.961  30.457  31.468  1.00  0.25           O  
HETATM    9  O   HOH T   8      -7.602  30.787  40.172  1.00  0.26           O  
HETATM   10  O   HOH T   9      -4.057  38.754  36.837  1.00  0.26           O  
HETATM   11  O   HOH T  10     -13.415  48.576  21.490  1.00  0.27           O  
HETATM   12  O   HOH T  11      -5.990  59.454  16.128  1.00  0.27           O  
HETATM   13  O   HOH T  12     -14.180  38.804  39.708  1.00  0.27           O  
HETATM   14  O   HOH T  13      14.516  20.719  29.788  1.00  0.28           O  
HETATM   15  O   HOH T  14       4.046  34.006  41.458  1.00  0.28           O  
HETATM   16  O   HOH T  15       2.510  27.211  33.062  1.00  0.29           O  
HETATM   17  O   HOH T  16     -16.423  43.663  18.377  1.00  0.29           O  
HETATM   18  O   HOH T  17      16.075  22.347  31.444  1.00  0.29           O  
HETATM   19  O   HOH T  18     -11.338  40.311  43.593  1.00  0.30           O  
HETATM   20  O   HOH T  19      -7.004  33.736  23.936  1.00  0.30           O  
HETATM   21  O   HOH T  20     -21.634  52.950  25.585  1.00  0.30           O  
HETATM   22  O   HOH T  21     -19.411  51.880  24.288  1.00  0.32           O  
HETATM   23  O   HOH T  22       0.247  27.984  34.533  1.00  0.32           O  
HETATM   24  O   HOH T  23       5.652  27.195  26.257  1.00  0.32           O  
HETATM   25  O   HOH T  24       8.831  53.103  17.563  1.00  0.32           O  
HETATM   26  O   HOH T  25      -4.911  44.681  39.858  1.00  0.32           O  
HETATM   27  O   HOH T  26     -18.288  60.583  23.658  1.00  0.32           O  
HETATM   28  O   HOH T  27      -9.468  56.104  24.167  1.00  0.32           O  
HETATM   29  O   HOH T  28     -16.868  58.430  23.377  1.00  0.33           O  
HETATM   30  O   HOH T  29     -14.027  57.501  16.162  1.00  0.33           O  
HETATM   31  O   HOH T  30      -2.704  31.968  39.940  1.00  0.33           O  
HETATM   32  O   HOH T  31      -8.355  56.672  20.242  1.00  0.33           O  
HETATM   33  O   HOH T  32       3.146  40.700  38.359  1.00  0.33           O  
HETATM   34  O   HOH T  33       1.551  60.034  24.371  1.00  0.33           O  
HETATM   35  O   HOH T  34      -4.517  32.596  24.042  1.00  0.34           O  
HETATM   36  O   HOH T  35      -0.484  57.488  11.507  1.00  0.34           O  
HETATM   37  O   HOH T  36       1.488  40.469  15.996  1.00  0.34           O  
HETATM   38  O   HOH T  37       5.646  31.492  38.769  1.00  0.34           O  
HETATM   39  O   HOH T  38      -2.496  33.313  25.801  1.00  0.34           O  
HETATM   40  O   HOH T  39       5.243  25.214  28.095  1.00  0.35           O  
HETATM   41  O   HOH T  40      13.431  23.369  35.743  1.00  0.35           O  
HETATM   42  O   HOH T  41      -3.592  28.007  37.117  1.00  0.36           O  
HETATM   43  O   HOH T  42     -17.409  42.971  15.947  1.00  0.36           O  
HETATM   44  O   HOH T  43       3.824  27.598  28.289  1.00  0.36           O  
HETATM   45  O   HOH T  44     -10.699  48.945  20.828  1.00  0.37           O  
HETATM   46  O   HOH T  45       9.289  51.366  19.719  1.00  0.37           O  
HETATM   47  O   HOH T  46     -10.602  50.815  23.203  1.00  0.37           O  
HETATM   48  O   HOH T  47      -3.967  42.778  10.236  1.00  0.38           O  
HETATM   49  O   HOH T  48     -13.716  39.882  42.196  1.00  0.38           O  
HETATM   50  O   HOH T  49      -6.908  59.097  25.928  1.00  0.38           O  
HETATM   51  O   HOH T  50       4.003  28.355  30.881  1.00  0.38           O  
HETATM   52  O   HOH T  51     -23.892  54.524  25.243  1.00  0.38           O  
HETATM   53  O   HOH T  52       5.316  45.171  36.117  1.00  0.39           O  
HETATM   54  O   HOH T  53      -4.216  30.629  37.953  1.00  0.39           O  
HETATM   55  O   HOH T  54      13.428  23.001  30.915  1.00  0.39           O  
HETATM   56  O   HOH T  55     -11.648  53.404  19.504  1.00  0.39           O  
HETATM   57  O   HOH T  56     -15.964  56.231  26.581  1.00  0.39           O  
HETATM   58  O   HOH T  57      -4.538  39.974  42.497  1.00  0.39           O  
HETATM   59  O   HOH T  58      -4.511  58.497   8.705  1.00  0.40           O  
HETATM   60  O   HOH T  59       5.470  34.276  39.077  1.00  0.40           O  
HETATM   61  O   HOH T  60      -5.017  37.311  42.955  1.00  0.40           O  
HETATM   62  O   HOH T  61       7.460  47.876  18.794  1.00  0.40           O  
HETATM   63  O   HOH T  62       1.722  54.663  31.810  1.00  0.40           O  
HETATM   64  O   HOH T  63       3.843  59.961  25.755  1.00  0.41           O  
HETATM   65  O   HOH T  64     -10.582  46.759   8.674  1.00  0.41           O  
HETATM   66  O   HOH T  65     -12.941  56.594  22.295  1.00  0.41           O  
HETATM   67  O   HOH T  66       7.957  51.008  29.551  1.00  0.42           O  
HETATM   68  O   HOH T  67      -9.862  52.890  21.536  1.00  0.42           O  
HETATM   69  O   HOH T  68      -2.967  35.483  43.503  1.00  0.42           O  
HETATM   70  O   HOH T  69      -2.279  59.172  10.164  1.00  0.42           O  
HETATM   71  O   HOH T  70      -5.511  40.069  39.849  1.00  0.43           O  
HETATM   72  O   HOH T  71       7.192  31.302  36.433  1.00  0.43           O  
HETATM   73  O   HOH T  72       0.613  43.030  15.258  1.00  0.43           O  
HETATM   74  O   HOH T  73     -14.533  57.472  24.471  1.00  0.44           O  
HETATM   75  O   HOH T  74      -9.631  58.390  25.768  1.00  0.44           O  
HETATM   76  O   HOH T  75      -4.892  29.105  34.834  1.00  0.44           O  
HETATM   77  O   HOH T  76     -15.377  55.147  29.133  1.00  0.45           O  
HETATM   78  O   HOH T  77     -15.285  52.344  29.220  1.00  0.45           O  
HETATM   79  O   HOH T  78      -3.881  26.483  34.738  1.00  0.45           O  
HETATM   80  O   HOH T  79     -11.249  50.779  18.775  1.00  0.45           O  
HETATM   81  O   HOH T  80     -17.939  55.156  28.263  1.00  0.46           O  
HETATM   82  O   HOH T  81       5.733  20.858  27.146  1.00  0.46           O  
HETATM   83  O   HOH T  82      -2.033  44.731   9.628  1.00  0.46           O  
HETATM   84  O   HOH T  83      -0.307  58.779  22.902  1.00  0.46           O  
HETATM   85  O   HOH T  84       3.118  43.470  37.658  1.00  0.46           O  
HETATM   86  O   HOH T  85      -6.623  35.677  44.381  1.00  0.46           O  
HETATM   87  O   HOH T  86       5.604  44.090  38.703  1.00  0.46           O  
HETATM   88  O   HOH T  87     -10.840  40.527  12.167  1.00  0.47           O  
HETATM   89  O   HOH T  88     -13.342  58.859  18.502  1.00  0.47           O  
HETATM   90  O   HOH T  89      -5.644  42.324  41.292  1.00  0.47           O  
HETATM   91  O   HOH T  90      -4.057  46.129  45.091  1.00  0.47           O  
HETATM   92  O   HOH T  91       5.157  23.284  26.067  1.00  0.48           O  
HETATM   93  O   HOH T  92     -14.604  58.722  21.905  1.00  0.48           O  
HETATM   94  O   HOH T  93       6.571  54.329  30.853  1.00  0.48           O  
HETATM   95  O   HOH T  94      -4.525  46.243  42.184  1.00  0.48           O  
HETATM   96  O   HOH T  95     -23.352  45.401  19.207  1.00  0.48           O  
HETATM   97  O   HOH T  96       8.037  55.765  17.118  1.00  0.48           O  
HETATM   98  O   HOH T  97     -10.839  37.826  21.273  1.00  0.48           O  
HETATM   99  O   HOH T  98      -3.351  43.753  41.964  1.00  0.49           O  
HETATM  100  O   HOH T  99     -11.941  37.800  42.620  1.00  0.49           O  
HETATM  101  O   HOH T 100      -6.535  34.165  21.025  1.00  0.49           O  
HETATM  102  O   HOH T 101     -19.077  53.283  26.659  1.00  0.49           O  
HETATM  103  O   HOH T 102     -12.335  38.279  45.318  1.00  0.50           O  
HETATM  104  O   HOH T 103      12.956  61.563  15.376  1.00  0.50           O  
HETATM  105  O   HOH T 104     -17.312  43.152  13.241  1.00  0.50           O  
HETATM  106  O   HOH T 105      -7.948  58.247  23.581  1.00  0.50           O  
HETATM  107  O   HOH T 106     -12.893  47.793   7.958  1.00  0.50           O  
HETATM  108  O   HOH T 107       9.197  36.935  22.330  1.00  0.50           O  
HETATM  109  O   HOH T 108      -4.073  28.108  32.448  1.00  0.50           O  
HETATM  110  O   HOH T 109      -2.597  38.286  43.712  1.00  0.50           O  
HETATM  111  O   HOH T 110      -4.568  60.787  10.200  1.00  0.50           O  
HETATM  112  O   HOH T 111     -12.252  36.932  40.059  1.00  0.50           O  
HETATM  113  O   HOH T 112     -24.326  51.938  14.670  1.00  0.51           O  
HETATM  114  O   HOH T 113       2.497  49.418  13.741  1.00  0.51           O  
HETATM  115  O   HOH T 114      14.573  23.869  33.251  1.00  0.52           O  
HETATM  116  O   HOH T 115     -10.623  50.691  35.422  1.00  0.52           O  
HETATM  117  O   HOH T 116       0.686  56.165   6.986  1.00  0.52           O  
HETATM  118  O   HOH T 117     -16.142  53.493  26.828  1.00  0.52           O  
HETATM  119  O   HOH T 118     -10.484  48.451   6.571  1.00  0.52           O  
HETATM  120  O   HOH T 119      -0.655  58.395   8.031  1.00  0.52           O  
HETATM  121  O   HOH T 120      15.607  53.348  18.434  1.00  0.52           O  
HETATM  122  O   HOH T 121       0.352  55.129  16.187  1.00  0.52           O  
HETATM  123  O   HOH T 122      -1.347  28.399  32.320  1.00  0.52           O  
HETATM  124  O   HOH T 123       5.491  22.839  23.441  1.00  0.53           O  
HETATM  125  O   HOH T 124     -16.187  50.738  27.088  1.00  0.53           O  
HETATM  126  O   HOH T 125     -10.771  55.937  19.303  1.00  0.53           O  
HETATM  127  O   HOH T 126     -12.253  51.242  21.190  1.00  0.53           O  
HETATM  128  O   HOH T 127       8.169  33.275  33.334  1.00  0.54           O  
HETATM  129  O   HOH T 128     -11.366  37.315  27.627  1.00  0.54           O  
HETATM  130  O   HOH T 129      -2.480  48.407  29.760  1.00  0.54           O  
HETATM  131  O   HOH T 130     -10.647  56.594   5.544  1.00  0.55           O  
HETATM  132  O   HOH T 131     -12.255  34.889  34.969  1.00  0.55           O  
HETATM  133  O   HOH T 132      -4.939  61.622  14.649  1.00  0.55           O  
HETATM  134  O   HOH T 133      -2.420  46.139   7.214  1.00  0.55           O  
HETATM  135  O   HOH T 134     -17.980  52.582   9.725  1.00  0.55           O  
HETATM  136  O   HOH T 135      -3.942  51.302  35.070  1.00  0.56           O  
HETATM  137  O   HOH T 136      -5.671  59.470  23.463  1.00  0.56           O  
HETATM  138  O   HOH T 137      -8.297  34.872  40.584  1.00  0.56           O  
HETATM  139  O   HOH T 138     -12.268  46.442  39.634  1.00  0.57           O  
HETATM  140  O   HOH T 139      -0.818  54.434  30.799  1.00  0.57           O  
HETATM  141  O   HOH T 140     -18.671  62.037  25.967  1.00  0.57           O  
HETATM  142  O   HOH T 141     -12.230  59.097  25.065  1.00  0.58           O  
HETATM  143  O   HOH T 142      -9.045  29.217  38.171  1.00  0.60           O  
HETATM  144  O   HOH T 143     -19.828  52.785   9.517  1.00  0.63           O  
TER     145      HOH T 143 
