# Supplementary material for: Accurate Prediction of Hydration Sites of Proteins Using Energy Model With Atom Embedding
Source: Front Mol Biosci. 2021 Sep 20;8:756075. doi: 10.3389/fmolb.2021.756075 (PMC8488165; doi:10.3389/fmolb.2021.756075)
Supplement: Supplementary file 1 [file DataSheet1.ZIP › Data Sheet 1/Our_result_pdb/our_dataset_output/3JXT_watersite.pdb]

HEADER                                                        XXXX


JRNL        PMID   -1
HETATM    1  O   HOH T   0      -1.187   1.593 -10.146  1.00  0.13           O  
HETATM    2  O   HOH T   1      15.640 -15.422 -12.158  1.00  0.14           O  
HETATM    3  O   HOH T   2      -5.324 -16.714   5.080  1.00  0.17           O  
HETATM    4  O   HOH T   3       4.955 -14.483  -3.338  1.00  0.18           O  
HETATM    5  O   HOH T   4       3.199   2.152 -12.820  1.00  0.18           O  
HETATM    6  O   HOH T   5      -0.901 -10.287 -18.170  1.00  0.19           O  
HETATM    7  O   HOH T   6      17.131  -5.072 -27.101  1.00  0.19           O  
HETATM    8  O   HOH T   7       5.704 -10.665 -27.549  1.00  0.20           O  
HETATM    9  O   HOH T   8      -2.789  12.141 -10.796  1.00  0.20           O  
HETATM   10  O   HOH T   9      18.953 -13.822 -18.314  1.00  0.21           O  
HETATM   11  O   HOH T  10       5.120  -7.168   5.561  1.00  0.22           O  
HETATM   12  O   HOH T  11      16.500 -10.654 -10.081  1.00  0.23           O  
HETATM   13  O   HOH T  12      12.544 -10.355   2.058  1.00  0.23           O  
HETATM   14  O   HOH T  13       0.240 -10.359 -28.227  1.00  0.24           O  
HETATM   15  O   HOH T  14      -3.211  -8.283  15.263  1.00  0.24           O  
HETATM   16  O   HOH T  15      -5.419 -10.637 -16.896  1.00  0.24           O  
HETATM   17  O   HOH T  16      15.901  -3.473   3.551  1.00  0.24           O  
HETATM   18  O   HOH T  17     -10.650 -10.971   0.924  1.00  0.24           O  
HETATM   19  O   HOH T  18      -3.777 -22.117 -24.882  1.00  0.25           O  
HETATM   20  O   HOH T  19     -12.415 -11.722   2.995  1.00  0.25           O  
HETATM   21  O   HOH T  20      10.043   4.166   3.395  1.00  0.25           O  
HETATM   22  O   HOH T  21       6.405 -19.662 -34.727  1.00  0.25           O  
HETATM   23  O   HOH T  22      -3.469  -6.148  13.556  1.00  0.25           O  
HETATM   24  O   HOH T  23       1.315 -29.456 -24.293  1.00  0.25           O  
HETATM   25  O   HOH T  24       1.780  -9.178  11.365  1.00  0.25           O  
HETATM   26  O   HOH T  25      -1.161 -21.328 -20.583  1.00  0.26           O  
HETATM   27  O   HOH T  26      -6.186 -14.762   0.362  1.00  0.26           O  
HETATM   28  O   HOH T  27      18.591 -10.951 -15.497  1.00  0.26           O  
HETATM   29  O   HOH T  28     -12.191  -8.273  -3.511  1.00  0.26           O  
HETATM   30  O   HOH T  29      27.556  -1.082 -35.139  1.00  0.27           O  
HETATM   31  O   HOH T  30      22.637  -1.850 -28.243  1.00  0.28           O  
HETATM   32  O   HOH T  31       5.331 -20.672 -37.999  1.00  0.28           O  
HETATM   33  O   HOH T  32      14.088   0.768   5.386  1.00  0.28           O  
HETATM   34  O   HOH T  33      22.841 -16.574 -23.490  1.00  0.28           O  
HETATM   35  O   HOH T  34       1.162   4.974  -4.330  1.00  0.29           O  
HETATM   36  O   HOH T  35      12.464  -9.929   4.808  1.00  0.29           O  
HETATM   37  O   HOH T  36       1.312  10.074   2.219  1.00  0.29           O  
HETATM   38  O   HOH T  37       4.603 -16.315   5.729  1.00  0.29           O  
HETATM   39  O   HOH T  38      13.806 -18.497 -29.889  1.00  0.29           O  
HETATM   40  O   HOH T  39       3.587   4.935  -7.381  1.00  0.29           O  
HETATM   41  O   HOH T  40       5.590 -12.623   6.458  1.00  0.29           O  
HETATM   42  O   HOH T  41      -9.048  -3.098   8.803  1.00  0.30           O  
HETATM   43  O   HOH T  42      11.023   1.144 -26.592  1.00  0.30           O  
HETATM   44  O   HOH T  43       4.038 -19.272 -36.021  1.00  0.30           O  
HETATM   45  O   HOH T  44      13.312  -0.010 -27.424  1.00  0.30           O  
HETATM   46  O   HOH T  45     -10.380  -4.358  10.923  1.00  0.30           O  
HETATM   47  O   HOH T  46       8.964   1.275 -19.287  1.00  0.30           O  
HETATM   48  O   HOH T  47      11.371 -19.898 -10.036  1.00  0.30           O  
HETATM   49  O   HOH T  48     -12.710   2.617   2.578  1.00  0.31           O  
HETATM   50  O   HOH T  49      20.862  -5.366 -27.941  1.00  0.31           O  
HETATM   51  O   HOH T  50       5.623   9.774   9.900  1.00  0.31           O  
HETATM   52  O   HOH T  51      12.516 -22.211 -38.464  1.00  0.31           O  
HETATM   53  O   HOH T  52      16.701 -20.292  -7.543  1.00  0.31           O  
HETATM   54  O   HOH T  53       0.097 -11.206 -10.849  1.00  0.31           O  
HETATM   55  O   HOH T  54      -5.854  -4.705 -11.264  1.00  0.31           O  
HETATM   56  O   HOH T  55      -6.285   0.607  16.422  1.00  0.31           O  
HETATM   57  O   HOH T  56       4.215   6.131  -9.851  1.00  0.32           O  
HETATM   58  O   HOH T  57      11.400   0.744  -7.041  1.00  0.32           O  
HETATM   59  O   HOH T  58      -1.958   0.826 -20.715  1.00  0.33           O  
HETATM   60  O   HOH T  59       5.131 -14.737   9.761  1.00  0.33           O  
HETATM   61  O   HOH T  60       7.080 -25.121 -25.861  1.00  0.33           O  
HETATM   62  O   HOH T  61       0.740 -11.713  11.766  1.00  0.33           O  
HETATM   63  O   HOH T  62      10.992  -0.808 -19.436  1.00  0.33           O  
HETATM   64  O   HOH T  63      -1.163 -13.503 -11.803  1.00  0.34           O  
HETATM   65  O   HOH T  64      13.208  -0.824  -5.758  1.00  0.34           O  
HETATM   66  O   HOH T  65     -10.932   0.445   3.032  1.00  0.34           O  
HETATM   67  O   HOH T  66       8.698 -20.386 -10.631  1.00  0.34           O  
HETATM   68  O   HOH T  67      -5.659 -22.125 -19.226  1.00  0.35           O  
HETATM   69  O   HOH T  68      -3.832 -20.388   6.363  1.00  0.35           O  
HETATM   70  O   HOH T  69      -2.757 -17.822   5.664  1.00  0.35           O  
HETATM   71  O   HOH T  70       3.240  -3.428 -26.739  1.00  0.35           O  
HETATM   72  O   HOH T  71      16.175  -4.587  -3.933  1.00  0.35           O  
HETATM   73  O   HOH T  72      15.606   1.750   3.319  1.00  0.35           O  
HETATM   74  O   HOH T  73      13.943 -17.536 -32.537  1.00  0.36           O  
HETATM   75  O   HOH T  74      12.702 -13.890 -32.611  1.00  0.36           O  
HETATM   76  O   HOH T  75       7.420   6.097 -17.039  1.00  0.36           O  
HETATM   77  O   HOH T  76       8.588   0.842 -16.502  1.00  0.36           O  
HETATM   78  O   HOH T  77      -0.806  -8.695 -32.205  1.00  0.36           O  
HETATM   79  O   HOH T  78      -3.280 -14.510  -3.741  1.00  0.36           O  
HETATM   80  O   HOH T  79     -14.265  -5.528   4.913  1.00  0.36           O  
HETATM   81  O   HOH T  80      -6.410 -14.830 -24.213  1.00  0.37           O  
HETATM   82  O   HOH T  81      -7.966   5.521   3.985  1.00  0.37           O  
HETATM   83  O   HOH T  82      -2.001 -16.028  -1.794  1.00  0.37           O  
HETATM   84  O   HOH T  83      -1.061   9.734   1.081  1.00  0.37           O  
HETATM   85  O   HOH T  84       0.717 -15.228  -9.239  1.00  0.37           O  
HETATM   86  O   HOH T  85     -12.563  -3.460   4.468  1.00  0.37           O  
HETATM   87  O   HOH T  86      -4.875  -1.040  14.819  1.00  0.37           O  
HETATM   88  O   HOH T  87      20.599 -23.423 -14.503  1.00  0.37           O  
HETATM   89  O   HOH T  88      20.967  -7.988 -34.153  1.00  0.37           O  
HETATM   90  O   HOH T  89      -6.493   0.860  13.626  1.00  0.37           O  
HETATM   91  O   HOH T  90      23.032 -17.519 -20.965  1.00  0.37           O  
HETATM   92  O   HOH T  91      -4.575 -16.887  13.259  1.00  0.38           O  
HETATM   93  O   HOH T  92      15.671 -21.437  -5.230  1.00  0.38           O  
HETATM   94  O   HOH T  93      10.900 -20.342  -7.290  1.00  0.38           O  
HETATM   95  O   HOH T  94      -2.198 -11.076 -27.129  1.00  0.38           O  
HETATM   96  O   HOH T  95     -13.173 -12.062   0.316  1.00  0.38           O  
HETATM   97  O   HOH T  96       3.270 -16.619 -35.772  1.00  0.38           O  
HETATM   98  O   HOH T  97       1.613  10.529   4.805  1.00  0.38           O  
HETATM   99  O   HOH T  98       7.492 -13.187  10.284  1.00  0.39           O  
HETATM  100  O   HOH T  99       8.539 -22.842 -27.651  1.00  0.39           O  
HETATM  101  O   HOH T 100      23.614 -15.596 -27.485  1.00  0.39           O  
HETATM  102  O   HOH T 101      -2.647 -12.689 -31.956  1.00  0.39           O  
HETATM  103  O   HOH T 102       1.973  -5.737 -30.299  1.00  0.39           O  
HETATM  104  O   HOH T 103       7.408   7.447  -1.565  1.00  0.39           O  
HETATM  105  O   HOH T 104      14.302 -10.844 -33.523  1.00  0.40           O  
HETATM  106  O   HOH T 105      21.372  -9.391 -36.434  1.00  0.40           O  
HETATM  107  O   HOH T 106      21.091  -7.306 -19.188  1.00  0.40           O  
HETATM  108  O   HOH T 107      -1.458 -15.011  11.815  1.00  0.40           O  
HETATM  109  O   HOH T 108      -4.878  10.195  -1.150  1.00  0.40           O  
HETATM  110  O   HOH T 109      -2.290 -17.524 -32.569  1.00  0.40           O  
HETATM  111  O   HOH T 110       6.777 -27.127 -27.725  1.00  0.40           O  
HETATM  112  O   HOH T 111      21.951 -12.136 -29.857  1.00  0.40           O  
HETATM  113  O   HOH T 112      17.223 -27.012 -26.213  1.00  0.41           O  
HETATM  114  O   HOH T 113      25.067 -15.300 -18.746  1.00  0.41           O  
HETATM  115  O   HOH T 114      15.172 -13.493 -33.971  1.00  0.41           O  
HETATM  116  O   HOH T 115       0.759 -19.439   3.810  1.00  0.41           O  
HETATM  117  O   HOH T 116       2.670 -15.774   9.301  1.00  0.41           O  
HETATM  118  O   HOH T 117      19.636  -7.567 -16.924  1.00  0.41           O  
HETATM  119  O   HOH T 118      -2.229   9.795  -1.339  1.00  0.41           O  
HETATM  120  O   HOH T 119      -5.389 -12.448 -25.162  1.00  0.41           O  
HETATM  121  O   HOH T 120      15.381  -2.951 -17.713  1.00  0.41           O  
HETATM  122  O   HOH T 121      26.977   4.267 -26.610  1.00  0.42           O  
HETATM  123  O   HOH T 122      14.007 -20.146 -10.111  1.00  0.42           O  
HETATM  124  O   HOH T 123       0.130  -5.735  16.081  1.00  0.42           O  
HETATM  125  O   HOH T 124      -4.926 -18.683  -1.407  1.00  0.42           O  
HETATM  126  O   HOH T 125       9.746 -25.162 -26.575  1.00  0.42           O  
HETATM  127  O   HOH T 126      21.068  -7.815 -21.808  1.00  0.42           O  
HETATM  128  O   HOH T 127      -0.015  11.562 -10.557  1.00  0.42           O  
HETATM  129  O   HOH T 128       3.460   8.797   1.741  1.00  0.42           O  
HETATM  130  O   HOH T 129      22.118 -12.235 -24.789  1.00  0.42           O  
HETATM  131  O   HOH T 130      -4.390  -5.923  16.207  1.00  0.42           O  
HETATM  132  O   HOH T 131      13.172  -1.451 -17.776  1.00  0.42           O  
HETATM  133  O   HOH T 132      18.491 -16.381 -32.347  1.00  0.42           O  
HETATM  134  O   HOH T 133      -3.068 -17.130  10.941  1.00  0.42           O  
HETATM  135  O   HOH T 134      -1.923 -14.124  -9.030  1.00  0.43           O  
HETATM  136  O   HOH T 135      15.408 -28.045 -24.603  1.00  0.43           O  
HETATM  137  O   HOH T 136      17.073 -24.336 -26.823  1.00  0.43           O  
HETATM  138  O   HOH T 137      11.636 -20.909 -36.302  1.00  0.43           O  
HETATM  139  O   HOH T 138       8.753 -18.842 -35.690  1.00  0.43           O  
HETATM  140  O   HOH T 139      23.066 -12.920 -27.338  1.00  0.43           O  
HETATM  141  O   HOH T 140      15.769  -8.137 -10.965  1.00  0.43           O  
HETATM  142  O   HOH T 141     -11.762  -5.553   6.183  1.00  0.43           O  
HETATM  143  O   HOH T 142       6.550 -21.081   5.360  1.00  0.43           O  
HETATM  144  O   HOH T 143       9.728 -25.020 -30.049  1.00  0.43           O  
HETATM  145  O   HOH T 144      -6.523  -5.819  -8.838  1.00  0.43           O  
HETATM  146  O   HOH T 145       9.563 -27.242 -28.327  1.00  0.43           O  
HETATM  147  O   HOH T 146      -1.145 -20.095   5.742  1.00  0.44           O  
HETATM  148  O   HOH T 147       4.873 -17.191   8.360  1.00  0.44           O  
HETATM  149  O   HOH T 148      -8.237  -6.020 -10.858  1.00  0.44           O  
HETATM  150  O   HOH T 149      23.299 -14.561 -25.052  1.00  0.44           O  
HETATM  151  O   HOH T 150     -12.506 -10.118  -5.507  1.00  0.44           O  
HETATM  152  O   HOH T 151       7.250   8.866   7.802  1.00  0.44           O  
HETATM  153  O   HOH T 152      -4.674 -15.815  -1.679  1.00  0.44           O  
HETATM  154  O   HOH T 153      17.428 -22.889  -6.853  1.00  0.44           O  
HETATM  155  O   HOH T 154      -5.407 -17.244 -25.057  1.00  0.44           O  
HETATM  156  O   HOH T 155      -8.732  -3.383   3.568  1.00  0.44           O  
HETATM  157  O   HOH T 156      -4.953 -13.331 -22.560  1.00  0.44           O  
HETATM  158  O   HOH T 157       3.273  11.350   0.735  1.00  0.44           O  
HETATM  159  O   HOH T 158       0.828 -14.095  12.993  1.00  0.44           O  
HETATM  160  O   HOH T 159      -4.866 -19.722 -25.859  1.00  0.44           O  
HETATM  161  O   HOH T 160      21.501  -9.801 -23.597  1.00  0.44           O  
HETATM  162  O   HOH T 161      -0.854   9.874   3.830  1.00  0.44           O  
HETATM  163  O   HOH T 162      -3.215 -14.635  -6.569  1.00  0.44           O  
HETATM  164  O   HOH T 163       4.811   3.663 -11.032  1.00  0.45           O  
HETATM  165  O   HOH T 164      -0.555  -8.429  15.892  1.00  0.45           O  
HETATM  166  O   HOH T 165       5.708   1.195 -12.140  1.00  0.45           O  
HETATM  167  O   HOH T 166      -8.934   8.128   4.146  1.00  0.45           O  
HETATM  168  O   HOH T 167       8.948 -22.685 -17.602  1.00  0.45           O  
HETATM  169  O   HOH T 168      -0.563 -15.112  -6.701  1.00  0.45           O  
HETATM  170  O   HOH T 169      -5.456   8.490  -3.199  1.00  0.45           O  
HETATM  171  O   HOH T 170     -14.669  -4.018   2.684  1.00  0.45           O  
HETATM  172  O   HOH T 171       3.326 -18.394   4.289  1.00  0.45           O  
HETATM  173  O   HOH T 172      17.840 -13.941 -33.390  1.00  0.45           O  
HETATM  174  O   HOH T 173      -6.352   2.664 -14.535  1.00  0.45           O  
HETATM  175  O   HOH T 174     -11.533  -4.212  -2.915  1.00  0.45           O  
HETATM  176  O   HOH T 175       4.768 -20.612   1.216  1.00  0.45           O  
HETATM  177  O   HOH T 176      -2.228 -15.270 -30.864  1.00  0.46           O  
HETATM  178  O   HOH T 177       8.980  -0.381  10.608  1.00  0.46           O  
HETATM  179  O   HOH T 178      15.618  -6.375 -14.648  1.00  0.46           O  
HETATM  180  O   HOH T 179      16.196  -0.826   4.349  1.00  0.46           O  
HETATM  181  O   HOH T 180       2.067 -18.072   1.876  1.00  0.46           O  
HETATM  182  O   HOH T 181       7.803  11.315   8.969  1.00  0.46           O  
HETATM  183  O   HOH T 182      -1.517  12.290  -8.304  1.00  0.46           O  
HETATM  184  O   HOH T 183      -2.840 -12.136 -29.305  1.00  0.46           O  
HETATM  185  O   HOH T 184      26.378  -1.148 -32.570  1.00  0.47           O  
HETATM  186  O   HOH T 185       7.740   7.258  -4.262  1.00  0.47           O  
HETATM  187  O   HOH T 186      -7.344 -10.849 -26.255  1.00  0.47           O  
HETATM  188  O   HOH T 187      -8.217   3.822   6.214  1.00  0.47           O  
HETATM  189  O   HOH T 188       0.674 -14.073  10.224  1.00  0.47           O  
HETATM  190  O   HOH T 189       7.128   5.852  -6.568  1.00  0.47           O  
HETATM  191  O   HOH T 190       1.295 -10.312  16.663  1.00  0.47           O  
HETATM  192  O   HOH T 191      -7.374 -10.538 -22.024  1.00  0.47           O  
HETATM  193  O   HOH T 192       5.924   4.280  -8.507  1.00  0.47           O  
HETATM  194  O   HOH T 193       5.659   8.331   0.224  1.00  0.47           O  
HETATM  195  O   HOH T 194      16.125 -16.184 -33.733  1.00  0.48           O  
HETATM  196  O   HOH T 195       4.886 -20.184  -5.444  1.00  0.48           O  
HETATM  197  O   HOH T 196       4.273 -21.017   3.867  1.00  0.48           O  
HETATM  198  O   HOH T 197      14.653  -2.212  -4.066  1.00  0.48           O  
HETATM  199  O   HOH T 198       1.741  -8.276 -31.242  1.00  0.48           O  
HETATM  200  O   HOH T 199      -7.104 -16.978  -1.129  1.00  0.48           O  
HETATM  201  O   HOH T 200       3.142 -10.991  14.654  1.00  0.48           O  
HETATM  202  O   HOH T 201      10.647   7.503   4.784  1.00  0.49           O  
HETATM  203  O   HOH T 202      14.915 -10.161   3.496  1.00  0.49           O  
HETATM  204  O   HOH T 203      17.822  -8.206 -14.942  1.00  0.49           O  
HETATM  205  O   HOH T 204      -4.936 -11.189 -27.599  1.00  0.49           O  
HETATM  206  O   HOH T 205      -9.754   9.195   1.794  1.00  0.49           O  
HETATM  207  O   HOH T 206      13.881   1.807  -6.369  1.00  0.49           O  
HETATM  208  O   HOH T 207      13.787 -26.612 -22.927  1.00  0.49           O  
HETATM  209  O   HOH T 208      -0.369  -9.063  18.614  1.00  0.49           O  
HETATM  210  O   HOH T 209       7.609   0.788  -8.975  1.00  0.49           O  
HETATM  211  O   HOH T 210       8.229 -19.890  -7.889  1.00  0.50           O  
HETATM  212  O   HOH T 211      16.455 -18.069 -31.614  1.00  0.50           O  
HETATM  213  O   HOH T 212      -3.327 -22.882 -20.354  1.00  0.50           O  
HETATM  214  O   HOH T 213      -5.944 -20.764 -23.524  1.00  0.50           O  
HETATM  215  O   HOH T 214       5.578 -19.139  -7.881  1.00  0.50           O  
HETATM  216  O   HOH T 215      23.732 -14.188 -29.818  1.00  0.50           O  
HETATM  217  O   HOH T 216       5.100 -15.709 -37.566  1.00  0.50           O  
HETATM  218  O   HOH T 217      13.959 -12.222   5.056  1.00  0.50           O  
HETATM  219  O   HOH T 218      -5.710  -4.136 -13.933  1.00  0.50           O  
HETATM  220  O   HOH T 219      12.948 -26.163  -5.342  1.00  0.50           O  
HETATM  221  O   HOH T 220      17.738  -9.355 -12.281  1.00  0.50           O  
HETATM  222  O   HOH T 221       3.919   3.254 -25.230  1.00  0.50           O  
HETATM  223  O   HOH T 222       7.463   5.784 -21.791  1.00  0.51           O  
HETATM  224  O   HOH T 223       0.126  -6.205 -32.246  1.00  0.51           O  
HETATM  225  O   HOH T 224      -1.756 -22.249 -18.040  1.00  0.51           O  
HETATM  226  O   HOH T 225       7.780 -10.790   8.855  1.00  0.51           O  
HETATM  227  O   HOH T 226       0.764  -9.892  13.900  1.00  0.51           O  
HETATM  228  O   HOH T 227      -4.678 -13.859 -30.576  1.00  0.51           O  
HETATM  229  O   HOH T 228      -3.083 -19.800   3.778  1.00  0.51           O  
HETATM  230  O   HOH T 229       2.436  -1.488 -25.004  1.00  0.51           O  
HETATM  231  O   HOH T 230       7.855   3.303 -17.740  1.00  0.51           O  
HETATM  232  O   HOH T 231       8.344   0.712 -13.674  1.00  0.51           O  
HETATM  233  O   HOH T 232      -6.593  -9.030 -15.055  1.00  0.51           O  
HETATM  234  O   HOH T 233       6.548 -19.313   7.527  1.00  0.51           O  
HETATM  235  O   HOH T 234      -7.721  -4.167  -3.362  1.00  0.51           O  
HETATM  236  O   HOH T 235       8.660   5.474 -19.393  1.00  0.51           O  
HETATM  237  O   HOH T 236      10.420   0.760 -11.856  1.00  0.52           O  
HETATM  238  O   HOH T 237      13.493   2.577 -26.660  1.00  0.52           O  
HETATM  239  O   HOH T 238       3.226 -20.626 -13.092  1.00  0.52           O  
HETATM  240  O   HOH T 239     -11.474   3.894   4.676  1.00  0.52           O  
HETATM  241  O   HOH T 240       0.105  11.522  -3.951  1.00  0.52           O  
HETATM  242  O   HOH T 241      13.962 -30.640  -7.335  1.00  0.52           O  
HETATM  243  O   HOH T 242     -15.394   2.415   1.616  1.00  0.53           O  
HETATM  244  O   HOH T 243      10.429 -10.588   8.082  1.00  0.53           O  
HETATM  245  O   HOH T 244      10.803  -0.750 -16.593  1.00  0.53           O  
HETATM  246  O   HOH T 245      -6.416   8.890  -5.827  1.00  0.53           O  
HETATM  247  O   HOH T 246      23.357 -20.126 -20.246  1.00  0.53           O  
HETATM  248  O   HOH T 247      -1.044 -15.539 -13.713  1.00  0.53           O  
HETATM  249  O   HOH T 248      21.893  -6.491   0.880  1.00  0.53           O  
HETATM  250  O   HOH T 249       7.121   8.141  -7.920  1.00  0.53           O  
HETATM  251  O   HOH T 250       8.233 -25.218 -16.713  1.00  0.54           O  
HETATM  252  O   HOH T 251      18.093   0.712   3.168  1.00  0.54           O  
HETATM  253  O   HOH T 252      15.222 -26.209 -27.903  1.00  0.54           O  
HETATM  254  O   HOH T 253      18.849  -4.705 -23.315  1.00  0.54           O  
HETATM  255  O   HOH T 254       6.330 -21.102  -9.633  1.00  0.54           O  
HETATM  256  O   HOH T 255      17.645   3.391 -28.169  1.00  0.54           O  
HETATM  257  O   HOH T 256       3.371   6.686 -23.936  1.00  0.54           O  
HETATM  258  O   HOH T 257      11.525  -0.662  -9.726  1.00  0.54           O  
HETATM  259  O   HOH T 258       8.228  -0.715 -11.275  1.00  0.54           O  
HETATM  260  O   HOH T 259       8.277  -8.650  10.605  1.00  0.54           O  
HETATM  261  O   HOH T 260       0.614  11.984   0.638  1.00  0.54           O  
HETATM  262  O   HOH T 261      23.045  -4.376 -29.234  1.00  0.54           O  
HETATM  263  O   HOH T 262      -3.226  11.384   0.721  1.00  0.55           O  
HETATM  264  O   HOH T 263      16.186 -28.473 -15.411  1.00  0.56           O  
HETATM  265  O   HOH T 264      10.047   5.744   0.944  1.00  0.56           O  
HETATM  266  O   HOH T 265      18.696  -5.689  -4.976  1.00  0.56           O  
HETATM  267  O   HOH T 266      -2.361  11.449  -4.760  1.00  0.56           O  
HETATM  268  O   HOH T 267      16.271   2.450  -4.906  1.00  0.57           O  
HETATM  269  O   HOH T 268      17.881 -23.672 -29.357  1.00  0.57           O  
HETATM  270  O   HOH T 269      -7.383 -11.368 -18.682  1.00  0.58           O  
HETATM  271  O   HOH T 270      11.122 -15.369 -34.275  1.00  0.58           O  
HETATM  272  O   HOH T 271       3.359 -13.672  13.903  1.00  0.58           O  
HETATM  273  O   HOH T 272      -8.871  -9.815 -24.145  1.00  0.59           O  
TER     274      HOH T 272 
