# Supplementary material for: Accurate Prediction of Hydration Sites of Proteins Using Energy Model With Atom Embedding
Source: Front Mol Biosci. 2021 Sep 20;8:756075. doi: 10.3389/fmolb.2021.756075 (PMC8488165; doi:10.3389/fmolb.2021.756075)
Supplement: Supplementary file 1 [file DataSheet1.ZIP › Data Sheet 1/Our_result_pdb/our_dataset_output/3K6V_watersite.pdb]

HEADER                                                        XXXX


JRNL        PMID   -1
HETATM    1  O   HOH T   0      25.744  57.706  -5.901  1.00  0.19           O  
HETATM    2  O   HOH T   1      30.313  41.517  23.843  1.00  0.20           O  
HETATM    3  O   HOH T   2      40.236  41.648  -4.232  1.00  0.20           O  
HETATM    4  O   HOH T   3      23.580  51.906  39.140  1.00  0.21           O  
HETATM    5  O   HOH T   4      17.489  43.098  -2.458  1.00  0.22           O  
HETATM    6  O   HOH T   5      19.378  37.534  17.931  1.00  0.22           O  
HETATM    7  O   HOH T   6      36.958  60.609  -3.787  1.00  0.22           O  
HETATM    8  O   HOH T   7      37.507  39.457  33.277  1.00  0.22           O  
HETATM    9  O   HOH T   8      24.974  32.322  -3.374  1.00  0.22           O  
HETATM   10  O   HOH T   9      22.443  37.906  -7.372  1.00  0.22           O  
HETATM   11  O   HOH T  10      36.226  54.032  -9.028  1.00  0.22           O  
HETATM   12  O   HOH T  11      23.327  27.139  40.873  1.00  0.22           O  
HETATM   13  O   HOH T  12      15.411  52.359  11.323  1.00  0.22           O  
HETATM   14  O   HOH T  13       9.303  61.031 -10.328  1.00  0.23           O  
HETATM   15  O   HOH T  14      41.755  49.447  26.349  1.00  0.23           O  
HETATM   16  O   HOH T  15      12.821  46.456  25.321  1.00  0.23           O  
HETATM   17  O   HOH T  16      45.321  49.756  36.316  1.00  0.23           O  
HETATM   18  O   HOH T  17      26.158  22.678  26.656  1.00  0.23           O  
HETATM   19  O   HOH T  18      35.831  56.237  35.864  1.00  0.24           O  
HETATM   20  O   HOH T  19      39.196  46.318  21.769  1.00  0.24           O  
HETATM   21  O   HOH T  20      38.057  50.162   2.604  1.00  0.25           O  
HETATM   22  O   HOH T  21      32.236  39.677  23.082  1.00  0.25           O  
HETATM   23  O   HOH T  22      40.910  58.351   7.201  1.00  0.25           O  
HETATM   24  O   HOH T  23      40.259  39.789  18.727  1.00  0.25           O  
HETATM   25  O   HOH T  24      16.391  54.739   8.060  1.00  0.25           O  
HETATM   26  O   HOH T  25      17.772  53.342  17.209  1.00  0.26           O  
HETATM   27  O   HOH T  26      12.711  44.473   3.124  1.00  0.26           O  
HETATM   28  O   HOH T  27      44.982  35.027  25.091  1.00  0.27           O  
HETATM   29  O   HOH T  28      20.941  28.426  40.635  1.00  0.27           O  
HETATM   30  O   HOH T  29      18.496  31.791  38.095  1.00  0.27           O  
HETATM   31  O   HOH T  30      25.560  48.568 -15.854  1.00  0.27           O  
HETATM   32  O   HOH T  31      31.365  26.562  27.477  1.00  0.27           O  
HETATM   33  O   HOH T  32      14.110  47.331  29.120  1.00  0.27           O  
HETATM   34  O   HOH T  33      10.800  41.125  19.596  1.00  0.28           O  
HETATM   35  O   HOH T  34      19.037  39.511  11.973  1.00  0.28           O  
HETATM   36  O   HOH T  35      19.916  20.873  37.414  1.00  0.28           O  
HETATM   37  O   HOH T  36      38.331  50.686 -10.231  1.00  0.28           O  
HETATM   38  O   HOH T  37      36.454  48.325  18.479  1.00  0.28           O  
HETATM   39  O   HOH T  38      31.960  45.306  17.592  1.00  0.29           O  
HETATM   40  O   HOH T  39      19.659  27.454  22.962  1.00  0.29           O  
HETATM   41  O   HOH T  40      17.098  45.355   9.781  1.00  0.29           O  
HETATM   42  O   HOH T  41      42.130  44.548   1.859  1.00  0.29           O  
HETATM   43  O   HOH T  42      34.111  59.332  33.019  1.00  0.29           O  
HETATM   44  O   HOH T  43      35.657  27.881  17.670  1.00  0.30           O  
HETATM   45  O   HOH T  44      27.803  28.205  42.499  1.00  0.30           O  
HETATM   46  O   HOH T  45      43.244  58.581  11.421  1.00  0.30           O  
HETATM   47  O   HOH T  46      20.338  65.716  -2.746  1.00  0.30           O  
HETATM   48  O   HOH T  47      39.761  41.127   5.137  1.00  0.30           O  
HETATM   49  O   HOH T  48      22.033  36.113  40.063  1.00  0.30           O  
HETATM   50  O   HOH T  49      23.495  50.568  11.026  1.00  0.31           O  
HETATM   51  O   HOH T  50      25.656  55.952  -8.143  1.00  0.31           O  
HETATM   52  O   HOH T  51      31.277  28.302  34.944  1.00  0.31           O  
HETATM   53  O   HOH T  52      20.076  49.402 -19.917  1.00  0.31           O  
HETATM   54  O   HOH T  53      18.955  60.447  17.993  1.00  0.31           O  
HETATM   55  O   HOH T  54      20.404  40.578  -9.589  1.00  0.31           O  
HETATM   56  O   HOH T  55      31.593  54.759 -15.366  1.00  0.31           O  
HETATM   57  O   HOH T  56      17.644  30.056  20.122  1.00  0.31           O  
HETATM   58  O   HOH T  57      16.576  28.385  38.779  1.00  0.31           O  
HETATM   59  O   HOH T  58      14.896  39.922   4.663  1.00  0.31           O  
HETATM   60  O   HOH T  59      29.250  34.197 -17.719  1.00  0.32           O  
HETATM   61  O   HOH T  60      41.137  53.301  -5.137  1.00  0.32           O  
HETATM   62  O   HOH T  61      31.413  54.766  20.131  1.00  0.32           O  
HETATM   63  O   HOH T  62      34.561  56.743  -5.197  1.00  0.32           O  
HETATM   64  O   HOH T  63      29.938  22.480  20.792  1.00  0.32           O  
HETATM   65  O   HOH T  64      19.699  41.812   0.626  1.00  0.32           O  
HETATM   66  O   HOH T  65      15.393  29.415  21.637  1.00  0.32           O  
HETATM   67  O   HOH T  66      22.673  58.834  -9.301  1.00  0.32           O  
HETATM   68  O   HOH T  67      35.700  66.189   0.117  1.00  0.32           O  
HETATM   69  O   HOH T  68      29.736  53.512  36.387  1.00  0.33           O  
HETATM   70  O   HOH T  69      31.396  52.659  18.268  1.00  0.33           O  
HETATM   71  O   HOH T  70      40.531  28.067  22.149  1.00  0.33           O  
HETATM   72  O   HOH T  71      31.578  32.358  -4.736  1.00  0.33           O  
HETATM   73  O   HOH T  72      37.644  49.357 -14.887  1.00  0.33           O  
HETATM   74  O   HOH T  73      27.755  21.129  32.901  1.00  0.33           O  
HETATM   75  O   HOH T  74      39.269  39.726   2.722  1.00  0.33           O  
HETATM   76  O   HOH T  75      34.121  23.897  22.325  1.00  0.34           O  
HETATM   77  O   HOH T  76      32.285  52.813  39.047  1.00  0.34           O  
HETATM   78  O   HOH T  77      14.790  58.793  20.686  1.00  0.34           O  
HETATM   79  O   HOH T  78      22.792  65.423   2.865  1.00  0.34           O  
HETATM   80  O   HOH T  79      31.714  21.080  30.414  1.00  0.34           O  
HETATM   81  O   HOH T  80      27.437  27.669  14.288  1.00  0.34           O  
HETATM   82  O   HOH T  81      30.977  55.628  35.064  1.00  0.34           O  
HETATM   83  O   HOH T  82      40.790  59.784  11.345  1.00  0.34           O  
HETATM   84  O   HOH T  83      26.104  35.949 -15.900  1.00  0.34           O  
HETATM   85  O   HOH T  84      41.744  51.943  39.110  1.00  0.34           O  
HETATM   86  O   HOH T  85      38.269  47.714  11.731  1.00  0.34           O  
HETATM   87  O   HOH T  86      17.790  46.134  36.782  1.00  0.35           O  
HETATM   88  O   HOH T  87      18.166  52.747  11.733  1.00  0.35           O  
HETATM   89  O   HOH T  88      36.286  33.327  -9.819  1.00  0.35           O  
HETATM   90  O   HOH T  89      21.899  52.197  12.854  1.00  0.35           O  
HETATM   91  O   HOH T  90      29.918  35.874 -21.981  1.00  0.35           O  
HETATM   92  O   HOH T  91      29.365  40.511  42.355  1.00  0.35           O  
HETATM   93  O   HOH T  92      11.951  58.788  22.833  1.00  0.35           O  
HETATM   94  O   HOH T  93      41.114  28.623  28.485  1.00  0.35           O  
HETATM   95  O   HOH T  94      18.585  33.280  -0.644  1.00  0.35           O  
HETATM   96  O   HOH T  95       5.995  53.112   1.611  1.00  0.36           O  
HETATM   97  O   HOH T  96      25.049  44.450 -20.403  1.00  0.36           O  
HETATM   98  O   HOH T  97       6.944  50.925   0.184  1.00  0.36           O  
HETATM   99  O   HOH T  98      31.700  14.780  20.759  1.00  0.36           O  
HETATM  100  O   HOH T  99      38.800  53.250  -9.346  1.00  0.36           O  
HETATM  101  O   HOH T 100      42.600  44.965   4.586  1.00  0.36           O  
HETATM  102  O   HOH T 101      27.612  48.661  39.746  1.00  0.36           O  
HETATM  103  O   HOH T 102      45.384  53.972  37.222  1.00  0.36           O  
HETATM  104  O   HOH T 103      34.104  43.387  41.539  1.00  0.36           O  
HETATM  105  O   HOH T 104      40.343  40.449  35.470  1.00  0.36           O  
HETATM  106  O   HOH T 105      35.512  54.966  25.056  1.00  0.36           O  
HETATM  107  O   HOH T 106      25.729  49.387  12.294  1.00  0.36           O  
HETATM  108  O   HOH T 107      34.095  62.692   5.751  1.00  0.36           O  
HETATM  109  O   HOH T 108      42.154  63.203   5.840  1.00  0.37           O  
HETATM  110  O   HOH T 109      40.760  39.893  -8.051  1.00  0.37           O  
HETATM  111  O   HOH T 110      10.903  51.402  15.749  1.00  0.37           O  
HETATM  112  O   HOH T 111      37.443  35.746  -4.258  1.00  0.37           O  
HETATM  113  O   HOH T 112      33.573  24.699  24.842  1.00  0.37           O  
HETATM  114  O   HOH T 113      12.385  39.352   3.442  1.00  0.37           O  
HETATM  115  O   HOH T 114      38.089  35.641  -7.090  1.00  0.37           O  
HETATM  116  O   HOH T 115      37.501  44.997  11.959  1.00  0.37           O  
HETATM  117  O   HOH T 116       9.779  47.639   7.078  1.00  0.37           O  
HETATM  118  O   HOH T 117      17.898  61.343  -0.466  1.00  0.37           O  
HETATM  119  O   HOH T 118      34.442  51.314  39.905  1.00  0.37           O  
HETATM  120  O   HOH T 119      14.672  36.994  -2.829  1.00  0.37           O  
HETATM  121  O   HOH T 120      17.059  48.889  34.013  1.00  0.37           O  
HETATM  122  O   HOH T 121      33.421  52.783  11.474  1.00  0.38           O  
HETATM  123  O   HOH T 122       8.568  38.049  27.236  1.00  0.38           O  
HETATM  124  O   HOH T 123      41.096  32.606  26.313  1.00  0.38           O  
HETATM  125  O   HOH T 124      28.423  62.047  28.946  1.00  0.38           O  
HETATM  126  O   HOH T 125      28.360  43.701  13.531  1.00  0.38           O  
HETATM  127  O   HOH T 126      34.107  52.153  18.702  1.00  0.38           O  
HETATM  128  O   HOH T 127      20.473  27.078  20.462  1.00  0.38           O  
HETATM  129  O   HOH T 128      22.204  26.986  18.405  1.00  0.38           O  
HETATM  130  O   HOH T 129      36.176  52.905  10.752  1.00  0.38           O  
HETATM  131  O   HOH T 130      24.952  51.066 -14.800  1.00  0.38           O  
HETATM  132  O   HOH T 131      32.489  43.263 -17.791  1.00  0.38           O  
HETATM  133  O   HOH T 132      10.100  56.561  -9.433  1.00  0.38           O  
HETATM  134  O   HOH T 133      39.870  51.327  41.167  1.00  0.38           O  
HETATM  135  O   HOH T 134      14.423  60.617   4.413  1.00  0.38           O  
HETATM  136  O   HOH T 135      31.956  38.474  11.813  1.00  0.38           O  
HETATM  137  O   HOH T 136      33.747  63.976  -6.817  1.00  0.38           O  
HETATM  138  O   HOH T 137      21.946  19.920  34.486  1.00  0.38           O  
HETATM  139  O   HOH T 138       9.909  55.615 -12.050  1.00  0.38           O  
HETATM  140  O   HOH T 139      16.314  54.642  12.736  1.00  0.39           O  
HETATM  141  O   HOH T 140      39.674  33.340  33.513  1.00  0.39           O  
HETATM  142  O   HOH T 141      31.779  64.099   4.916  1.00  0.39           O  
HETATM  143  O   HOH T 142      29.169  33.306  41.455  1.00  0.39           O  
HETATM  144  O   HOH T 143      33.817  15.484  22.509  1.00  0.39           O  
HETATM  145  O   HOH T 144      16.795  41.410  -4.489  1.00  0.39           O  
HETATM  146  O   HOH T 145      27.362  45.790  10.752  1.00  0.39           O  
HETATM  147  O   HOH T 146      30.782  38.485 -18.750  1.00  0.39           O  
HETATM  148  O   HOH T 147      32.584  57.169  33.410  1.00  0.39           O  
HETATM  149  O   HOH T 148      21.450  23.258  23.311  1.00  0.39           O  
HETATM  150  O   HOH T 149      16.833  56.015  10.418  1.00  0.39           O  
HETATM  151  O   HOH T 150      26.679  37.769  41.492  1.00  0.39           O  
HETATM  152  O   HOH T 151      33.148  23.451  30.231  1.00  0.39           O  
HETATM  153  O   HOH T 152       8.315  42.453  19.492  1.00  0.39           O  
HETATM  154  O   HOH T 153      29.888  22.426  31.881  1.00  0.39           O  
HETATM  155  O   HOH T 154      14.981  47.938  38.943  1.00  0.39           O  
HETATM  156  O   HOH T 155      18.988  23.159  36.156  1.00  0.39           O  
HETATM  157  O   HOH T 156      16.506  32.546  39.951  1.00  0.40           O  
HETATM  158  O   HOH T 157      14.517  53.602  31.757  1.00  0.40           O  
HETATM  159  O   HOH T 158      40.889  54.120  -7.662  1.00  0.40           O  
HETATM  160  O   HOH T 159      13.578  60.724  -0.233  1.00  0.40           O  
HETATM  161  O   HOH T 160      22.414  60.038  22.043  1.00  0.40           O  
HETATM  162  O   HOH T 161      19.938  63.957  22.937  1.00  0.40           O  
HETATM  163  O   HOH T 162      12.051  54.877  -8.426  1.00  0.40           O  
HETATM  164  O   HOH T 163      26.797  29.182  44.799  1.00  0.40           O  
HETATM  165  O   HOH T 164      14.602  44.082  10.030  1.00  0.40           O  
HETATM  166  O   HOH T 165      39.769  44.289  38.620  1.00  0.40           O  
HETATM  167  O   HOH T 166      27.821  61.057  21.952  1.00  0.40           O  
HETATM  168  O   HOH T 167      33.793  29.204  34.199  1.00  0.40           O  
HETATM  169  O   HOH T 168      26.162  52.933 -11.467  1.00  0.40           O  
HETATM  170  O   HOH T 169      39.433  40.193  42.609  1.00  0.40           O  
HETATM  171  O   HOH T 170      23.587  54.436  17.351  1.00  0.40           O  
HETATM  172  O   HOH T 171      12.835  51.047  28.398  1.00  0.40           O  
HETATM  173  O   HOH T 172      27.221  21.053  28.699  1.00  0.40           O  
HETATM  174  O   HOH T 173      16.021  29.953  40.873  1.00  0.41           O  
HETATM  175  O   HOH T 174      25.100  21.545  32.350  1.00  0.41           O  
HETATM  176  O   HOH T 175      20.864  51.847  38.954  1.00  0.41           O  
HETATM  177  O   HOH T 176      11.955  54.651  31.880  1.00  0.41           O  
HETATM  178  O   HOH T 177      40.662  60.999   6.551  1.00  0.41           O  
HETATM  179  O   HOH T 178      31.999  67.869  -5.990  1.00  0.41           O  
HETATM  180  O   HOH T 179      14.020  58.485  -2.062  1.00  0.41           O  
HETATM  181  O   HOH T 180      25.030  27.398  15.516  1.00  0.41           O  
HETATM  182  O   HOH T 181      24.612  63.415  12.085  1.00  0.41           O  
HETATM  183  O   HOH T 182      31.766  48.349 -17.385  1.00  0.41           O  
HETATM  184  O   HOH T 183      15.739  36.782  -7.751  1.00  0.41           O  
HETATM  185  O   HOH T 184      41.997  55.828  -5.760  1.00  0.41           O  
HETATM  186  O   HOH T 185      26.081  62.737  23.112  1.00  0.41           O  
HETATM  187  O   HOH T 186      13.890  56.793  22.399  1.00  0.41           O  
HETATM  188  O   HOH T 187      35.365  56.832  20.031  1.00  0.41           O  
HETATM  189  O   HOH T 188      21.253  35.574  -8.349  1.00  0.41           O  
HETATM  190  O   HOH T 189      26.603  30.638  -1.764  1.00  0.41           O  
HETATM  191  O   HOH T 190      33.102  30.917  37.371  1.00  0.41           O  
HETATM  192  O   HOH T 191      37.535  63.580  -1.650  1.00  0.41           O  
HETATM  193  O   HOH T 192      38.949  53.646  26.815  1.00  0.41           O  
HETATM  194  O   HOH T 193      46.849  54.181   6.899  1.00  0.41           O  
HETATM  195  O   HOH T 194      46.475  56.436   5.428  1.00  0.41           O  
HETATM  196  O   HOH T 195      42.256  42.781  -2.605  1.00  0.41           O  
HETATM  197  O   HOH T 196      25.022  37.678  37.605  1.00  0.41           O  
HETATM  198  O   HOH T 197      29.108  45.955  41.634  1.00  0.41           O  
HETATM  199  O   HOH T 198      30.399  46.236  15.484  1.00  0.41           O  
HETATM  200  O   HOH T 199      23.137  56.143  -9.511  1.00  0.42           O  
HETATM  201  O   HOH T 200      19.646  25.039  24.057  1.00  0.42           O  
HETATM  202  O   HOH T 201      13.186  57.888  -4.778  1.00  0.42           O  
HETATM  203  O   HOH T 202      11.628  51.736  11.490  1.00  0.42           O  
HETATM  204  O   HOH T 203      36.414  30.297  34.374  1.00  0.42           O  
HETATM  205  O   HOH T 204      14.005  55.654  -2.108  1.00  0.42           O  
HETATM  206  O   HOH T 205      29.590  46.603 -17.093  1.00  0.42           O  
HETATM  207  O   HOH T 206      13.394  48.750  26.890  1.00  0.42           O  
HETATM  208  O   HOH T 207       9.856  39.531  36.549  1.00  0.42           O  
HETATM  209  O   HOH T 208      31.706  25.856  30.150  1.00  0.42           O  
HETATM  210  O   HOH T 209      34.925  33.739 -15.690  1.00  0.42           O  
HETATM  211  O   HOH T 210      34.780  53.956  39.285  1.00  0.42           O  
HETATM  212  O   HOH T 211      23.553  49.383  18.615  1.00  0.42           O  
HETATM  213  O   HOH T 212      22.662  31.398  -4.591  1.00  0.42           O  
HETATM  214  O   HOH T 213      30.891  31.018  38.958  1.00  0.42           O  
HETATM  215  O   HOH T 214      31.709  33.961 -20.902  1.00  0.42           O  
HETATM  216  O   HOH T 215      22.078  17.275  25.918  1.00  0.42           O  
HETATM  217  O   HOH T 216      34.427  40.148 -18.770  1.00  0.42           O  
HETATM  218  O   HOH T 217      12.121  57.013  -0.559  1.00  0.43           O  
HETATM  219  O   HOH T 218      42.845  33.469  24.361  1.00  0.43           O  
HETATM  220  O   HOH T 219      14.619  60.172  -4.191  1.00  0.43           O  
HETATM  221  O   HOH T 220      21.913  17.045  28.692  1.00  0.43           O  
HETATM  222  O   HOH T 221      40.117  66.166   3.214  1.00  0.43           O  
HETATM  223  O   HOH T 222      19.695  59.439  -1.379  1.00  0.43           O  
HETATM  224  O   HOH T 223       7.960  49.838   2.528  1.00  0.43           O  
HETATM  225  O   HOH T 224      43.382  55.025  28.549  1.00  0.43           O  
HETATM  226  O   HOH T 225      42.674  47.069   2.820  1.00  0.43           O  
HETATM  227  O   HOH T 226      15.698  47.958  36.262  1.00  0.43           O  
HETATM  228  O   HOH T 227      25.980  19.913  26.597  1.00  0.43           O  
HETATM  229  O   HOH T 228      23.795  59.115  11.455  1.00  0.43           O  
HETATM  230  O   HOH T 229       8.282  50.004  11.318  1.00  0.43           O  
HETATM  231  O   HOH T 230      14.571  53.145  28.979  1.00  0.43           O  
HETATM  232  O   HOH T 231      28.797  33.004   3.171  1.00  0.44           O  
HETATM  233  O   HOH T 232       8.490  50.431  15.664  1.00  0.44           O  
HETATM  234  O   HOH T 233      14.802  39.576  -3.939  1.00  0.44           O  
HETATM  235  O   HOH T 234       9.602  38.635  19.850  1.00  0.44           O  
HETATM  236  O   HOH T 235      39.486  45.355  28.638  1.00  0.44           O  
HETATM  237  O   HOH T 236      39.649  31.811  -8.996  1.00  0.44           O  
HETATM  238  O   HOH T 237      17.421  39.008  14.284  1.00  0.44           O  
HETATM  239  O   HOH T 238      18.398  37.497  -8.441  1.00  0.44           O  
HETATM  240  O   HOH T 239      17.318  25.990  22.788  1.00  0.44           O  
HETATM  241  O   HOH T 240      26.274  42.437 -18.930  1.00  0.44           O  
HETATM  242  O   HOH T 241      27.978  36.630 -17.734  1.00  0.44           O  
HETATM  243  O   HOH T 242      14.397  50.964  30.764  1.00  0.44           O  
HETATM  244  O   HOH T 243      38.852  37.978  40.868  1.00  0.44           O  
HETATM  245  O   HOH T 244      12.437  55.854 -10.866  1.00  0.44           O  
HETATM  246  O   HOH T 245      40.331  37.180  -7.372  1.00  0.44           O  
HETATM  247  O   HOH T 246      41.399  42.645  -0.052  1.00  0.44           O  
HETATM  248  O   HOH T 247      34.800  55.977  22.590  1.00  0.44           O  
HETATM  249  O   HOH T 248      18.393  53.920  14.459  1.00  0.44           O  
HETATM  250  O   HOH T 249      10.101  59.181  -8.412  1.00  0.44           O  
HETATM  251  O   HOH T 250      10.558  42.800   3.137  1.00  0.44           O  
HETATM  252  O   HOH T 251      38.921  37.152  -2.481  1.00  0.44           O  
HETATM  253  O   HOH T 252      26.345  54.183  17.857  1.00  0.44           O  
HETATM  254  O   HOH T 253      28.599  62.350  24.349  1.00  0.44           O  
HETATM  255  O   HOH T 254      40.693  65.531   5.848  1.00  0.45           O  
HETATM  256  O   HOH T 255      13.369  51.803  -0.971  1.00  0.45           O  
HETATM  257  O   HOH T 256      29.221  31.527  -2.297  1.00  0.45           O  
HETATM  258  O   HOH T 257      33.319  53.389 -17.014  1.00  0.45           O  
HETATM  259  O   HOH T 258       8.655  47.896  16.186  1.00  0.45           O  
HETATM  260  O   HOH T 259      25.203  64.930   6.858  1.00  0.45           O  
HETATM  261  O   HOH T 260      24.269  29.709  -3.039  1.00  0.45           O  
HETATM  262  O   HOH T 261      33.399  45.955  40.704  1.00  0.45           O  
HETATM  263  O   HOH T 262      31.641  31.258  -7.338  1.00  0.45           O  
HETATM  264  O   HOH T 263      32.244  34.929 -23.407  1.00  0.45           O  
HETATM  265  O   HOH T 264      33.202  18.036  23.352  1.00  0.45           O  
HETATM  266  O   HOH T 265      33.120  56.938  36.219  1.00  0.45           O  
HETATM  267  O   HOH T 266      19.552  63.258  -1.704  1.00  0.45           O  
HETATM  268  O   HOH T 267      17.699  59.929  25.684  1.00  0.45           O  
HETATM  269  O   HOH T 268       8.107  47.070   2.505  1.00  0.45           O  
HETATM  270  O   HOH T 269      43.152  28.382  26.556  1.00  0.45           O  
HETATM  271  O   HOH T 270      27.059  51.455  17.523  1.00  0.45           O  
HETATM  272  O   HOH T 271      15.547  22.805  26.742  1.00  0.45           O  
HETATM  273  O   HOH T 272      15.959  50.699  35.816  1.00  0.46           O  
HETATM  274  O   HOH T 273      17.881  20.159  25.060  1.00  0.46           O  
HETATM  275  O   HOH T 274      31.724  64.450   2.223  1.00  0.46           O  
HETATM  276  O   HOH T 275      38.912  44.470  33.718  1.00  0.46           O  
HETATM  277  O   HOH T 276      16.919  37.160  16.469  1.00  0.46           O  
HETATM  278  O   HOH T 277      16.542  57.447  12.799  1.00  0.46           O  
HETATM  279  O   HOH T 278      41.274  47.604  28.406  1.00  0.46           O  
HETATM  280  O   HOH T 279      22.576  38.915 -10.225  1.00  0.46           O  
HETATM  281  O   HOH T 280       7.812  48.837  13.749  1.00  0.46           O  
HETATM  282  O   HOH T 281      12.146  58.943  25.633  1.00  0.46           O  
HETATM  283  O   HOH T 282      29.852  44.554  11.372  1.00  0.46           O  
HETATM  284  O   HOH T 283      33.186  25.048  32.380  1.00  0.46           O  
HETATM  285  O   HOH T 284       7.287  38.190  32.856  1.00  0.46           O  
HETATM  286  O   HOH T 285      34.088  65.753   2.342  1.00  0.46           O  
HETATM  287  O   HOH T 286       8.798  40.433  17.788  1.00  0.46           O  
HETATM  288  O   HOH T 287      23.437  31.919  -7.295  1.00  0.46           O  
HETATM  289  O   HOH T 288      25.453  64.654  -6.107  1.00  0.46           O  
HETATM  290  O   HOH T 289      24.713  64.176   4.289  1.00  0.46           O  
HETATM  291  O   HOH T 290      14.788  38.782  13.499  1.00  0.46           O  
HETATM  292  O   HOH T 291      33.188  56.121  18.532  1.00  0.46           O  
HETATM  293  O   HOH T 292      12.001  28.371  32.339  1.00  0.46           O  
HETATM  294  O   HOH T 293      23.690  19.408  25.118  1.00  0.46           O  
HETATM  295  O   HOH T 294      29.751  31.688 -13.451  1.00  0.46           O  
HETATM  296  O   HOH T 295      35.262  36.351  41.575  1.00  0.46           O  
HETATM  297  O   HOH T 296      36.498  22.585  22.432  1.00  0.47           O  
HETATM  298  O   HOH T 297      23.888  51.278  14.567  1.00  0.47           O  
HETATM  299  O   HOH T 298      23.539  54.729  39.167  1.00  0.47           O  
HETATM  300  O   HOH T 299      38.662  48.592  20.250  1.00  0.47           O  
HETATM  301  O   HOH T 300       6.538  37.087  30.372  1.00  0.47           O  
HETATM  302  O   HOH T 301      10.103  49.677  17.853  1.00  0.47           O  
HETATM  303  O   HOH T 302      13.735  48.659 -12.616  1.00  0.47           O  
HETATM  304  O   HOH T 303      27.344  64.542   3.894  1.00  0.47           O  
HETATM  305  O   HOH T 304       4.848  38.850  31.714  1.00  0.47           O  
HETATM  306  O   HOH T 305      20.834  68.011  -1.305  1.00  0.47           O  
HETATM  307  O   HOH T 306      19.728  52.146 -20.013  1.00  0.47           O  
HETATM  308  O   HOH T 307      31.722  45.775 -18.619  1.00  0.47           O  
HETATM  309  O   HOH T 308      27.537  23.293  37.283  1.00  0.47           O  
HETATM  310  O   HOH T 309      17.084  41.533  44.737  1.00  0.47           O  
HETATM  311  O   HOH T 310      26.023  31.133 -10.938  1.00  0.47           O  
HETATM  312  O   HOH T 311      24.961  33.231  -9.293  1.00  0.47           O  
HETATM  313  O   HOH T 312      18.821  22.355  23.841  1.00  0.47           O  
HETATM  314  O   HOH T 313      23.422  53.944  14.563  1.00  0.47           O  
HETATM  315  O   HOH T 314      13.886  31.849  40.589  1.00  0.47           O  
HETATM  316  O   HOH T 315       7.146  39.499  29.012  1.00  0.47           O  
HETATM  317  O   HOH T 316      11.066  30.815  31.302  1.00  0.47           O  
HETATM  318  O   HOH T 317      20.825  18.331  36.515  1.00  0.48           O  
HETATM  319  O   HOH T 318      14.945  64.540  25.880  1.00  0.48           O  
HETATM  320  O   HOH T 319      23.981  18.432  27.682  1.00  0.48           O  
HETATM  321  O   HOH T 320      39.662  43.133  36.059  1.00  0.48           O  
HETATM  322  O   HOH T 321      43.609  58.903   6.886  1.00  0.48           O  
HETATM  323  O   HOH T 322      14.070  38.800  -6.628  1.00  0.48           O  
HETATM  324  O   HOH T 323      14.877  35.496 -10.091  1.00  0.48           O  
HETATM  325  O   HOH T 324      38.883  41.899  32.564  1.00  0.48           O  
HETATM  326  O   HOH T 325      43.115  61.536   7.838  1.00  0.48           O  
HETATM  327  O   HOH T 326      31.199  16.190  23.137  1.00  0.48           O  
HETATM  328  O   HOH T 327      12.439  41.541  38.836  1.00  0.48           O  
HETATM  329  O   HOH T 328      28.657  35.920  42.191  1.00  0.48           O  
HETATM  330  O   HOH T 329      19.188  17.177  28.417  1.00  0.48           O  
HETATM  331  O   HOH T 330      31.437  38.444   9.089  1.00  0.48           O  
HETATM  332  O   HOH T 331      42.899  29.562  18.343  1.00  0.48           O  
HETATM  333  O   HOH T 332      18.494  58.165  37.878  1.00  0.49           O  
HETATM  334  O   HOH T 333      30.549  42.209  12.763  1.00  0.49           O  
HETATM  335  O   HOH T 334       4.970  38.366  34.400  1.00  0.49           O  
HETATM  336  O   HOH T 335       6.771  47.671  11.478  1.00  0.49           O  
HETATM  337  O   HOH T 336      25.119  53.687 -13.946  1.00  0.49           O  
HETATM  338  O   HOH T 337      28.511  27.452  11.819  1.00  0.49           O  
HETATM  339  O   HOH T 338       7.245  41.352  25.241  1.00  0.49           O  
HETATM  340  O   HOH T 339      31.734  58.979  31.489  1.00  0.49           O  
HETATM  341  O   HOH T 340      27.801  33.821  43.866  1.00  0.49           O  
HETATM  342  O   HOH T 341      27.533  41.919  44.045  1.00  0.49           O  
HETATM  343  O   HOH T 342      43.011  45.325  -3.315  1.00  0.49           O  
HETATM  344  O   HOH T 343      21.782  24.774  19.968  1.00  0.49           O  
HETATM  345  O   HOH T 344      32.533  39.239 -20.770  1.00  0.49           O  
HETATM  346  O   HOH T 345      21.172  42.457  41.734  1.00  0.49           O  
HETATM  347  O   HOH T 346      42.877  28.251  23.765  1.00  0.49           O  
HETATM  348  O   HOH T 347      29.404  24.782  19.397  1.00  0.49           O  
HETATM  349  O   HOH T 348      18.555  61.081  -3.176  1.00  0.49           O  
HETATM  350  O   HOH T 349      27.030  31.506 -13.433  1.00  0.49           O  
HETATM  351  O   HOH T 350       9.603  53.171  10.179  1.00  0.49           O  
HETATM  352  O   HOH T 351      33.297  61.271  31.390  1.00  0.49           O  
HETATM  353  O   HOH T 352      30.615  49.414 -19.623  1.00  0.49           O  
HETATM  354  O   HOH T 353      46.184  52.158  35.304  1.00  0.50           O  
HETATM  355  O   HOH T 354      22.062  35.809  42.847  1.00  0.50           O  
HETATM  356  O   HOH T 355      41.272  39.159 -10.636  1.00  0.50           O  
HETATM  357  O   HOH T 356       9.945  43.129  37.270  1.00  0.50           O  
HETATM  358  O   HOH T 357      21.995  34.624   8.393  1.00  0.50           O  
HETATM  359  O   HOH T 358      18.110  63.454  31.572  1.00  0.50           O  
HETATM  360  O   HOH T 359      38.033  29.039  18.733  1.00  0.50           O  
HETATM  361  O   HOH T 360      23.553  33.682 -11.698  1.00  0.50           O  
HETATM  362  O   HOH T 361      10.238  45.595   3.204  1.00  0.50           O  
HETATM  363  O   HOH T 362      24.663  55.337 -11.771  1.00  0.50           O  
HETATM  364  O   HOH T 363       7.319  48.886   7.663  1.00  0.50           O  
HETATM  365  O   HOH T 364      24.824  36.380  40.002  1.00  0.50           O  
HETATM  366  O   HOH T 365      16.143  37.631  -5.146  1.00  0.50           O  
HETATM  367  O   HOH T 366      19.653  56.346  10.547  1.00  0.50           O  
HETATM  368  O   HOH T 367      28.283  61.062  19.181  1.00  0.50           O  
HETATM  369  O   HOH T 368      16.434  40.738  12.352  1.00  0.50           O  
HETATM  370  O   HOH T 369      11.823  53.540  29.284  1.00  0.50           O  
HETATM  371  O   HOH T 370      18.700  31.263  -2.358  1.00  0.50           O  
HETATM  372  O   HOH T 371      41.113  42.949 -15.541  1.00  0.50           O  
HETATM  373  O   HOH T 372      17.650  47.990  39.857  1.00  0.50           O  
HETATM  374  O   HOH T 373      31.387  55.232  37.773  1.00  0.50           O  
HETATM  375  O   HOH T 374      29.069  20.097  30.591  1.00  0.50           O  
HETATM  376  O   HOH T 375      17.128  24.246  24.951  1.00  0.51           O  
HETATM  377  O   HOH T 376       6.929  42.889  27.422  1.00  0.51           O  
HETATM  378  O   HOH T 377      34.928  56.627  38.372  1.00  0.51           O  
HETATM  379  O   HOH T 378      28.351  29.231  -8.730  1.00  0.51           O  
HETATM  380  O   HOH T 379      19.308  17.767  25.664  1.00  0.51           O  
HETATM  381  O   HOH T 380      27.984  47.804  12.643  1.00  0.51           O  
HETATM  382  O   HOH T 381      21.698  64.443  -4.790  1.00  0.51           O  
HETATM  383  O   HOH T 382      19.759  36.652  41.639  1.00  0.51           O  
HETATM  384  O   HOH T 383      12.974  41.921   4.300  1.00  0.51           O  
HETATM  385  O   HOH T 384       6.483  41.535  35.871  1.00  0.51           O  
HETATM  386  O   HOH T 385      40.462  55.268  28.777  1.00  0.51           O  
HETATM  387  O   HOH T 386      33.466  48.796 -19.513  1.00  0.51           O  
HETATM  388  O   HOH T 387      16.158  36.453  13.950  1.00  0.51           O  
HETATM  389  O   HOH T 388      23.183  49.928 -16.617  1.00  0.51           O  
HETATM  390  O   HOH T 389      45.218  61.558  -0.171  1.00  0.51           O  
HETATM  391  O   HOH T 390      25.104  30.522  -5.552  1.00  0.51           O  
HETATM  392  O   HOH T 391      39.604  66.343   0.691  1.00  0.51           O  
HETATM  393  O   HOH T 392      38.735  50.741 -12.898  1.00  0.51           O  
HETATM  394  O   HOH T 393      27.018  56.207 -10.485  1.00  0.51           O  
HETATM  395  O   HOH T 394      15.791  52.684  33.899  1.00  0.51           O  
HETATM  396  O   HOH T 395      20.773  61.548  23.708  1.00  0.51           O  
HETATM  397  O   HOH T 396      34.132  38.970  43.842  1.00  0.51           O  
HETATM  398  O   HOH T 397      26.486  58.484  10.920  1.00  0.51           O  
HETATM  399  O   HOH T 398      10.897  48.503  25.709  1.00  0.51           O  
HETATM  400  O   HOH T 399      23.315  68.220   3.030  1.00  0.52           O  
HETATM  401  O   HOH T 400      34.435  37.883  12.625  1.00  0.52           O  
HETATM  402  O   HOH T 401      27.350  21.759  20.007  1.00  0.52           O  
HETATM  403  O   HOH T 402      37.926  31.801  -4.782  1.00  0.52           O  
HETATM  404  O   HOH T 403      28.279  63.575  26.751  1.00  0.52           O  
HETATM  405  O   HOH T 404      16.715  37.983  11.741  1.00  0.52           O  
HETATM  406  O   HOH T 405      11.302  44.414  -8.909  1.00  0.52           O  
HETATM  407  O   HOH T 406      27.640  44.853 -19.562  1.00  0.52           O  
HETATM  408  O   HOH T 407      42.986  50.185  31.560  1.00  0.52           O  
HETATM  409  O   HOH T 408      30.147  40.327  10.888  1.00  0.52           O  
HETATM  410  O   HOH T 409       8.878  41.021  15.160  1.00  0.52           O  
HETATM  411  O   HOH T 410      11.197  61.637  -5.431  1.00  0.52           O  
HETATM  412  O   HOH T 411      14.772  42.745  43.841  1.00  0.52           O  
HETATM  413  O   HOH T 412      28.773  29.950  -0.167  1.00  0.52           O  
HETATM  414  O   HOH T 413      34.984  42.881 -18.839  1.00  0.52           O  
HETATM  415  O   HOH T 414      33.920  25.689  17.783  1.00  0.52           O  
HETATM  416  O   HOH T 415      24.604  52.014  18.403  1.00  0.52           O  
HETATM  417  O   HOH T 416      14.442  24.739  25.051  1.00  0.52           O  
HETATM  418  O   HOH T 417      32.432  50.944 -18.075  1.00  0.53           O  
HETATM  419  O   HOH T 418      22.740  55.076 -13.800  1.00  0.53           O  
HETATM  420  O   HOH T 419      35.412  19.030  28.361  1.00  0.53           O  
HETATM  421  O   HOH T 420      34.933  26.873  33.385  1.00  0.53           O  
HETATM  422  O   HOH T 421      20.477  61.851  26.458  1.00  0.53           O  
HETATM  423  O   HOH T 422       7.382  46.079  29.884  1.00  0.53           O  
HETATM  424  O   HOH T 423      14.223  45.517   7.636  1.00  0.53           O  
HETATM  425  O   HOH T 424      36.495  56.134  12.727  1.00  0.53           O  
HETATM  426  O   HOH T 425      20.008  59.131  21.262  1.00  0.53           O  
HETATM  427  O   HOH T 426      19.357  29.998  17.857  1.00  0.53           O  
HETATM  428  O   HOH T 427      40.578  37.709   4.206  1.00  0.53           O  
HETATM  429  O   HOH T 428       7.479  39.013  35.460  1.00  0.53           O  
HETATM  430  O   HOH T 429      16.097  59.313  37.376  1.00  0.53           O  
HETATM  431  O   HOH T 430      29.488  33.246   9.725  1.00  0.53           O  
HETATM  432  O   HOH T 431      43.358  44.491  -0.661  1.00  0.53           O  
HETATM  433  O   HOH T 432      20.333  54.372  12.380  1.00  0.53           O  
HETATM  434  O   HOH T 433      37.337  31.723  -7.629  1.00  0.53           O  
HETATM  435  O   HOH T 434      39.548  33.294  -6.622  1.00  0.53           O  
HETATM  436  O   HOH T 435      29.841  48.600  41.416  1.00  0.54           O  
HETATM  437  O   HOH T 436      43.070  52.825  -3.211  1.00  0.54           O  
HETATM  438  O   HOH T 437      36.261  37.245  17.040  1.00  0.54           O  
HETATM  439  O   HOH T 438      26.608  46.236  42.837  1.00  0.54           O  
HETATM  440  O   HOH T 439      32.378  51.646   4.687  1.00  0.54           O  
HETATM  441  O   HOH T 440      16.598  37.782   5.814  1.00  0.54           O  
HETATM  442  O   HOH T 441      33.819  66.011  -4.975  1.00  0.54           O  
HETATM  443  O   HOH T 442      36.673  64.895  -4.125  1.00  0.54           O  
HETATM  444  O   HOH T 443      25.062  55.819  13.215  1.00  0.54           O  
HETATM  445  O   HOH T 444      38.964  34.835 -16.184  1.00  0.54           O  
HETATM  446  O   HOH T 445      13.798  49.740  37.213  1.00  0.54           O  
HETATM  447  O   HOH T 446      40.766  39.020  -3.111  1.00  0.54           O  
HETATM  448  O   HOH T 447      33.172  35.724  43.240  1.00  0.54           O  
HETATM  449  O   HOH T 448      14.451  24.565  28.704  1.00  0.54           O  
HETATM  450  O   HOH T 449      34.904  31.167 -14.622  1.00  0.55           O  
HETATM  451  O   HOH T 450      41.771  52.874  29.224  1.00  0.55           O  
HETATM  452  O   HOH T 451      30.750  40.055  18.432  1.00  0.55           O  
HETATM  453  O   HOH T 452      42.876  29.262  21.174  1.00  0.55           O  
HETATM  454  O   HOH T 453      40.489  29.704  19.768  1.00  0.55           O  
HETATM  455  O   HOH T 454      40.429  30.754  34.157  1.00  0.55           O  
HETATM  456  O   HOH T 455      23.618  46.161  42.225  1.00  0.55           O  
HETATM  457  O   HOH T 456      22.306  41.042   1.460  1.00  0.55           O  
HETATM  458  O   HOH T 457      30.739  29.974  -9.788  1.00  0.55           O  
HETATM  459  O   HOH T 458      11.696  47.876  -7.053  1.00  0.55           O  
HETATM  460  O   HOH T 459      20.978  32.523  41.285  1.00  0.55           O  
HETATM  461  O   HOH T 460      38.208  46.336  31.750  1.00  0.55           O  
HETATM  462  O   HOH T 461      10.354  40.445   1.664  1.00  0.55           O  
HETATM  463  O   HOH T 462      11.239  48.997  38.052  1.00  0.55           O  
HETATM  464  O   HOH T 463      24.264  53.362  41.329  1.00  0.56           O  
HETATM  465  O   HOH T 464      44.626  59.133  -0.853  1.00  0.56           O  
HETATM  466  O   HOH T 465      13.014  43.069  -5.563  1.00  0.56           O  
HETATM  467  O   HOH T 466      28.393  47.597 -19.353  1.00  0.56           O  
HETATM  468  O   HOH T 467      18.618  19.452  31.633  1.00  0.56           O  
HETATM  469  O   HOH T 468       6.456  43.747  17.826  1.00  0.56           O  
HETATM  470  O   HOH T 469      15.291  30.723  19.273  1.00  0.56           O  
HETATM  471  O   HOH T 470      13.144  63.227   0.739  1.00  0.56           O  
HETATM  472  O   HOH T 471      38.249  22.592  20.346  1.00  0.56           O  
HETATM  473  O   HOH T 472      41.865  37.499  -5.024  1.00  0.56           O  
HETATM  474  O   HOH T 473      29.190  54.260  12.955  1.00  0.56           O  
HETATM  475  O   HOH T 474      35.672  32.189  37.220  1.00  0.56           O  
HETATM  476  O   HOH T 475      33.304  41.231  16.158  1.00  0.56           O  
HETATM  477  O   HOH T 476      29.195  31.465  -5.707  1.00  0.56           O  
HETATM  478  O   HOH T 477      35.723  60.017 -11.352  1.00  0.57           O  
HETATM  479  O   HOH T 478      18.657  63.160  28.324  1.00  0.57           O  
HETATM  480  O   HOH T 479      14.450  48.777  32.523  1.00  0.57           O  
HETATM  481  O   HOH T 480      37.263  66.486   2.419  1.00  0.57           O  
HETATM  482  O   HOH T 481      14.885  39.949  44.109  1.00  0.57           O  
HETATM  483  O   HOH T 482      28.386  64.851   0.808  1.00  0.57           O  
HETATM  484  O   HOH T 483      18.740  50.246  38.418  1.00  0.58           O  
HETATM  485  O   HOH T 484      39.917  63.421   7.477  1.00  0.58           O  
HETATM  486  O   HOH T 485      31.366  41.270 -19.341  1.00  0.59           O  
HETATM  487  O   HOH T 486      25.771  43.999  44.544  1.00  0.59           O  
HETATM  488  O   HOH T 487      15.398  21.102  33.953  1.00  0.60           O  
HETATM  489  O   HOH T 488      43.829  39.582 -11.463  1.00  0.61           O  
HETATM  490  O   HOH T 489      22.745  25.935  16.066  1.00  0.61           O  
HETATM  491  O   HOH T 490      13.010  65.691  27.425  1.00  0.63           O  
TER     492      HOH T 490 
