# Supplementary material for: Accurate Prediction of Hydration Sites of Proteins Using Energy Model With Atom Embedding
Source: Front Mol Biosci. 2021 Sep 20;8:756075. doi: 10.3389/fmolb.2021.756075 (PMC8488165; doi:10.3389/fmolb.2021.756075)
Supplement: Supplementary file 1 [file DataSheet1.ZIP › Data Sheet 1/Our_result_pdb/our_dataset_output/3KDH_watersite.pdb]

HEADER                                                        XXXX


JRNL        PMID   -1
HETATM    1  O   HOH T   0     -16.746 -27.082   7.487  1.00  0.17           O  
HETATM    2  O   HOH T   1      -5.888 -25.071  -4.498  1.00  0.17           O  
HETATM    3  O   HOH T   2     -43.331 -15.283  26.515  1.00  0.17           O  
HETATM    4  O   HOH T   3     -31.512   1.157  23.674  1.00  0.18           O  
HETATM    5  O   HOH T   4     -24.403   9.074  35.878  1.00  0.18           O  
HETATM    6  O   HOH T   5     -50.339  -9.520  46.988  1.00  0.18           O  
HETATM    7  O   HOH T   6     -50.254 -13.049  41.028  1.00  0.18           O  
HETATM    8  O   HOH T   7     -66.752 -14.252  39.027  1.00  0.19           O  
HETATM    9  O   HOH T   8      -4.373 -16.474  15.999  1.00  0.19           O  
HETATM   10  O   HOH T   9      -7.329 -18.288   9.983  1.00  0.19           O  
HETATM   11  O   HOH T  10     -15.593   5.261  15.557  1.00  0.19           O  
HETATM   12  O   HOH T  11     -18.971   3.924  21.515  1.00  0.19           O  
HETATM   13  O   HOH T  12      -9.403 -11.690  26.844  1.00  0.20           O  
HETATM   14  O   HOH T  13     -63.552 -30.588  49.445  1.00  0.20           O  
HETATM   15  O   HOH T  14     -50.680 -26.926  34.979  1.00  0.20           O  
HETATM   16  O   HOH T  15     -39.347   6.398   8.900  1.00  0.20           O  
HETATM   17  O   HOH T  16     -55.238 -30.478  31.404  1.00  0.20           O  
HETATM   18  O   HOH T  17     -45.286 -13.898  39.353  1.00  0.20           O  
HETATM   19  O   HOH T  18     -44.544 -25.964  53.492  1.00  0.21           O  
HETATM   20  O   HOH T  19     -12.878 -35.494  -0.184  1.00  0.21           O  
HETATM   21  O   HOH T  20     -42.505 -57.373  45.567  1.00  0.21           O  
HETATM   22  O   HOH T  21     -68.741 -11.389  35.726  1.00  0.21           O  
HETATM   23  O   HOH T  22     -28.240 -16.349  13.061  1.00  0.22           O  
HETATM   24  O   HOH T  23     -15.444  -0.983  18.674  1.00  0.22           O  
HETATM   25  O   HOH T  24     -46.922 -25.397  38.702  1.00  0.22           O  
HETATM   26  O   HOH T  25      -9.332 -12.620  12.951  1.00  0.22           O  
HETATM   27  O   HOH T  26     -32.741   2.586   8.786  1.00  0.22           O  
HETATM   28  O   HOH T  27     -12.569 -34.784   9.572  1.00  0.22           O  
HETATM   29  O   HOH T  28     -31.100  -2.861  27.338  1.00  0.22           O  
HETATM   30  O   HOH T  29     -24.715  -0.946   4.740  1.00  0.23           O  
HETATM   31  O   HOH T  30     -23.331 -12.786  25.860  1.00  0.23           O  
HETATM   32  O   HOH T  31     -62.872  -8.684  39.097  1.00  0.23           O  
HETATM   33  O   HOH T  32     -53.407 -44.796  23.185  1.00  0.23           O  
HETATM   34  O   HOH T  33     -51.003 -26.468  25.827  1.00  0.23           O  
HETATM   35  O   HOH T  34     -16.139  -3.879   7.721  1.00  0.23           O  
HETATM   36  O   HOH T  35     -25.071 -21.930   0.127  1.00  0.23           O  
HETATM   37  O   HOH T  36     -19.790   4.090   2.375  1.00  0.24           O  
HETATM   38  O   HOH T  37     -40.293 -34.799  40.248  1.00  0.24           O  
HETATM   39  O   HOH T  38     -15.896   2.886  33.689  1.00  0.24           O  
HETATM   40  O   HOH T  39     -30.586  -2.858  36.533  1.00  0.24           O  
HETATM   41  O   HOH T  40     -32.015  -8.729  30.922  1.00  0.24           O  
HETATM   42  O   HOH T  41     -30.475   6.641  14.725  1.00  0.24           O  
HETATM   43  O   HOH T  42     -42.269 -22.024  47.745  1.00  0.24           O  
HETATM   44  O   HOH T  43     -48.131  -6.755  53.202  1.00  0.24           O  
HETATM   45  O   HOH T  44      -5.837 -22.967   8.202  1.00  0.25           O  
HETATM   46  O   HOH T  45     -52.119 -11.183  34.846  1.00  0.25           O  
HETATM   47  O   HOH T  46     -29.122 -14.264  18.133  1.00  0.25           O  
HETATM   48  O   HOH T  47     -12.110 -29.209  17.160  1.00  0.25           O  
HETATM   49  O   HOH T  48     -14.820 -11.757  -2.002  1.00  0.25           O  
HETATM   50  O   HOH T  49     -24.939 -44.236  15.426  1.00  0.25           O  
HETATM   51  O   HOH T  50     -38.685 -11.625  30.433  1.00  0.25           O  
HETATM   52  O   HOH T  51     -36.477  -5.041  34.162  1.00  0.25           O  
HETATM   53  O   HOH T  52     -32.500  -2.933  23.408  1.00  0.25           O  
HETATM   54  O   HOH T  53     -55.729 -16.700  21.449  1.00  0.25           O  
HETATM   55  O   HOH T  54     -18.004  -6.117  -3.369  1.00  0.26           O  
HETATM   56  O   HOH T  55     -13.081  -0.825  25.373  1.00  0.26           O  
HETATM   57  O   HOH T  56     -37.738 -10.758  32.998  1.00  0.26           O  
HETATM   58  O   HOH T  57     -42.347 -45.797  14.243  1.00  0.26           O  
HETATM   59  O   HOH T  58     -47.725 -60.589  44.082  1.00  0.26           O  
HETATM   60  O   HOH T  59     -40.414 -14.714  17.846  1.00  0.26           O  
HETATM   61  O   HOH T  60     -30.669 -25.267  -2.294  1.00  0.26           O  
HETATM   62  O   HOH T  61     -44.207 -13.485  45.285  1.00  0.27           O  
HETATM   63  O   HOH T  62     -17.927  18.343   7.395  1.00  0.27           O  
HETATM   64  O   HOH T  63     -29.887  -5.214  19.555  1.00  0.27           O  
HETATM   65  O   HOH T  64     -39.451 -17.158  48.493  1.00  0.27           O  
HETATM   66  O   HOH T  65     -38.954  -7.108  11.844  1.00  0.27           O  
HETATM   67  O   HOH T  66     -17.875  -5.793  33.422  1.00  0.27           O  
HETATM   68  O   HOH T  67     -14.541  15.911  12.092  1.00  0.27           O  
HETATM   69  O   HOH T  68     -54.330 -21.672  35.716  1.00  0.27           O  
HETATM   70  O   HOH T  69     -24.816  -3.489  26.785  1.00  0.27           O  
HETATM   71  O   HOH T  70     -34.203  10.707  30.964  1.00  0.27           O  
HETATM   72  O   HOH T  71     -14.460  -0.990   4.226  1.00  0.27           O  
HETATM   73  O   HOH T  72     -61.206 -22.088  26.880  1.00  0.27           O  
HETATM   74  O   HOH T  73     -50.194 -13.113  16.681  1.00  0.27           O  
HETATM   75  O   HOH T  74     -13.009  -7.663  23.169  1.00  0.27           O  
HETATM   76  O   HOH T  75     -46.681 -59.564  47.798  1.00  0.27           O  
HETATM   77  O   HOH T  76     -20.728 -13.171  -3.560  1.00  0.28           O  
HETATM   78  O   HOH T  77     -20.771 -25.159   8.499  1.00  0.28           O  
HETATM   79  O   HOH T  78     -14.063 -11.975  34.395  1.00  0.28           O  
HETATM   80  O   HOH T  79     -22.050   8.938  17.103  1.00  0.28           O  
HETATM   81  O   HOH T  80     -11.578 -16.512   6.738  1.00  0.28           O  
HETATM   82  O   HOH T  81     -34.243  10.844  35.506  1.00  0.28           O  
HETATM   83  O   HOH T  82     -27.962  -0.973  20.969  1.00  0.28           O  
HETATM   84  O   HOH T  83     -21.851 -15.355  13.047  1.00  0.28           O  
HETATM   85  O   HOH T  84     -23.223  -0.978  23.338  1.00  0.28           O  
HETATM   86  O   HOH T  85     -11.096 -11.206   6.281  1.00  0.28           O  
HETATM   87  O   HOH T  86      -5.221 -28.391  18.006  1.00  0.28           O  
HETATM   88  O   HOH T  87     -58.852 -45.259  38.986  1.00  0.28           O  
HETATM   89  O   HOH T  88     -19.308 -26.615  -4.096  1.00  0.28           O  
HETATM   90  O   HOH T  89     -27.291  11.287  13.880  1.00  0.28           O  
HETATM   91  O   HOH T  90     -16.164   3.219  27.780  1.00  0.28           O  
HETATM   92  O   HOH T  91     -57.978 -13.171  37.353  1.00  0.28           O  
HETATM   93  O   HOH T  92     -55.192 -32.724  29.845  1.00  0.28           O  
HETATM   94  O   HOH T  93     -35.540 -14.415  17.673  1.00  0.29           O  
HETATM   95  O   HOH T  94     -54.914 -37.771  32.157  1.00  0.29           O  
HETATM   96  O   HOH T  95     -56.642 -40.992  44.451  1.00  0.29           O  
HETATM   97  O   HOH T  96     -54.369 -36.798  29.637  1.00  0.29           O  
HETATM   98  O   HOH T  97     -37.637  -6.680  56.984  1.00  0.29           O  
HETATM   99  O   HOH T  98     -50.015  -5.324  34.801  1.00  0.29           O  
HETATM  100  O   HOH T  99     -17.052   5.546  22.721  1.00  0.29           O  
HETATM  101  O   HOH T 100      -5.102 -18.202  28.287  1.00  0.29           O  
HETATM  102  O   HOH T 101     -38.422 -14.165  29.261  1.00  0.29           O  
HETATM  103  O   HOH T 102     -35.089 -25.613  13.060  1.00  0.29           O  
HETATM  104  O   HOH T 103     -19.946 -24.483   4.086  1.00  0.29           O  
HETATM  105  O   HOH T 104     -33.182  -2.534   9.200  1.00  0.29           O  
HETATM  106  O   HOH T 105     -43.861  -4.124  30.063  1.00  0.29           O  
HETATM  107  O   HOH T 106      -0.961 -19.552  20.055  1.00  0.29           O  
HETATM  108  O   HOH T 107     -30.230 -29.722  -6.627  1.00  0.29           O  
HETATM  109  O   HOH T 108     -10.850 -12.761  22.738  1.00  0.29           O  
HETATM  110  O   HOH T 109      -8.828 -12.967  24.540  1.00  0.29           O  
HETATM  111  O   HOH T 110      -6.977 -30.105  16.564  1.00  0.30           O  
HETATM  112  O   HOH T 111     -21.917 -37.381   9.165  1.00  0.30           O  
HETATM  113  O   HOH T 112      -8.593 -10.176  11.979  1.00  0.30           O  
HETATM  114  O   HOH T 113     -64.347 -14.275  25.599  1.00  0.30           O  
HETATM  115  O   HOH T 114     -26.992 -22.902  -1.629  1.00  0.30           O  
HETATM  116  O   HOH T 115     -44.541 -22.419  23.071  1.00  0.30           O  
HETATM  117  O   HOH T 116     -39.828 -25.943   7.666  1.00  0.30           O  
HETATM  118  O   HOH T 117     -50.681 -10.531  39.868  1.00  0.30           O  
HETATM  119  O   HOH T 118     -49.895 -28.184  39.007  1.00  0.30           O  
HETATM  120  O   HOH T 119     -50.276 -23.127  41.418  1.00  0.30           O  
HETATM  121  O   HOH T 120     -33.225 -18.585  -0.789  1.00  0.30           O  
HETATM  122  O   HOH T 121     -14.548  15.237   9.365  1.00  0.30           O  
HETATM  123  O   HOH T 122     -32.065   4.908   7.394  1.00  0.30           O  
HETATM  124  O   HOH T 123     -13.489  -6.545   7.926  1.00  0.30           O  
HETATM  125  O   HOH T 124     -55.150 -11.164  23.478  1.00  0.30           O  
HETATM  126  O   HOH T 125     -52.961 -26.867  42.760  1.00  0.30           O  
HETATM  127  O   HOH T 126     -35.150 -43.492  13.868  1.00  0.30           O  
HETATM  128  O   HOH T 127     -15.292   0.062   6.692  1.00  0.30           O  
HETATM  129  O   HOH T 128     -38.298 -30.218  53.578  1.00  0.30           O  
HETATM  130  O   HOH T 129      -5.046 -23.825  14.380  1.00  0.31           O  
HETATM  131  O   HOH T 130     -48.713 -27.678  26.875  1.00  0.31           O  
HETATM  132  O   HOH T 131     -22.560 -14.577  23.770  1.00  0.31           O  
HETATM  133  O   HOH T 132     -63.967 -14.510  45.754  1.00  0.31           O  
HETATM  134  O   HOH T 133     -34.693 -30.569  35.930  1.00  0.31           O  
HETATM  135  O   HOH T 134     -63.101 -13.130  39.248  1.00  0.31           O  
HETATM  136  O   HOH T 135     -38.203 -14.687  48.751  1.00  0.31           O  
HETATM  137  O   HOH T 136     -13.841 -35.181  19.323  1.00  0.31           O  
HETATM  138  O   HOH T 137     -13.502  -6.904  -7.738  1.00  0.31           O  
HETATM  139  O   HOH T 138      -5.392 -18.569  -1.745  1.00  0.31           O  
HETATM  140  O   HOH T 139     -27.823 -28.341  19.448  1.00  0.31           O  
HETATM  141  O   HOH T 140     -14.273   8.717   9.466  1.00  0.31           O  
HETATM  142  O   HOH T 141     -23.427 -27.222  20.967  1.00  0.31           O  
HETATM  143  O   HOH T 142     -40.849 -43.972  44.390  1.00  0.31           O  
HETATM  144  O   HOH T 143     -20.443  -9.409  -5.805  1.00  0.31           O  
HETATM  145  O   HOH T 144     -39.795  13.650  13.916  1.00  0.31           O  
HETATM  146  O   HOH T 145     -30.183 -40.814  13.275  1.00  0.31           O  
HETATM  147  O   HOH T 146     -51.030 -20.462  57.545  1.00  0.31           O  
HETATM  148  O   HOH T 147     -65.098 -40.372  33.215  1.00  0.31           O  
HETATM  149  O   HOH T 148     -29.733 -26.466  18.566  1.00  0.32           O  
HETATM  150  O   HOH T 149     -53.181 -36.584  49.787  1.00  0.32           O  
HETATM  151  O   HOH T 150     -25.735 -38.241   1.515  1.00  0.32           O  
HETATM  152  O   HOH T 151     -55.205 -11.679  55.760  1.00  0.32           O  
HETATM  153  O   HOH T 152     -59.575 -16.848  28.922  1.00  0.32           O  
HETATM  154  O   HOH T 153     -41.869   9.448  26.253  1.00  0.32           O  
HETATM  155  O   HOH T 154     -56.227 -12.010  44.021  1.00  0.32           O  
HETATM  156  O   HOH T 155     -21.038  11.538  17.225  1.00  0.32           O  
HETATM  157  O   HOH T 156     -19.771  -2.398  41.077  1.00  0.32           O  
HETATM  158  O   HOH T 157     -55.268 -21.975  23.237  1.00  0.32           O  
HETATM  159  O   HOH T 158     -55.721 -18.388  37.169  1.00  0.32           O  
HETATM  160  O   HOH T 159     -16.800 -19.018   4.691  1.00  0.32           O  
HETATM  161  O   HOH T 160     -37.817 -25.932  30.743  1.00  0.32           O  
HETATM  162  O   HOH T 161     -52.824 -10.639  28.982  1.00  0.32           O  
HETATM  163  O   HOH T 162     -35.028  -4.371  10.208  1.00  0.32           O  
HETATM  164  O   HOH T 163     -37.865 -43.995  51.640  1.00  0.32           O  
HETATM  165  O   HOH T 164     -25.943  13.872  33.259  1.00  0.32           O  
HETATM  166  O   HOH T 165     -56.614 -20.991  37.378  1.00  0.32           O  
HETATM  167  O   HOH T 166     -46.033 -29.934  52.832  1.00  0.33           O  
HETATM  168  O   HOH T 167      -8.754  -5.473  23.378  1.00  0.33           O  
HETATM  169  O   HOH T 168      -8.485 -13.631  32.087  1.00  0.33           O  
HETATM  170  O   HOH T 169     -26.875   8.308   8.858  1.00  0.33           O  
HETATM  171  O   HOH T 170     -25.948   5.817   7.917  1.00  0.33           O  
HETATM  172  O   HOH T 171     -15.196  -6.498  14.544  1.00  0.33           O  
HETATM  173  O   HOH T 172     -57.491 -53.251  42.370  1.00  0.33           O  
HETATM  174  O   HOH T 173     -38.767 -12.186  13.580  1.00  0.33           O  
HETATM  175  O   HOH T 174     -75.191 -16.083  30.433  1.00  0.33           O  
HETATM  176  O   HOH T 175      -7.843 -34.965  22.097  1.00  0.33           O  
HETATM  177  O   HOH T 176     -15.968   9.977  11.348  1.00  0.33           O  
HETATM  178  O   HOH T 177     -10.615 -25.049  23.187  1.00  0.33           O  
HETATM  179  O   HOH T 178     -32.527 -24.553  13.688  1.00  0.33           O  
HETATM  180  O   HOH T 179     -40.594 -38.352  36.753  1.00  0.33           O  
HETATM  181  O   HOH T 180     -14.992  -4.605  -0.070  1.00  0.33           O  
HETATM  182  O   HOH T 181     -22.313  -6.916  -0.066  1.00  0.33           O  
HETATM  183  O   HOH T 182     -49.954  -6.459  55.349  1.00  0.33           O  
HETATM  184  O   HOH T 183     -50.515 -35.926  50.357  1.00  0.33           O  
HETATM  185  O   HOH T 184     -48.172 -34.764  58.227  1.00  0.33           O  
HETATM  186  O   HOH T 185     -40.938 -40.579  40.251  1.00  0.33           O  
HETATM  187  O   HOH T 186     -57.977 -10.111  42.886  1.00  0.33           O  
HETATM  188  O   HOH T 187     -36.513  12.268   6.444  1.00  0.33           O  
HETATM  189  O   HOH T 188     -40.295   0.960   4.423  1.00  0.33           O  
HETATM  190  O   HOH T 189     -20.918 -26.735  22.079  1.00  0.33           O  
HETATM  191  O   HOH T 190     -21.103 -22.148  11.533  1.00  0.33           O  
HETATM  192  O   HOH T 191     -48.248  -0.936  19.291  1.00  0.33           O  
HETATM  193  O   HOH T 192     -22.396 -44.826  20.374  1.00  0.34           O  
HETATM  194  O   HOH T 193     -38.181  -9.752  12.451  1.00  0.34           O  
HETATM  195  O   HOH T 194     -23.491 -12.323   5.437  1.00  0.34           O  
HETATM  196  O   HOH T 195     -20.129 -28.927  23.693  1.00  0.34           O  
HETATM  197  O   HOH T 196     -41.498 -31.389  57.553  1.00  0.34           O  
HETATM  198  O   HOH T 197     -50.336  -2.152  17.887  1.00  0.34           O  
HETATM  199  O   HOH T 198     -31.236 -26.757  46.987  1.00  0.34           O  
HETATM  200  O   HOH T 199     -13.188 -10.659  -3.831  1.00  0.34           O  
HETATM  201  O   HOH T 200     -32.958 -41.807  13.256  1.00  0.34           O  
HETATM  202  O   HOH T 201     -44.392 -12.302  35.991  1.00  0.34           O  
HETATM  203  O   HOH T 202     -10.810  -2.382  28.848  1.00  0.34           O  
HETATM  204  O   HOH T 203      -0.487 -13.755  17.500  1.00  0.34           O  
HETATM  205  O   HOH T 204     -14.744 -20.355  26.771  1.00  0.34           O  
HETATM  206  O   HOH T 205      -5.716 -25.987  23.611  1.00  0.34           O  
HETATM  207  O   HOH T 206     -18.581 -10.627  15.450  1.00  0.34           O  
HETATM  208  O   HOH T 207     -20.975 -38.662  21.506  1.00  0.34           O  
HETATM  209  O   HOH T 208     -42.587 -22.702  52.797  1.00  0.34           O  
HETATM  210  O   HOH T 209     -29.050 -25.636  -4.463  1.00  0.34           O  
HETATM  211  O   HOH T 210      -7.677 -19.070  29.012  1.00  0.34           O  
HETATM  212  O   HOH T 211     -61.812 -14.170  24.568  1.00  0.34           O  
HETATM  213  O   HOH T 212     -46.550 -27.613  54.163  1.00  0.34           O  
HETATM  214  O   HOH T 213      -2.703 -28.071  16.661  1.00  0.34           O  
HETATM  215  O   HOH T 214     -46.343 -40.899  13.318  1.00  0.34           O  
HETATM  216  O   HOH T 215     -44.034 -16.354  24.055  1.00  0.35           O  
HETATM  217  O   HOH T 216     -37.252   9.783   5.517  1.00  0.35           O  
HETATM  218  O   HOH T 217     -31.615   5.957  12.251  1.00  0.35           O  
HETATM  219  O   HOH T 218     -16.708 -21.160  25.001  1.00  0.35           O  
HETATM  220  O   HOH T 219      -3.796 -14.827   9.412  1.00  0.35           O  
HETATM  221  O   HOH T 220     -36.901 -22.568  31.325  1.00  0.35           O  
HETATM  222  O   HOH T 221      -1.086 -17.870  22.364  1.00  0.35           O  
HETATM  223  O   HOH T 222      -5.553 -30.322   5.029  1.00  0.35           O  
HETATM  224  O   HOH T 223     -35.767 -25.138  44.668  1.00  0.35           O  
HETATM  225  O   HOH T 224     -44.618 -18.489  54.481  1.00  0.35           O  
HETATM  226  O   HOH T 225     -38.875   3.142   4.772  1.00  0.35           O  
HETATM  227  O   HOH T 226     -42.037 -18.081  53.503  1.00  0.35           O  
HETATM  228  O   HOH T 227     -60.054  -9.450  46.933  1.00  0.35           O  
HETATM  229  O   HOH T 228     -42.819   2.794  21.914  1.00  0.35           O  
HETATM  230  O   HOH T 229     -26.359  -2.305   6.550  1.00  0.35           O  
HETATM  231  O   HOH T 230     -40.308  -9.886  58.909  1.00  0.35           O  
HETATM  232  O   HOH T 231     -42.264 -23.404  50.186  1.00  0.35           O  
HETATM  233  O   HOH T 232     -24.729  -8.667  35.115  1.00  0.35           O  
HETATM  234  O   HOH T 233     -47.866 -14.012  17.787  1.00  0.35           O  
HETATM  235  O   HOH T 234     -47.103 -17.271  19.307  1.00  0.35           O  
HETATM  236  O   HOH T 235     -51.873   0.148  10.699  1.00  0.35           O  
HETATM  237  O   HOH T 236     -32.804  -1.530  35.432  1.00  0.35           O  
HETATM  238  O   HOH T 237     -18.701   0.095  23.417  1.00  0.35           O  
HETATM  239  O   HOH T 238     -63.198 -12.158  44.499  1.00  0.35           O  
HETATM  240  O   HOH T 239     -41.110 -38.692  32.838  1.00  0.36           O  
HETATM  241  O   HOH T 240      -2.289 -24.459  14.281  1.00  0.36           O  
HETATM  242  O   HOH T 241      -8.318 -10.691   6.434  1.00  0.36           O  
HETATM  243  O   HOH T 242     -36.221  10.968  17.667  1.00  0.36           O  
HETATM  244  O   HOH T 243     -39.414 -30.196  56.185  1.00  0.36           O  
HETATM  245  O   HOH T 244     -40.624 -23.543  45.886  1.00  0.36           O  
HETATM  246  O   HOH T 245     -12.258 -36.598   7.487  1.00  0.36           O  
HETATM  247  O   HOH T 246     -41.753 -22.655  23.274  1.00  0.36           O  
HETATM  248  O   HOH T 247      -3.639 -20.026  26.849  1.00  0.36           O  
HETATM  249  O   HOH T 248     -17.086 -27.393  22.384  1.00  0.36           O  
HETATM  250  O   HOH T 249     -49.726 -31.291  52.130  1.00  0.36           O  
HETATM  251  O   HOH T 250     -58.441 -22.275  41.227  1.00  0.36           O  
HETATM  252  O   HOH T 251     -21.165  15.918   3.640  1.00  0.36           O  
HETATM  253  O   HOH T 252       1.235 -25.256  17.570  1.00  0.36           O  
HETATM  254  O   HOH T 253     -52.290 -36.579  52.383  1.00  0.36           O  
HETATM  255  O   HOH T 254     -39.107  -4.828  34.881  1.00  0.36           O  
HETATM  256  O   HOH T 255     -36.426   8.950  31.393  1.00  0.36           O  
HETATM  257  O   HOH T 256      -9.385 -33.993  13.367  1.00  0.36           O  
HETATM  258  O   HOH T 257     -46.788  10.644   6.644  1.00  0.36           O  
HETATM  259  O   HOH T 258     -61.586 -33.631  38.131  1.00  0.36           O  
HETATM  260  O   HOH T 259     -46.239 -43.762  34.870  1.00  0.36           O  
HETATM  261  O   HOH T 260      -0.440 -18.253  15.221  1.00  0.36           O  
HETATM  262  O   HOH T 261      -3.777 -17.119  -0.094  1.00  0.36           O  
HETATM  263  O   HOH T 262     -39.515  -4.412   4.471  1.00  0.37           O  
HETATM  264  O   HOH T 263     -24.980  -0.829   1.908  1.00  0.37           O  
HETATM  265  O   HOH T 264     -52.404 -47.246  44.230  1.00  0.37           O  
HETATM  266  O   HOH T 265     -48.977  -9.746  29.097  1.00  0.37           O  
HETATM  267  O   HOH T 266     -30.844   5.963   9.633  1.00  0.37           O  
HETATM  268  O   HOH T 267     -59.463 -40.529  26.079  1.00  0.37           O  
HETATM  269  O   HOH T 268     -11.352 -33.941   7.182  1.00  0.37           O  
HETATM  270  O   HOH T 269     -35.249 -40.670  46.226  1.00  0.37           O  
HETATM  271  O   HOH T 270     -23.141  -7.803  21.108  1.00  0.37           O  
HETATM  272  O   HOH T 271     -39.442 -24.770  56.772  1.00  0.37           O  
HETATM  273  O   HOH T 272     -31.045  -1.284  25.101  1.00  0.37           O  
HETATM  274  O   HOH T 273     -20.149 -15.091  10.775  1.00  0.37           O  
HETATM  275  O   HOH T 274     -39.578  -8.480  48.694  1.00  0.37           O  
HETATM  276  O   HOH T 275     -62.822 -32.588  20.535  1.00  0.37           O  
HETATM  277  O   HOH T 276     -31.000 -17.673   6.650  1.00  0.37           O  
HETATM  278  O   HOH T 277     -24.009 -44.792  18.084  1.00  0.37           O  
HETATM  279  O   HOH T 278     -56.628 -33.227  23.535  1.00  0.37           O  
HETATM  280  O   HOH T 279     -25.880  -2.613  20.332  1.00  0.37           O  
HETATM  281  O   HOH T 280     -53.651 -56.187  40.851  1.00  0.37           O  
HETATM  282  O   HOH T 281     -15.139  -0.740  39.264  1.00  0.37           O  
HETATM  283  O   HOH T 282     -13.210 -30.031  19.543  1.00  0.37           O  
HETATM  284  O   HOH T 283     -47.706 -45.665  33.370  1.00  0.37           O  
HETATM  285  O   HOH T 284     -41.354 -46.815  44.491  1.00  0.37           O  
HETATM  286  O   HOH T 285     -46.985 -41.940  15.677  1.00  0.37           O  
HETATM  287  O   HOH T 286     -35.829 -31.793  51.068  1.00  0.37           O  
HETATM  288  O   HOH T 287     -55.184 -19.554  21.642  1.00  0.37           O  
HETATM  289  O   HOH T 288     -59.859 -34.681  25.257  1.00  0.37           O  
HETATM  290  O   HOH T 289     -38.619 -28.199   6.779  1.00  0.37           O  
HETATM  291  O   HOH T 290     -24.803 -10.555   8.087  1.00  0.37           O  
HETATM  292  O   HOH T 291      -9.669 -32.091   5.859  1.00  0.37           O  
HETATM  293  O   HOH T 292     -38.145 -13.804  39.043  1.00  0.37           O  
HETATM  294  O   HOH T 293     -54.966 -38.312  48.688  1.00  0.37           O  
HETATM  295  O   HOH T 294     -22.844  -7.991   3.978  1.00  0.37           O  
HETATM  296  O   HOH T 295     -26.905 -23.880  -4.240  1.00  0.37           O  
HETATM  297  O   HOH T 296     -34.582  10.383   5.762  1.00  0.37           O  
HETATM  298  O   HOH T 297     -58.569  -8.775  34.909  1.00  0.37           O  
HETATM  299  O   HOH T 298     -43.528 -35.067  43.411  1.00  0.37           O  
HETATM  300  O   HOH T 299     -18.489 -31.251  24.134  1.00  0.37           O  
HETATM  301  O   HOH T 300      -8.885 -17.229  30.727  1.00  0.37           O  
HETATM  302  O   HOH T 301     -44.422  11.381   7.881  1.00  0.37           O  
HETATM  303  O   HOH T 302     -60.491 -33.354  33.608  1.00  0.37           O  
HETATM  304  O   HOH T 303     -61.710 -21.745  24.179  1.00  0.37           O  
HETATM  305  O   HOH T 304     -37.524  -4.658  55.005  1.00  0.37           O  
HETATM  306  O   HOH T 305     -49.214 -26.118  37.246  1.00  0.37           O  
HETATM  307  O   HOH T 306     -59.017 -14.478  30.282  1.00  0.37           O  
HETATM  308  O   HOH T 307     -44.280 -59.458  54.772  1.00  0.38           O  
HETATM  309  O   HOH T 308     -58.801 -14.548  27.479  1.00  0.38           O  
HETATM  310  O   HOH T 309     -39.182   5.206   6.482  1.00  0.38           O  
HETATM  311  O   HOH T 310      -0.769 -20.377   3.422  1.00  0.38           O  
HETATM  312  O   HOH T 311     -66.340 -17.497  25.872  1.00  0.38           O  
HETATM  313  O   HOH T 312     -27.916 -40.033  11.678  1.00  0.38           O  
HETATM  314  O   HOH T 313     -48.297  -9.258  40.044  1.00  0.38           O  
HETATM  315  O   HOH T 314     -21.116  -3.918  43.126  1.00  0.38           O  
HETATM  316  O   HOH T 315     -30.081 -18.337   2.482  1.00  0.38           O  
HETATM  317  O   HOH T 316     -42.992 -20.204  23.866  1.00  0.38           O  
HETATM  318  O   HOH T 317     -21.976  -4.263   0.725  1.00  0.38           O  
HETATM  319  O   HOH T 318      -2.384 -14.596  15.766  1.00  0.38           O  
HETATM  320  O   HOH T 319     -18.757   1.209  20.853  1.00  0.38           O  
HETATM  321  O   HOH T 320     -49.774  -9.301  31.787  1.00  0.38           O  
HETATM  322  O   HOH T 321     -41.878  -3.371   4.526  1.00  0.38           O  
HETATM  323  O   HOH T 322     -35.367 -21.560  29.092  1.00  0.38           O  
HETATM  324  O   HOH T 323     -32.142 -25.700  17.432  1.00  0.38           O  
HETATM  325  O   HOH T 324      -9.840  -6.779   1.154  1.00  0.38           O  
HETATM  326  O   HOH T 325      -9.084 -16.127  10.363  1.00  0.38           O  
HETATM  327  O   HOH T 326     -15.303  -4.529  16.583  1.00  0.38           O  
HETATM  328  O   HOH T 327     -28.189 -34.243   1.063  1.00  0.38           O  
HETATM  329  O   HOH T 328     -29.386 -40.743   9.397  1.00  0.38           O  
HETATM  330  O   HOH T 329     -19.605  15.047  14.069  1.00  0.38           O  
HETATM  331  O   HOH T 330     -20.996  -0.214  21.786  1.00  0.38           O  
HETATM  332  O   HOH T 331     -63.234 -34.933  36.345  1.00  0.38           O  
HETATM  333  O   HOH T 332     -22.809 -13.045  37.032  1.00  0.38           O  
HETATM  334  O   HOH T 333     -18.949 -25.785   6.547  1.00  0.38           O  
HETATM  335  O   HOH T 334     -11.816 -13.766   7.163  1.00  0.38           O  
HETATM  336  O   HOH T 335     -36.302 -24.202  29.143  1.00  0.38           O  
HETATM  337  O   HOH T 336     -40.595 -41.548  42.881  1.00  0.38           O  
HETATM  338  O   HOH T 337     -36.012 -29.048  31.632  1.00  0.38           O  
HETATM  339  O   HOH T 338     -63.015 -24.651  36.615  1.00  0.39           O  
HETATM  340  O   HOH T 339     -22.267 -11.848  -1.723  1.00  0.39           O  
HETATM  341  O   HOH T 340     -20.449  -0.060  19.025  1.00  0.39           O  
HETATM  342  O   HOH T 341     -12.633  -5.564  20.148  1.00  0.39           O  
HETATM  343  O   HOH T 342     -53.665 -14.220  39.145  1.00  0.39           O  
HETATM  344  O   HOH T 343      -8.460 -39.015  19.725  1.00  0.39           O  
HETATM  345  O   HOH T 344     -58.486 -12.088  17.108  1.00  0.39           O  
HETATM  346  O   HOH T 345      -2.533 -29.010  -1.925  1.00  0.39           O  
HETATM  347  O   HOH T 346       1.107 -19.744   1.511  1.00  0.39           O  
HETATM  348  O   HOH T 347     -38.998  -9.029   9.917  1.00  0.39           O  
HETATM  349  O   HOH T 348     -11.198  -1.532  23.359  1.00  0.39           O  
HETATM  350  O   HOH T 349     -56.202  -8.170  36.376  1.00  0.39           O  
HETATM  351  O   HOH T 350     -12.378 -29.805  13.285  1.00  0.39           O  
HETATM  352  O   HOH T 351     -27.674 -44.641  19.405  1.00  0.39           O  
HETATM  353  O   HOH T 352     -40.231 -29.178  58.661  1.00  0.39           O  
HETATM  354  O   HOH T 353     -56.228 -10.969  18.276  1.00  0.39           O  
HETATM  355  O   HOH T 354     -47.746 -37.488  58.088  1.00  0.39           O  
HETATM  356  O   HOH T 355     -13.580 -16.970  13.691  1.00  0.39           O  
HETATM  357  O   HOH T 356     -46.116 -37.655  17.040  1.00  0.39           O  
HETATM  358  O   HOH T 357     -33.090 -35.979   3.731  1.00  0.39           O  
HETATM  359  O   HOH T 358      -3.795 -22.614  25.870  1.00  0.39           O  
HETATM  360  O   HOH T 359     -52.507  -9.190  31.321  1.00  0.39           O  
HETATM  361  O   HOH T 360     -52.433 -42.181  22.844  1.00  0.39           O  
HETATM  362  O   HOH T 361      -4.889 -17.843   8.863  1.00  0.39           O  
HETATM  363  O   HOH T 362     -45.932  -0.028  29.371  1.00  0.39           O  
HETATM  364  O   HOH T 363     -12.996 -28.066  -8.150  1.00  0.39           O  
HETATM  365  O   HOH T 364     -12.766   1.027  27.552  1.00  0.39           O  
HETATM  366  O   HOH T 365     -42.907  -8.091   8.202  1.00  0.39           O  
HETATM  367  O   HOH T 366     -11.801 -32.532  13.396  1.00  0.39           O  
HETATM  368  O   HOH T 367     -20.374  -0.000  -0.002  1.00  0.39           O  
HETATM  369  O   HOH T 368     -10.786 -38.464  21.119  1.00  0.39           O  
HETATM  370  O   HOH T 369     -33.729   7.767   5.729  1.00  0.39           O  
HETATM  371  O   HOH T 370      -5.900 -27.713  21.355  1.00  0.39           O  
HETATM  372  O   HOH T 371     -54.168 -10.430  33.133  1.00  0.39           O  
HETATM  373  O   HOH T 372     -48.088  -7.643  27.441  1.00  0.40           O  
HETATM  374  O   HOH T 373     -12.921  -1.901  19.518  1.00  0.40           O  
HETATM  375  O   HOH T 374     -47.090 -14.749  20.318  1.00  0.40           O  
HETATM  376  O   HOH T 375     -44.152  -1.466  30.875  1.00  0.40           O  
HETATM  377  O   HOH T 376     -48.717   9.573   8.207  1.00  0.40           O  
HETATM  378  O   HOH T 377     -55.164 -13.961  51.186  1.00  0.40           O  
HETATM  379  O   HOH T 378      -9.182  -7.944  -1.270  1.00  0.40           O  
HETATM  380  O   HOH T 379     -30.643   4.586  39.533  1.00  0.40           O  
HETATM  381  O   HOH T 380     -10.770 -14.079  20.276  1.00  0.40           O  
HETATM  382  O   HOH T 381     -60.669 -38.189  25.596  1.00  0.40           O  
HETATM  383  O   HOH T 382     -58.911  -6.098  39.753  1.00  0.40           O  
HETATM  384  O   HOH T 383     -19.874 -14.638  23.317  1.00  0.40           O  
HETATM  385  O   HOH T 384     -18.668 -37.274  22.012  1.00  0.40           O  
HETATM  386  O   HOH T 385     -43.080 -50.459  48.320  1.00  0.40           O  
HETATM  387  O   HOH T 386     -47.684  -0.904  22.017  1.00  0.40           O  
HETATM  388  O   HOH T 387     -58.730 -11.074  19.569  1.00  0.40           O  
HETATM  389  O   HOH T 388     -36.907 -41.507  17.469  1.00  0.40           O  
HETATM  390  O   HOH T 389     -59.430  -8.486  44.443  1.00  0.40           O  
HETATM  391  O   HOH T 390     -53.990 -16.849  38.770  1.00  0.40           O  
HETATM  392  O   HOH T 391     -40.702 -15.323  55.614  1.00  0.40           O  
HETATM  393  O   HOH T 392     -59.165  -9.525  29.847  1.00  0.40           O  
HETATM  394  O   HOH T 393     -39.317 -17.007  36.443  1.00  0.40           O  
HETATM  395  O   HOH T 394     -14.609   3.819  31.383  1.00  0.40           O  
HETATM  396  O   HOH T 395      -1.062 -17.805  17.808  1.00  0.40           O  
HETATM  397  O   HOH T 396     -60.261 -33.641  20.653  1.00  0.40           O  
HETATM  398  O   HOH T 397     -49.715 -39.952  54.584  1.00  0.40           O  
HETATM  399  O   HOH T 398     -26.296 -31.666  25.834  1.00  0.40           O  
HETATM  400  O   HOH T 399     -56.868  -9.081  20.092  1.00  0.41           O  
HETATM  401  O   HOH T 400     -15.061  17.824  10.205  1.00  0.41           O  
HETATM  402  O   HOH T 401     -17.546  -9.675  19.372  1.00  0.41           O  
HETATM  403  O   HOH T 402     -17.415  -1.101  11.319  1.00  0.41           O  
HETATM  404  O   HOH T 403     -16.628 -12.985  33.824  1.00  0.41           O  
HETATM  405  O   HOH T 404     -52.923 -20.072  59.418  1.00  0.41           O  
HETATM  406  O   HOH T 405     -17.501 -33.932  24.177  1.00  0.41           O  
HETATM  407  O   HOH T 406     -28.029 -26.629  53.672  1.00  0.41           O  
HETATM  408  O   HOH T 407     -33.713  -0.003   8.225  1.00  0.41           O  
HETATM  409  O   HOH T 408     -45.254 -43.846  16.094  1.00  0.41           O  
HETATM  410  O   HOH T 409     -46.489 -10.304  38.324  1.00  0.41           O  
HETATM  411  O   HOH T 410     -32.499   7.422  16.635  1.00  0.41           O  
HETATM  412  O   HOH T 411     -39.583  -6.692  38.780  1.00  0.41           O  
HETATM  413  O   HOH T 412     -25.020   7.912  38.355  1.00  0.41           O  
HETATM  414  O   HOH T 413     -32.453 -25.742  52.601  1.00  0.41           O  
HETATM  415  O   HOH T 414     -39.469 -30.810  28.972  1.00  0.41           O  
HETATM  416  O   HOH T 415     -51.761 -22.575  56.015  1.00  0.41           O  
HETATM  417  O   HOH T 416      -4.339 -16.118  -2.626  1.00  0.41           O  
HETATM  418  O   HOH T 417     -40.077 -20.860  46.448  1.00  0.41           O  
HETATM  419  O   HOH T 418     -29.202 -15.392  15.574  1.00  0.41           O  
HETATM  420  O   HOH T 419     -60.797  -9.592  32.059  1.00  0.41           O  
HETATM  421  O   HOH T 420      -7.311 -34.261  15.215  1.00  0.41           O  
HETATM  422  O   HOH T 421      -4.385 -27.897  25.152  1.00  0.41           O  
HETATM  423  O   HOH T 422     -16.073  -6.672  -1.635  1.00  0.41           O  
HETATM  424  O   HOH T 423     -30.993 -32.322  41.443  1.00  0.41           O  
HETATM  425  O   HOH T 424     -41.984 -12.049  58.253  1.00  0.41           O  
HETATM  426  O   HOH T 425     -30.830 -17.425  -0.066  1.00  0.41           O  
HETATM  427  O   HOH T 426     -40.963 -50.216  44.804  1.00  0.41           O  
HETATM  428  O   HOH T 427     -18.381   7.793  23.515  1.00  0.41           O  
HETATM  429  O   HOH T 428     -40.219 -48.346  12.781  1.00  0.41           O  
HETATM  430  O   HOH T 429     -49.236 -59.415  47.945  1.00  0.41           O  
HETATM  431  O   HOH T 430     -52.391 -43.275  25.369  1.00  0.41           O  
HETATM  432  O   HOH T 431     -42.024 -18.905  19.995  1.00  0.41           O  
HETATM  433  O   HOH T 432     -12.871  -3.363  21.947  1.00  0.41           O  
HETATM  434  O   HOH T 433     -32.519  -1.565  42.111  1.00  0.41           O  
HETATM  435  O   HOH T 434     -58.644 -11.472  39.500  1.00  0.41           O  
HETATM  436  O   HOH T 435     -45.524 -38.928  32.277  1.00  0.42           O  
HETATM  437  O   HOH T 436     -24.570  -9.611  18.110  1.00  0.42           O  
HETATM  438  O   HOH T 437     -19.295 -35.844  25.331  1.00  0.42           O  
HETATM  439  O   HOH T 438     -22.743  -9.753  -7.265  1.00  0.42           O  
HETATM  440  O   HOH T 439     -39.935   9.123  30.723  1.00  0.42           O  
HETATM  441  O   HOH T 440     -42.881 -24.339  55.061  1.00  0.42           O  
HETATM  442  O   HOH T 441     -58.866 -12.094  28.776  1.00  0.42           O  
HETATM  443  O   HOH T 442     -10.184 -31.713   8.449  1.00  0.42           O  
HETATM  444  O   HOH T 443     -56.120 -28.798  25.684  1.00  0.42           O  
HETATM  445  O   HOH T 444      -6.825 -26.897  26.000  1.00  0.42           O  
HETATM  446  O   HOH T 445      -7.928  -7.649   3.019  1.00  0.42           O  
HETATM  447  O   HOH T 446     -18.736   1.662   1.430  1.00  0.42           O  
HETATM  448  O   HOH T 447     -26.151 -21.309  -3.715  1.00  0.42           O  
HETATM  449  O   HOH T 448      -3.921 -23.088   6.109  1.00  0.42           O  
HETATM  450  O   HOH T 449       1.483 -20.777  10.992  1.00  0.42           O  
HETATM  451  O   HOH T 450     -38.094 -13.061  17.425  1.00  0.42           O  
HETATM  452  O   HOH T 451     -42.738  15.444  10.112  1.00  0.42           O  
HETATM  453  O   HOH T 452     -25.198 -39.379  11.033  1.00  0.42           O  
HETATM  454  O   HOH T 453     -30.863 -16.352  17.659  1.00  0.42           O  
HETATM  455  O   HOH T 454      -8.721  -4.768  26.021  1.00  0.42           O  
HETATM  456  O   HOH T 455     -61.760 -16.951  24.362  1.00  0.42           O  
HETATM  457  O   HOH T 456     -54.560  -3.971  50.096  1.00  0.42           O  
HETATM  458  O   HOH T 457     -50.170   4.198  16.153  1.00  0.42           O  
HETATM  459  O   HOH T 458     -16.231  -9.065  15.203  1.00  0.42           O  
HETATM  460  O   HOH T 459     -24.828  -3.171  22.858  1.00  0.42           O  
HETATM  461  O   HOH T 460     -16.284 -15.781   6.781  1.00  0.42           O  
HETATM  462  O   HOH T 461     -14.616 -35.128  -2.356  1.00  0.42           O  
HETATM  463  O   HOH T 462     -15.524 -15.522  33.773  1.00  0.42           O  
HETATM  464  O   HOH T 463     -33.400 -38.911  51.174  1.00  0.42           O  
HETATM  465  O   HOH T 464     -11.296   5.436  28.406  1.00  0.42           O  
HETATM  466  O   HOH T 465     -15.476 -15.906  31.034  1.00  0.42           O  
HETATM  467  O   HOH T 466     -63.149 -34.136  33.704  1.00  0.42           O  
HETATM  468  O   HOH T 467     -36.351   7.272   5.062  1.00  0.42           O  
HETATM  469  O   HOH T 468     -52.500 -25.191  55.375  1.00  0.42           O  
HETATM  470  O   HOH T 469     -15.286   6.512   4.188  1.00  0.42           O  
HETATM  471  O   HOH T 470     -56.635 -19.973  19.302  1.00  0.43           O  
HETATM  472  O   HOH T 471     -46.362 -42.342  18.199  1.00  0.43           O  
HETATM  473  O   HOH T 472     -17.654 -36.657  -1.943  1.00  0.43           O  
HETATM  474  O   HOH T 473     -31.932 -35.573  49.547  1.00  0.43           O  
HETATM  475  O   HOH T 474     -24.050  14.643  14.710  1.00  0.43           O  
HETATM  476  O   HOH T 475     -34.924 -21.660  -6.837  1.00  0.43           O  
HETATM  477  O   HOH T 476     -17.001 -15.550  28.680  1.00  0.43           O  
HETATM  478  O   HOH T 477     -44.576 -17.792  20.366  1.00  0.43           O  
HETATM  479  O   HOH T 478     -44.255 -43.951  13.477  1.00  0.43           O  
HETATM  480  O   HOH T 479     -19.378 -24.020  -5.179  1.00  0.43           O  
HETATM  481  O   HOH T 480      -0.104 -15.986   6.463  1.00  0.43           O  
HETATM  482  O   HOH T 481     -47.270 -11.898  29.592  1.00  0.43           O  
HETATM  483  O   HOH T 482     -49.317   6.575  10.479  1.00  0.43           O  
HETATM  484  O   HOH T 483     -30.194   6.406  17.584  1.00  0.43           O  
HETATM  485  O   HOH T 484      -6.720 -11.426  -3.505  1.00  0.43           O  
HETATM  486  O   HOH T 485     -56.820 -23.062  25.331  1.00  0.43           O  
HETATM  487  O   HOH T 486     -48.672 -19.464  18.660  1.00  0.43           O  
HETATM  488  O   HOH T 487     -19.140  12.429  15.162  1.00  0.43           O  
HETATM  489  O   HOH T 488     -38.706 -31.903  12.609  1.00  0.43           O  
HETATM  490  O   HOH T 489     -51.195 -25.839  39.240  1.00  0.43           O  
HETATM  491  O   HOH T 490     -20.067 -38.326  24.176  1.00  0.43           O  
HETATM  492  O   HOH T 491     -11.346  -4.772  30.169  1.00  0.43           O  
HETATM  493  O   HOH T 492     -44.003 -11.472  38.654  1.00  0.43           O  
HETATM  494  O   HOH T 493     -10.780 -30.682  15.296  1.00  0.43           O  
HETATM  495  O   HOH T 494     -39.622 -40.688  18.731  1.00  0.43           O  
HETATM  496  O   HOH T 495     -60.367 -18.043  26.548  1.00  0.43           O  
HETATM  497  O   HOH T 496     -43.207 -37.819  31.396  1.00  0.43           O  
HETATM  498  O   HOH T 497     -36.882 -19.537  21.743  1.00  0.43           O  
HETATM  499  O   HOH T 498     -27.185 -39.154   9.122  1.00  0.43           O  
HETATM  500  O   HOH T 499     -41.033 -45.431  42.064  1.00  0.43           O  
HETATM  501  O   HOH T 500     -50.969 -26.237  23.069  1.00  0.43           O  
HETATM  502  O   HOH T 501     -38.814 -27.338  28.655  1.00  0.43           O  
HETATM  503  O   HOH T 502      -7.058  -9.825  -1.236  1.00  0.43           O  
HETATM  504  O   HOH T 503     -29.973 -26.337  51.764  1.00  0.43           O  
HETATM  505  O   HOH T 504     -11.502 -17.049   9.435  1.00  0.43           O  
HETATM  506  O   HOH T 505     -20.948 -14.350  26.070  1.00  0.43           O  
HETATM  507  O   HOH T 506     -34.309 -40.107  48.770  1.00  0.43           O  
HETATM  508  O   HOH T 507     -52.305 -27.831  32.867  1.00  0.43           O  
HETATM  509  O   HOH T 508     -29.356 -15.816   1.618  1.00  0.43           O  
HETATM  510  O   HOH T 509     -18.715 -15.176   8.260  1.00  0.43           O  
HETATM  511  O   HOH T 510     -39.415 -37.137  39.065  1.00  0.43           O  
HETATM  512  O   HOH T 511     -37.326 -17.948  19.548  1.00  0.43           O  
HETATM  513  O   HOH T 512     -40.473 -43.195  40.623  1.00  0.43           O  
HETATM  514  O   HOH T 513     -26.026 -26.355  20.460  1.00  0.44           O  
HETATM  515  O   HOH T 514     -45.514 -33.951  58.637  1.00  0.44           O  
HETATM  516  O   HOH T 515     -54.021 -17.889  60.533  1.00  0.44           O  
HETATM  517  O   HOH T 516     -42.706 -39.541  38.396  1.00  0.44           O  
HETATM  518  O   HOH T 517     -20.256 -14.635  31.591  1.00  0.44           O  
HETATM  519  O   HOH T 518     -11.760 -13.734  12.129  1.00  0.44           O  
HETATM  520  O   HOH T 519     -16.044 -38.122  21.823  1.00  0.44           O  
HETATM  521  O   HOH T 520     -51.219  -6.880  46.863  1.00  0.44           O  
HETATM  522  O   HOH T 521     -15.495 -32.505  -3.671  1.00  0.44           O  
HETATM  523  O   HOH T 522     -36.661 -24.521  56.713  1.00  0.44           O  
HETATM  524  O   HOH T 523      -8.356 -30.048   9.649  1.00  0.44           O  
HETATM  525  O   HOH T 524     -45.823  -2.076  23.691  1.00  0.44           O  
HETATM  526  O   HOH T 525     -47.356 -39.042  30.323  1.00  0.44           O  
HETATM  527  O   HOH T 526     -56.111  -8.692  22.721  1.00  0.44           O  
HETATM  528  O   HOH T 527      -0.806 -23.496  16.571  1.00  0.44           O  
HETATM  529  O   HOH T 528     -60.608  -8.129  40.610  1.00  0.44           O  
HETATM  530  O   HOH T 529     -58.400  -7.408  42.104  1.00  0.44           O  
HETATM  531  O   HOH T 530     -52.629 -14.263  41.723  1.00  0.44           O  
HETATM  532  O   HOH T 531     -62.195 -30.037  20.507  1.00  0.44           O  
HETATM  533  O   HOH T 532     -10.862 -11.431  10.942  1.00  0.44           O  
HETATM  534  O   HOH T 533     -41.914 -10.406  46.152  1.00  0.44           O  
HETATM  535  O   HOH T 534     -16.587  -4.222  35.259  1.00  0.44           O  
HETATM  536  O   HOH T 535     -19.309   7.037  32.750  1.00  0.44           O  
HETATM  537  O   HOH T 536     -42.809 -33.811  57.976  1.00  0.44           O  
HETATM  538  O   HOH T 537     -40.530  -2.594   6.398  1.00  0.44           O  
HETATM  539  O   HOH T 538     -50.219  -3.710  55.333  1.00  0.44           O  
HETATM  540  O   HOH T 539      -9.595 -36.051  20.133  1.00  0.44           O  
HETATM  541  O   HOH T 540     -36.014 -17.124  17.264  1.00  0.44           O  
HETATM  542  O   HOH T 541     -21.023 -23.232   1.850  1.00  0.44           O  
HETATM  543  O   HOH T 542     -16.870  -3.362  18.534  1.00  0.44           O  
HETATM  544  O   HOH T 543     -58.936 -36.534  44.702  1.00  0.44           O  
HETATM  545  O   HOH T 544     -57.983 -22.434  19.337  1.00  0.44           O  
HETATM  546  O   HOH T 545     -62.792  -8.405  33.644  1.00  0.44           O  
HETATM  547  O   HOH T 546     -16.178   6.006  30.781  1.00  0.44           O  
HETATM  548  O   HOH T 547     -37.865 -15.478  18.560  1.00  0.44           O  
HETATM  549  O   HOH T 548     -29.270  11.545  15.742  1.00  0.44           O  
HETATM  550  O   HOH T 549     -18.229  -8.434  17.030  1.00  0.44           O  
HETATM  551  O   HOH T 550     -27.879 -14.510   3.431  1.00  0.44           O  
HETATM  552  O   HOH T 551      -2.277 -11.863  16.405  1.00  0.44           O  
HETATM  553  O   HOH T 552     -62.482 -31.121  46.968  1.00  0.44           O  
HETATM  554  O   HOH T 553     -15.739  -7.184  17.153  1.00  0.44           O  
HETATM  555  O   HOH T 554     -62.105 -33.045  31.395  1.00  0.44           O  
HETATM  556  O   HOH T 555     -11.011  -8.145  -7.306  1.00  0.44           O  
HETATM  557  O   HOH T 556     -33.040 -26.021  44.883  1.00  0.45           O  
HETATM  558  O   HOH T 557     -41.070 -27.037  26.936  1.00  0.45           O  
HETATM  559  O   HOH T 558     -38.811 -39.682   5.606  1.00  0.45           O  
HETATM  560  O   HOH T 559     -11.301 -16.457  12.123  1.00  0.45           O  
HETATM  561  O   HOH T 560     -59.228 -16.118  17.913  1.00  0.45           O  
HETATM  562  O   HOH T 561     -45.395 -38.963  58.440  1.00  0.45           O  
HETATM  563  O   HOH T 562     -49.697 -58.935  45.456  1.00  0.45           O  
HETATM  564  O   HOH T 563     -11.371  -9.288  -2.254  1.00  0.45           O  
HETATM  565  O   HOH T 564     -63.063  -8.018  36.431  1.00  0.45           O  
HETATM  566  O   HOH T 565     -29.104 -44.627  17.084  1.00  0.45           O  
HETATM  567  O   HOH T 566     -16.971 -17.158   8.996  1.00  0.45           O  
HETATM  568  O   HOH T 567     -44.303 -11.919  56.667  1.00  0.45           O  
HETATM  569  O   HOH T 568     -13.983 -36.252  21.928  1.00  0.45           O  
HETATM  570  O   HOH T 569     -37.093  14.798   7.524  1.00  0.45           O  
HETATM  571  O   HOH T 570     -49.040 -40.662  29.085  1.00  0.45           O  
HETATM  572  O   HOH T 571     -56.258  -8.841  33.773  1.00  0.45           O  
HETATM  573  O   HOH T 572     -22.533  -1.565   0.849  1.00  0.45           O  
HETATM  574  O   HOH T 573     -58.924 -24.711  30.515  1.00  0.45           O  
HETATM  575  O   HOH T 574     -18.013  -1.231  19.763  1.00  0.45           O  
HETATM  576  O   HOH T 575     -18.648  -4.773  41.841  1.00  0.45           O  
HETATM  577  O   HOH T 576     -32.332 -21.749  13.186  1.00  0.45           O  
HETATM  578  O   HOH T 577     -62.772 -30.021  34.798  1.00  0.45           O  
HETATM  579  O   HOH T 578     -34.404 -20.432  26.601  1.00  0.45           O  
HETATM  580  O   HOH T 579     -39.729 -14.045  15.332  1.00  0.45           O  
HETATM  581  O   HOH T 580     -59.319 -24.459  44.301  1.00  0.45           O  
HETATM  582  O   HOH T 581     -52.694 -24.596  41.199  1.00  0.45           O  
HETATM  583  O   HOH T 582     -22.878  -9.352  -0.903  1.00  0.45           O  
HETATM  584  O   HOH T 583     -65.127 -25.033  39.262  1.00  0.45           O  
HETATM  585  O   HOH T 584     -16.537 -21.903  10.113  1.00  0.45           O  
HETATM  586  O   HOH T 585     -28.745 -16.754  19.349  1.00  0.45           O  
HETATM  587  O   HOH T 586     -35.959 -22.755  26.767  1.00  0.45           O  
HETATM  588  O   HOH T 587      -7.344 -10.653  28.326  1.00  0.45           O  
HETATM  589  O   HOH T 588     -38.266  13.747   9.850  1.00  0.45           O  
HETATM  590  O   HOH T 589     -32.273 -17.463   4.192  1.00  0.46           O  
HETATM  591  O   HOH T 590     -14.322 -37.834  19.657  1.00  0.46           O  
HETATM  592  O   HOH T 591     -17.110  16.352   9.054  1.00  0.46           O  
HETATM  593  O   HOH T 592     -34.767  14.469   6.214  1.00  0.46           O  
HETATM  594  O   HOH T 593      -6.702 -28.589  23.878  1.00  0.46           O  
HETATM  595  O   HOH T 594     -35.671  14.516  17.022  1.00  0.46           O  
HETATM  596  O   HOH T 595     -24.953   9.909   5.638  1.00  0.46           O  
HETATM  597  O   HOH T 596     -40.513   5.725  33.217  1.00  0.46           O  
HETATM  598  O   HOH T 597      -8.834  -2.811  24.072  1.00  0.46           O  
HETATM  599  O   HOH T 598     -46.102 -35.754  56.629  1.00  0.46           O  
HETATM  600  O   HOH T 599     -24.458 -11.420  35.460  1.00  0.46           O  
HETATM  601  O   HOH T 600      -8.441  -8.174  28.604  1.00  0.46           O  
HETATM  602  O   HOH T 601      -6.389  -9.326   1.462  1.00  0.46           O  
HETATM  603  O   HOH T 602      -1.018 -17.893   2.391  1.00  0.46           O  
HETATM  604  O   HOH T 603     -56.569 -38.169  44.795  1.00  0.46           O  
HETATM  605  O   HOH T 604     -14.627 -16.879  28.571  1.00  0.46           O  
HETATM  606  O   HOH T 605     -22.850  -3.266  24.842  1.00  0.46           O  
HETATM  607  O   HOH T 606     -48.286   1.453  29.157  1.00  0.46           O  
HETATM  608  O   HOH T 607     -14.593   1.617  29.655  1.00  0.46           O  
HETATM  609  O   HOH T 608     -41.809 -14.799  44.790  1.00  0.46           O  
HETATM  610  O   HOH T 609     -33.553  -0.752  39.748  1.00  0.46           O  
HETATM  611  O   HOH T 610     -34.066 -25.089  55.764  1.00  0.46           O  
HETATM  612  O   HOH T 611      -1.391 -10.613  18.783  1.00  0.46           O  
HETATM  613  O   HOH T 612     -33.940  12.490  17.821  1.00  0.46           O  
HETATM  614  O   HOH T 613      -6.876 -39.631  17.502  1.00  0.46           O  
HETATM  615  O   HOH T 614     -60.407 -14.018  16.498  1.00  0.46           O  
HETATM  616  O   HOH T 615     -62.845 -30.502  32.103  1.00  0.46           O  
HETATM  617  O   HOH T 616     -60.777  -7.151  35.224  1.00  0.46           O  
HETATM  618  O   HOH T 617      -6.312 -30.080  13.835  1.00  0.46           O  
HETATM  619  O   HOH T 618     -52.064 -38.936  53.683  1.00  0.46           O  
HETATM  620  O   HOH T 619     -29.496  -4.273  28.973  1.00  0.46           O  
HETATM  621  O   HOH T 620     -39.109  12.979   7.277  1.00  0.47           O  
HETATM  622  O   HOH T 621     -52.996 -33.423  28.277  1.00  0.47           O  
HETATM  623  O   HOH T 622     -58.402  -8.133  32.159  1.00  0.47           O  
HETATM  624  O   HOH T 623     -41.318 -29.970  27.138  1.00  0.47           O  
HETATM  625  O   HOH T 624     -31.548 -41.464  10.863  1.00  0.47           O  
HETATM  626  O   HOH T 625      -8.344 -31.755  14.734  1.00  0.47           O  
HETATM  627  O   HOH T 626     -52.520  -3.844  18.507  1.00  0.47           O  
HETATM  628  O   HOH T 627     -38.118   5.560   3.886  1.00  0.47           O  
HETATM  629  O   HOH T 628     -38.166 -23.534  44.327  1.00  0.47           O  
HETATM  630  O   HOH T 629     -31.012 -25.912   0.451  1.00  0.47           O  
HETATM  631  O   HOH T 630     -12.229   7.919  27.547  1.00  0.47           O  
HETATM  632  O   HOH T 631      -1.598 -20.310  23.580  1.00  0.47           O  
HETATM  633  O   HOH T 632      -6.240 -14.171  -3.388  1.00  0.47           O  
HETATM  634  O   HOH T 633     -30.105 -27.631  21.020  1.00  0.47           O  
HETATM  635  O   HOH T 634     -68.848 -13.315  40.234  1.00  0.47           O  
HETATM  636  O   HOH T 635     -26.749   7.803   6.116  1.00  0.47           O  
HETATM  637  O   HOH T 636     -59.348 -20.060  19.932  1.00  0.47           O  
HETATM  638  O   HOH T 637      -8.863  -8.087  10.154  1.00  0.47           O  
HETATM  639  O   HOH T 638     -44.003 -31.613  58.853  1.00  0.47           O  
HETATM  640  O   HOH T 639     -52.715 -22.025  42.184  1.00  0.47           O  
HETATM  641  O   HOH T 640     -13.586   5.538   2.226  1.00  0.47           O  
HETATM  642  O   HOH T 641     -53.429 -37.353  27.170  1.00  0.47           O  
HETATM  643  O   HOH T 642     -15.522 -18.569   7.117  1.00  0.47           O  
HETATM  644  O   HOH T 643     -29.112   6.847  22.986  1.00  0.47           O  
HETATM  645  O   HOH T 644     -20.625 -14.832  28.816  1.00  0.47           O  
HETATM  646  O   HOH T 645     -20.321  -6.913  -2.149  1.00  0.47           O  
HETATM  647  O   HOH T 646     -29.095 -28.370  -4.624  1.00  0.47           O  
HETATM  648  O   HOH T 647     -16.642 -35.435  22.135  1.00  0.47           O  
HETATM  649  O   HOH T 648     -59.555 -23.313  25.042  1.00  0.47           O  
HETATM  650  O   HOH T 649     -31.581 -29.184  -8.809  1.00  0.47           O  
HETATM  651  O   HOH T 650      -6.186 -29.911   7.719  1.00  0.47           O  
HETATM  652  O   HOH T 651     -31.602 -33.202  45.333  1.00  0.47           O  
HETATM  653  O   HOH T 652     -25.220 -39.961  25.735  1.00  0.47           O  
HETATM  654  O   HOH T 653     -41.658 -15.424  52.961  1.00  0.47           O  
HETATM  655  O   HOH T 654     -15.303  -5.483  19.287  1.00  0.47           O  
HETATM  656  O   HOH T 655       0.041 -22.845  14.005  1.00  0.47           O  
HETATM  657  O   HOH T 656     -16.298  -1.563   8.776  1.00  0.47           O  
HETATM  658  O   HOH T 657     -57.498 -10.970  22.029  1.00  0.47           O  
HETATM  659  O   HOH T 658       0.211 -19.099  12.827  1.00  0.47           O  
HETATM  660  O   HOH T 659     -16.908 -17.993  29.795  1.00  0.47           O  
HETATM  661  O   HOH T 660     -14.500 -32.466  19.348  1.00  0.47           O  
HETATM  662  O   HOH T 661     -50.201 -33.038  28.189  1.00  0.47           O  
HETATM  663  O   HOH T 662      -8.859 -29.730   6.951  1.00  0.48           O  
HETATM  664  O   HOH T 663     -25.929  -9.194   5.929  1.00  0.48           O  
HETATM  665  O   HOH T 664     -42.759  -8.268  44.816  1.00  0.48           O  
HETATM  666  O   HOH T 665     -45.659   0.354  25.118  1.00  0.48           O  
HETATM  667  O   HOH T 666     -60.846  -7.146  38.008  1.00  0.48           O  
HETATM  668  O   HOH T 667     -56.129 -39.951  46.893  1.00  0.48           O  
HETATM  669  O   HOH T 668     -18.376   9.830  25.421  1.00  0.48           O  
HETATM  670  O   HOH T 669     -28.178  -3.815  21.304  1.00  0.48           O  
HETATM  671  O   HOH T 670     -40.412 -30.014  11.377  1.00  0.48           O  
HETATM  672  O   HOH T 671     -27.479 -37.007   7.342  1.00  0.48           O  
HETATM  673  O   HOH T 672     -40.264 -10.536  38.890  1.00  0.48           O  
HETATM  674  O   HOH T 673     -44.698 -43.029  58.306  1.00  0.48           O  
HETATM  675  O   HOH T 674       1.297 -17.114   0.805  1.00  0.48           O  
HETATM  676  O   HOH T 675     -38.745 -40.009  33.210  1.00  0.48           O  
HETATM  677  O   HOH T 676     -26.504 -45.651  17.147  1.00  0.48           O  
HETATM  678  O   HOH T 677     -50.080  -4.424  37.476  1.00  0.48           O  
HETATM  679  O   HOH T 678     -47.800  -5.230   3.829  1.00  0.48           O  
HETATM  680  O   HOH T 679     -50.993  -4.549  40.048  1.00  0.48           O  
HETATM  681  O   HOH T 680      -6.379 -11.959  32.978  1.00  0.48           O  
HETATM  682  O   HOH T 681     -17.439 -43.646  10.946  1.00  0.48           O  
HETATM  683  O   HOH T 682     -59.974 -20.283  22.631  1.00  0.48           O  
HETATM  684  O   HOH T 683      -4.039 -10.586   1.584  1.00  0.48           O  
HETATM  685  O   HOH T 684      -6.412 -12.119   1.816  1.00  0.48           O  
HETATM  686  O   HOH T 685     -47.701 -57.888  43.942  1.00  0.48           O  
HETATM  687  O   HOH T 686     -29.251 -43.171  20.910  1.00  0.48           O  
HETATM  688  O   HOH T 687     -30.151  -2.952  39.210  1.00  0.48           O  
HETATM  689  O   HOH T 688     -26.915  12.809  16.176  1.00  0.48           O  
HETATM  690  O   HOH T 689     -41.396  10.404  28.793  1.00  0.48           O  
HETATM  691  O   HOH T 690     -59.399 -33.039  23.118  1.00  0.48           O  
HETATM  692  O   HOH T 691     -41.437   7.795  10.267  1.00  0.48           O  
HETATM  693  O   HOH T 692     -58.840 -20.588  39.069  1.00  0.48           O  
HETATM  694  O   HOH T 693     -50.454 -25.967  20.282  1.00  0.48           O  
HETATM  695  O   HOH T 694     -30.836  -6.411  29.976  1.00  0.48           O  
HETATM  696  O   HOH T 695     -36.346   9.030  35.483  1.00  0.49           O  
HETATM  697  O   HOH T 696     -42.037 -60.727  53.395  1.00  0.49           O  
HETATM  698  O   HOH T 697     -31.021   8.939  18.646  1.00  0.49           O  
HETATM  699  O   HOH T 698     -10.180 -28.785  -7.535  1.00  0.49           O  
HETATM  700  O   HOH T 699      -2.444 -24.432  27.530  1.00  0.49           O  
HETATM  701  O   HOH T 700     -43.121 -21.599  43.801  1.00  0.49           O  
HETATM  702  O   HOH T 701     -32.639 -28.604  -6.459  1.00  0.49           O  
HETATM  703  O   HOH T 702     -62.480 -10.825  46.977  1.00  0.49           O  
HETATM  704  O   HOH T 703     -40.373 -26.438  58.744  1.00  0.49           O  
HETATM  705  O   HOH T 704      -9.136  -4.562  28.596  1.00  0.49           O  
HETATM  706  O   HOH T 705     -26.624 -35.337  26.045  1.00  0.49           O  
HETATM  707  O   HOH T 706      -0.091 -18.614  10.143  1.00  0.49           O  
HETATM  708  O   HOH T 707     -28.481  -3.962   7.059  1.00  0.49           O  
HETATM  709  O   HOH T 708      -6.755 -12.654  -1.007  1.00  0.49           O  
HETATM  710  O   HOH T 709     -24.493 -34.971  27.821  1.00  0.49           O  
HETATM  711  O   HOH T 710     -53.948 -20.420  38.116  1.00  0.49           O  
HETATM  712  O   HOH T 711     -57.742 -45.015  41.445  1.00  0.49           O  
HETATM  713  O   HOH T 712     -26.846  -8.818   8.535  1.00  0.49           O  
HETATM  714  O   HOH T 713     -18.927 -20.493  11.050  1.00  0.49           O  
HETATM  715  O   HOH T 714     -30.688 -27.344  54.191  1.00  0.49           O  
HETATM  716  O   HOH T 715     -42.111 -12.121  43.961  1.00  0.49           O  
HETATM  717  O   HOH T 716      -2.531 -27.091  26.961  1.00  0.49           O  
HETATM  718  O   HOH T 717     -14.578 -30.821  21.753  1.00  0.49           O  
HETATM  719  O   HOH T 718     -43.647 -18.604  17.811  1.00  0.49           O  
HETATM  720  O   HOH T 719     -29.826 -16.389   4.377  1.00  0.49           O  
HETATM  721  O   HOH T 720     -41.283  14.552   7.957  1.00  0.49           O  
HETATM  722  O   HOH T 721     -34.263 -25.666  15.667  1.00  0.49           O  
HETATM  723  O   HOH T 722     -18.653 -20.346  -8.985  1.00  0.49           O  
HETATM  724  O   HOH T 723     -27.599 -34.402  -1.687  1.00  0.49           O  
HETATM  725  O   HOH T 724     -14.609  -5.581  22.063  1.00  0.49           O  
HETATM  726  O   HOH T 725     -11.877   5.060  16.141  1.00  0.49           O  
HETATM  727  O   HOH T 726     -60.360 -36.192  27.555  1.00  0.49           O  
HETATM  728  O   HOH T 727     -34.986  -3.263  35.797  1.00  0.49           O  
HETATM  729  O   HOH T 728     -31.513 -36.439  27.418  1.00  0.49           O  
HETATM  730  O   HOH T 729      -0.793 -26.219  15.883  1.00  0.49           O  
HETATM  731  O   HOH T 730     -32.383 -34.219  42.856  1.00  0.49           O  
HETATM  732  O   HOH T 731      -8.666   5.463  29.029  1.00  0.50           O  
HETATM  733  O   HOH T 732      -2.522 -19.035   8.992  1.00  0.50           O  
HETATM  734  O   HOH T 733     -56.513 -51.079  43.721  1.00  0.50           O  
HETATM  735  O   HOH T 734     -72.637 -14.877  30.091  1.00  0.50           O  
HETATM  736  O   HOH T 735     -39.839  -1.740   3.813  1.00  0.50           O  
HETATM  737  O   HOH T 736     -25.663 -12.499  33.325  1.00  0.50           O  
HETATM  738  O   HOH T 737     -37.989  16.260  11.051  1.00  0.50           O  
HETATM  739  O   HOH T 738     -43.366  13.536   6.510  1.00  0.50           O  
HETATM  740  O   HOH T 739     -29.991  -2.361  41.969  1.00  0.50           O  
HETATM  741  O   HOH T 740     -12.107 -29.471  22.095  1.00  0.50           O  
HETATM  742  O   HOH T 741     -33.462 -16.260  16.810  1.00  0.50           O  
HETATM  743  O   HOH T 742     -45.897 -19.630  18.702  1.00  0.50           O  
HETATM  744  O   HOH T 743     -27.150  10.439   7.021  1.00  0.50           O  
HETATM  745  O   HOH T 744     -42.077  -8.003  47.535  1.00  0.50           O  
HETATM  746  O   HOH T 745      -3.983  -8.913  26.742  1.00  0.50           O  
HETATM  747  O   HOH T 746     -10.244 -34.605   0.141  1.00  0.50           O  
HETATM  748  O   HOH T 747     -65.593  -8.800  33.936  1.00  0.50           O  
HETATM  749  O   HOH T 748     -37.742 -20.933  44.959  1.00  0.50           O  
HETATM  750  O   HOH T 749     -24.395  -9.004  -3.113  1.00  0.50           O  
HETATM  751  O   HOH T 750     -37.668   7.492  33.528  1.00  0.50           O  
HETATM  752  O   HOH T 751     -15.332 -18.992  12.801  1.00  0.50           O  
HETATM  753  O   HOH T 752     -37.496 -32.367  29.460  1.00  0.50           O  
HETATM  754  O   HOH T 753     -28.238 -13.356  33.971  1.00  0.50           O  
HETATM  755  O   HOH T 754     -25.423 -38.401   5.930  1.00  0.50           O  
HETATM  756  O   HOH T 755     -51.173 -23.286  20.007  1.00  0.50           O  
HETATM  757  O   HOH T 756     -49.435 -28.225  24.330  1.00  0.50           O  
HETATM  758  O   HOH T 757     -31.556  11.304  17.068  1.00  0.50           O  
HETATM  759  O   HOH T 758     -38.585 -27.578  57.016  1.00  0.50           O  
HETATM  760  O   HOH T 759     -60.583 -13.364  40.138  1.00  0.50           O  
HETATM  761  O   HOH T 760      -1.137 -15.208   8.850  1.00  0.50           O  
HETATM  762  O   HOH T 761     -32.974  -2.751  37.945  1.00  0.50           O  
HETATM  763  O   HOH T 762     -29.599   7.132  20.202  1.00  0.51           O  
HETATM  764  O   HOH T 763     -37.630 -35.333  40.393  1.00  0.51           O  
HETATM  765  O   HOH T 764     -39.214 -26.445  10.383  1.00  0.51           O  
HETATM  766  O   HOH T 765     -14.803 -34.286  23.808  1.00  0.51           O  
HETATM  767  O   HOH T 766     -40.475  -4.685  37.247  1.00  0.51           O  
HETATM  768  O   HOH T 767     -11.164  -2.473  31.632  1.00  0.51           O  
HETATM  769  O   HOH T 768      -9.703 -36.785  22.901  1.00  0.51           O  
HETATM  770  O   HOH T 769     -43.244 -13.869  59.944  1.00  0.51           O  
HETATM  771  O   HOH T 770     -62.005 -32.550  35.656  1.00  0.51           O  
HETATM  772  O   HOH T 771     -13.281 -18.211  11.188  1.00  0.51           O  
HETATM  773  O   HOH T 772     -53.486 -21.806  20.951  1.00  0.51           O  
HETATM  774  O   HOH T 773     -39.288 -19.568  20.295  1.00  0.51           O  
HETATM  775  O   HOH T 774     -21.465  -7.394  23.319  1.00  0.51           O  
HETATM  776  O   HOH T 775     -37.060 -29.526  29.207  1.00  0.51           O  
HETATM  777  O   HOH T 776     -41.716 -48.456  46.797  1.00  0.51           O  
HETATM  778  O   HOH T 777     -26.799 -14.044  31.576  1.00  0.51           O  
HETATM  779  O   HOH T 778     -25.080 -35.653  -0.987  1.00  0.51           O  
HETATM  780  O   HOH T 779     -11.772  -6.903  -0.777  1.00  0.51           O  
HETATM  781  O   HOH T 780     -67.268 -21.896  30.790  1.00  0.51           O  
HETATM  782  O   HOH T 781     -53.716 -24.083  22.296  1.00  0.51           O  
HETATM  783  O   HOH T 782     -57.482 -21.160  21.723  1.00  0.51           O  
HETATM  784  O   HOH T 783     -51.092  -2.135  12.233  1.00  0.51           O  
HETATM  785  O   HOH T 784     -26.816 -29.118  26.689  1.00  0.52           O  
HETATM  786  O   HOH T 785      -7.182  -8.929   8.044  1.00  0.52           O  
HETATM  787  O   HOH T 786      -3.227 -17.763   6.595  1.00  0.52           O  
HETATM  788  O   HOH T 787     -11.229 -31.538  -7.240  1.00  0.52           O  
HETATM  789  O   HOH T 788     -25.962  10.869  17.857  1.00  0.52           O  
HETATM  790  O   HOH T 789     -39.855 -11.422  11.144  1.00  0.52           O  
HETATM  791  O   HOH T 790     -44.749   1.214  22.606  1.00  0.52           O  
HETATM  792  O   HOH T 791     -49.364  -7.185  29.916  1.00  0.52           O  
HETATM  793  O   HOH T 792     -25.529  -8.462   3.235  1.00  0.52           O  
HETATM  794  O   HOH T 793       0.134 -17.086  20.065  1.00  0.52           O  
HETATM  795  O   HOH T 794     -49.837 -12.419  13.900  1.00  0.52           O  
HETATM  796  O   HOH T 795     -21.565  13.780  15.630  1.00  0.52           O  
HETATM  797  O   HOH T 796     -67.164 -11.279  28.173  1.00  0.52           O  
HETATM  798  O   HOH T 797     -39.577 -39.348  30.592  1.00  0.52           O  
HETATM  799  O   HOH T 798     -27.641 -44.883  14.742  1.00  0.52           O  
HETATM  800  O   HOH T 799     -25.009  10.996  15.348  1.00  0.52           O  
HETATM  801  O   HOH T 800     -15.325  -2.586  24.901  1.00  0.52           O  
HETATM  802  O   HOH T 801     -44.130  -4.071   3.875  1.00  0.52           O  
HETATM  803  O   HOH T 802     -21.103  -4.432   3.374  1.00  0.52           O  
HETATM  804  O   HOH T 803     -34.760 -21.919  24.369  1.00  0.52           O  
HETATM  805  O   HOH T 804     -36.838  17.083  16.856  1.00  0.53           O  
HETATM  806  O   HOH T 805     -47.206   0.999  31.664  1.00  0.53           O  
HETATM  807  O   HOH T 806     -33.279 -40.157   9.017  1.00  0.53           O  
HETATM  808  O   HOH T 807     -10.607 -27.778  23.546  1.00  0.53           O  
HETATM  809  O   HOH T 808     -31.531 -26.946  -4.415  1.00  0.53           O  
HETATM  810  O   HOH T 809     -16.267 -14.473   9.233  1.00  0.53           O  
HETATM  811  O   HOH T 810     -50.116 -26.286  54.615  1.00  0.53           O  
HETATM  812  O   HOH T 811     -58.726 -11.176  45.192  1.00  0.53           O  
HETATM  813  O   HOH T 812     -37.777 -24.298  41.637  1.00  0.53           O  
HETATM  814  O   HOH T 813     -42.570 -20.499  54.637  1.00  0.53           O  
HETATM  815  O   HOH T 814     -11.334  -2.402   2.458  1.00  0.53           O  
HETATM  816  O   HOH T 815     -34.015 -29.897  33.348  1.00  0.53           O  
HETATM  817  O   HOH T 816     -27.515  -3.887  40.047  1.00  0.53           O  
HETATM  818  O   HOH T 817     -38.135  11.095  31.735  1.00  0.53           O  
HETATM  819  O   HOH T 818     -33.545 -19.417  -3.336  1.00  0.53           O  
HETATM  820  O   HOH T 819     -21.470  -9.422  -3.064  1.00  0.53           O  
HETATM  821  O   HOH T 820     -37.902  14.912  15.430  1.00  0.53           O  
HETATM  822  O   HOH T 821     -33.634   9.700  18.079  1.00  0.53           O  
HETATM  823  O   HOH T 822     -12.798 -12.965   9.659  1.00  0.53           O  
HETATM  824  O   HOH T 823      -9.624   7.450  27.466  1.00  0.53           O  
HETATM  825  O   HOH T 824     -24.291 -11.343   0.146  1.00  0.53           O  
HETATM  826  O   HOH T 825     -25.601 -12.987   3.739  1.00  0.53           O  
HETATM  827  O   HOH T 826     -24.530  -3.475   1.342  1.00  0.53           O  
HETATM  828  O   HOH T 827     -64.200 -44.499  38.231  1.00  0.53           O  
HETATM  829  O   HOH T 828     -34.407 -41.581  15.705  1.00  0.53           O  
HETATM  830  O   HOH T 829     -29.139 -28.315 -13.000  1.00  0.53           O  
HETATM  831  O   HOH T 830     -36.288 -15.497  37.943  1.00  0.53           O  
HETATM  832  O   HOH T 831     -19.310 -21.851  24.311  1.00  0.53           O  
HETATM  833  O   HOH T 832      -3.150 -23.742   8.685  1.00  0.53           O  
HETATM  834  O   HOH T 833     -44.667 -45.342  53.403  1.00  0.53           O  
HETATM  835  O   HOH T 834     -16.875 -34.916  -3.989  1.00  0.53           O  
HETATM  836  O   HOH T 835     -62.226 -17.814  50.400  1.00  0.53           O  
HETATM  837  O   HOH T 836     -24.240   4.924  42.938  1.00  0.53           O  
HETATM  838  O   HOH T 837     -14.085   1.312  32.387  1.00  0.54           O  
HETATM  839  O   HOH T 838     -27.455 -21.181  -7.344  1.00  0.54           O  
HETATM  840  O   HOH T 839     -46.461   0.994  20.448  1.00  0.54           O  
HETATM  841  O   HOH T 840     -21.297 -14.778  35.599  1.00  0.54           O  
HETATM  842  O   HOH T 841     -38.861 -38.989  56.704  1.00  0.54           O  
HETATM  843  O   HOH T 842     -19.416  17.752   9.717  1.00  0.54           O  
HETATM  844  O   HOH T 843     -40.179 -14.973  46.928  1.00  0.54           O  
HETATM  845  O   HOH T 844     -58.003 -14.205  39.786  1.00  0.54           O  
HETATM  846  O   HOH T 845       0.424 -21.052   8.444  1.00  0.54           O  
HETATM  847  O   HOH T 846     -62.351 -12.807  26.952  1.00  0.54           O  
HETATM  848  O   HOH T 847     -27.467 -36.719  -0.069  1.00  0.54           O  
HETATM  849  O   HOH T 848     -25.203 -37.572  27.074  1.00  0.54           O  
HETATM  850  O   HOH T 849     -40.955 -20.351  22.122  1.00  0.54           O  
HETATM  851  O   HOH T 850     -23.179  -9.607   6.266  1.00  0.54           O  
HETATM  852  O   HOH T 851     -27.596 -30.161  -6.235  1.00  0.54           O  
HETATM  853  O   HOH T 852     -21.894  16.435  14.792  1.00  0.54           O  
HETATM  854  O   HOH T 853     -41.981  -5.819   4.540  1.00  0.54           O  
HETATM  855  O   HOH T 854     -37.280  -5.056  38.820  1.00  0.54           O  
HETATM  856  O   HOH T 855     -47.001   1.797   5.545  1.00  0.54           O  
HETATM  857  O   HOH T 856     -18.703 -25.175  22.721  1.00  0.54           O  
HETATM  858  O   HOH T 857     -34.470 -27.528  17.941  1.00  0.54           O  
HETATM  859  O   HOH T 858     -26.128 -40.730   2.321  1.00  0.54           O  
HETATM  860  O   HOH T 859     -30.834 -15.471  27.555  1.00  0.54           O  
HETATM  861  O   HOH T 860     -44.651   4.904  21.989  1.00  0.54           O  
HETATM  862  O   HOH T 861     -34.756   9.599  20.904  1.00  0.54           O  
HETATM  863  O   HOH T 862     -31.080 -30.927  23.348  1.00  0.54           O  
HETATM  864  O   HOH T 863     -52.506  -4.047  34.671  1.00  0.54           O  
HETATM  865  O   HOH T 864      -3.195 -22.100  28.533  1.00  0.55           O  
HETATM  866  O   HOH T 865     -27.577  17.326   9.771  1.00  0.55           O  
HETATM  867  O   HOH T 866     -47.553 -39.475  15.458  1.00  0.55           O  
HETATM  868  O   HOH T 867     -10.098 -10.104   8.582  1.00  0.55           O  
HETATM  869  O   HOH T 868     -41.317 -17.266  17.824  1.00  0.55           O  
HETATM  870  O   HOH T 869     -50.254   5.549  13.549  1.00  0.55           O  
HETATM  871  O   HOH T 870      -0.817 -18.489   5.416  1.00  0.55           O  
HETATM  872  O   HOH T 871     -24.922 -27.618  -2.878  1.00  0.55           O  
HETATM  873  O   HOH T 872     -14.699 -19.537  29.550  1.00  0.55           O  
HETATM  874  O   HOH T 873     -11.460  -7.338   9.677  1.00  0.55           O  
HETATM  875  O   HOH T 874     -48.540   7.298   6.586  1.00  0.55           O  
HETATM  876  O   HOH T 875     -24.362 -38.406   8.533  1.00  0.55           O  
HETATM  877  O   HOH T 876     -30.759 -40.635  18.665  1.00  0.55           O  
HETATM  878  O   HOH T 877     -30.600  -2.447   8.037  1.00  0.55           O  
HETATM  879  O   HOH T 878       0.307 -12.107  15.375  1.00  0.55           O  
HETATM  880  O   HOH T 879     -30.980 -27.445 -10.964  1.00  0.55           O  
HETATM  881  O   HOH T 880     -43.361   4.167   9.521  1.00  0.55           O  
HETATM  882  O   HOH T 881     -37.319 -39.586  44.485  1.00  0.55           O  
HETATM  883  O   HOH T 882     -34.097 -14.580  53.395  1.00  0.56           O  
HETATM  884  O   HOH T 883     -34.762 -30.847  53.464  1.00  0.56           O  
HETATM  885  O   HOH T 884     -29.662 -22.830  51.226  1.00  0.56           O  
HETATM  886  O   HOH T 885      -8.881  -0.071  24.218  1.00  0.56           O  
HETATM  887  O   HOH T 886     -17.704  -9.767  13.012  1.00  0.56           O  
HETATM  888  O   HOH T 887     -57.512 -33.169  21.025  1.00  0.56           O  
HETATM  889  O   HOH T 888     -21.768 -40.497  23.511  1.00  0.56           O  
HETATM  890  O   HOH T 889      -9.006   1.721   4.886  1.00  0.56           O  
HETATM  891  O   HOH T 890     -48.012   3.219  17.734  1.00  0.56           O  
HETATM  892  O   HOH T 891     -68.628  -5.477  36.258  1.00  0.56           O  
HETATM  893  O   HOH T 892     -15.101   1.594  37.587  1.00  0.56           O  
HETATM  894  O   HOH T 893      -9.513  -4.924   8.034  1.00  0.56           O  
HETATM  895  O   HOH T 894     -46.221  -3.321  31.163  1.00  0.56           O  
HETATM  896  O   HOH T 895     -44.851 -52.453  49.577  1.00  0.56           O  
HETATM  897  O   HOH T 896     -47.057 -37.006  14.485  1.00  0.56           O  
HETATM  898  O   HOH T 897     -36.298 -43.848  49.415  1.00  0.56           O  
HETATM  899  O   HOH T 898     -61.267 -13.949  45.529  1.00  0.56           O  
HETATM  900  O   HOH T 899     -46.249  -5.738  36.660  1.00  0.56           O  
HETATM  901  O   HOH T 900     -23.462  -9.017   1.553  1.00  0.56           O  
HETATM  902  O   HOH T 901     -37.422   3.177   2.571  1.00  0.56           O  
HETATM  903  O   HOH T 902     -36.281 -12.251  40.018  1.00  0.56           O  
HETATM  904  O   HOH T 903     -32.447   2.834  40.579  1.00  0.56           O  
HETATM  905  O   HOH T 904     -62.455  -7.998  46.976  1.00  0.56           O  
HETATM  906  O   HOH T 905     -54.328 -49.378  44.585  1.00  0.57           O  
HETATM  907  O   HOH T 906     -42.931 -46.361  40.254  1.00  0.57           O  
HETATM  908  O   HOH T 907     -38.292   4.035  35.074  1.00  0.57           O  
HETATM  909  O   HOH T 908     -43.667  -8.090   5.574  1.00  0.57           O  
HETATM  910  O   HOH T 909       0.386 -13.886   4.708  1.00  0.57           O  
HETATM  911  O   HOH T 910     -29.602 -21.881  48.650  1.00  0.57           O  
HETATM  912  O   HOH T 911     -64.066 -32.480  37.328  1.00  0.57           O  
HETATM  913  O   HOH T 912     -42.092 -17.035  57.413  1.00  0.57           O  
HETATM  914  O   HOH T 913      -8.780   1.992   9.550  1.00  0.57           O  
HETATM  915  O   HOH T 914     -32.304  13.800   5.462  1.00  0.57           O  
HETATM  916  O   HOH T 915     -31.084   2.473   6.520  1.00  0.57           O  
HETATM  917  O   HOH T 916      -4.603 -25.277  26.127  1.00  0.57           O  
HETATM  918  O   HOH T 917     -22.112  -7.341   8.837  1.00  0.57           O  
HETATM  919  O   HOH T 918     -35.580 -20.845  46.630  1.00  0.57           O  
HETATM  920  O   HOH T 919     -39.019  16.359  13.517  1.00  0.57           O  
HETATM  921  O   HOH T 920     -14.529 -28.239  23.118  1.00  0.58           O  
HETATM  922  O   HOH T 921     -41.318 -11.226  41.383  1.00  0.58           O  
HETATM  923  O   HOH T 922     -36.490 -15.182  46.674  1.00  0.59           O  
HETATM  924  O   HOH T 923     -34.152  -3.270  40.514  1.00  0.59           O  
HETATM  925  O   HOH T 924     -19.509 -29.669  26.084  1.00  0.59           O  
HETATM  926  O   HOH T 925     -47.878 -59.121  50.212  1.00  0.59           O  
HETATM  927  O   HOH T 926     -35.821  10.645  33.293  1.00  0.59           O  
HETATM  928  O   HOH T 927     -10.403 -29.087  11.466  1.00  0.59           O  
HETATM  929  O   HOH T 928      -5.431 -27.427  13.678  1.00  0.59           O  
HETATM  930  O   HOH T 929      -4.062 -31.559  14.435  1.00  0.60           O  
HETATM  931  O   HOH T 930       2.397 -21.645  17.758  1.00  0.60           O  
HETATM  932  O   HOH T 931     -25.776  15.625  12.797  1.00  0.62           O  
HETATM  933  O   HOH T 932     -39.407 -10.674  47.014  1.00  0.62           O  
TER     934      HOH T 932 
