# Supplementary material for: Accurate Prediction of Hydration Sites of Proteins Using Energy Model With Atom Embedding
Source: Front Mol Biosci. 2021 Sep 20;8:756075. doi: 10.3389/fmolb.2021.756075 (PMC8488165; doi:10.3389/fmolb.2021.756075)
Supplement: Supplementary file 1 [file DataSheet1.ZIP › Data Sheet 1/Our_result_pdb/our_dataset_output/3KNB_watersite.pdb]

HEADER                                                        XXXX


JRNL        PMID   -1
HETATM    1  O   HOH T   0      23.432  20.476  10.830  1.00  0.16           O  
HETATM    2  O   HOH T   1      17.832  31.774  14.449  1.00  0.16           O  
HETATM    3  O   HOH T   2      37.053  39.421   7.088  1.00  0.17           O  
HETATM    4  O   HOH T   3      18.028  33.896  17.383  1.00  0.20           O  
HETATM    5  O   HOH T   4       3.466  26.433  16.314  1.00  0.20           O  
HETATM    6  O   HOH T   5      30.651  32.602   0.167  1.00  0.20           O  
HETATM    7  O   HOH T   6      30.032  56.694   9.009  1.00  0.22           O  
HETATM    8  O   HOH T   7      18.786  38.081  17.764  1.00  0.22           O  
HETATM    9  O   HOH T   8       7.079  21.076  18.694  1.00  0.22           O  
HETATM   10  O   HOH T   9      -0.804  37.193  32.967  1.00  0.23           O  
HETATM   11  O   HOH T  10      35.918  42.122   0.004  1.00  0.23           O  
HETATM   12  O   HOH T  11      19.987  36.843   5.187  1.00  0.24           O  
HETATM   13  O   HOH T  12      27.074  17.566   0.965  1.00  0.24           O  
HETATM   14  O   HOH T  13      42.183  24.210   7.687  1.00  0.24           O  
HETATM   15  O   HOH T  14       8.253   9.859   5.556  1.00  0.24           O  
HETATM   16  O   HOH T  15      19.084  38.527   7.200  1.00  0.24           O  
HETATM   17  O   HOH T  16      22.453  10.251  18.664  1.00  0.24           O  
HETATM   18  O   HOH T  17      13.226  32.396  28.697  1.00  0.25           O  
HETATM   19  O   HOH T  18      25.270  17.428  -1.064  1.00  0.25           O  
HETATM   20  O   HOH T  19      34.319  28.739   8.262  1.00  0.25           O  
HETATM   21  O   HOH T  20       7.523  42.589  25.143  1.00  0.26           O  
HETATM   22  O   HOH T  21      31.121  49.087  10.947  1.00  0.26           O  
HETATM   23  O   HOH T  22       9.635  32.599   6.470  1.00  0.26           O  
HETATM   24  O   HOH T  23      25.191  31.962  23.109  1.00  0.26           O  
HETATM   25  O   HOH T  24      29.349  43.674   2.929  1.00  0.27           O  
HETATM   26  O   HOH T  25      29.475  18.119  14.371  1.00  0.27           O  
HETATM   27  O   HOH T  26      -2.802  20.748  10.577  1.00  0.27           O  
HETATM   28  O   HOH T  27      28.821  46.141  20.835  1.00  0.27           O  
HETATM   29  O   HOH T  28      20.064  35.656  18.000  1.00  0.27           O  
HETATM   30  O   HOH T  29      22.683  20.850  20.415  1.00  0.27           O  
HETATM   31  O   HOH T  30      28.994  56.707  19.984  1.00  0.27           O  
HETATM   32  O   HOH T  31      25.968  45.607   8.077  1.00  0.27           O  
HETATM   33  O   HOH T  32      24.245  13.747   6.435  1.00  0.28           O  
HETATM   34  O   HOH T  33      27.133  51.102   6.424  1.00  0.28           O  
HETATM   35  O   HOH T  34      36.360  32.077  23.327  1.00  0.28           O  
HETATM   36  O   HOH T  35      38.316  24.695  12.585  1.00  0.28           O  
HETATM   37  O   HOH T  36      26.942  24.358  23.556  1.00  0.28           O  
HETATM   38  O   HOH T  37      38.623  45.335  20.453  1.00  0.28           O  
HETATM   39  O   HOH T  38      18.010  34.809  24.192  1.00  0.29           O  
HETATM   40  O   HOH T  39      17.933  41.053   7.368  1.00  0.29           O  
HETATM   41  O   HOH T  40      34.680  25.809  10.944  1.00  0.29           O  
HETATM   42  O   HOH T  41      14.660  11.269   0.725  1.00  0.29           O  
HETATM   43  O   HOH T  42      34.039  30.621   6.227  1.00  0.29           O  
HETATM   44  O   HOH T  43      10.501  19.448  -1.240  1.00  0.29           O  
HETATM   45  O   HOH T  44      25.862  39.627  -1.976  1.00  0.29           O  
HETATM   46  O   HOH T  45       9.857  12.767   0.484  1.00  0.29           O  
HETATM   47  O   HOH T  46      33.921  34.757  11.114  1.00  0.29           O  
HETATM   48  O   HOH T  47      21.053  27.414  26.009  1.00  0.29           O  
HETATM   49  O   HOH T  48      29.342  27.552   2.310  1.00  0.30           O  
HETATM   50  O   HOH T  49      18.311  39.014  24.595  1.00  0.30           O  
HETATM   51  O   HOH T  50      21.669  12.885   6.918  1.00  0.30           O  
HETATM   52  O   HOH T  51      31.768  51.829  10.188  1.00  0.30           O  
HETATM   53  O   HOH T  52      27.118  34.824  21.093  1.00  0.30           O  
HETATM   54  O   HOH T  53      18.336  49.909  15.848  1.00  0.30           O  
HETATM   55  O   HOH T  54      22.612  39.515  23.963  1.00  0.30           O  
HETATM   56  O   HOH T  55      24.322  37.371  -2.355  1.00  0.31           O  
HETATM   57  O   HOH T  56      12.492  38.659  28.951  1.00  0.31           O  
HETATM   58  O   HOH T  57      12.478  12.342  -0.517  1.00  0.31           O  
HETATM   59  O   HOH T  58      13.390  51.962  20.679  1.00  0.31           O  
HETATM   60  O   HOH T  59      16.192  42.481   9.286  1.00  0.31           O  
HETATM   61  O   HOH T  60      16.443  35.659   6.544  1.00  0.31           O  
HETATM   62  O   HOH T  61      38.352  29.502  10.967  1.00  0.31           O  
HETATM   63  O   HOH T  62      26.750  17.730  14.634  1.00  0.31           O  
HETATM   64  O   HOH T  63      11.069  38.186  26.645  1.00  0.31           O  
HETATM   65  O   HOH T  64      19.709  43.379  19.173  1.00  0.31           O  
HETATM   66  O   HOH T  65      11.162  22.007  -0.336  1.00  0.32           O  
HETATM   67  O   HOH T  66      40.252  37.615   7.707  1.00  0.32           O  
HETATM   68  O   HOH T  67      13.897  19.549  24.003  1.00  0.32           O  
HETATM   69  O   HOH T  68      39.704  35.796   9.669  1.00  0.32           O  
HETATM   70  O   HOH T  69      25.123  44.407  23.423  1.00  0.32           O  
HETATM   71  O   HOH T  70      39.071  25.900  17.227  1.00  0.32           O  
HETATM   72  O   HOH T  71      28.113  50.035   2.845  1.00  0.32           O  
HETATM   73  O   HOH T  72      20.338  22.720  23.070  1.00  0.32           O  
HETATM   74  O   HOH T  73      29.369  42.512  20.488  1.00  0.32           O  
HETATM   75  O   HOH T  74      29.236  58.462  23.729  1.00  0.33           O  
HETATM   76  O   HOH T  75      31.925  10.005  16.245  1.00  0.33           O  
HETATM   77  O   HOH T  76      23.432  24.871  19.498  1.00  0.33           O  
HETATM   78  O   HOH T  77       5.108  42.597  23.831  1.00  0.33           O  
HETATM   79  O   HOH T  78      16.216  21.713  11.145  1.00  0.33           O  
HETATM   80  O   HOH T  79      10.494   7.406   8.886  1.00  0.33           O  
HETATM   81  O   HOH T  80      15.421  11.128  21.719  1.00  0.33           O  
HETATM   82  O   HOH T  81      34.805  24.034  13.133  1.00  0.33           O  
HETATM   83  O   HOH T  82       3.814  24.433   6.872  1.00  0.33           O  
HETATM   84  O   HOH T  83      42.948  28.273  15.256  1.00  0.34           O  
HETATM   85  O   HOH T  84      18.771  52.289  14.533  1.00  0.34           O  
HETATM   86  O   HOH T  85       8.953  22.320  20.200  1.00  0.34           O  
HETATM   87  O   HOH T  86      16.963  39.796  18.932  1.00  0.34           O  
HETATM   88  O   HOH T  87      15.118  34.850   3.028  1.00  0.34           O  
HETATM   89  O   HOH T  88      24.992  32.576   4.048  1.00  0.34           O  
HETATM   90  O   HOH T  89      14.011  13.220  22.705  1.00  0.34           O  
HETATM   91  O   HOH T  90      11.572  30.944  34.102  1.00  0.34           O  
HETATM   92  O   HOH T  91      23.502  16.503  -2.905  1.00  0.35           O  
HETATM   93  O   HOH T  92      35.956  28.422  21.313  1.00  0.35           O  
HETATM   94  O   HOH T  93      16.867  33.461   4.794  1.00  0.35           O  
HETATM   95  O   HOH T  94      33.861  49.996   4.155  1.00  0.35           O  
HETATM   96  O   HOH T  95      14.777  13.318  20.051  1.00  0.35           O  
HETATM   97  O   HOH T  96       1.461  30.856   9.348  1.00  0.35           O  
HETATM   98  O   HOH T  97      11.390  34.288  10.652  1.00  0.35           O  
HETATM   99  O   HOH T  98       3.860  32.241   9.041  1.00  0.36           O  
HETATM  100  O   HOH T  99      24.799  17.202  19.359  1.00  0.36           O  
HETATM  101  O   HOH T 100      21.289  18.538  20.185  1.00  0.36           O  
HETATM  102  O   HOH T 101      24.773  26.777  21.009  1.00  0.36           O  
HETATM  103  O   HOH T 102      21.404  23.430  20.653  1.00  0.36           O  
HETATM  104  O   HOH T 103      20.997  54.416   5.537  1.00  0.36           O  
HETATM  105  O   HOH T 104      14.199  49.768  19.209  1.00  0.36           O  
HETATM  106  O   HOH T 105       6.882  41.512  41.667  1.00  0.36           O  
HETATM  107  O   HOH T 106       4.620  32.782  12.790  1.00  0.36           O  
HETATM  108  O   HOH T 107      13.401  38.632  13.568  1.00  0.36           O  
HETATM  109  O   HOH T 108      -2.513  25.189   3.441  1.00  0.36           O  
HETATM  110  O   HOH T 109      12.870  36.275  12.044  1.00  0.36           O  
HETATM  111  O   HOH T 110      34.728  20.294  14.669  1.00  0.37           O  
HETATM  112  O   HOH T 111      19.218  32.044   4.811  1.00  0.37           O  
HETATM  113  O   HOH T 112      34.940   8.691   5.957  1.00  0.37           O  
HETATM  114  O   HOH T 113      26.748  37.209  19.508  1.00  0.37           O  
HETATM  115  O   HOH T 114      21.128  31.048   3.101  1.00  0.37           O  
HETATM  116  O   HOH T 115       9.691  31.962   1.402  1.00  0.37           O  
HETATM  117  O   HOH T 116      16.232  31.290  32.508  1.00  0.37           O  
HETATM  118  O   HOH T 117       4.632  19.205  11.347  1.00  0.37           O  
HETATM  119  O   HOH T 118       8.097  28.081  32.482  1.00  0.37           O  
HETATM  120  O   HOH T 119      30.333  25.027   1.694  1.00  0.37           O  
HETATM  121  O   HOH T 120      24.440  13.586  12.898  1.00  0.37           O  
HETATM  122  O   HOH T 121      31.398  44.959   1.586  1.00  0.38           O  
HETATM  123  O   HOH T 122      30.070  33.040  -2.485  1.00  0.38           O  
HETATM  124  O   HOH T 123      38.171  43.935  18.043  1.00  0.38           O  
HETATM  125  O   HOH T 124       3.118  30.966  11.415  1.00  0.38           O  
HETATM  126  O   HOH T 125      19.502  16.986  -2.986  1.00  0.38           O  
HETATM  127  O   HOH T 126       5.158  40.505  37.087  1.00  0.38           O  
HETATM  128  O   HOH T 127      37.799  44.673  11.281  1.00  0.38           O  
HETATM  129  O   HOH T 128      19.494   9.338   9.971  1.00  0.38           O  
HETATM  130  O   HOH T 129      -4.824  13.249   9.091  1.00  0.38           O  
HETATM  131  O   HOH T 130       5.703  33.348   5.011  1.00  0.38           O  
HETATM  132  O   HOH T 131      30.831  55.872  13.101  1.00  0.39           O  
HETATM  133  O   HOH T 132      38.544  42.357  12.607  1.00  0.39           O  
HETATM  134  O   HOH T 133      24.496  46.354  25.161  1.00  0.39           O  
HETATM  135  O   HOH T 134      43.482  23.935  16.155  1.00  0.39           O  
HETATM  136  O   HOH T 135      36.707  30.105   8.804  1.00  0.39           O  
HETATM  137  O   HOH T 136       8.202  23.577  25.981  1.00  0.40           O  
HETATM  138  O   HOH T 137       5.713  29.050  29.562  1.00  0.40           O  
HETATM  139  O   HOH T 138       4.856  22.584  22.741  1.00  0.40           O  
HETATM  140  O   HOH T 139       1.890  33.752   2.566  1.00  0.40           O  
HETATM  141  O   HOH T 140      -0.769  33.928  28.151  1.00  0.40           O  
HETATM  142  O   HOH T 141      27.458  58.409  21.661  1.00  0.40           O  
HETATM  143  O   HOH T 142      38.531  50.563   8.962  1.00  0.40           O  
HETATM  144  O   HOH T 143      27.183  21.186   2.132  1.00  0.40           O  
HETATM  145  O   HOH T 144       8.735  26.551  30.138  1.00  0.40           O  
HETATM  146  O   HOH T 145       2.591  35.898  16.356  1.00  0.41           O  
HETATM  147  O   HOH T 146      26.743  58.027  19.027  1.00  0.41           O  
HETATM  148  O   HOH T 147      11.794  18.438  22.536  1.00  0.41           O  
HETATM  149  O   HOH T 148      19.325  54.447  16.079  1.00  0.41           O  
HETATM  150  O   HOH T 149      20.470  56.675   7.149  1.00  0.41           O  
HETATM  151  O   HOH T 150       4.638  43.126  36.378  1.00  0.41           O  
HETATM  152  O   HOH T 151       6.198  19.212   2.265  1.00  0.41           O  
HETATM  153  O   HOH T 152      24.110  41.870  23.723  1.00  0.41           O  
HETATM  154  O   HOH T 153      35.881  49.159   2.432  1.00  0.41           O  
HETATM  155  O   HOH T 154      22.619  25.117  25.395  1.00  0.41           O  
HETATM  156  O   HOH T 155       9.982  34.683   8.245  1.00  0.41           O  
HETATM  157  O   HOH T 156      16.216  50.635  24.524  1.00  0.41           O  
HETATM  158  O   HOH T 157      27.388  47.578  22.780  1.00  0.41           O  
HETATM  159  O   HOH T 158      35.302  22.410  -0.705  1.00  0.41           O  
HETATM  160  O   HOH T 159      23.518  23.539  17.025  1.00  0.42           O  
HETATM  161  O   HOH T 160      -3.720  15.782   9.507  1.00  0.42           O  
HETATM  162  O   HOH T 161      19.549  28.759   2.590  1.00  0.42           O  
HETATM  163  O   HOH T 162      32.839  19.493  21.107  1.00  0.42           O  
HETATM  164  O   HOH T 163      34.633  43.403  -2.199  1.00  0.42           O  
HETATM  165  O   HOH T 164      12.156  36.452  14.758  1.00  0.42           O  
HETATM  166  O   HOH T 165       8.250   8.604   8.035  1.00  0.42           O  
HETATM  167  O   HOH T 166      16.384  11.214   2.752  1.00  0.42           O  
HETATM  168  O   HOH T 167      -0.349  34.267  37.527  1.00  0.42           O  
HETATM  169  O   HOH T 168      12.303  38.062   5.091  1.00  0.43           O  
HETATM  170  O   HOH T 169      17.174  41.205  21.221  1.00  0.43           O  
HETATM  171  O   HOH T 170       0.306  26.215   9.772  1.00  0.43           O  
HETATM  172  O   HOH T 171      25.200  45.201   5.425  1.00  0.43           O  
HETATM  173  O   HOH T 172       8.721  35.106  10.667  1.00  0.43           O  
HETATM  174  O   HOH T 173      27.792  58.717  12.577  1.00  0.43           O  
HETATM  175  O   HOH T 174      24.214  18.189  15.797  1.00  0.43           O  
HETATM  176  O   HOH T 175      -1.148  33.401  24.256  1.00  0.43           O  
HETATM  177  O   HOH T 176      25.524  48.813  24.424  1.00  0.43           O  
HETATM  178  O   HOH T 177       0.126  25.670   4.525  1.00  0.43           O  
HETATM  179  O   HOH T 178      15.336  33.907  32.259  1.00  0.44           O  
HETATM  180  O   HOH T 179      14.265  34.778  29.761  1.00  0.44           O  
HETATM  181  O   HOH T 180      33.553  55.940  17.575  1.00  0.44           O  
HETATM  182  O   HOH T 181      -0.378  26.687   7.193  1.00  0.44           O  
HETATM  183  O   HOH T 182       3.316  33.284   6.500  1.00  0.44           O  
HETATM  184  O   HOH T 183      21.970  51.705  26.204  1.00  0.44           O  
HETATM  185  O   HOH T 184      10.167  33.136   3.839  1.00  0.44           O  
HETATM  186  O   HOH T 185       9.739  25.144   0.897  1.00  0.44           O  
HETATM  187  O   HOH T 186      -0.110  28.778   8.717  1.00  0.44           O  
HETATM  188  O   HOH T 187      16.204  40.408  23.539  1.00  0.44           O  
HETATM  189  O   HOH T 188      14.612  40.391  15.365  1.00  0.44           O  
HETATM  190  O   HOH T 189      30.041  10.029  14.190  1.00  0.44           O  
HETATM  191  O   HOH T 190      32.710   6.974   5.705  1.00  0.45           O  
HETATM  192  O   HOH T 191      23.025  11.975  11.148  1.00  0.45           O  
HETATM  193  O   HOH T 192      15.563  32.323  30.011  1.00  0.45           O  
HETATM  194  O   HOH T 193       6.699  17.709   6.495  1.00  0.45           O  
HETATM  195  O   HOH T 194      25.164  29.017  22.823  1.00  0.45           O  
HETATM  196  O   HOH T 195      20.791   9.997   3.118  1.00  0.45           O  
HETATM  197  O   HOH T 196       4.196  38.332  38.487  1.00  0.45           O  
HETATM  198  O   HOH T 197      37.879  42.955   6.289  1.00  0.45           O  
HETATM  199  O   HOH T 198      27.298  12.248  10.277  1.00  0.45           O  
HETATM  200  O   HOH T 199      26.589  27.409   2.410  1.00  0.45           O  
HETATM  201  O   HOH T 200       4.390  17.106  12.863  1.00  0.45           O  
HETATM  202  O   HOH T 201      17.037  29.162   1.431  1.00  0.45           O  
HETATM  203  O   HOH T 202      25.880  23.496   1.339  1.00  0.45           O  
HETATM  204  O   HOH T 203      37.130  23.260  14.600  1.00  0.45           O  
HETATM  205  O   HOH T 204       9.734  20.309  21.950  1.00  0.45           O  
HETATM  206  O   HOH T 205      31.678  12.757  16.880  1.00  0.45           O  
HETATM  207  O   HOH T 206      15.341  40.269   7.863  1.00  0.45           O  
HETATM  208  O   HOH T 207      13.653  37.222   2.780  1.00  0.45           O  
HETATM  209  O   HOH T 208      26.709  58.204  15.088  1.00  0.45           O  
HETATM  210  O   HOH T 209       5.052  40.663  39.832  1.00  0.45           O  
HETATM  211  O   HOH T 210      28.863  35.588  -2.511  1.00  0.46           O  
HETATM  212  O   HOH T 211      34.392   7.026   8.033  1.00  0.46           O  
HETATM  213  O   HOH T 212      27.870  29.285   0.728  1.00  0.46           O  
HETATM  214  O   HOH T 213       7.542  15.365  24.325  1.00  0.46           O  
HETATM  215  O   HOH T 214       8.793  21.984  23.914  1.00  0.46           O  
HETATM  216  O   HOH T 215      11.706  21.280  -2.964  1.00  0.46           O  
HETATM  217  O   HOH T 216      17.087  59.375  21.159  1.00  0.46           O  
HETATM  218  O   HOH T 217      41.641  25.971  16.255  1.00  0.46           O  
HETATM  219  O   HOH T 218      21.258  15.030  -2.287  1.00  0.46           O  
HETATM  220  O   HOH T 219      29.224  10.531   5.736  1.00  0.46           O  
HETATM  221  O   HOH T 220      12.656  18.662  -2.889  1.00  0.46           O  
HETATM  222  O   HOH T 221      28.621  23.091   0.701  1.00  0.46           O  
HETATM  223  O   HOH T 222      -3.193  20.205  13.336  1.00  0.46           O  
HETATM  224  O   HOH T 223       0.725  32.396  26.085  1.00  0.46           O  
HETATM  225  O   HOH T 224       5.242  20.750   4.468  1.00  0.46           O  
HETATM  226  O   HOH T 225      39.231  45.270   6.713  1.00  0.46           O  
HETATM  227  O   HOH T 226      -0.390  19.190  16.359  1.00  0.46           O  
HETATM  228  O   HOH T 227      30.798  45.834   4.086  1.00  0.46           O  
HETATM  229  O   HOH T 228      21.543  10.433   5.633  1.00  0.46           O  
HETATM  230  O   HOH T 229      23.842  11.913   8.469  1.00  0.47           O  
HETATM  231  O   HOH T 230      39.237  22.054  13.192  1.00  0.47           O  
HETATM  232  O   HOH T 231      15.503  61.024  19.562  1.00  0.47           O  
HETATM  233  O   HOH T 232       6.310  14.060  22.262  1.00  0.47           O  
HETATM  234  O   HOH T 233       8.691  24.370  28.538  1.00  0.47           O  
HETATM  235  O   HOH T 234      15.377  36.531   8.914  1.00  0.47           O  
HETATM  236  O   HOH T 235       4.200  31.361  32.384  1.00  0.47           O  
HETATM  237  O   HOH T 236      26.023  30.950   1.987  1.00  0.47           O  
HETATM  238  O   HOH T 237      19.684   9.666  12.748  1.00  0.47           O  
HETATM  239  O   HOH T 238      14.534  39.486   4.146  1.00  0.48           O  
HETATM  240  O   HOH T 239      37.073  48.834  19.670  1.00  0.48           O  
HETATM  241  O   HOH T 240      38.042  23.372  17.308  1.00  0.48           O  
HETATM  242  O   HOH T 241      29.391  57.705  14.629  1.00  0.48           O  
HETATM  243  O   HOH T 242      -1.639  27.396   1.907  1.00  0.48           O  
HETATM  244  O   HOH T 243      22.996  35.502  -0.870  1.00  0.48           O  
HETATM  245  O   HOH T 244      19.950  36.780  24.280  1.00  0.48           O  
HETATM  246  O   HOH T 245      25.233  39.526  22.797  1.00  0.48           O  
HETATM  247  O   HOH T 246       0.786  29.155   6.247  1.00  0.48           O  
HETATM  248  O   HOH T 247      39.775  33.295  18.642  1.00  0.48           O  
HETATM  249  O   HOH T 248      23.414  51.370  28.531  1.00  0.48           O  
HETATM  250  O   HOH T 249      28.173  12.021   7.760  1.00  0.48           O  
HETATM  251  O   HOH T 250      16.208  43.139  13.751  1.00  0.49           O  
HETATM  252  O   HOH T 251      21.966  55.070   8.896  1.00  0.49           O  
HETATM  253  O   HOH T 252       0.948  29.887  27.356  1.00  0.49           O  
HETATM  254  O   HOH T 253      12.060   4.943  12.711  1.00  0.49           O  
HETATM  255  O   HOH T 254      33.338  49.325   1.428  1.00  0.49           O  
HETATM  256  O   HOH T 255      30.856  54.551  10.661  1.00  0.49           O  
HETATM  257  O   HOH T 256      13.193  48.248  17.241  1.00  0.49           O  
HETATM  258  O   HOH T 257      36.522  49.117  15.820  1.00  0.49           O  
HETATM  259  O   HOH T 258      25.258  24.427  25.700  1.00  0.49           O  
HETATM  260  O   HOH T 259      37.579  31.702  25.174  1.00  0.49           O  
HETATM  261  O   HOH T 260      36.561  44.857   0.528  1.00  0.49           O  
HETATM  262  O   HOH T 261      13.645  41.364   9.734  1.00  0.49           O  
HETATM  263  O   HOH T 262      16.085  37.179   4.194  1.00  0.49           O  
HETATM  264  O   HOH T 263      39.064  47.870   9.590  1.00  0.49           O  
HETATM  265  O   HOH T 264      36.495  43.575  20.277  1.00  0.49           O  
HETATM  266  O   HOH T 265      39.726  49.285  18.540  1.00  0.49           O  
HETATM  267  O   HOH T 266      14.605  43.179  11.517  1.00  0.50           O  
HETATM  268  O   HOH T 267      17.452  44.760  16.039  1.00  0.50           O  
HETATM  269  O   HOH T 268      34.199  17.897  15.936  1.00  0.50           O  
HETATM  270  O   HOH T 269      13.268  37.113  31.070  1.00  0.51           O  
HETATM  271  O   HOH T 270      34.173  31.767  22.406  1.00  0.51           O  
HETATM  272  O   HOH T 271      14.125  32.072  34.137  1.00  0.51           O  
HETATM  273  O   HOH T 272      22.047  25.694  28.008  1.00  0.51           O  
HETATM  274  O   HOH T 273      30.756  46.172  22.836  1.00  0.51           O  
HETATM  275  O   HOH T 274      21.643  37.081  -2.557  1.00  0.51           O  
HETATM  276  O   HOH T 275      35.524  23.087   4.193  1.00  0.51           O  
HETATM  277  O   HOH T 276      44.157  26.527  17.091  1.00  0.51           O  
HETATM  278  O   HOH T 277      26.538  18.022  17.347  1.00  0.51           O  
HETATM  279  O   HOH T 278       7.985  19.461   0.029  1.00  0.52           O  
HETATM  280  O   HOH T 279      18.439   9.785   1.684  1.00  0.52           O  
HETATM  281  O   HOH T 280      33.748  44.932   0.051  1.00  0.52           O  
HETATM  282  O   HOH T 281       7.576  32.448   3.135  1.00  0.52           O  
HETATM  283  O   HOH T 282       8.144   7.237  10.477  1.00  0.52           O  
HETATM  284  O   HOH T 283      30.125   7.969   5.590  1.00  0.52           O  
HETATM  285  O   HOH T 284      21.305  11.261   9.210  1.00  0.52           O  
HETATM  286  O   HOH T 285      37.332  45.725   8.742  1.00  0.52           O  
HETATM  287  O   HOH T 286      23.528  46.676   7.078  1.00  0.53           O  
HETATM  288  O   HOH T 287      21.063  48.518   4.075  1.00  0.53           O  
HETATM  289  O   HOH T 288      14.746  37.932   6.523  1.00  0.53           O  
HETATM  290  O   HOH T 289      21.201   8.831   7.876  1.00  0.53           O  
HETATM  291  O   HOH T 290       3.725  12.983  22.250  1.00  0.53           O  
HETATM  292  O   HOH T 291      36.762  21.123  16.313  1.00  0.53           O  
HETATM  293  O   HOH T 292      38.954  32.100  22.806  1.00  0.53           O  
HETATM  294  O   HOH T 293       3.605  34.992   4.298  1.00  0.53           O  
HETATM  295  O   HOH T 294      33.278  33.912  18.104  1.00  0.53           O  
HETATM  296  O   HOH T 295      30.018  41.155  -3.281  1.00  0.53           O  
HETATM  297  O   HOH T 296      -3.925  30.898  35.761  1.00  0.53           O  
HETATM  298  O   HOH T 297       1.309  16.779  16.232  1.00  0.53           O  
HETATM  299  O   HOH T 298      15.333  42.983  16.437  1.00  0.53           O  
HETATM  300  O   HOH T 299      26.891  37.328  -3.285  1.00  0.53           O  
HETATM  301  O   HOH T 300       6.323  14.586  26.730  1.00  0.54           O  
HETATM  302  O   HOH T 301       7.206  15.390  10.552  1.00  0.54           O  
HETATM  303  O   HOH T 302       8.194  10.549   0.221  1.00  0.54           O  
HETATM  304  O   HOH T 303      -1.714  35.472  26.012  1.00  0.54           O  
HETATM  305  O   HOH T 304      16.322   8.020   7.928  1.00  0.54           O  
HETATM  306  O   HOH T 305      12.222  38.971  16.098  1.00  0.54           O  
HETATM  307  O   HOH T 306      25.515  11.149  12.044  1.00  0.54           O  
HETATM  308  O   HOH T 307       7.664  18.556   8.877  1.00  0.54           O  
HETATM  309  O   HOH T 308      39.780  30.510  18.435  1.00  0.54           O  
HETATM  310  O   HOH T 309      24.529  33.179   1.463  1.00  0.55           O  
HETATM  311  O   HOH T 310      10.560  32.415  36.327  1.00  0.55           O  
HETATM  312  O   HOH T 311      35.707  51.091  18.768  1.00  0.55           O  
HETATM  313  O   HOH T 312      38.219  40.735  10.677  1.00  0.55           O  
HETATM  314  O   HOH T 313       4.059  27.532  31.557  1.00  0.55           O  
HETATM  315  O   HOH T 314      16.994  23.426  -9.016  1.00  0.55           O  
HETATM  316  O   HOH T 315      14.663   8.127  16.001  1.00  0.55           O  
HETATM  317  O   HOH T 316       1.723  27.176  30.140  1.00  0.56           O  
HETATM  318  O   HOH T 317      25.834  25.977   0.114  1.00  0.56           O  
HETATM  319  O   HOH T 318       7.255  26.078   1.503  1.00  0.56           O  
HETATM  320  O   HOH T 319      12.156  39.594  33.963  1.00  0.57           O  
HETATM  321  O   HOH T 320      26.919  34.135  23.760  1.00  0.57           O  
HETATM  322  O   HOH T 321      24.086  57.781  14.406  1.00  0.57           O  
HETATM  323  O   HOH T 322       5.536  28.986  33.225  1.00  0.57           O  
HETATM  324  O   HOH T 323      23.028  56.133   6.585  1.00  0.57           O  
HETATM  325  O   HOH T 324       0.722  25.792   1.680  1.00  0.59           O  
HETATM  326  O   HOH T 325      17.090  16.014  -4.386  1.00  0.59           O  
HETATM  327  O   HOH T 326       3.326  24.259  24.221  1.00  0.60           O  
HETATM  328  O   HOH T 327      32.225  35.916  26.705  1.00  0.61           O  
HETATM  329  O   HOH T 328       3.254  28.402  28.431  1.00  0.63           O  
TER     330      HOH T 328 
