# Supplementary material for: Accurate Prediction of Hydration Sites of Proteins Using Energy Model With Atom Embedding
Source: Front Mol Biosci. 2021 Sep 20;8:756075. doi: 10.3389/fmolb.2021.756075 (PMC8488165; doi:10.3389/fmolb.2021.756075)
Supplement: Supplementary file 1 [file DataSheet1.ZIP › Data Sheet 1/Our_result_pdb/our_dataset_output/3KT9_watersite.pdb]

HEADER                                                        XXXX


JRNL        PMID   -1
HETATM    1  O   HOH T   0      21.210 -13.858  17.994  1.00  0.17           O  
HETATM    2  O   HOH T   1      14.660   9.401   3.506  1.00  0.19           O  
HETATM    3  O   HOH T   2      16.605   6.114  17.131  1.00  0.20           O  
HETATM    4  O   HOH T   3      11.197   3.868   4.774  1.00  0.20           O  
HETATM    5  O   HOH T   4      23.571 -12.298   0.673  1.00  0.22           O  
HETATM    6  O   HOH T   5      15.949  -8.128  20.226  1.00  0.22           O  
HETATM    7  O   HOH T   6       6.078 -17.036  15.159  1.00  0.24           O  
HETATM    8  O   HOH T   7       3.653  11.769  14.957  1.00  0.24           O  
HETATM    9  O   HOH T   8       9.149 -22.523  18.379  1.00  0.26           O  
HETATM   10  O   HOH T   9      21.589  -7.002   5.288  1.00  0.26           O  
HETATM   11  O   HOH T  10      25.131   4.965   3.037  1.00  0.26           O  
HETATM   12  O   HOH T  11      18.063   8.442  17.217  1.00  0.27           O  
HETATM   13  O   HOH T  12      29.631   4.047  15.681  1.00  0.27           O  
HETATM   14  O   HOH T  13       7.021 -19.596  15.588  1.00  0.27           O  
HETATM   15  O   HOH T  14       6.641   3.875  20.047  1.00  0.28           O  
HETATM   16  O   HOH T  15       6.725  -1.290   8.876  1.00  0.28           O  
HETATM   17  O   HOH T  16      20.201 -11.960   2.608  1.00  0.29           O  
HETATM   18  O   HOH T  17       7.195  18.274   9.927  1.00  0.29           O  
HETATM   19  O   HOH T  18      20.357  18.568   9.112  1.00  0.29           O  
HETATM   20  O   HOH T  19      16.244 -16.008   6.875  1.00  0.29           O  
HETATM   21  O   HOH T  20      26.073 -11.219   0.283  1.00  0.30           O  
HETATM   22  O   HOH T  21      24.977 -11.261  26.753  1.00  0.30           O  
HETATM   23  O   HOH T  22       4.588   2.552  18.885  1.00  0.30           O  
HETATM   24  O   HOH T  23      12.075  -3.907   0.810  1.00  0.30           O  
HETATM   25  O   HOH T  24       9.294   0.393  22.318  1.00  0.30           O  
HETATM   26  O   HOH T  25       7.771   3.971  -7.792  1.00  0.31           O  
HETATM   27  O   HOH T  26      25.504 -12.011   5.916  1.00  0.31           O  
HETATM   28  O   HOH T  27       1.961   9.628  15.031  1.00  0.31           O  
HETATM   29  O   HOH T  28      13.515 -15.155   1.709  1.00  0.31           O  
HETATM   30  O   HOH T  29      14.526 -14.524  13.087  1.00  0.31           O  
HETATM   31  O   HOH T  30       3.124  10.584  17.393  1.00  0.32           O  
HETATM   32  O   HOH T  31      19.523   2.715  28.700  1.00  0.32           O  
HETATM   33  O   HOH T  32      15.486  18.735   4.668  1.00  0.33           O  
HETATM   34  O   HOH T  33      15.939 -14.026   1.505  1.00  0.33           O  
HETATM   35  O   HOH T  34      18.789  -0.999  25.182  1.00  0.33           O  
HETATM   36  O   HOH T  35      14.015  15.020  -2.292  1.00  0.33           O  
HETATM   37  O   HOH T  36      25.627   0.603  19.927  1.00  0.34           O  
HETATM   38  O   HOH T  37      14.045  15.217   0.415  1.00  0.34           O  
HETATM   39  O   HOH T  38      14.557   1.638  -0.627  1.00  0.34           O  
HETATM   40  O   HOH T  39      23.997 -11.895  24.161  1.00  0.34           O  
HETATM   41  O   HOH T  40      26.670  -5.371  16.995  1.00  0.34           O  
HETATM   42  O   HOH T  41       1.191  -4.276  16.674  1.00  0.34           O  
HETATM   43  O   HOH T  42      19.109  -3.832  25.353  1.00  0.35           O  
HETATM   44  O   HOH T  43      15.519  -8.227   3.585  1.00  0.35           O  
HETATM   45  O   HOH T  44       8.365  -0.874  -0.729  1.00  0.36           O  
HETATM   46  O   HOH T  45      17.238  12.928  14.115  1.00  0.36           O  
HETATM   47  O   HOH T  46      11.386 -13.557   7.995  1.00  0.36           O  
HETATM   48  O   HOH T  47      23.703 -14.772  18.690  1.00  0.36           O  
HETATM   49  O   HOH T  48      11.969  19.438   6.144  1.00  0.36           O  
HETATM   50  O   HOH T  49      10.897  17.081   6.916  1.00  0.36           O  
HETATM   51  O   HOH T  50       9.017   2.556  20.612  1.00  0.37           O  
HETATM   52  O   HOH T  51      17.996   4.220  23.878  1.00  0.37           O  
HETATM   53  O   HOH T  52       6.966  -1.030  22.742  1.00  0.38           O  
HETATM   54  O   HOH T  53      28.316  -7.228  15.469  1.00  0.38           O  
HETATM   55  O   HOH T  54      16.101   9.395   1.156  1.00  0.38           O  
HETATM   56  O   HOH T  55      21.739 -12.398  22.649  1.00  0.38           O  
HETATM   57  O   HOH T  56      19.033  -7.038   4.376  1.00  0.38           O  
HETATM   58  O   HOH T  57       6.877  -3.666  21.939  1.00  0.38           O  
HETATM   59  O   HOH T  58      27.271   5.711   4.652  1.00  0.38           O  
HETATM   60  O   HOH T  59      17.680  -2.630  -0.849  1.00  0.39           O  
HETATM   61  O   HOH T  60      16.376  16.533  12.230  1.00  0.39           O  
HETATM   62  O   HOH T  61      30.068  -9.570   8.210  1.00  0.39           O  
HETATM   63  O   HOH T  62      28.631  -6.422   2.455  1.00  0.39           O  
HETATM   64  O   HOH T  63      24.266  -7.827  26.903  1.00  0.39           O  
HETATM   65  O   HOH T  64      15.113 -20.098  21.099  1.00  0.39           O  
HETATM   66  O   HOH T  65      16.803  16.903   3.018  1.00  0.40           O  
HETATM   67  O   HOH T  66       5.649  -8.705   9.647  1.00  0.40           O  
HETATM   68  O   HOH T  67       9.862  17.549   9.702  1.00  0.40           O  
HETATM   69  O   HOH T  68      27.584   0.289   4.568  1.00  0.41           O  
HETATM   70  O   HOH T  69      18.643  13.212  -1.409  1.00  0.41           O  
HETATM   71  O   HOH T  70      16.554   1.648   1.242  1.00  0.41           O  
HETATM   72  O   HOH T  71       5.271  -5.651  21.392  1.00  0.41           O  
HETATM   73  O   HOH T  72      29.163   6.880   6.167  1.00  0.41           O  
HETATM   74  O   HOH T  73       2.911  16.470   9.876  1.00  0.41           O  
HETATM   75  O   HOH T  74      29.933   4.945   4.523  1.00  0.41           O  
HETATM   76  O   HOH T  75       3.934 -12.635  16.880  1.00  0.42           O  
HETATM   77  O   HOH T  76      22.830  11.374   9.769  1.00  0.42           O  
HETATM   78  O   HOH T  77      20.552  18.623  11.943  1.00  0.42           O  
HETATM   79  O   HOH T  78      24.658   9.273  10.203  1.00  0.42           O  
HETATM   80  O   HOH T  79      15.078   8.067  -1.072  1.00  0.42           O  
HETATM   81  O   HOH T  80      21.125  -6.887   2.523  1.00  0.43           O  
HETATM   82  O   HOH T  81      12.635  -6.177  -0.573  1.00  0.43           O  
HETATM   83  O   HOH T  82      20.896  -7.829  -2.780  1.00  0.43           O  
HETATM   84  O   HOH T  83       2.163  -2.447  18.554  1.00  0.43           O  
HETATM   85  O   HOH T  84      18.057   8.056  26.875  1.00  0.43           O  
HETATM   86  O   HOH T  85      10.587   0.638  -0.792  1.00  0.43           O  
HETATM   87  O   HOH T  86      18.777  -9.698   3.544  1.00  0.43           O  
HETATM   88  O   HOH T  87      17.752 -17.911   9.899  1.00  0.43           O  
HETATM   89  O   HOH T  88      25.169  -0.889   4.068  1.00  0.43           O  
HETATM   90  O   HOH T  89      26.732   2.970   4.413  1.00  0.43           O  
HETATM   91  O   HOH T  90      20.530  15.791  11.605  1.00  0.44           O  
HETATM   92  O   HOH T  91      19.948   6.257  23.444  1.00  0.44           O  
HETATM   93  O   HOH T  92      14.357 -19.346  11.959  1.00  0.44           O  
HETATM   94  O   HOH T  93       6.205 -12.445   9.444  1.00  0.44           O  
HETATM   95  O   HOH T  94      23.880 -15.731   5.476  1.00  0.44           O  
HETATM   96  O   HOH T  95      15.029  21.350   4.103  1.00  0.44           O  
HETATM   97  O   HOH T  96       1.410   9.446  12.381  1.00  0.44           O  
HETATM   98  O   HOH T  97      22.611   0.942   8.575  1.00  0.44           O  
HETATM   99  O   HOH T  98      23.473 -13.212   4.539  1.00  0.44           O  
HETATM  100  O   HOH T  99       6.229  -5.613  23.947  1.00  0.45           O  
HETATM  101  O   HOH T 100      27.651 -10.579   2.453  1.00  0.45           O  
HETATM  102  O   HOH T 101      14.299 -14.516   5.542  1.00  0.45           O  
HETATM  103  O   HOH T 102      25.764 -13.390  17.629  1.00  0.45           O  
HETATM  104  O   HOH T 103      29.146  -8.754   0.955  1.00  0.45           O  
HETATM  105  O   HOH T 104      15.762  22.089   1.481  1.00  0.45           O  
HETATM  106  O   HOH T 105      33.167   0.538  12.347  1.00  0.46           O  
HETATM  107  O   HOH T 106       5.686   5.849   8.889  1.00  0.46           O  
HETATM  108  O   HOH T 107      27.355   8.618  10.555  1.00  0.47           O  
HETATM  109  O   HOH T 108      29.233  -8.776   3.748  1.00  0.47           O  
HETATM  110  O   HOH T 109      21.880 -14.328  20.687  1.00  0.47           O  
HETATM  111  O   HOH T 110      21.000  -5.744  25.915  1.00  0.47           O  
HETATM  112  O   HOH T 111      27.551  -6.099  10.921  1.00  0.47           O  
HETATM  113  O   HOH T 112      17.273  10.810  15.805  1.00  0.47           O  
HETATM  114  O   HOH T 113      31.870  -7.599   8.928  1.00  0.47           O  
HETATM  115  O   HOH T 114      12.033 -14.624   4.013  1.00  0.47           O  
HETATM  116  O   HOH T 115      17.798  21.988   3.293  1.00  0.47           O  
HETATM  117  O   HOH T 116       2.999   2.210  16.790  1.00  0.48           O  
HETATM  118  O   HOH T 117      21.074  13.678   4.693  1.00  0.48           O  
HETATM  119  O   HOH T 118      29.389   2.321   4.734  1.00  0.48           O  
HETATM  120  O   HOH T 119      27.409  -2.457   4.840  1.00  0.48           O  
HETATM  121  O   HOH T 120       4.112   8.901  -0.077  1.00  0.48           O  
HETATM  122  O   HOH T 121      26.501   5.962  16.455  1.00  0.48           O  
HETATM  123  O   HOH T 122      22.617  13.853  11.124  1.00  0.49           O  
HETATM  124  O   HOH T 123       9.462   2.100  -6.481  1.00  0.49           O  
HETATM  125  O   HOH T 124      18.529  15.241  13.533  1.00  0.49           O  
HETATM  126  O   HOH T 125       8.509  18.560   7.588  1.00  0.49           O  
HETATM  127  O   HOH T 126       9.484  18.650   5.079  1.00  0.49           O  
HETATM  128  O   HOH T 127       0.821  -1.581  16.229  1.00  0.49           O  
HETATM  129  O   HOH T 128       5.343   0.721  24.149  1.00  0.49           O  
HETATM  130  O   HOH T 129      22.804  -9.768  25.662  1.00  0.49           O  
HETATM  131  O   HOH T 130      27.047  -9.947   5.074  1.00  0.49           O  
HETATM  132  O   HOH T 131      16.276  19.240  11.400  1.00  0.50           O  
HETATM  133  O   HOH T 132      12.851   0.156  -2.326  1.00  0.50           O  
HETATM  134  O   HOH T 133      29.673  -8.038  10.568  1.00  0.50           O  
HETATM  135  O   HOH T 134      12.113 -15.715  10.387  1.00  0.50           O  
HETATM  136  O   HOH T 135       9.599 -14.967   9.543  1.00  0.50           O  
HETATM  137  O   HOH T 136      -1.457  14.033  11.399  1.00  0.50           O  
HETATM  138  O   HOH T 137       2.635   4.392  18.506  1.00  0.50           O  
HETATM  139  O   HOH T 138      18.776  20.391  10.633  1.00  0.50           O  
HETATM  140  O   HOH T 139      19.592   3.993  26.174  1.00  0.50           O  
HETATM  141  O   HOH T 140      25.205 -17.772  13.041  1.00  0.51           O  
HETATM  142  O   HOH T 141       5.565   0.854   0.750  1.00  0.51           O  
HETATM  143  O   HOH T 142      16.294   5.945  26.822  1.00  0.51           O  
HETATM  144  O   HOH T 143      12.339  21.879   4.871  1.00  0.51           O  
HETATM  145  O   HOH T 144      18.974   8.808  24.302  1.00  0.51           O  
HETATM  146  O   HOH T 145       4.758  18.291  11.196  1.00  0.52           O  
HETATM  147  O   HOH T 146      18.814  -2.171  27.619  1.00  0.52           O  
HETATM  148  O   HOH T 147       9.999  -5.672  -0.022  1.00  0.52           O  
HETATM  149  O   HOH T 148      16.467   7.759  24.741  1.00  0.52           O  
HETATM  150  O   HOH T 149      23.264  17.201   0.225  1.00  0.52           O  
HETATM  151  O   HOH T 150       1.571  -4.999  19.334  1.00  0.53           O  
HETATM  152  O   HOH T 151      21.433 -19.320   4.767  1.00  0.53           O  
HETATM  153  O   HOH T 152      30.860  -2.241   9.995  1.00  0.54           O  
HETATM  154  O   HOH T 153      15.411 -17.070  10.739  1.00  0.54           O  
HETATM  155  O   HOH T 154       8.121   1.201  -2.428  1.00  0.54           O  
HETATM  156  O   HOH T 155      24.363  12.311   4.862  1.00  0.54           O  
HETATM  157  O   HOH T 156      24.932   2.353   2.422  1.00  0.54           O  
HETATM  158  O   HOH T 157      33.133  -4.150  10.451  1.00  0.54           O  
HETATM  159  O   HOH T 158      17.015 -18.768  12.282  1.00  0.55           O  
HETATM  160  O   HOH T 159       3.942  13.009   5.771  1.00  0.55           O  
HETATM  161  O   HOH T 160      26.921 -17.219   9.675  1.00  0.55           O  
HETATM  162  O   HOH T 161      15.469 -19.510  14.500  1.00  0.56           O  
HETATM  163  O   HOH T 162      11.413 -13.491   1.676  1.00  0.56           O  
HETATM  164  O   HOH T 163      17.004 -17.017  18.601  1.00  0.56           O  
HETATM  165  O   HOH T 164      14.021  11.107   1.500  1.00  0.56           O  
HETATM  166  O   HOH T 165      18.416  17.564  10.763  1.00  0.57           O  
HETATM  167  O   HOH T 166      35.105  -1.490  11.475  1.00  0.57           O  
TER     168      HOH T 166 
