# Supplementary material for: Accurate Prediction of Hydration Sites of Proteins Using Energy Model With Atom Embedding
Source: Front Mol Biosci. 2021 Sep 20;8:756075. doi: 10.3389/fmolb.2021.756075 (PMC8488165; doi:10.3389/fmolb.2021.756075)
Supplement: Supplementary file 1 [file DataSheet1.ZIP › Data Sheet 1/Our_result_pdb/our_dataset_output/3LNX_watersite.pdb]

HEADER                                                        XXXX


JRNL        PMID   -1
HETATM    1  O   HOH T   0     -11.791 -18.236  30.126  1.00  0.13           O  
HETATM    2  O   HOH T   1       9.681  18.950  29.006  1.00  0.13           O  
HETATM    3  O   HOH T   2      -7.994 -18.289  56.117  1.00  0.16           O  
HETATM    4  O   HOH T   3     -13.725  21.446  40.399  1.00  0.17           O  
HETATM    5  O   HOH T   4     -10.822 -13.475  40.323  1.00  0.17           O  
HETATM    6  O   HOH T   5     -11.275 -12.018  33.360  1.00  0.18           O  
HETATM    7  O   HOH T   6      15.185  -9.231  36.809  1.00  0.18           O  
HETATM    8  O   HOH T   7      -2.581  29.021  32.345  1.00  0.18           O  
HETATM    9  O   HOH T   8       7.692  19.497  55.256  1.00  0.18           O  
HETATM   10  O   HOH T   9       5.538   8.055  58.031  1.00  0.18           O  
HETATM   11  O   HOH T  10       1.102 -14.548  50.259  1.00  0.19           O  
HETATM   12  O   HOH T  11       9.253  12.729  32.408  1.00  0.19           O  
HETATM   13  O   HOH T  12      -3.002 -18.005  49.349  1.00  0.19           O  
HETATM   14  O   HOH T  13      -6.799 -10.848  40.600  1.00  0.19           O  
HETATM   15  O   HOH T  14      -1.792  15.380  50.070  1.00  0.19           O  
HETATM   16  O   HOH T  15       6.234  22.220  30.642  1.00  0.19           O  
HETATM   17  O   HOH T  16      13.137  -2.483  52.043  1.00  0.20           O  
HETATM   18  O   HOH T  17       2.495   7.020  55.644  1.00  0.20           O  
HETATM   19  O   HOH T  18      -5.429  15.626  34.992  1.00  0.20           O  
HETATM   20  O   HOH T  19      -0.656   5.553  21.405  1.00  0.20           O  
HETATM   21  O   HOH T  20      -2.549  -4.741  21.498  1.00  0.20           O  
HETATM   22  O   HOH T  21      -3.469  12.502  38.155  1.00  0.20           O  
HETATM   23  O   HOH T  22      -4.533 -12.498  54.126  1.00  0.20           O  
HETATM   24  O   HOH T  23       4.179  13.426  53.636  1.00  0.20           O  
HETATM   25  O   HOH T  24     -11.660  14.941  38.654  1.00  0.21           O  
HETATM   26  O   HOH T  25       4.326 -18.819  38.907  1.00  0.21           O  
HETATM   27  O   HOH T  26      11.775   7.035  28.861  1.00  0.21           O  
HETATM   28  O   HOH T  27      -0.246 -11.466  46.865  1.00  0.21           O  
HETATM   29  O   HOH T  28      10.187 -14.134  38.056  1.00  0.21           O  
HETATM   30  O   HOH T  29     -17.785 -11.681  41.325  1.00  0.21           O  
HETATM   31  O   HOH T  30     -16.790  10.032  37.927  1.00  0.21           O  
HETATM   32  O   HOH T  31     -17.531   7.343  52.003  1.00  0.21           O  
HETATM   33  O   HOH T  32      -8.977 -21.254  52.125  1.00  0.21           O  
HETATM   34  O   HOH T  33       1.932 -11.617  38.165  1.00  0.21           O  
HETATM   35  O   HOH T  34       1.740   2.695  16.522  1.00  0.22           O  
HETATM   36  O   HOH T  35      -0.617  12.269  46.708  1.00  0.22           O  
HETATM   37  O   HOH T  36      -5.803  19.608  38.991  1.00  0.22           O  
HETATM   38  O   HOH T  37      -5.053 -17.977  26.984  1.00  0.22           O  
HETATM   39  O   HOH T  38     -18.550   8.656  56.906  1.00  0.22           O  
HETATM   40  O   HOH T  39       5.927  16.189  38.229  1.00  0.22           O  
HETATM   41  O   HOH T  40      12.584 -20.591  39.582  1.00  0.22           O  
HETATM   42  O   HOH T  41       2.771  19.119  26.275  1.00  0.22           O  
HETATM   43  O   HOH T  42       8.626  19.929  19.456  1.00  0.22           O  
HETATM   44  O   HOH T  43     -14.067  -6.473  29.995  1.00  0.23           O  
HETATM   45  O   HOH T  44     -10.211  23.915  42.769  1.00  0.23           O  
HETATM   46  O   HOH T  45       2.329 -24.200  45.251  1.00  0.23           O  
HETATM   47  O   HOH T  46      17.568   3.994  51.341  1.00  0.23           O  
HETATM   48  O   HOH T  47       2.345  19.570  48.904  1.00  0.23           O  
HETATM   49  O   HOH T  48      19.032  17.030  53.203  1.00  0.23           O  
HETATM   50  O   HOH T  49       5.732 -13.648  55.874  1.00  0.23           O  
HETATM   51  O   HOH T  50     -12.136  11.779  58.238  1.00  0.23           O  
HETATM   52  O   HOH T  51      -8.857 -19.165  37.725  1.00  0.23           O  
HETATM   53  O   HOH T  52       9.284 -23.092  42.418  1.00  0.23           O  
HETATM   54  O   HOH T  53      -5.428  -7.112  58.627  1.00  0.23           O  
HETATM   55  O   HOH T  54     -24.913  12.262  64.773  1.00  0.23           O  
HETATM   56  O   HOH T  55     -23.337  25.006  51.091  1.00  0.23           O  
HETATM   57  O   HOH T  56      -1.942 -15.758  48.031  1.00  0.23           O  
HETATM   58  O   HOH T  57     -13.940 -17.364  51.650  1.00  0.23           O  
HETATM   59  O   HOH T  58     -13.408   8.599  36.425  1.00  0.23           O  
HETATM   60  O   HOH T  59     -12.177  23.176  34.436  1.00  0.24           O  
HETATM   61  O   HOH T  60      -7.631  -2.438  10.232  1.00  0.24           O  
HETATM   62  O   HOH T  61      19.949 -17.910  38.744  1.00  0.24           O  
HETATM   63  O   HOH T  62      18.650  -7.378  55.335  1.00  0.24           O  
HETATM   64  O   HOH T  63      -5.607  14.438  55.952  1.00  0.24           O  
HETATM   65  O   HOH T  64       3.699 -14.881  34.893  1.00  0.25           O  
HETATM   66  O   HOH T  65      16.991  -6.118  50.747  1.00  0.25           O  
HETATM   67  O   HOH T  66       9.267  14.393  39.462  1.00  0.25           O  
HETATM   68  O   HOH T  67       5.367  11.654  40.000  1.00  0.25           O  
HETATM   69  O   HOH T  68      13.484 -17.079  33.421  1.00  0.25           O  
HETATM   70  O   HOH T  69      -8.214 -21.340  31.398  1.00  0.25           O  
HETATM   71  O   HOH T  70     -15.172  17.850  34.204  1.00  0.25           O  
HETATM   72  O   HOH T  71       1.859 -17.911  57.107  1.00  0.25           O  
HETATM   73  O   HOH T  72      -1.780  18.836  57.025  1.00  0.25           O  
HETATM   74  O   HOH T  73      -2.378 -15.381  59.695  1.00  0.25           O  
HETATM   75  O   HOH T  74      12.837   6.196  22.766  1.00  0.25           O  
HETATM   76  O   HOH T  75      11.557  -7.806  35.705  1.00  0.25           O  
HETATM   77  O   HOH T  76      -7.490 -15.425  38.894  1.00  0.26           O  
HETATM   78  O   HOH T  77      -3.833   7.034  17.860  1.00  0.26           O  
HETATM   79  O   HOH T  78       3.189 -16.324  38.726  1.00  0.26           O  
HETATM   80  O   HOH T  79      -7.519 -18.786  61.732  1.00  0.26           O  
HETATM   81  O   HOH T  80     -23.070 -10.964  43.757  1.00  0.26           O  
HETATM   82  O   HOH T  81       0.106  -6.294  17.567  1.00  0.26           O  
HETATM   83  O   HOH T  82      -4.224   9.970  38.804  1.00  0.26           O  
HETATM   84  O   HOH T  83       4.603  31.443  27.625  1.00  0.26           O  
HETATM   85  O   HOH T  84       5.059  30.221  30.123  1.00  0.26           O  
HETATM   86  O   HOH T  85     -12.607  20.909  47.698  1.00  0.26           O  
HETATM   87  O   HOH T  86      -9.488  14.836  22.624  1.00  0.26           O  
HETATM   88  O   HOH T  87     -16.185 -14.187  24.980  1.00  0.26           O  
HETATM   89  O   HOH T  88      11.398  28.308  30.631  1.00  0.27           O  
HETATM   90  O   HOH T  89     -20.848  31.634  40.305  1.00  0.27           O  
HETATM   91  O   HOH T  90      25.384  -5.639  57.386  1.00  0.27           O  
HETATM   92  O   HOH T  91     -22.007  -7.754  45.899  1.00  0.27           O  
HETATM   93  O   HOH T  92       6.721  -3.535  38.218  1.00  0.27           O  
HETATM   94  O   HOH T  93      10.772  -4.841  27.225  1.00  0.27           O  
HETATM   95  O   HOH T  94       2.416  21.833  57.046  1.00  0.27           O  
HETATM   96  O   HOH T  95     -16.557 -19.841  62.301  1.00  0.27           O  
HETATM   97  O   HOH T  96       1.174   6.289  51.368  1.00  0.28           O  
HETATM   98  O   HOH T  97      -8.308  14.407  28.812  1.00  0.28           O  
HETATM   99  O   HOH T  98       6.504  24.262  44.371  1.00  0.28           O  
HETATM  100  O   HOH T  99      14.033  16.369  49.209  1.00  0.28           O  
HETATM  101  O   HOH T 100      19.269 -15.757  37.082  1.00  0.28           O  
HETATM  102  O   HOH T 101     -19.536  24.461  49.432  1.00  0.28           O  
HETATM  103  O   HOH T 102     -23.217  -3.850  51.805  1.00  0.28           O  
HETATM  104  O   HOH T 103      11.837 -19.602  46.919  1.00  0.28           O  
HETATM  105  O   HOH T 104     -17.909  -2.869  52.956  1.00  0.28           O  
HETATM  106  O   HOH T 105     -21.292   2.481  54.210  1.00  0.28           O  
HETATM  107  O   HOH T 106      -4.629  17.053  38.738  1.00  0.28           O  
HETATM  108  O   HOH T 107      -9.074   7.236  37.725  1.00  0.28           O  
HETATM  109  O   HOH T 108       5.812 -13.472  28.755  1.00  0.28           O  
HETATM  110  O   HOH T 109     -15.088  -7.514  38.736  1.00  0.28           O  
HETATM  111  O   HOH T 110     -22.967   5.457  52.461  1.00  0.28           O  
HETATM  112  O   HOH T 111      16.054  16.200  51.094  1.00  0.28           O  
HETATM  113  O   HOH T 112      17.711 -19.245  50.258  1.00  0.28           O  
HETATM  114  O   HOH T 113     -26.902  -4.438  68.921  1.00  0.28           O  
HETATM  115  O   HOH T 114     -14.866 -20.291  33.737  1.00  0.28           O  
HETATM  116  O   HOH T 115      -1.108   7.304  40.290  1.00  0.28           O  
HETATM  117  O   HOH T 116     -22.785   9.763  40.080  1.00  0.28           O  
HETATM  118  O   HOH T 117       4.850   9.127  39.194  1.00  0.28           O  
HETATM  119  O   HOH T 118       5.453  -2.655  63.159  1.00  0.28           O  
HETATM  120  O   HOH T 119     -18.129 -16.786  49.048  1.00  0.28           O  
HETATM  121  O   HOH T 120      12.535 -18.762  51.551  1.00  0.29           O  
HETATM  122  O   HOH T 121       6.727  19.649  36.832  1.00  0.29           O  
HETATM  123  O   HOH T 122      14.086  12.982  25.087  1.00  0.29           O  
HETATM  124  O   HOH T 123      -0.751   7.278  43.050  1.00  0.29           O  
HETATM  125  O   HOH T 124     -25.020  -0.635  63.061  1.00  0.29           O  
HETATM  126  O   HOH T 125       1.441   7.056  41.380  1.00  0.29           O  
HETATM  127  O   HOH T 126      20.504   1.441  42.937  1.00  0.29           O  
HETATM  128  O   HOH T 127      28.403   8.392  59.236  1.00  0.29           O  
HETATM  129  O   HOH T 128       4.843 -10.160  21.842  1.00  0.29           O  
HETATM  130  O   HOH T 129      12.717  13.696  30.442  1.00  0.29           O  
HETATM  131  O   HOH T 130      19.801  -9.000  38.273  1.00  0.29           O  
HETATM  132  O   HOH T 131       7.744   5.600  35.765  1.00  0.29           O  
HETATM  133  O   HOH T 132     -14.773 -13.064  31.661  1.00  0.29           O  
HETATM  134  O   HOH T 133       5.957   3.694  36.677  1.00  0.29           O  
HETATM  135  O   HOH T 134     -17.192 -14.054  32.695  1.00  0.29           O  
HETATM  136  O   HOH T 135       1.924  10.972   7.722  1.00  0.29           O  
HETATM  137  O   HOH T 136      20.969   8.993  44.463  1.00  0.29           O  
HETATM  138  O   HOH T 137       1.710   0.664  53.950  1.00  0.29           O  
HETATM  139  O   HOH T 138      -8.064   4.927  38.740  1.00  0.29           O  
HETATM  140  O   HOH T 139     -19.347 -15.714  54.289  1.00  0.29           O  
HETATM  141  O   HOH T 140      10.634   3.318  19.706  1.00  0.29           O  
HETATM  142  O   HOH T 141     -23.154  -1.032  51.590  1.00  0.30           O  
HETATM  143  O   HOH T 142      29.006 -13.636  55.184  1.00  0.30           O  
HETATM  144  O   HOH T 143       5.450  21.620  21.606  1.00  0.30           O  
HETATM  145  O   HOH T 144     -16.383 -18.827  59.676  1.00  0.30           O  
HETATM  146  O   HOH T 145      15.288  18.231  36.929  1.00  0.30           O  
HETATM  147  O   HOH T 146      17.505 -21.800  36.435  1.00  0.30           O  
HETATM  148  O   HOH T 147      -0.825  -8.830  47.047  1.00  0.30           O  
HETATM  149  O   HOH T 148       8.707  13.908  61.599  1.00  0.30           O  
HETATM  150  O   HOH T 149      -9.803   2.360  63.080  1.00  0.30           O  
HETATM  151  O   HOH T 150       2.820  -9.128  38.682  1.00  0.30           O  
HETATM  152  O   HOH T 151      -2.451 -23.759  35.910  1.00  0.30           O  
HETATM  153  O   HOH T 152      -1.699  -2.477  50.142  1.00  0.30           O  
HETATM  154  O   HOH T 153      -1.185  18.815  24.372  1.00  0.30           O  
HETATM  155  O   HOH T 154      13.083  20.880  32.440  1.00  0.30           O  
HETATM  156  O   HOH T 155      -3.705  -5.609  57.058  1.00  0.30           O  
HETATM  157  O   HOH T 156     -21.128  28.892  39.873  1.00  0.30           O  
HETATM  158  O   HOH T 157     -14.649 -19.568  45.637  1.00  0.30           O  
HETATM  159  O   HOH T 158     -10.537   5.648  24.431  1.00  0.30           O  
HETATM  160  O   HOH T 159      -9.391  -4.456  36.700  1.00  0.31           O  
HETATM  161  O   HOH T 160      13.261  18.718  50.534  1.00  0.31           O  
HETATM  162  O   HOH T 161      16.061  12.419  40.085  1.00  0.31           O  
HETATM  163  O   HOH T 162       9.723  24.770  28.487  1.00  0.31           O  
HETATM  164  O   HOH T 163       7.203  -2.595  33.113  1.00  0.31           O  
HETATM  165  O   HOH T 164     -12.837  -2.574  63.293  1.00  0.31           O  
HETATM  166  O   HOH T 165     -23.397  27.443  40.795  1.00  0.31           O  
HETATM  167  O   HOH T 166      19.540   3.112  41.019  1.00  0.31           O  
HETATM  168  O   HOH T 167      21.115  -4.192  55.786  1.00  0.32           O  
HETATM  169  O   HOH T 168     -10.164  14.914  59.934  1.00  0.32           O  
HETATM  170  O   HOH T 169     -13.184   5.534  28.380  1.00  0.32           O  
HETATM  171  O   HOH T 170     -21.592  -0.533  44.510  1.00  0.32           O  
HETATM  172  O   HOH T 171     -10.823 -15.213  62.750  1.00  0.32           O  
HETATM  173  O   HOH T 172     -28.644  -2.927  67.475  1.00  0.32           O  
HETATM  174  O   HOH T 173     -10.661  12.935  32.638  1.00  0.32           O  
HETATM  175  O   HOH T 174      14.971  18.561  26.087  1.00  0.32           O  
HETATM  176  O   HOH T 175     -12.696   3.187  52.921  1.00  0.32           O  
HETATM  177  O   HOH T 176       6.730  -4.217  22.415  1.00  0.32           O  
HETATM  178  O   HOH T 177       6.294   0.265   8.814  1.00  0.32           O  
HETATM  179  O   HOH T 178     -17.087 -14.916  52.851  1.00  0.32           O  
HETATM  180  O   HOH T 179      -0.445  -6.587  43.270  1.00  0.32           O  
HETATM  181  O   HOH T 180      10.658  -8.405  57.164  1.00  0.32           O  
HETATM  182  O   HOH T 181     -10.305   6.298  14.989  1.00  0.32           O  
HETATM  183  O   HOH T 182      -7.966 -23.260  45.003  1.00  0.32           O  
HETATM  184  O   HOH T 183     -10.177 -21.523  42.184  1.00  0.33           O  
HETATM  185  O   HOH T 184      -7.472  11.079  22.422  1.00  0.33           O  
HETATM  186  O   HOH T 185      -2.516  -6.495  41.535  1.00  0.33           O  
HETATM  187  O   HOH T 186      13.421  14.996  23.350  1.00  0.33           O  
HETATM  188  O   HOH T 187       5.914 -10.718  29.061  1.00  0.33           O  
HETATM  189  O   HOH T 188     -16.889 -12.133  26.598  1.00  0.33           O  
HETATM  190  O   HOH T 189      -3.201  25.083  44.810  1.00  0.33           O  
HETATM  191  O   HOH T 190      21.930  11.985  42.057  1.00  0.33           O  
HETATM  192  O   HOH T 191      21.642  -0.083  52.529  1.00  0.33           O  
HETATM  193  O   HOH T 192       0.828  -3.694  17.928  1.00  0.33           O  
HETATM  194  O   HOH T 193     -14.214 -19.997  61.011  1.00  0.33           O  
HETATM  195  O   HOH T 194       2.519  16.171  59.301  1.00  0.33           O  
HETATM  196  O   HOH T 195     -22.626  21.871  47.012  1.00  0.33           O  
HETATM  197  O   HOH T 196     -14.803  16.395  36.587  1.00  0.33           O  
HETATM  198  O   HOH T 197       1.355  15.533  47.567  1.00  0.33           O  
HETATM  199  O   HOH T 198      -8.432 -13.038  62.565  1.00  0.33           O  
HETATM  200  O   HOH T 199      -6.282  -8.334  39.812  1.00  0.33           O  
HETATM  201  O   HOH T 200      -7.596  -2.416  37.131  1.00  0.33           O  
HETATM  202  O   HOH T 201       0.165 -20.823  29.379  1.00  0.33           O  
HETATM  203  O   HOH T 202      28.319  12.329  49.776  1.00  0.33           O  
HETATM  204  O   HOH T 203       2.669  -4.413  59.295  1.00  0.33           O  
HETATM  205  O   HOH T 204      16.904   0.270  21.805  1.00  0.33           O  
HETATM  206  O   HOH T 205       6.874  31.337  47.692  1.00  0.34           O  
HETATM  207  O   HOH T 206      -8.715 -26.075  58.044  1.00  0.34           O  
HETATM  208  O   HOH T 207     -29.666  -0.602  55.034  1.00  0.34           O  
HETATM  209  O   HOH T 208       2.525  13.485  13.511  1.00  0.34           O  
HETATM  210  O   HOH T 209      -8.057 -22.065  27.086  1.00  0.34           O  
HETATM  211  O   HOH T 210     -15.482 -20.674  47.974  1.00  0.34           O  
HETATM  212  O   HOH T 211      -4.152   2.216  25.326  1.00  0.34           O  
HETATM  213  O   HOH T 212      24.616  -5.899  62.763  1.00  0.34           O  
HETATM  214  O   HOH T 213      20.332 -21.946  45.230  1.00  0.34           O  
HETATM  215  O   HOH T 214      21.612  19.219  55.688  1.00  0.34           O  
HETATM  216  O   HOH T 215       6.540 -22.298  52.694  1.00  0.34           O  
HETATM  217  O   HOH T 216      -0.035   9.684  46.854  1.00  0.34           O  
HETATM  218  O   HOH T 217     -26.064 -15.107  64.451  1.00  0.34           O  
HETATM  219  O   HOH T 218     -27.447  -2.964  64.928  1.00  0.34           O  
HETATM  220  O   HOH T 219       9.027   7.414  61.154  1.00  0.34           O  
HETATM  221  O   HOH T 220     -12.395  -0.833  39.144  1.00  0.34           O  
HETATM  222  O   HOH T 221     -25.174   9.529  41.369  1.00  0.34           O  
HETATM  223  O   HOH T 222     -15.500  -5.359  24.340  1.00  0.34           O  
HETATM  224  O   HOH T 223     -17.000 -12.153  63.950  1.00  0.34           O  
HETATM  225  O   HOH T 224      -0.893  -6.191   8.129  1.00  0.34           O  
HETATM  226  O   HOH T 225      10.677 -22.694  34.470  1.00  0.34           O  
HETATM  227  O   HOH T 226       2.391  -9.020  55.124  1.00  0.34           O  
HETATM  228  O   HOH T 227      24.320 -15.081  52.927  1.00  0.35           O  
HETATM  229  O   HOH T 228      29.006   1.475  52.335  1.00  0.35           O  
HETATM  230  O   HOH T 229     -17.260 -17.658  27.964  1.00  0.35           O  
HETATM  231  O   HOH T 230     -13.008 -26.913  49.573  1.00  0.35           O  
HETATM  232  O   HOH T 231       2.572  -1.930  53.093  1.00  0.35           O  
HETATM  233  O   HOH T 232       8.918  -0.309  33.521  1.00  0.35           O  
HETATM  234  O   HOH T 233      -9.171   3.471  33.661  1.00  0.35           O  
HETATM  235  O   HOH T 234     -16.256  -8.659  61.812  1.00  0.35           O  
HETATM  236  O   HOH T 235     -25.274  10.299  47.839  1.00  0.35           O  
HETATM  237  O   HOH T 236      16.156  12.099  31.721  1.00  0.35           O  
HETATM  238  O   HOH T 237      -8.580  21.419  31.699  1.00  0.35           O  
HETATM  239  O   HOH T 238       5.461  -4.005  59.393  1.00  0.35           O  
HETATM  240  O   HOH T 239      -1.443   0.590  17.110  1.00  0.35           O  
HETATM  241  O   HOH T 240      -8.738  -6.441  61.849  1.00  0.35           O  
HETATM  242  O   HOH T 241     -10.381  10.177  32.455  1.00  0.35           O  
HETATM  243  O   HOH T 242      11.561  23.371  21.510  1.00  0.35           O  
HETATM  244  O   HOH T 243     -26.810  -1.483  58.878  1.00  0.35           O  
HETATM  245  O   HOH T 244      -7.801  22.289  24.941  1.00  0.35           O  
HETATM  246  O   HOH T 245      25.051  -5.083  39.985  1.00  0.35           O  
HETATM  247  O   HOH T 246     -25.673   2.950  48.915  1.00  0.35           O  
HETATM  248  O   HOH T 247       9.186 -18.811  30.888  1.00  0.35           O  
HETATM  249  O   HOH T 248       0.120  -6.602  40.525  1.00  0.35           O  
HETATM  250  O   HOH T 249      -9.327   7.064  22.367  1.00  0.35           O  
HETATM  251  O   HOH T 250       9.095  -6.420  35.445  1.00  0.35           O  
HETATM  252  O   HOH T 251     -20.213  26.613  61.373  1.00  0.36           O  
HETATM  253  O   HOH T 252       6.224  18.086  61.620  1.00  0.36           O  
HETATM  254  O   HOH T 253      22.727  -4.134  61.695  1.00  0.36           O  
HETATM  255  O   HOH T 254     -28.462  -4.869  46.644  1.00  0.36           O  
HETATM  256  O   HOH T 255     -10.630  19.634  31.246  1.00  0.36           O  
HETATM  257  O   HOH T 256       6.920 -14.110  31.224  1.00  0.36           O  
HETATM  258  O   HOH T 257      -5.455  22.128  39.826  1.00  0.36           O  
HETATM  259  O   HOH T 258       1.378  17.796  24.296  1.00  0.36           O  
HETATM  260  O   HOH T 259      10.467   5.335  36.588  1.00  0.36           O  
HETATM  261  O   HOH T 260      -3.687 -22.281  53.094  1.00  0.36           O  
HETATM  262  O   HOH T 261       5.985  -4.784  14.016  1.00  0.36           O  
HETATM  263  O   HOH T 262     -17.223   7.402  54.842  1.00  0.36           O  
HETATM  264  O   HOH T 263       4.295  14.697  57.577  1.00  0.36           O  
HETATM  265  O   HOH T 264      22.228  -5.887  42.867  1.00  0.36           O  
HETATM  266  O   HOH T 265     -13.651   7.102  31.962  1.00  0.36           O  
HETATM  267  O   HOH T 266     -12.906  21.265  51.836  1.00  0.36           O  
HETATM  268  O   HOH T 267      33.624   9.709  51.026  1.00  0.36           O  
HETATM  269  O   HOH T 268      -4.363   4.550  60.364  1.00  0.36           O  
HETATM  270  O   HOH T 269      -1.373 -22.398  24.850  1.00  0.36           O  
HETATM  271  O   HOH T 270       1.151   4.017  49.780  1.00  0.37           O  
HETATM  272  O   HOH T 271      -5.147  11.627   7.055  1.00  0.37           O  
HETATM  273  O   HOH T 272      -2.307  21.475  29.269  1.00  0.37           O  
HETATM  274  O   HOH T 273       4.205  -1.386   9.615  1.00  0.37           O  
HETATM  275  O   HOH T 274      21.496  20.923  59.099  1.00  0.37           O  
HETATM  276  O   HOH T 275      20.528 -27.705  37.604  1.00  0.37           O  
HETATM  277  O   HOH T 276      15.229  14.663  31.274  1.00  0.37           O  
HETATM  278  O   HOH T 277      18.640 -25.863  48.363  1.00  0.37           O  
HETATM  279  O   HOH T 278      -5.774   7.383  35.880  1.00  0.37           O  
HETATM  280  O   HOH T 279     -18.077 -11.421  33.205  1.00  0.37           O  
HETATM  281  O   HOH T 280      35.489   3.903  61.727  1.00  0.37           O  
HETATM  282  O   HOH T 281     -12.383 -19.980  41.461  1.00  0.37           O  
HETATM  283  O   HOH T 282     -16.124 -25.052  45.595  1.00  0.37           O  
HETATM  284  O   HOH T 283     -12.207  25.374  44.046  1.00  0.37           O  
HETATM  285  O   HOH T 284       2.283  -1.951  16.330  1.00  0.37           O  
HETATM  286  O   HOH T 285      -3.084   5.619  20.044  1.00  0.37           O  
HETATM  287  O   HOH T 286      -4.675 -24.356  37.446  1.00  0.37           O  
HETATM  288  O   HOH T 287     -21.433 -18.720  43.199  1.00  0.37           O  
HETATM  289  O   HOH T 288       8.448  -6.300  32.789  1.00  0.37           O  
HETATM  290  O   HOH T 289     -20.549   4.767  55.684  1.00  0.37           O  
HETATM  291  O   HOH T 290       7.301  23.420  28.342  1.00  0.37           O  
HETATM  292  O   HOH T 291      23.715   1.319  51.508  1.00  0.37           O  
HETATM  293  O   HOH T 292      -7.347 -15.530  16.010  1.00  0.37           O  
HETATM  294  O   HOH T 293     -22.017 -22.658  46.413  1.00  0.37           O  
HETATM  295  O   HOH T 294       5.794  -8.339  23.858  1.00  0.37           O  
HETATM  296  O   HOH T 295       7.718   5.966  39.439  1.00  0.37           O  
HETATM  297  O   HOH T 296      -9.743  11.705  11.230  1.00  0.37           O  
HETATM  298  O   HOH T 297       7.263  12.927  13.212  1.00  0.37           O  
HETATM  299  O   HOH T 298     -29.928  -9.575  57.684  1.00  0.37           O  
HETATM  300  O   HOH T 299       2.876 -13.494  55.312  1.00  0.37           O  
HETATM  301  O   HOH T 300      17.641   2.525  36.310  1.00  0.37           O  
HETATM  302  O   HOH T 301      27.111 -14.545  53.258  1.00  0.37           O  
HETATM  303  O   HOH T 302       1.264 -22.563  35.038  1.00  0.37           O  
HETATM  304  O   HOH T 303      18.440  -4.648  55.408  1.00  0.37           O  
HETATM  305  O   HOH T 304       7.553  22.484  20.175  1.00  0.37           O  
HETATM  306  O   HOH T 305       4.771  23.625  37.909  1.00  0.37           O  
HETATM  307  O   HOH T 306      22.521  20.112  53.236  1.00  0.37           O  
HETATM  308  O   HOH T 307      11.190  20.880  20.250  1.00  0.37           O  
HETATM  309  O   HOH T 308      17.985  18.165  50.896  1.00  0.37           O  
HETATM  310  O   HOH T 309     -10.052 -23.870  51.783  1.00  0.37           O  
HETATM  311  O   HOH T 310      16.183  20.588  48.136  1.00  0.38           O  
HETATM  312  O   HOH T 311      -0.646  -4.521  48.656  1.00  0.38           O  
HETATM  313  O   HOH T 312     -31.586  -2.364  60.755  1.00  0.38           O  
HETATM  314  O   HOH T 313     -10.764  15.349  14.572  1.00  0.38           O  
HETATM  315  O   HOH T 314      -8.224  11.575  29.267  1.00  0.38           O  
HETATM  316  O   HOH T 315     -11.173   4.630  58.745  1.00  0.38           O  
HETATM  317  O   HOH T 316      -2.911   2.929  53.398  1.00  0.38           O  
HETATM  318  O   HOH T 317       6.652 -13.609  21.982  1.00  0.38           O  
HETATM  319  O   HOH T 318     -29.049 -11.112  51.143  1.00  0.38           O  
HETATM  320  O   HOH T 319      29.398  11.810  47.138  1.00  0.38           O  
HETATM  321  O   HOH T 320       3.550   0.549  16.456  1.00  0.38           O  
HETATM  322  O   HOH T 321      -2.869  -0.111  49.243  1.00  0.38           O  
HETATM  323  O   HOH T 322     -15.563 -11.836  39.647  1.00  0.38           O  
HETATM  324  O   HOH T 323     -26.056  -4.890  45.137  1.00  0.38           O  
HETATM  325  O   HOH T 324      19.924   3.215  50.115  1.00  0.38           O  
HETATM  326  O   HOH T 325      12.619  -6.663  58.258  1.00  0.38           O  
HETATM  327  O   HOH T 326      -2.760  27.385  34.619  1.00  0.38           O  
HETATM  328  O   HOH T 327      14.546  23.336  53.520  1.00  0.38           O  
HETATM  329  O   HOH T 328       2.823  33.185  46.161  1.00  0.38           O  
HETATM  330  O   HOH T 329      11.610 -22.123  48.076  1.00  0.38           O  
HETATM  331  O   HOH T 330     -16.443 -17.698  38.633  1.00  0.38           O  
HETATM  332  O   HOH T 331      32.950  13.171  53.607  1.00  0.38           O  
HETATM  333  O   HOH T 332     -11.850   7.287  59.363  1.00  0.38           O  
HETATM  334  O   HOH T 333       7.267  30.478  32.759  1.00  0.38           O  
HETATM  335  O   HOH T 334      13.114   6.130  25.536  1.00  0.38           O  
HETATM  336  O   HOH T 335      13.267 -15.709  35.866  1.00  0.39           O  
HETATM  337  O   HOH T 336     -22.618   1.716  51.857  1.00  0.39           O  
HETATM  338  O   HOH T 337      -8.663  24.326  37.574  1.00  0.39           O  
HETATM  339  O   HOH T 338     -24.506   7.534  43.302  1.00  0.39           O  
HETATM  340  O   HOH T 339      17.014  -8.243  62.656  1.00  0.39           O  
HETATM  341  O   HOH T 340      14.810   8.161  33.427  1.00  0.39           O  
HETATM  342  O   HOH T 341     -19.330 -10.801  63.245  1.00  0.39           O  
HETATM  343  O   HOH T 342     -23.288 -15.107  64.645  1.00  0.39           O  
HETATM  344  O   HOH T 343     -11.024  30.787  46.448  1.00  0.39           O  
HETATM  345  O   HOH T 344     -10.671   7.232  19.857  1.00  0.39           O  
HETATM  346  O   HOH T 345      -1.521  -5.051  51.268  1.00  0.39           O  
HETATM  347  O   HOH T 346      13.416   4.029  61.651  1.00  0.39           O  
HETATM  348  O   HOH T 347     -29.736 -12.290  53.562  1.00  0.39           O  
HETATM  349  O   HOH T 348     -27.097   8.053  56.874  1.00  0.39           O  
HETATM  350  O   HOH T 349       8.996  24.408  21.537  1.00  0.39           O  
HETATM  351  O   HOH T 350     -10.667   9.375  57.982  1.00  0.39           O  
HETATM  352  O   HOH T 351     -21.526  20.361  50.097  1.00  0.39           O  
HETATM  353  O   HOH T 352       3.920   3.170   9.158  1.00  0.39           O  
HETATM  354  O   HOH T 353      -9.370  23.944  50.618  1.00  0.39           O  
HETATM  355  O   HOH T 354       2.945   7.192  39.101  1.00  0.39           O  
HETATM  356  O   HOH T 355       0.606 -11.296  59.687  1.00  0.39           O  
HETATM  357  O   HOH T 356      26.133 -16.433  49.192  1.00  0.39           O  
HETATM  358  O   HOH T 357       2.168  26.600  28.340  1.00  0.39           O  
HETATM  359  O   HOH T 358       2.805  23.923  46.241  1.00  0.39           O  
HETATM  360  O   HOH T 359       3.013  12.292   9.972  1.00  0.39           O  
HETATM  361  O   HOH T 360      12.909   1.306  62.002  1.00  0.39           O  
HETATM  362  O   HOH T 361      15.133 -18.912  50.648  1.00  0.39           O  
HETATM  363  O   HOH T 362       7.200  -4.236  11.503  1.00  0.39           O  
HETATM  364  O   HOH T 363       6.920  -8.087  15.113  1.00  0.39           O  
HETATM  365  O   HOH T 364      20.323  -6.387  34.648  1.00  0.39           O  
HETATM  366  O   HOH T 365      13.733  10.718  36.479  1.00  0.39           O  
HETATM  367  O   HOH T 366     -23.556 -13.796  62.201  1.00  0.40           O  
HETATM  368  O   HOH T 367     -27.673   1.130  49.548  1.00  0.40           O  
HETATM  369  O   HOH T 368      -3.337  21.558  54.226  1.00  0.40           O  
HETATM  370  O   HOH T 369      -2.786 -24.320  54.743  1.00  0.40           O  
HETATM  371  O   HOH T 370      12.889  22.230  36.682  1.00  0.40           O  
HETATM  372  O   HOH T 371      -2.604   9.890  55.205  1.00  0.40           O  
HETATM  373  O   HOH T 372     -14.812  -4.256  62.316  1.00  0.40           O  
HETATM  374  O   HOH T 373      11.038  26.436  32.670  1.00  0.40           O  
HETATM  375  O   HOH T 374      22.658 -23.234  46.086  1.00  0.40           O  
HETATM  376  O   HOH T 375      10.732  -6.254  31.334  1.00  0.40           O  
HETATM  377  O   HOH T 376       0.370   6.350  53.983  1.00  0.40           O  
HETATM  378  O   HOH T 377      -7.153  22.404  50.711  1.00  0.40           O  
HETATM  379  O   HOH T 378     -14.276  10.973  33.000  1.00  0.40           O  
HETATM  380  O   HOH T 379       4.691  25.980  45.818  1.00  0.40           O  
HETATM  381  O   HOH T 380      20.738 -11.065  36.643  1.00  0.40           O  
HETATM  382  O   HOH T 381      -9.340 -16.542  37.088  1.00  0.40           O  
HETATM  383  O   HOH T 382      13.210 -18.220  48.827  1.00  0.40           O  
HETATM  384  O   HOH T 383     -13.188  25.363  47.785  1.00  0.40           O  
HETATM  385  O   HOH T 384     -13.563  -2.562  20.816  1.00  0.40           O  
HETATM  386  O   HOH T 385      20.887   4.235  43.164  1.00  0.40           O  
HETATM  387  O   HOH T 386     -16.402  -3.556  36.365  1.00  0.40           O  
HETATM  388  O   HOH T 387      16.078  22.127  44.656  1.00  0.40           O  
HETATM  389  O   HOH T 388      -4.355  -6.454  39.635  1.00  0.40           O  
HETATM  390  O   HOH T 389      11.297 -24.650  43.669  1.00  0.40           O  
HETATM  391  O   HOH T 390     -17.895  -2.492  26.721  1.00  0.40           O  
HETATM  392  O   HOH T 391       6.438  15.373  62.271  1.00  0.40           O  
HETATM  393  O   HOH T 392      -5.755  22.914  35.449  1.00  0.40           O  
HETATM  394  O   HOH T 393     -26.661  14.083  63.685  1.00  0.40           O  
HETATM  395  O   HOH T 394      27.068  -6.555  55.393  1.00  0.40           O  
HETATM  396  O   HOH T 395     -25.099   0.936  50.787  1.00  0.41           O  
HETATM  397  O   HOH T 396       1.305  13.690  59.932  1.00  0.41           O  
HETATM  398  O   HOH T 397     -10.644   0.621  61.018  1.00  0.41           O  
HETATM  399  O   HOH T 398     -10.968   7.480  35.644  1.00  0.41           O  
HETATM  400  O   HOH T 399       7.144  -6.153  37.288  1.00  0.41           O  
HETATM  401  O   HOH T 400      19.512 -20.530  37.913  1.00  0.41           O  
HETATM  402  O   HOH T 401      11.409 -10.445  32.130  1.00  0.41           O  
HETATM  403  O   HOH T 402       3.058  -1.733  50.450  1.00  0.41           O  
HETATM  404  O   HOH T 403      14.064   5.804  34.822  1.00  0.41           O  
HETATM  405  O   HOH T 404       3.905 -14.326  57.767  1.00  0.41           O  
HETATM  406  O   HOH T 405     -20.483   5.757  44.436  1.00  0.41           O  
HETATM  407  O   HOH T 406       6.642  -8.793  20.184  1.00  0.41           O  
HETATM  408  O   HOH T 407     -15.487  -9.932  37.653  1.00  0.41           O  
HETATM  409  O   HOH T 408     -12.042 -25.805  33.252  1.00  0.41           O  
HETATM  410  O   HOH T 409      15.125  14.357  36.290  1.00  0.41           O  
HETATM  411  O   HOH T 410       1.104  -1.698  24.428  1.00  0.41           O  
HETATM  412  O   HOH T 411      -1.023 -24.716  28.125  1.00  0.41           O  
HETATM  413  O   HOH T 412       4.535  -5.183  37.890  1.00  0.41           O  
HETATM  414  O   HOH T 413     -18.380   5.875  56.938  1.00  0.41           O  
HETATM  415  O   HOH T 414      10.690   7.384  63.335  1.00  0.41           O  
HETATM  416  O   HOH T 415      14.826   9.780  40.305  1.00  0.41           O  
HETATM  417  O   HOH T 416       2.673 -21.452  32.917  1.00  0.41           O  
HETATM  418  O   HOH T 417     -30.109  -2.521  56.865  1.00  0.41           O  
HETATM  419  O   HOH T 418     -15.842 -18.318  23.977  1.00  0.41           O  
HETATM  420  O   HOH T 419       0.773   7.526  45.305  1.00  0.41           O  
HETATM  421  O   HOH T 420     -12.027  23.815  51.449  1.00  0.41           O  
HETATM  422  O   HOH T 421      -9.716  -4.997  39.333  1.00  0.41           O  
HETATM  423  O   HOH T 422      -1.547  12.246  55.844  1.00  0.41           O  
HETATM  424  O   HOH T 423      16.341  17.782  48.680  1.00  0.41           O  
HETATM  425  O   HOH T 424     -23.032 -24.969  45.171  1.00  0.41           O  
HETATM  426  O   HOH T 425      20.896  -2.521  53.570  1.00  0.42           O  
HETATM  427  O   HOH T 426     -21.293  -9.812  41.854  1.00  0.42           O  
HETATM  428  O   HOH T 427      -0.215  21.432  24.972  1.00  0.42           O  
HETATM  429  O   HOH T 428      26.687   2.223  57.166  1.00  0.42           O  
HETATM  430  O   HOH T 429     -14.162 -25.955  47.324  1.00  0.42           O  
HETATM  431  O   HOH T 430      -6.472 -22.642  38.597  1.00  0.42           O  
HETATM  432  O   HOH T 431     -17.010  -5.984  62.340  1.00  0.42           O  
HETATM  433  O   HOH T 432      -9.464  26.529  35.869  1.00  0.42           O  
HETATM  434  O   HOH T 433     -16.025 -20.355  43.386  1.00  0.42           O  
HETATM  435  O   HOH T 434       7.476   2.862  22.664  1.00  0.42           O  
HETATM  436  O   HOH T 435       2.895  -6.851  41.446  1.00  0.42           O  
HETATM  437  O   HOH T 436      23.884 -16.949  50.839  1.00  0.42           O  
HETATM  438  O   HOH T 437      12.169 -21.392  50.627  1.00  0.42           O  
HETATM  439  O   HOH T 438      -1.086 -23.207  15.420  1.00  0.42           O  
HETATM  440  O   HOH T 439      -8.480   9.030  24.180  1.00  0.42           O  
HETATM  441  O   HOH T 440      19.563 -28.606  40.039  1.00  0.42           O  
HETATM  442  O   HOH T 441      10.634  -9.171  27.602  1.00  0.42           O  
HETATM  443  O   HOH T 442      10.213   1.656  38.529  1.00  0.42           O  
HETATM  444  O   HOH T 443      27.832   2.384  54.673  1.00  0.42           O  
HETATM  445  O   HOH T 444     -21.066 -15.477  56.610  1.00  0.42           O  
HETATM  446  O   HOH T 445     -24.822  22.316  49.743  1.00  0.42           O  
HETATM  447  O   HOH T 446       3.269  25.896  36.968  1.00  0.42           O  
HETATM  448  O   HOH T 447      22.380   4.195  49.336  1.00  0.42           O  
HETATM  449  O   HOH T 448      17.162 -19.656  34.777  1.00  0.42           O  
HETATM  450  O   HOH T 449      11.484  -2.301  60.119  1.00  0.42           O  
HETATM  451  O   HOH T 450     -29.052  12.490  51.027  1.00  0.42           O  
HETATM  452  O   HOH T 451     -15.245 -19.682  50.610  1.00  0.42           O  
HETATM  453  O   HOH T 452      26.250   1.293  52.727  1.00  0.42           O  
HETATM  454  O   HOH T 453      18.784 -23.418  47.090  1.00  0.42           O  
HETATM  455  O   HOH T 454       8.509   1.535  20.409  1.00  0.42           O  
HETATM  456  O   HOH T 455     -30.103   7.117  53.988  1.00  0.42           O  
HETATM  457  O   HOH T 456      -1.344  -4.363  10.139  1.00  0.42           O  
HETATM  458  O   HOH T 457      23.581  -7.358  40.999  1.00  0.42           O  
HETATM  459  O   HOH T 458      -8.945  14.792  31.542  1.00  0.43           O  
HETATM  460  O   HOH T 459       7.862  -5.065  18.663  1.00  0.43           O  
HETATM  461  O   HOH T 460     -21.887 -12.449  41.827  1.00  0.43           O  
HETATM  462  O   HOH T 461      12.357   2.651  57.778  1.00  0.43           O  
HETATM  463  O   HOH T 462      19.499  -5.431  42.622  1.00  0.43           O  
HETATM  464  O   HOH T 463      15.036  -4.560  52.052  1.00  0.43           O  
HETATM  465  O   HOH T 464       0.644  13.154   8.905  1.00  0.43           O  
HETATM  466  O   HOH T 465      14.995 -19.224  58.334  1.00  0.43           O  
HETATM  467  O   HOH T 466      26.064   5.657  43.620  1.00  0.43           O  
HETATM  468  O   HOH T 467      19.404  -8.919  35.465  1.00  0.43           O  
HETATM  469  O   HOH T 468     -26.033  12.825  48.583  1.00  0.43           O  
HETATM  470  O   HOH T 469      -7.321 -20.580  19.713  1.00  0.43           O  
HETATM  471  O   HOH T 470     -10.941   2.779  21.642  1.00  0.43           O  
HETATM  472  O   HOH T 471       7.486  23.519  38.241  1.00  0.43           O  
HETATM  473  O   HOH T 472      26.800  -3.829  55.905  1.00  0.43           O  
HETATM  474  O   HOH T 473     -10.811   1.172  34.315  1.00  0.43           O  
HETATM  475  O   HOH T 474     -22.647 -19.264  55.029  1.00  0.43           O  
HETATM  476  O   HOH T 475      -4.748   3.161  39.324  1.00  0.43           O  
HETATM  477  O   HOH T 476     -27.826  10.887  49.011  1.00  0.43           O  
HETATM  478  O   HOH T 477      -1.225  22.164  52.390  1.00  0.43           O  
HETATM  479  O   HOH T 478     -17.245 -16.650  25.500  1.00  0.43           O  
HETATM  480  O   HOH T 479      -7.789 -22.009  24.320  1.00  0.43           O  
HETATM  481  O   HOH T 480      -3.103  17.849  14.387  1.00  0.43           O  
HETATM  482  O   HOH T 481     -15.667  15.324  33.029  1.00  0.43           O  
HETATM  483  O   HOH T 482      18.546  12.229  38.932  1.00  0.43           O  
HETATM  484  O   HOH T 483     -10.353  13.664  25.119  1.00  0.43           O  
HETATM  485  O   HOH T 484     -10.789  16.881  31.609  1.00  0.43           O  
HETATM  486  O   HOH T 485       1.362  -6.470  55.277  1.00  0.43           O  
HETATM  487  O   HOH T 486      14.623  24.328  48.603  1.00  0.43           O  
HETATM  488  O   HOH T 487     -13.077   5.834  25.623  1.00  0.43           O  
HETATM  489  O   HOH T 488       5.014   5.408  38.721  1.00  0.44           O  
HETATM  490  O   HOH T 489      15.700   3.553  34.420  1.00  0.44           O  
HETATM  491  O   HOH T 490     -20.340  16.790  38.356  1.00  0.44           O  
HETATM  492  O   HOH T 491      12.484 -10.552  57.476  1.00  0.44           O  
HETATM  493  O   HOH T 492      11.107   0.340  60.085  1.00  0.44           O  
HETATM  494  O   HOH T 493      21.179 -24.950  47.744  1.00  0.44           O  
HETATM  495  O   HOH T 494      -0.253  -5.274  19.996  1.00  0.44           O  
HETATM  496  O   HOH T 495      -8.251 -15.530  63.767  1.00  0.44           O  
HETATM  497  O   HOH T 496       0.070   9.741  58.286  1.00  0.44           O  
HETATM  498  O   HOH T 497      -5.648 -22.738  25.919  1.00  0.44           O  
HETATM  499  O   HOH T 498     -22.024  23.038  49.486  1.00  0.44           O  
HETATM  500  O   HOH T 499       4.907 -10.010  55.022  1.00  0.44           O  
HETATM  501  O   HOH T 500     -22.195 -17.836  57.395  1.00  0.44           O  
HETATM  502  O   HOH T 501      20.692  -2.242  40.998  1.00  0.44           O  
HETATM  503  O   HOH T 502       6.710  14.827  11.240  1.00  0.44           O  
HETATM  504  O   HOH T 503      11.279 -17.250  31.659  1.00  0.44           O  
HETATM  505  O   HOH T 504      25.256  16.383  50.941  1.00  0.44           O  
HETATM  506  O   HOH T 505     -10.602   9.170  15.492  1.00  0.44           O  
HETATM  507  O   HOH T 506      19.750   8.196  42.130  1.00  0.44           O  
HETATM  508  O   HOH T 507     -18.632 -18.766  39.775  1.00  0.44           O  
HETATM  509  O   HOH T 508     -13.735  19.445  49.779  1.00  0.44           O  
HETATM  510  O   HOH T 509      -5.520  -2.977   8.451  1.00  0.44           O  
HETATM  511  O   HOH T 510      -7.503  15.788  59.482  1.00  0.44           O  
HETATM  512  O   HOH T 511       7.863 -25.552  35.592  1.00  0.44           O  
HETATM  513  O   HOH T 512       2.326  18.007  20.173  1.00  0.44           O  
HETATM  514  O   HOH T 513     -20.394 -18.384  62.685  1.00  0.44           O  
HETATM  515  O   HOH T 514      -2.212   6.422  54.923  1.00  0.44           O  
HETATM  516  O   HOH T 515      -7.979  20.334  13.202  1.00  0.44           O  
HETATM  517  O   HOH T 516     -21.028  -2.434  42.676  1.00  0.45           O  
HETATM  518  O   HOH T 517      -5.215  19.609  18.803  1.00  0.45           O  
HETATM  519  O   HOH T 518       4.947   1.833   6.873  1.00  0.45           O  
HETATM  520  O   HOH T 519      -2.955   2.171  50.835  1.00  0.45           O  
HETATM  521  O   HOH T 520       1.593  -1.687   8.747  1.00  0.45           O  
HETATM  522  O   HOH T 521      13.576  20.778  44.368  1.00  0.45           O  
HETATM  523  O   HOH T 522       9.670  -0.112  22.356  1.00  0.45           O  
HETATM  524  O   HOH T 523      -9.362  32.630  45.148  1.00  0.45           O  
HETATM  525  O   HOH T 524      24.038  18.779  51.308  1.00  0.45           O  
HETATM  526  O   HOH T 525     -23.212   5.608  44.930  1.00  0.45           O  
HETATM  527  O   HOH T 526      30.918   8.248  57.857  1.00  0.45           O  
HETATM  528  O   HOH T 527       3.988  -6.825  35.629  1.00  0.45           O  
HETATM  529  O   HOH T 528      11.694  -4.025  58.086  1.00  0.45           O  
HETATM  530  O   HOH T 529       8.833 -16.089  30.998  1.00  0.45           O  
HETATM  531  O   HOH T 530      -6.073  23.822  21.676  1.00  0.45           O  
HETATM  532  O   HOH T 531       4.790   0.058  14.012  1.00  0.45           O  
HETATM  533  O   HOH T 532      -1.310   6.825  50.389  1.00  0.45           O  
HETATM  534  O   HOH T 533      25.015  -2.567  61.339  1.00  0.45           O  
HETATM  535  O   HOH T 534       6.889 -21.226  50.232  1.00  0.45           O  
HETATM  536  O   HOH T 535      -5.842 -22.621  20.877  1.00  0.45           O  
HETATM  537  O   HOH T 536      -3.105 -27.333  29.460  1.00  0.45           O  
HETATM  538  O   HOH T 537     -10.246  12.781  27.801  1.00  0.45           O  
HETATM  539  O   HOH T 538       0.121 -16.151  58.532  1.00  0.45           O  
HETATM  540  O   HOH T 539       3.183  23.379  52.650  1.00  0.45           O  
HETATM  541  O   HOH T 540     -18.832  -9.158  40.644  1.00  0.45           O  
HETATM  542  O   HOH T 541      -2.404 -21.000  57.323  1.00  0.45           O  
HETATM  543  O   HOH T 542     -16.861   9.843  64.041  1.00  0.45           O  
HETATM  544  O   HOH T 543     -17.941 -17.558  61.688  1.00  0.45           O  
HETATM  545  O   HOH T 544     -33.830  -7.747  49.065  1.00  0.45           O  
HETATM  546  O   HOH T 545     -14.456  -5.245  37.336  1.00  0.45           O  
HETATM  547  O   HOH T 546     -22.711  13.891  65.416  1.00  0.45           O  
HETATM  548  O   HOH T 547     -12.059   9.935  60.278  1.00  0.45           O  
HETATM  549  O   HOH T 548     -17.266   4.735  63.896  1.00  0.45           O  
HETATM  550  O   HOH T 549     -30.147   4.499  54.454  1.00  0.45           O  
HETATM  551  O   HOH T 550       0.686  12.982   6.195  1.00  0.45           O  
HETATM  552  O   HOH T 551      -0.264  14.152   3.891  1.00  0.45           O  
HETATM  553  O   HOH T 552      11.240  -0.005  35.060  1.00  0.45           O  
HETATM  554  O   HOH T 553       9.067 -25.874  42.461  1.00  0.45           O  
HETATM  555  O   HOH T 554      -1.901   5.932  57.768  1.00  0.45           O  
HETATM  556  O   HOH T 555      30.264   3.626  55.090  1.00  0.45           O  
HETATM  557  O   HOH T 556     -15.252 -21.772  52.400  1.00  0.45           O  
HETATM  558  O   HOH T 557      -6.955  21.869  37.637  1.00  0.45           O  
HETATM  559  O   HOH T 558      -7.993  13.114  59.418  1.00  0.46           O  
HETATM  560  O   HOH T 559       3.425 -20.610  54.457  1.00  0.46           O  
HETATM  561  O   HOH T 560     -13.020  -5.235  33.901  1.00  0.46           O  
HETATM  562  O   HOH T 561     -16.252  -8.217  41.191  1.00  0.46           O  
HETATM  563  O   HOH T 562      -0.651 -20.761  14.381  1.00  0.46           O  
HETATM  564  O   HOH T 563      -5.993  12.218  57.656  1.00  0.46           O  
HETATM  565  O   HOH T 564      20.307   0.423  50.083  1.00  0.46           O  
HETATM  566  O   HOH T 565       3.260  15.730  15.114  1.00  0.46           O  
HETATM  567  O   HOH T 566     -30.146   9.521  48.329  1.00  0.46           O  
HETATM  568  O   HOH T 567     -23.101   2.793  45.018  1.00  0.46           O  
HETATM  569  O   HOH T 568      -1.467  25.324  35.841  1.00  0.46           O  
HETATM  570  O   HOH T 569       7.324 -23.299  37.111  1.00  0.46           O  
HETATM  571  O   HOH T 570      10.911 -13.797  59.425  1.00  0.46           O  
HETATM  572  O   HOH T 571      -3.077  -4.392   8.047  1.00  0.46           O  
HETATM  573  O   HOH T 572       4.936  16.031  60.051  1.00  0.46           O  
HETATM  574  O   HOH T 573     -25.495  12.234  41.820  1.00  0.46           O  
HETATM  575  O   HOH T 574     -16.142 -19.044  40.945  1.00  0.46           O  
HETATM  576  O   HOH T 575      15.642   0.737  46.874  1.00  0.46           O  
HETATM  577  O   HOH T 576      -1.590 -22.031  27.586  1.00  0.46           O  
HETATM  578  O   HOH T 577      -4.259 -13.866  58.249  1.00  0.46           O  
HETATM  579  O   HOH T 578      -5.047 -25.874  54.202  1.00  0.46           O  
HETATM  580  O   HOH T 579     -10.889  11.643  30.159  1.00  0.46           O  
HETATM  581  O   HOH T 580      -1.212  14.840  59.267  1.00  0.46           O  
HETATM  582  O   HOH T 581       2.402 -10.456   6.565  1.00  0.46           O  
HETATM  583  O   HOH T 582       2.986  30.237  25.747  1.00  0.46           O  
HETATM  584  O   HOH T 583      20.140  18.163  41.682  1.00  0.46           O  
HETATM  585  O   HOH T 584      13.872 -14.543  32.246  1.00  0.46           O  
HETATM  586  O   HOH T 585      14.136  -4.215  25.457  1.00  0.46           O  
HETATM  587  O   HOH T 586      14.008  12.771  38.243  1.00  0.46           O  
HETATM  588  O   HOH T 587      -1.542 -12.837  60.474  1.00  0.46           O  
HETATM  589  O   HOH T 588     -13.046  18.234  32.324  1.00  0.46           O  
HETATM  590  O   HOH T 589     -23.353 -23.154  48.738  1.00  0.46           O  
HETATM  591  O   HOH T 590      22.819  -3.539  40.042  1.00  0.46           O  
HETATM  592  O   HOH T 591      31.656  11.493  51.807  1.00  0.46           O  
HETATM  593  O   HOH T 592       1.407  -6.269  49.403  1.00  0.46           O  
HETATM  594  O   HOH T 593      10.080 -27.055  44.795  1.00  0.46           O  
HETATM  595  O   HOH T 594      17.741   1.561  50.005  1.00  0.46           O  
HETATM  596  O   HOH T 595      -4.948   4.088  63.169  1.00  0.47           O  
HETATM  597  O   HOH T 596      19.407   4.800  60.032  1.00  0.47           O  
HETATM  598  O   HOH T 597     -17.056 -13.692  30.004  1.00  0.47           O  
HETATM  599  O   HOH T 598     -16.488   0.245  48.489  1.00  0.47           O  
HETATM  600  O   HOH T 599     -18.891  22.458  37.470  1.00  0.47           O  
HETATM  601  O   HOH T 600       6.812 -20.050  31.444  1.00  0.47           O  
HETATM  602  O   HOH T 601       0.580  23.820  53.523  1.00  0.47           O  
HETATM  603  O   HOH T 602      15.857  20.926  54.146  1.00  0.47           O  
HETATM  604  O   HOH T 603     -24.978 -15.377  60.438  1.00  0.47           O  
HETATM  605  O   HOH T 604       0.552  -0.971  18.223  1.00  0.47           O  
HETATM  606  O   HOH T 605      24.286  12.125  56.766  1.00  0.47           O  
HETATM  607  O   HOH T 606      -9.818  23.561  32.976  1.00  0.47           O  
HETATM  608  O   HOH T 607      28.557  -2.413  54.230  1.00  0.47           O  
HETATM  609  O   HOH T 608     -20.747  -5.642  44.435  1.00  0.47           O  
HETATM  610  O   HOH T 609       3.620  -9.961  57.458  1.00  0.47           O  
HETATM  611  O   HOH T 610      -7.652 -28.376  59.211  1.00  0.47           O  
HETATM  612  O   HOH T 611      -6.276  -1.589  67.273  1.00  0.47           O  
HETATM  613  O   HOH T 612     -12.350   1.528  63.045  1.00  0.47           O  
HETATM  614  O   HOH T 613       2.409   0.792   9.580  1.00  0.47           O  
HETATM  615  O   HOH T 614      11.561  -8.564  30.115  1.00  0.47           O  
HETATM  616  O   HOH T 615       3.129   0.620  49.026  1.00  0.47           O  
HETATM  617  O   HOH T 616      19.399 -30.284  37.740  1.00  0.47           O  
HETATM  618  O   HOH T 617      -2.970  14.365  55.320  1.00  0.47           O  
HETATM  619  O   HOH T 618      10.029  -6.113  58.655  1.00  0.47           O  
HETATM  620  O   HOH T 619     -24.226   9.459  45.286  1.00  0.47           O  
HETATM  621  O   HOH T 620       2.027 -23.105  47.843  1.00  0.47           O  
HETATM  622  O   HOH T 621      13.721  20.882  52.354  1.00  0.47           O  
HETATM  623  O   HOH T 622      20.254 -19.034  51.040  1.00  0.47           O  
HETATM  624  O   HOH T 623      31.388   2.992  52.564  1.00  0.47           O  
HETATM  625  O   HOH T 624     -12.082  12.999  14.010  1.00  0.47           O  
HETATM  626  O   HOH T 625     -20.826 -17.777  53.427  1.00  0.47           O  
HETATM  627  O   HOH T 626      13.730  -5.607  60.728  1.00  0.47           O  
HETATM  628  O   HOH T 627     -32.418  10.786  49.341  1.00  0.47           O  
HETATM  629  O   HOH T 628      14.783  19.738  39.168  1.00  0.47           O  
HETATM  630  O   HOH T 629      10.845   5.976  32.457  1.00  0.47           O  
HETATM  631  O   HOH T 630     -31.747 -11.712  51.729  1.00  0.47           O  
HETATM  632  O   HOH T 631      -6.502  24.624  24.242  1.00  0.47           O  
HETATM  633  O   HOH T 632     -13.196  -7.332  12.889  1.00  0.47           O  
HETATM  634  O   HOH T 633     -10.790   3.584  16.062  1.00  0.47           O  
HETATM  635  O   HOH T 634       2.171 -25.920  42.864  1.00  0.48           O  
HETATM  636  O   HOH T 635      16.990  -6.086  53.492  1.00  0.48           O  
HETATM  637  O   HOH T 636     -13.512   7.995  61.509  1.00  0.48           O  
HETATM  638  O   HOH T 637     -20.446 -24.300  44.759  1.00  0.48           O  
HETATM  639  O   HOH T 638       8.247  23.521  40.816  1.00  0.48           O  
HETATM  640  O   HOH T 639       9.274  28.584  32.444  1.00  0.48           O  
HETATM  641  O   HOH T 640      -3.062 -26.882  55.805  1.00  0.48           O  
HETATM  642  O   HOH T 641      -3.182   5.478  39.748  1.00  0.48           O  
HETATM  643  O   HOH T 642      15.785  -1.876  51.552  1.00  0.48           O  
HETATM  644  O   HOH T 643      32.560   7.321  49.954  1.00  0.48           O  
HETATM  645  O   HOH T 644      -8.658  23.625  22.739  1.00  0.48           O  
HETATM  646  O   HOH T 645      -3.109  26.803  42.111  1.00  0.48           O  
HETATM  647  O   HOH T 646      23.492   4.642  43.500  1.00  0.48           O  
HETATM  648  O   HOH T 647     -30.833 -12.176  49.190  1.00  0.48           O  
HETATM  649  O   HOH T 648       8.540   3.815  37.808  1.00  0.48           O  
HETATM  650  O   HOH T 649       7.679  -3.912  35.590  1.00  0.48           O  
HETATM  651  O   HOH T 650       5.799  -6.583  21.630  1.00  0.48           O  
HETATM  652  O   HOH T 651     -22.053   3.171  42.586  1.00  0.48           O  
HETATM  653  O   HOH T 652      20.964 -22.121  48.011  1.00  0.48           O  
HETATM  654  O   HOH T 653      28.844  -4.846  52.598  1.00  0.48           O  
HETATM  655  O   HOH T 654      -5.725 -25.080  46.171  1.00  0.48           O  
HETATM  656  O   HOH T 655     -20.133  16.727  61.360  1.00  0.48           O  
HETATM  657  O   HOH T 656      -0.767  12.081  59.389  1.00  0.48           O  
HETATM  658  O   HOH T 657      -8.003  24.396  34.884  1.00  0.48           O  
HETATM  659  O   HOH T 658       8.232 -10.540  27.502  1.00  0.48           O  
HETATM  660  O   HOH T 659      14.385   8.137  36.121  1.00  0.48           O  
HETATM  661  O   HOH T 660     -10.022  -2.317  38.470  1.00  0.48           O  
HETATM  662  O   HOH T 661      -4.599  22.038  33.162  1.00  0.48           O  
HETATM  663  O   HOH T 662     -17.800  -7.946  24.882  1.00  0.48           O  
HETATM  664  O   HOH T 663       3.528  28.979  28.131  1.00  0.49           O  
HETATM  665  O   HOH T 664     -22.725  12.960  38.074  1.00  0.49           O  
HETATM  666  O   HOH T 665       1.575  -6.749  58.121  1.00  0.49           O  
HETATM  667  O   HOH T 666       2.482  25.699  54.168  1.00  0.49           O  
HETATM  668  O   HOH T 667       0.158  23.078  27.237  1.00  0.49           O  
HETATM  669  O   HOH T 668       4.558  31.009  46.223  1.00  0.49           O  
HETATM  670  O   HOH T 669     -23.485  -5.808  44.433  1.00  0.49           O  
HETATM  671  O   HOH T 670      -4.320  12.011  55.480  1.00  0.49           O  
HETATM  672  O   HOH T 671       8.779 -23.001  50.989  1.00  0.49           O  
HETATM  673  O   HOH T 672      -4.505 -28.703  54.178  1.00  0.49           O  
HETATM  674  O   HOH T 673       1.078   0.856  47.201  1.00  0.49           O  
HETATM  675  O   HOH T 674      -5.669 -19.948  21.792  1.00  0.49           O  
HETATM  676  O   HOH T 675       2.756 -16.367  59.220  1.00  0.49           O  
HETATM  677  O   HOH T 676       8.928   9.497  63.259  1.00  0.49           O  
HETATM  678  O   HOH T 677     -30.255   5.325  51.812  1.00  0.49           O  
HETATM  679  O   HOH T 678     -16.274 -14.894  64.198  1.00  0.49           O  
HETATM  680  O   HOH T 679      -9.720 -17.766  63.027  1.00  0.49           O  
HETATM  681  O   HOH T 680     -19.476   0.666  23.471  1.00  0.49           O  
HETATM  682  O   HOH T 681     -16.380 -17.608  63.931  1.00  0.49           O  
HETATM  683  O   HOH T 682      -0.175   7.080  47.813  1.00  0.49           O  
HETATM  684  O   HOH T 683      19.192 -13.778  52.571  1.00  0.49           O  
HETATM  685  O   HOH T 684       9.683 -26.919  39.959  1.00  0.49           O  
HETATM  686  O   HOH T 685      -7.237  27.610  32.699  1.00  0.49           O  
HETATM  687  O   HOH T 686      19.371   7.976  39.389  1.00  0.49           O  
HETATM  688  O   HOH T 687      22.721  -3.091  42.800  1.00  0.49           O  
HETATM  689  O   HOH T 688     -17.988 -24.738  43.591  1.00  0.49           O  
HETATM  690  O   HOH T 689       4.072  -4.513  61.723  1.00  0.49           O  
HETATM  691  O   HOH T 690     -16.274  26.265  59.791  1.00  0.49           O  
HETATM  692  O   HOH T 691      16.116 -24.126  54.285  1.00  0.49           O  
HETATM  693  O   HOH T 692      -4.077 -20.547  48.772  1.00  0.49           O  
HETATM  694  O   HOH T 693      -6.372 -27.480  52.500  1.00  0.49           O  
HETATM  695  O   HOH T 694      25.034  -0.548  46.299  1.00  0.49           O  
HETATM  696  O   HOH T 695      20.630  13.392  40.157  1.00  0.49           O  
HETATM  697  O   HOH T 696      13.756  13.459  27.850  1.00  0.49           O  
HETATM  698  O   HOH T 697      24.632  -5.101  59.991  1.00  0.49           O  
HETATM  699  O   HOH T 698      -3.000  23.115  35.239  1.00  0.49           O  
HETATM  700  O   HOH T 699       0.804  -5.933  60.762  1.00  0.49           O  
HETATM  701  O   HOH T 700      12.379   5.528  20.086  1.00  0.49           O  
HETATM  702  O   HOH T 701      14.807 -21.535  51.541  1.00  0.49           O  
HETATM  703  O   HOH T 702      15.782  16.480  34.810  1.00  0.49           O  
HETATM  704  O   HOH T 703     -26.143  11.297  44.383  1.00  0.50           O  
HETATM  705  O   HOH T 704     -14.458  22.996  48.037  1.00  0.50           O  
HETATM  706  O   HOH T 705       9.649  -0.913  19.657  1.00  0.50           O  
HETATM  707  O   HOH T 706      14.328  22.159  46.752  1.00  0.50           O  
HETATM  708  O   HOH T 707     -18.450  -8.154  63.366  1.00  0.50           O  
HETATM  709  O   HOH T 708       7.479  -7.663  17.826  1.00  0.50           O  
HETATM  710  O   HOH T 709      -5.731  26.978  25.601  1.00  0.50           O  
HETATM  711  O   HOH T 710     -28.148   3.976  50.127  1.00  0.50           O  
HETATM  712  O   HOH T 711      14.493  -7.995  61.574  1.00  0.50           O  
HETATM  713  O   HOH T 712     -12.086  -2.466  59.065  1.00  0.50           O  
HETATM  714  O   HOH T 713      28.260   5.617  45.323  1.00  0.50           O  
HETATM  715  O   HOH T 714      -6.948  -5.593  39.416  1.00  0.50           O  
HETATM  716  O   HOH T 715      -1.574  -0.120  51.710  1.00  0.50           O  
HETATM  717  O   HOH T 716      19.562   2.821  38.224  1.00  0.50           O  
HETATM  718  O   HOH T 717      13.313  25.781  46.655  1.00  0.50           O  
HETATM  719  O   HOH T 718     -10.171  16.300  24.869  1.00  0.50           O  
HETATM  720  O   HOH T 719      27.890   2.994  46.032  1.00  0.50           O  
HETATM  721  O   HOH T 720       4.193 -21.346  39.913  1.00  0.50           O  
HETATM  722  O   HOH T 721      17.285  -3.401  53.230  1.00  0.50           O  
HETATM  723  O   HOH T 722       2.538 -21.265  51.124  1.00  0.50           O  
HETATM  724  O   HOH T 723     -12.219 -22.633  40.670  1.00  0.50           O  
HETATM  725  O   HOH T 724     -22.265  -3.244  45.001  1.00  0.50           O  
HETATM  726  O   HOH T 725     -32.309  -9.875  49.792  1.00  0.50           O  
HETATM  727  O   HOH T 726      -2.475  23.714  48.038  1.00  0.50           O  
HETATM  728  O   HOH T 727      25.745 -16.407  54.782  1.00  0.50           O  
HETATM  729  O   HOH T 728     -12.958   0.214  23.225  1.00  0.50           O  
HETATM  730  O   HOH T 729     -17.647 -14.790  27.447  1.00  0.50           O  
HETATM  731  O   HOH T 730      11.350  -7.231  25.870  1.00  0.50           O  
HETATM  732  O   HOH T 731       0.721  -8.543  60.128  1.00  0.50           O  
HETATM  733  O   HOH T 732     -11.376   4.587  19.606  1.00  0.50           O  
HETATM  734  O   HOH T 733      14.780  20.625  35.593  1.00  0.50           O  
HETATM  735  O   HOH T 734      11.498  -4.943  24.463  1.00  0.50           O  
HETATM  736  O   HOH T 735     -32.333  -3.332  55.819  1.00  0.50           O  
HETATM  737  O   HOH T 736     -11.481   3.208  61.041  1.00  0.50           O  
HETATM  738  O   HOH T 737      -3.341 -29.602  34.419  1.00  0.50           O  
HETATM  739  O   HOH T 738       2.220  -5.044  39.471  1.00  0.50           O  
HETATM  740  O   HOH T 739      21.842 -16.915  37.028  1.00  0.51           O  
HETATM  741  O   HOH T 740      25.947 -17.779  43.739  1.00  0.51           O  
HETATM  742  O   HOH T 741     -11.610   7.341  17.164  1.00  0.51           O  
HETATM  743  O   HOH T 742       7.133  -2.801  15.561  1.00  0.51           O  
HETATM  744  O   HOH T 743      -1.375  -0.216  46.968  1.00  0.51           O  
HETATM  745  O   HOH T 744       1.650 -13.843  59.166  1.00  0.51           O  
HETATM  746  O   HOH T 745       6.423  13.496  38.213  1.00  0.51           O  
HETATM  747  O   HOH T 746     -14.386  13.428  31.619  1.00  0.51           O  
HETATM  748  O   HOH T 747      21.822   5.604  61.746  1.00  0.51           O  
HETATM  749  O   HOH T 748     -25.126 -18.012  54.689  1.00  0.51           O  
HETATM  750  O   HOH T 749      -0.696 -27.518  28.180  1.00  0.51           O  
HETATM  751  O   HOH T 750       0.615  -5.492  52.861  1.00  0.51           O  
HETATM  752  O   HOH T 751      -1.707  -6.847  45.598  1.00  0.51           O  
HETATM  753  O   HOH T 752      17.855 -16.889  34.823  1.00  0.51           O  
HETATM  754  O   HOH T 753      24.335  -3.076  47.213  1.00  0.51           O  
HETATM  755  O   HOH T 754      -9.815 -13.617  64.889  1.00  0.51           O  
HETATM  756  O   HOH T 755     -13.366  24.893  32.735  1.00  0.51           O  
HETATM  757  O   HOH T 756     -19.196  21.655  52.735  1.00  0.51           O  
HETATM  758  O   HOH T 757     -29.551  -1.253  59.104  1.00  0.51           O  
HETATM  759  O   HOH T 758      -5.692  -0.476   9.632  1.00  0.51           O  
HETATM  760  O   HOH T 759       8.753  -4.124  13.792  1.00  0.51           O  
HETATM  761  O   HOH T 760      -6.331  15.042   6.723  1.00  0.51           O  
HETATM  762  O   HOH T 761      12.833   3.996  36.622  1.00  0.51           O  
HETATM  763  O   HOH T 762      14.589  17.409  23.650  1.00  0.51           O  
HETATM  764  O   HOH T 763     -20.283  -7.210  42.041  1.00  0.51           O  
HETATM  765  O   HOH T 764       4.994 -18.954  17.266  1.00  0.52           O  
HETATM  766  O   HOH T 765       9.747 -10.620  29.839  1.00  0.52           O  
HETATM  767  O   HOH T 766      15.722  21.026  32.972  1.00  0.52           O  
HETATM  768  O   HOH T 767     -12.540   8.851  33.739  1.00  0.52           O  
HETATM  769  O   HOH T 768      11.183  24.408  36.721  1.00  0.52           O  
HETATM  770  O   HOH T 769      -2.288 -18.713  14.446  1.00  0.52           O  
HETATM  771  O   HOH T 770     -22.092  -5.047  42.033  1.00  0.52           O  
HETATM  772  O   HOH T 771       7.749  -5.546  15.937  1.00  0.52           O  
HETATM  773  O   HOH T 772     -12.259  -4.895  64.721  1.00  0.52           O  
HETATM  774  O   HOH T 773      12.084  23.329  39.084  1.00  0.52           O  
HETATM  775  O   HOH T 774      27.581  -0.160  55.865  1.00  0.52           O  
HETATM  776  O   HOH T 775     -15.342 -23.729  50.478  1.00  0.52           O  
HETATM  777  O   HOH T 776       2.086 -14.101  13.100  1.00  0.52           O  
HETATM  778  O   HOH T 777     -22.685 -15.537  58.877  1.00  0.52           O  
HETATM  779  O   HOH T 778      20.428  18.983  51.866  1.00  0.52           O  
HETATM  780  O   HOH T 779       7.883 -25.616  50.798  1.00  0.52           O  
HETATM  781  O   HOH T 780      -2.537  17.297  59.252  1.00  0.52           O  
HETATM  782  O   HOH T 781     -14.317  -2.627  37.967  1.00  0.52           O  
HETATM  783  O   HOH T 782     -31.834  -1.698  53.649  1.00  0.52           O  
HETATM  784  O   HOH T 783      -8.738 -22.644  18.521  1.00  0.52           O  
HETATM  785  O   HOH T 784     -15.225  -1.550  62.307  1.00  0.52           O  
HETATM  786  O   HOH T 785     -30.221  -9.985  47.797  1.00  0.52           O  
HETATM  787  O   HOH T 786       9.286   5.451  18.752  1.00  0.52           O  
HETATM  788  O   HOH T 787       0.828  -9.512  57.509  1.00  0.52           O  
HETATM  789  O   HOH T 788      17.374   9.850  39.437  1.00  0.52           O  
HETATM  790  O   HOH T 789       7.425  -2.349  18.313  1.00  0.52           O  
HETATM  791  O   HOH T 790      -1.703  16.150  56.832  1.00  0.52           O  
HETATM  792  O   HOH T 791      12.161 -12.954  30.818  1.00  0.52           O  
HETATM  793  O   HOH T 792      -5.740   4.891  37.253  1.00  0.52           O  
HETATM  794  O   HOH T 793     -25.034  -2.369  45.027  1.00  0.52           O  
HETATM  795  O   HOH T 794      14.244   2.171  59.774  1.00  0.52           O  
HETATM  796  O   HOH T 795     -12.643   4.348  23.269  1.00  0.52           O  
HETATM  797  O   HOH T 796      -3.903 -22.803  46.974  1.00  0.52           O  
HETATM  798  O   HOH T 797     -10.488  -2.543  22.801  1.00  0.52           O  
HETATM  799  O   HOH T 798     -11.232   6.438  33.042  1.00  0.52           O  
HETATM  800  O   HOH T 799     -20.445   9.788  38.462  1.00  0.52           O  
HETATM  801  O   HOH T 800      20.588   0.987  34.607  1.00  0.52           O  
HETATM  802  O   HOH T 801      12.475  19.083  18.522  1.00  0.52           O  
HETATM  803  O   HOH T 802       6.841  -4.476  61.695  1.00  0.52           O  
HETATM  804  O   HOH T 803      13.016  -3.343  62.223  1.00  0.52           O  
HETATM  805  O   HOH T 804      -9.936  -0.216  40.350  1.00  0.52           O  
HETATM  806  O   HOH T 805      16.431  10.481  33.820  1.00  0.52           O  
HETATM  807  O   HOH T 806     -19.406  -1.787  38.729  1.00  0.52           O  
HETATM  808  O   HOH T 807      19.106  20.304  55.985  1.00  0.53           O  
HETATM  809  O   HOH T 808      -9.751  11.158  24.175  1.00  0.53           O  
HETATM  810  O   HOH T 809     -23.081  30.537  38.813  1.00  0.53           O  
HETATM  811  O   HOH T 810     -14.866   1.086  62.245  1.00  0.53           O  
HETATM  812  O   HOH T 811       3.277 -20.306  57.157  1.00  0.53           O  
HETATM  813  O   HOH T 812       4.874  12.885  11.898  1.00  0.53           O  
HETATM  814  O   HOH T 813      -5.046   7.325  38.549  1.00  0.53           O  
HETATM  815  O   HOH T 814      -3.091  14.037   4.122  1.00  0.53           O  
HETATM  816  O   HOH T 815      -2.242   3.238  38.229  1.00  0.53           O  
HETATM  817  O   HOH T 816     -14.764  23.362  51.522  1.00  0.53           O  
HETATM  818  O   HOH T 817      -5.101  22.906  52.541  1.00  0.53           O  
HETATM  819  O   HOH T 818      30.538  11.734  54.237  1.00  0.53           O  
HETATM  820  O   HOH T 819      -1.486  -6.266  55.594  1.00  0.53           O  
HETATM  821  O   HOH T 820     -16.865   4.837  26.750  1.00  0.53           O  
HETATM  822  O   HOH T 821      -8.986  -7.430  64.427  1.00  0.53           O  
HETATM  823  O   HOH T 822      22.270   9.292  41.935  1.00  0.53           O  
HETATM  824  O   HOH T 823      17.819  -5.599  62.764  1.00  0.53           O  
HETATM  825  O   HOH T 824     -11.292  -1.519  19.474  1.00  0.53           O  
HETATM  826  O   HOH T 825       0.008  22.775  56.032  1.00  0.53           O  
HETATM  827  O   HOH T 826     -18.394 -17.136  51.937  1.00  0.53           O  
HETATM  828  O   HOH T 827       5.789  28.538  46.380  1.00  0.54           O  
HETATM  829  O   HOH T 828     -16.072 -15.973  50.578  1.00  0.54           O  
HETATM  830  O   HOH T 829     -22.539  -0.236  36.461  1.00  0.54           O  
HETATM  831  O   HOH T 830     -29.064  -2.398  47.045  1.00  0.54           O  
HETATM  832  O   HOH T 831      -3.238  13.287   8.148  1.00  0.54           O  
HETATM  833  O   HOH T 832       1.632  14.527  11.096  1.00  0.54           O  
HETATM  834  O   HOH T 833     -12.377  -4.829  19.859  1.00  0.54           O  
HETATM  835  O   HOH T 834       9.711  -2.030  35.672  1.00  0.54           O  
HETATM  836  O   HOH T 835      -6.432 -20.142  25.841  1.00  0.54           O  
HETATM  837  O   HOH T 836     -13.672 -24.499  35.079  1.00  0.54           O  
HETATM  838  O   HOH T 837      -3.375 -29.405  56.648  1.00  0.54           O  
HETATM  839  O   HOH T 838      -0.872   0.953  55.205  1.00  0.54           O  
HETATM  840  O   HOH T 839     -17.101   2.443  62.251  1.00  0.54           O  
HETATM  841  O   HOH T 840       0.052  17.285  58.599  1.00  0.54           O  
HETATM  842  O   HOH T 841       3.591 -13.749  38.113  1.00  0.54           O  
HETATM  843  O   HOH T 842      -2.450 -13.030   9.688  1.00  0.54           O  
HETATM  844  O   HOH T 843      19.628 -18.464  35.980  1.00  0.54           O  
HETATM  845  O   HOH T 844      -6.398  25.224  31.738  1.00  0.54           O  
HETATM  846  O   HOH T 845      15.529   5.611  60.930  1.00  0.54           O  
HETATM  847  O   HOH T 846      26.347 -16.914  52.065  1.00  0.54           O  
HETATM  848  O   HOH T 847     -21.168 -19.677  40.571  1.00  0.54           O  
HETATM  849  O   HOH T 848     -12.871  14.725  16.102  1.00  0.54           O  
HETATM  850  O   HOH T 849      -0.131   7.596  56.458  1.00  0.54           O  
HETATM  851  O   HOH T 850     -18.214 -21.972  43.473  1.00  0.54           O  
HETATM  852  O   HOH T 851       1.343   0.170  51.314  1.00  0.54           O  
HETATM  853  O   HOH T 852      26.711 -13.894  47.961  1.00  0.54           O  
HETATM  854  O   HOH T 853      -8.142  10.559  58.345  1.00  0.54           O  
HETATM  855  O   HOH T 854      20.954  11.061  52.829  1.00  0.55           O  
HETATM  856  O   HOH T 855      -4.839  20.175  13.865  1.00  0.55           O  
HETATM  857  O   HOH T 856     -20.085 -19.324  51.467  1.00  0.55           O  
HETATM  858  O   HOH T 857       9.730  25.053  38.958  1.00  0.55           O  
HETATM  859  O   HOH T 858     -17.171  -6.538  22.578  1.00  0.55           O  
HETATM  860  O   HOH T 859     -17.838  -5.041  25.824  1.00  0.55           O  
HETATM  861  O   HOH T 860     -20.869 -21.351  42.711  1.00  0.55           O  
HETATM  862  O   HOH T 861      20.123  10.484  40.342  1.00  0.55           O  
HETATM  863  O   HOH T 862     -31.661  -4.055  58.444  1.00  0.55           O  
HETATM  864  O   HOH T 863       5.644  14.990  13.755  1.00  0.55           O  
HETATM  865  O   HOH T 864     -24.748 -17.173  49.321  1.00  0.55           O  
HETATM  866  O   HOH T 865      -8.636  24.602  53.269  1.00  0.55           O  
HETATM  867  O   HOH T 866       8.127 -21.282  59.245  1.00  0.55           O  
HETATM  868  O   HOH T 867      23.402  13.661  59.033  1.00  0.56           O  
HETATM  869  O   HOH T 868     -26.884 -16.142  55.841  1.00  0.56           O  
HETATM  870  O   HOH T 869      15.290   4.150  25.146  1.00  0.56           O  
HETATM  871  O   HOH T 870      16.938  22.478  30.848  1.00  0.56           O  
HETATM  872  O   HOH T 871     -13.520   3.420  20.866  1.00  0.56           O  
HETATM  873  O   HOH T 872      -6.387  30.030  48.479  1.00  0.56           O  
HETATM  874  O   HOH T 873     -18.434  -9.819  35.436  1.00  0.56           O  
HETATM  875  O   HOH T 874       5.775 -27.680  51.422  1.00  0.56           O  
HETATM  876  O   HOH T 875     -25.930  16.199  61.581  1.00  0.56           O  
HETATM  877  O   HOH T 876     -16.202  -7.276  20.229  1.00  0.56           O  
HETATM  878  O   HOH T 877     -26.909 -18.740  52.660  1.00  0.56           O  
HETATM  879  O   HOH T 878       3.807 -21.801  11.350  1.00  0.56           O  
HETATM  880  O   HOH T 879     -19.432 -13.048  31.512  1.00  0.56           O  
HETATM  881  O   HOH T 880      -5.576 -17.137  14.623  1.00  0.56           O  
HETATM  882  O   HOH T 881       7.452 -11.176  21.210  1.00  0.56           O  
HETATM  883  O   HOH T 882     -23.517 -20.275  46.161  1.00  0.57           O  
HETATM  884  O   HOH T 883     -12.974   0.811  36.032  1.00  0.57           O  
HETATM  885  O   HOH T 884      16.883  17.138  27.539  1.00  0.57           O  
HETATM  886  O   HOH T 885       2.368 -24.342  40.405  1.00  0.57           O  
HETATM  887  O   HOH T 886      25.048  -2.478  41.284  1.00  0.57           O  
HETATM  888  O   HOH T 887      -4.779  22.711  29.903  1.00  0.57           O  
HETATM  889  O   HOH T 888     -16.160   7.266  64.106  1.00  0.57           O  
HETATM  890  O   HOH T 889      -9.770  28.290  37.986  1.00  0.57           O  
HETATM  891  O   HOH T 890       7.833  -6.520  23.459  1.00  0.57           O  
HETATM  892  O   HOH T 891     -17.764  -4.973  20.362  1.00  0.57           O  
HETATM  893  O   HOH T 892     -27.501  13.708  44.622  1.00  0.57           O  
HETATM  894  O   HOH T 893      12.158  16.251  17.806  1.00  0.58           O  
HETATM  895  O   HOH T 894       5.938 -22.566  21.819  1.00  0.58           O  
HETATM  896  O   HOH T 895       5.402 -29.073  39.614  1.00  0.58           O  
HETATM  897  O   HOH T 896      18.569 -28.452  35.773  1.00  0.58           O  
HETATM  898  O   HOH T 897     -27.409  14.635  47.094  1.00  0.59           O  
HETATM  899  O   HOH T 898      -9.685  21.859  29.220  1.00  0.59           O  
HETATM  900  O   HOH T 899     -28.668  -1.379  48.481  1.00  0.59           O  
HETATM  901  O   HOH T 900      24.256   2.223  42.965  1.00  0.60           O  
HETATM  902  O   HOH T 901      -2.925  22.729  50.451  1.00  0.60           O  
HETATM  903  O   HOH T 902       5.541  -8.895  59.198  1.00  0.61           O  
HETATM  904  O   HOH T 903     -25.227   0.900  41.959  1.00  0.61           O  
HETATM  905  O   HOH T 904     -25.227  13.646  39.397  1.00  0.61           O  
HETATM  906  O   HOH T 905      24.299  -8.826  53.898  1.00  0.70           O  
TER     907      HOH T 905 
