# Supplementary material for: Accurate Prediction of Hydration Sites of Proteins Using Energy Model With Atom Embedding
Source: Front Mol Biosci. 2021 Sep 20;8:756075. doi: 10.3389/fmolb.2021.756075 (PMC8488165; doi:10.3389/fmolb.2021.756075)
Supplement: Supplementary file 1 [file DataSheet1.ZIP › Data Sheet 1/Our_result_pdb/our_dataset_output/3M0I_watersite.pdb]

HEADER                                                        XXXX


JRNL        PMID   -1
HETATM    1  O   HOH T   0      16.507  23.256 -25.300  1.00  0.17           O  
HETATM    2  O   HOH T   1       3.566  27.988  -5.799  1.00  0.17           O  
HETATM    3  O   HOH T   2       3.909  24.620 -20.077  1.00  0.18           O  
HETATM    4  O   HOH T   3      11.897  23.617 -11.482  1.00  0.19           O  
HETATM    5  O   HOH T   4       9.703   4.461  -1.501  1.00  0.19           O  
HETATM    6  O   HOH T   5      -3.287  23.460   8.313  1.00  0.19           O  
HETATM    7  O   HOH T   6      33.316  32.321 -14.668  1.00  0.19           O  
HETATM    8  O   HOH T   7      29.331  22.347 -21.648  1.00  0.21           O  
HETATM    9  O   HOH T   8      24.084  25.259  -9.988  1.00  0.21           O  
HETATM   10  O   HOH T   9      14.015  -2.437 -12.887  1.00  0.22           O  
HETATM   11  O   HOH T  10      32.675  22.266 -39.692  1.00  0.22           O  
HETATM   12  O   HOH T  11       5.915  13.610 -25.609  1.00  0.22           O  
HETATM   13  O   HOH T  12      25.068  19.491 -25.170  1.00  0.22           O  
HETATM   14  O   HOH T  13      17.274   2.265  -0.148  1.00  0.22           O  
HETATM   15  O   HOH T  14       9.905  32.811 -39.796  1.00  0.22           O  
HETATM   16  O   HOH T  15       9.252  21.104 -36.934  1.00  0.23           O  
HETATM   17  O   HOH T  16      14.323  33.736 -12.505  1.00  0.23           O  
HETATM   18  O   HOH T  17       7.520  30.364 -21.215  1.00  0.23           O  
HETATM   19  O   HOH T  18       4.667  11.362   6.273  1.00  0.23           O  
HETATM   20  O   HOH T  19      26.818  27.748 -25.963  1.00  0.23           O  
HETATM   21  O   HOH T  20       1.326   6.958 -24.437  1.00  0.24           O  
HETATM   22  O   HOH T  21       0.268  25.508   1.729  1.00  0.24           O  
HETATM   23  O   HOH T  22       5.674  33.773   5.590  1.00  0.24           O  
HETATM   24  O   HOH T  23       6.048  33.985 -20.688  1.00  0.24           O  
HETATM   25  O   HOH T  24       0.797   3.468  -9.126  1.00  0.24           O  
HETATM   26  O   HOH T  25      -9.397  27.942  -8.596  1.00  0.24           O  
HETATM   27  O   HOH T  26     -17.084  11.258  -5.323  1.00  0.24           O  
HETATM   28  O   HOH T  27       9.563  22.369 -12.214  1.00  0.24           O  
HETATM   29  O   HOH T  28       6.102   7.696 -21.854  1.00  0.26           O  
HETATM   30  O   HOH T  29      18.085  29.683   3.213  1.00  0.26           O  
HETATM   31  O   HOH T  30      13.896  11.842 -19.014  1.00  0.26           O  
HETATM   32  O   HOH T  31      12.914  16.135  -0.722  1.00  0.26           O  
HETATM   33  O   HOH T  32      18.575  17.578   1.180  1.00  0.26           O  
HETATM   34  O   HOH T  33      11.442  13.243 -18.382  1.00  0.26           O  
HETATM   35  O   HOH T  34      23.845  19.248   1.113  1.00  0.26           O  
HETATM   36  O   HOH T  35      22.966   6.637  -1.789  1.00  0.26           O  
HETATM   37  O   HOH T  36       9.355  -4.533 -10.873  1.00  0.26           O  
HETATM   38  O   HOH T  37      10.416  10.200  -6.625  1.00  0.27           O  
HETATM   39  O   HOH T  38      19.937   7.787 -18.680  1.00  0.27           O  
HETATM   40  O   HOH T  39       9.306  38.020   1.826  1.00  0.27           O  
HETATM   41  O   HOH T  40       8.646  -1.834 -16.427  1.00  0.27           O  
HETATM   42  O   HOH T  41      11.511  23.015 -25.798  1.00  0.27           O  
HETATM   43  O   HOH T  42     -12.917   9.724 -10.578  1.00  0.27           O  
HETATM   44  O   HOH T  43       6.674   1.928  -6.054  1.00  0.27           O  
HETATM   45  O   HOH T  44       4.818  30.252  -4.761  1.00  0.27           O  
HETATM   46  O   HOH T  45       7.296  32.665  -2.285  1.00  0.28           O  
HETATM   47  O   HOH T  46      19.657  20.793  -5.111  1.00  0.28           O  
HETATM   48  O   HOH T  47      24.637   7.935 -22.672  1.00  0.28           O  
HETATM   49  O   HOH T  48      29.059  14.749 -22.888  1.00  0.28           O  
HETATM   50  O   HOH T  49      17.021   7.589 -26.041  1.00  0.28           O  
HETATM   51  O   HOH T  50      13.070  -1.324   3.272  1.00  0.29           O  
HETATM   52  O   HOH T  51       7.123  11.458   7.746  1.00  0.29           O  
HETATM   53  O   HOH T  52       7.930  -6.933 -18.970  1.00  0.29           O  
HETATM   54  O   HOH T  53       4.706  -4.269  -4.941  1.00  0.29           O  
HETATM   55  O   HOH T  54      -0.550  21.550  -6.833  1.00  0.29           O  
HETATM   56  O   HOH T  55      -0.666  29.997 -16.862  1.00  0.30           O  
HETATM   57  O   HOH T  56      11.900  34.080 -15.387  1.00  0.30           O  
HETATM   58  O   HOH T  57      22.486   9.774 -22.629  1.00  0.30           O  
HETATM   59  O   HOH T  58      19.452  23.972  12.394  1.00  0.30           O  
HETATM   60  O   HOH T  59      -4.550  16.137   2.201  1.00  0.30           O  
HETATM   61  O   HOH T  60      -2.666  22.281 -12.757  1.00  0.31           O  
HETATM   62  O   HOH T  61       7.740  33.766  -8.092  1.00  0.31           O  
HETATM   63  O   HOH T  62      24.107  31.295   5.173  1.00  0.31           O  
HETATM   64  O   HOH T  63       9.752  18.848 -41.323  1.00  0.31           O  
HETATM   65  O   HOH T  64      17.000  -3.692   5.324  1.00  0.31           O  
HETATM   66  O   HOH T  65      27.748  28.507 -28.364  1.00  0.31           O  
HETATM   67  O   HOH T  66      28.902  32.426   0.822  1.00  0.31           O  
HETATM   68  O   HOH T  67      -6.981  12.930  -2.485  1.00  0.32           O  
HETATM   69  O   HOH T  68      18.627  -9.686 -13.610  1.00  0.32           O  
HETATM   70  O   HOH T  69       3.065  20.378 -27.860  1.00  0.32           O  
HETATM   71  O   HOH T  70       2.445   3.723 -13.577  1.00  0.32           O  
HETATM   72  O   HOH T  71      -0.999  24.456 -13.109  1.00  0.32           O  
HETATM   73  O   HOH T  72      -0.532  28.228  -2.660  1.00  0.32           O  
HETATM   74  O   HOH T  73      -8.253  21.828 -22.804  1.00  0.32           O  
HETATM   75  O   HOH T  74      23.810  13.599  -6.392  1.00  0.32           O  
HETATM   76  O   HOH T  75     -12.374  16.075  -3.876  1.00  0.32           O  
HETATM   77  O   HOH T  76     -11.316  15.445  -1.301  1.00  0.32           O  
HETATM   78  O   HOH T  77      12.866  -3.141 -10.497  1.00  0.32           O  
HETATM   79  O   HOH T  78      -1.324  23.811  -4.031  1.00  0.32           O  
HETATM   80  O   HOH T  79      -7.453  22.876 -18.778  1.00  0.32           O  
HETATM   81  O   HOH T  80       5.356   3.440 -19.390  1.00  0.32           O  
HETATM   82  O   HOH T  81      11.897  14.398 -41.411  1.00  0.32           O  
HETATM   83  O   HOH T  82      -0.717  30.758  -3.834  1.00  0.32           O  
HETATM   84  O   HOH T  83      17.178  30.983   5.580  1.00  0.32           O  
HETATM   85  O   HOH T  84      24.880   5.591 -21.204  1.00  0.33           O  
HETATM   86  O   HOH T  85      20.318   8.553   2.601  1.00  0.33           O  
HETATM   87  O   HOH T  86      21.804  28.613 -15.825  1.00  0.33           O  
HETATM   88  O   HOH T  87      27.835  19.053 -25.450  1.00  0.33           O  
HETATM   89  O   HOH T  88      29.944  24.970 -37.689  1.00  0.33           O  
HETATM   90  O   HOH T  89      23.460  17.237 -25.757  1.00  0.33           O  
HETATM   91  O   HOH T  90      14.538   5.775   2.412  1.00  0.33           O  
HETATM   92  O   HOH T  91      -1.652   4.597  -8.210  1.00  0.33           O  
HETATM   93  O   HOH T  92       8.129  -2.363  -9.520  1.00  0.33           O  
HETATM   94  O   HOH T  93      21.751   5.978 -17.588  1.00  0.33           O  
HETATM   95  O   HOH T  94      28.506   7.861 -12.078  1.00  0.33           O  
HETATM   96  O   HOH T  95       7.750  14.839 -29.830  1.00  0.33           O  
HETATM   97  O   HOH T  96      20.645  17.395  -0.744  1.00  0.33           O  
HETATM   98  O   HOH T  97       2.924  20.381   9.867  1.00  0.33           O  
HETATM   99  O   HOH T  98      16.340  28.394 -38.324  1.00  0.33           O  
HETATM  100  O   HOH T  99       7.765  -6.233 -21.620  1.00  0.33           O  
HETATM  101  O   HOH T 100       2.509  34.952  -7.103  1.00  0.34           O  
HETATM  102  O   HOH T 101       4.810   4.340  -7.756  1.00  0.34           O  
HETATM  103  O   HOH T 102       4.898  25.159  11.067  1.00  0.34           O  
HETATM  104  O   HOH T 103      30.075  17.997 -10.895  1.00  0.34           O  
HETATM  105  O   HOH T 104      29.927  26.227  -2.742  1.00  0.34           O  
HETATM  106  O   HOH T 105      15.100  14.182  -4.557  1.00  0.34           O  
HETATM  107  O   HOH T 106      27.477   5.050 -20.346  1.00  0.34           O  
HETATM  108  O   HOH T 107       6.071  24.072 -29.944  1.00  0.34           O  
HETATM  109  O   HOH T 108       9.352  18.226 -32.593  1.00  0.34           O  
HETATM  110  O   HOH T 109      15.401  39.580   2.698  1.00  0.34           O  
HETATM  111  O   HOH T 110      -9.383  21.272 -13.735  1.00  0.34           O  
HETATM  112  O   HOH T 111      11.667  -2.505   5.302  1.00  0.35           O  
HETATM  113  O   HOH T 112     -10.399  13.721  -9.774  1.00  0.35           O  
HETATM  114  O   HOH T 113      -6.245  26.852   3.139  1.00  0.35           O  
HETATM  115  O   HOH T 114      -5.231  22.493   6.559  1.00  0.35           O  
HETATM  116  O   HOH T 115      20.897  40.740   8.094  1.00  0.35           O  
HETATM  117  O   HOH T 116       9.626  35.835  -8.555  1.00  0.35           O  
HETATM  118  O   HOH T 117      17.730  25.068   8.948  1.00  0.35           O  
HETATM  119  O   HOH T 118      -6.495  23.527 -12.158  1.00  0.35           O  
HETATM  120  O   HOH T 119      -6.209  16.054   9.743  1.00  0.35           O  
HETATM  121  O   HOH T 120      28.492  29.217 -24.188  1.00  0.35           O  
HETATM  122  O   HOH T 121       7.973  10.935 -21.562  1.00  0.35           O  
HETATM  123  O   HOH T 122      15.278  39.128 -12.626  1.00  0.35           O  
HETATM  124  O   HOH T 123       2.790   5.601  -1.482  1.00  0.35           O  
HETATM  125  O   HOH T 124       7.935   1.041 -25.542  1.00  0.35           O  
HETATM  126  O   HOH T 125      24.921  32.858   7.388  1.00  0.35           O  
HETATM  127  O   HOH T 126       5.443  34.704  -2.798  1.00  0.35           O  
HETATM  128  O   HOH T 127       4.029  33.673 -18.820  1.00  0.35           O  
HETATM  129  O   HOH T 128       9.896  13.705 -28.421  1.00  0.36           O  
HETATM  130  O   HOH T 129       0.536  32.512 -17.108  1.00  0.36           O  
HETATM  131  O   HOH T 130      22.800  -1.585 -12.168  1.00  0.36           O  
HETATM  132  O   HOH T 131      18.592  41.312   6.778  1.00  0.36           O  
HETATM  133  O   HOH T 132      28.977  16.341  -8.986  1.00  0.36           O  
HETATM  134  O   HOH T 133      -6.017  28.461  -6.421  1.00  0.36           O  
HETATM  135  O   HOH T 134      21.143  14.694   0.144  1.00  0.36           O  
HETATM  136  O   HOH T 135      18.512  27.157 -39.557  1.00  0.36           O  
HETATM  137  O   HOH T 136       6.621   8.875 -28.618  1.00  0.36           O  
HETATM  138  O   HOH T 137       7.468  11.835 -18.840  1.00  0.36           O  
HETATM  139  O   HOH T 138       5.746  13.431 -28.449  1.00  0.37           O  
HETATM  140  O   HOH T 139      13.486  13.318  -0.748  1.00  0.37           O  
HETATM  141  O   HOH T 140      17.431   6.629   0.170  1.00  0.37           O  
HETATM  142  O   HOH T 141      -6.393  21.763  -7.821  1.00  0.37           O  
HETATM  143  O   HOH T 142       5.313  31.419 -19.845  1.00  0.37           O  
HETATM  144  O   HOH T 143       3.797  24.464 -26.290  1.00  0.37           O  
HETATM  145  O   HOH T 144      10.138  17.707 -38.865  1.00  0.37           O  
HETATM  146  O   HOH T 145     -11.659  13.492 -13.705  1.00  0.37           O  
HETATM  147  O   HOH T 146      -3.020  37.632  -7.173  1.00  0.37           O  
HETATM  148  O   HOH T 147       7.369  20.084  12.472  1.00  0.37           O  
HETATM  149  O   HOH T 148      16.017  27.053 -40.802  1.00  0.37           O  
HETATM  150  O   HOH T 149      12.859  38.069   3.180  1.00  0.37           O  
HETATM  151  O   HOH T 150      26.958   4.403 -29.796  1.00  0.37           O  
HETATM  152  O   HOH T 151      -2.336  25.627   2.443  1.00  0.37           O  
HETATM  153  O   HOH T 152      11.281   1.660 -22.409  1.00  0.37           O  
HETATM  154  O   HOH T 153      15.535  38.272 -32.449  1.00  0.38           O  
HETATM  155  O   HOH T 154      24.366  16.206 -32.099  1.00  0.38           O  
HETATM  156  O   HOH T 155      22.727   4.865  -4.053  1.00  0.38           O  
HETATM  157  O   HOH T 156      -1.573  15.201 -26.307  1.00  0.38           O  
HETATM  158  O   HOH T 157      25.253  15.161 -25.109  1.00  0.38           O  
HETATM  159  O   HOH T 158      34.286  25.974  -1.521  1.00  0.38           O  
HETATM  160  O   HOH T 159      28.832  38.423 -15.363  1.00  0.38           O  
HETATM  161  O   HOH T 160      11.428  38.085 -34.135  1.00  0.38           O  
HETATM  162  O   HOH T 161      18.918   7.634 -21.255  1.00  0.38           O  
HETATM  163  O   HOH T 162      14.544  31.266   4.972  1.00  0.38           O  
HETATM  164  O   HOH T 163      -4.547  25.761  -3.970  1.00  0.38           O  
HETATM  165  O   HOH T 164      31.801  33.129  -7.916  1.00  0.38           O  
HETATM  166  O   HOH T 165      22.783  37.993 -16.525  1.00  0.38           O  
HETATM  167  O   HOH T 166       6.149  -3.893 -21.430  1.00  0.38           O  
HETATM  168  O   HOH T 167      29.936  30.396 -22.055  1.00  0.38           O  
HETATM  169  O   HOH T 168      12.686  24.005 -40.724  1.00  0.38           O  
HETATM  170  O   HOH T 169      12.034  39.380 -38.760  1.00  0.38           O  
HETATM  171  O   HOH T 170       4.776   5.483  -5.114  1.00  0.39           O  
HETATM  172  O   HOH T 171      19.497  39.055 -31.629  1.00  0.39           O  
HETATM  173  O   HOH T 172      14.531  21.867 -40.549  1.00  0.39           O  
HETATM  174  O   HOH T 173      13.196  36.598 -15.090  1.00  0.39           O  
HETATM  175  O   HOH T 174      30.596  10.606 -18.360  1.00  0.39           O  
HETATM  176  O   HOH T 175       9.519  -5.364 -17.459  1.00  0.39           O  
HETATM  177  O   HOH T 176      34.493  30.069 -13.335  1.00  0.39           O  
HETATM  178  O   HOH T 177      17.995   6.728 -23.639  1.00  0.39           O  
HETATM  179  O   HOH T 178      11.028  45.472  -4.544  1.00  0.39           O  
HETATM  180  O   HOH T 179     -10.028  21.843 -18.970  1.00  0.39           O  
HETATM  181  O   HOH T 180      13.612   5.462 -21.845  1.00  0.39           O  
HETATM  182  O   HOH T 181      28.878  17.090   0.933  1.00  0.39           O  
HETATM  183  O   HOH T 182      32.769   7.366 -14.612  1.00  0.39           O  
HETATM  184  O   HOH T 183      13.616   6.632 -29.063  1.00  0.39           O  
HETATM  185  O   HOH T 184      12.600   8.825 -25.771  1.00  0.39           O  
HETATM  186  O   HOH T 185      32.582  25.932 -13.028  1.00  0.40           O  
HETATM  187  O   HOH T 186      22.494  -1.032 -14.872  1.00  0.40           O  
HETATM  188  O   HOH T 187     -10.151  23.131 -24.309  1.00  0.40           O  
HETATM  189  O   HOH T 188      26.283   6.059 -27.644  1.00  0.40           O  
HETATM  190  O   HOH T 189      31.252  37.508 -14.426  1.00  0.40           O  
HETATM  191  O   HOH T 190      -3.295  25.687 -20.280  1.00  0.40           O  
HETATM  192  O   HOH T 191      -4.350   6.459 -16.823  1.00  0.40           O  
HETATM  193  O   HOH T 192       3.055   0.655 -21.085  1.00  0.40           O  
HETATM  194  O   HOH T 193      -7.196   7.287 -11.789  1.00  0.40           O  
HETATM  195  O   HOH T 194      -0.314  27.618 -18.269  1.00  0.40           O  
HETATM  196  O   HOH T 195      19.266   7.755   5.080  1.00  0.40           O  
HETATM  197  O   HOH T 196       8.943  18.359 -36.451  1.00  0.40           O  
HETATM  198  O   HOH T 197      23.472  -8.775 -13.845  1.00  0.40           O  
HETATM  199  O   HOH T 198      33.430  14.317 -18.668  1.00  0.40           O  
HETATM  200  O   HOH T 199      15.023  15.616   1.970  1.00  0.40           O  
HETATM  201  O   HOH T 200      26.543  15.784   0.318  1.00  0.40           O  
HETATM  202  O   HOH T 201      24.561  17.857  -7.278  1.00  0.40           O  
HETATM  203  O   HOH T 202      -9.919  20.607 -16.435  1.00  0.40           O  
HETATM  204  O   HOH T 203       2.128   3.661 -25.873  1.00  0.41           O  
HETATM  205  O   HOH T 204     -12.330  12.377 -11.283  1.00  0.41           O  
HETATM  206  O   HOH T 205      11.263  17.880 -43.372  1.00  0.41           O  
HETATM  207  O   HOH T 206      27.780  16.291 -24.851  1.00  0.41           O  
HETATM  208  O   HOH T 207      -7.393  18.020 -21.934  1.00  0.41           O  
HETATM  209  O   HOH T 208      -8.584  21.263 -25.506  1.00  0.41           O  
HETATM  210  O   HOH T 209      -3.055  29.469  -3.102  1.00  0.41           O  
HETATM  211  O   HOH T 210      -1.150  25.034 -18.635  1.00  0.41           O  
HETATM  212  O   HOH T 211      11.651  39.905 -18.537  1.00  0.42           O  
HETATM  213  O   HOH T 212     -10.510  20.456 -23.686  1.00  0.42           O  
HETATM  214  O   HOH T 213       9.695  12.536 -20.229  1.00  0.42           O  
HETATM  215  O   HOH T 214      15.221  42.479   2.872  1.00  0.42           O  
HETATM  216  O   HOH T 215       5.667  21.385 -30.331  1.00  0.42           O  
HETATM  217  O   HOH T 216      13.589  36.546 -34.884  1.00  0.42           O  
HETATM  218  O   HOH T 217      -8.620  15.651 -17.314  1.00  0.42           O  
HETATM  219  O   HOH T 218      -6.476  30.999  -7.209  1.00  0.42           O  
HETATM  220  O   HOH T 219       4.846  37.338 -15.540  1.00  0.42           O  
HETATM  221  O   HOH T 220      -7.334  21.510   1.069  1.00  0.42           O  
HETATM  222  O   HOH T 221       6.367  -0.321 -16.202  1.00  0.42           O  
HETATM  223  O   HOH T 222       4.186   1.906 -25.879  1.00  0.42           O  
HETATM  224  O   HOH T 223       7.090  20.090 -35.433  1.00  0.42           O  
HETATM  225  O   HOH T 224      18.044   5.047 -21.434  1.00  0.42           O  
HETATM  226  O   HOH T 225      18.384  -7.548  -0.193  1.00  0.42           O  
HETATM  227  O   HOH T 226       1.259   3.174  -1.680  1.00  0.42           O  
HETATM  228  O   HOH T 227      -5.192  27.339 -13.689  1.00  0.42           O  
HETATM  229  O   HOH T 228       7.184  11.521 -24.217  1.00  0.42           O  
HETATM  230  O   HOH T 229       5.186  21.786 -34.405  1.00  0.42           O  
HETATM  231  O   HOH T 230      25.110  17.633 -34.371  1.00  0.42           O  
HETATM  232  O   HOH T 231      -4.636  13.829   0.719  1.00  0.42           O  
HETATM  233  O   HOH T 232       1.452  25.713 -19.323  1.00  0.42           O  
HETATM  234  O   HOH T 233       1.119   1.836 -19.358  1.00  0.42           O  
HETATM  235  O   HOH T 234      28.984  12.686 -26.807  1.00  0.42           O  
HETATM  236  O   HOH T 235      13.029   6.573 -24.308  1.00  0.42           O  
HETATM  237  O   HOH T 236      18.644  22.702 -40.351  1.00  0.43           O  
HETATM  238  O   HOH T 237      25.233  35.679   6.912  1.00  0.43           O  
HETATM  239  O   HOH T 238      -3.965  16.754 -25.985  1.00  0.43           O  
HETATM  240  O   HOH T 239       5.006  38.268 -12.905  1.00  0.43           O  
HETATM  241  O   HOH T 240      24.562  13.330  -9.082  1.00  0.43           O  
HETATM  242  O   HOH T 241     -10.014   6.233 -20.983  1.00  0.43           O  
HETATM  243  O   HOH T 242      -9.107  16.334 -12.832  1.00  0.43           O  
HETATM  244  O   HOH T 243      -8.259  18.456 -17.227  1.00  0.43           O  
HETATM  245  O   HOH T 244      12.162  21.314   8.535  1.00  0.44           O  
HETATM  246  O   HOH T 245      26.987  14.559  -9.767  1.00  0.44           O  
HETATM  247  O   HOH T 246      -7.955   8.052 -21.582  1.00  0.44           O  
HETATM  248  O   HOH T 247       8.932  40.127 -18.795  1.00  0.44           O  
HETATM  249  O   HOH T 248      17.825   9.934 -10.535  1.00  0.44           O  
HETATM  250  O   HOH T 249      13.682  42.245 -21.818  1.00  0.44           O  
HETATM  251  O   HOH T 250      26.194  31.989   0.945  1.00  0.44           O  
HETATM  252  O   HOH T 251      25.335  18.542   3.324  1.00  0.44           O  
HETATM  253  O   HOH T 252      -4.862  11.858 -24.101  1.00  0.44           O  
HETATM  254  O   HOH T 253      11.860   4.161 -23.503  1.00  0.44           O  
HETATM  255  O   HOH T 254      -5.697  24.300 -20.439  1.00  0.44           O  
HETATM  256  O   HOH T 255      36.690  26.034  -0.106  1.00  0.44           O  
HETATM  257  O   HOH T 256       7.183  -4.770 -12.665  1.00  0.44           O  
HETATM  258  O   HOH T 257      23.573 -11.392 -12.980  1.00  0.44           O  
HETATM  259  O   HOH T 258      30.078  12.450 -24.294  1.00  0.44           O  
HETATM  260  O   HOH T 259      26.254 -10.854  -8.041  1.00  0.44           O  
HETATM  261  O   HOH T 260      -0.018  34.872  -5.965  1.00  0.44           O  
HETATM  262  O   HOH T 261      14.191  39.210 -15.189  1.00  0.45           O  
HETATM  263  O   HOH T 262      -5.269  26.451 -16.337  1.00  0.45           O  
HETATM  264  O   HOH T 263      13.906  22.731 -24.530  1.00  0.45           O  
HETATM  265  O   HOH T 264       4.543  23.167 -32.085  1.00  0.45           O  
HETATM  266  O   HOH T 265      24.971 -11.011 -10.539  1.00  0.45           O  
HETATM  267  O   HOH T 266       7.904  16.355 -38.080  1.00  0.45           O  
HETATM  268  O   HOH T 267       8.063  36.416   3.535  1.00  0.45           O  
HETATM  269  O   HOH T 268      16.165   3.324 -20.326  1.00  0.45           O  
HETATM  270  O   HOH T 269       4.688  -1.574 -20.625  1.00  0.45           O  
HETATM  271  O   HOH T 270       5.111  -2.119 -23.372  1.00  0.45           O  
HETATM  272  O   HOH T 271      11.071  46.387  -1.941  1.00  0.45           O  
HETATM  273  O   HOH T 272       6.572   3.227 -26.732  1.00  0.45           O  
HETATM  274  O   HOH T 273      -3.937  27.775   1.882  1.00  0.45           O  
HETATM  275  O   HOH T 274      30.159  13.098 -17.244  1.00  0.45           O  
HETATM  276  O   HOH T 275      -0.038  -1.648  -9.851  1.00  0.45           O  
HETATM  277  O   HOH T 276      15.037  25.259   8.073  1.00  0.45           O  
HETATM  278  O   HOH T 277      -2.023  25.869  -2.502  1.00  0.45           O  
HETATM  279  O   HOH T 278       8.825  29.824  10.459  1.00  0.45           O  
HETATM  280  O   HOH T 279      -1.820  19.985 -33.922  1.00  0.46           O  
HETATM  281  O   HOH T 280       6.821  39.984 -16.939  1.00  0.46           O  
HETATM  282  O   HOH T 281      23.420   8.051 -28.482  1.00  0.46           O  
HETATM  283  O   HOH T 282      31.321  28.280  -1.463  1.00  0.46           O  
HETATM  284  O   HOH T 283      17.904  38.691 -33.840  1.00  0.46           O  
HETATM  285  O   HOH T 284      14.409  16.884 -39.450  1.00  0.46           O  
HETATM  286  O   HOH T 285      17.719   7.616   2.750  1.00  0.46           O  
HETATM  287  O   HOH T 286      17.984  25.189 -41.480  1.00  0.46           O  
HETATM  288  O   HOH T 287      -9.045  18.607 -14.577  1.00  0.46           O  
HETATM  289  O   HOH T 288      28.198  25.847 -27.628  1.00  0.46           O  
HETATM  290  O   HOH T 289      -6.604  13.878 -23.325  1.00  0.46           O  
HETATM  291  O   HOH T 290      14.280  40.418 -17.700  1.00  0.46           O  
HETATM  292  O   HOH T 291      26.197  18.066  -5.197  1.00  0.46           O  
HETATM  293  O   HOH T 292      12.477  10.444 -34.111  1.00  0.46           O  
HETATM  294  O   HOH T 293      32.619  24.610 -38.092  1.00  0.46           O  
HETATM  295  O   HOH T 294      -5.566  33.362  -8.239  1.00  0.46           O  
HETATM  296  O   HOH T 295      10.979  36.646 -10.791  1.00  0.46           O  
HETATM  297  O   HOH T 296       1.520  -1.051 -12.036  1.00  0.46           O  
HETATM  298  O   HOH T 297      -3.017  26.989 -17.893  1.00  0.46           O  
HETATM  299  O   HOH T 298      -6.832  28.842  -8.961  1.00  0.46           O  
HETATM  300  O   HOH T 299      22.158   8.246   0.421  1.00  0.46           O  
HETATM  301  O   HOH T 300      16.226  30.093   8.085  1.00  0.46           O  
HETATM  302  O   HOH T 301      15.359  -4.638 -13.999  1.00  0.46           O  
HETATM  303  O   HOH T 302      -7.236  15.490 -21.214  1.00  0.46           O  
HETATM  304  O   HOH T 303       0.891  33.103  -3.952  1.00  0.46           O  
HETATM  305  O   HOH T 304      18.572  34.939   5.992  1.00  0.46           O  
HETATM  306  O   HOH T 305      17.062  40.755 -17.213  1.00  0.46           O  
HETATM  307  O   HOH T 306       1.306   0.756  -9.860  1.00  0.47           O  
HETATM  308  O   HOH T 307       4.764  12.858  10.638  1.00  0.47           O  
HETATM  309  O   HOH T 308      -6.600  12.978 -25.925  1.00  0.47           O  
HETATM  310  O   HOH T 309      -7.131  24.234 -16.314  1.00  0.47           O  
HETATM  311  O   HOH T 310       9.634  34.710   5.012  1.00  0.47           O  
HETATM  312  O   HOH T 311      21.391   1.529 -14.872  1.00  0.47           O  
HETATM  313  O   HOH T 312      32.406  13.086 -28.394  1.00  0.47           O  
HETATM  314  O   HOH T 313      25.114  20.182 -40.397  1.00  0.47           O  
HETATM  315  O   HOH T 314       2.141   1.035 -13.748  1.00  0.47           O  
HETATM  316  O   HOH T 315       5.801   0.033   1.931  1.00  0.47           O  
HETATM  317  O   HOH T 316       7.254  38.745 -14.523  1.00  0.47           O  
HETATM  318  O   HOH T 317      27.479  13.486 -24.703  1.00  0.47           O  
HETATM  319  O   HOH T 318      -1.395  27.562 -15.721  1.00  0.47           O  
HETATM  320  O   HOH T 319       1.725  -5.272 -15.968  1.00  0.47           O  
HETATM  321  O   HOH T 320      11.138  36.070 -13.419  1.00  0.47           O  
HETATM  322  O   HOH T 321      20.309  -2.625  -2.128  1.00  0.47           O  
HETATM  323  O   HOH T 322      17.122   8.661 -30.797  1.00  0.47           O  
HETATM  324  O   HOH T 323       8.160   7.330 -26.871  1.00  0.47           O  
HETATM  325  O   HOH T 324      23.358  15.652  -8.223  1.00  0.47           O  
HETATM  326  O   HOH T 325      24.429  25.075   6.900  1.00  0.47           O  
HETATM  327  O   HOH T 326      10.662  39.953 -21.100  1.00  0.47           O  
HETATM  328  O   HOH T 327      31.044   7.191 -16.782  1.00  0.47           O  
HETATM  329  O   HOH T 328      19.331   0.851   1.354  1.00  0.47           O  
HETATM  330  O   HOH T 329       3.144  12.673   8.235  1.00  0.47           O  
HETATM  331  O   HOH T 330      -9.710  14.631 -15.014  1.00  0.47           O  
HETATM  332  O   HOH T 331       2.055  14.740   6.531  1.00  0.47           O  
HETATM  333  O   HOH T 332      -3.023  28.909 -13.998  1.00  0.48           O  
HETATM  334  O   HOH T 333       4.803  22.575 -27.958  1.00  0.48           O  
HETATM  335  O   HOH T 334      14.785  10.285 -35.632  1.00  0.48           O  
HETATM  336  O   HOH T 335      -8.592  10.569 -22.740  1.00  0.48           O  
HETATM  337  O   HOH T 336       2.481  13.744   4.071  1.00  0.48           O  
HETATM  338  O   HOH T 337      -8.843  17.219 -19.656  1.00  0.48           O  
HETATM  339  O   HOH T 338      20.857  25.886 -38.990  1.00  0.48           O  
HETATM  340  O   HOH T 339      21.439  22.915  10.767  1.00  0.48           O  
HETATM  341  O   HOH T 340      -6.670  20.180   5.737  1.00  0.48           O  
HETATM  342  O   HOH T 341       4.771   7.117  -7.299  1.00  0.48           O  
HETATM  343  O   HOH T 342      16.949  39.051   6.531  1.00  0.48           O  
HETATM  344  O   HOH T 343       1.635   4.102 -17.936  1.00  0.48           O  
HETATM  345  O   HOH T 344       1.757  18.956 -29.835  1.00  0.48           O  
HETATM  346  O   HOH T 345      12.876  43.423  -4.980  1.00  0.48           O  
HETATM  347  O   HOH T 346       4.187   3.818 -17.006  1.00  0.48           O  
HETATM  348  O   HOH T 347      16.268   7.185 -28.582  1.00  0.48           O  
HETATM  349  O   HOH T 348      19.521  -5.235  -2.284  1.00  0.48           O  
HETATM  350  O   HOH T 349      17.208  -3.484 -17.229  1.00  0.48           O  
HETATM  351  O   HOH T 350      -0.978  36.113  -8.254  1.00  0.49           O  
HETATM  352  O   HOH T 351      13.587  30.004   7.251  1.00  0.49           O  
HETATM  353  O   HOH T 352      18.824  39.054   8.483  1.00  0.49           O  
HETATM  354  O   HOH T 353      30.542  40.173 -13.941  1.00  0.49           O  
HETATM  355  O   HOH T 354      23.122   4.507 -19.443  1.00  0.49           O  
HETATM  356  O   HOH T 355      27.151  30.195 -32.973  1.00  0.49           O  
HETATM  357  O   HOH T 356      10.527  12.358 -34.627  1.00  0.49           O  
HETATM  358  O   HOH T 357      10.607  39.874   3.459  1.00  0.49           O  
HETATM  359  O   HOH T 358      14.985  16.604 -43.045  1.00  0.49           O  
HETATM  360  O   HOH T 359      23.635   4.103 -16.789  1.00  0.49           O  
HETATM  361  O   HOH T 360       3.271  13.954  12.924  1.00  0.49           O  
HETATM  362  O   HOH T 361       5.558  35.846   3.793  1.00  0.49           O  
HETATM  363  O   HOH T 362      13.983  36.290   4.983  1.00  0.49           O  
HETATM  364  O   HOH T 363      16.657  41.109   4.715  1.00  0.49           O  
HETATM  365  O   HOH T 364       9.755  38.512 -37.420  1.00  0.49           O  
HETATM  366  O   HOH T 365      22.517  -1.515  -3.350  1.00  0.49           O  
HETATM  367  O   HOH T 366      17.491  -1.952   7.545  1.00  0.49           O  
HETATM  368  O   HOH T 367      15.282  24.427 -41.607  1.00  0.49           O  
HETATM  369  O   HOH T 368      10.924  35.313 -39.942  1.00  0.50           O  
HETATM  370  O   HOH T 369      -5.806  10.538 -21.818  1.00  0.50           O  
HETATM  371  O   HOH T 370      10.016   2.700 -24.776  1.00  0.50           O  
HETATM  372  O   HOH T 371     -11.984  18.697   3.010  1.00  0.50           O  
HETATM  373  O   HOH T 372      -4.796  29.924 -10.553  1.00  0.50           O  
HETATM  374  O   HOH T 373      -5.794  16.457 -23.628  1.00  0.50           O  
HETATM  375  O   HOH T 374       0.612  -0.614  -7.412  1.00  0.50           O  
HETATM  376  O   HOH T 375       4.864  10.572   8.991  1.00  0.50           O  
HETATM  377  O   HOH T 376       3.441   4.192   4.951  1.00  0.50           O  
HETATM  378  O   HOH T 377      11.978  17.159 -40.817  1.00  0.50           O  
HETATM  379  O   HOH T 378      22.781   7.509   2.926  1.00  0.50           O  
HETATM  380  O   HOH T 379      13.123  33.632   4.968  1.00  0.50           O  
HETATM  381  O   HOH T 380      24.135 -11.063 -15.552  1.00  0.50           O  
HETATM  382  O   HOH T 381      17.080  42.846  -6.166  1.00  0.50           O  
HETATM  383  O   HOH T 382      15.552  38.485 -35.297  1.00  0.50           O  
HETATM  384  O   HOH T 383      20.549  10.425 -32.889  1.00  0.50           O  
HETATM  385  O   HOH T 384      -3.356  24.228  -5.845  1.00  0.50           O  
HETATM  386  O   HOH T 385      12.599  24.020   8.202  1.00  0.51           O  
HETATM  387  O   HOH T 386       5.011  33.942  -7.066  1.00  0.51           O  
HETATM  388  O   HOH T 387      12.905  15.260   8.698  1.00  0.51           O  
HETATM  389  O   HOH T 388      30.239  35.969  -4.536  1.00  0.51           O  
HETATM  390  O   HOH T 389      16.942   9.156   4.921  1.00  0.51           O  
HETATM  391  O   HOH T 390      -5.196  24.673 -14.234  1.00  0.51           O  
HETATM  392  O   HOH T 391      -2.450  21.850 -25.304  1.00  0.51           O  
HETATM  393  O   HOH T 392      18.841   2.551 -20.564  1.00  0.51           O  
HETATM  394  O   HOH T 393       9.906  -0.036 -23.828  1.00  0.51           O  
HETATM  395  O   HOH T 394      15.034  36.451 -37.198  1.00  0.51           O  
HETATM  396  O   HOH T 395      26.705  -8.895  -9.905  1.00  0.51           O  
HETATM  397  O   HOH T 396       7.342  13.639   9.628  1.00  0.51           O  
HETATM  398  O   HOH T 397      13.130  40.774   3.626  1.00  0.51           O  
HETATM  399  O   HOH T 398       7.721  -1.408 -24.148  1.00  0.51           O  
HETATM  400  O   HOH T 399      10.371  37.351   4.363  1.00  0.51           O  
HETATM  401  O   HOH T 400     -11.689  14.102  -7.372  1.00  0.51           O  
HETATM  402  O   HOH T 401      20.733  -3.159 -14.612  1.00  0.52           O  
HETATM  403  O   HOH T 402       6.549  11.177 -26.947  1.00  0.52           O  
HETATM  404  O   HOH T 403       8.329   7.464 -23.538  1.00  0.52           O  
HETATM  405  O   HOH T 404      22.014   6.424 -10.637  1.00  0.52           O  
HETATM  406  O   HOH T 405       4.849  22.409  10.381  1.00  0.52           O  
HETATM  407  O   HOH T 406      29.320   7.128 -14.640  1.00  0.52           O  
HETATM  408  O   HOH T 407       8.504  -5.335 -14.966  1.00  0.52           O  
HETATM  409  O   HOH T 408       4.841  35.674 -22.588  1.00  0.52           O  
HETATM  410  O   HOH T 409      24.339  31.667 -39.217  1.00  0.52           O  
HETATM  411  O   HOH T 410      11.344  10.444   5.743  1.00  0.52           O  
HETATM  412  O   HOH T 411      11.530  14.585 -35.870  1.00  0.52           O  
HETATM  413  O   HOH T 412      19.362  42.198 -28.332  1.00  0.52           O  
HETATM  414  O   HOH T 413       6.750  -2.267 -27.608  1.00  0.52           O  
HETATM  415  O   HOH T 414       8.903  34.677 -33.460  1.00  0.52           O  
HETATM  416  O   HOH T 415       3.468  34.042  -4.685  1.00  0.52           O  
HETATM  417  O   HOH T 416       2.139  13.893  10.456  1.00  0.53           O  
HETATM  418  O   HOH T 417      22.637   7.362 -25.974  1.00  0.53           O  
HETATM  419  O   HOH T 418      17.945  40.848 -30.281  1.00  0.53           O  
HETATM  420  O   HOH T 419      20.540   7.931 -23.468  1.00  0.53           O  
HETATM  421  O   HOH T 420      -5.154  30.567  -4.720  1.00  0.53           O  
HETATM  422  O   HOH T 421      13.019  36.776 -39.005  1.00  0.53           O  
HETATM  423  O   HOH T 422       5.662   8.122   9.826  1.00  0.53           O  
HETATM  424  O   HOH T 423      -1.125   5.936 -23.746  1.00  0.53           O  
HETATM  425  O   HOH T 424      -8.109  21.684   3.756  1.00  0.53           O  
HETATM  426  O   HOH T 425      23.484   1.908 -18.607  1.00  0.53           O  
HETATM  427  O   HOH T 426      17.308  22.995  10.850  1.00  0.53           O  
HETATM  428  O   HOH T 427      30.035  31.558 -24.376  1.00  0.53           O  
HETATM  429  O   HOH T 428      14.466   7.040 -26.564  1.00  0.54           O  
HETATM  430  O   HOH T 429      20.242  24.031   8.164  1.00  0.54           O  
HETATM  431  O   HOH T 430       3.996  -1.829 -15.673  1.00  0.54           O  
HETATM  432  O   HOH T 431      13.788  36.532 -12.325  1.00  0.54           O  
HETATM  433  O   HOH T 432      35.092   9.082 -24.058  1.00  0.54           O  
HETATM  434  O   HOH T 433      26.463  18.444   0.787  1.00  0.54           O  
HETATM  435  O   HOH T 434      16.191  36.409   6.525  1.00  0.54           O  
HETATM  436  O   HOH T 435      23.757   5.980   0.827  1.00  0.54           O  
HETATM  437  O   HOH T 436      15.265   1.516   6.117  1.00  0.54           O  
HETATM  438  O   HOH T 437      20.496  43.249 -25.061  1.00  0.54           O  
HETATM  439  O   HOH T 438       8.397   5.049 -25.290  1.00  0.54           O  
HETATM  440  O   HOH T 439       5.723  14.295 -31.684  1.00  0.54           O  
HETATM  441  O   HOH T 440      12.832  12.181 -36.124  1.00  0.54           O  
HETATM  442  O   HOH T 441      26.889  25.781 -40.130  1.00  0.54           O  
HETATM  443  O   HOH T 442       9.782  40.106 -14.407  1.00  0.54           O  
HETATM  444  O   HOH T 443      21.647   2.584 -20.586  1.00  0.54           O  
HETATM  445  O   HOH T 444      33.144  29.885  -0.226  1.00  0.55           O  
HETATM  446  O   HOH T 445       8.901  35.166 -28.334  1.00  0.55           O  
HETATM  447  O   HOH T 446      29.173  17.808 -34.835  1.00  0.55           O  
HETATM  448  O   HOH T 447      -2.369  17.764 -32.328  1.00  0.55           O  
HETATM  449  O   HOH T 448      19.460  20.268   8.054  1.00  0.55           O  
HETATM  450  O   HOH T 449       2.457  -1.602 -14.590  1.00  0.55           O  
HETATM  451  O   HOH T 450       5.294  19.861  11.003  1.00  0.55           O  
HETATM  452  O   HOH T 451      23.451   2.394  -4.923  1.00  0.55           O  
HETATM  453  O   HOH T 452       4.833  26.835 -36.880  1.00  0.56           O  
HETATM  454  O   HOH T 453      23.504  -3.432 -13.966  1.00  0.56           O  
HETATM  455  O   HOH T 454      19.445  -4.936 -16.411  1.00  0.56           O  
HETATM  456  O   HOH T 455       8.712  42.233  -4.178  1.00  0.56           O  
HETATM  457  O   HOH T 456      -9.606   6.878 -10.584  1.00  0.56           O  
HETATM  458  O   HOH T 457       5.027  34.025 -36.329  1.00  0.56           O  
HETATM  459  O   HOH T 458      20.608  16.189   2.553  1.00  0.56           O  
HETATM  460  O   HOH T 459      -8.986   8.197  -3.977  1.00  0.56           O  
HETATM  461  O   HOH T 460       2.106  34.895 -17.181  1.00  0.56           O  
HETATM  462  O   HOH T 461      33.244  17.803 -25.917  1.00  0.56           O  
HETATM  463  O   HOH T 462      26.977  36.518 -34.851  1.00  0.56           O  
HETATM  464  O   HOH T 463       8.918  14.558 -34.120  1.00  0.57           O  
HETATM  465  O   HOH T 464       3.932  20.405 -32.339  1.00  0.57           O  
HETATM  466  O   HOH T 465      12.831  38.870 -11.277  1.00  0.57           O  
HETATM  467  O   HOH T 466      21.896  -6.368  -3.122  1.00  0.57           O  
HETATM  468  O   HOH T 467      17.913  -7.383  -3.057  1.00  0.57           O  
HETATM  469  O   HOH T 468      -4.094  12.179 -26.745  1.00  0.57           O  
HETATM  470  O   HOH T 469      13.802   7.316 -31.707  1.00  0.57           O  
HETATM  471  O   HOH T 470       8.911  38.891 -34.806  1.00  0.58           O  
HETATM  472  O   HOH T 471      25.718  40.518 -16.646  1.00  0.58           O  
HETATM  473  O   HOH T 472      30.816  15.481 -28.355  1.00  0.58           O  
HETATM  474  O   HOH T 473       0.813  28.269   1.527  1.00  0.58           O  
HETATM  475  O   HOH T 474      29.398   5.519 -18.418  1.00  0.58           O  
HETATM  476  O   HOH T 475      -1.549   3.163 -10.510  1.00  0.58           O  
HETATM  477  O   HOH T 476     -14.607  10.686  -8.695  1.00  0.58           O  
HETATM  478  O   HOH T 477      23.262  46.098   5.712  1.00  0.59           O  
HETATM  479  O   HOH T 478       3.402   0.102 -23.808  1.00  0.59           O  
HETATM  480  O   HOH T 479      20.170   6.465   7.297  1.00  0.60           O  
HETATM  481  O   HOH T 480       0.820  -3.448  -7.962  1.00  0.60           O  
HETATM  482  O   HOH T 481       8.913   9.881 -27.522  1.00  0.60           O  
TER     483      HOH T 481 
