# Supplementary material for: Accurate Prediction of Hydration Sites of Proteins Using Energy Model With Atom Embedding
Source: Front Mol Biosci. 2021 Sep 20;8:756075. doi: 10.3389/fmolb.2021.756075 (PMC8488165; doi:10.3389/fmolb.2021.756075)
Supplement: Supplementary file 1 [file DataSheet1.ZIP › Data Sheet 1/Our_result_pdb/our_dataset_output/3M0S_watersite.pdb]

HEADER                                                        XXXX


JRNL        PMID   -1
HETATM    1  O   HOH T   0       6.433   0.032  -8.089  1.00  0.21           O  
HETATM    2  O   HOH T   1     -12.567 -20.371 -20.893  1.00  0.23           O  
HETATM    3  O   HOH T   2      -7.692 -11.567 -14.445  1.00  0.25           O  
HETATM    4  O   HOH T   3      -1.113   8.606 -13.880  1.00  0.26           O  
HETATM    5  O   HOH T   4       7.767  -1.328  -6.150  1.00  0.28           O  
HETATM    6  O   HOH T   5      -1.625 -13.986 -24.225  1.00  0.28           O  
HETATM    7  O   HOH T   6       4.118 -18.306 -17.174  1.00  0.29           O  
HETATM    8  O   HOH T   7      -9.912 -10.228 -22.891  1.00  0.29           O  
HETATM    9  O   HOH T   8     -10.436 -15.389 -13.933  1.00  0.29           O  
HETATM   10  O   HOH T   9      -5.636   3.207 -12.406  1.00  0.29           O  
HETATM   11  O   HOH T  10     -14.915 -14.625 -21.913  1.00  0.29           O  
HETATM   12  O   HOH T  11       4.404   3.175  -6.472  1.00  0.31           O  
HETATM   13  O   HOH T  12      -8.030  -2.005 -21.053  1.00  0.31           O  
HETATM   14  O   HOH T  13      -6.116 -16.015 -27.808  1.00  0.31           O  
HETATM   15  O   HOH T  14      -3.555  -6.401  -4.437  1.00  0.31           O  
HETATM   16  O   HOH T  15      -4.853 -16.148 -25.346  1.00  0.32           O  
HETATM   17  O   HOH T  16      -5.703   2.243  -9.660  1.00  0.32           O  
HETATM   18  O   HOH T  17     -10.771   1.134 -17.796  1.00  0.32           O  
HETATM   19  O   HOH T  18       6.532 -11.407 -19.088  1.00  0.32           O  
HETATM   20  O   HOH T  19       7.192 -11.735 -10.363  1.00  0.32           O  
HETATM   21  O   HOH T  20       0.711 -12.586 -25.008  1.00  0.32           O  
HETATM   22  O   HOH T  21      -4.261   2.839 -14.799  1.00  0.33           O  
HETATM   23  O   HOH T  22      -8.189 -13.985 -13.196  1.00  0.34           O  
HETATM   24  O   HOH T  23     -13.818 -12.030 -21.623  1.00  0.34           O  
HETATM   25  O   HOH T  24      -5.390 -18.482 -26.635  1.00  0.34           O  
HETATM   26  O   HOH T  25       4.635 -13.113 -20.202  1.00  0.34           O  
HETATM   27  O   HOH T  26      -4.924 -19.059 -22.167  1.00  0.34           O  
HETATM   28  O   HOH T  27     -17.484 -14.123 -21.093  1.00  0.35           O  
HETATM   29  O   HOH T  28      -8.766  -0.552 -18.823  1.00  0.35           O  
HETATM   30  O   HOH T  29      -0.435   5.986 -22.559  1.00  0.35           O  
HETATM   31  O   HOH T  30      11.461  -1.673  -7.612  1.00  0.36           O  
HETATM   32  O   HOH T  31       3.086  -9.911  -5.253  1.00  0.36           O  
HETATM   33  O   HOH T  32       9.624 -13.860 -21.203  1.00  0.36           O  
HETATM   34  O   HOH T  33      -0.755  -1.046  -6.138  1.00  0.36           O  
HETATM   35  O   HOH T  34       8.551  -6.070 -14.767  1.00  0.37           O  
HETATM   36  O   HOH T  35      -6.503   5.895 -18.321  1.00  0.37           O  
HETATM   37  O   HOH T  36      -6.508   3.417 -19.537  1.00  0.38           O  
HETATM   38  O   HOH T  37      -9.798  -6.633 -17.517  1.00  0.39           O  
HETATM   39  O   HOH T  38       2.331  -7.379  -6.069  1.00  0.40           O  
HETATM   40  O   HOH T  39      -5.096   3.124 -21.911  1.00  0.41           O  
HETATM   41  O   HOH T  40      10.530 -16.177 -17.627  1.00  0.41           O  
HETATM   42  O   HOH T  41     -14.057 -10.206 -23.796  1.00  0.41           O  
HETATM   43  O   HOH T  42     -12.202   3.517 -17.412  1.00  0.41           O  
HETATM   44  O   HOH T  43     -11.215  -8.349 -13.720  1.00  0.42           O  
HETATM   45  O   HOH T  44      11.518  -6.223 -18.737  1.00  0.43           O  
HETATM   46  O   HOH T  45     -13.749 -17.862 -20.514  1.00  0.43           O  
HETATM   47  O   HOH T  46     -11.872 -16.870 -17.429  1.00  0.43           O  
HETATM   48  O   HOH T  47       8.394 -13.333 -18.738  1.00  0.43           O  
HETATM   49  O   HOH T  48      -3.505  10.115 -21.789  1.00  0.44           O  
HETATM   50  O   HOH T  49      10.851   6.532  -7.993  1.00  0.44           O  
HETATM   51  O   HOH T  50      -3.345 -15.858 -22.990  1.00  0.44           O  
HETATM   52  O   HOH T  51       4.289   7.746 -18.632  1.00  0.45           O  
HETATM   53  O   HOH T  52       0.930 -10.565  -3.556  1.00  0.45           O  
HETATM   54  O   HOH T  53       7.133   7.621 -18.643  1.00  0.45           O  
HETATM   55  O   HOH T  54       1.365  -4.832  -5.614  1.00  0.45           O  
HETATM   56  O   HOH T  55      11.290  -1.652  -4.807  1.00  0.45           O  
HETATM   57  O   HOH T  56      -5.840  -8.817  -6.501  1.00  0.45           O  
HETATM   58  O   HOH T  57      -9.756  -9.422 -17.910  1.00  0.46           O  
HETATM   59  O   HOH T  58      -9.843 -10.091 -15.228  1.00  0.46           O  
HETATM   60  O   HOH T  59      -5.105 -20.417 -24.610  1.00  0.46           O  
HETATM   61  O   HOH T  60      -1.472   8.528 -22.858  1.00  0.46           O  
HETATM   62  O   HOH T  61       9.742 -13.833 -16.342  1.00  0.47           O  
HETATM   63  O   HOH T  62       7.406  -5.858  -4.772  1.00  0.47           O  
HETATM   64  O   HOH T  63      -3.974 -10.601  -5.542  1.00  0.47           O  
HETATM   65  O   HOH T  64      -8.924   2.013 -19.775  1.00  0.47           O  
HETATM   66  O   HOH T  65     -10.236 -12.708 -14.538  1.00  0.47           O  
HETATM   67  O   HOH T  66      -5.187   7.951 -21.490  1.00  0.47           O  
HETATM   68  O   HOH T  67     -12.825 -10.617 -19.484  1.00  0.47           O  
HETATM   69  O   HOH T  68      -0.836  -5.737  -4.056  1.00  0.47           O  
HETATM   70  O   HOH T  69      -0.124  -3.064  -4.394  1.00  0.48           O  
HETATM   71  O   HOH T  70       7.429 -12.965  -7.880  1.00  0.48           O  
HETATM   72  O   HOH T  71       0.786   4.945 -26.065  1.00  0.49           O  
HETATM   73  O   HOH T  72      -2.768  -1.390 -26.575  1.00  0.49           O  
HETATM   74  O   HOH T  73      -6.099  -7.393 -30.214  1.00  0.49           O  
HETATM   75  O   HOH T  74       4.935  -6.595  -5.485  1.00  0.49           O  
HETATM   76  O   HOH T  75      -5.883 -11.485  -7.346  1.00  0.49           O  
HETATM   77  O   HOH T  76      -1.710  -9.715  -4.143  1.00  0.50           O  
HETATM   78  O   HOH T  77     -11.505  -6.355 -15.301  1.00  0.50           O  
HETATM   79  O   HOH T  78      10.627  -5.301 -16.343  1.00  0.50           O  
HETATM   80  O   HOH T  79      -4.647   5.350 -20.427  1.00  0.51           O  
HETATM   81  O   HOH T  80     -16.183 -16.455 -20.303  1.00  0.51           O  
HETATM   82  O   HOH T  81       6.514 -11.552 -21.818  1.00  0.51           O  
HETATM   83  O   HOH T  82     -12.127  -8.069 -18.475  1.00  0.51           O  
HETATM   84  O   HOH T  83      12.264  -0.483 -11.956  1.00  0.51           O  
HETATM   85  O   HOH T  84       8.302   3.396 -29.336  1.00  0.51           O  
HETATM   86  O   HOH T  85      -6.247  -6.497  -4.855  1.00  0.51           O  
HETATM   87  O   HOH T  86      12.190  -4.014  -8.869  1.00  0.51           O  
HETATM   88  O   HOH T  87      -2.736  -2.668  -5.155  1.00  0.52           O  
HETATM   89  O   HOH T  88     -13.059  -5.641 -17.308  1.00  0.52           O  
HETATM   90  O   HOH T  89      -8.026  -8.194  -8.020  1.00  0.52           O  
HETATM   91  O   HOH T  90       5.893   4.011 -30.697  1.00  0.52           O  
HETATM   92  O   HOH T  91       9.765   0.855 -24.303  1.00  0.52           O  
HETATM   93  O   HOH T  92      -4.874  -4.117  -3.974  1.00  0.53           O  
HETATM   94  O   HOH T  93      -6.328   1.129  -7.012  1.00  0.53           O  
HETATM   95  O   HOH T  94      -6.886   8.395 -19.331  1.00  0.53           O  
HETATM   96  O   HOH T  95      -5.856   5.698 -22.844  1.00  0.53           O  
HETATM   97  O   HOH T  96      -1.363   6.636 -24.977  1.00  0.53           O  
HETATM   98  O   HOH T  97       3.248 -13.607 -24.374  1.00  0.53           O  
HETATM   99  O   HOH T  98      -9.935  -0.019 -21.322  1.00  0.54           O  
HETATM  100  O   HOH T  99     -12.193  -5.688 -13.776  1.00  0.54           O  
HETATM  101  O   HOH T 100       5.736   7.528 -20.982  1.00  0.54           O  
HETATM  102  O   HOH T 101       3.273   8.946 -20.991  1.00  0.55           O  
HETATM  103  O   HOH T 102       7.090  -8.163  -6.469  1.00  0.57           O  
HETATM  104  O   HOH T 103     -11.620  -9.059 -24.619  1.00  0.57           O  
HETATM  105  O   HOH T 104      12.046   2.366 -10.599  1.00  0.58           O  
HETATM  106  O   HOH T 105     -13.598 -14.696 -16.977  1.00  0.59           O  
TER     107      HOH T 105 
