# Supplementary material for: Accurate Prediction of Hydration Sites of Proteins Using Energy Model With Atom Embedding
Source: Front Mol Biosci. 2021 Sep 20;8:756075. doi: 10.3389/fmolb.2021.756075 (PMC8488165; doi:10.3389/fmolb.2021.756075)
Supplement: Supplementary file 1 [file DataSheet1.ZIP › Data Sheet 1/Our_result_pdb/our_dataset_output/3M7U_watersite.pdb]

HEADER                                                        XXXX


JRNL        PMID   -1
HETATM    1  O   HOH T   0     -20.077  18.669  -8.930  1.00  0.17           O  
HETATM    2  O   HOH T   1     -38.950  26.890 -20.721  1.00  0.18           O  
HETATM    3  O   HOH T   2     -52.748  13.183 -16.554  1.00  0.20           O  
HETATM    4  O   HOH T   3     -24.548  11.475 -21.909  1.00  0.20           O  
HETATM    5  O   HOH T   4     -33.526  17.564 -14.050  1.00  0.21           O  
HETATM    6  O   HOH T   5     -27.293  -4.746 -15.006  1.00  0.21           O  
HETATM    7  O   HOH T   6     -24.594   1.629   0.361  1.00  0.21           O  
HETATM    8  O   HOH T   7     -43.458  -8.883 -21.265  1.00  0.22           O  
HETATM    9  O   HOH T   8     -46.685   6.218  -3.140  1.00  0.22           O  
HETATM   10  O   HOH T   9     -31.027  -6.267   2.822  1.00  0.23           O  
HETATM   11  O   HOH T  10     -25.648   6.674 -21.700  1.00  0.23           O  
HETATM   12  O   HOH T  11     -42.276  14.674  -7.430  1.00  0.23           O  
HETATM   13  O   HOH T  12     -41.880   5.918  -2.981  1.00  0.23           O  
HETATM   14  O   HOH T  13     -37.271   3.812 -16.234  1.00  0.24           O  
HETATM   15  O   HOH T  14     -40.258  26.249 -18.391  1.00  0.25           O  
HETATM   16  O   HOH T  15     -19.011   2.253 -13.718  1.00  0.25           O  
HETATM   17  O   HOH T  16     -36.730  -3.643   4.150  1.00  0.25           O  
HETATM   18  O   HOH T  17     -55.009   4.609 -13.551  1.00  0.25           O  
HETATM   19  O   HOH T  18     -19.466  -6.468  -9.704  1.00  0.25           O  
HETATM   20  O   HOH T  19     -41.405  25.369 -14.469  1.00  0.26           O  
HETATM   21  O   HOH T  20     -46.479  17.752  -5.059  1.00  0.26           O  
HETATM   22  O   HOH T  21     -28.945   7.592   3.003  1.00  0.26           O  
HETATM   23  O   HOH T  22     -44.052  15.546 -23.193  1.00  0.26           O  
HETATM   24  O   HOH T  23     -36.578   7.074 -31.405  1.00  0.27           O  
HETATM   25  O   HOH T  24     -45.908  -4.835  -5.242  1.00  0.27           O  
HETATM   26  O   HOH T  25     -28.949 -10.085  -6.365  1.00  0.27           O  
HETATM   27  O   HOH T  26     -33.445 -14.522 -20.049  1.00  0.27           O  
HETATM   28  O   HOH T  27     -30.686  22.288  -9.376  1.00  0.27           O  
HETATM   29  O   HOH T  28     -35.536 -14.331 -18.186  1.00  0.28           O  
HETATM   30  O   HOH T  29     -46.224   0.564   1.279  1.00  0.28           O  
HETATM   31  O   HOH T  30     -48.838  -3.201  -1.326  1.00  0.28           O  
HETATM   32  O   HOH T  31     -22.575  -0.925  -5.739  1.00  0.29           O  
HETATM   33  O   HOH T  32     -33.440   3.108 -28.221  1.00  0.29           O  
HETATM   34  O   HOH T  33     -48.688  12.673 -18.985  1.00  0.29           O  
HETATM   35  O   HOH T  34     -36.374   7.309 -24.666  1.00  0.29           O  
HETATM   36  O   HOH T  35     -50.666  -0.821 -12.561  1.00  0.30           O  
HETATM   37  O   HOH T  36     -31.127  13.457   8.463  1.00  0.30           O  
HETATM   38  O   HOH T  37     -23.523  -6.494 -12.079  1.00  0.30           O  
HETATM   39  O   HOH T  38     -47.410  10.814  -8.207  1.00  0.30           O  
HETATM   40  O   HOH T  39     -45.901 -10.019   6.396  1.00  0.30           O  
HETATM   41  O   HOH T  40     -26.387  15.867   0.228  1.00  0.30           O  
HETATM   42  O   HOH T  41     -38.910  26.255 -13.605  1.00  0.31           O  
HETATM   43  O   HOH T  42     -15.436   6.166  -4.656  1.00  0.31           O  
HETATM   44  O   HOH T  43     -28.094 -11.352  -3.997  1.00  0.31           O  
HETATM   45  O   HOH T  44     -36.340  -6.931 -12.718  1.00  0.31           O  
HETATM   46  O   HOH T  45     -29.351   1.110   2.217  1.00  0.31           O  
HETATM   47  O   HOH T  46     -32.651  15.578 -15.816  1.00  0.31           O  
HETATM   48  O   HOH T  47     -43.755  -8.388  -3.752  1.00  0.32           O  
HETATM   49  O   HOH T  48     -28.655  14.448   3.707  1.00  0.32           O  
HETATM   50  O   HOH T  49     -42.437  -3.680  10.651  1.00  0.32           O  
HETATM   51  O   HOH T  50     -19.818  21.349  -9.436  1.00  0.32           O  
HETATM   52  O   HOH T  51     -46.210   9.315  -6.369  1.00  0.32           O  
HETATM   53  O   HOH T  52     -45.847   0.965 -22.005  1.00  0.32           O  
HETATM   54  O   HOH T  53     -19.875   3.843 -19.663  1.00  0.32           O  
HETATM   55  O   HOH T  54     -53.285   3.153  -3.361  1.00  0.32           O  
HETATM   56  O   HOH T  55     -40.374  -8.129   3.315  1.00  0.33           O  
HETATM   57  O   HOH T  56     -51.533  18.028 -16.384  1.00  0.33           O  
HETATM   58  O   HOH T  57     -44.735  11.497  -7.612  1.00  0.33           O  
HETATM   59  O   HOH T  58     -35.845  20.331  -4.124  1.00  0.33           O  
HETATM   60  O   HOH T  59     -52.039   0.746  -3.045  1.00  0.33           O  
HETATM   61  O   HOH T  60     -47.827  16.028 -11.959  1.00  0.33           O  
HETATM   62  O   HOH T  61     -29.839  12.078   4.317  1.00  0.33           O  
HETATM   63  O   HOH T  62     -32.246  11.476  10.209  1.00  0.34           O  
HETATM   64  O   HOH T  63     -51.708  16.333  -9.047  1.00  0.34           O  
HETATM   65  O   HOH T  64     -52.215  -2.466 -14.116  1.00  0.34           O  
HETATM   66  O   HOH T  65     -33.201  11.880 -26.170  1.00  0.34           O  
HETATM   67  O   HOH T  66     -19.356   8.833  -2.741  1.00  0.34           O  
HETATM   68  O   HOH T  67     -24.139  21.746 -15.377  1.00  0.34           O  
HETATM   69  O   HOH T  68     -40.700  14.873 -26.054  1.00  0.35           O  
HETATM   70  O   HOH T  69     -56.754   7.207 -16.053  1.00  0.35           O  
HETATM   71  O   HOH T  70     -44.598  12.827 -23.381  1.00  0.35           O  
HETATM   72  O   HOH T  71     -16.767  12.294 -17.258  1.00  0.35           O  
HETATM   73  O   HOH T  72     -27.365  17.933   1.653  1.00  0.35           O  
HETATM   74  O   HOH T  73     -50.792  17.738  -6.973  1.00  0.35           O  
HETATM   75  O   HOH T  74     -19.447   0.834  -2.906  1.00  0.35           O  
HETATM   76  O   HOH T  75     -29.662  -3.611 -14.172  1.00  0.35           O  
HETATM   77  O   HOH T  76     -46.211  22.244 -18.054  1.00  0.36           O  
HETATM   78  O   HOH T  77     -43.683  23.463 -12.339  1.00  0.36           O  
HETATM   79  O   HOH T  78     -26.495   6.564   2.428  1.00  0.36           O  
HETATM   80  O   HOH T  79     -40.063  15.596   0.679  1.00  0.36           O  
HETATM   81  O   HOH T  80     -37.266 -16.259 -17.406  1.00  0.37           O  
HETATM   82  O   HOH T  81     -39.020  17.427  -1.282  1.00  0.37           O  
HETATM   83  O   HOH T  82     -46.459  20.881 -15.646  1.00  0.37           O  
HETATM   84  O   HOH T  83     -47.576  -5.653  -1.383  1.00  0.37           O  
HETATM   85  O   HOH T  84     -15.102   0.090 -11.467  1.00  0.37           O  
HETATM   86  O   HOH T  85     -49.442   1.595 -20.495  1.00  0.37           O  
HETATM   87  O   HOH T  86     -19.189   2.914   1.168  1.00  0.37           O  
HETATM   88  O   HOH T  87     -46.979 -10.556 -26.048  1.00  0.37           O  
HETATM   89  O   HOH T  88     -40.857 -16.170  -0.684  1.00  0.37           O  
HETATM   90  O   HOH T  89     -12.873   7.885 -16.946  1.00  0.37           O  
HETATM   91  O   HOH T  90     -24.838  -2.280  -8.718  1.00  0.37           O  
HETATM   92  O   HOH T  91     -19.988  -1.609  -1.706  1.00  0.37           O  
HETATM   93  O   HOH T  92     -20.047  17.724 -19.794  1.00  0.38           O  
HETATM   94  O   HOH T  93     -49.171  -9.812 -14.556  1.00  0.38           O  
HETATM   95  O   HOH T  94     -49.871  12.392 -21.412  1.00  0.38           O  
HETATM   96  O   HOH T  95     -42.317   6.370 -26.808  1.00  0.38           O  
HETATM   97  O   HOH T  96     -46.600 -13.201  -1.007  1.00  0.38           O  
HETATM   98  O   HOH T  97     -46.036   3.040 -23.786  1.00  0.38           O  
HETATM   99  O   HOH T  98     -32.175 -15.455  -2.759  1.00  0.38           O  
HETATM  100  O   HOH T  99     -22.860  -5.264  -5.486  1.00  0.38           O  
HETATM  101  O   HOH T 100     -29.133  22.876  -3.935  1.00  0.39           O  
HETATM  102  O   HOH T 101     -23.613   7.096 -23.533  1.00  0.39           O  
HETATM  103  O   HOH T 102     -47.936  -4.169  -7.054  1.00  0.39           O  
HETATM  104  O   HOH T 103     -30.370  -5.532  -6.259  1.00  0.39           O  
HETATM  105  O   HOH T 104     -26.350  -2.629  -6.394  1.00  0.39           O  
HETATM  106  O   HOH T 105     -27.113  12.397 -22.696  1.00  0.39           O  
HETATM  107  O   HOH T 106     -21.817  19.871 -22.374  1.00  0.39           O  
HETATM  108  O   HOH T 107     -46.150  -6.820   0.654  1.00  0.39           O  
HETATM  109  O   HOH T 108     -31.144  24.335  -0.806  1.00  0.39           O  
HETATM  110  O   HOH T 109     -40.315   4.427  -1.117  1.00  0.39           O  
HETATM  111  O   HOH T 110     -47.893   4.247 -15.698  1.00  0.39           O  
HETATM  112  O   HOH T 111     -27.483  22.914   0.264  1.00  0.39           O  
HETATM  113  O   HOH T 112     -39.906 -20.368 -20.724  1.00  0.39           O  
HETATM  114  O   HOH T 113     -40.090  18.921  -4.548  1.00  0.39           O  
HETATM  115  O   HOH T 114     -30.957   9.654 -34.913  1.00  0.40           O  
HETATM  116  O   HOH T 115     -49.010  22.281 -17.785  1.00  0.40           O  
HETATM  117  O   HOH T 116     -37.130  -5.169 -23.750  1.00  0.40           O  
HETATM  118  O   HOH T 117     -36.044   9.480   1.780  1.00  0.40           O  
HETATM  119  O   HOH T 118     -42.655  12.510  -5.757  1.00  0.40           O  
HETATM  120  O   HOH T 119     -30.826  13.714 -29.374  1.00  0.40           O  
HETATM  121  O   HOH T 120     -45.188  23.363 -15.707  1.00  0.40           O  
HETATM  122  O   HOH T 121     -42.919   8.970 -27.538  1.00  0.41           O  
HETATM  123  O   HOH T 122     -34.985   7.163   0.826  1.00  0.41           O  
HETATM  124  O   HOH T 123     -44.359   6.359 -24.899  1.00  0.41           O  
HETATM  125  O   HOH T 124     -20.892  15.199  -3.018  1.00  0.41           O  
HETATM  126  O   HOH T 125     -38.984  -2.166   4.462  1.00  0.41           O  
HETATM  127  O   HOH T 126     -15.677  13.008 -14.815  1.00  0.41           O  
HETATM  128  O   HOH T 127     -52.068   2.553 -19.667  1.00  0.41           O  
HETATM  129  O   HOH T 128     -33.741 -14.229  -0.710  1.00  0.41           O  
HETATM  130  O   HOH T 129     -37.945  -5.492 -26.572  1.00  0.41           O  
HETATM  131  O   HOH T 130     -42.102  -8.820   6.661  1.00  0.41           O  
HETATM  132  O   HOH T 131     -33.913   7.400 -25.895  1.00  0.42           O  
HETATM  133  O   HOH T 132     -37.669   7.768   0.319  1.00  0.42           O  
HETATM  134  O   HOH T 133     -50.766   3.369 -21.981  1.00  0.42           O  
HETATM  135  O   HOH T 134     -19.041   8.111   2.419  1.00  0.42           O  
HETATM  136  O   HOH T 135     -39.903  -7.220 -25.610  1.00  0.42           O  
HETATM  137  O   HOH T 136     -32.413  11.205   7.461  1.00  0.42           O  
HETATM  138  O   HOH T 137     -32.281  27.597  -3.561  1.00  0.42           O  
HETATM  139  O   HOH T 138     -21.655   3.839 -21.803  1.00  0.42           O  
HETATM  140  O   HOH T 139     -45.836  -5.591  -7.903  1.00  0.42           O  
HETATM  141  O   HOH T 140     -26.598   4.016   2.699  1.00  0.42           O  
HETATM  142  O   HOH T 141     -26.624   1.380   2.116  1.00  0.42           O  
HETATM  143  O   HOH T 142     -20.308  -4.107  -8.827  1.00  0.43           O  
HETATM  144  O   HOH T 143     -22.574   3.815 -19.248  1.00  0.43           O  
HETATM  145  O   HOH T 144     -36.059  18.440 -29.048  1.00  0.43           O  
HETATM  146  O   HOH T 145     -24.994  -0.798   1.672  1.00  0.43           O  
HETATM  147  O   HOH T 146     -15.439  -2.597 -10.323  1.00  0.43           O  
HETATM  148  O   HOH T 147     -20.108  -4.205 -20.197  1.00  0.43           O  
HETATM  149  O   HOH T 148     -43.220  -9.745  -9.877  1.00  0.43           O  
HETATM  150  O   HOH T 149     -25.431   9.105 -23.063  1.00  0.43           O  
HETATM  151  O   HOH T 150     -15.209   3.444  -4.209  1.00  0.43           O  
HETATM  152  O   HOH T 151     -25.115   4.750 -23.591  1.00  0.43           O  
HETATM  153  O   HOH T 152     -40.498   1.609 -28.301  1.00  0.44           O  
HETATM  154  O   HOH T 153     -52.174  -4.848 -12.651  1.00  0.44           O  
HETATM  155  O   HOH T 154     -46.245 -16.925  -2.430  1.00  0.44           O  
HETATM  156  O   HOH T 155     -29.198  -3.073   0.733  1.00  0.44           O  
HETATM  157  O   HOH T 156     -40.432   3.157   3.315  1.00  0.44           O  
HETATM  158  O   HOH T 157     -55.204  -3.804 -20.650  1.00  0.44           O  
HETATM  159  O   HOH T 158     -54.455  -3.305 -12.857  1.00  0.44           O  
HETATM  160  O   HOH T 159     -45.934  -6.830  -3.328  1.00  0.44           O  
HETATM  161  O   HOH T 160     -45.234  -8.814 -27.295  1.00  0.44           O  
HETATM  162  O   HOH T 161     -29.066  -4.988  -3.845  1.00  0.44           O  
HETATM  163  O   HOH T 162     -43.004   7.104  -0.629  1.00  0.45           O  
HETATM  164  O   HOH T 163     -28.419  -7.705  -3.590  1.00  0.45           O  
HETATM  165  O   HOH T 164     -56.959  10.428  -7.589  1.00  0.45           O  
HETATM  166  O   HOH T 165     -51.194   0.774   0.920  1.00  0.45           O  
HETATM  167  O   HOH T 166     -41.294  17.502 -25.155  1.00  0.45           O  
HETATM  168  O   HOH T 167     -16.130   2.583  -6.634  1.00  0.45           O  
HETATM  169  O   HOH T 168     -47.417 -14.604  -3.299  1.00  0.45           O  
HETATM  170  O   HOH T 169     -33.052   9.052   9.108  1.00  0.45           O  
HETATM  171  O   HOH T 170     -29.122  -1.573   3.134  1.00  0.45           O  
HETATM  172  O   HOH T 171     -37.947  -4.657 -12.519  1.00  0.45           O  
HETATM  173  O   HOH T 172     -52.680   2.316  -0.805  1.00  0.45           O  
HETATM  174  O   HOH T 173     -29.008  26.850  -5.562  1.00  0.45           O  
HETATM  175  O   HOH T 174     -48.485  15.647 -24.691  1.00  0.45           O  
HETATM  176  O   HOH T 175     -13.723   5.134 -17.072  1.00  0.45           O  
HETATM  177  O   HOH T 176     -32.629  24.830 -13.209  1.00  0.45           O  
HETATM  178  O   HOH T 177     -53.574  17.249  -7.243  1.00  0.45           O  
HETATM  179  O   HOH T 178     -42.753  16.188   0.206  1.00  0.45           O  
HETATM  180  O   HOH T 179     -40.293   7.001   0.071  1.00  0.45           O  
HETATM  181  O   HOH T 180     -51.341  17.889 -19.243  1.00  0.46           O  
HETATM  182  O   HOH T 181     -46.222  17.025 -23.745  1.00  0.46           O  
HETATM  183  O   HOH T 182     -45.800   6.877  -0.541  1.00  0.46           O  
HETATM  184  O   HOH T 183     -30.441  14.262   5.801  1.00  0.46           O  
HETATM  185  O   HOH T 184     -29.094  -5.842   0.898  1.00  0.46           O  
HETATM  186  O   HOH T 185     -42.074  13.233 -31.710  1.00  0.46           O  
HETATM  187  O   HOH T 186     -29.184  -4.099 -16.890  1.00  0.46           O  
HETATM  188  O   HOH T 187     -20.265  24.074  -9.145  1.00  0.46           O  
HETATM  189  O   HOH T 188     -45.012 -10.905  -1.394  1.00  0.46           O  
HETATM  190  O   HOH T 189     -22.477   0.517   1.625  1.00  0.46           O  
HETATM  191  O   HOH T 190     -31.761 -12.227 -17.639  1.00  0.46           O  
HETATM  192  O   HOH T 191     -42.095 -12.072   0.725  1.00  0.46           O  
HETATM  193  O   HOH T 192     -20.727  16.204 -22.807  1.00  0.46           O  
HETATM  194  O   HOH T 193     -27.805  -6.036  -1.555  1.00  0.47           O  
HETATM  195  O   HOH T 194     -20.254  12.730  -2.547  1.00  0.47           O  
HETATM  196  O   HOH T 195     -43.207  14.024 -25.389  1.00  0.47           O  
HETATM  197  O   HOH T 196     -35.834  -2.124 -14.128  1.00  0.47           O  
HETATM  198  O   HOH T 197     -16.981  19.482 -19.562  1.00  0.47           O  
HETATM  199  O   HOH T 198     -47.682  -8.934   4.514  1.00  0.47           O  
HETATM  200  O   HOH T 199     -43.643   4.083 -26.346  1.00  0.47           O  
HETATM  201  O   HOH T 200     -42.605  -7.052   4.650  1.00  0.47           O  
HETATM  202  O   HOH T 201     -45.901  14.640 -25.125  1.00  0.47           O  
HETATM  203  O   HOH T 202     -38.771   2.812 -26.703  1.00  0.47           O  
HETATM  204  O   HOH T 203     -35.802   7.231   5.982  1.00  0.47           O  
HETATM  205  O   HOH T 204     -42.745 -10.926 -12.281  1.00  0.47           O  
HETATM  206  O   HOH T 205     -56.084   4.385 -16.107  1.00  0.47           O  
HETATM  207  O   HOH T 206     -30.768  24.393 -11.223  1.00  0.47           O  
HETATM  208  O   HOH T 207     -28.833  -6.859 -19.495  1.00  0.47           O  
HETATM  209  O   HOH T 208     -22.743  23.540  -9.832  1.00  0.47           O  
HETATM  210  O   HOH T 209     -14.535   8.885  -4.759  1.00  0.48           O  
HETATM  211  O   HOH T 210     -22.416   4.746 -24.345  1.00  0.48           O  
HETATM  212  O   HOH T 211     -38.533  20.297  -6.487  1.00  0.48           O  
HETATM  213  O   HOH T 212     -20.260   0.713  -0.152  1.00  0.48           O  
HETATM  214  O   HOH T 213     -54.363   2.948 -17.915  1.00  0.48           O  
HETATM  215  O   HOH T 214     -45.409   1.951 -26.216  1.00  0.48           O  
HETATM  216  O   HOH T 215     -53.361  -3.129 -22.756  1.00  0.48           O  
HETATM  217  O   HOH T 216     -21.172  -4.134  -2.006  1.00  0.48           O  
HETATM  218  O   HOH T 217     -20.475  -5.767  -4.055  1.00  0.48           O  
HETATM  219  O   HOH T 218     -29.097  -4.327   3.273  1.00  0.48           O  
HETATM  220  O   HOH T 219     -51.022  -8.904 -12.893  1.00  0.48           O  
HETATM  221  O   HOH T 220     -44.452  19.712  -5.235  1.00  0.49           O  
HETATM  222  O   HOH T 221     -40.949  21.343  -5.616  1.00  0.49           O  
HETATM  223  O   HOH T 222     -16.893   8.294  -3.547  1.00  0.49           O  
HETATM  224  O   HOH T 223     -39.362   8.055   2.527  1.00  0.49           O  
HETATM  225  O   HOH T 224     -23.852  22.322 -26.937  1.00  0.49           O  
HETATM  226  O   HOH T 225     -27.278  10.446 -24.646  1.00  0.49           O  
HETATM  227  O   HOH T 226     -43.396 -15.112 -18.622  1.00  0.49           O  
HETATM  228  O   HOH T 227     -47.938  -8.897 -28.127  1.00  0.50           O  
HETATM  229  O   HOH T 228     -49.509  17.971 -25.843  1.00  0.50           O  
HETATM  230  O   HOH T 229     -14.274  11.575 -16.769  1.00  0.50           O  
HETATM  231  O   HOH T 230     -34.152   4.629 -26.046  1.00  0.50           O  
HETATM  232  O   HOH T 231     -46.306  10.911 -24.465  1.00  0.50           O  
HETATM  233  O   HOH T 232     -42.951  -6.401   7.408  1.00  0.50           O  
HETATM  234  O   HOH T 233     -36.634  19.567 -26.499  1.00  0.50           O  
HETATM  235  O   HOH T 234     -46.254  -2.473 -24.329  1.00  0.50           O  
HETATM  236  O   HOH T 235     -43.019   1.627 -27.416  1.00  0.50           O  
HETATM  237  O   HOH T 236     -29.617   7.745 -36.366  1.00  0.50           O  
HETATM  238  O   HOH T 237     -46.023   2.326   3.412  1.00  0.50           O  
HETATM  239  O   HOH T 238     -48.357  -1.394   0.878  1.00  0.51           O  
HETATM  240  O   HOH T 239     -28.859  24.440   2.315  1.00  0.51           O  
HETATM  241  O   HOH T 240     -12.466   6.457 -19.179  1.00  0.51           O  
HETATM  242  O   HOH T 241     -26.813  -5.671 -21.094  1.00  0.51           O  
HETATM  243  O   HOH T 242     -43.042 -14.545  -1.037  1.00  0.51           O  
HETATM  244  O   HOH T 243     -38.239  -1.950 -13.001  1.00  0.51           O  
HETATM  245  O   HOH T 244     -46.720  -9.326  -0.052  1.00  0.51           O  
HETATM  246  O   HOH T 245     -26.604   8.782   3.954  1.00  0.51           O  
HETATM  247  O   HOH T 246     -28.413  25.438  -3.314  1.00  0.51           O  
HETATM  248  O   HOH T 247     -26.834  -2.844   2.264  1.00  0.52           O  
HETATM  249  O   HOH T 248     -41.586 -12.837  -8.735  1.00  0.52           O  
HETATM  250  O   HOH T 249     -25.507  -4.794  -4.965  1.00  0.52           O  
HETATM  251  O   HOH T 250     -36.165   3.387 -27.625  1.00  0.52           O  
HETATM  252  O   HOH T 251     -50.081  -6.536 -11.882  1.00  0.52           O  
HETATM  253  O   HOH T 252     -19.079  -0.014 -17.811  1.00  0.52           O  
HETATM  254  O   HOH T 253     -35.532   7.751   8.645  1.00  0.52           O  
HETATM  255  O   HOH T 254     -45.704  -8.799   2.467  1.00  0.52           O  
HETATM  256  O   HOH T 255     -50.445  -0.923  -1.147  1.00  0.52           O  
HETATM  257  O   HOH T 256     -30.847  -3.913 -19.158  1.00  0.52           O  
HETATM  258  O   HOH T 257     -21.160  -1.717   0.798  1.00  0.52           O  
HETATM  259  O   HOH T 258     -31.406  -1.334 -24.888  1.00  0.53           O  
HETATM  260  O   HOH T 259     -38.933   0.002 -26.623  1.00  0.53           O  
HETATM  261  O   HOH T 260     -17.756   1.543  -0.775  1.00  0.53           O  
HETATM  262  O   HOH T 261     -55.376   9.385 -17.394  1.00  0.53           O  
HETATM  263  O   HOH T 262     -48.462  10.433 -22.789  1.00  0.53           O  
HETATM  264  O   HOH T 263     -40.590  -2.099   9.506  1.00  0.53           O  
HETATM  265  O   HOH T 264     -34.809   6.276 -22.561  1.00  0.53           O  
HETATM  266  O   HOH T 265     -31.021  25.138  -4.321  1.00  0.53           O  
HETATM  267  O   HOH T 266     -41.149  -4.566   8.396  1.00  0.53           O  
HETATM  268  O   HOH T 267     -56.551  -4.833 -13.768  1.00  0.53           O  
HETATM  269  O   HOH T 268     -16.978   1.237  -4.365  1.00  0.53           O  
HETATM  270  O   HOH T 269     -25.776  -4.385  -2.258  1.00  0.54           O  
HETATM  271  O   HOH T 270     -30.293  -9.795  -3.784  1.00  0.54           O  
HETATM  272  O   HOH T 271     -23.536   2.477 -23.407  1.00  0.54           O  
HETATM  273  O   HOH T 272     -46.364 -12.074  -3.573  1.00  0.54           O  
HETATM  274  O   HOH T 273     -17.552  18.761 -22.739  1.00  0.54           O  
HETATM  275  O   HOH T 274     -57.554   5.609 -14.023  1.00  0.54           O  
HETATM  276  O   HOH T 275     -52.121   3.162   1.740  1.00  0.54           O  
HETATM  277  O   HOH T 276     -18.515  20.991 -21.321  1.00  0.54           O  
HETATM  278  O   HOH T 277     -29.829   0.878 -24.391  1.00  0.54           O  
HETATM  279  O   HOH T 278     -17.042   8.882   0.752  1.00  0.54           O  
HETATM  280  O   HOH T 279     -38.271 -12.491 -14.533  1.00  0.55           O  
HETATM  281  O   HOH T 280     -48.721   3.258 -23.835  1.00  0.55           O  
HETATM  282  O   HOH T 281     -13.610   2.446 -10.758  1.00  0.55           O  
HETATM  283  O   HOH T 282     -47.801 -10.501 -12.212  1.00  0.56           O  
HETATM  284  O   HOH T 283     -19.468  20.408 -18.854  1.00  0.56           O  
HETATM  285  O   HOH T 284     -25.011  24.416  -8.376  1.00  0.56           O  
HETATM  286  O   HOH T 285     -45.442   4.971   3.260  1.00  0.56           O  
HETATM  287  O   HOH T 286     -32.312   0.656   4.052  1.00  0.56           O  
HETATM  288  O   HOH T 287     -14.514   7.357  -2.450  1.00  0.57           O  
HETATM  289  O   HOH T 288     -46.338  -3.352   3.637  1.00  0.57           O  
HETATM  290  O   HOH T 289     -25.092  26.734  -1.619  1.00  0.57           O  
HETATM  291  O   HOH T 290     -43.018   4.212   3.372  1.00  0.57           O  
HETATM  292  O   HOH T 291     -15.197   1.565  -9.014  1.00  0.60           O  
HETATM  293  O   HOH T 292     -34.013   2.455 -24.292  1.00  0.61           O  
TER     294      HOH T 292 
