# Supplementary material for: Accurate Prediction of Hydration Sites of Proteins Using Energy Model With Atom Embedding
Source: Front Mol Biosci. 2021 Sep 20;8:756075. doi: 10.3389/fmolb.2021.756075 (PMC8488165; doi:10.3389/fmolb.2021.756075)
Supplement: Supplementary file 1 [file DataSheet1.ZIP › Data Sheet 1/Our_result_pdb/our_dataset_output/3MAN_watersite.pdb]

HEADER                                                        XXXX


JRNL        PMID   -1
HETATM    1  O   HOH T   0      24.806   8.821  33.633  1.00  0.17           O  
HETATM    2  O   HOH T   1      16.404  13.500  21.185  1.00  0.18           O  
HETATM    3  O   HOH T   2      25.239  11.936  27.485  1.00  0.18           O  
HETATM    4  O   HOH T   3       4.576  -0.442  21.939  1.00  0.19           O  
HETATM    5  O   HOH T   4       5.992   1.709  45.487  1.00  0.19           O  
HETATM    6  O   HOH T   5      10.070   7.949  44.822  1.00  0.20           O  
HETATM    7  O   HOH T   6      21.325   8.335  32.173  1.00  0.21           O  
HETATM    8  O   HOH T   7       5.401  12.435  40.699  1.00  0.22           O  
HETATM    9  O   HOH T   8       1.457   5.544  16.814  1.00  0.22           O  
HETATM   10  O   HOH T   9       4.886  23.946  19.522  1.00  0.22           O  
HETATM   11  O   HOH T  10      10.597   8.785  54.783  1.00  0.22           O  
HETATM   12  O   HOH T  11       7.733  10.575  36.212  1.00  0.22           O  
HETATM   13  O   HOH T  12      28.701  12.386  32.120  1.00  0.22           O  
HETATM   14  O   HOH T  13      -0.297  -1.299  47.883  1.00  0.23           O  
HETATM   15  O   HOH T  14      -0.231  -7.499  42.112  1.00  0.23           O  
HETATM   16  O   HOH T  15      -3.924  24.669  42.324  1.00  0.23           O  
HETATM   17  O   HOH T  16      12.975   1.148  48.660  1.00  0.23           O  
HETATM   18  O   HOH T  17      22.988  12.211  25.877  1.00  0.24           O  
HETATM   19  O   HOH T  18      24.287   8.549  19.331  1.00  0.24           O  
HETATM   20  O   HOH T  19       8.999  10.834  53.682  1.00  0.24           O  
HETATM   21  O   HOH T  20      14.212  20.055  34.074  1.00  0.24           O  
HETATM   22  O   HOH T  21       8.721   3.347  15.601  1.00  0.24           O  
HETATM   23  O   HOH T  22       0.031  -0.093  40.811  1.00  0.24           O  
HETATM   24  O   HOH T  23       9.751   6.882  42.263  1.00  0.24           O  
HETATM   25  O   HOH T  24       5.799 -13.498  28.185  1.00  0.25           O  
HETATM   26  O   HOH T  25      -0.824  31.892  34.158  1.00  0.25           O  
HETATM   27  O   HOH T  26      14.760  -0.448  47.223  1.00  0.25           O  
HETATM   28  O   HOH T  27      10.837  -8.307  43.276  1.00  0.25           O  
HETATM   29  O   HOH T  28      33.983   4.032  29.994  1.00  0.25           O  
HETATM   30  O   HOH T  29       3.538  -6.324  27.021  1.00  0.25           O  
HETATM   31  O   HOH T  30      16.513   4.786  53.660  1.00  0.25           O  
HETATM   32  O   HOH T  31      17.133  23.168  39.764  1.00  0.26           O  
HETATM   33  O   HOH T  32      -1.860  11.805  52.071  1.00  0.26           O  
HETATM   34  O   HOH T  33      29.514  12.723  46.476  1.00  0.26           O  
HETATM   35  O   HOH T  34      25.556   5.418  26.310  1.00  0.26           O  
HETATM   36  O   HOH T  35      13.727  19.825  49.901  1.00  0.26           O  
HETATM   37  O   HOH T  36      10.572  -7.427  40.680  1.00  0.26           O  
HETATM   38  O   HOH T  37      14.492  22.596  39.105  1.00  0.27           O  
HETATM   39  O   HOH T  38      -0.283   5.342  50.071  1.00  0.27           O  
HETATM   40  O   HOH T  39      14.430  20.488  24.158  1.00  0.27           O  
HETATM   41  O   HOH T  40       0.737  21.760  51.979  1.00  0.27           O  
HETATM   42  O   HOH T  41       4.937 -11.239  34.523  1.00  0.27           O  
HETATM   43  O   HOH T  42       2.349  11.212  55.744  1.00  0.27           O  
HETATM   44  O   HOH T  43      -3.659   3.537  29.030  1.00  0.27           O  
HETATM   45  O   HOH T  44      25.591  15.587  52.023  1.00  0.28           O  
HETATM   46  O   HOH T  45     -14.890   8.847  33.971  1.00  0.28           O  
HETATM   47  O   HOH T  46      18.162  20.752  32.165  1.00  0.28           O  
HETATM   48  O   HOH T  47      19.264  27.731  42.617  1.00  0.29           O  
HETATM   49  O   HOH T  48      22.591   8.160  52.174  1.00  0.29           O  
HETATM   50  O   HOH T  49      15.275  18.329  31.143  1.00  0.30           O  
HETATM   51  O   HOH T  50       3.746  11.559  30.986  1.00  0.30           O  
HETATM   52  O   HOH T  51      21.434  15.609  17.489  1.00  0.30           O  
HETATM   53  O   HOH T  52      -2.951  -7.121  38.529  1.00  0.30           O  
HETATM   54  O   HOH T  53      16.496  23.200  37.148  1.00  0.31           O  
HETATM   55  O   HOH T  54       1.540  -9.661  42.214  1.00  0.31           O  
HETATM   56  O   HOH T  55      -2.301   5.570  27.584  1.00  0.31           O  
HETATM   57  O   HOH T  56      -4.114  15.372  12.881  1.00  0.31           O  
HETATM   58  O   HOH T  57      -4.038  24.843  45.107  1.00  0.31           O  
HETATM   59  O   HOH T  58      -6.595  30.875  27.884  1.00  0.31           O  
HETATM   60  O   HOH T  59       1.610  27.649  27.381  1.00  0.31           O  
HETATM   61  O   HOH T  60      -9.285  16.198  16.887  1.00  0.32           O  
HETATM   62  O   HOH T  61      17.147  20.253  24.927  1.00  0.32           O  
HETATM   63  O   HOH T  62      10.568  -8.466  38.180  1.00  0.32           O  
HETATM   64  O   HOH T  63      -6.457  16.384  13.901  1.00  0.32           O  
HETATM   65  O   HOH T  64      -7.148  -4.675  20.066  1.00  0.32           O  
HETATM   66  O   HOH T  65      19.295  -1.979  22.653  1.00  0.33           O  
HETATM   67  O   HOH T  66       0.337   5.694  13.369  1.00  0.33           O  
HETATM   68  O   HOH T  67      -1.736   9.428  33.952  1.00  0.33           O  
HETATM   69  O   HOH T  68       2.826  24.965  45.205  1.00  0.33           O  
HETATM   70  O   HOH T  69       4.186  -5.010  46.972  1.00  0.33           O  
HETATM   71  O   HOH T  70      21.126  18.770  24.711  1.00  0.33           O  
HETATM   72  O   HOH T  71      19.219  -8.191  31.430  1.00  0.34           O  
HETATM   73  O   HOH T  72      -3.607  -4.227  24.207  1.00  0.34           O  
HETATM   74  O   HOH T  73       2.802  31.209  18.729  1.00  0.34           O  
HETATM   75  O   HOH T  74      -1.210  14.092  55.230  1.00  0.34           O  
HETATM   76  O   HOH T  75      -5.695   5.175  51.975  1.00  0.34           O  
HETATM   77  O   HOH T  76       8.122  11.610  56.205  1.00  0.34           O  
HETATM   78  O   HOH T  77     -10.276  14.018  22.257  1.00  0.34           O  
HETATM   79  O   HOH T  78      12.444  18.384  17.703  1.00  0.34           O  
HETATM   80  O   HOH T  79     -10.437  26.070  42.264  1.00  0.34           O  
HETATM   81  O   HOH T  80      10.074  -4.249  22.677  1.00  0.34           O  
HETATM   82  O   HOH T  81      20.373  18.933  18.508  1.00  0.35           O  
HETATM   83  O   HOH T  82      -8.241   5.421  24.189  1.00  0.35           O  
HETATM   84  O   HOH T  83      -8.413   7.127  20.793  1.00  0.35           O  
HETATM   85  O   HOH T  84      -4.883  25.840  30.514  1.00  0.35           O  
HETATM   86  O   HOH T  85      -7.742  21.357  32.484  1.00  0.35           O  
HETATM   87  O   HOH T  86     -11.505  11.176  34.493  1.00  0.35           O  
HETATM   88  O   HOH T  87      20.453   7.237  15.987  1.00  0.35           O  
HETATM   89  O   HOH T  88      -6.673   5.363  21.881  1.00  0.35           O  
HETATM   90  O   HOH T  89      -1.359   5.686  35.596  1.00  0.35           O  
HETATM   91  O   HOH T  90      11.982  -6.656  46.836  1.00  0.35           O  
HETATM   92  O   HOH T  91       8.871  -1.920  15.427  1.00  0.35           O  
HETATM   93  O   HOH T  92      -8.410  12.414  23.560  1.00  0.36           O  
HETATM   94  O   HOH T  93      22.123  21.792  23.031  1.00  0.36           O  
HETATM   95  O   HOH T  94      17.083  19.861  56.039  1.00  0.36           O  
HETATM   96  O   HOH T  95      25.852  15.507  44.514  1.00  0.36           O  
HETATM   97  O   HOH T  96       0.867  28.616  47.993  1.00  0.36           O  
HETATM   98  O   HOH T  97      -8.142  26.267  40.837  1.00  0.36           O  
HETATM   99  O   HOH T  98       7.501  30.892  44.456  1.00  0.36           O  
HETATM  100  O   HOH T  99      16.176   8.709  13.259  1.00  0.37           O  
HETATM  101  O   HOH T 100      21.891   9.375  15.098  1.00  0.37           O  
HETATM  102  O   HOH T 101      14.120  16.031  55.085  1.00  0.37           O  
HETATM  103  O   HOH T 102      -0.647  16.420  56.796  1.00  0.37           O  
HETATM  104  O   HOH T 103      -7.276   1.151  31.538  1.00  0.37           O  
HETATM  105  O   HOH T 104      -5.826  13.109  46.426  1.00  0.37           O  
HETATM  106  O   HOH T 105      25.048   2.161  34.408  1.00  0.37           O  
HETATM  107  O   HOH T 106      15.570  20.739  36.387  1.00  0.37           O  
HETATM  108  O   HOH T 107       5.889 -11.265  29.880  1.00  0.37           O  
HETATM  109  O   HOH T 108       7.684  28.701  23.402  1.00  0.37           O  
HETATM  110  O   HOH T 109      15.392  21.075  31.779  1.00  0.37           O  
HETATM  111  O   HOH T 110      -3.064  12.995  43.782  1.00  0.37           O  
HETATM  112  O   HOH T 111      11.746 -10.097  26.626  1.00  0.38           O  
HETATM  113  O   HOH T 112      12.690  25.283  28.193  1.00  0.38           O  
HETATM  114  O   HOH T 113      27.509  21.159  39.854  1.00  0.38           O  
HETATM  115  O   HOH T 114      -3.370  -4.642  37.263  1.00  0.38           O  
HETATM  116  O   HOH T 115     -17.738   9.195  28.225  1.00  0.38           O  
HETATM  117  O   HOH T 116      -7.246  24.831  35.760  1.00  0.38           O  
HETATM  118  O   HOH T 117      13.530  27.103  47.347  1.00  0.38           O  
HETATM  119  O   HOH T 118      -7.344  -0.896  26.429  1.00  0.38           O  
HETATM  120  O   HOH T 119      28.344  12.134  39.005  1.00  0.38           O  
HETATM  121  O   HOH T 120      29.023   3.687  29.086  1.00  0.38           O  
HETATM  122  O   HOH T 121       2.347  25.028  15.462  1.00  0.38           O  
HETATM  123  O   HOH T 122      16.948   6.464  11.812  1.00  0.38           O  
HETATM  124  O   HOH T 123       7.488   1.644  47.853  1.00  0.38           O  
HETATM  125  O   HOH T 124      -3.983  26.874  22.389  1.00  0.38           O  
HETATM  126  O   HOH T 125      -4.867  28.573  36.718  1.00  0.38           O  
HETATM  127  O   HOH T 126      25.703  24.526  35.045  1.00  0.38           O  
HETATM  128  O   HOH T 127       8.059  28.681  46.078  1.00  0.39           O  
HETATM  129  O   HOH T 128      32.190  13.666  29.689  1.00  0.39           O  
HETATM  130  O   HOH T 129       5.043 -11.898  37.185  1.00  0.39           O  
HETATM  131  O   HOH T 130      13.134   2.542  53.847  1.00  0.39           O  
HETATM  132  O   HOH T 131       6.292  17.571  54.512  1.00  0.39           O  
HETATM  133  O   HOH T 132       6.389  31.802  25.035  1.00  0.39           O  
HETATM  134  O   HOH T 133      11.273  -5.993  49.453  1.00  0.39           O  
HETATM  135  O   HOH T 134       1.899  17.995  54.858  1.00  0.39           O  
HETATM  136  O   HOH T 135      -5.230  29.667  30.041  1.00  0.39           O  
HETATM  137  O   HOH T 136       0.107  11.890  54.111  1.00  0.39           O  
HETATM  138  O   HOH T 137      -1.988   5.528  57.261  1.00  0.39           O  
HETATM  139  O   HOH T 138     -13.132   9.781  29.328  1.00  0.39           O  
HETATM  140  O   HOH T 139      23.121  23.814  35.805  1.00  0.39           O  
HETATM  141  O   HOH T 140      -8.470  24.291  18.289  1.00  0.39           O  
HETATM  142  O   HOH T 141      -5.005   2.427  52.298  1.00  0.39           O  
HETATM  143  O   HOH T 142      -0.496  29.074  18.423  1.00  0.40           O  
HETATM  144  O   HOH T 143       4.807 -12.517  32.081  1.00  0.40           O  
HETATM  145  O   HOH T 144       3.164  27.117  48.356  1.00  0.40           O  
HETATM  146  O   HOH T 145      26.880   3.225  40.632  1.00  0.40           O  
HETATM  147  O   HOH T 146      -7.273  -0.585  45.053  1.00  0.40           O  
HETATM  148  O   HOH T 147      13.986 -11.647  27.331  1.00  0.40           O  
HETATM  149  O   HOH T 148      15.168  24.398  21.973  1.00  0.40           O  
HETATM  150  O   HOH T 149      22.730  18.056  17.418  1.00  0.40           O  
HETATM  151  O   HOH T 150      -5.391   4.063  54.432  1.00  0.41           O  
HETATM  152  O   HOH T 151      13.529  25.551  23.950  1.00  0.41           O  
HETATM  153  O   HOH T 152      -8.818  15.165  24.263  1.00  0.41           O  
HETATM  154  O   HOH T 153      21.634  23.117  25.414  1.00  0.41           O  
HETATM  155  O   HOH T 154      18.727   7.323  13.717  1.00  0.41           O  
HETATM  156  O   HOH T 155      21.118  -8.482  33.357  1.00  0.41           O  
HETATM  157  O   HOH T 156       7.938  -4.160  16.834  1.00  0.41           O  
HETATM  158  O   HOH T 157      27.841   2.270  33.961  1.00  0.41           O  
HETATM  159  O   HOH T 158      11.746  27.702  21.281  1.00  0.41           O  
HETATM  160  O   HOH T 159      28.000  14.125  44.597  1.00  0.41           O  
HETATM  161  O   HOH T 160      -2.008  -8.191  30.457  1.00  0.41           O  
HETATM  162  O   HOH T 161      -3.424  28.451  44.919  1.00  0.41           O  
HETATM  163  O   HOH T 162      -9.816  10.003  23.199  1.00  0.41           O  
HETATM  164  O   HOH T 163      30.322  14.581  31.404  1.00  0.42           O  
HETATM  165  O   HOH T 164      -4.262  -5.163  39.866  1.00  0.42           O  
HETATM  166  O   HOH T 165      -2.627  16.481  54.865  1.00  0.42           O  
HETATM  167  O   HOH T 166       1.766  -6.139  46.313  1.00  0.42           O  
HETATM  168  O   HOH T 167       2.577 -12.362  33.499  1.00  0.42           O  
HETATM  169  O   HOH T 168      25.918  14.921  39.422  1.00  0.42           O  
HETATM  170  O   HOH T 169      11.953   5.105  12.207  1.00  0.42           O  
HETATM  171  O   HOH T 170      25.254   8.397  38.445  1.00  0.42           O  
HETATM  172  O   HOH T 171       0.752  -3.910  47.680  1.00  0.42           O  
HETATM  173  O   HOH T 172      25.041  -1.017  26.195  1.00  0.42           O  
HETATM  174  O   HOH T 173      -4.403  26.983  25.122  1.00  0.42           O  
HETATM  175  O   HOH T 174       2.179  16.168  56.890  1.00  0.42           O  
HETATM  176  O   HOH T 175       2.683  24.518  49.087  1.00  0.42           O  
HETATM  177  O   HOH T 176      11.749  22.643  17.906  1.00  0.42           O  
HETATM  178  O   HOH T 177       9.694  31.269  21.324  1.00  0.42           O  
HETATM  179  O   HOH T 178       8.195   2.666  12.955  1.00  0.42           O  
HETATM  180  O   HOH T 179      12.970   0.867  51.523  1.00  0.42           O  
HETATM  181  O   HOH T 180      20.057 -10.651  34.492  1.00  0.43           O  
HETATM  182  O   HOH T 181       3.881  -1.152  15.143  1.00  0.43           O  
HETATM  183  O   HOH T 182      -9.995  -5.639  30.323  1.00  0.43           O  
HETATM  184  O   HOH T 183      -4.494  -8.929  29.191  1.00  0.43           O  
HETATM  185  O   HOH T 184      -7.645  22.210  29.897  1.00  0.43           O  
HETATM  186  O   HOH T 185      -1.850   7.124  37.858  1.00  0.43           O  
HETATM  187  O   HOH T 186     -10.870   3.621  26.732  1.00  0.43           O  
HETATM  188  O   HOH T 187      25.377  25.605  32.493  1.00  0.43           O  
HETATM  189  O   HOH T 188      -3.236  30.841  33.308  1.00  0.43           O  
HETATM  190  O   HOH T 189      29.139  23.239  40.792  1.00  0.43           O  
HETATM  191  O   HOH T 190      -9.916   0.543  30.857  1.00  0.43           O  
HETATM  192  O   HOH T 191      -9.002  21.151  40.642  1.00  0.44           O  
HETATM  193  O   HOH T 192      -9.941   7.308  23.118  1.00  0.44           O  
HETATM  194  O   HOH T 193     -15.150   9.330  31.213  1.00  0.44           O  
HETATM  195  O   HOH T 194       5.908  30.213  46.658  1.00  0.44           O  
HETATM  196  O   HOH T 195      27.340   5.746  28.392  1.00  0.44           O  
HETATM  197  O   HOH T 196       4.785  12.527  54.543  1.00  0.44           O  
HETATM  198  O   HOH T 197      -9.634  23.441  36.359  1.00  0.44           O  
HETATM  199  O   HOH T 198       9.026  -9.643  27.502  1.00  0.44           O  
HETATM  200  O   HOH T 199      -5.058  -1.658  49.115  1.00  0.44           O  
HETATM  201  O   HOH T 200      10.570   2.280  55.054  1.00  0.44           O  
HETATM  202  O   HOH T 201      -2.382   1.991  38.258  1.00  0.44           O  
HETATM  203  O   HOH T 202      -6.359  28.477  26.496  1.00  0.44           O  
HETATM  204  O   HOH T 203      12.363  23.549  25.515  1.00  0.44           O  
HETATM  205  O   HOH T 204       0.427  -1.297  15.221  1.00  0.44           O  
HETATM  206  O   HOH T 205      17.442 -10.934  33.788  1.00  0.44           O  
HETATM  207  O   HOH T 206      10.587  20.205  16.891  1.00  0.44           O  
HETATM  208  O   HOH T 207       8.394  -8.998  39.842  1.00  0.44           O  
HETATM  209  O   HOH T 208     -15.335  11.205  35.419  1.00  0.44           O  
HETATM  210  O   HOH T 209      17.935  29.210  40.661  1.00  0.44           O  
HETATM  211  O   HOH T 210      -7.452  26.136  33.381  1.00  0.45           O  
HETATM  212  O   HOH T 211      -3.612  -7.416  32.669  1.00  0.45           O  
HETATM  213  O   HOH T 212      22.961  25.308  31.131  1.00  0.45           O  
HETATM  214  O   HOH T 213      -3.888   5.620  36.853  1.00  0.45           O  
HETATM  215  O   HOH T 214       1.054  -9.693  37.244  1.00  0.45           O  
HETATM  216  O   HOH T 215      -7.414   1.485  49.465  1.00  0.45           O  
HETATM  217  O   HOH T 216       2.043 -10.767  39.697  1.00  0.45           O  
HETATM  218  O   HOH T 217      -4.348  -0.195  51.405  1.00  0.46           O  
HETATM  219  O   HOH T 218      -1.548  11.099  39.005  1.00  0.46           O  
HETATM  220  O   HOH T 219       7.500 -10.600  37.655  1.00  0.46           O  
HETATM  221  O   HOH T 220      29.281  12.789  34.777  1.00  0.46           O  
HETATM  222  O   HOH T 221      20.388  25.993  37.920  1.00  0.46           O  
HETATM  223  O   HOH T 222      -6.843  -3.355  33.346  1.00  0.46           O  
HETATM  224  O   HOH T 223      15.711  -7.403  21.497  1.00  0.46           O  
HETATM  225  O   HOH T 224      -4.835   3.157  37.488  1.00  0.46           O  
HETATM  226  O   HOH T 225      -1.238   9.585  36.597  1.00  0.46           O  
HETATM  227  O   HOH T 226      17.641  22.940  24.283  1.00  0.46           O  
HETATM  228  O   HOH T 227      16.239  17.589  54.689  1.00  0.46           O  
HETATM  229  O   HOH T 228       2.174  22.883  46.812  1.00  0.46           O  
HETATM  230  O   HOH T 229       1.633  13.946  55.213  1.00  0.46           O  
HETATM  231  O   HOH T 230       0.459 -10.633  33.808  1.00  0.46           O  
HETATM  232  O   HOH T 231      25.157   5.100  48.524  1.00  0.46           O  
HETATM  233  O   HOH T 232      -5.168  31.867  31.506  1.00  0.46           O  
HETATM  234  O   HOH T 233      -4.215  31.096  44.457  1.00  0.46           O  
HETATM  235  O   HOH T 234       9.862   7.567  57.211  1.00  0.46           O  
HETATM  236  O   HOH T 235      -7.764   1.619  46.729  1.00  0.46           O  
HETATM  237  O   HOH T 236      20.278  28.133  36.159  1.00  0.46           O  
HETATM  238  O   HOH T 237      18.452  27.957  38.247  1.00  0.46           O  
HETATM  239  O   HOH T 238      24.080  23.863  26.643  1.00  0.47           O  
HETATM  240  O   HOH T 239      -4.324   0.589  36.727  1.00  0.47           O  
HETATM  241  O   HOH T 240      25.004   2.501  47.704  1.00  0.47           O  
HETATM  242  O   HOH T 241       9.964   9.797  12.690  1.00  0.47           O  
HETATM  243  O   HOH T 242       9.946  -8.049  48.140  1.00  0.47           O  
HETATM  244  O   HOH T 243      -7.392  17.955  15.946  1.00  0.47           O  
HETATM  245  O   HOH T 244      -8.484  -2.305  28.672  1.00  0.47           O  
HETATM  246  O   HOH T 245      19.124  23.003  26.543  1.00  0.47           O  
HETATM  247  O   HOH T 246      -9.366  -3.918  32.418  1.00  0.47           O  
HETATM  248  O   HOH T 247      -7.643  23.385  27.443  1.00  0.47           O  
HETATM  249  O   HOH T 248      18.857  18.986  23.136  1.00  0.47           O  
HETATM  250  O   HOH T 249       3.371  29.764  47.639  1.00  0.47           O  
HETATM  251  O   HOH T 250      13.692  15.933  18.621  1.00  0.47           O  
HETATM  252  O   HOH T 251      11.691   7.787  12.029  1.00  0.47           O  
HETATM  253  O   HOH T 252      31.713   3.818  28.363  1.00  0.47           O  
HETATM  254  O   HOH T 253      16.951  19.649  17.071  1.00  0.48           O  
HETATM  255  O   HOH T 254      32.242  25.987  39.933  1.00  0.48           O  
HETATM  256  O   HOH T 255      28.181   1.699  25.330  1.00  0.48           O  
HETATM  257  O   HOH T 256      -2.511  15.122  10.552  1.00  0.48           O  
HETATM  258  O   HOH T 257      10.424  -0.484  48.968  1.00  0.48           O  
HETATM  259  O   HOH T 258      14.104  20.404  52.515  1.00  0.48           O  
HETATM  260  O   HOH T 259       7.168 -12.470  35.586  1.00  0.48           O  
HETATM  261  O   HOH T 260      29.216  20.838  43.452  1.00  0.48           O  
HETATM  262  O   HOH T 261      11.194  -9.209  45.919  1.00  0.48           O  
HETATM  263  O   HOH T 262      29.254  19.226  38.953  1.00  0.48           O  
HETATM  264  O   HOH T 263      -7.218  27.451  35.860  1.00  0.48           O  
HETATM  265  O   HOH T 264      -9.431   0.185  28.063  1.00  0.48           O  
HETATM  266  O   HOH T 265      -5.886  24.726  25.851  1.00  0.49           O  
HETATM  267  O   HOH T 266      -5.160  -3.248  35.589  1.00  0.49           O  
HETATM  268  O   HOH T 267      34.531   1.541  31.120  1.00  0.49           O  
HETATM  269  O   HOH T 268      -5.361  -5.718  34.132  1.00  0.49           O  
HETATM  270  O   HOH T 269      -7.380  -0.874  47.886  1.00  0.49           O  
HETATM  271  O   HOH T 270      -6.846  22.052  18.429  1.00  0.49           O  
HETATM  272  O   HOH T 271      17.204  -8.895  40.845  1.00  0.49           O  
HETATM  273  O   HOH T 272      -4.321   2.959  40.115  1.00  0.49           O  
HETATM  274  O   HOH T 273       8.736  -5.583  48.590  1.00  0.49           O  
HETATM  275  O   HOH T 274     -13.870  11.134  33.003  1.00  0.49           O  
HETATM  276  O   HOH T 275      21.059  -4.343  25.125  1.00  0.49           O  
HETATM  277  O   HOH T 276      20.403  -1.664  25.260  1.00  0.49           O  
HETATM  278  O   HOH T 277      -5.877   0.988  39.086  1.00  0.49           O  
HETATM  279  O   HOH T 278      27.937  14.474  37.573  1.00  0.49           O  
HETATM  280  O   HOH T 279      22.432  -3.419  45.283  1.00  0.49           O  
HETATM  281  O   HOH T 280       6.367 -12.367  25.671  1.00  0.49           O  
HETATM  282  O   HOH T 281     -13.843   3.258  32.536  1.00  0.49           O  
HETATM  283  O   HOH T 282      -6.523  -0.792  35.696  1.00  0.49           O  
HETATM  284  O   HOH T 283      -1.582  -9.378  38.132  1.00  0.49           O  
HETATM  285  O   HOH T 284      20.308  17.588  16.091  1.00  0.50           O  
HETATM  286  O   HOH T 285      22.731  -2.294  26.047  1.00  0.50           O  
HETATM  287  O   HOH T 286      -5.918  21.985  25.667  1.00  0.50           O  
HETATM  288  O   HOH T 287      -2.364  -4.896  48.373  1.00  0.50           O  
HETATM  289  O   HOH T 288      14.434  -0.837  49.893  1.00  0.50           O  
HETATM  290  O   HOH T 289      27.104   7.323  23.247  1.00  0.50           O  
HETATM  291  O   HOH T 290      12.145  21.120  54.149  1.00  0.50           O  
HETATM  292  O   HOH T 291      -1.158  -9.399  35.505  1.00  0.50           O  
HETATM  293  O   HOH T 292      10.515  27.719  17.661  1.00  0.50           O  
HETATM  294  O   HOH T 293      13.679  11.994  57.405  1.00  0.50           O  
HETATM  295  O   HOH T 294      -7.239   1.398  34.235  1.00  0.50           O  
HETATM  296  O   HOH T 295      24.476  -3.415  27.624  1.00  0.51           O  
HETATM  297  O   HOH T 296      28.499  14.624  40.356  1.00  0.51           O  
HETATM  298  O   HOH T 297       3.101  -1.472  33.062  1.00  0.51           O  
HETATM  299  O   HOH T 298      26.882   3.818  24.390  1.00  0.51           O  
HETATM  300  O   HOH T 299      21.337  -0.187  22.476  1.00  0.51           O  
HETATM  301  O   HOH T 300      15.643  18.163  35.470  1.00  0.51           O  
HETATM  302  O   HOH T 301      -5.935  -3.933  38.102  1.00  0.51           O  
HETATM  303  O   HOH T 302      -2.324   7.229  59.486  1.00  0.51           O  
HETATM  304  O   HOH T 303      12.369  21.890  51.114  1.00  0.51           O  
HETATM  305  O   HOH T 304       9.185  28.585  20.840  1.00  0.51           O  
HETATM  306  O   HOH T 305      -8.959   2.912  24.928  1.00  0.51           O  
HETATM  307  O   HOH T 306       5.174  -4.431  25.958  1.00  0.51           O  
HETATM  308  O   HOH T 307      11.904  29.198  46.674  1.00  0.51           O  
HETATM  309  O   HOH T 308      -8.132  -1.589  31.482  1.00  0.51           O  
HETATM  310  O   HOH T 309      10.037  30.373  45.285  1.00  0.51           O  
HETATM  311  O   HOH T 310      29.191  21.482  25.648  1.00  0.51           O  
HETATM  312  O   HOH T 311       8.898  -9.746  44.546  1.00  0.51           O  
HETATM  313  O   HOH T 312      -8.206  20.223  16.947  1.00  0.51           O  
HETATM  314  O   HOH T 313      13.057  27.935  27.377  1.00  0.51           O  
HETATM  315  O   HOH T 314      16.978   9.527  53.299  1.00  0.51           O  
HETATM  316  O   HOH T 315      -7.326   8.835  48.592  1.00  0.51           O  
HETATM  317  O   HOH T 316      30.724  19.664  41.429  1.00  0.52           O  
HETATM  318  O   HOH T 317      -3.950 -10.010  31.556  1.00  0.52           O  
HETATM  319  O   HOH T 318      27.690  16.972  38.877  1.00  0.52           O  
HETATM  320  O   HOH T 319      18.831   1.517  17.135  1.00  0.52           O  
HETATM  321  O   HOH T 320      25.868  -5.607  29.110  1.00  0.52           O  
HETATM  322  O   HOH T 321       0.976  -8.118  44.539  1.00  0.52           O  
HETATM  323  O   HOH T 322       8.863  31.259  23.958  1.00  0.52           O  
HETATM  324  O   HOH T 323       9.841   3.810  11.180  1.00  0.52           O  
HETATM  325  O   HOH T 324      -7.607   0.680  24.069  1.00  0.52           O  
HETATM  326  O   HOH T 325      -2.439  -1.026  49.512  1.00  0.52           O  
HETATM  327  O   HOH T 326       9.160   0.757  14.522  1.00  0.52           O  
HETATM  328  O   HOH T 327      10.874   3.105  13.821  1.00  0.52           O  
HETATM  329  O   HOH T 328      12.867  28.279  23.787  1.00  0.52           O  
HETATM  330  O   HOH T 329      -7.690  28.030  38.594  1.00  0.53           O  
HETATM  331  O   HOH T 330      15.529  22.509  53.448  1.00  0.53           O  
HETATM  332  O   HOH T 331      -9.643  21.858  18.629  1.00  0.53           O  
HETATM  333  O   HOH T 332      12.017   6.112  43.694  1.00  0.53           O  
HETATM  334  O   HOH T 333      23.527  26.206  34.550  1.00  0.53           O  
HETATM  335  O   HOH T 334      23.071   7.880  16.981  1.00  0.53           O  
HETATM  336  O   HOH T 335      17.649   6.417  23.578  1.00  0.53           O  
HETATM  337  O   HOH T 336      30.029   1.846  27.396  1.00  0.53           O  
HETATM  338  O   HOH T 337     -15.216   8.216  28.690  1.00  0.53           O  
HETATM  339  O   HOH T 338      -8.610  14.773  14.648  1.00  0.53           O  
HETATM  340  O   HOH T 339      26.873   4.923  21.769  1.00  0.53           O  
HETATM  341  O   HOH T 340      14.568 -10.593  33.891  1.00  0.54           O  
HETATM  342  O   HOH T 341       4.829   5.650  58.979  1.00  0.54           O  
HETATM  343  O   HOH T 342      -8.096  -5.693  34.160  1.00  0.54           O  
HETATM  344  O   HOH T 343      -2.841   8.873  39.701  1.00  0.54           O  
HETATM  345  O   HOH T 344       3.132  31.130  43.022  1.00  0.54           O  
HETATM  346  O   HOH T 345      15.317 -10.737  40.884  1.00  0.54           O  
HETATM  347  O   HOH T 346      25.279  16.959  17.782  1.00  0.54           O  
HETATM  348  O   HOH T 347      -8.048  29.112  41.194  1.00  0.54           O  
HETATM  349  O   HOH T 348      -5.133  -2.999  19.201  1.00  0.54           O  
HETATM  350  O   HOH T 349       6.616  -0.852  14.381  1.00  0.54           O  
HETATM  351  O   HOH T 350      -7.074  16.546  31.010  1.00  0.54           O  
HETATM  352  O   HOH T 351      14.344  20.343  17.155  1.00  0.54           O  
HETATM  353  O   HOH T 352      -3.182   0.841  53.617  1.00  0.54           O  
HETATM  354  O   HOH T 353      -6.698  23.946  31.796  1.00  0.55           O  
HETATM  355  O   HOH T 354     -13.024   4.026  25.184  1.00  0.55           O  
HETATM  356  O   HOH T 355      14.304  26.986  21.842  1.00  0.55           O  
HETATM  357  O   HOH T 356       6.328  -9.158  28.134  1.00  0.55           O  
HETATM  358  O   HOH T 357      14.883  23.198  24.423  1.00  0.55           O  
HETATM  359  O   HOH T 358      29.146  17.315  41.132  1.00  0.55           O  
HETATM  360  O   HOH T 359      -5.045  -3.993  21.740  1.00  0.55           O  
HETATM  361  O   HOH T 360      19.769  21.239  24.467  1.00  0.55           O  
HETATM  362  O   HOH T 361      19.449   0.595  50.284  1.00  0.55           O  
HETATM  363  O   HOH T 362      26.919  13.852  25.014  1.00  0.55           O  
HETATM  364  O   HOH T 363       1.545   5.973  28.384  1.00  0.55           O  
HETATM  365  O   HOH T 364      10.584  30.523  25.893  1.00  0.55           O  
HETATM  366  O   HOH T 365      -0.179  -6.574  47.984  1.00  0.55           O  
HETATM  367  O   HOH T 366      -7.502   7.363  14.271  1.00  0.56           O  
HETATM  368  O   HOH T 367      16.065  -5.628  19.334  1.00  0.56           O  
HETATM  369  O   HOH T 368      17.891   2.487  54.298  1.00  0.56           O  
HETATM  370  O   HOH T 369      25.032  -5.651  39.988  1.00  0.56           O  
HETATM  371  O   HOH T 370      -5.338  14.288  43.952  1.00  0.56           O  
HETATM  372  O   HOH T 371       6.670  23.421  54.334  1.00  0.56           O  
HETATM  373  O   HOH T 372       0.142  14.478  10.463  1.00  0.56           O  
HETATM  374  O   HOH T 373      28.617   0.523  35.725  1.00  0.56           O  
HETATM  375  O   HOH T 374      17.117   4.104  10.453  1.00  0.57           O  
HETATM  376  O   HOH T 375      21.966 -10.678  32.382  1.00  0.57           O  
HETATM  377  O   HOH T 376      -8.596  23.625  33.852  1.00  0.57           O  
HETATM  378  O   HOH T 377      11.362   0.121  53.587  1.00  0.57           O  
HETATM  379  O   HOH T 378       8.828  -5.202  19.346  1.00  0.57           O  
HETATM  380  O   HOH T 379      22.992  -5.712  26.448  1.00  0.57           O  
HETATM  381  O   HOH T 380       5.715  -7.062  25.312  1.00  0.57           O  
HETATM  382  O   HOH T 381      13.396   9.139  13.595  1.00  0.58           O  
HETATM  383  O   HOH T 382      -6.439  14.703  39.690  1.00  0.58           O  
HETATM  384  O   HOH T 383      16.572  31.423  41.420  1.00  0.59           O  
HETATM  385  O   HOH T 384      -0.851  22.821  13.702  1.00  0.59           O  
HETATM  386  O   HOH T 385       4.001  -4.462  50.960  1.00  0.59           O  
HETATM  387  O   HOH T 386      24.375  -2.276  23.777  1.00  0.62           O  
HETATM  388  O   HOH T 387     -12.893  15.506  30.847  1.00  0.64           O  
TER     389      HOH T 387 
