# Supplementary material for: Accurate Prediction of Hydration Sites of Proteins Using Energy Model With Atom Embedding
Source: Front Mol Biosci. 2021 Sep 20;8:756075. doi: 10.3389/fmolb.2021.756075 (PMC8488165; doi:10.3389/fmolb.2021.756075)
Supplement: Supplementary file 1 [file DataSheet1.ZIP › Data Sheet 1/Our_result_pdb/our_dataset_output/3MPC_watersite.pdb]

HEADER                                                        XXXX


JRNL        PMID   -1
HETATM    1  O   HOH T   0      32.595  38.112  -9.159  1.00  0.16           O  
HETATM    2  O   HOH T   1      32.951  36.311   5.014  1.00  0.17           O  
HETATM    3  O   HOH T   2      32.693  17.200  -1.323  1.00  0.19           O  
HETATM    4  O   HOH T   3      28.148  32.584   7.515  1.00  0.20           O  
HETATM    5  O   HOH T   4      20.865  45.990  11.182  1.00  0.20           O  
HETATM    6  O   HOH T   5      33.659  53.712   4.430  1.00  0.20           O  
HETATM    7  O   HOH T   6      33.061  13.510   9.623  1.00  0.21           O  
HETATM    8  O   HOH T   7      20.944  24.270  19.051  1.00  0.21           O  
HETATM    9  O   HOH T   8      30.524  33.113   9.049  1.00  0.22           O  
HETATM   10  O   HOH T   9      36.595  14.732   3.681  1.00  0.22           O  
HETATM   11  O   HOH T  10      20.278  24.219   5.650  1.00  0.22           O  
HETATM   12  O   HOH T  11      32.209  33.386   2.357  1.00  0.23           O  
HETATM   13  O   HOH T  12      29.176  45.632 -12.205  1.00  0.23           O  
HETATM   14  O   HOH T  13      16.087  32.514  10.771  1.00  0.23           O  
HETATM   15  O   HOH T  14      29.015  47.946  24.259  1.00  0.23           O  
HETATM   16  O   HOH T  15      38.062  19.437  32.853  1.00  0.23           O  
HETATM   17  O   HOH T  16      36.289  28.291  29.155  1.00  0.24           O  
HETATM   18  O   HOH T  17      28.943  24.639  -4.475  1.00  0.25           O  
HETATM   19  O   HOH T  18      27.655  26.827   2.190  1.00  0.25           O  
HETATM   20  O   HOH T  19      27.545  47.659  -5.759  1.00  0.25           O  
HETATM   21  O   HOH T  20      34.924  12.506   3.999  1.00  0.25           O  
HETATM   22  O   HOH T  21      17.107  19.269  10.718  1.00  0.25           O  
HETATM   23  O   HOH T  22      26.747  37.639  18.646  1.00  0.25           O  
HETATM   24  O   HOH T  23      33.538  15.280  15.282  1.00  0.25           O  
HETATM   25  O   HOH T  24      25.267  32.597   7.464  1.00  0.25           O  
HETATM   26  O   HOH T  25      28.780  12.813  19.257  1.00  0.26           O  
HETATM   27  O   HOH T  26      25.910  52.725   5.357  1.00  0.26           O  
HETATM   28  O   HOH T  27      34.508  19.295  20.593  1.00  0.26           O  
HETATM   29  O   HOH T  28      41.199  22.569   8.058  1.00  0.26           O  
HETATM   30  O   HOH T  29      41.566  33.764   0.705  1.00  0.27           O  
HETATM   31  O   HOH T  30      27.069  13.140   0.683  1.00  0.27           O  
HETATM   32  O   HOH T  31      44.112  14.932   0.750  1.00  0.27           O  
HETATM   33  O   HOH T  32      28.298  57.199   7.218  1.00  0.27           O  
HETATM   34  O   HOH T  33      34.258  33.280  -3.945  1.00  0.27           O  
HETATM   35  O   HOH T  34      18.176  34.416  10.941  1.00  0.28           O  
HETATM   36  O   HOH T  35      28.136  34.207  12.135  1.00  0.28           O  
HETATM   37  O   HOH T  36      33.180  20.158  28.501  1.00  0.28           O  
HETATM   38  O   HOH T  37      28.547   8.721   7.225  1.00  0.28           O  
HETATM   39  O   HOH T  38      33.996  40.325  12.826  1.00  0.28           O  
HETATM   40  O   HOH T  39      22.248  37.972  -9.136  1.00  0.28           O  
HETATM   41  O   HOH T  40      26.618  31.677  15.500  1.00  0.28           O  
HETATM   42  O   HOH T  41      29.847  27.521  29.317  1.00  0.28           O  
HETATM   43  O   HOH T  42      37.460  23.553  17.843  1.00  0.28           O  
HETATM   44  O   HOH T  43      25.612  46.992  25.335  1.00  0.29           O  
HETATM   45  O   HOH T  44      33.759  61.271  11.652  1.00  0.29           O  
HETATM   46  O   HOH T  45      20.147  21.794   4.409  1.00  0.29           O  
HETATM   47  O   HOH T  46      44.169  37.338  28.618  1.00  0.29           O  
HETATM   48  O   HOH T  47      21.066  43.146  17.803  1.00  0.29           O  
HETATM   49  O   HOH T  48      19.217  14.810  12.490  1.00  0.29           O  
HETATM   50  O   HOH T  49      32.694  36.363  16.385  1.00  0.30           O  
HETATM   51  O   HOH T  50      17.170  40.347  10.371  1.00  0.30           O  
HETATM   52  O   HOH T  51      38.939  28.648  30.051  1.00  0.30           O  
HETATM   53  O   HOH T  52      40.636  24.256  10.104  1.00  0.30           O  
HETATM   54  O   HOH T  53      28.919  11.226  14.514  1.00  0.30           O  
HETATM   55  O   HOH T  54      25.207  35.486  17.795  1.00  0.31           O  
HETATM   56  O   HOH T  55      36.564  23.573   0.475  1.00  0.31           O  
HETATM   57  O   HOH T  56      21.314  24.306  29.438  1.00  0.31           O  
HETATM   58  O   HOH T  57      23.450  34.360   6.426  1.00  0.31           O  
HETATM   59  O   HOH T  58      28.800  47.606 -10.163  1.00  0.31           O  
HETATM   60  O   HOH T  59      17.299  40.507   2.735  1.00  0.31           O  
HETATM   61  O   HOH T  60      19.812  48.545  16.355  1.00  0.31           O  
HETATM   62  O   HOH T  61      21.613  37.019  16.896  1.00  0.31           O  
HETATM   63  O   HOH T  62      32.686  15.151  20.161  1.00  0.31           O  
HETATM   64  O   HOH T  63      26.451  58.643  10.803  1.00  0.31           O  
HETATM   65  O   HOH T  64      32.380  36.684  12.387  1.00  0.31           O  
HETATM   66  O   HOH T  65      24.094  32.850   9.901  1.00  0.31           O  
HETATM   67  O   HOH T  66      32.439  19.035  -6.372  1.00  0.32           O  
HETATM   68  O   HOH T  67      23.849  28.101   1.322  1.00  0.32           O  
HETATM   69  O   HOH T  68      28.638  33.964  30.217  1.00  0.32           O  
HETATM   70  O   HOH T  69      36.218  35.188  -4.208  1.00  0.32           O  
HETATM   71  O   HOH T  70      31.727  13.788  -6.393  1.00  0.32           O  
HETATM   72  O   HOH T  71      23.149  25.726   0.022  1.00  0.32           O  
HETATM   73  O   HOH T  72      41.422  26.905  33.137  1.00  0.32           O  
HETATM   74  O   HOH T  73      40.827  41.341  24.246  1.00  0.33           O  
HETATM   75  O   HOH T  74      25.260  33.831   1.575  1.00  0.33           O  
HETATM   76  O   HOH T  75      32.911  36.381   7.834  1.00  0.33           O  
HETATM   77  O   HOH T  76      28.833  10.955   0.357  1.00  0.33           O  
HETATM   78  O   HOH T  77      32.683  55.126  -1.130  1.00  0.33           O  
HETATM   79  O   HOH T  78      29.325  24.169  32.394  1.00  0.33           O  
HETATM   80  O   HOH T  79      28.884  28.994  -2.377  1.00  0.33           O  
HETATM   81  O   HOH T  80      30.892  32.358  30.093  1.00  0.33           O  
HETATM   82  O   HOH T  81      19.690  32.469  12.294  1.00  0.33           O  
HETATM   83  O   HOH T  82      18.873  38.268   3.499  1.00  0.33           O  
HETATM   84  O   HOH T  83      25.167   9.929  14.712  1.00  0.34           O  
HETATM   85  O   HOH T  84      37.485  44.712   9.696  1.00  0.34           O  
HETATM   86  O   HOH T  85      36.732  36.641  -1.939  1.00  0.34           O  
HETATM   87  O   HOH T  86      26.669  55.425  -5.957  1.00  0.34           O  
HETATM   88  O   HOH T  87      34.386  38.135  11.128  1.00  0.34           O  
HETATM   89  O   HOH T  88      18.762  17.144  11.084  1.00  0.34           O  
HETATM   90  O   HOH T  89      39.931  38.933   4.954  1.00  0.34           O  
HETATM   91  O   HOH T  90      27.671   8.696   1.583  1.00  0.34           O  
HETATM   92  O   HOH T  91      28.387  34.190  -6.123  1.00  0.34           O  
HETATM   93  O   HOH T  92      31.504  56.397   1.106  1.00  0.34           O  
HETATM   94  O   HOH T  93      33.839  53.093  -2.451  1.00  0.34           O  
HETATM   95  O   HOH T  94      38.107  27.550  21.868  1.00  0.35           O  
HETATM   96  O   HOH T  95      34.330  57.092  15.500  1.00  0.35           O  
HETATM   97  O   HOH T  96      36.839  33.147  17.777  1.00  0.35           O  
HETATM   98  O   HOH T  97      36.020  32.701  20.375  1.00  0.35           O  
HETATM   99  O   HOH T  98      23.676  13.969   6.871  1.00  0.35           O  
HETATM  100  O   HOH T  99      18.575  12.586  17.823  1.00  0.35           O  
HETATM  101  O   HOH T 100      33.682  15.349  -3.207  1.00  0.35           O  
HETATM  102  O   HOH T 101      16.151  13.209  16.903  1.00  0.35           O  
HETATM  103  O   HOH T 102      20.878  39.477   1.926  1.00  0.35           O  
HETATM  104  O   HOH T 103      30.921  40.675  19.630  1.00  0.35           O  
HETATM  105  O   HOH T 104      33.608  34.862  24.138  1.00  0.35           O  
HETATM  106  O   HOH T 105      38.388  42.239  16.970  1.00  0.35           O  
HETATM  107  O   HOH T 106      20.125  46.863  21.182  1.00  0.35           O  
HETATM  108  O   HOH T 107      32.794  32.763  12.491  1.00  0.36           O  
HETATM  109  O   HOH T 108      42.593  14.533  -1.541  1.00  0.36           O  
HETATM  110  O   HOH T 109      24.329  30.553  16.283  1.00  0.36           O  
HETATM  111  O   HOH T 110      31.641  38.362  18.158  1.00  0.36           O  
HETATM  112  O   HOH T 111      48.532  42.129  28.416  1.00  0.36           O  
HETATM  113  O   HOH T 112      18.459  21.944  16.353  1.00  0.36           O  
HETATM  114  O   HOH T 113      24.118  32.808  28.329  1.00  0.36           O  
HETATM  115  O   HOH T 114      33.881  34.969  31.081  1.00  0.36           O  
HETATM  116  O   HOH T 115      25.746  58.154   8.131  1.00  0.37           O  
HETATM  117  O   HOH T 116      27.172  48.680  18.272  1.00  0.37           O  
HETATM  118  O   HOH T 117      20.613  25.921  16.761  1.00  0.37           O  
HETATM  119  O   HOH T 118      27.687  26.621  26.717  1.00  0.37           O  
HETATM  120  O   HOH T 119      40.648  44.549   2.184  1.00  0.37           O  
HETATM  121  O   HOH T 120      20.911  34.379   5.301  1.00  0.37           O  
HETATM  122  O   HOH T 121      22.263  15.837   0.484  1.00  0.37           O  
HETATM  123  O   HOH T 122      24.753  13.528  12.898  1.00  0.37           O  
HETATM  124  O   HOH T 123      35.468  31.009   8.128  1.00  0.37           O  
HETATM  125  O   HOH T 124      19.976  48.807  19.142  1.00  0.38           O  
HETATM  126  O   HOH T 125      32.978  32.260   7.867  1.00  0.38           O  
HETATM  127  O   HOH T 126      21.698   9.217  12.768  1.00  0.38           O  
HETATM  128  O   HOH T 127      36.263  14.997  15.450  1.00  0.38           O  
HETATM  129  O   HOH T 128      38.542  50.807  -9.296  1.00  0.38           O  
HETATM  130  O   HOH T 129      23.806  46.750 -15.336  1.00  0.38           O  
HETATM  131  O   HOH T 130      29.257  38.427  19.652  1.00  0.38           O  
HETATM  132  O   HOH T 131      31.280  43.103  23.204  1.00  0.38           O  
HETATM  133  O   HOH T 132      20.424  11.883  21.839  1.00  0.38           O  
HETATM  134  O   HOH T 133      35.660  26.185   0.793  1.00  0.38           O  
HETATM  135  O   HOH T 134      34.120  16.880  21.803  1.00  0.38           O  
HETATM  136  O   HOH T 135      48.286  39.326  27.978  1.00  0.38           O  
HETATM  137  O   HOH T 136      37.199  55.146  18.994  1.00  0.39           O  
HETATM  138  O   HOH T 137      20.424  47.517   8.974  1.00  0.39           O  
HETATM  139  O   HOH T 138      15.397  25.351  14.735  1.00  0.39           O  
HETATM  140  O   HOH T 139      22.678  17.308   2.866  1.00  0.39           O  
HETATM  141  O   HOH T 140      33.037  40.494 -14.037  1.00  0.39           O  
HETATM  142  O   HOH T 141      26.893  33.511  23.692  1.00  0.39           O  
HETATM  143  O   HOH T 142      36.411   9.604   7.780  1.00  0.39           O  
HETATM  144  O   HOH T 143      33.484  43.173  24.827  1.00  0.39           O  
HETATM  145  O   HOH T 144      42.028  33.624  32.787  1.00  0.39           O  
HETATM  146  O   HOH T 145      18.618  23.676  29.970  1.00  0.39           O  
HETATM  147  O   HOH T 146      37.204  40.682  18.892  1.00  0.39           O  
HETATM  148  O   HOH T 147      18.635  23.183   7.563  1.00  0.39           O  
HETATM  149  O   HOH T 148      35.868  42.669  23.475  1.00  0.39           O  
HETATM  150  O   HOH T 149      29.466  27.333  -9.239  1.00  0.39           O  
HETATM  151  O   HOH T 150      36.176   7.691   5.694  1.00  0.40           O  
HETATM  152  O   HOH T 151      39.883  20.438  13.483  1.00  0.40           O  
HETATM  153  O   HOH T 152      26.046  10.536   0.244  1.00  0.40           O  
HETATM  154  O   HOH T 153      25.784  23.937  35.642  1.00  0.40           O  
HETATM  155  O   HOH T 154      39.817  52.756  17.741  1.00  0.40           O  
HETATM  156  O   HOH T 155      26.496  33.558   4.117  1.00  0.40           O  
HETATM  157  O   HOH T 156      40.115  32.606  31.035  1.00  0.40           O  
HETATM  158  O   HOH T 157      43.256  18.862  36.910  1.00  0.40           O  
HETATM  159  O   HOH T 158      41.448  27.824  29.168  1.00  0.40           O  
HETATM  160  O   HOH T 159      23.454  25.955  -7.285  1.00  0.40           O  
HETATM  161  O   HOH T 160      28.485  40.906  24.191  1.00  0.40           O  
HETATM  162  O   HOH T 161      17.755  42.819  11.232  1.00  0.40           O  
HETATM  163  O   HOH T 162      35.871  55.576  13.700  1.00  0.40           O  
HETATM  164  O   HOH T 163      22.482  32.413  12.171  1.00  0.40           O  
HETATM  165  O   HOH T 164      34.057  31.719  10.310  1.00  0.40           O  
HETATM  166  O   HOH T 165      36.529  34.016  15.098  1.00  0.40           O  
HETATM  167  O   HOH T 166      36.412  31.528  13.775  1.00  0.40           O  
HETATM  168  O   HOH T 167      34.742  56.984   9.391  1.00  0.41           O  
HETATM  169  O   HOH T 168      38.880  35.468  27.638  1.00  0.41           O  
HETATM  170  O   HOH T 169      24.328  13.238  24.436  1.00  0.41           O  
HETATM  171  O   HOH T 170      35.549  41.481  20.961  1.00  0.41           O  
HETATM  172  O   HOH T 171      34.956  10.205   5.458  1.00  0.41           O  
HETATM  173  O   HOH T 172      21.063  35.428  -0.427  1.00  0.41           O  
HETATM  174  O   HOH T 173      19.865  39.093  17.603  1.00  0.41           O  
HETATM  175  O   HOH T 174      30.799  34.493  11.538  1.00  0.41           O  
HETATM  176  O   HOH T 175      37.289  16.628   5.613  1.00  0.41           O  
HETATM  177  O   HOH T 176      29.194  30.662  34.221  1.00  0.41           O  
HETATM  178  O   HOH T 177      23.927  39.045  -2.648  1.00  0.41           O  
HETATM  179  O   HOH T 178      41.124  43.056  16.939  1.00  0.42           O  
HETATM  180  O   HOH T 179      22.643  30.060  30.305  1.00  0.42           O  
HETATM  181  O   HOH T 180      21.600  52.713  11.256  1.00  0.42           O  
HETATM  182  O   HOH T 181      29.086  34.850  22.743  1.00  0.42           O  
HETATM  183  O   HOH T 182      31.356  18.584  27.108  1.00  0.42           O  
HETATM  184  O   HOH T 183      49.030  37.462  30.004  1.00  0.42           O  
HETATM  185  O   HOH T 184      35.180  13.196  11.452  1.00  0.42           O  
HETATM  186  O   HOH T 185      16.326  46.944   8.851  1.00  0.42           O  
HETATM  187  O   HOH T 186      37.917  12.958  11.700  1.00  0.42           O  
HETATM  188  O   HOH T 187      25.873  33.972  30.180  1.00  0.42           O  
HETATM  189  O   HOH T 188      21.952  50.816  13.263  1.00  0.42           O  
HETATM  190  O   HOH T 189      33.001  36.226  21.769  1.00  0.43           O  
HETATM  191  O   HOH T 190      36.601  32.561  -5.377  1.00  0.43           O  
HETATM  192  O   HOH T 191      27.443  49.197  -8.211  1.00  0.43           O  
HETATM  193  O   HOH T 192      27.262  47.150  27.463  1.00  0.43           O  
HETATM  194  O   HOH T 193      37.919  27.587   0.279  1.00  0.43           O  
HETATM  195  O   HOH T 194      23.977  55.125  19.831  1.00  0.43           O  
HETATM  196  O   HOH T 195      43.148  44.746  18.060  1.00  0.44           O  
HETATM  197  O   HOH T 196      38.887  40.954   6.674  1.00  0.44           O  
HETATM  198  O   HOH T 197      22.856  26.341  30.708  1.00  0.44           O  
HETATM  199  O   HOH T 198      33.553  36.491  19.012  1.00  0.44           O  
HETATM  200  O   HOH T 199      18.788  50.812  17.632  1.00  0.44           O  
HETATM  201  O   HOH T 200      18.381  43.342   8.546  1.00  0.44           O  
HETATM  202  O   HOH T 201      23.641  32.508  31.019  1.00  0.44           O  
HETATM  203  O   HOH T 202      24.380  32.030  13.889  1.00  0.44           O  
HETATM  204  O   HOH T 203      24.029  54.794  -5.156  1.00  0.44           O  
HETATM  205  O   HOH T 204      24.364  35.180   3.889  1.00  0.44           O  
HETATM  206  O   HOH T 205      22.612  54.931  -7.516  1.00  0.45           O  
HETATM  207  O   HOH T 206      33.670  56.054   2.913  1.00  0.45           O  
HETATM  208  O   HOH T 207      31.501  12.170  -8.706  1.00  0.45           O  
HETATM  209  O   HOH T 208      40.031  22.680  17.483  1.00  0.45           O  
HETATM  210  O   HOH T 209      20.186  51.113  15.354  1.00  0.45           O  
HETATM  211  O   HOH T 210      27.616  27.086  -7.205  1.00  0.45           O  
HETATM  212  O   HOH T 211      20.921  42.809  -2.890  1.00  0.45           O  
HETATM  213  O   HOH T 212      25.274  50.707  -6.845  1.00  0.45           O  
HETATM  214  O   HOH T 213      38.379  34.634  30.230  1.00  0.45           O  
HETATM  215  O   HOH T 214      17.921  20.499  18.693  1.00  0.45           O  
HETATM  216  O   HOH T 215      25.012  12.528  15.379  1.00  0.46           O  
HETATM  217  O   HOH T 216      40.471  33.530  -1.734  1.00  0.46           O  
HETATM  218  O   HOH T 217      24.564  14.282   0.029  1.00  0.46           O  
HETATM  219  O   HOH T 218      30.247  27.846  -6.634  1.00  0.46           O  
HETATM  220  O   HOH T 219      51.218  35.714  29.544  1.00  0.46           O  
HETATM  221  O   HOH T 220      18.479  24.453  17.590  1.00  0.46           O  
HETATM  222  O   HOH T 221      38.979  17.795  15.895  1.00  0.46           O  
HETATM  223  O   HOH T 222      21.705  29.004  21.918  1.00  0.46           O  
HETATM  224  O   HOH T 223      34.127  55.664  -3.565  1.00  0.46           O  
HETATM  225  O   HOH T 224      38.534  42.188  22.937  1.00  0.46           O  
HETATM  226  O   HOH T 225      37.450  56.669   9.920  1.00  0.46           O  
HETATM  227  O   HOH T 226      25.264  56.372  22.013  1.00  0.47           O  
HETATM  228  O   HOH T 227      35.463  35.396   7.697  1.00  0.47           O  
HETATM  229  O   HOH T 228      36.613  28.881  14.764  1.00  0.47           O  
HETATM  230  O   HOH T 229      26.230  28.115  -2.666  1.00  0.47           O  
HETATM  231  O   HOH T 230      40.231  34.691   6.575  1.00  0.47           O  
HETATM  232  O   HOH T 231      21.569  30.348  -7.581  1.00  0.47           O  
HETATM  233  O   HOH T 232      39.064  34.090   4.105  1.00  0.47           O  
HETATM  234  O   HOH T 233      37.717  35.284  33.755  1.00  0.47           O  
HETATM  235  O   HOH T 234      24.689  35.257  -7.645  1.00  0.47           O  
HETATM  236  O   HOH T 235      40.570  17.751  13.712  1.00  0.47           O  
HETATM  237  O   HOH T 236      24.167  27.515  32.865  1.00  0.48           O  
HETATM  238  O   HOH T 237      26.169  26.426  34.357  1.00  0.48           O  
HETATM  239  O   HOH T 238      39.013  14.485   5.161  1.00  0.48           O  
HETATM  240  O   HOH T 239      21.507  30.859  19.352  1.00  0.48           O  
HETATM  241  O   HOH T 240      20.472  32.899  -8.092  1.00  0.48           O  
HETATM  242  O   HOH T 241      41.614  34.818  27.988  1.00  0.48           O  
HETATM  243  O   HOH T 242      22.906  36.945  -3.961  1.00  0.48           O  
HETATM  244  O   HOH T 243      50.857  39.416  29.082  1.00  0.48           O  
HETATM  245  O   HOH T 244      40.766  21.764  23.746  1.00  0.49           O  
HETATM  246  O   HOH T 245      36.378  47.714  -9.147  1.00  0.49           O  
HETATM  247  O   HOH T 246      25.077  29.653  -0.650  1.00  0.49           O  
HETATM  248  O   HOH T 247      37.139  31.253  -0.890  1.00  0.49           O  
HETATM  249  O   HOH T 248      37.348  36.951  31.398  1.00  0.49           O  
HETATM  250  O   HOH T 249      25.081  53.529  -7.310  1.00  0.49           O  
HETATM  251  O   HOH T 250      40.378  19.943  17.094  1.00  0.49           O  
HETATM  252  O   HOH T 251      27.046  47.321 -12.416  1.00  0.49           O  
HETATM  253  O   HOH T 252      41.286  40.794   3.382  1.00  0.49           O  
HETATM  254  O   HOH T 253      32.510  16.348  -5.570  1.00  0.49           O  
HETATM  255  O   HOH T 254      23.020  11.470  13.736  1.00  0.49           O  
HETATM  256  O   HOH T 255      27.370  28.081  -0.188  1.00  0.49           O  
HETATM  257  O   HOH T 256      20.217  11.274  13.741  1.00  0.50           O  
HETATM  258  O   HOH T 257      33.741  34.971  33.869  1.00  0.50           O  
HETATM  259  O   HOH T 258      42.827  20.536   7.386  1.00  0.50           O  
HETATM  260  O   HOH T 259      25.853  33.283  26.242  1.00  0.50           O  
HETATM  261  O   HOH T 260      18.506  45.493   9.748  1.00  0.50           O  
HETATM  262  O   HOH T 261      17.524  13.623  14.389  1.00  0.50           O  
HETATM  263  O   HOH T 262      36.739  54.418  11.339  1.00  0.50           O  
HETATM  264  O   HOH T 263      28.334  24.931  -8.807  1.00  0.50           O  
HETATM  265  O   HOH T 264      50.131  37.272  27.477  1.00  0.51           O  
HETATM  266  O   HOH T 265      19.341  24.883  27.586  1.00  0.51           O  
HETATM  267  O   HOH T 266      48.683  41.139  21.698  1.00  0.51           O  
HETATM  268  O   HOH T 267      37.083  16.583  17.620  1.00  0.51           O  
HETATM  269  O   HOH T 268      19.422  33.981  14.618  1.00  0.51           O  
HETATM  270  O   HOH T 269      23.429   8.075   4.858  1.00  0.51           O  
HETATM  271  O   HOH T 270      19.531  53.358  16.801  1.00  0.51           O  
HETATM  272  O   HOH T 271      37.578  34.250  25.478  1.00  0.51           O  
HETATM  273  O   HOH T 272      34.984  11.980  18.127  1.00  0.51           O  
HETATM  274  O   HOH T 273      26.835  58.475  21.213  1.00  0.51           O  
HETATM  275  O   HOH T 274      32.538  32.917  32.290  1.00  0.51           O  
HETATM  276  O   HOH T 275      40.060  43.724   9.637  1.00  0.51           O  
HETATM  277  O   HOH T 276      18.645  41.640  17.764  1.00  0.51           O  
HETATM  278  O   HOH T 277      22.605  34.529  17.824  1.00  0.51           O  
HETATM  279  O   HOH T 278      41.351  43.285   4.555  1.00  0.51           O  
HETATM  280  O   HOH T 279      19.406  26.529  19.250  1.00  0.52           O  
HETATM  281  O   HOH T 280      33.265  14.136  17.839  1.00  0.52           O  
HETATM  282  O   HOH T 281      28.858  40.491  21.455  1.00  0.52           O  
HETATM  283  O   HOH T 282      43.539  26.574  27.911  1.00  0.52           O  
HETATM  284  O   HOH T 283      36.373  36.788   9.897  1.00  0.52           O  
HETATM  285  O   HOH T 284      26.790  24.009  33.052  1.00  0.52           O  
HETATM  286  O   HOH T 285      23.157  53.508  22.026  1.00  0.52           O  
HETATM  287  O   HOH T 286      22.443  15.372   4.853  1.00  0.52           O  
HETATM  288  O   HOH T 287      17.854  11.436  22.717  1.00  0.52           O  
HETATM  289  O   HOH T 288      36.304  12.629  13.963  1.00  0.52           O  
HETATM  290  O   HOH T 289      16.265  11.180  18.752  1.00  0.52           O  
HETATM  291  O   HOH T 290      42.316  33.265  25.781  1.00  0.52           O  
HETATM  292  O   HOH T 291      18.938  15.823   8.682  1.00  0.53           O  
HETATM  293  O   HOH T 292      27.231  33.318  32.540  1.00  0.53           O  
HETATM  294  O   HOH T 293      32.277  23.646  -8.069  1.00  0.53           O  
HETATM  295  O   HOH T 294      24.350  30.238  32.425  1.00  0.53           O  
HETATM  296  O   HOH T 295      33.517  12.288  -4.919  1.00  0.53           O  
HETATM  297  O   HOH T 296      28.072  12.127  -6.476  1.00  0.53           O  
HETATM  298  O   HOH T 297      18.664  11.280  20.092  1.00  0.53           O  
HETATM  299  O   HOH T 298      46.573  40.332  23.359  1.00  0.53           O  
HETATM  300  O   HOH T 299      26.768  26.319  -4.680  1.00  0.54           O  
HETATM  301  O   HOH T 300      39.649  27.560  24.090  1.00  0.54           O  
HETATM  302  O   HOH T 301      17.185  14.816  10.589  1.00  0.54           O  
HETATM  303  O   HOH T 302      44.087  34.776  29.783  1.00  0.54           O  
HETATM  304  O   HOH T 303      25.874  53.819   7.980  1.00  0.54           O  
HETATM  305  O   HOH T 304      39.099  55.354  17.033  1.00  0.54           O  
HETATM  306  O   HOH T 305      36.424  53.622  -1.560  1.00  0.54           O  
HETATM  307  O   HOH T 306      19.837  15.822   4.018  1.00  0.54           O  
HETATM  308  O   HOH T 307      30.376  37.156  21.884  1.00  0.55           O  
HETATM  309  O   HOH T 308      36.684  49.659   7.290  1.00  0.55           O  
HETATM  310  O   HOH T 309      37.959  34.046  21.804  1.00  0.55           O  
HETATM  311  O   HOH T 310      39.540  56.896  19.295  1.00  0.56           O  
HETATM  312  O   HOH T 311      34.271  35.494  14.224  1.00  0.56           O  
HETATM  313  O   HOH T 312      22.543  50.166  21.980  1.00  0.56           O  
HETATM  314  O   HOH T 313      22.587  36.653  -6.747  1.00  0.56           O  
HETATM  315  O   HOH T 314      20.957  31.656  21.899  1.00  0.56           O  
HETATM  316  O   HOH T 315      52.912  43.882  23.433  1.00  0.57           O  
HETATM  317  O   HOH T 316      28.236  28.159  33.488  1.00  0.57           O  
HETATM  318  O   HOH T 317      50.195  18.544  29.176  1.00  0.57           O  
HETATM  319  O   HOH T 318      26.646  47.010 -15.348  1.00  0.57           O  
HETATM  320  O   HOH T 319      33.040  21.739  -6.277  1.00  0.57           O  
HETATM  321  O   HOH T 320      21.059  17.796   6.464  1.00  0.57           O  
HETATM  322  O   HOH T 321      21.931  31.822  16.866  1.00  0.58           O  
HETATM  323  O   HOH T 322      26.567  30.947  33.949  1.00  0.58           O  
HETATM  324  O   HOH T 323      36.560  17.592  20.391  1.00  0.58           O  
HETATM  325  O   HOH T 324      31.030  28.435  -4.040  1.00  0.59           O  
HETATM  326  O   HOH T 325      21.799  55.108  17.022  1.00  0.60           O  
HETATM  327  O   HOH T 326      40.359  32.265  24.102  1.00  0.60           O  
HETATM  328  O   HOH T 327      27.492  54.164  17.519  1.00  0.77           O  
TER     329      HOH T 327 
