# Supplementary material for: Accurate Prediction of Hydration Sites of Proteins Using Energy Model With Atom Embedding
Source: Front Mol Biosci. 2021 Sep 20;8:756075. doi: 10.3389/fmolb.2021.756075 (PMC8488165; doi:10.3389/fmolb.2021.756075)
Supplement: Supplementary file 1 [file DataSheet1.ZIP › Data Sheet 1/Our_result_pdb/our_dataset_output/3MZQ_watersite.pdb]

HEADER                                                        XXXX


JRNL        PMID   -1
HETATM    1  O   HOH T   0      24.447  -4.300 -41.566  1.00  0.17           O  
HETATM    2  O   HOH T   1      37.109 -10.946  -2.906  1.00  0.21           O  
HETATM    3  O   HOH T   2      20.076  -9.237 -41.343  1.00  0.22           O  
HETATM    4  O   HOH T   3      32.423   0.020 -21.239  1.00  0.22           O  
HETATM    5  O   HOH T   4      18.943 -16.351 -37.704  1.00  0.23           O  
HETATM    6  O   HOH T   5      13.870 -23.001 -31.355  1.00  0.23           O  
HETATM    7  O   HOH T   6      19.187  -2.367 -30.031  1.00  0.24           O  
HETATM    8  O   HOH T   7      33.825 -17.958 -10.559  1.00  0.24           O  
HETATM    9  O   HOH T   8      29.244  -2.175 -12.842  1.00  0.24           O  
HETATM   10  O   HOH T   9      35.846 -17.649 -39.832  1.00  0.25           O  
HETATM   11  O   HOH T  10      16.191 -22.006 -30.305  1.00  0.25           O  
HETATM   12  O   HOH T  11      30.420  -1.345 -39.742  1.00  0.25           O  
HETATM   13  O   HOH T  12      20.308  -8.861 -25.075  1.00  0.25           O  
HETATM   14  O   HOH T  13      25.809 -18.164 -37.485  1.00  0.26           O  
HETATM   15  O   HOH T  14      30.676 -19.115 -29.632  1.00  0.26           O  
HETATM   16  O   HOH T  15      37.872   4.316 -40.582  1.00  0.26           O  
HETATM   17  O   HOH T  16      30.147  -1.482 -10.357  1.00  0.26           O  
HETATM   18  O   HOH T  17      33.254 -22.657 -25.617  1.00  0.26           O  
HETATM   19  O   HOH T  18      16.714   1.356 -36.485  1.00  0.27           O  
HETATM   20  O   HOH T  19      32.878 -20.451 -28.602  1.00  0.27           O  
HETATM   21  O   HOH T  20      34.370 -11.232  -2.822  1.00  0.27           O  
HETATM   22  O   HOH T  21      39.958  -8.105 -22.251  1.00  0.27           O  
HETATM   23  O   HOH T  22      29.421 -24.549 -28.180  1.00  0.27           O  
HETATM   24  O   HOH T  23      21.504 -22.846 -28.404  1.00  0.28           O  
HETATM   25  O   HOH T  24      37.716 -16.884 -24.294  1.00  0.28           O  
HETATM   26  O   HOH T  25      16.862 -15.982 -13.626  1.00  0.29           O  
HETATM   27  O   HOH T  26      17.603 -13.770 -25.427  1.00  0.29           O  
HETATM   28  O   HOH T  27      17.765   2.716 -47.447  1.00  0.30           O  
HETATM   29  O   HOH T  28      18.110  -4.530 -17.401  1.00  0.30           O  
HETATM   30  O   HOH T  29      36.918  -9.141 -36.607  1.00  0.30           O  
HETATM   31  O   HOH T  30      26.802  -0.052 -16.936  1.00  0.30           O  
HETATM   32  O   HOH T  31      18.671  -4.267 -43.880  1.00  0.30           O  
HETATM   33  O   HOH T  32      21.046 -19.318 -32.077  1.00  0.30           O  
HETATM   34  O   HOH T  33      15.590   0.556 -38.941  1.00  0.31           O  
HETATM   35  O   HOH T  34      16.463  -8.623 -37.870  1.00  0.32           O  
HETATM   36  O   HOH T  35      11.028  -5.559 -44.103  1.00  0.32           O  
HETATM   37  O   HOH T  36      34.637   3.521 -34.446  1.00  0.32           O  
HETATM   38  O   HOH T  37      38.276 -18.340 -36.388  1.00  0.32           O  
HETATM   39  O   HOH T  38      12.526 -15.842 -29.833  1.00  0.32           O  
HETATM   40  O   HOH T  39      36.996   1.639 -27.222  1.00  0.33           O  
HETATM   41  O   HOH T  40      28.258 -17.999 -38.908  1.00  0.34           O  
HETATM   42  O   HOH T  41      25.425 -19.501 -10.954  1.00  0.35           O  
HETATM   43  O   HOH T  42      32.423  -8.896 -39.550  1.00  0.35           O  
HETATM   44  O   HOH T  43      41.362 -10.354 -27.746  1.00  0.35           O  
HETATM   45  O   HOH T  44      36.809   2.019 -24.432  1.00  0.35           O  
HETATM   46  O   HOH T  45      28.082 -14.122 -38.474  1.00  0.35           O  
HETATM   47  O   HOH T  46      20.938   7.868 -36.228  1.00  0.36           O  
HETATM   48  O   HOH T  47      26.643  -8.759  -1.943  1.00  0.36           O  
HETATM   49  O   HOH T  48      37.472 -17.750 -28.986  1.00  0.36           O  
HETATM   50  O   HOH T  49      35.176 -20.083 -15.307  1.00  0.36           O  
HETATM   51  O   HOH T  50      16.645  -9.972 -35.503  1.00  0.36           O  
HETATM   52  O   HOH T  51      40.647 -10.548 -34.631  1.00  0.37           O  
HETATM   53  O   HOH T  52      26.694  -9.078  -4.858  1.00  0.37           O  
HETATM   54  O   HOH T  53      18.415 -11.017 -25.167  1.00  0.37           O  
HETATM   55  O   HOH T  54      39.566  -0.982 -24.365  1.00  0.37           O  
HETATM   56  O   HOH T  55      23.622 -15.988 -41.599  1.00  0.37           O  
HETATM   57  O   HOH T  56      22.956 -28.778 -19.385  1.00  0.37           O  
HETATM   58  O   HOH T  57      33.076   1.727 -37.941  1.00  0.37           O  
HETATM   59  O   HOH T  58      21.181  -3.417 -44.722  1.00  0.38           O  
HETATM   60  O   HOH T  59      32.800  -8.731 -11.656  1.00  0.38           O  
HETATM   61  O   HOH T  60      17.120   3.461 -34.738  1.00  0.38           O  
HETATM   62  O   HOH T  61      17.742 -20.420 -20.336  1.00  0.38           O  
HETATM   63  O   HOH T  62      26.178 -20.798 -17.487  1.00  0.38           O  
HETATM   64  O   HOH T  63      11.348 -18.694 -26.602  1.00  0.38           O  
HETATM   65  O   HOH T  64      40.870  -5.069 -28.189  1.00  0.38           O  
HETATM   66  O   HOH T  65      14.773  -6.552 -38.105  1.00  0.38           O  
HETATM   67  O   HOH T  66       9.861 -22.018 -36.122  1.00  0.38           O  
HETATM   68  O   HOH T  67       9.440 -21.112 -23.368  1.00  0.38           O  
HETATM   69  O   HOH T  68      20.082  10.647 -39.683  1.00  0.38           O  
HETATM   70  O   HOH T  69      37.192  -3.068 -43.860  1.00  0.38           O  
HETATM   71  O   HOH T  70      11.955 -16.492 -32.469  1.00  0.38           O  
HETATM   72  O   HOH T  71       7.024 -22.130 -29.958  1.00  0.38           O  
HETATM   73  O   HOH T  72      23.293   5.814 -46.381  1.00  0.39           O  
HETATM   74  O   HOH T  73      31.698  -0.019 -46.266  1.00  0.39           O  
HETATM   75  O   HOH T  74      23.895  -2.956 -44.068  1.00  0.39           O  
HETATM   76  O   HOH T  75      27.810   8.166 -45.047  1.00  0.39           O  
HETATM   77  O   HOH T  76      19.453  -6.734 -23.403  1.00  0.39           O  
HETATM   78  O   HOH T  77      27.860  -0.012 -21.226  1.00  0.39           O  
HETATM   79  O   HOH T  78      26.078   2.108 -18.680  1.00  0.39           O  
HETATM   80  O   HOH T  79      18.415 -23.168 -19.944  1.00  0.39           O  
HETATM   81  O   HOH T  80      29.204 -24.453 -23.782  1.00  0.40           O  
HETATM   82  O   HOH T  81      42.898  -5.942 -38.053  1.00  0.40           O  
HETATM   83  O   HOH T  82      32.047 -25.482 -28.172  1.00  0.40           O  
HETATM   84  O   HOH T  83      11.790 -21.306 -34.206  1.00  0.40           O  
HETATM   85  O   HOH T  84      37.508 -16.205 -38.069  1.00  0.40           O  
HETATM   86  O   HOH T  85      36.987 -10.349 -39.066  1.00  0.40           O  
HETATM   87  O   HOH T  86      35.639   1.811 -44.753  1.00  0.40           O  
HETATM   88  O   HOH T  87      20.305  12.719 -35.304  1.00  0.40           O  
HETATM   89  O   HOH T  88      17.725  -6.692 -44.712  1.00  0.40           O  
HETATM   90  O   HOH T  89      20.209   8.287 -43.165  1.00  0.40           O  
HETATM   91  O   HOH T  90      20.865  10.574 -36.963  1.00  0.40           O  
HETATM   92  O   HOH T  91      39.400 -12.060 -27.763  1.00  0.40           O  
HETATM   93  O   HOH T  92      25.315  -5.178 -44.036  1.00  0.40           O  
HETATM   94  O   HOH T  93      20.548 -11.147 -43.245  1.00  0.41           O  
HETATM   95  O   HOH T  94      42.986  -7.040 -15.661  1.00  0.41           O  
HETATM   96  O   HOH T  95      20.359  -2.763 -20.318  1.00  0.41           O  
HETATM   97  O   HOH T  96      22.612  -4.123 -24.076  1.00  0.41           O  
HETATM   98  O   HOH T  97      21.098   4.245 -45.506  1.00  0.42           O  
HETATM   99  O   HOH T  98      20.591 -14.101  -9.618  1.00  0.42           O  
HETATM  100  O   HOH T  99      32.484 -18.473 -13.076  1.00  0.42           O  
HETATM  101  O   HOH T 100      37.427  -1.417 -34.219  1.00  0.42           O  
HETATM  102  O   HOH T 101      35.854 -23.025 -24.519  1.00  0.42           O  
HETATM  103  O   HOH T 102      37.355 -19.918 -31.601  1.00  0.42           O  
HETATM  104  O   HOH T 103      43.511  -4.478 -35.673  1.00  0.42           O  
HETATM  105  O   HOH T 104      25.544  -2.250 -26.408  1.00  0.43           O  
HETATM  106  O   HOH T 105      19.424  -6.206 -20.616  1.00  0.43           O  
HETATM  107  O   HOH T 106      25.472 -11.574 -44.523  1.00  0.43           O  
HETATM  108  O   HOH T 107      20.306 -29.211 -20.401  1.00  0.43           O  
HETATM  109  O   HOH T 108      39.835 -10.902 -22.328  1.00  0.43           O  
HETATM  110  O   HOH T 109      30.986 -24.380 -25.902  1.00  0.43           O  
HETATM  111  O   HOH T 110      33.825   7.700 -37.968  1.00  0.43           O  
HETATM  112  O   HOH T 111      18.410  -1.953 -27.357  1.00  0.43           O  
HETATM  113  O   HOH T 112      28.686   1.204 -18.675  1.00  0.43           O  
HETATM  114  O   HOH T 113      24.125 -17.571  -9.305  1.00  0.43           O  
HETATM  115  O   HOH T 114      18.898 -18.936 -33.987  1.00  0.43           O  
HETATM  116  O   HOH T 115      34.279 -10.924 -38.941  1.00  0.43           O  
HETATM  117  O   HOH T 116      22.429 -29.011 -22.043  1.00  0.43           O  
HETATM  118  O   HOH T 117      33.454 -22.579 -17.324  1.00  0.43           O  
HETATM  119  O   HOH T 118      23.672   3.317 -45.308  1.00  0.43           O  
HETATM  120  O   HOH T 119      35.682  -6.731 -41.111  1.00  0.43           O  
HETATM  121  O   HOH T 120      26.543 -24.520 -24.762  1.00  0.43           O  
HETATM  122  O   HOH T 121      16.092 -19.478 -34.487  1.00  0.43           O  
HETATM  123  O   HOH T 122      36.744 -21.260 -22.425  1.00  0.43           O  
HETATM  124  O   HOH T 123      34.216  -6.329 -11.801  1.00  0.44           O  
HETATM  125  O   HOH T 124      20.370  -6.564  -3.846  1.00  0.44           O  
HETATM  126  O   HOH T 125      30.632 -15.053 -39.020  1.00  0.44           O  
HETATM  127  O   HOH T 126      14.574 -21.882 -33.832  1.00  0.44           O  
HETATM  128  O   HOH T 127      33.180   6.055 -40.043  1.00  0.44           O  
HETATM  129  O   HOH T 128      19.191  -7.008 -18.011  1.00  0.44           O  
HETATM  130  O   HOH T 129       8.726 -21.807 -27.759  1.00  0.44           O  
HETATM  131  O   HOH T 130      39.064 -17.426 -26.685  1.00  0.44           O  
HETATM  132  O   HOH T 131      21.779   2.665 -16.206  1.00  0.44           O  
HETATM  133  O   HOH T 132      37.006 -19.812 -38.377  1.00  0.45           O  
HETATM  134  O   HOH T 133      22.536  -5.307 -43.262  1.00  0.45           O  
HETATM  135  O   HOH T 134      37.386 -19.998 -34.410  1.00  0.45           O  
HETATM  136  O   HOH T 135      40.651 -14.082 -24.640  1.00  0.45           O  
HETATM  137  O   HOH T 136      17.334 -17.380 -35.718  1.00  0.45           O  
HETATM  138  O   HOH T 137      19.742   5.392 -36.189  1.00  0.45           O  
HETATM  139  O   HOH T 138      19.313  -8.063  -1.850  1.00  0.45           O  
HETATM  140  O   HOH T 139      41.926  -6.484 -21.098  1.00  0.45           O  
HETATM  141  O   HOH T 140      27.711 -20.326 -15.118  1.00  0.45           O  
HETATM  142  O   HOH T 141      20.123  -7.926 -27.640  1.00  0.46           O  
HETATM  143  O   HOH T 142      29.904   9.420 -43.638  1.00  0.46           O  
HETATM  144  O   HOH T 143      38.170   2.429 -43.881  1.00  0.46           O  
HETATM  145  O   HOH T 144      17.114 -25.781 -20.553  1.00  0.46           O  
HETATM  146  O   HOH T 145      15.066   3.348 -47.254  1.00  0.46           O  
HETATM  147  O   HOH T 146      40.479 -11.314 -25.157  1.00  0.46           O  
HETATM  148  O   HOH T 147       9.737 -22.831 -30.095  1.00  0.46           O  
HETATM  149  O   HOH T 148      14.634 -10.364  -9.904  1.00  0.46           O  
HETATM  150  O   HOH T 149      36.094  -5.609 -43.609  1.00  0.46           O  
HETATM  151  O   HOH T 150      23.537 -24.304 -14.515  1.00  0.46           O  
HETATM  152  O   HOH T 151      19.465  -8.860 -44.280  1.00  0.47           O  
HETATM  153  O   HOH T 152      26.169 -16.039 -39.076  1.00  0.47           O  
HETATM  154  O   HOH T 153      41.465 -13.098 -34.473  1.00  0.47           O  
HETATM  155  O   HOH T 154      16.111 -12.134 -37.261  1.00  0.47           O  
HETATM  156  O   HOH T 155      26.187 -23.572 -17.861  1.00  0.47           O  
HETATM  157  O   HOH T 156      26.133 -16.043 -42.735  1.00  0.47           O  
HETATM  158  O   HOH T 157      16.086   2.699 -40.425  1.00  0.47           O  
HETATM  159  O   HOH T 158      20.147  -3.997 -28.001  1.00  0.48           O  
HETATM  160  O   HOH T 159      34.496  -8.118  -9.668  1.00  0.48           O  
HETATM  161  O   HOH T 160      13.617   3.167 -43.694  1.00  0.48           O  
HETATM  162  O   HOH T 161      35.378 -23.273 -27.291  1.00  0.48           O  
HETATM  163  O   HOH T 162      25.666 -21.089 -13.235  1.00  0.48           O  
HETATM  164  O   HOH T 163      21.478 -12.177 -45.635  1.00  0.48           O  
HETATM  165  O   HOH T 164       6.645 -21.087 -23.186  1.00  0.48           O  
HETATM  166  O   HOH T 165      28.619 -25.977 -25.944  1.00  0.48           O  
HETATM  167  O   HOH T 166      13.914 -14.626 -31.834  1.00  0.48           O  
HETATM  168  O   HOH T 167      27.465  -9.902 -43.973  1.00  0.49           O  
HETATM  169  O   HOH T 168      37.257  -8.952 -41.352  1.00  0.49           O  
HETATM  170  O   HOH T 169      39.340   0.123 -26.883  1.00  0.49           O  
HETATM  171  O   HOH T 170      19.939 -28.144 -23.000  1.00  0.49           O  
HETATM  172  O   HOH T 171      37.479 -15.042 -29.511  1.00  0.49           O  
HETATM  173  O   HOH T 172      17.792 -28.322 -19.647  1.00  0.49           O  
HETATM  174  O   HOH T 173      39.963  -1.545 -21.725  1.00  0.50           O  
HETATM  175  O   HOH T 174      29.817 -11.776 -41.183  1.00  0.50           O  
HETATM  176  O   HOH T 175      18.455   4.686 -38.550  1.00  0.50           O  
HETATM  177  O   HOH T 176      31.404   4.487 -38.629  1.00  0.50           O  
HETATM  178  O   HOH T 177      10.249  -3.409 -42.444  1.00  0.50           O  
HETATM  179  O   HOH T 178      16.771  -9.031 -15.834  1.00  0.50           O  
HETATM  180  O   HOH T 179      16.776 -10.797 -32.906  1.00  0.50           O  
HETATM  181  O   HOH T 180      39.127 -14.641 -27.094  1.00  0.50           O  
HETATM  182  O   HOH T 181      38.181  -6.582 -42.246  1.00  0.50           O  
HETATM  183  O   HOH T 182      16.673 -16.095 -39.443  1.00  0.50           O  
HETATM  184  O   HOH T 183      15.429  -8.161 -45.379  1.00  0.50           O  
HETATM  185  O   HOH T 184      35.128 -21.174 -19.130  1.00  0.50           O  
HETATM  186  O   HOH T 185      20.256  -4.310 -22.610  1.00  0.51           O  
HETATM  187  O   HOH T 186      29.341  -8.159  -2.625  1.00  0.51           O  
HETATM  188  O   HOH T 187      28.246  -7.589  -0.060  1.00  0.51           O  
HETATM  189  O   HOH T 188      16.199 -18.639 -13.749  1.00  0.51           O  
HETATM  190  O   HOH T 189      20.471  -3.696 -47.637  1.00  0.51           O  
HETATM  191  O   HOH T 190      12.910   1.651 -46.173  1.00  0.52           O  
HETATM  192  O   HOH T 191      35.943 -13.472  -2.448  1.00  0.52           O  
HETATM  193  O   HOH T 192      23.476 -15.394  -7.444  1.00  0.52           O  
HETATM  194  O   HOH T 193      12.130  -5.573 -46.635  1.00  0.52           O  
HETATM  195  O   HOH T 194      26.675 -17.303  -8.292  1.00  0.52           O  
HETATM  196  O   HOH T 195      17.113   6.358 -40.401  1.00  0.52           O  
HETATM  197  O   HOH T 196      13.217 -23.476 -19.865  1.00  0.53           O  
HETATM  198  O   HOH T 197      18.200 -23.165 -23.231  1.00  0.53           O  
HETATM  199  O   HOH T 198      14.405 -15.904 -27.949  1.00  0.53           O  
HETATM  200  O   HOH T 199      19.027  -8.892  -4.437  1.00  0.53           O  
HETATM  201  O   HOH T 200      21.772   7.965 -45.537  1.00  0.53           O  
HETATM  202  O   HOH T 201      36.410 -24.171 -22.028  1.00  0.53           O  
HETATM  203  O   HOH T 202      33.282 -12.717 -37.146  1.00  0.53           O  
HETATM  204  O   HOH T 203      17.866 -16.045 -11.074  1.00  0.53           O  
HETATM  205  O   HOH T 204      34.457   0.094 -46.593  1.00  0.54           O  
HETATM  206  O   HOH T 205      18.840 -11.377 -45.395  1.00  0.54           O  
HETATM  207  O   HOH T 206      40.617  -7.813 -28.367  1.00  0.54           O  
HETATM  208  O   HOH T 207      12.089 -17.158 -24.370  1.00  0.54           O  
HETATM  209  O   HOH T 208      12.634  -7.707 -44.751  1.00  0.54           O  
HETATM  210  O   HOH T 209      38.914 -16.287 -31.462  1.00  0.55           O  
HETATM  211  O   HOH T 210      21.005 -24.496 -13.586  1.00  0.55           O  
HETATM  212  O   HOH T 211       7.891 -20.275 -25.560  1.00  0.55           O  
HETATM  213  O   HOH T 212      14.475  -3.946  -7.907  1.00  0.56           O  
HETATM  214  O   HOH T 213      19.394   2.531 -17.774  1.00  0.57           O  
HETATM  215  O   HOH T 214       9.780 -18.666 -24.296  1.00  0.57           O  
HETATM  216  O   HOH T 215      26.770 -10.661 -46.899  1.00  0.58           O  
HETATM  217  O   HOH T 216      33.267 -10.707 -41.455  1.00  0.58           O  
HETATM  218  O   HOH T 217      17.604  -8.559 -28.097  1.00  0.58           O  
TER     219      HOH T 217 
