# Supplementary material for: Accurate Prediction of Hydration Sites of Proteins Using Energy Model With Atom Embedding
Source: Front Mol Biosci. 2021 Sep 20;8:756075. doi: 10.3389/fmolb.2021.756075 (PMC8488165; doi:10.3389/fmolb.2021.756075)
Supplement: Supplementary file 3 [file DataSheet2.XLSX]

## Sheet: TrainingSet
pdb id
3E13
4E19
1D3G
1DBW
1F6K
1F8N
1FLM
1FW9
1G3P
1G6S
1GKF
1GVK
1GZC
1H5E
1H5F
1HF6
1HJ8
1HTY
1I1N
1I4U
1I5R
1I71
1I88
1IG5
1IZR
1J1G
1JAT
1JF8
1JUB
1JX6
1JXG
1KOU
1L0G
1L6P
1LJN
1LLF
1LZI
1M1F
1M70
1MRQ
1MY6
1N1X
1N45
1N6H
1NC7
1NK4
1NLU
1NNL
1NQ7
1NU0
1O2O
1O2T
1O34
1O54
1OBN
1OH0
1OJN
1OQQ
1OQR
1P3C
1P7S
1P9G
1PO5
1PQ5
1PZG
1Q4T
1Q7L
1QXW
1QZY
1R50
1RB0
1RC9
1RDP
1RJO
1RTZ
1RUP
1S6A
1S95
1S9R
1SDQ
1SF5
1SSH
1SWZ
1SZ3
1T00
1T1V
1T92
1TB7
1U0X
1U69
1UGU
1UOZ
1UQ5
1UTK
1UTN
1UU5
1UWC
1V0L
1V6S
1V9Y
1VAU
1VIA
1VKI
1W2U
1W7Z
1W9M
1WDS
1WLU
1WLY
1WME
1WN9
1WTO
1X82
1X8H
1X97
1XWW
1Y07
1Y5A
1YB3
1YM1
1YM8
1YPY
1YQD
1YS1
1YS7
1Z6M
1Z89
1ZMH
1ZR6
1ZUR
1ZV9
1ZZK
2A08
2A7C
2A84
2A8U
2A8W
2A9Z
2ABS
2ALL
2ANV
2AT3
2AX9
2BCM
2BCQ
2BD7
2BLP
2BLY
2BMQ
2BPU
2BY0
2BY7
2BYA
2BZ6
2C5A
2C71
2CIR
2CJY
2CLL
2CNL
2CVD
2D51
2DRT
2E3H
2E8B
2EGV
2EIX
2EQ6
2ESO
2ESP
2ETB
2EVB
2F5T
2F5V
2F91
2FAO
2FE5
2FF7
2FOJ
2FOU
2FRF
2FRK
2FRQ
2FW0
2FX4
2G2C
2G6Y
2GIM
2GQ1
2GQU
2GW3
2GWM
2GXQ
2H03
2HAL
2HE4
2HKR
2HY6
2I3D
2I4G
2I5R
2I61
2IBN
2IFQ
2IHP
2IML
2IOG
2IS8
2IXT
2JBZ
2JEP
2JFG
2NN8
2NNS
2NU5
2NVE
2NW8
2NYB
2O0M
2O2H
2O9C
2OBI
2OIT
2ON8
2OPJ
2OSX
2OZT
2P14
2P51
2PDC
2PEG
2PI6
2PKT
2PKY
2PPP
2PTZ
2Q0I
2Q0L
2Q20
2Q2H
2QDY
2QF4
2QFT
2QFU
2QIK
2QJ7
2QO5
2QOA
2QSB
2RBR
2RBV
2RBX
2RDG
2RI6
2RJ5
2RJ8
2RK3
2RK6
2UUX
2V1A
2V27
2V2E
2VBB
2VBP
2VIZ
2VNG
2VNR
2VU7
2VVK
2W13
2W1J
2W1R
2W31
2W3Q
2W72
2W7H
2W87
2W8V
2WAN
2WBQ
2WEE
2WMF
2WU9
2WZ1
2X45
2X5N
2X5O
2XE4
2XEV
2XGU
2XKR
2XL8
2XLH
2XNR
2XPC
2XPU
2XS5
2XWS
2XYG
2Y27
2Y52
2Y8G
2YKI
2YLN
2YNT
2YOI
2YV9
2YVE
2Z1W
2Z2F
2Z53
2Z8I
2ZAW
2ZFI
2ZGB
2ZHP
2ZOU
2ZQ2
2ZSP
2ZT1
2ZW2
3A19
3A3U
3A47
3A55
3A7J
3A8H
3A8O
3A93
3A9K
3A9Z
3AAM
3ACF
3ACI
3ADM
3AGH
3AGO
3AI9
3ALJ
3AWV
3AWY
3AZ6
3B0K
3B0T
3B4Q
3BAE
3BFQ
3BHQ
3BJH
3BKM
3BT5
3BTO
3BU9
3BZR
3C22
3C2U
3CBM
3CBZ
3CE1
3CI6
3CO1
3CR6
3CTG
3CUF
3CUI
3D93
3D9X
3DEO
3DGQ
3DKC
3DMF
3DQY
3DR2
3DS2
3DT7
3DVD
3DX2
3DZP
3E4G
3E81
3E8M
3EDG
3EJF
3EJQ
3ELN
3EUR
3EUX
3EX6
3EXB
3EY7
3F05
3F4R
3F6V
3FA6
3FGD
3FI5
3FIL
3FOJ
3FP6
3FV4
3FVH
3FVP
3FWG
3G1P
3G2Y
3G32
3G35
3G3P
3G52
3G9X
3GD0
3GD6
3GF6
3GHA
3GJY
3GKM
3GKV
3GN2
3GOH
3GUZ
3GZQ
3H4W
3HAP
3HH6
3HHI
3HID
3HIS
3HMZ
3HNY
3HOI
3HP4
3HT6
3HVK
3HZL
3I1U
3I2V
3I3Q
3I4G
3I5W
3I67
3I8Z
3IB7
3IFN
3IJ8
3IKB
3ILW
3IP2
3IRV
3ITF
3ITU
3IUS
3IV4
3IWL
3JWB
3K02
3K12
3K4I
3K7H
3KCS
3KEO
3KI7
3KU3
3KUS
3KXQ
3L1N
3L1Y
3L8E
3L8Q
3L91
3L9C
3LE7
3LI3
3LJD
3LSN
3LYD
3LYG
3LYP
3M2Y
3M3G
3M4H
3M56
3M5S
3M8J
3MCH
3MDM
3MIY
3MJC
3MJO
3MJV
3MNS
3MQH
3MWQ
3MYB
3MYX
3N03
3N11
3N2W
3NDI
3NER
3NIY
3NMW
3NON
3NPK
3NV3
3NWE
3NYF
3NZM
3NZZ
3O0I
3O1S
3O1U
3O1W
3O89
3O91
3OBS
3ODG
3ODT
3OEF
3OF5
3OGG
3OGN
3OHE
3OLE
3ON1
3ONH
3OQP
3OVX
3P5H
3PD1
3PF6
3PG0
3PKC
3POW
3PVH
3PYK
3PZI
3Q49
3Q6R
3QAT
3QC0
3QL0
3QL2
3QNG
3QQD
3QQX
3QUO
3QUQ
3R4V
3R72
3RD5
3RLD
3RLE
3RLW
3RML
3RO3
3RPW
3RQ7
3RQX
3RR6
3RVK
3RZN
3S0A
3S0B
3S0E
3S8M
3S92
3SCT
3SH4
3SHG
3SIG
3SIH
3SL2
3SNF
3SU3
3SUU
3SX8
3SXM
3SZH
3T10
3T2S
3T3T
3T50
3T5Z
3T78
3T8C
3TC7
3TF3
3TGB
3TKF
3TKI
3TN7
3TOD
3TQE
3TQL
3TRG
3TT9
3U2K
3U80
3U81
3U9Q
3UAH
3UC8
3UJ7
3UJA
3UKJ
3UW3
3V0D
3V0G
3V7X
3VBD
3VDF
3VE9
3VIL
3VJQ
3VNB
3VOG
3VY5
3VYP
3W43
3W72
3W77
3W7E
3W7I
3W7O
3W87
3WDD
3WPC
3WRQ
3WXQ
3X0T
3X28
3X33
3ZBD
3ZHI
3ZL8
3ZN4
3ZNV
3ZOD
3ZSU
3ZXC
4A2V
4A3Z
4A6P
4A6V
4A95
4ACJ
4AE8
4AF9
4AFC
4AFD
4AFM
4ALC
4AMP
4AO6
4AXQ
4B0H
4B1A
4B1Y
4B49
4B4E
4B4U
4B62
4BAP
4BBT
4BBV
4BCT
4BGB
4BJ0
4BMB
4BN6
4BRC
4BRN
4BRQ
4BUU
4BW1
4C06
4C1D
4C2Y
4C3T
4C5B
4C5K
4CBP
4CBU
4CDV
4CF8
4CFY
4CJ2
4CJO
4COC
4CW2
4CZH
4D0P
4D0Q
4D3W
4D5O
4D6C
4D7U
4DC6
4DDS
4DE1
4DE2
4DFA
4DMI
4DN7
4DOE
4DP4
4DQ7
4DRQ
4DWO
4DXU
4E3O
4E3U
4E40
4E4A
4E6F
4E9W
4EE7
4EEW
4EIS
4EK0
4EKA
4EKQ
4EPV
4EQ9
4ETM
4EUS
4EVQ
4EVZ
4F19
4F5Z
4FDV
4FDX
4FMX
4G41
4GE0
4GF7
4GGL
4GHF
4GJY
4GM0
4GZ1
4H0D
4H3U
4H60
4H6K
4H89
4H8R
4H9A
4H9B
4H9I
4HBU
4HDR
4HE2
4HEQ
4HG7
4HIL
4HKD
4HPI
4HRF
4HTG
4HX4
4HZ8
4I07
4I0B
4I15
4I4S
4I5U
4I6R
4I74
4I7S
4IAU
4IES
4IEY
4IFX
4IGH
4IHE
4IIX
4IKC
4INE
4INO
4IPD
4IRX
4ITK
4J42
4J7K
4J7N
4J7W
4J8P
4J9D
4J9Y
4JC1
4JK9
4JKN
4JMP
4JNF
4JOH
4JQK
4JRU
4K14
4K41
4K93
4KAF
4KH8
4KJJ
4KM0
4KOT
4KPM
4KQW
4KTS
4KU0
4KUY
4KV0
4KZ3
4KZ5
4L1Y
4L7G
4L7T
4L9P
4L9U
4LBU
4LD1
4LEB
4LIW
4LKE
4LKQ
4LM3
4LPL
4LUN
4LV6
4LXQ
4LY0
4M1N
4M1X
4M24
4M7G
4M9U
4MAE
4MAQ
4MAX
4MDX
4MLV
4MM2
4MMG
4MUS
4MVK
4MX5
4MXT
4MZC
4MZD
4N0K
4N0X
4N30
4NB3
4NCW
4NF1
4NFV
4NGW
4NHI
4NLJ
4NOH
4NP5
4NVB
4NWH
4NZK
4O37
4O3C
4O9W
4OA3
4OA4
4ODO
4OEE
4OG6
4OLJ
4OMO
4OWB
4P1V
4P32
4PAI
4PBP
4PCP
4PH8
4PHR
4PJ2
4PL6
4PLP
4PM6
4PNC
4PNO
4PNT
4PUJ
4Q1R
4Q3K
4Q4N
4Q8T
4Q8U
4Q9B
4QDT
4QEU
4QMW
4QPW
4QRB
4QSD
4QYY
4R4Q
4R5B
4R81
4R94
4R9C
4RCB
4RDS
4RFU
4RMI
4RN4
4RNX
4ROQ
4RXL
4RY0
4S0N
4S1H
4S2Y
4S3S
4TPO
4TPS
4TPV
4TVO
4U5H
4UDQ
4UGK
4UIT
4UTO
4UUL
4UWW
4V2P
4W5J
4W8B
4W8T
4WB8
4WBR
4WE2
4WLJ
4WS5
4WU0
4WYZ
4WZE
4X06
4X08
4X2G
4X2R
4X3U
4XD3
4XDT
4XEN
4XJ5
4XQW
4XV4
4XYZ
4XZF
4YDX
4YKP
4YLK
4YMX
4YT9
4YWK
4YZA
4YZX
4Z1Q
4Z28
4Z3V
4ZA2
4ZD4
4ZEY
4ZHN
4ZQA
5A35
5A89
5ABX
5AF5
5AMD
5AWZ
5C1H
5C28
5C48
5C5T
5CCC
5CDS
5CEG
5CL9
5CQ8
5CV7
5CVE
5D6Q
5D7C
5D81
5D82
5D94
5D9C
5DFF
5DUT
5E2R
5F6Q

## Sheet: ValidationSet
pdb id
1ELU
1HB2
1IYB
1J1M
1MG4
1OHL
1P5Z
1U53
1Y3V
1Y9U
1YQZ
1Z9T
1ZNK
1ZUA
2ASF
2B0V
2E7Z
2HHC
2IUV
2IUW
2JB4
2JHQ
2NPN
2NQT
2NVF
2UUK
2W2J
2WDC
2WZ8
2Z68
2ZYP
3AI0
3ATG
3BZZ
3C9U
3DFF
3DR0
3DVW
3E2N
3E8O
3FN5
3FU7
3G2Z
3G6M
3GBY
3I45
3I4W
3IHZ
3KRS
3LHQ
3NED
3OIK
3P34
3P73
3Q0W
3QHF
3QXC
3QXG
3QXS
3RJU
3SM1
3T48
3T7P
3WRS
3WVX
3WVY
3ZS5
3ZSL
4B32
4CQH
4DP7
4ETN
4FD5
4HY6
4I8I
4ICV
4JJ2
4JLB
4JLP
4JM9
4K6B
4LHL
4LR6
4MI1
4MZB
4NWE
4NYN
4OBA
4ONW
4OZE
4Q01
4Q4S
4QI3
4QOM
4QUB
4U70
4UDX
4UYR
4XHV
5D5R

## Sheet: TestSet
pdb id
1EGU
1FCX
1FG7
1GOI
1GPI
1H2C
1HD5
1JBE
1JOV
1LC0
1LYV
1M44
1N7N
1NBU
1NCW
1O0M
1O26
1O5X
1O83
1O85
1O8B
1OFZ
1OQV
1P5F
1QK3
1S9U
1SMB
1TQH
1U7I
1VAT
1VK5
1WCK
1WKU
1X6Q
1X9H
1XMZ
1XW3
2A2K
2AAL
2ACF
2AL5
2AML
2ANY
2BKL
2BW8
2C2T
2CIT
2CL2
2D3M
2D59
2DPL
2E2O
2E2R
2E3P
2EUZ
2F21
2F2X
2FC3
2FCJ
2FCL
2FNU
2FQ3
2FSR
2FZ9
2G13
2GB4
2GHA
2GI9
2GUD
2H90
2HA8
2HHJ
2I51
2IA1
2IKI
2JDC
2JIK
2NVD
2NWD
2O3T
2O6F
2OFB
2OFZ
2OKM
2OXC
2PDI
2PDY
2PMK
2PWO
2Q8K
2QXW
2QZZ
2R5D
2RBD
2RC3
2RFF
2RJ6
2RKL
2UYT
2VCL
2VIJ
2VWR
2W0R
2W39
2W7F
2WB9
2WFP
2WT8
2X46
2X9V
2XGI
2XRH
2Y6X
2YZY
2ZAB
2ZMU
3A0A
3A0N
3A0S
3A0Y
3A57
3A6R
3ABN
3ACW
3AK0
3AKT
3AP6
3B0F
3B0S
3B27
3BCJ
3BEX
3BKR
3BU3
3BUW
3C36
3C5A
3CCD
3CIM
3CKM
3COV
3CWR
3DI8
3E10
3E5T
3EDQ
3EQY
3ESS
3EWX
3EYE
3EYI
3F0M
3F0U
3FCN
3FEV
3FVF
3FVO
3GEN
3GPK
3GUJ
3H4X
3H6C
3H74
3H82
3HH7
3HRV
3HUK
3HUQ
3HYN
3I8U
3IHS
3IOS
3IQL
3IU5
3JXT
3K6V
3KDH
3KNB
3KT9
3LNX
3M0I
3M0S
3M7U
3MAN
3MPC
3MZQ
3N3G
3N6Y
3NC8
3NOF
3NUF
3NYE
3NZ1
3O6W
3O88
3ODV
3OL0
3OMT
3OT8
3OU2
3OYV
3P0B
3P2V
3P67
3P80
3PA6
3PES
3PFG
3PHH
3PJY
3POZ
3PWW
3Q1N
3Q3A
3Q64
3Q67
3Q7R
3QB8
3QFS
3QFT
3QNC
3R6U
3R8E
3RKZ
3S5V
3SOE
3SRQ
3T6I
3T7H
3TC2
3TPD
3U2C
3UF7
3UI4
3ULR
3USH
3UXV
3UZX
3V30
3VE7
3VQF
3W01
3W4O
3W6Z
3WKH
3WL5
3WP4
3WP6
3WUR
3WUZ
3WW6
3WZD
3ZL2
3ZSJ
3ZSK
3ZZO
4A2S
4A30
4AGI
4AIW
4ALG
4AUJ
4B4J
4B8V
4BFO
4BMH
4BVK
4C04
4CFK
4CMD
4CP6
4D13
4DE3
4DRV
4DYQ
4E35
4E97
4EBY
4EHD
4EZG
4F1U
4F8X
4G2E
4G4M
4G55
4GB5
4GOS
4H8Y
4H94
4HCI
4HDD
4HFQ
4HMT
4HMV
4HNH
4HZ6
4IHZ
4IKE
4IO3
4IVA
4IZV
4J8C
4JNU
4JOF
4JTM
4JZ5
4K5A
4K6K
4K75
4K8Y
4KDU
4KGI
4KLV
4KRU
4KX4
4L2I
4L6B
4LBL
4LBM
4LEN
4LHS
4LMS
4LUJ
4LUP
4LWG
4LWL
4LXY
4LYP
4LZX
4M3S
4M82
4M91
4MMM
4MNC
4MNL
4MQB
4NDV
4NFB
4NJ8
4NUT
4OAD
4OGF
4OH0
4OMJ
4ONL
4OX6
4P7O
4PAK
4PAS
4PF8
4PUX
4PVI
4PZJ
4Q27
4Q4K
4Q7E
4QC3
4QC6
4QT7
4QTC
4QTE
4R4C
4R9P
4RCP
4REI
4RFV
4RH9
4RP5
4RQR
4RQV
4RX5
4RYV
4TR1
4U0J
4U21
4U9O
4UDR
4UIY
4UMG
4UQZ
4V2L
4W64
4W8R
4W8S
4WCD
4WOC
4WOH
4WPY
4WVP
4WXT
4XDX
4XMQ
4XRJ
4XRM
4XUW
4XUZ
4XVE
4YEP
4YFZ
4YJU
4YJV
4YTW
4YYD
4Z2O
4Z8U
4ZBG
5ACM
5AIF
5BU1
5DKV
5DL9
5DPO
5F4C

## Sheet: TestSet(BindingSite)
pdb id
1FCX
1FG7
1GPI
1O0M
1O8B
1QK3
1VK5
1X9H
2AL5
2BKL
2D3M
2E2R
2E3P
2I51
2JDC
2O3T
2OFB
2OXC
2R5D
2RJ6
2UYT
2VIJ
2W39
2W7F
2WB9
3A6R
3ACW
3B27
3BEX
3BKR
3C36
3EWX
3F0M
3FVO
3GEN
3GUJ
3I8U
3N3G
3O88
3OT8
3P67
3POZ
3PWW
3QB8
3QFS
3QFT
3RKZ
3UXV
3VE7
3W4O
3WUR
3WZD
3ZL2
4A30
4AGI
4AIW
4ALG
4AUJ
4B8V
4C04
4CFK
4CMD
4DE3
4F8X
4G55
4HMV
4IHZ
4IKE
4IVA
4KGI
4KLV
4KRU
4KX4
4L2I
4L6B
4LEN
4LMS
4LUJ
4LWG
4LXY
4M3S
4M82
4OAD
4OMJ
4Q4K
4QTC
4QTE
4R4C
4RQV
4RX5
4RYV
4TR1
4U21
4UDR
4UIY
4WOH
4XRJ
4XUZ
4YJU
4YJV
